# Supplementary material
Source: PubMed Central journal article supplement (PMC7211476)

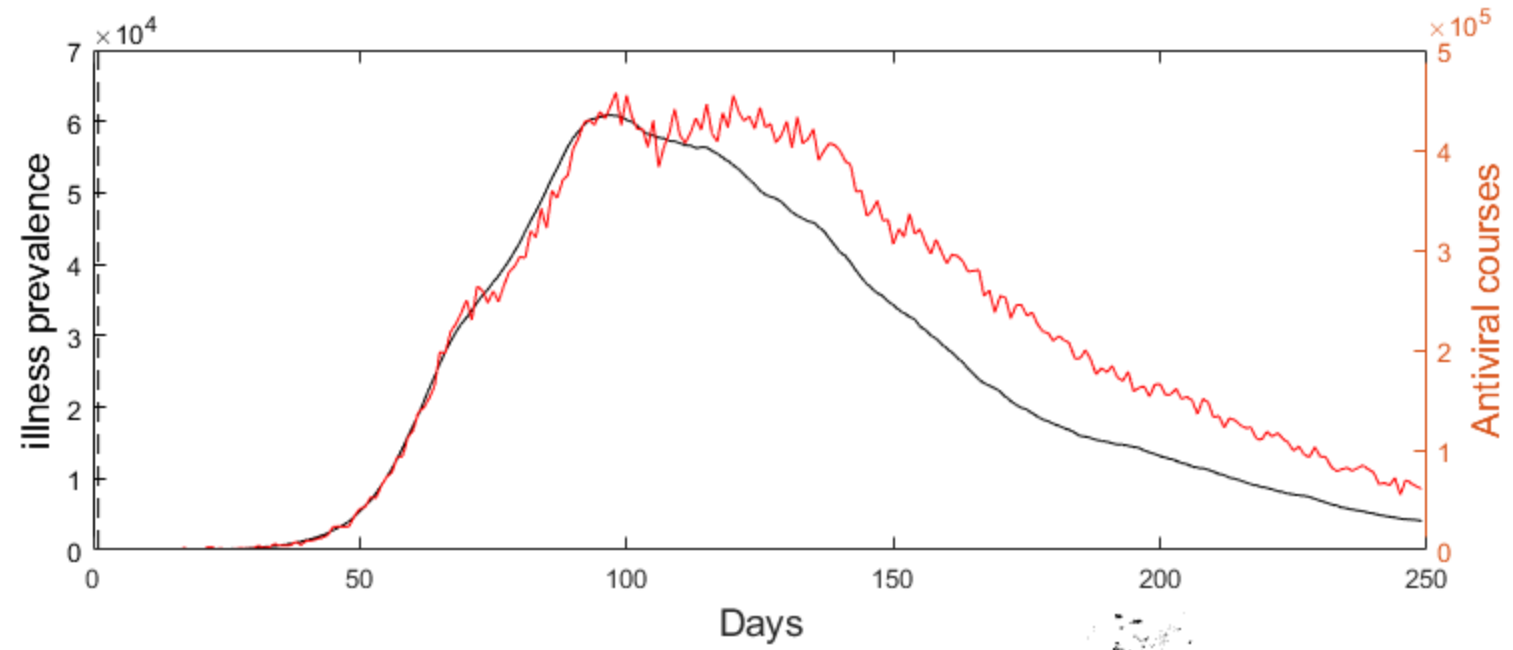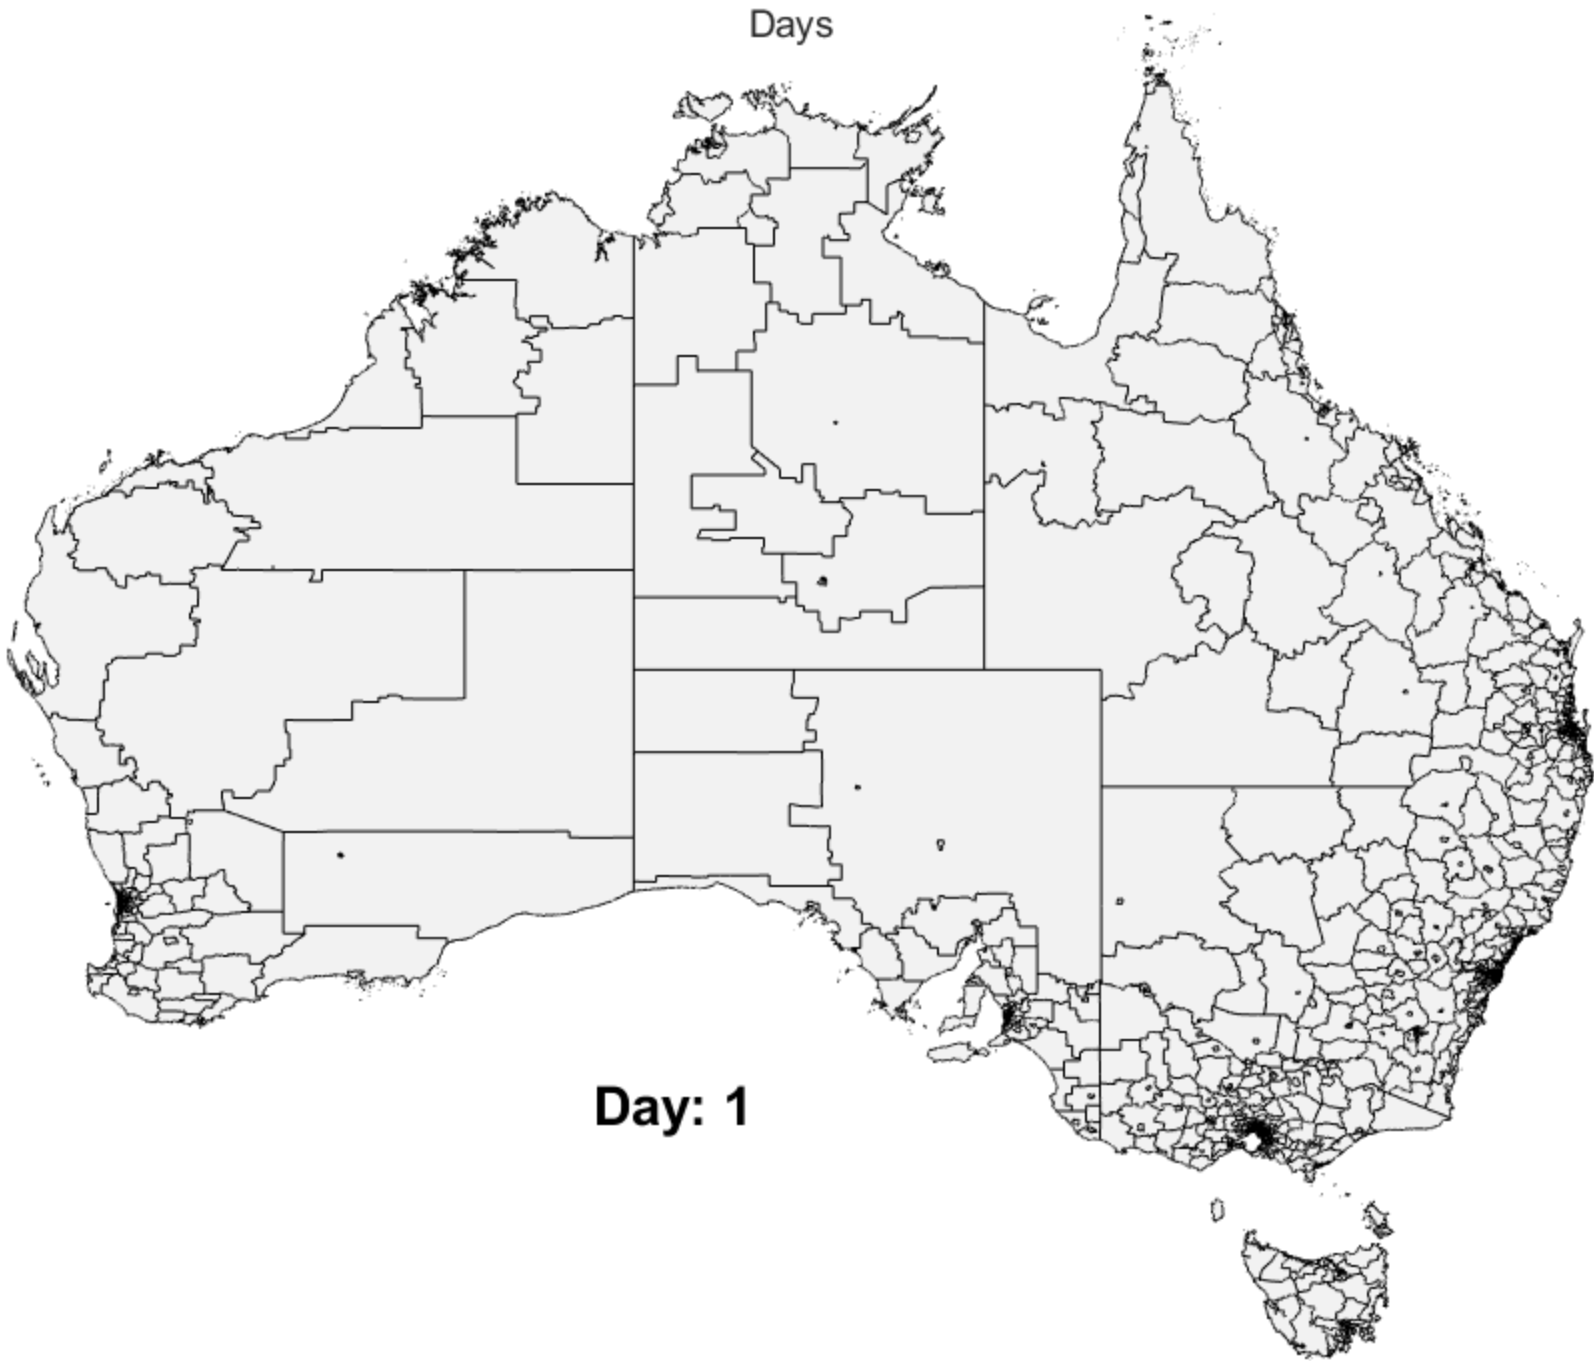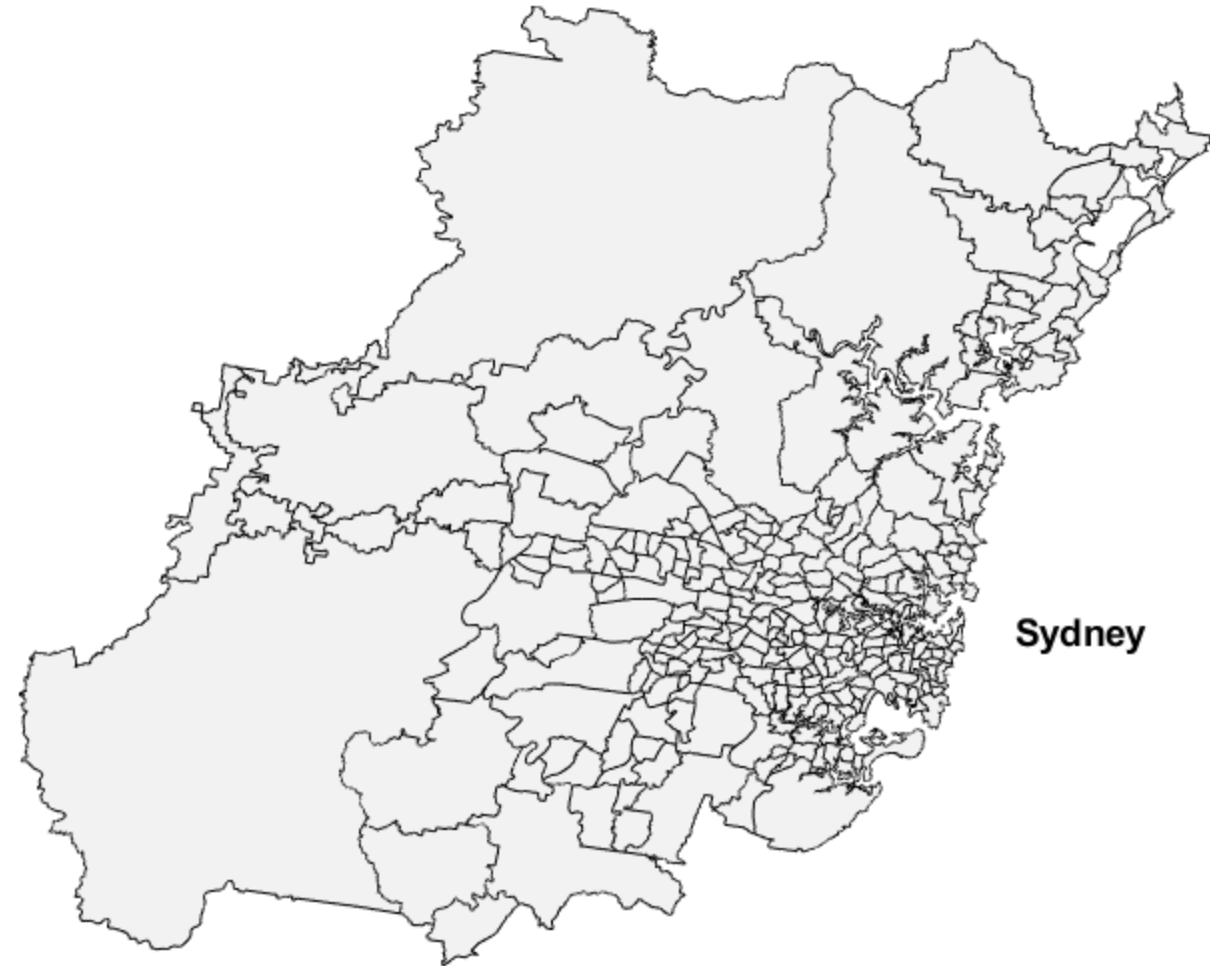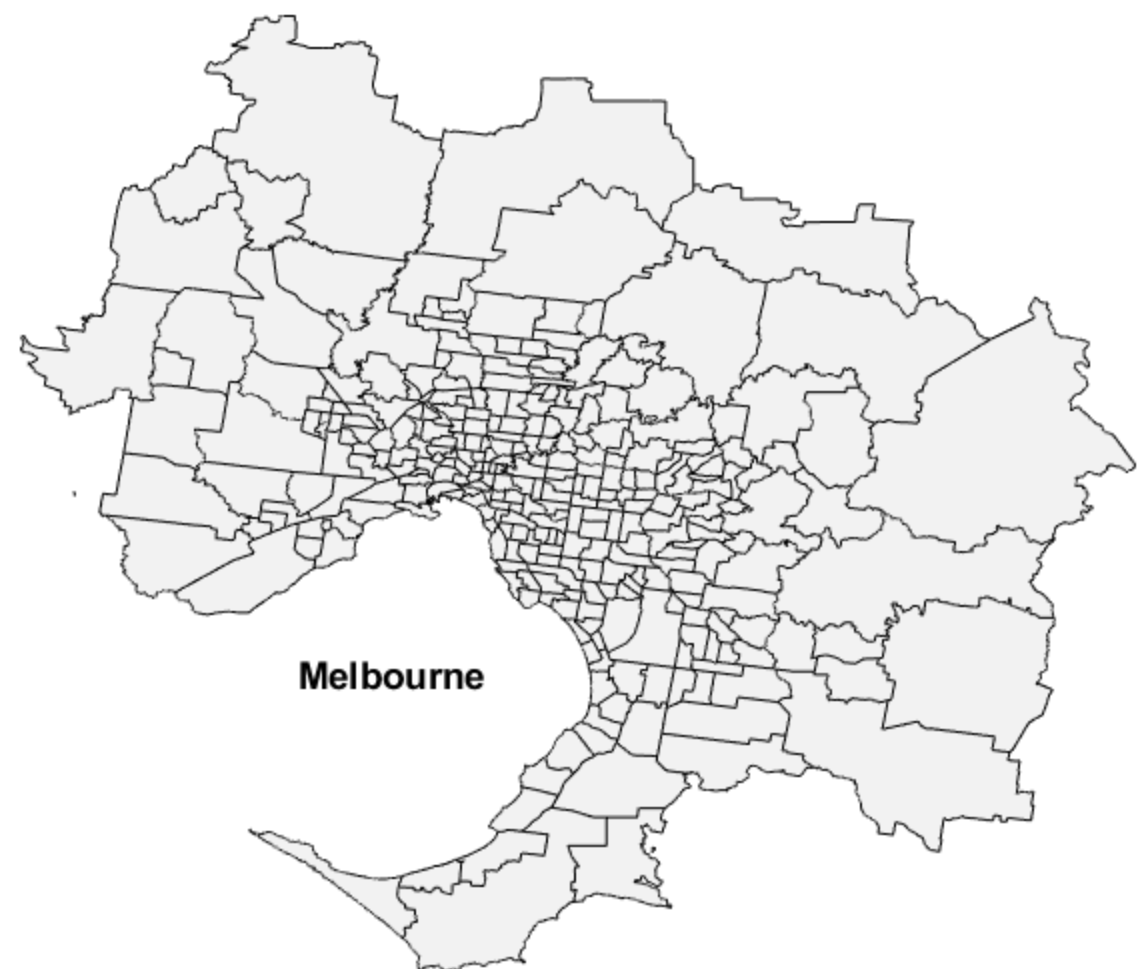

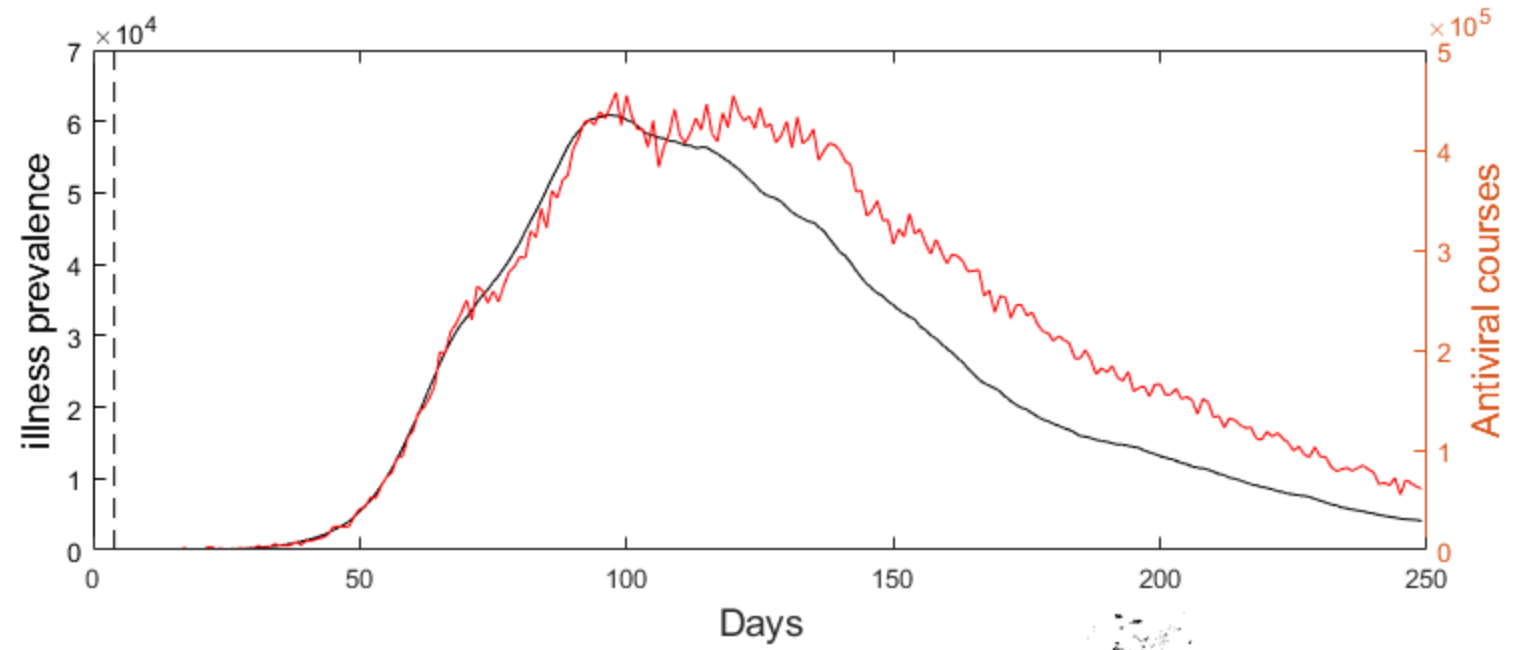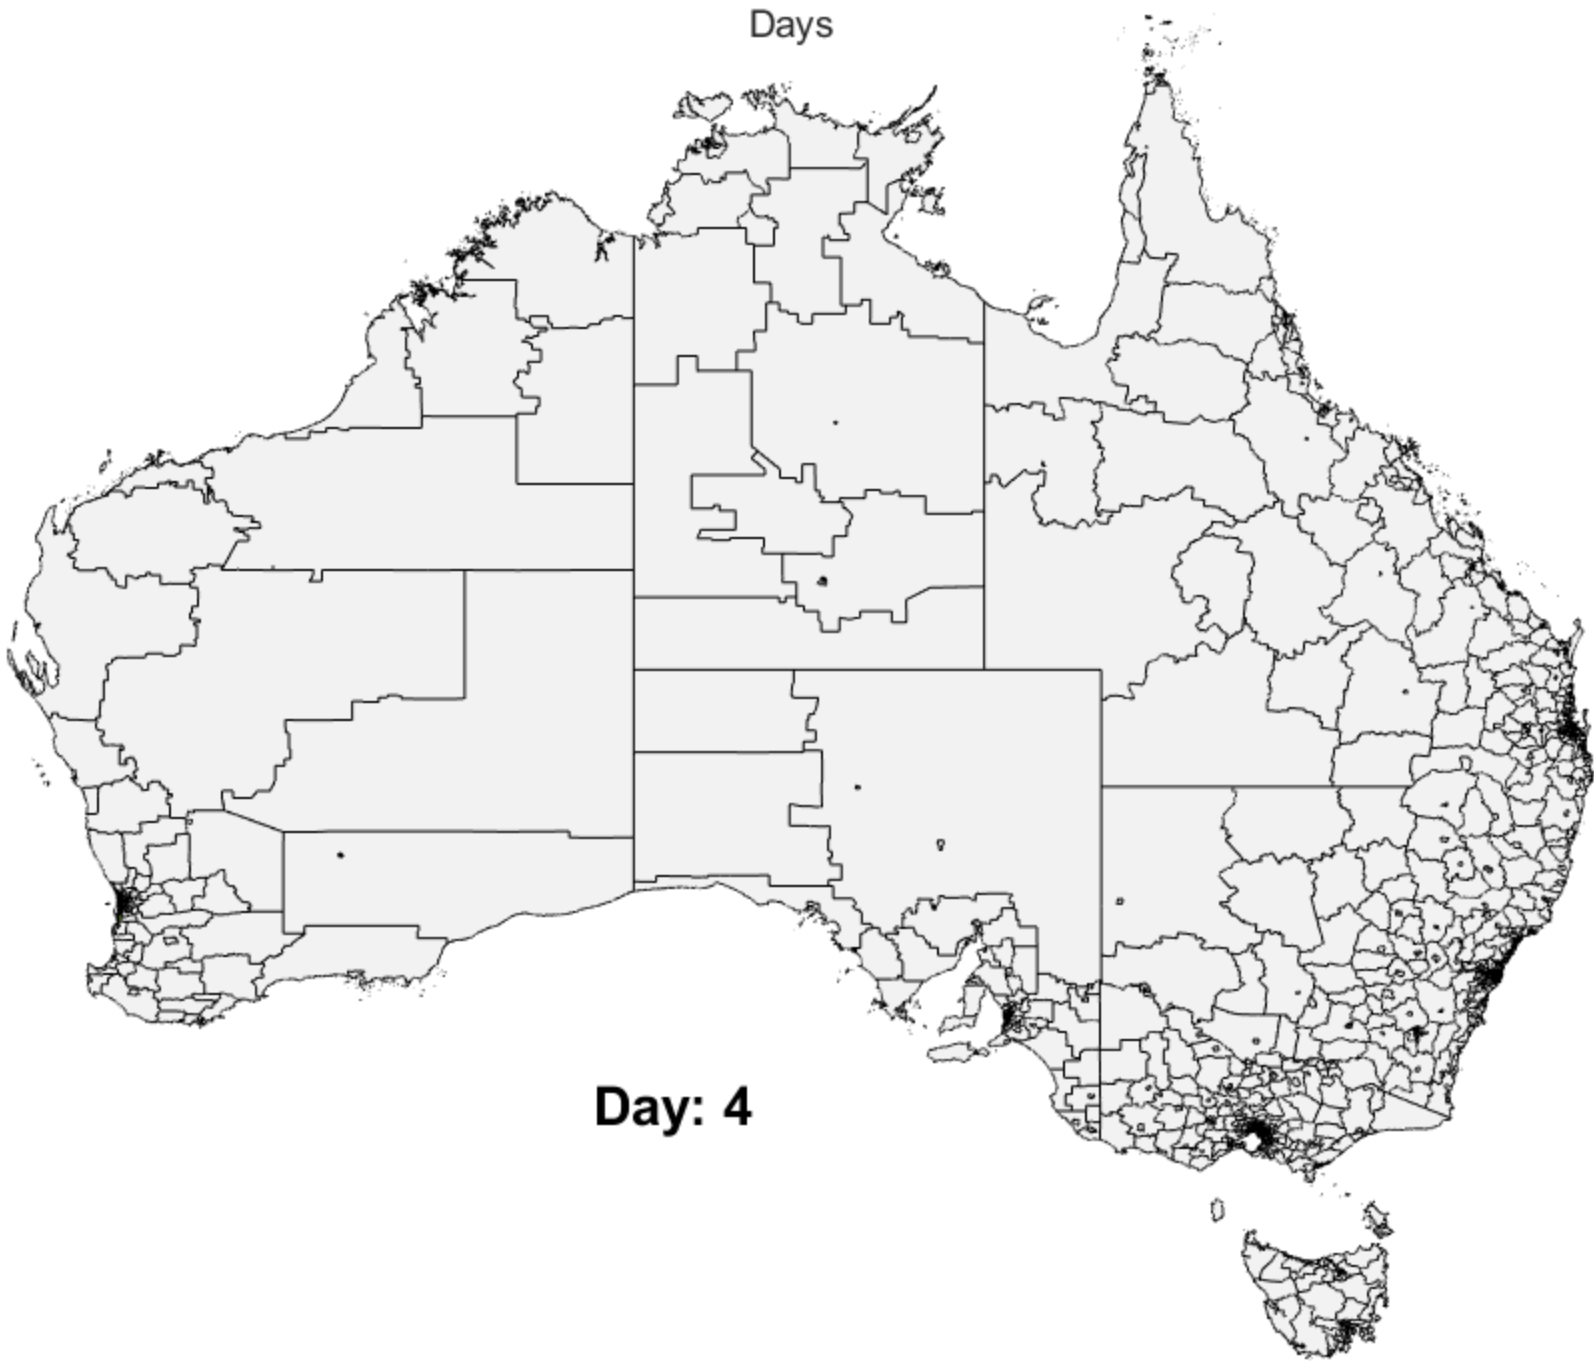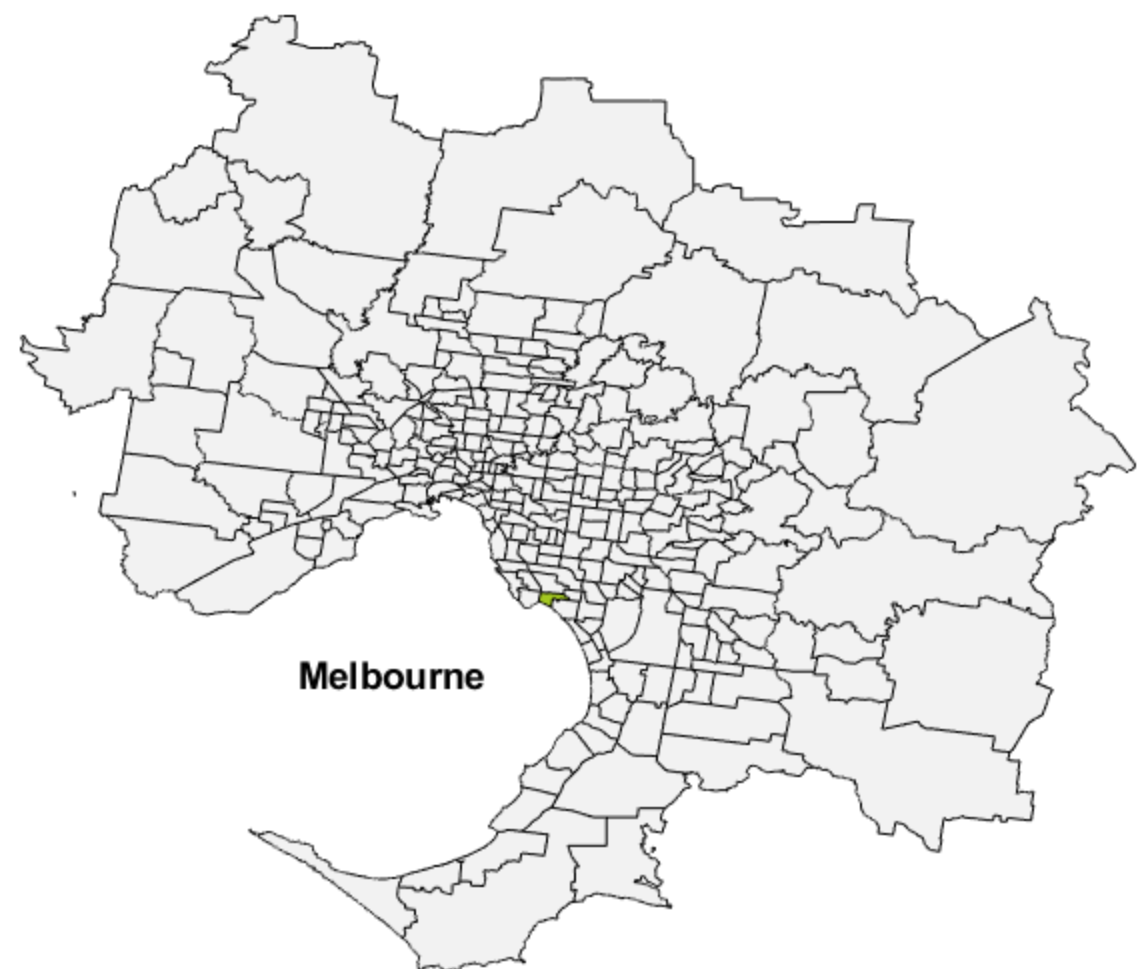

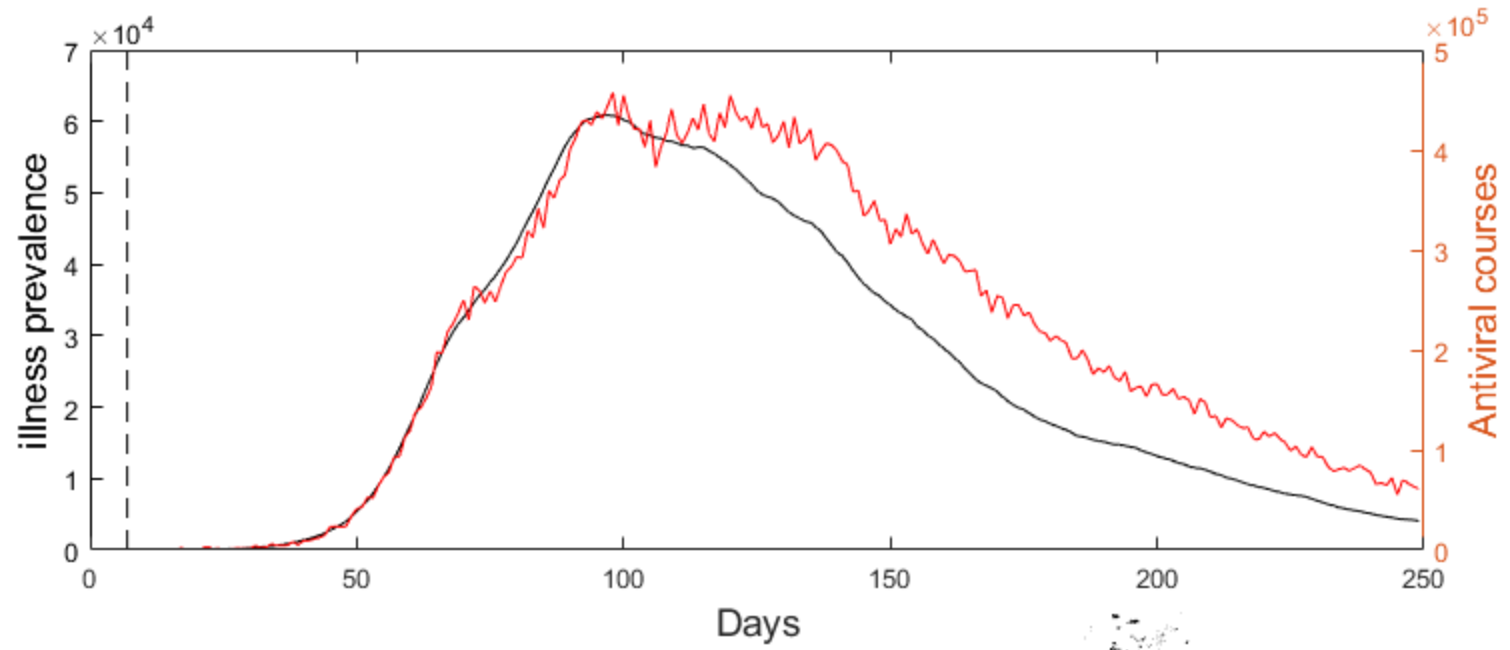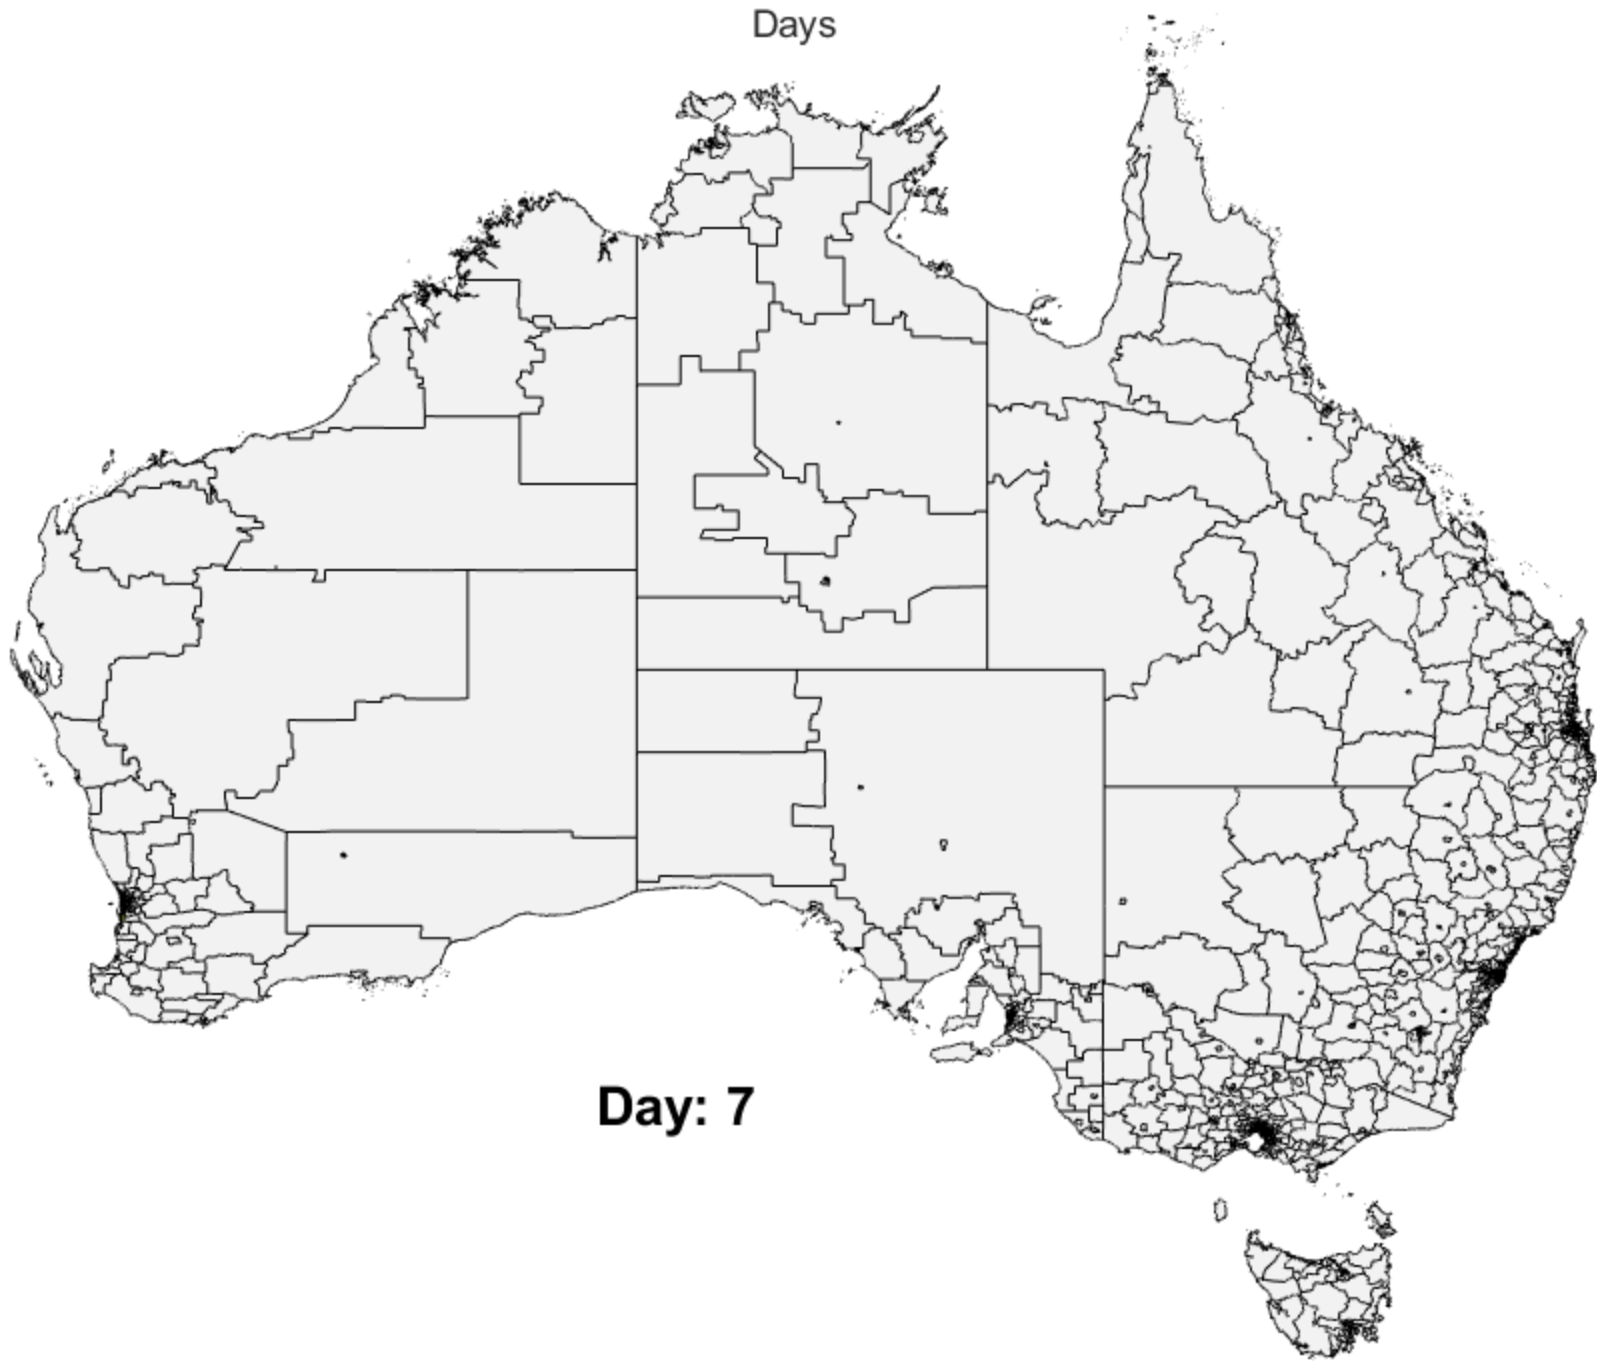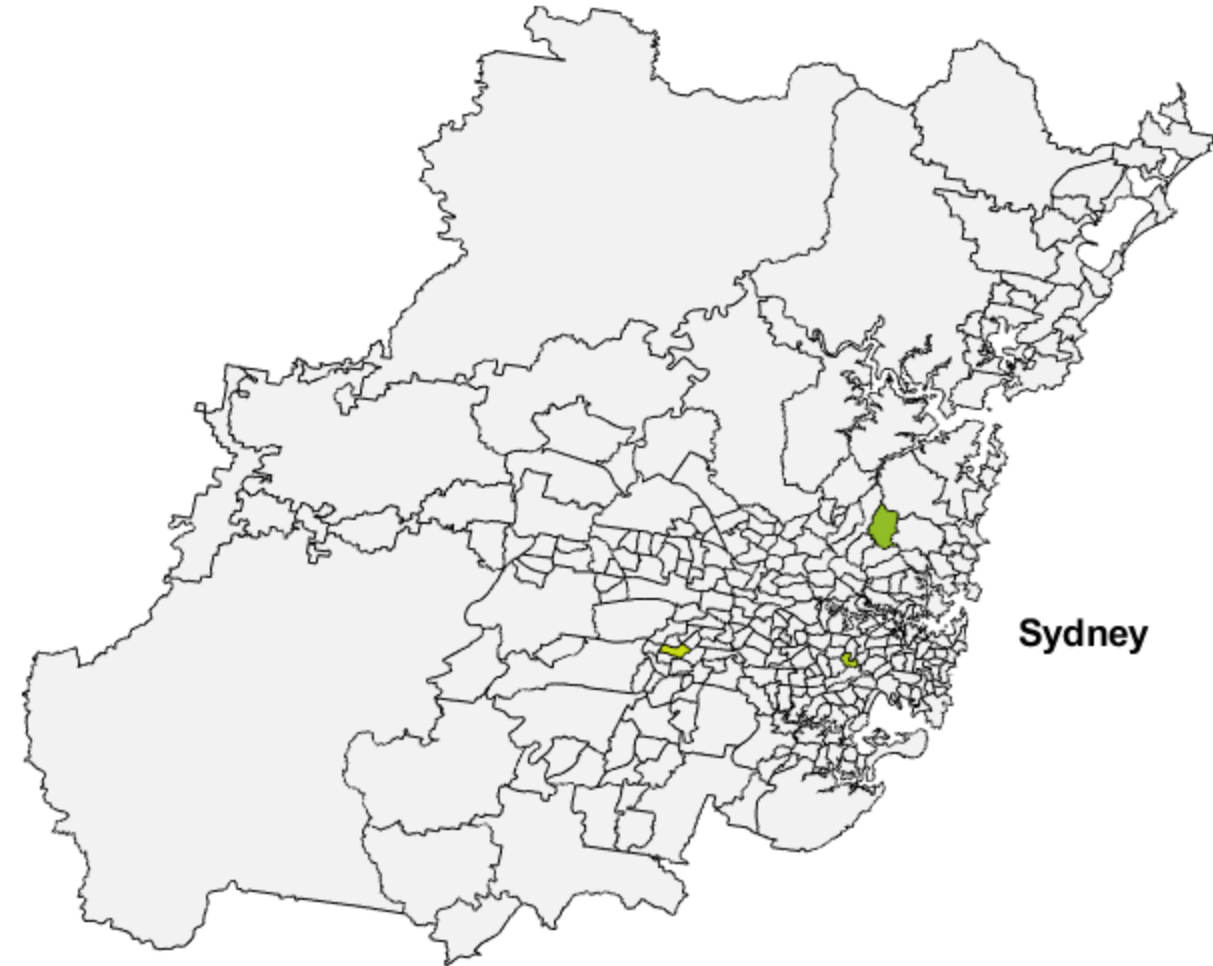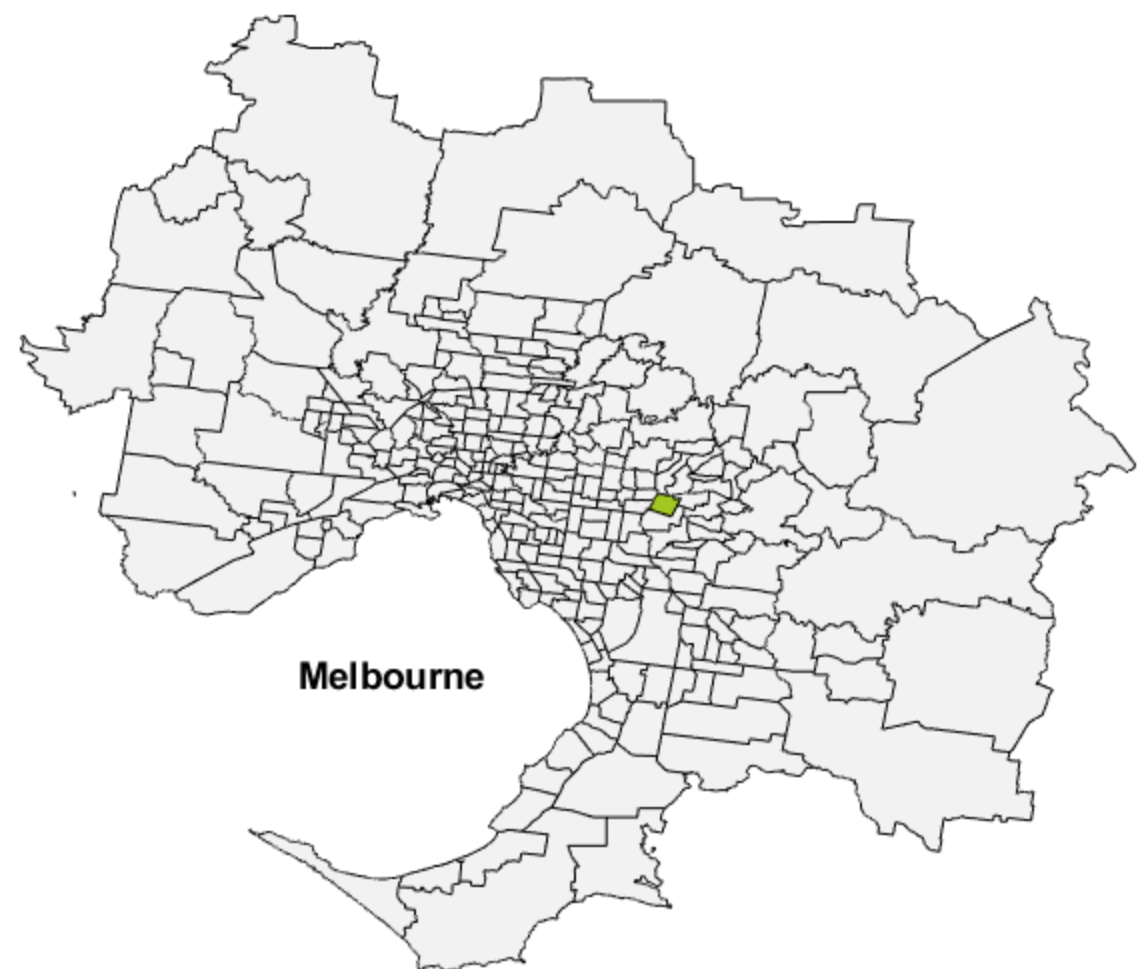



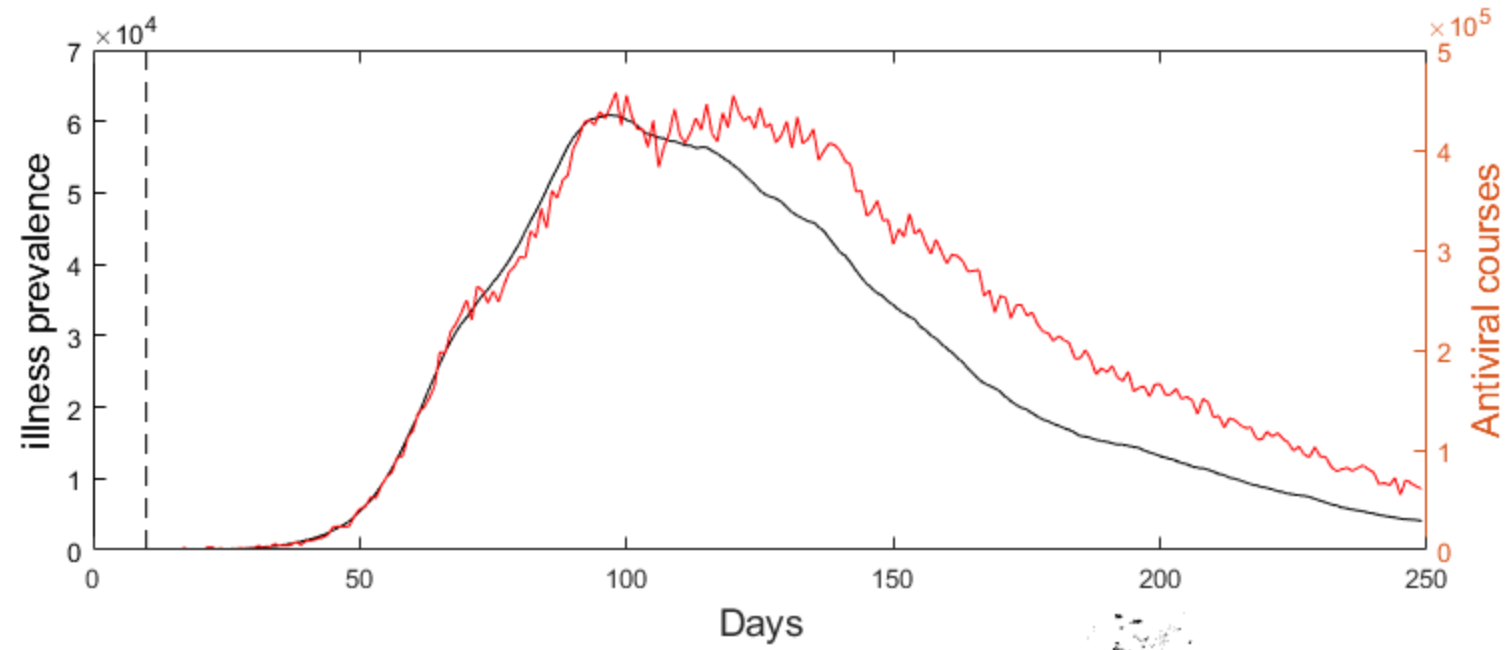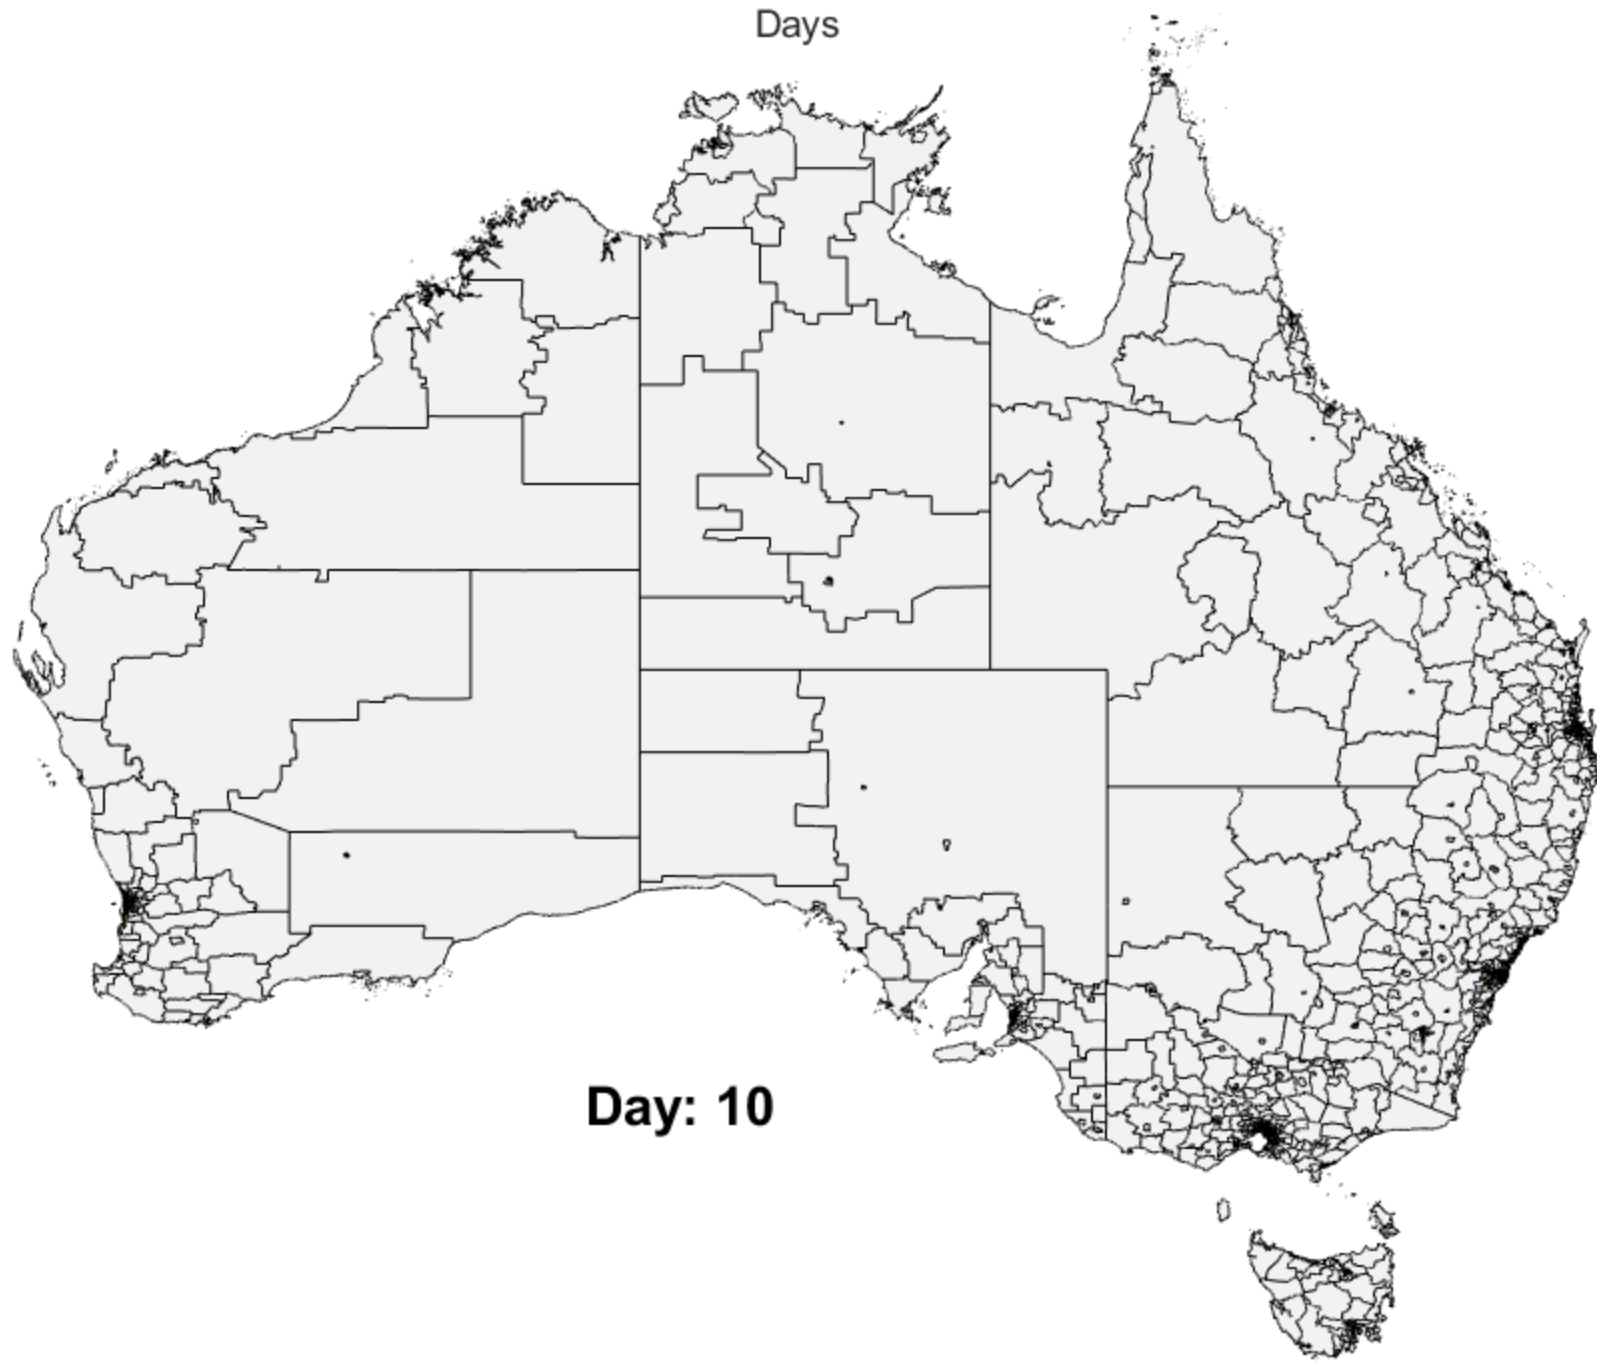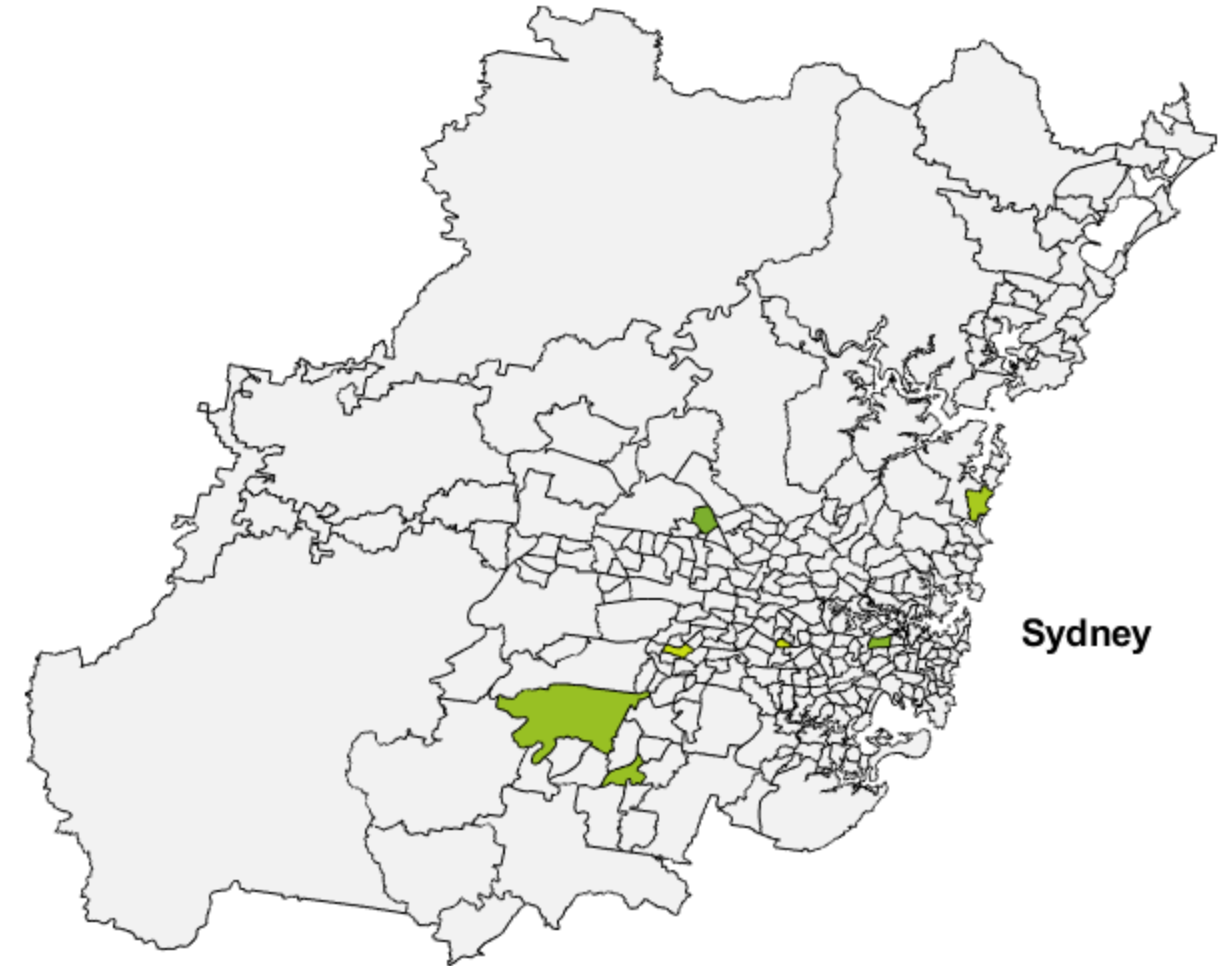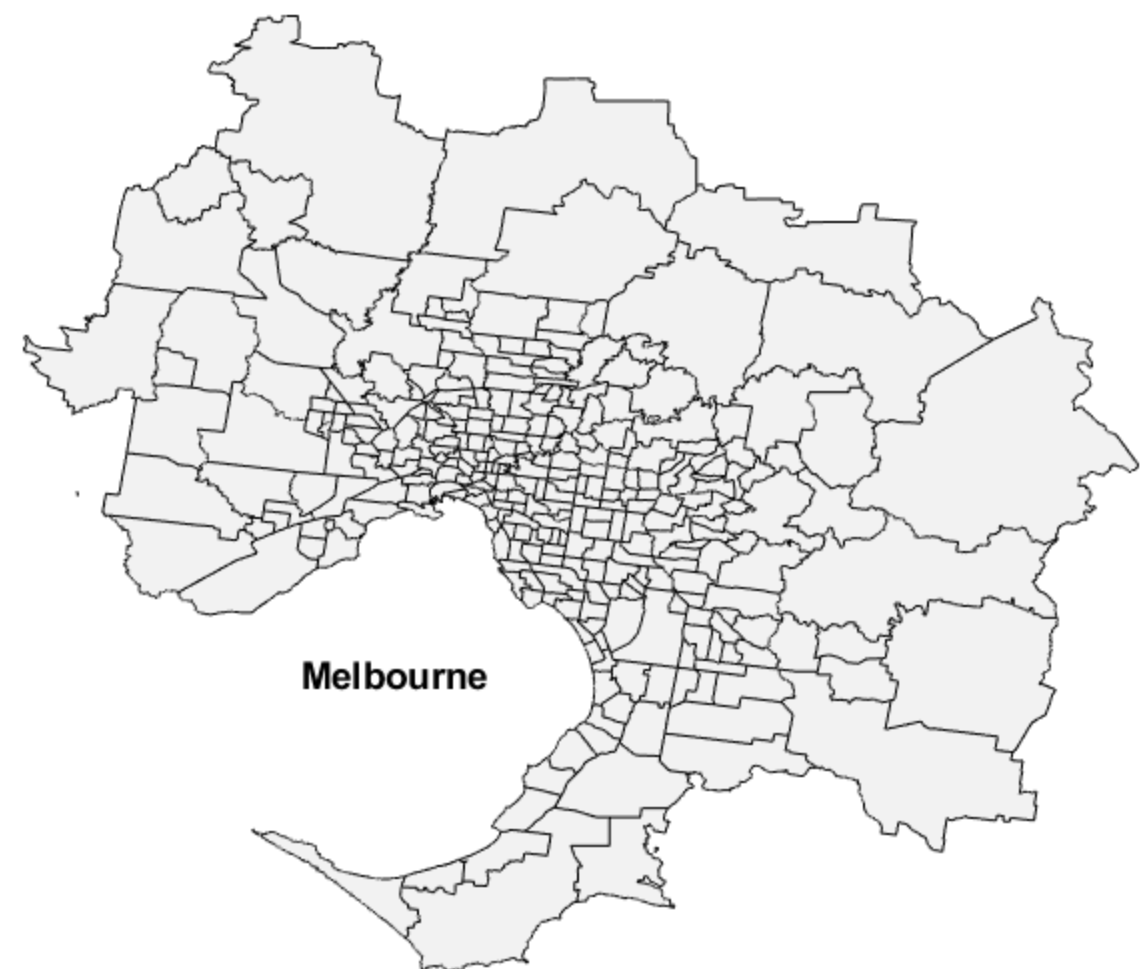



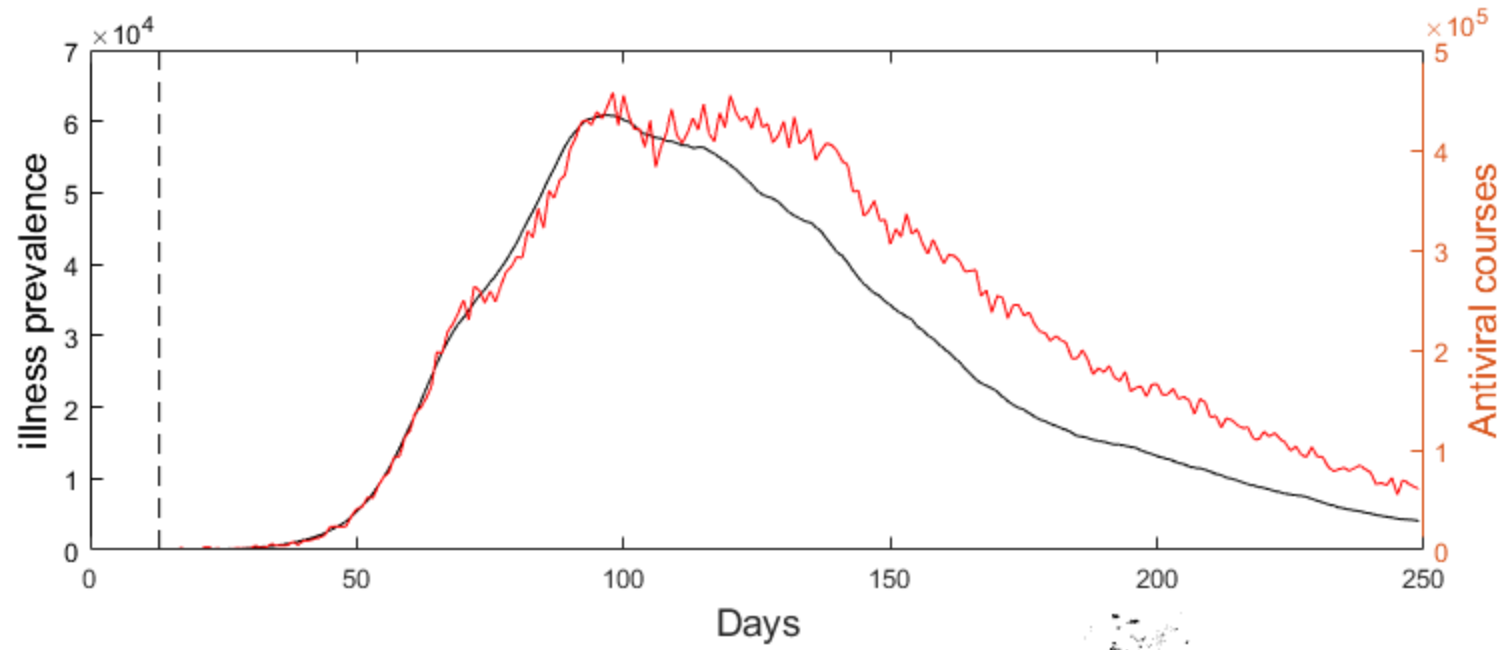

Days

Day: 13

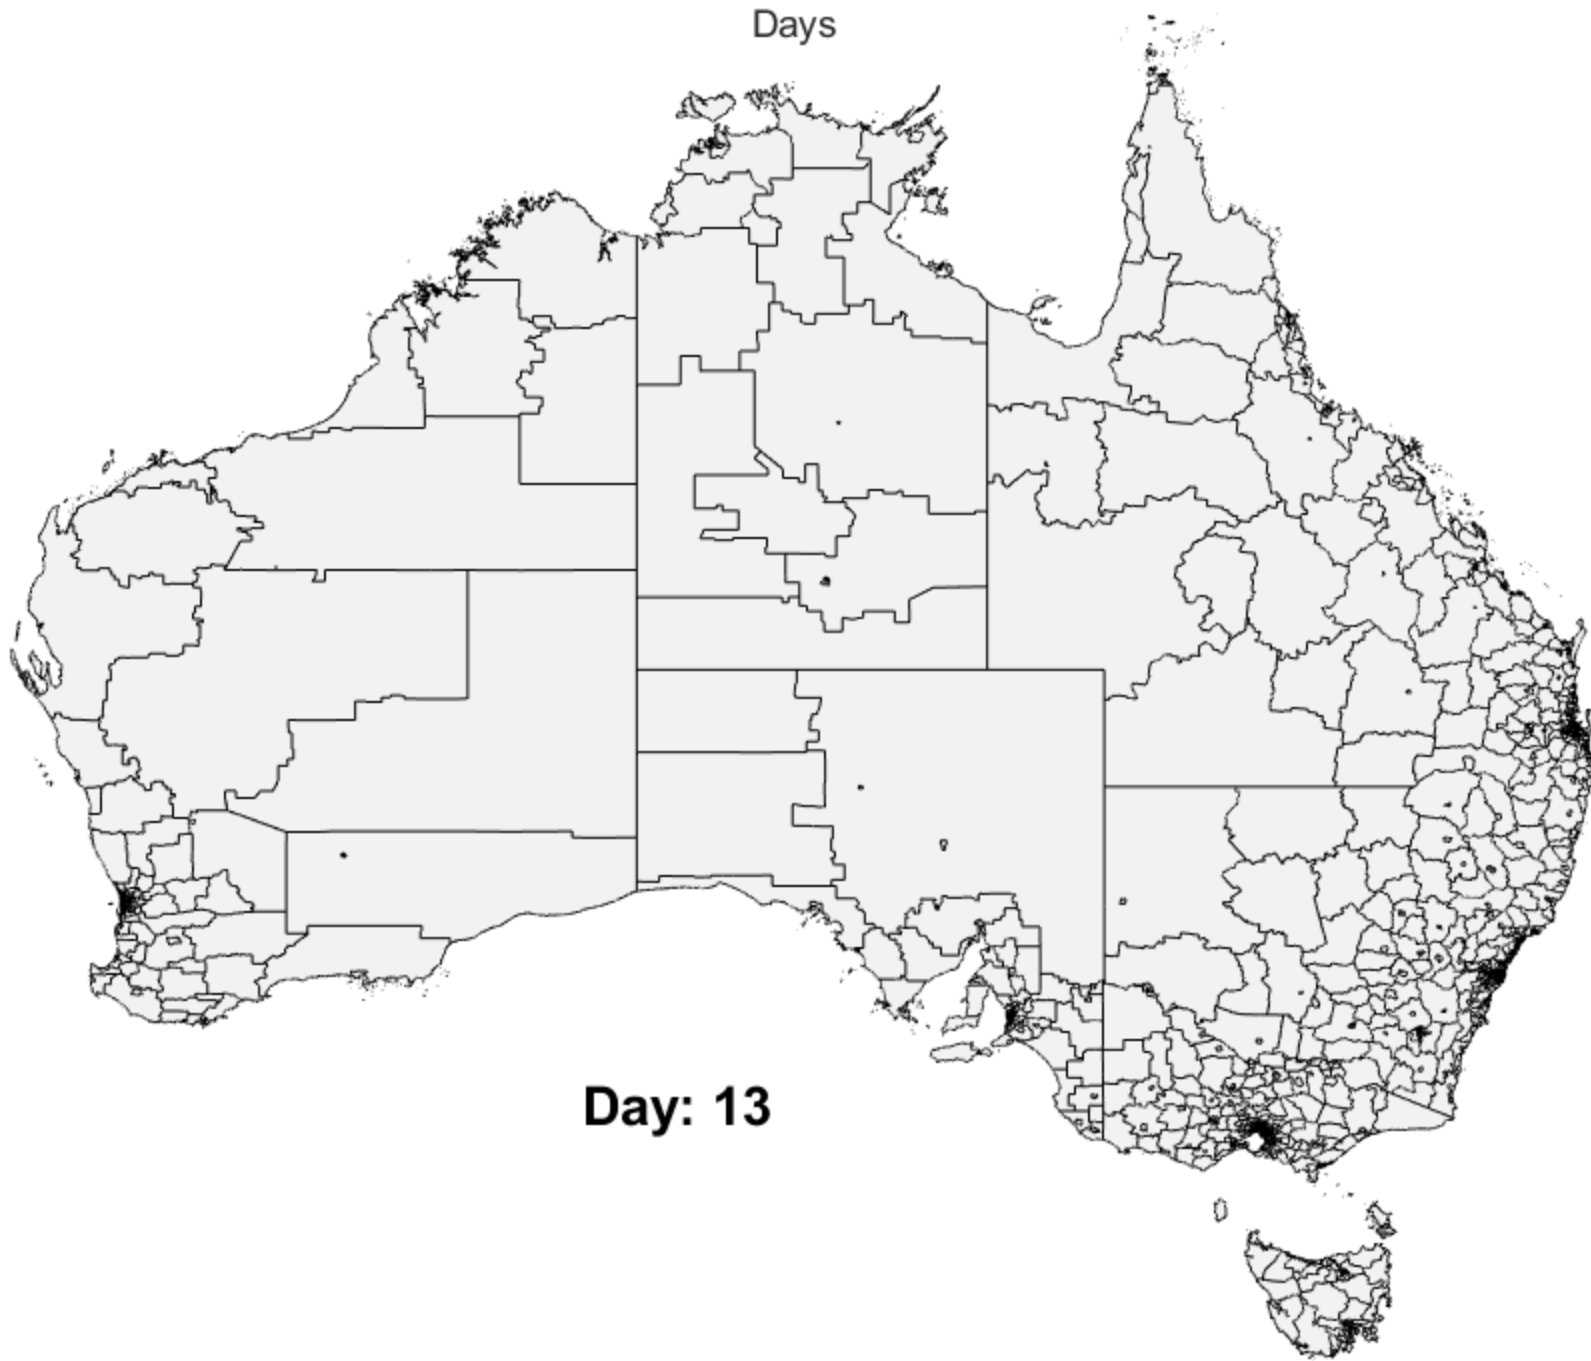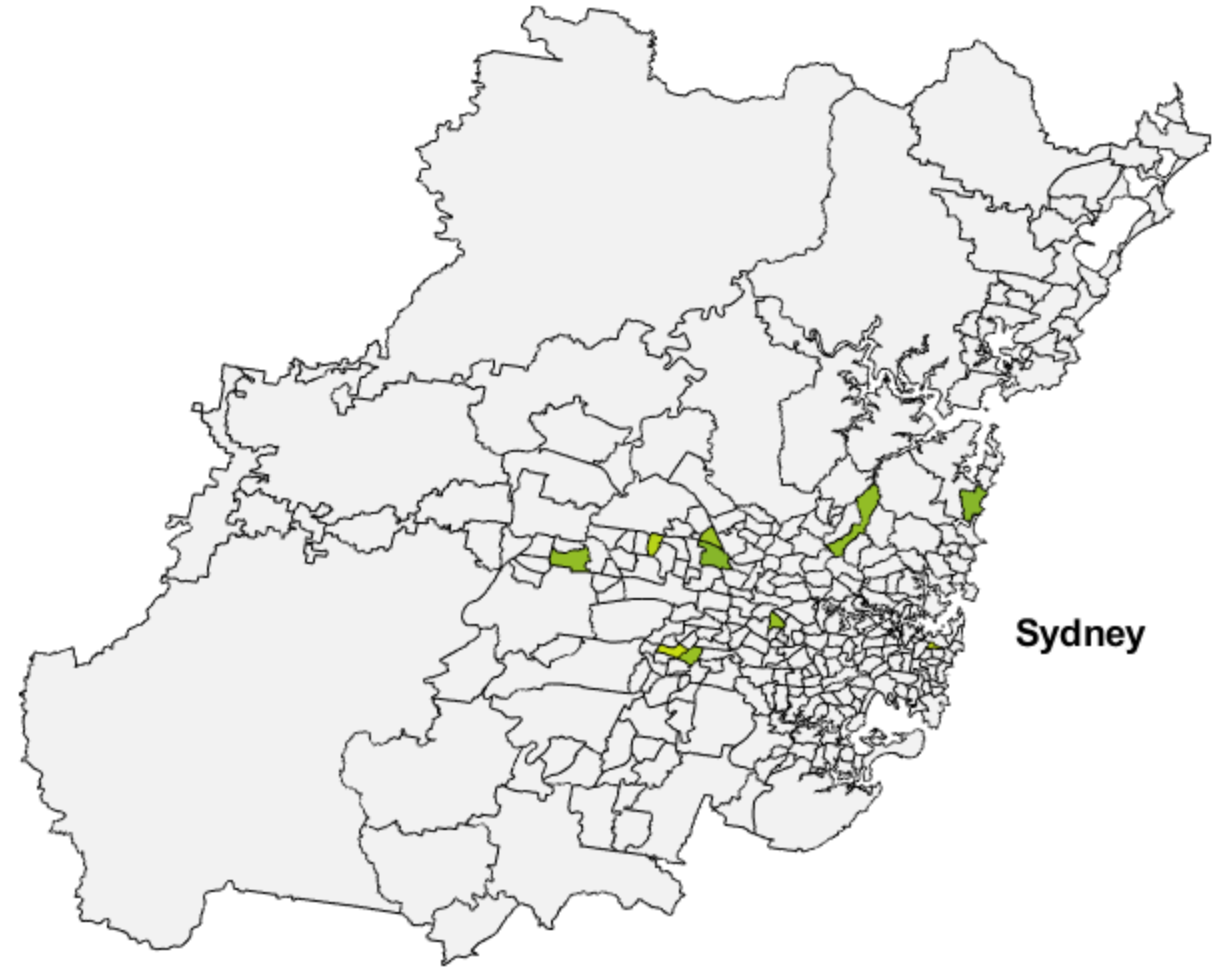

Sydney

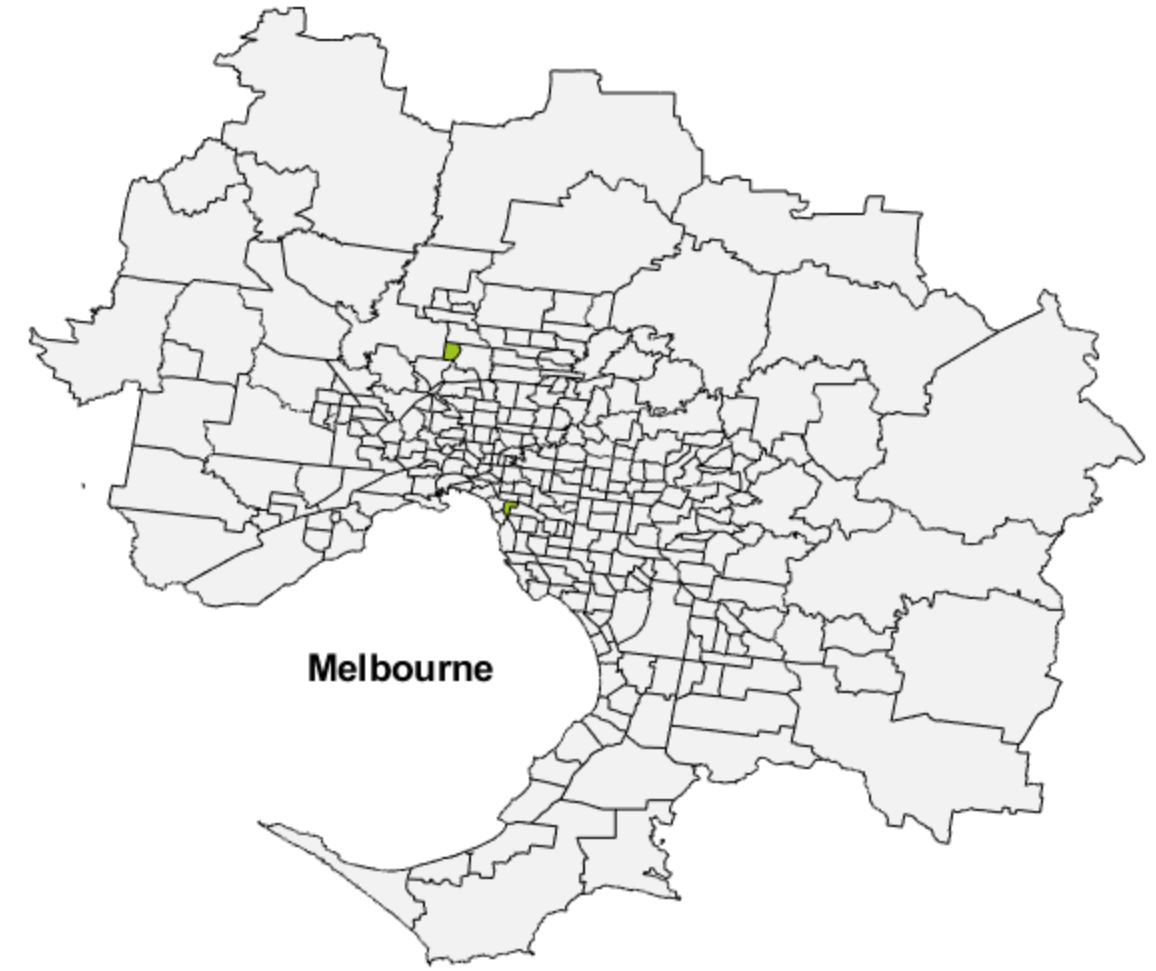

Melbourne

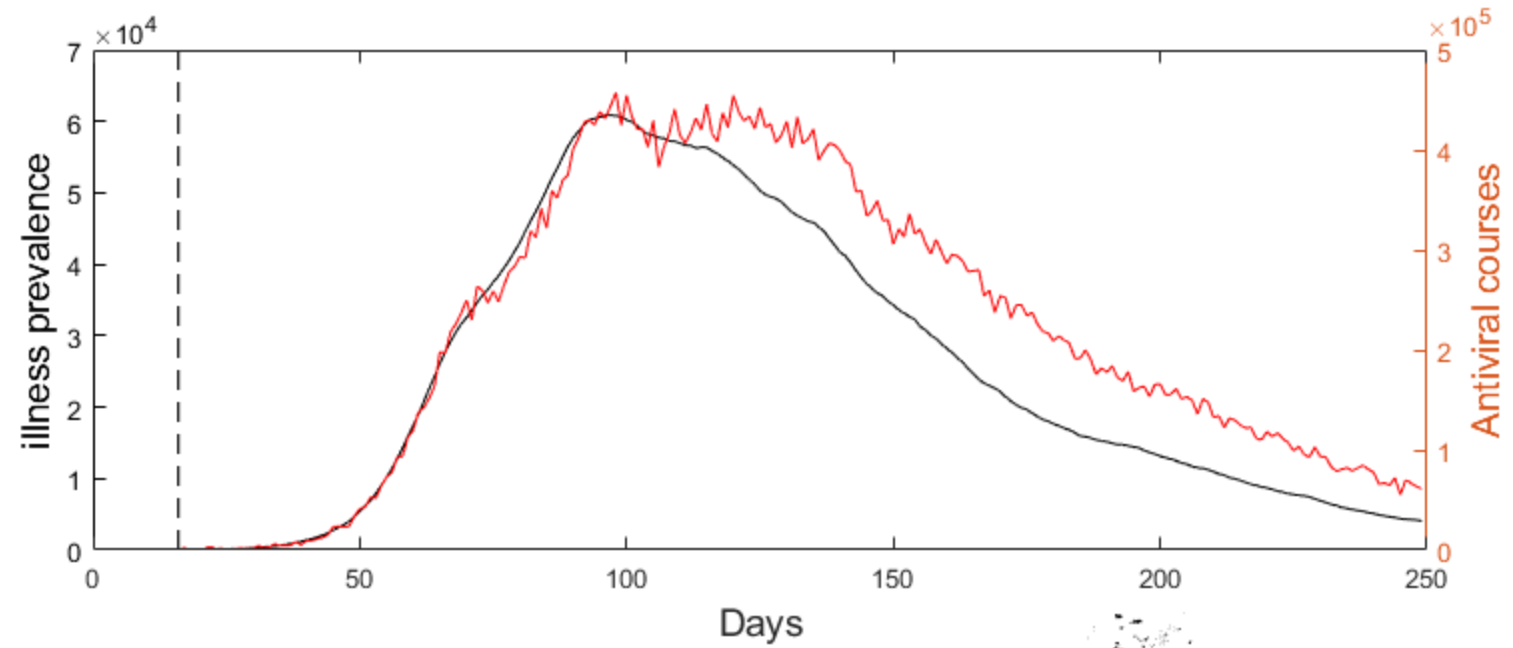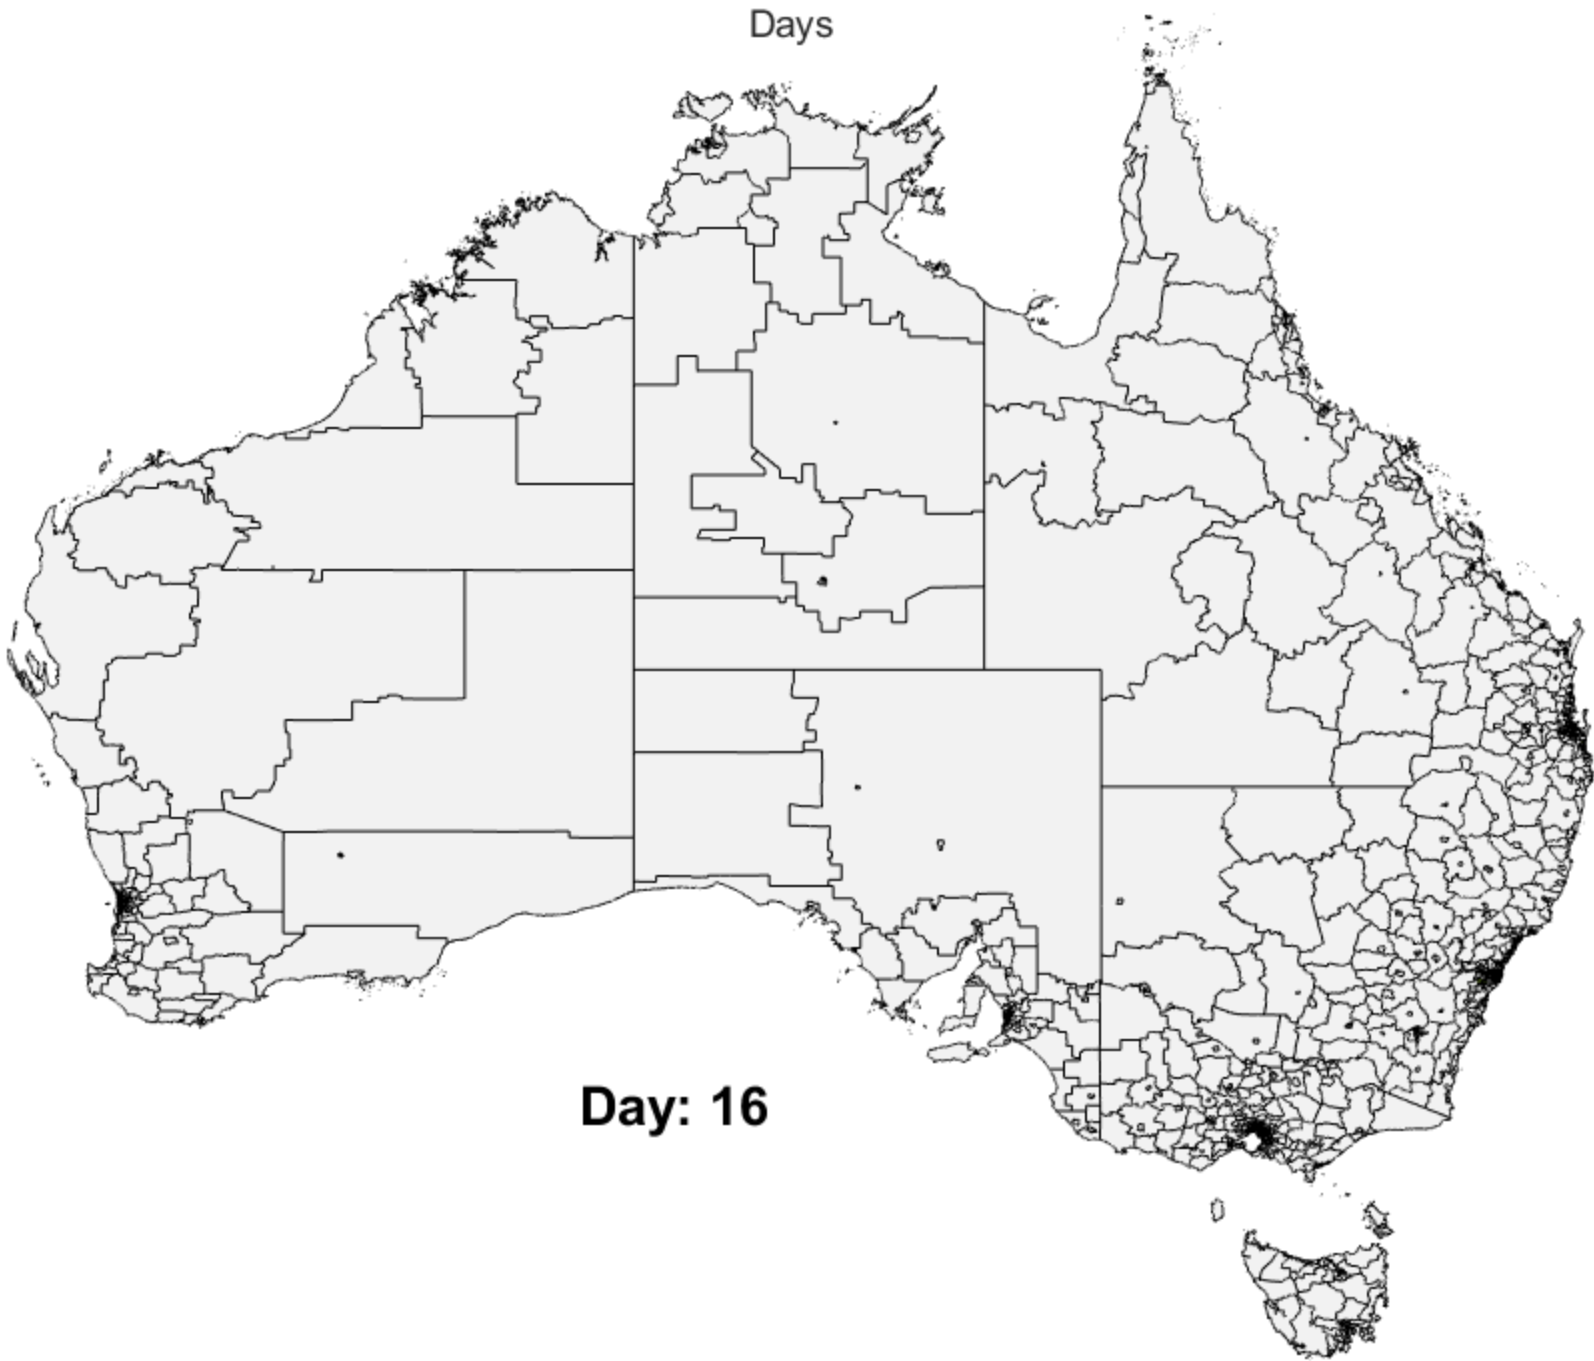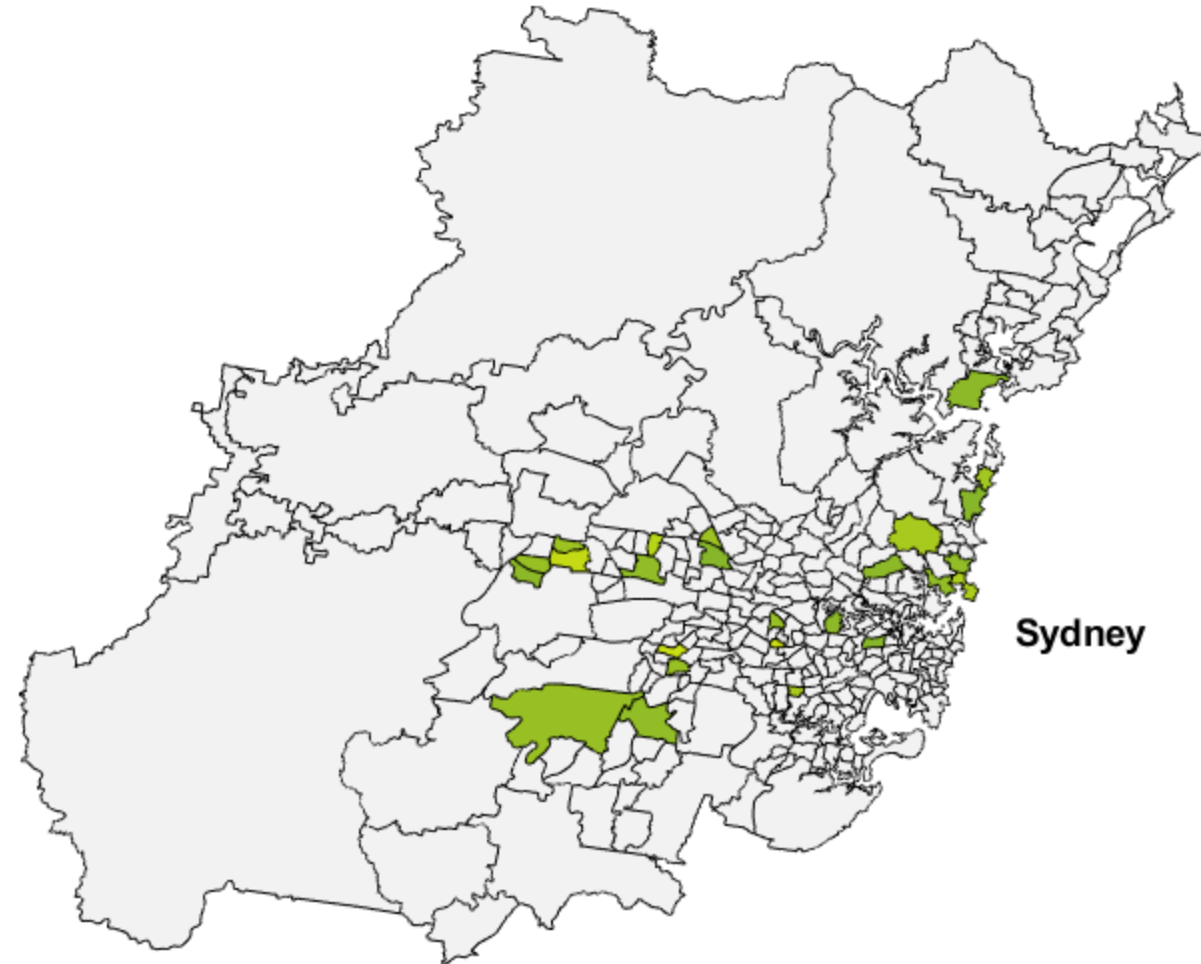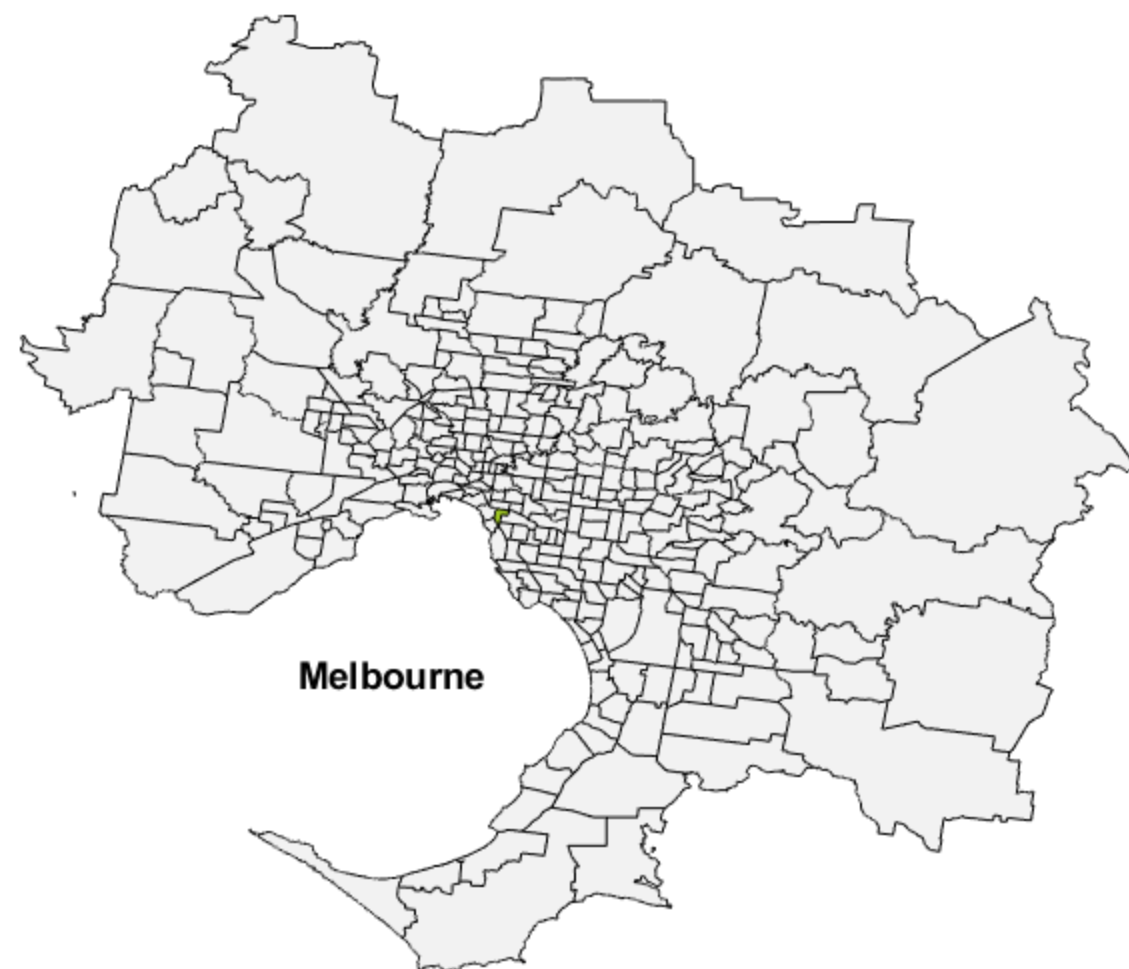

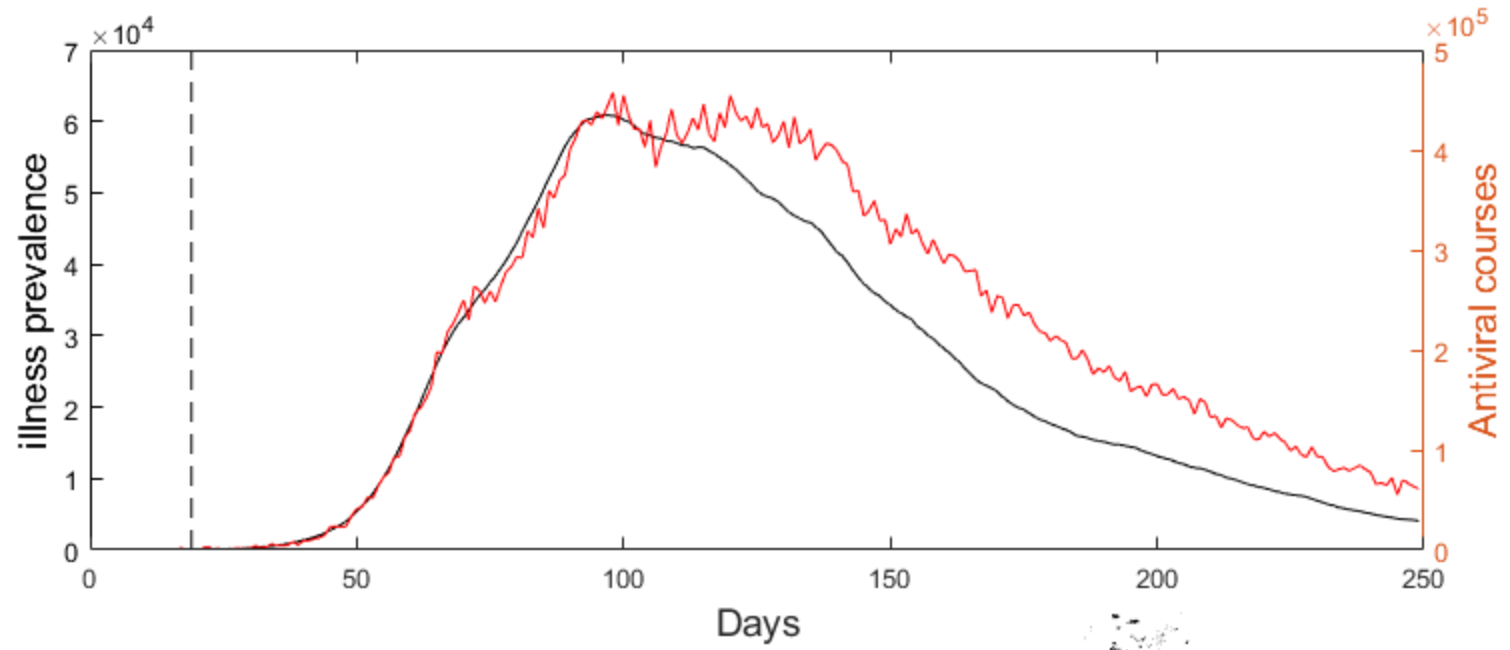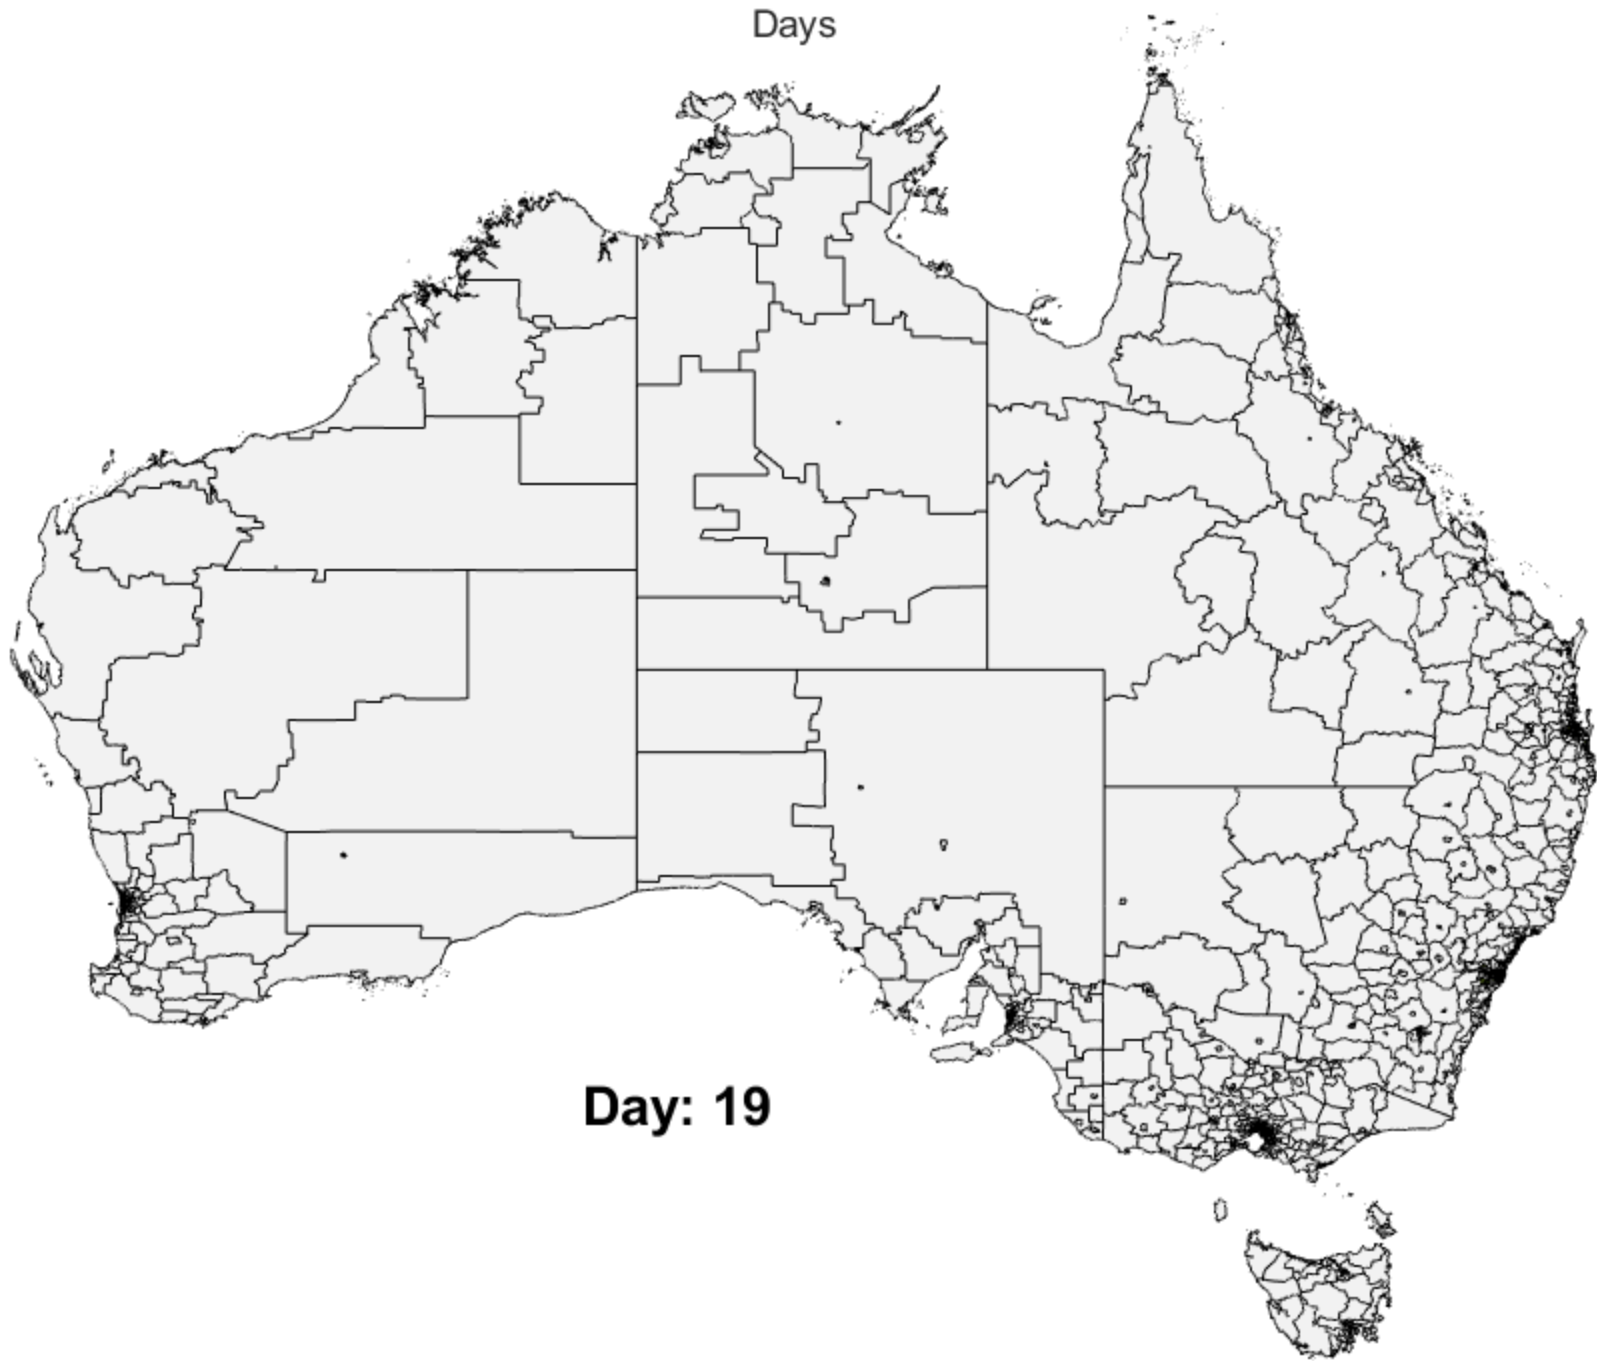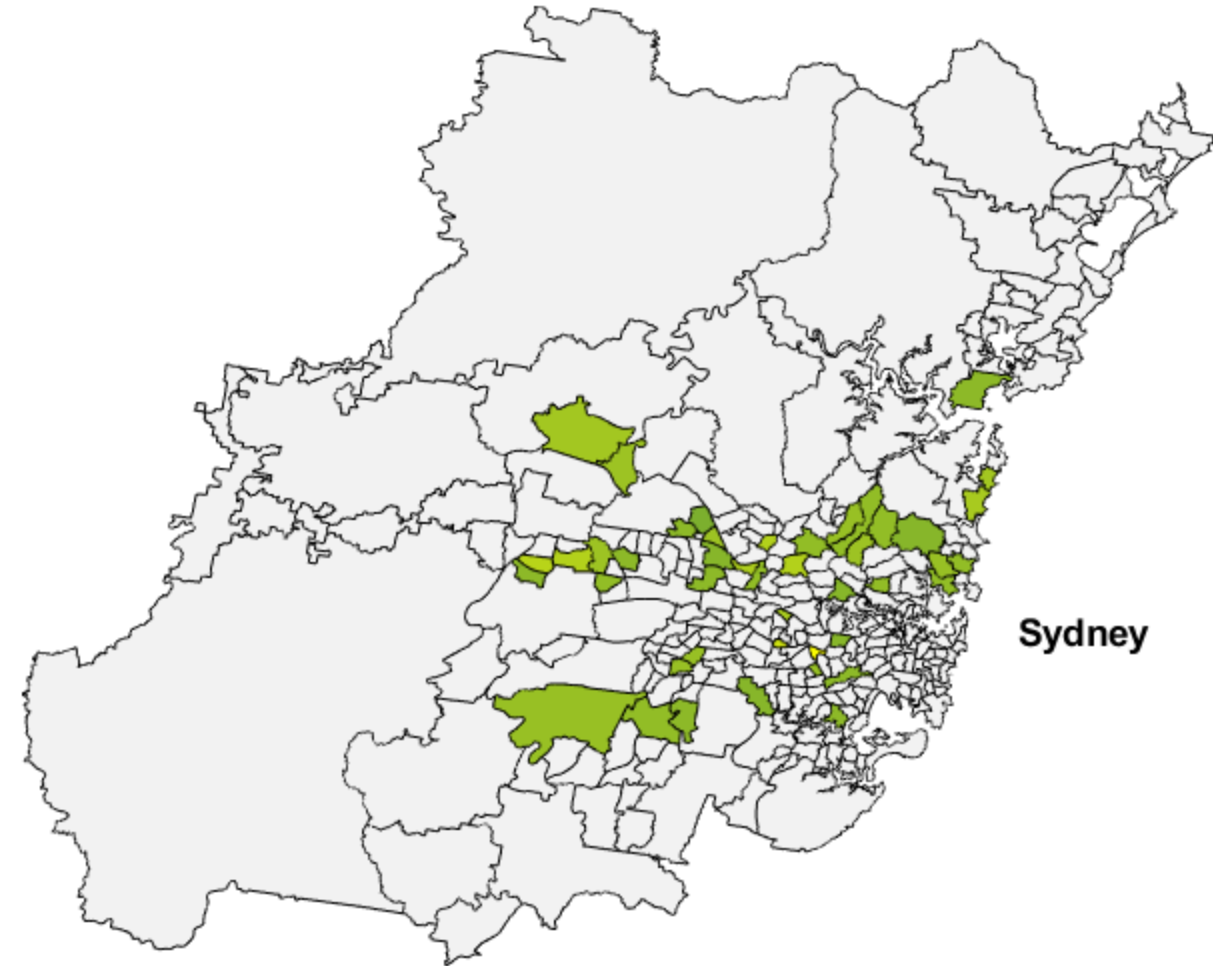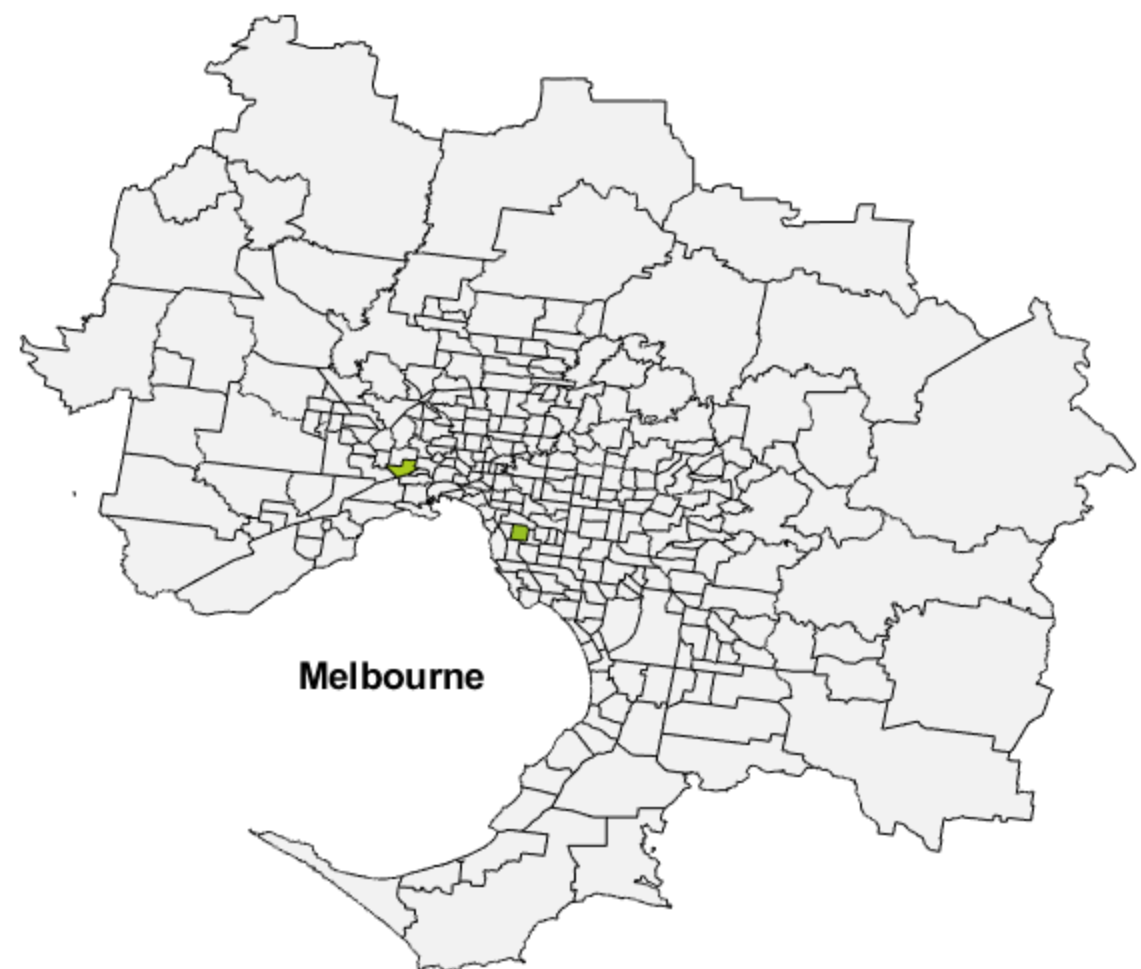



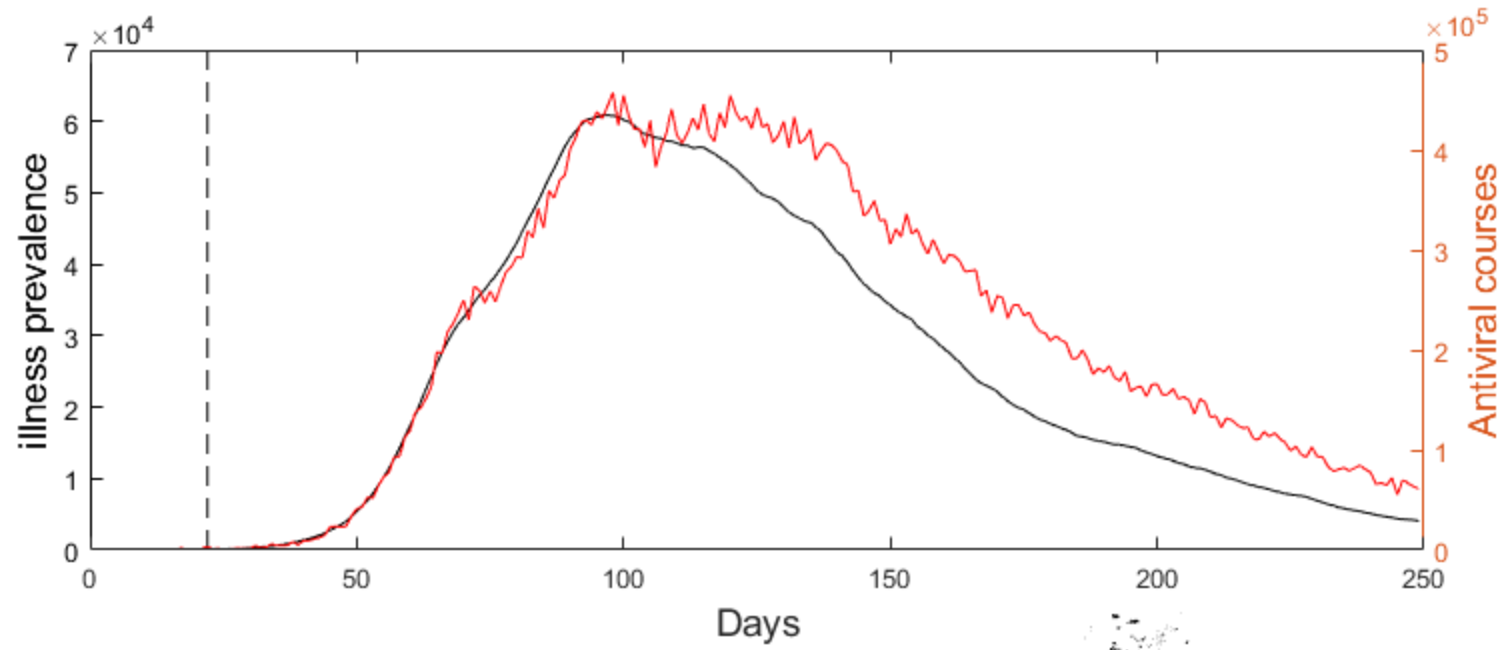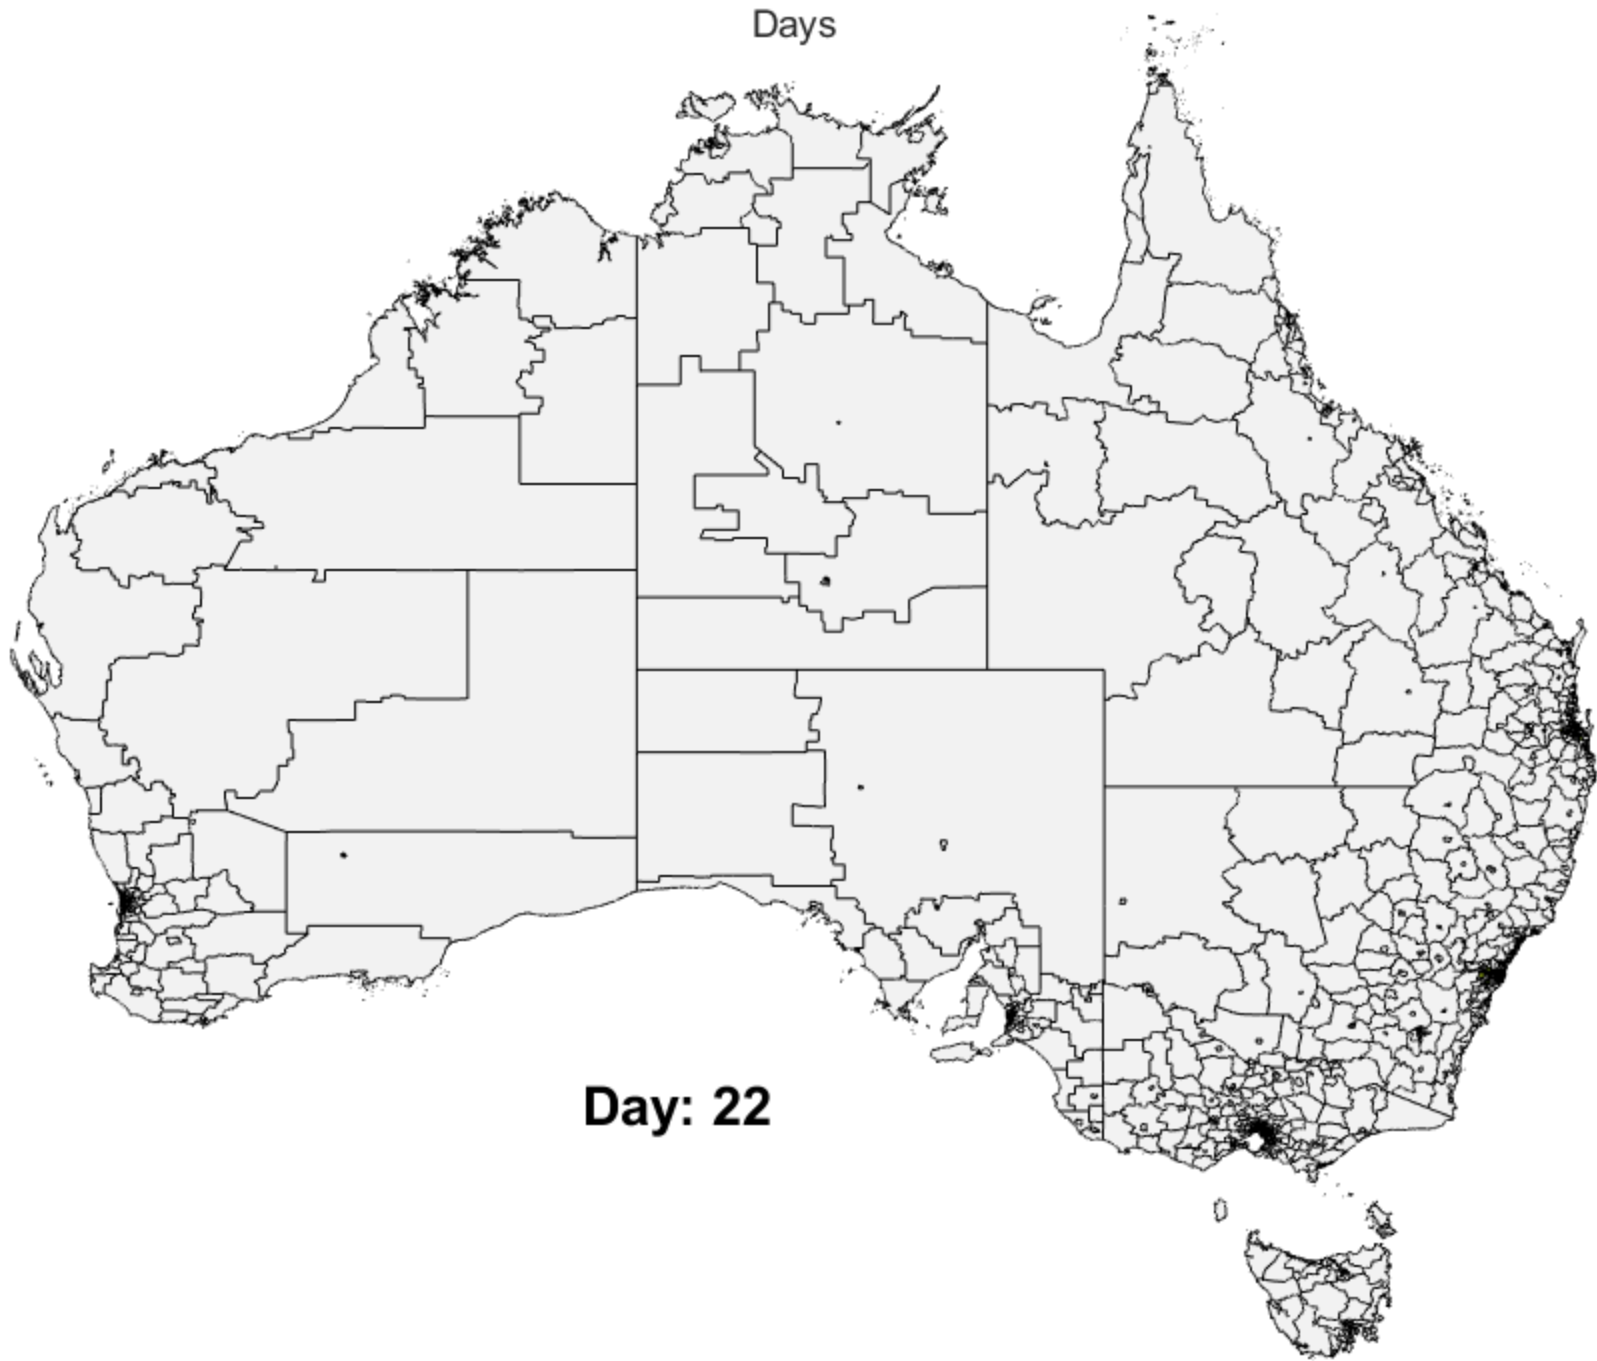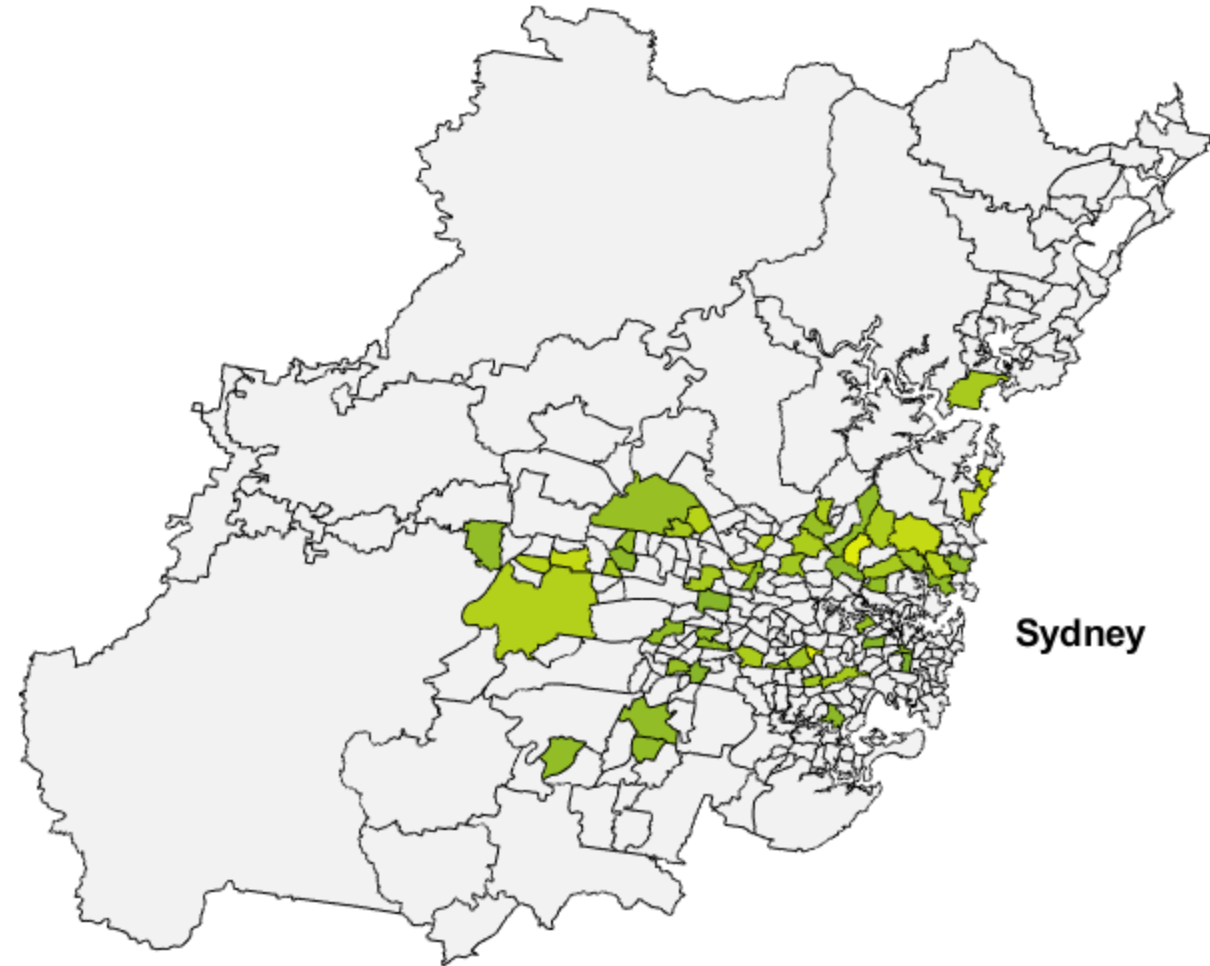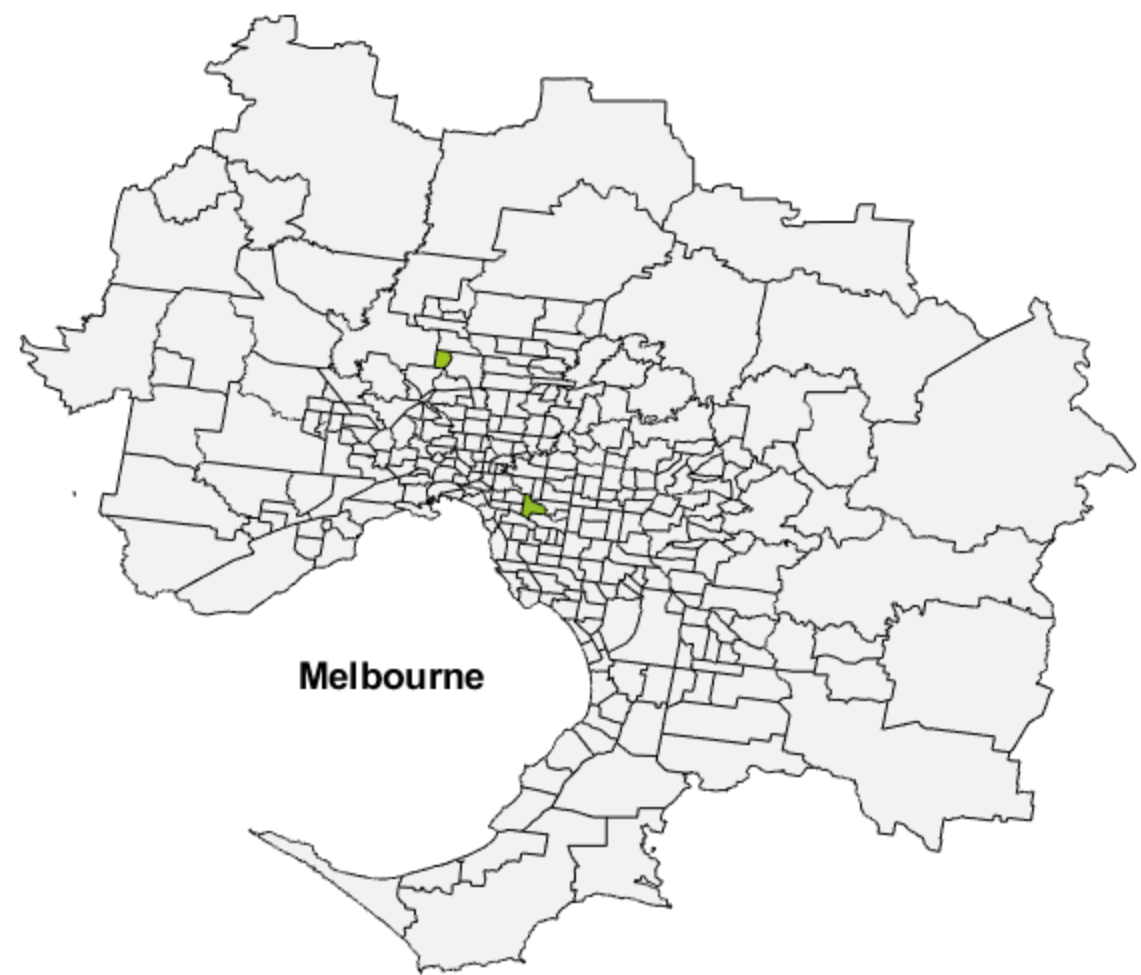

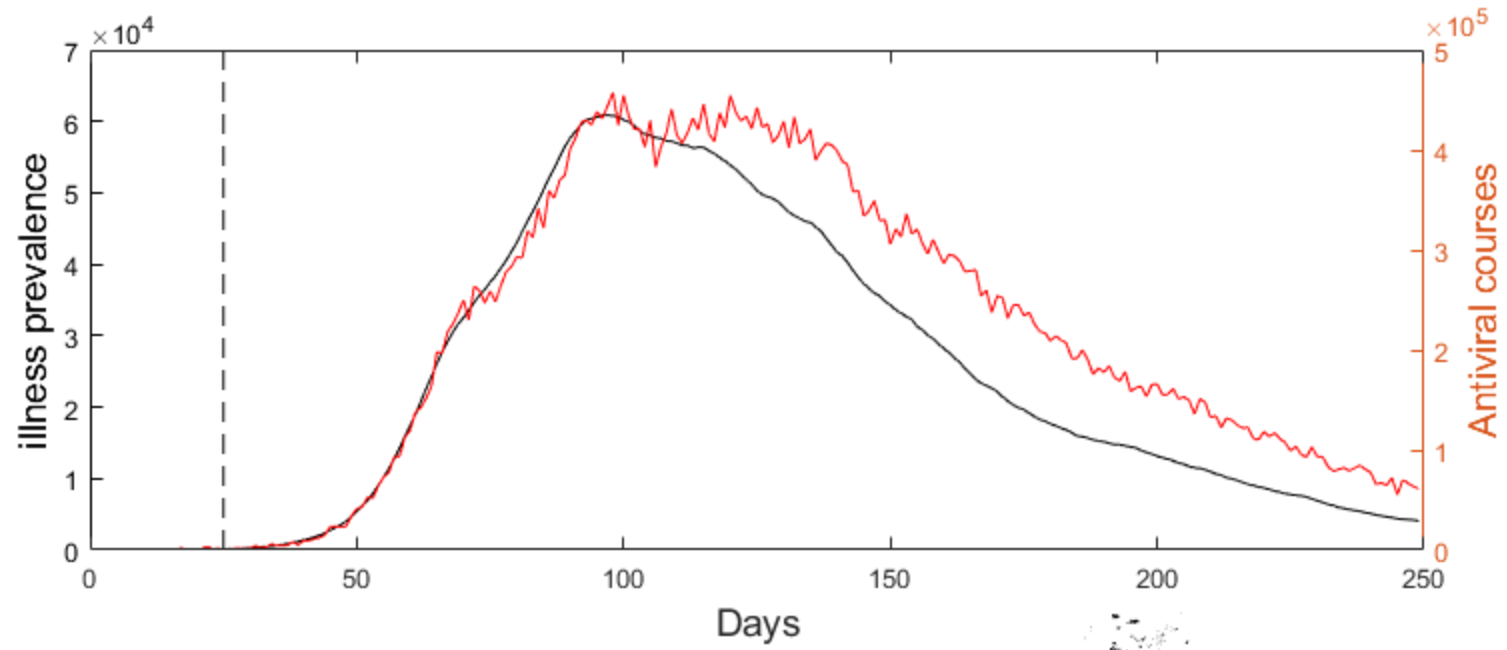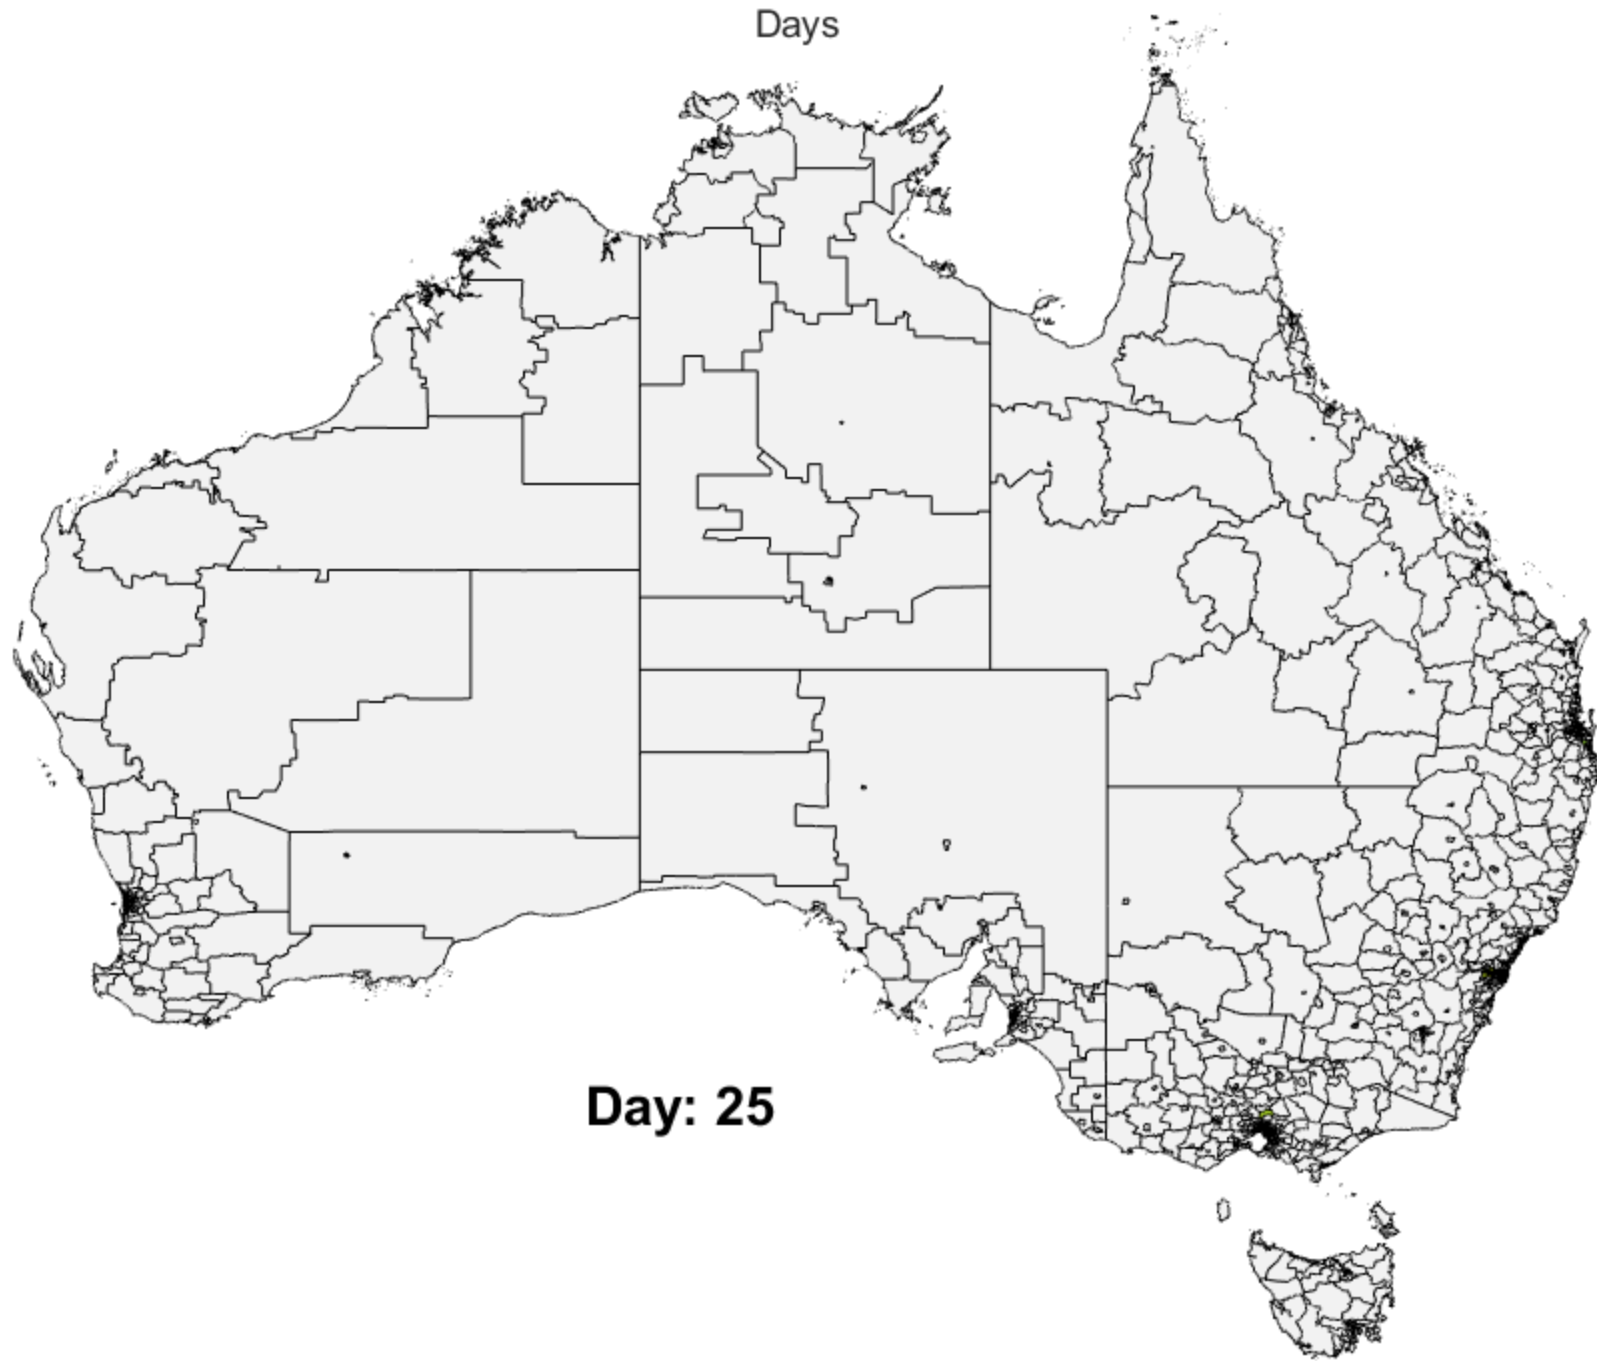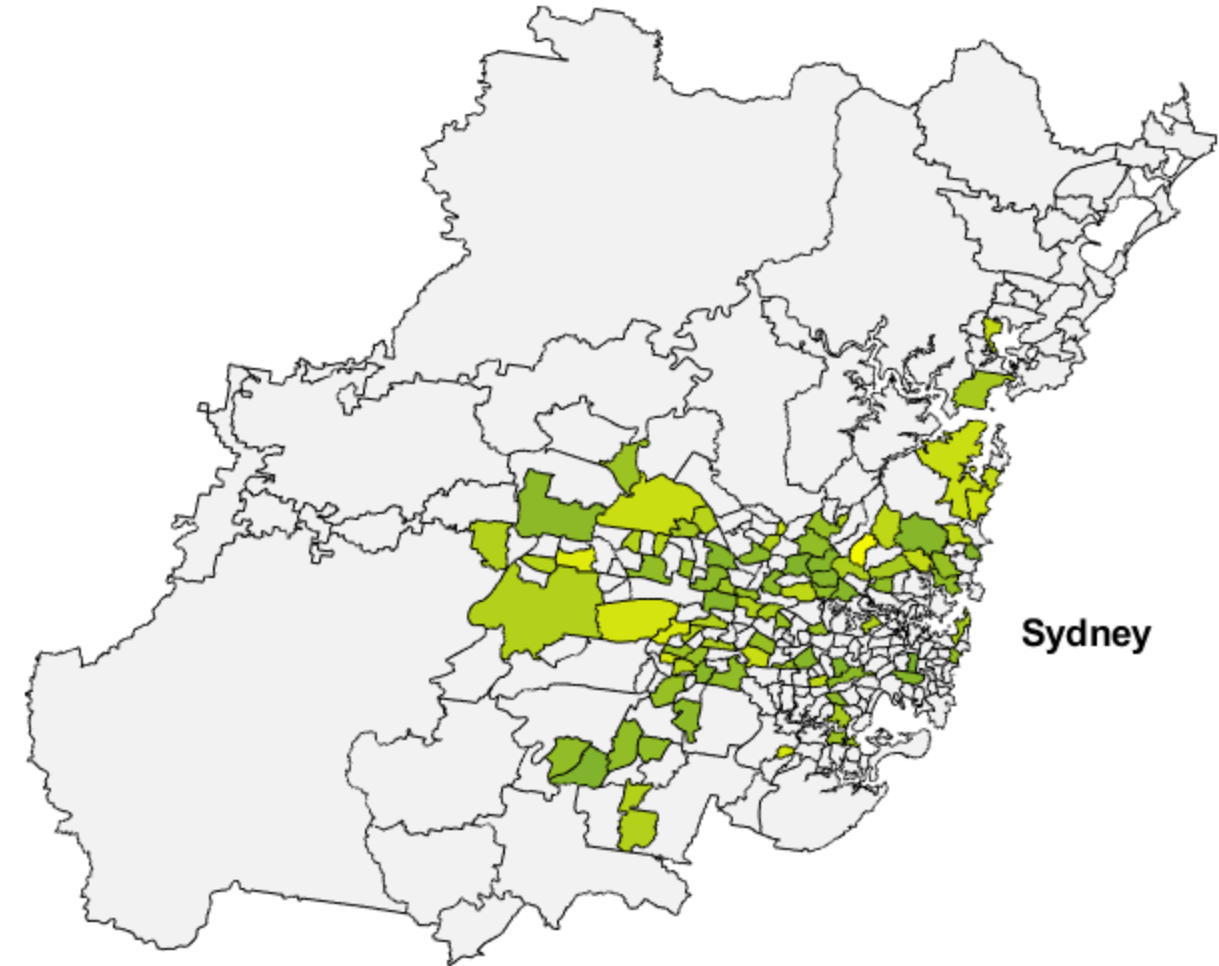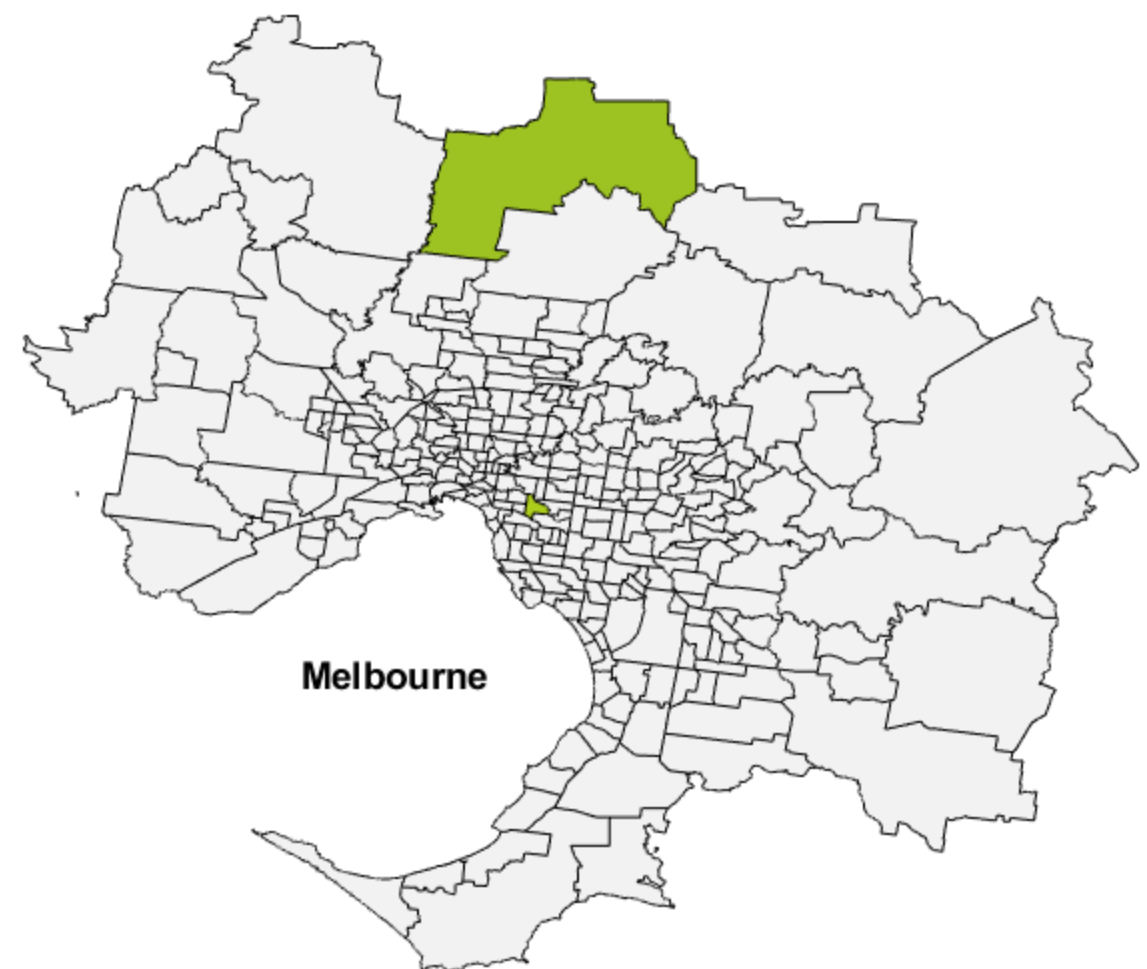

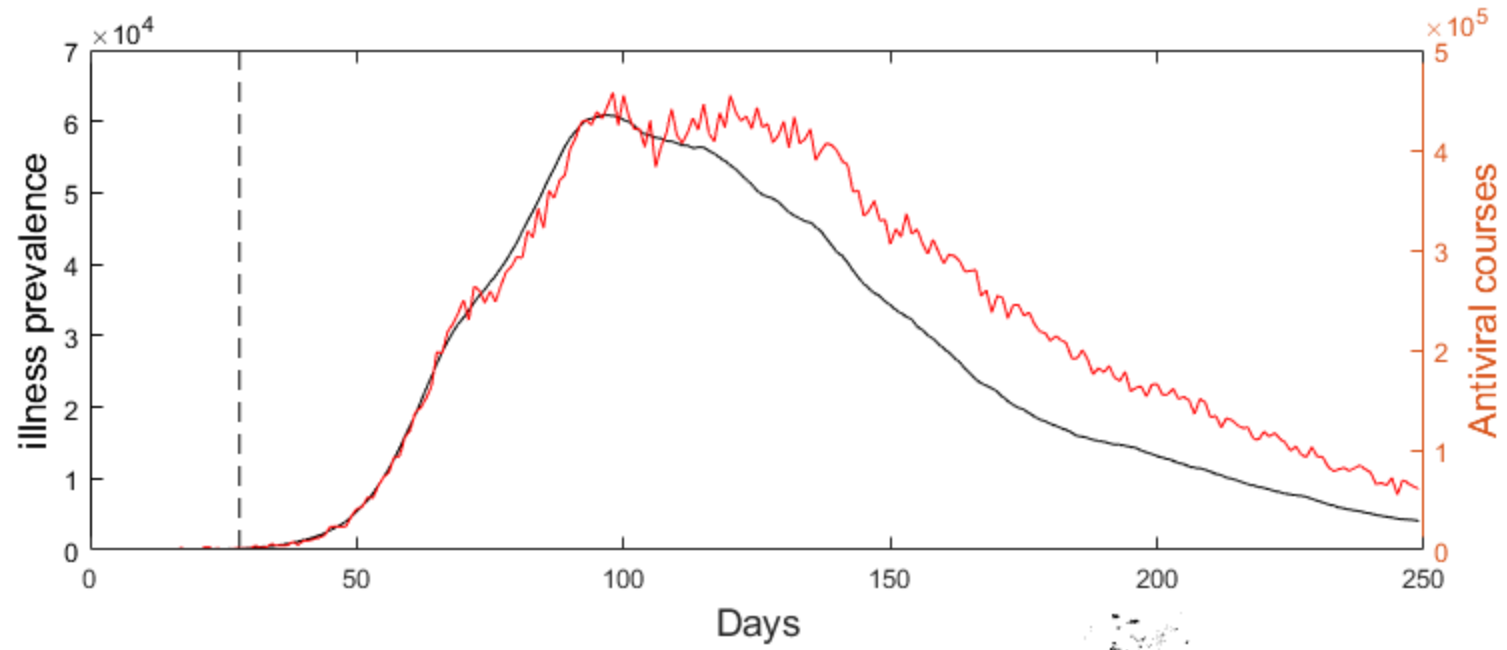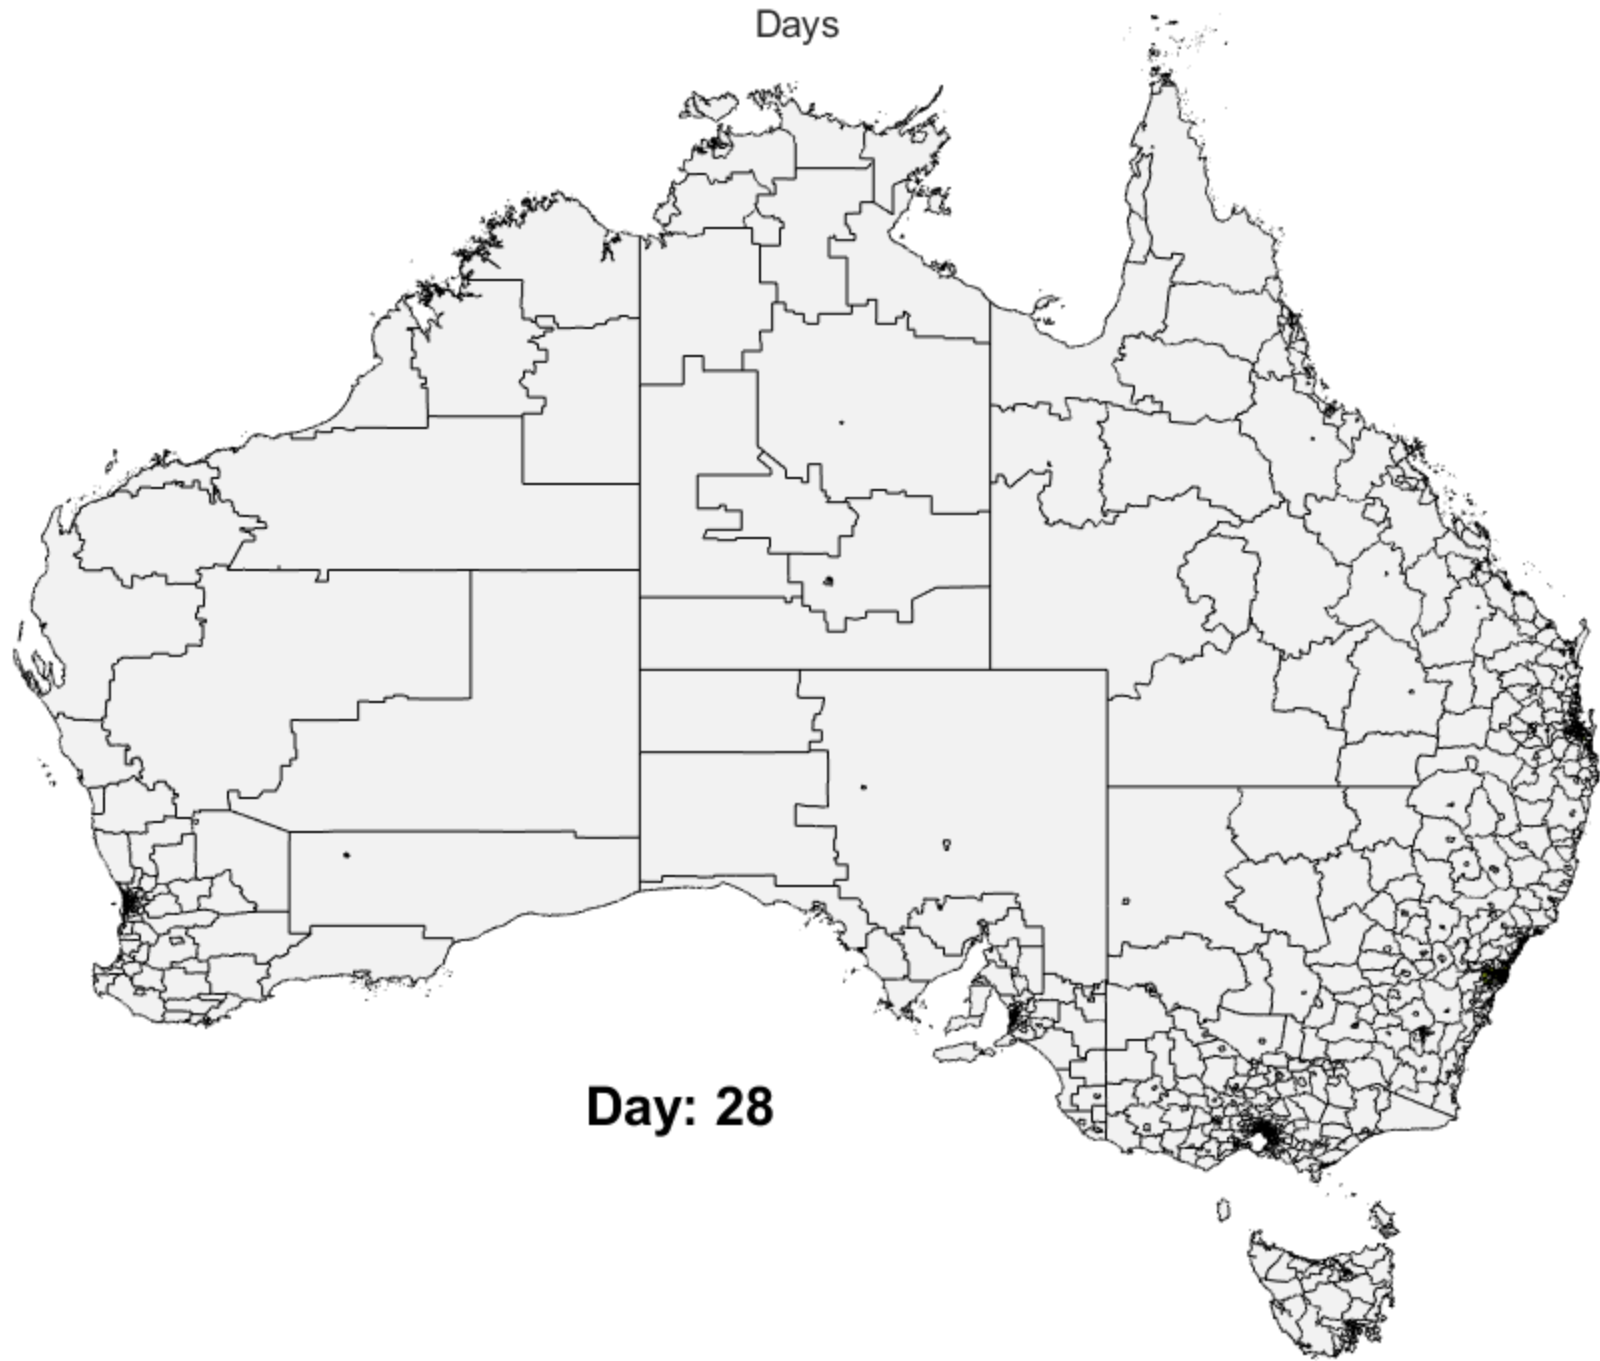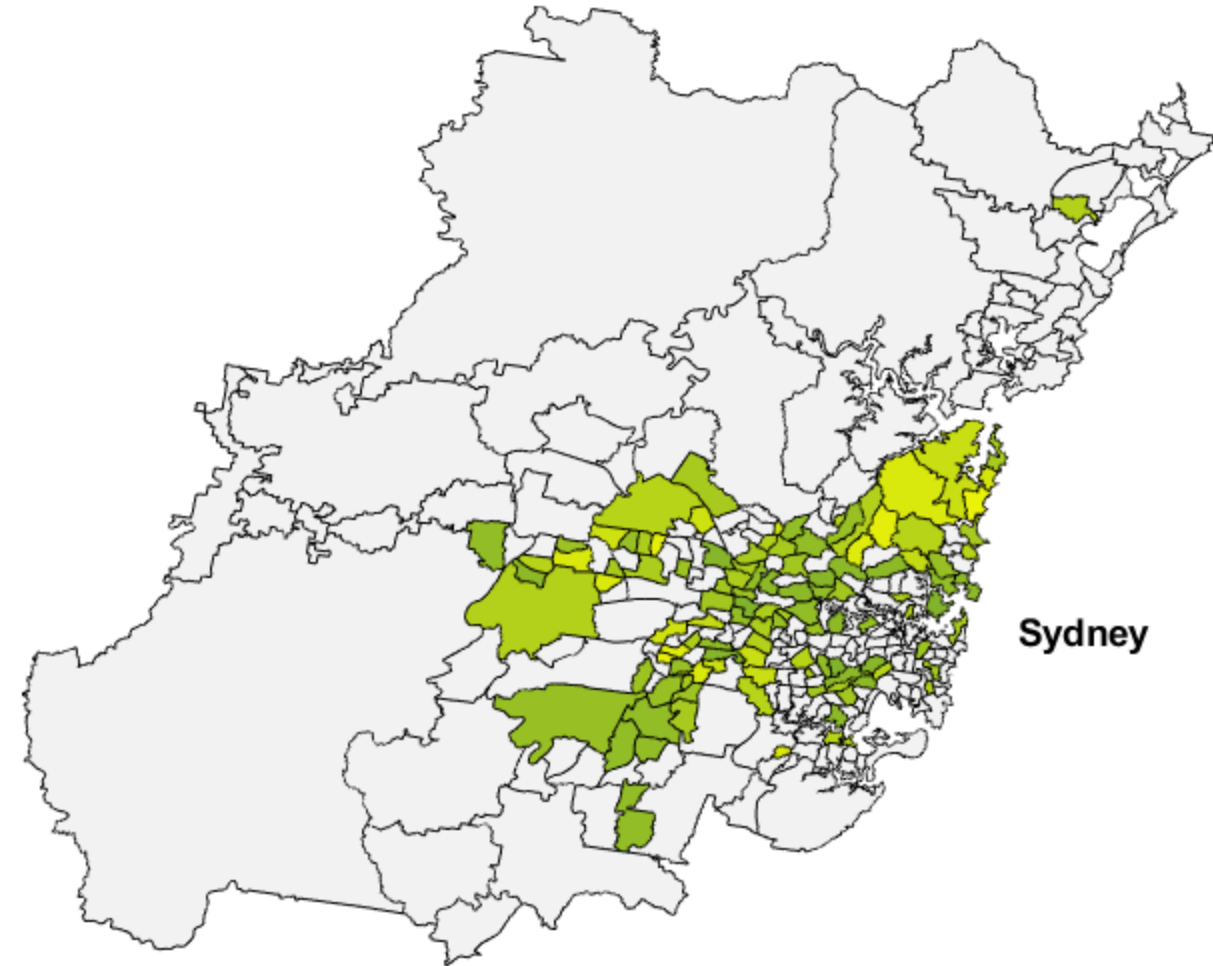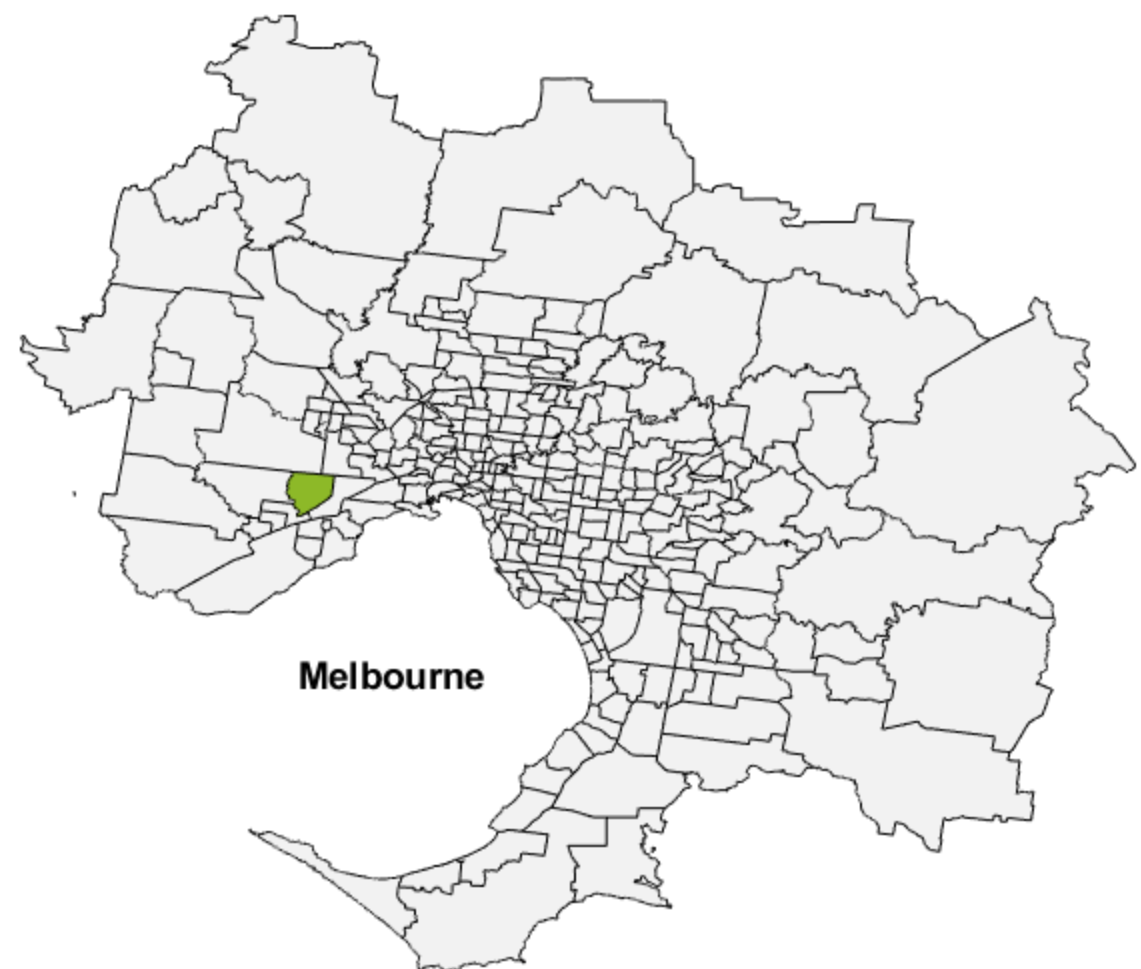



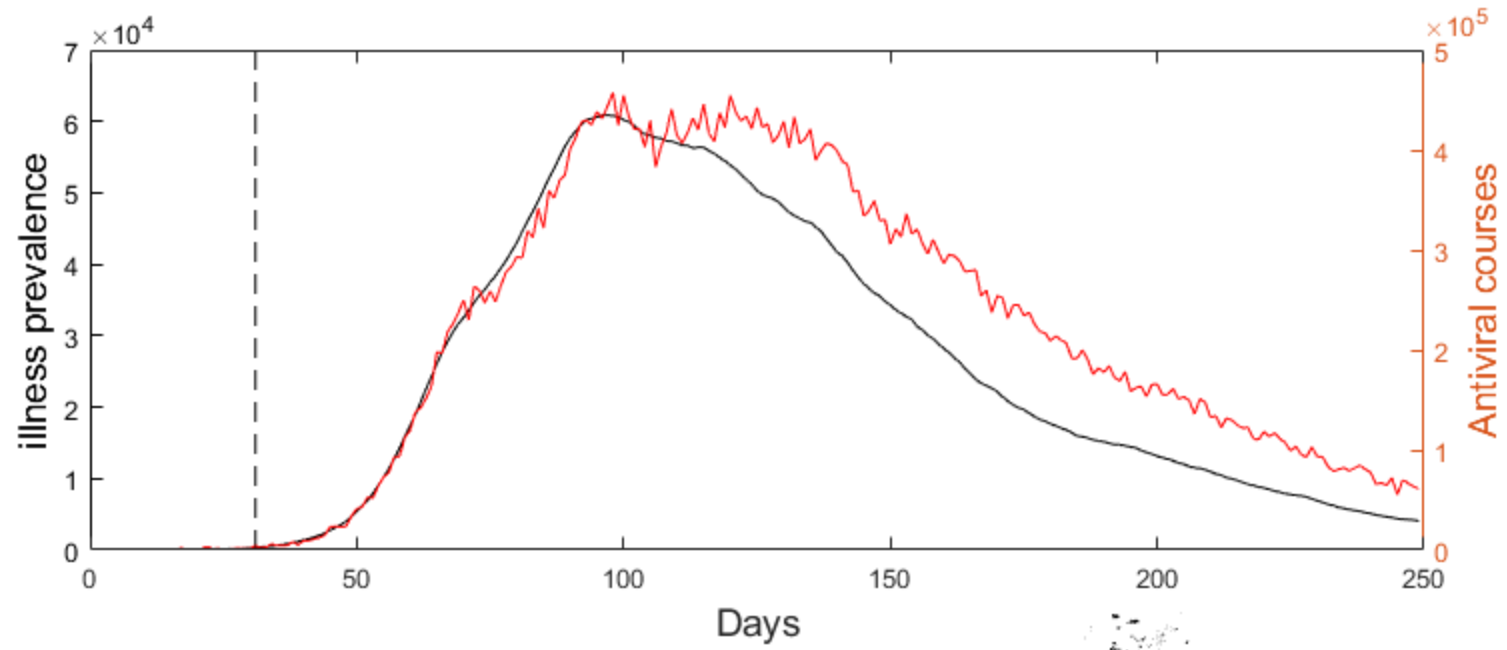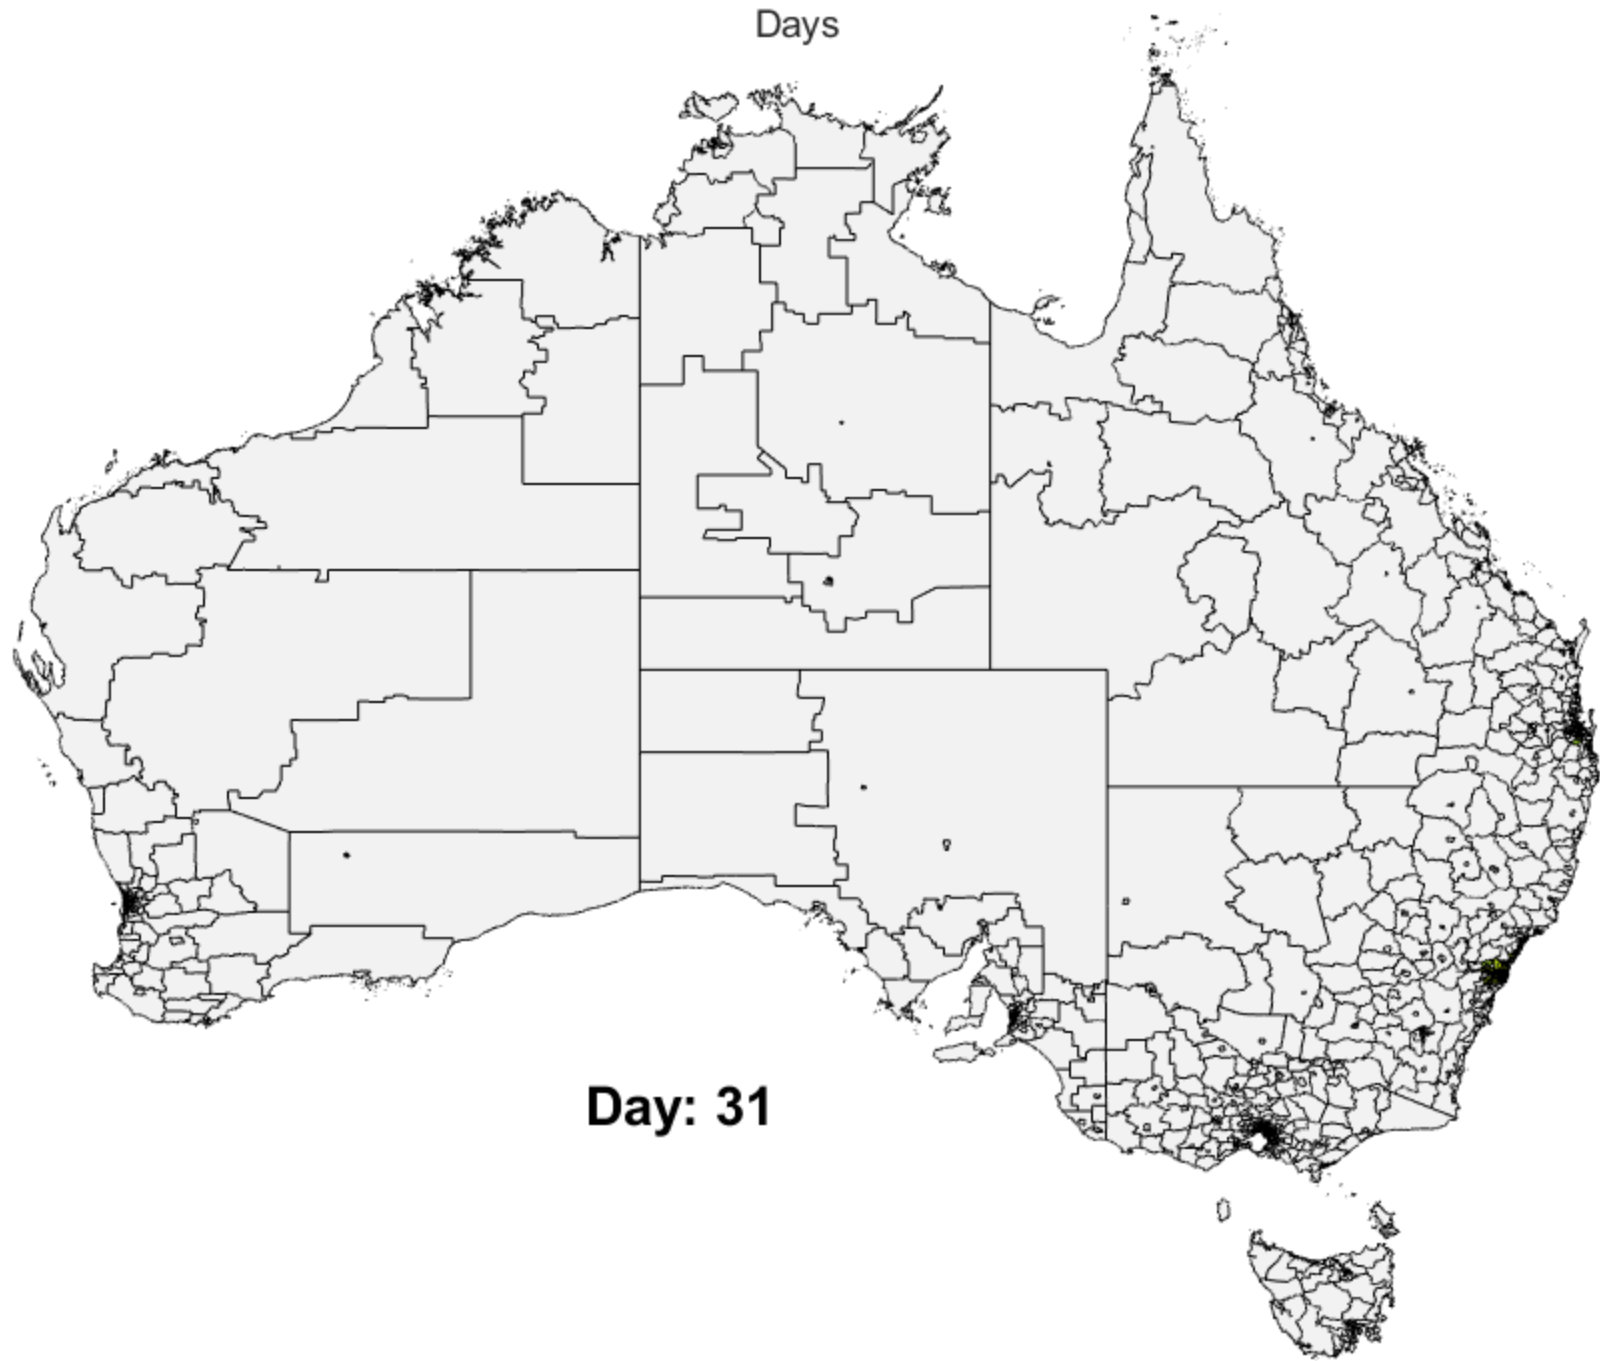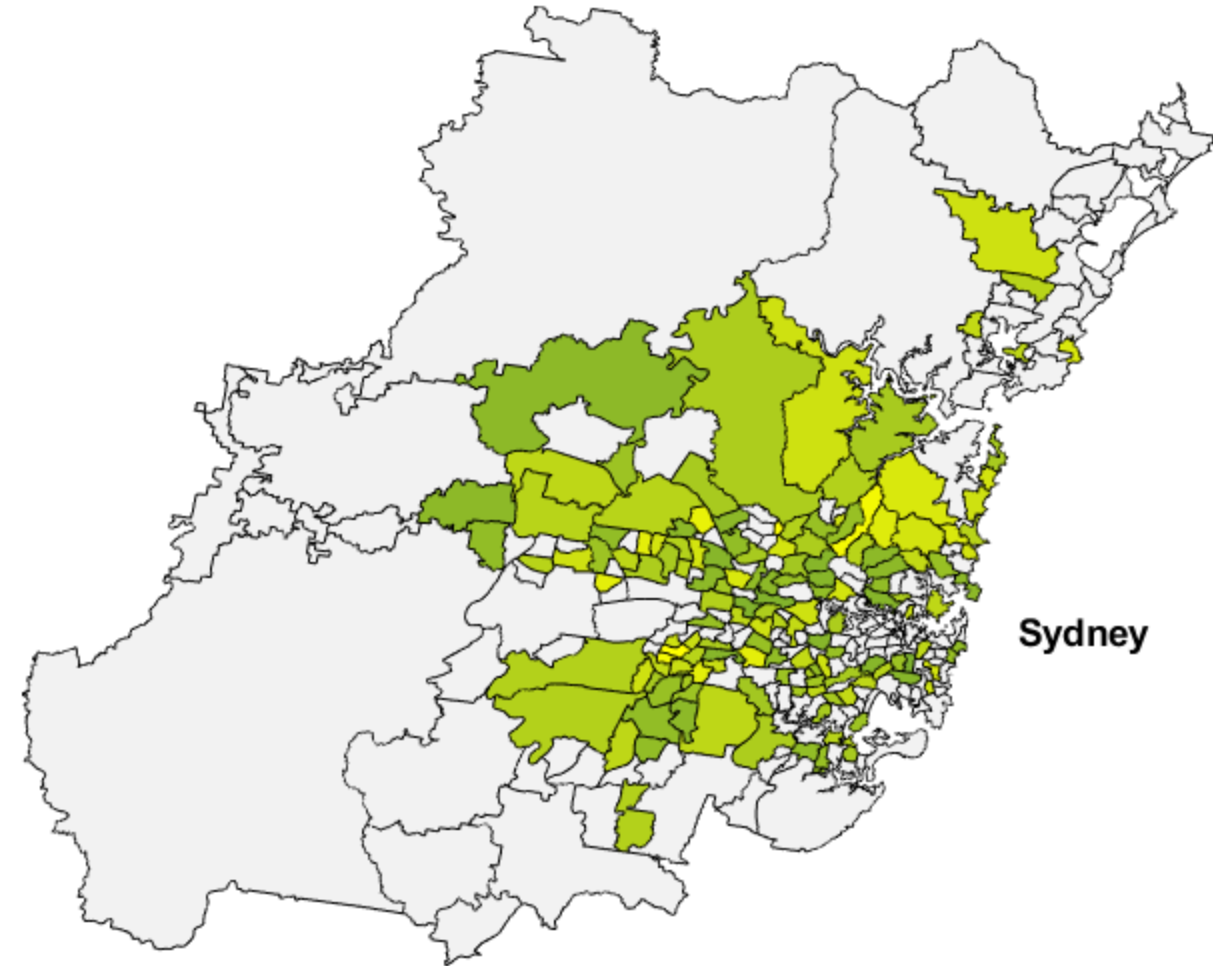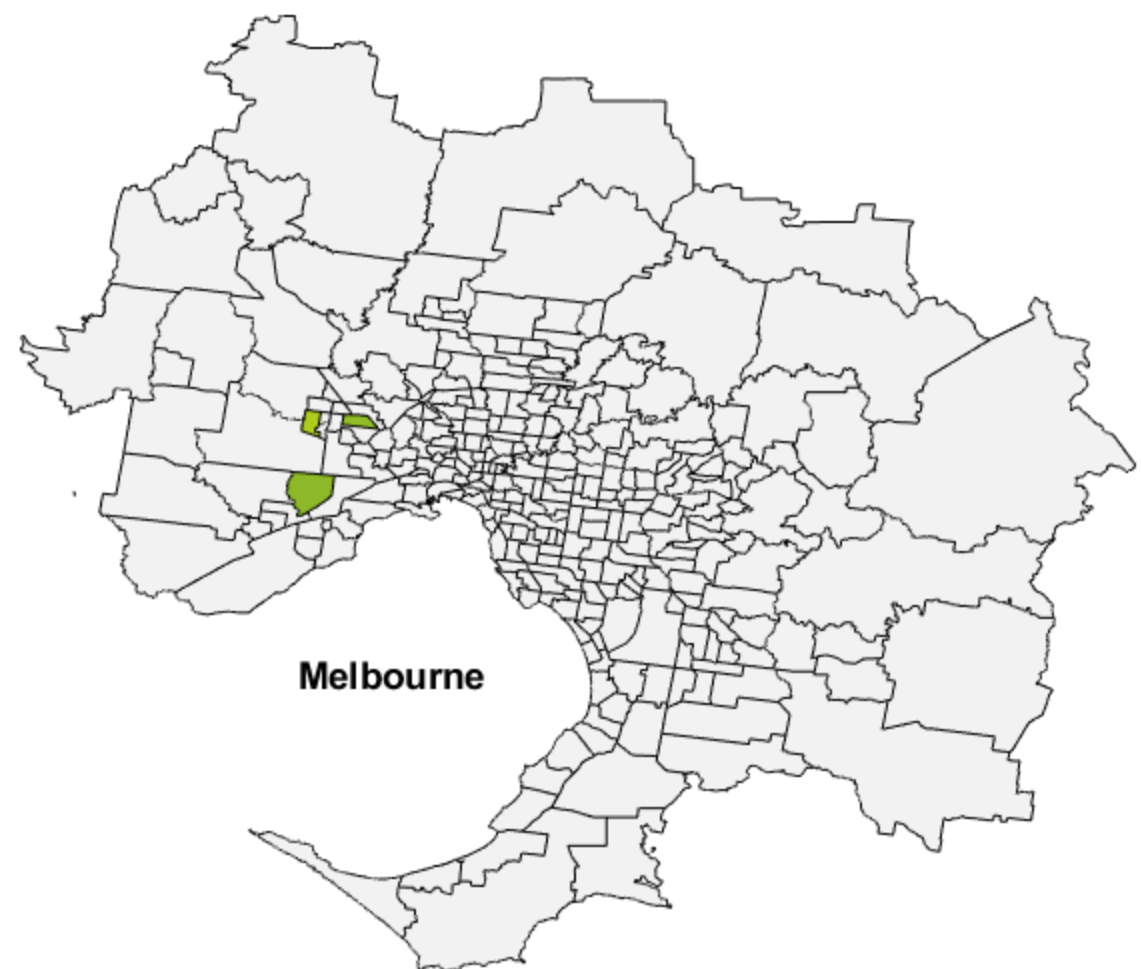

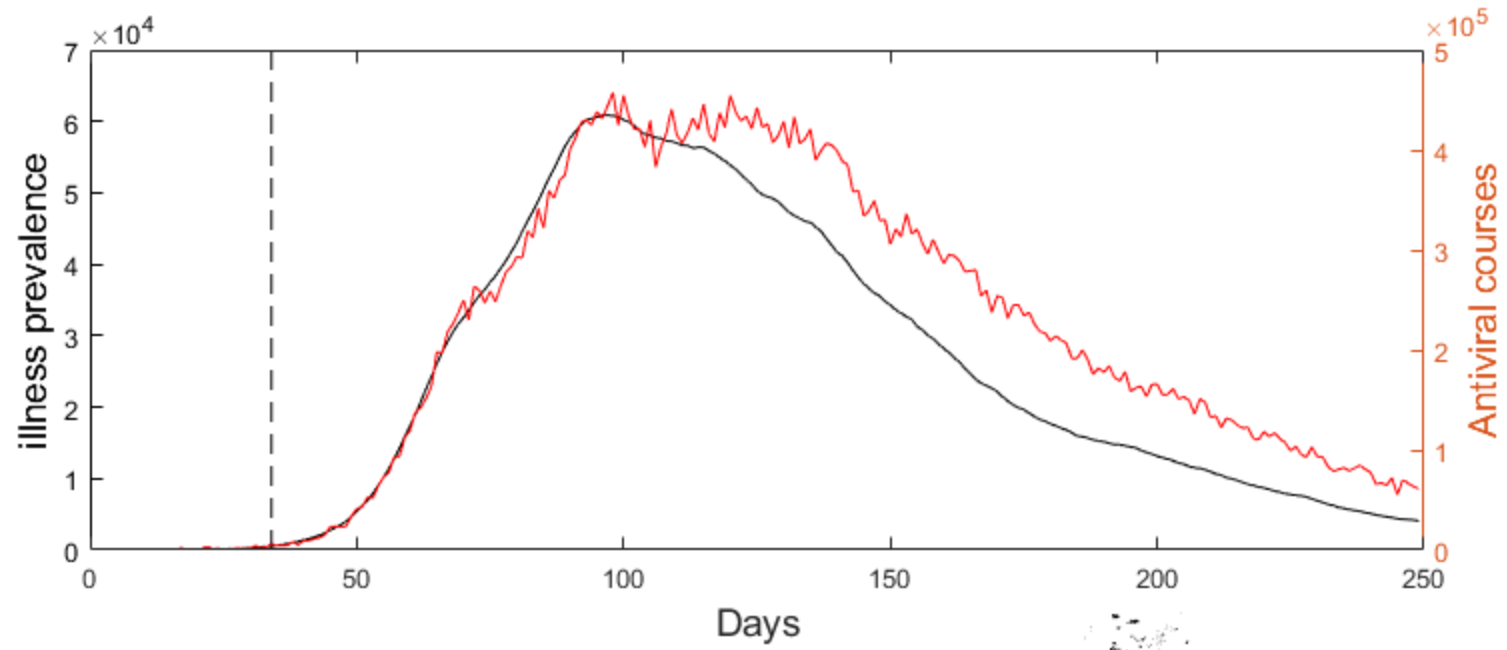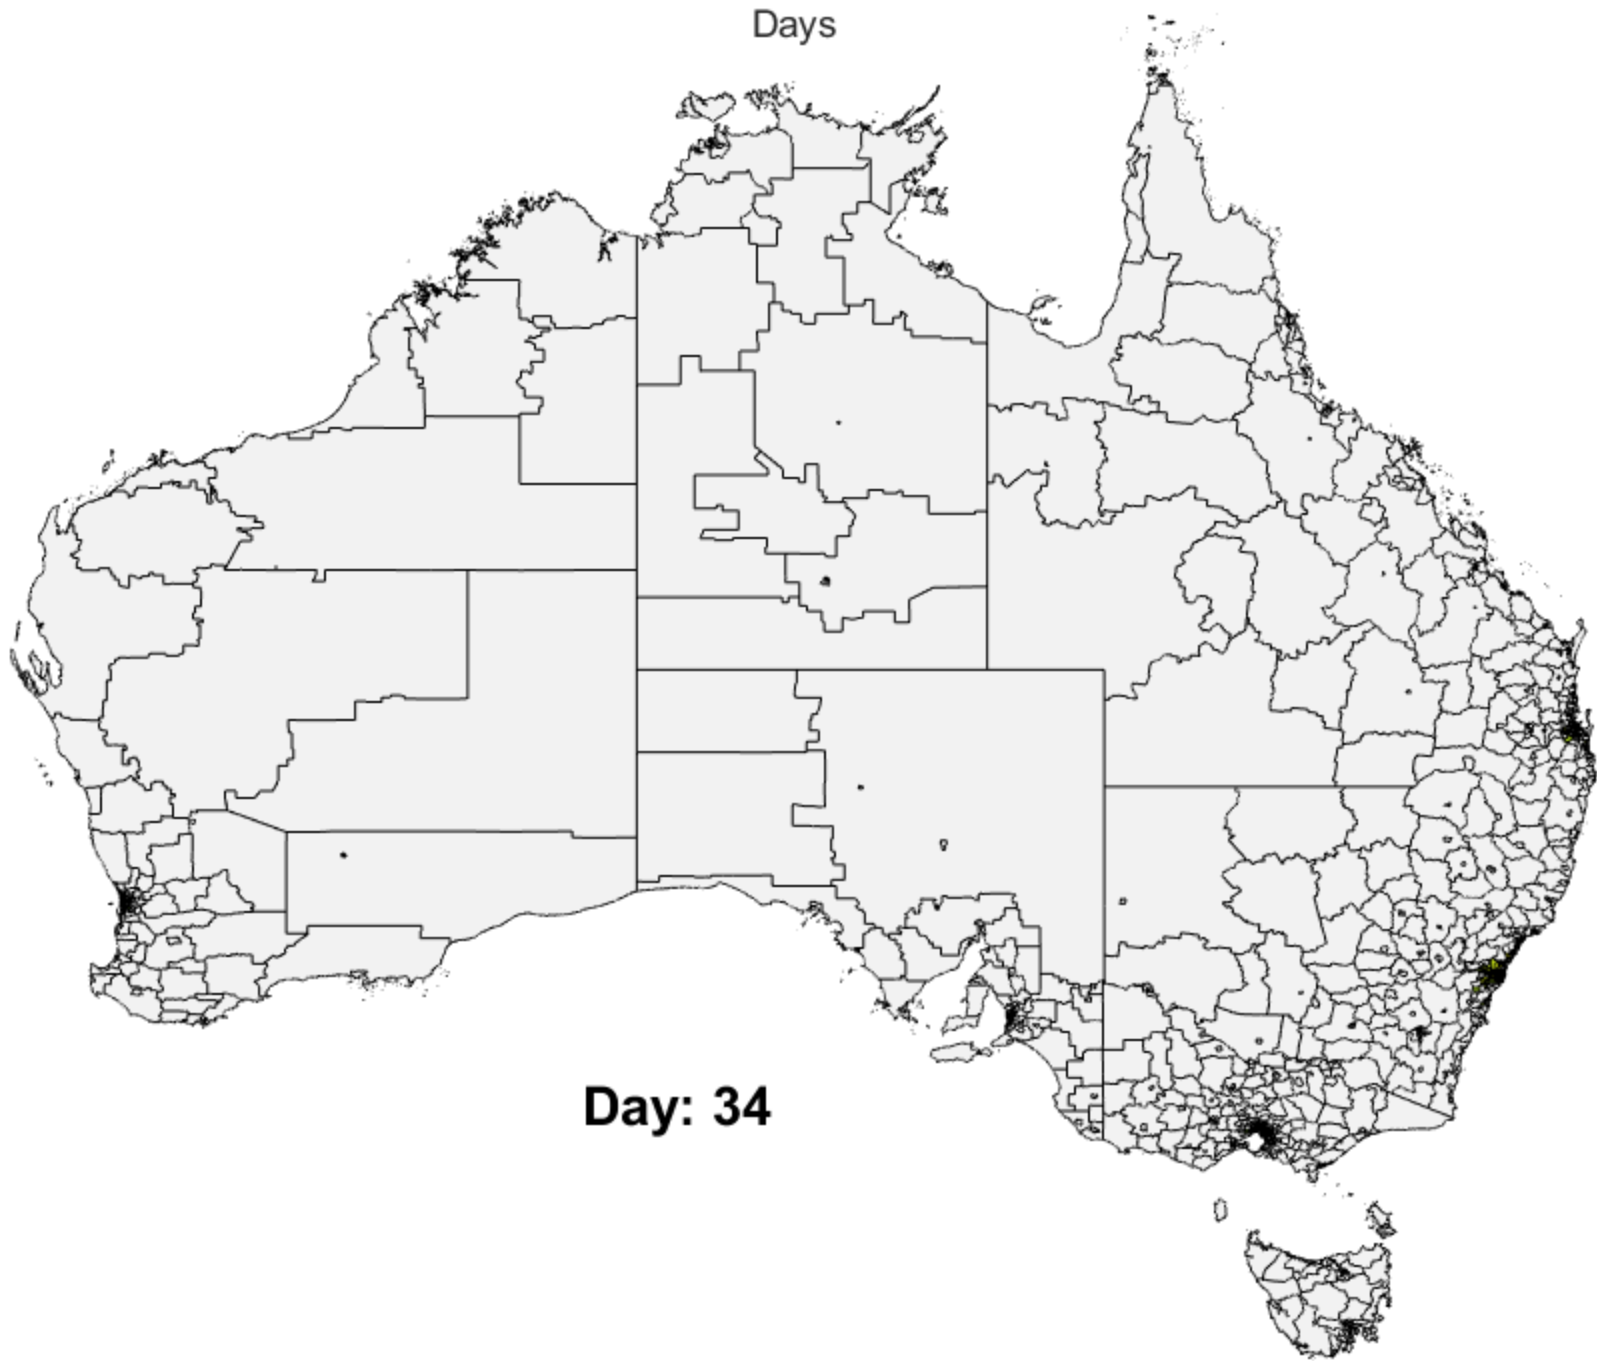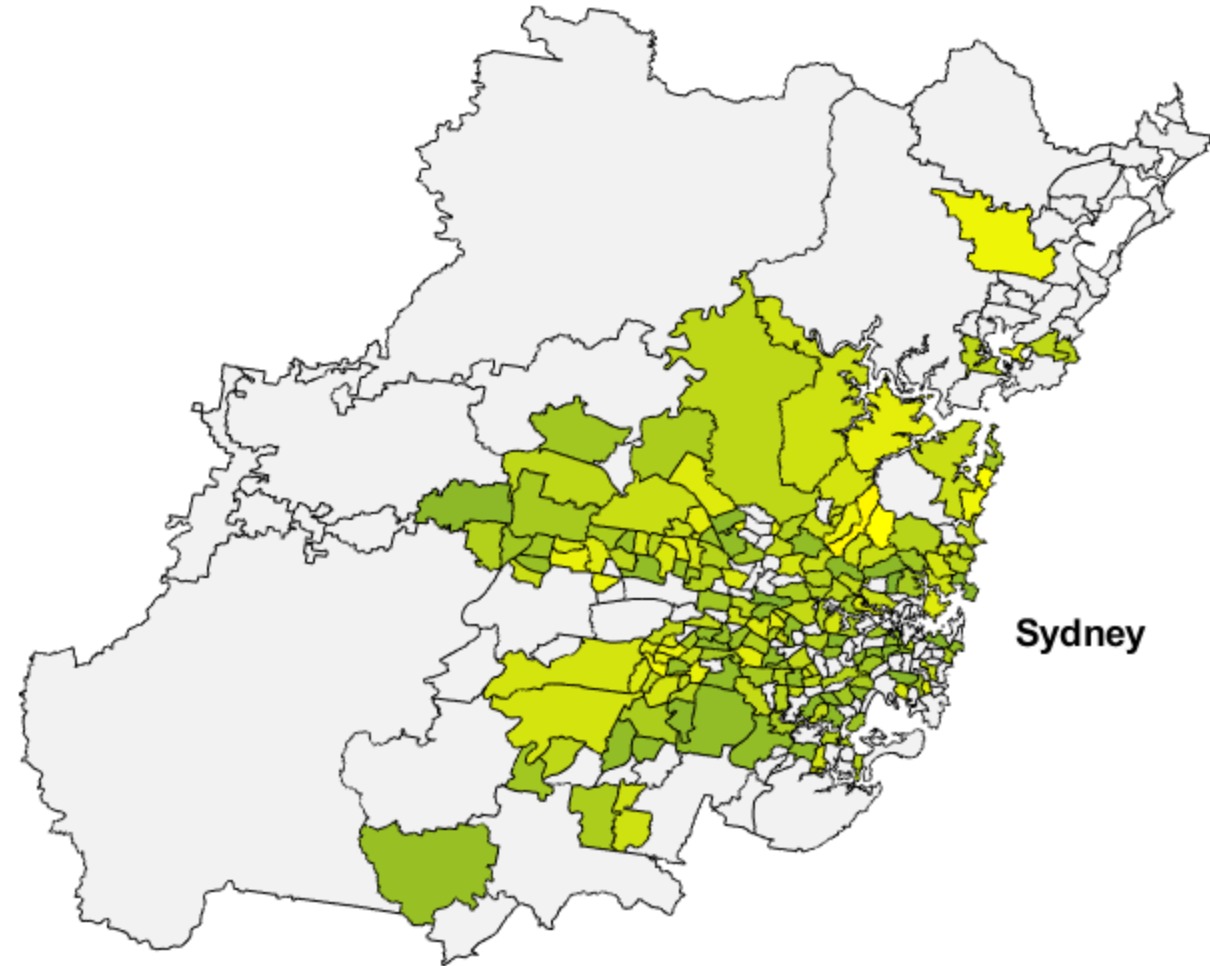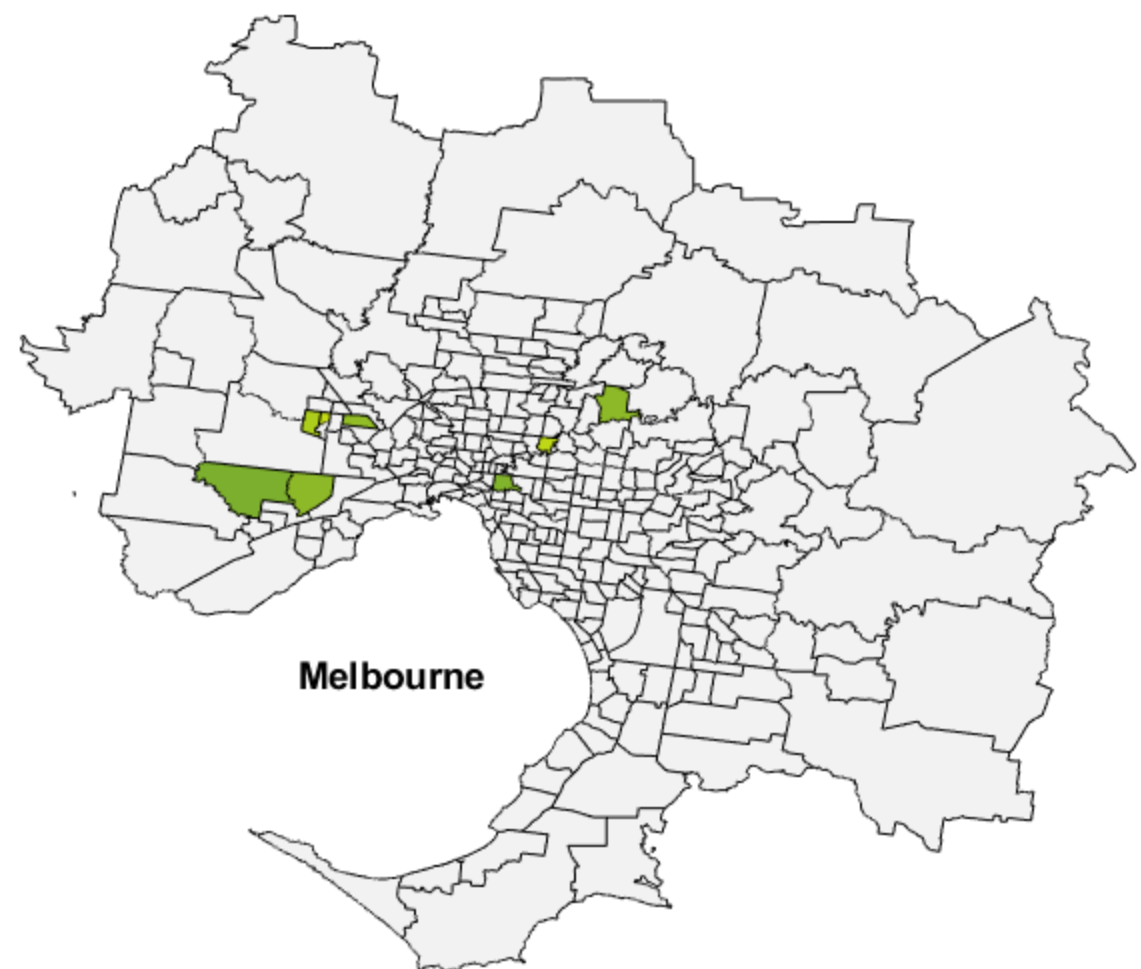

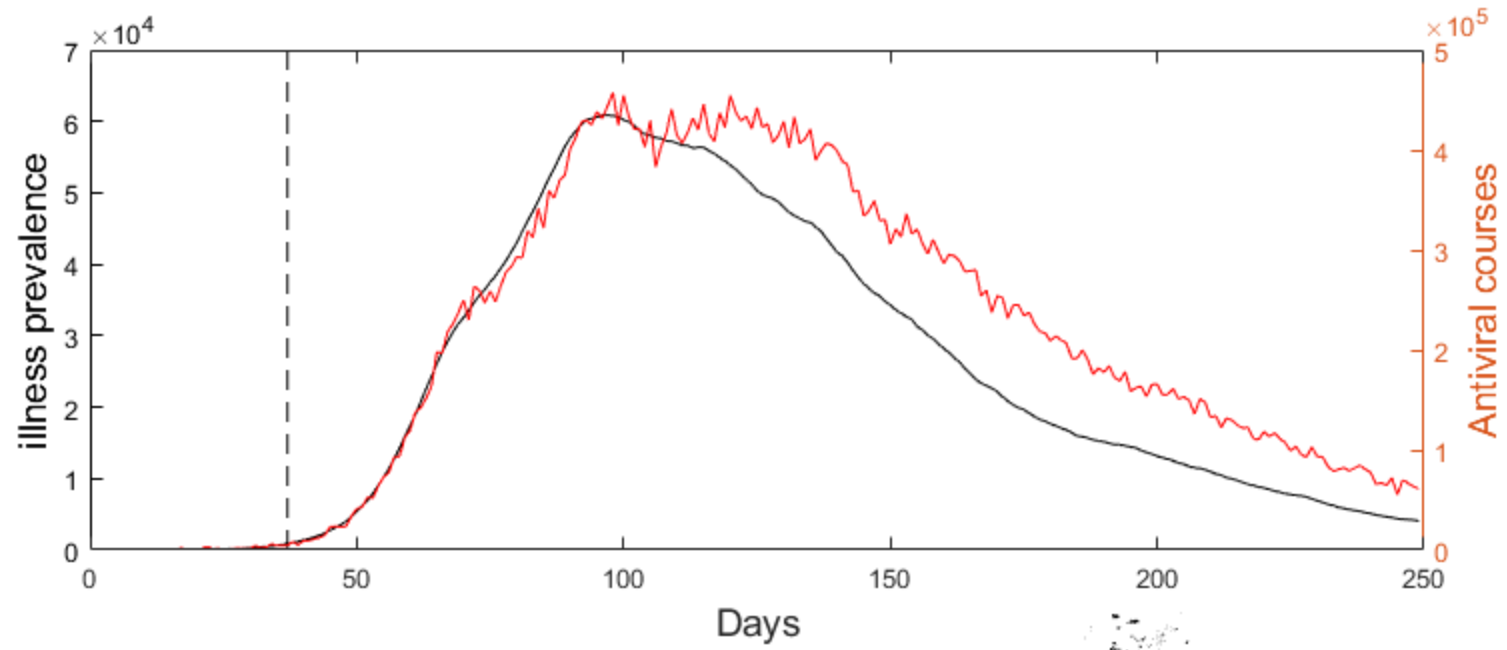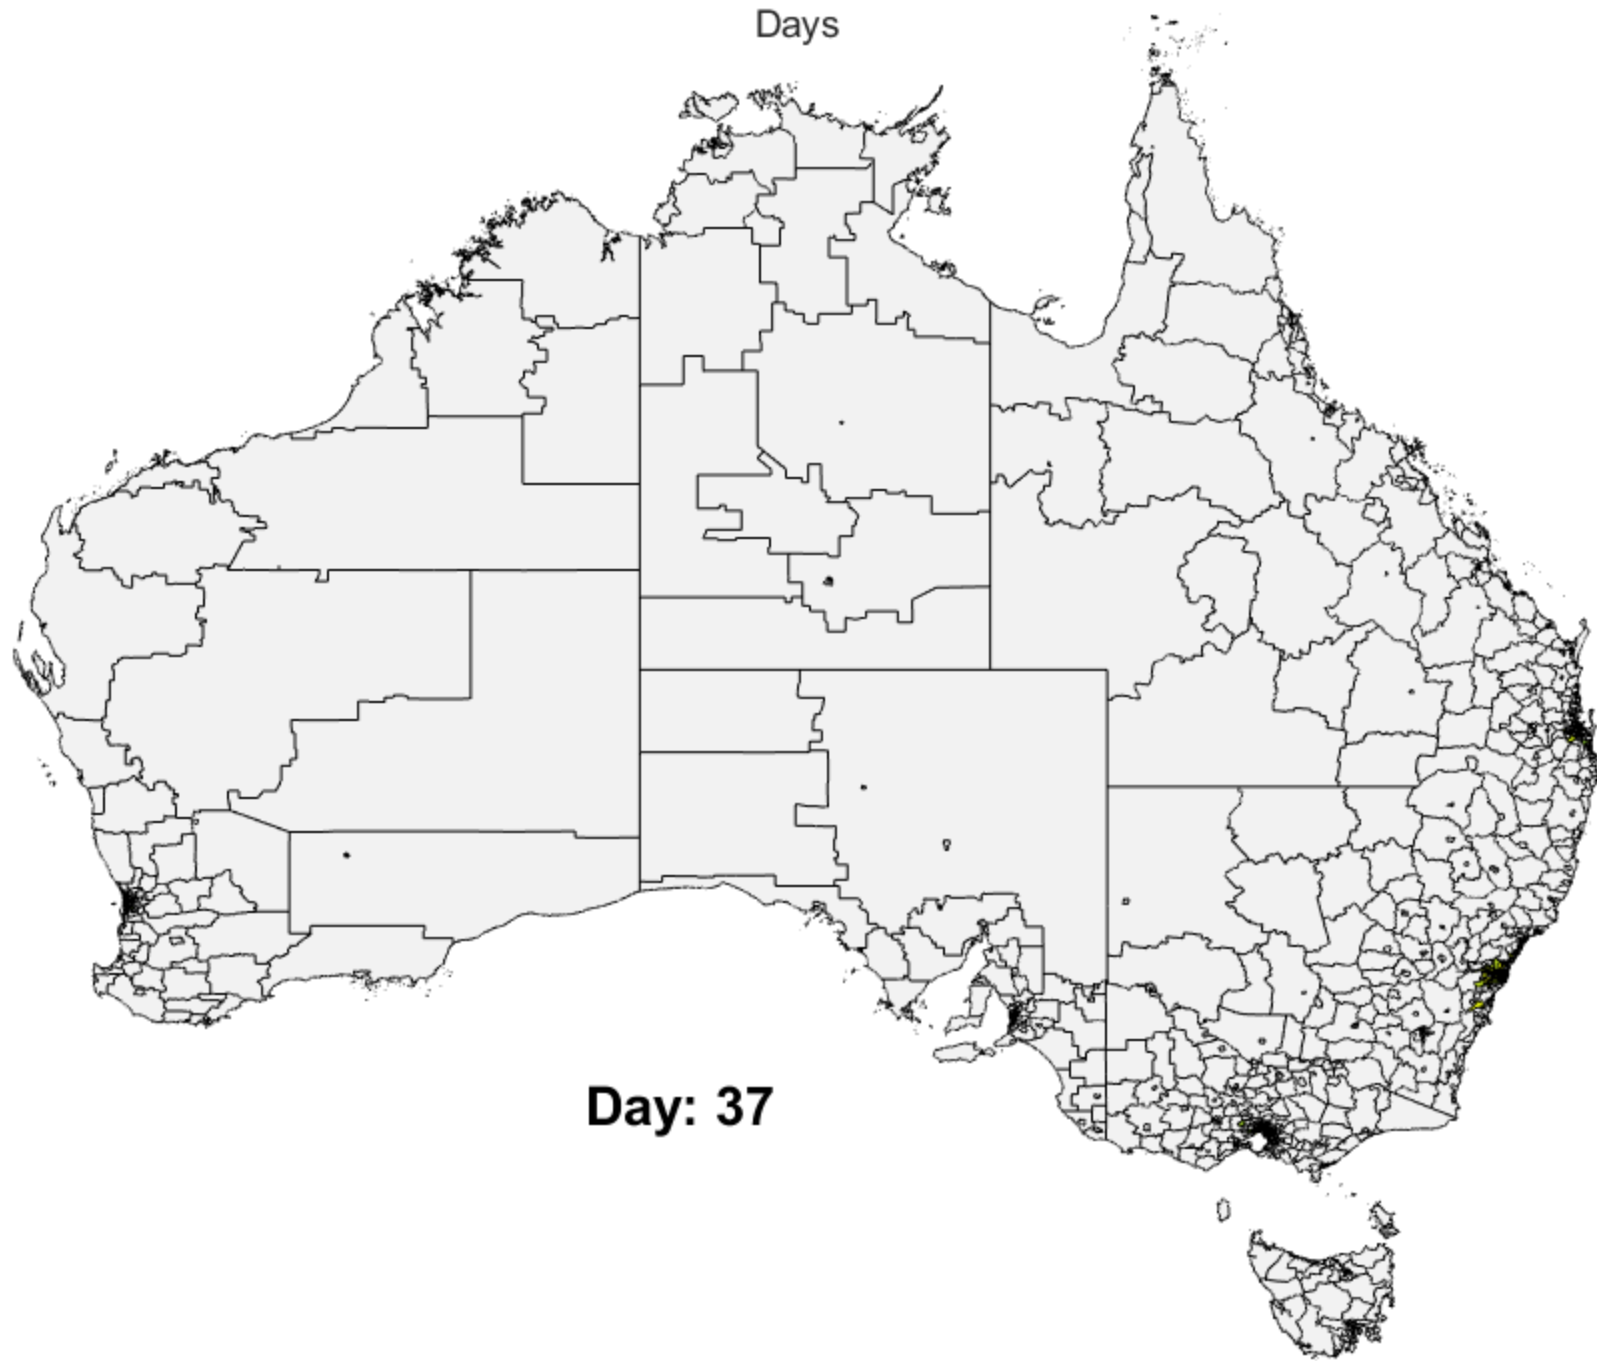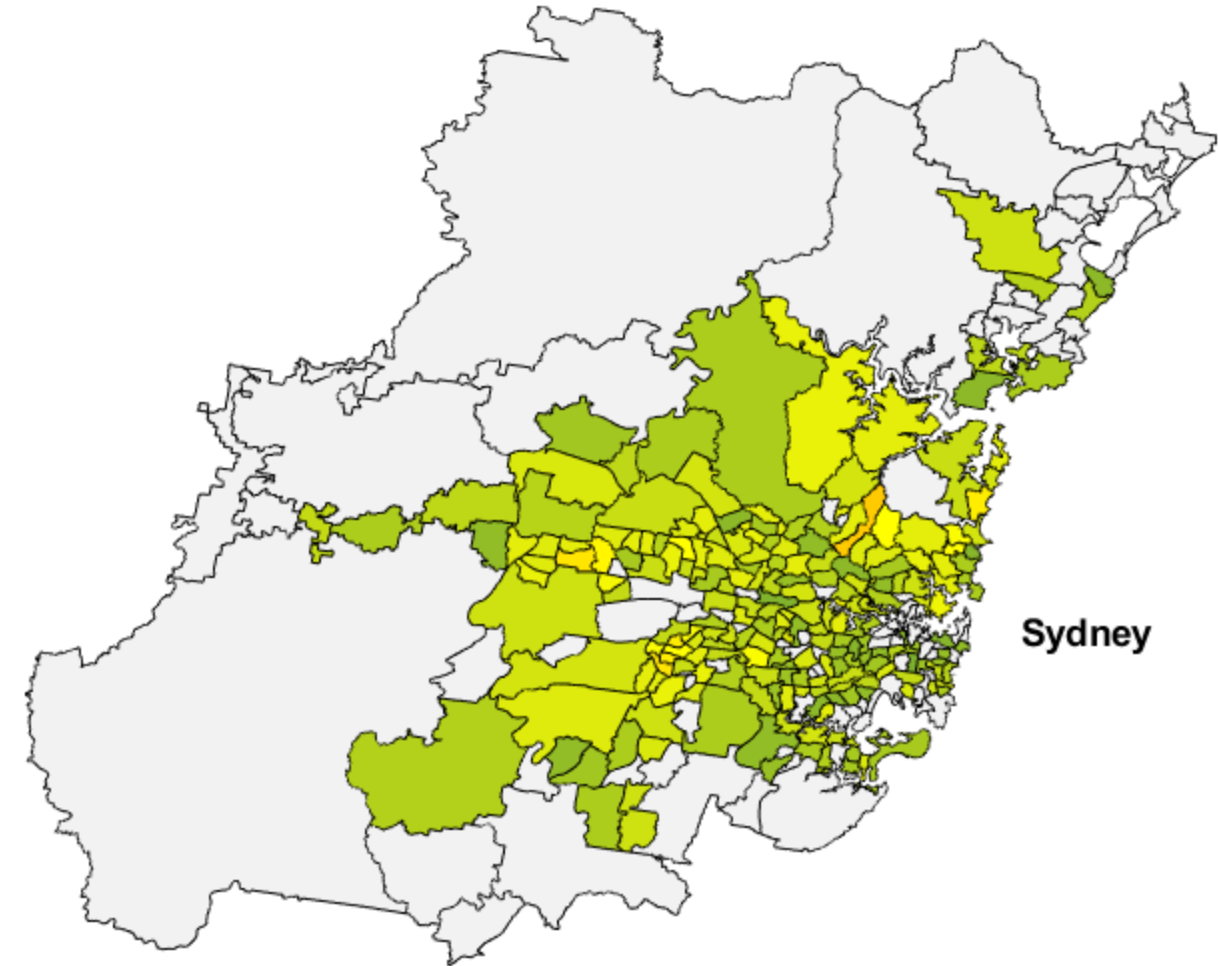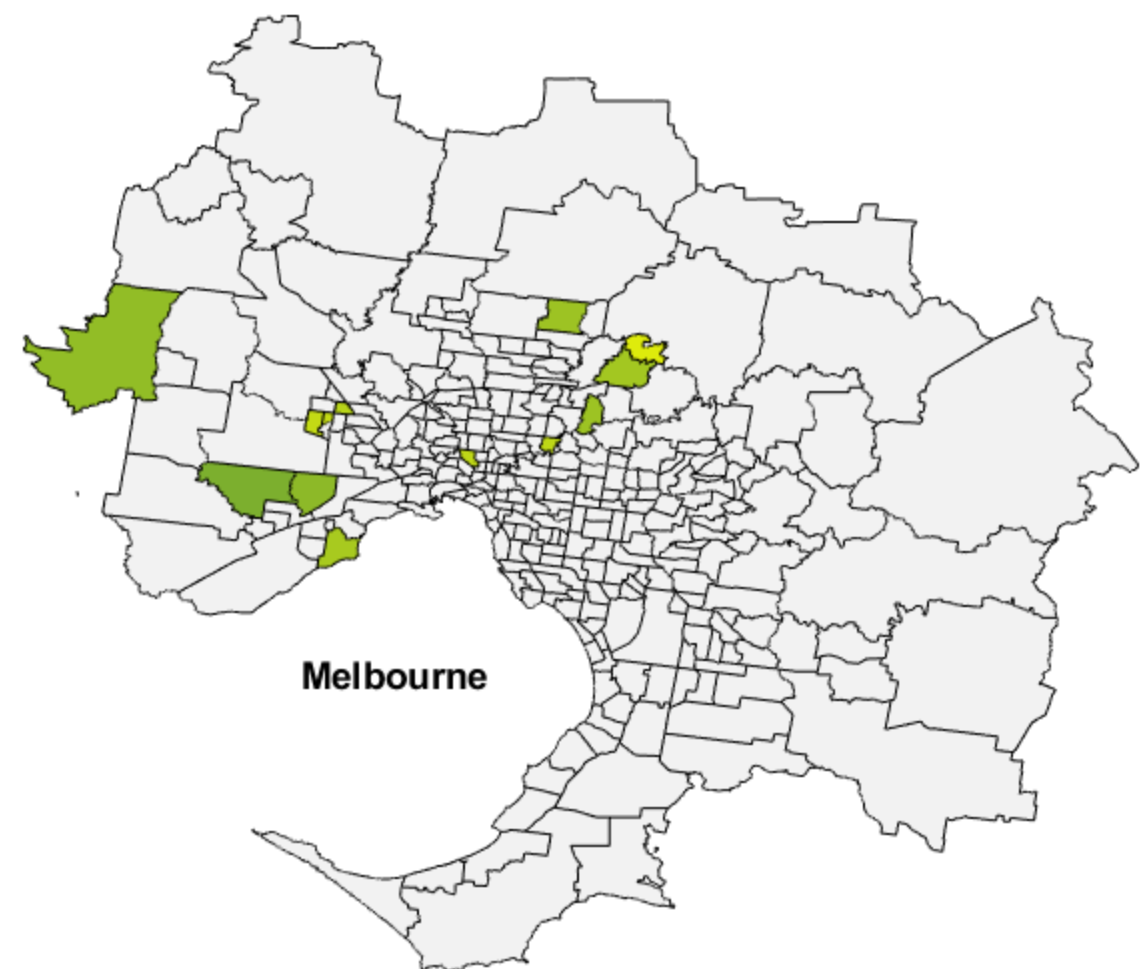



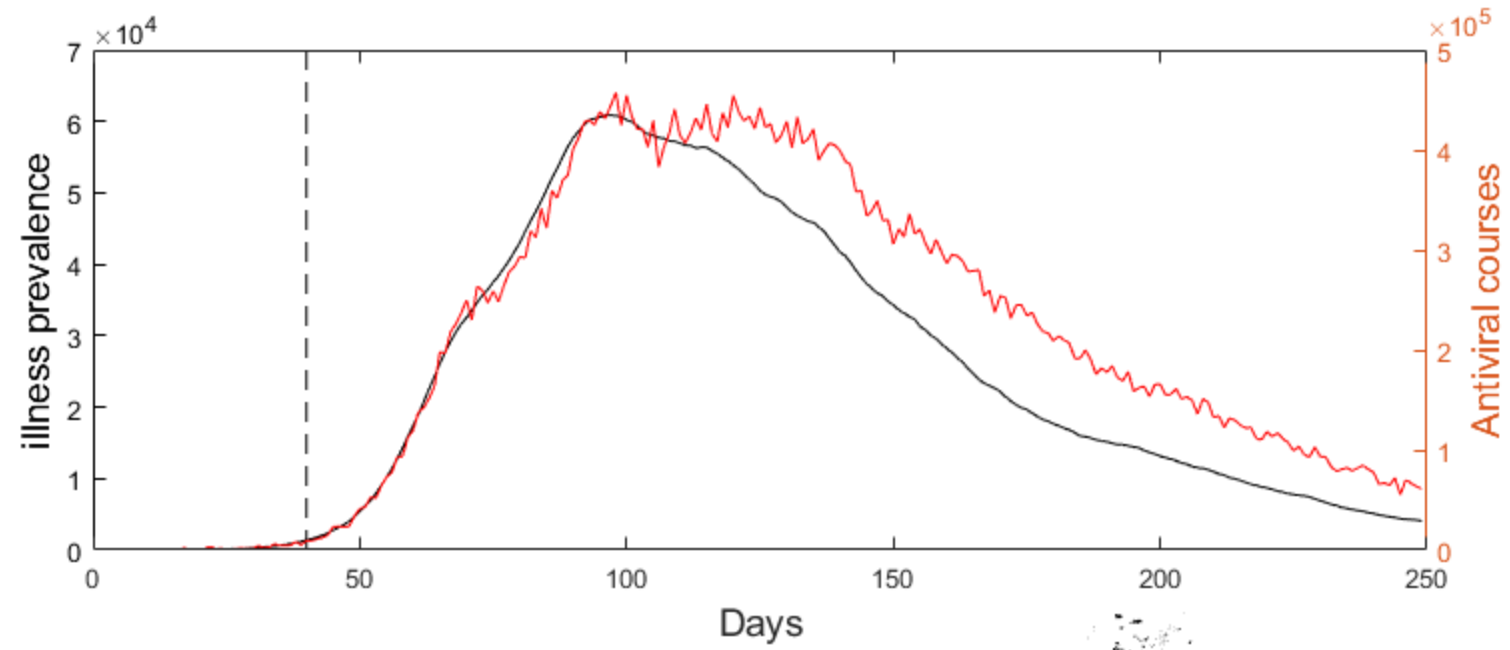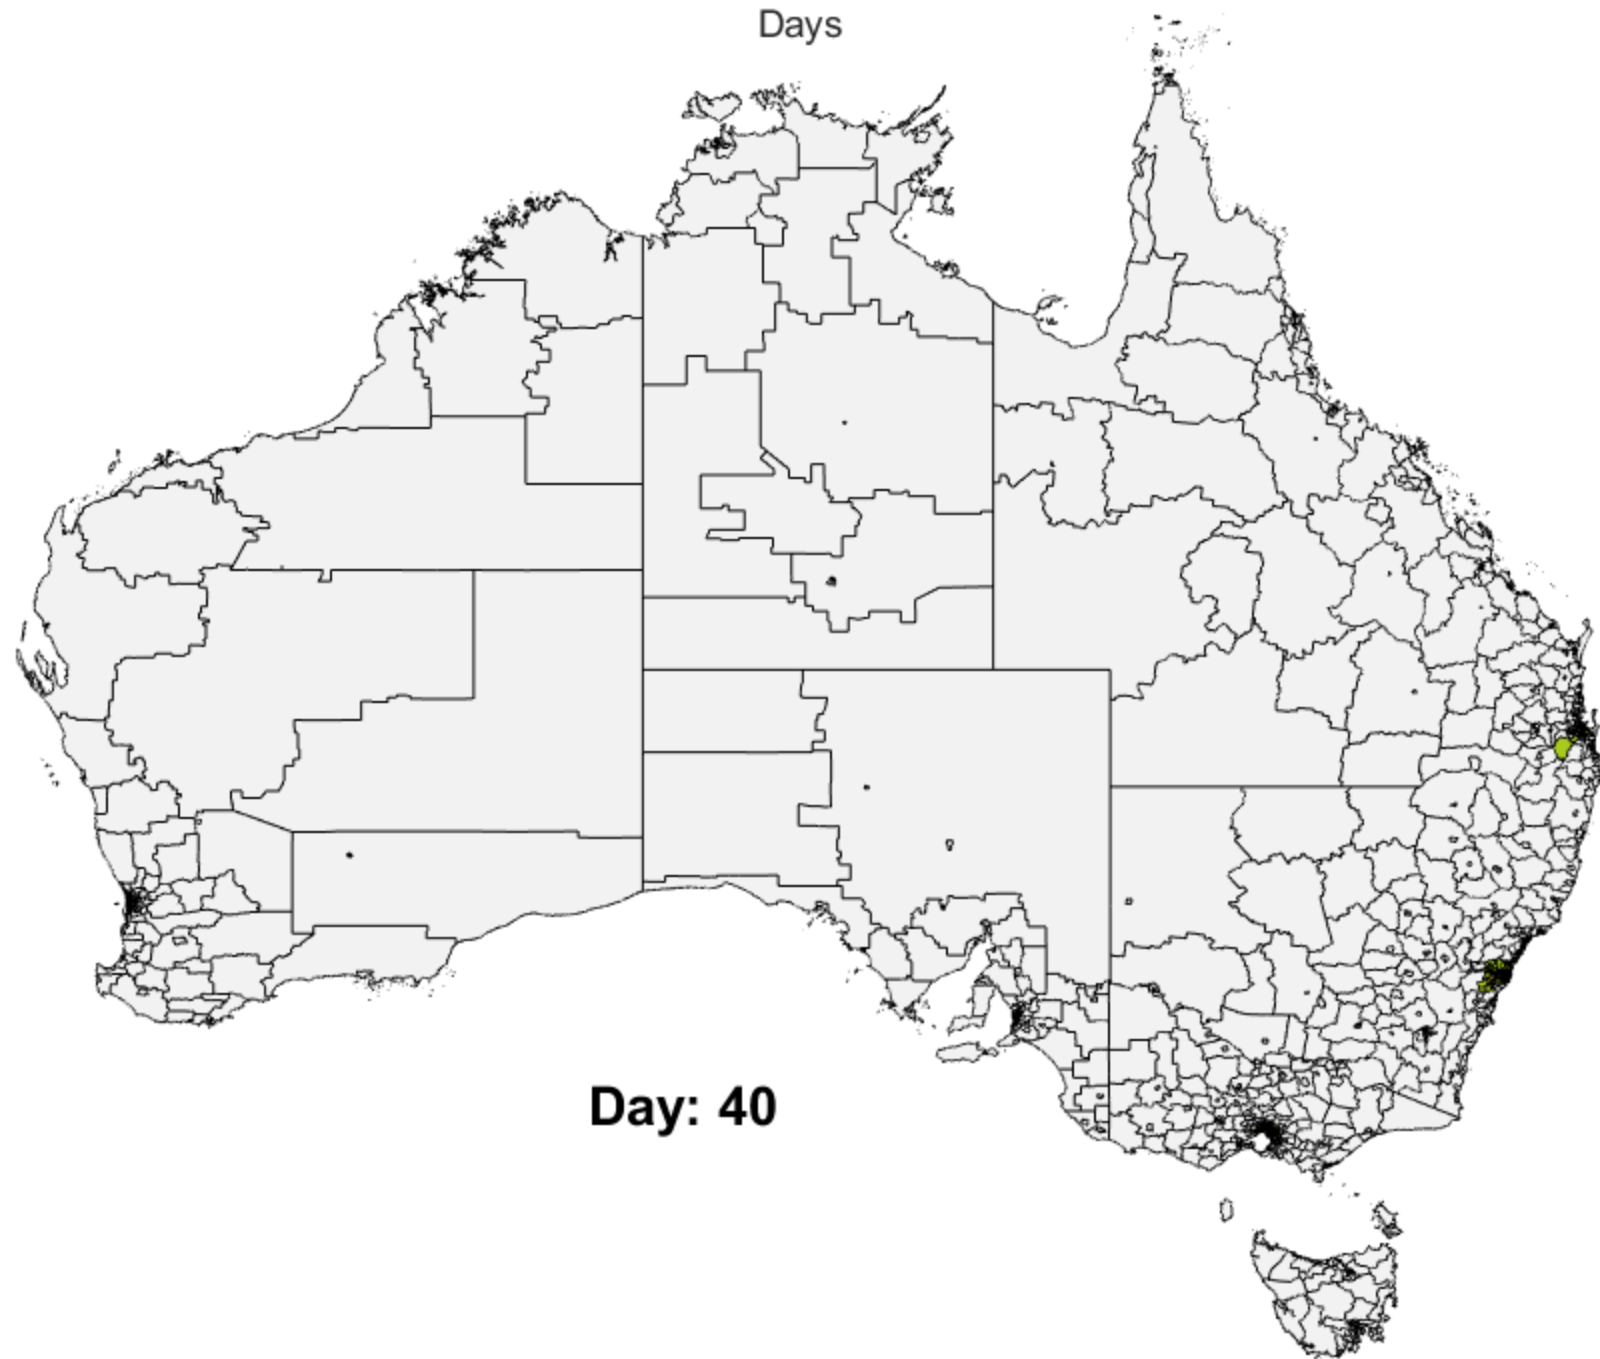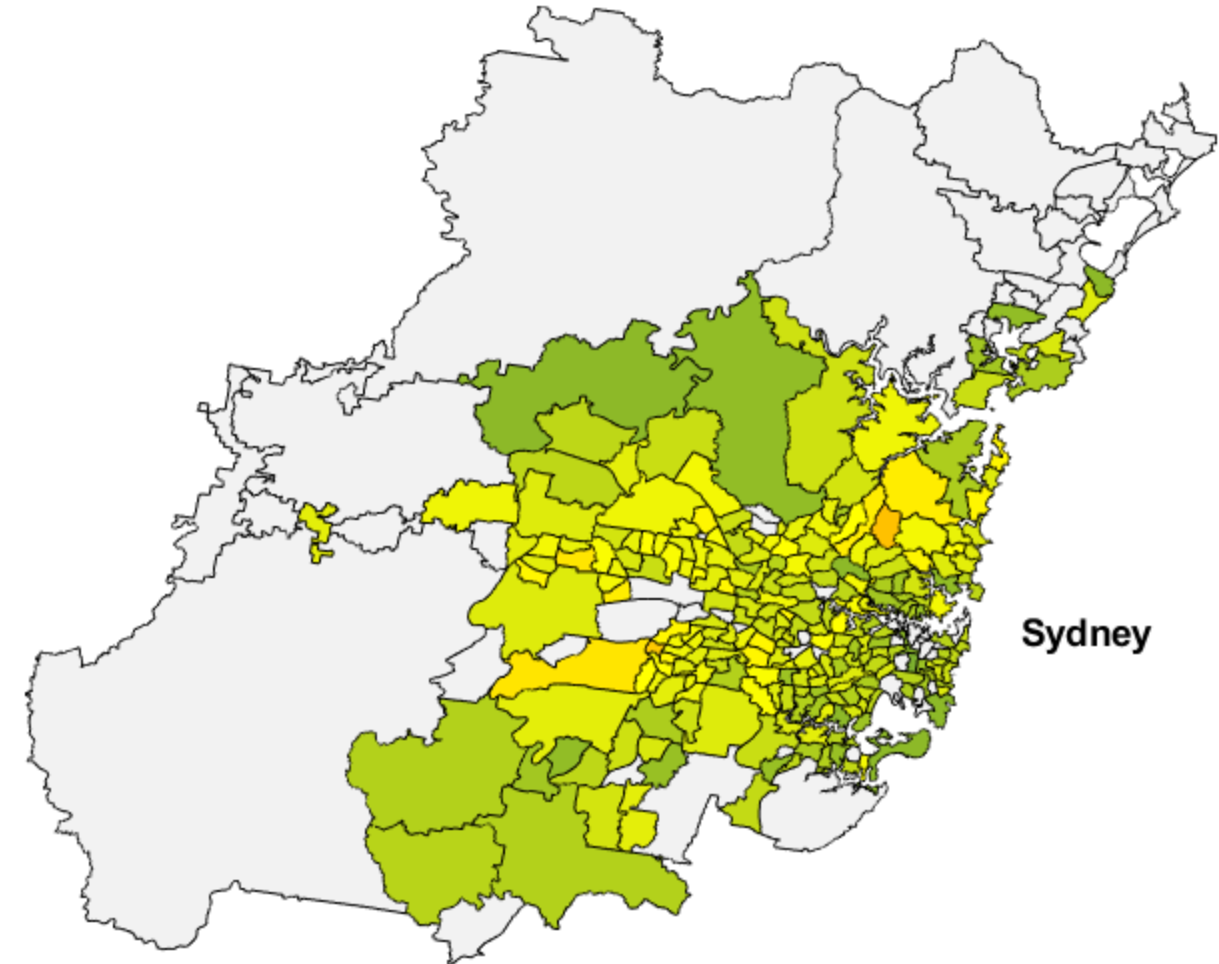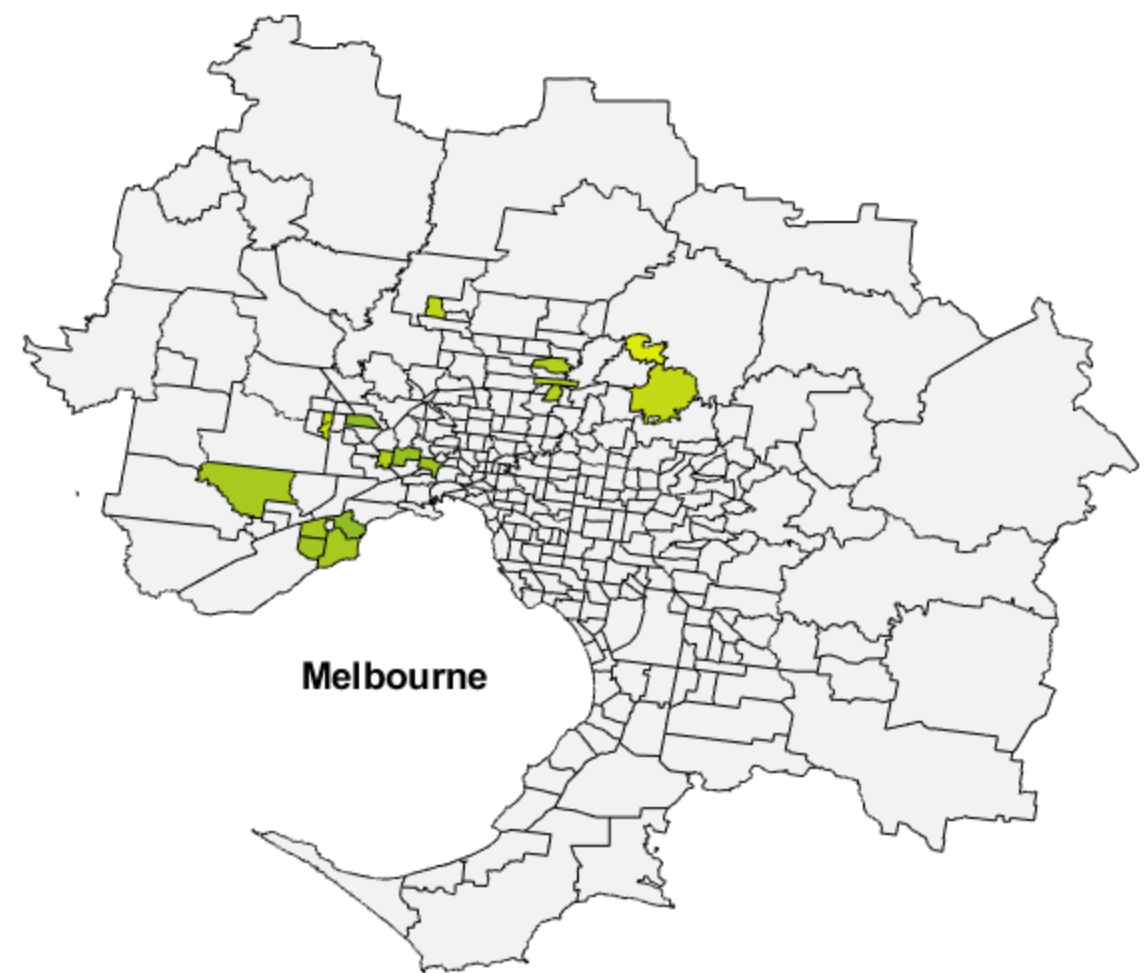

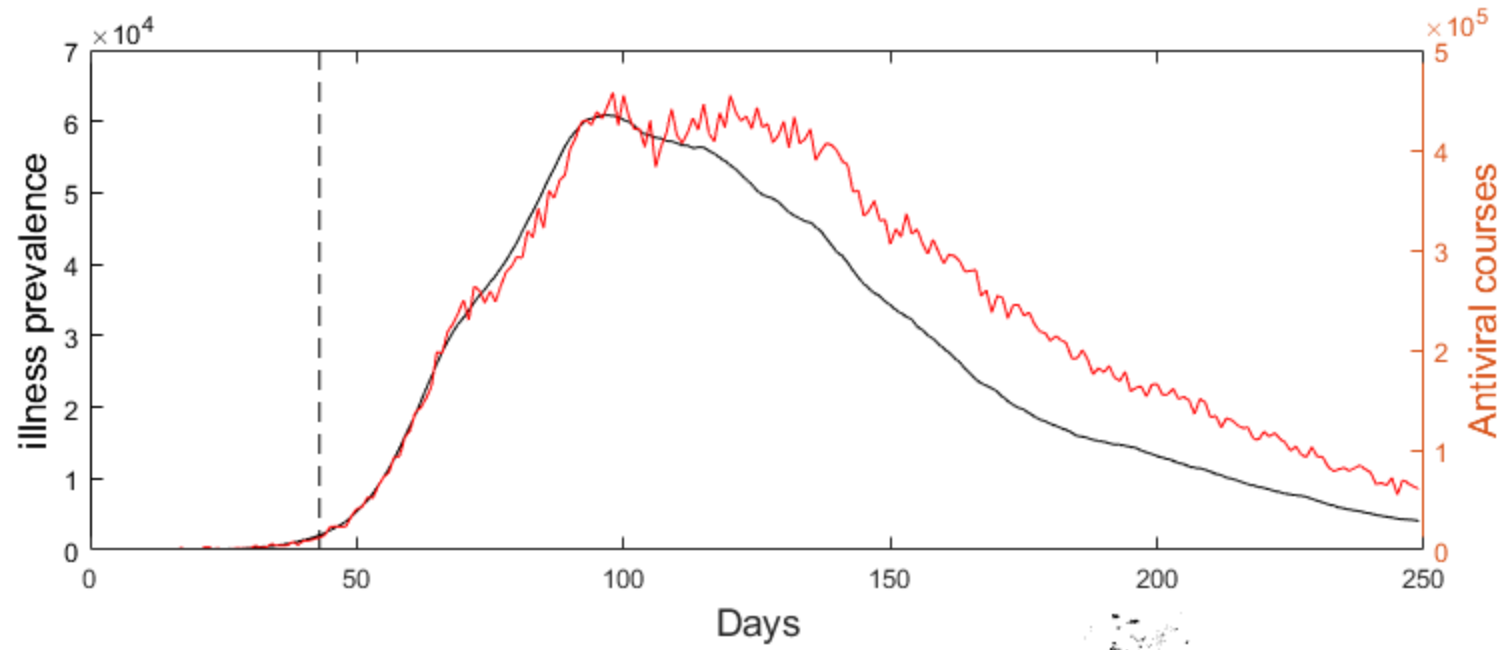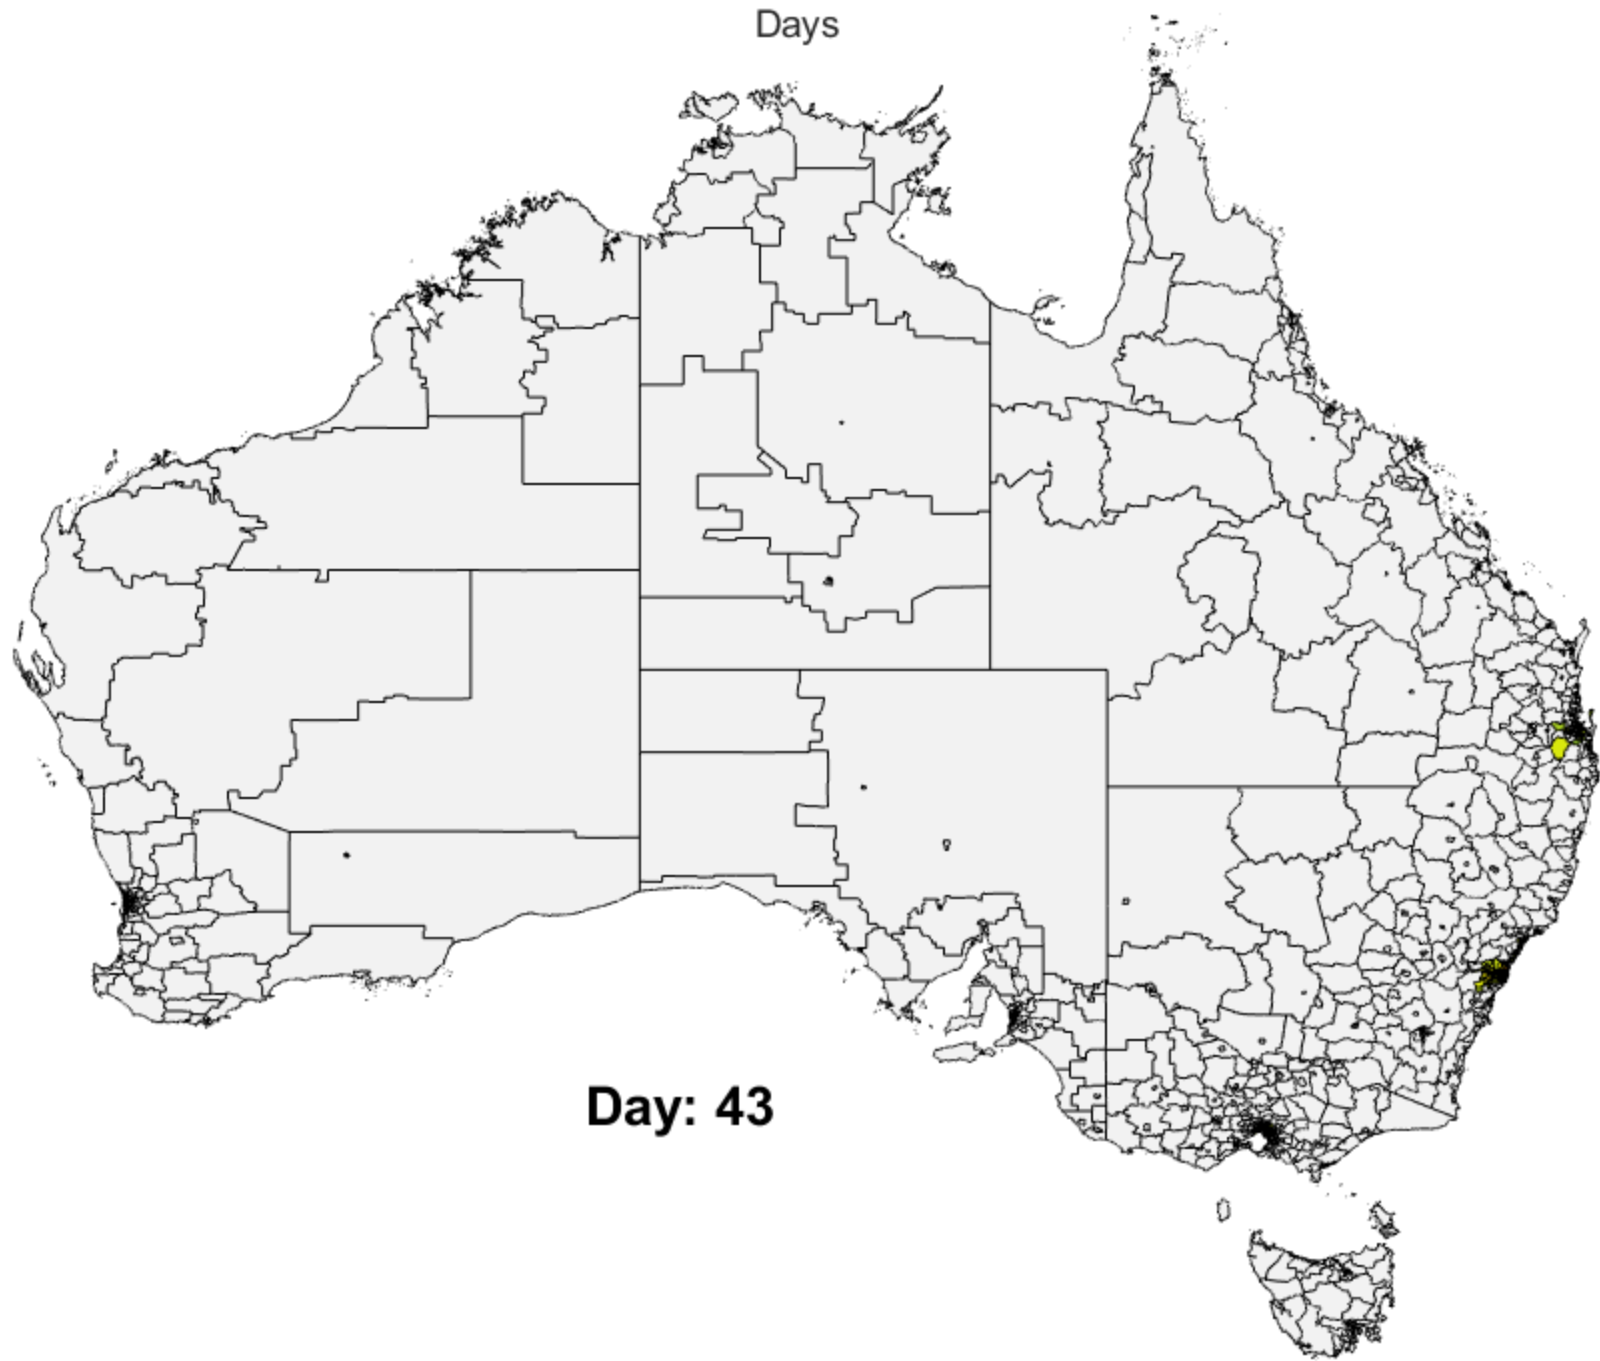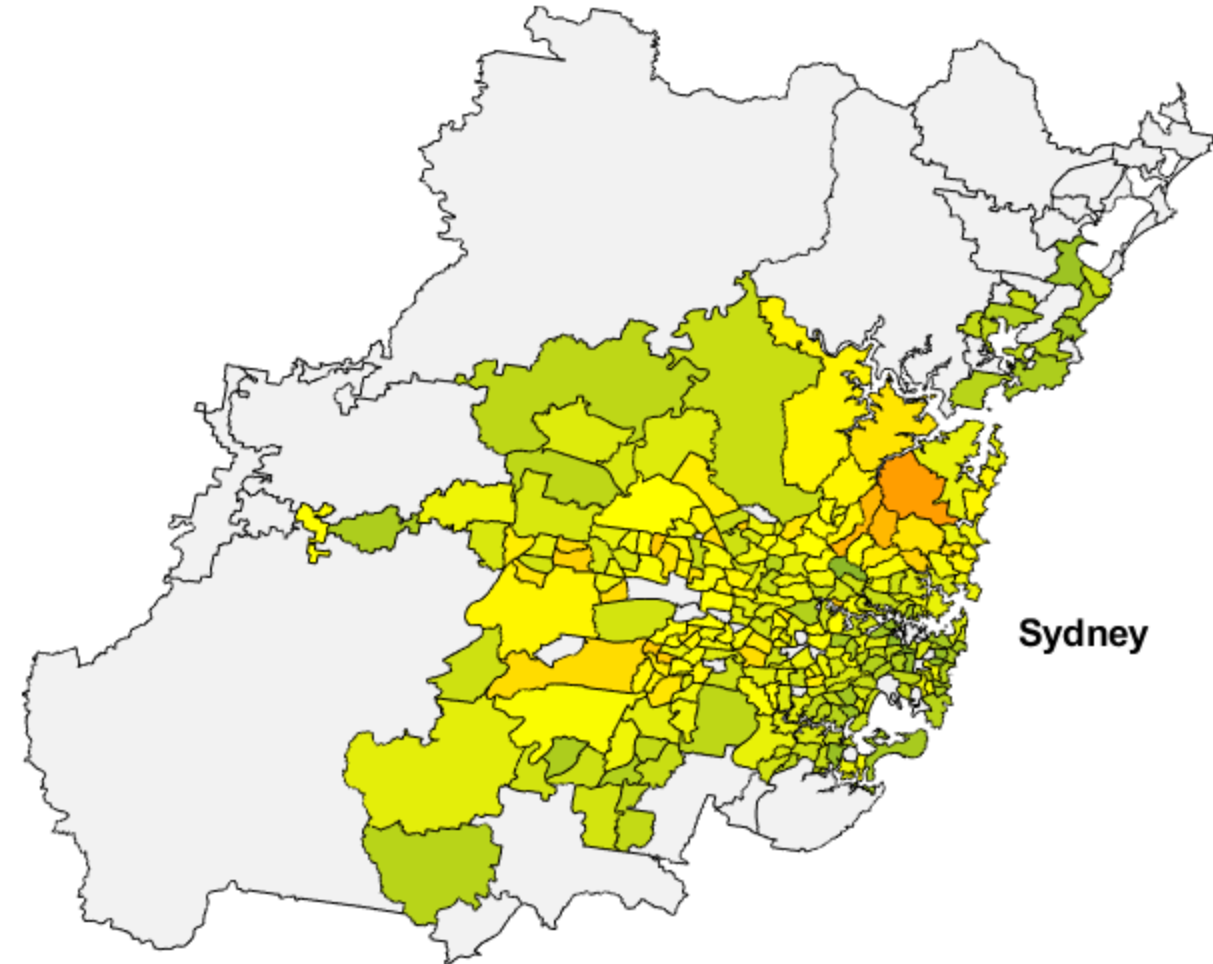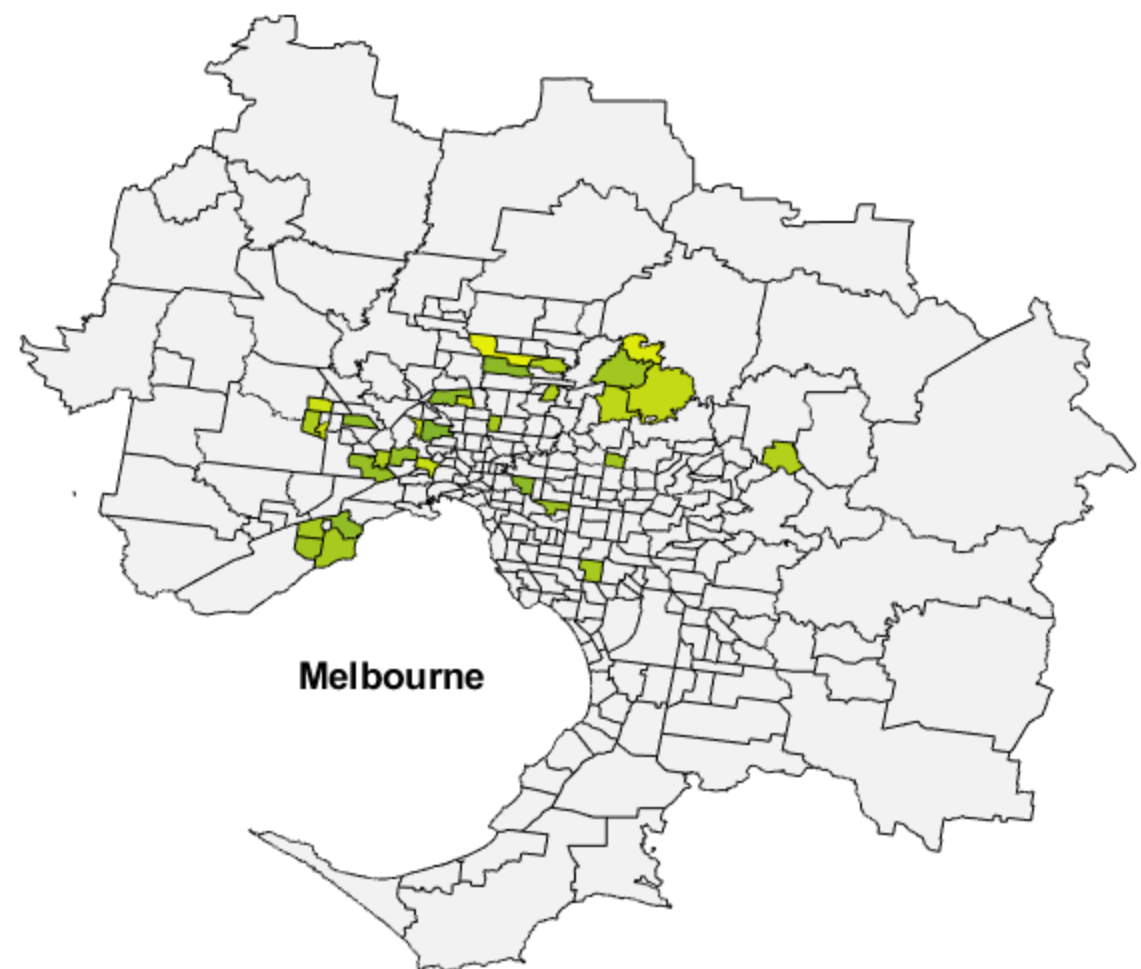

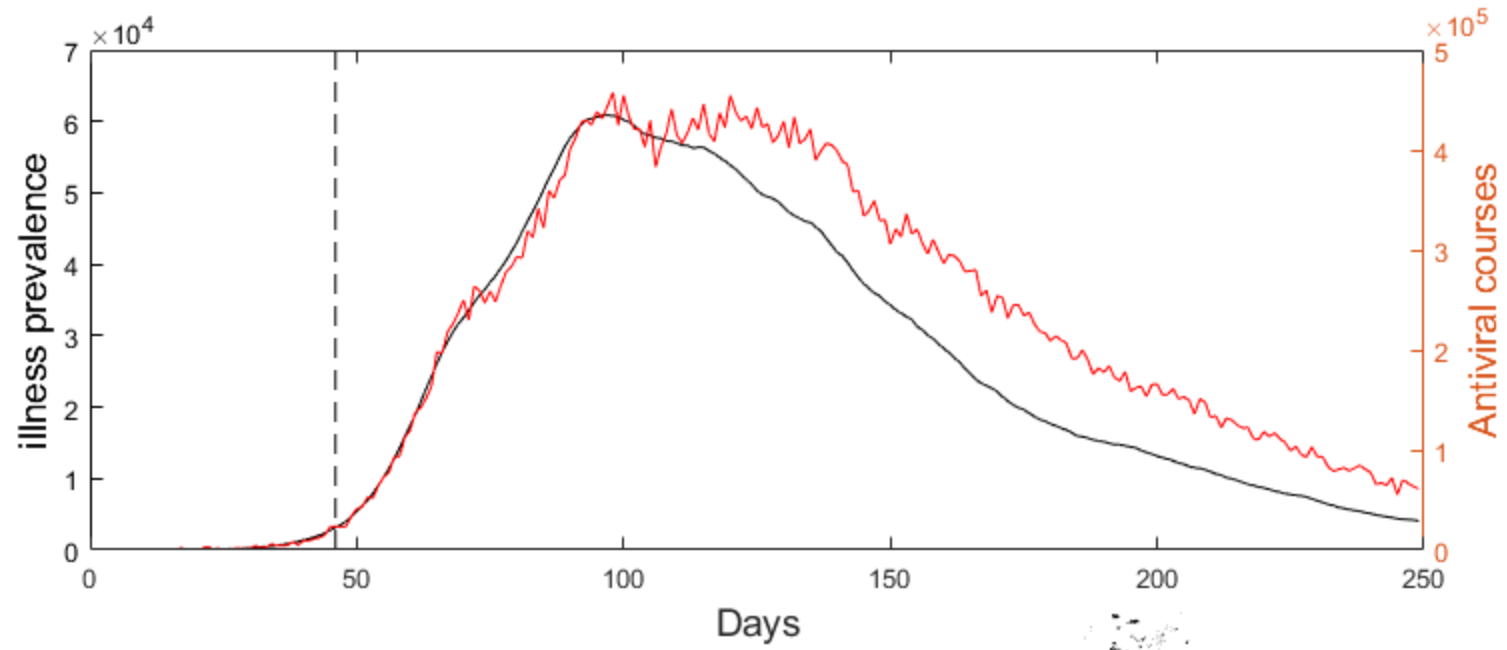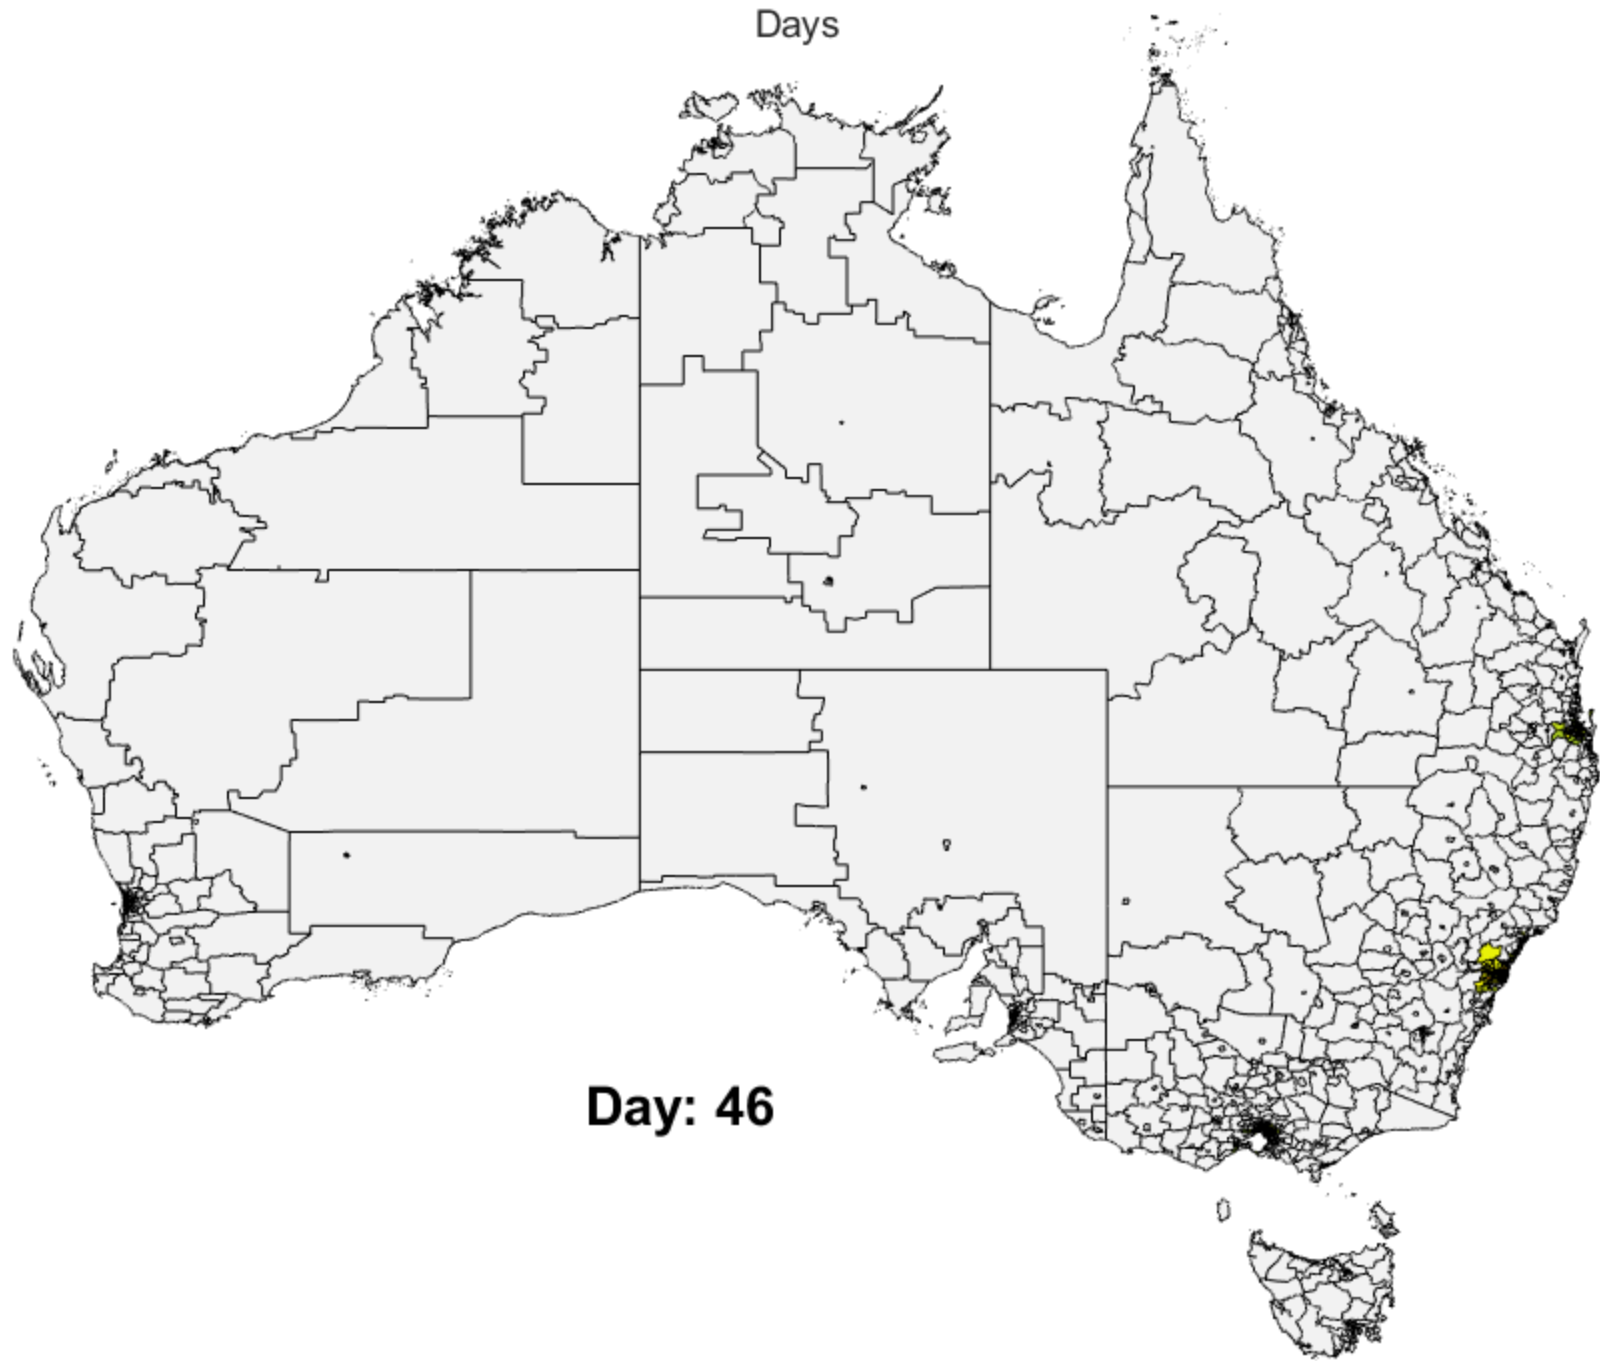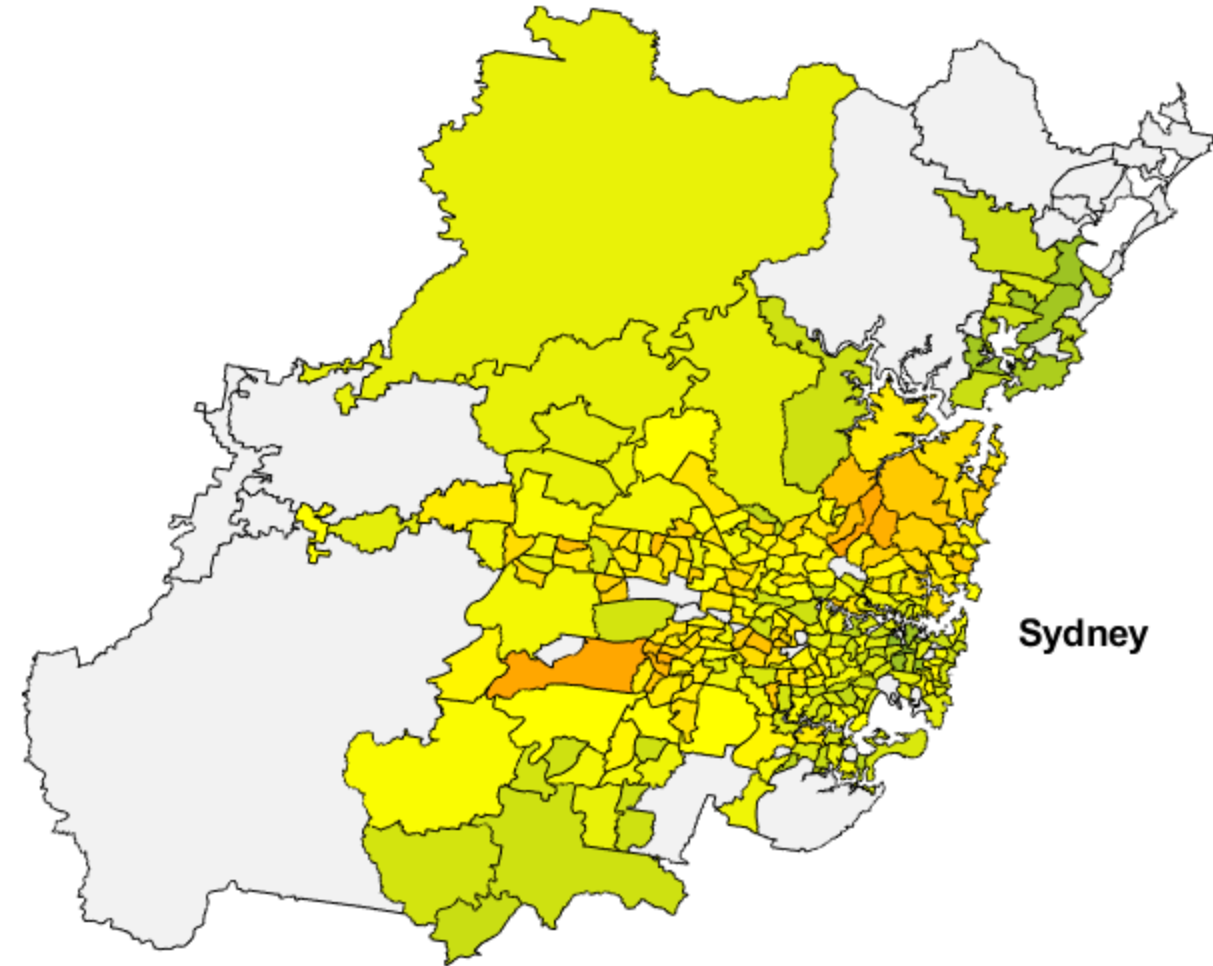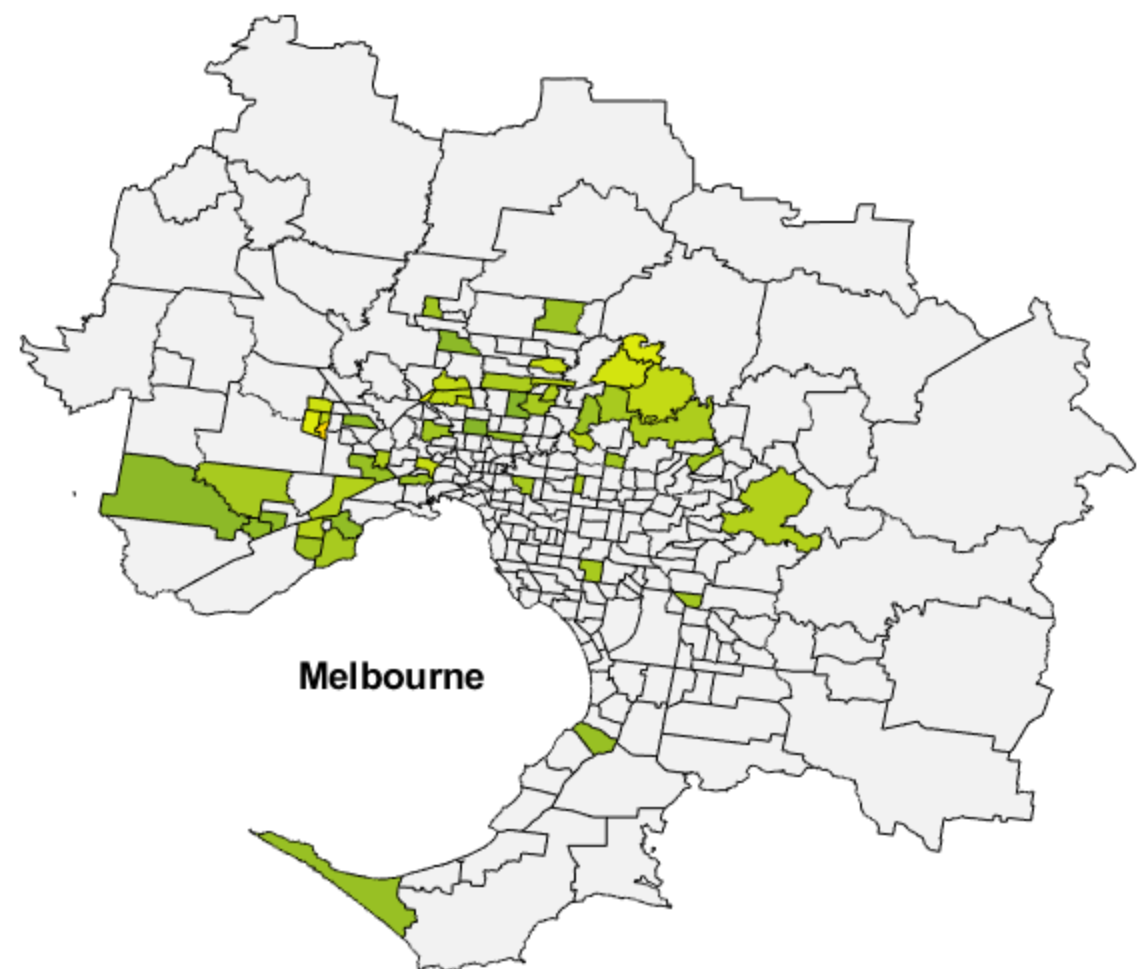



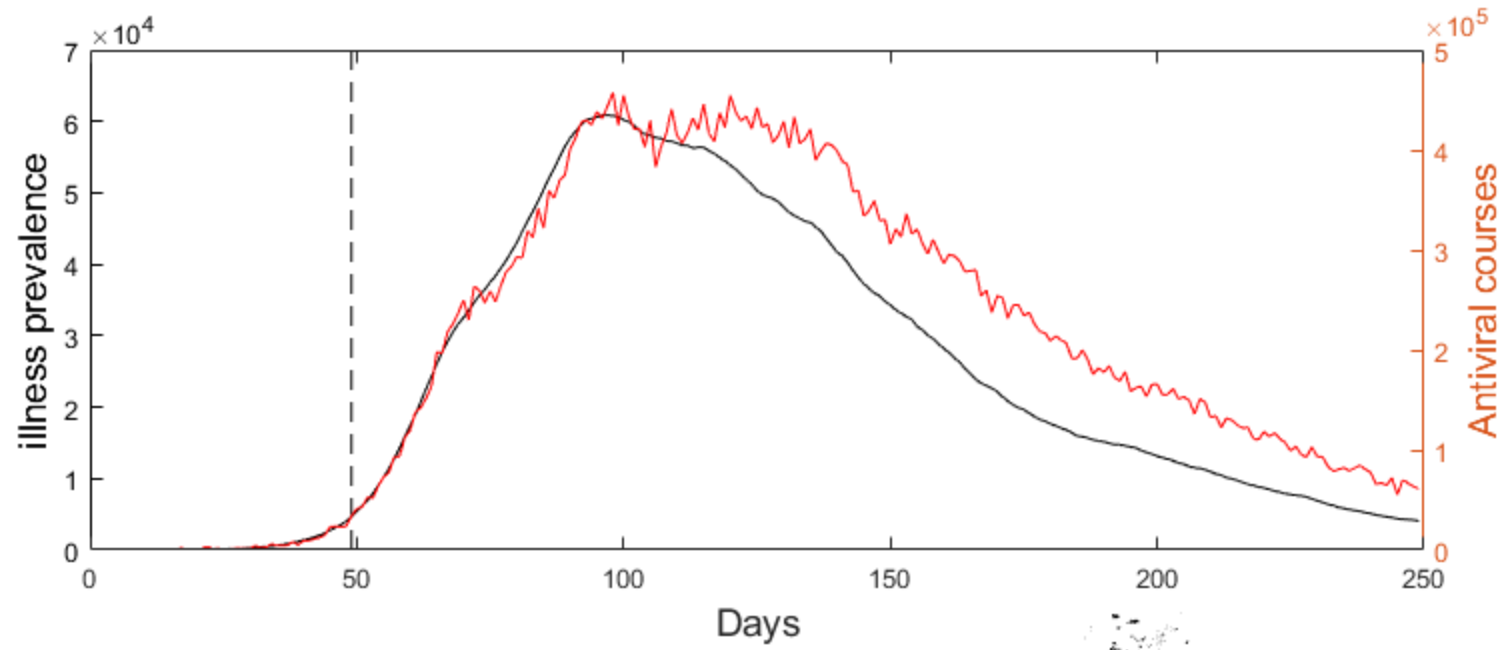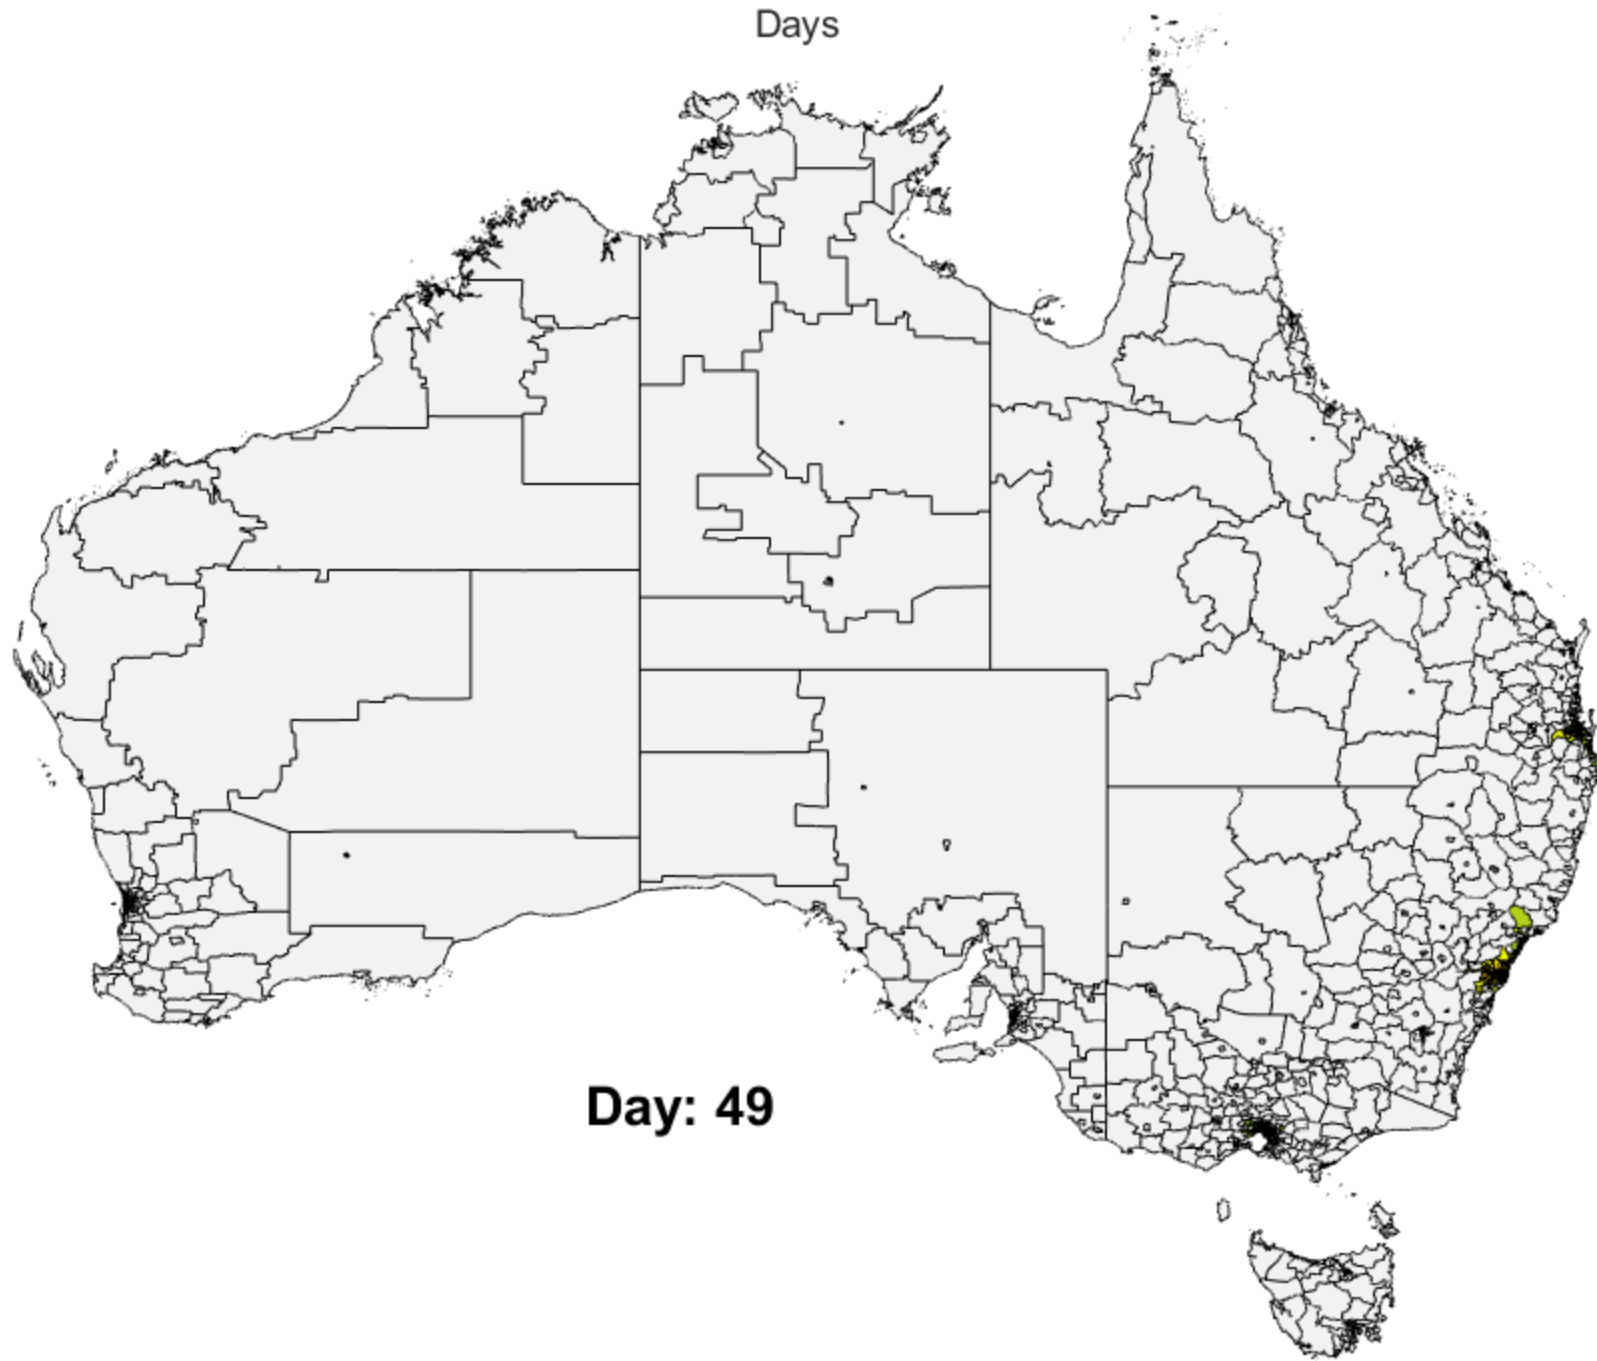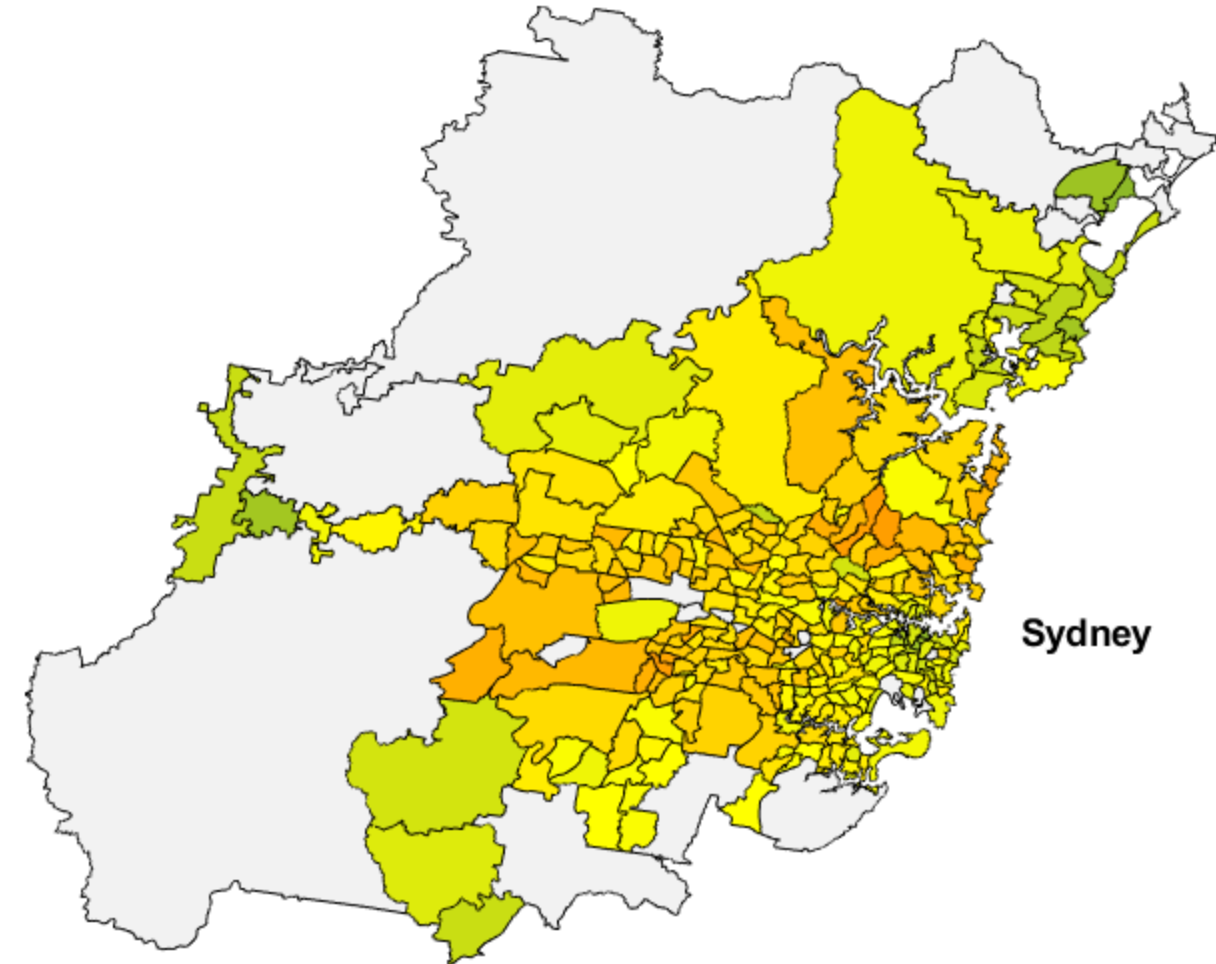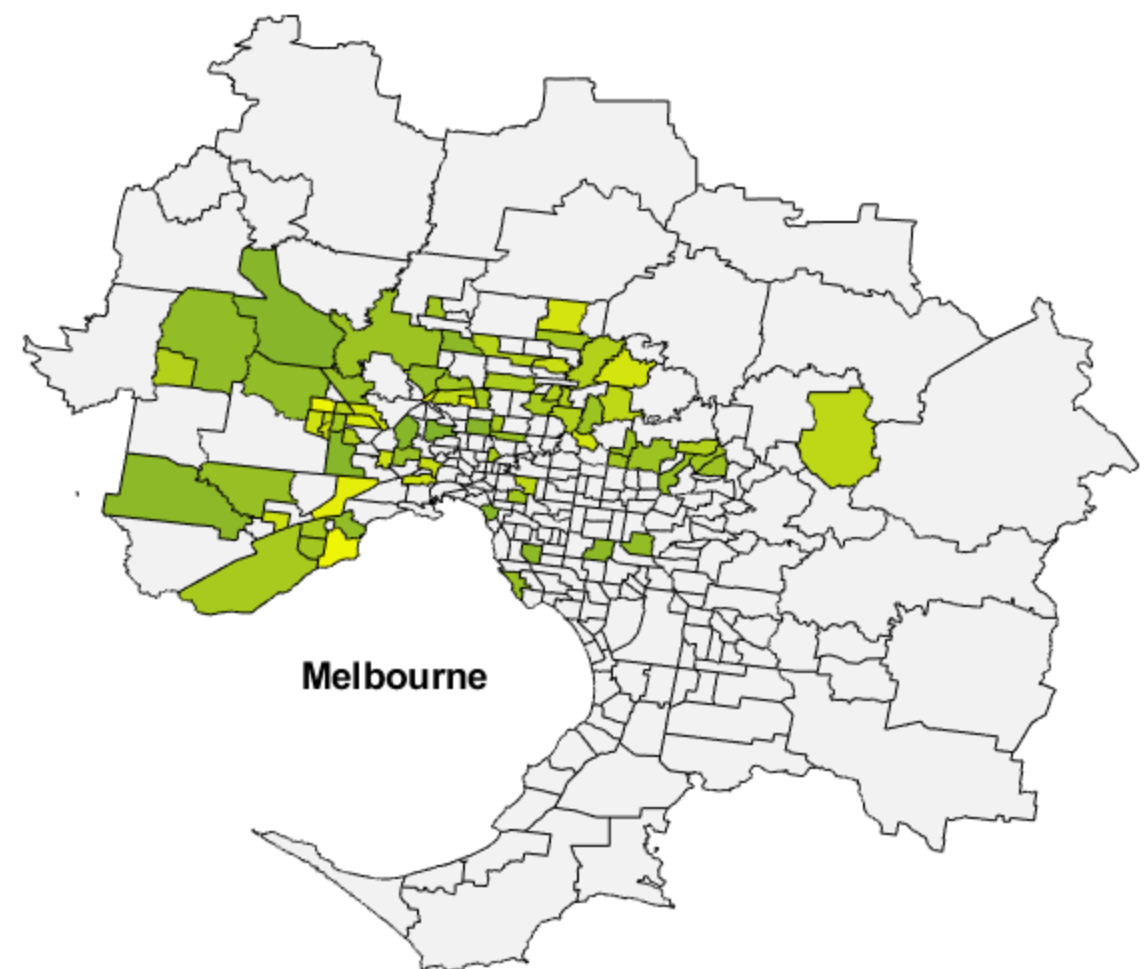

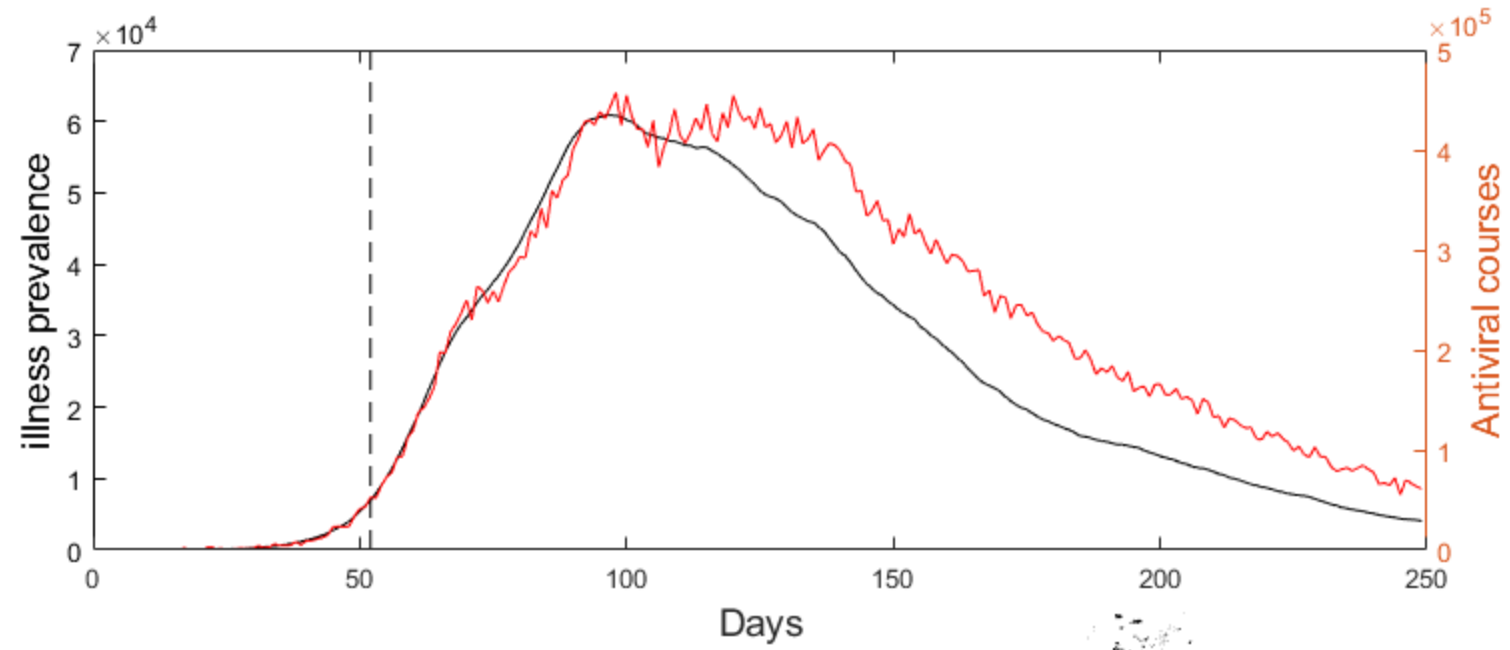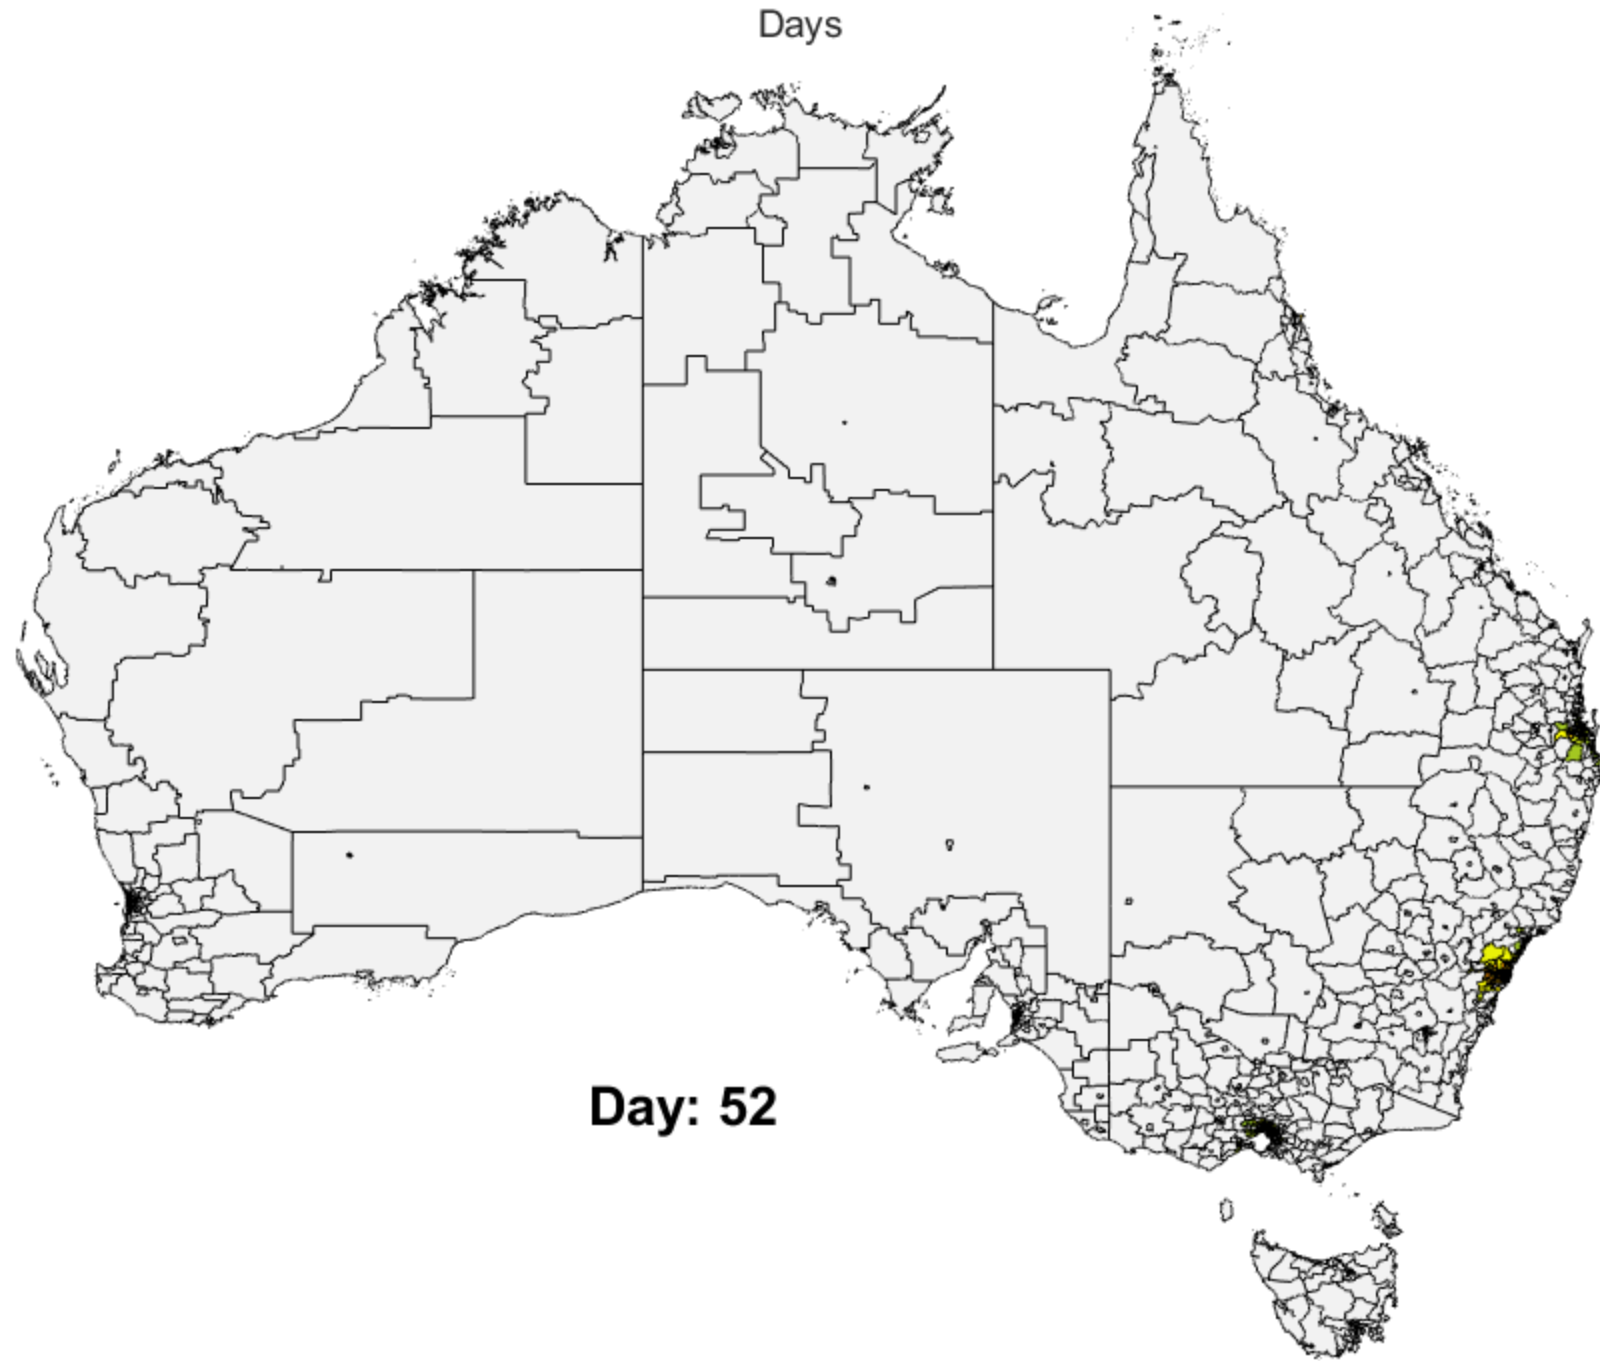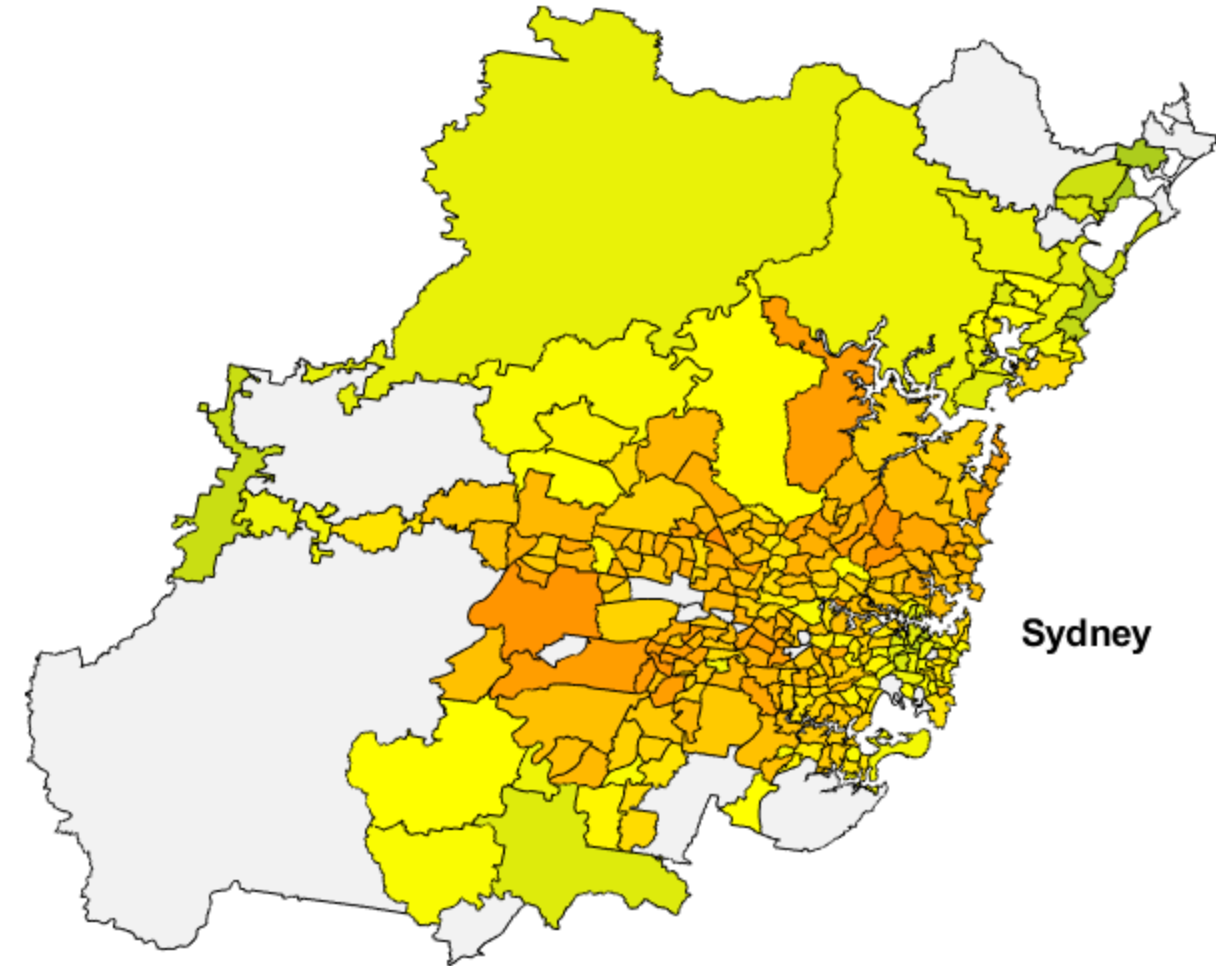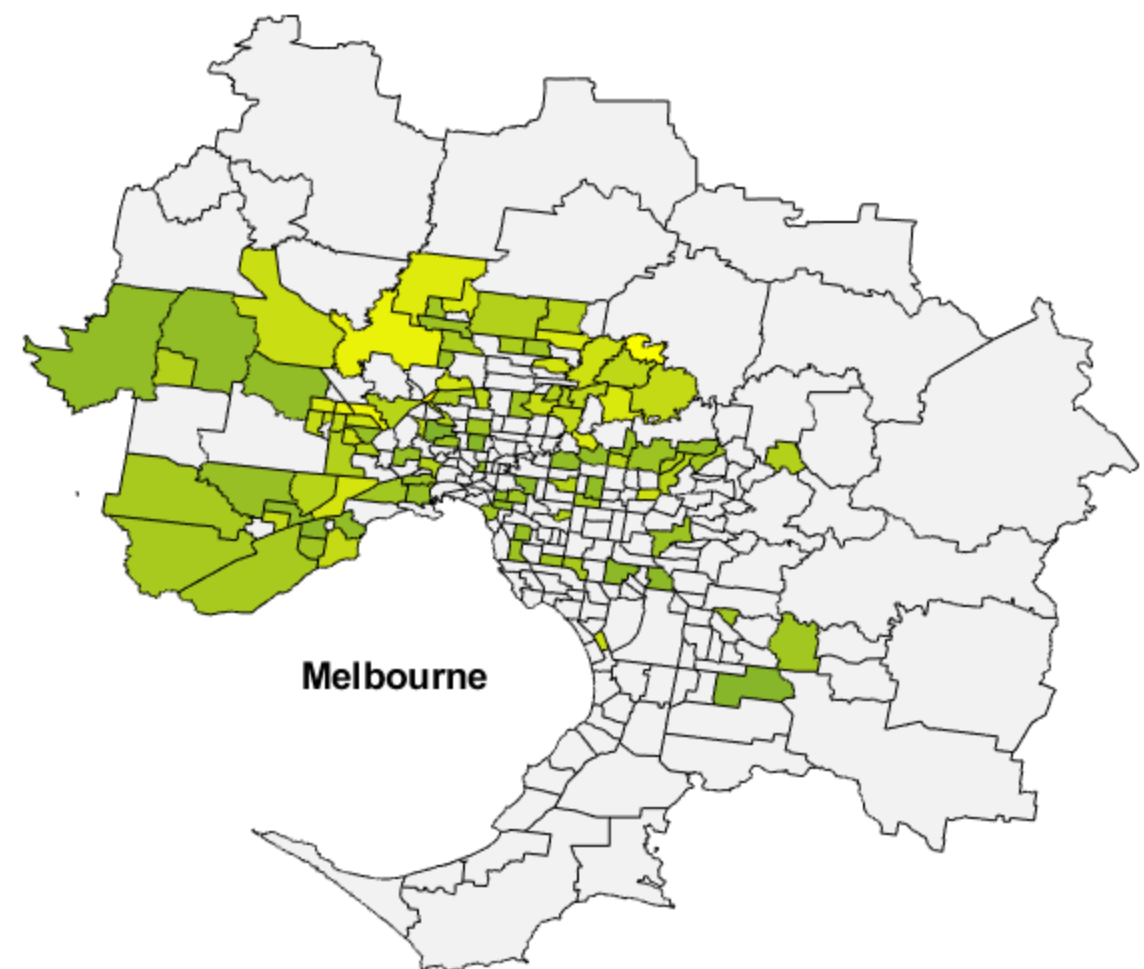

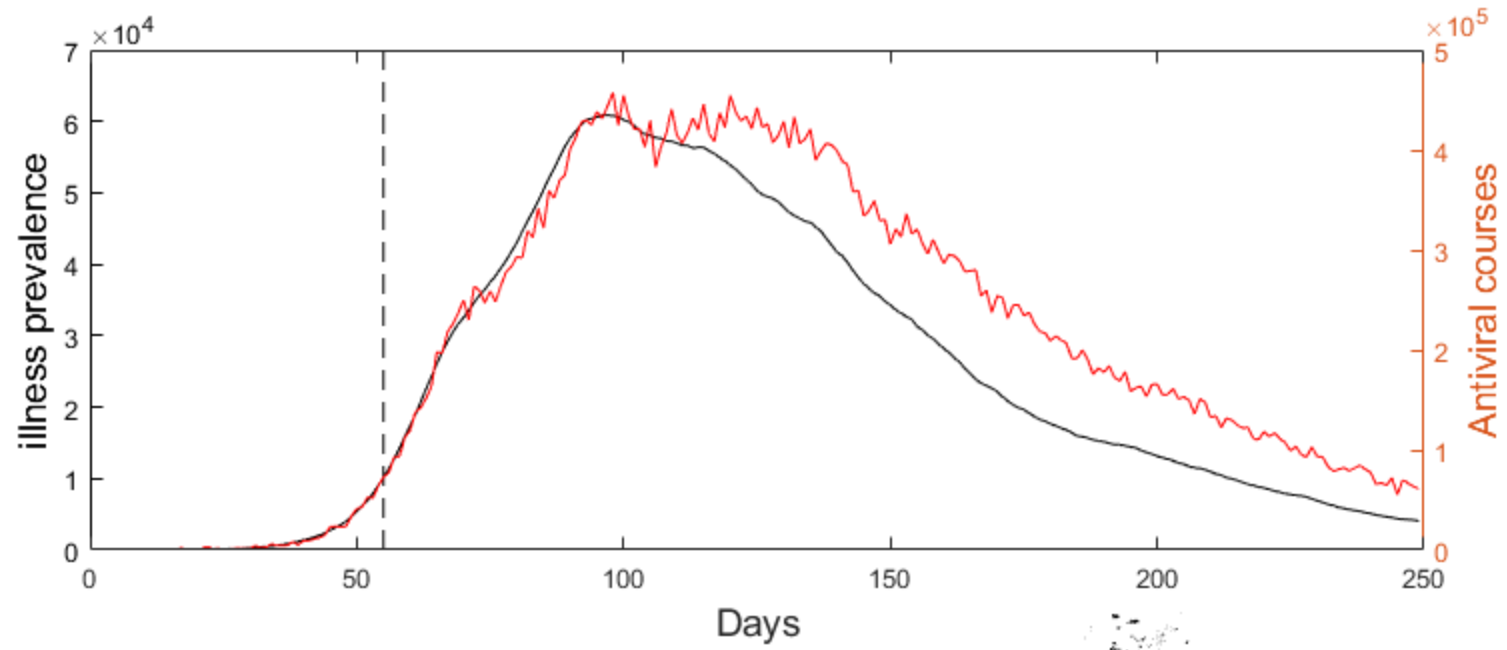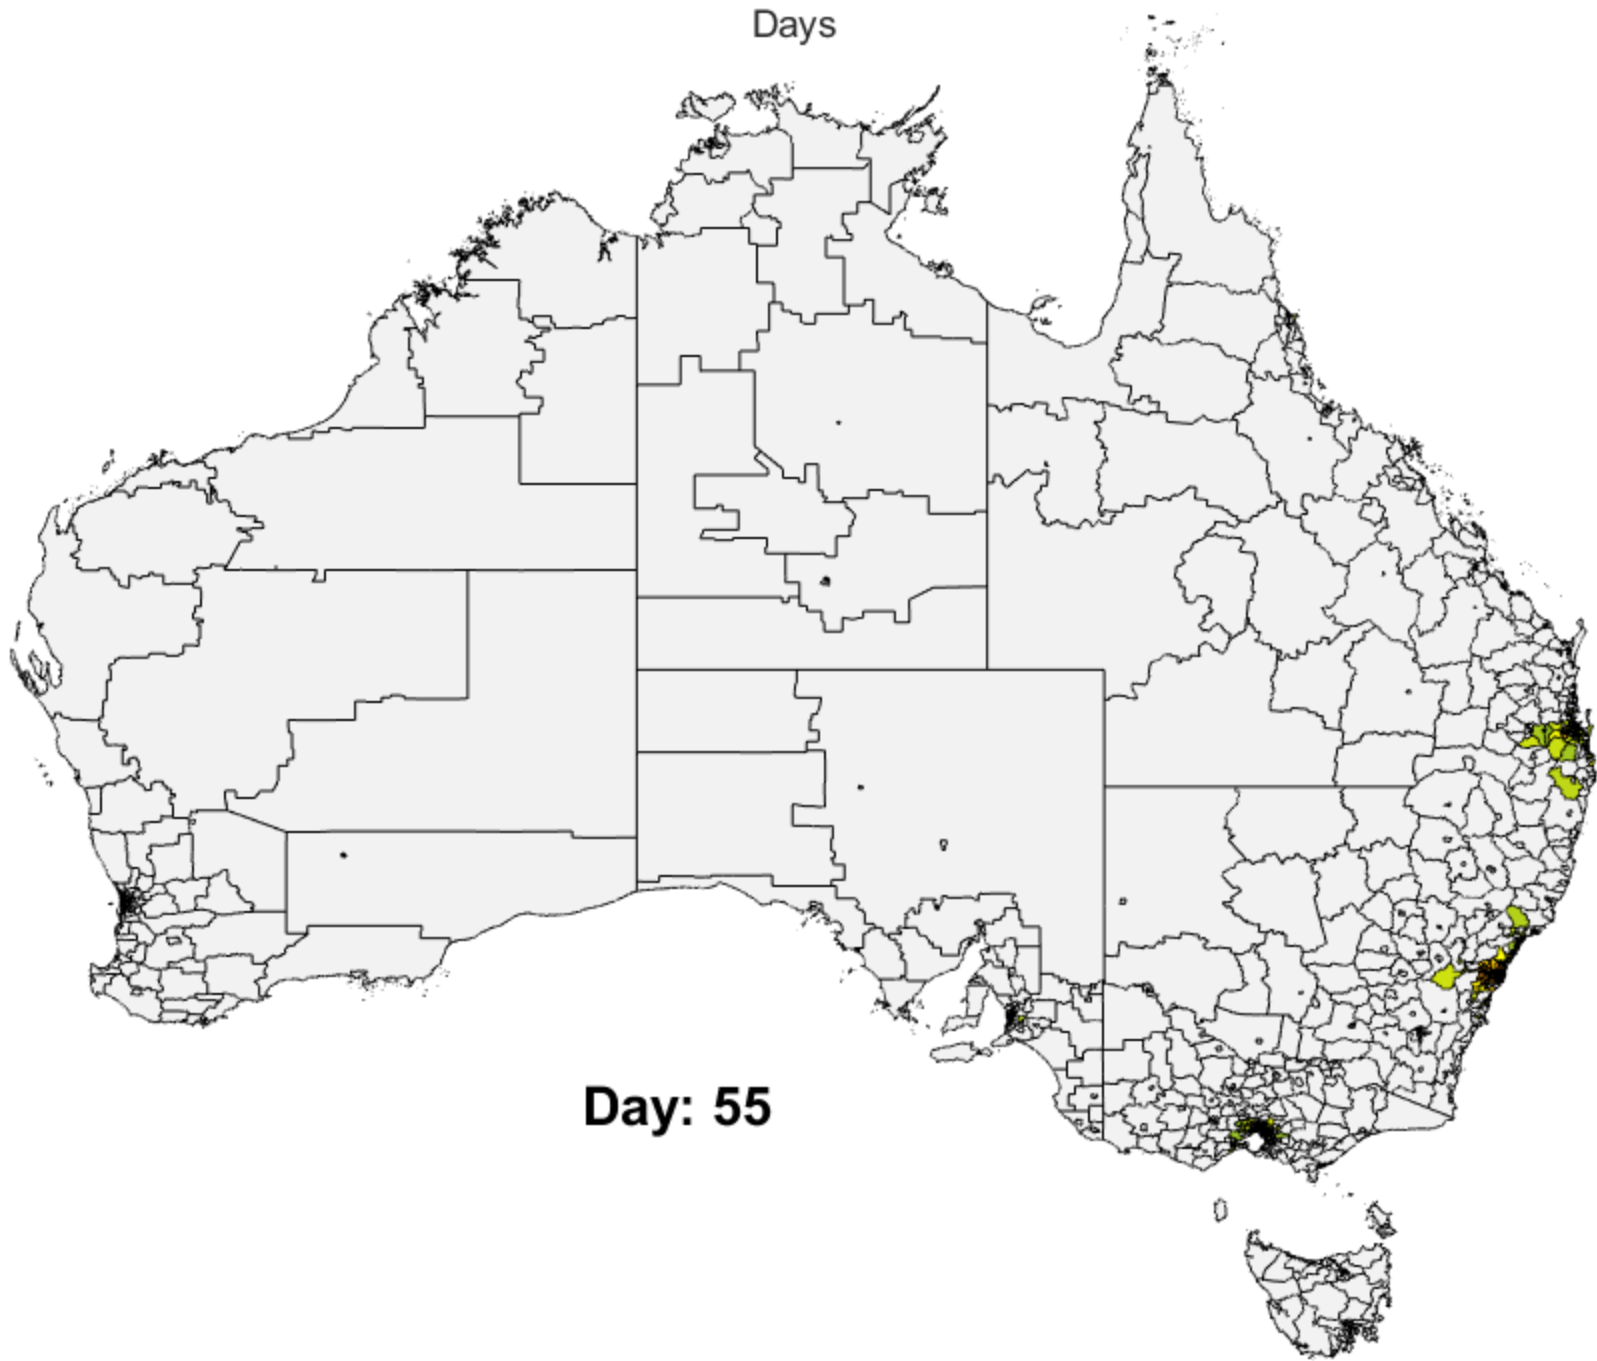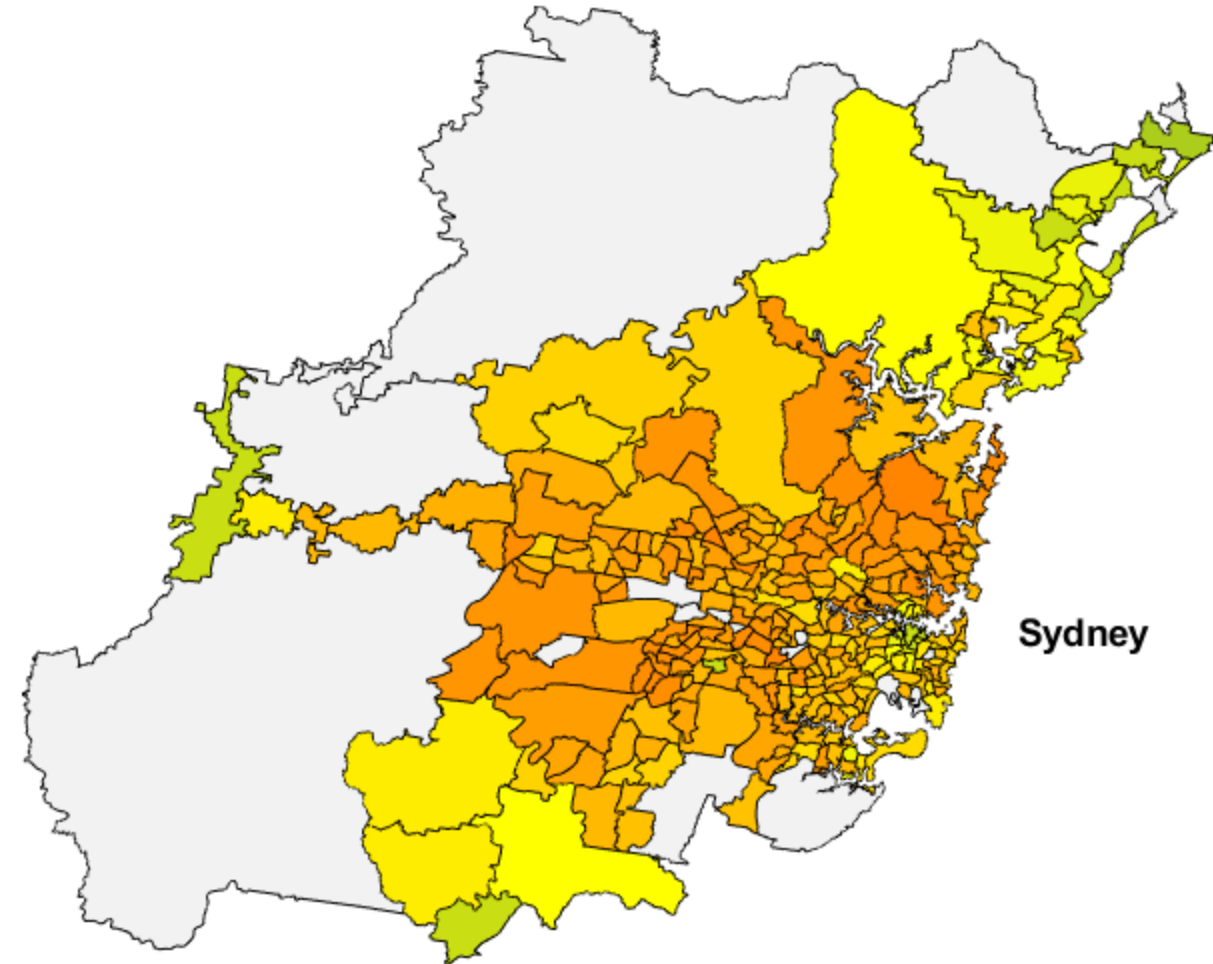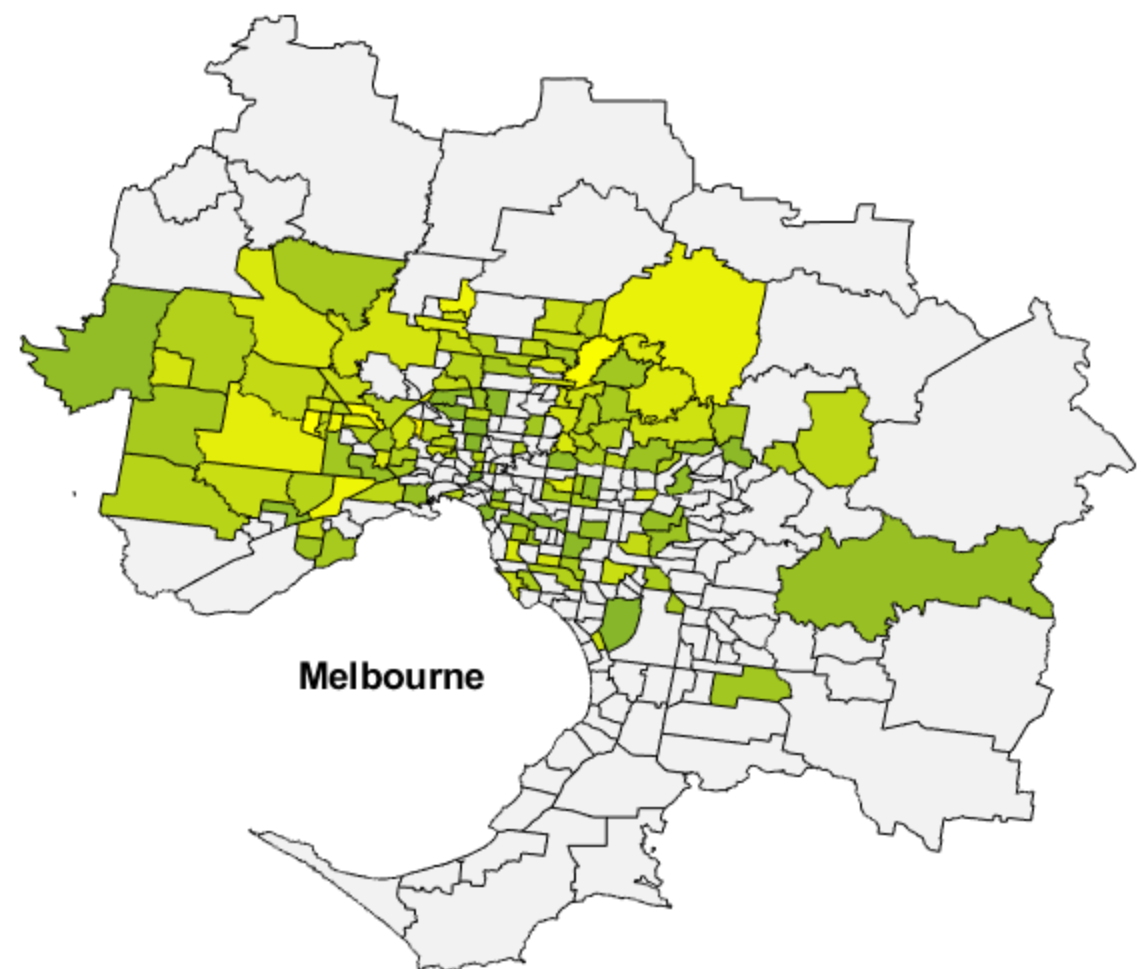



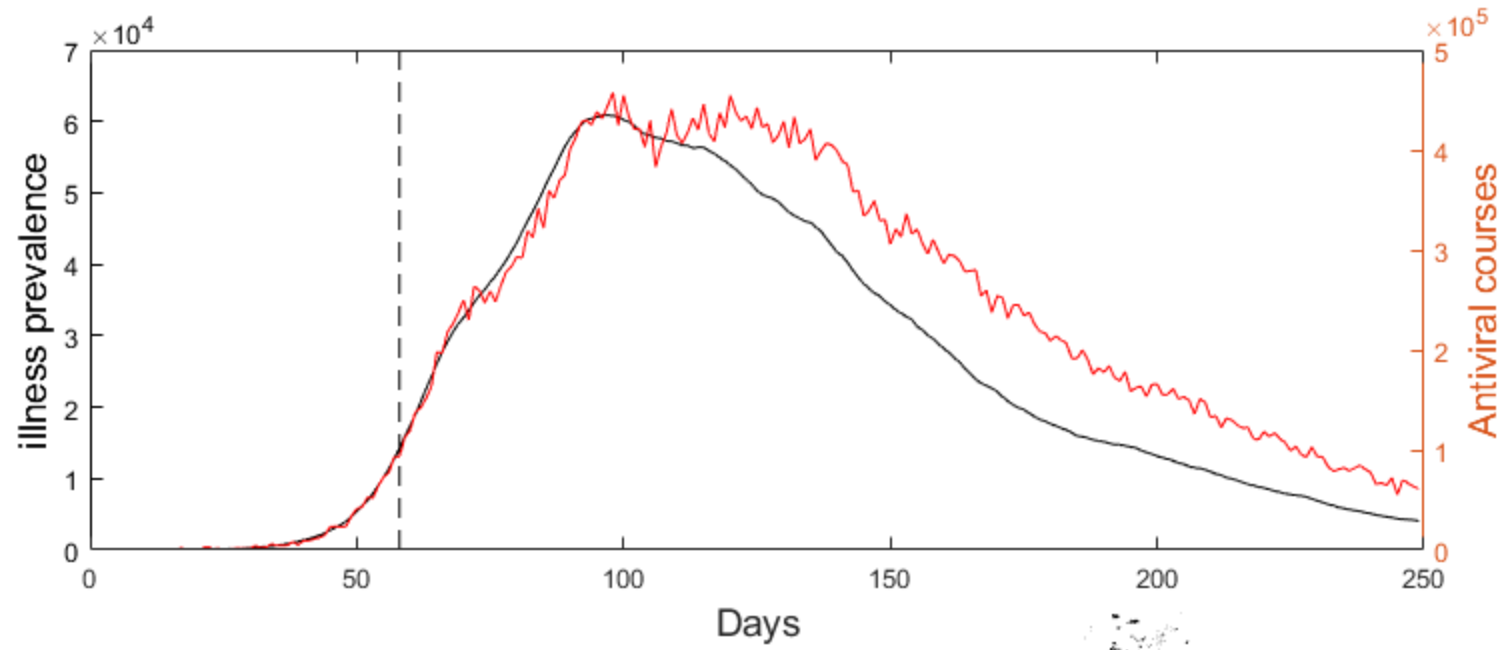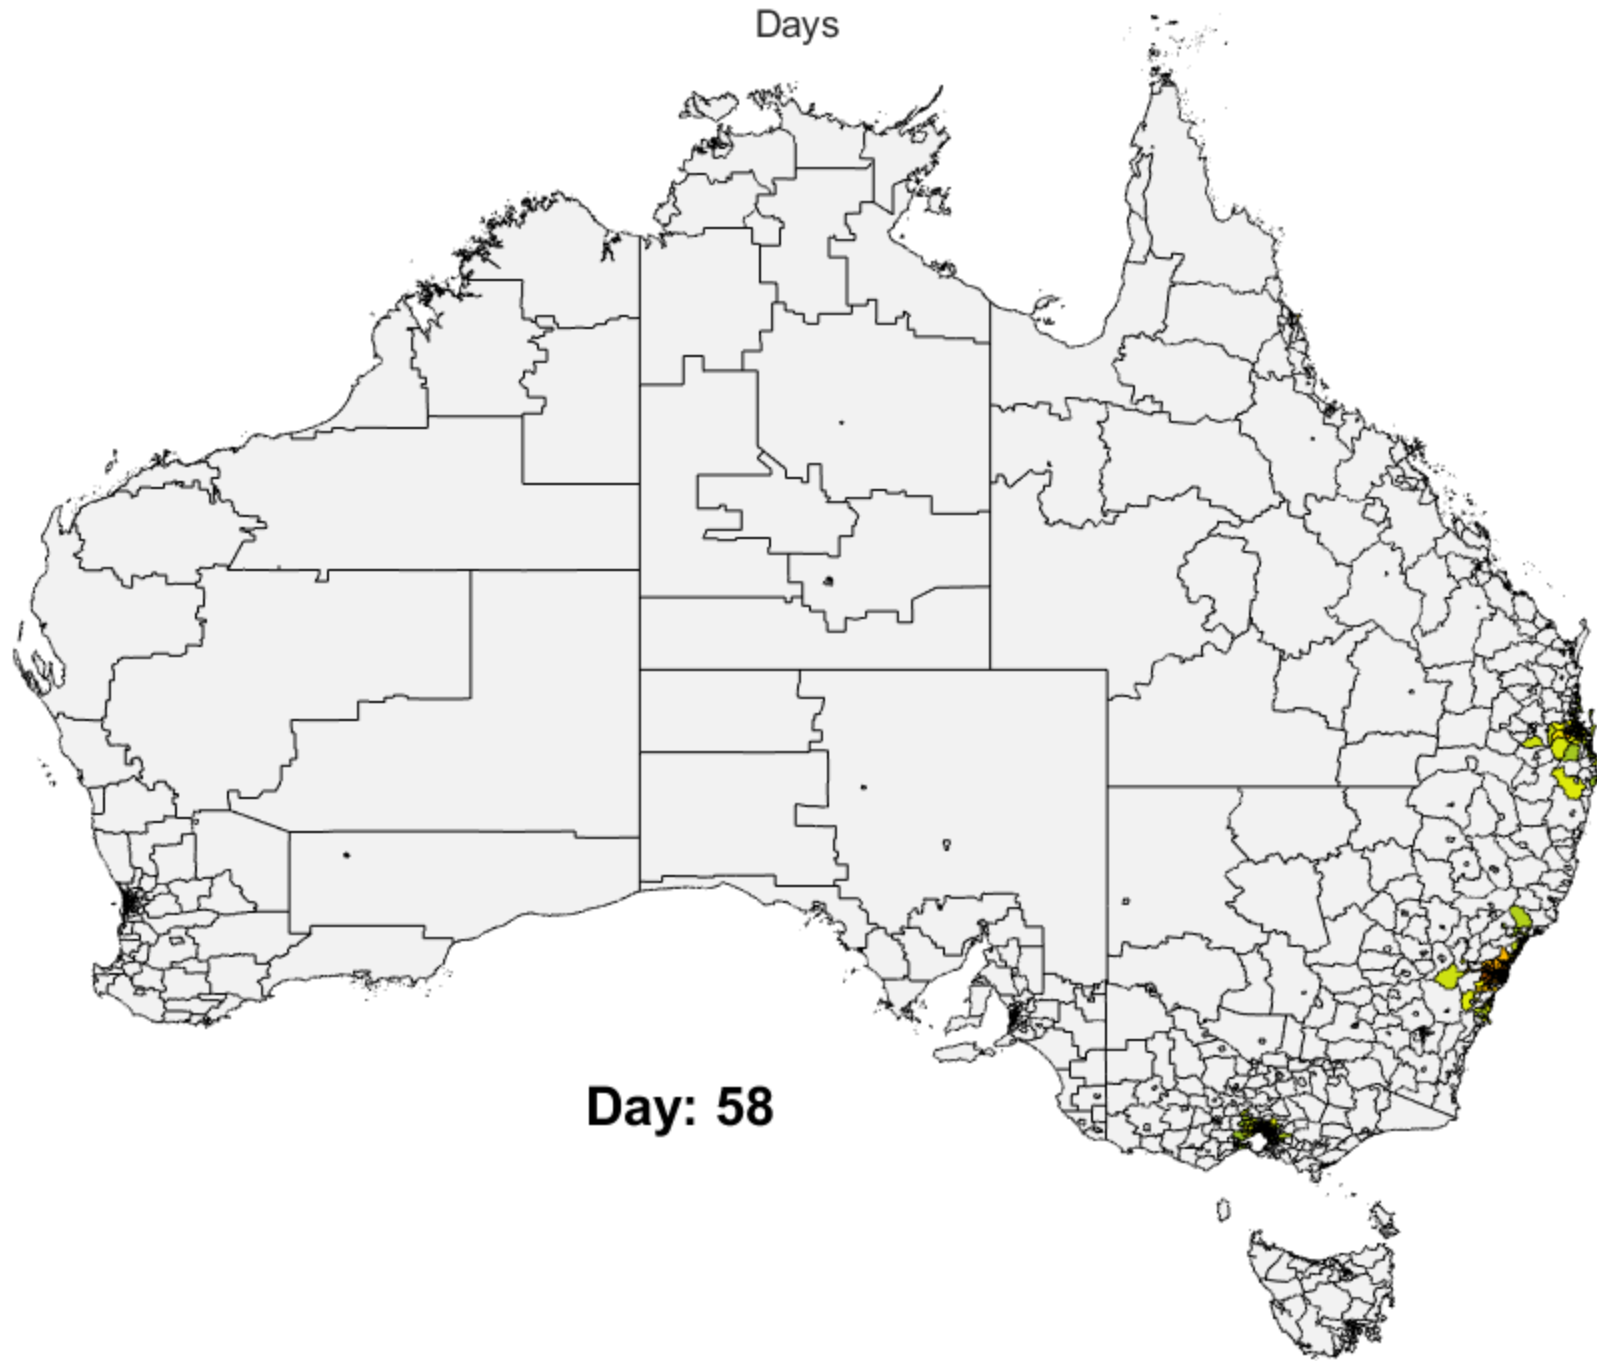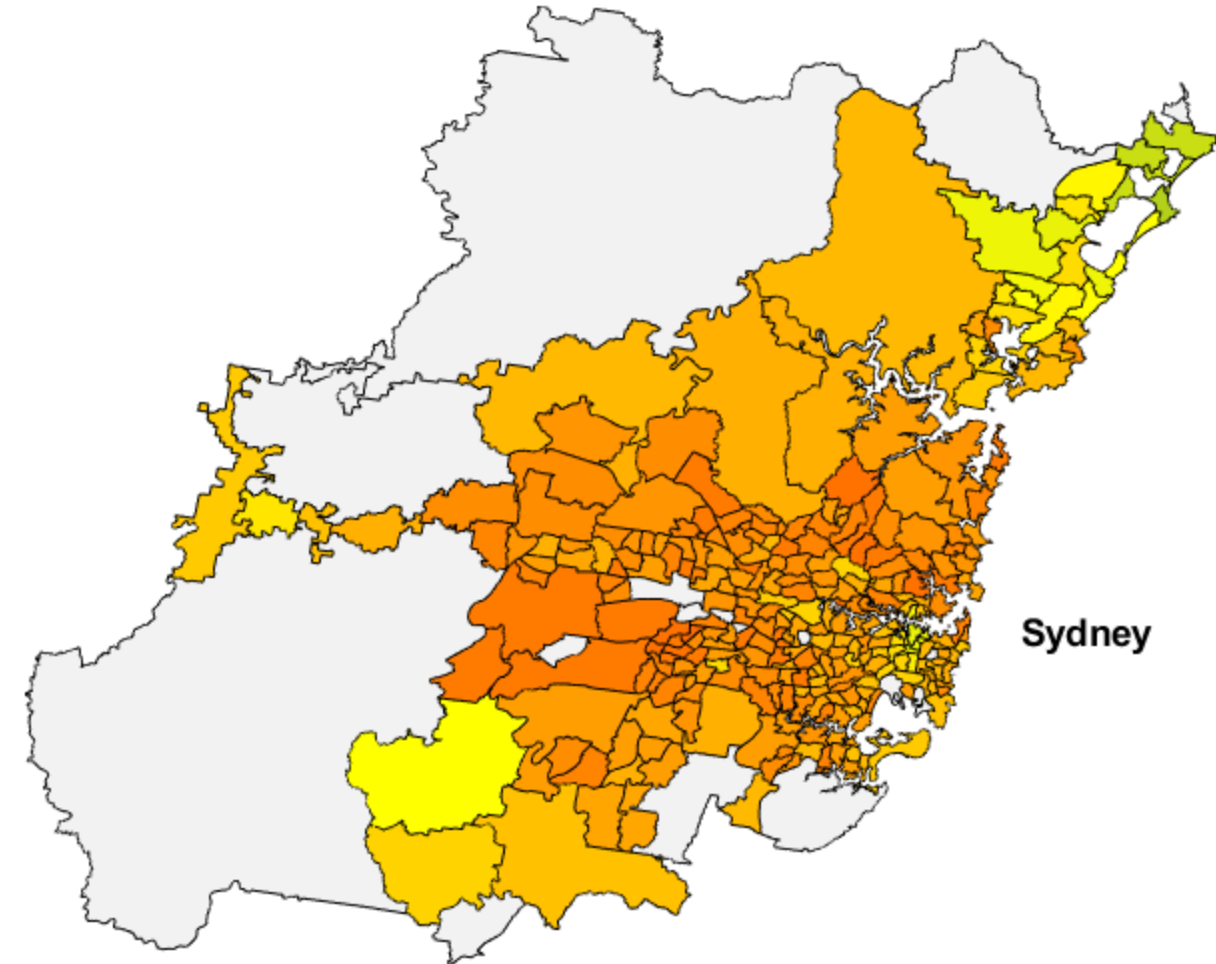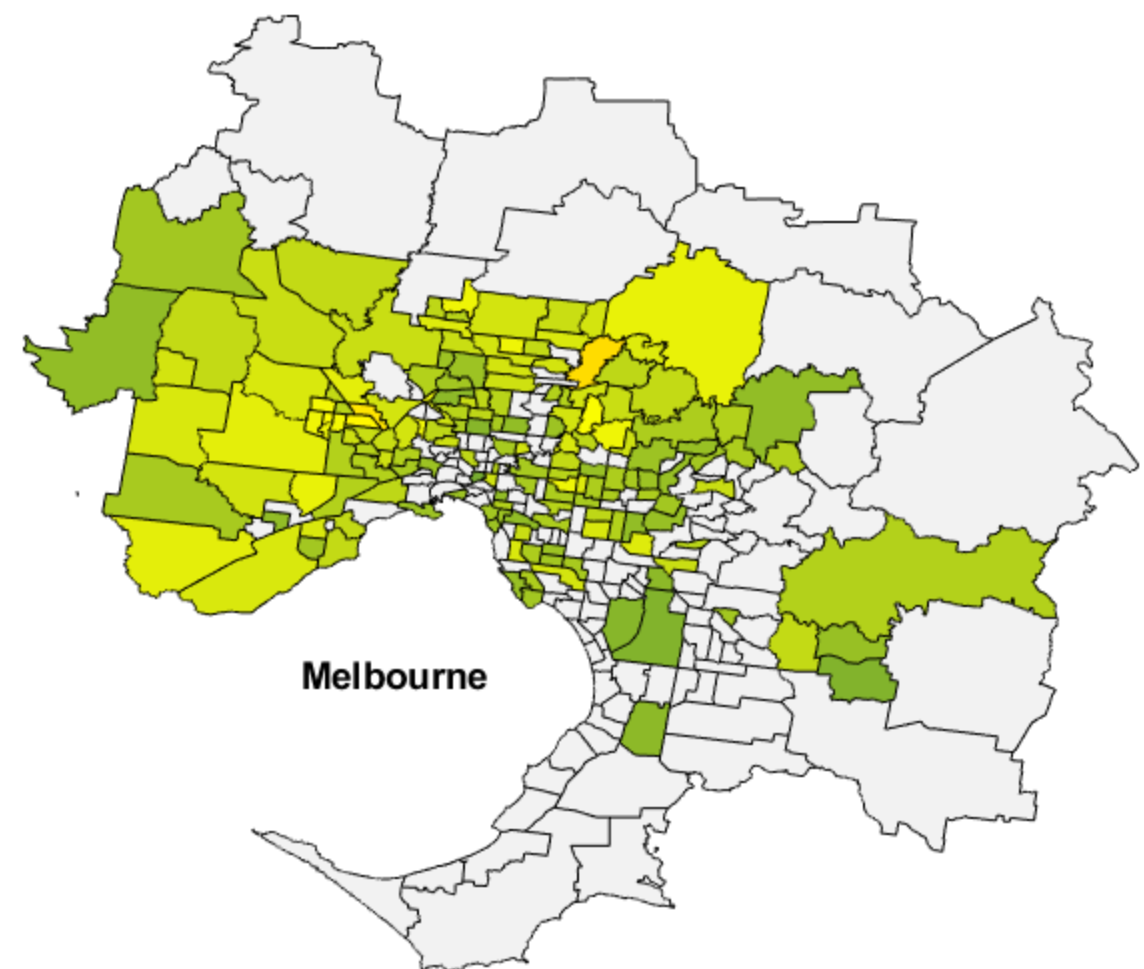

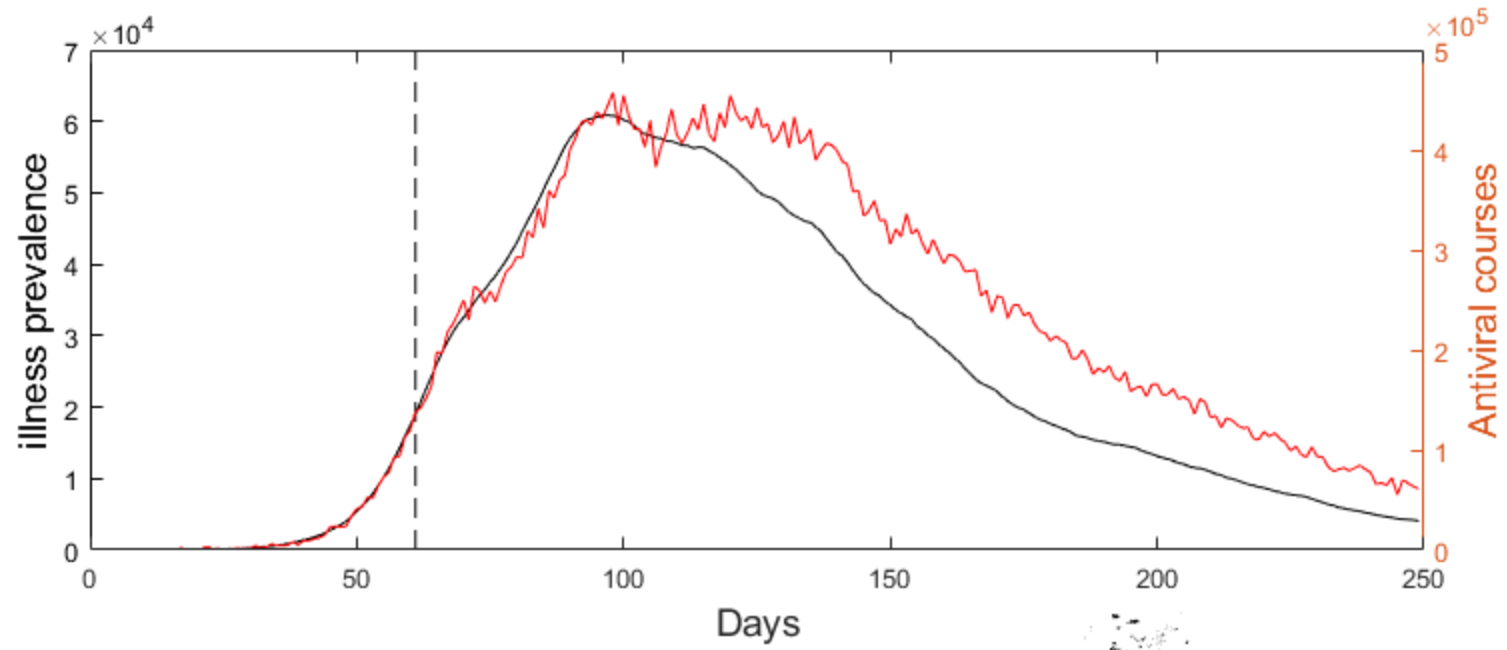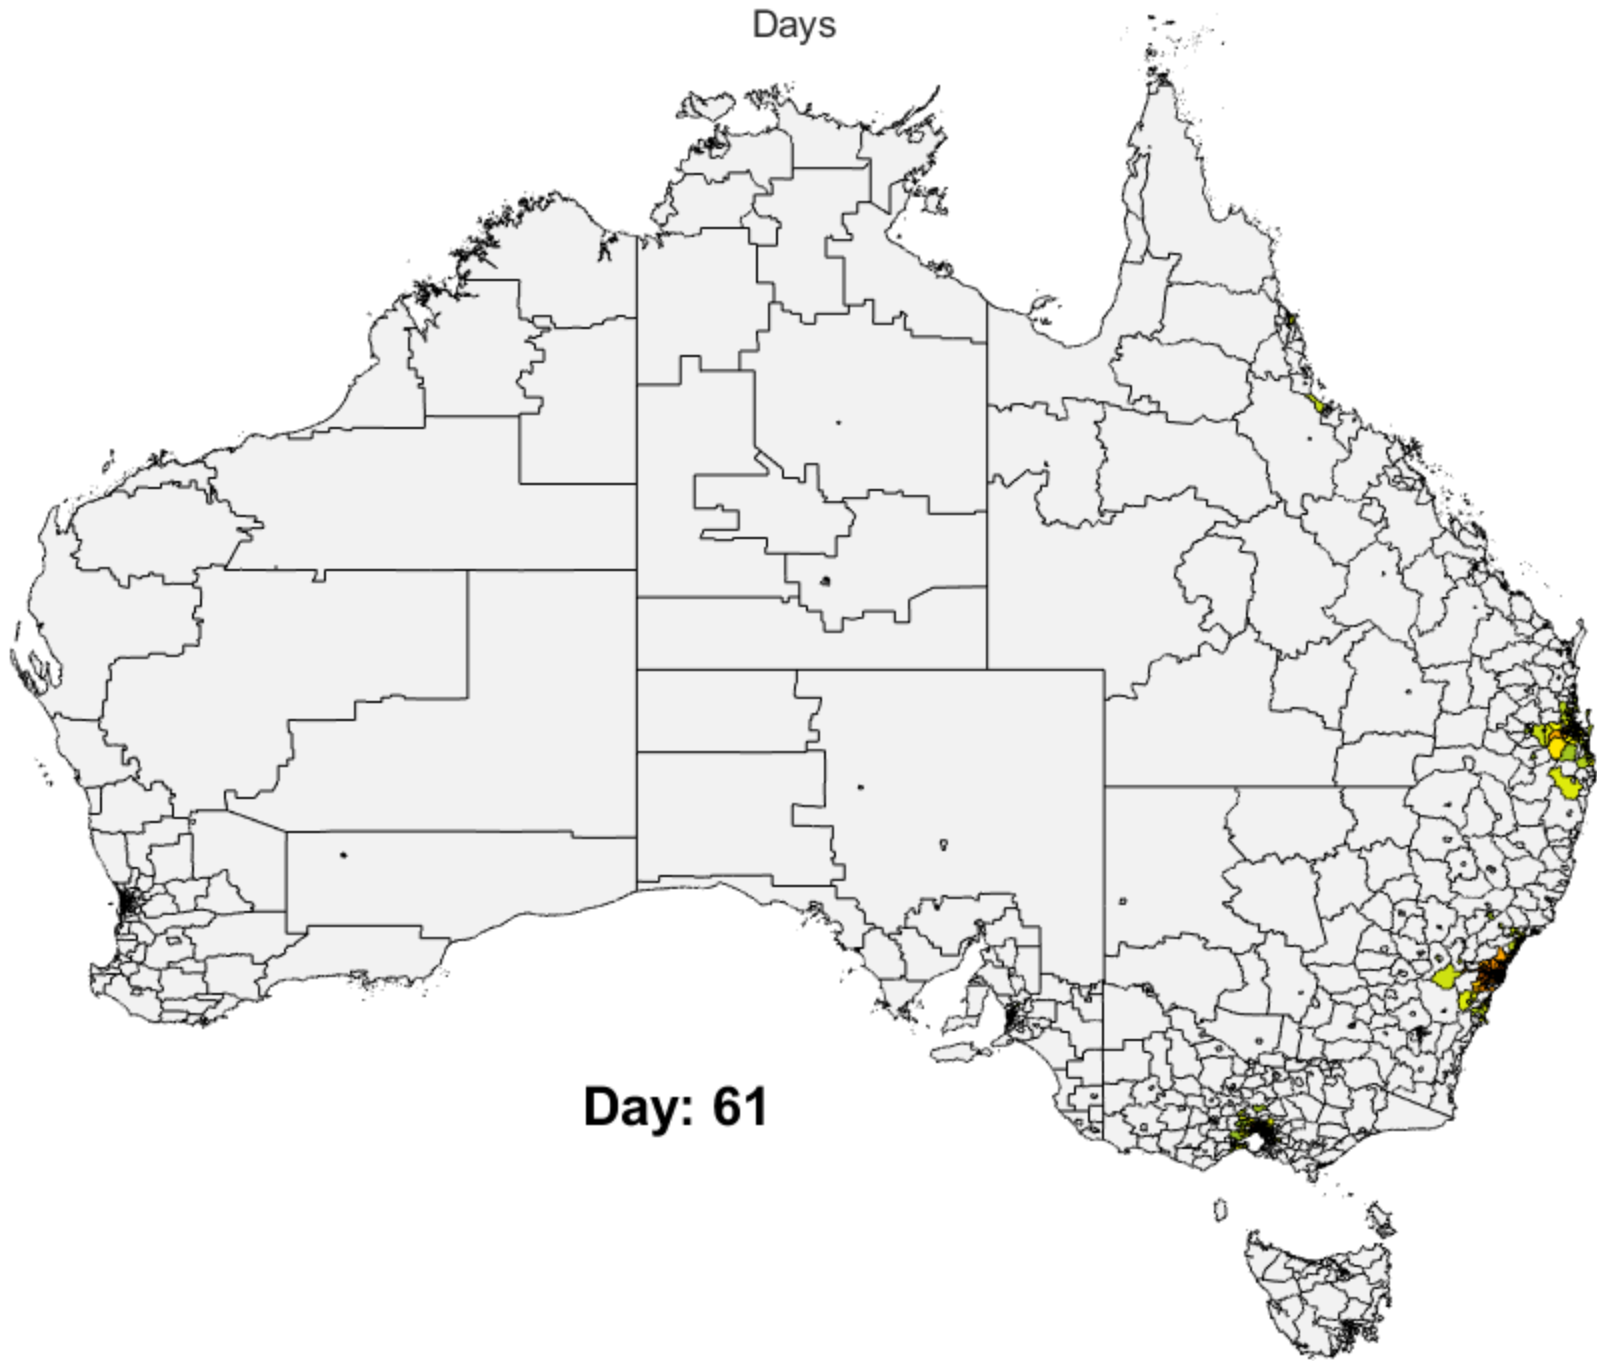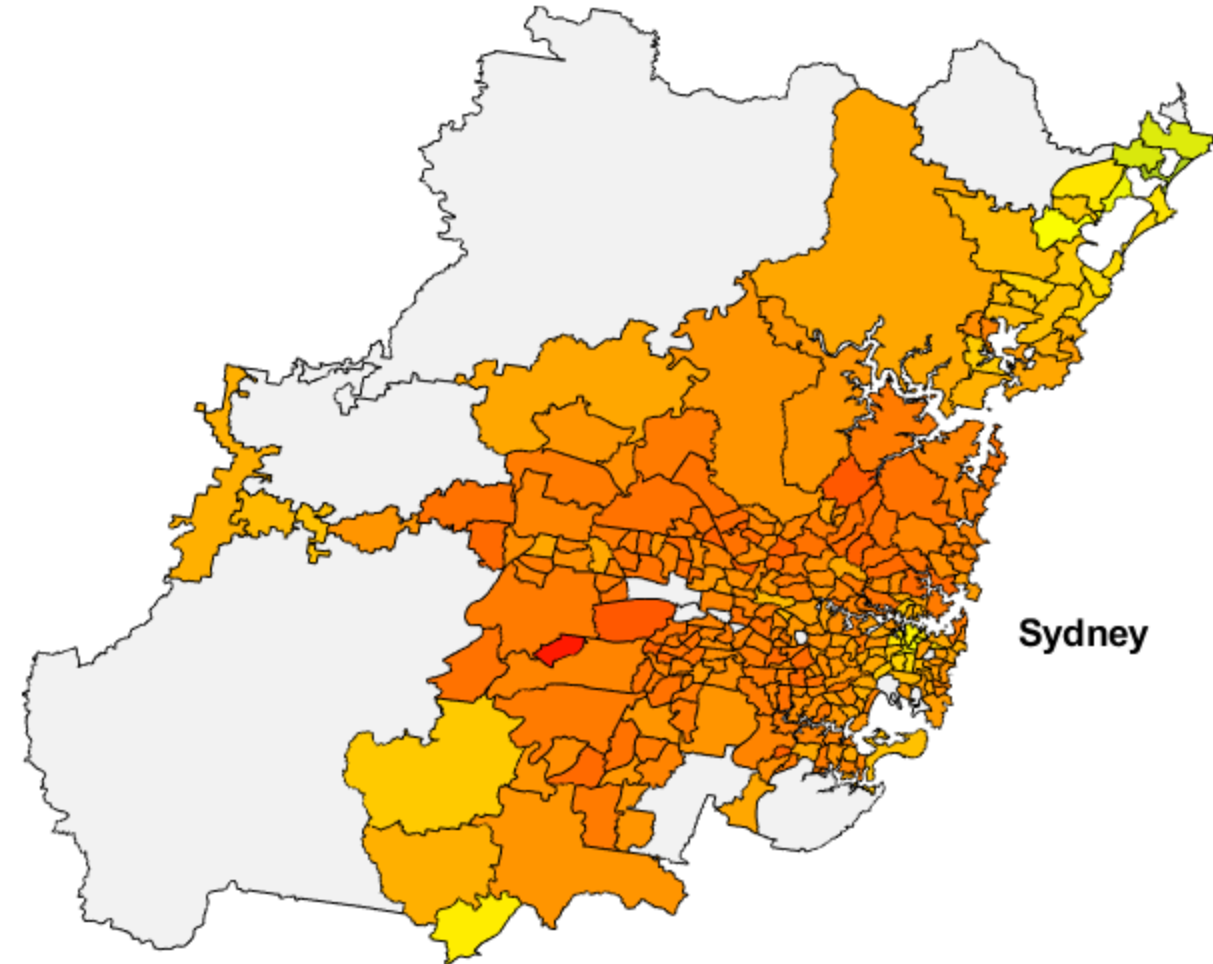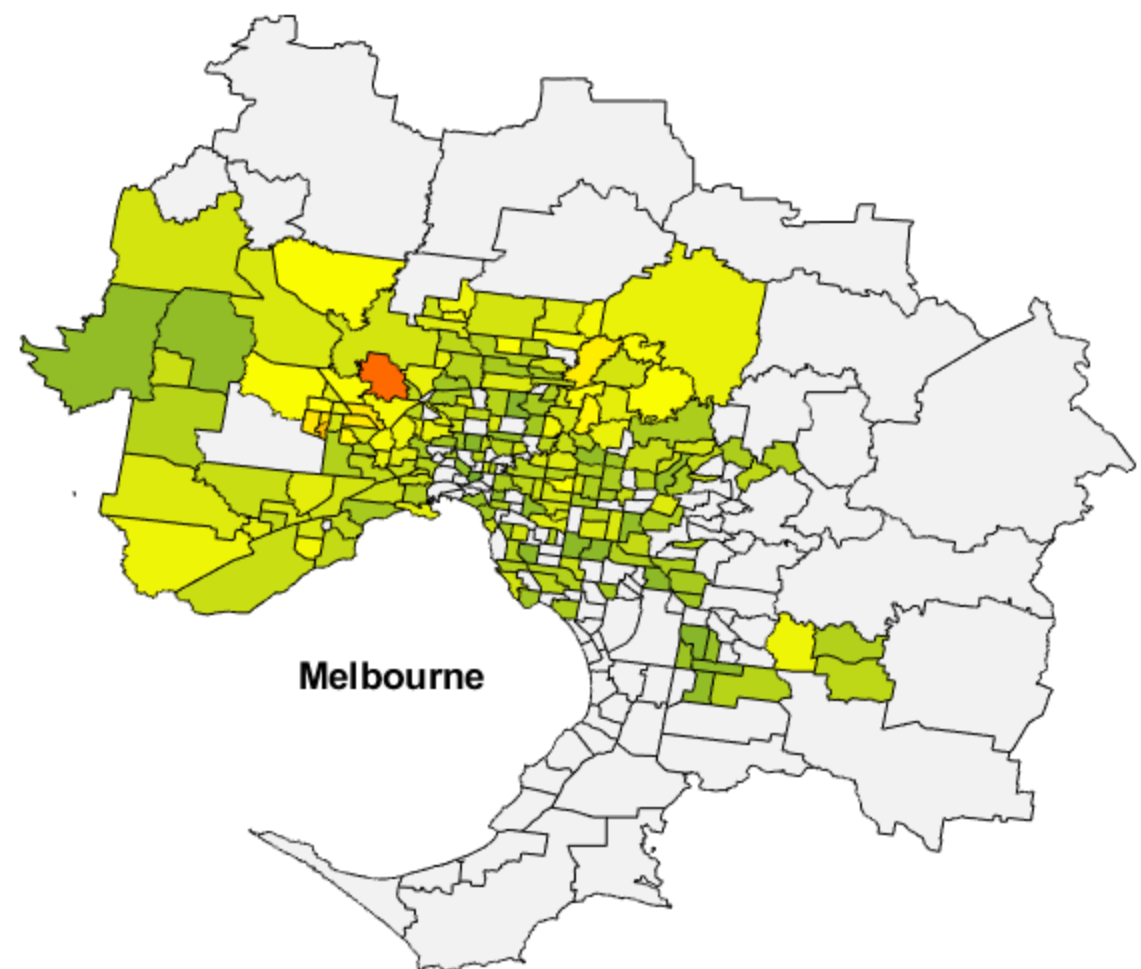

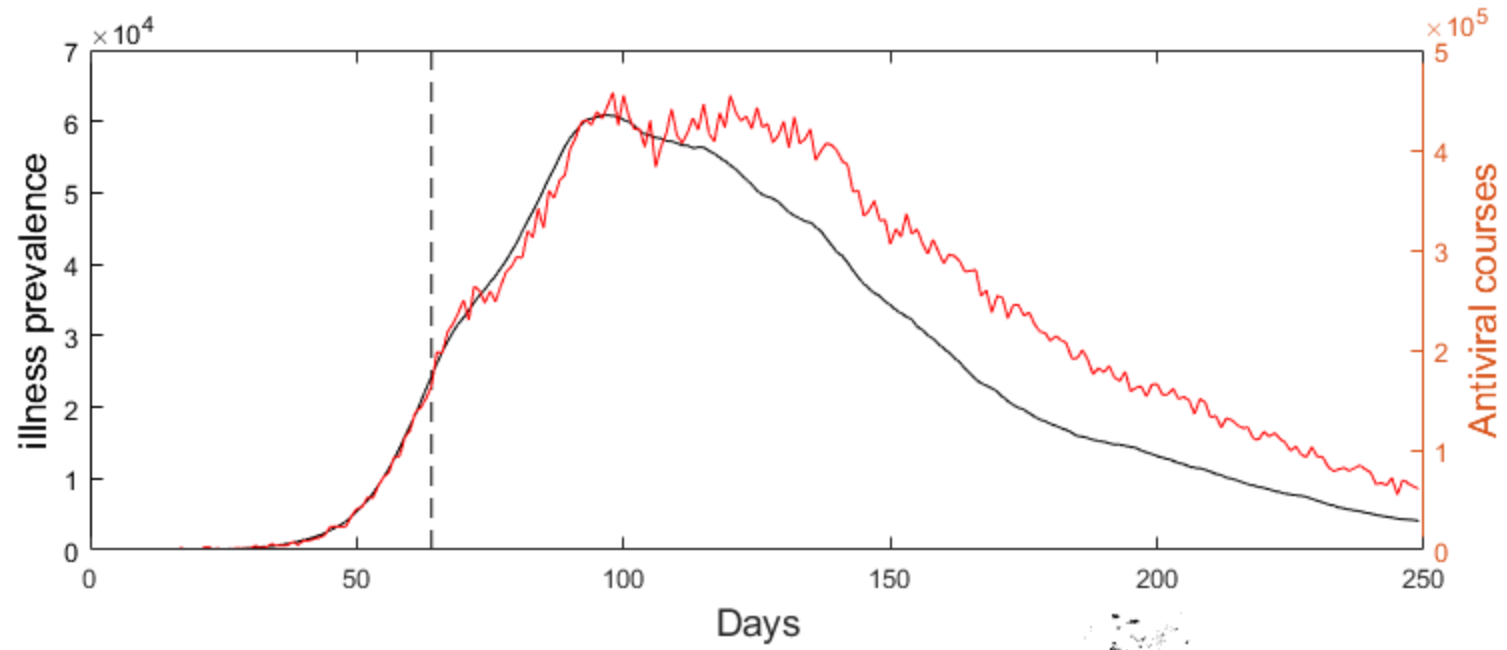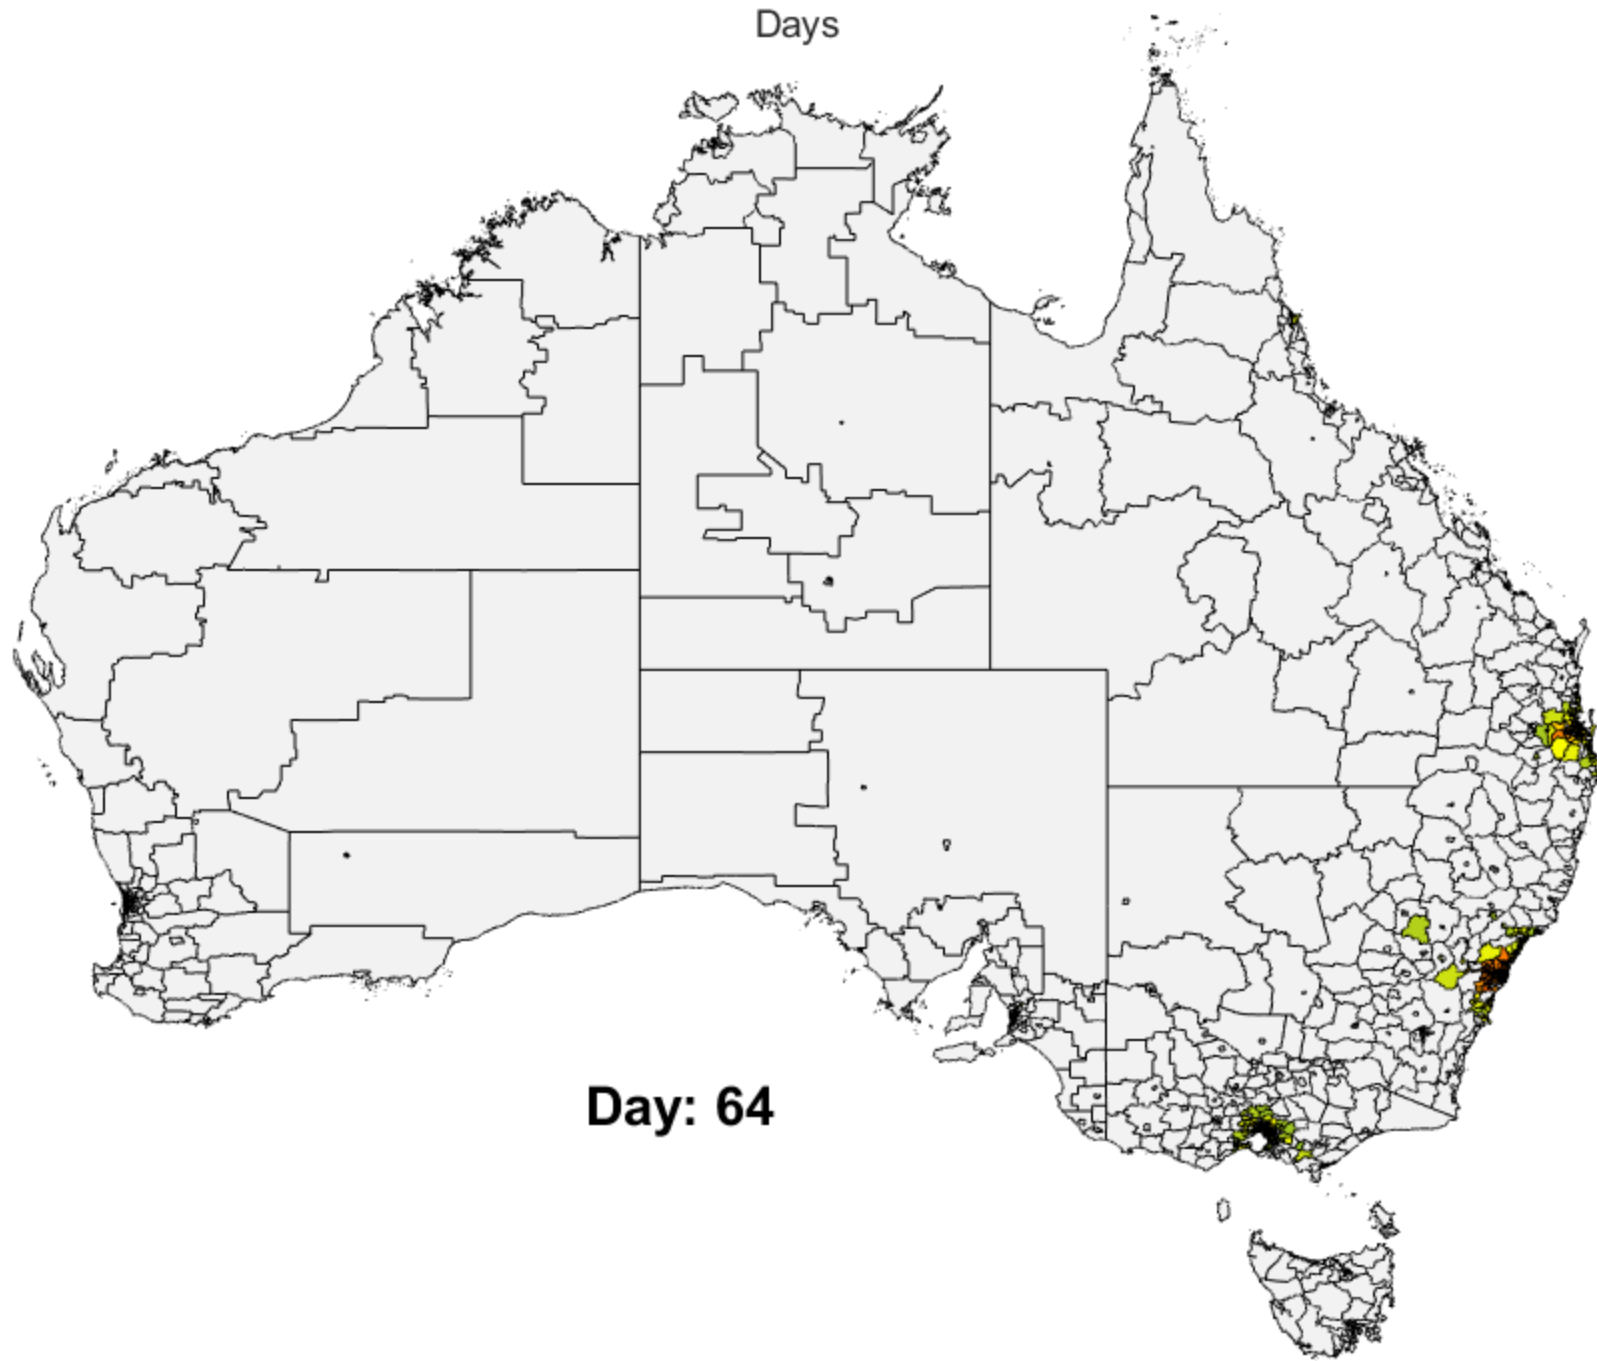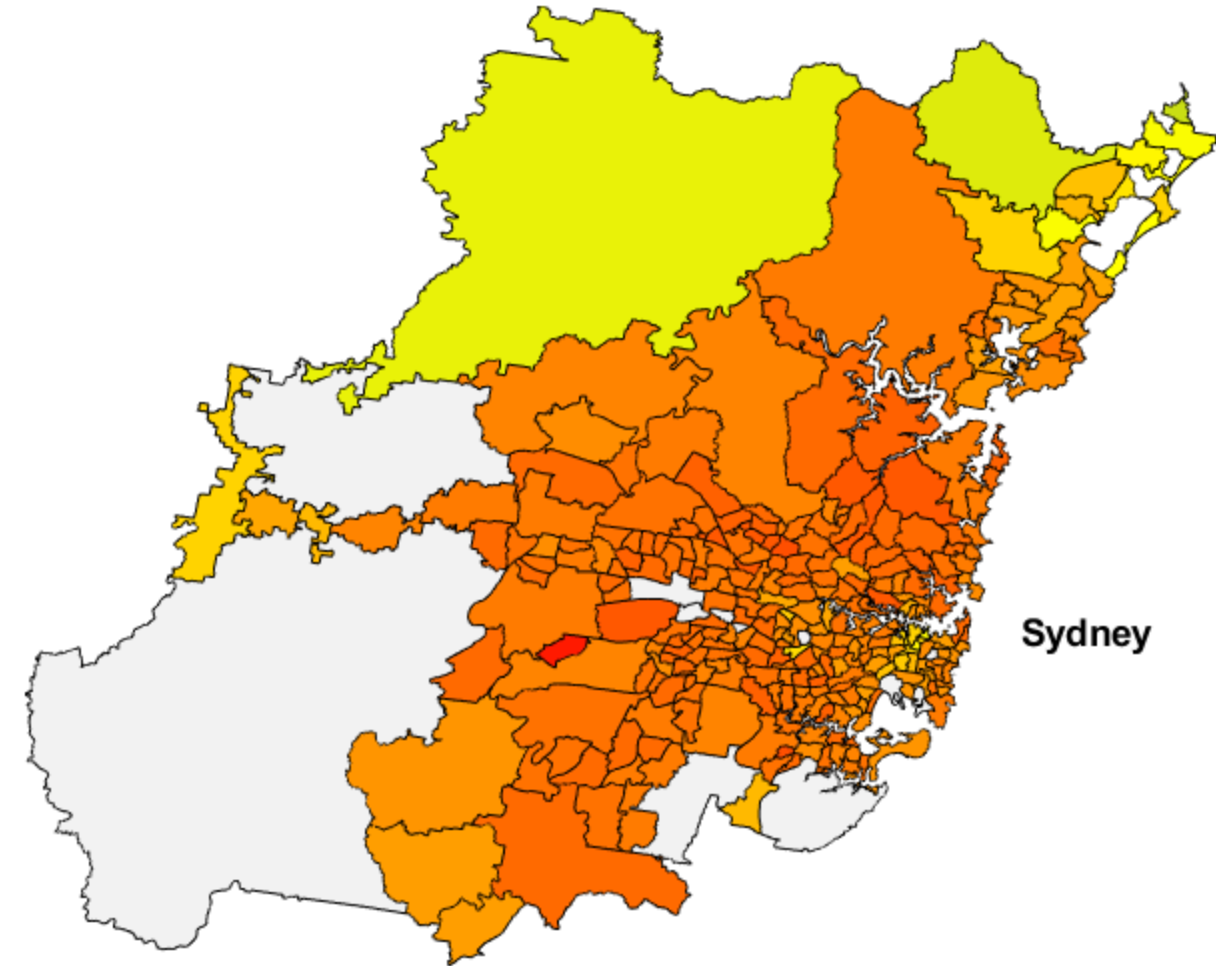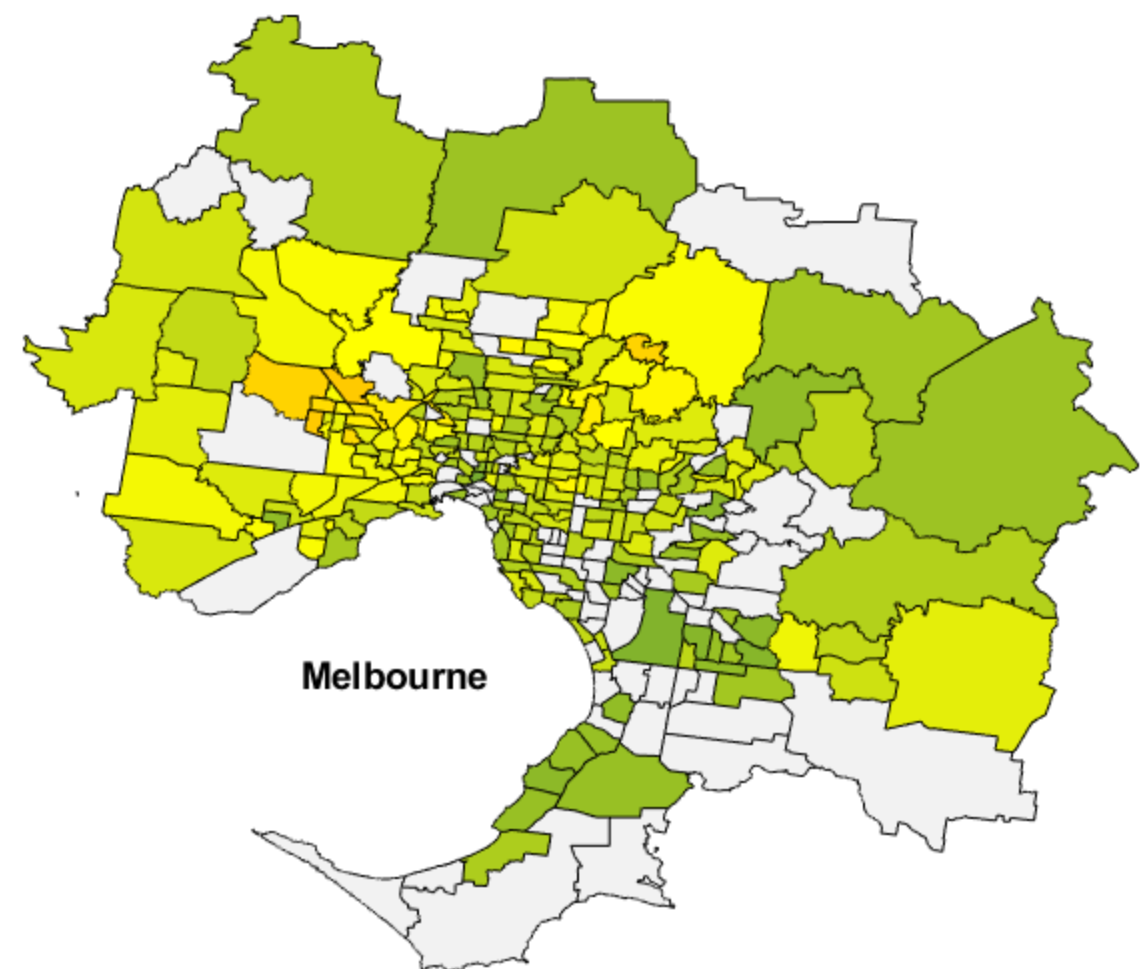



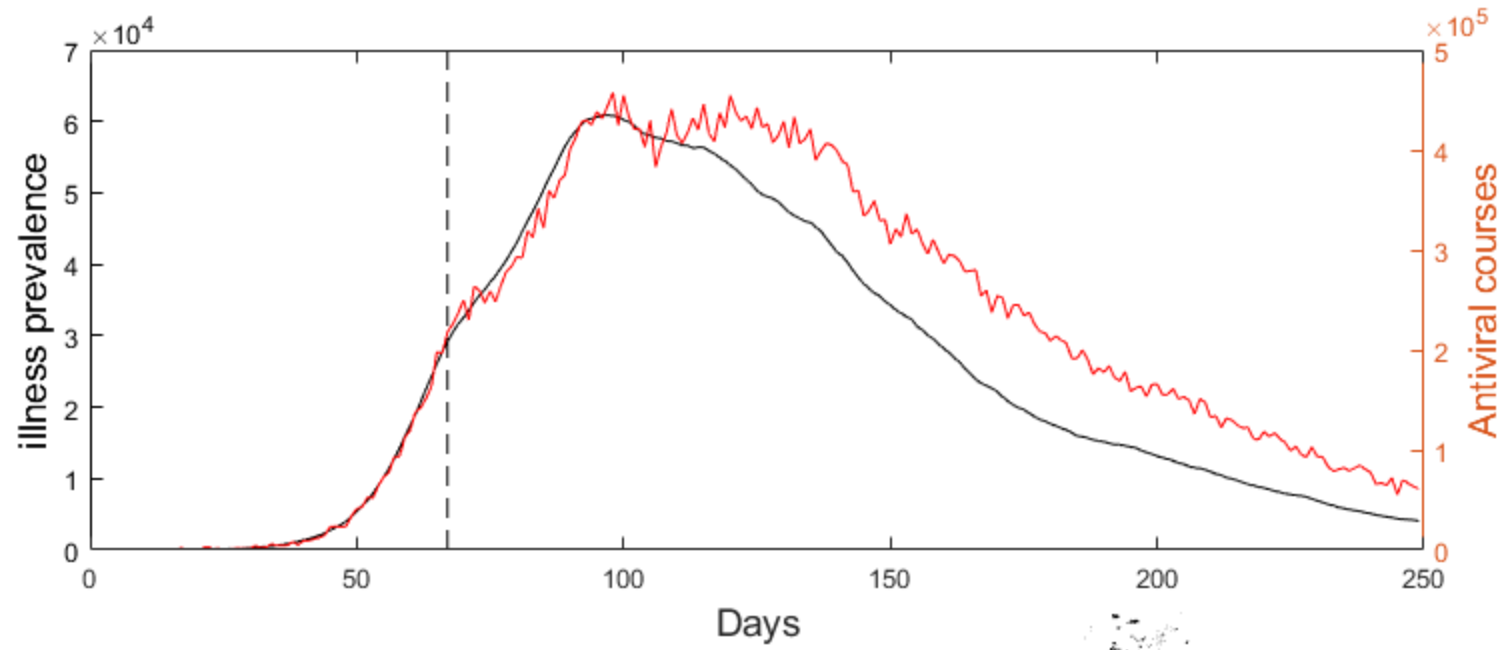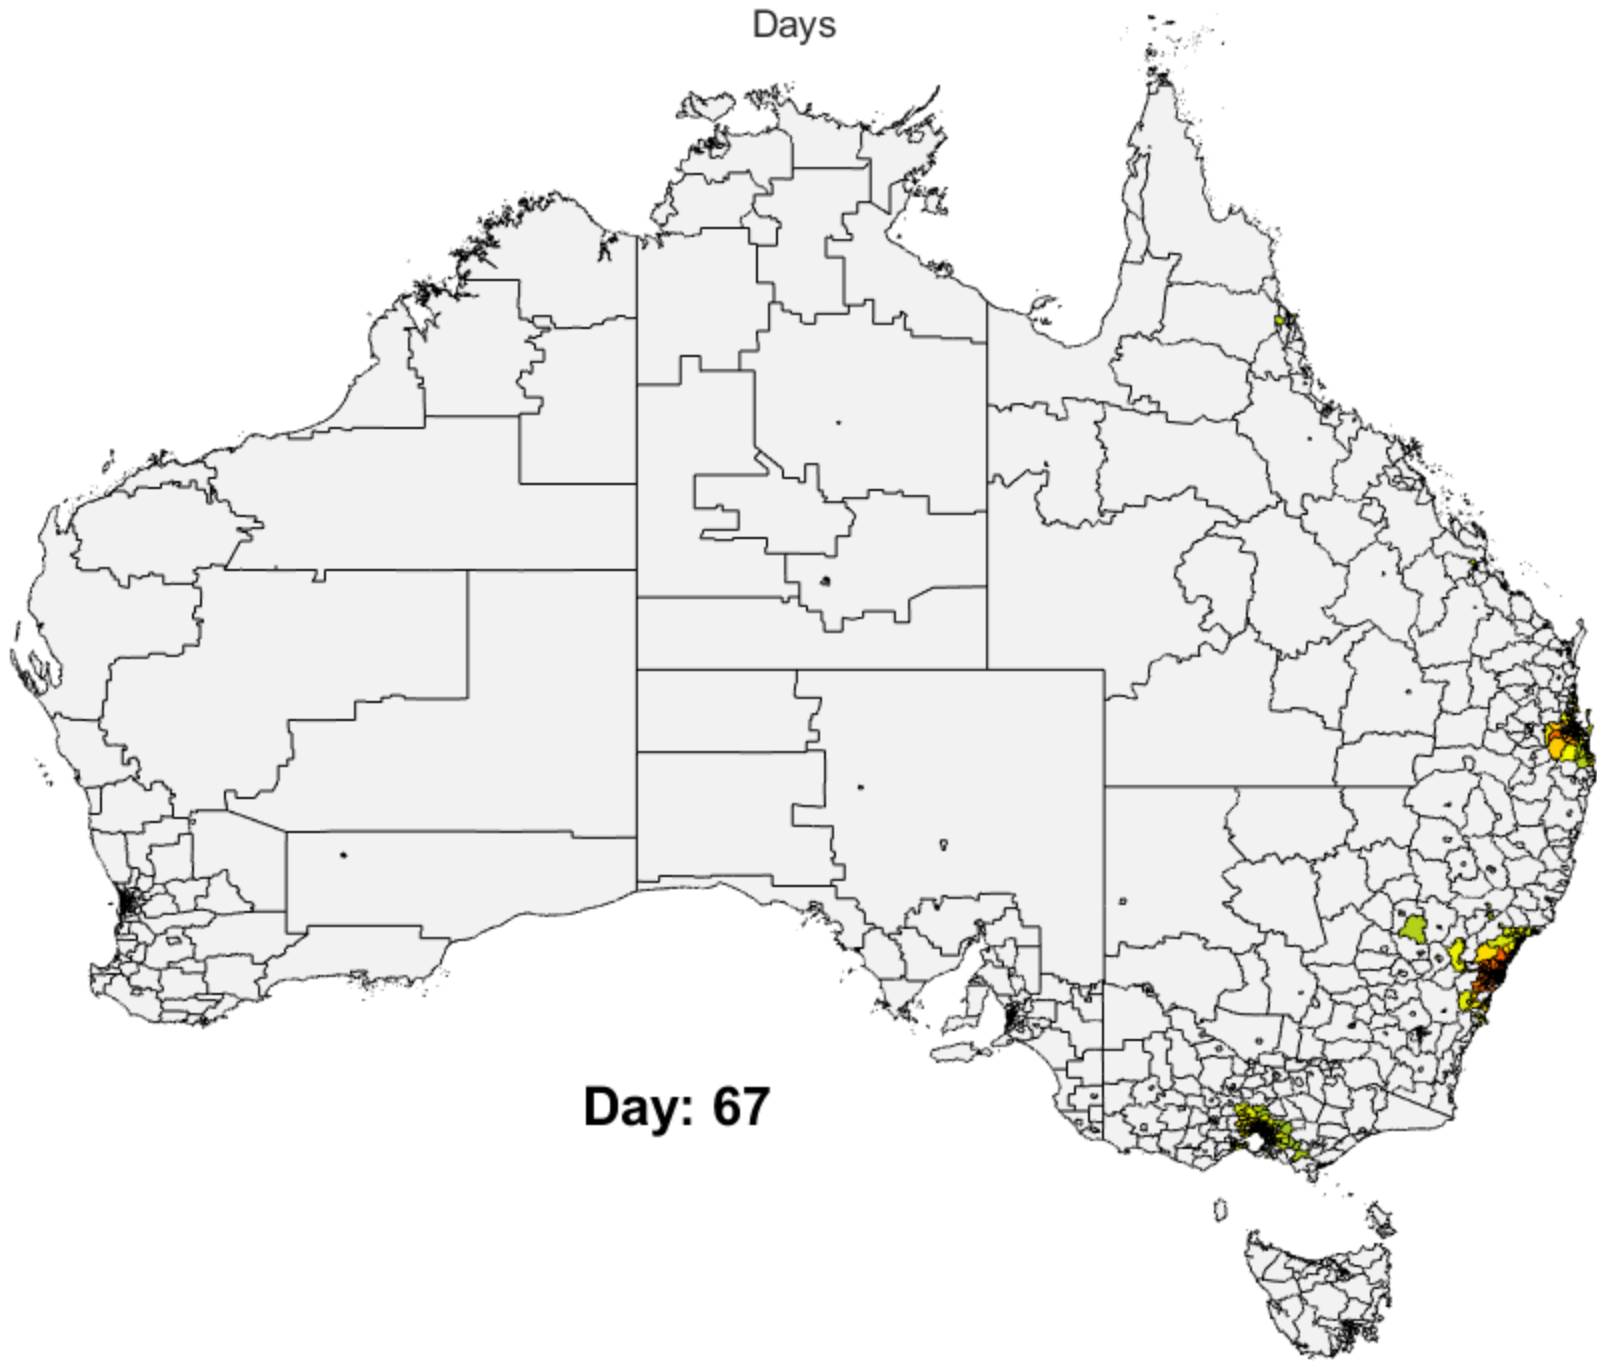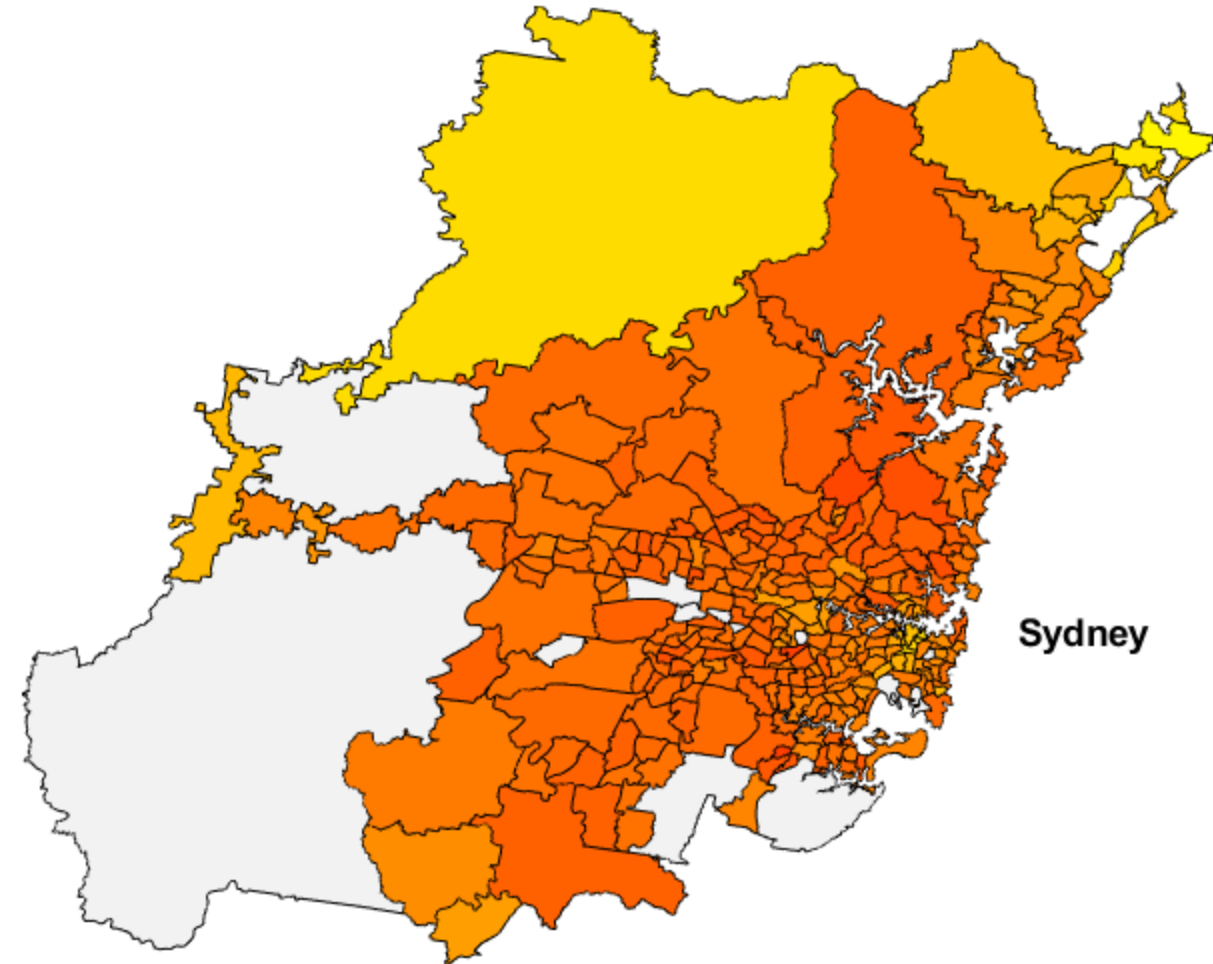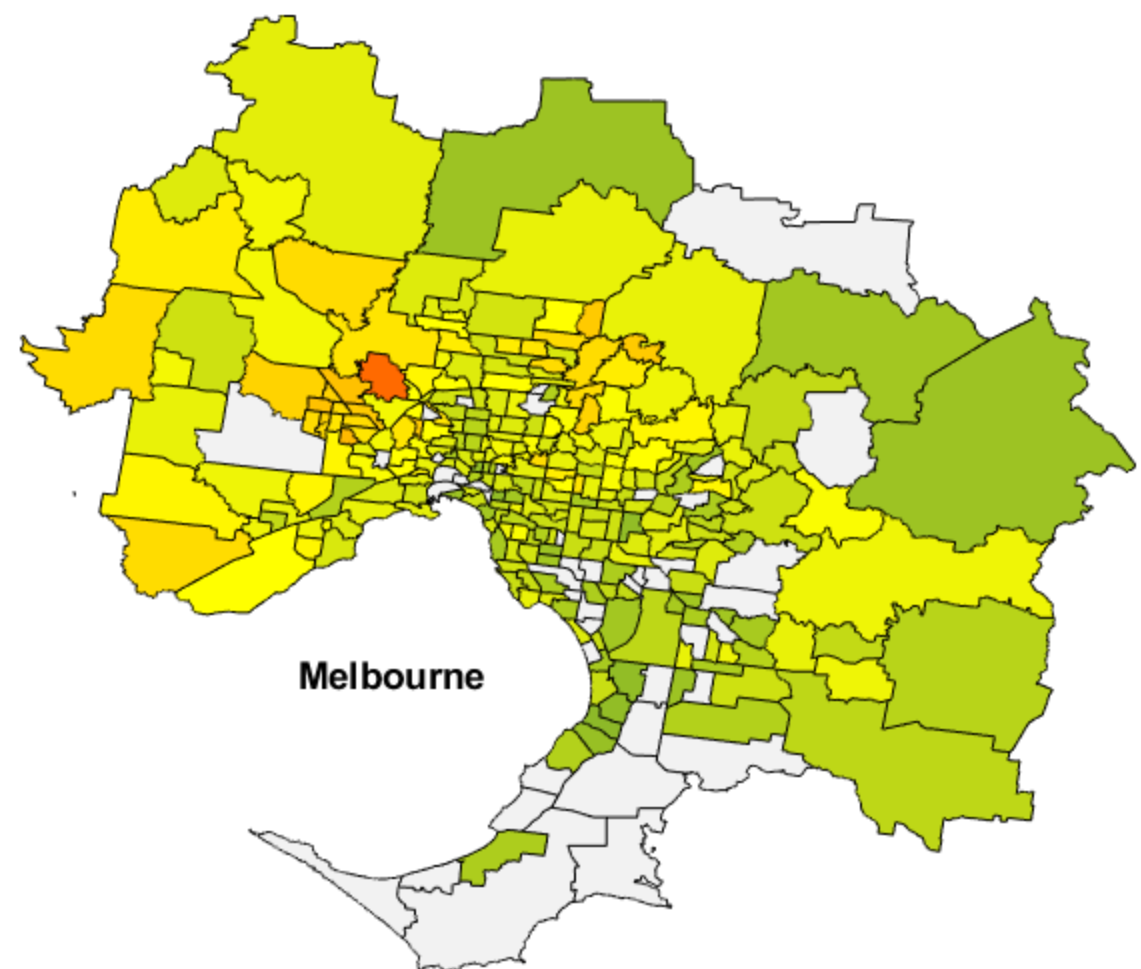

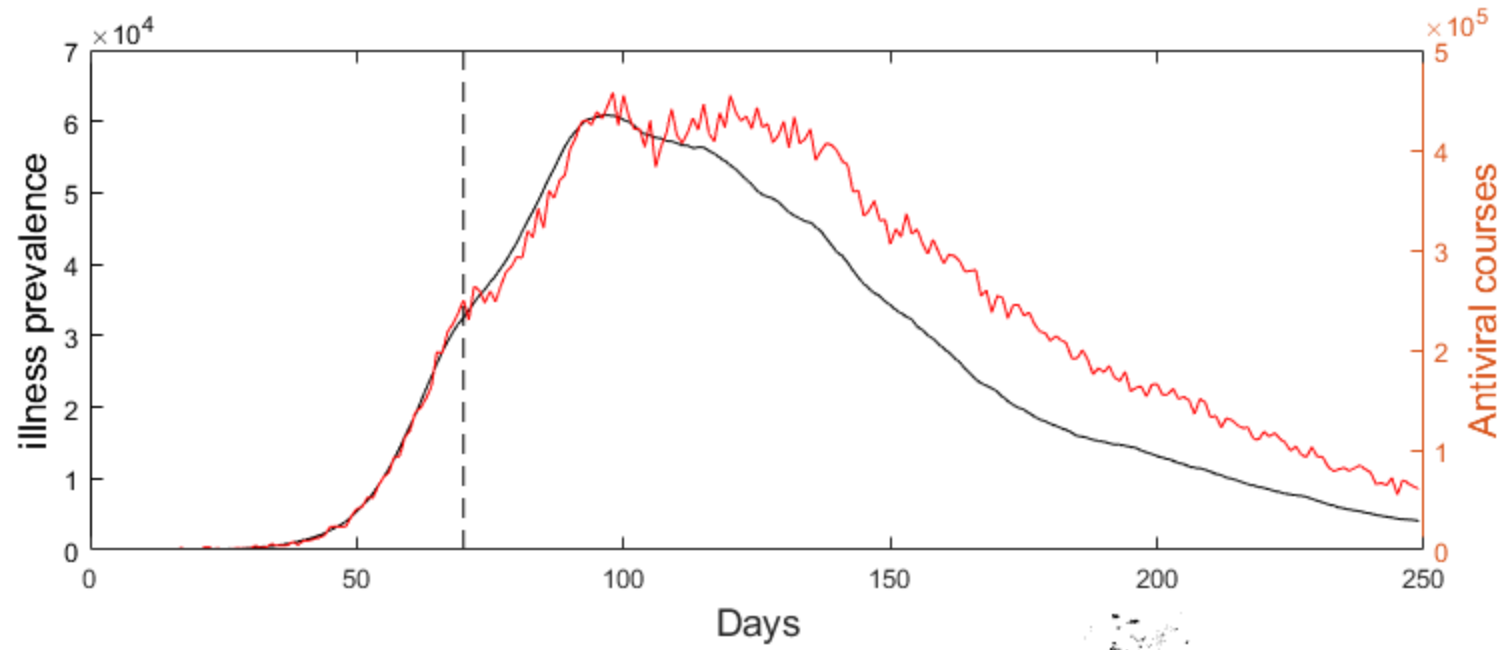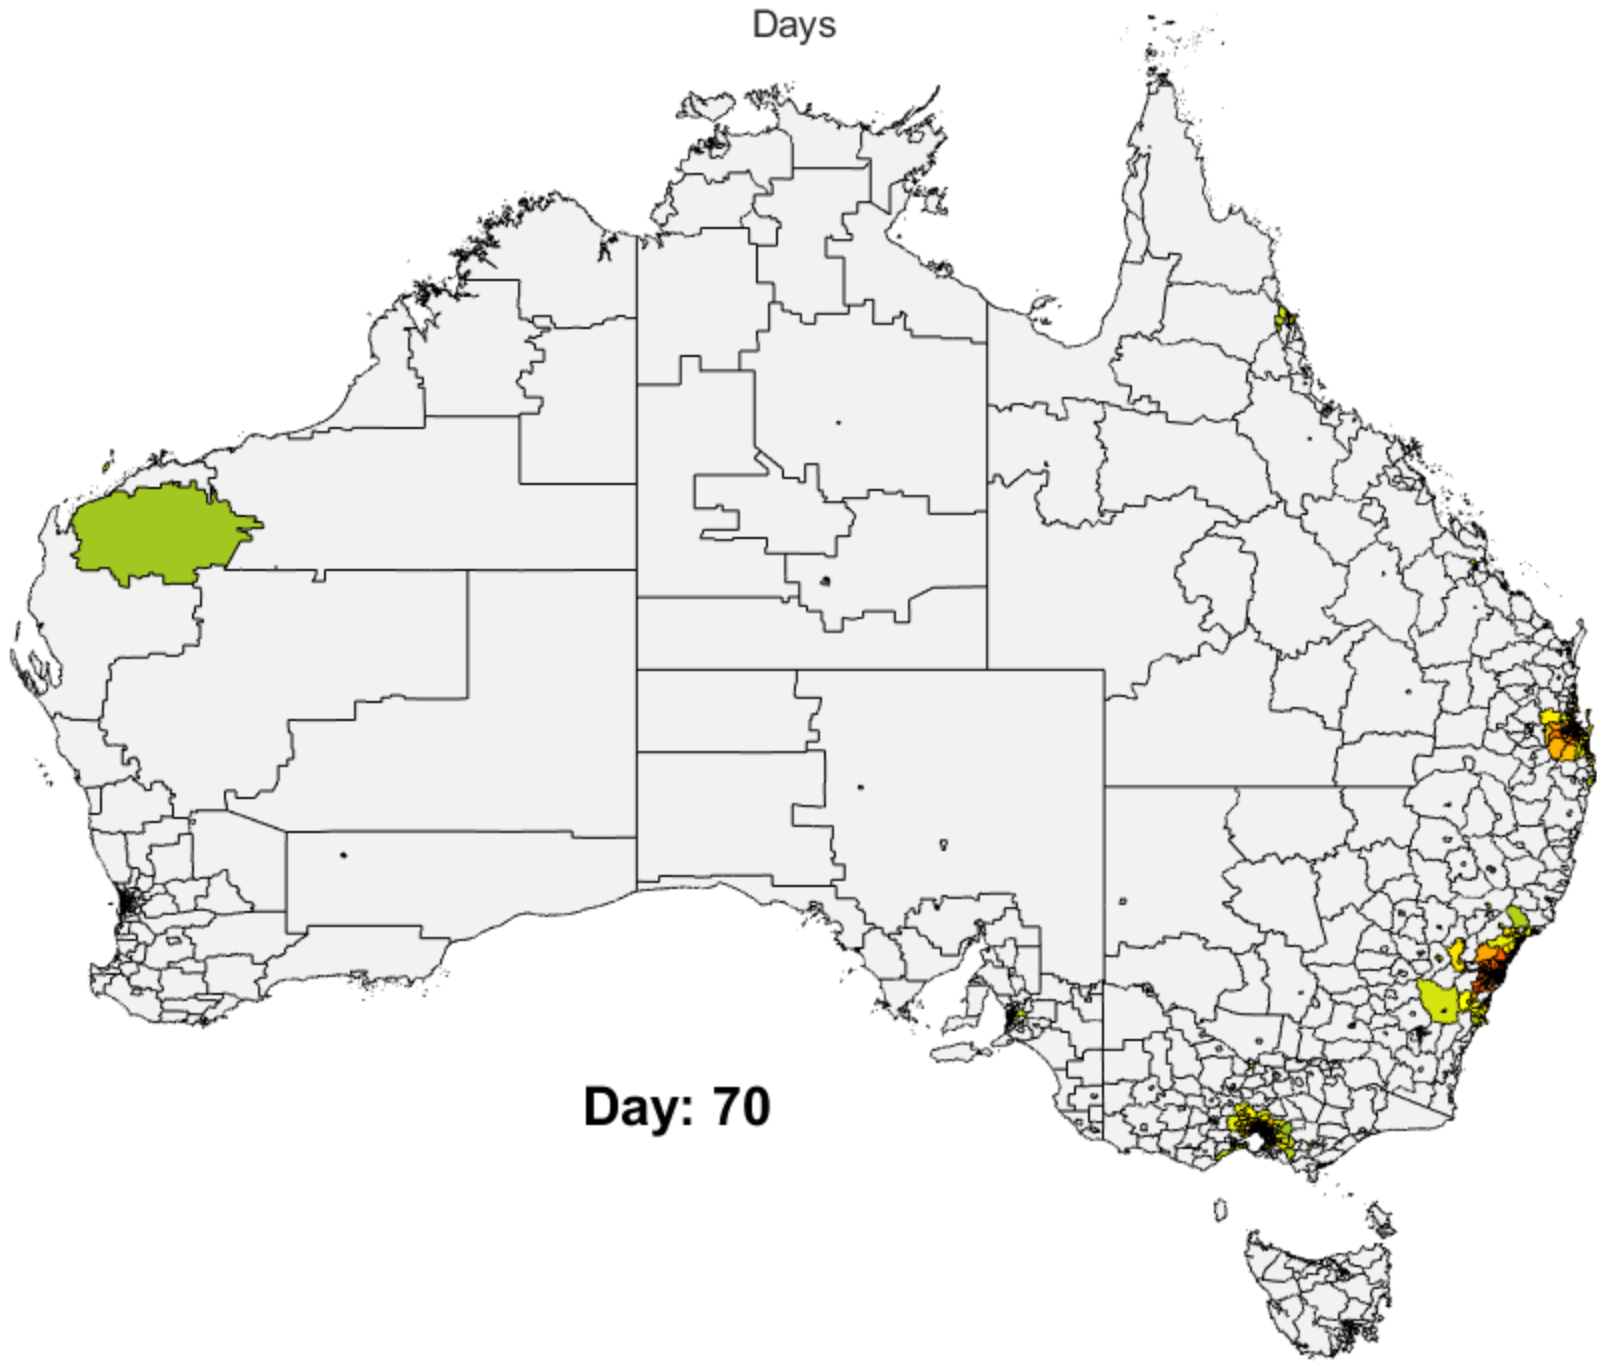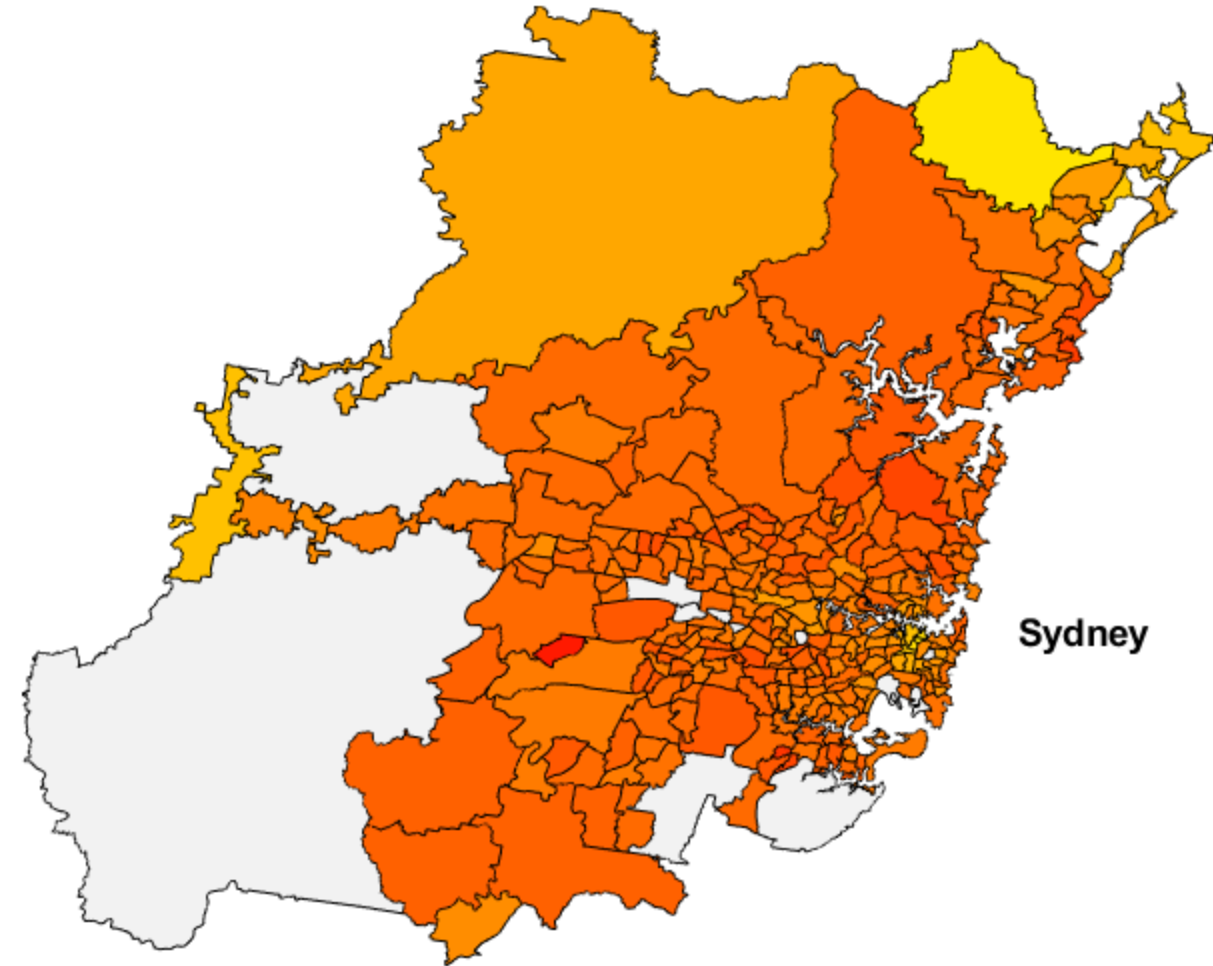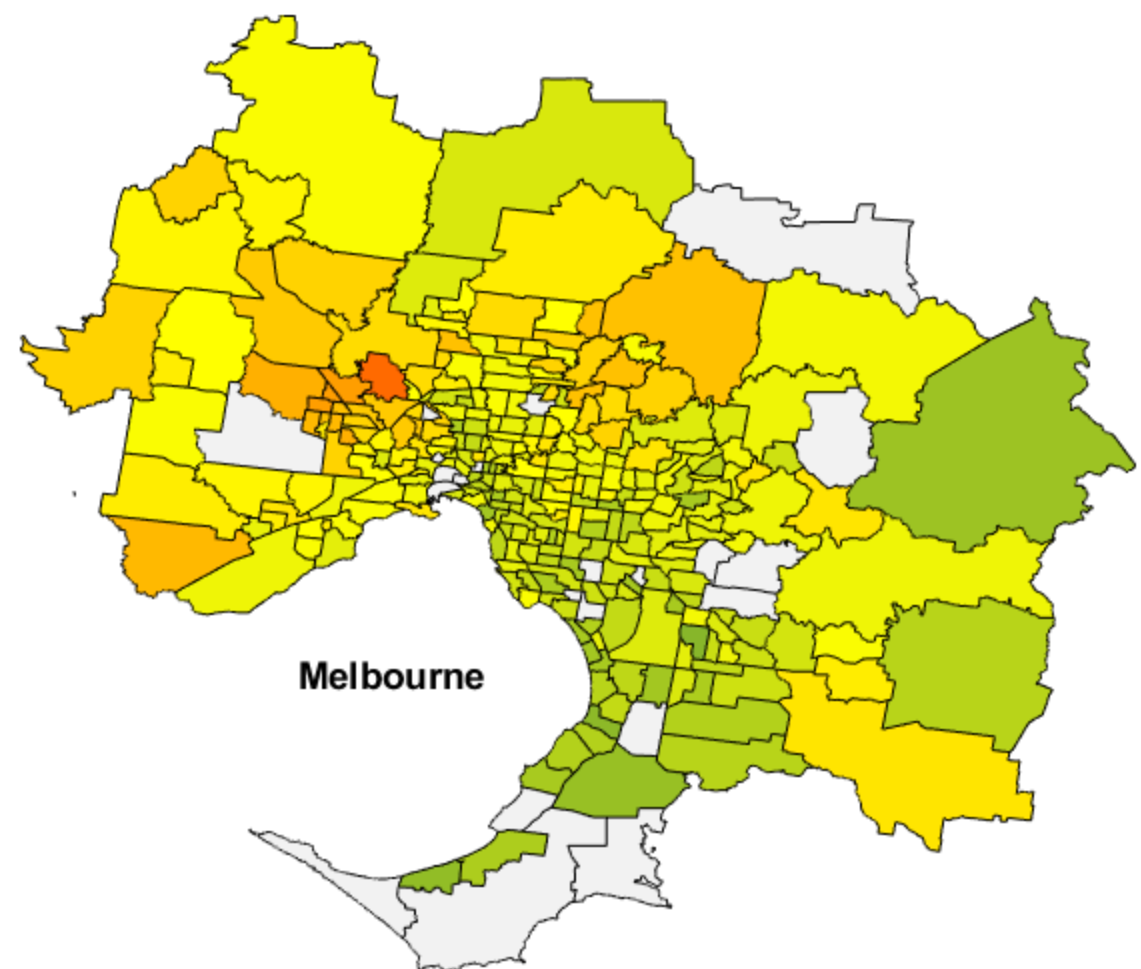

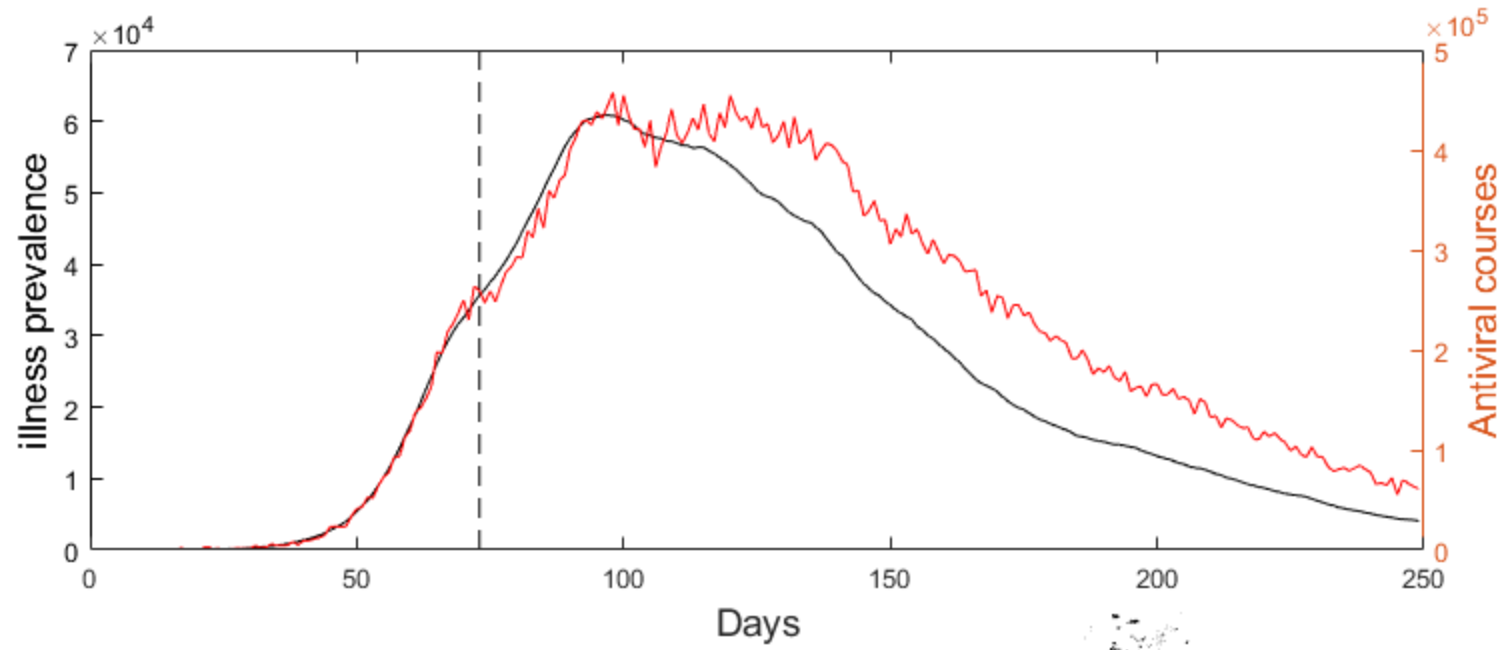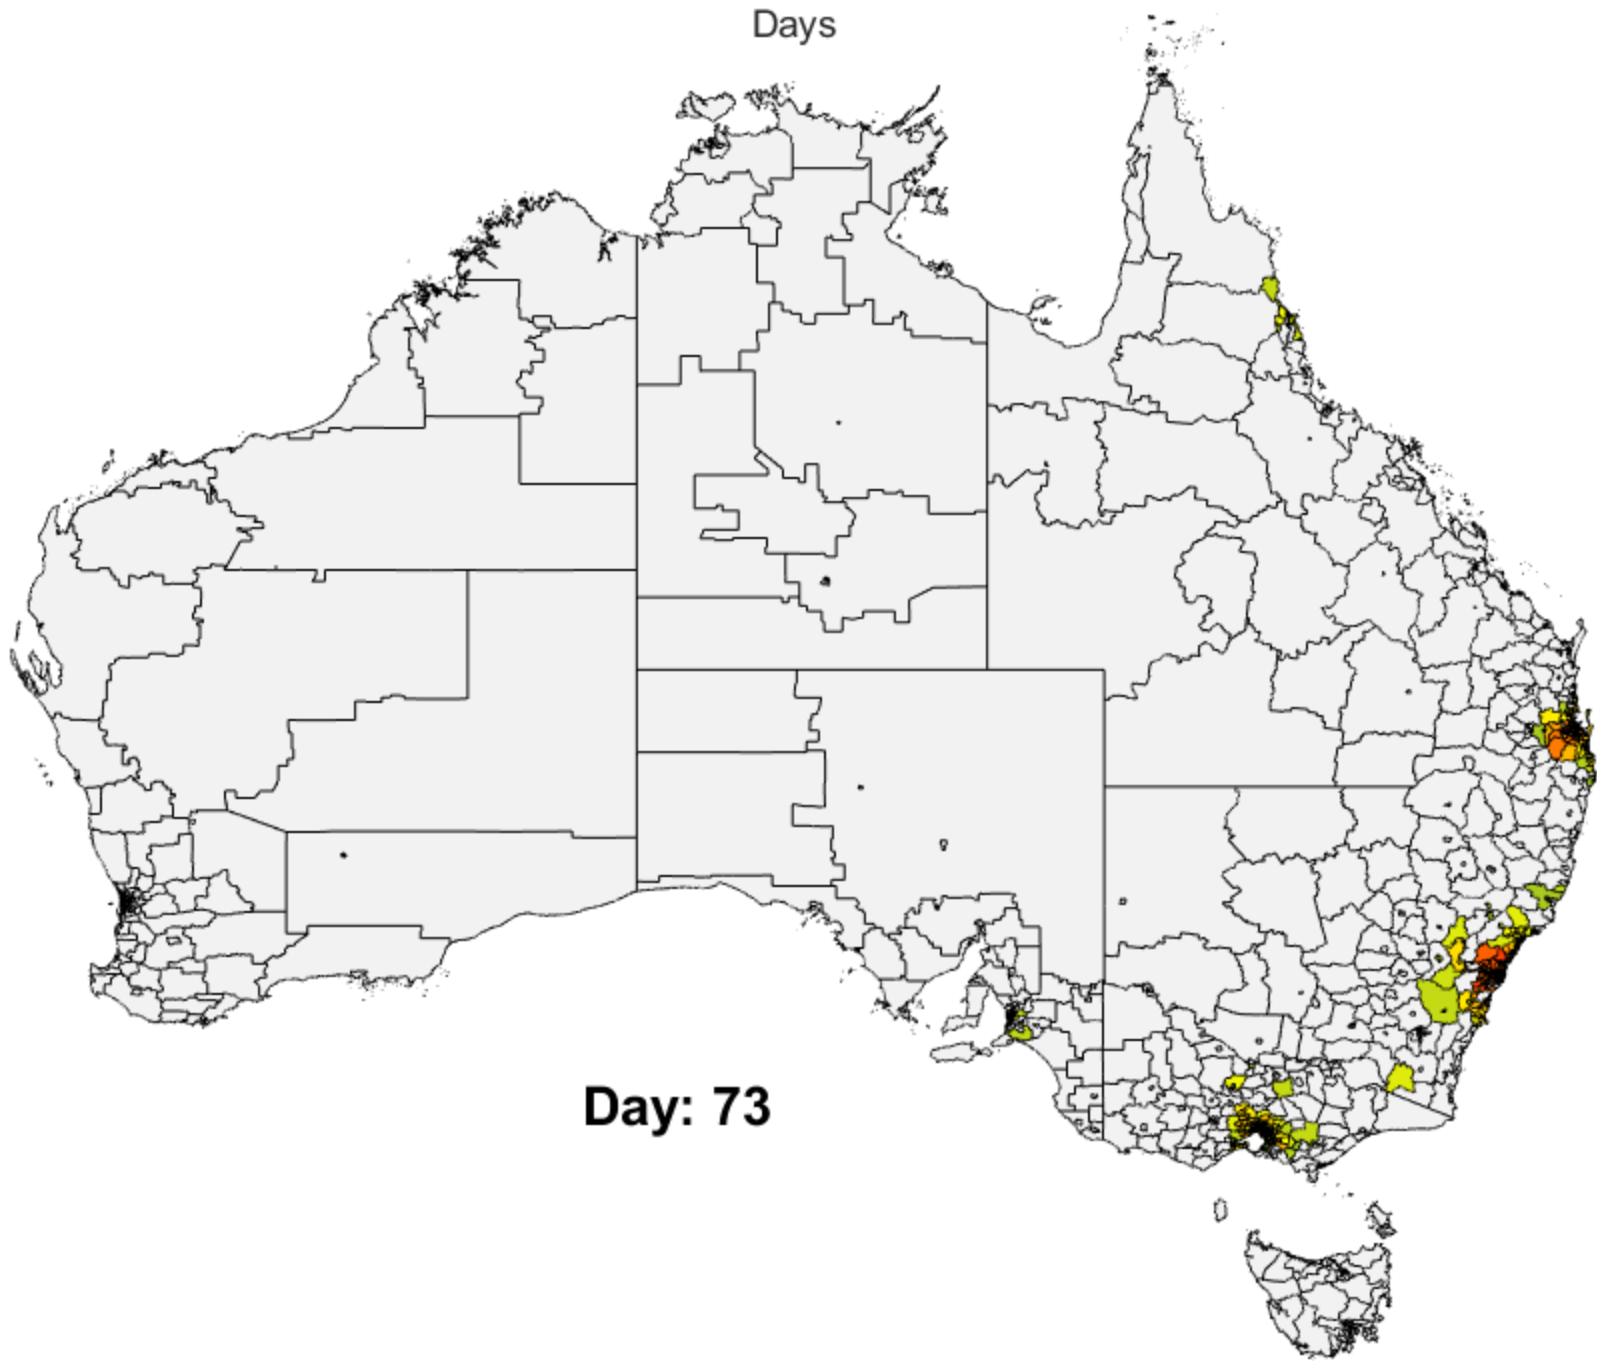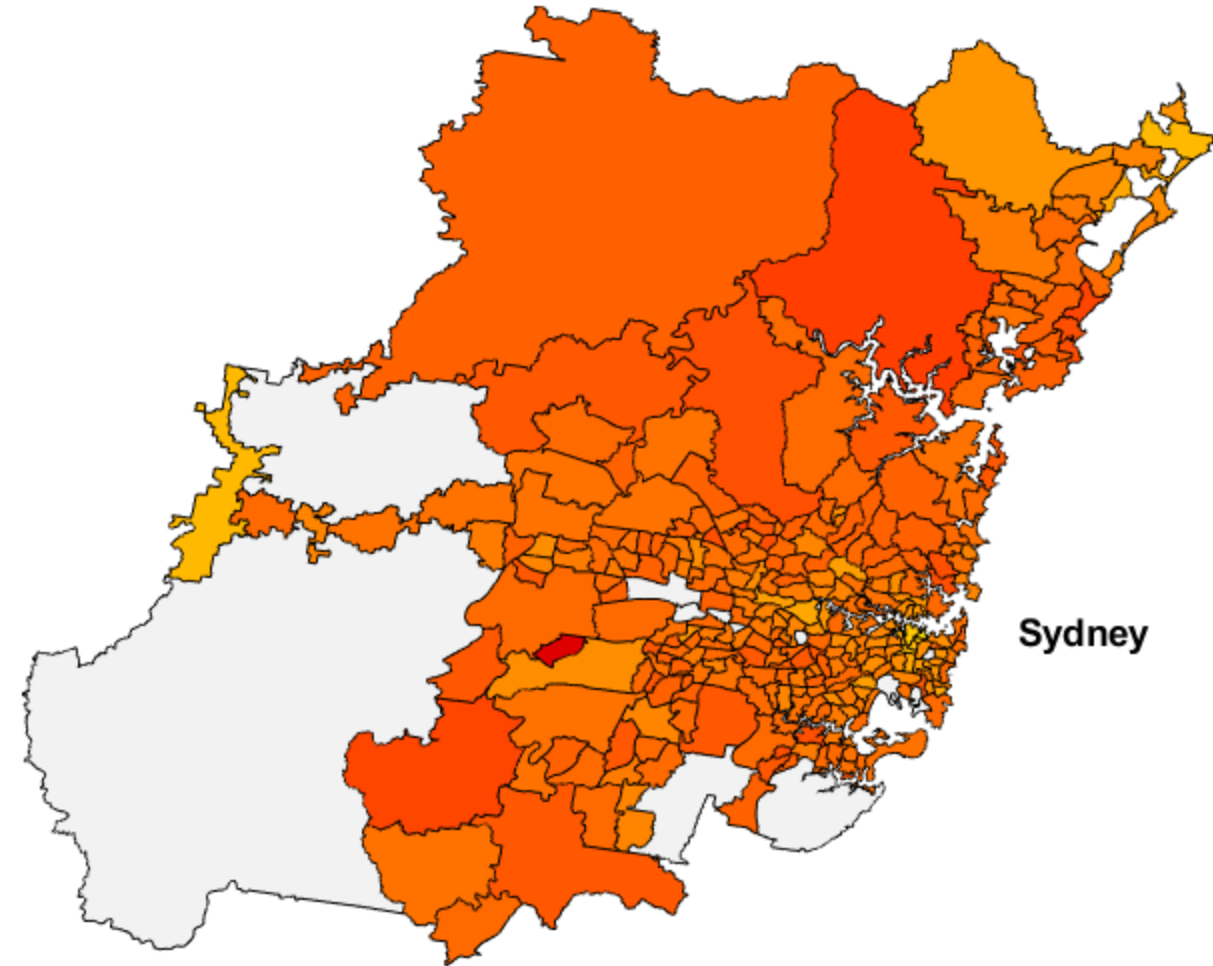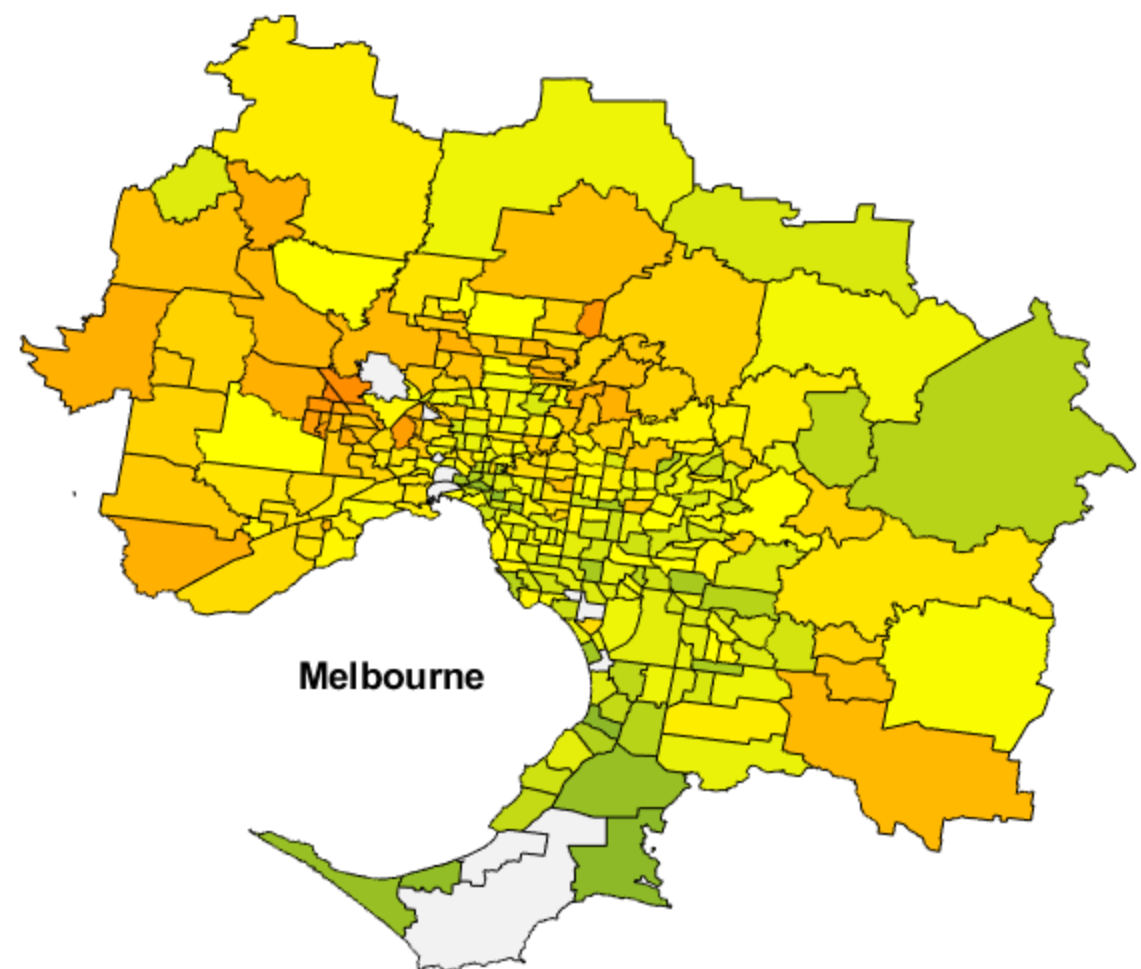



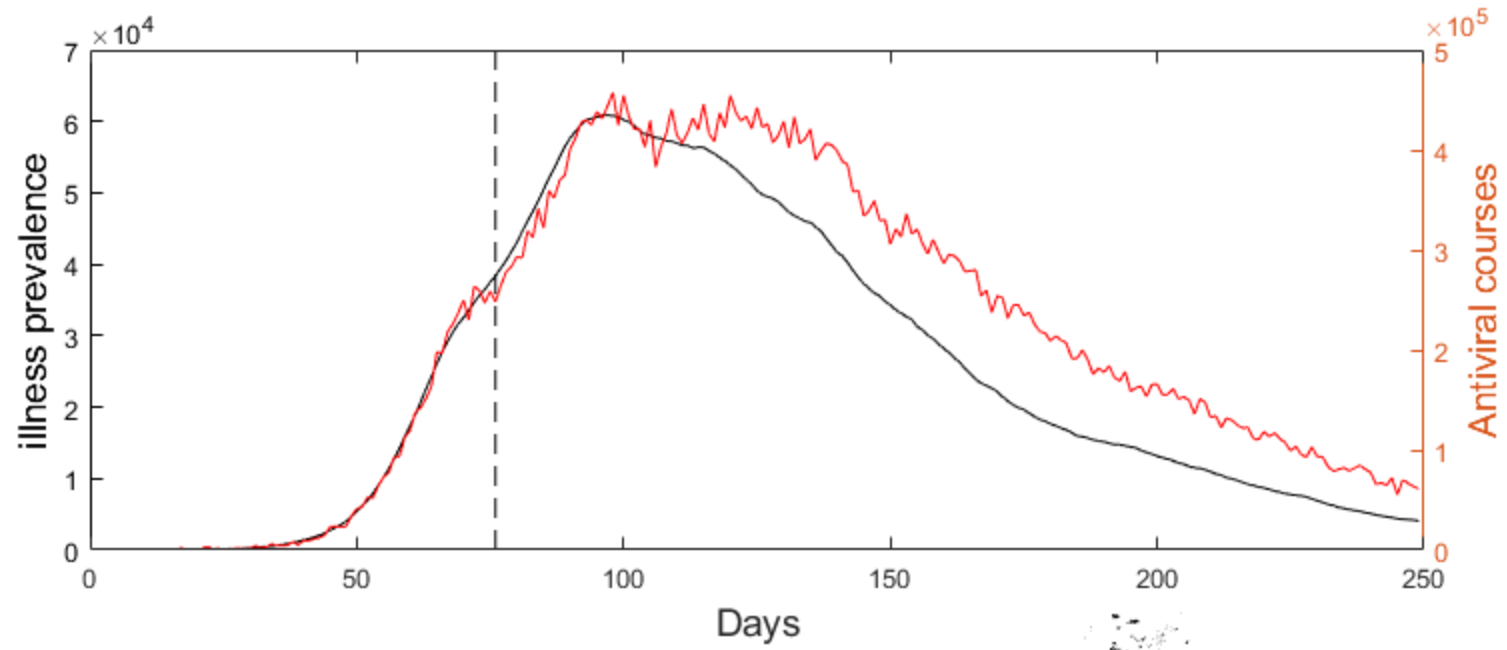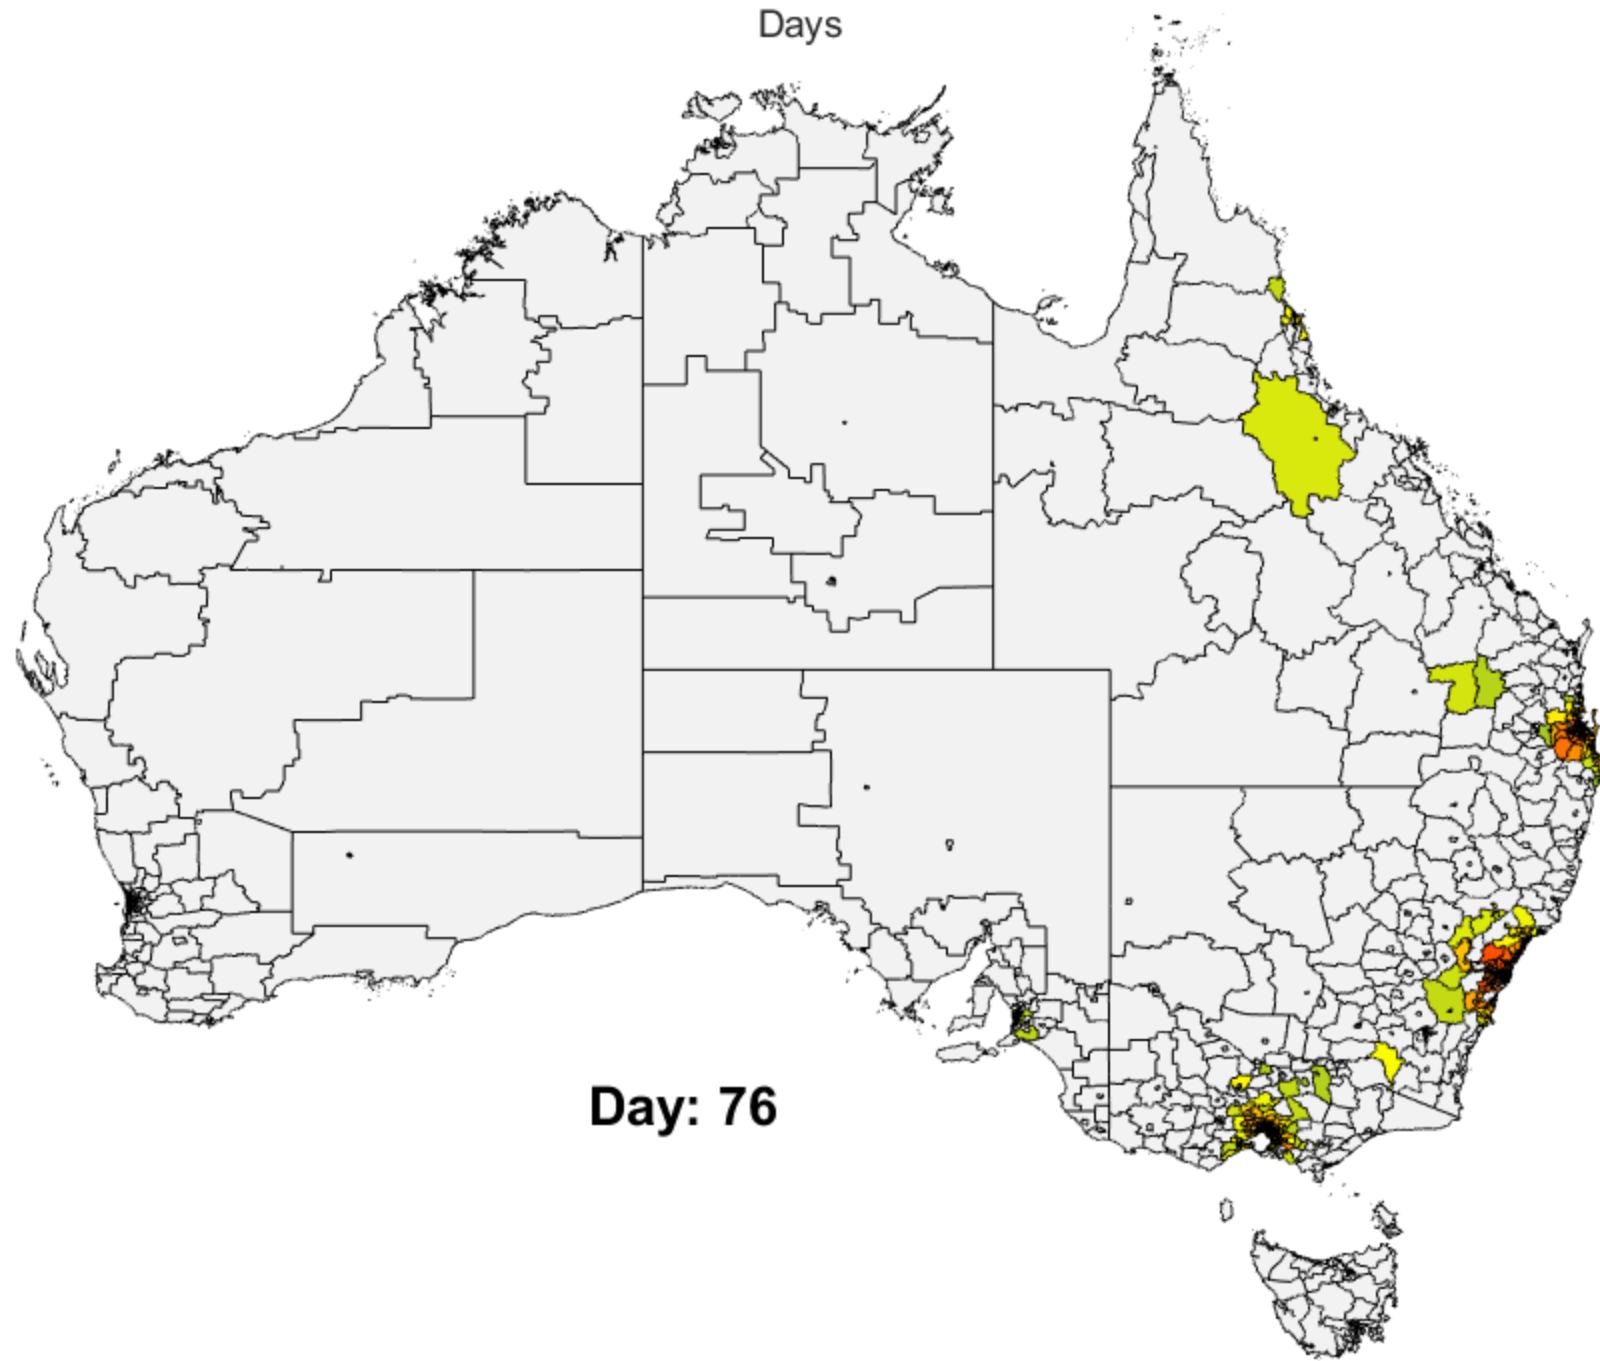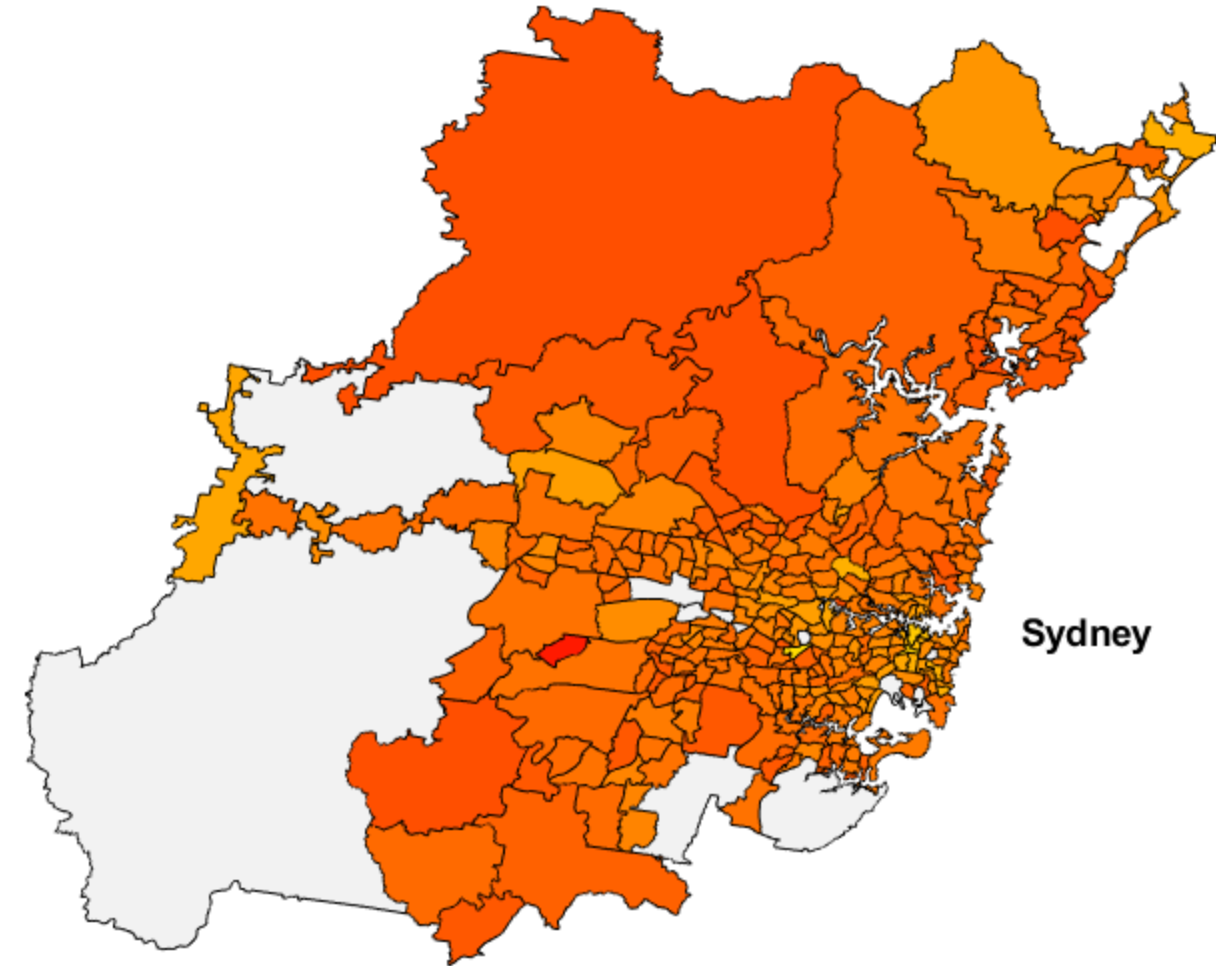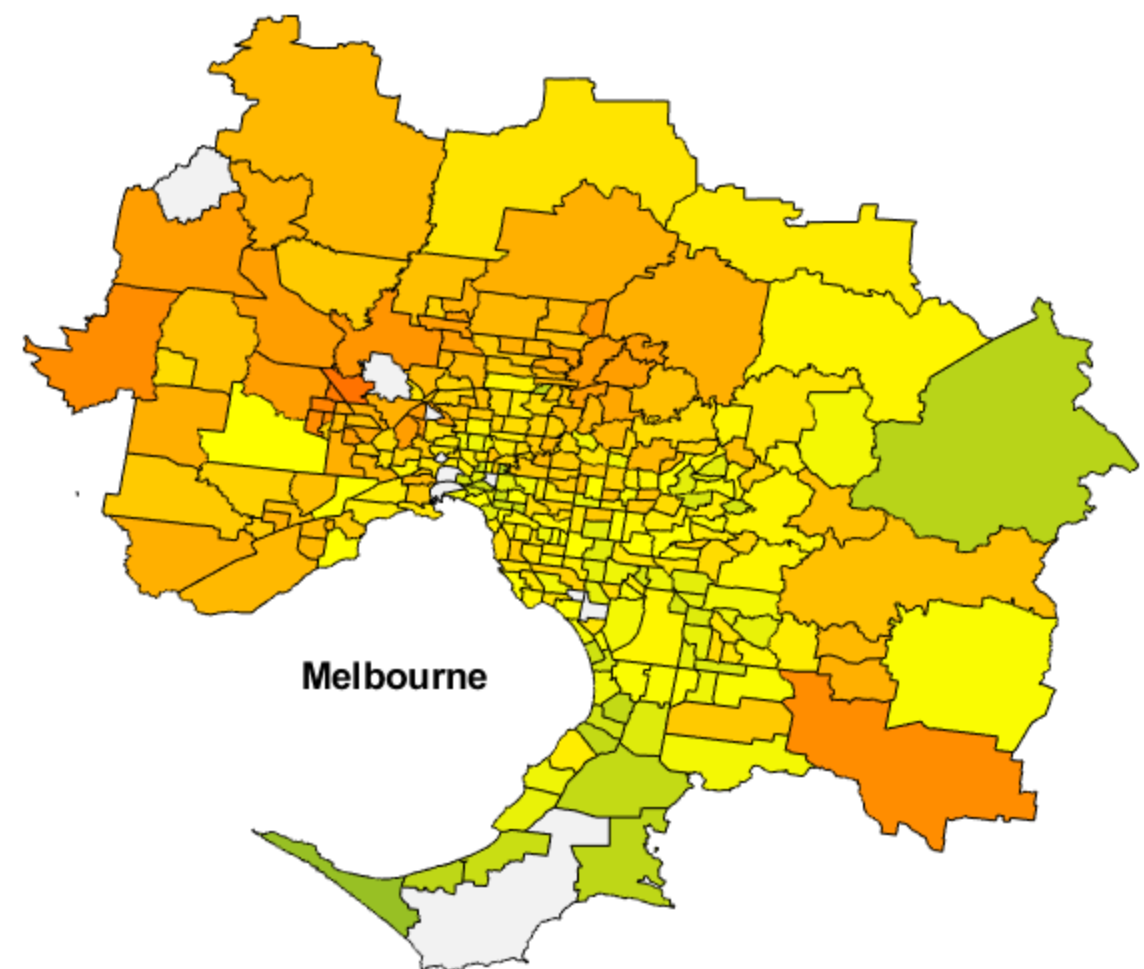

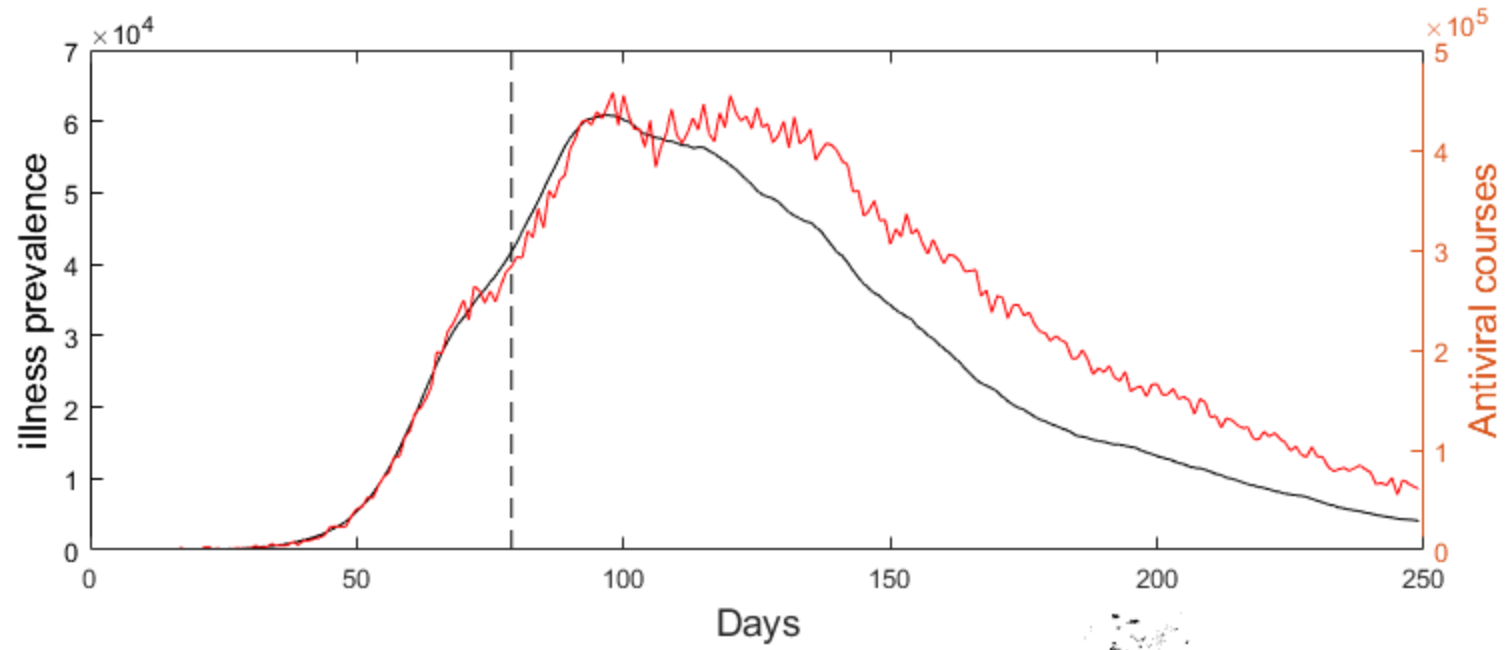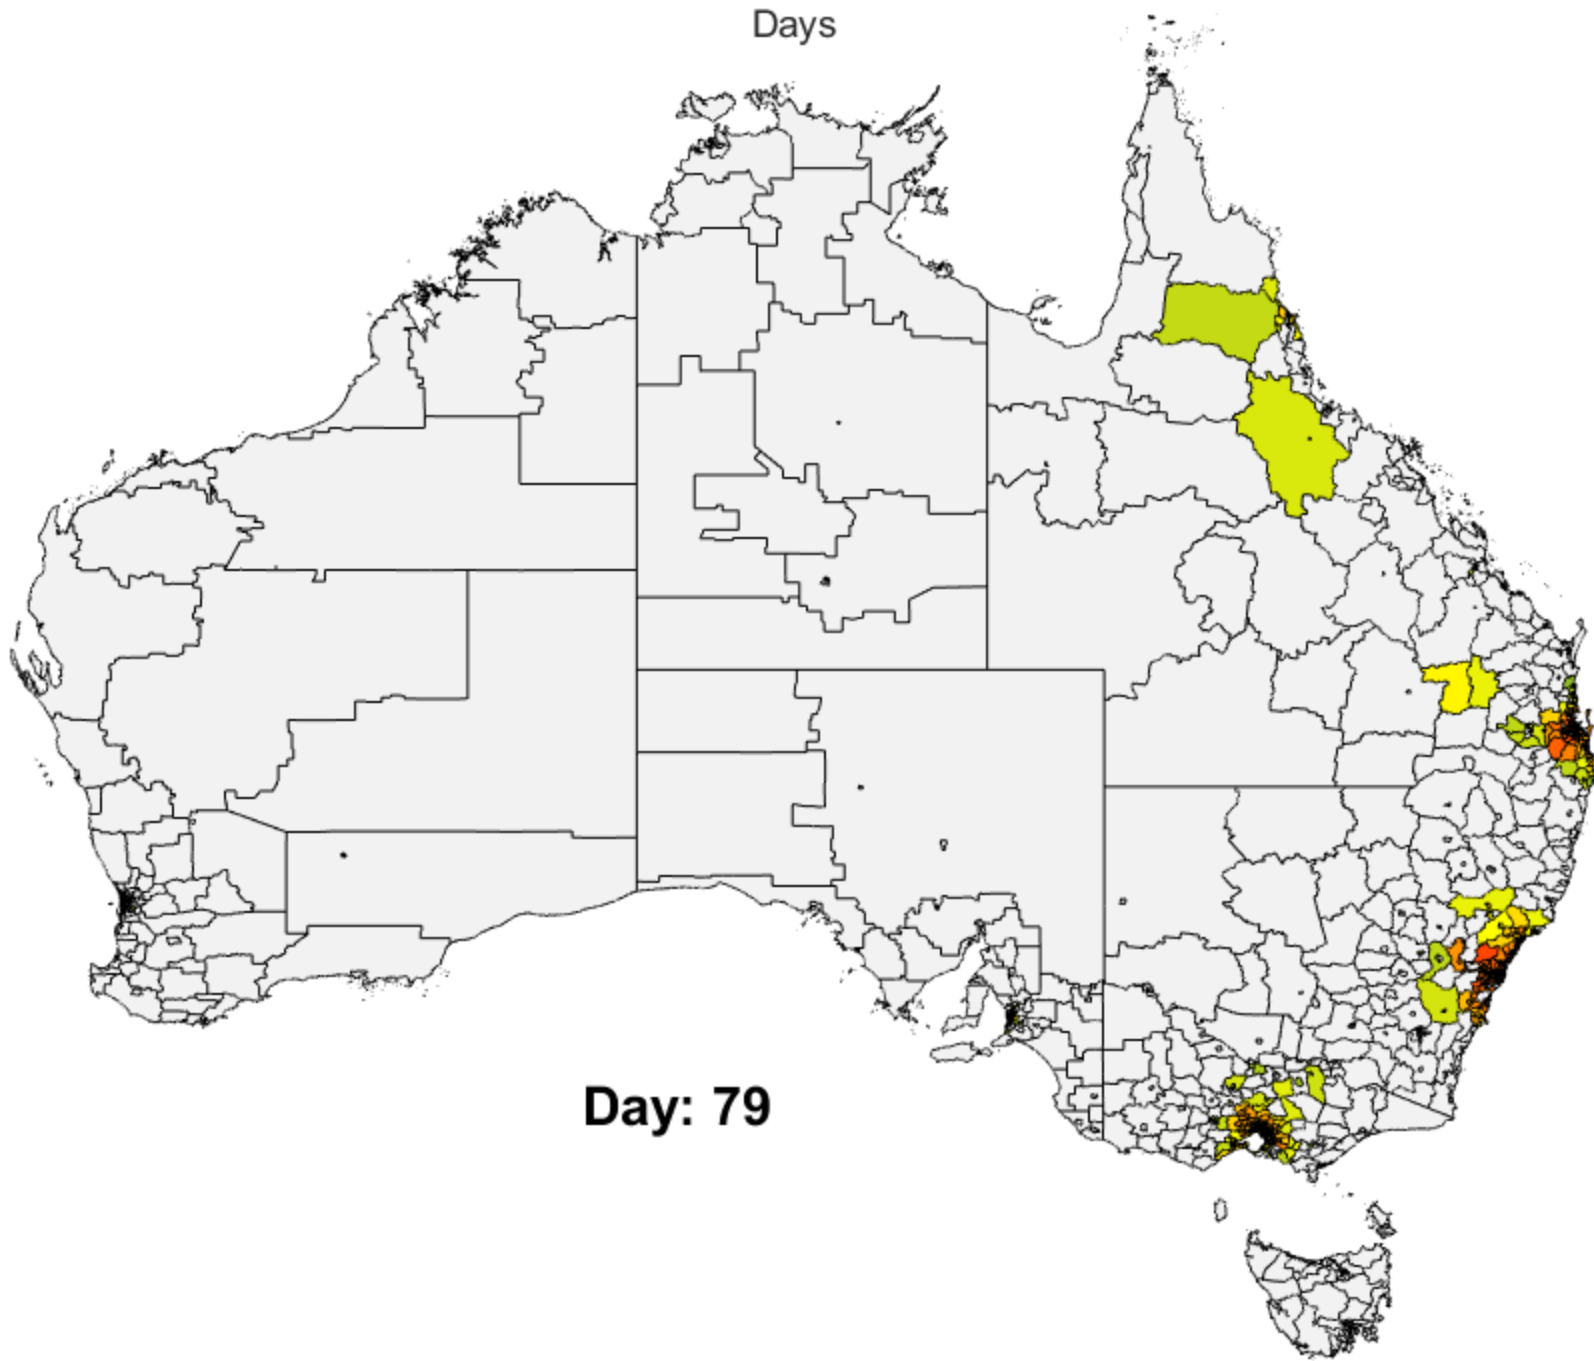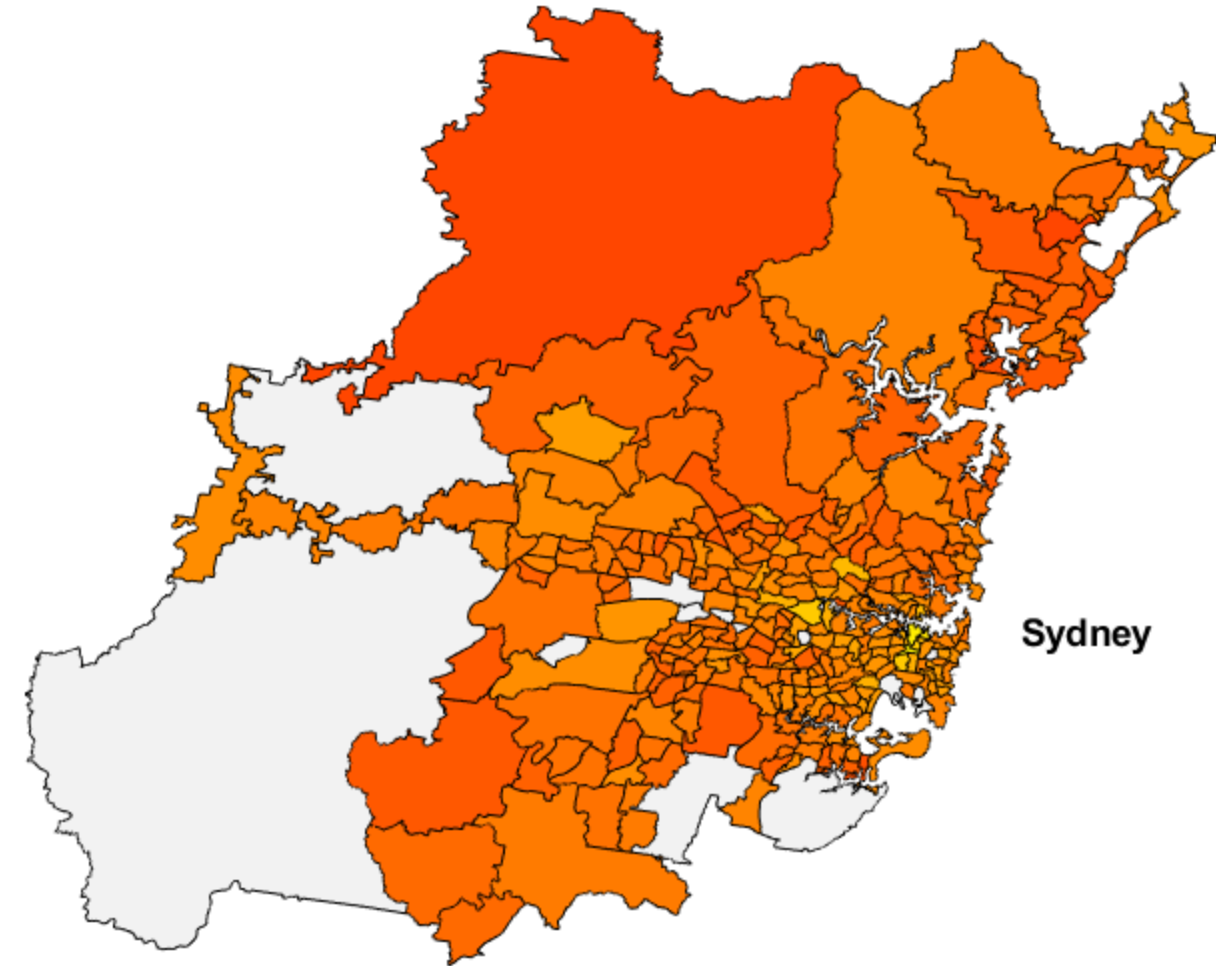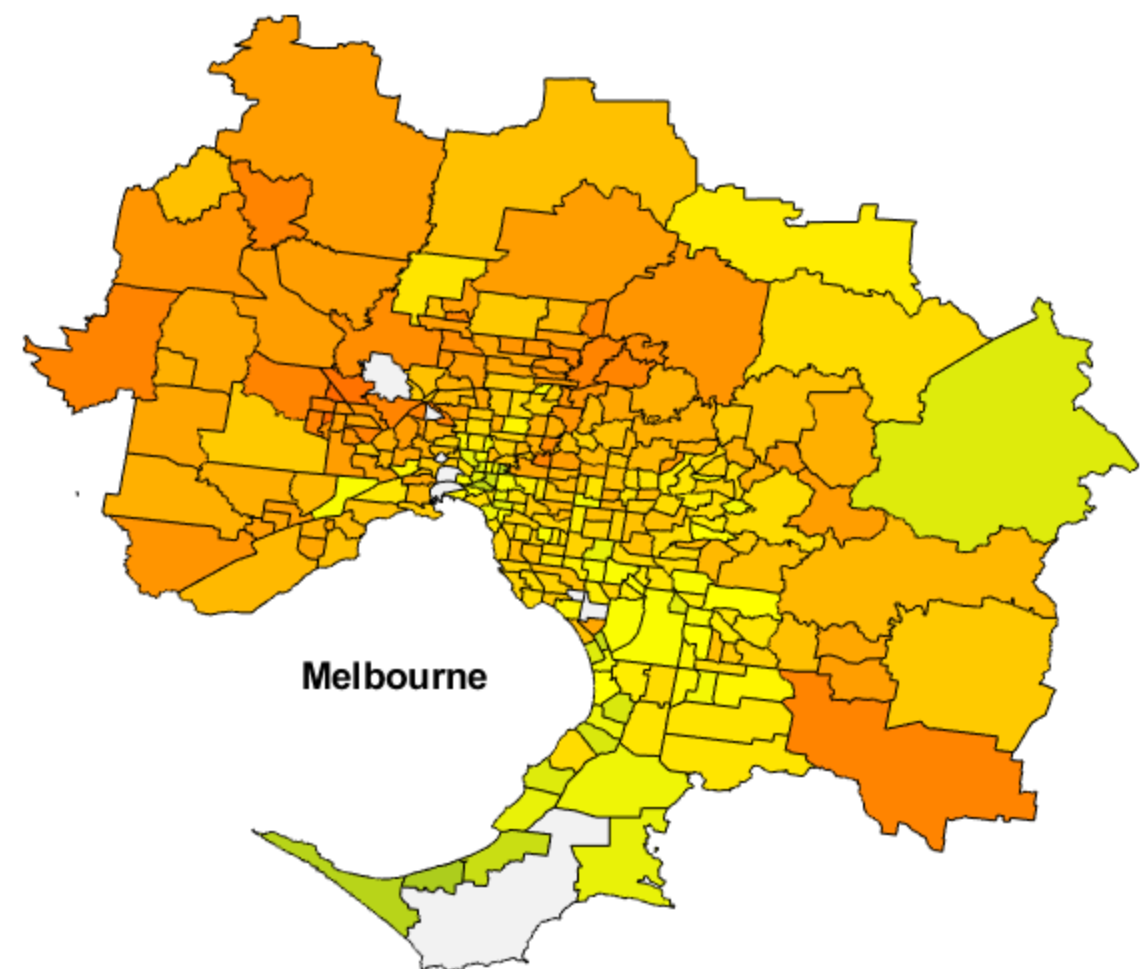

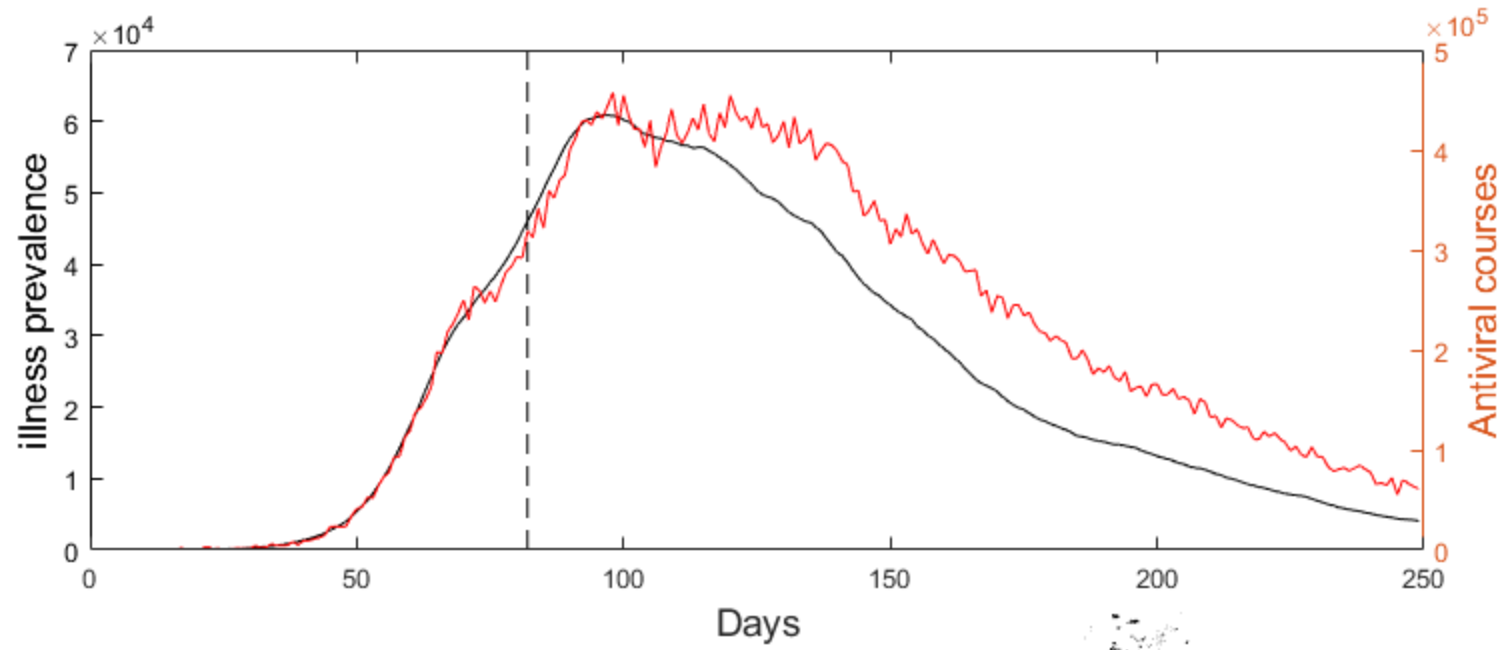

Days

Antiviral courses

Day: 82

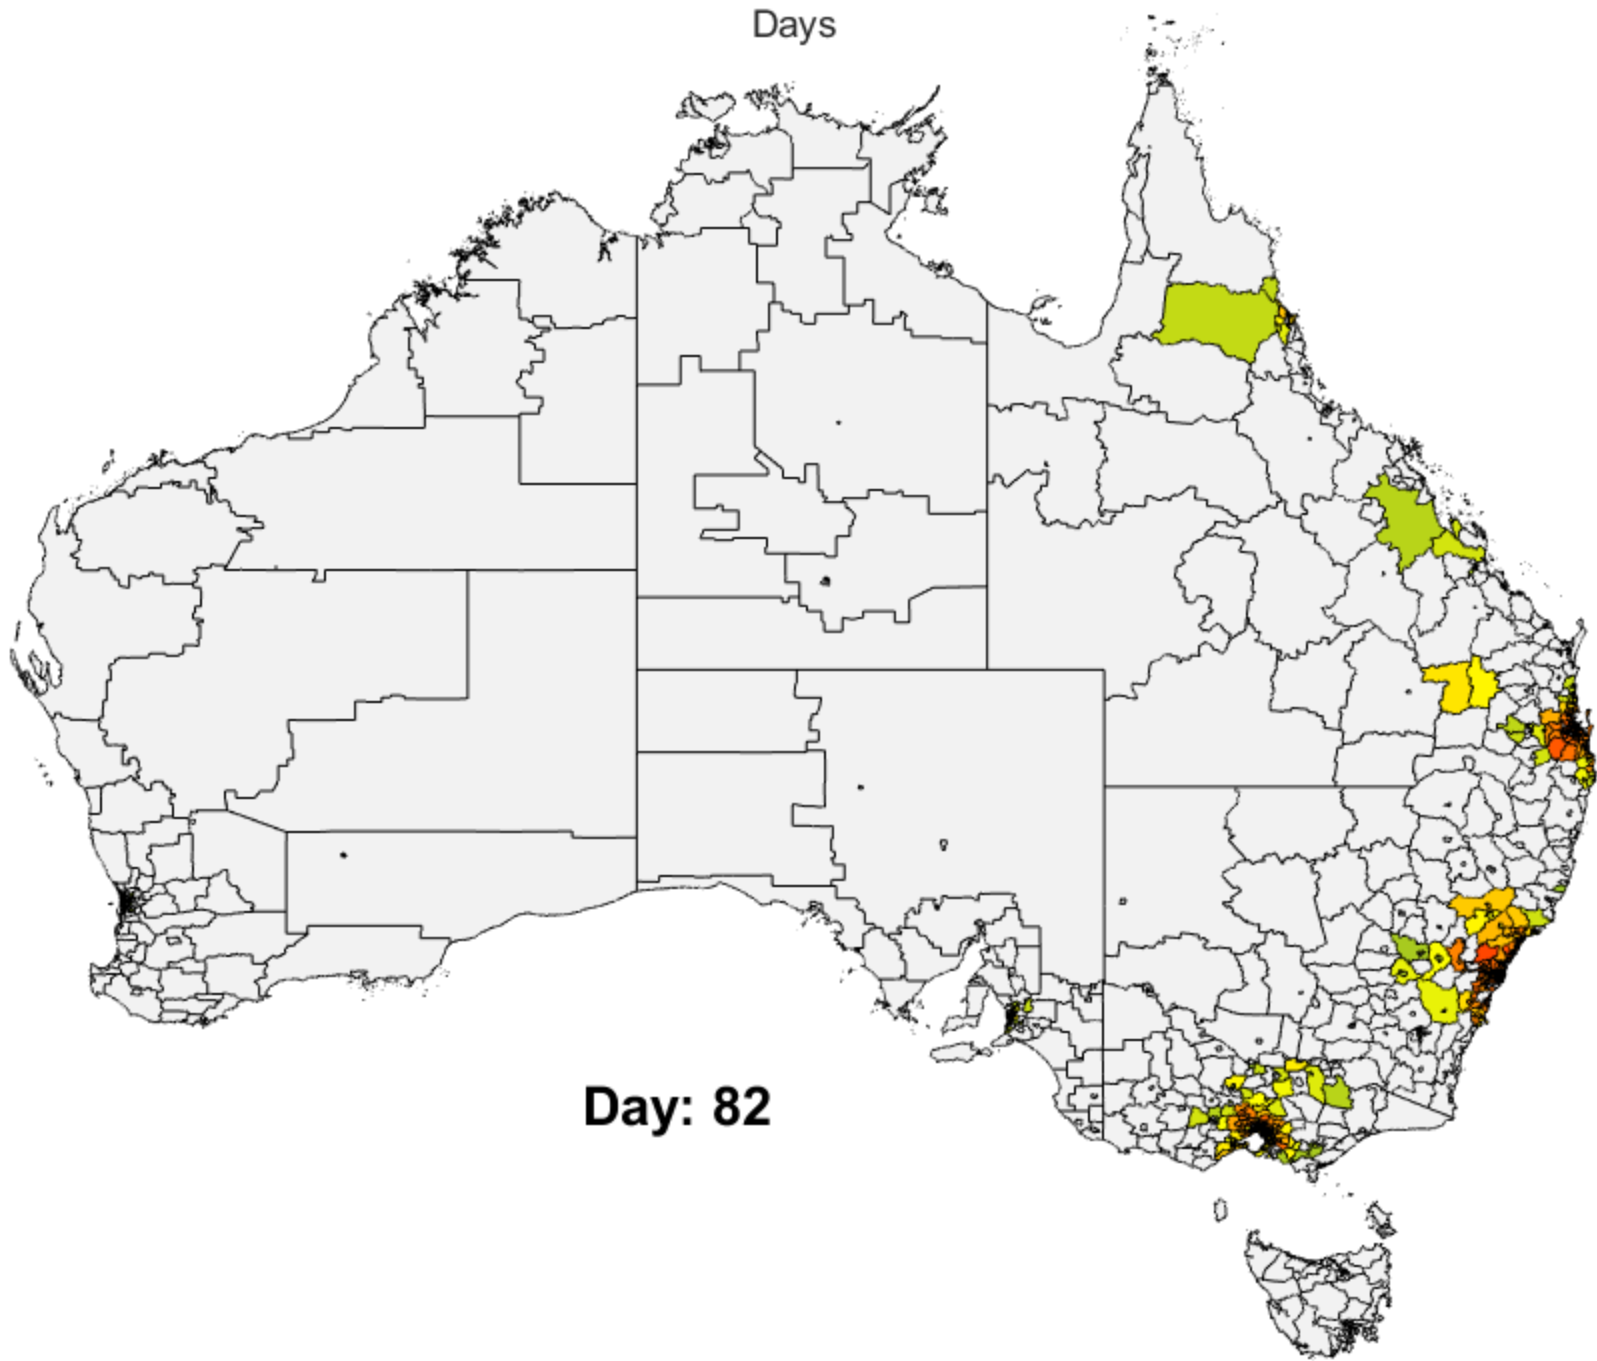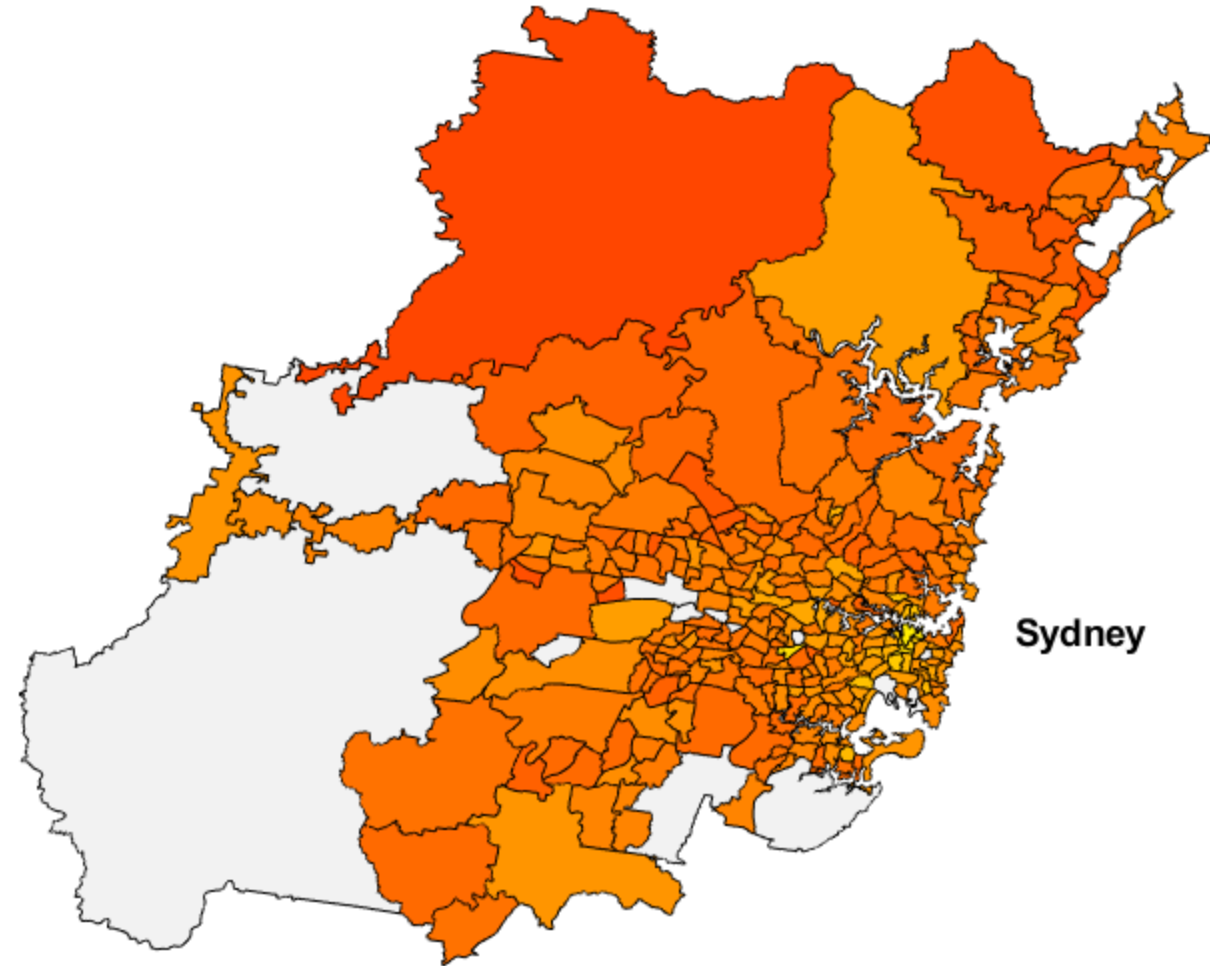

Sydney

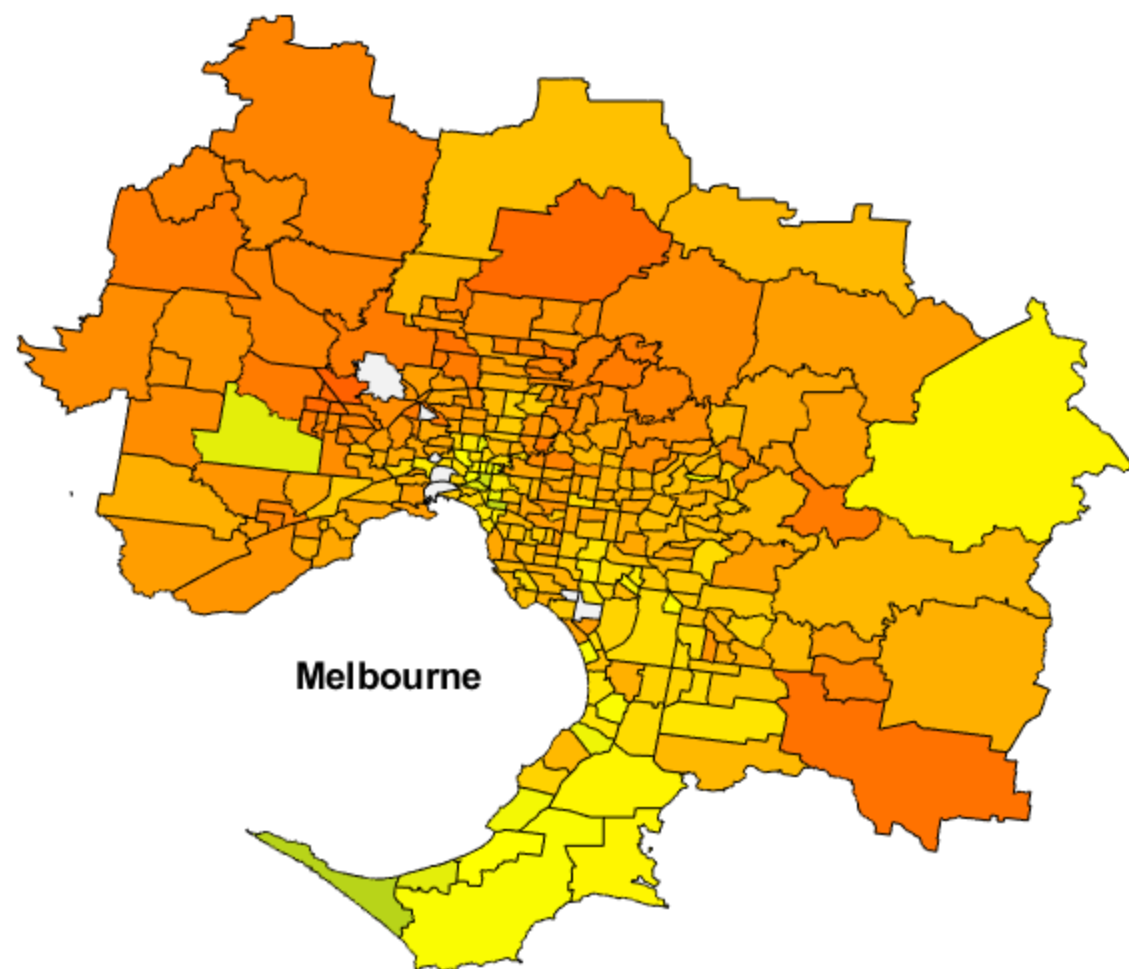

Melbourne



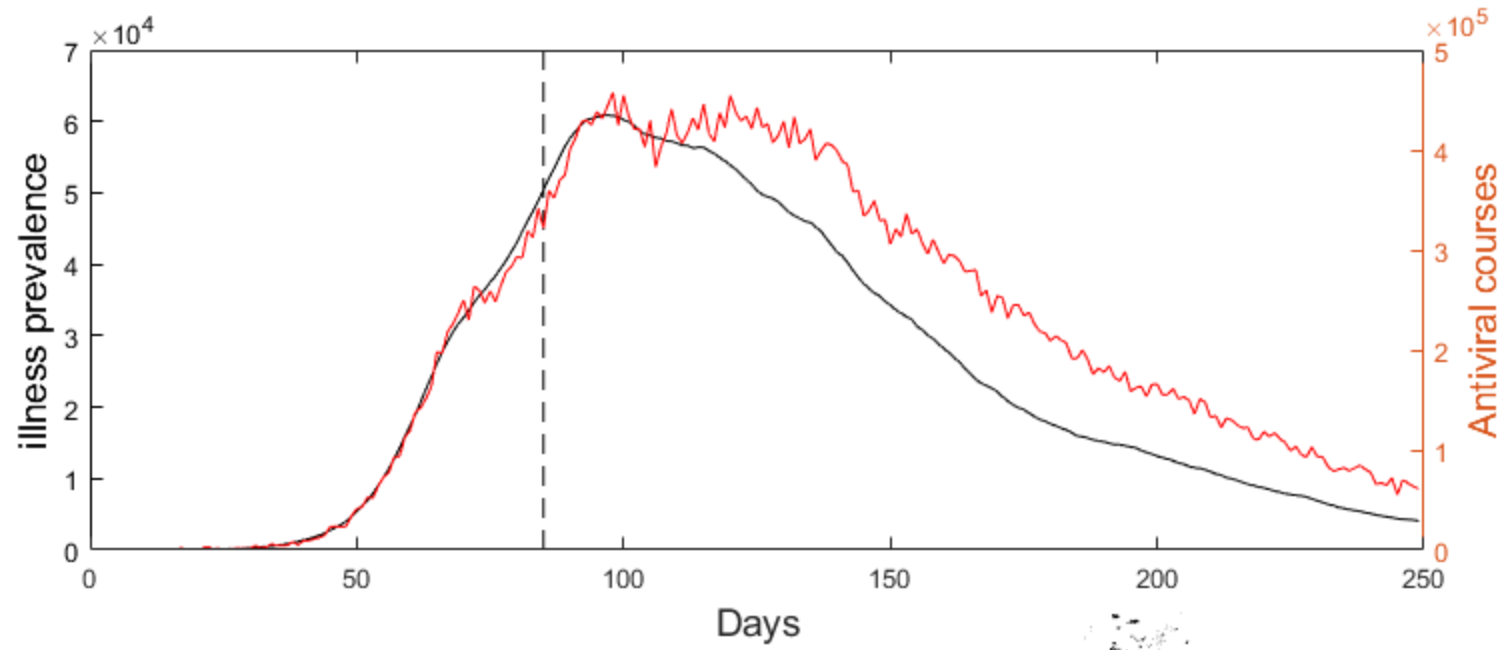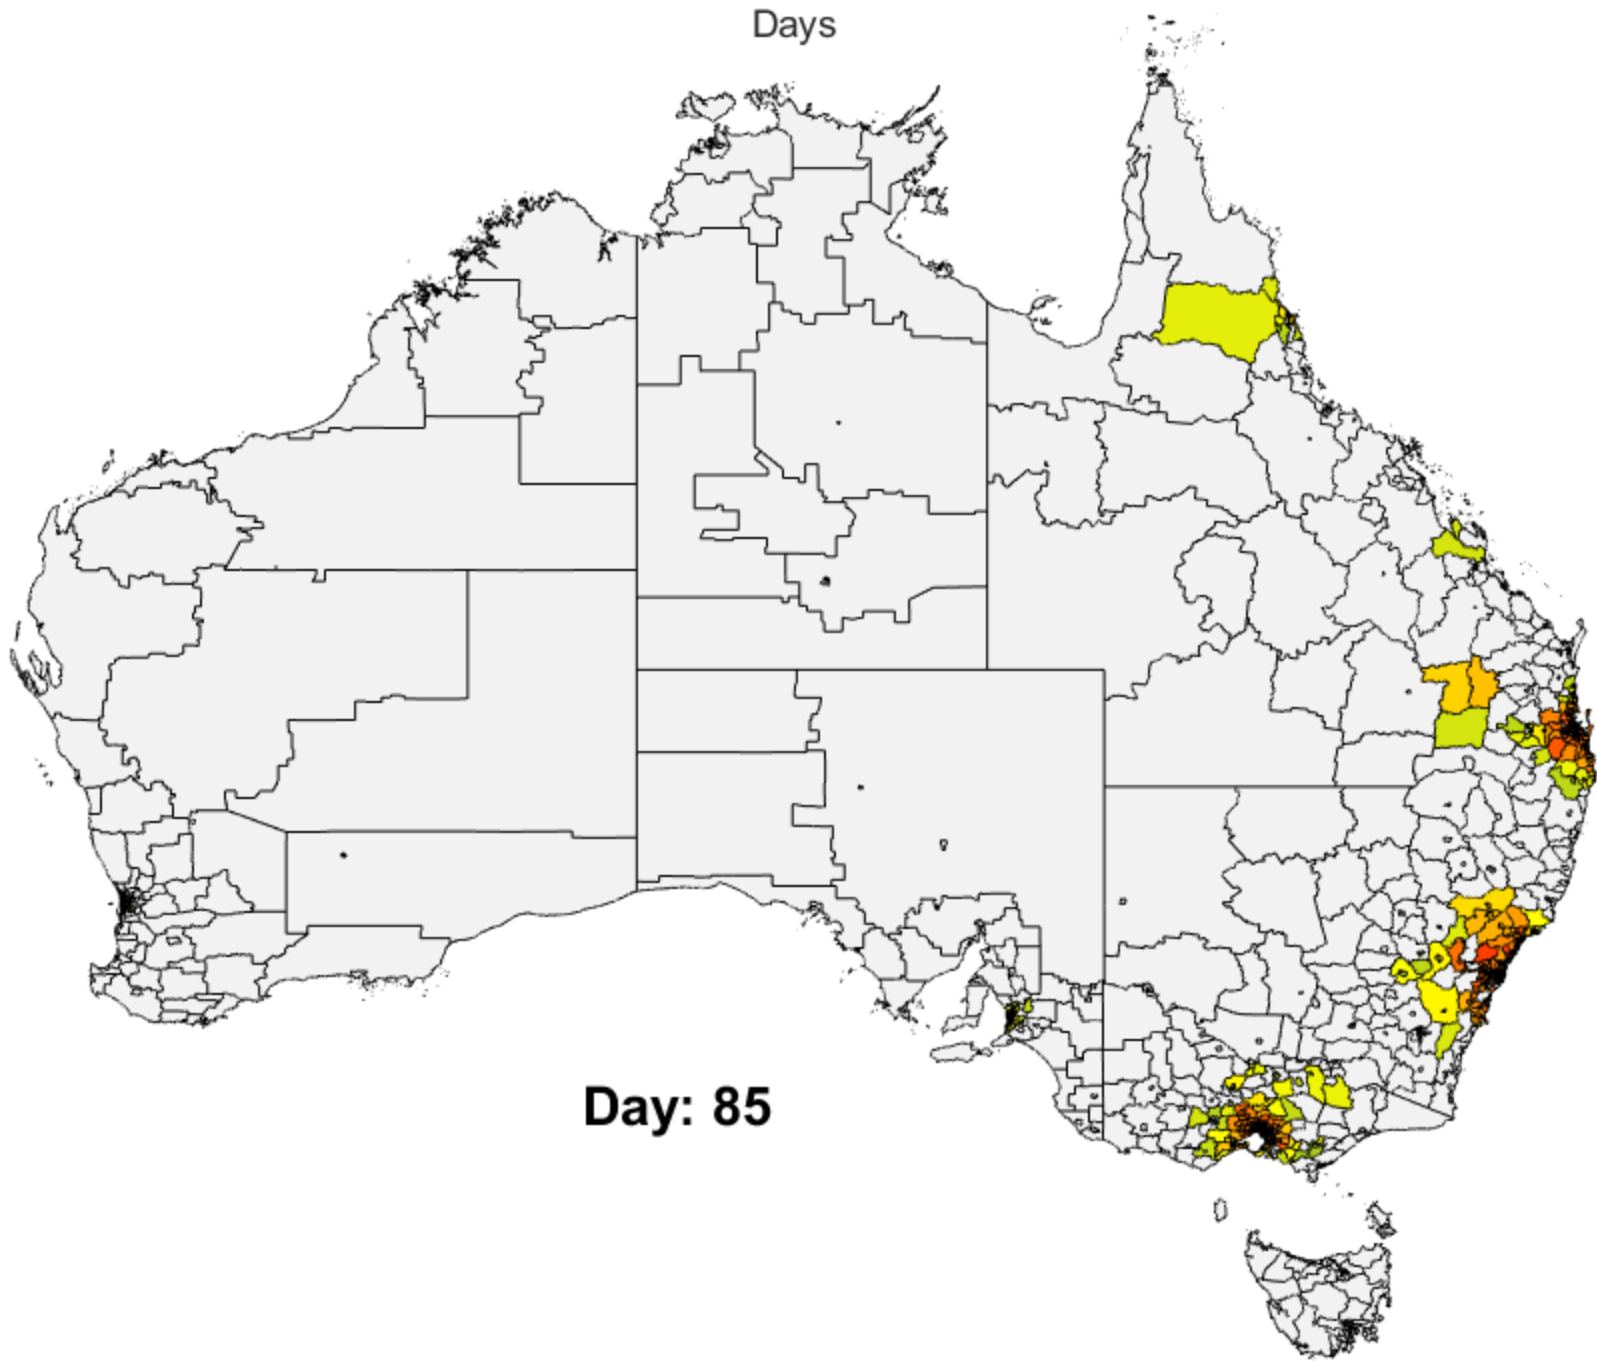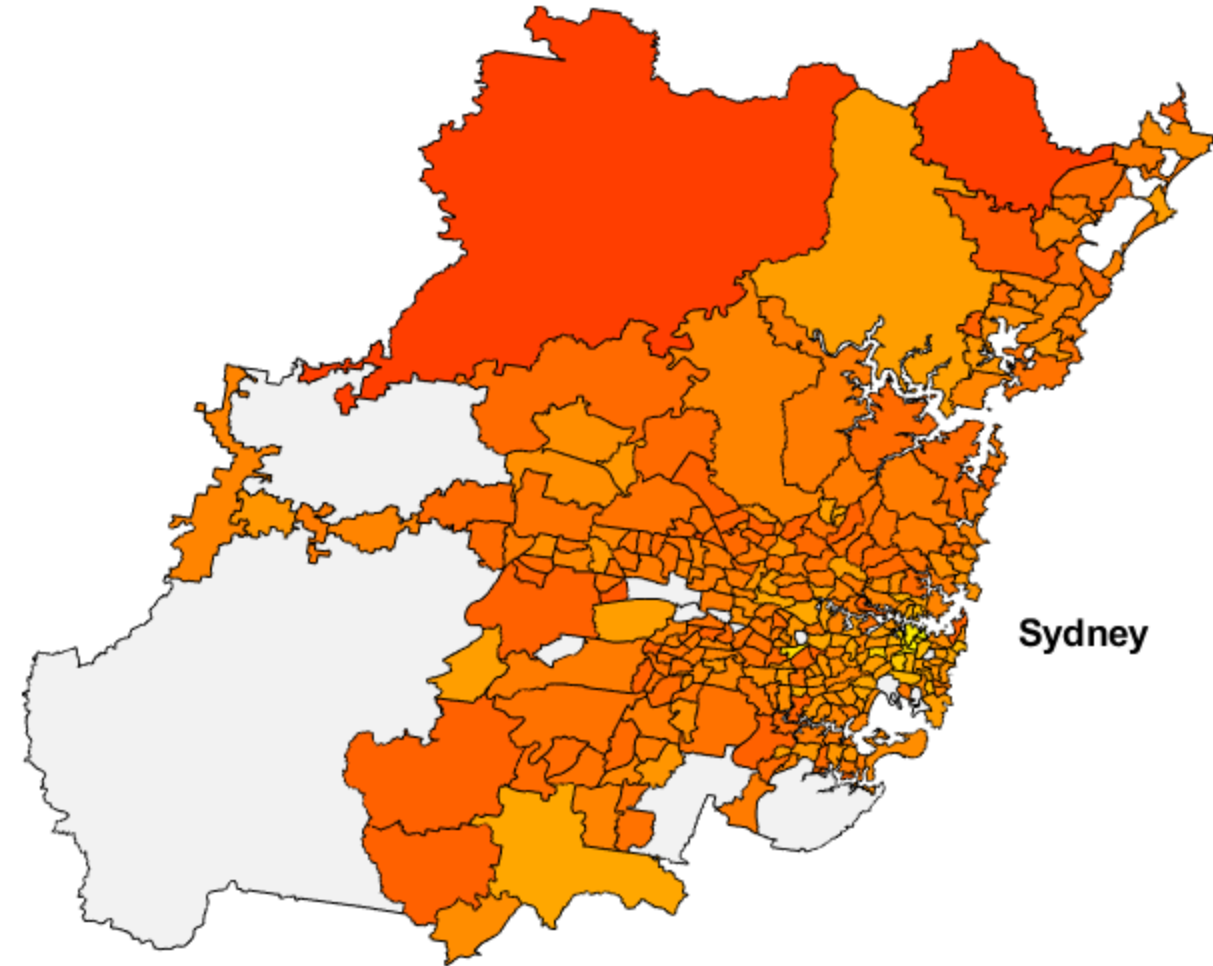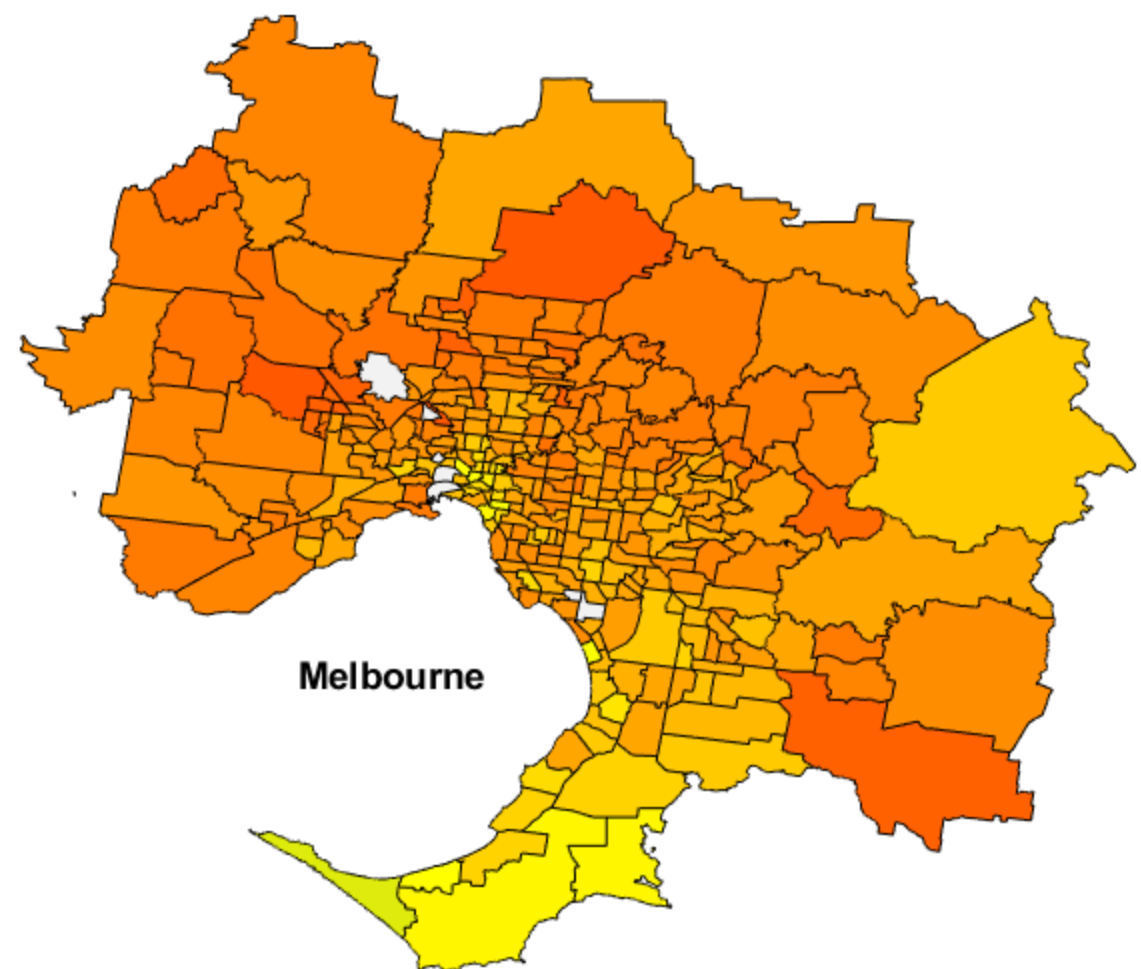

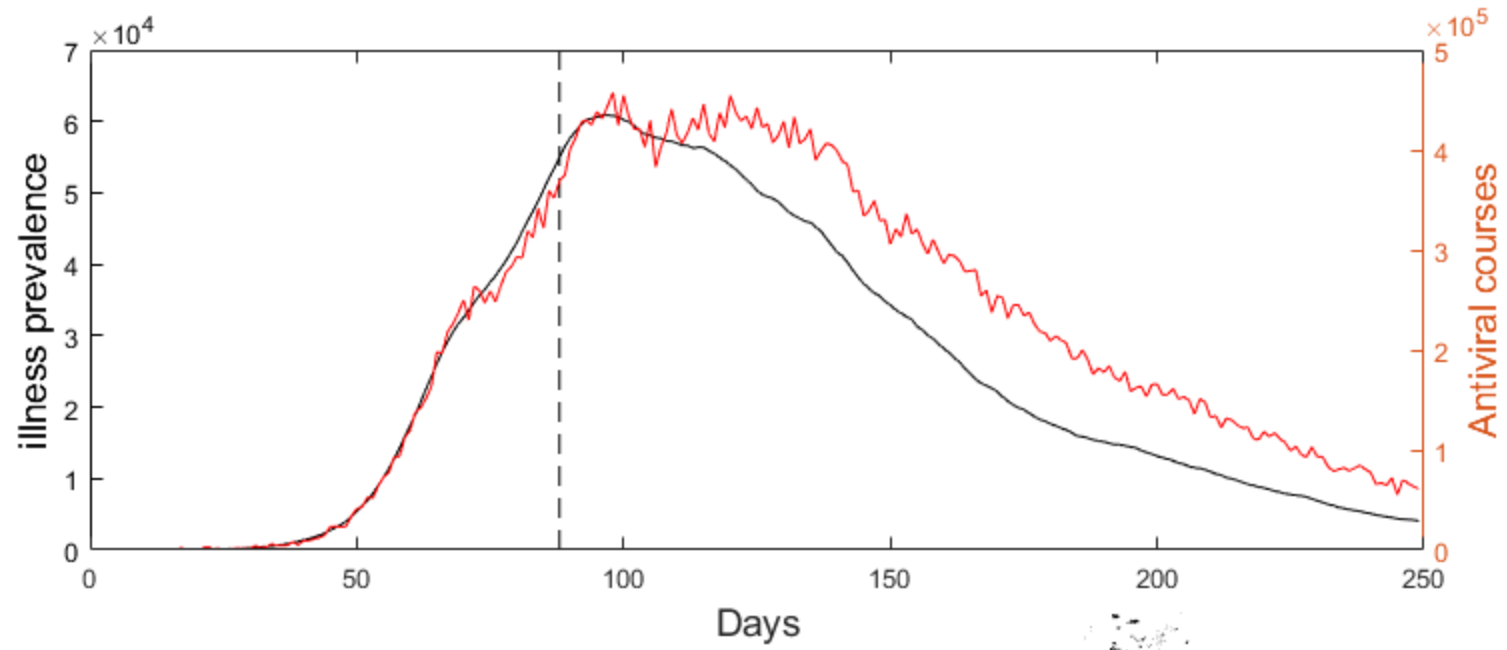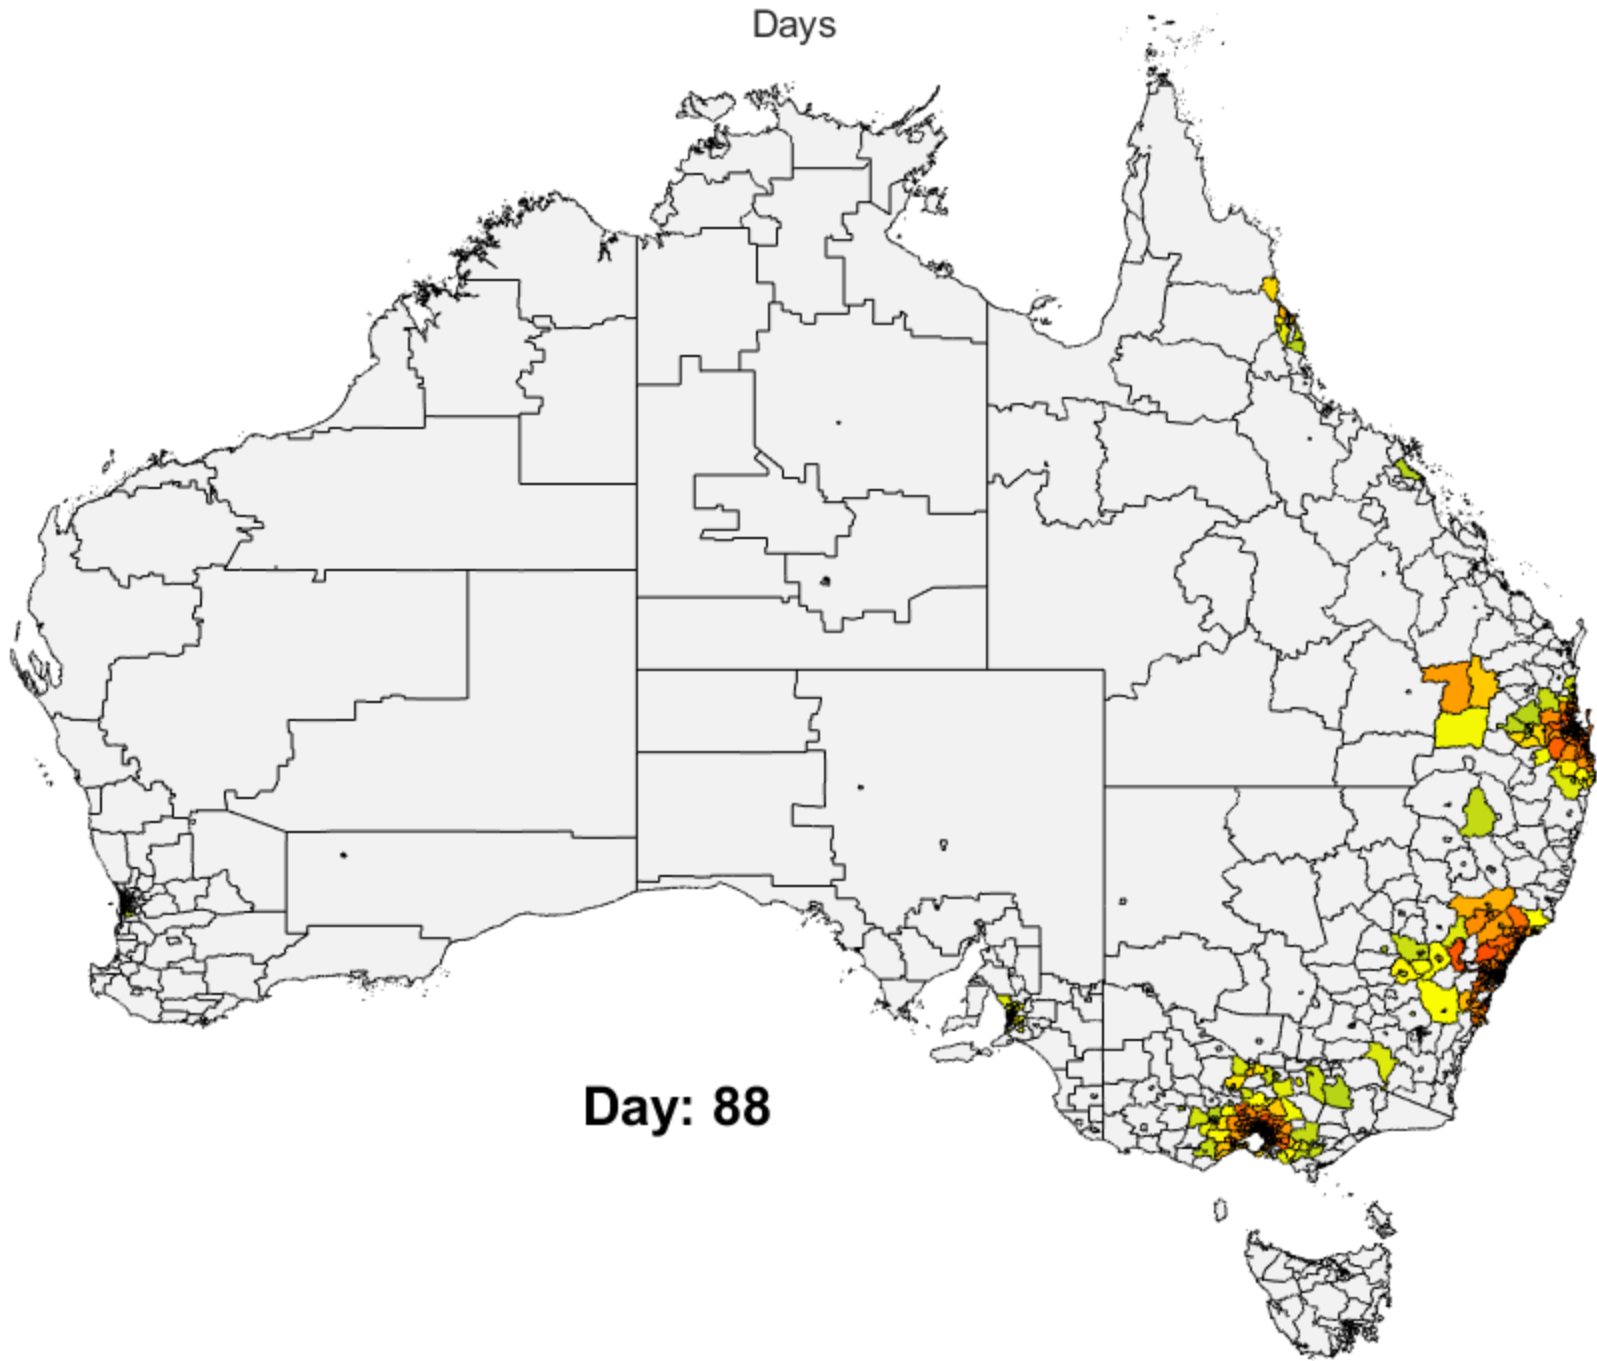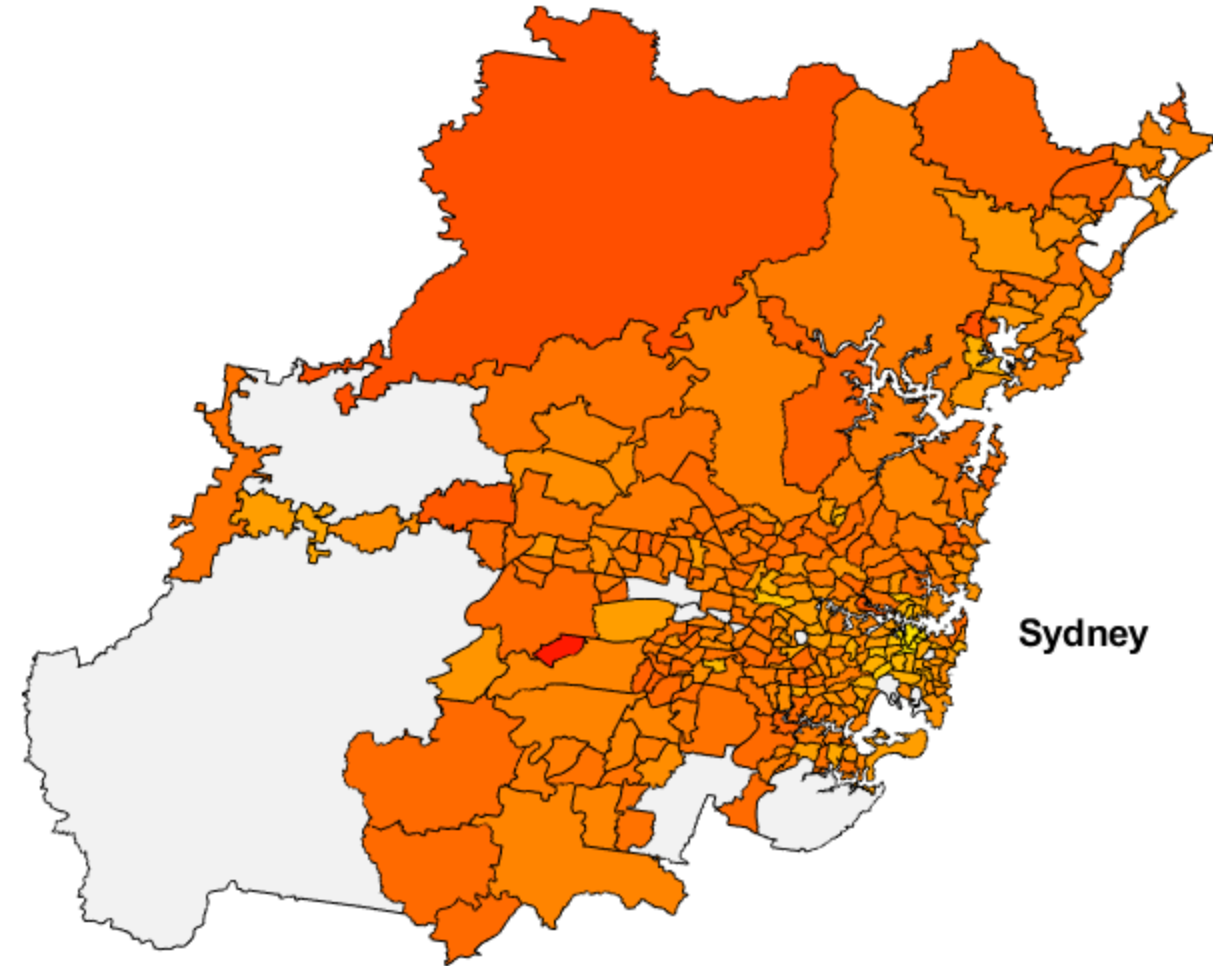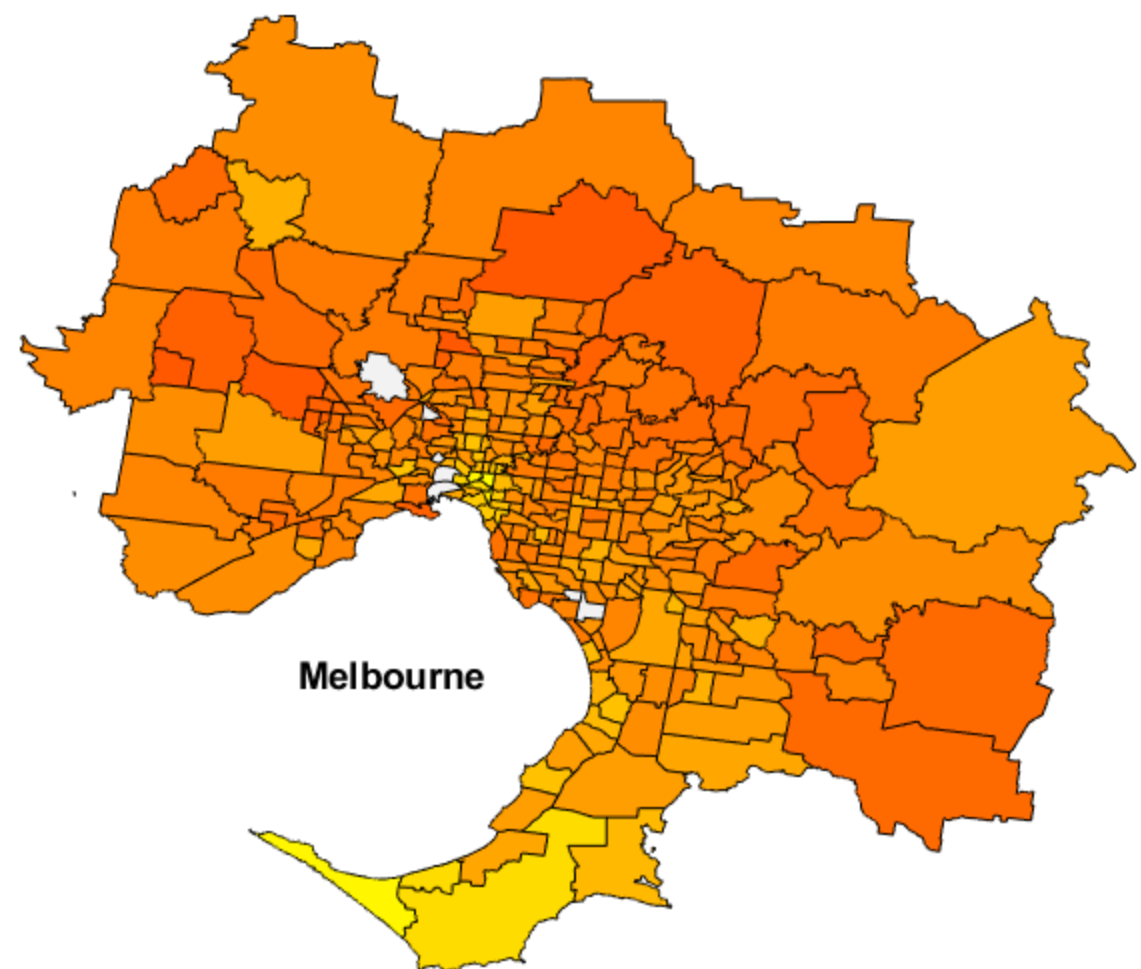

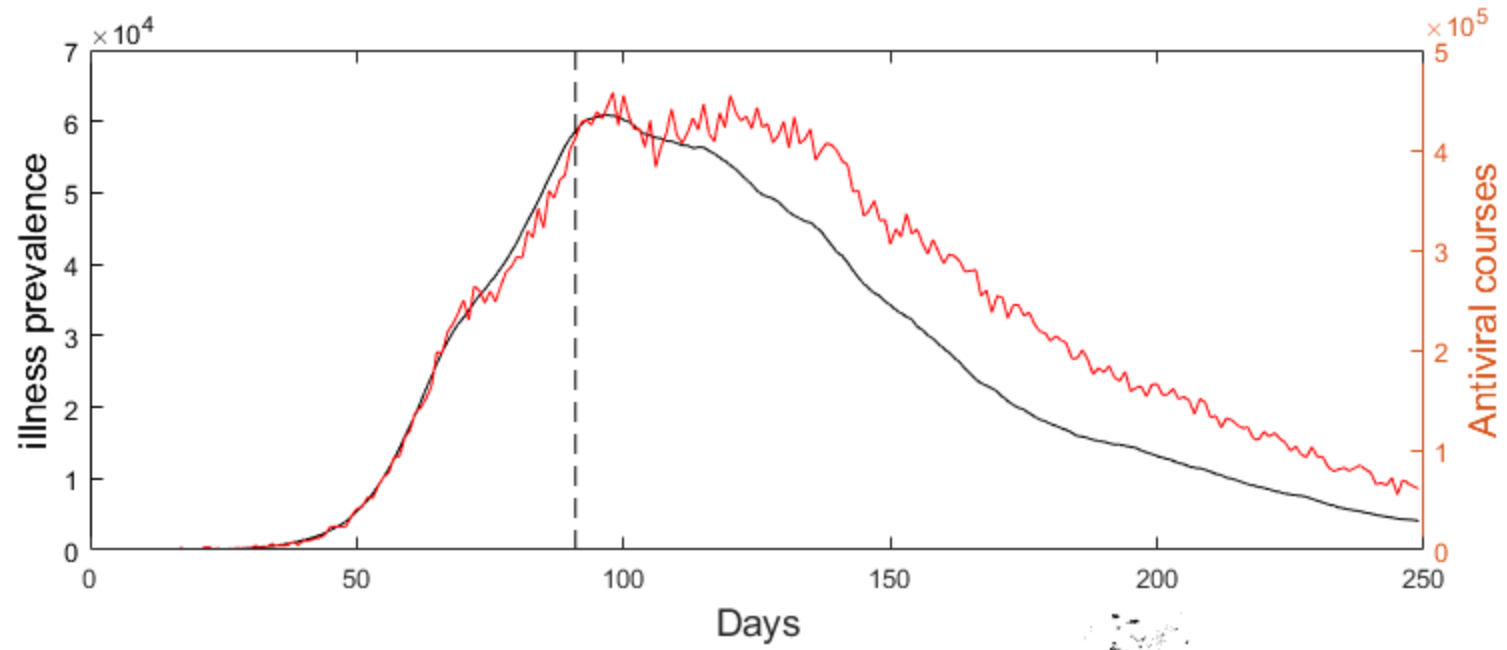

Days

Antiviral courses

Day: 91

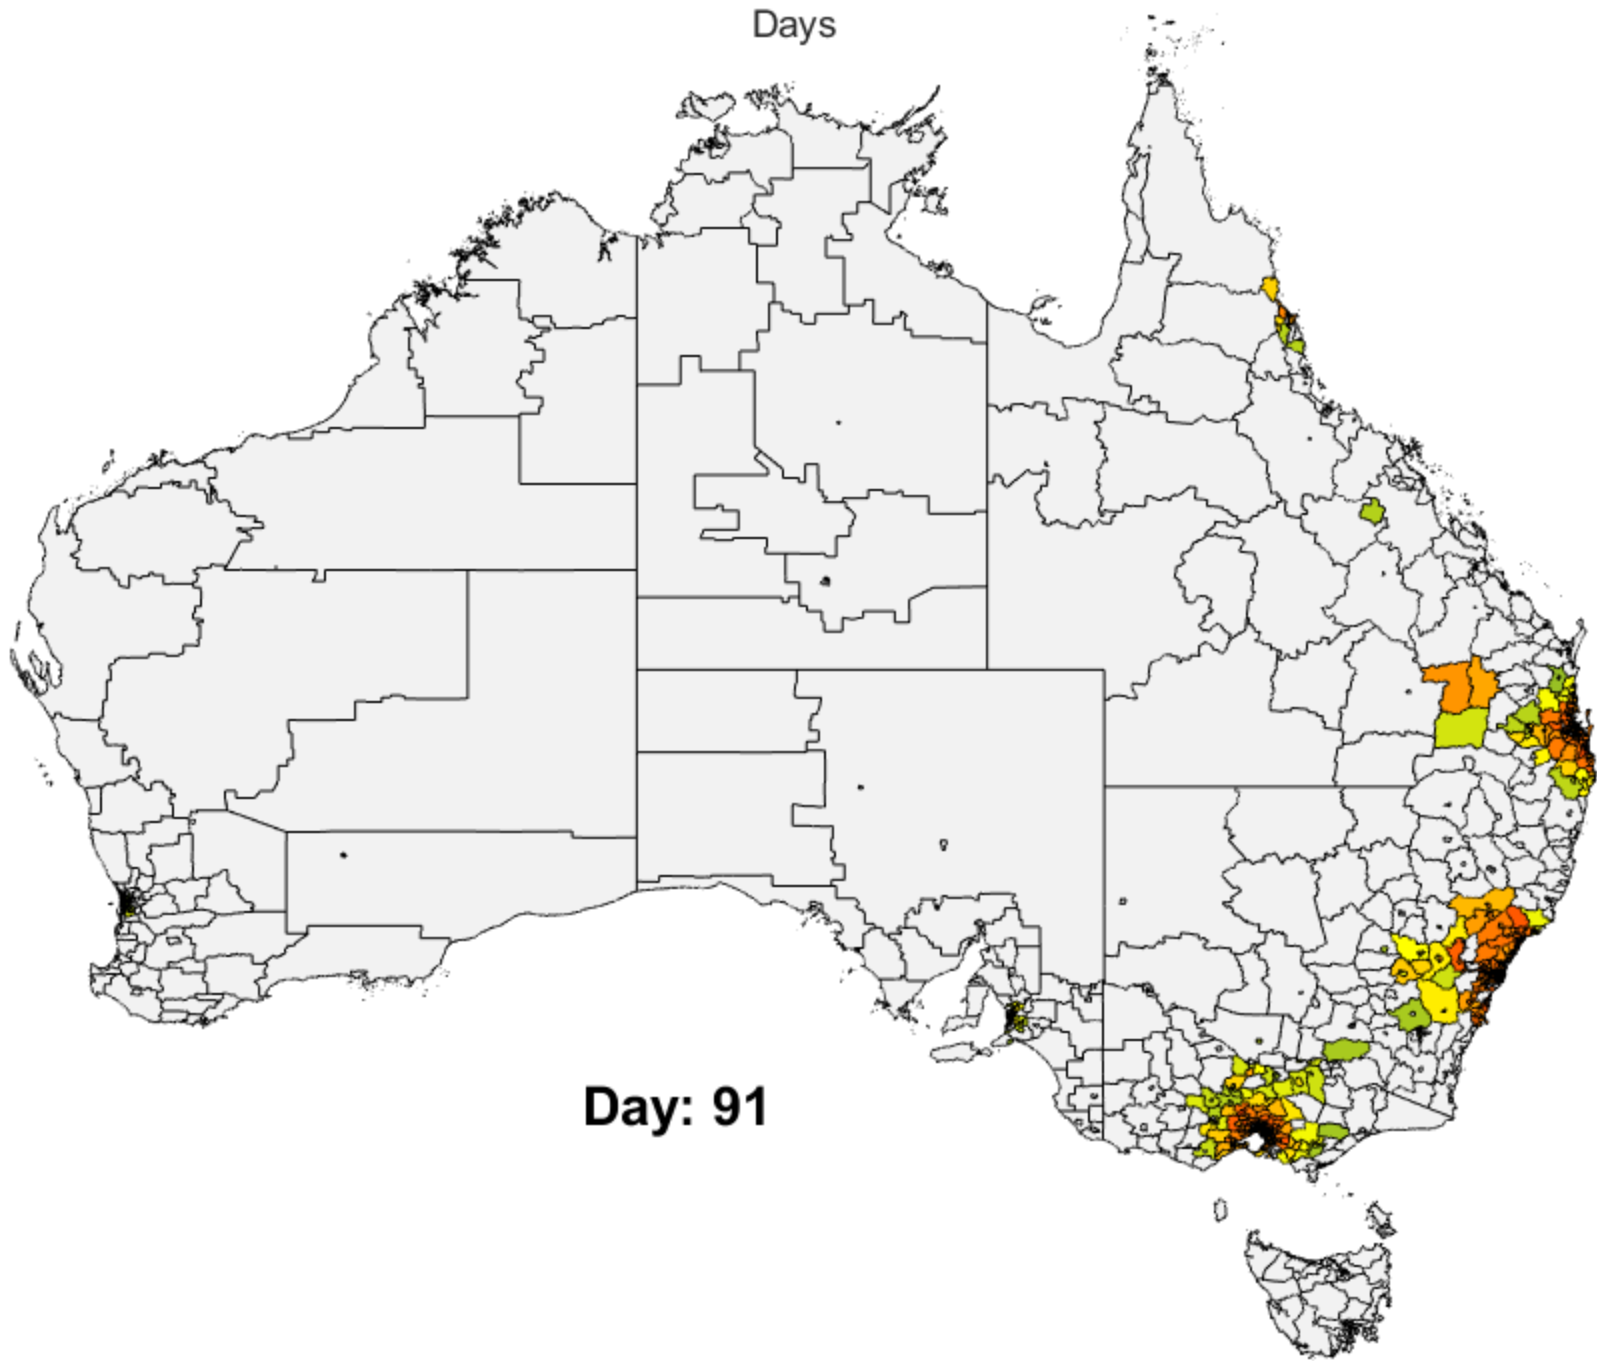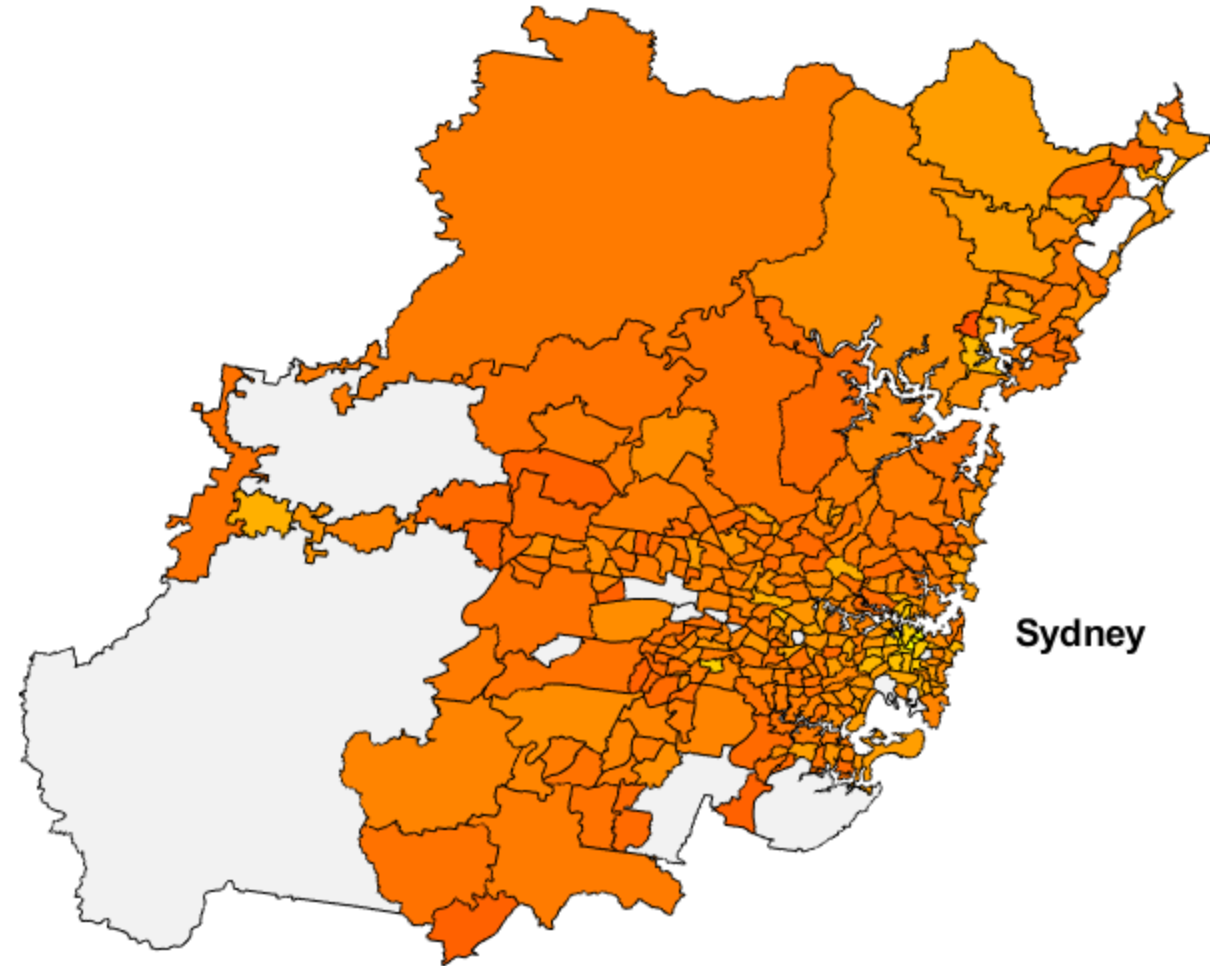

Sydney

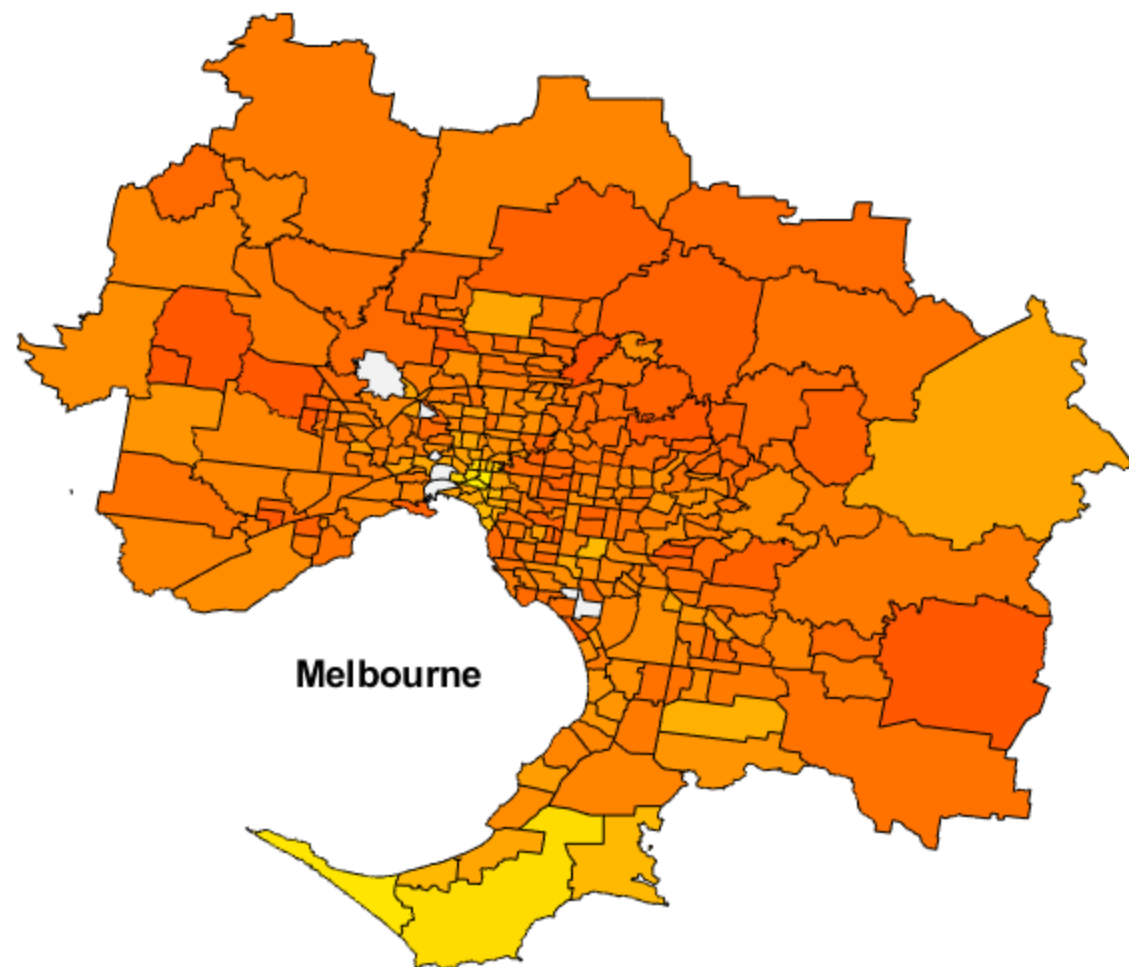

Melbourne



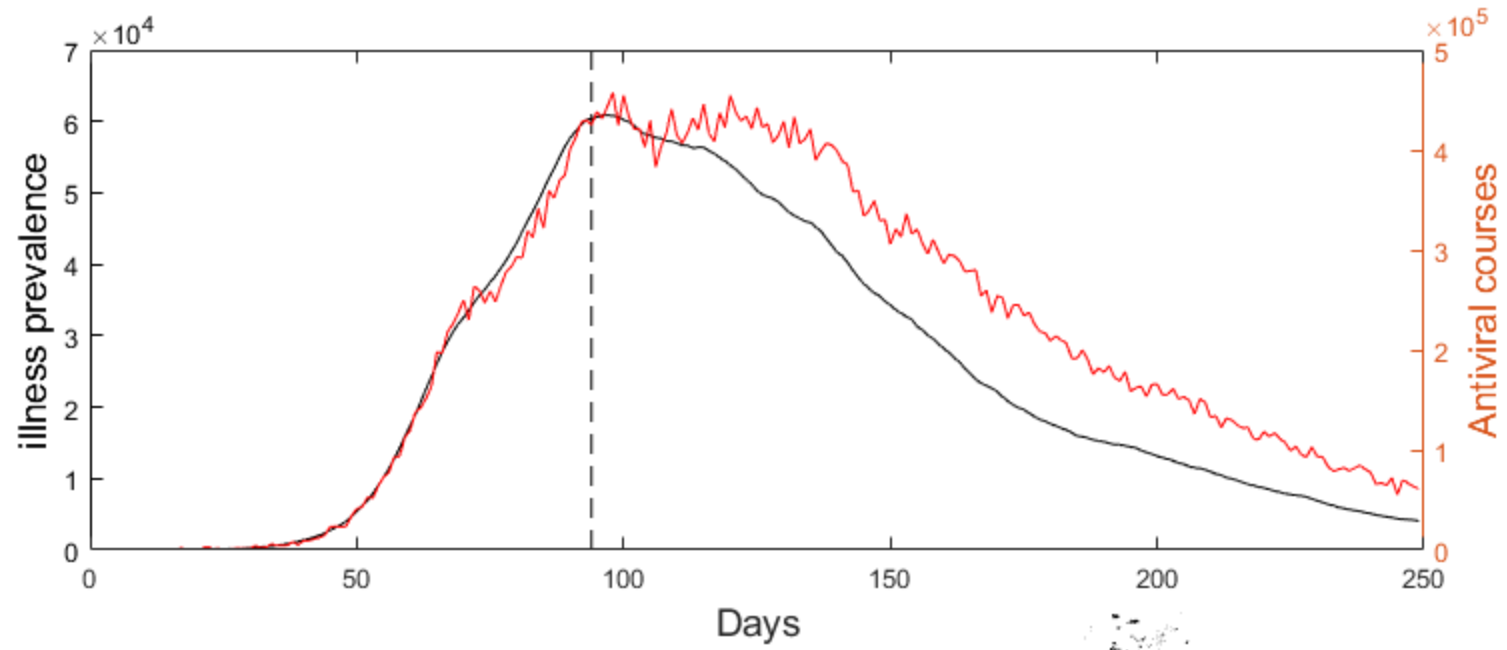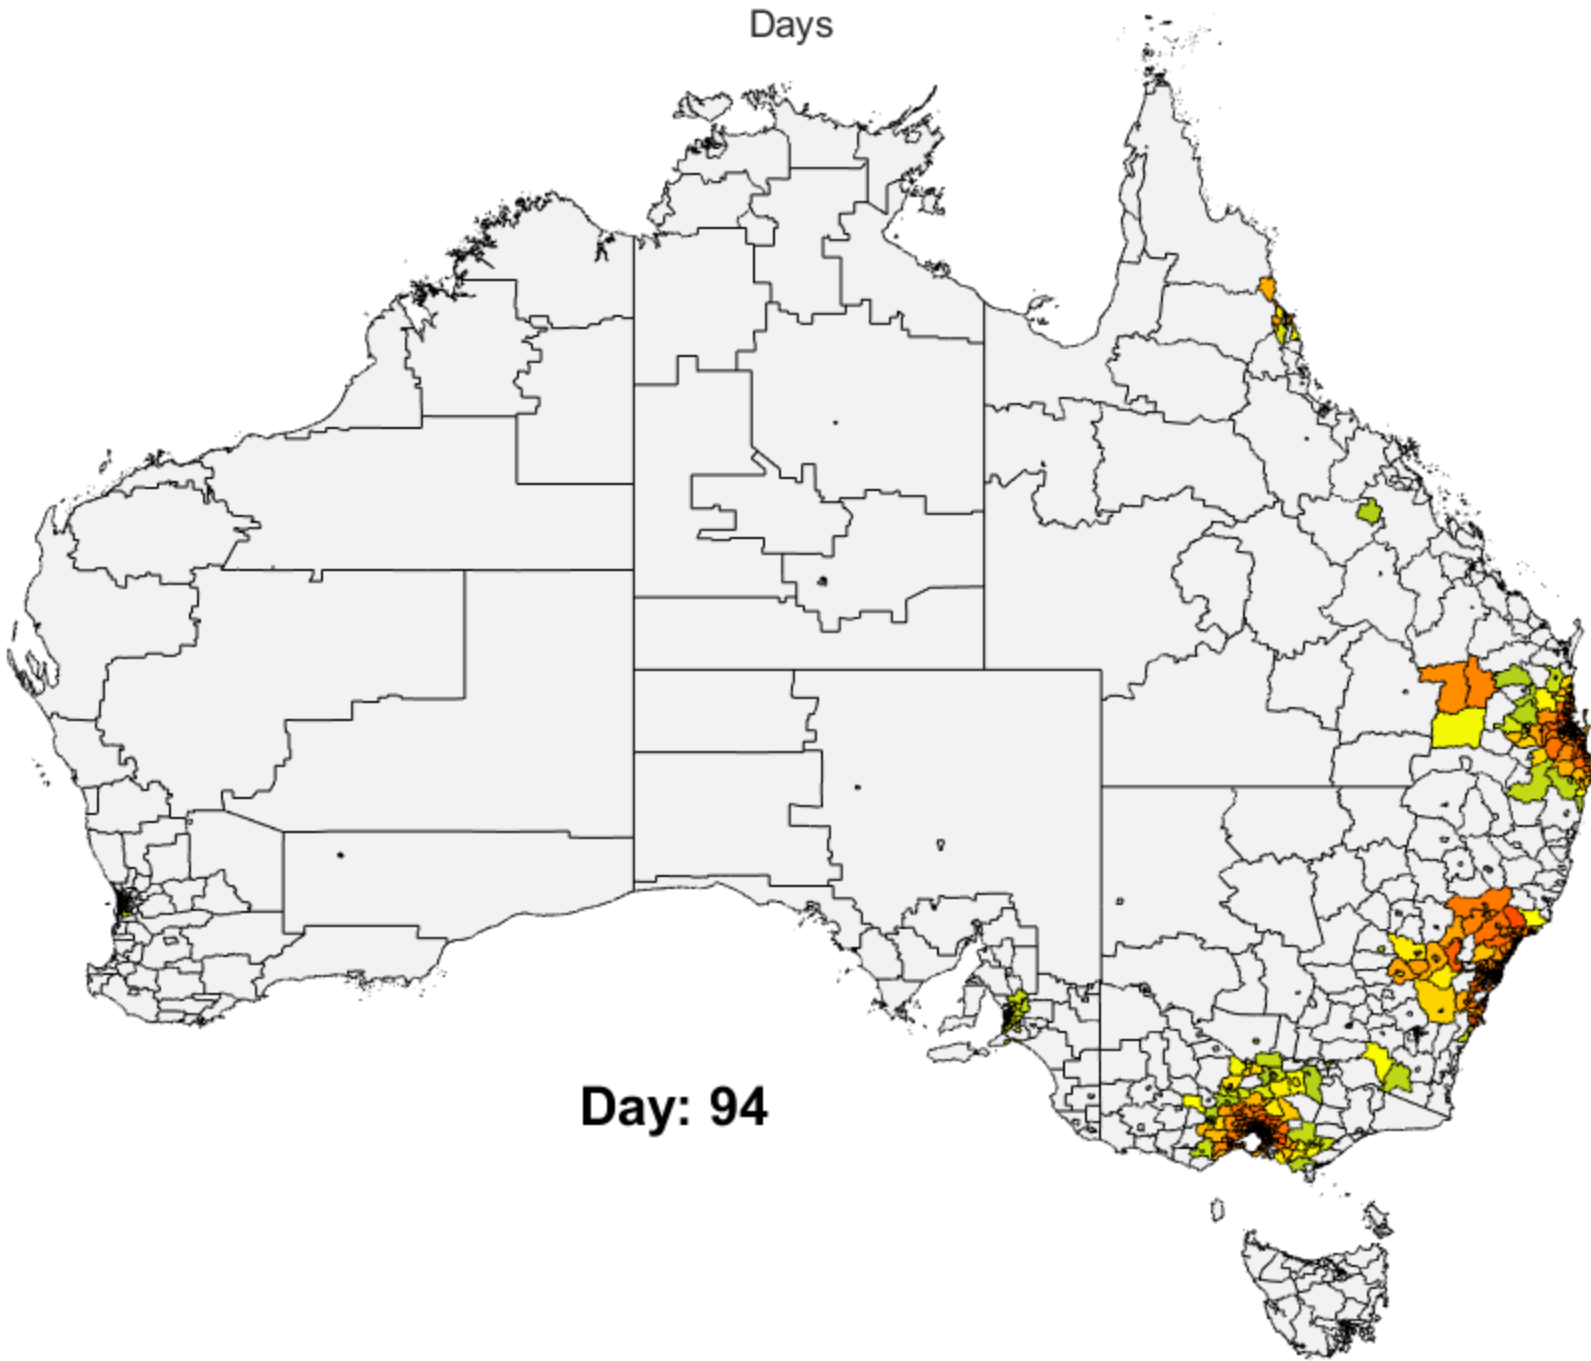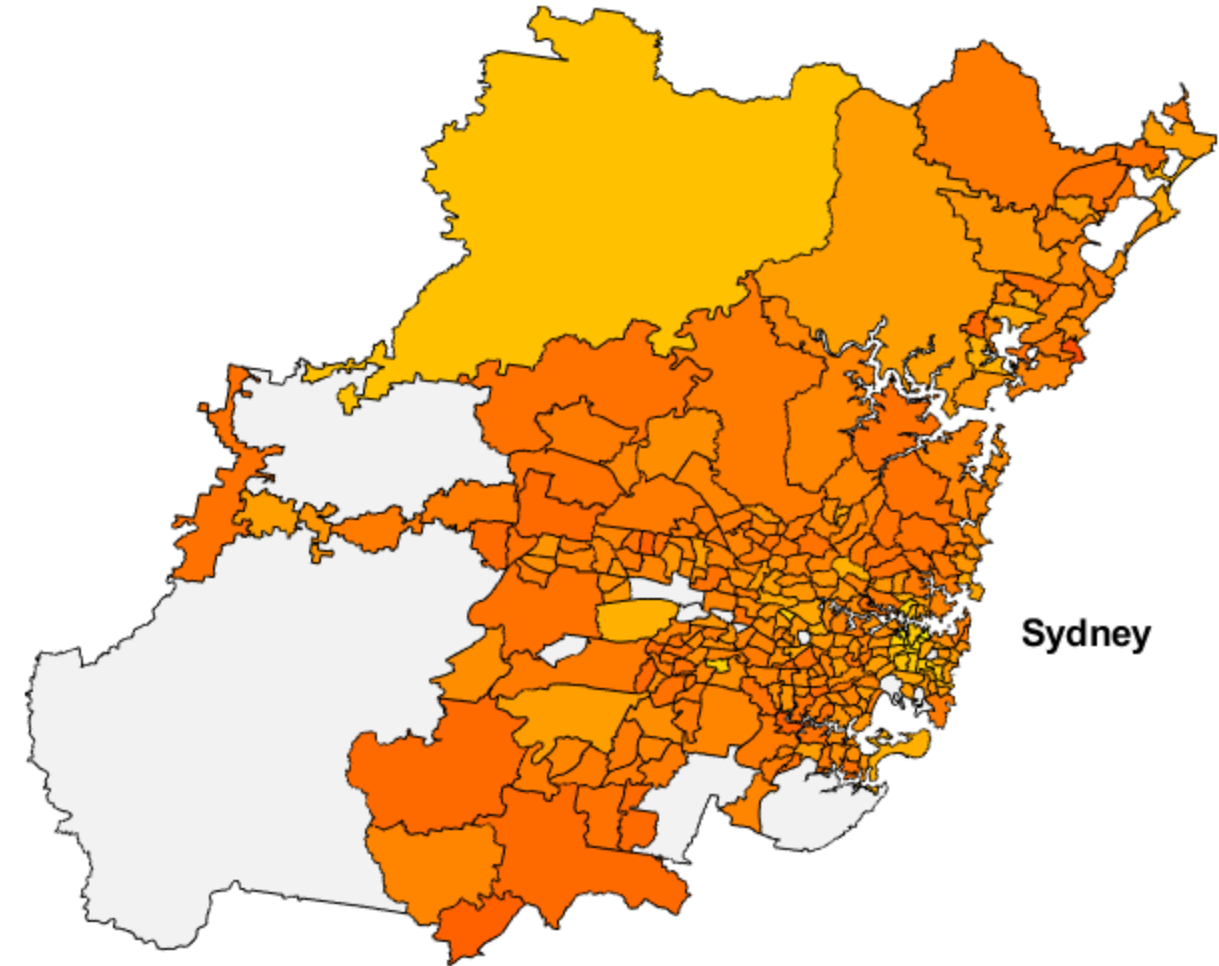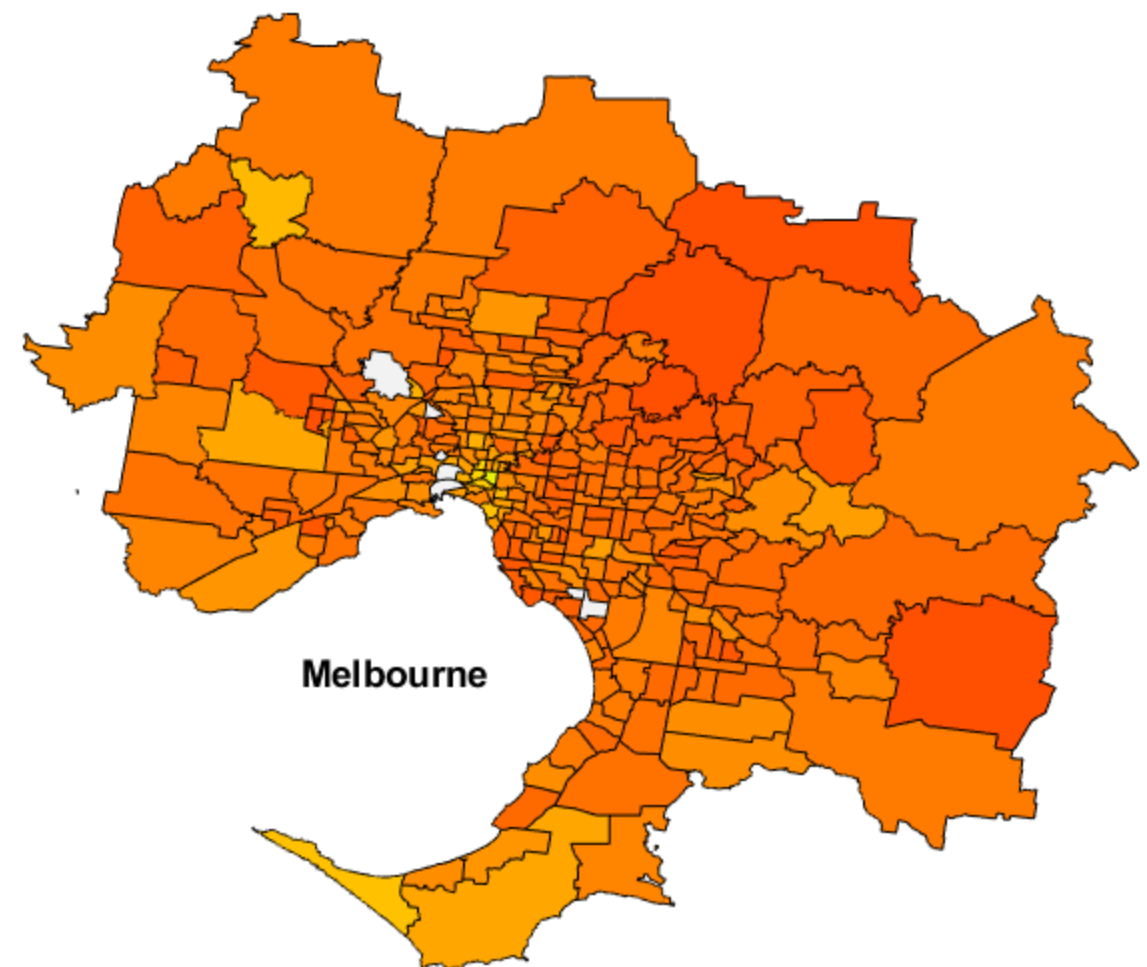

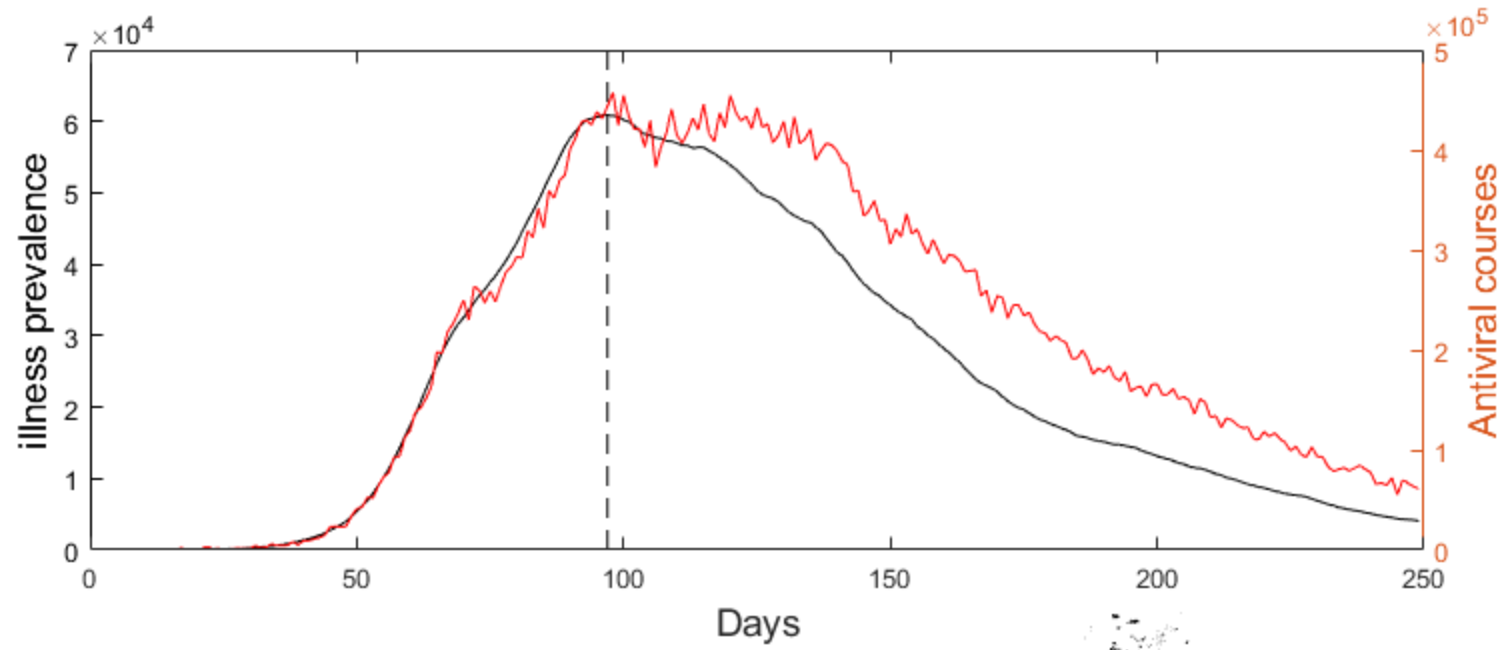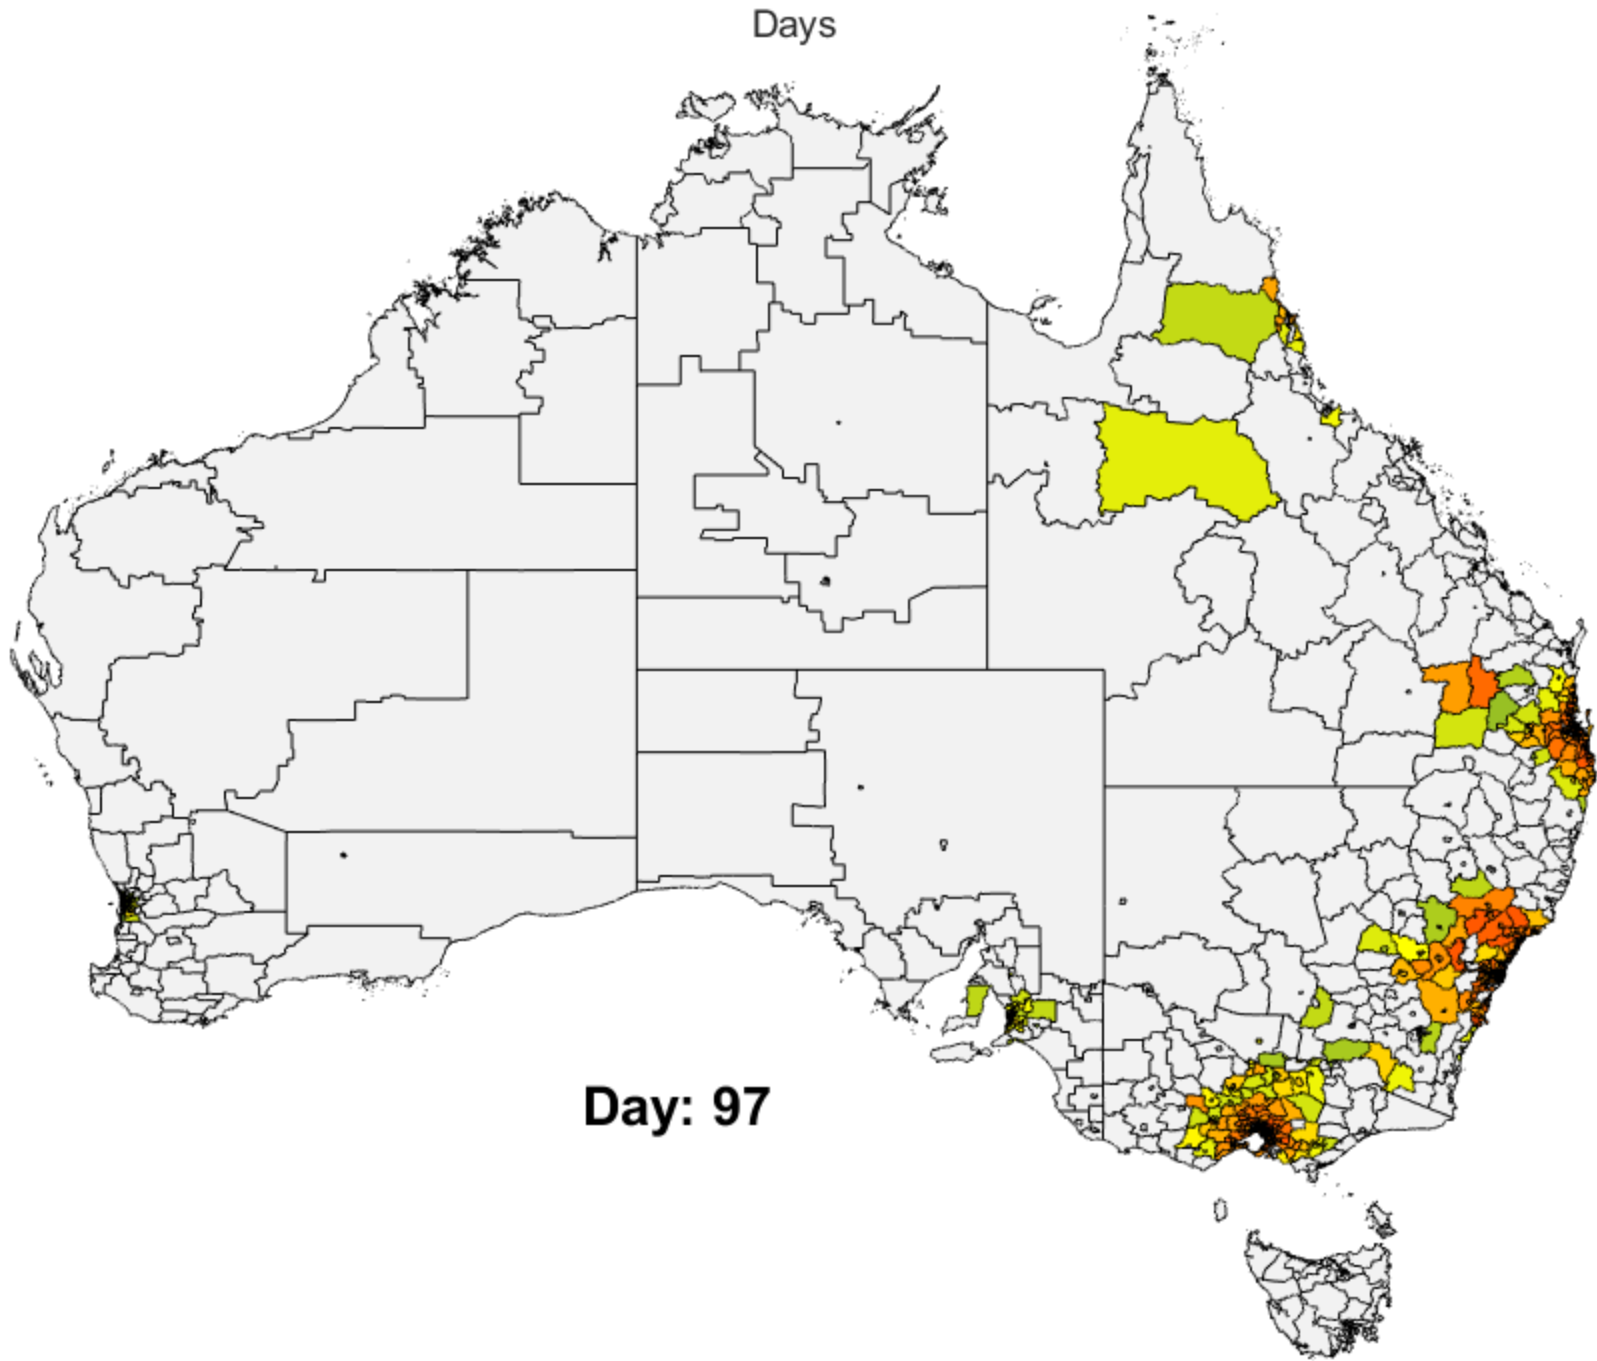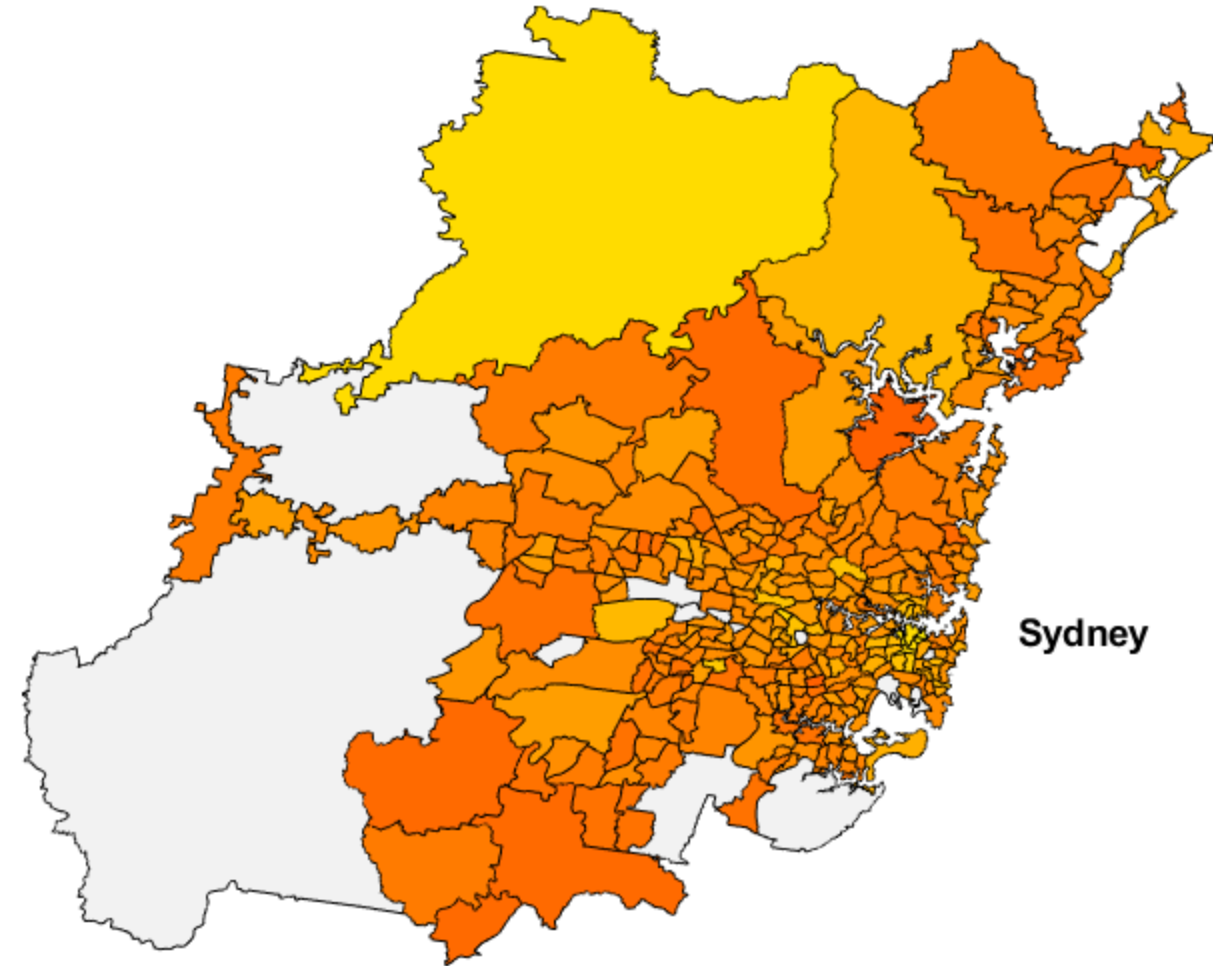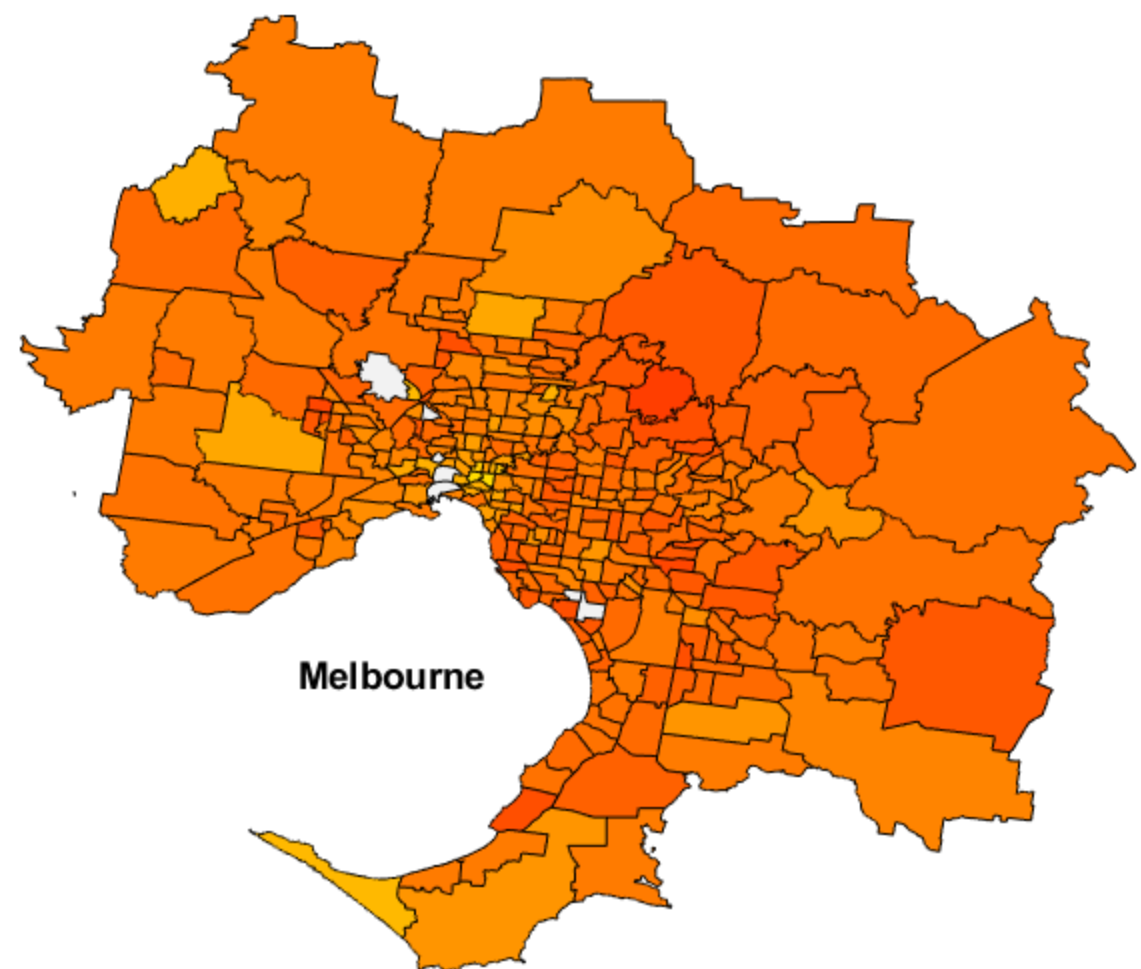

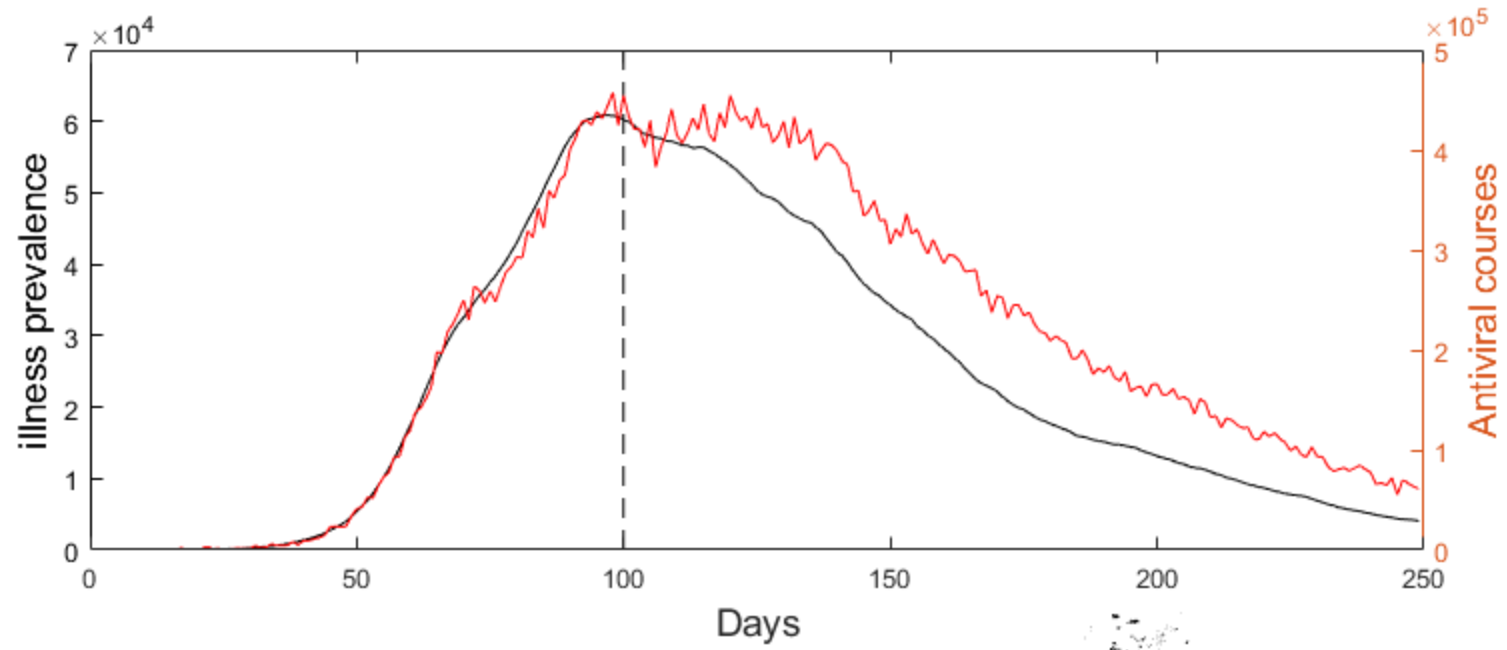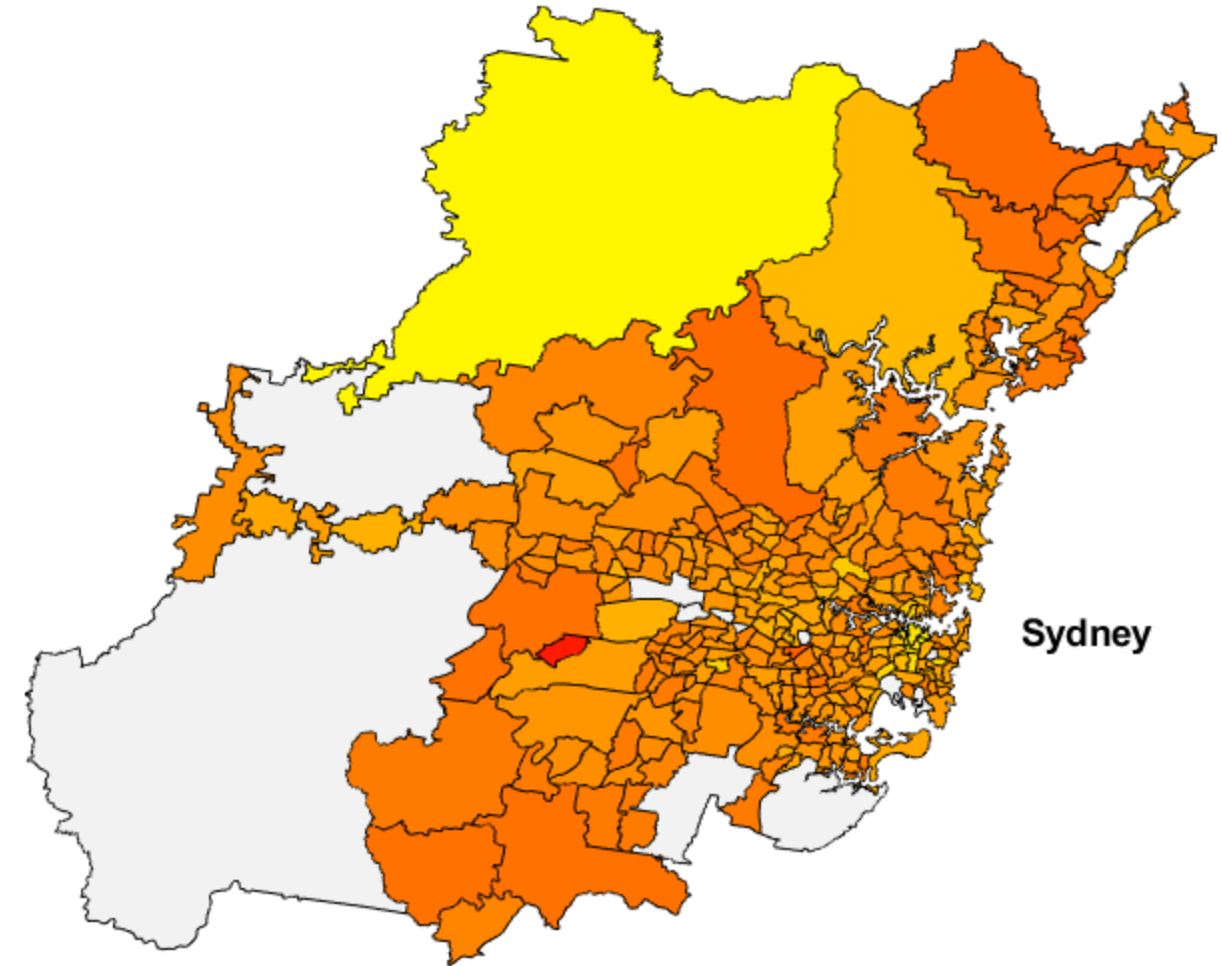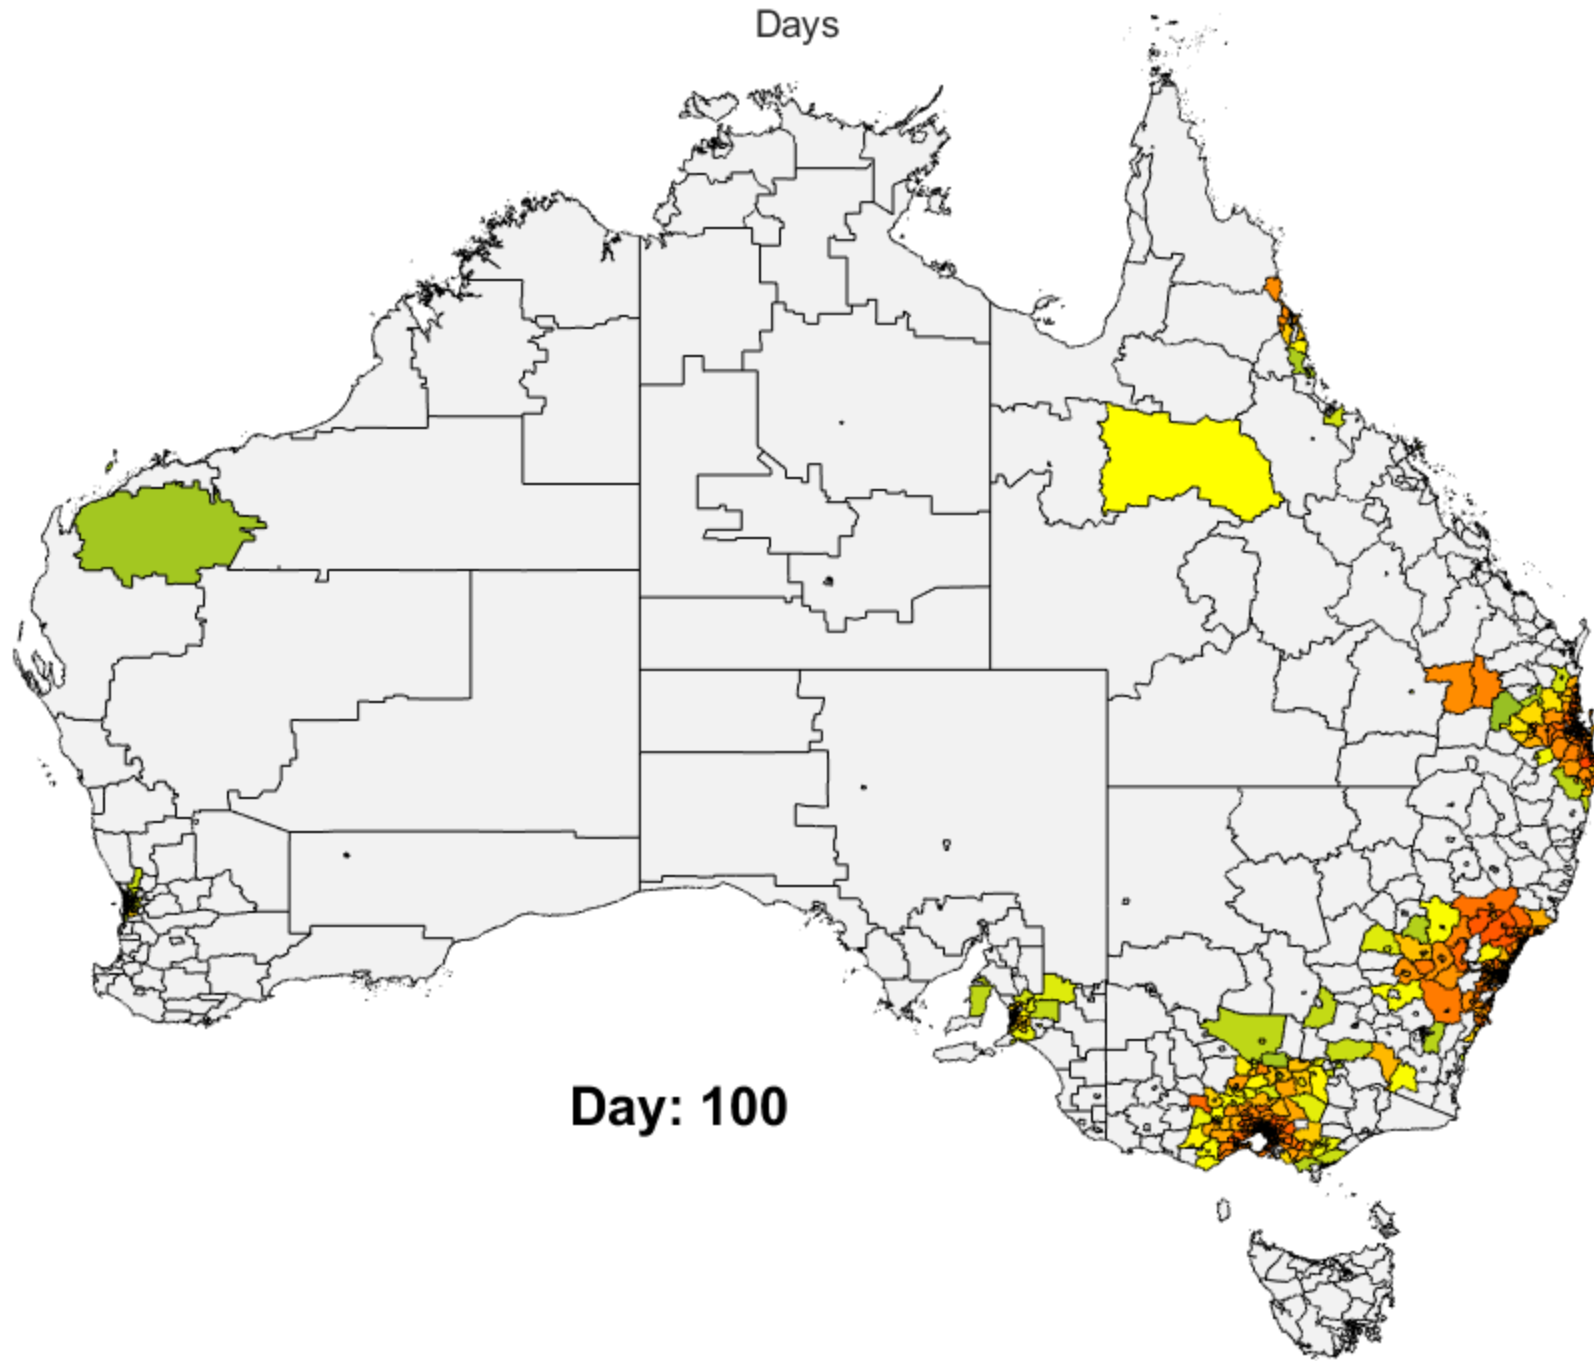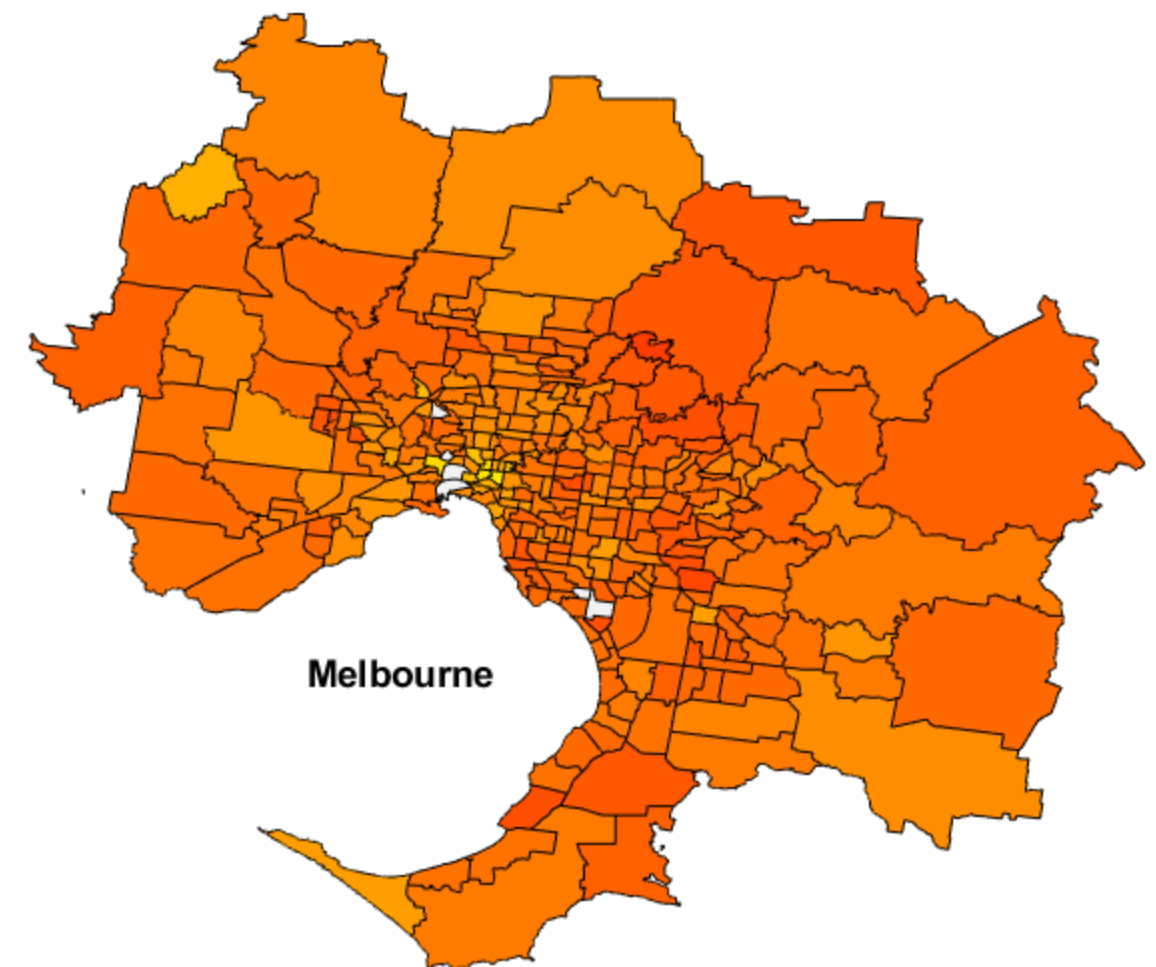



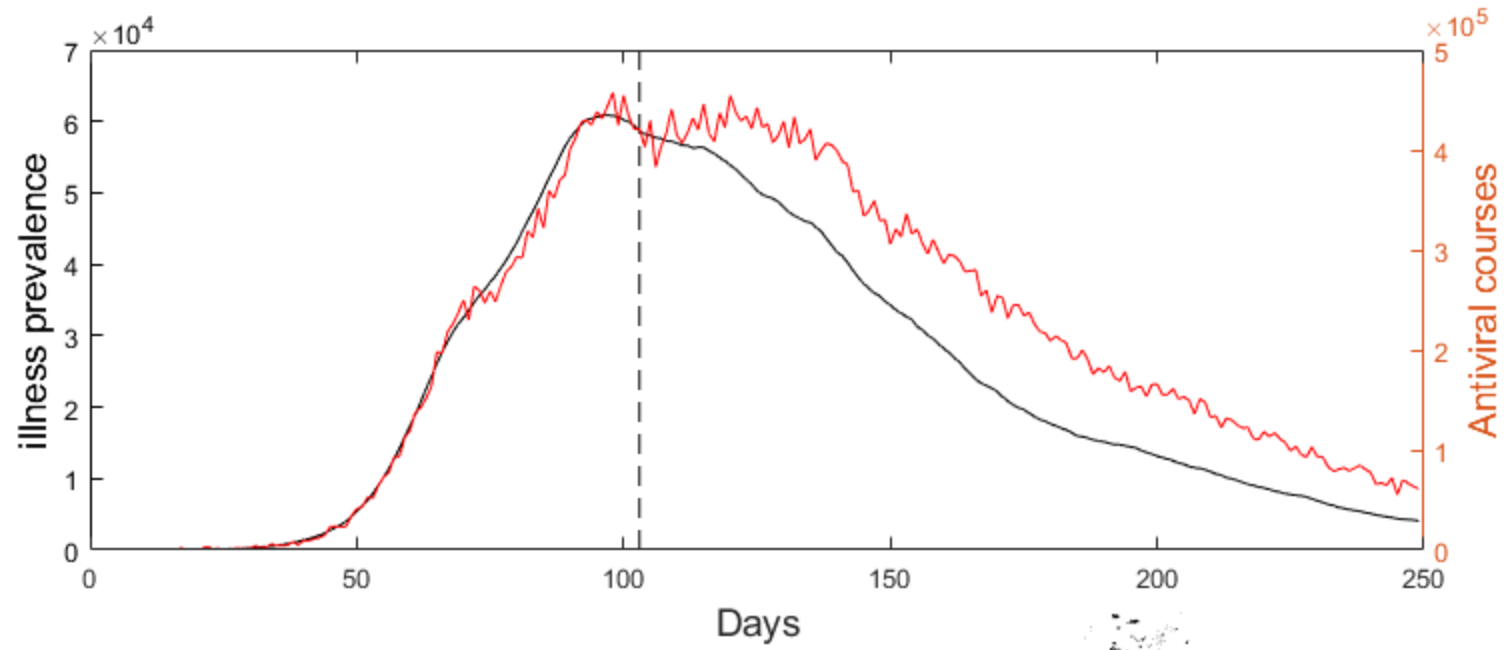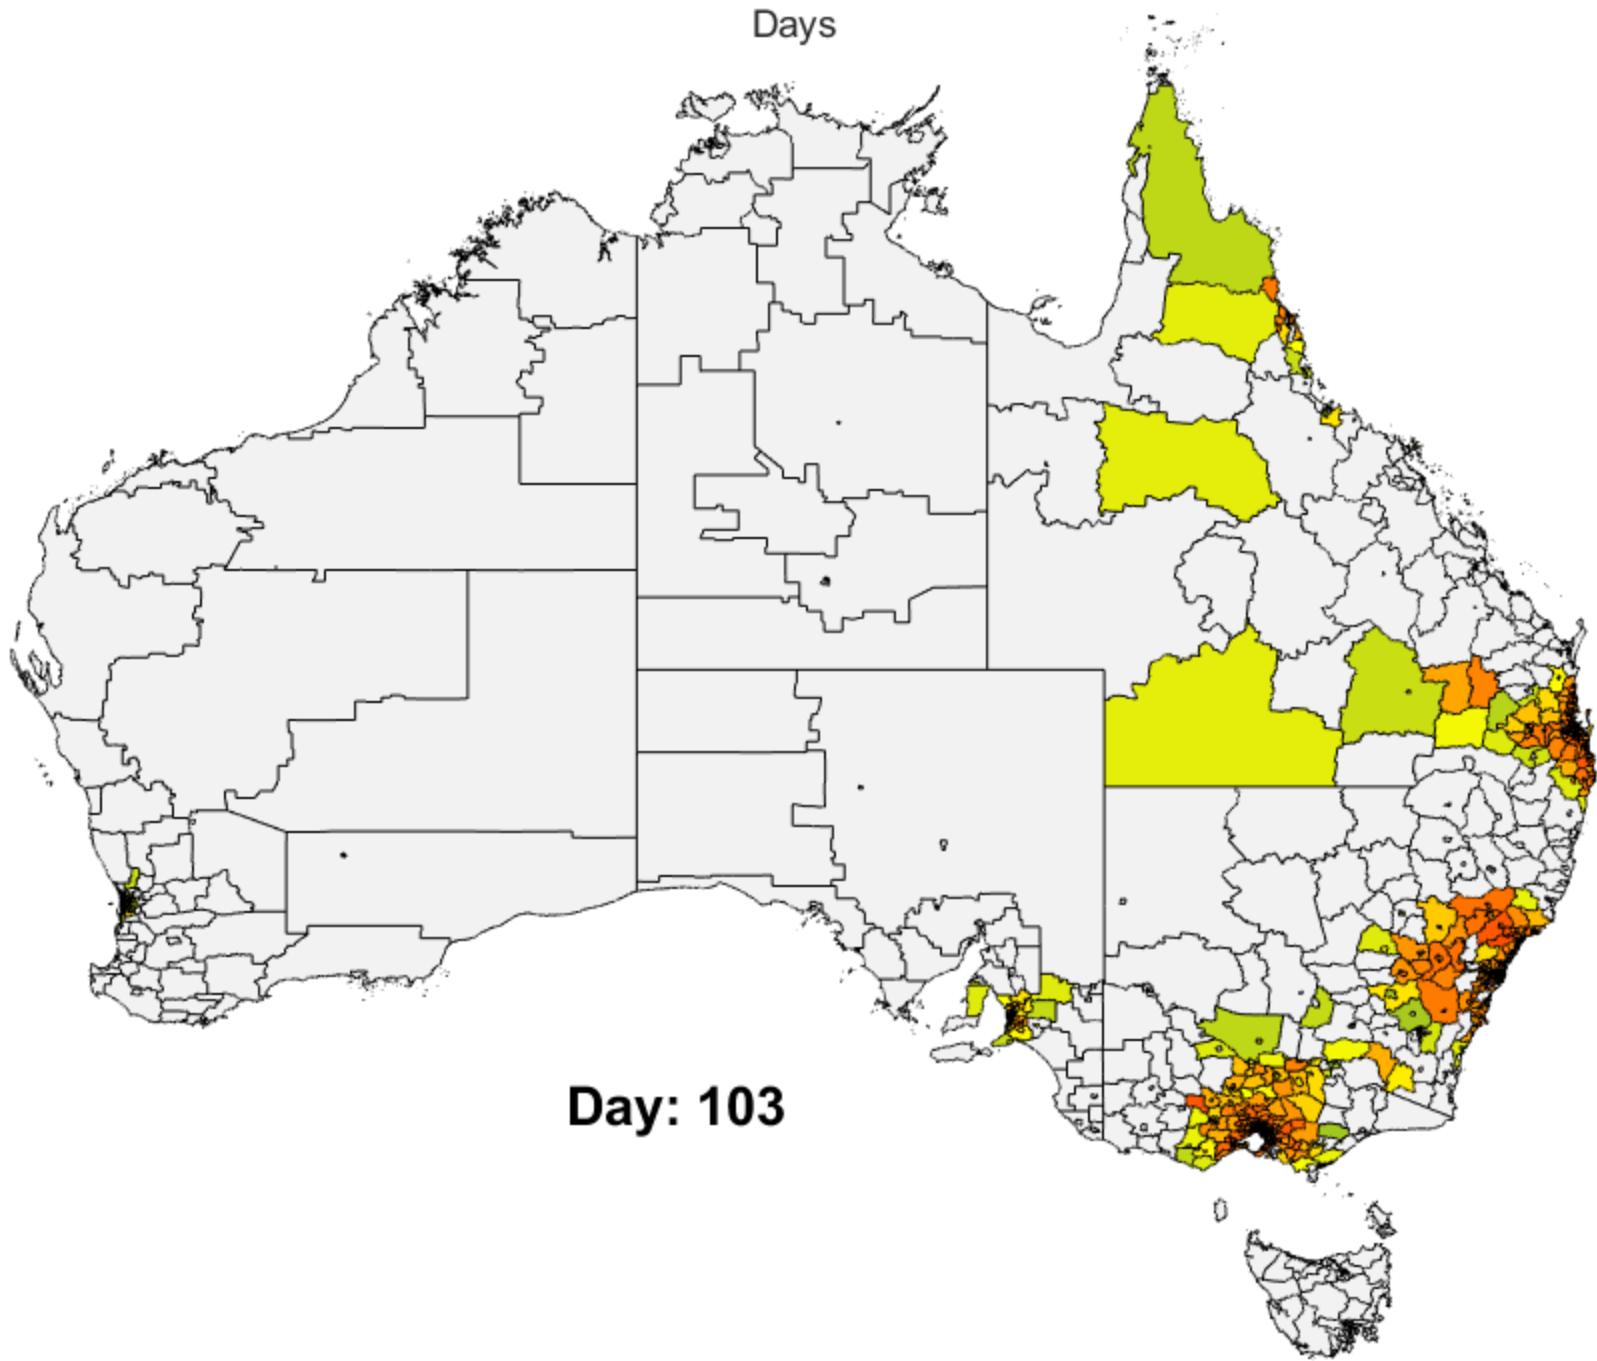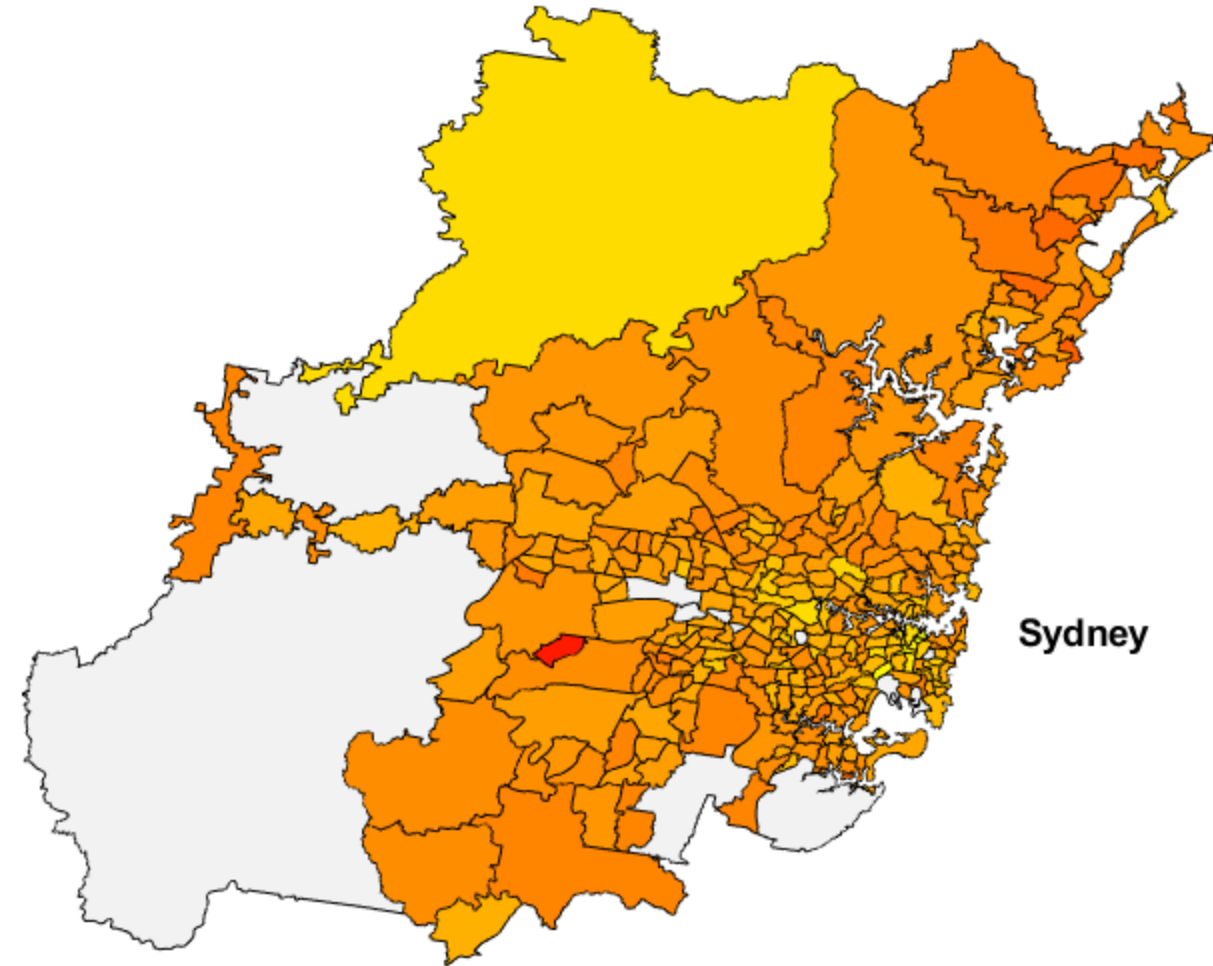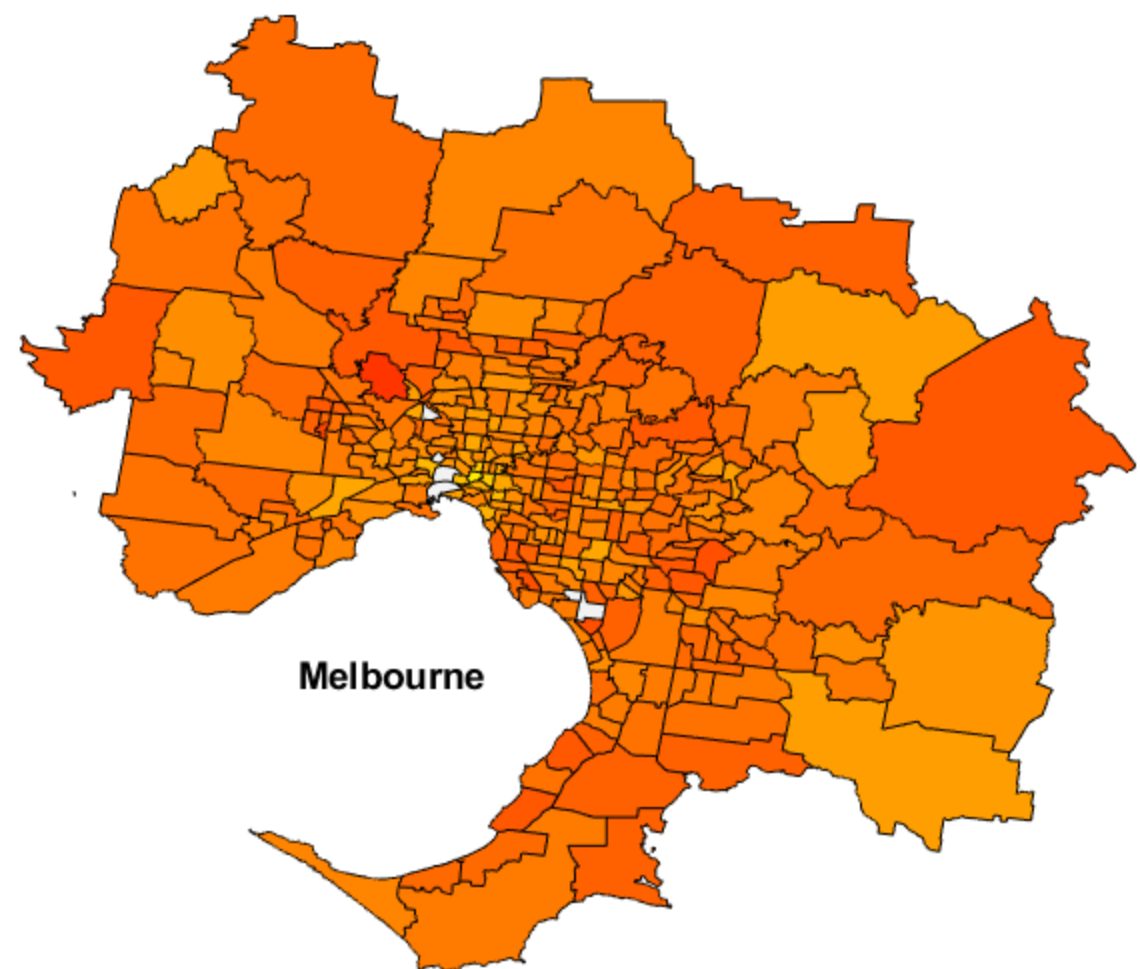

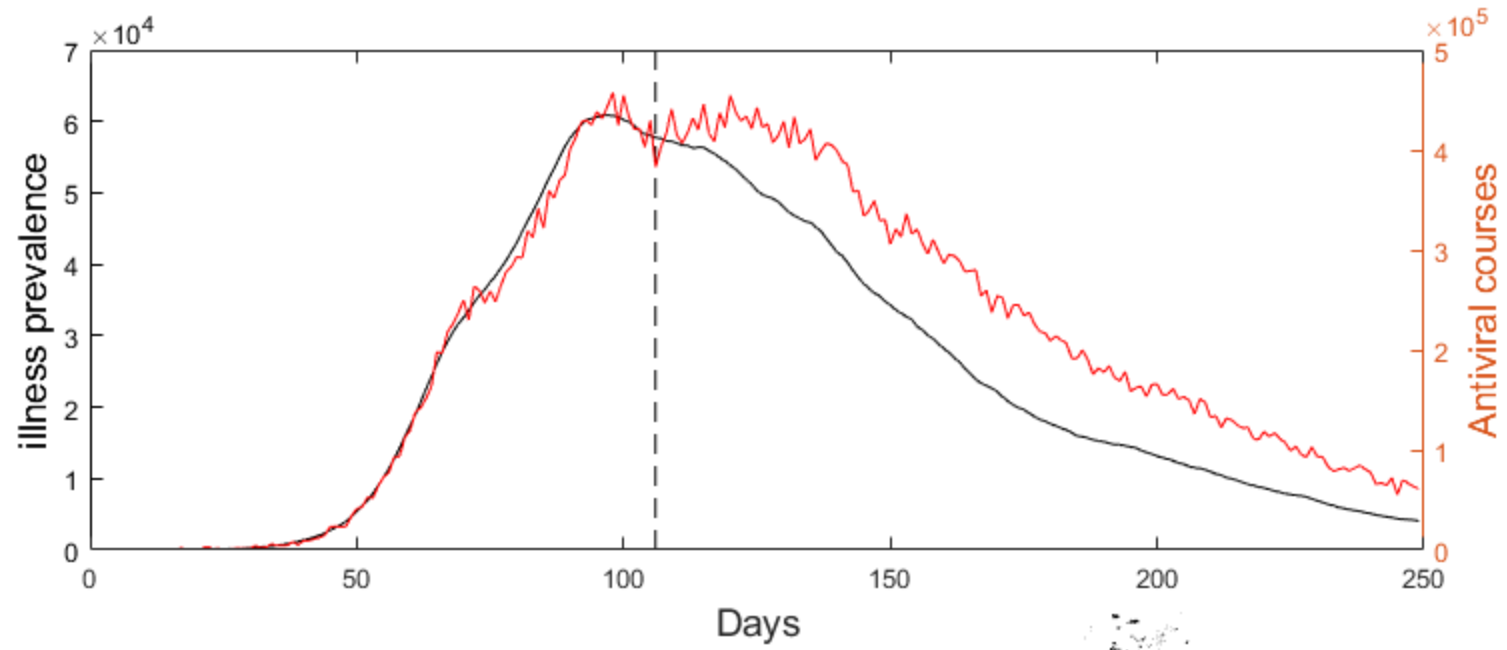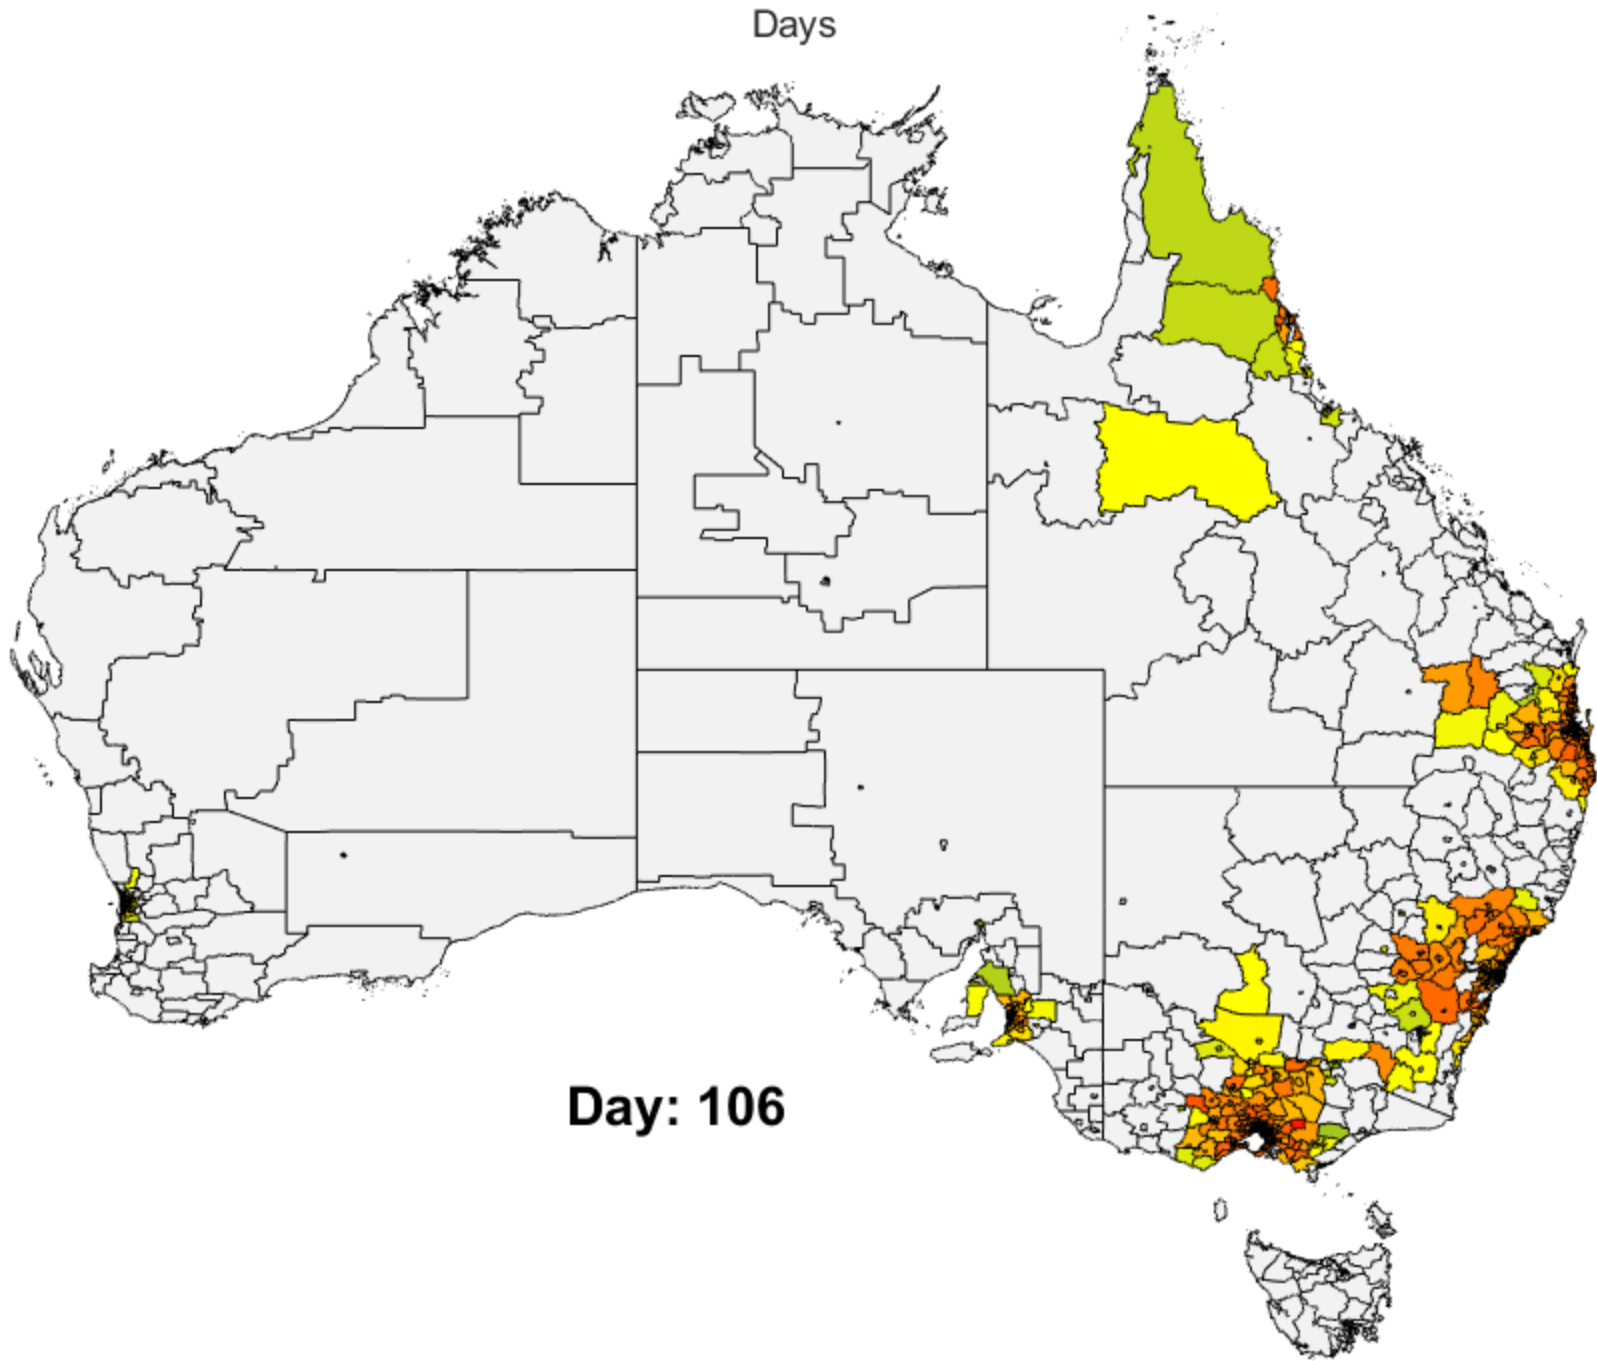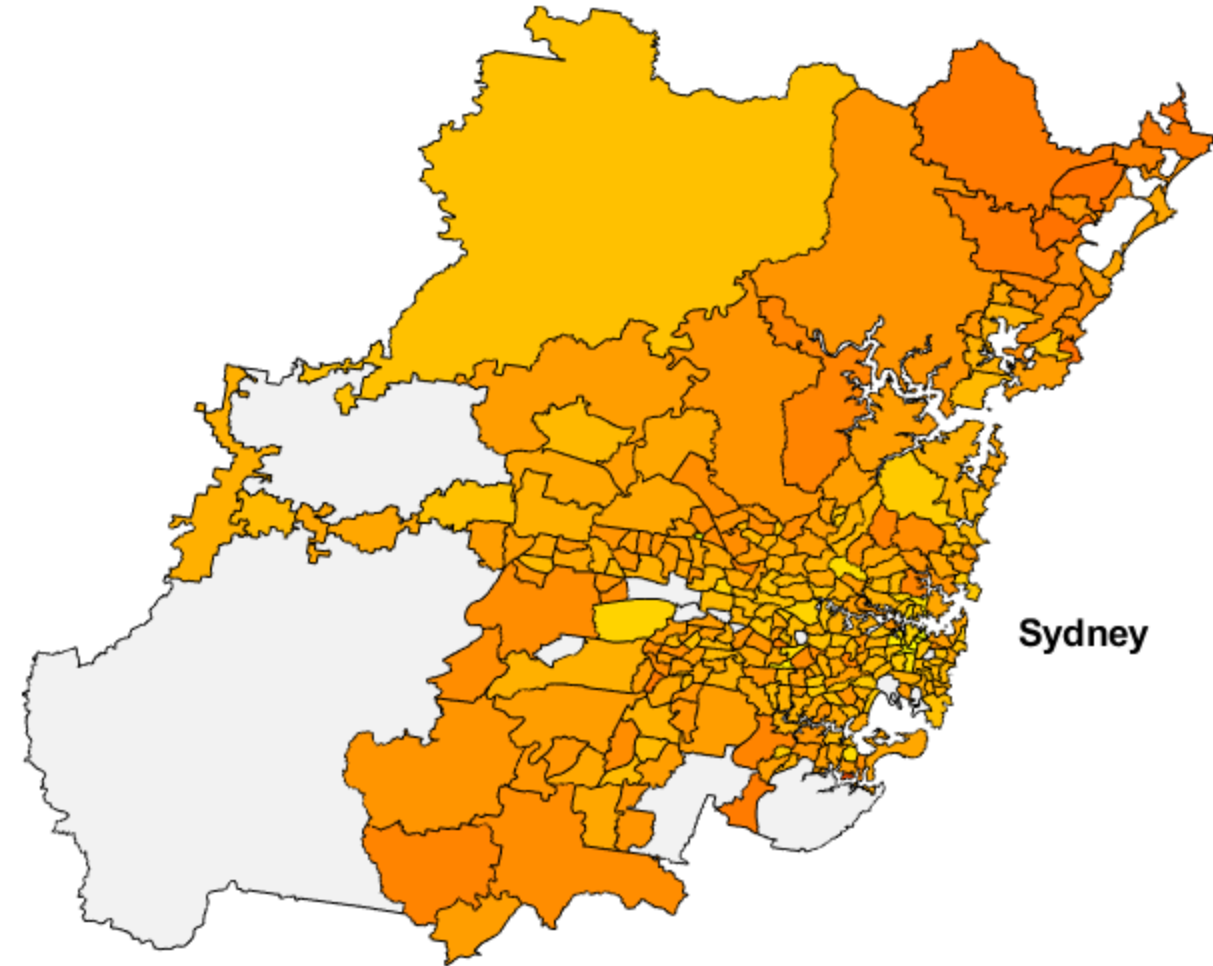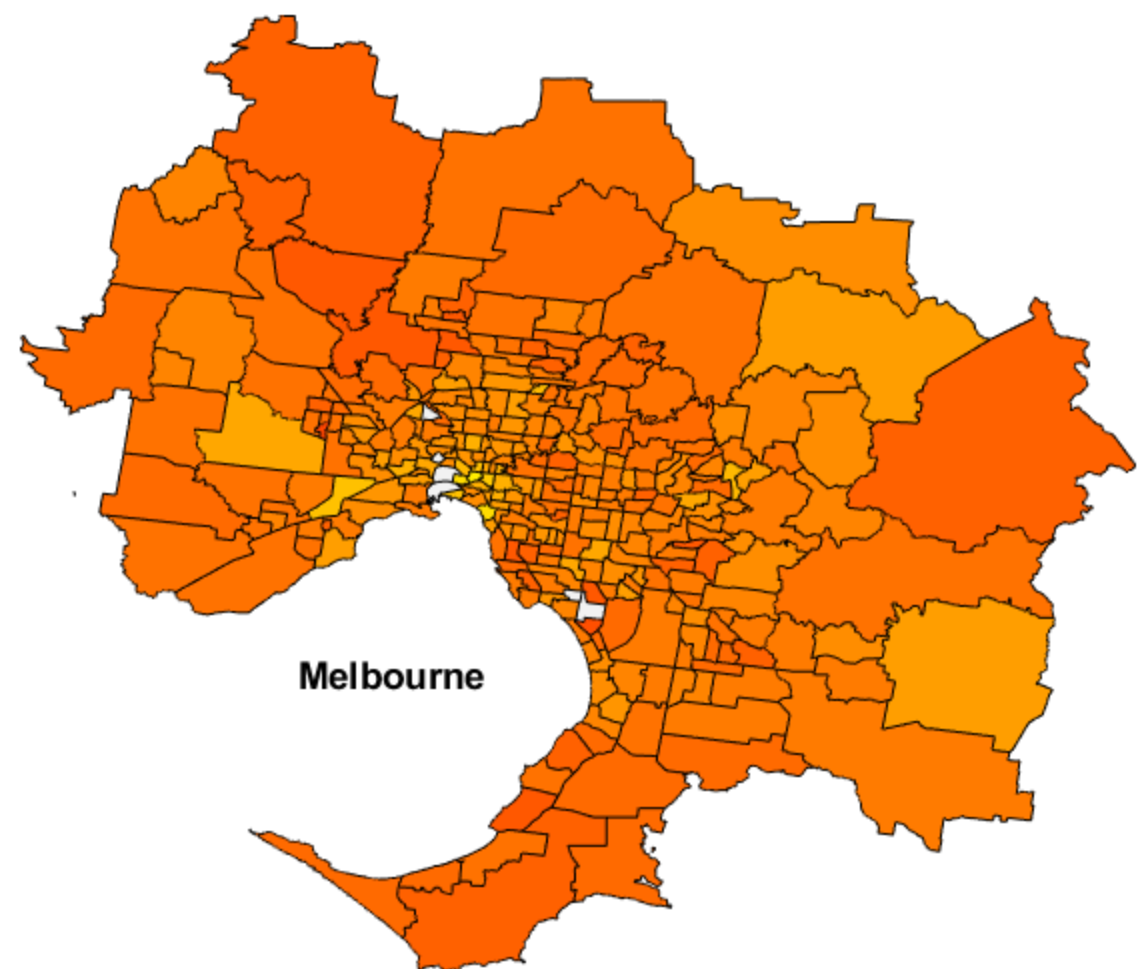

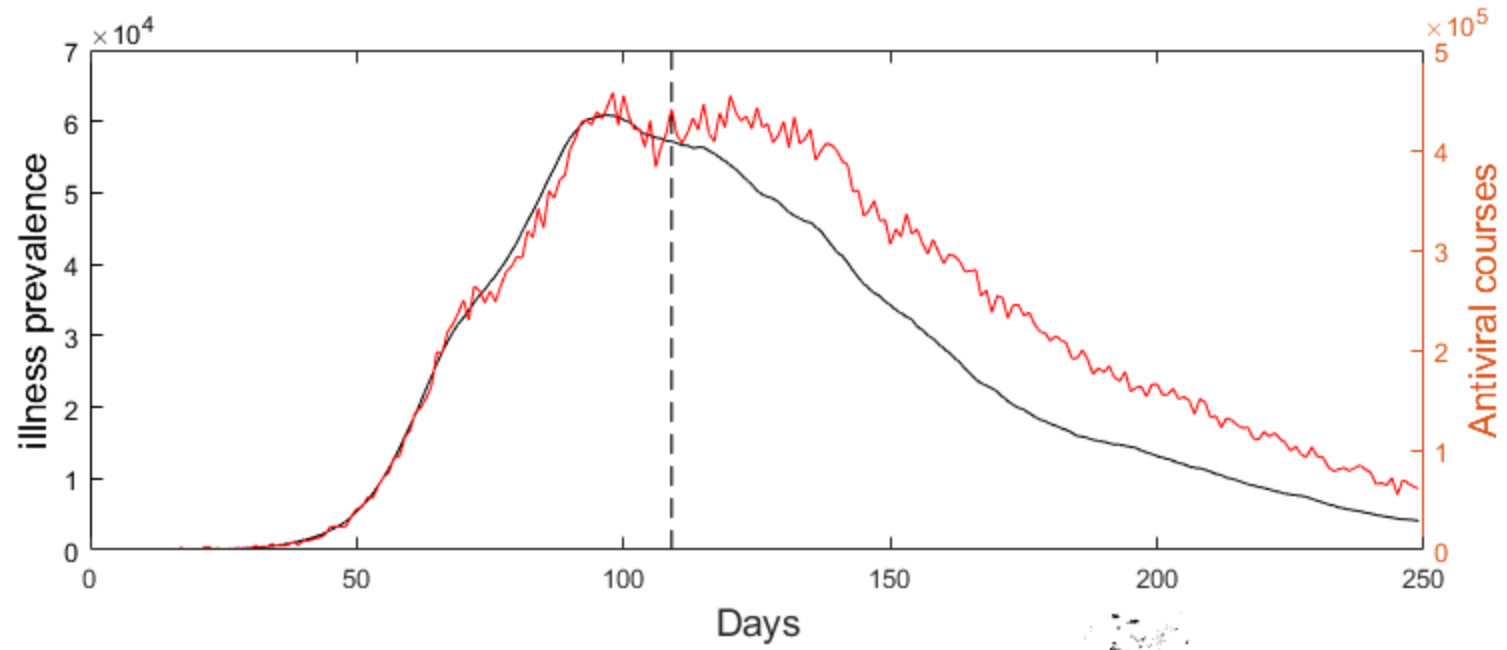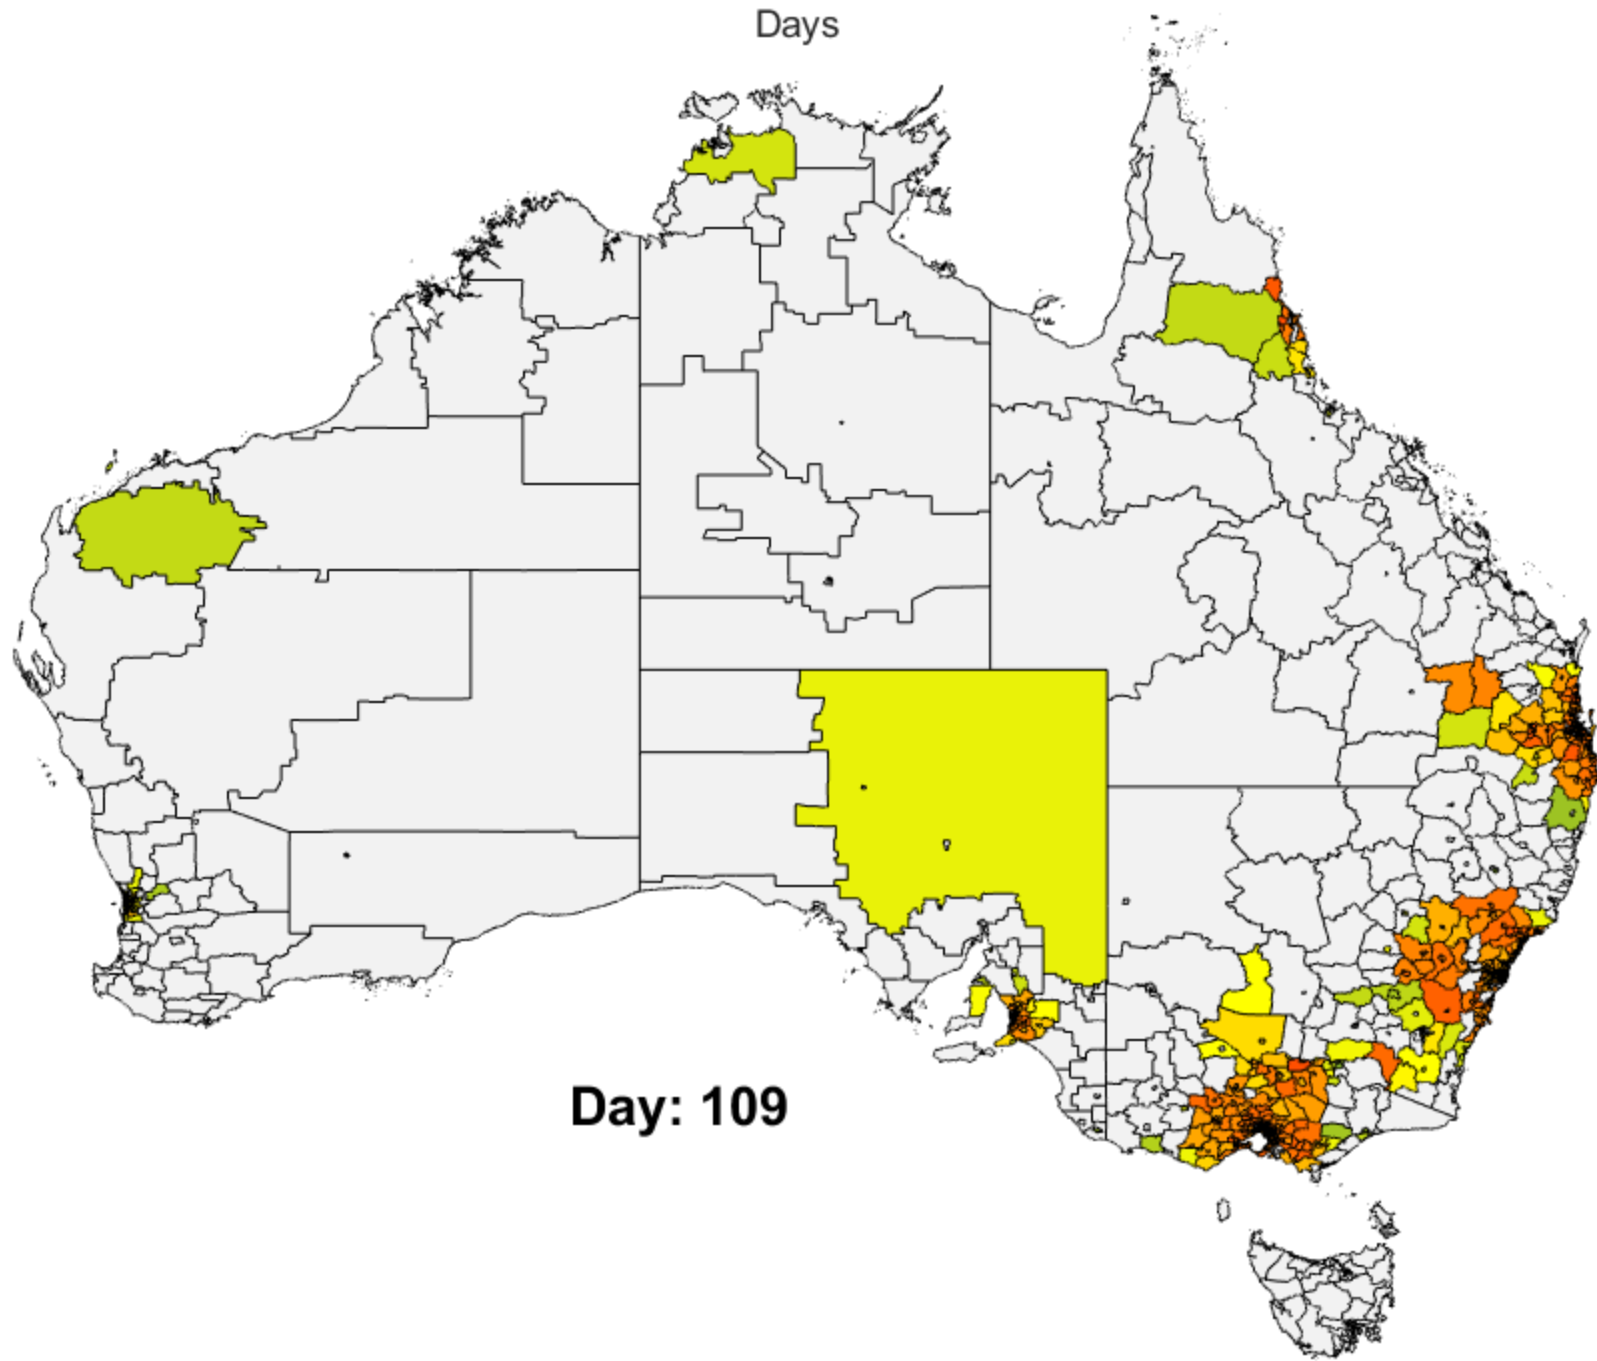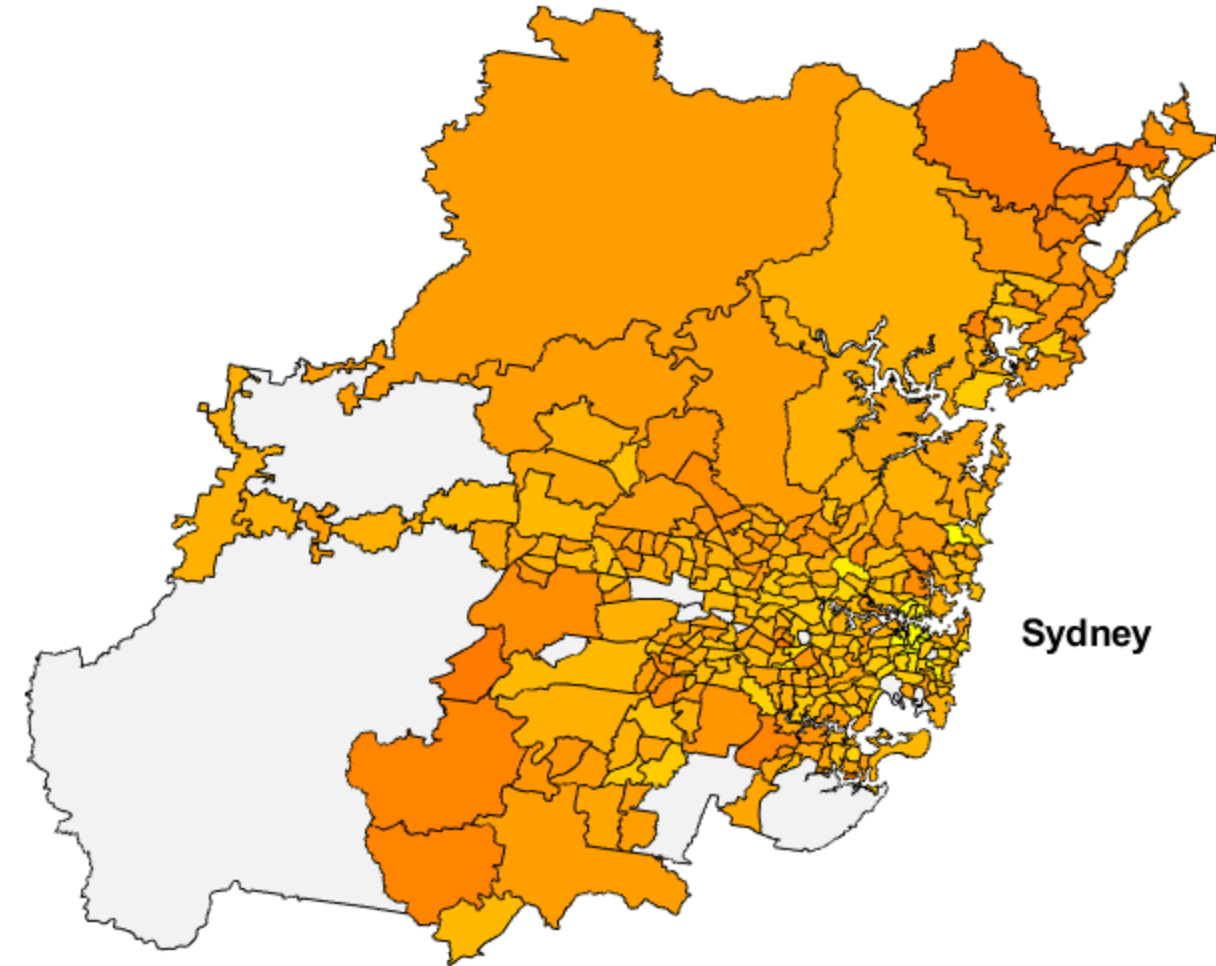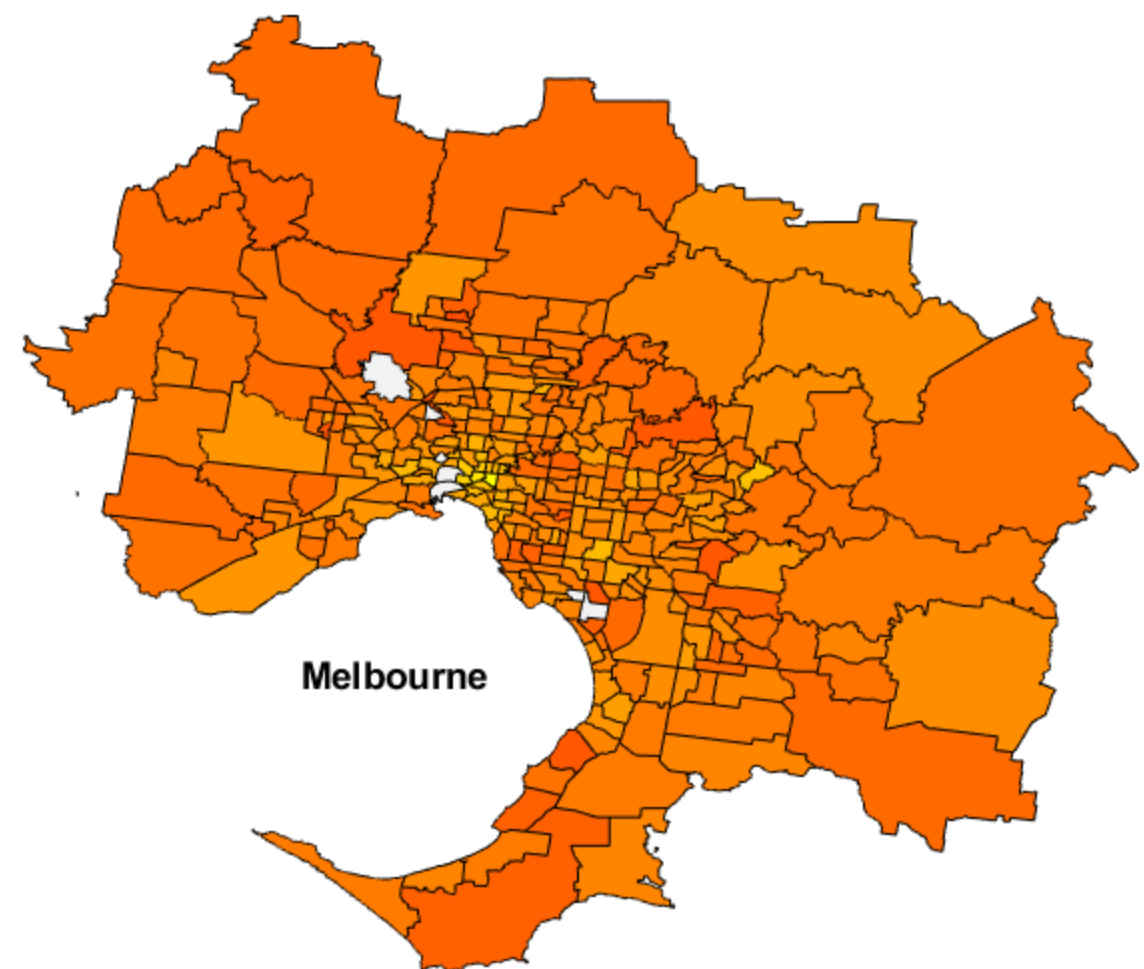



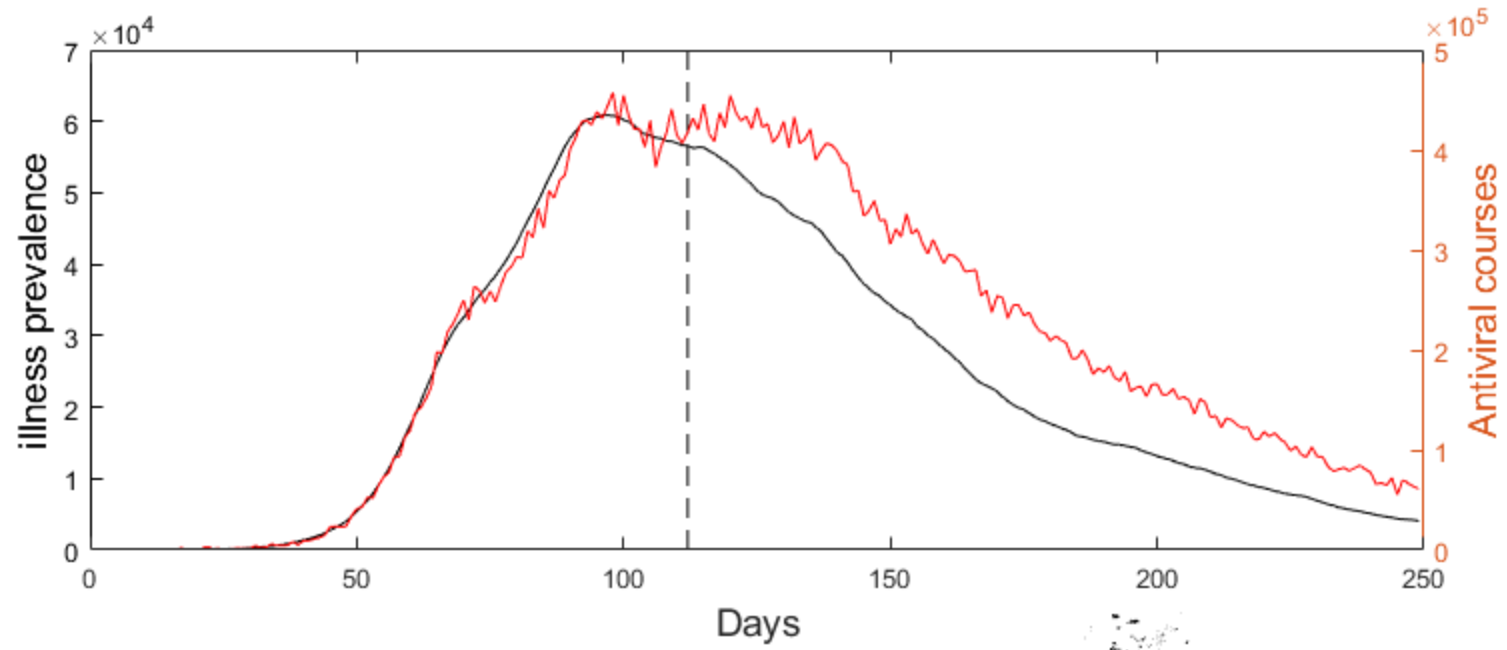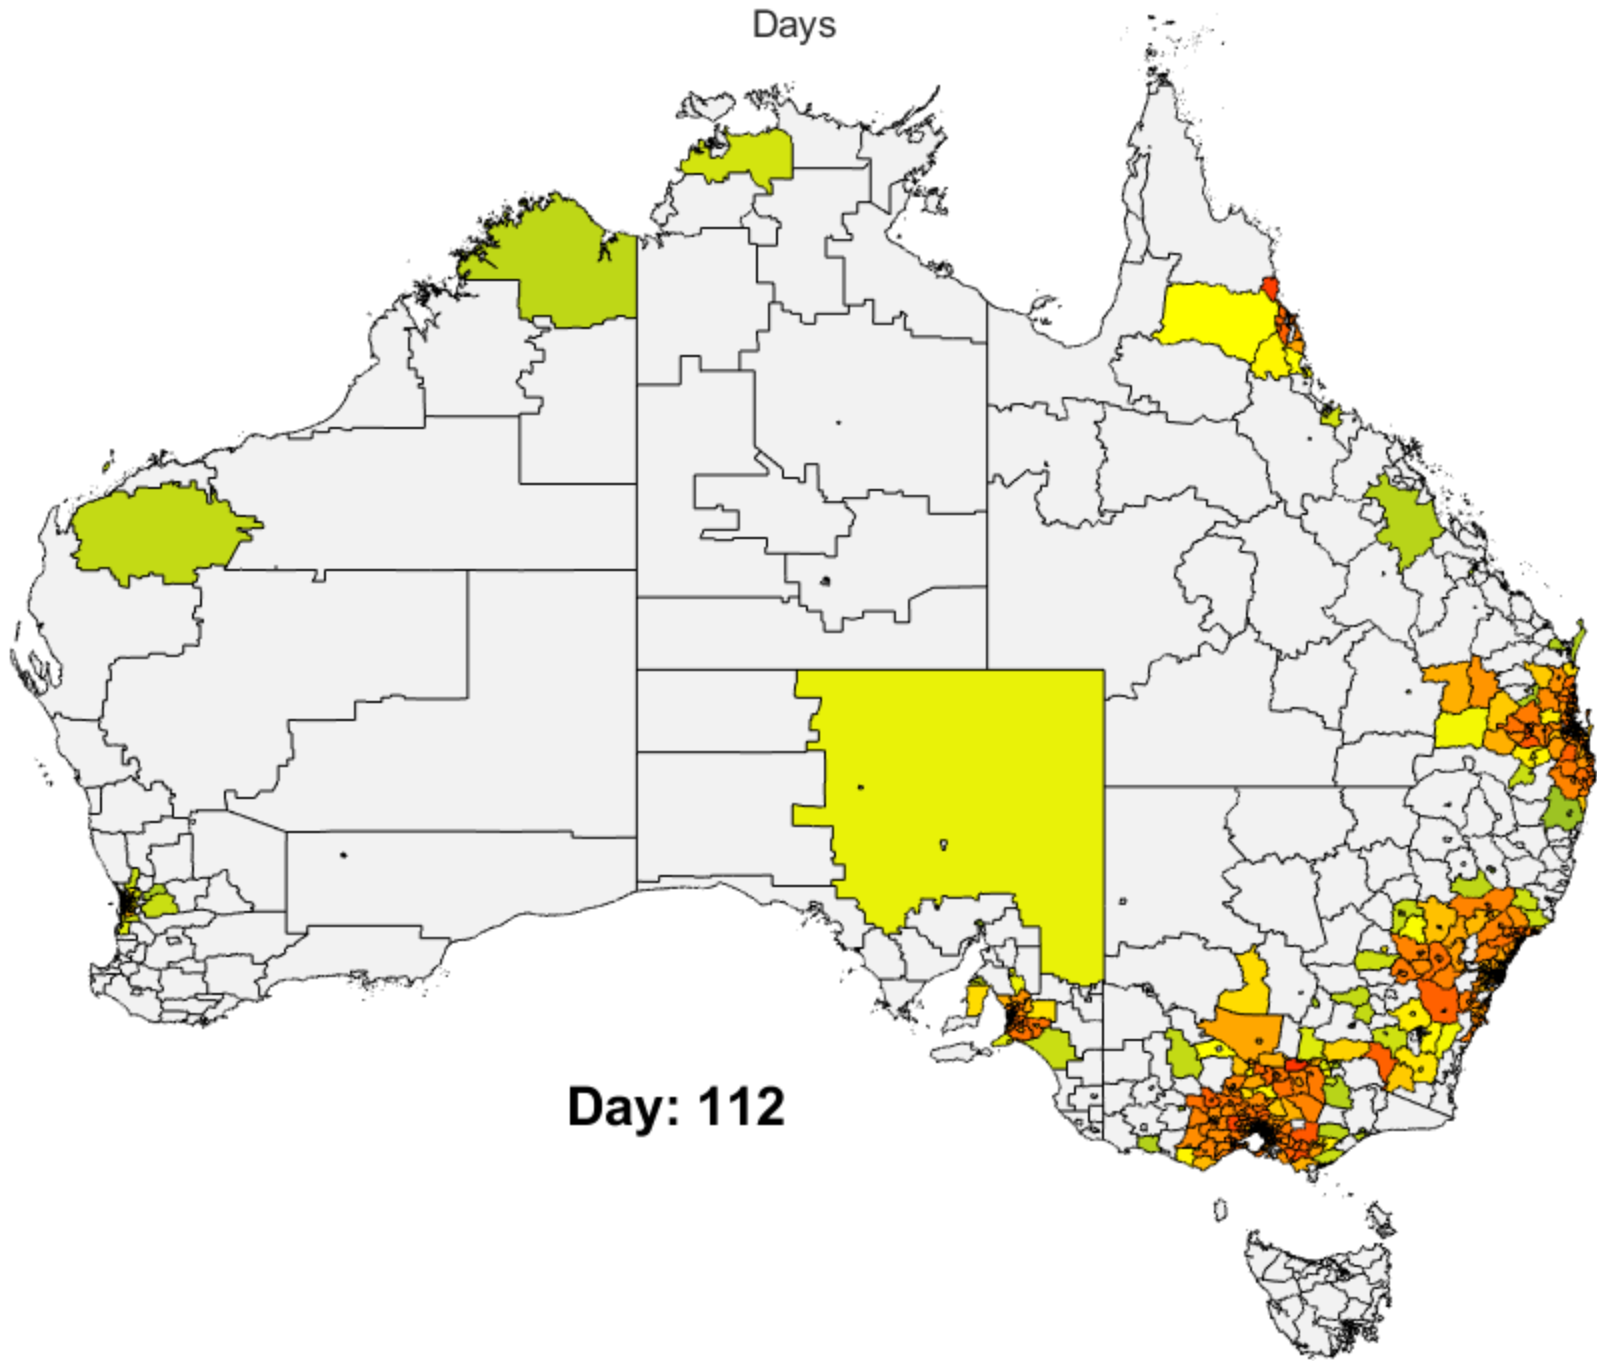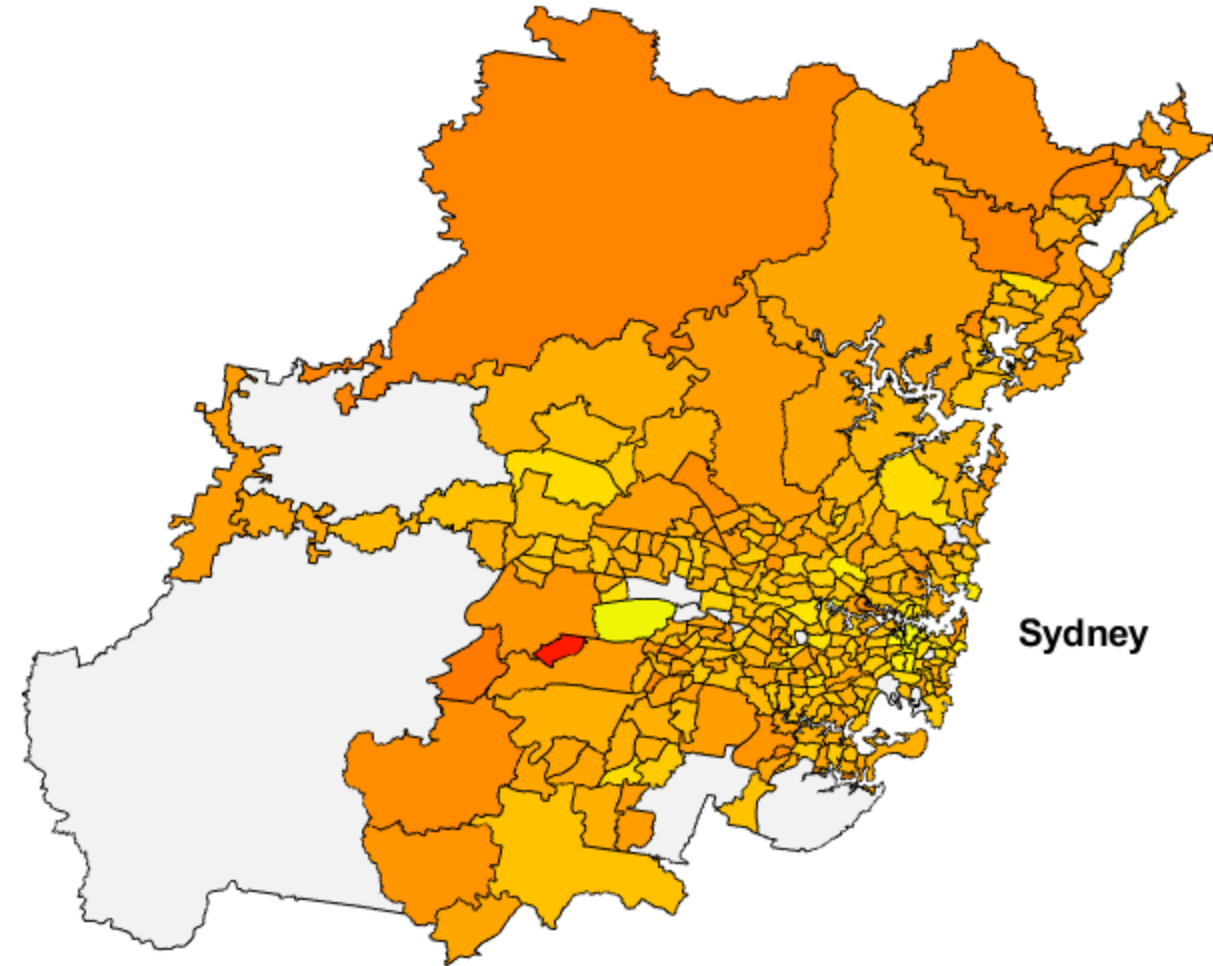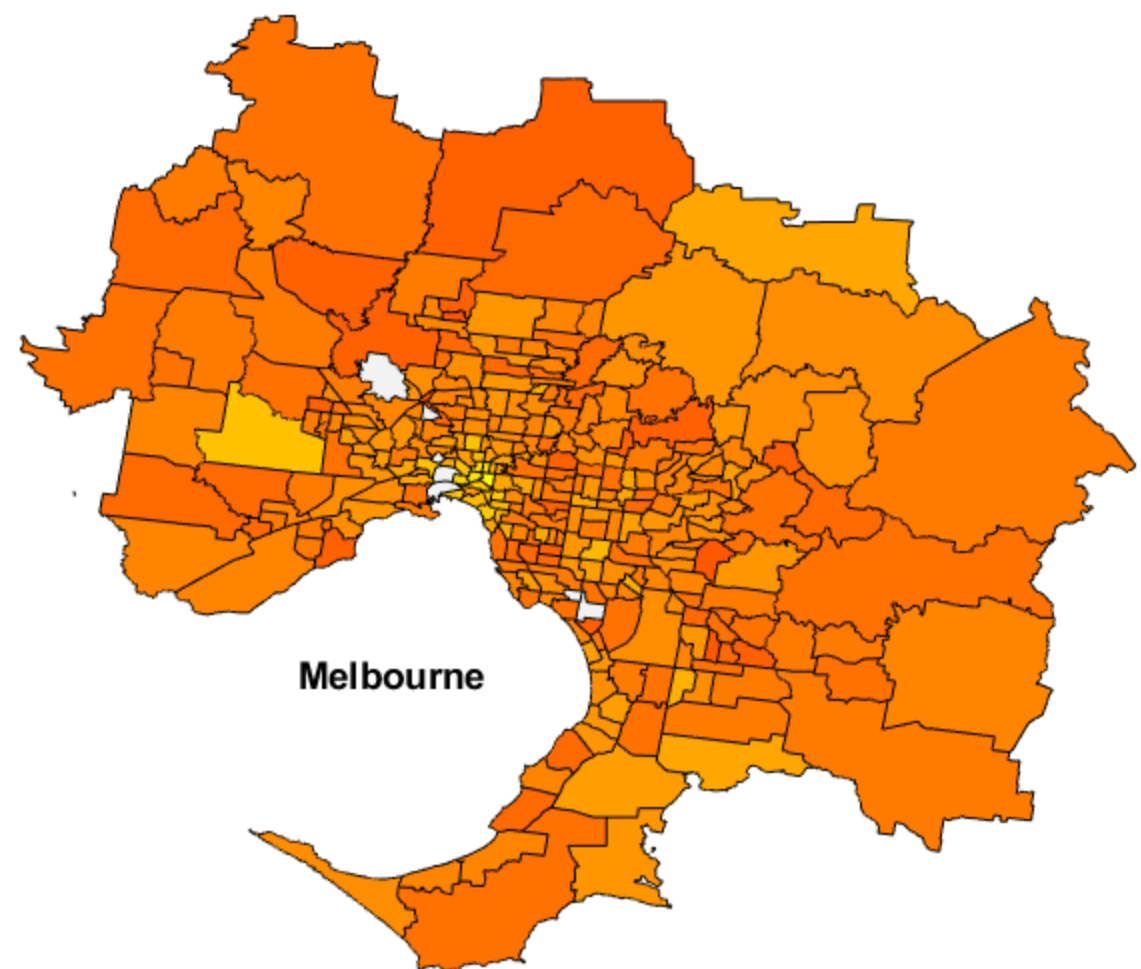

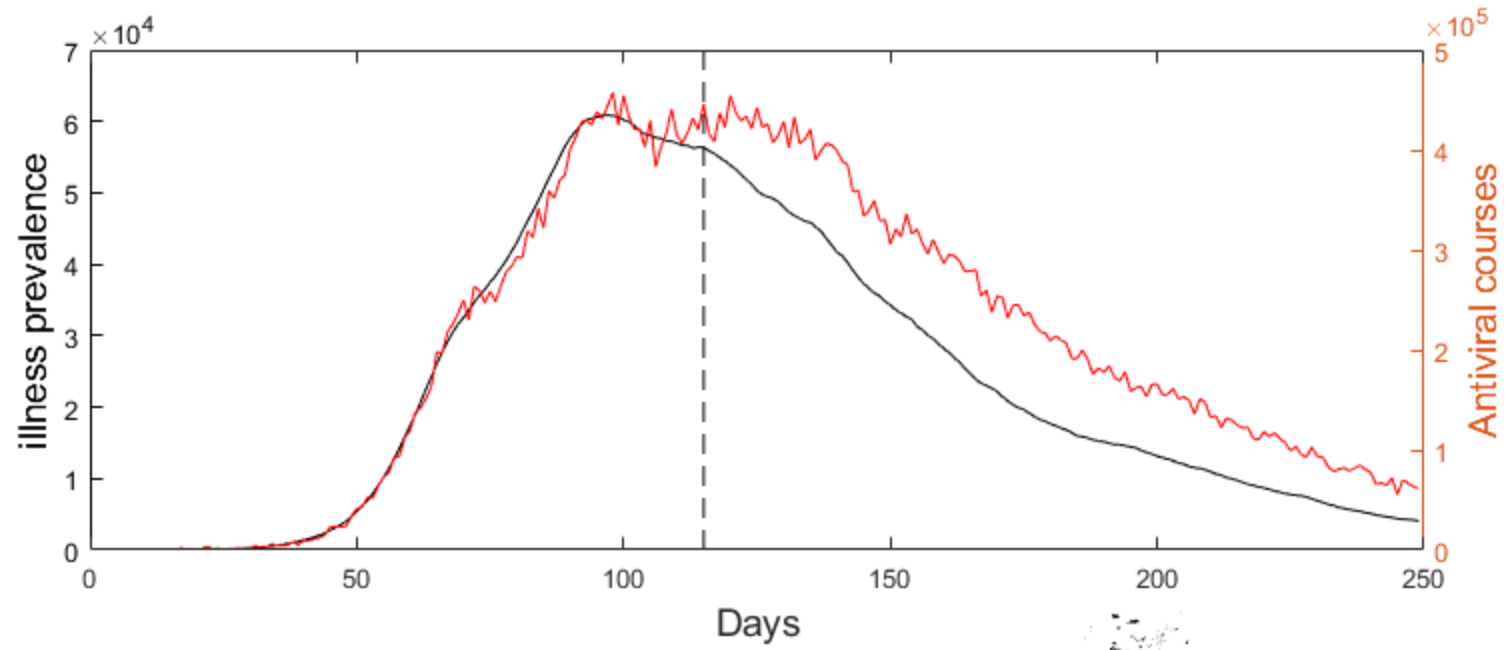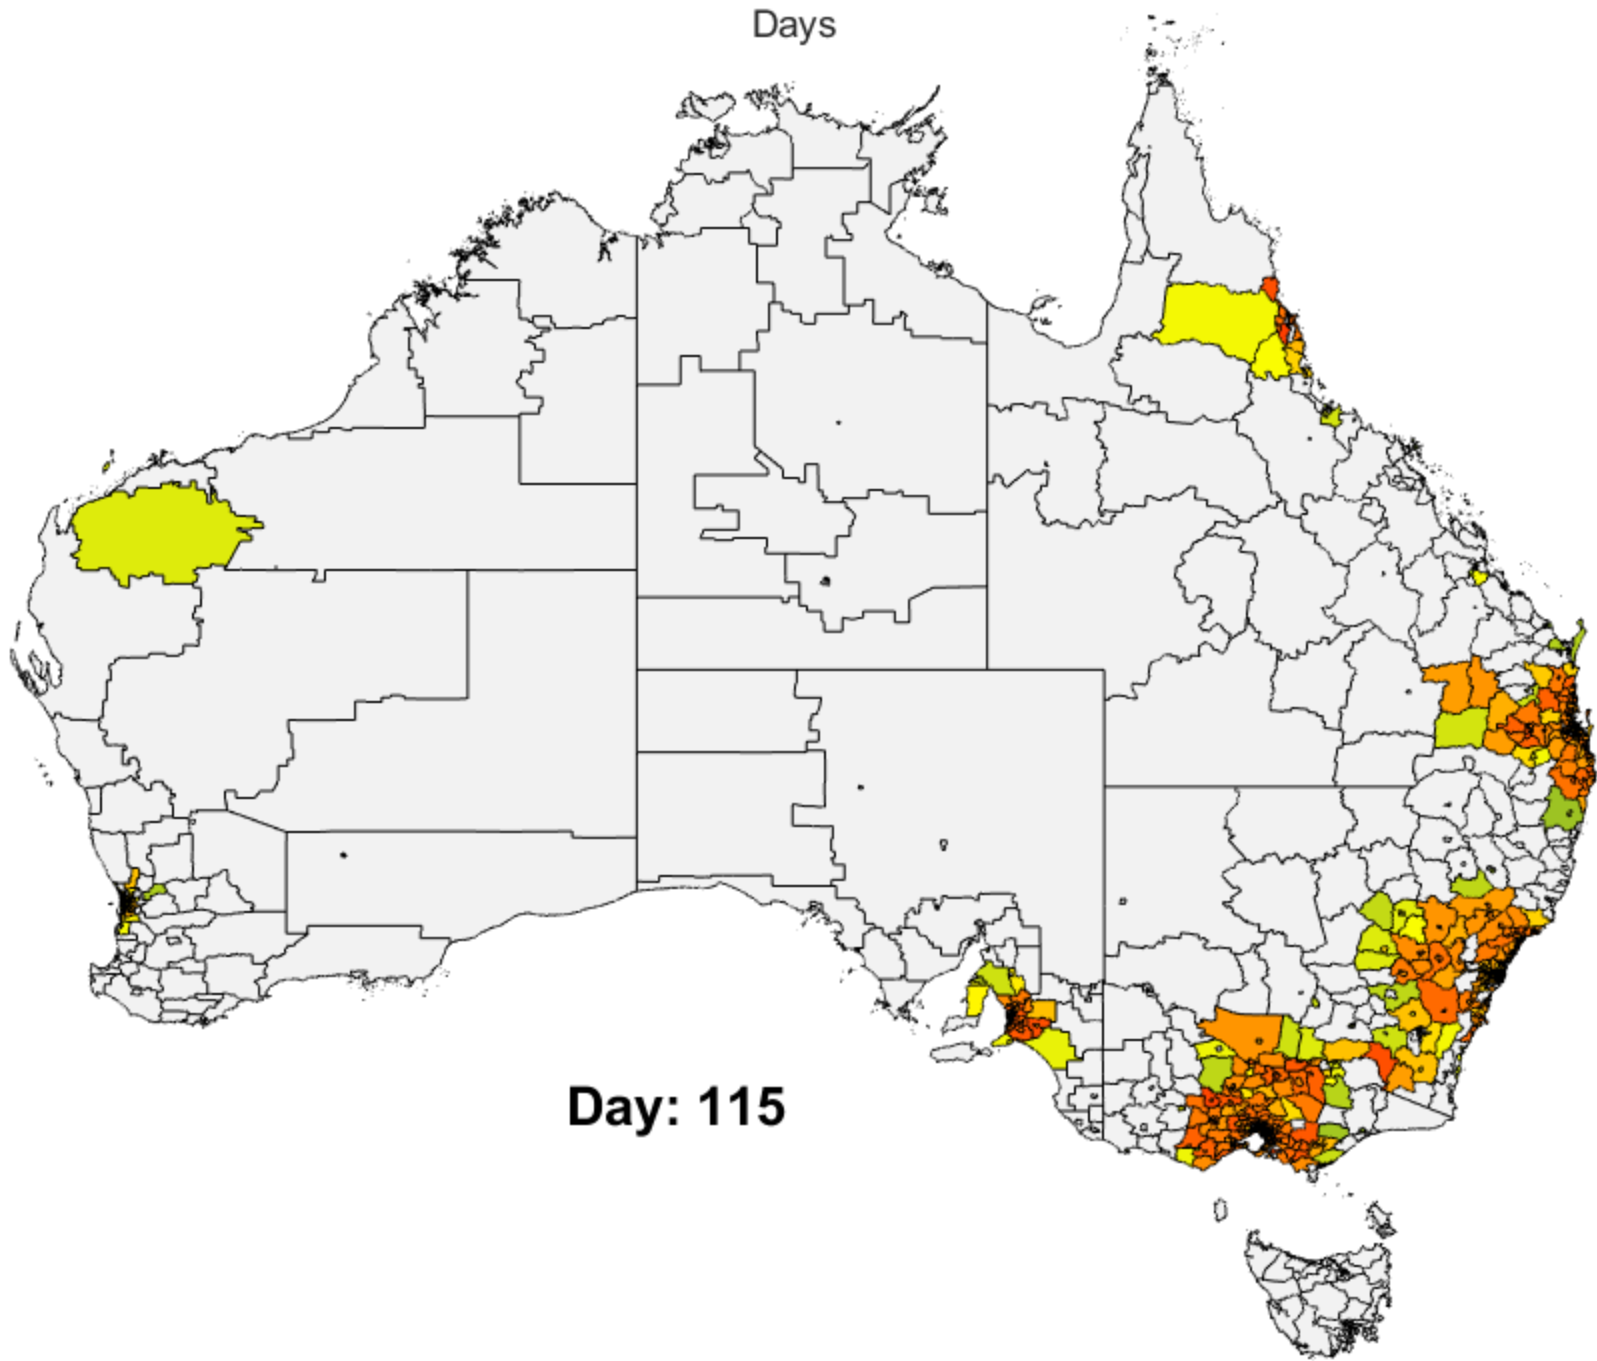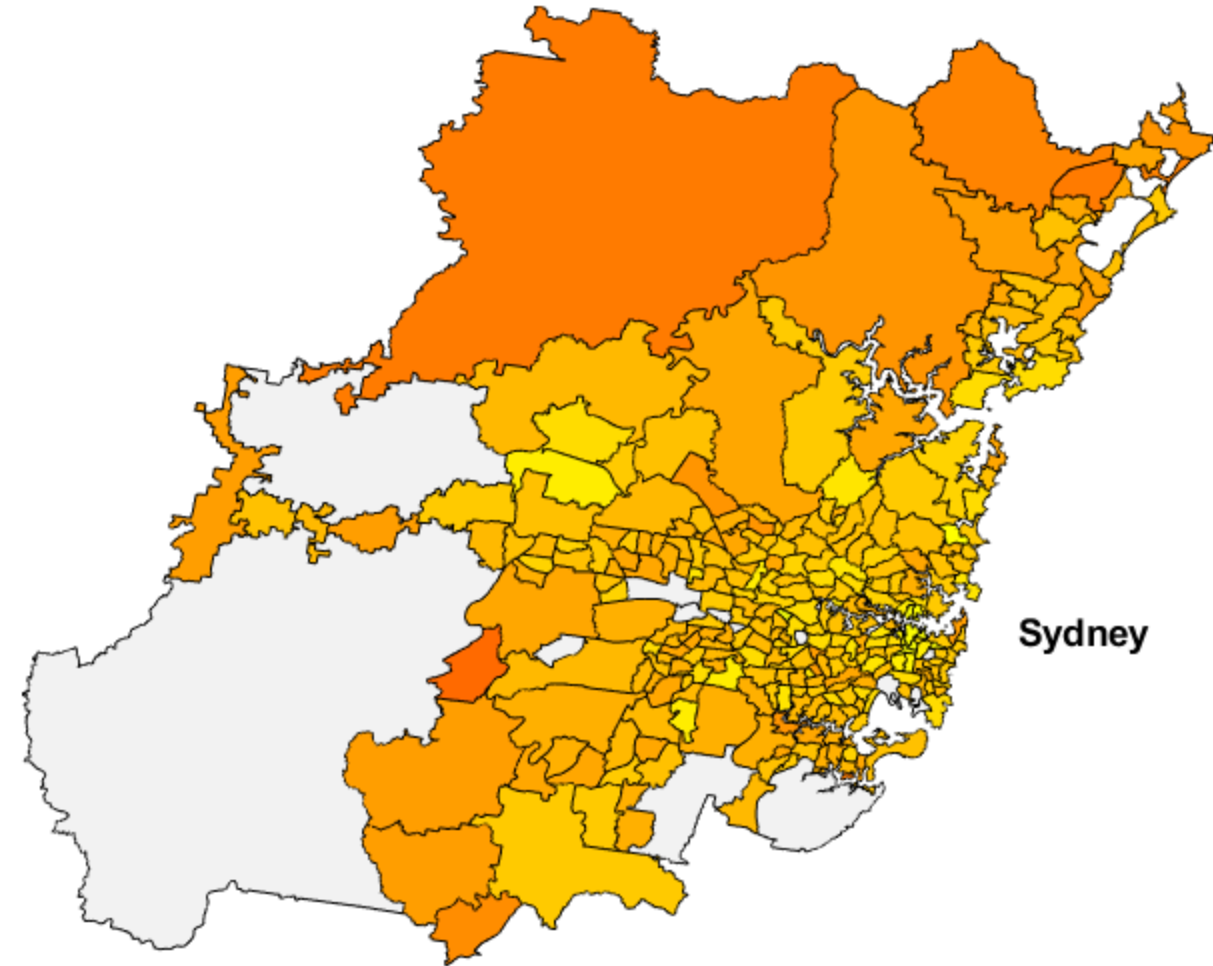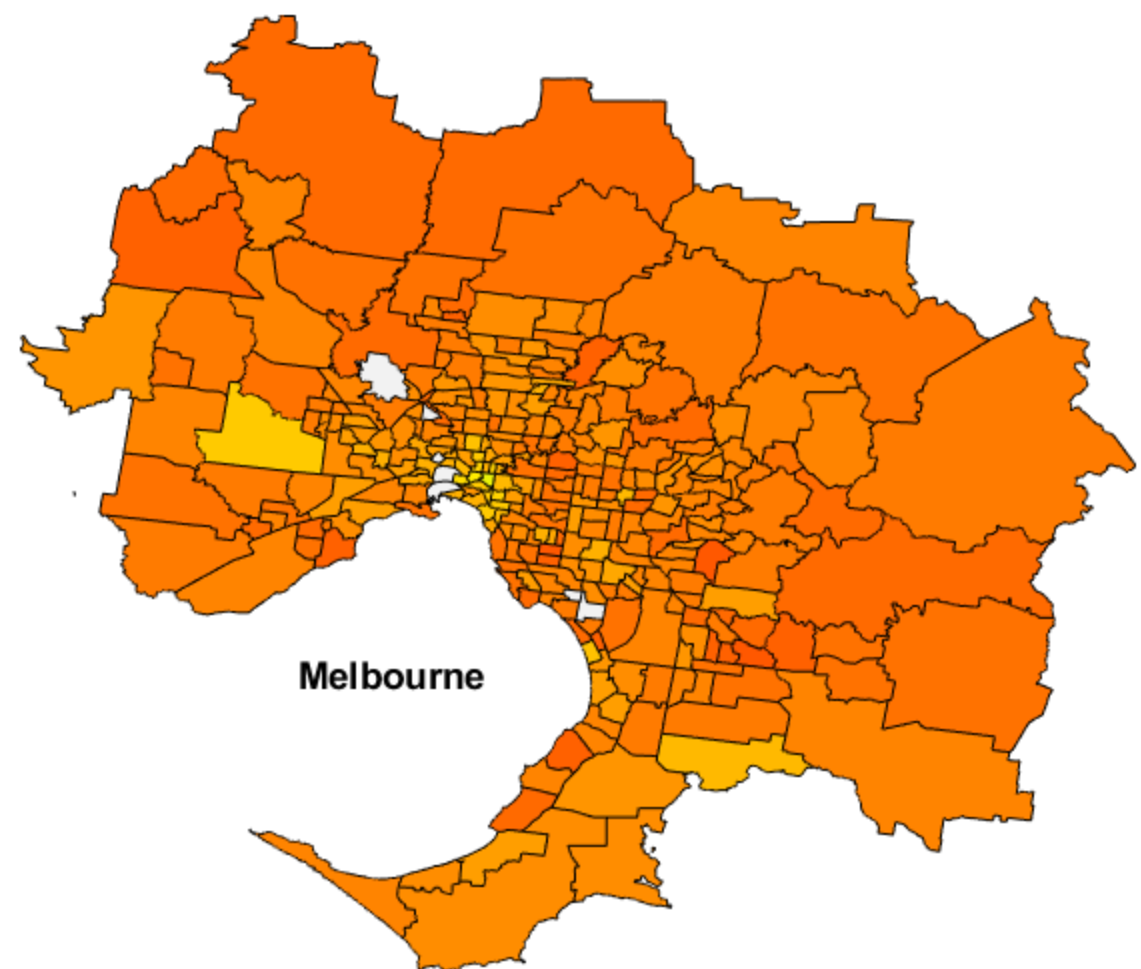

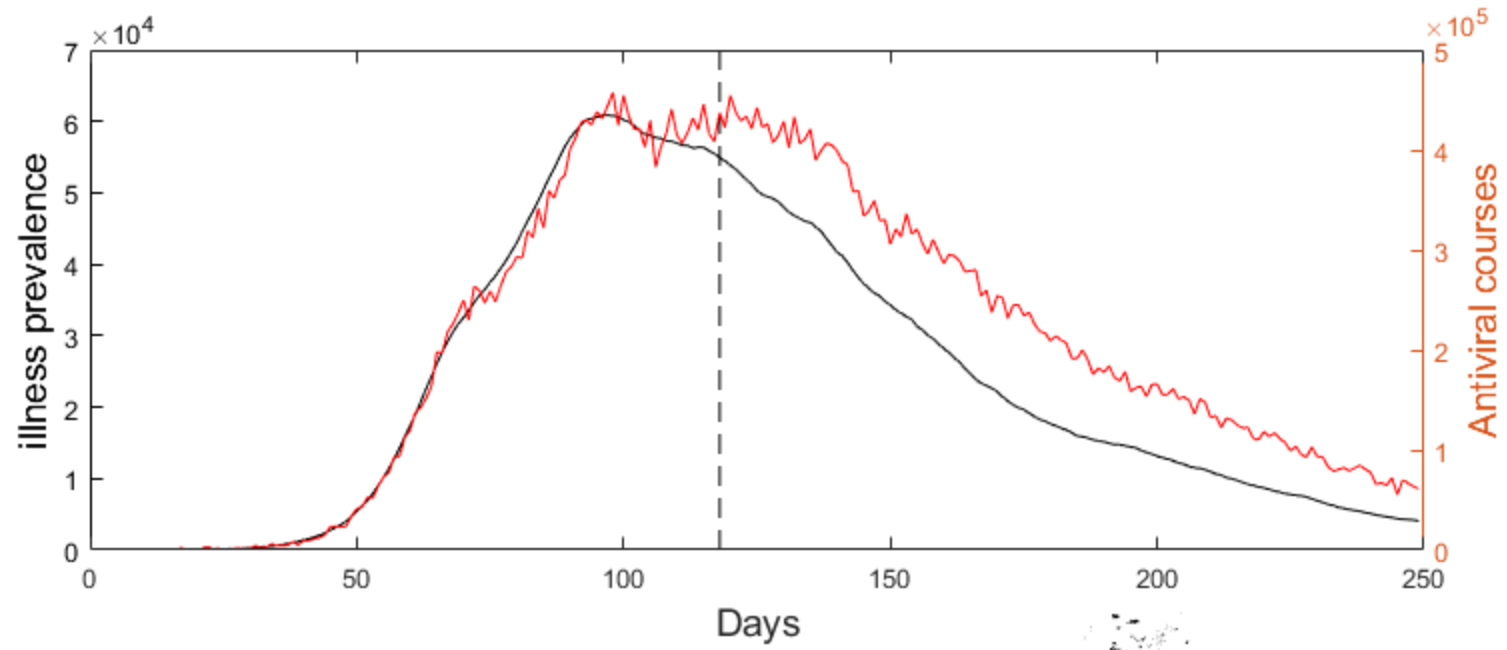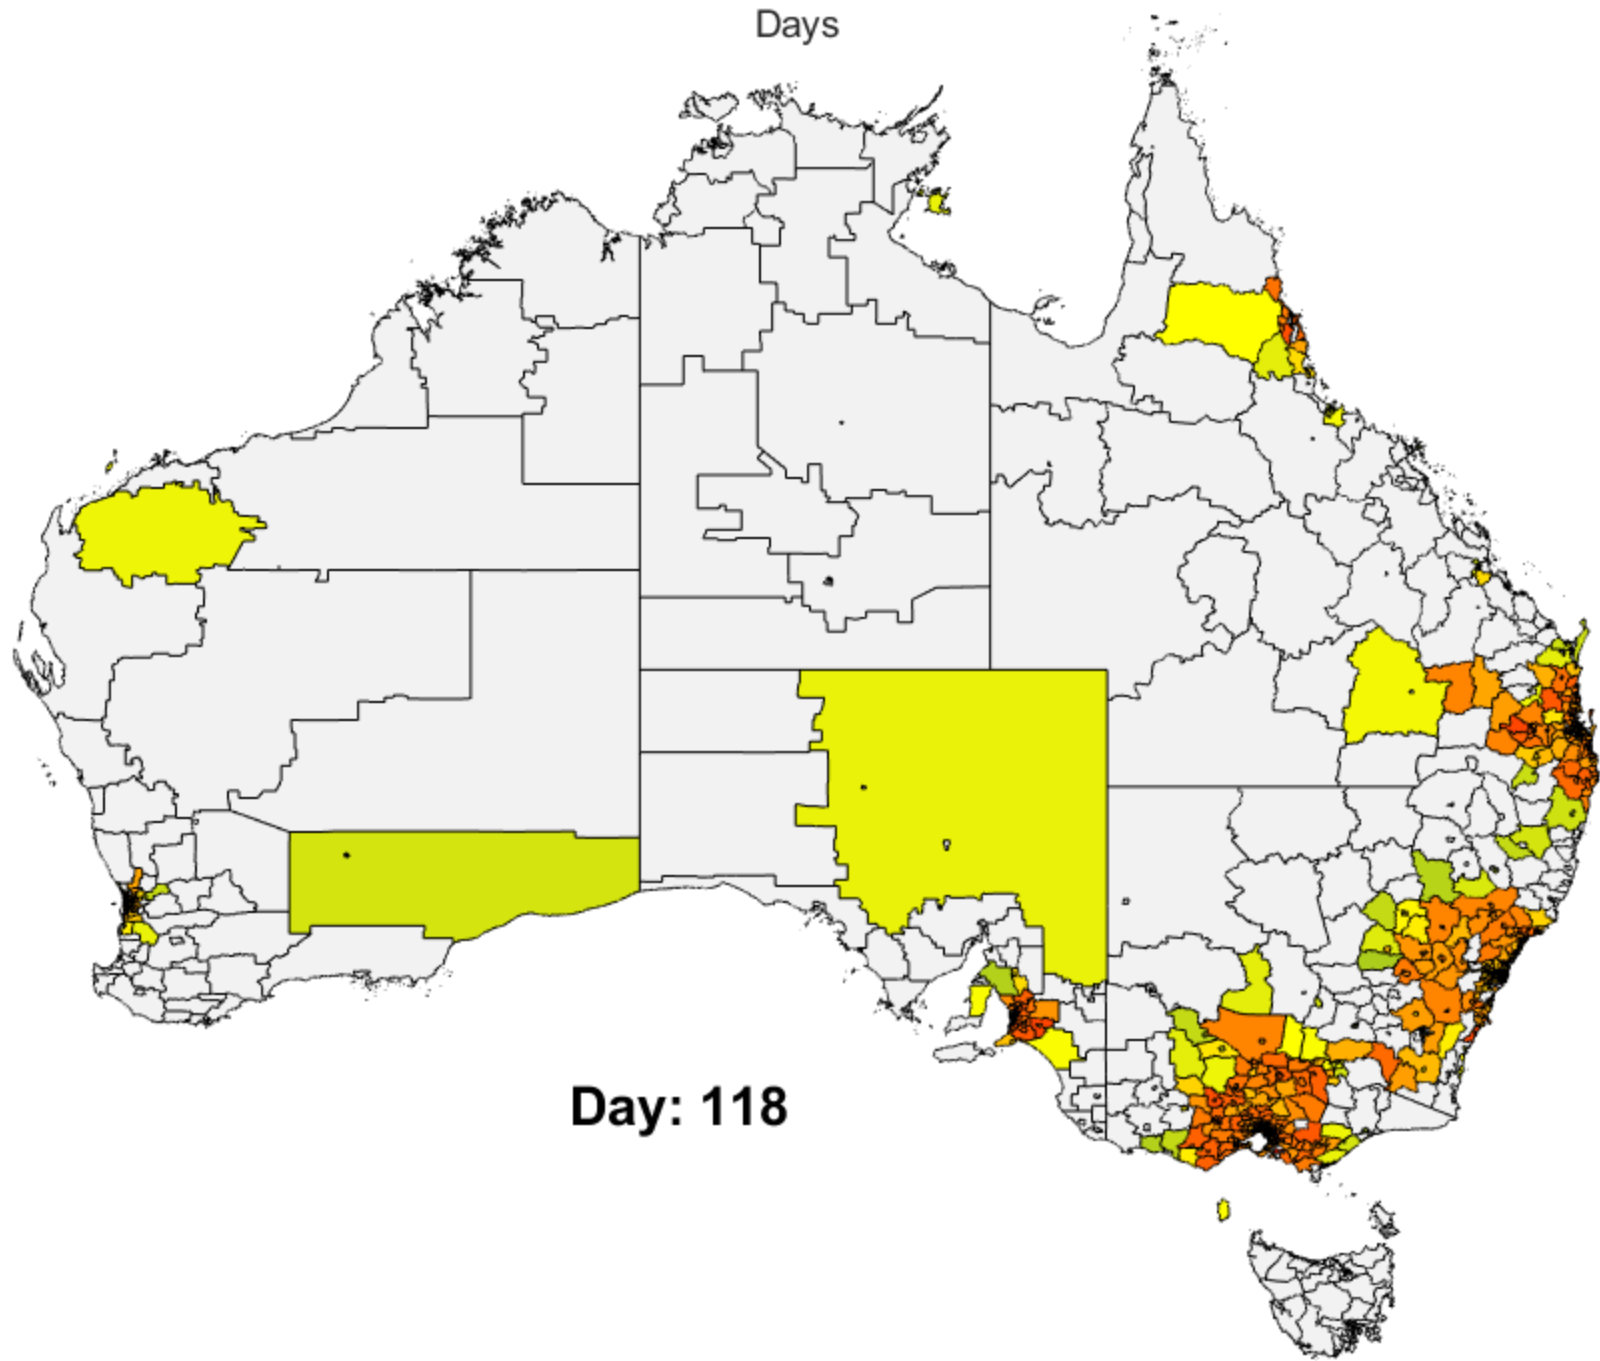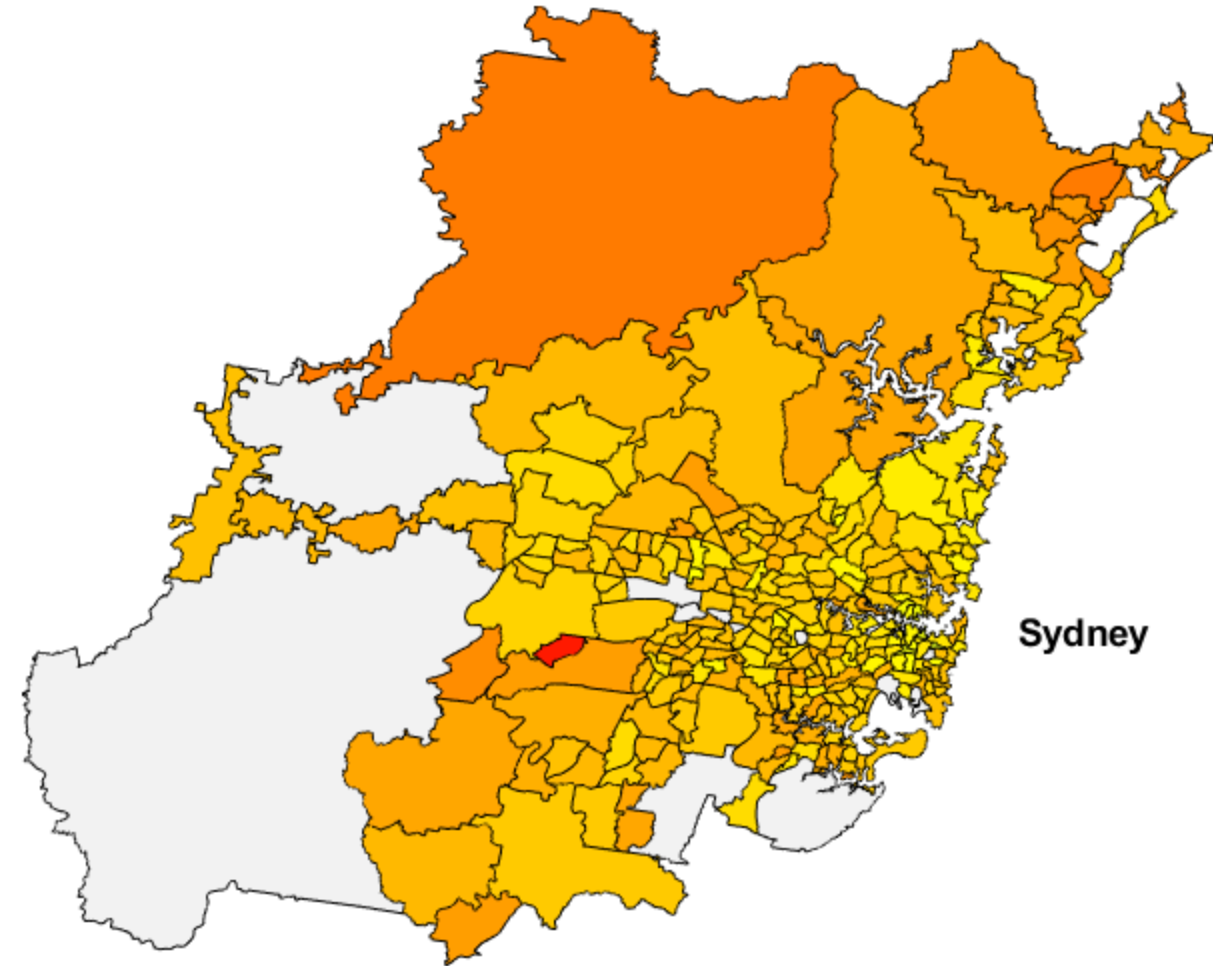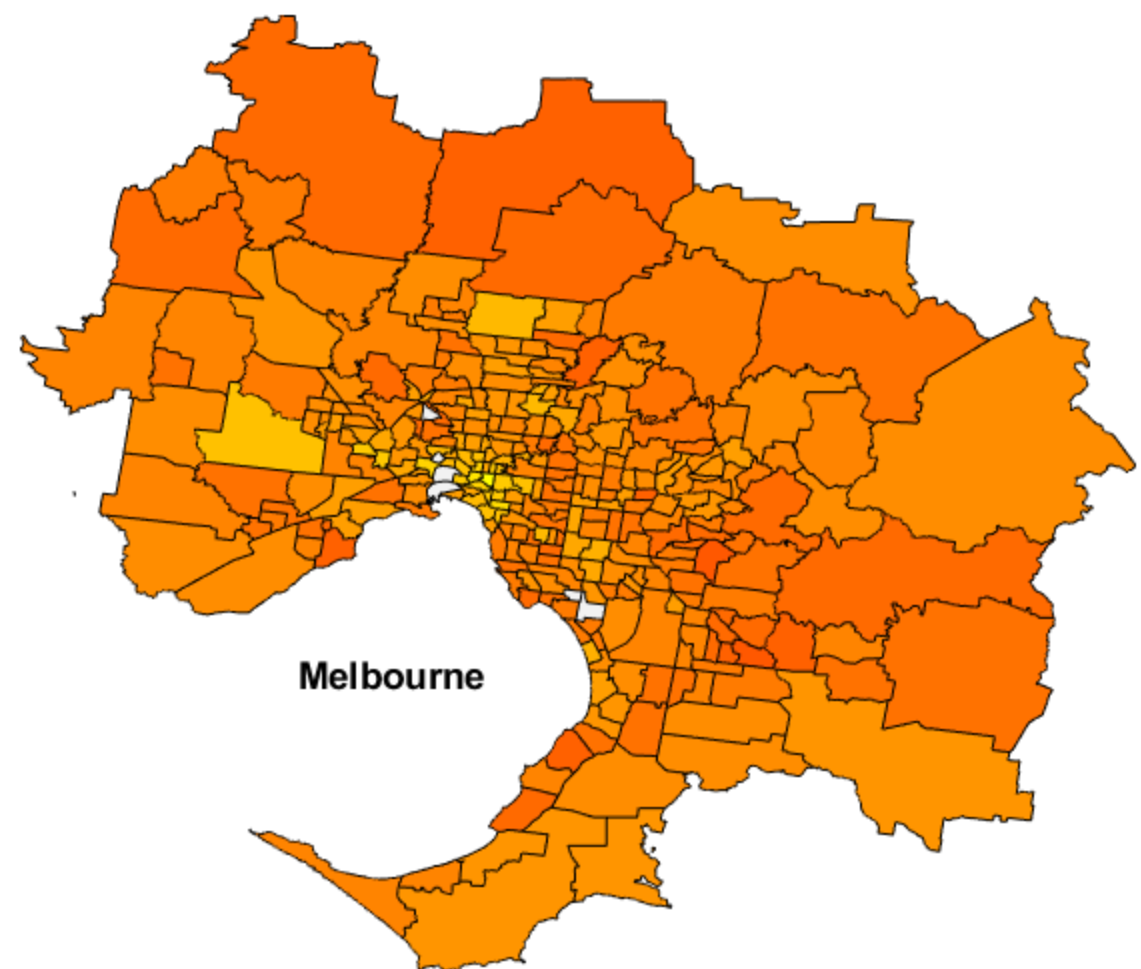



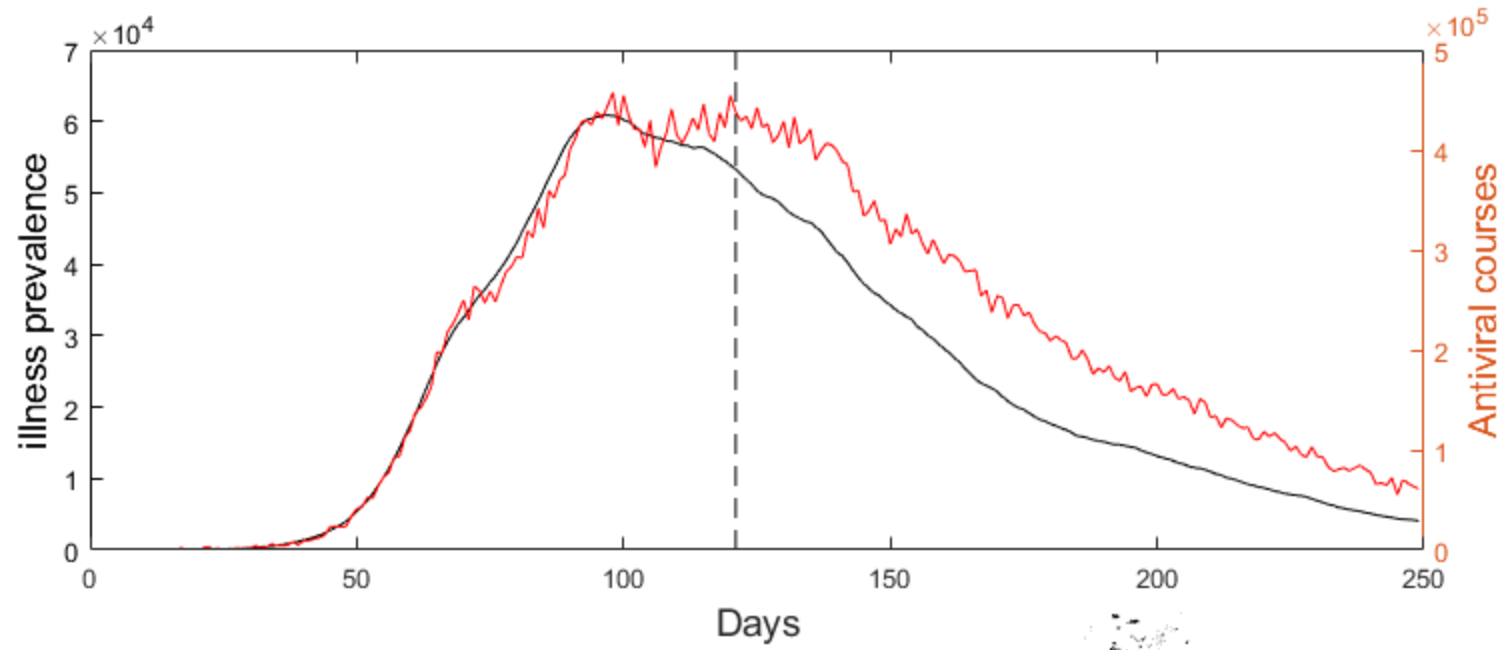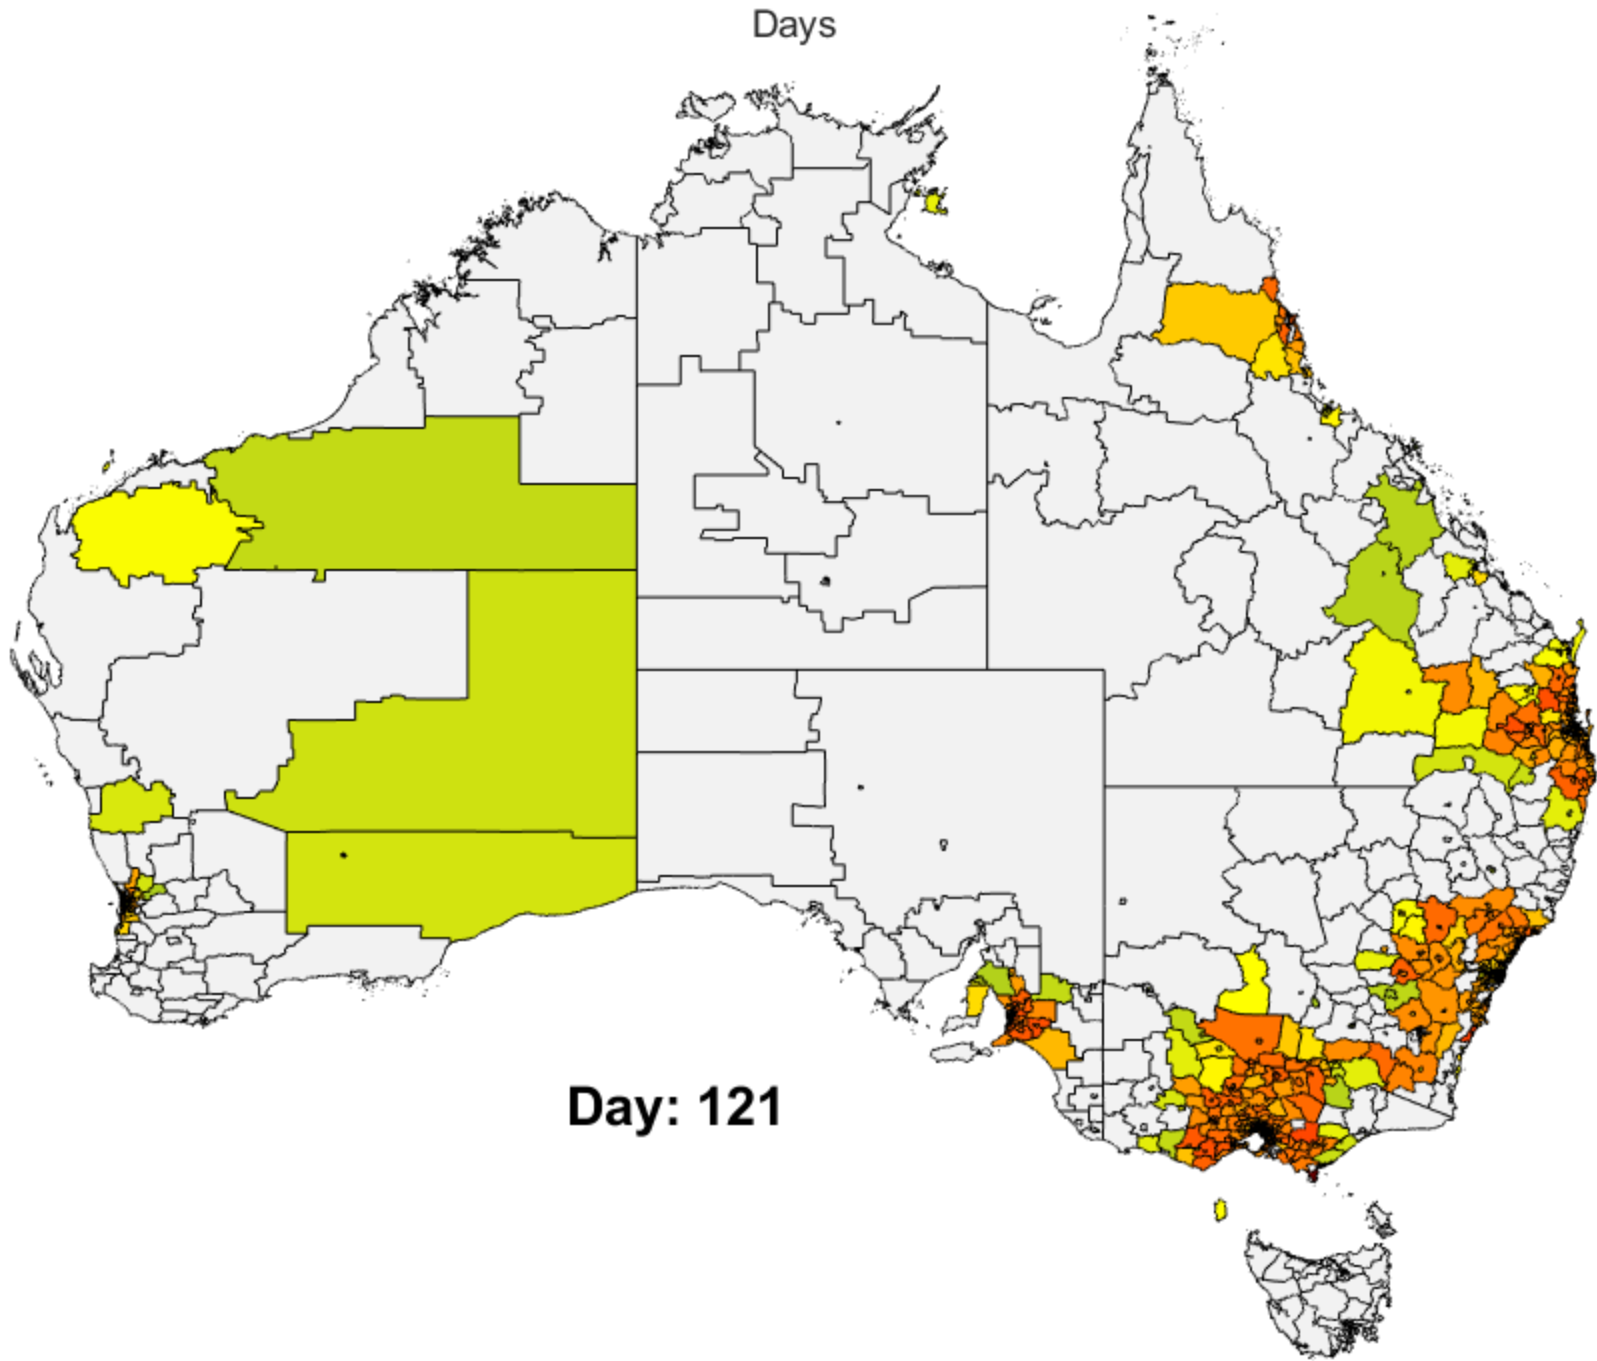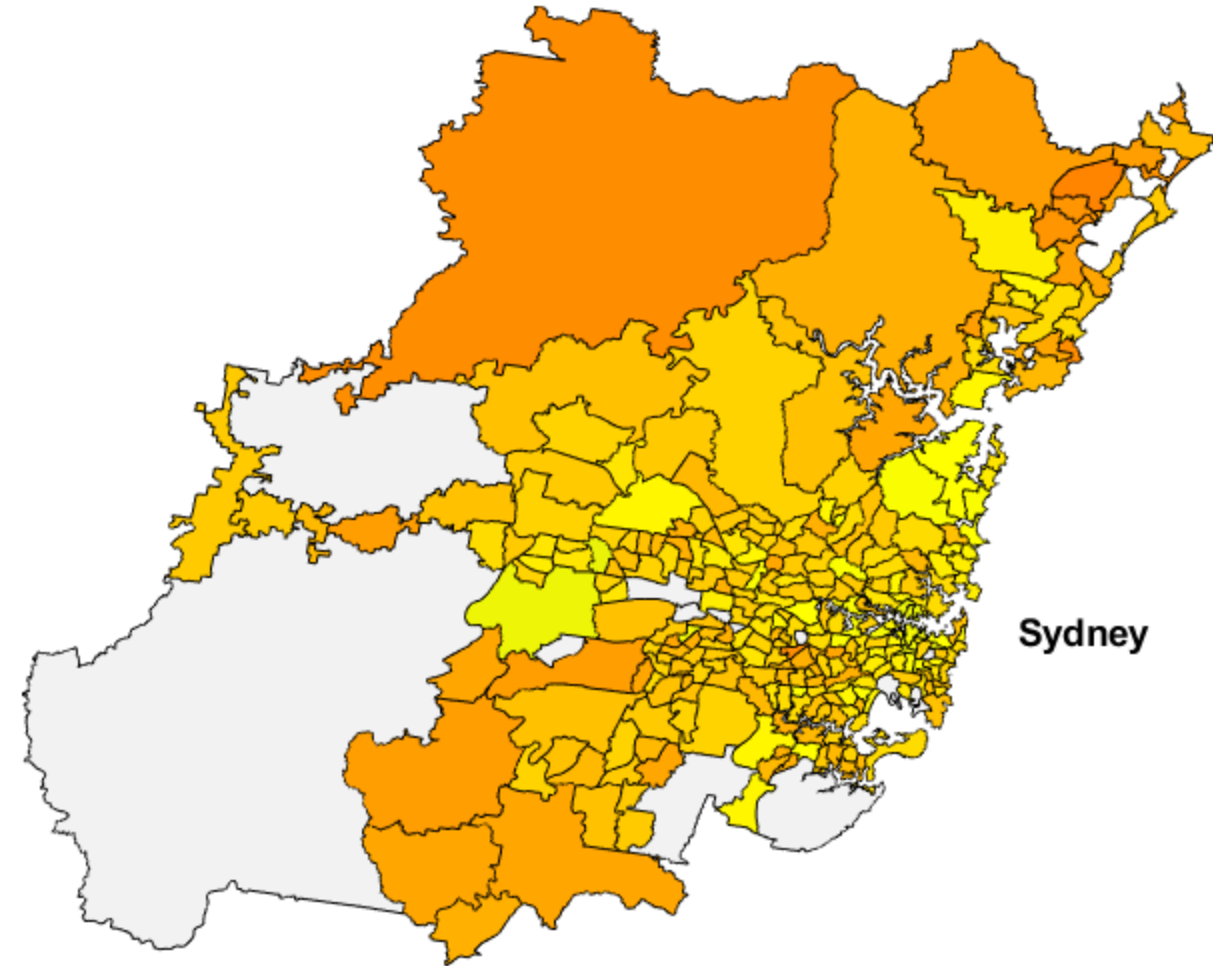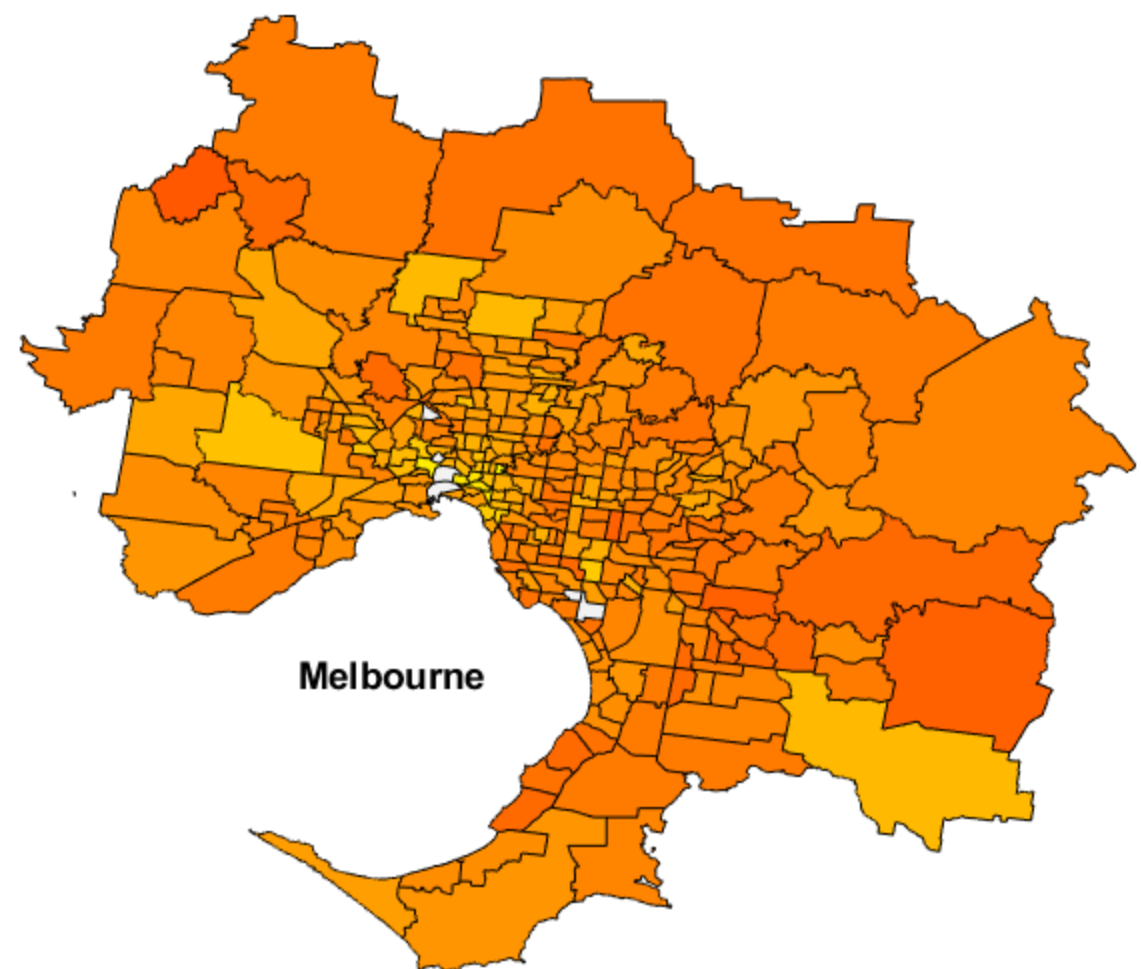

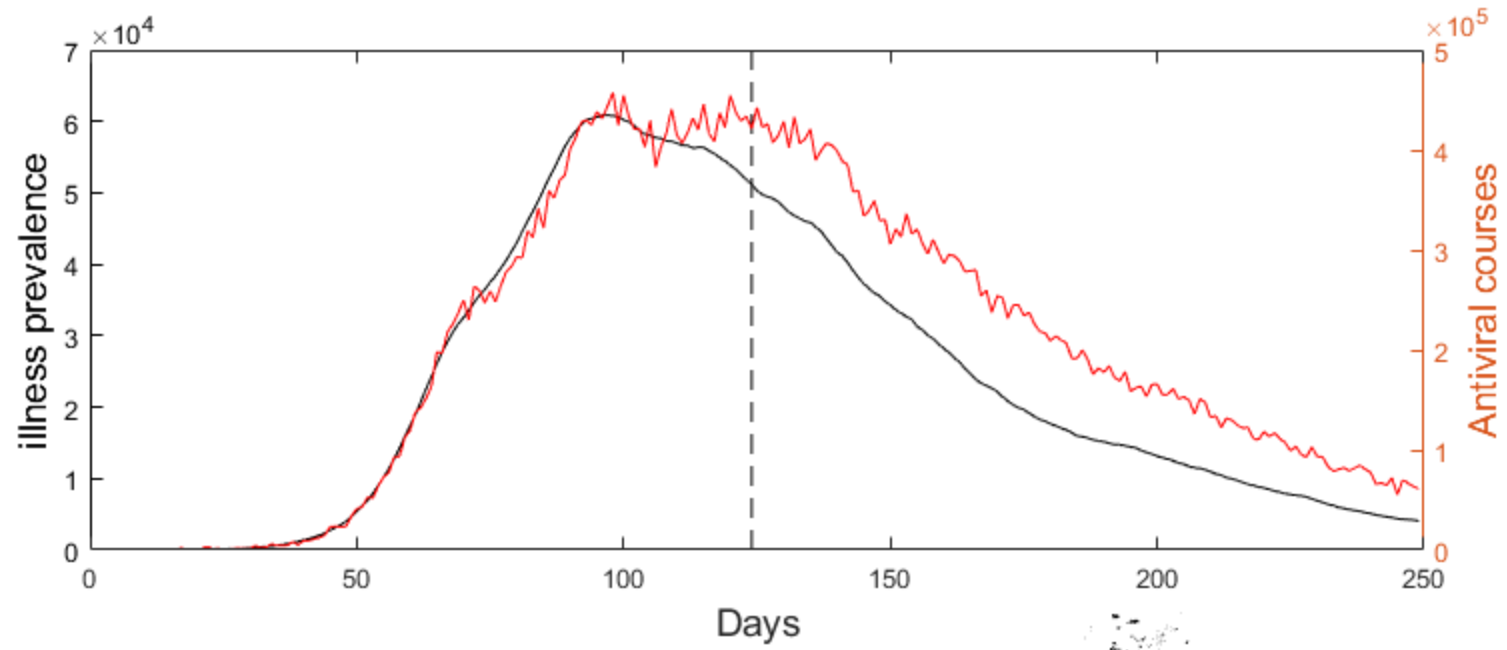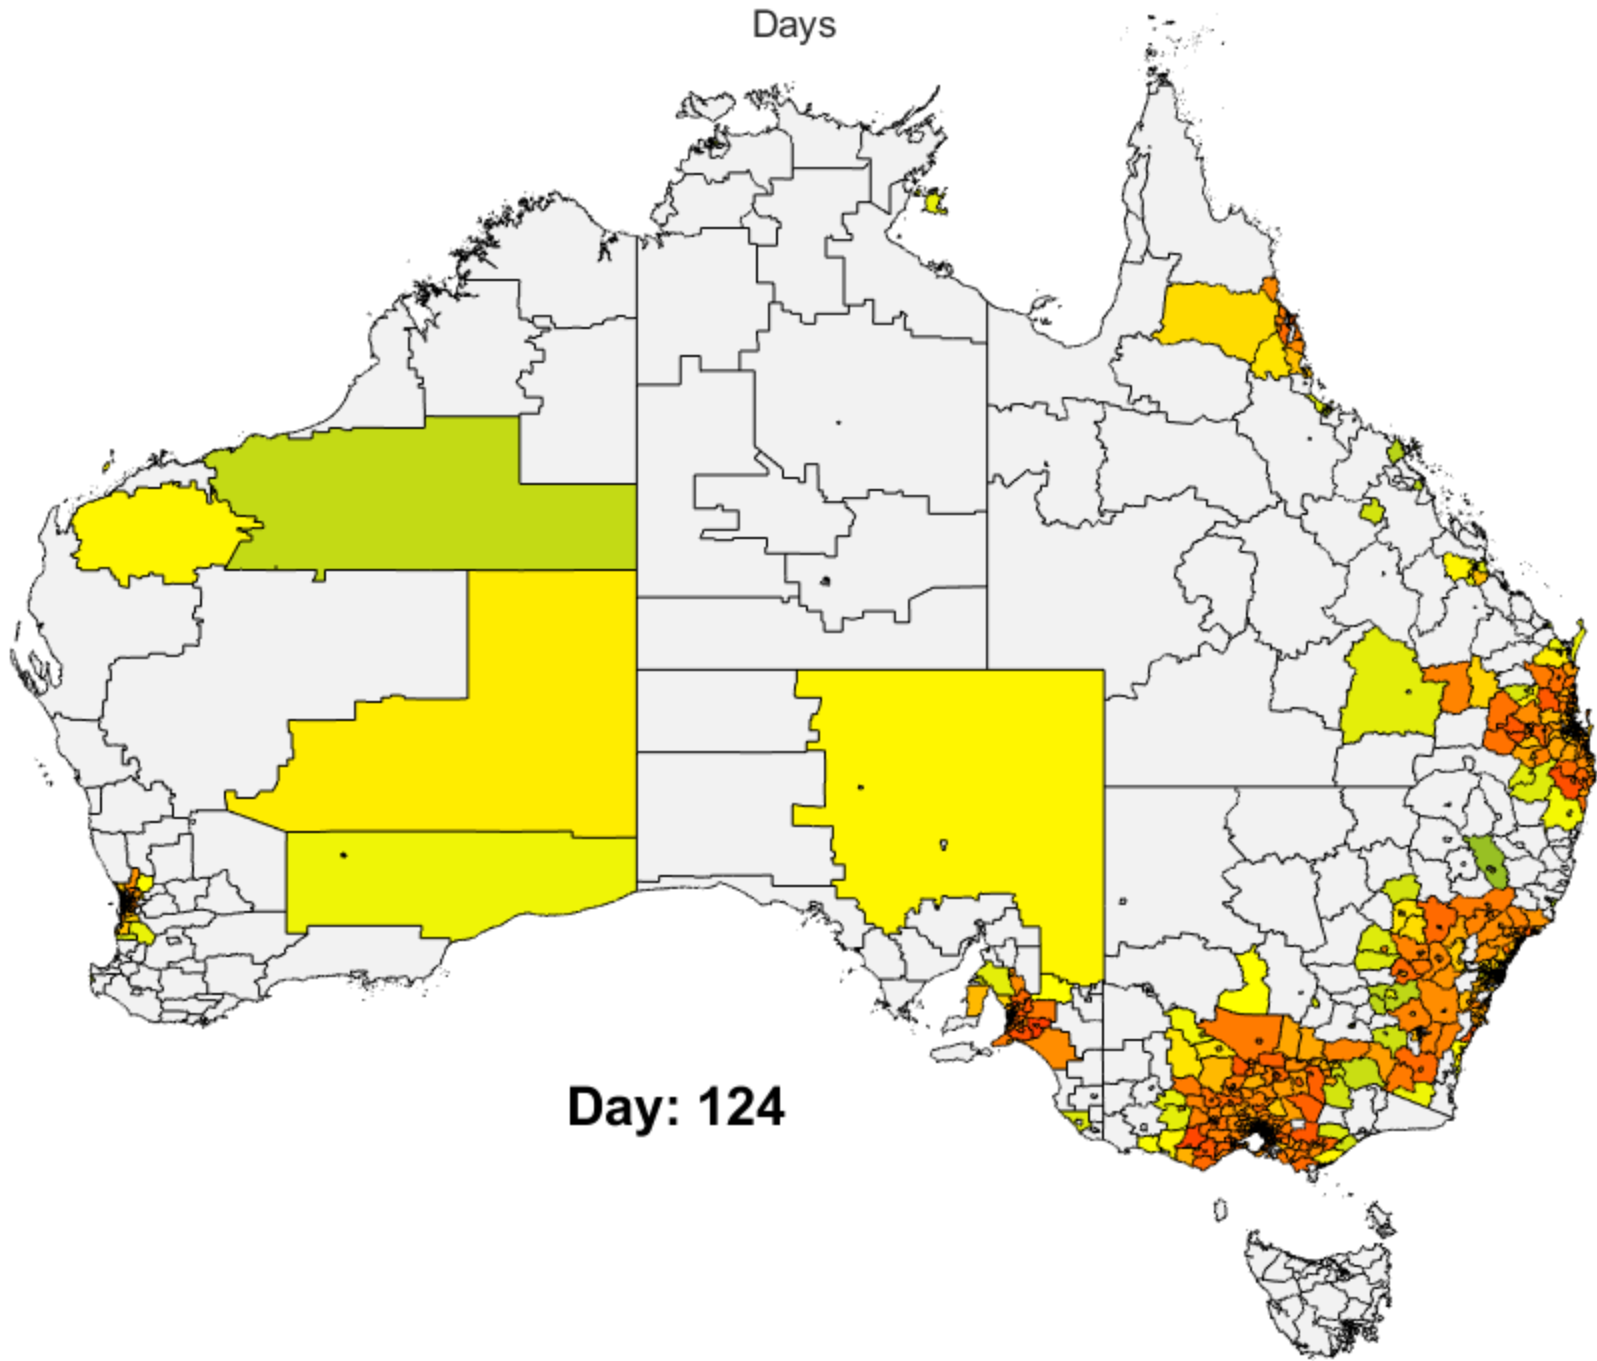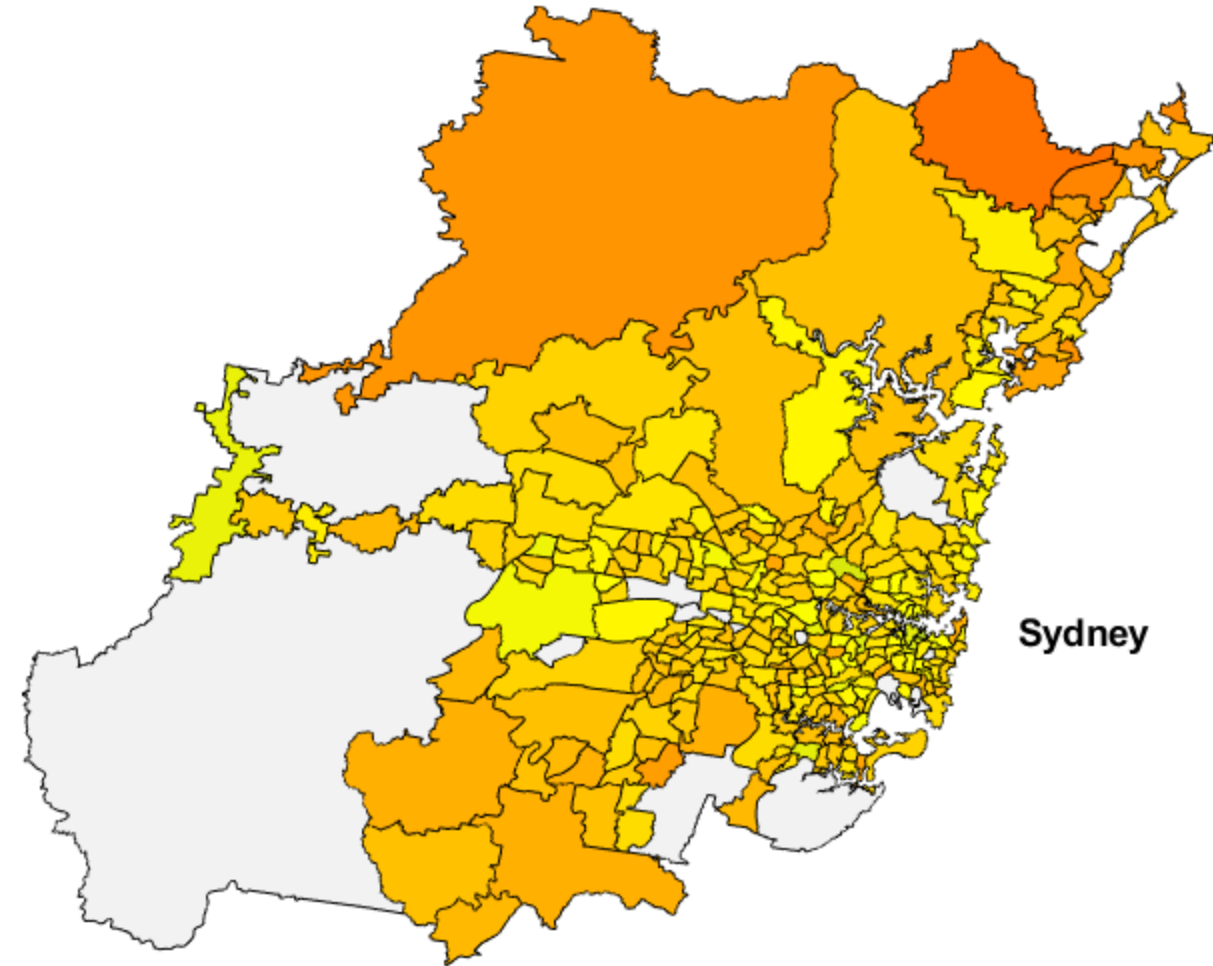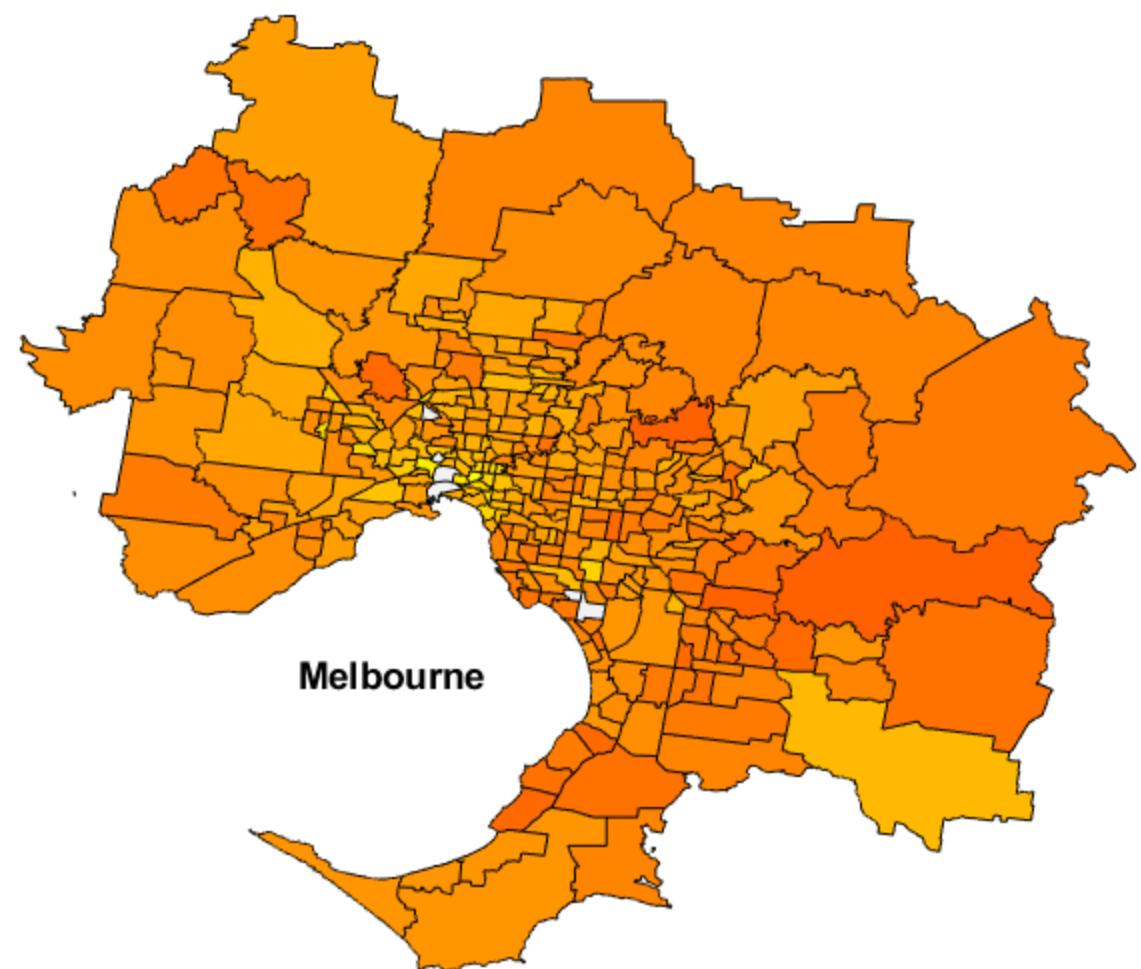

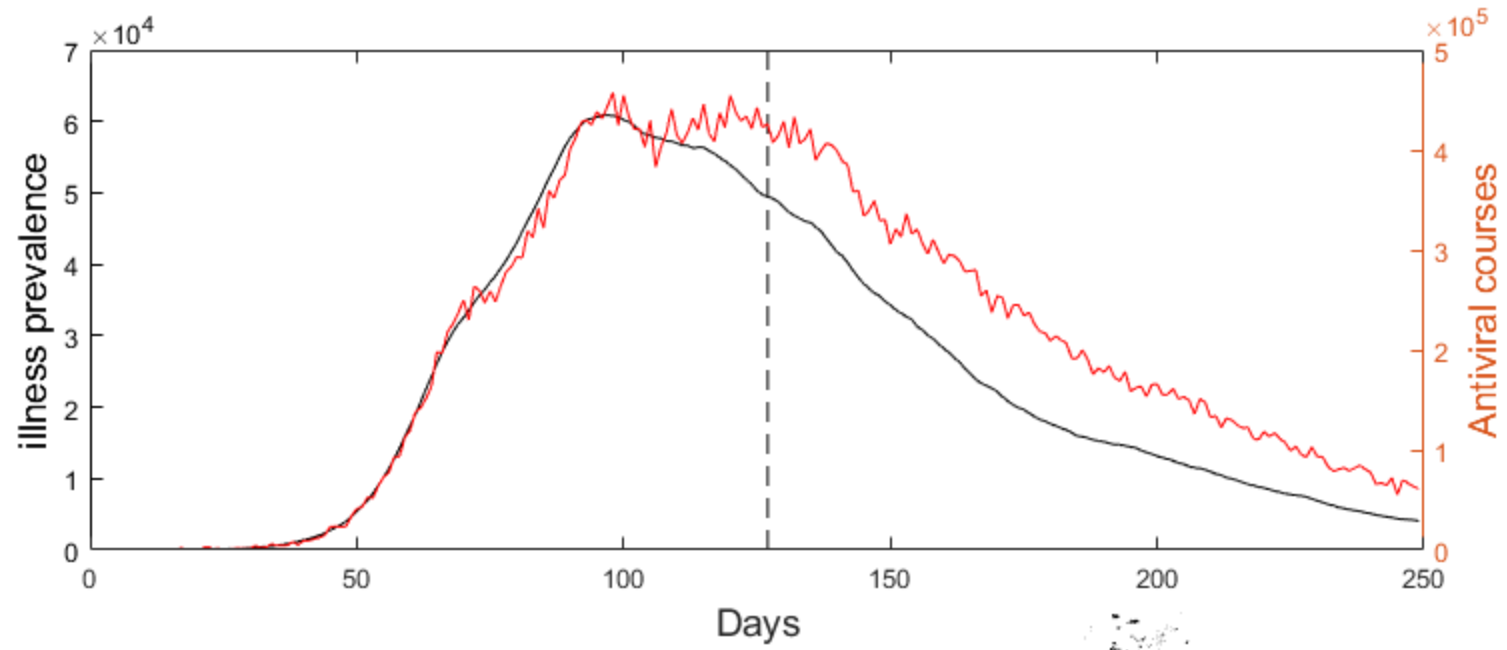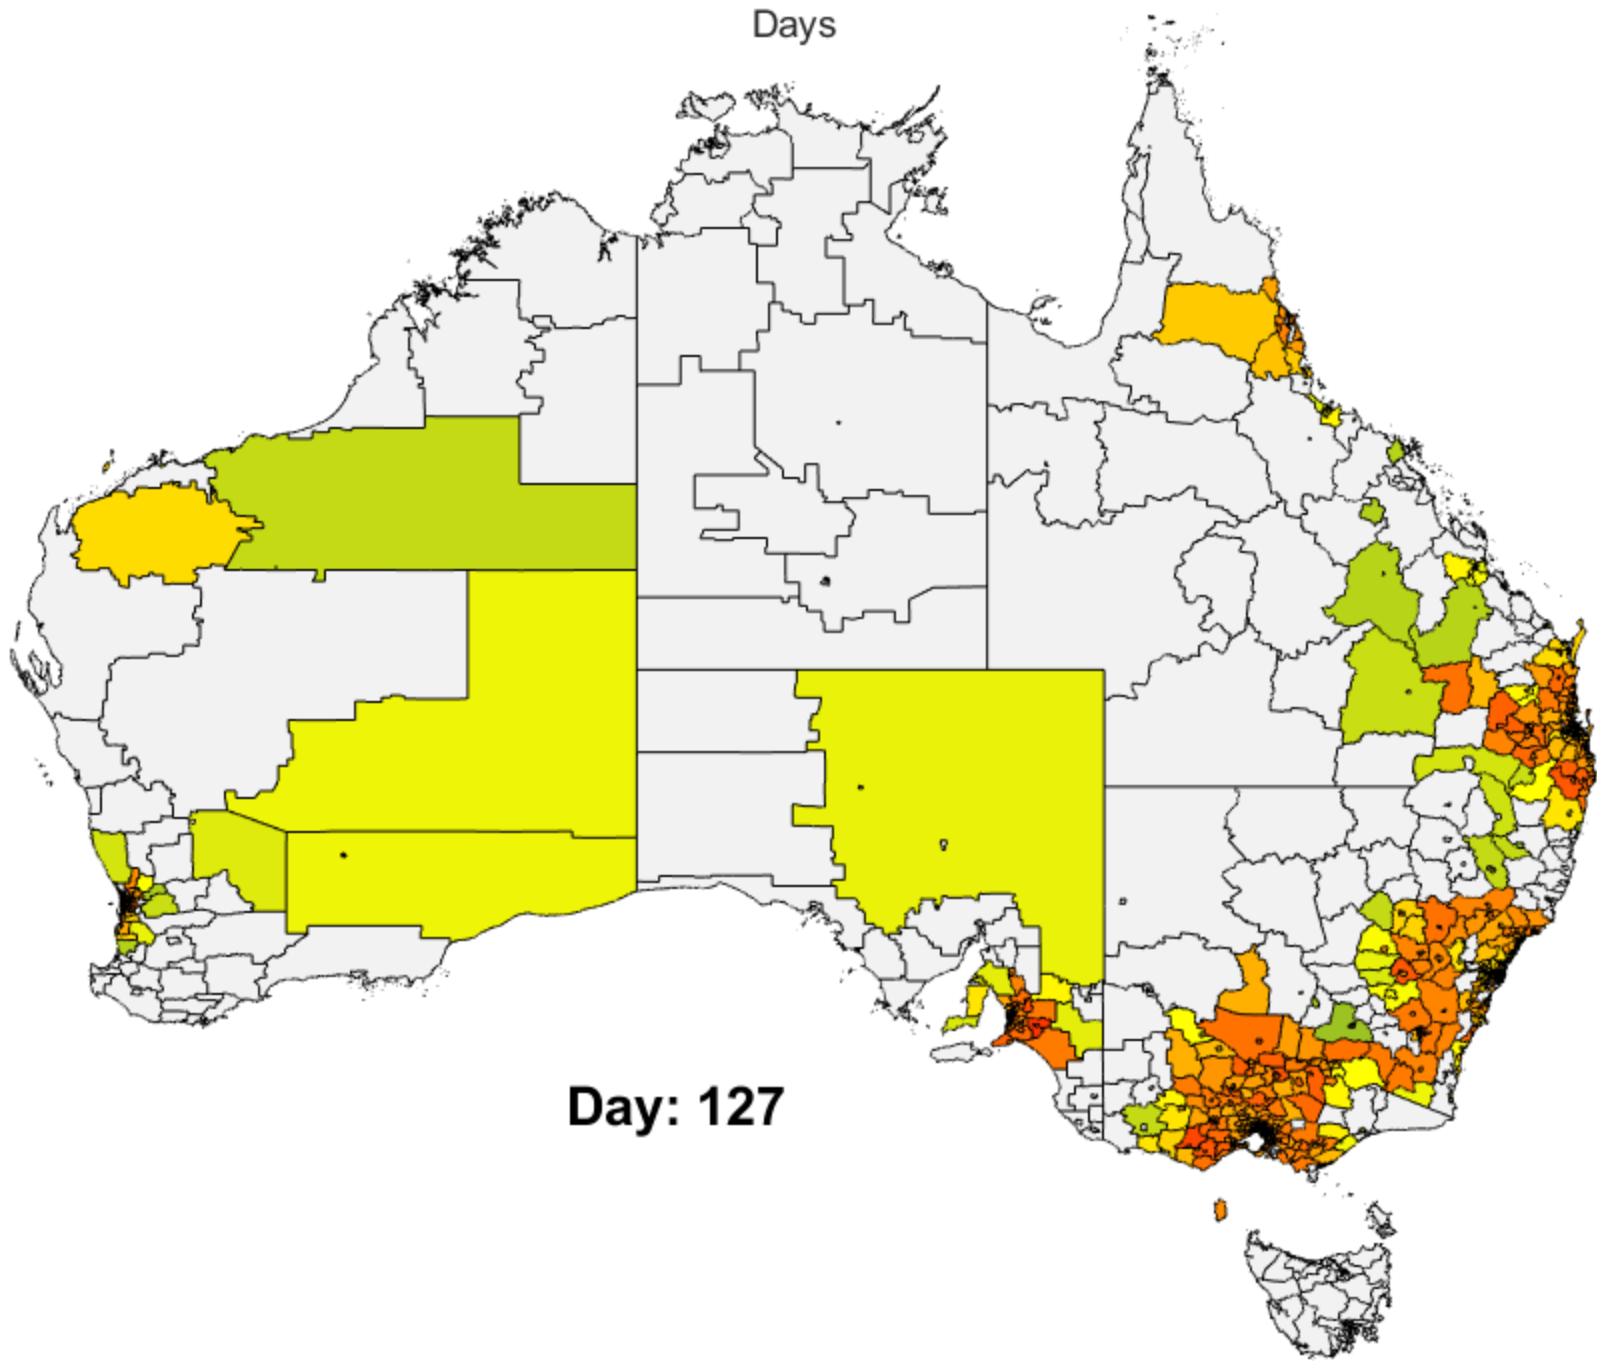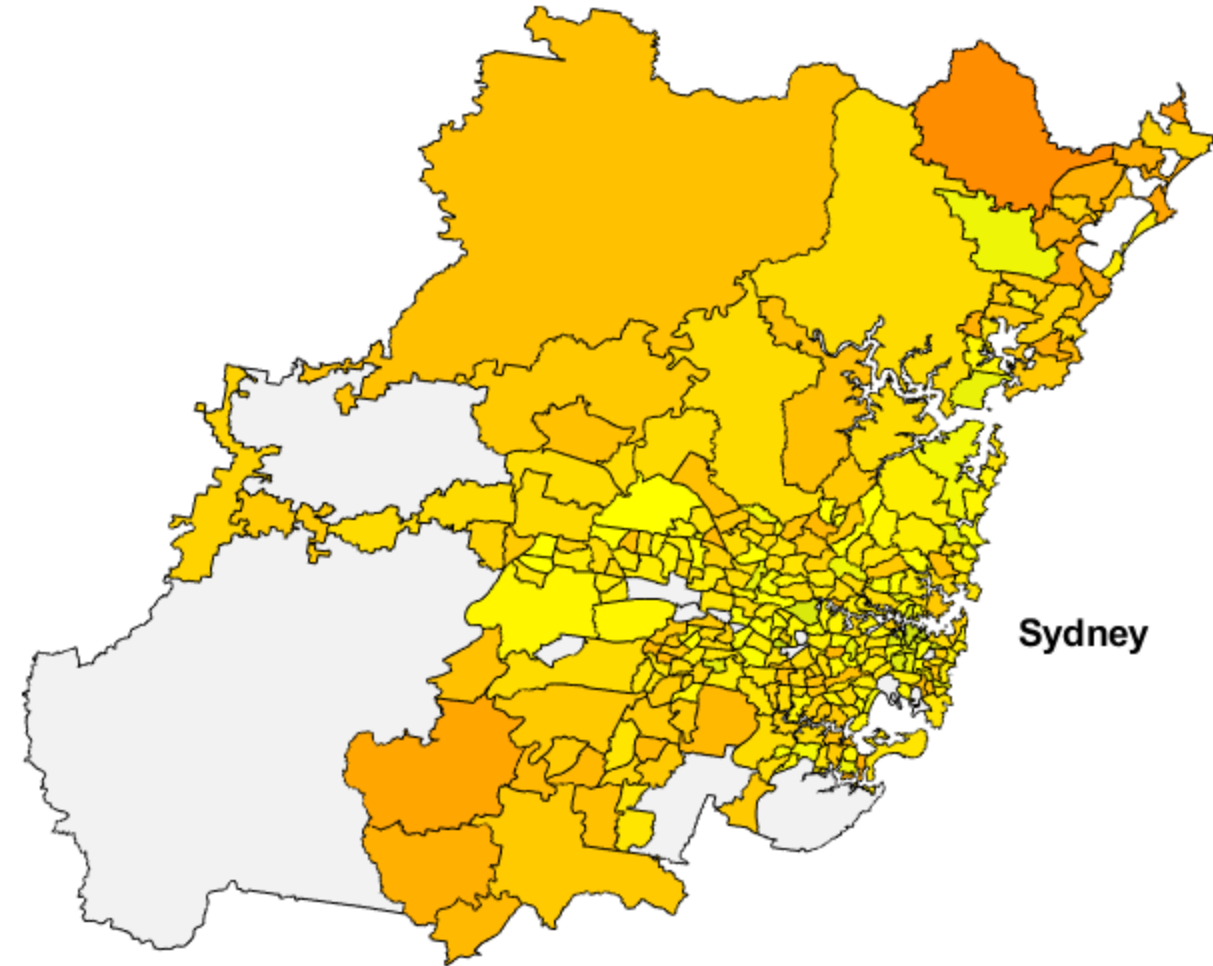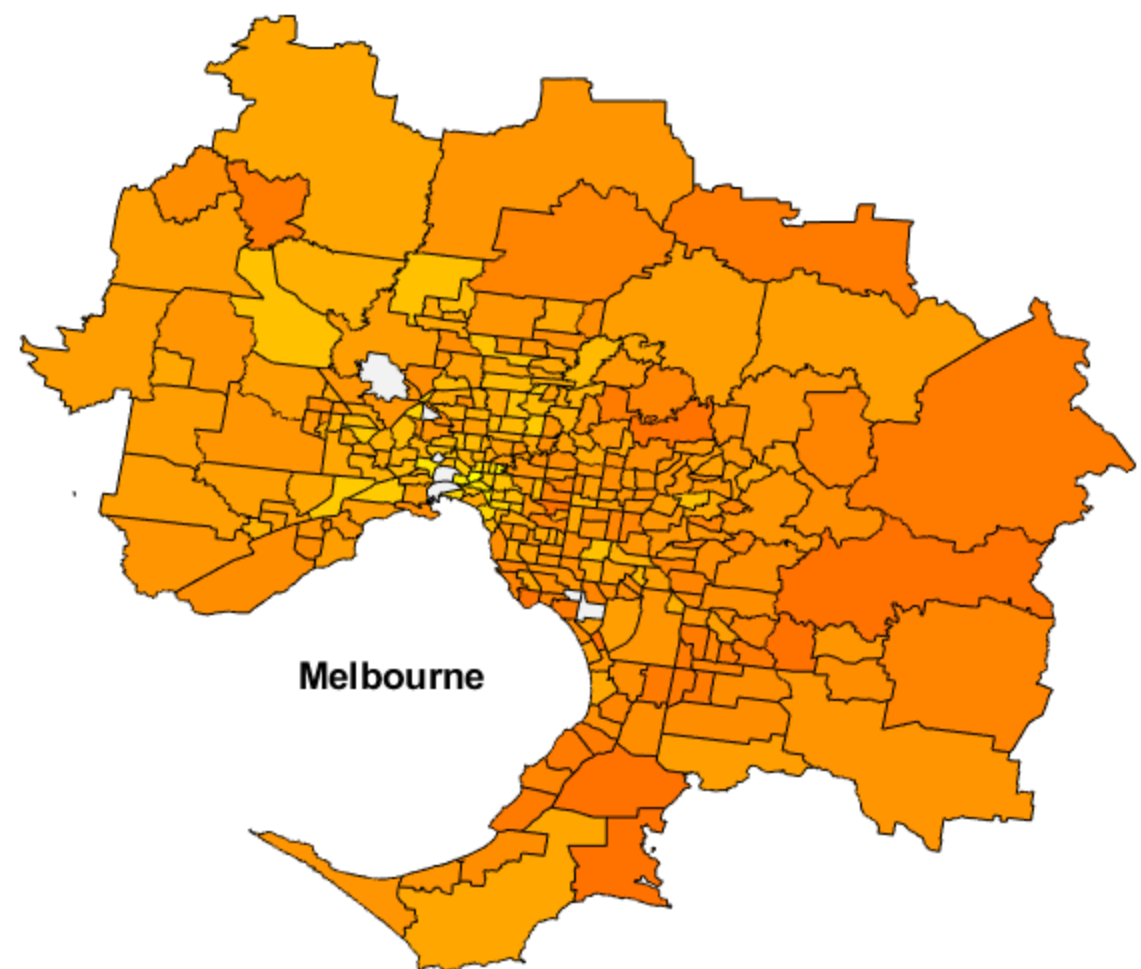



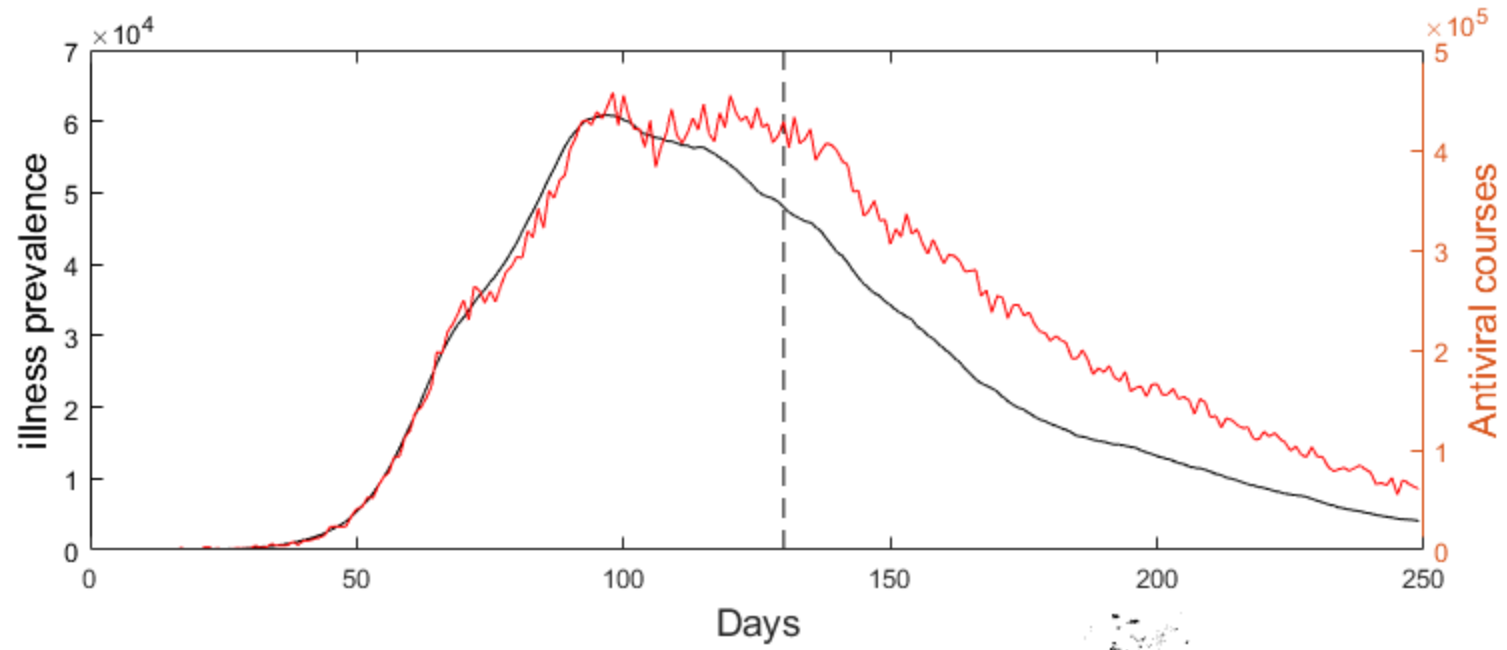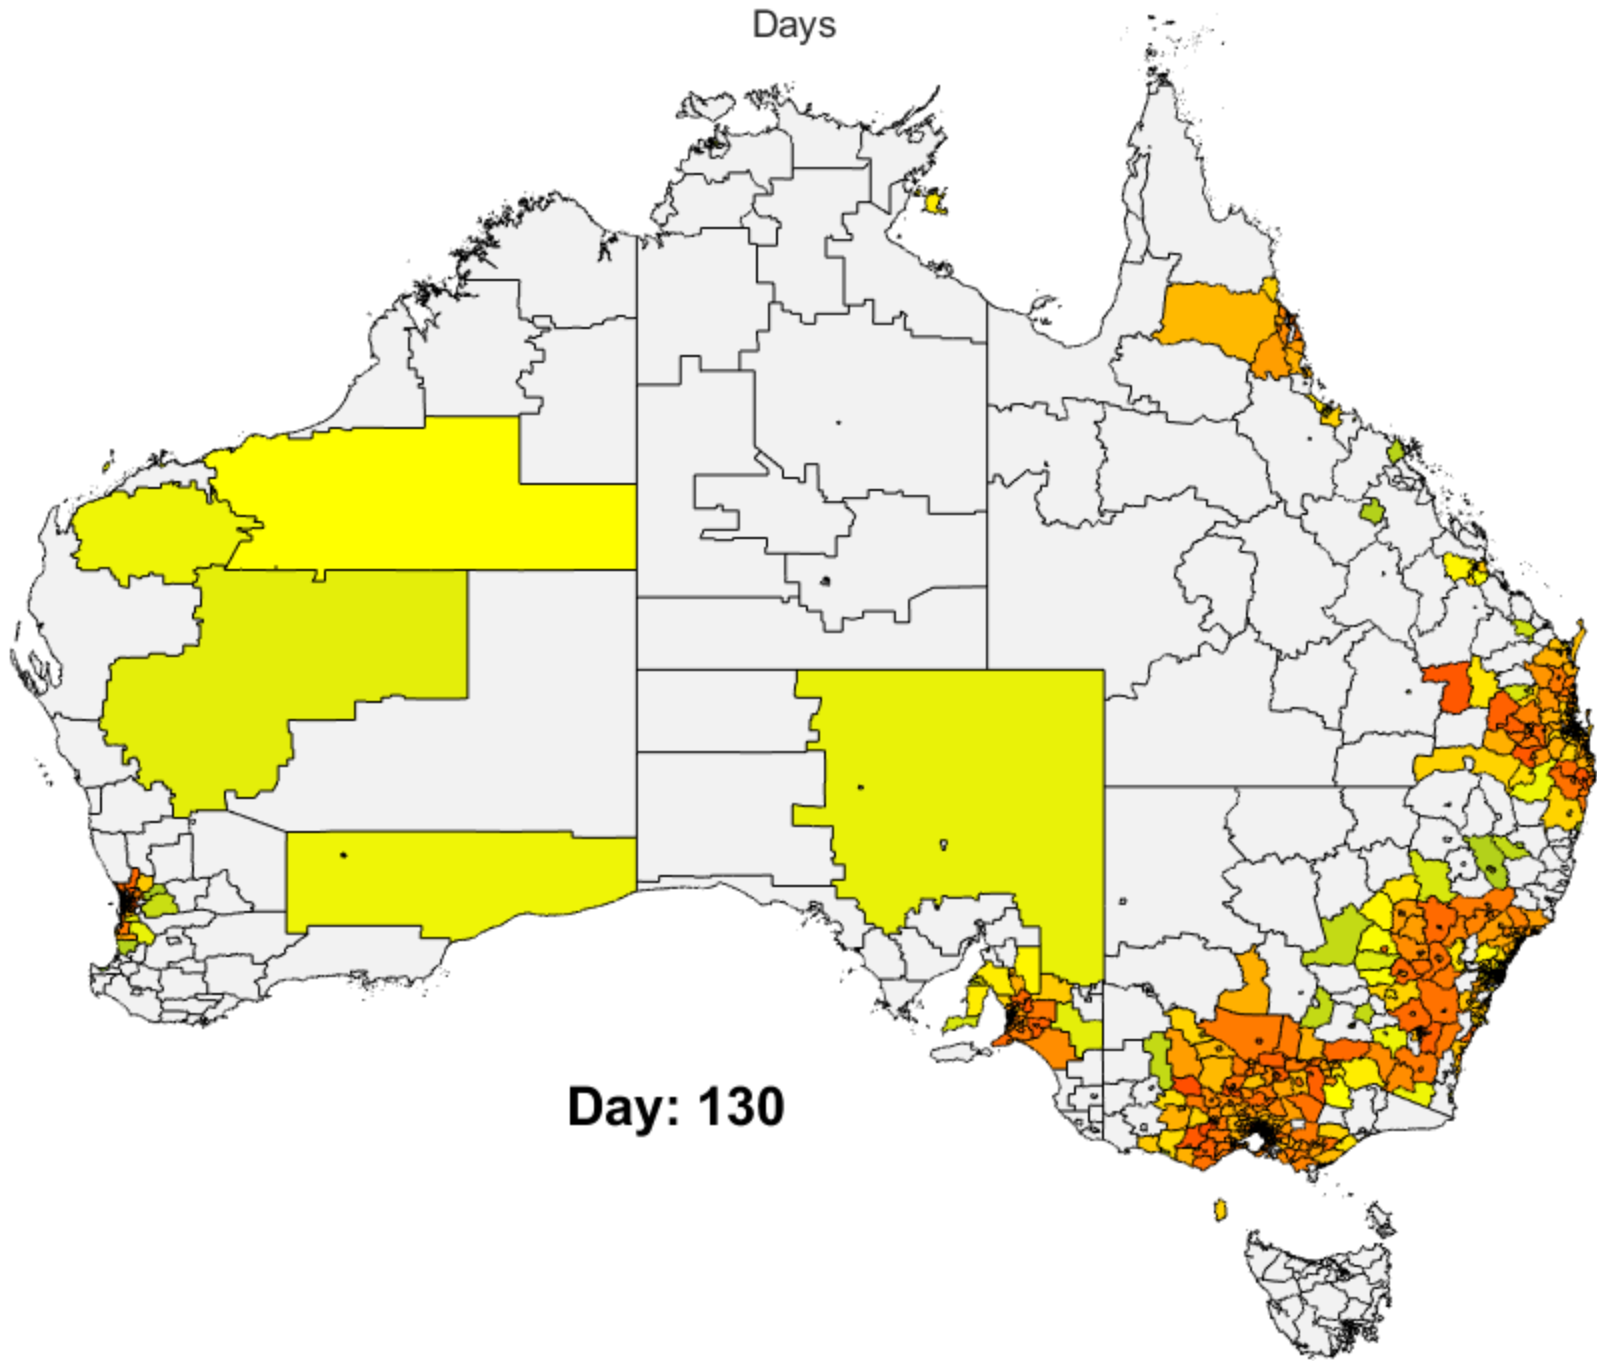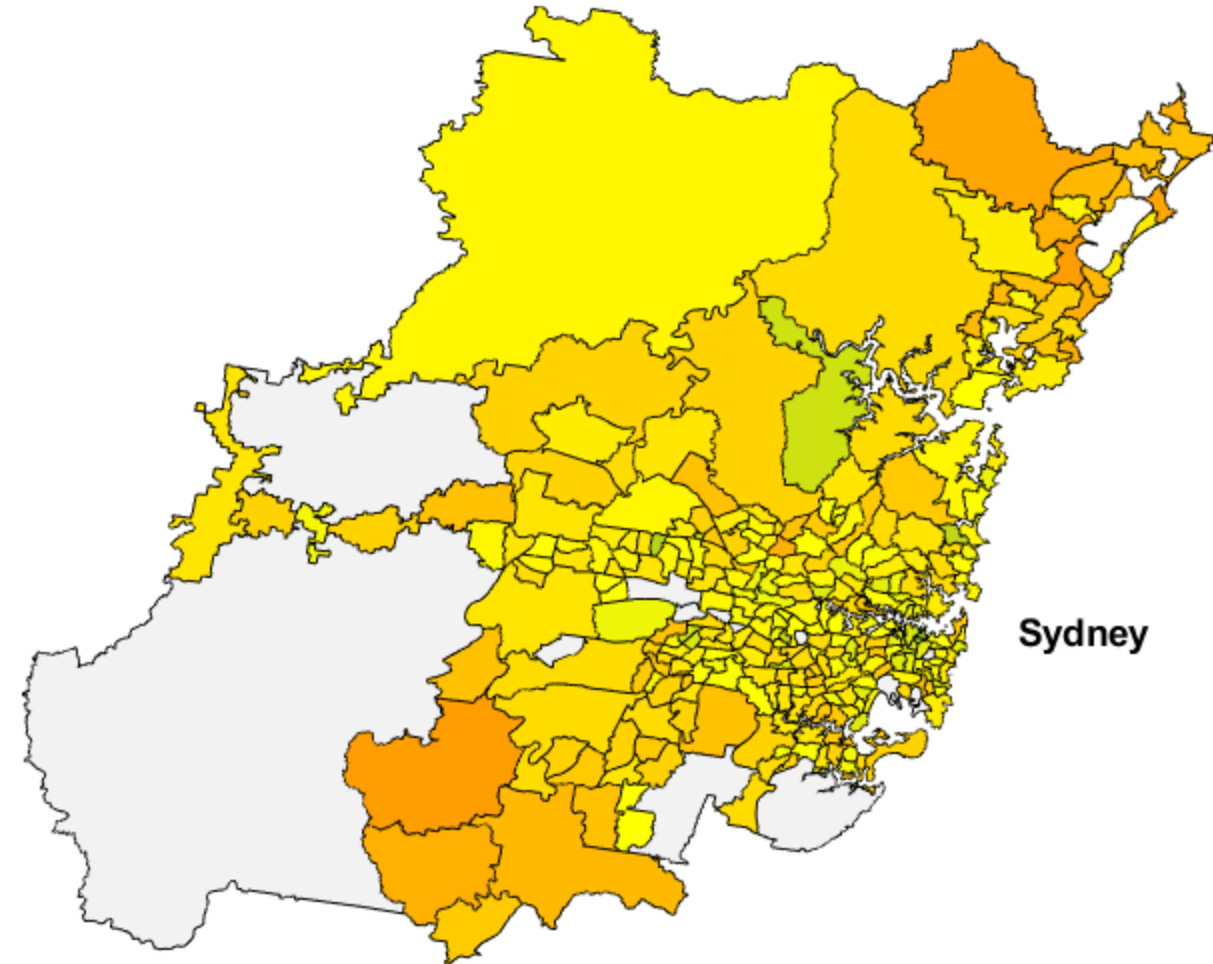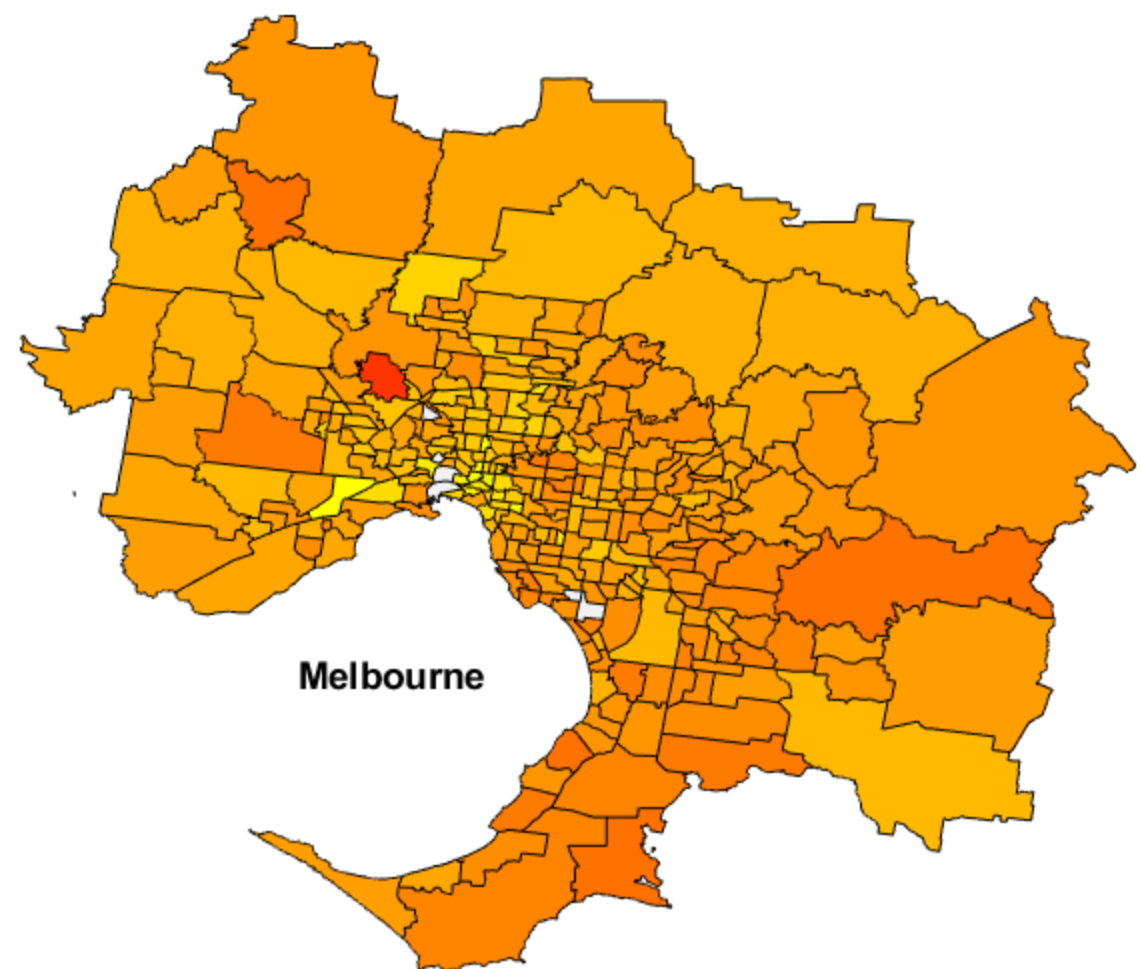

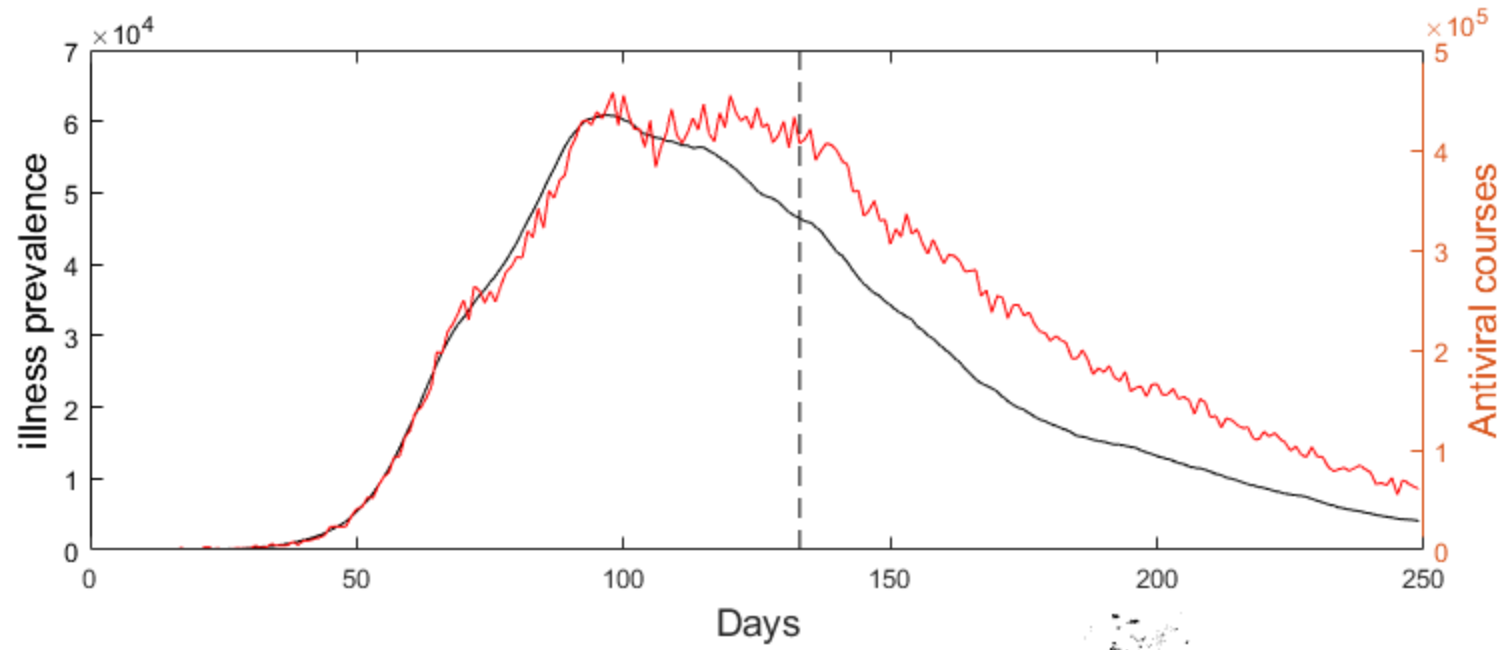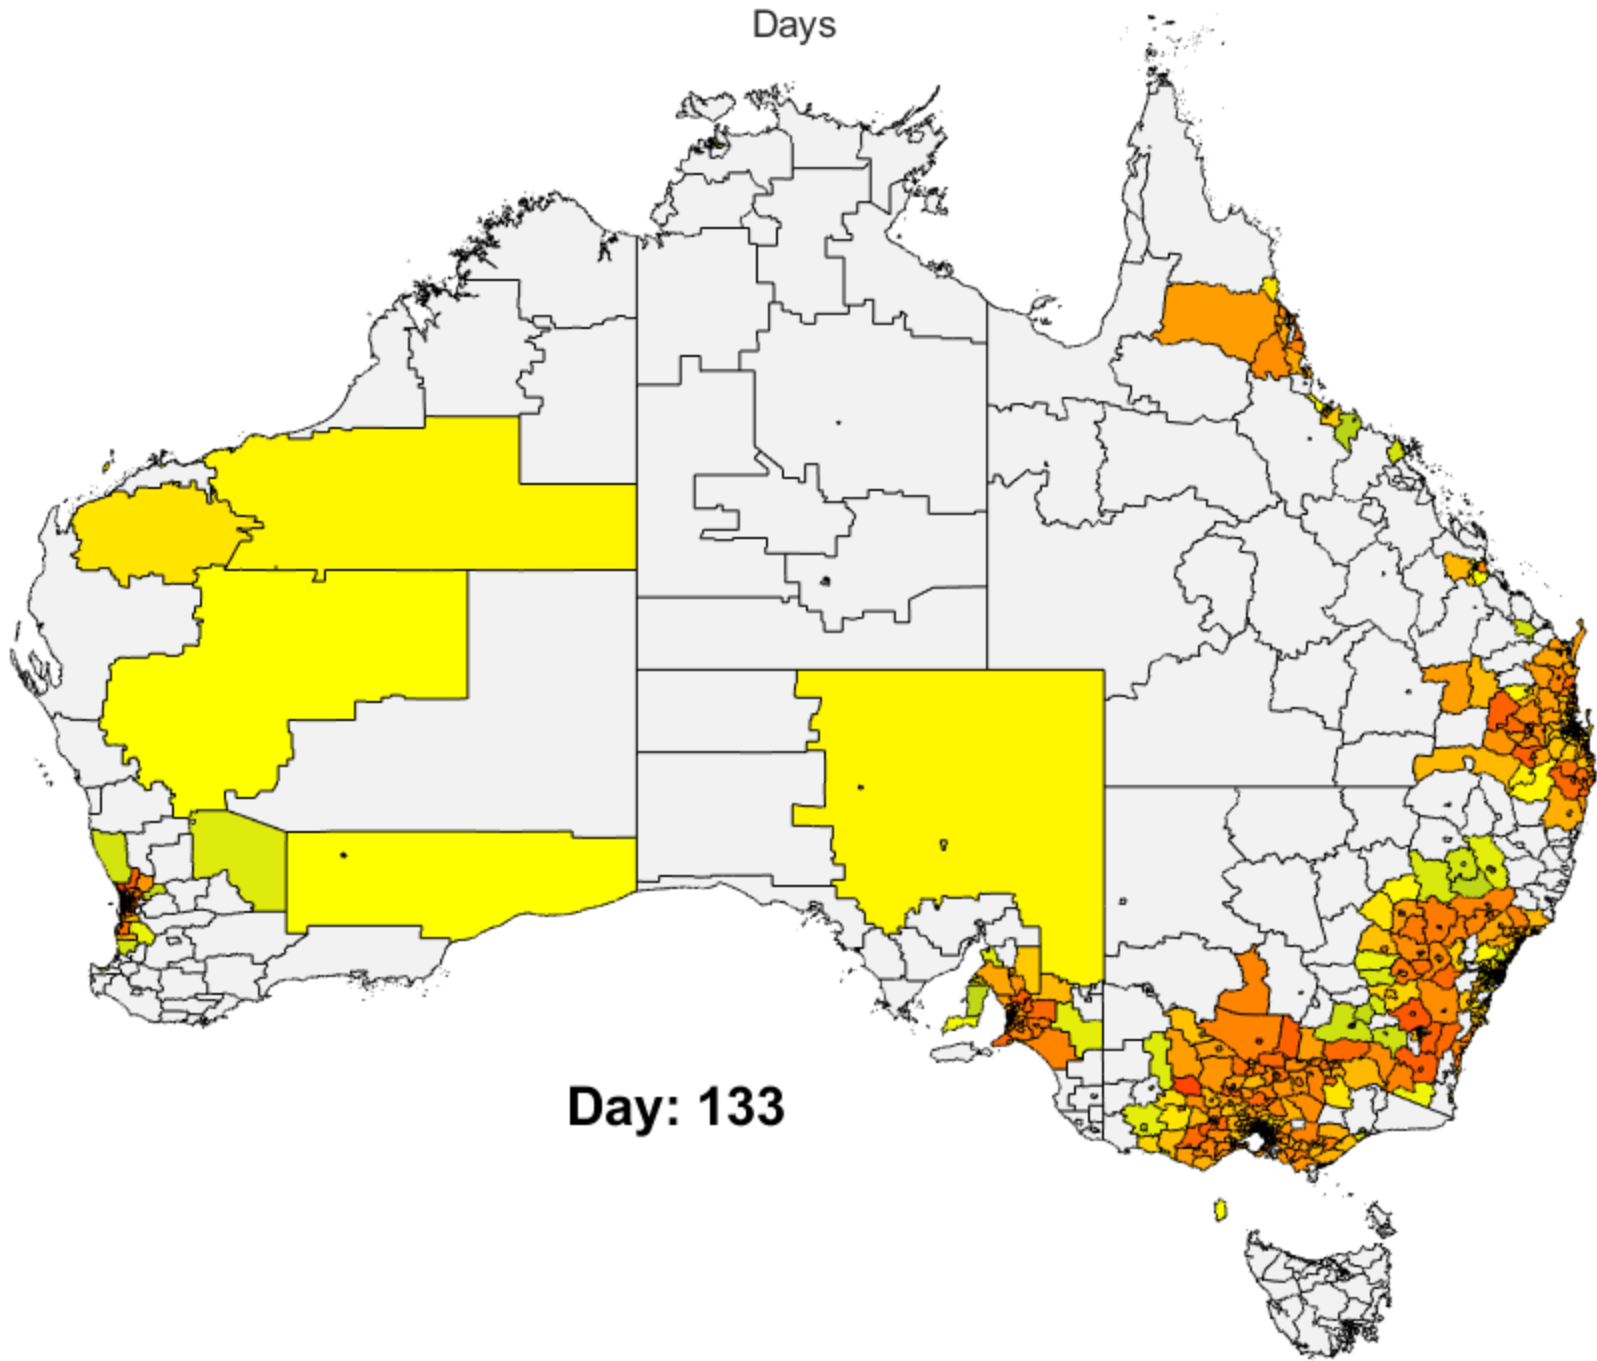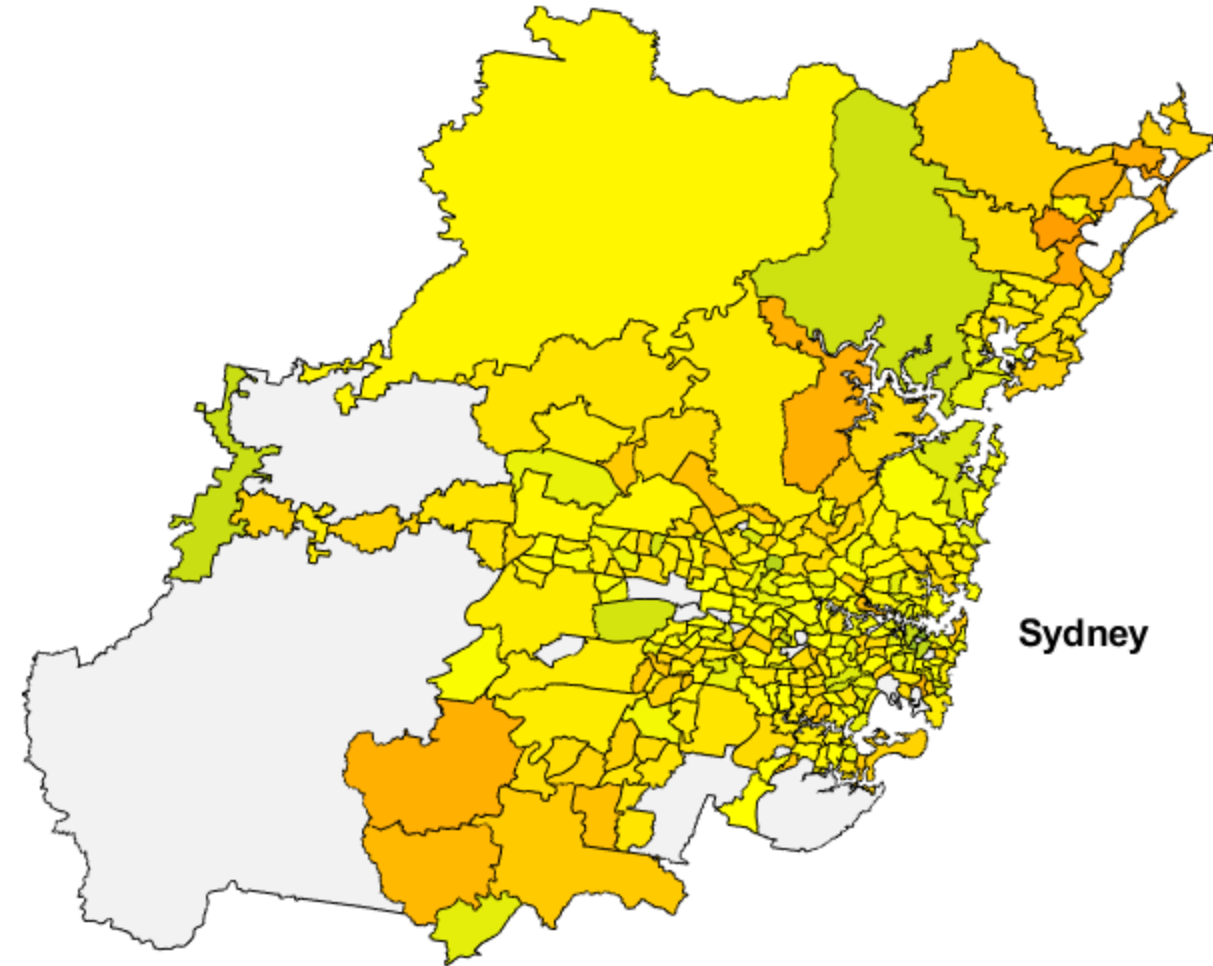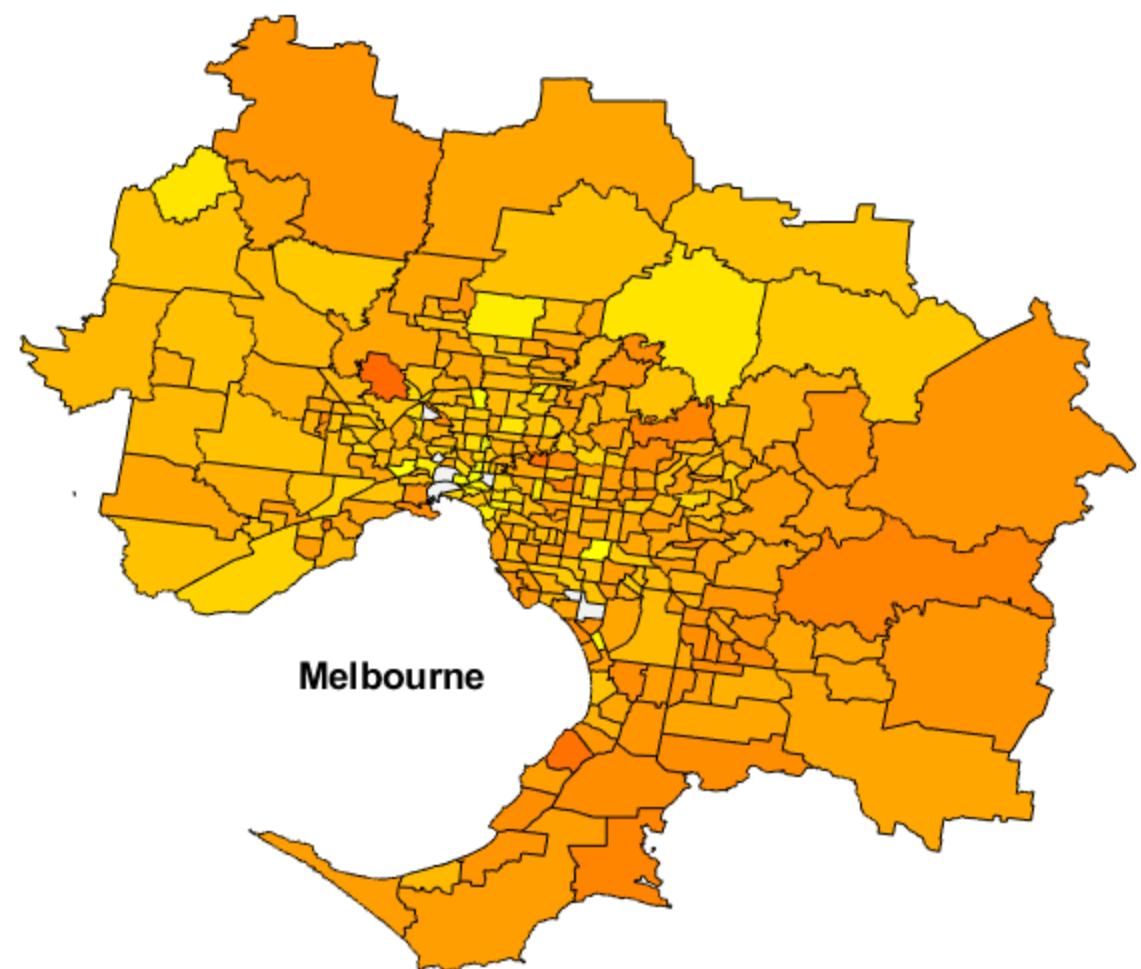

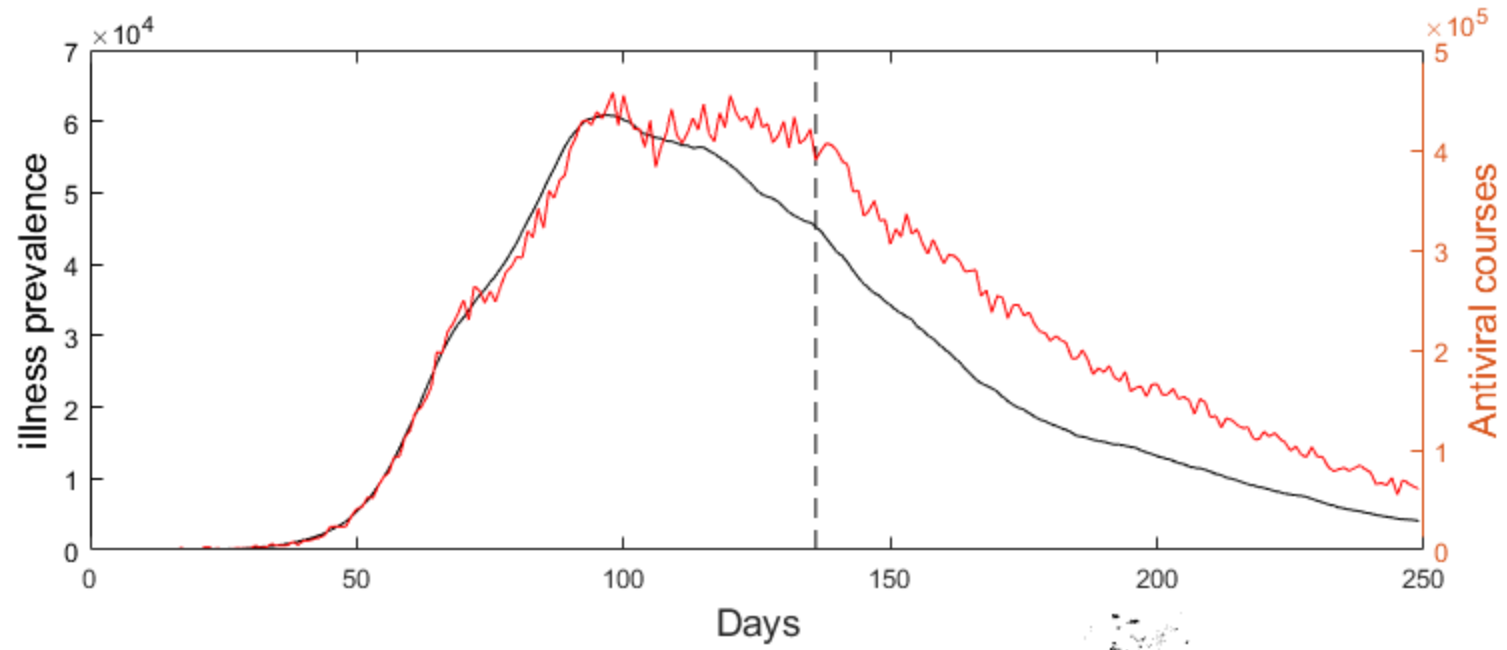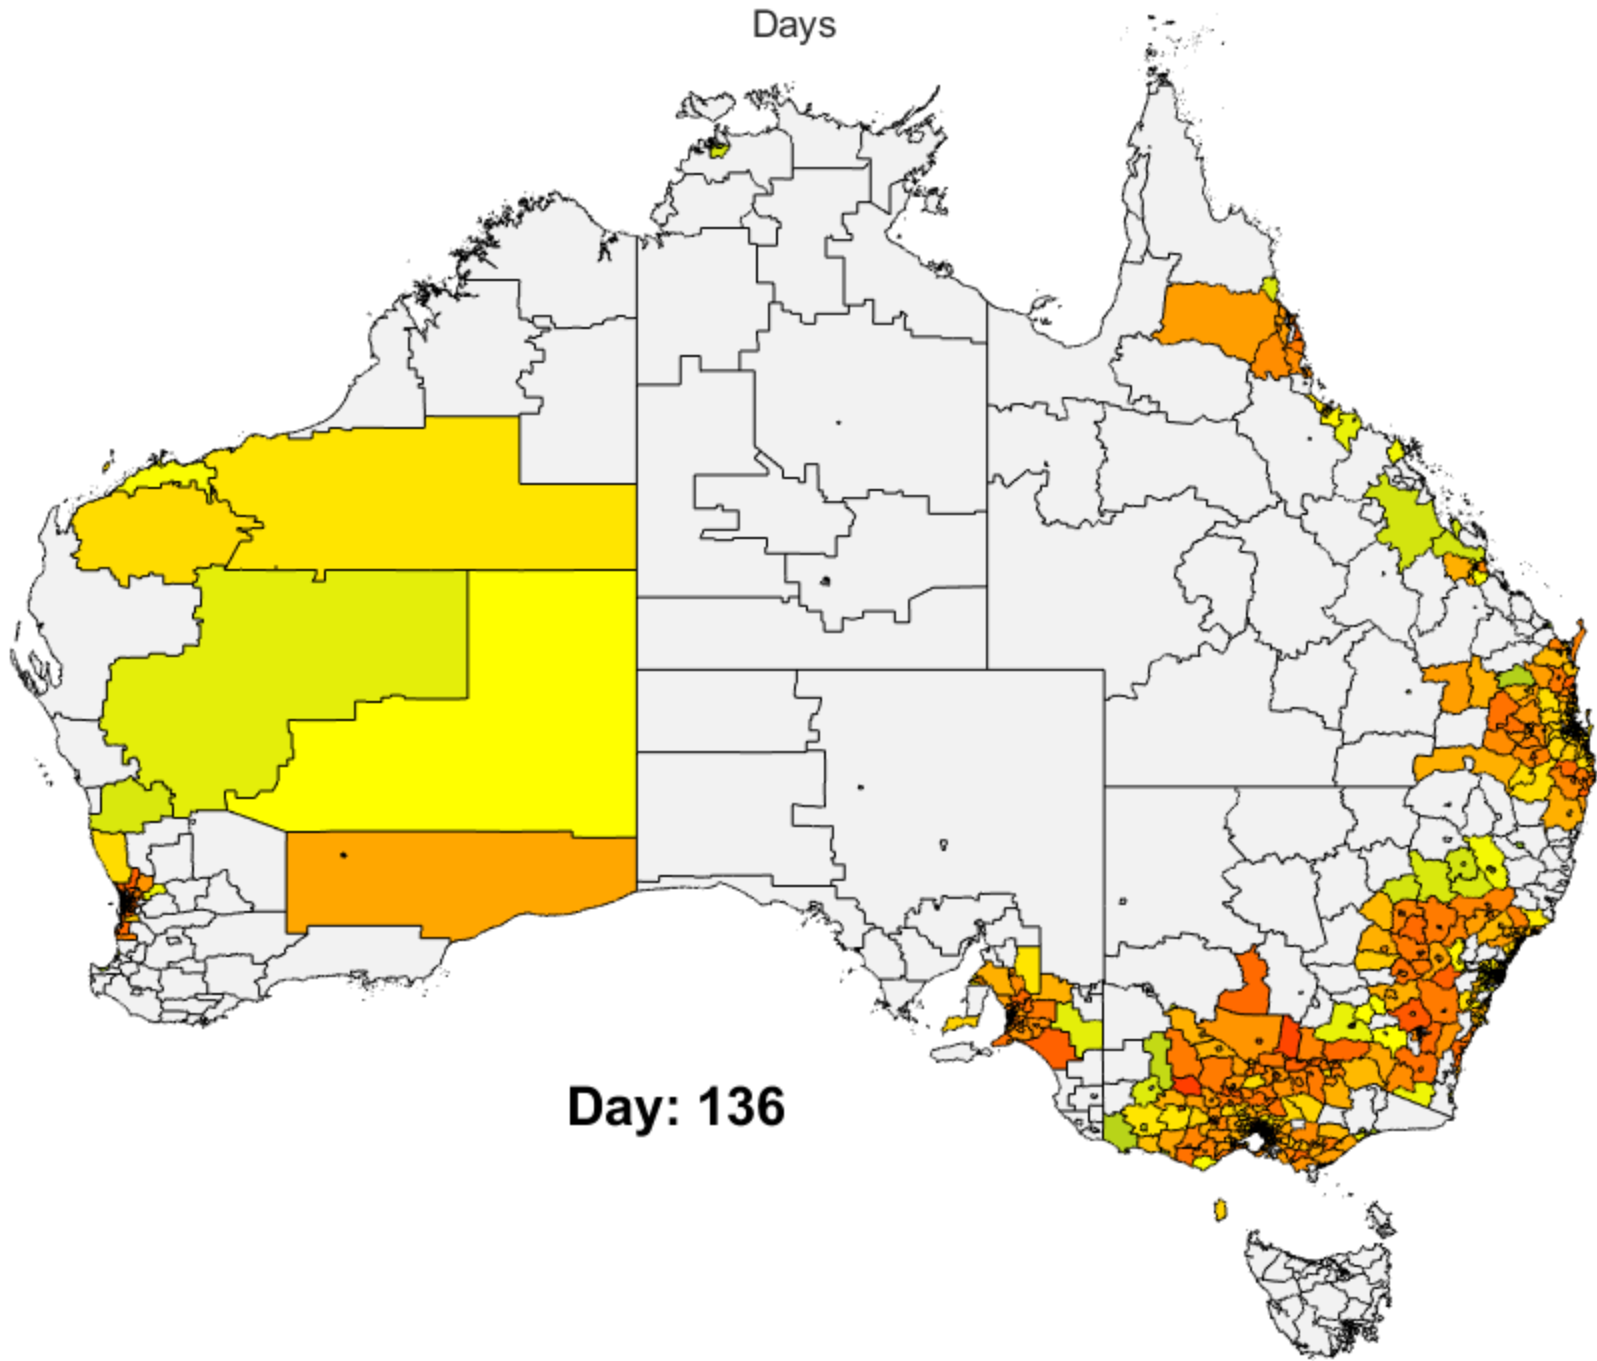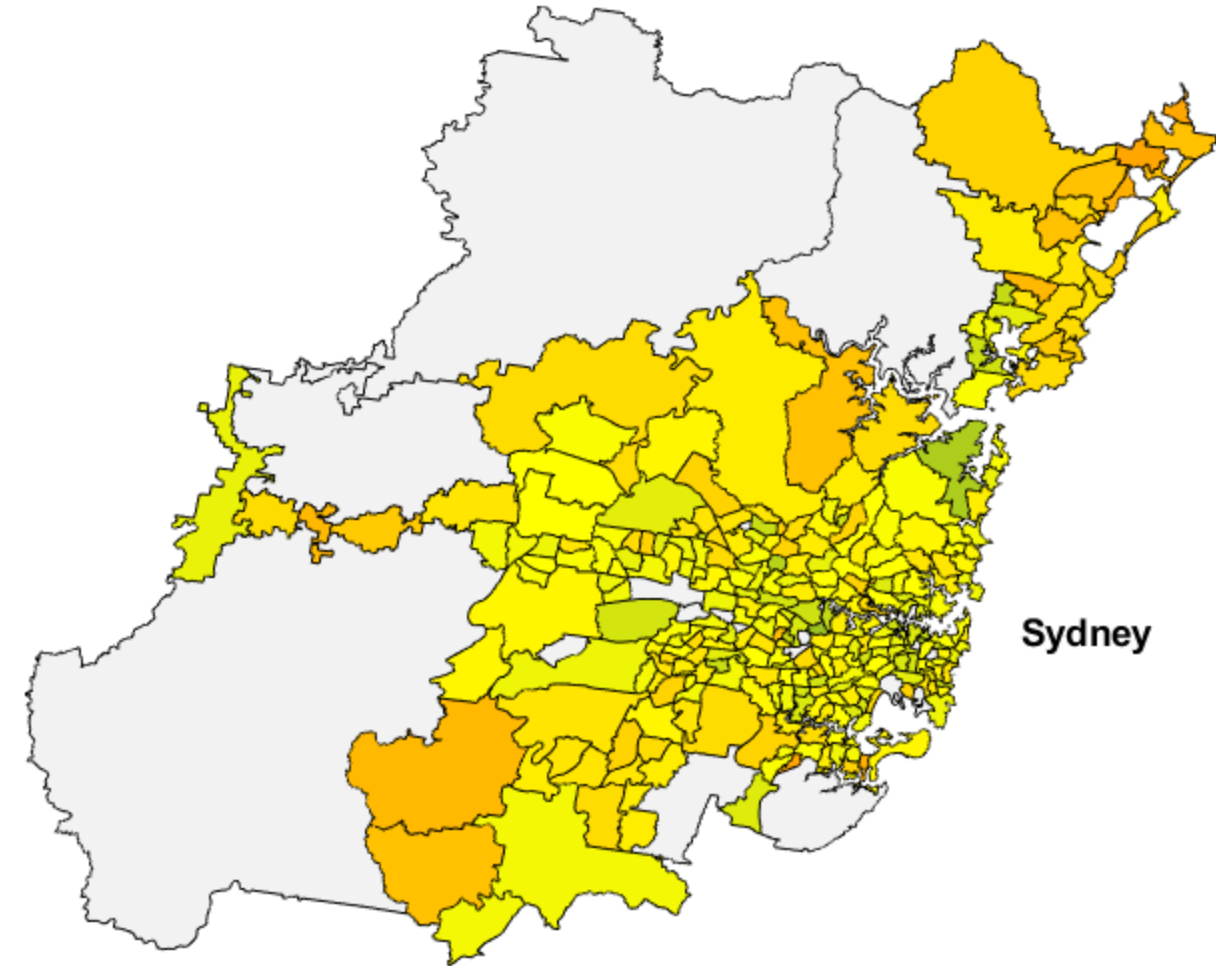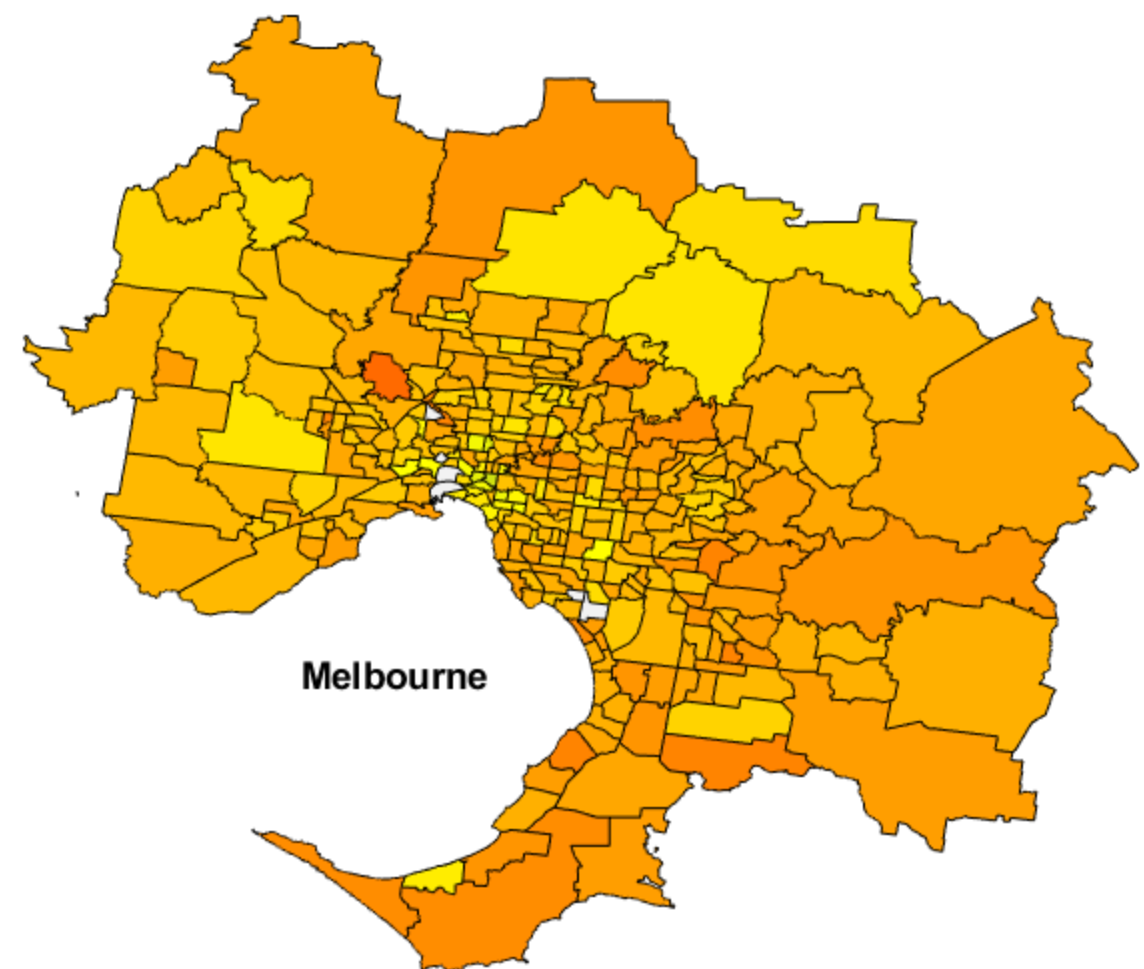



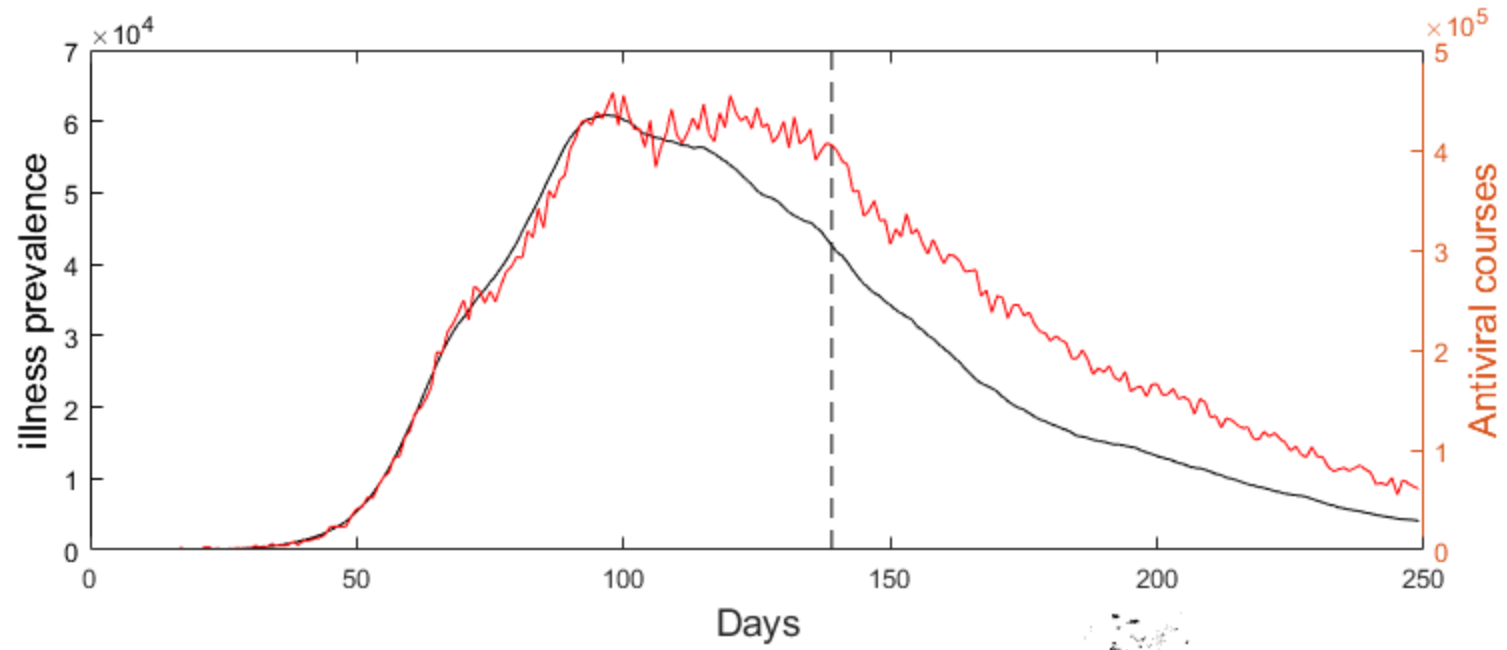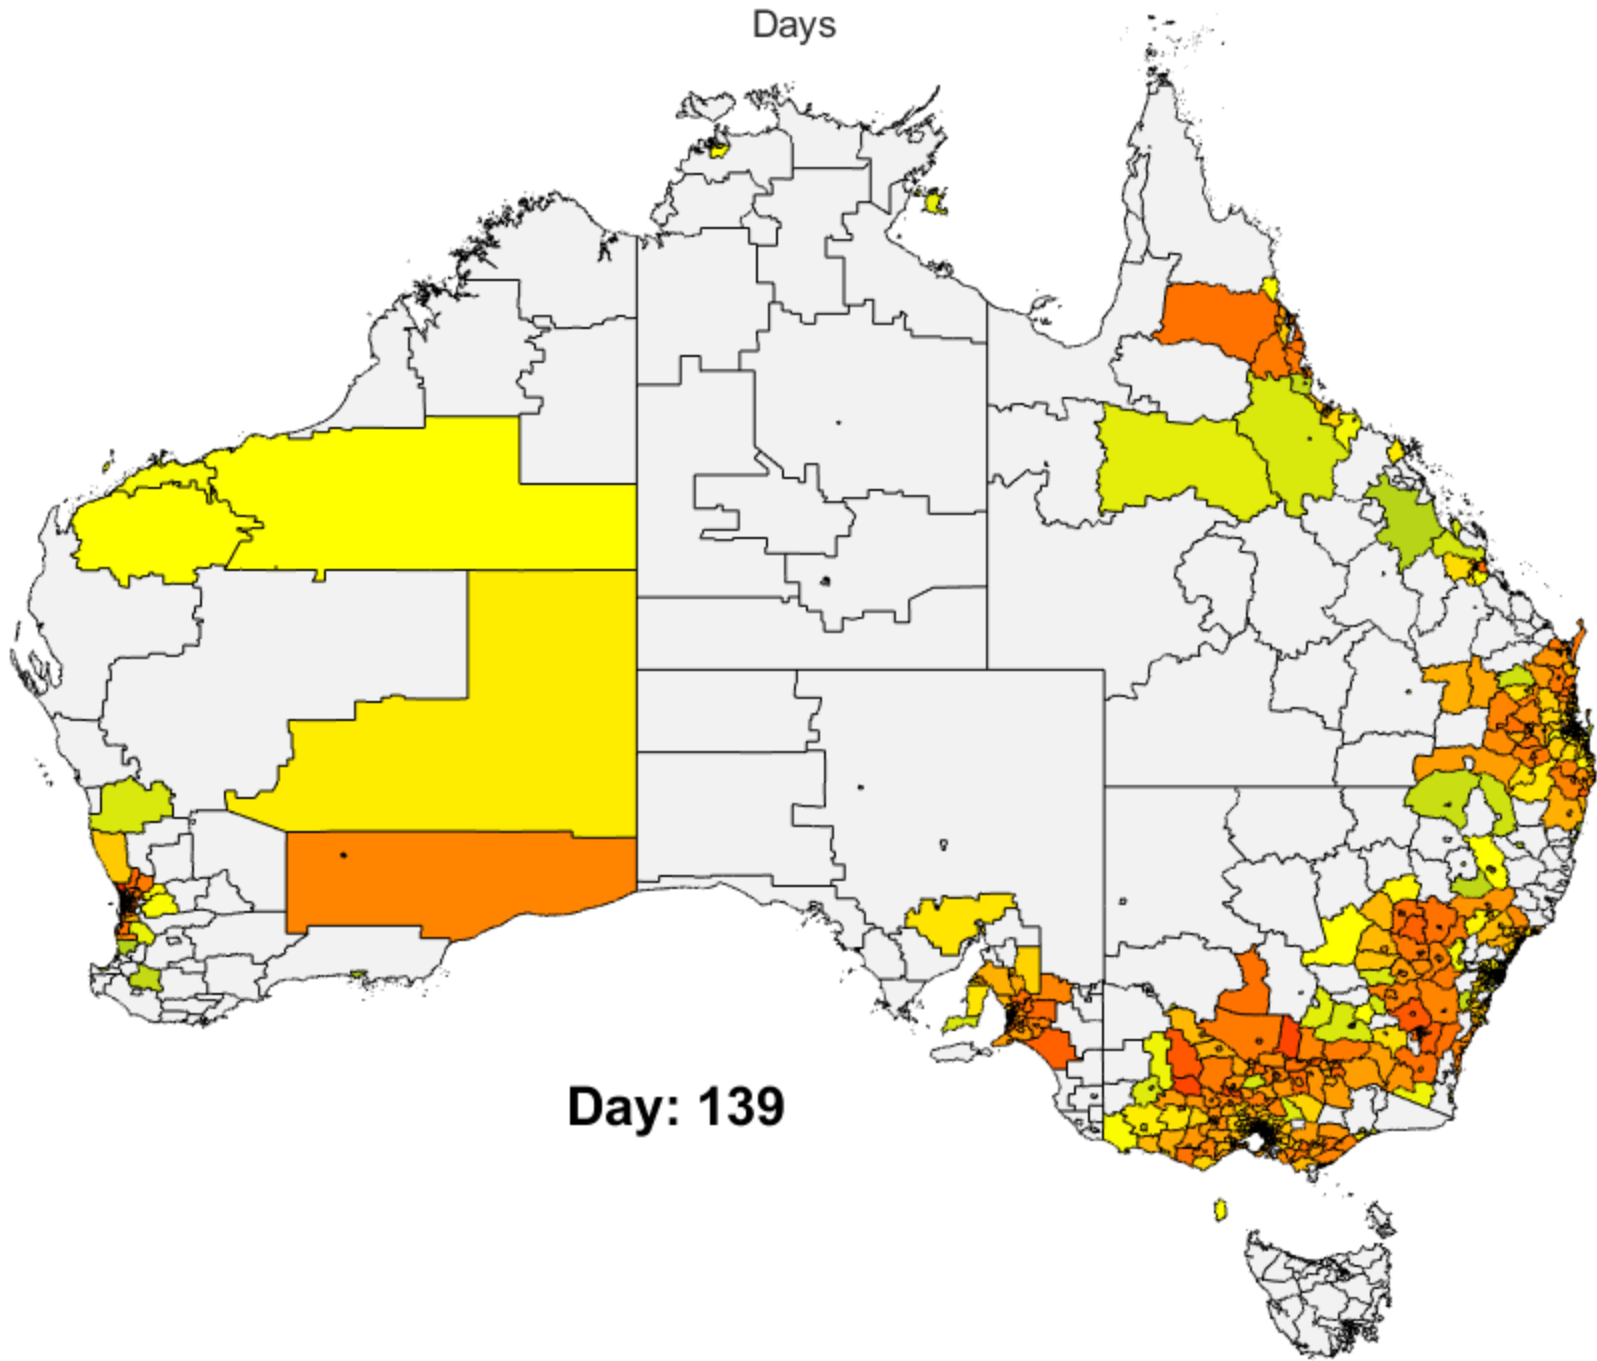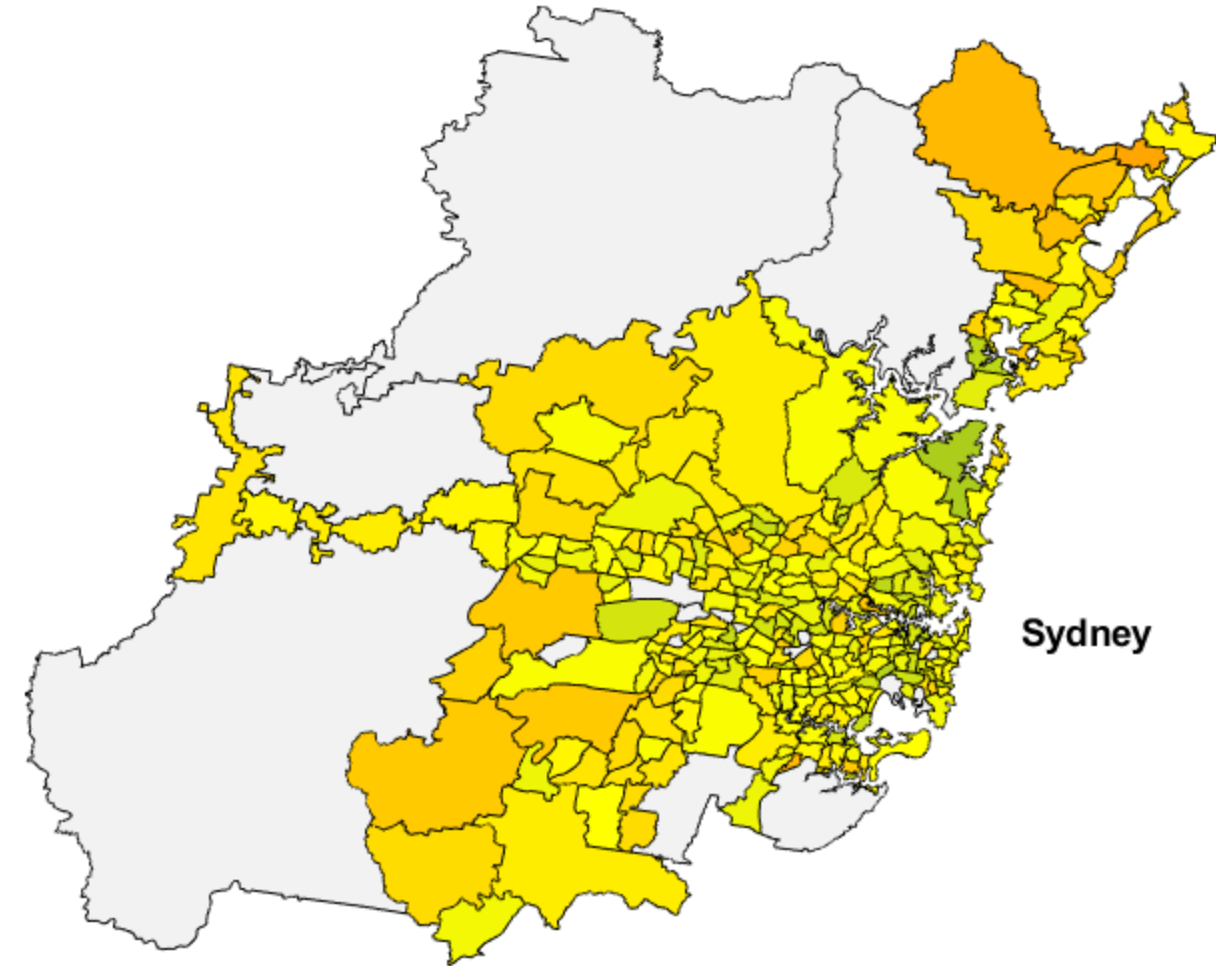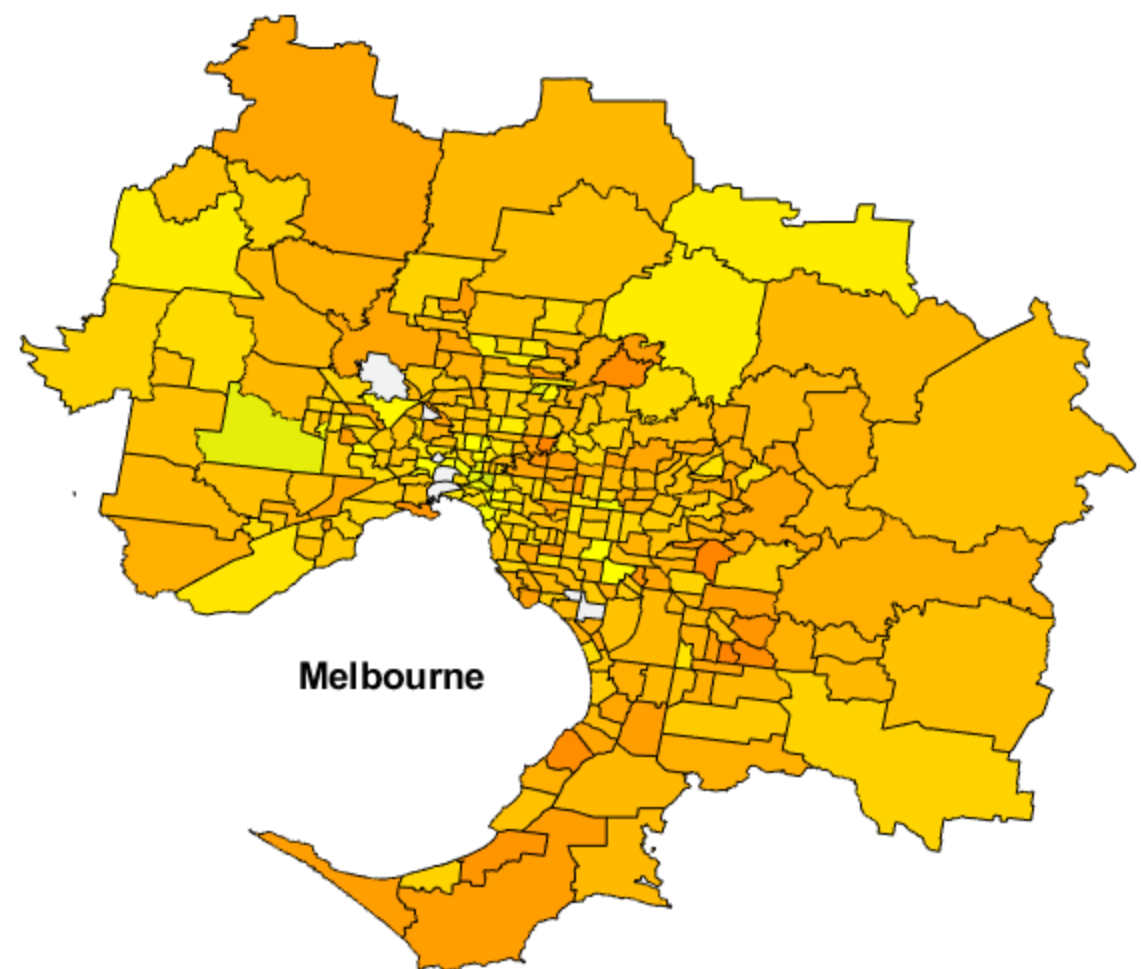

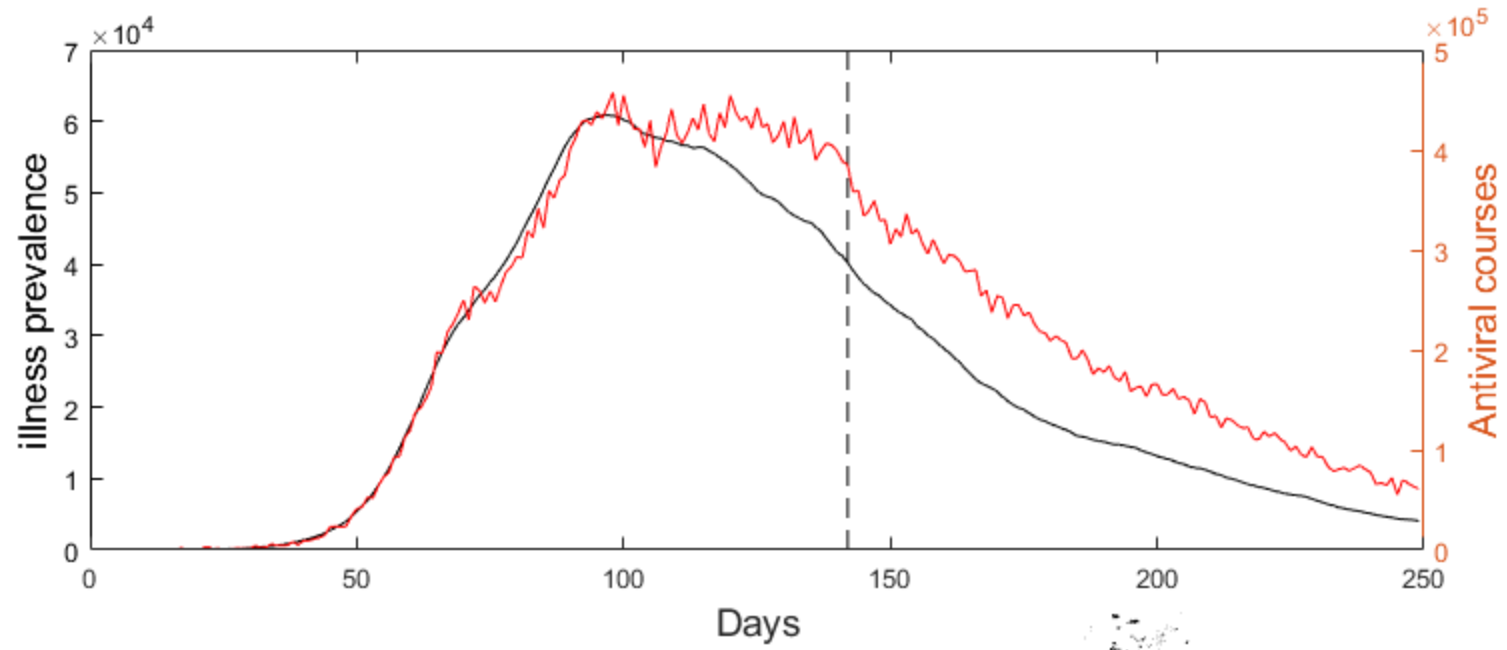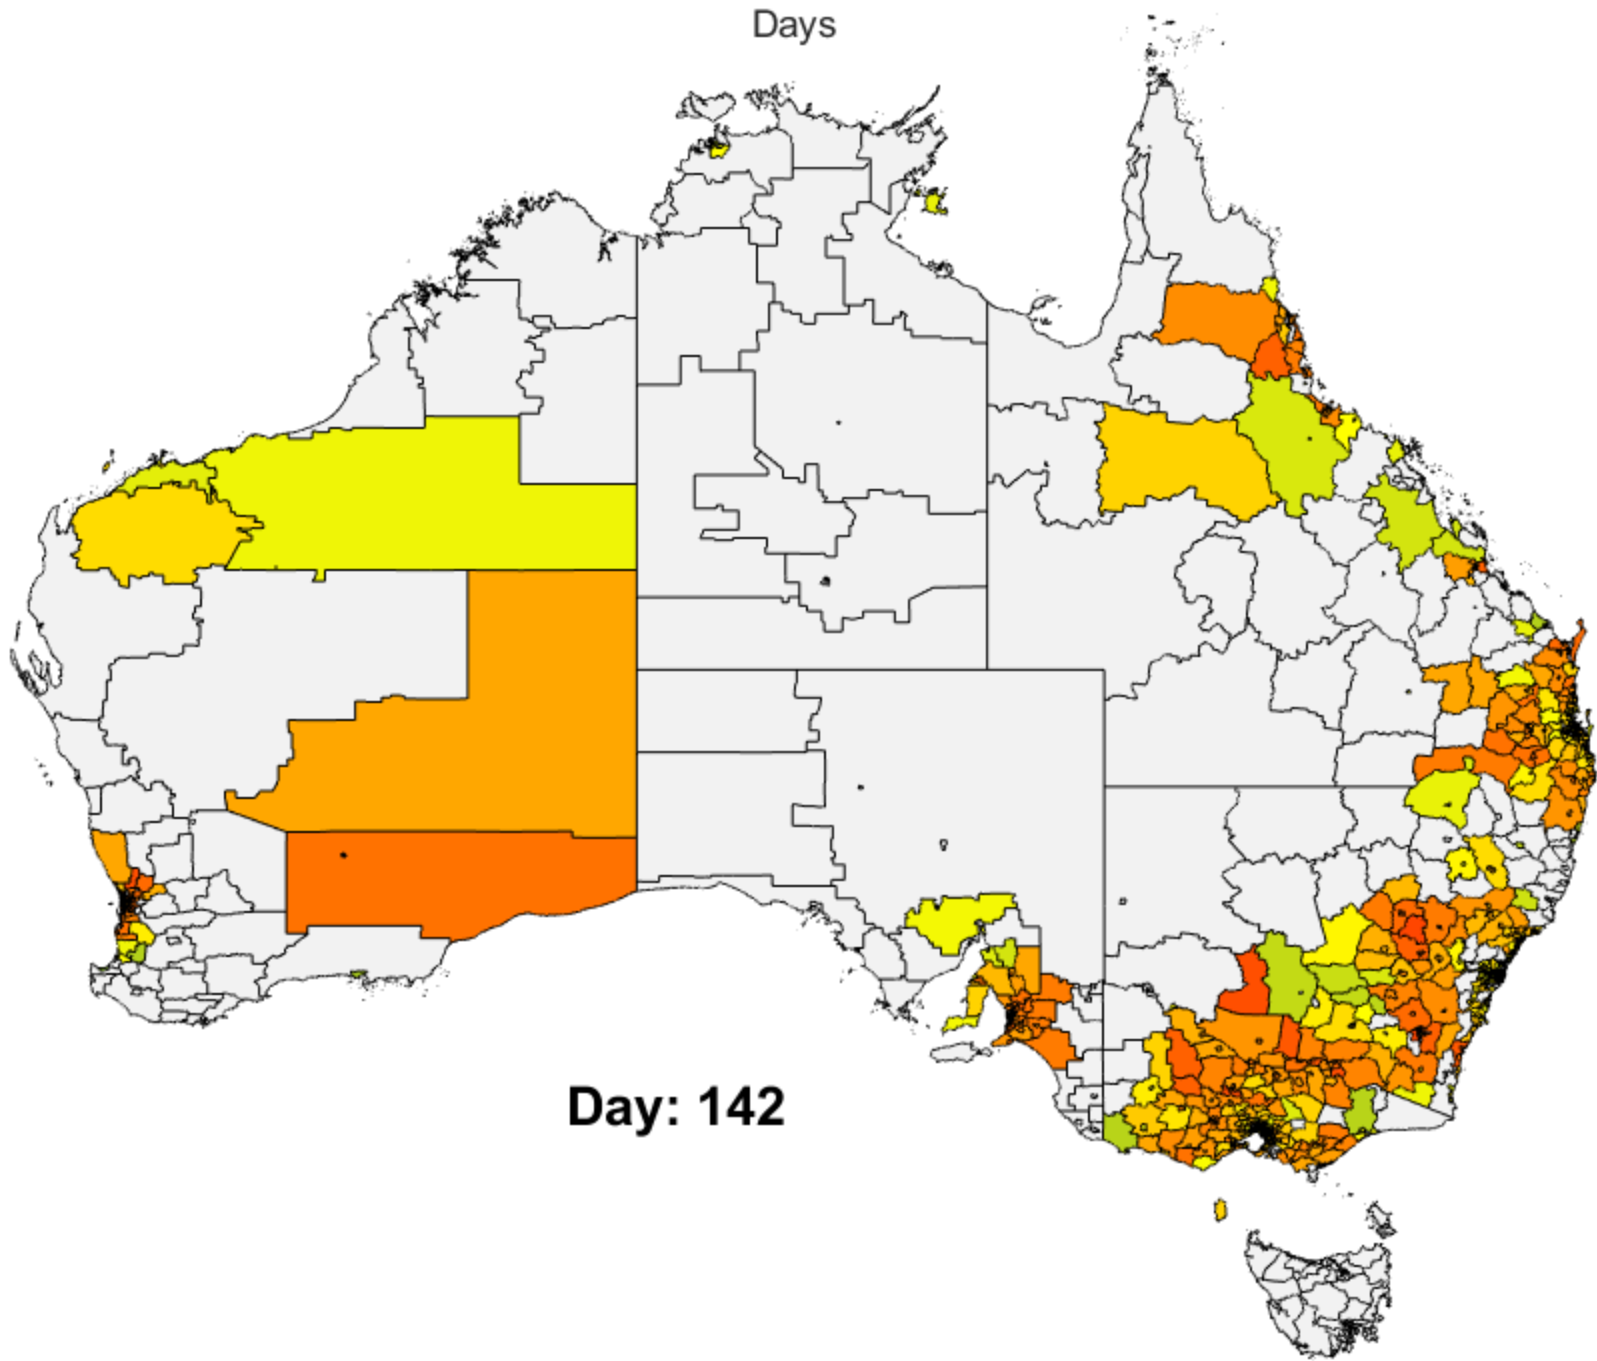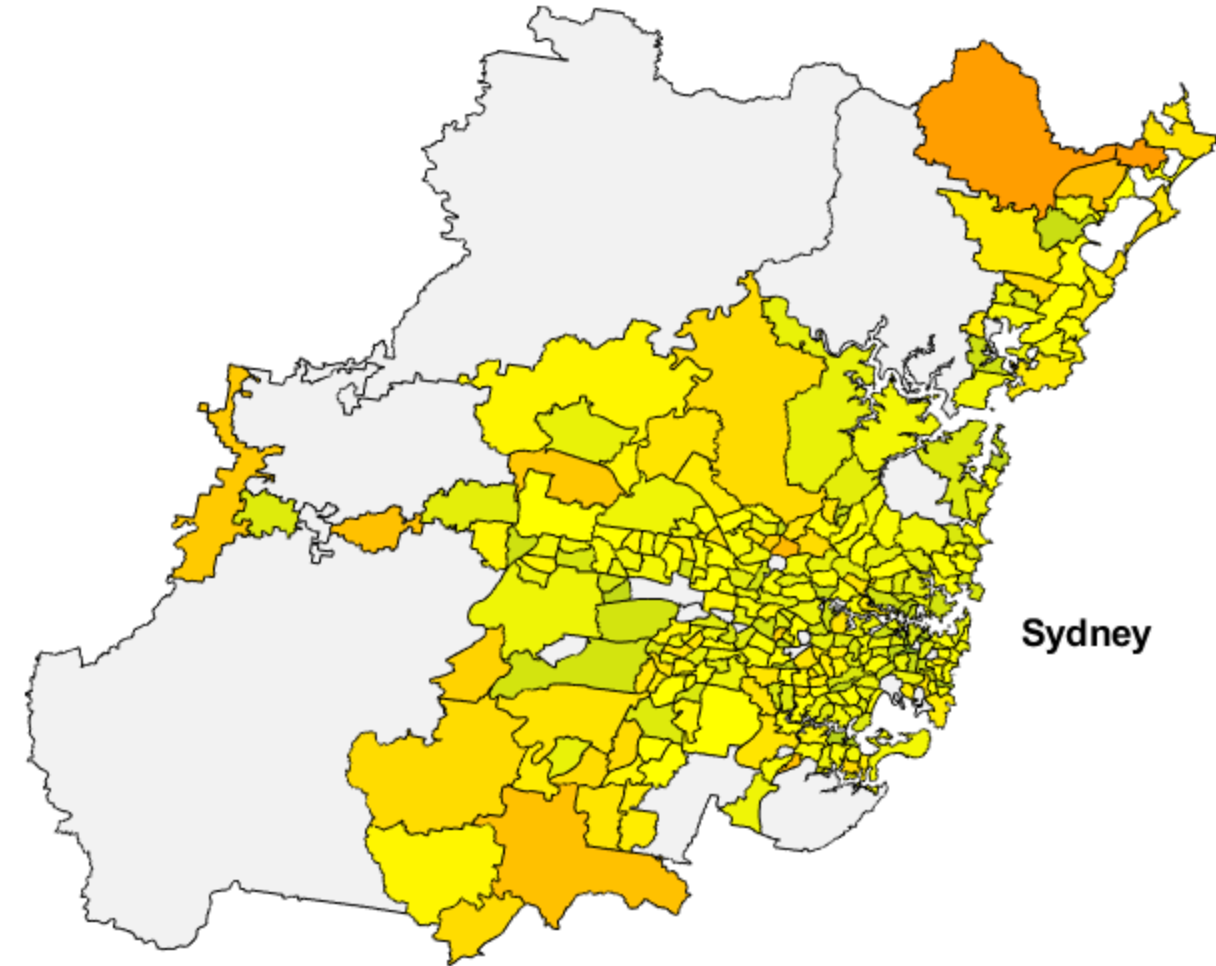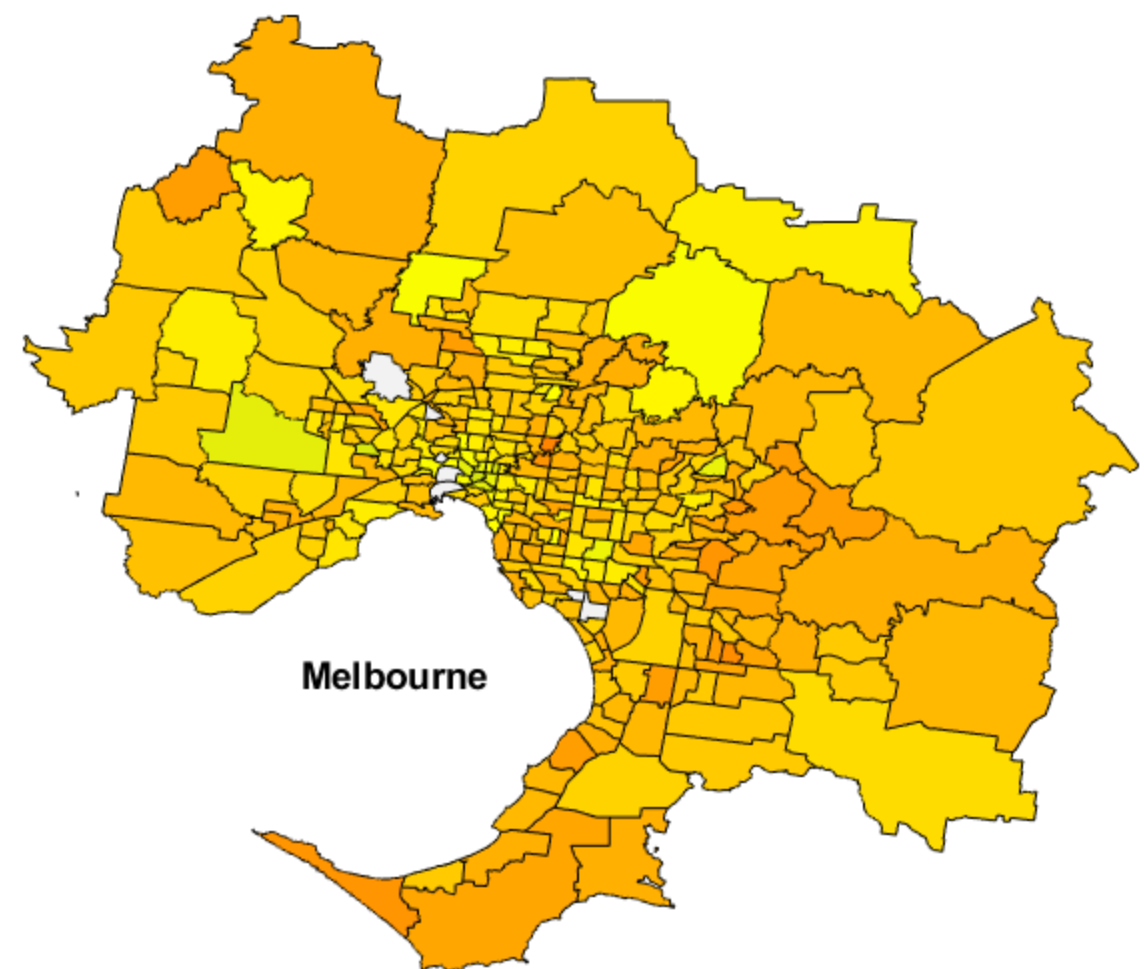

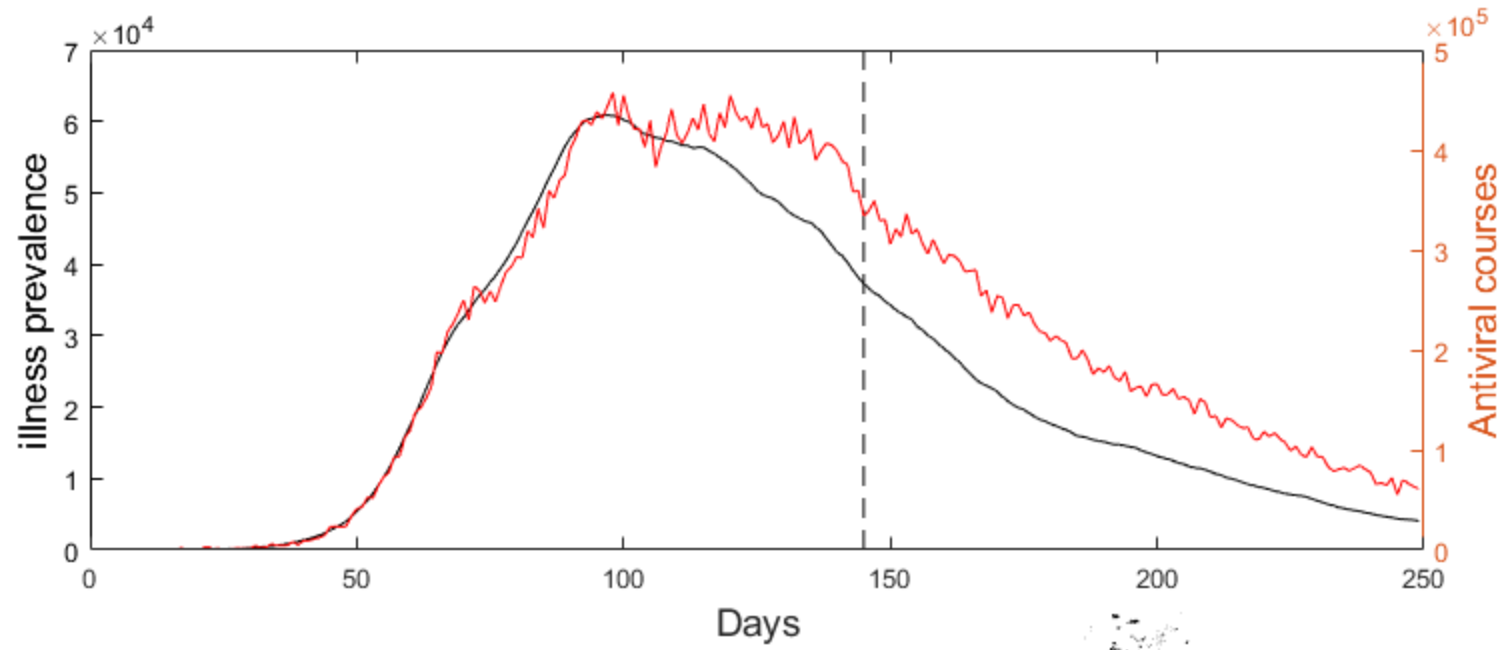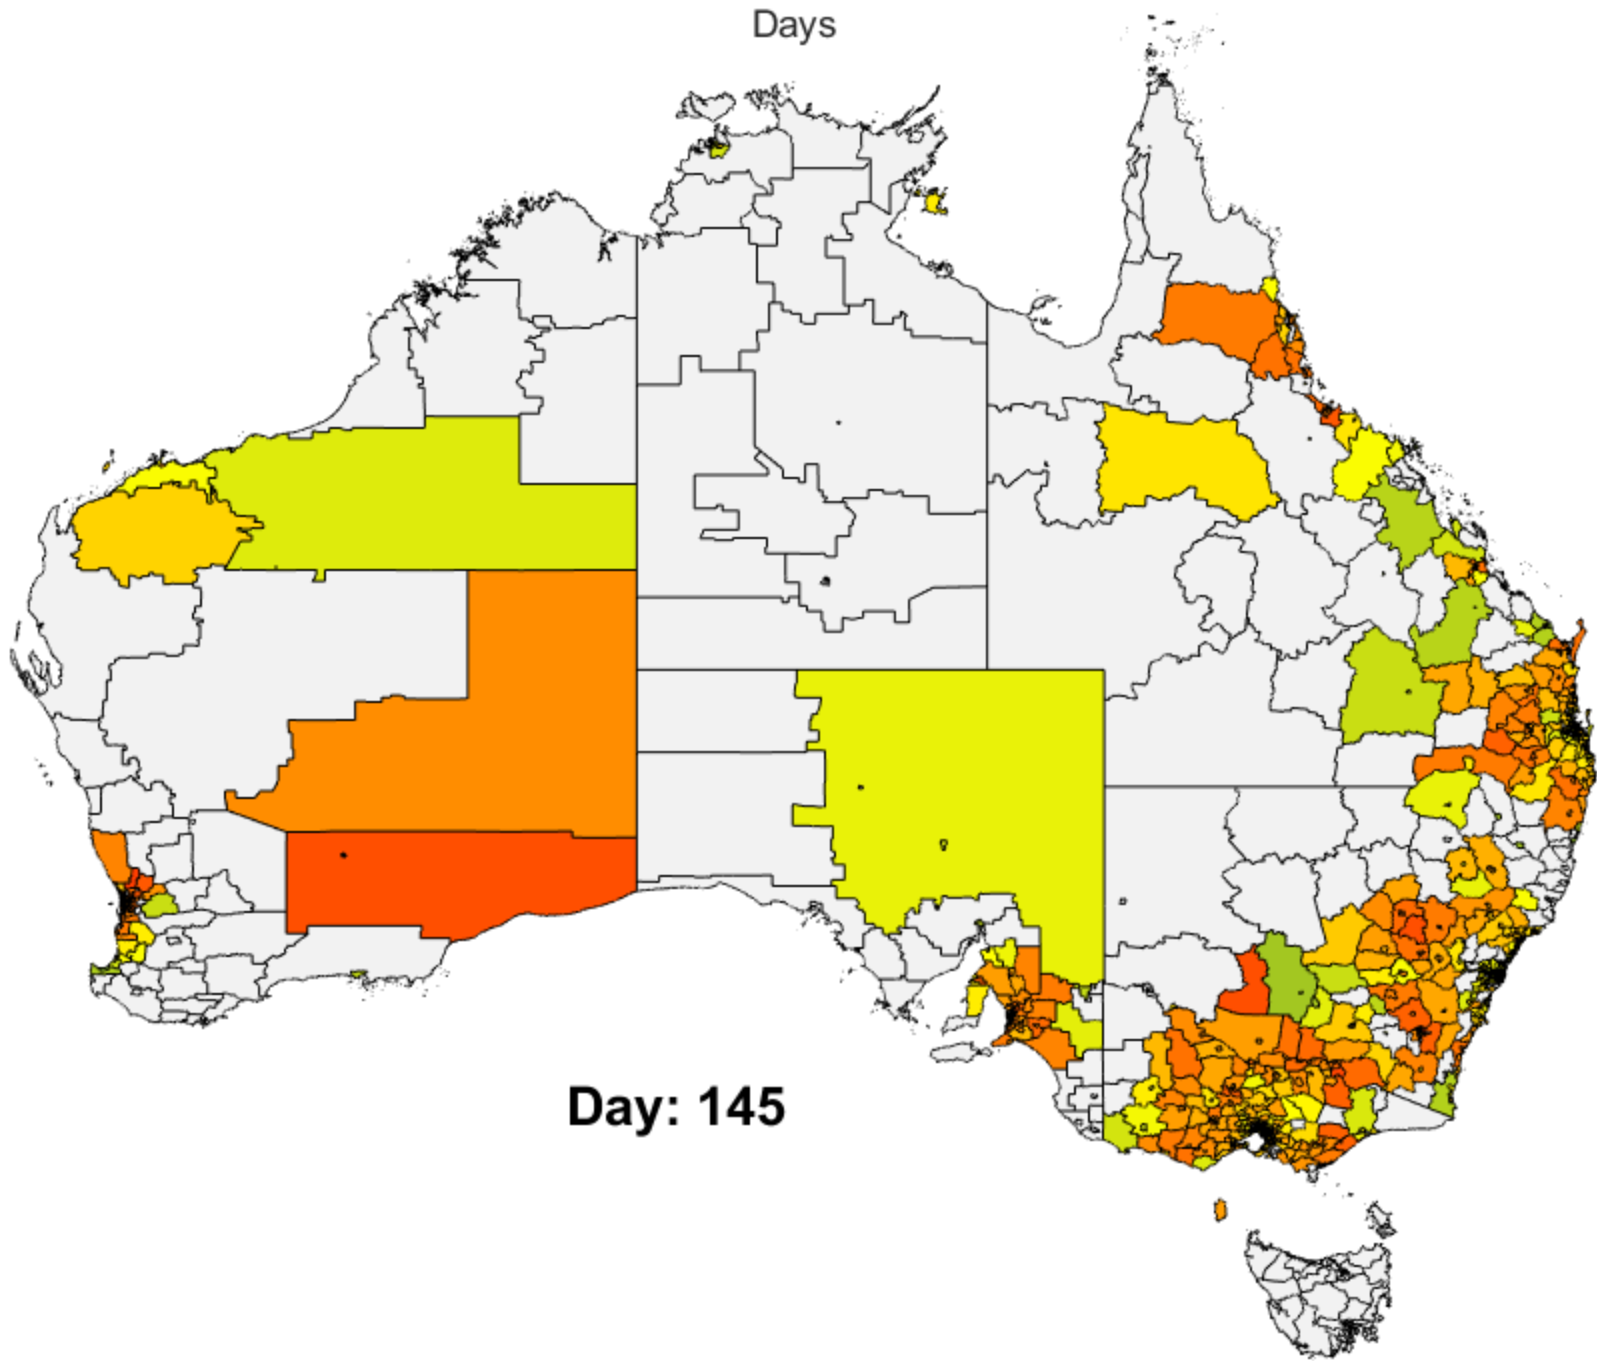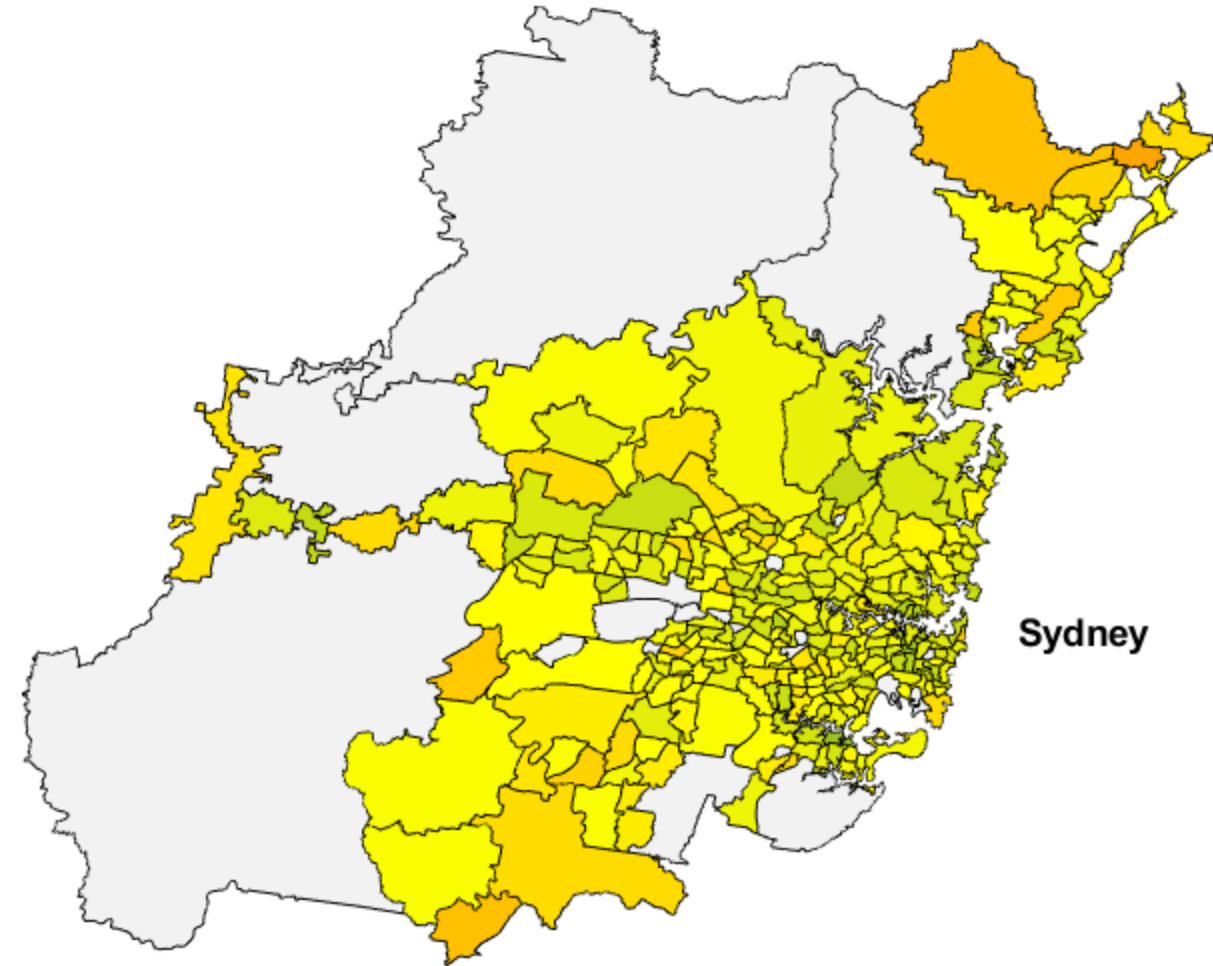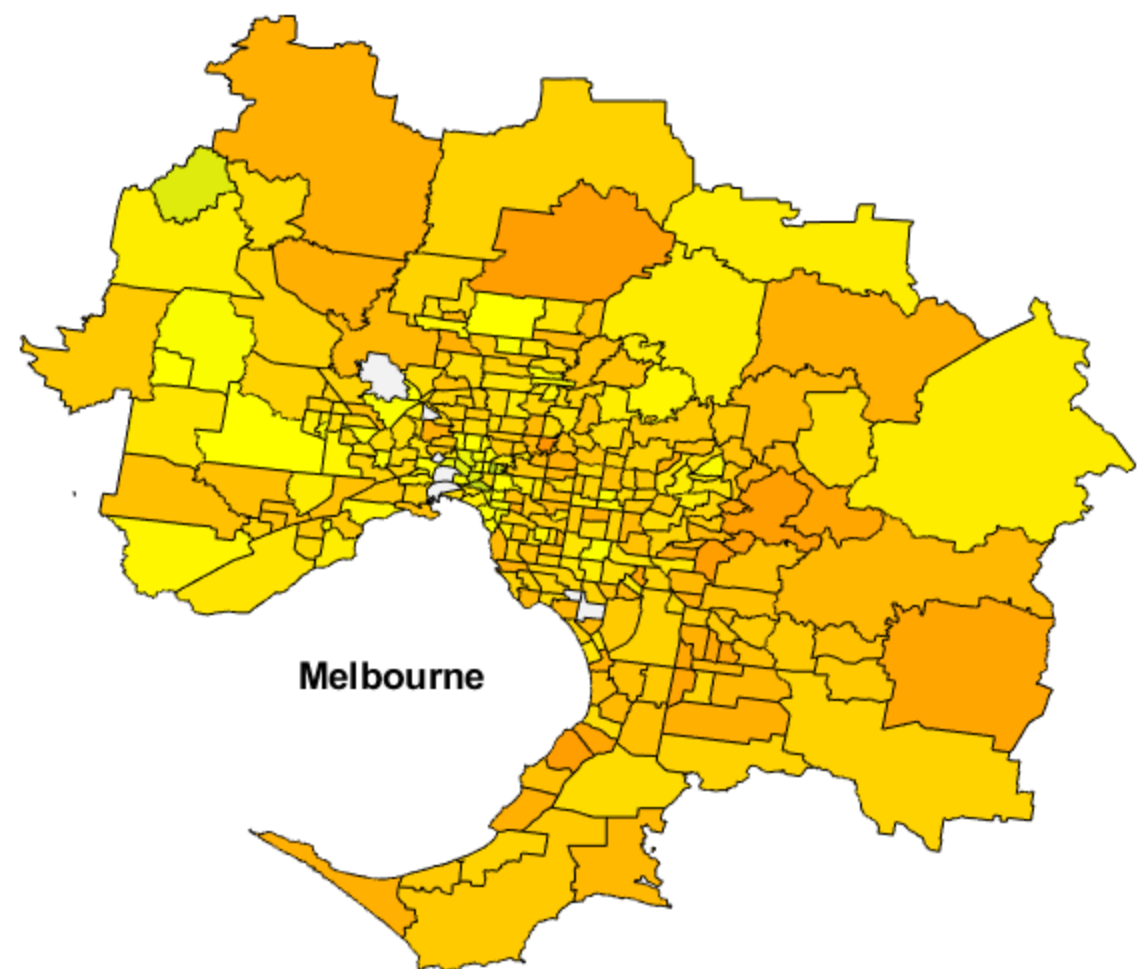



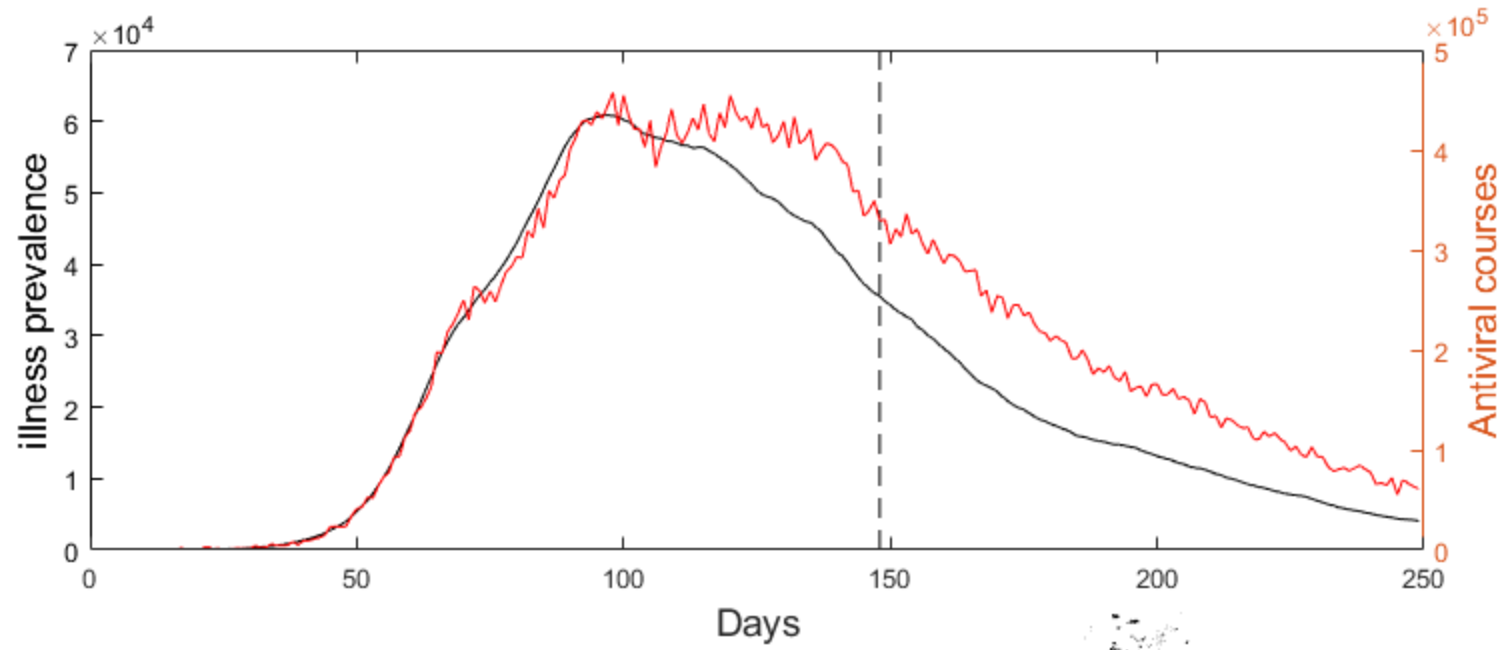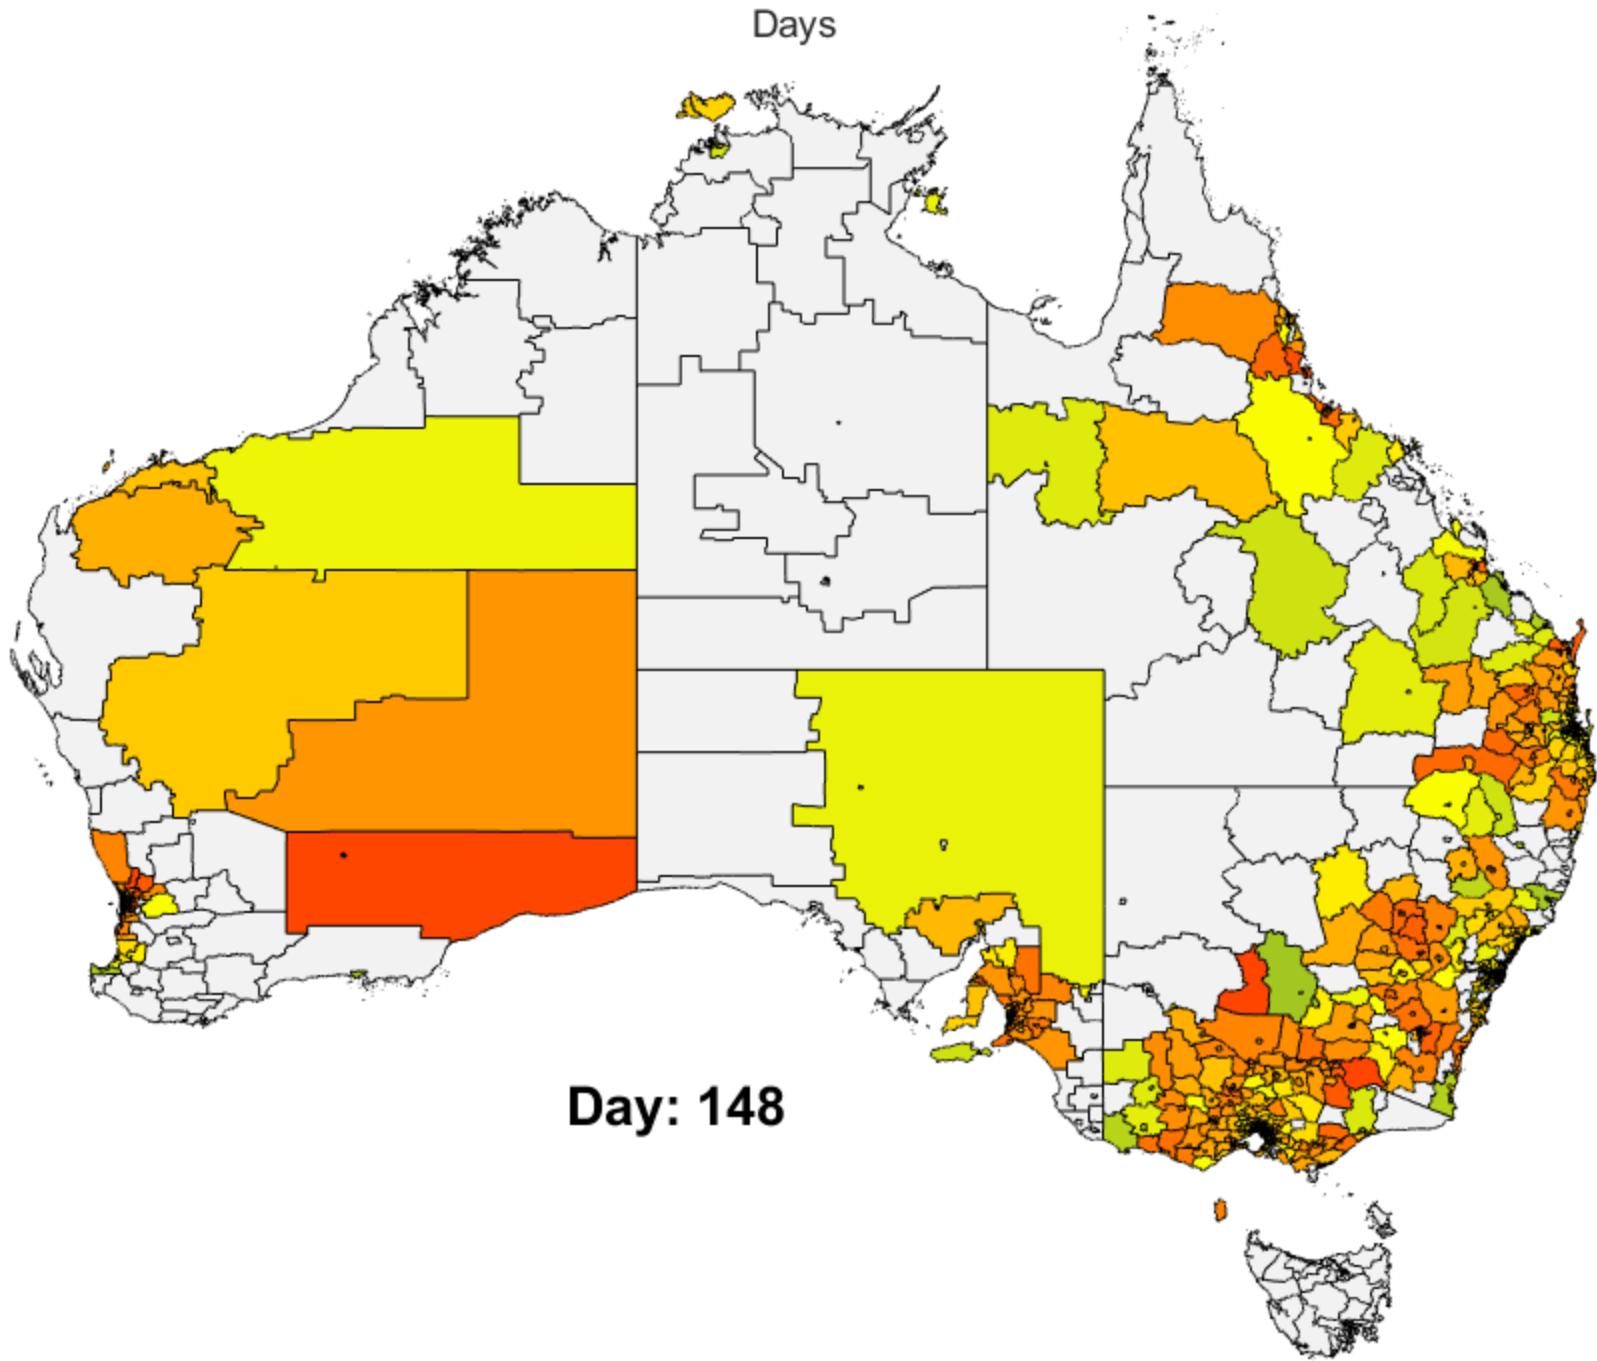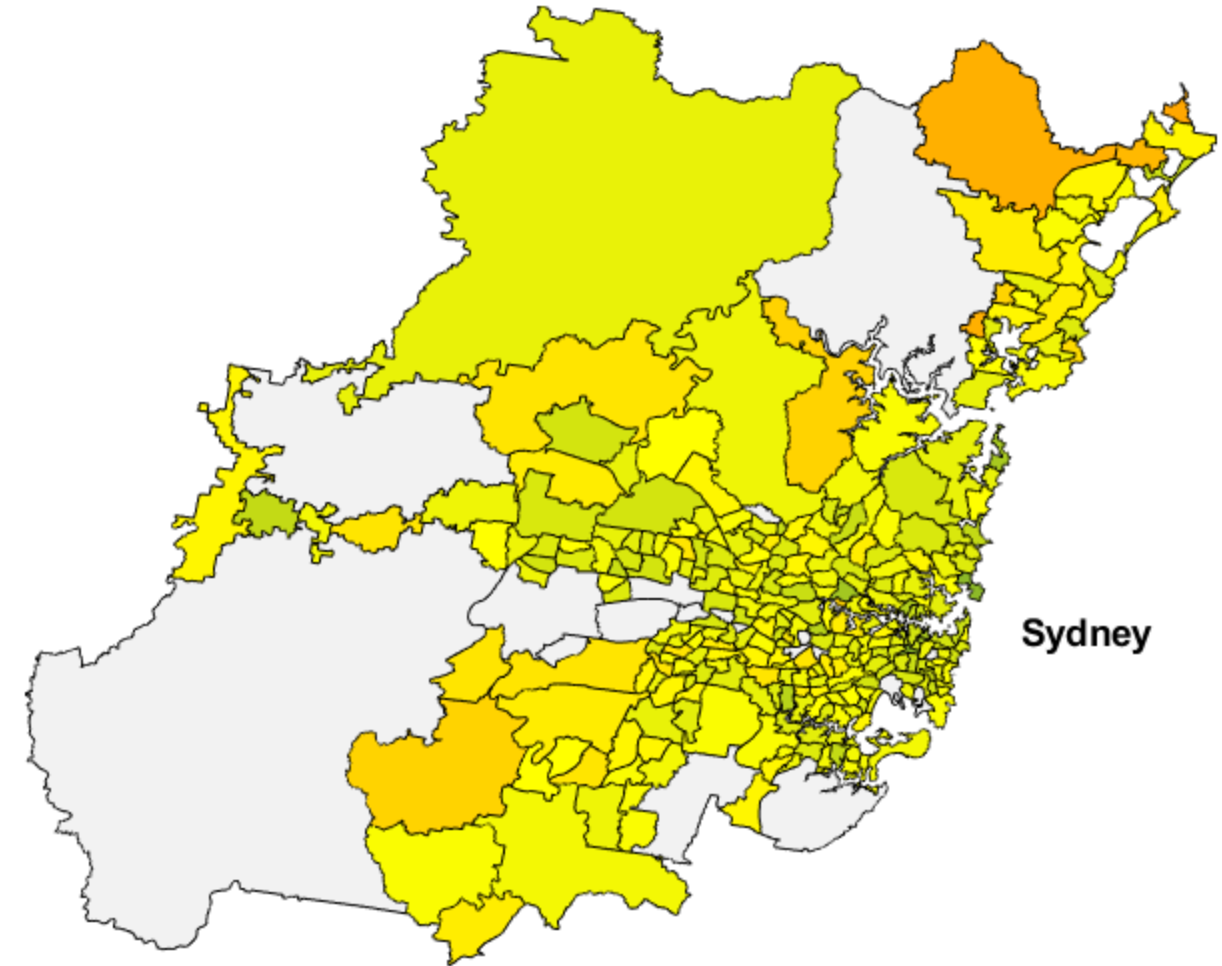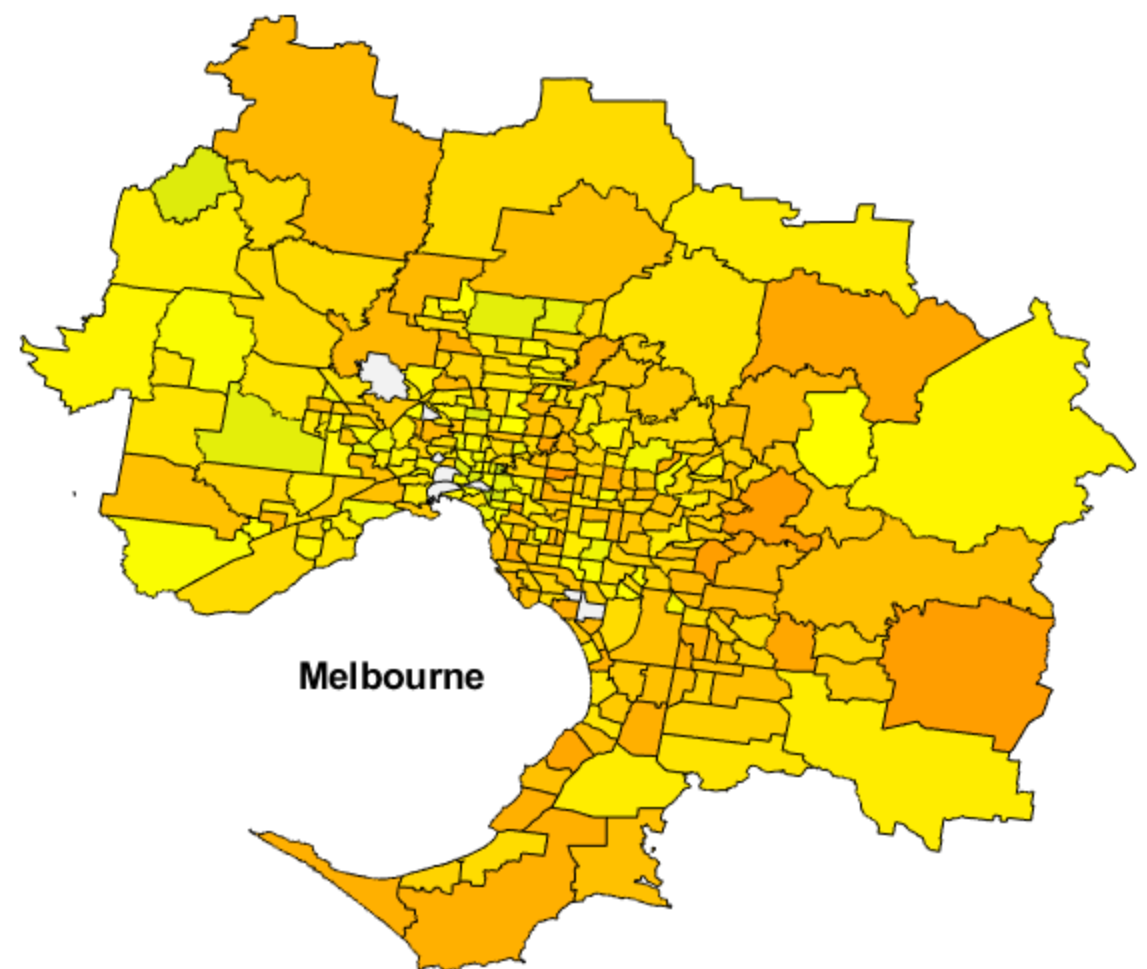

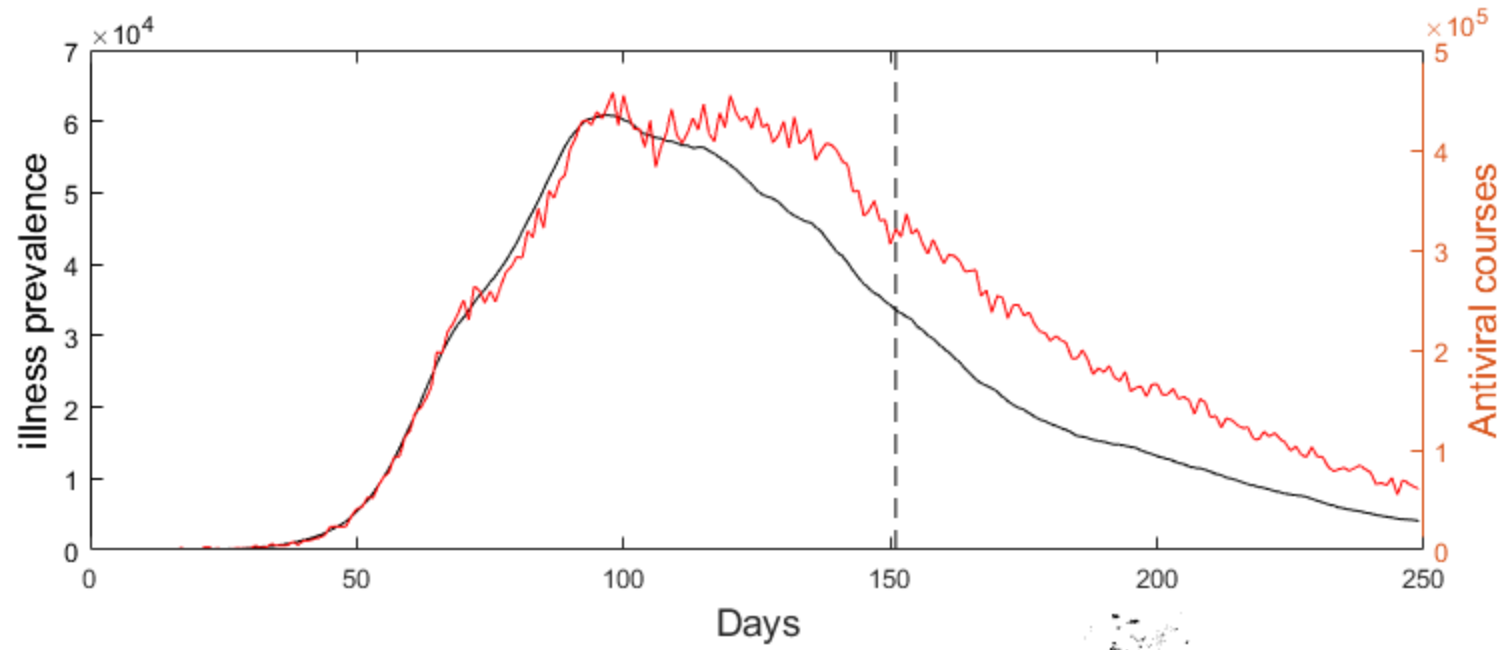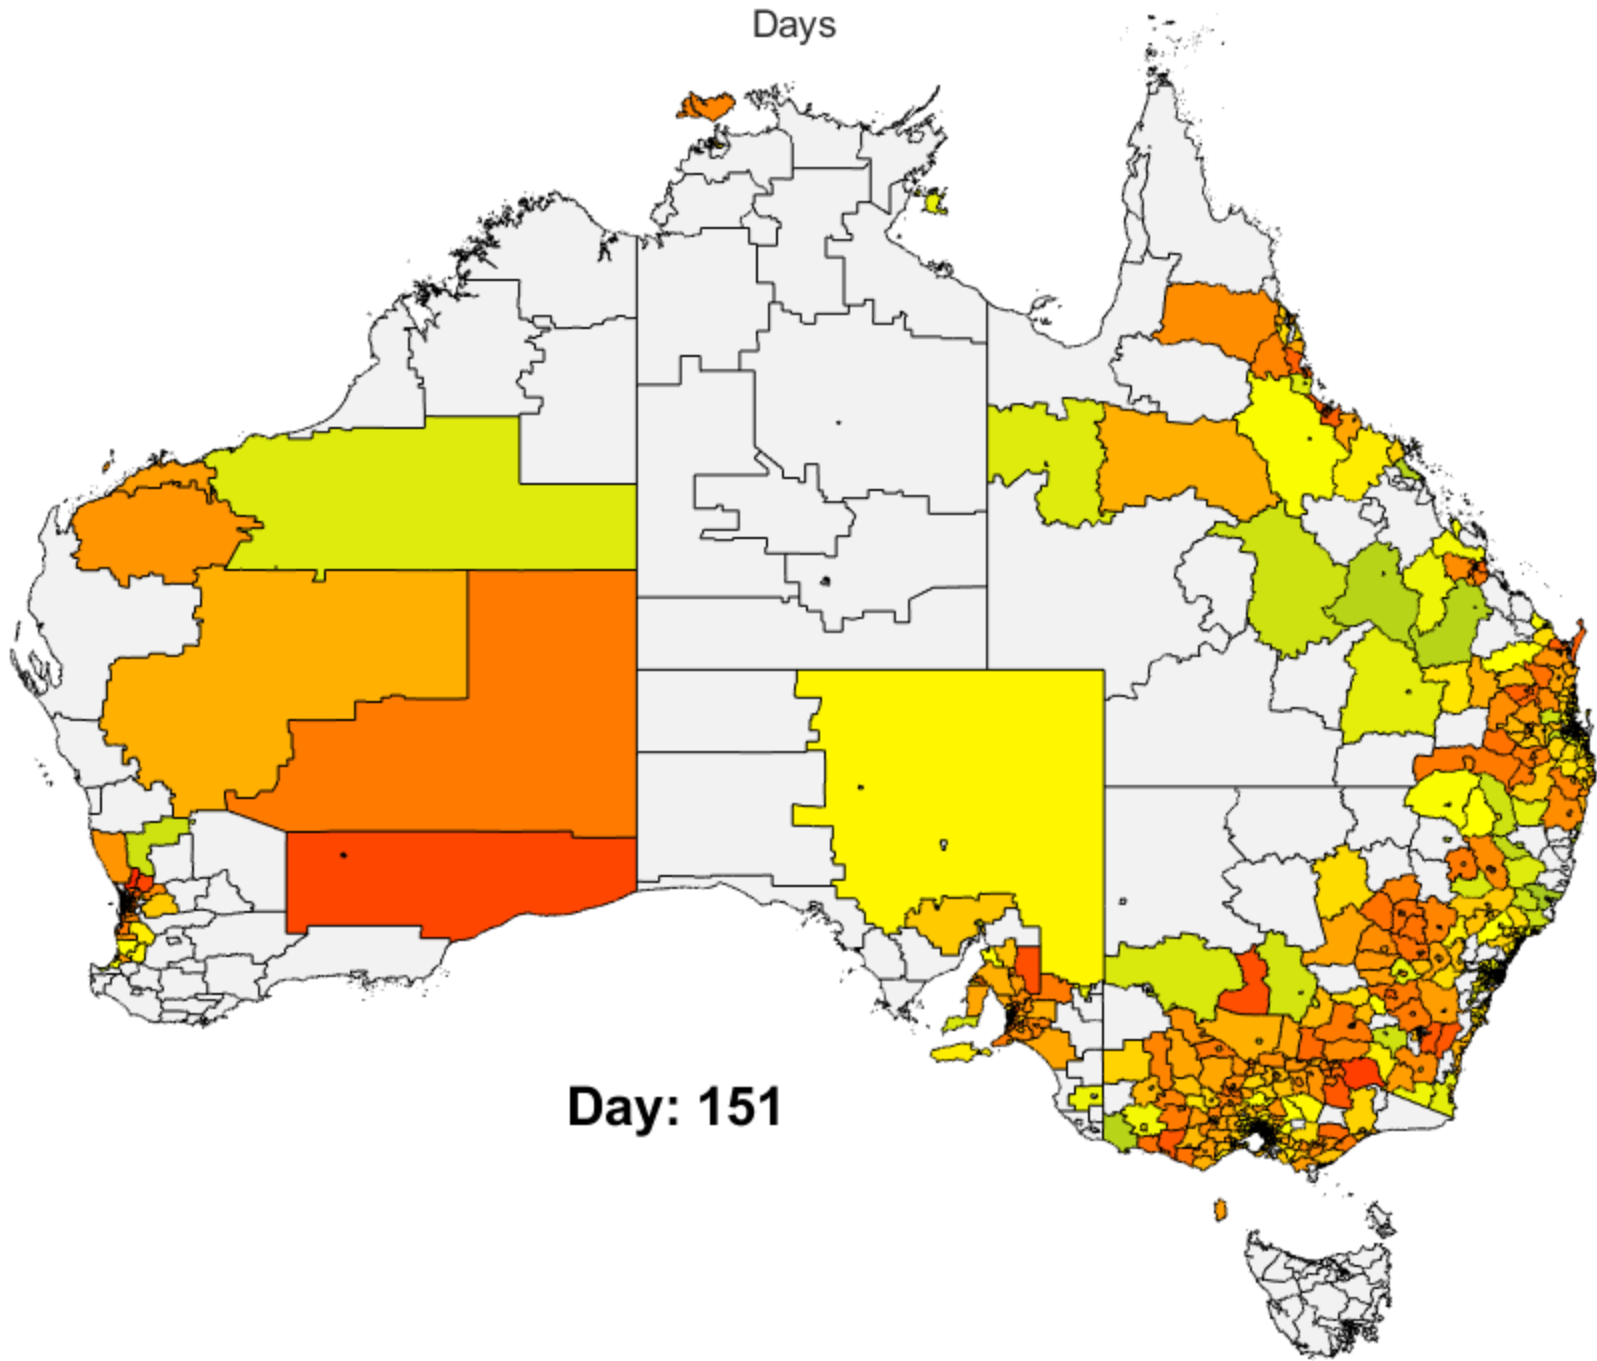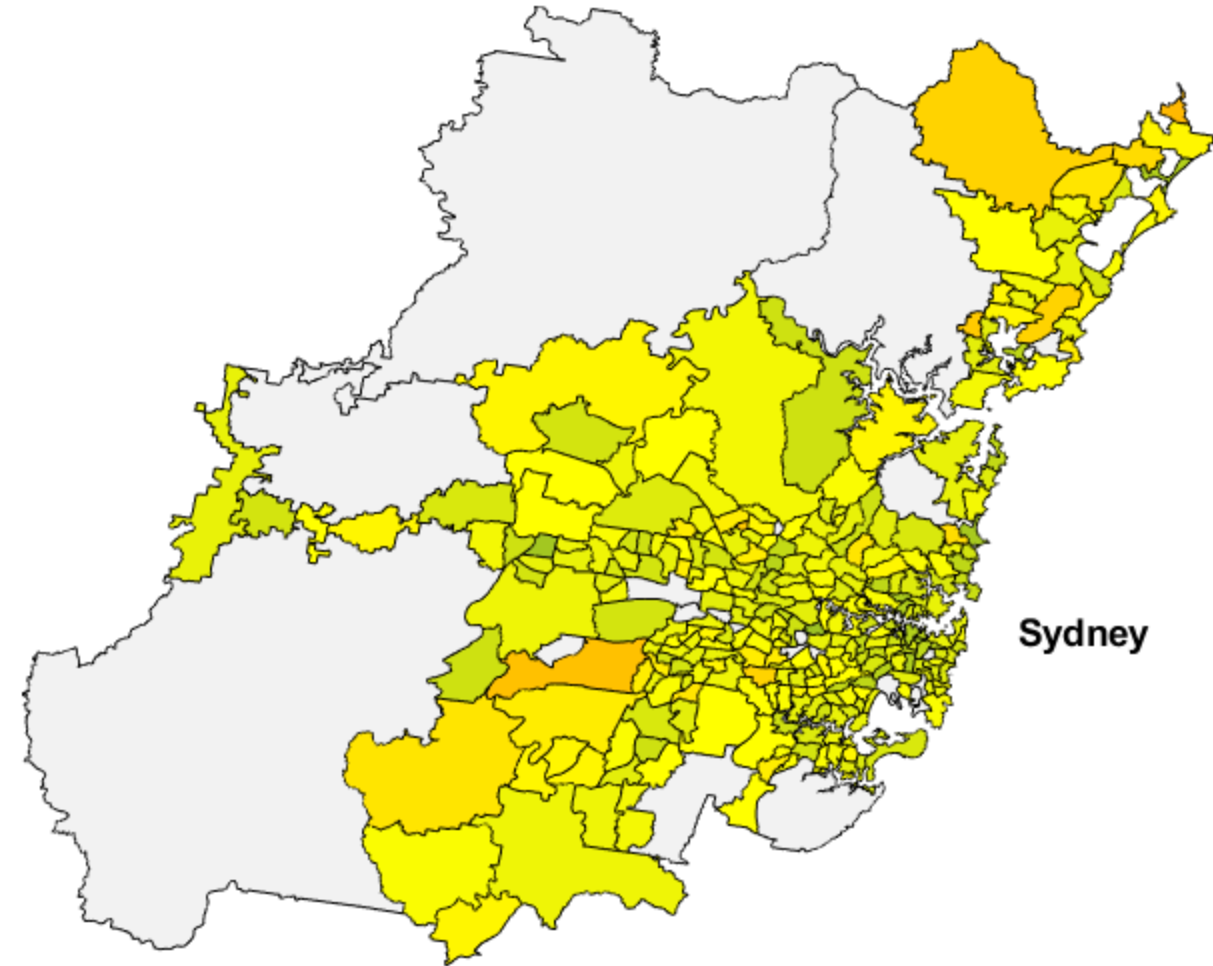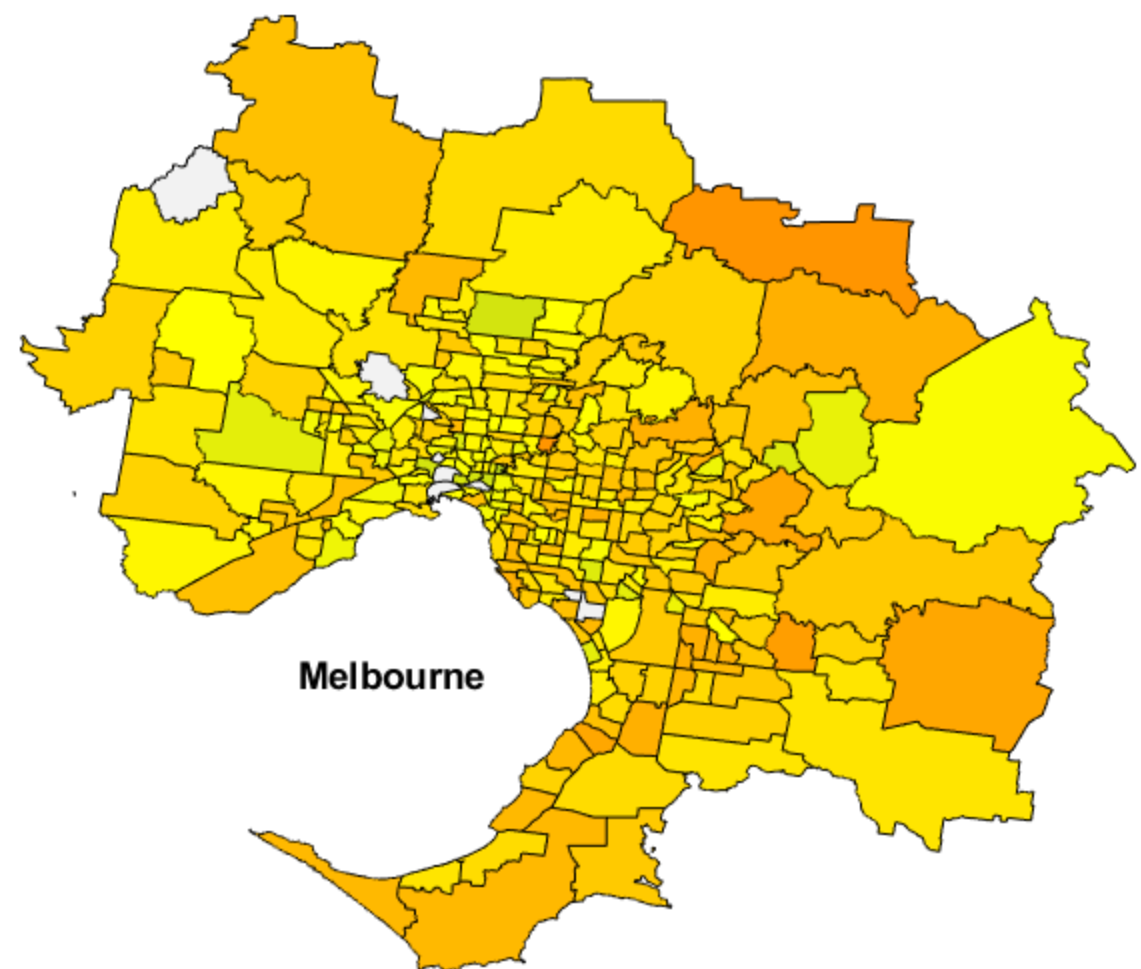

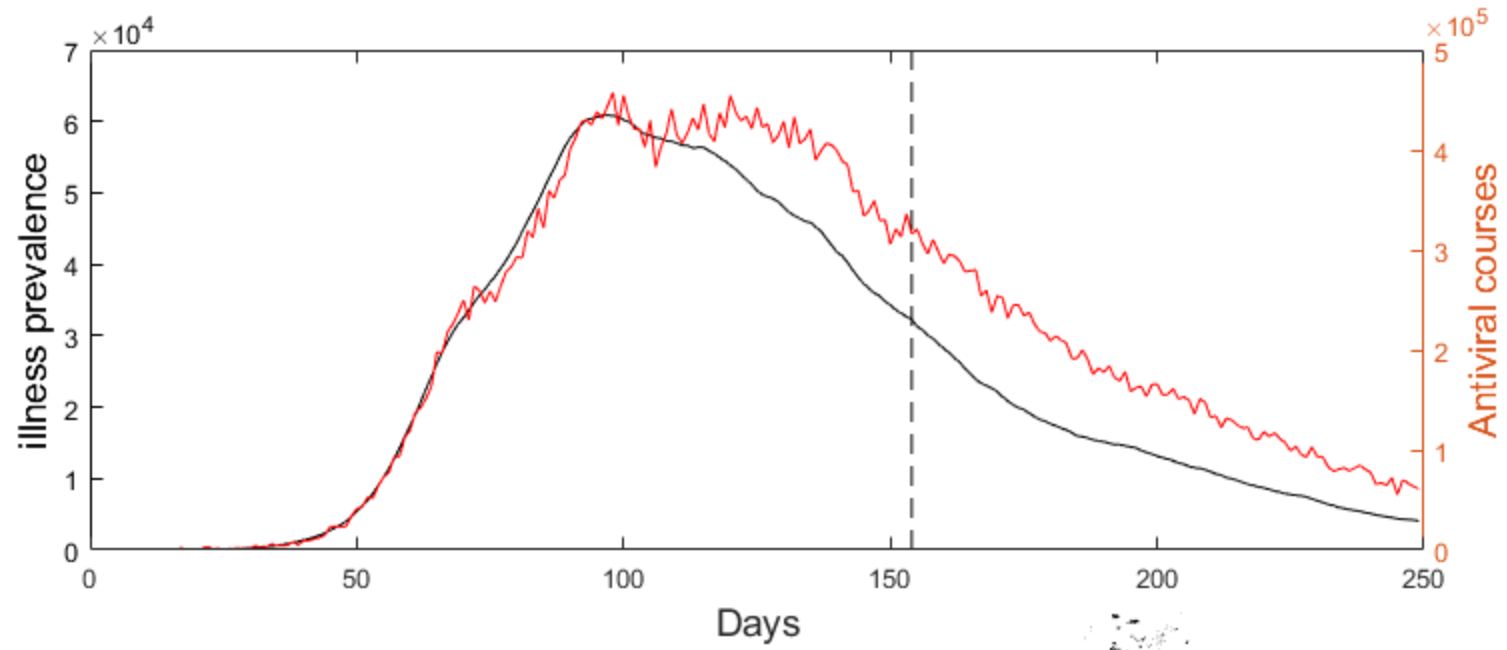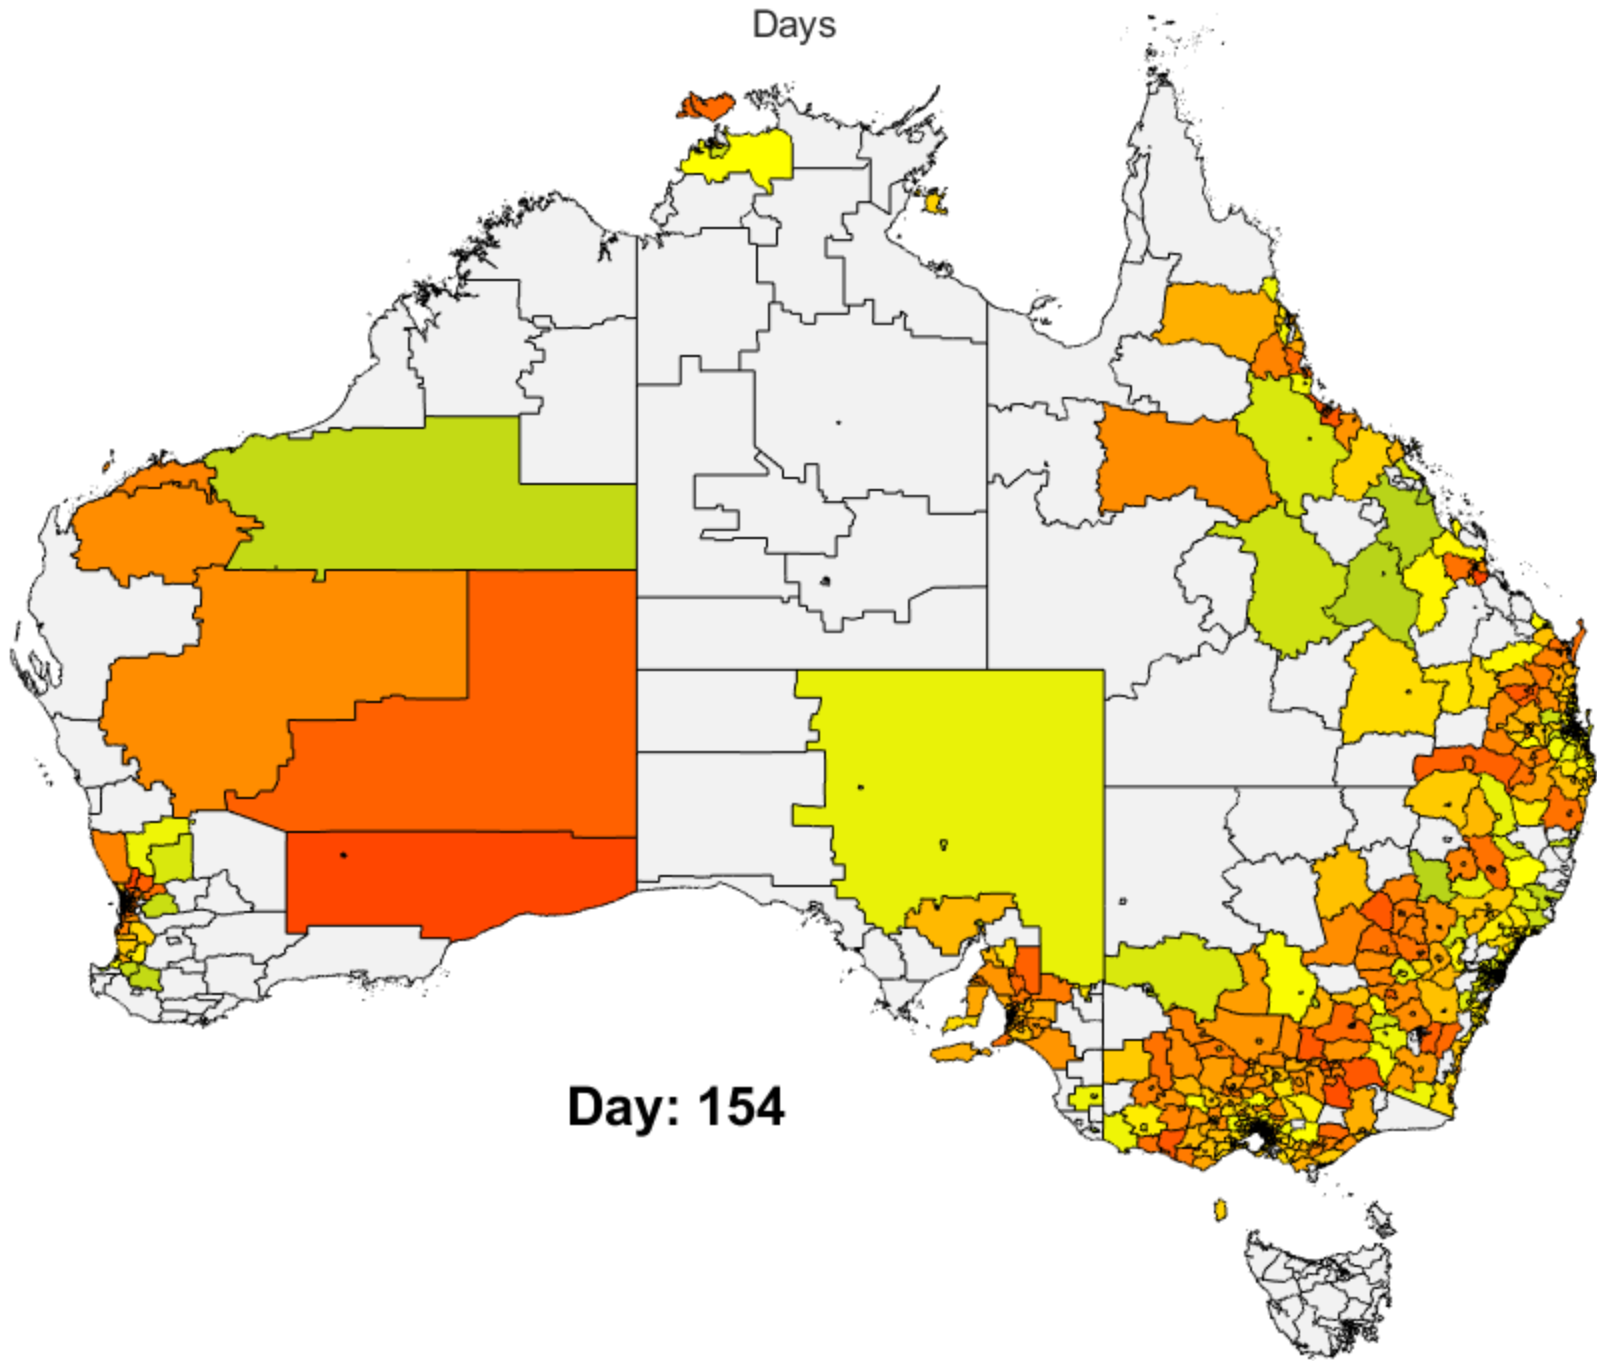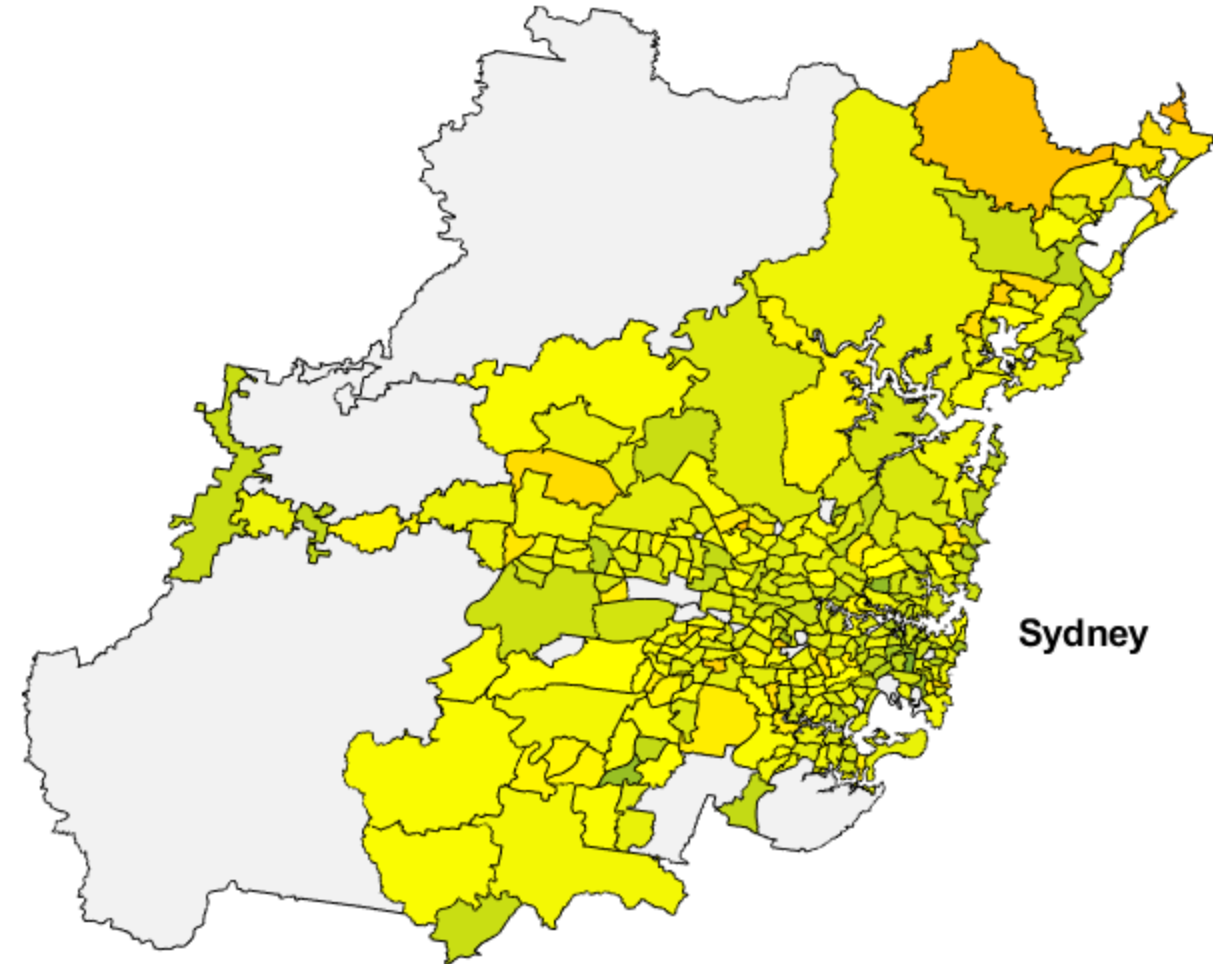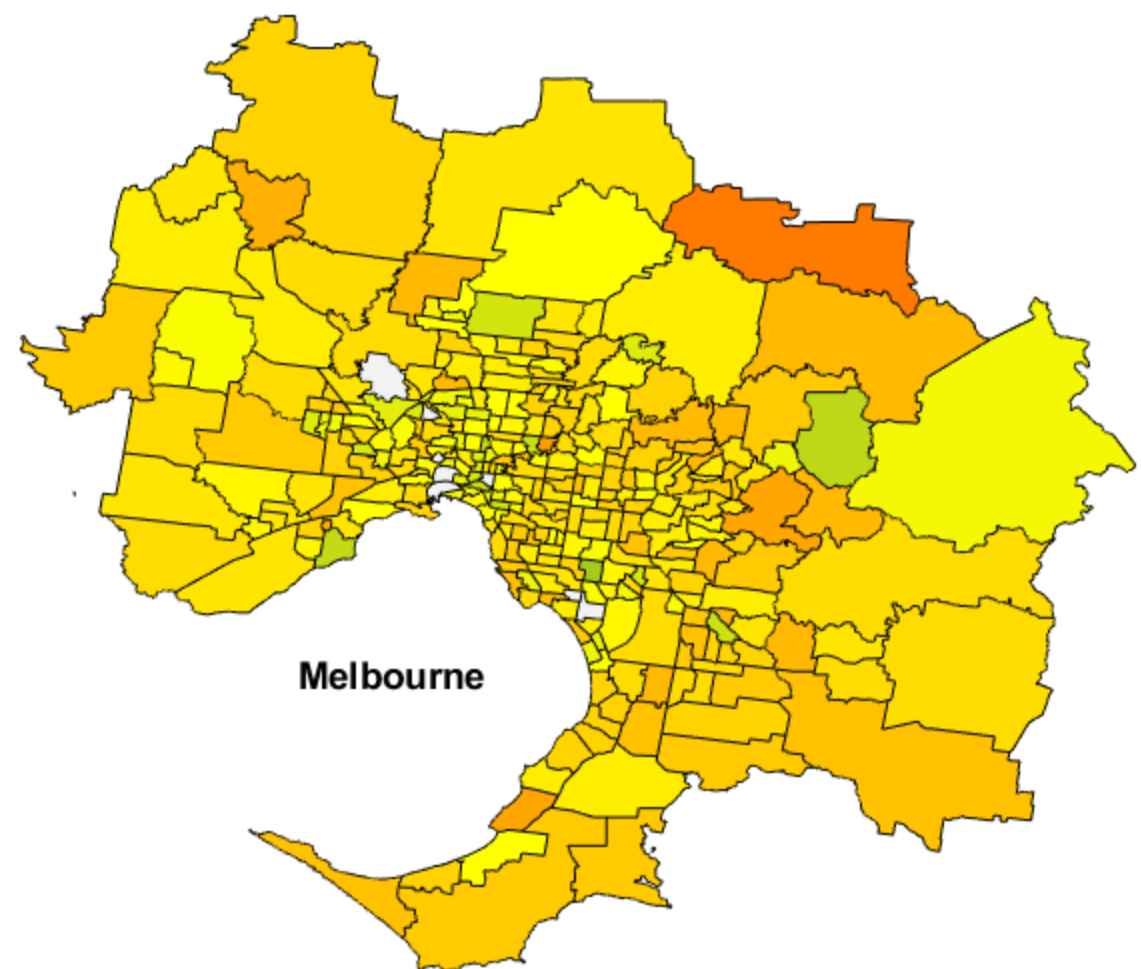



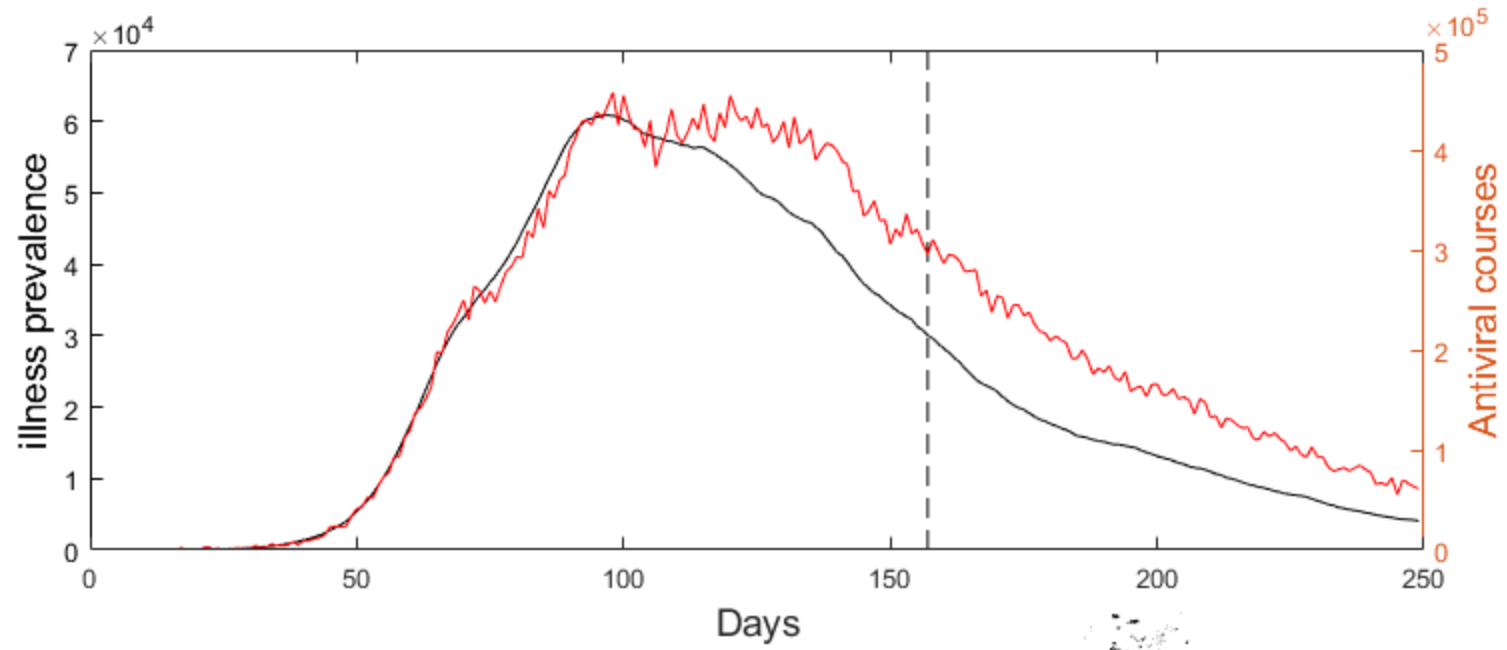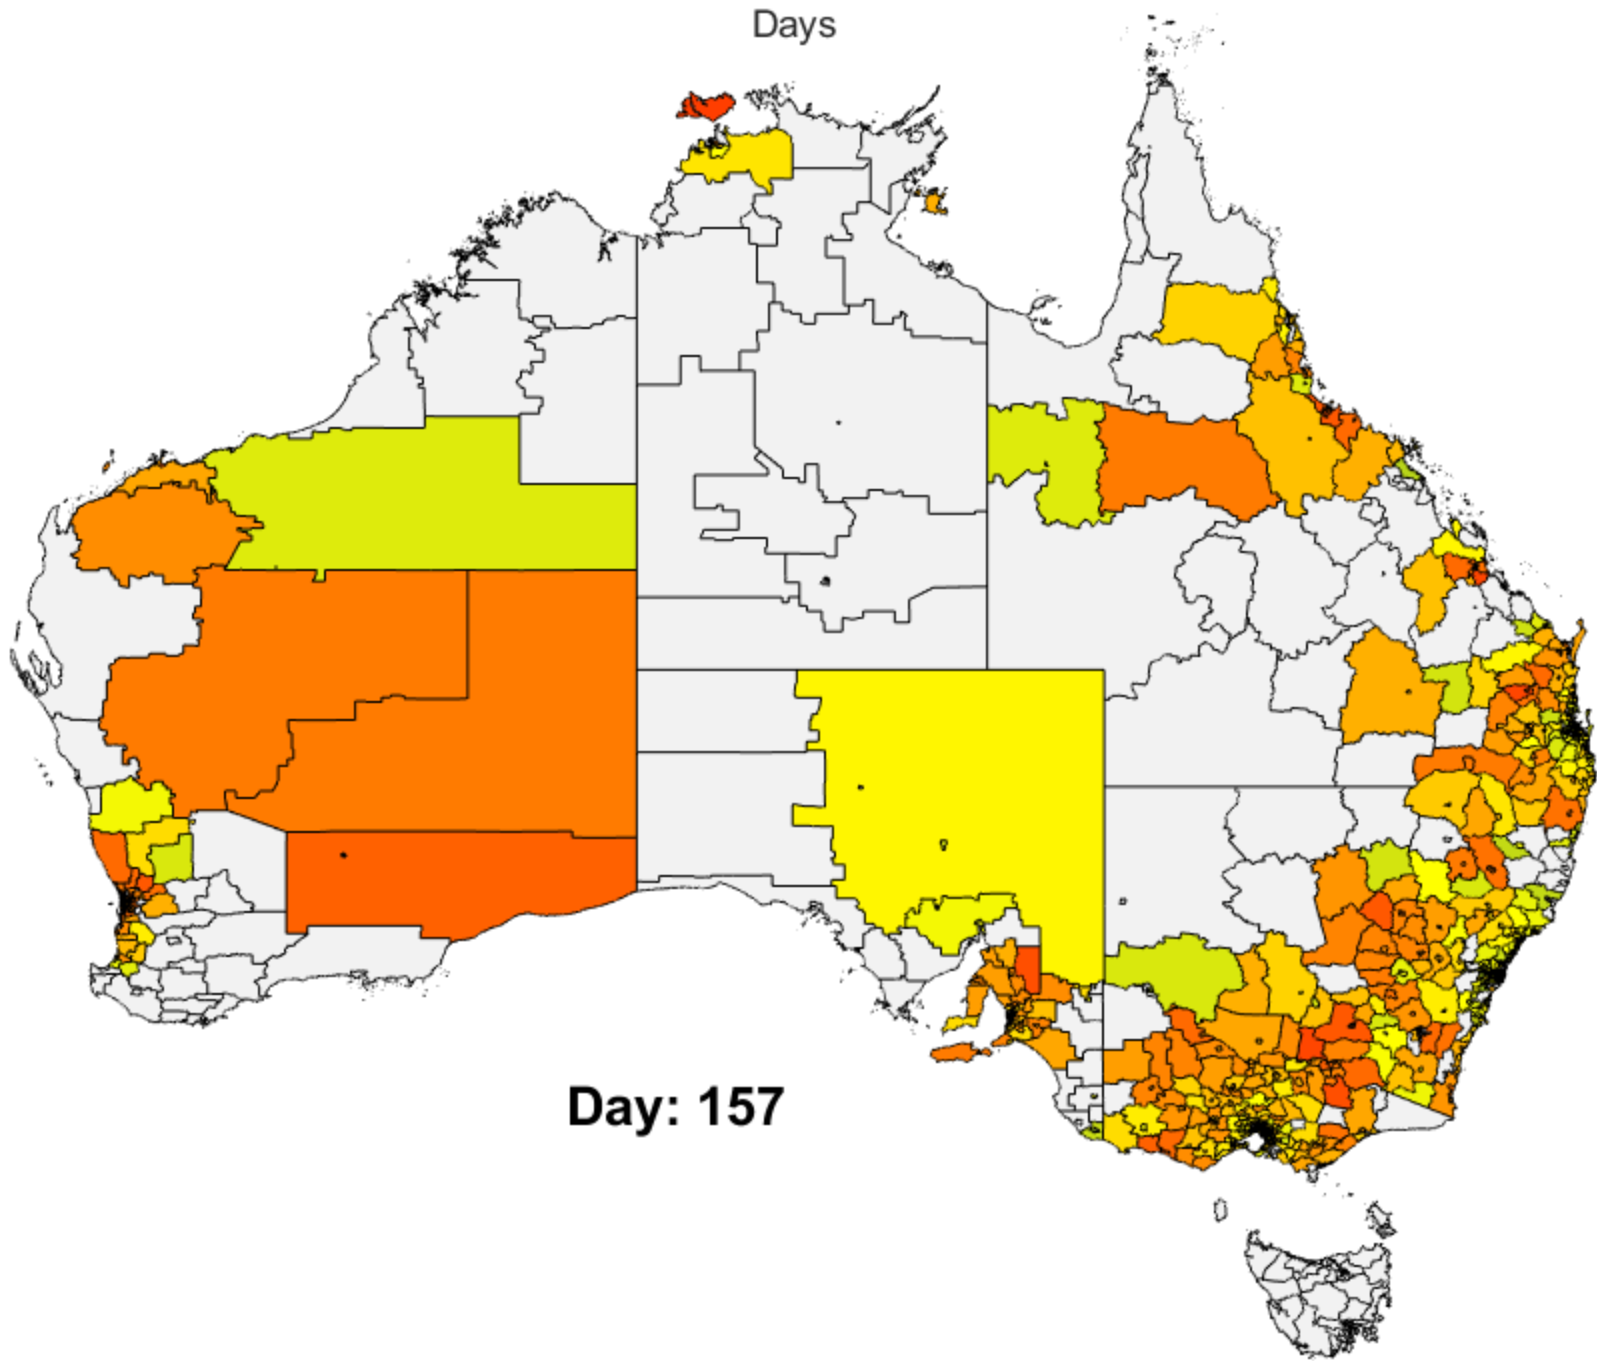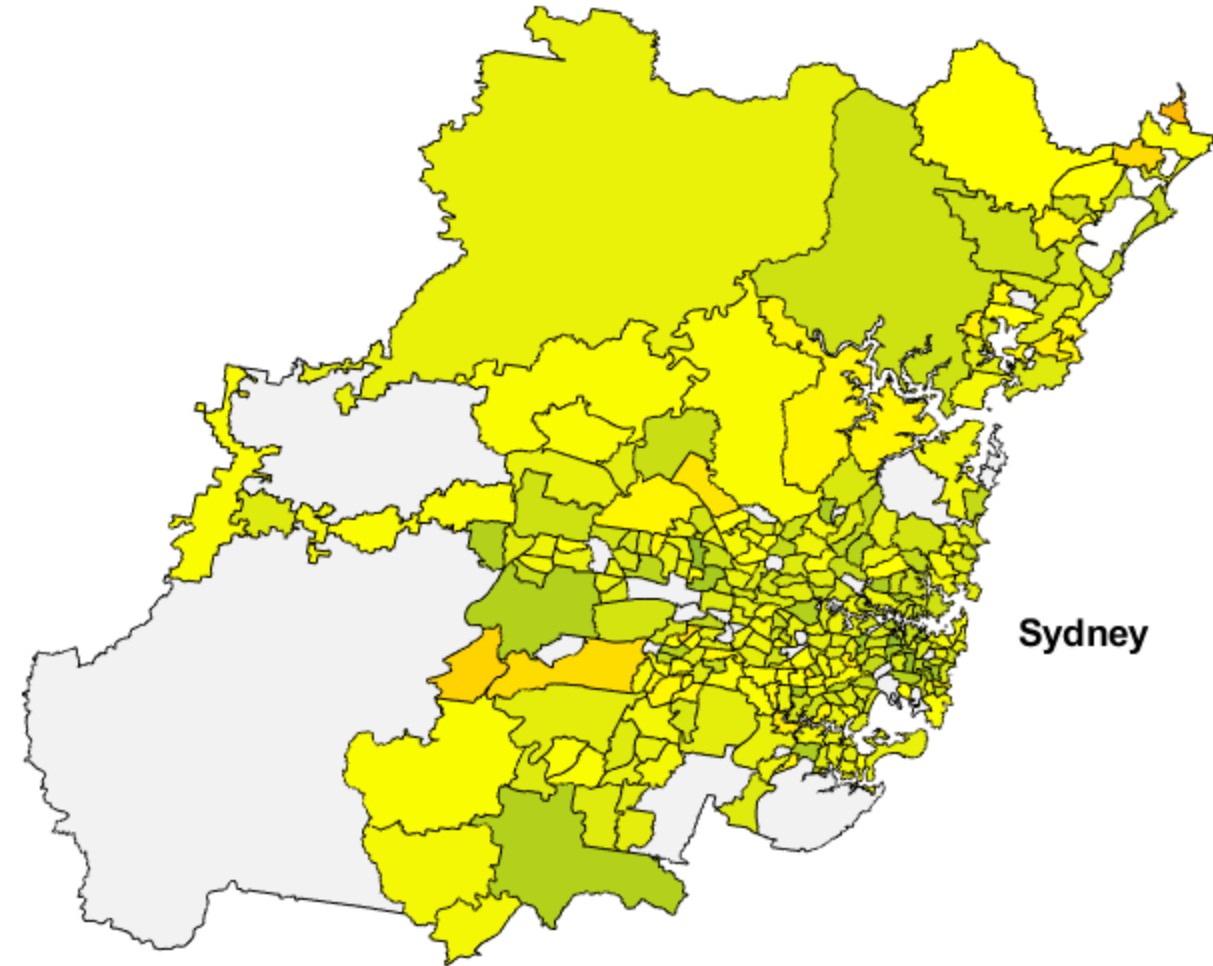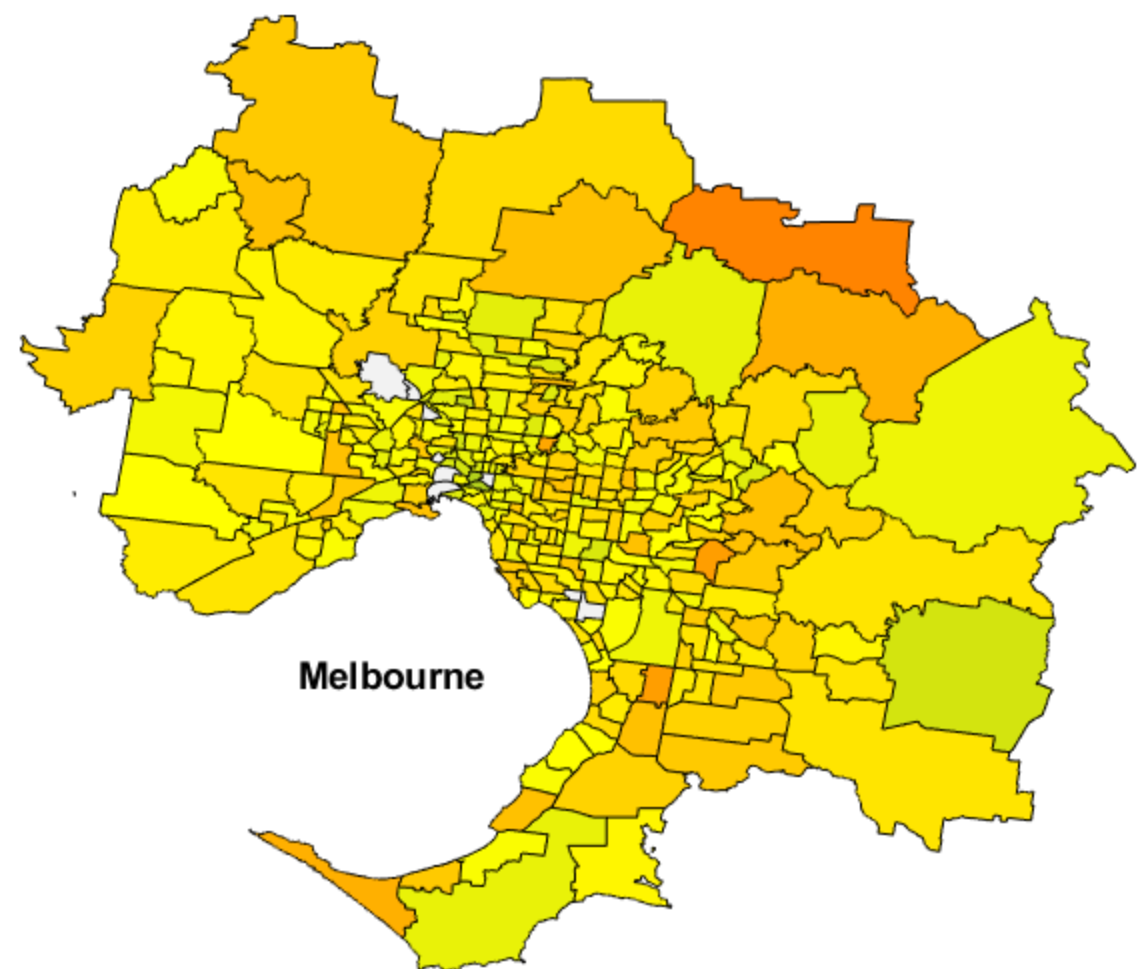

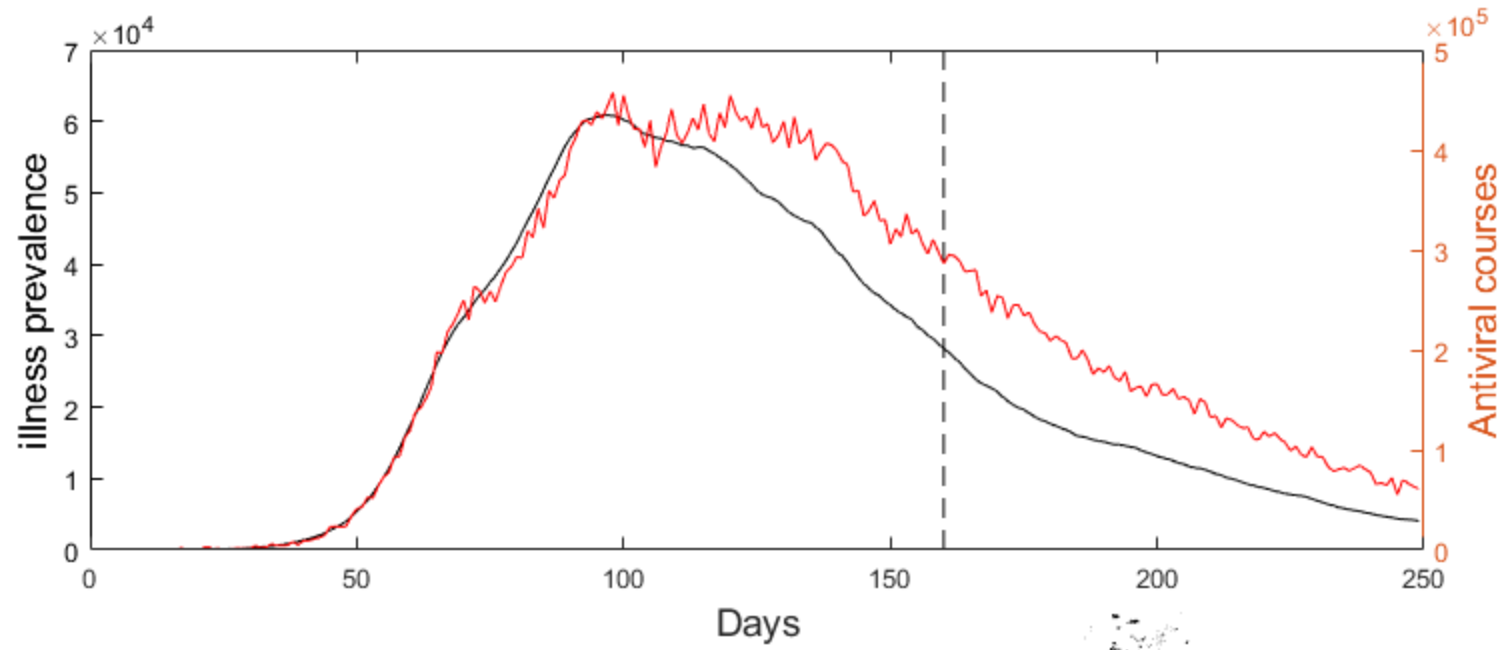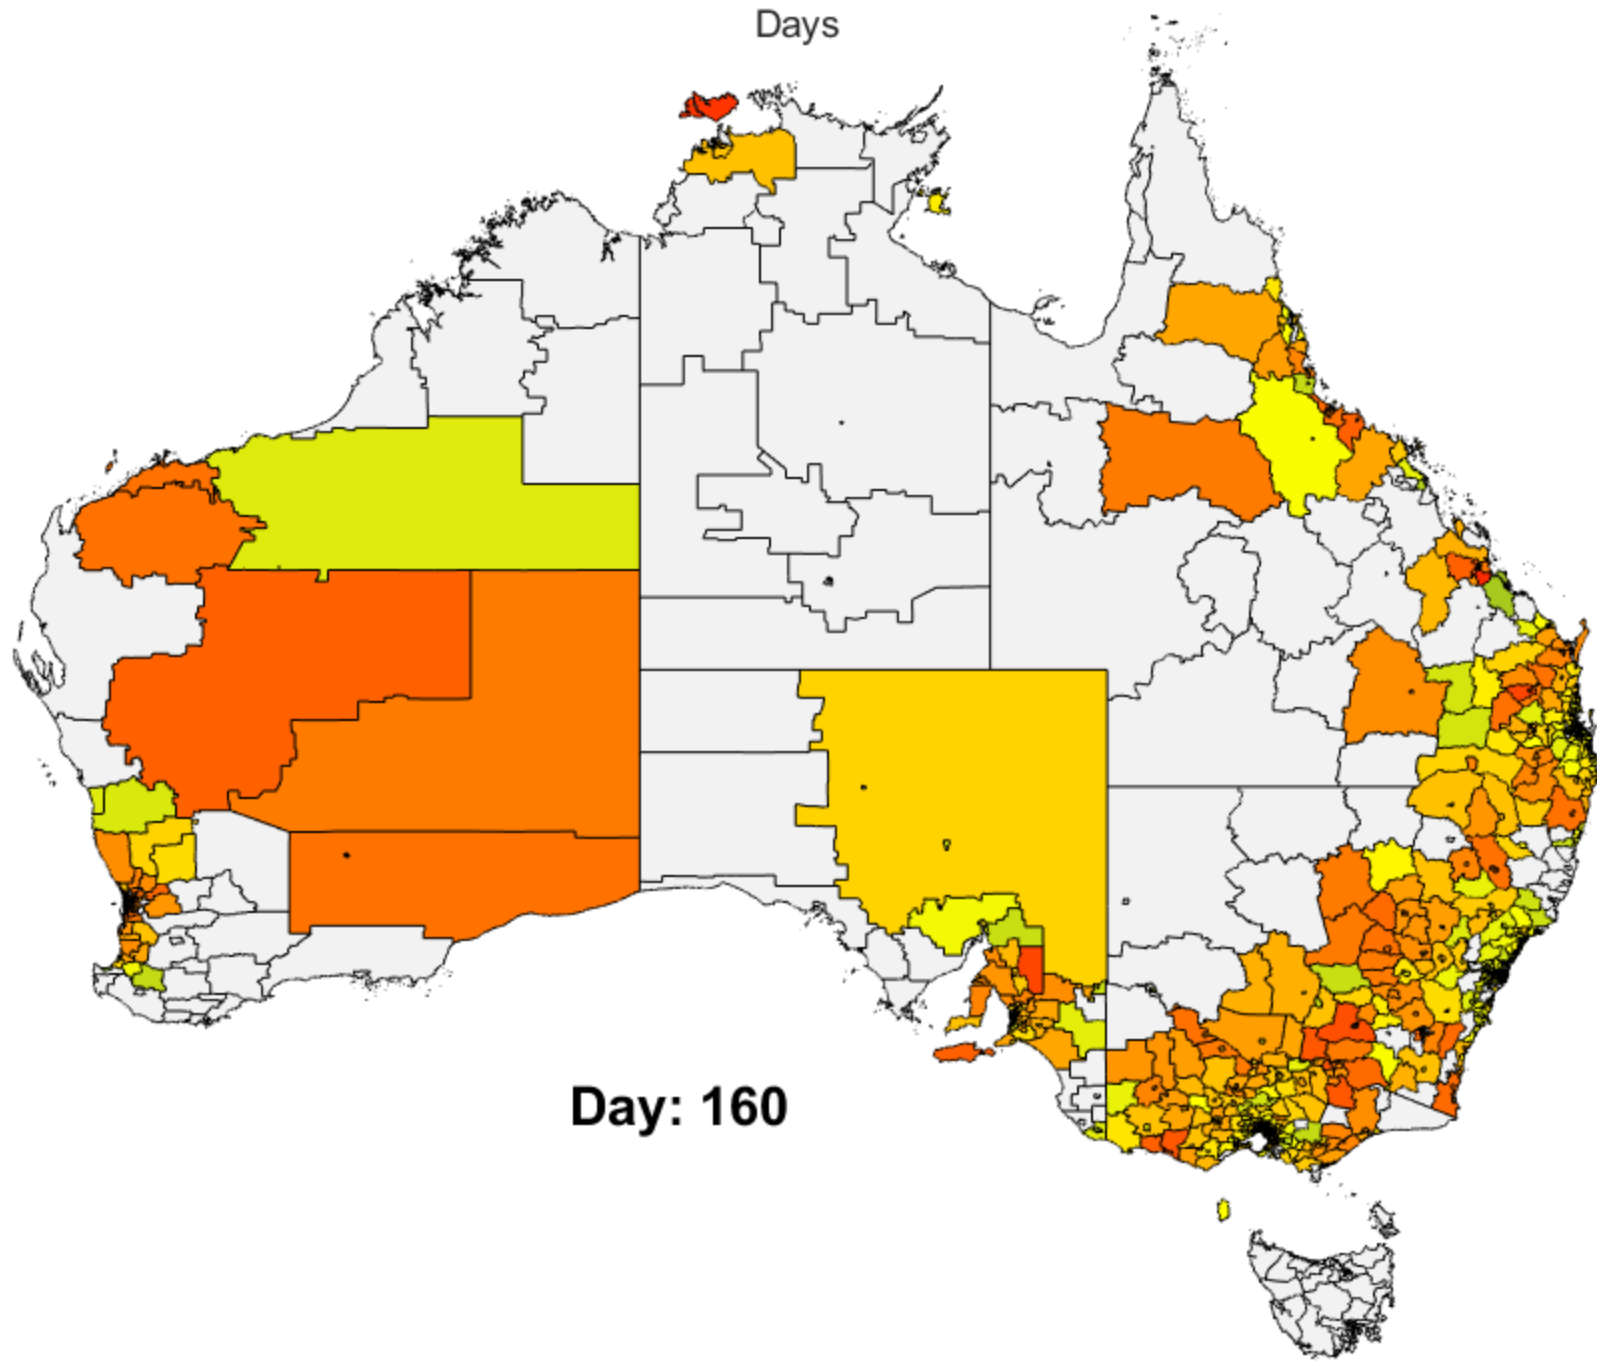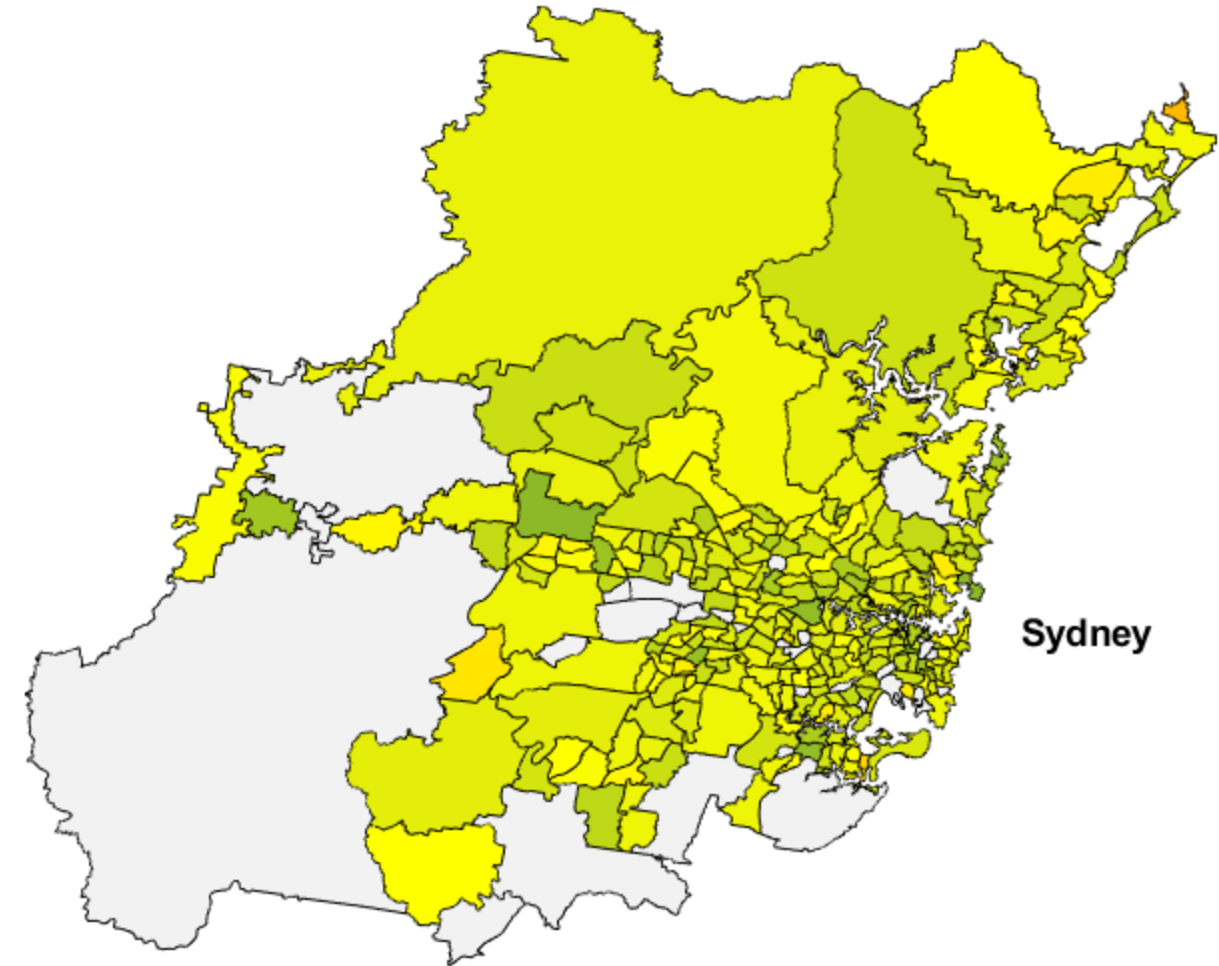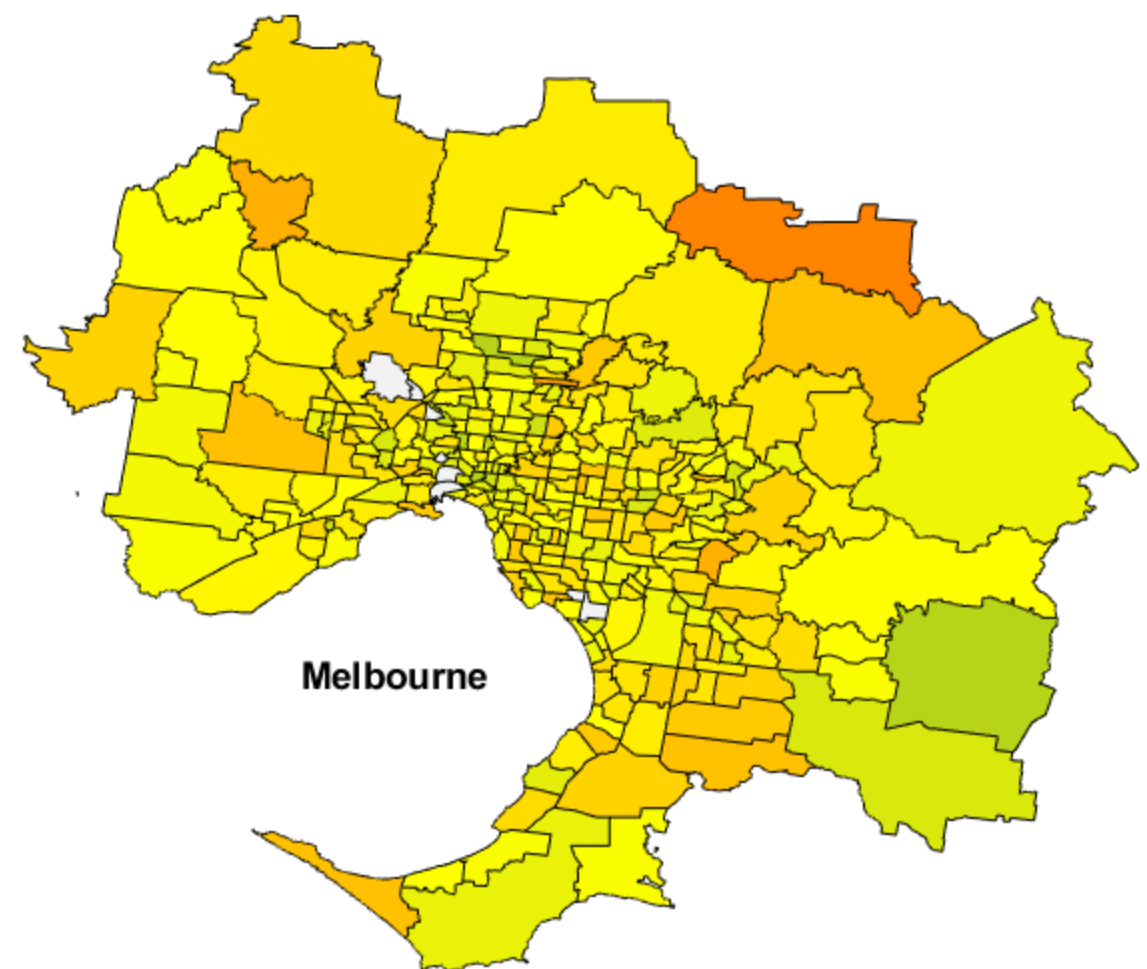

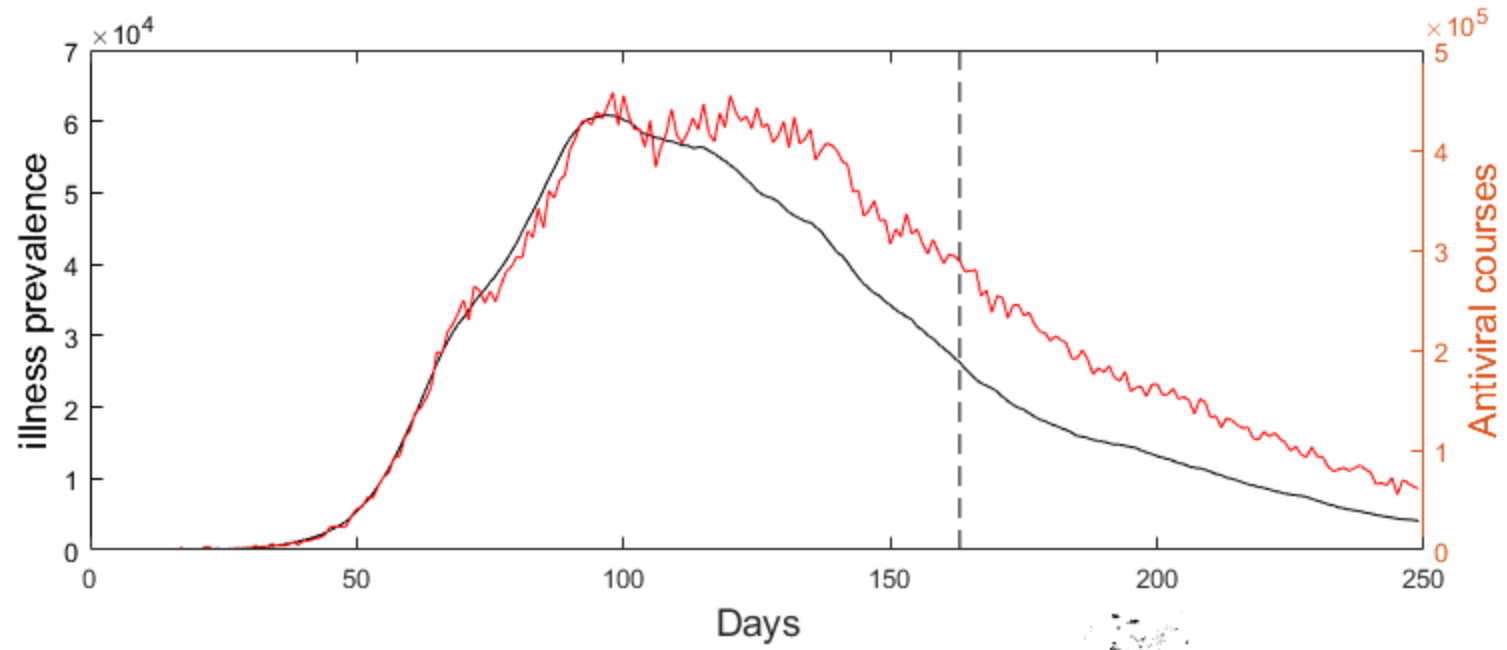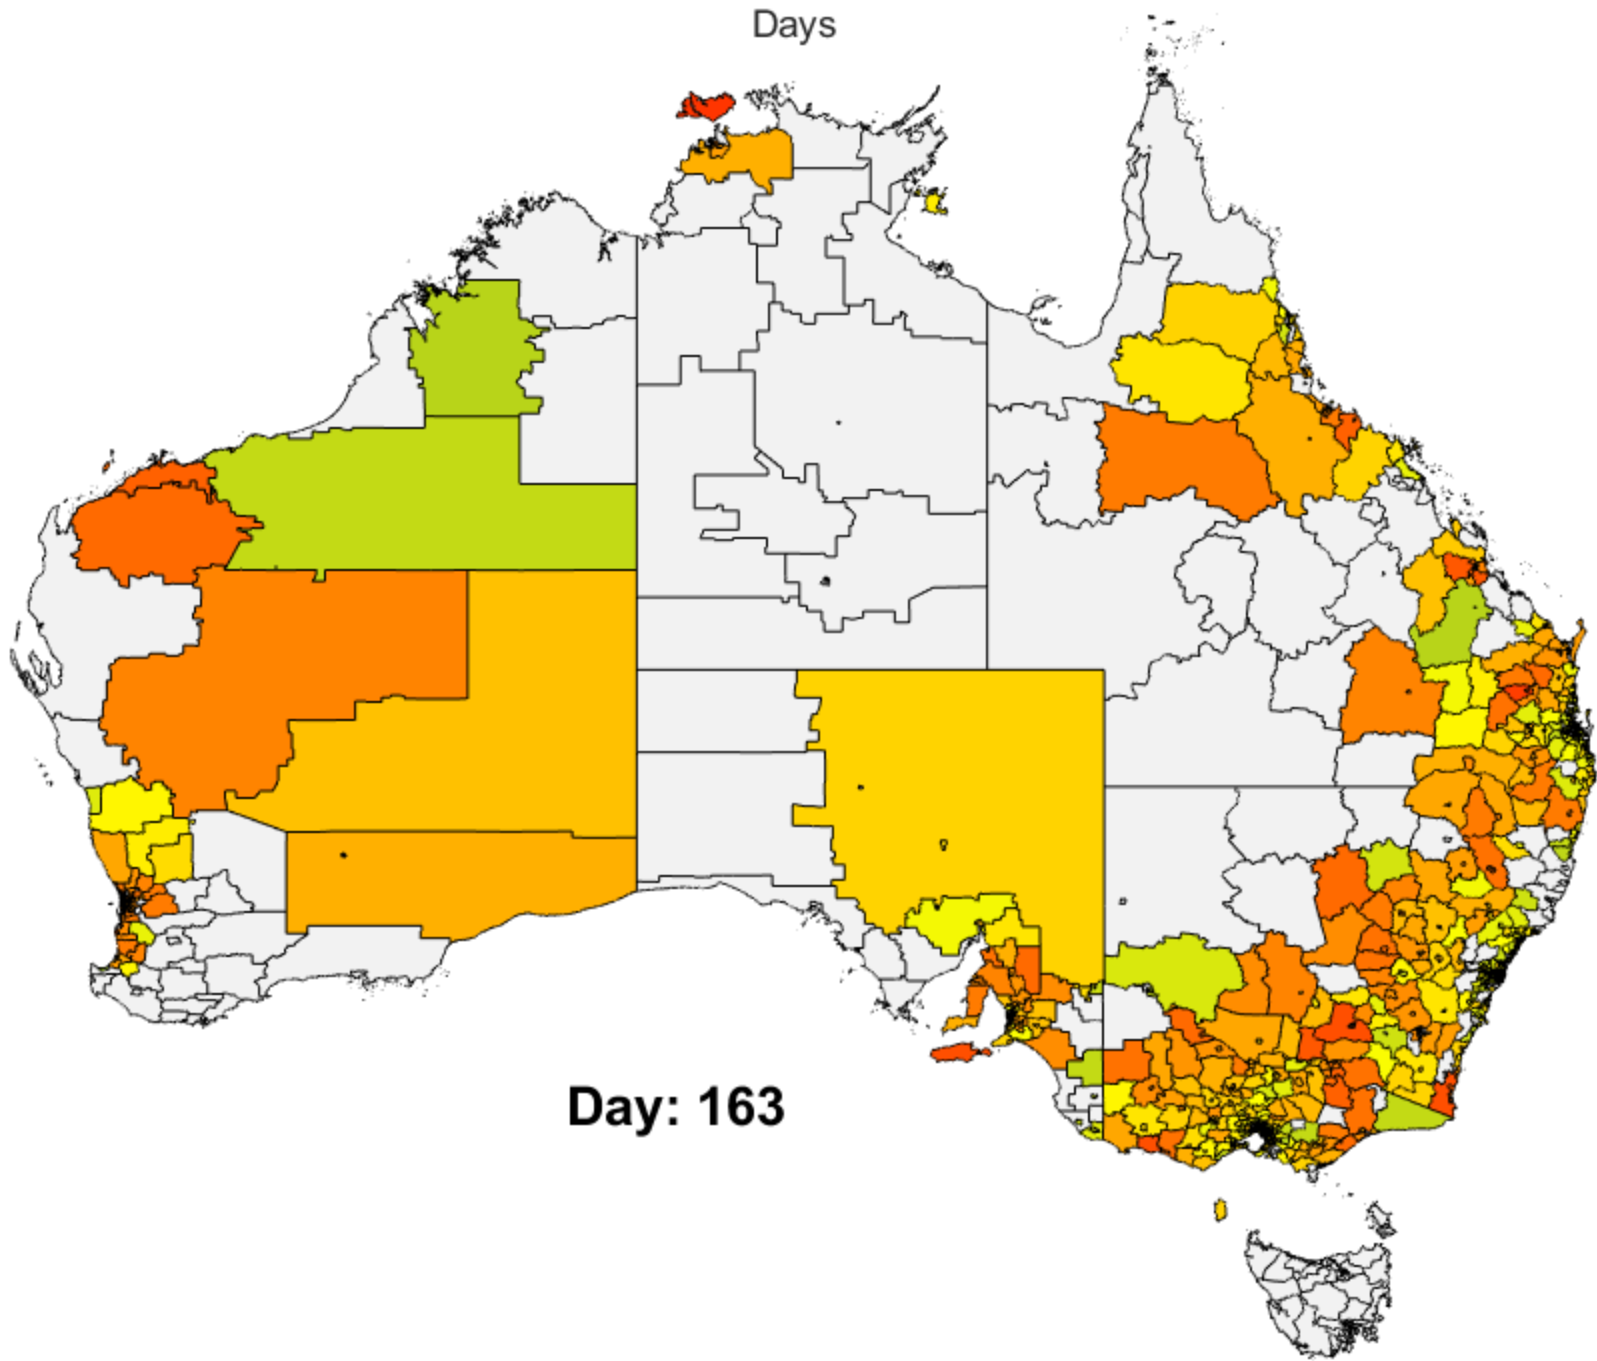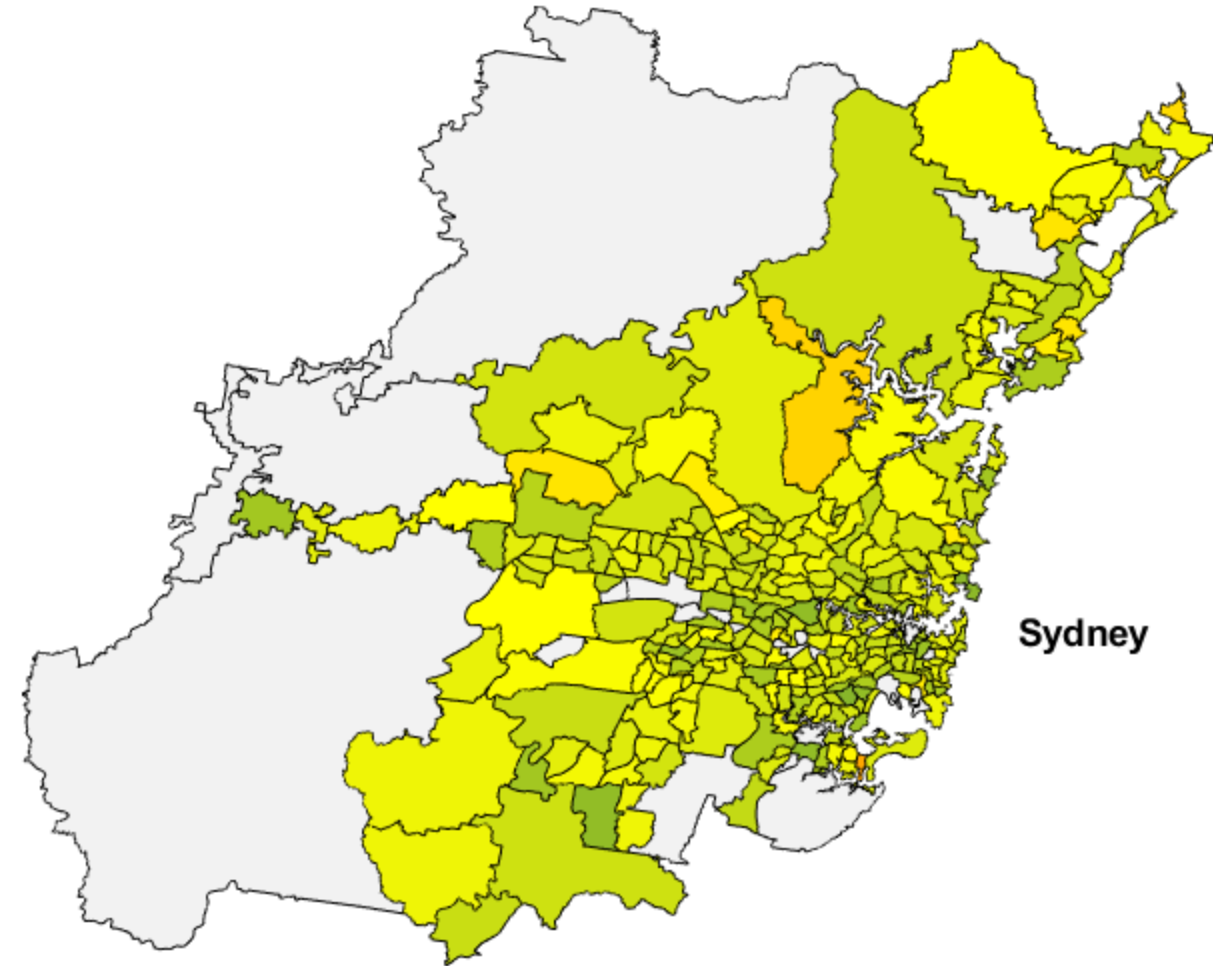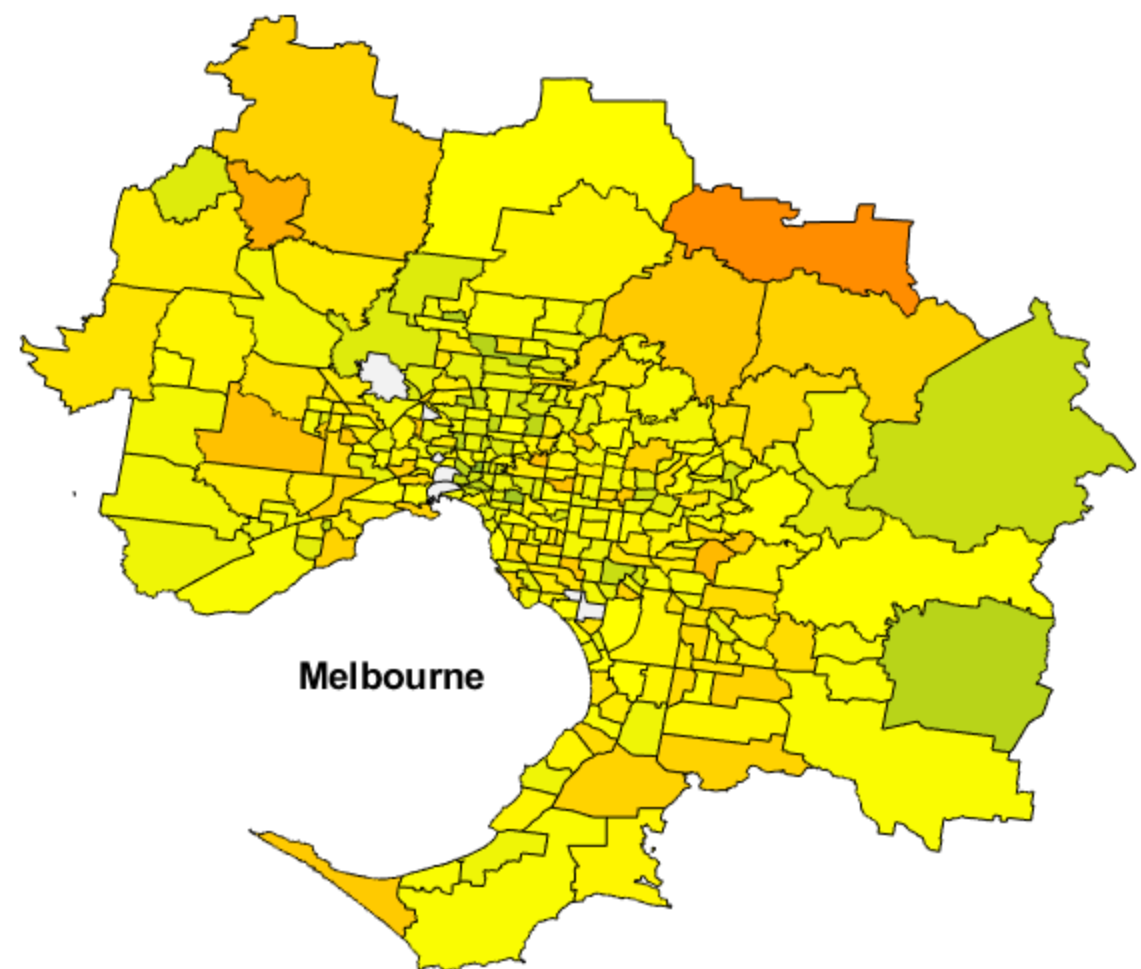



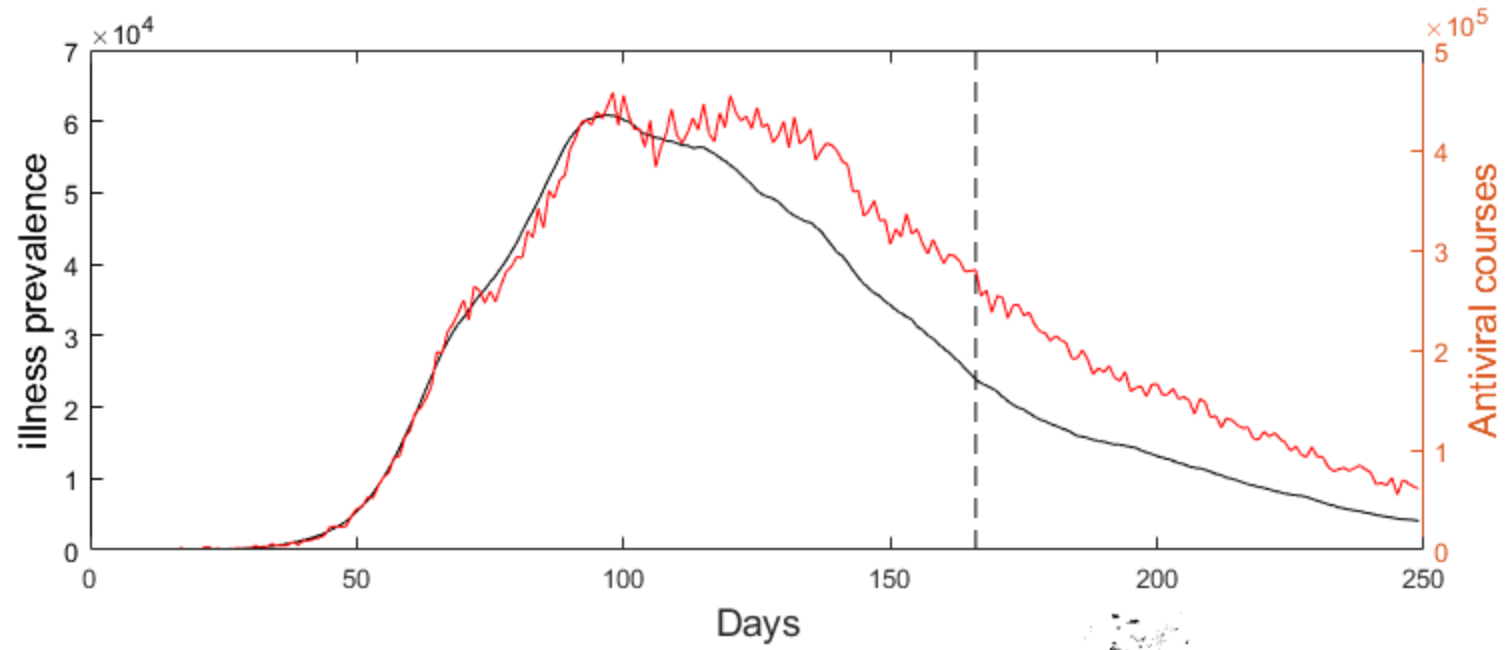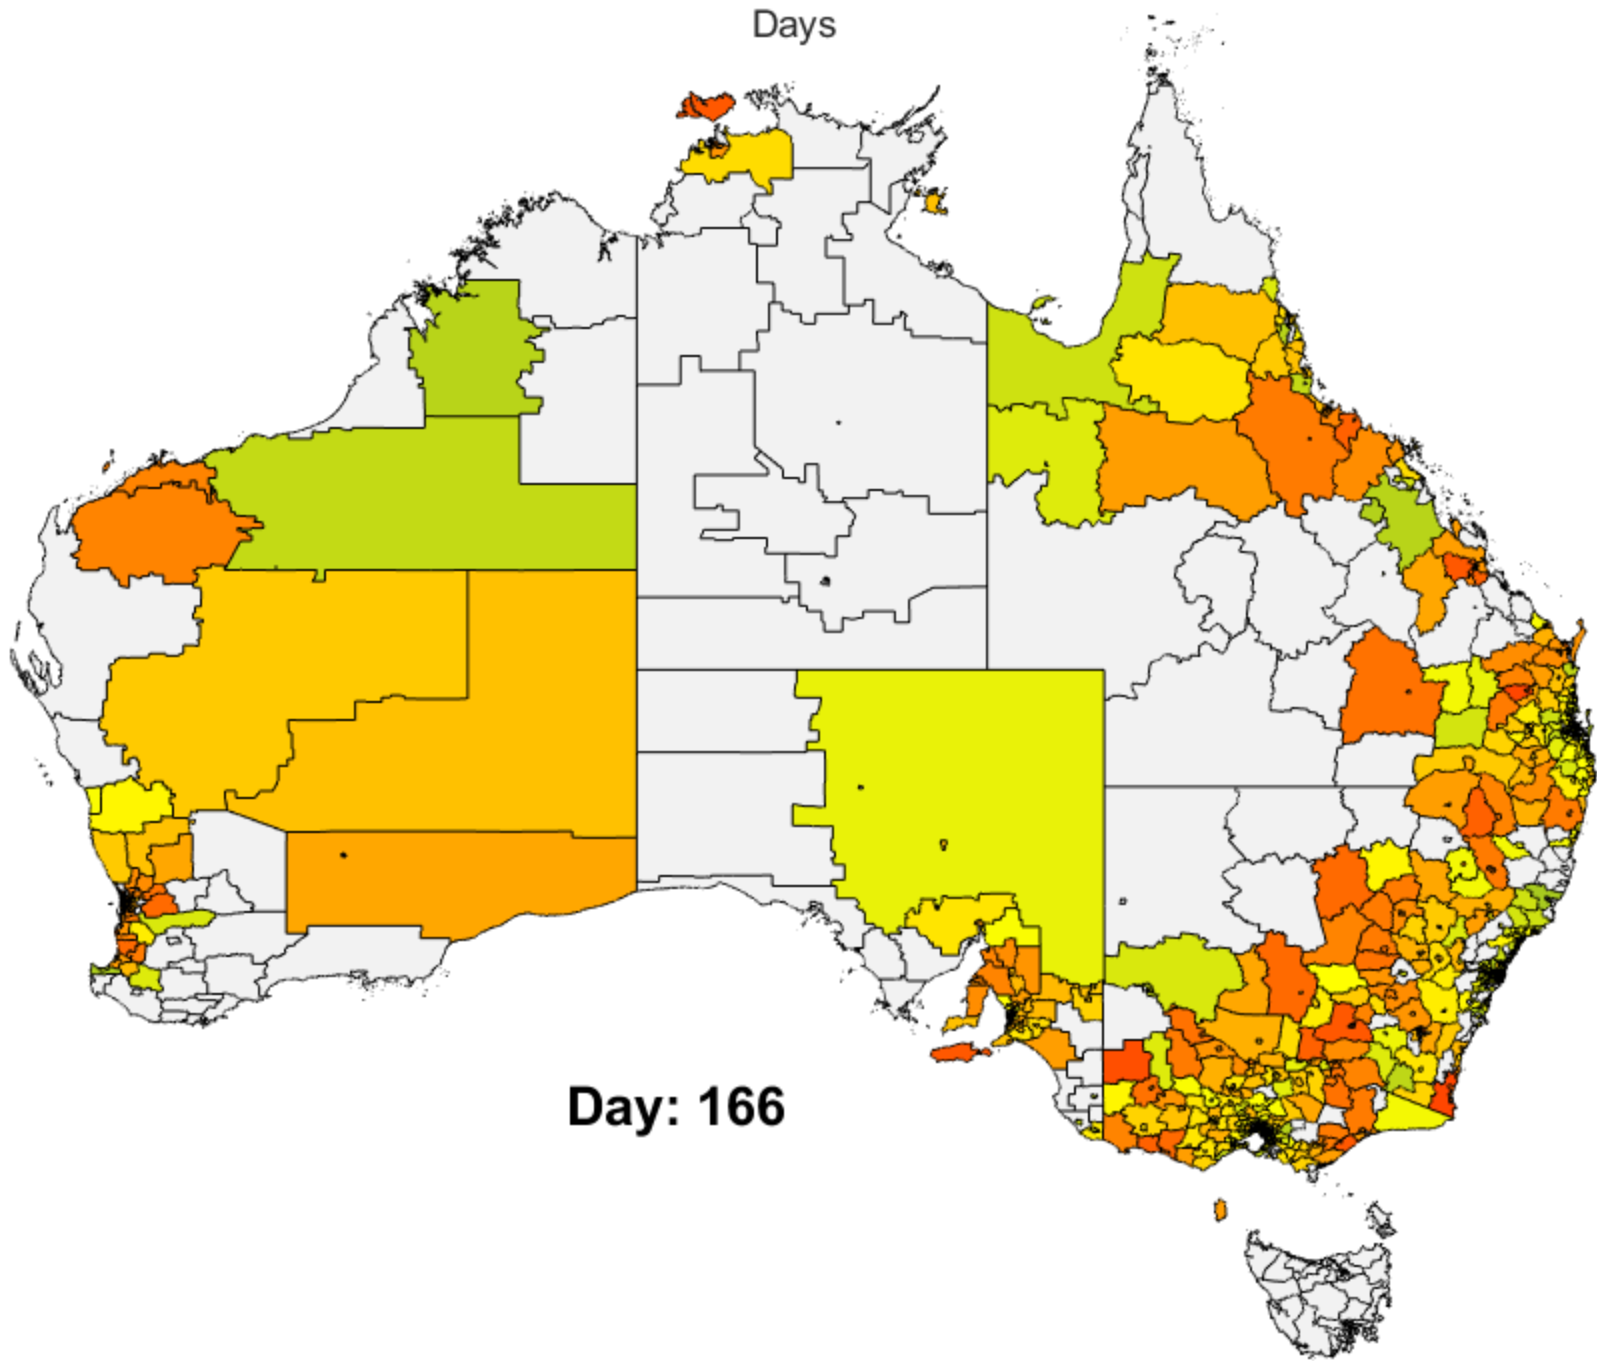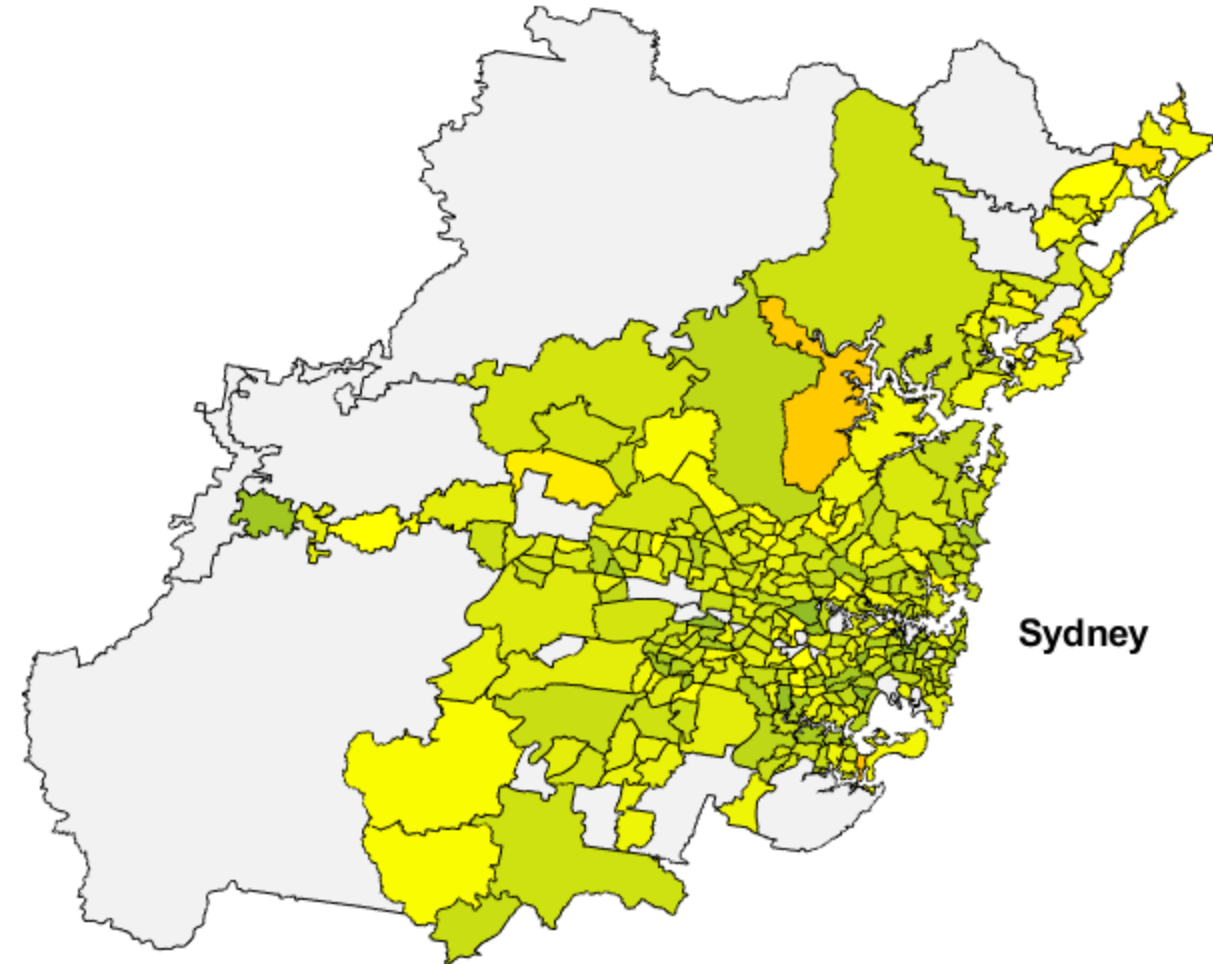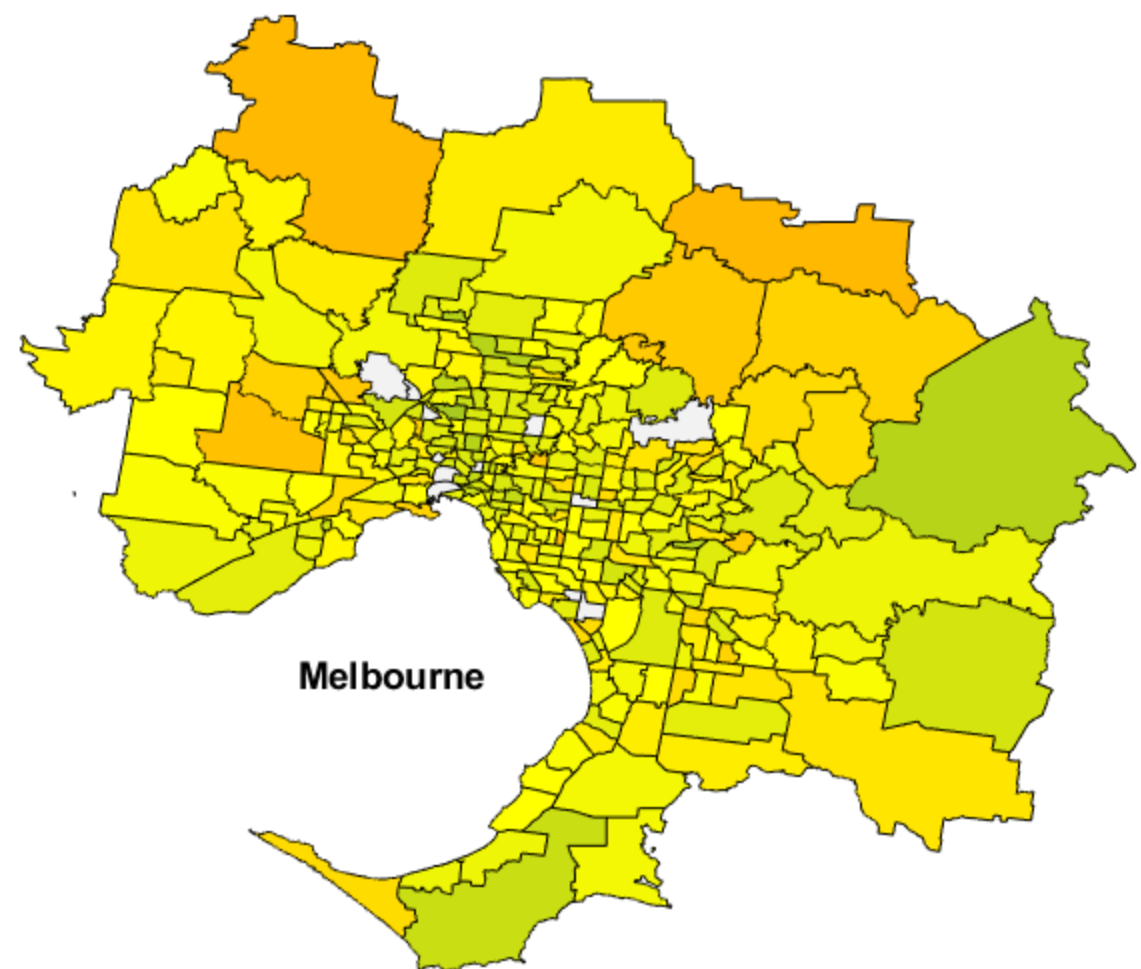

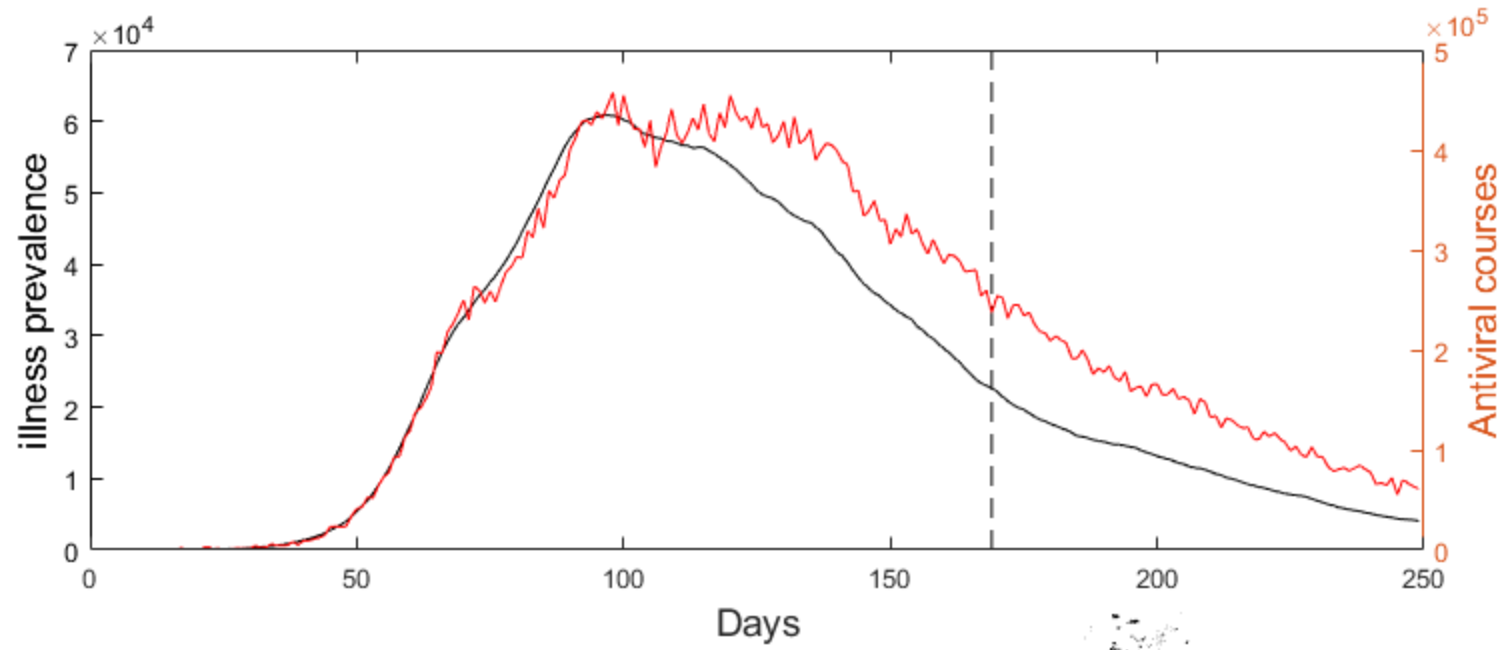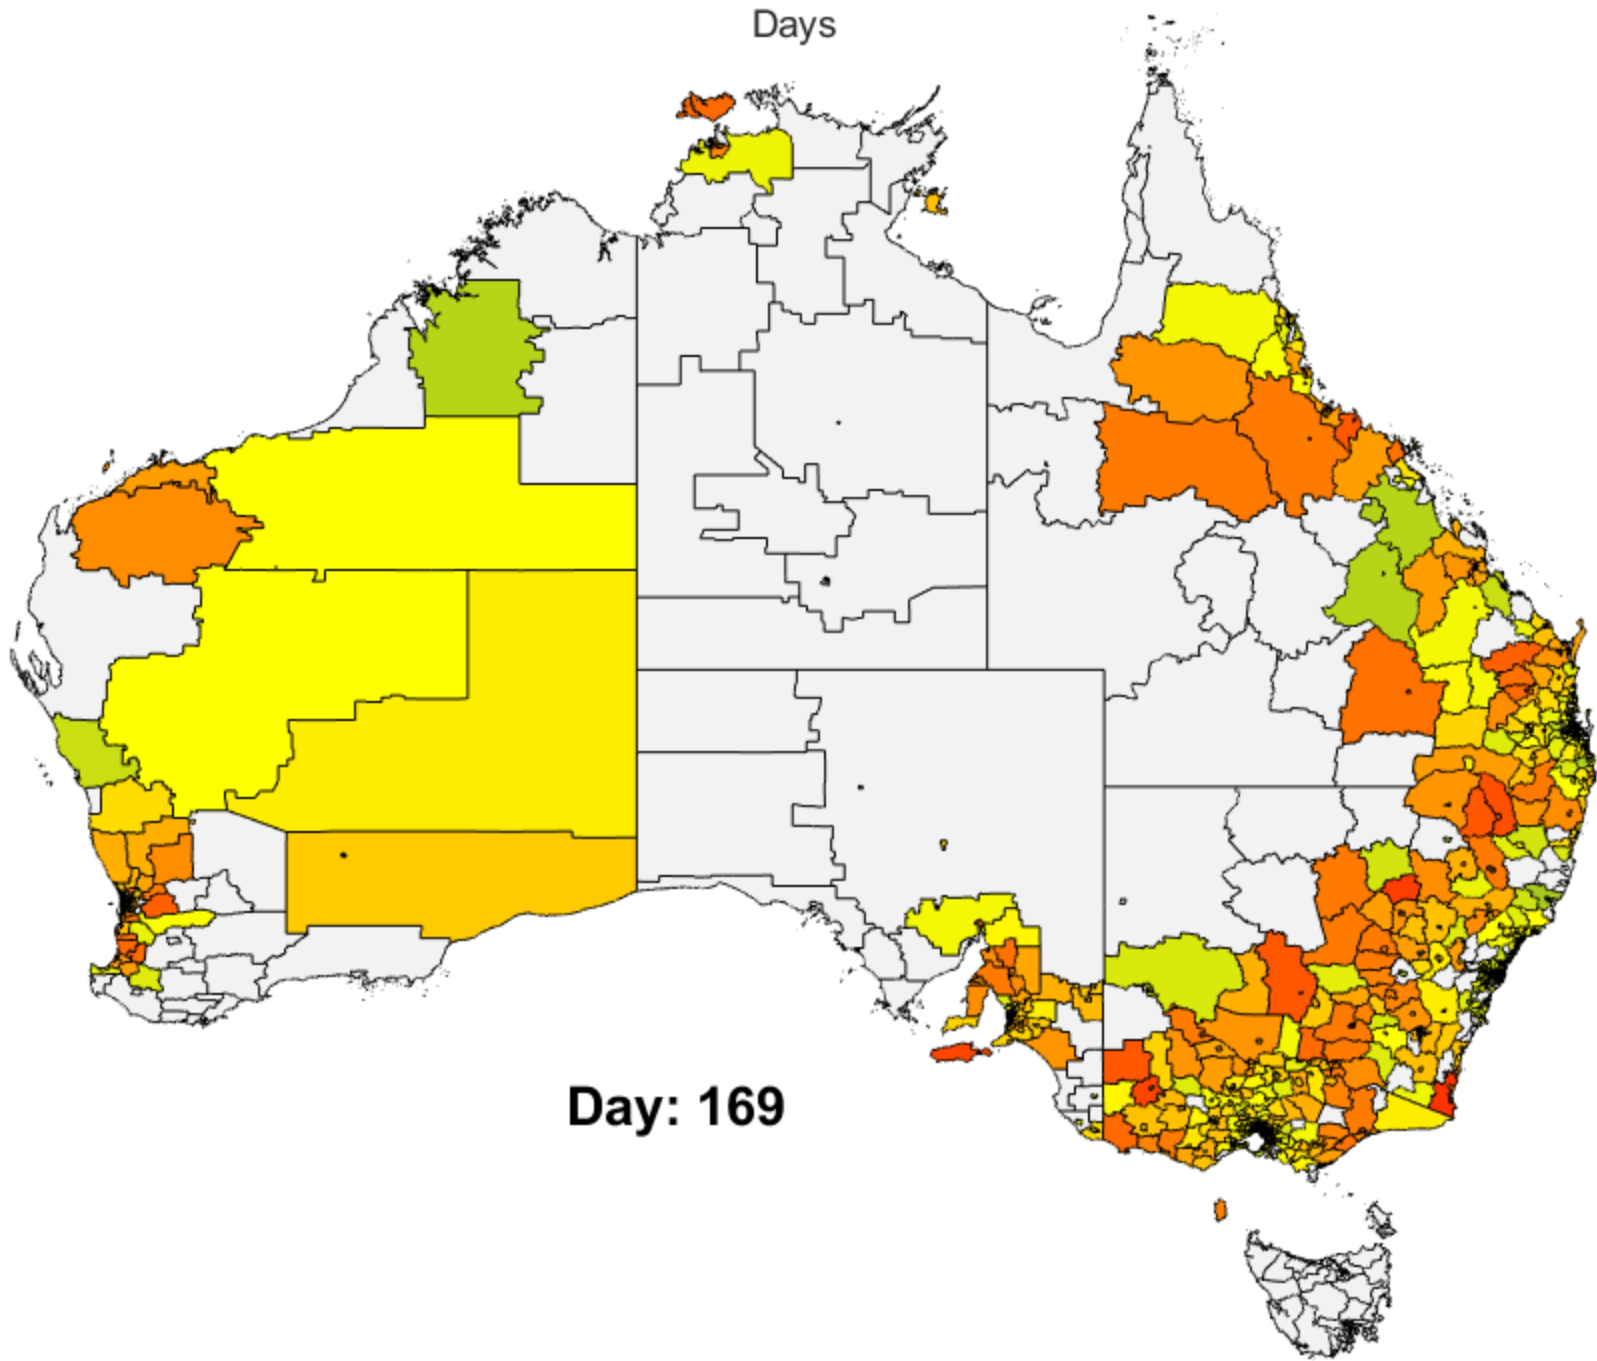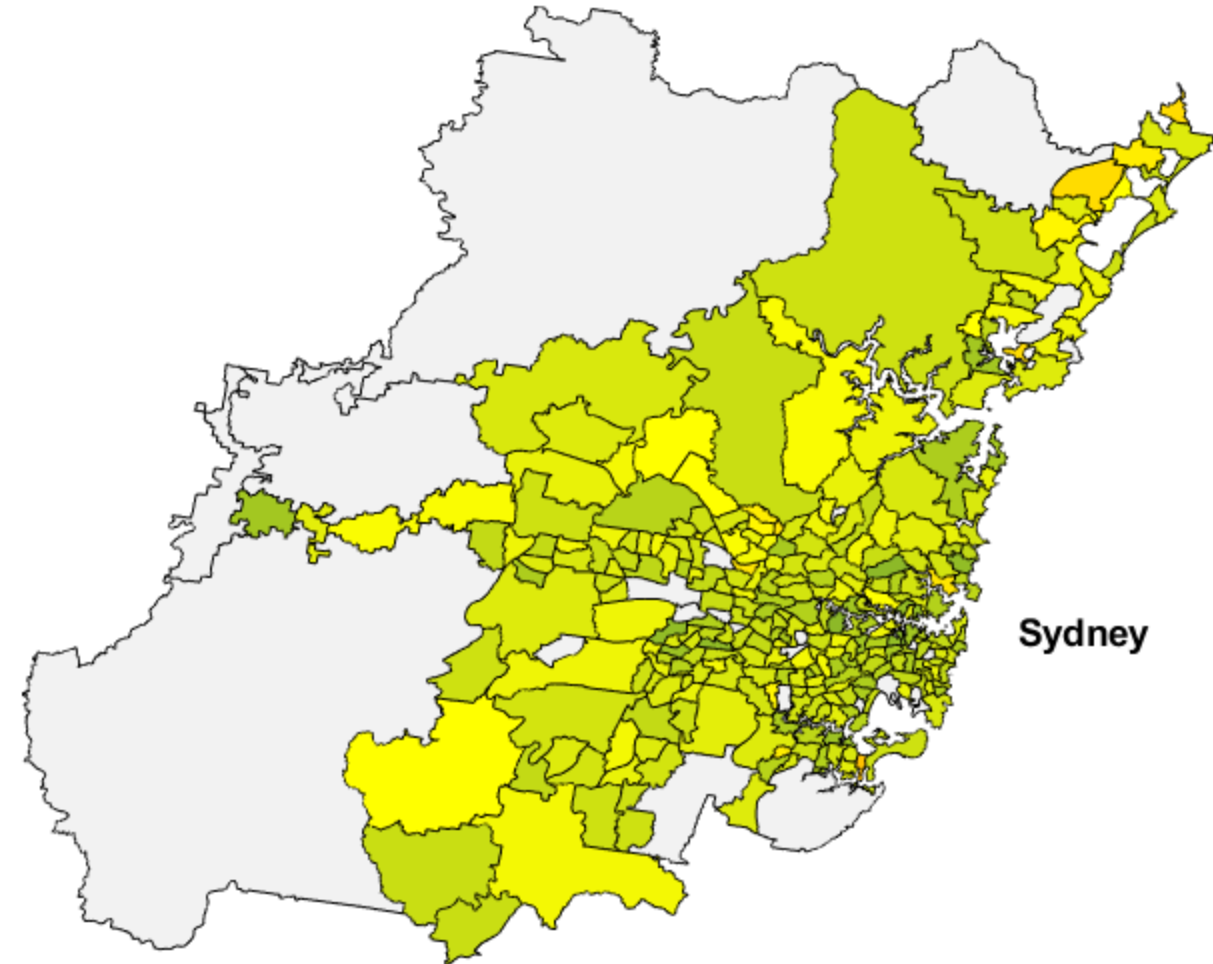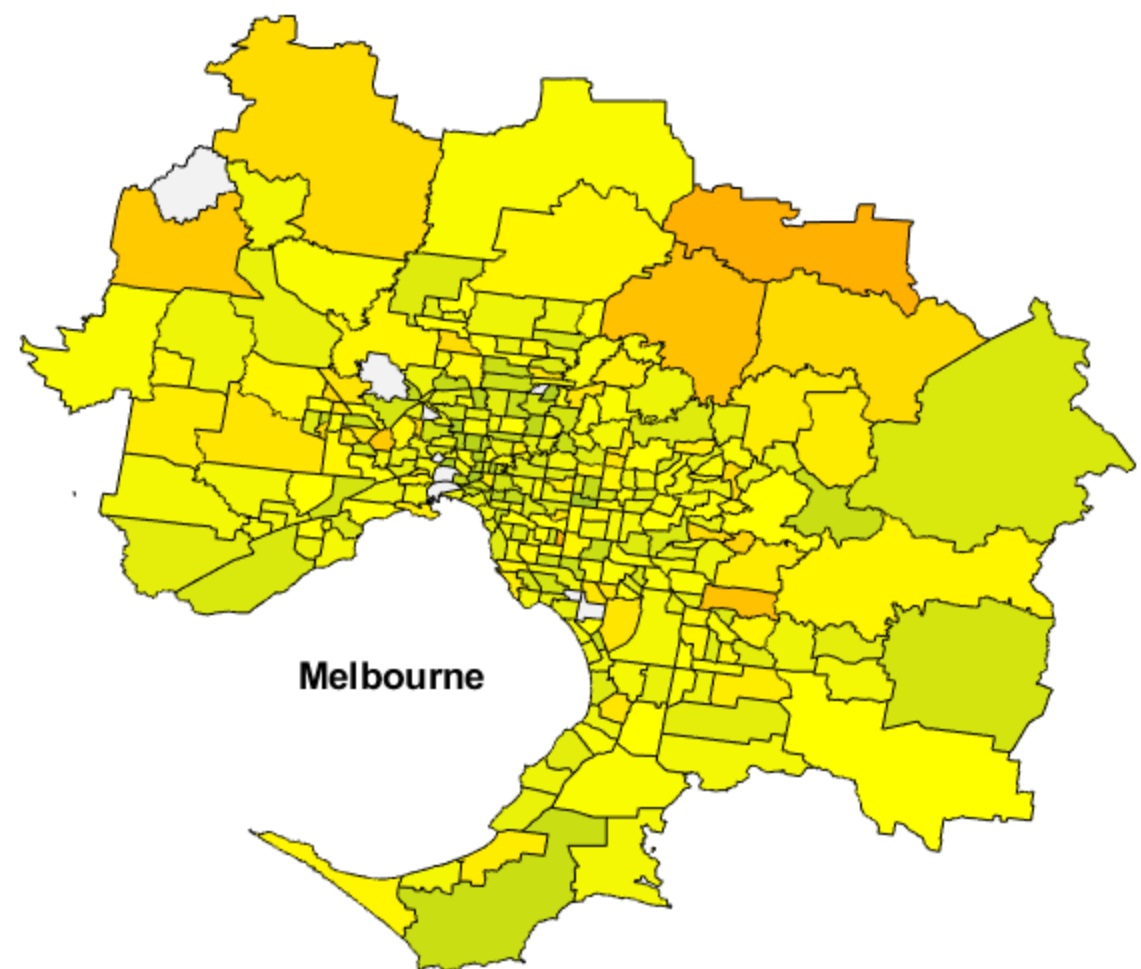



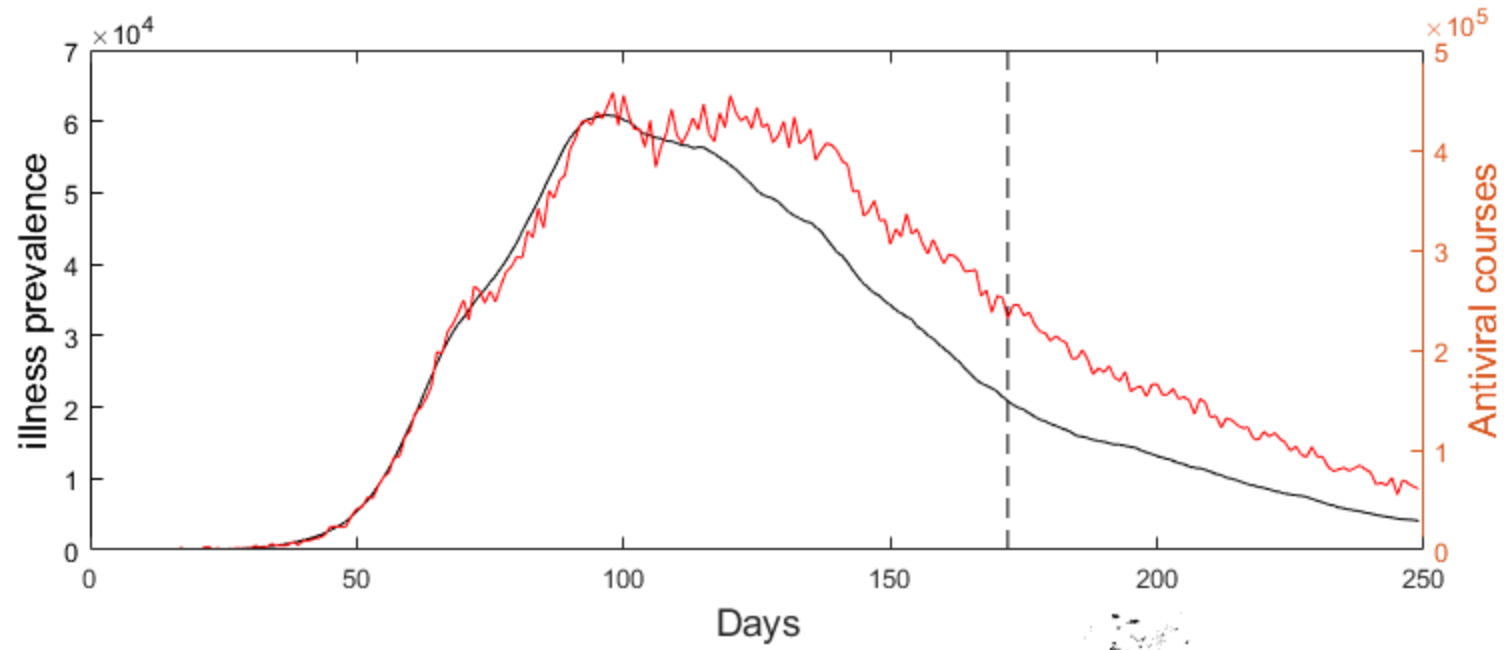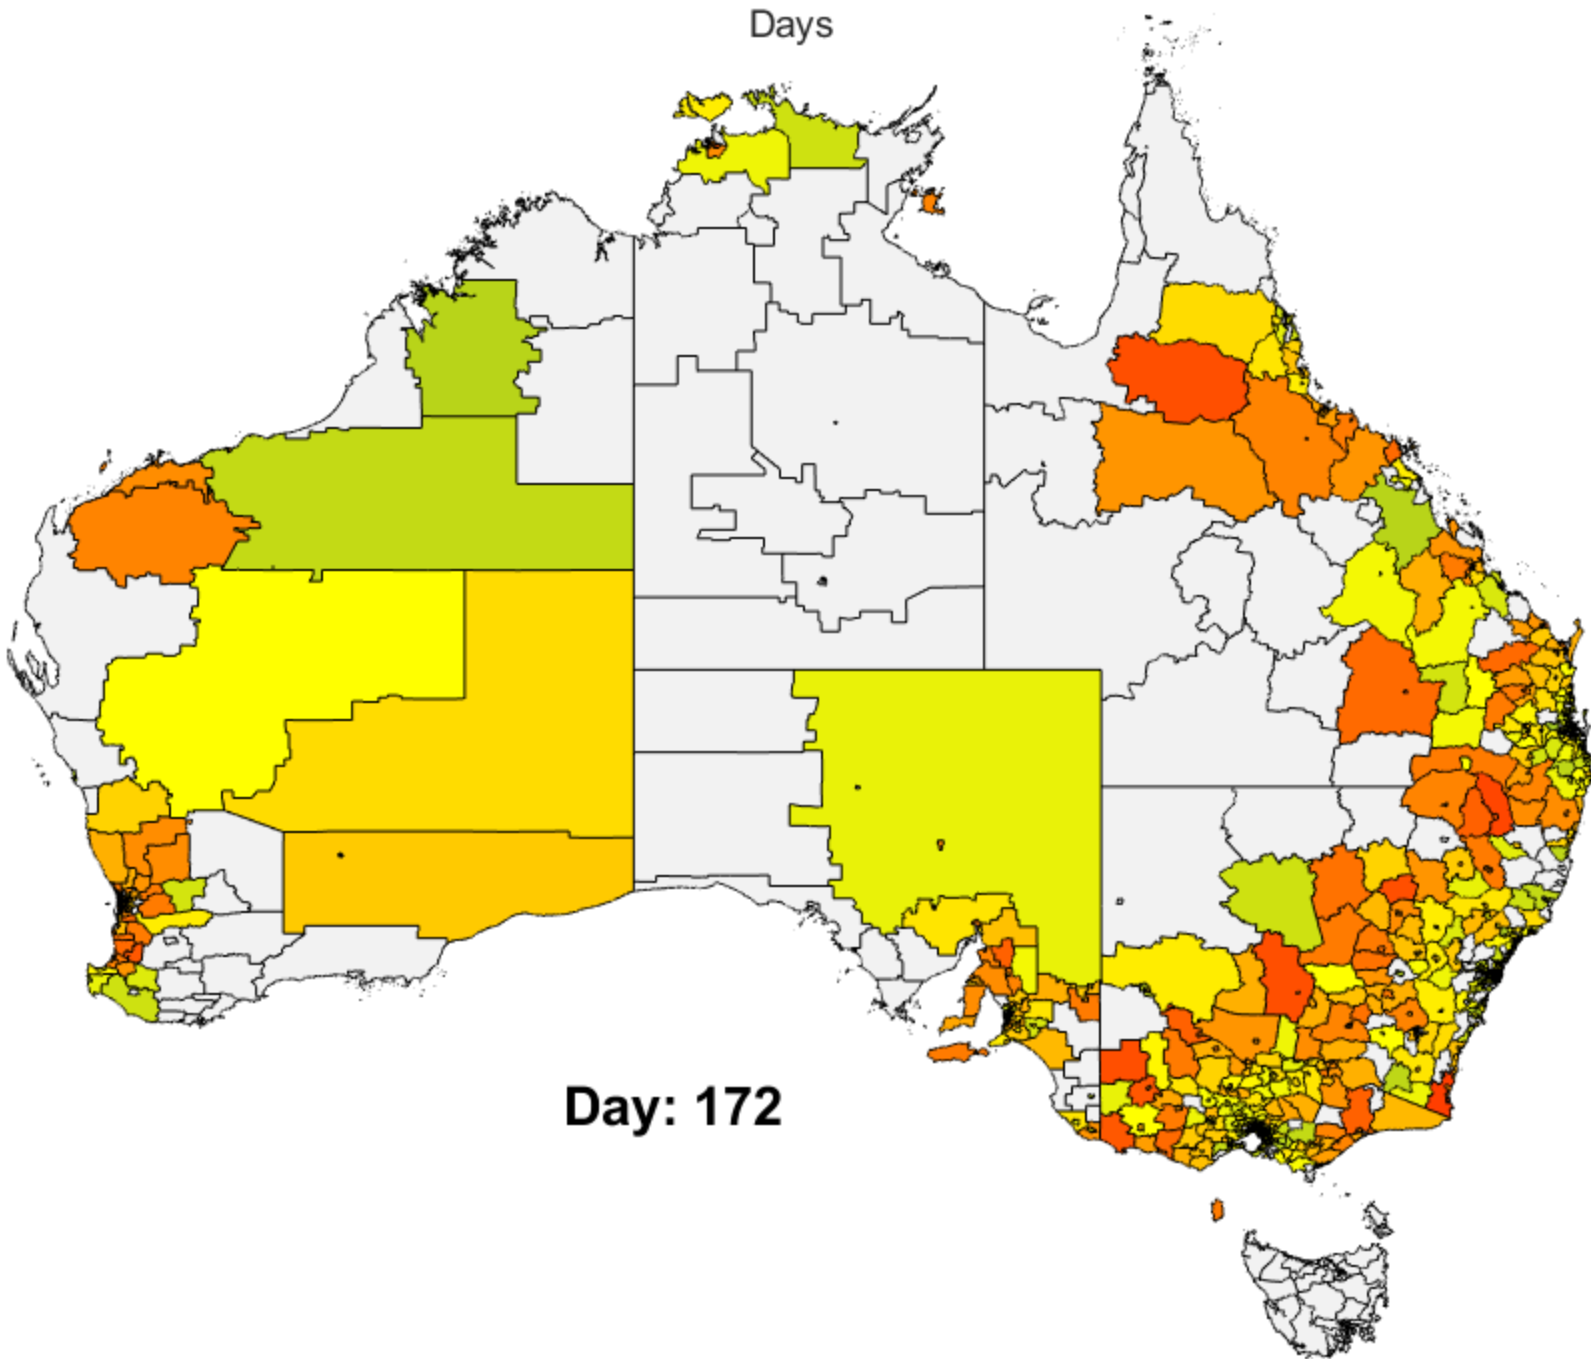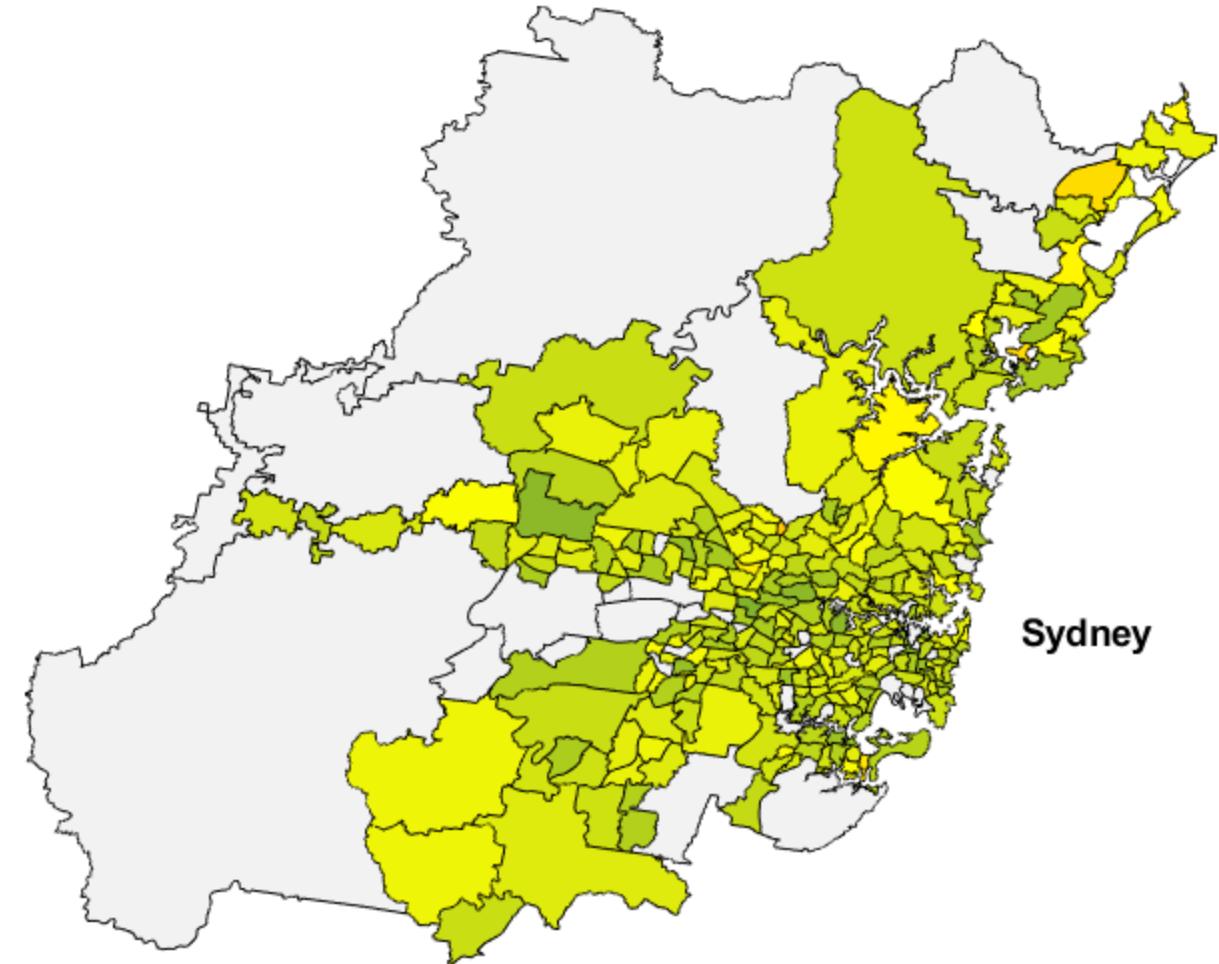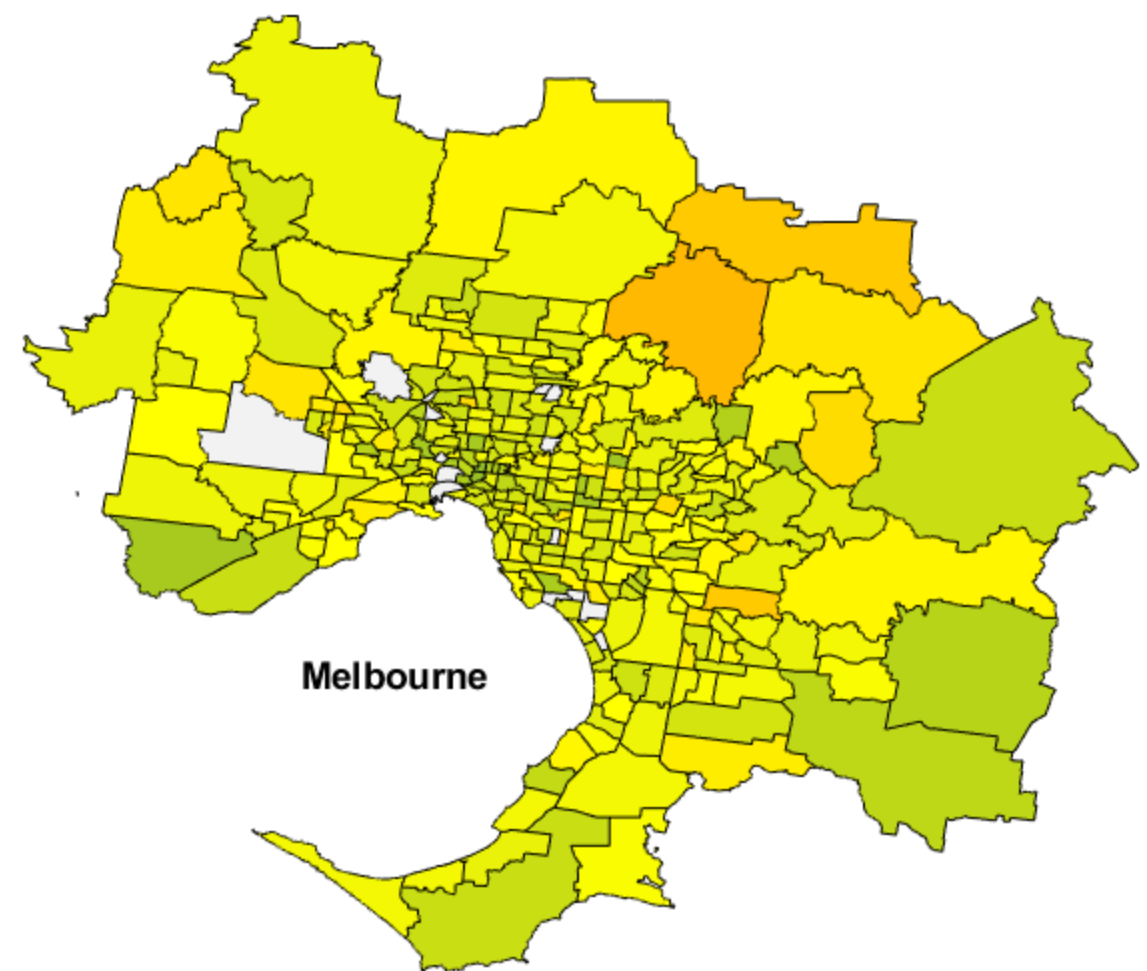



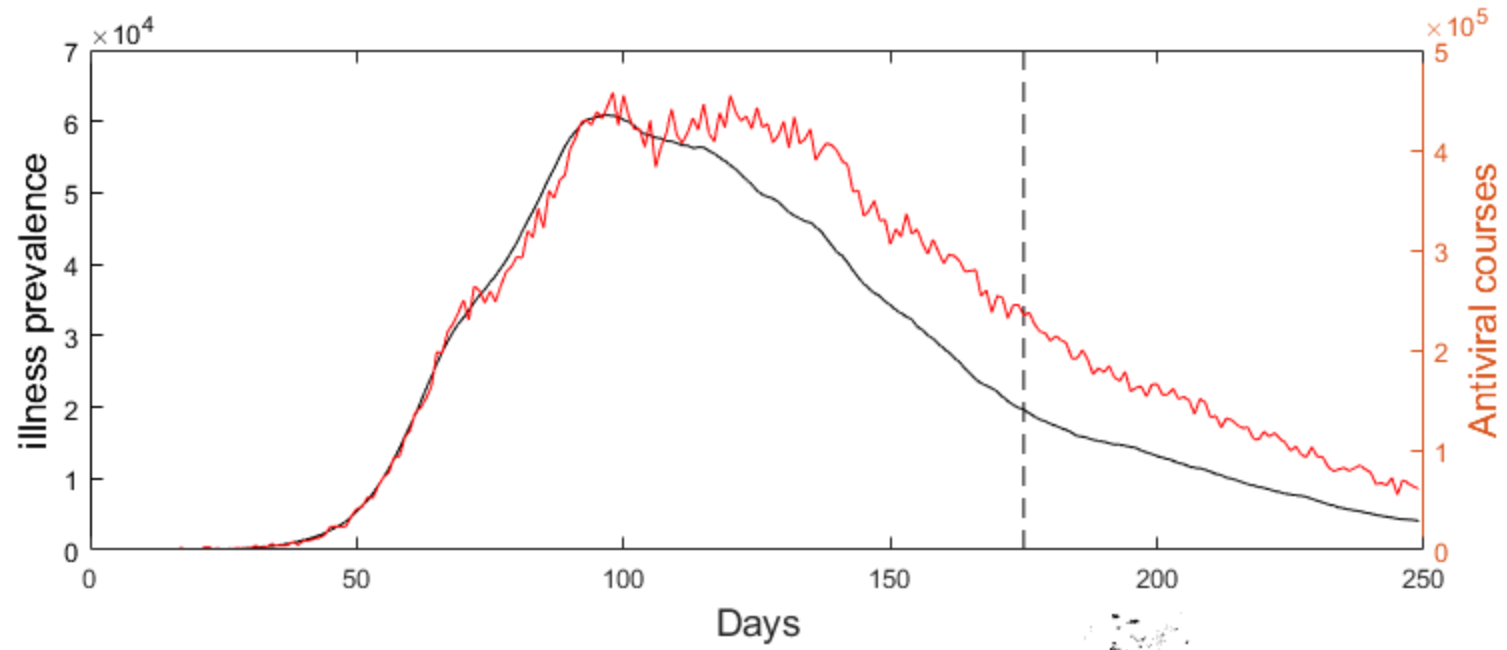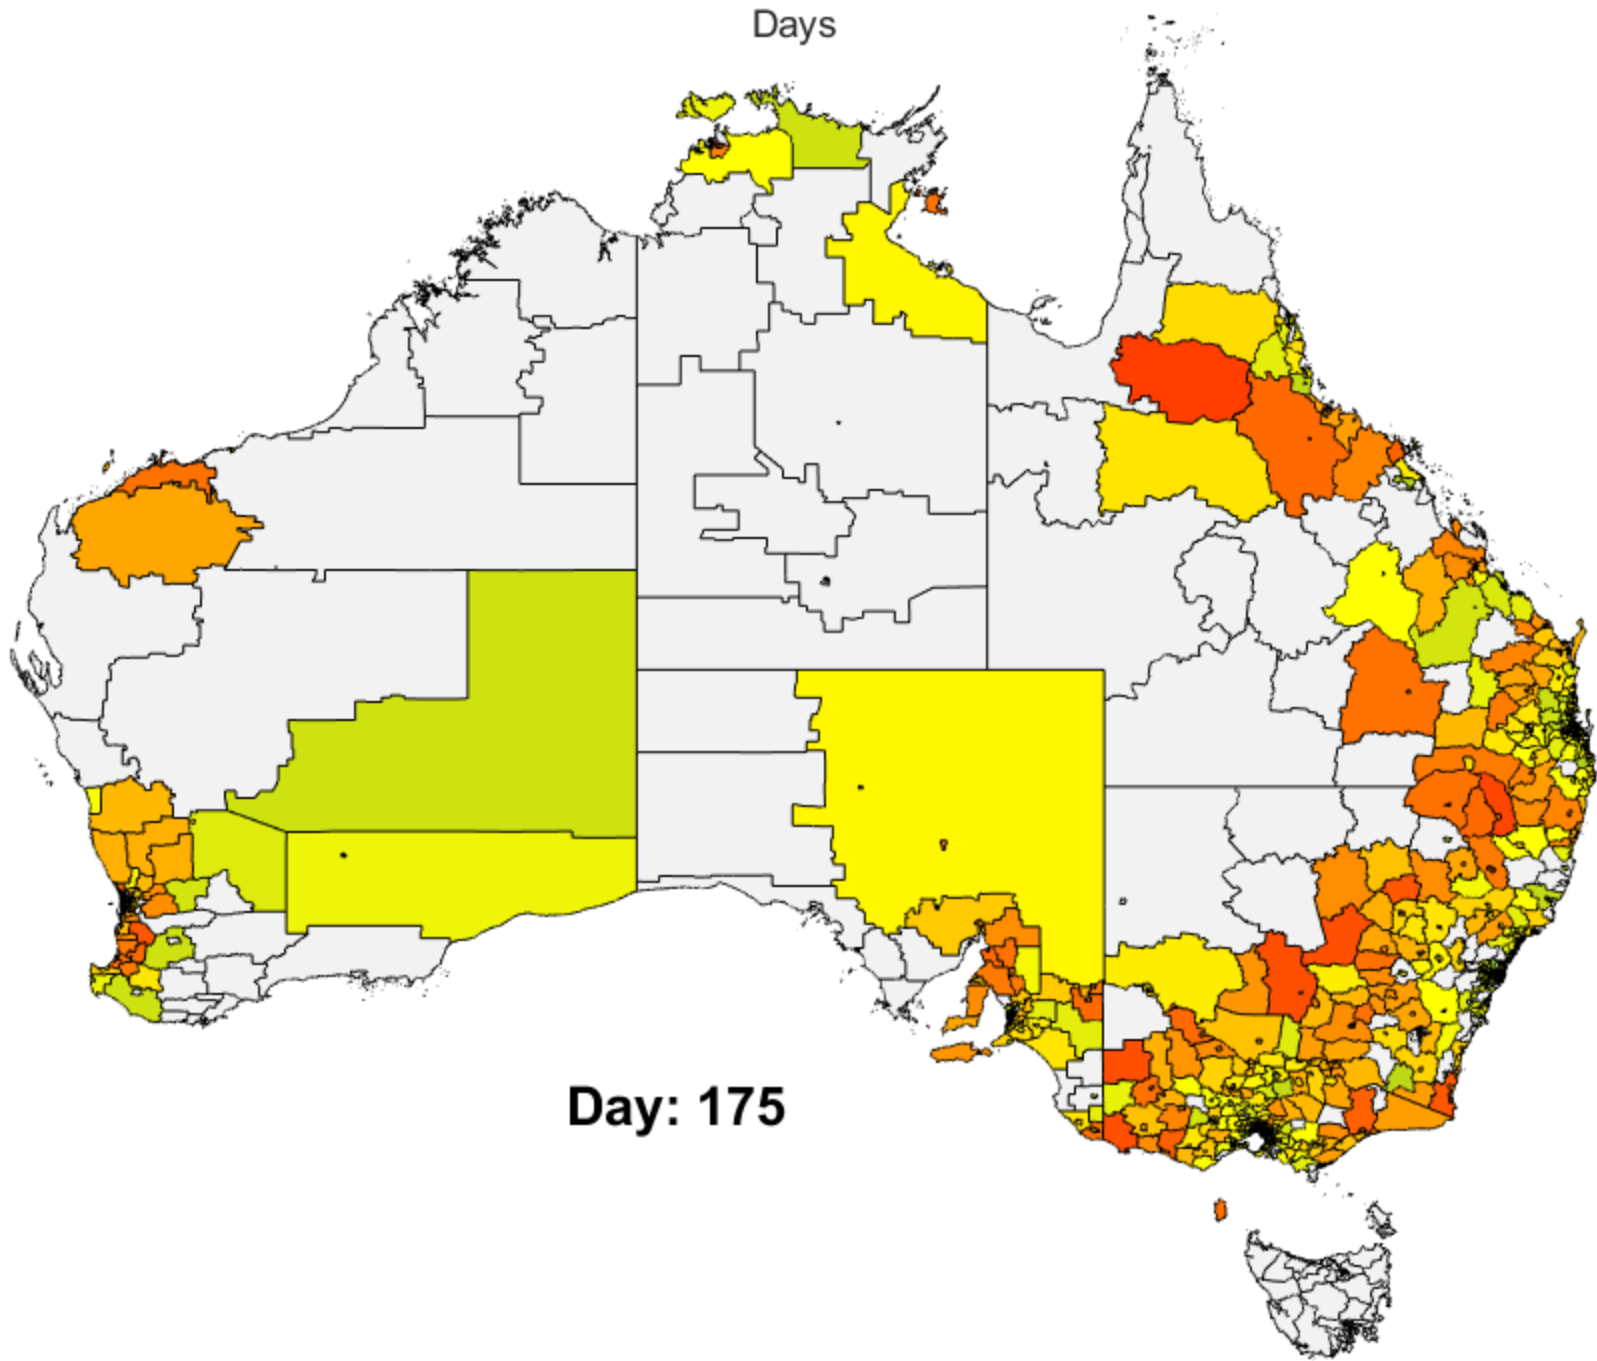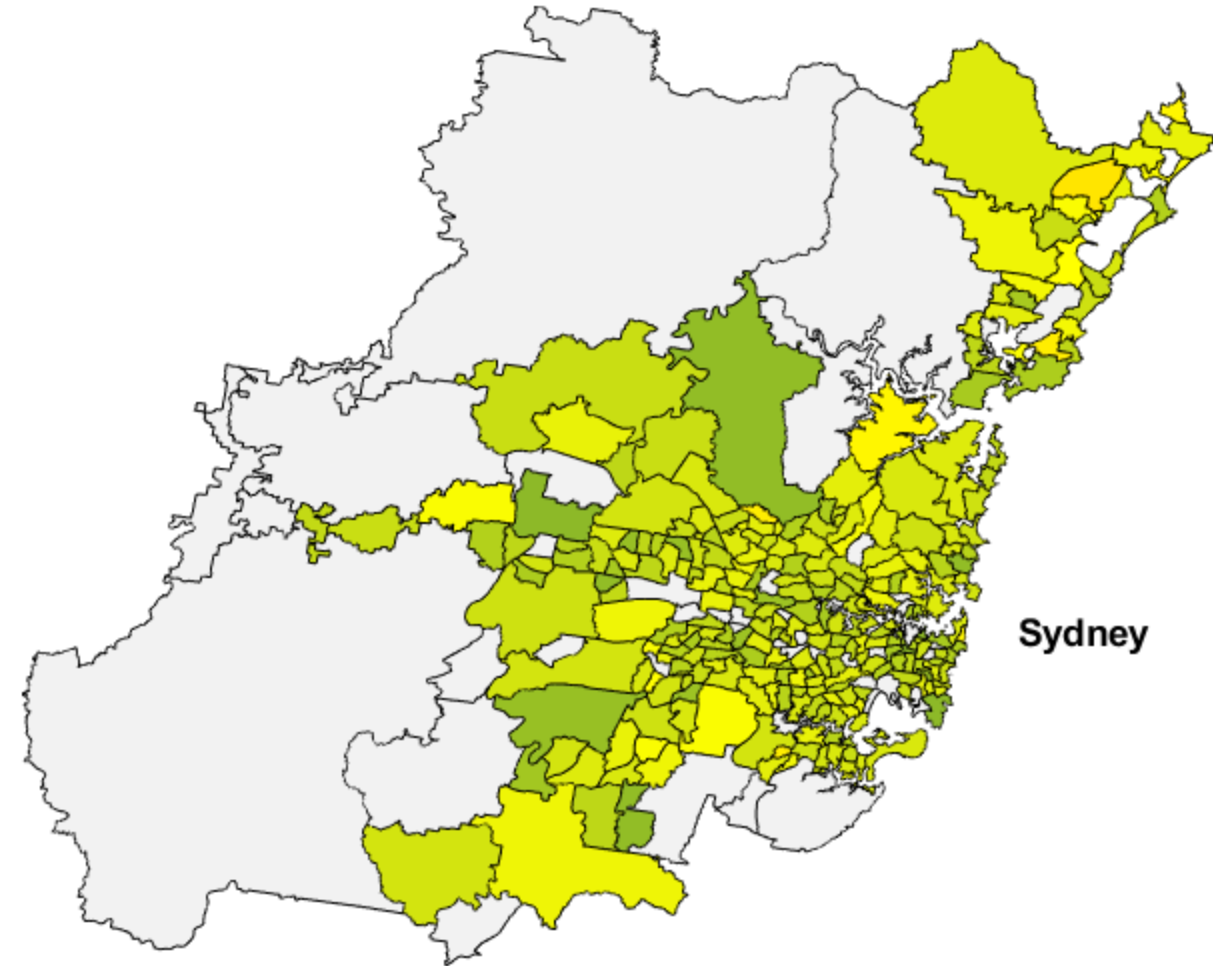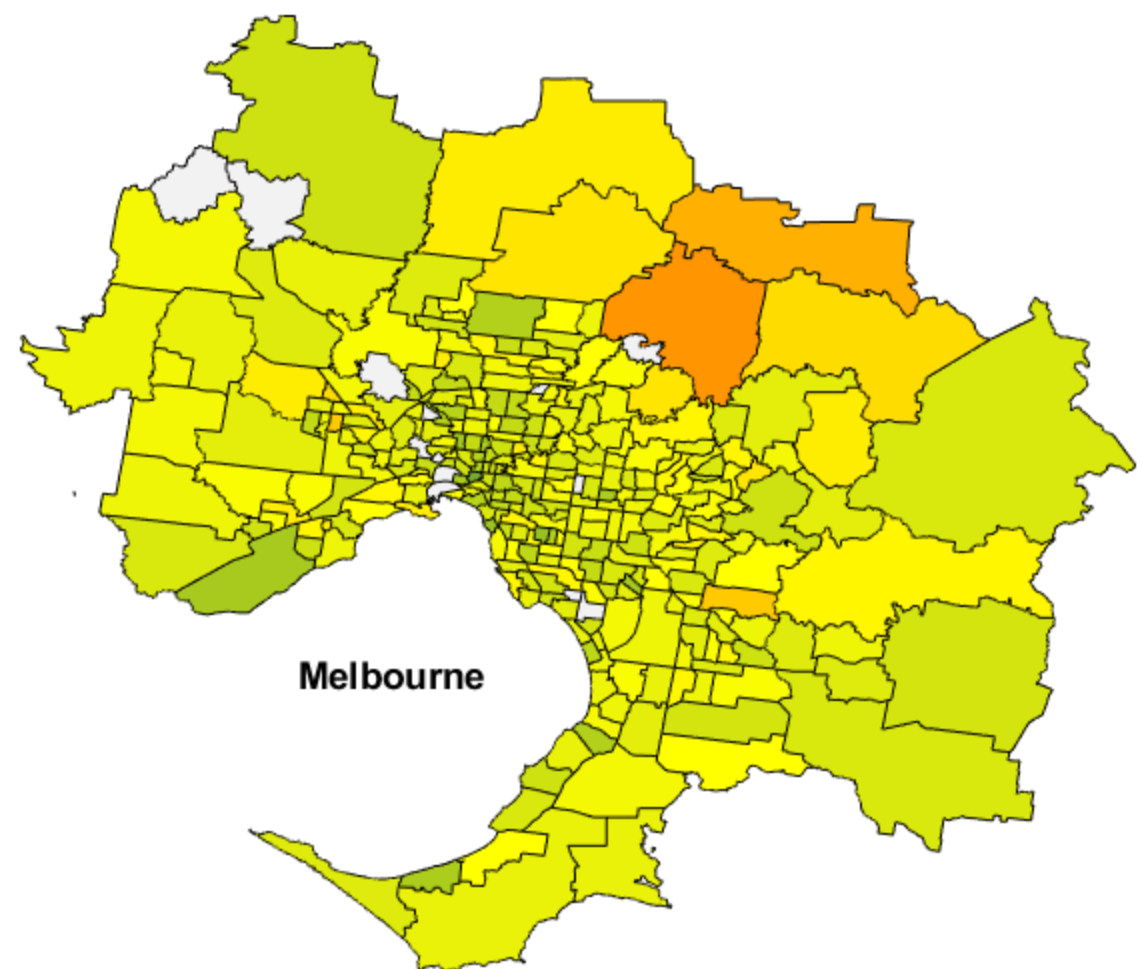

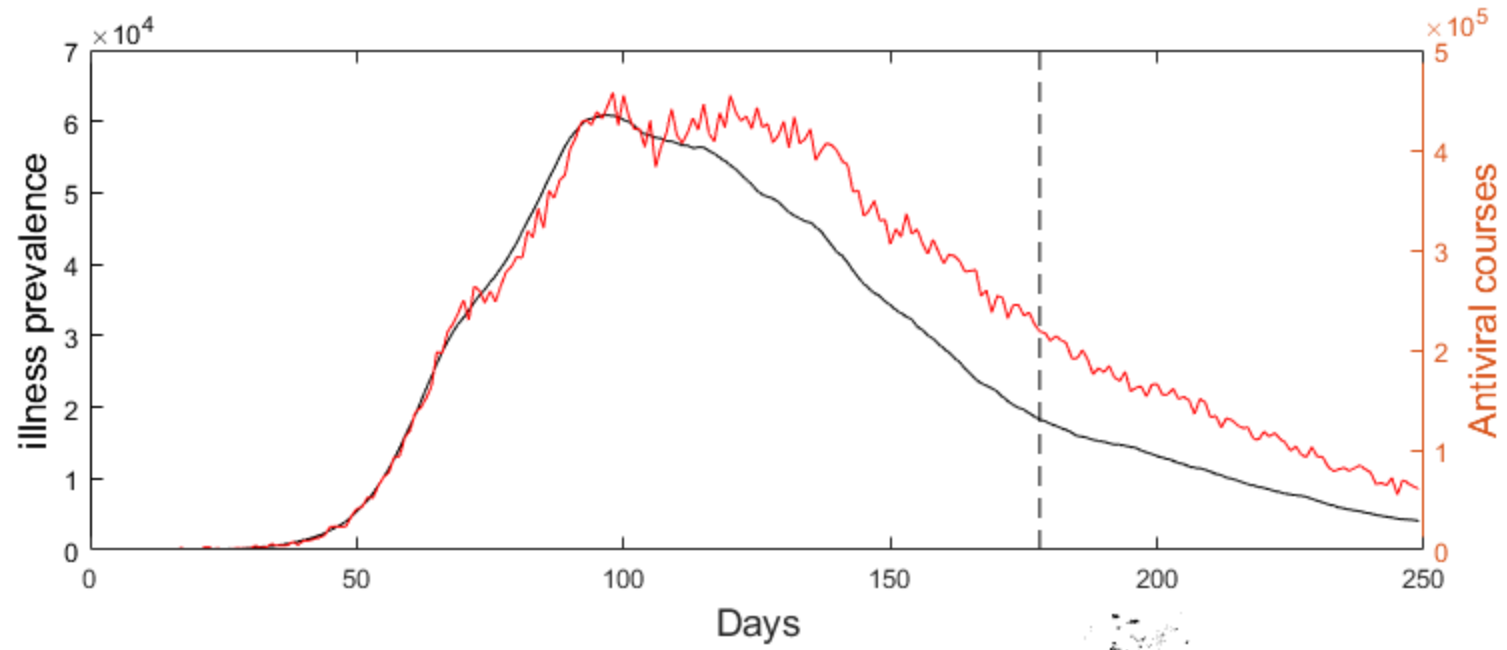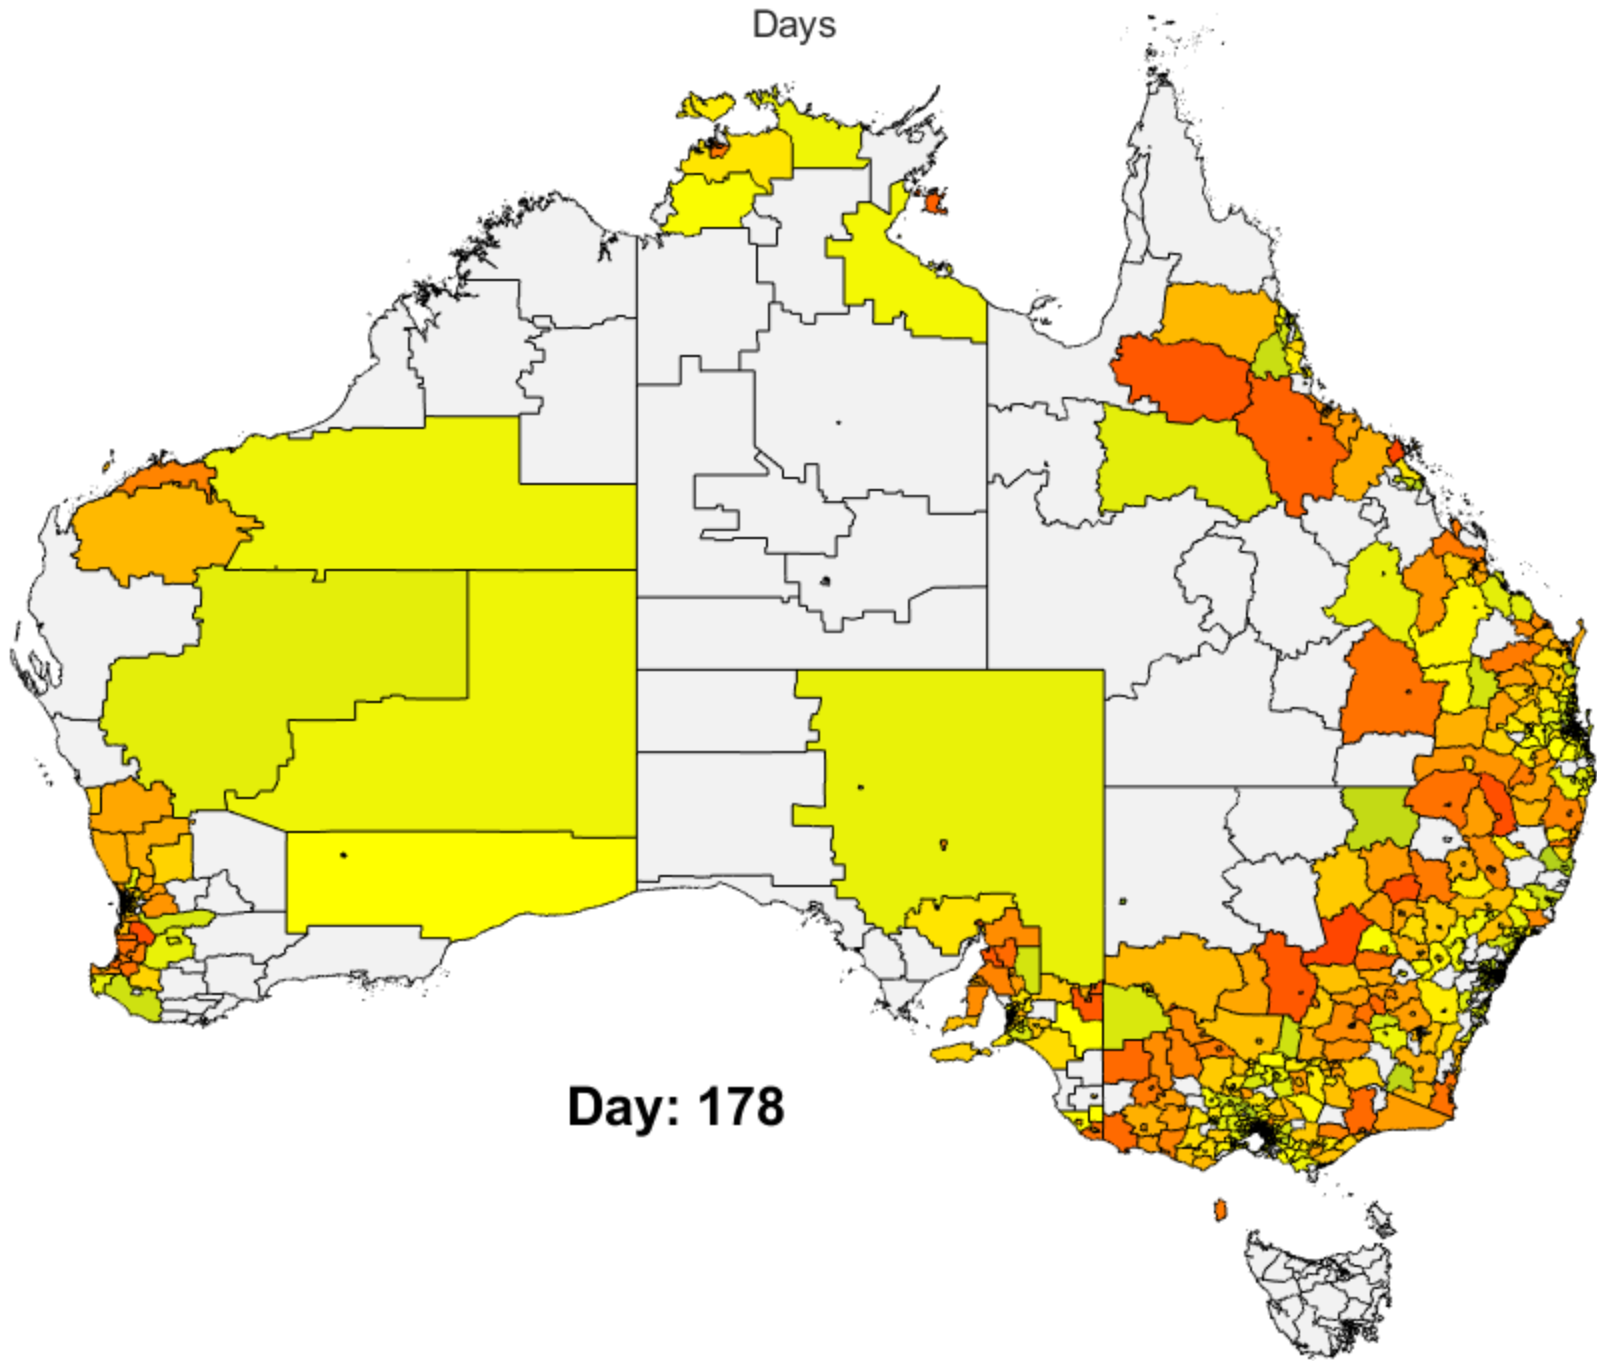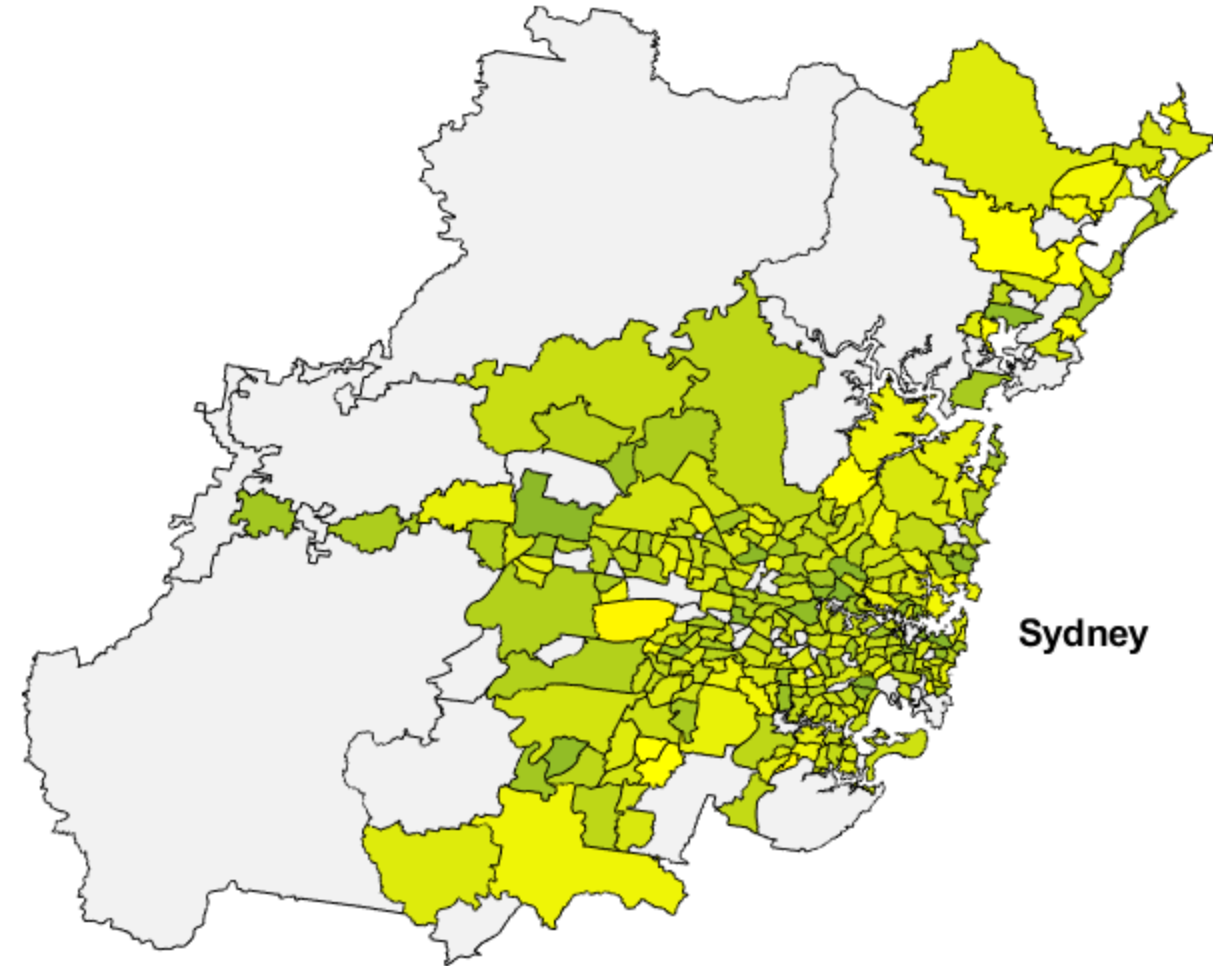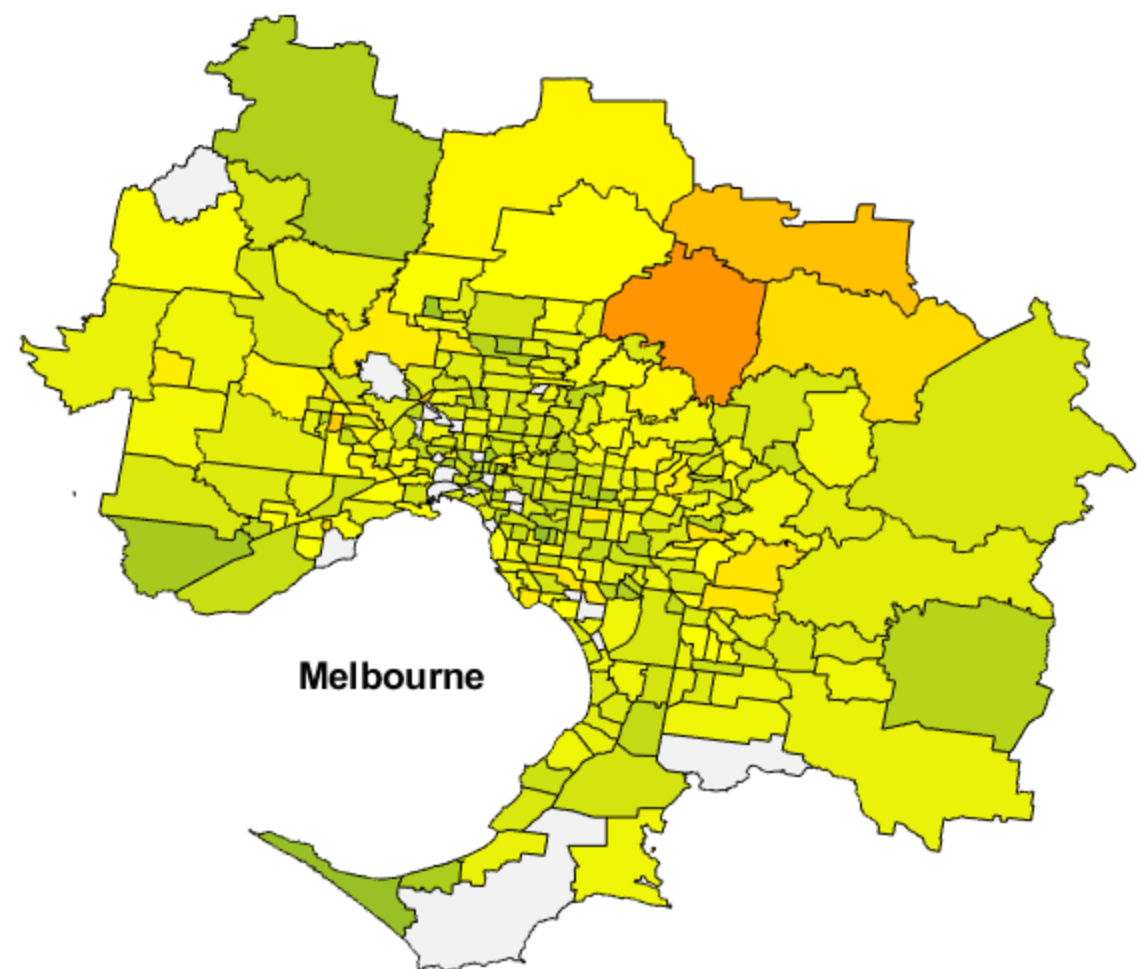



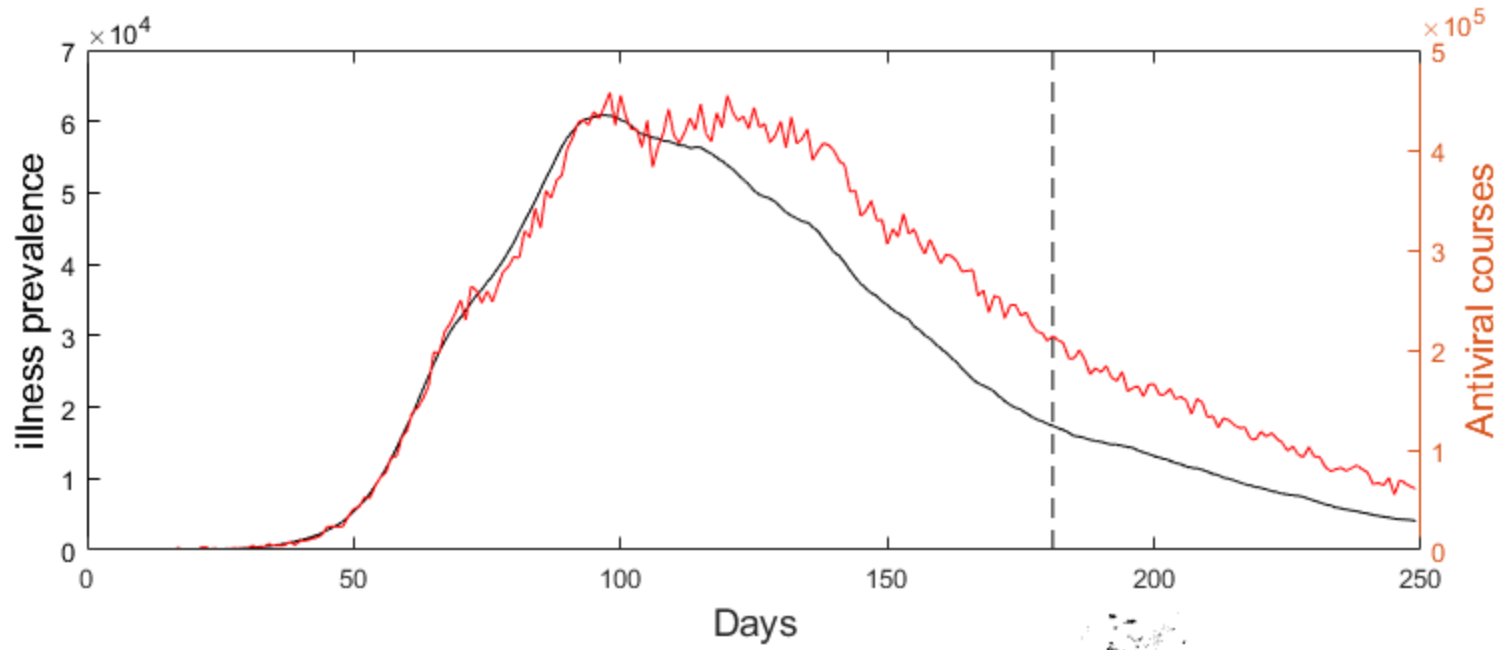

Days

Antiviral courses

Day: 181

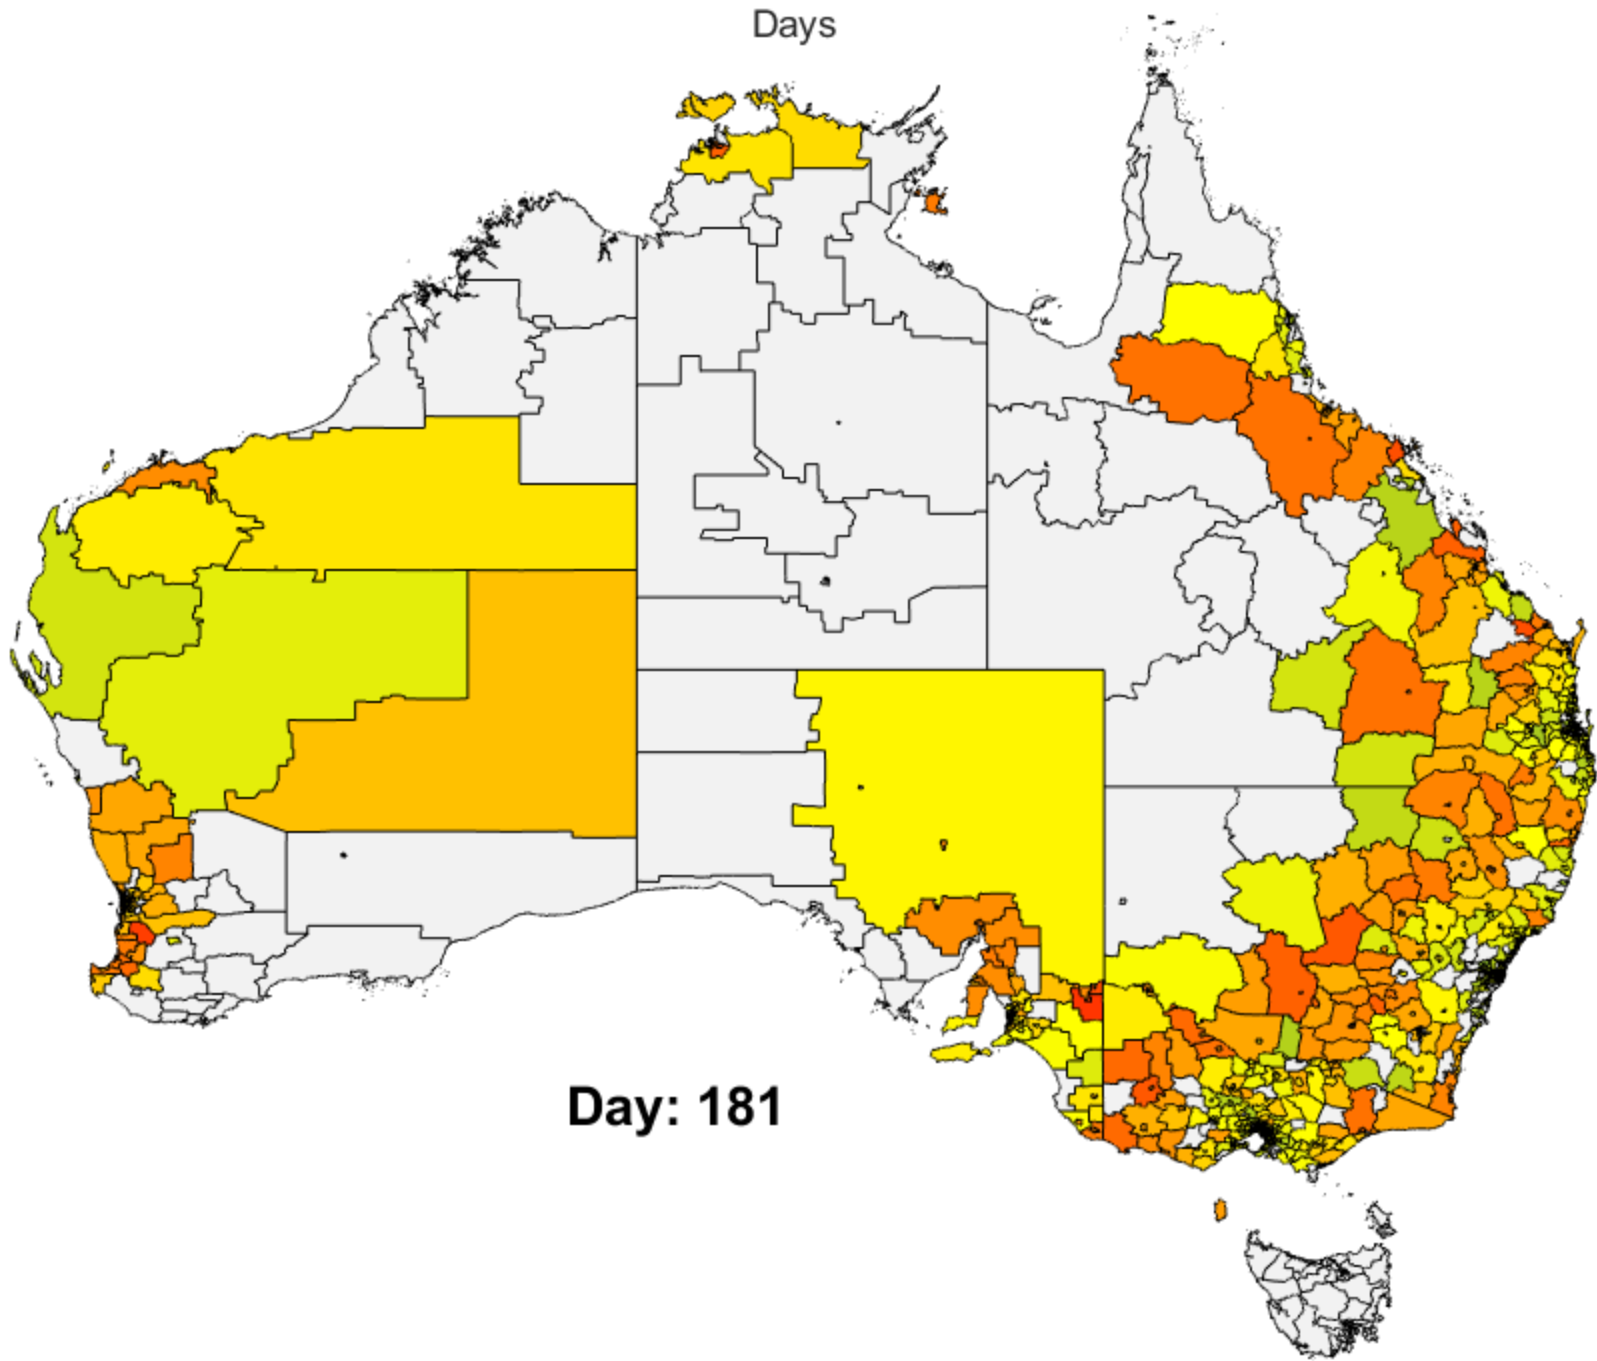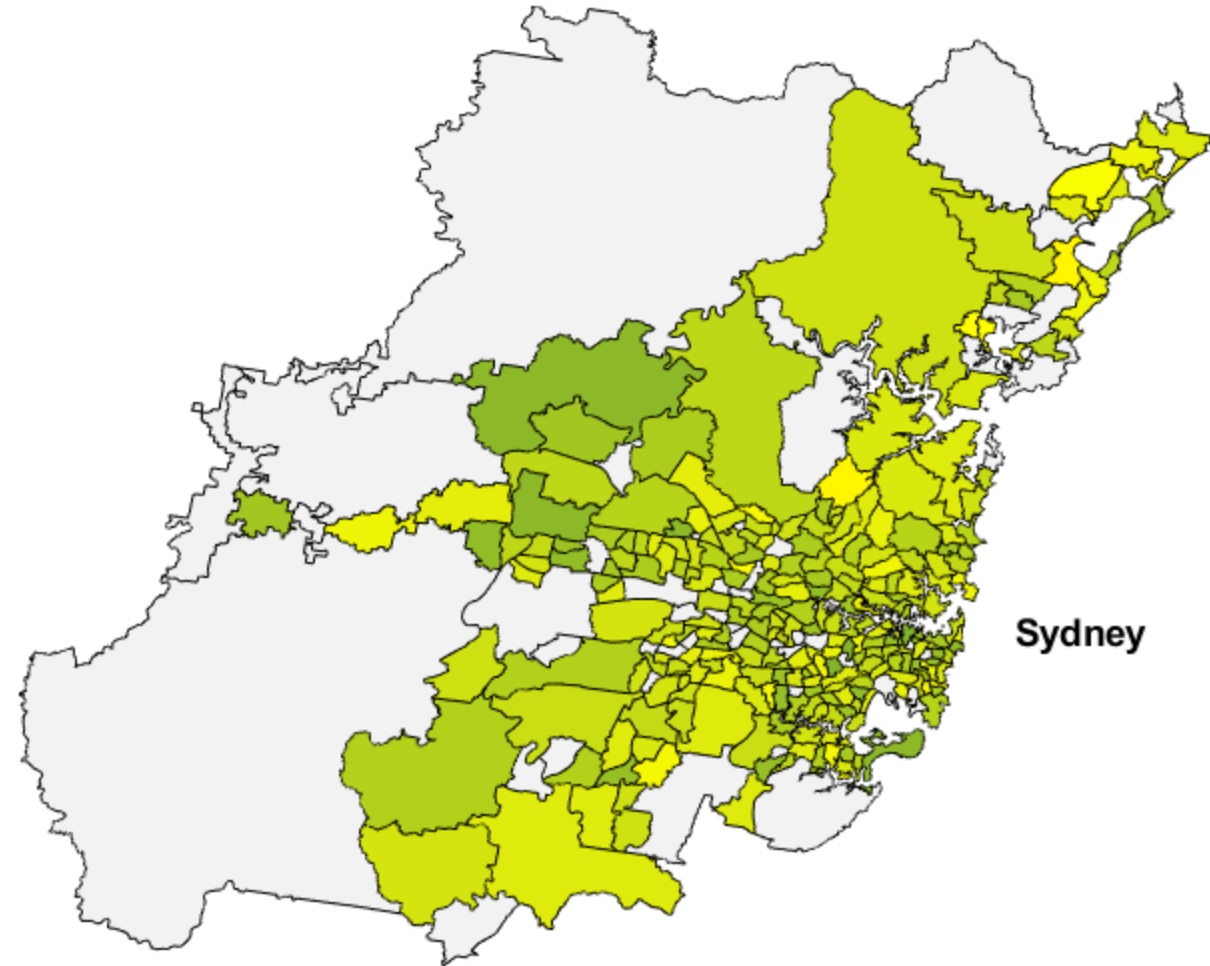

Sydney

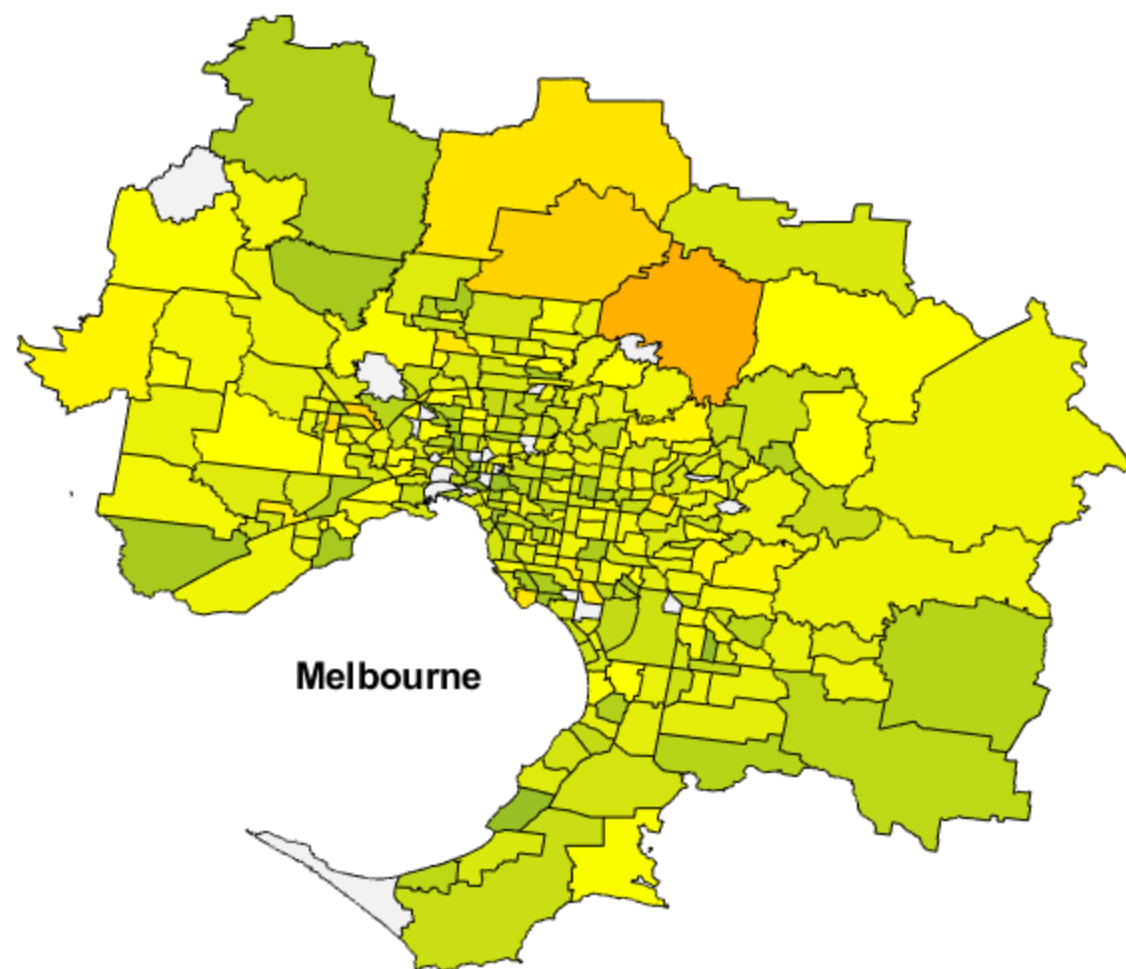

Melbourne



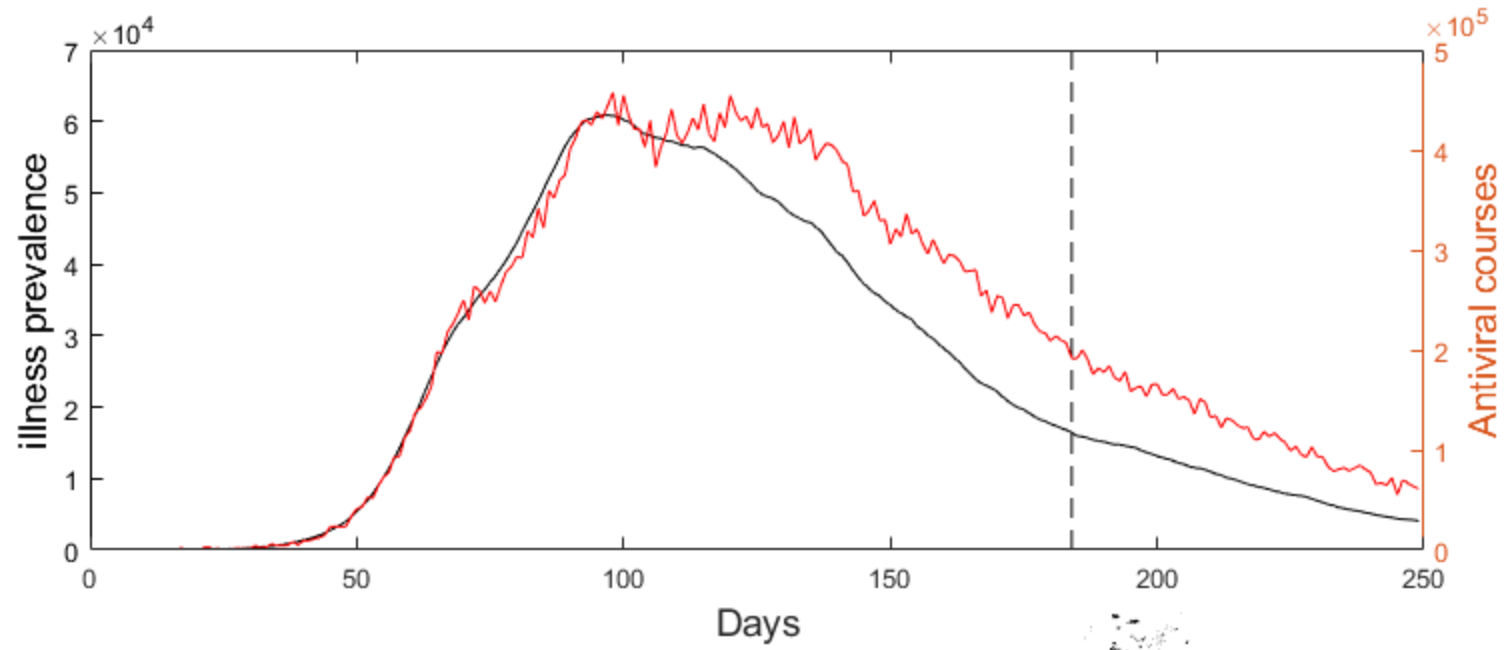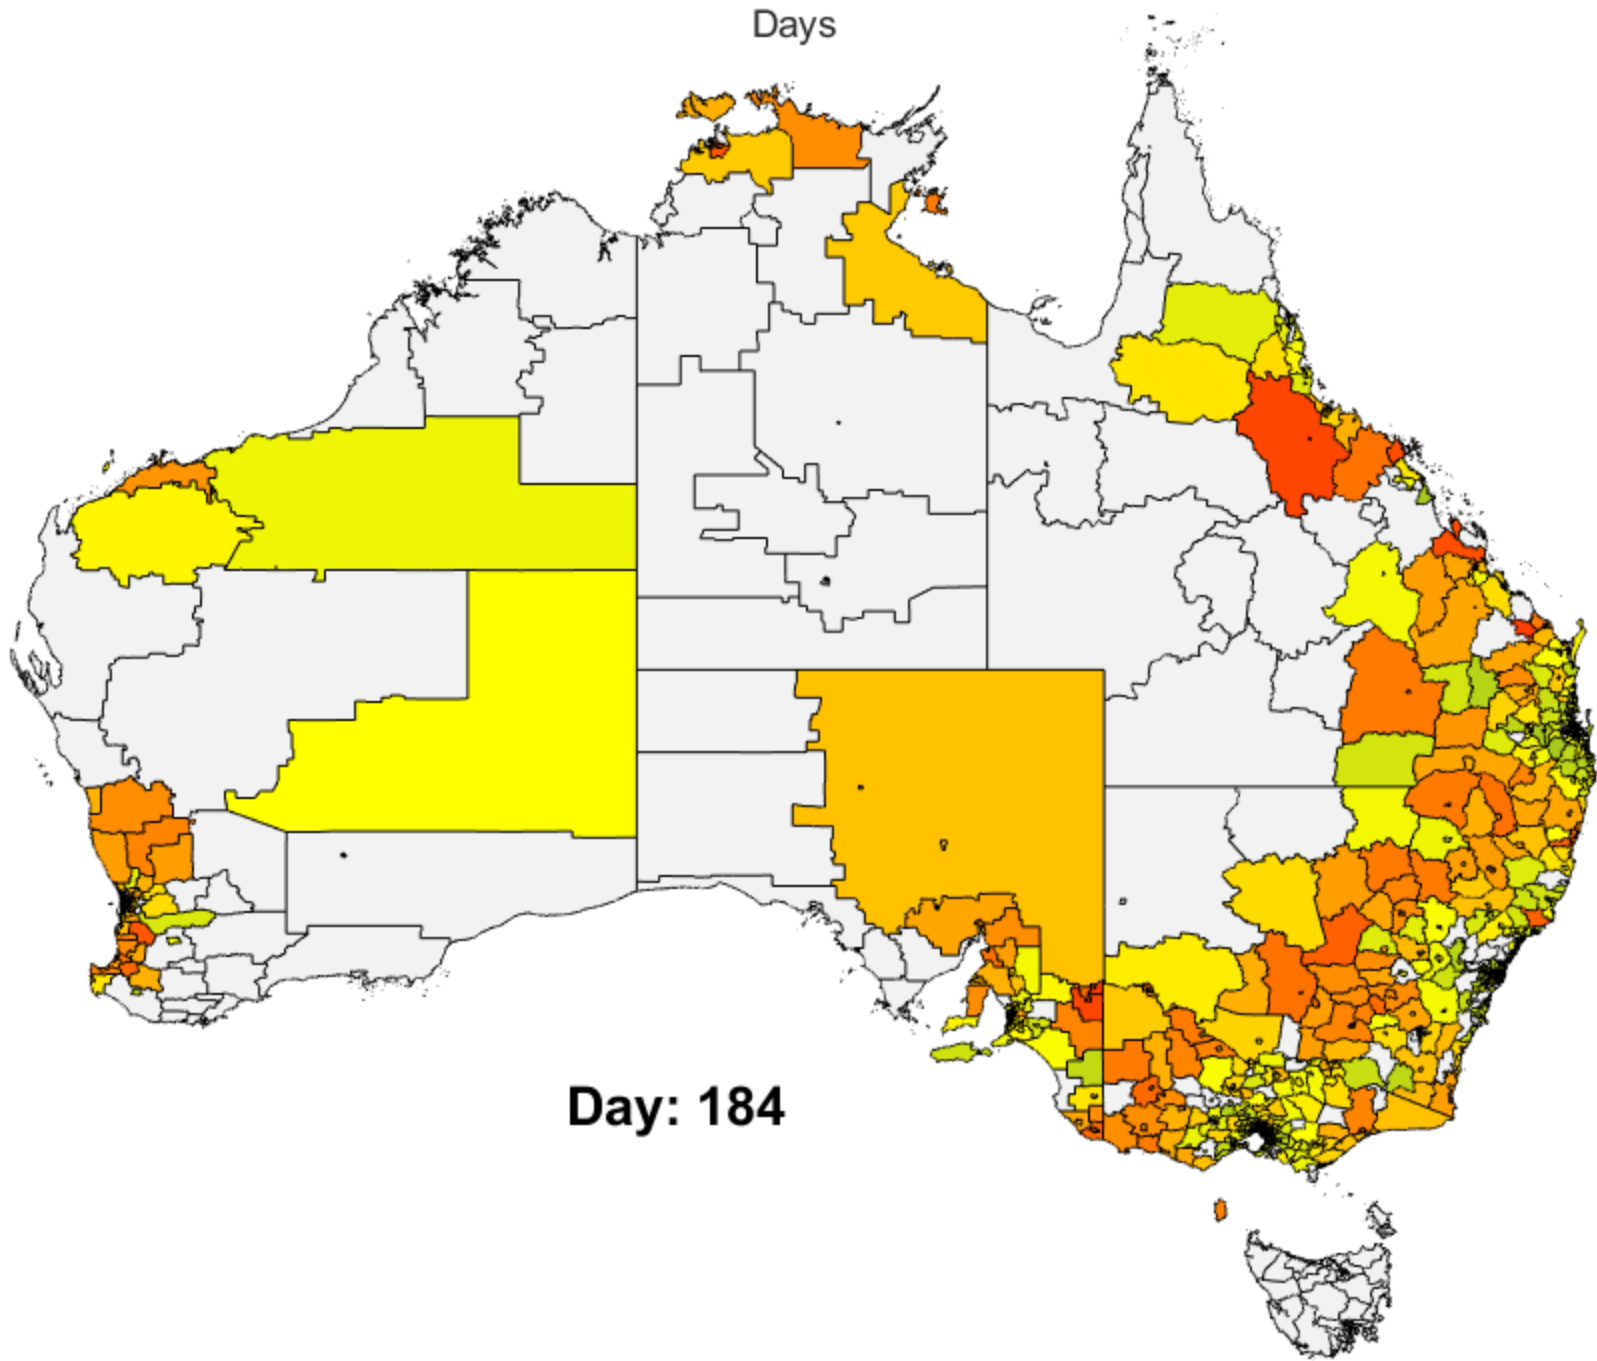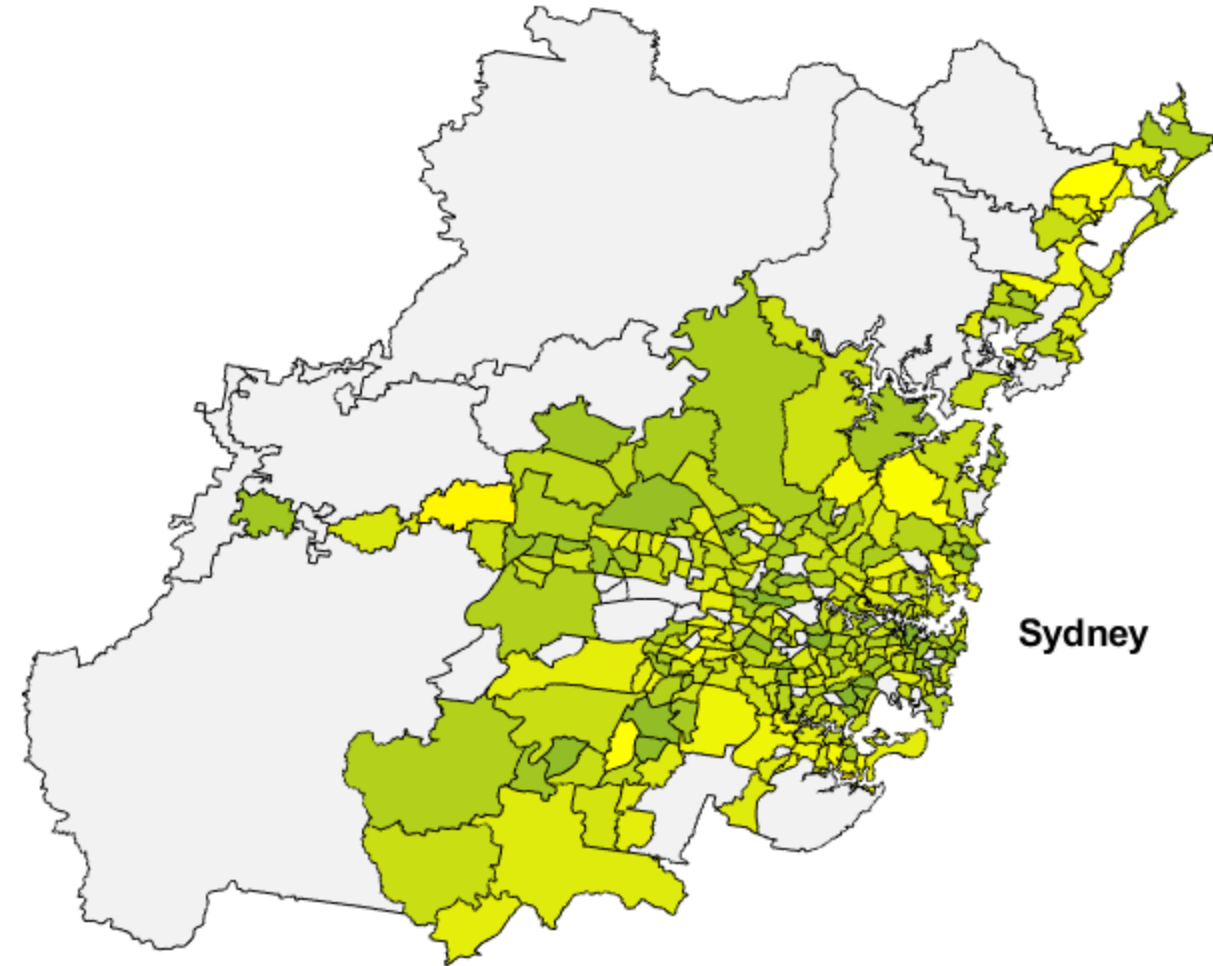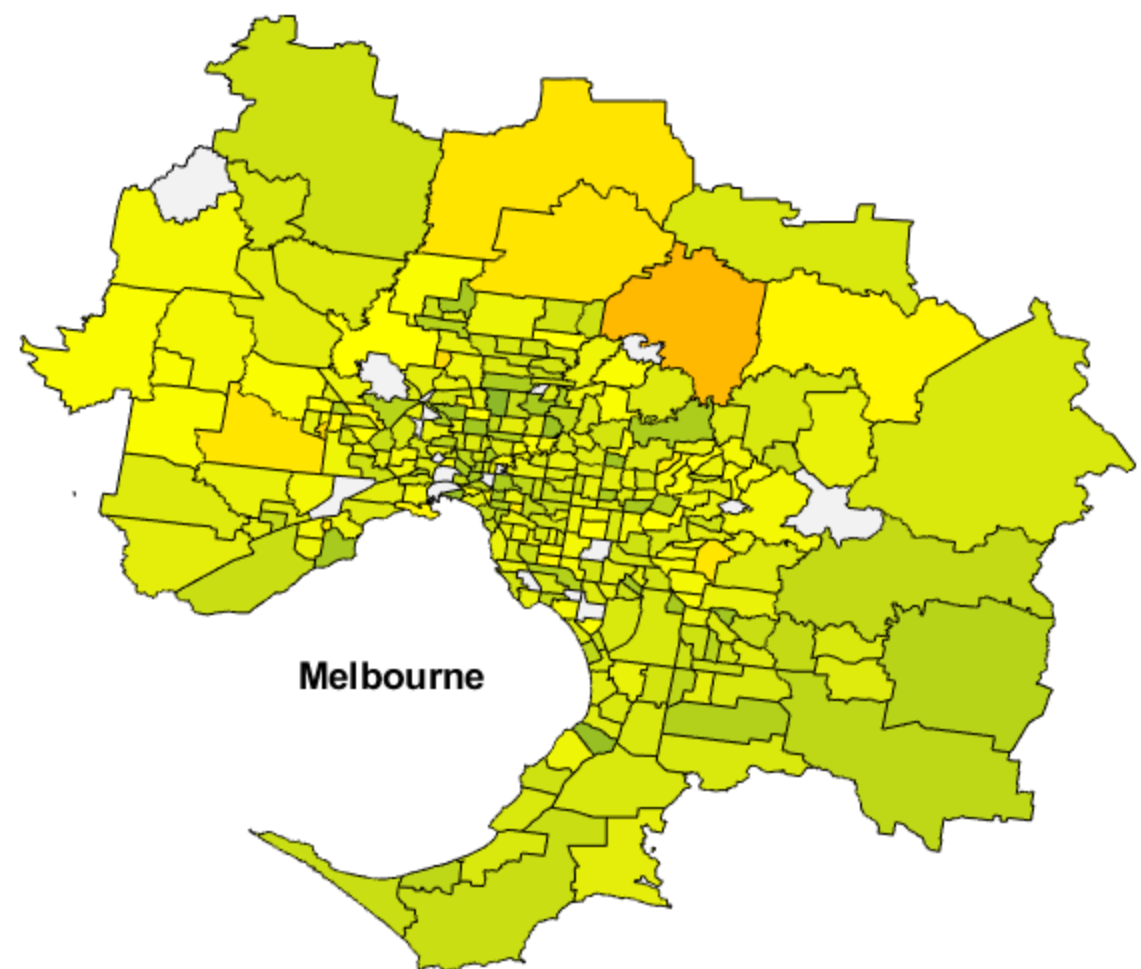

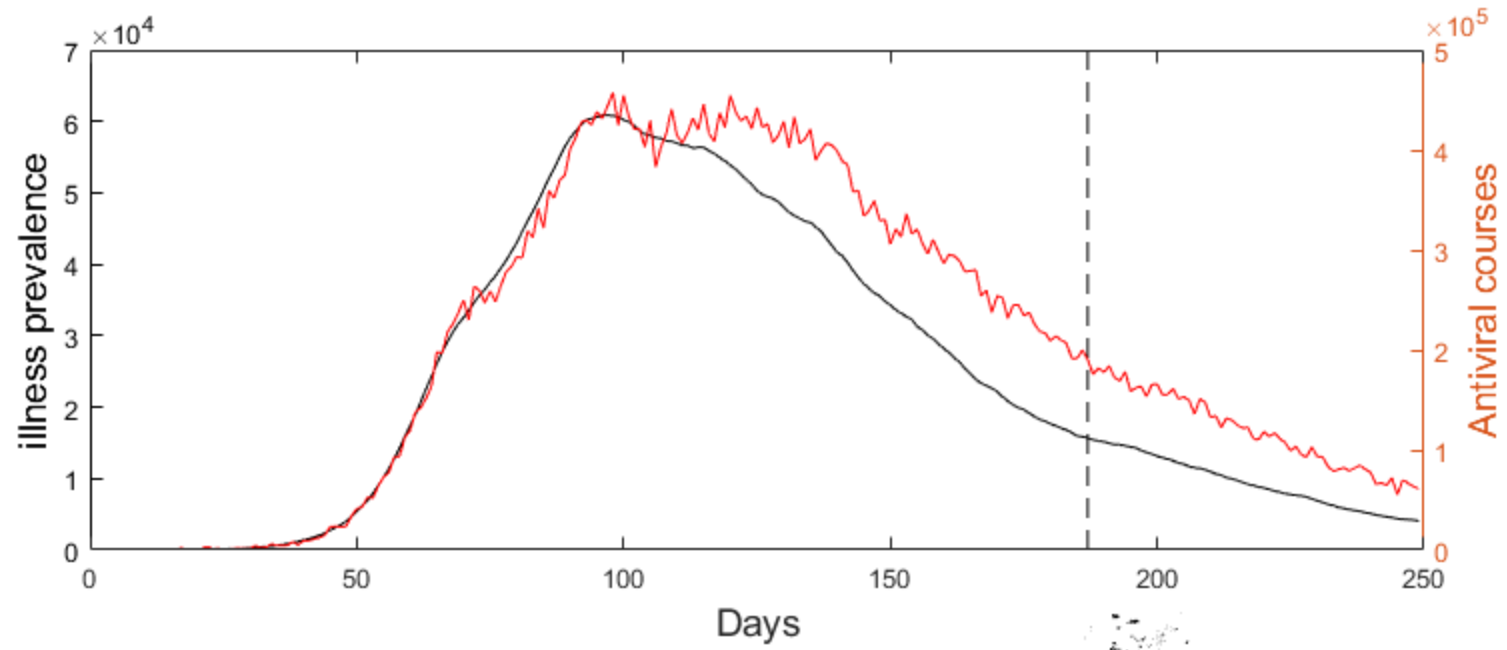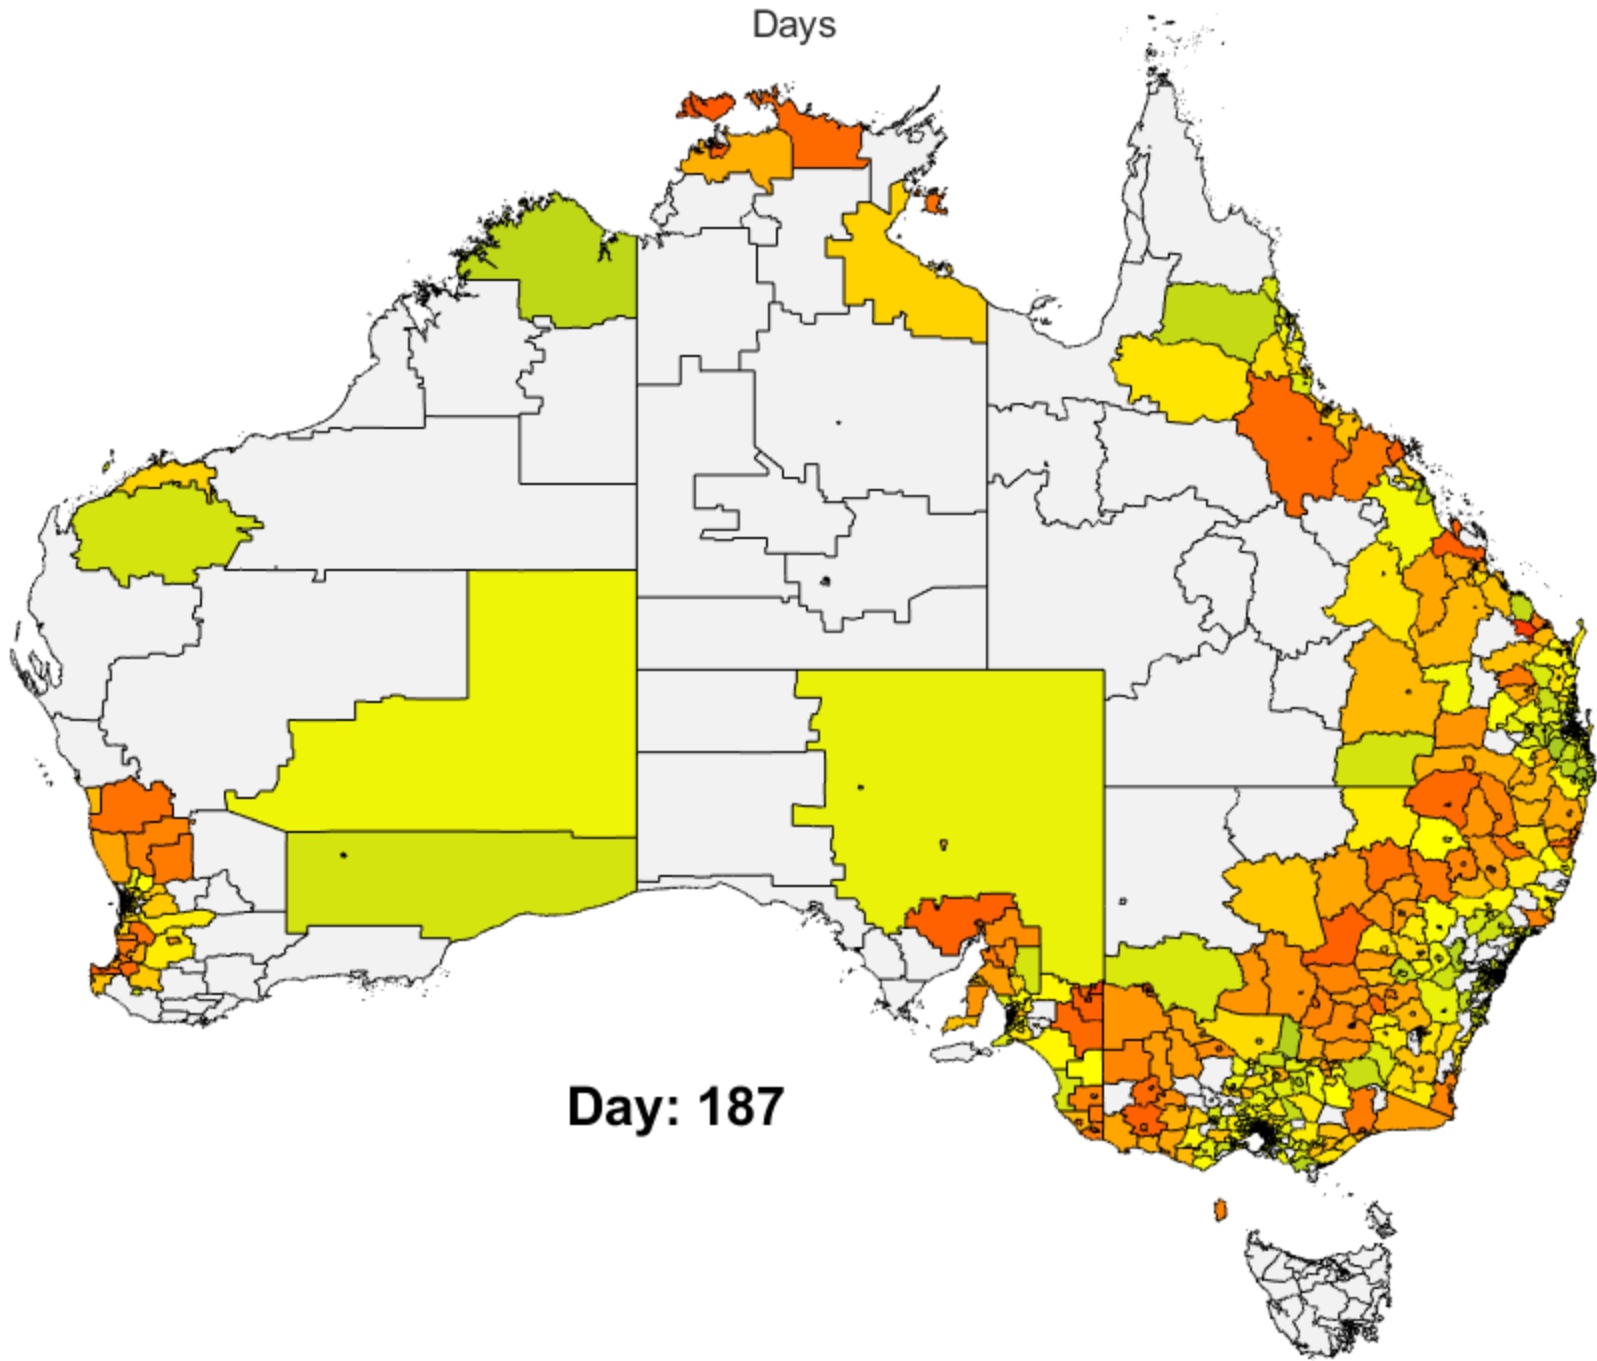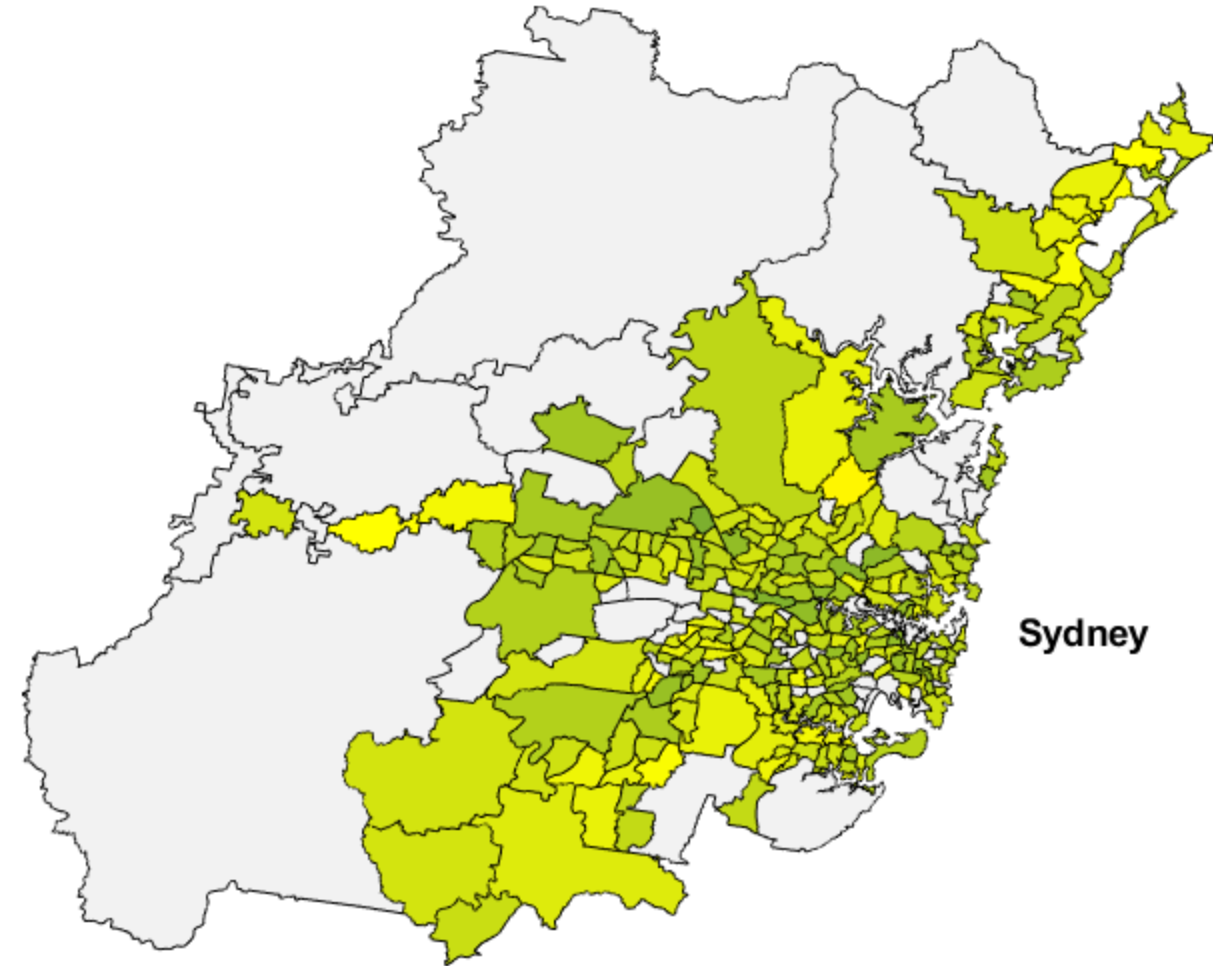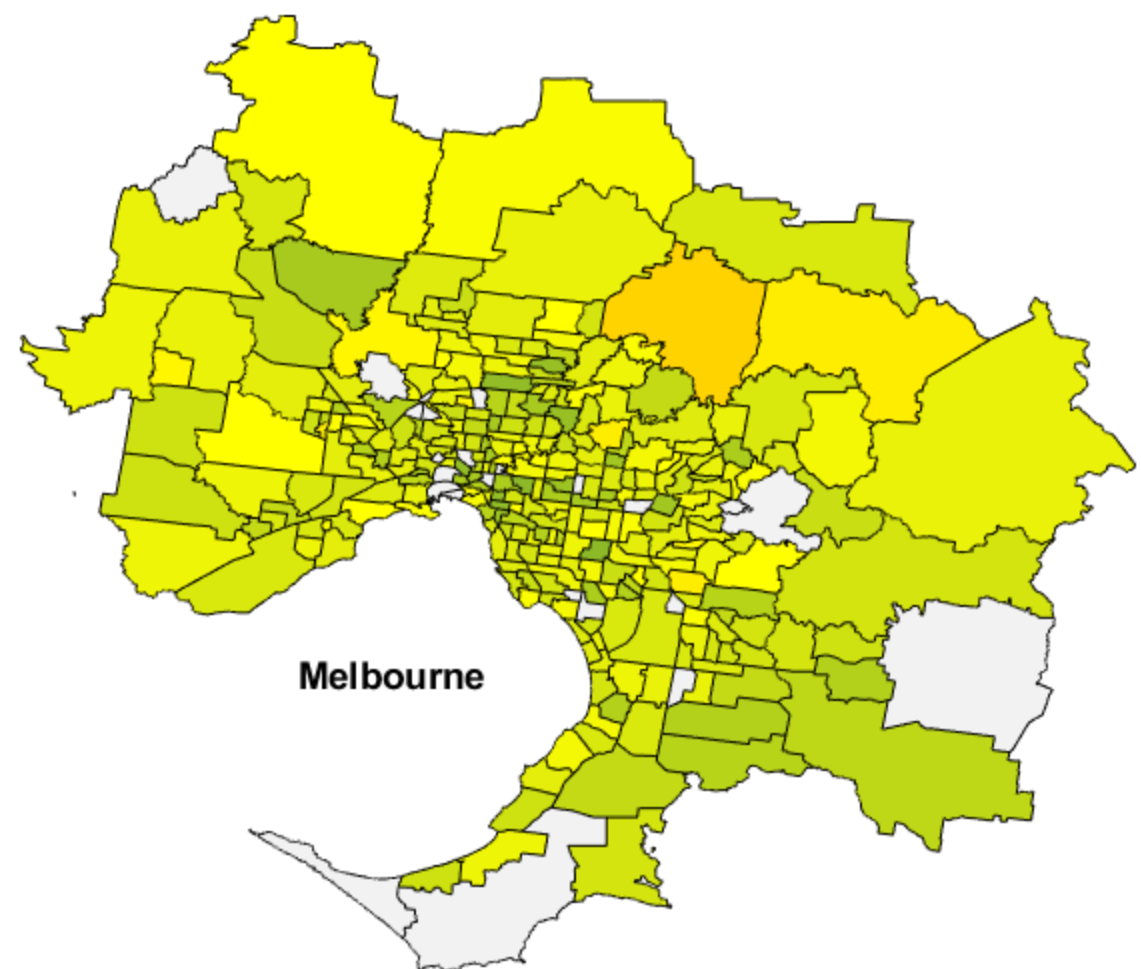



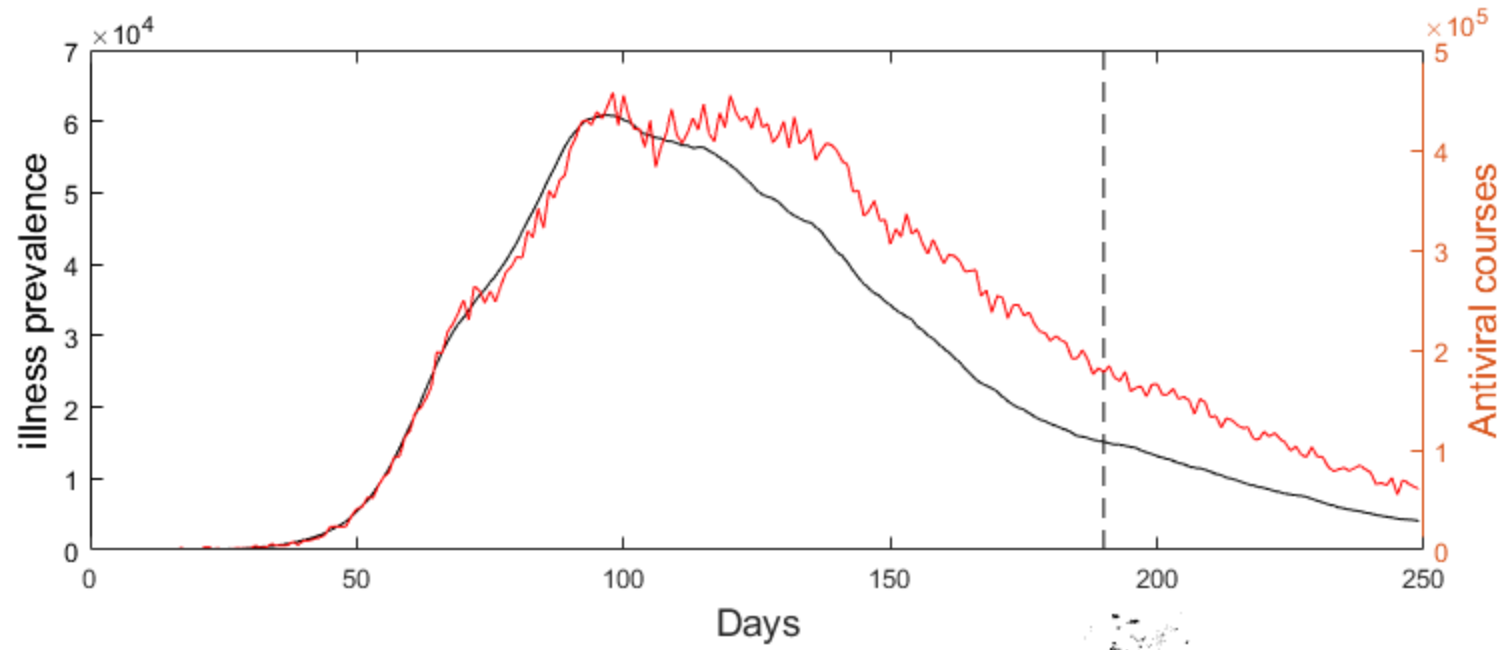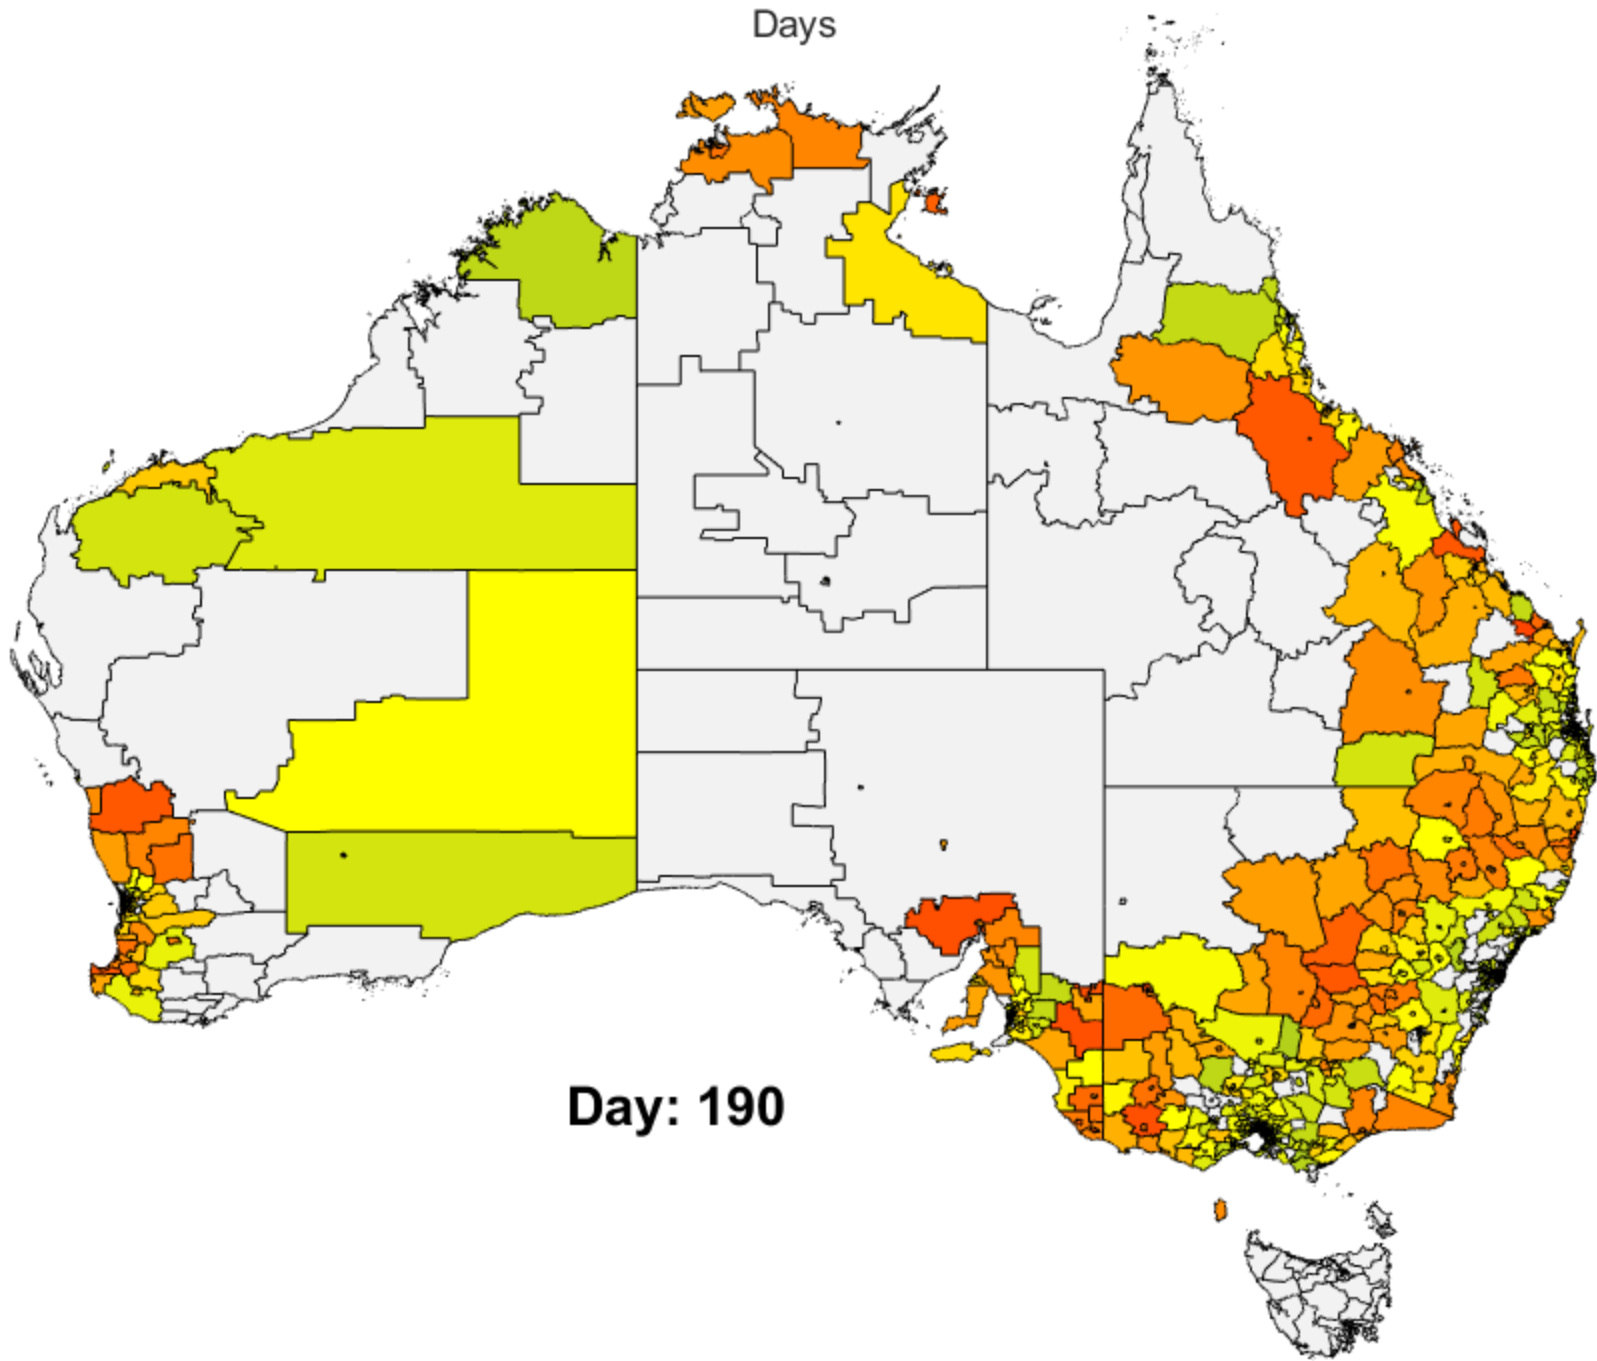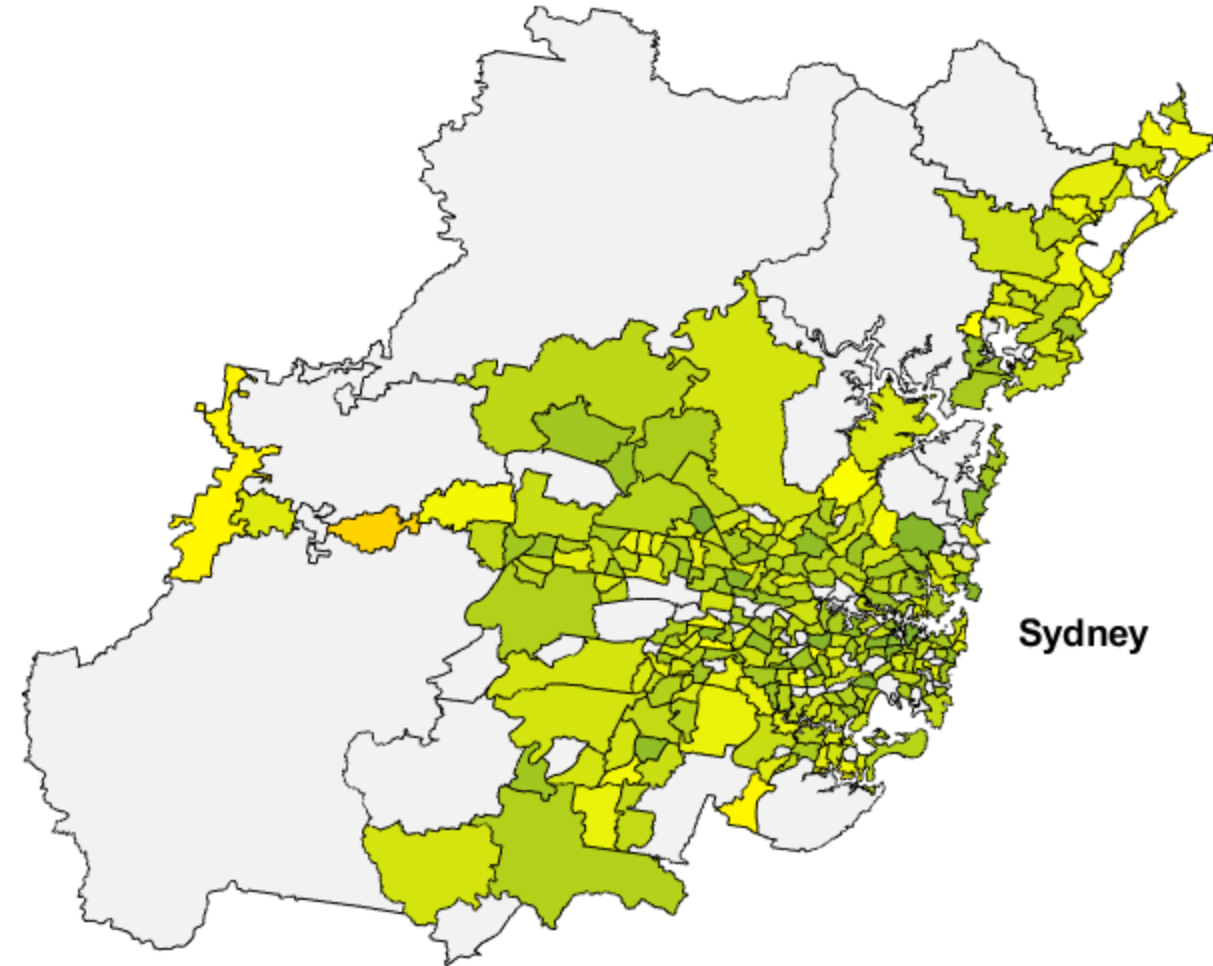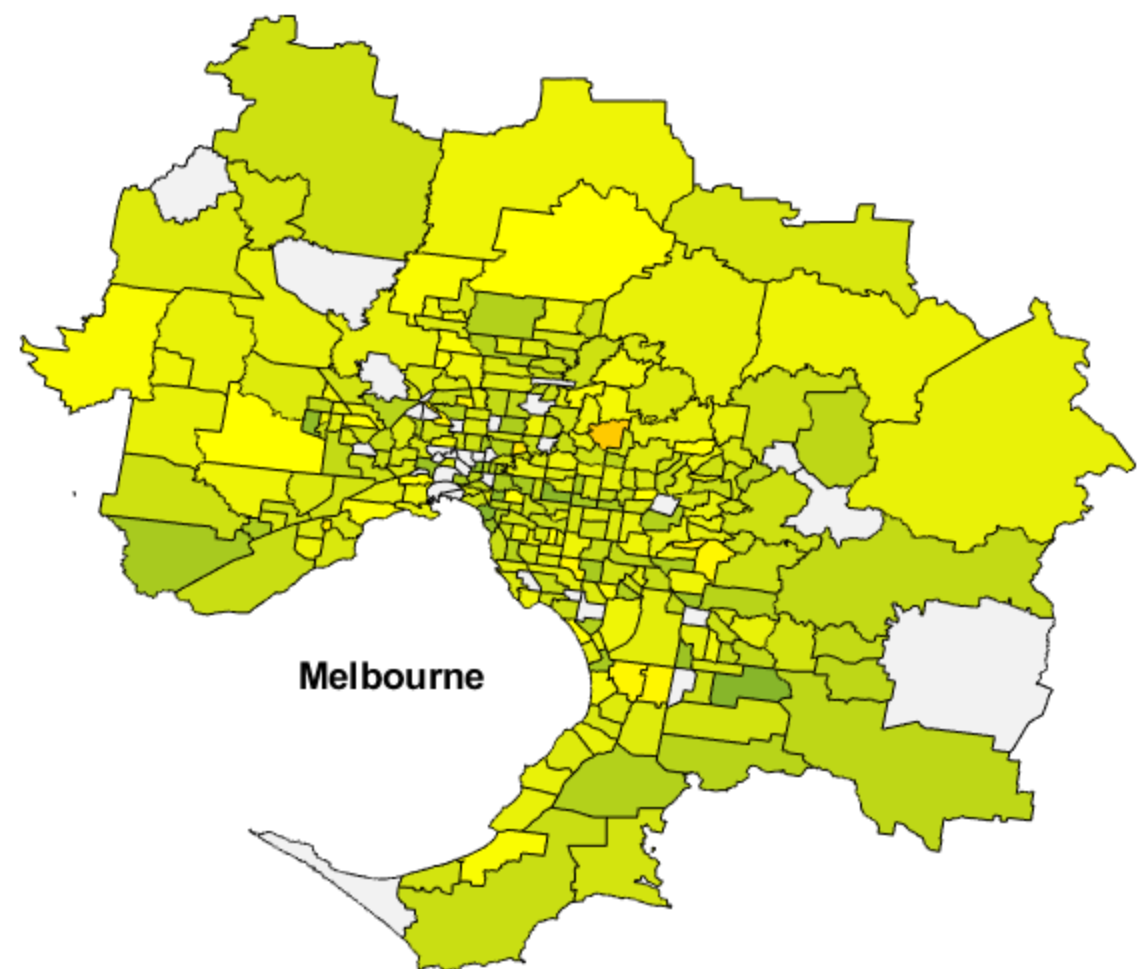



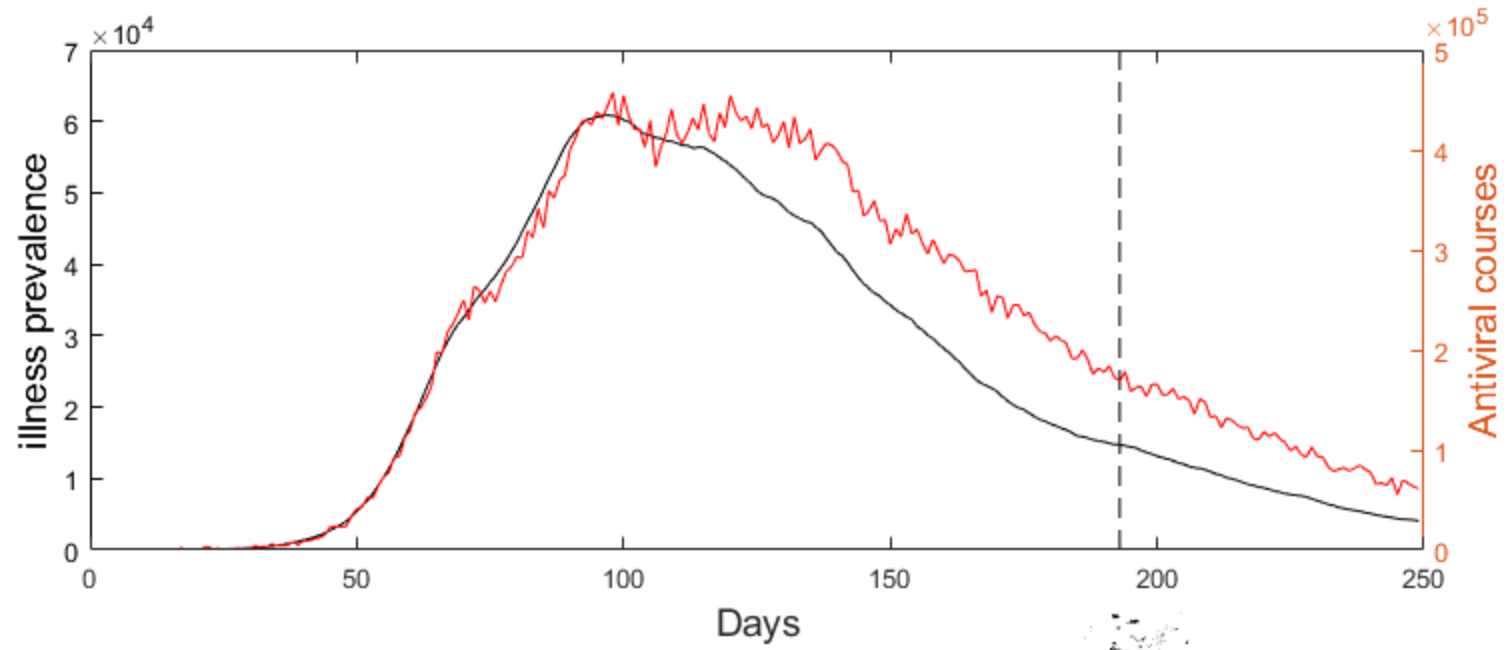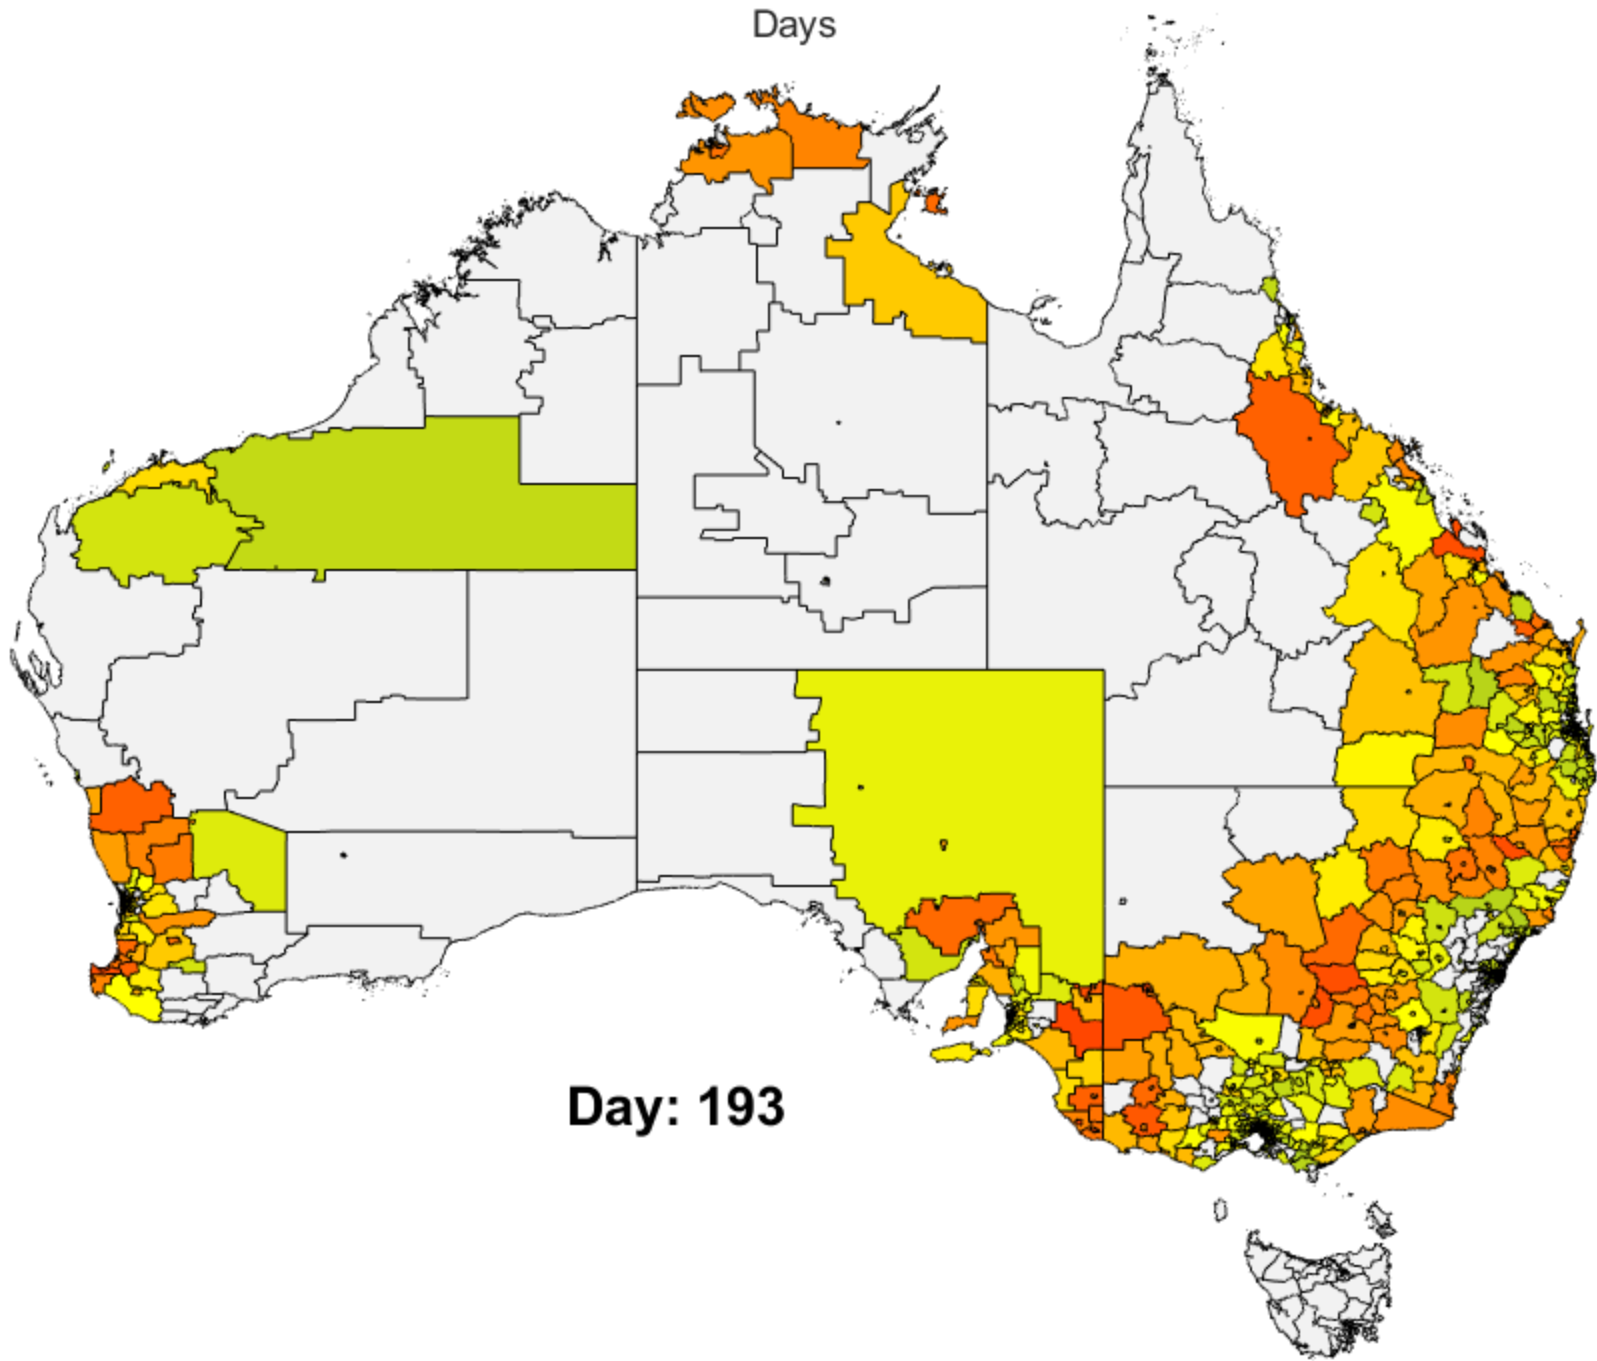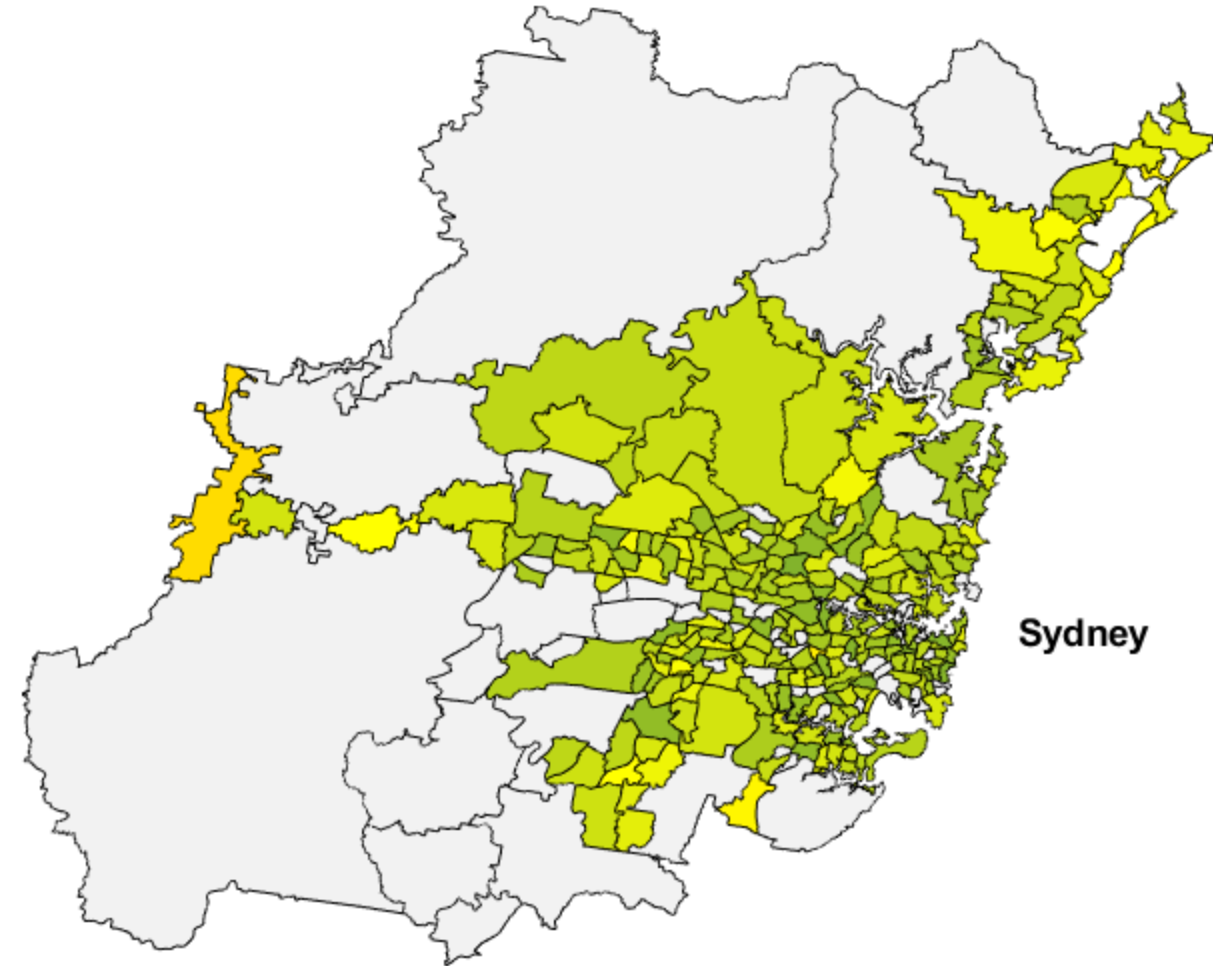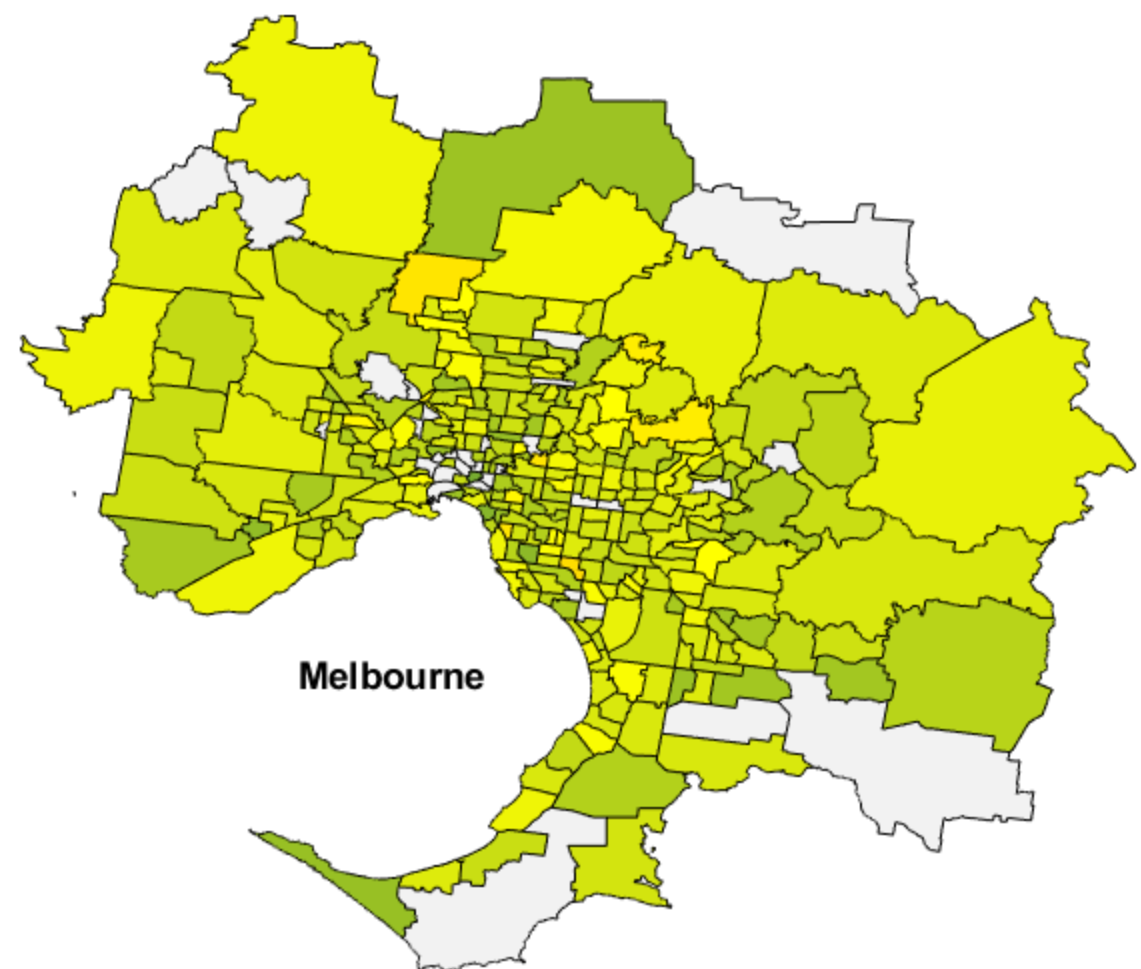

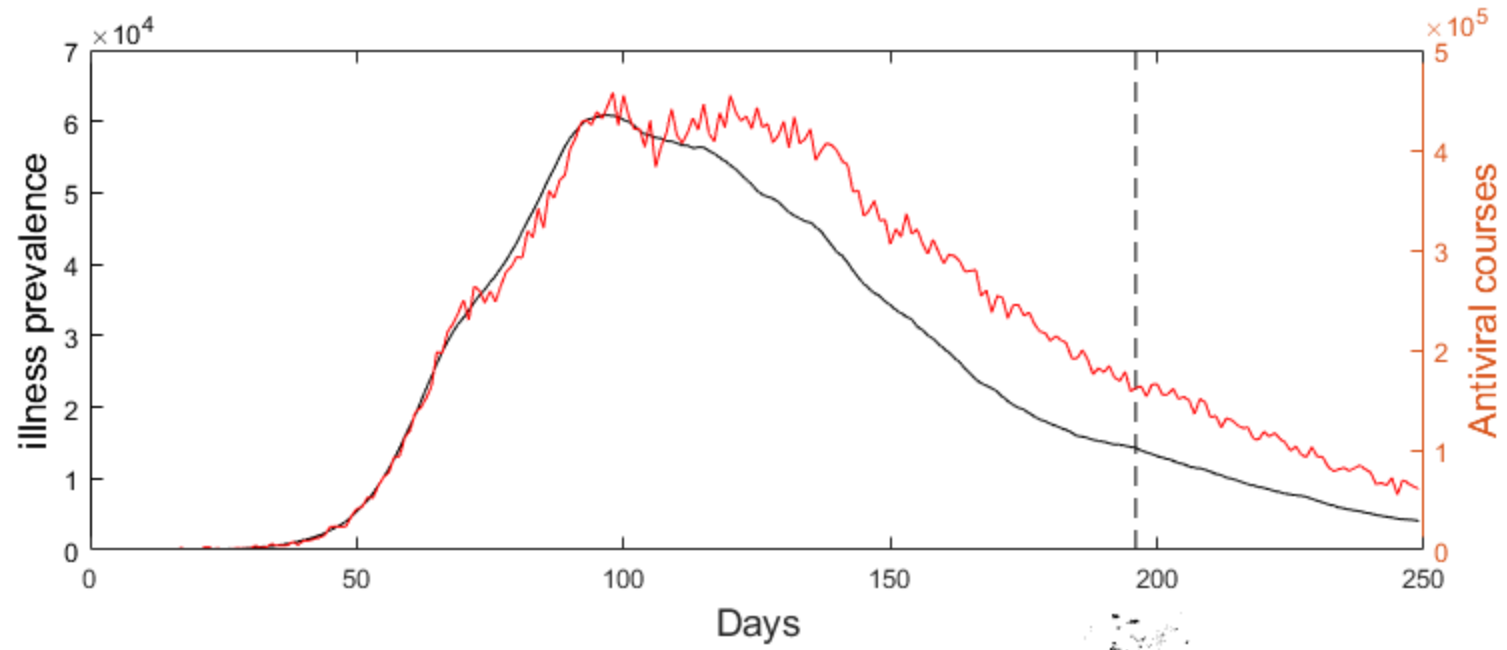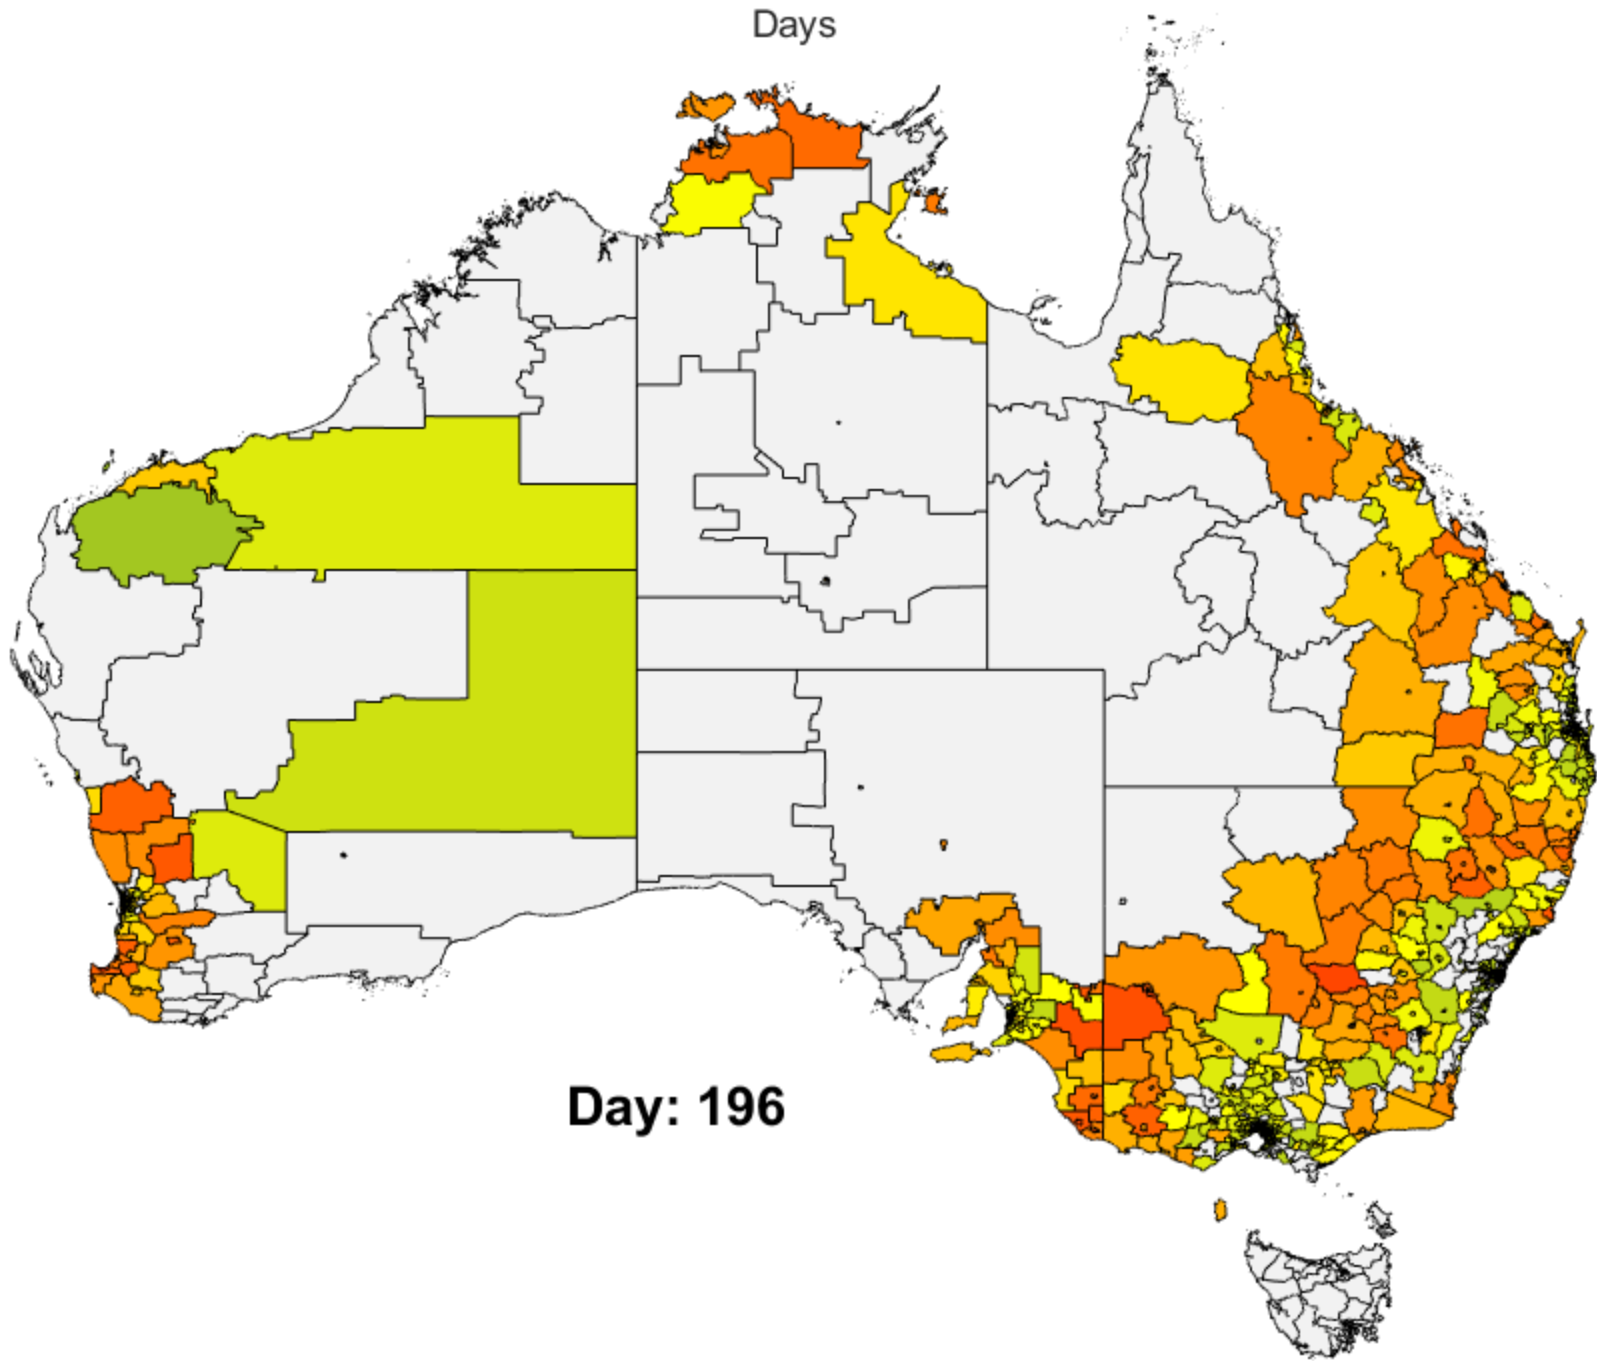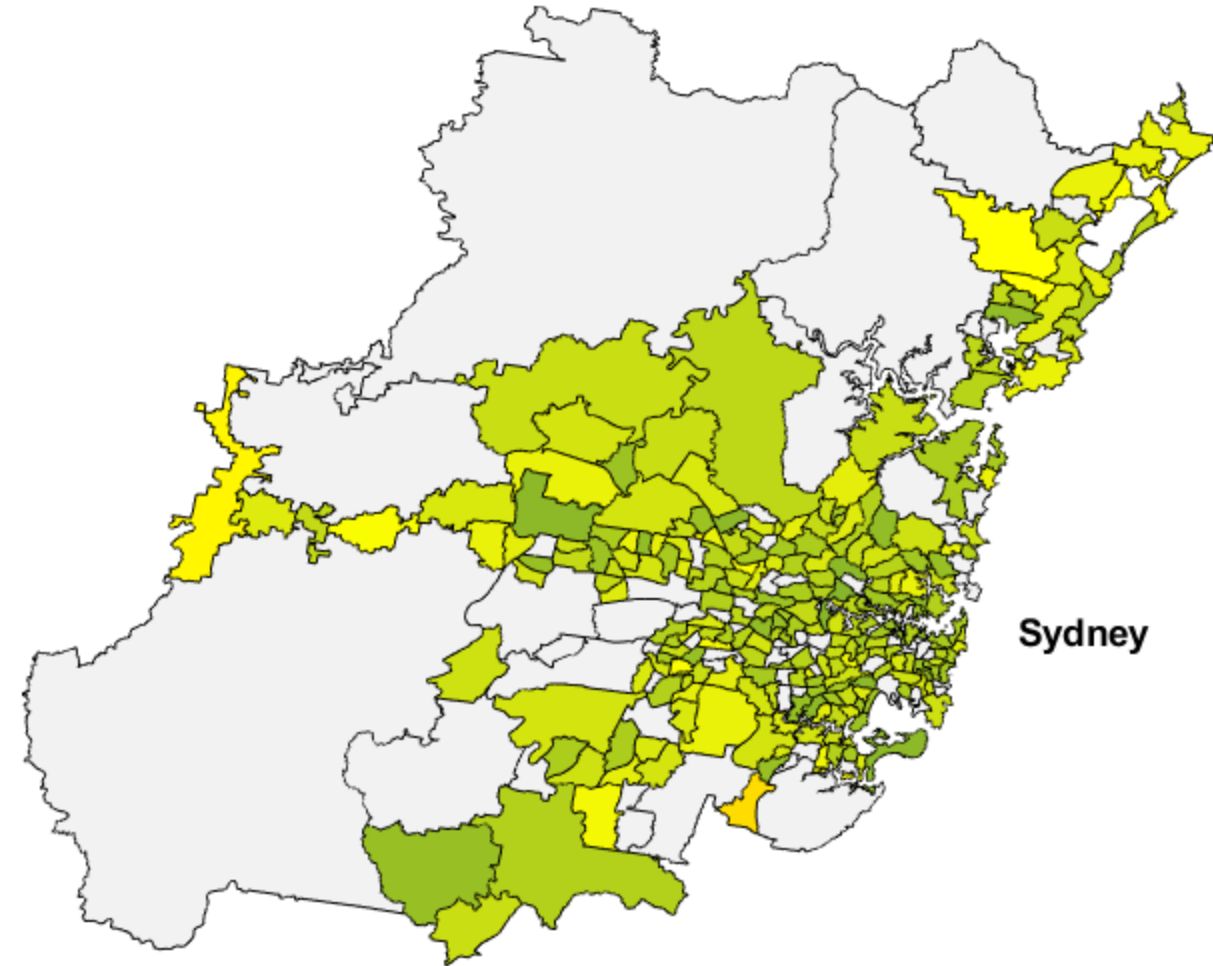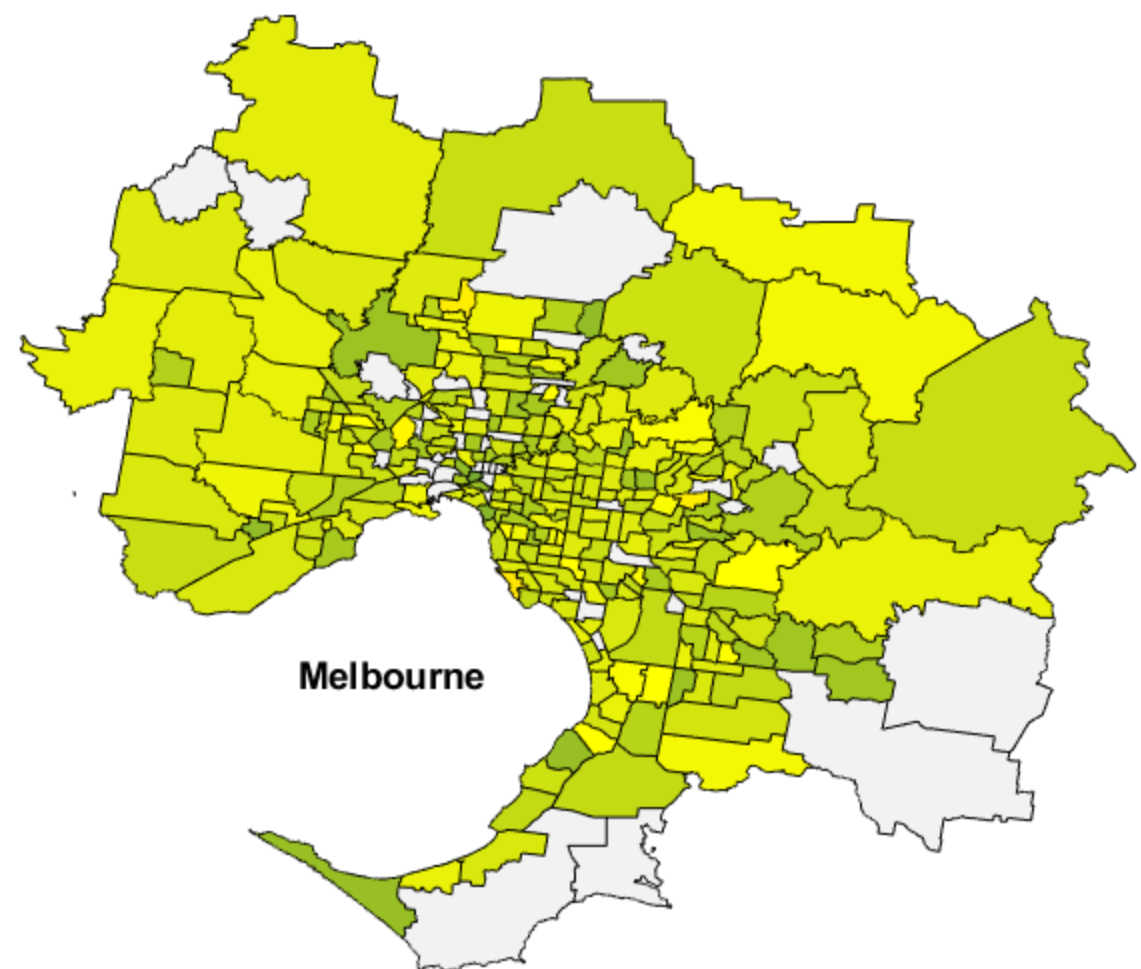



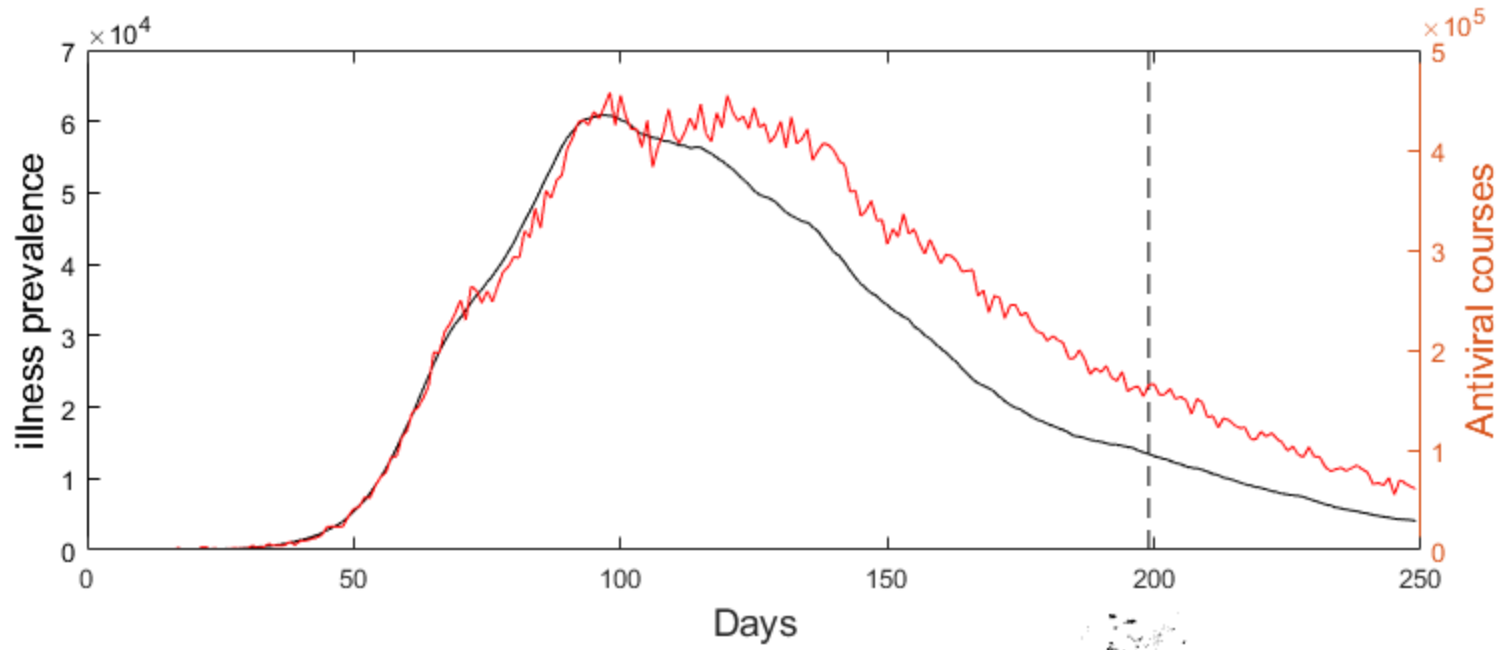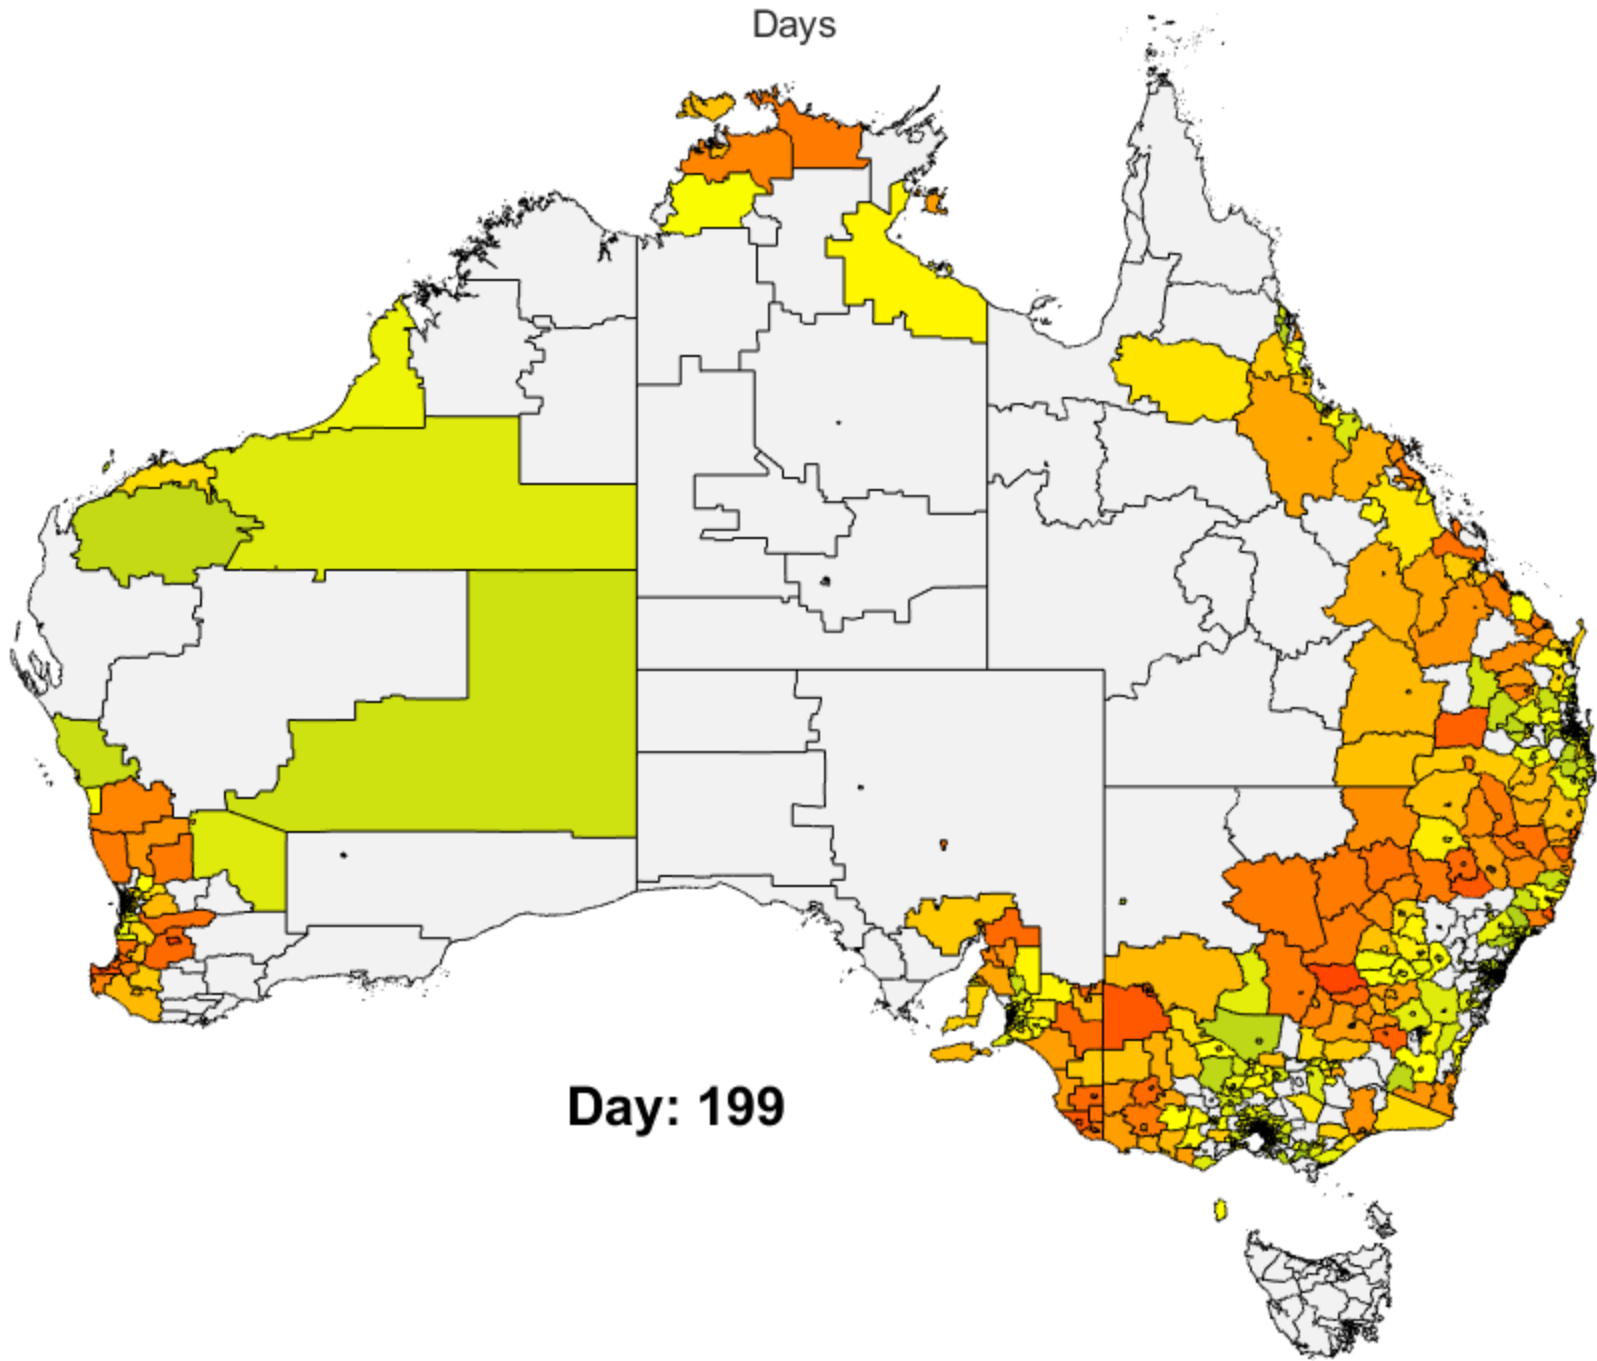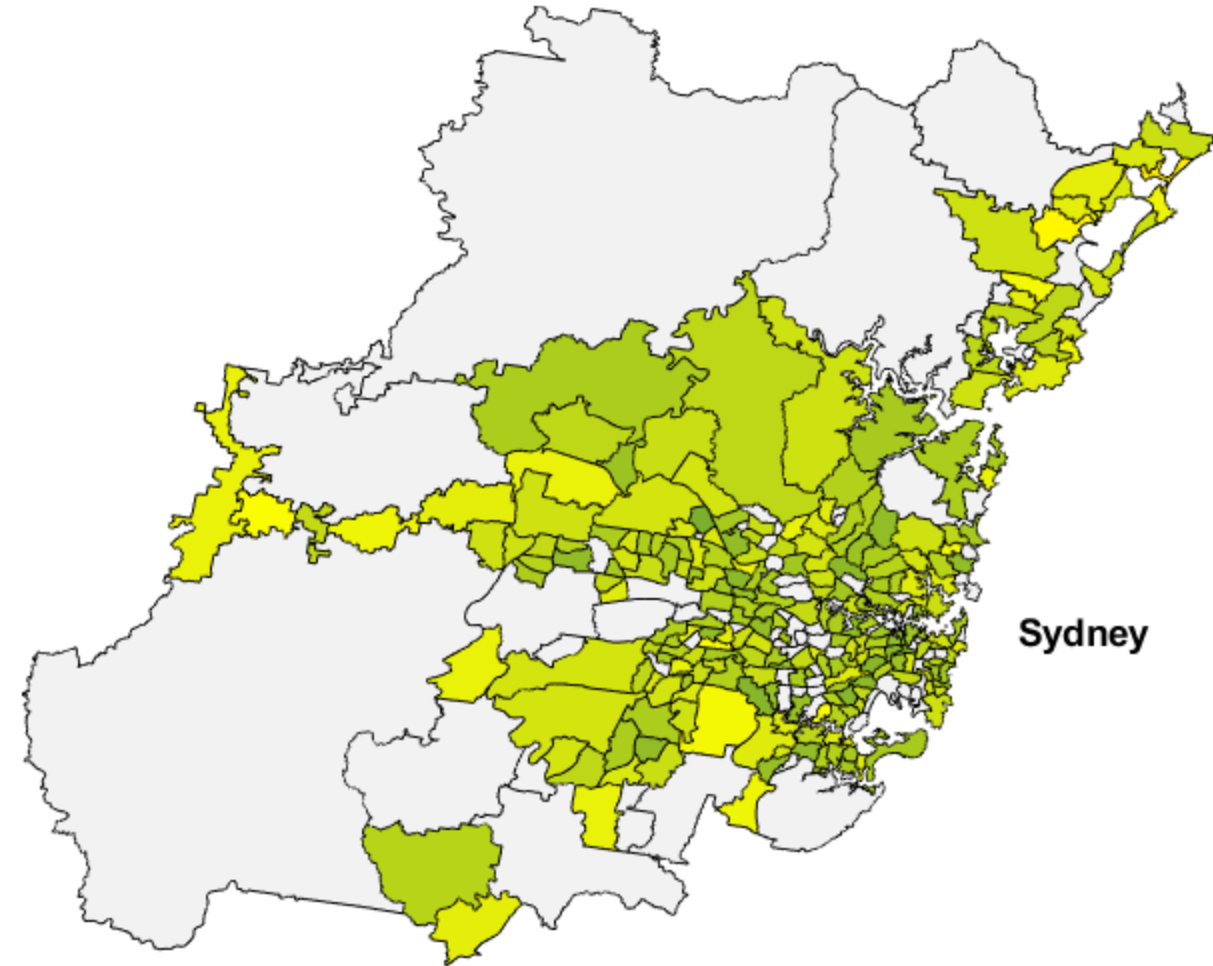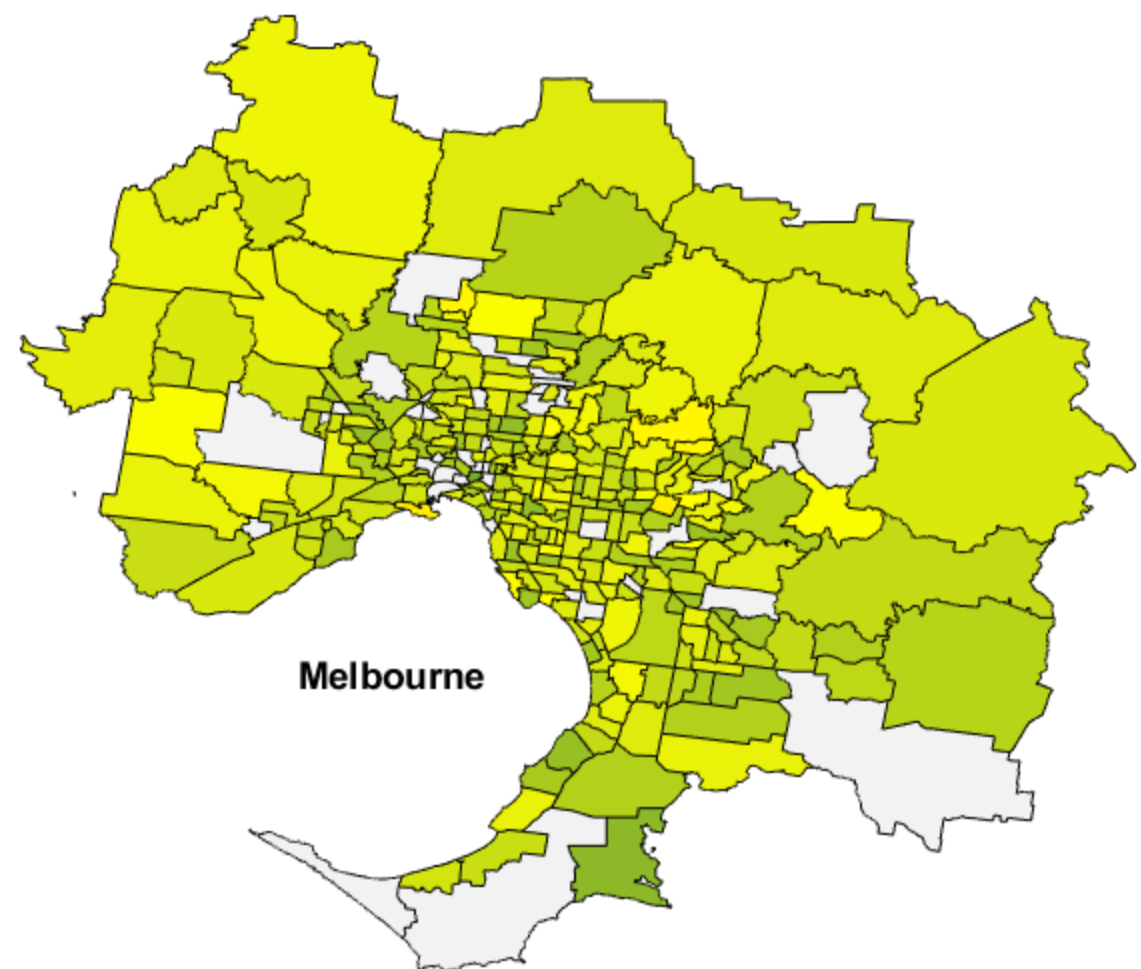



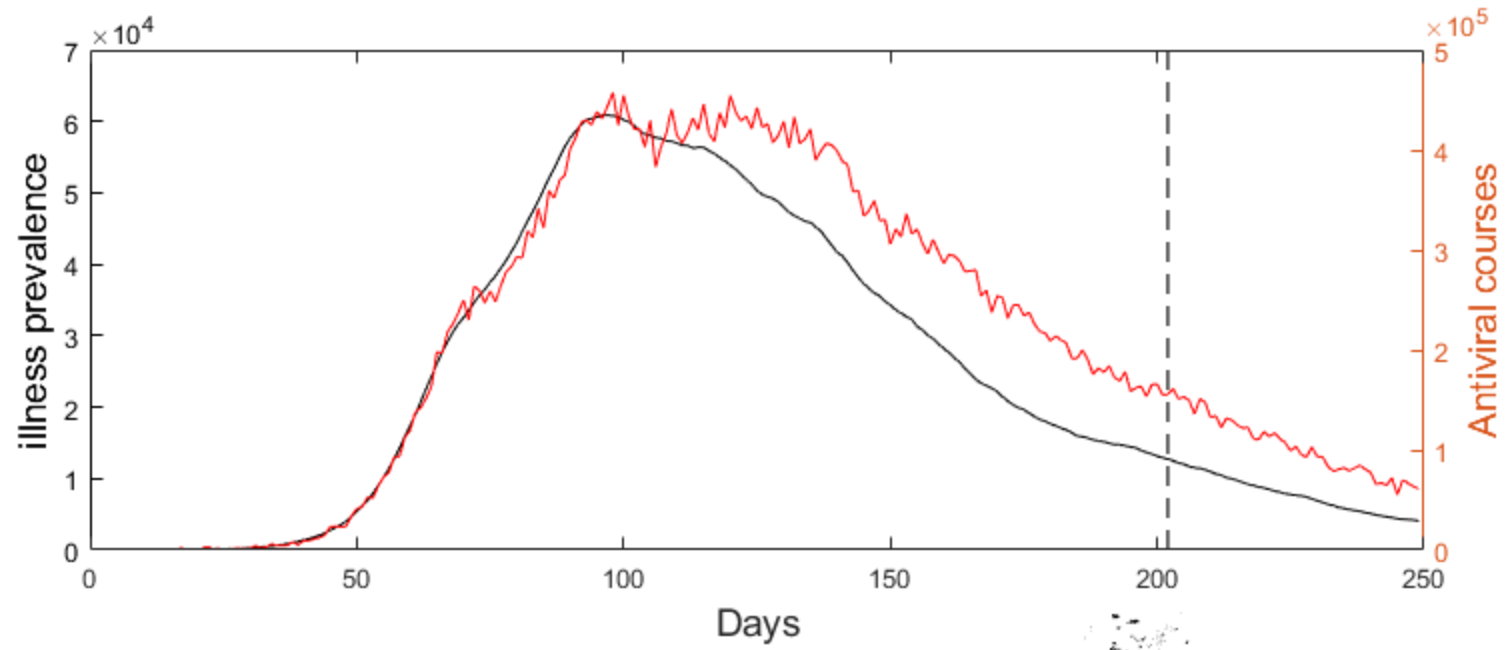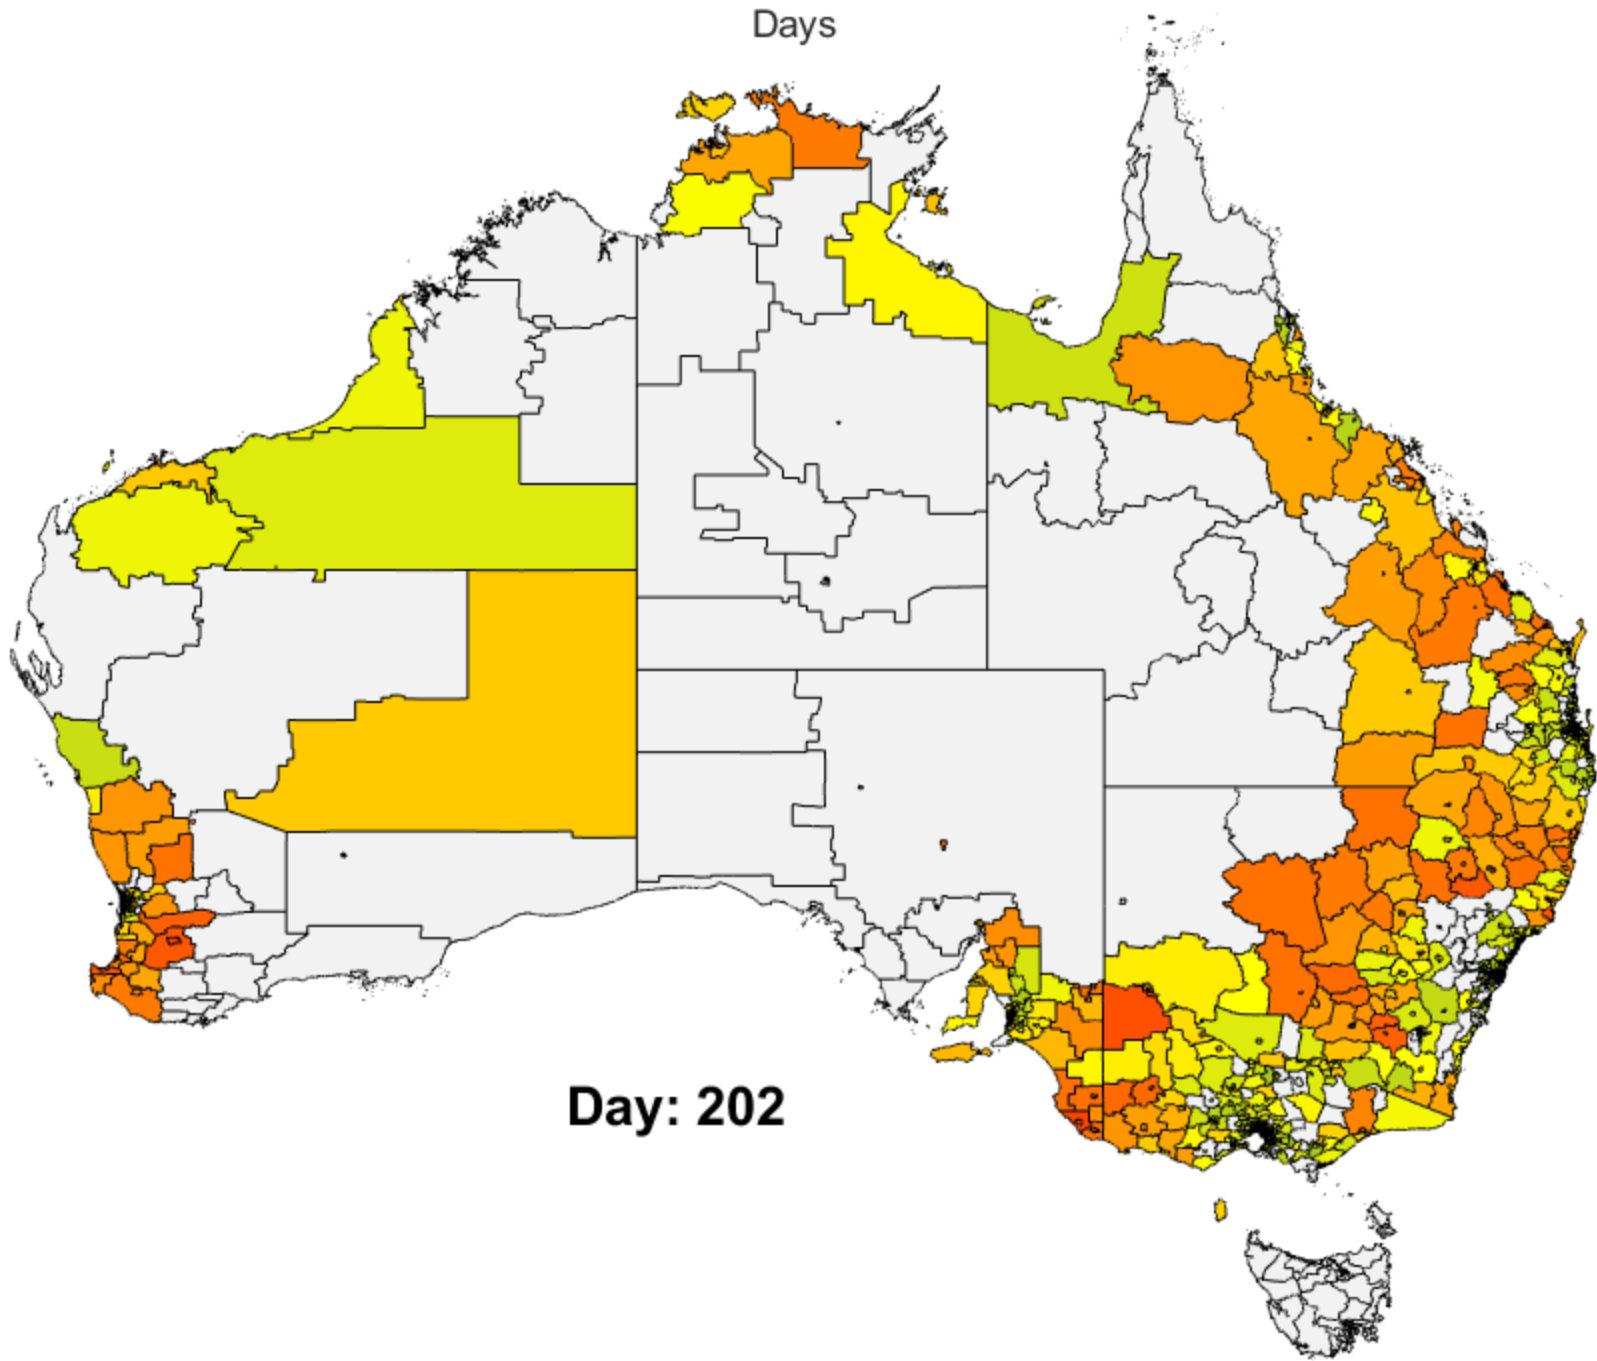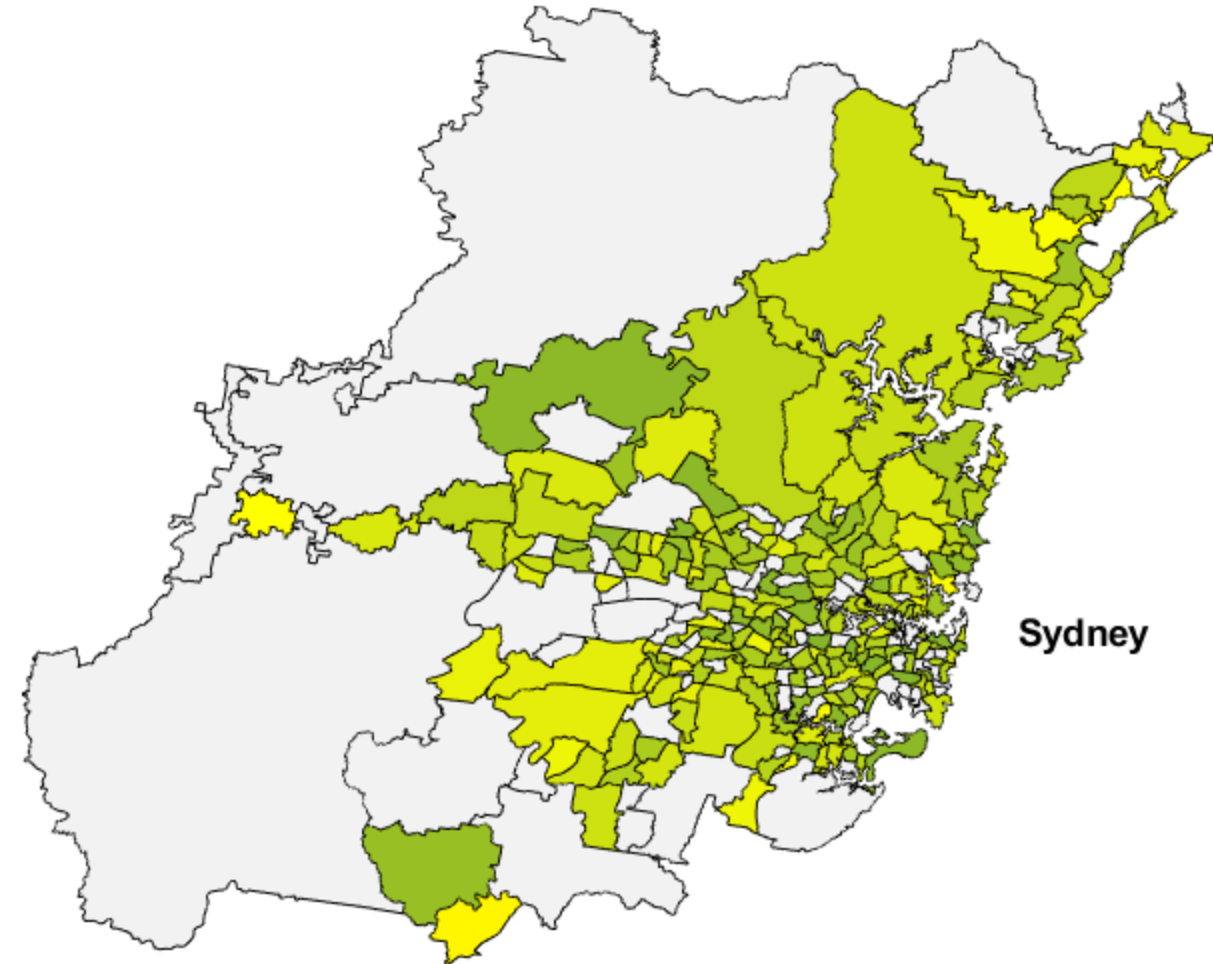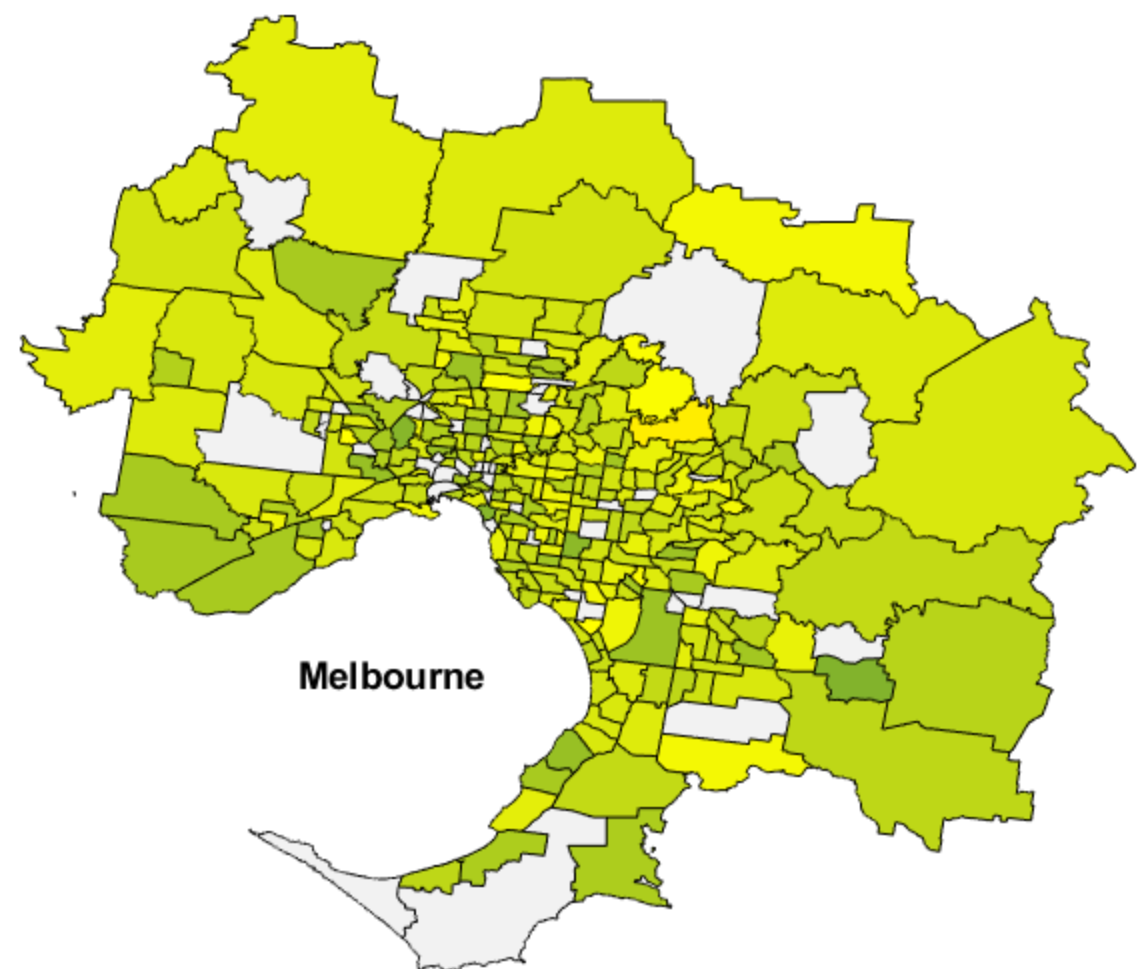

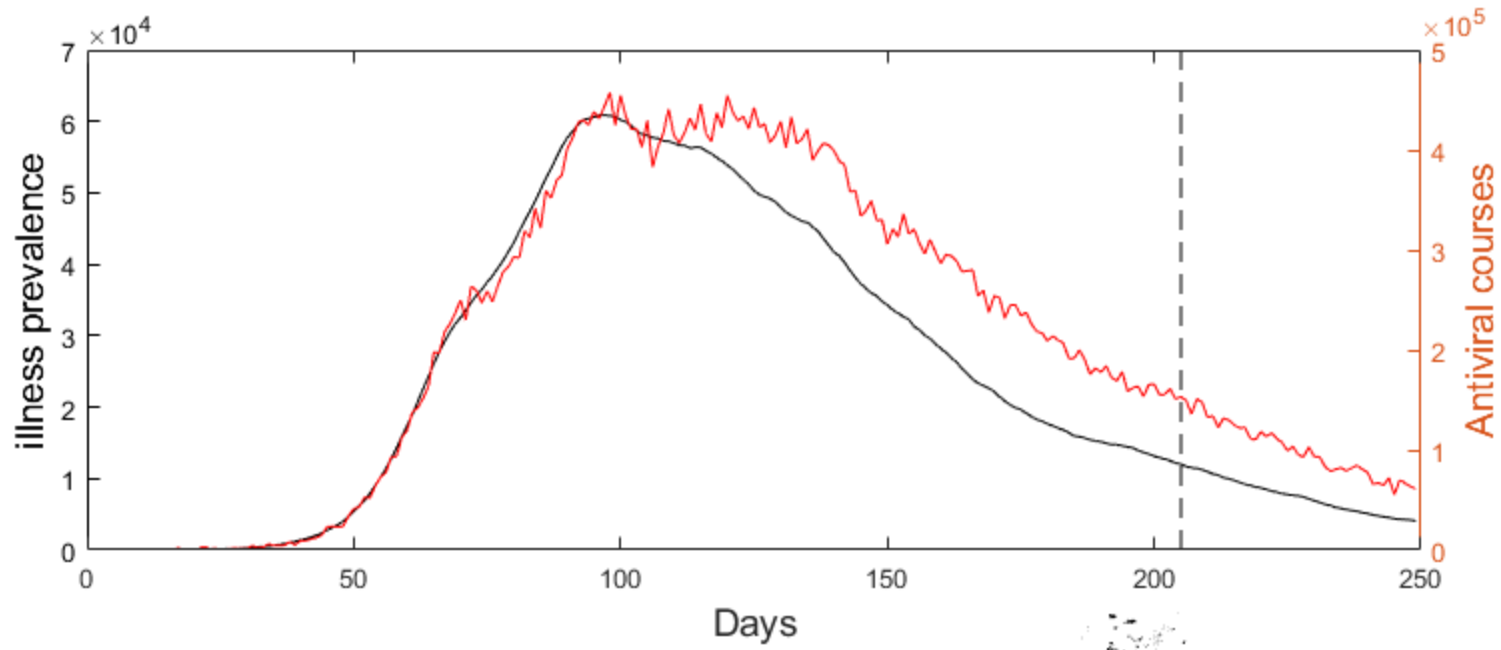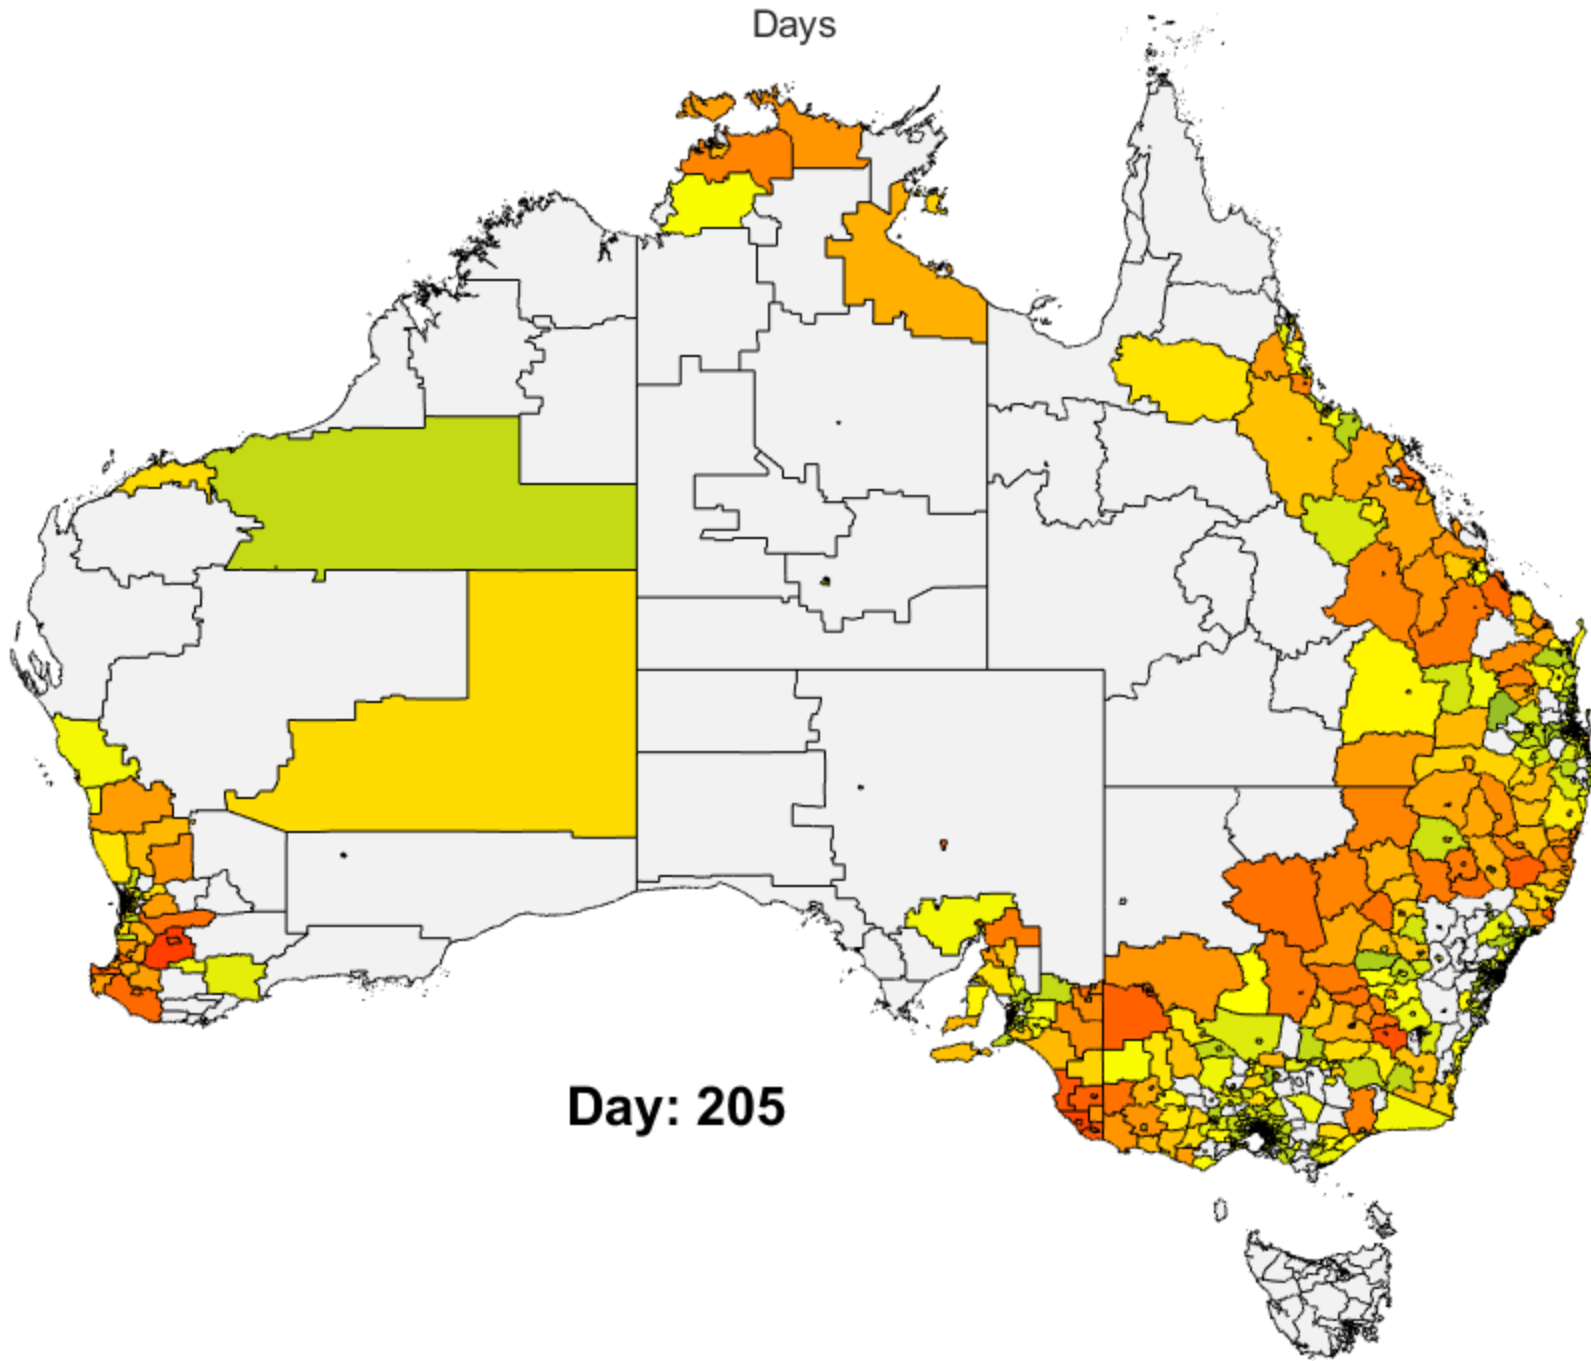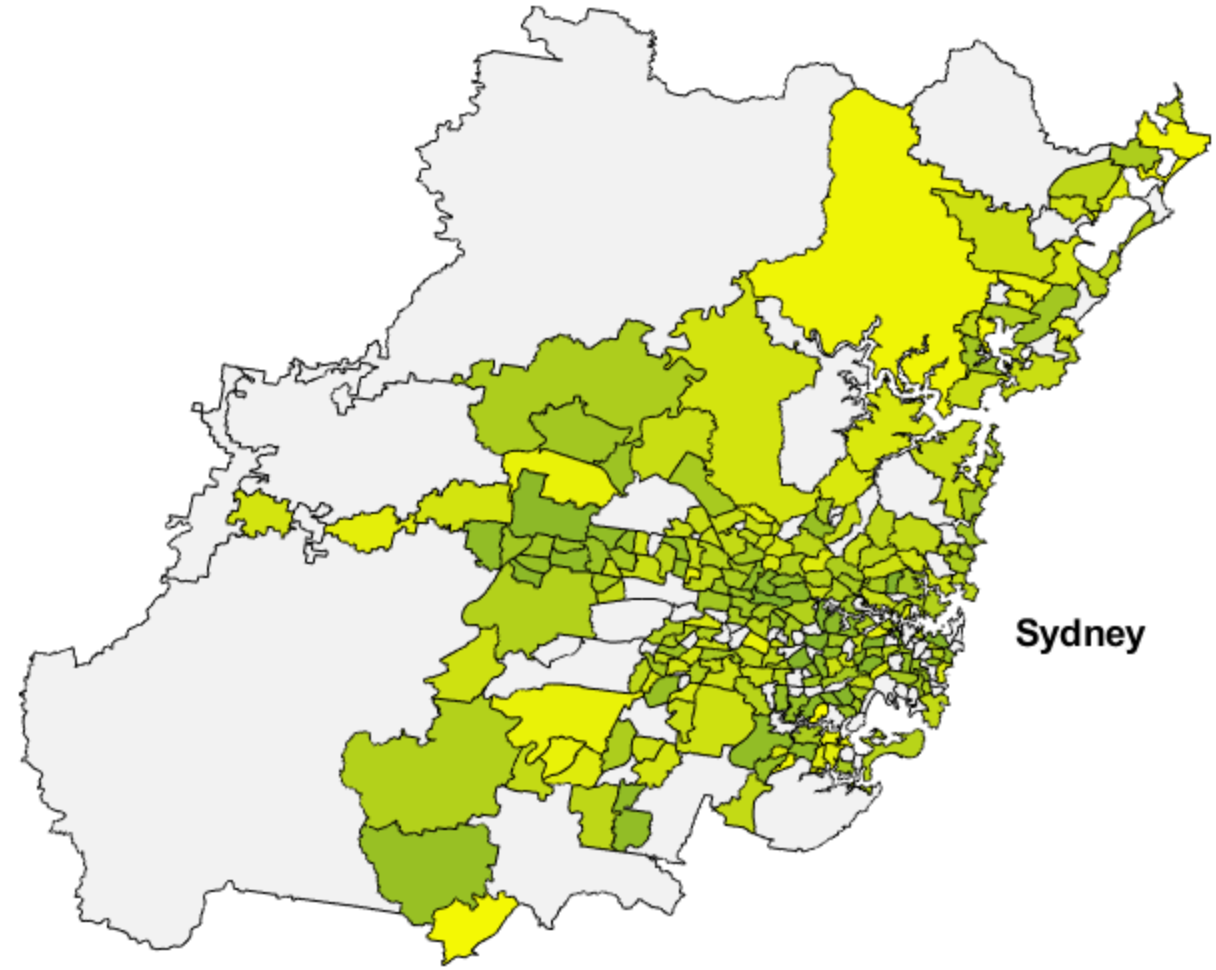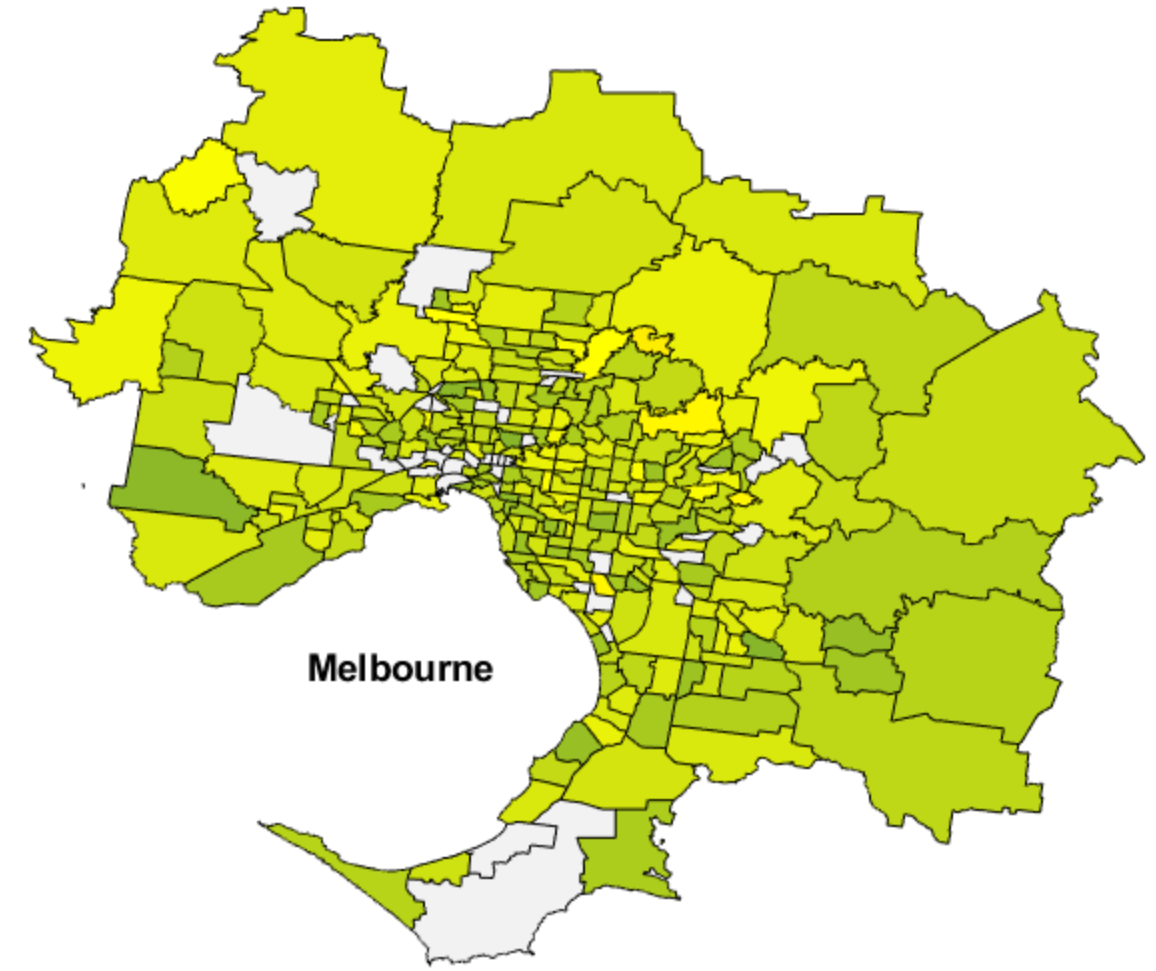



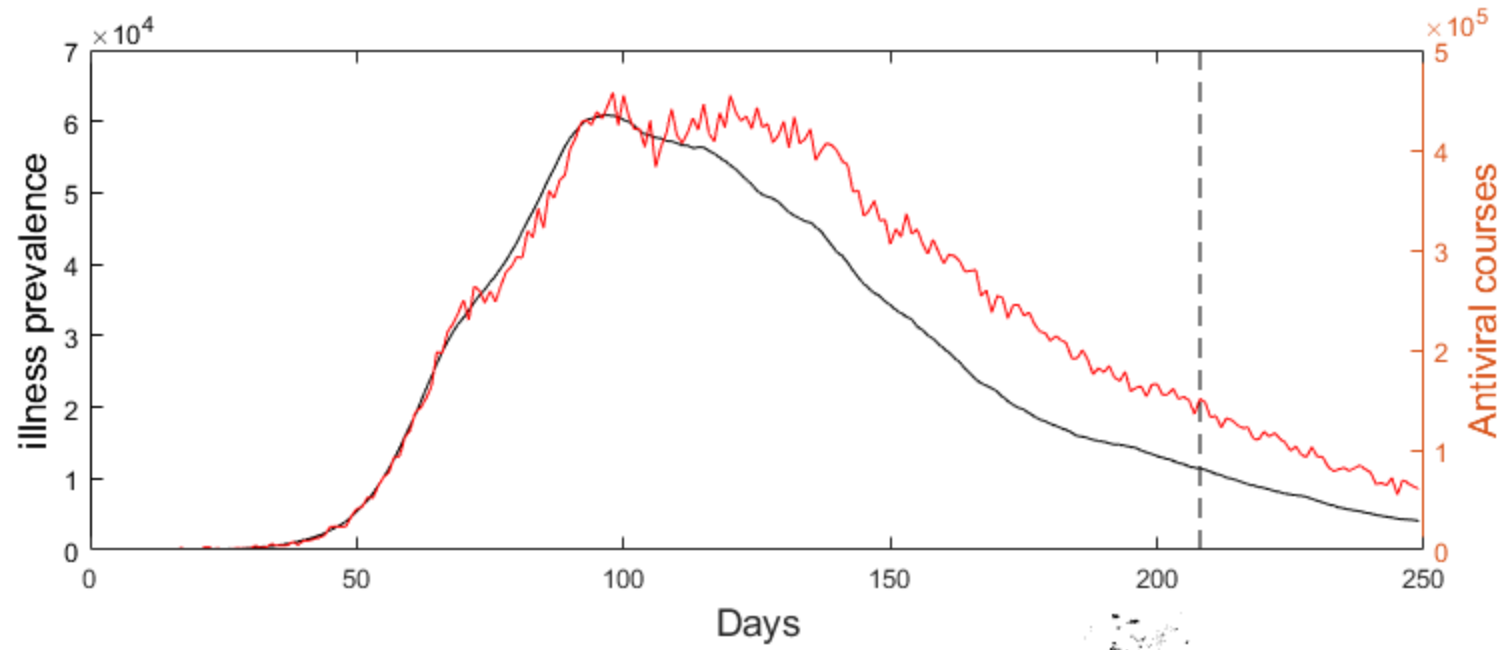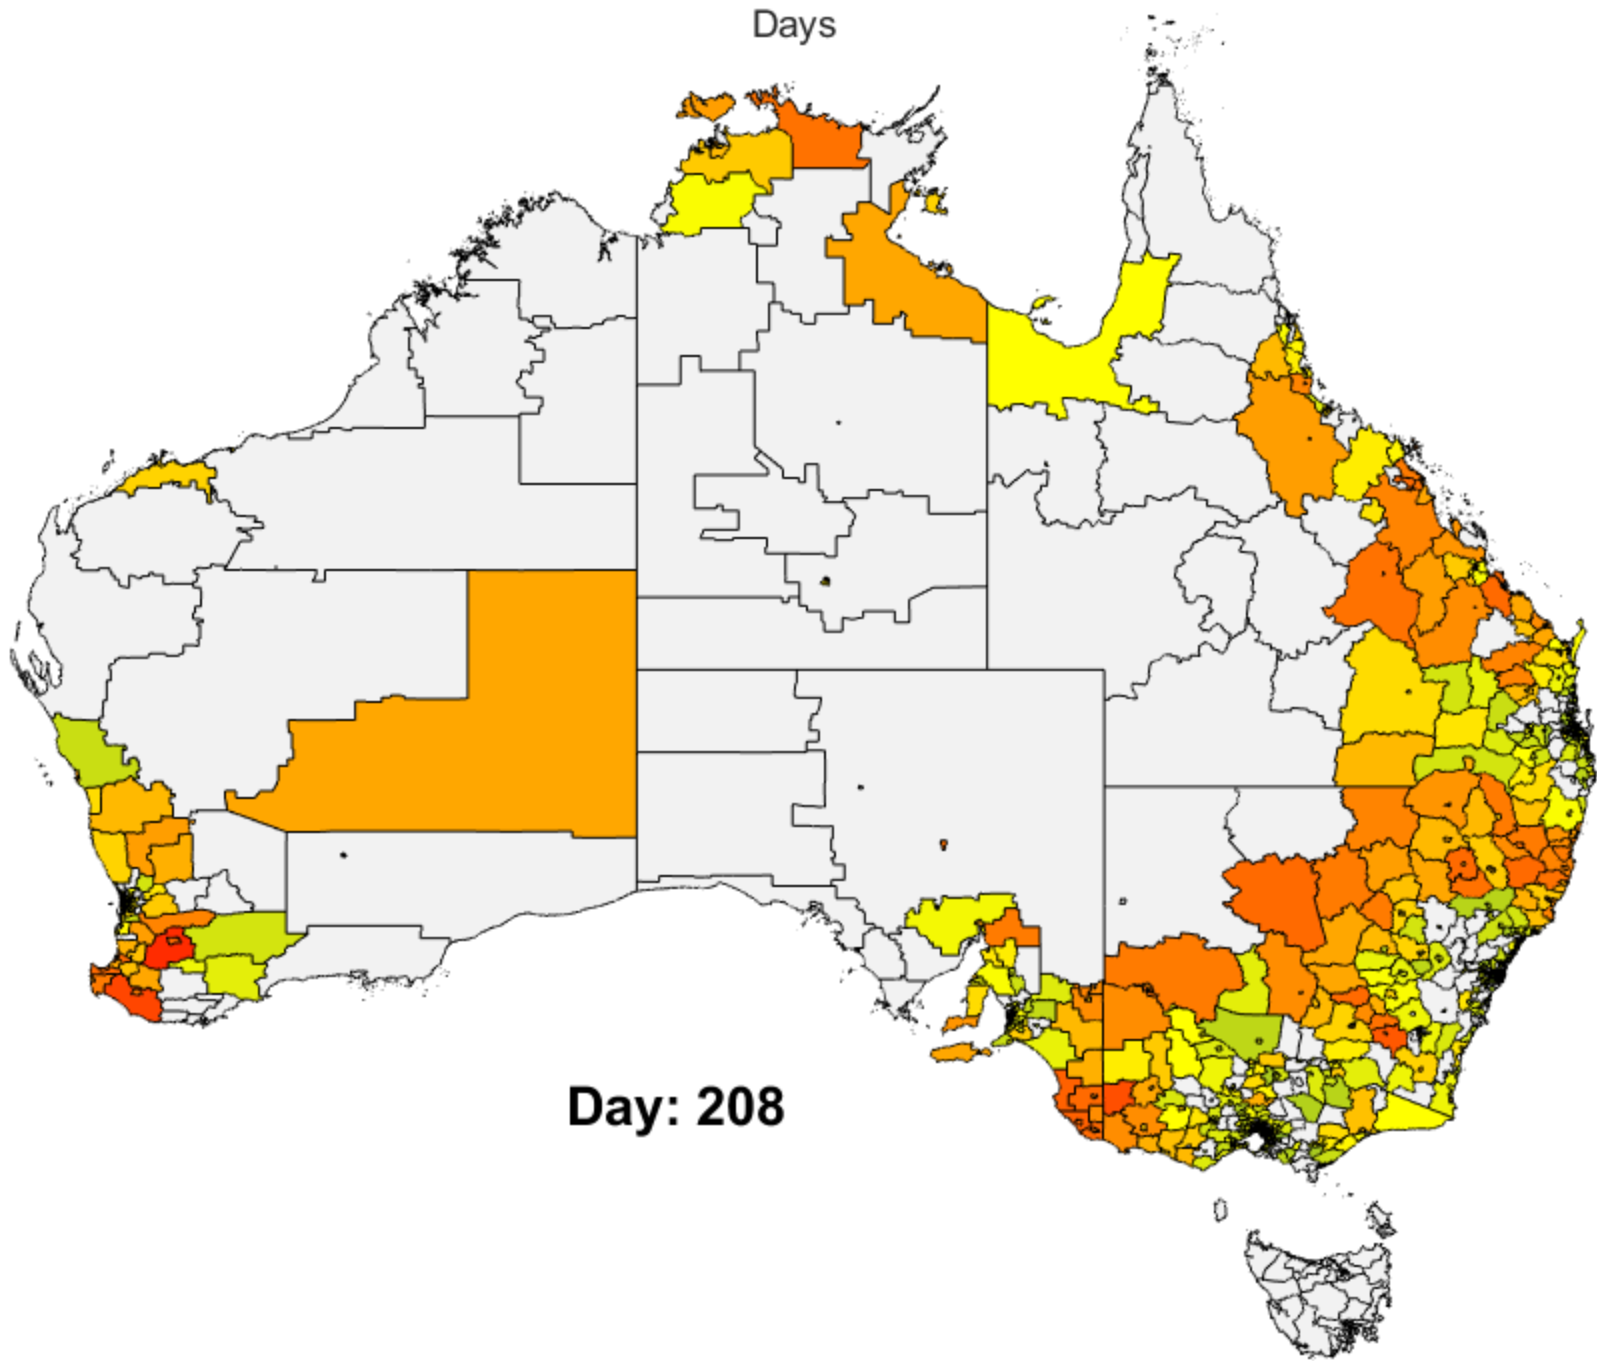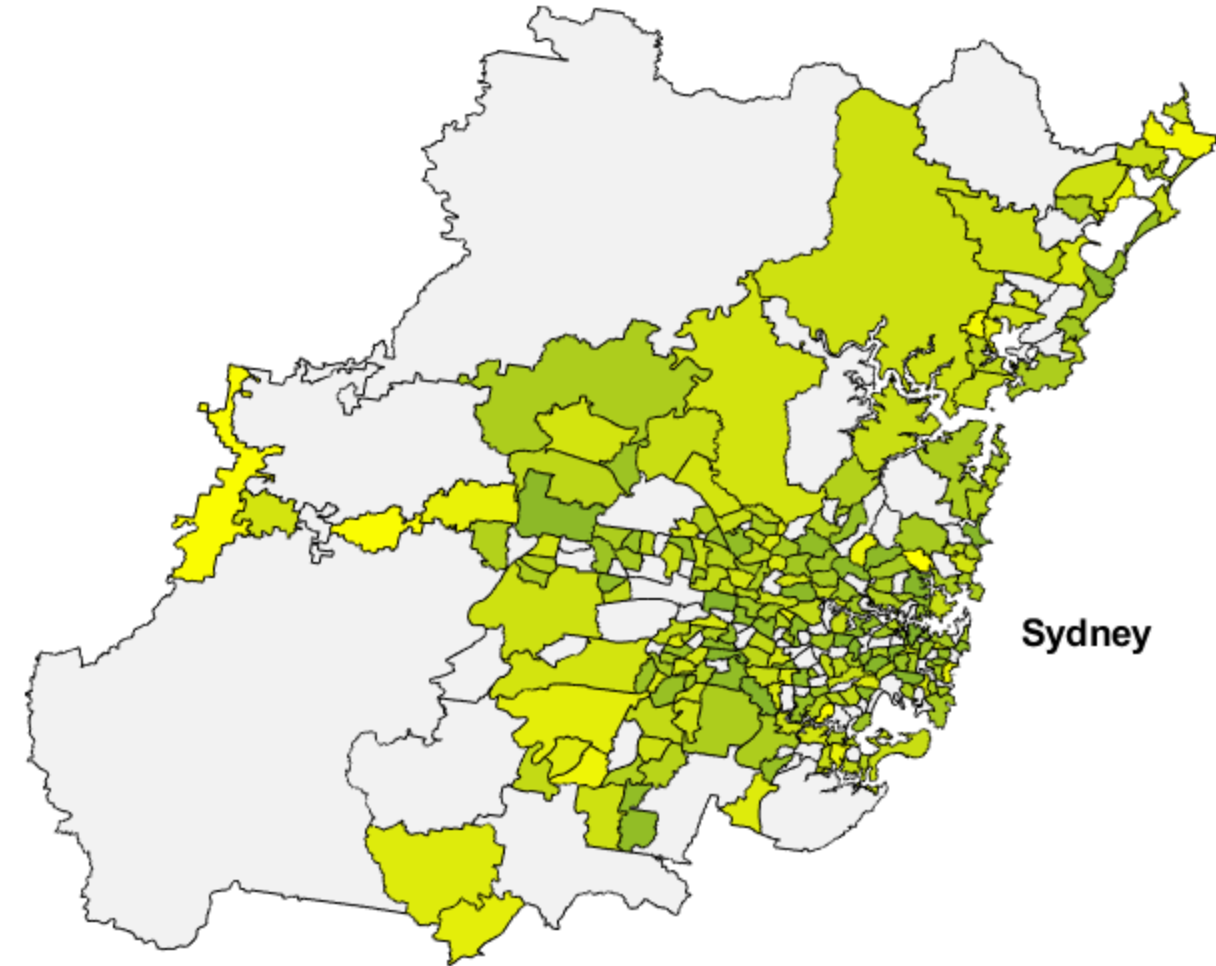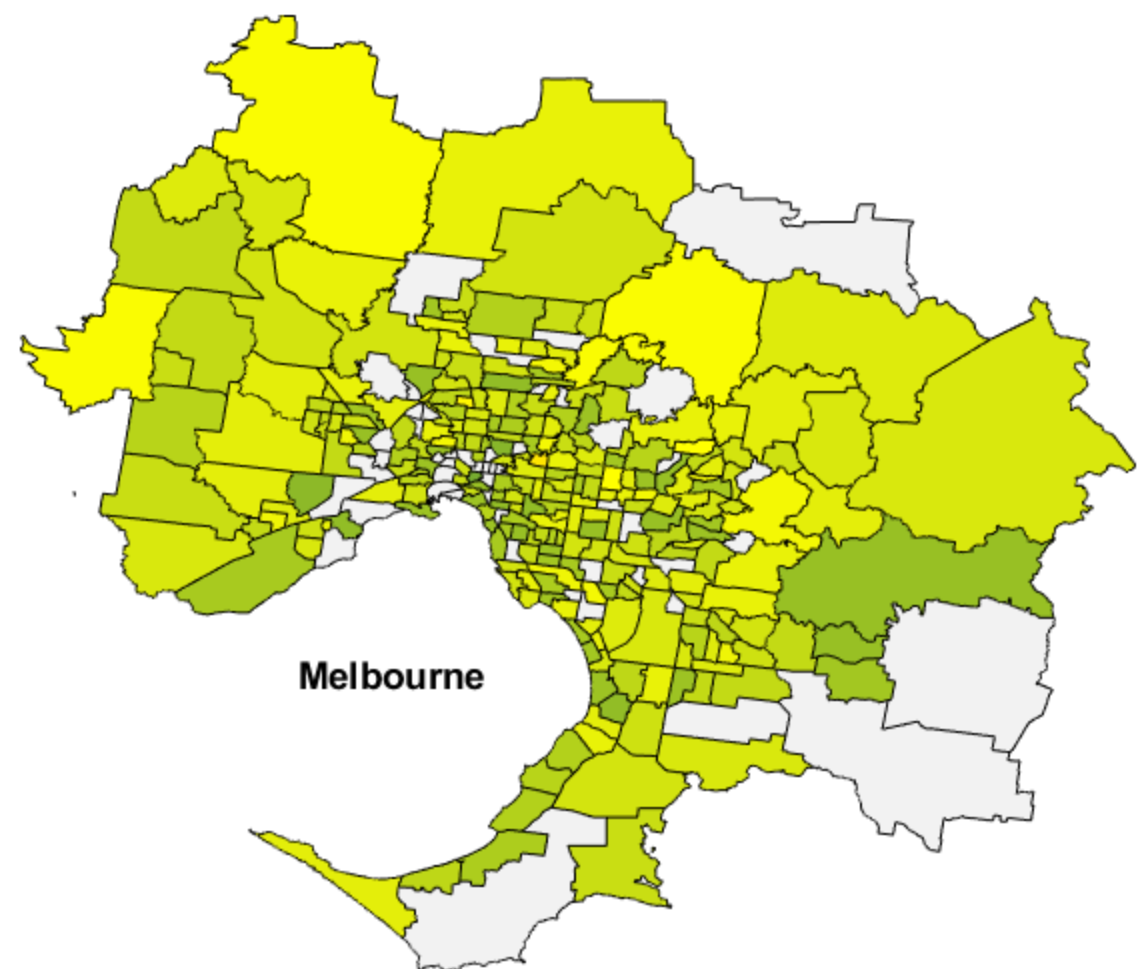



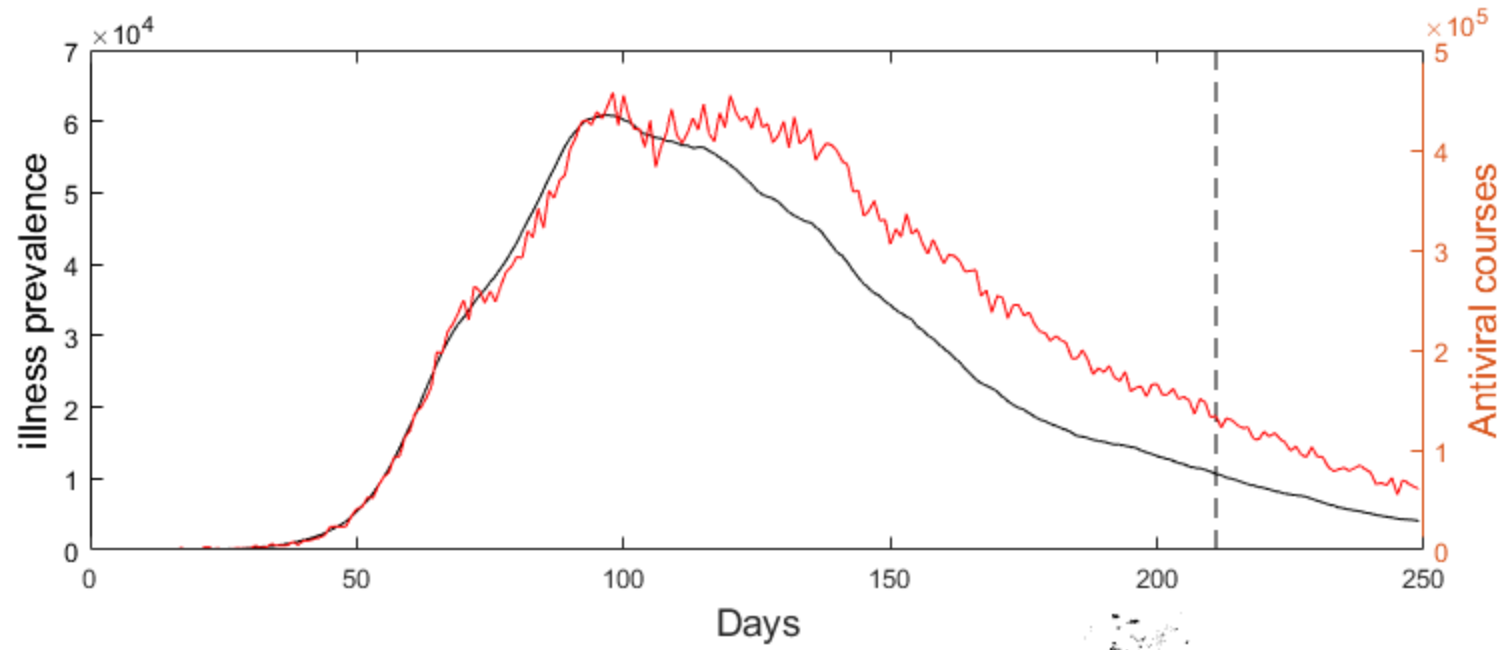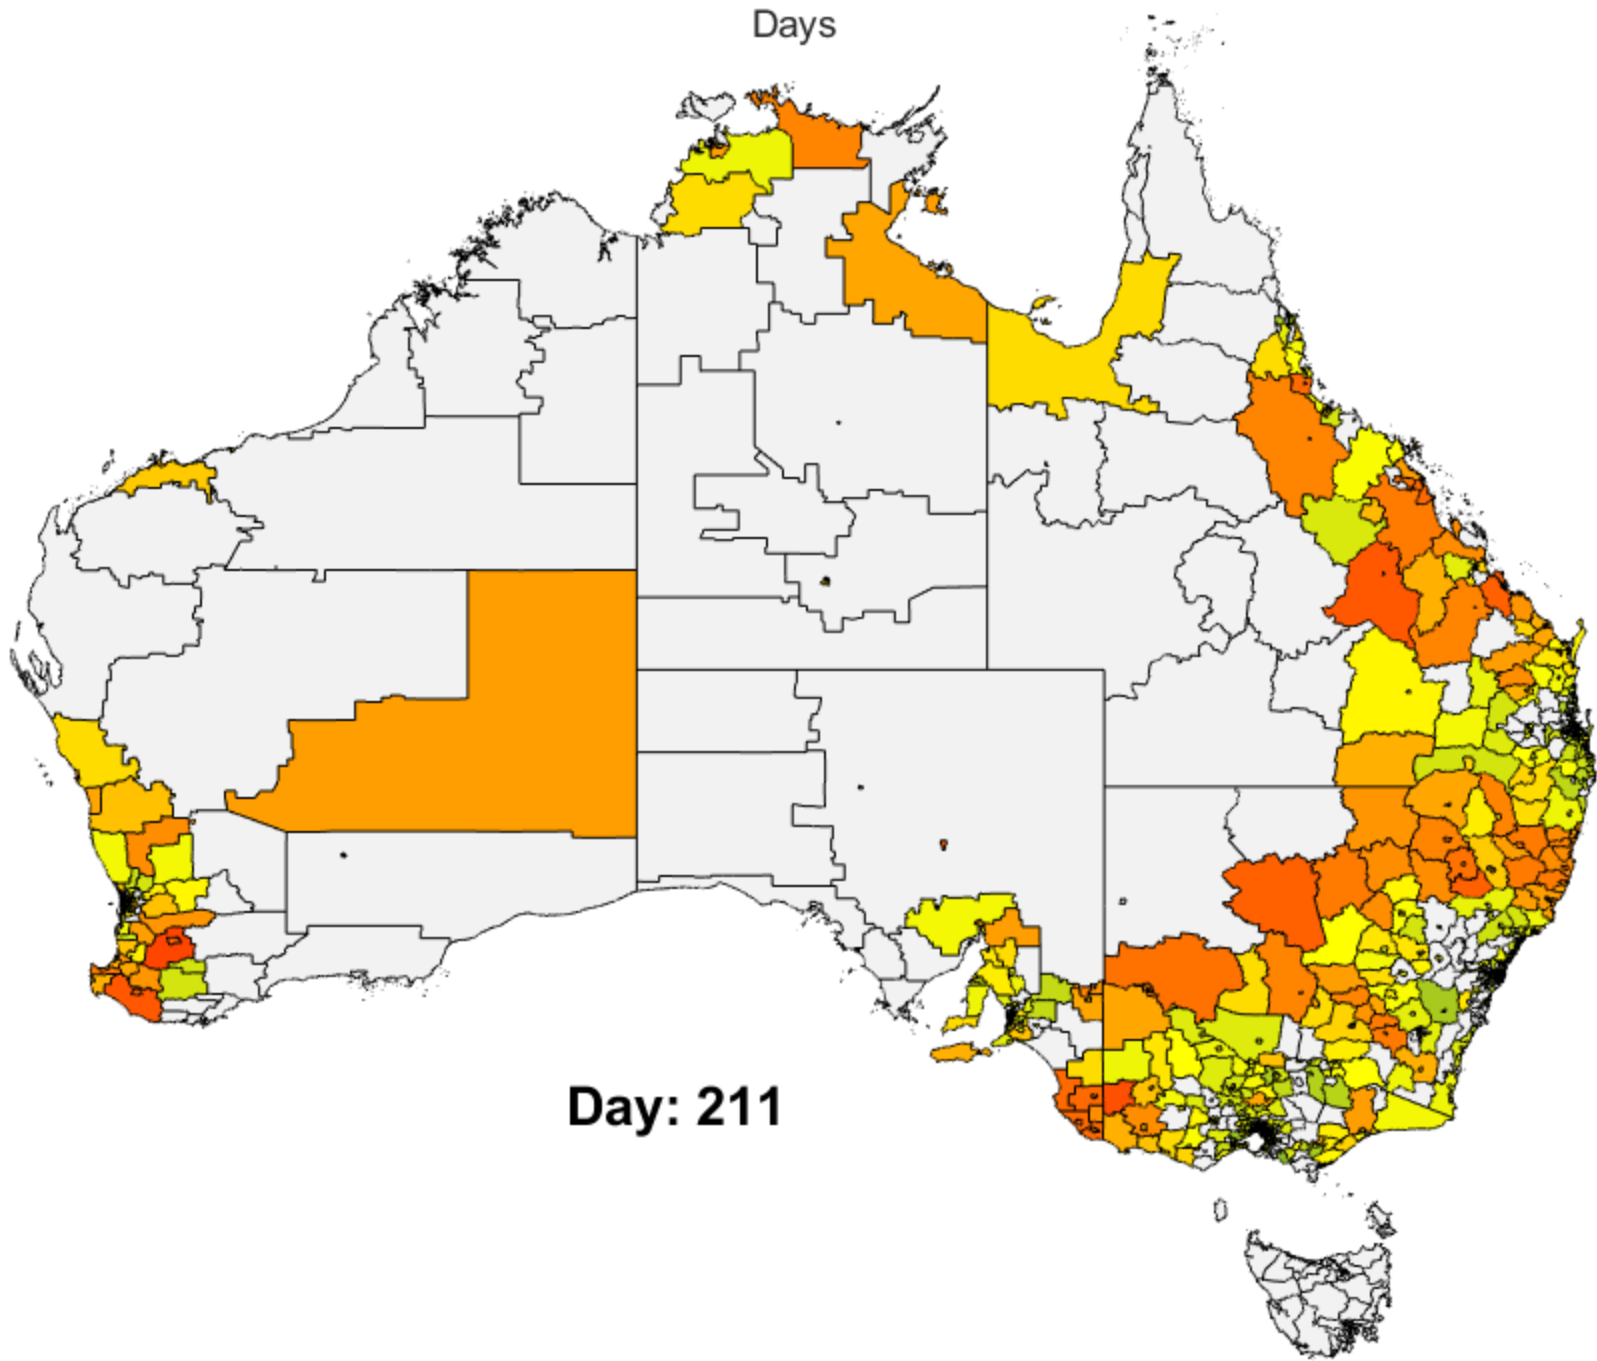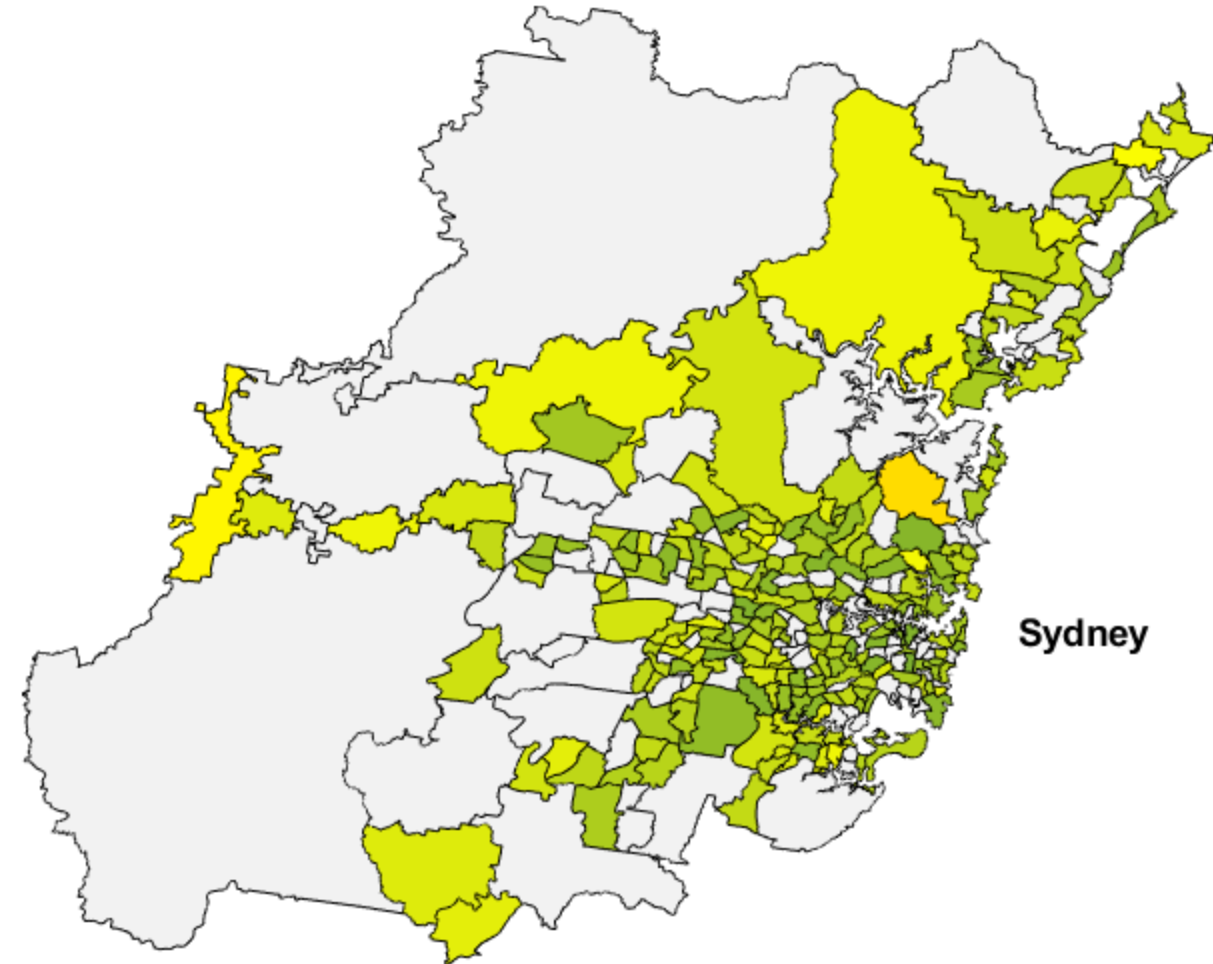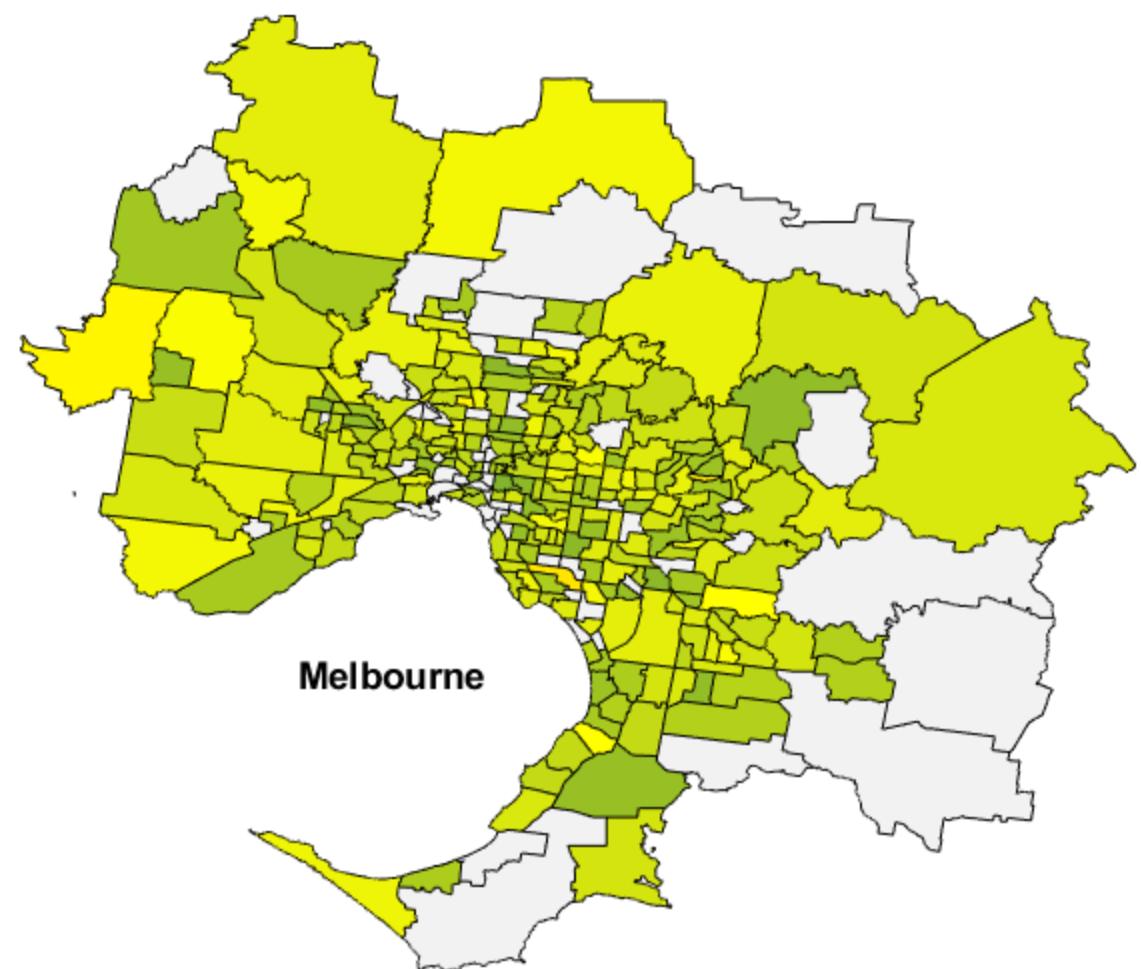

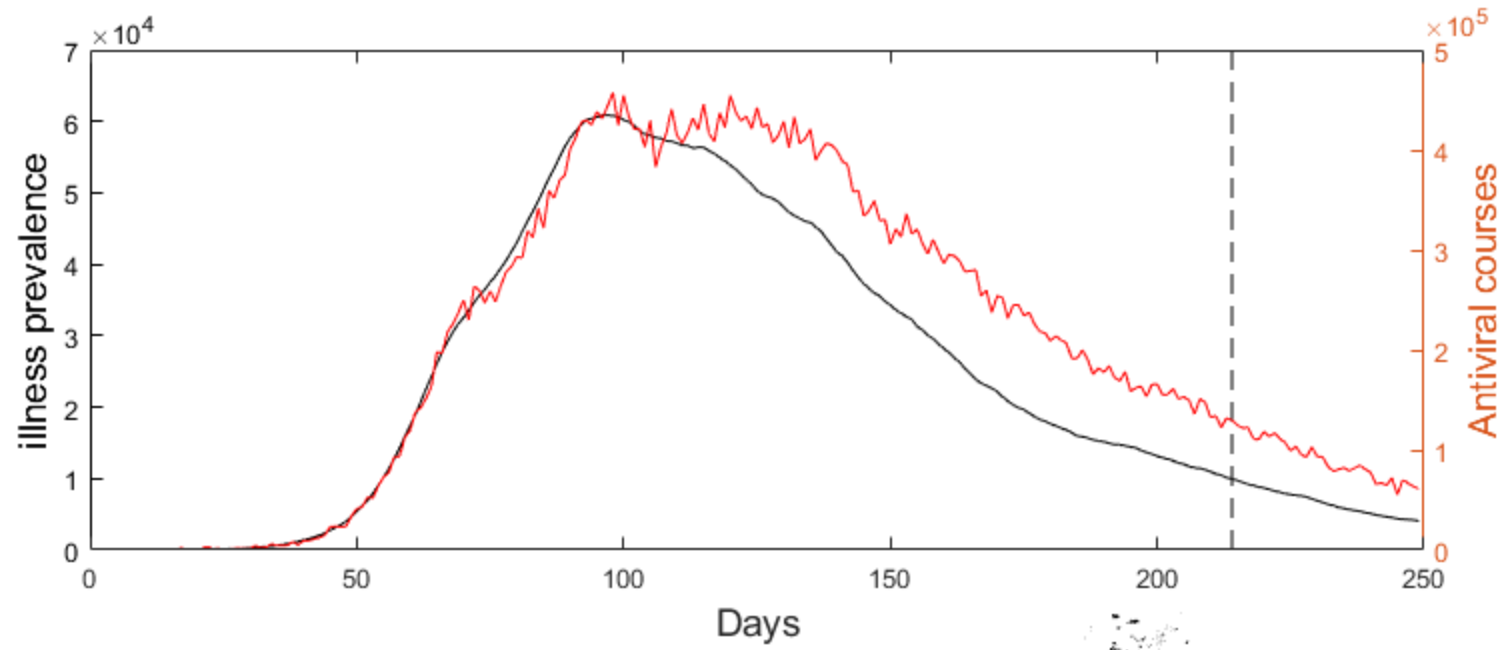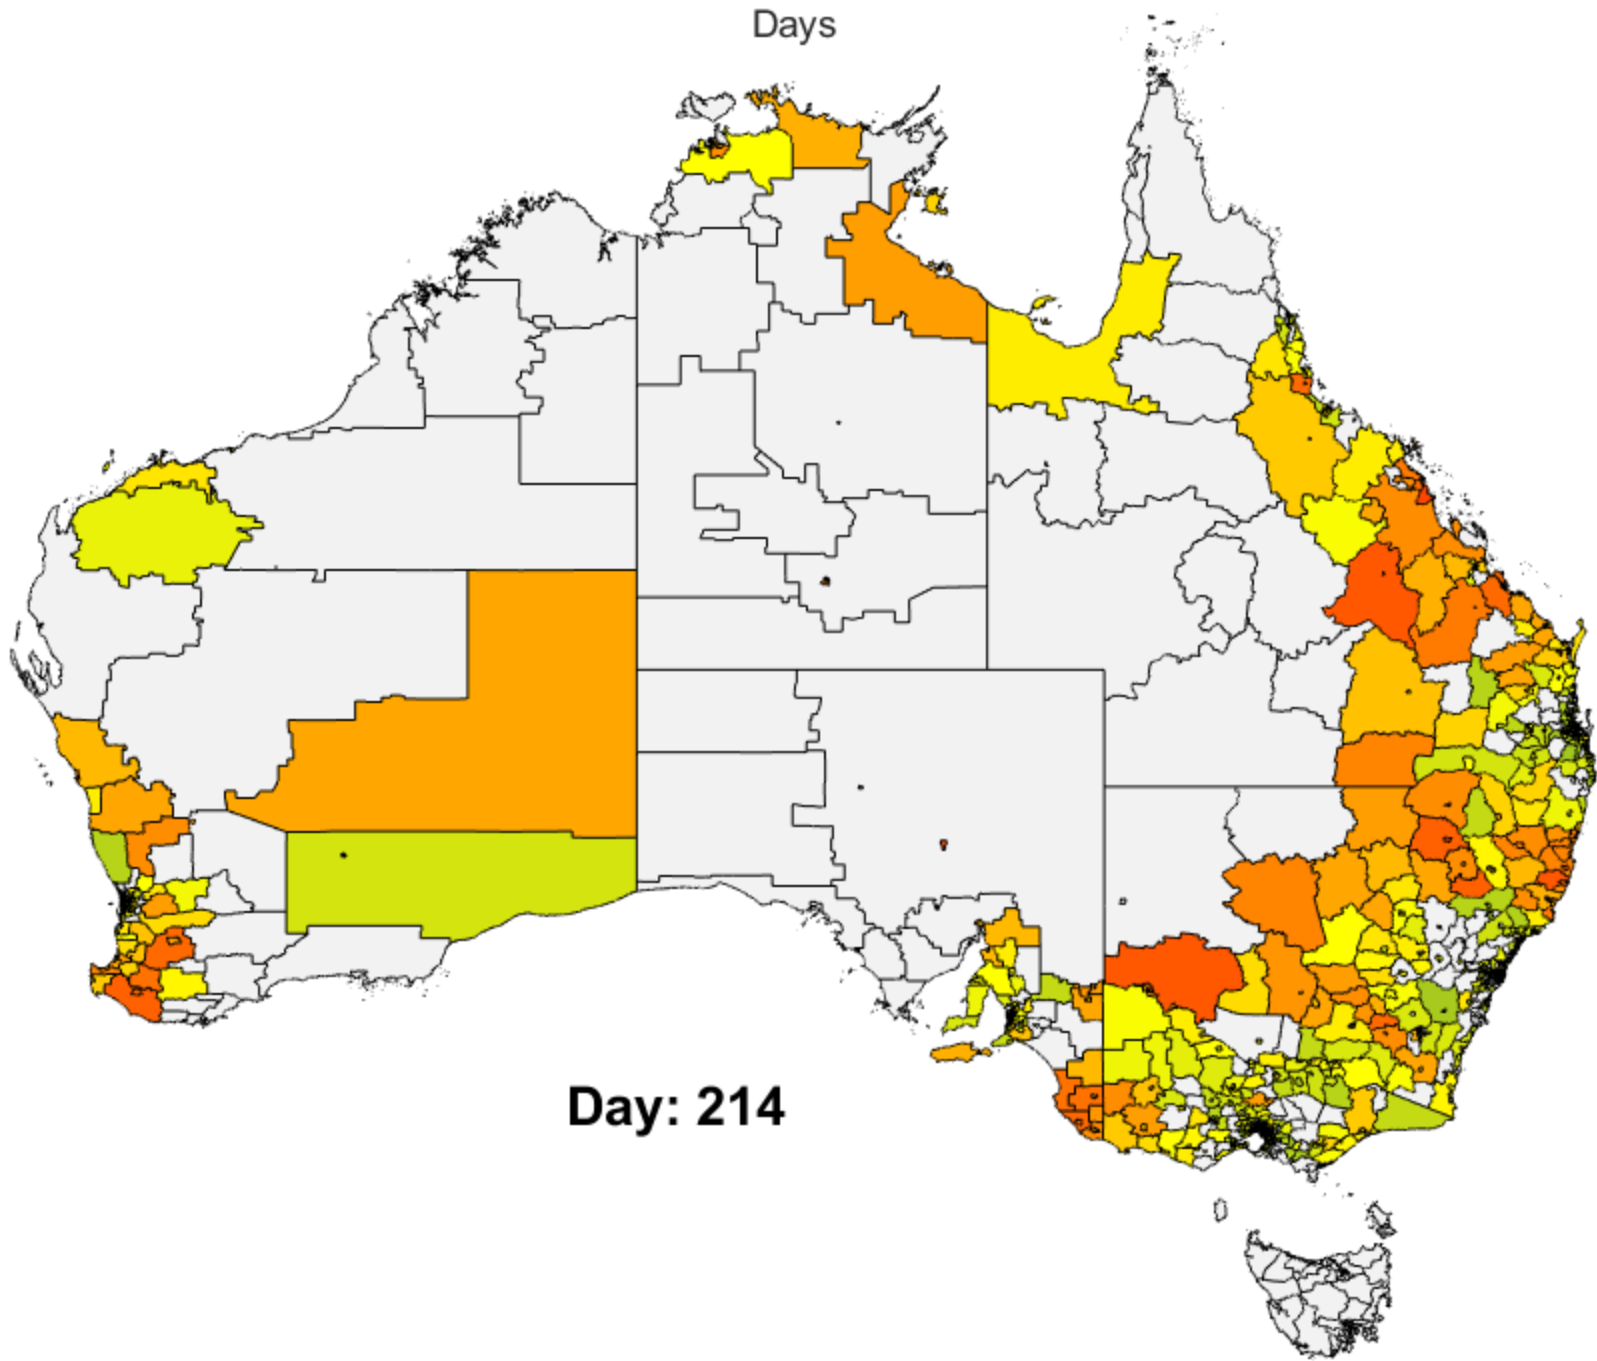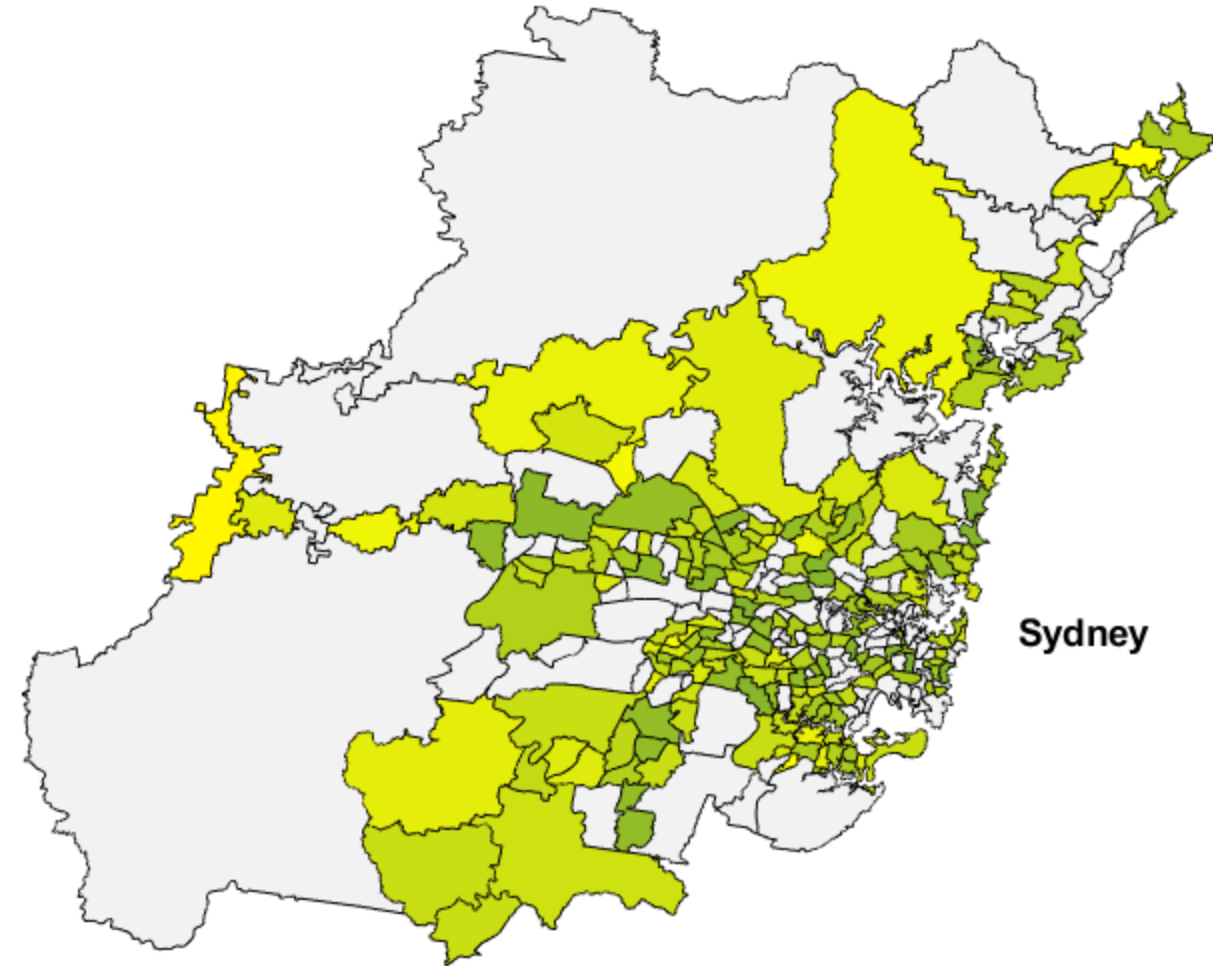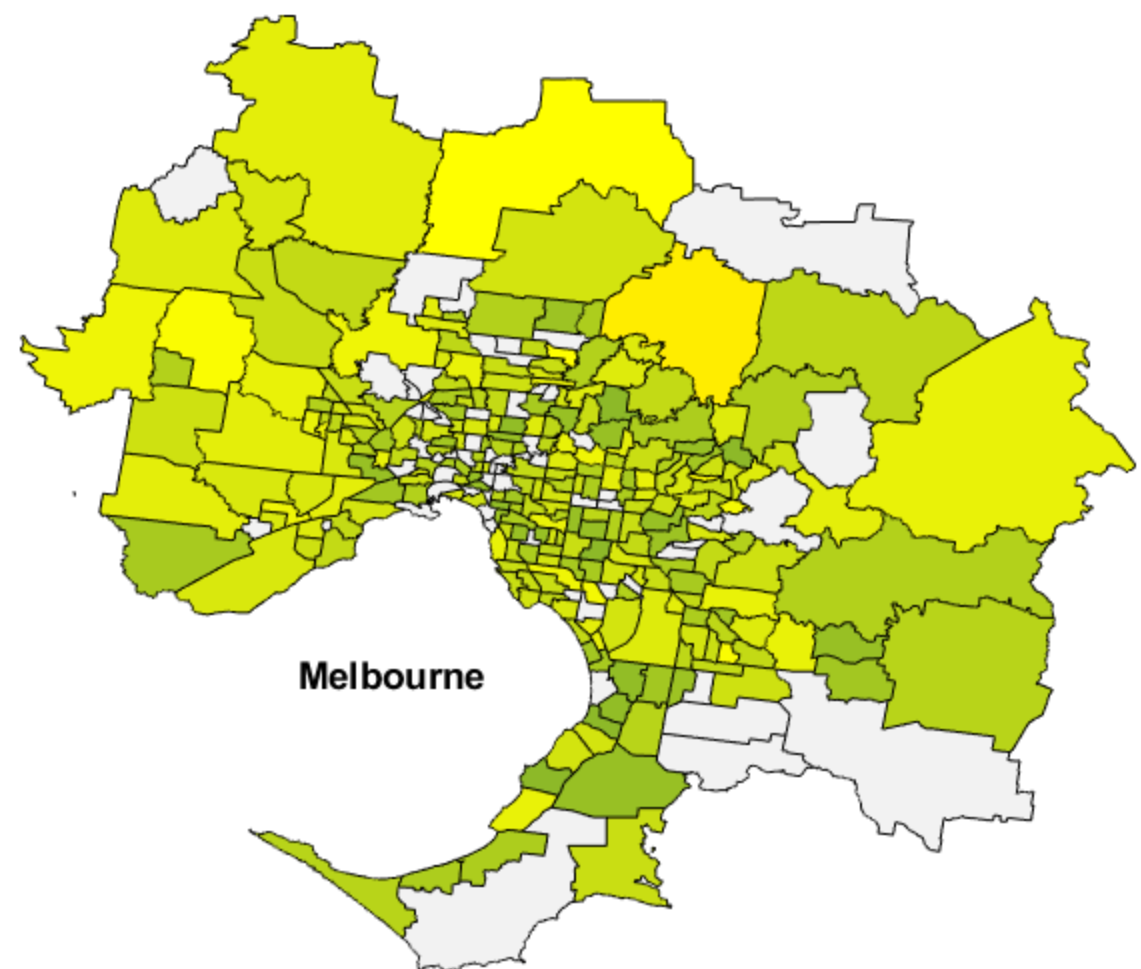



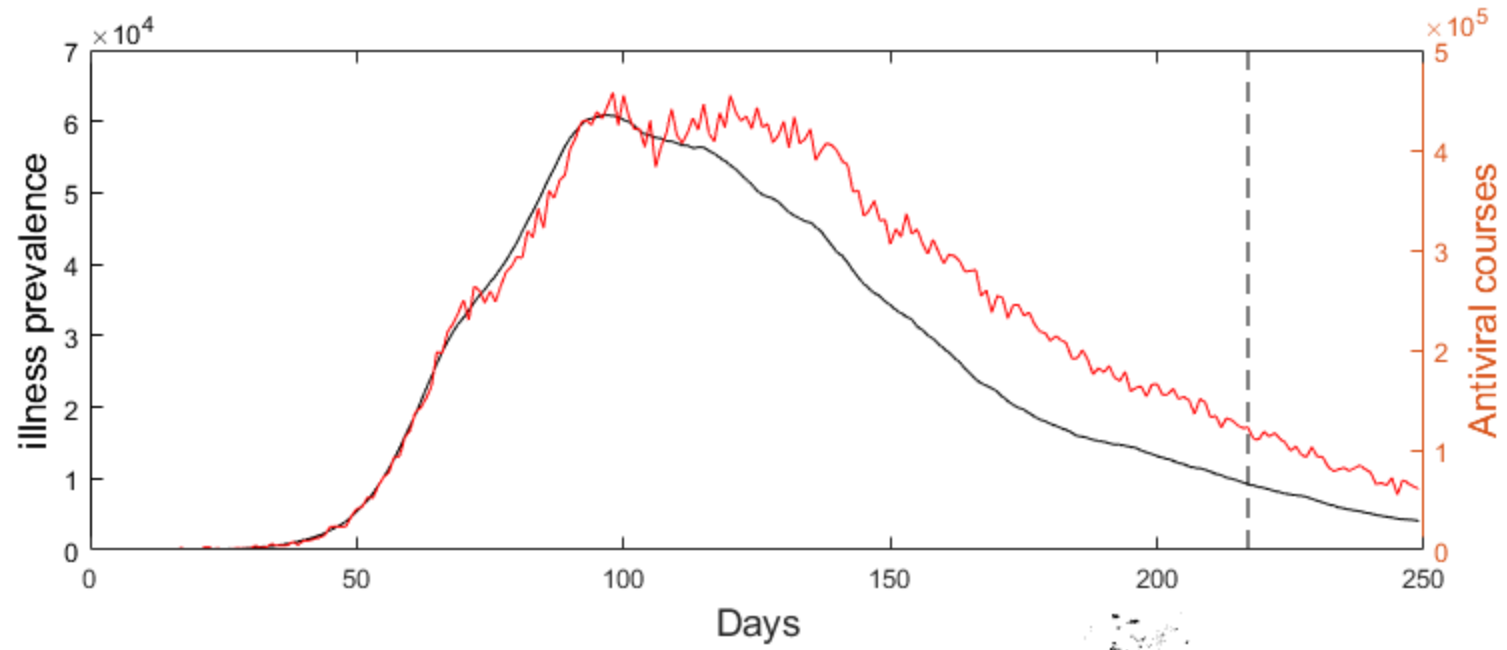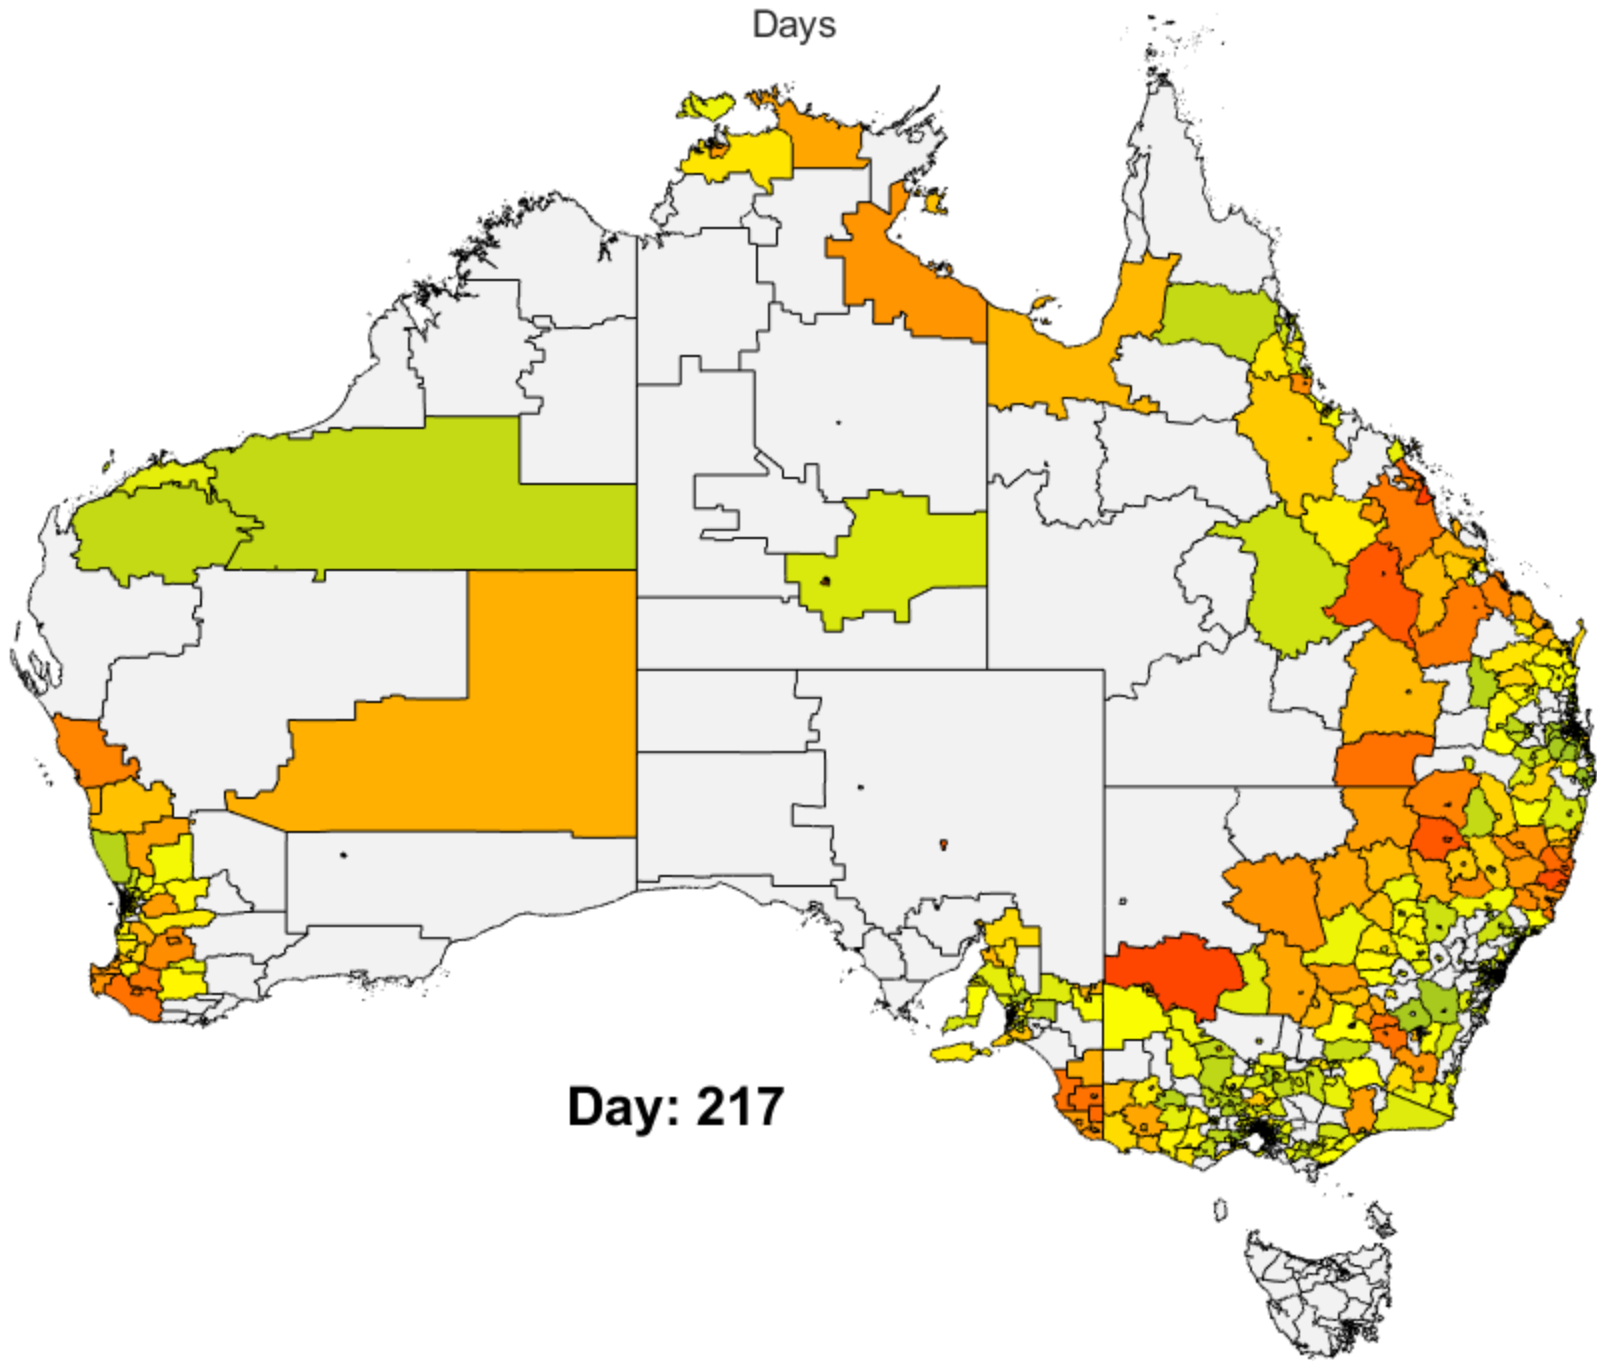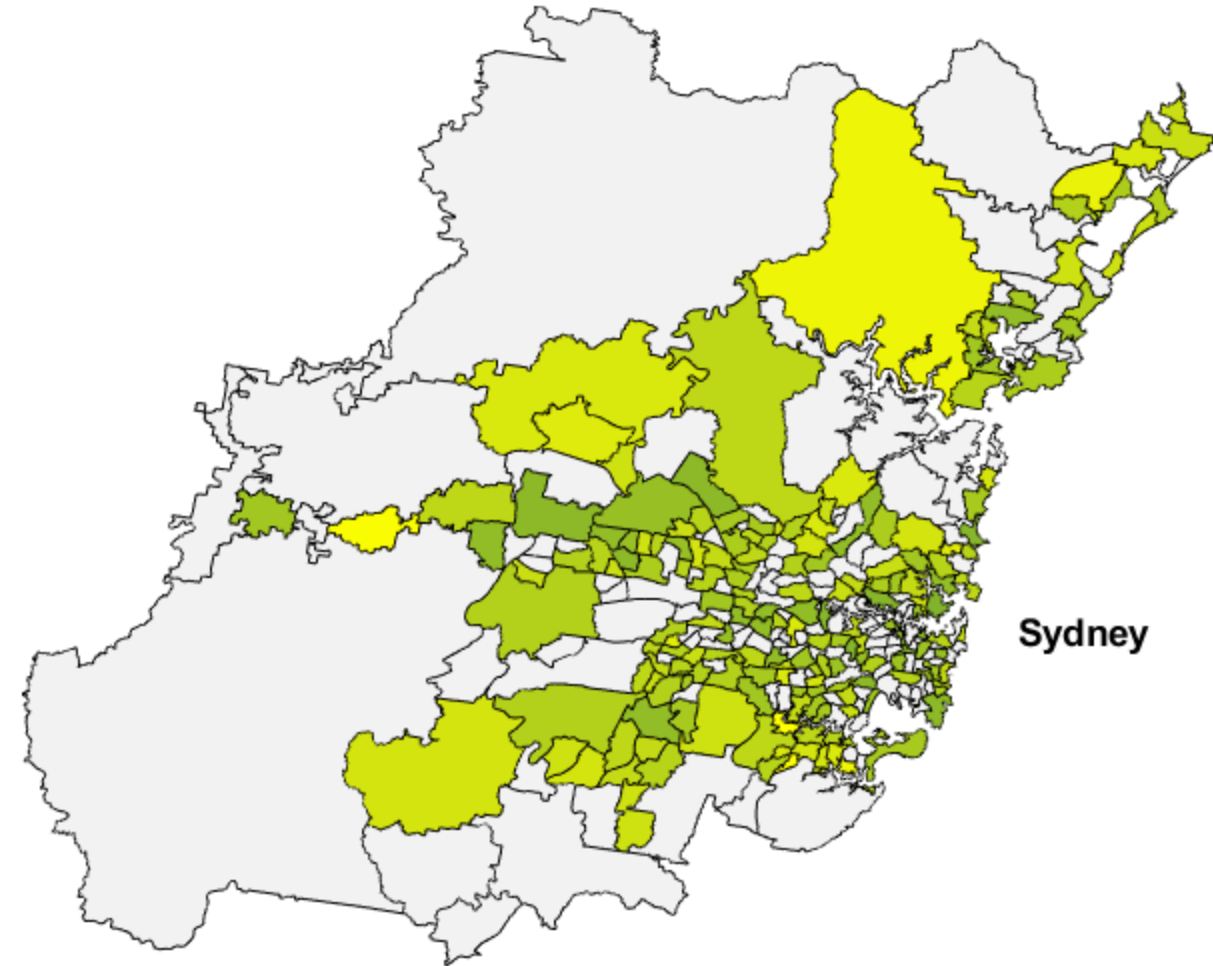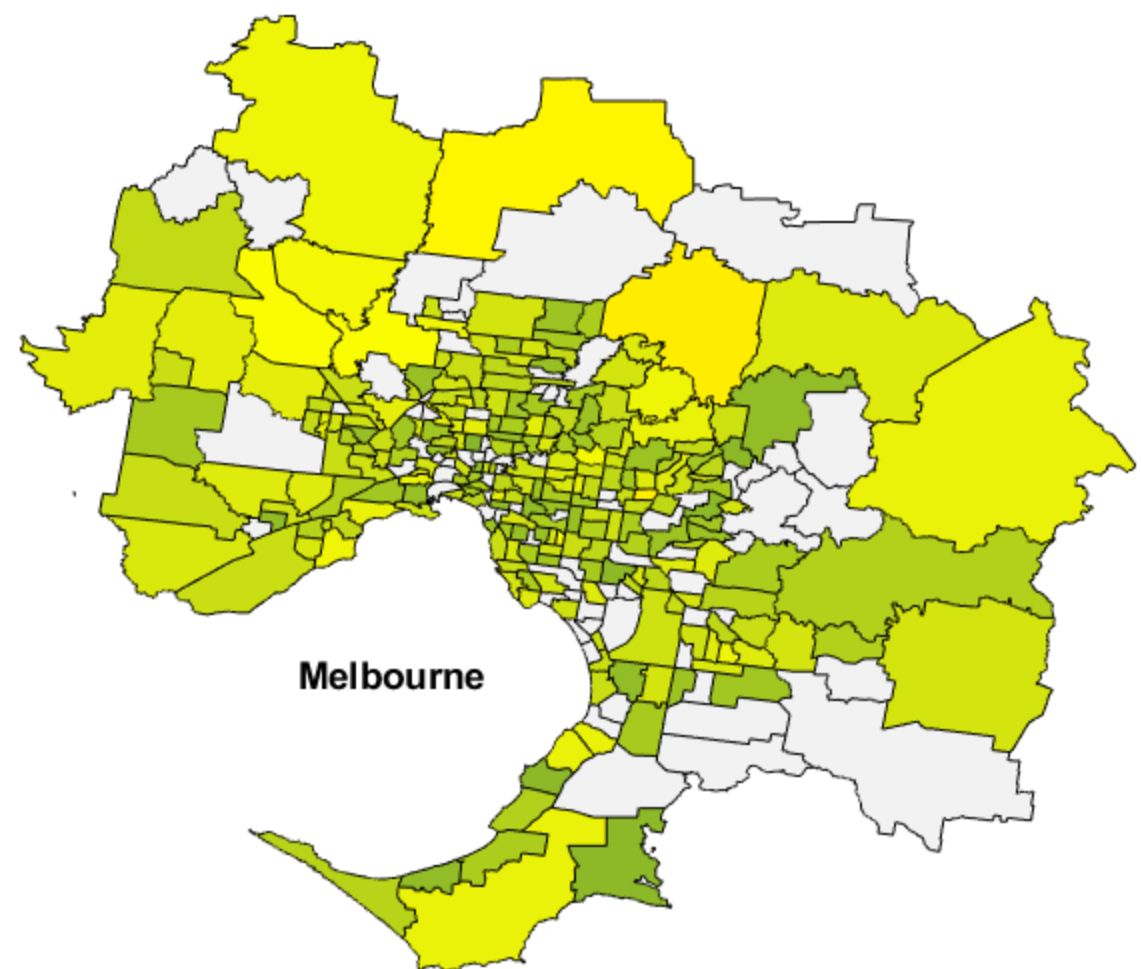



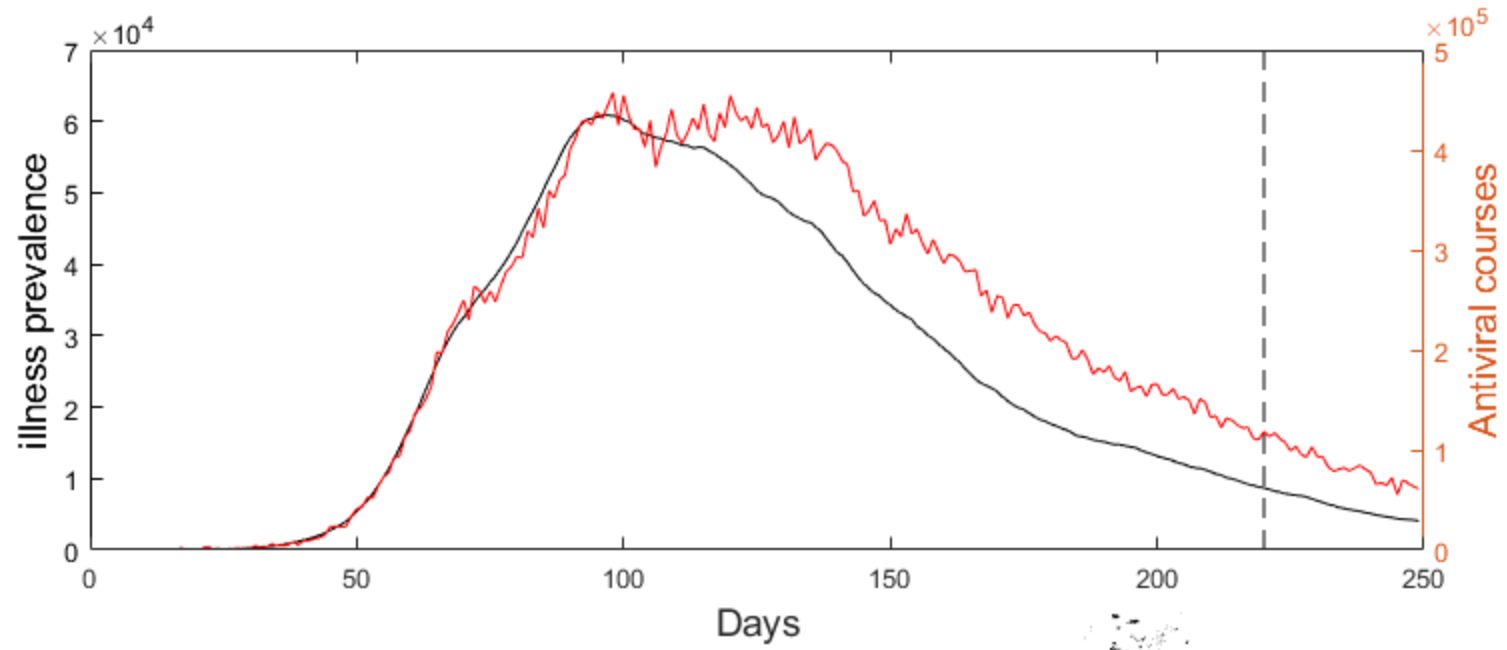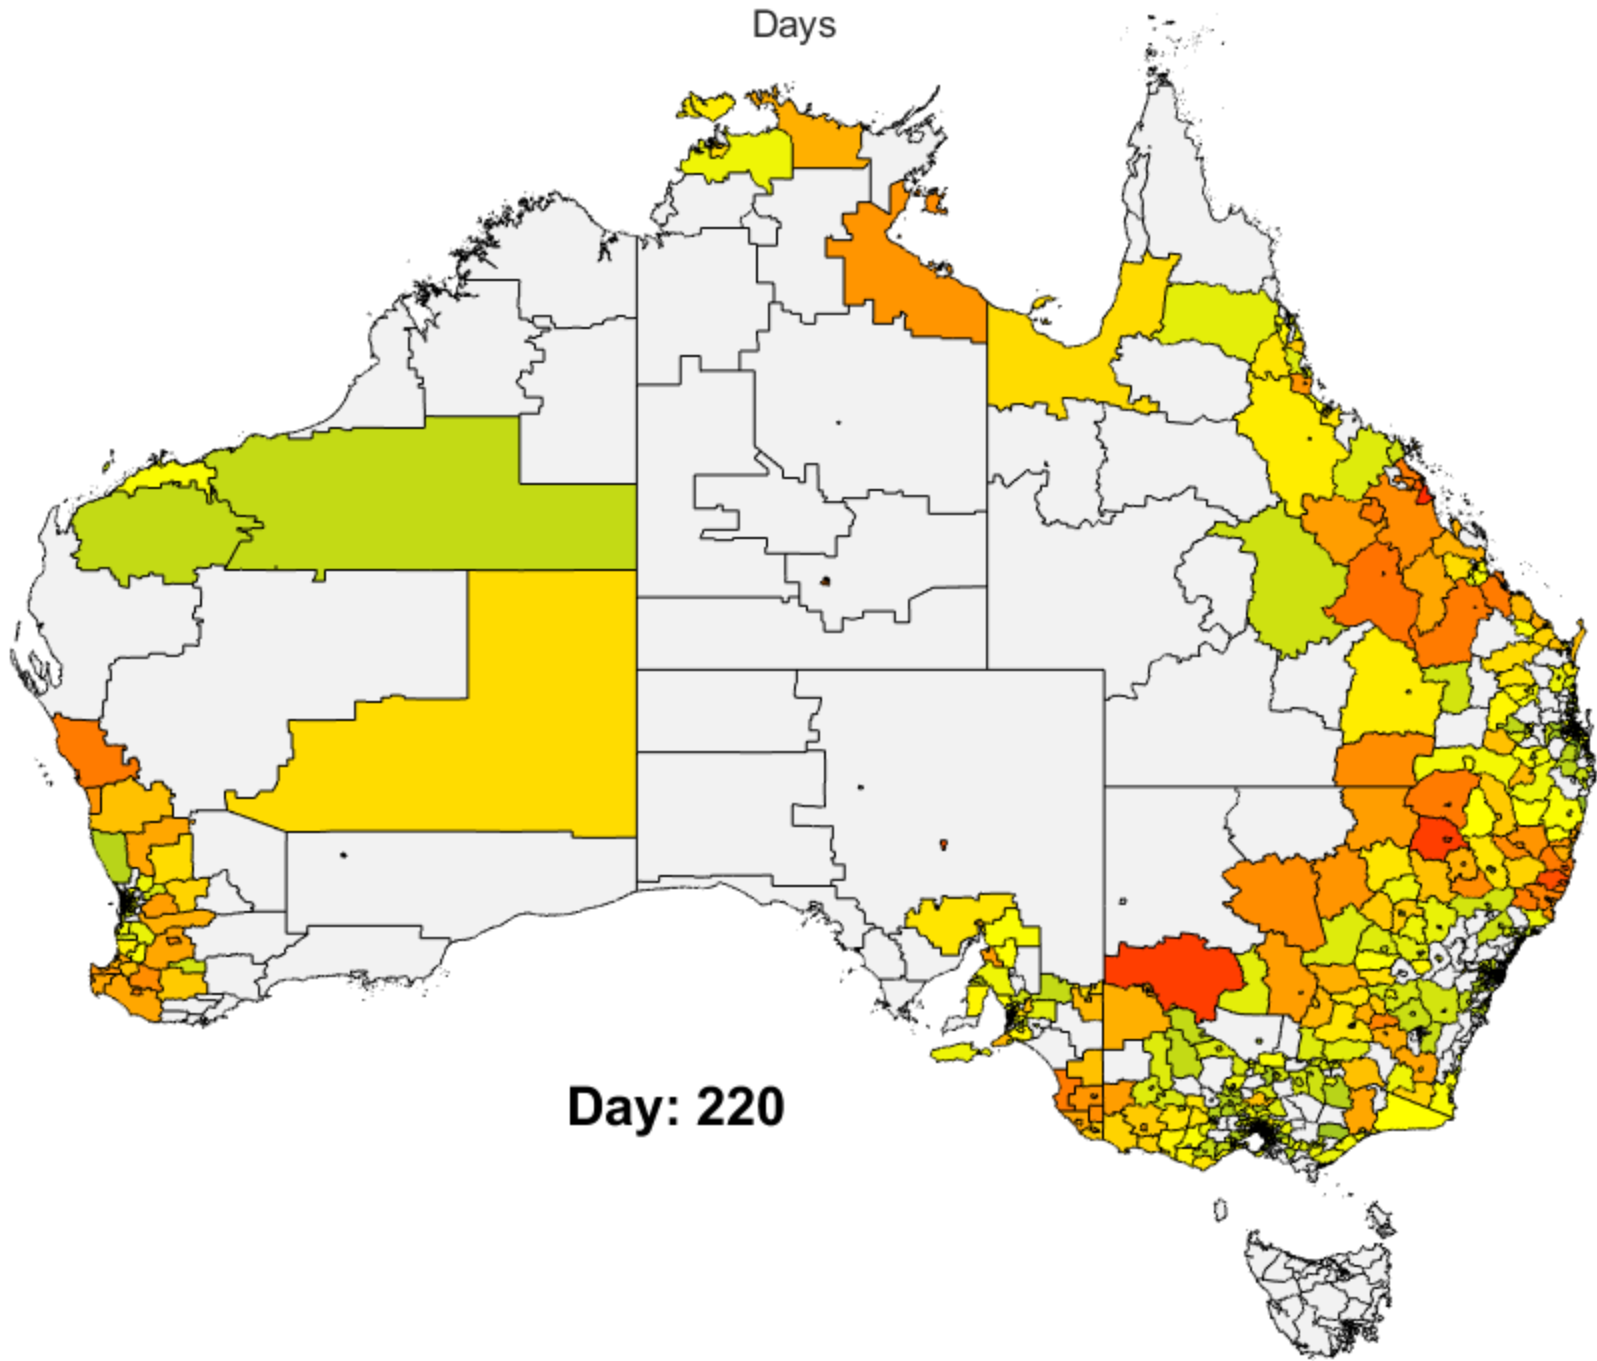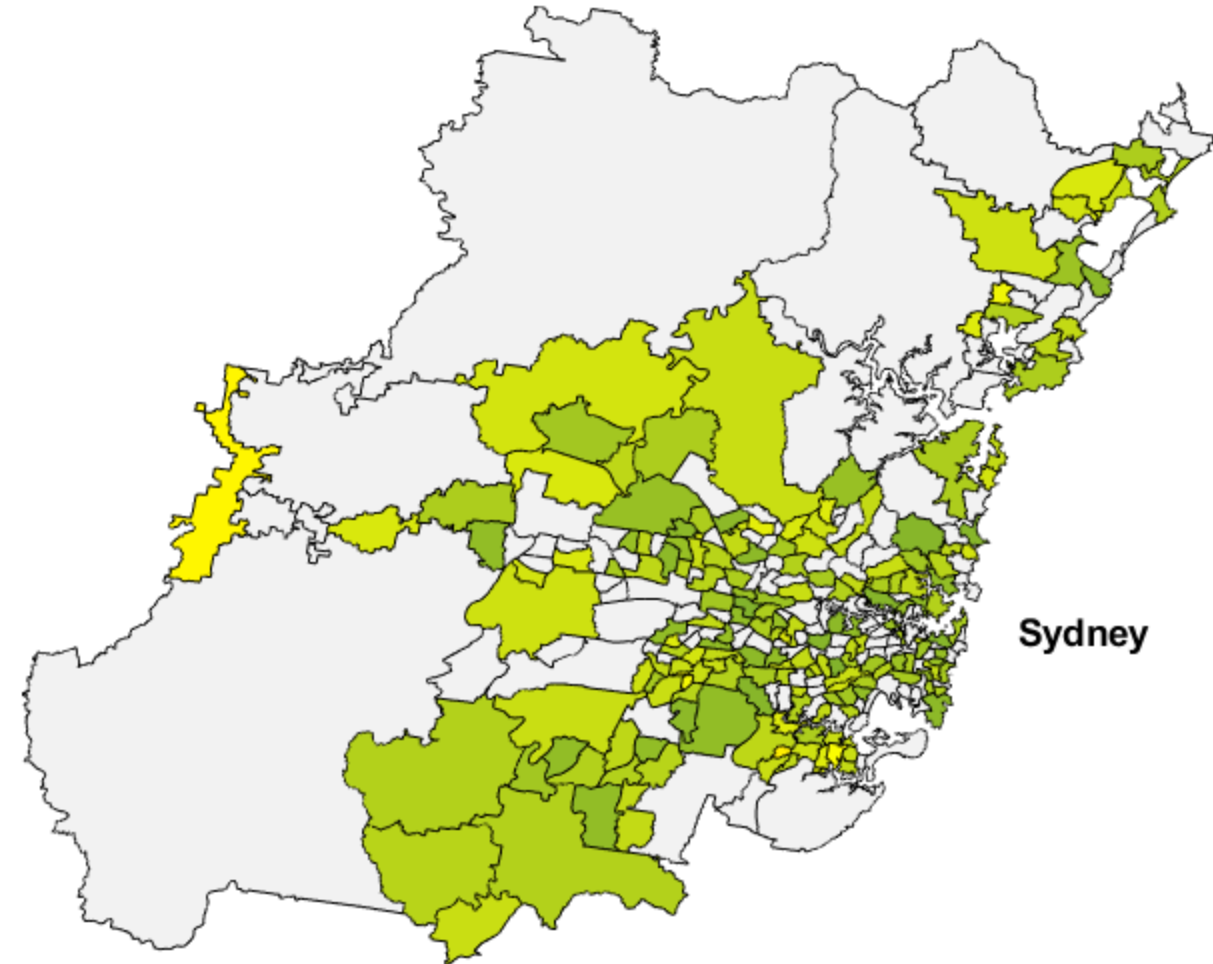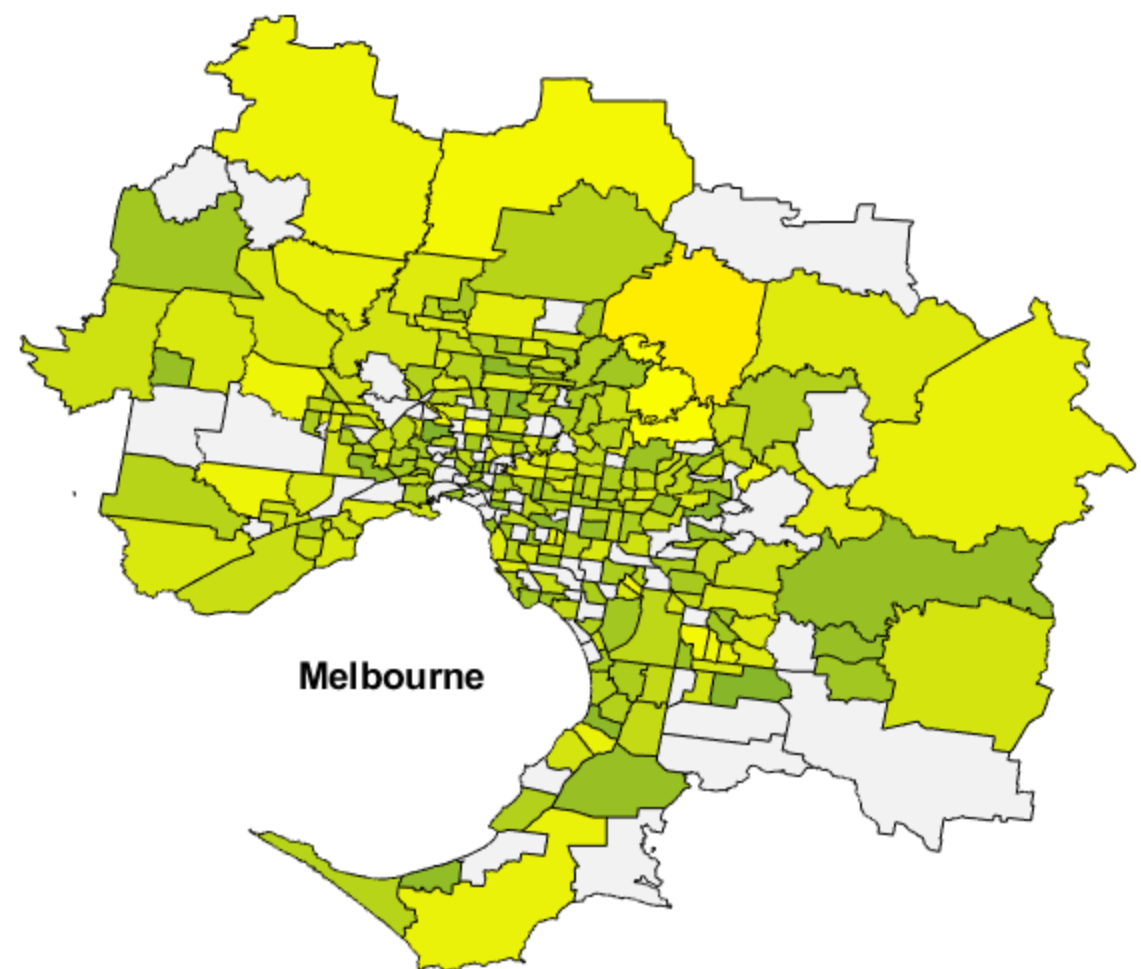

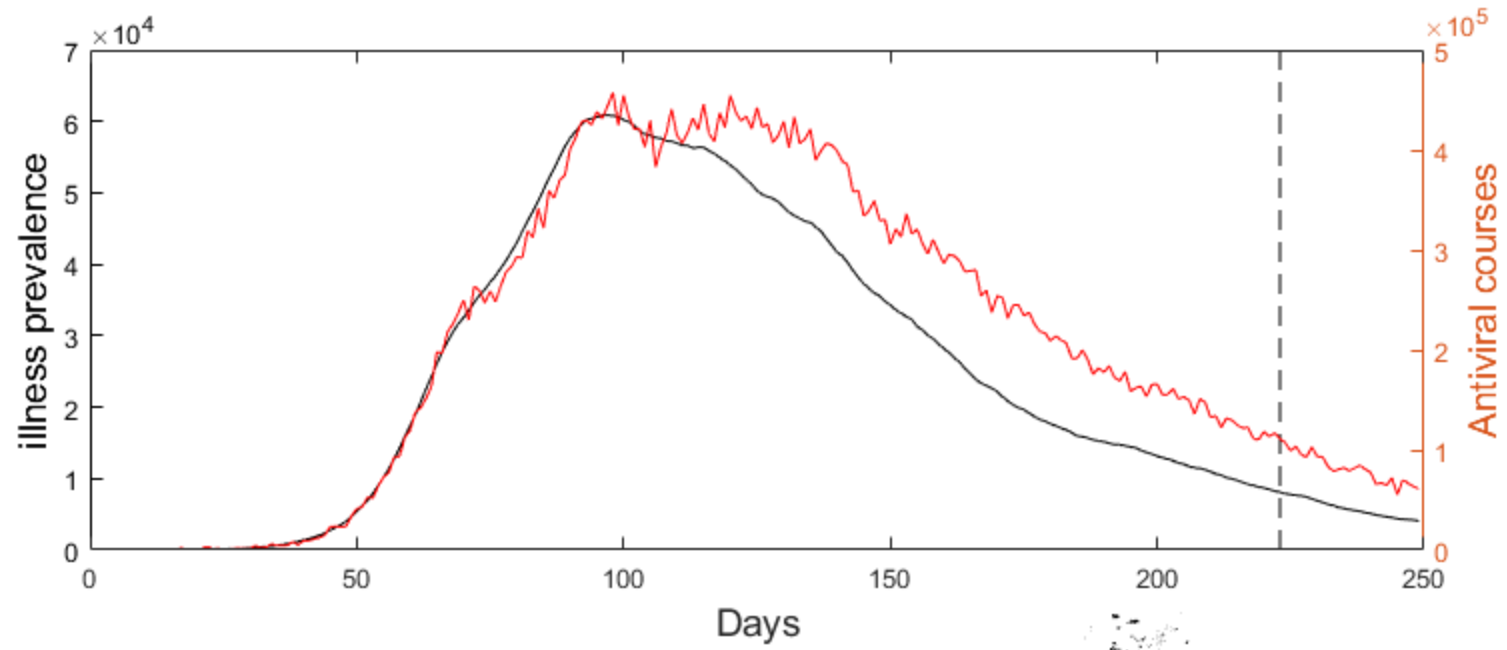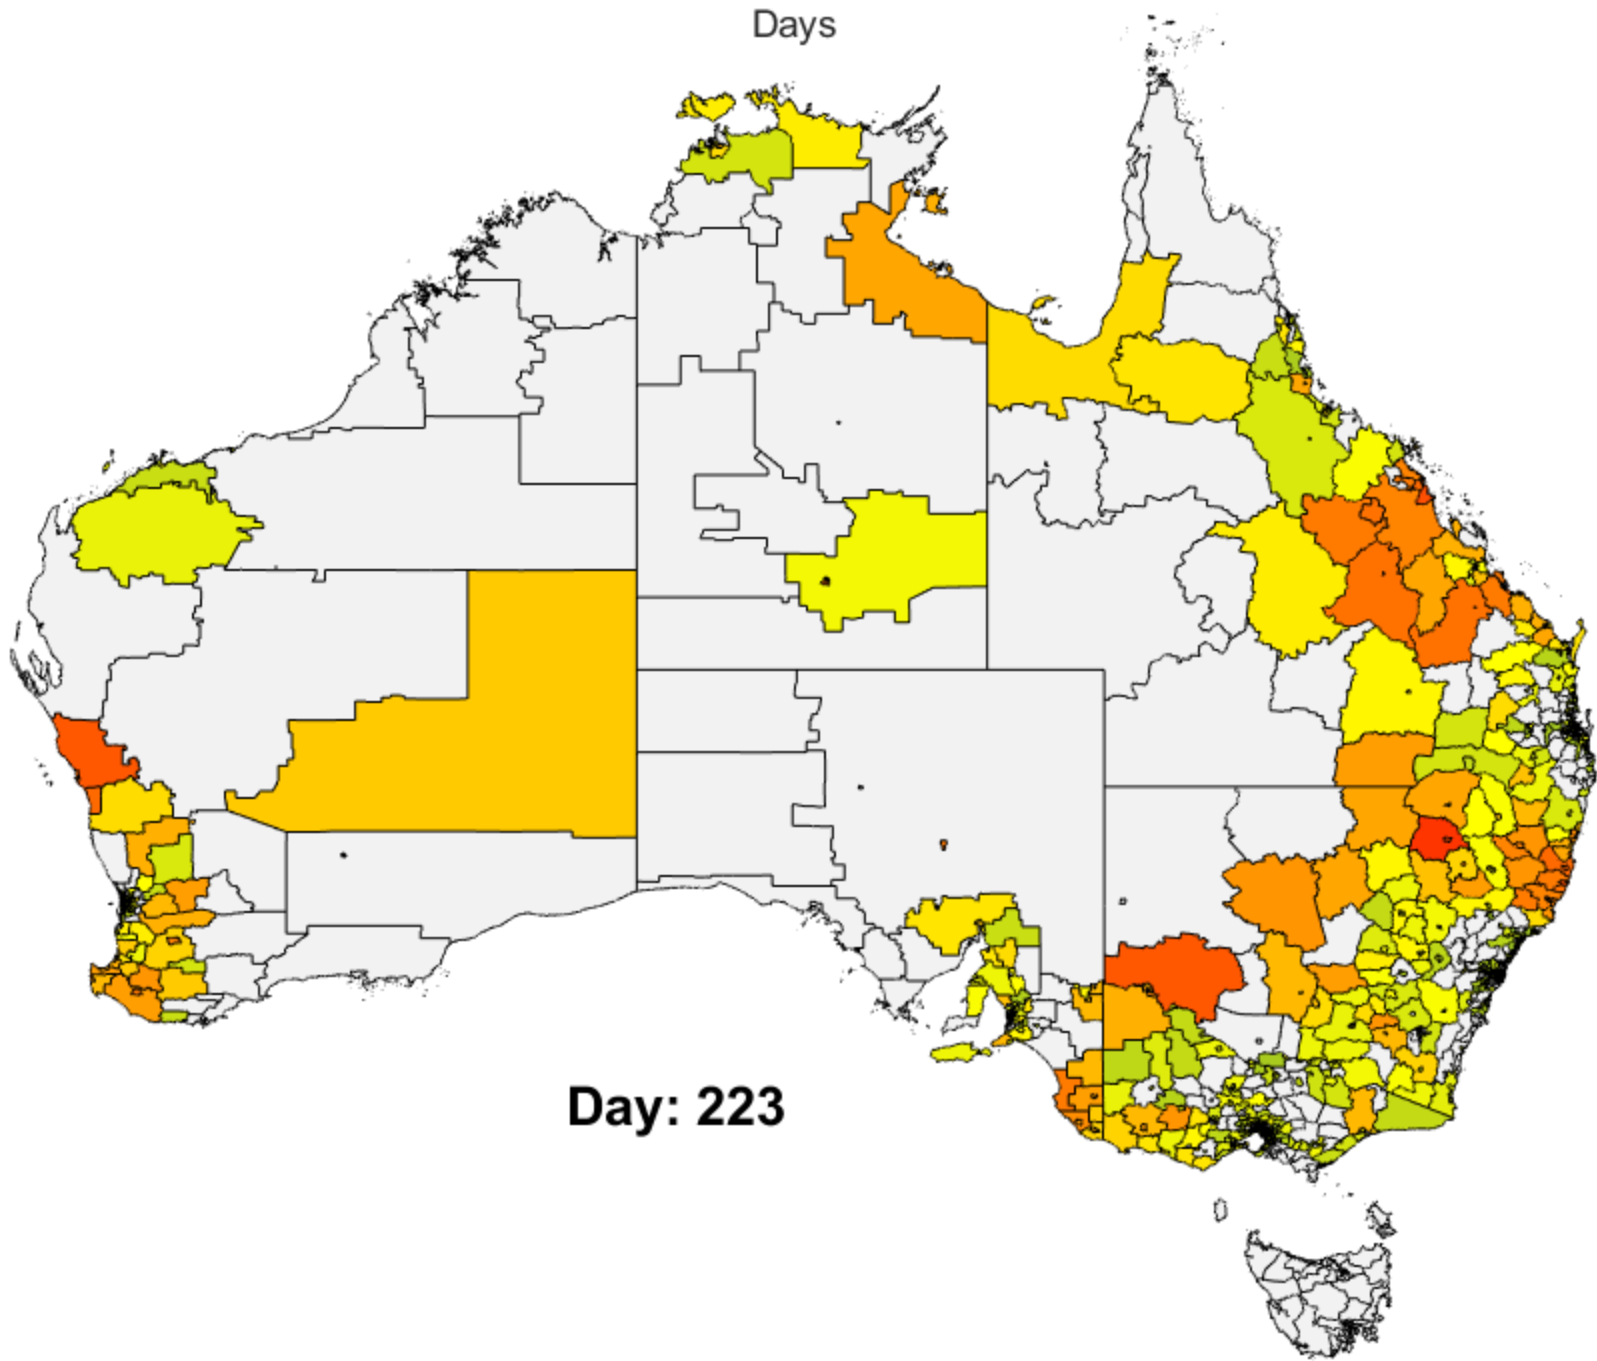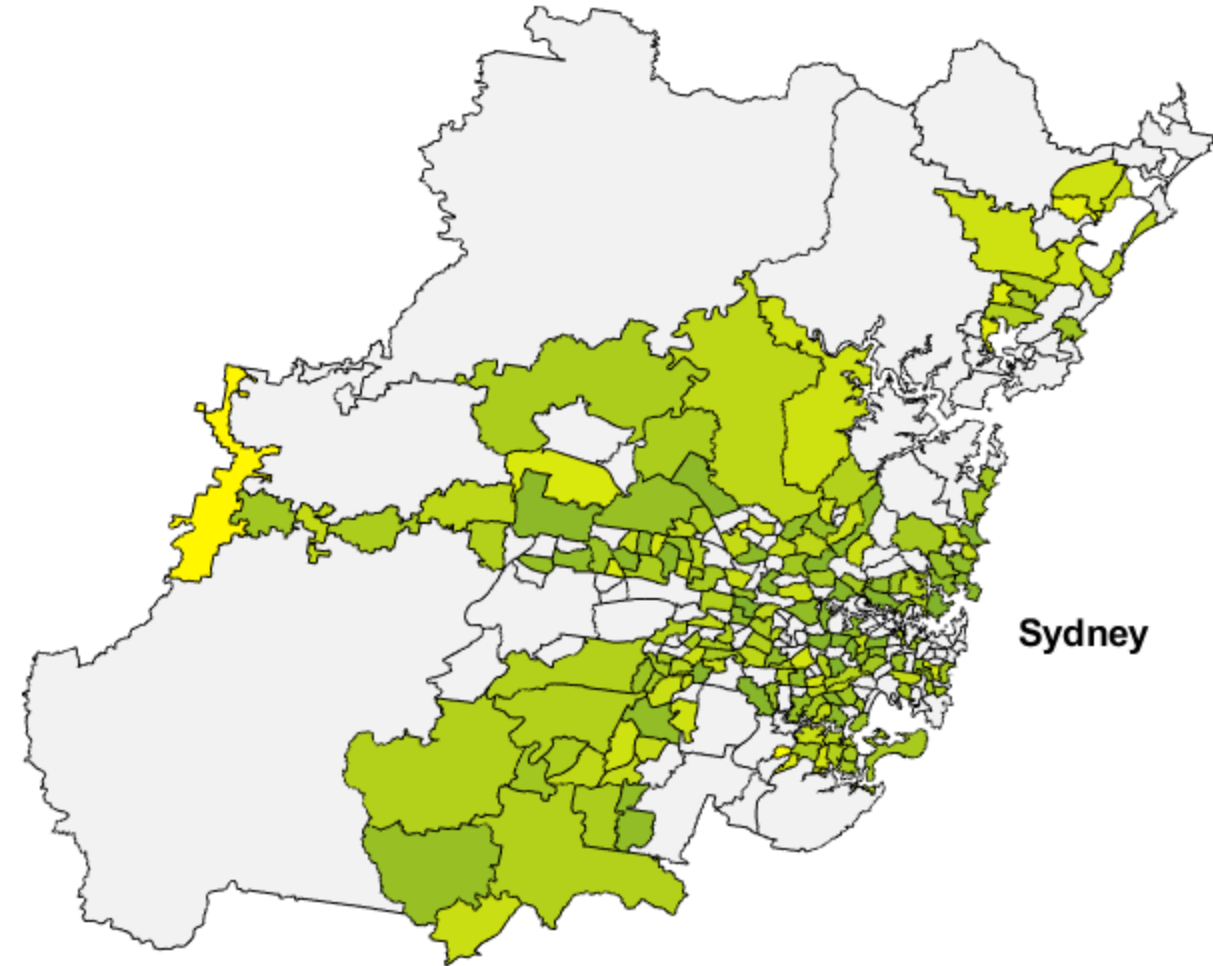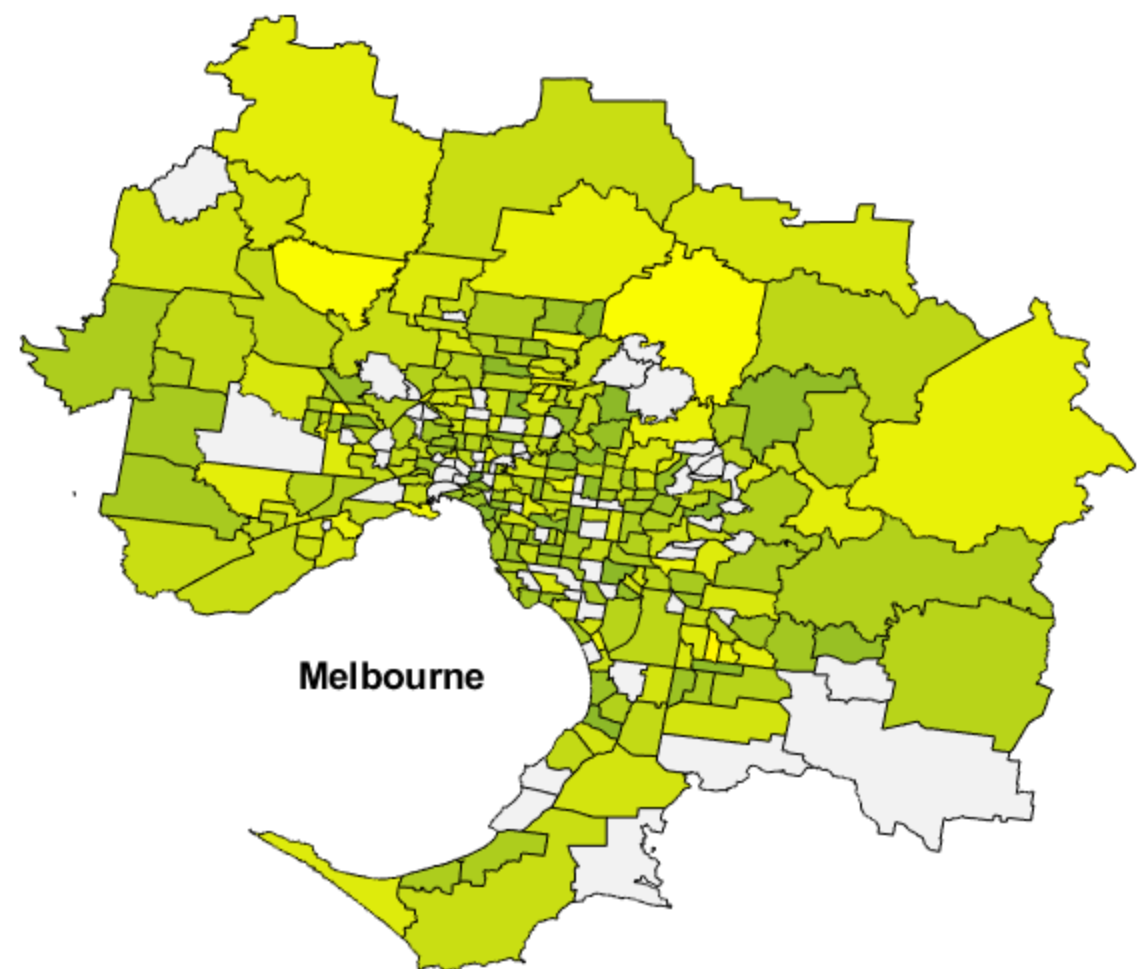



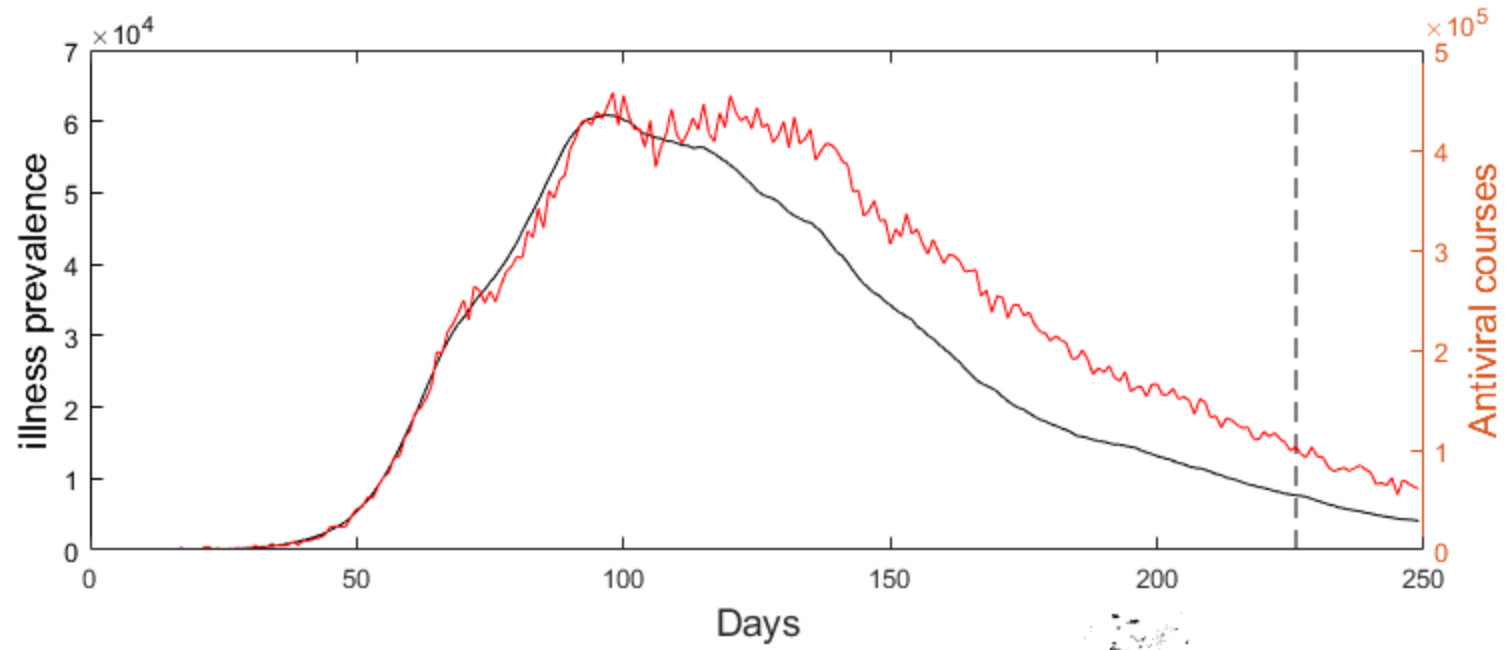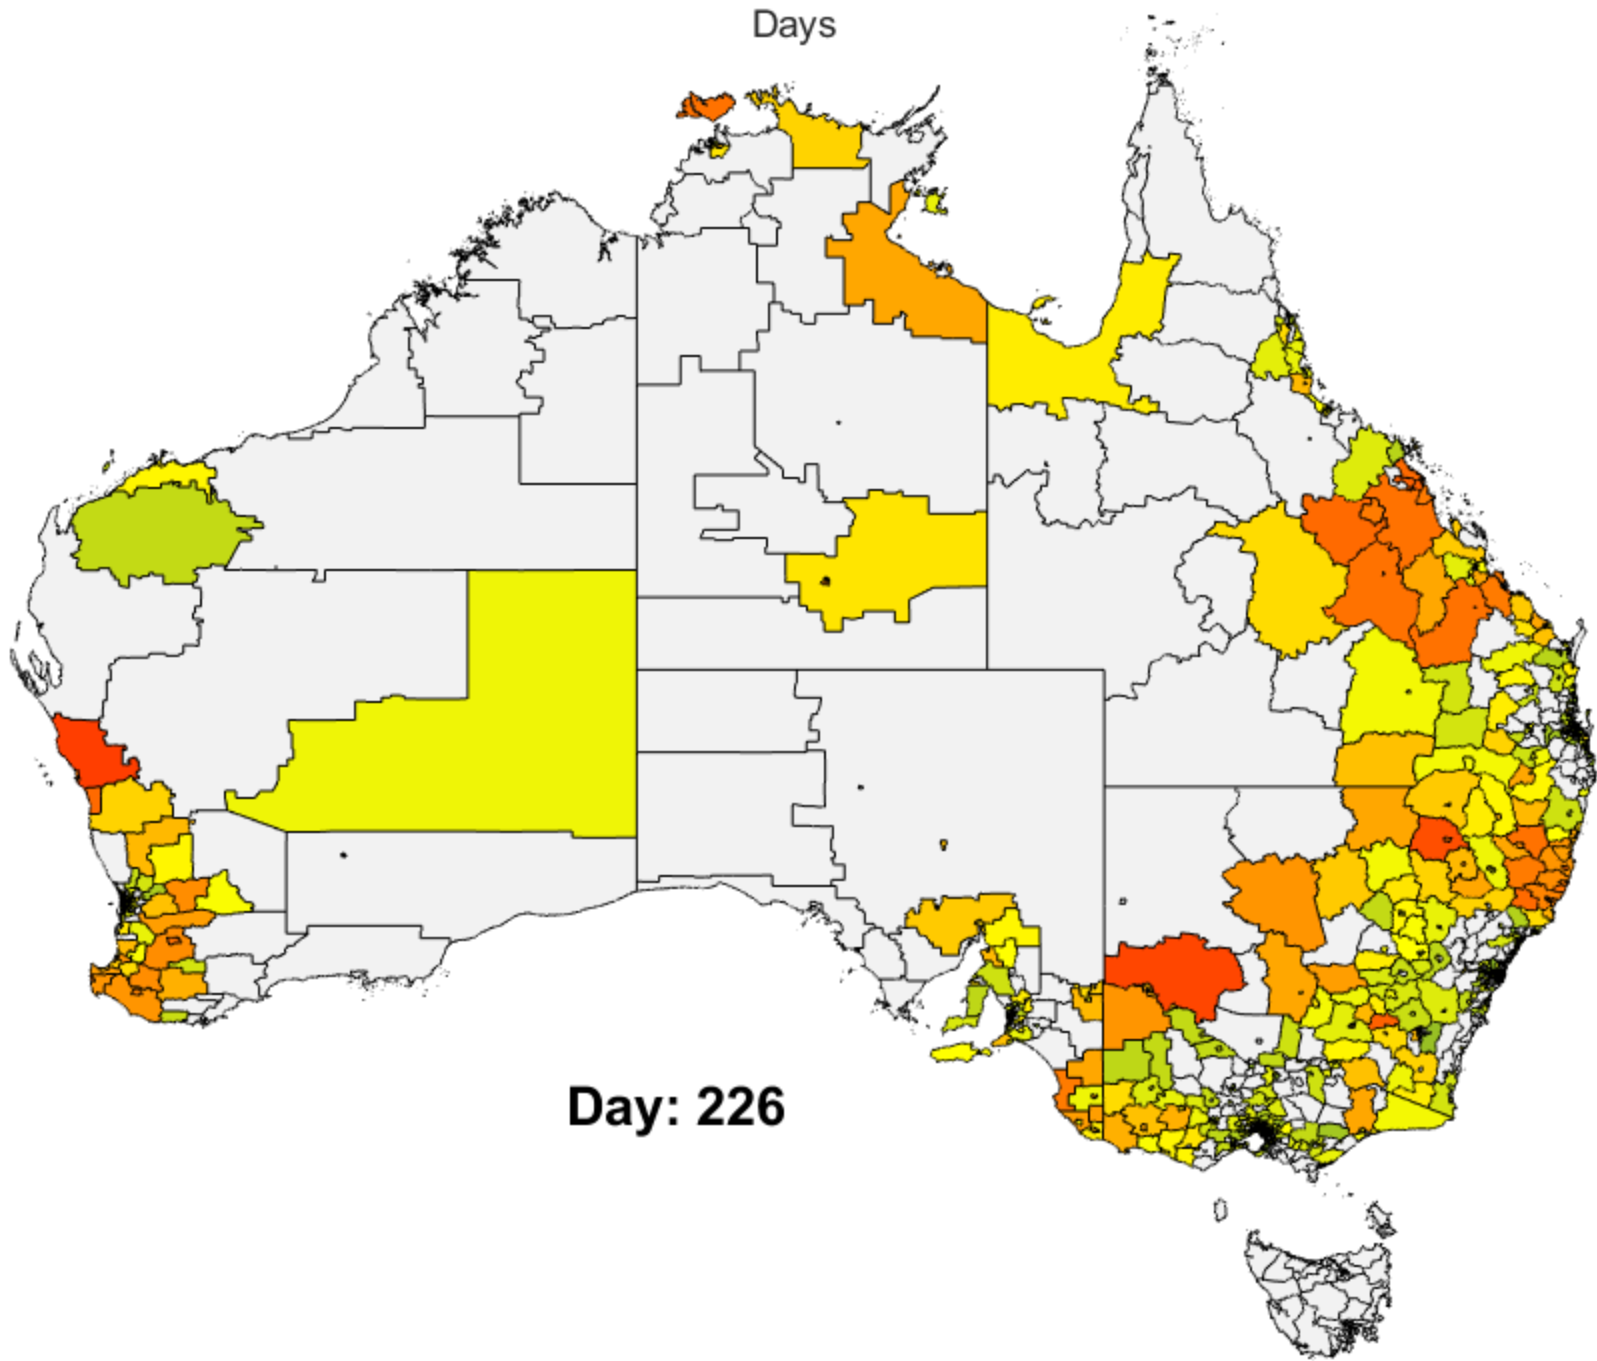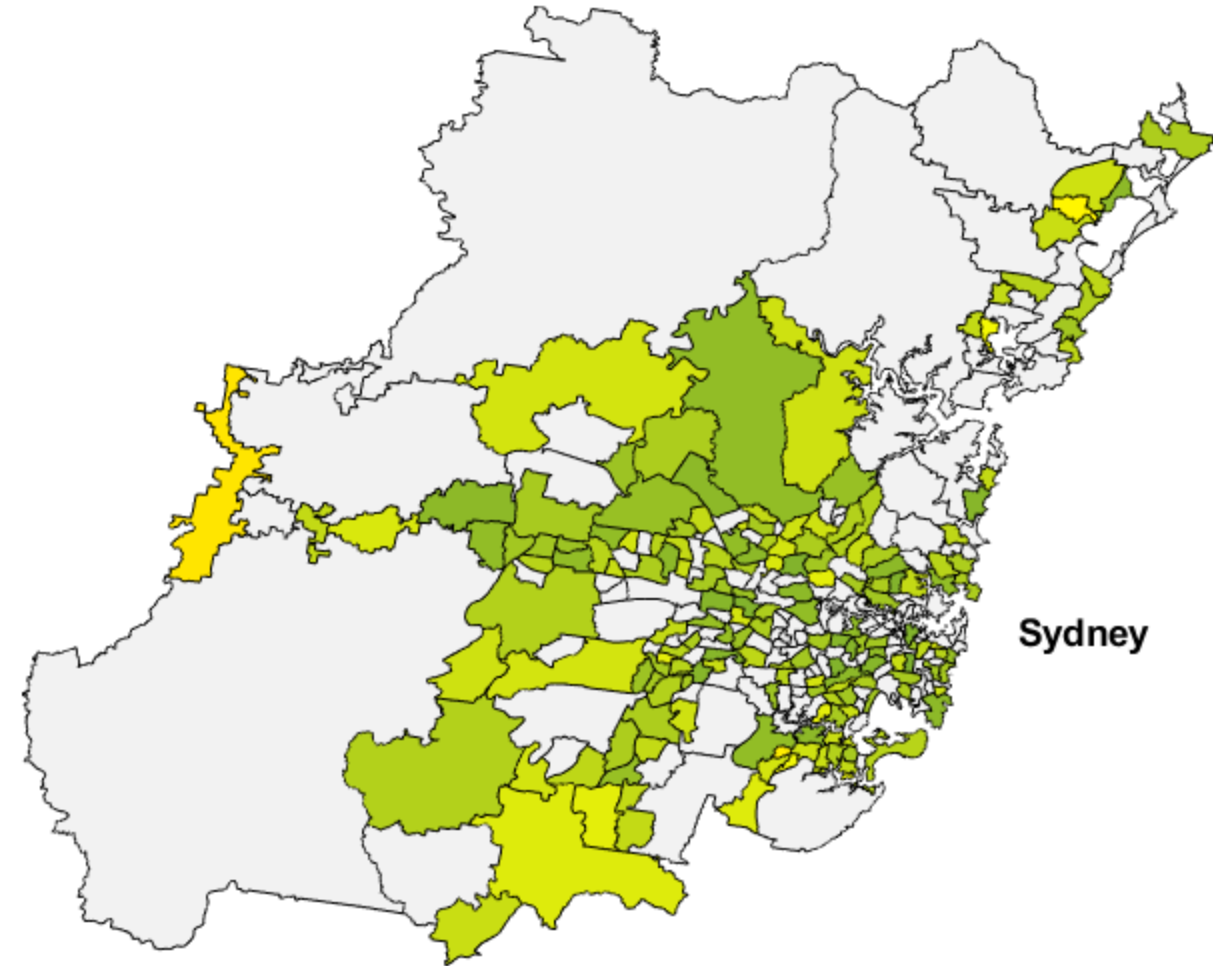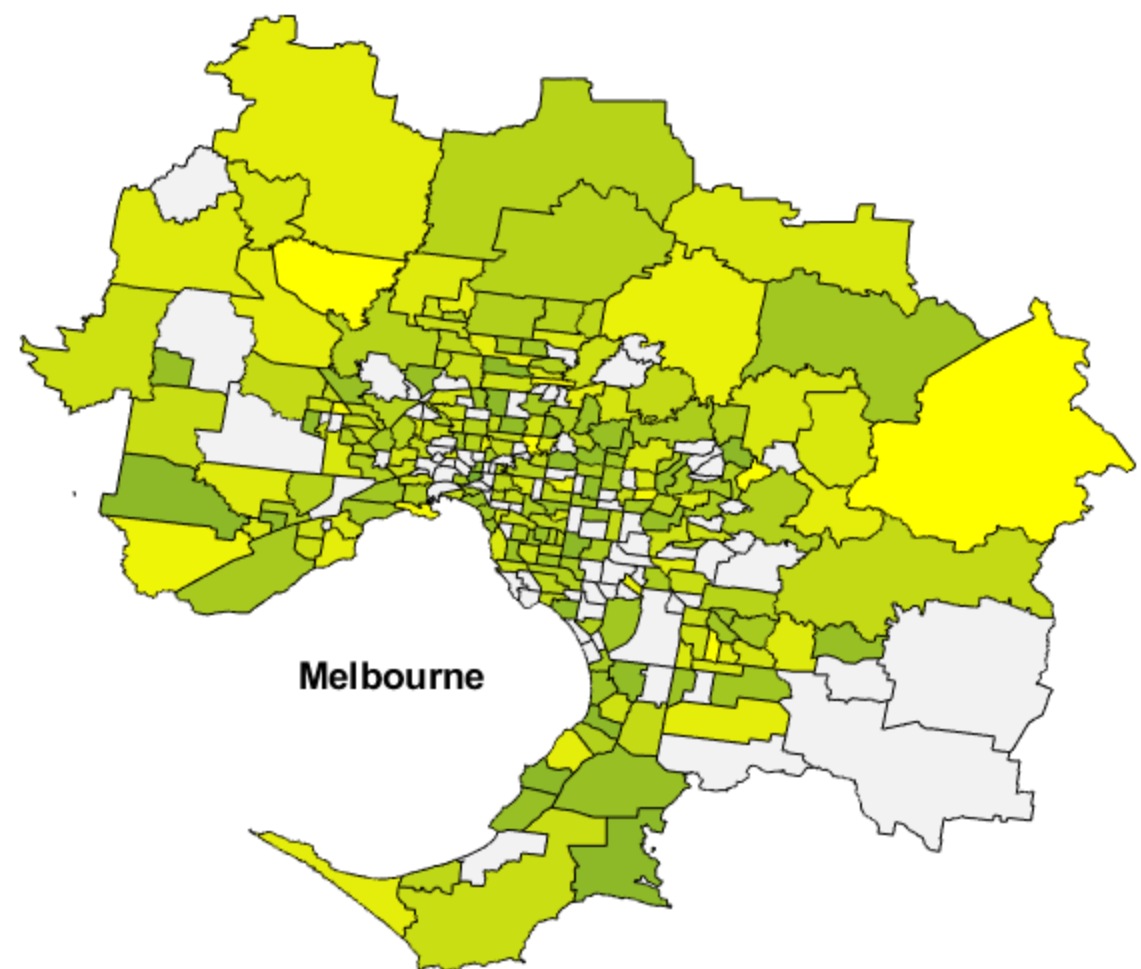



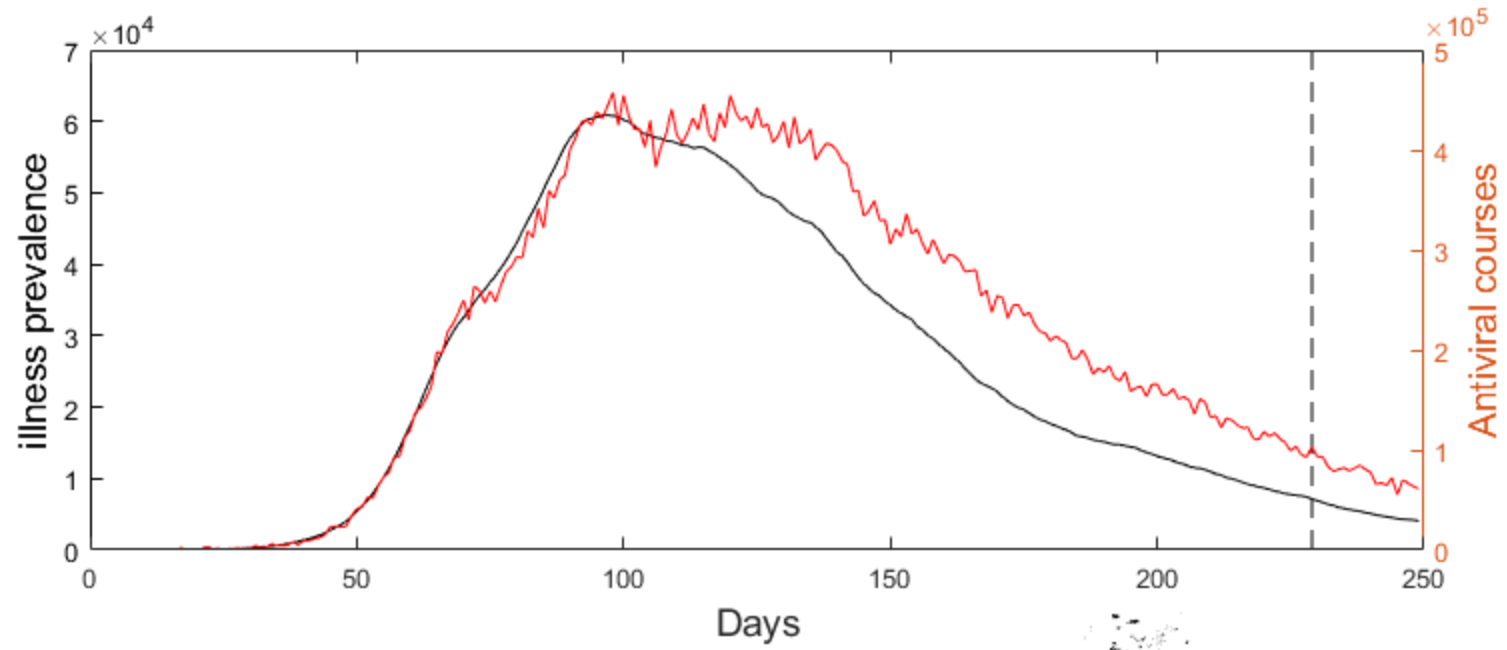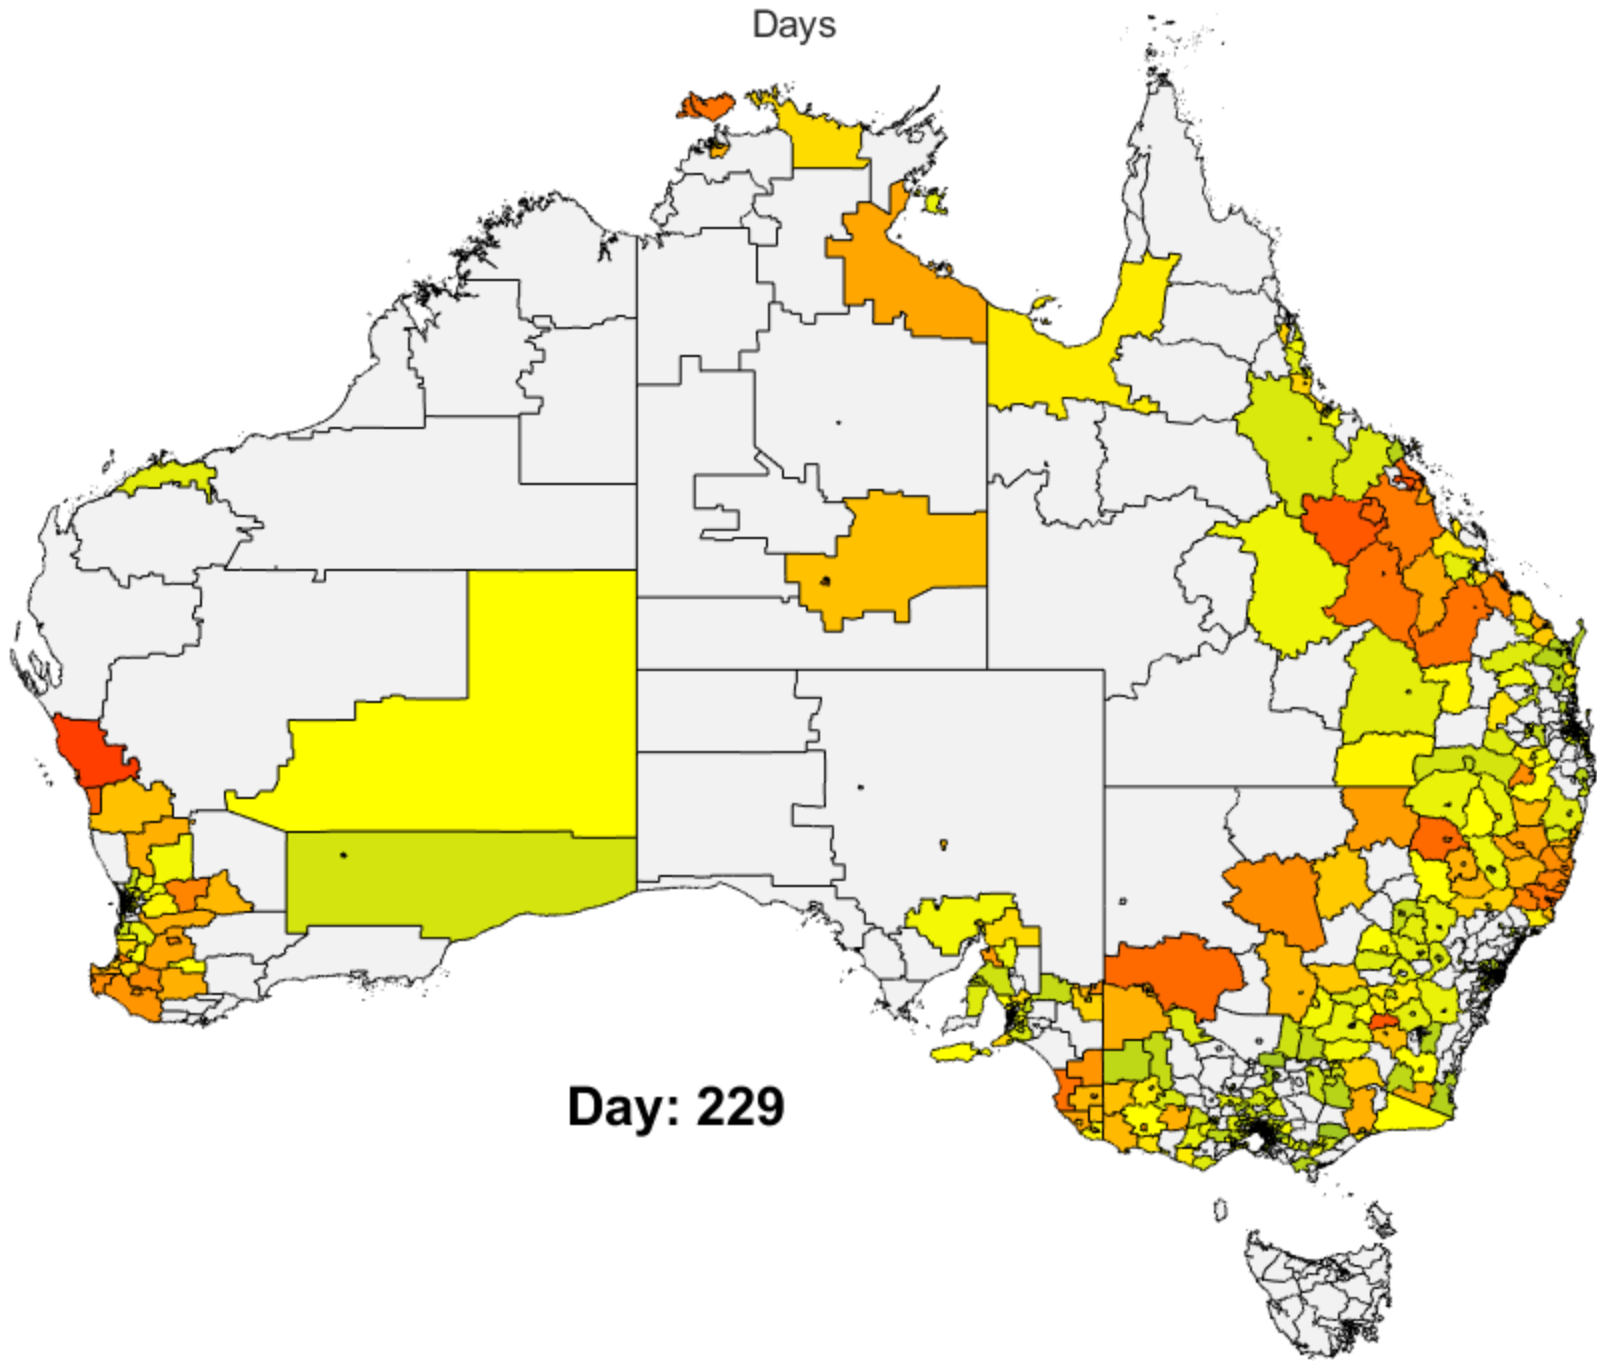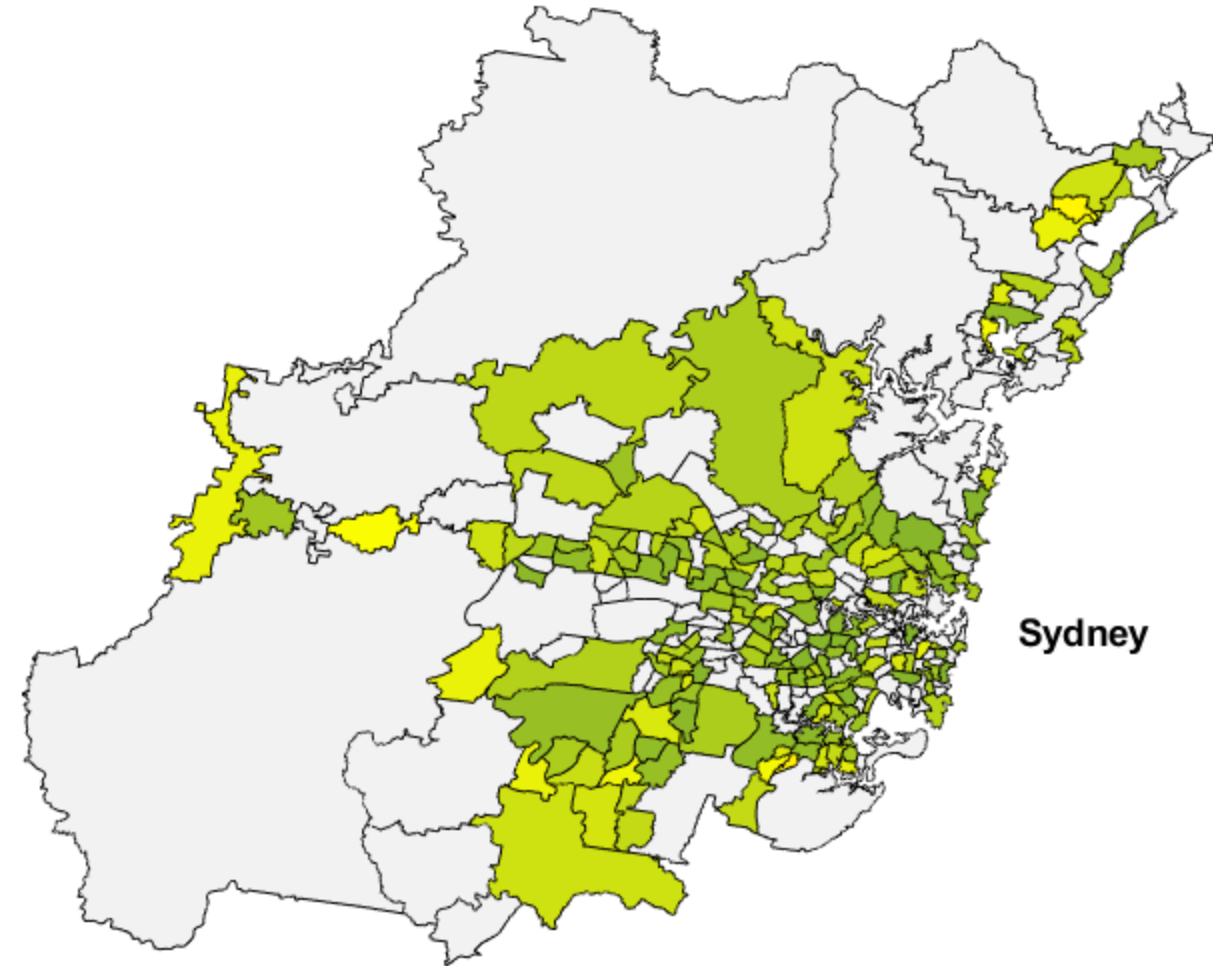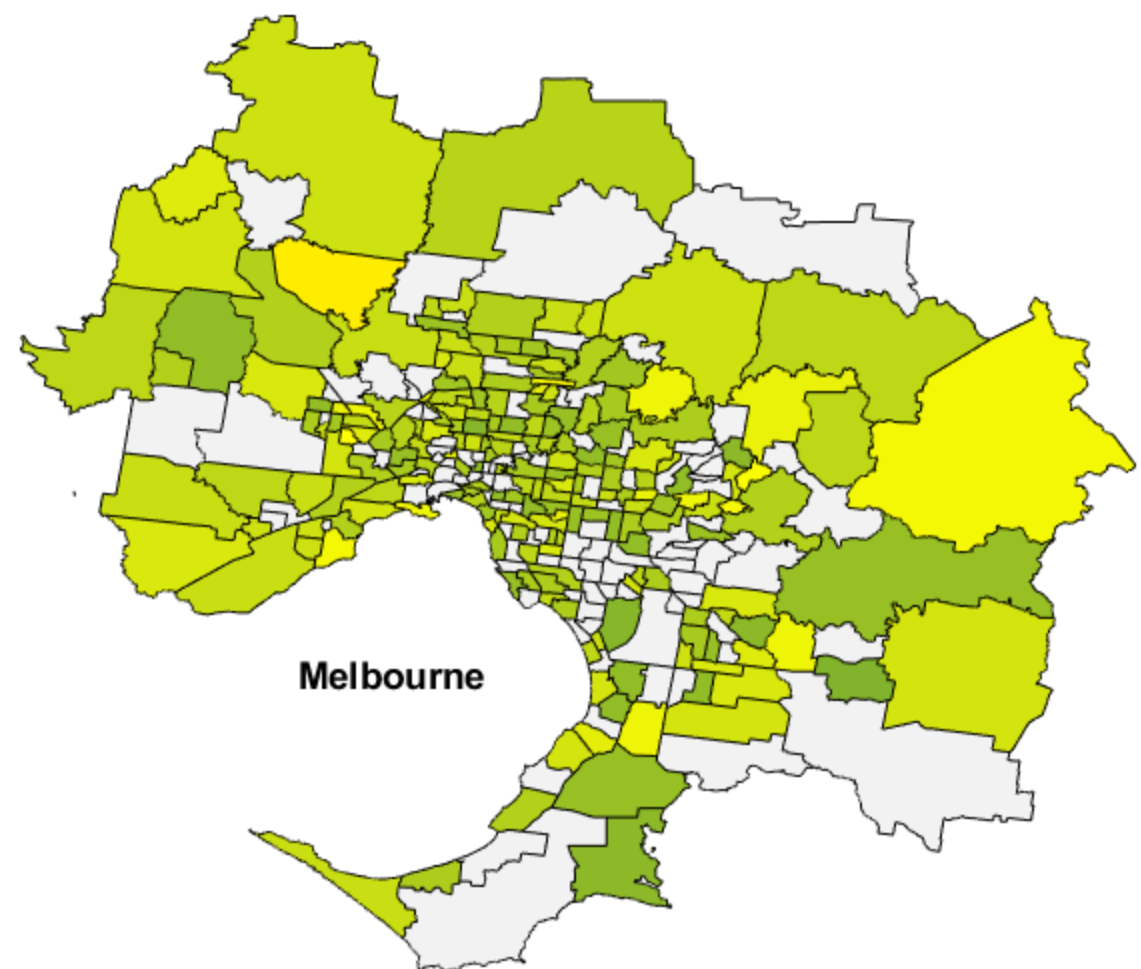

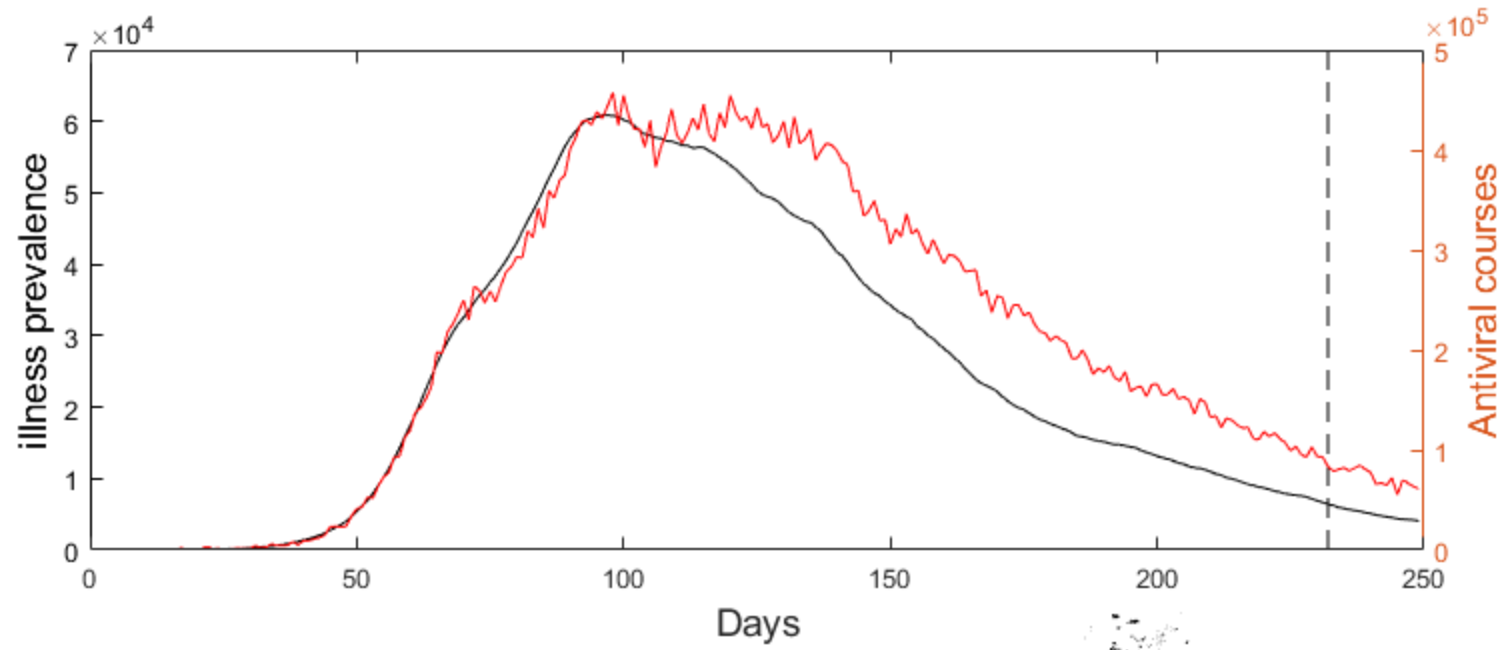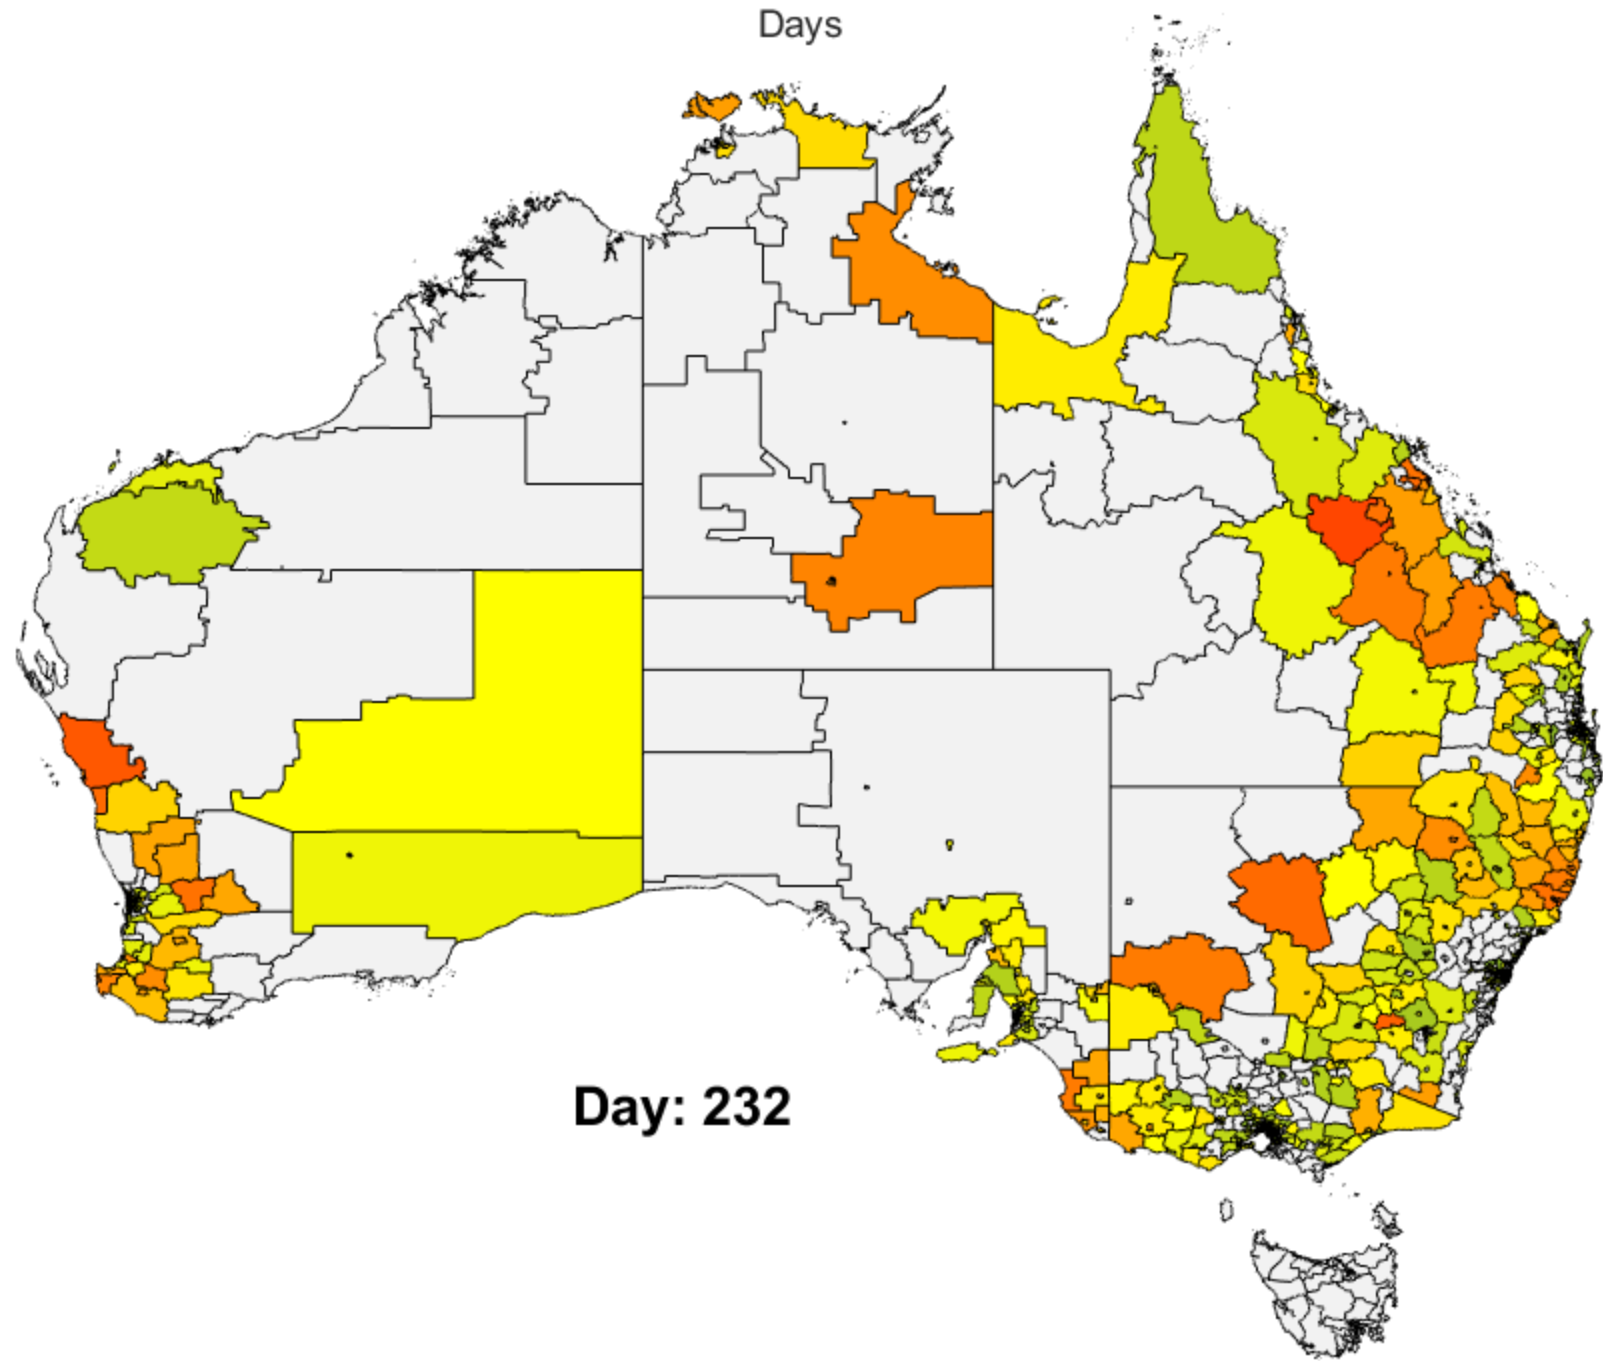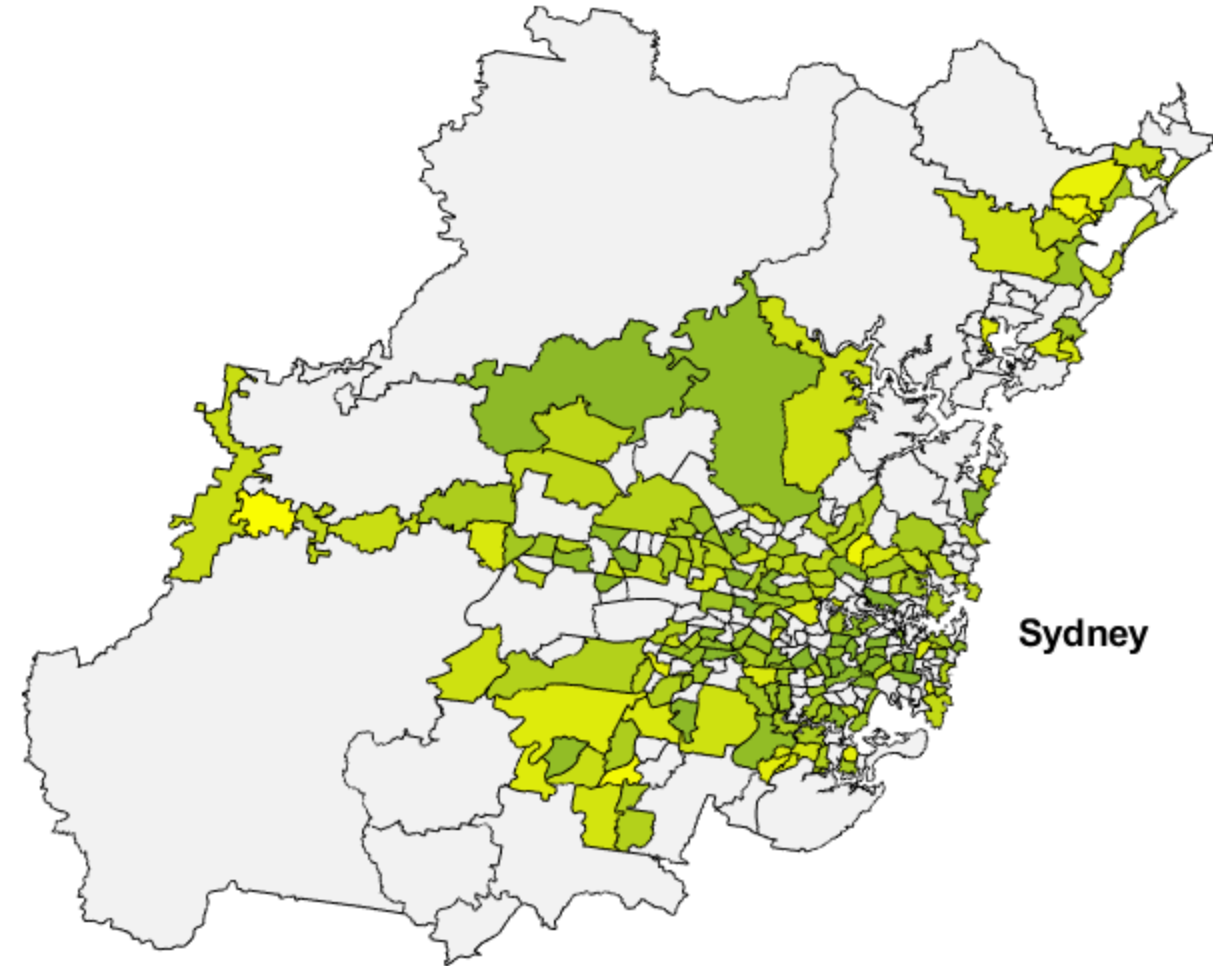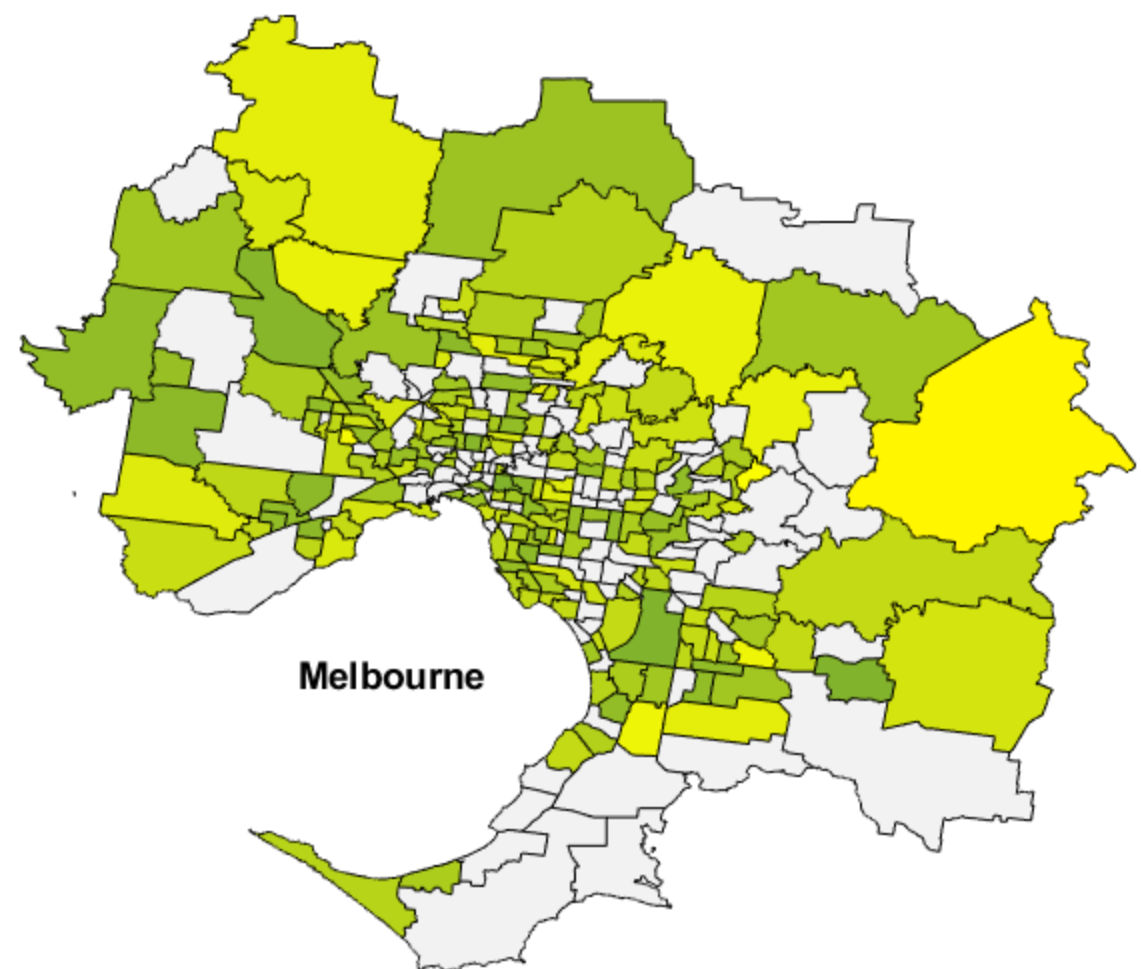



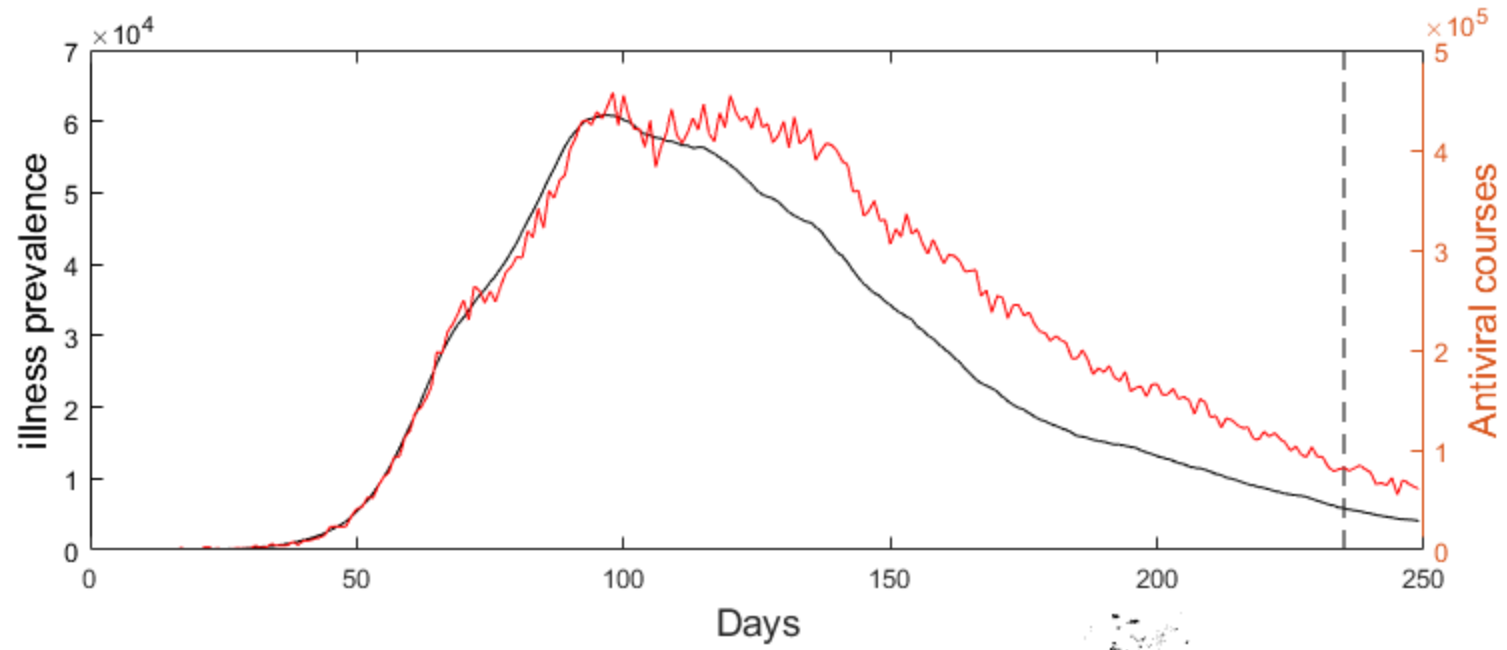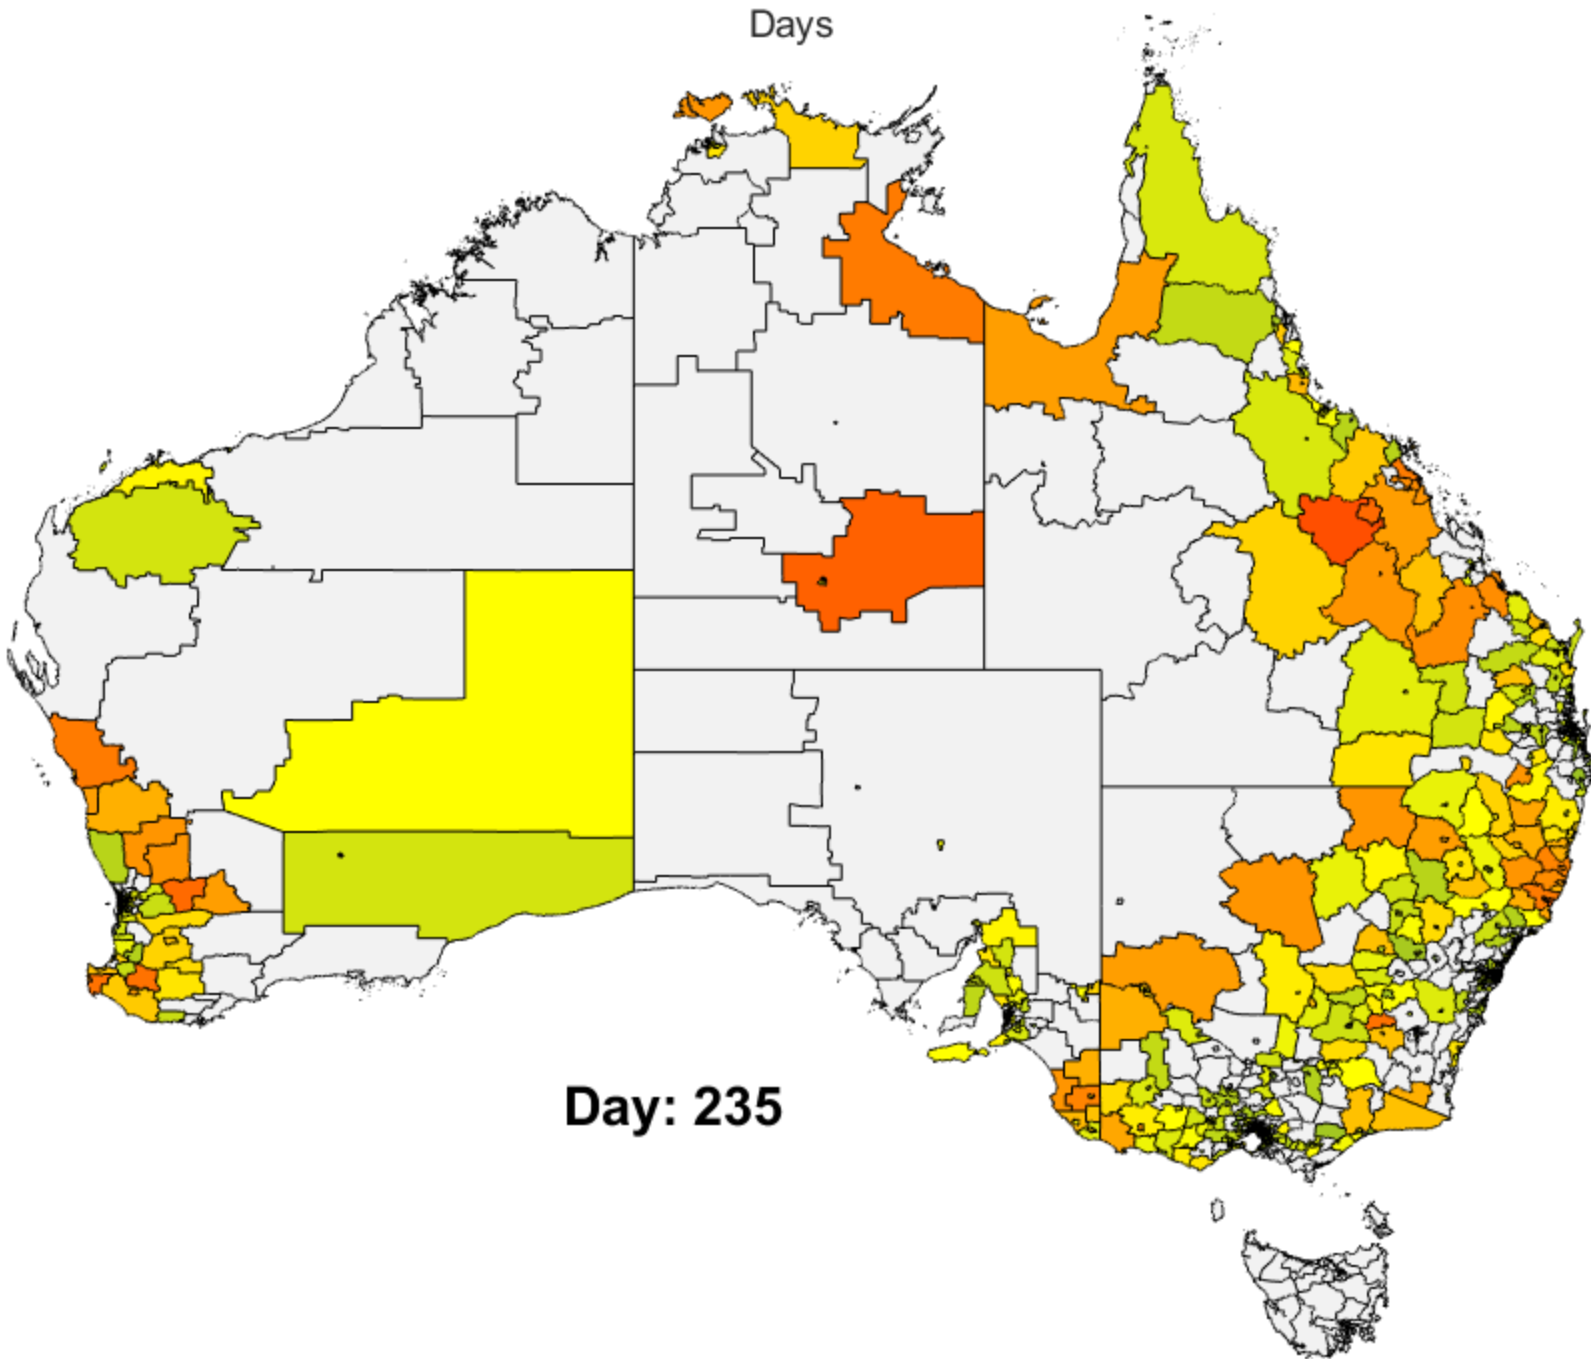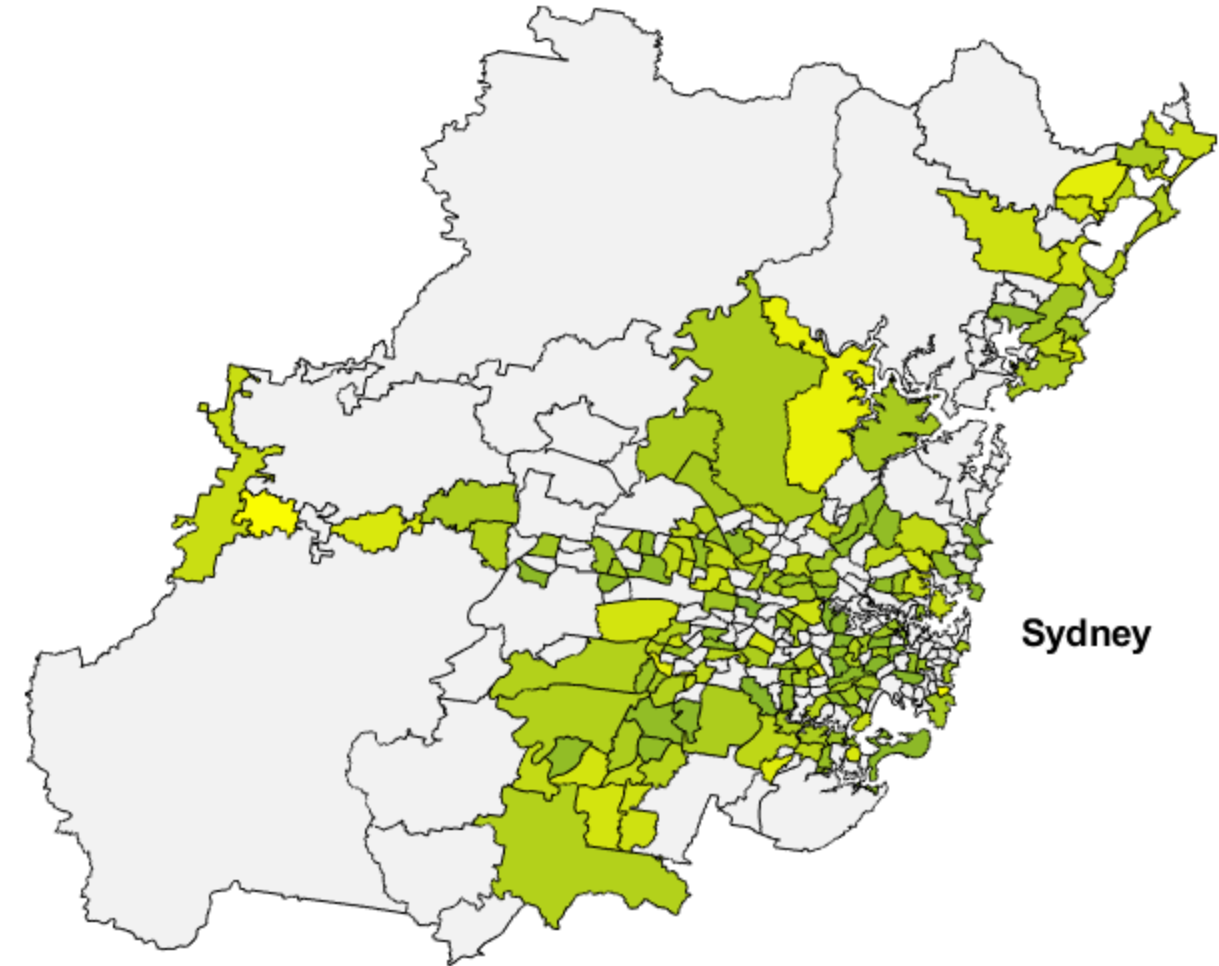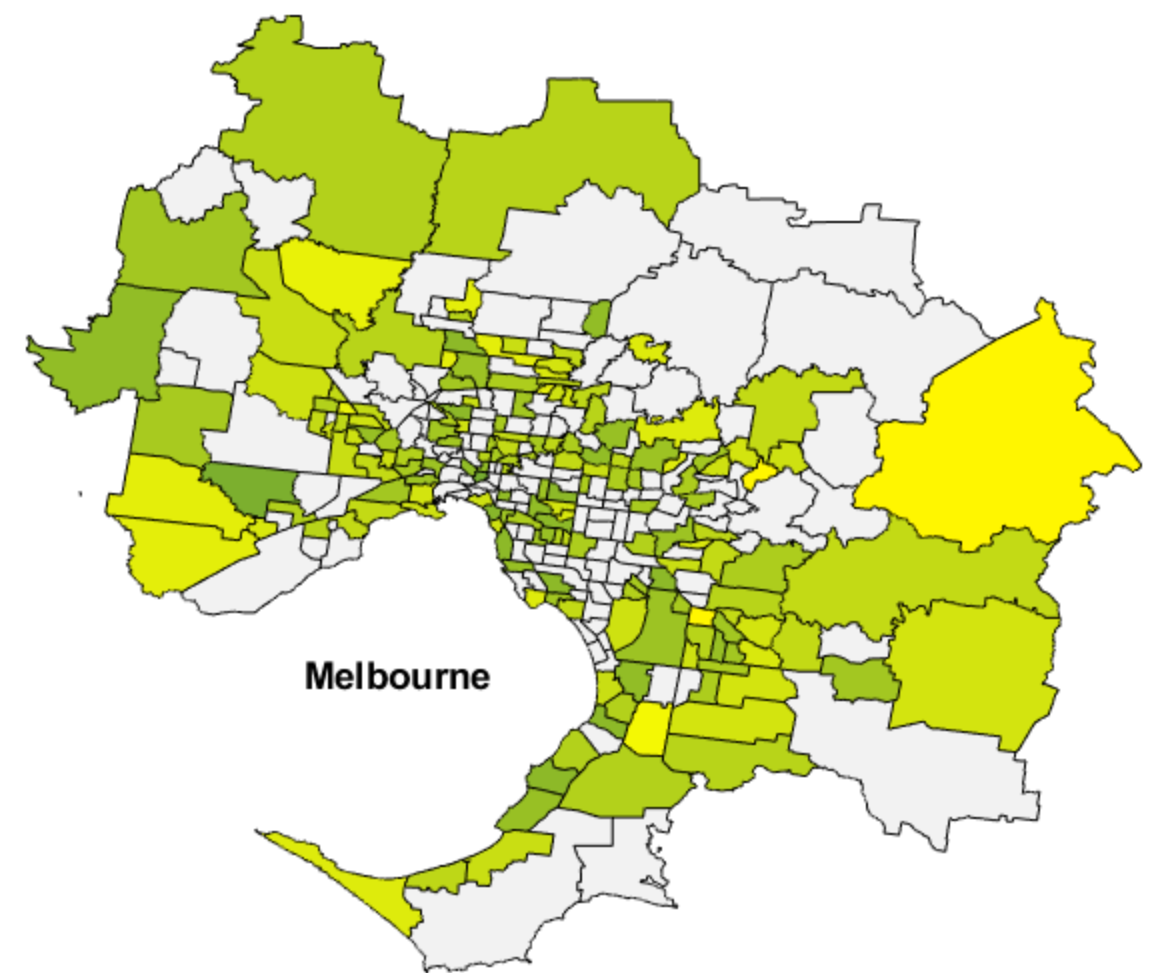



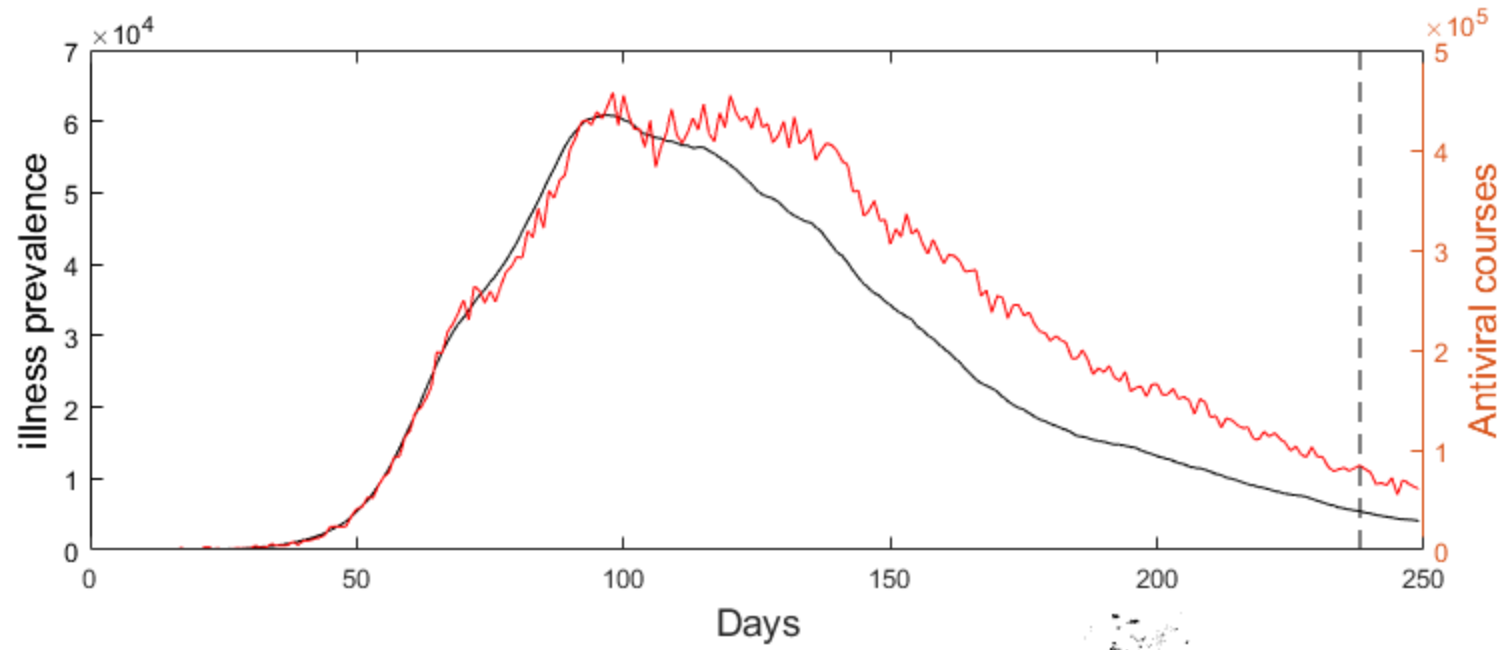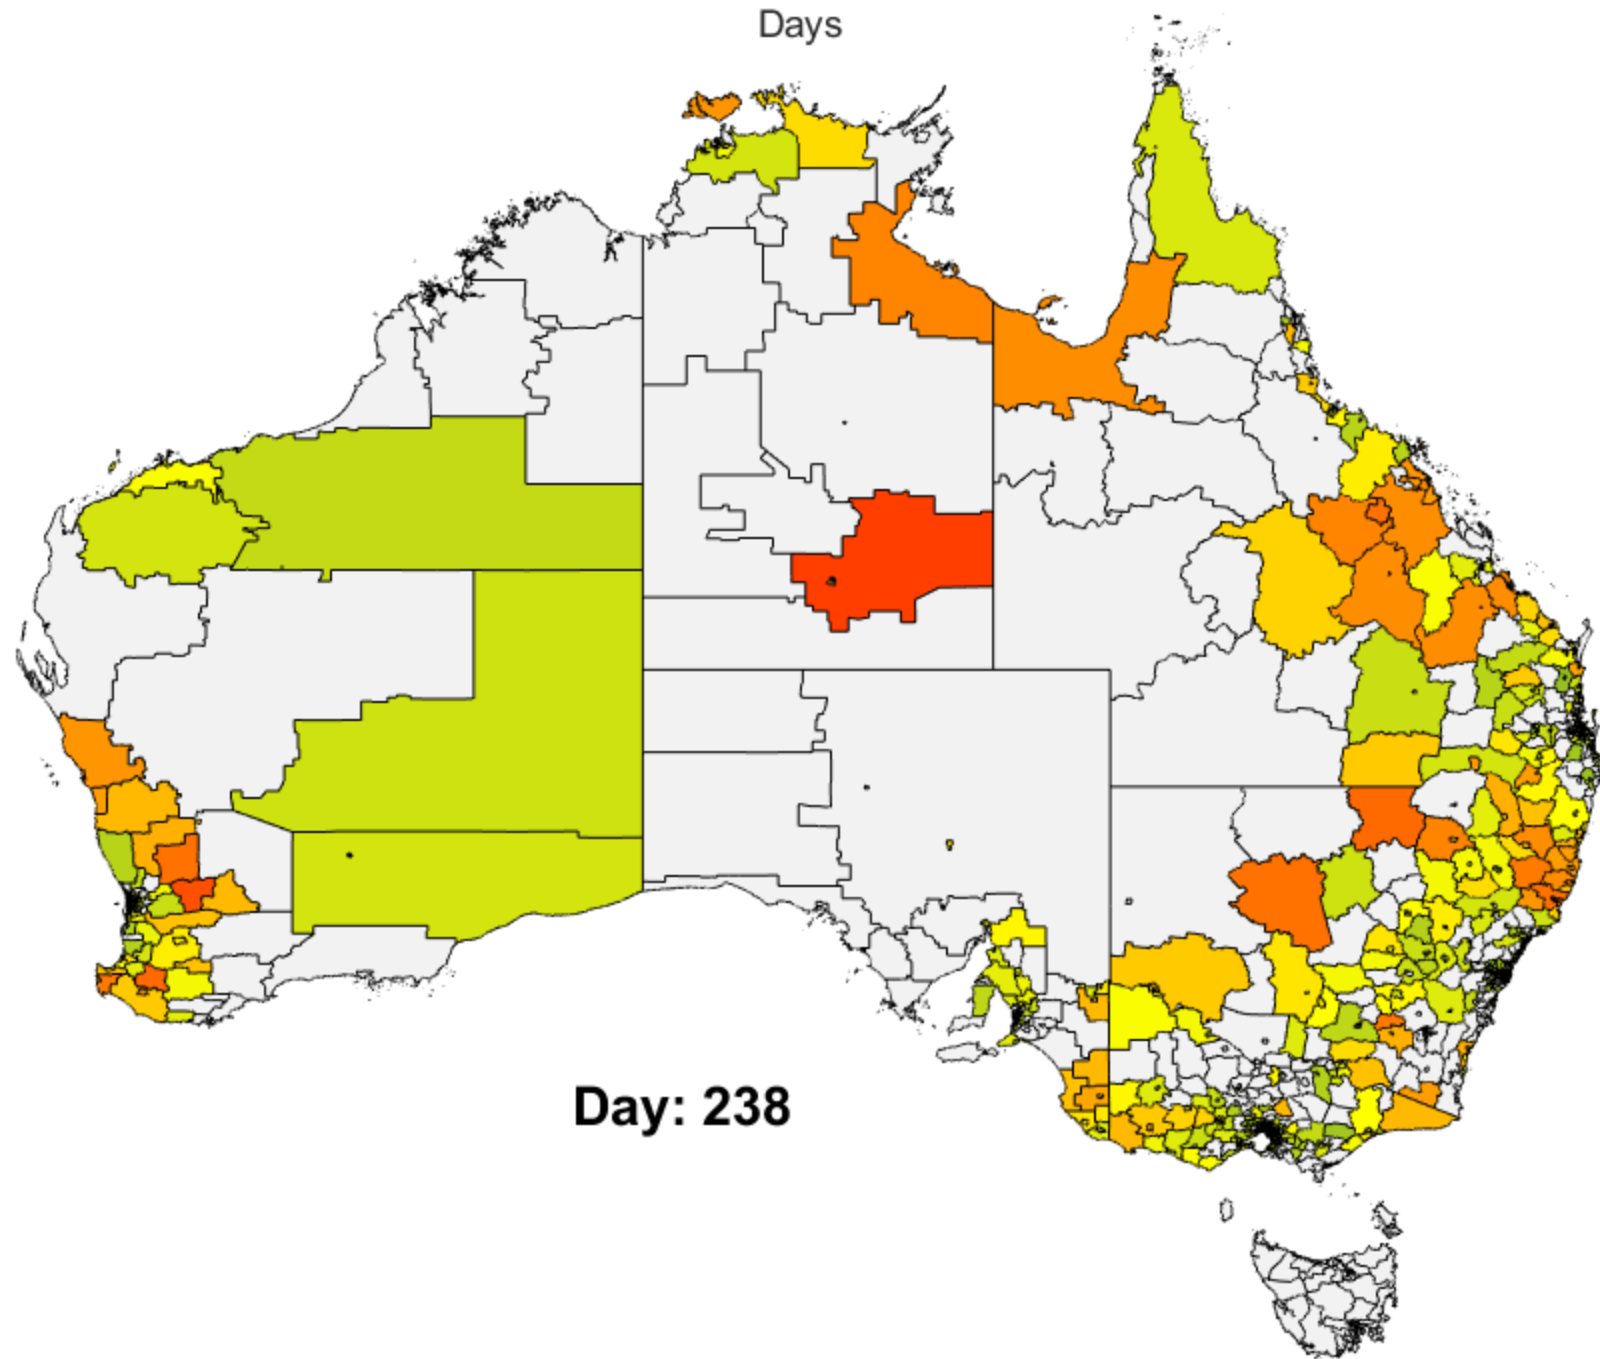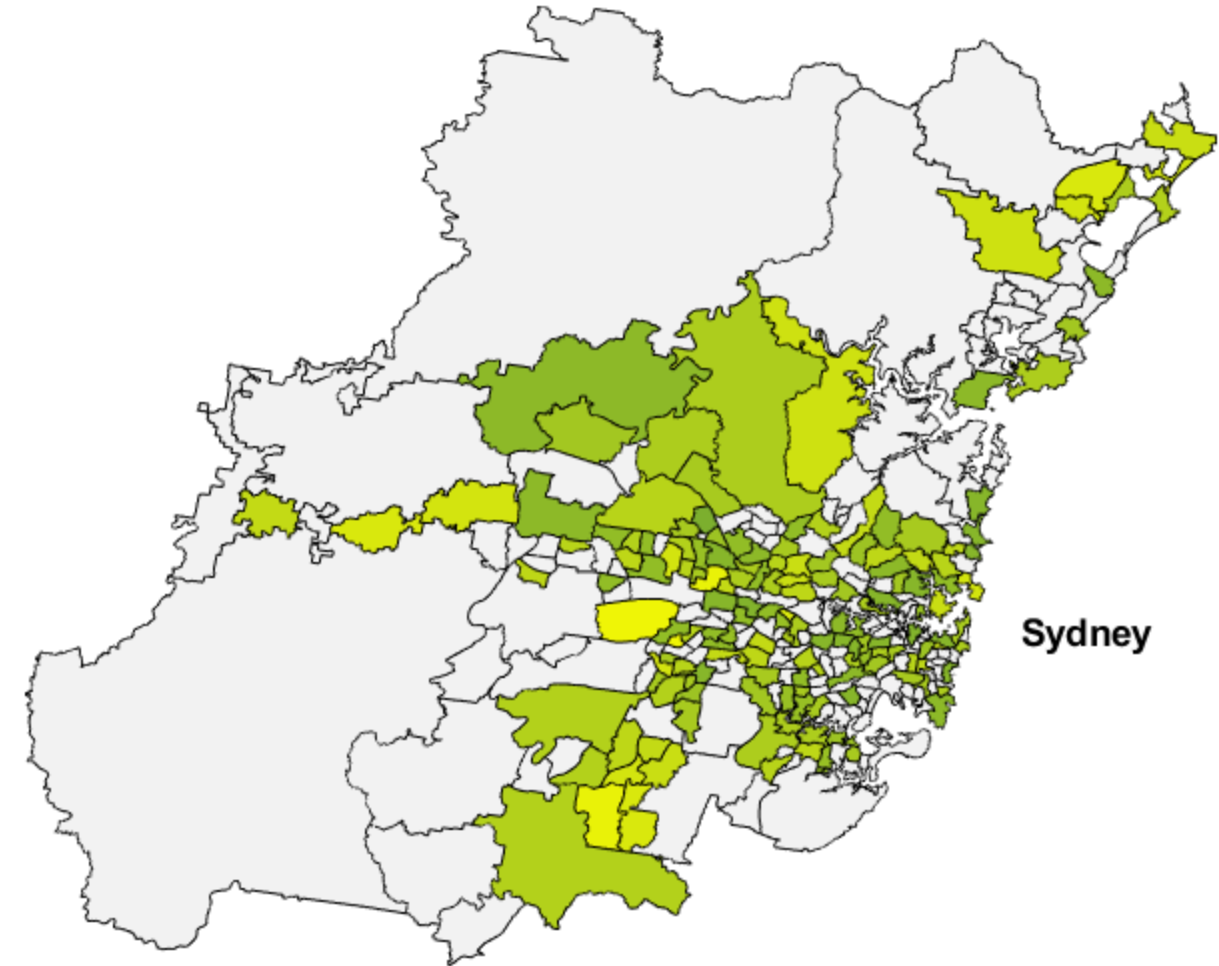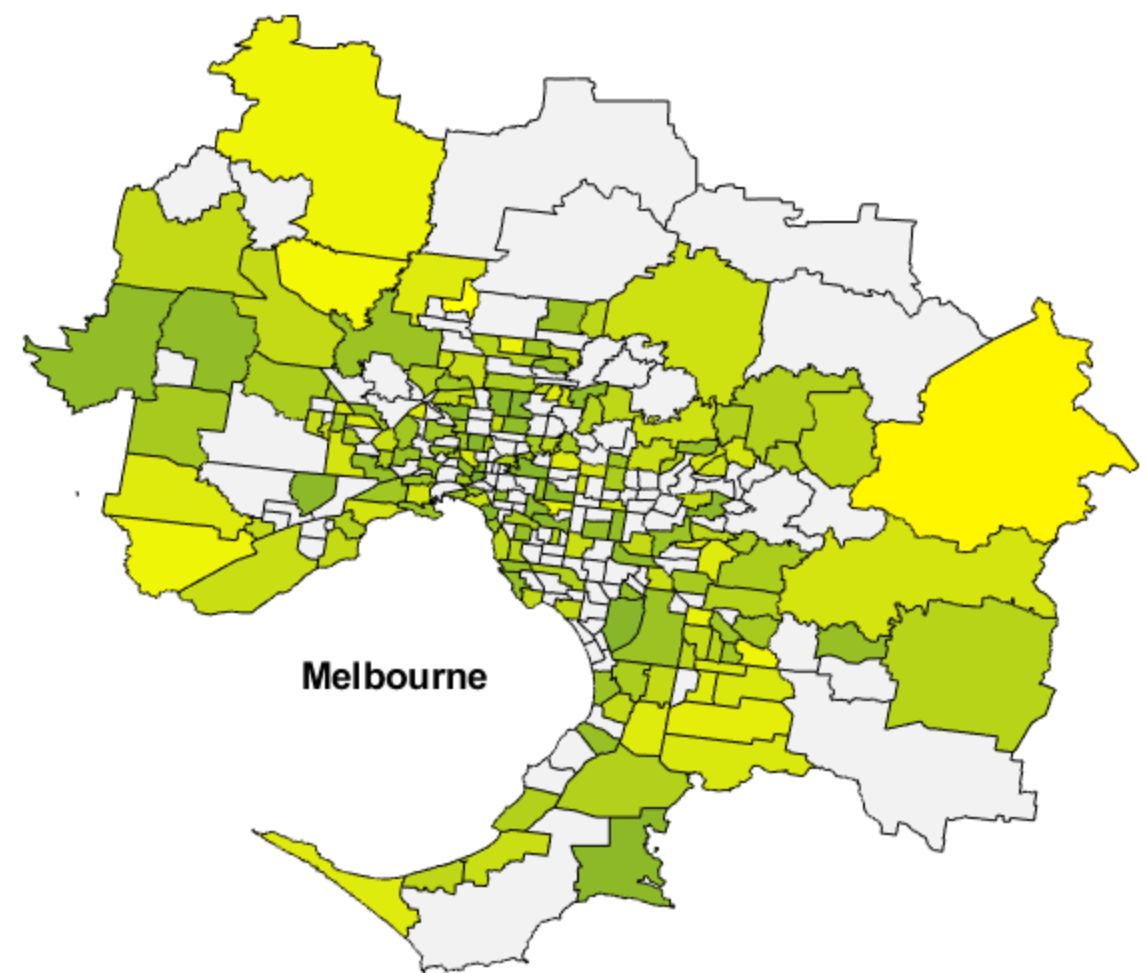

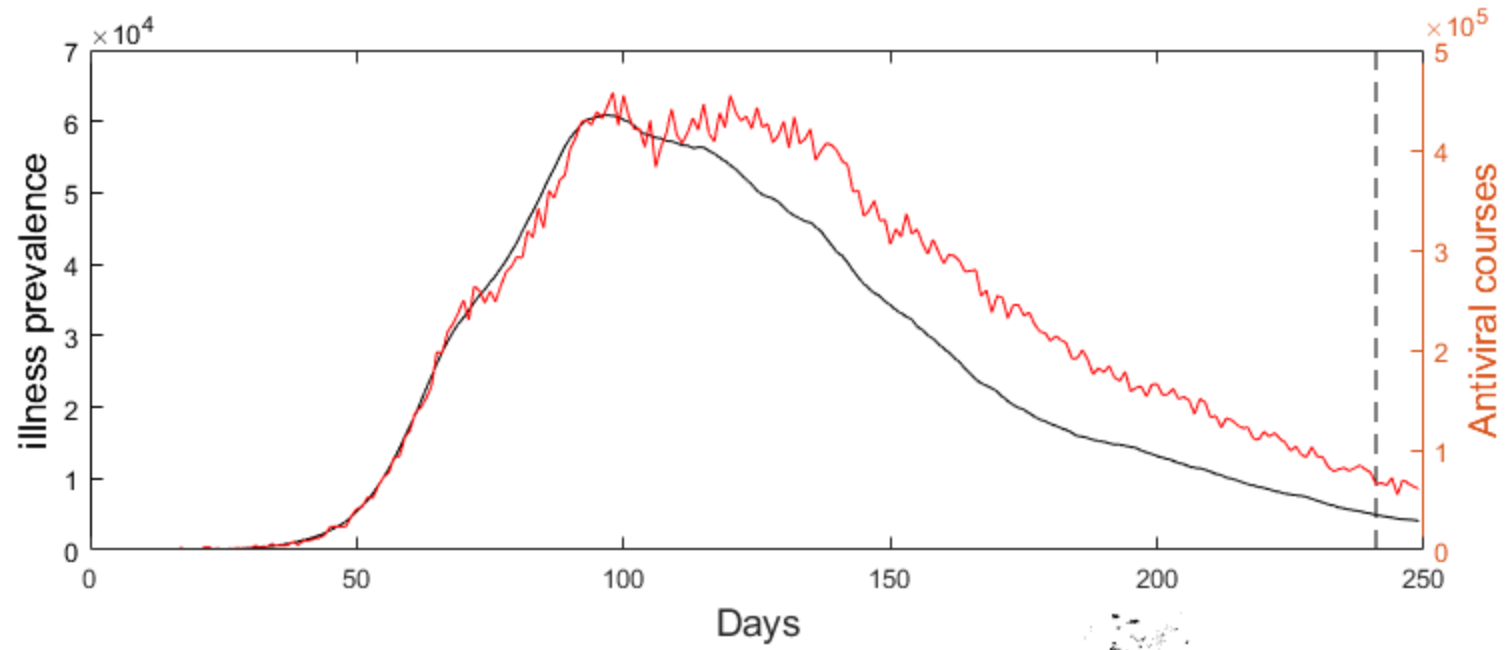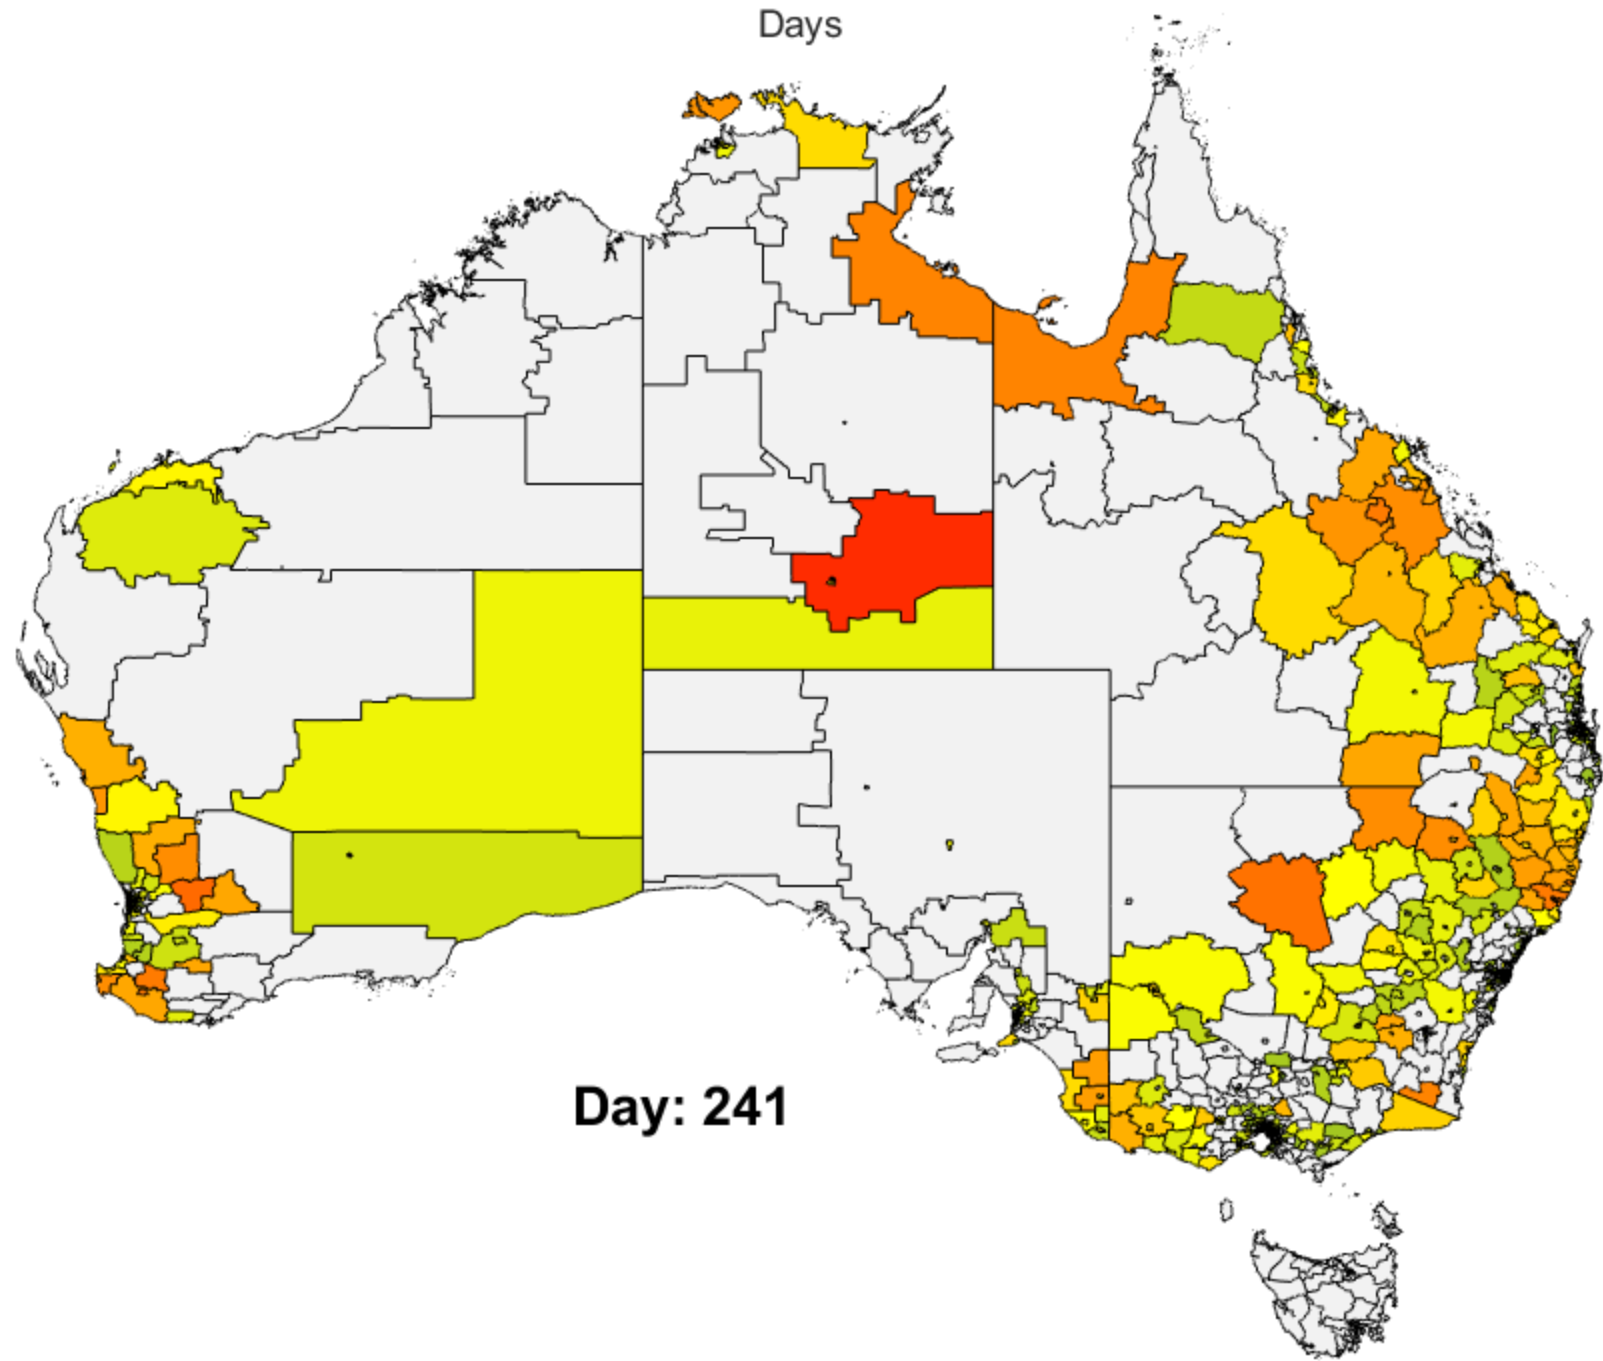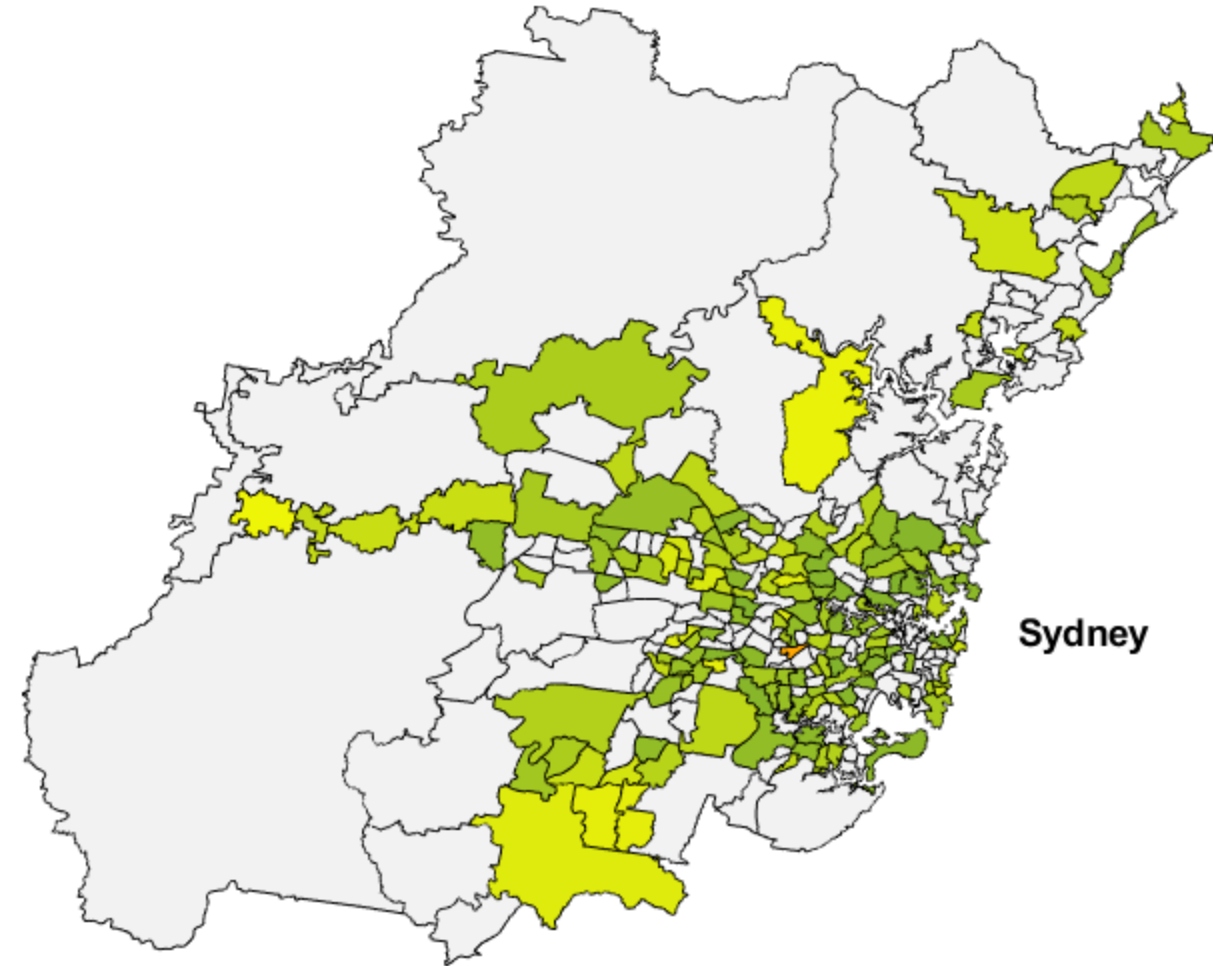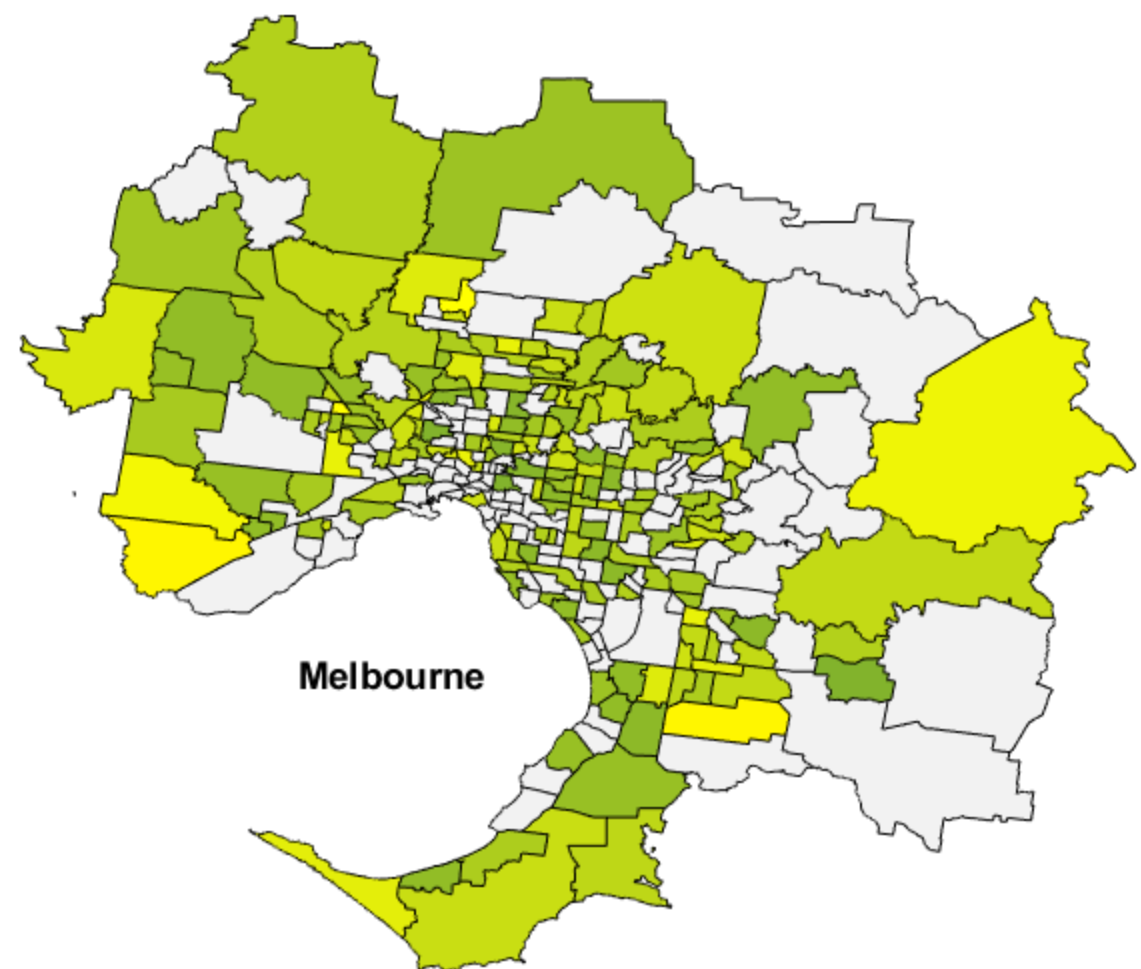



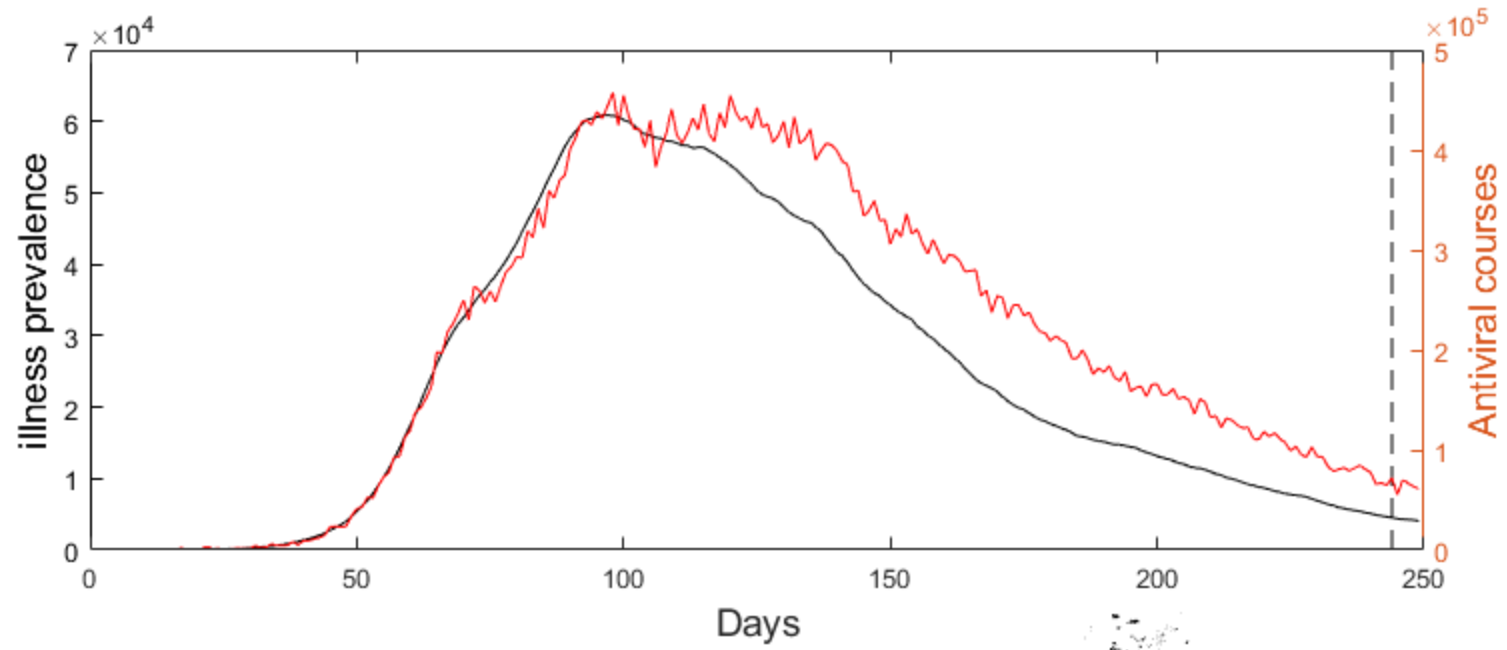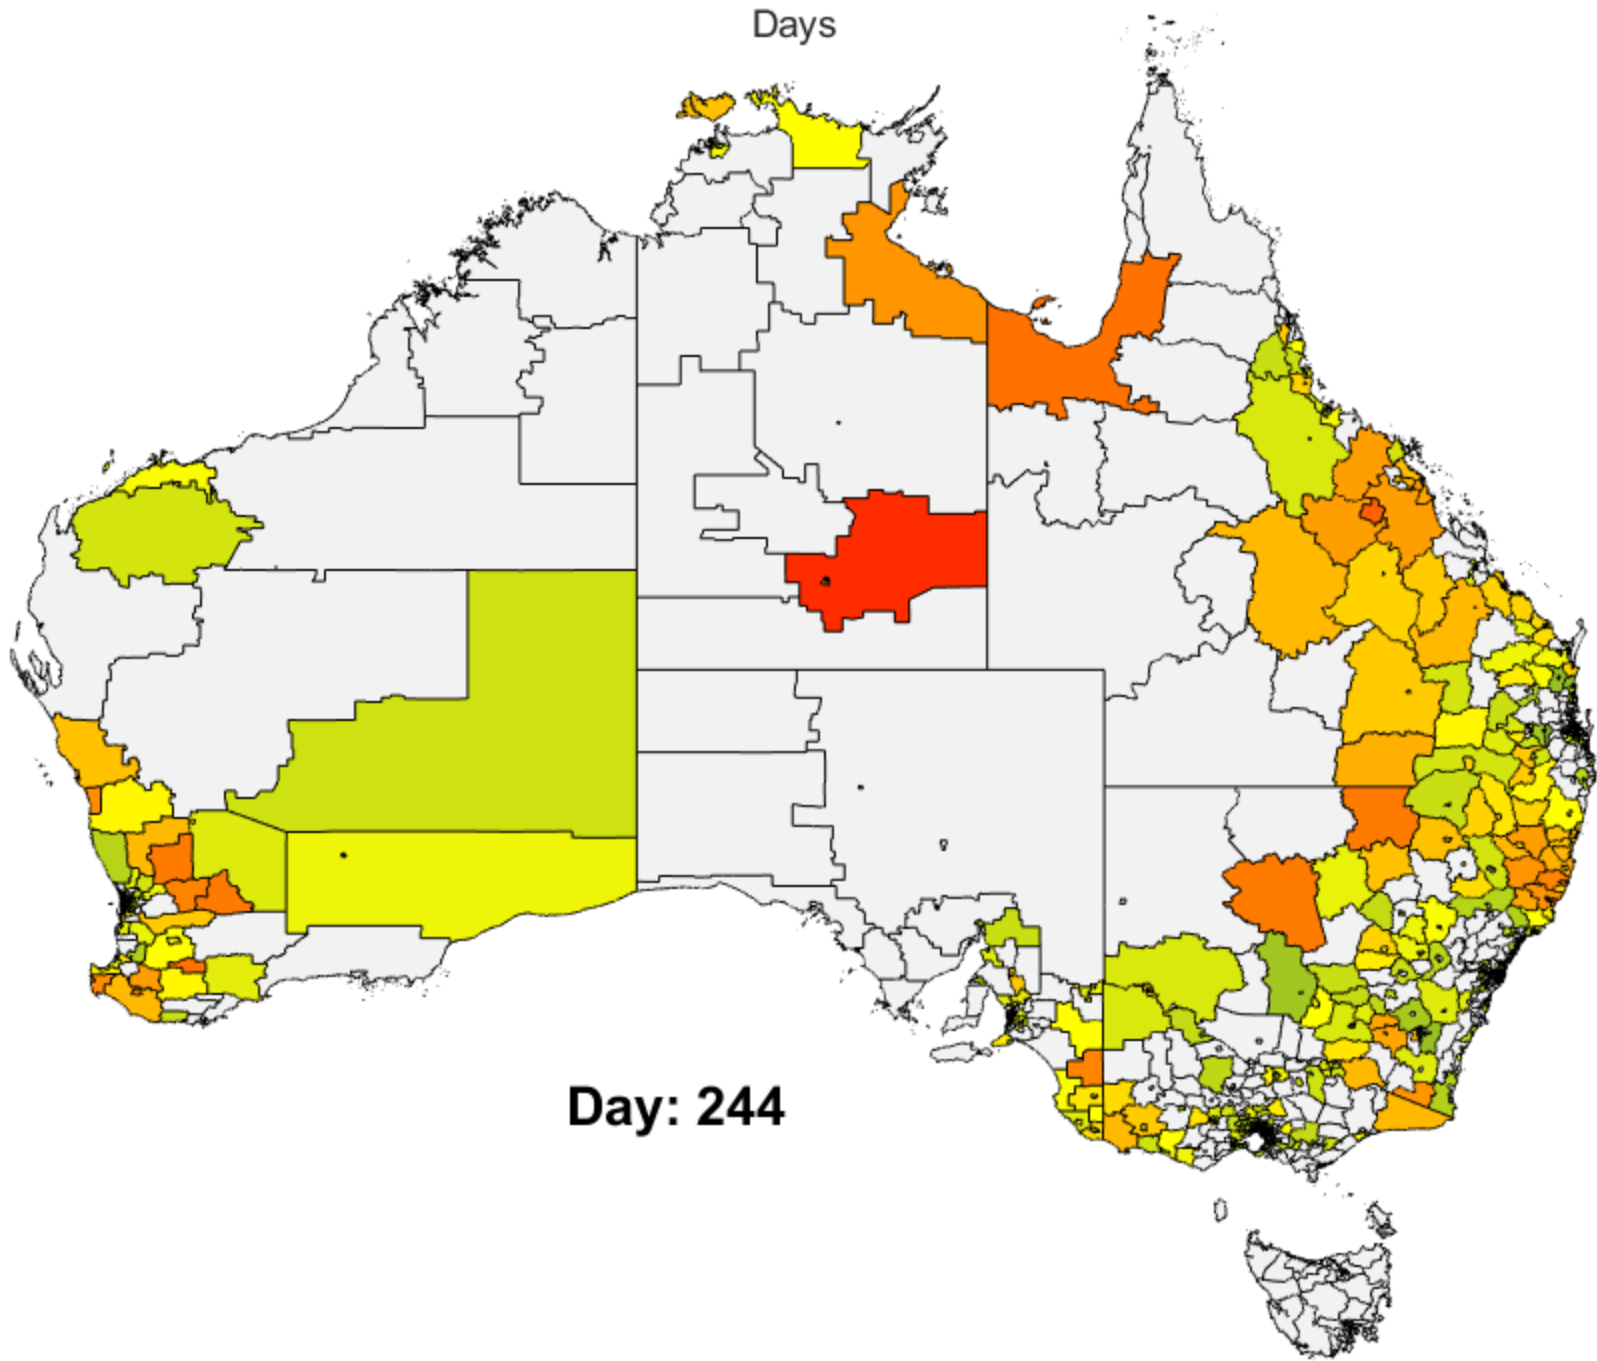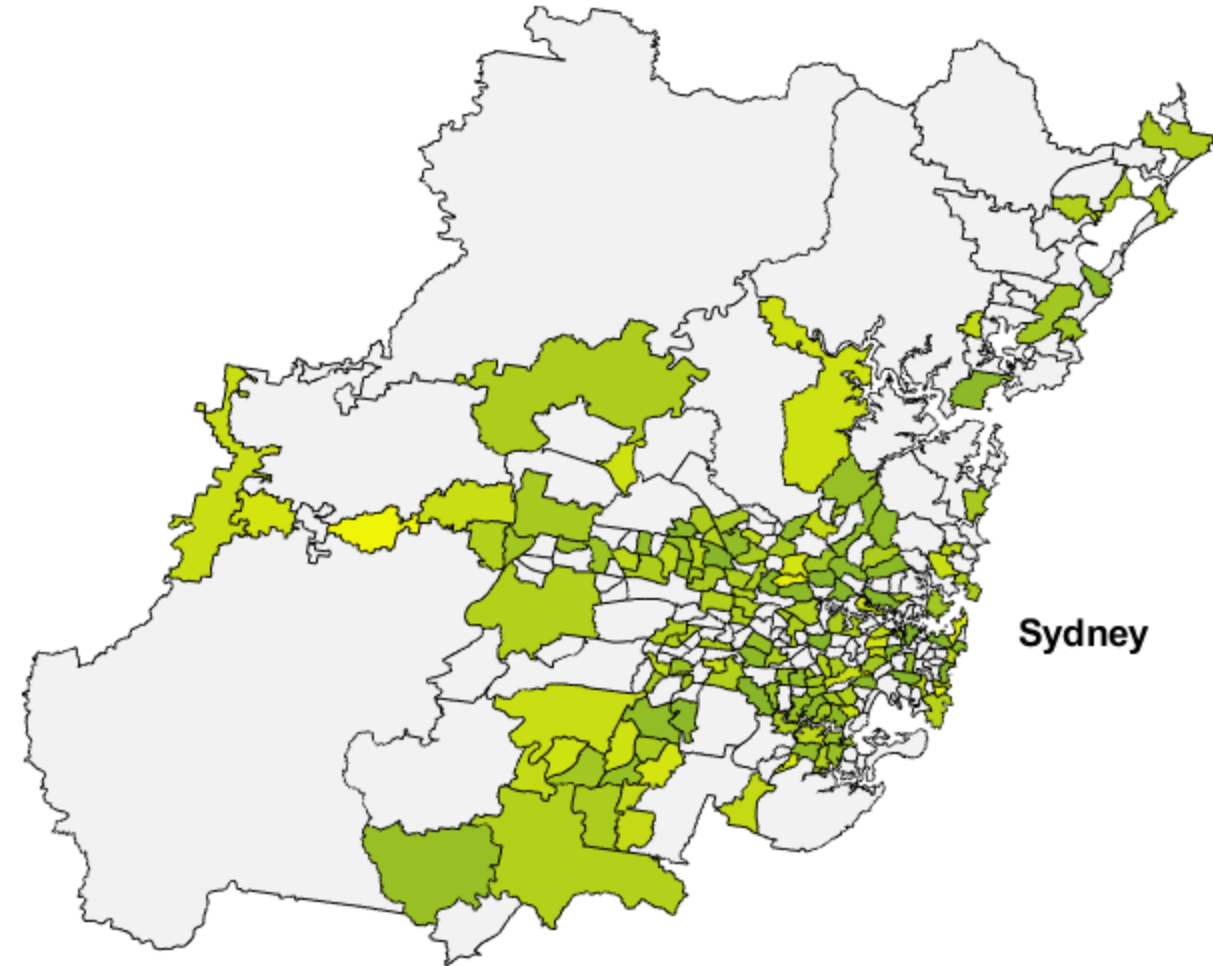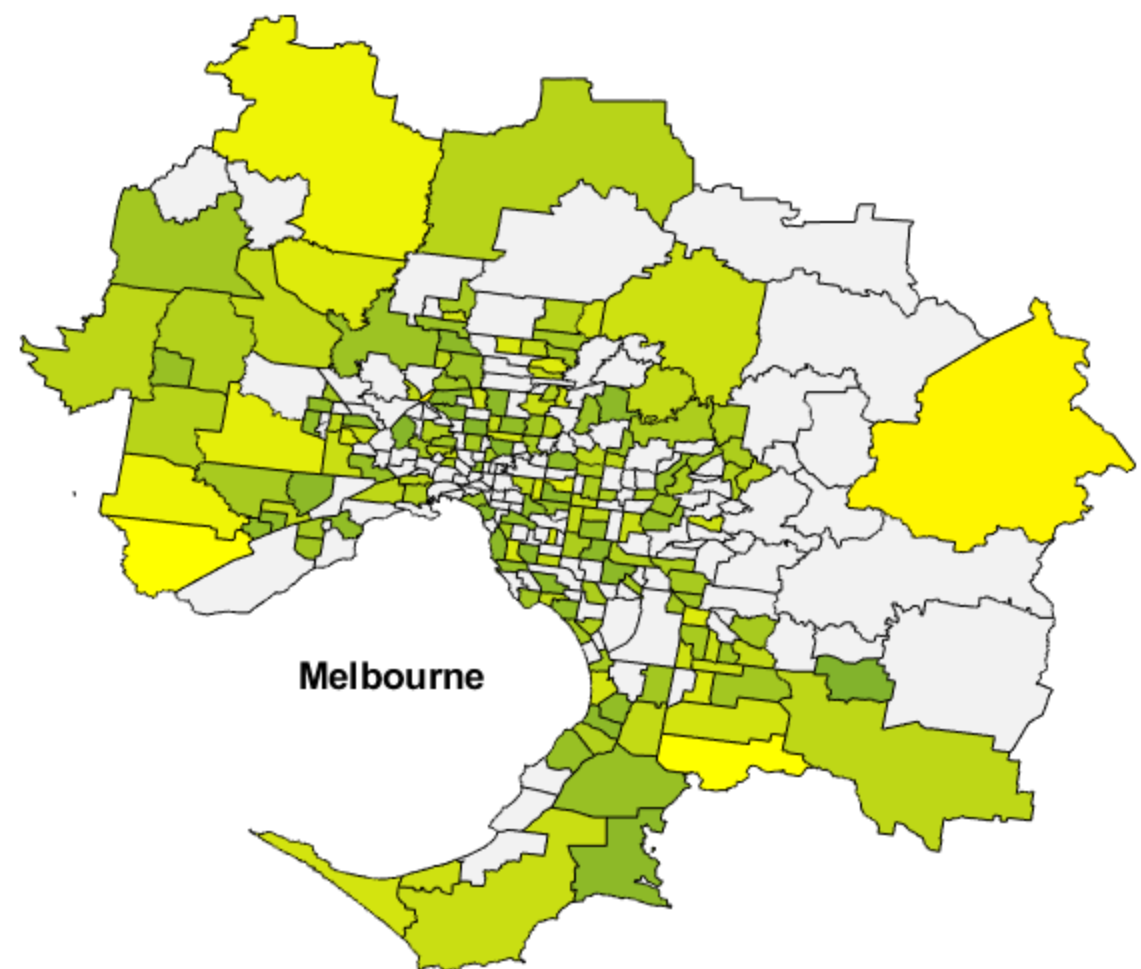



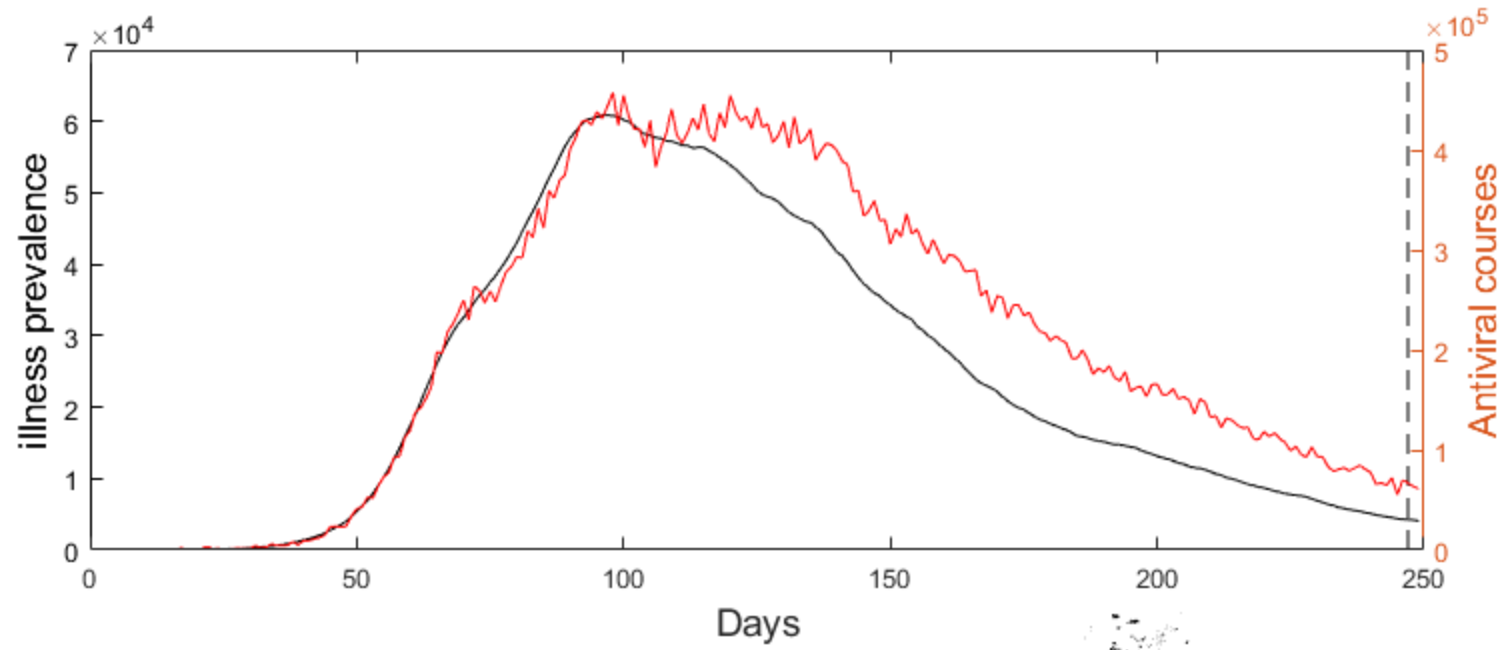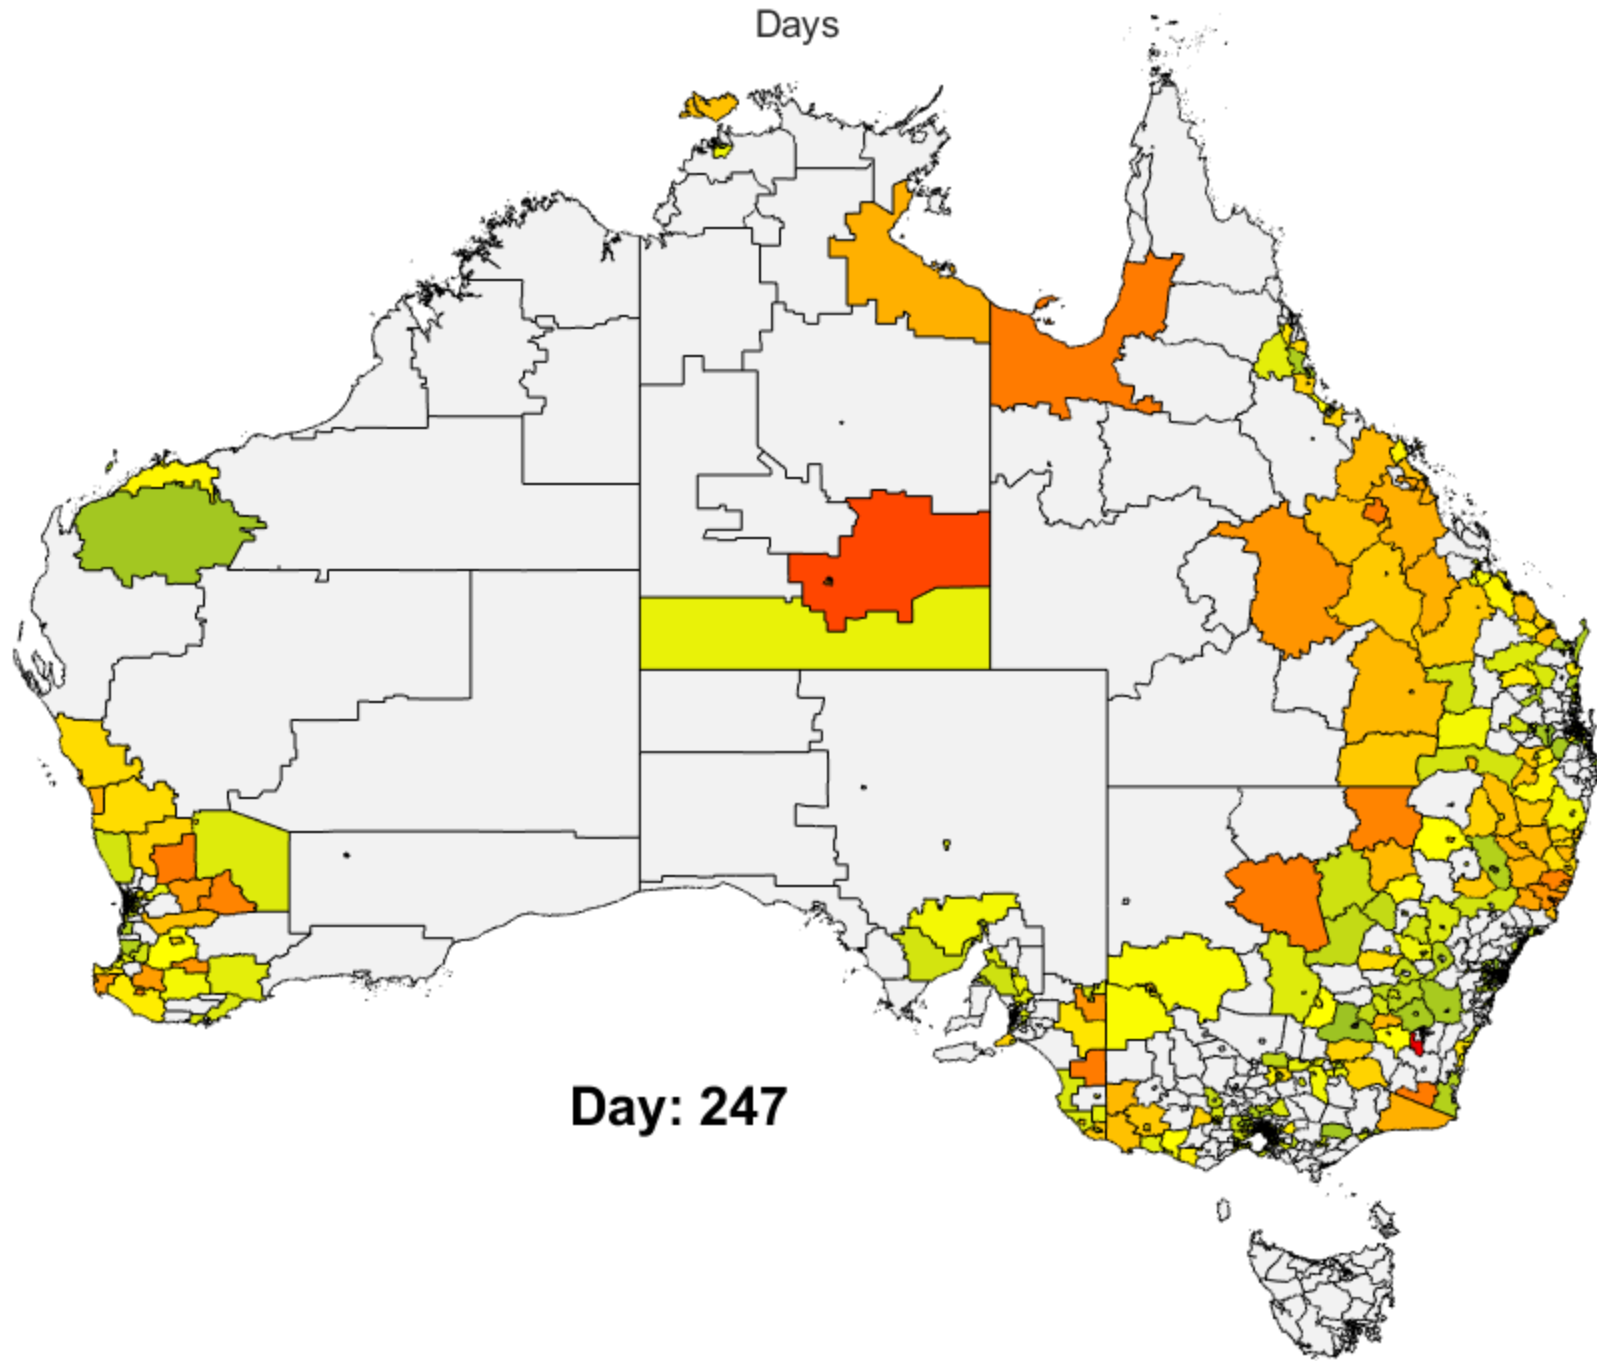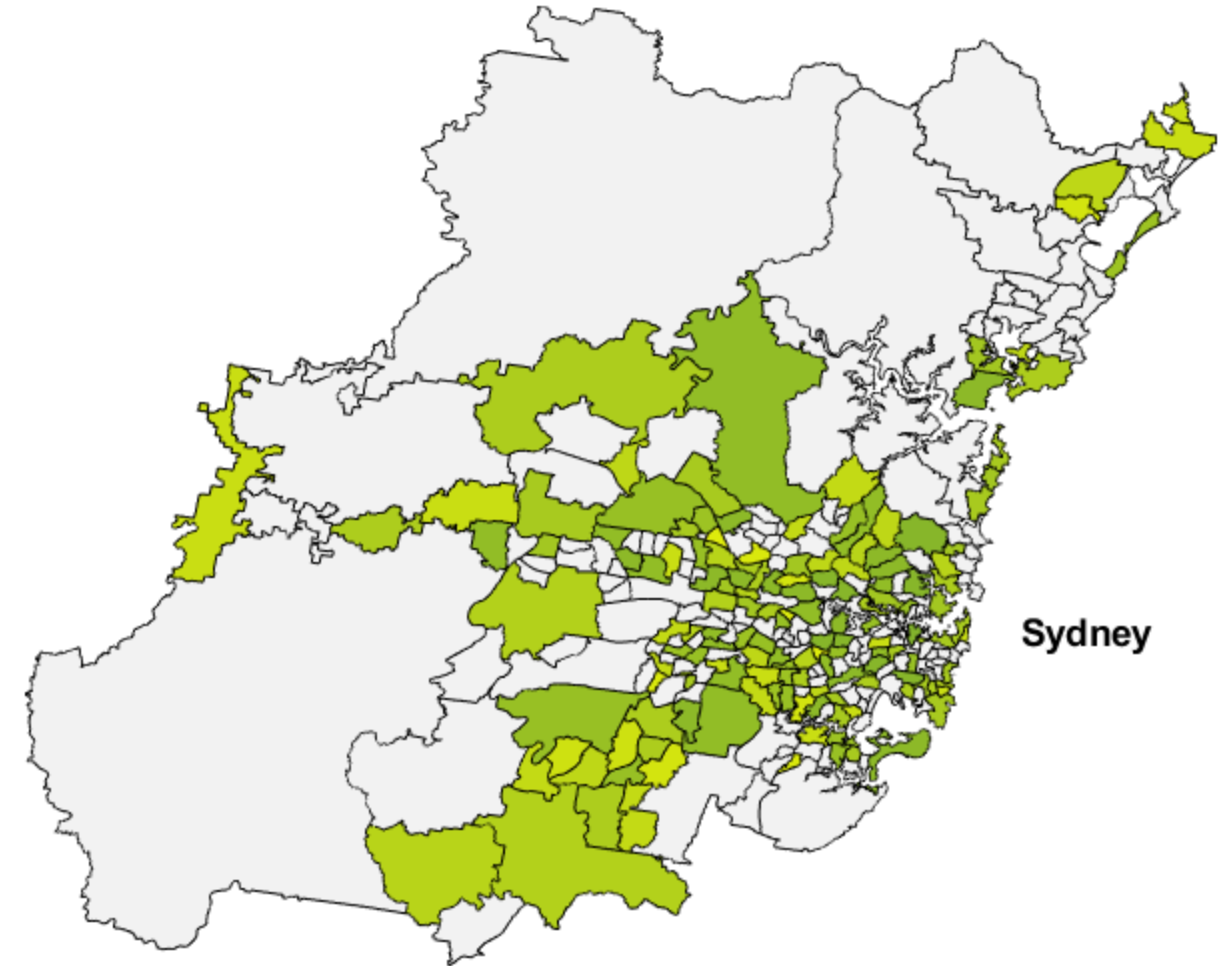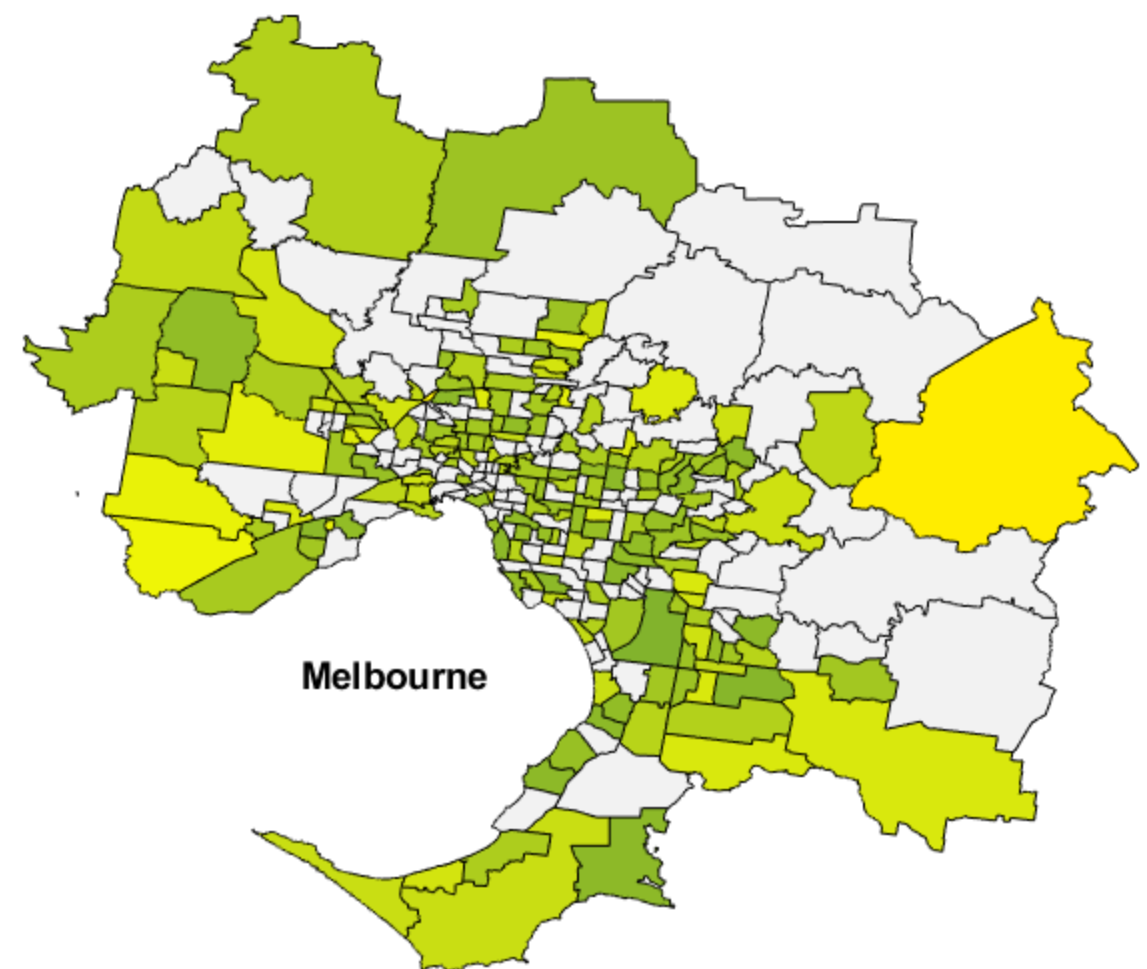

Supplement: rsif20190728supp9.pdf [file rsif20190728supp9.pdf]
