# Supplementary material
Source: PubMed Central journal article supplement (PMC7211476)
Supplement: rsif20190728supp4.pdf [file rsif20190728supp4.pdf]

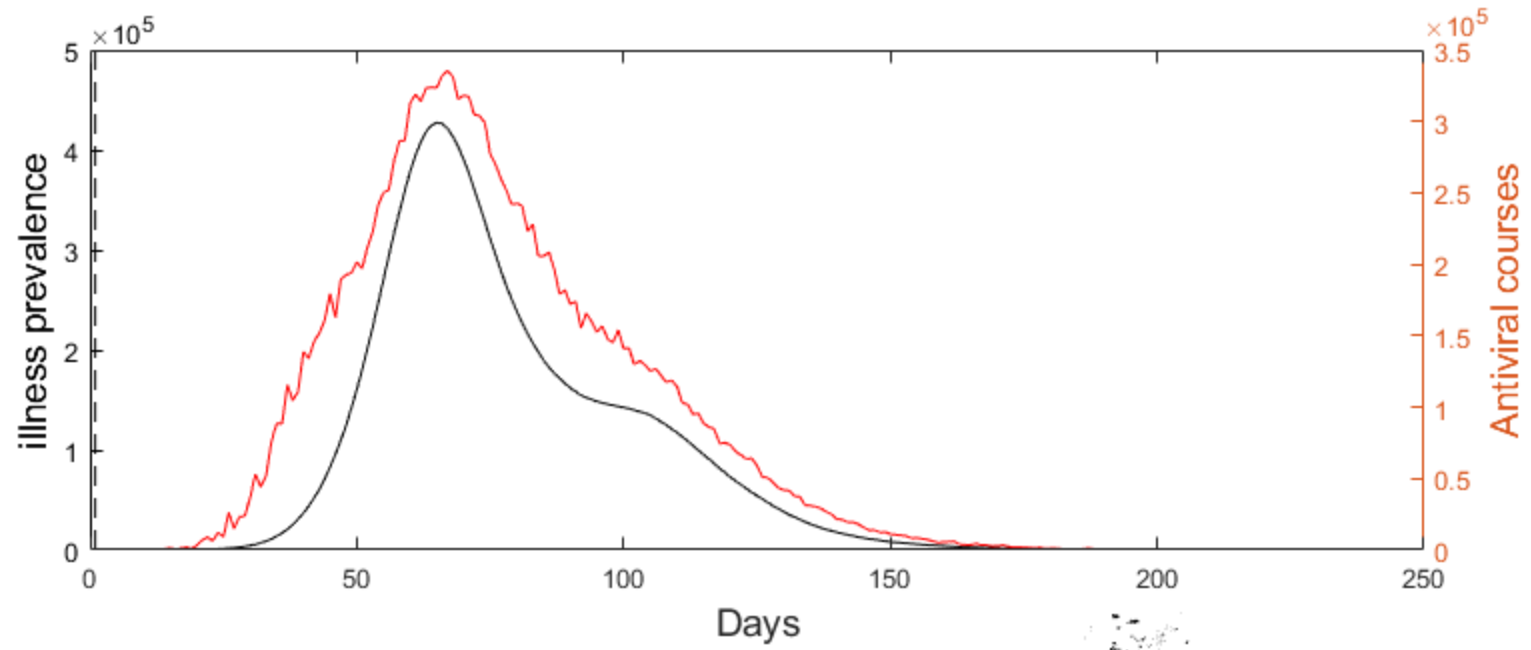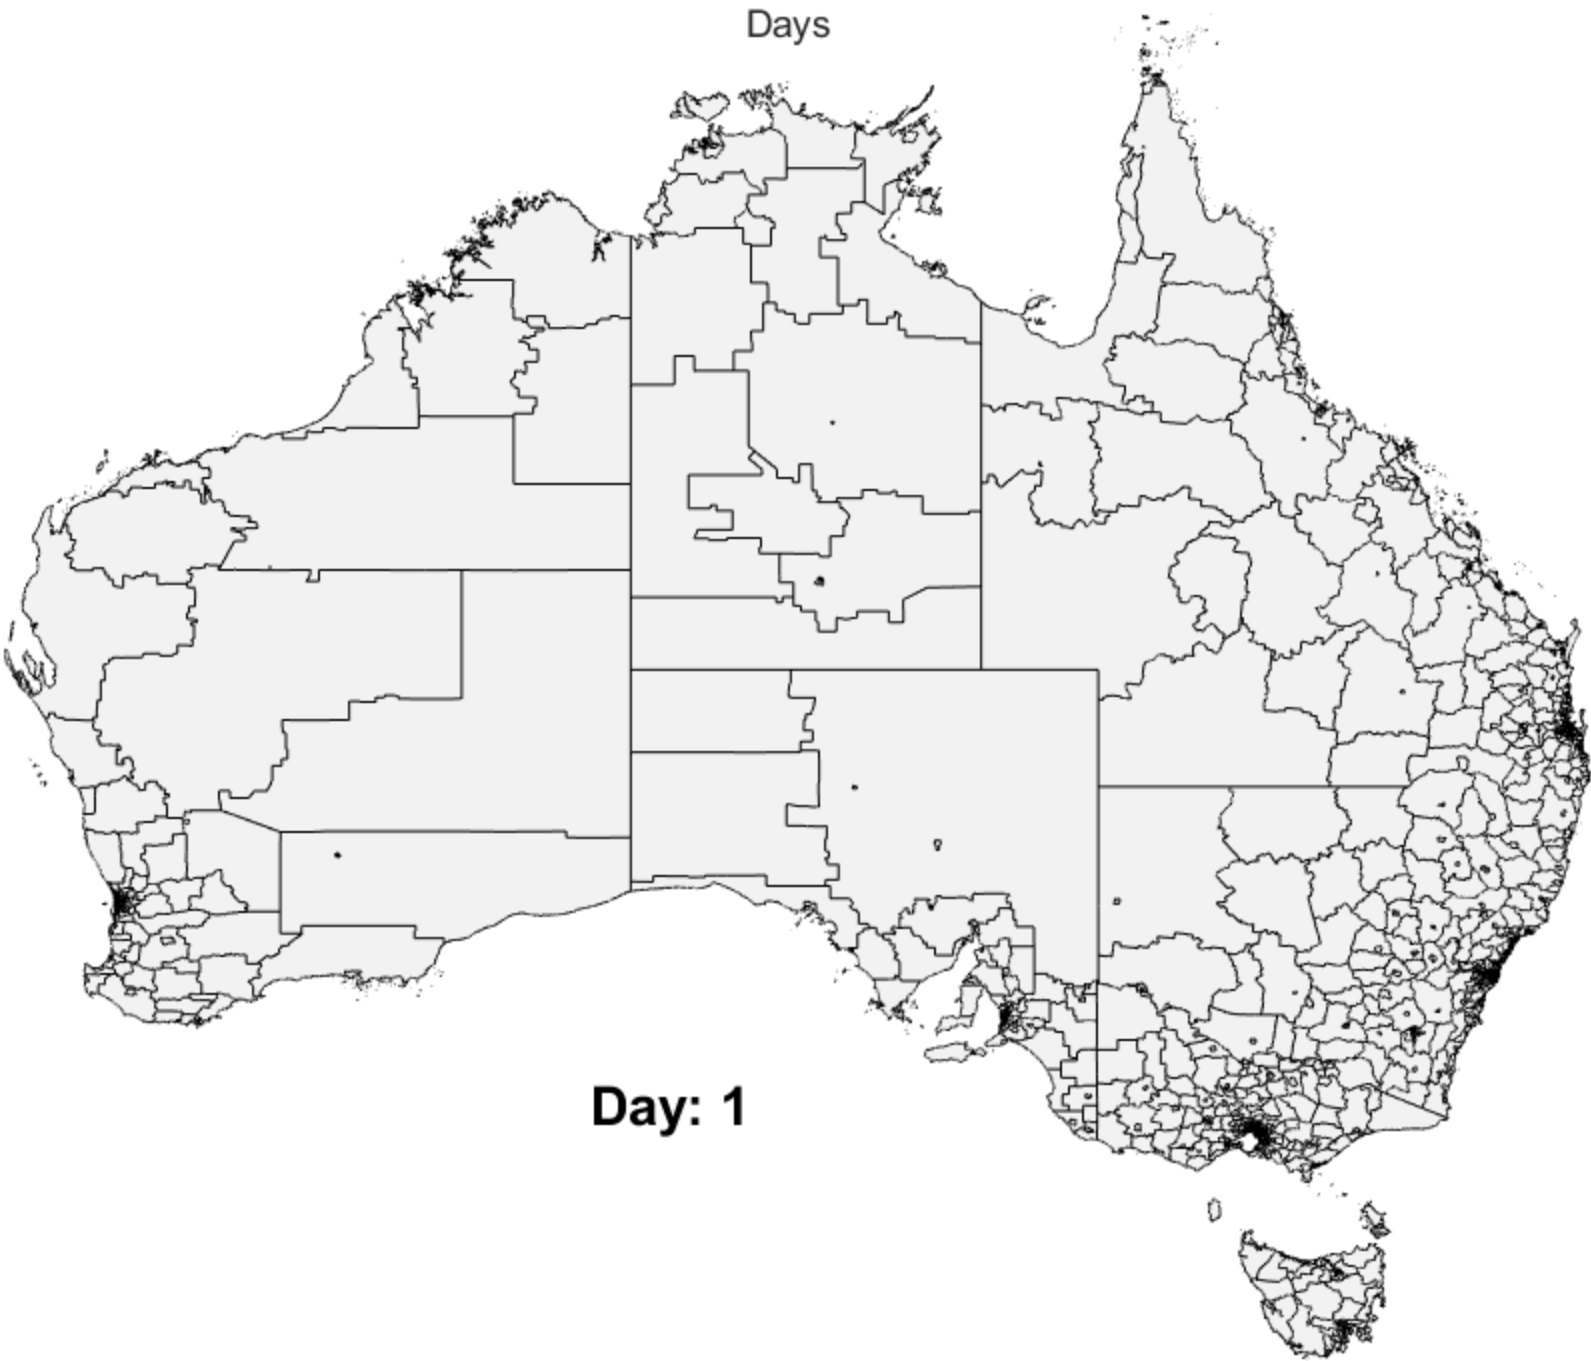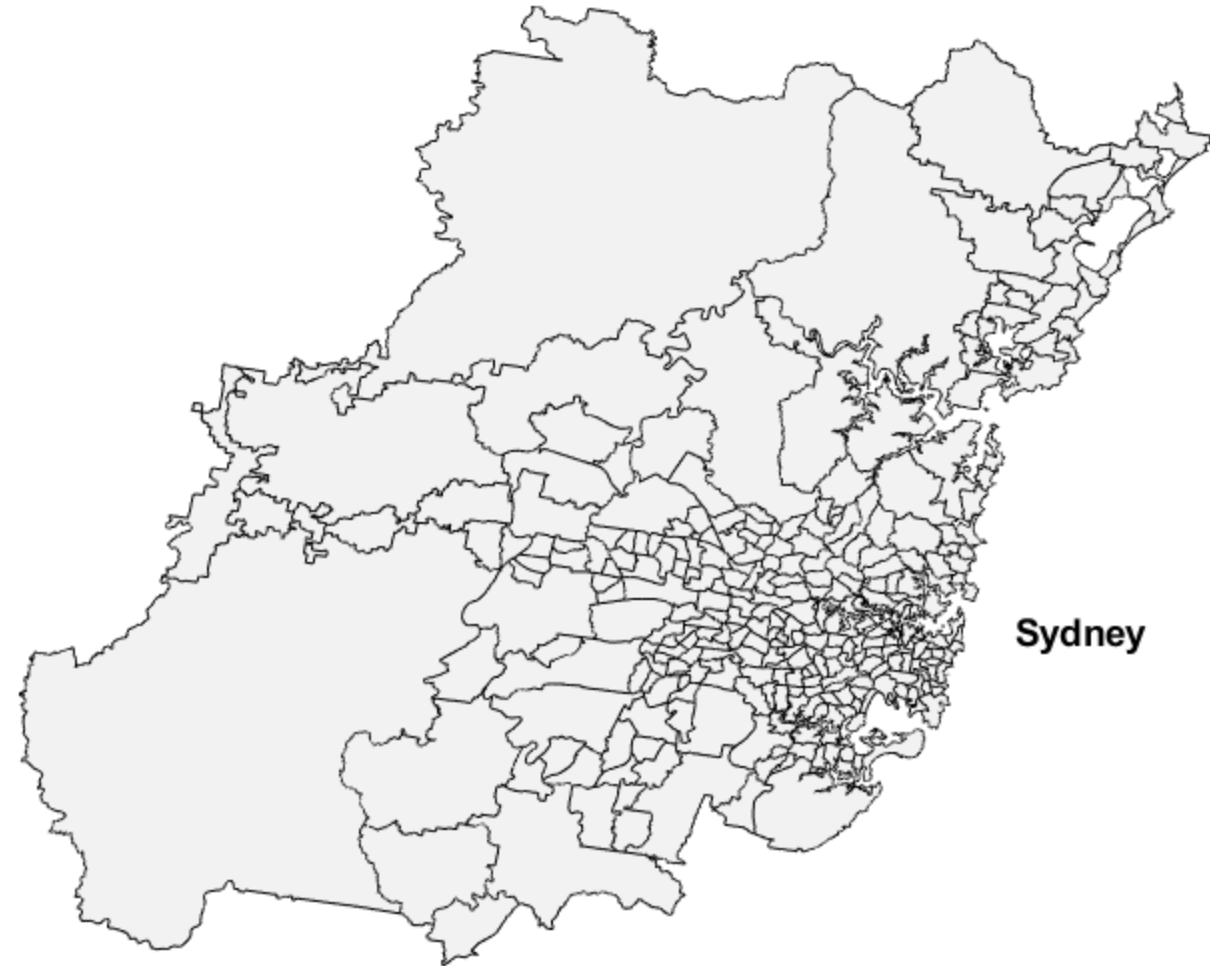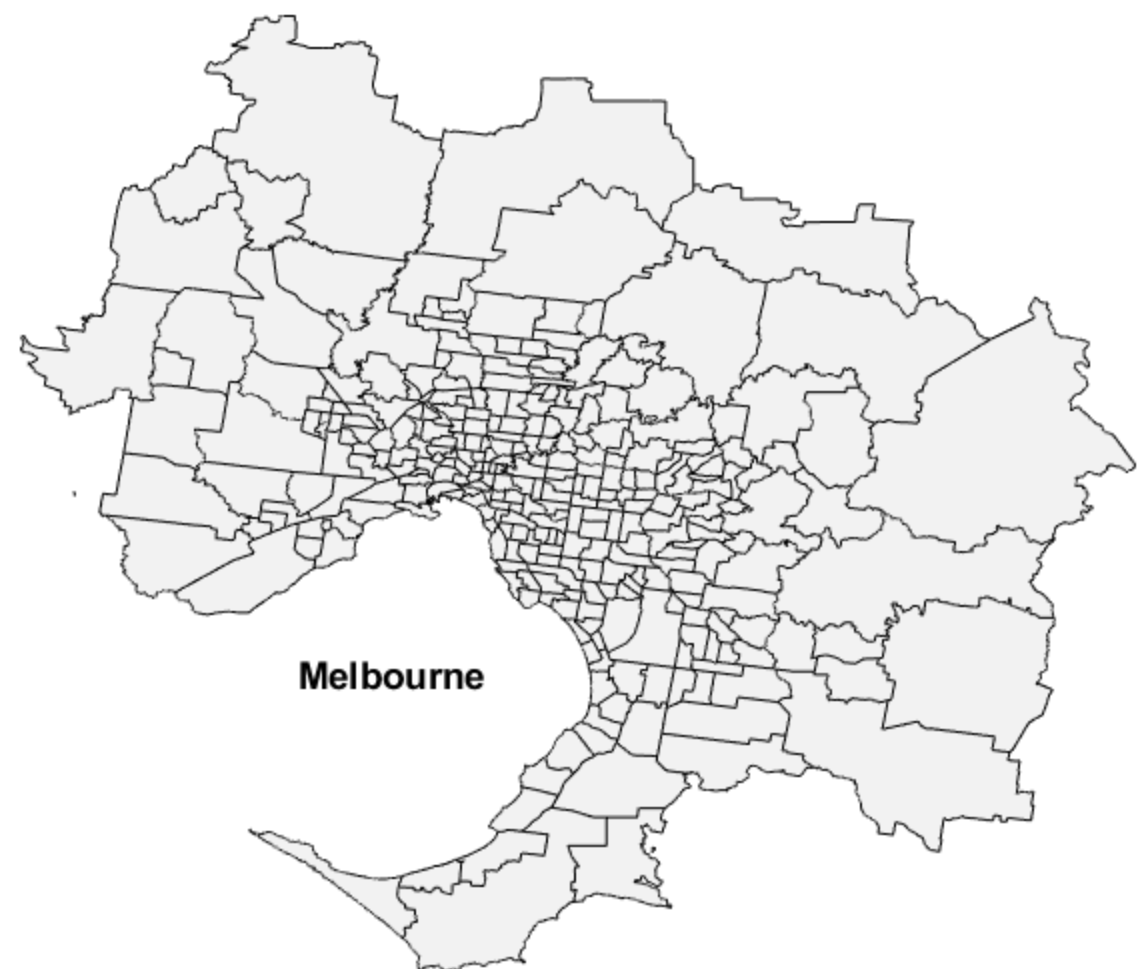

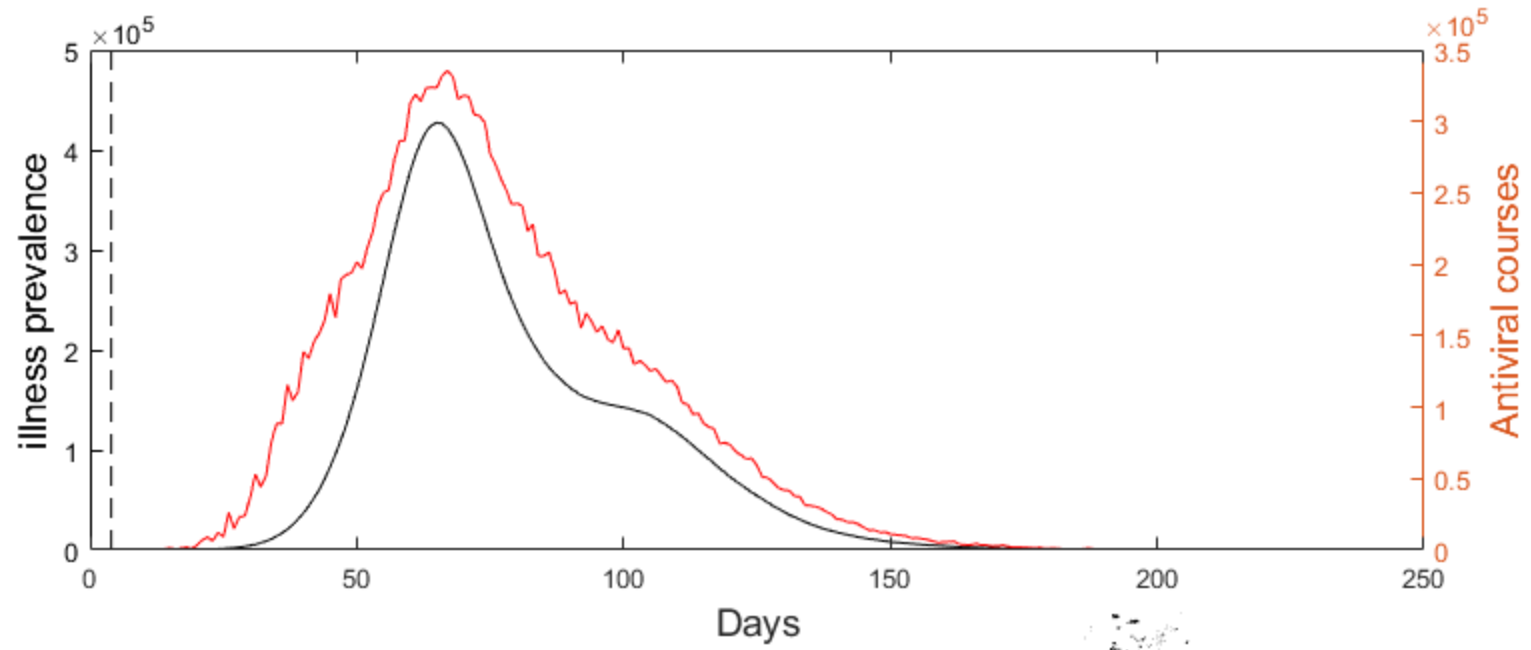

Days

Day: 4

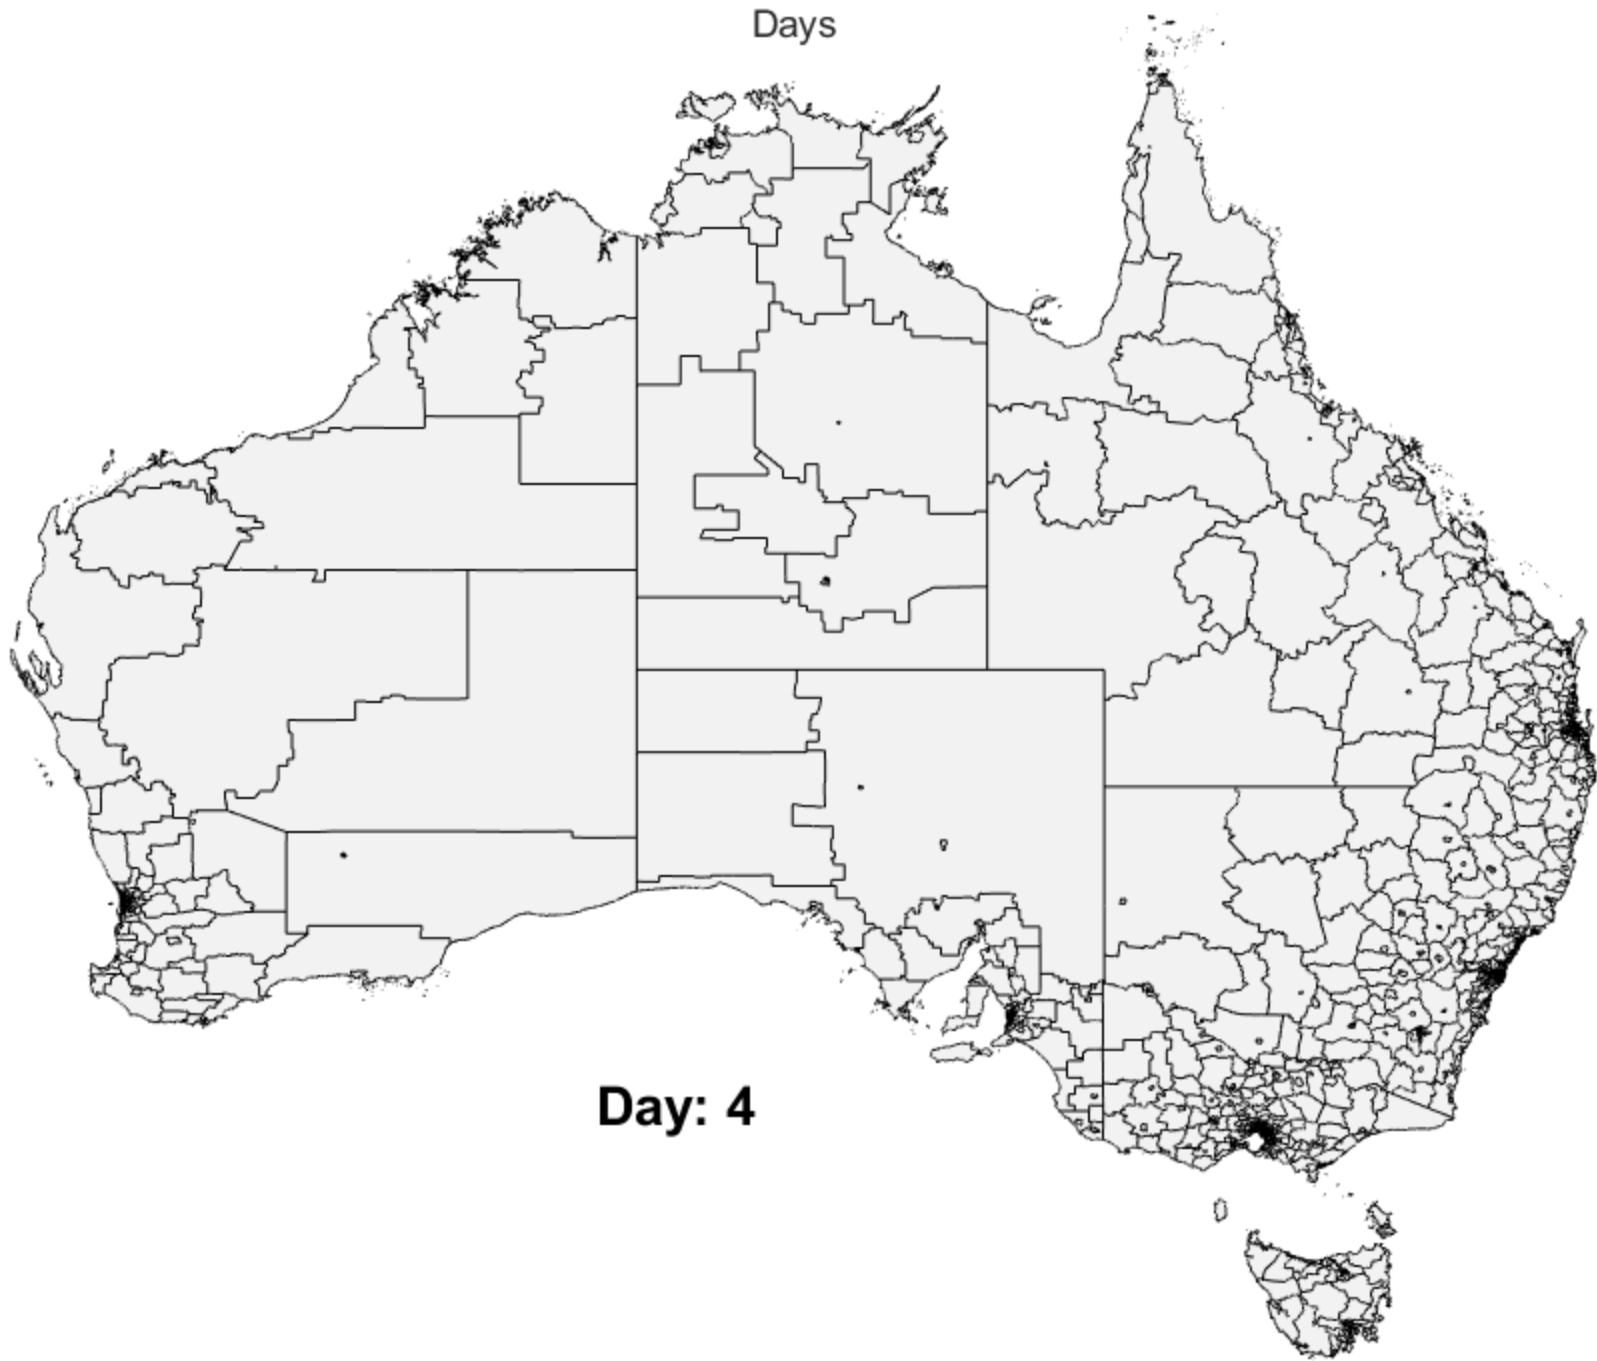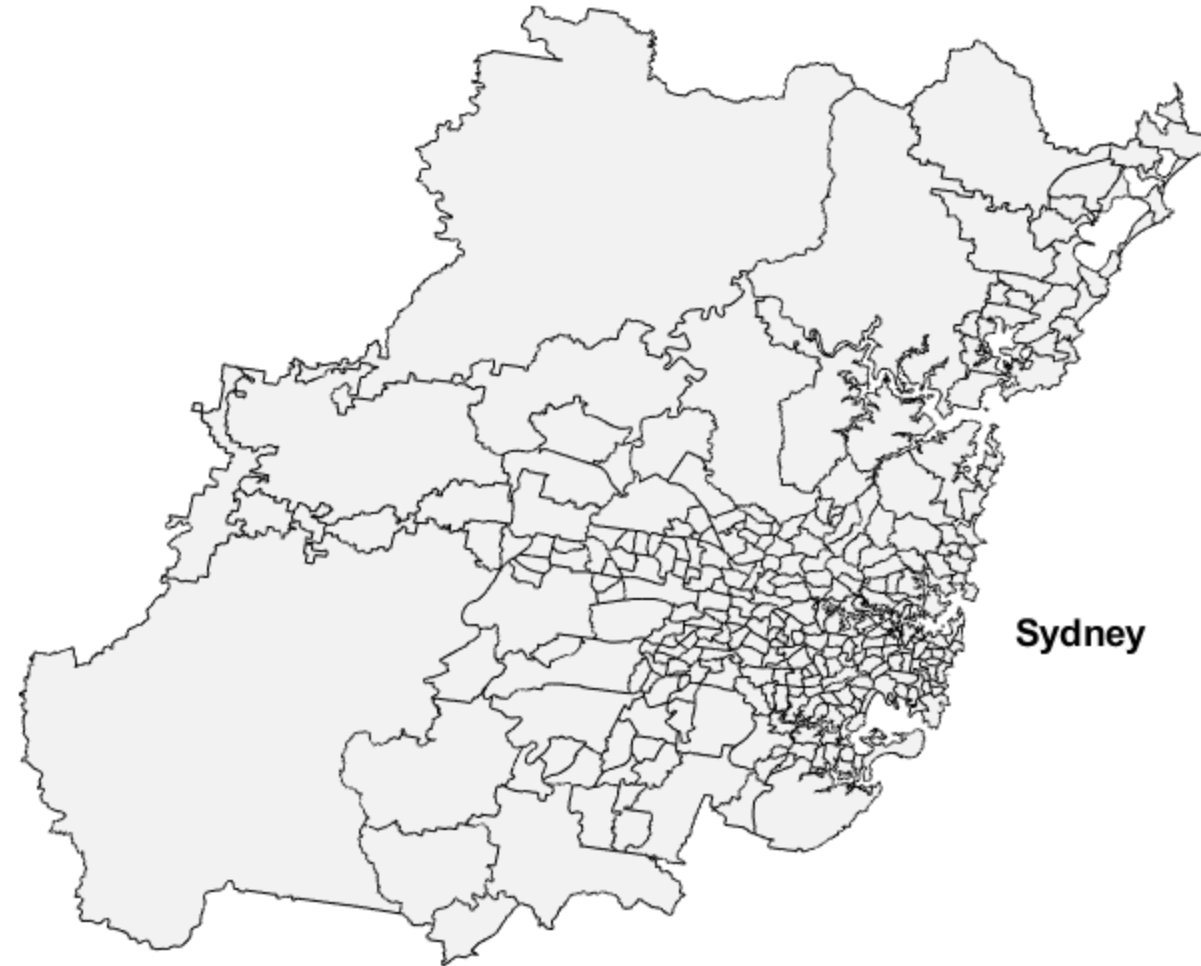

Sydney

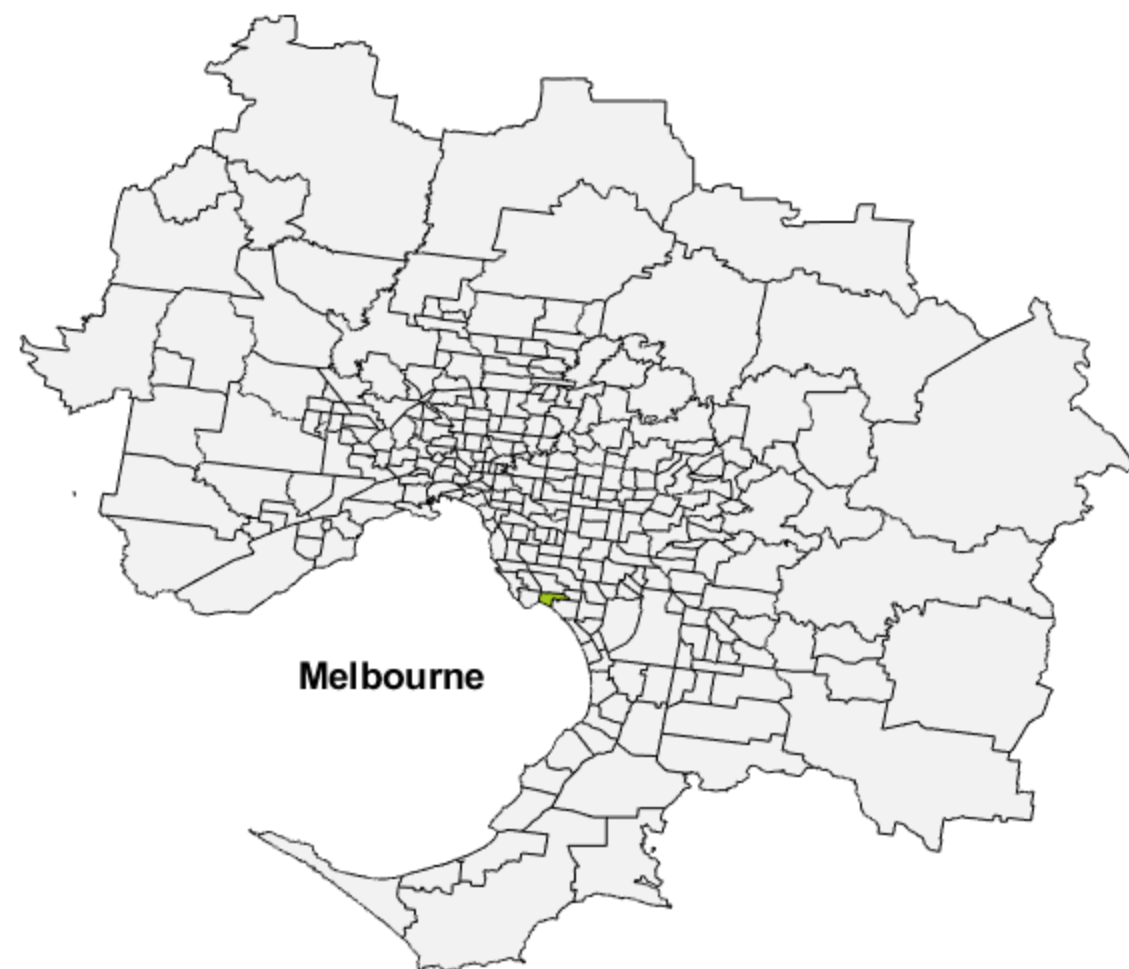

Melbourne

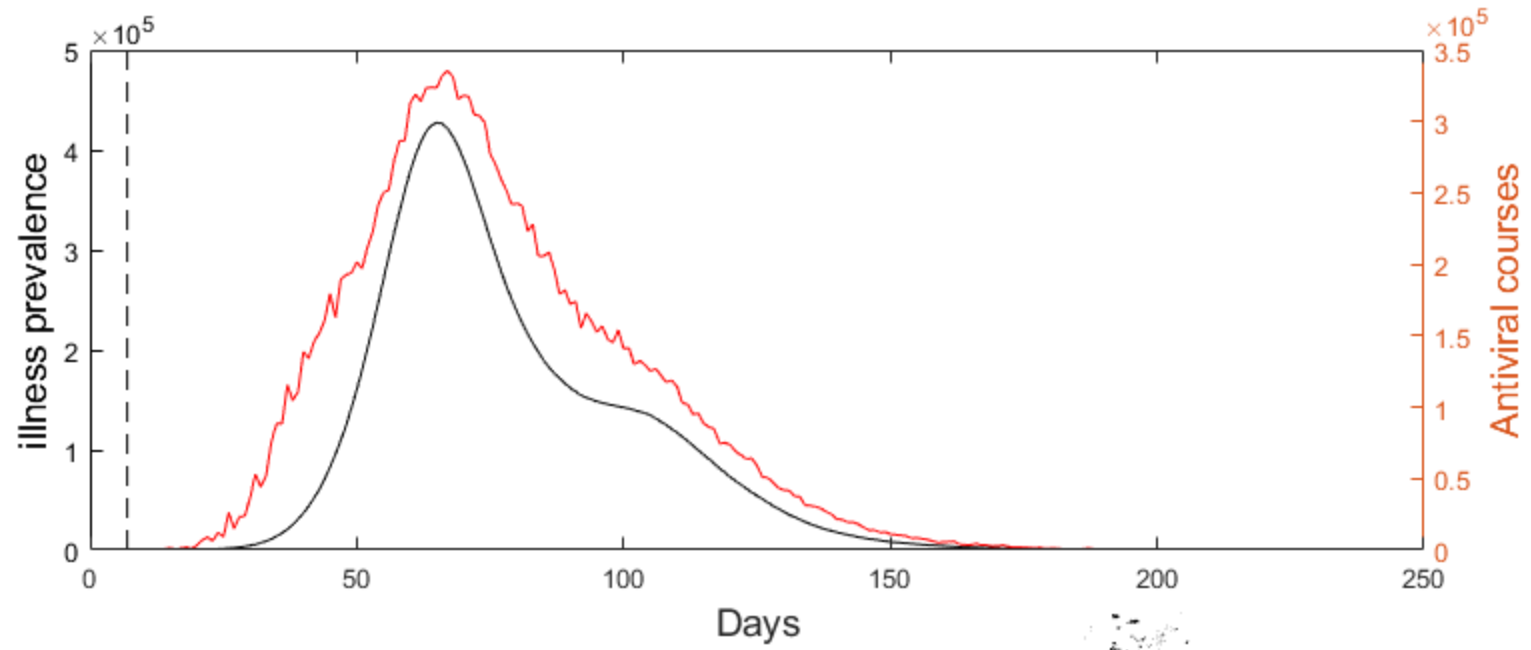

Days

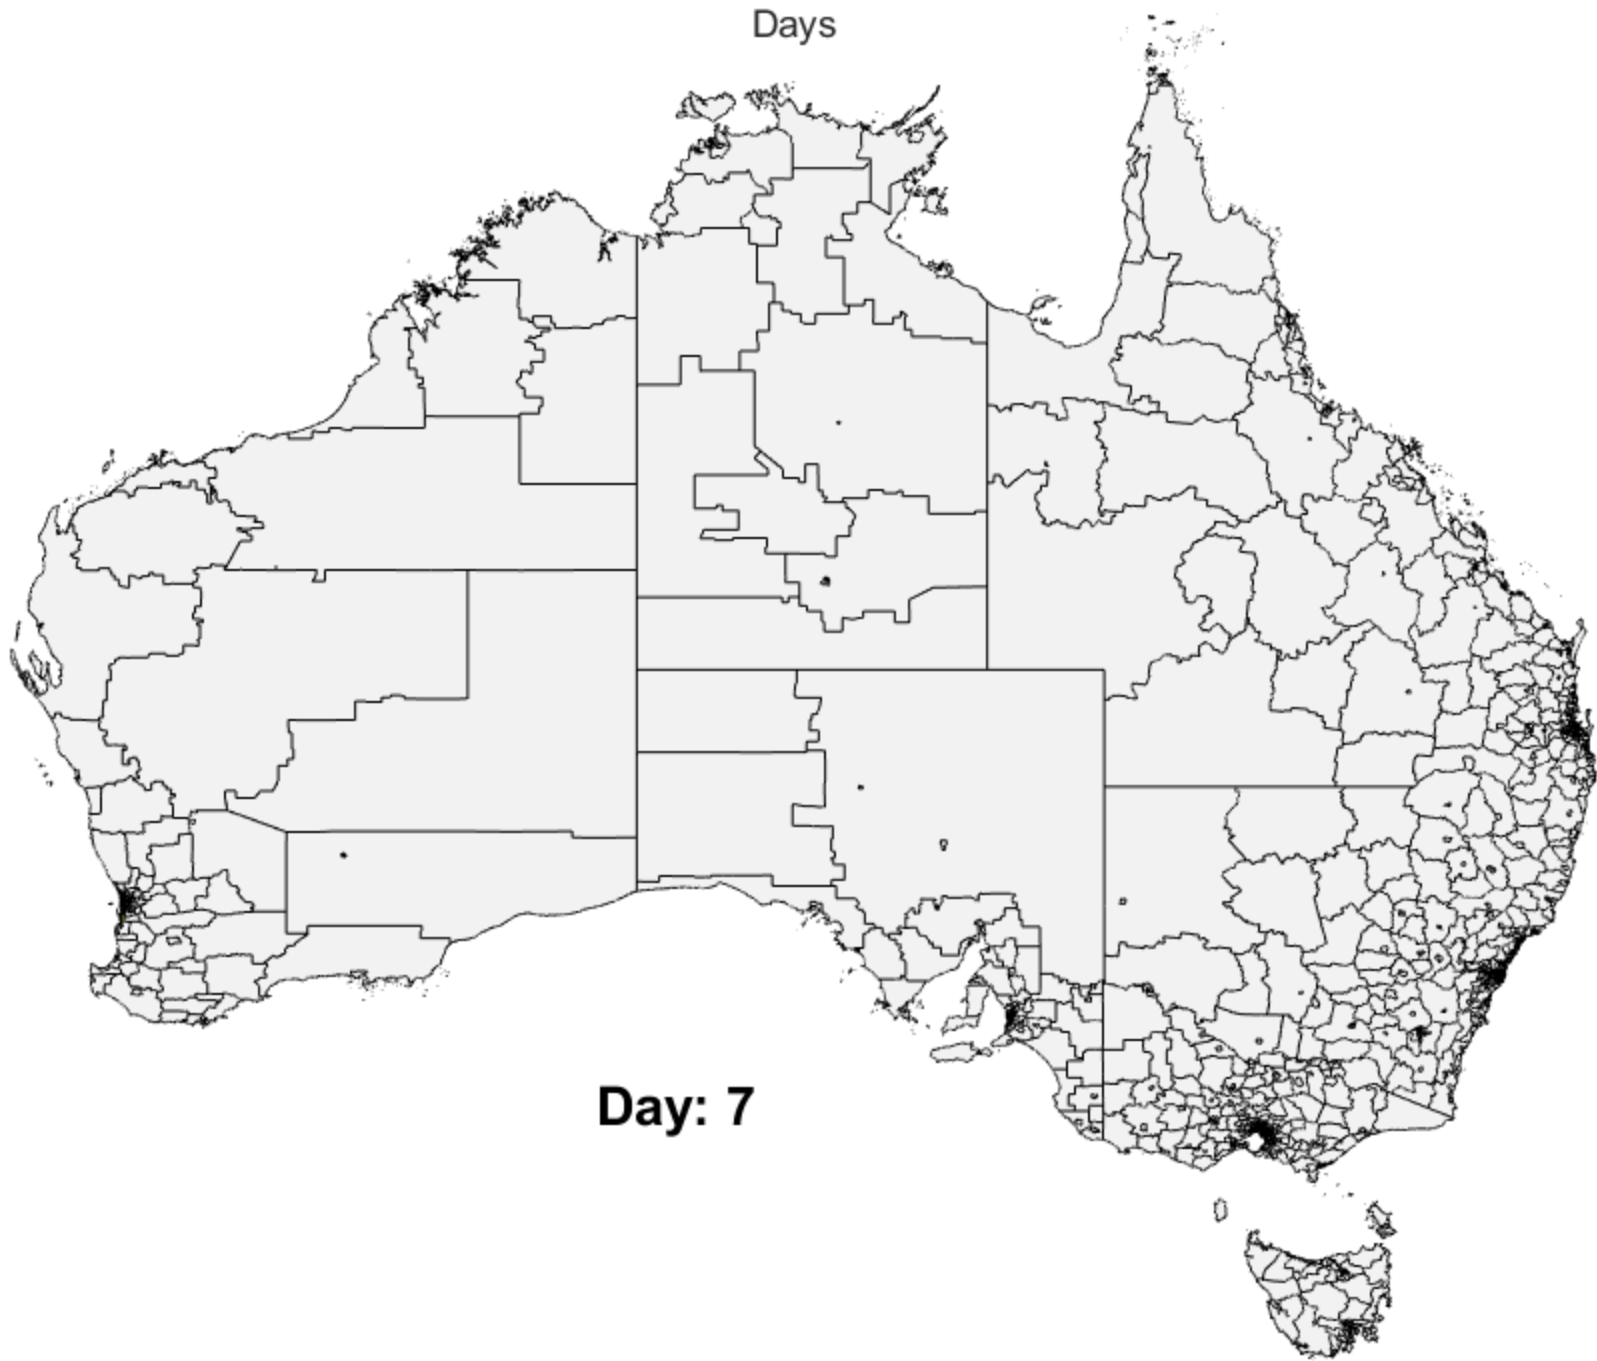

Day: 7

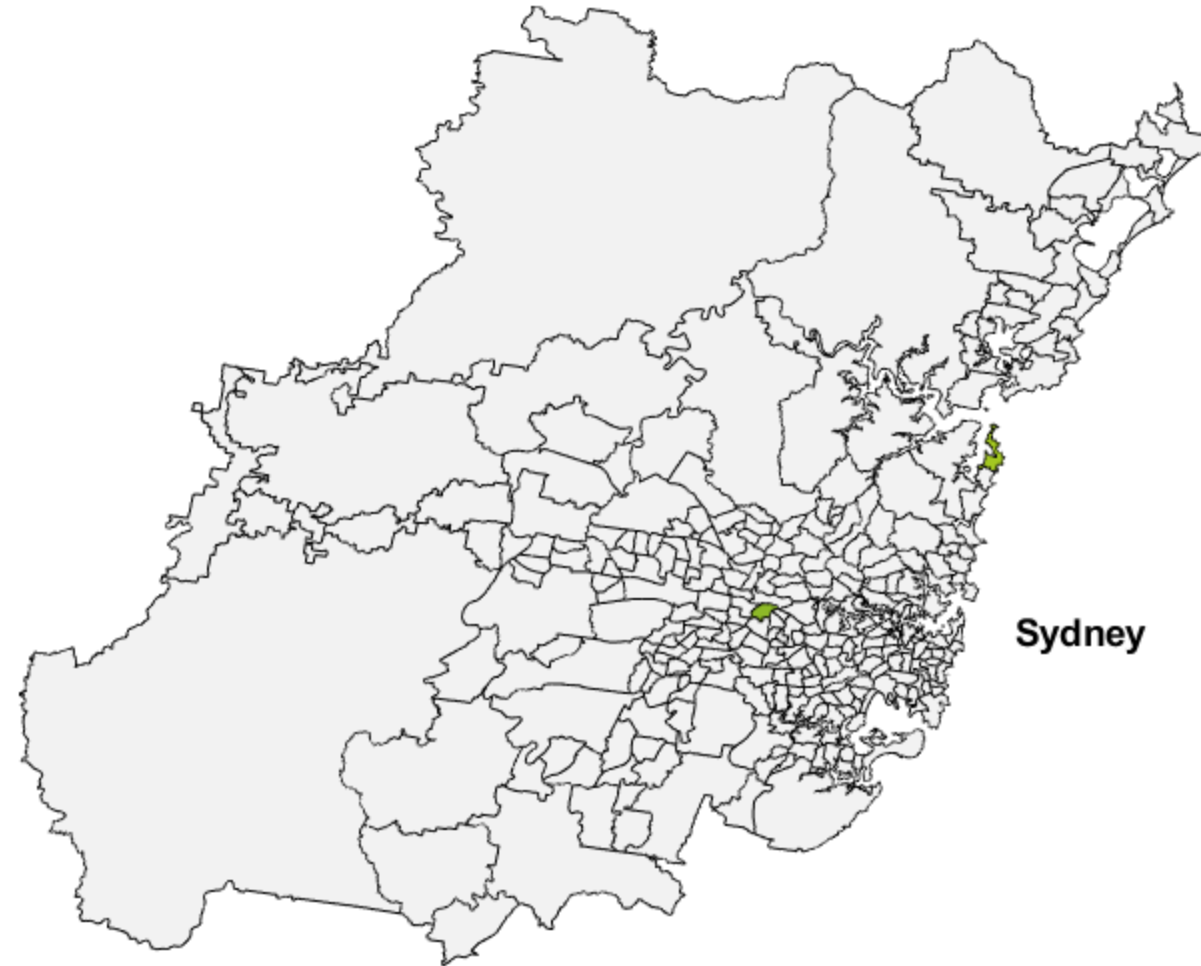

Sydney

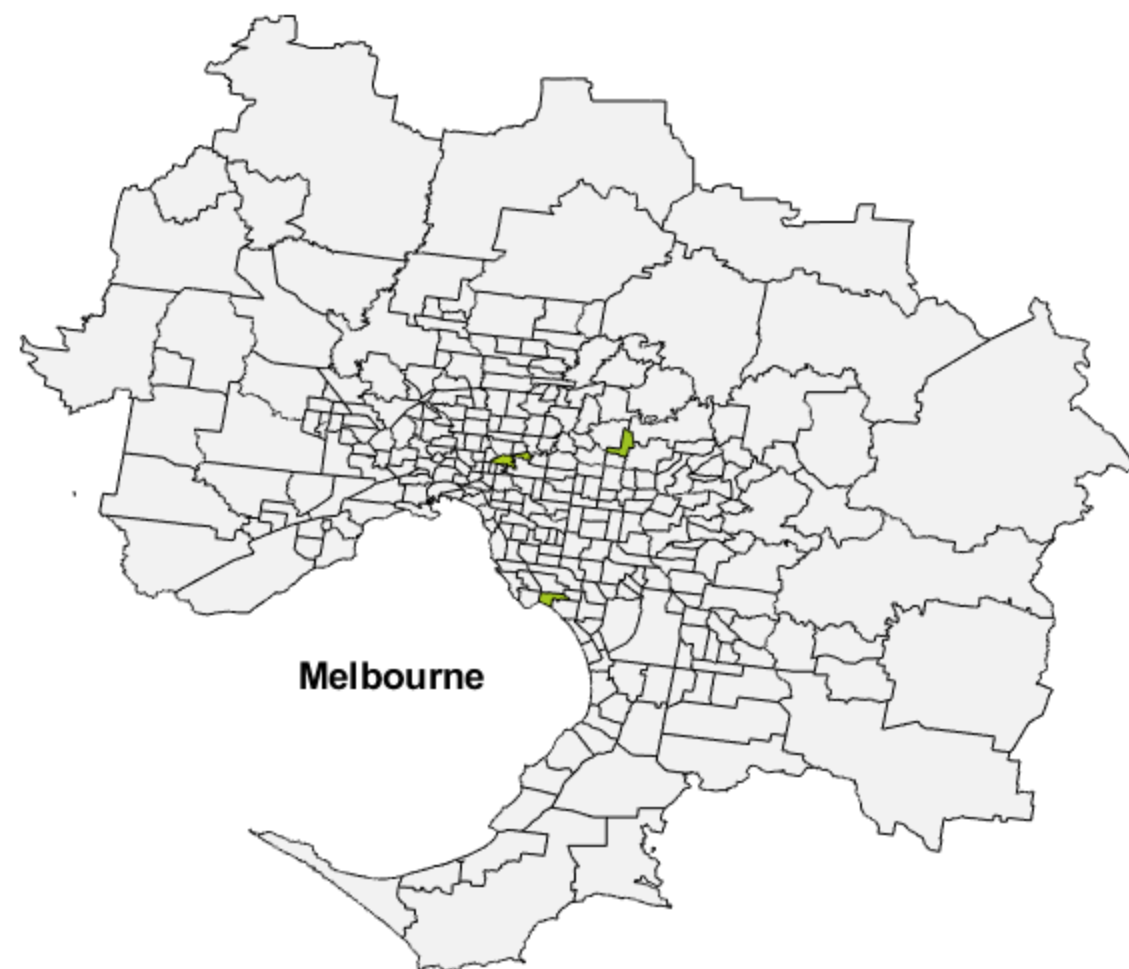

Melbourne



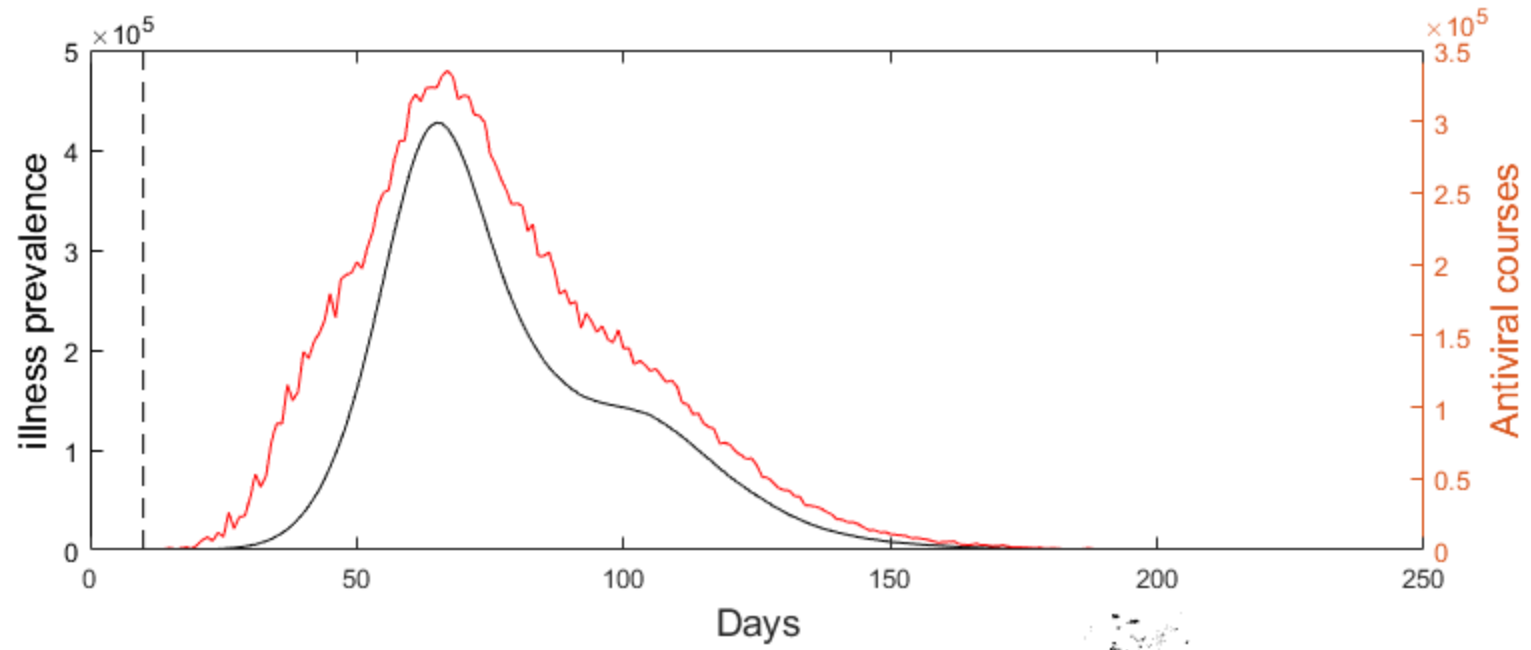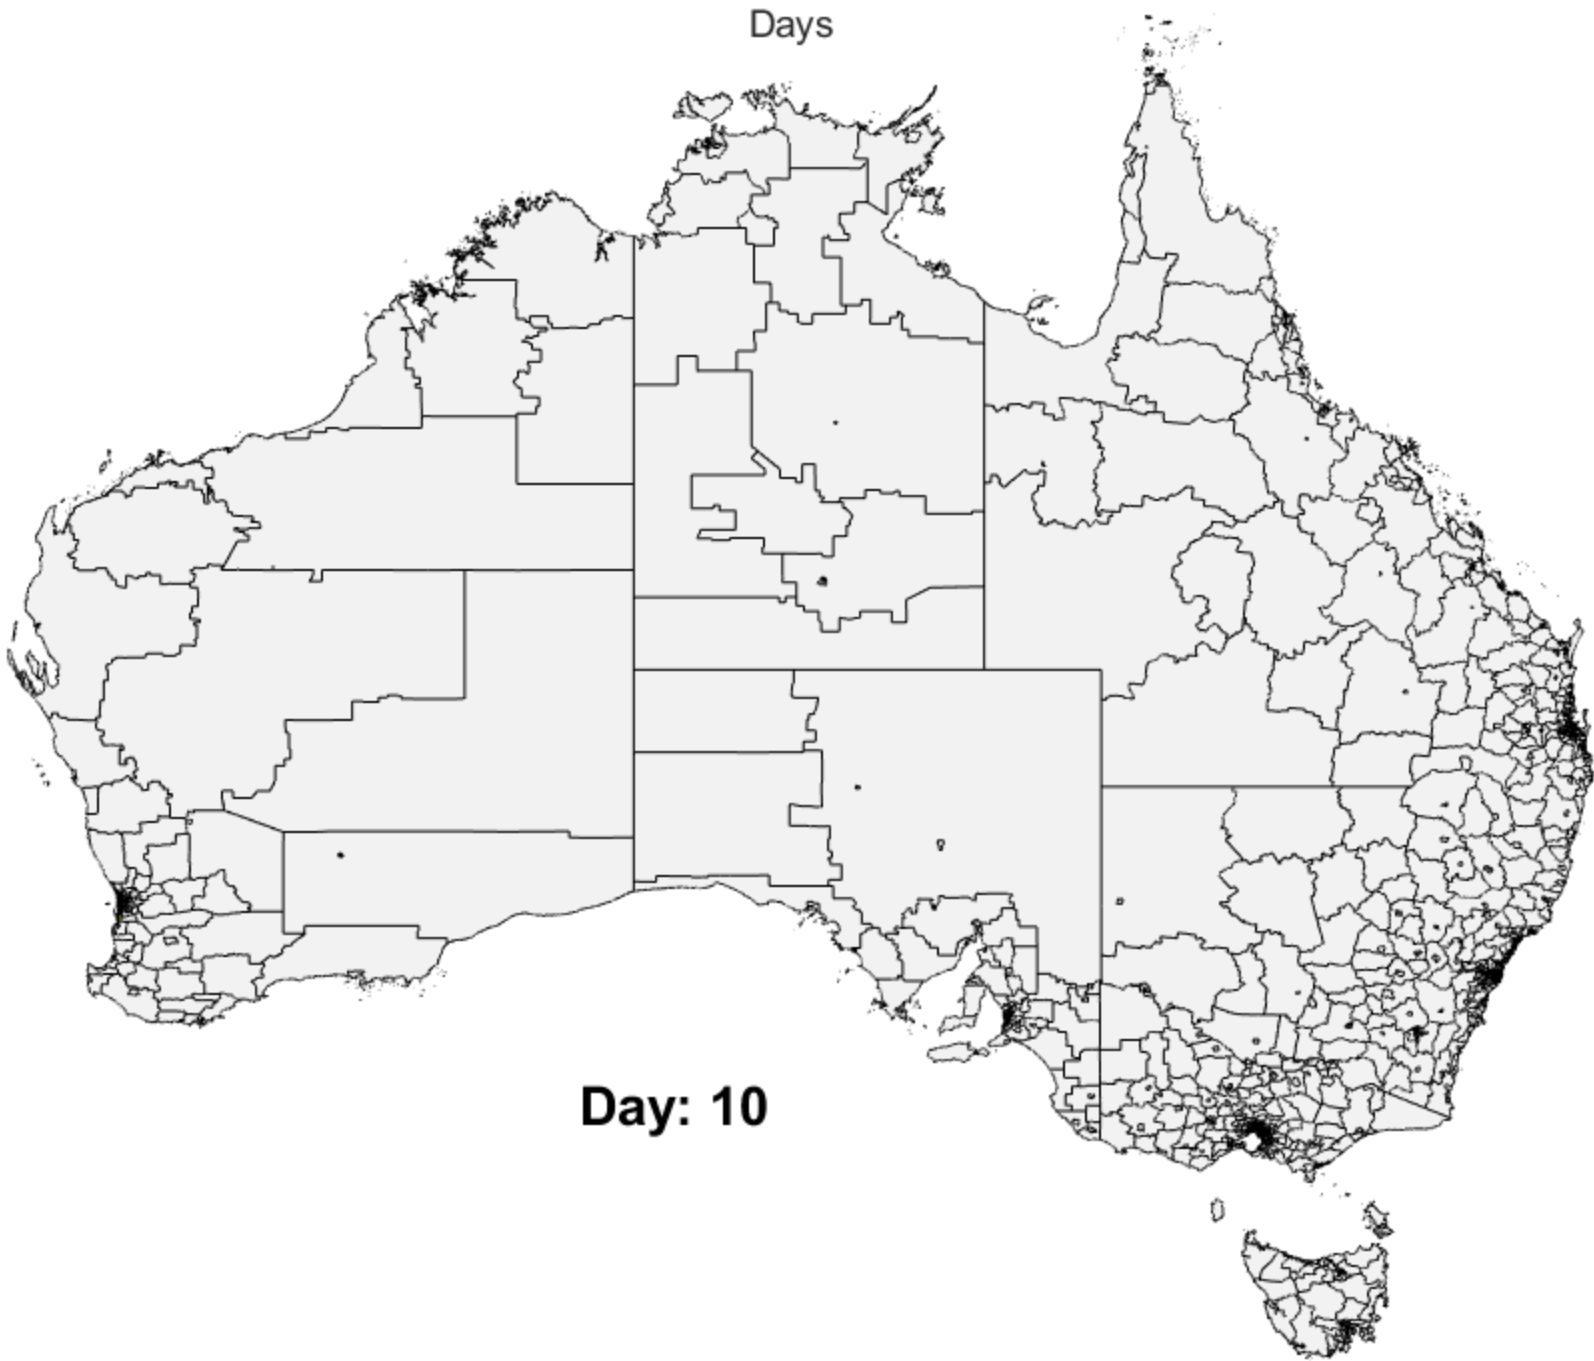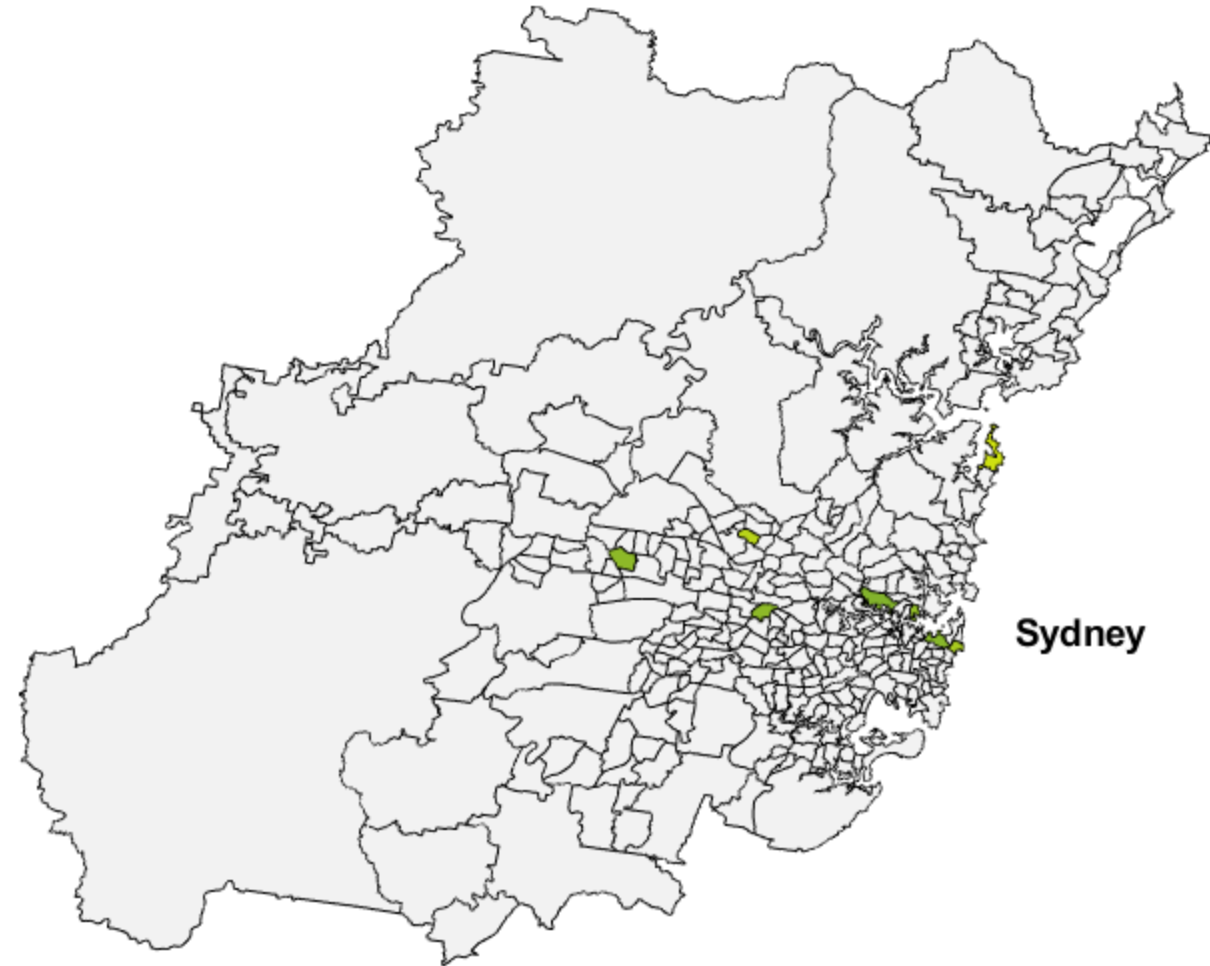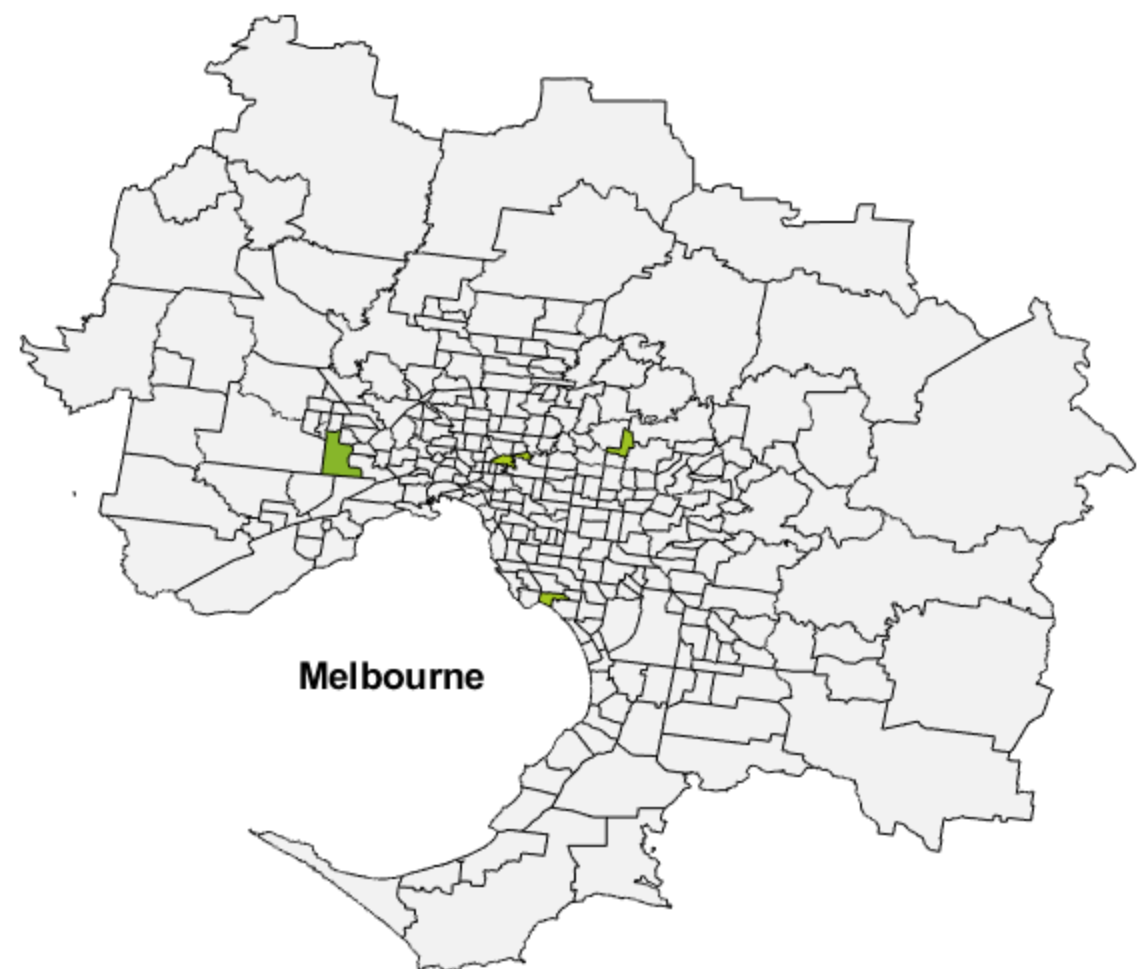



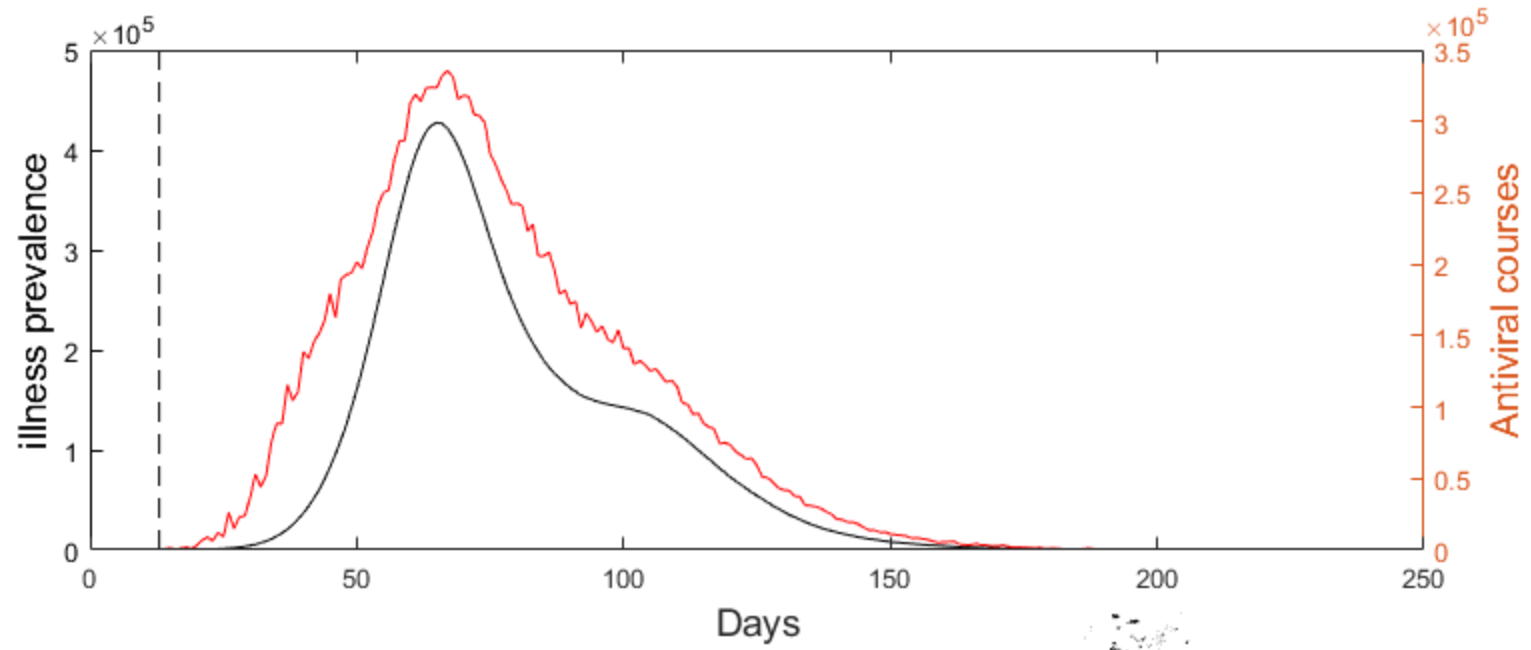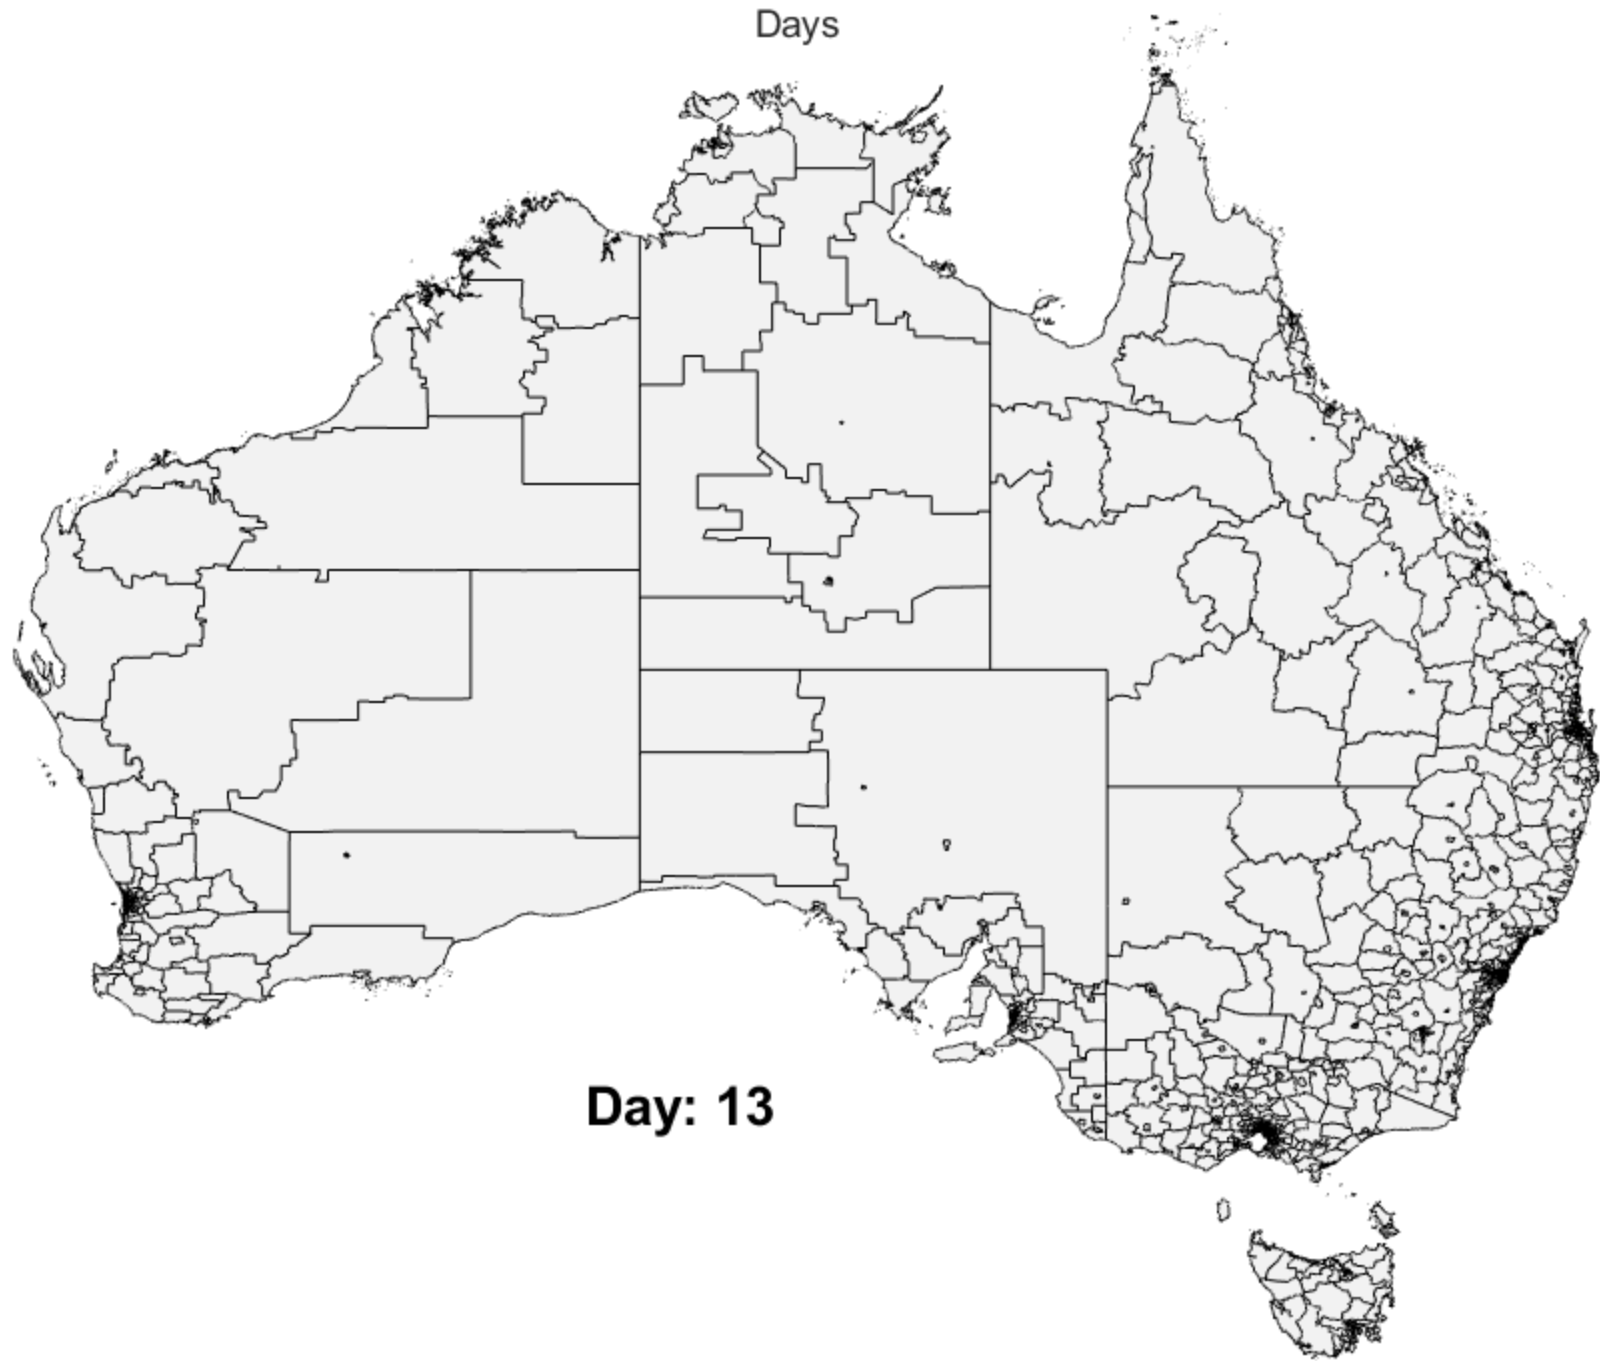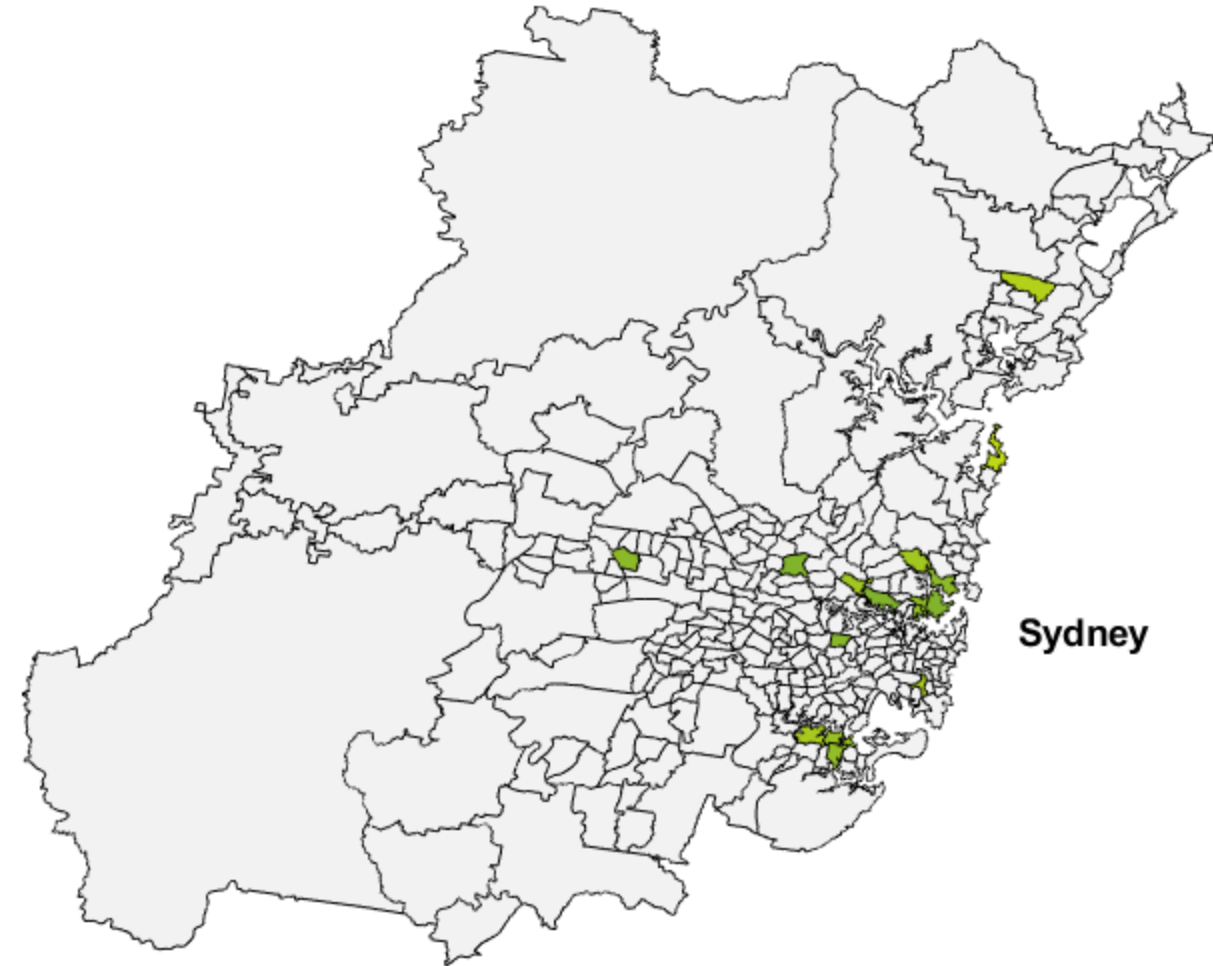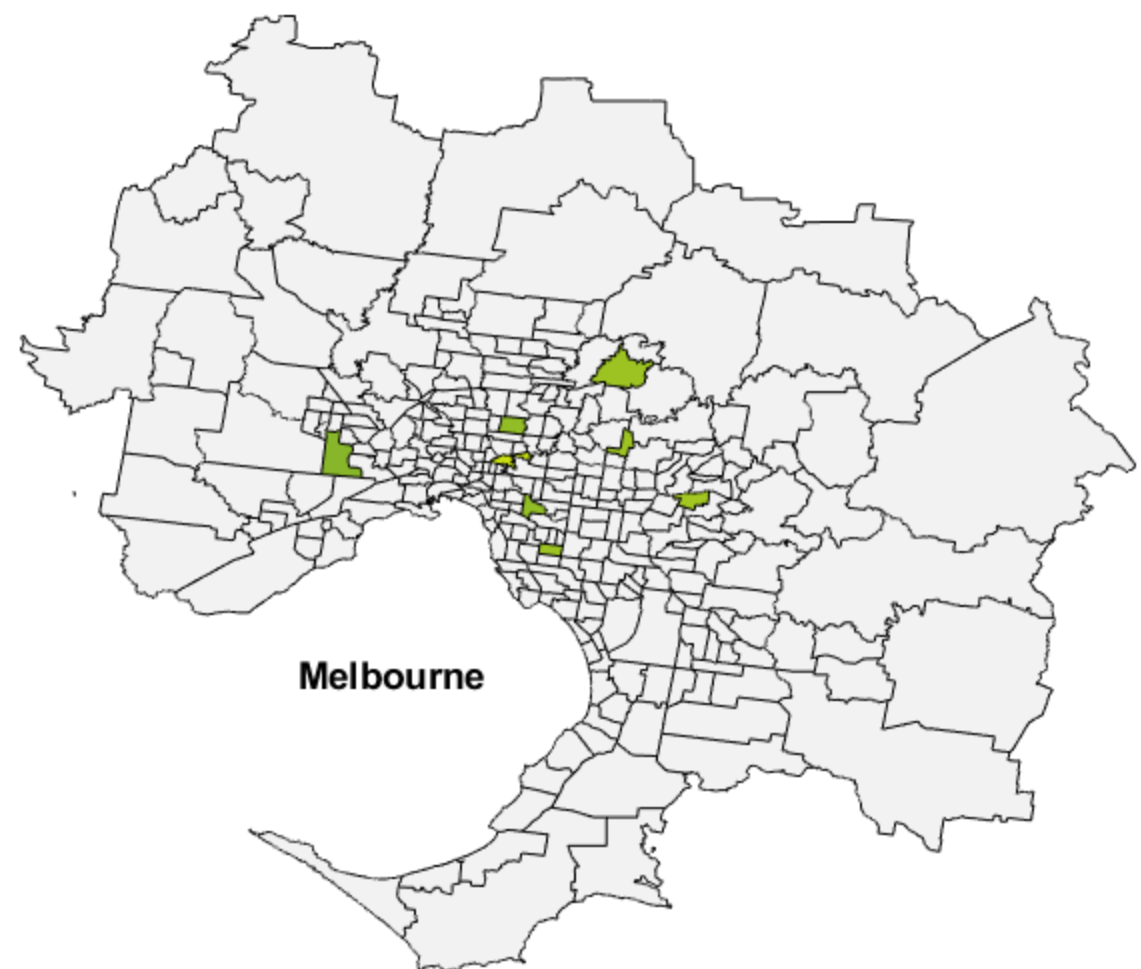

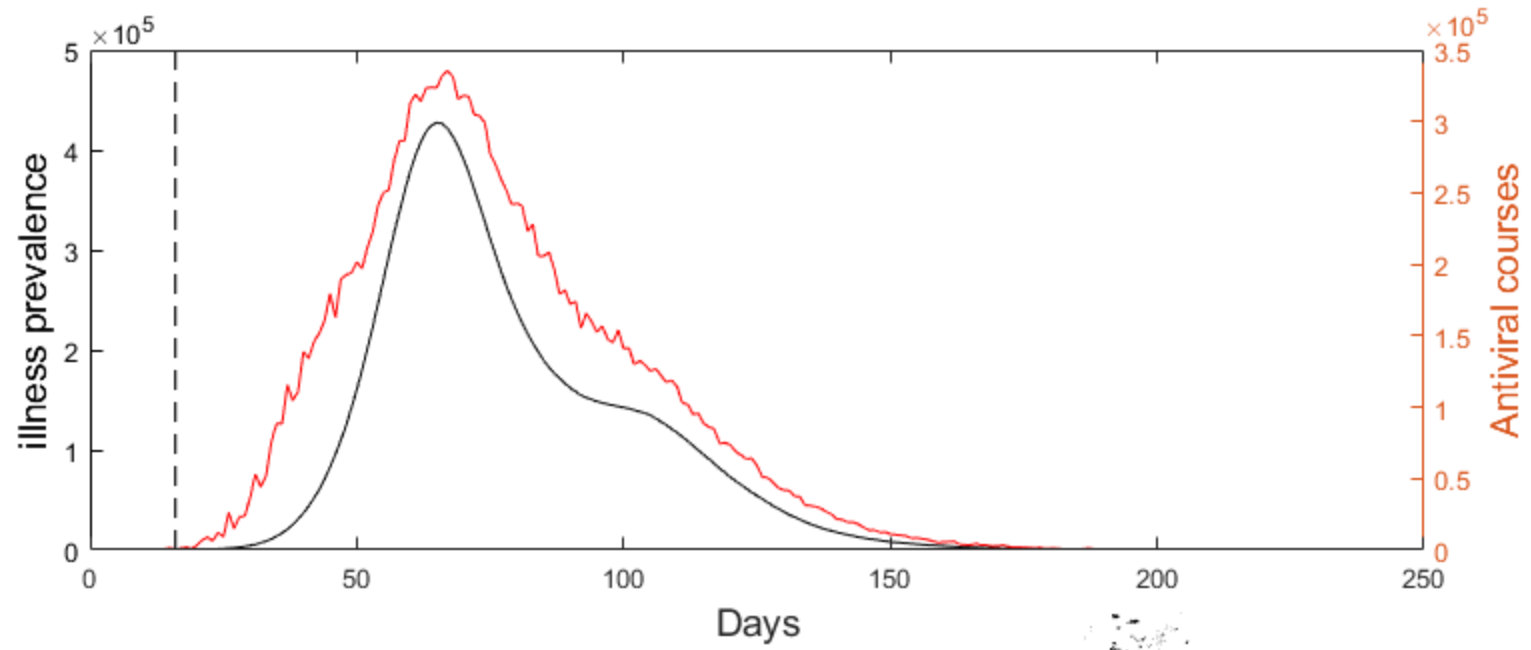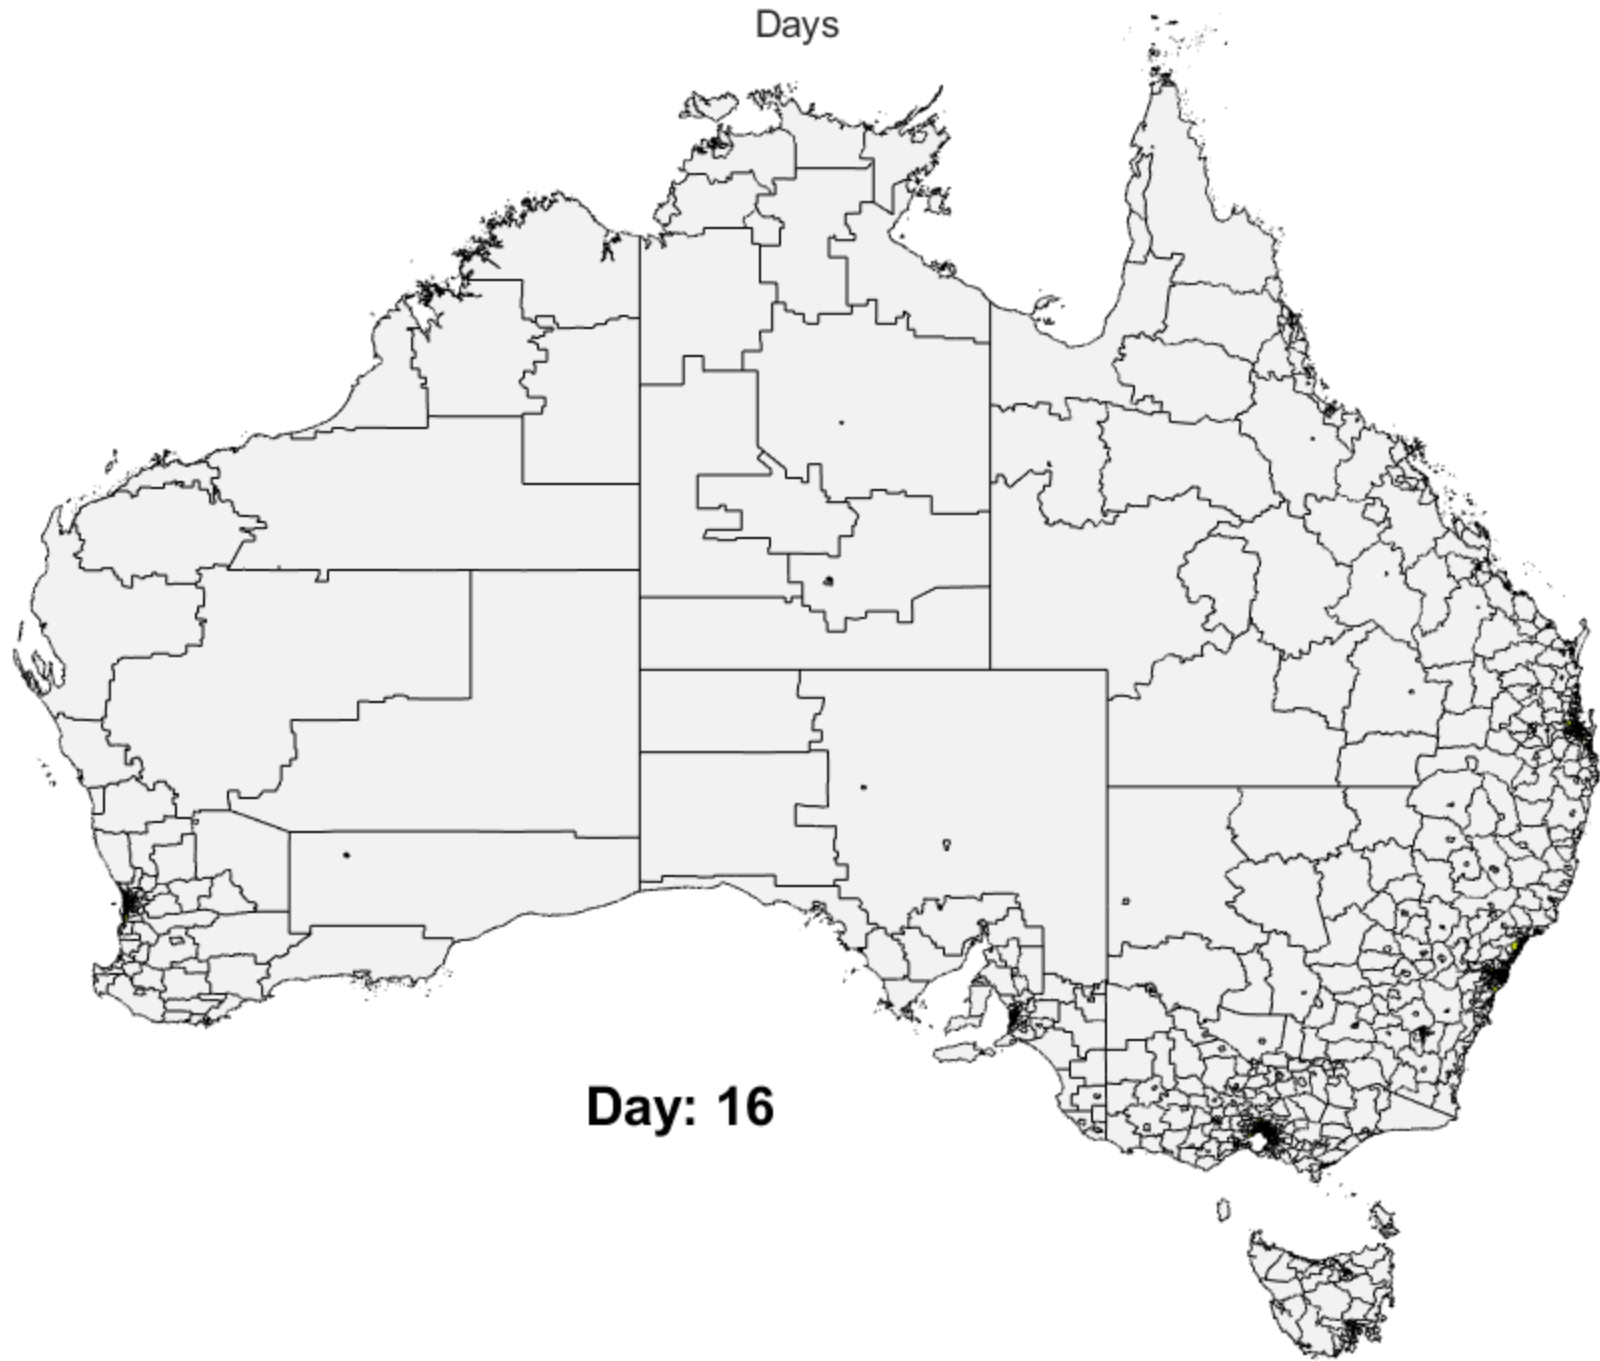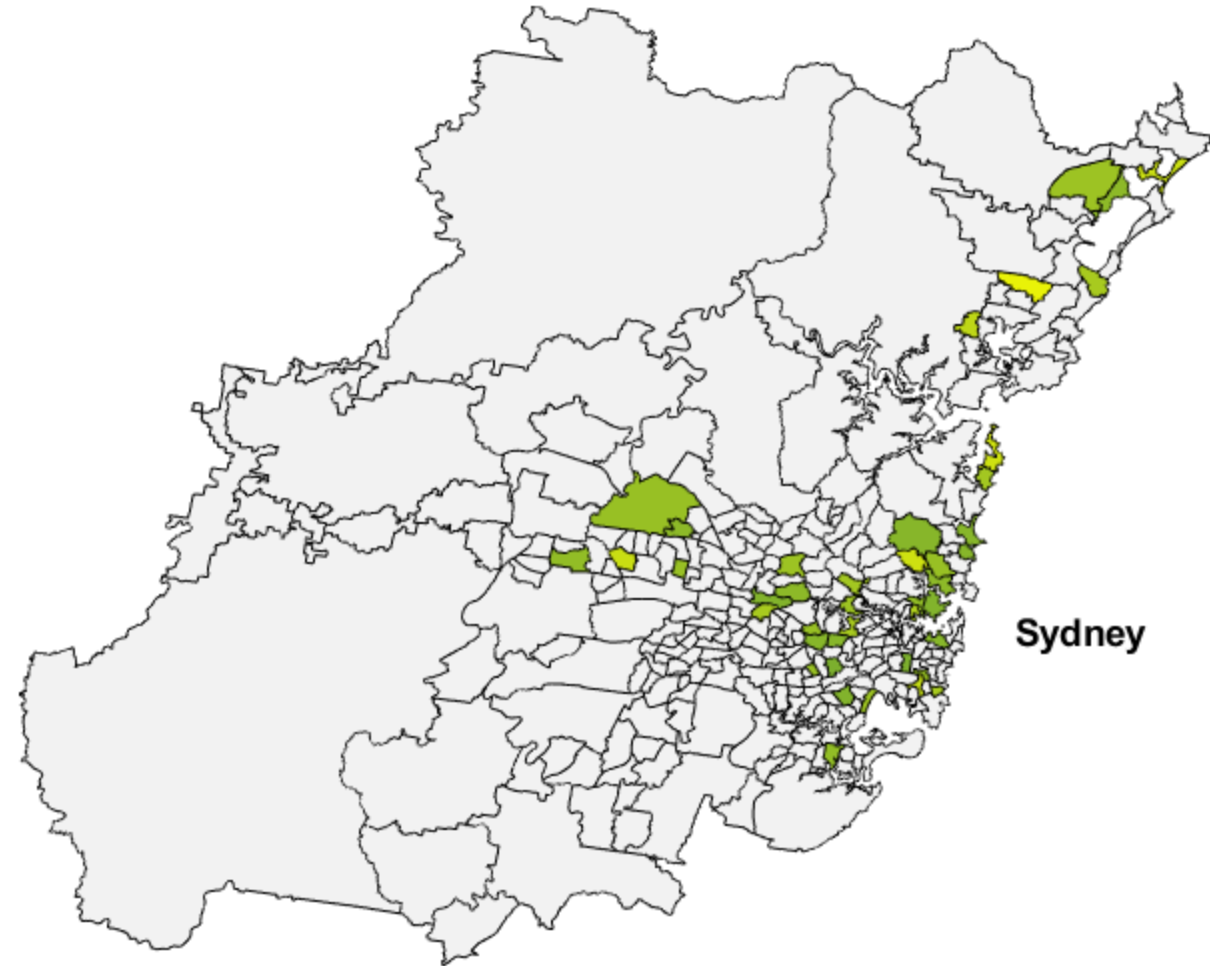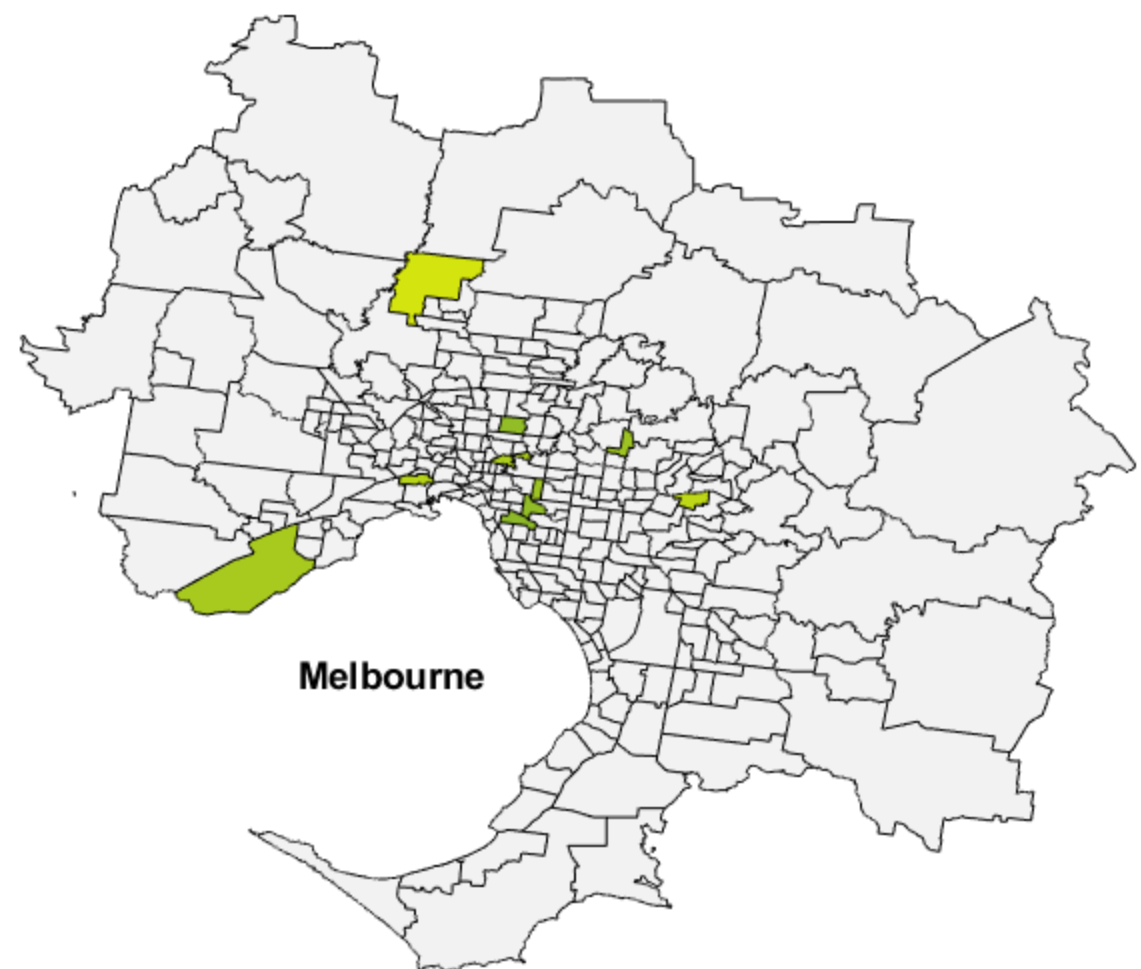

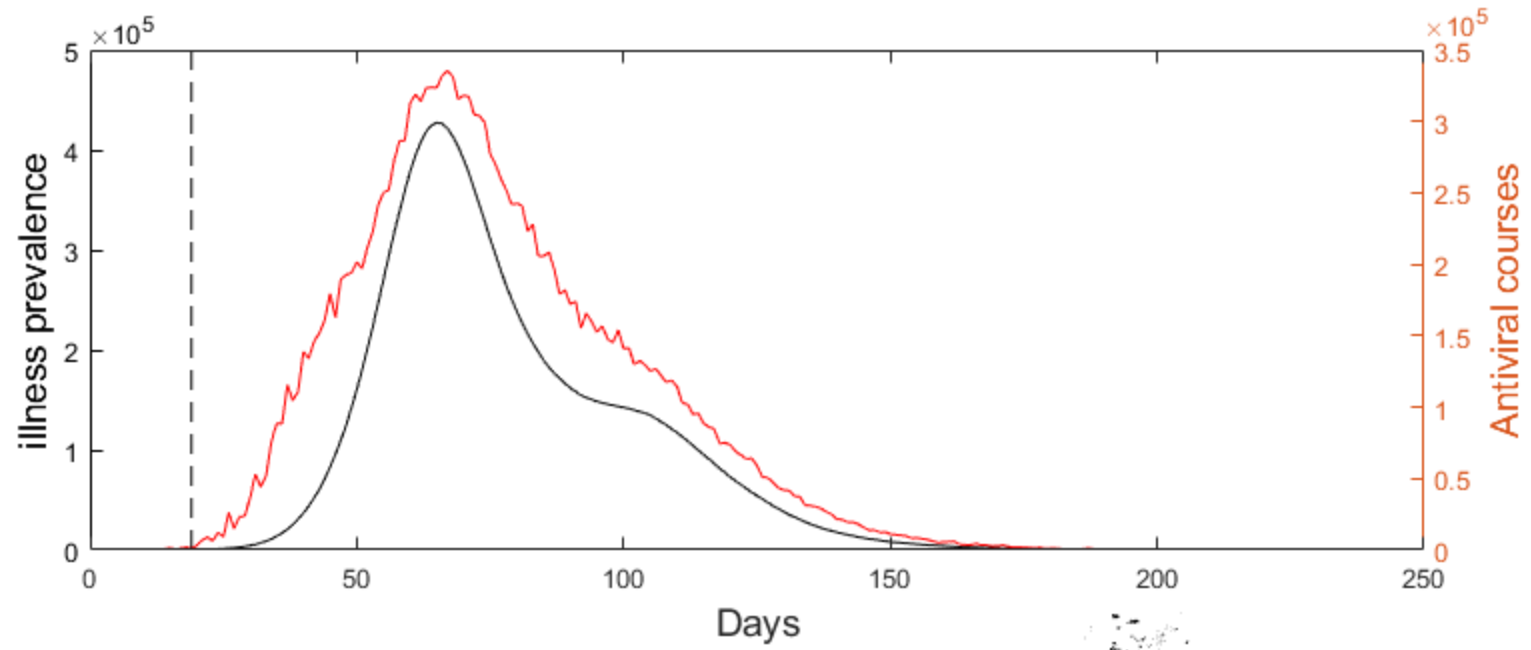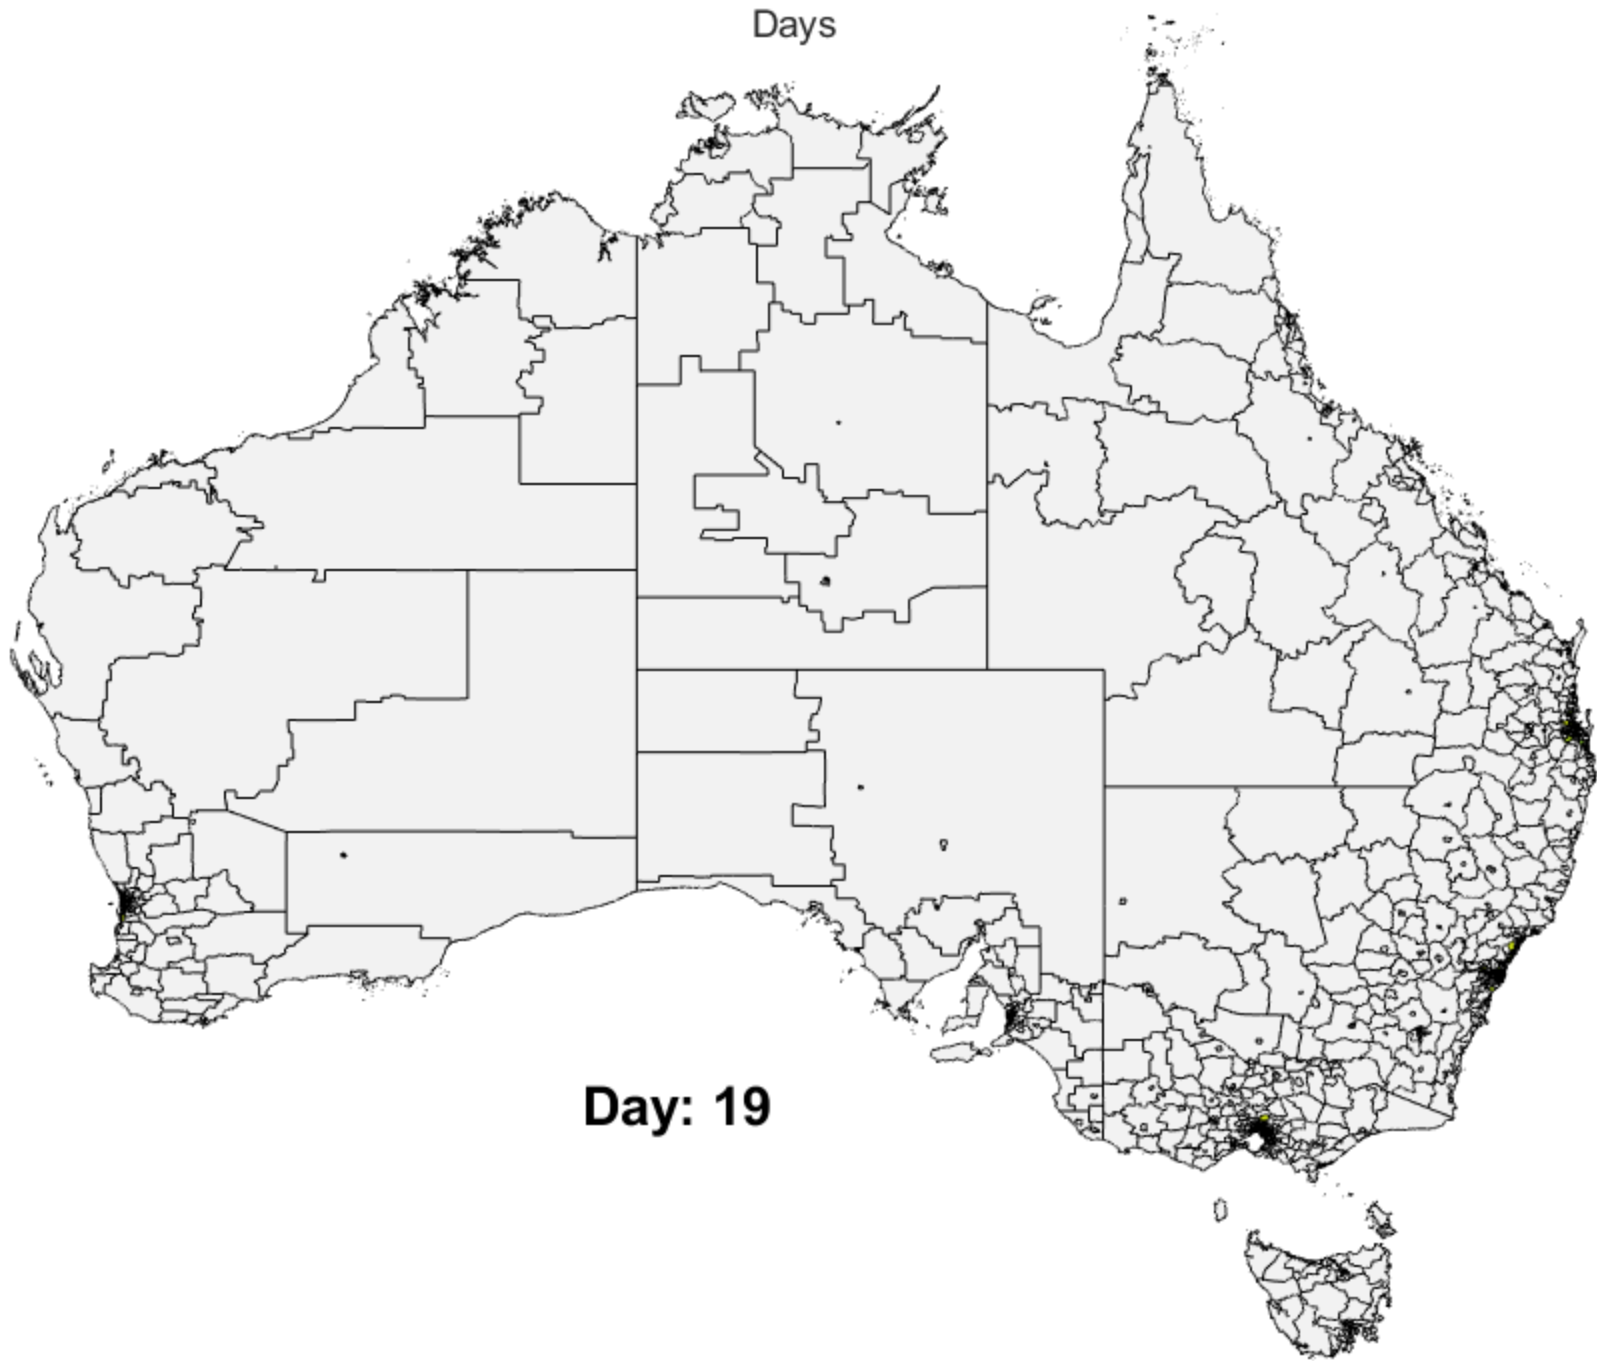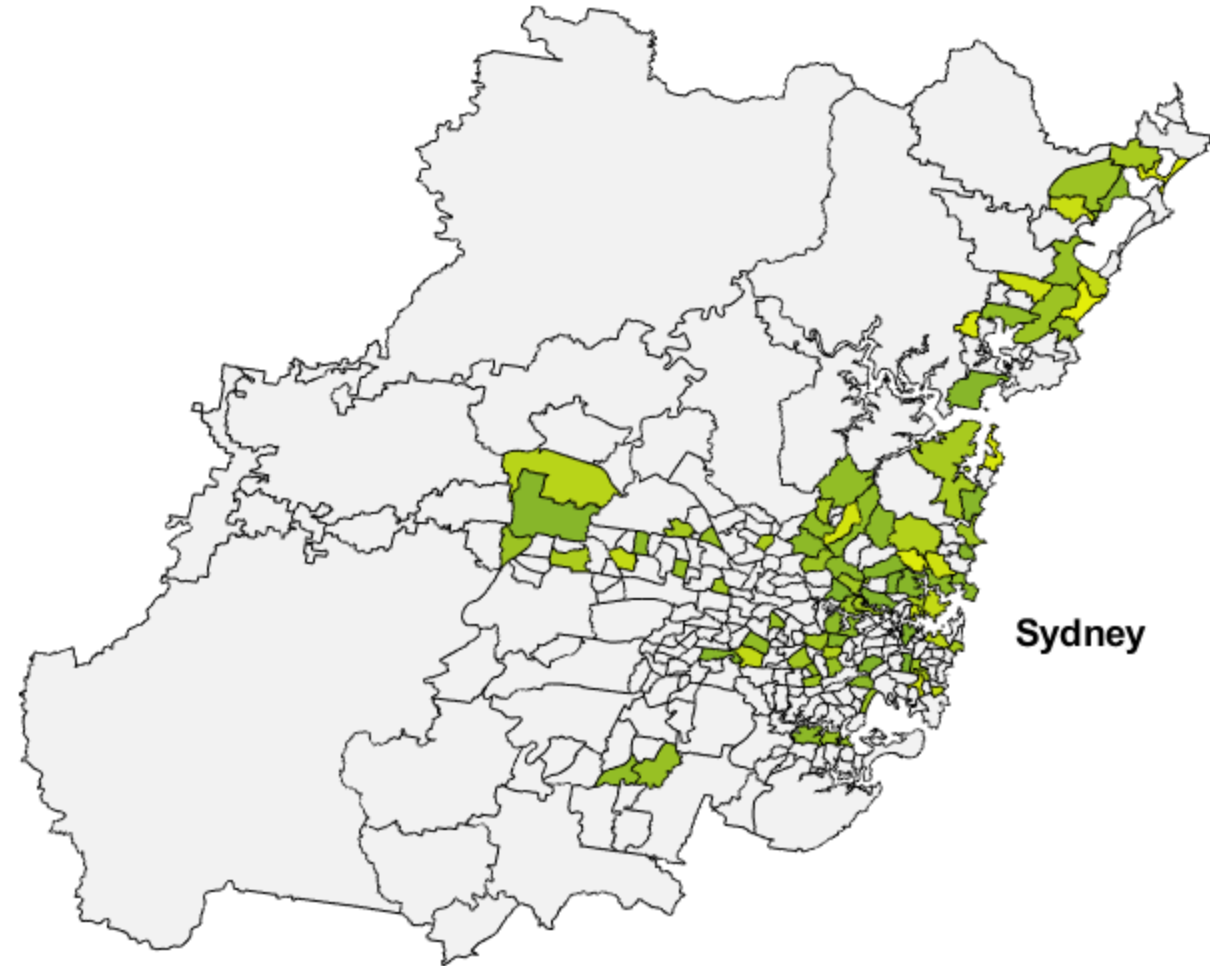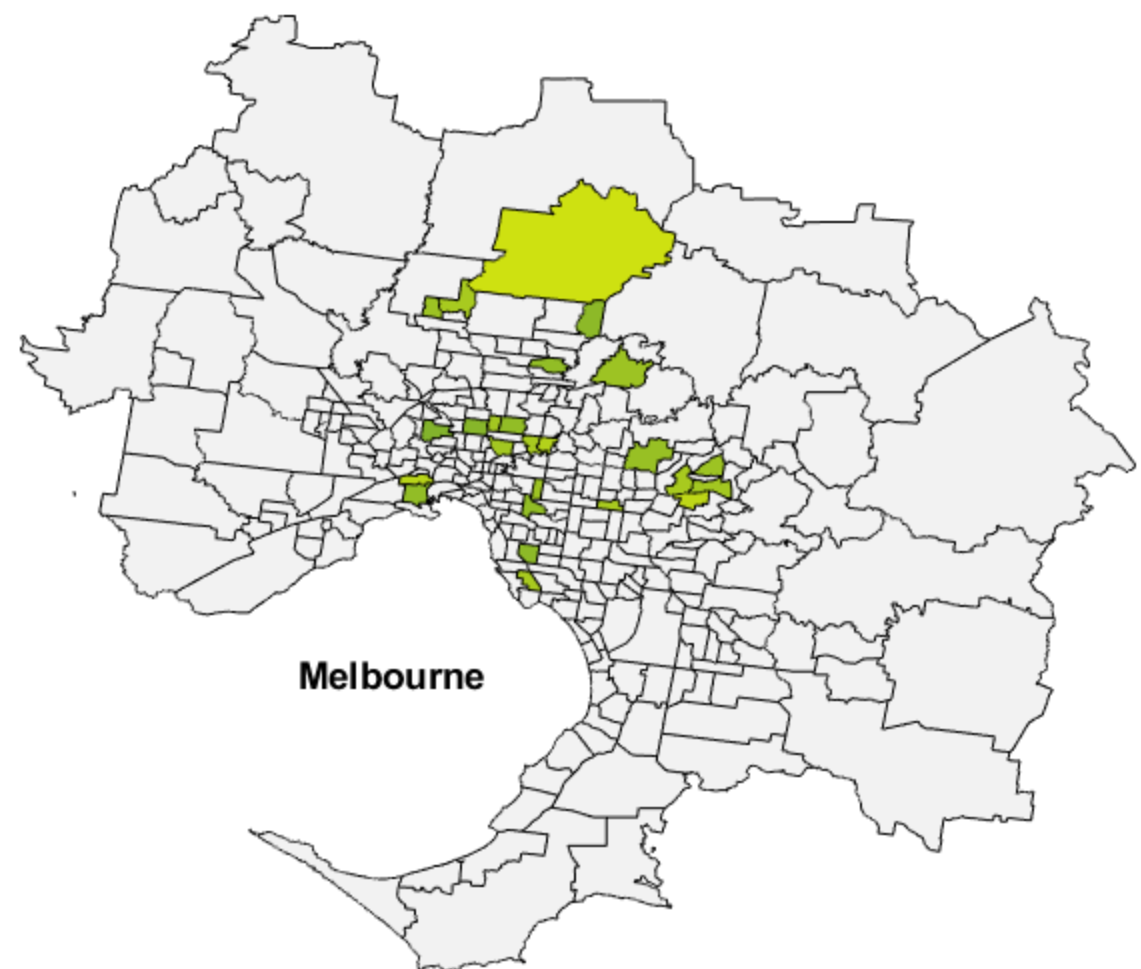



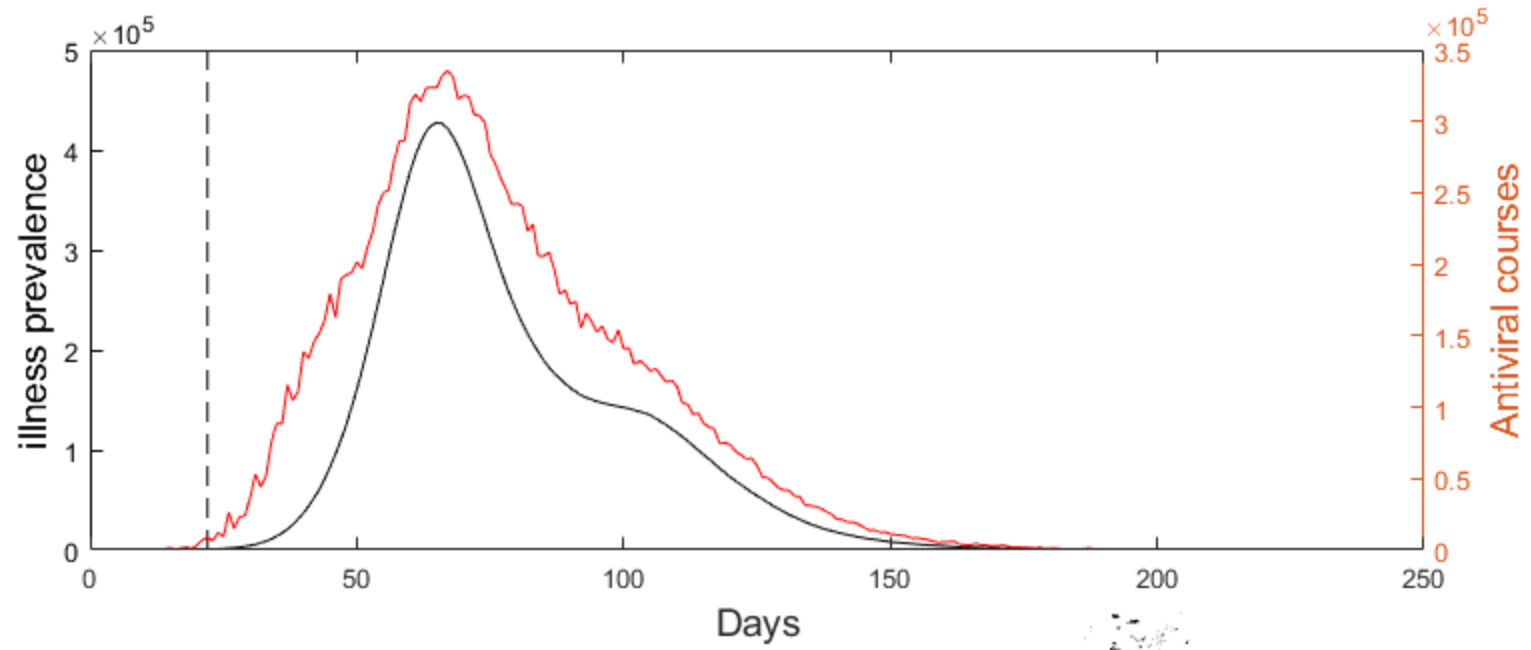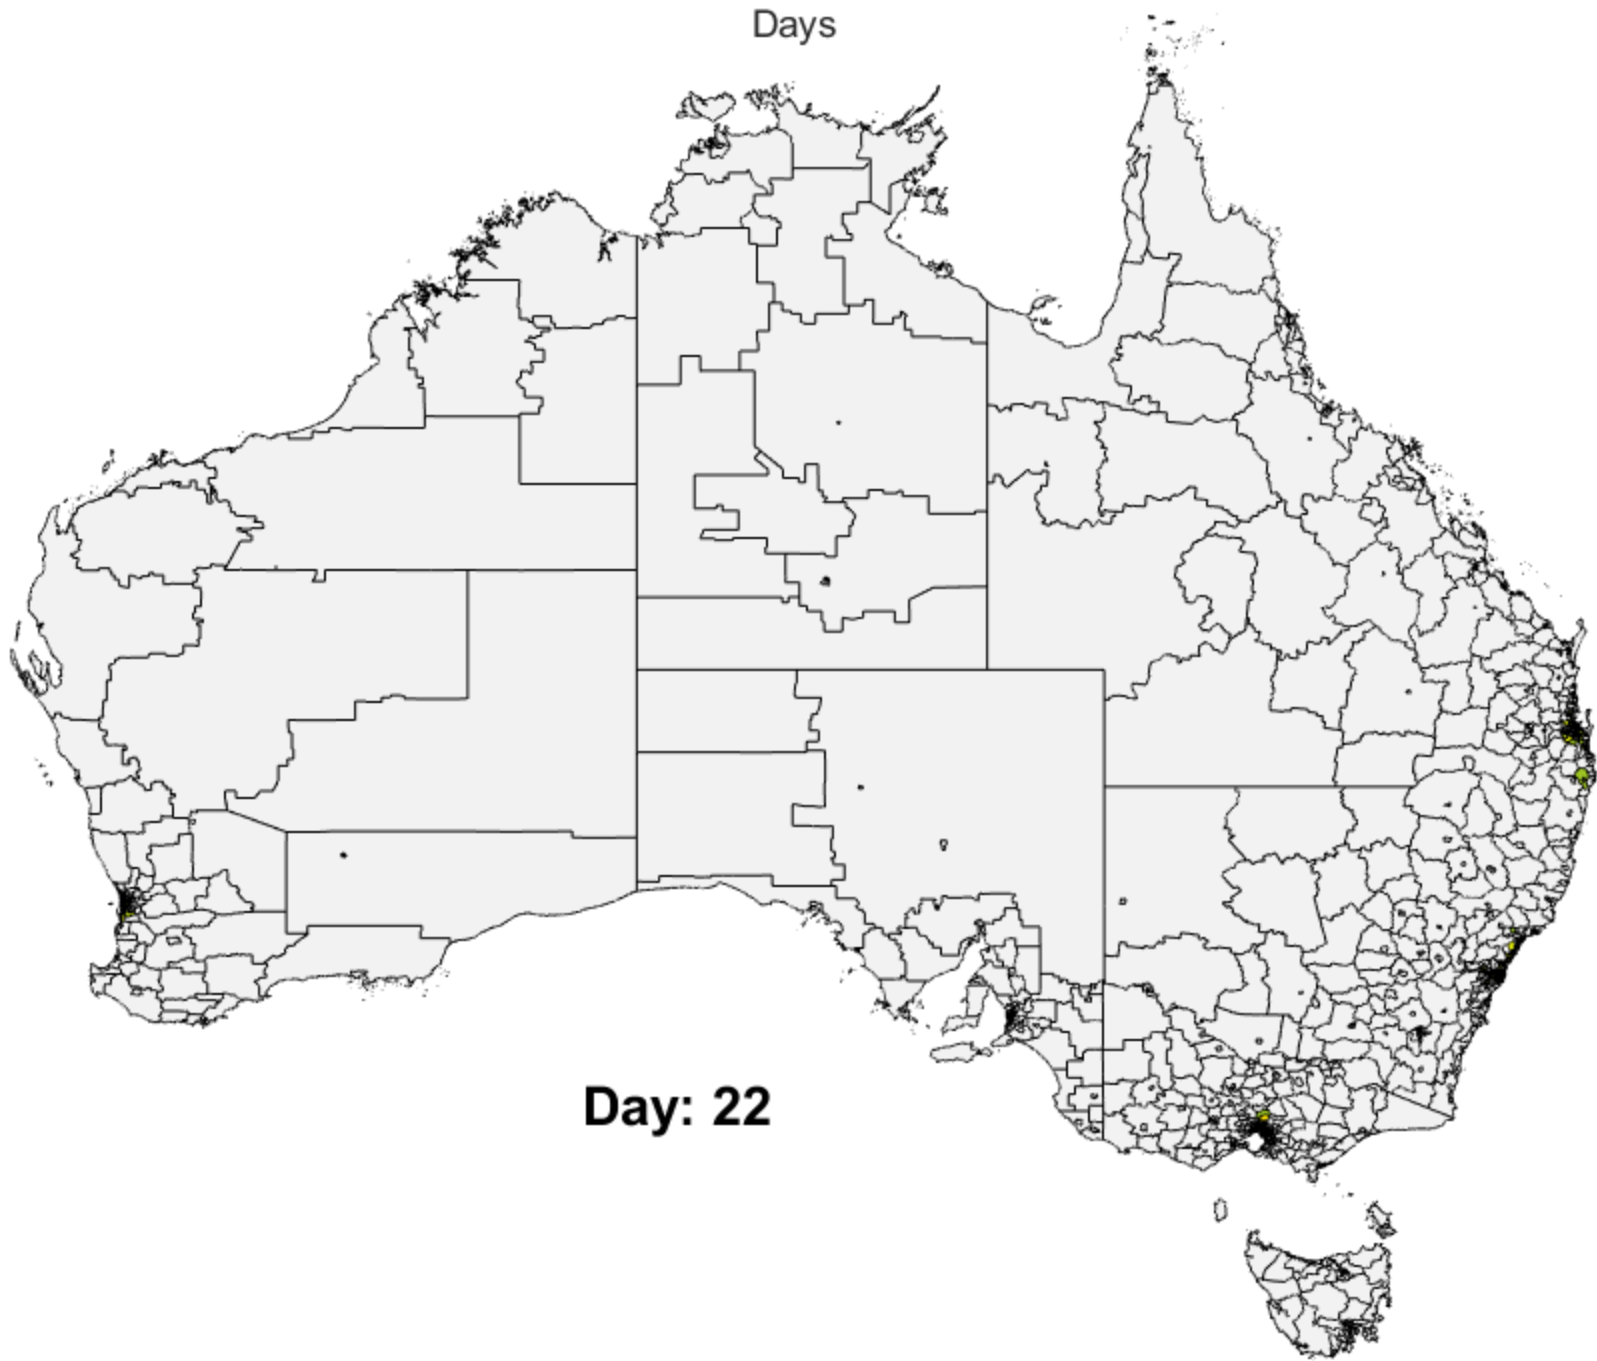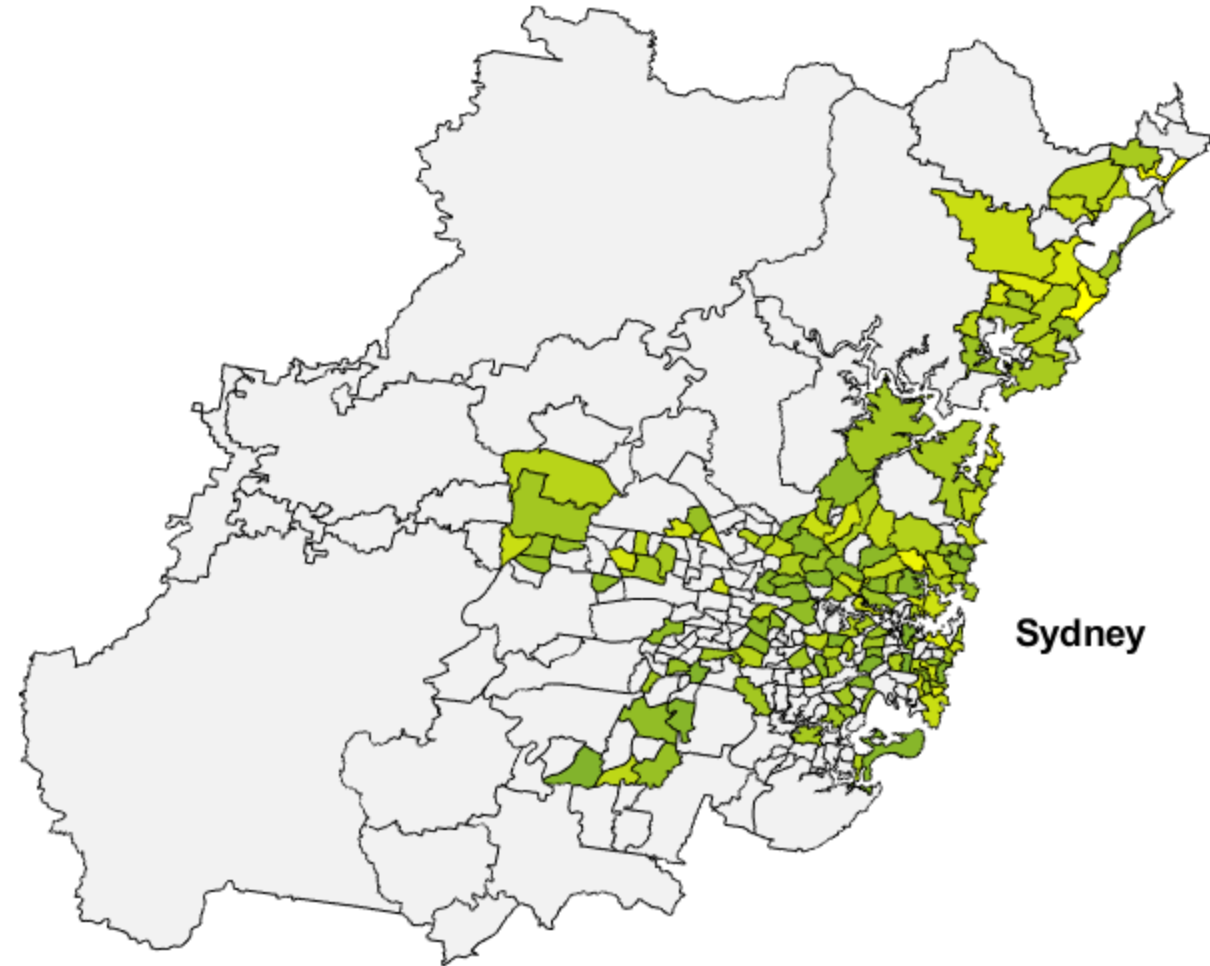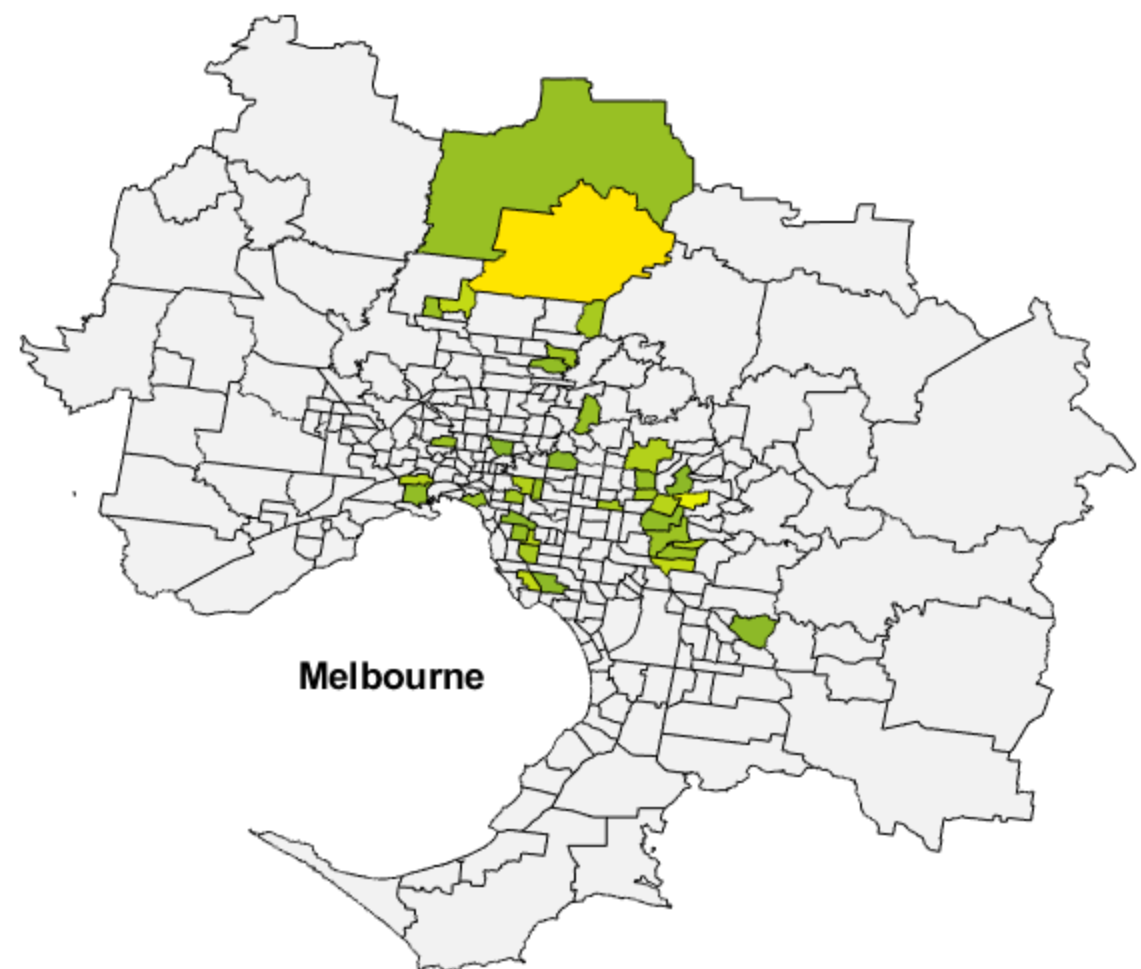

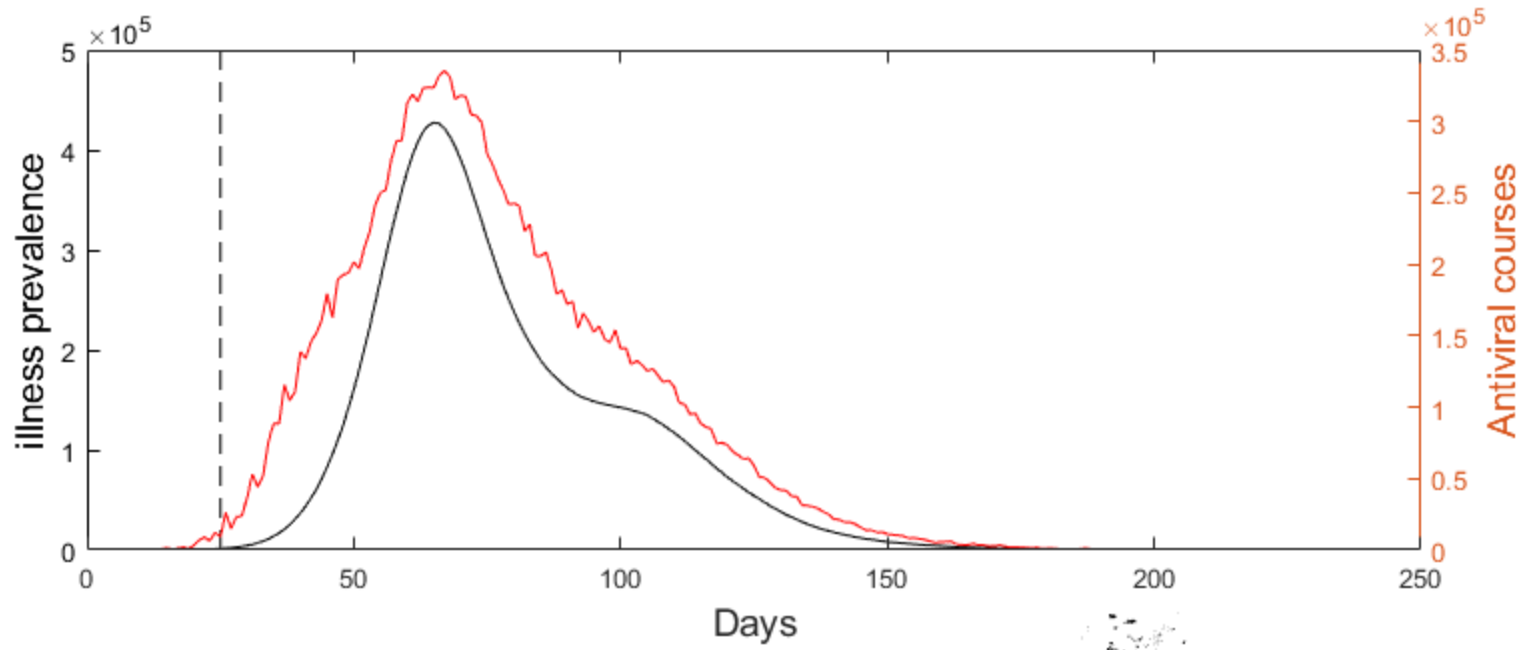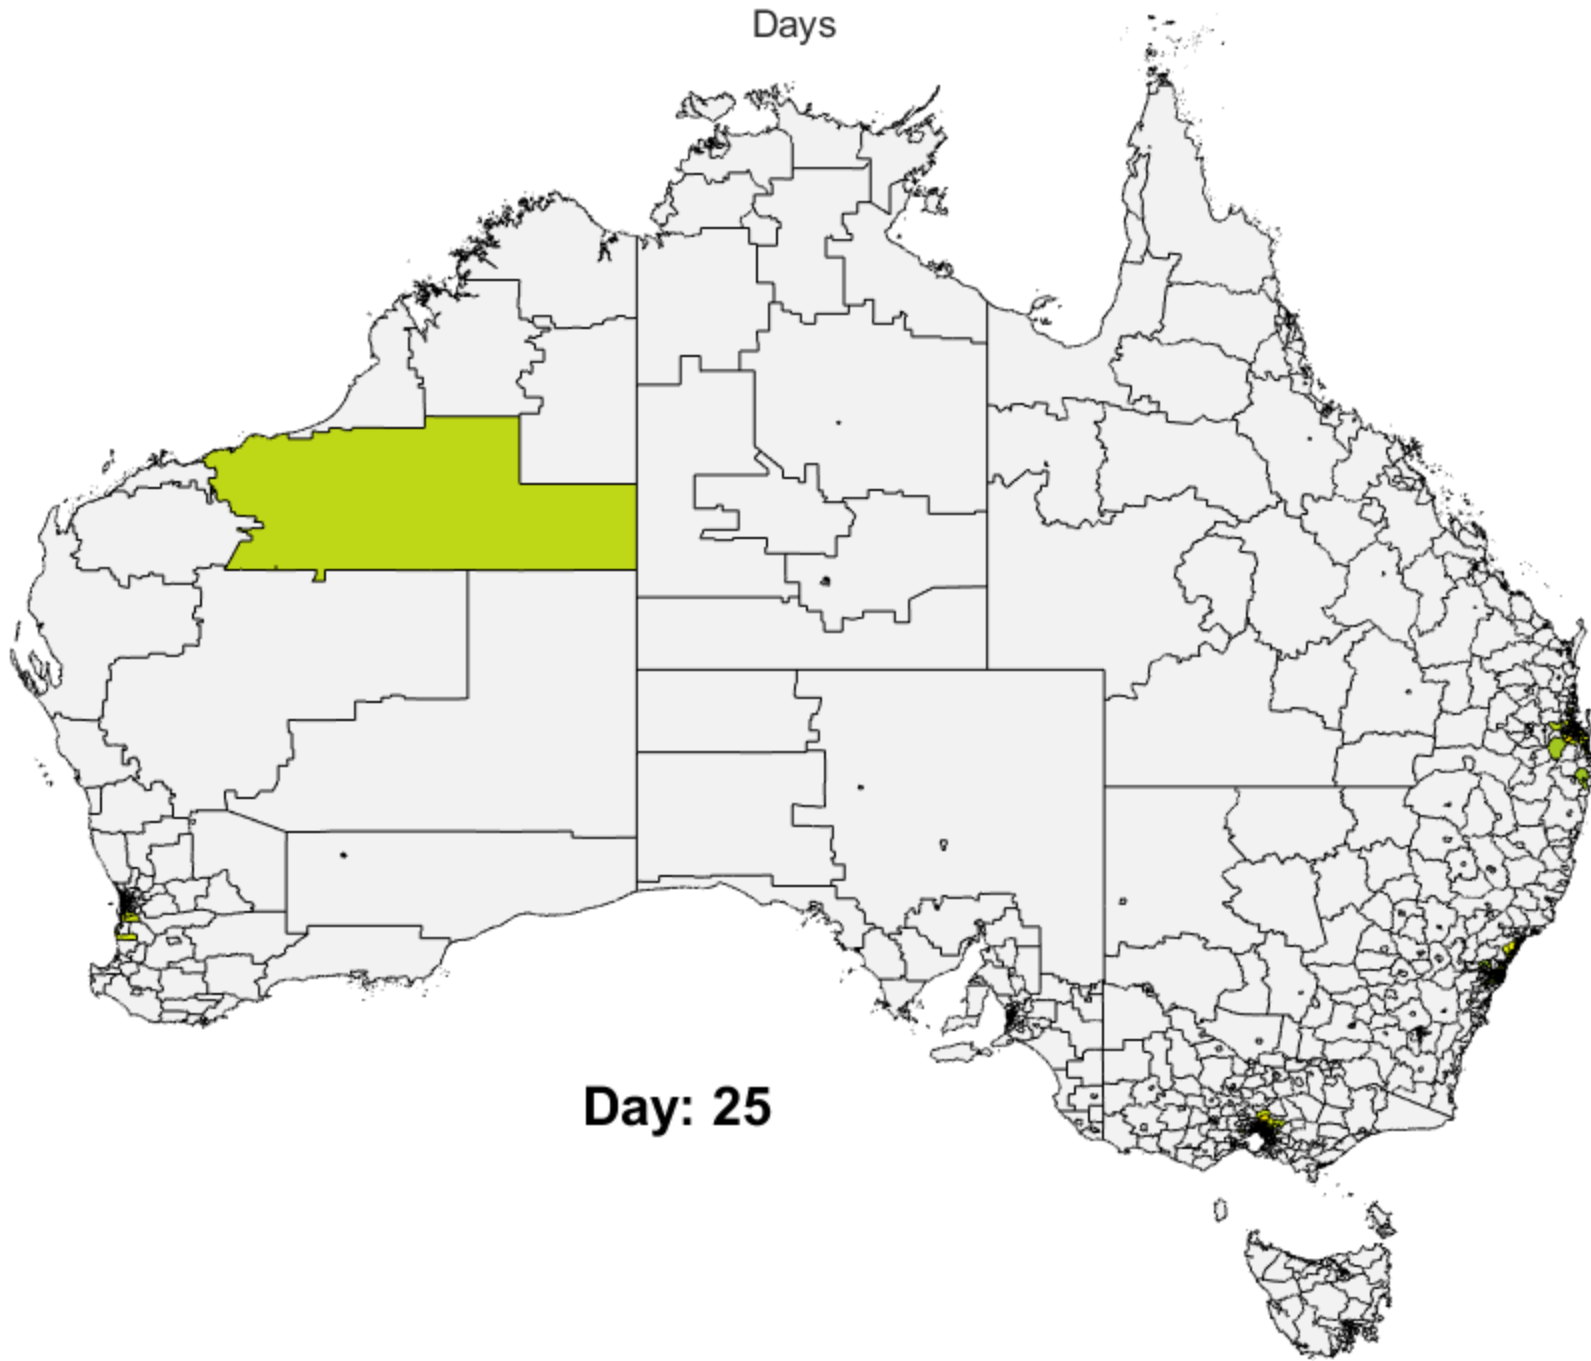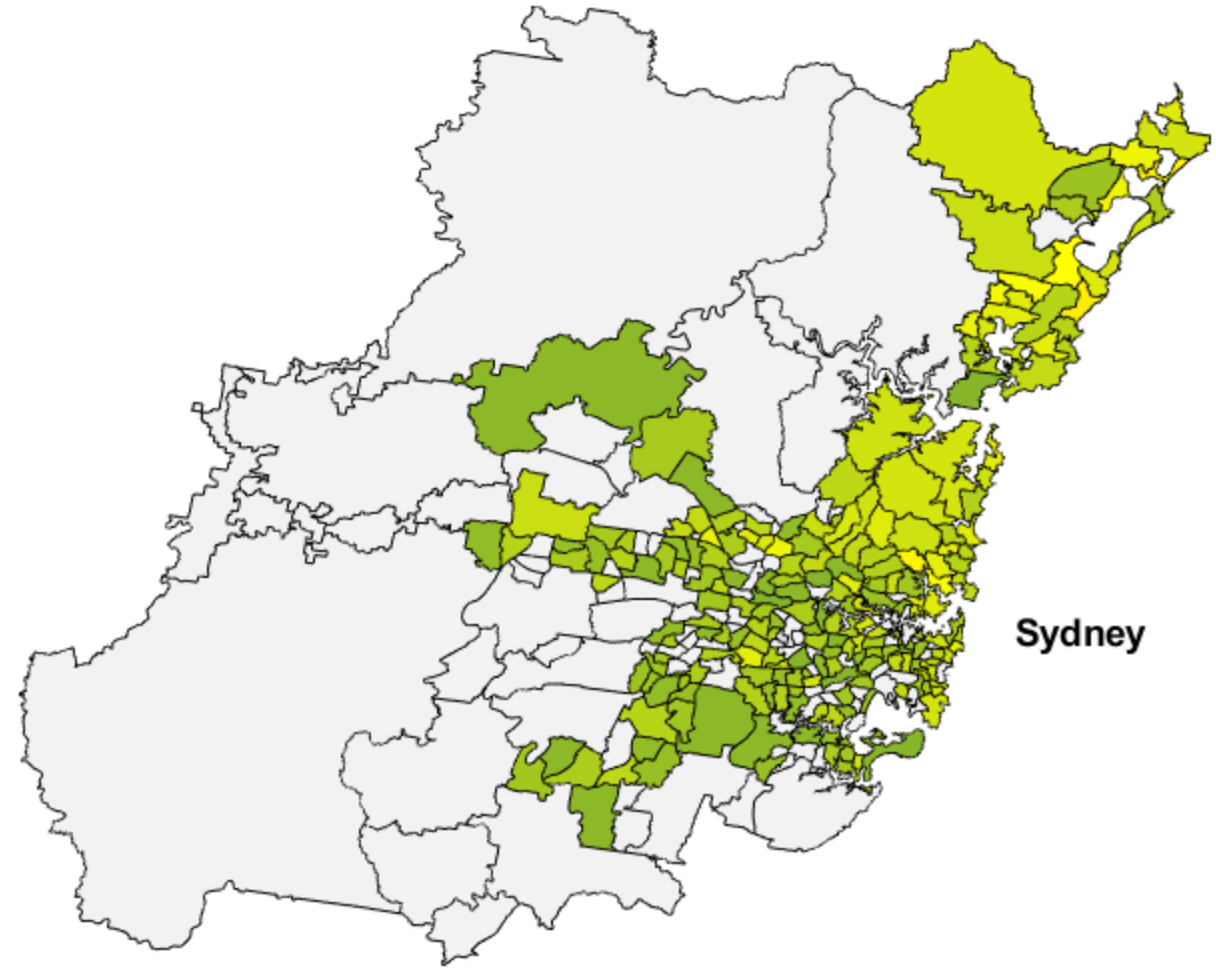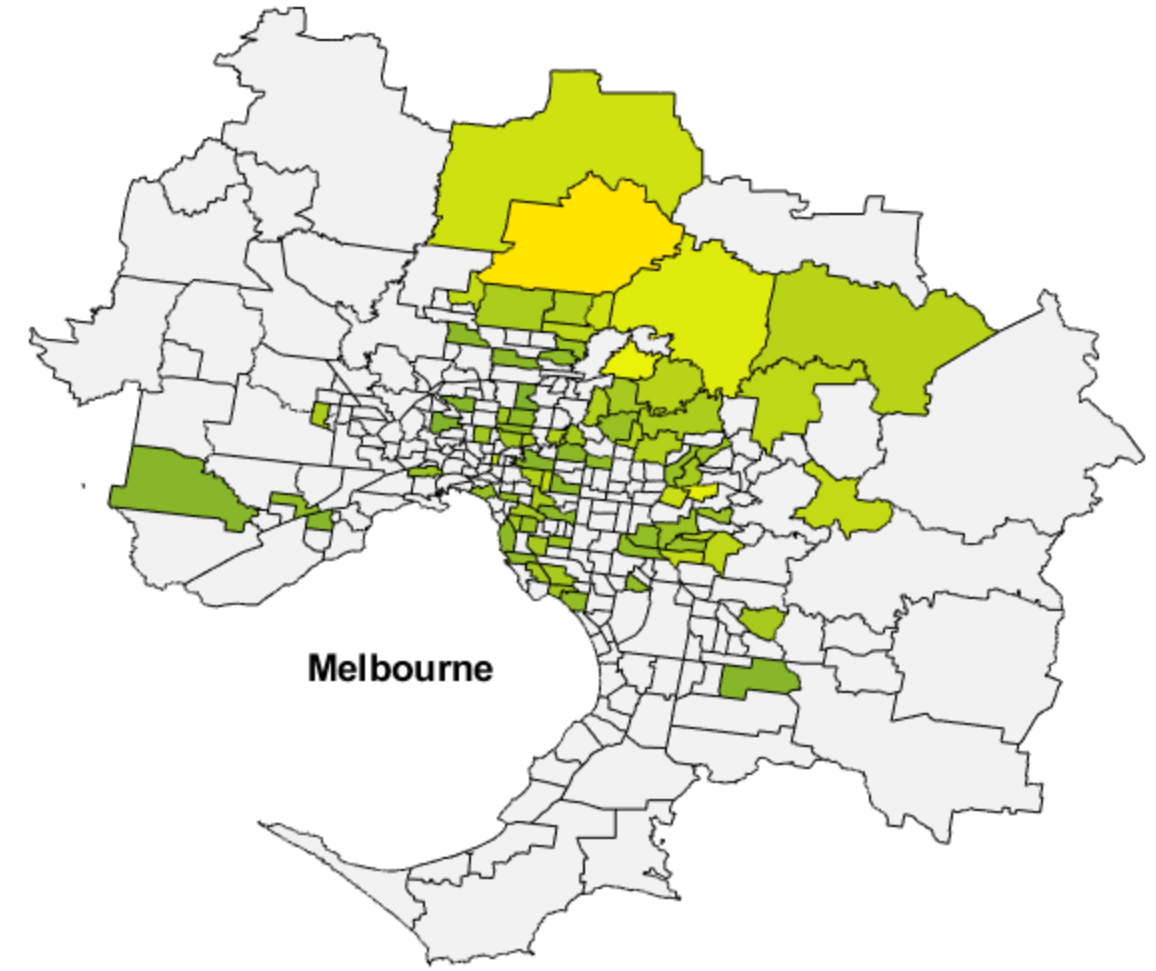

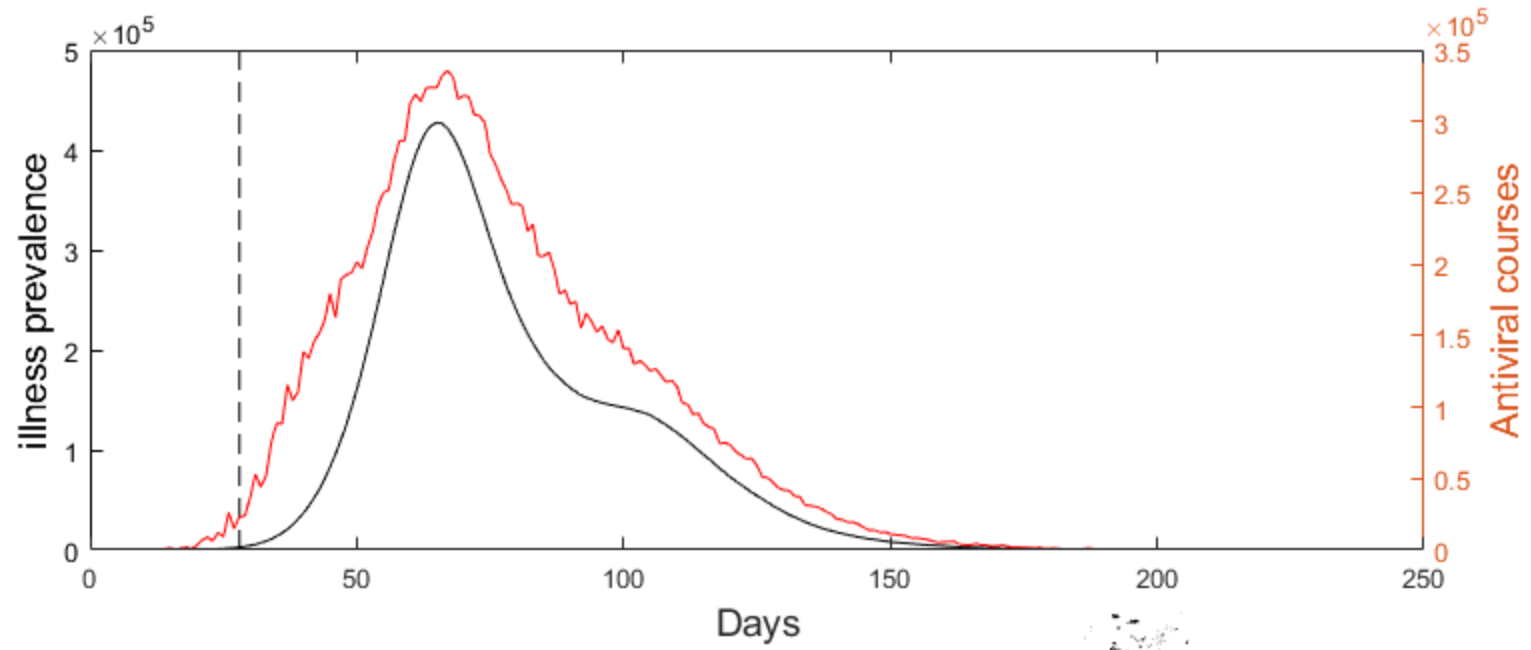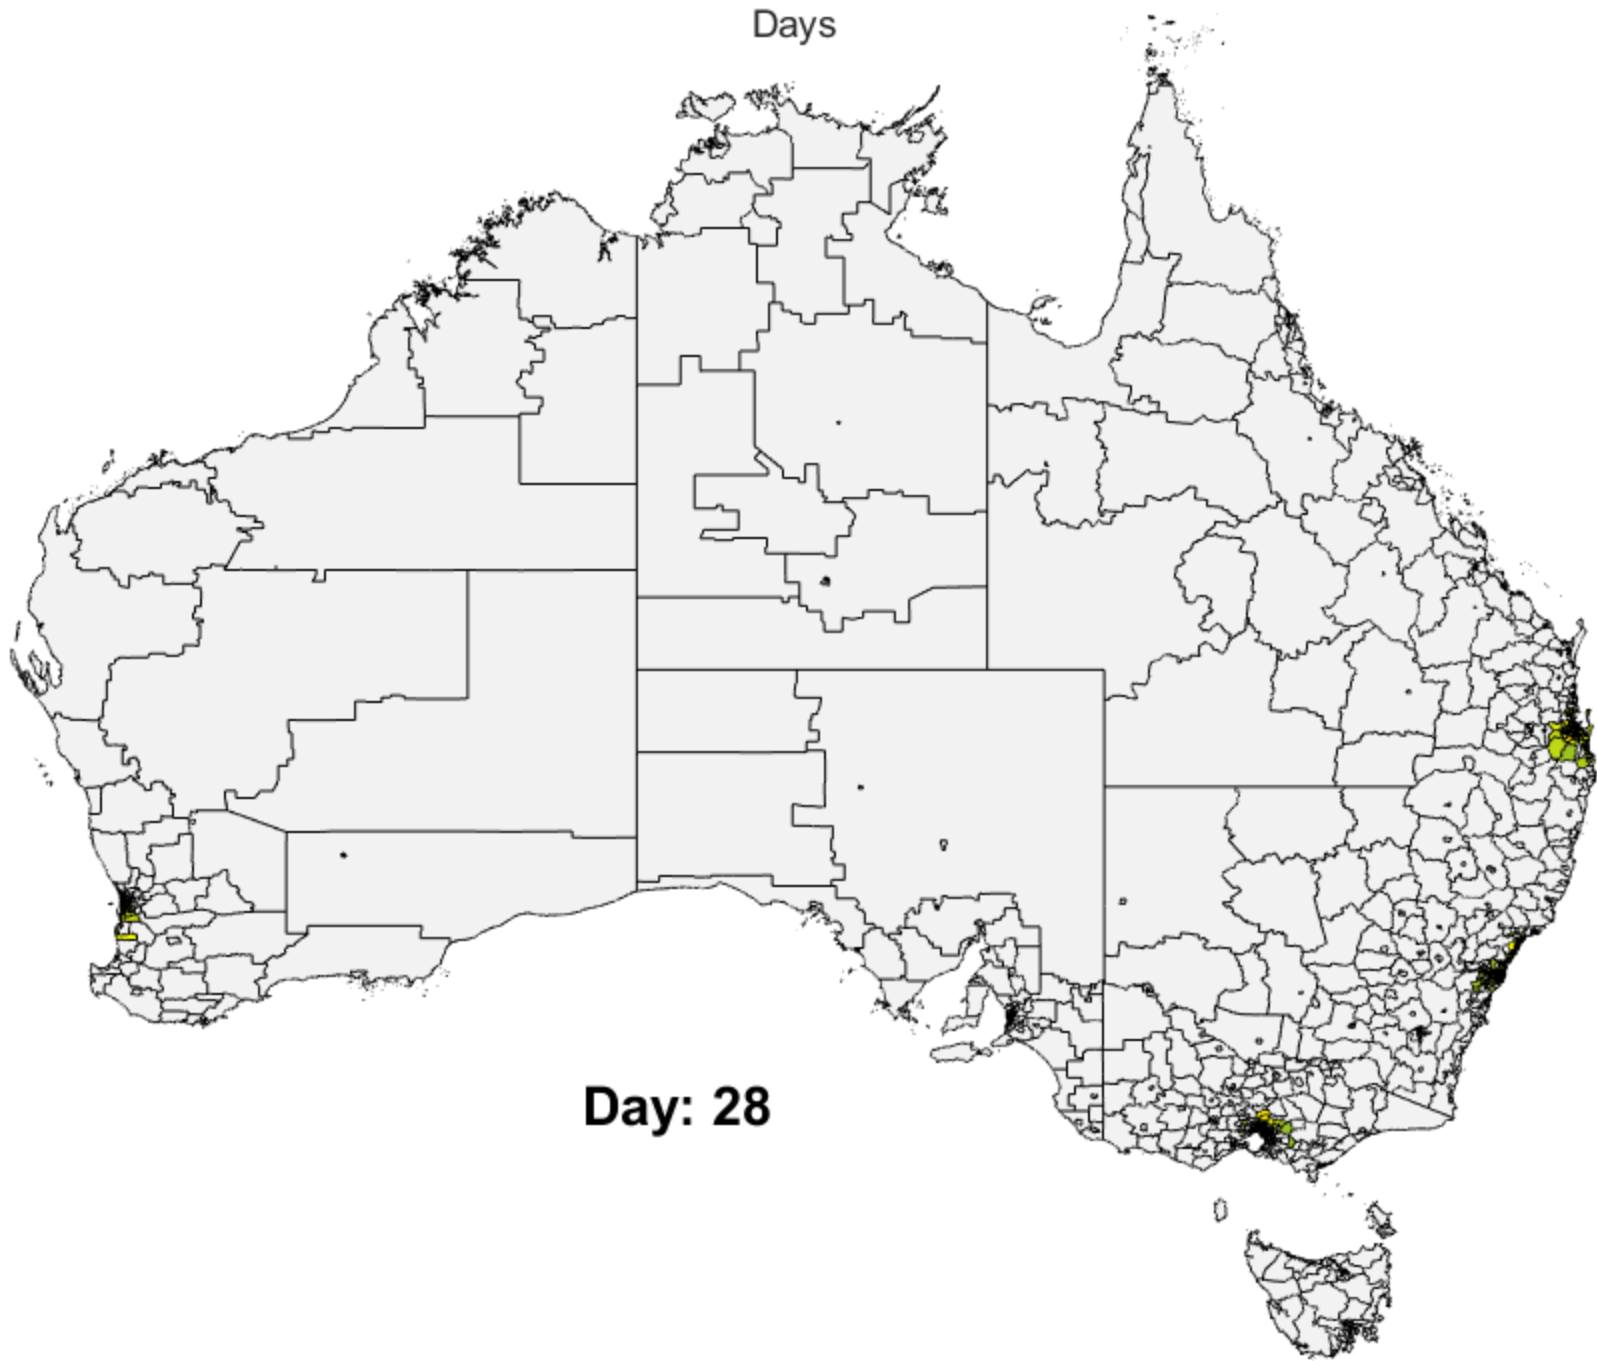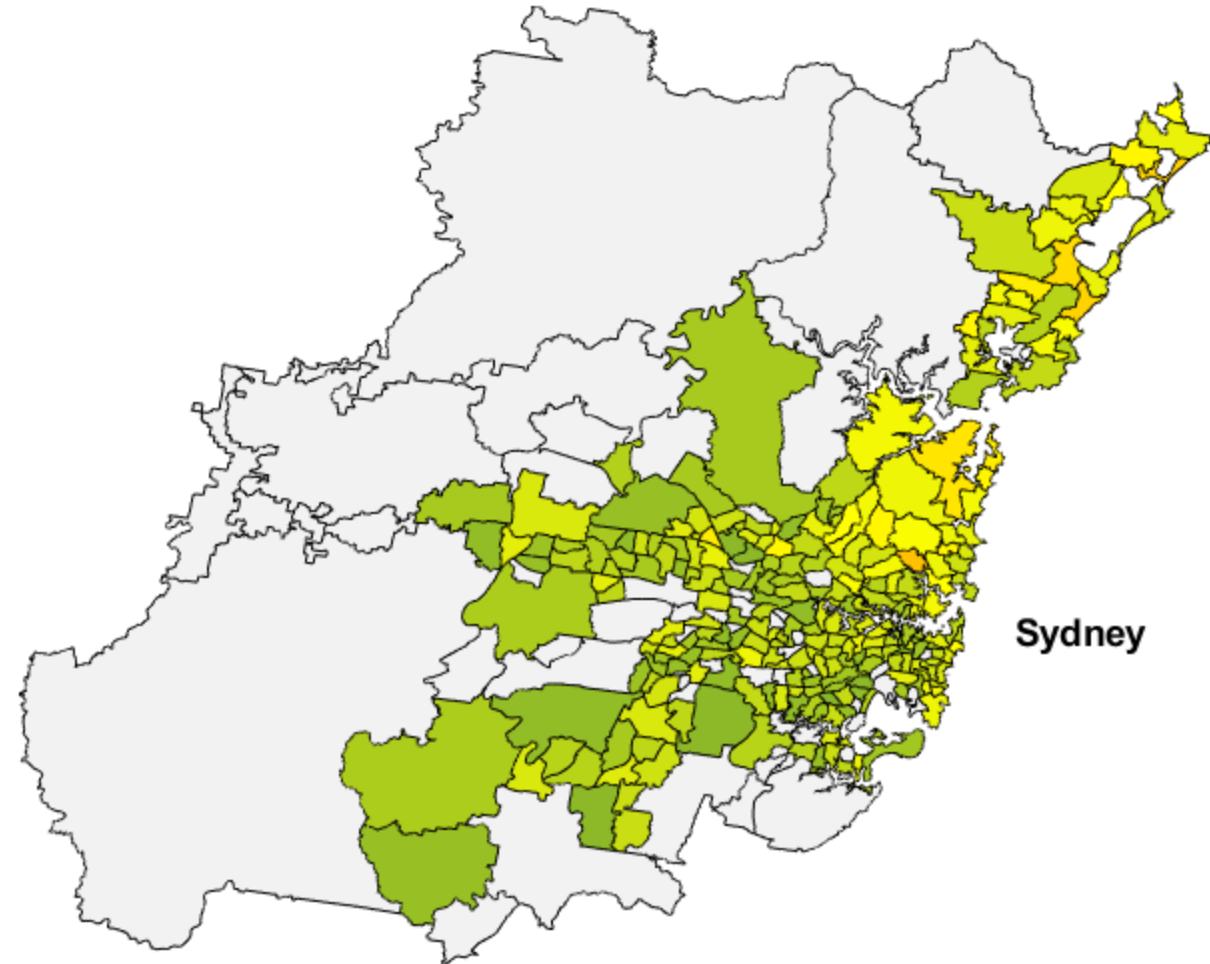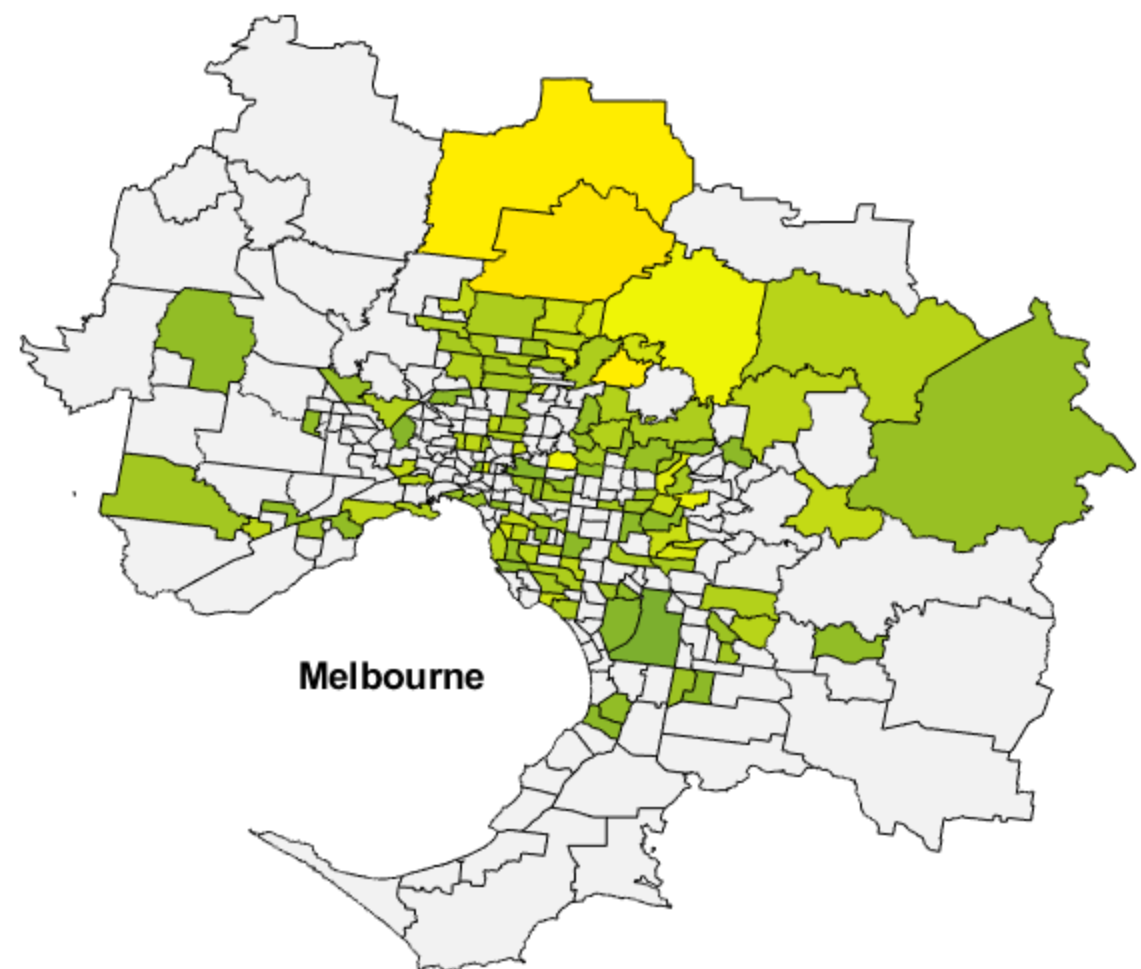



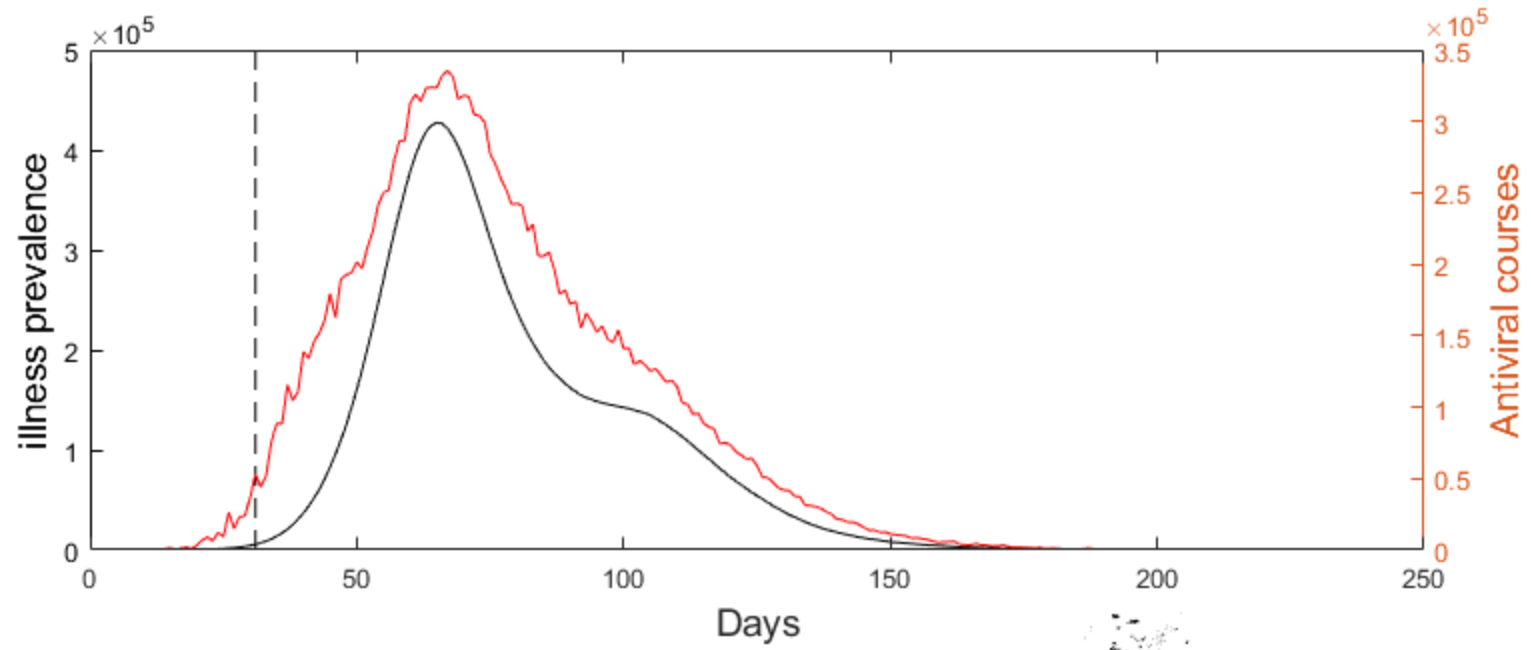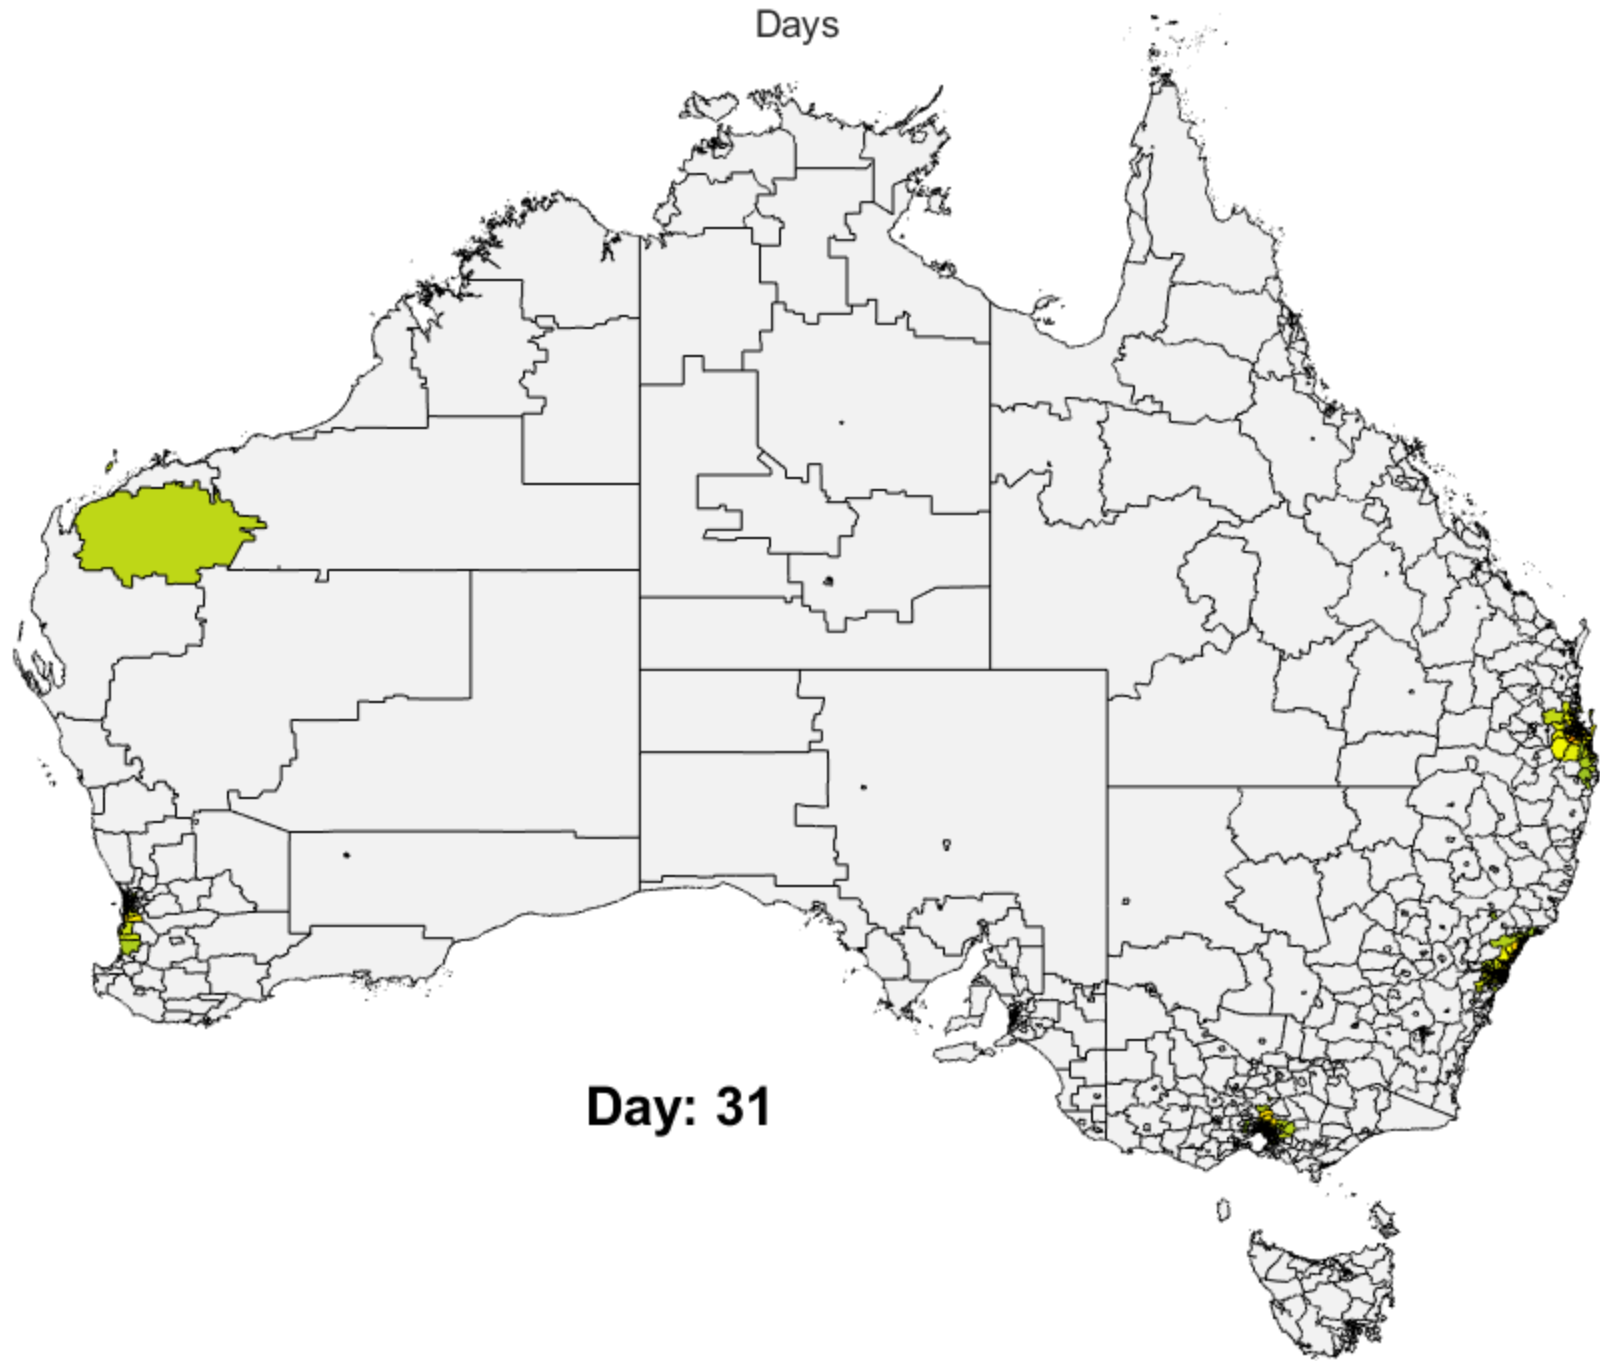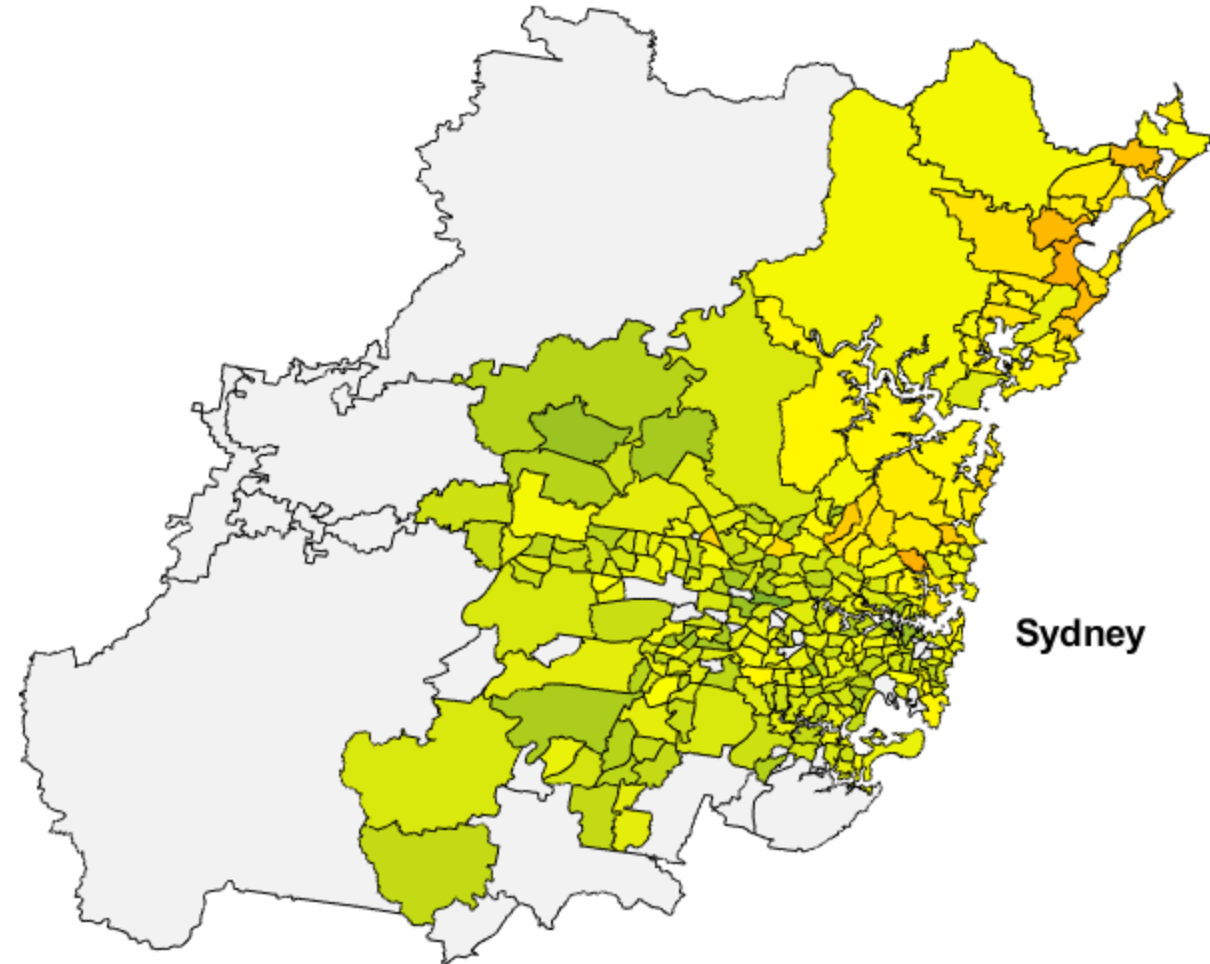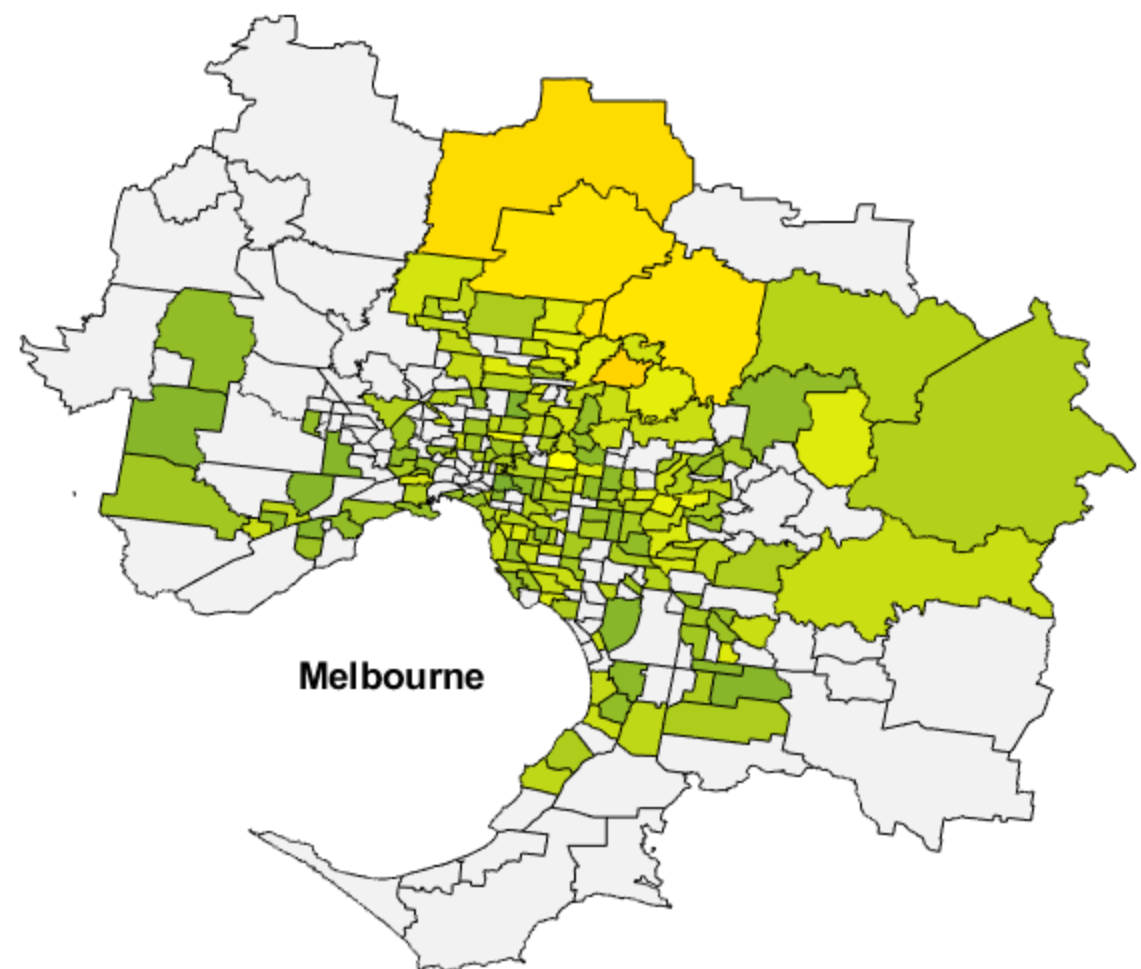

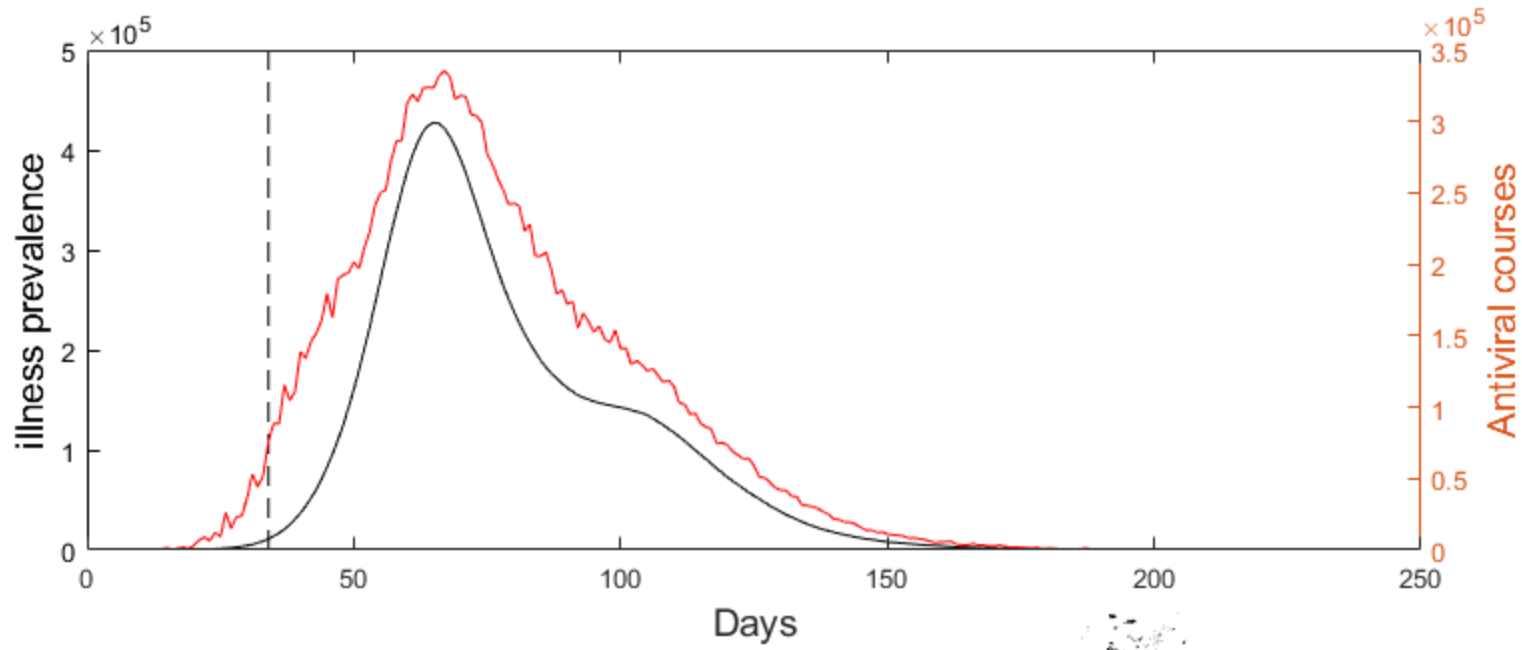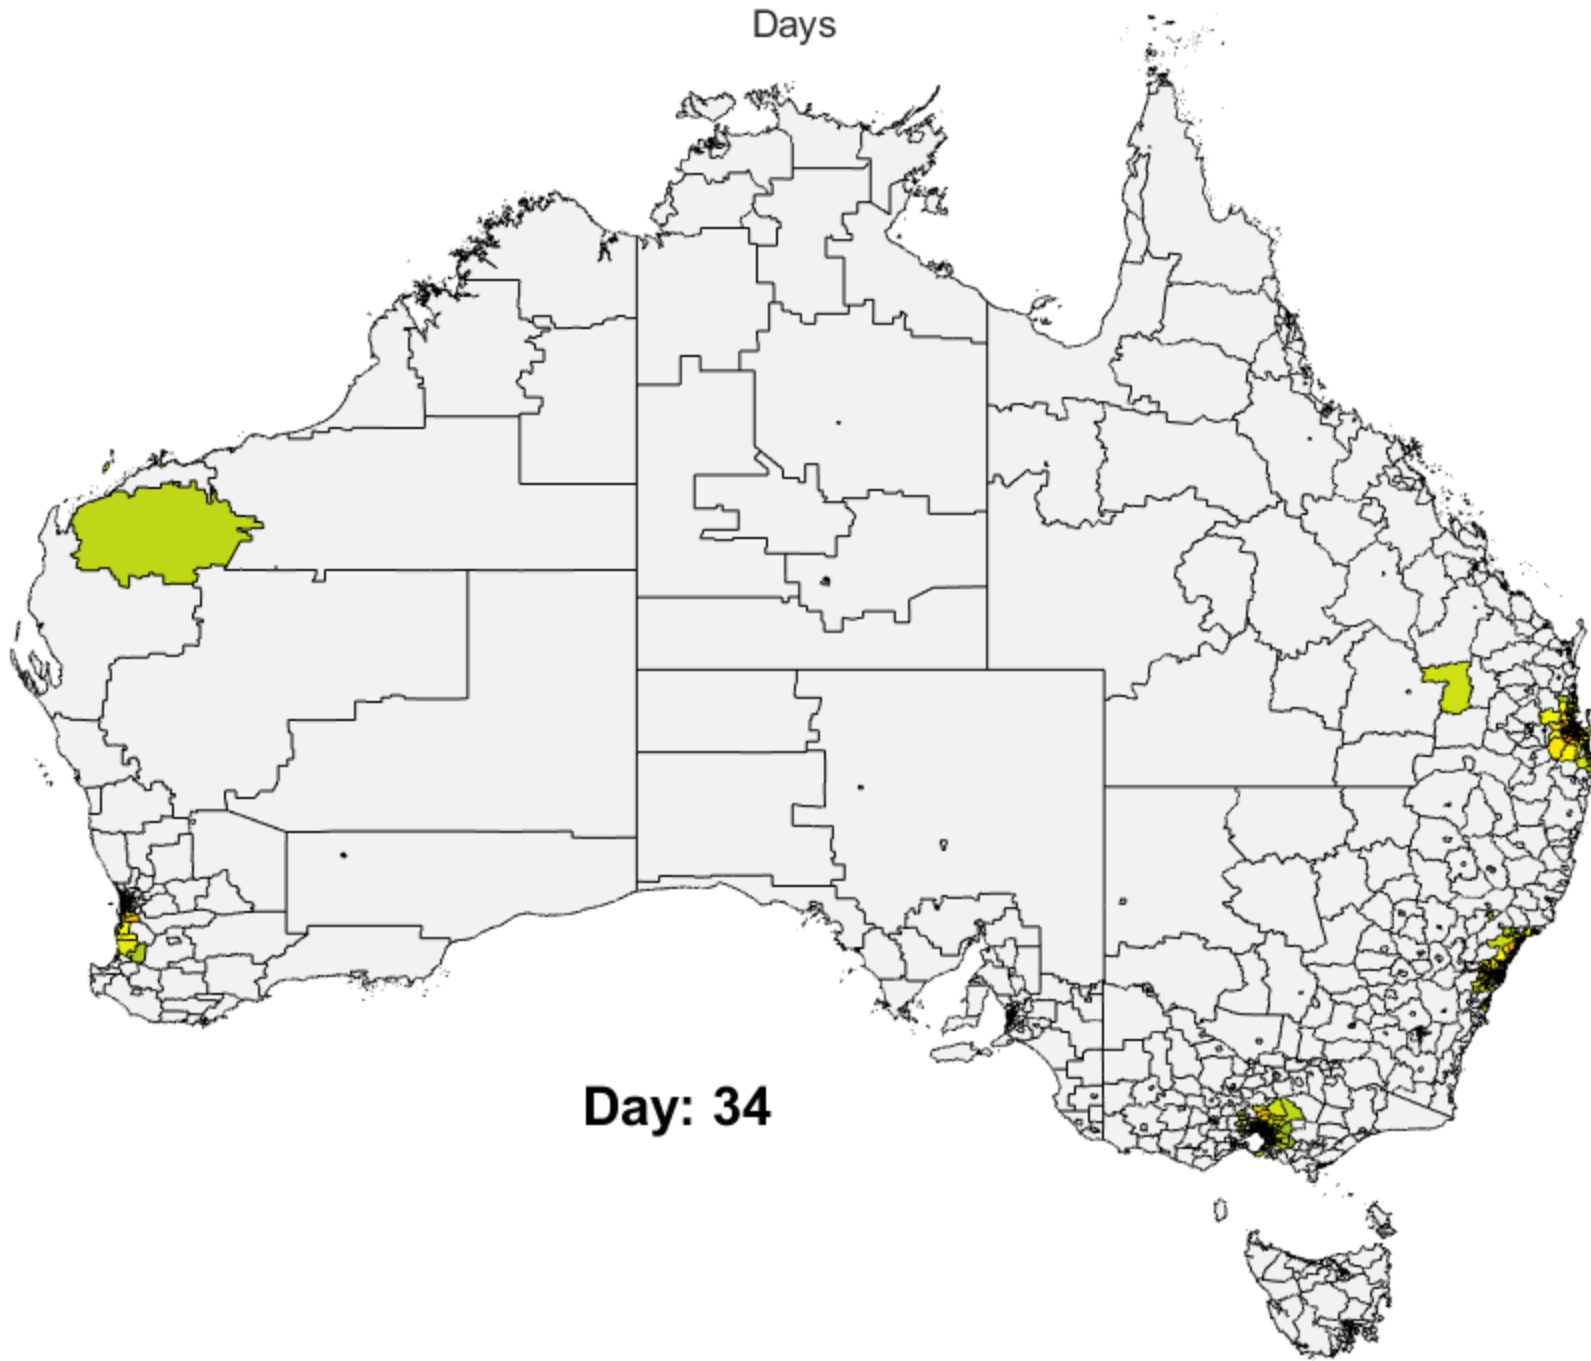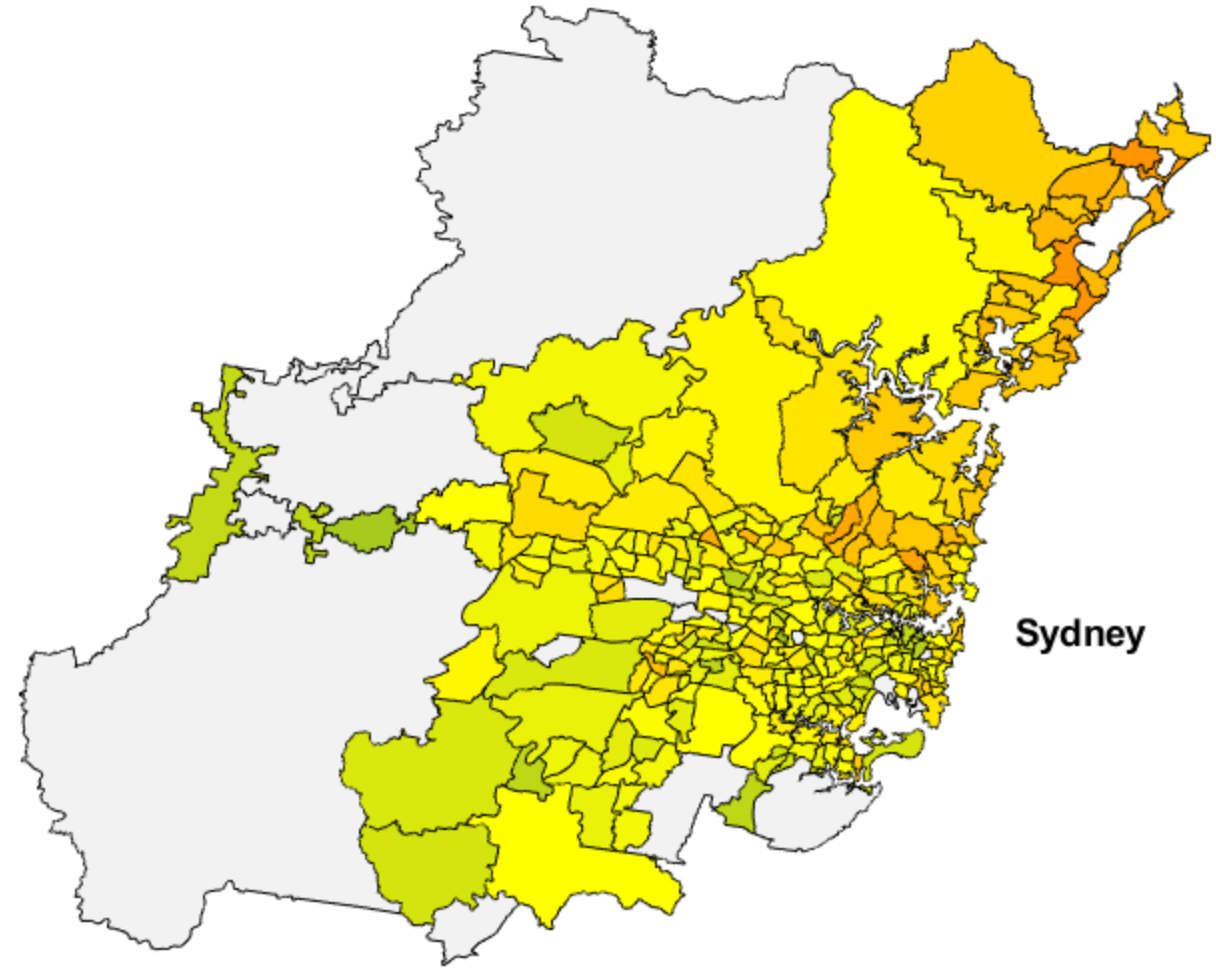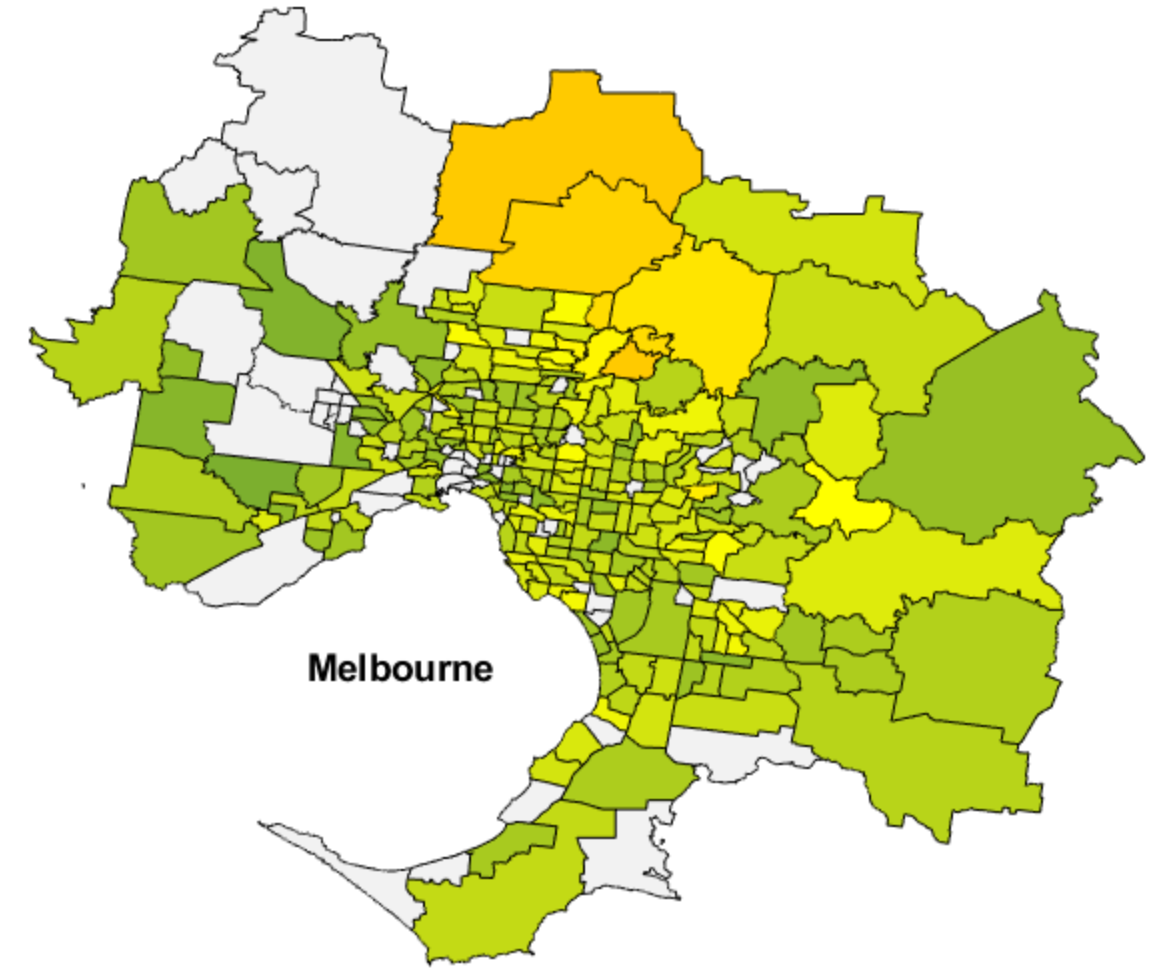

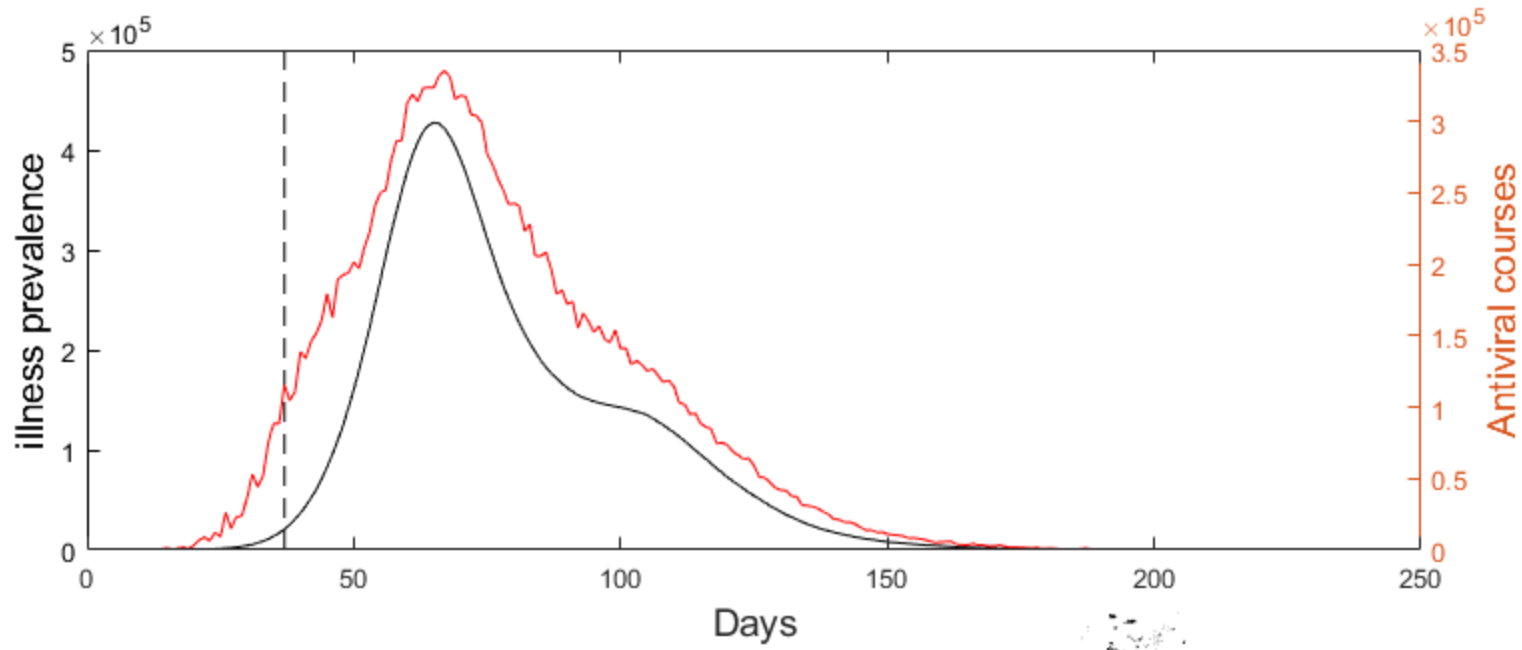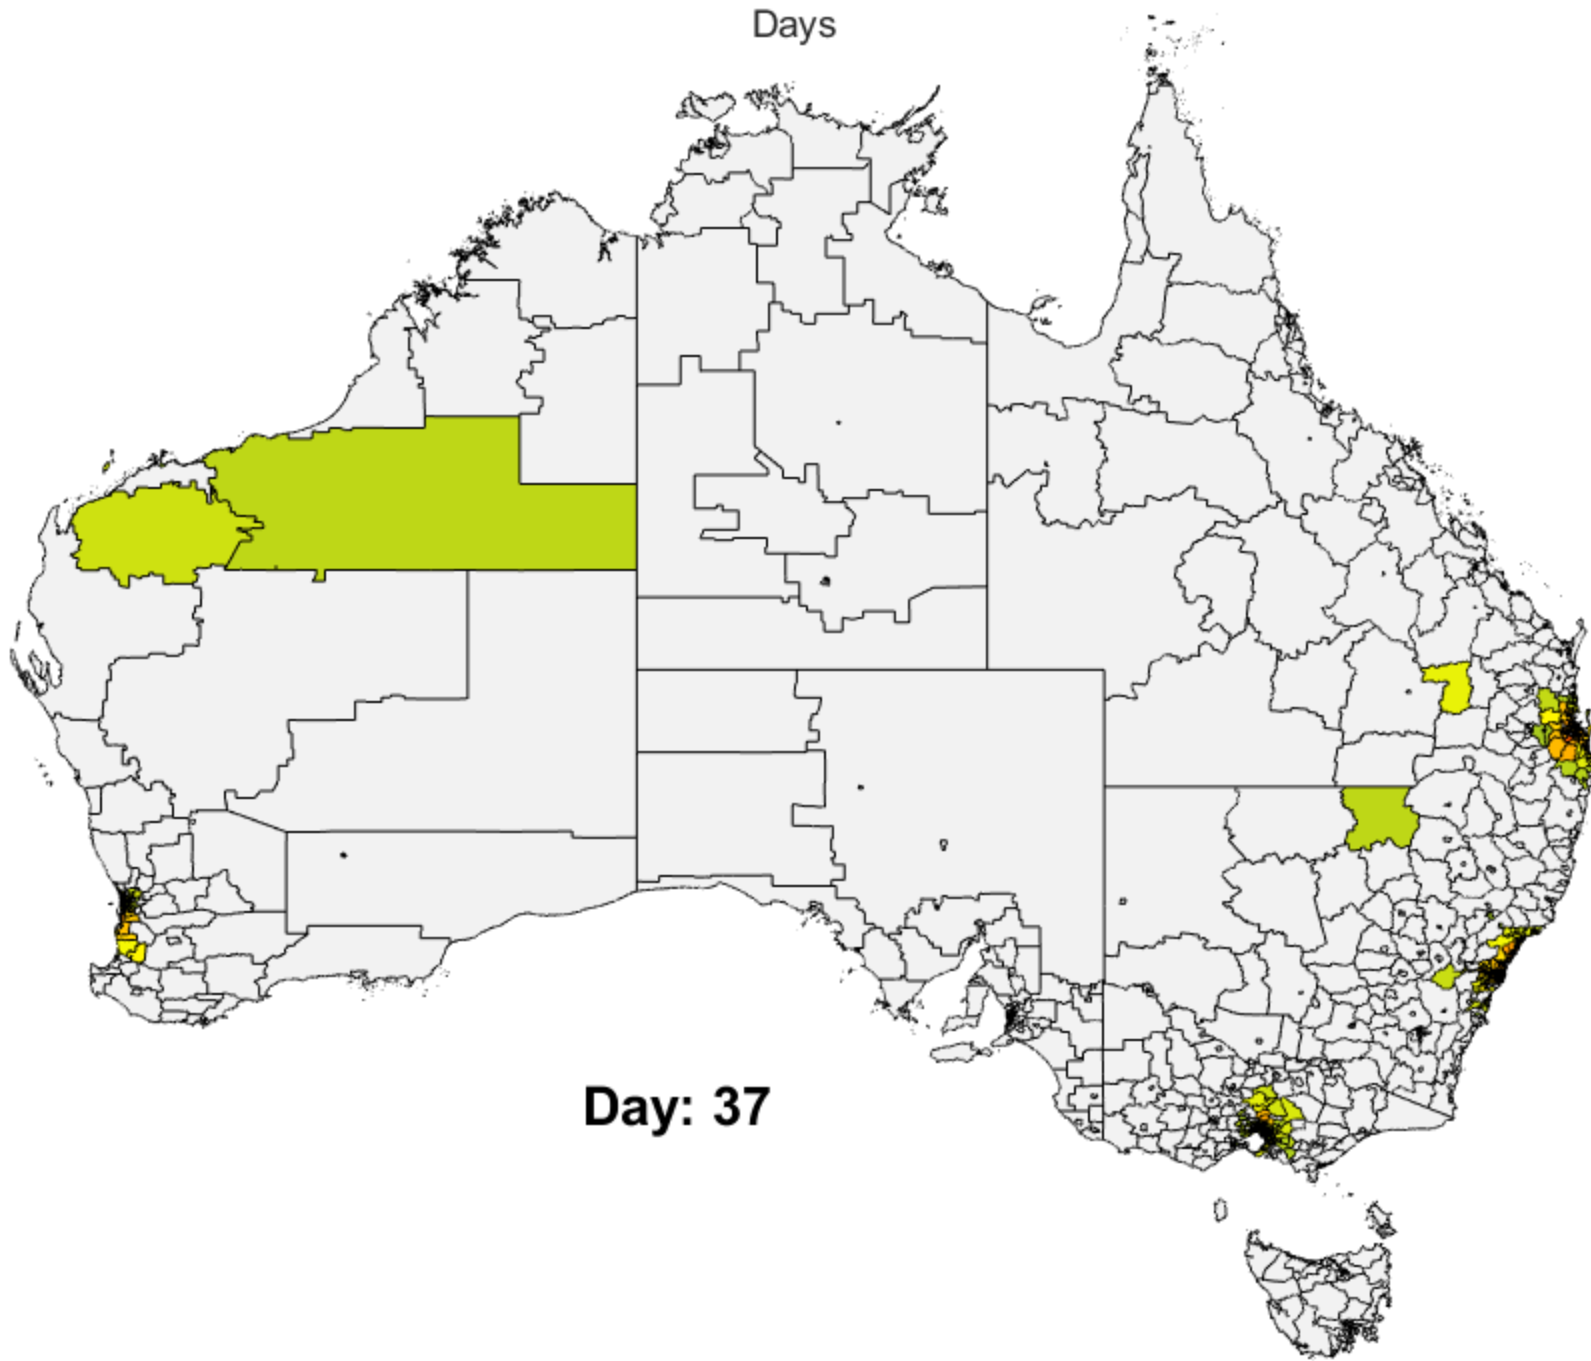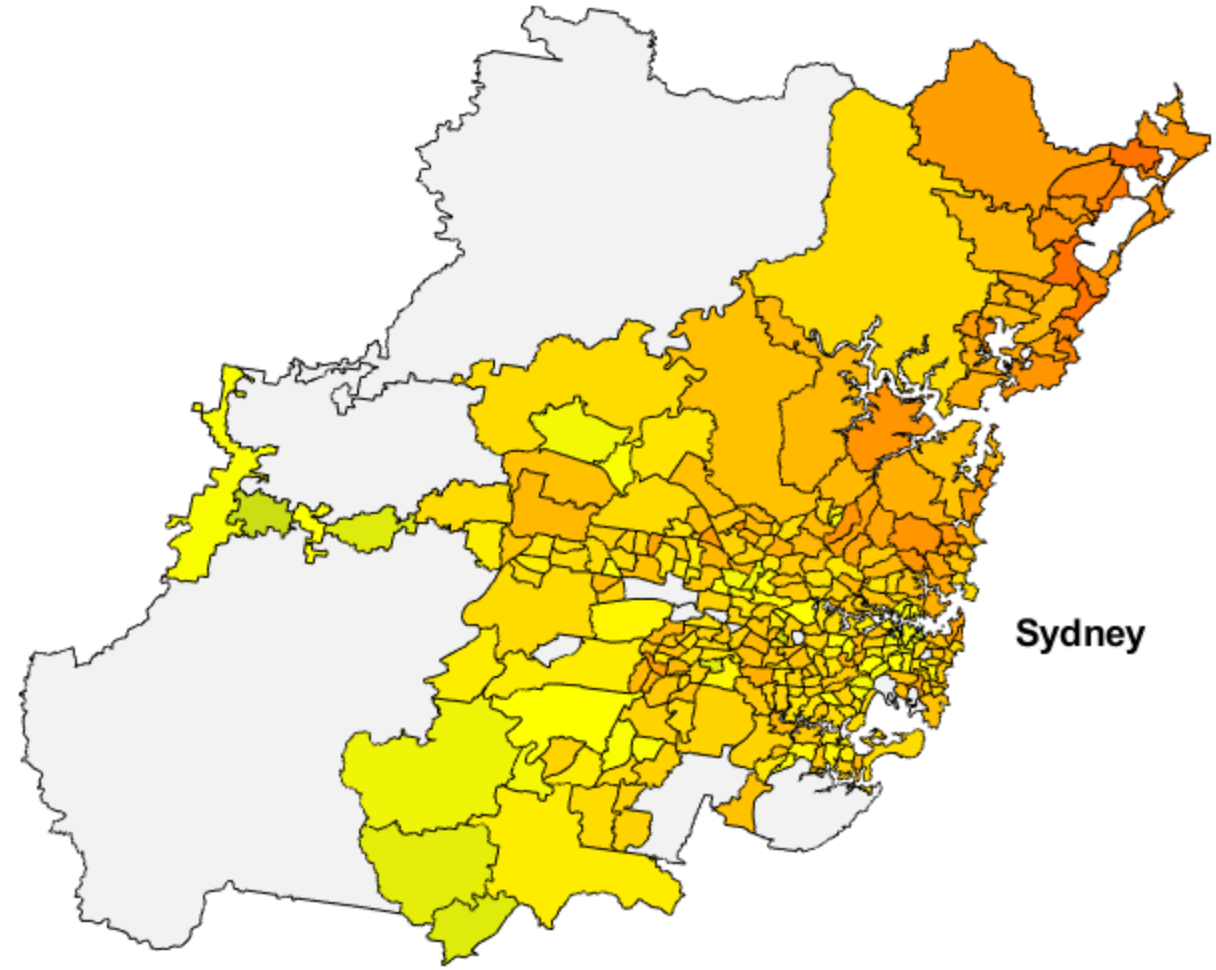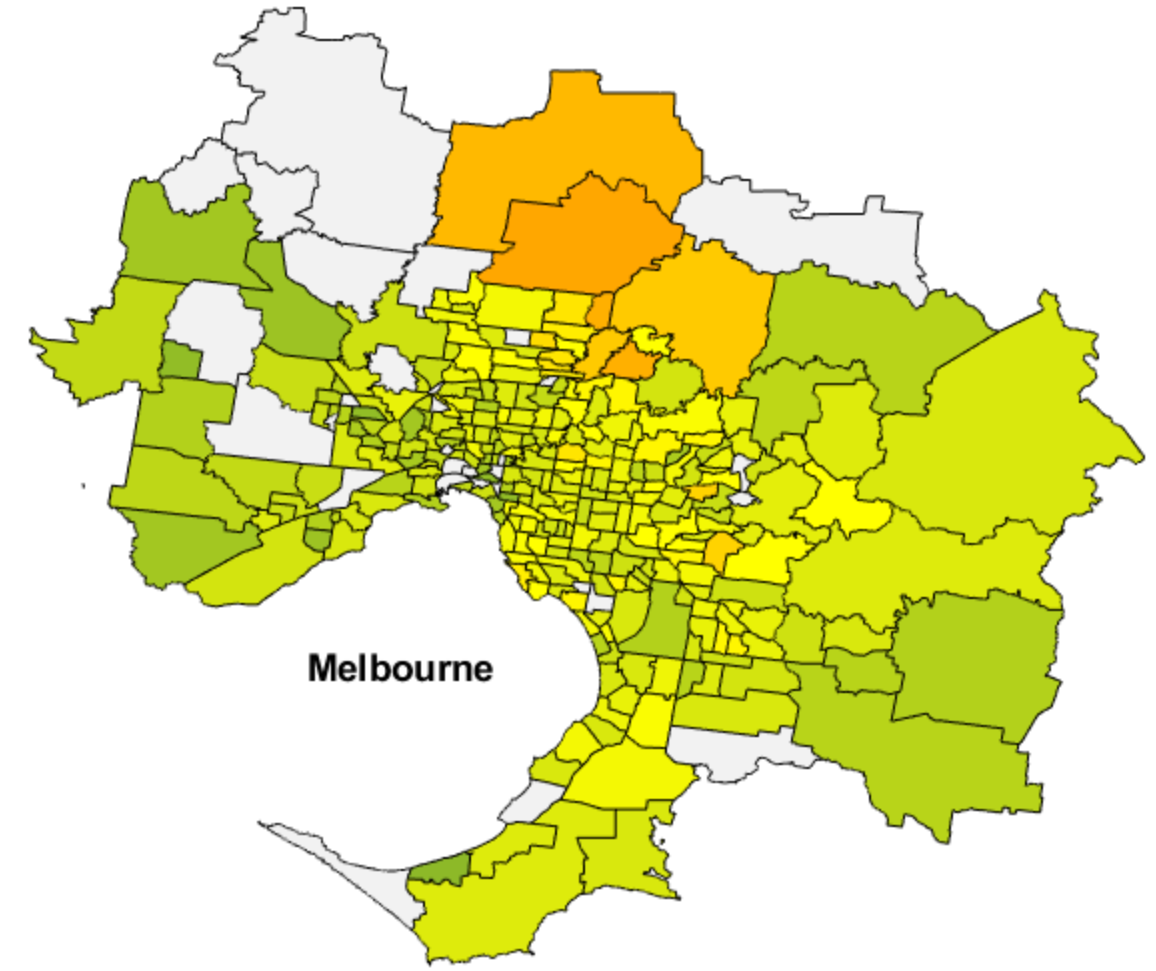



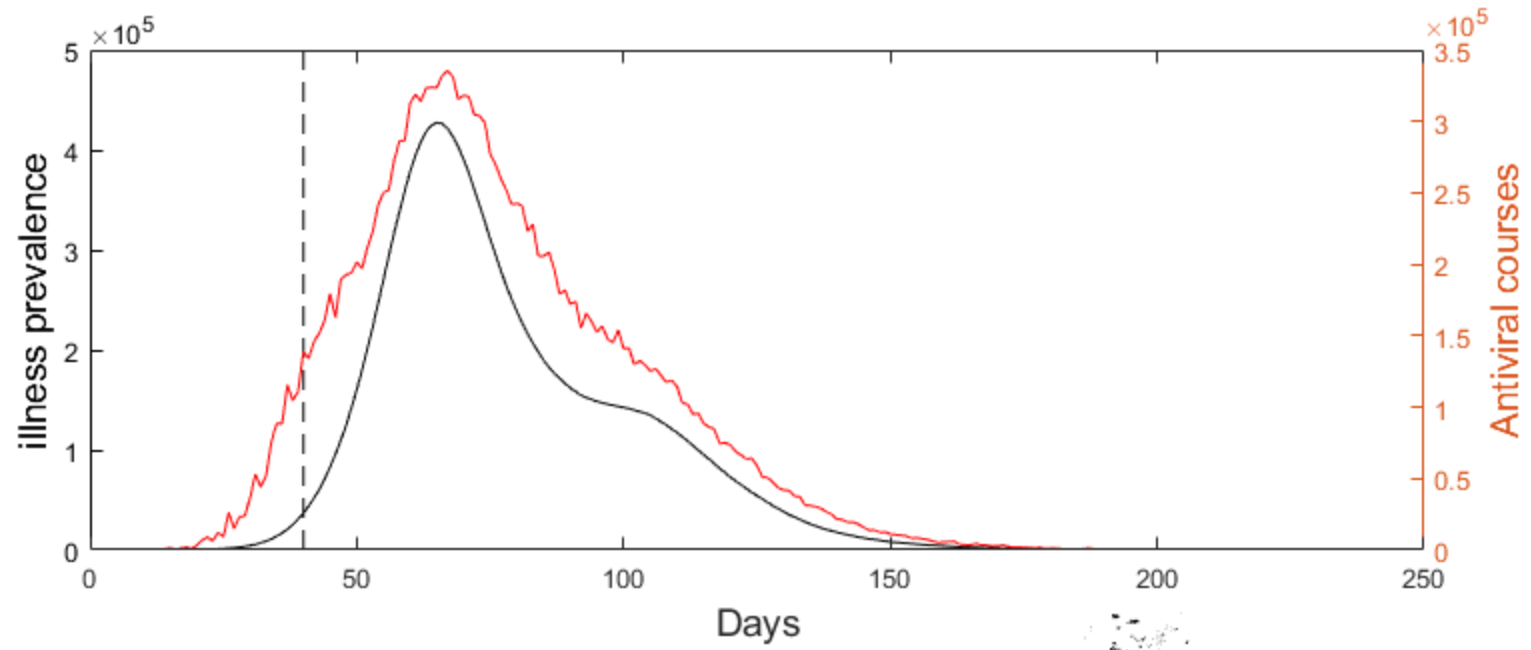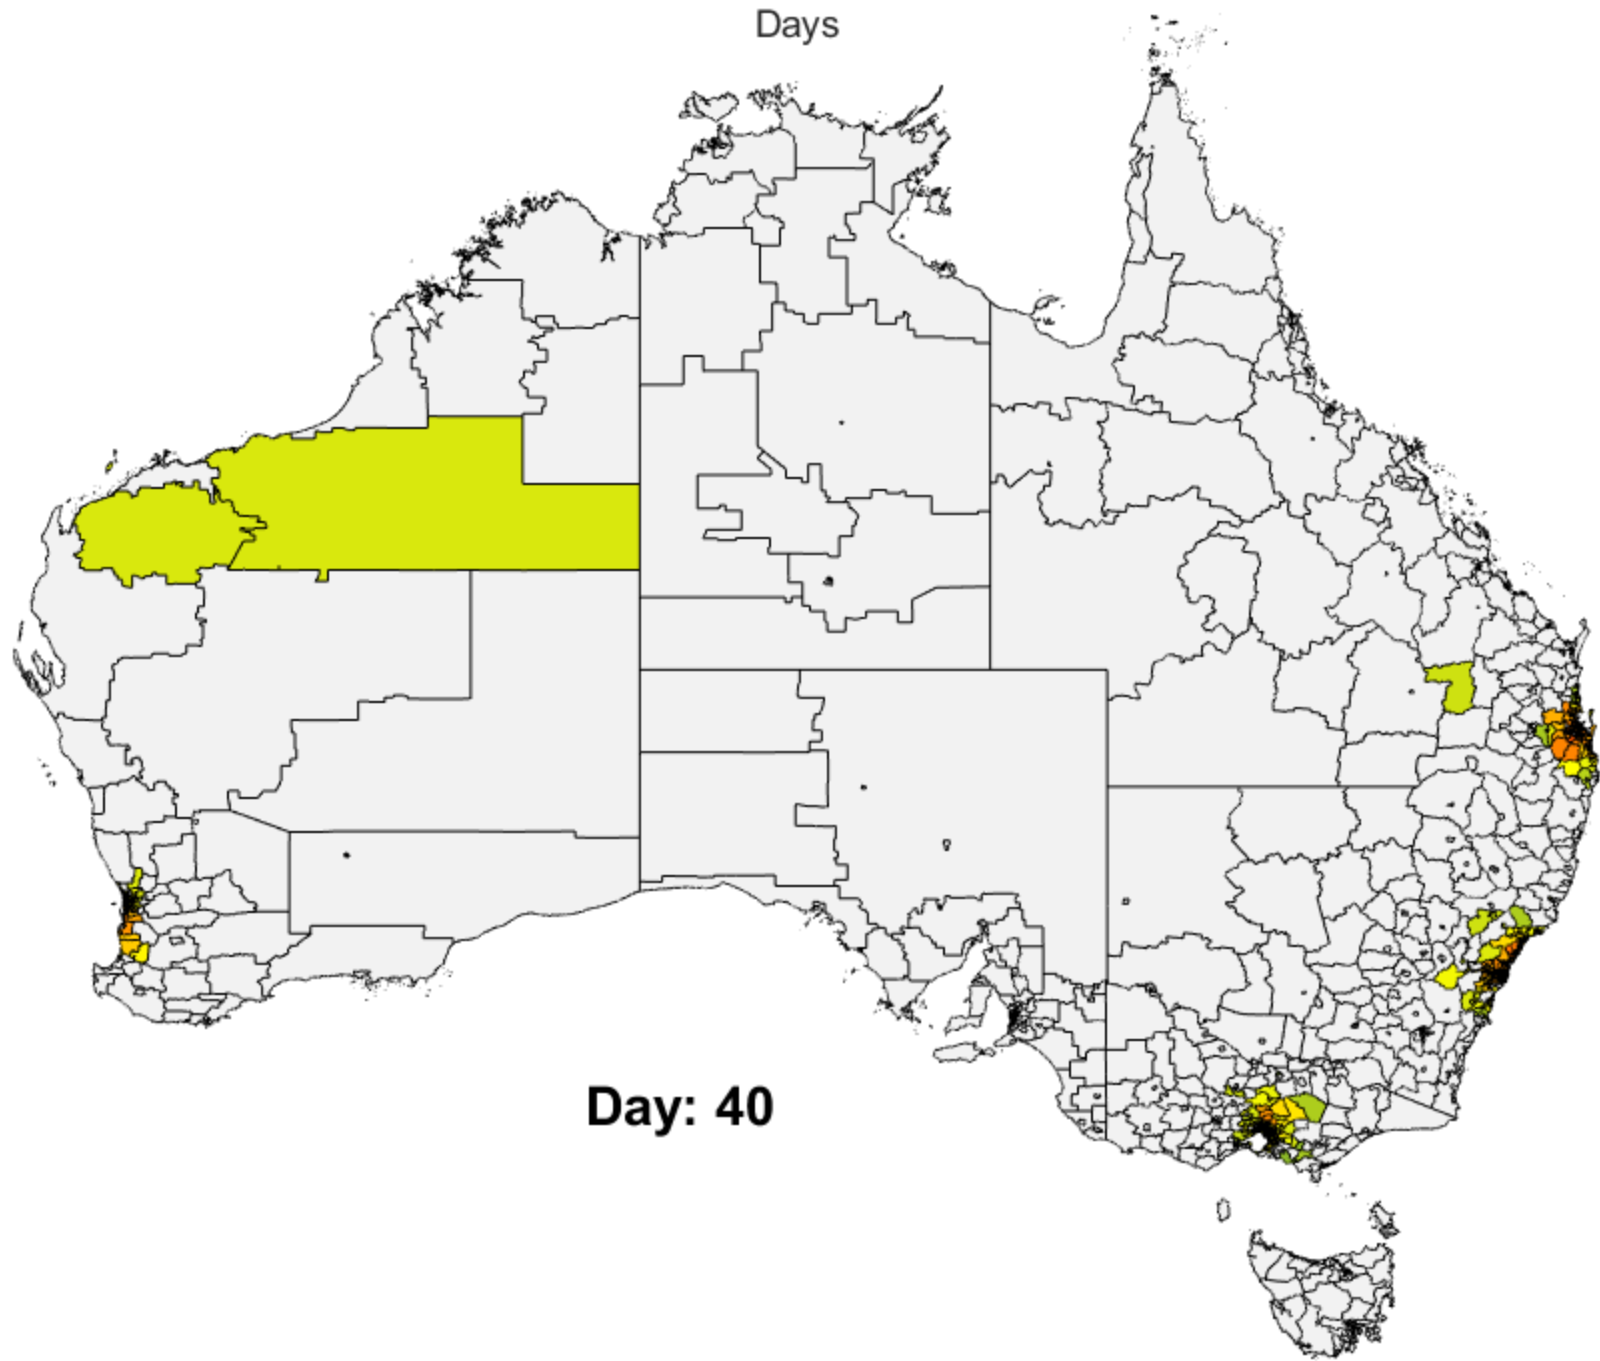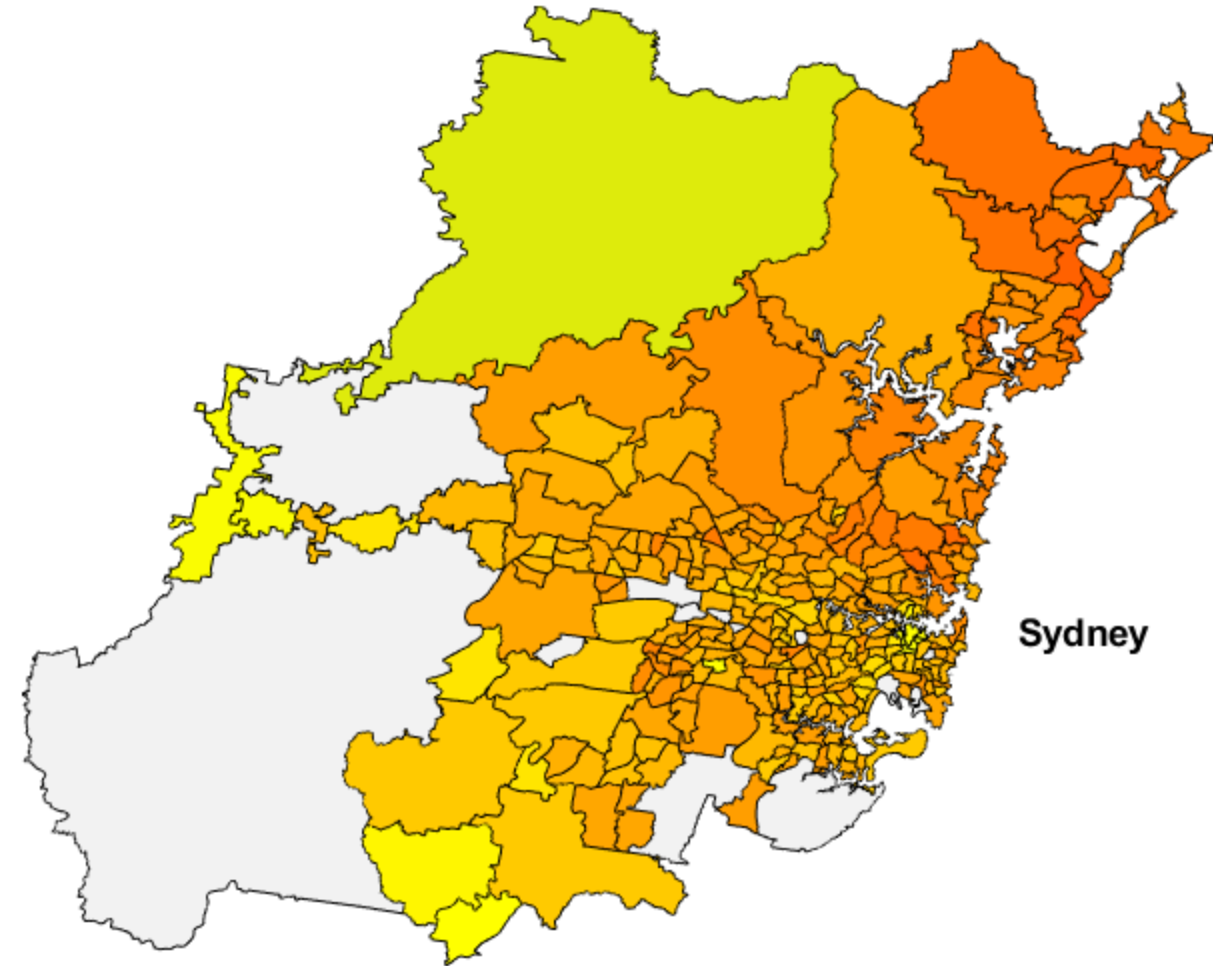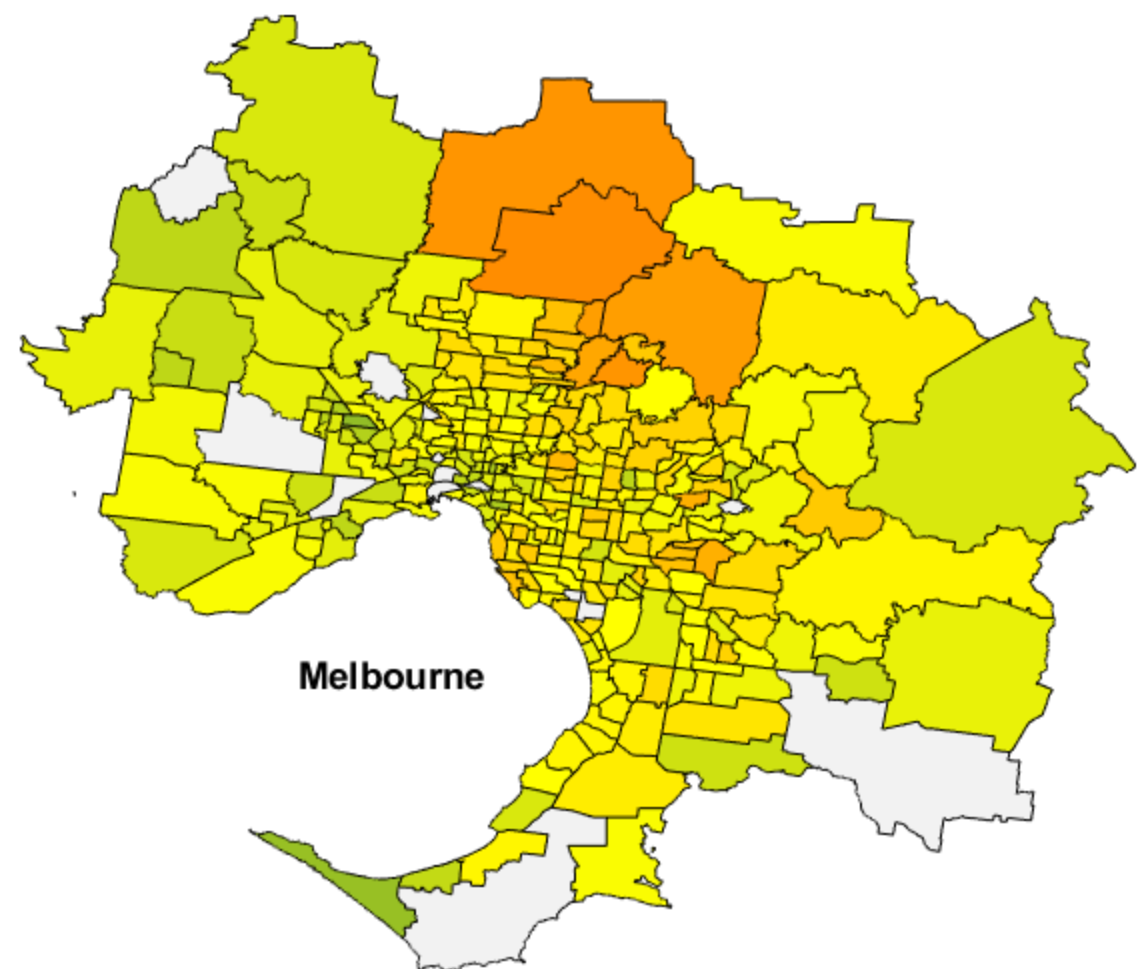

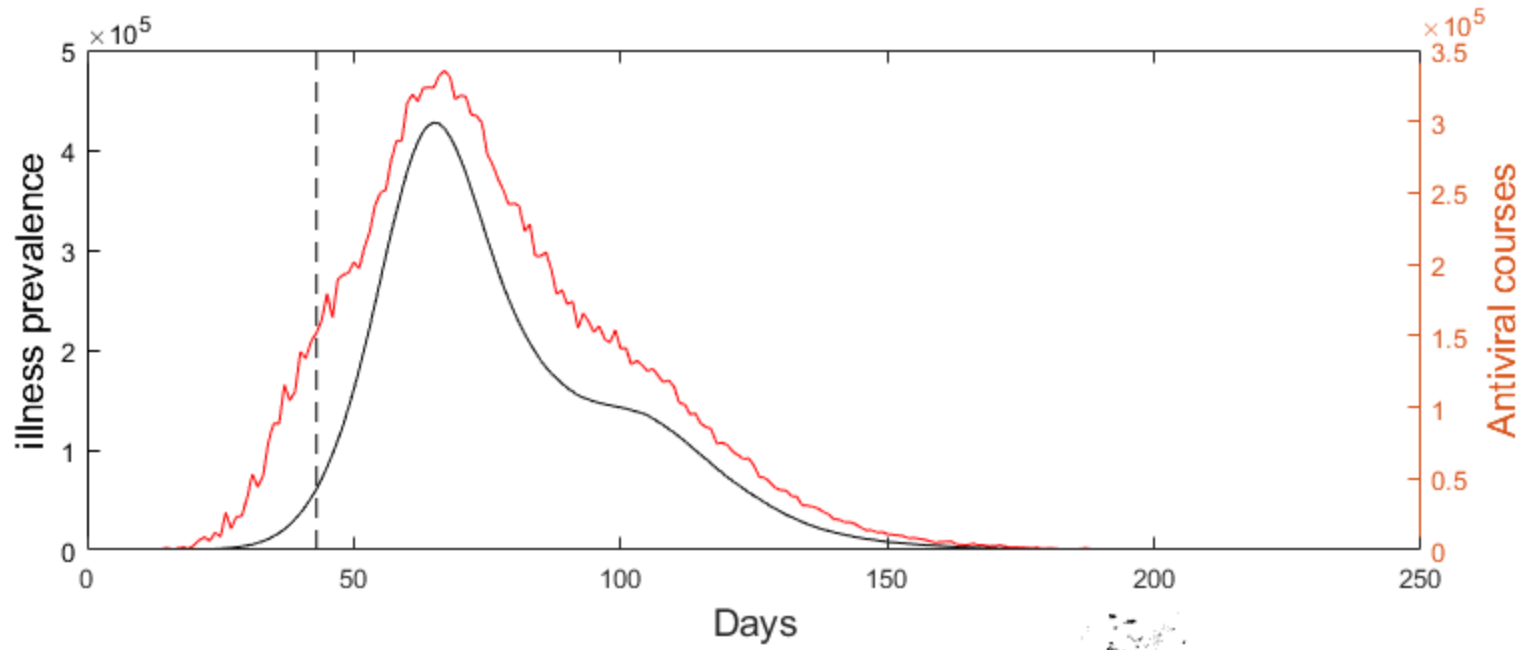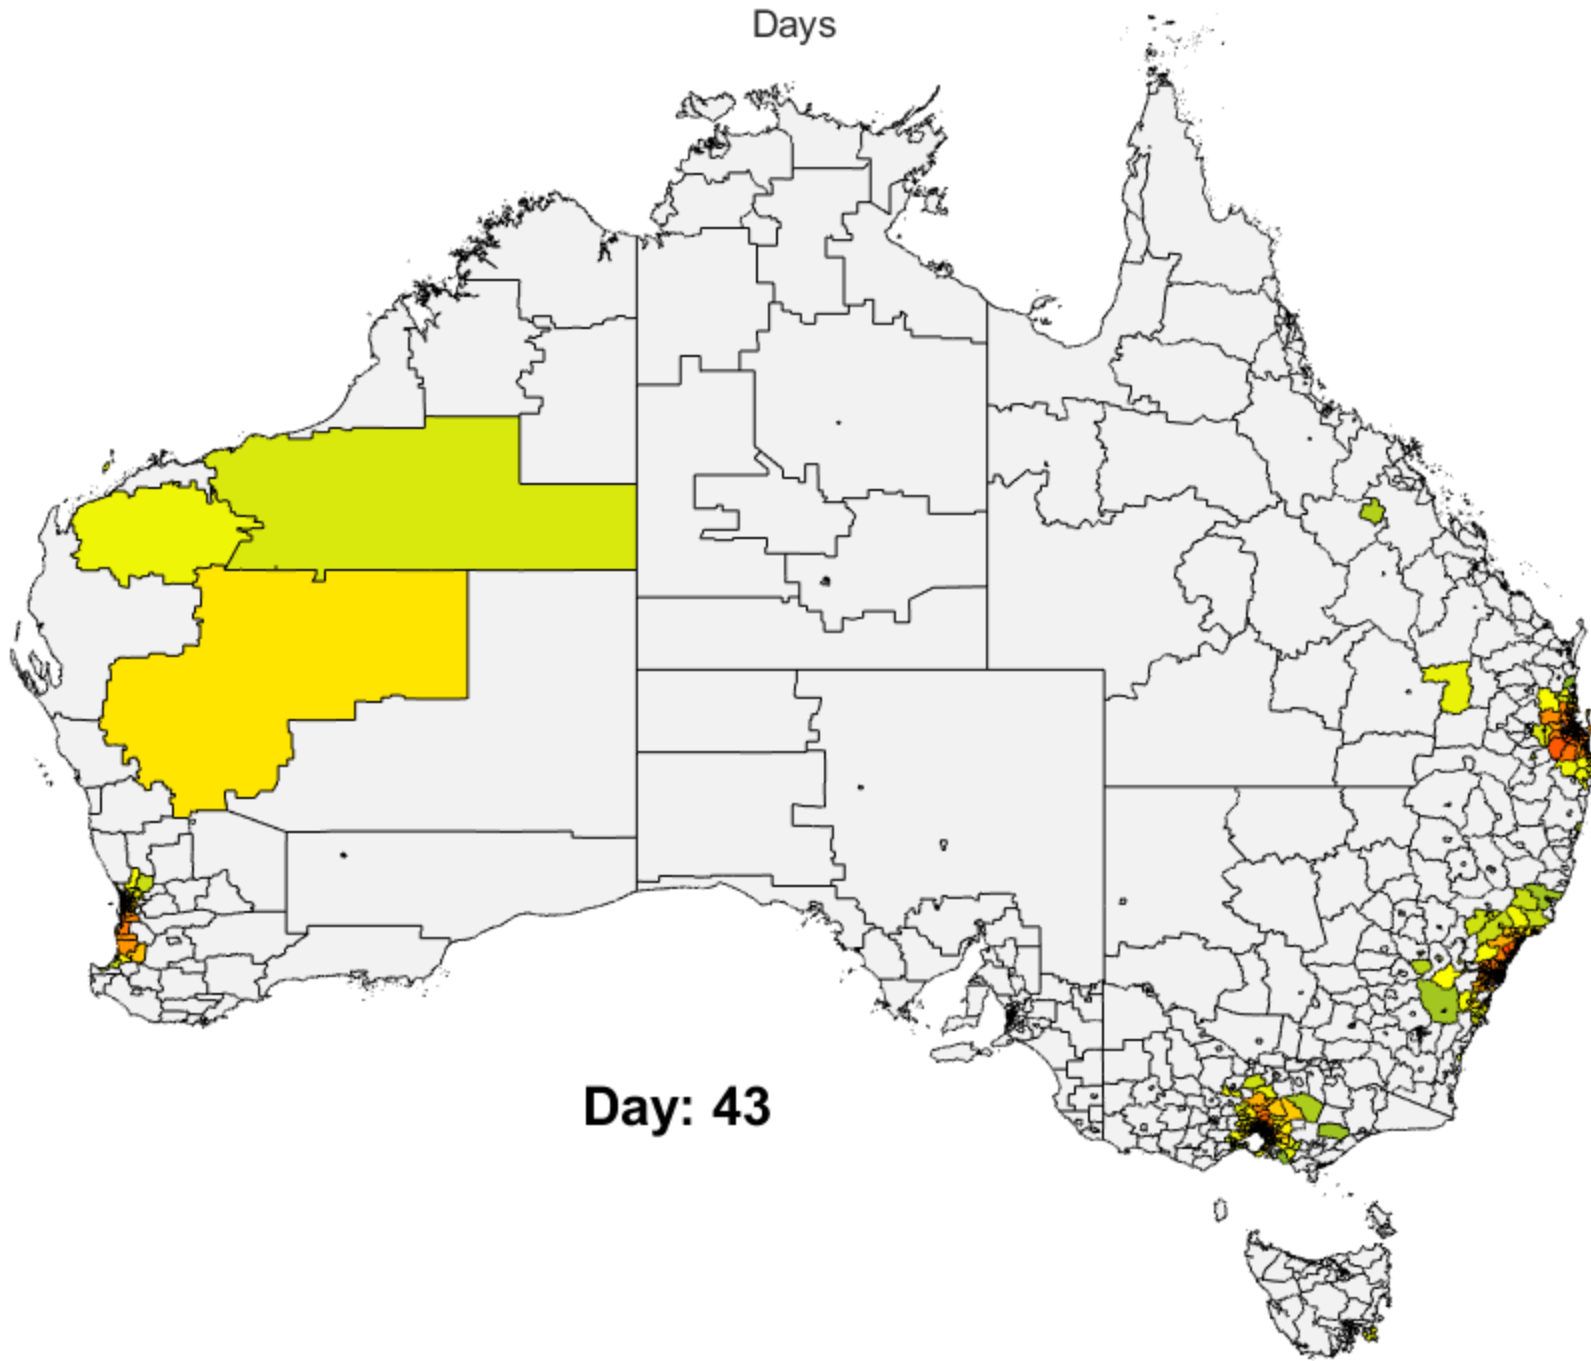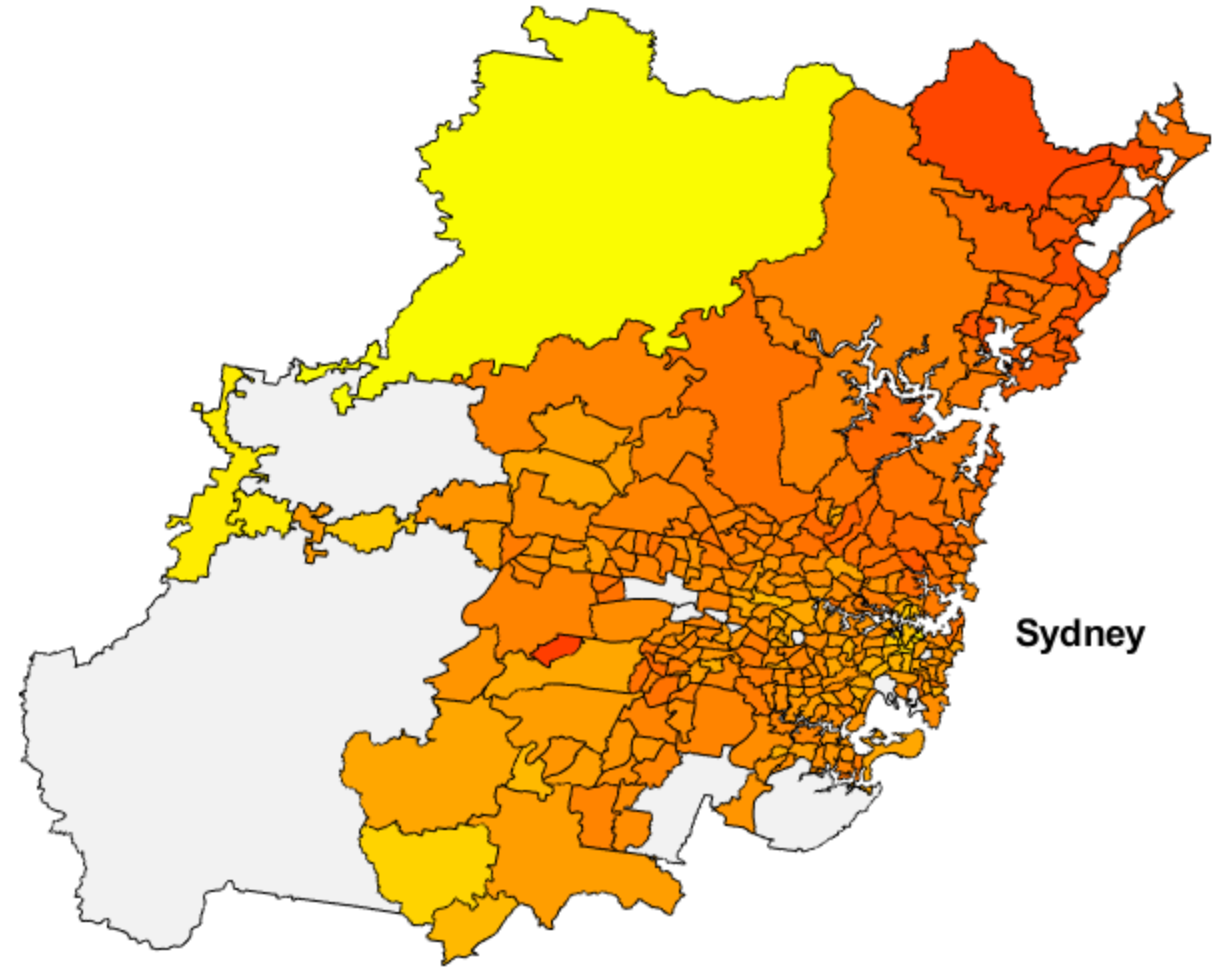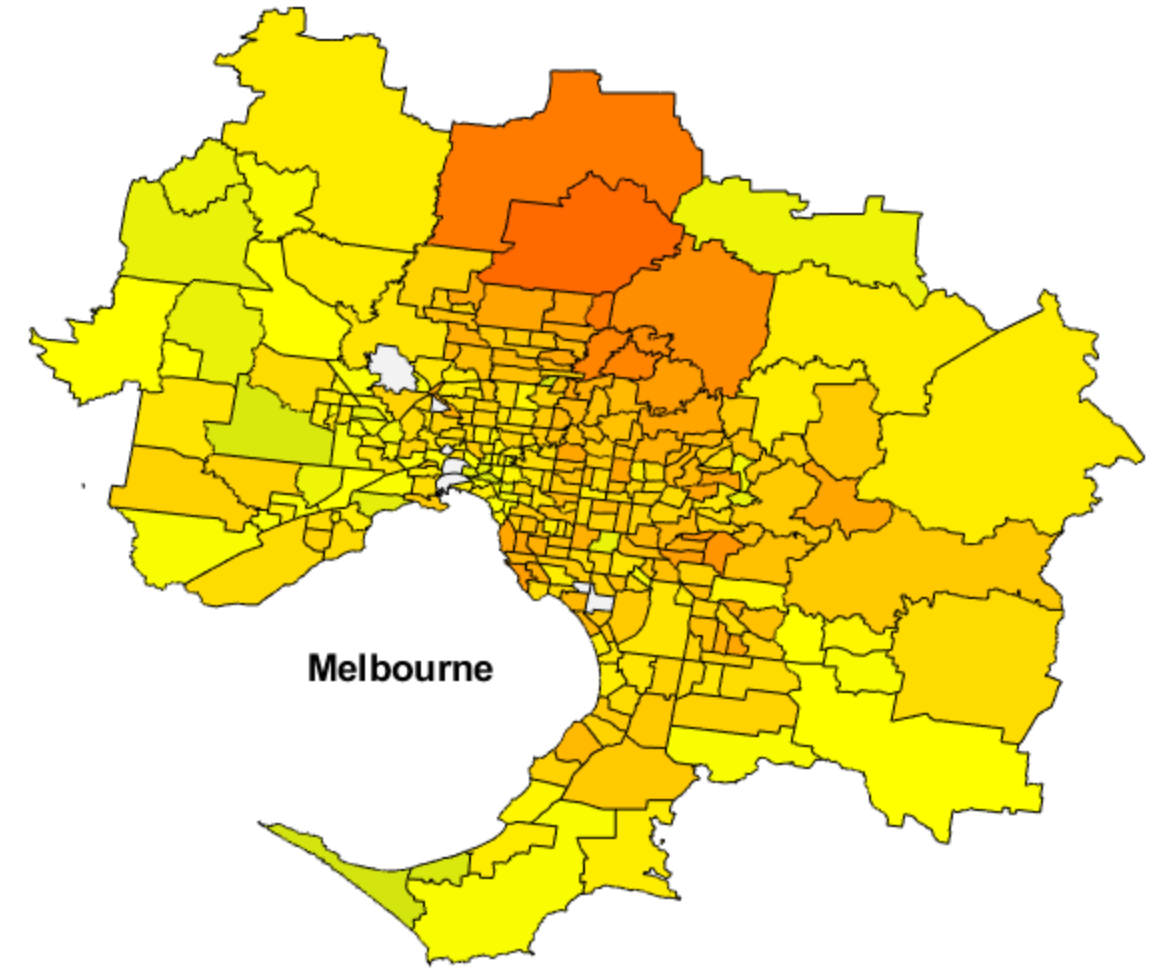

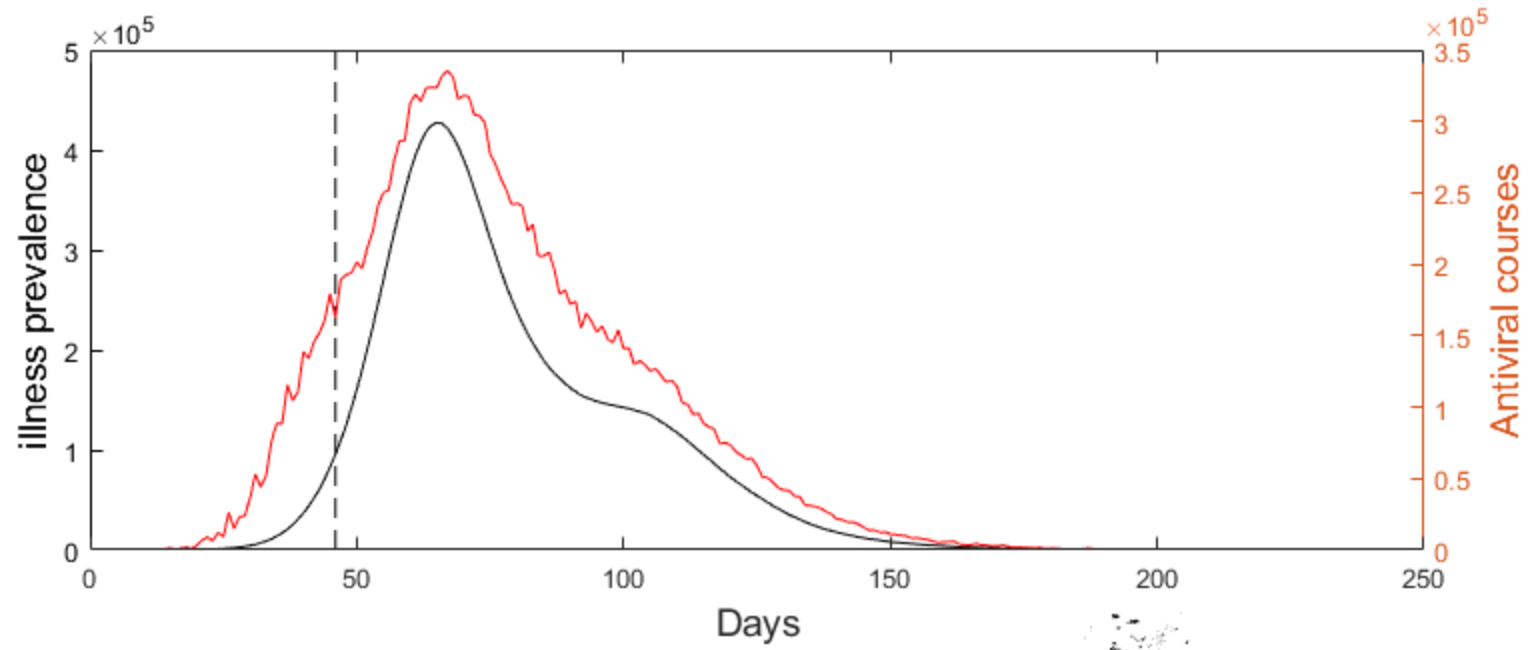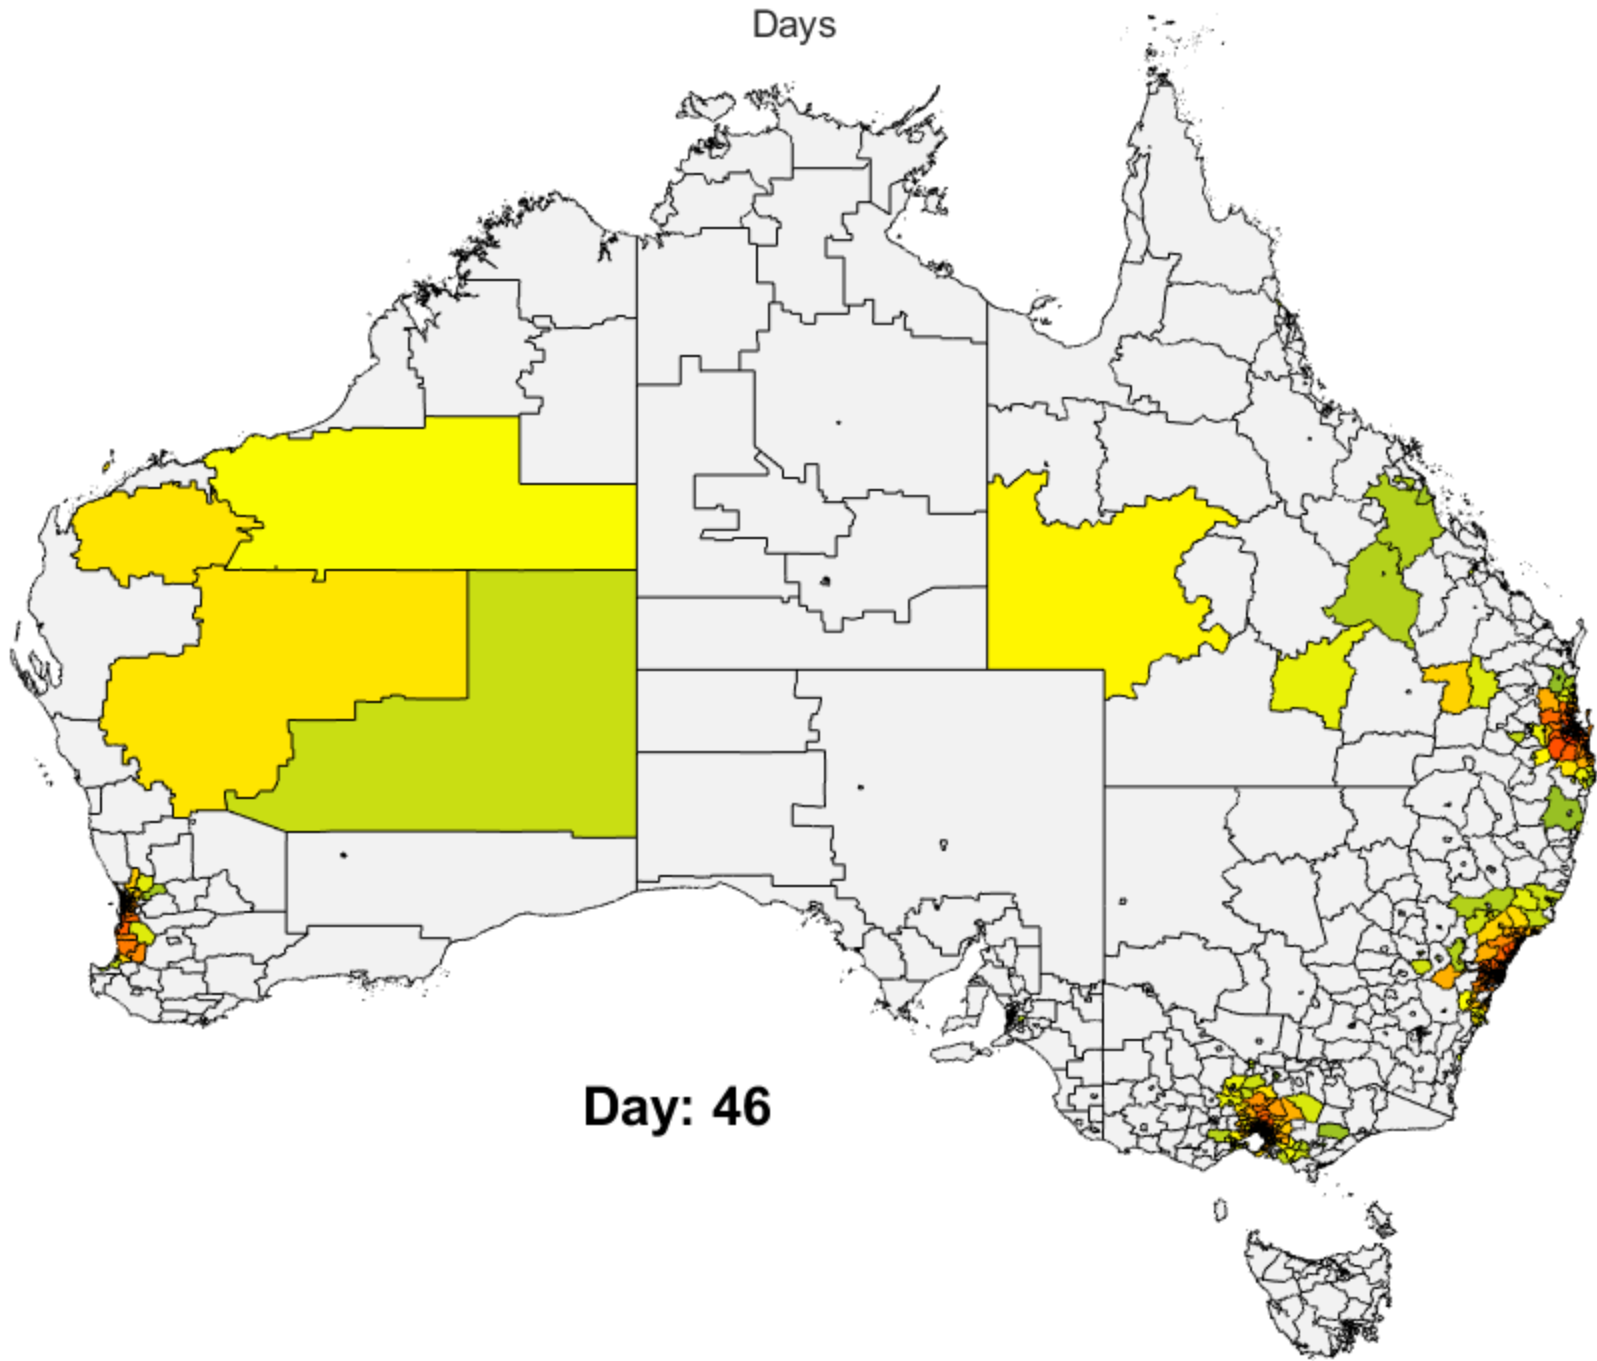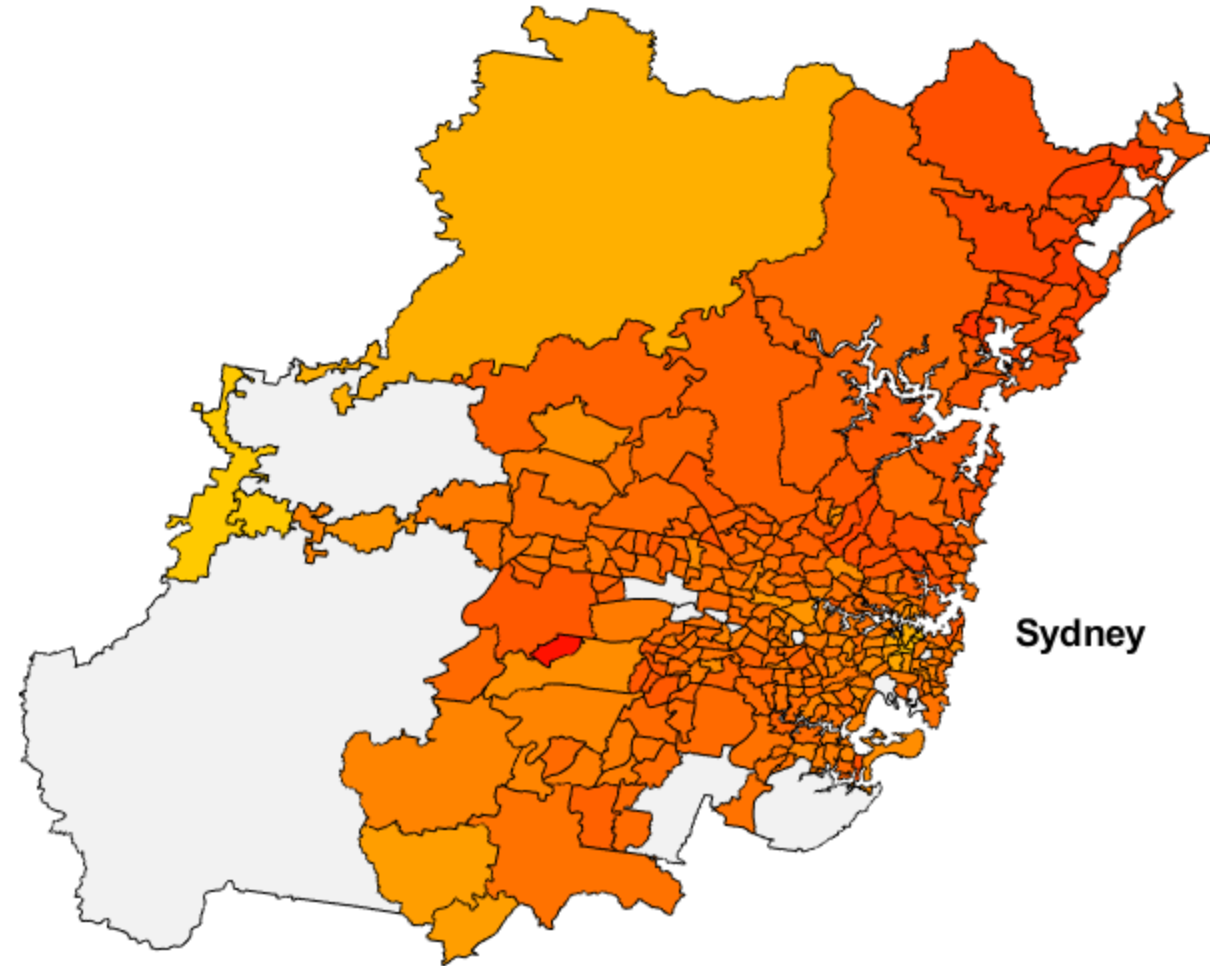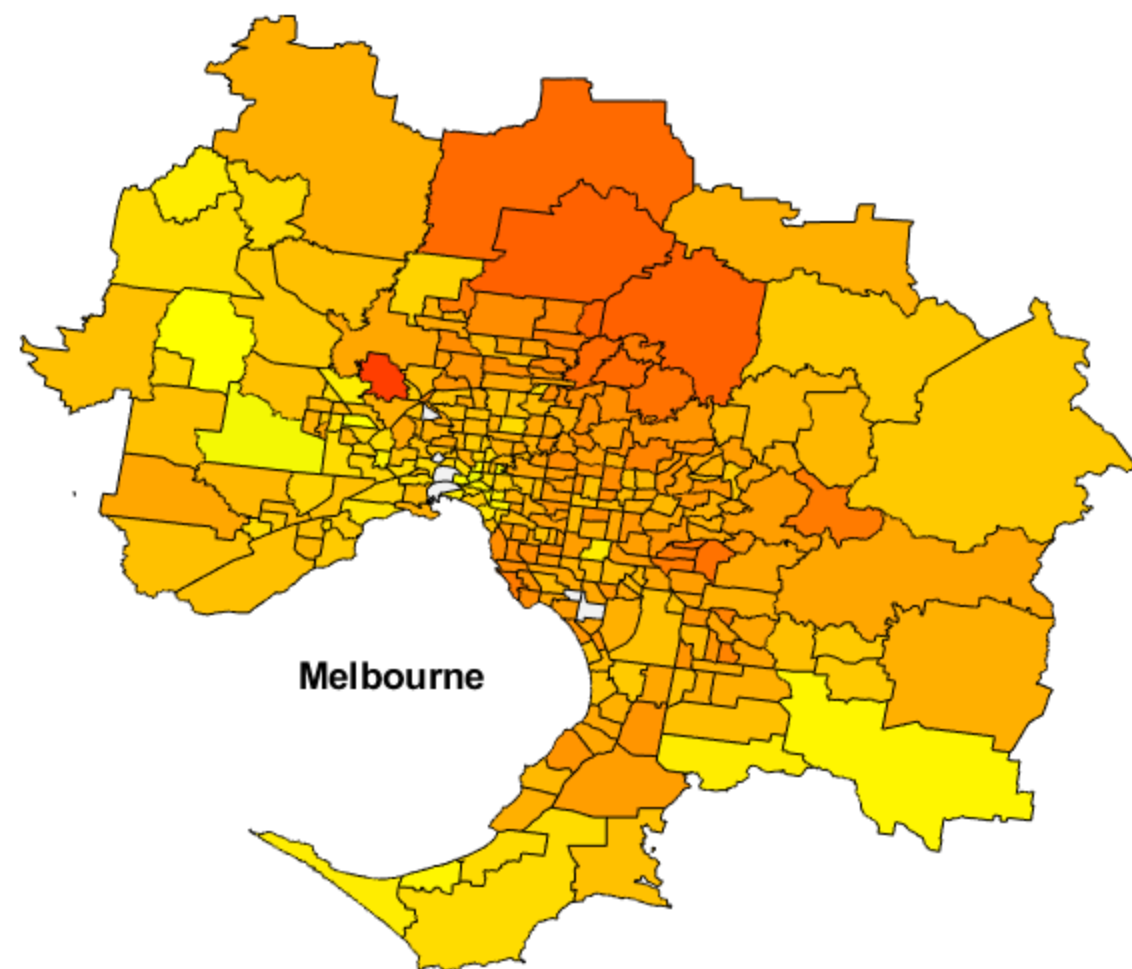



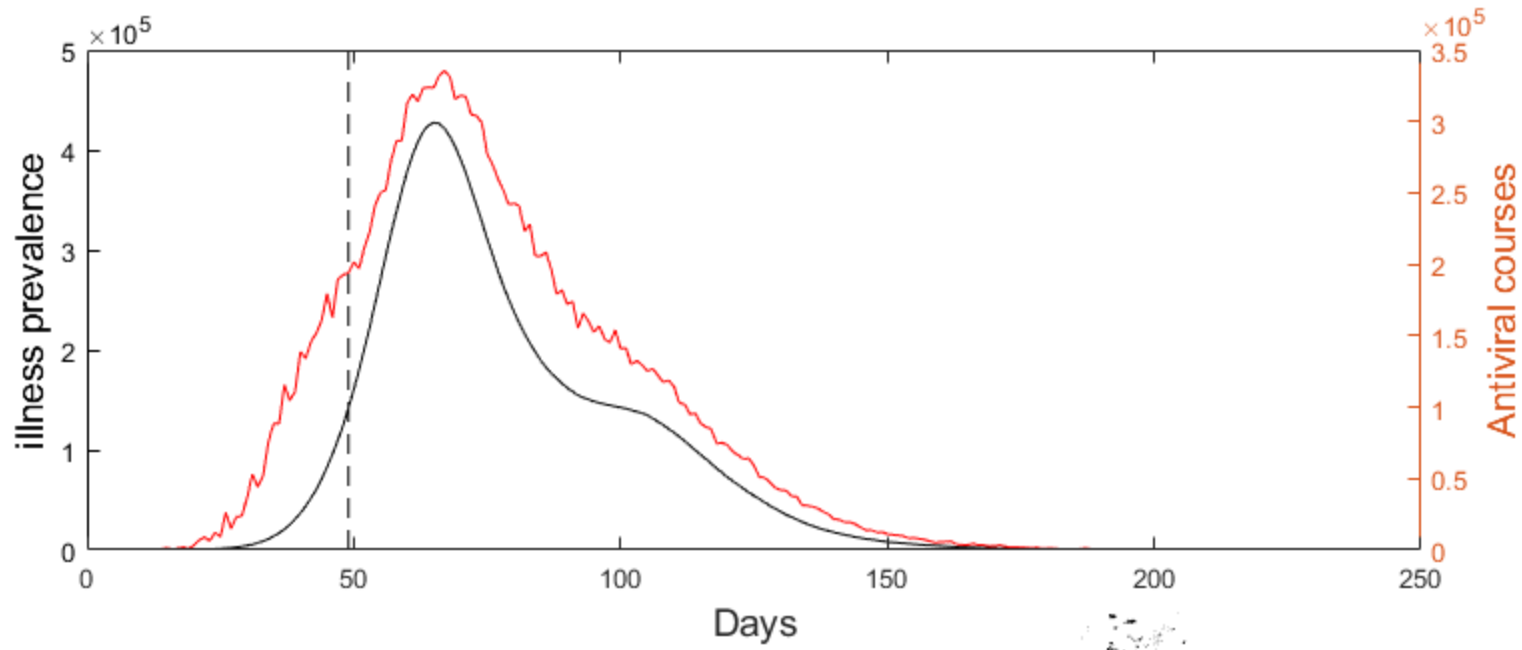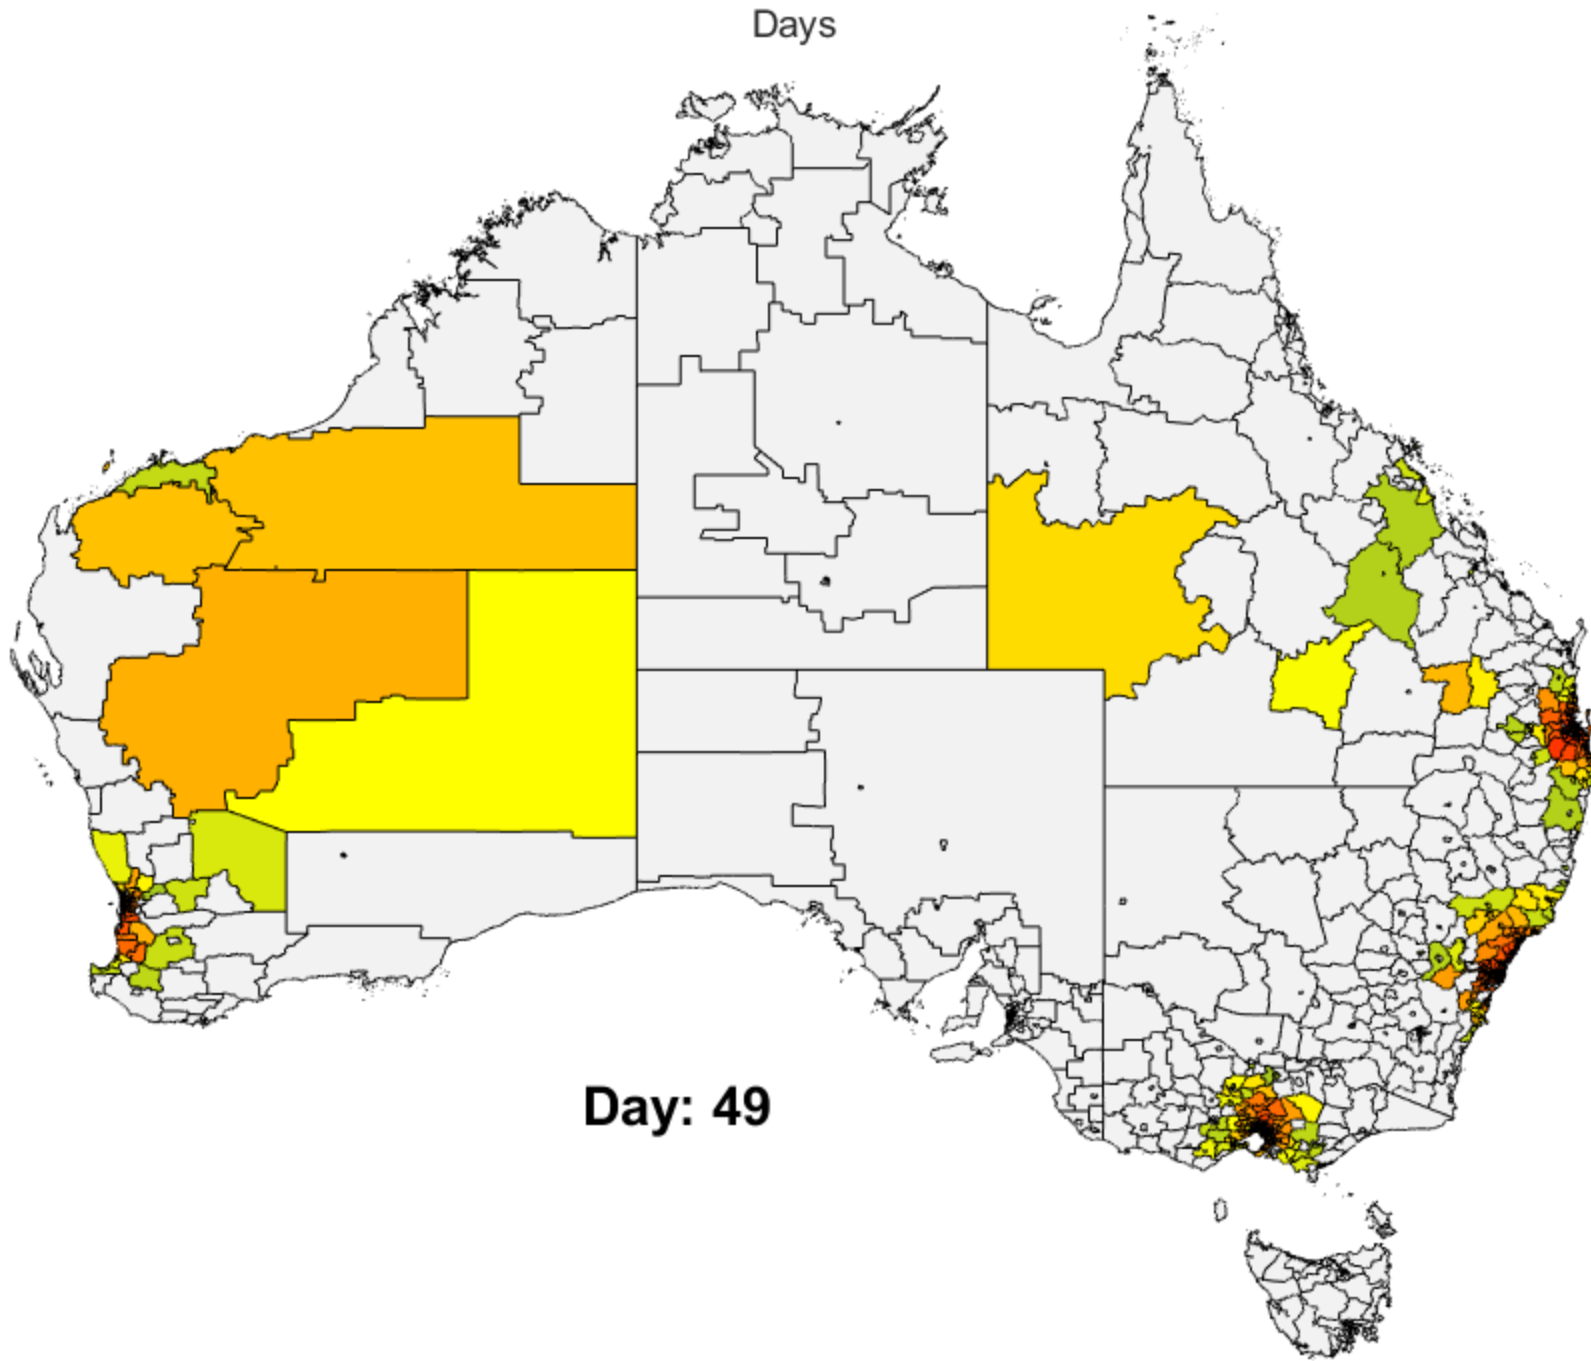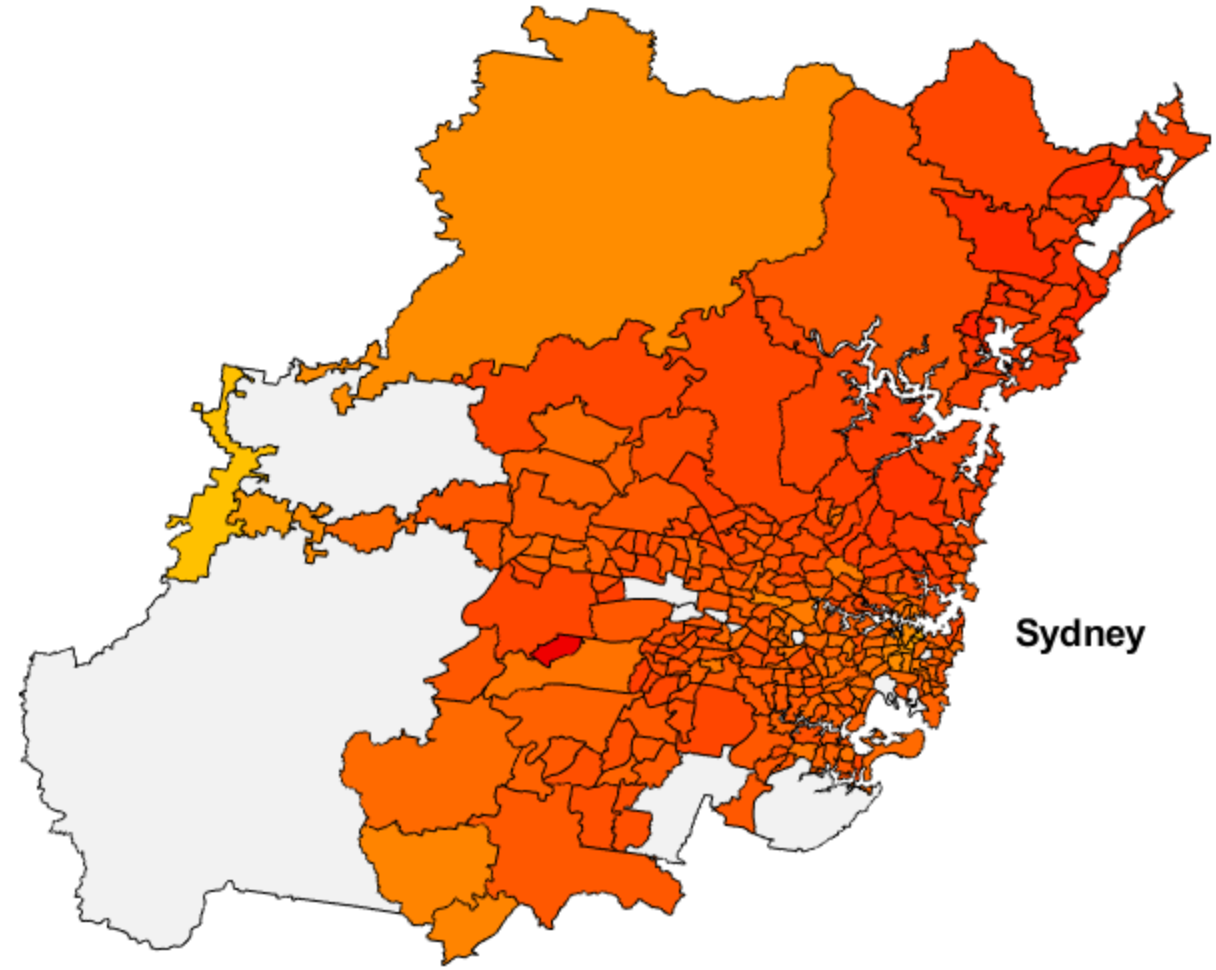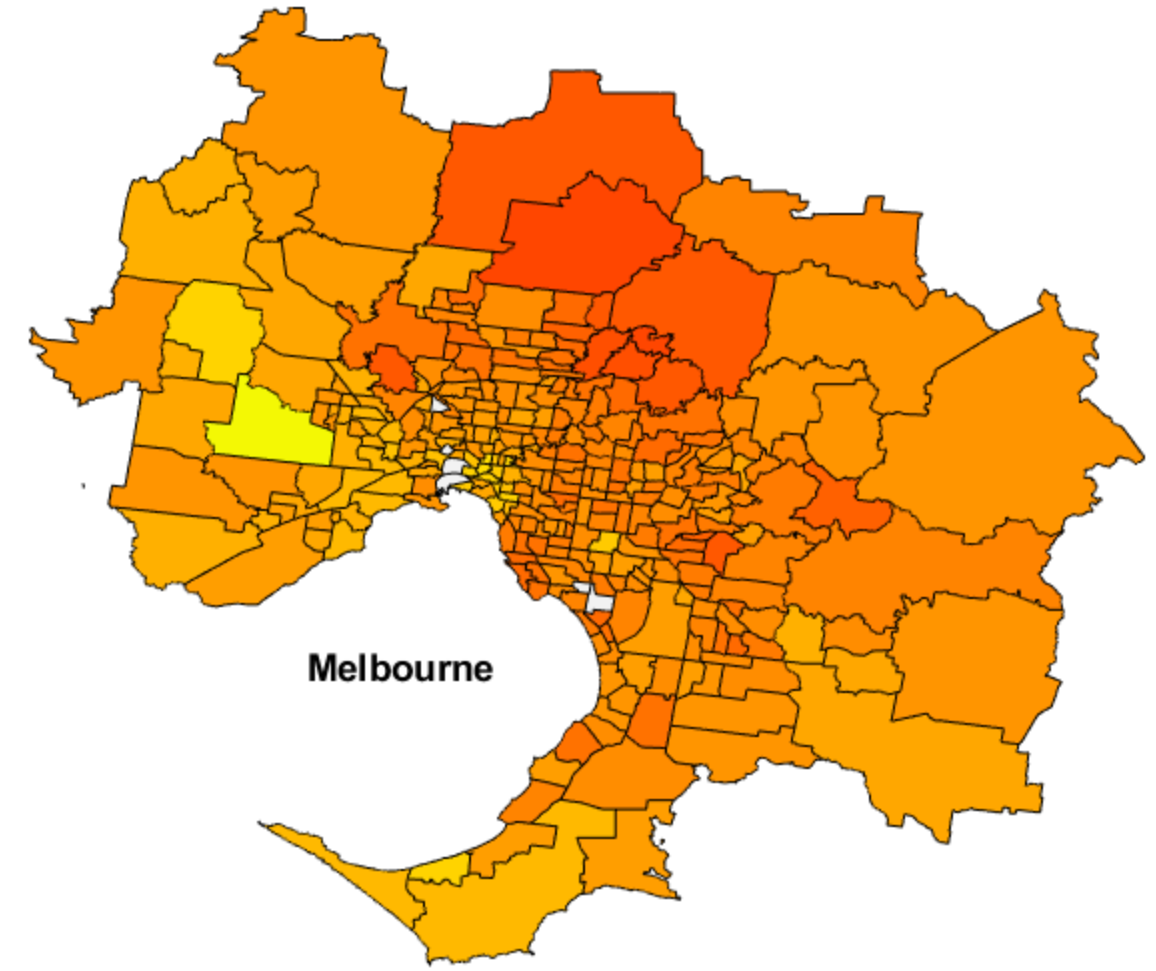

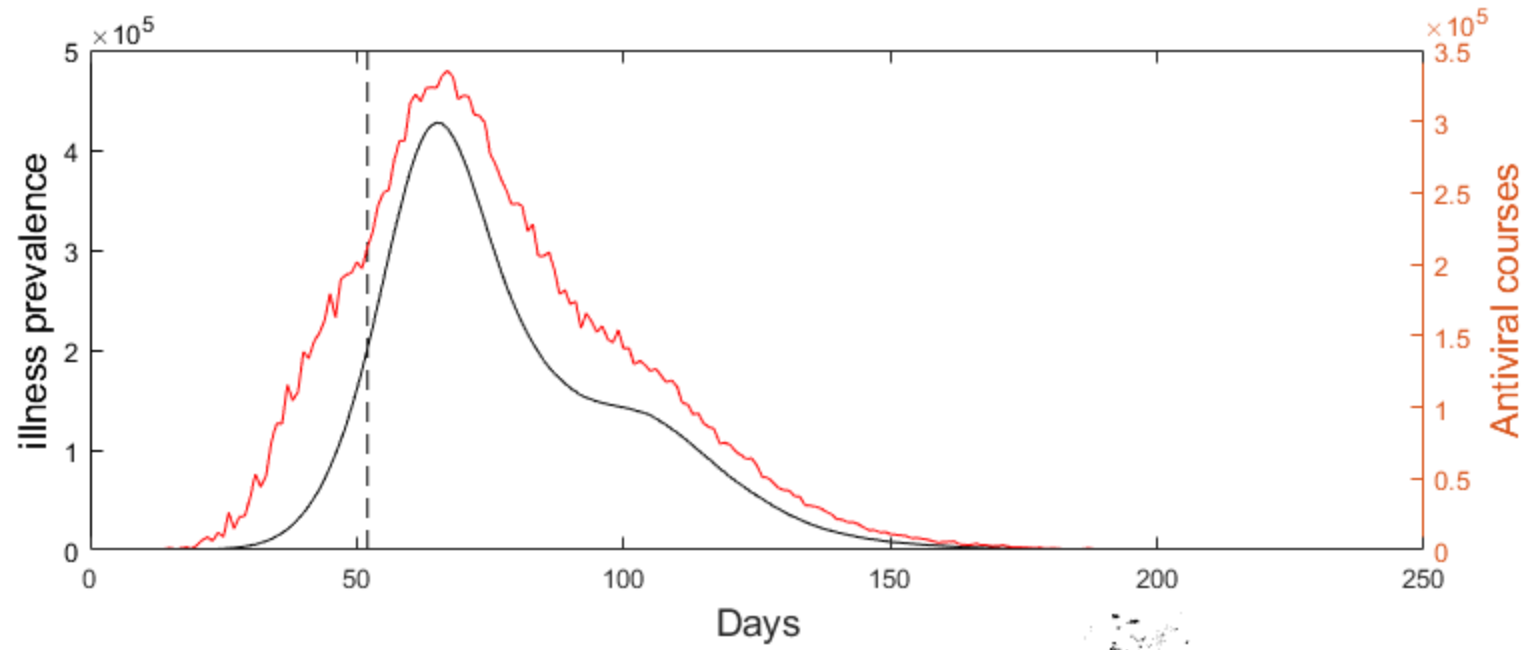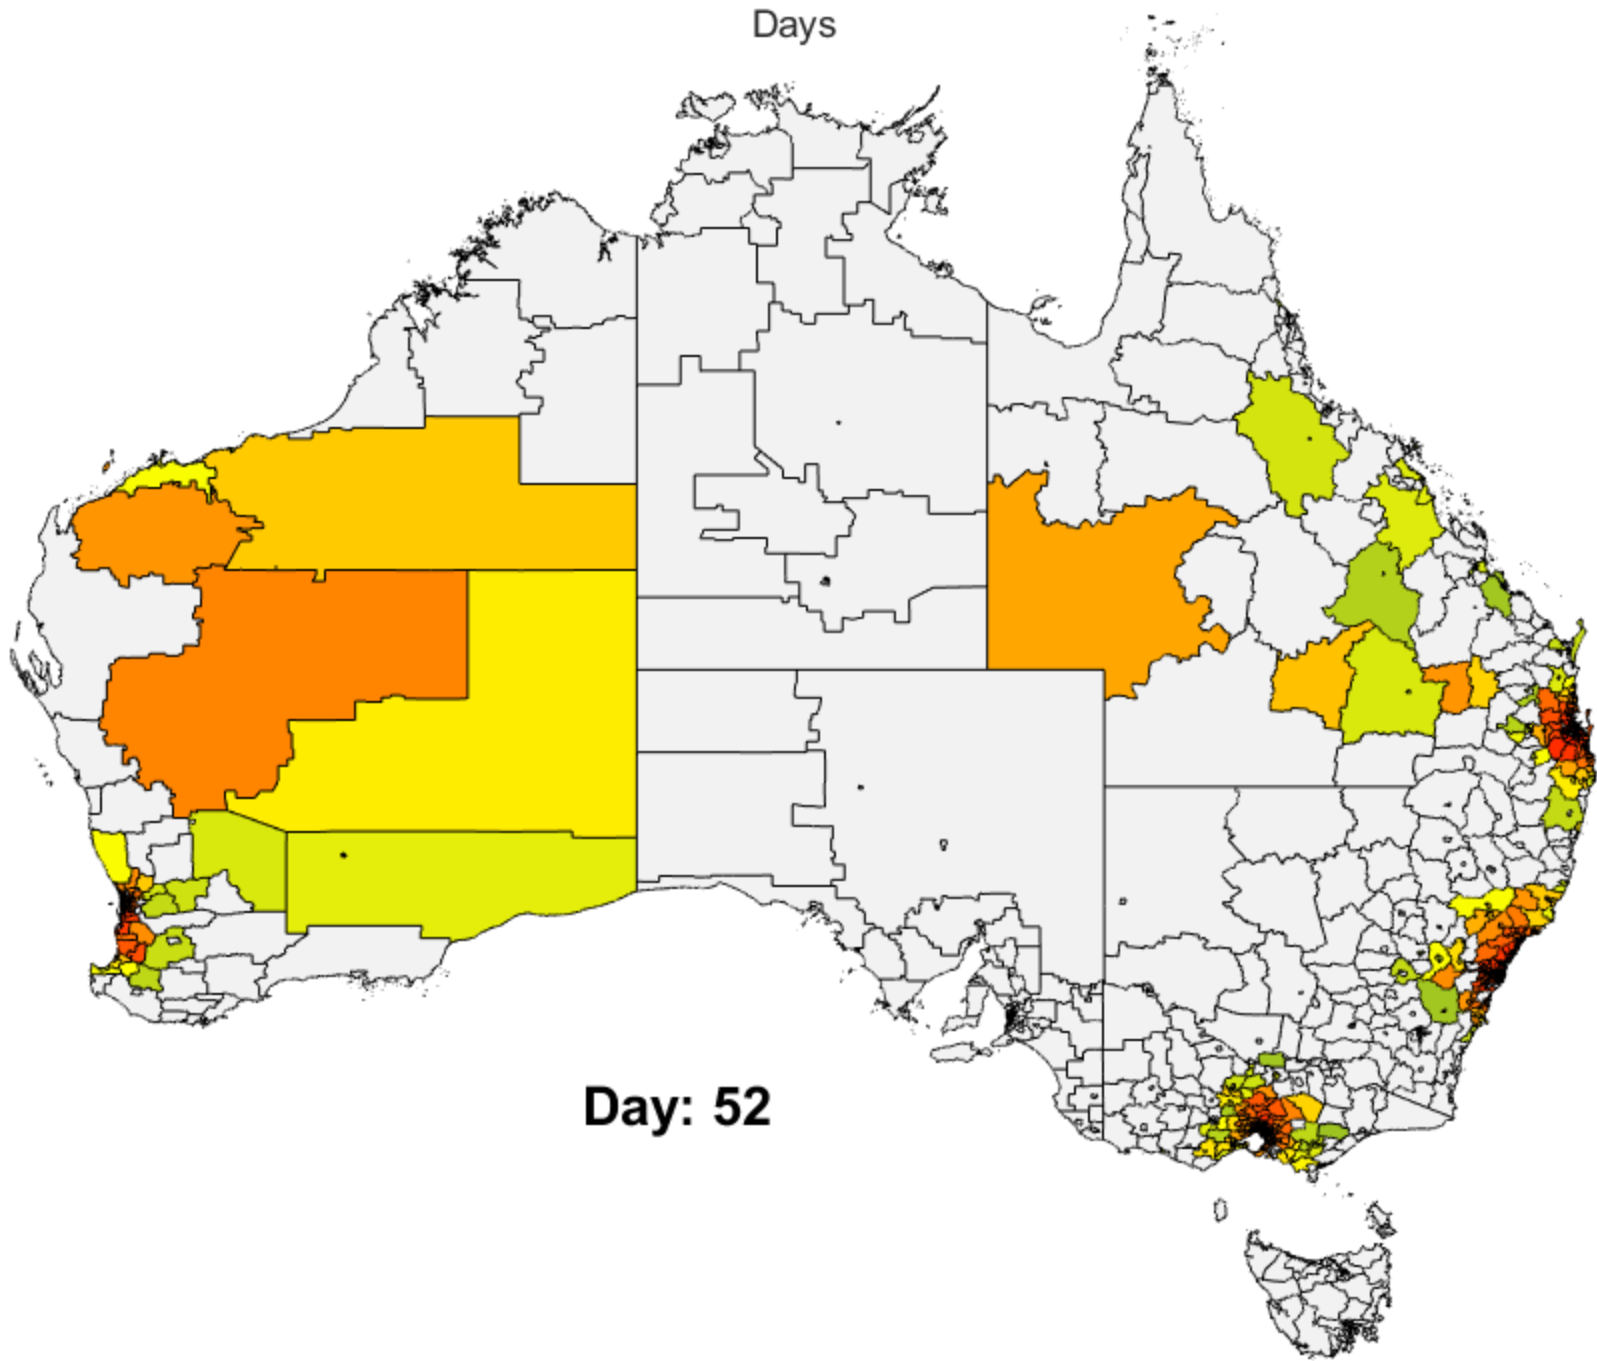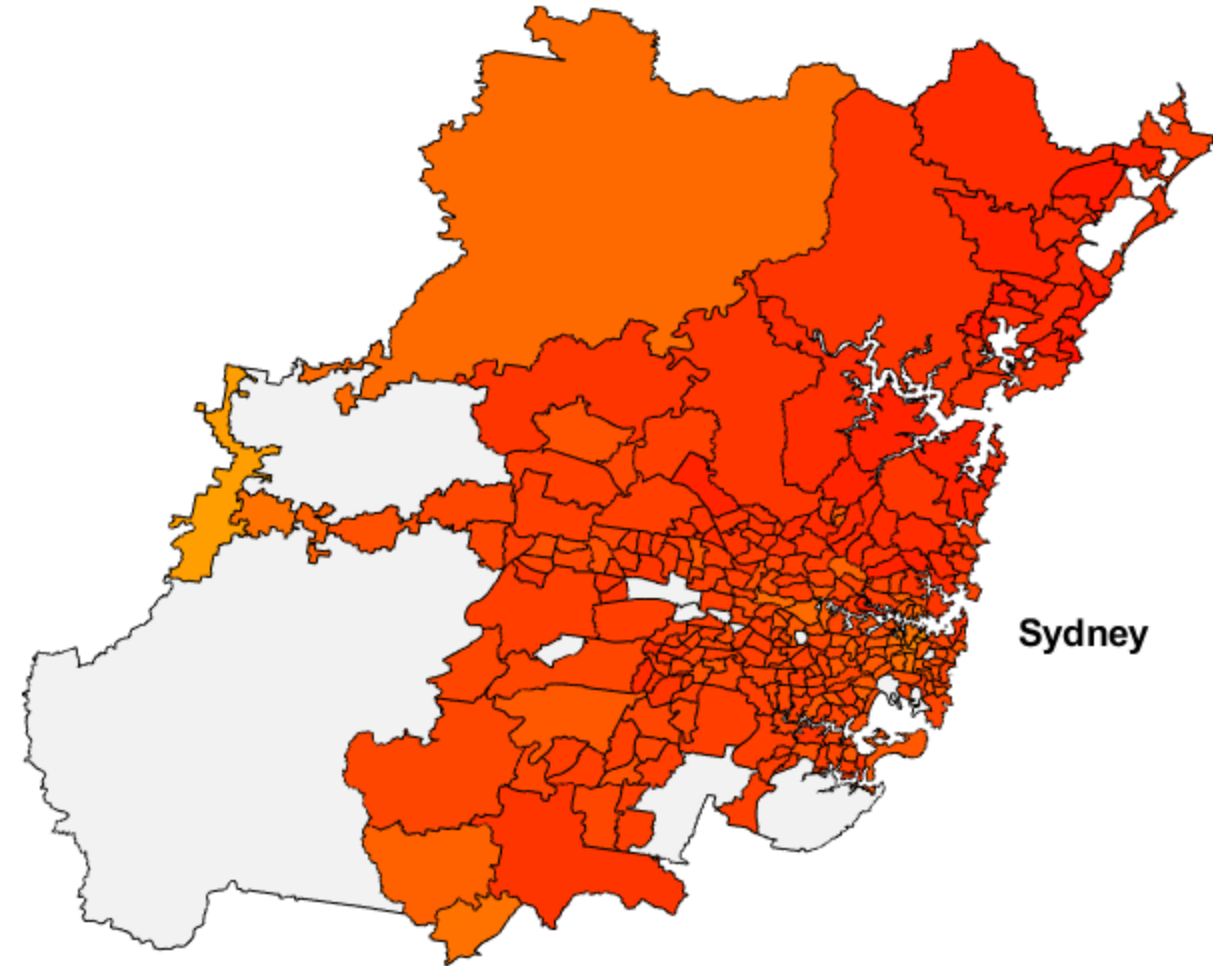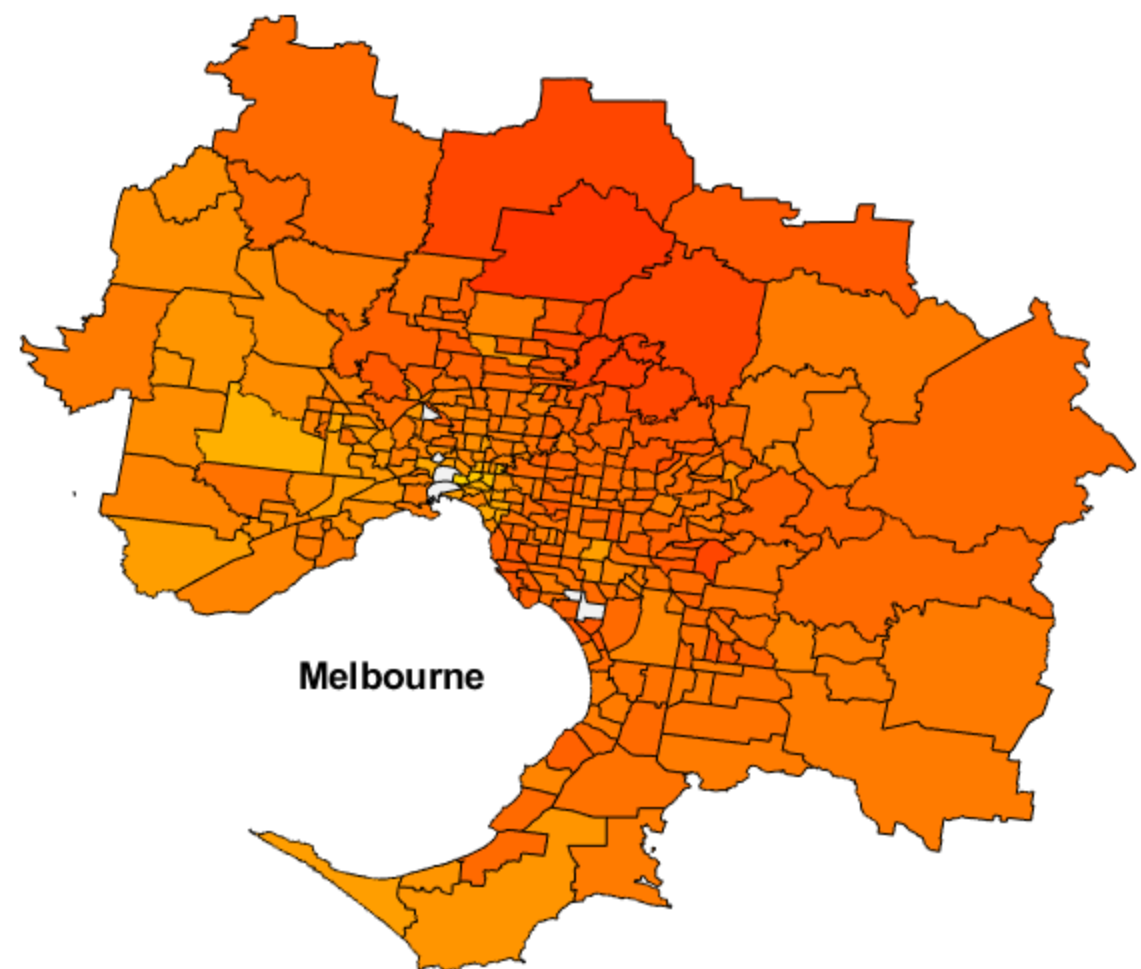

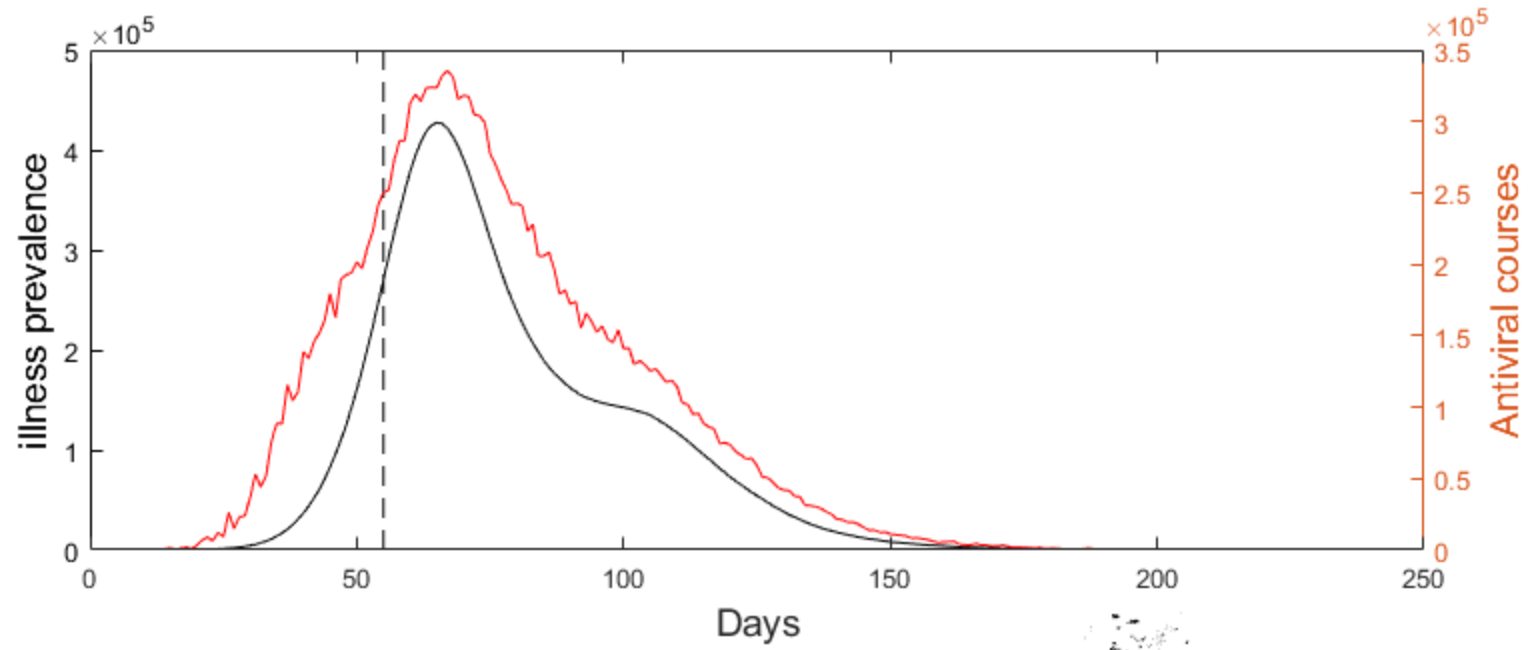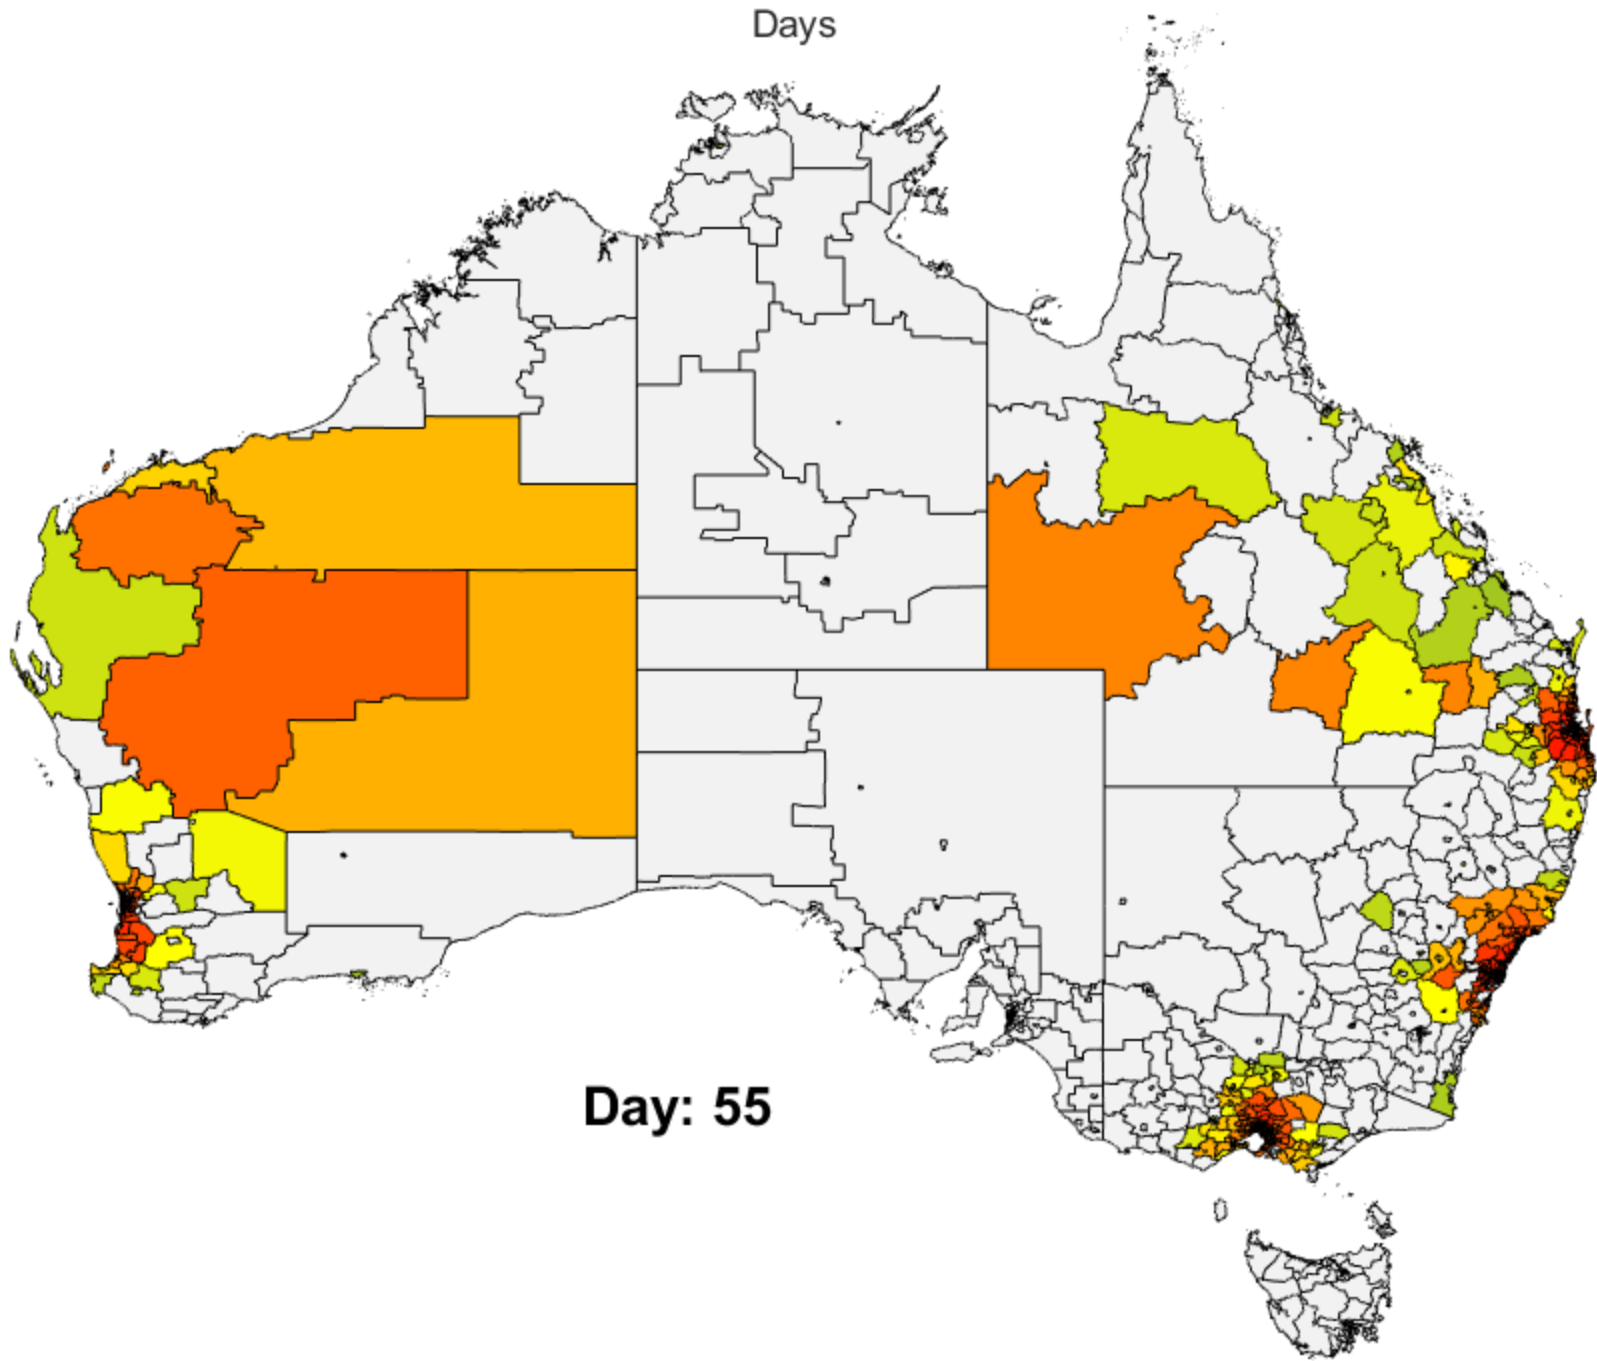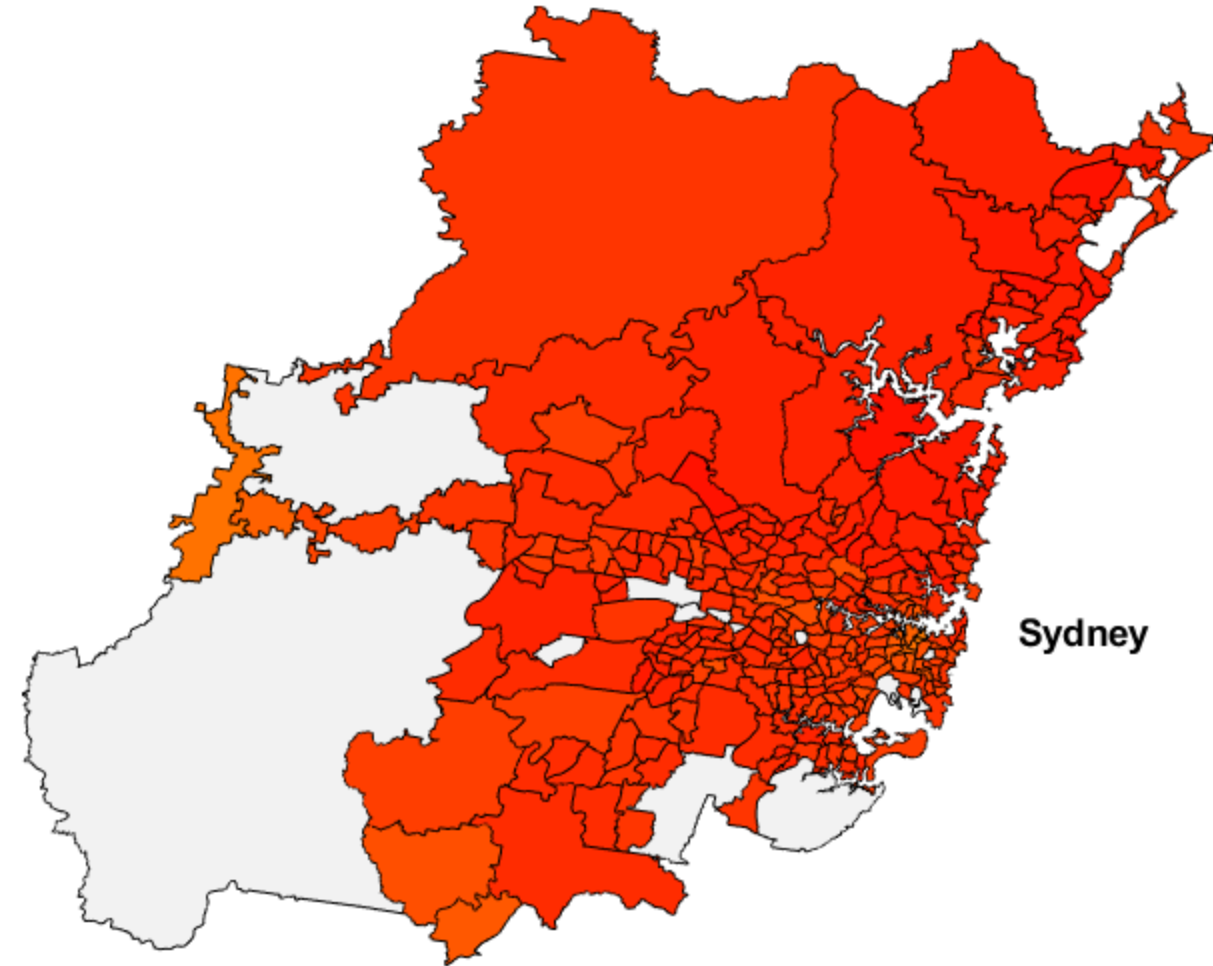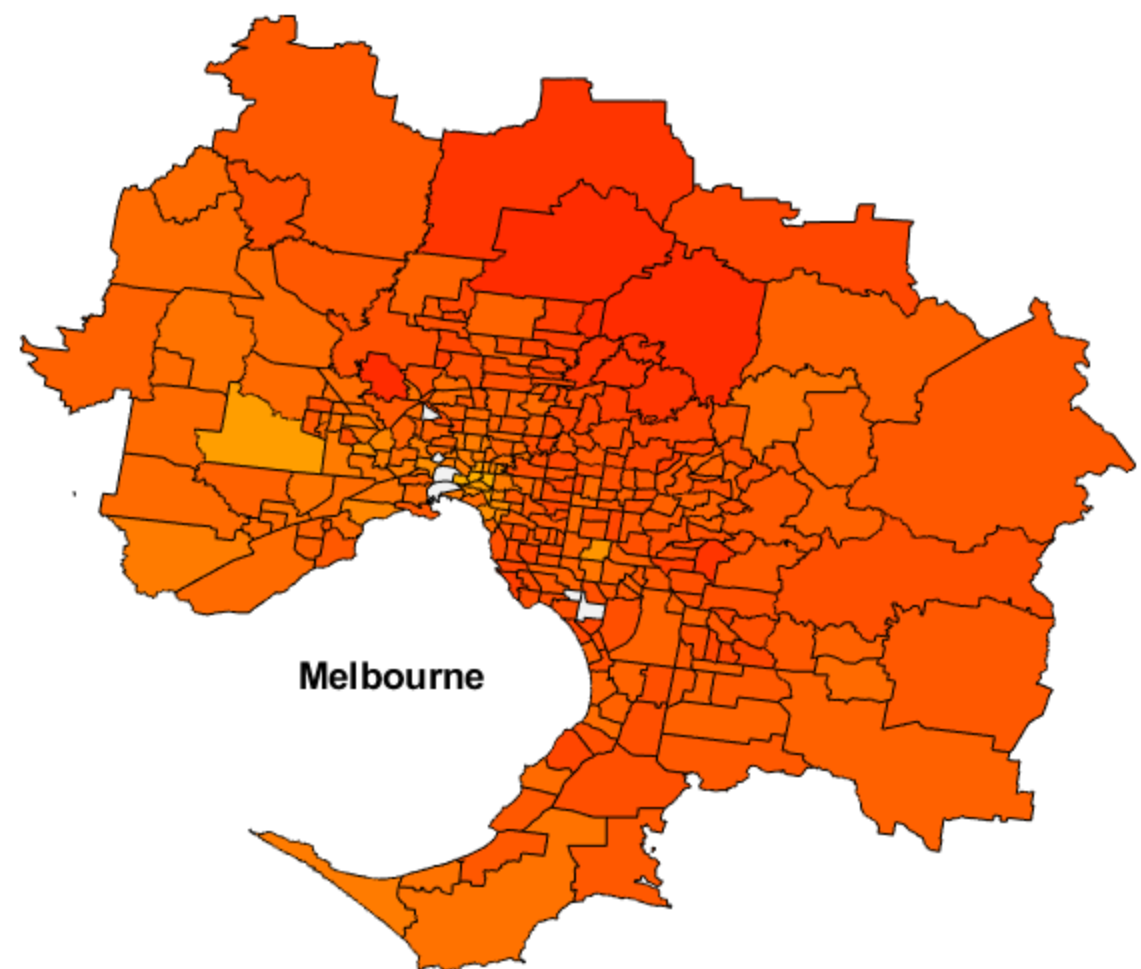



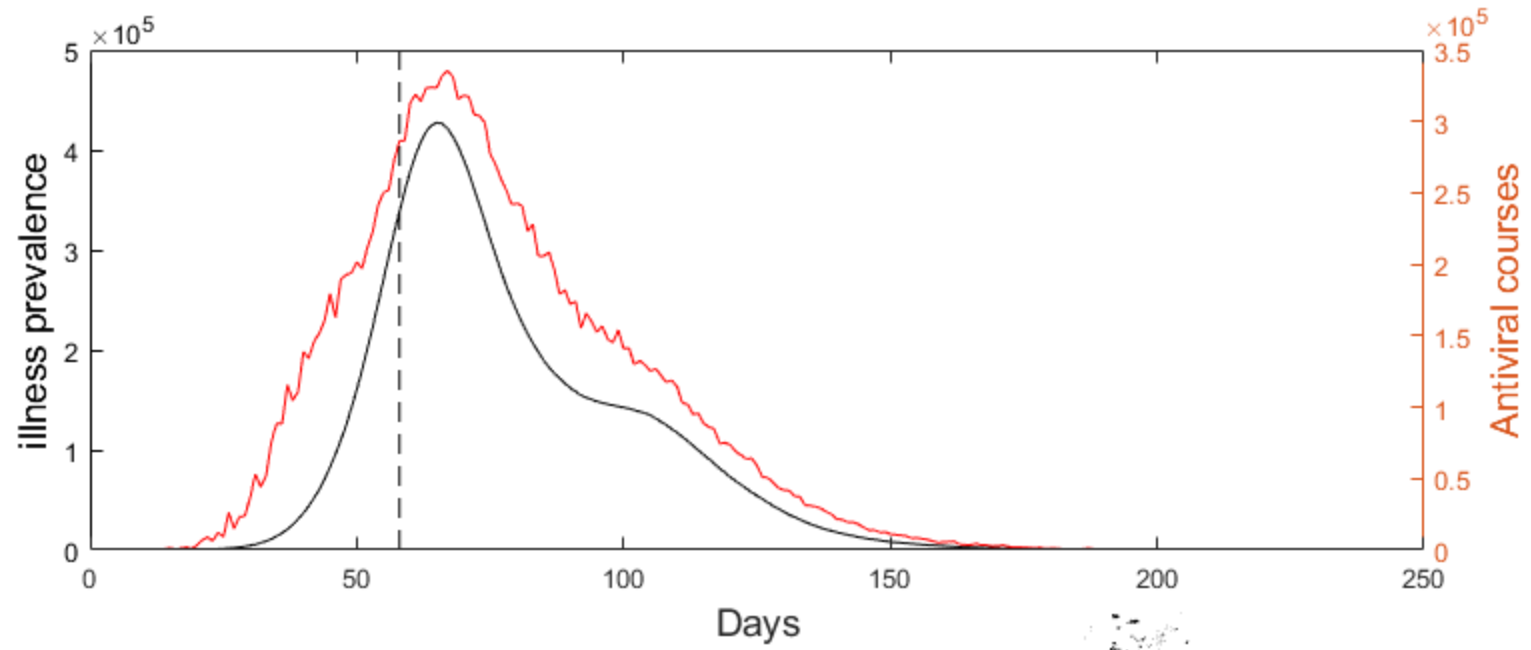

Days

Antiviral courses

Day: 58

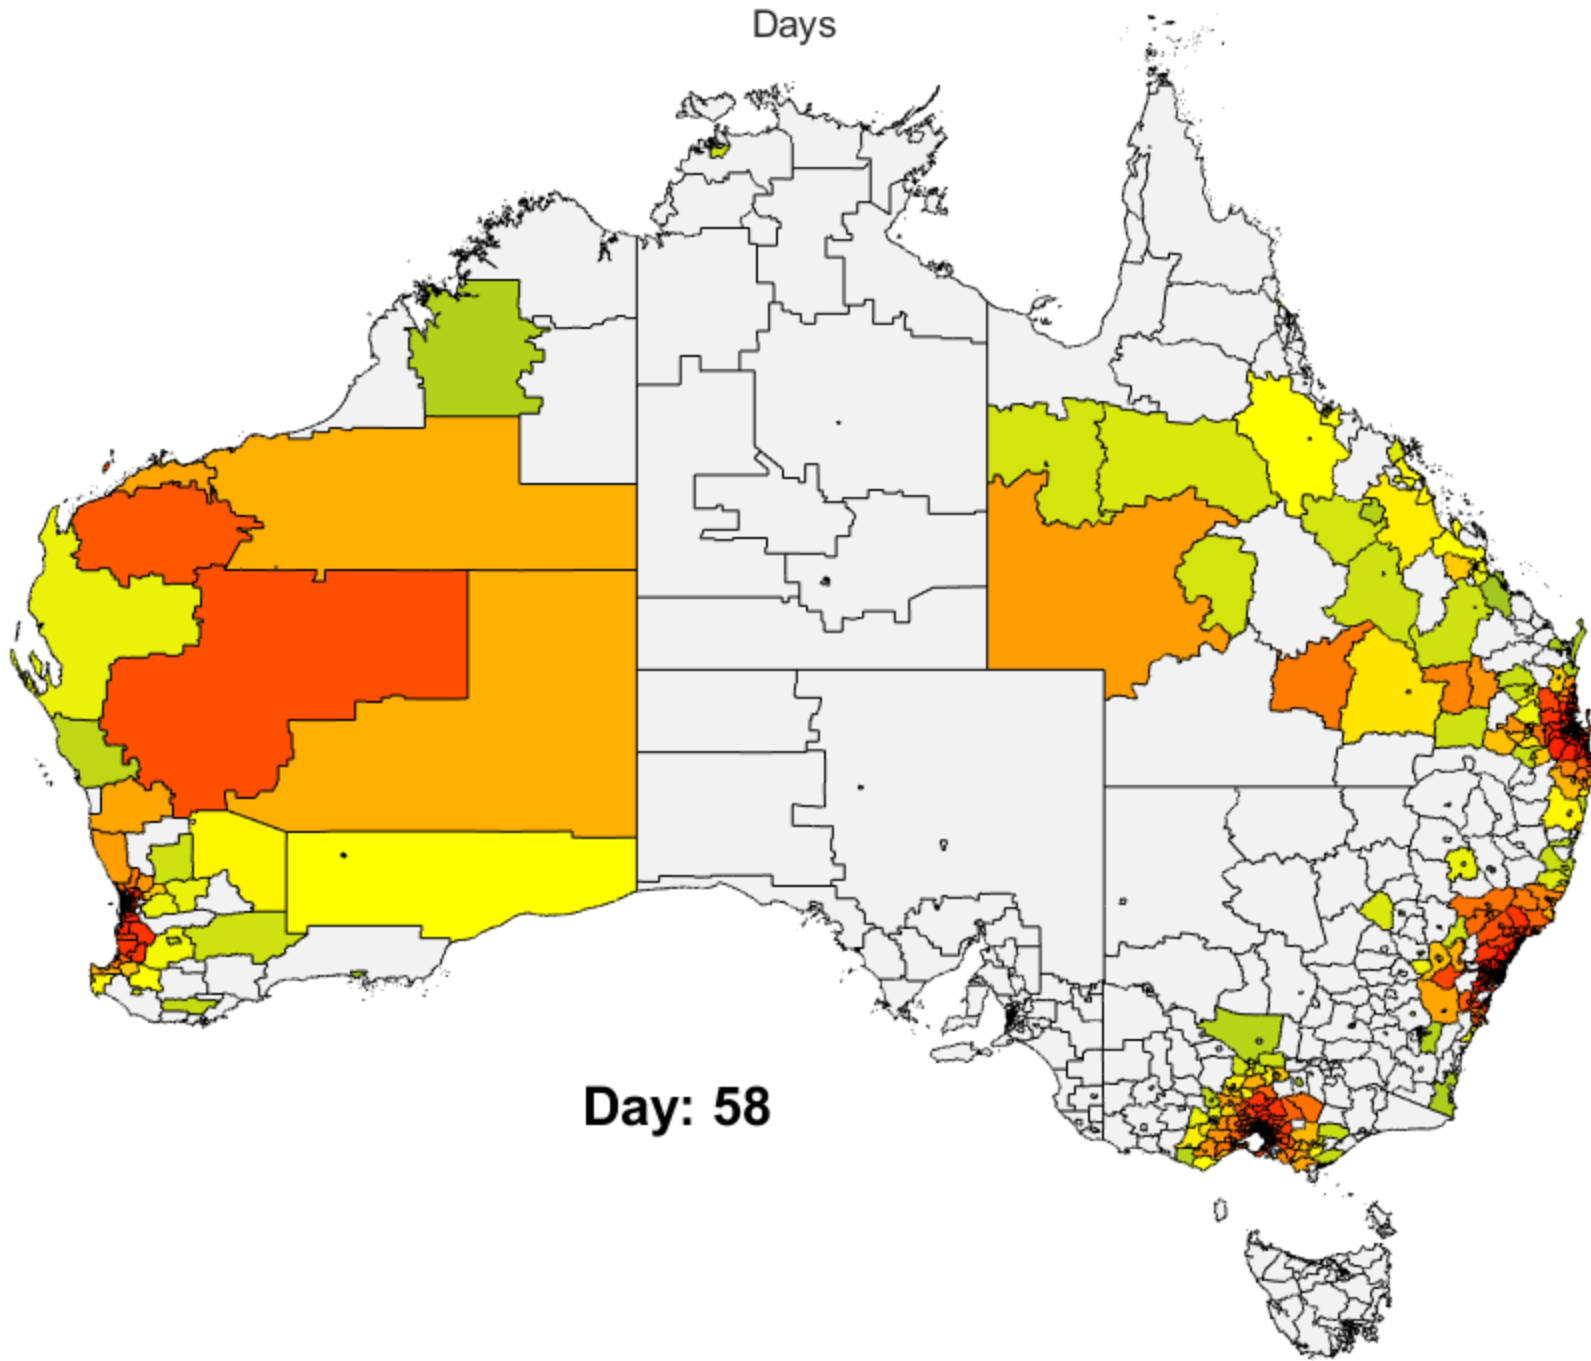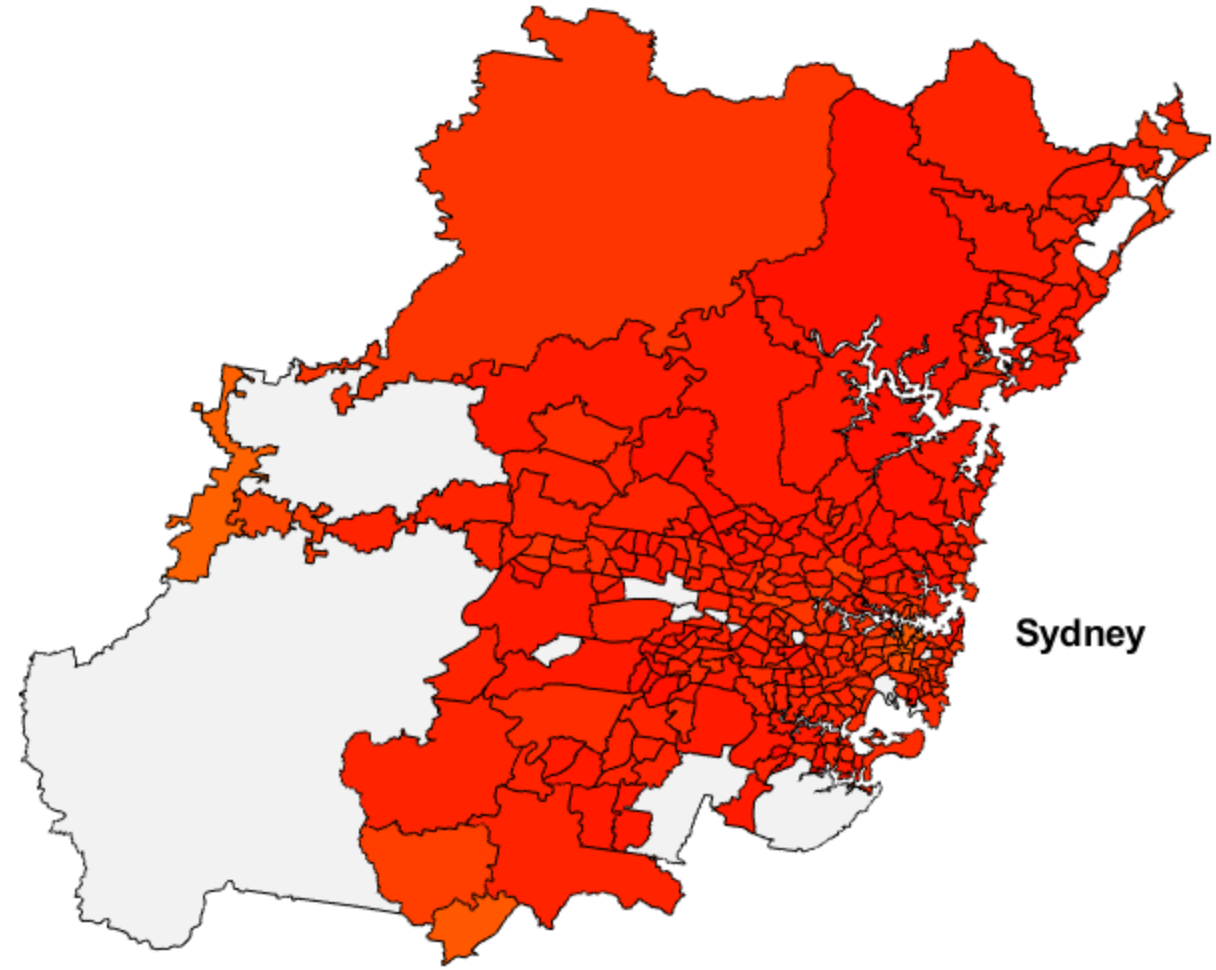

Sydney

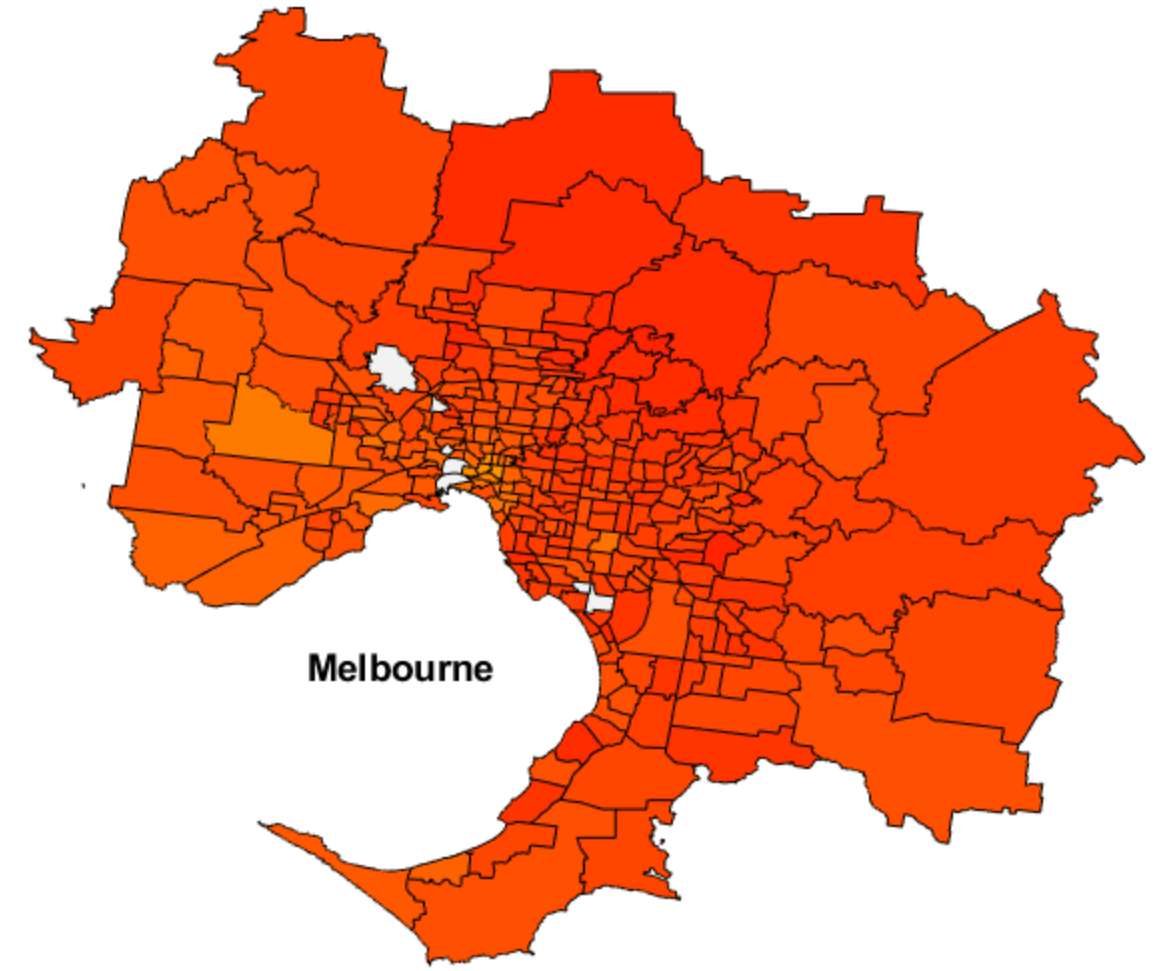

Melbourne

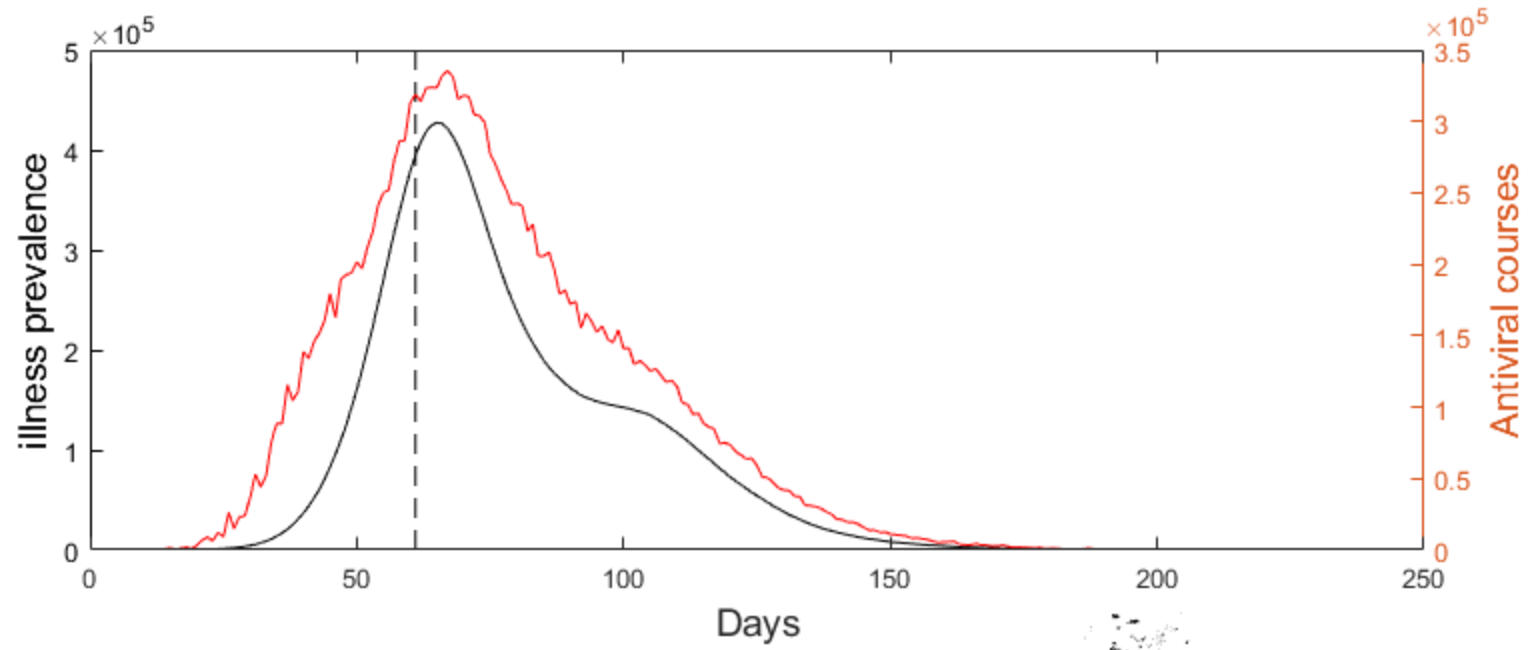

Days

Antiviral courses

Day: 61

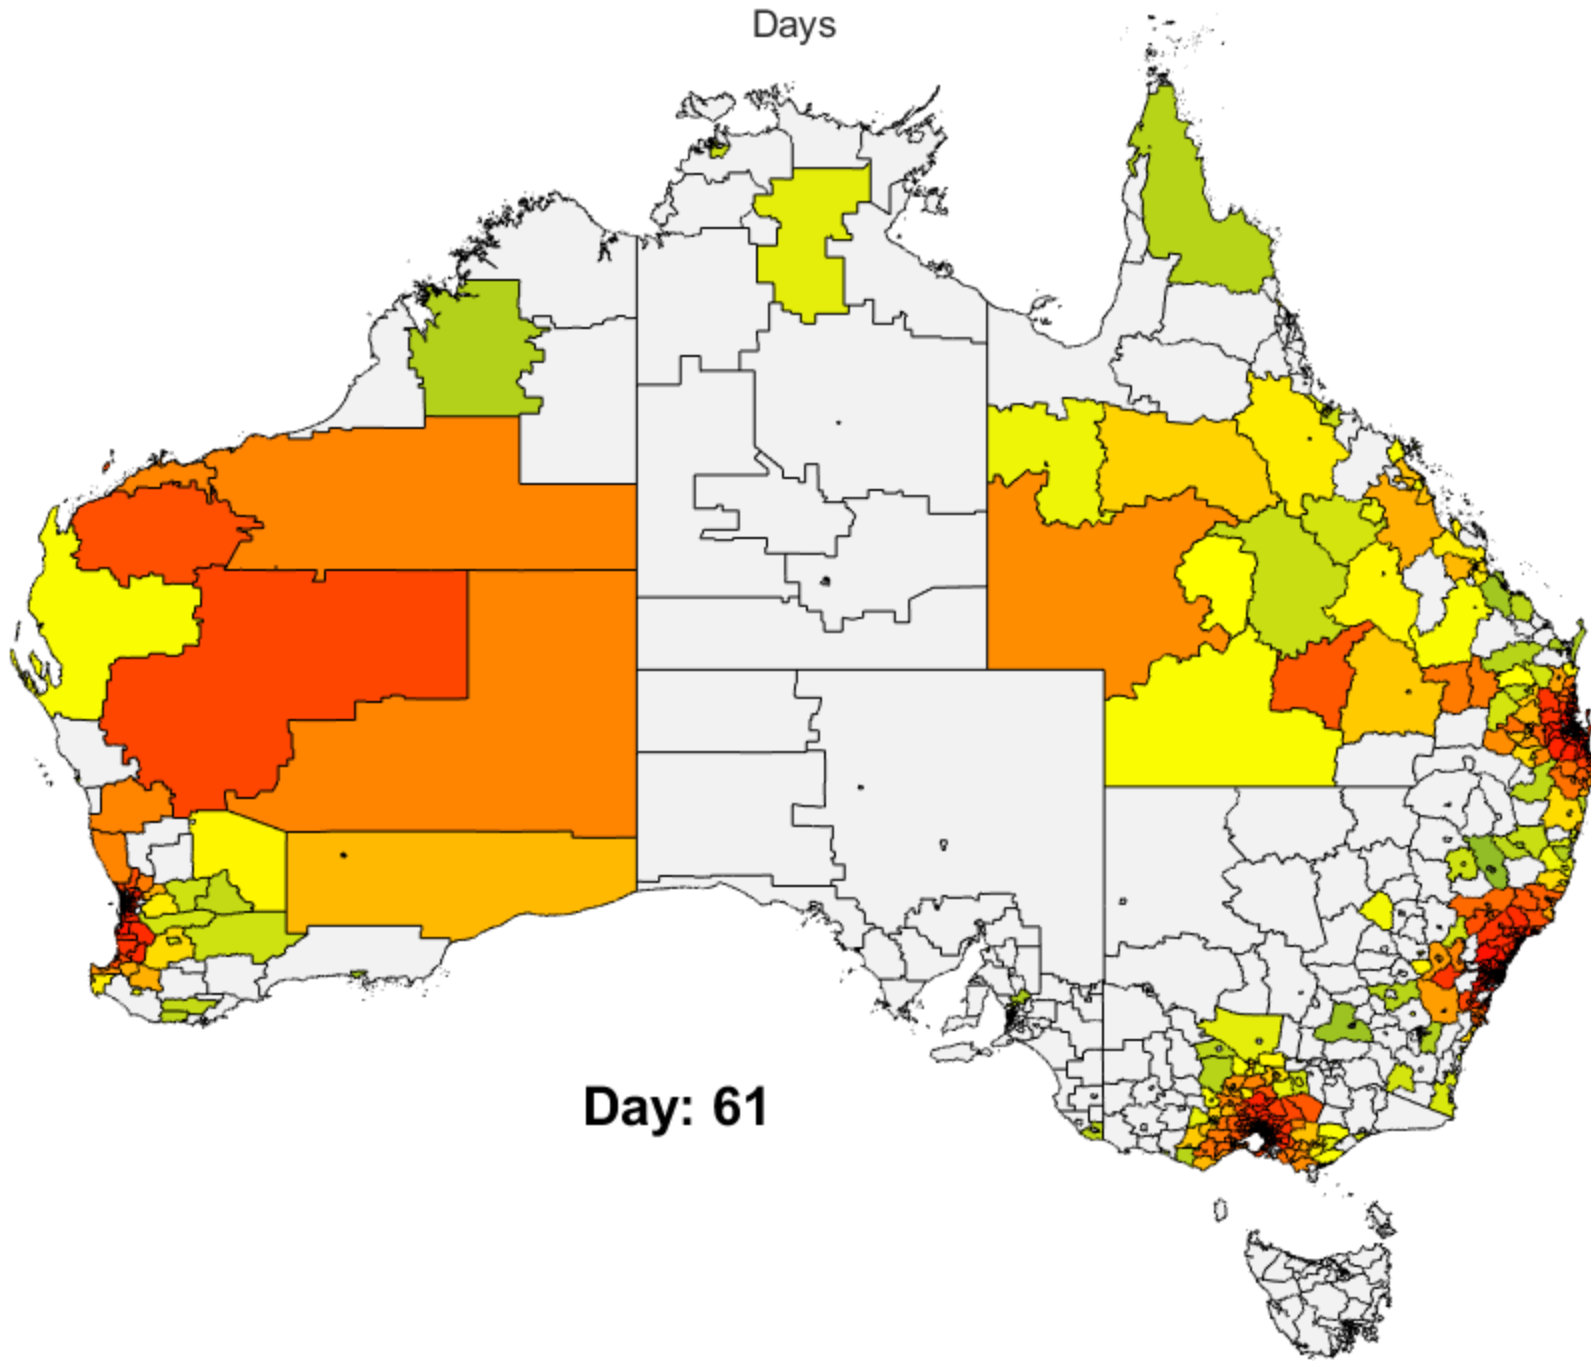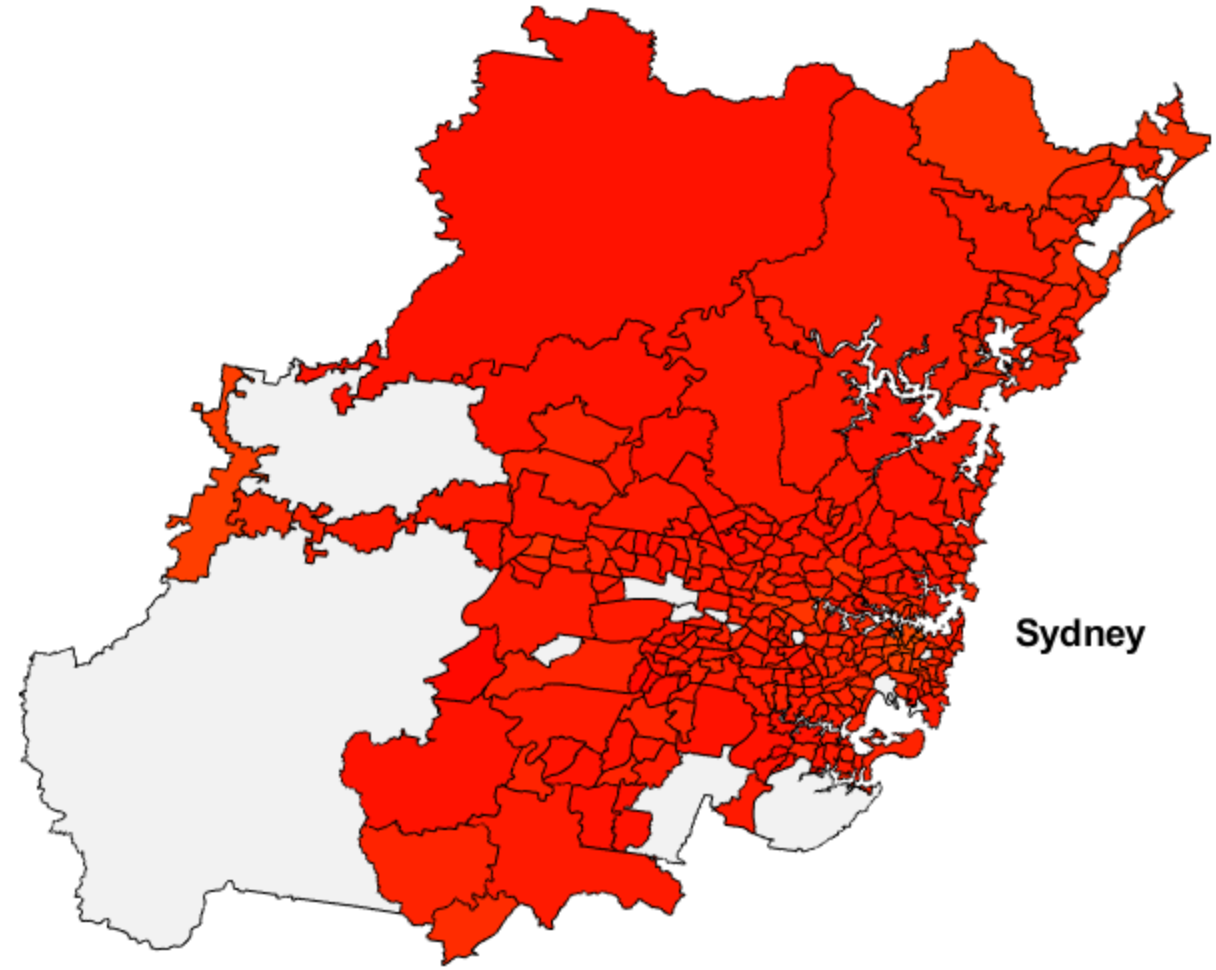

Sydney

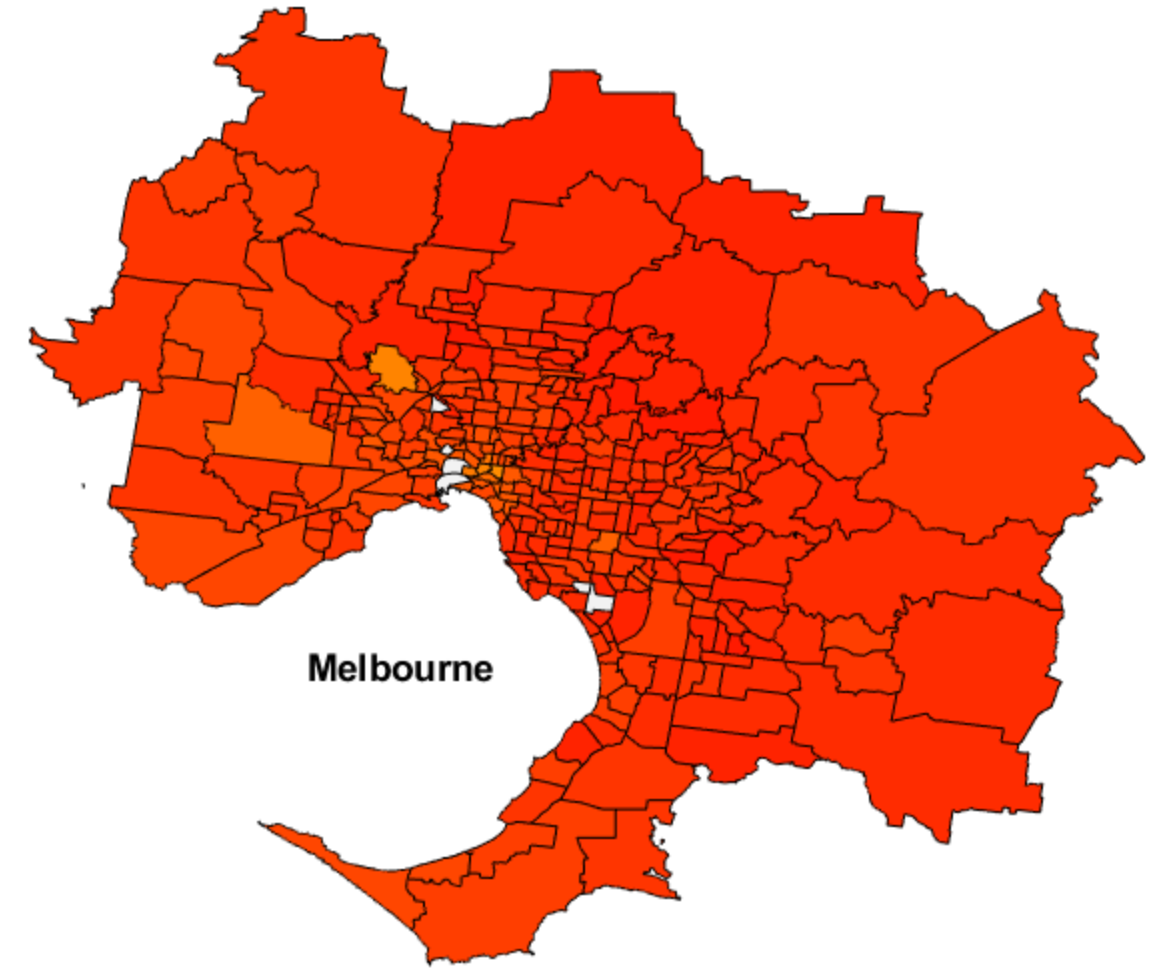

Melbourne

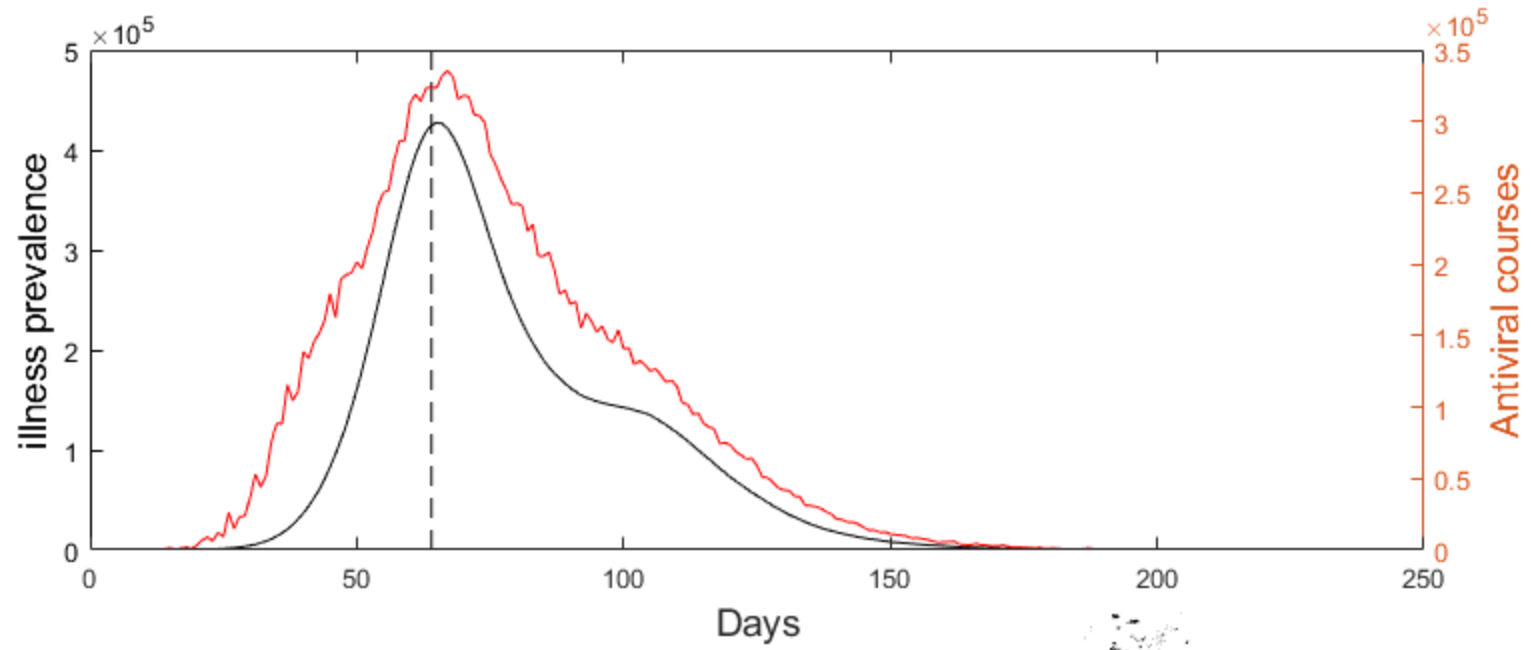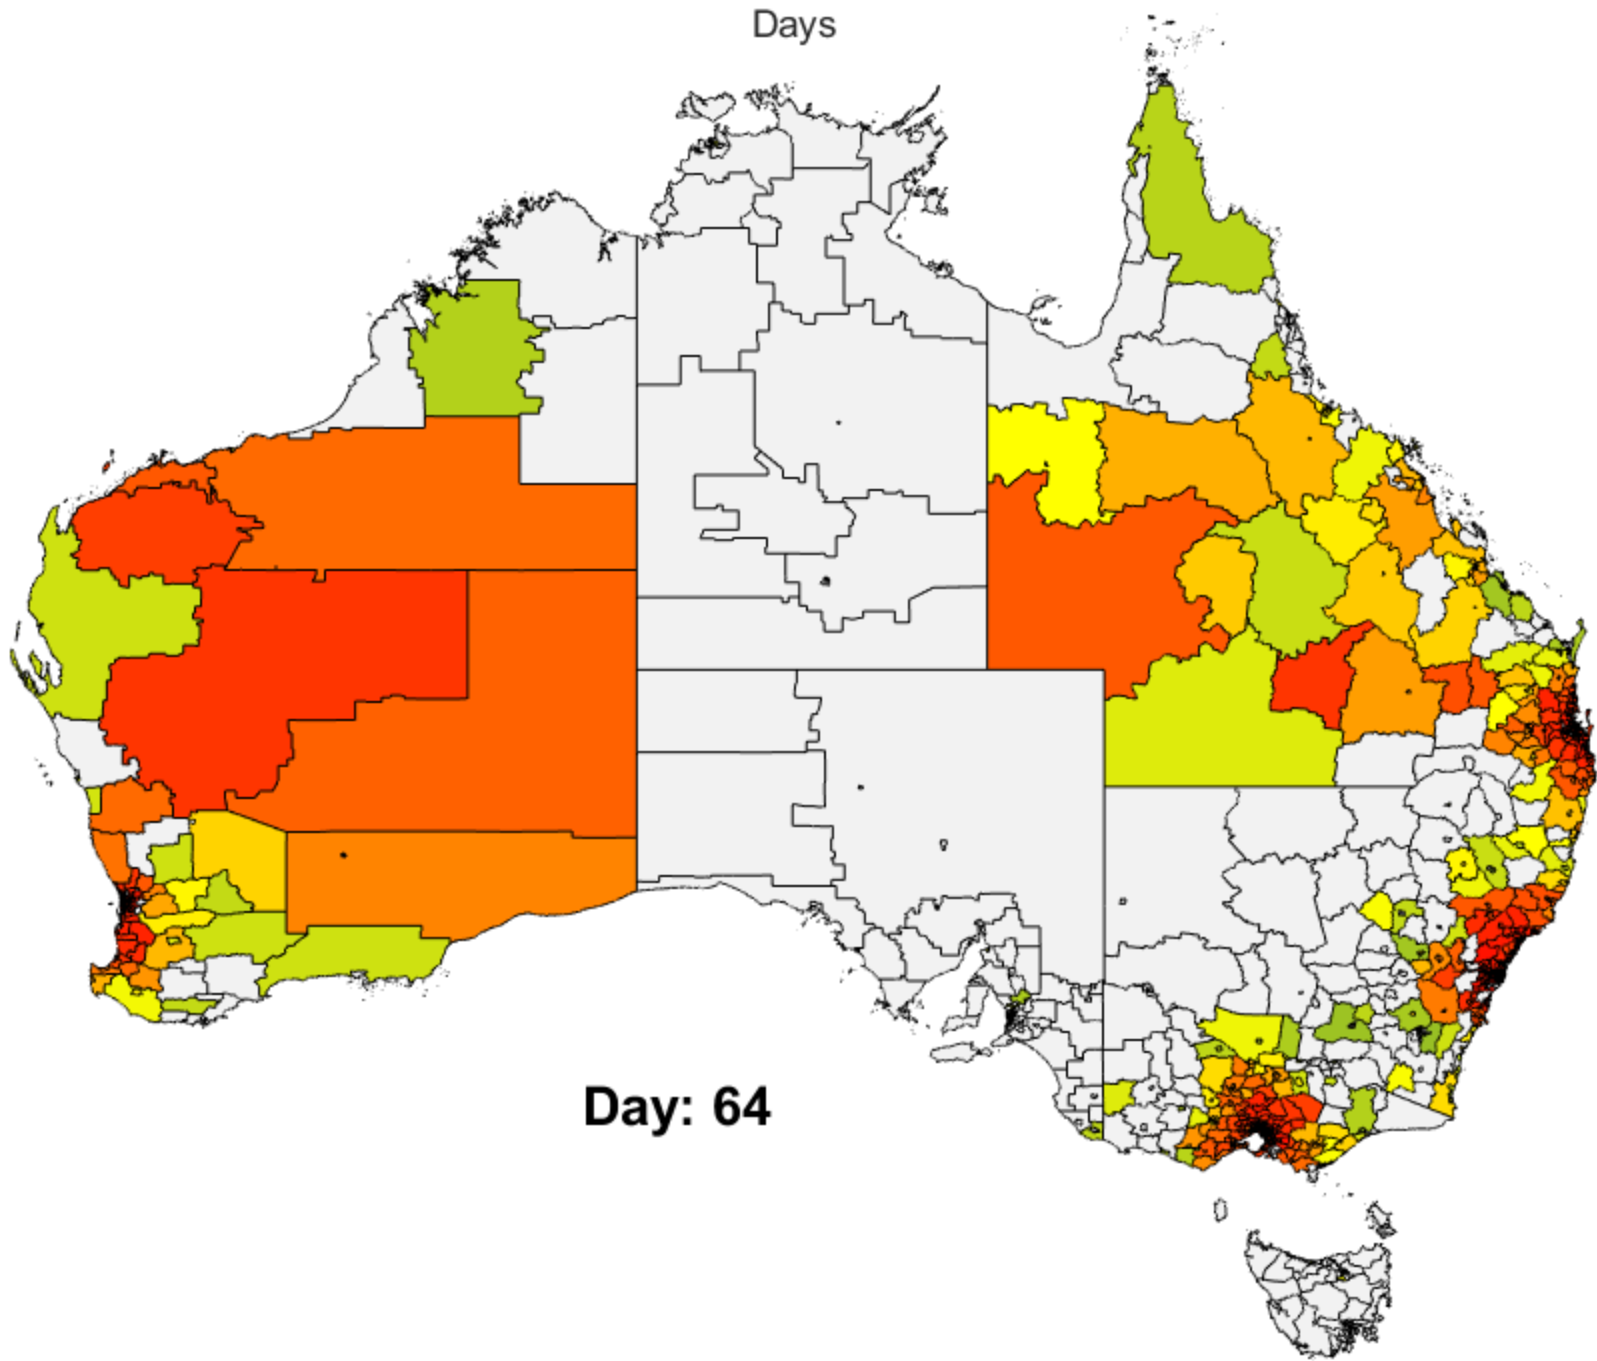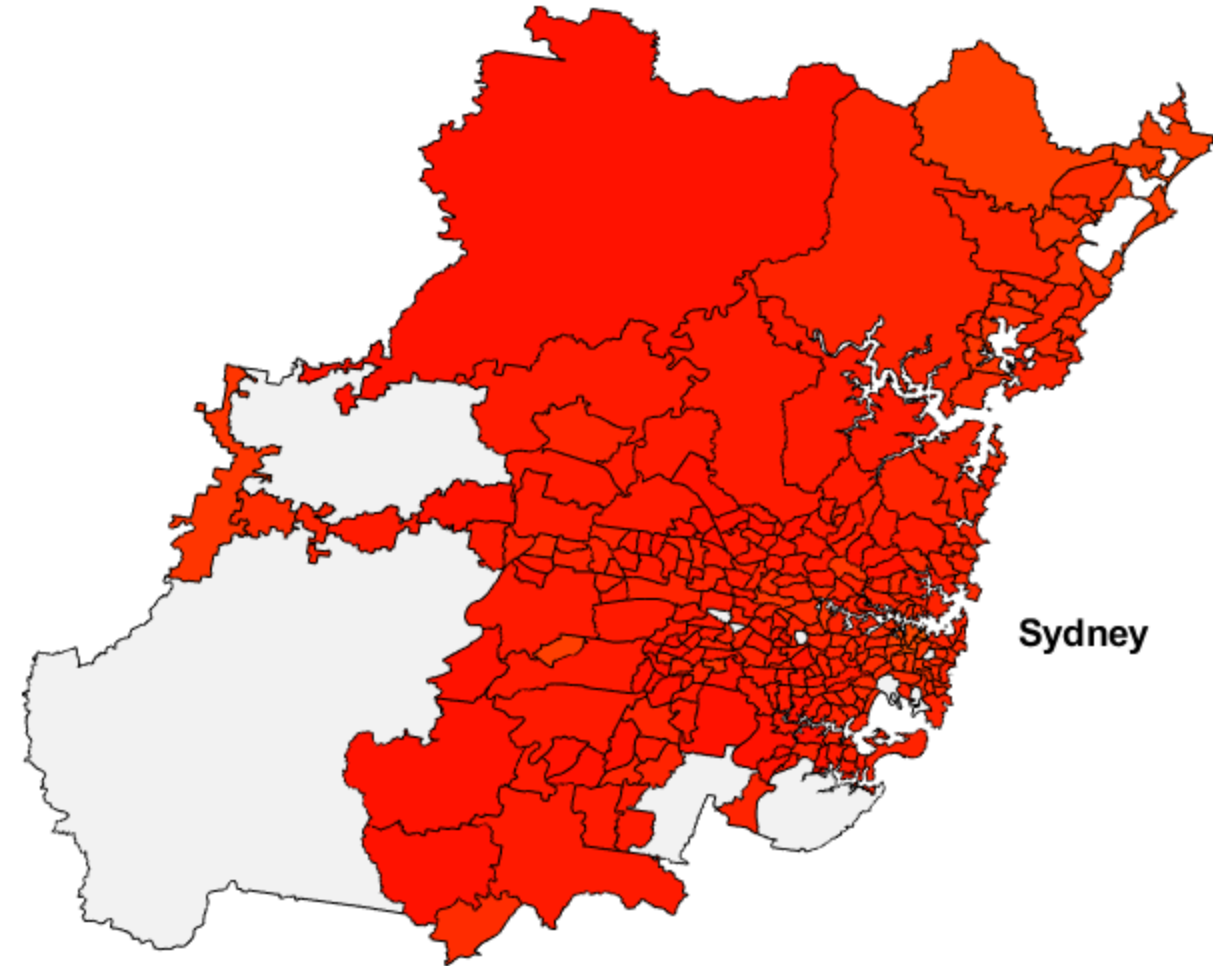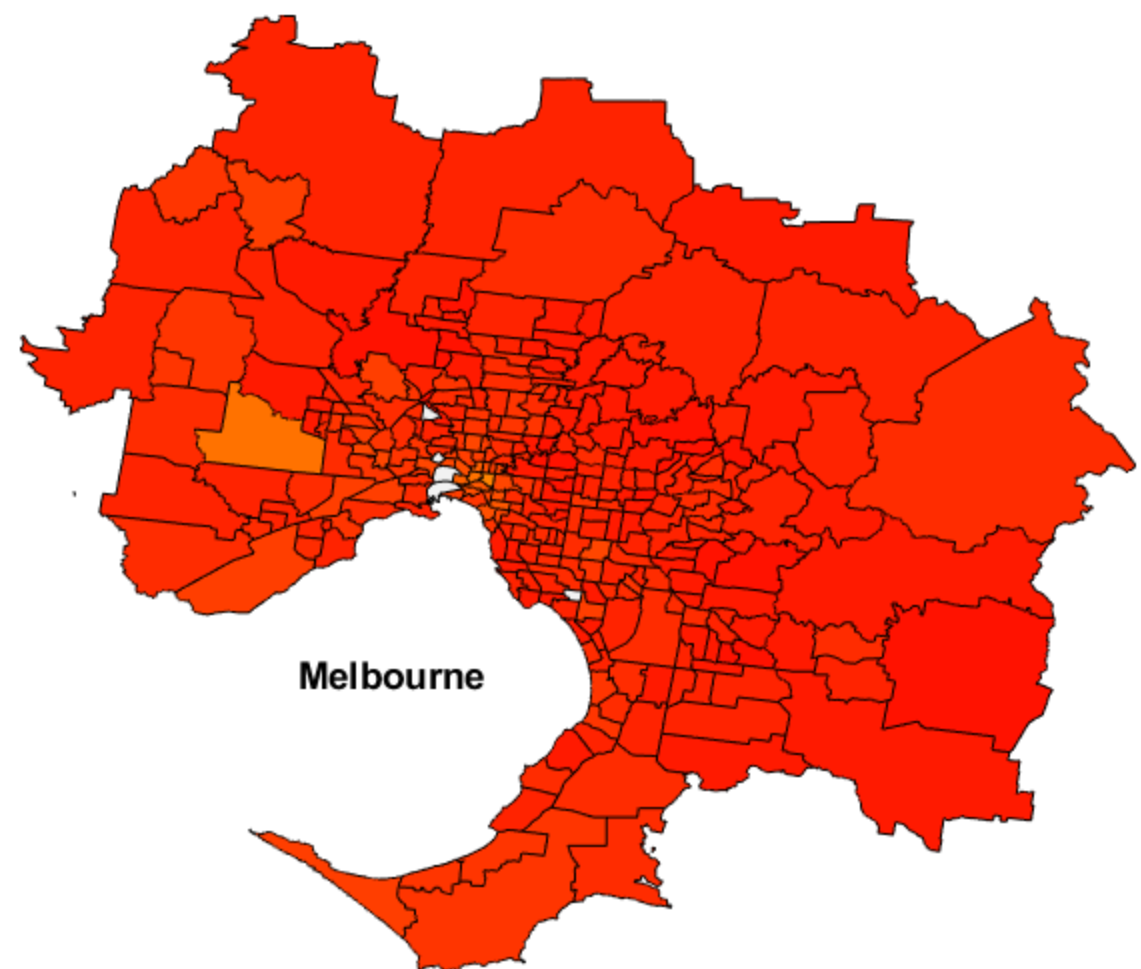



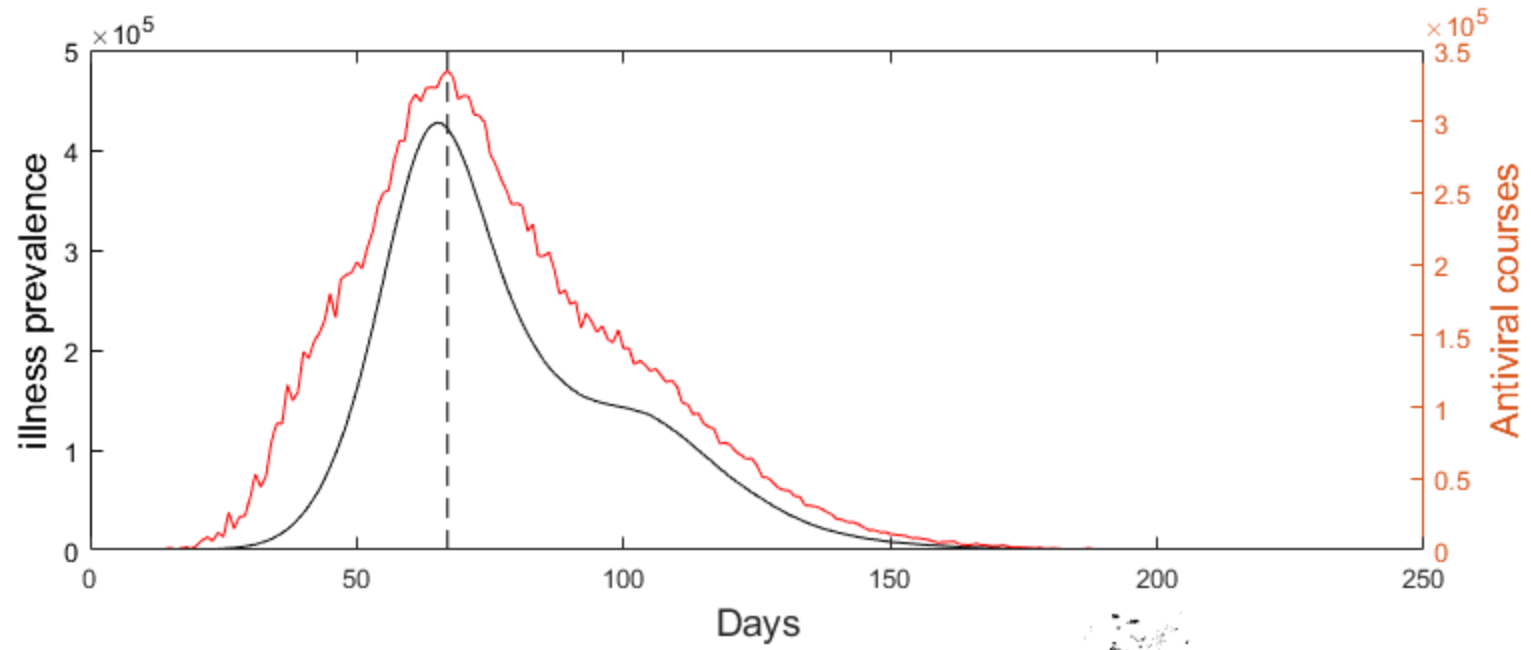

Days

Antiviral courses

Day: 67

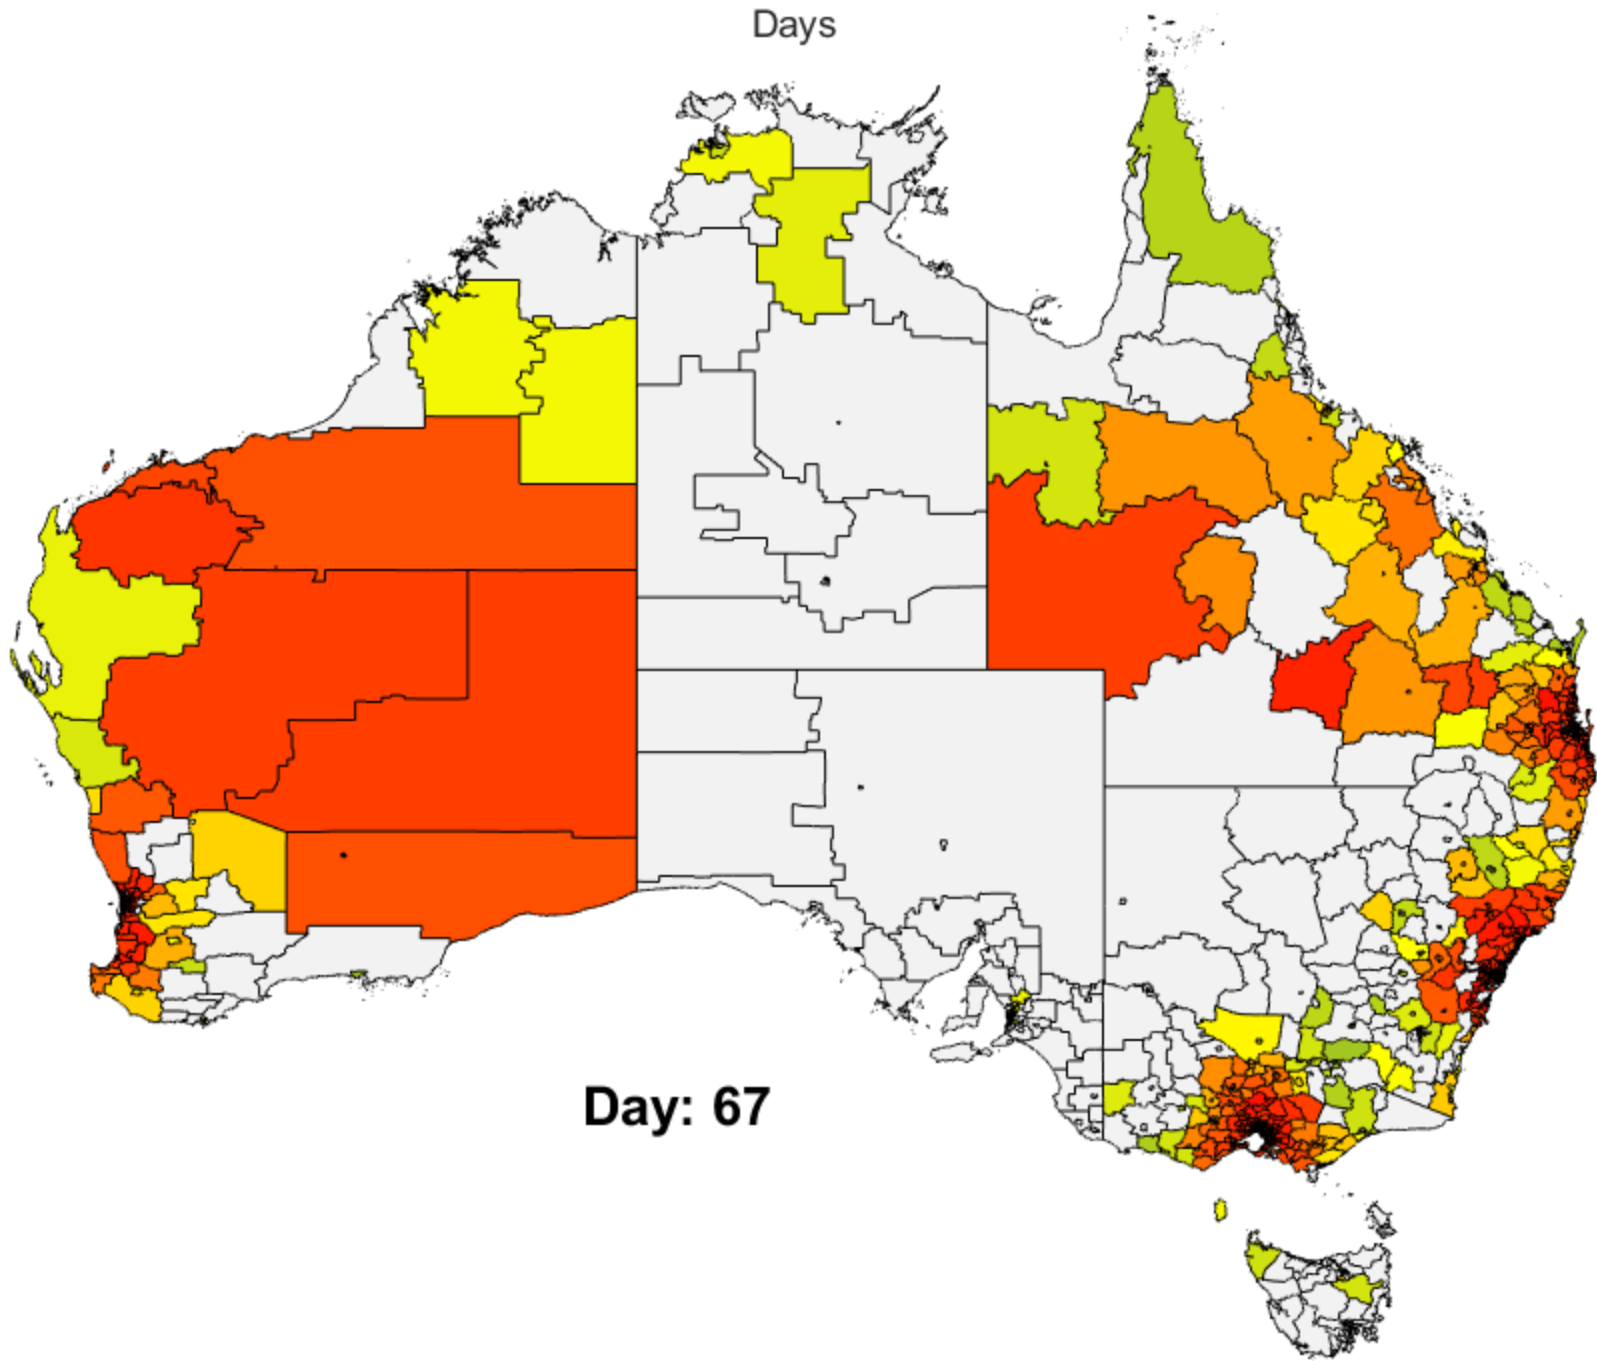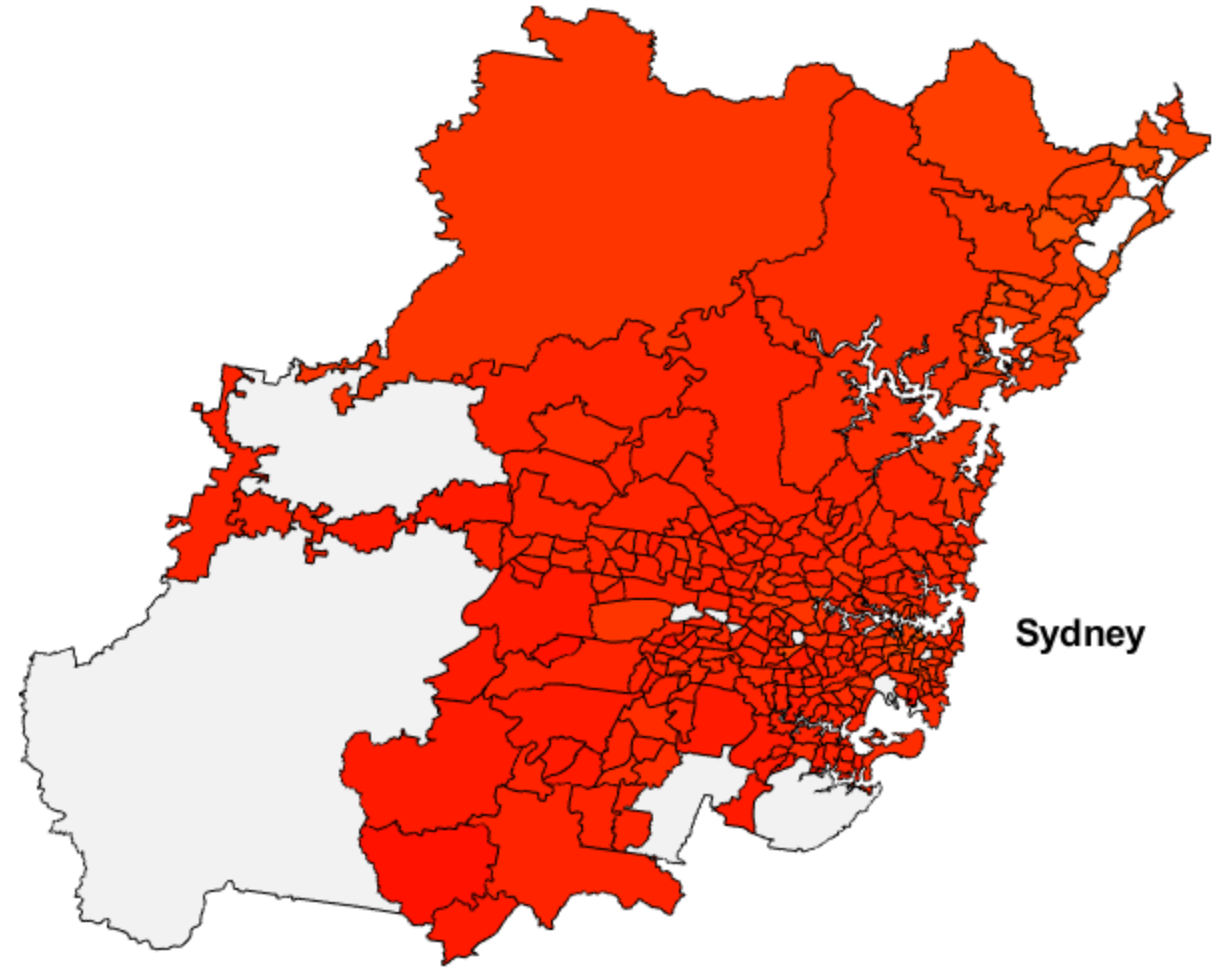

Sydney

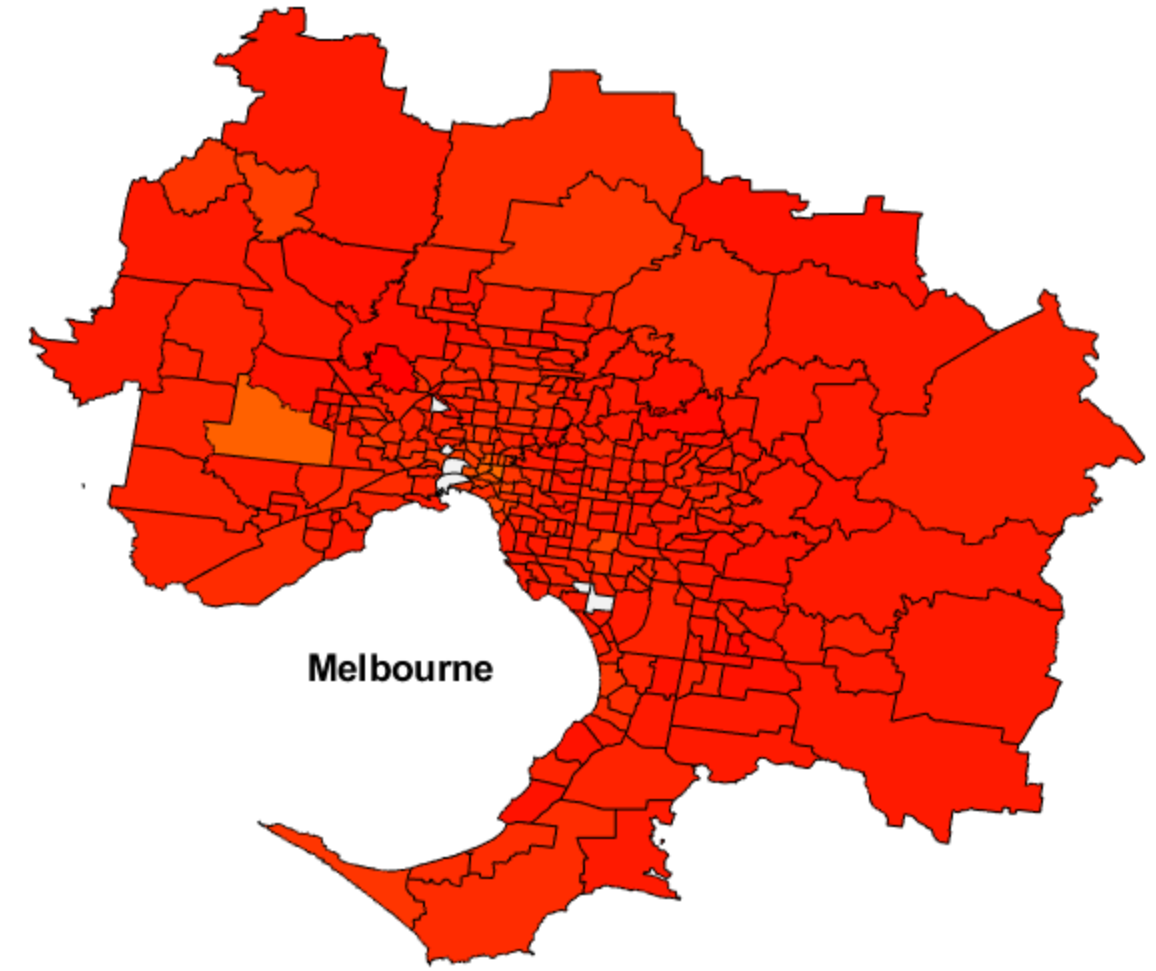

Melbourne

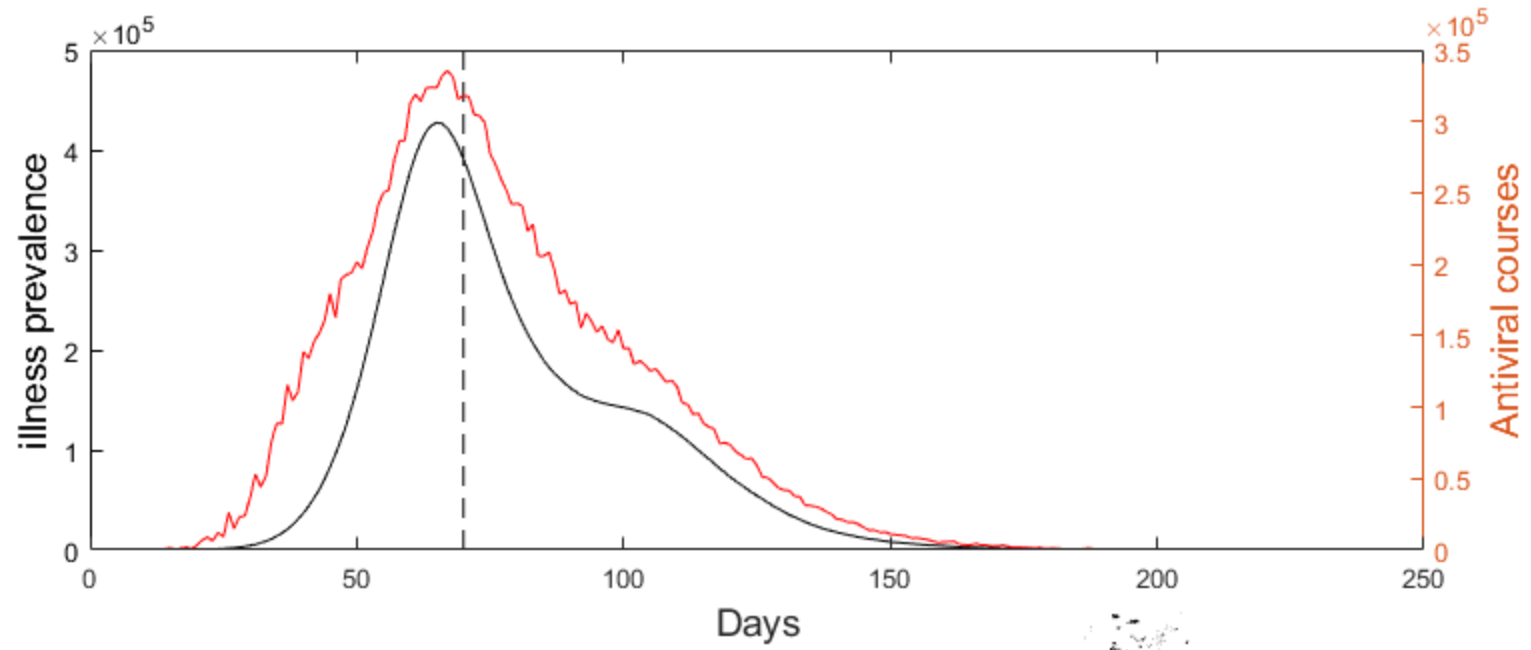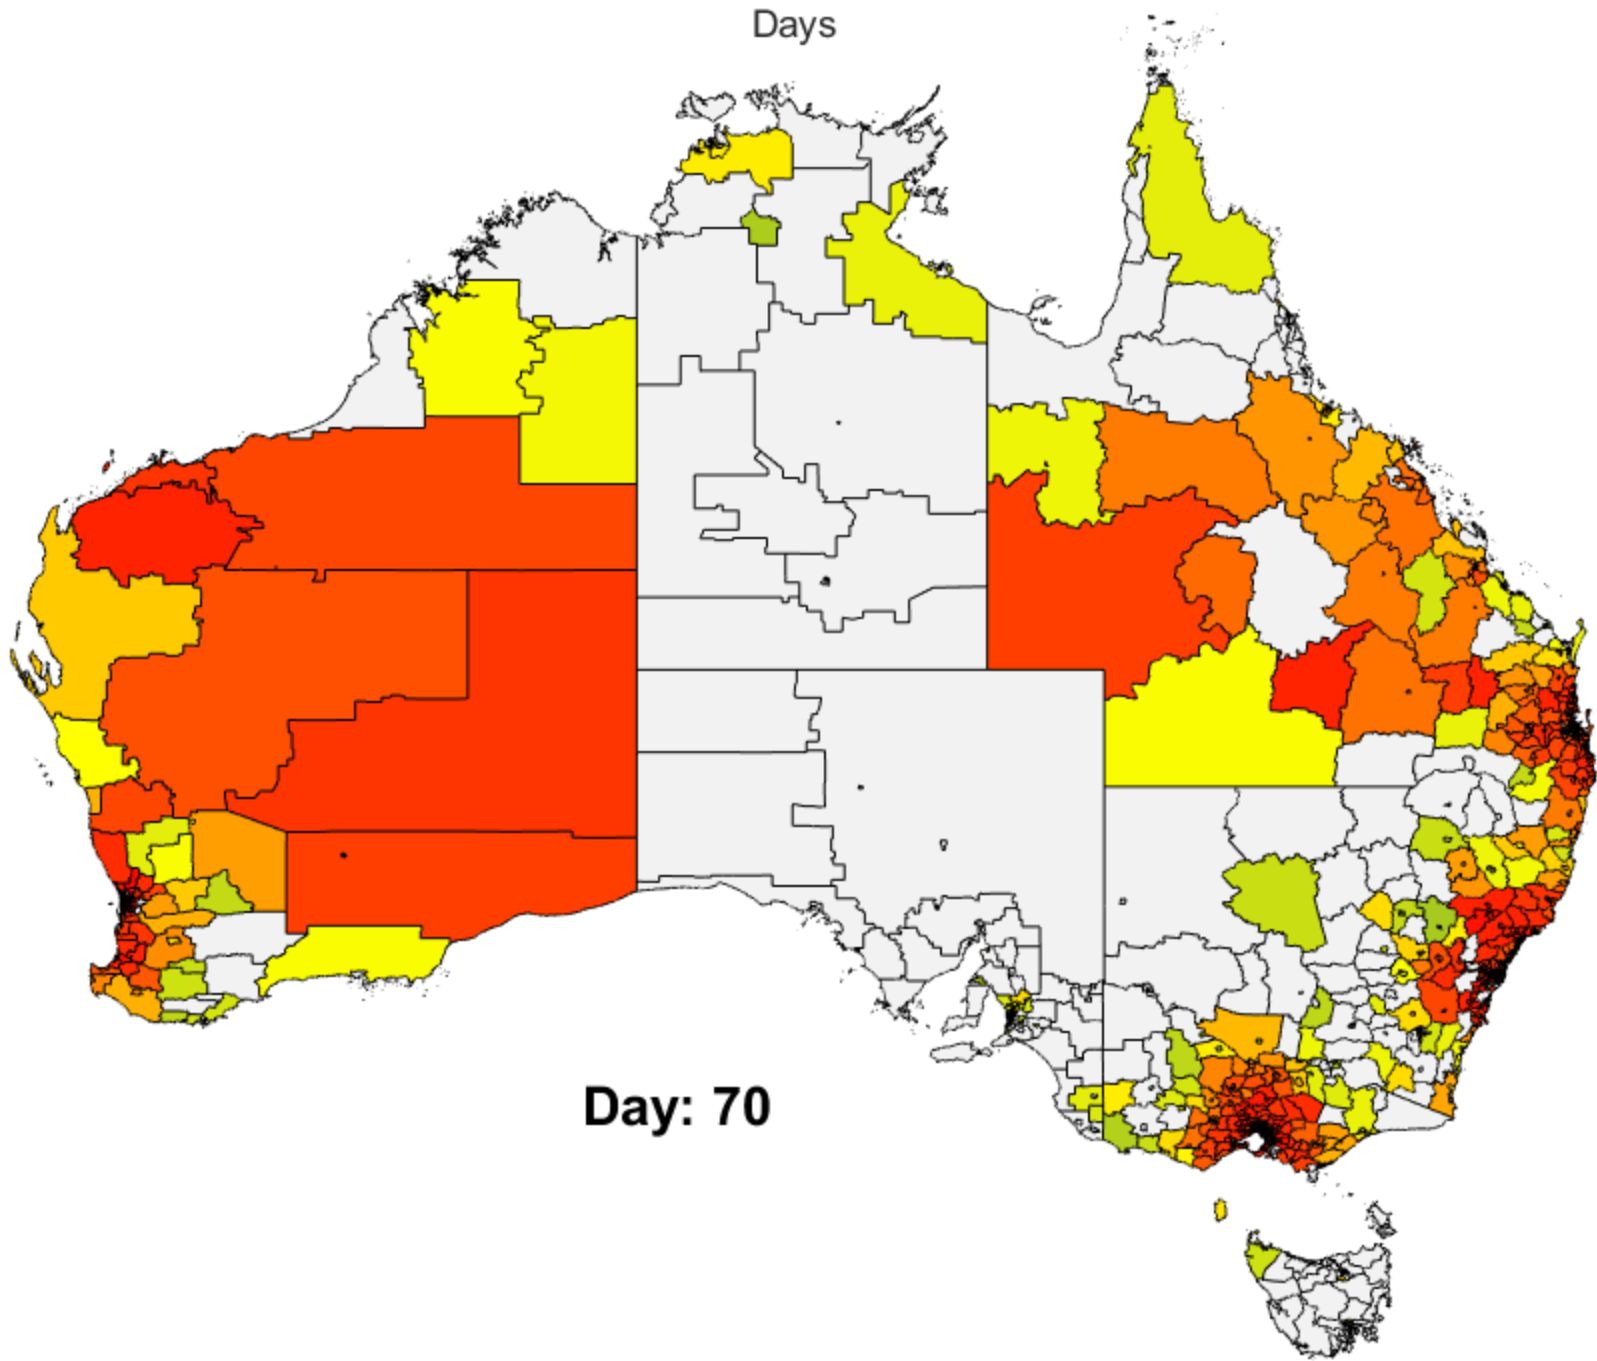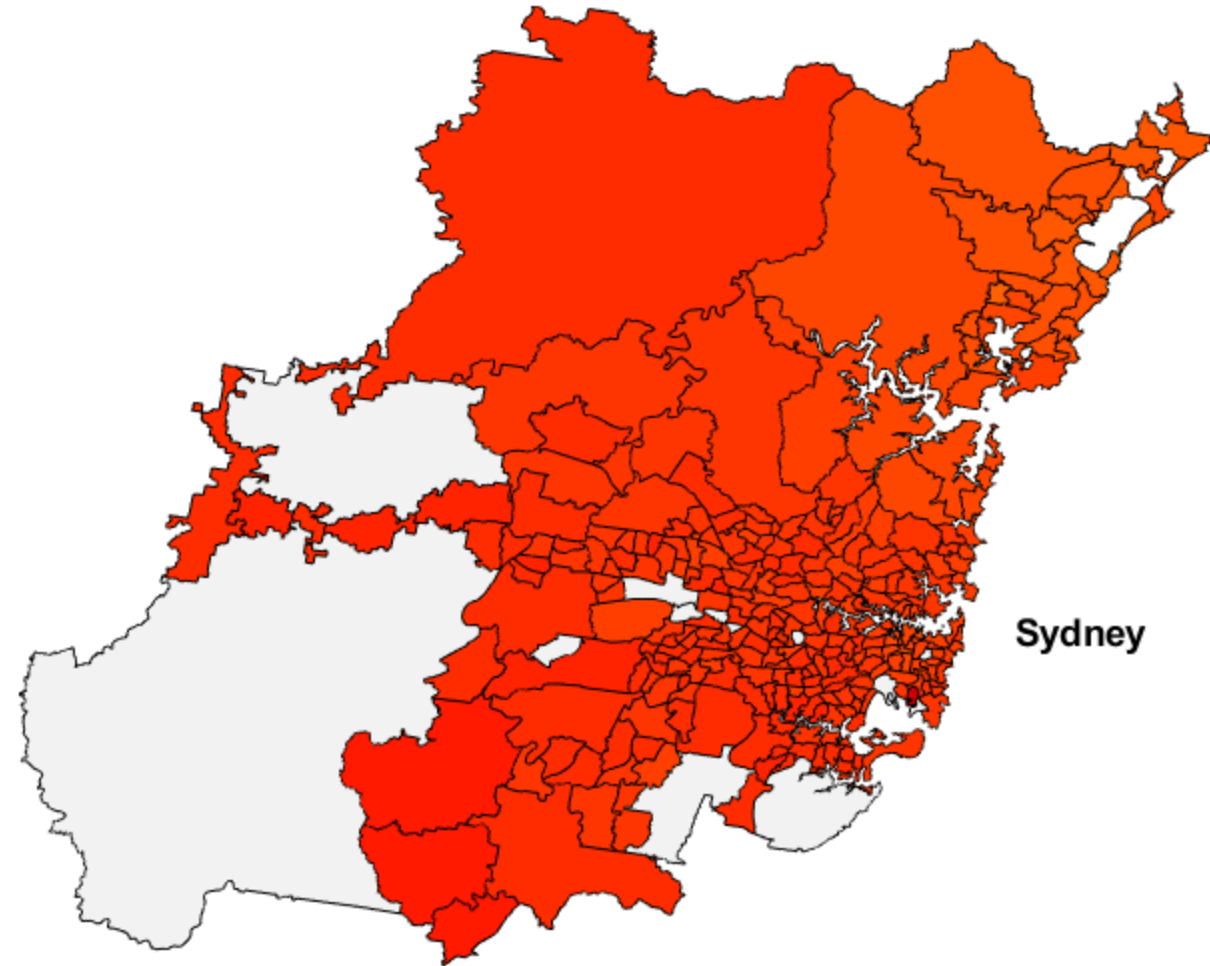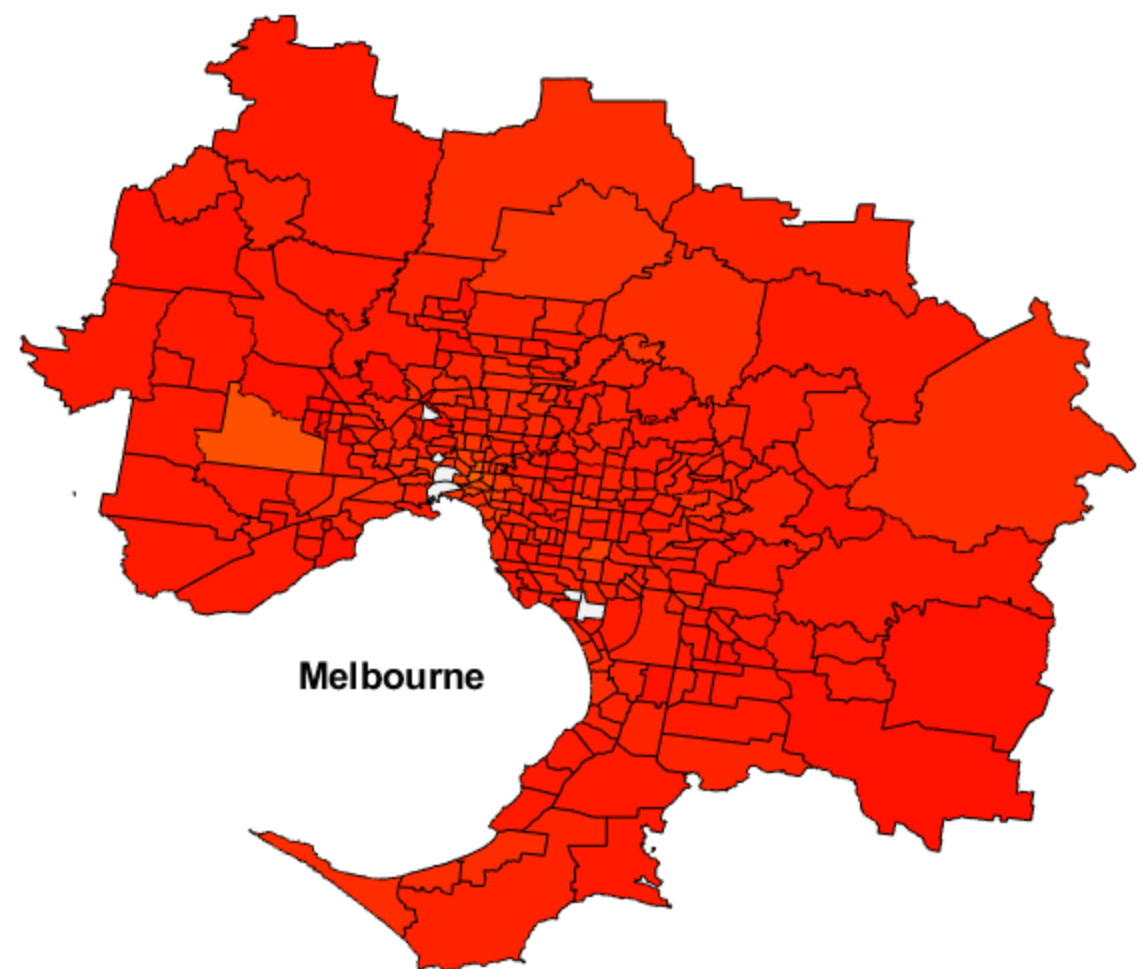

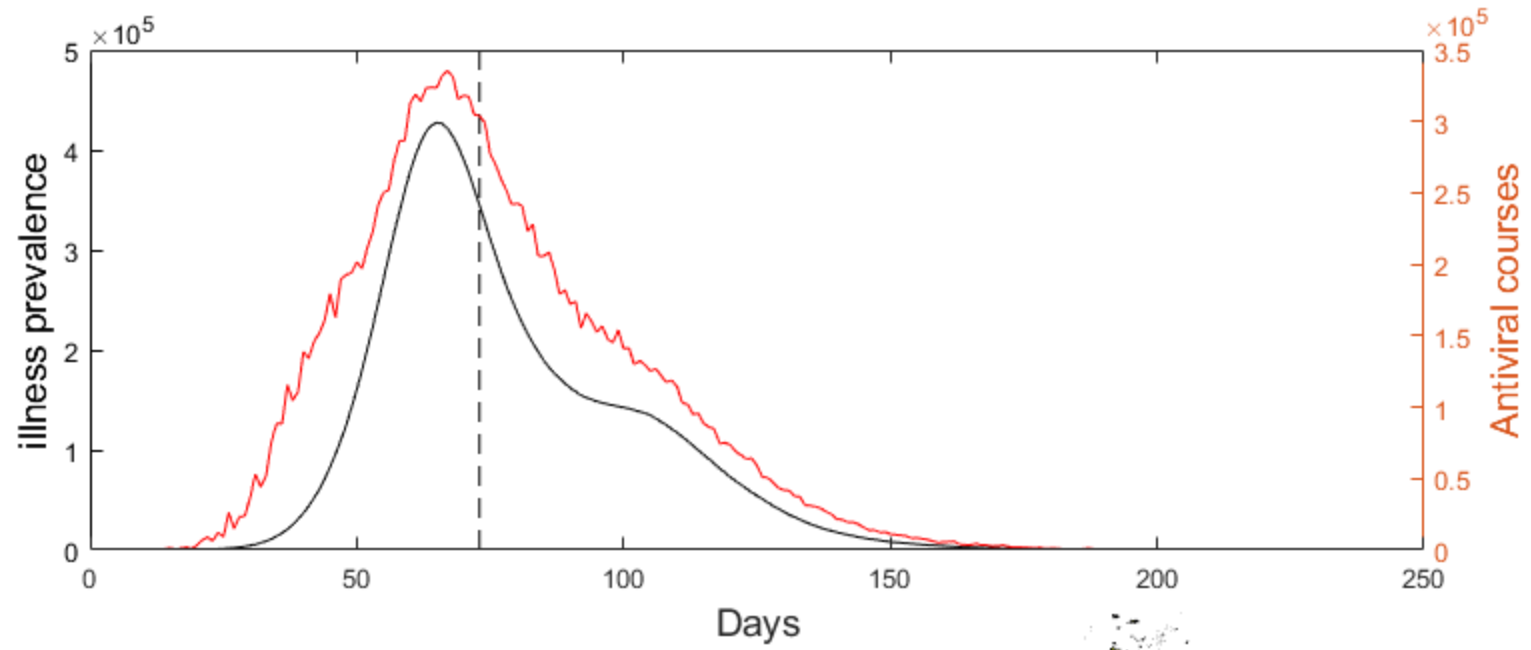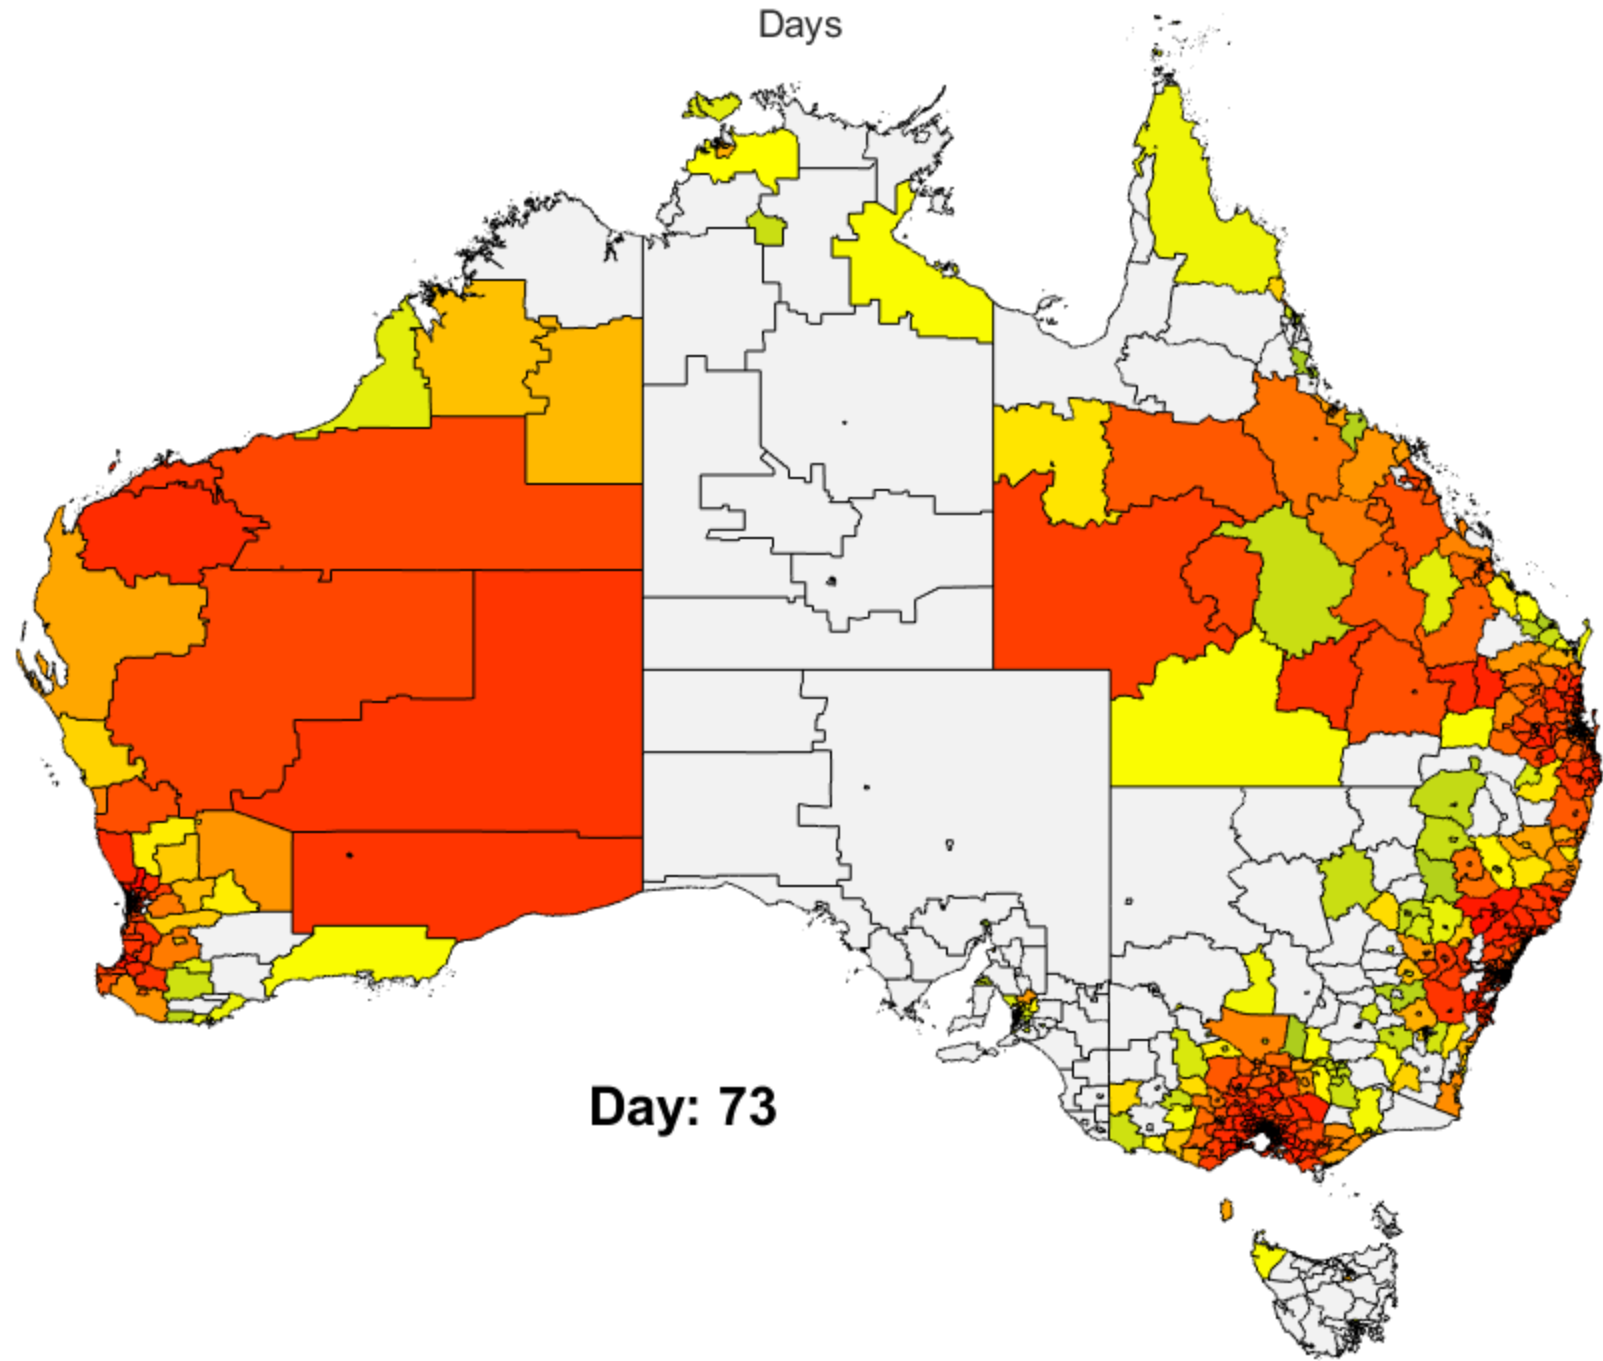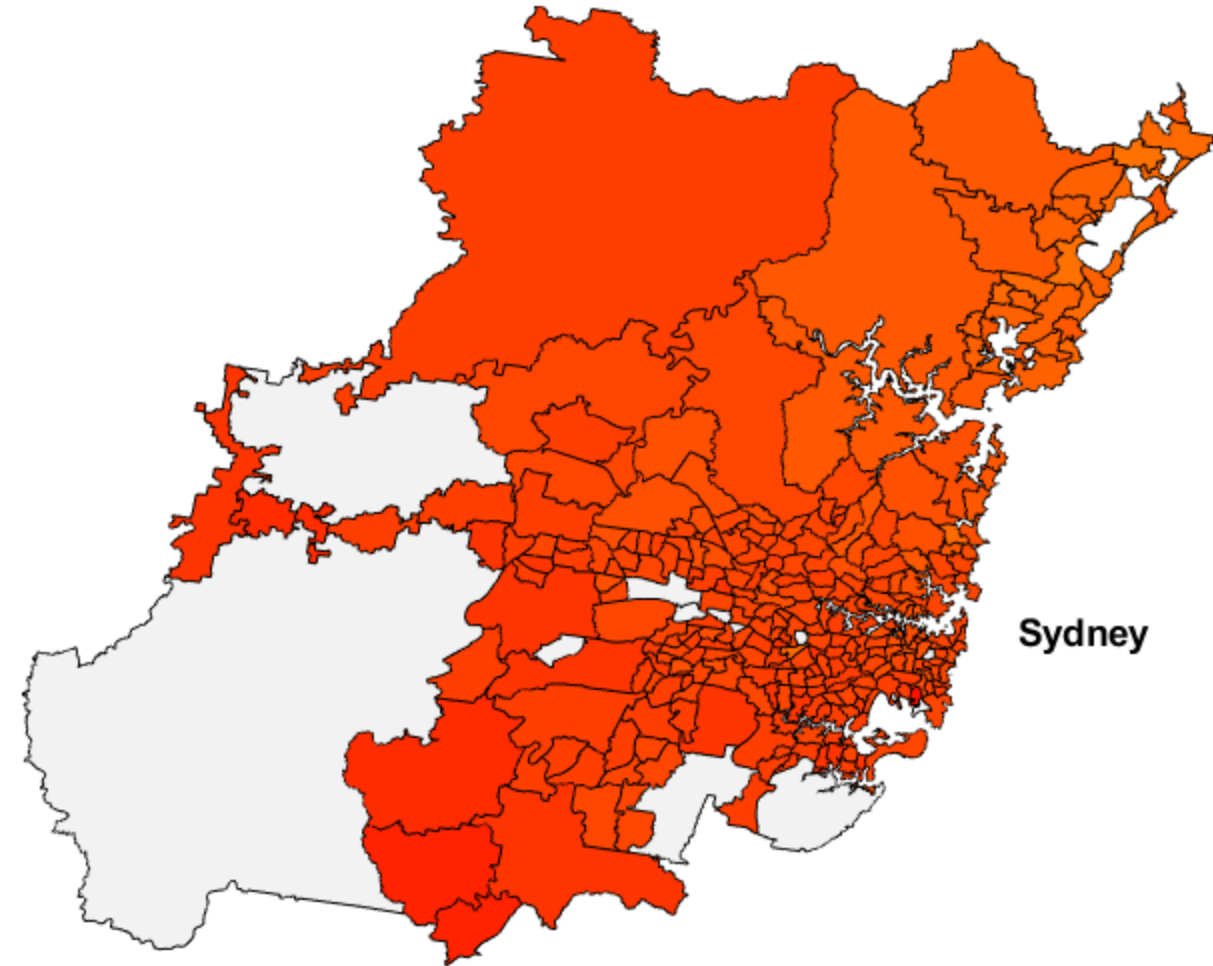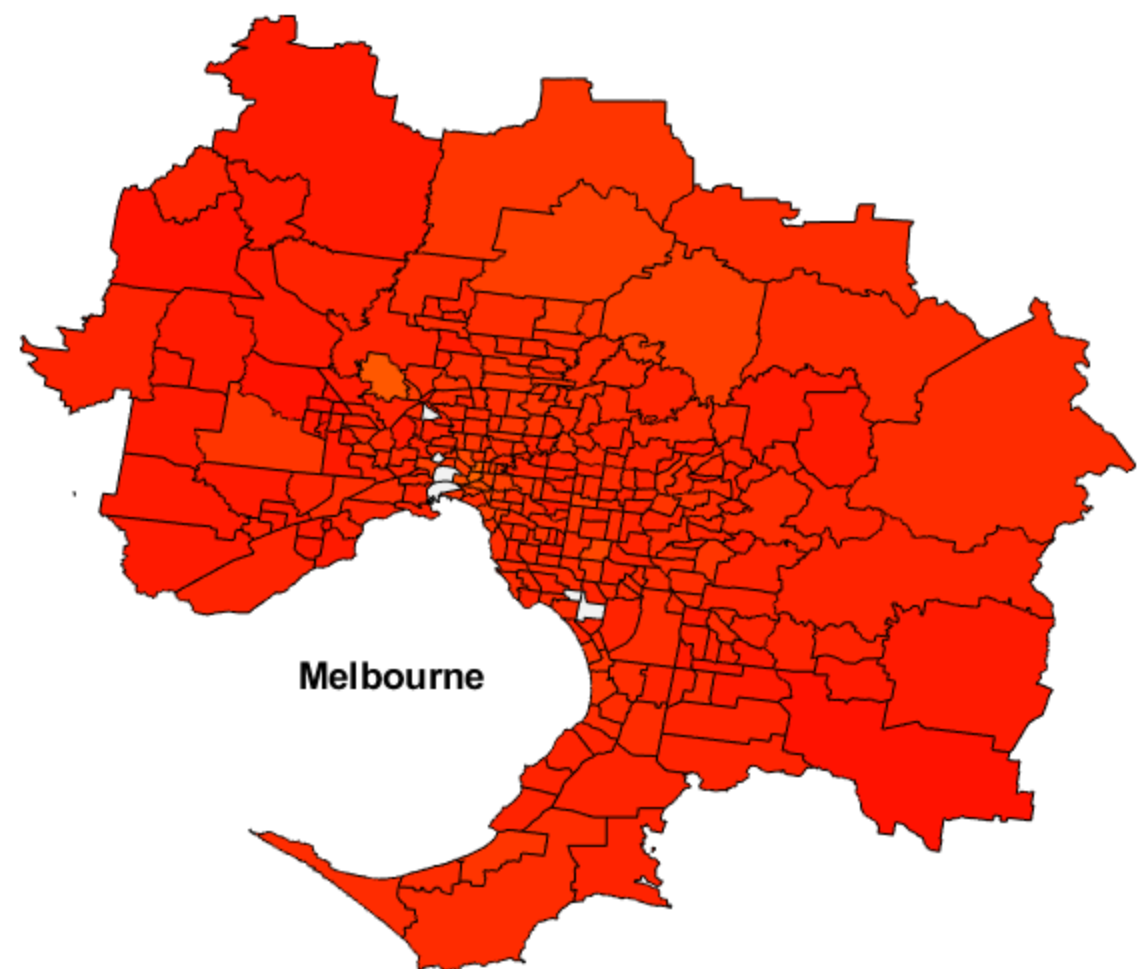



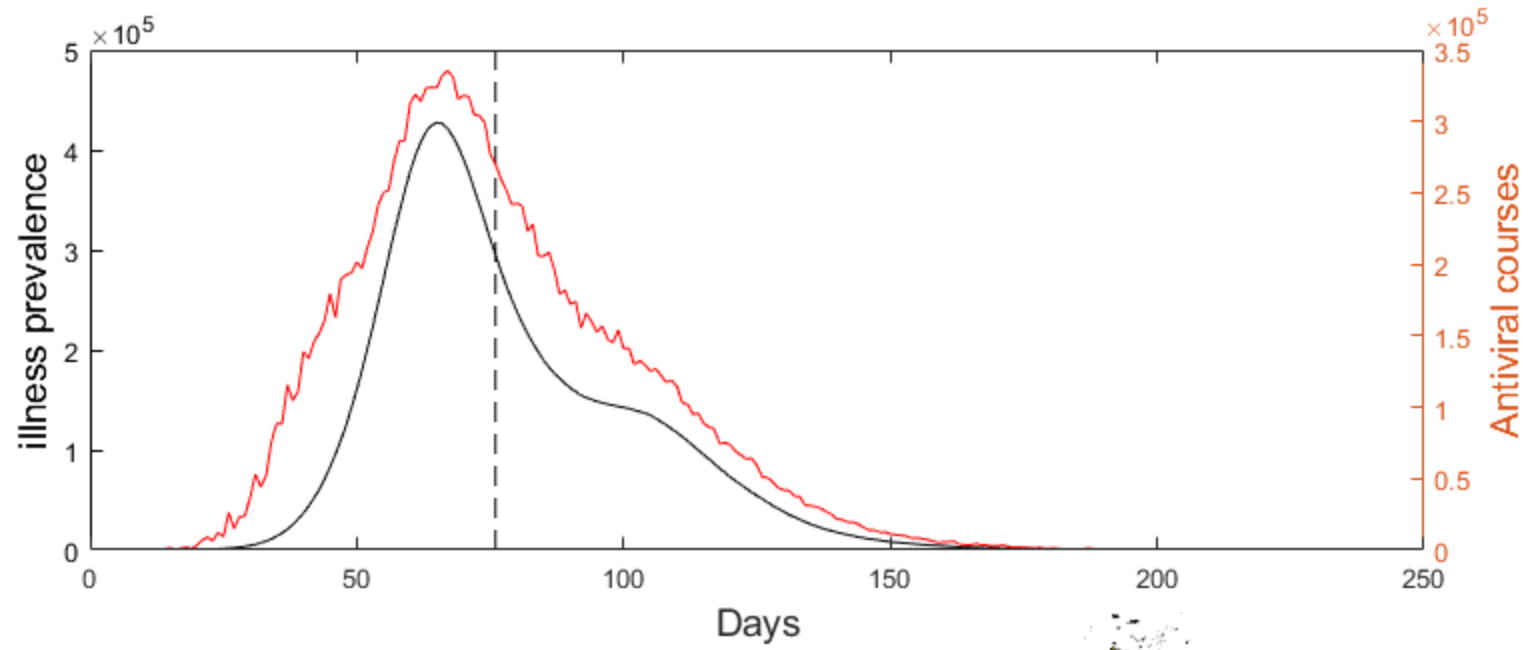

Days

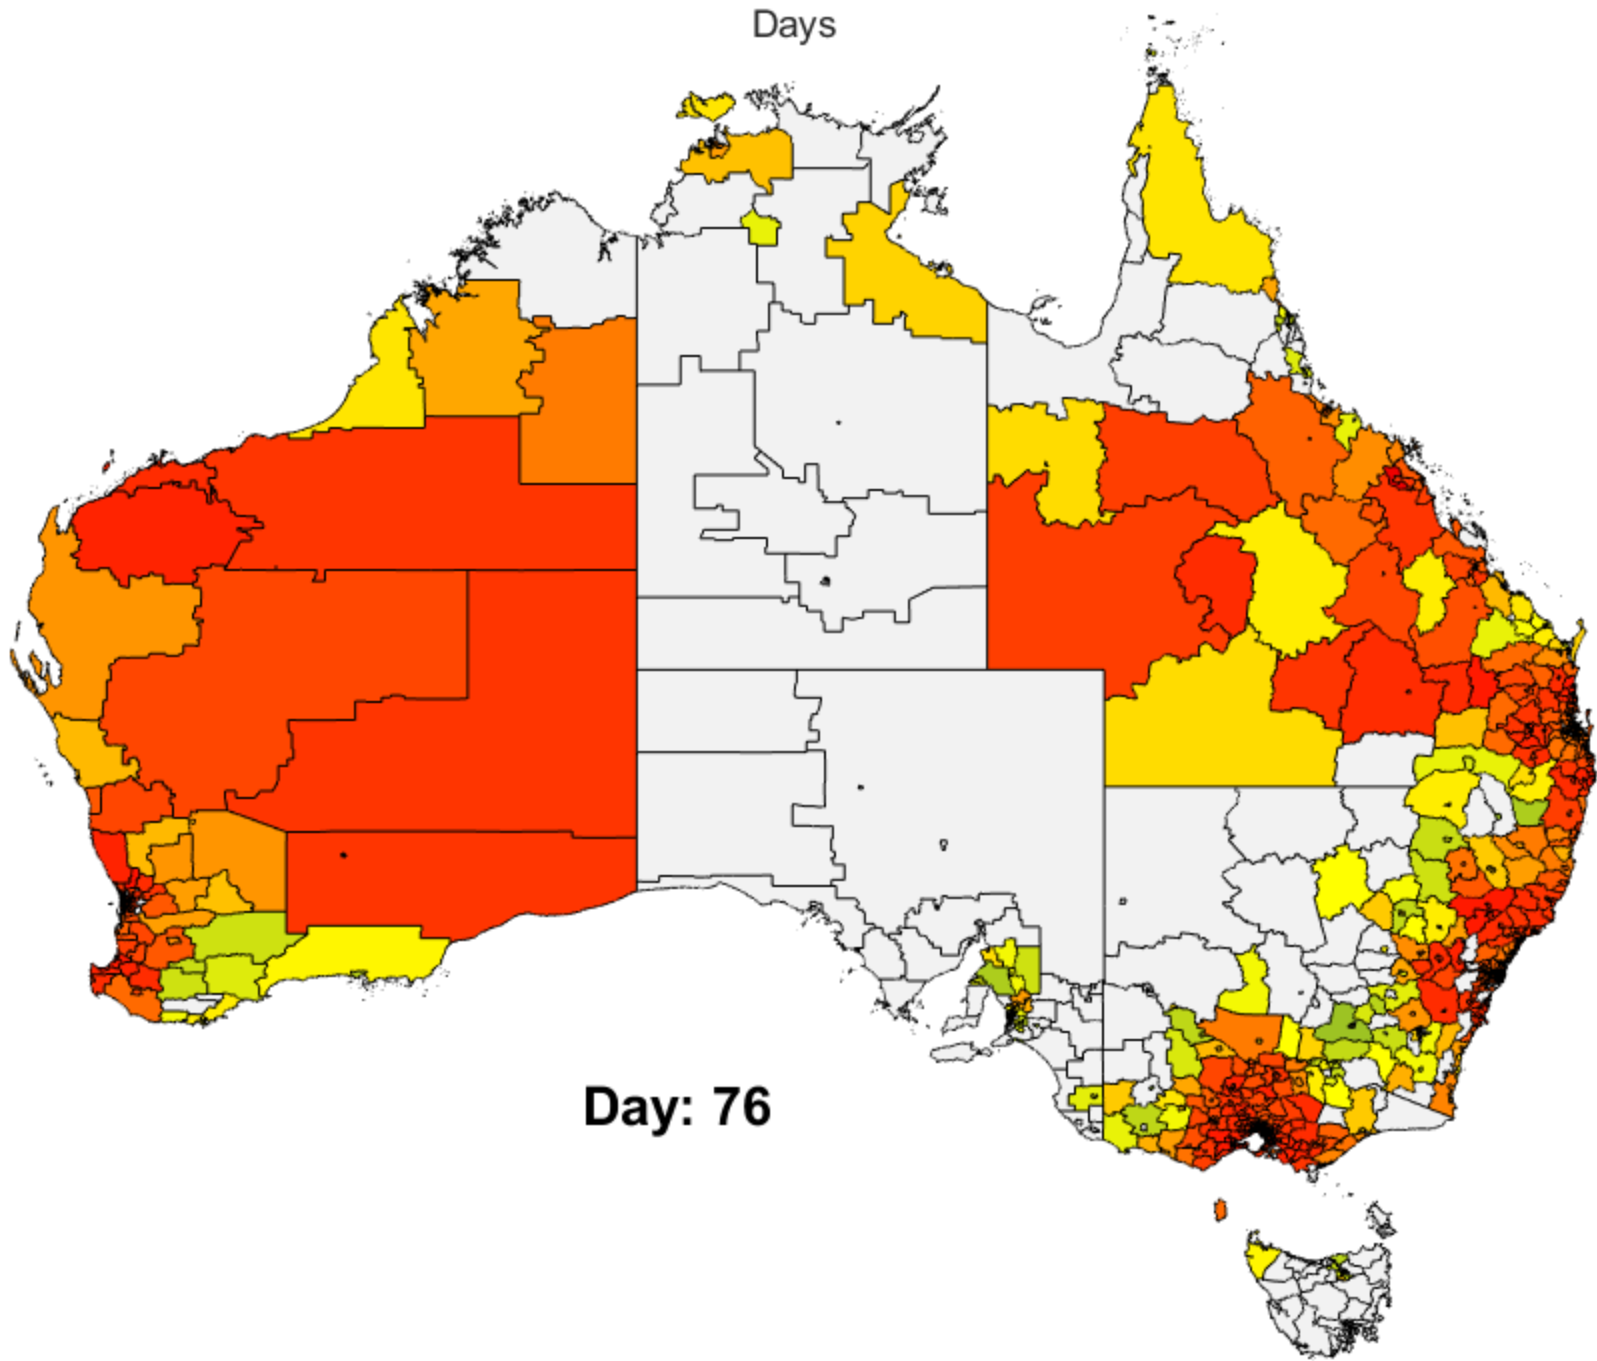

Day: 76

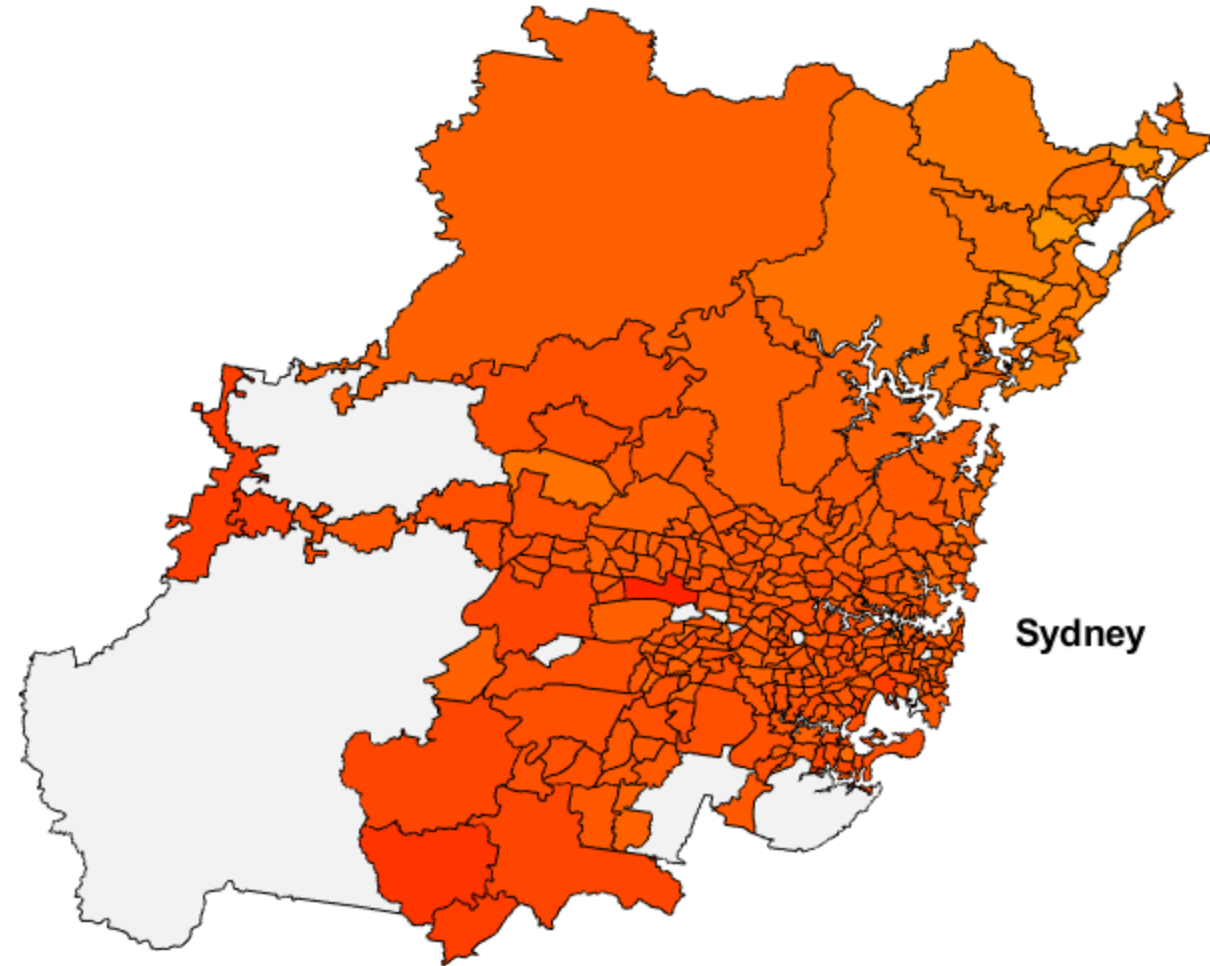

Sydney

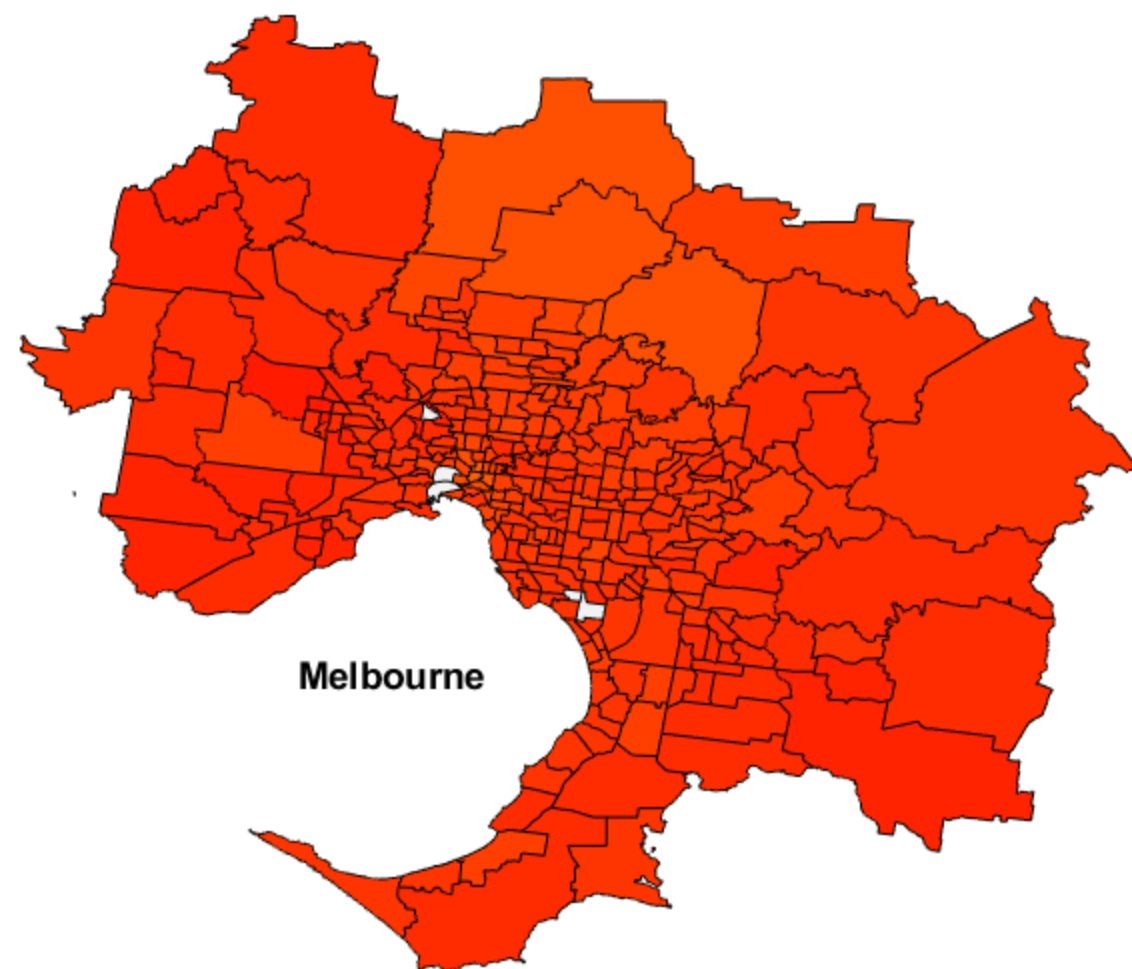

Melbourne

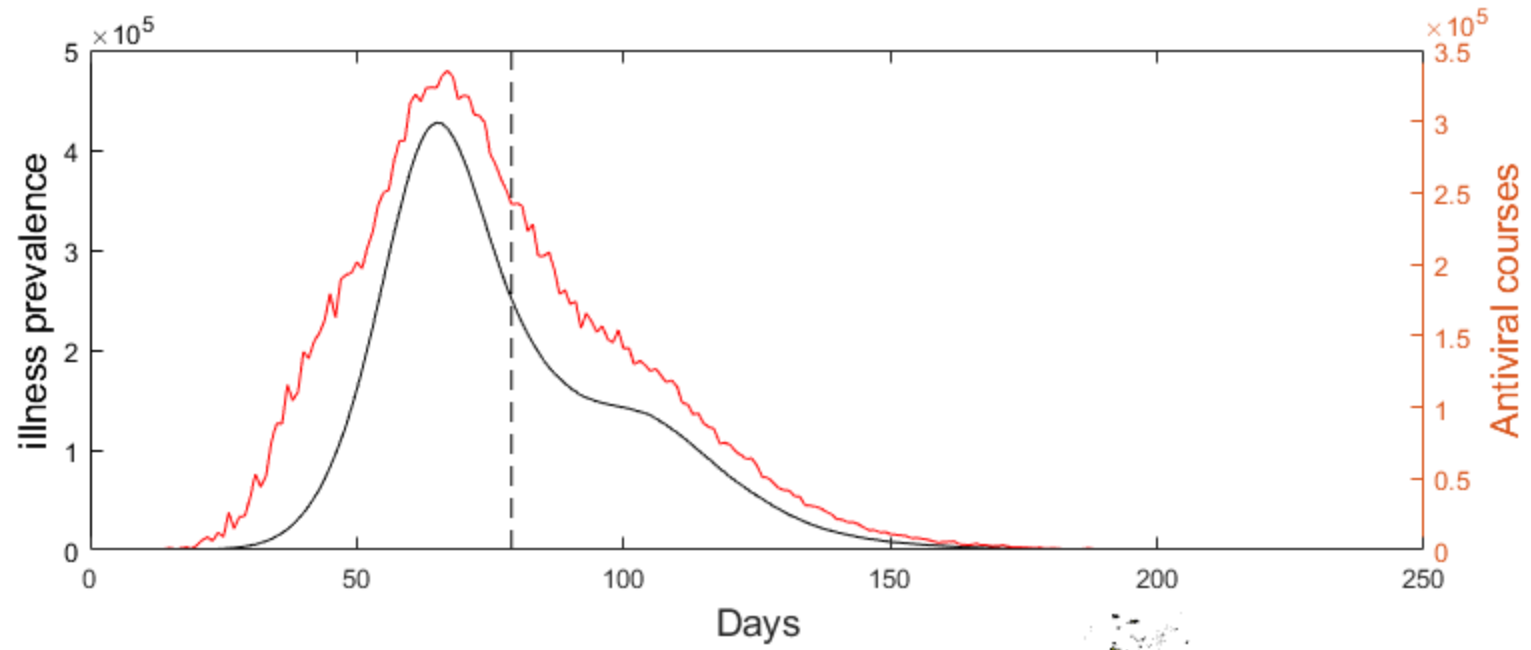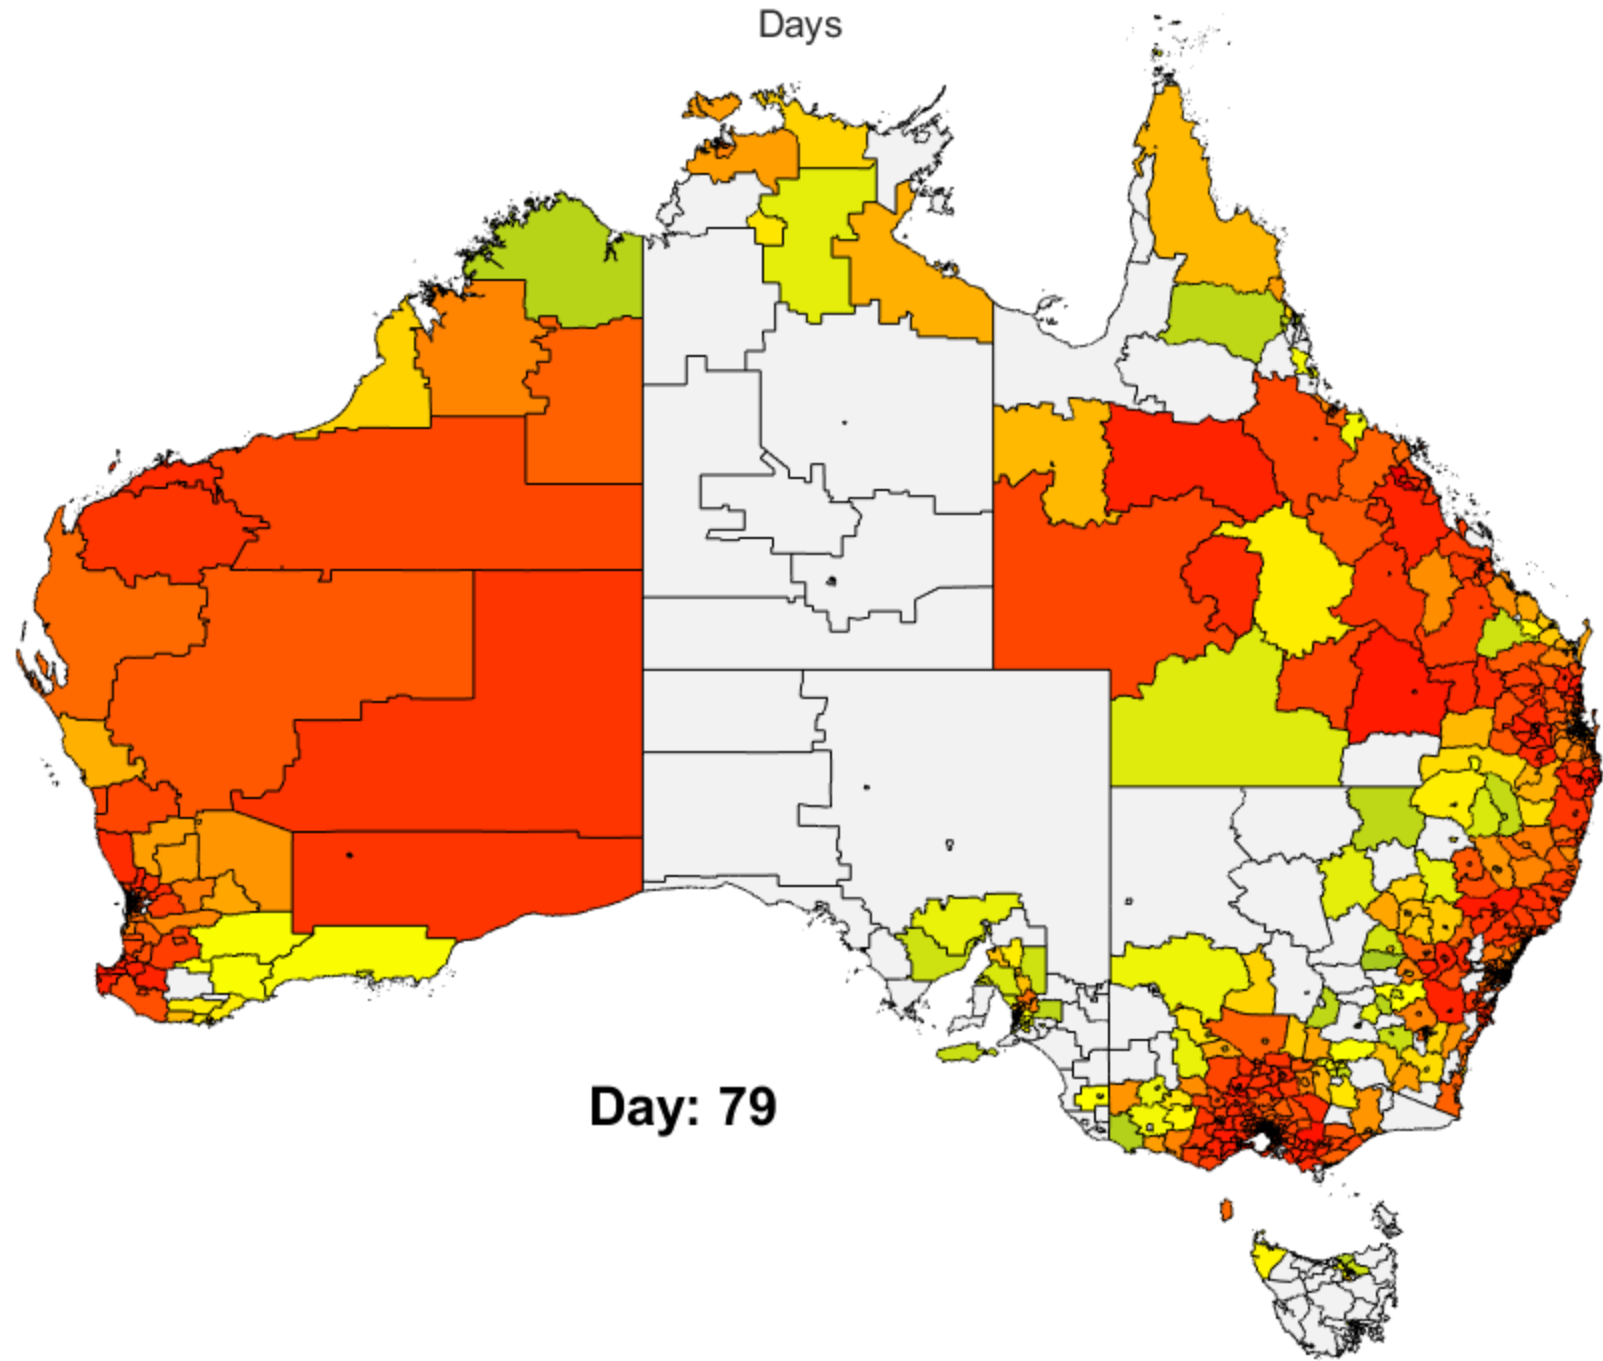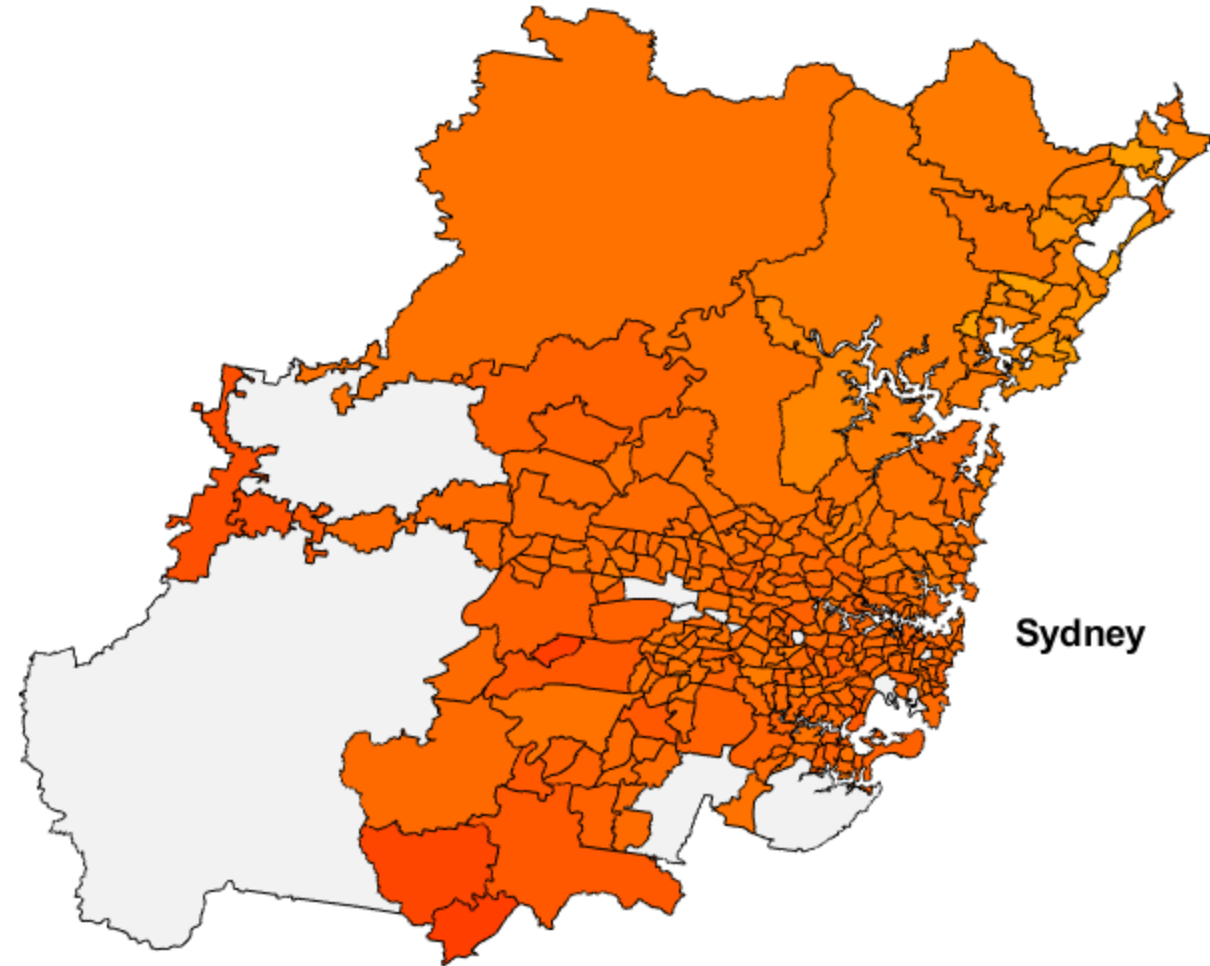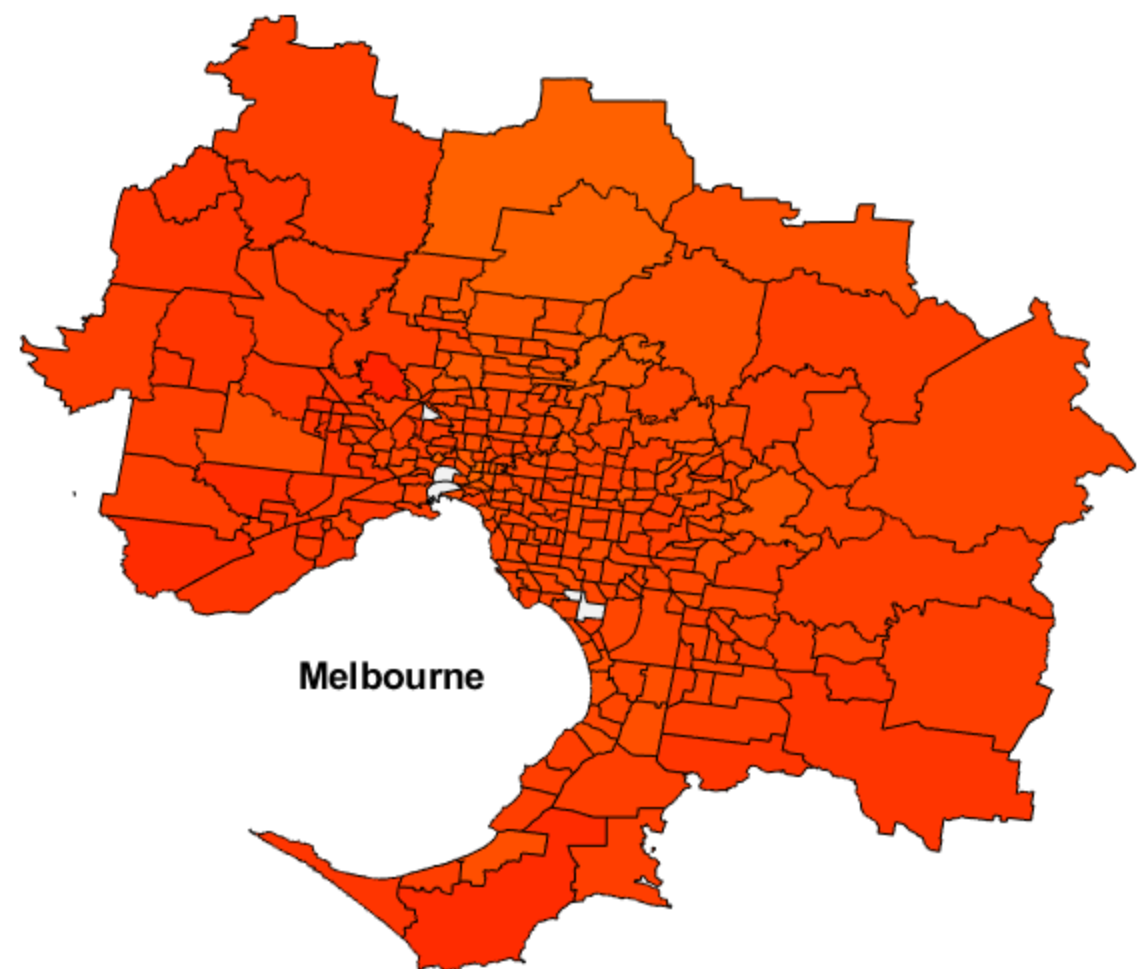

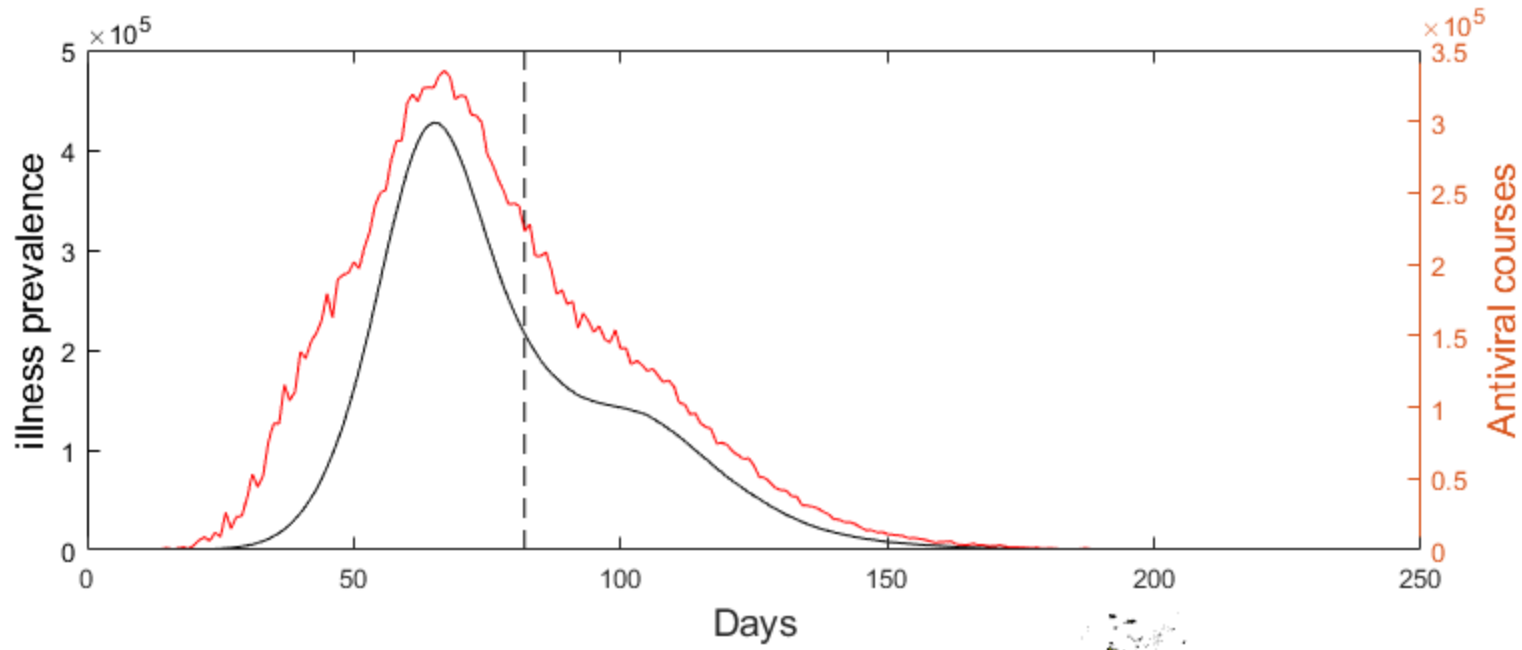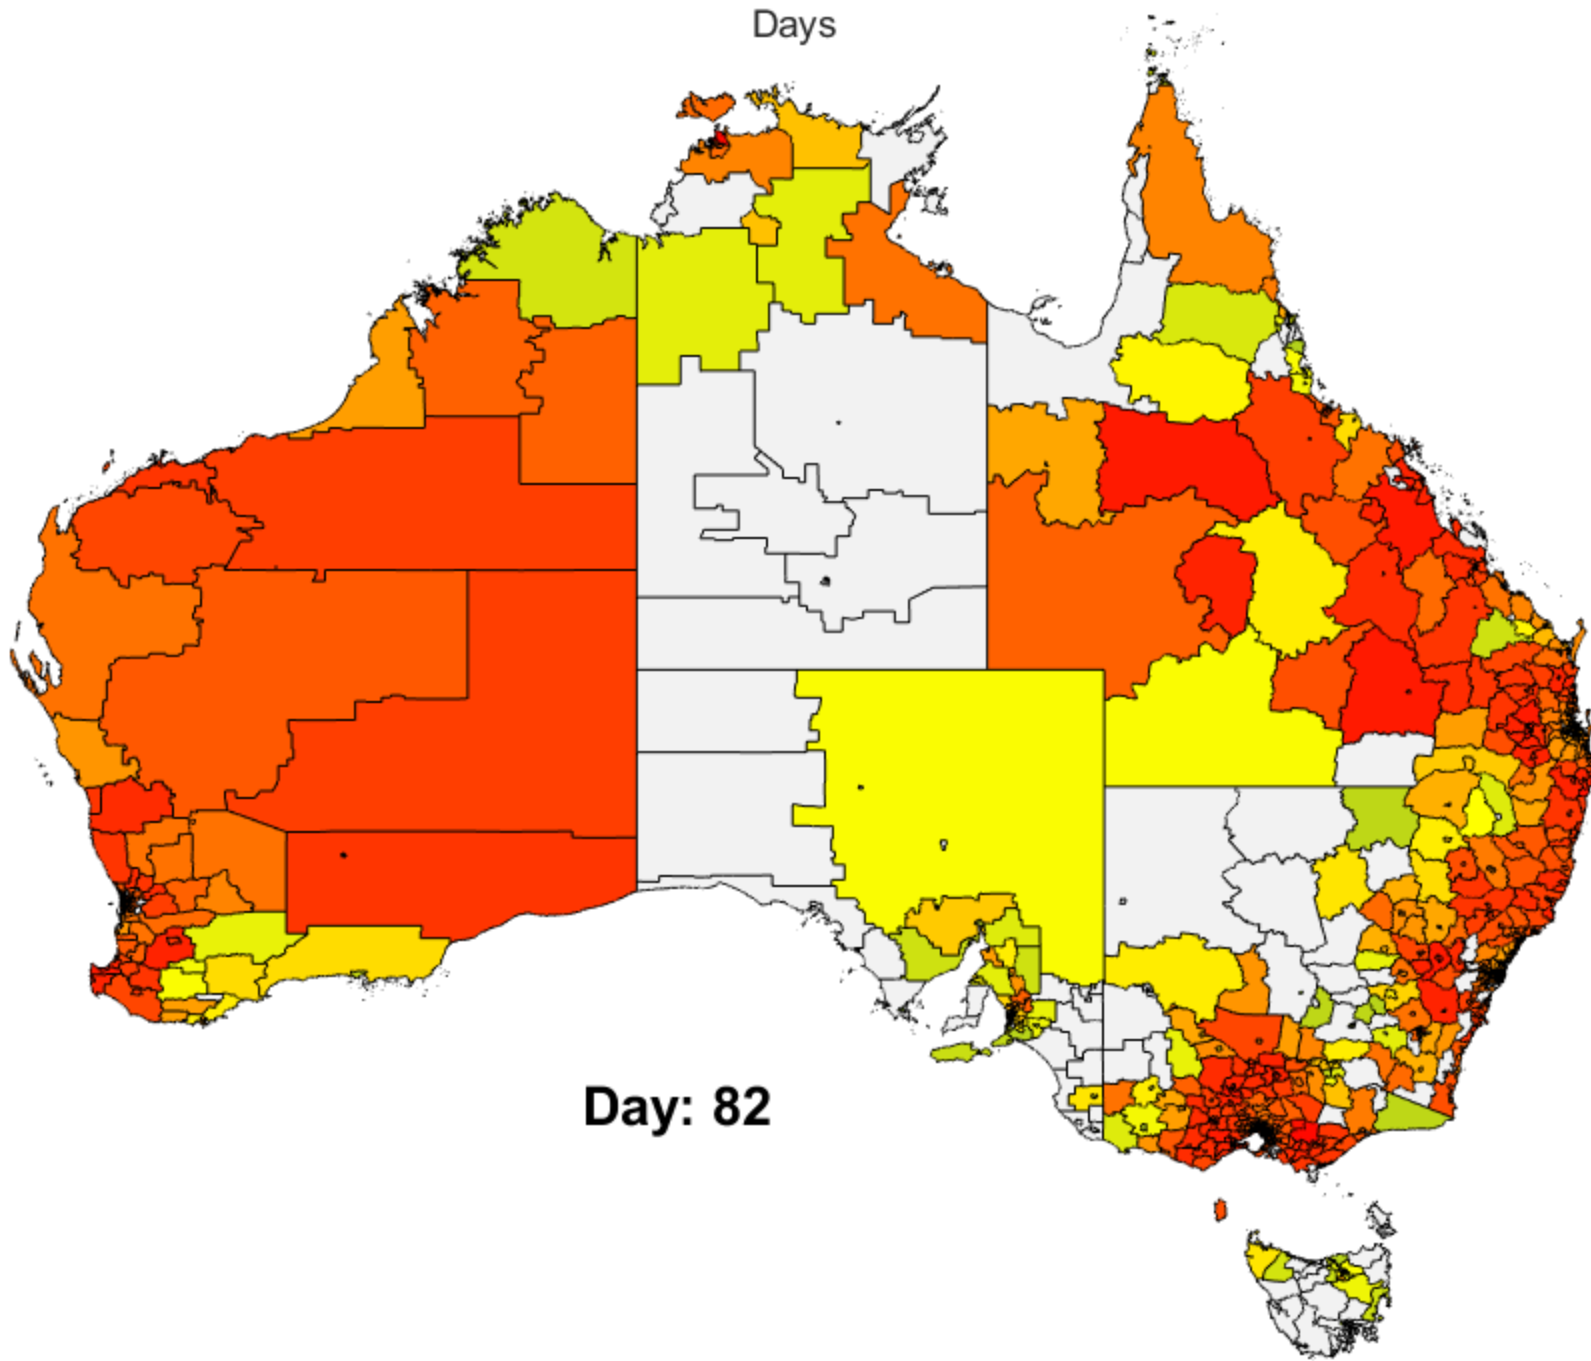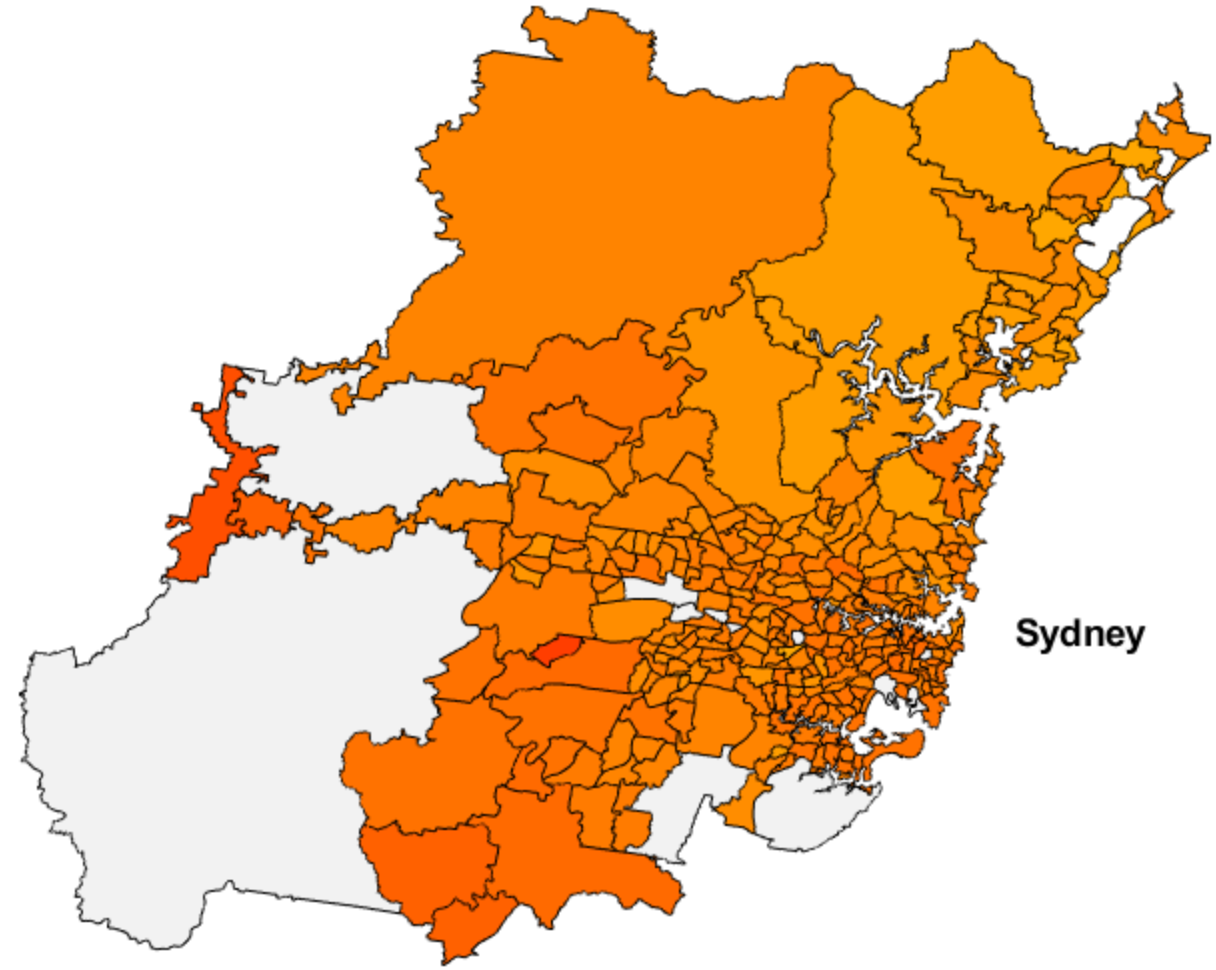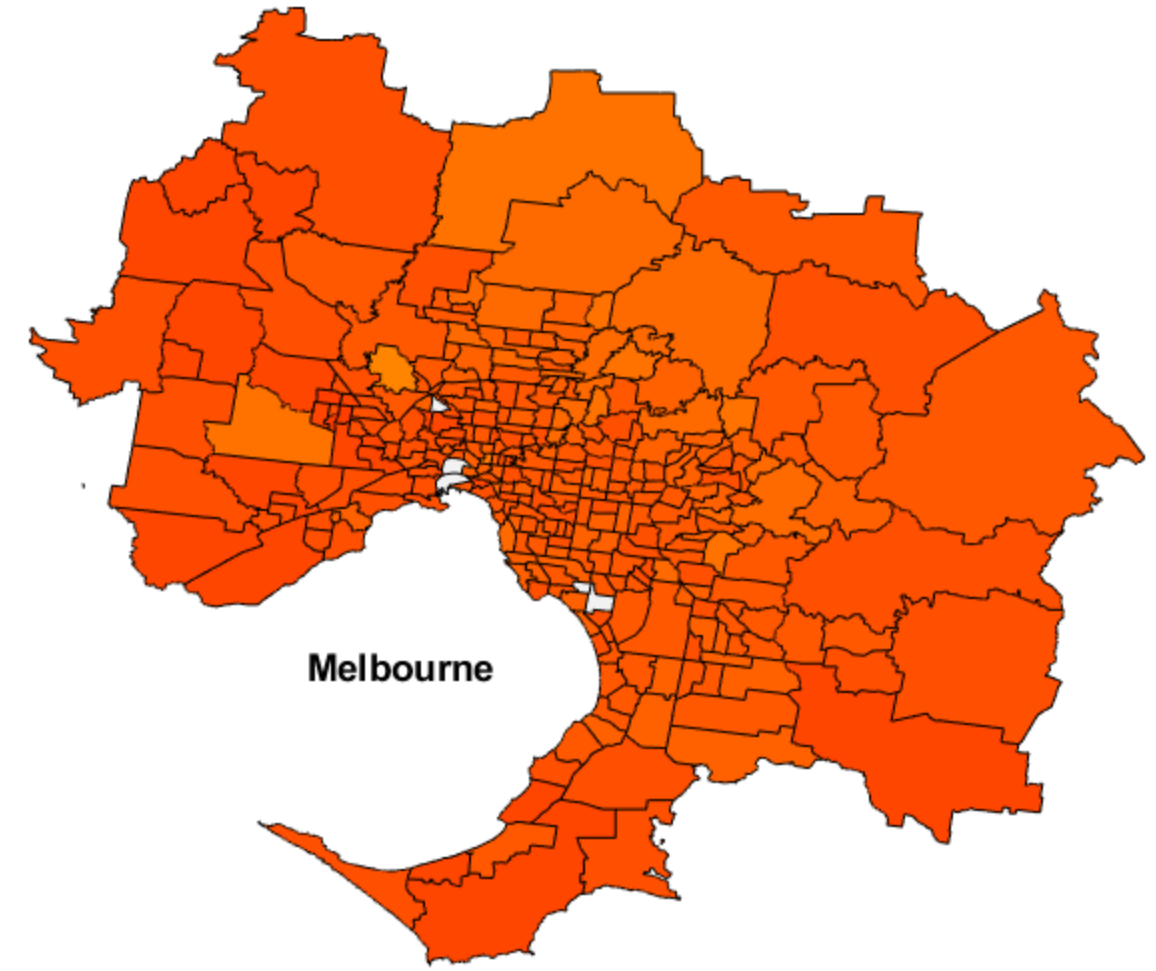



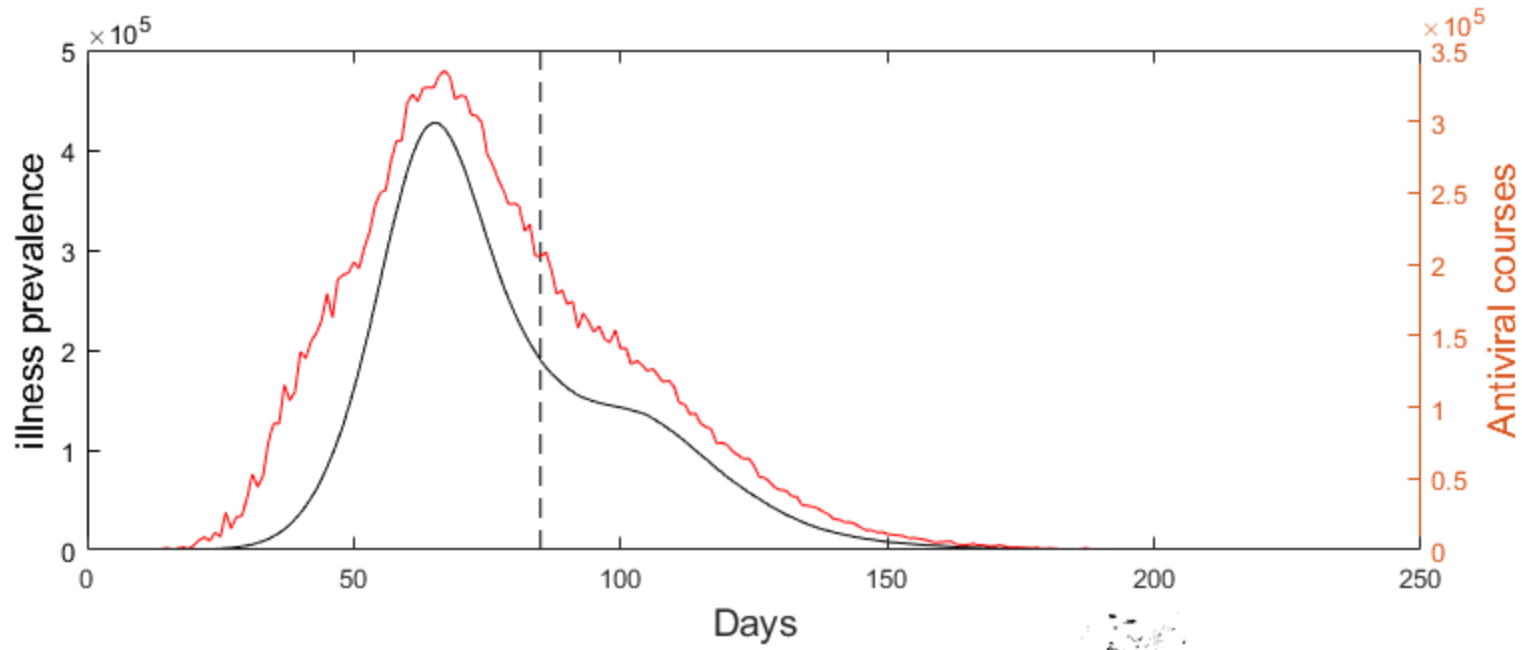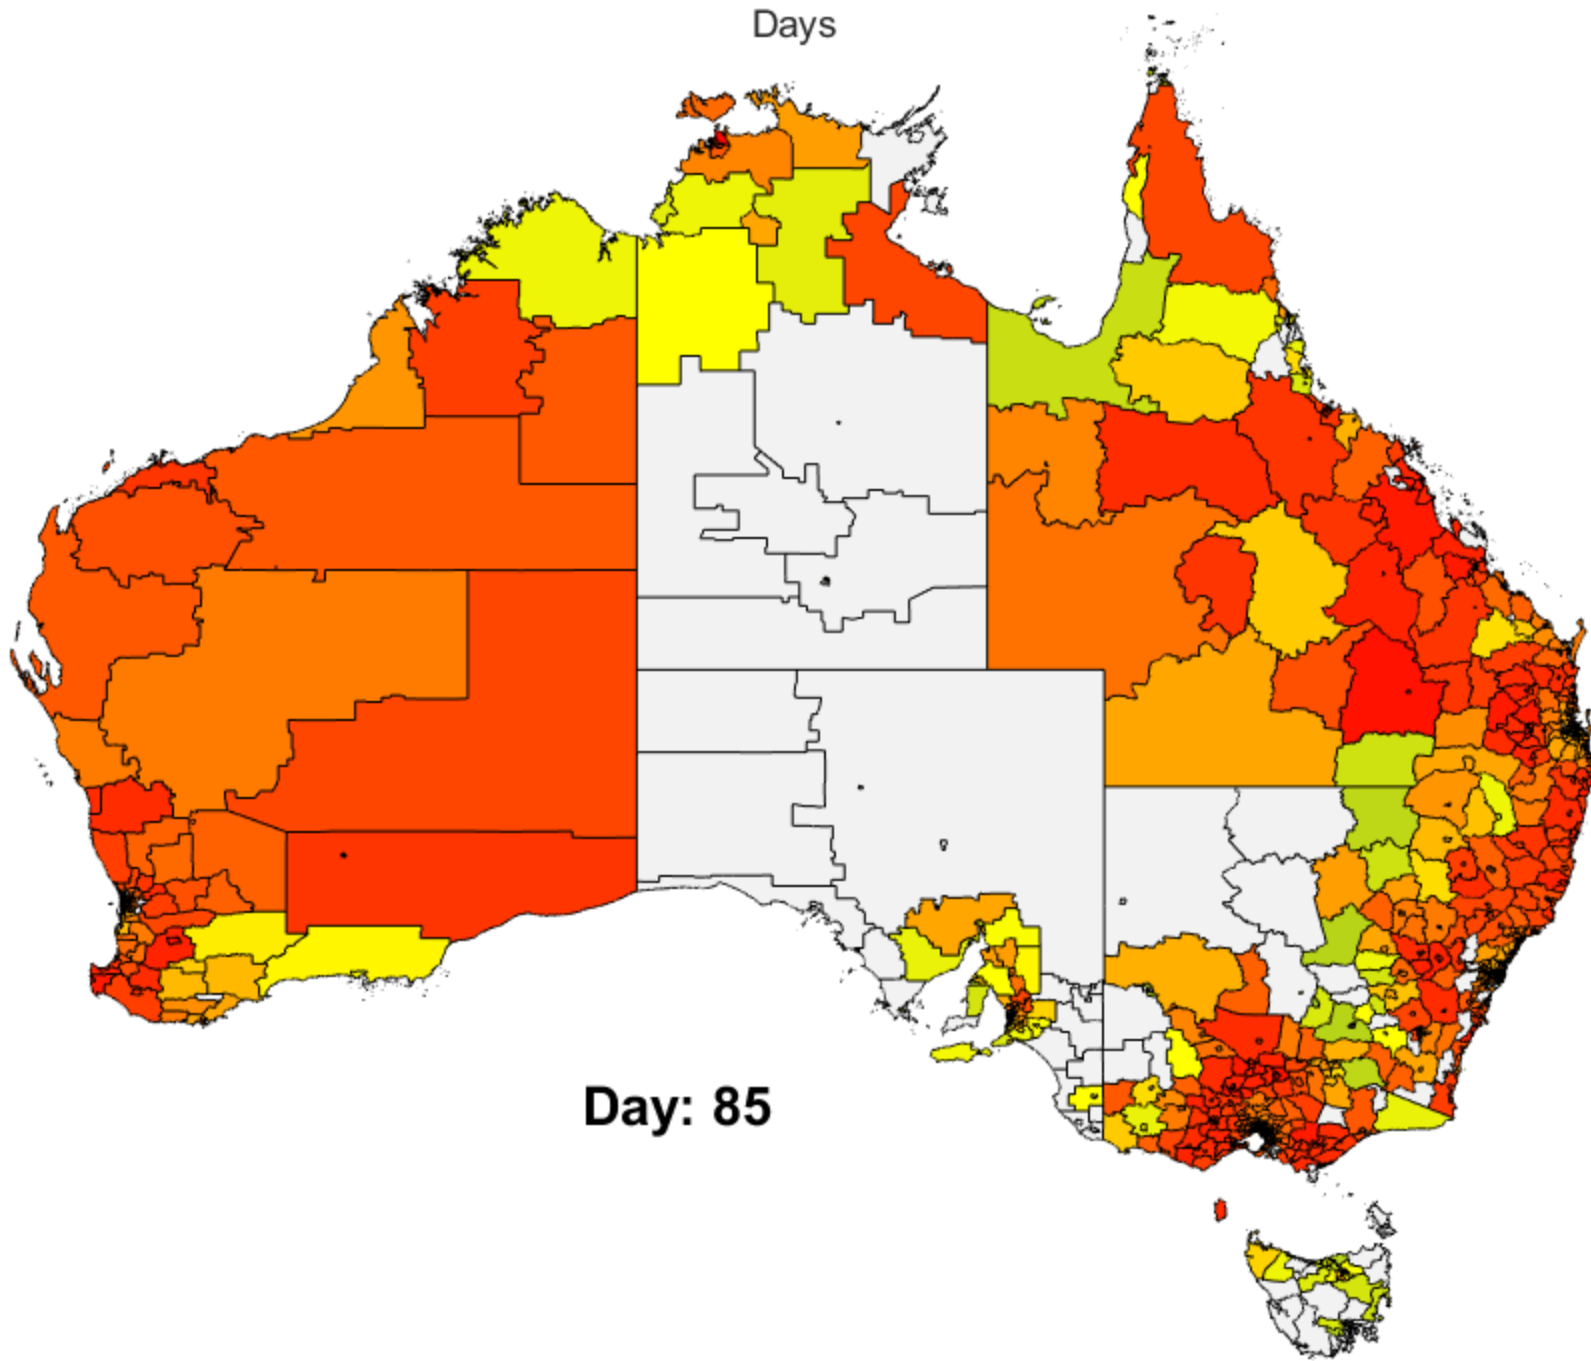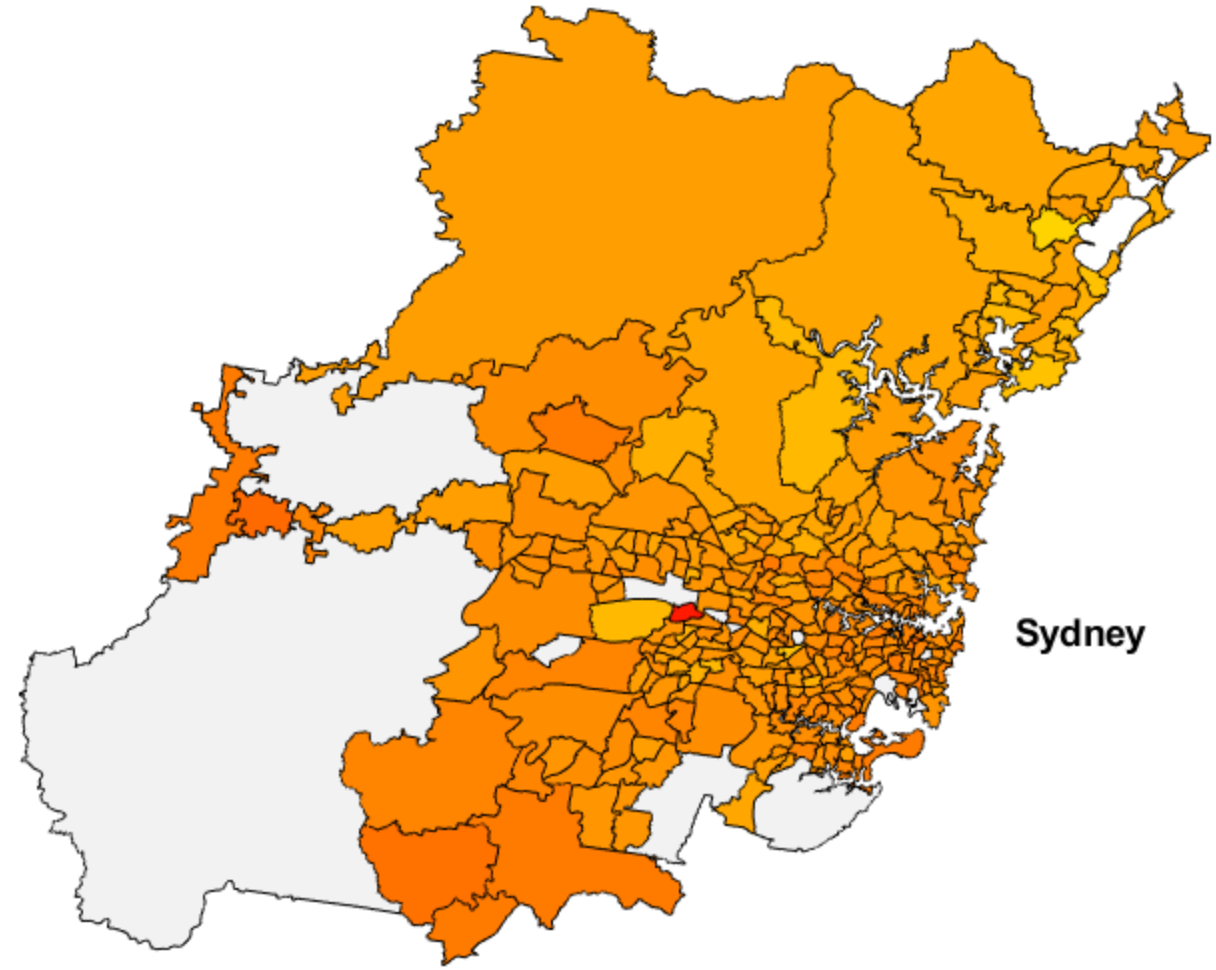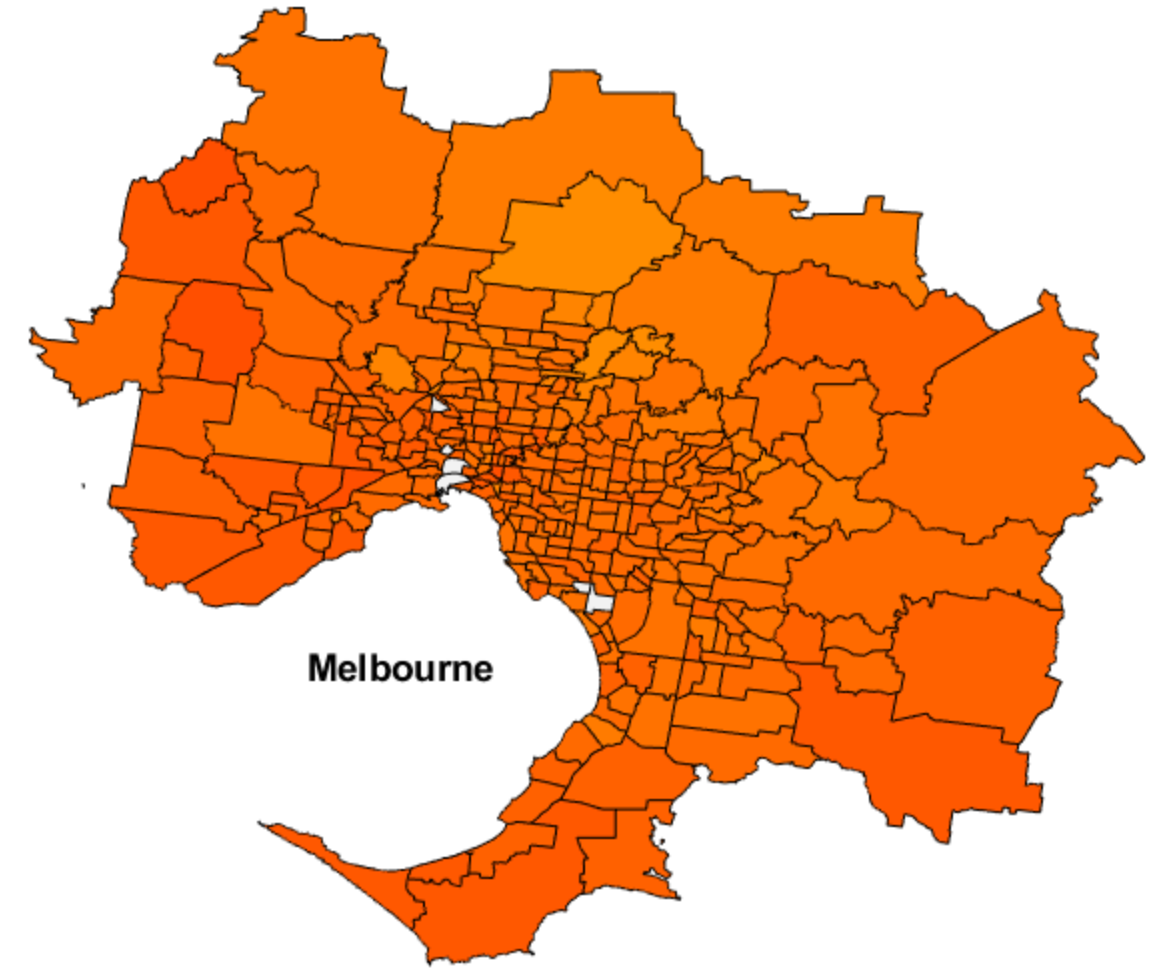

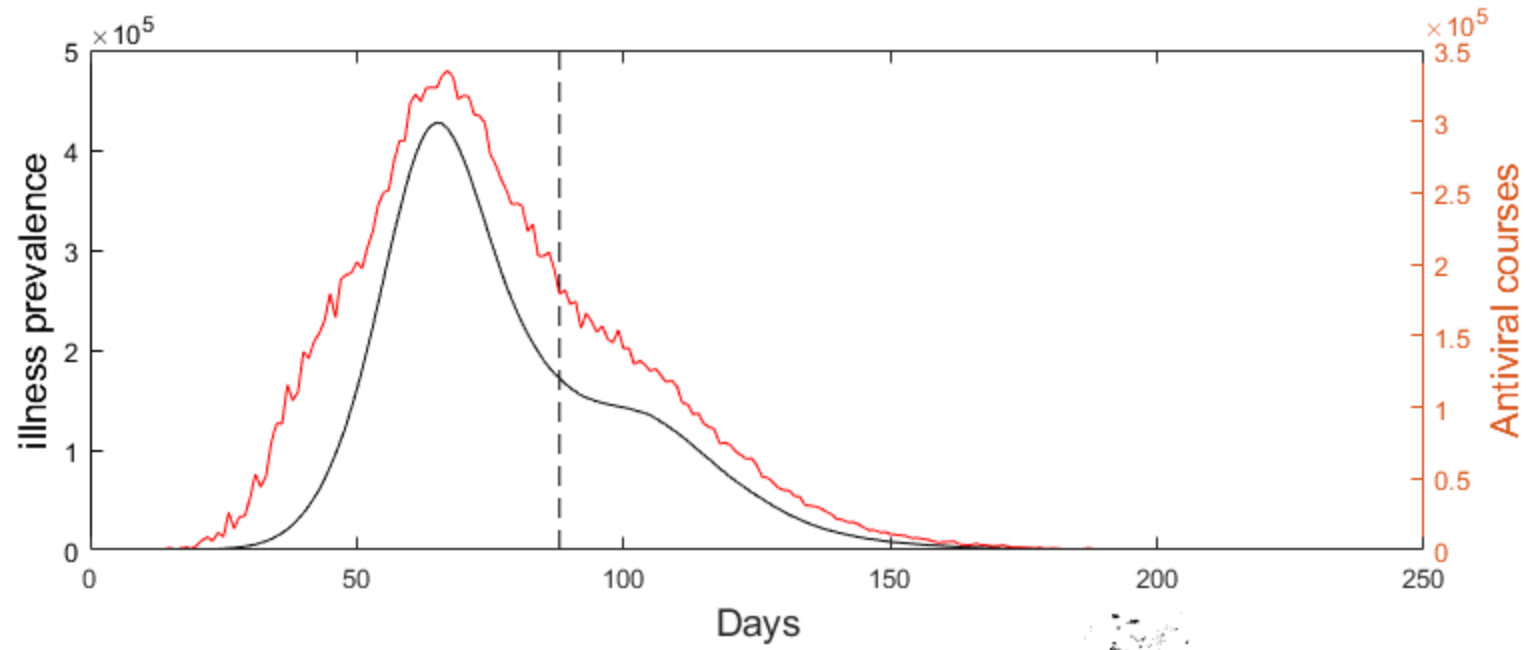

Days

Antiviral courses

Day: 88

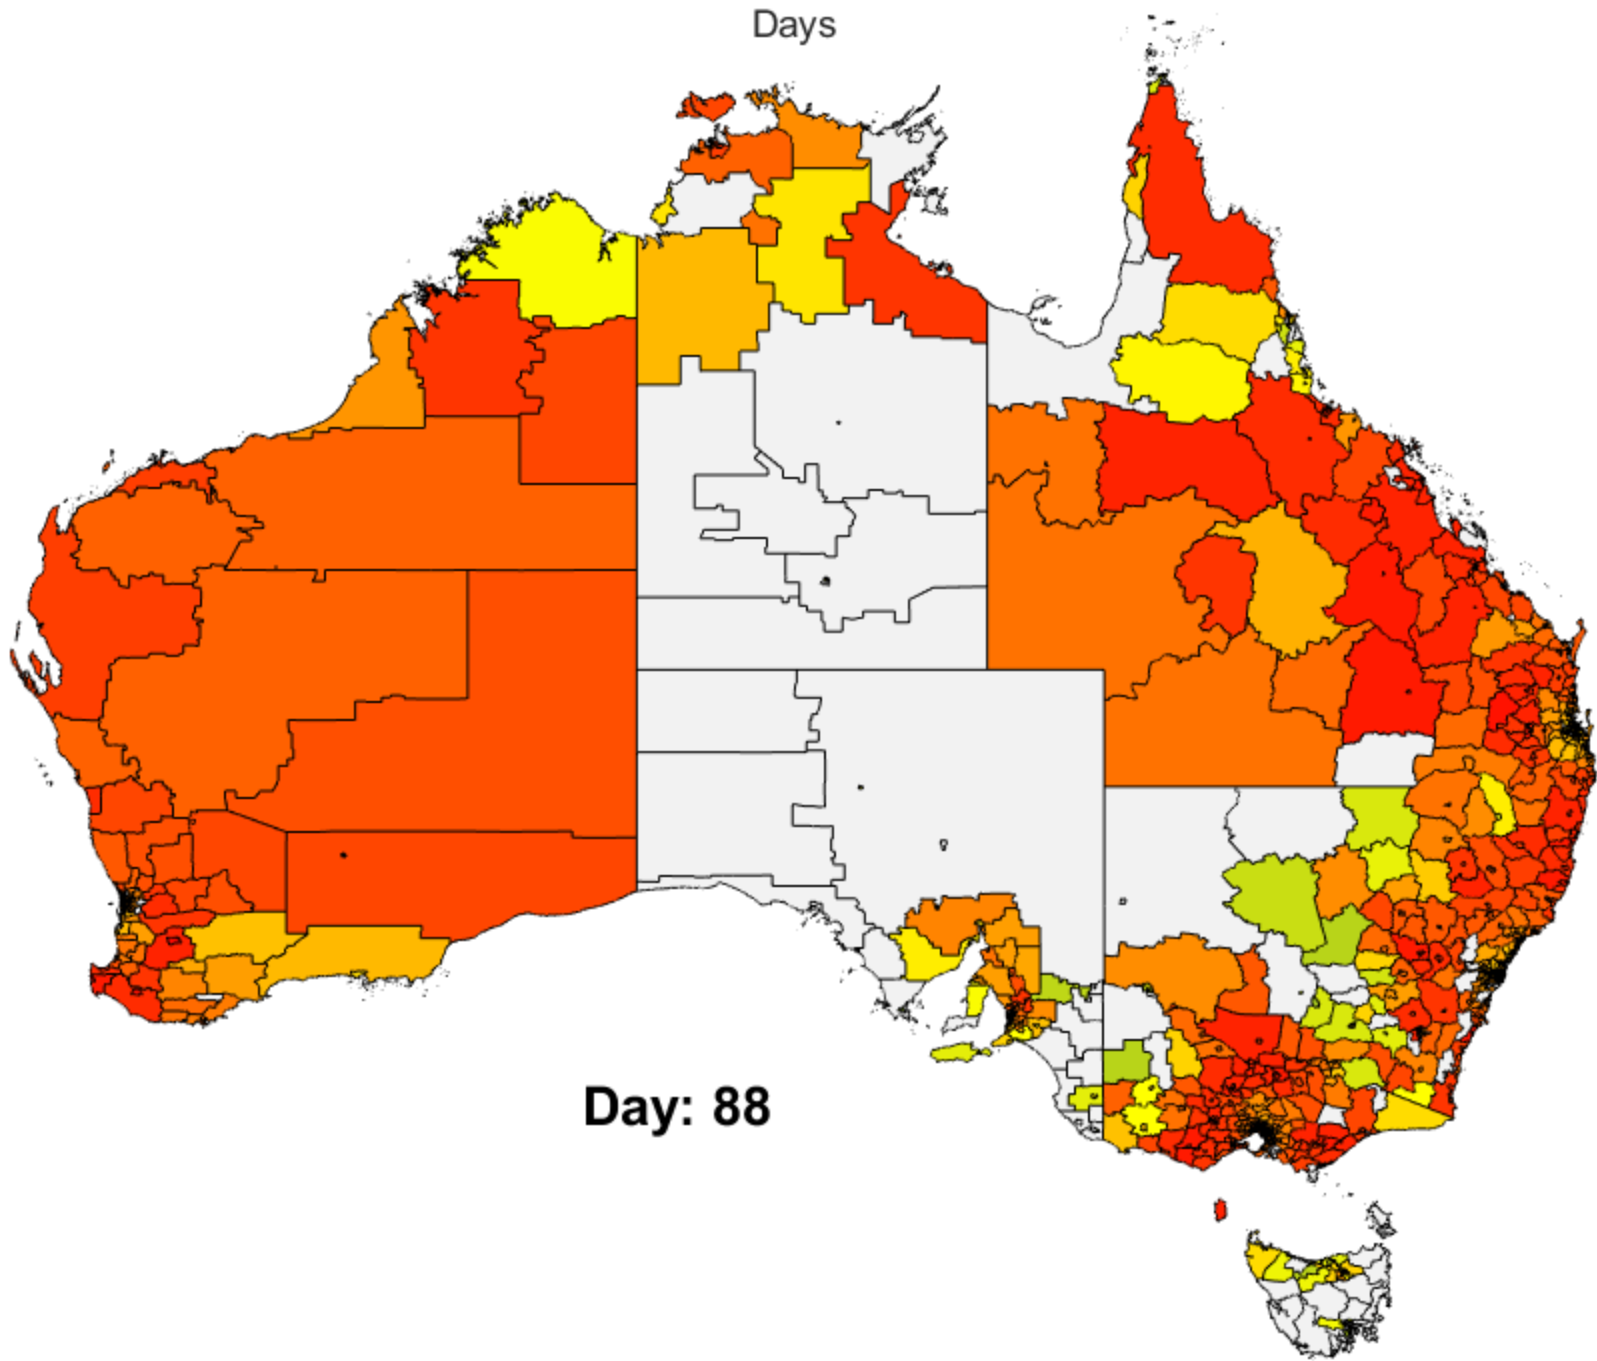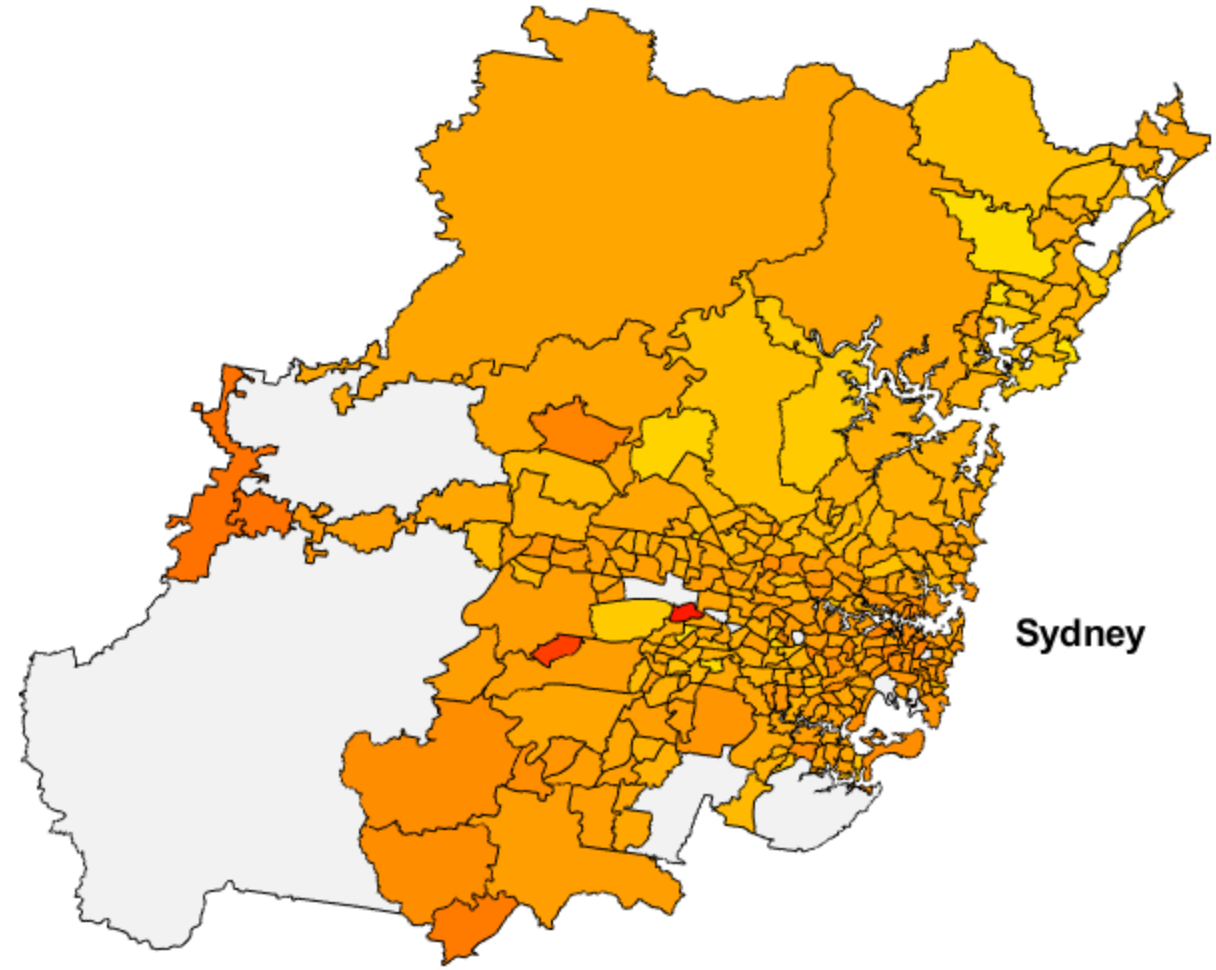

Sydney

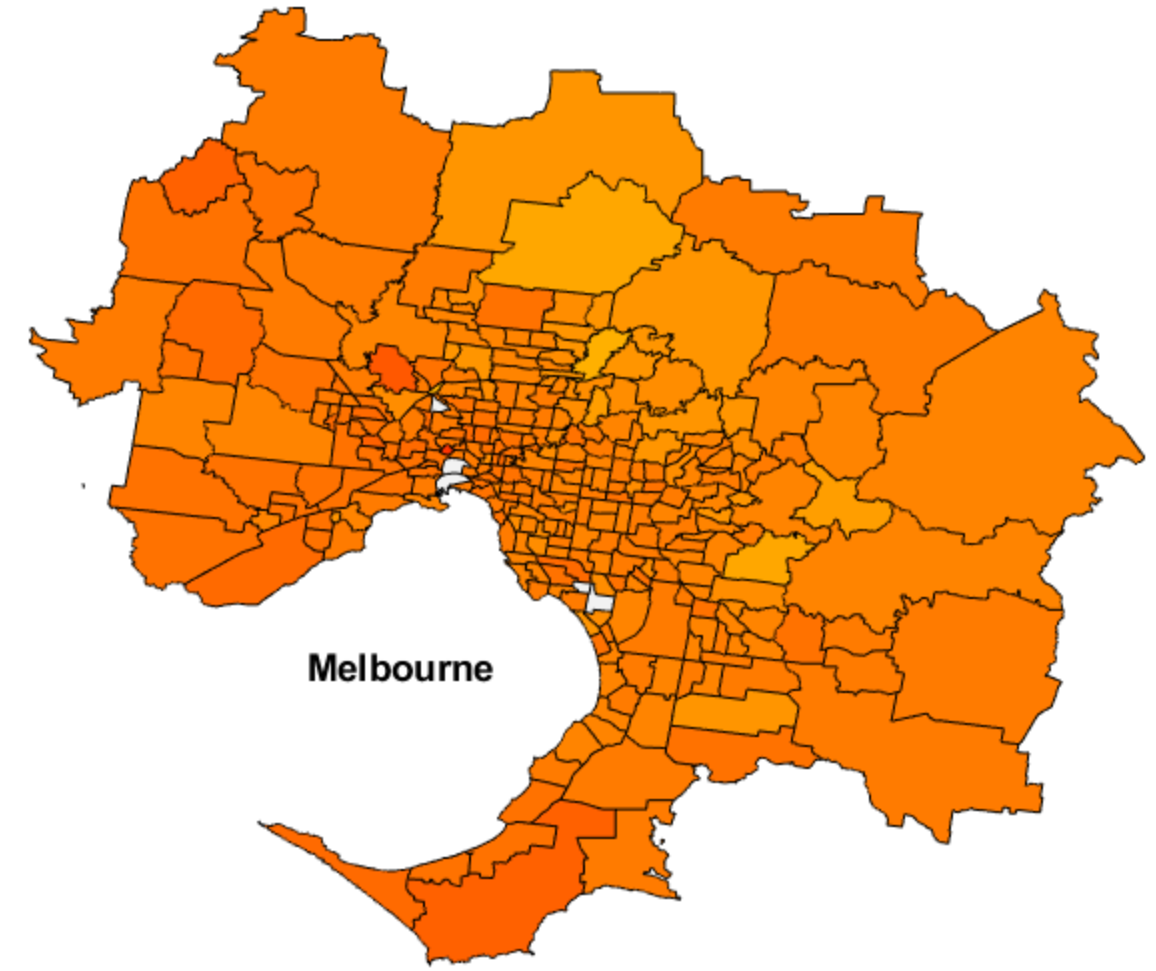

Melbourne

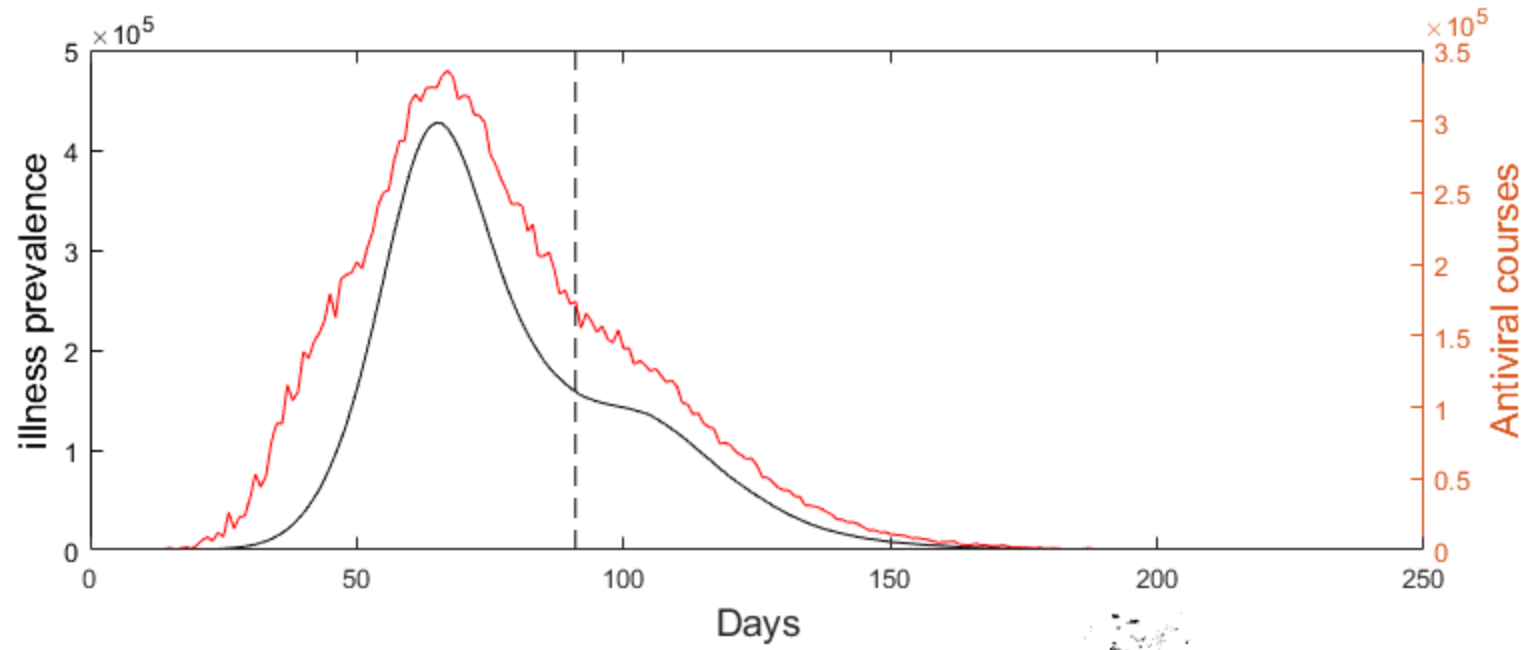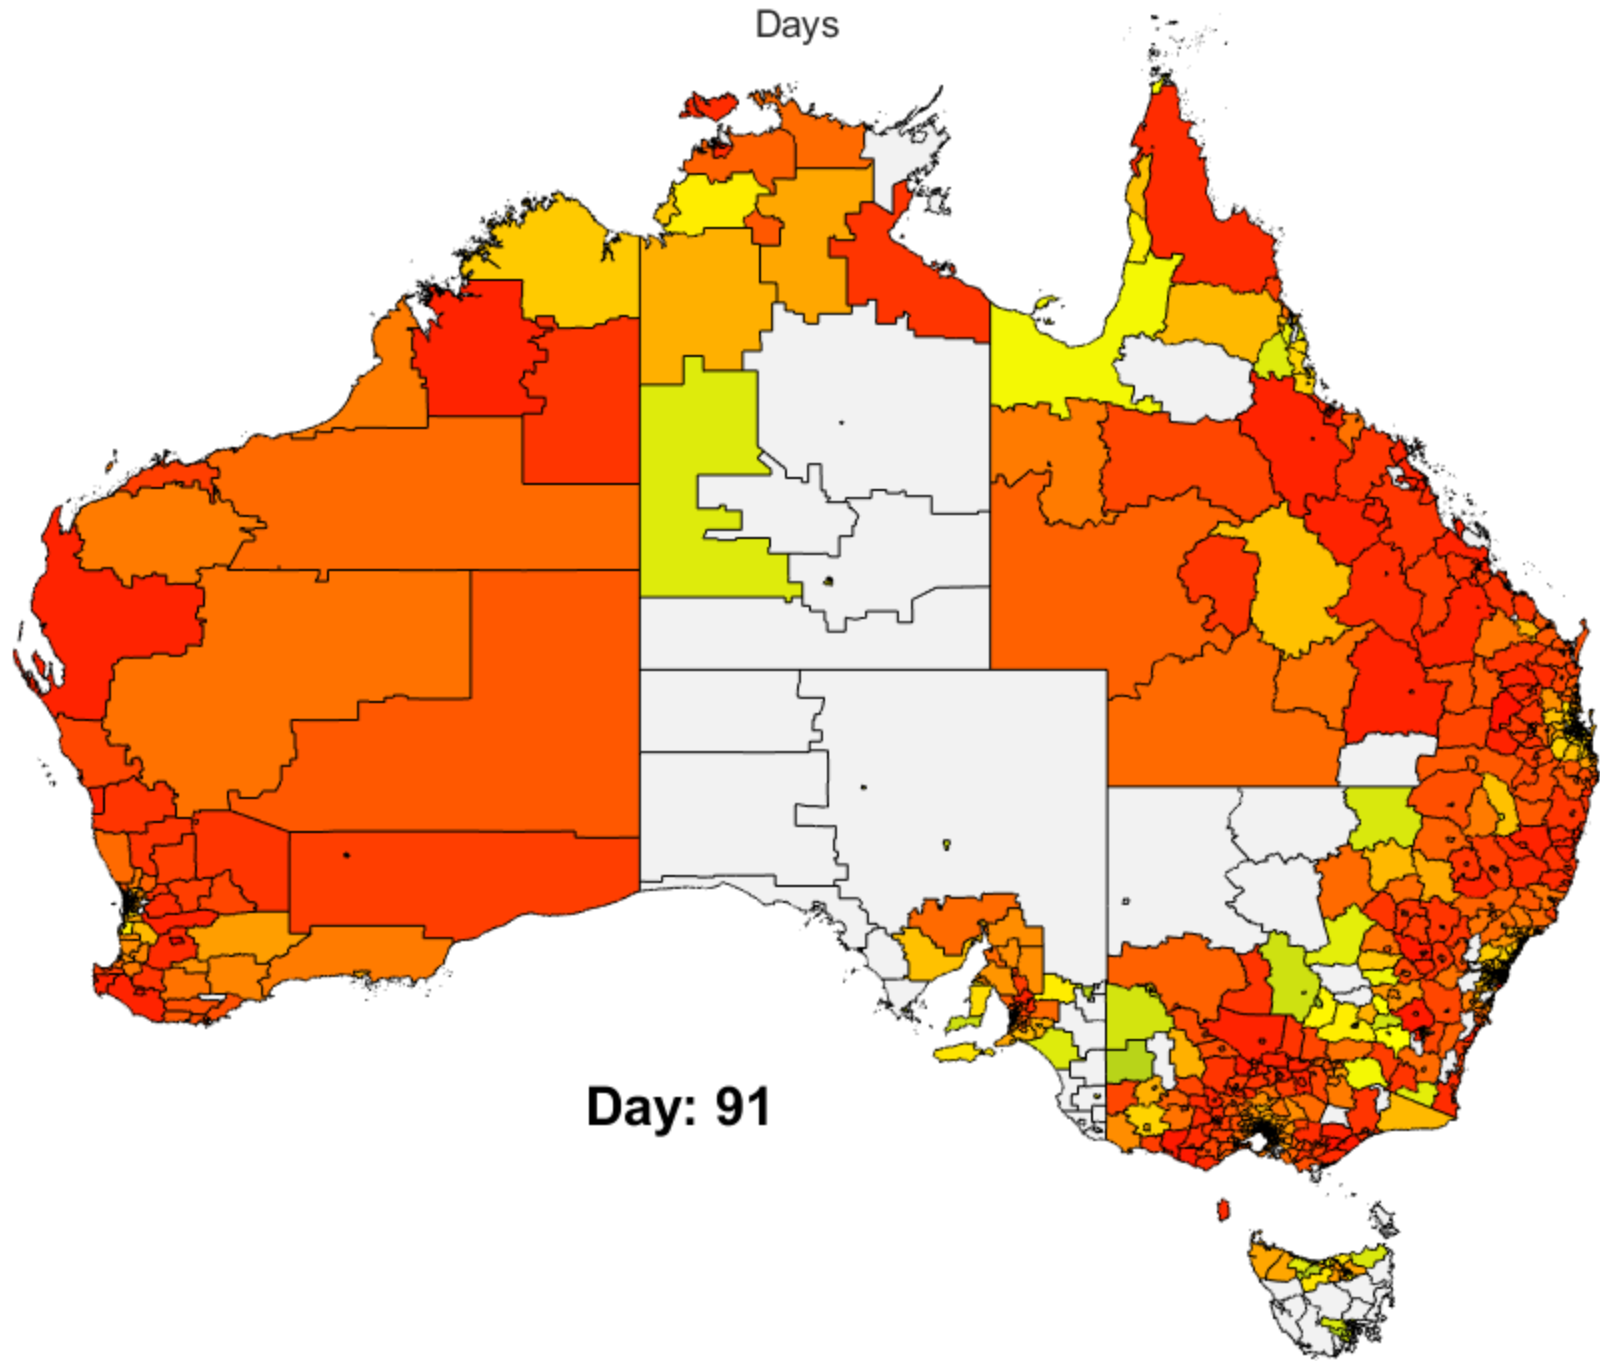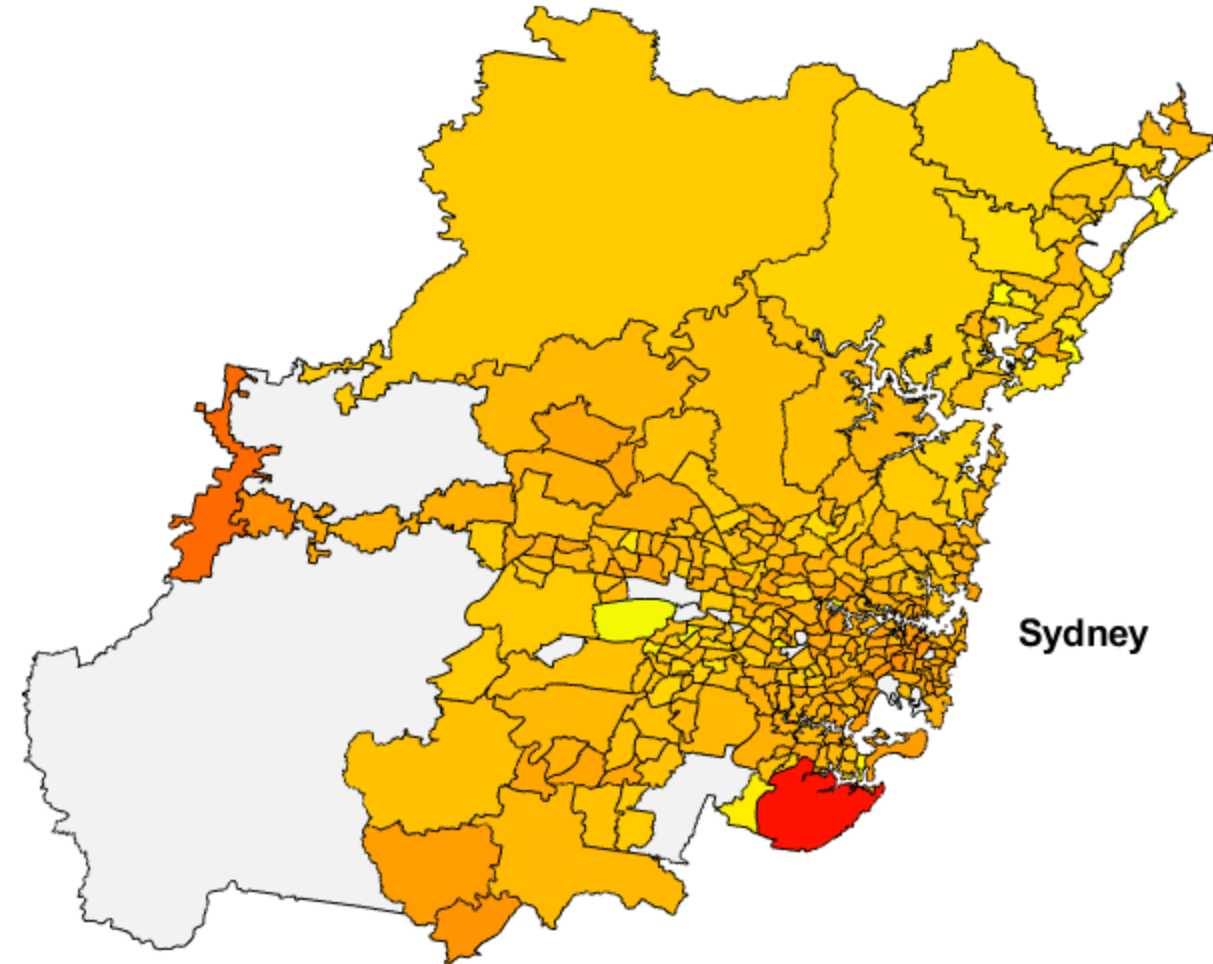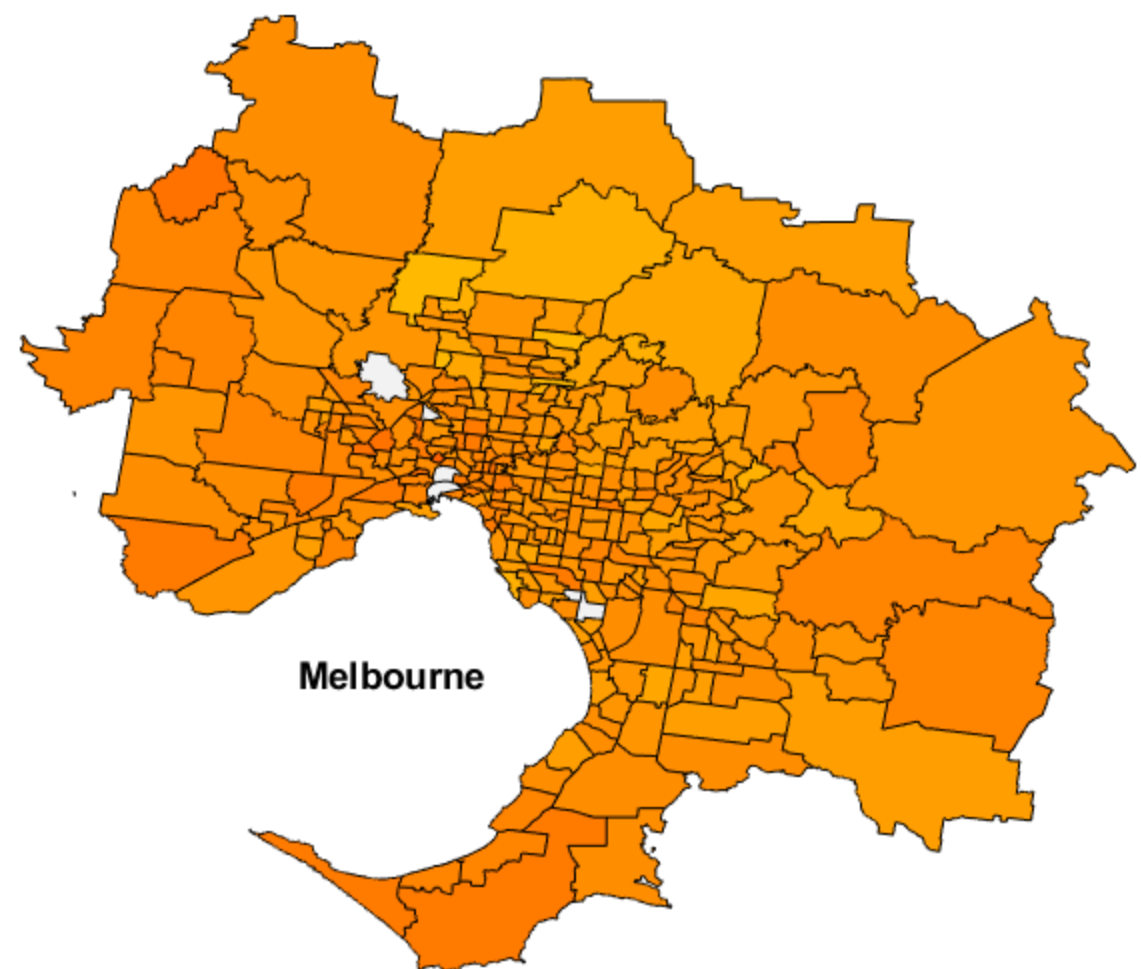



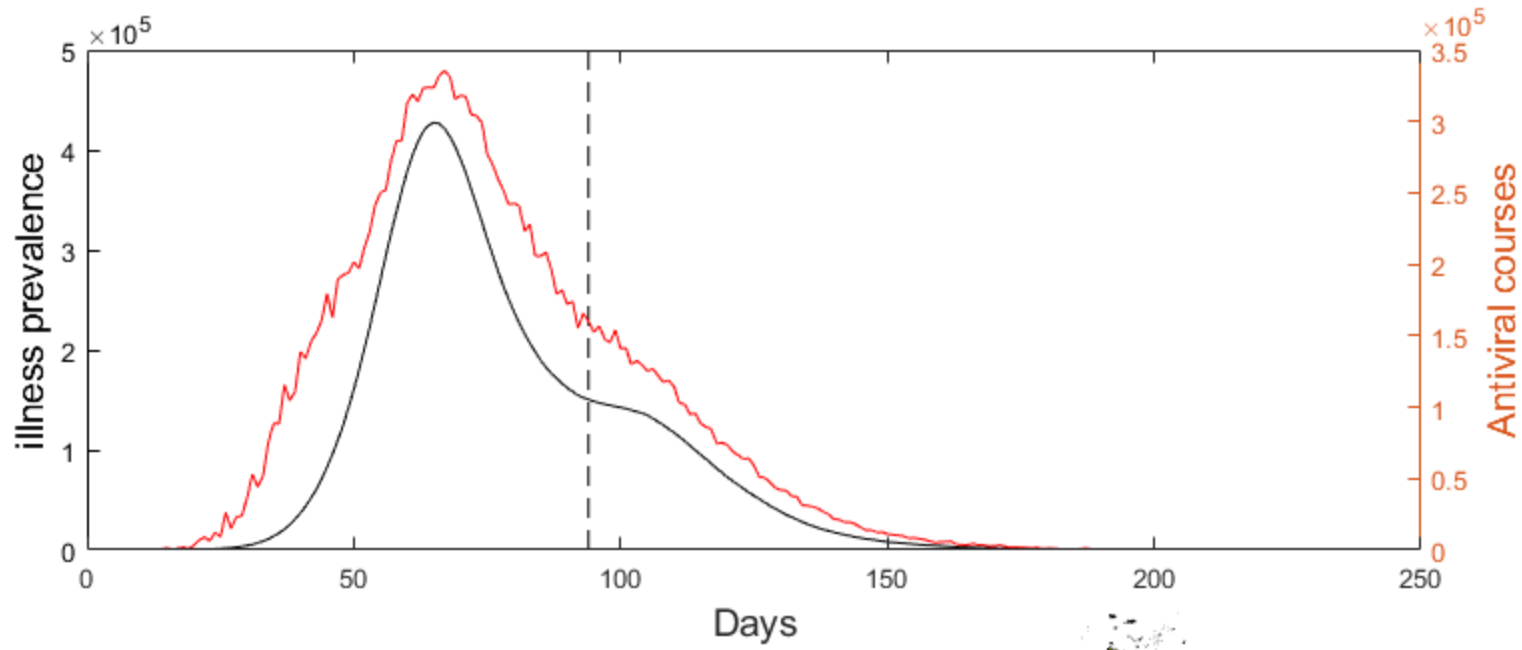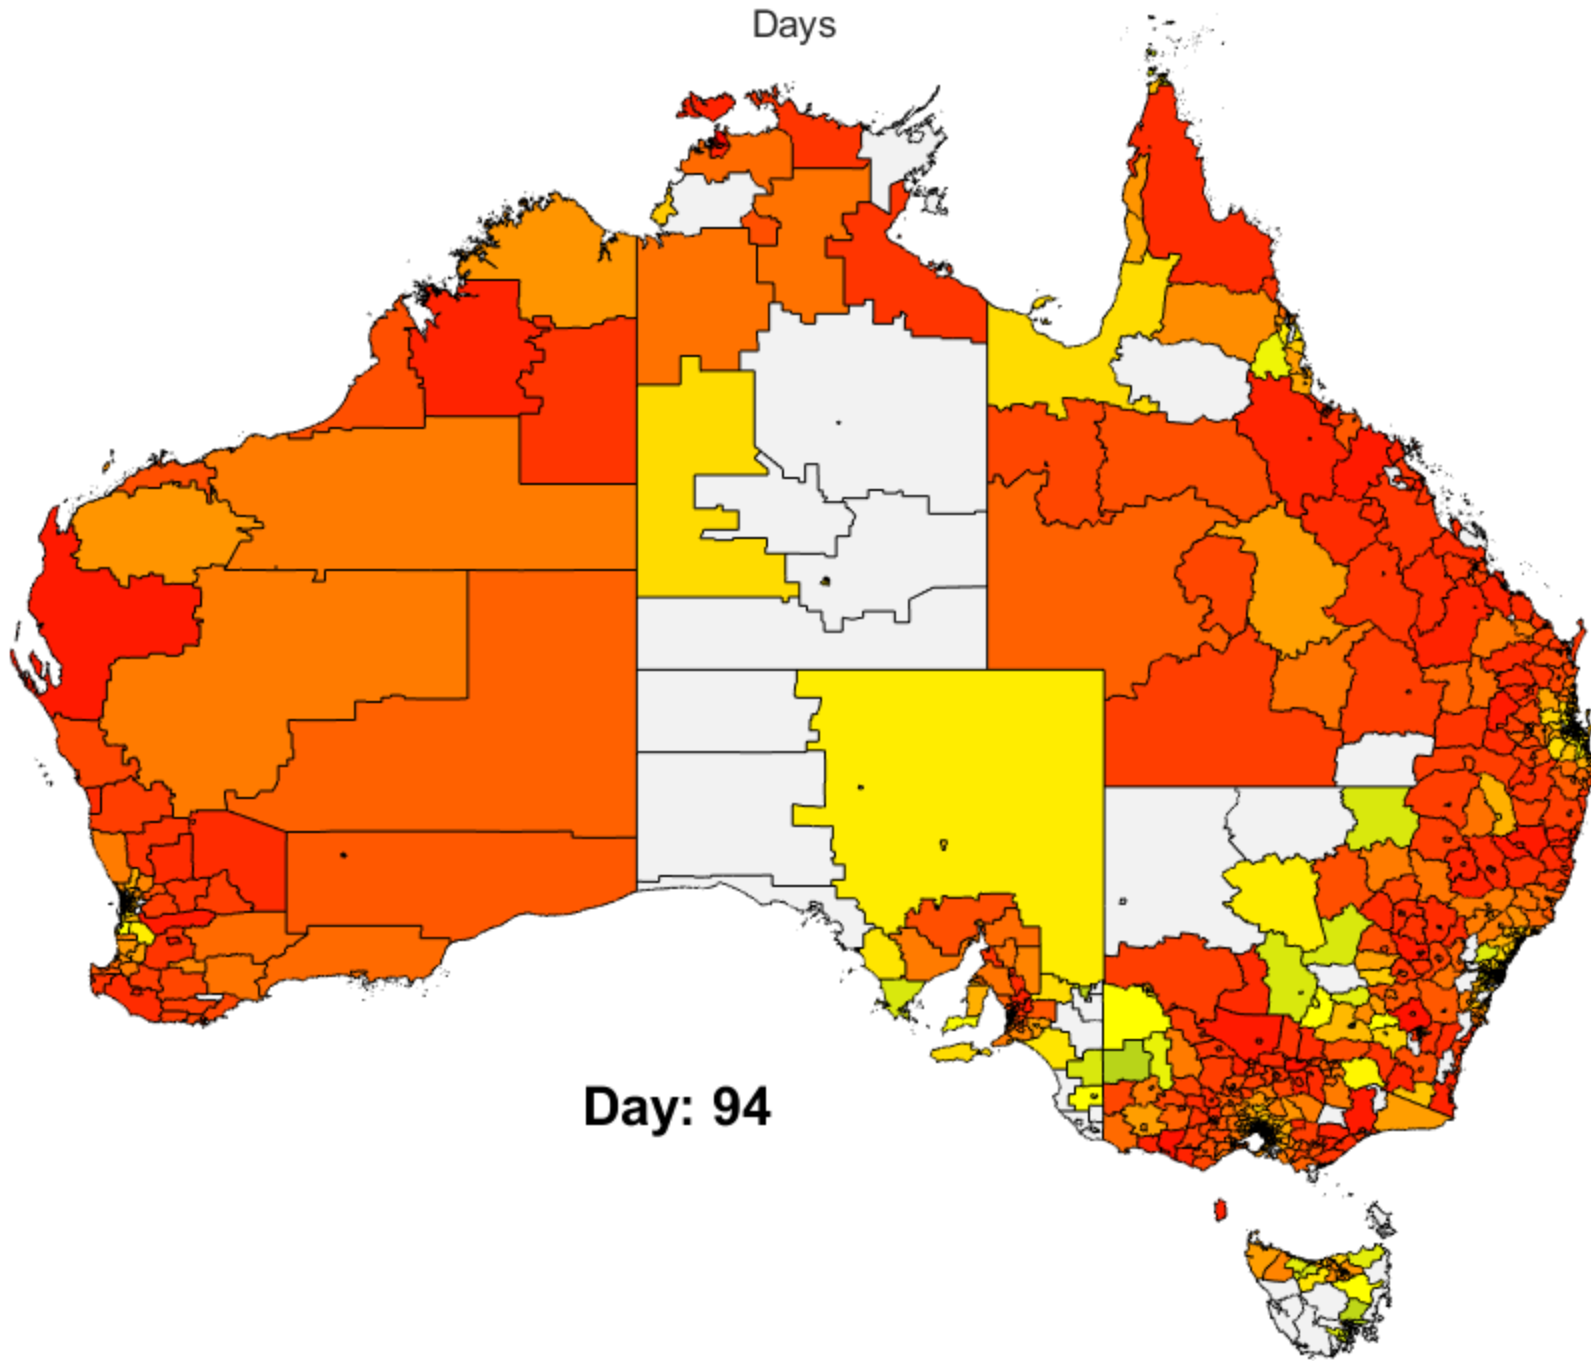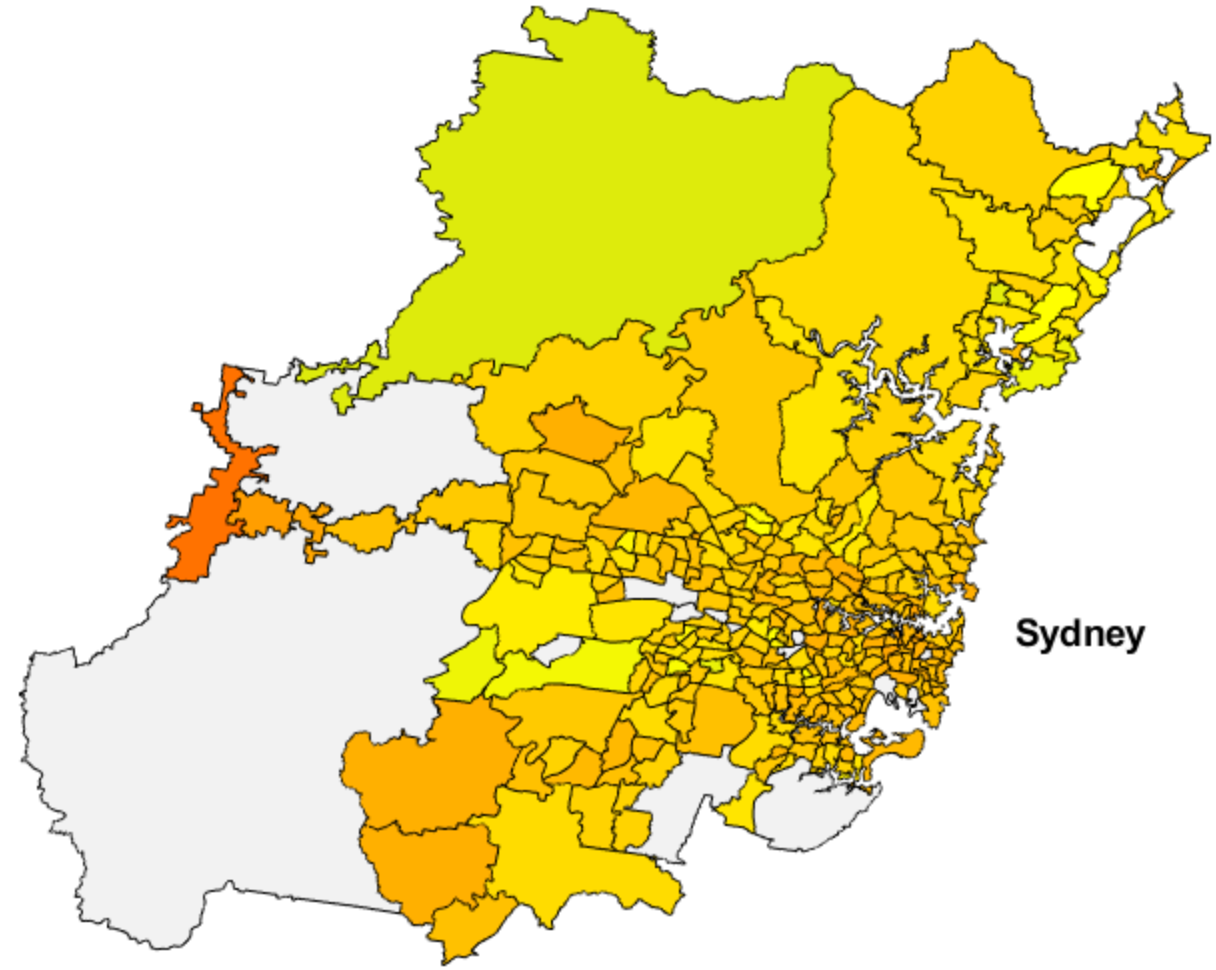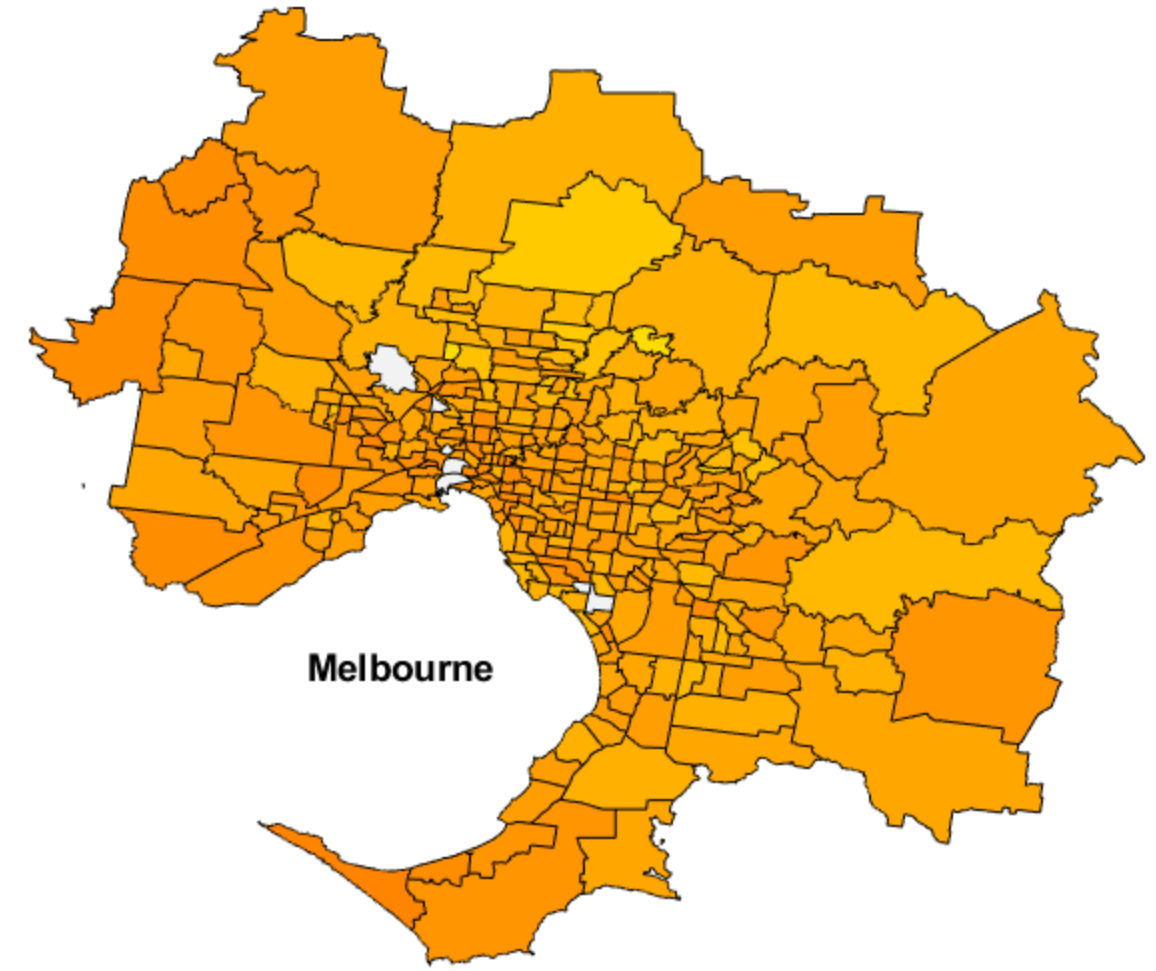

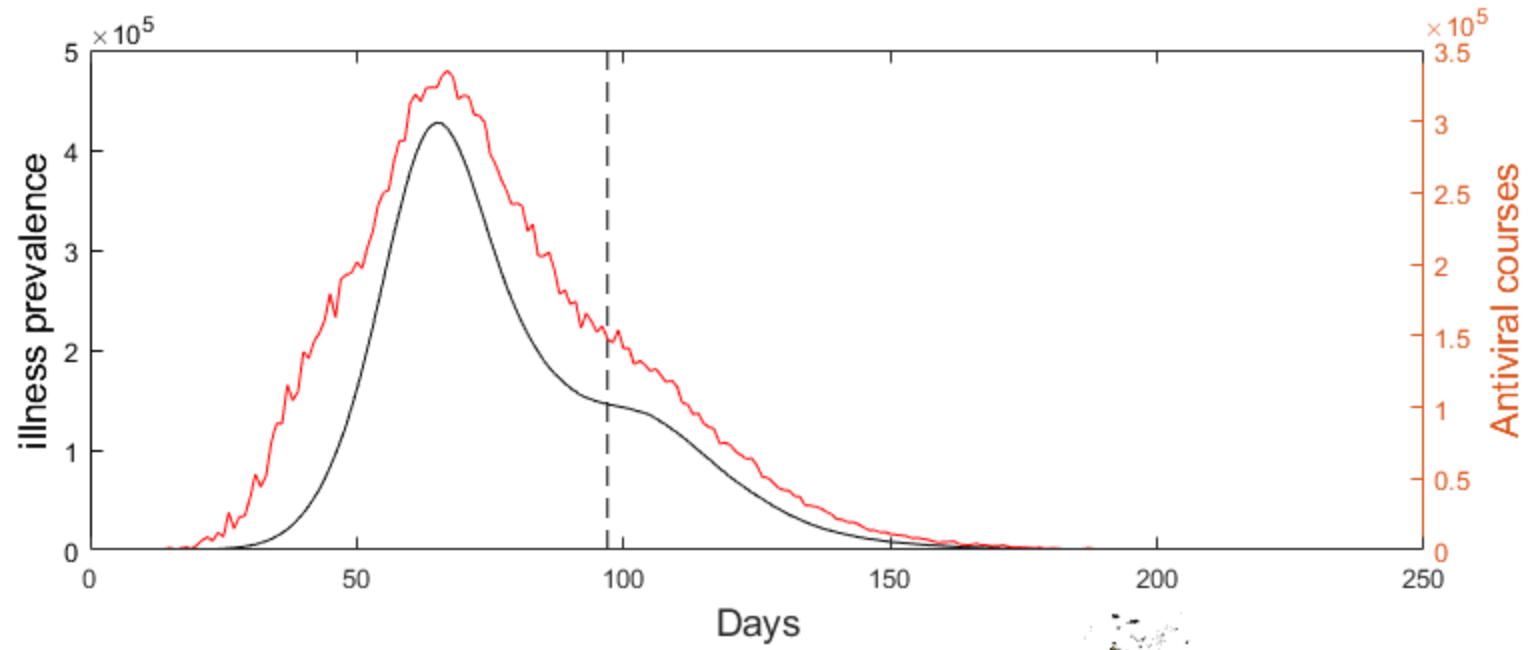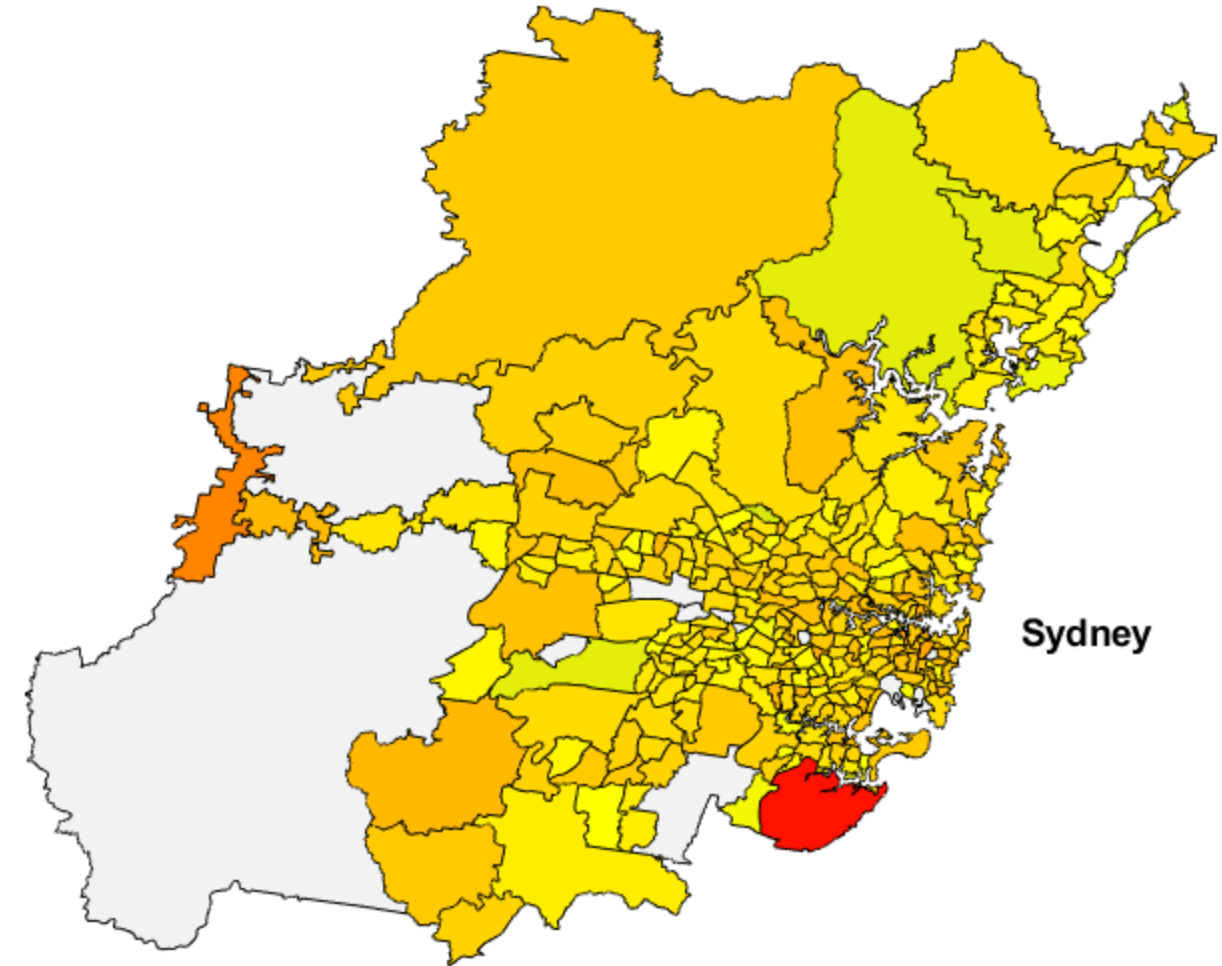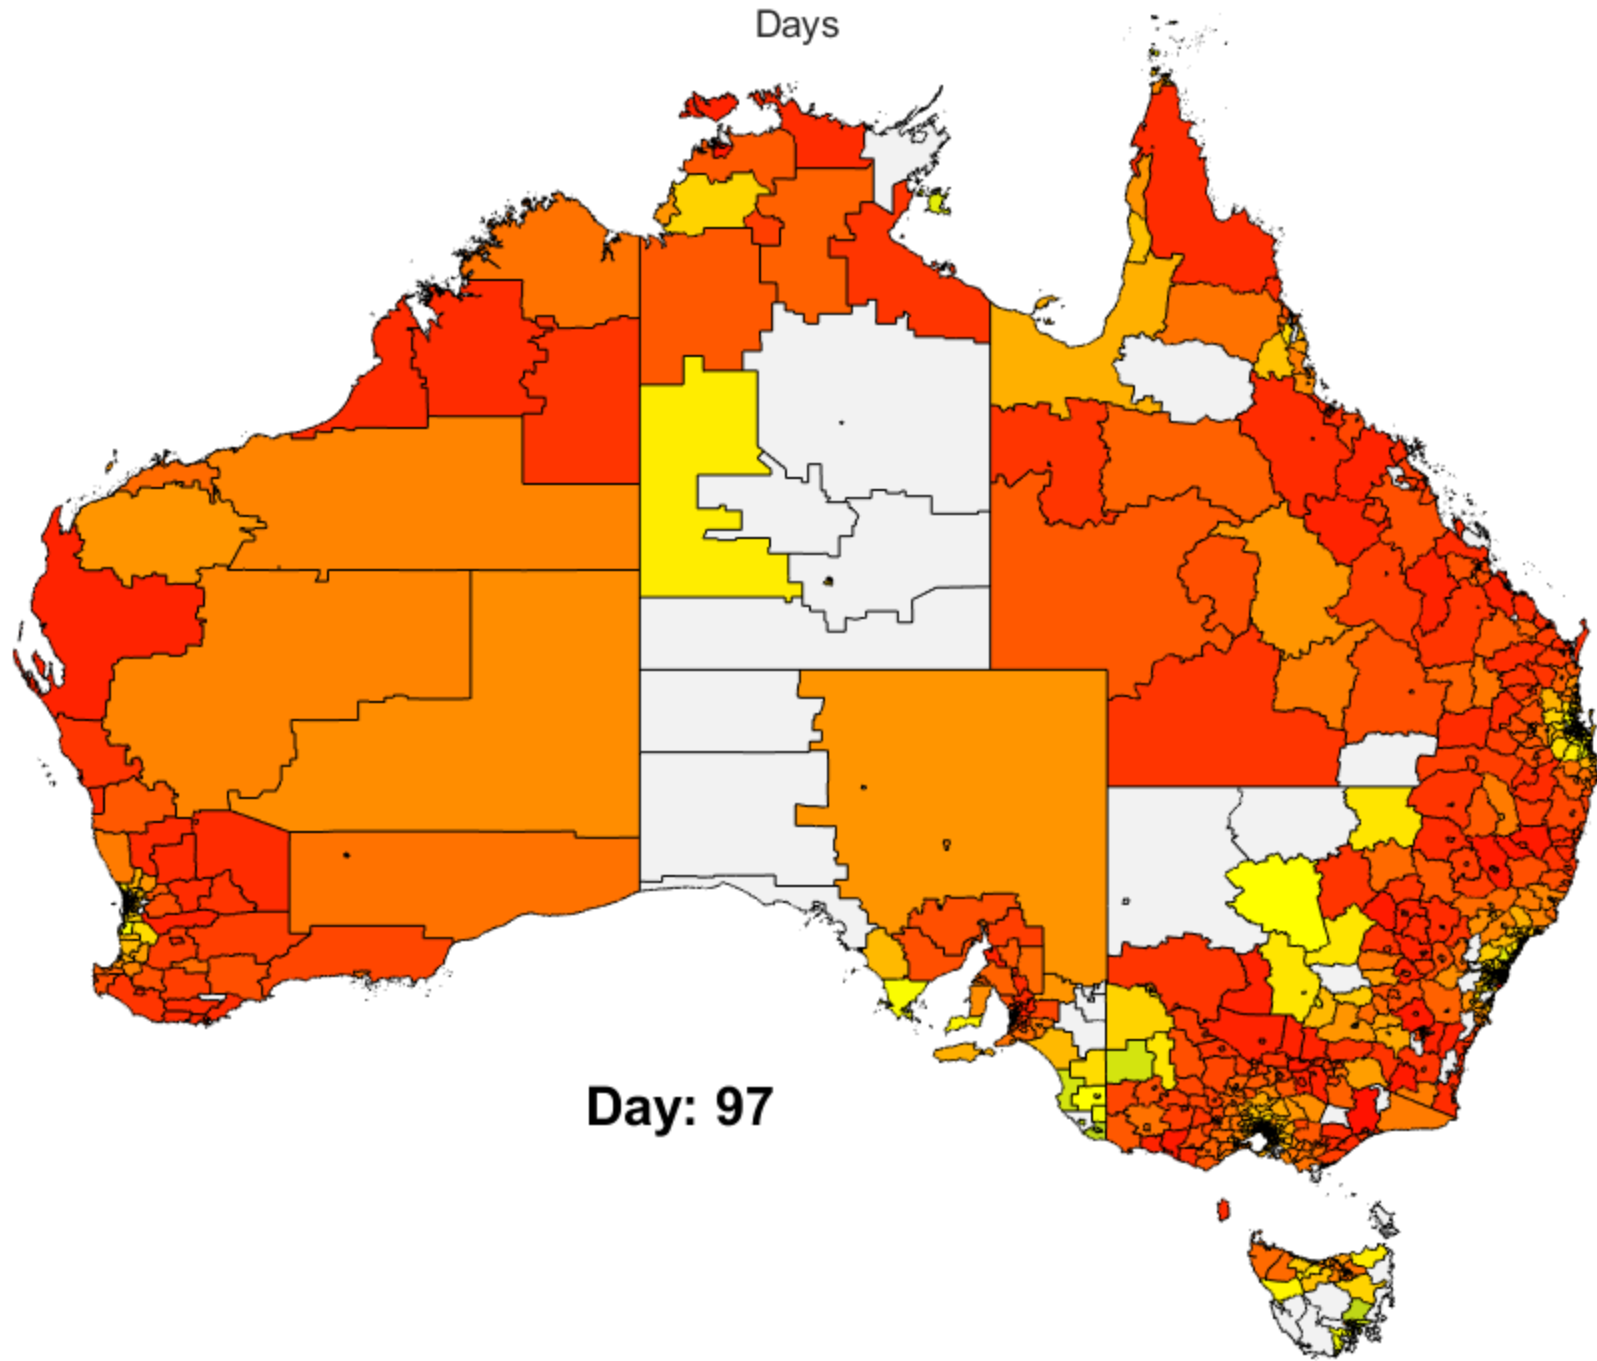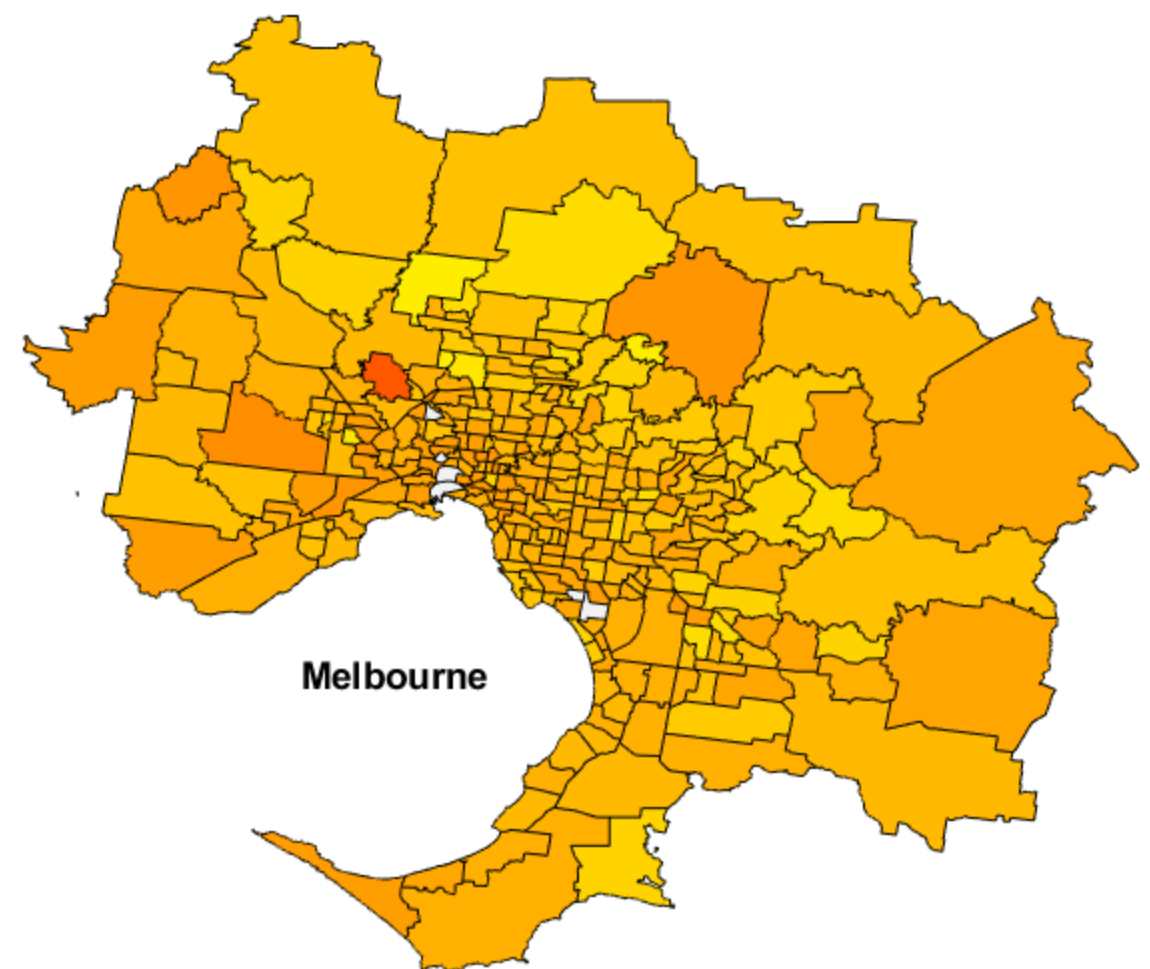

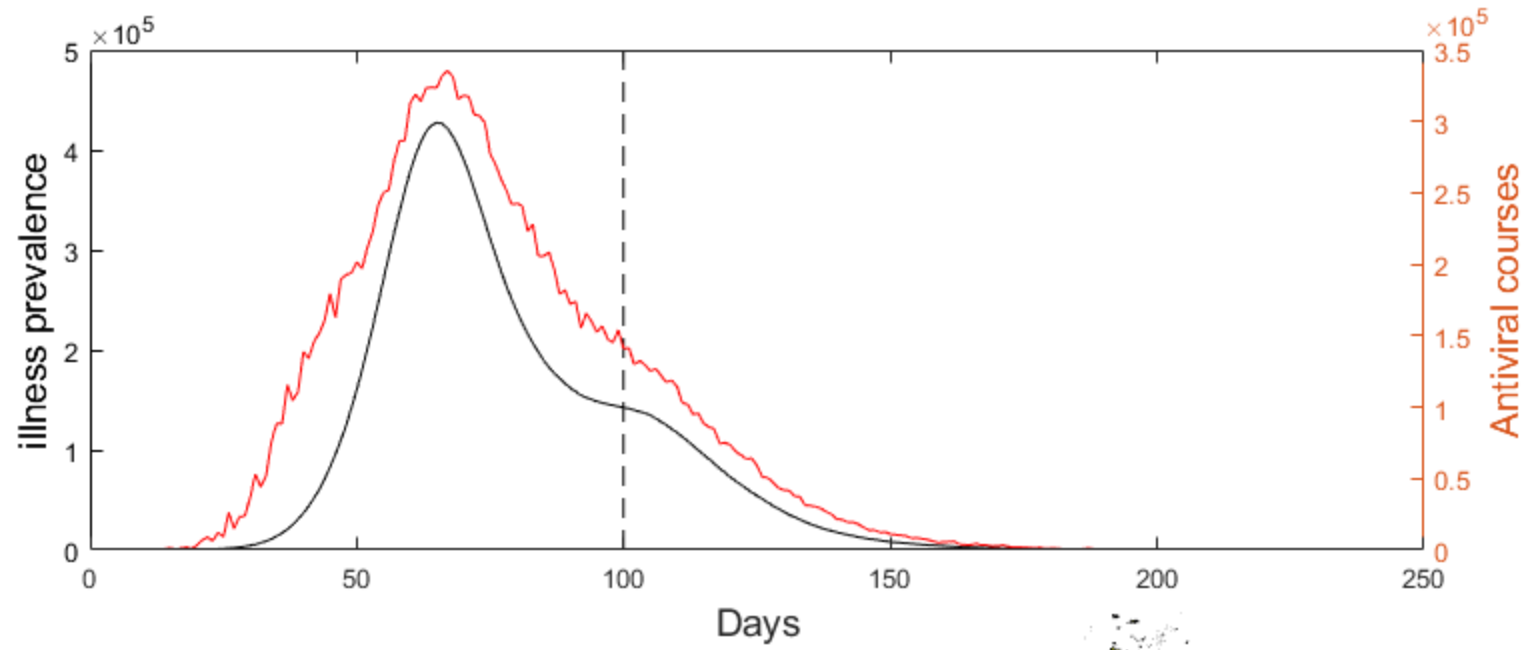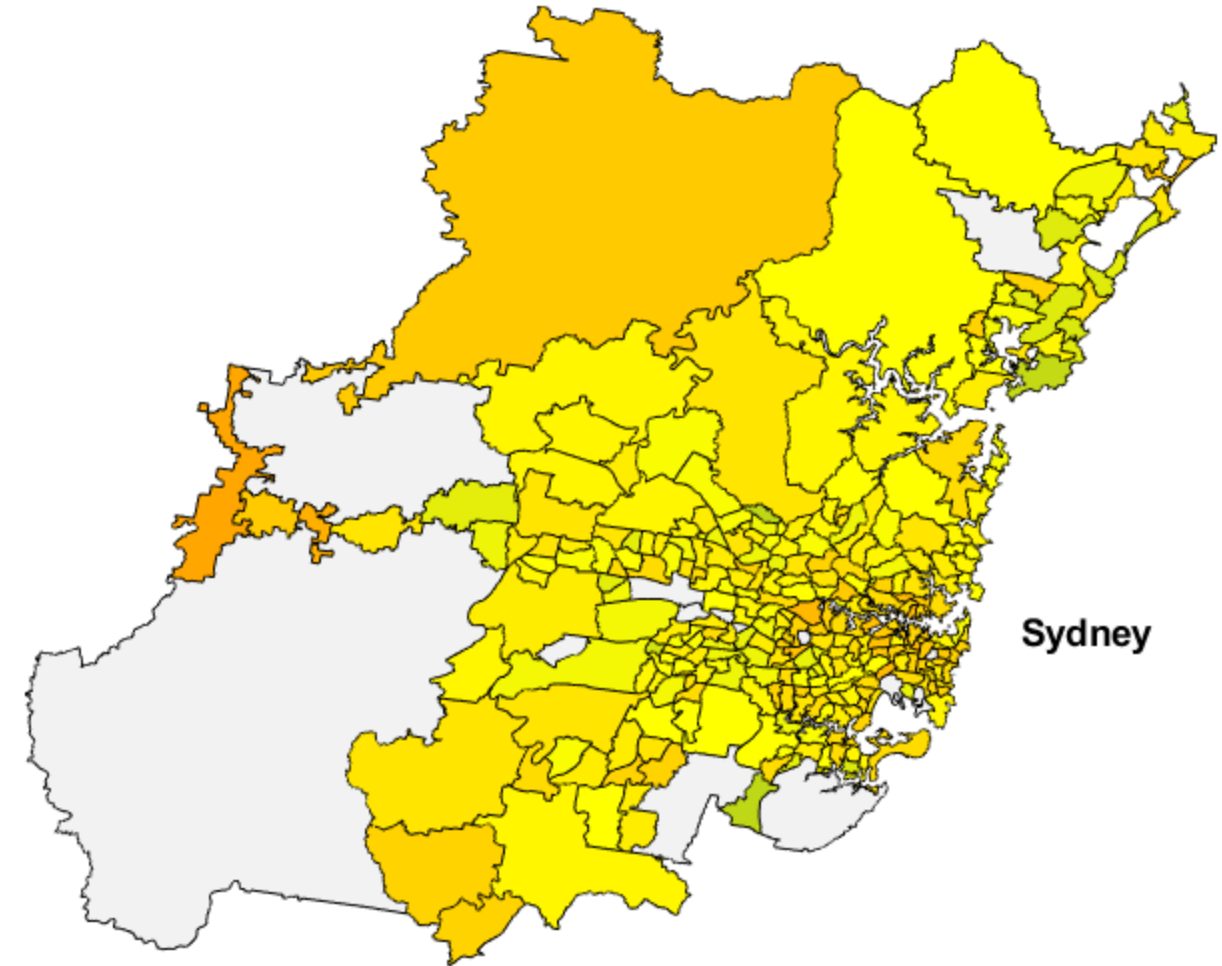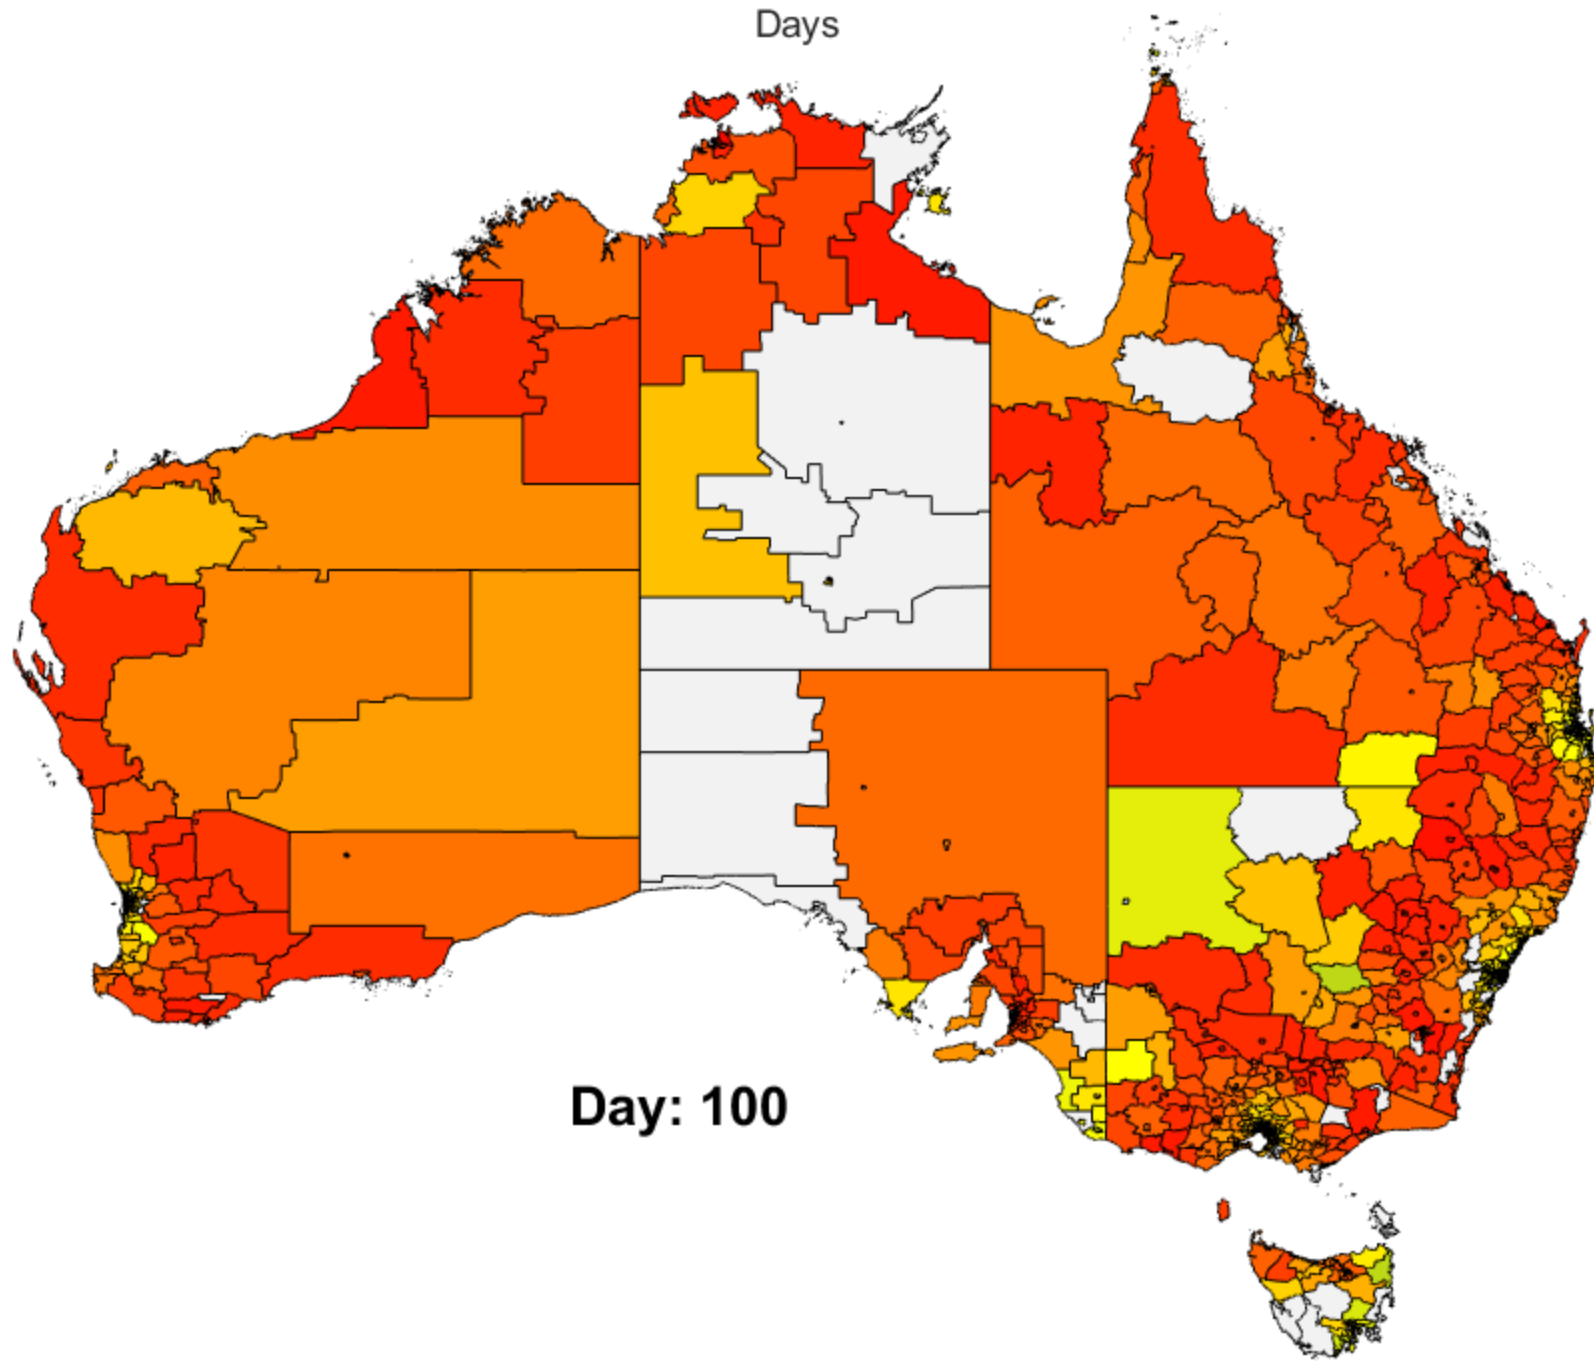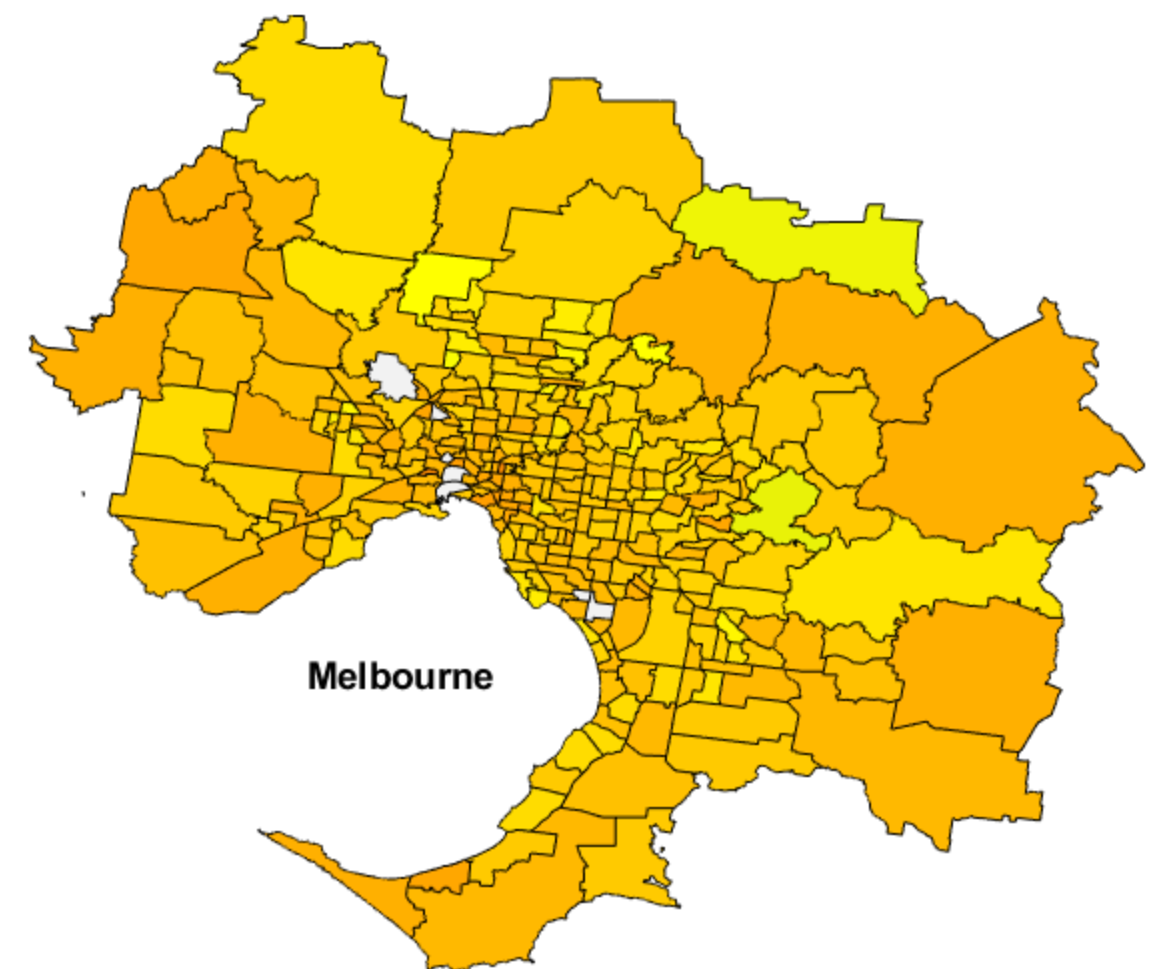



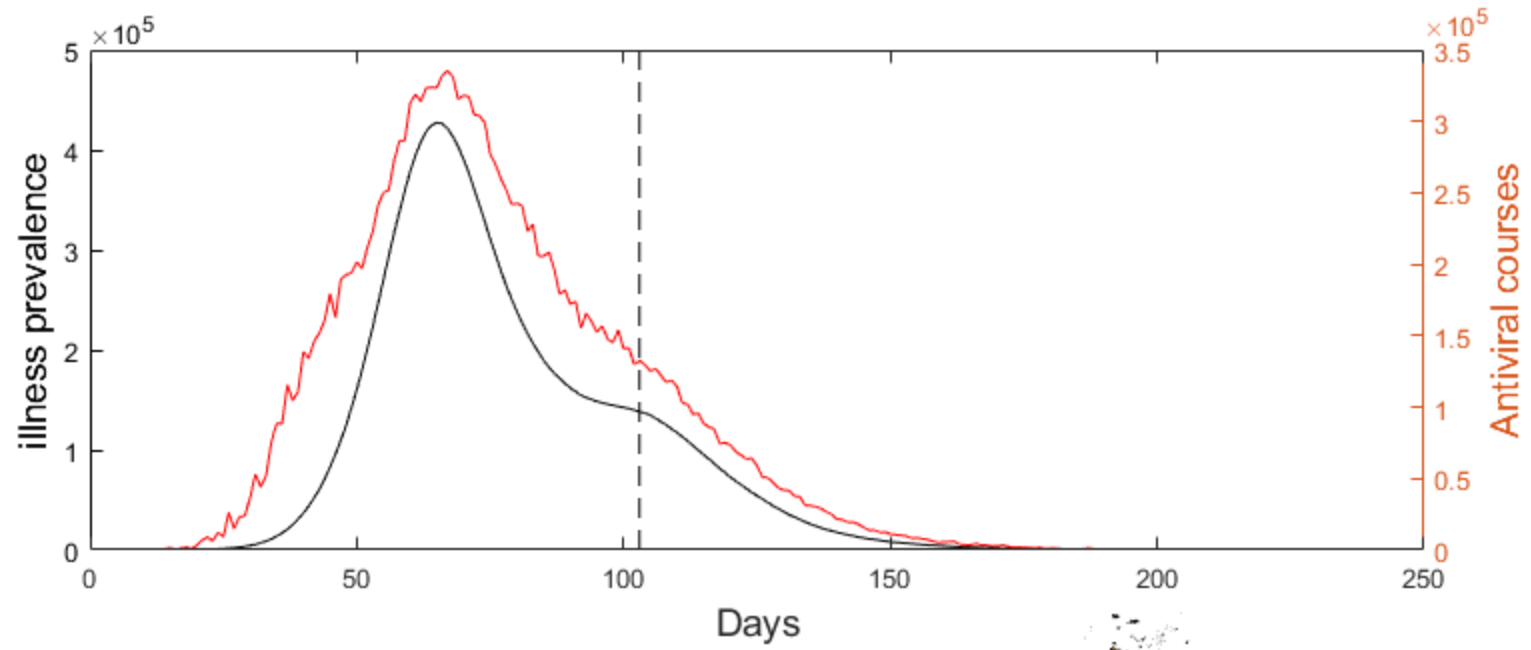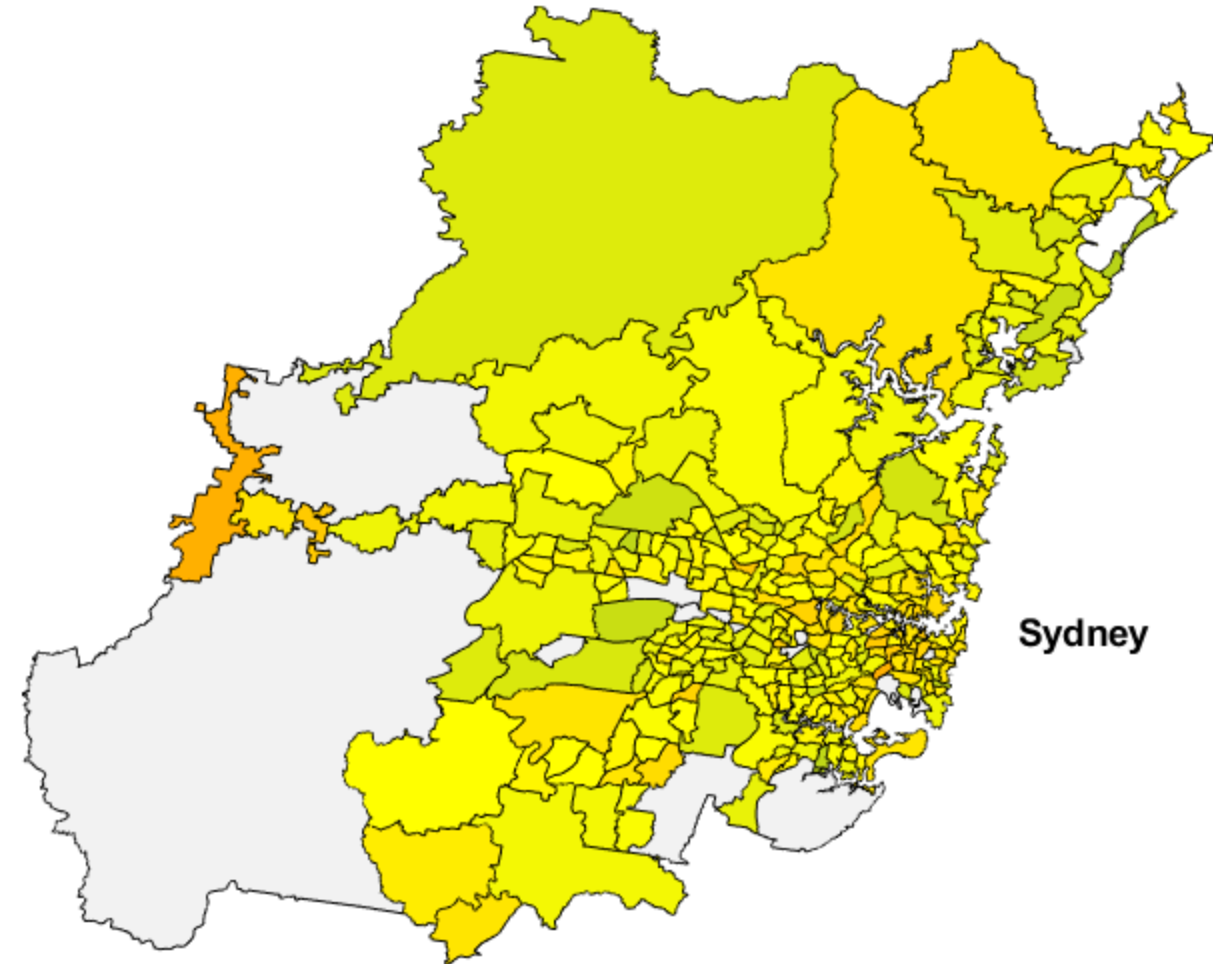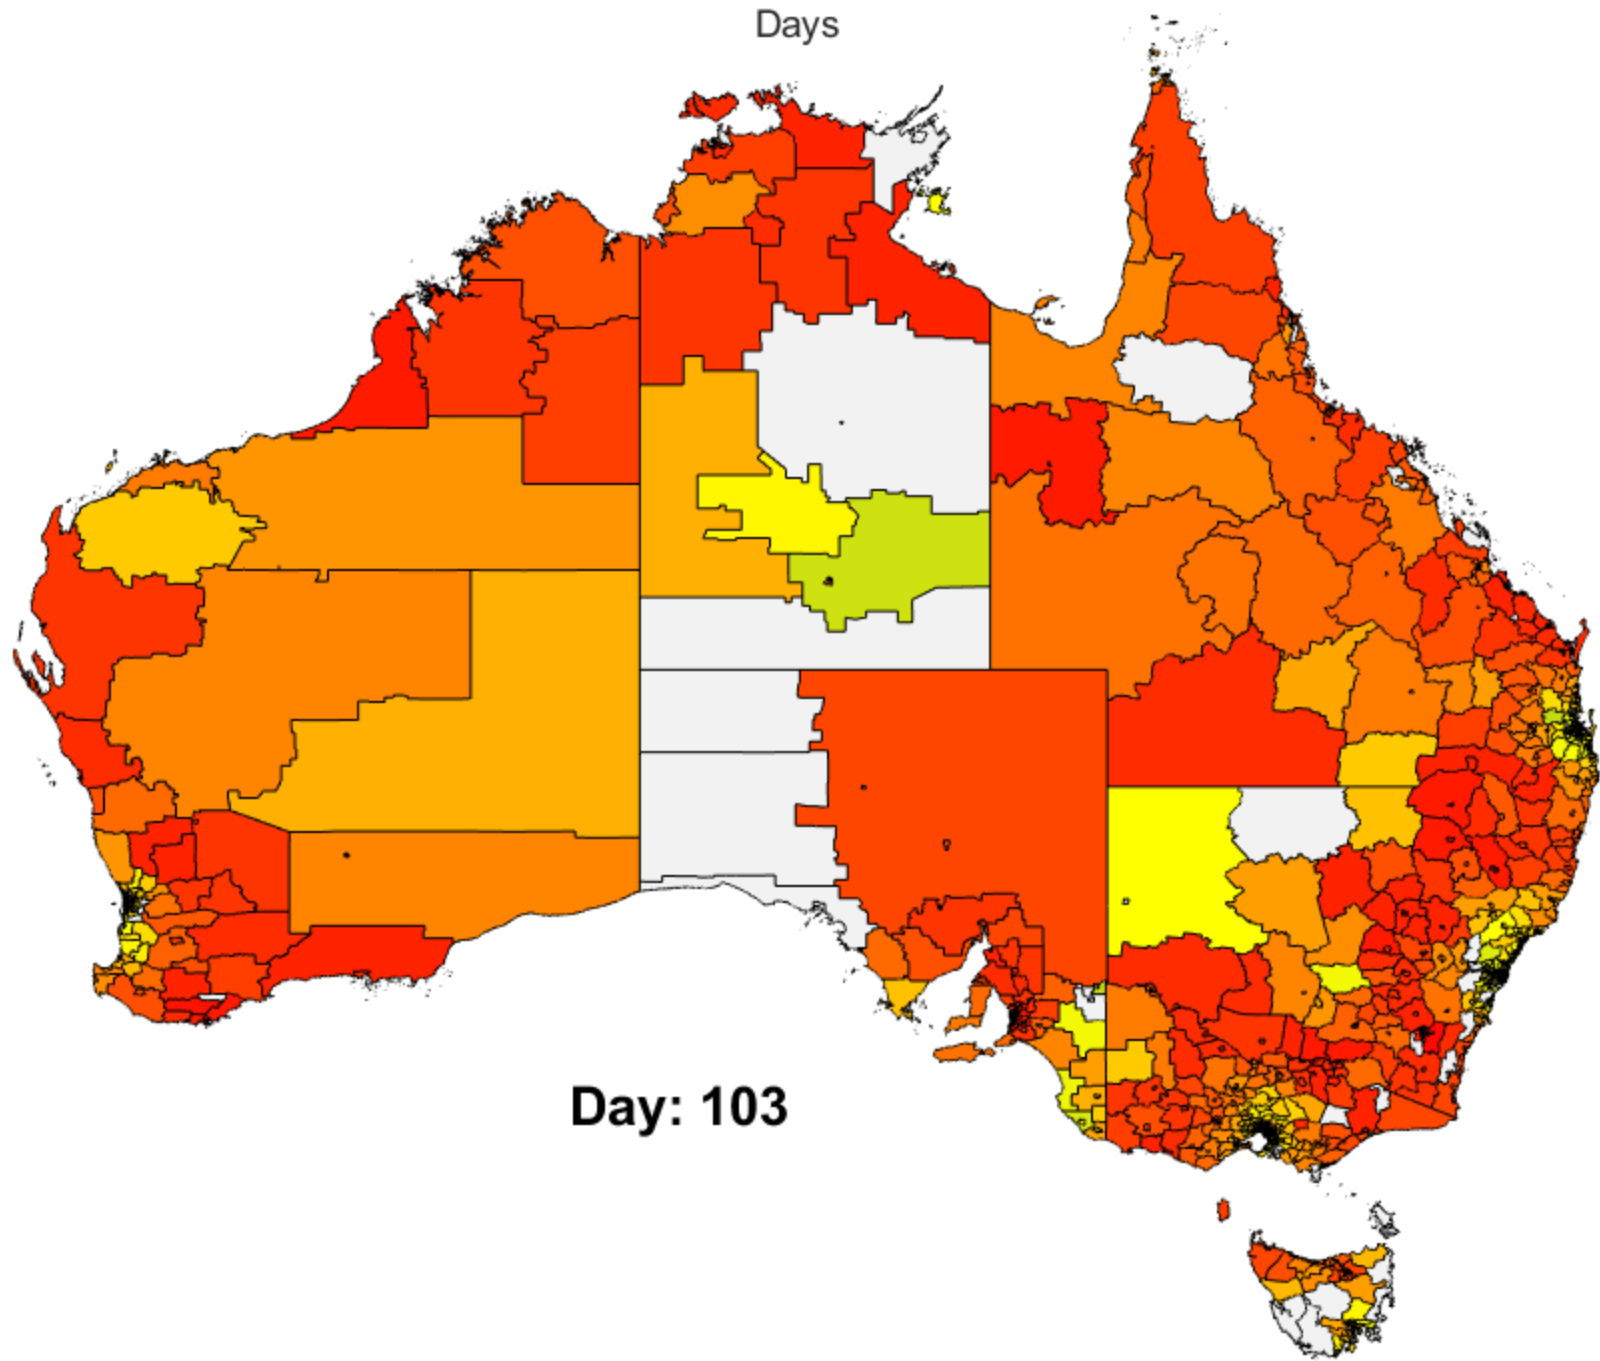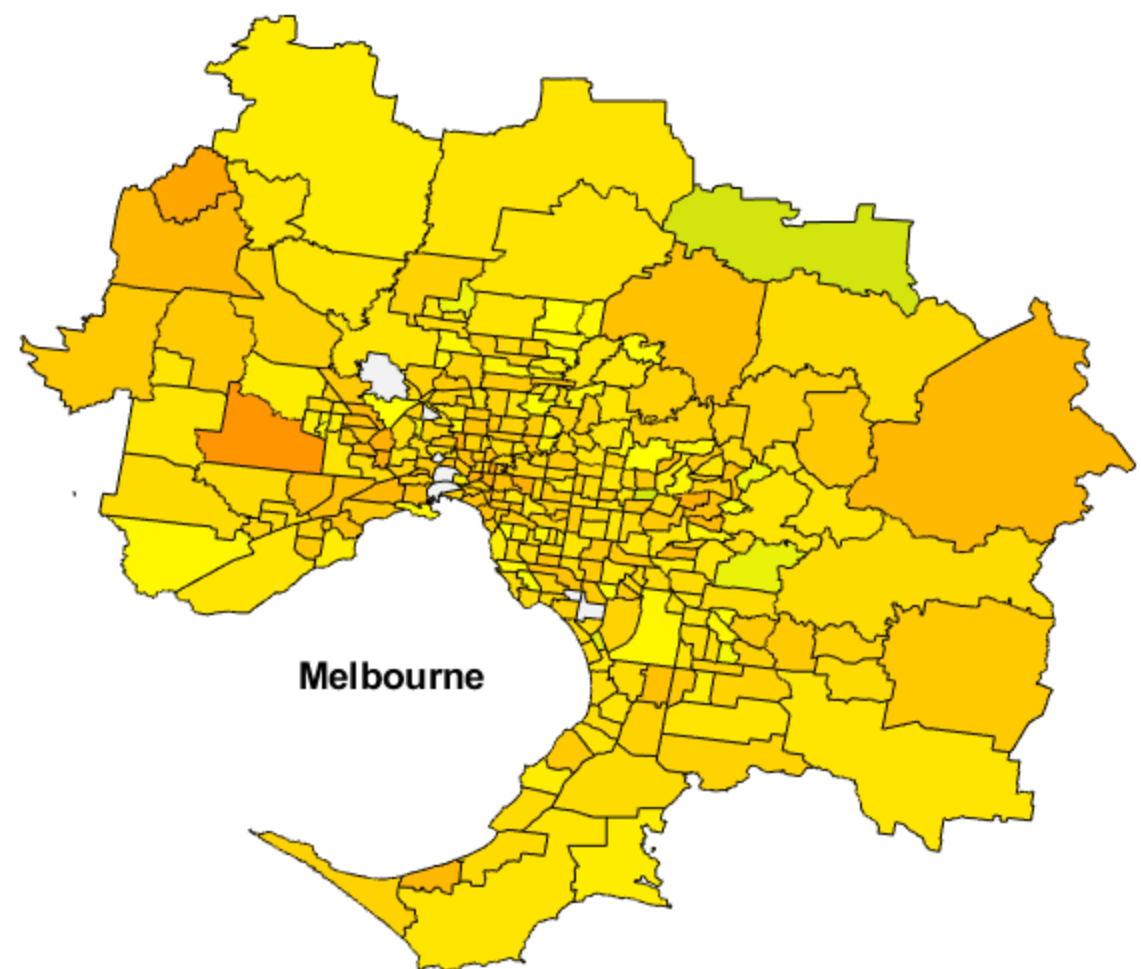

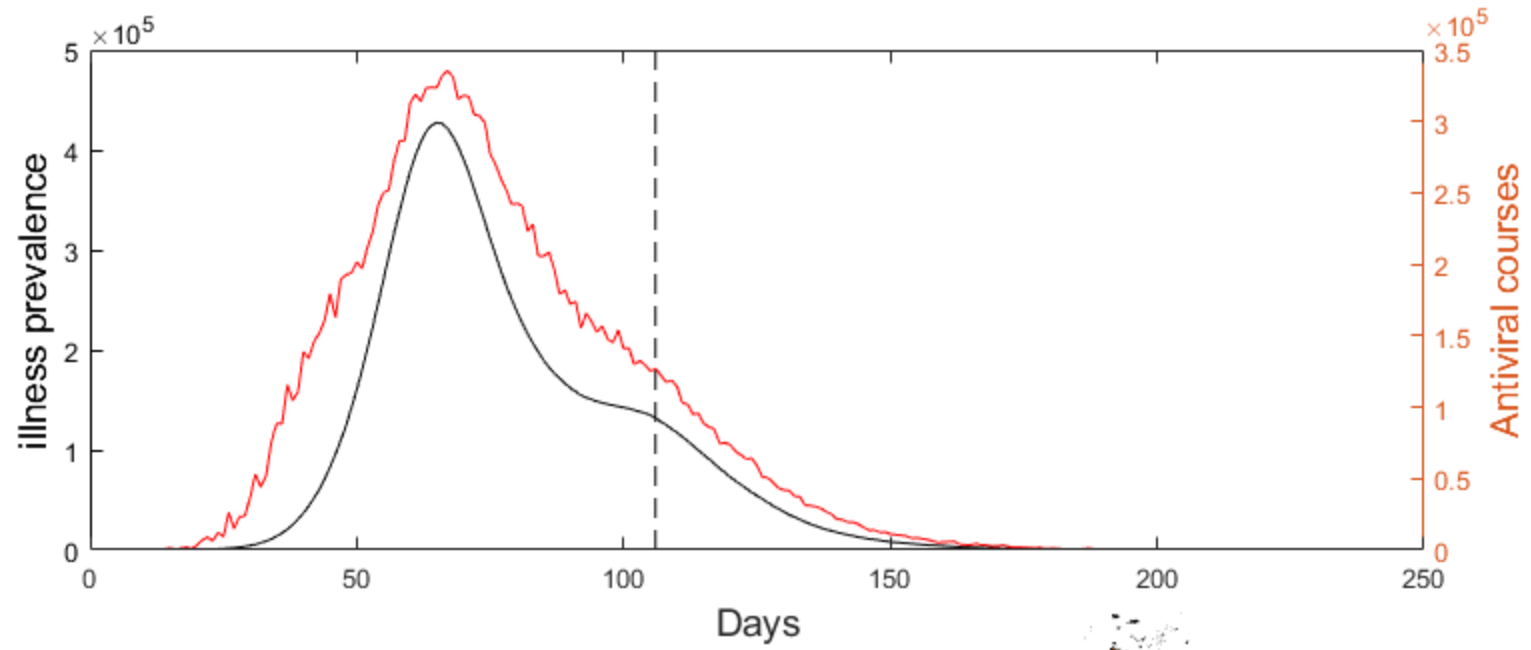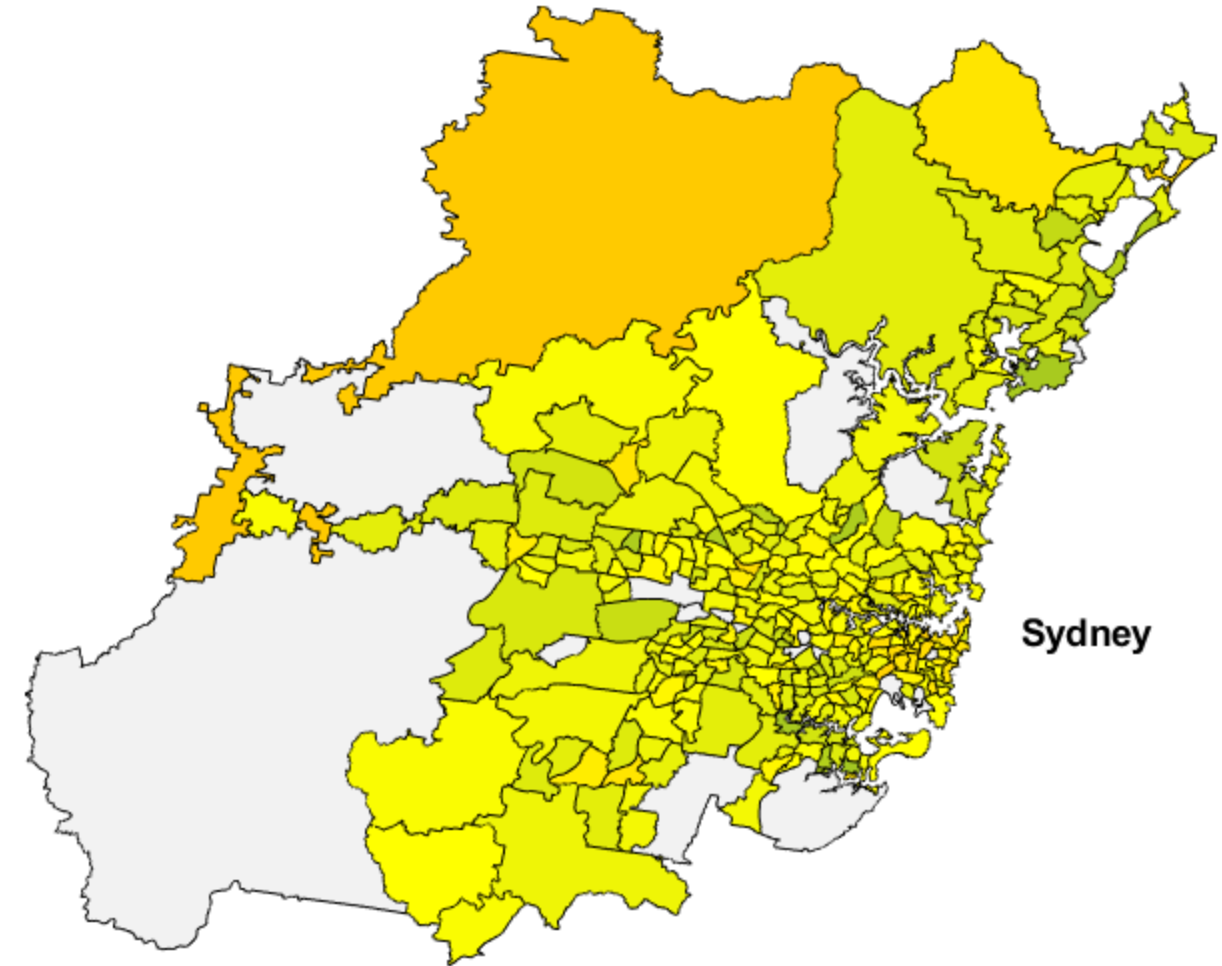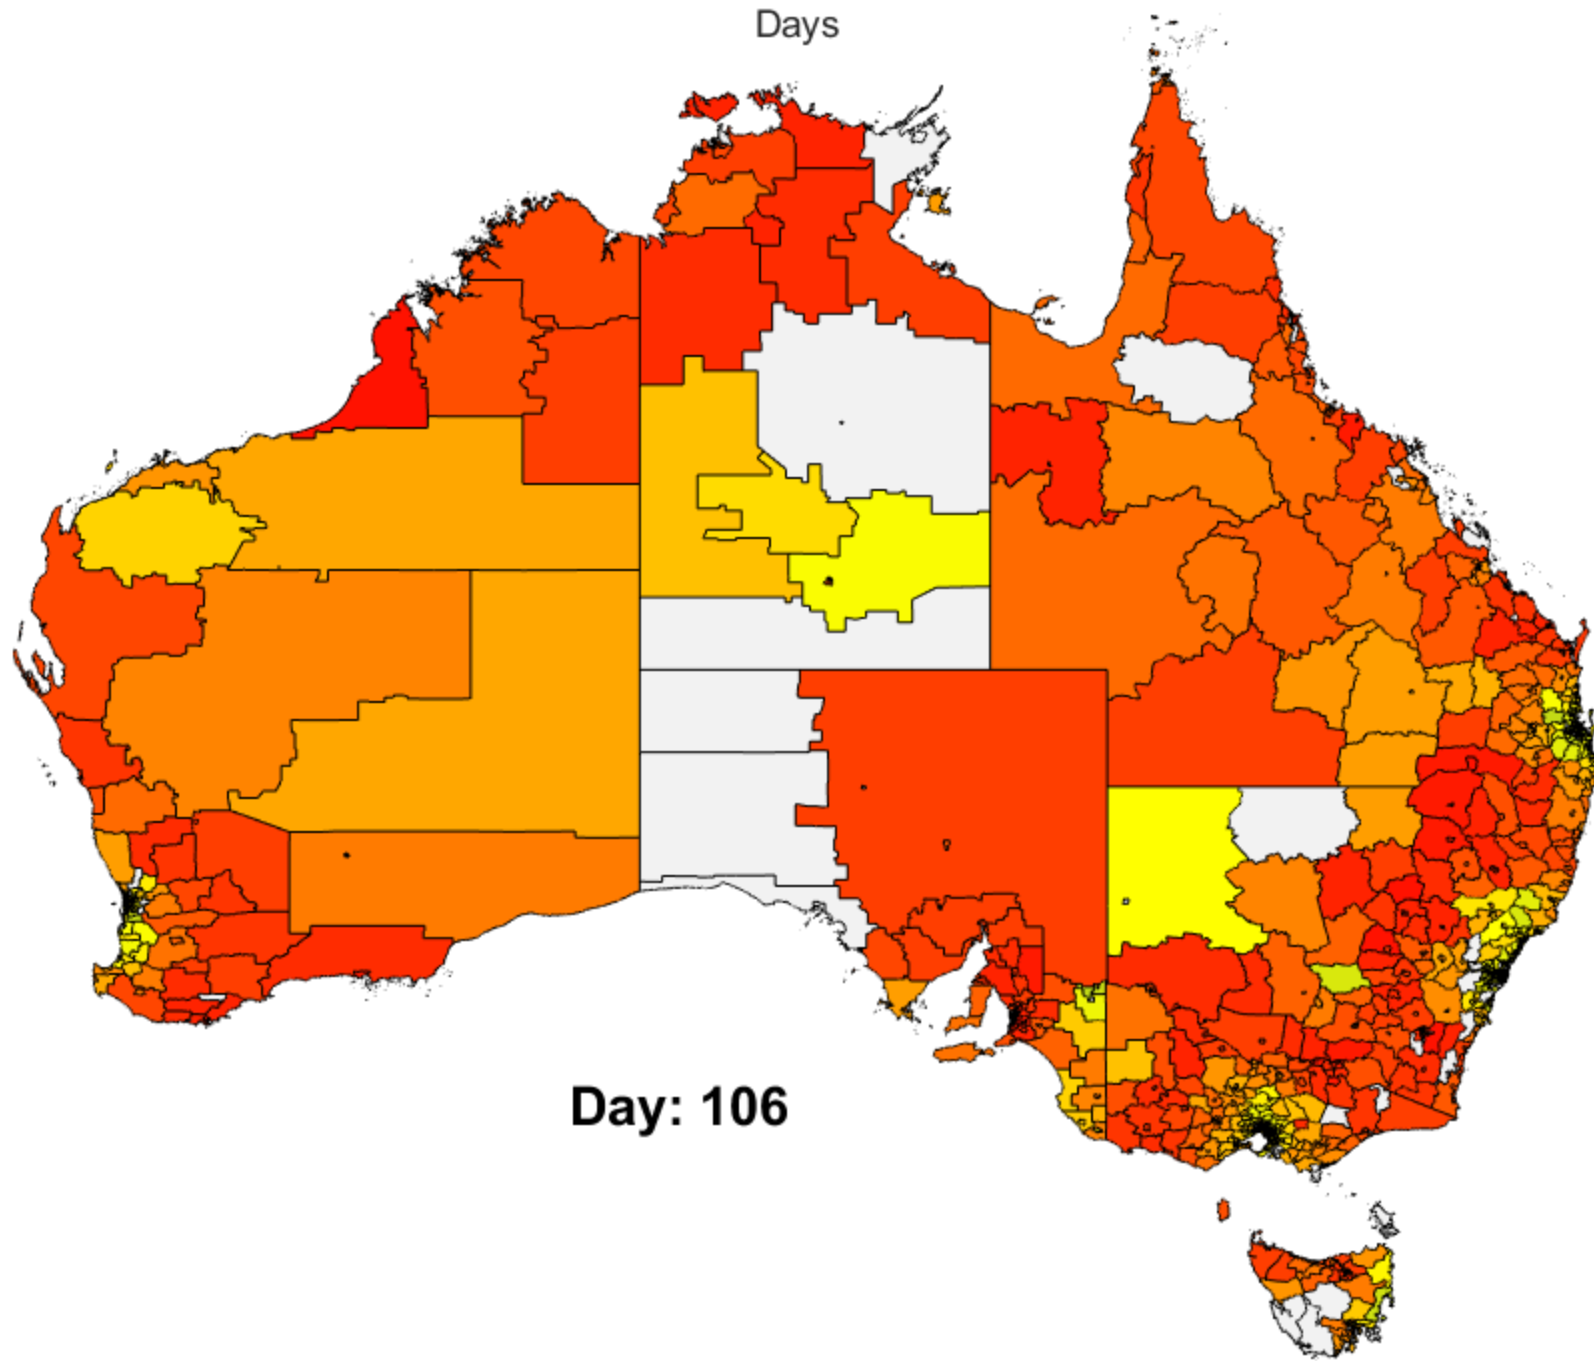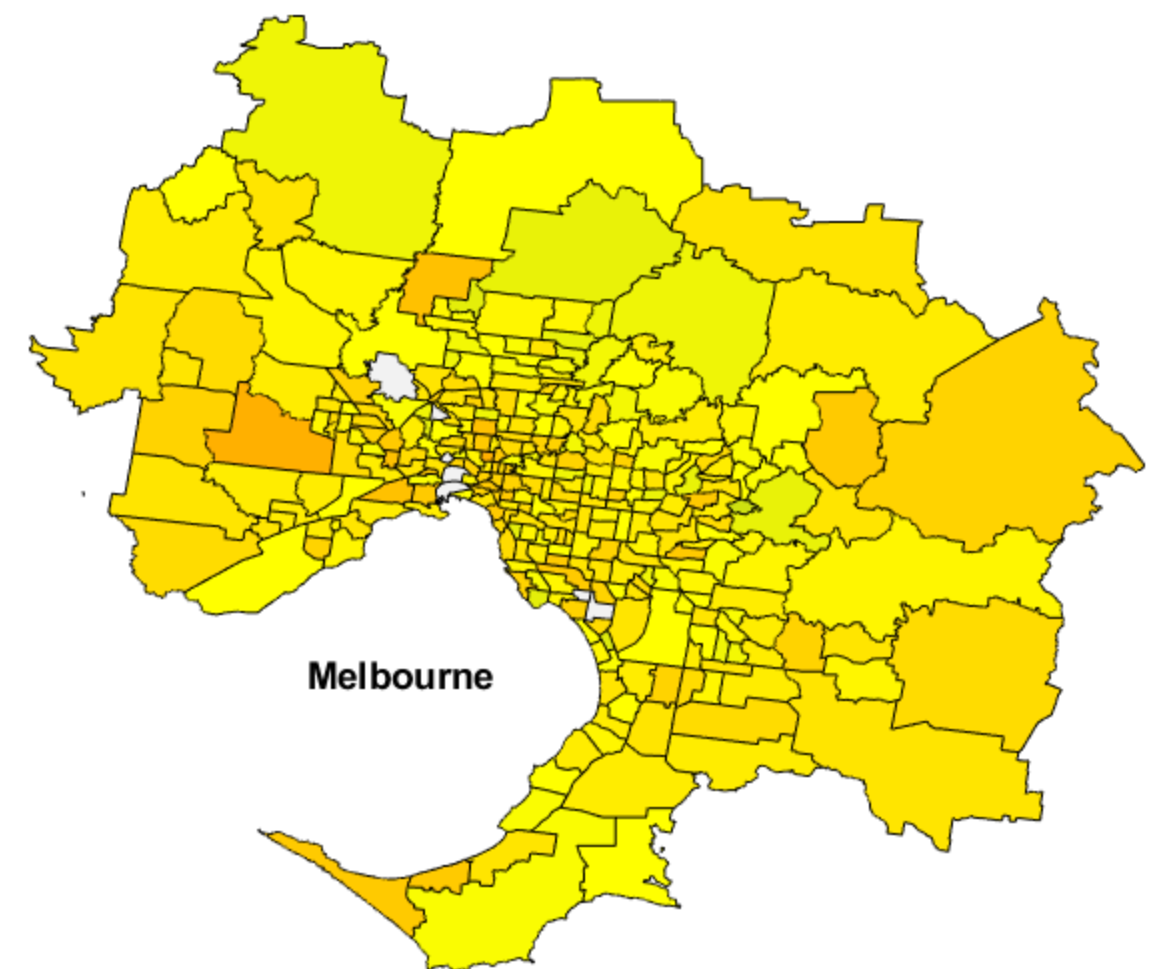

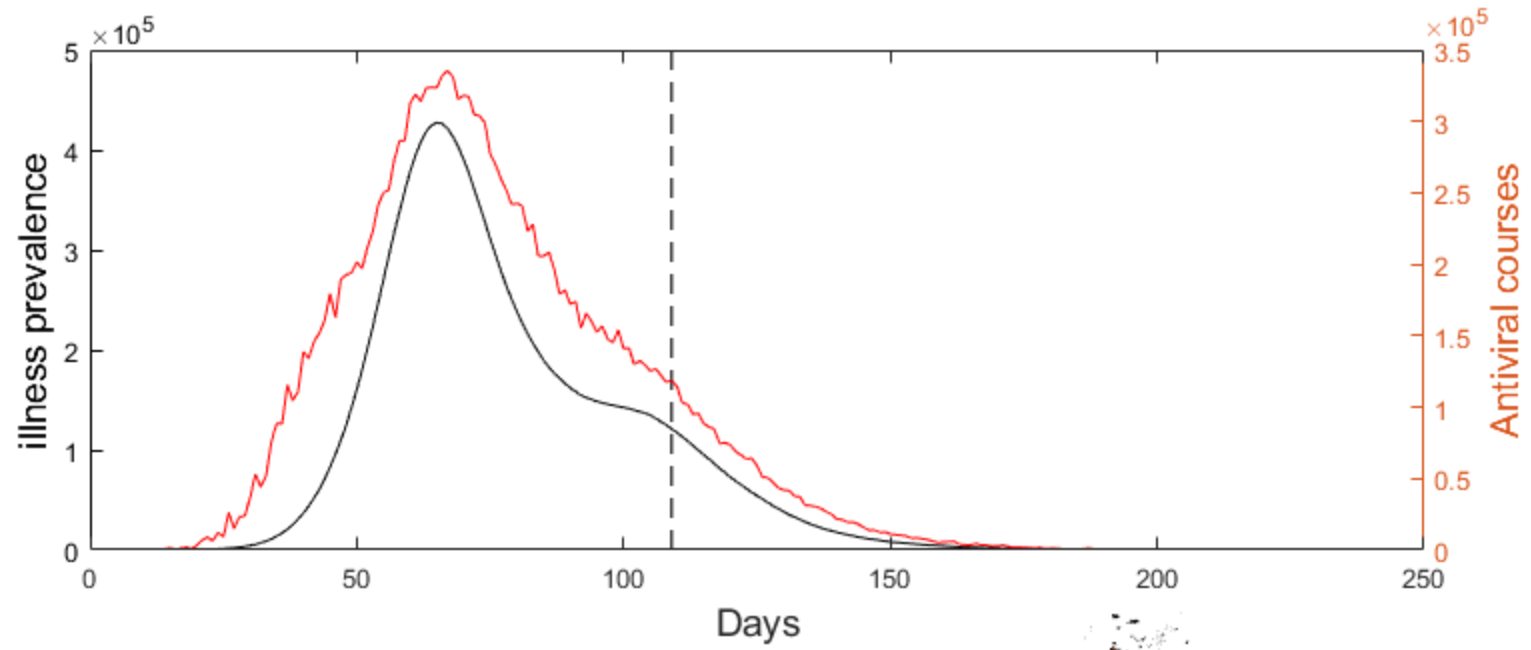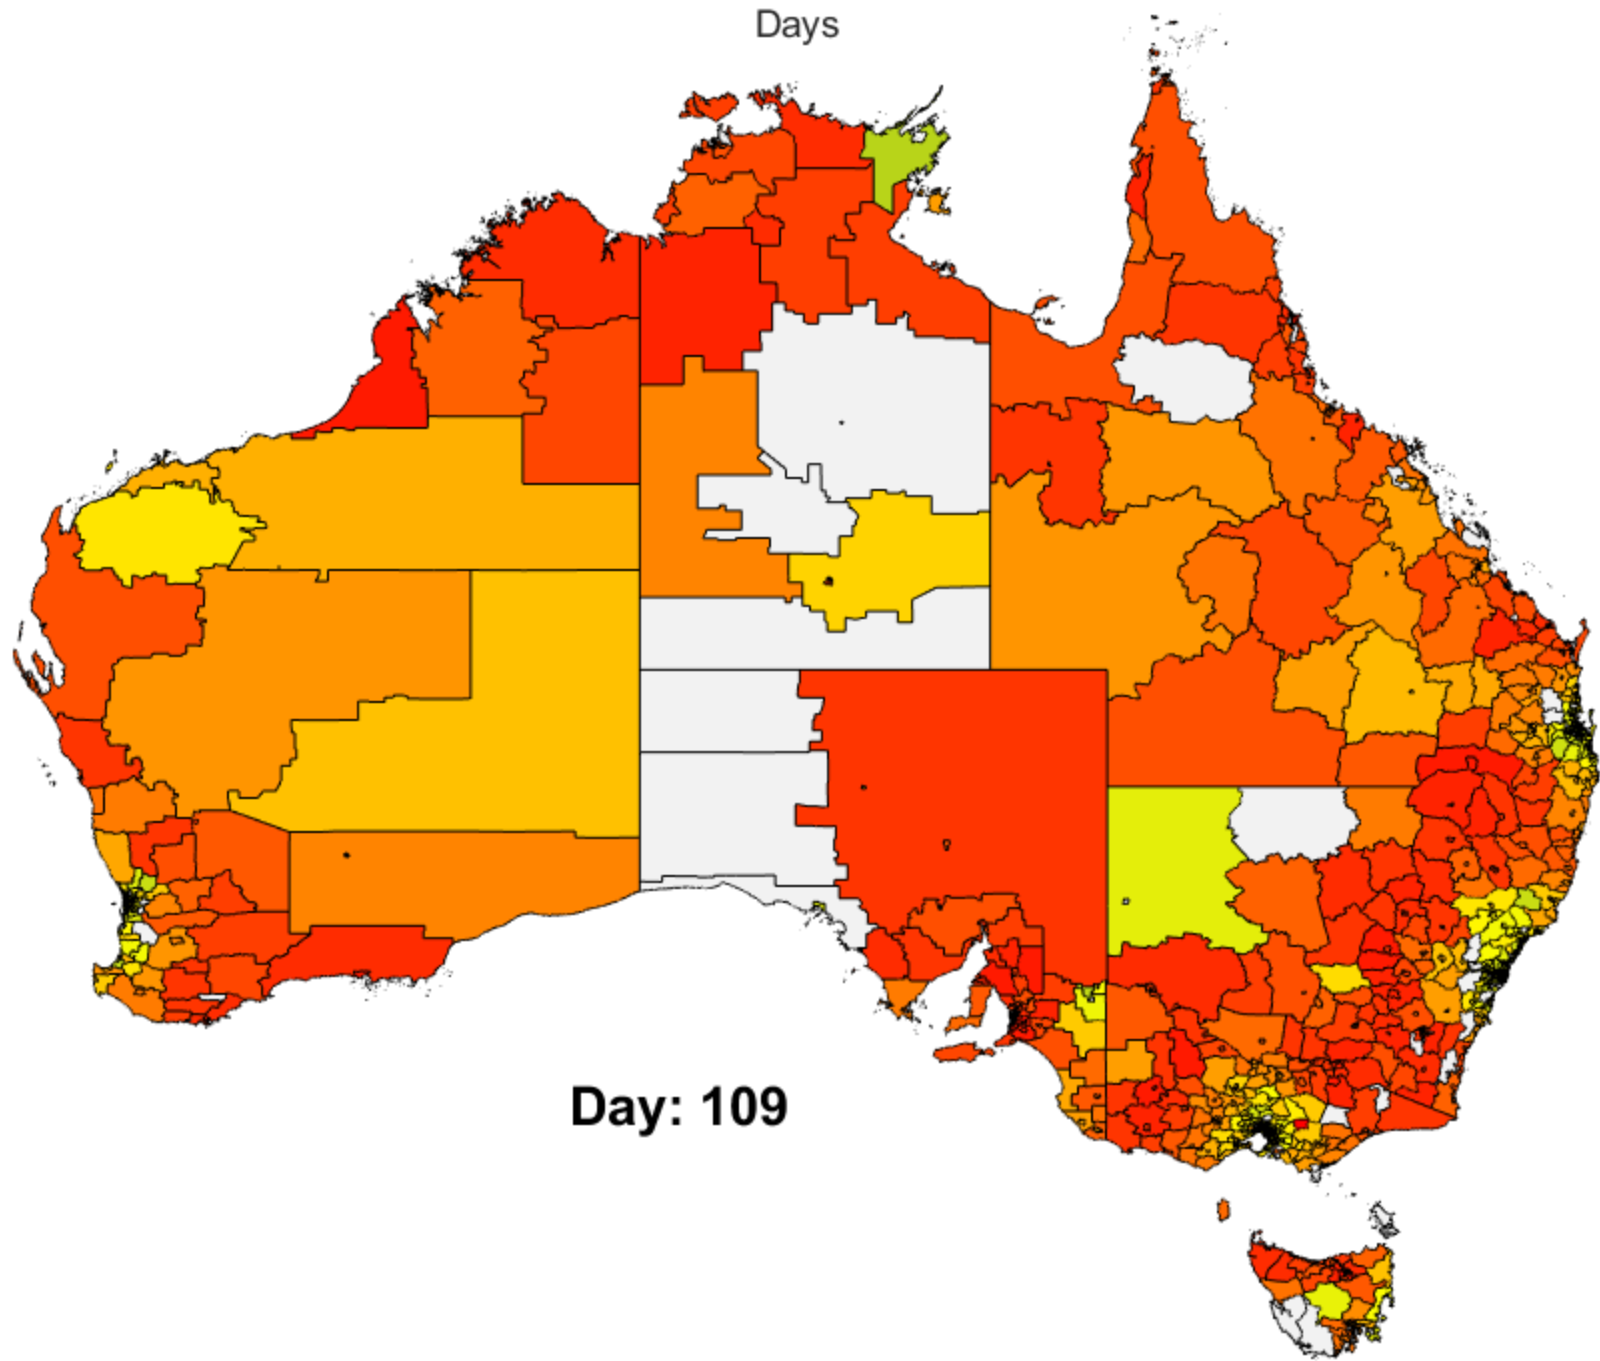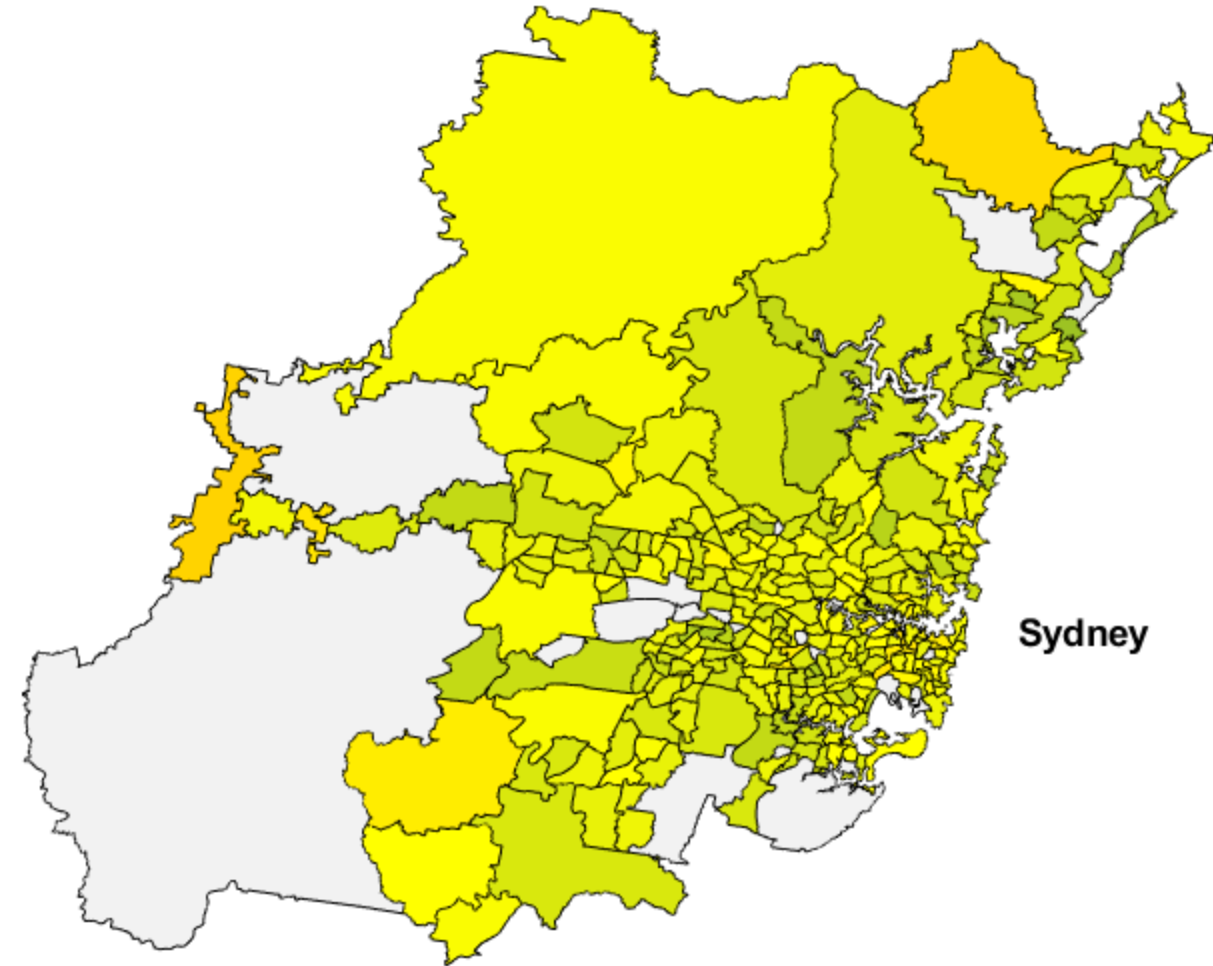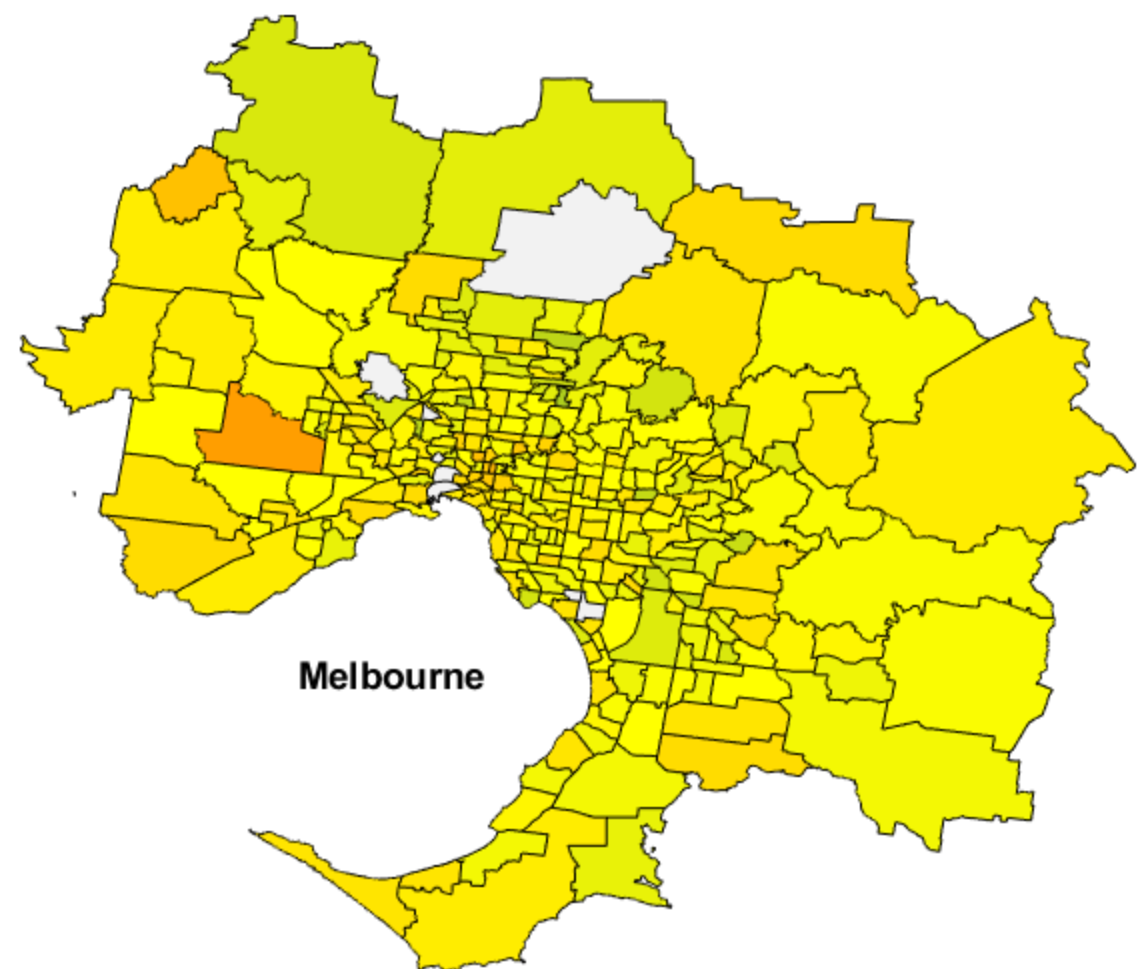



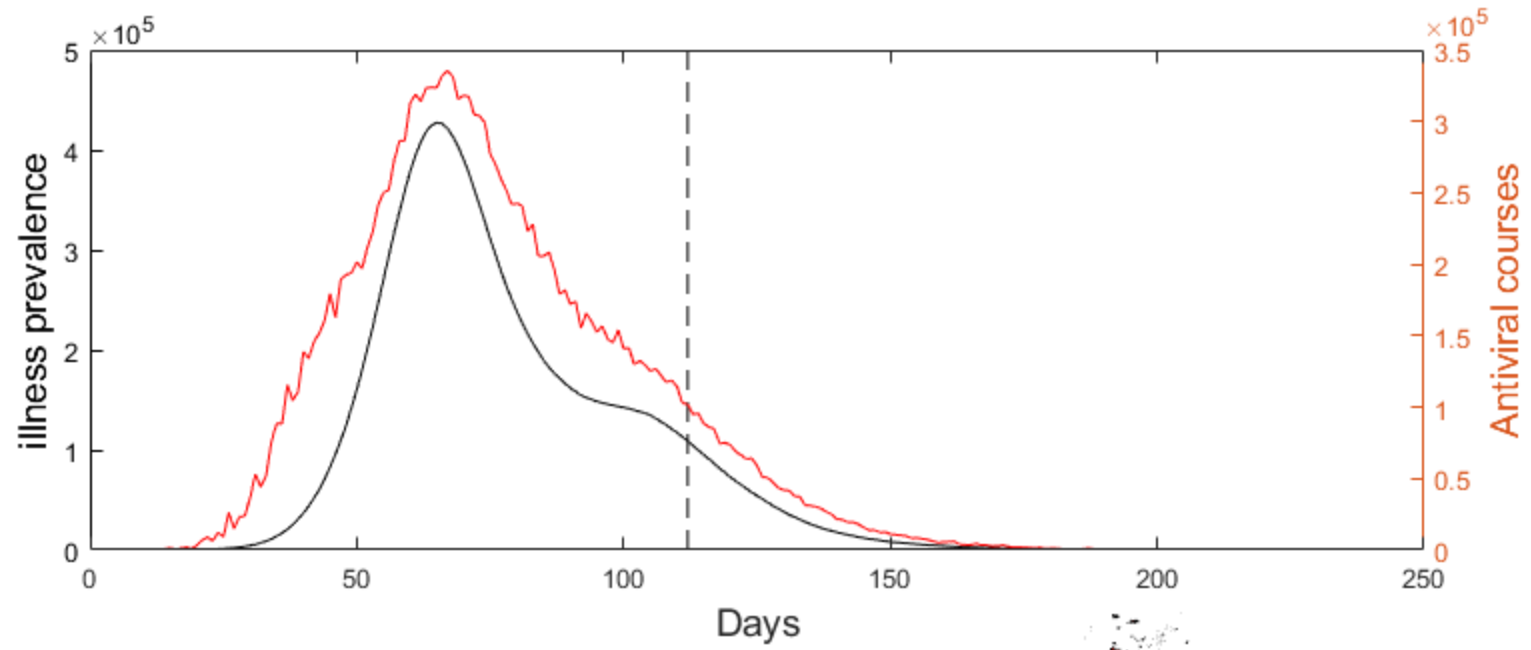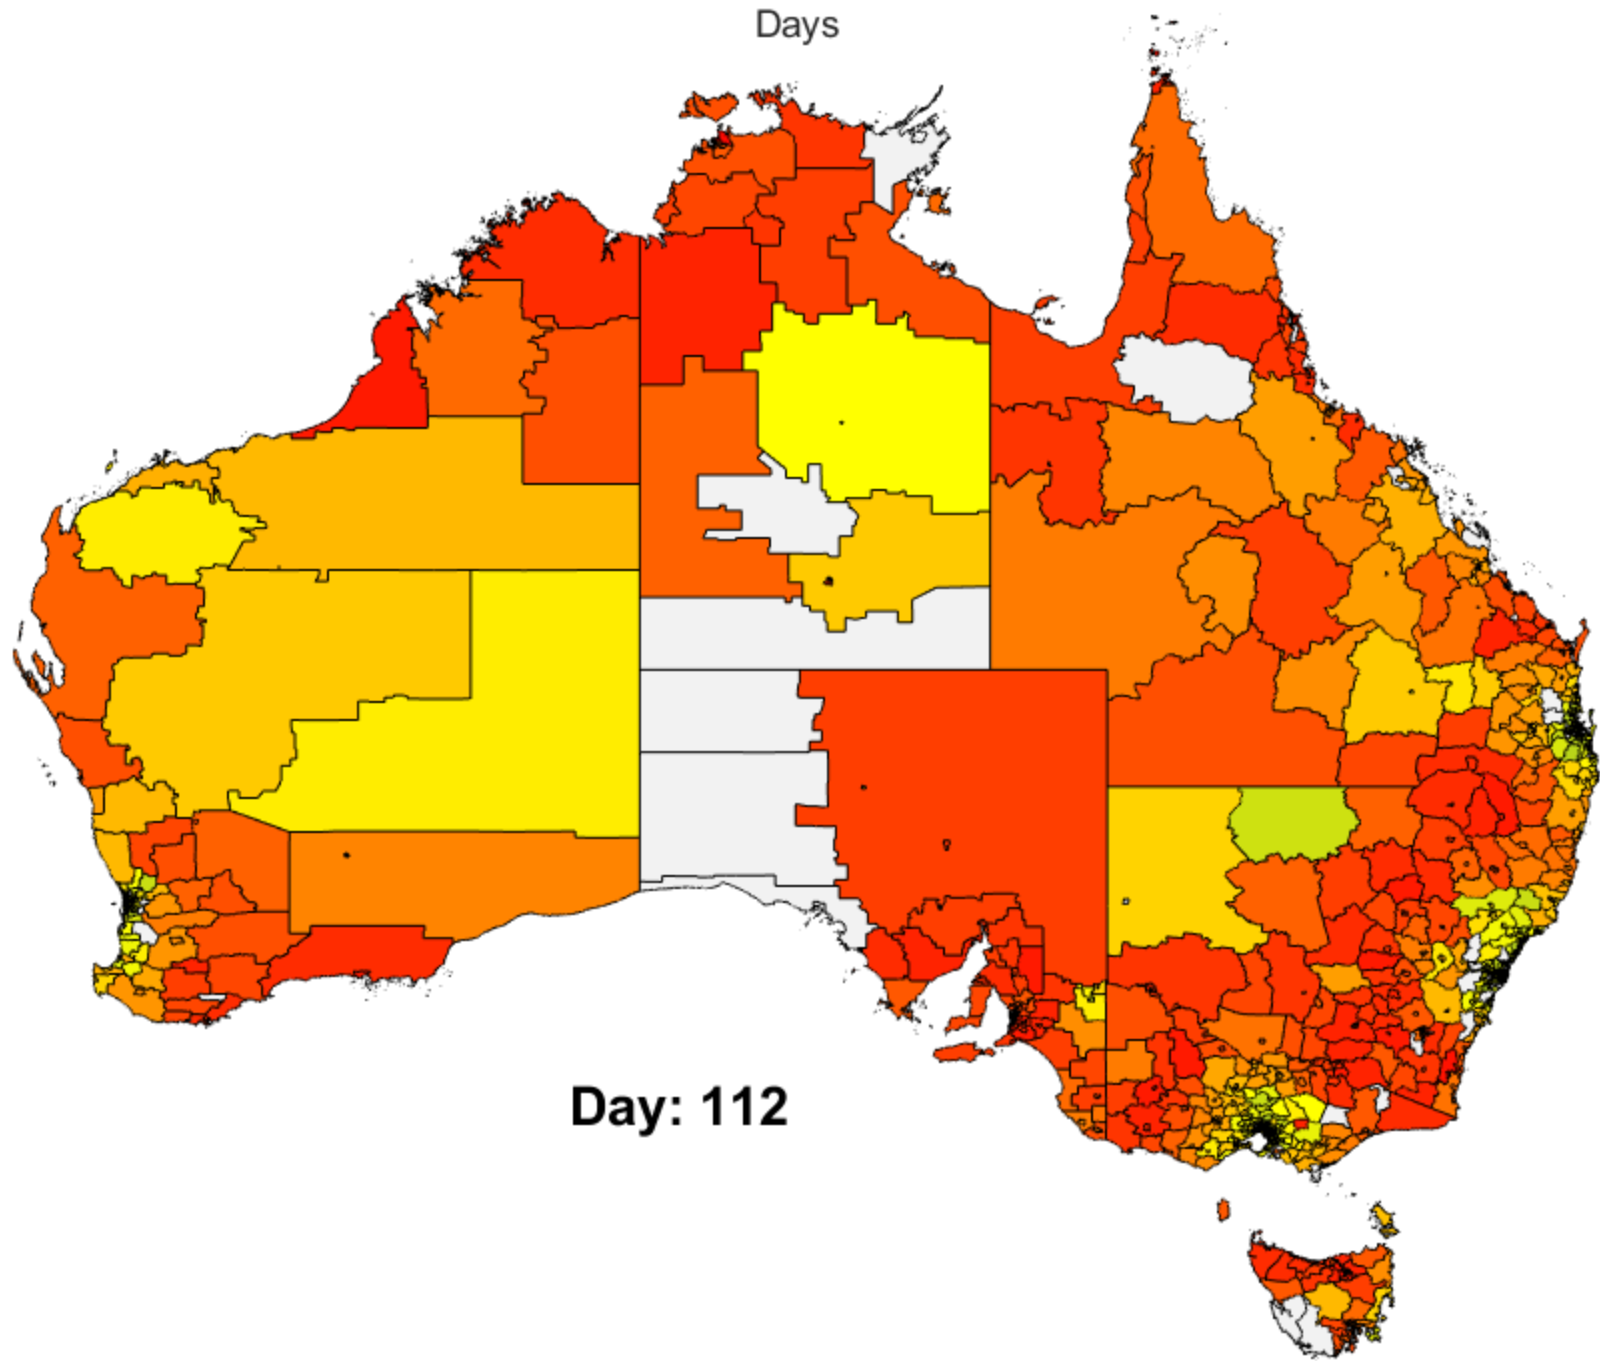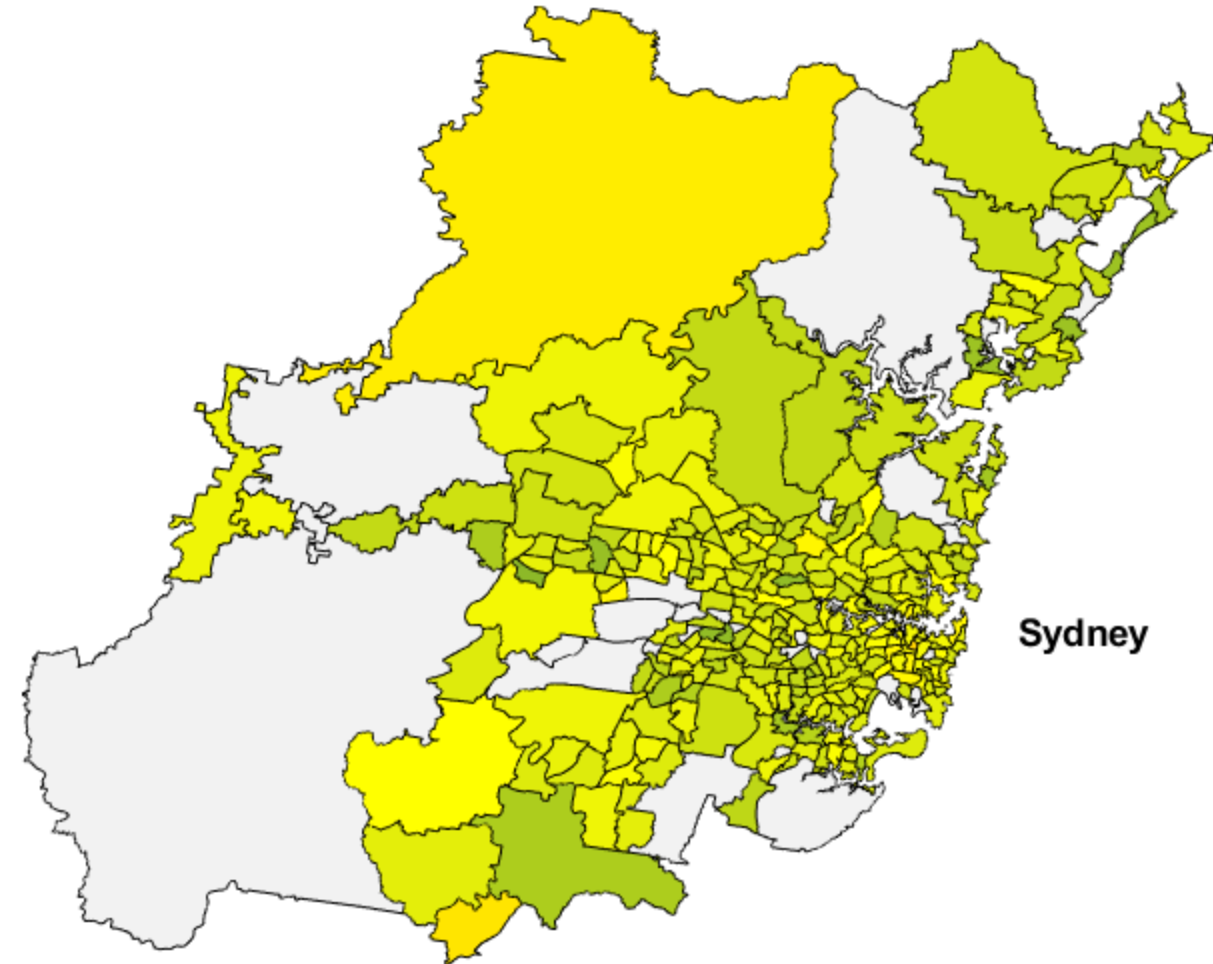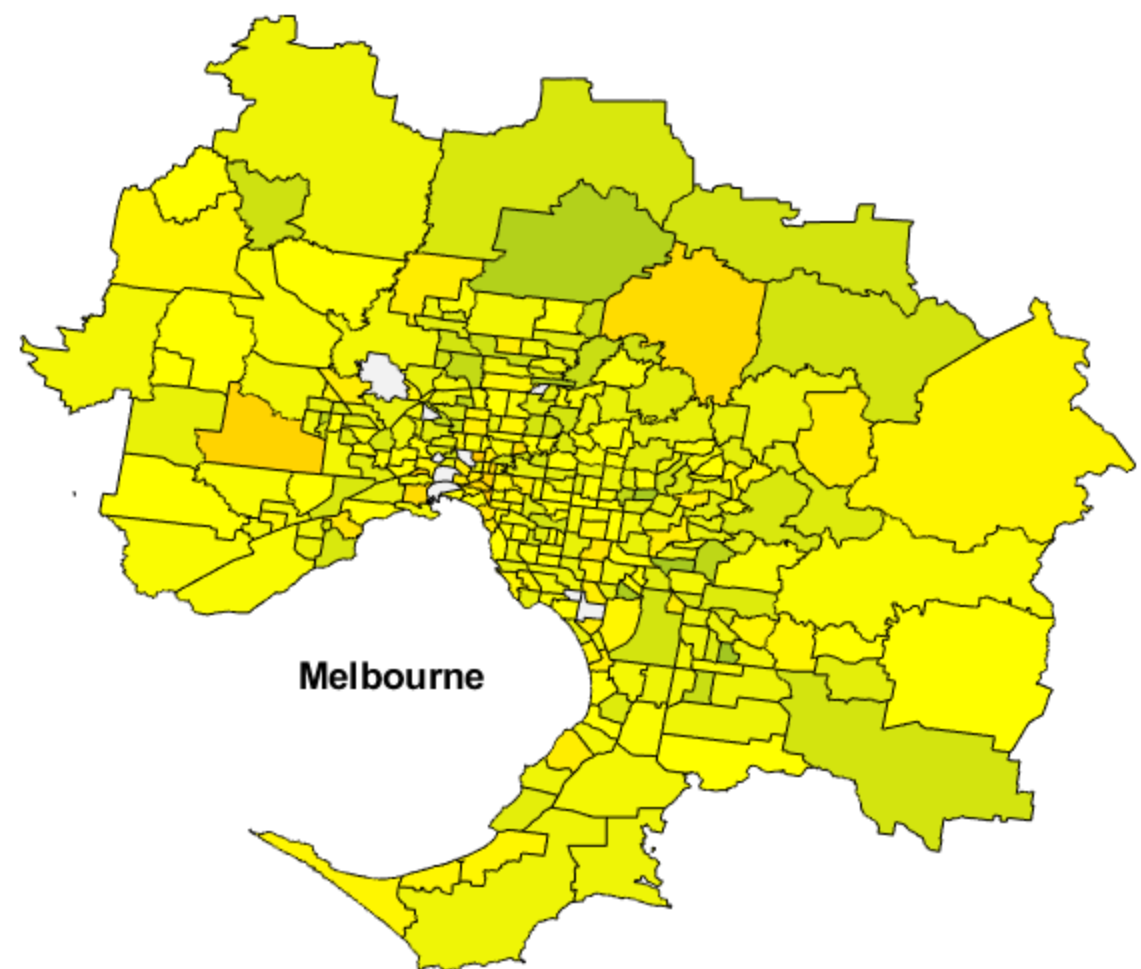

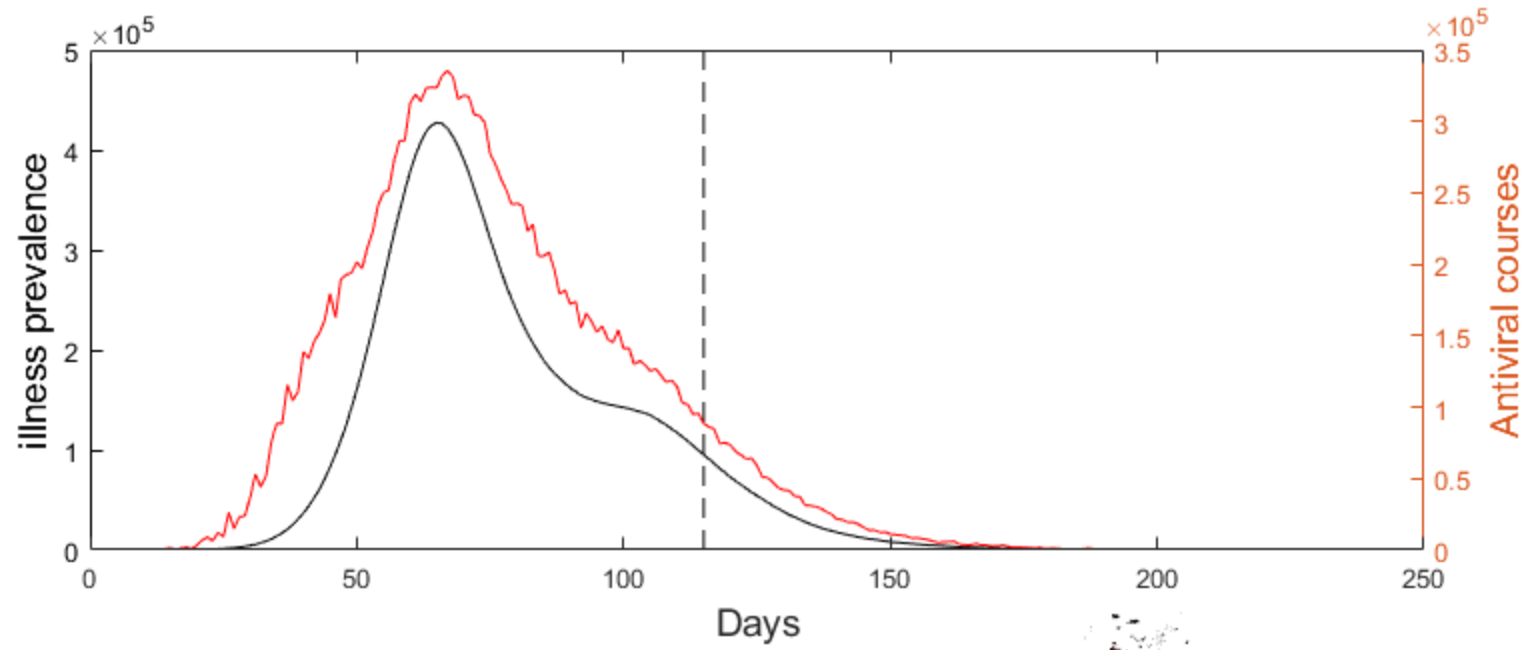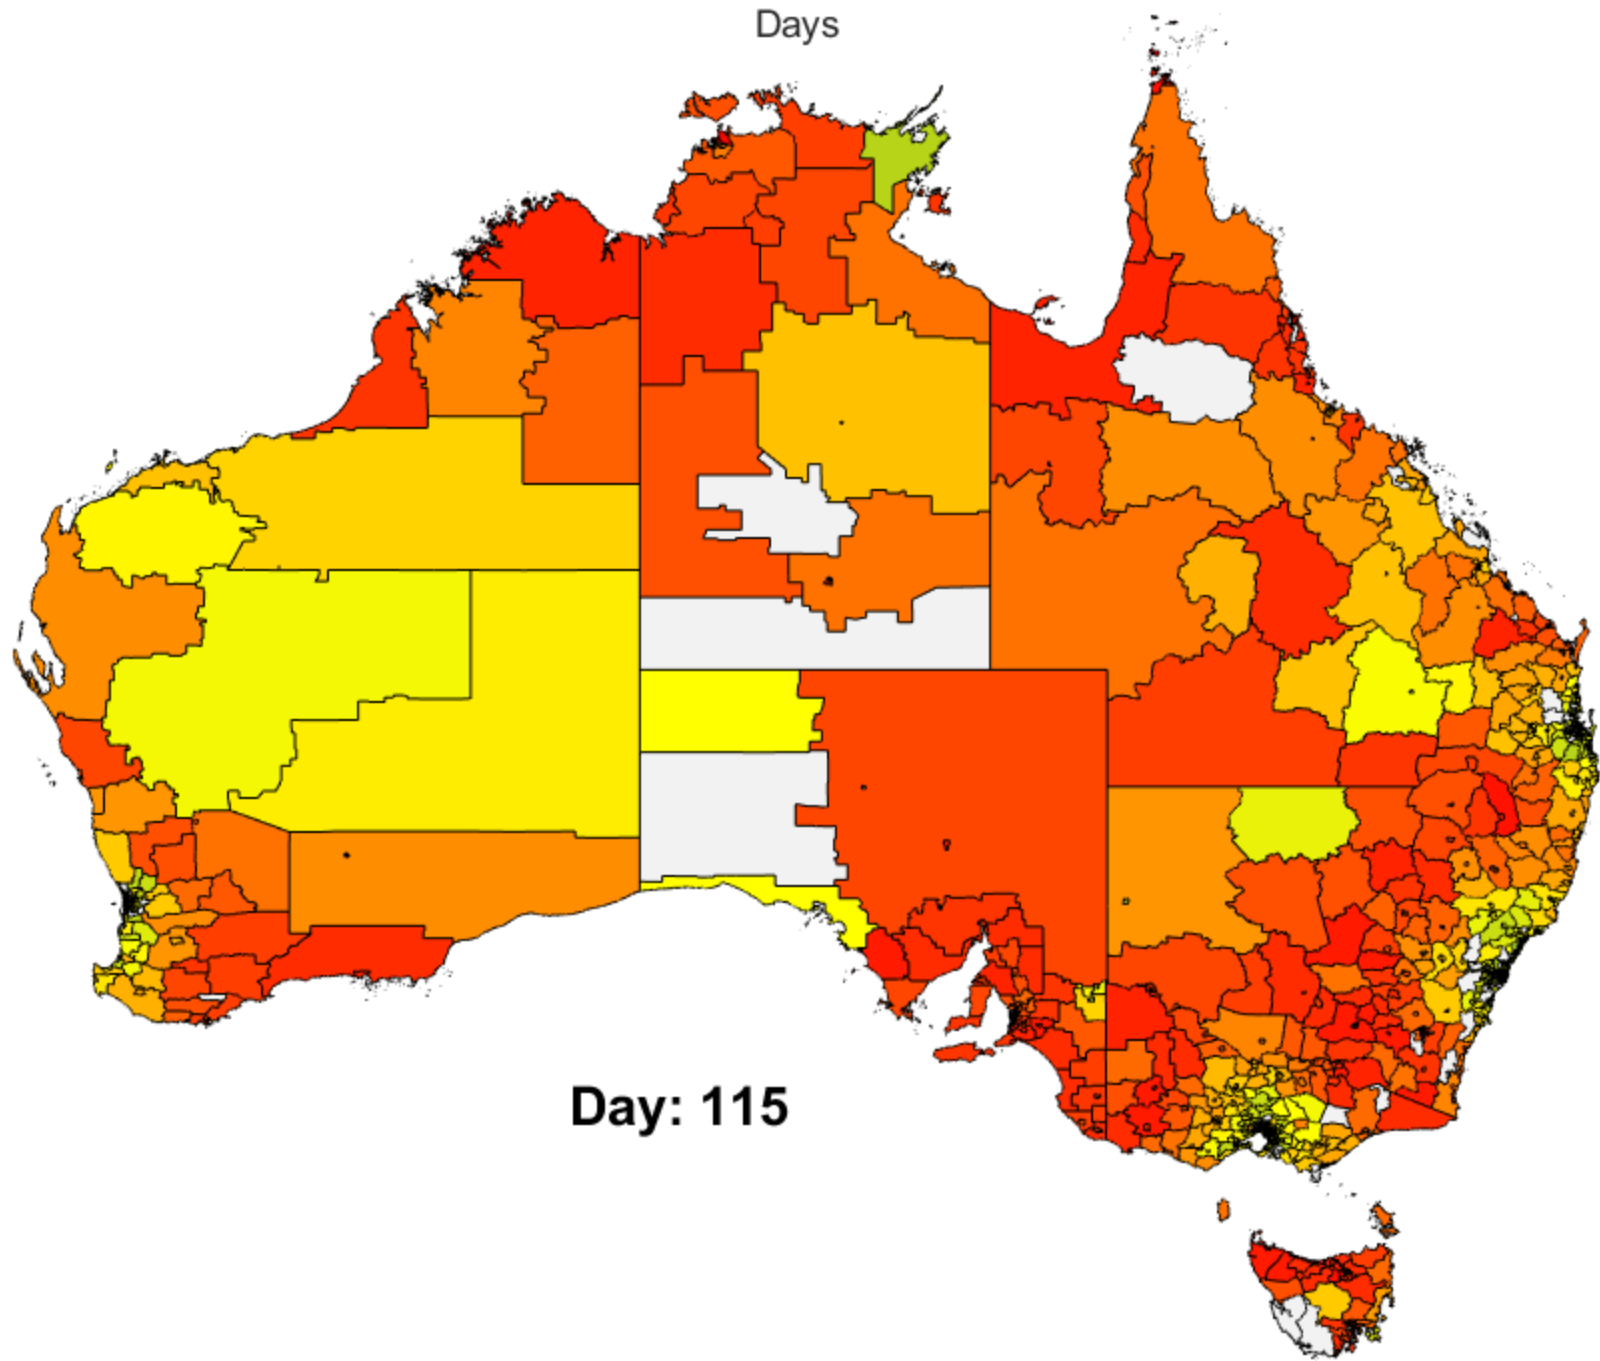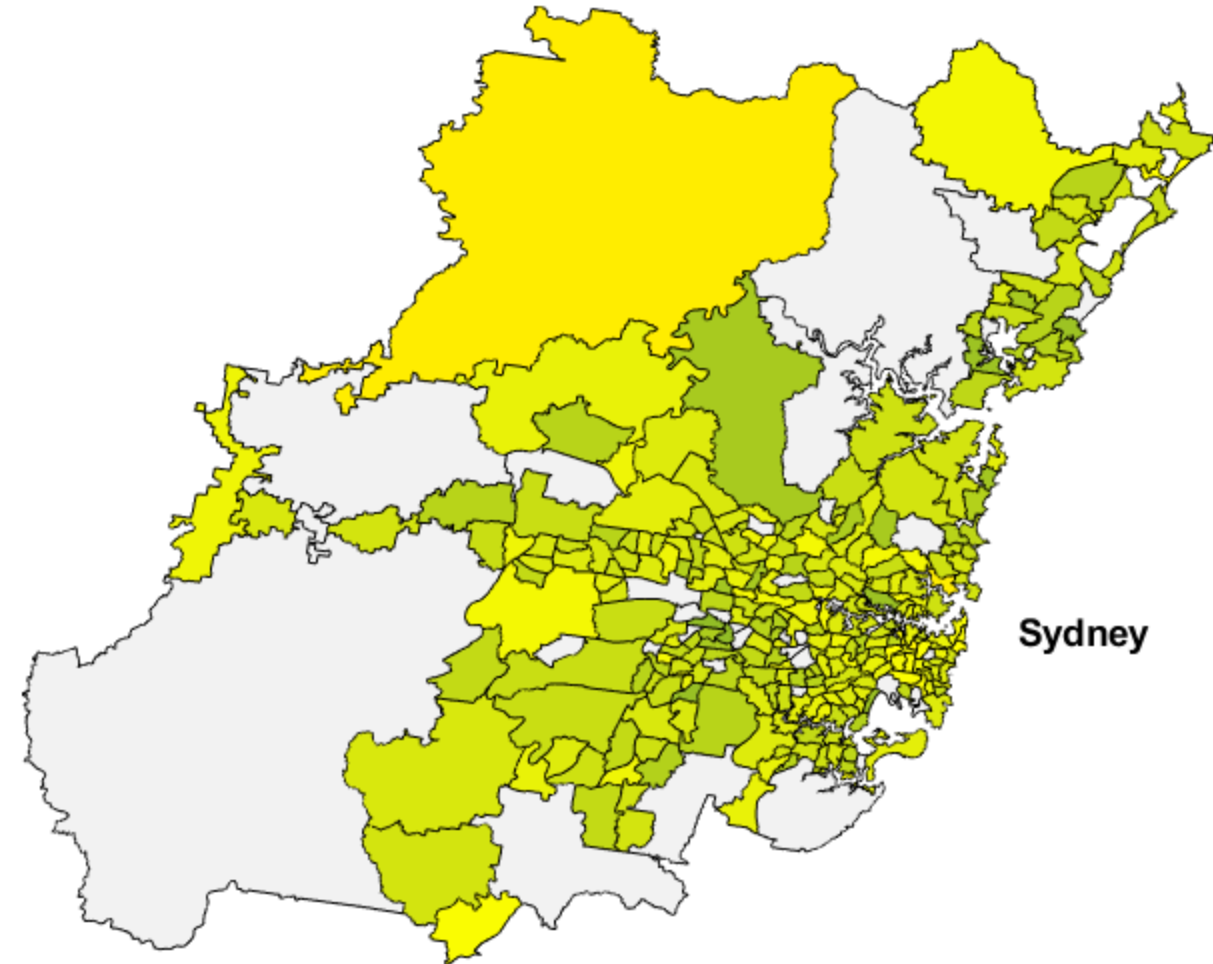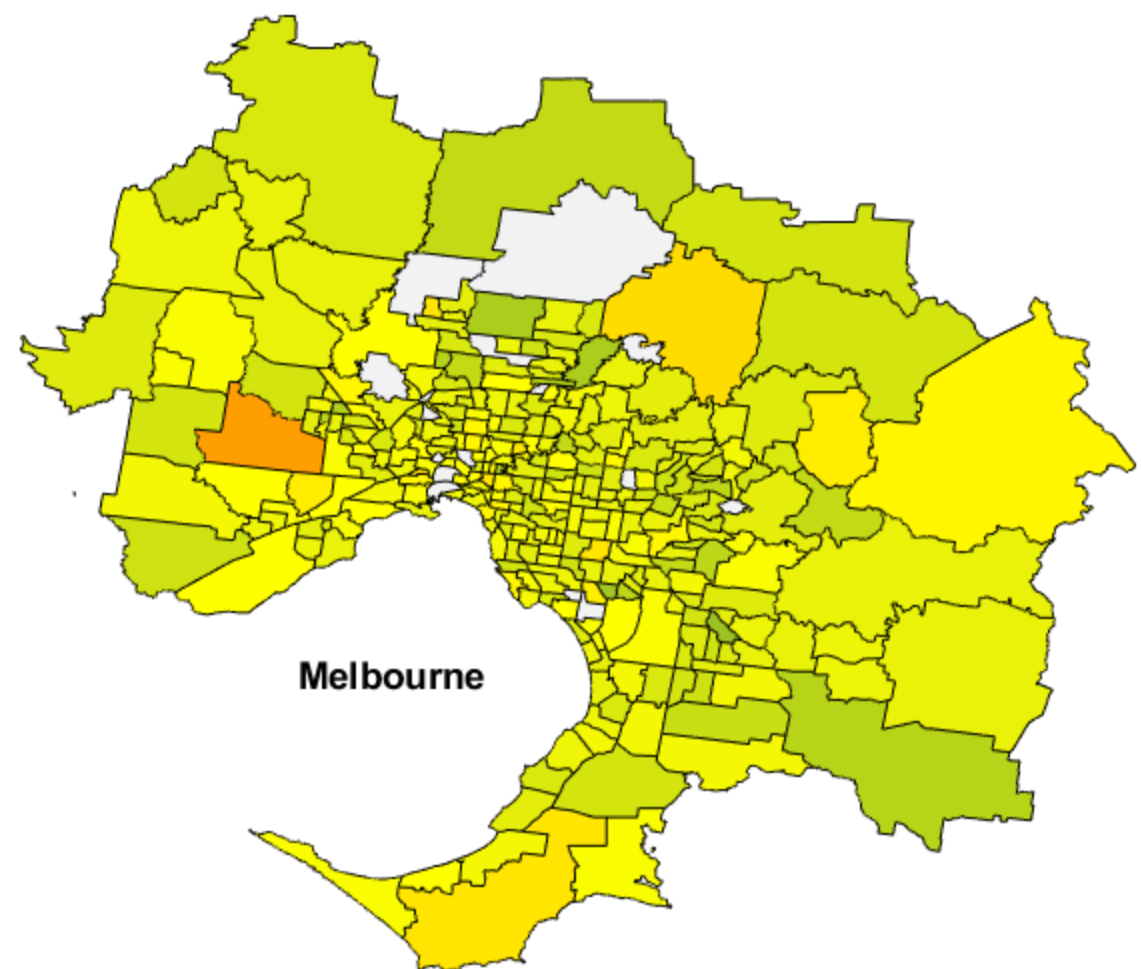

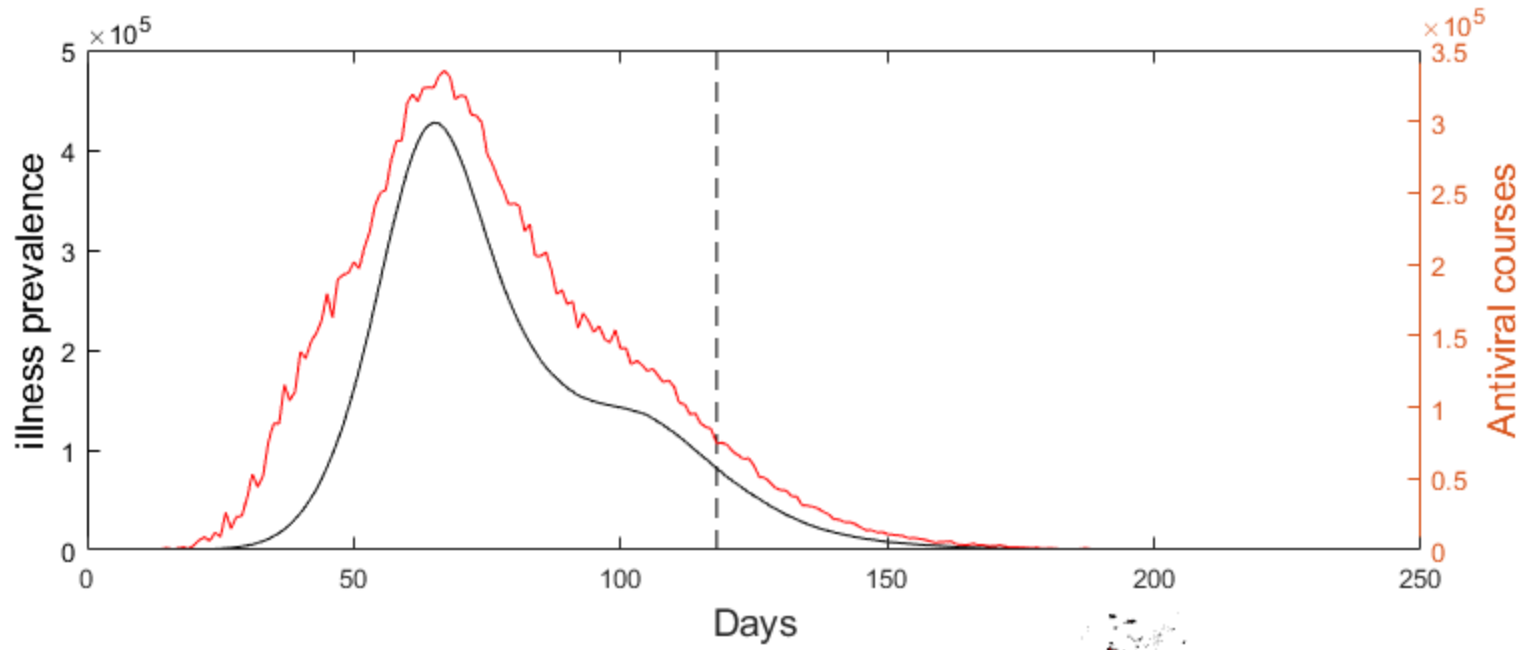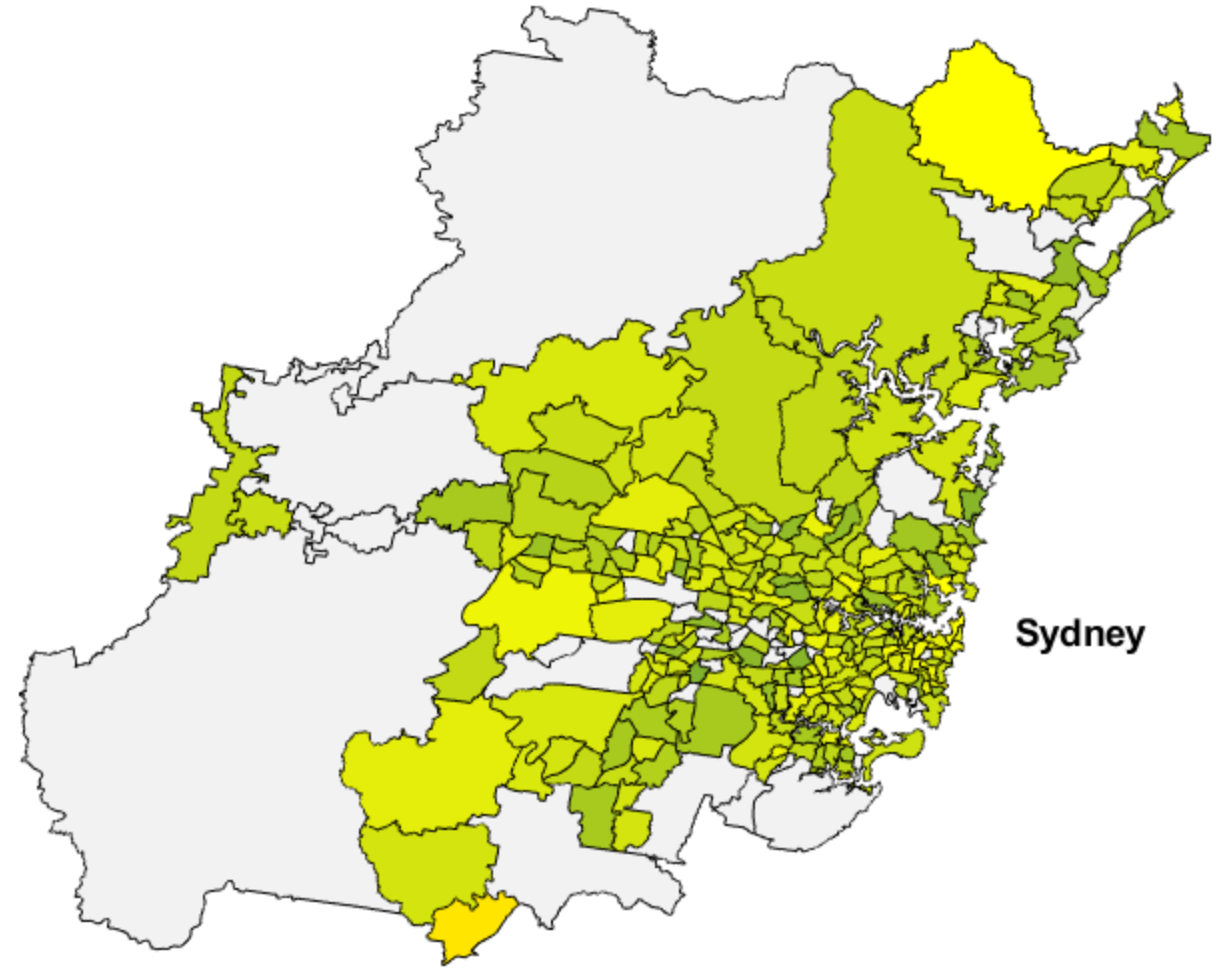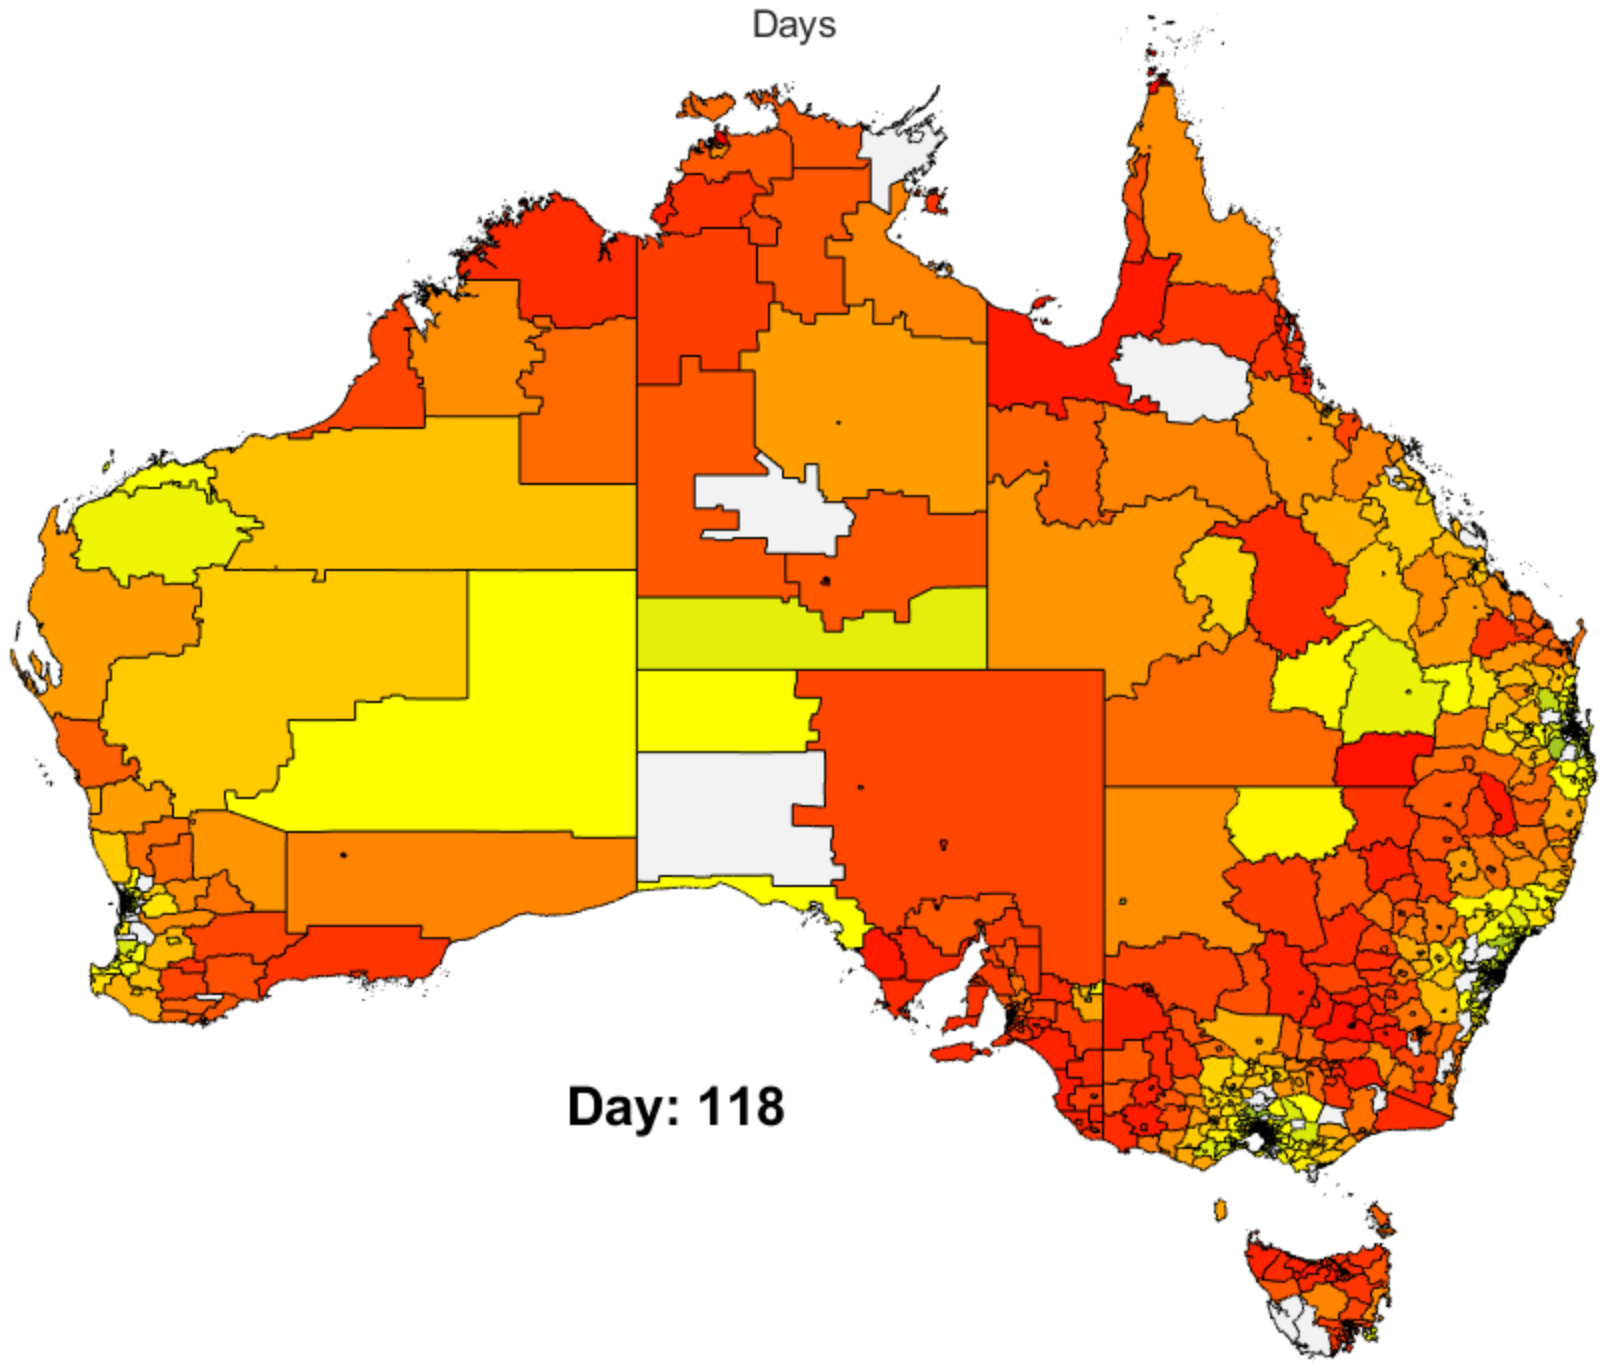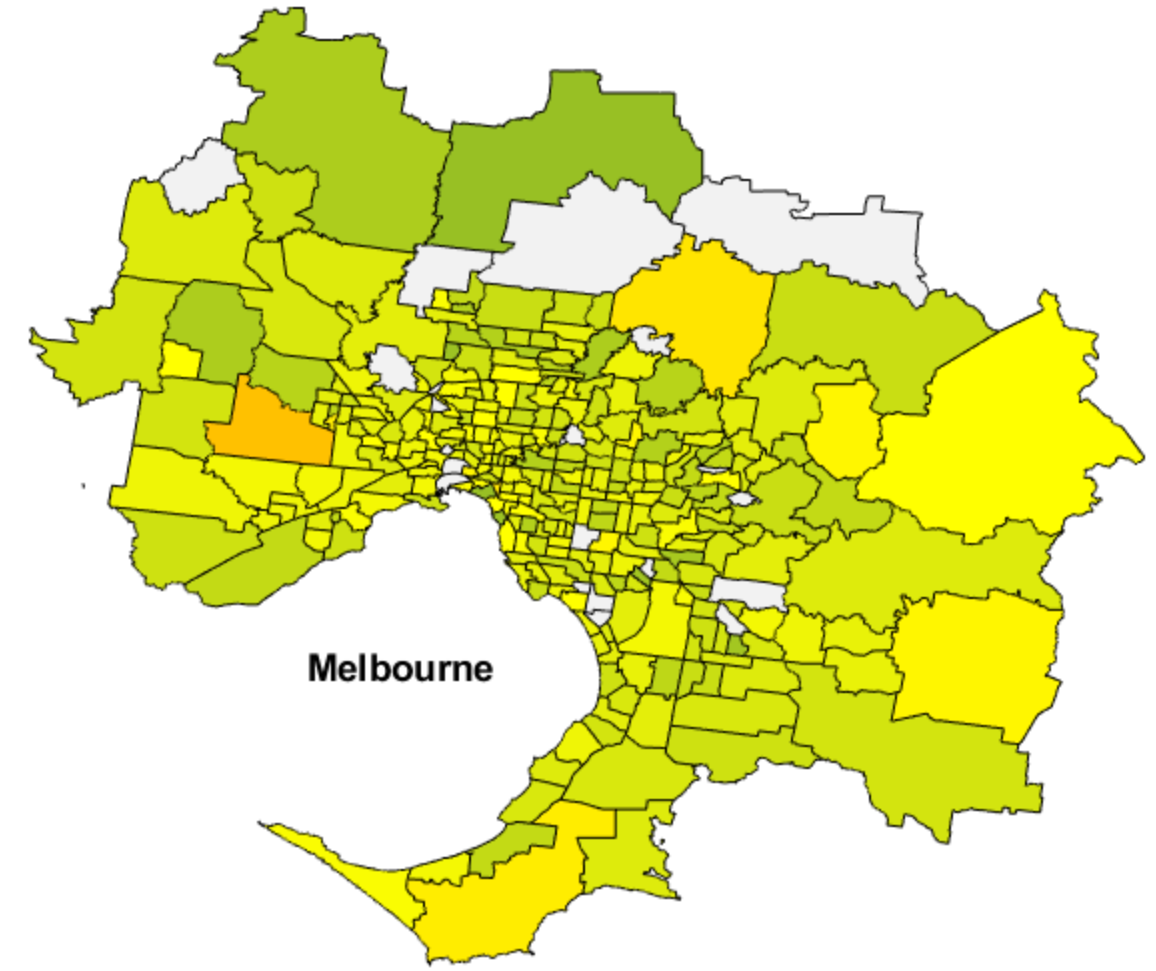



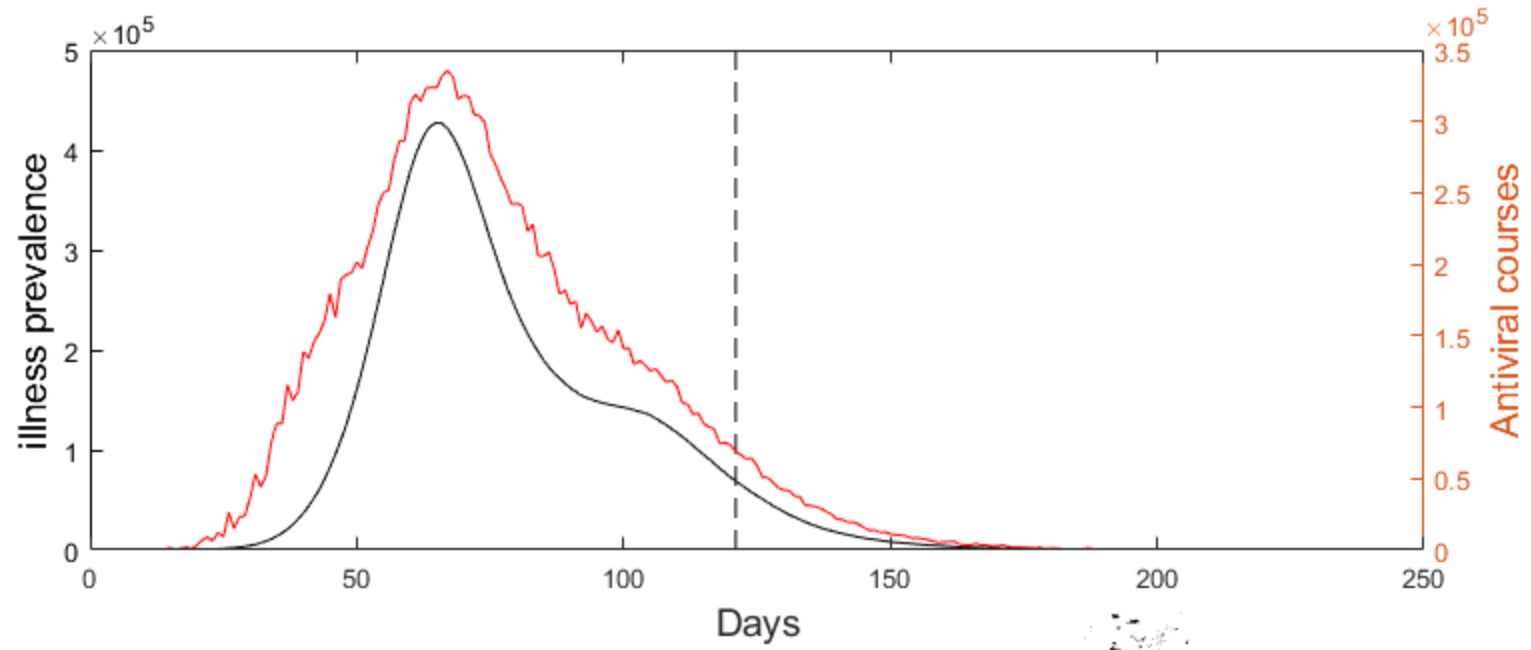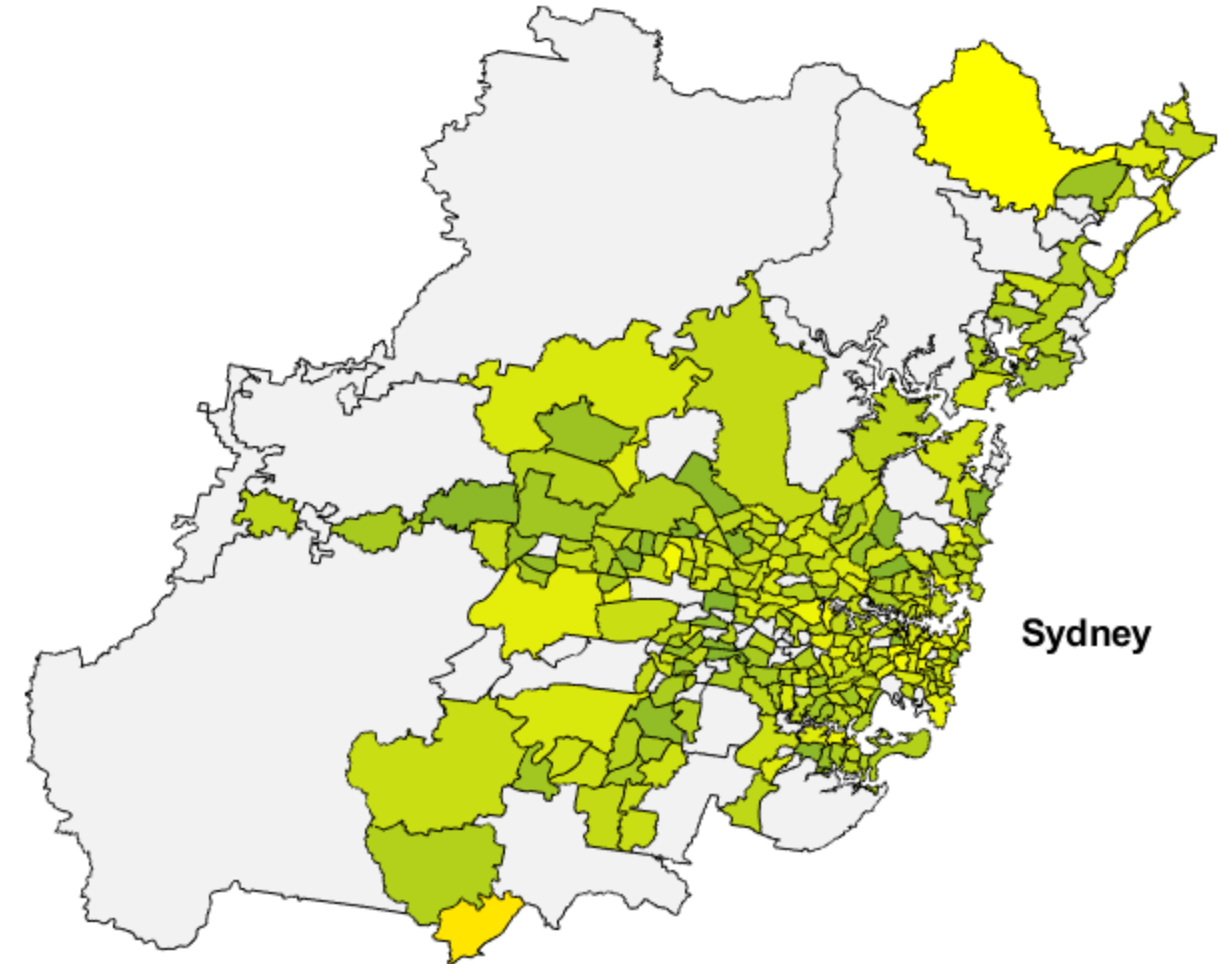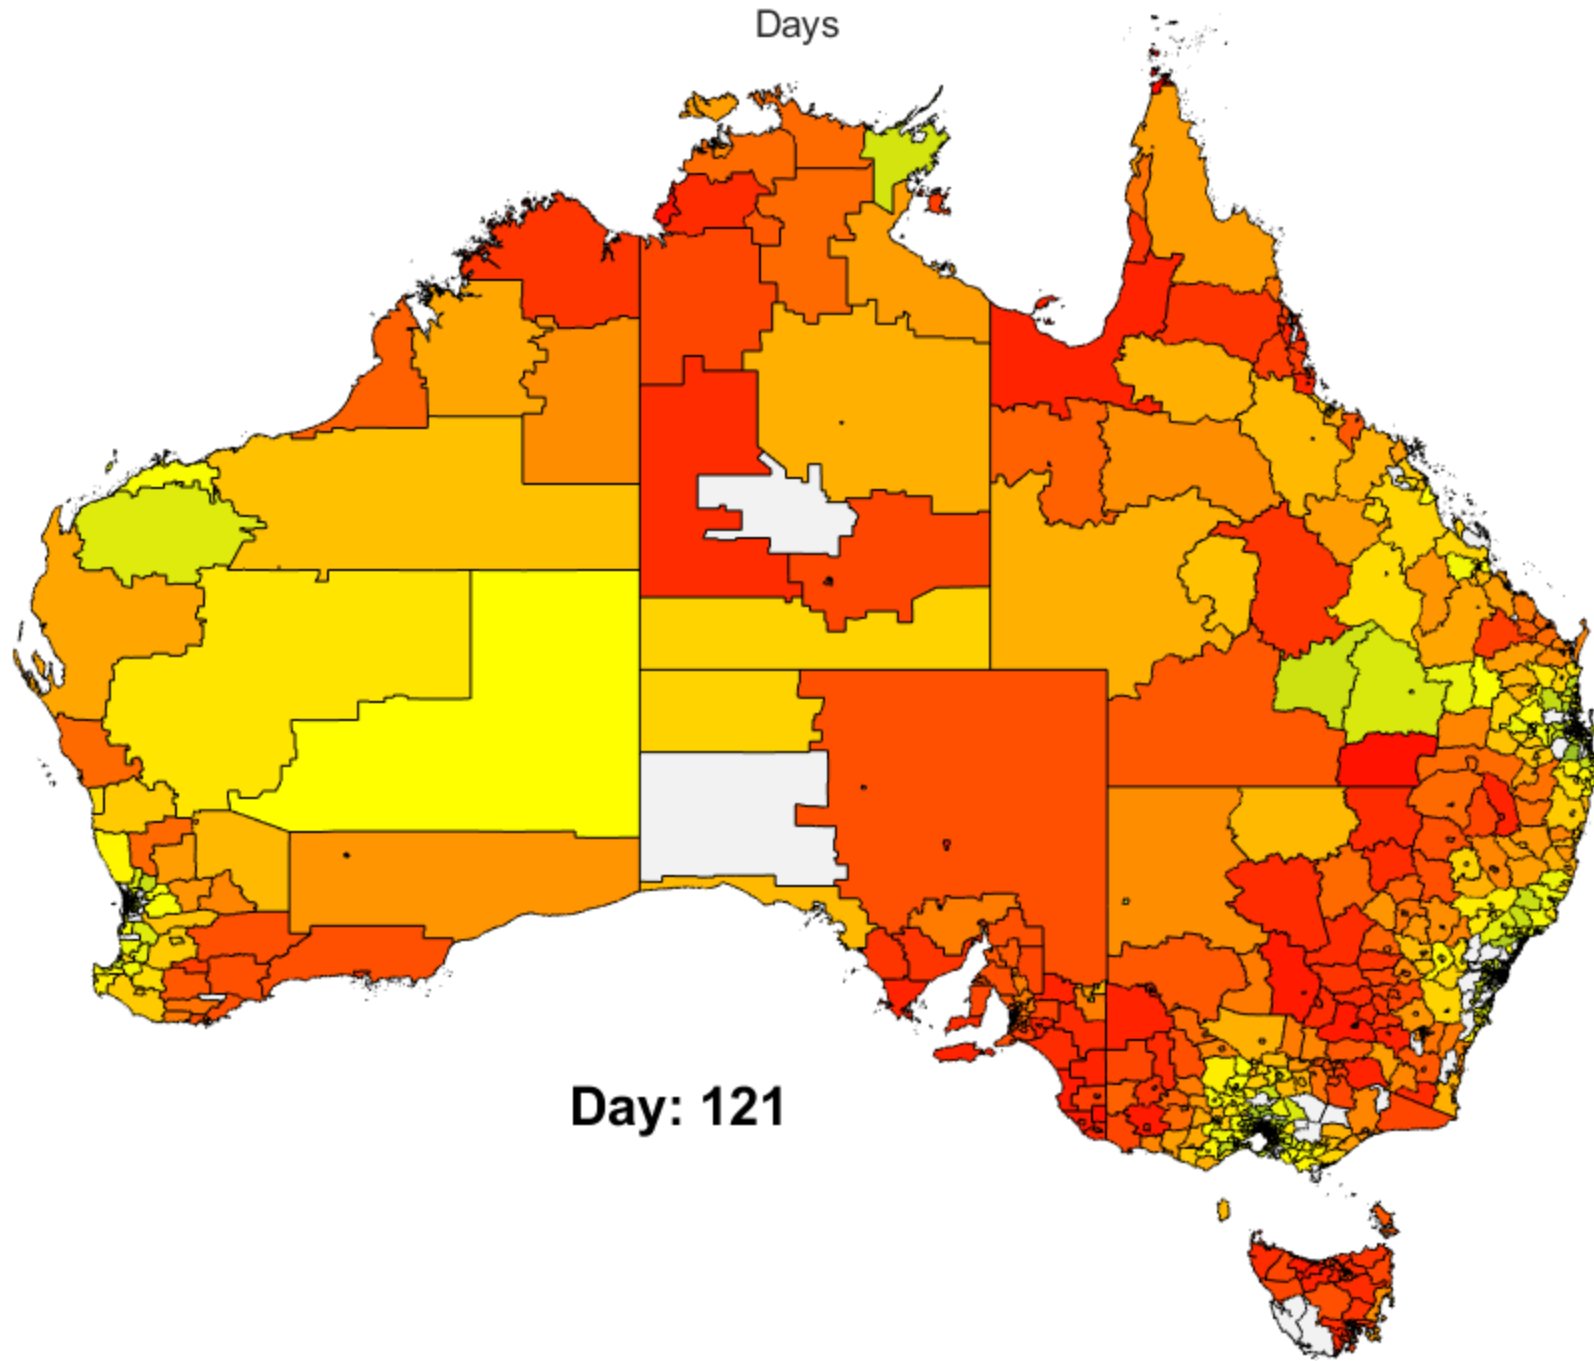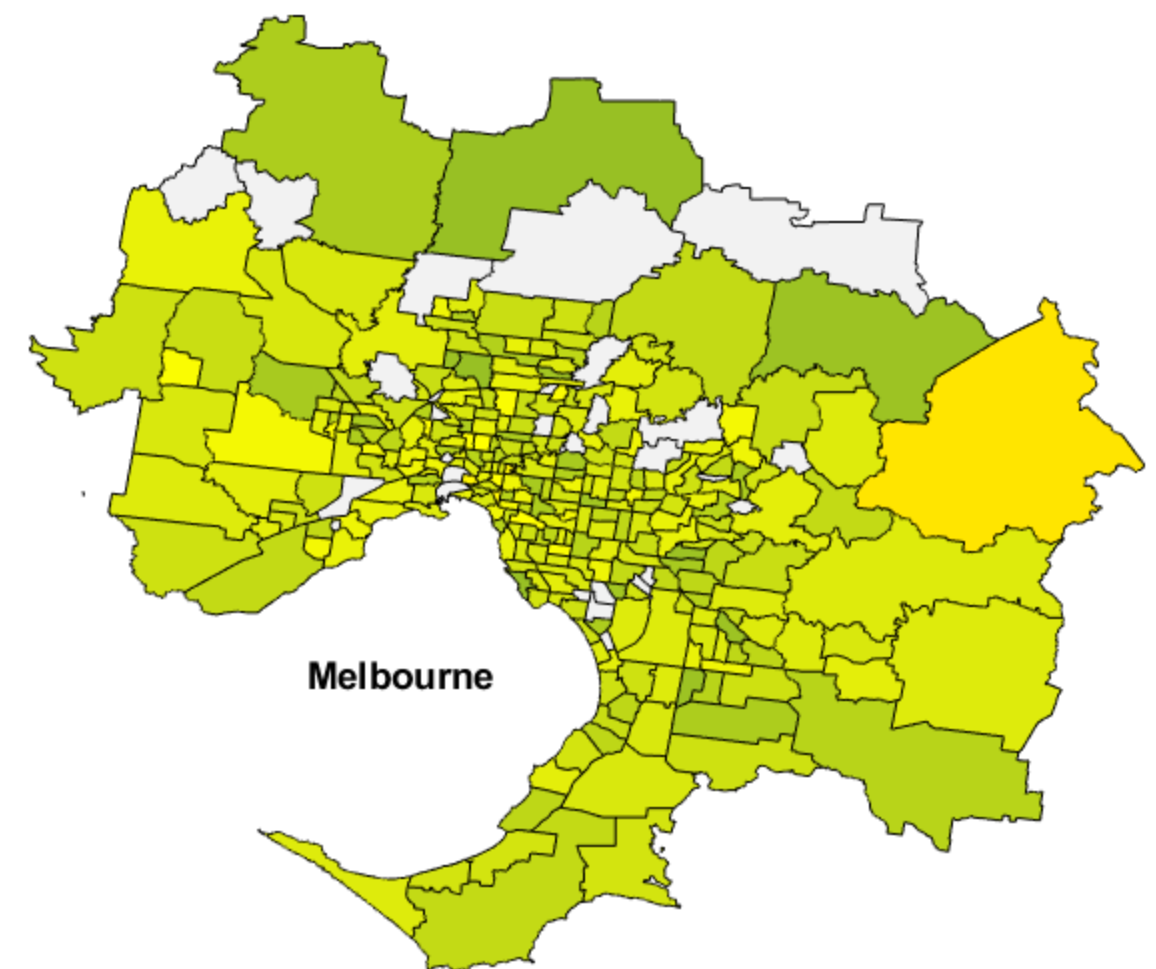

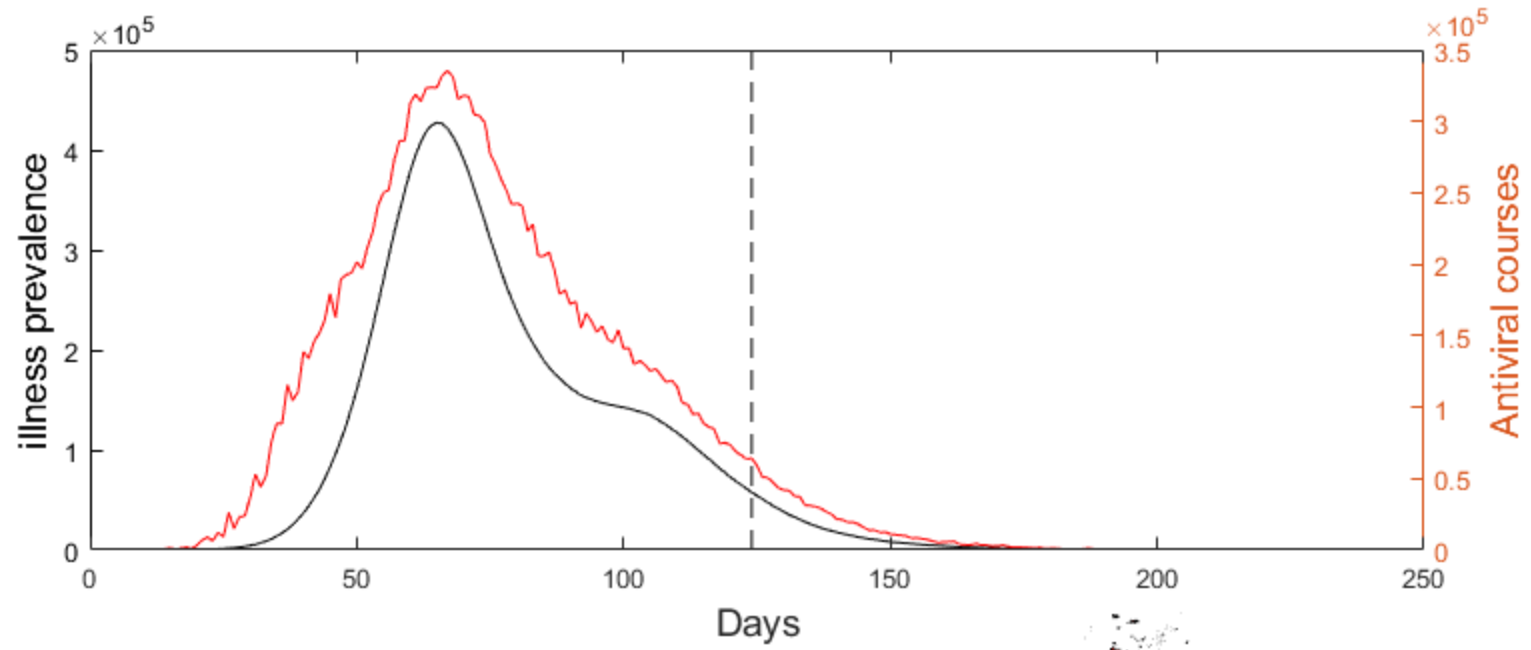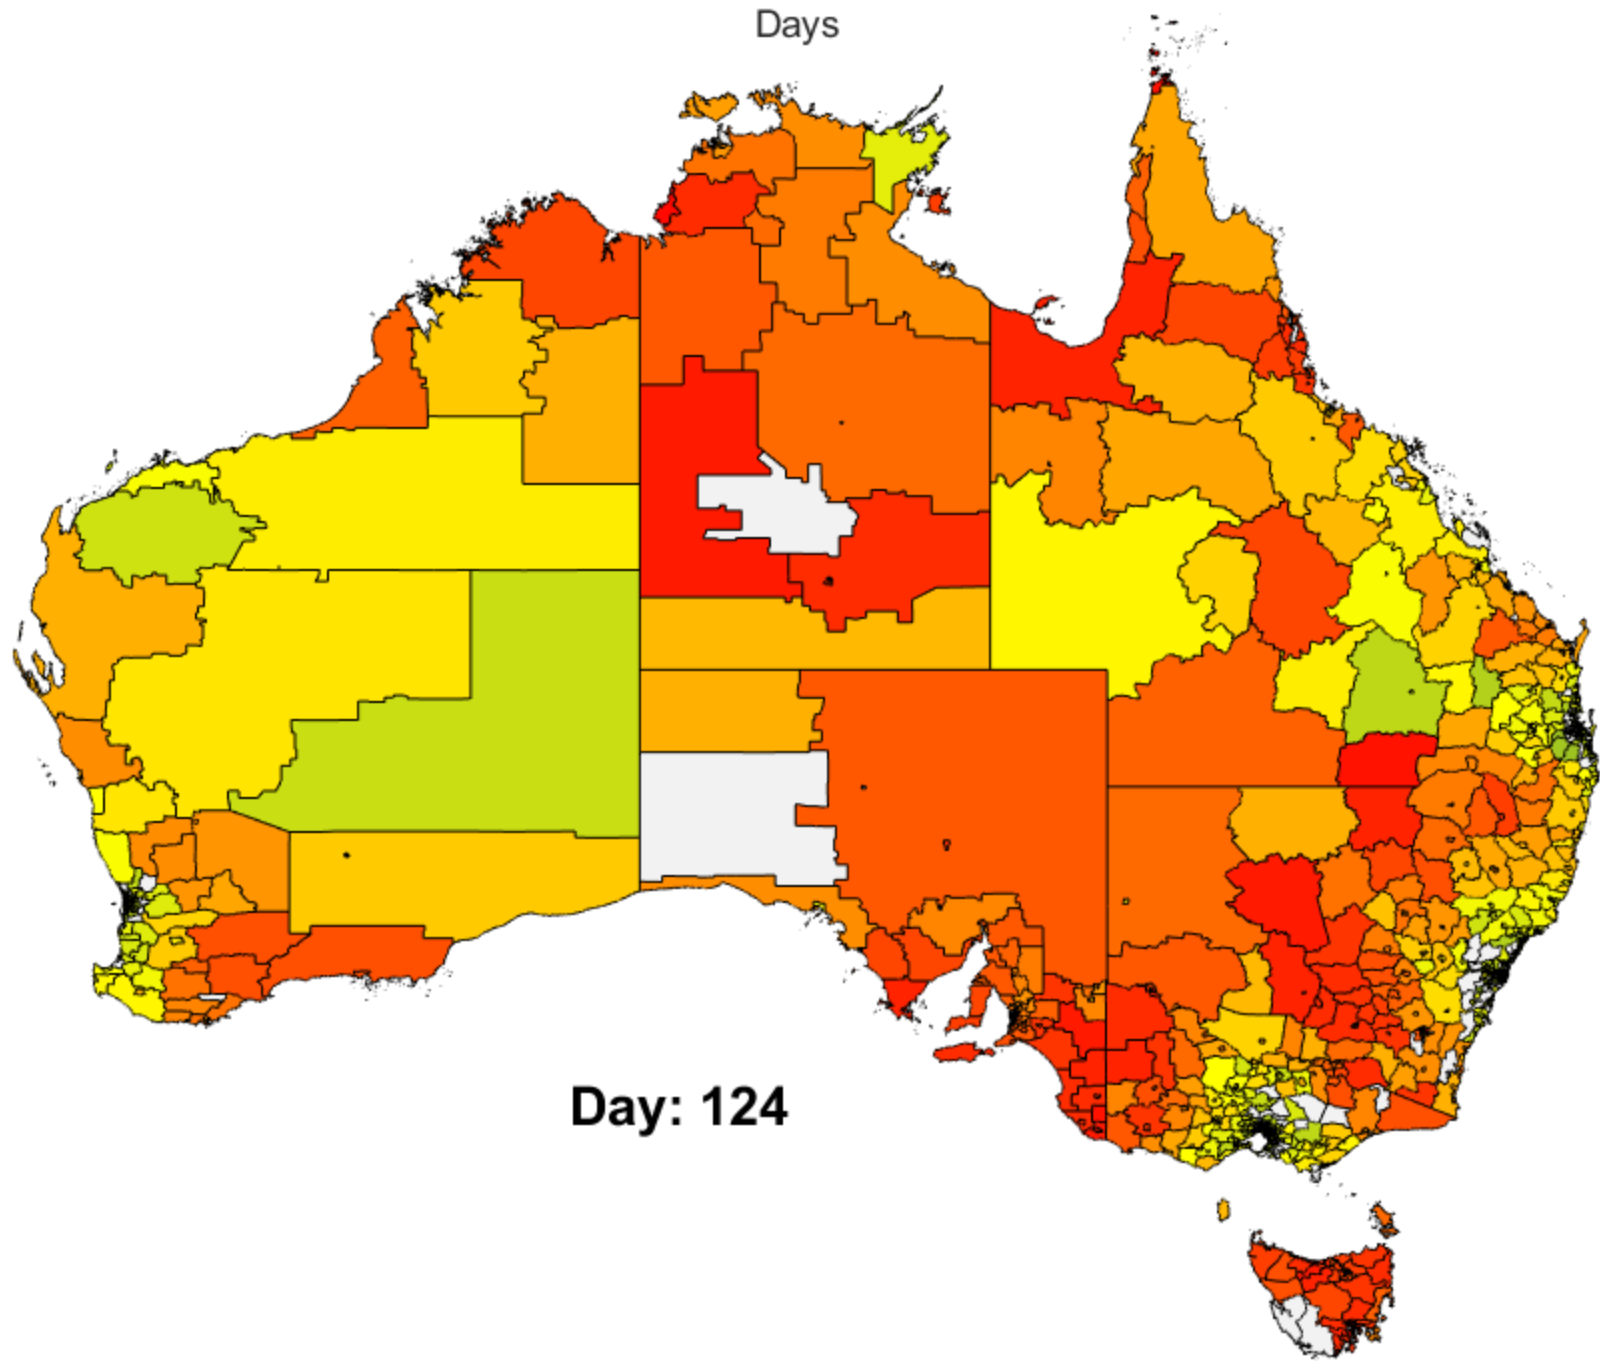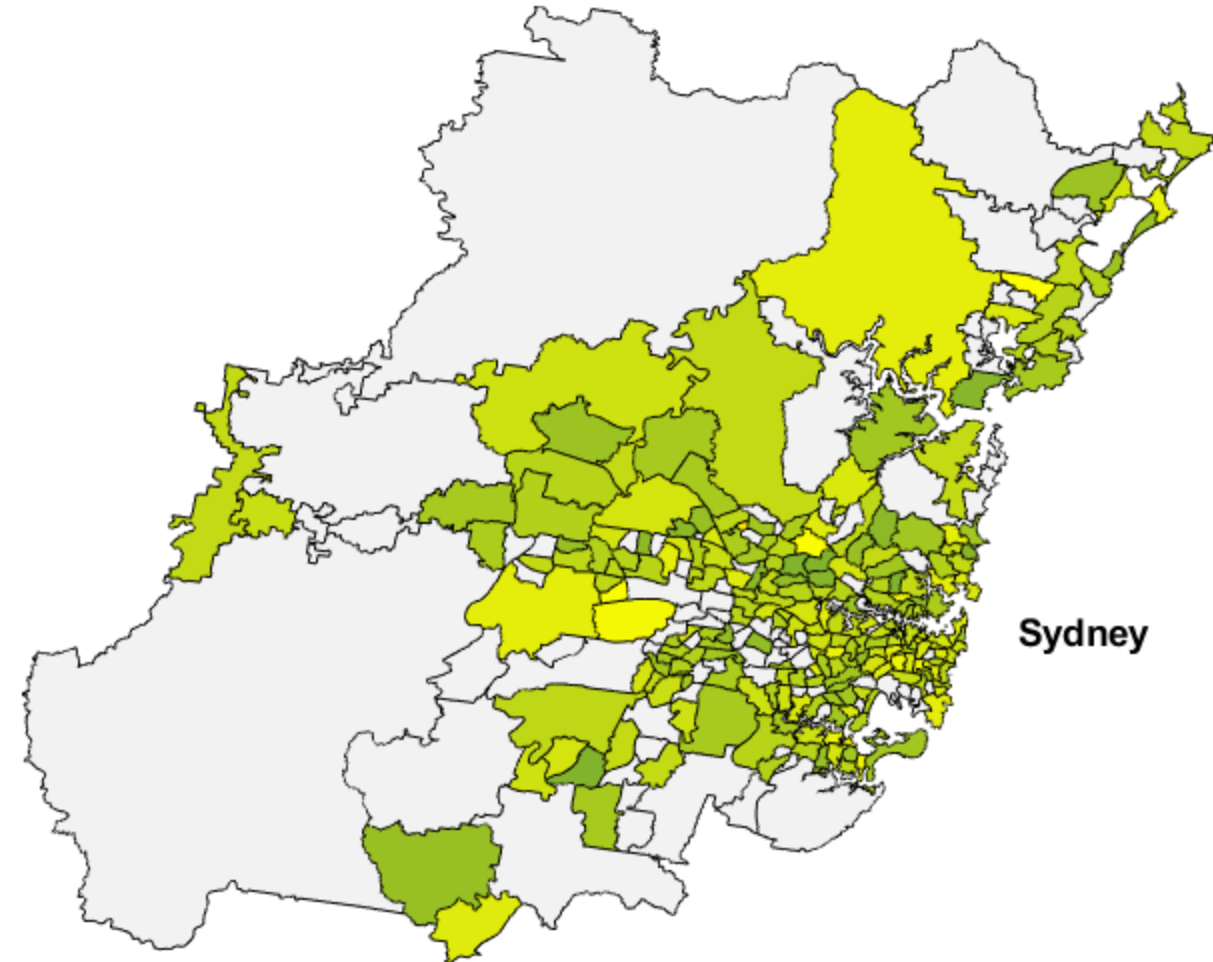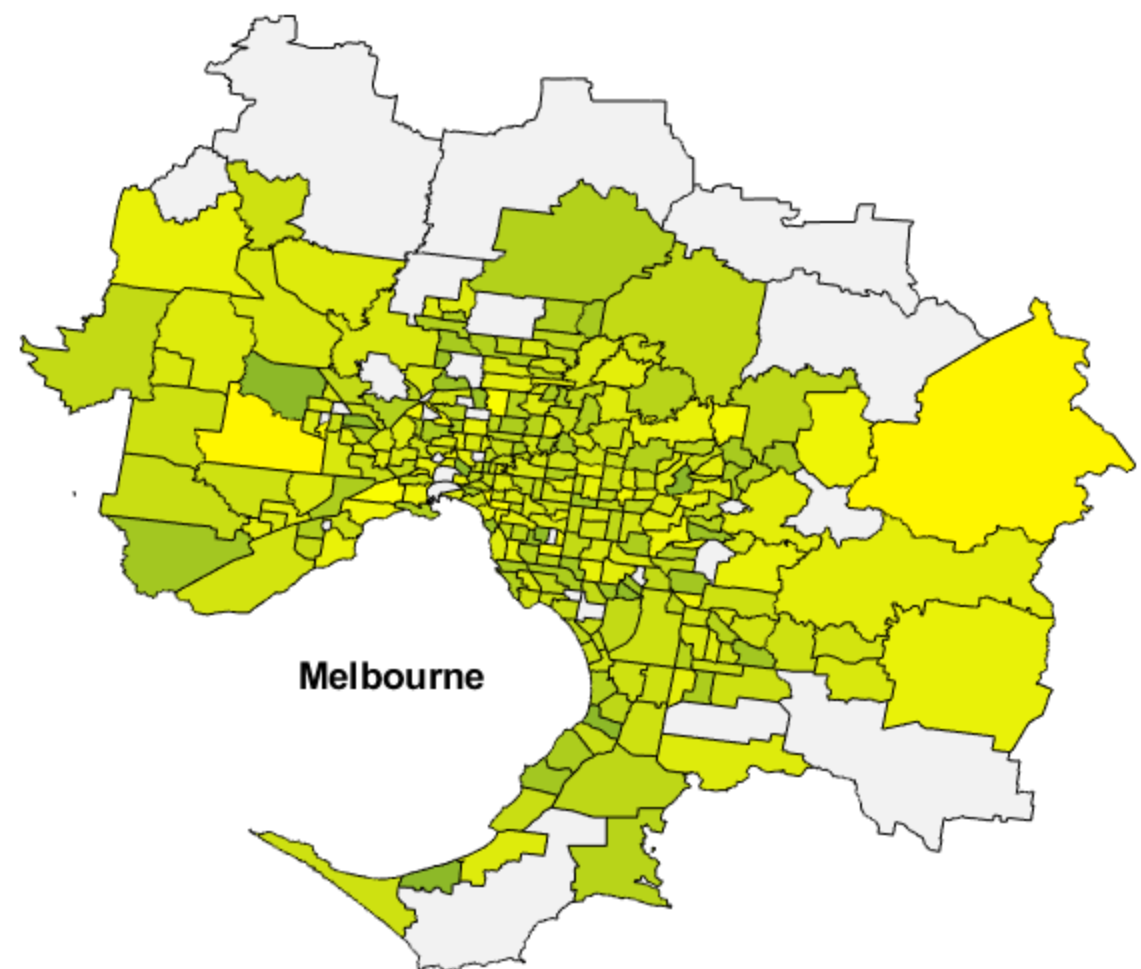



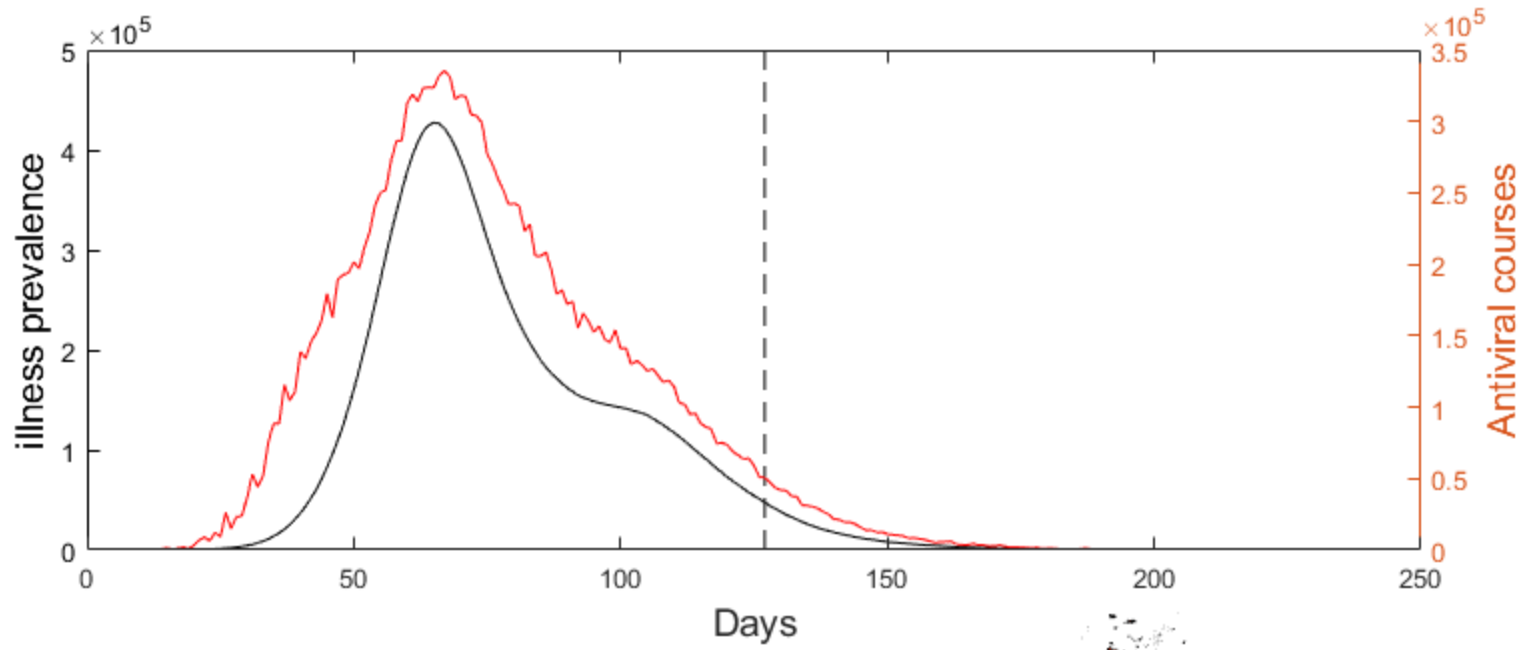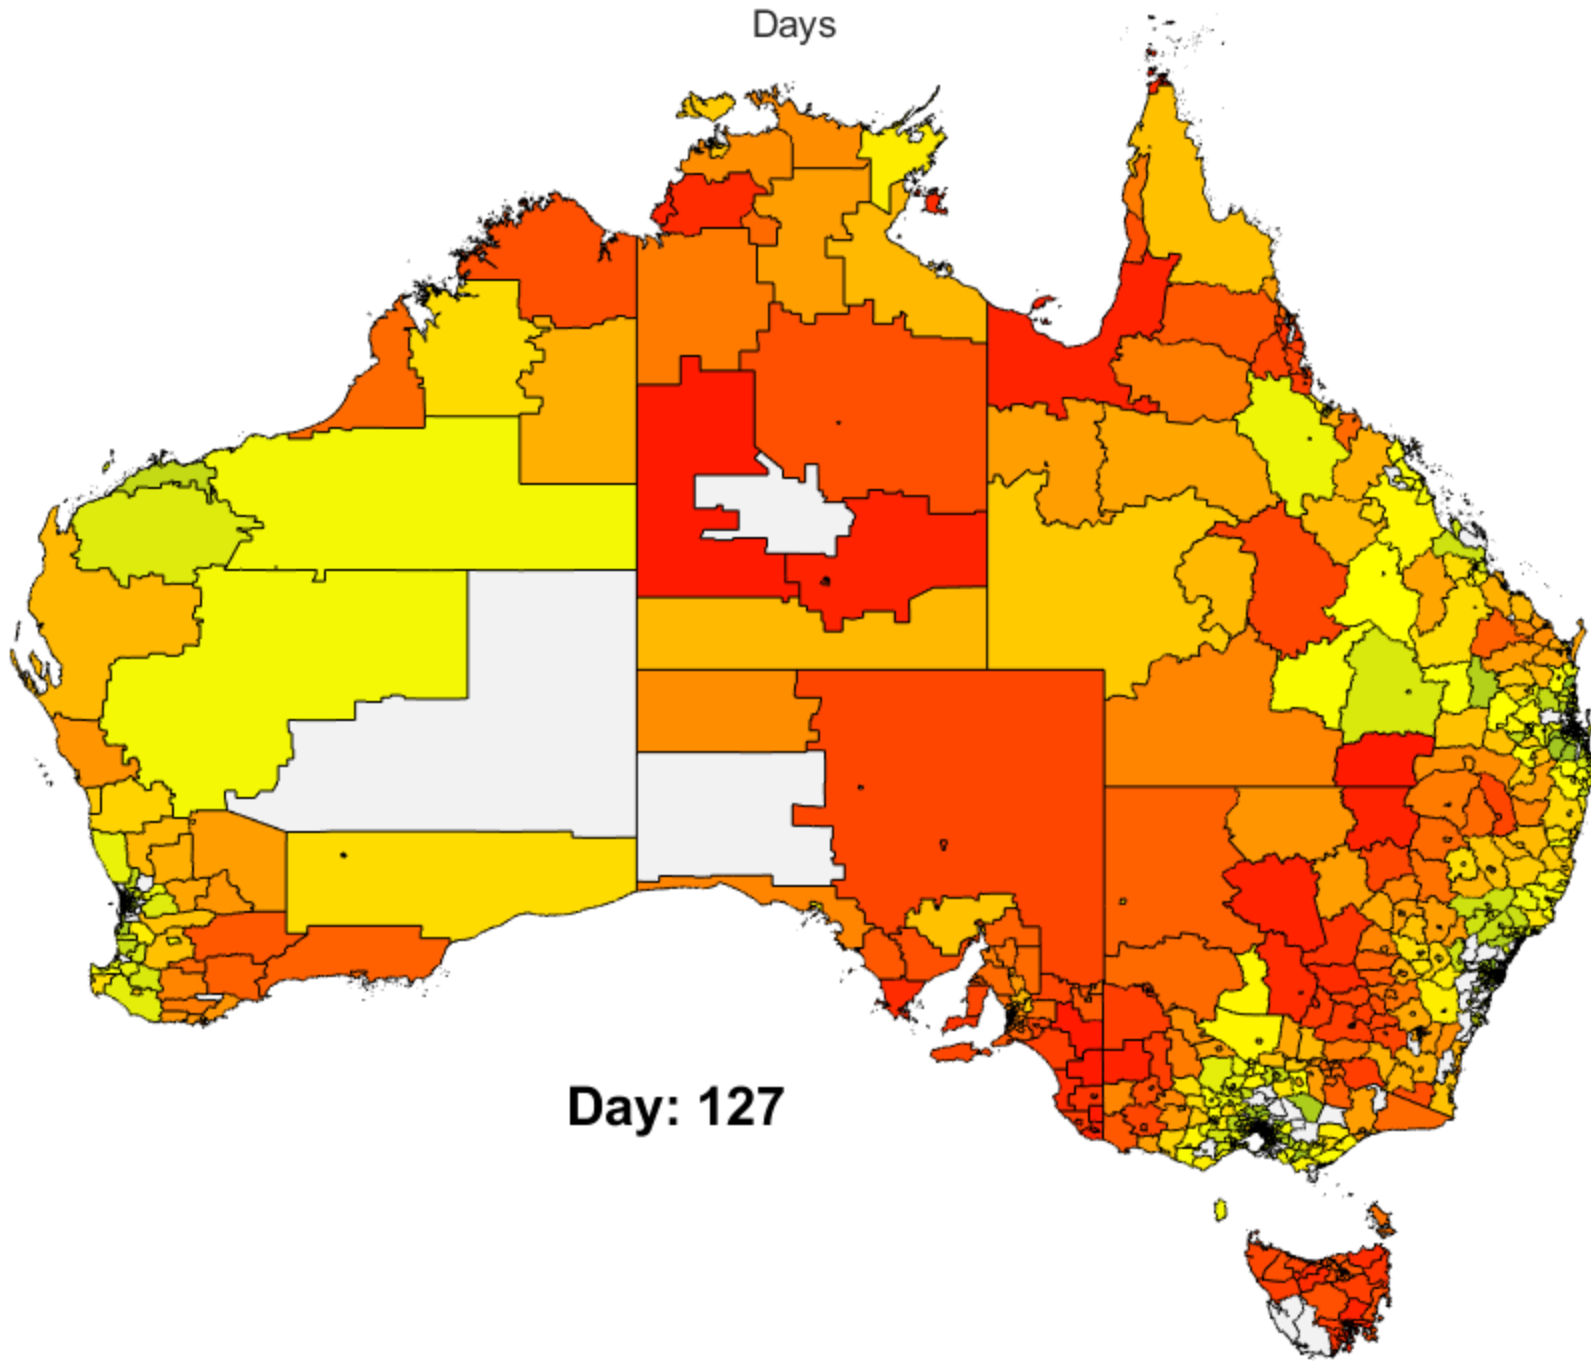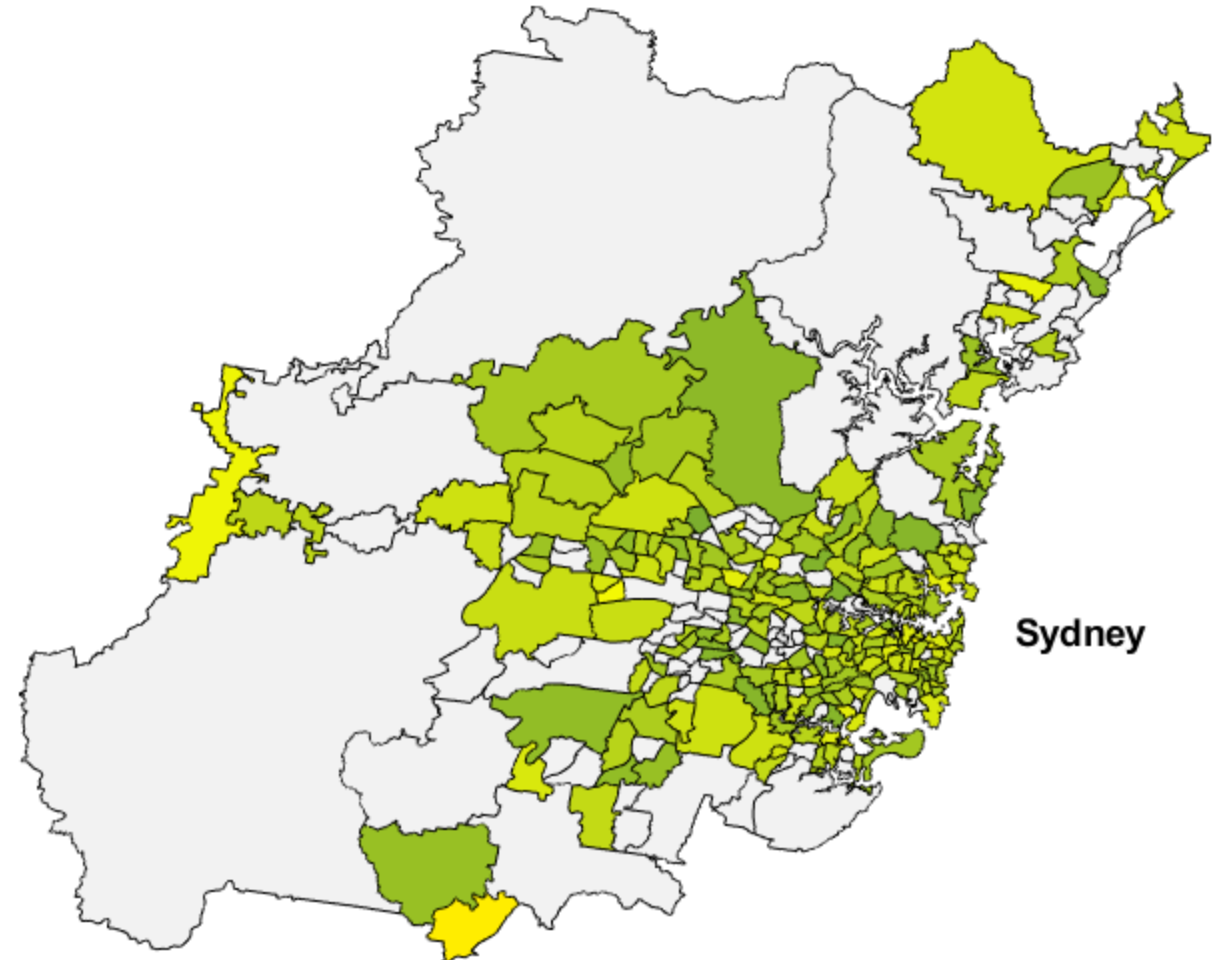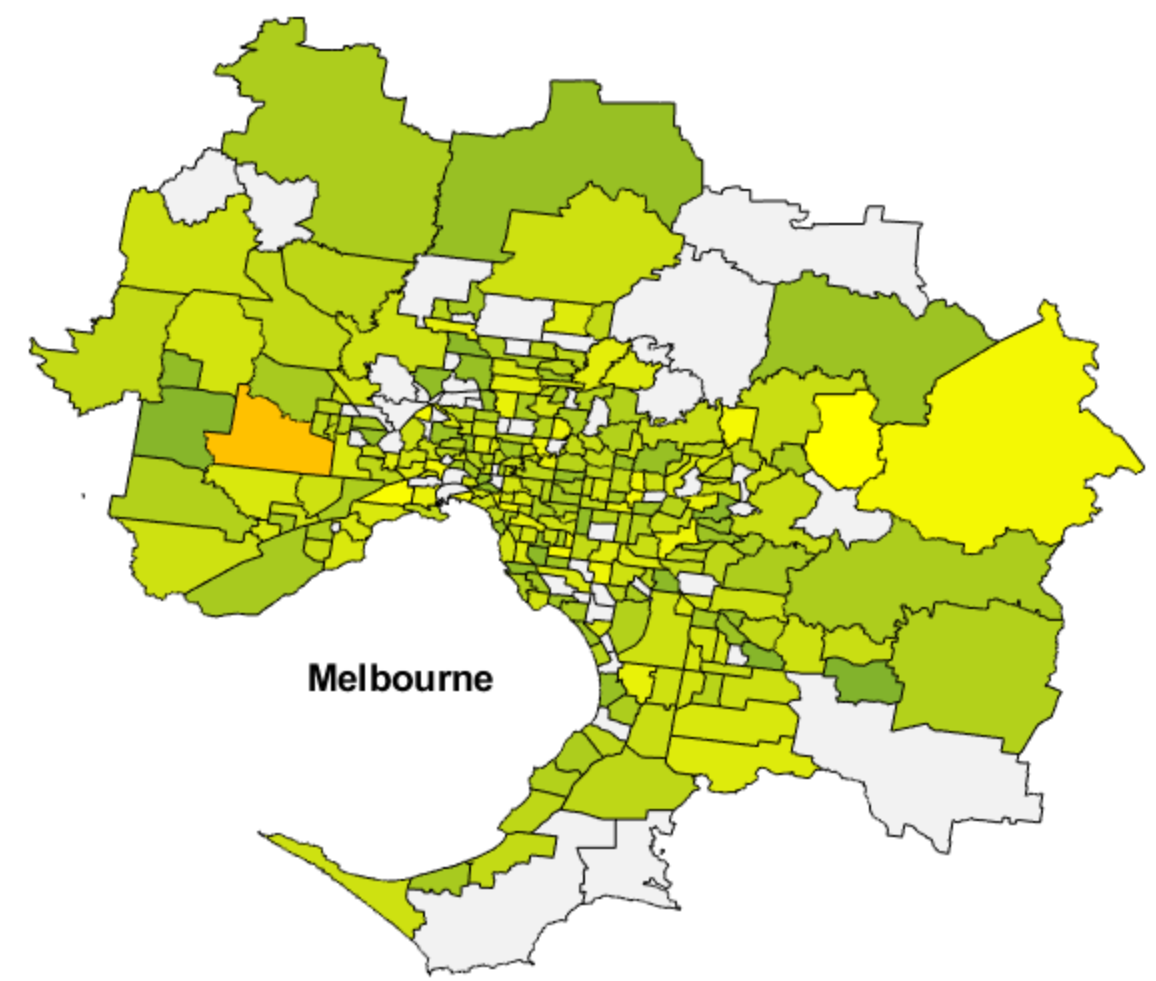



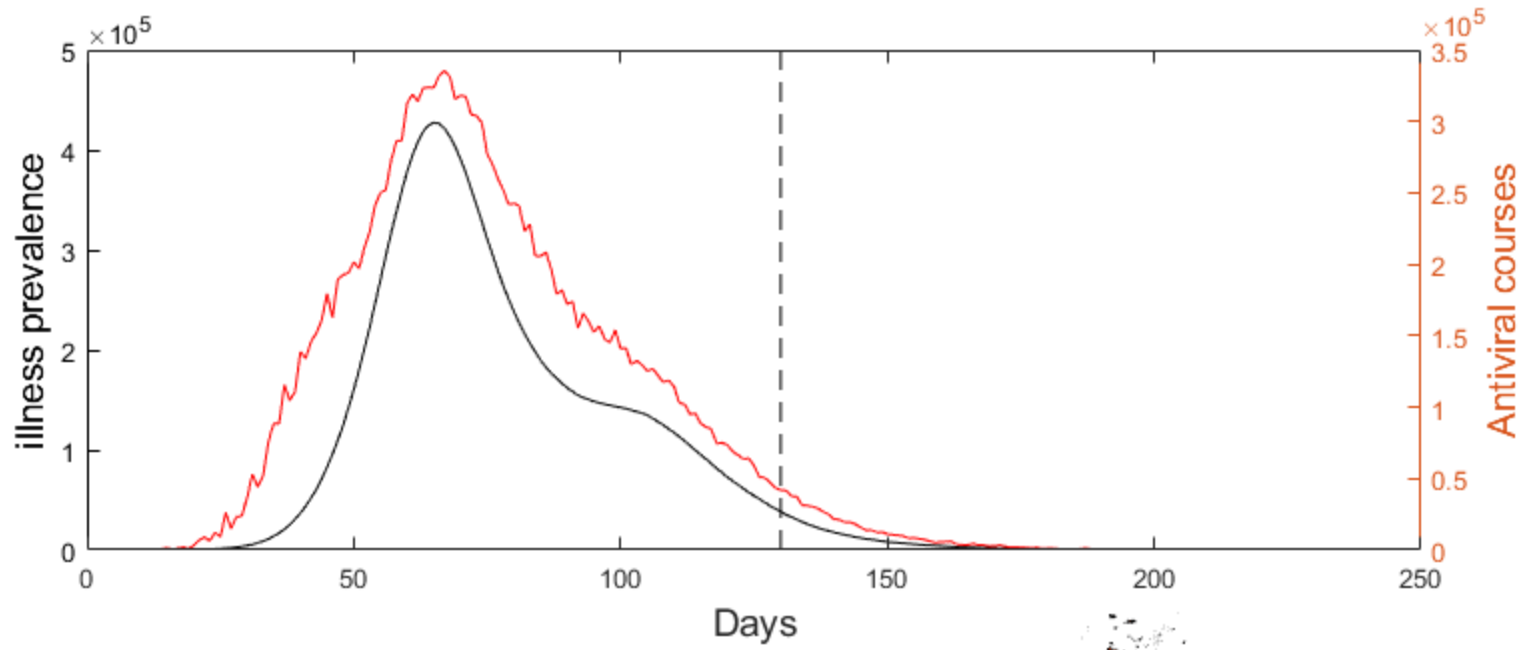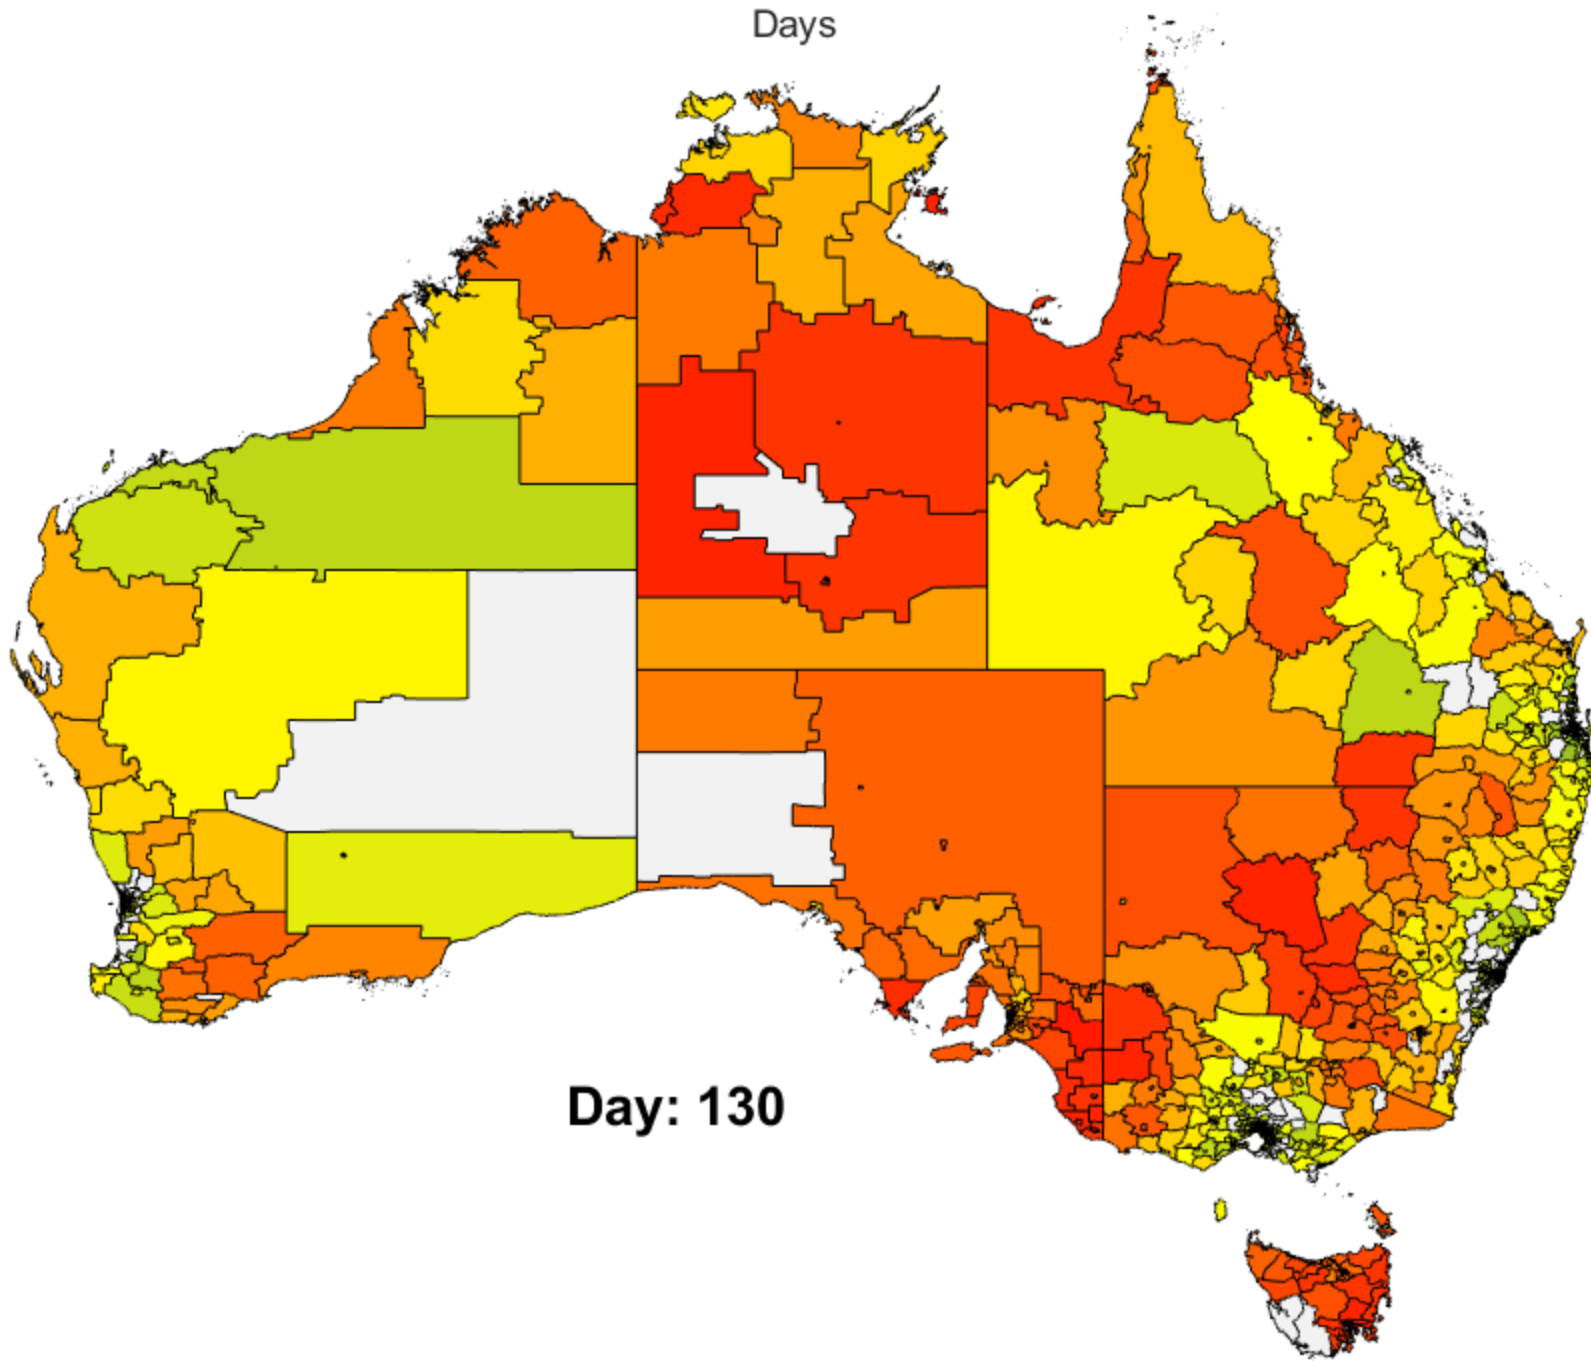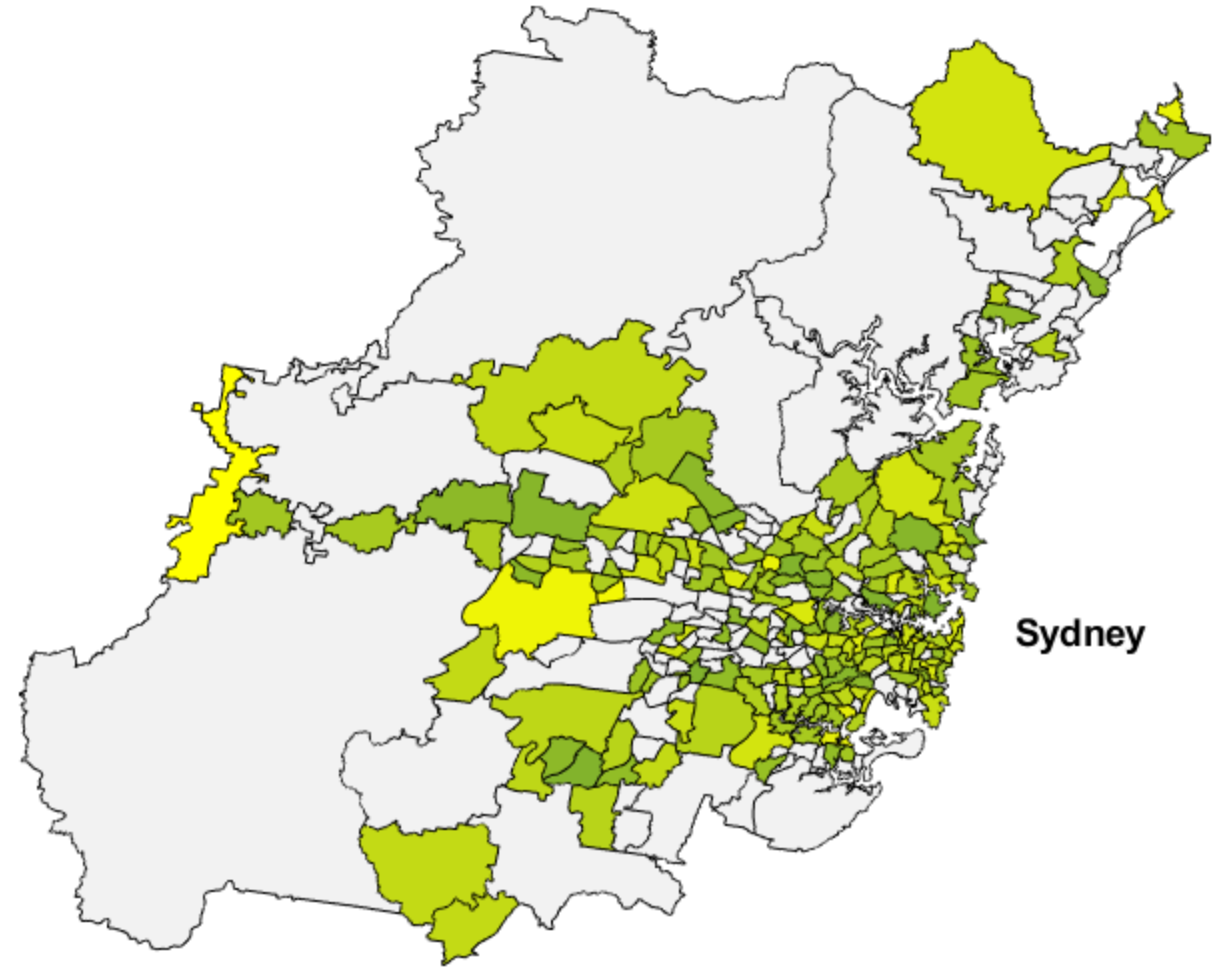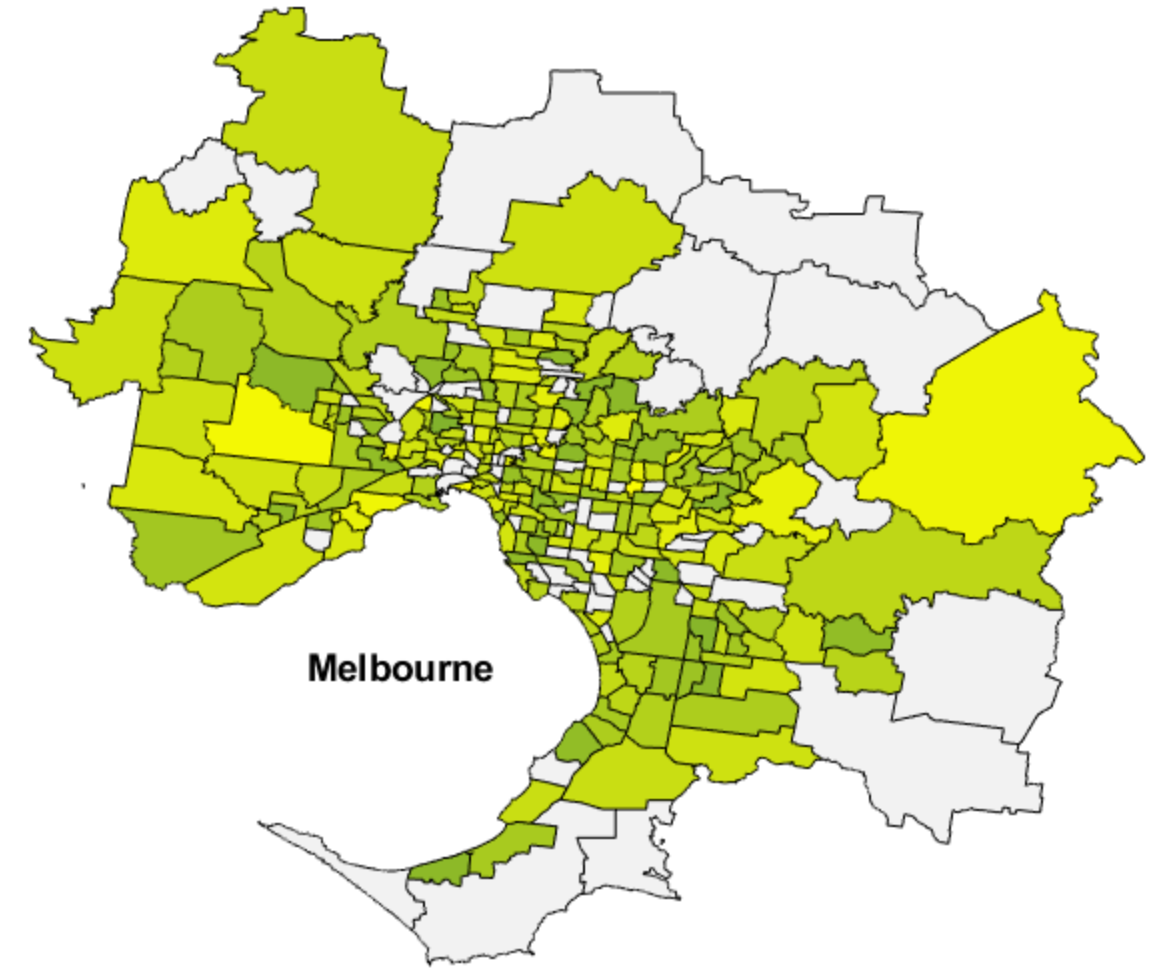

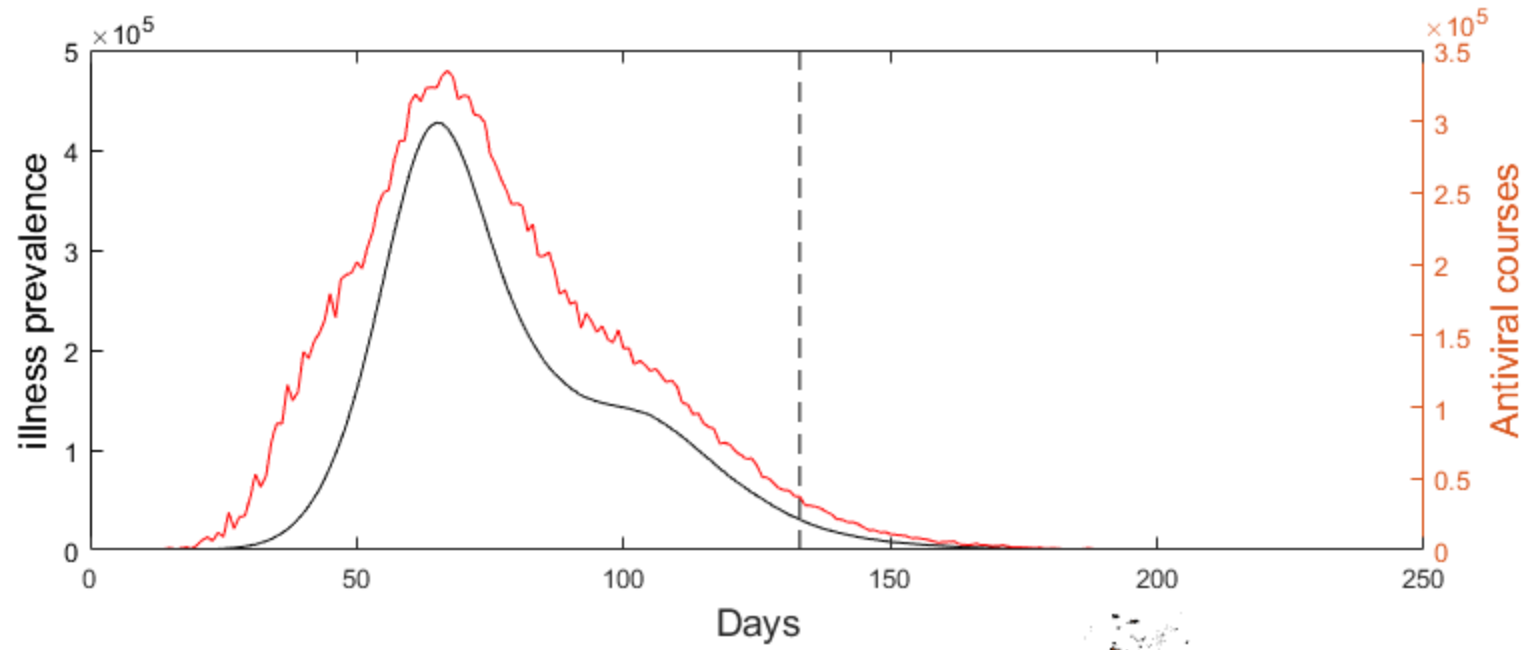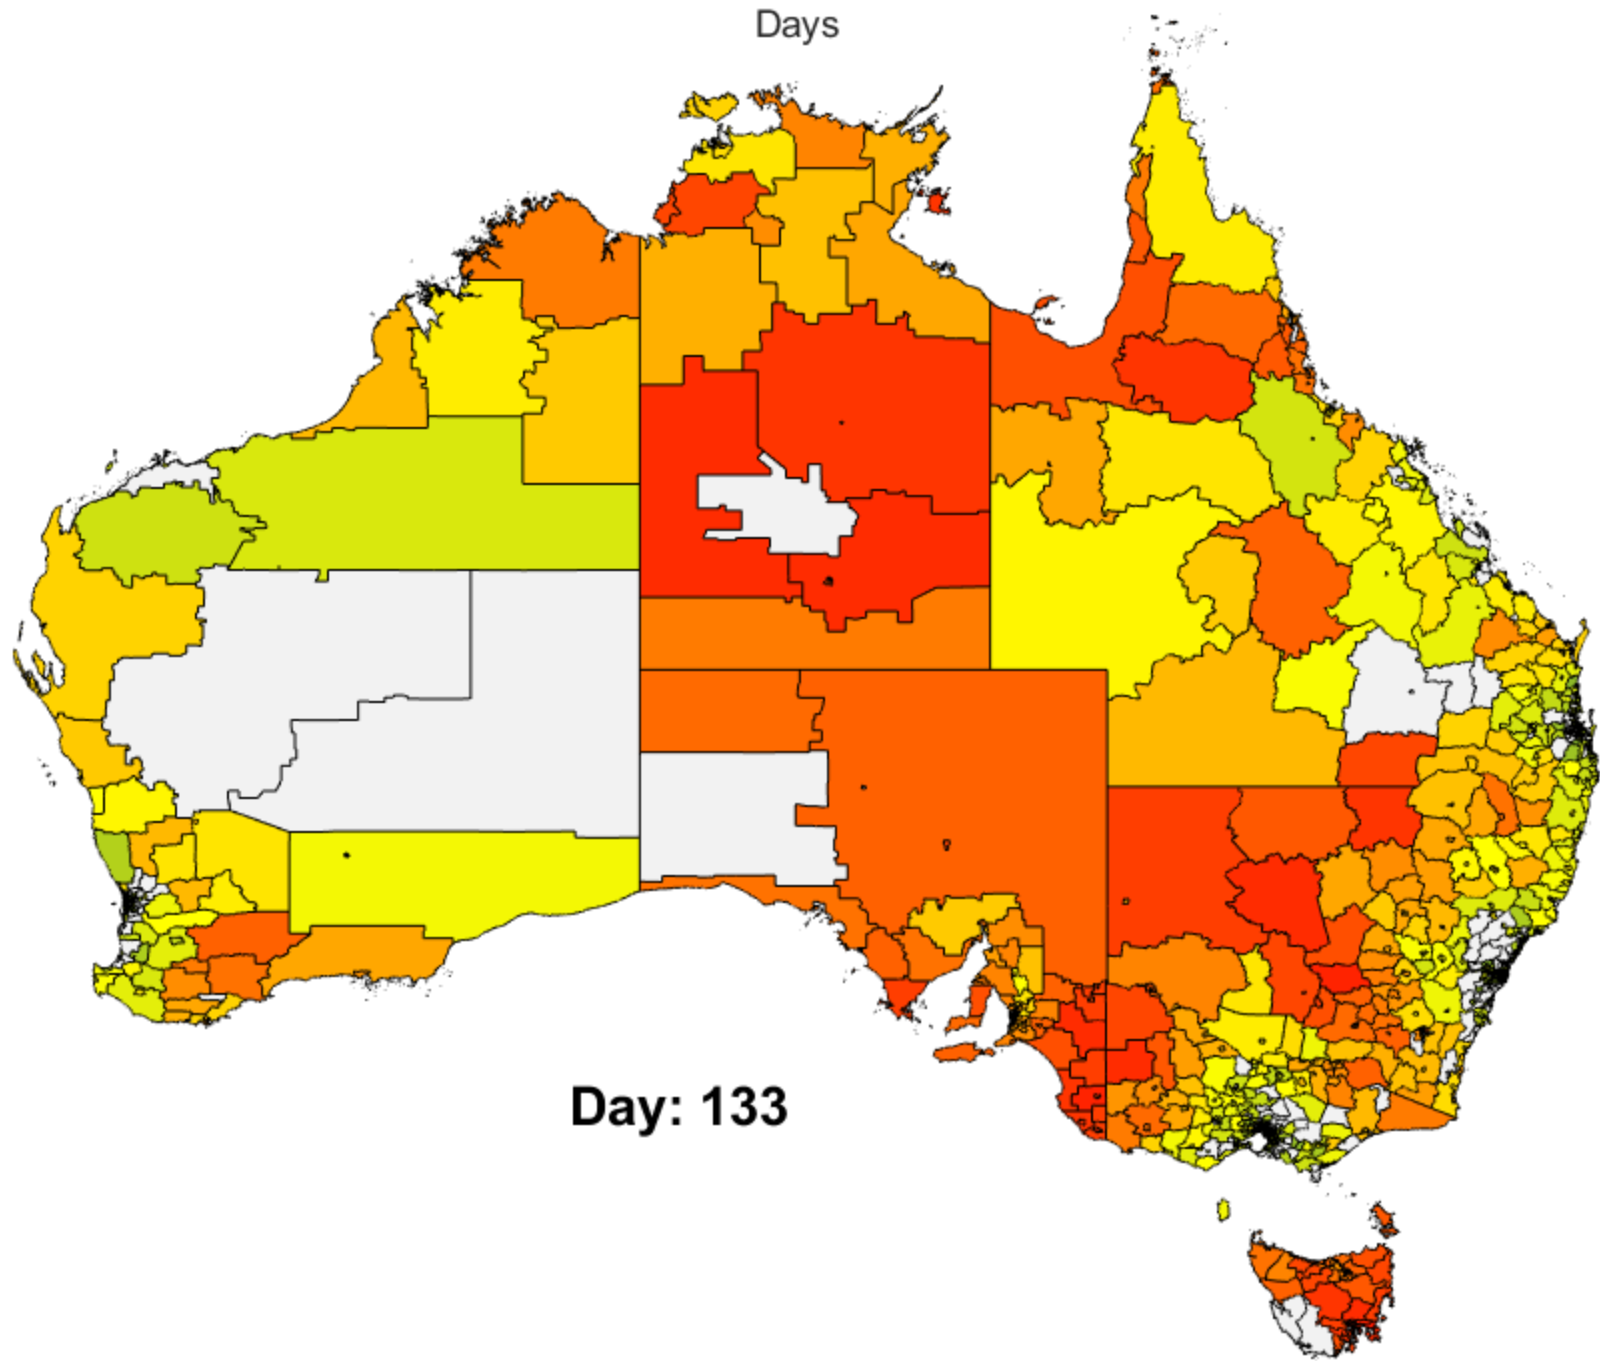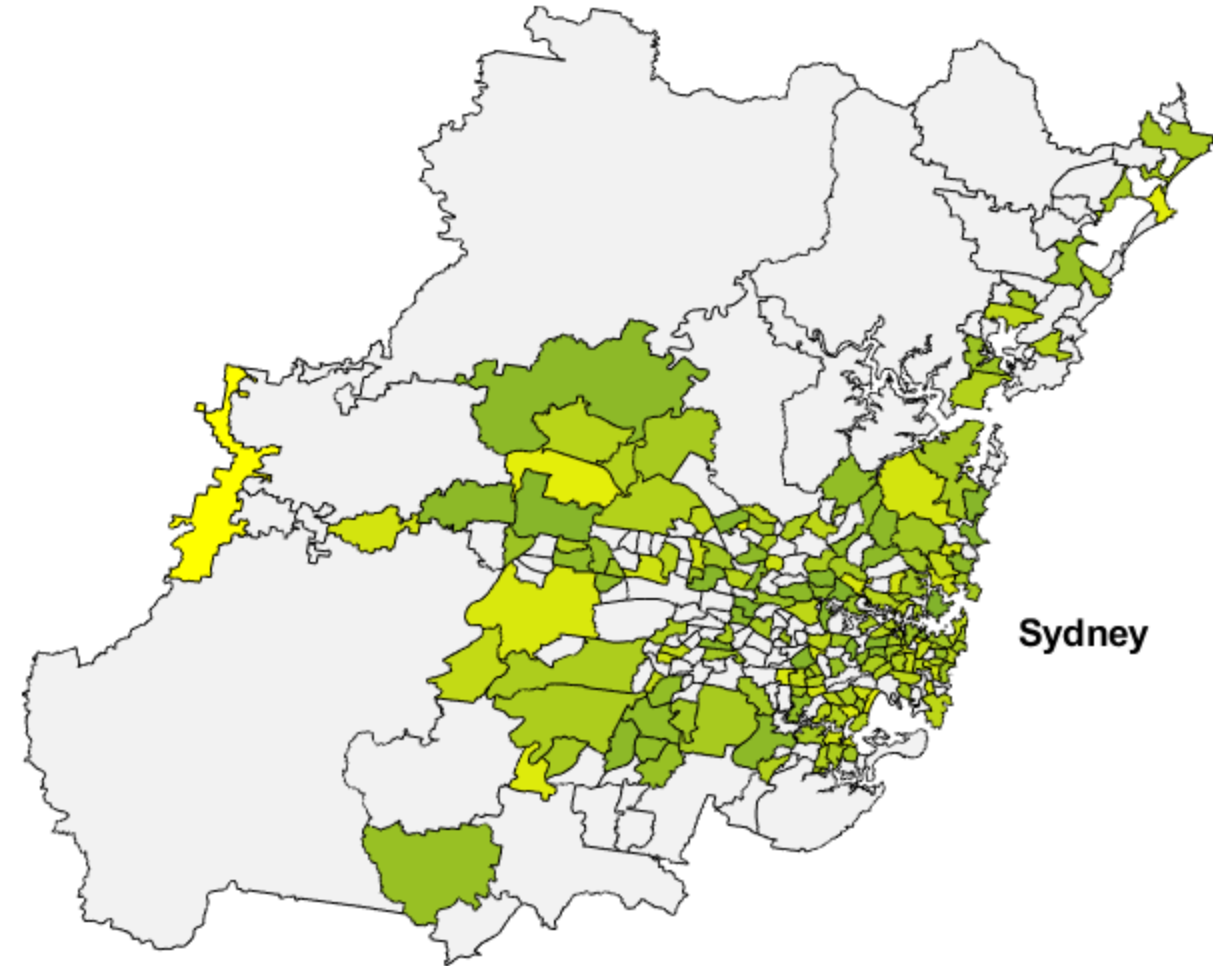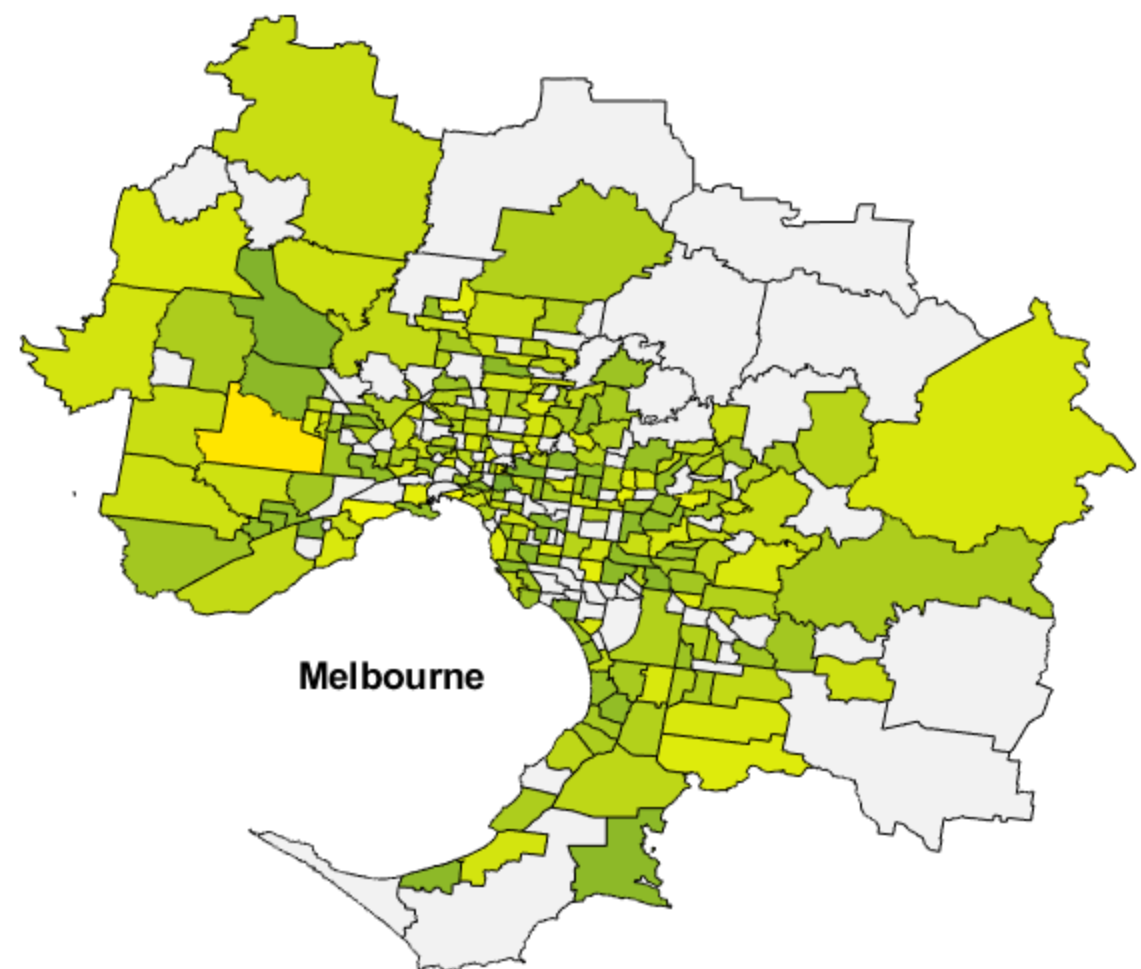



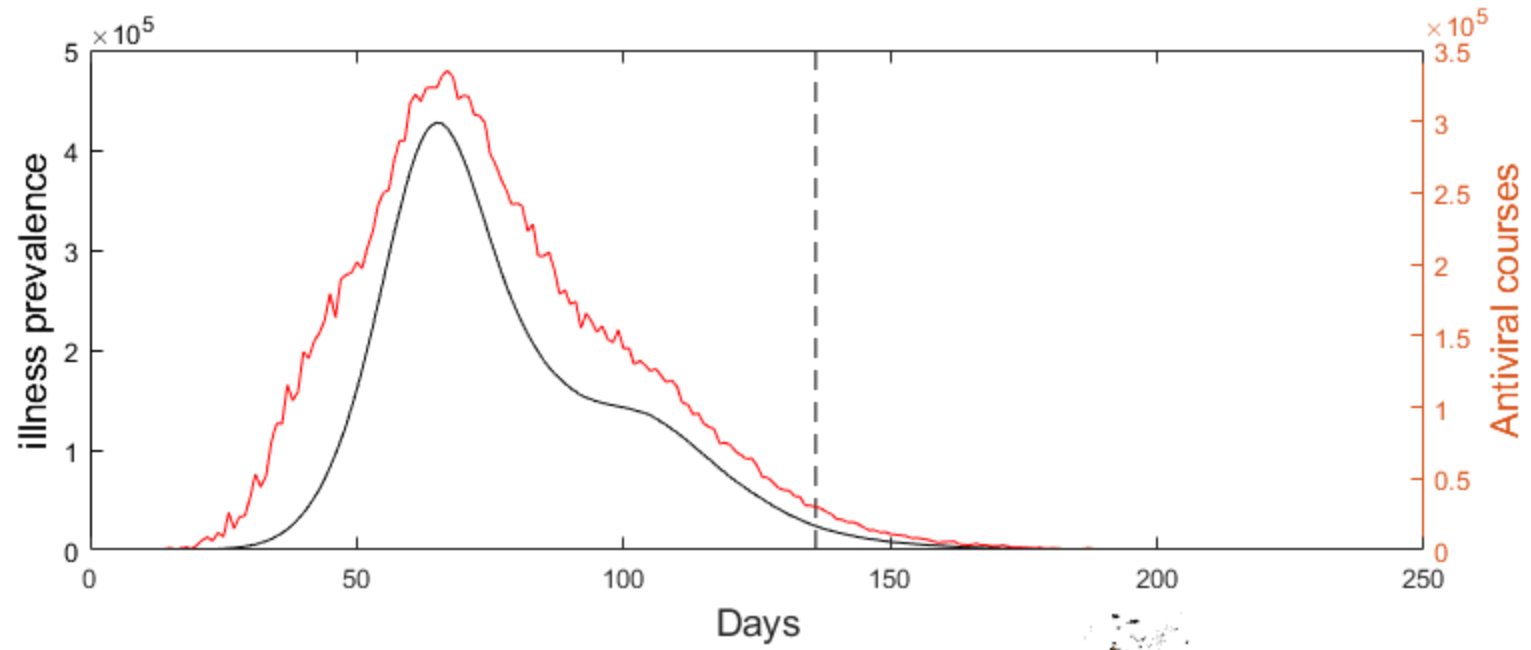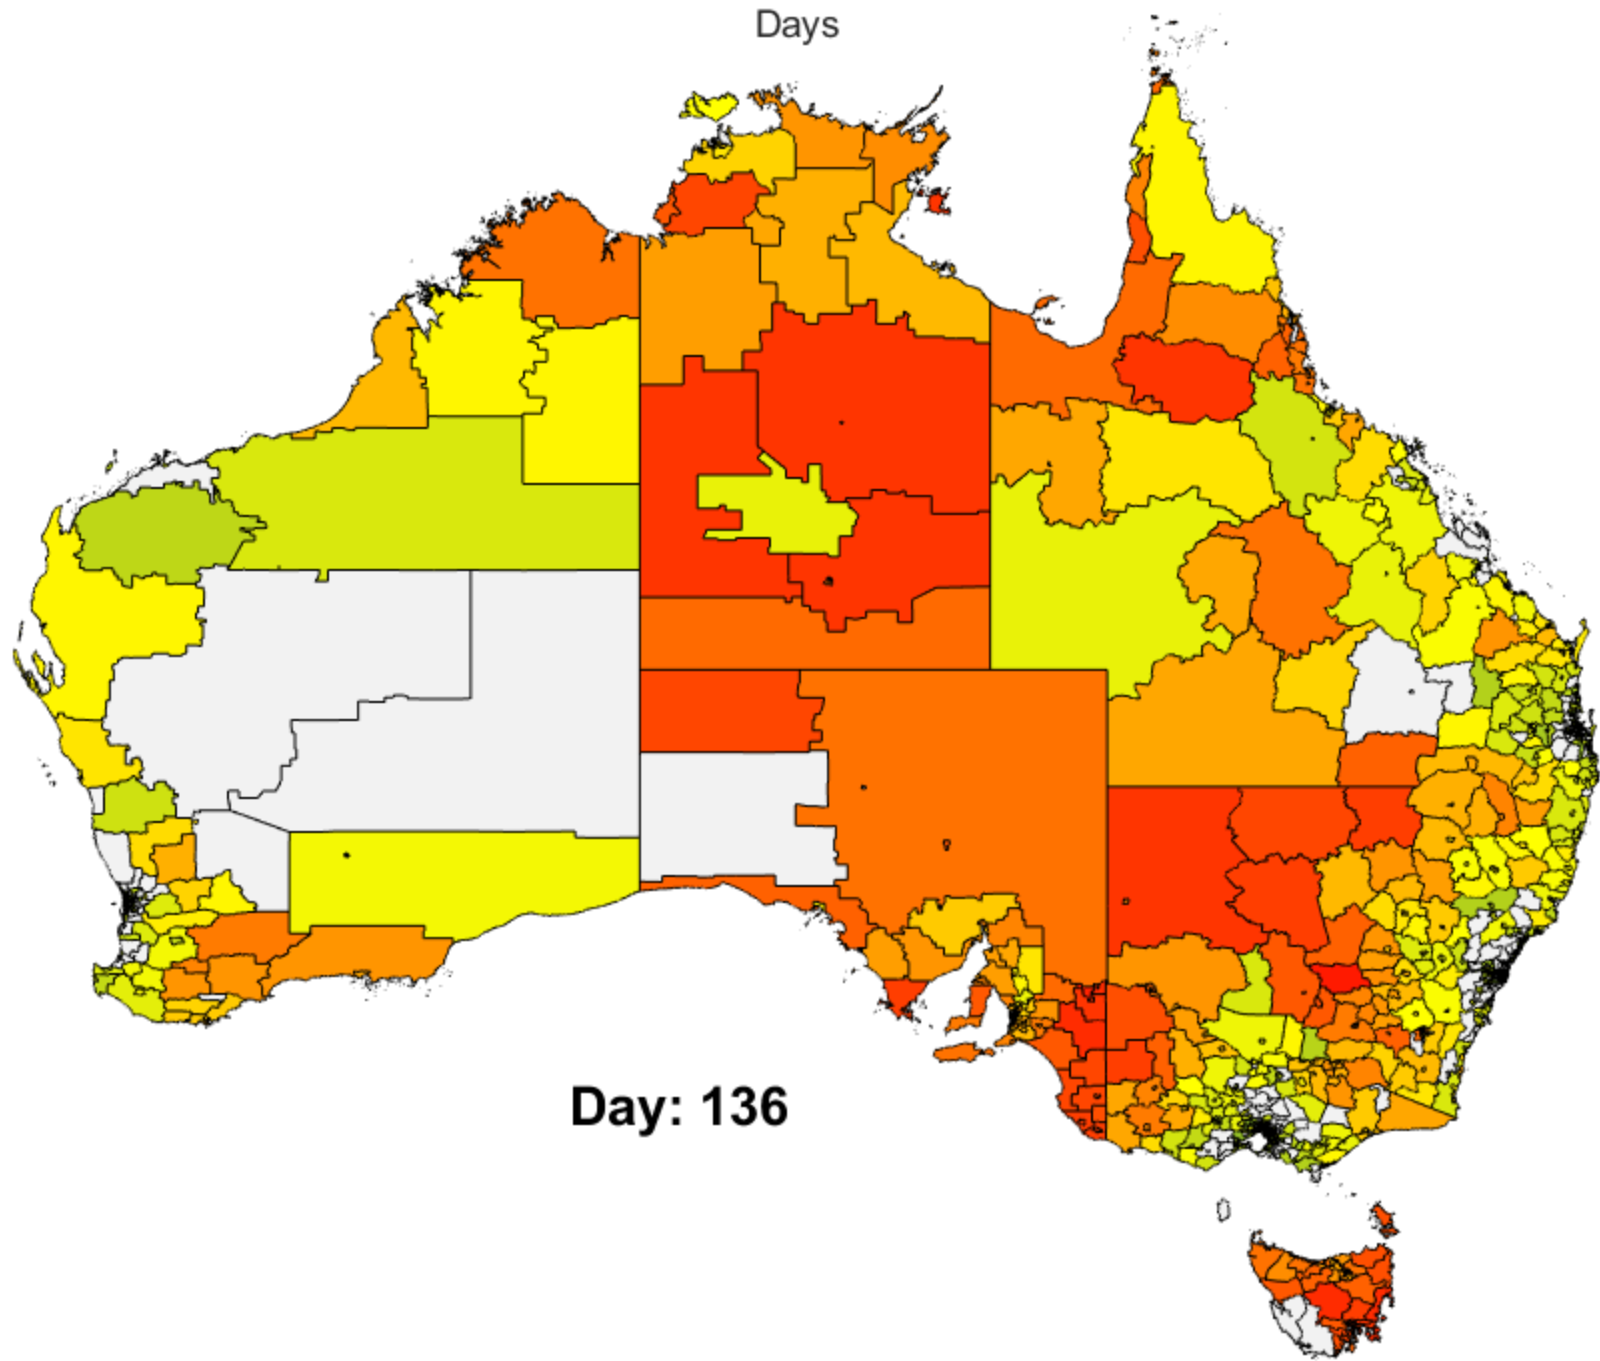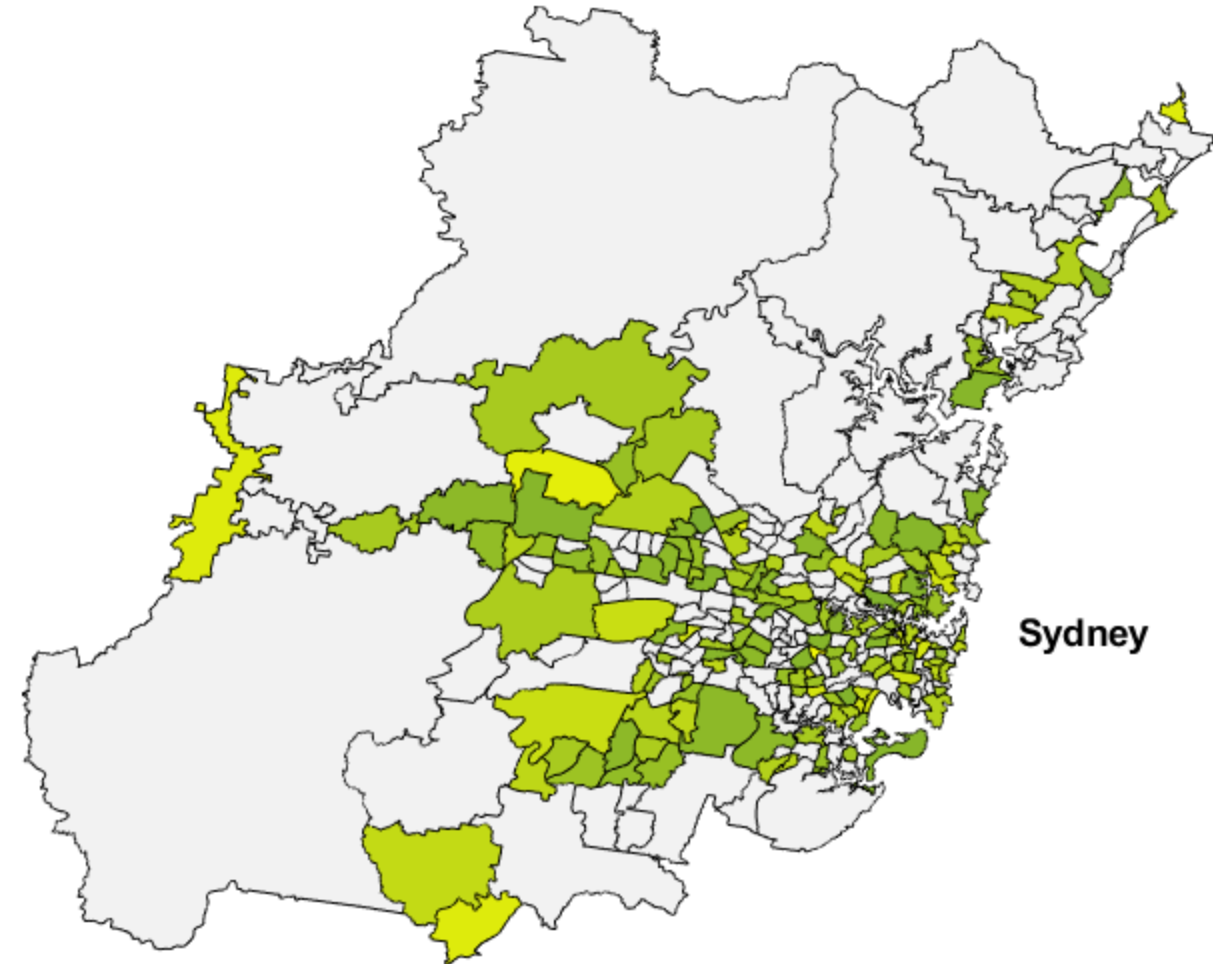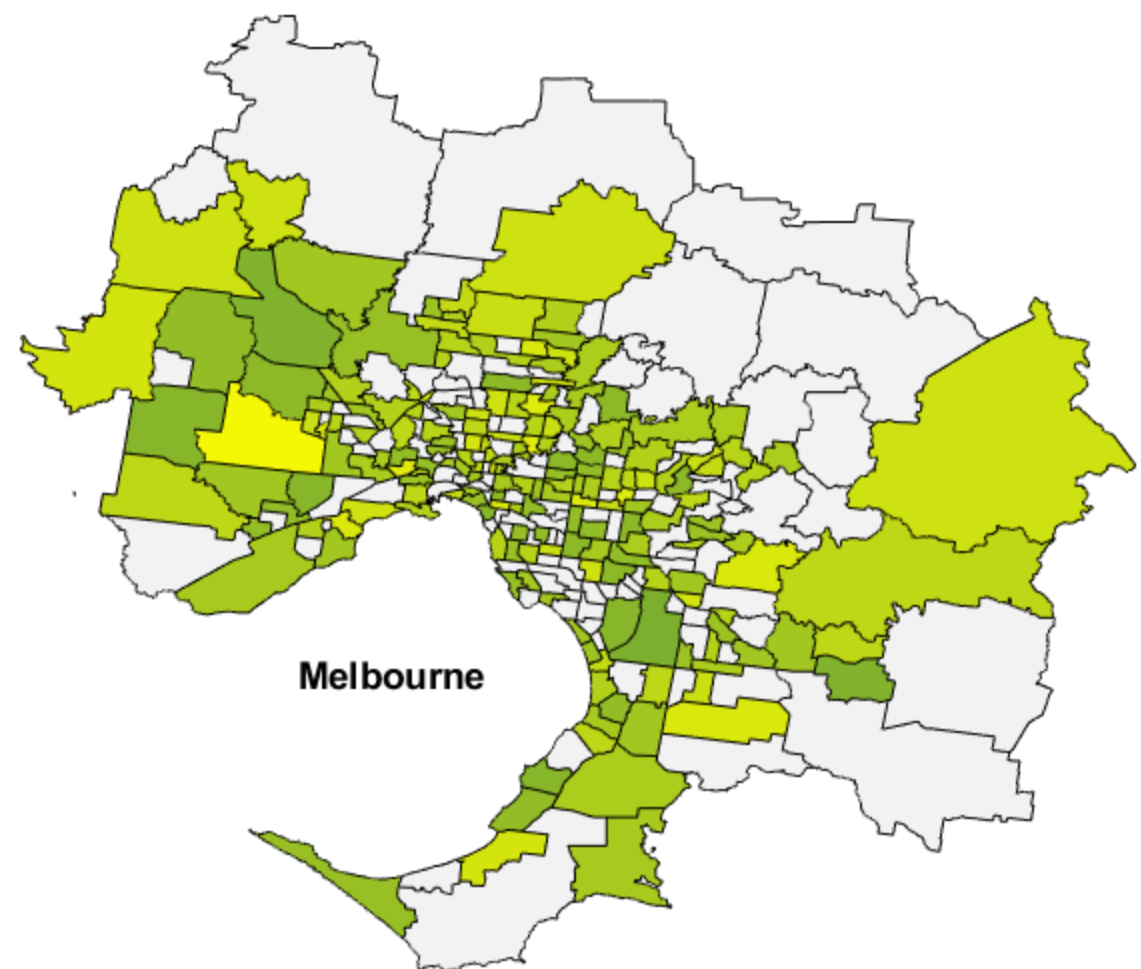



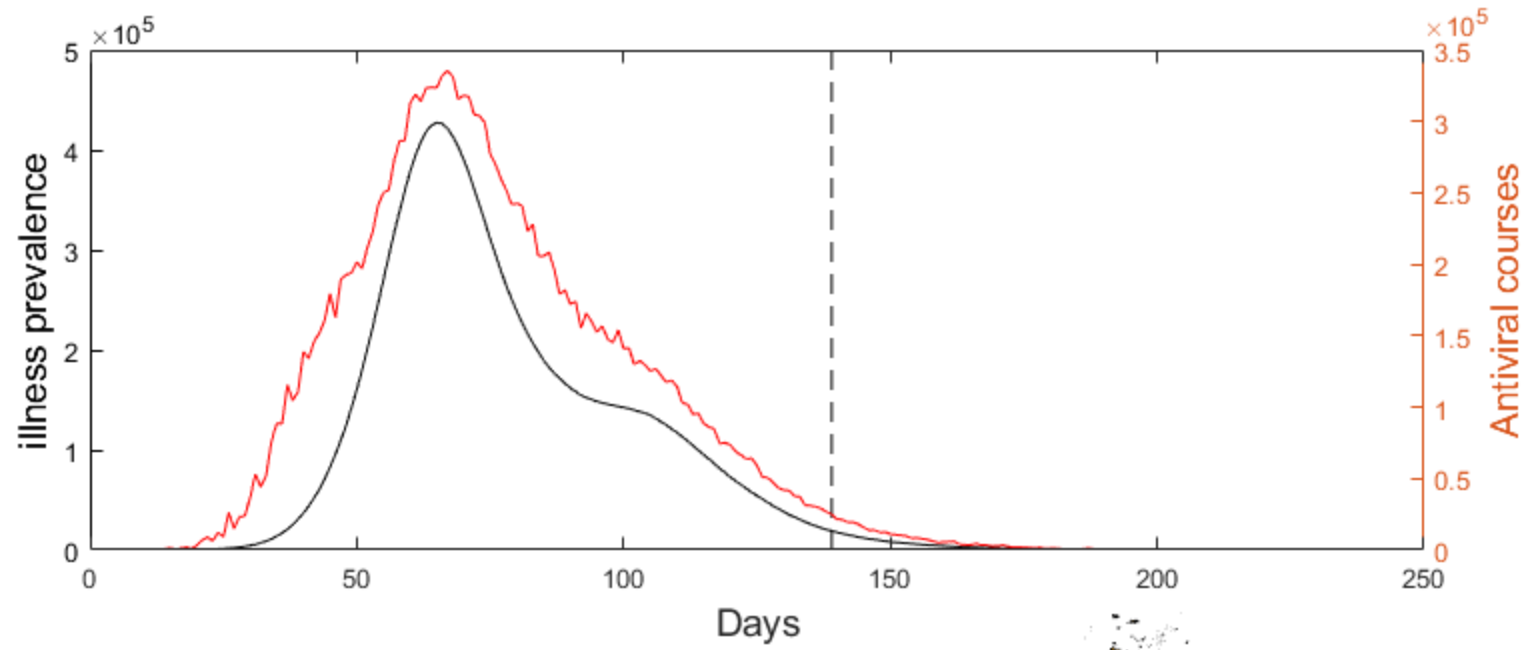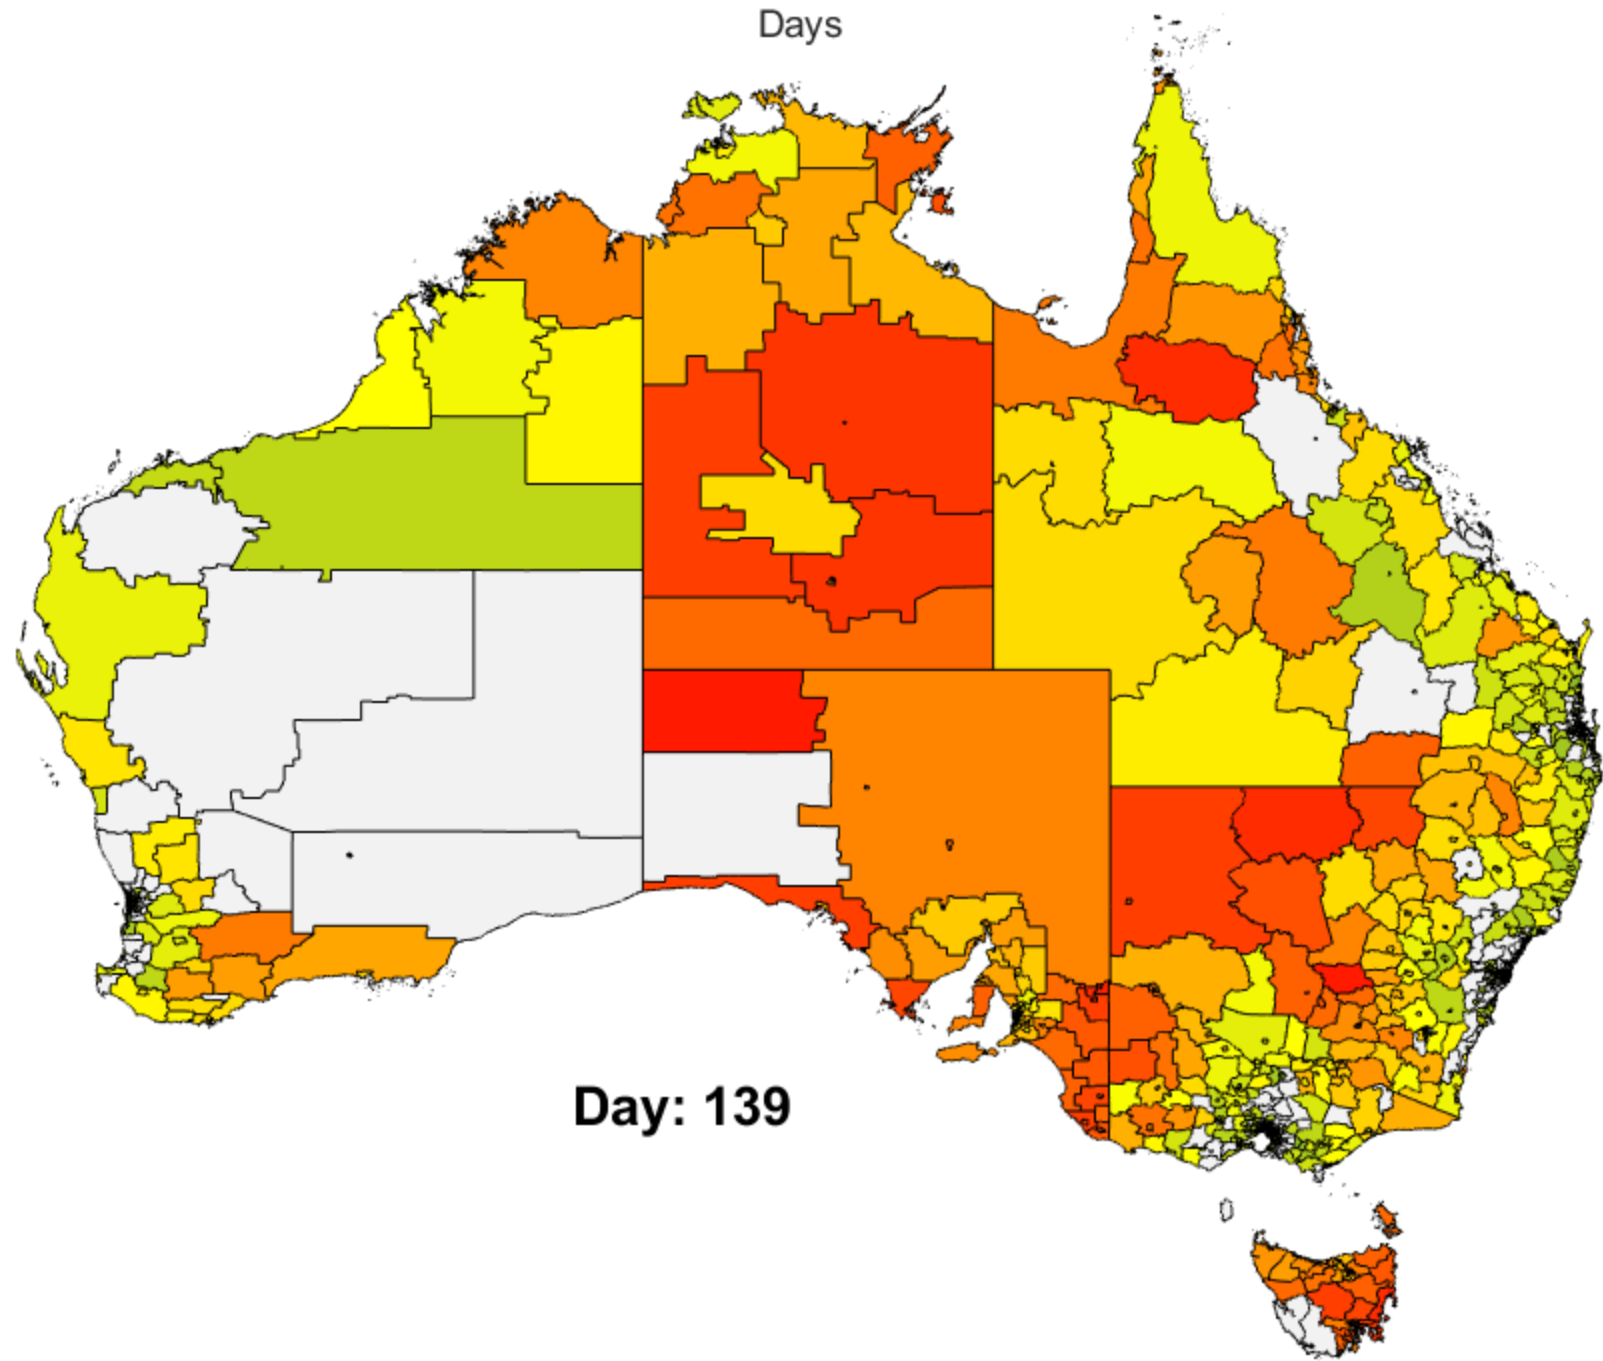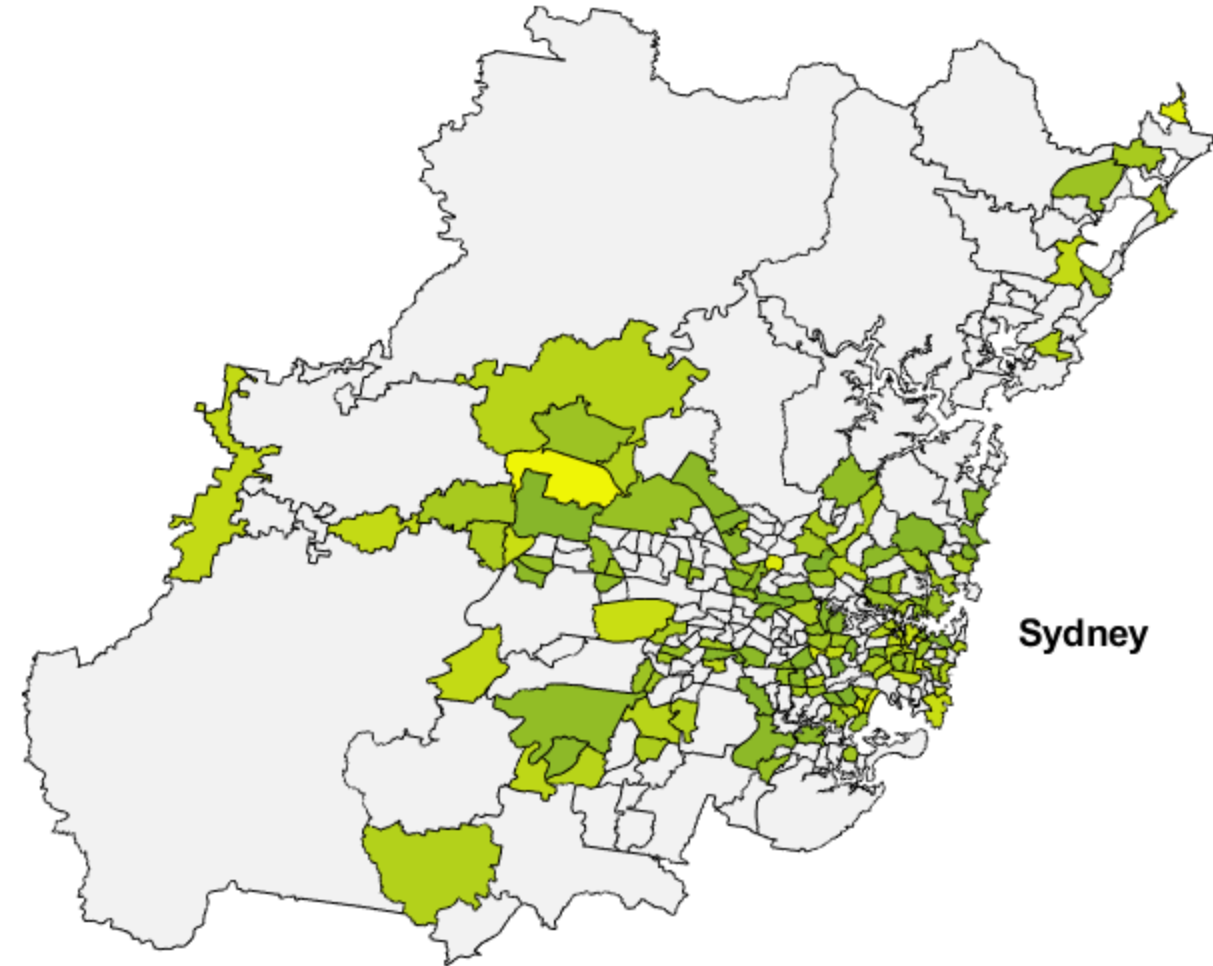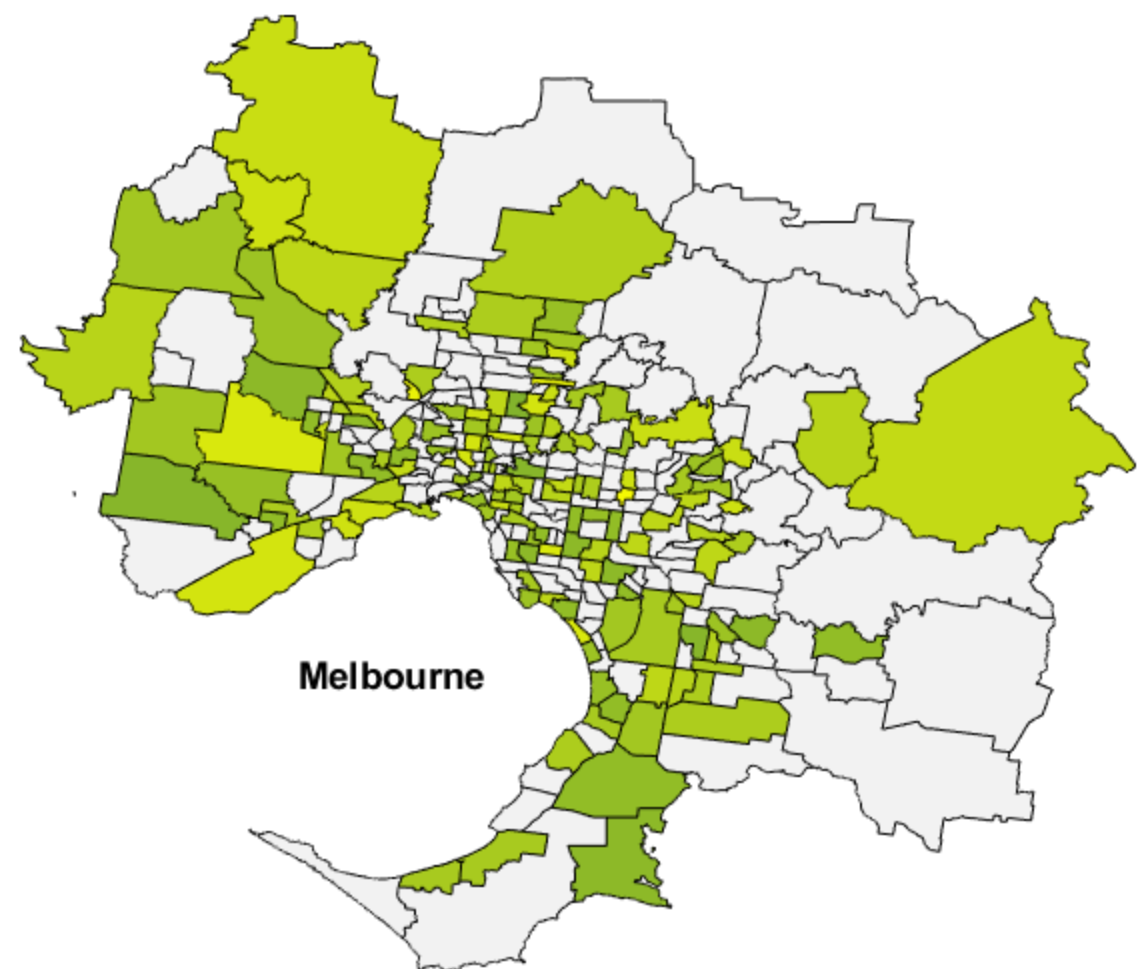

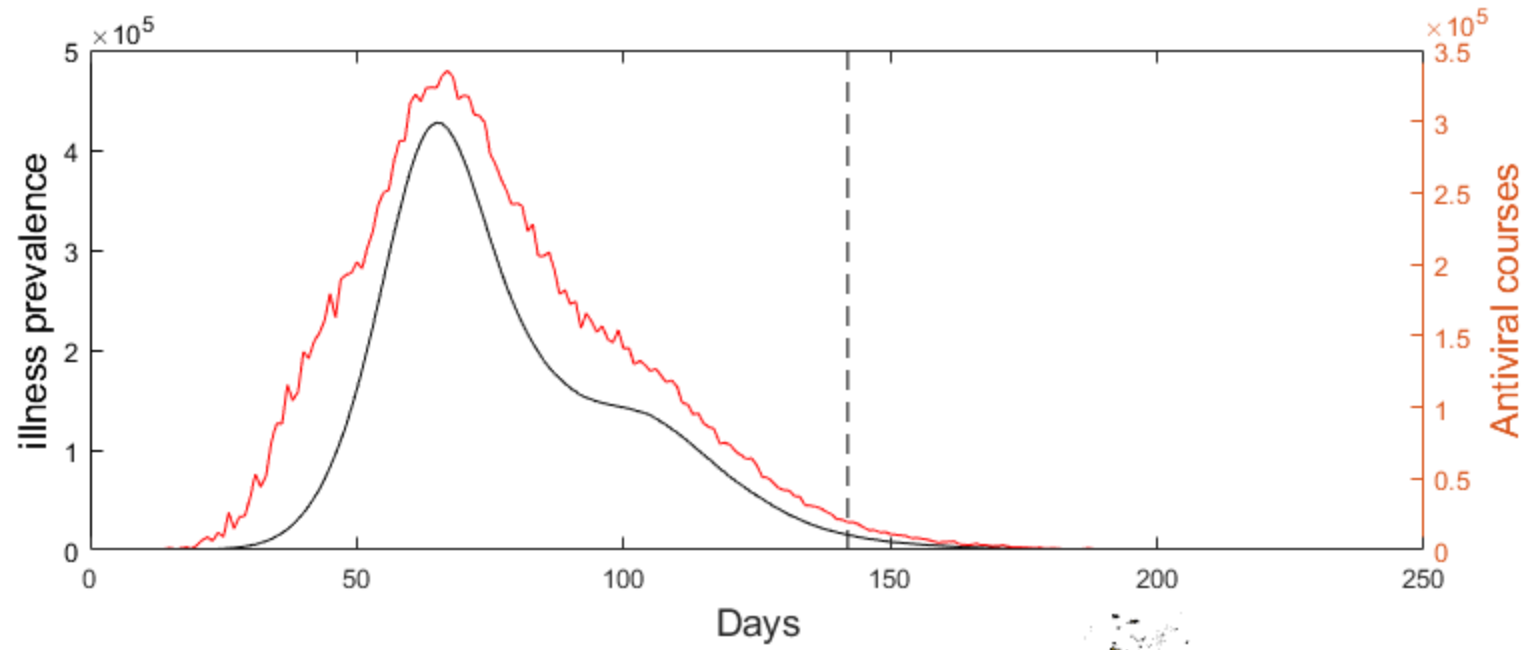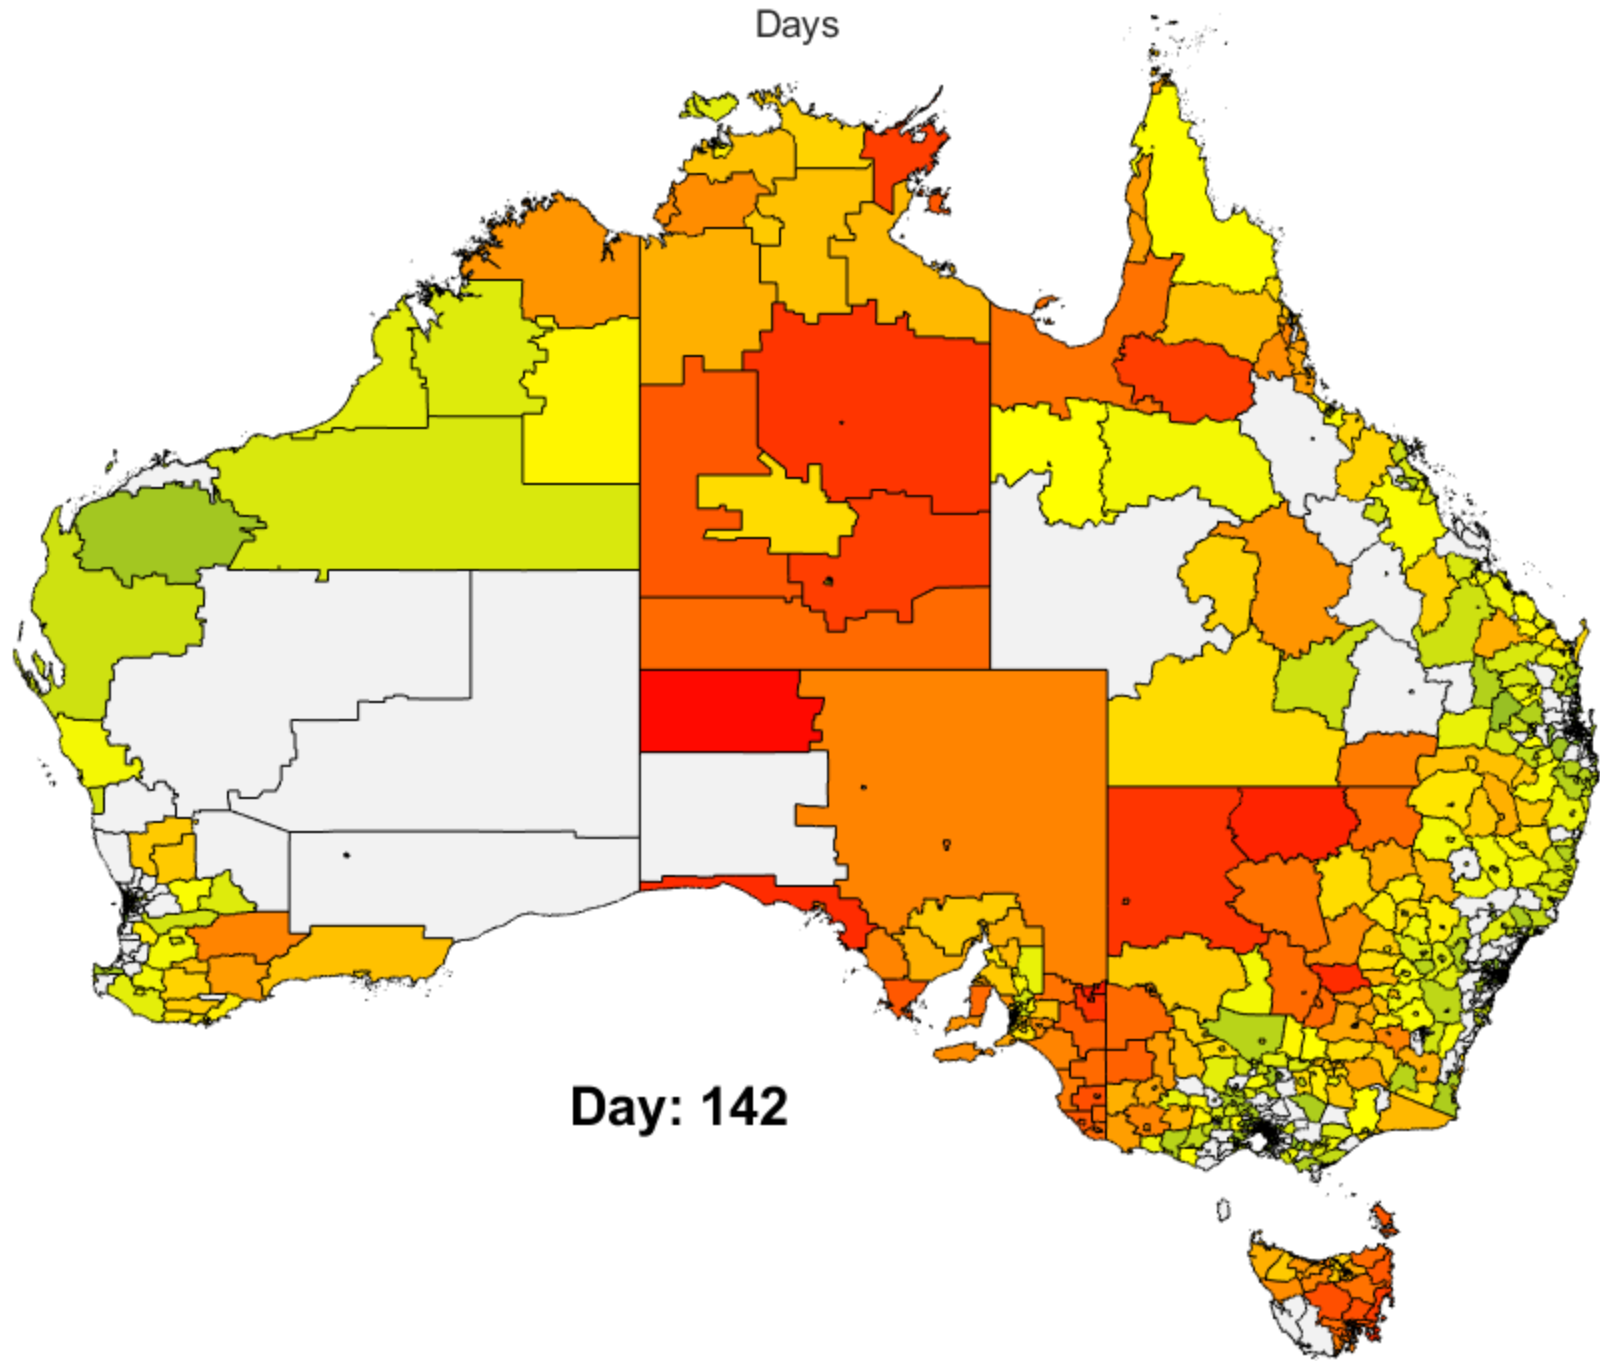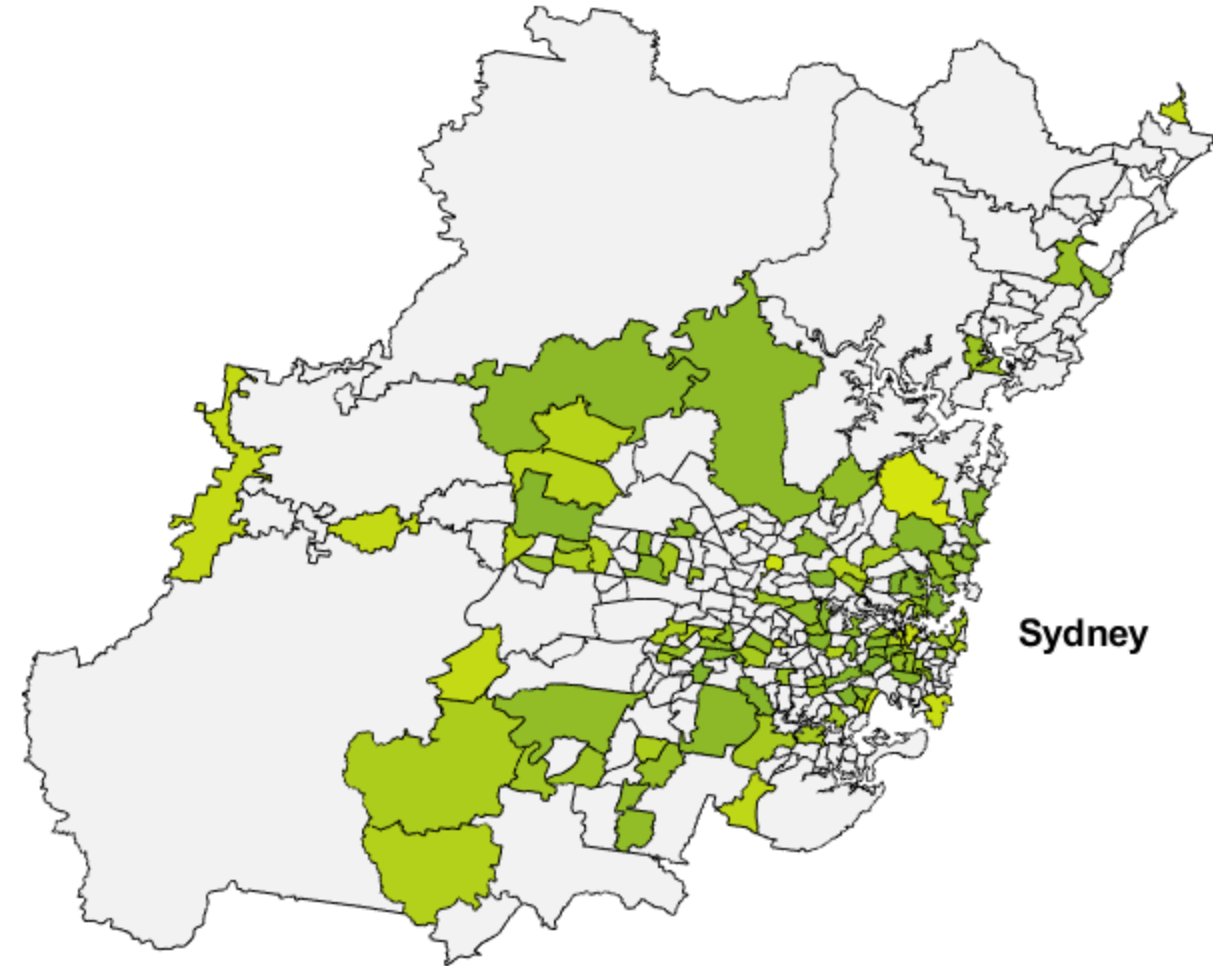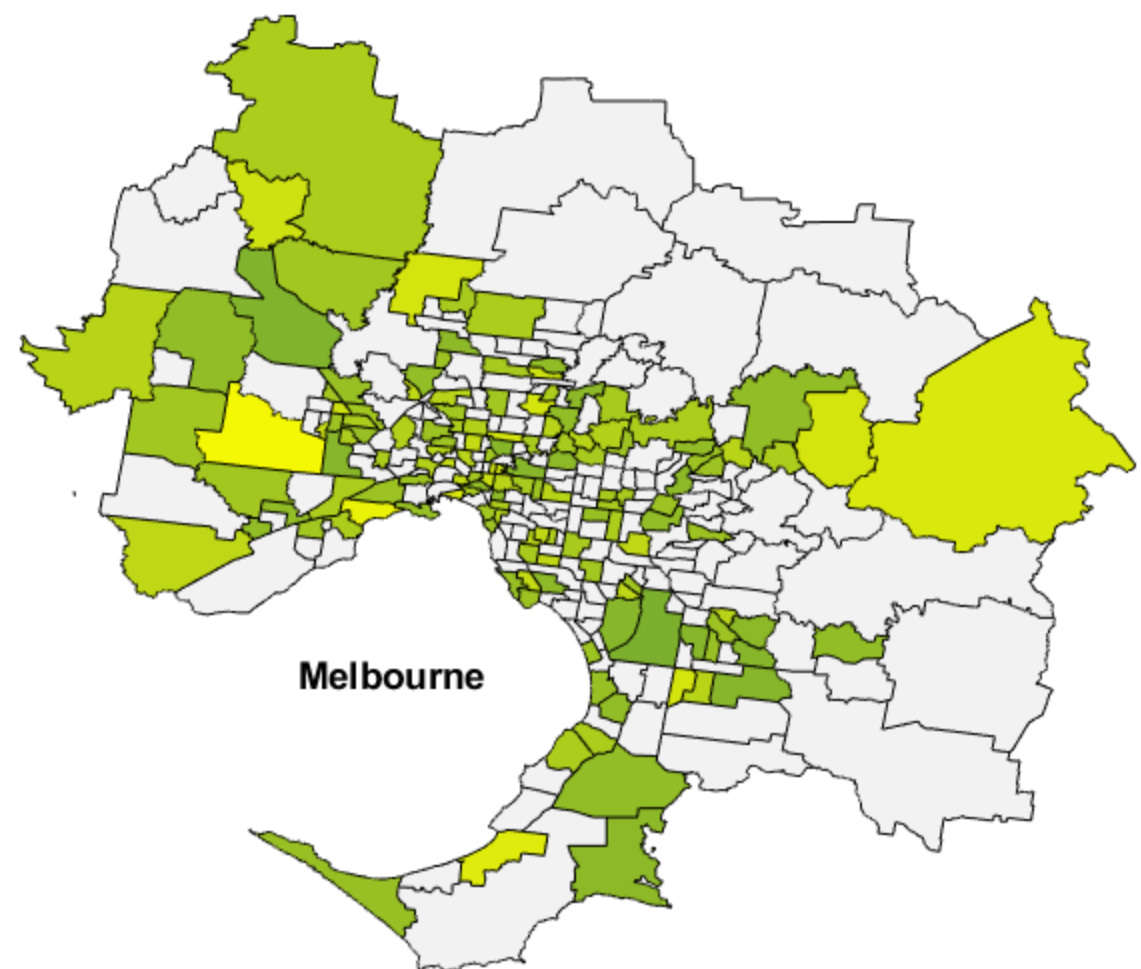



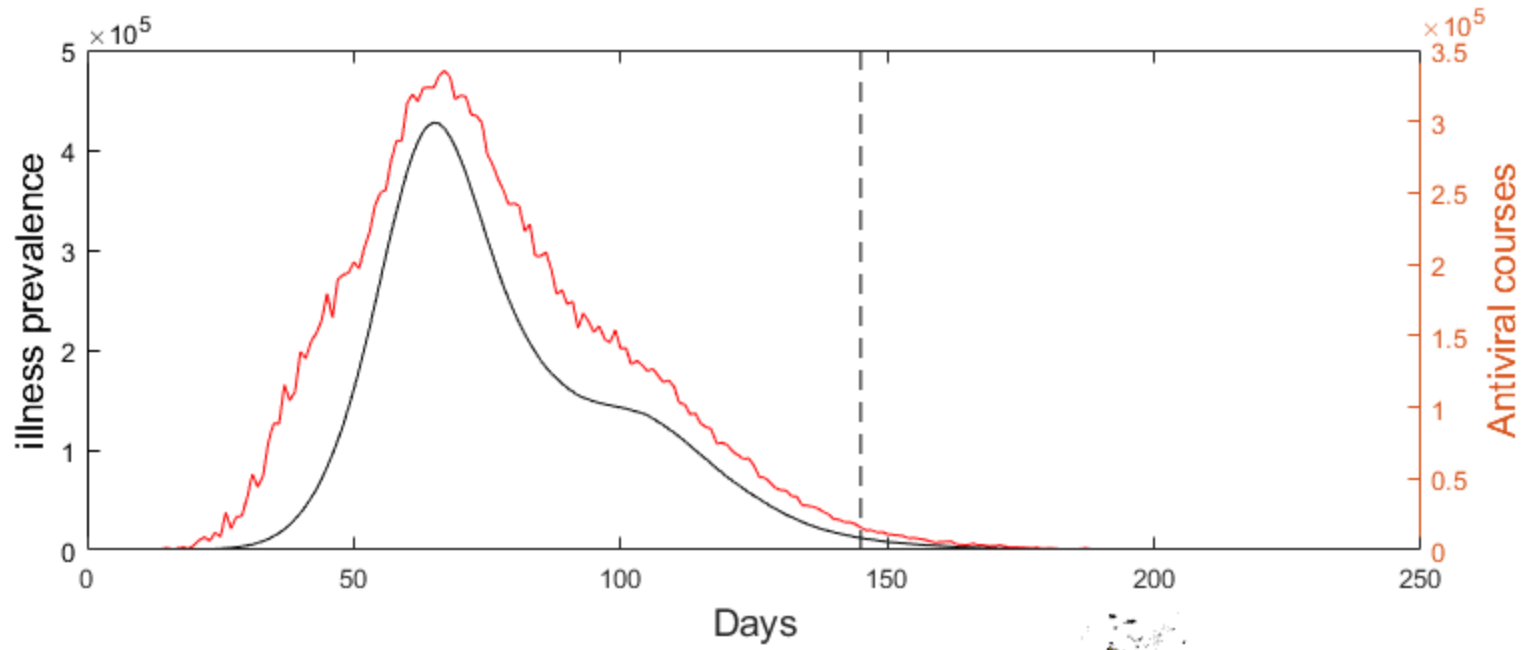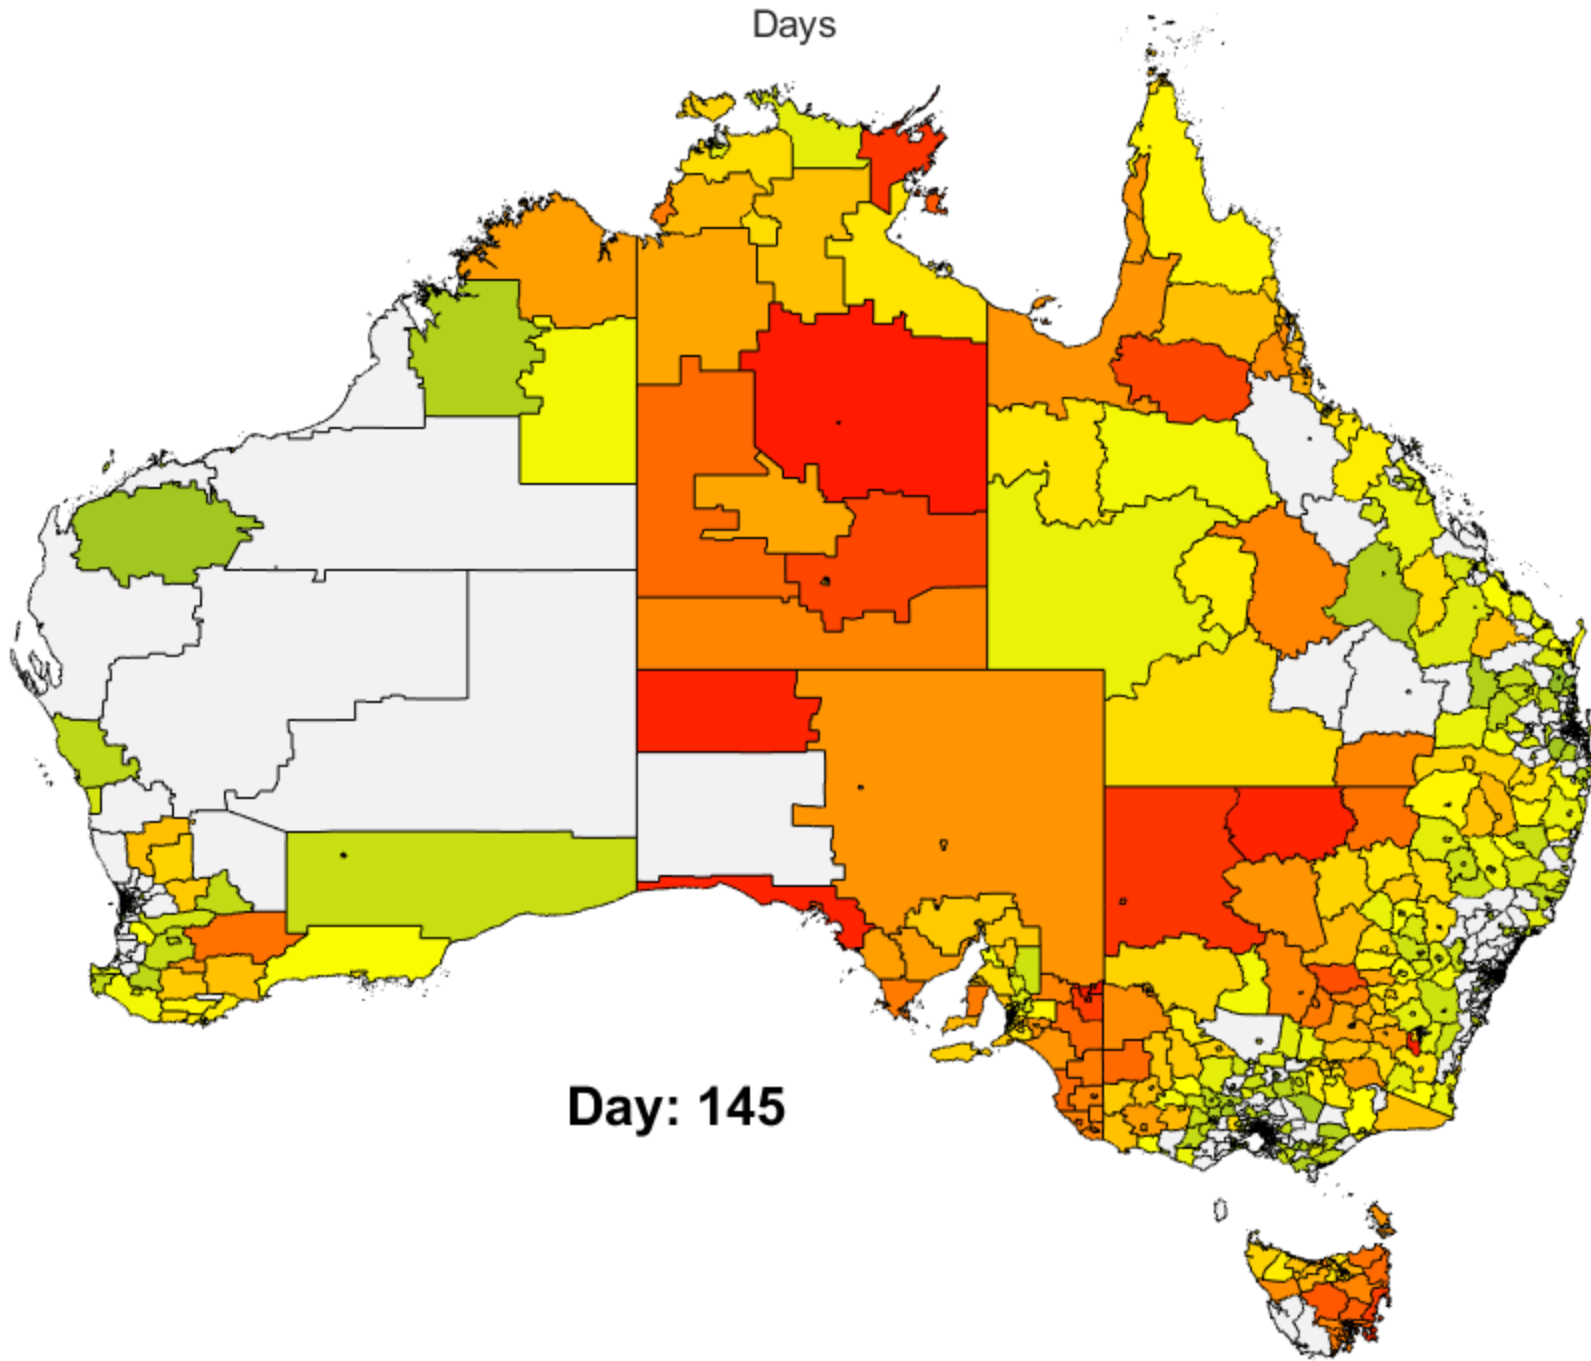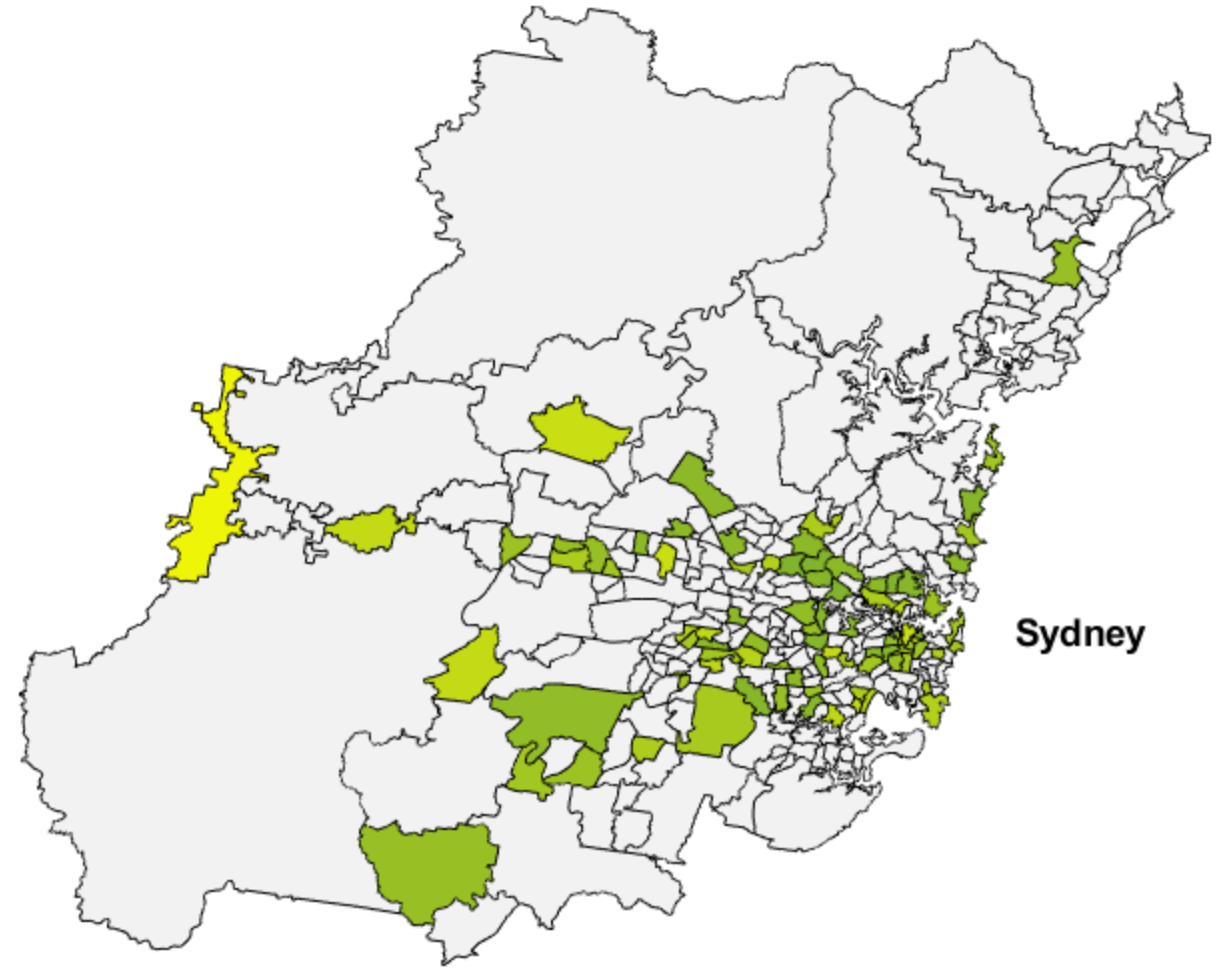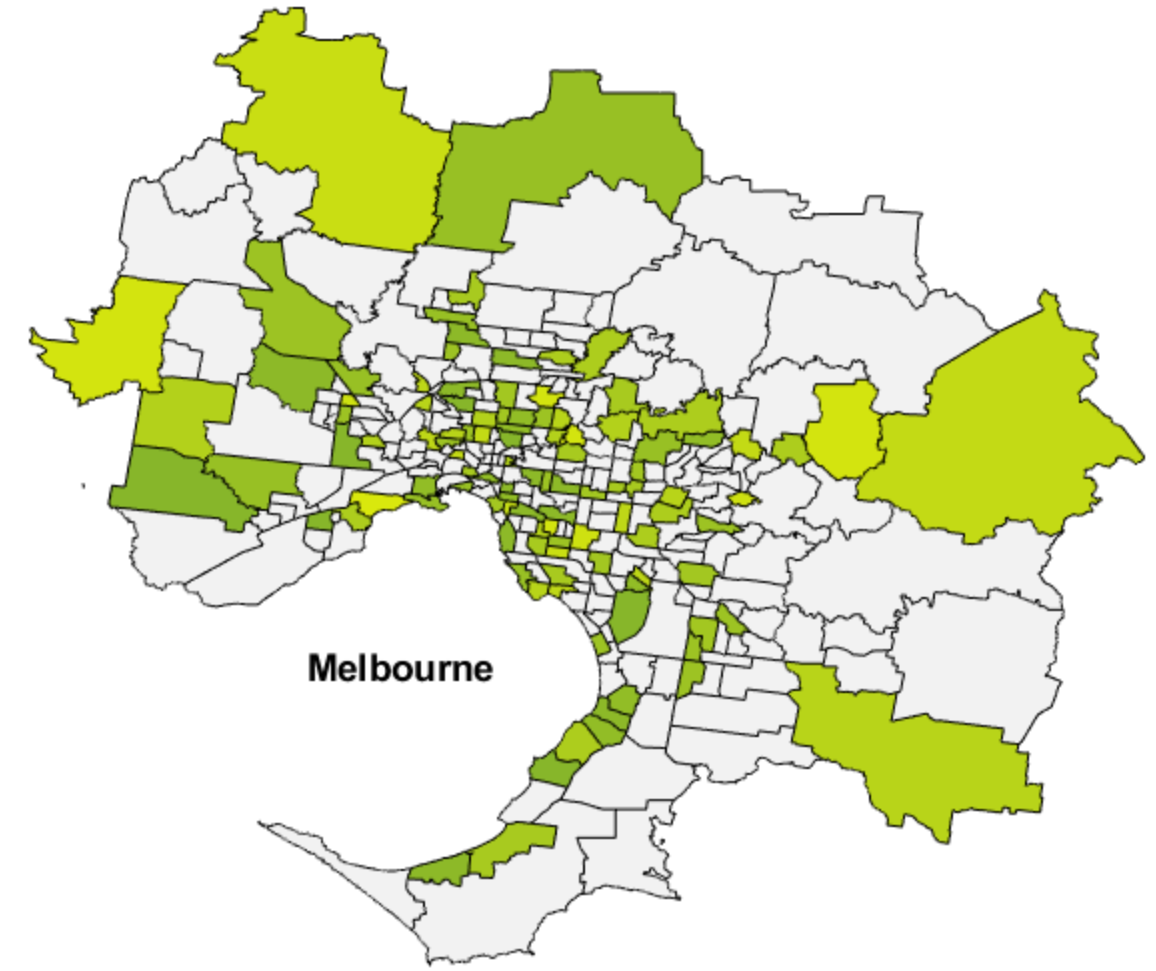



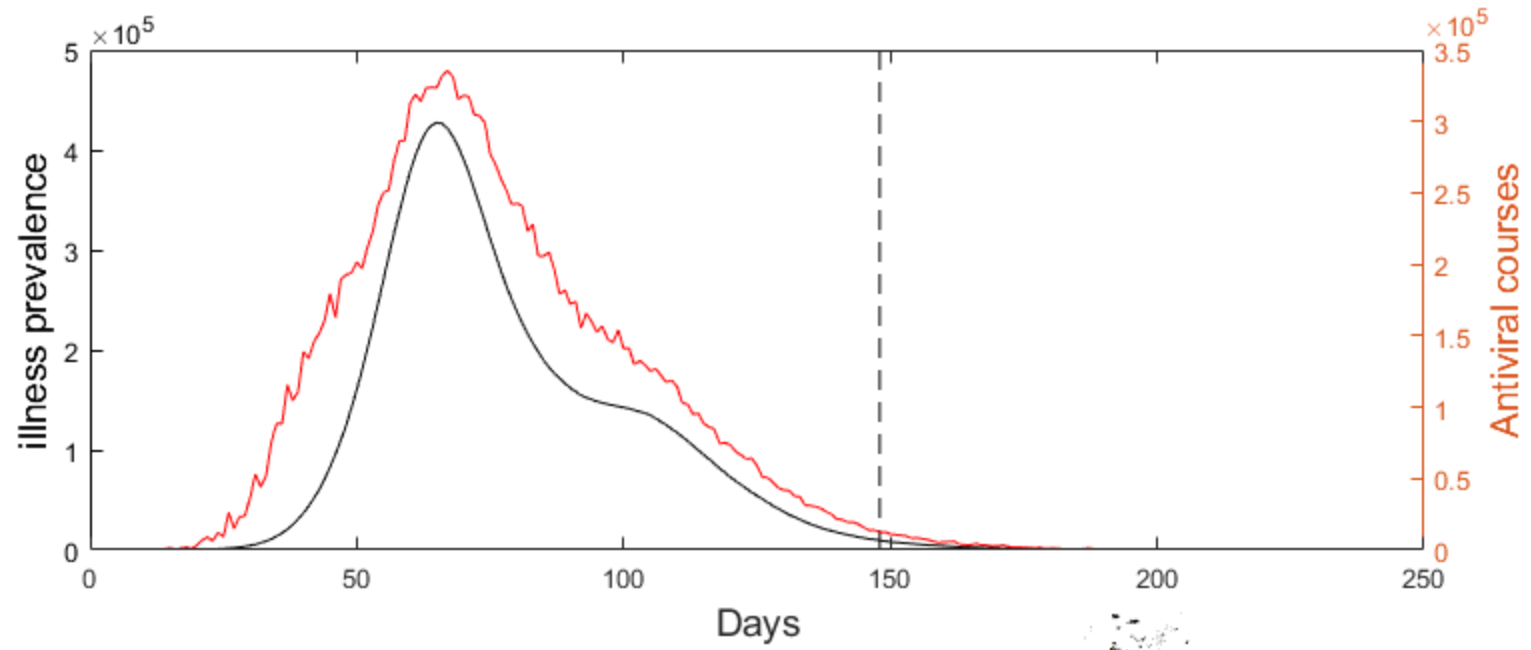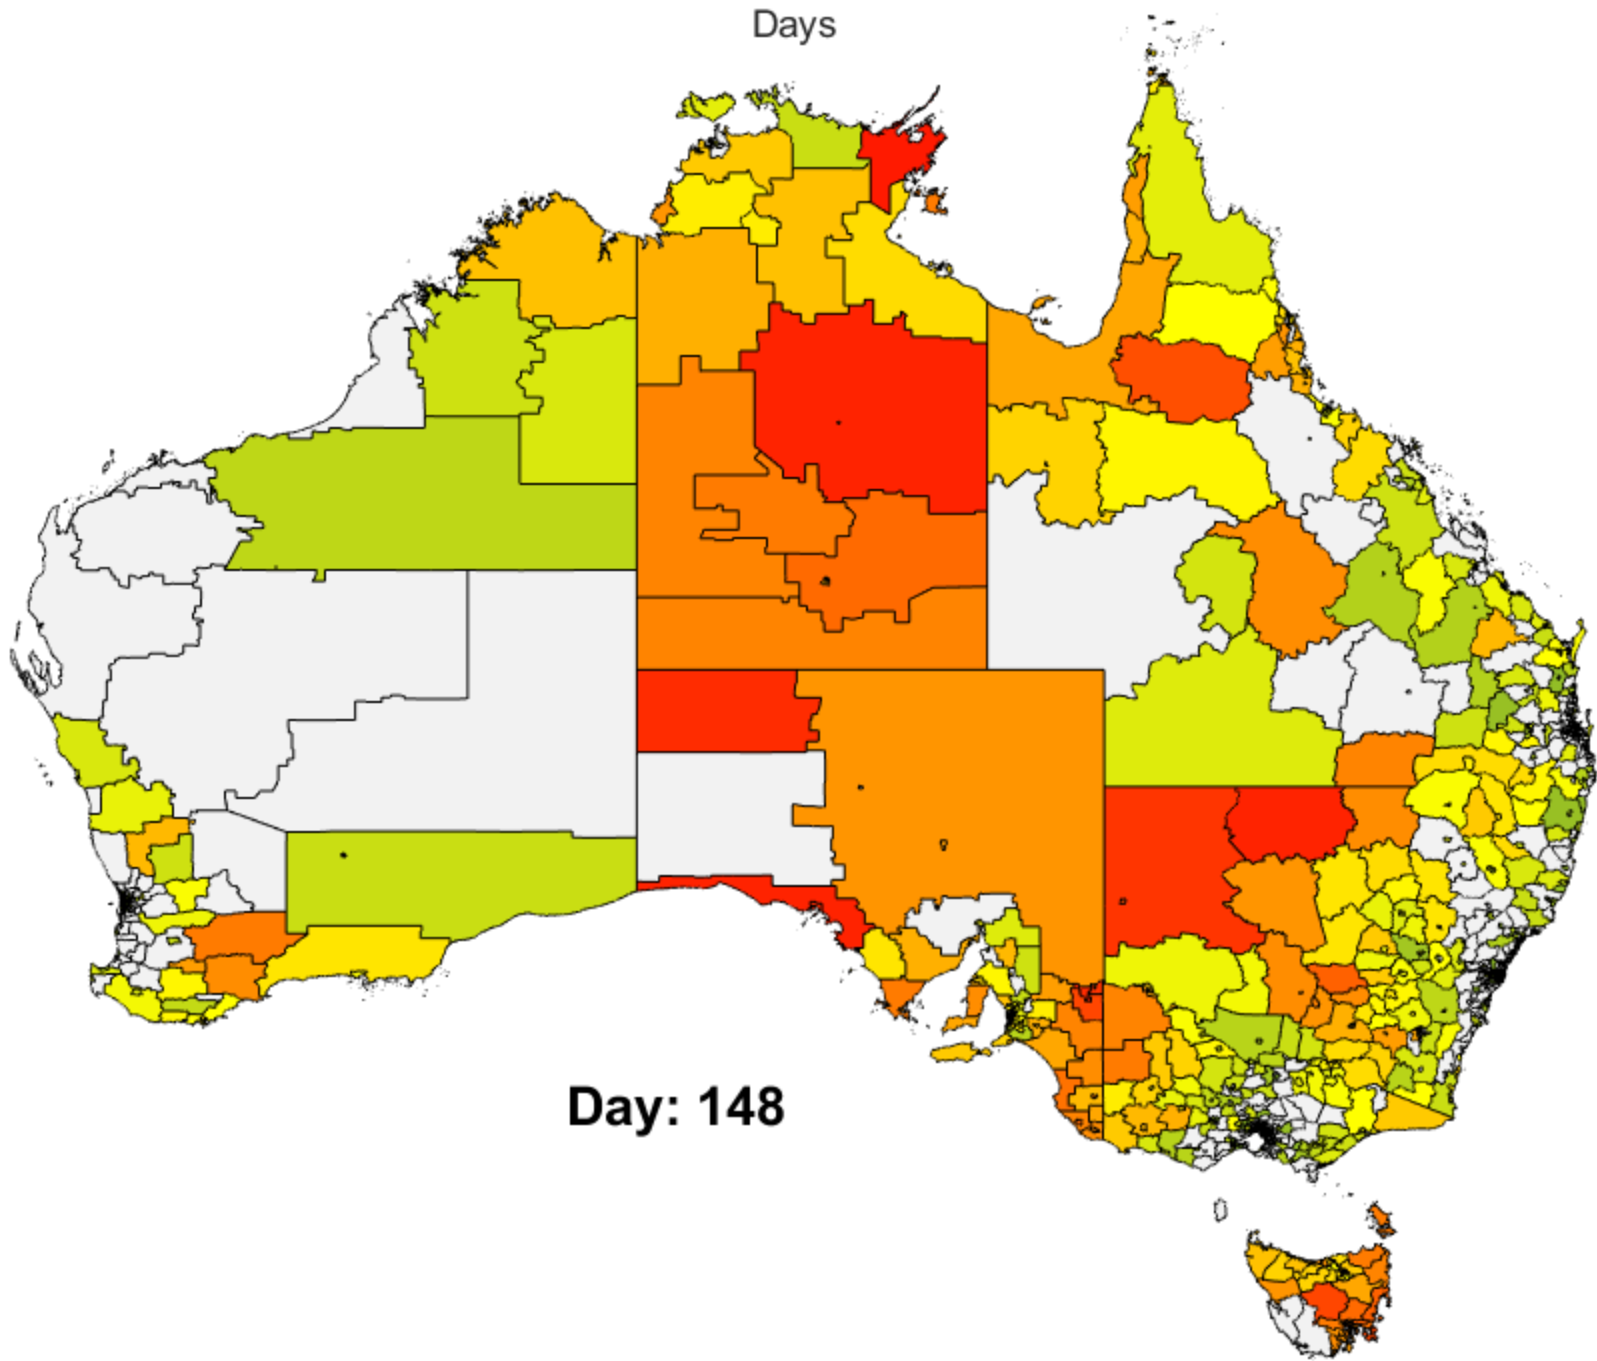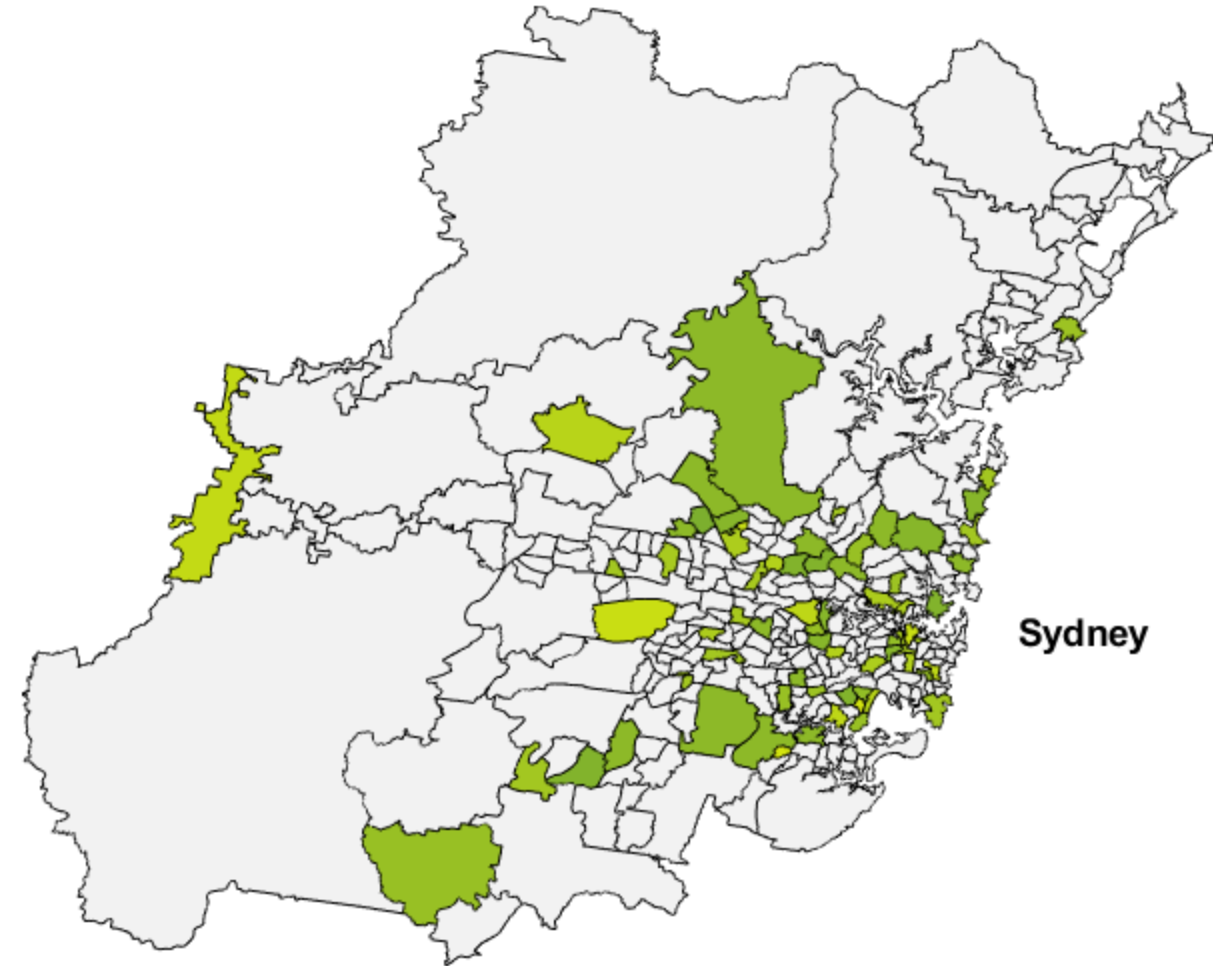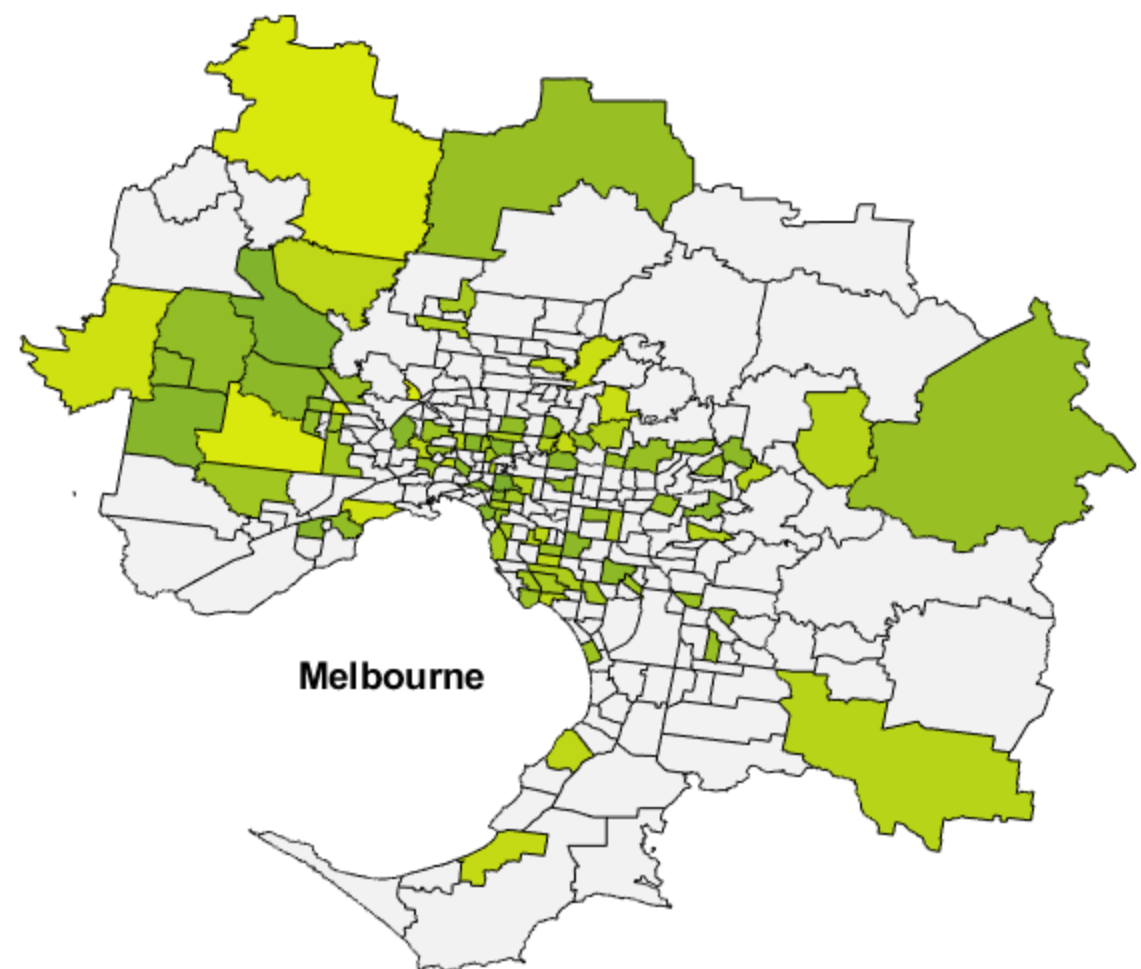

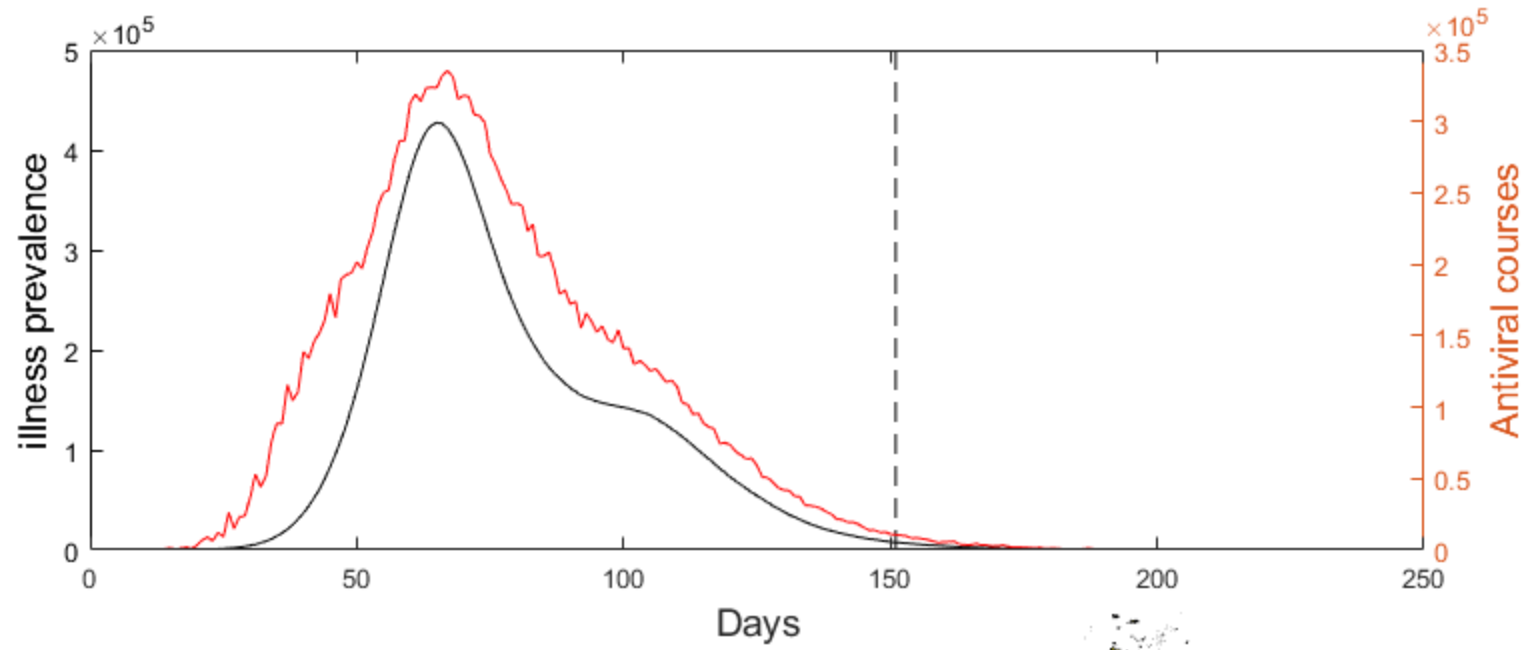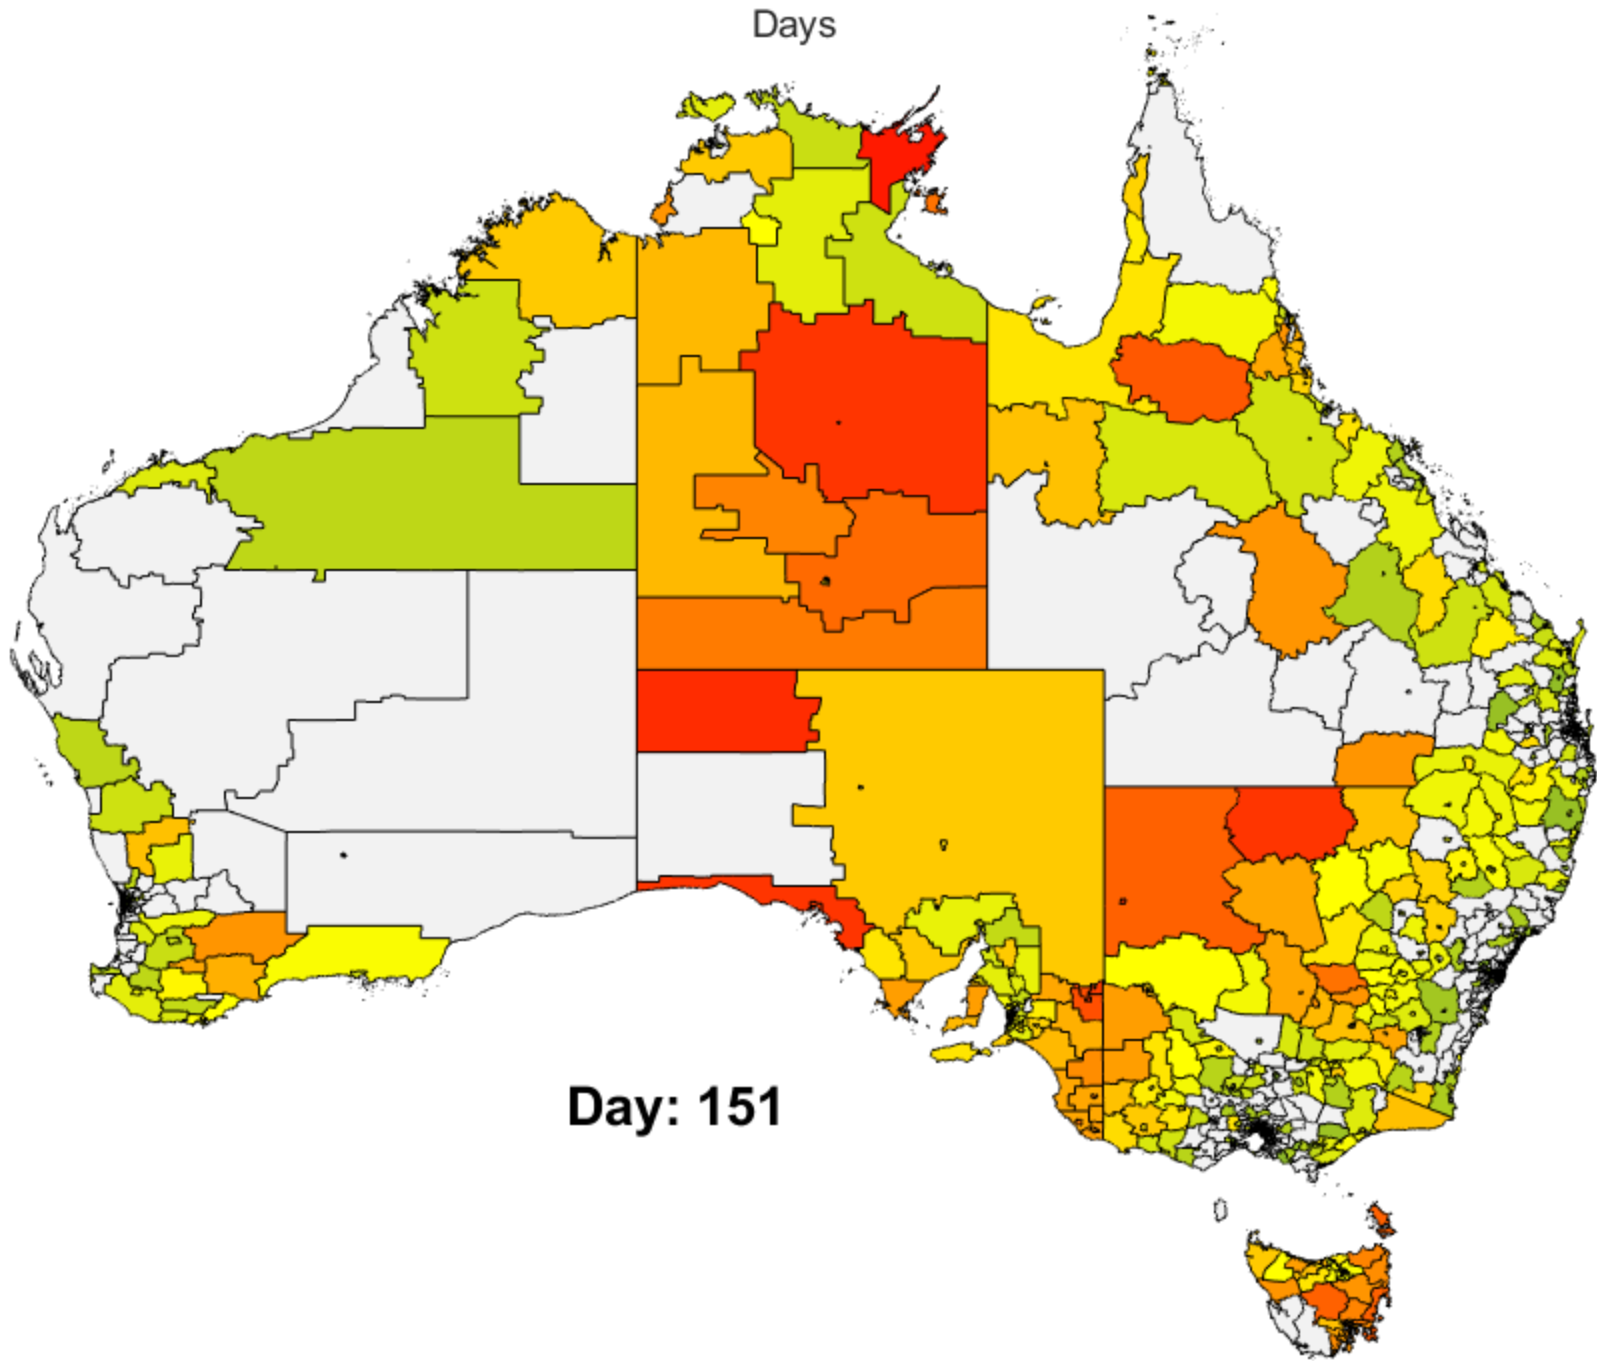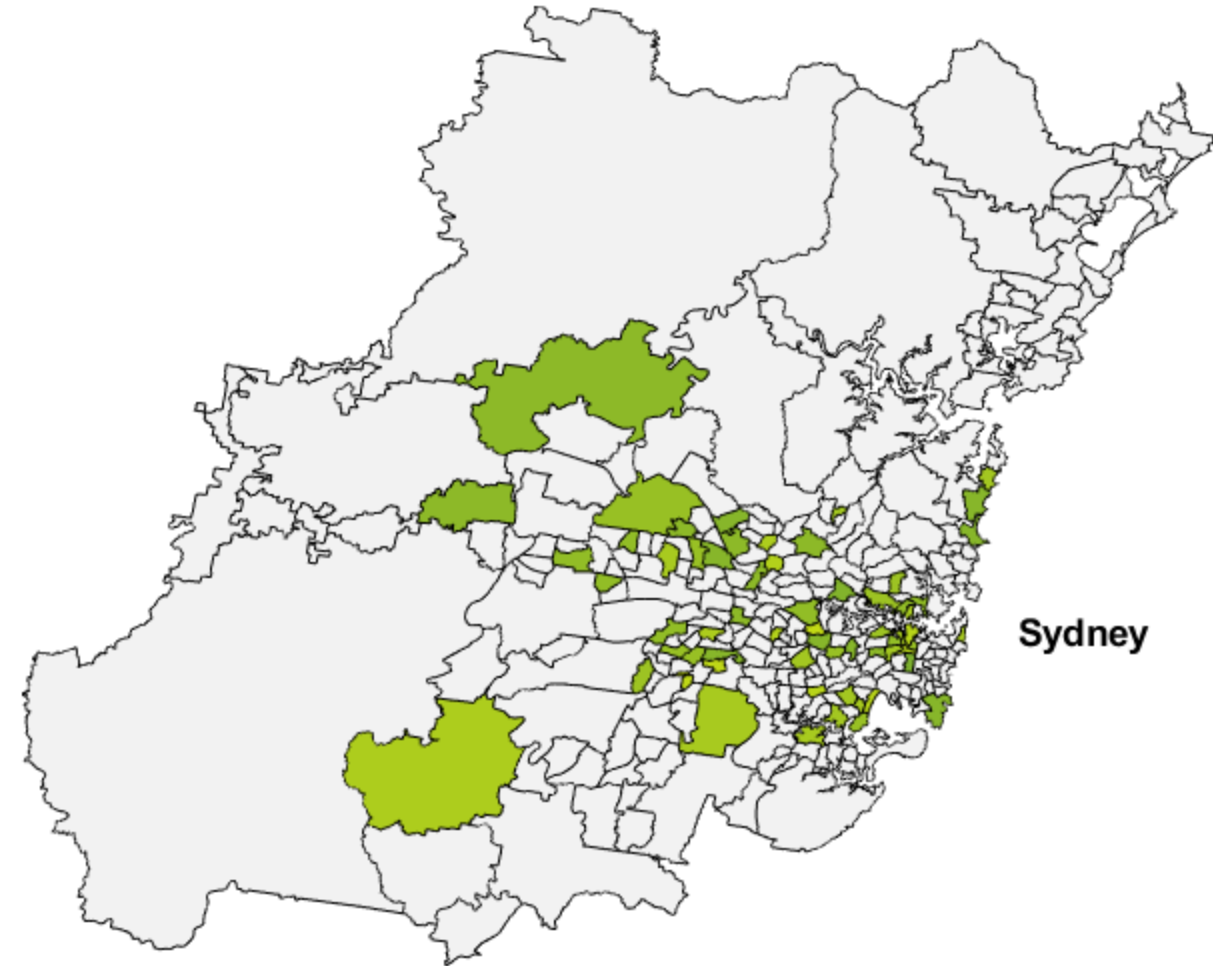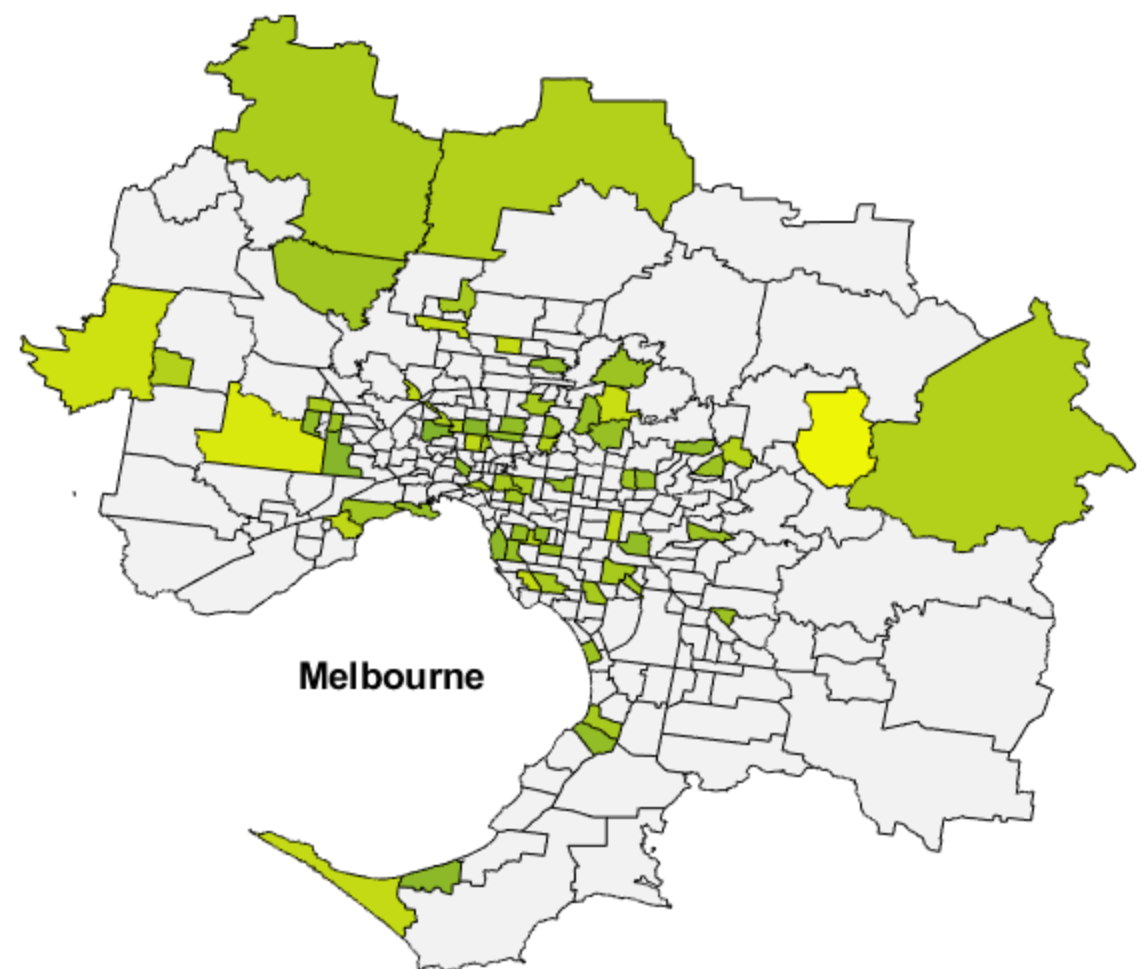

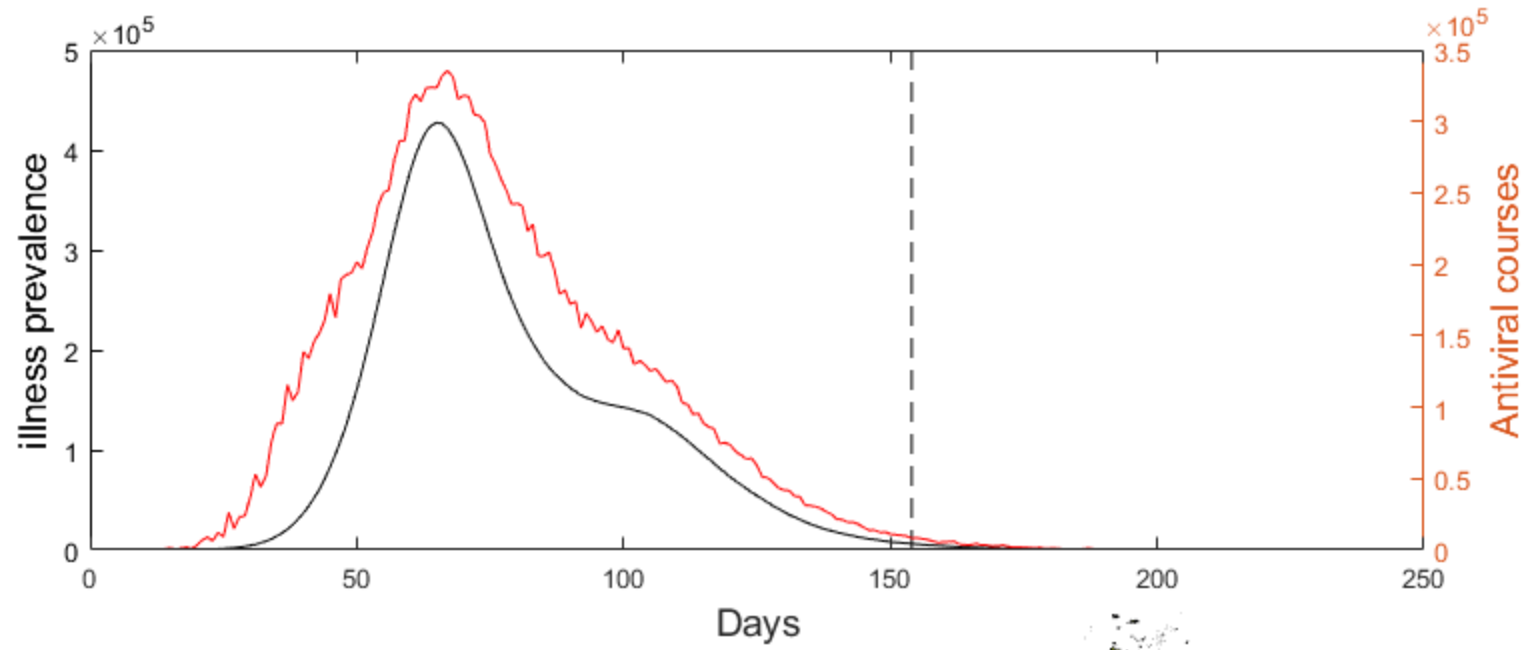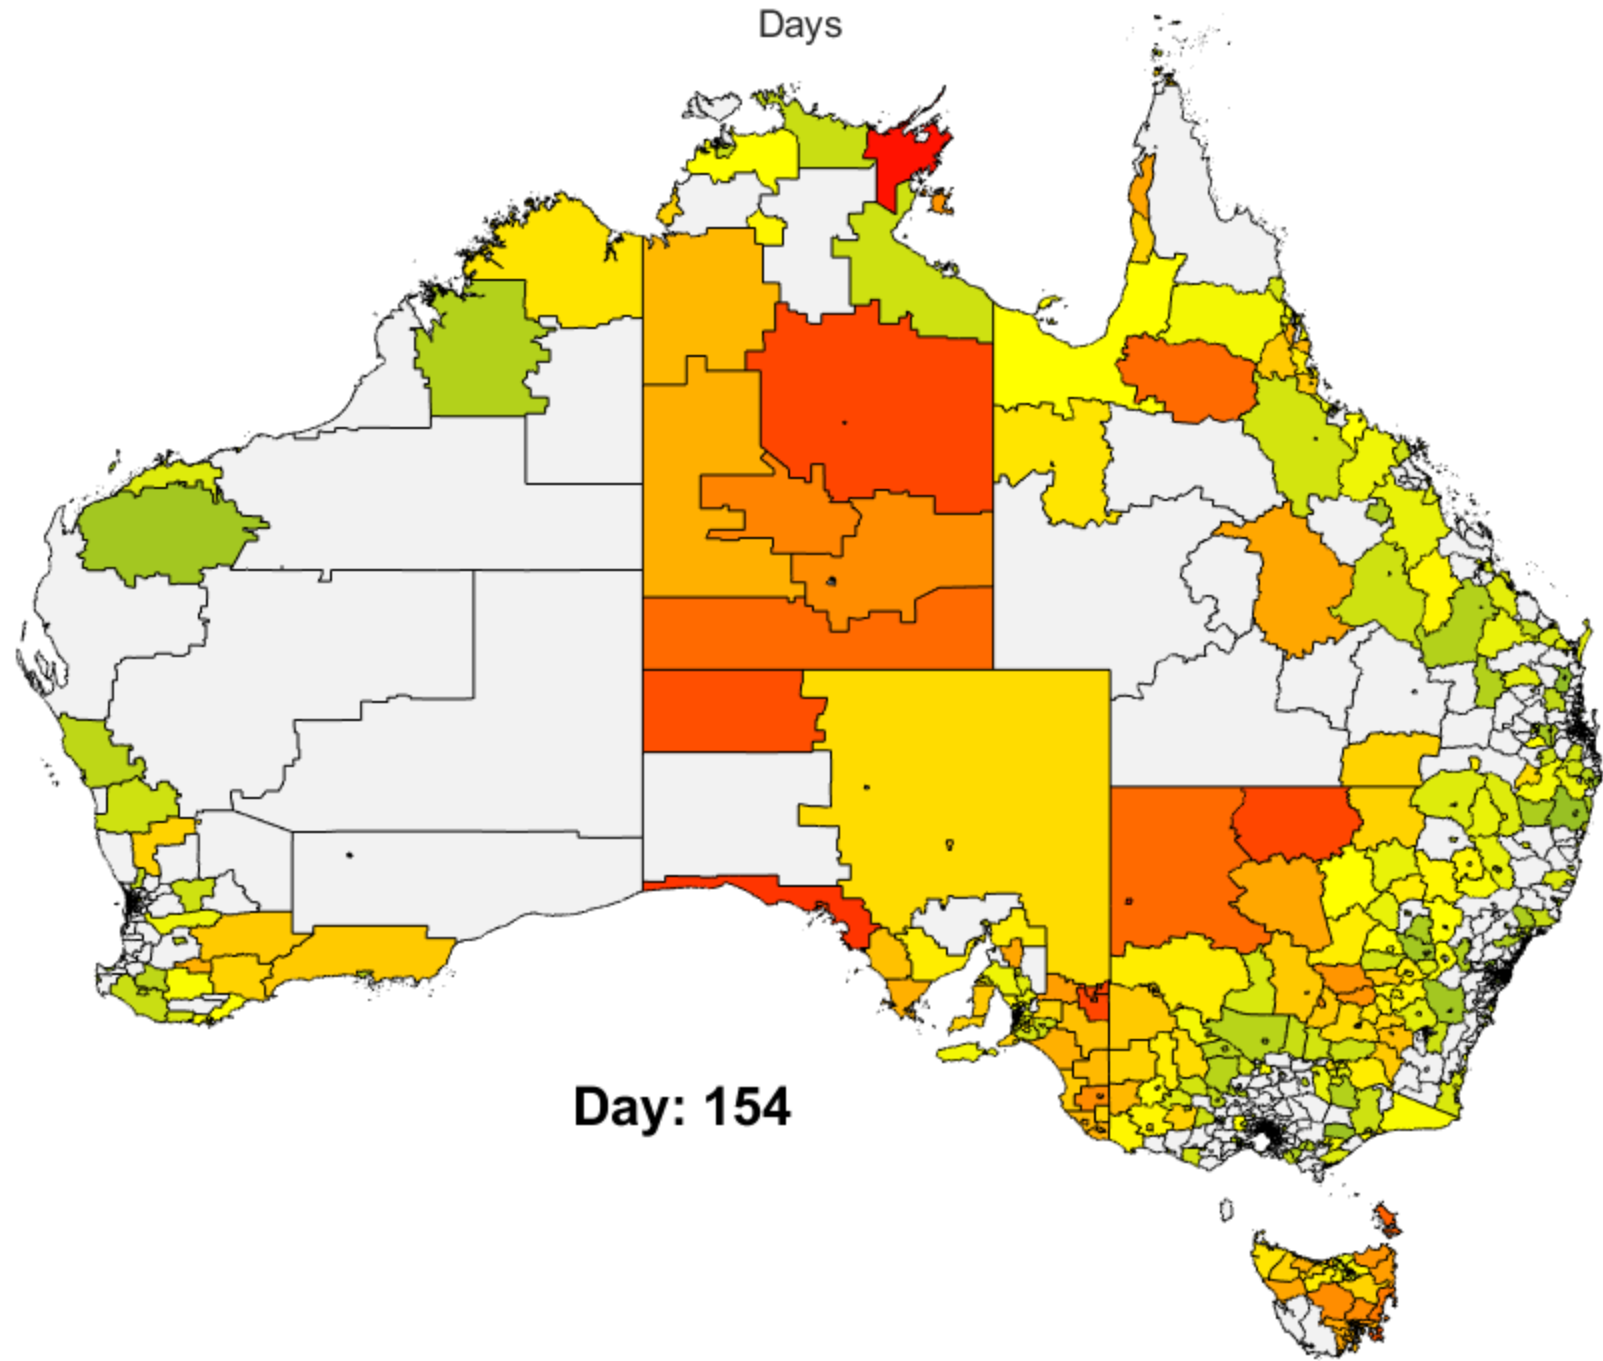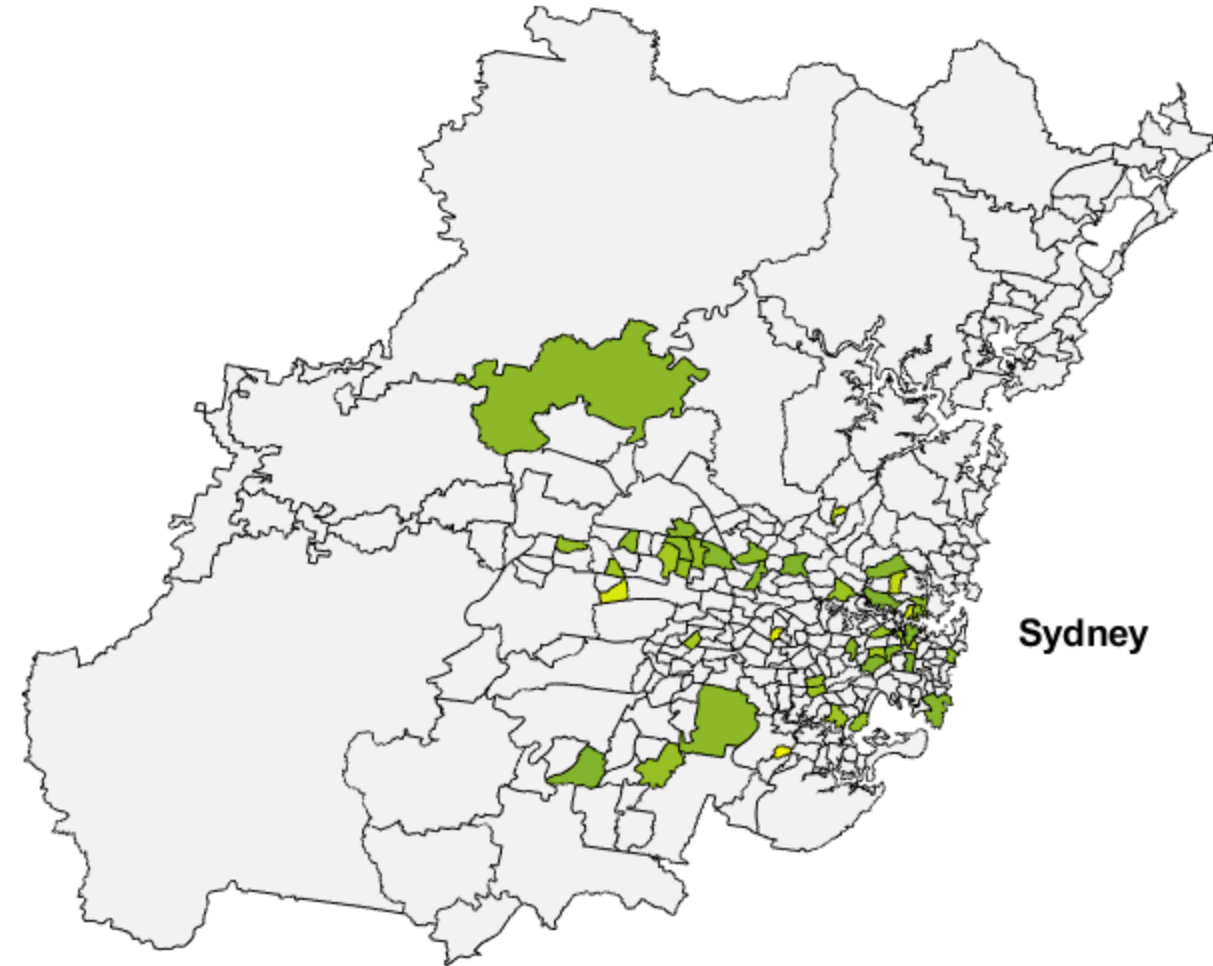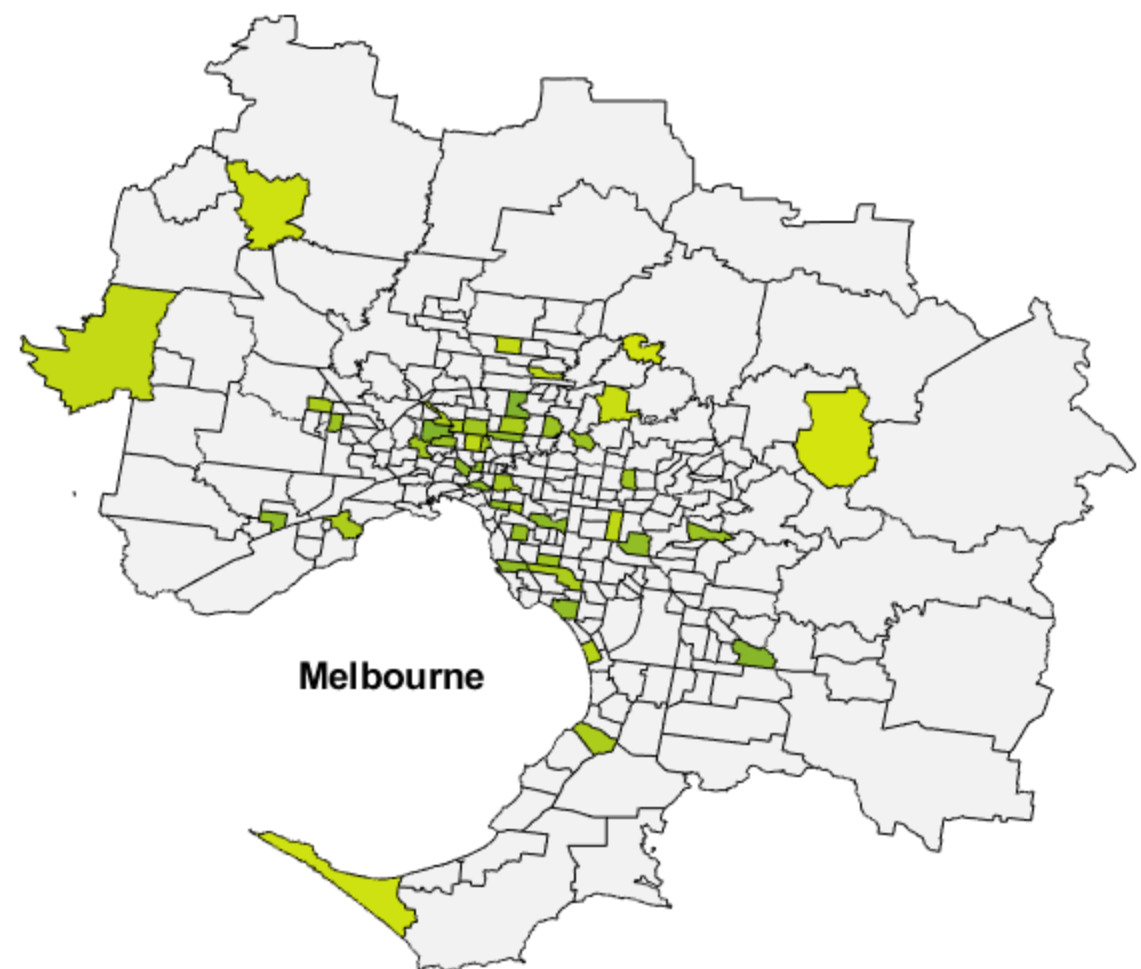



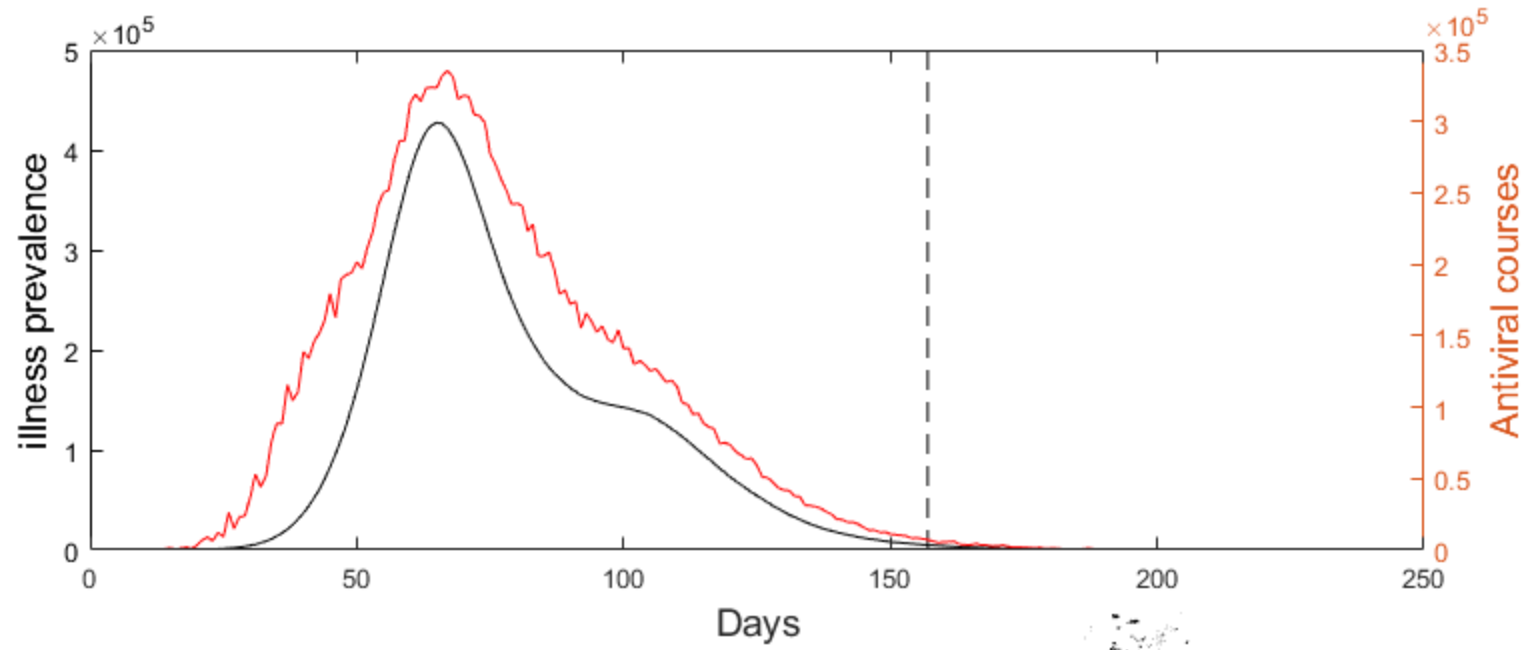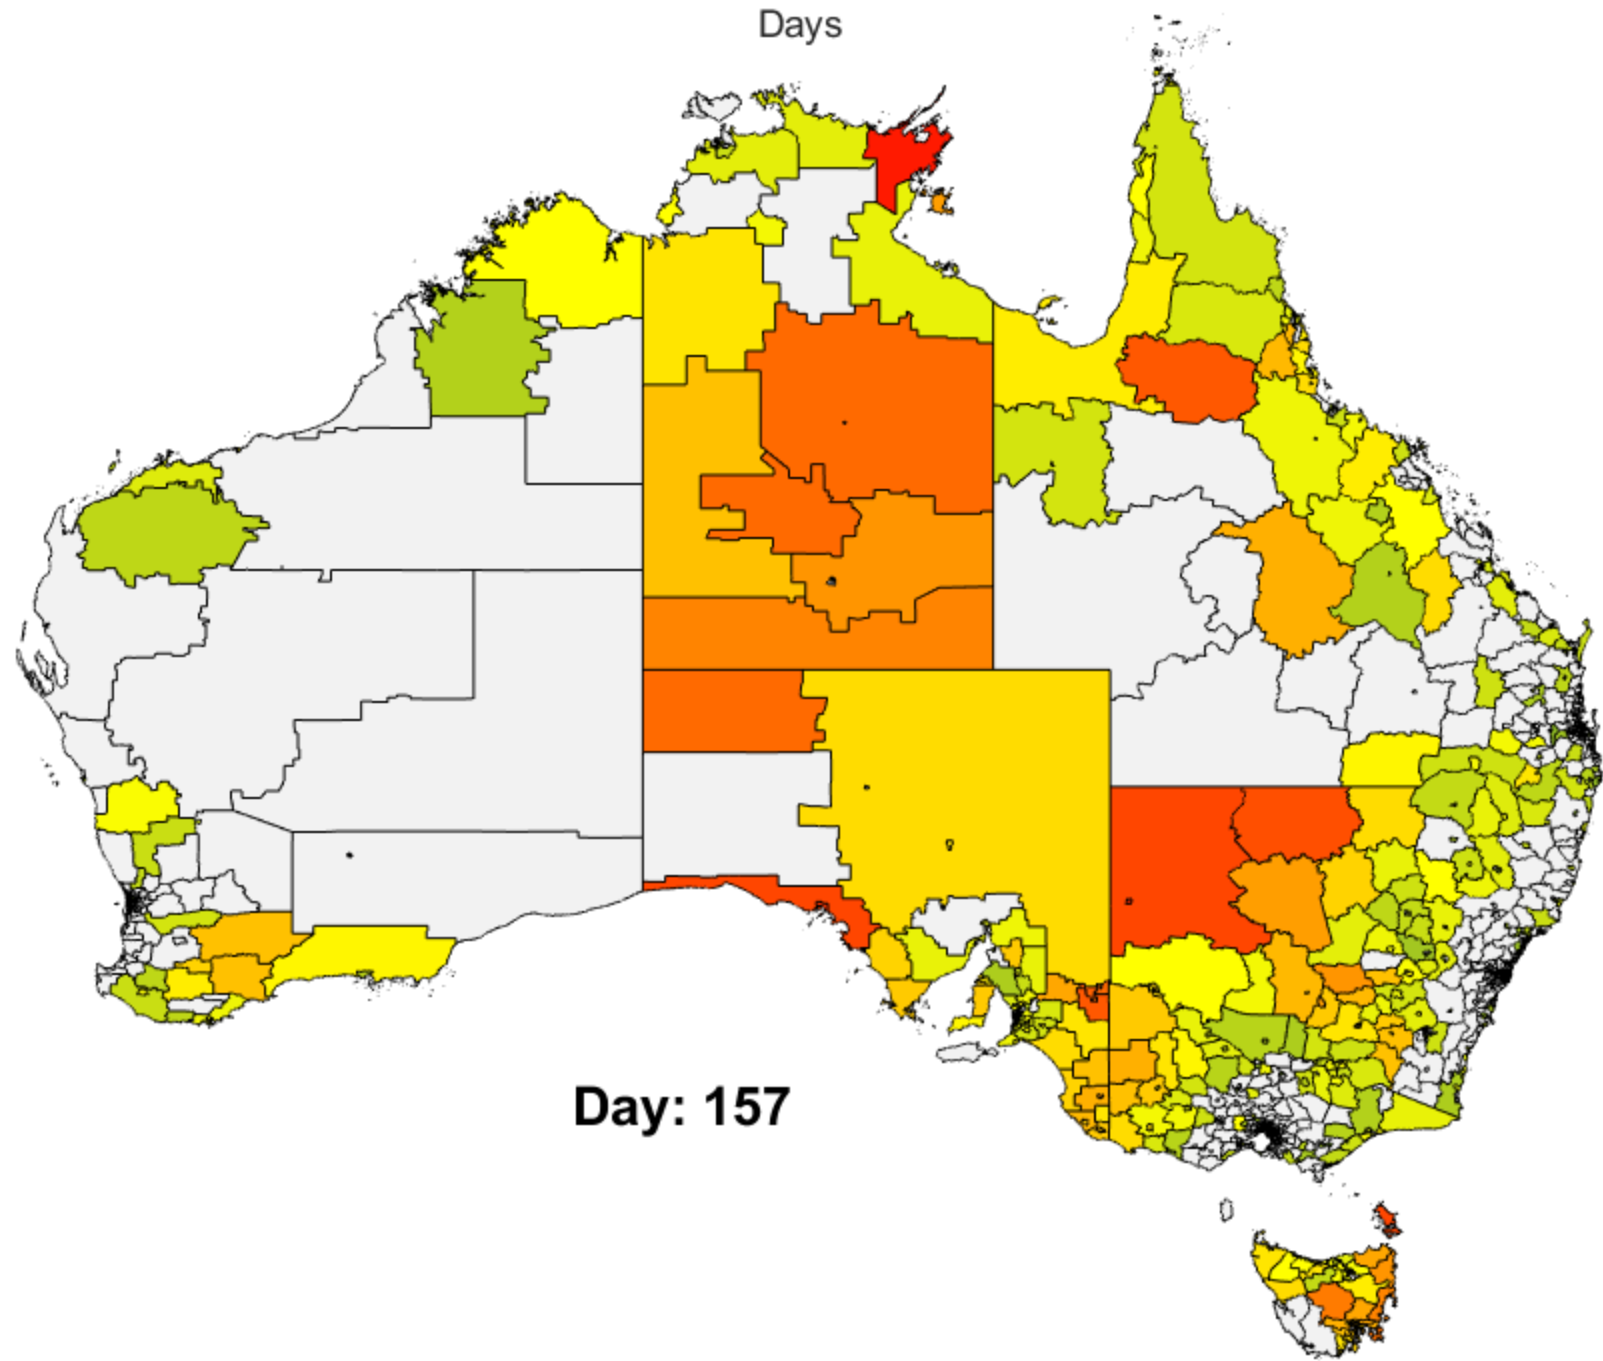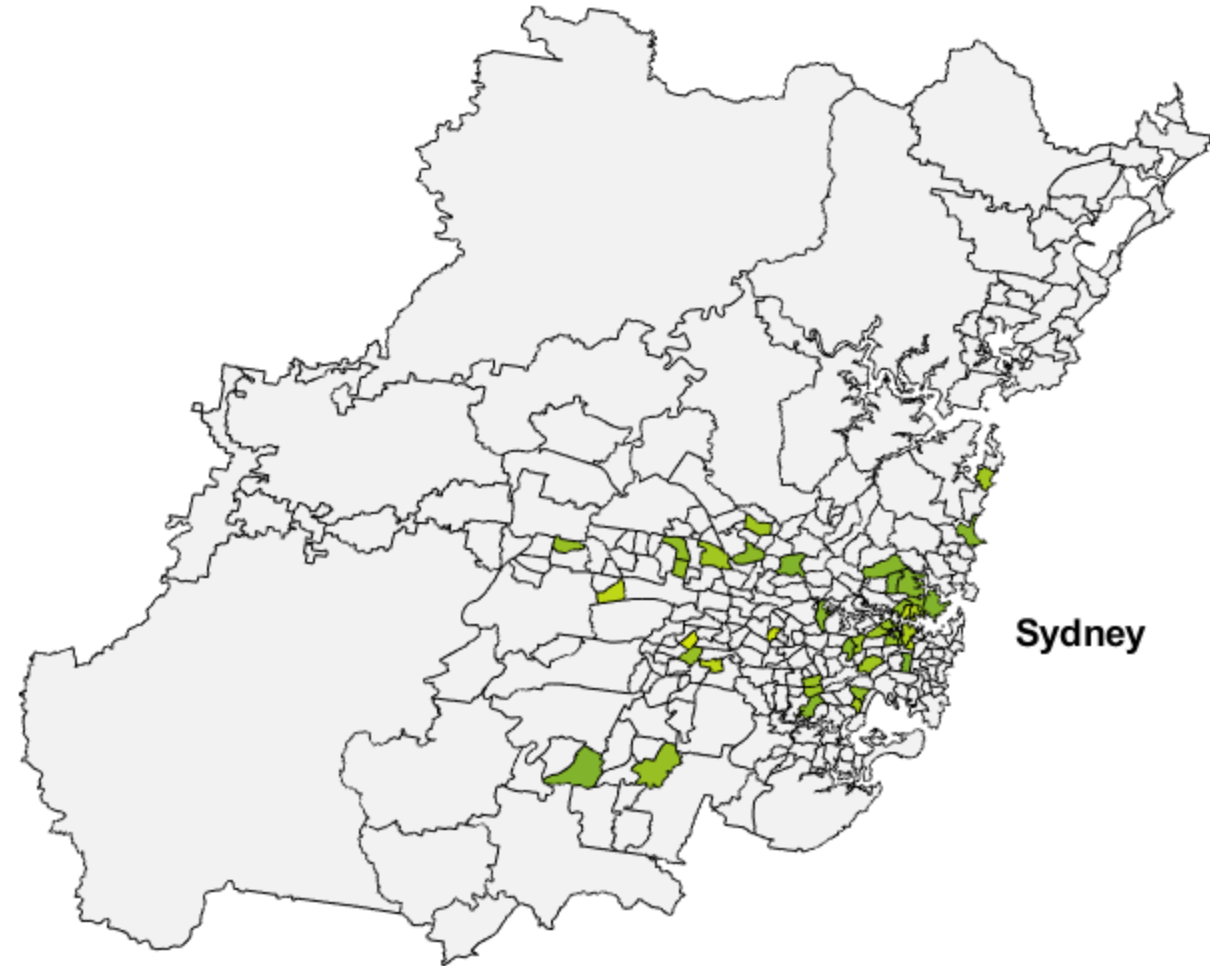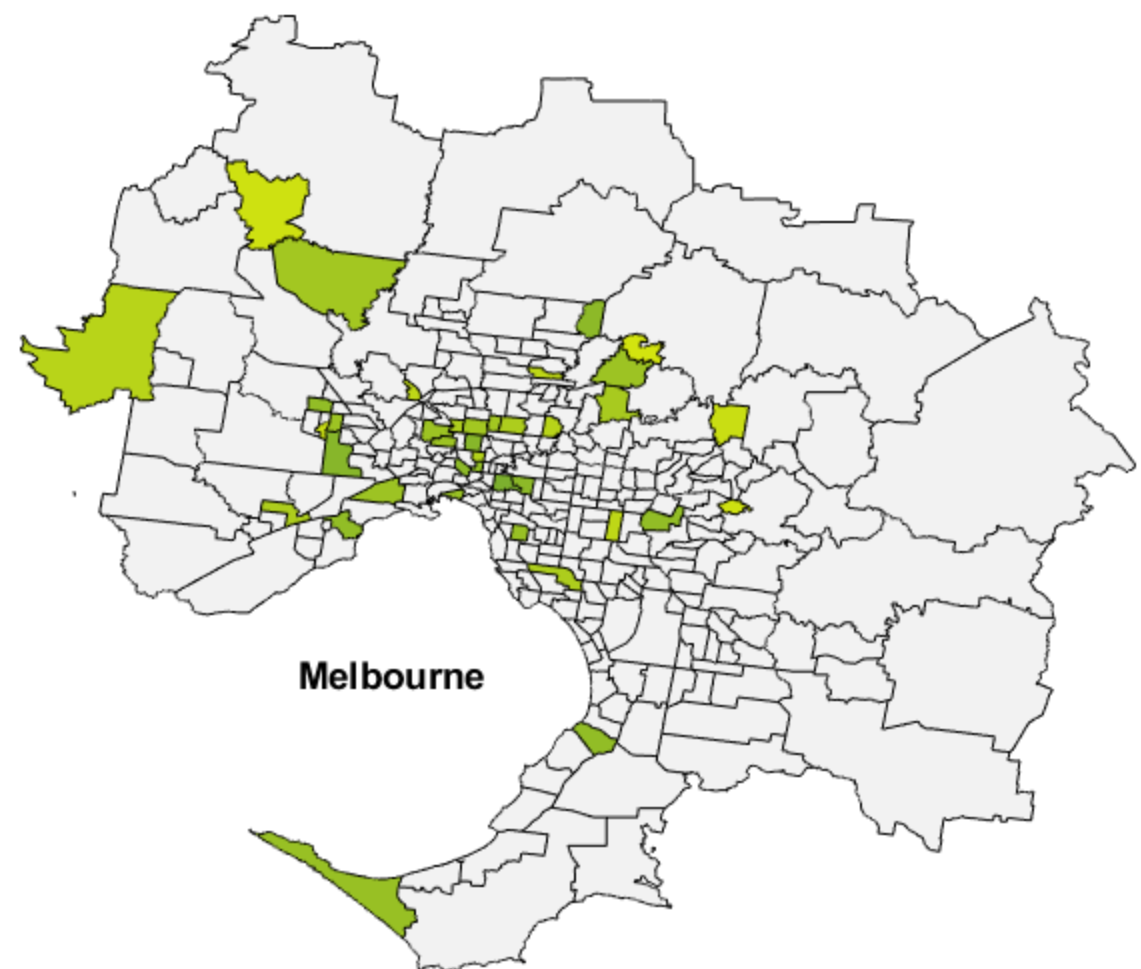

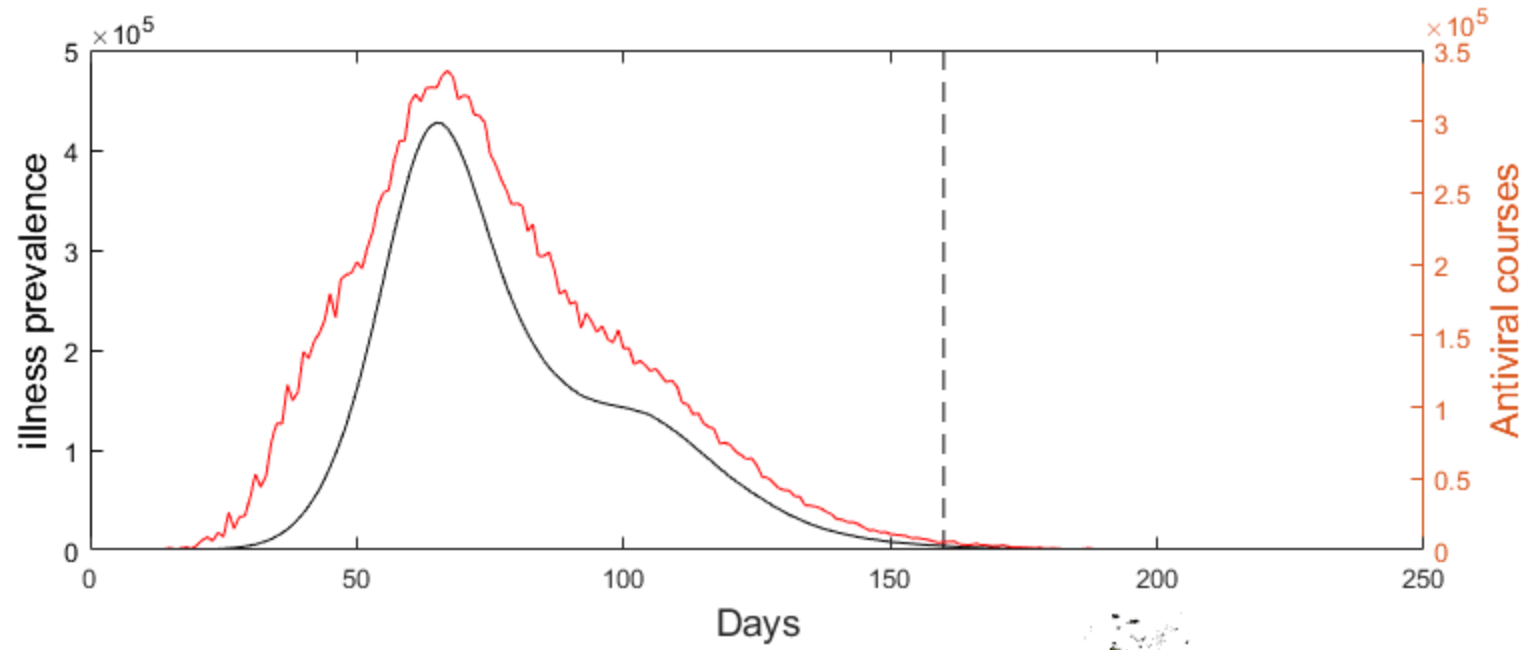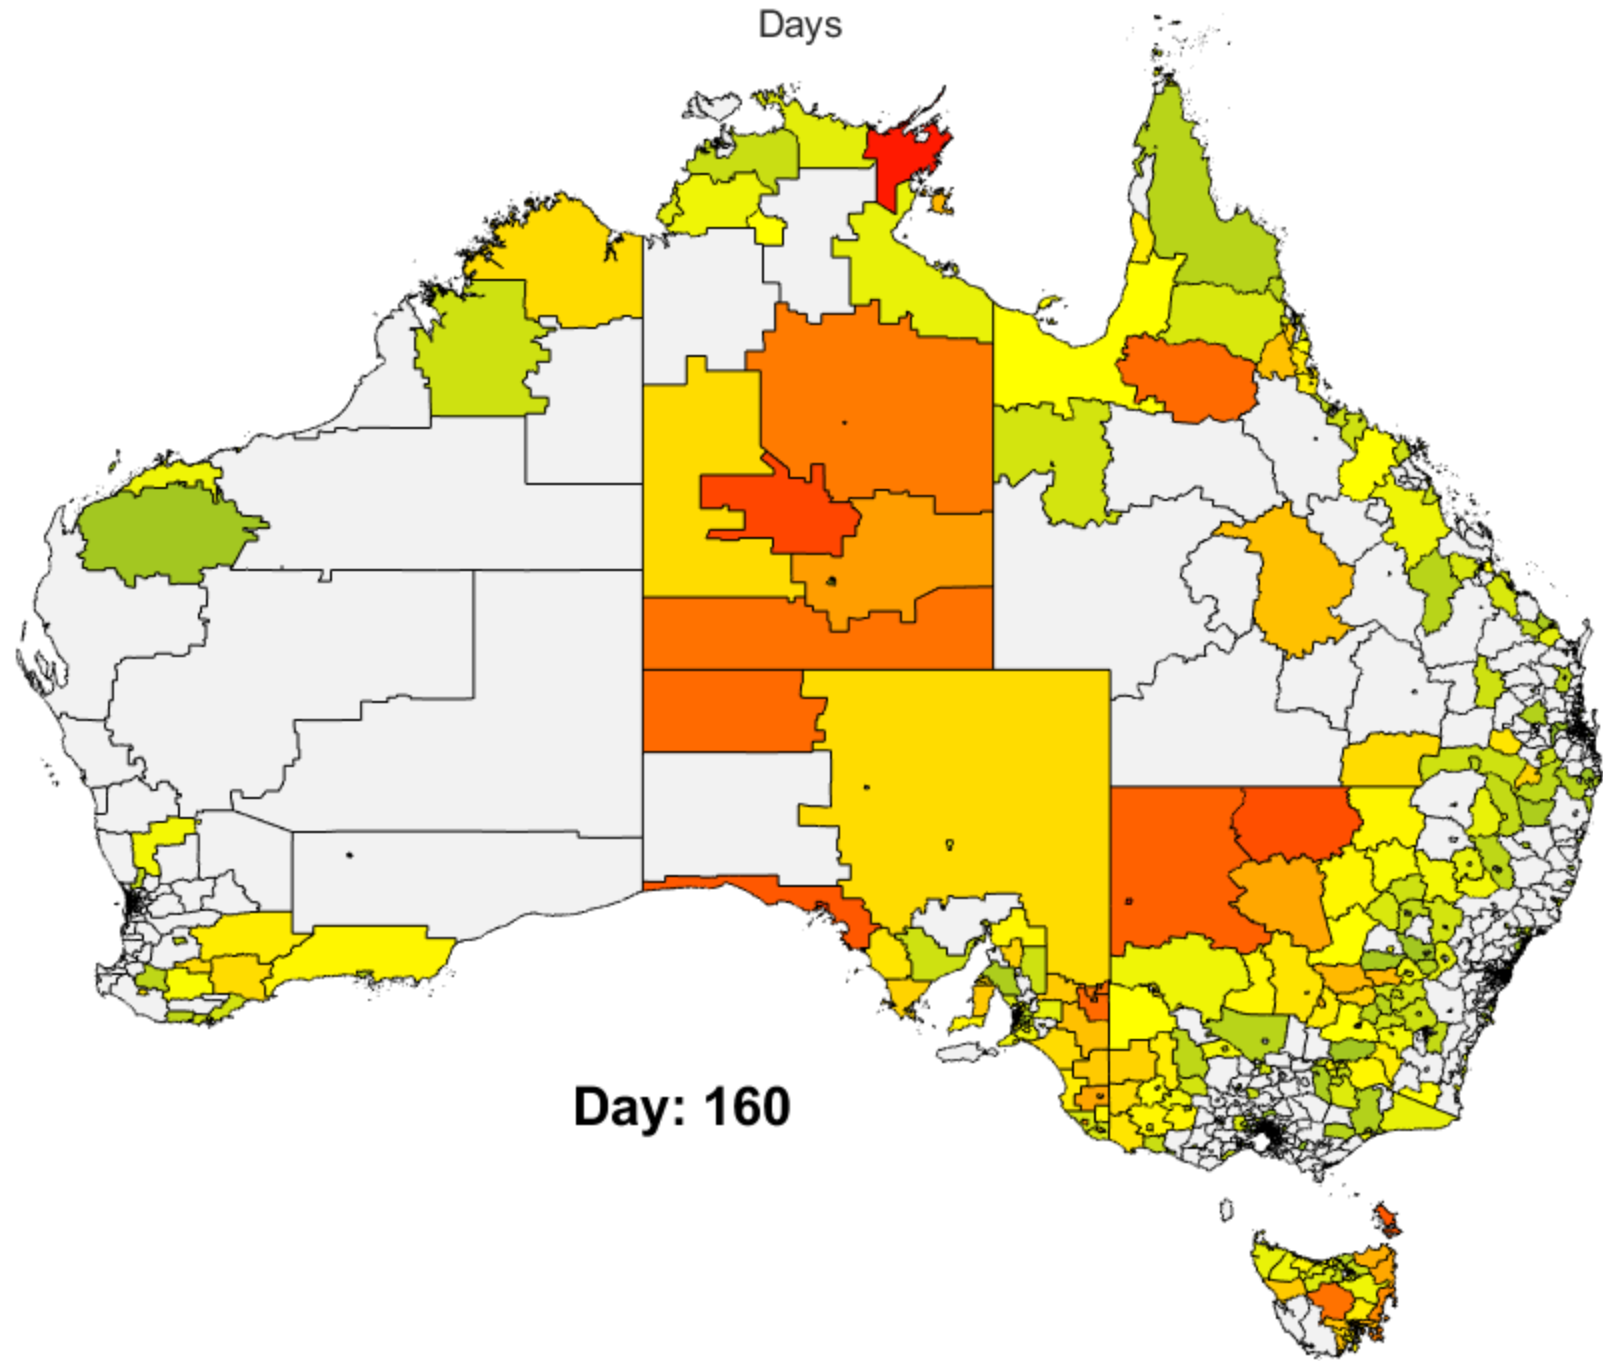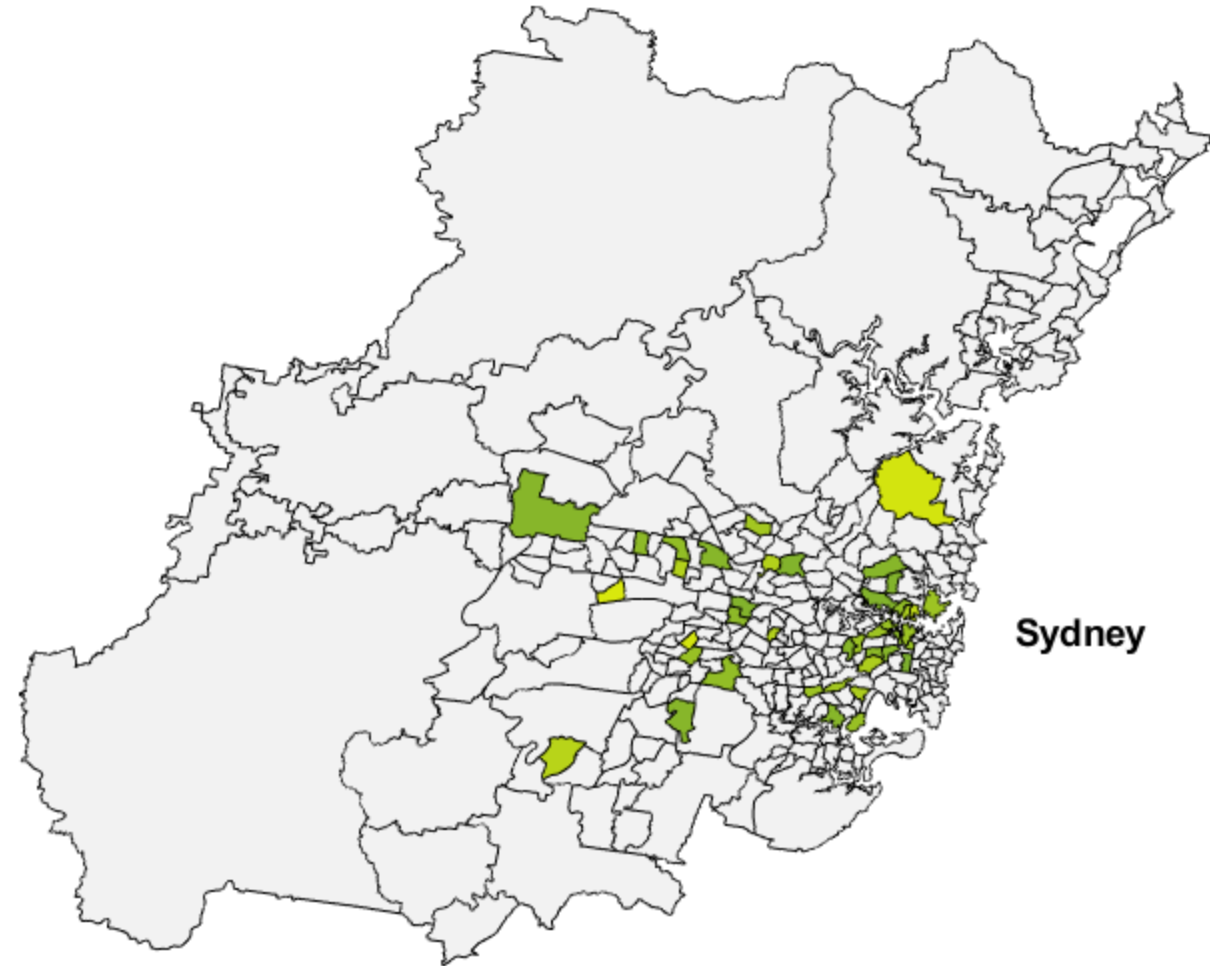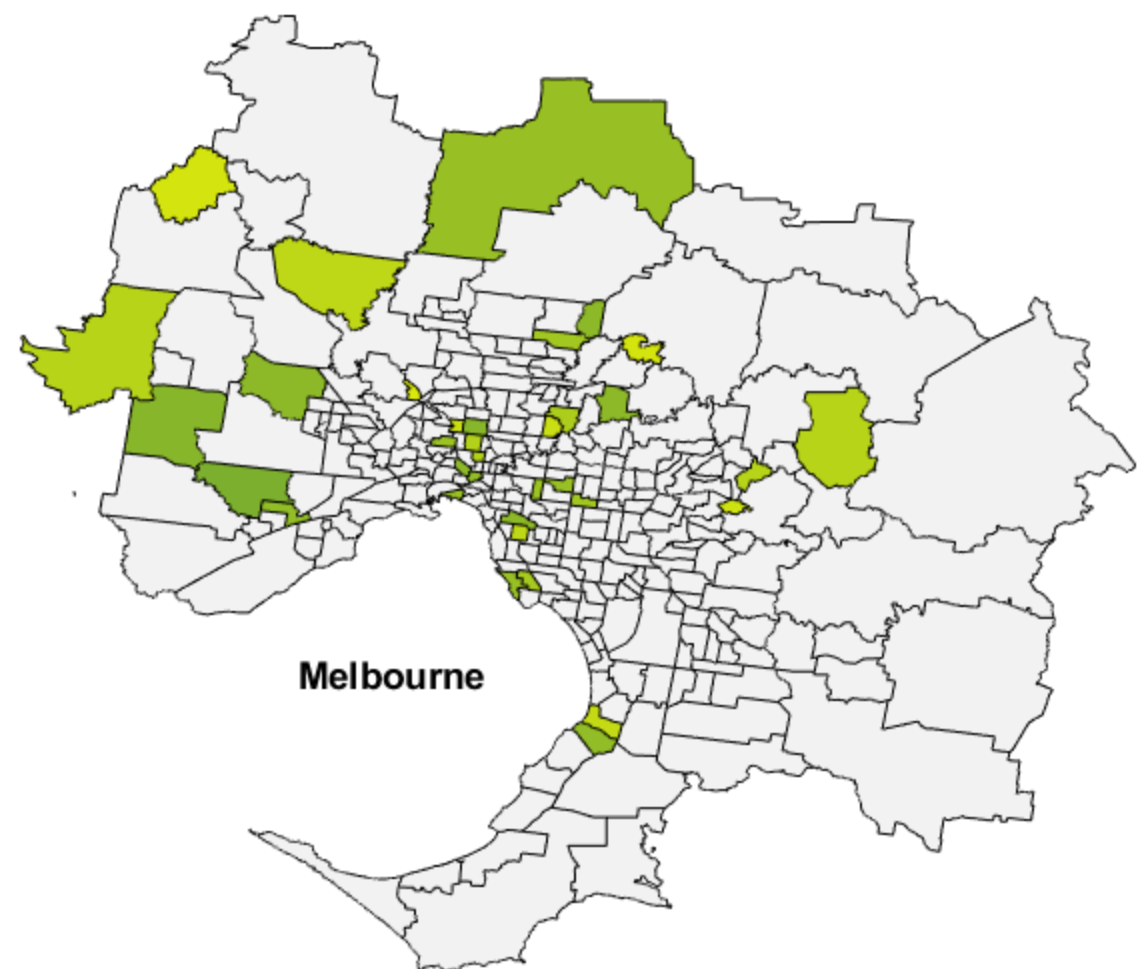

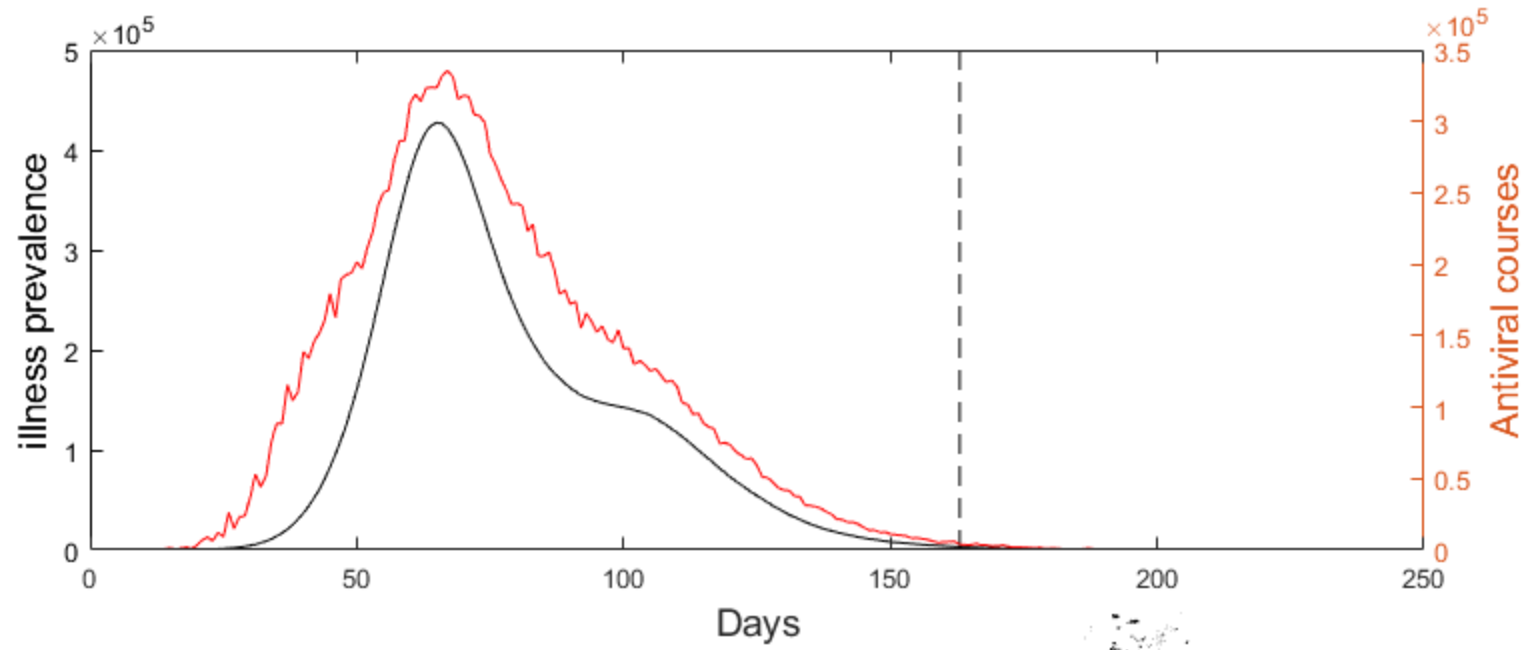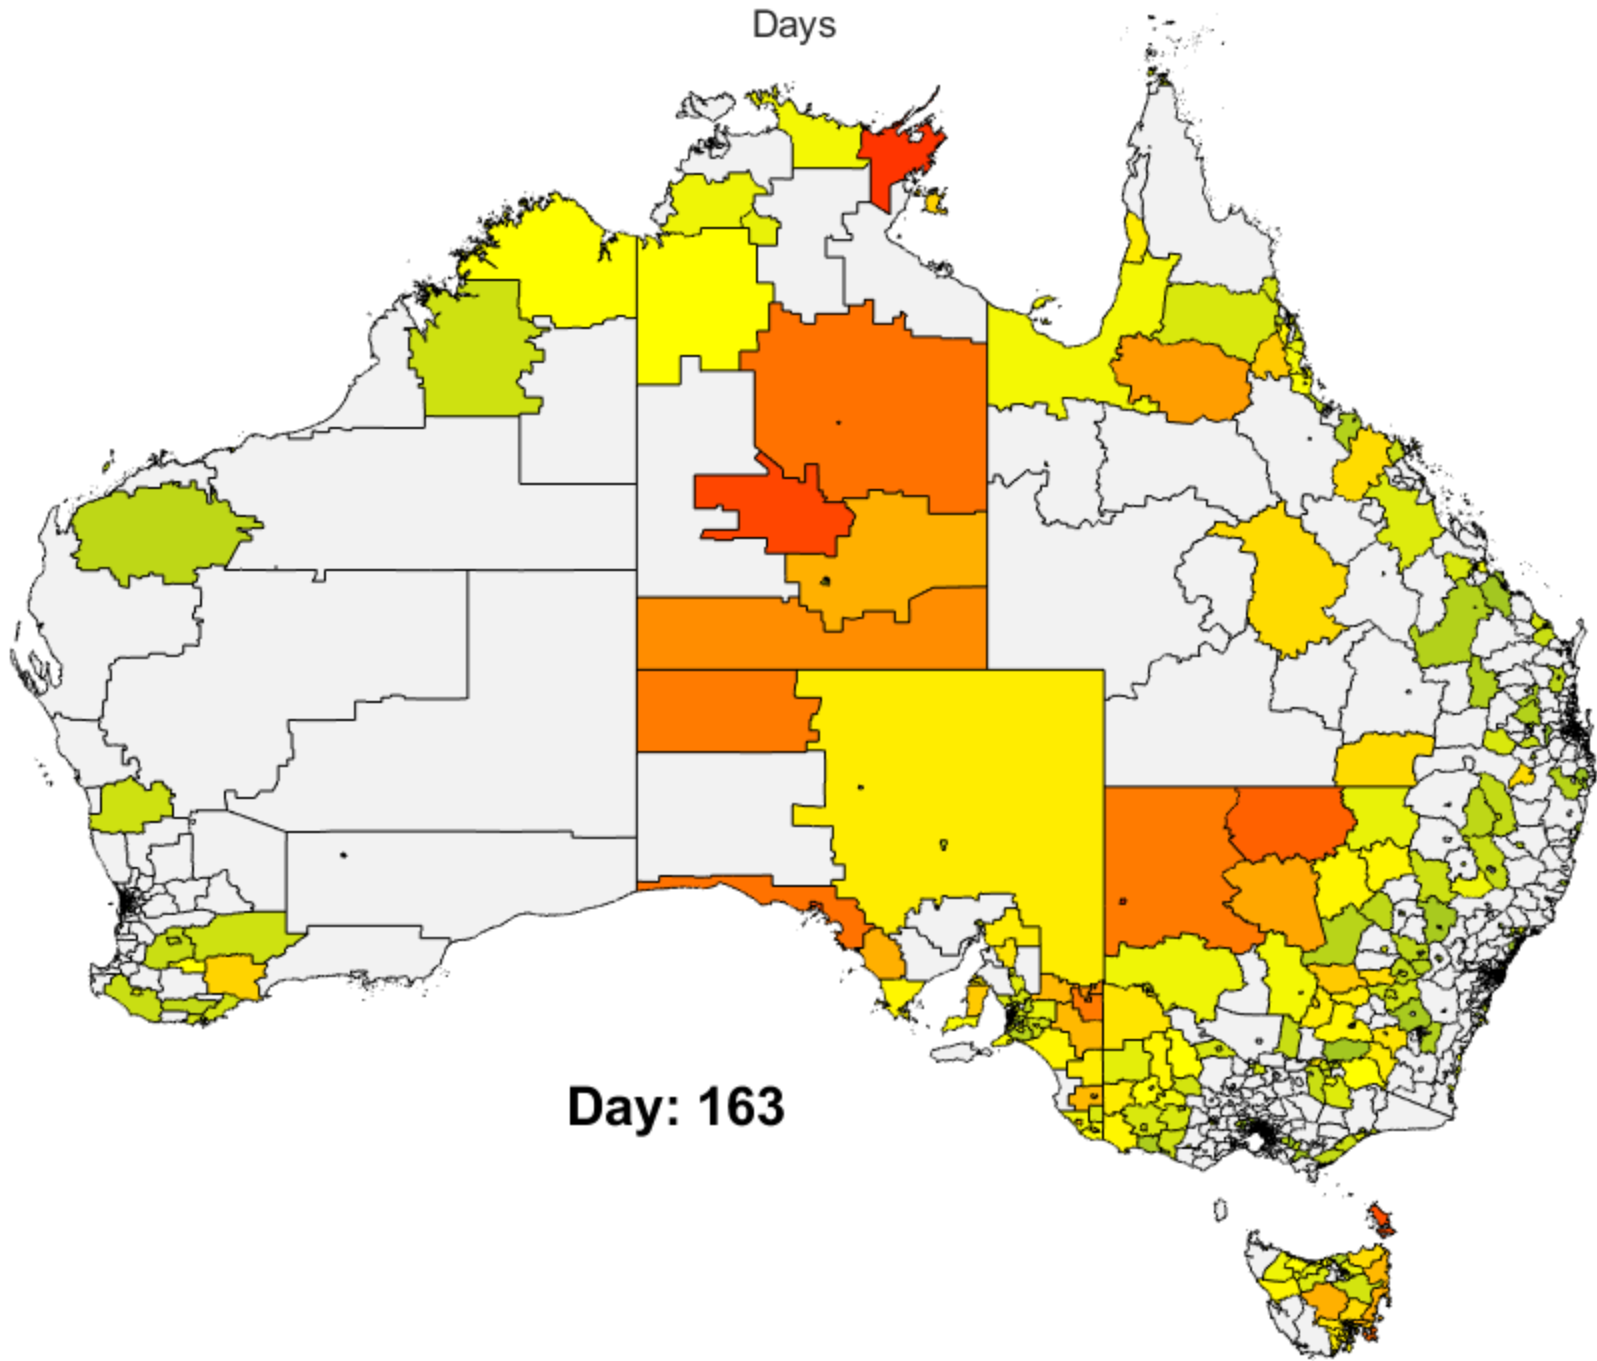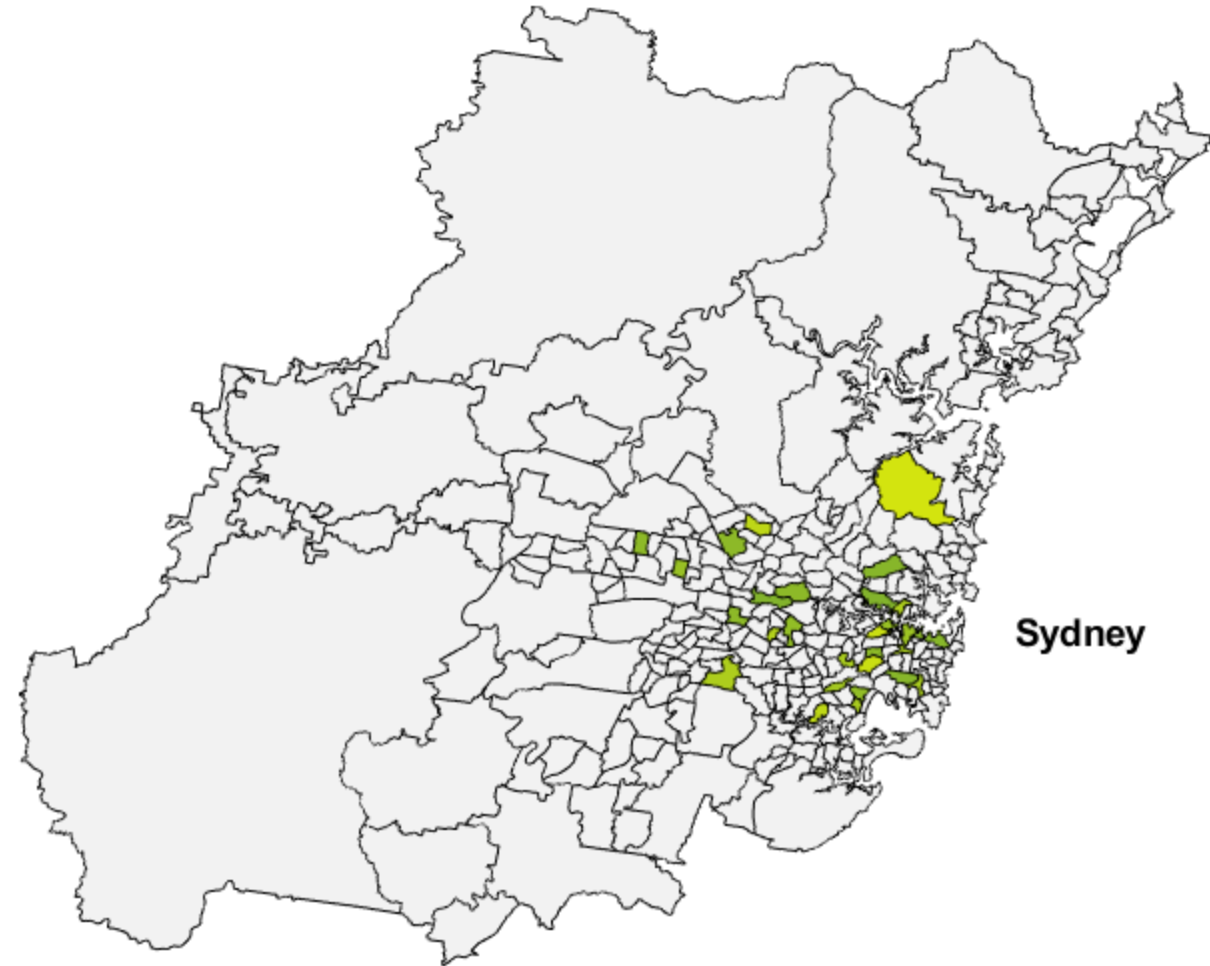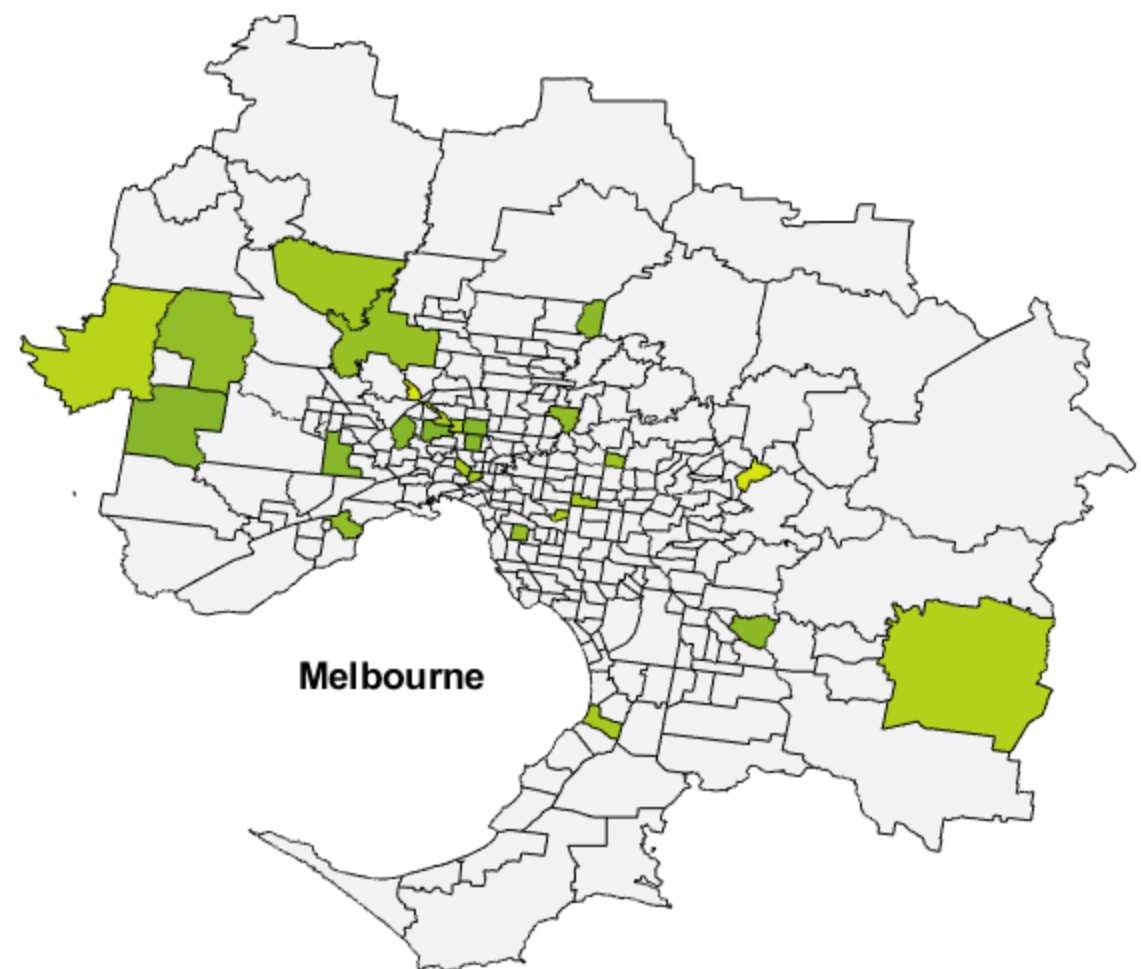



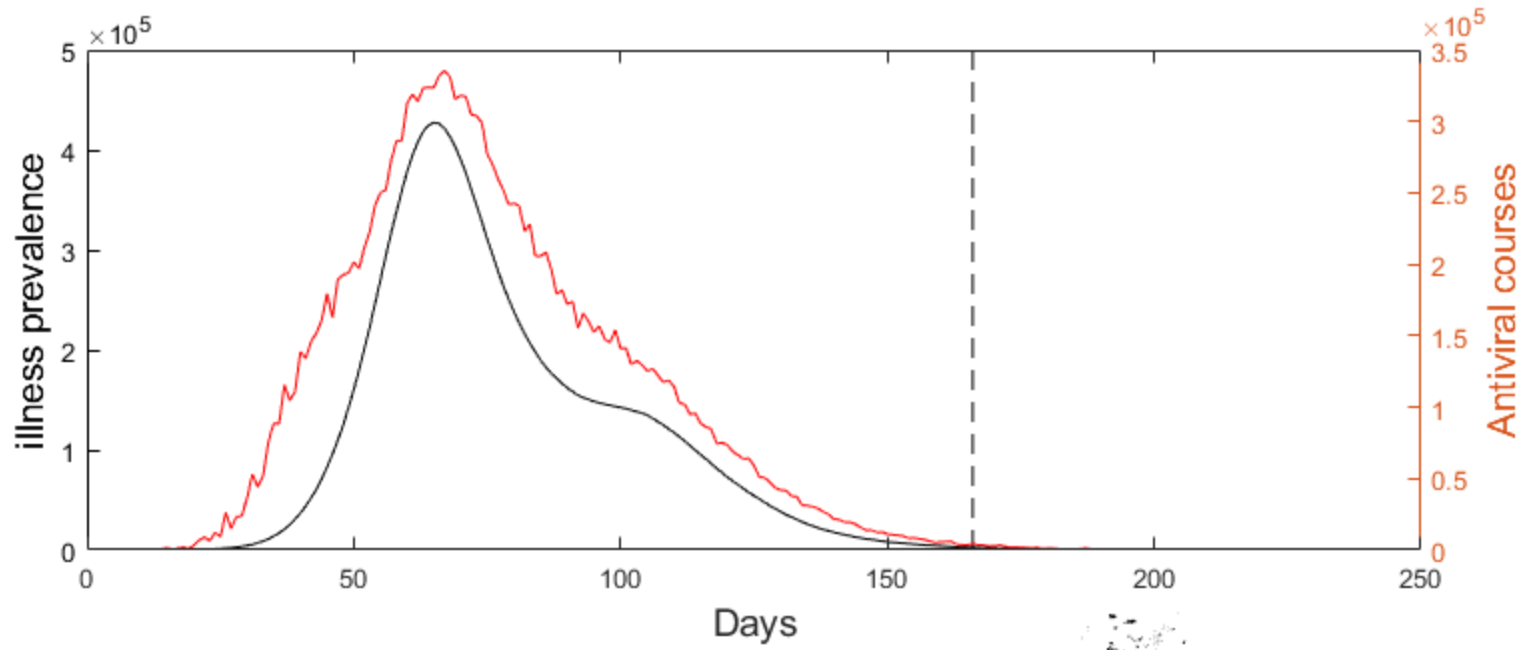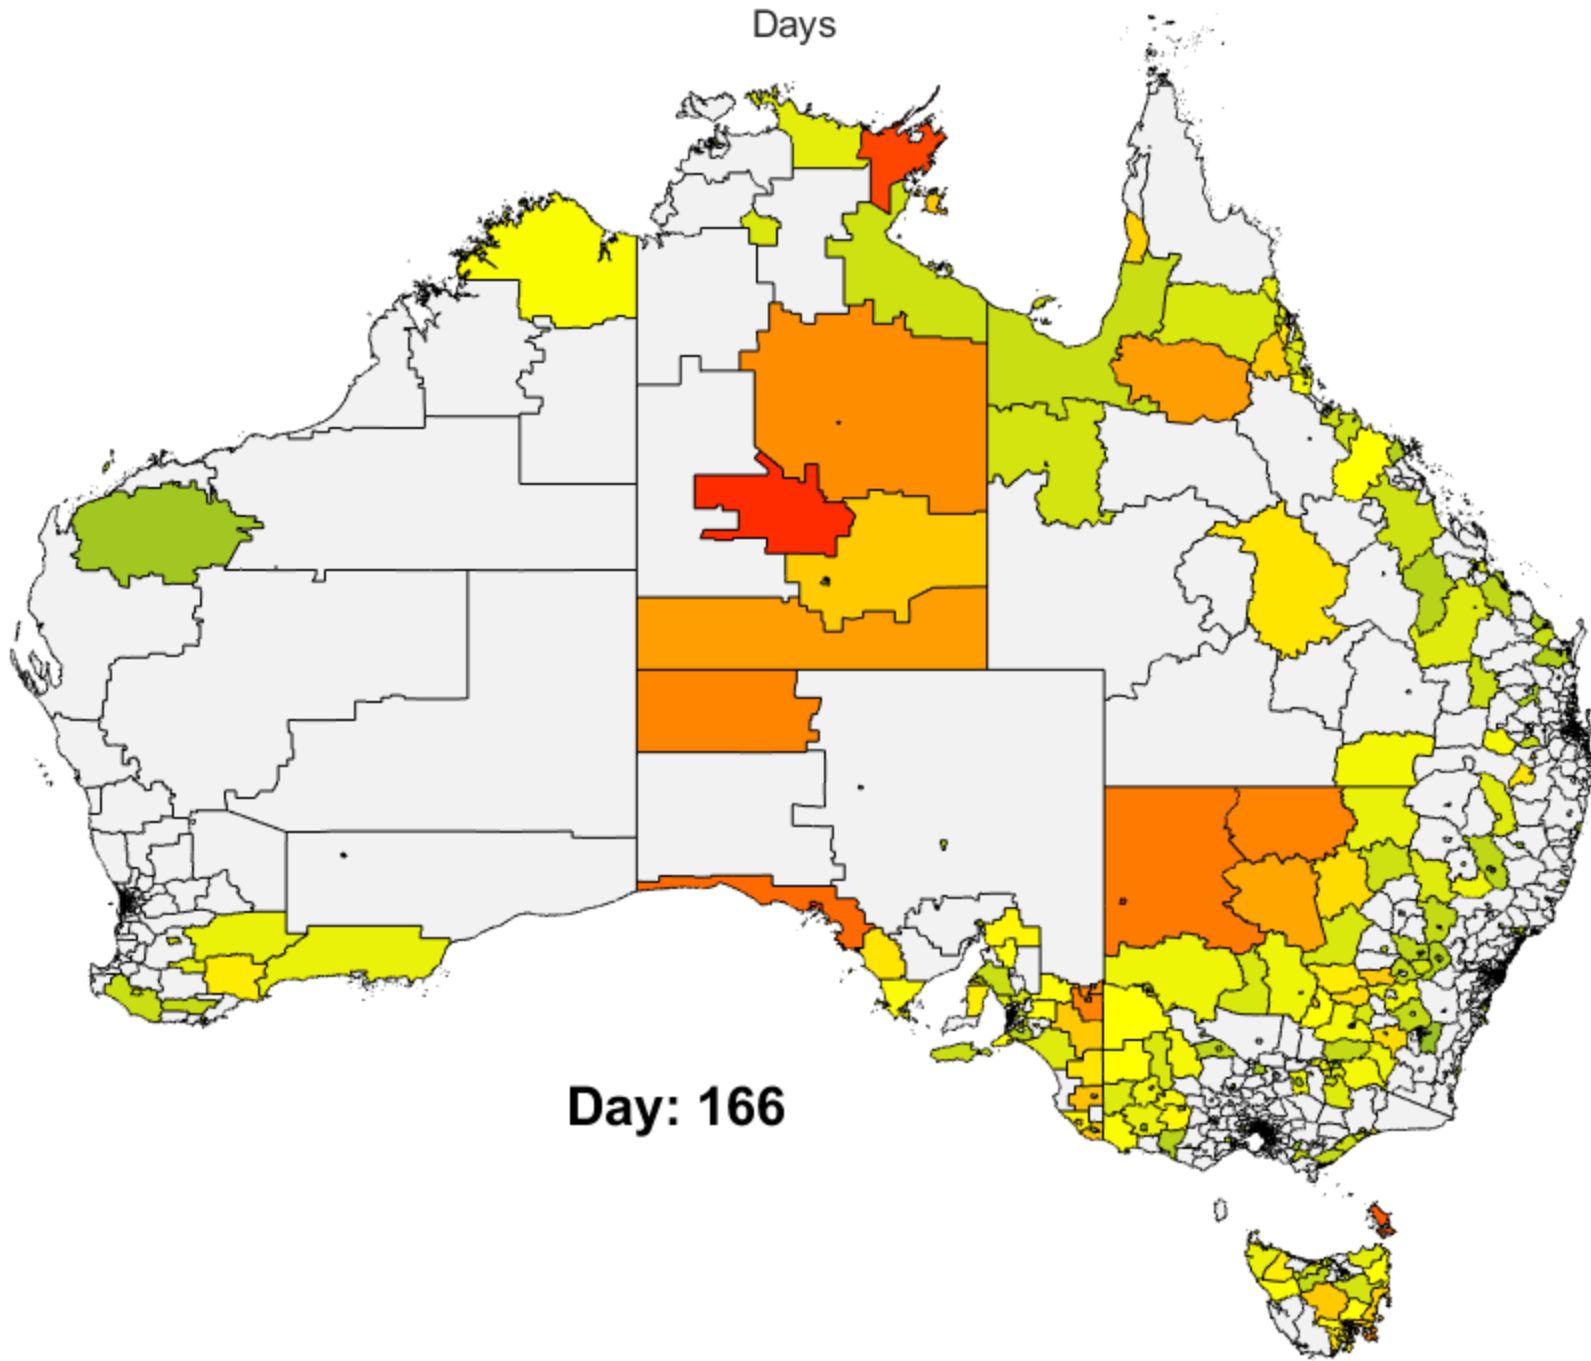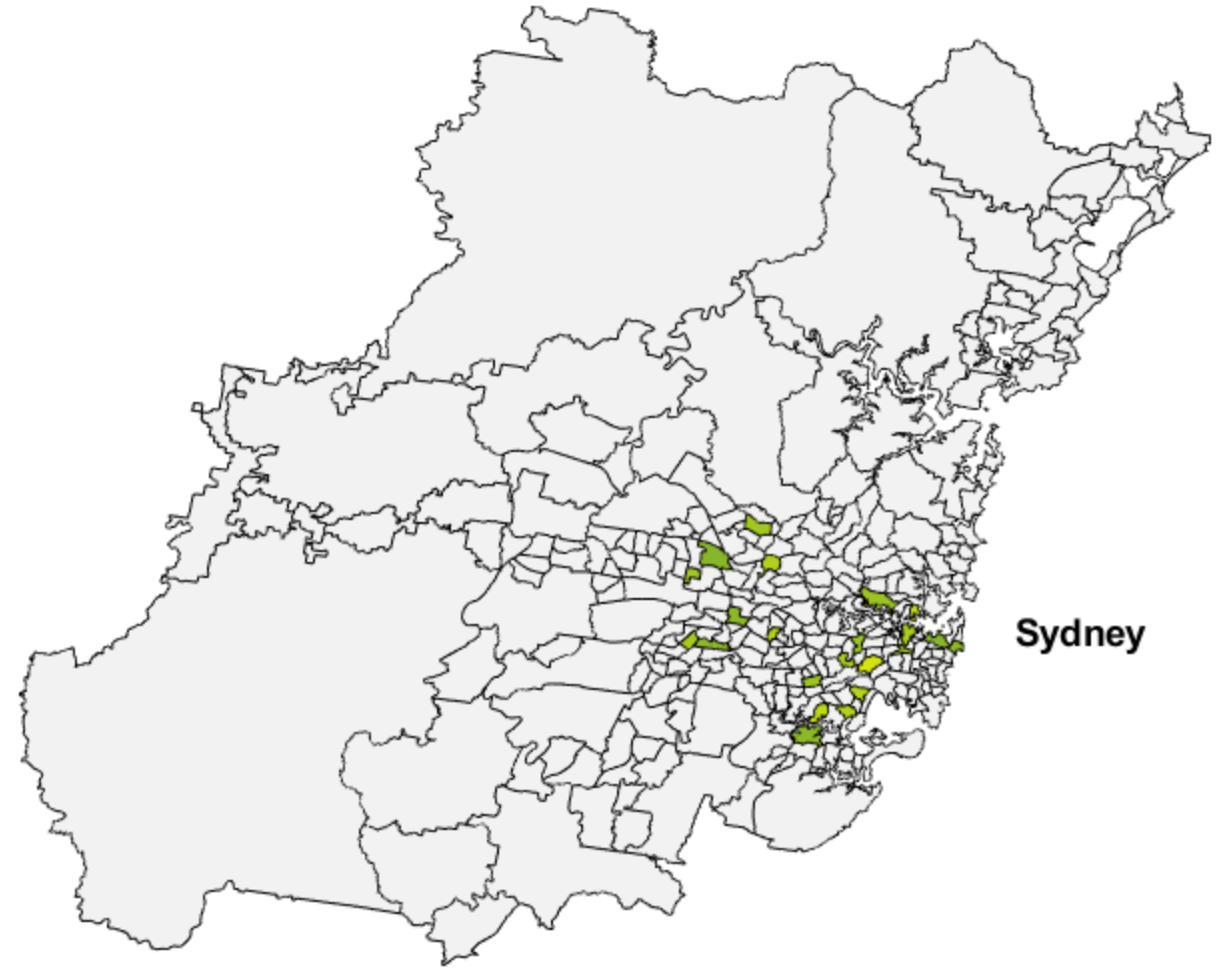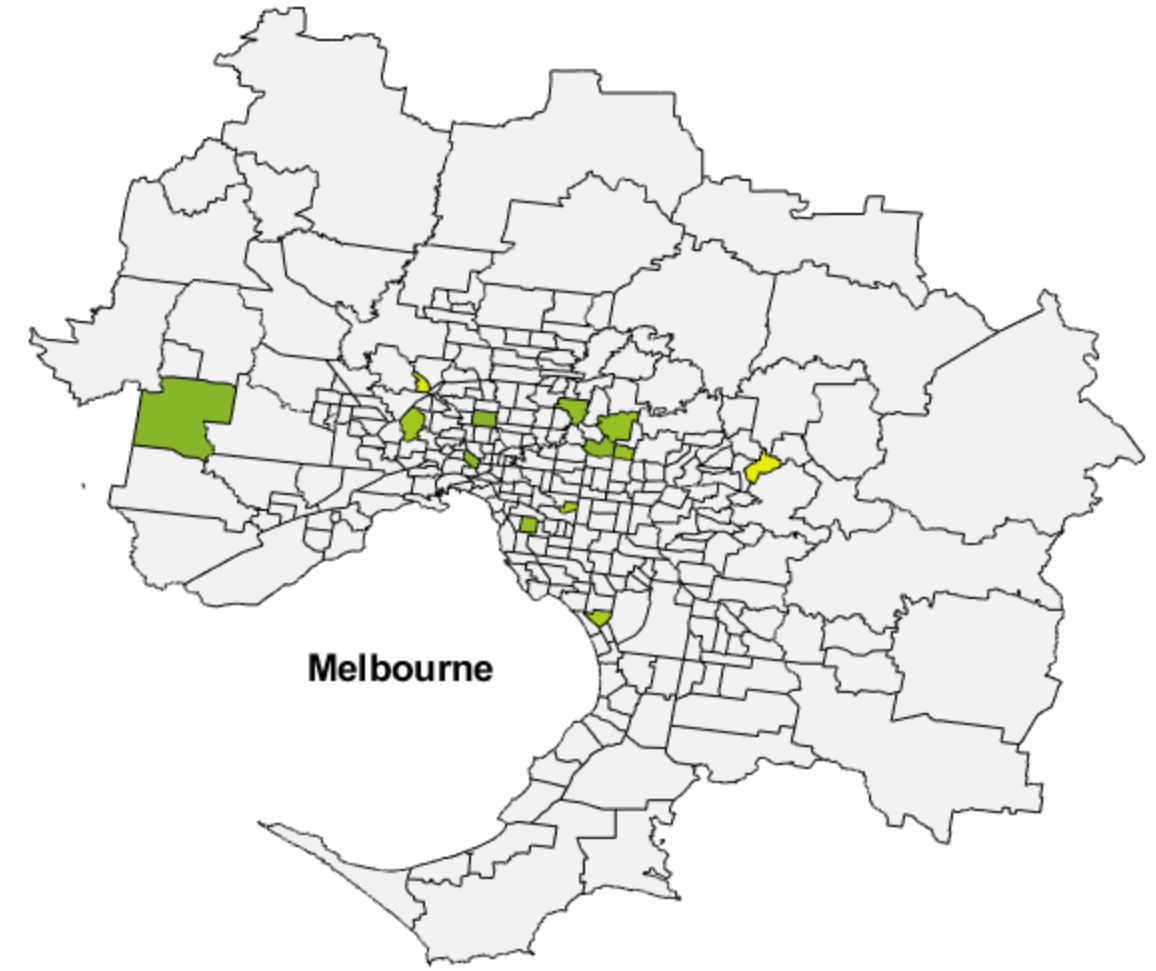

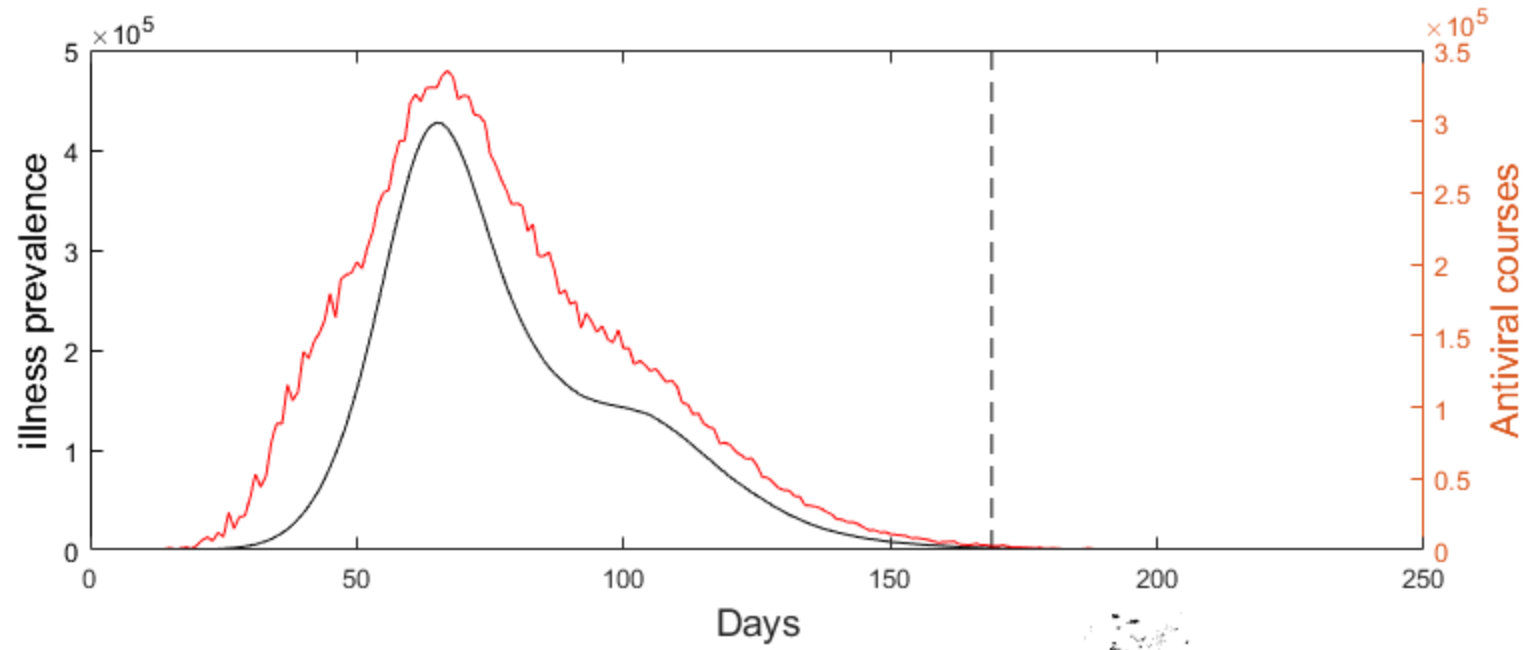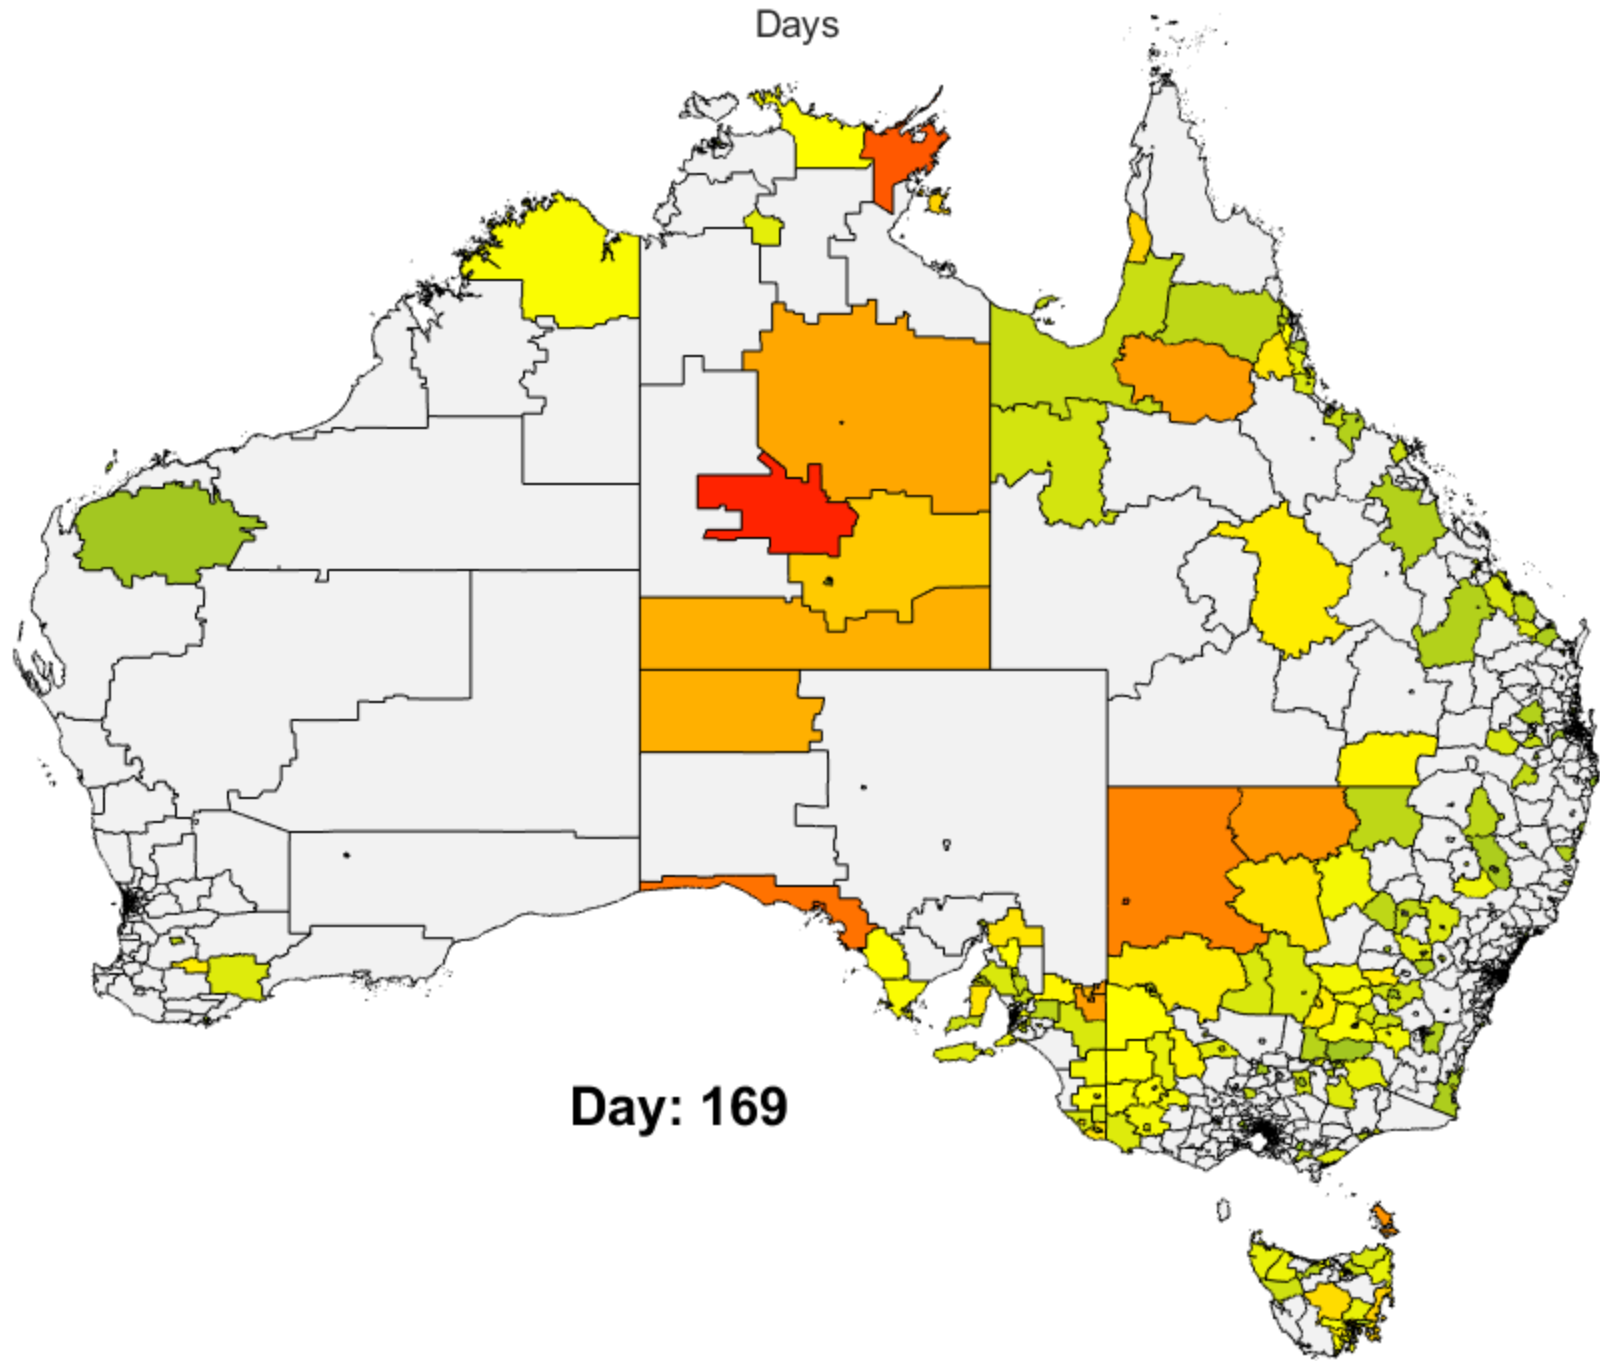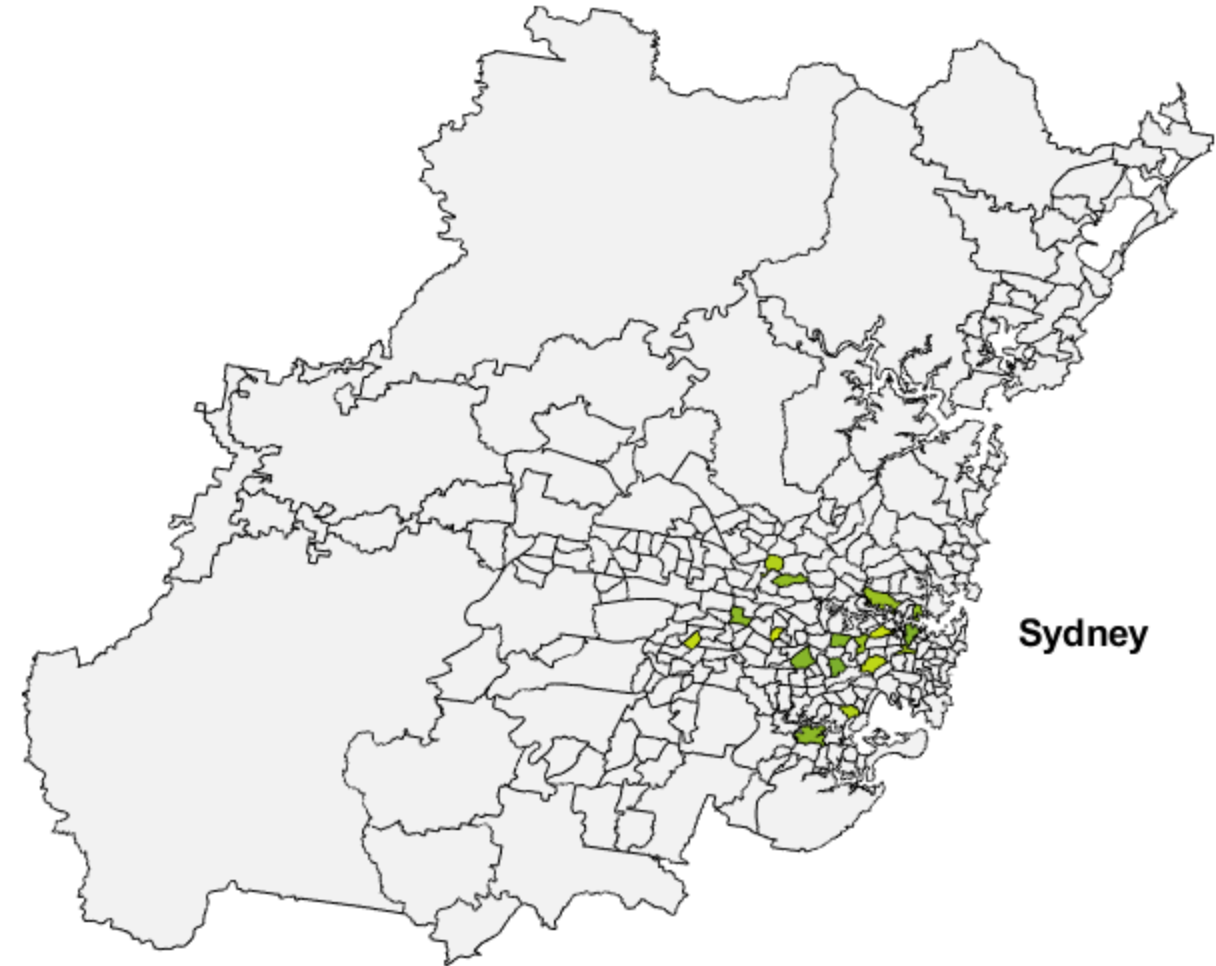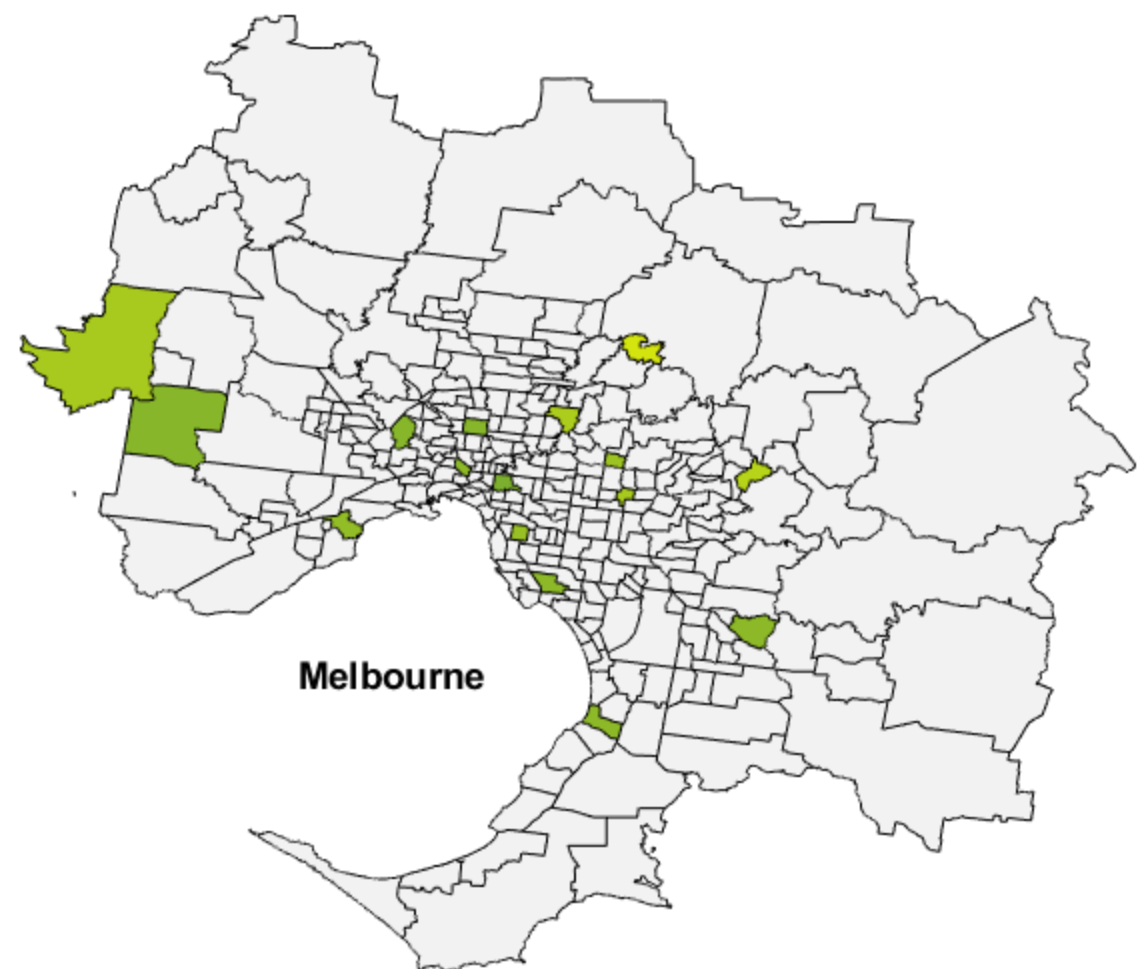

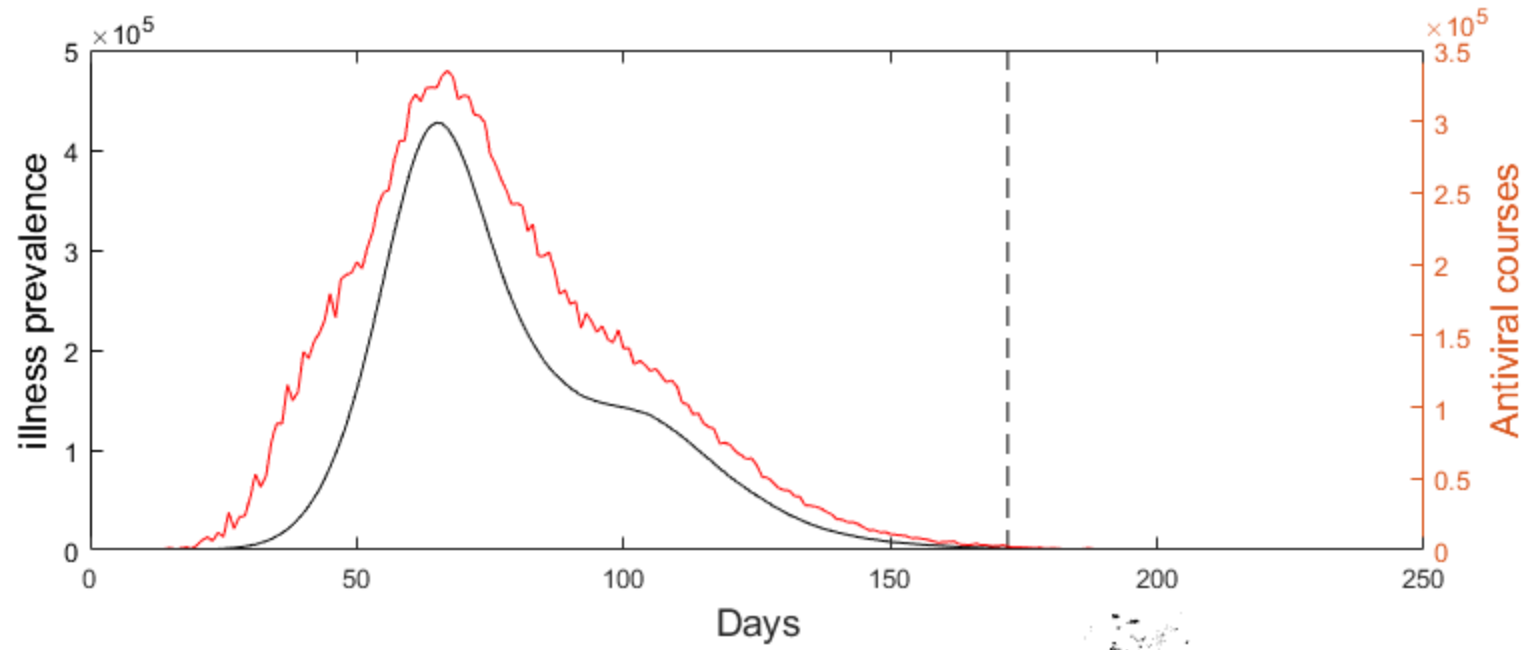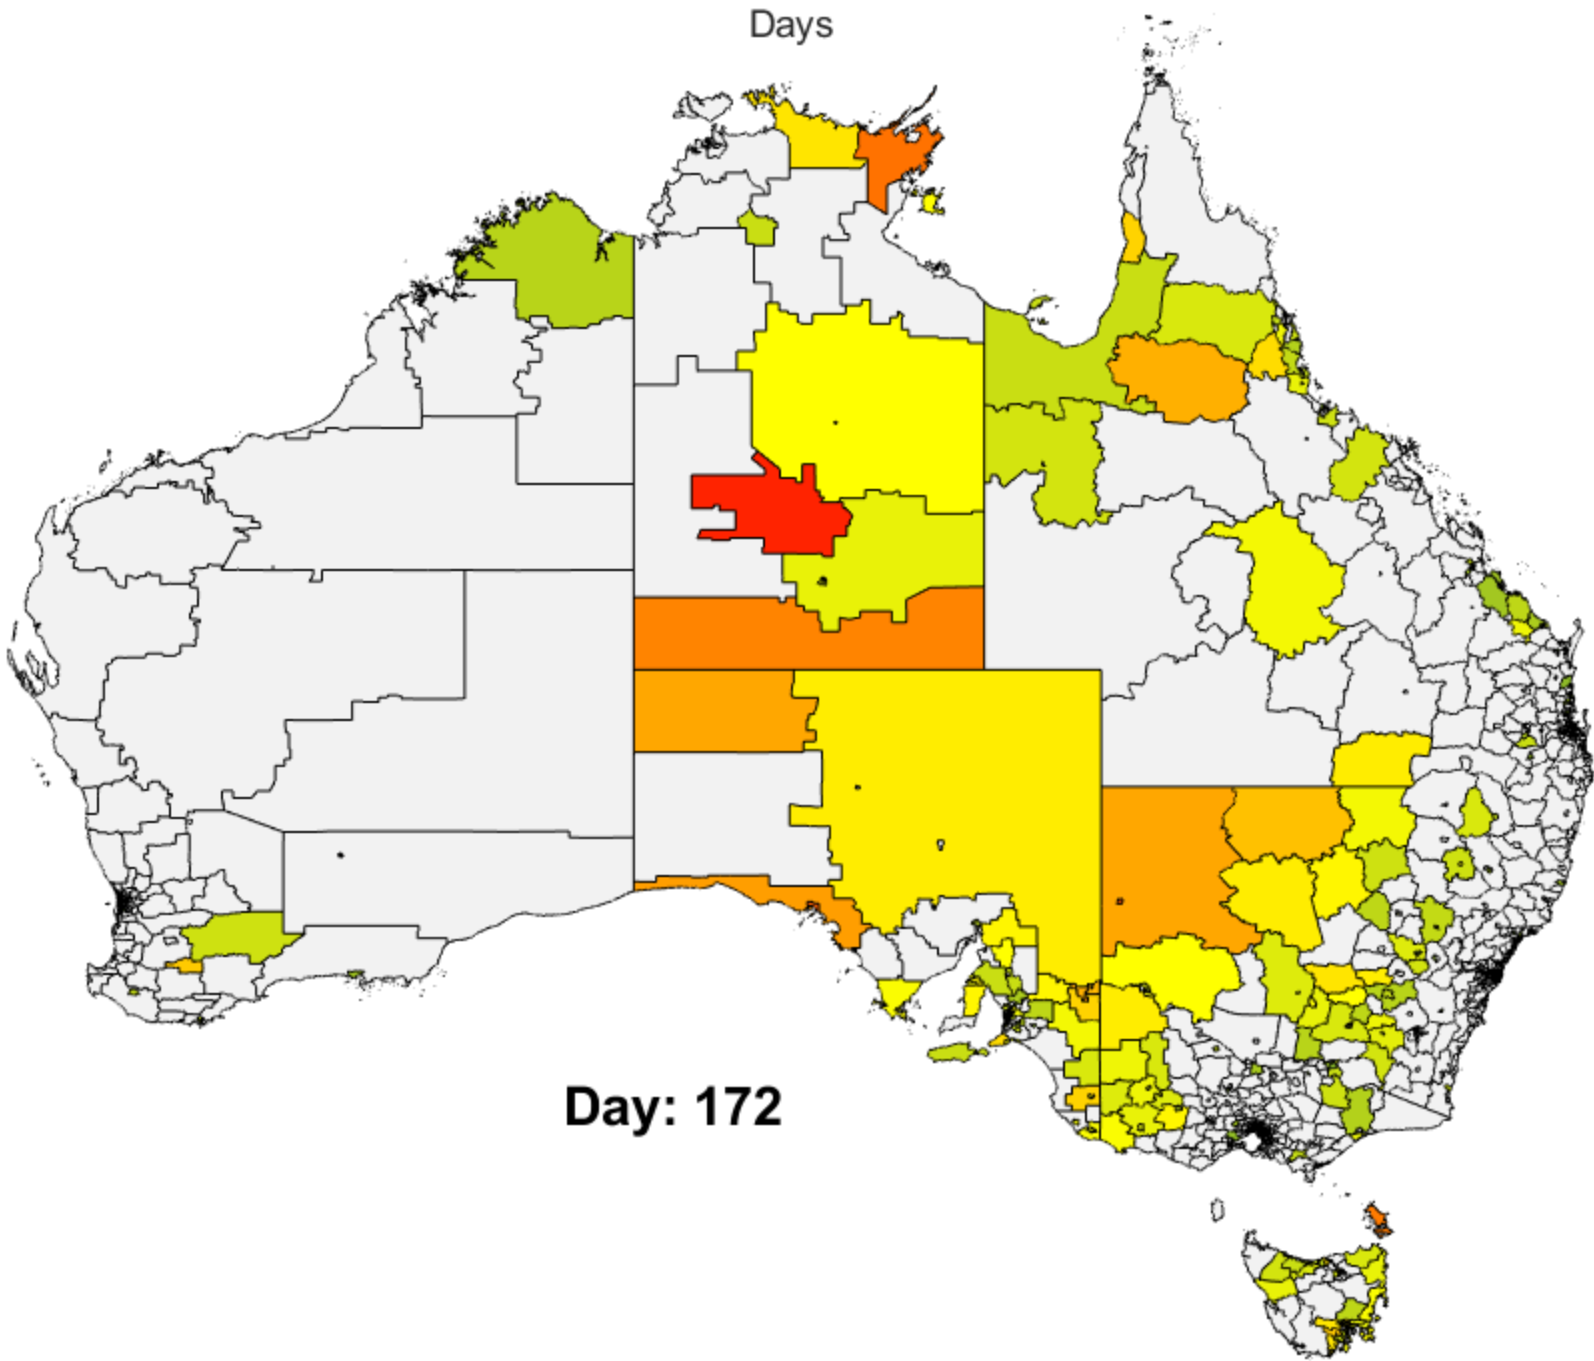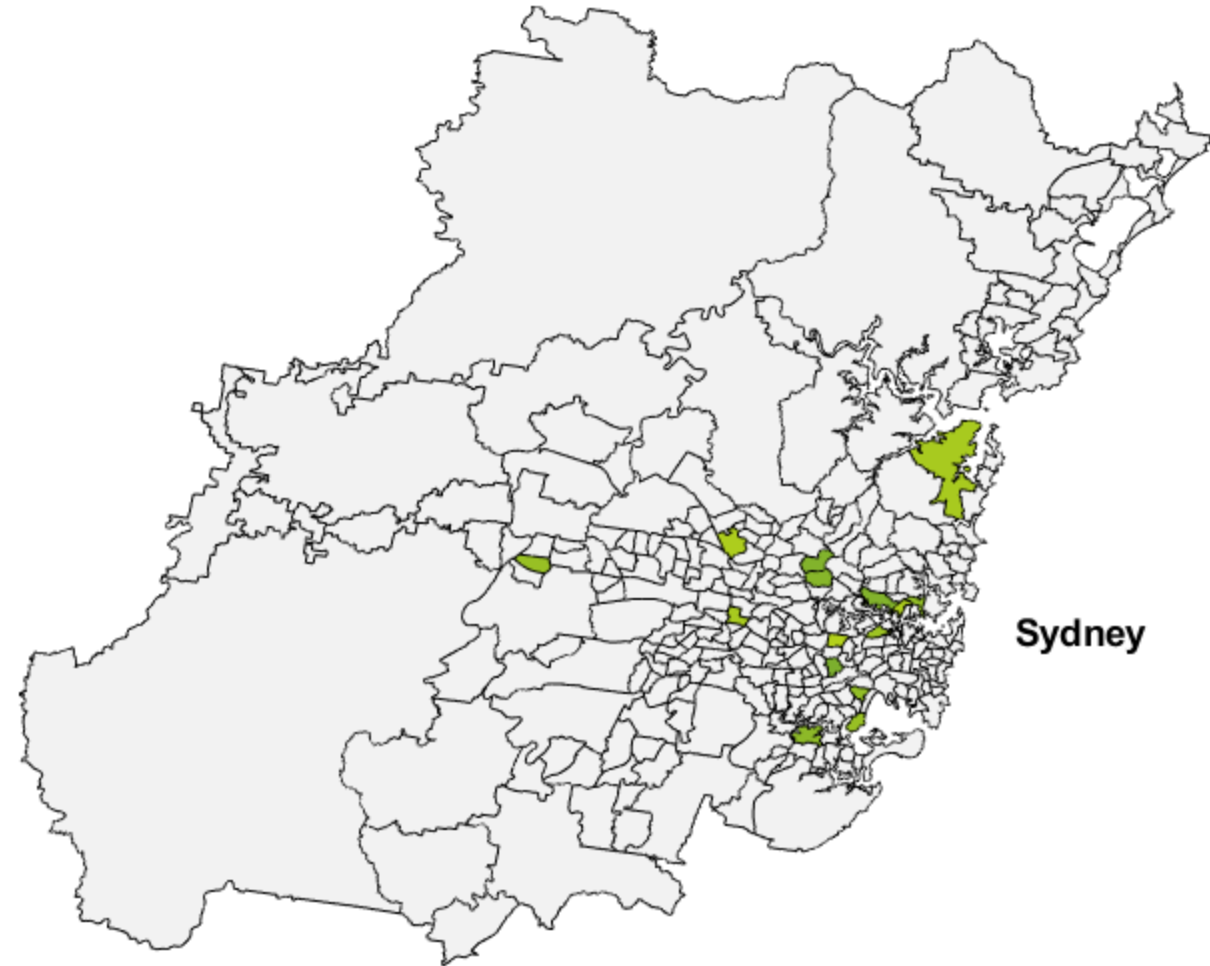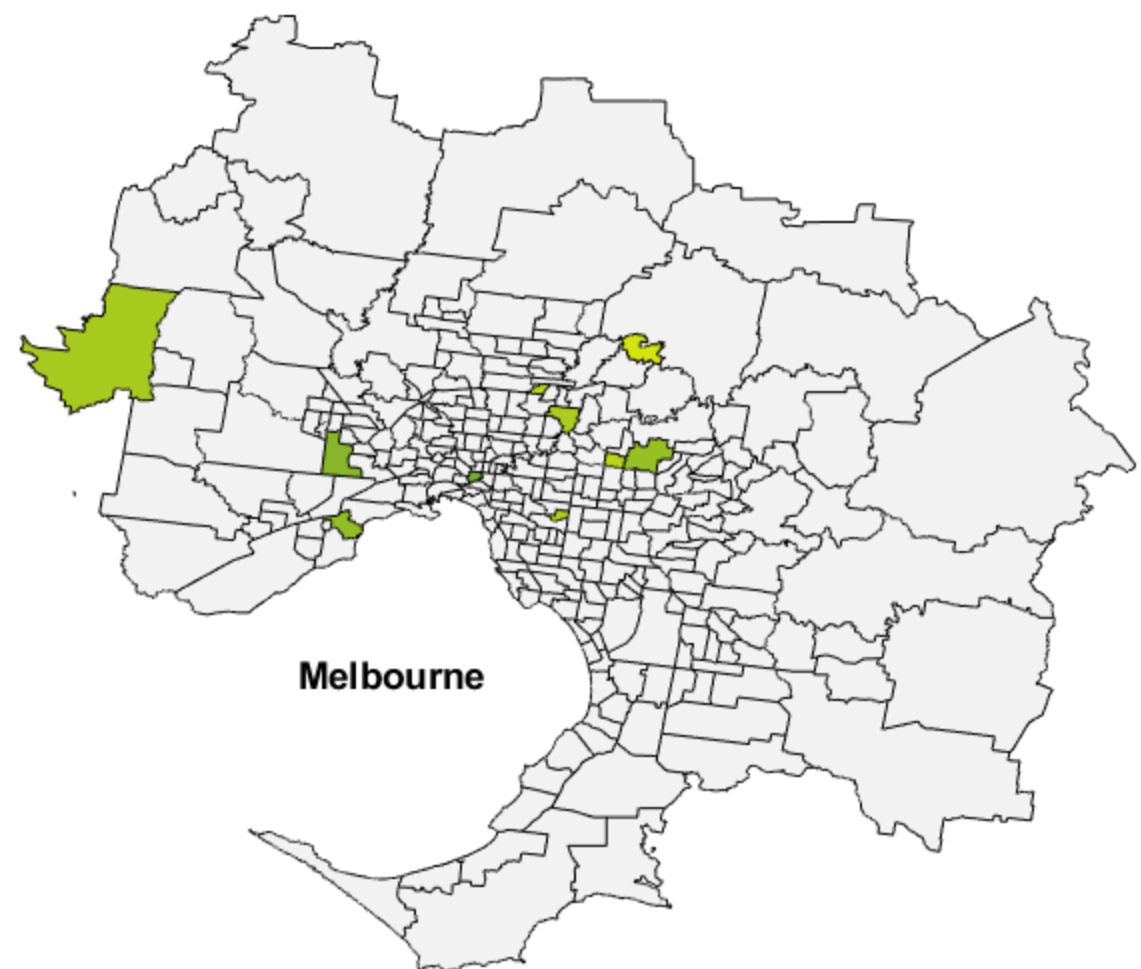



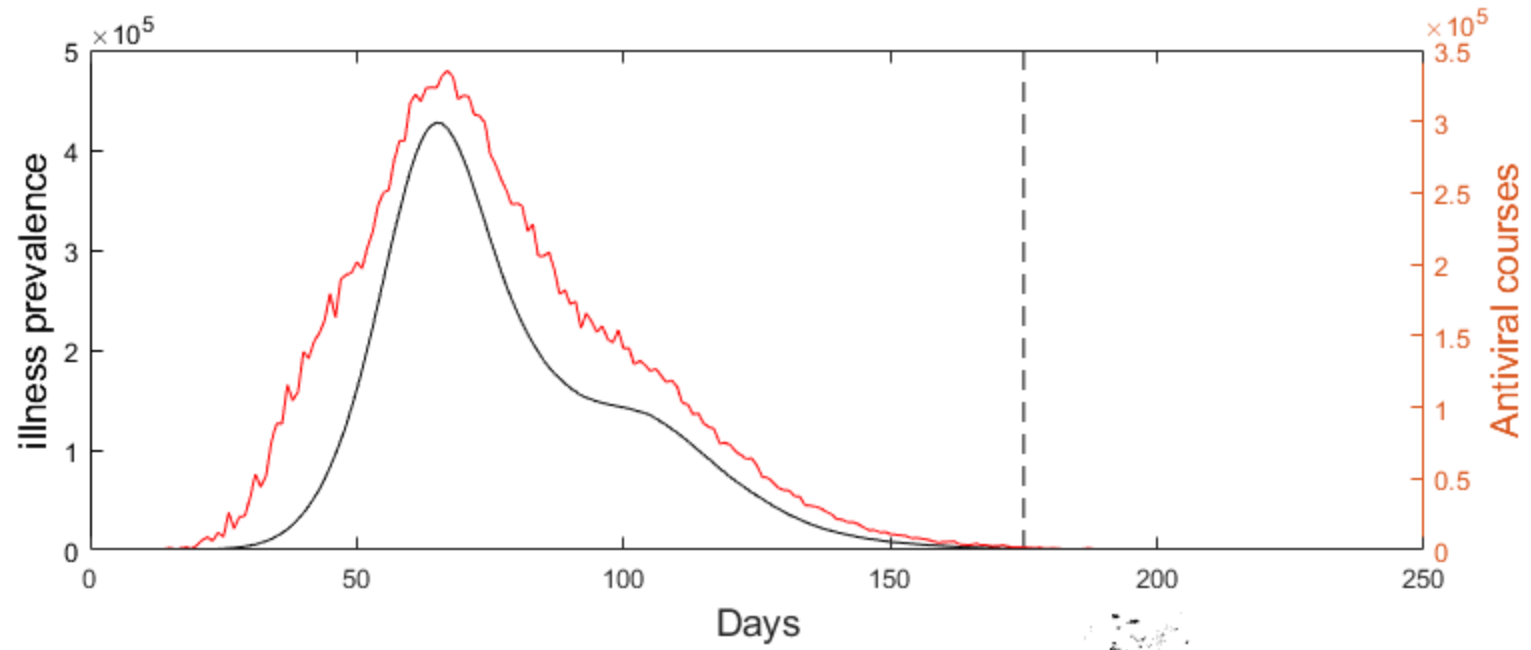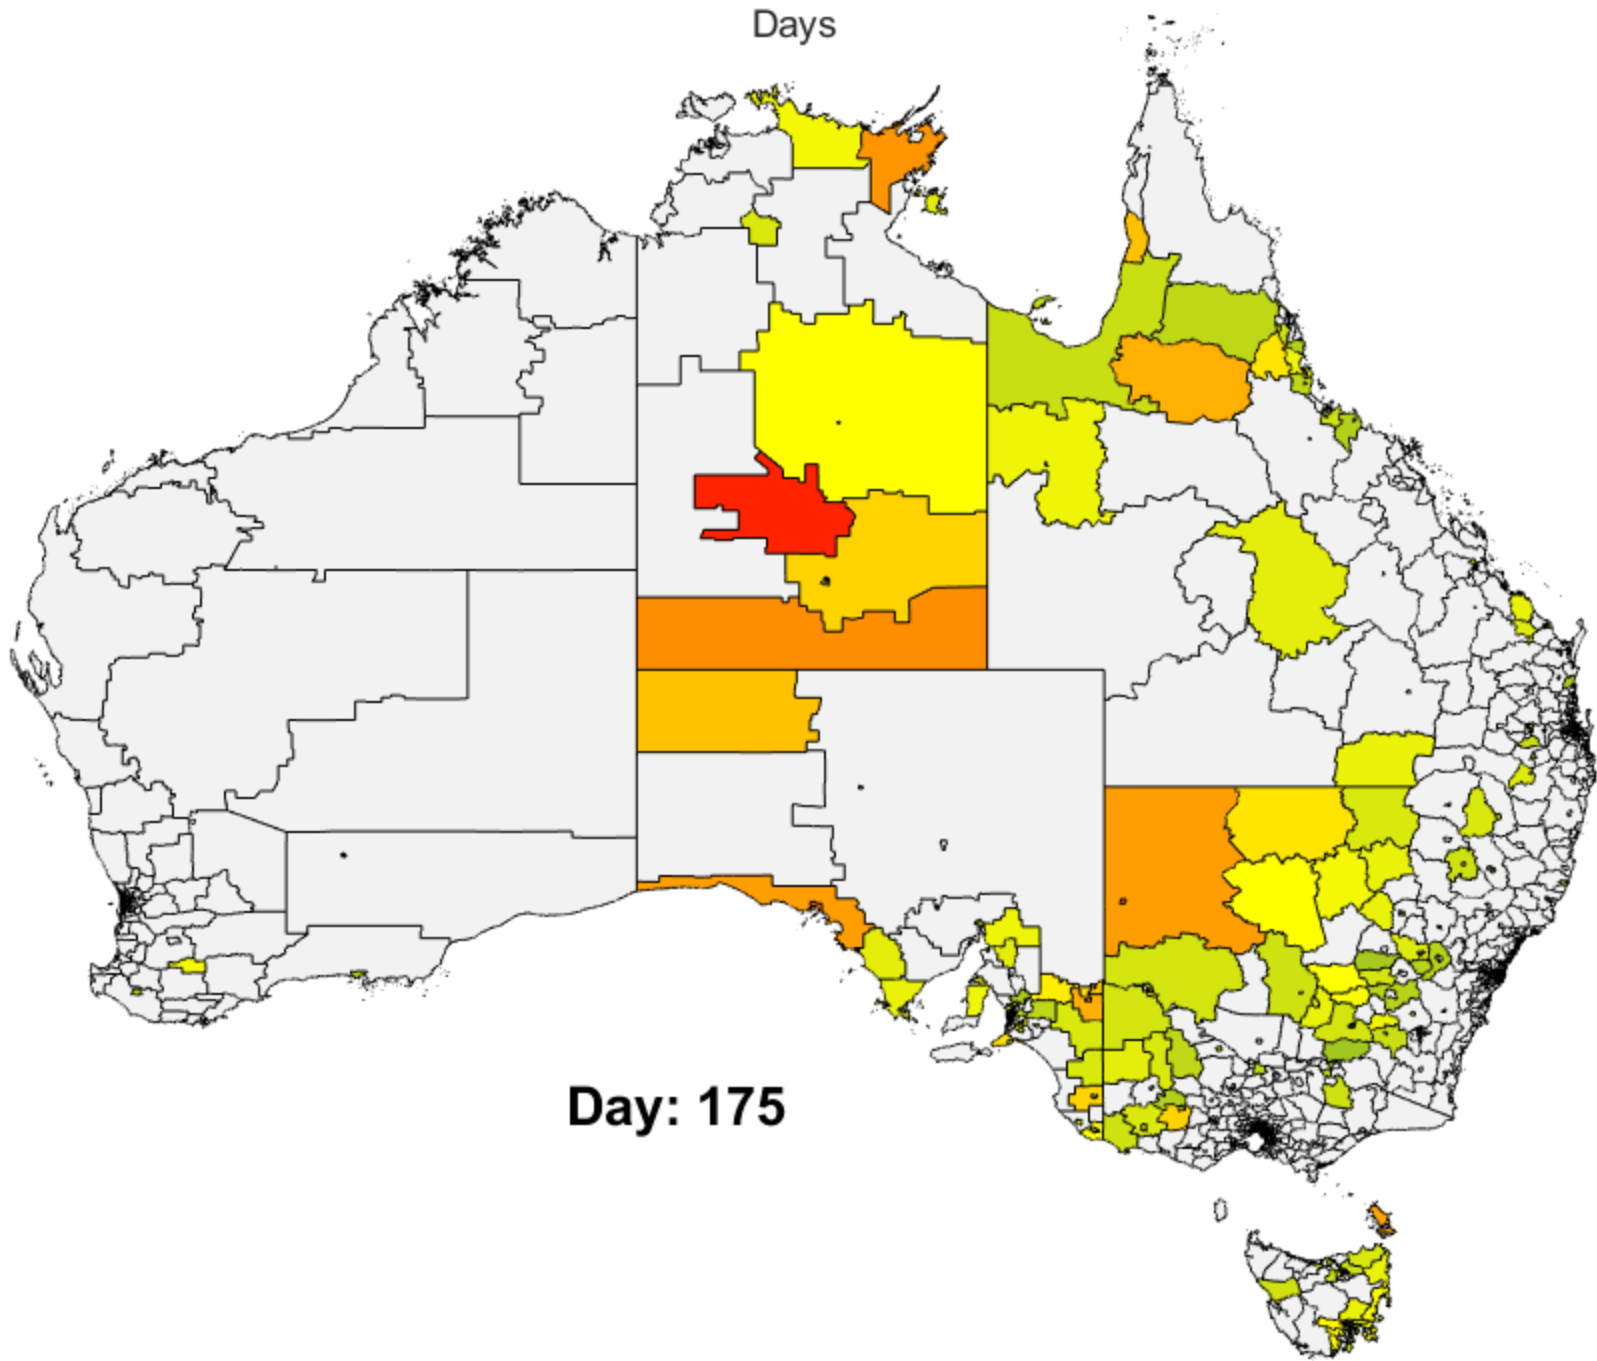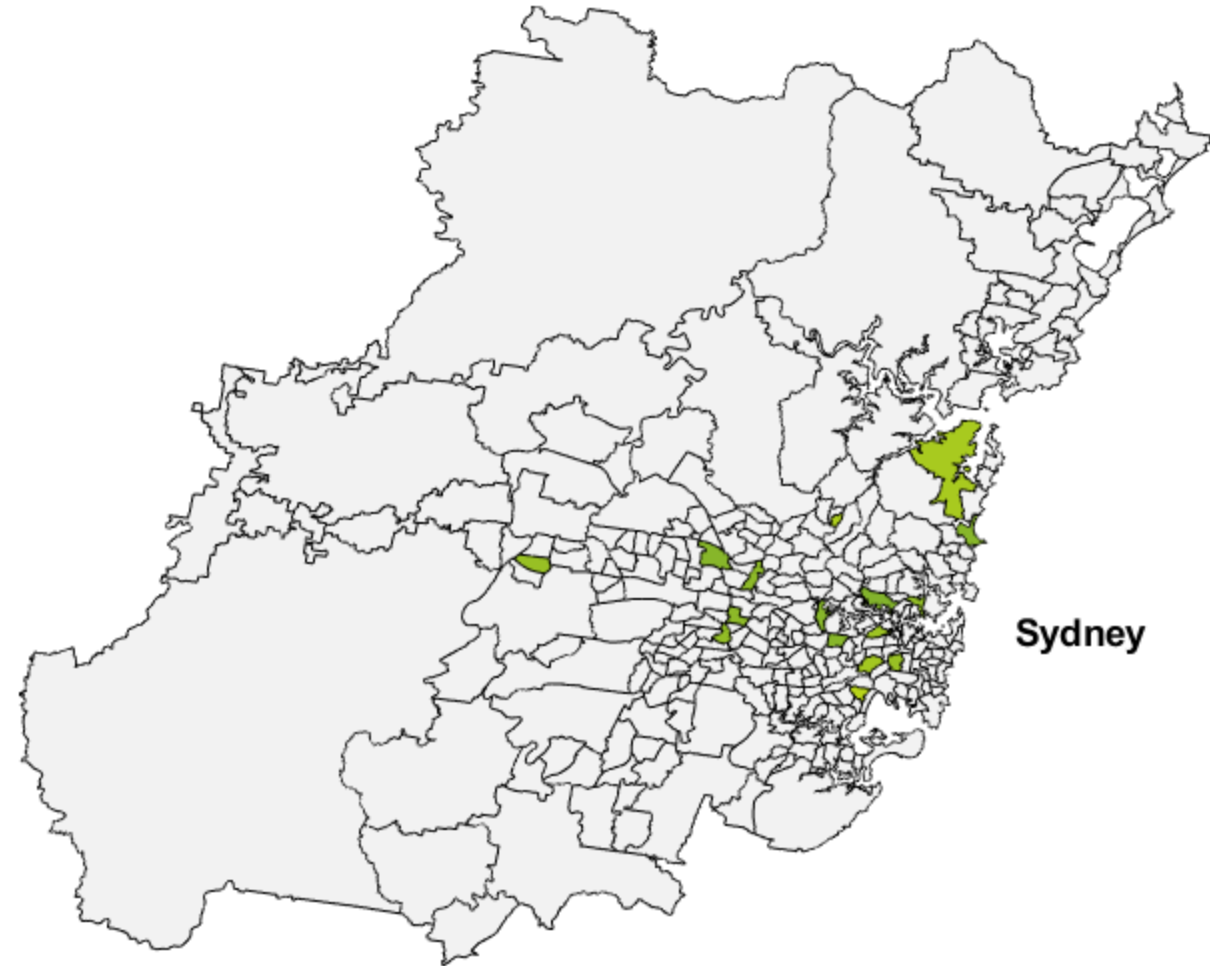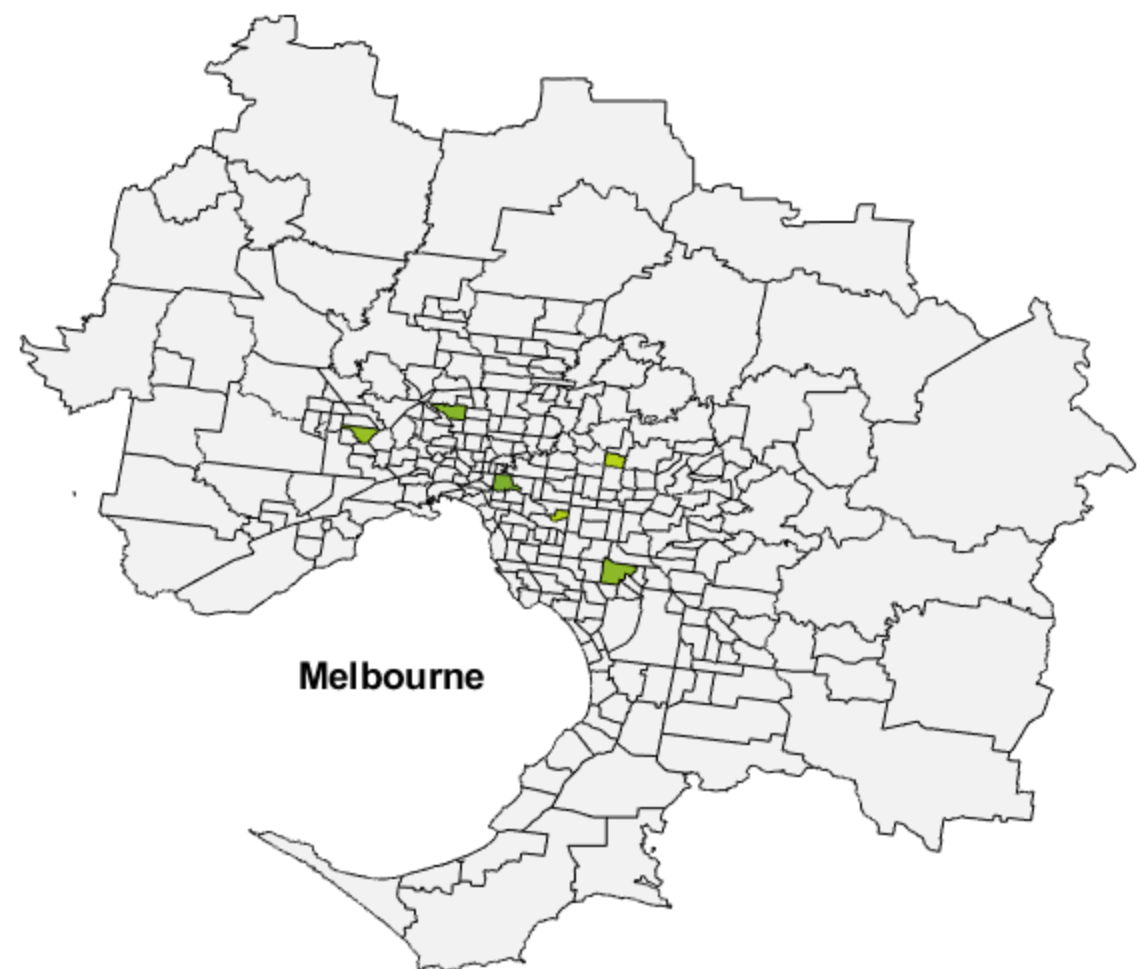

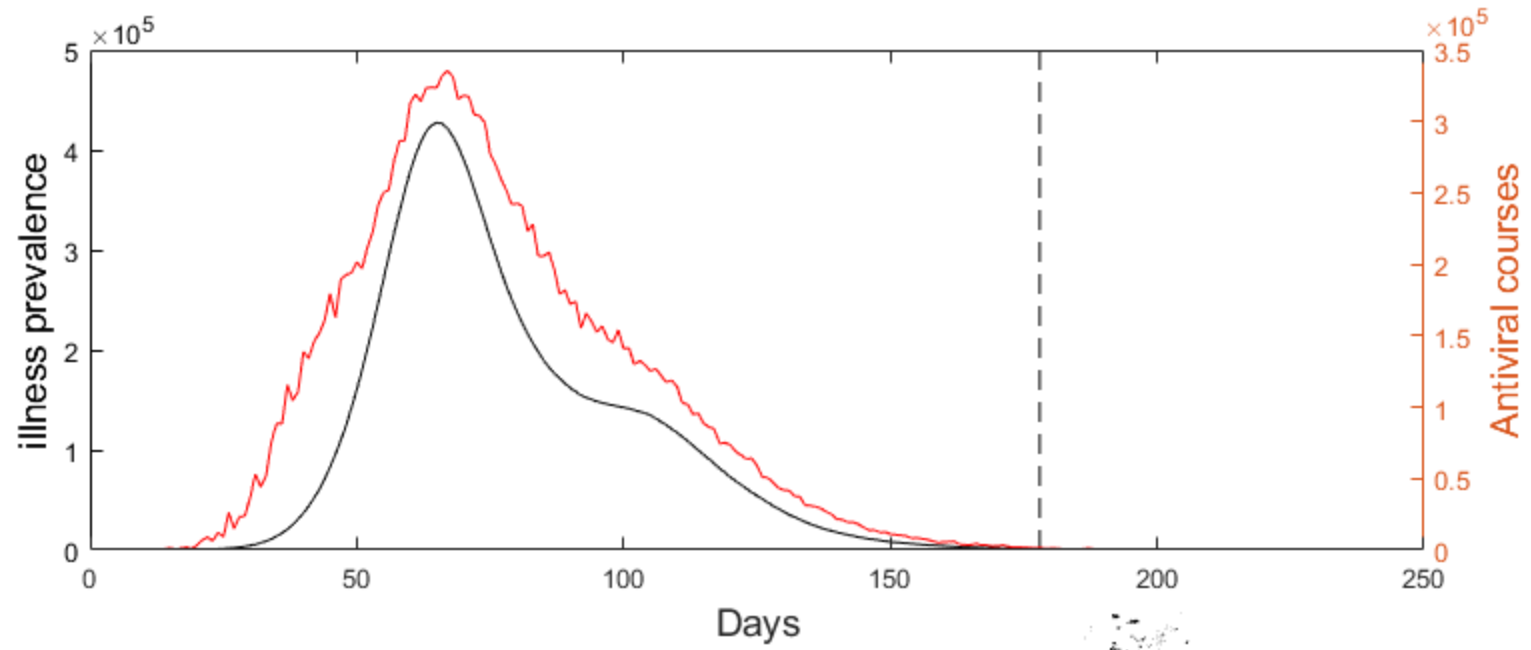

Days

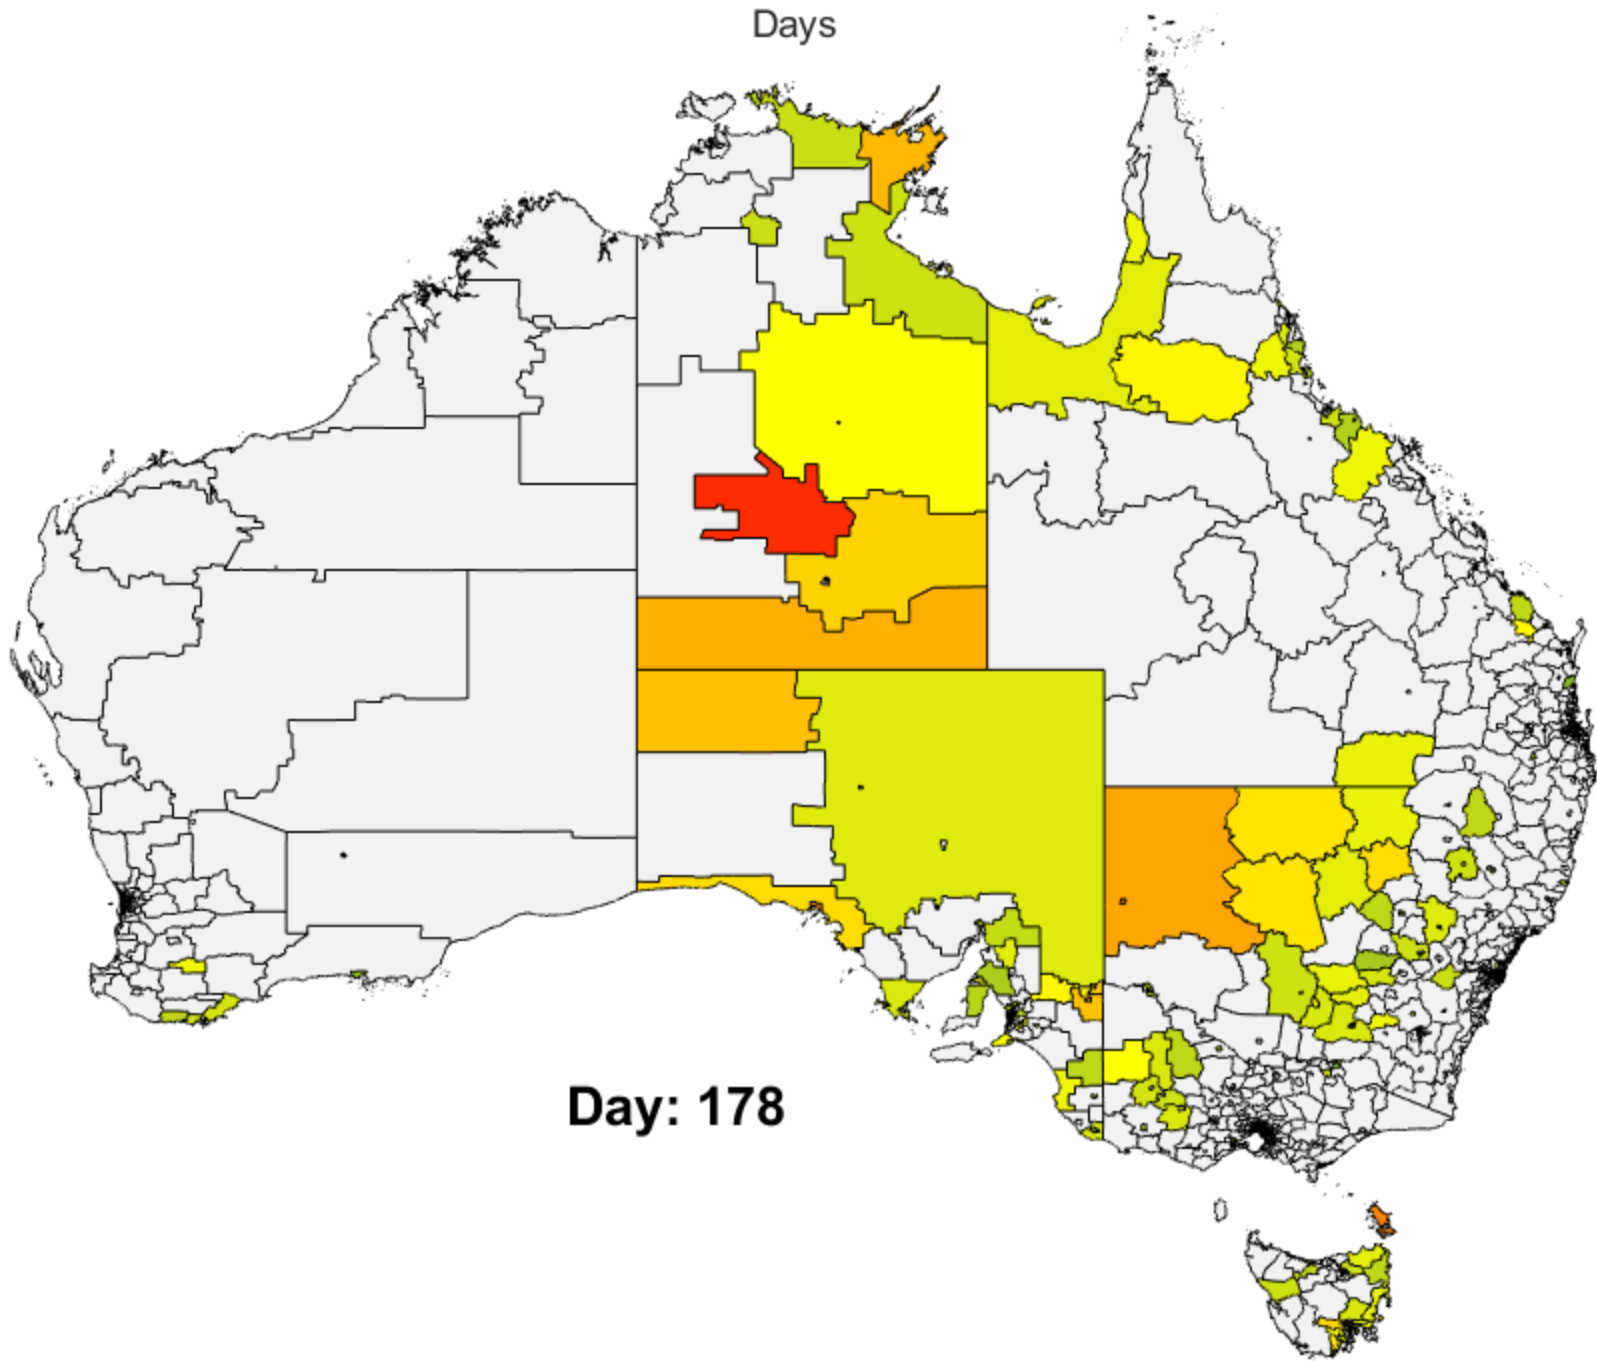

Day: 178

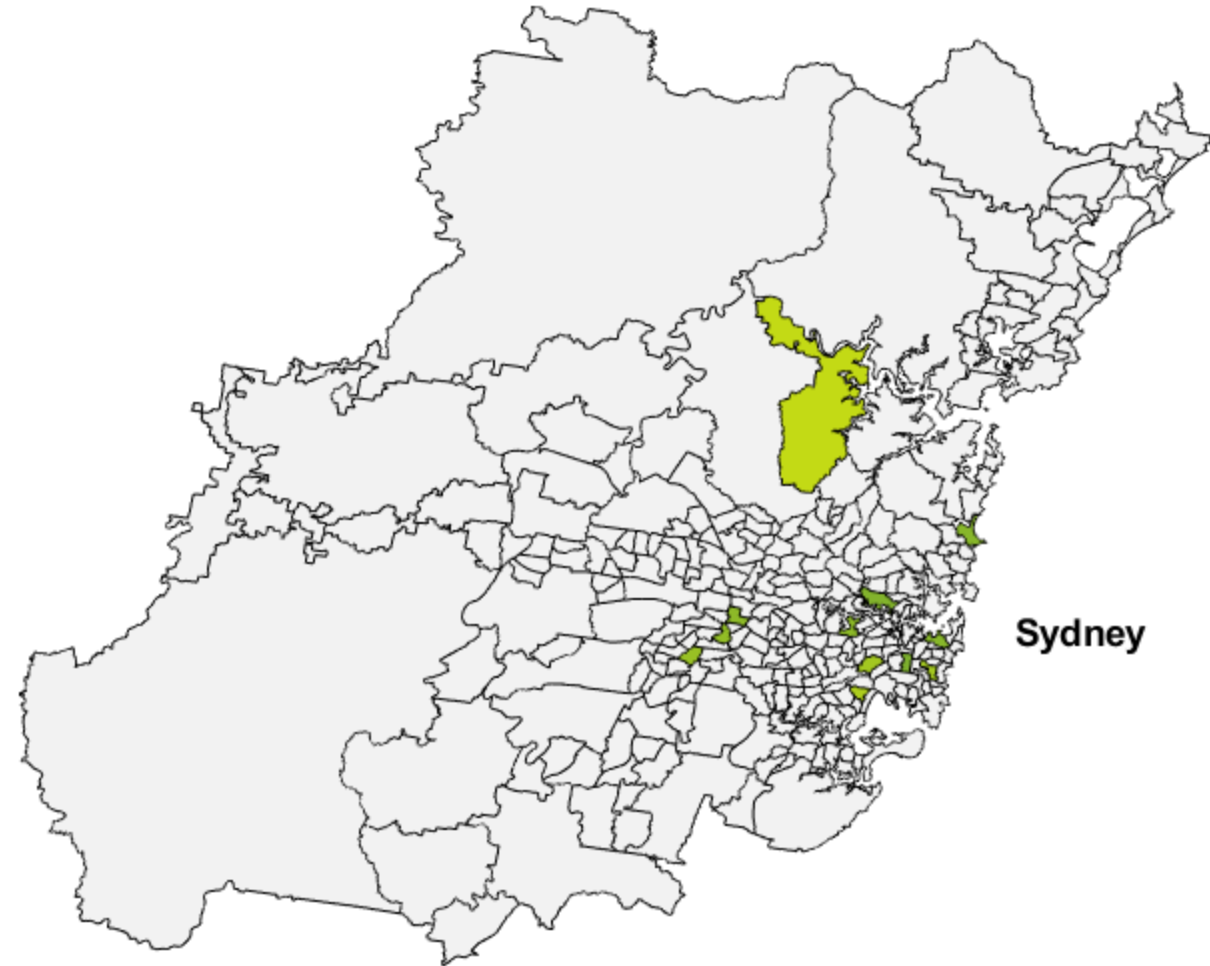

Sydney

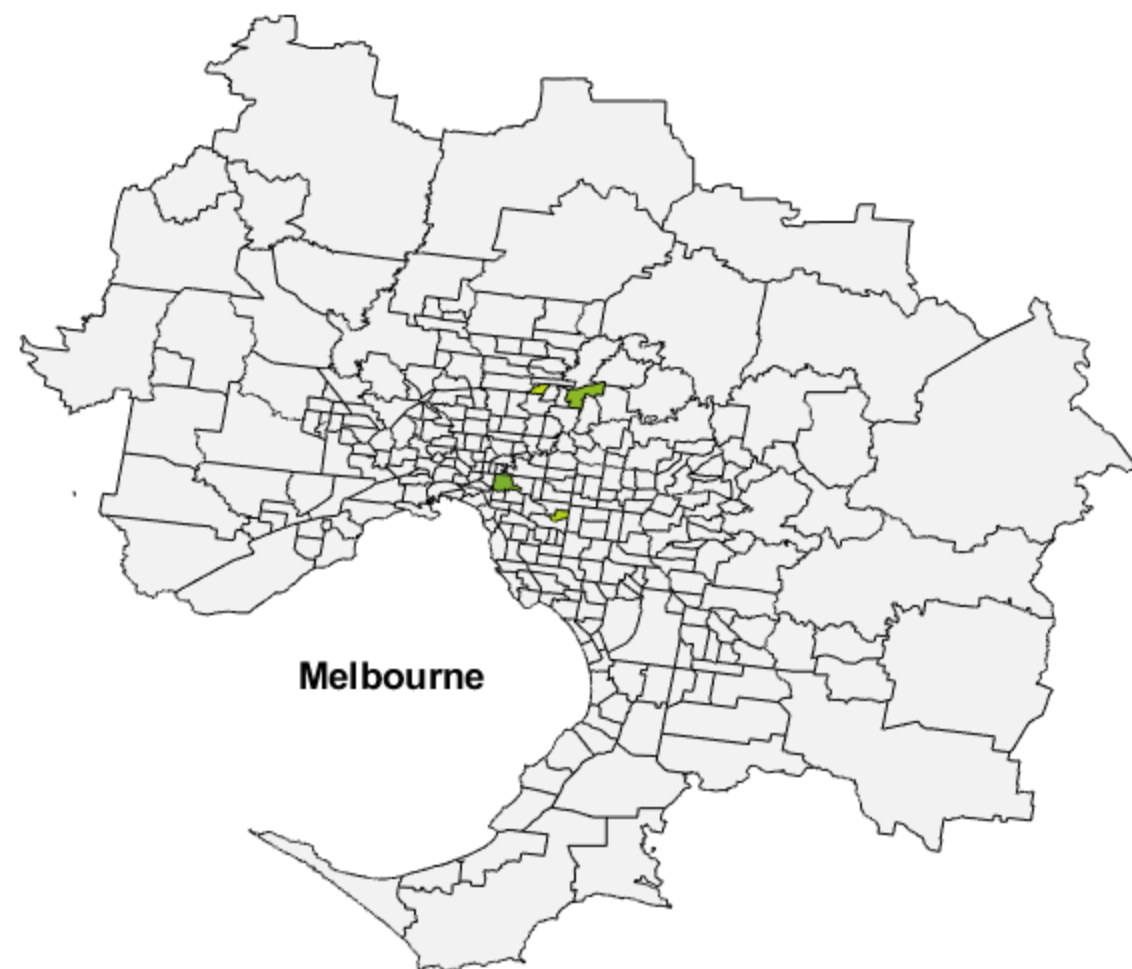

Melbourne

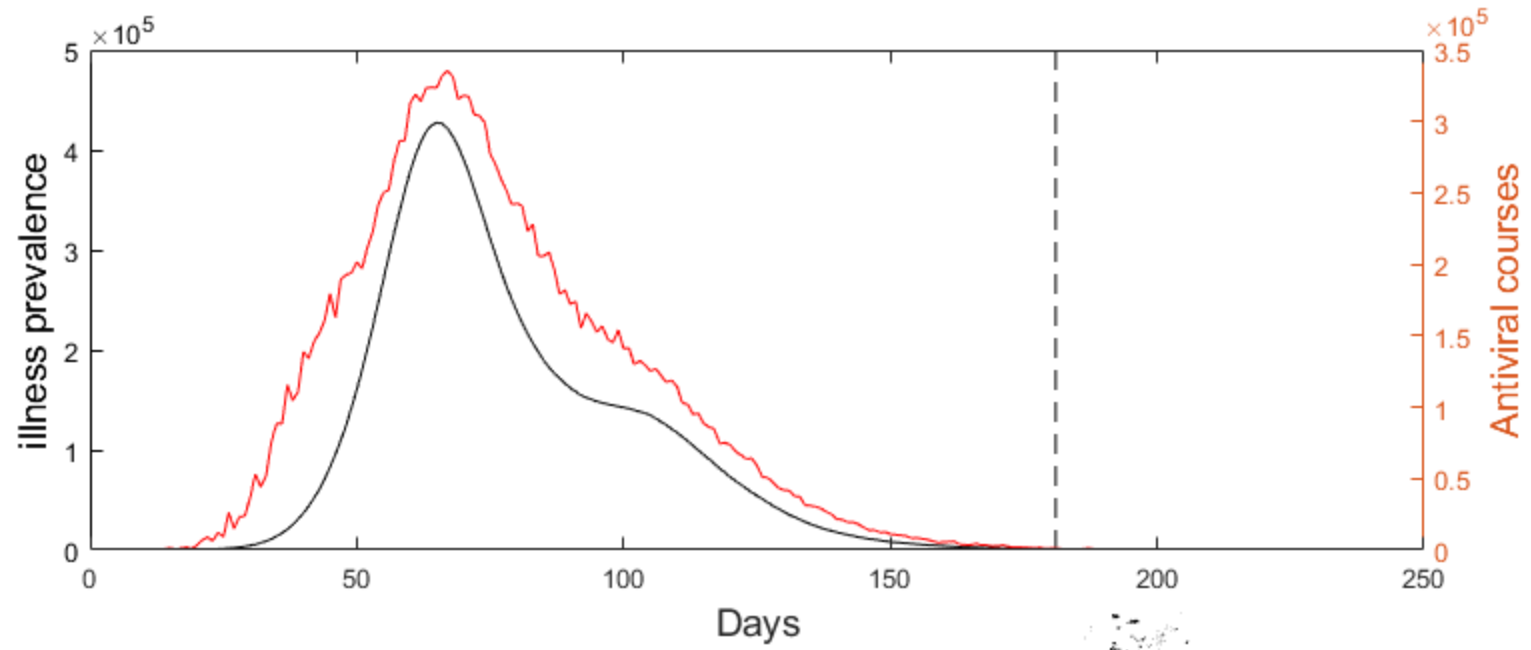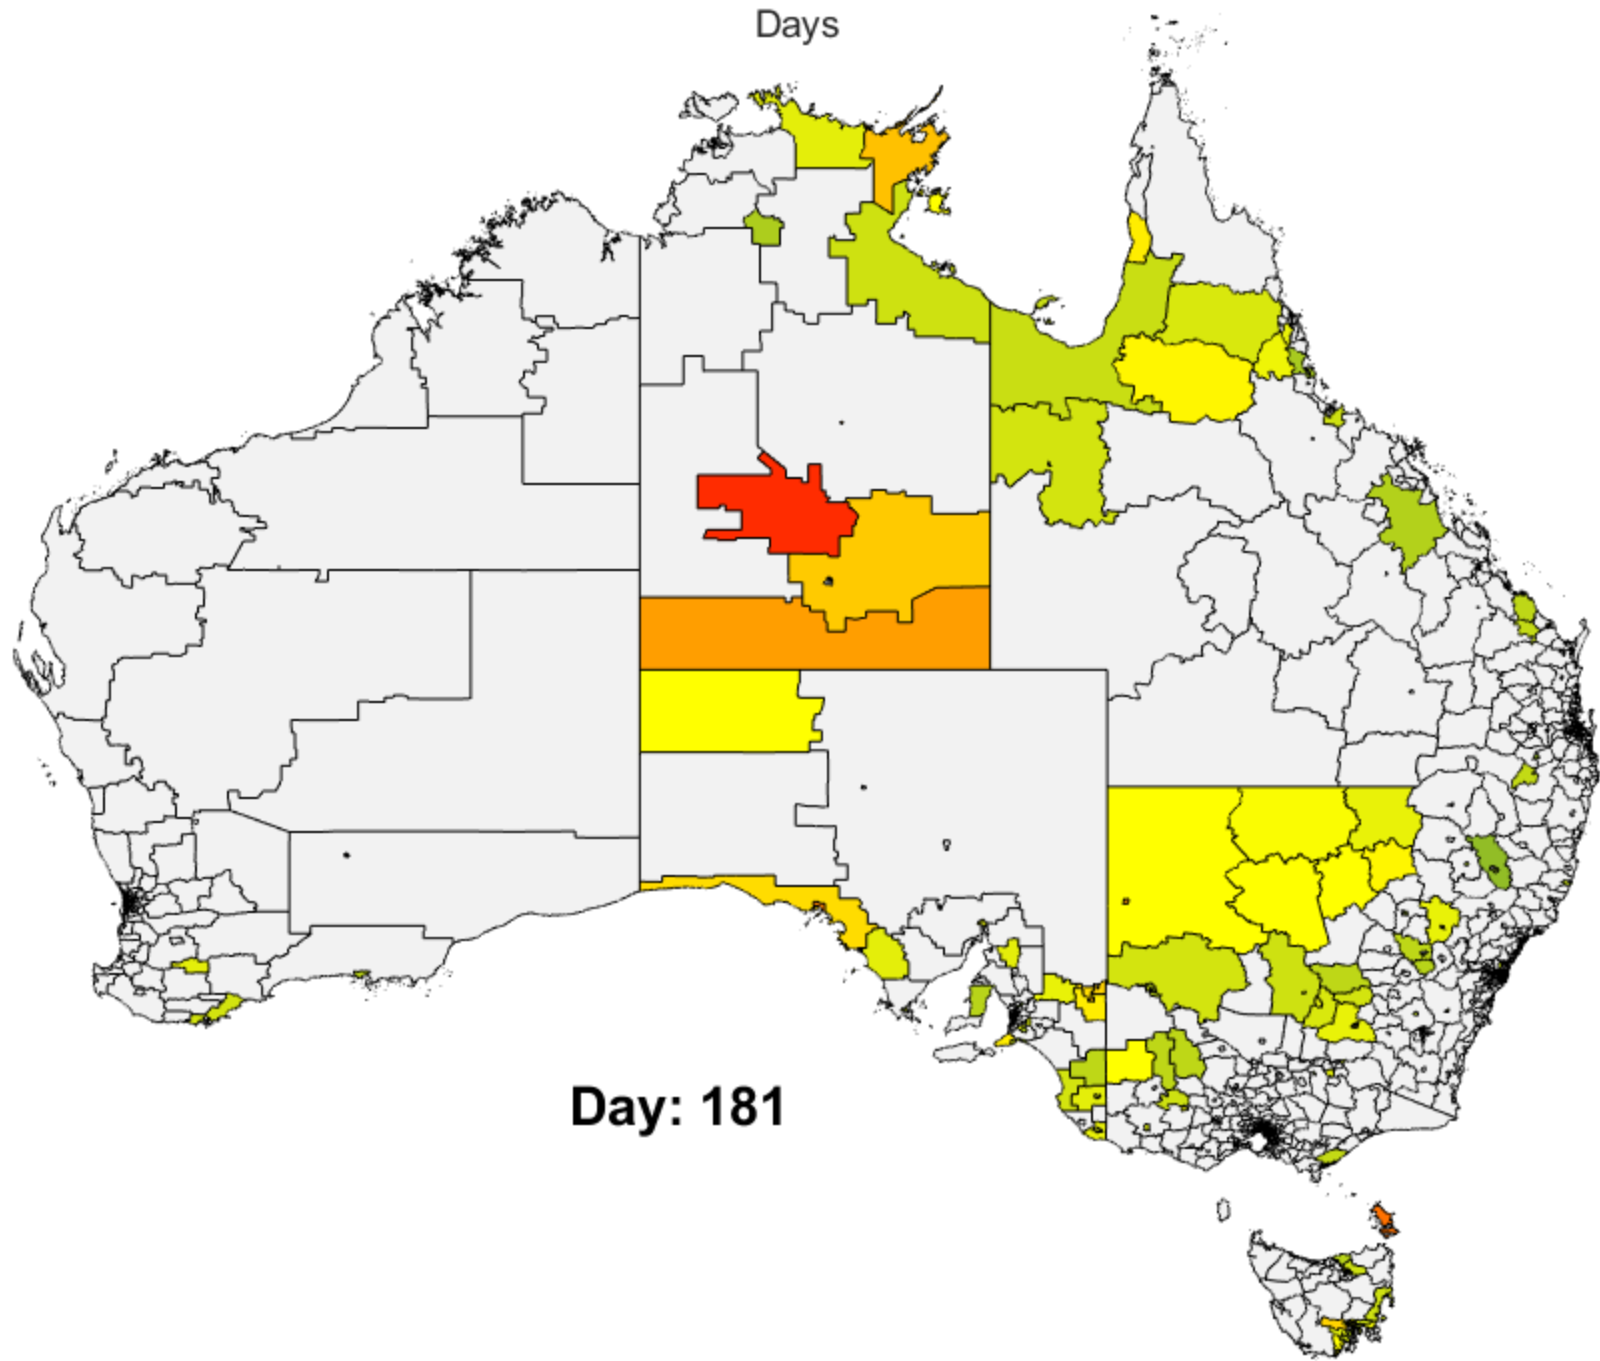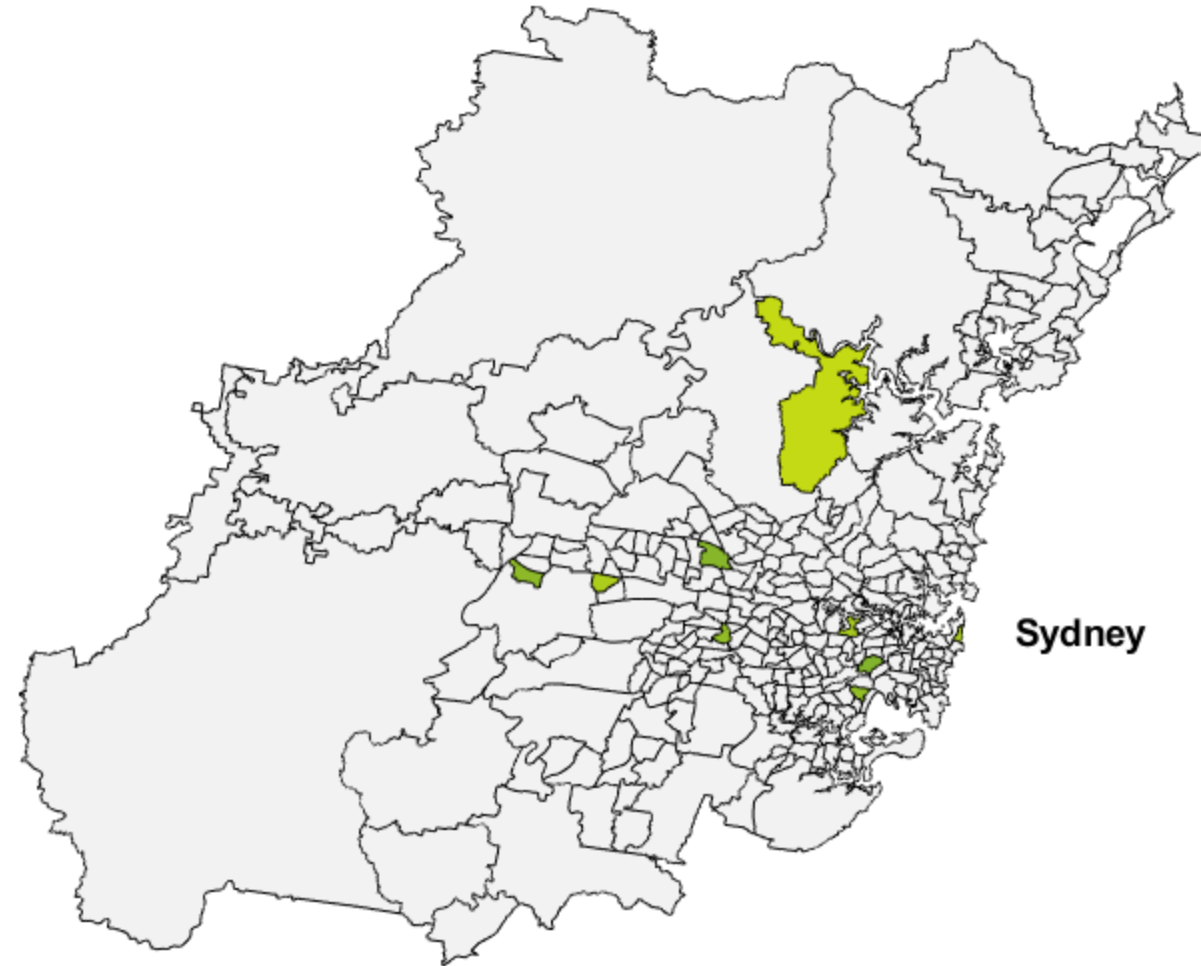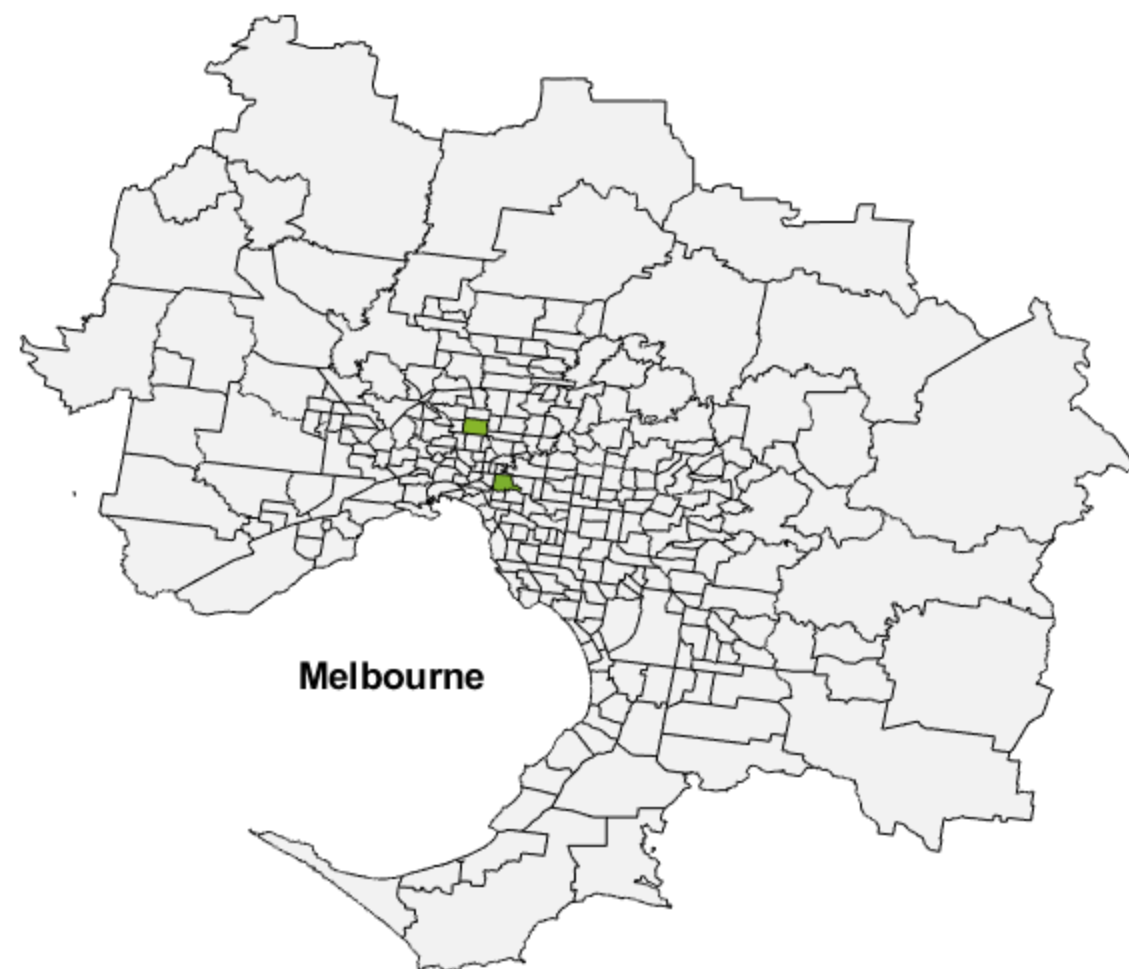



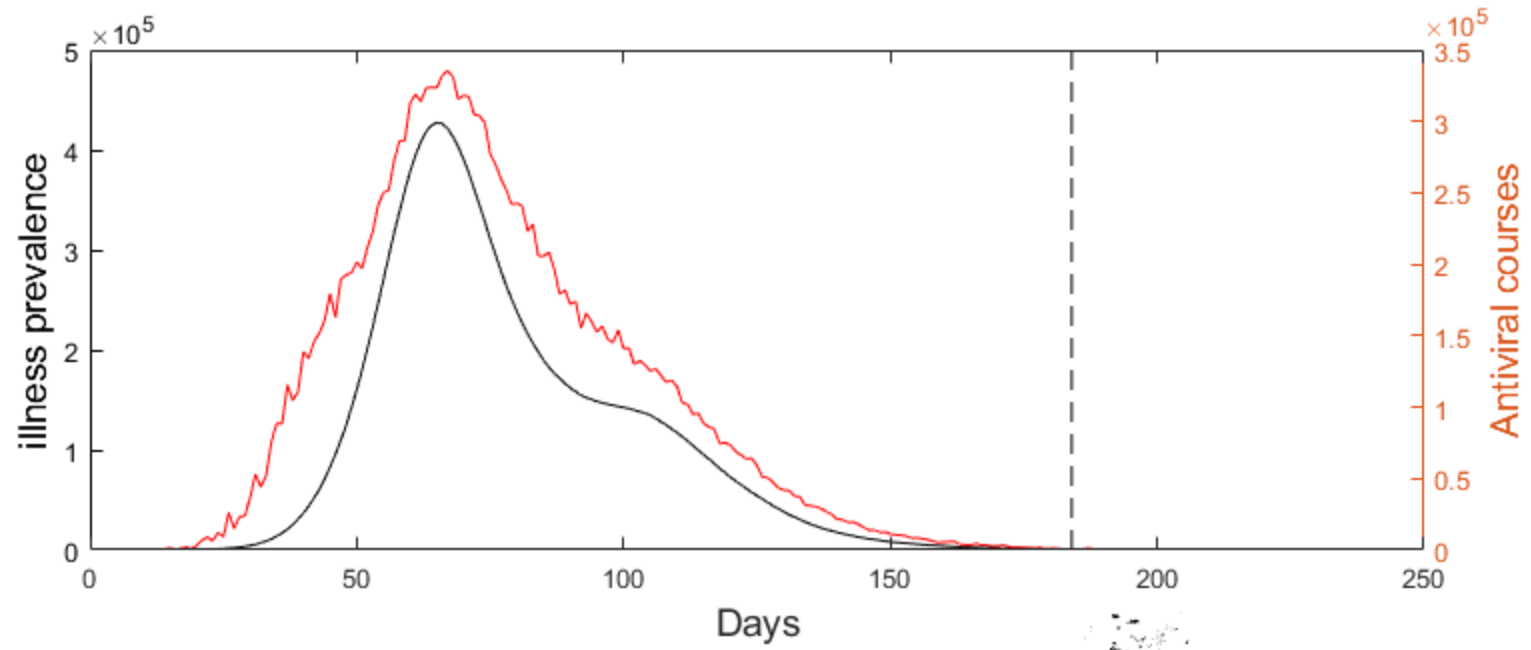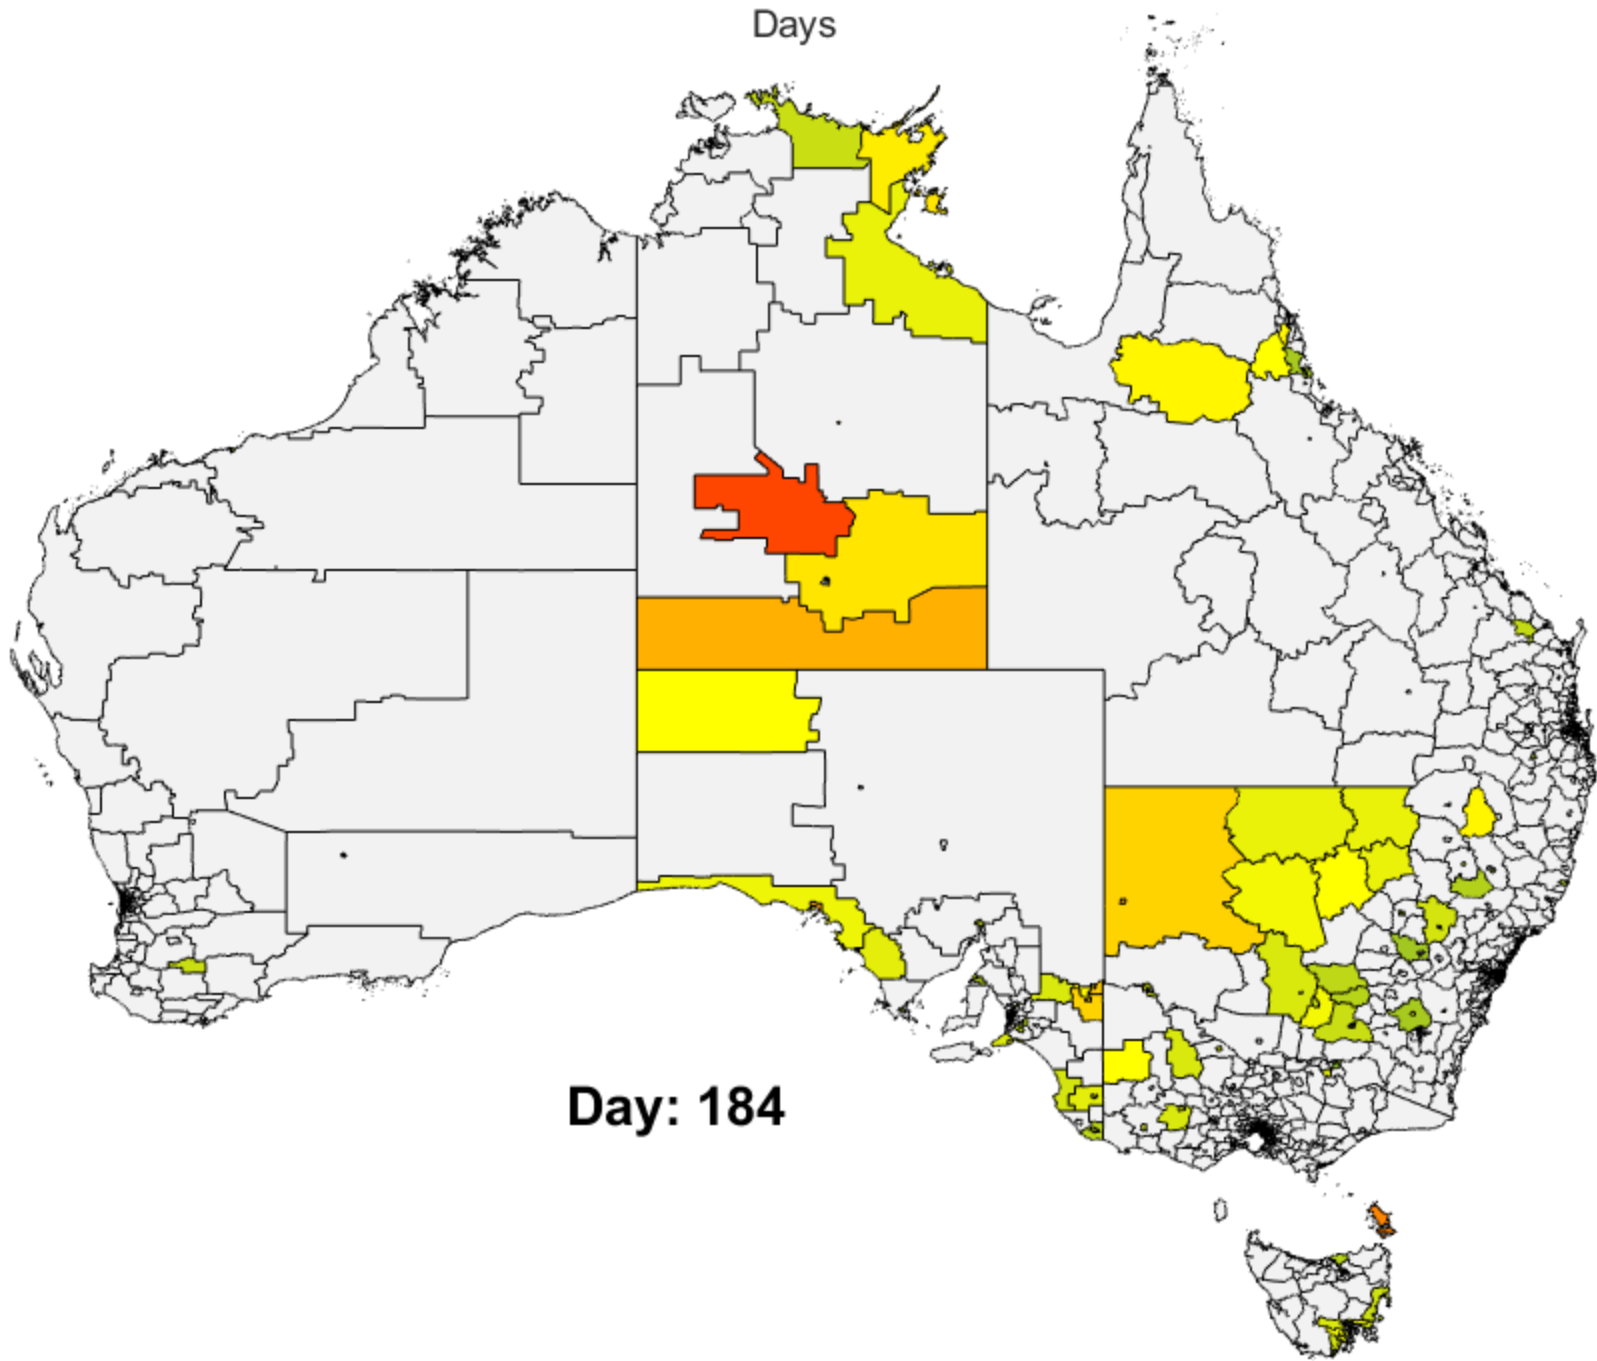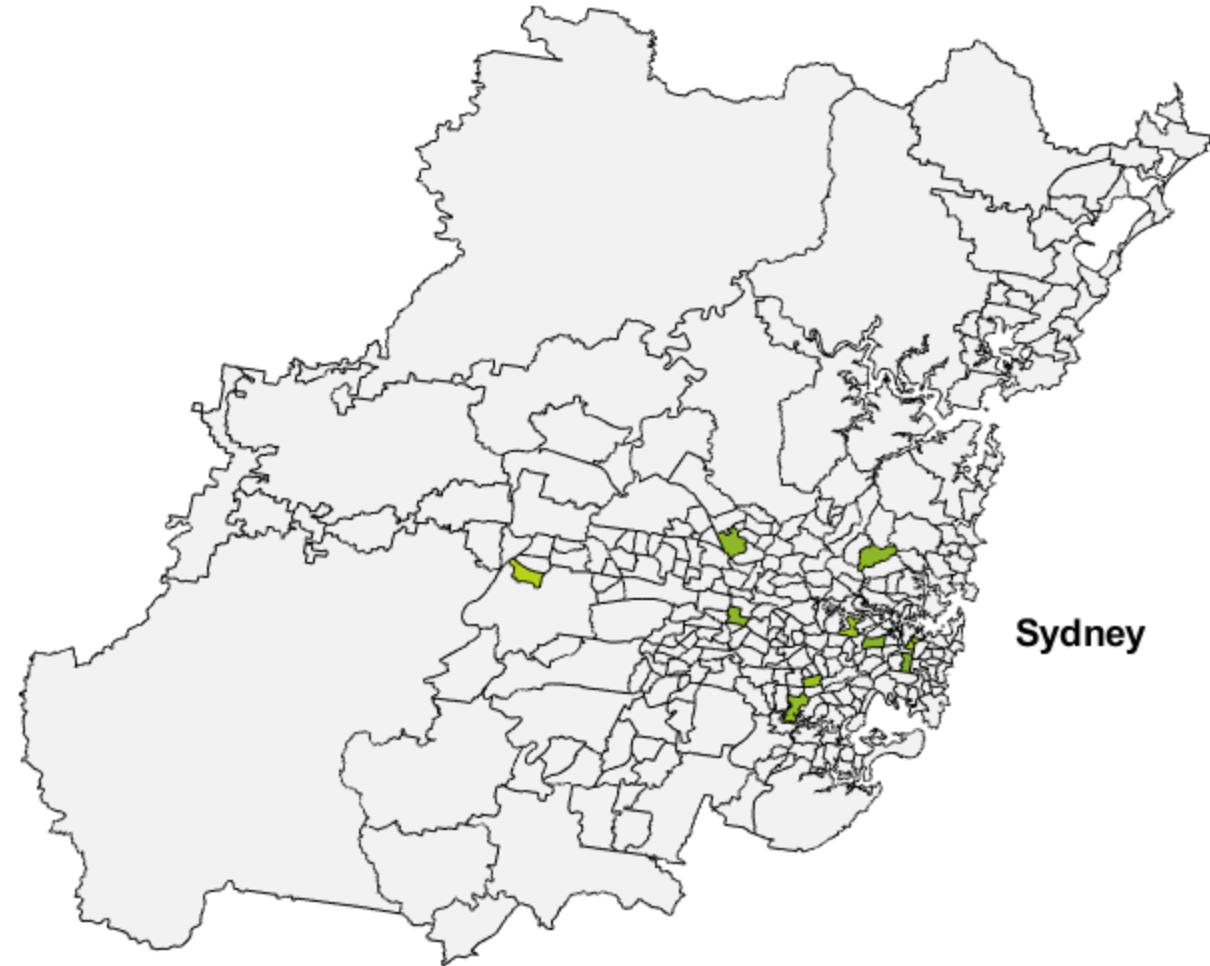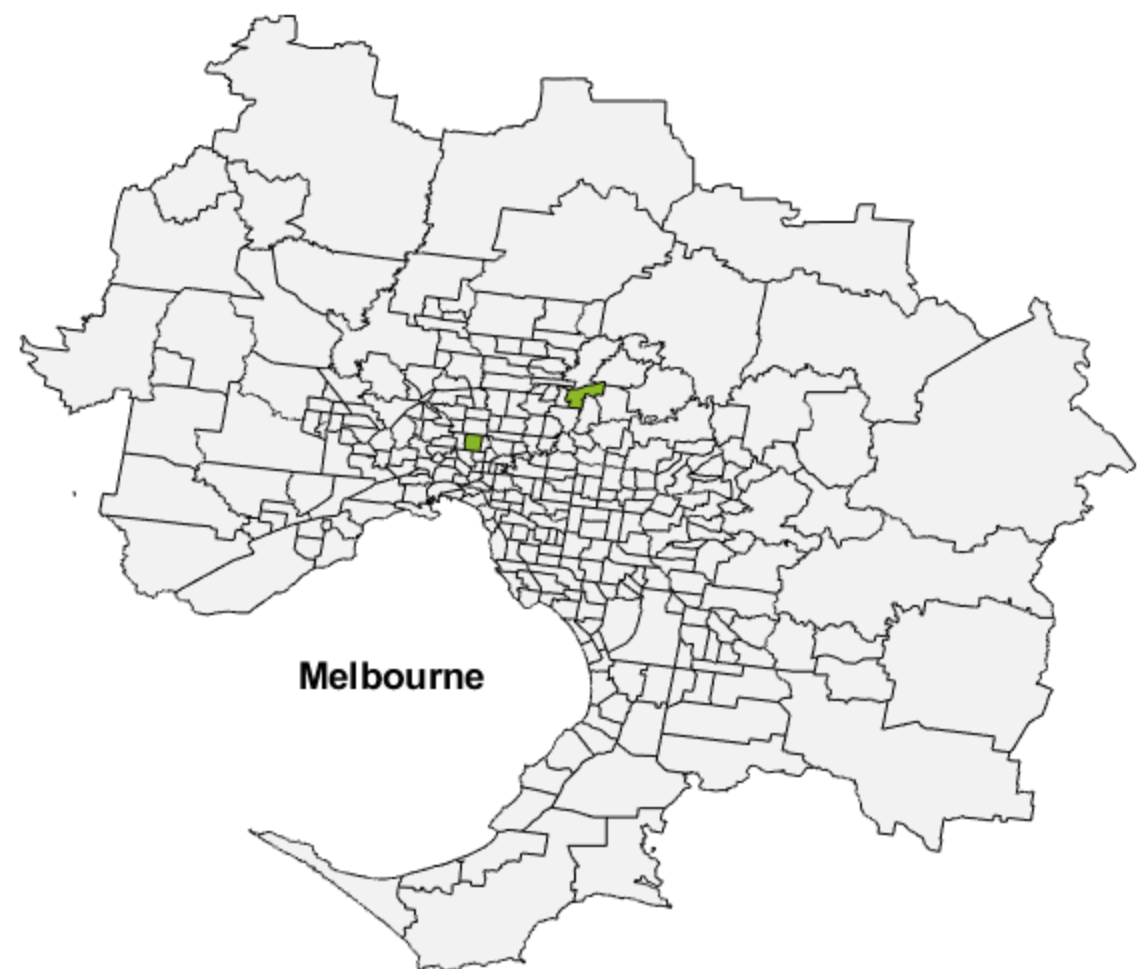

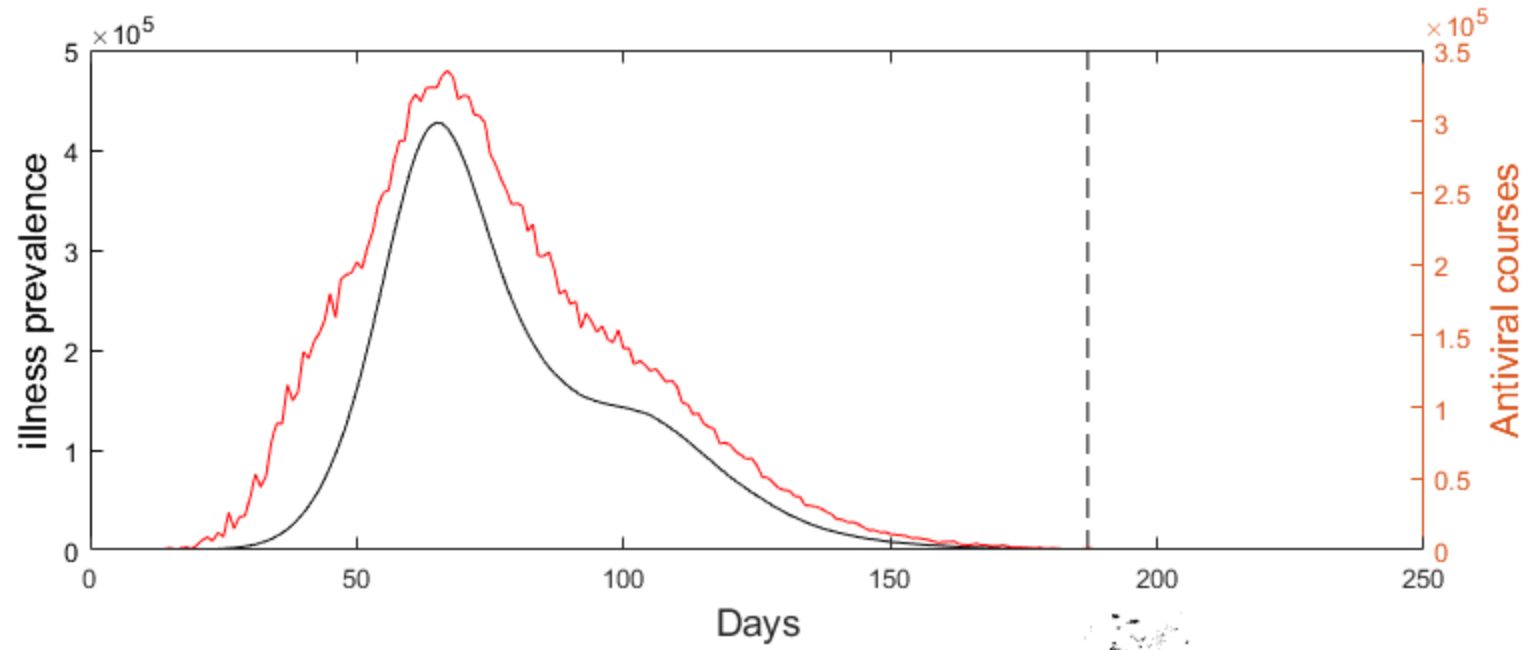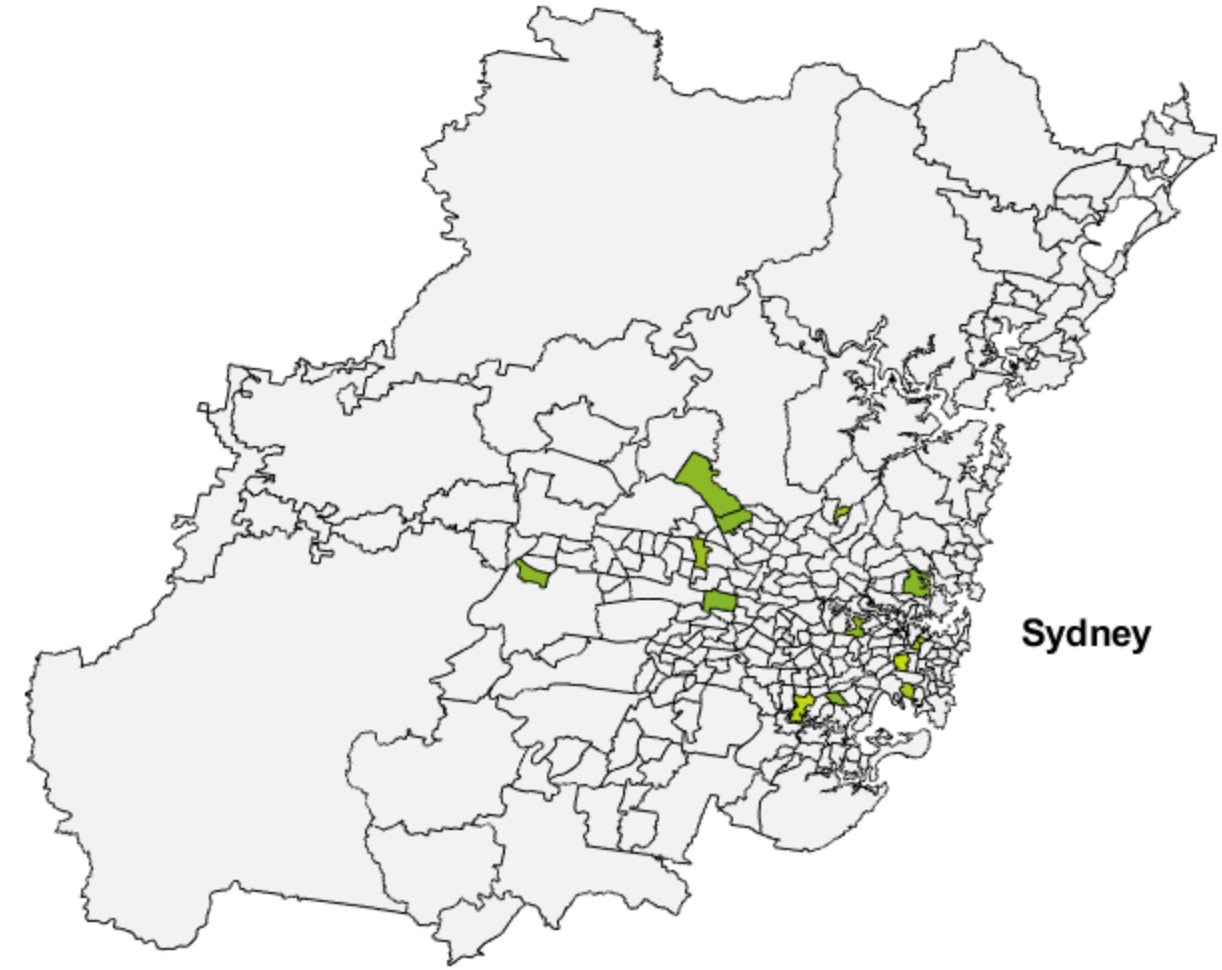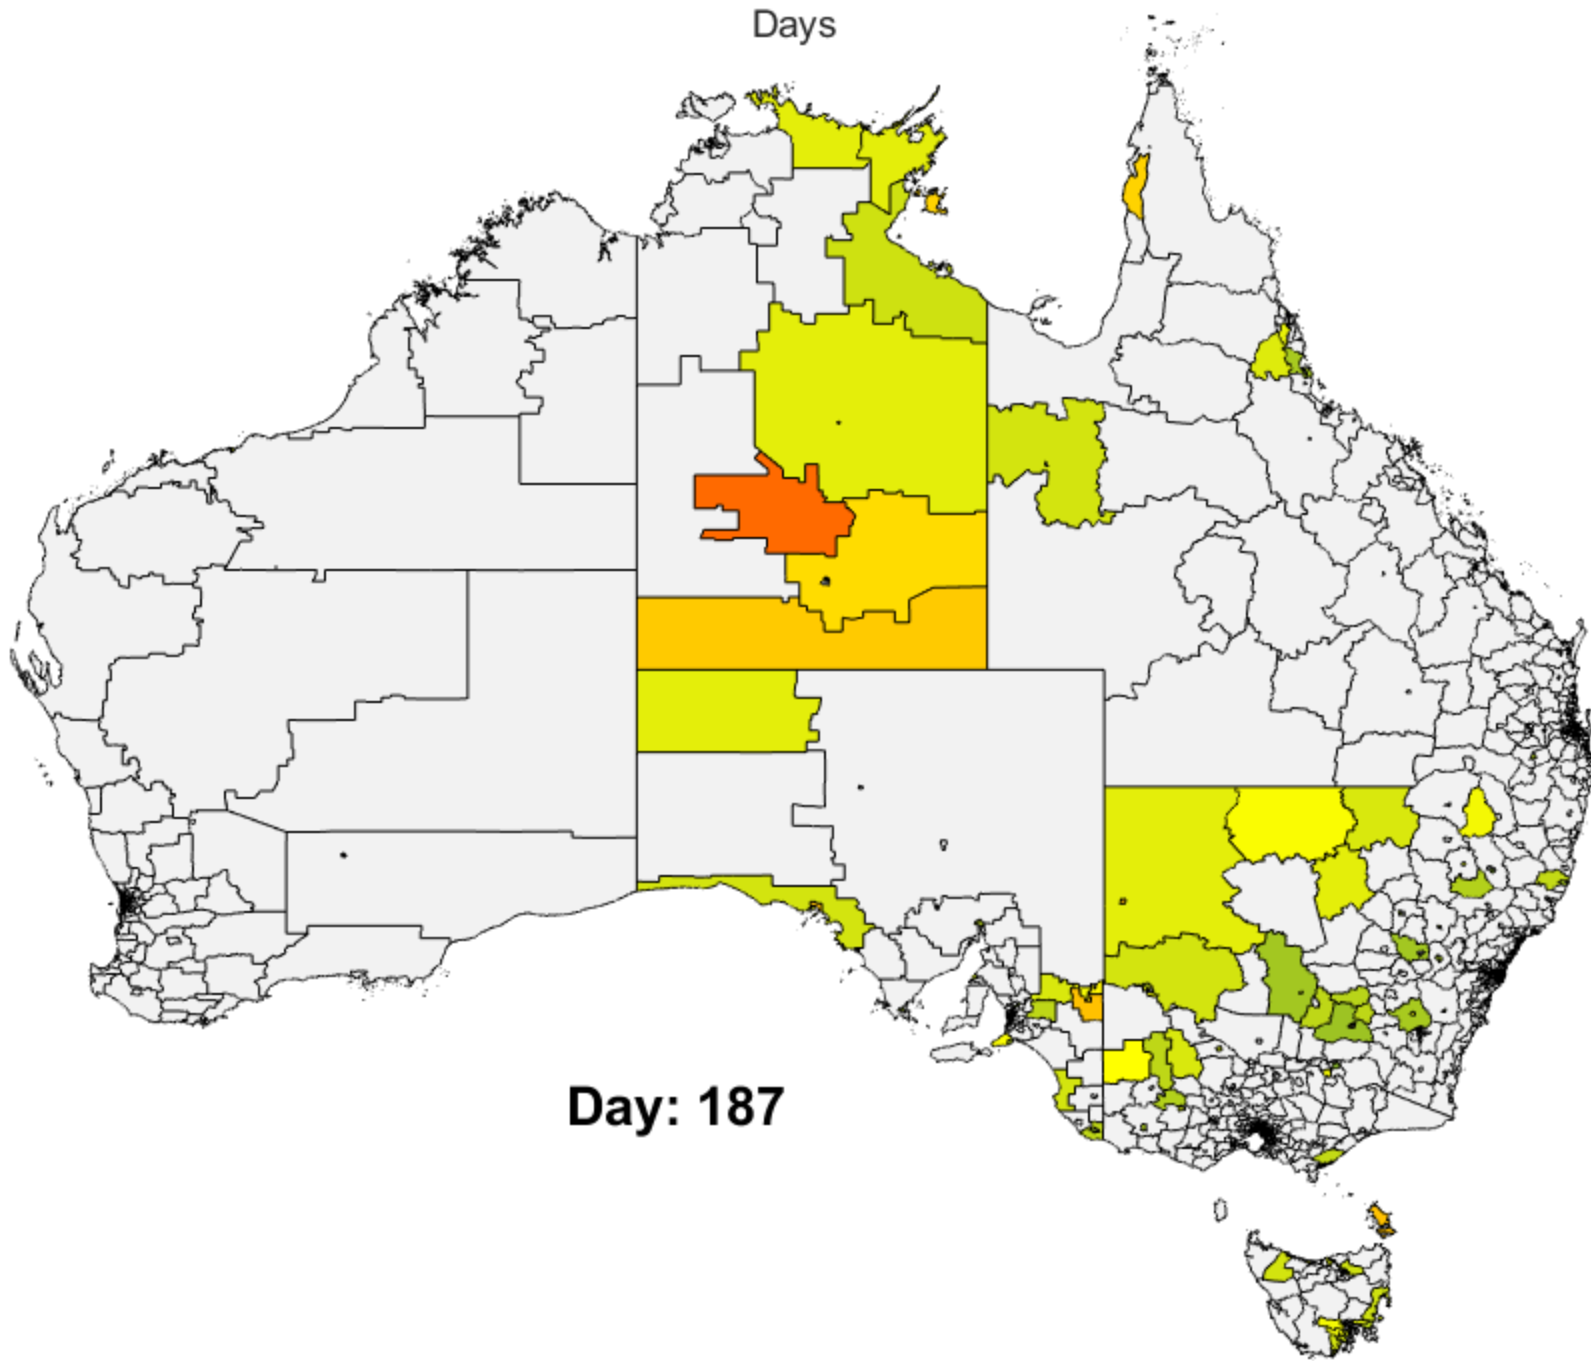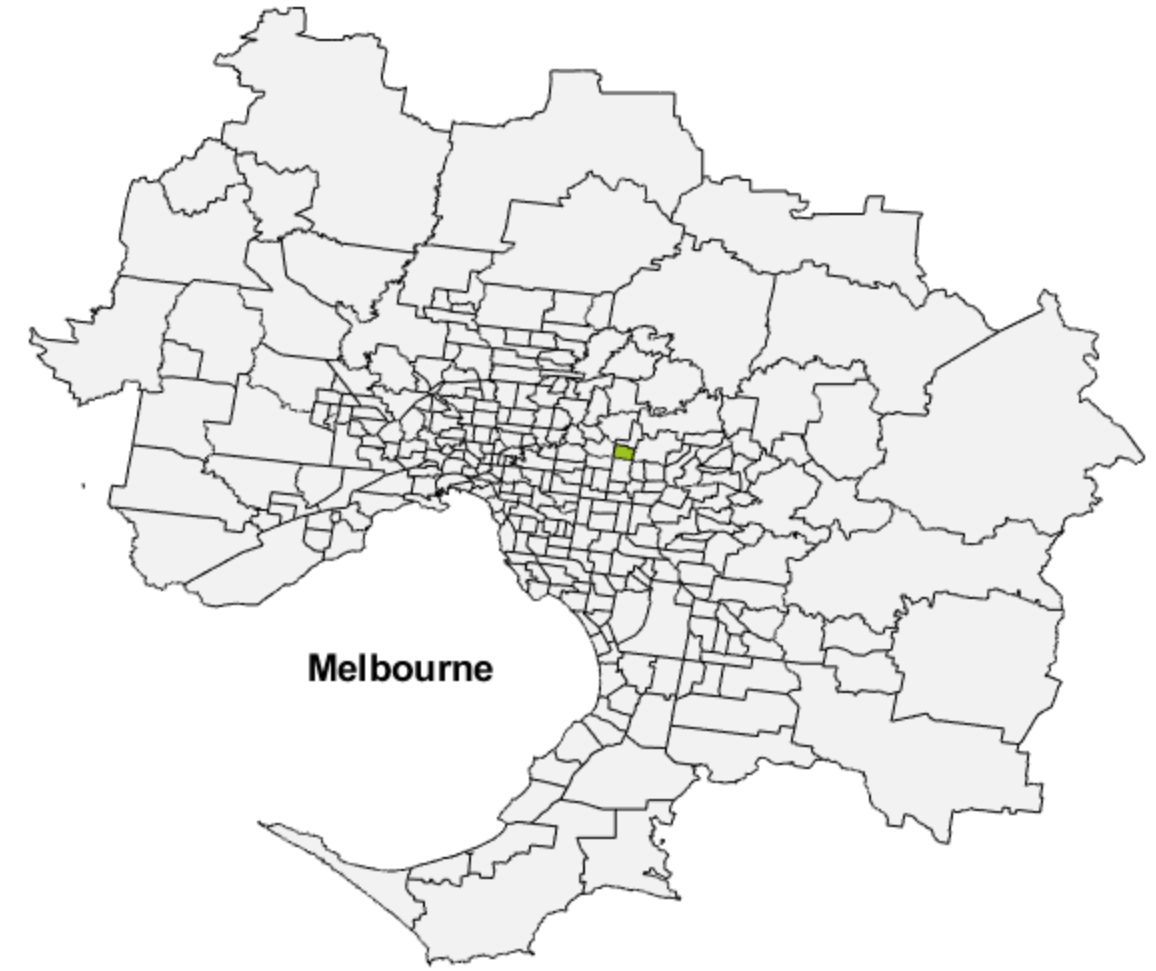

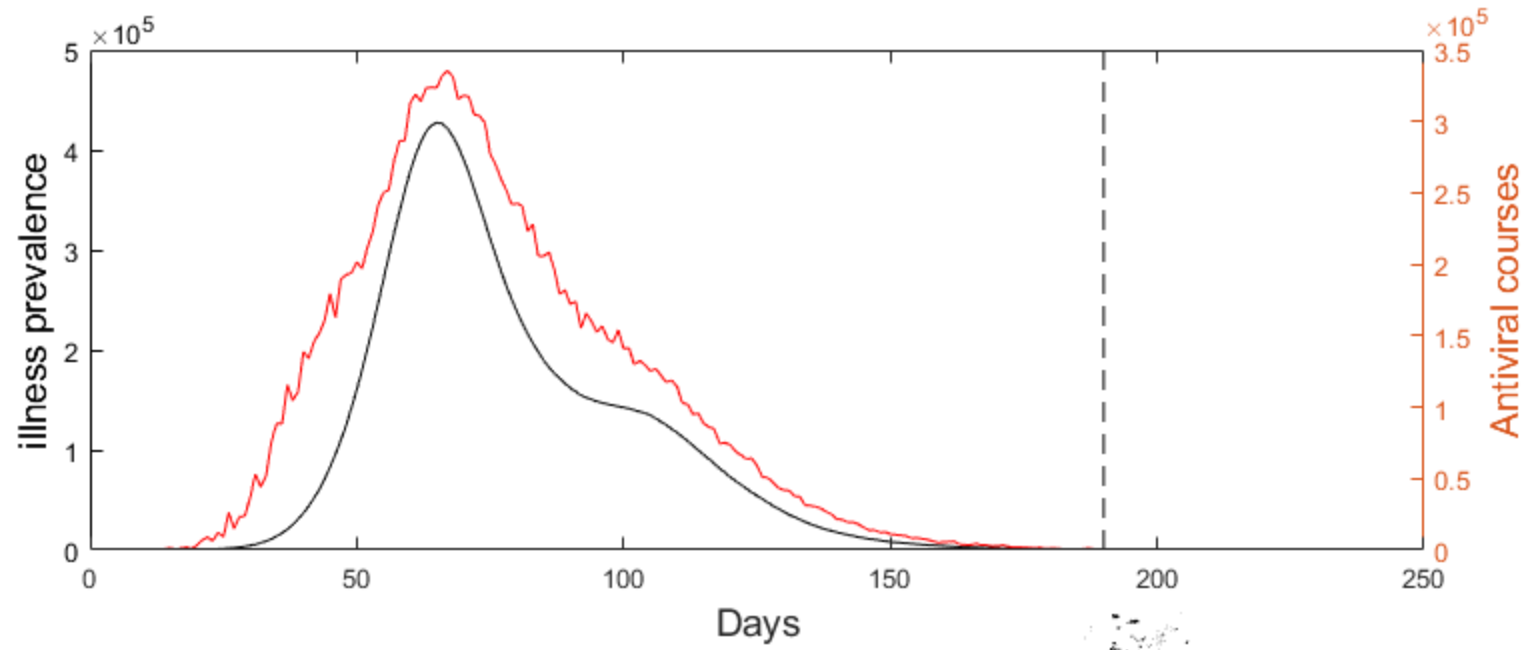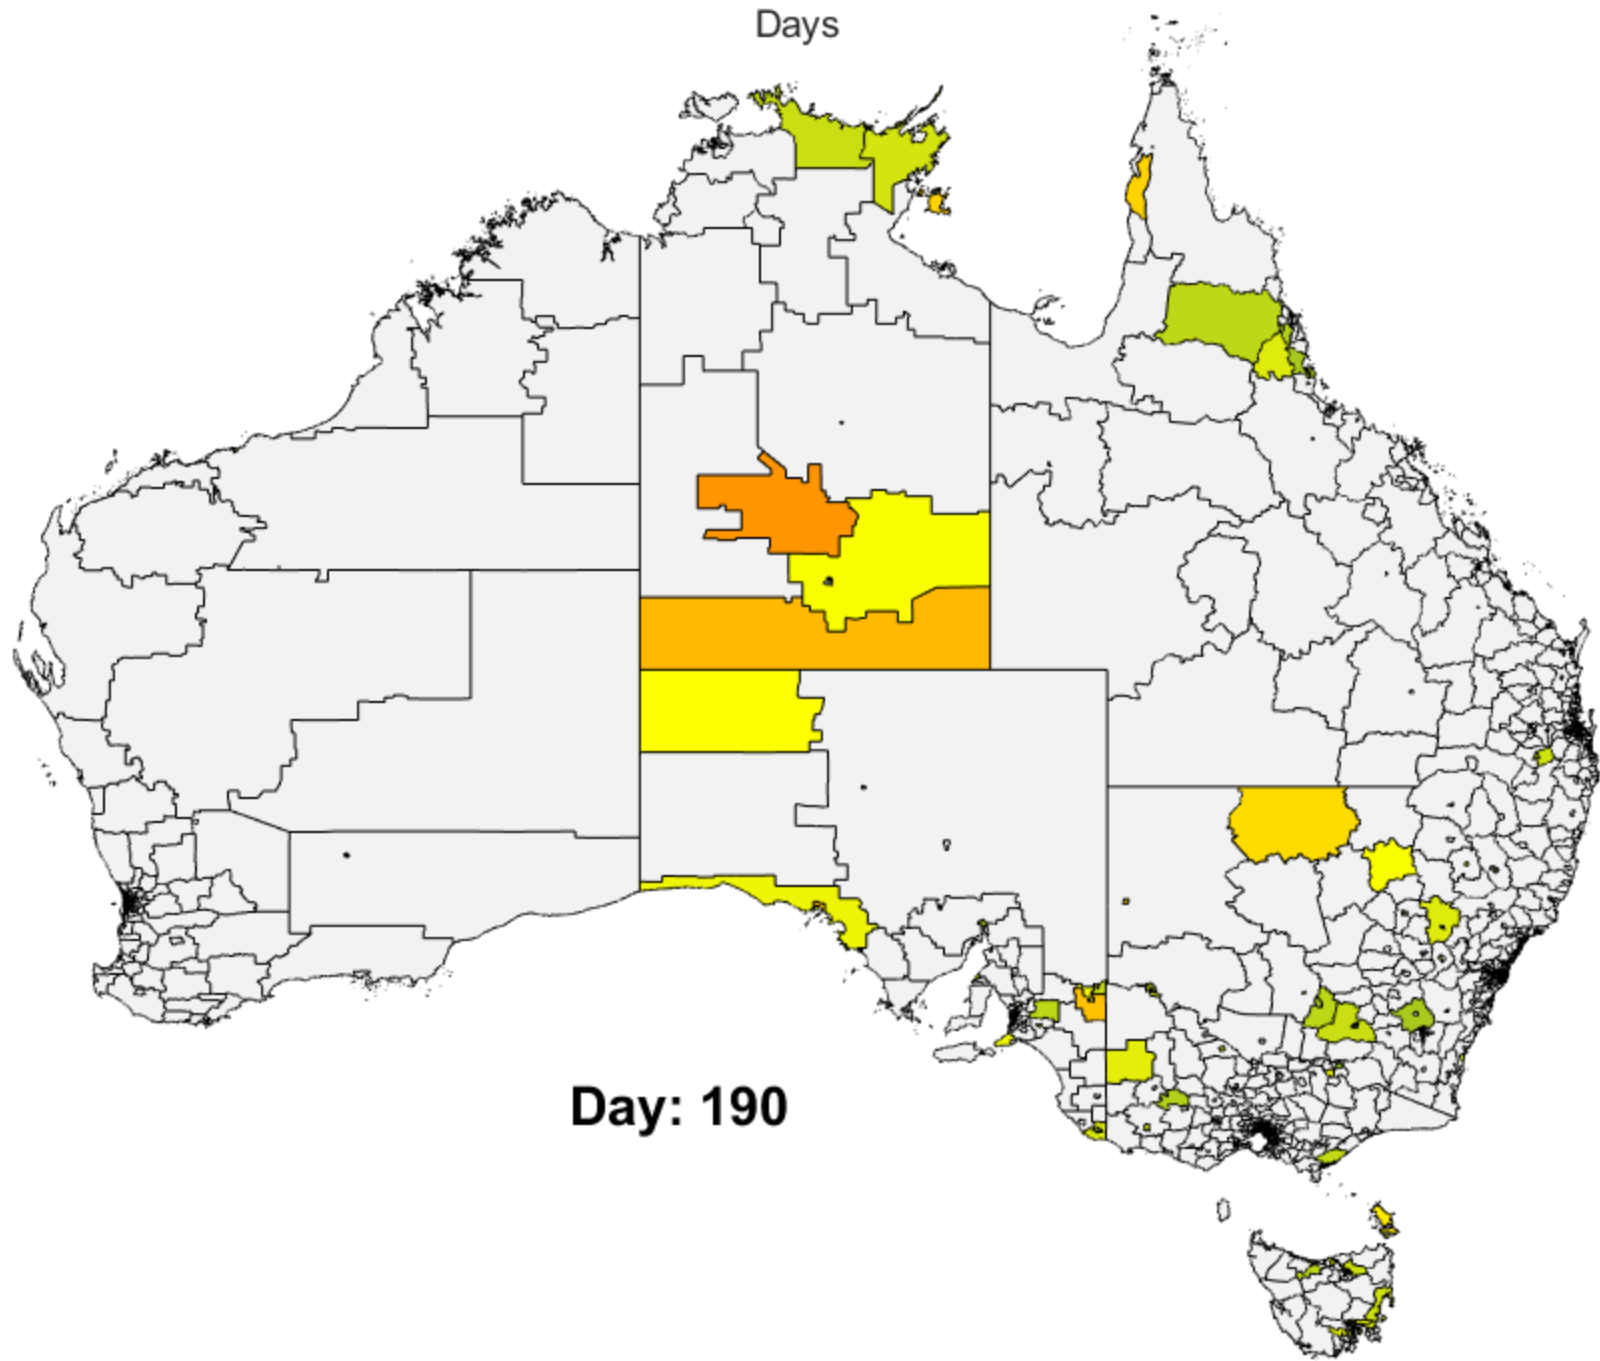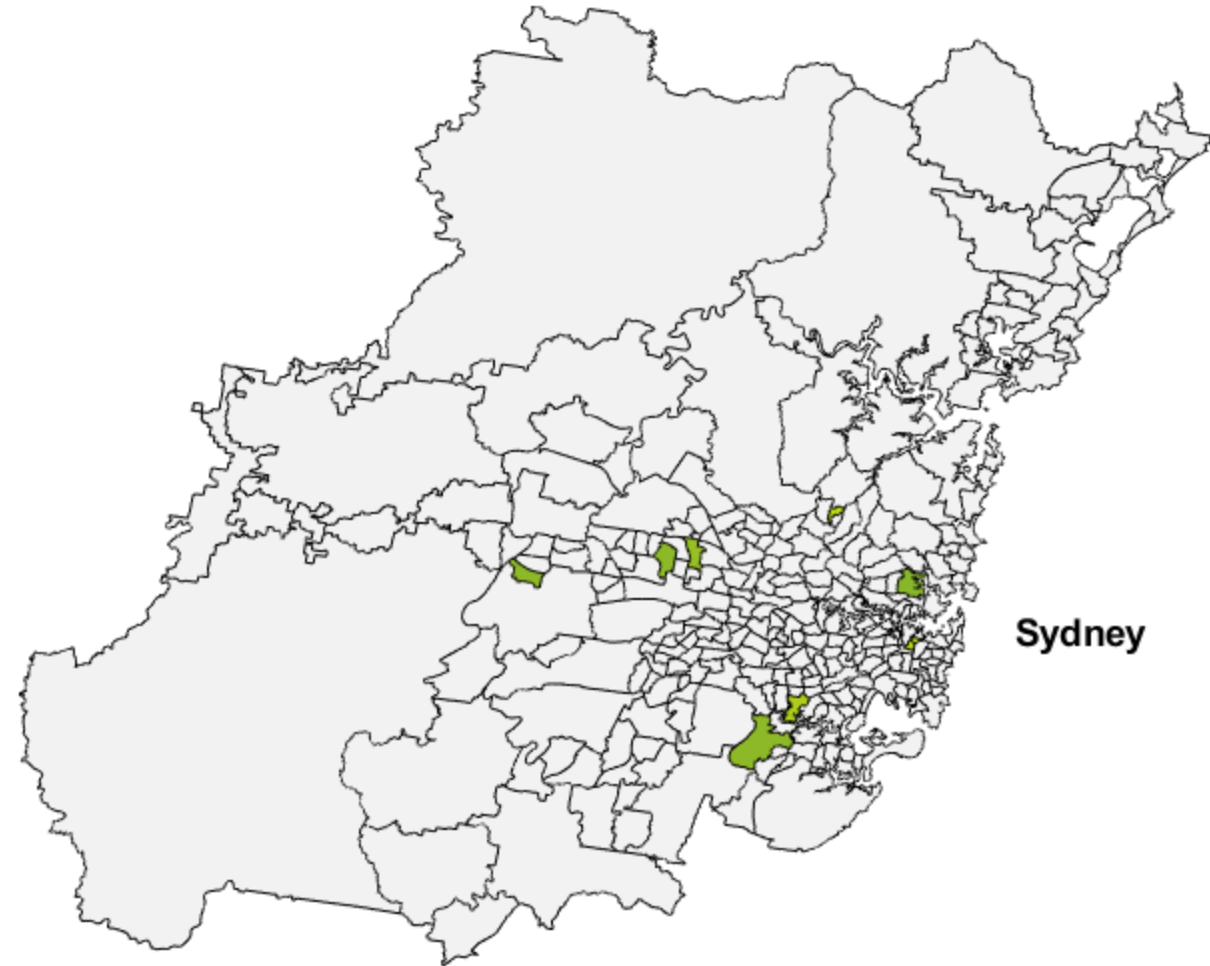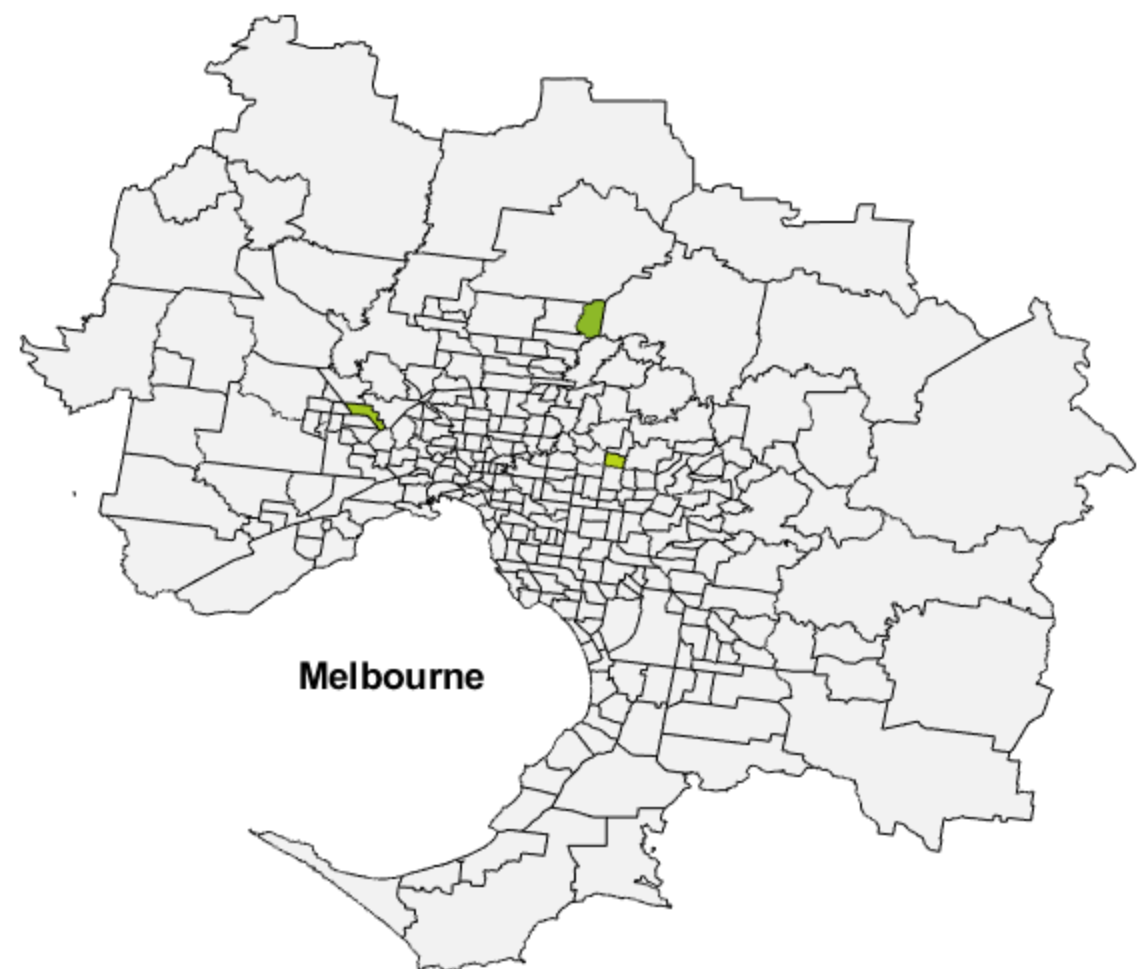



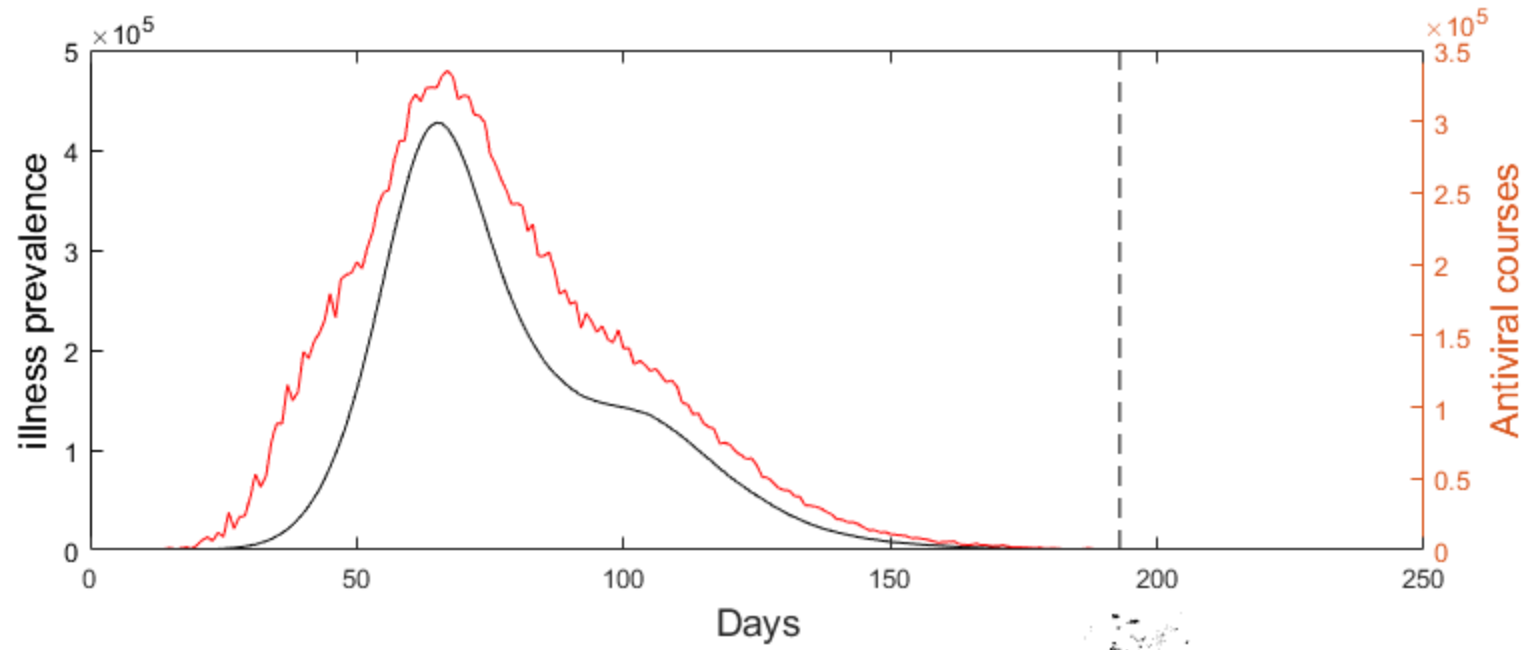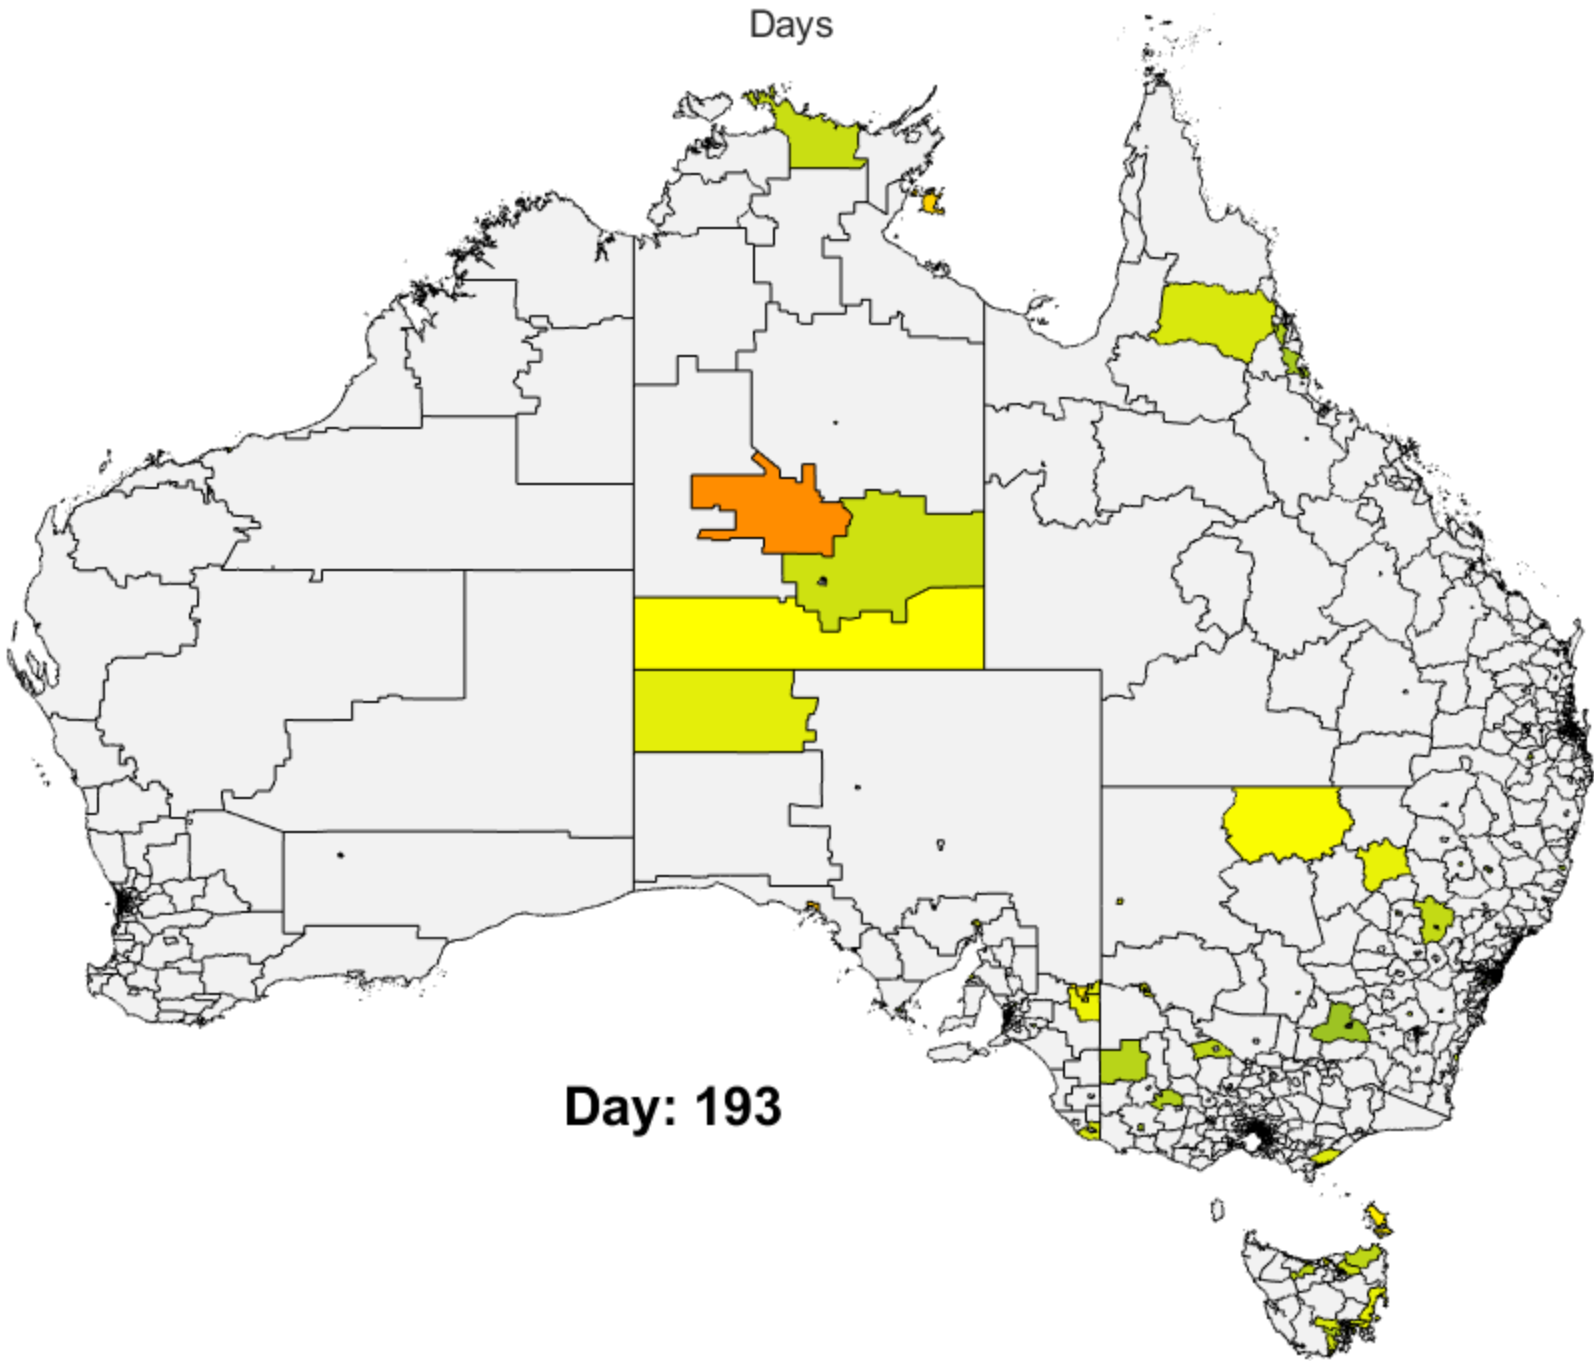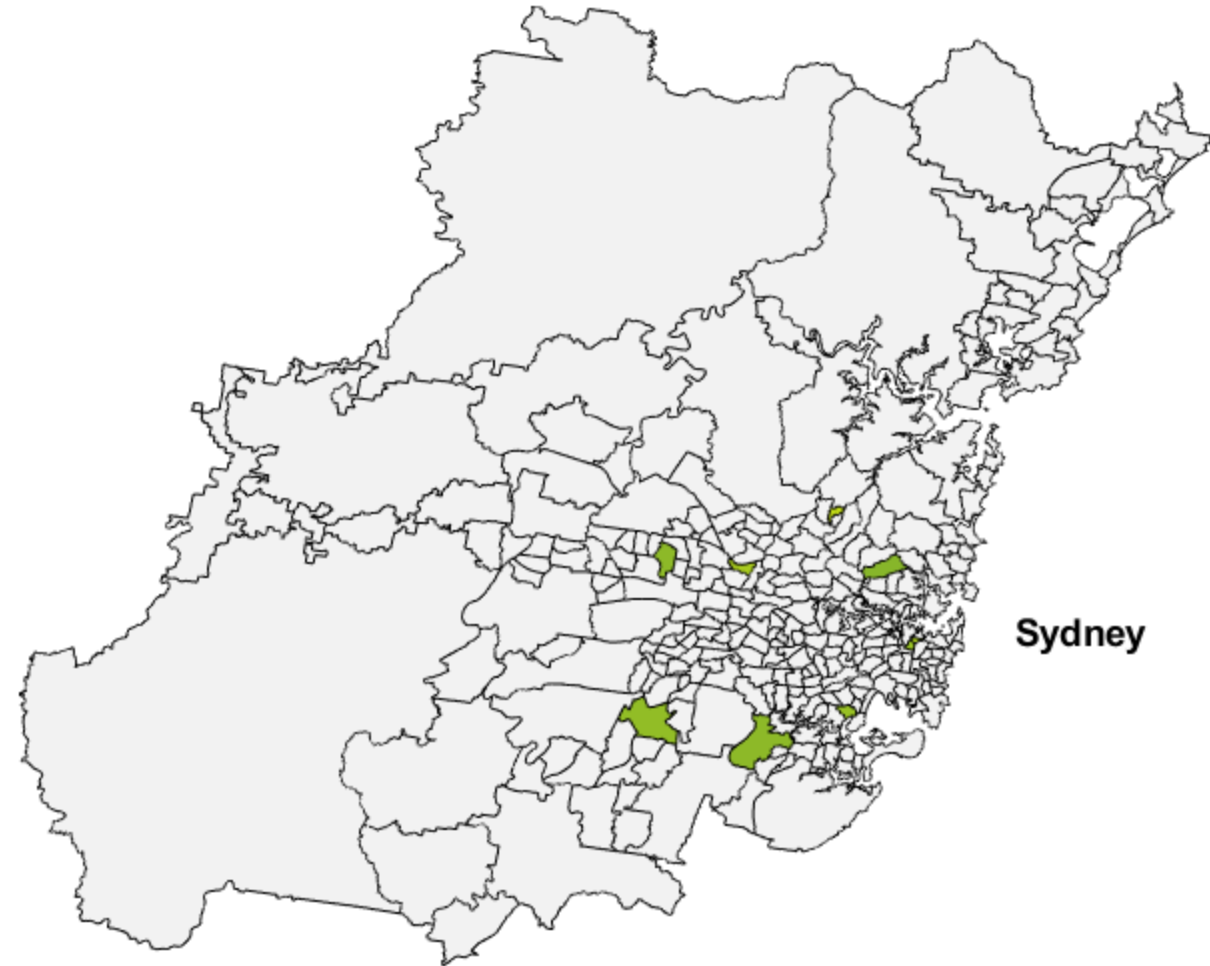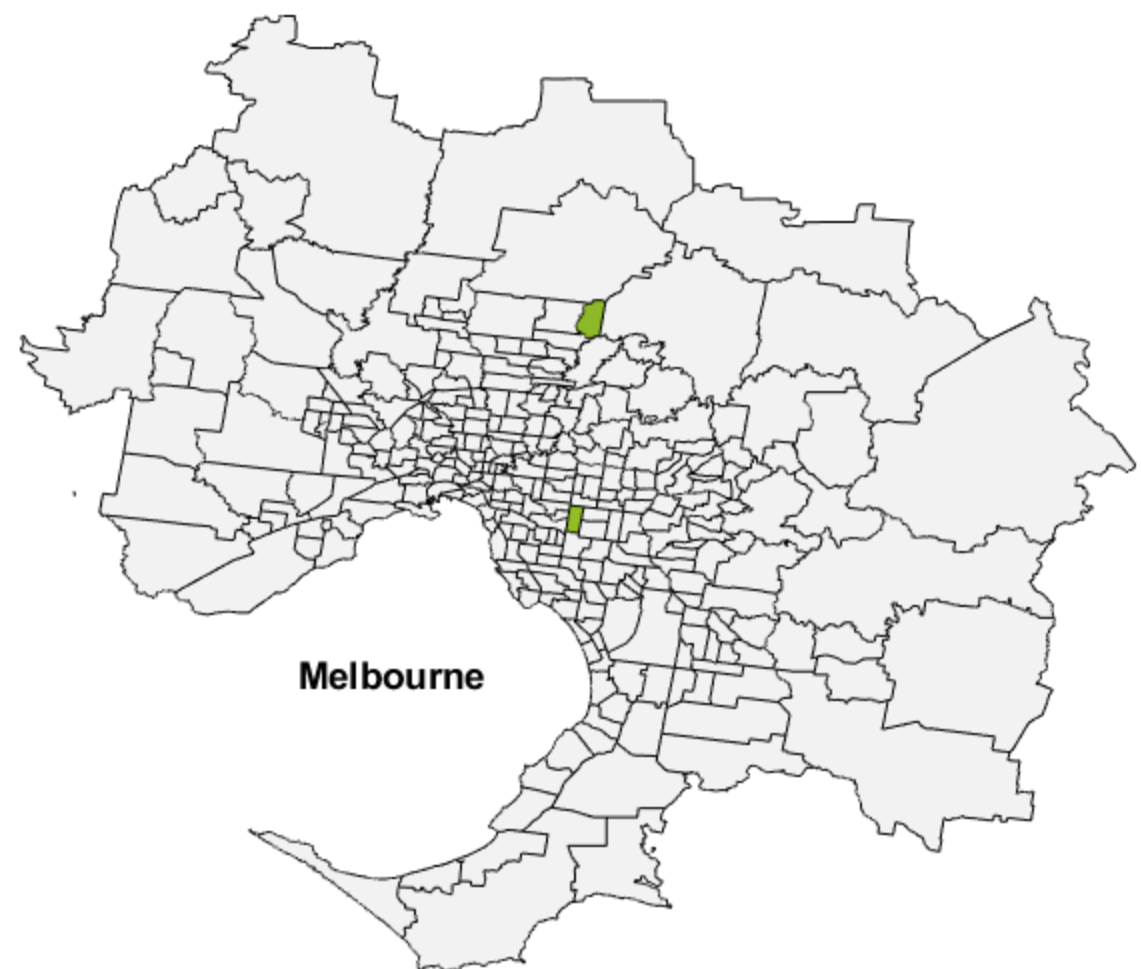

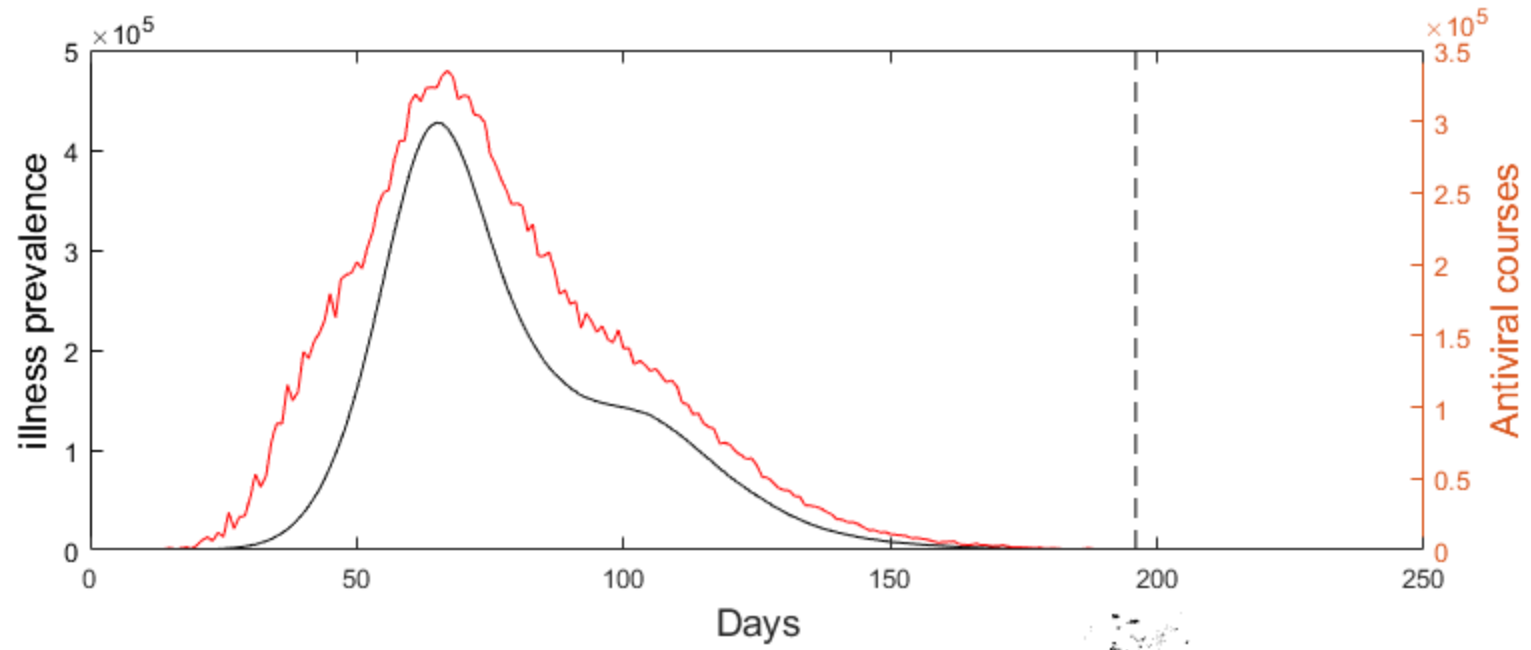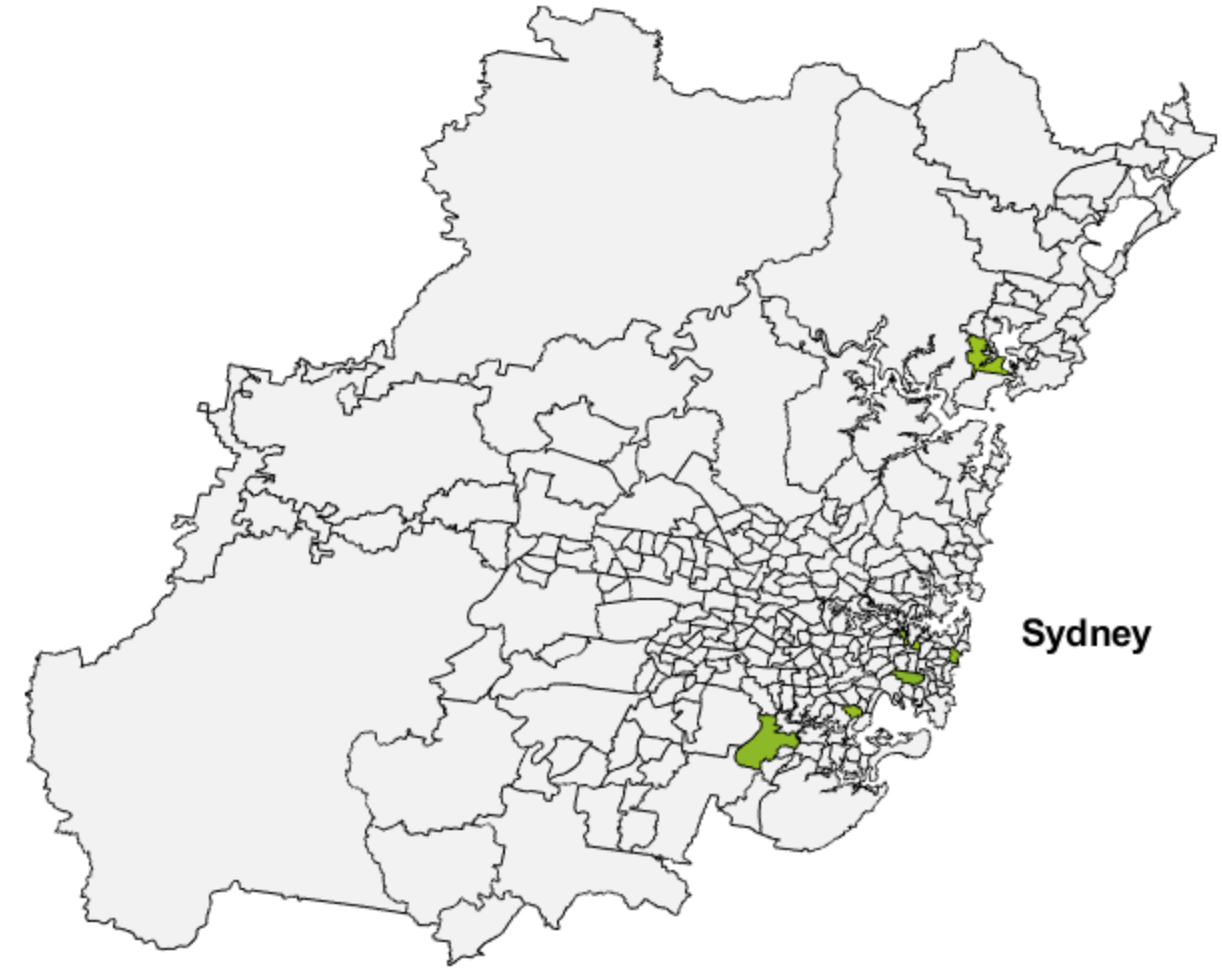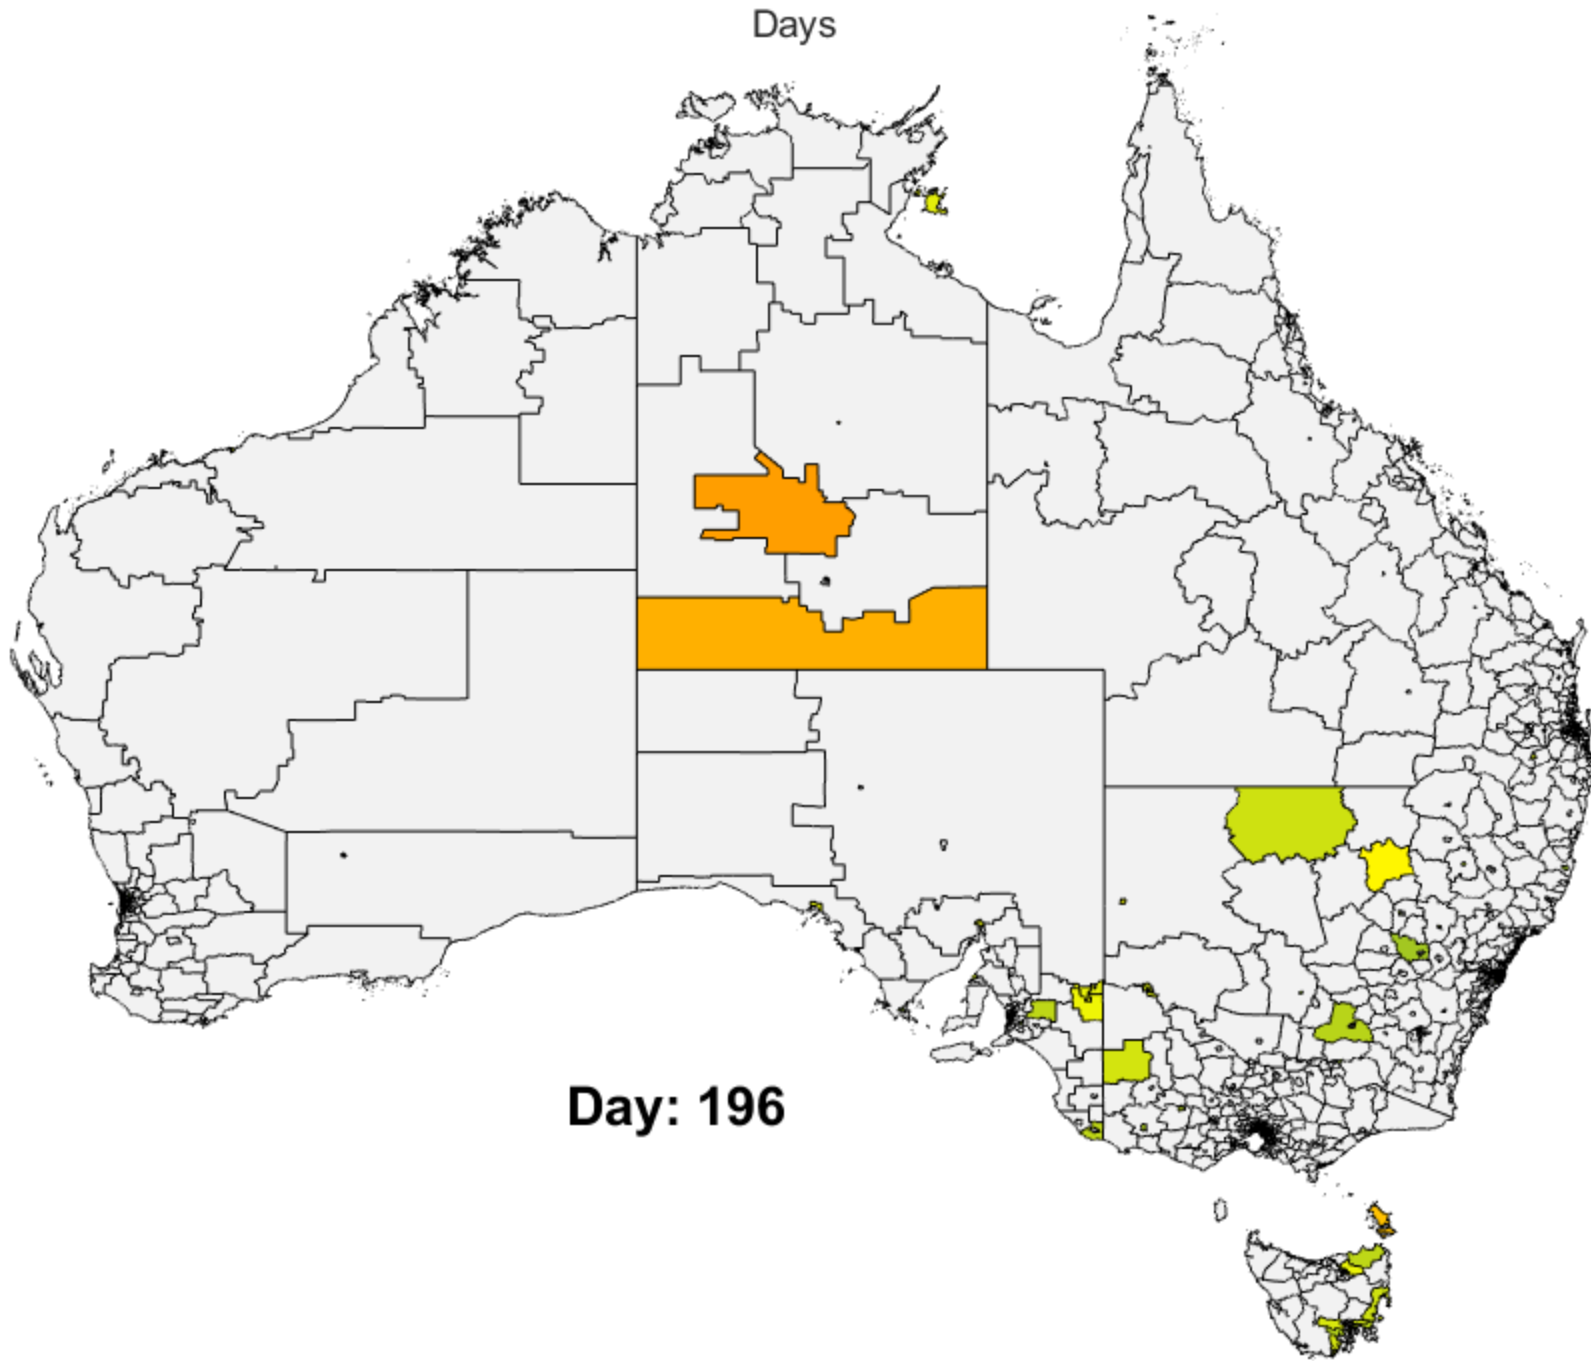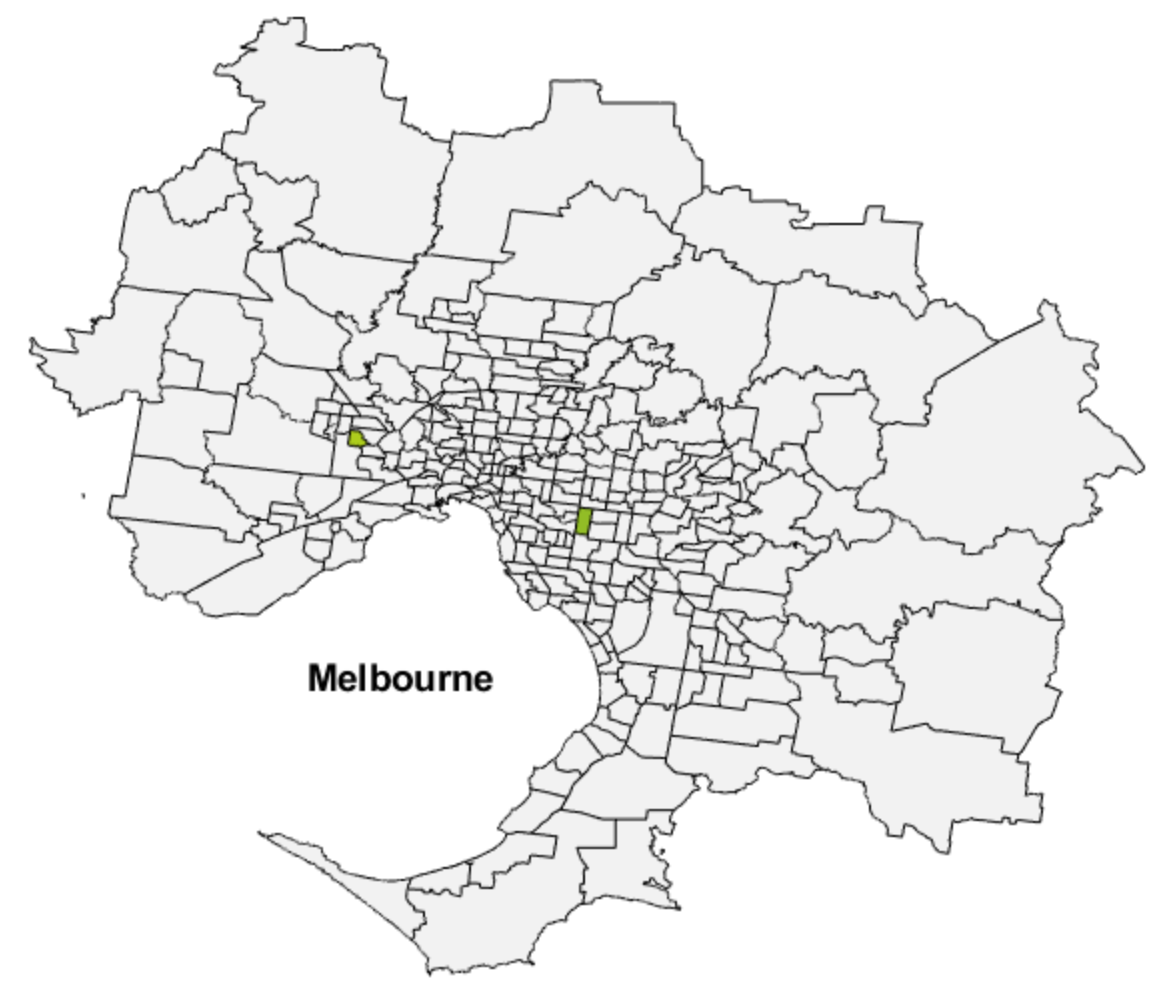

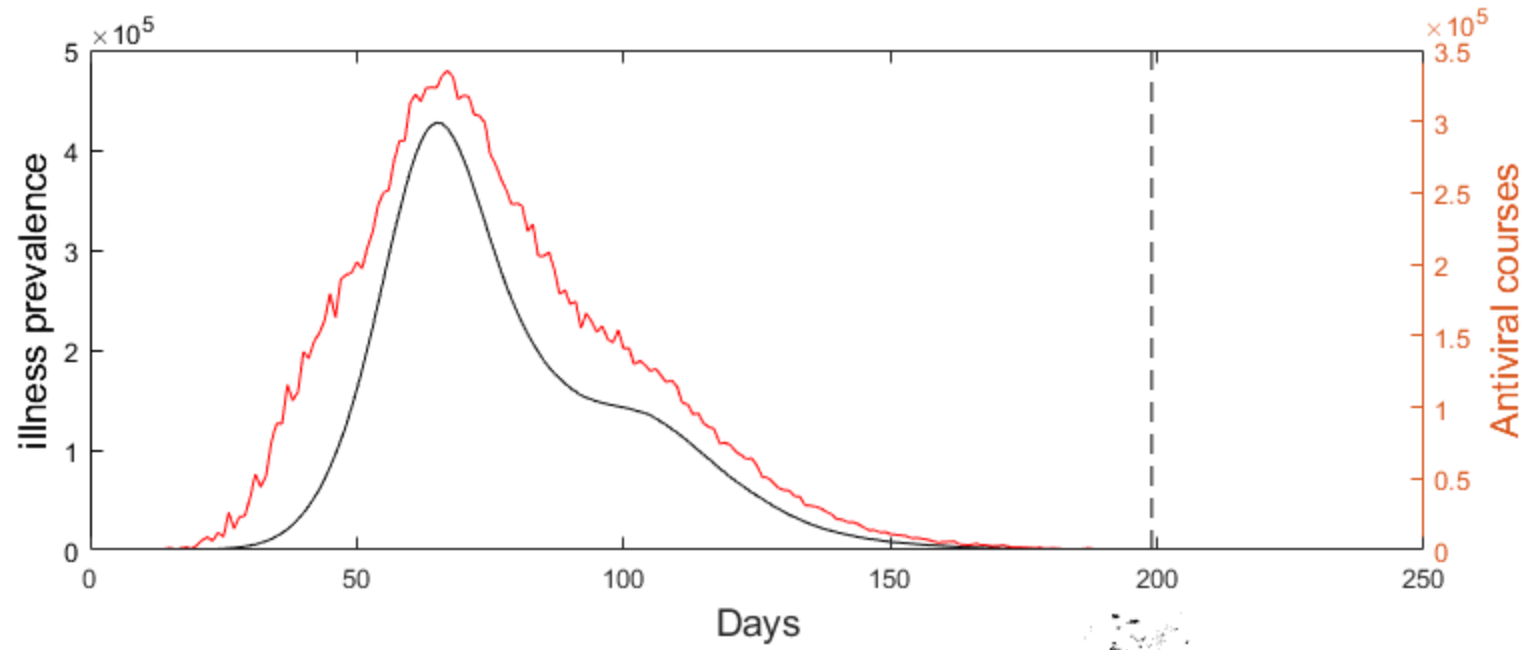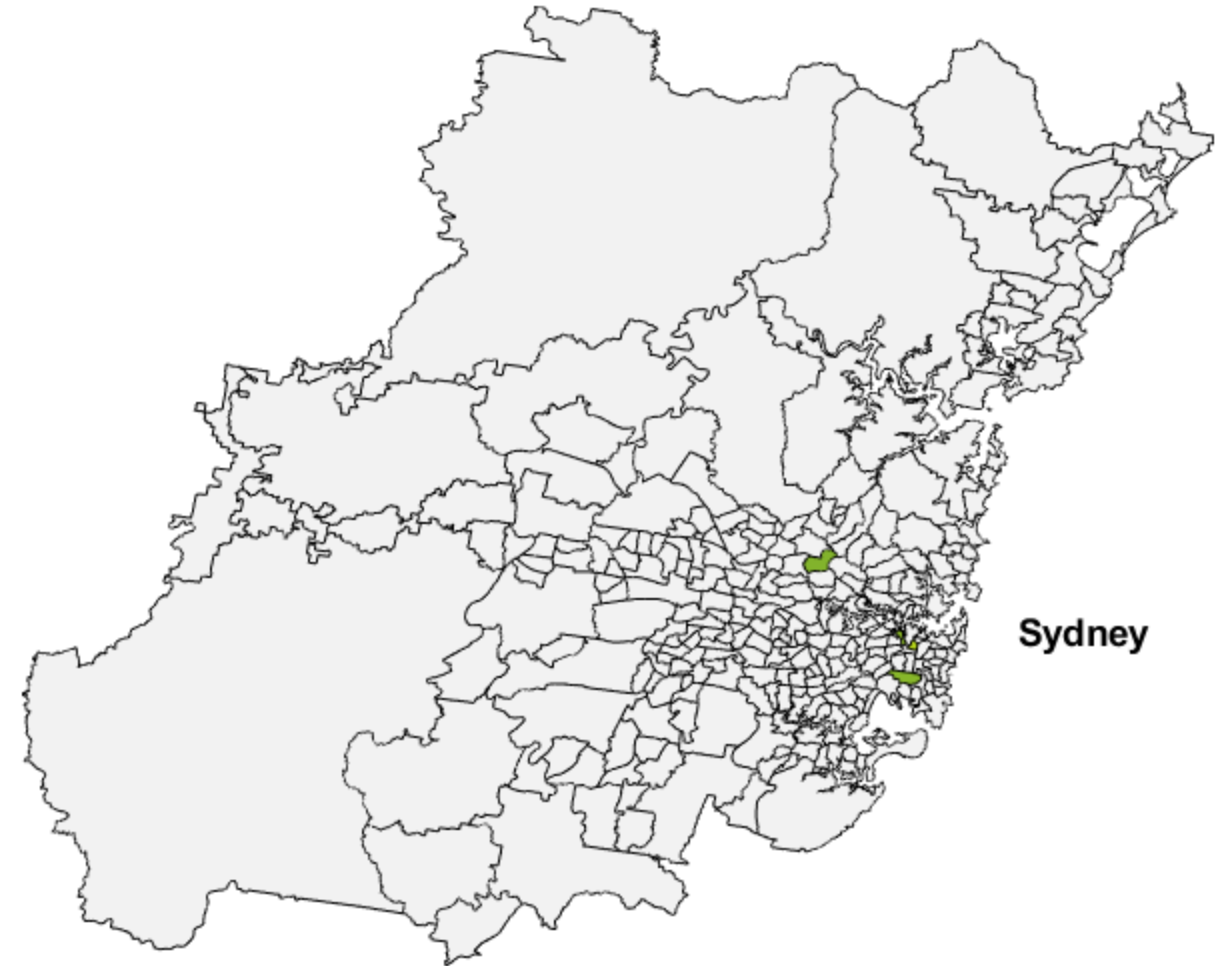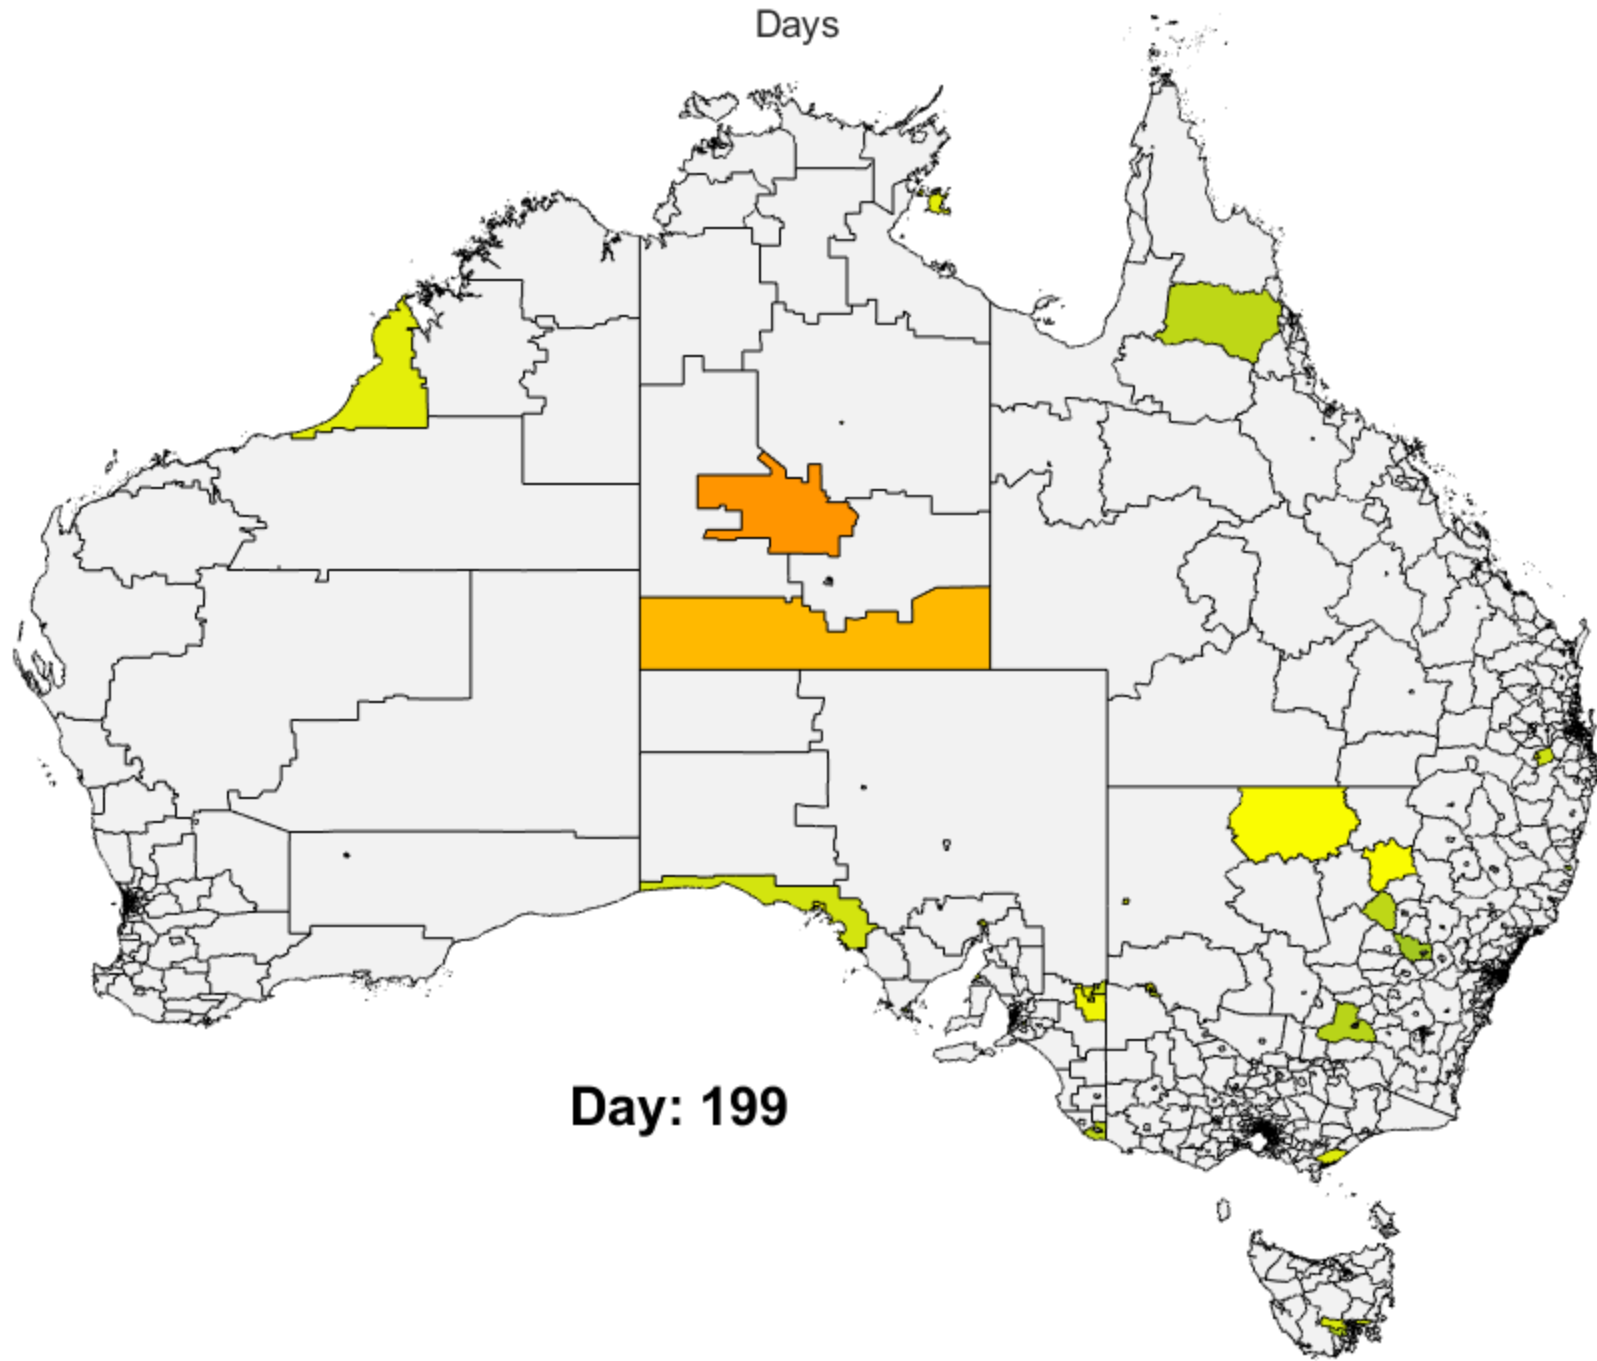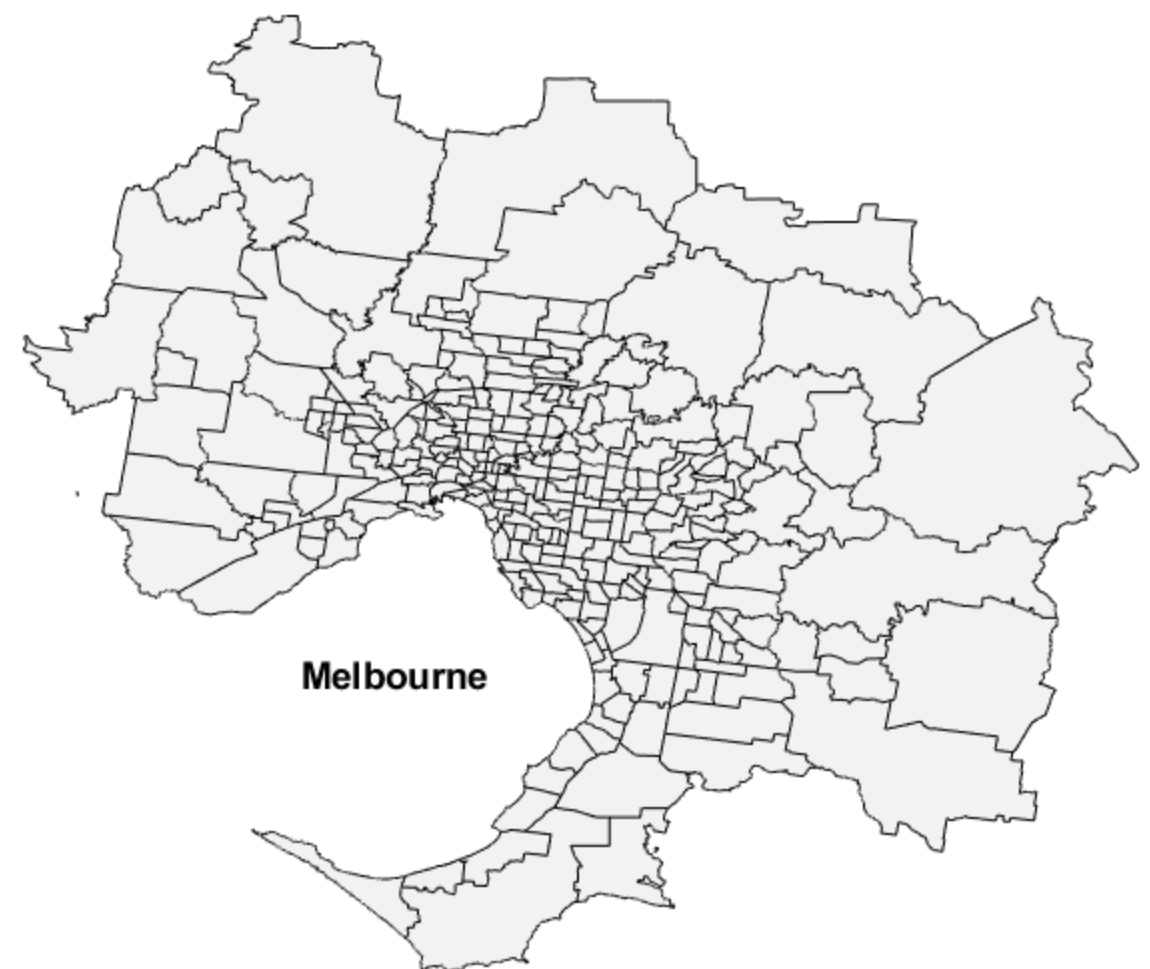



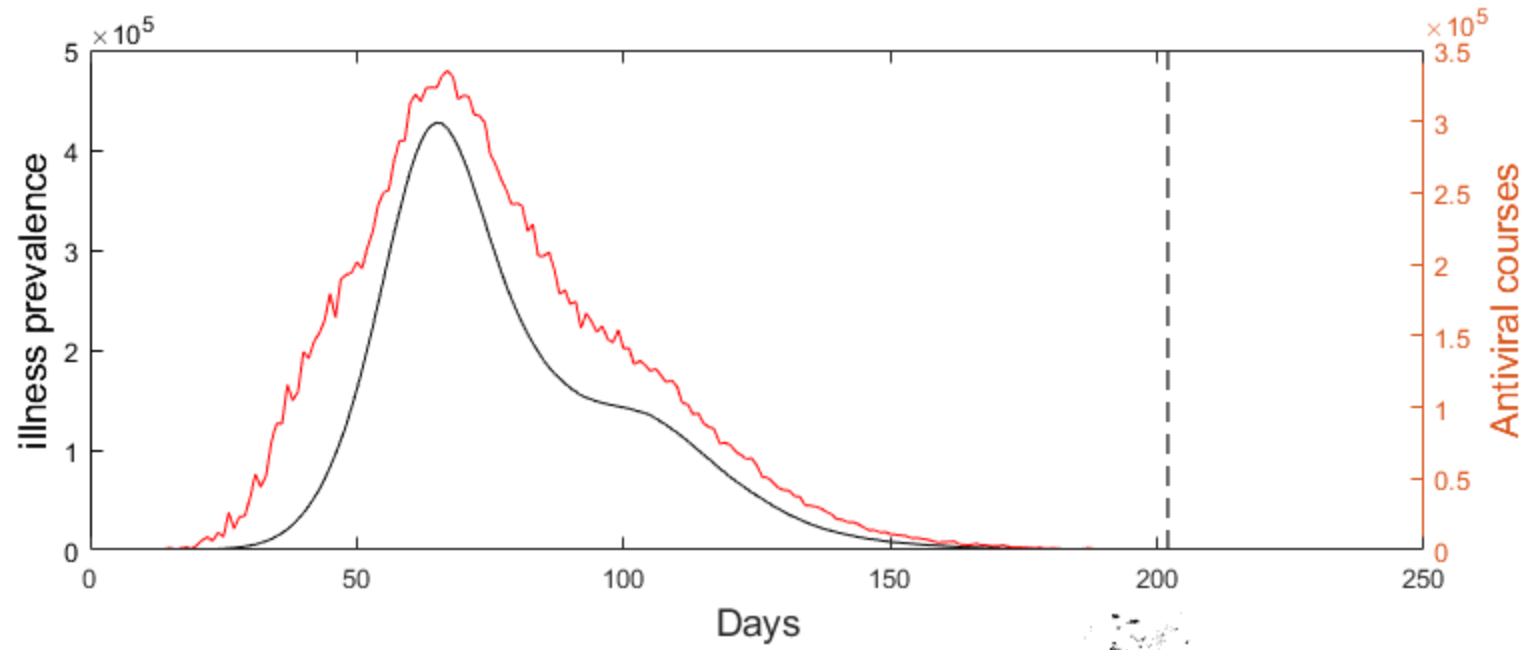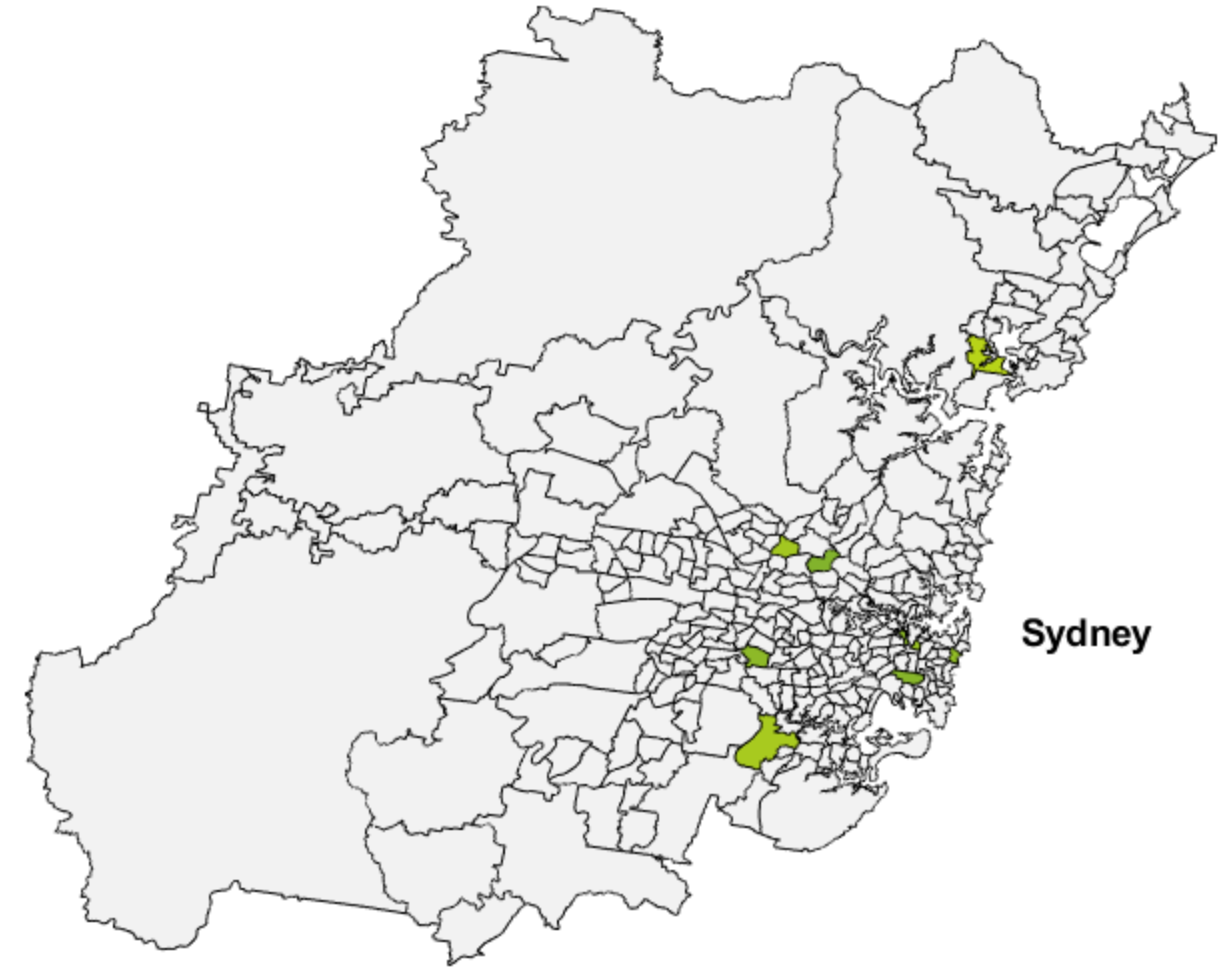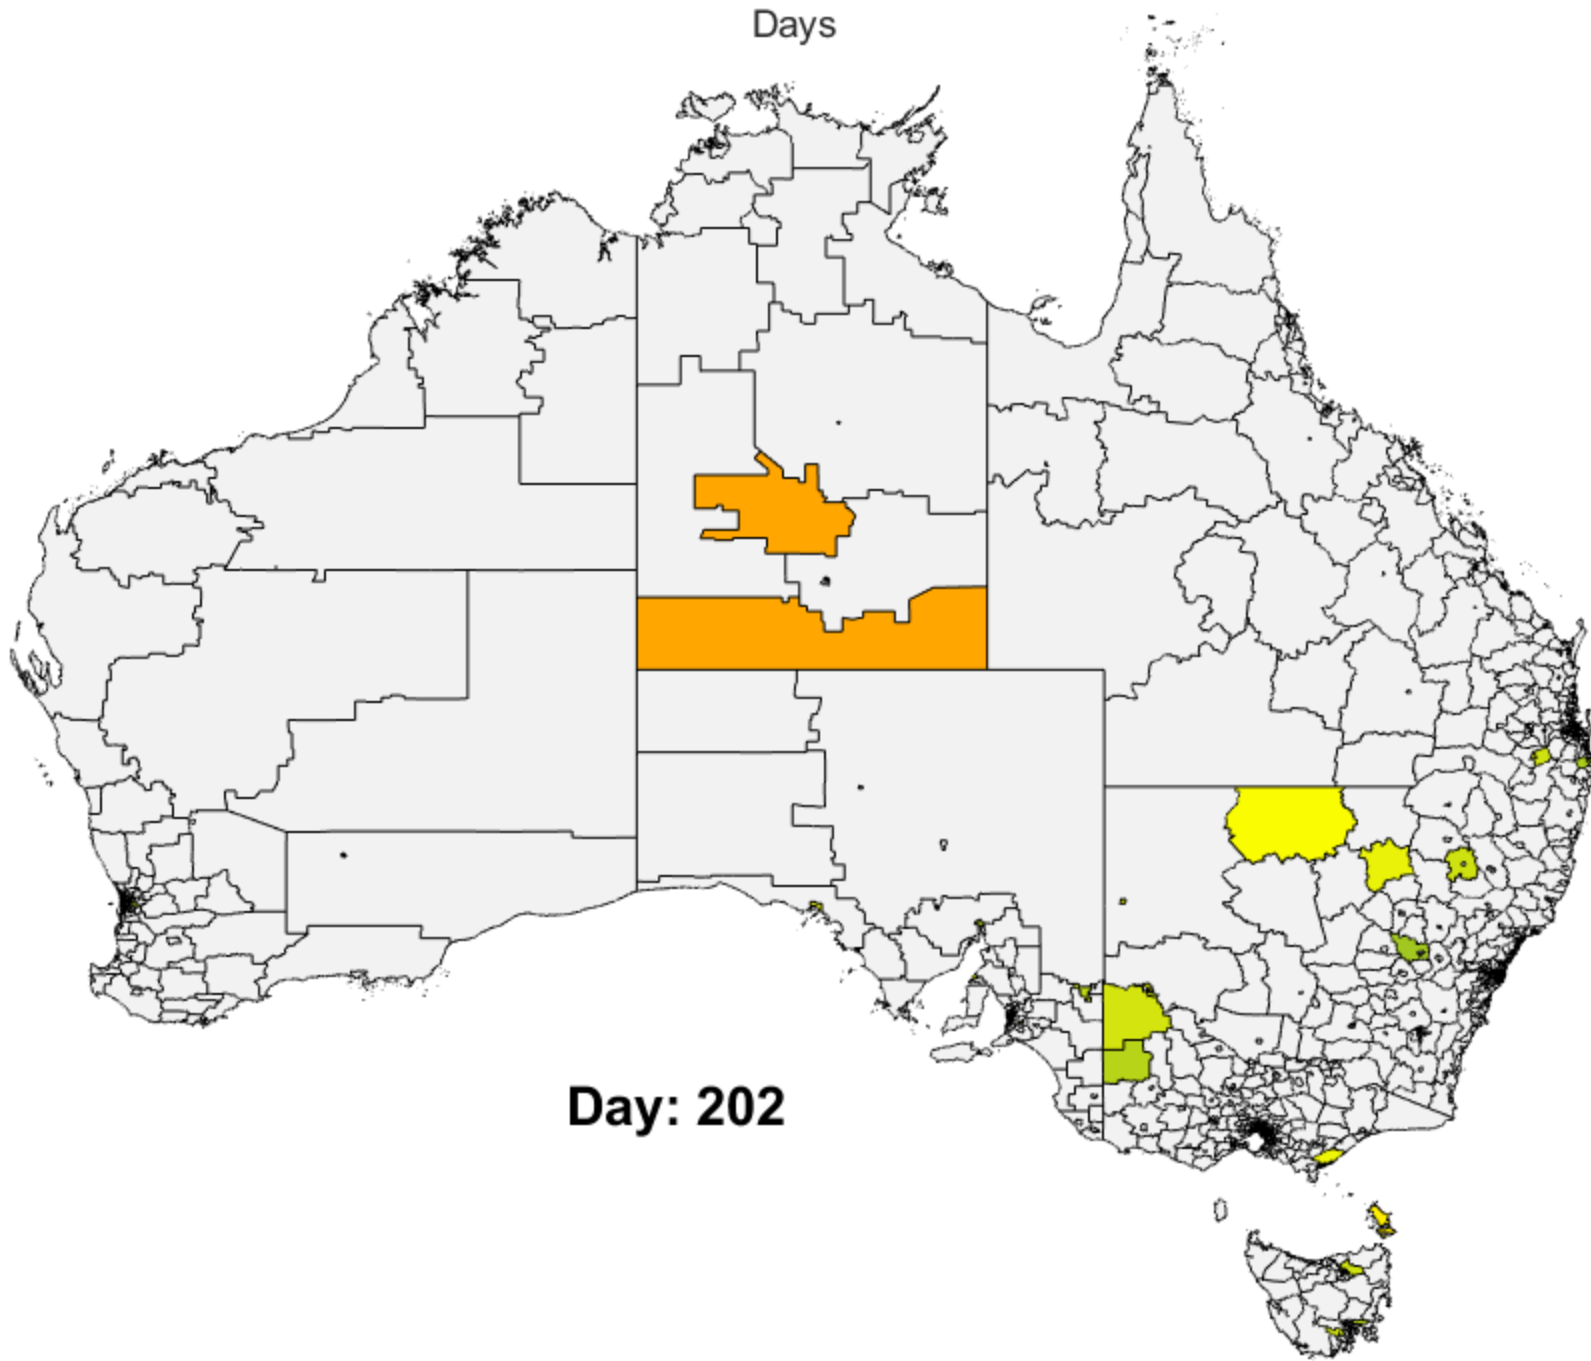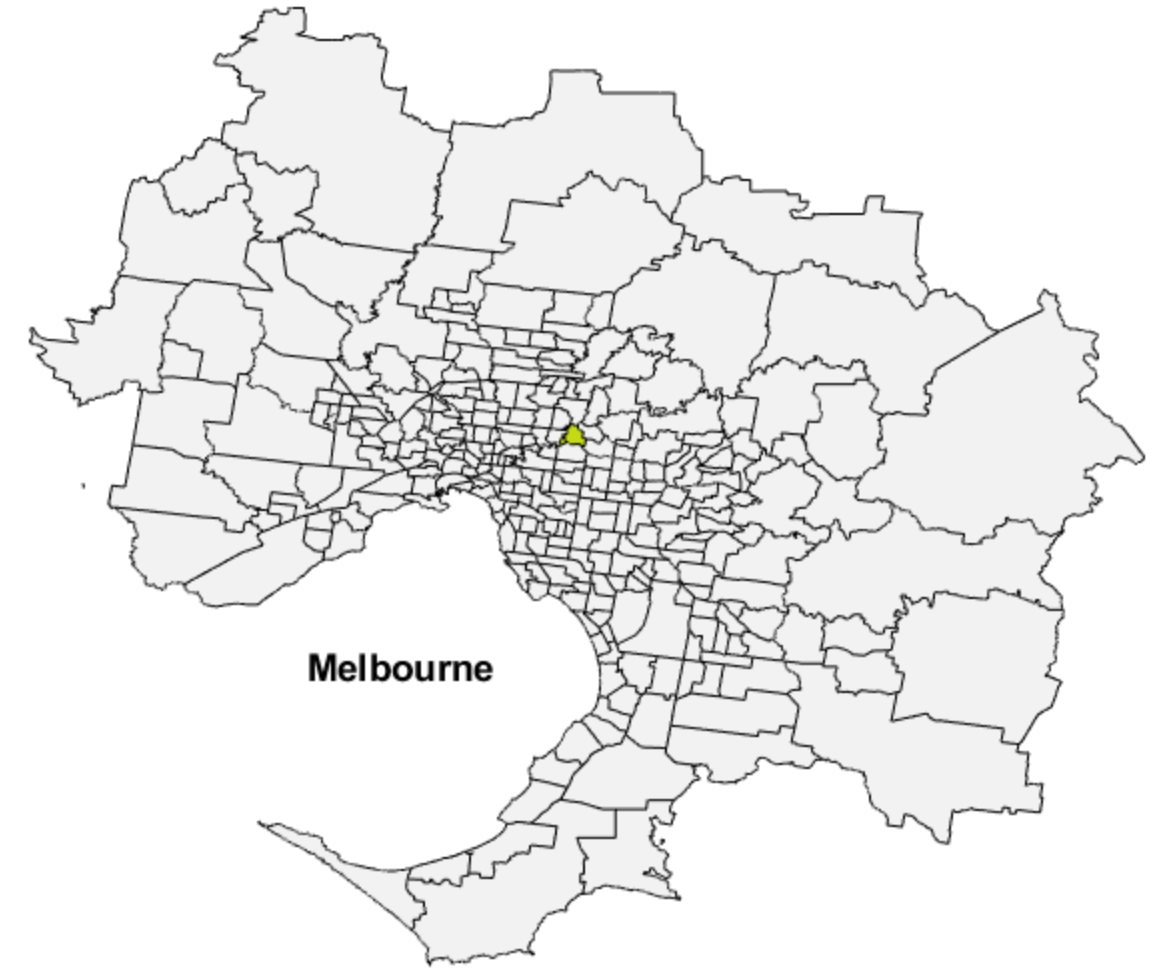

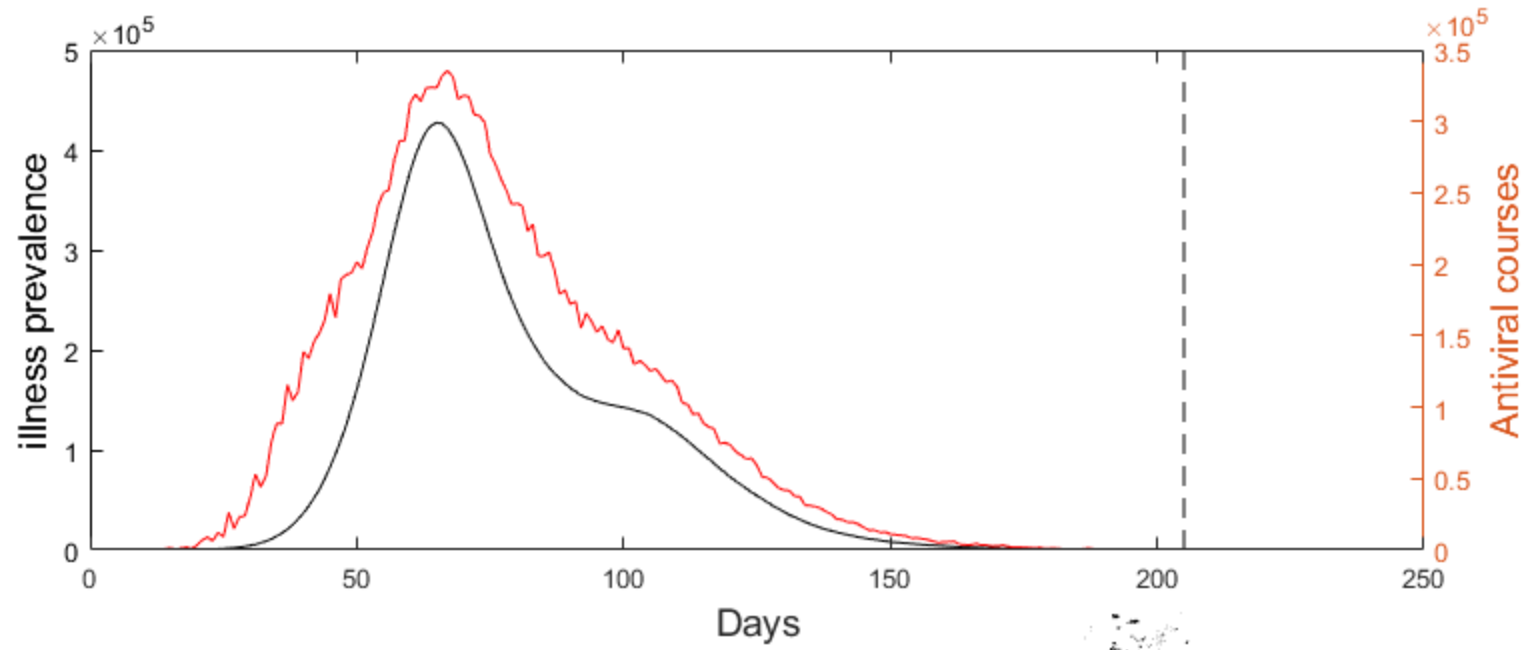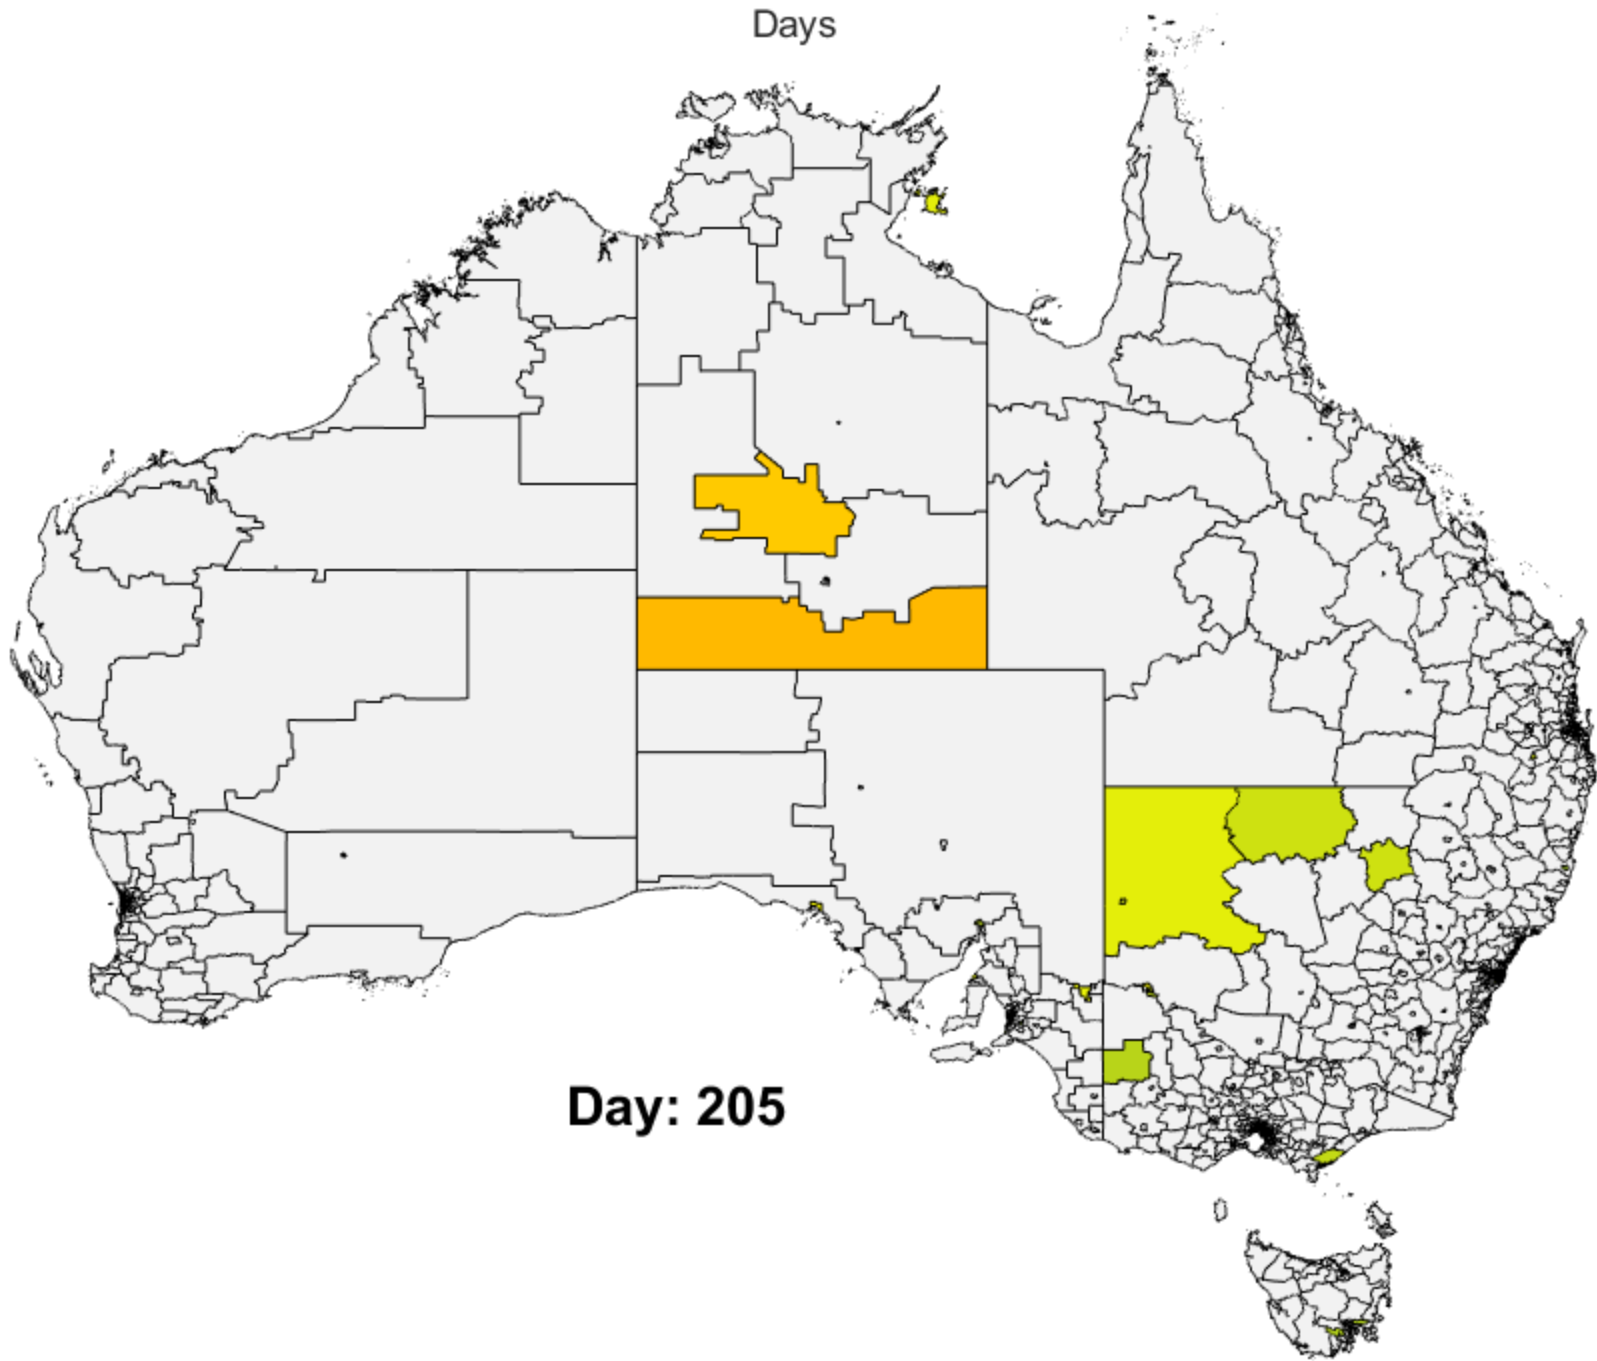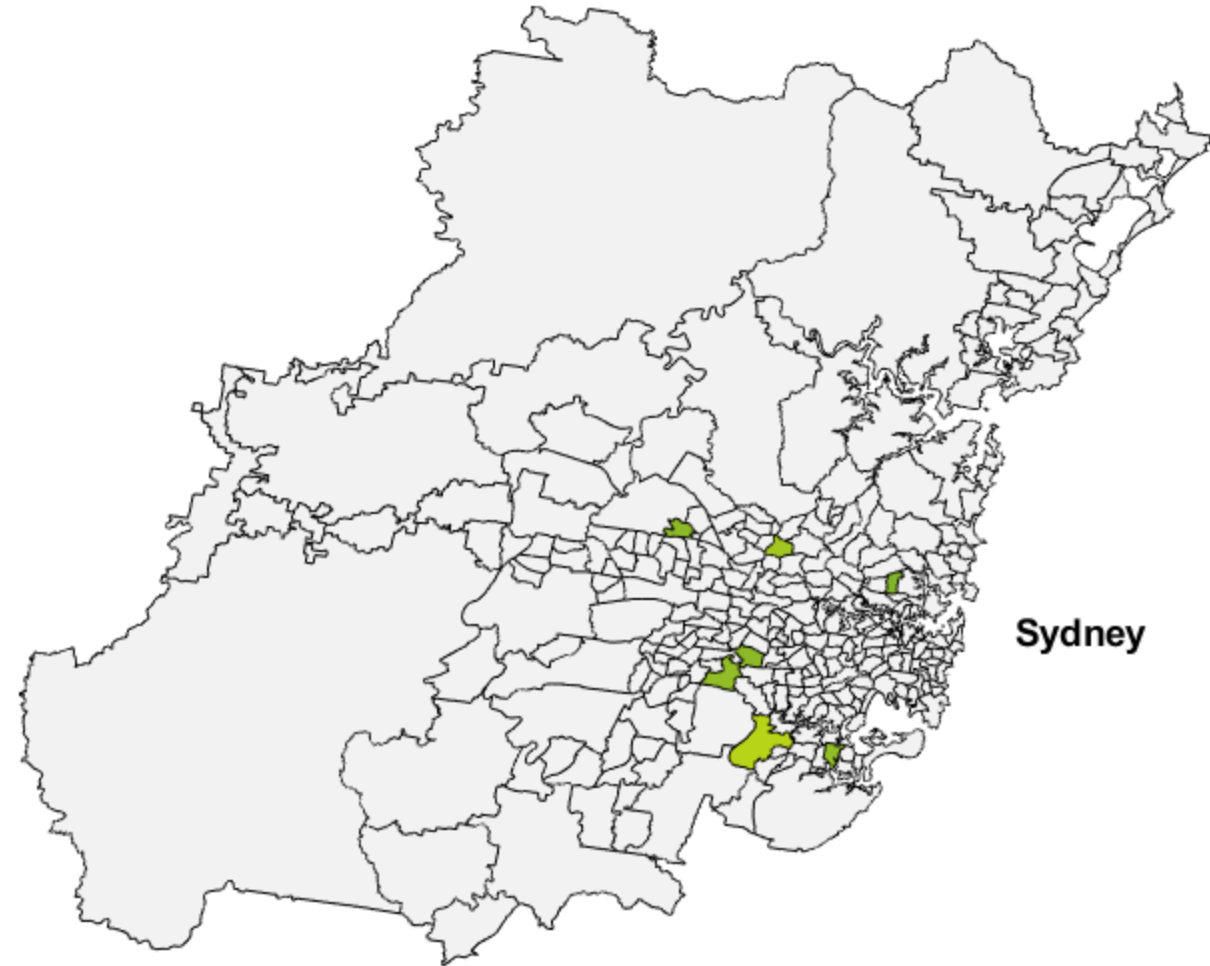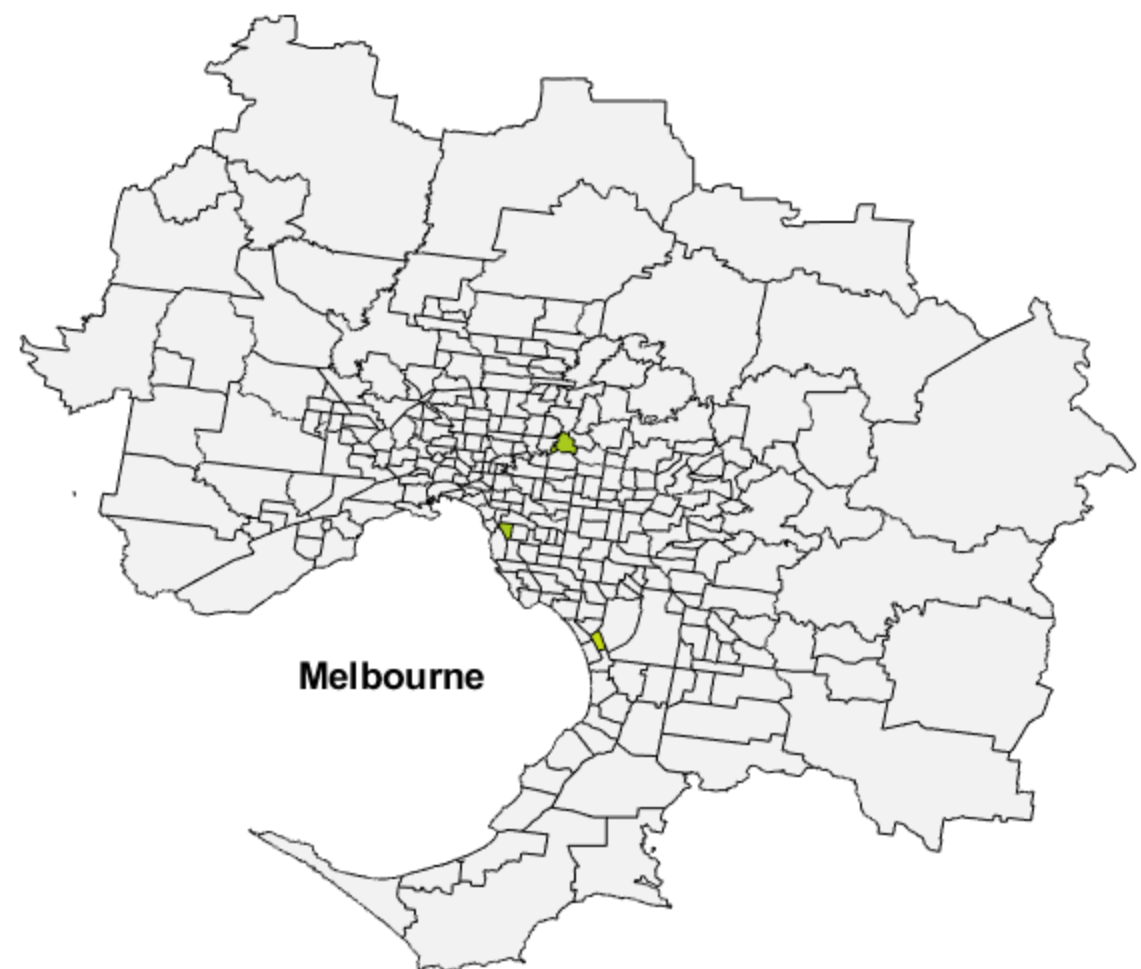

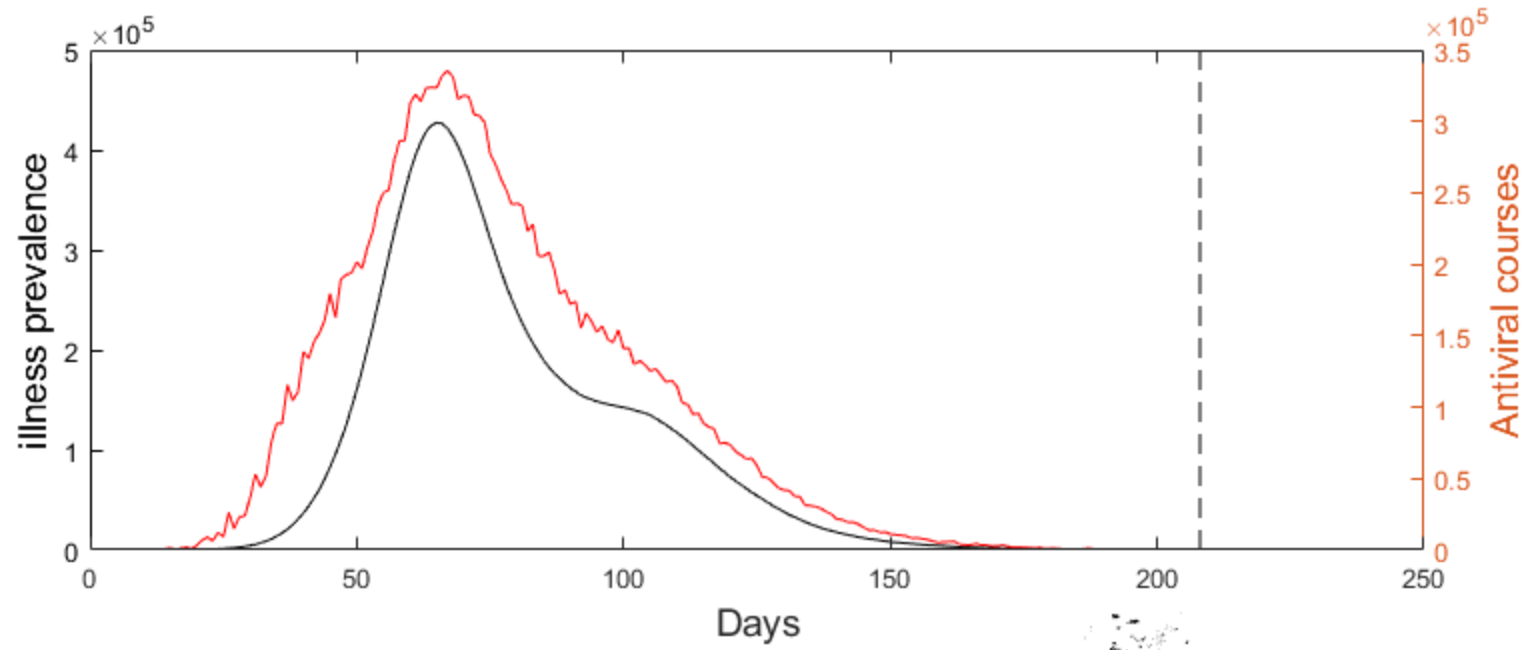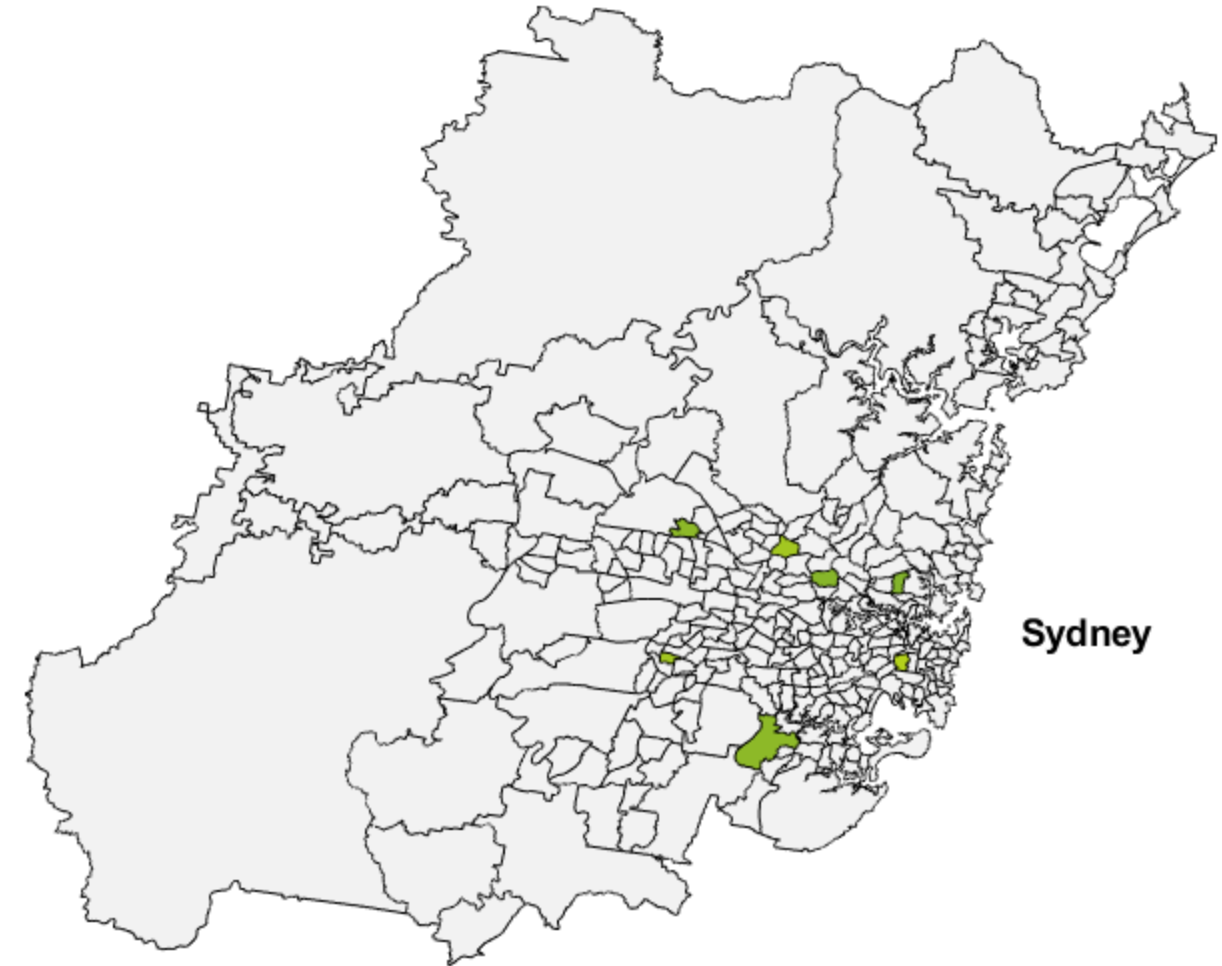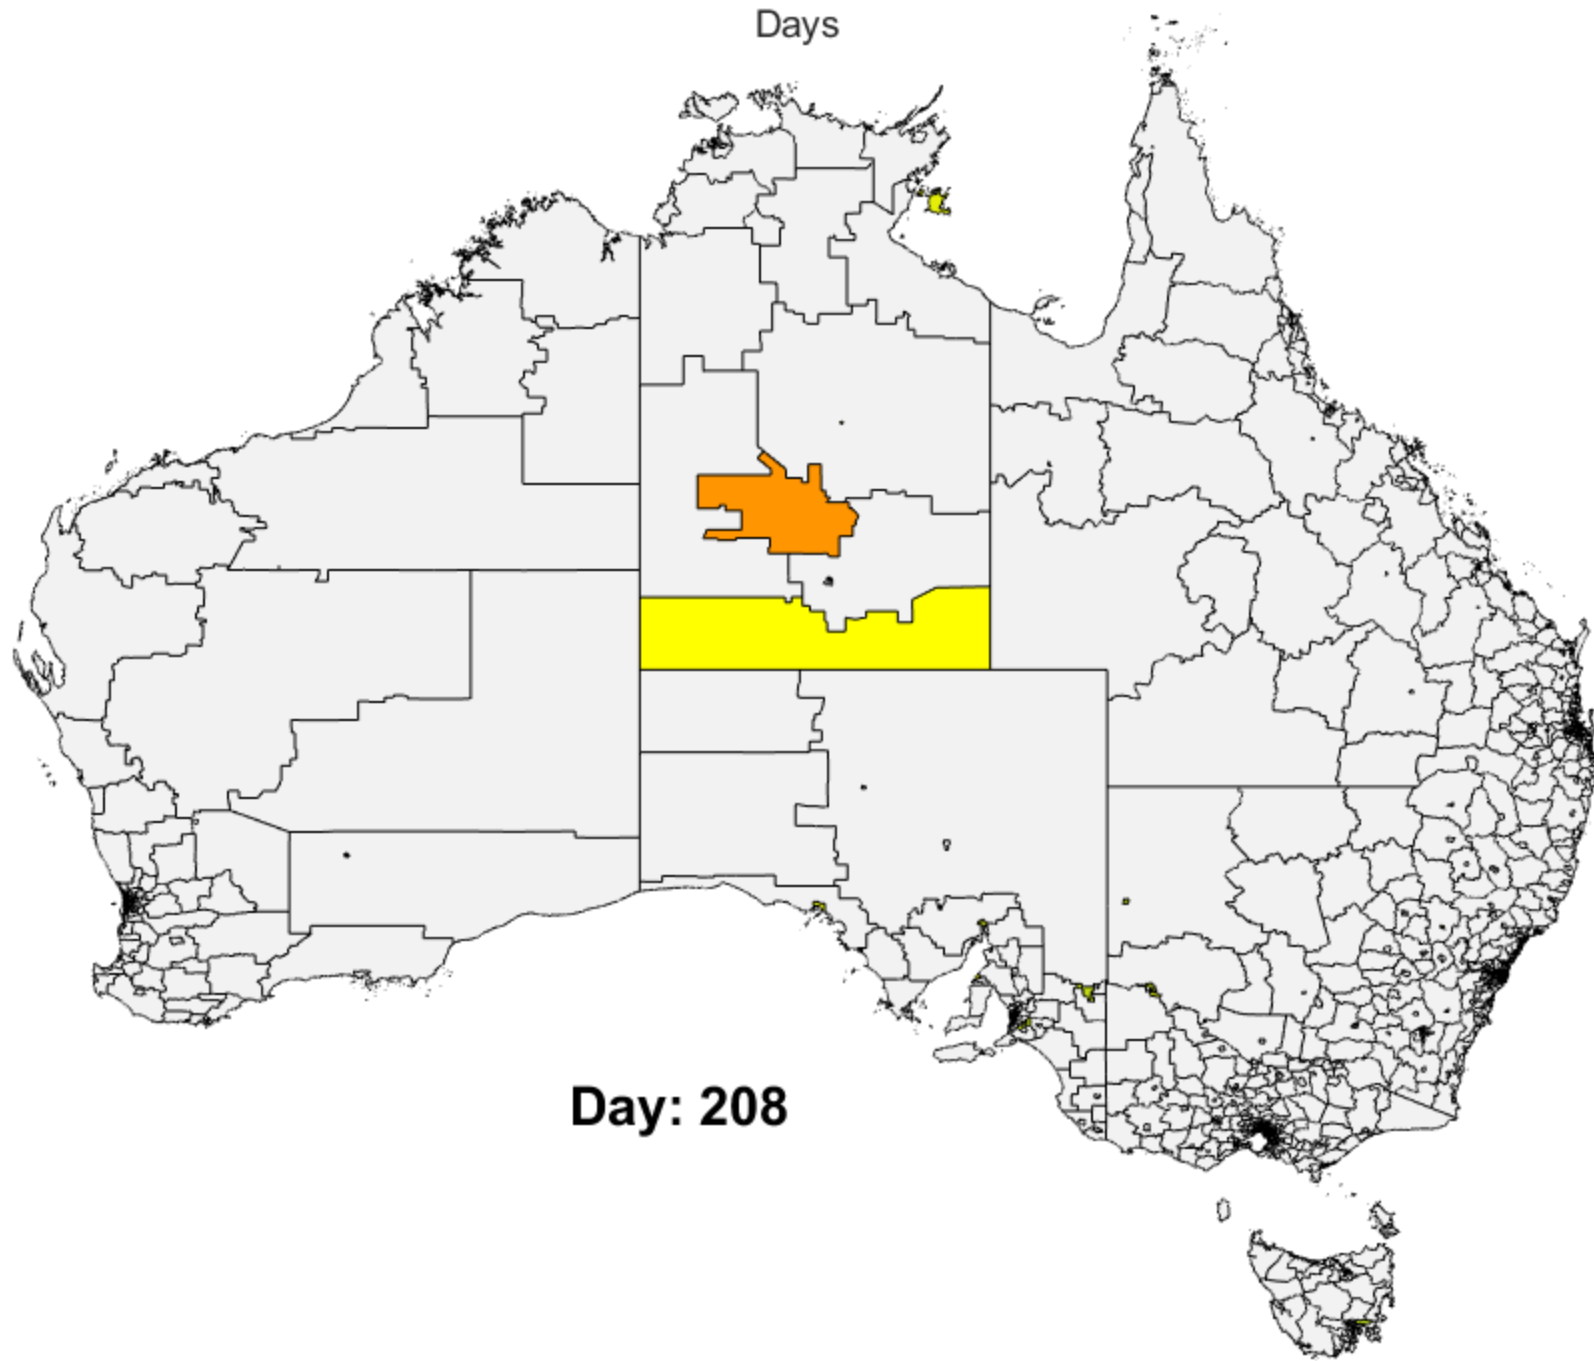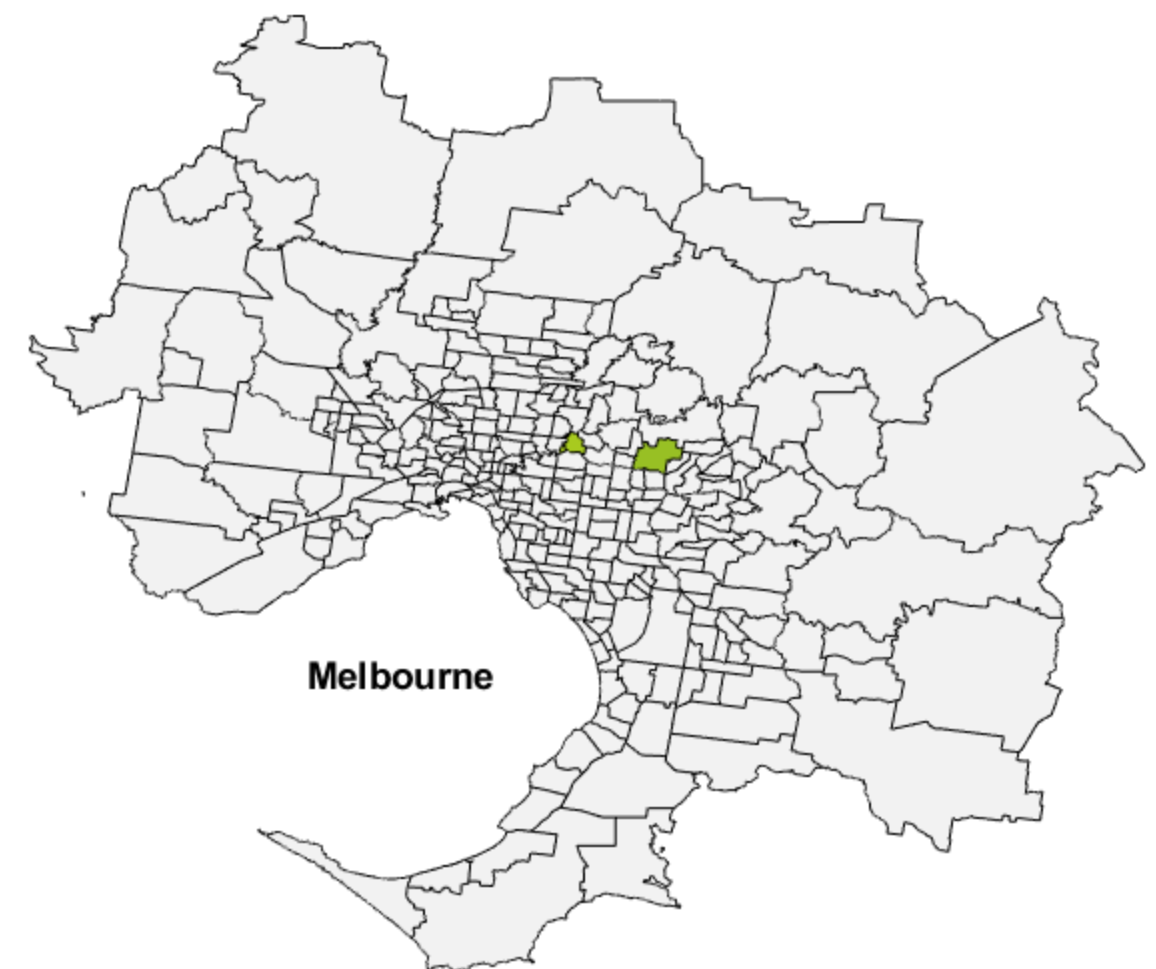



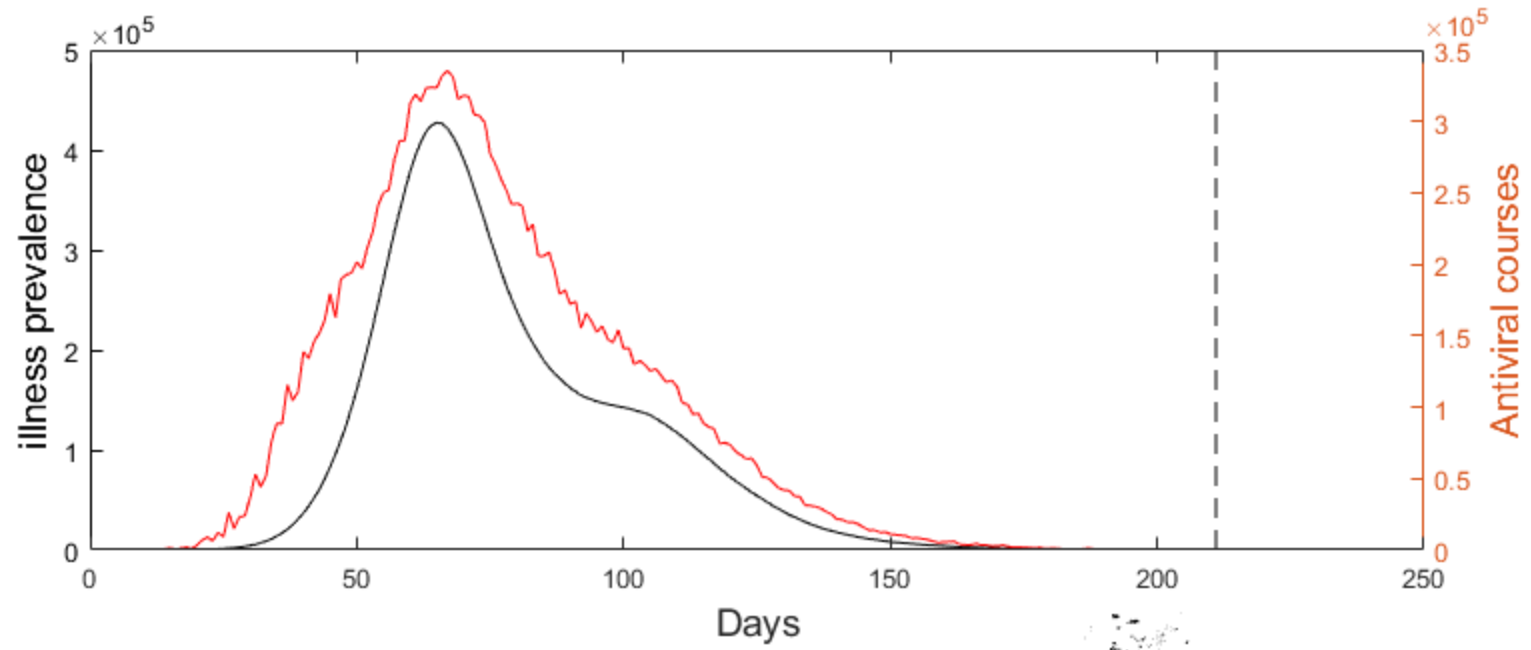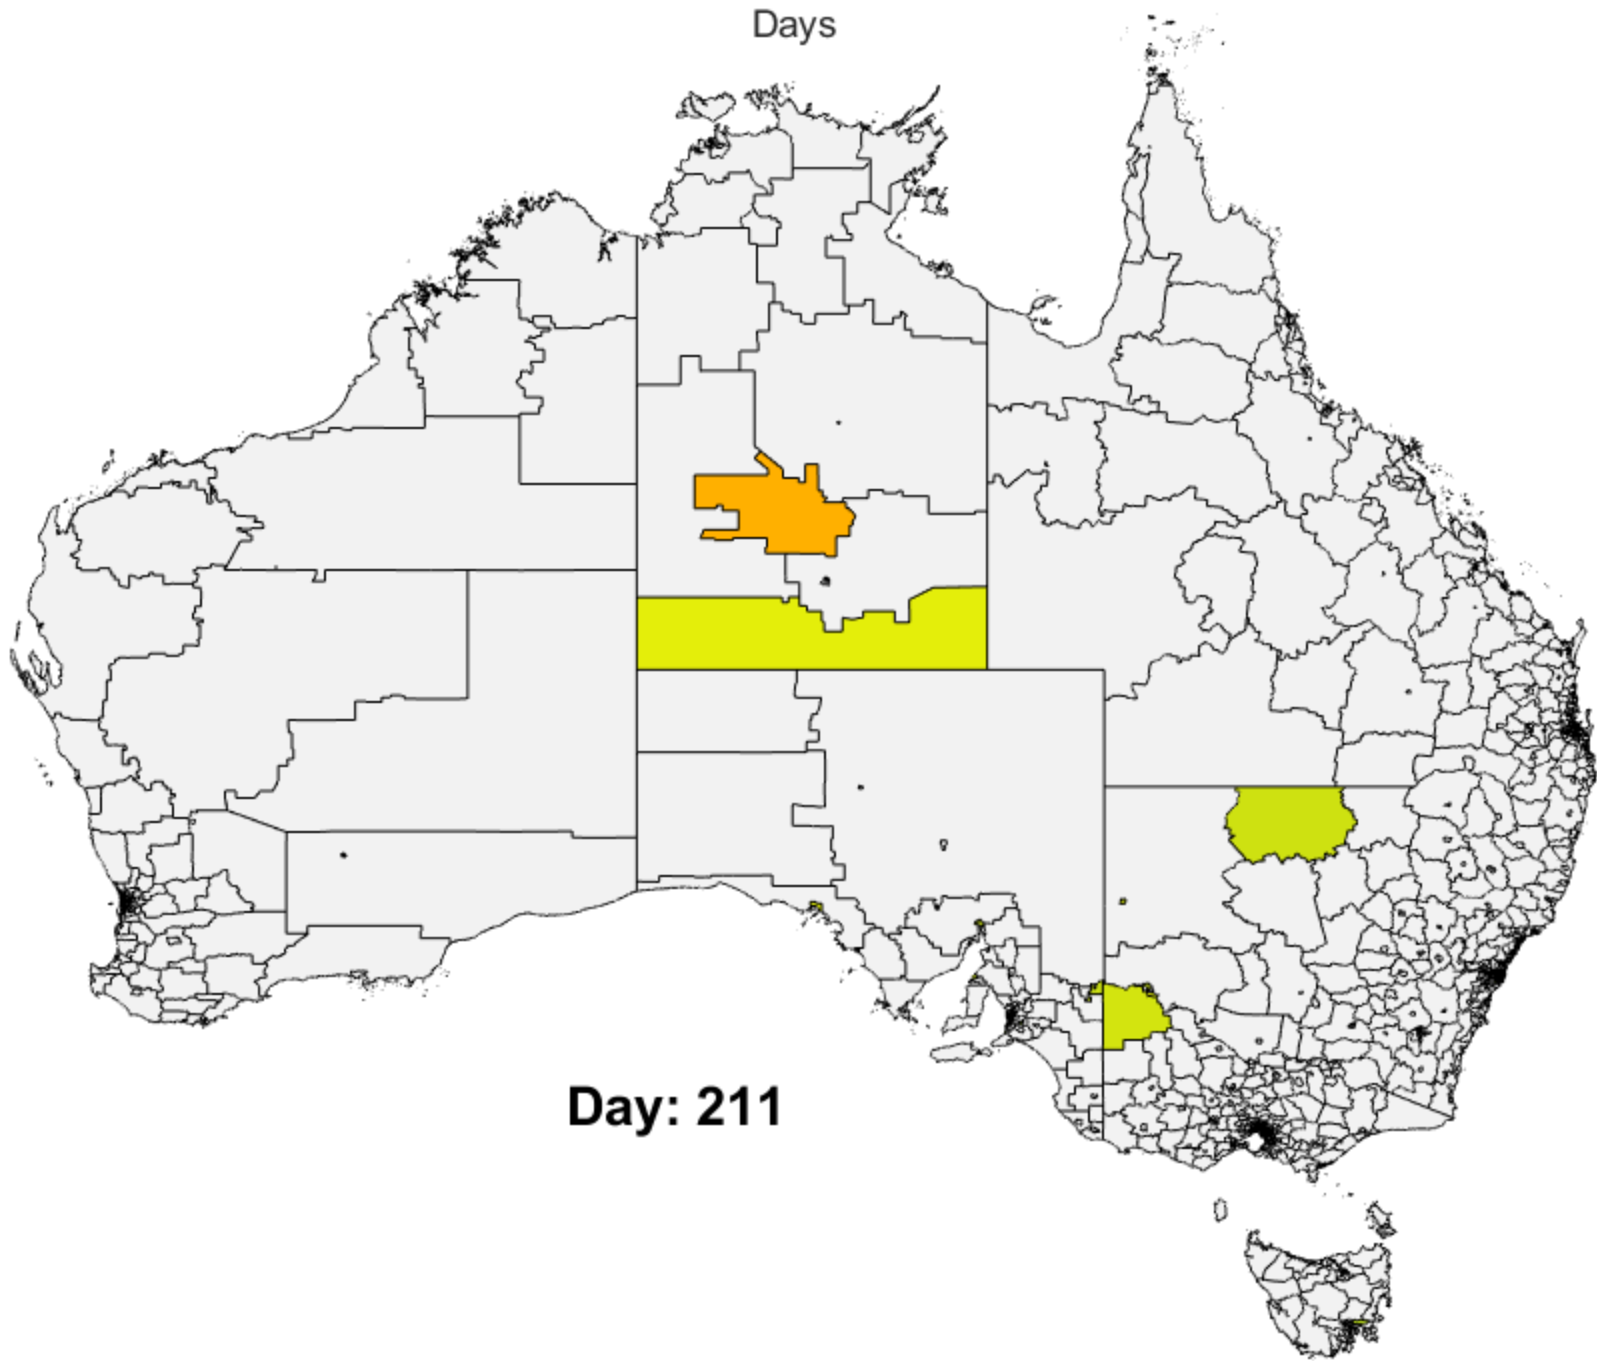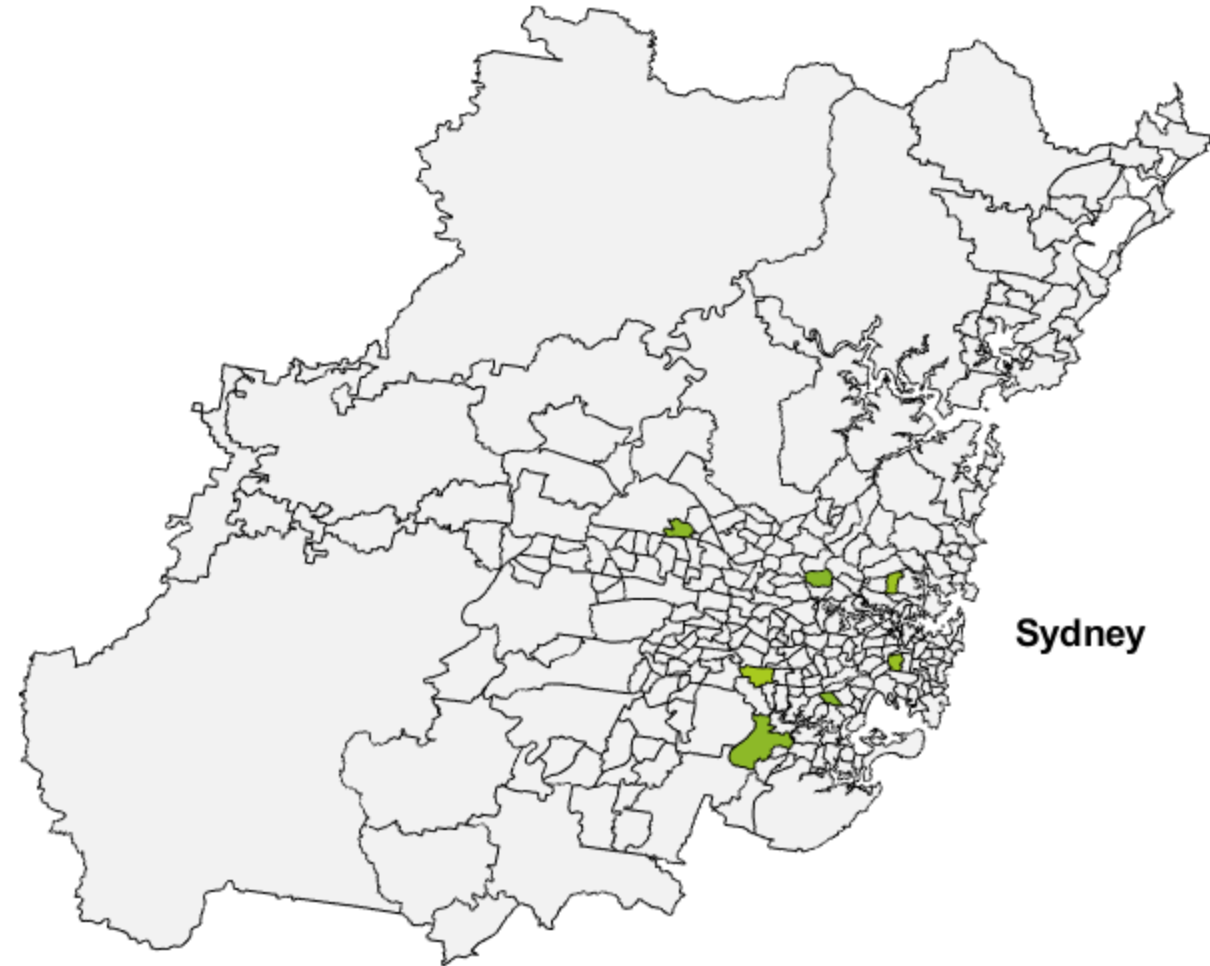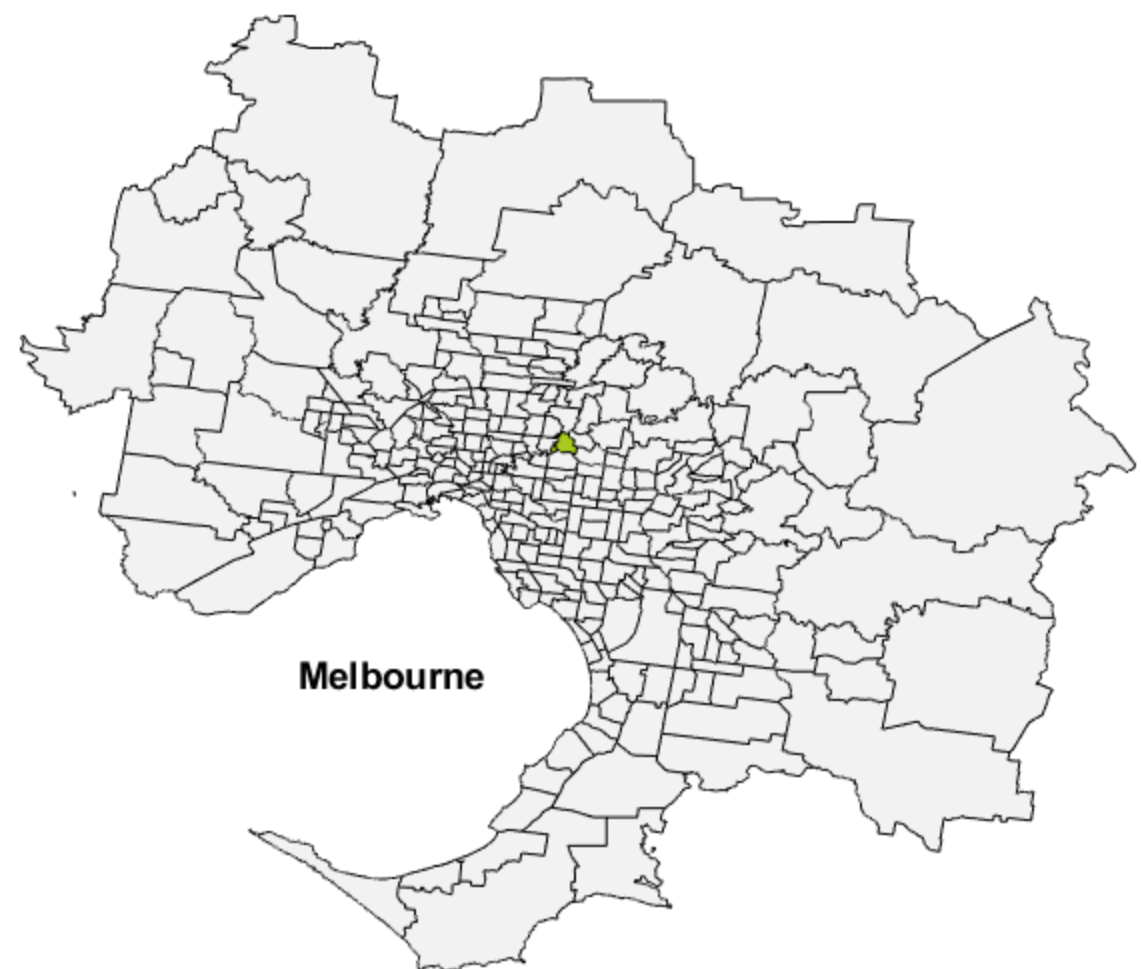

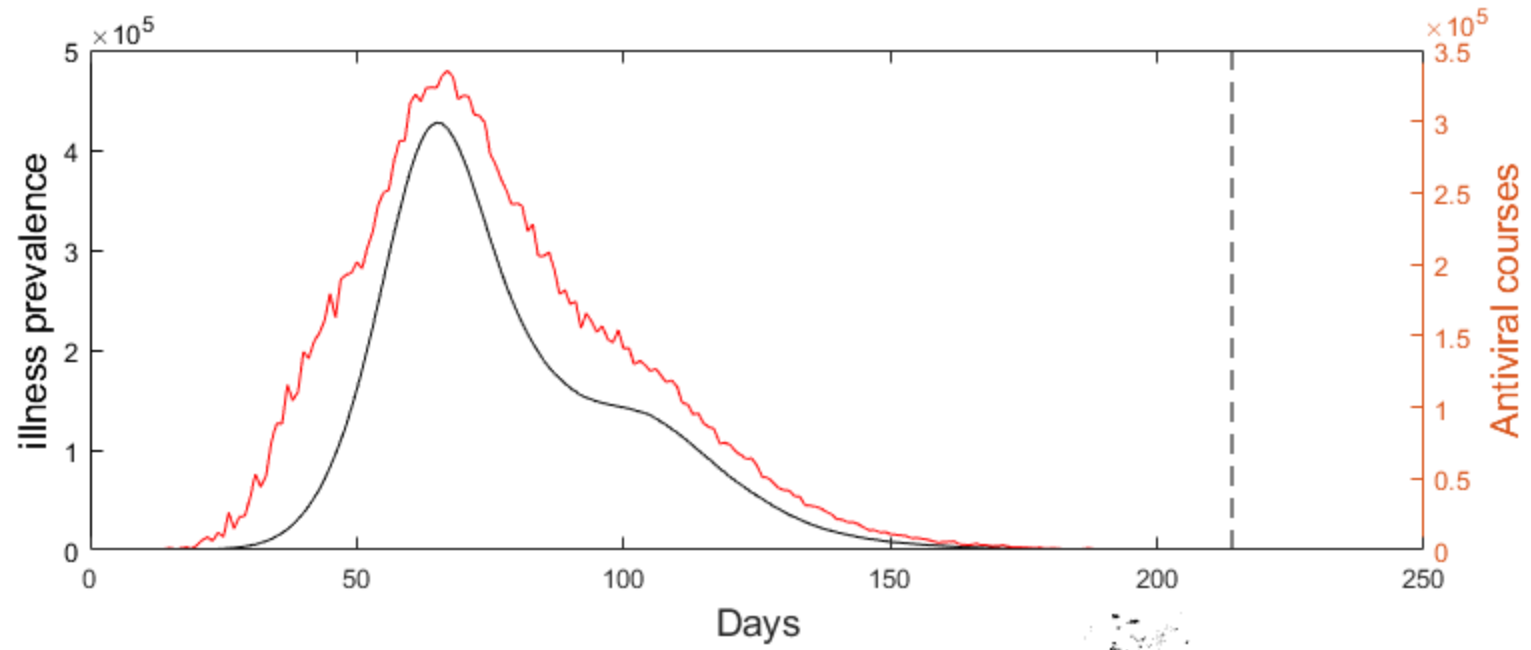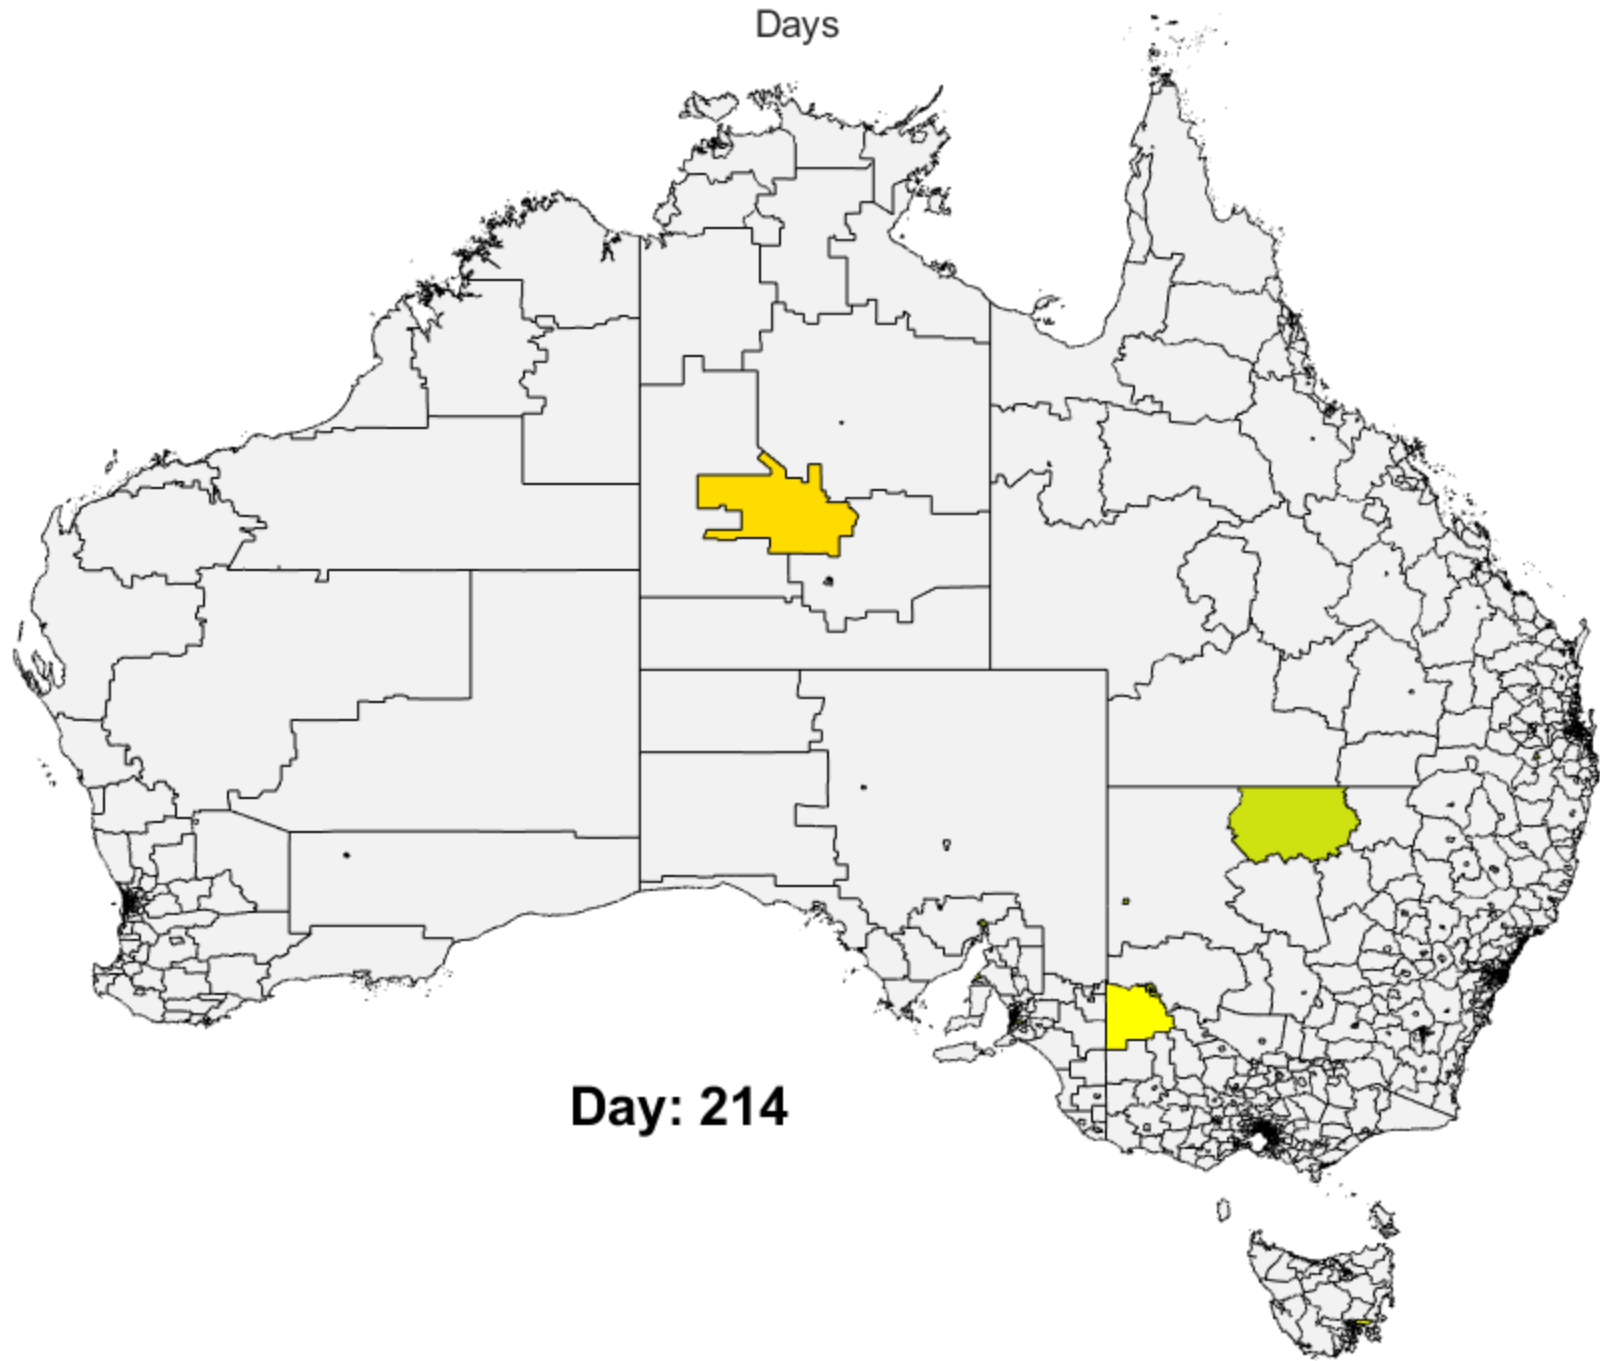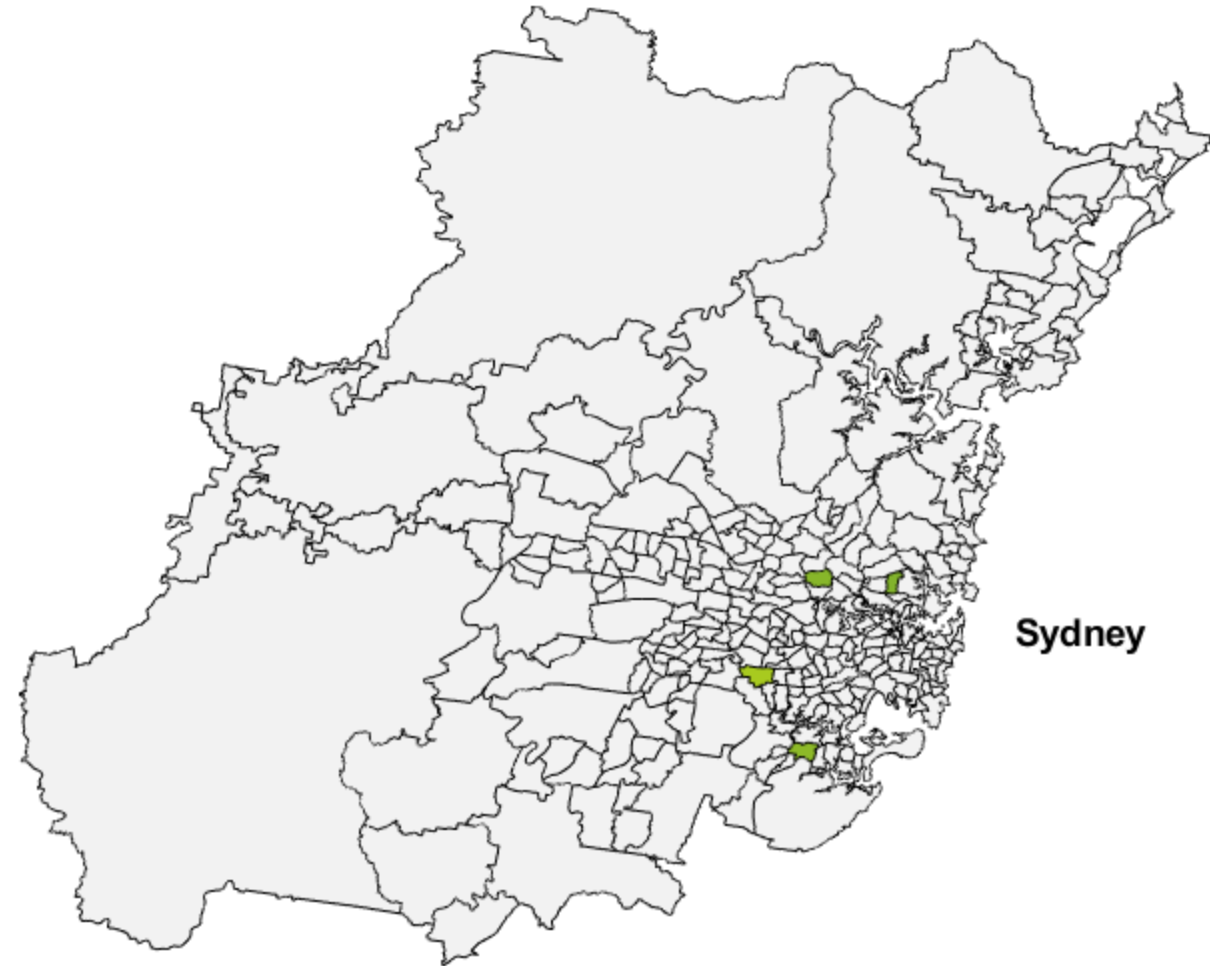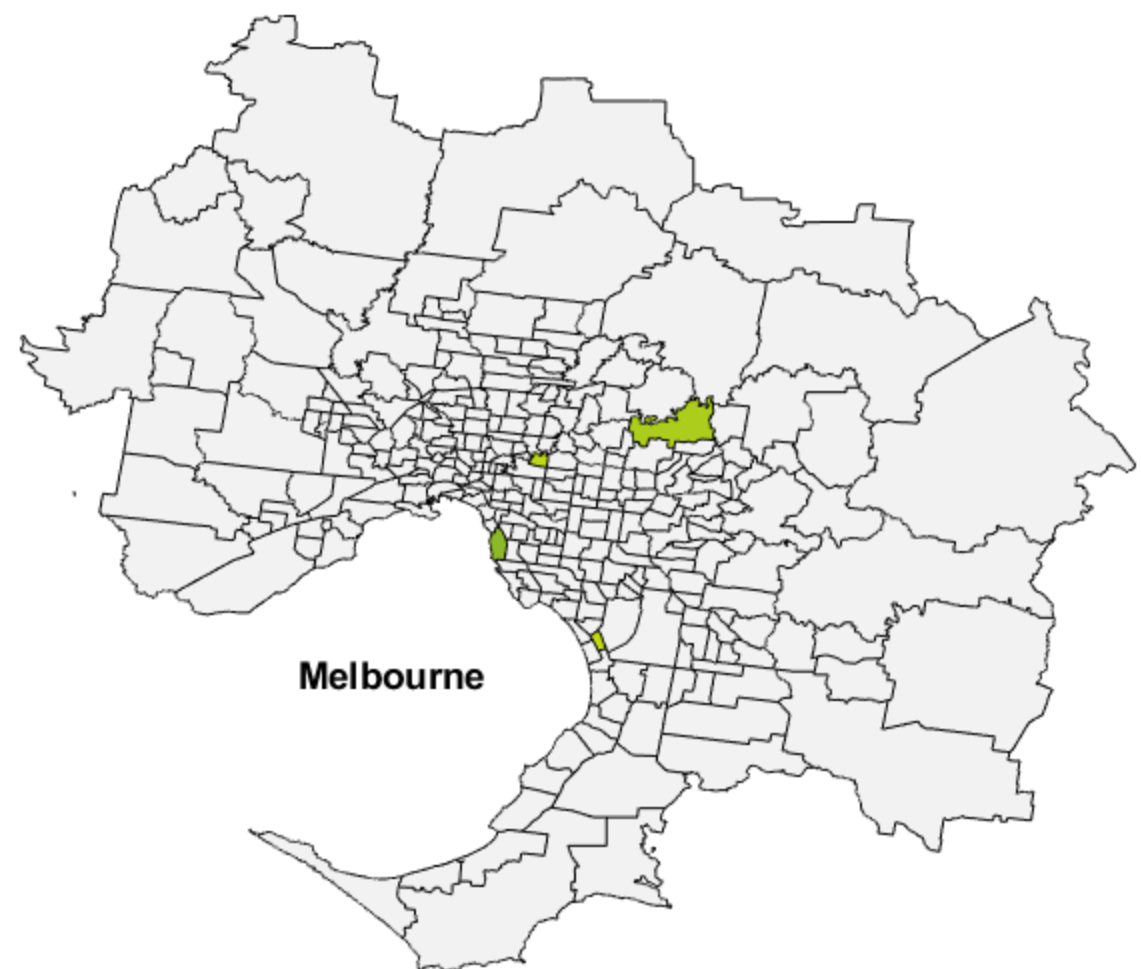

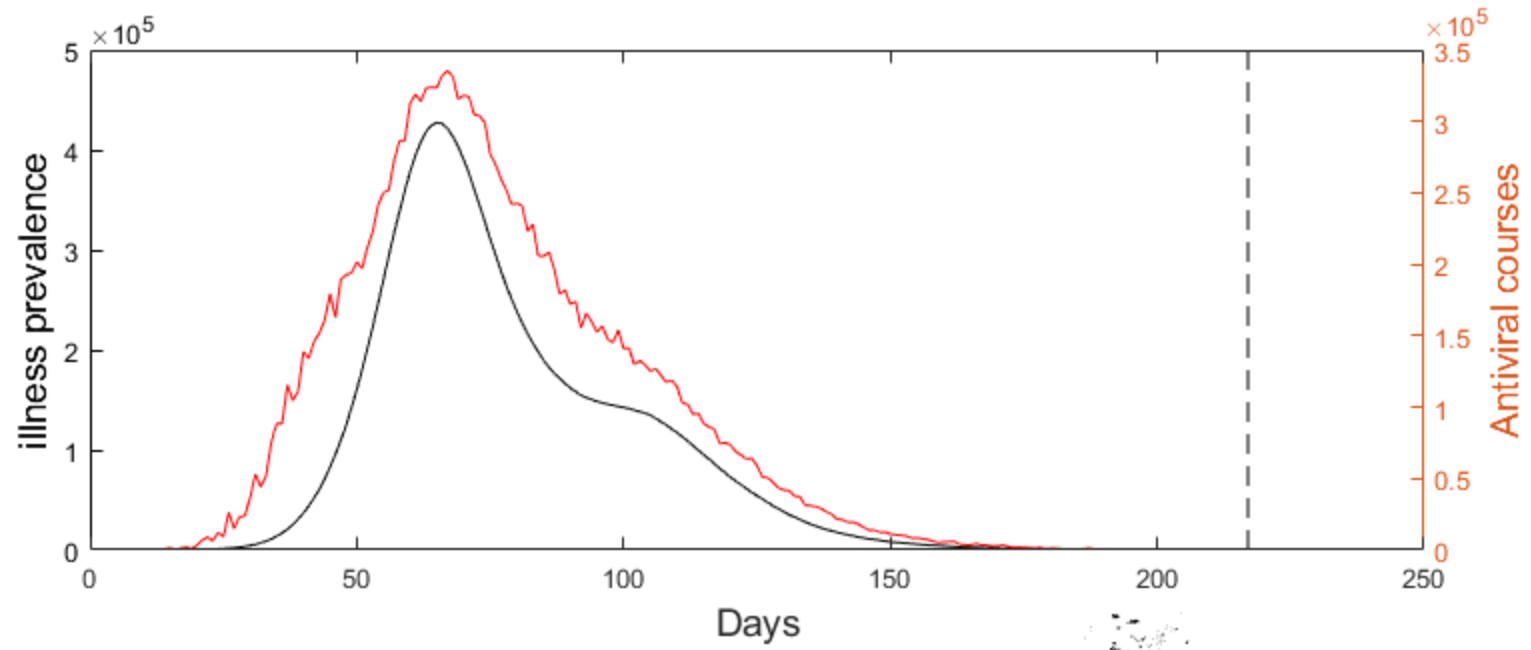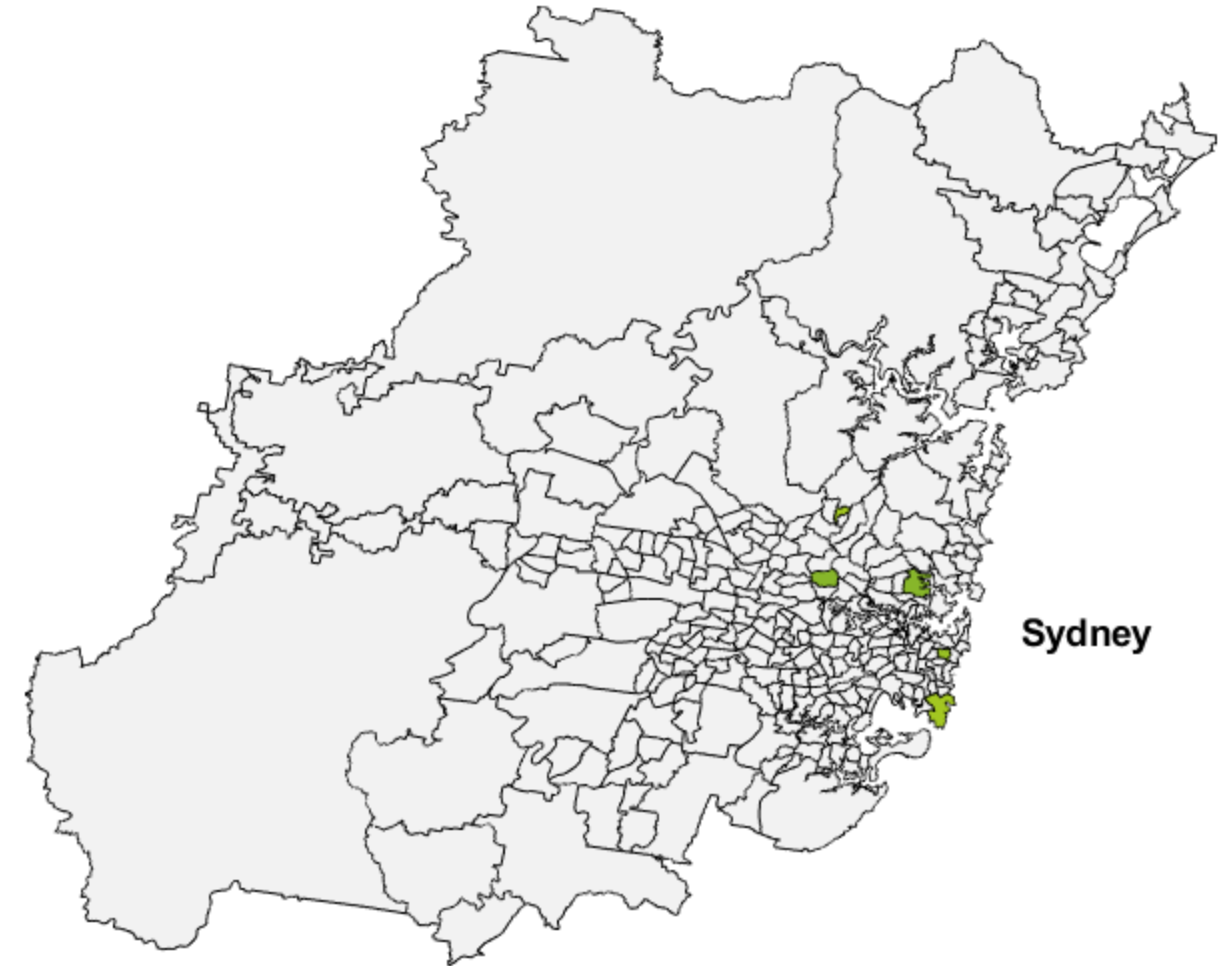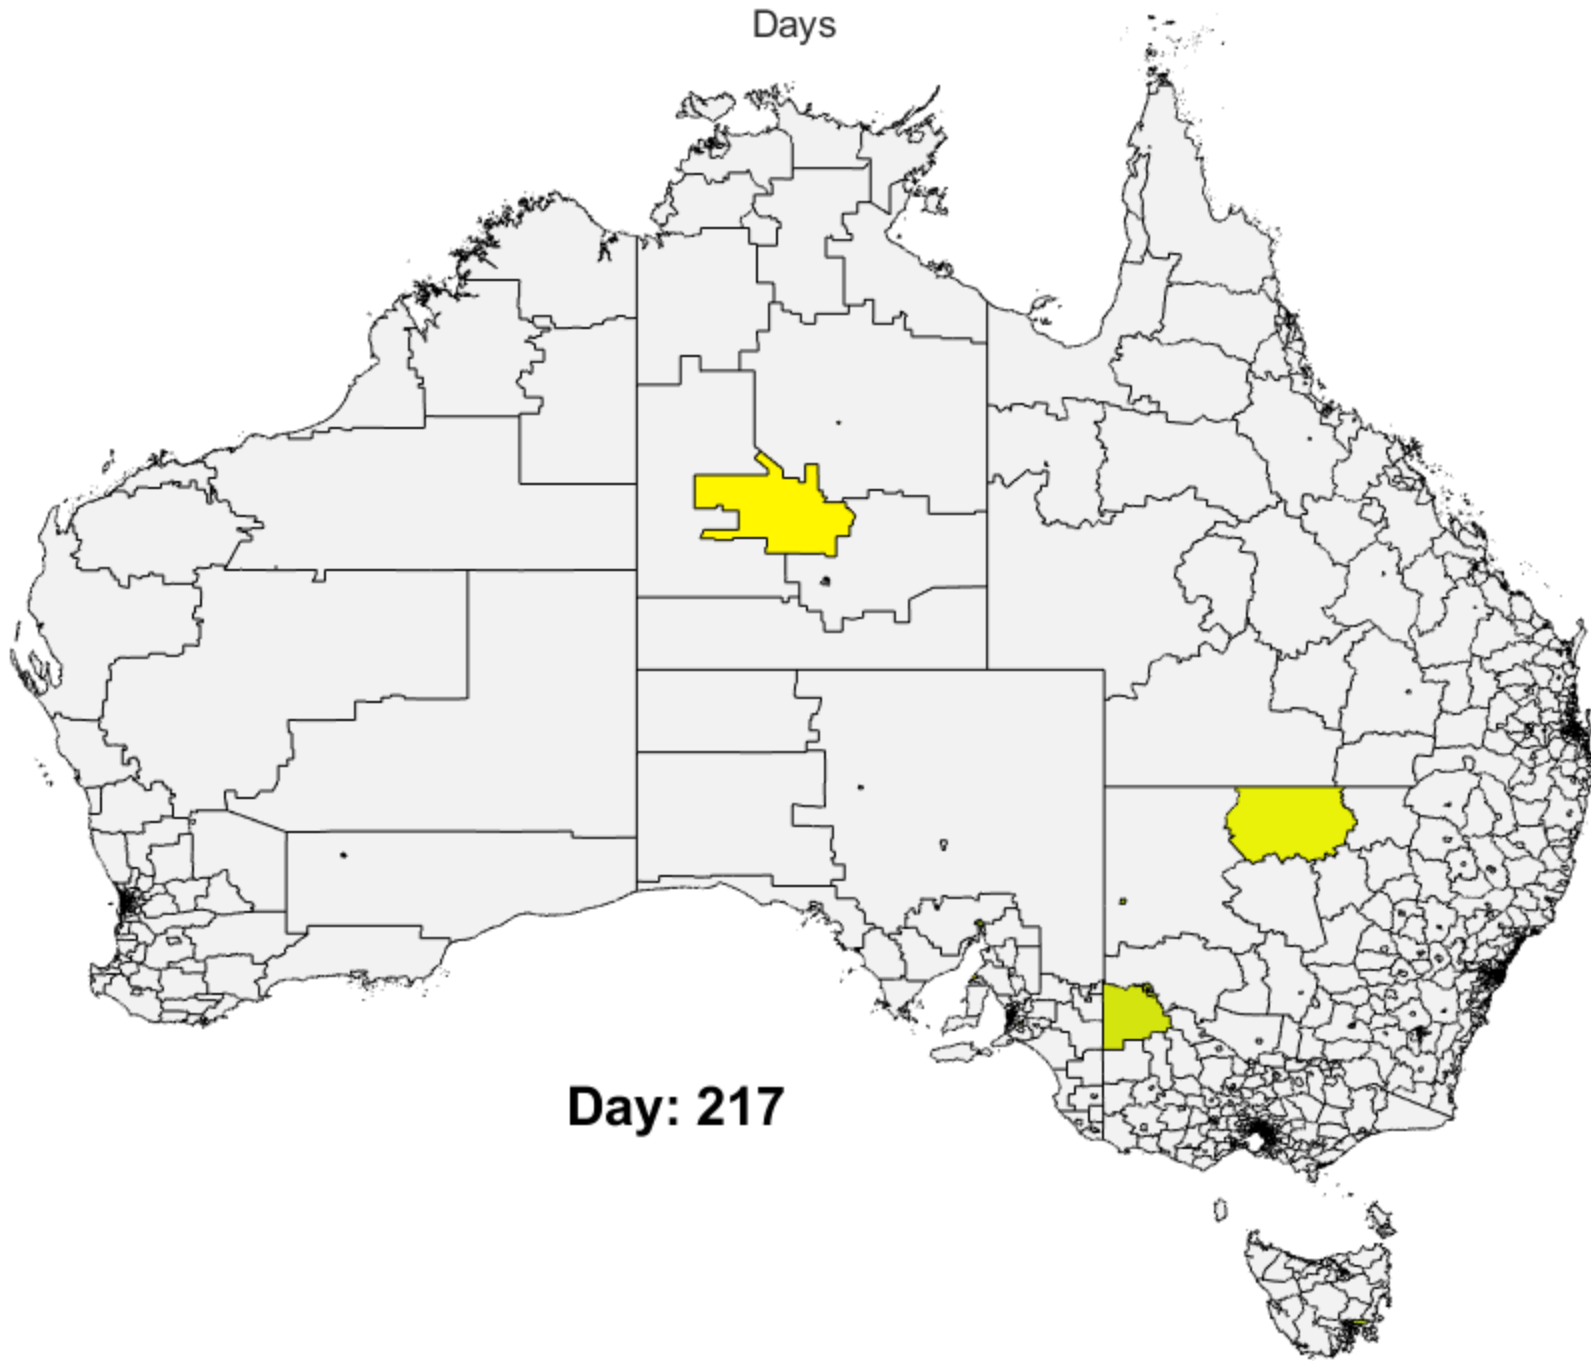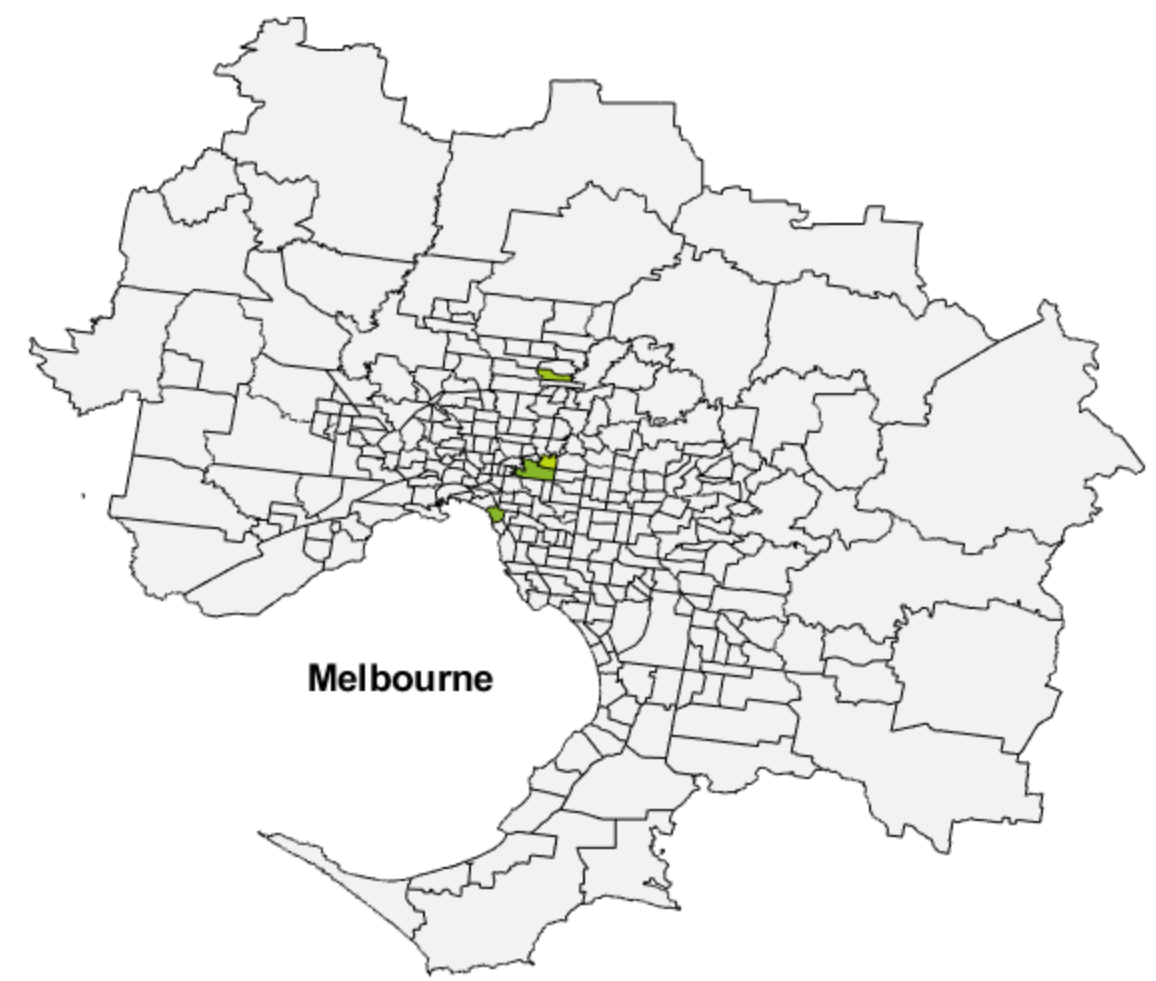



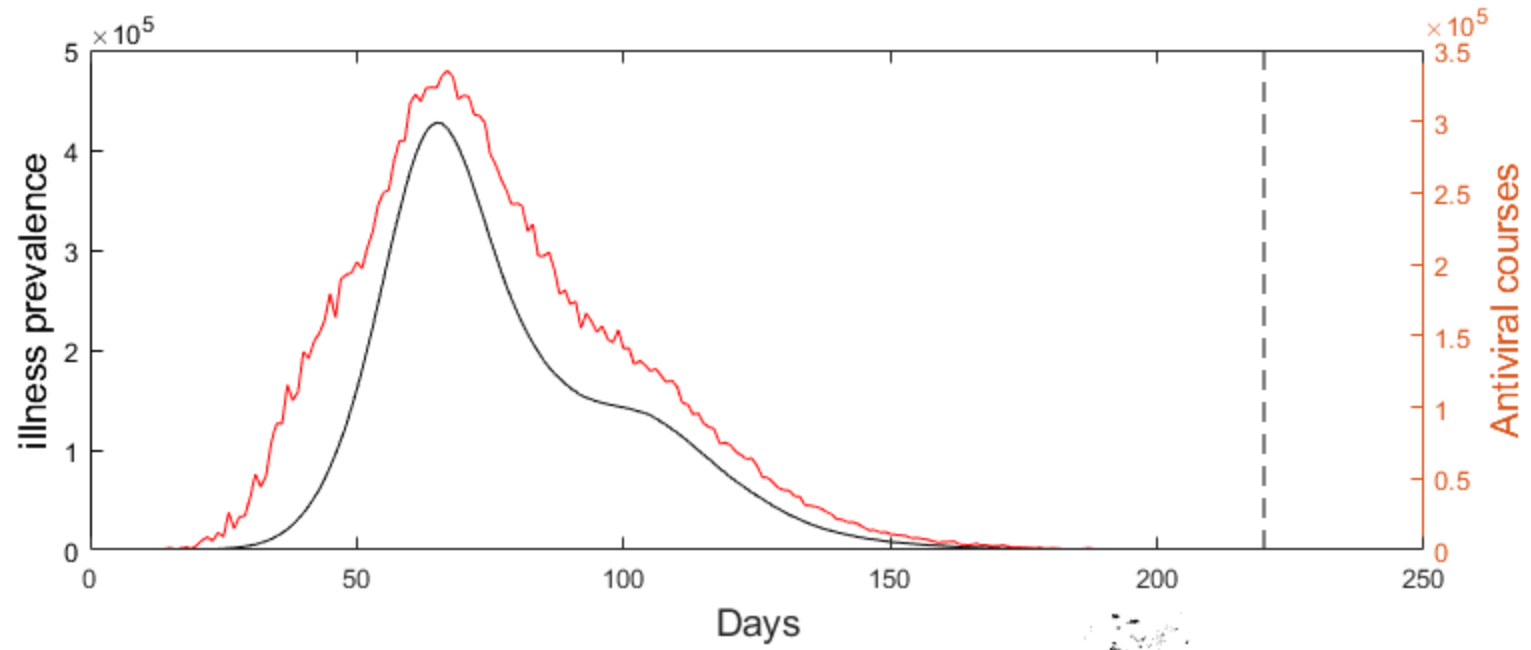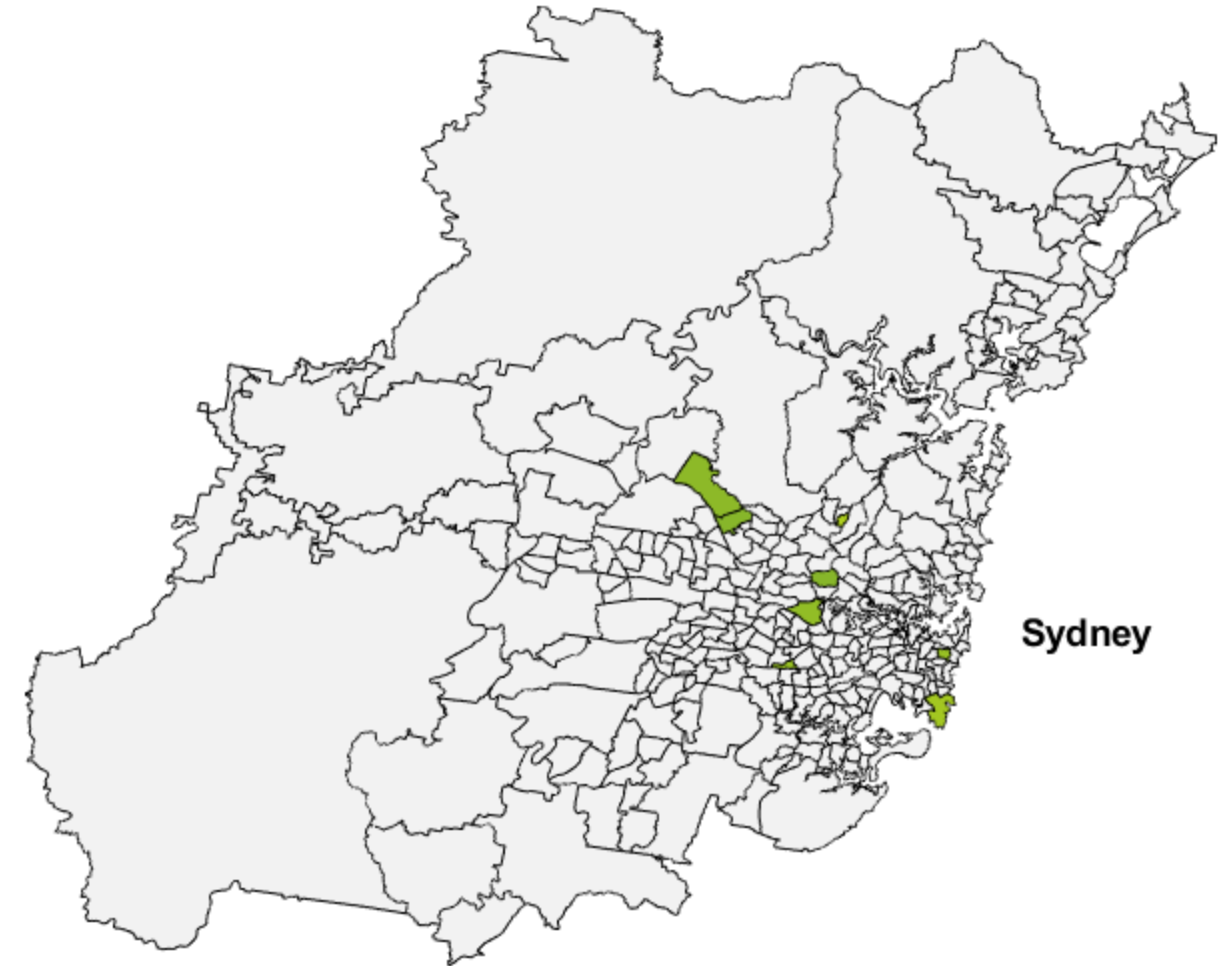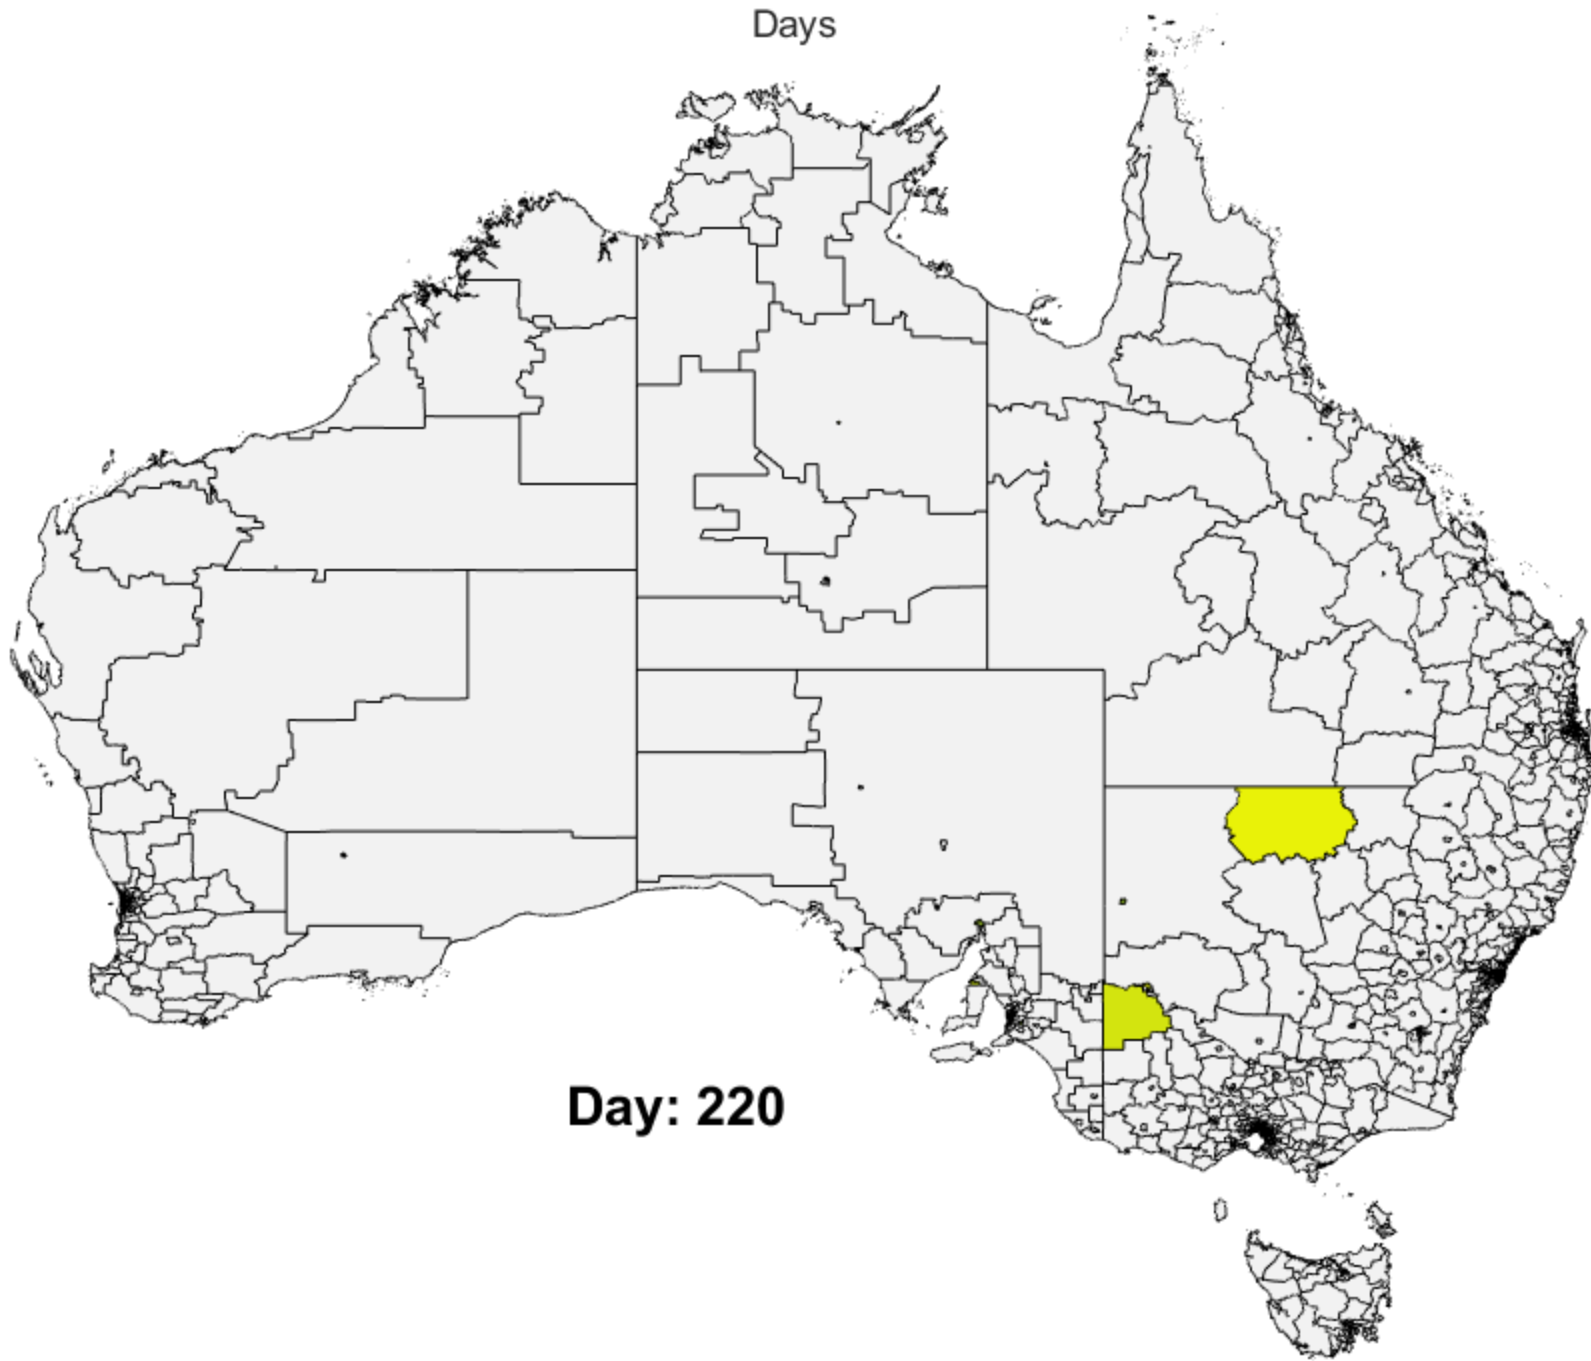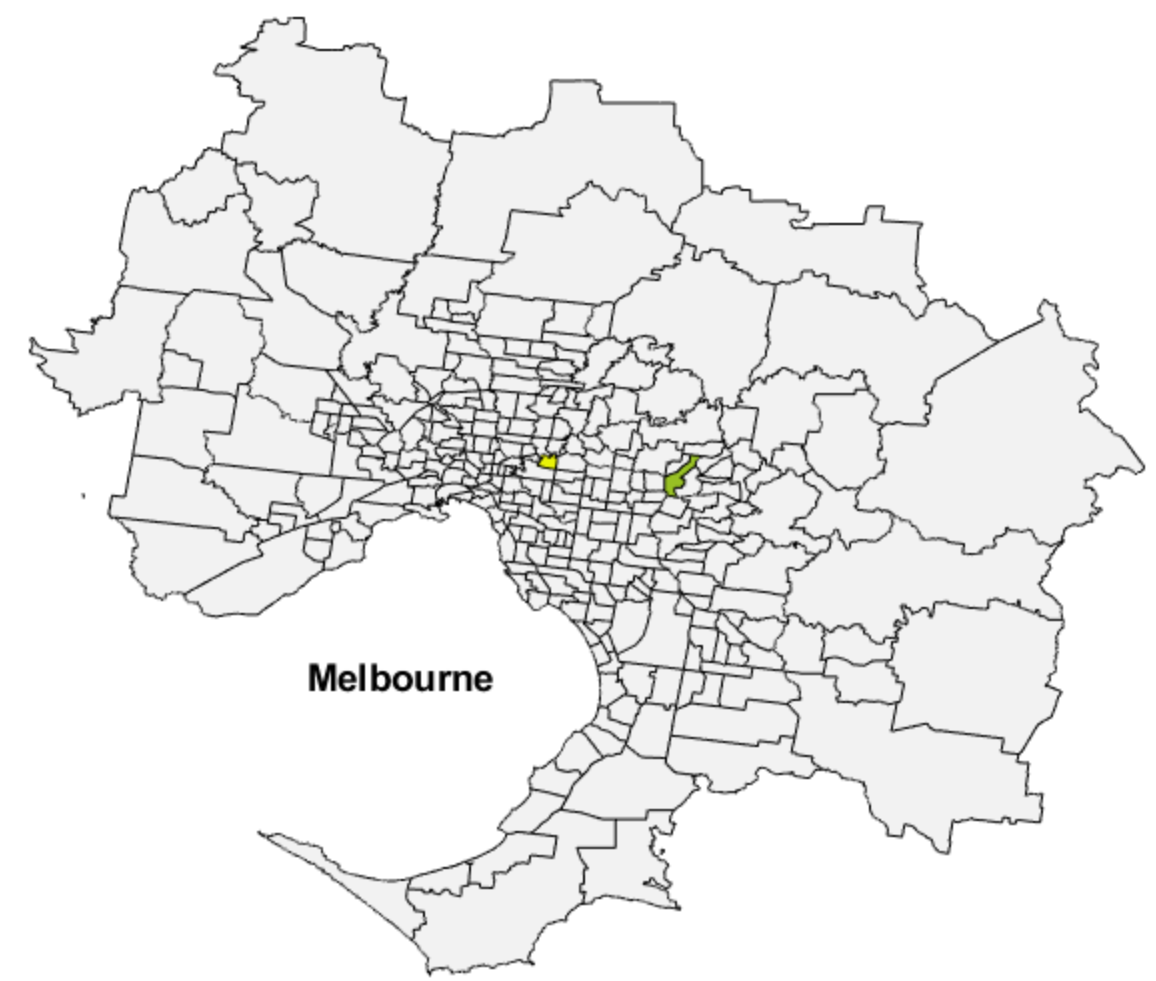

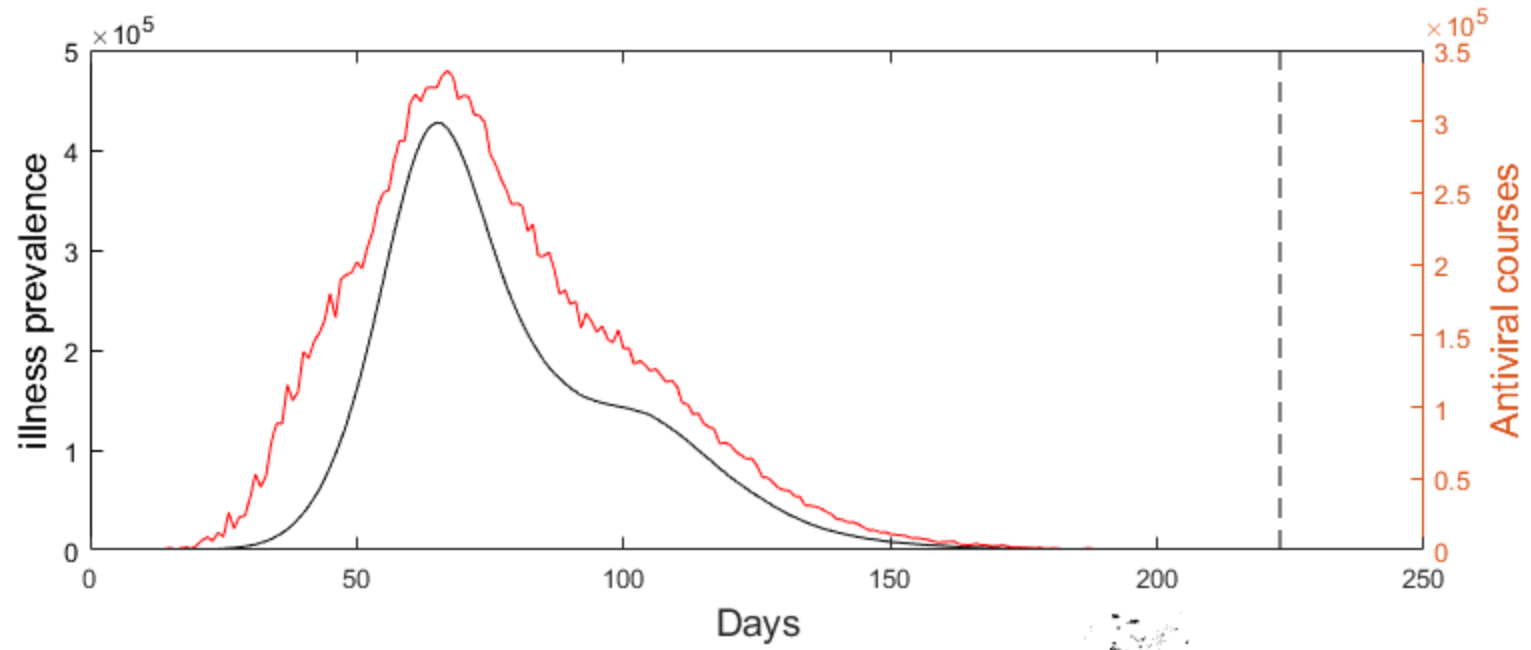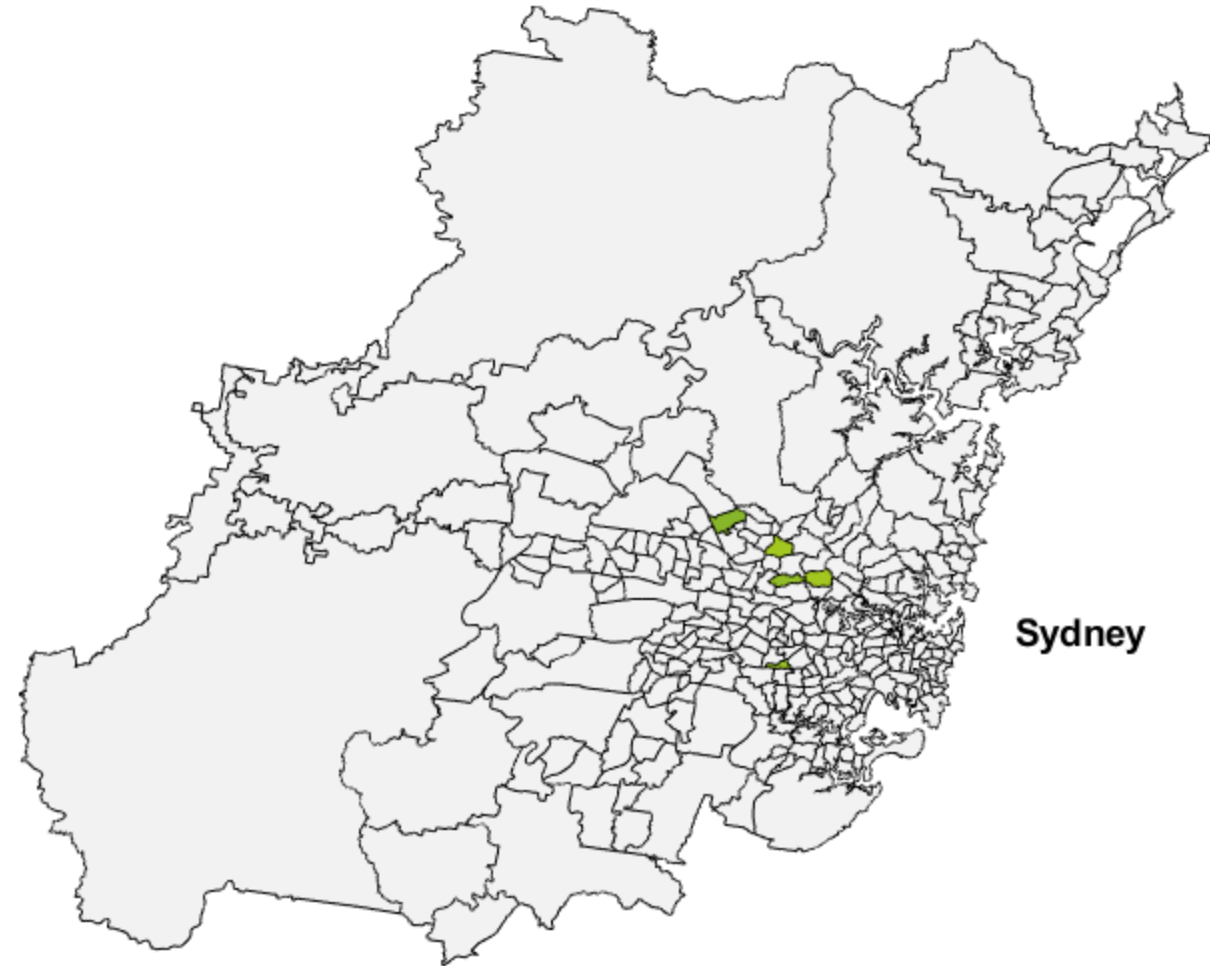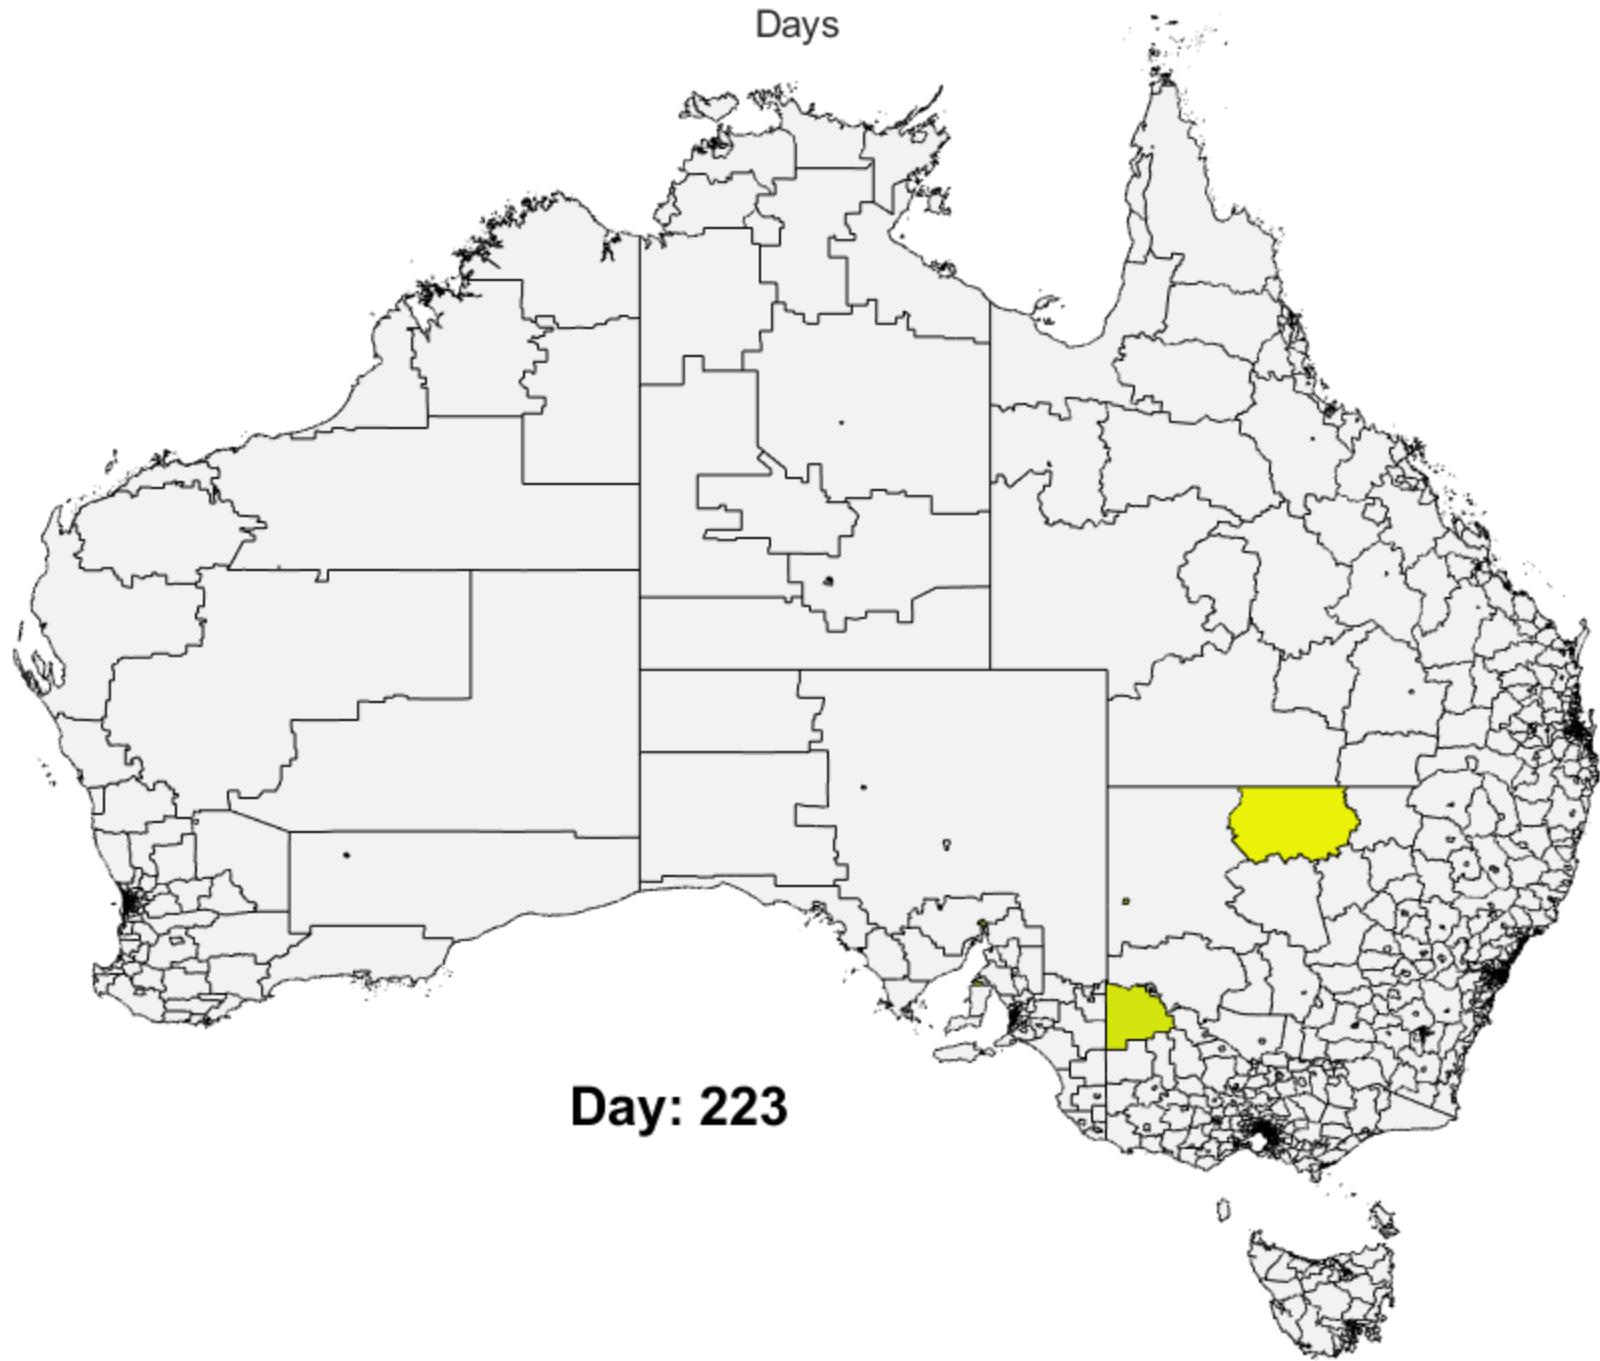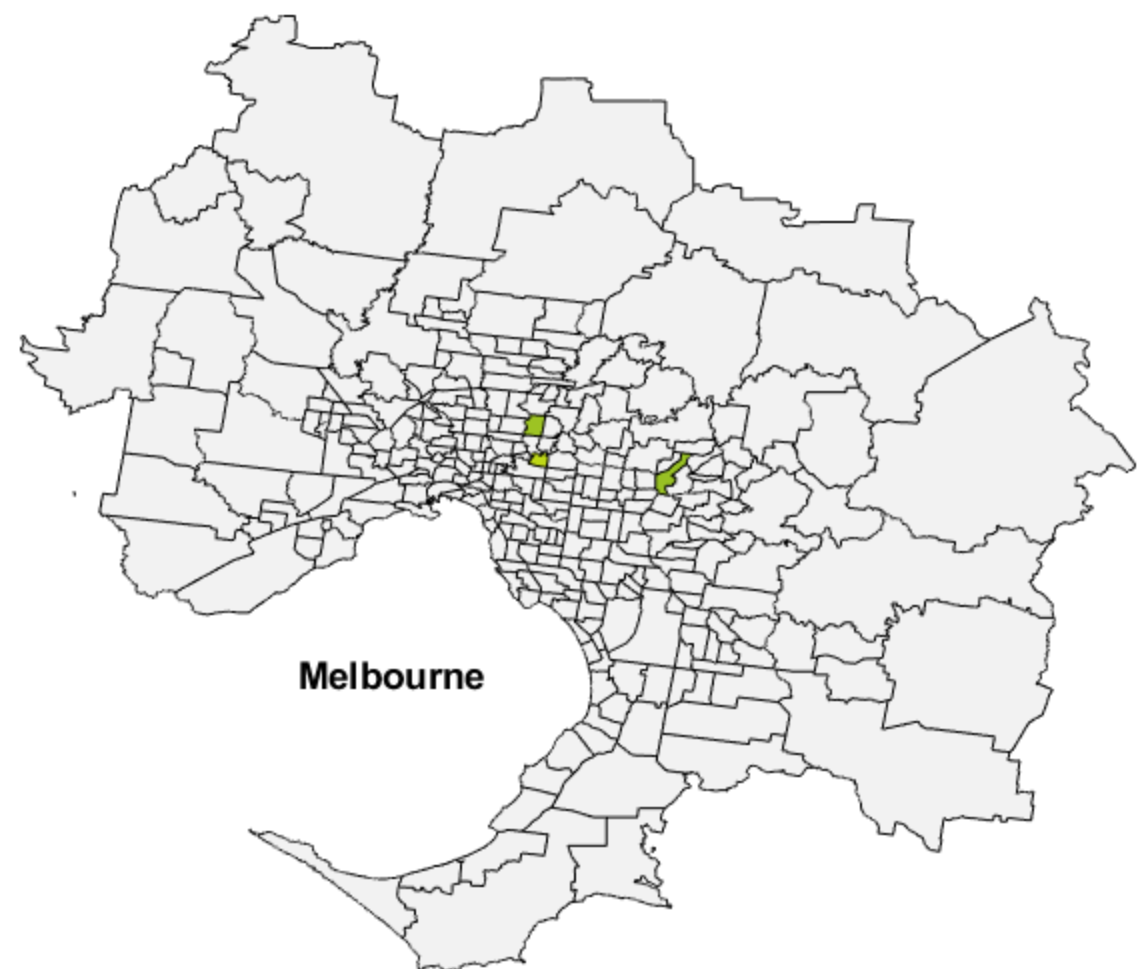

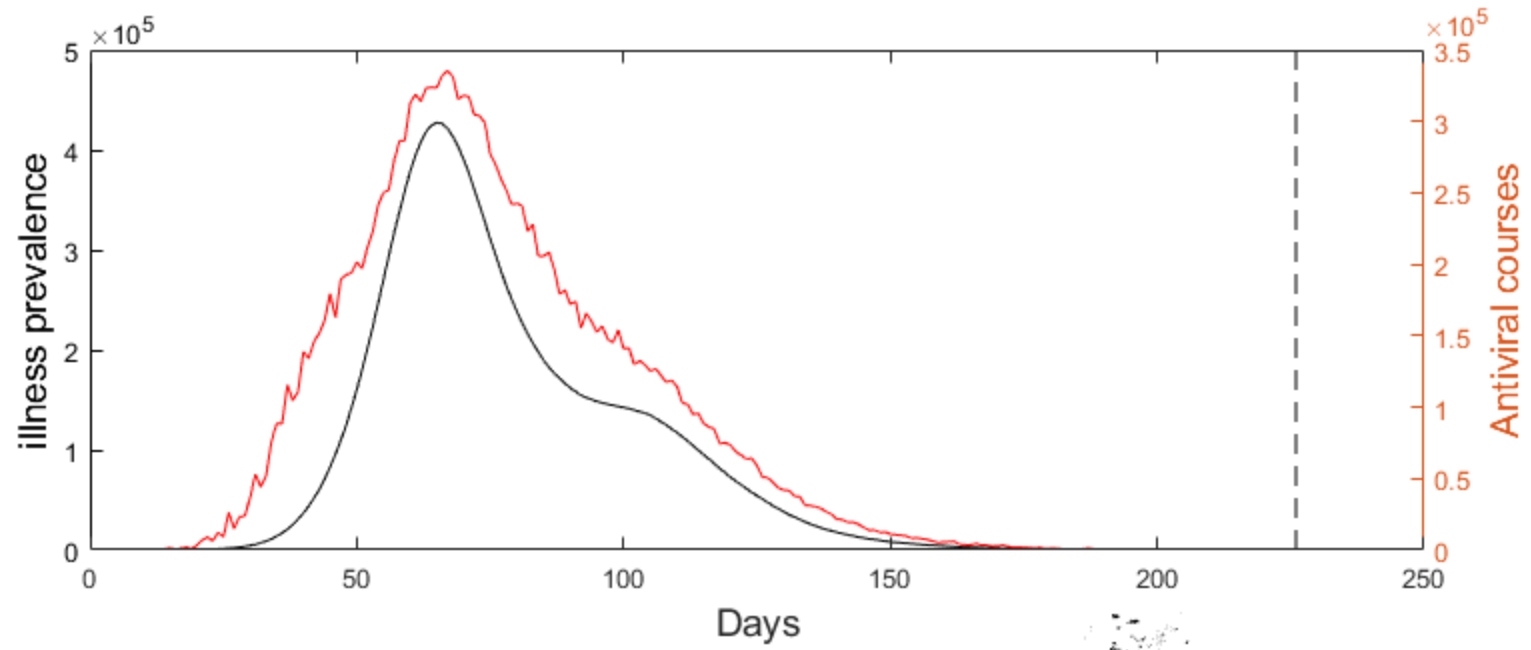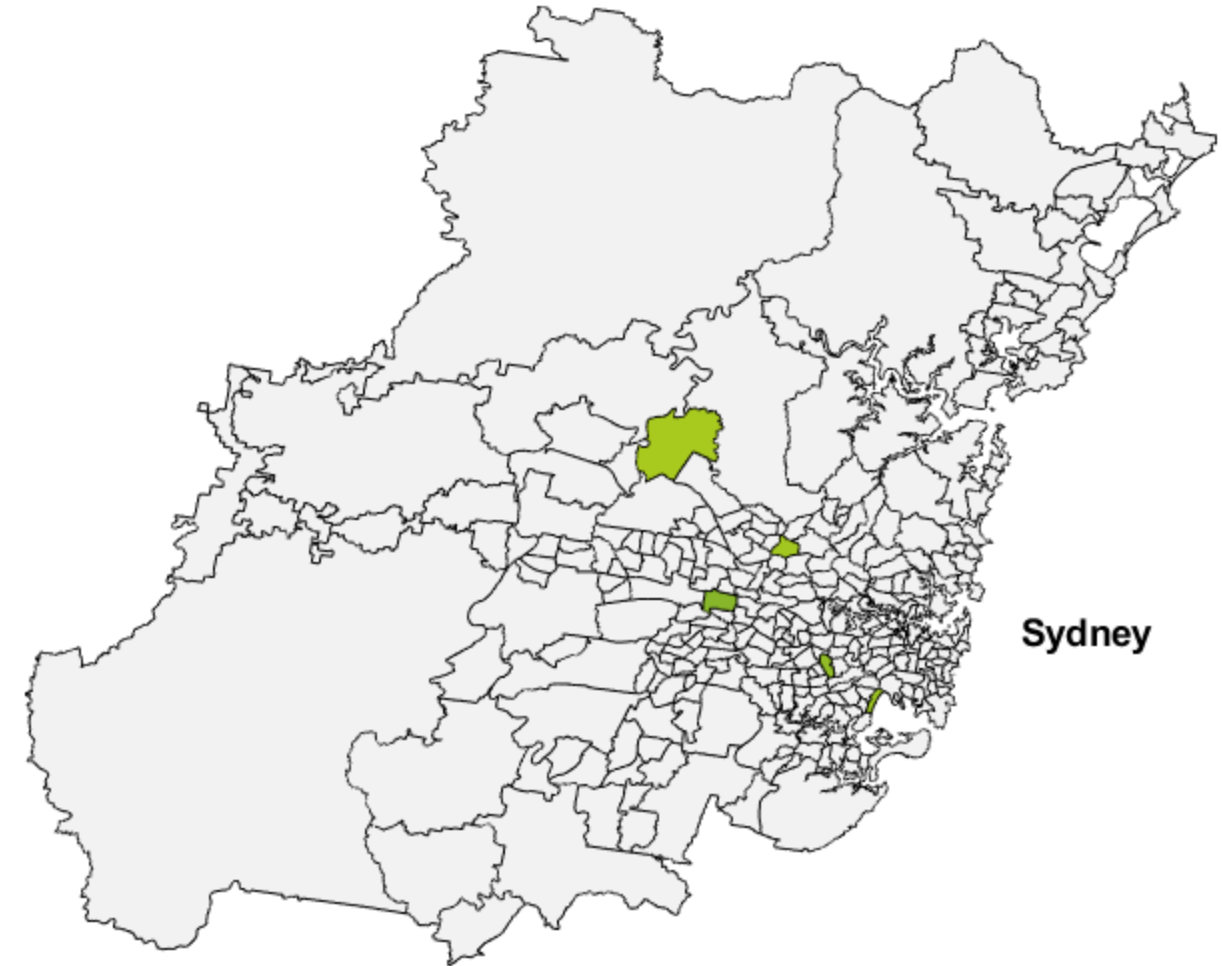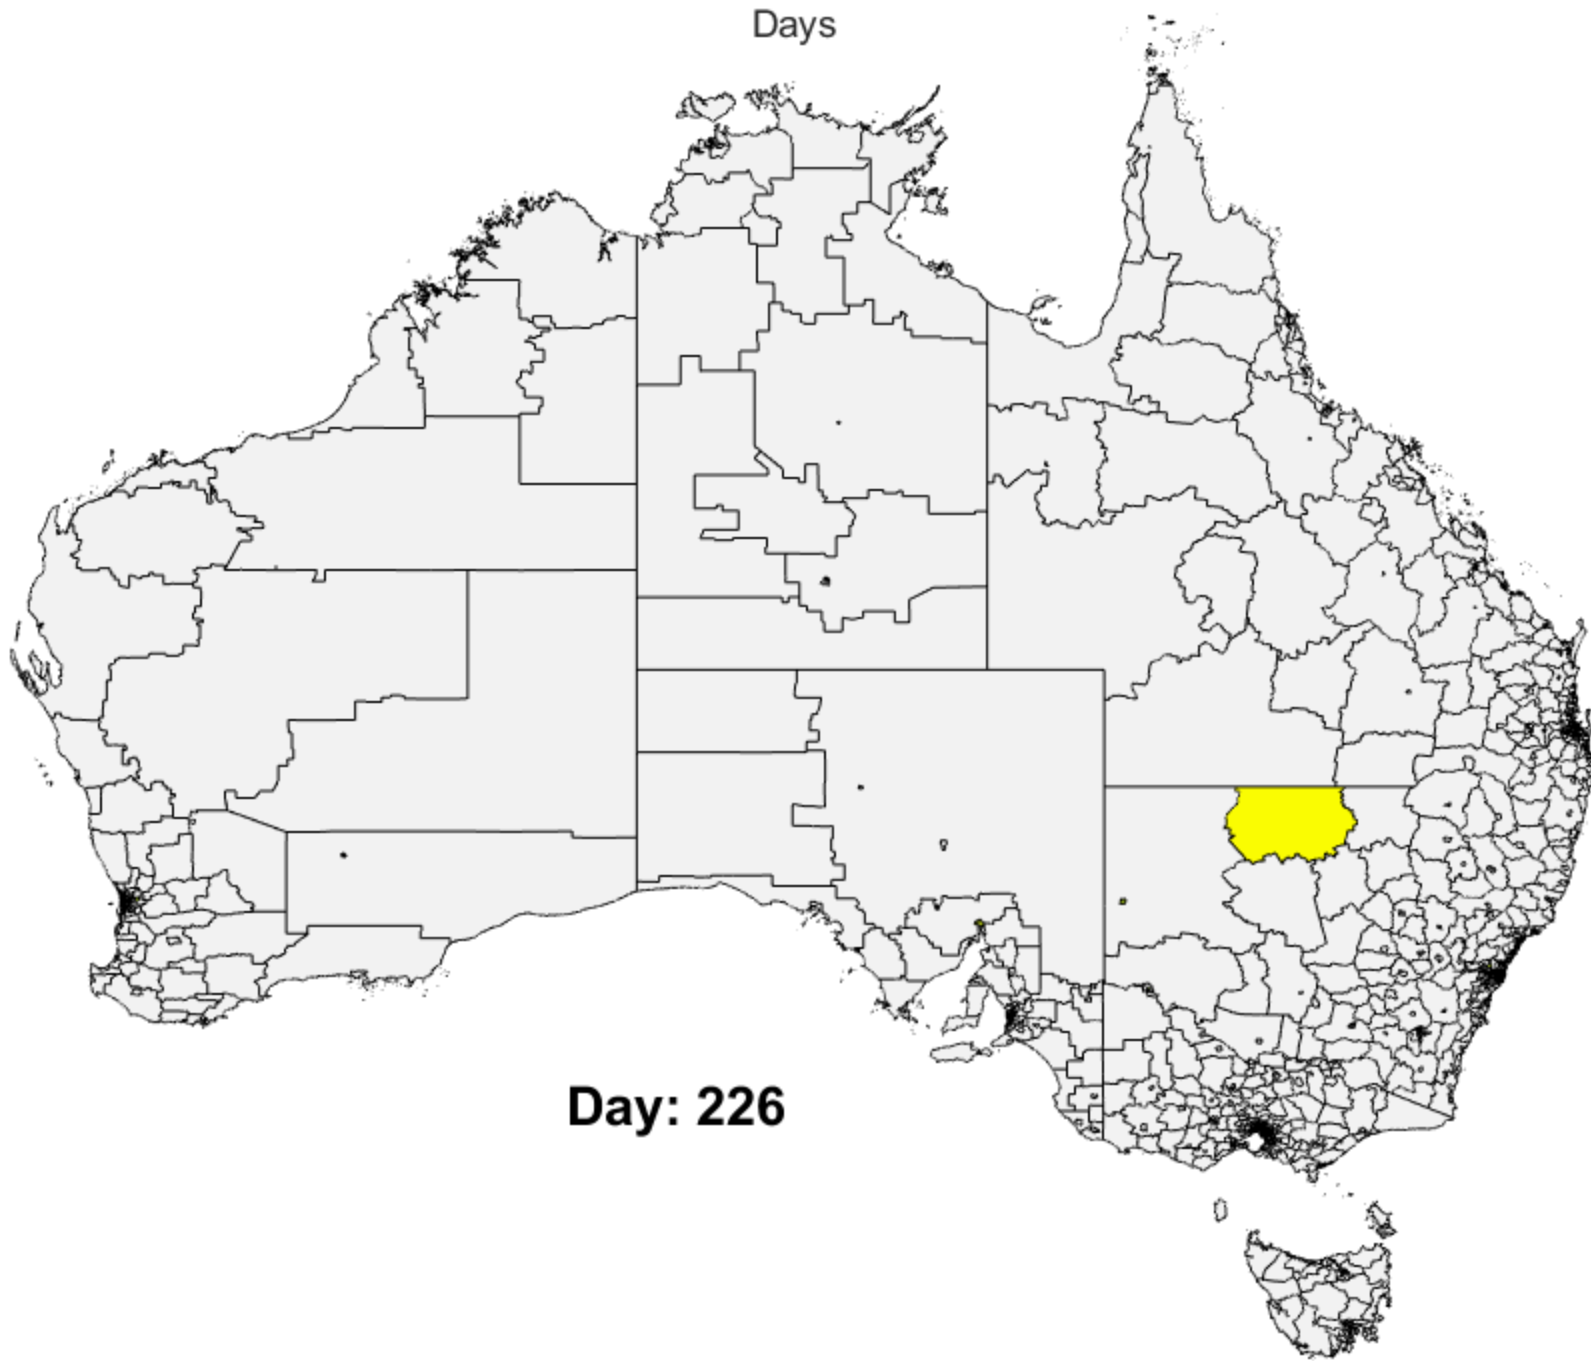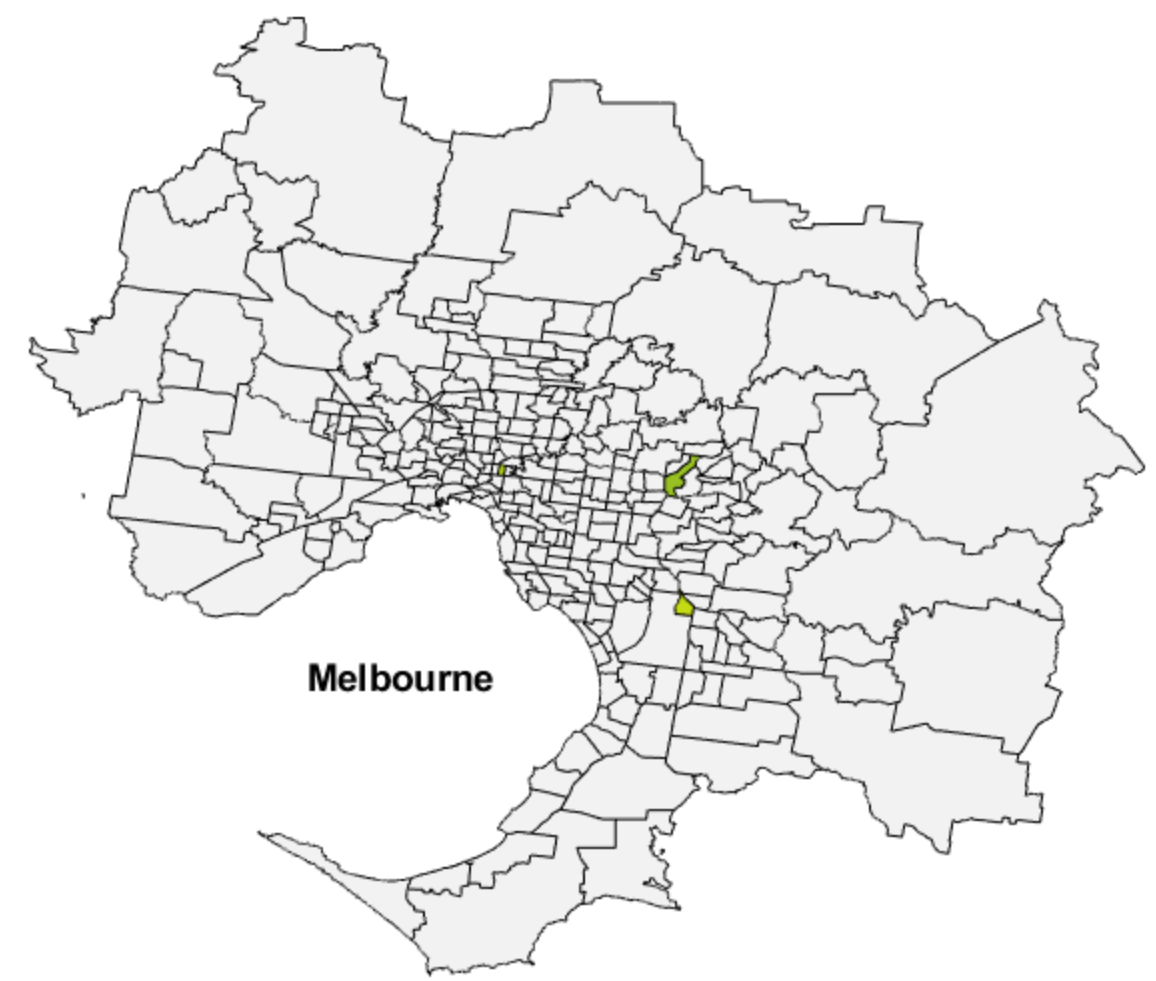



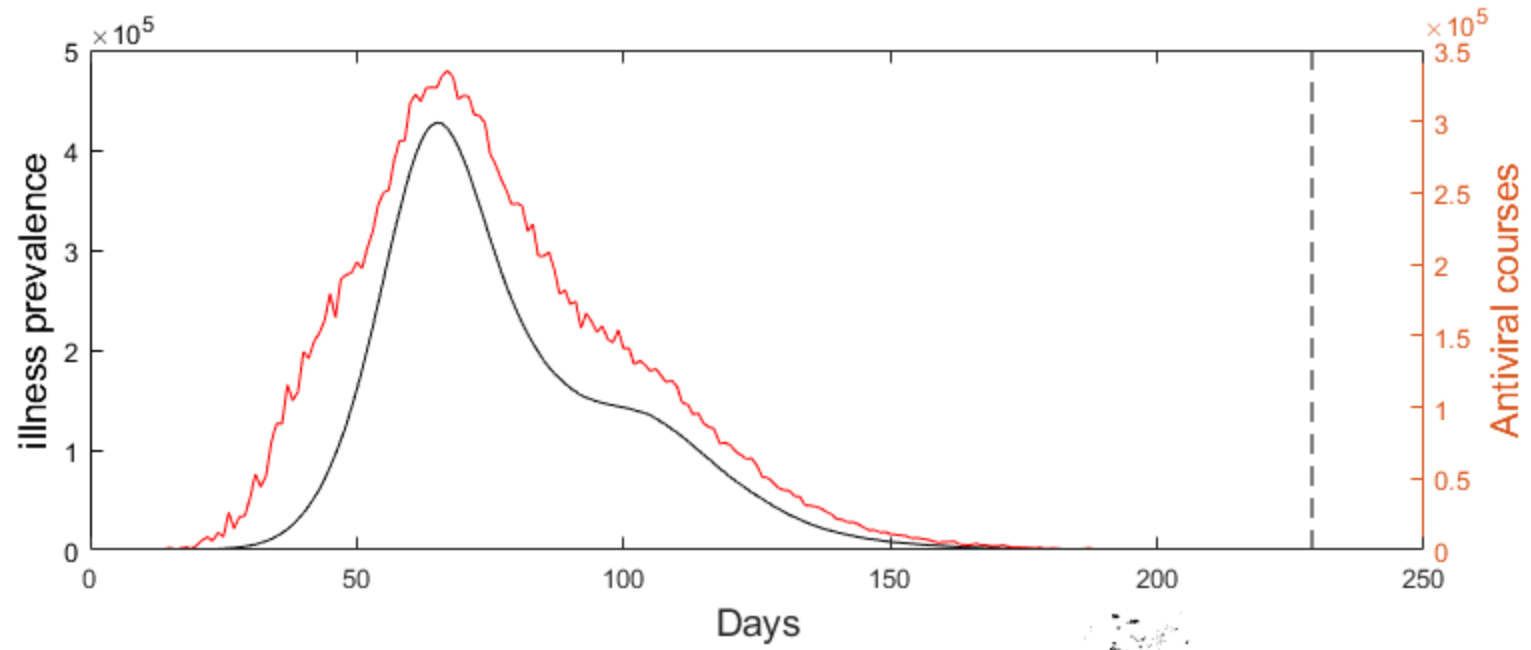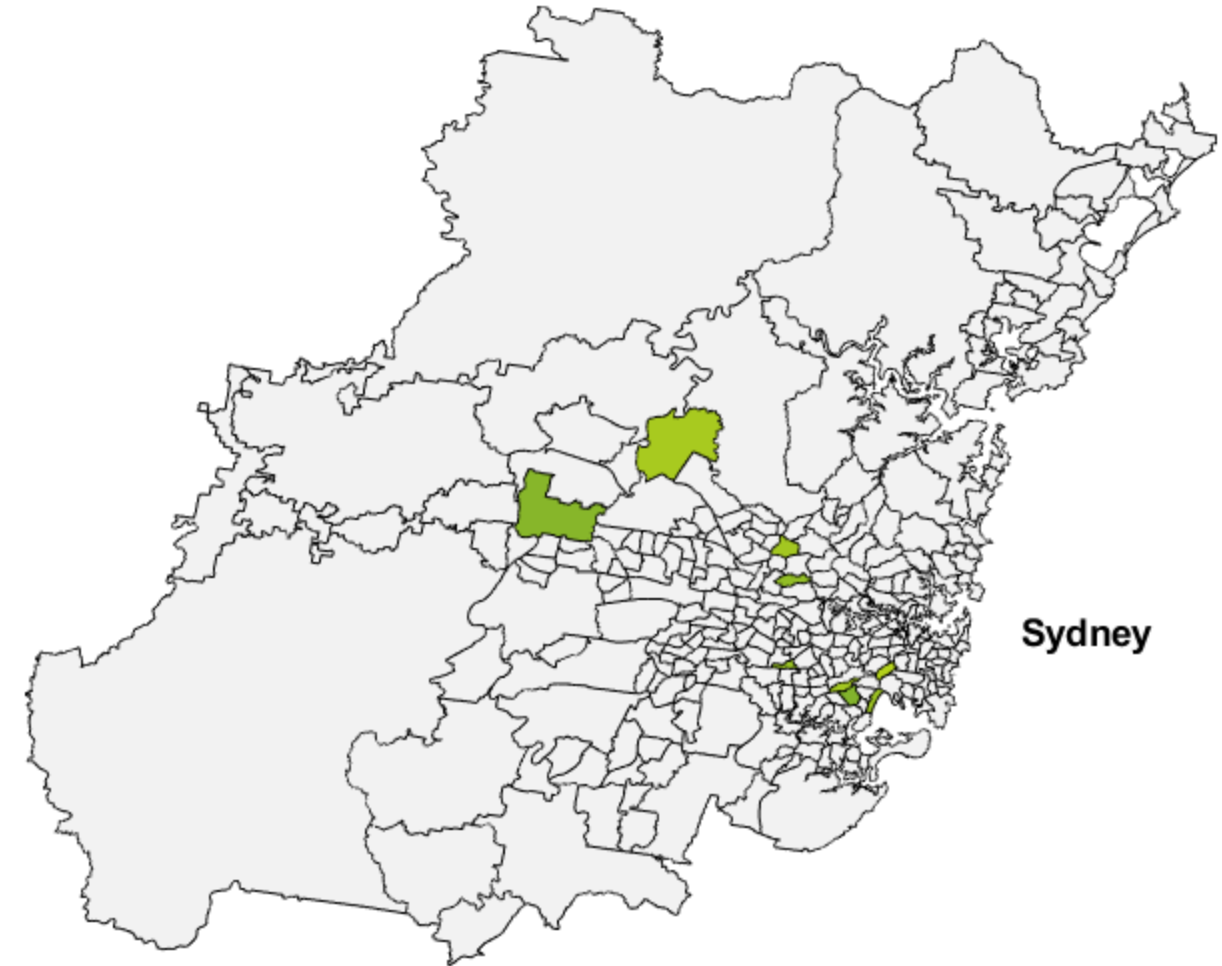

**Sydney**

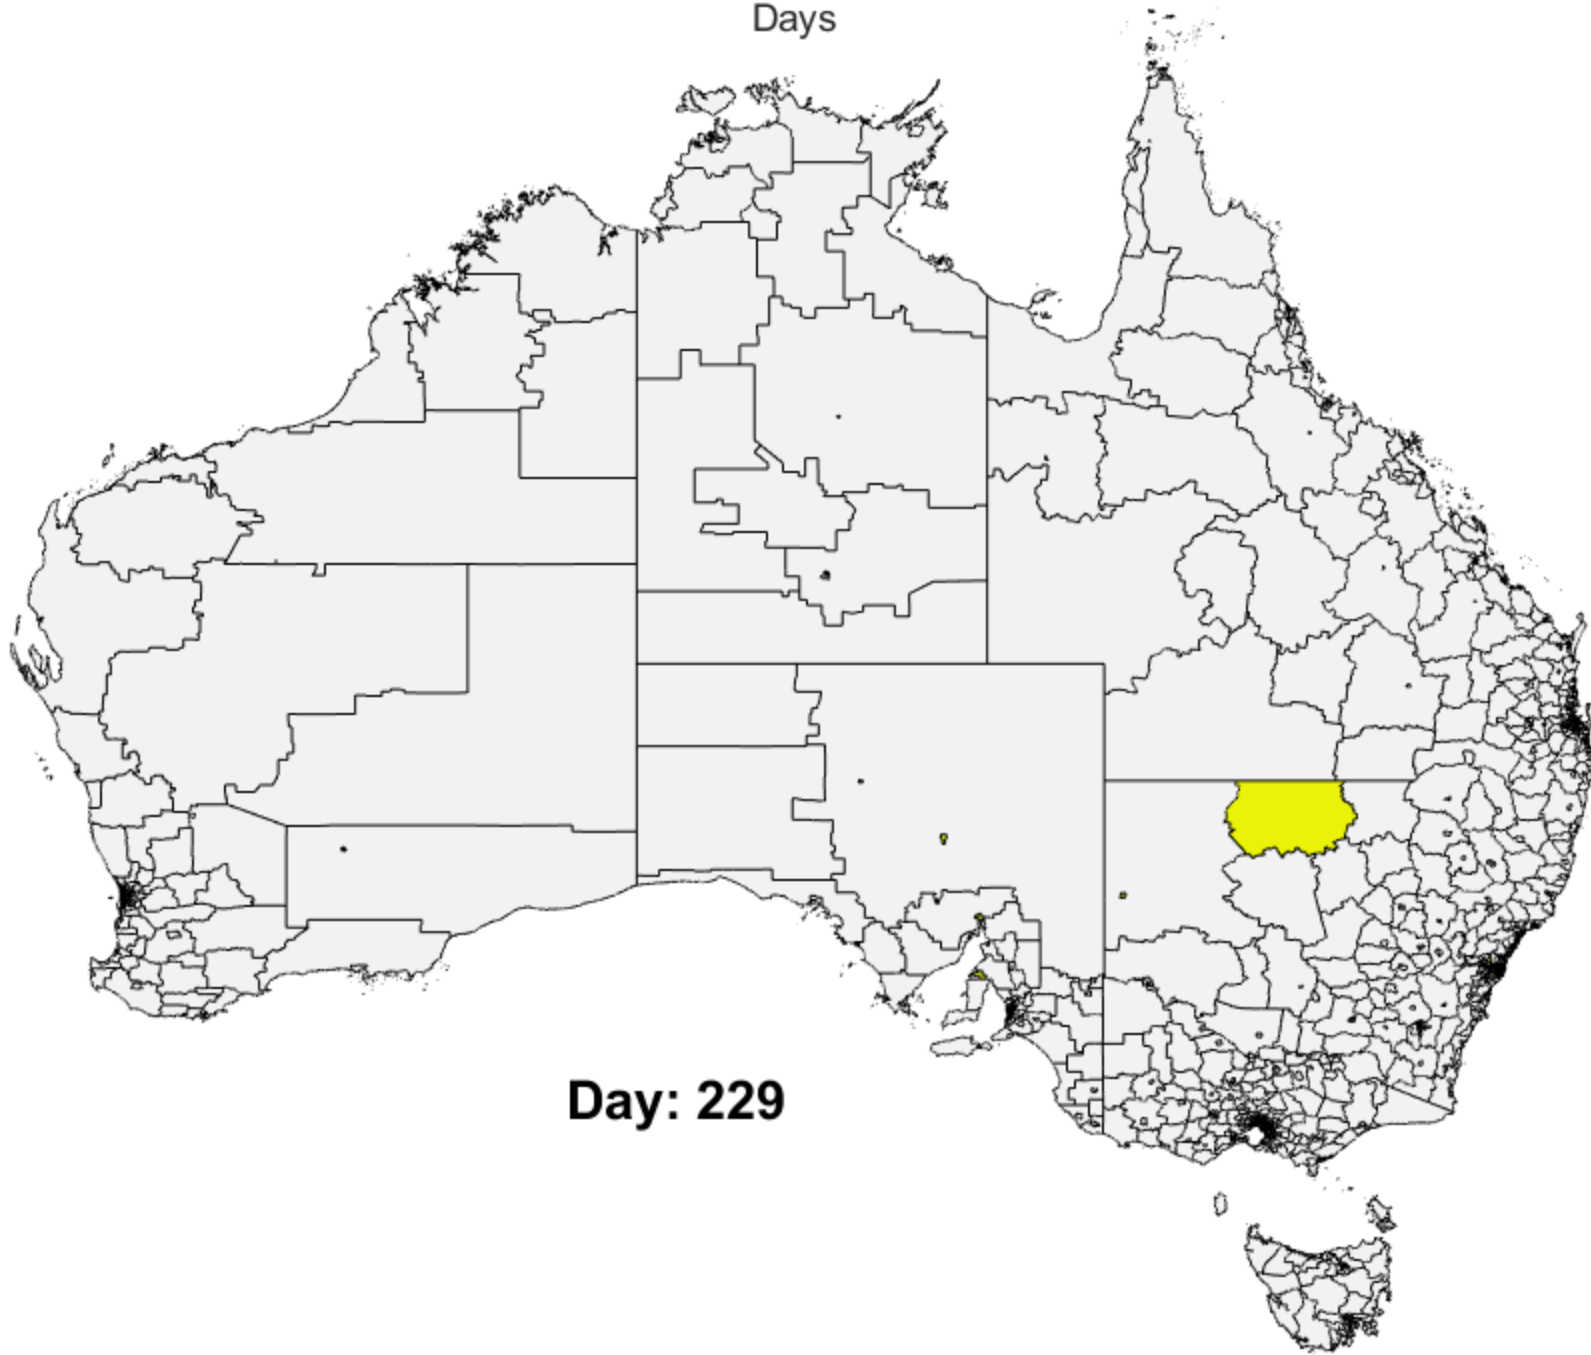

**Day: 229**

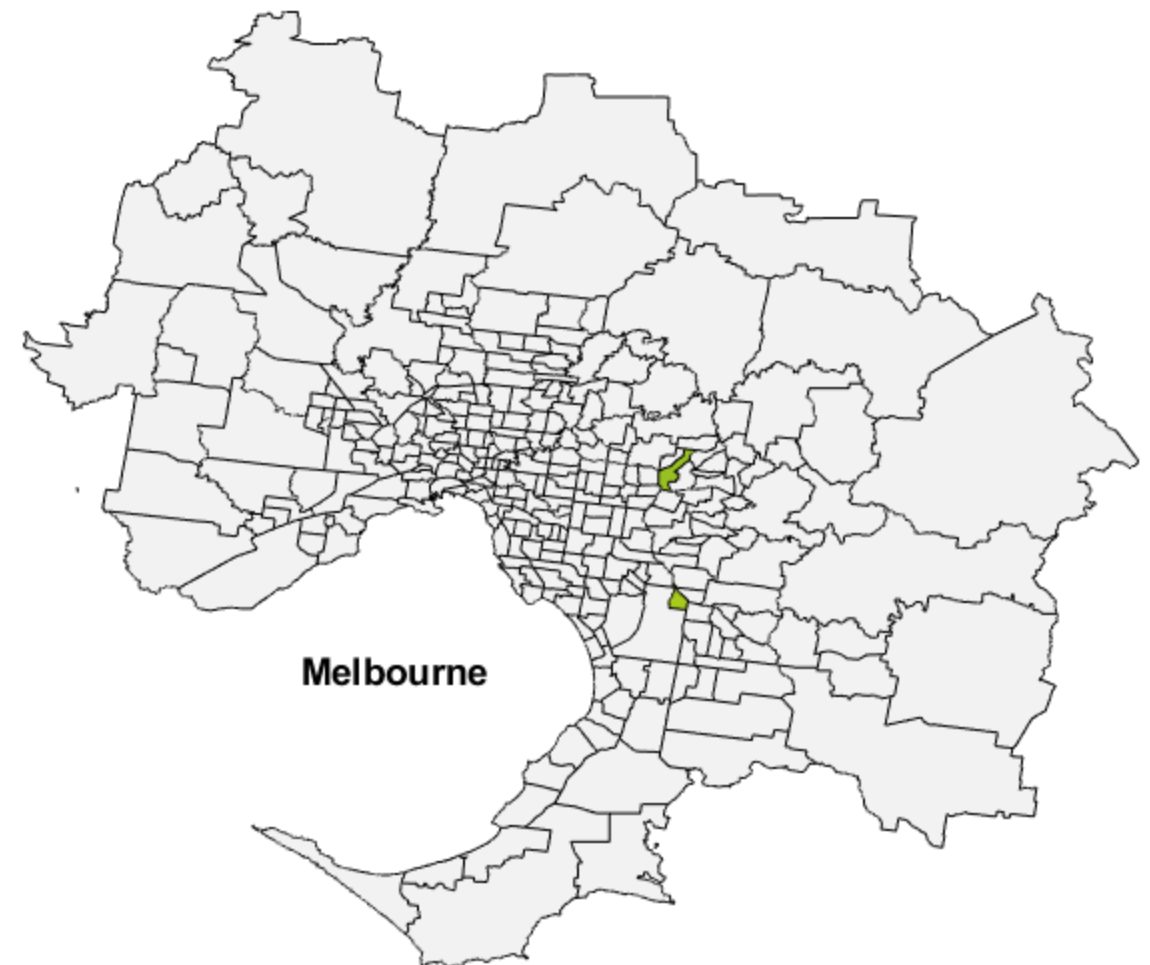

**Melbourne**

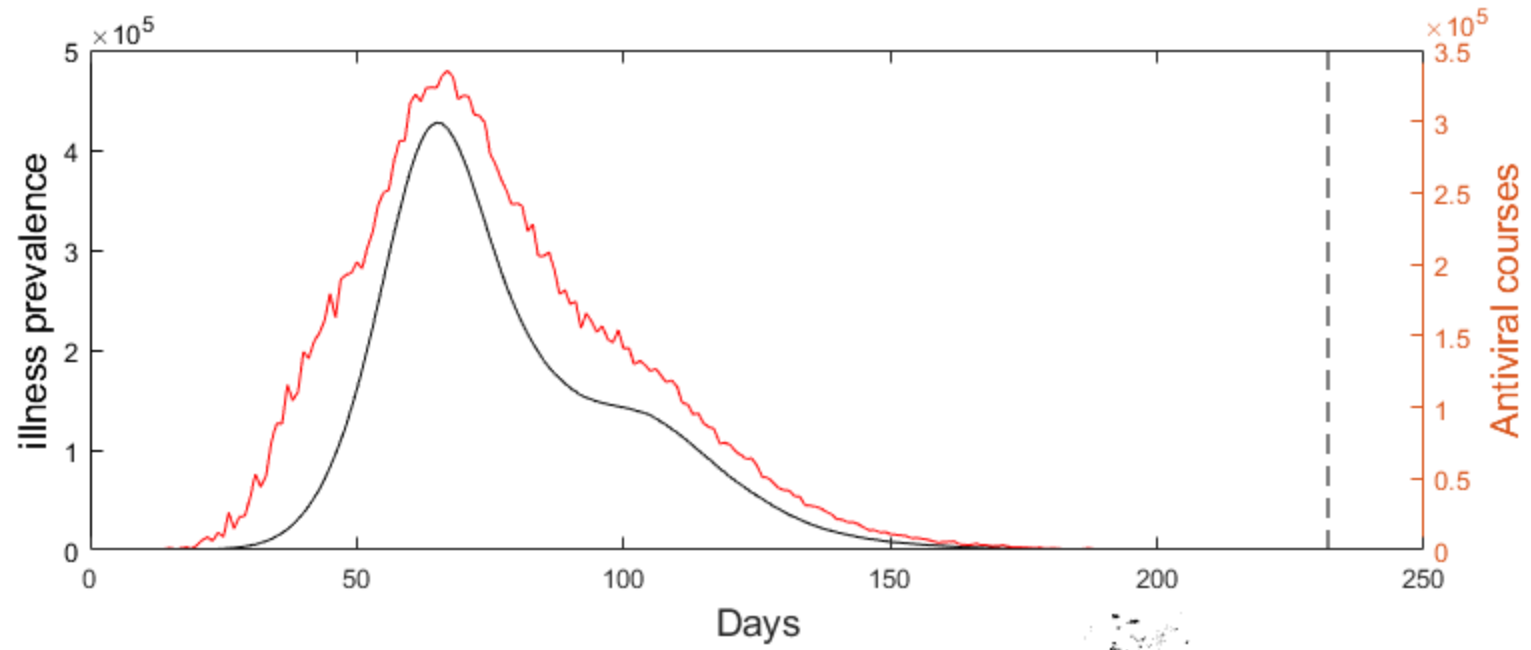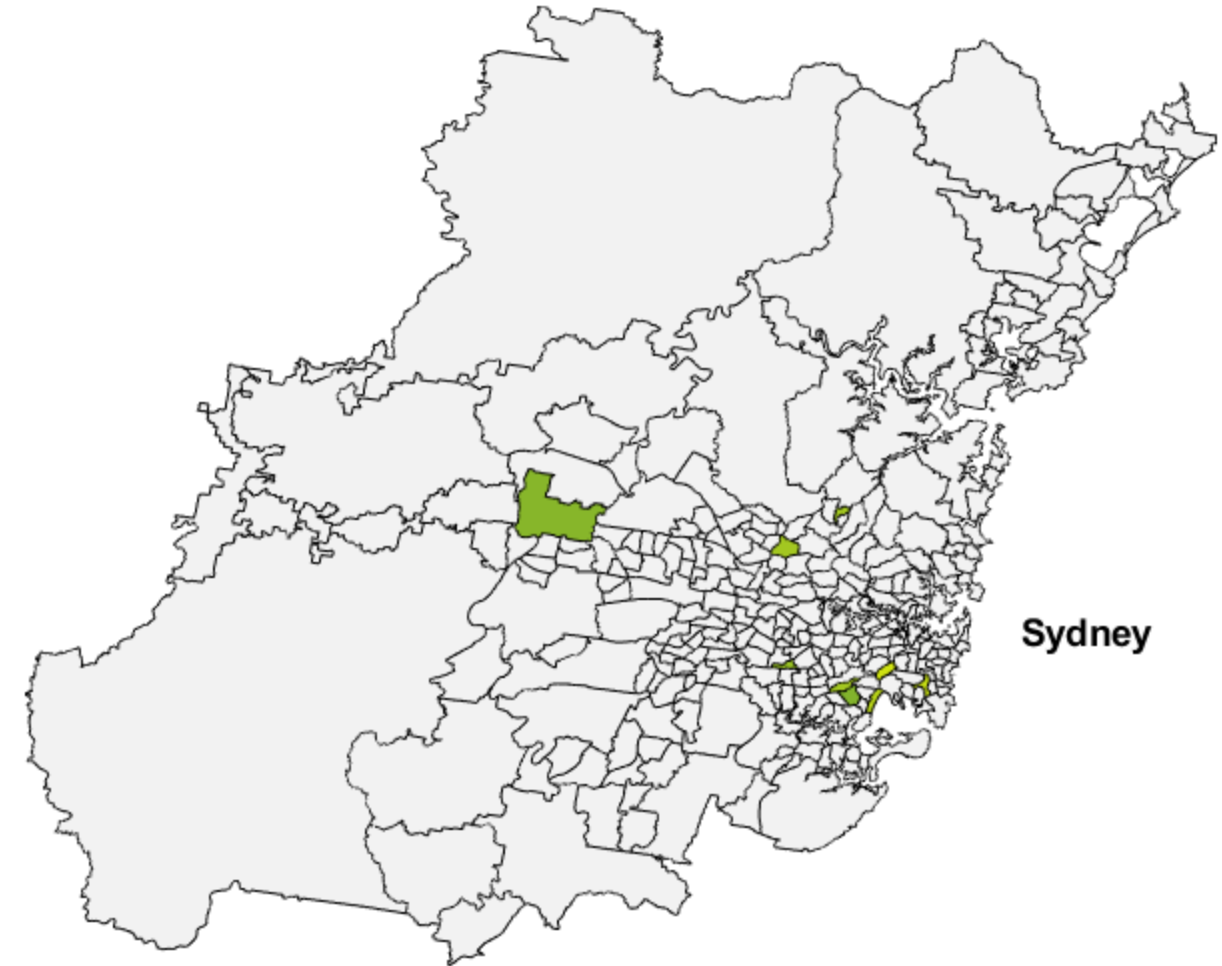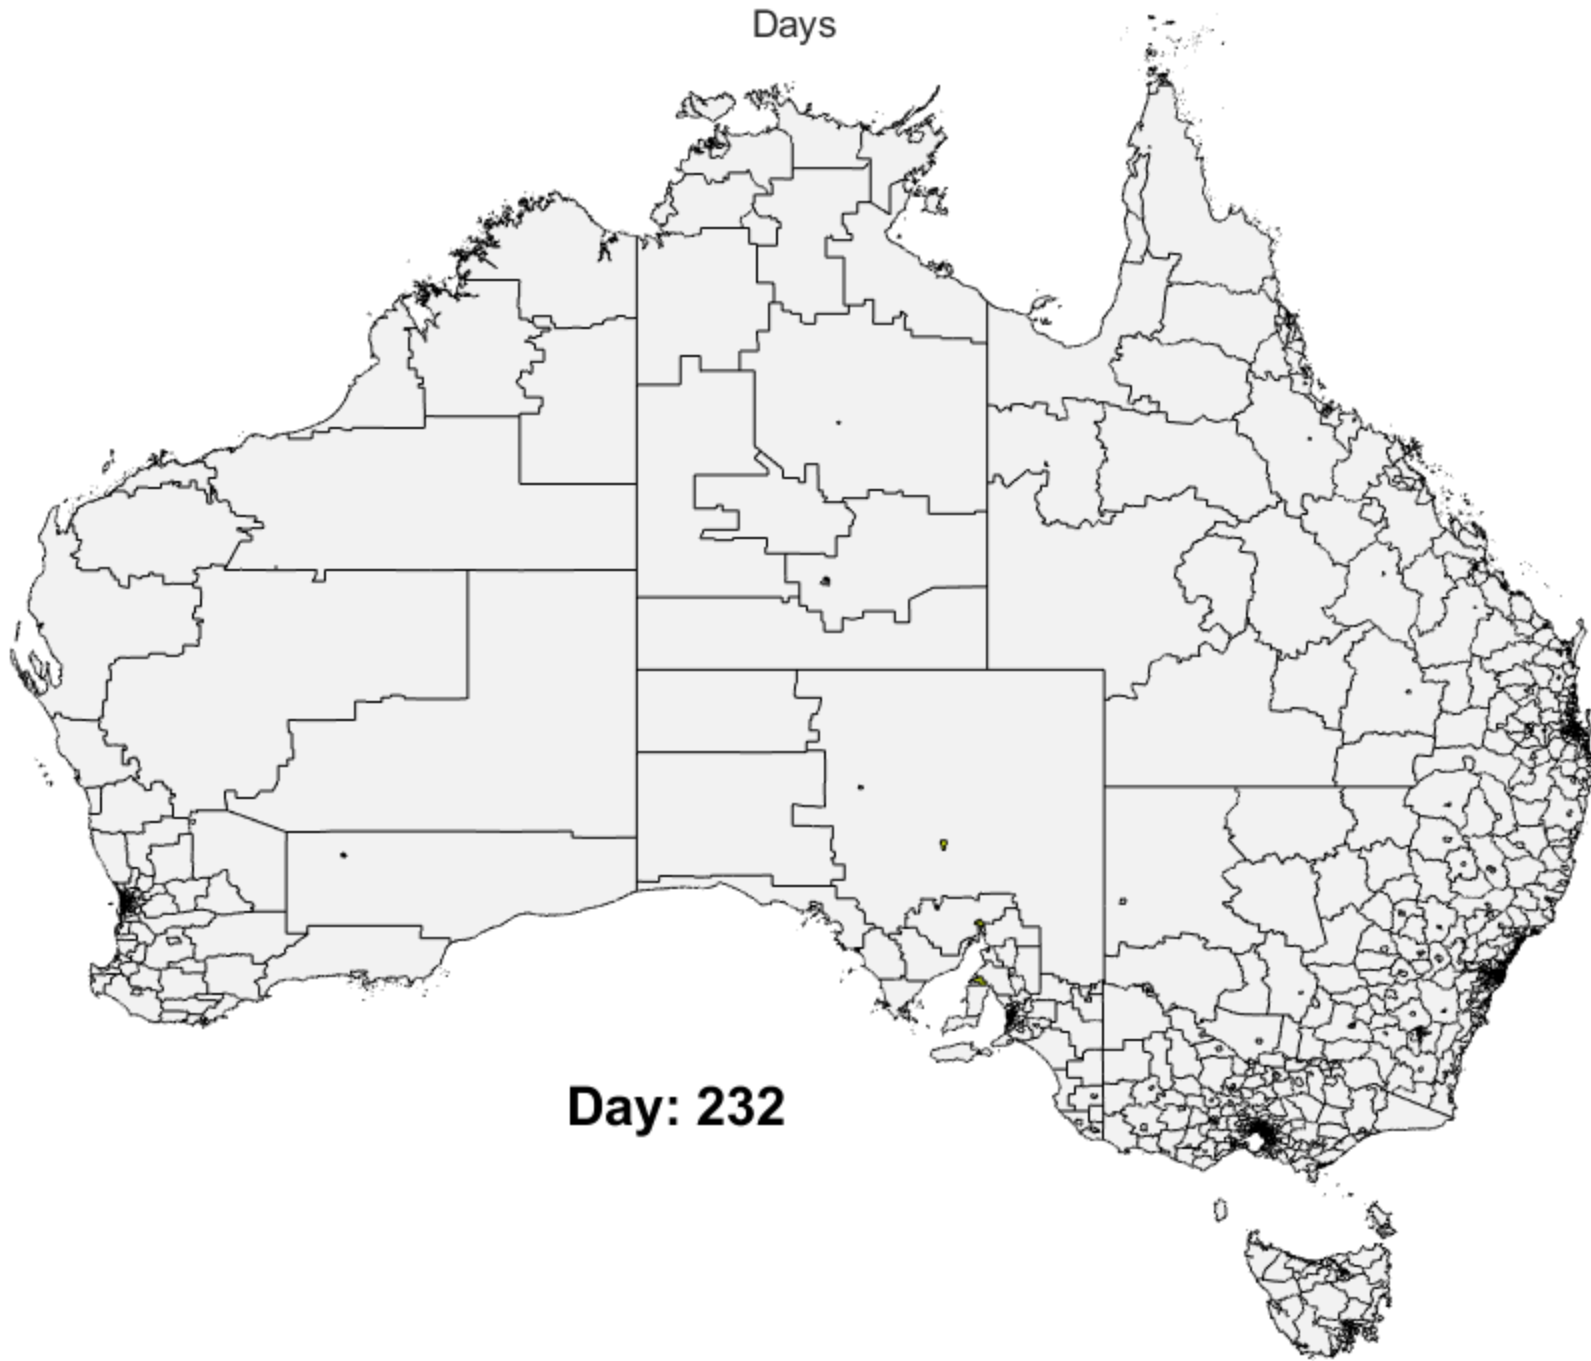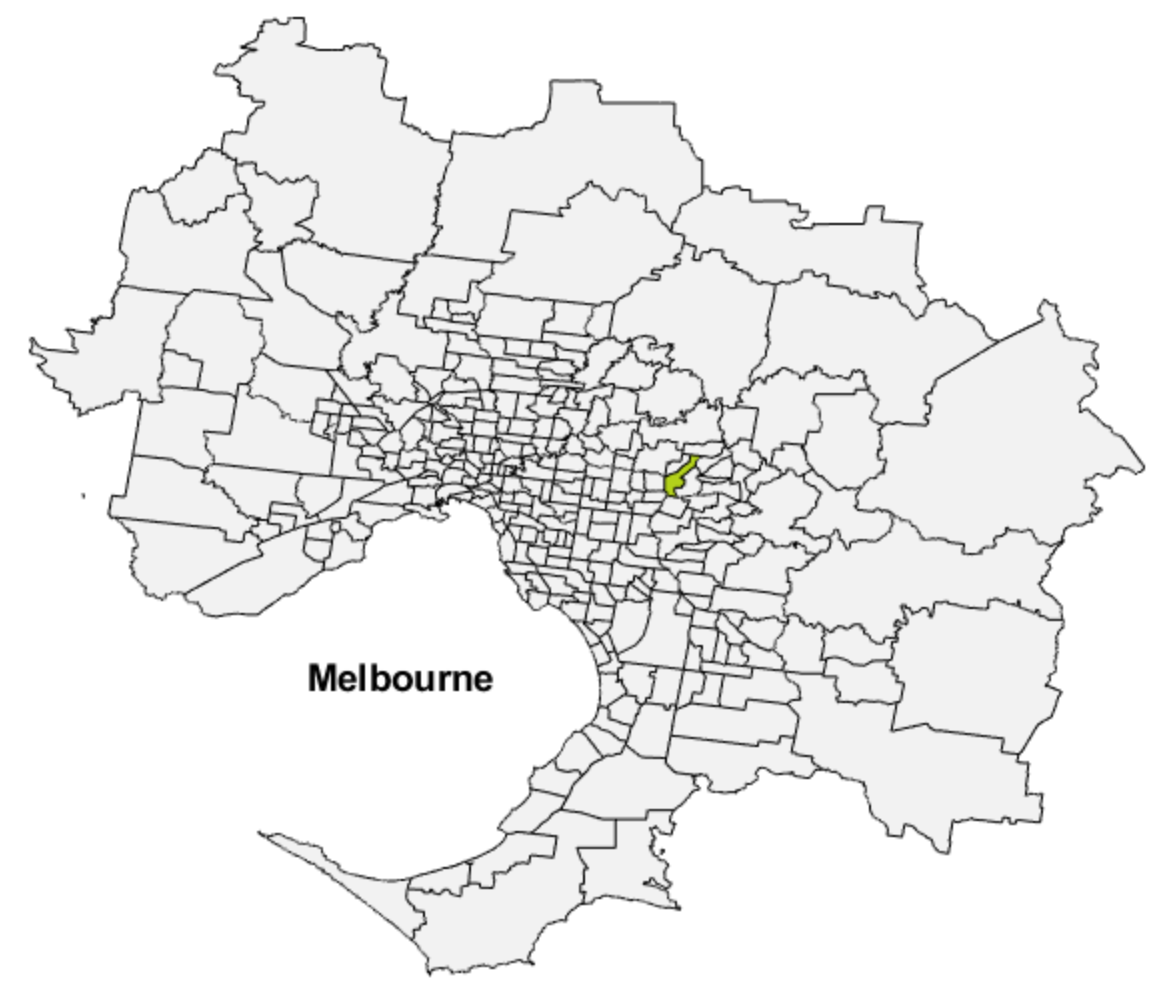

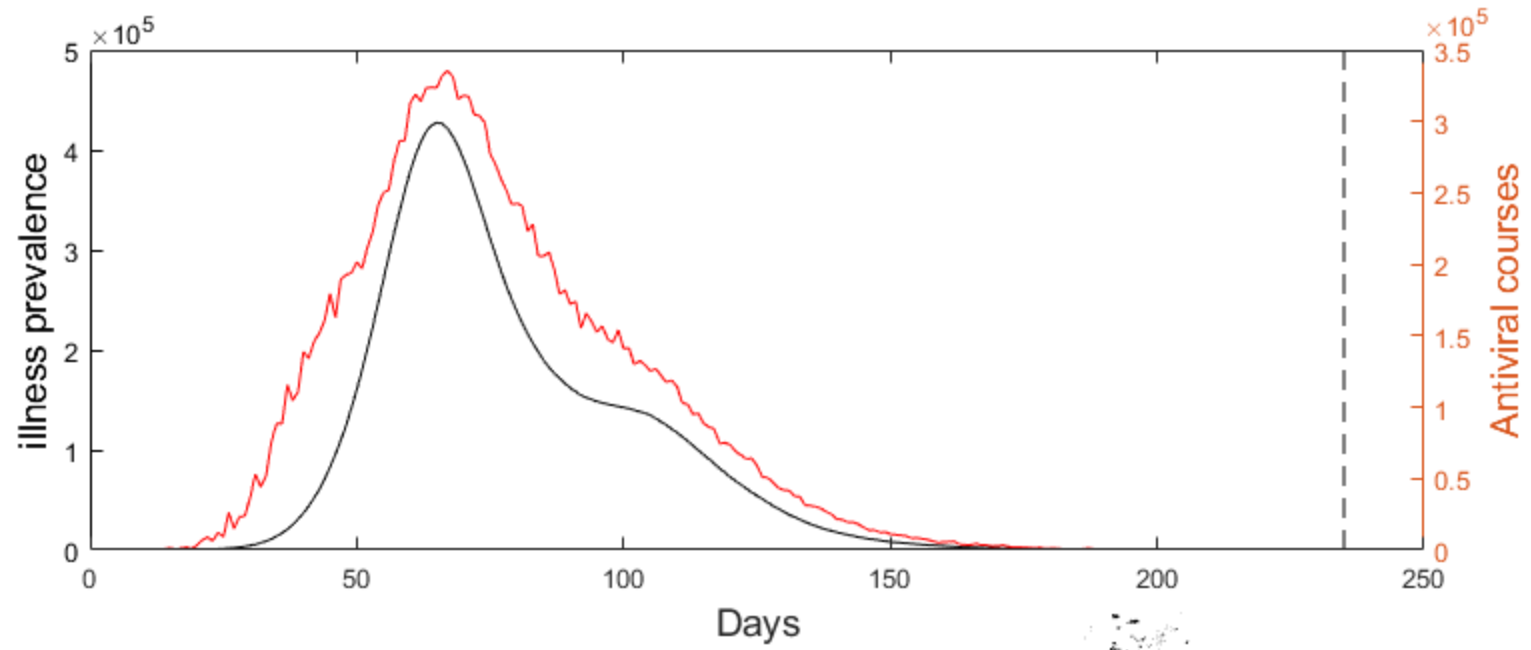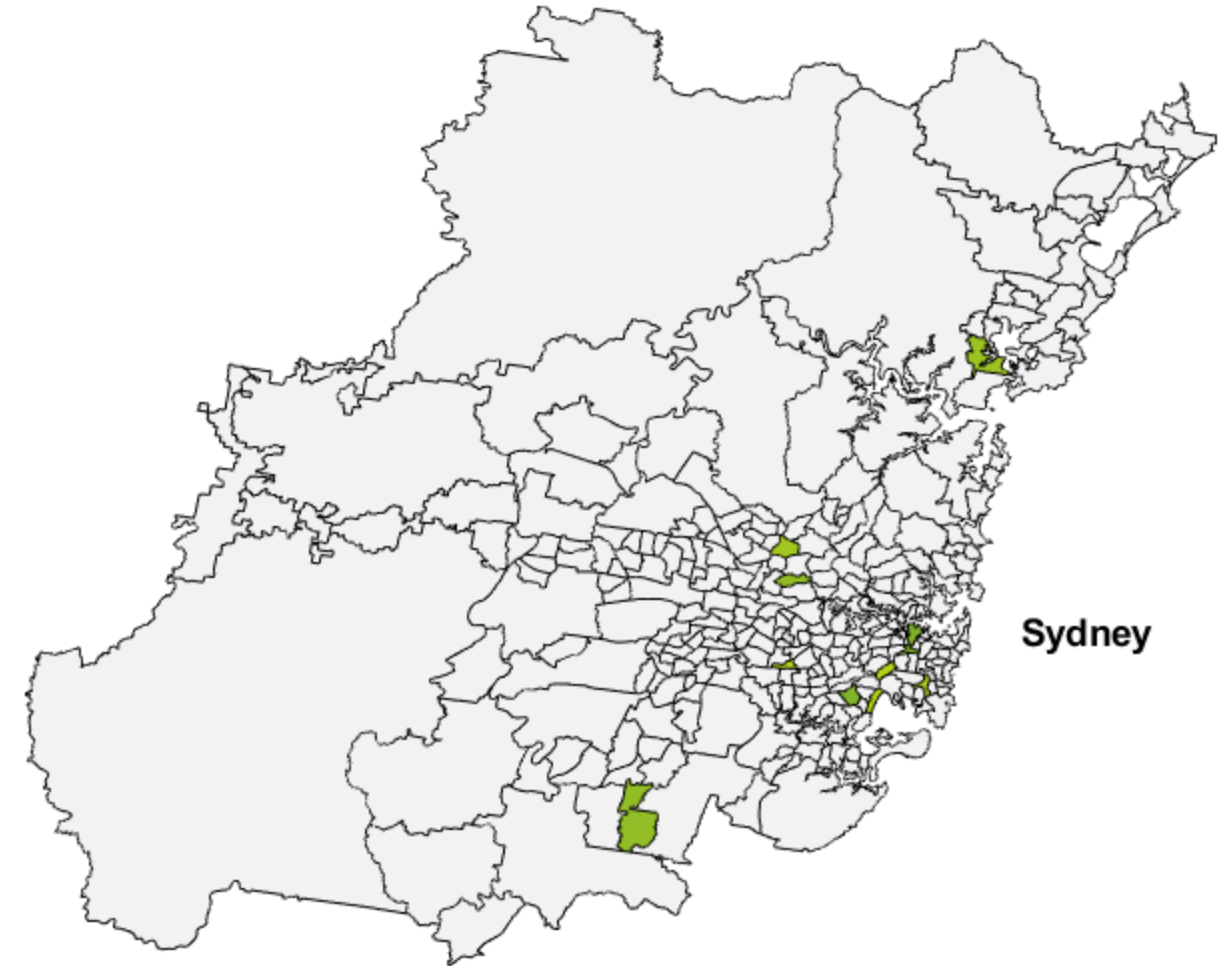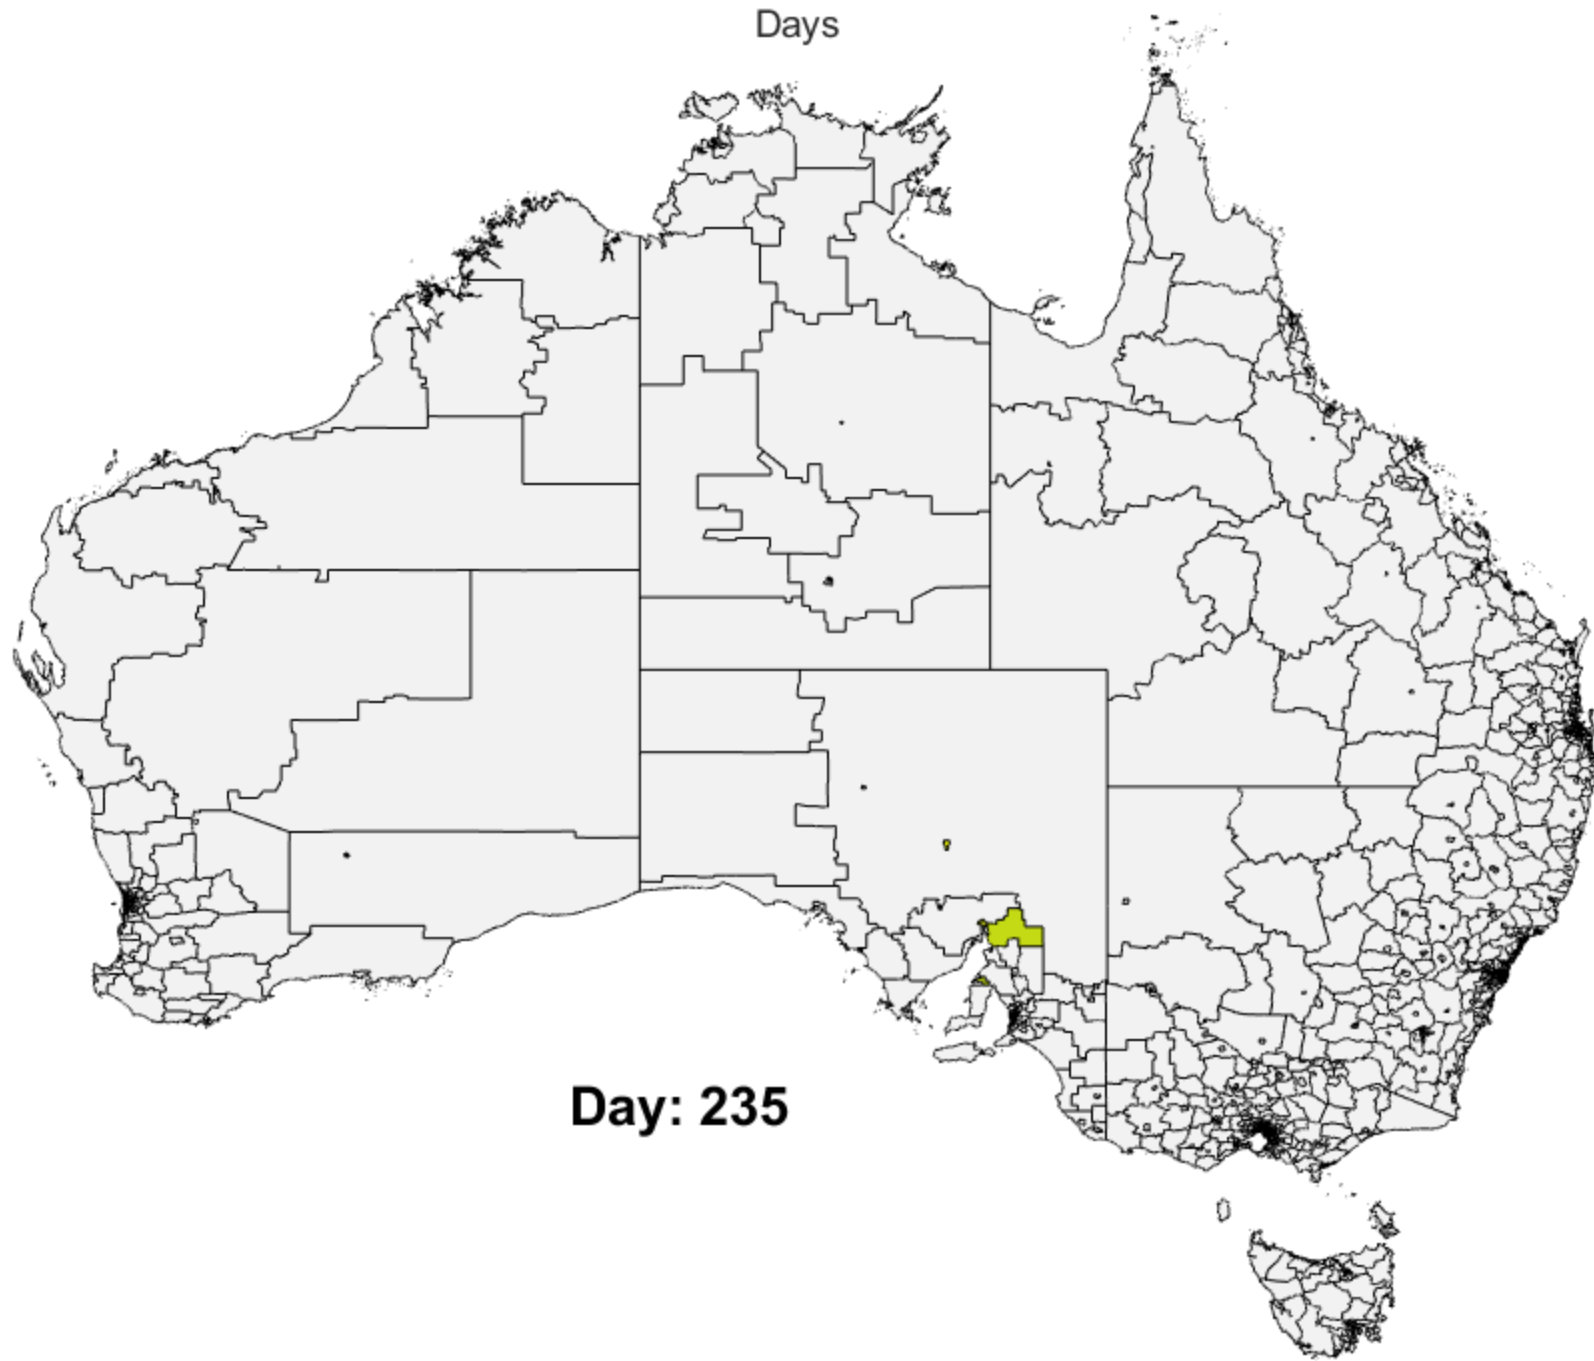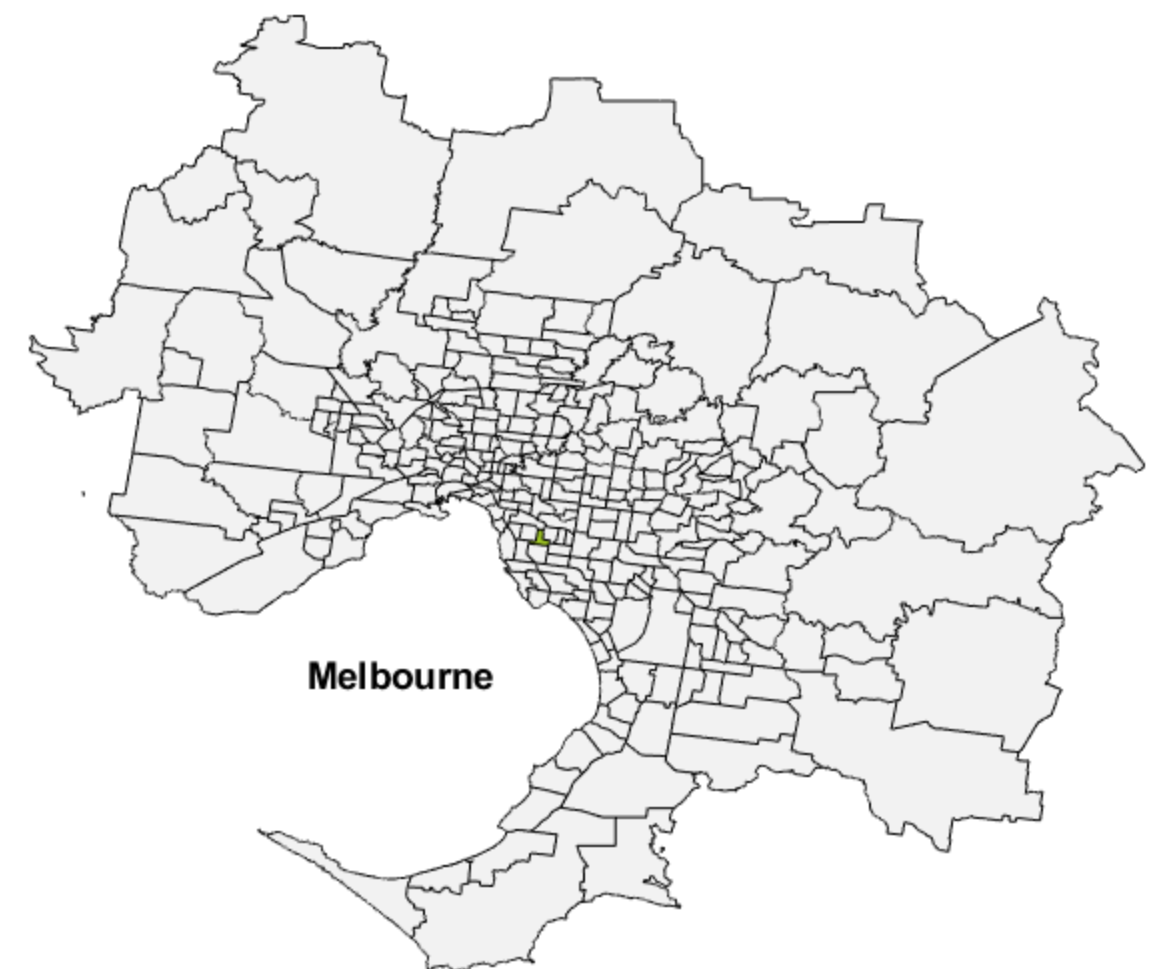



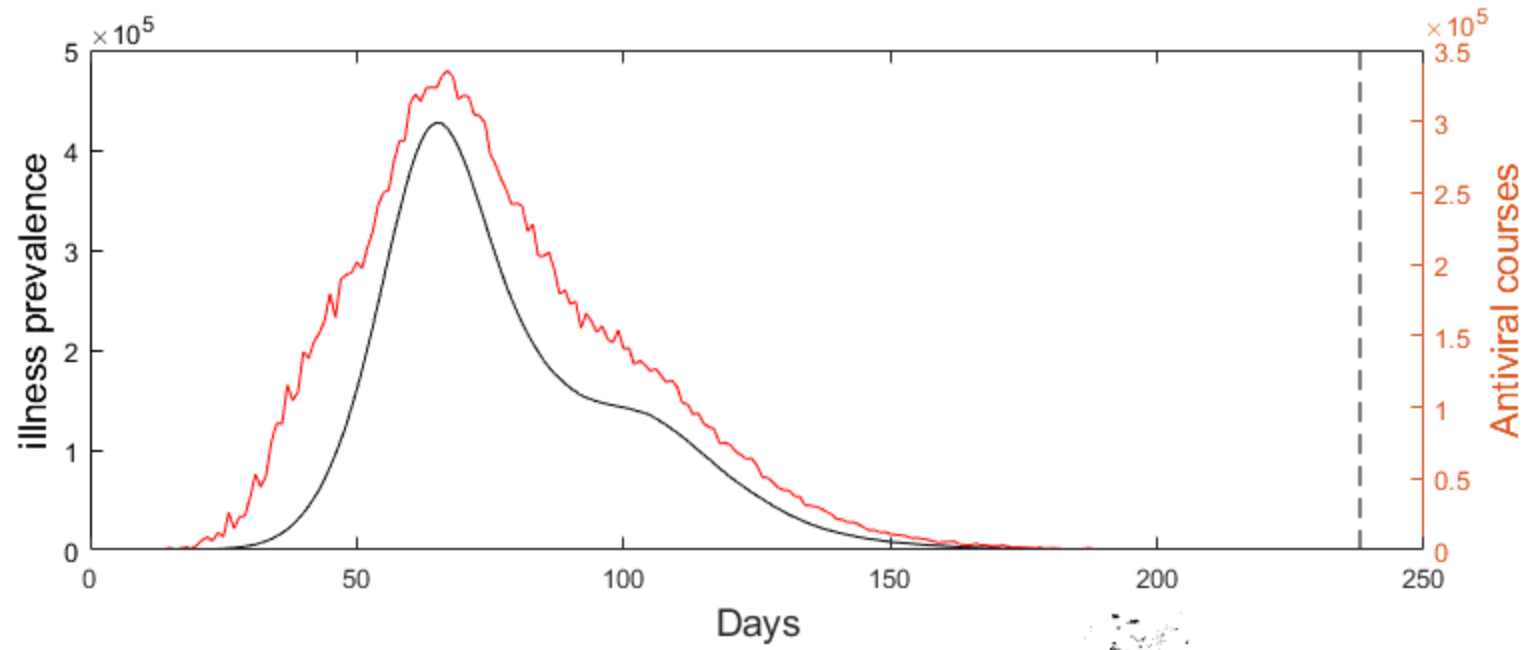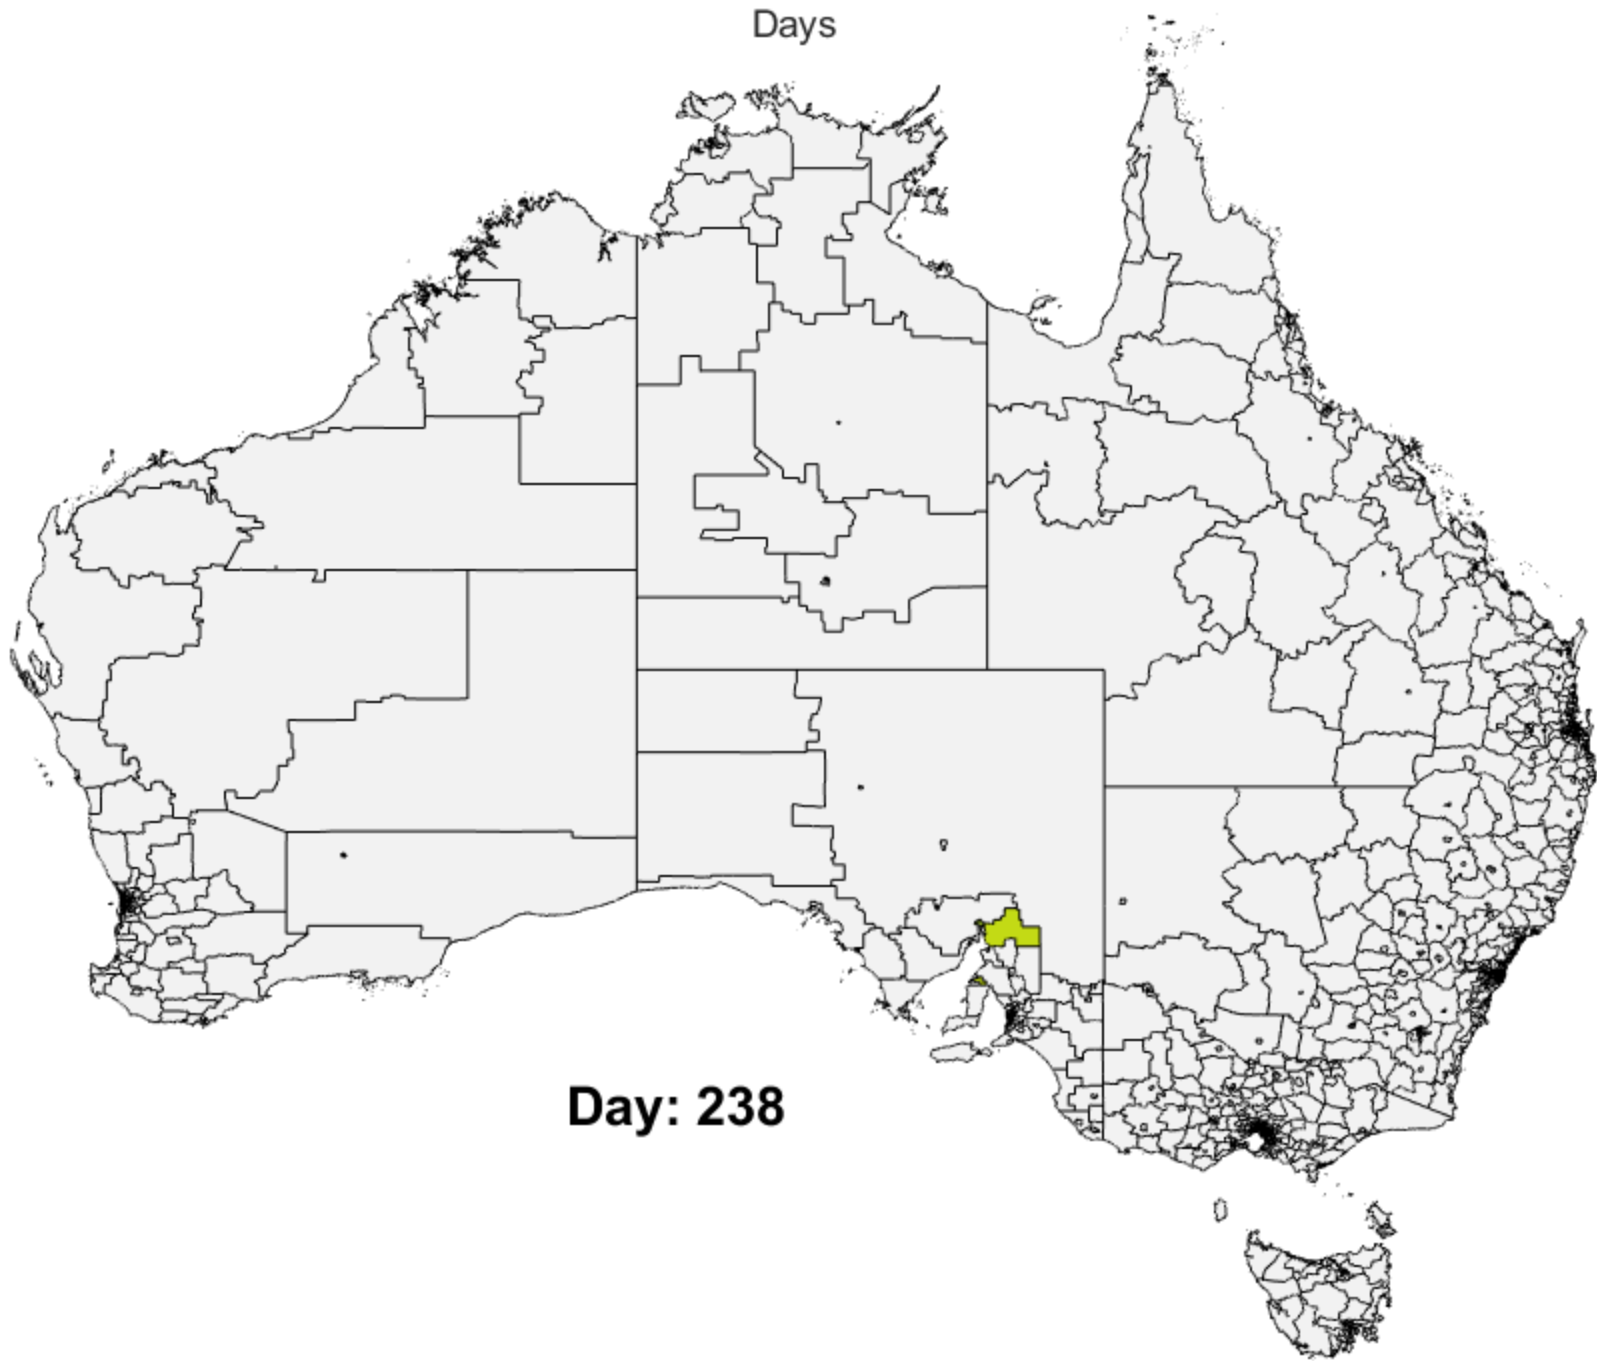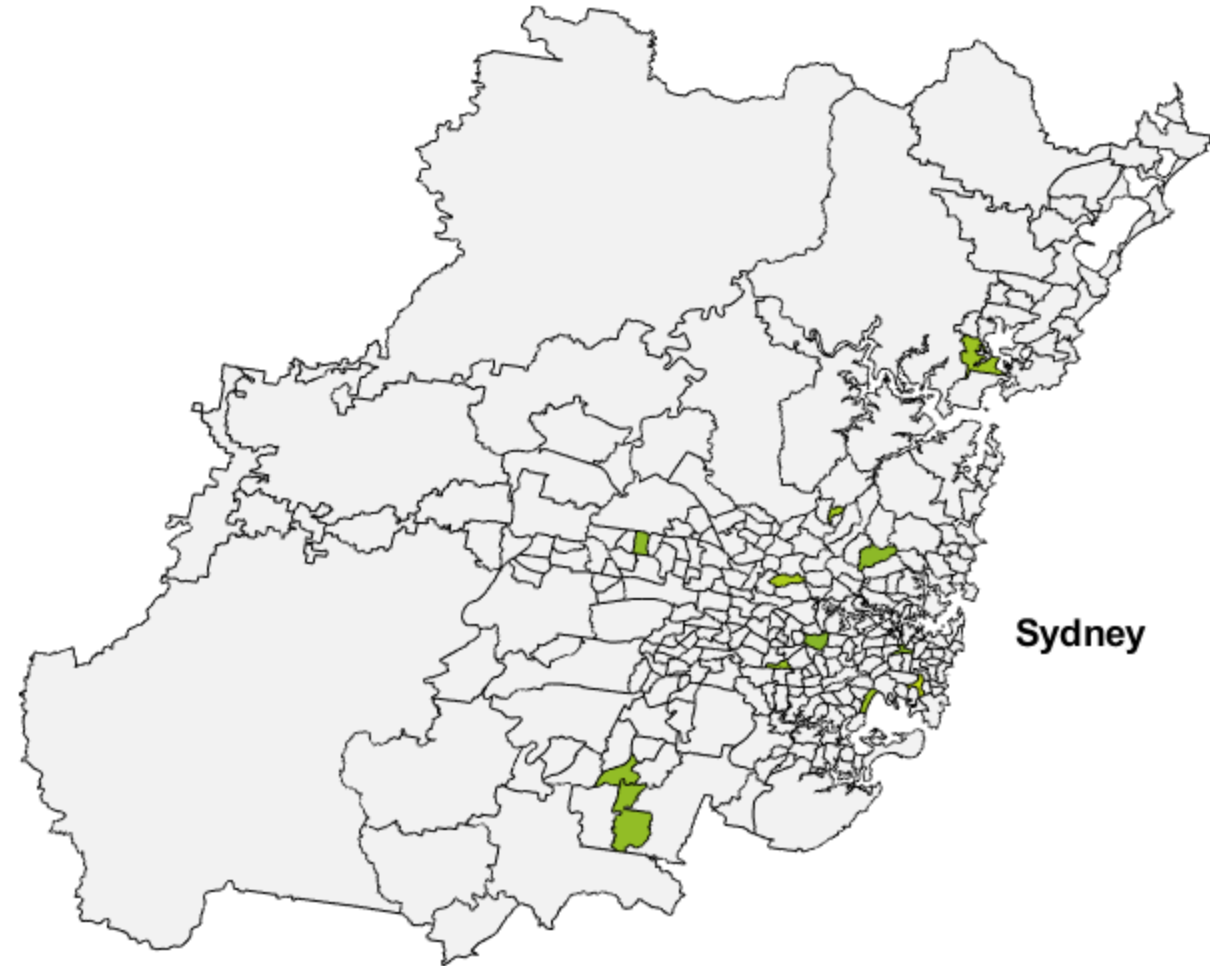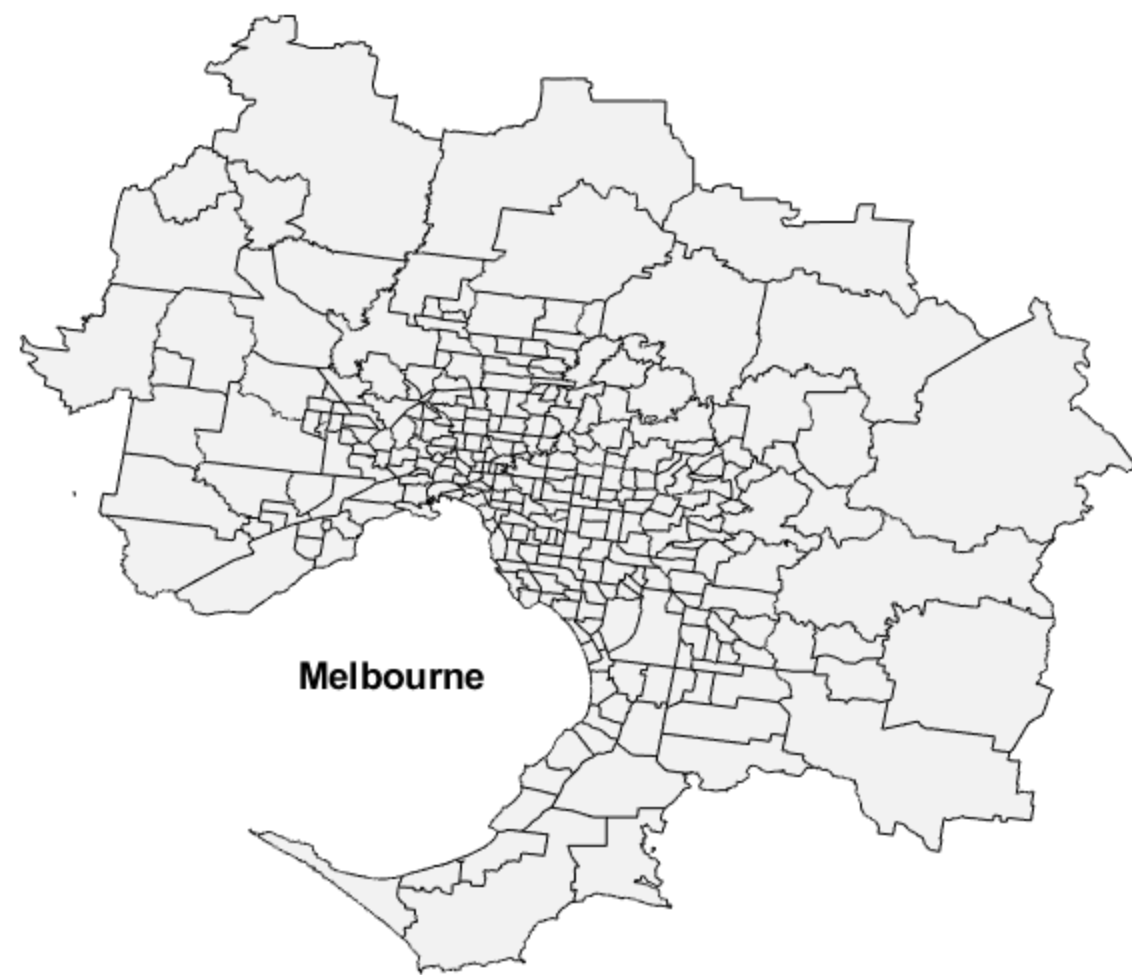

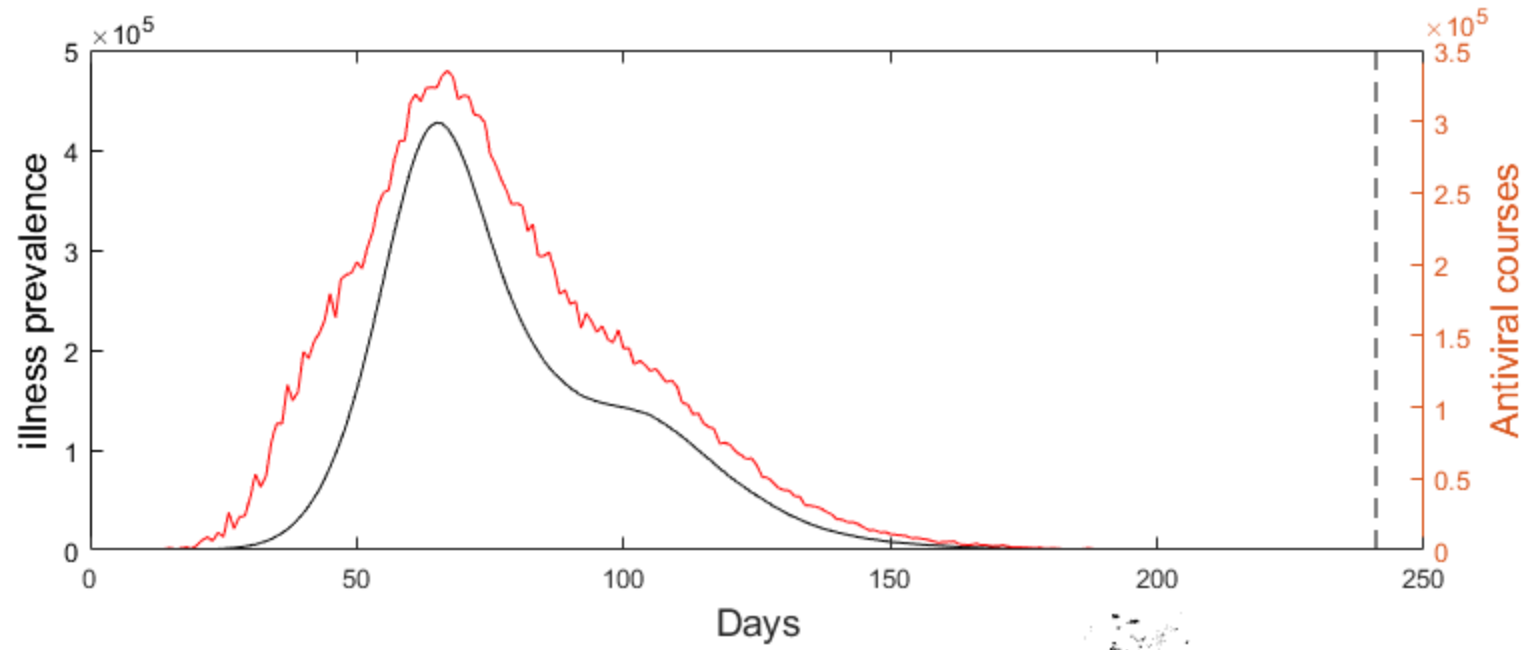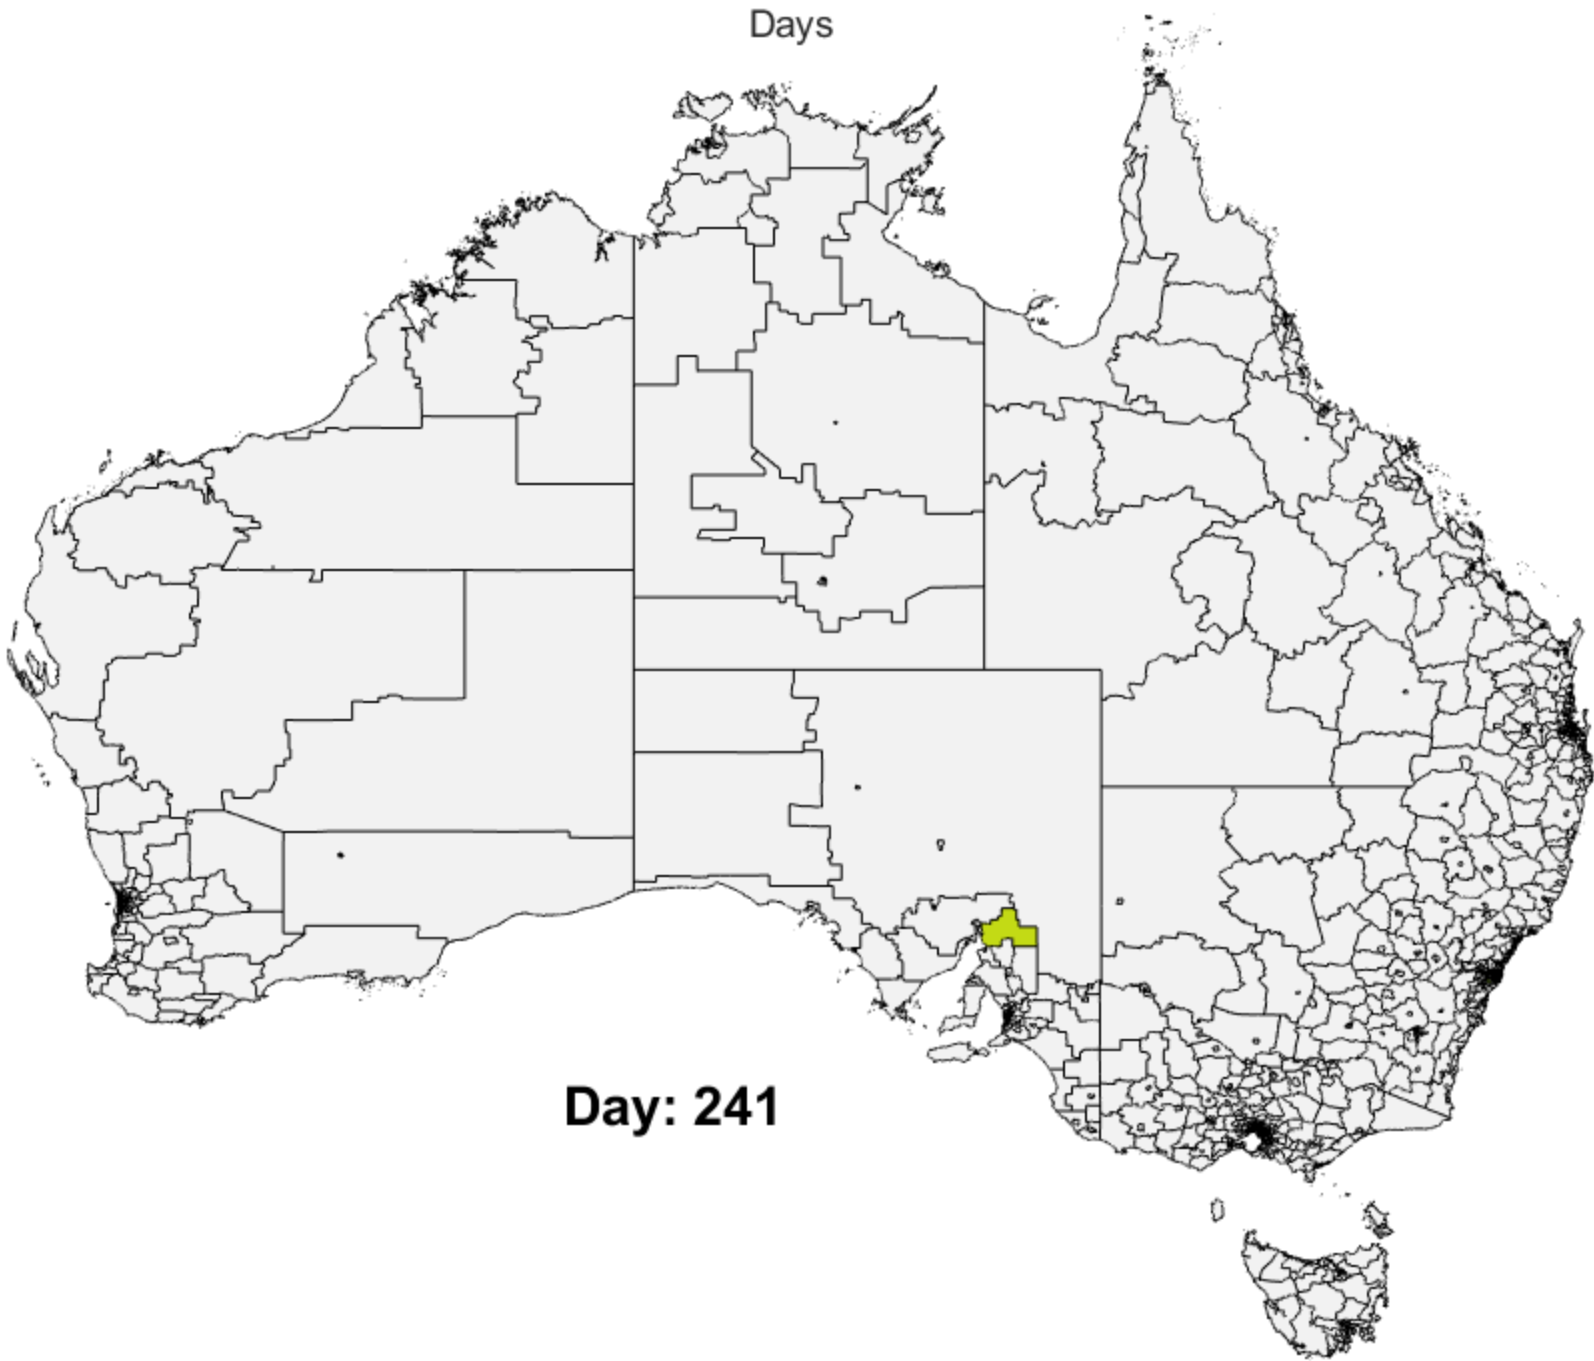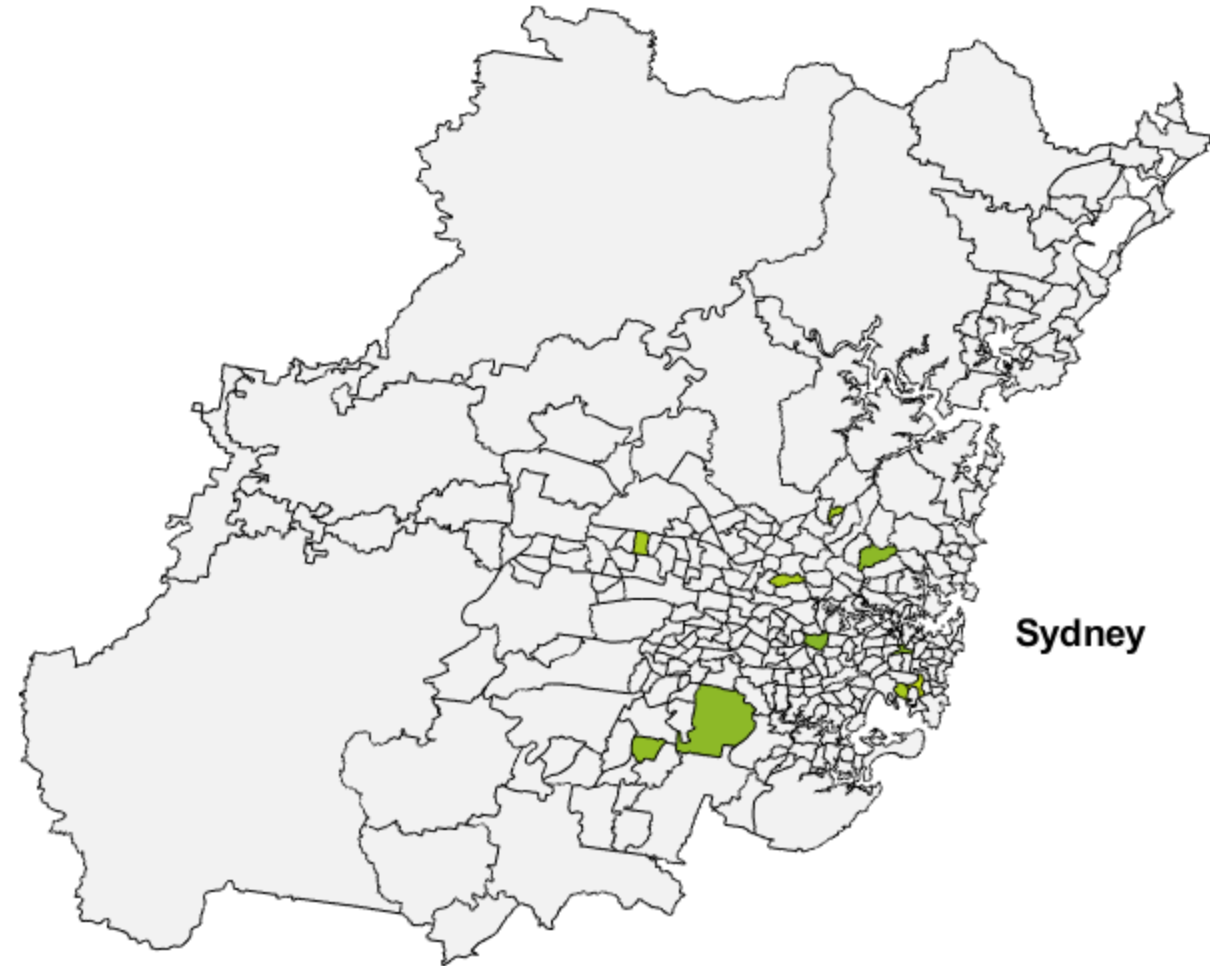

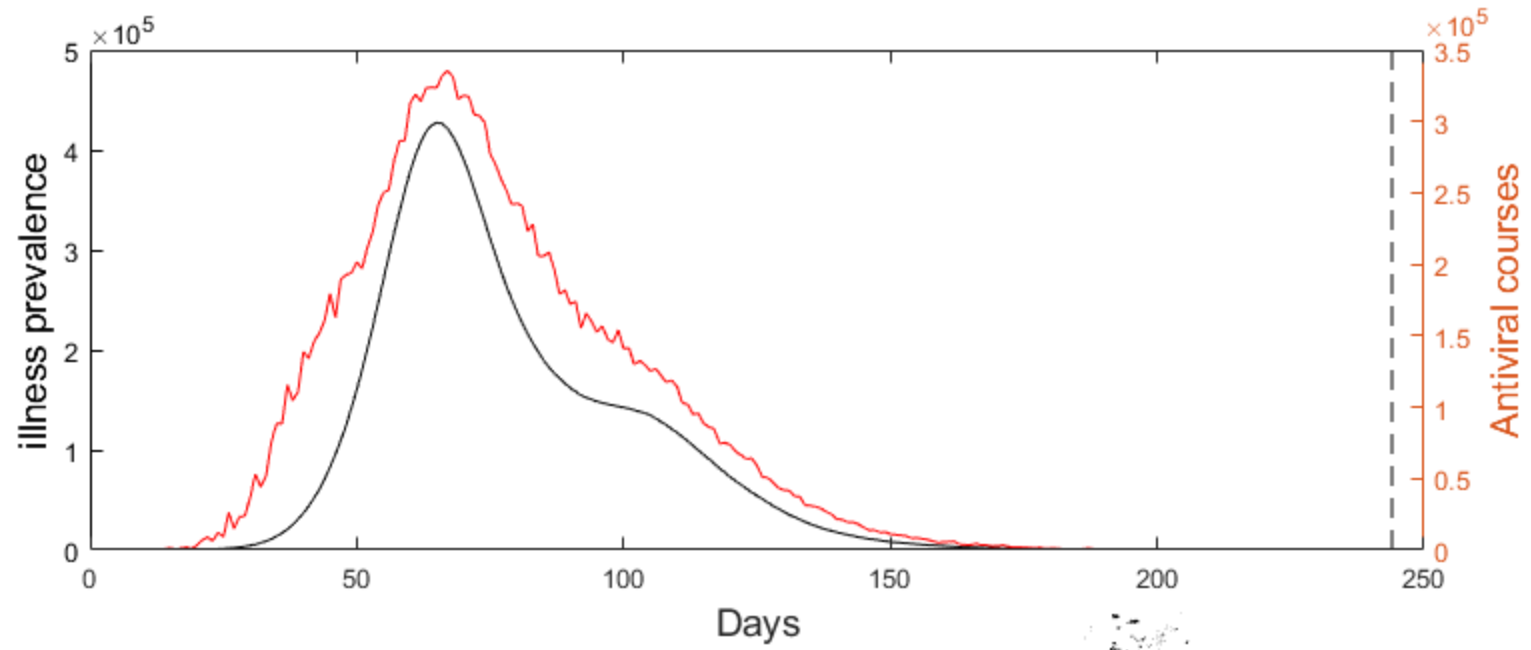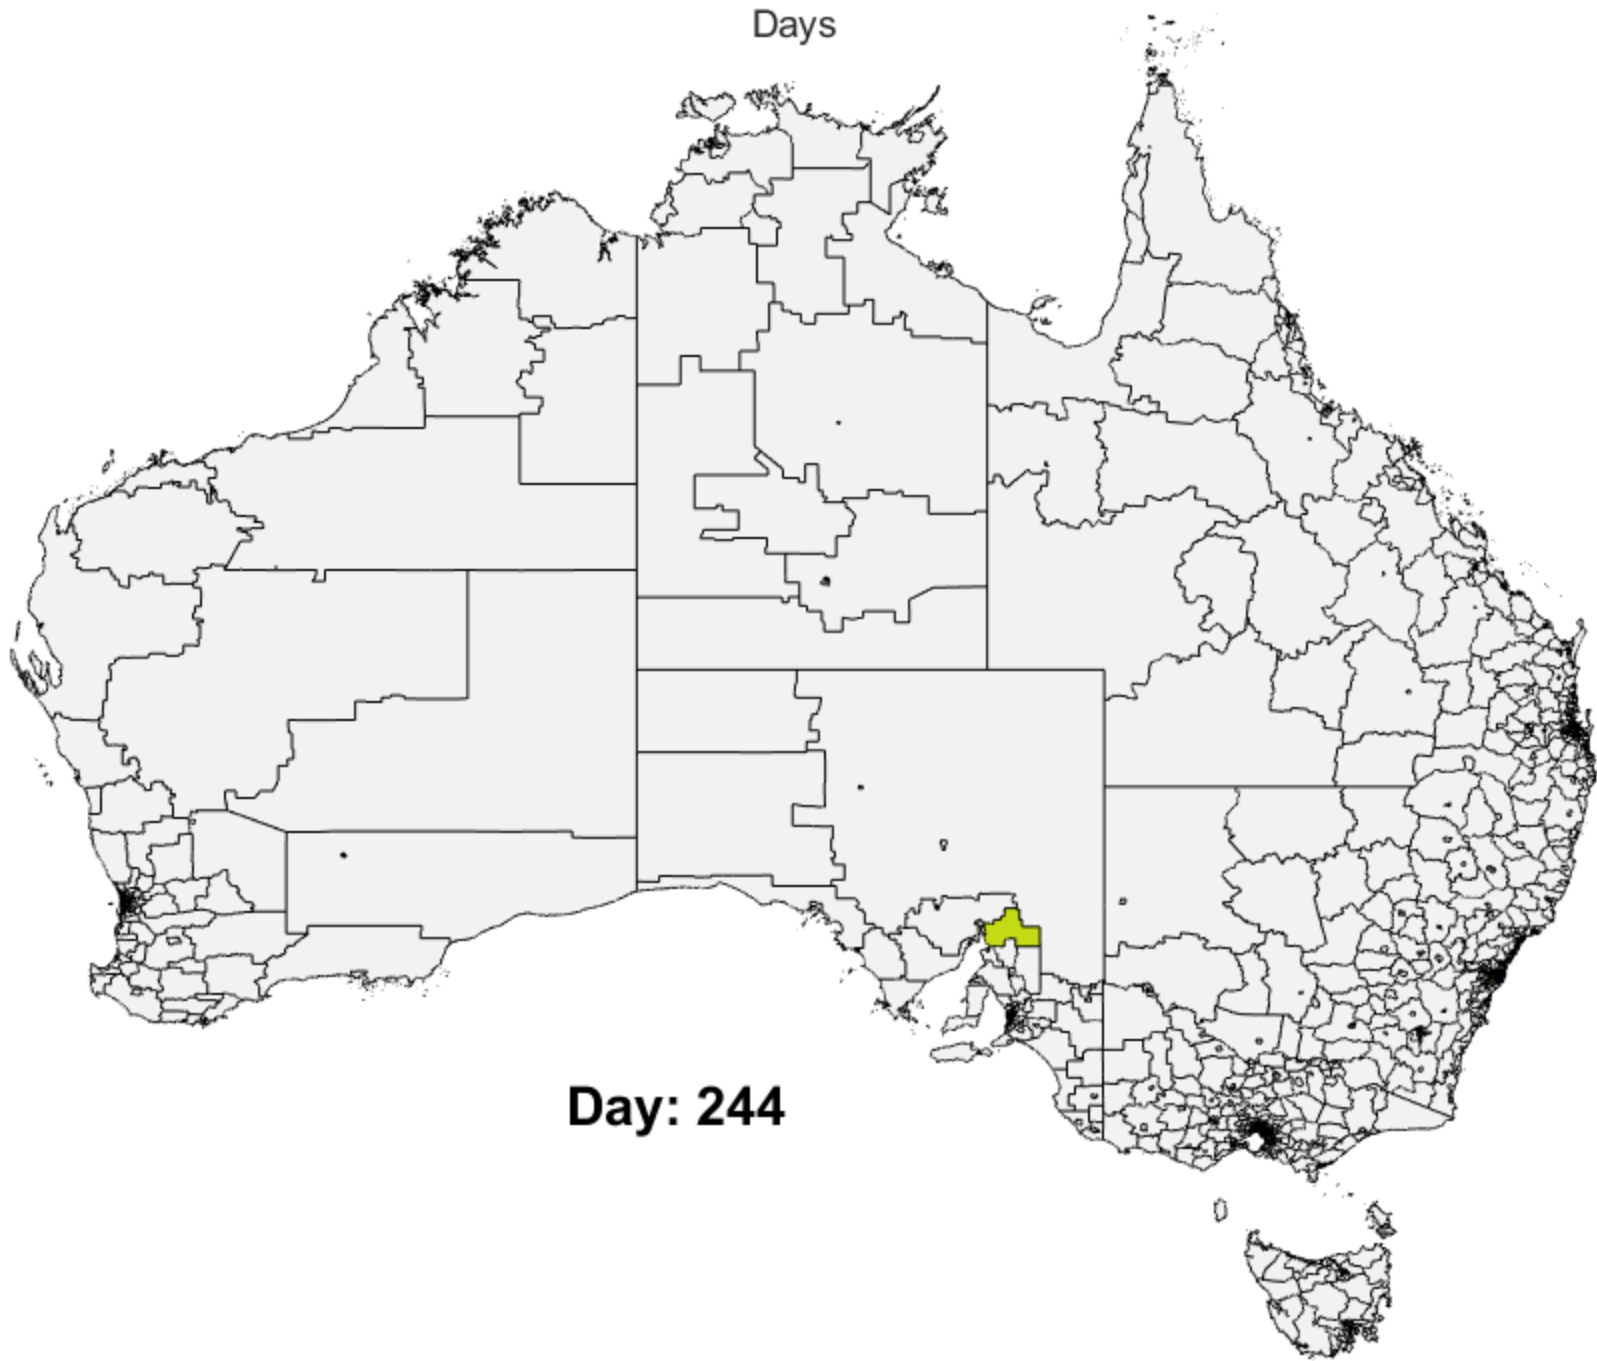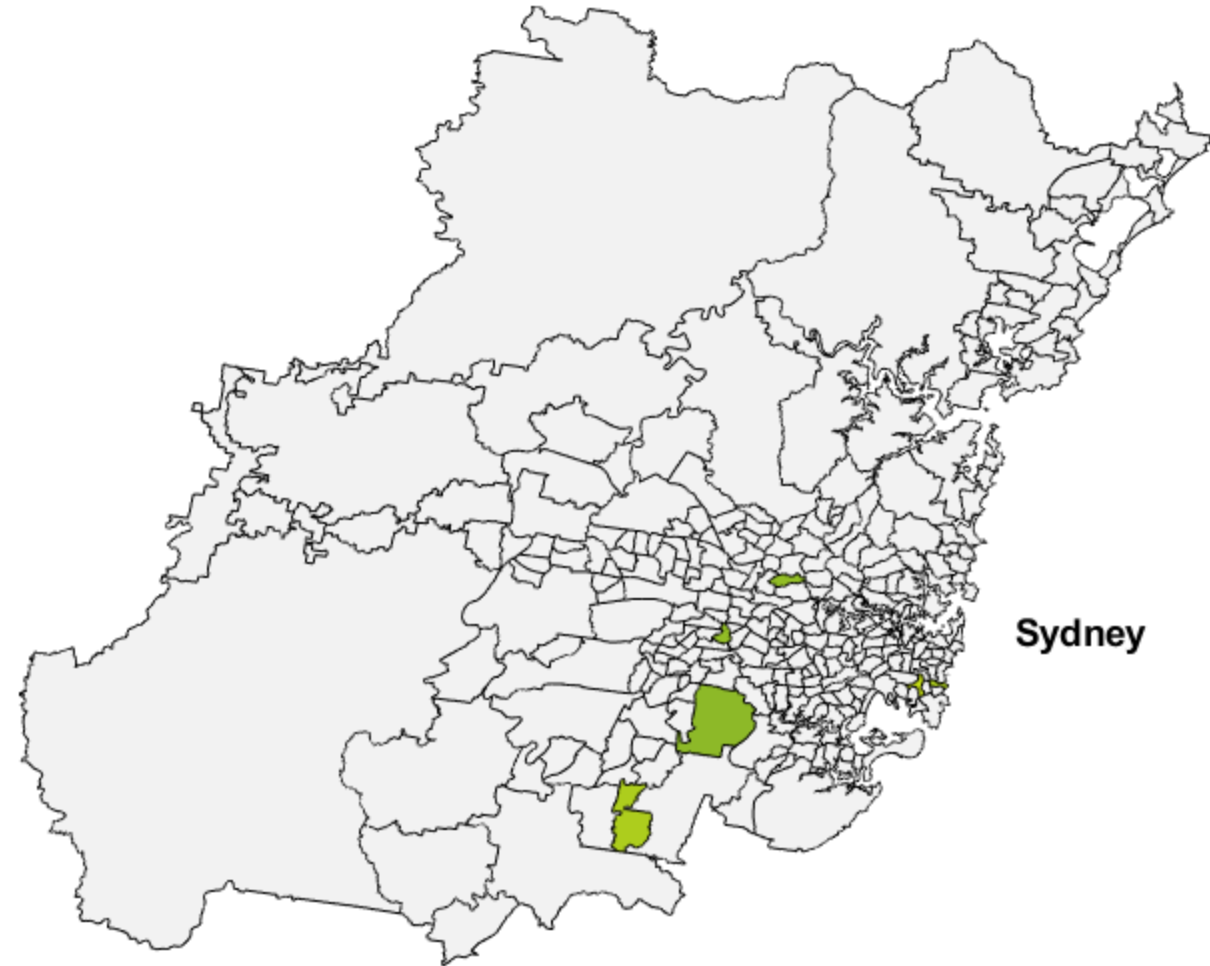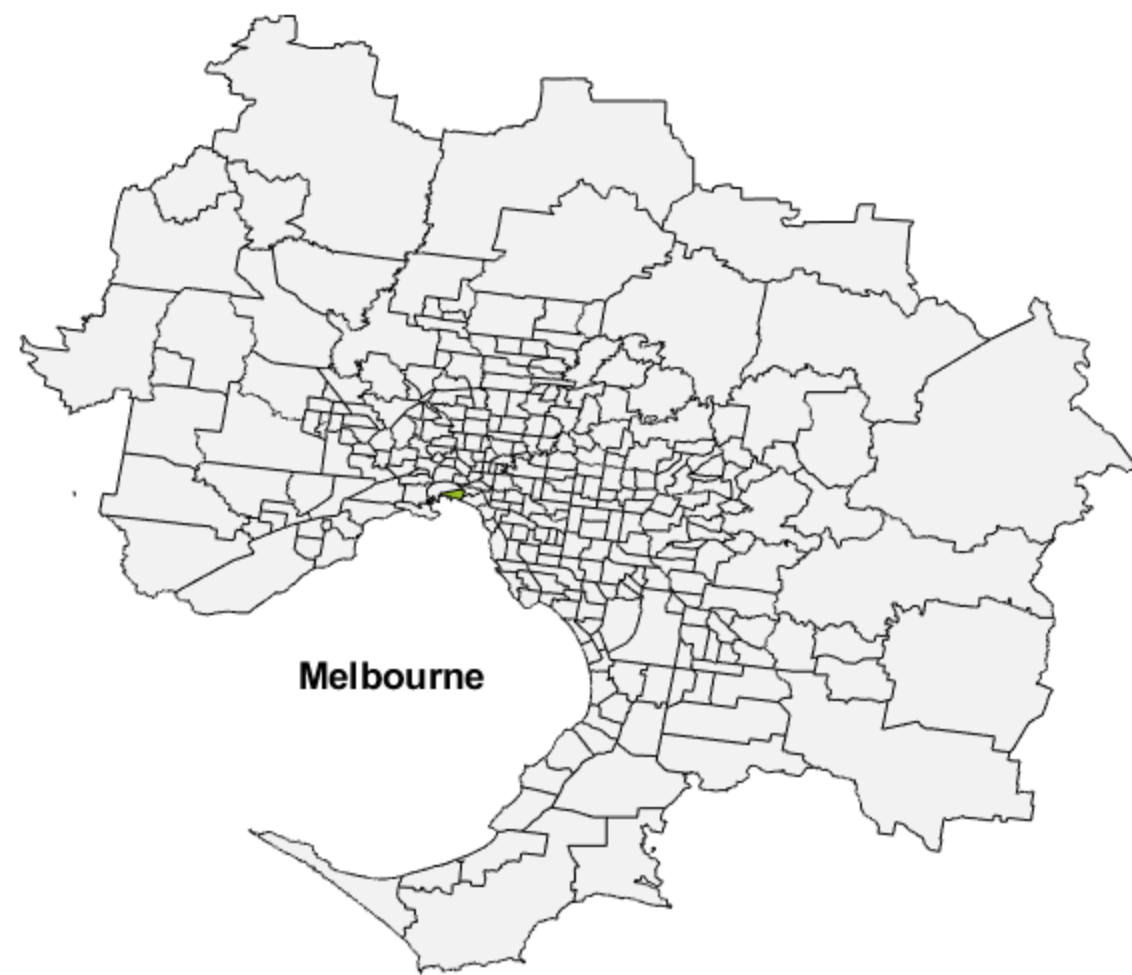



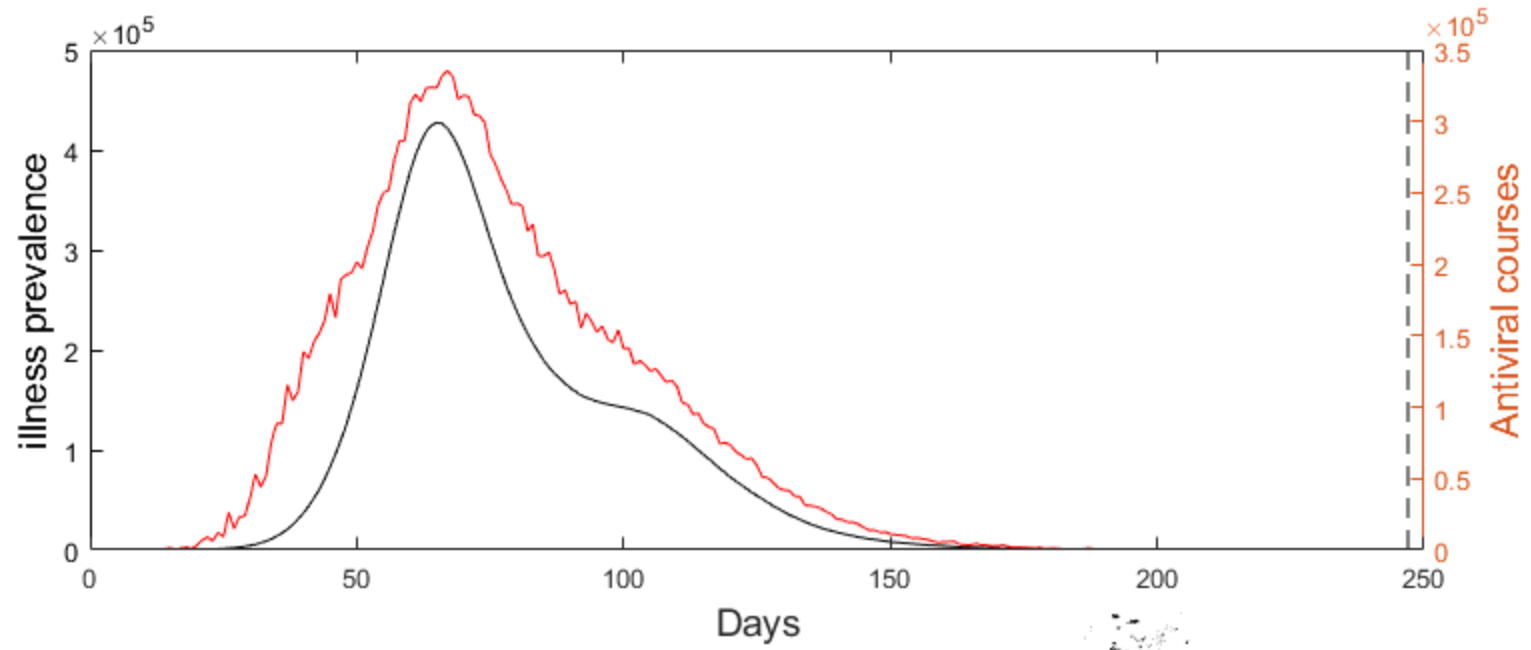

Days

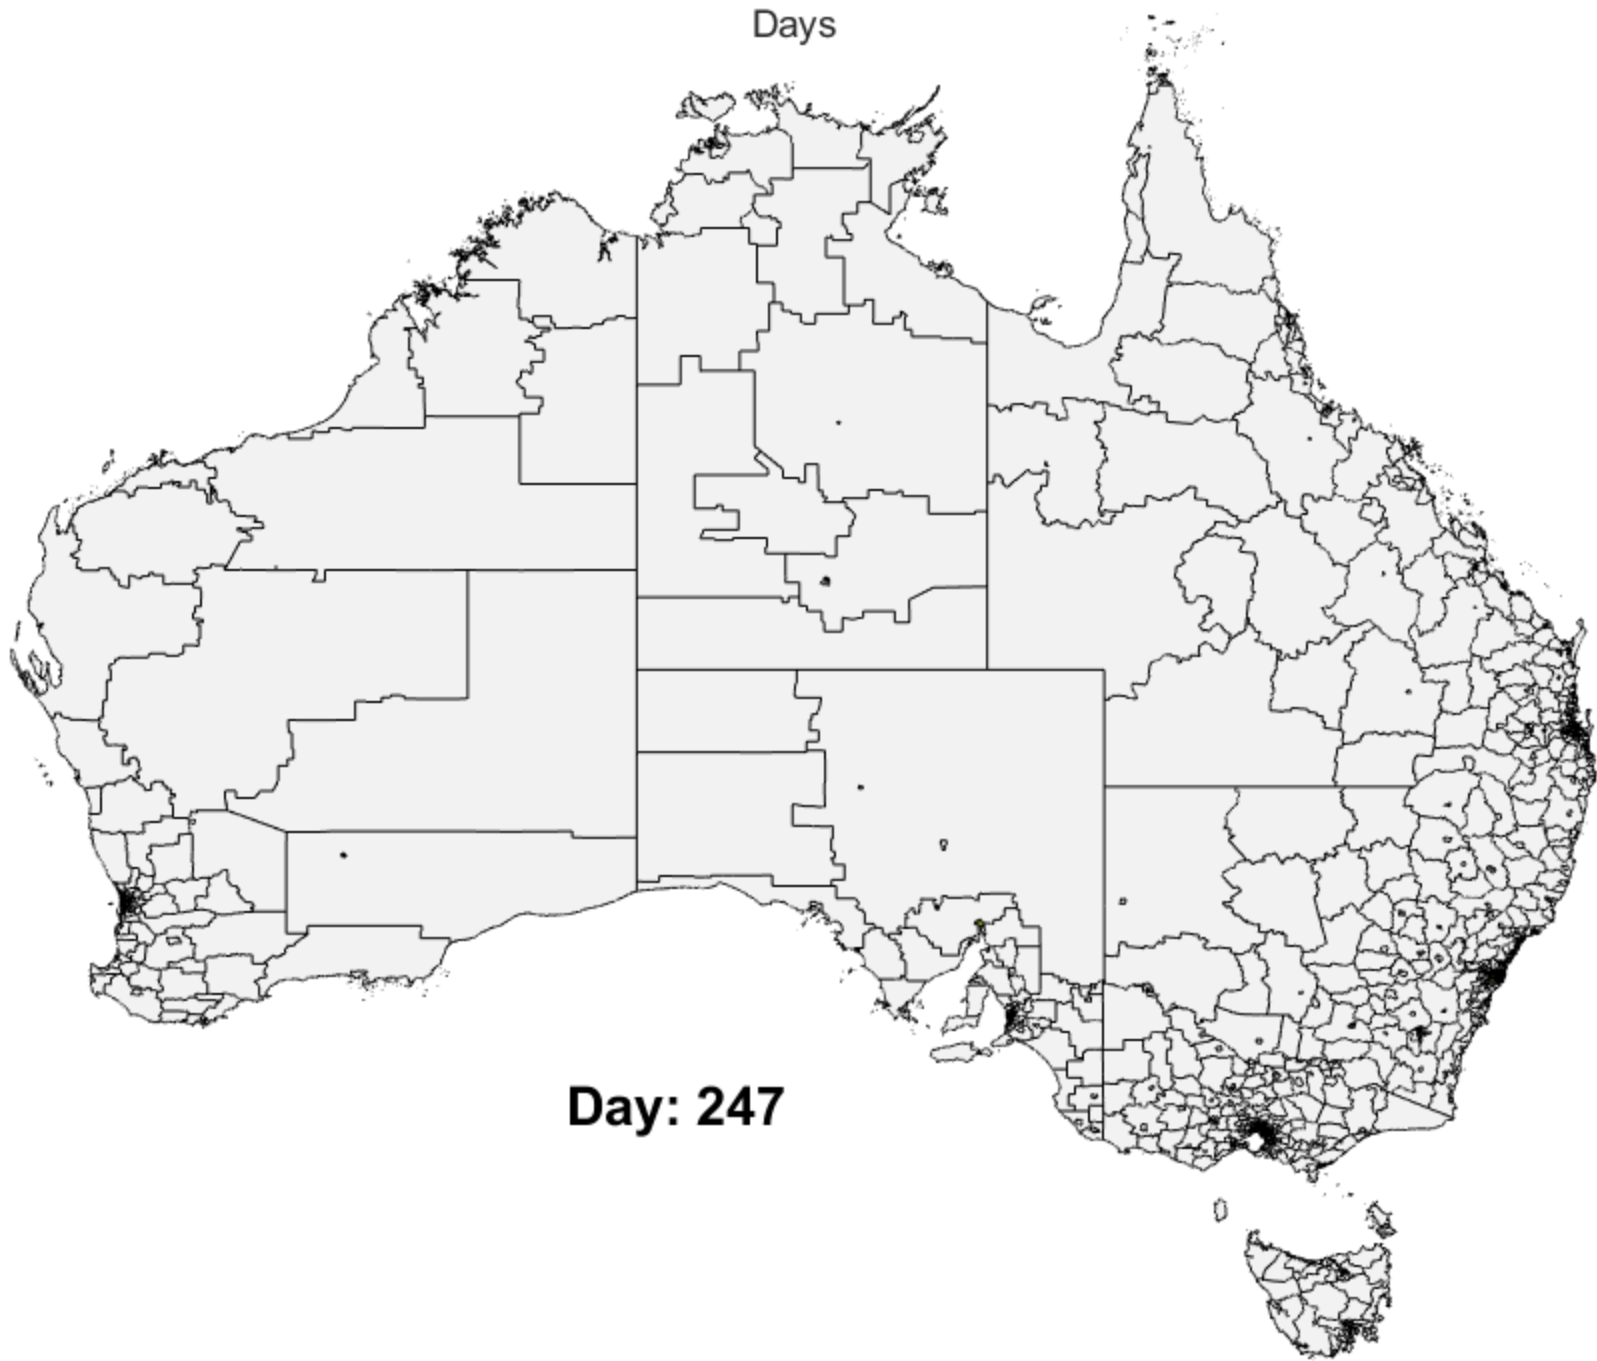

Day: 247

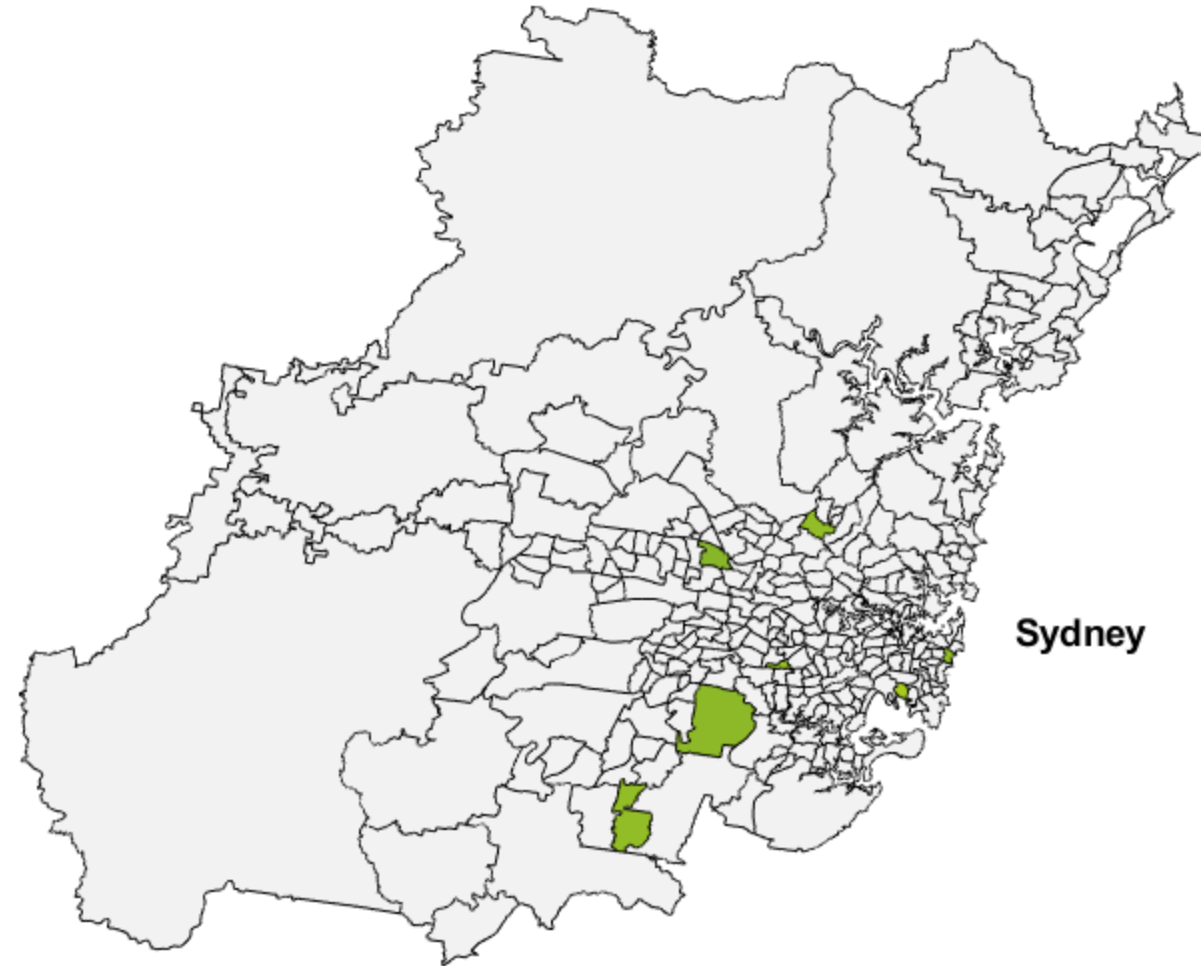

Sydney

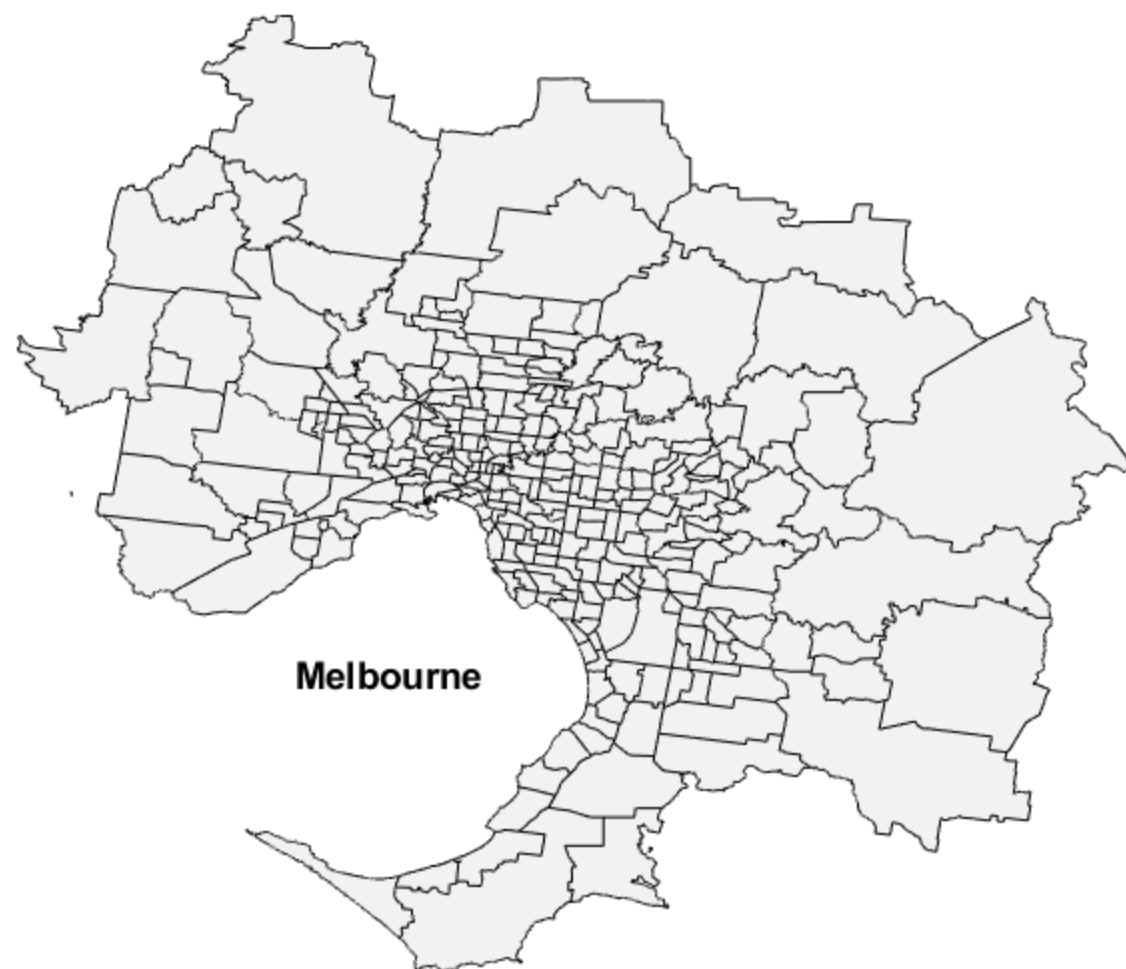

Melbourne
