# Supplementary material
Source: PubMed Central journal article supplement (PMC7211476)

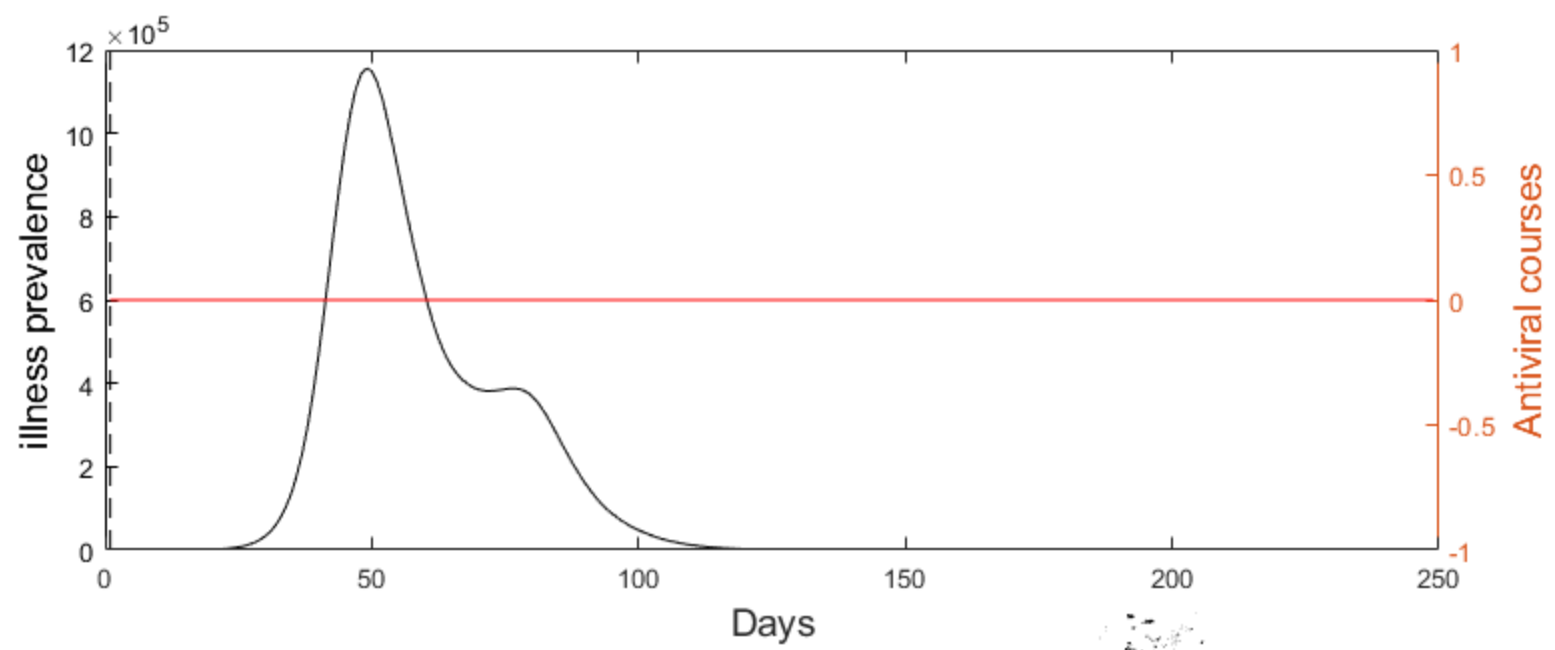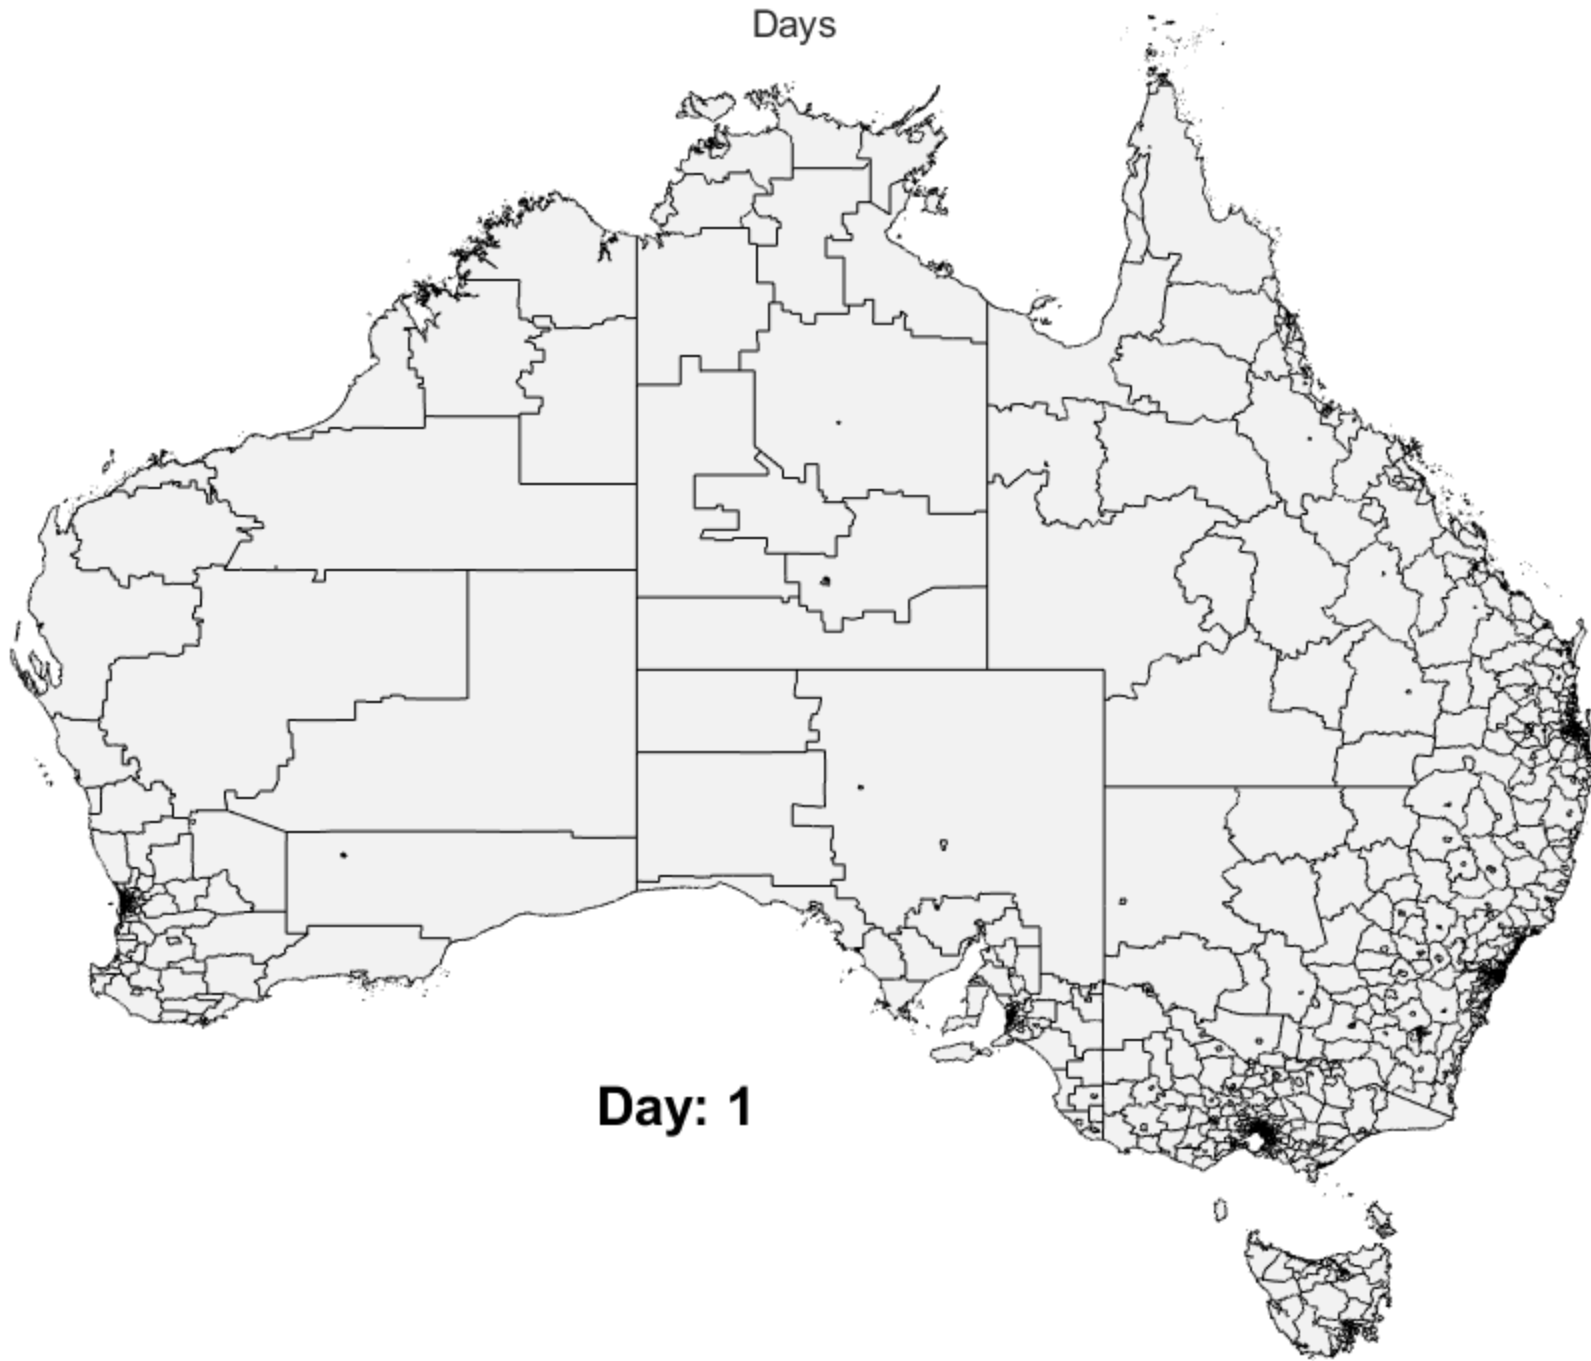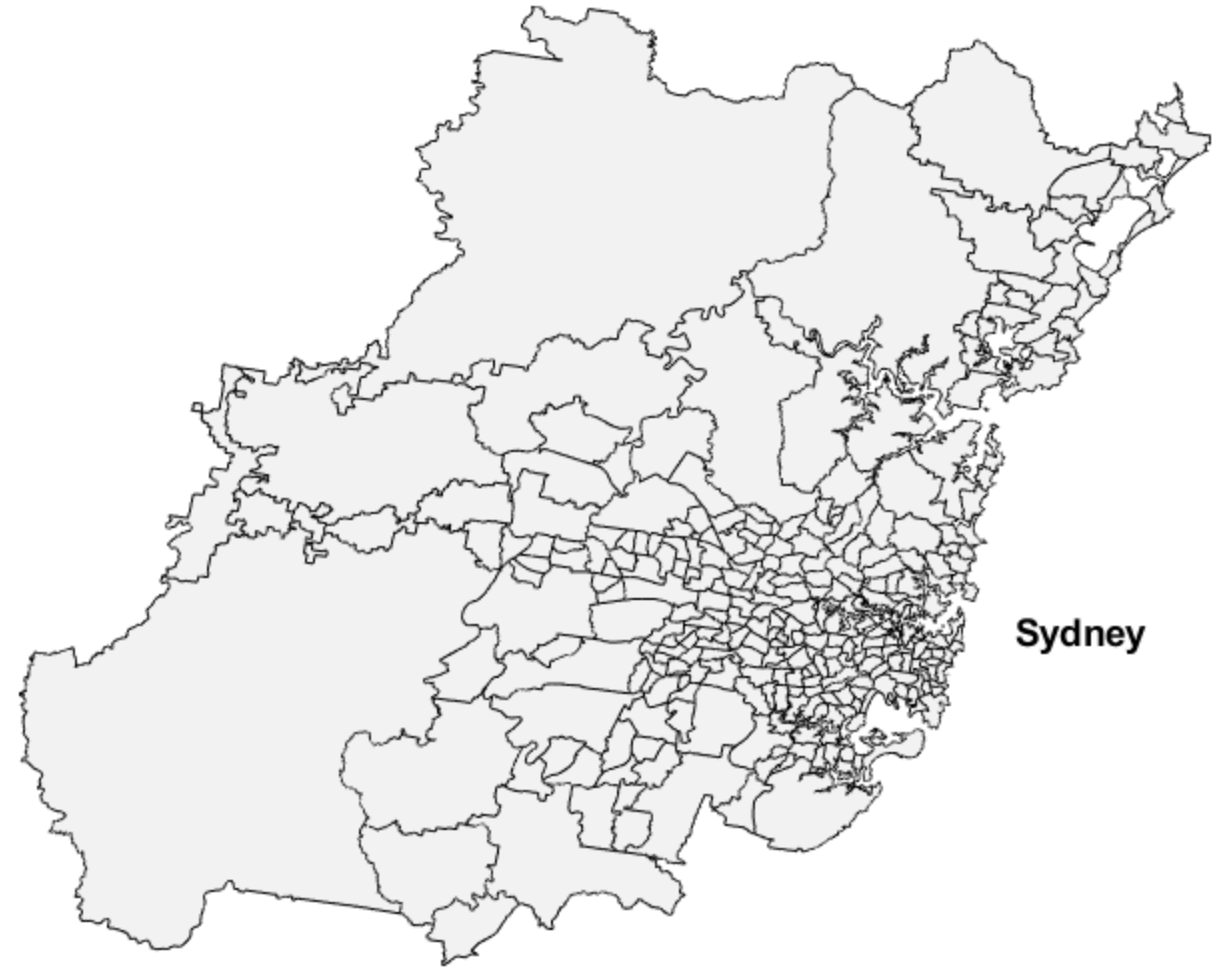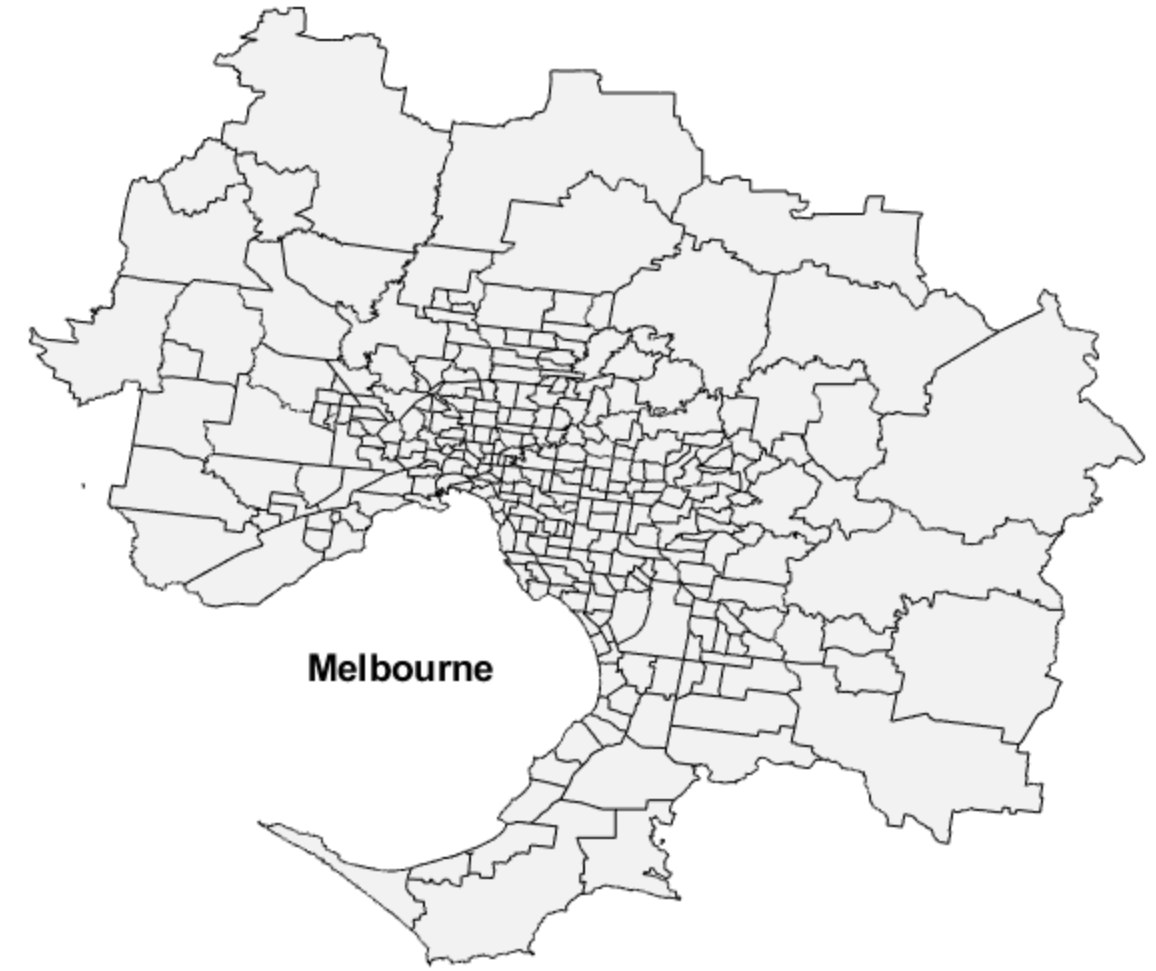

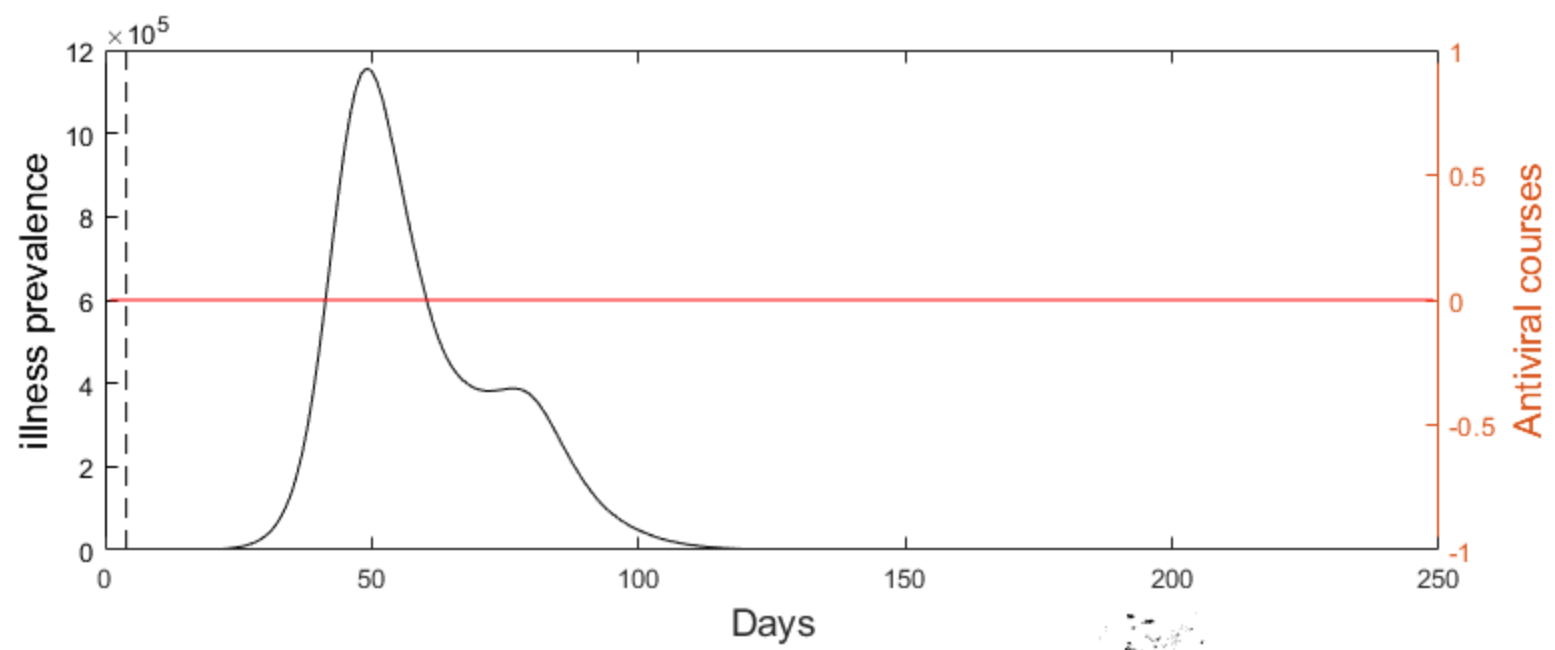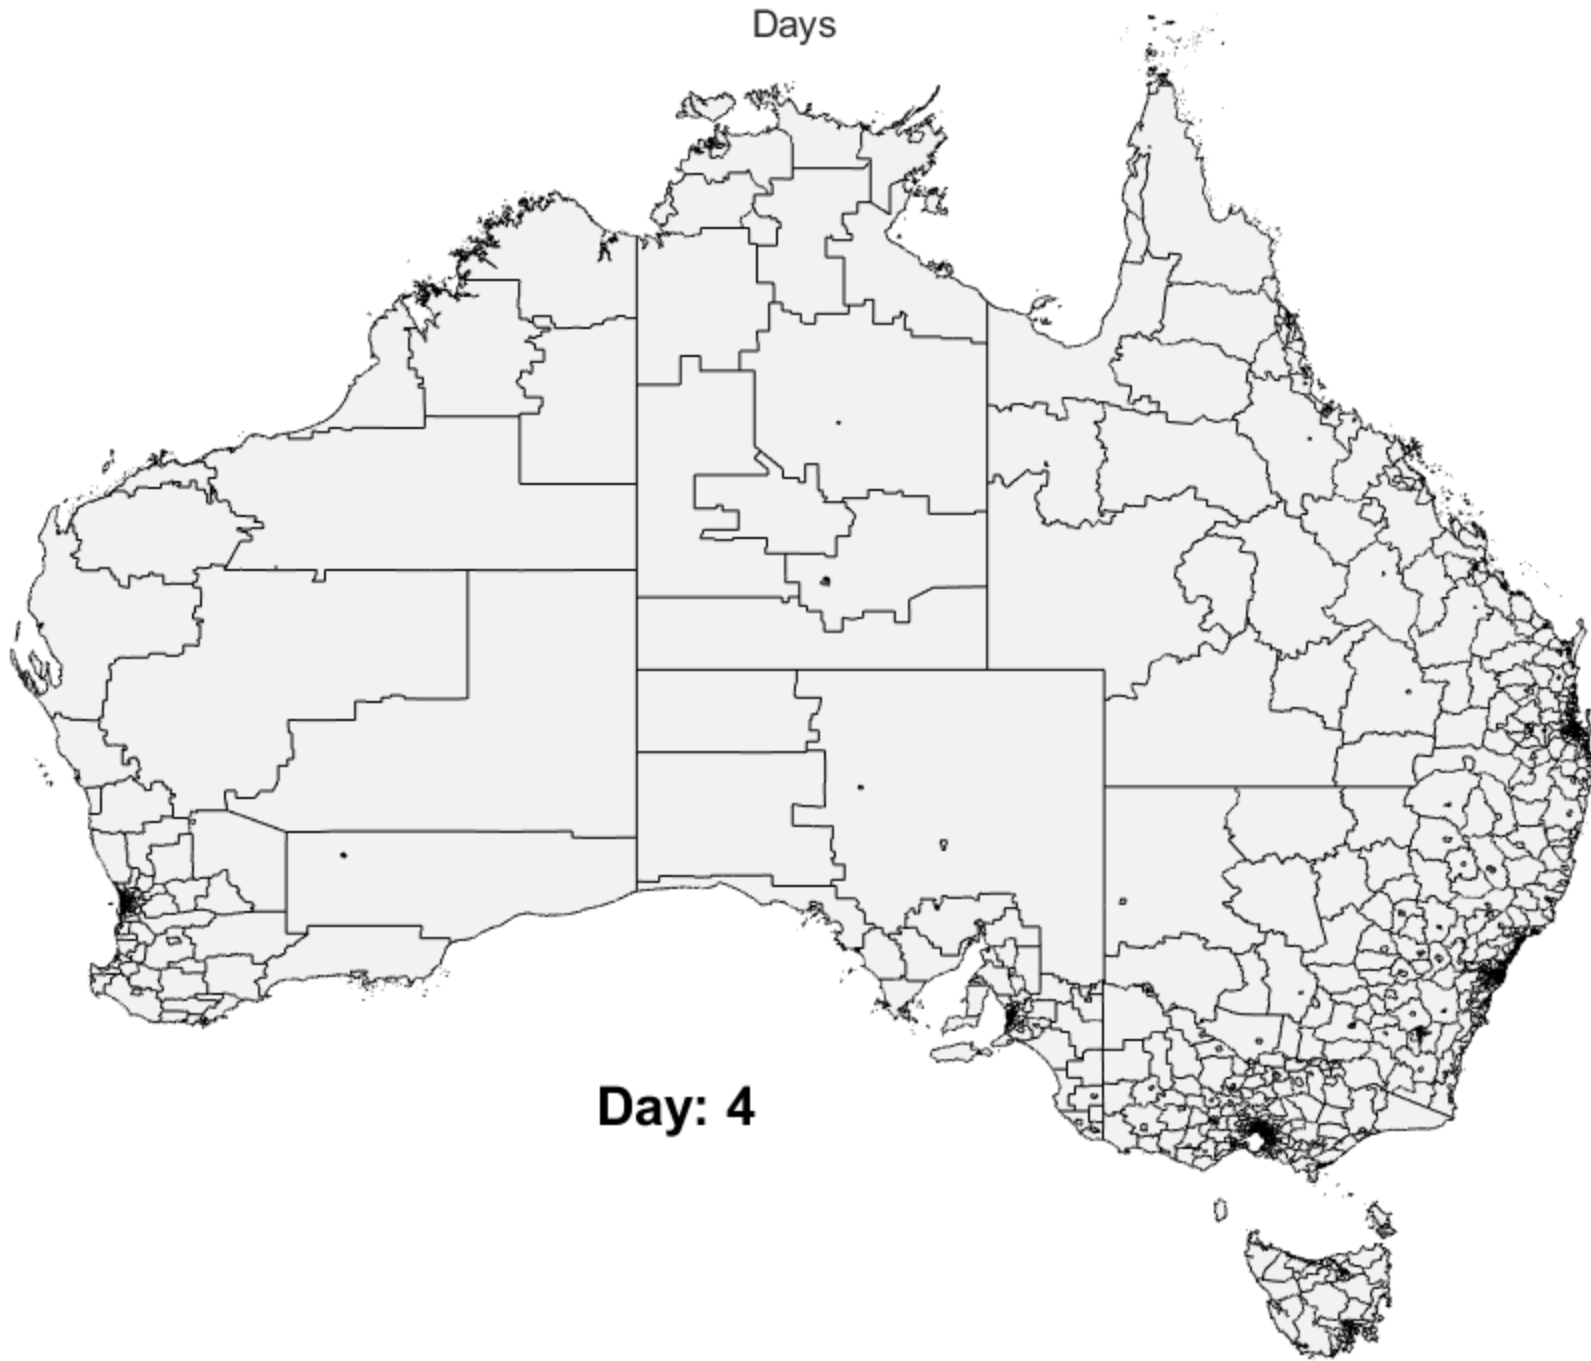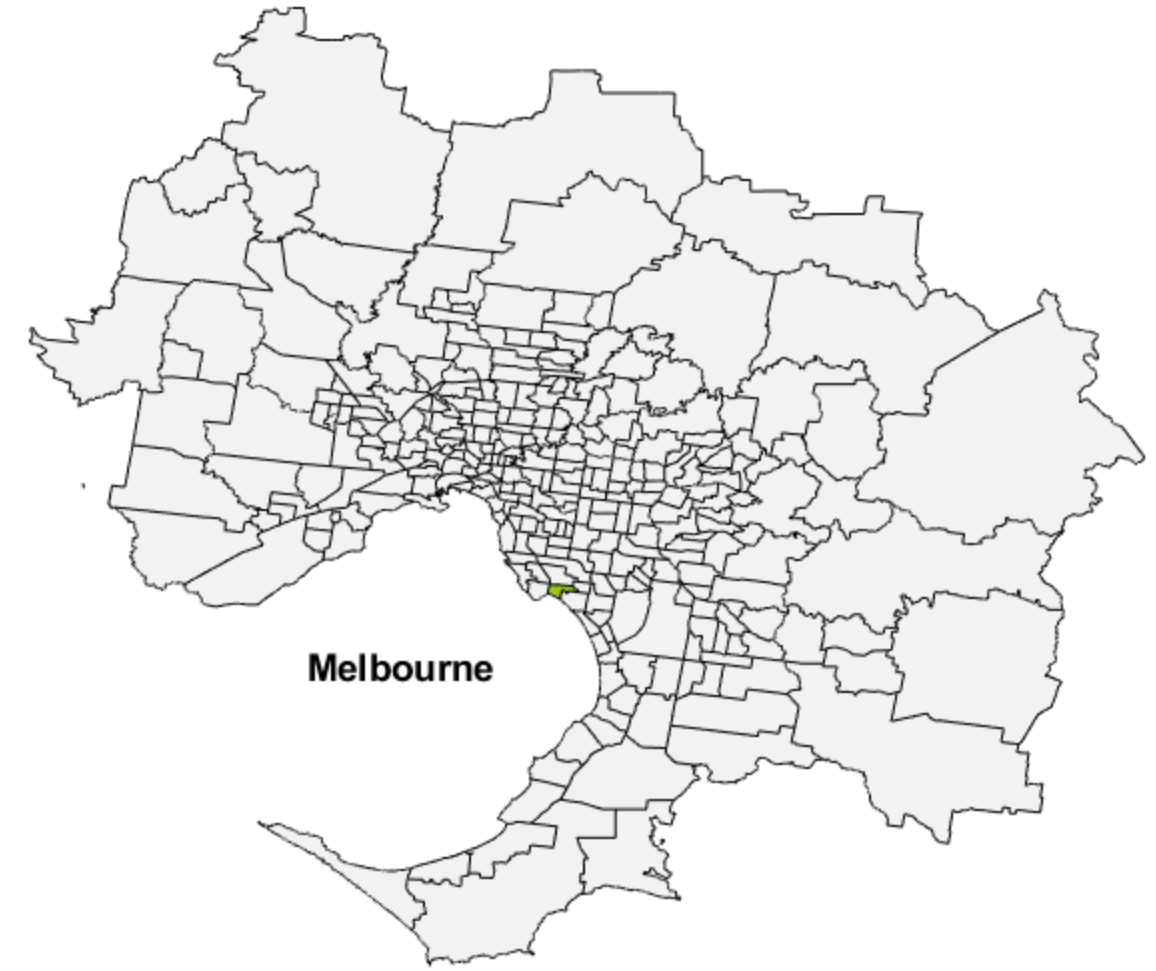

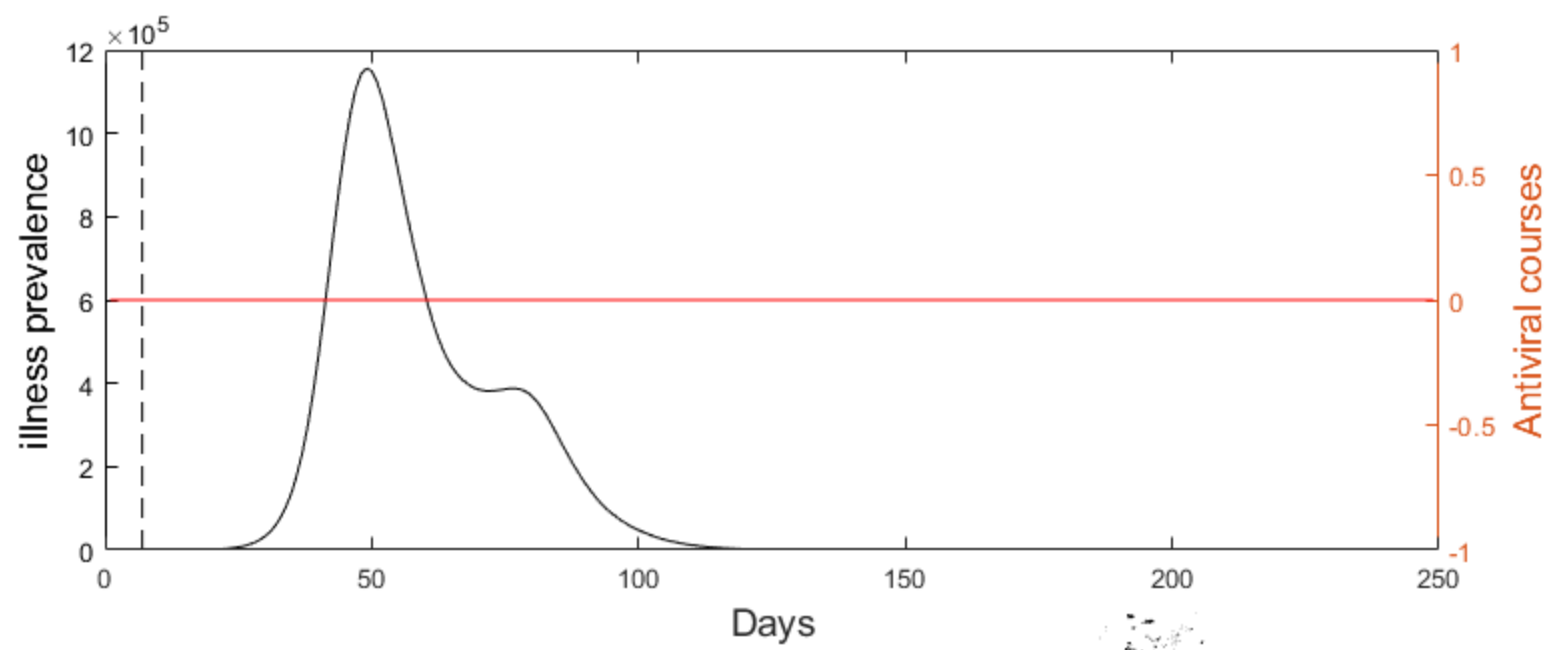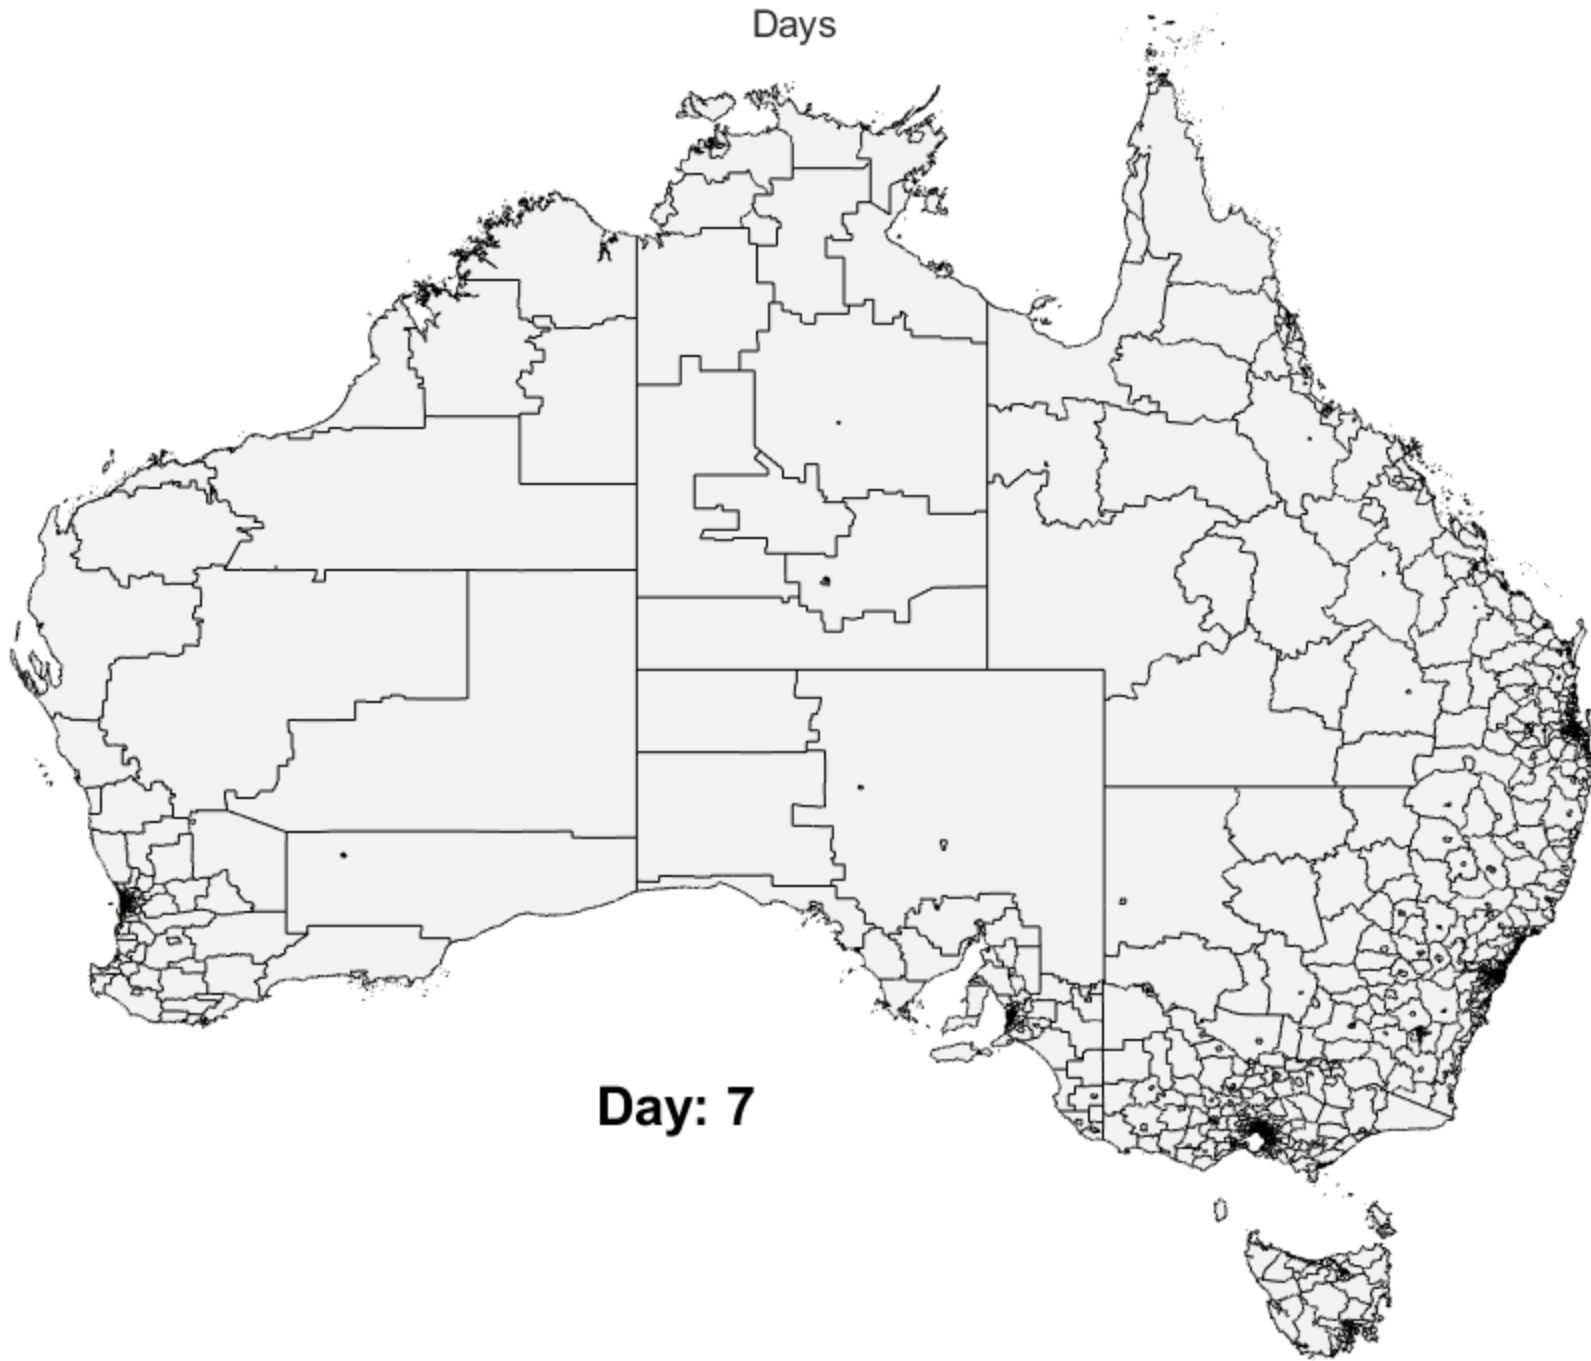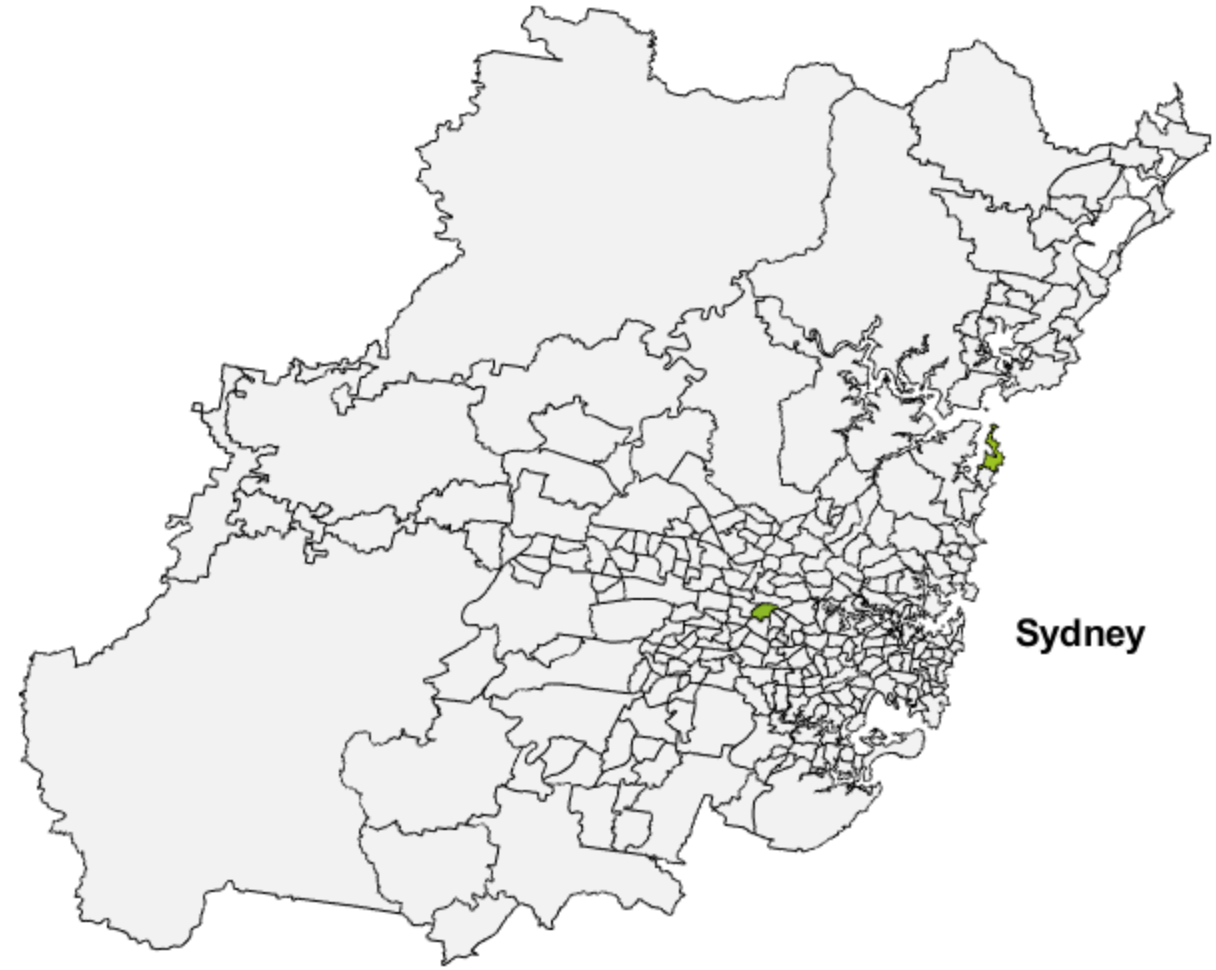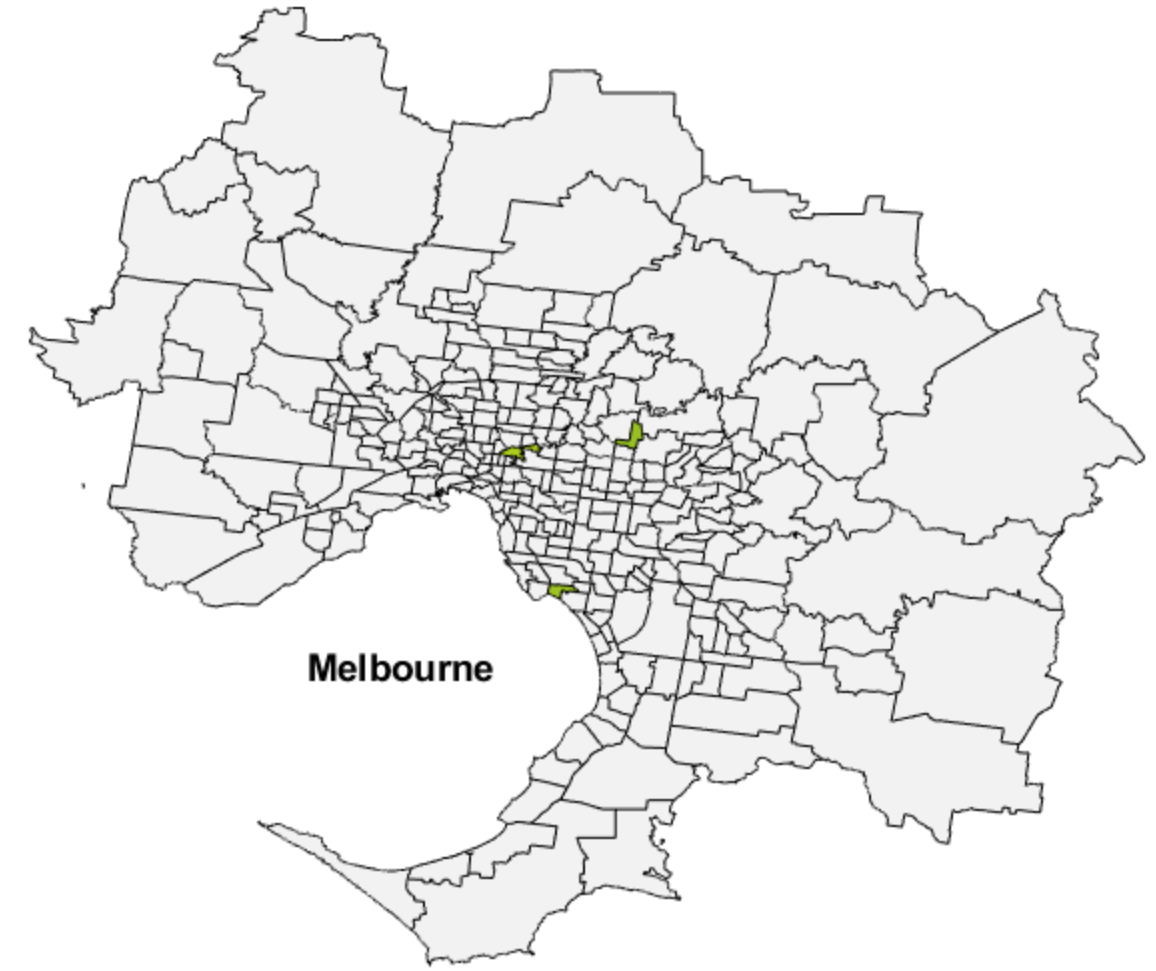



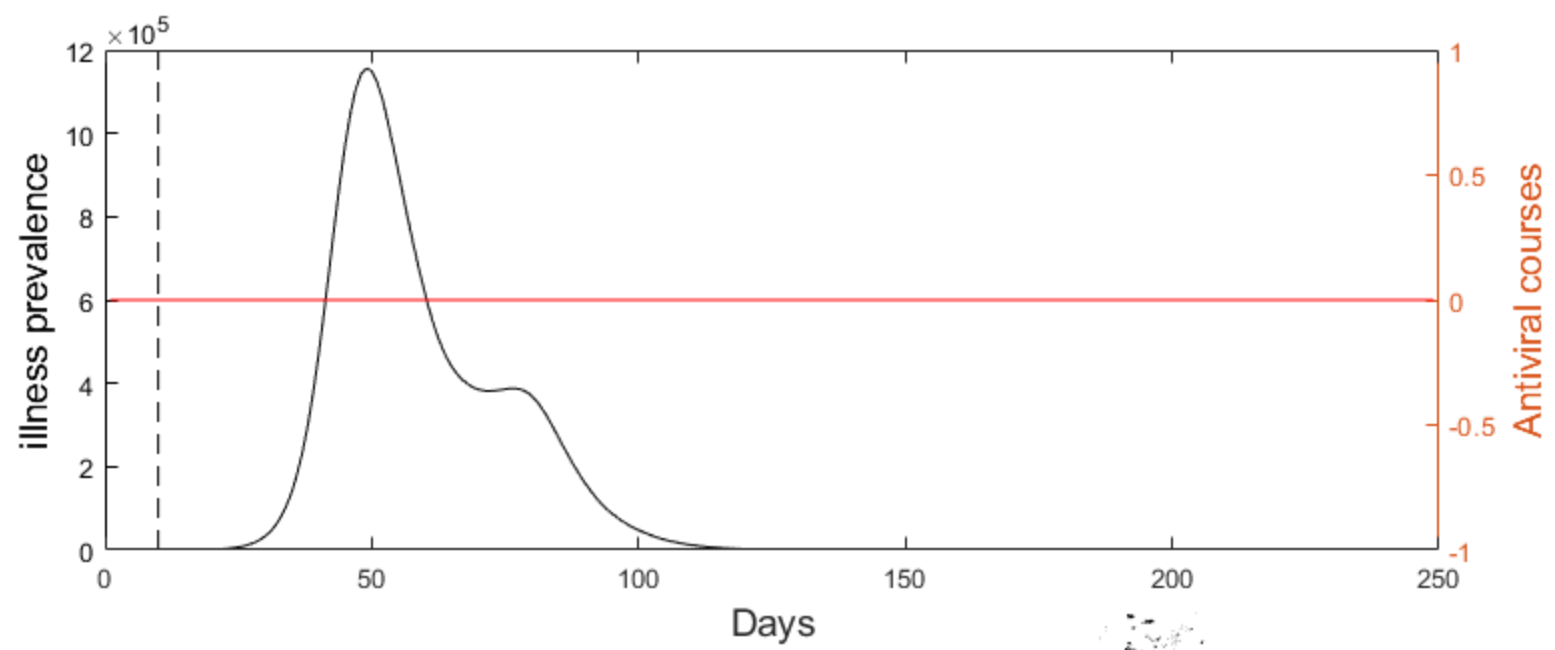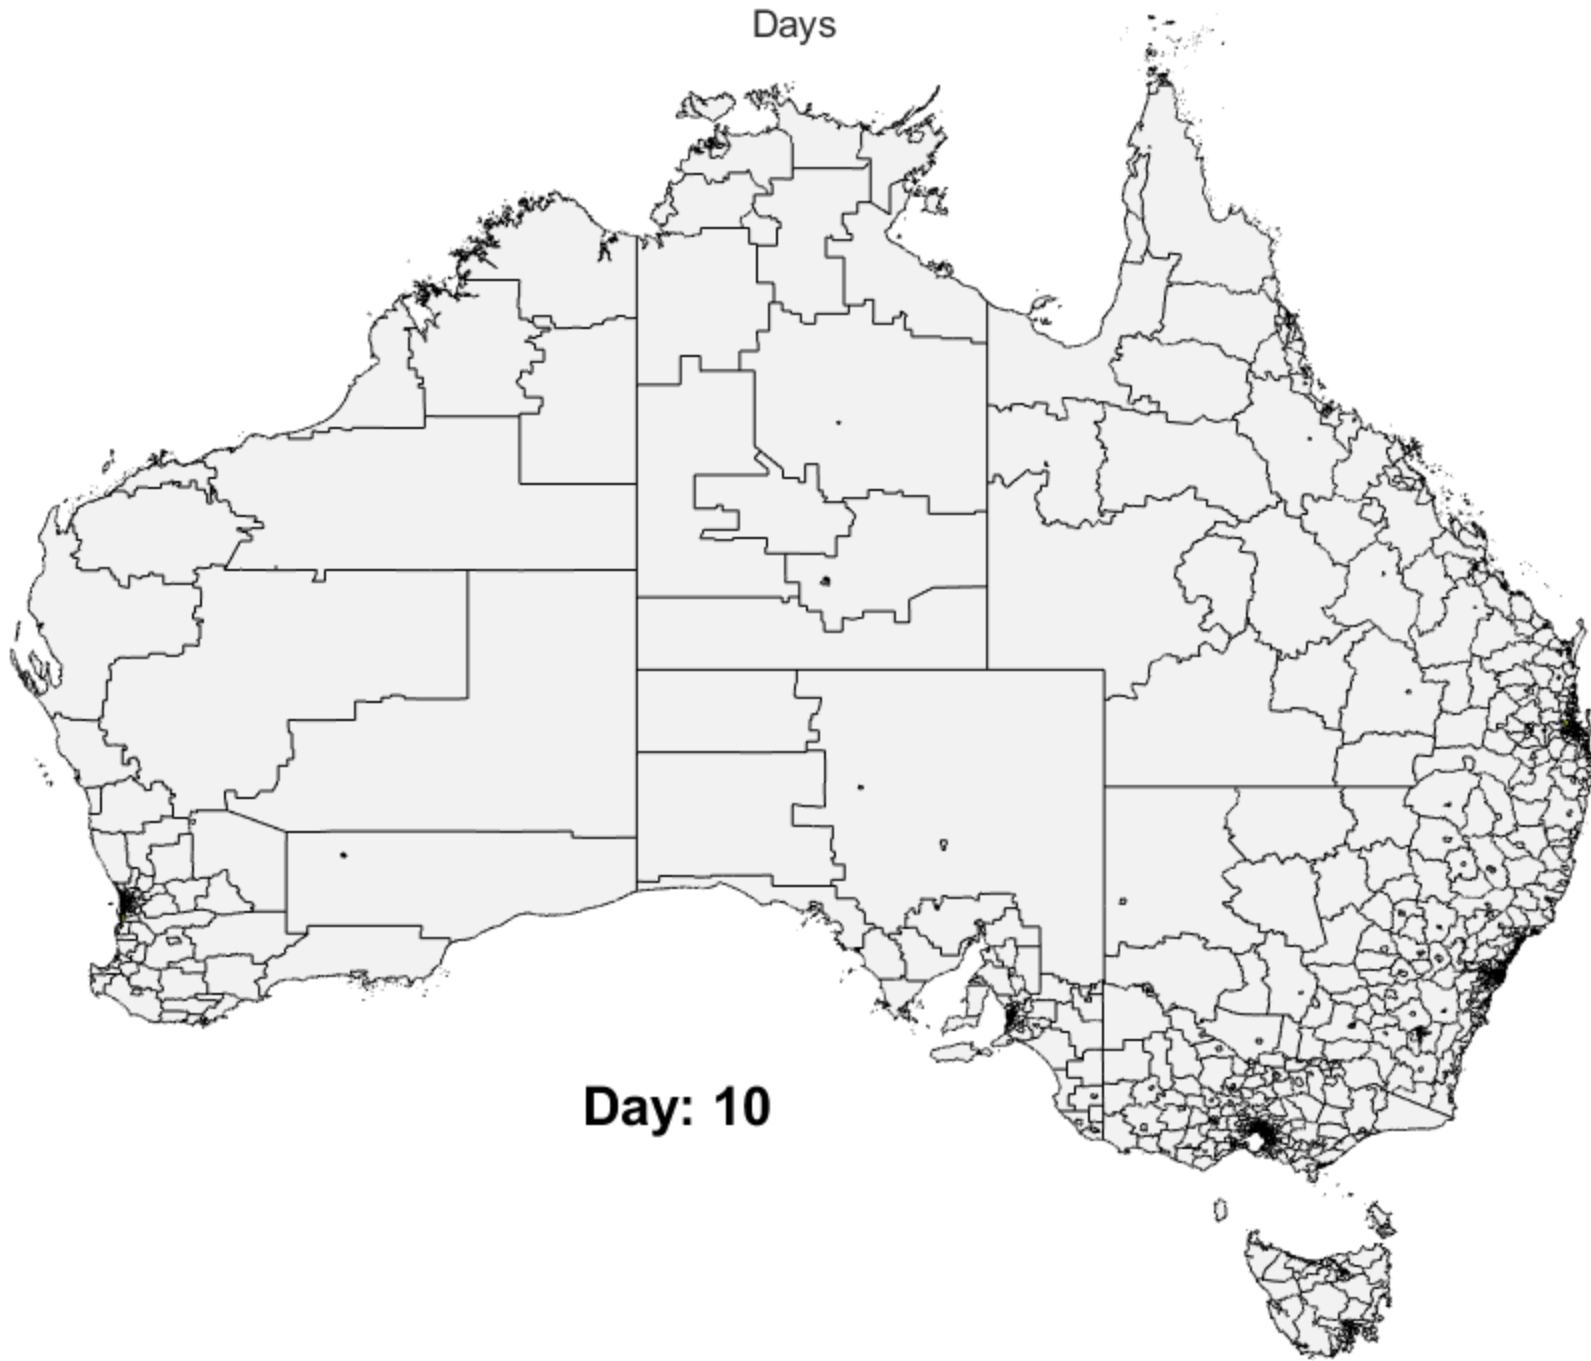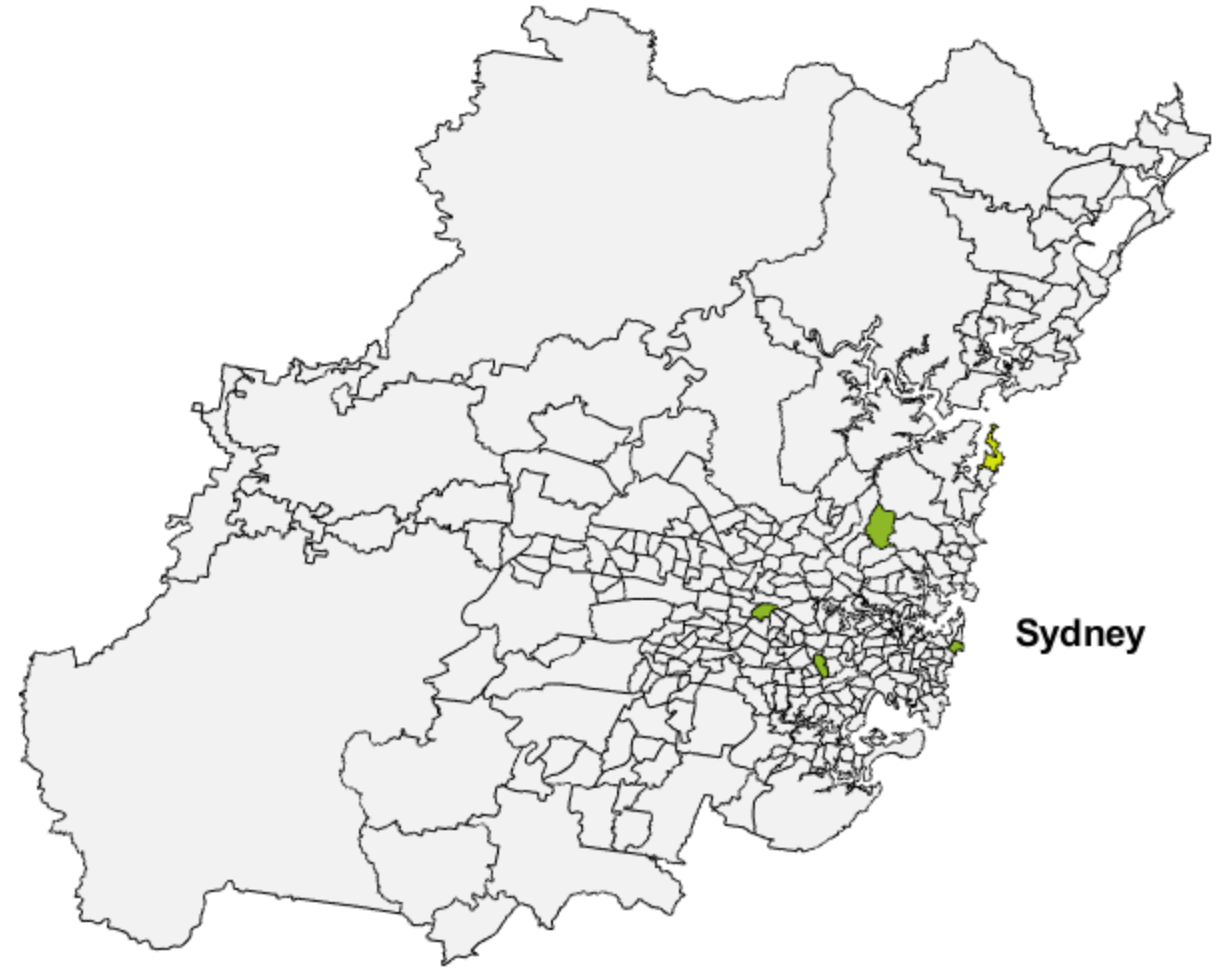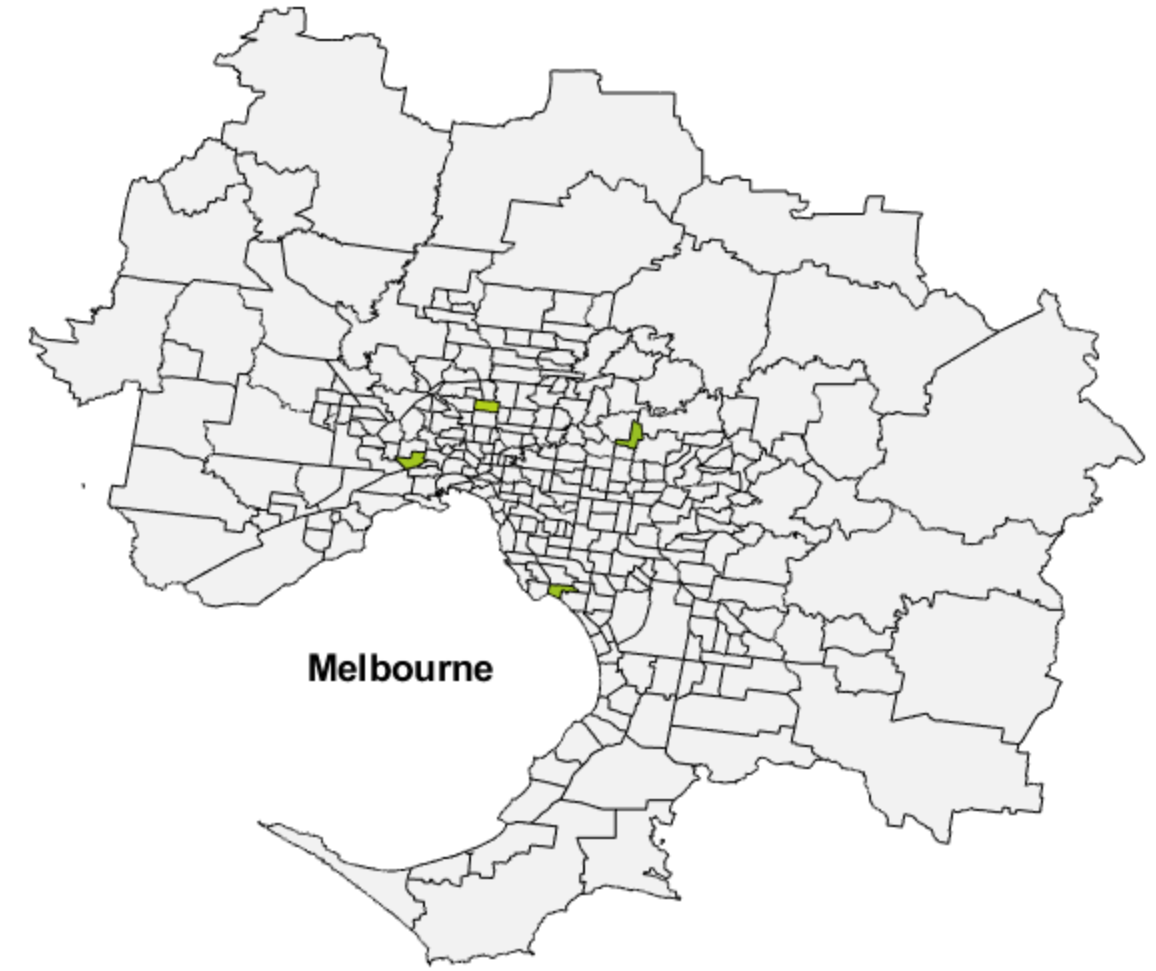



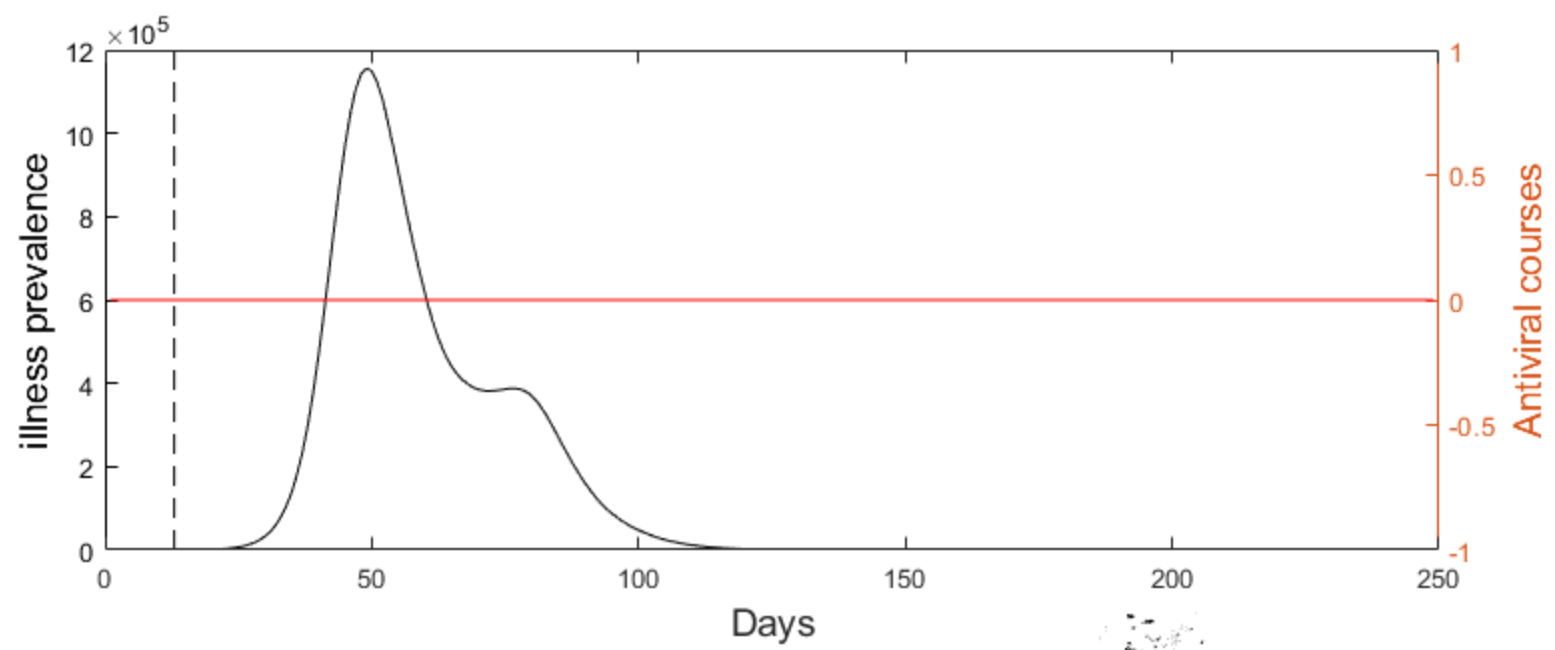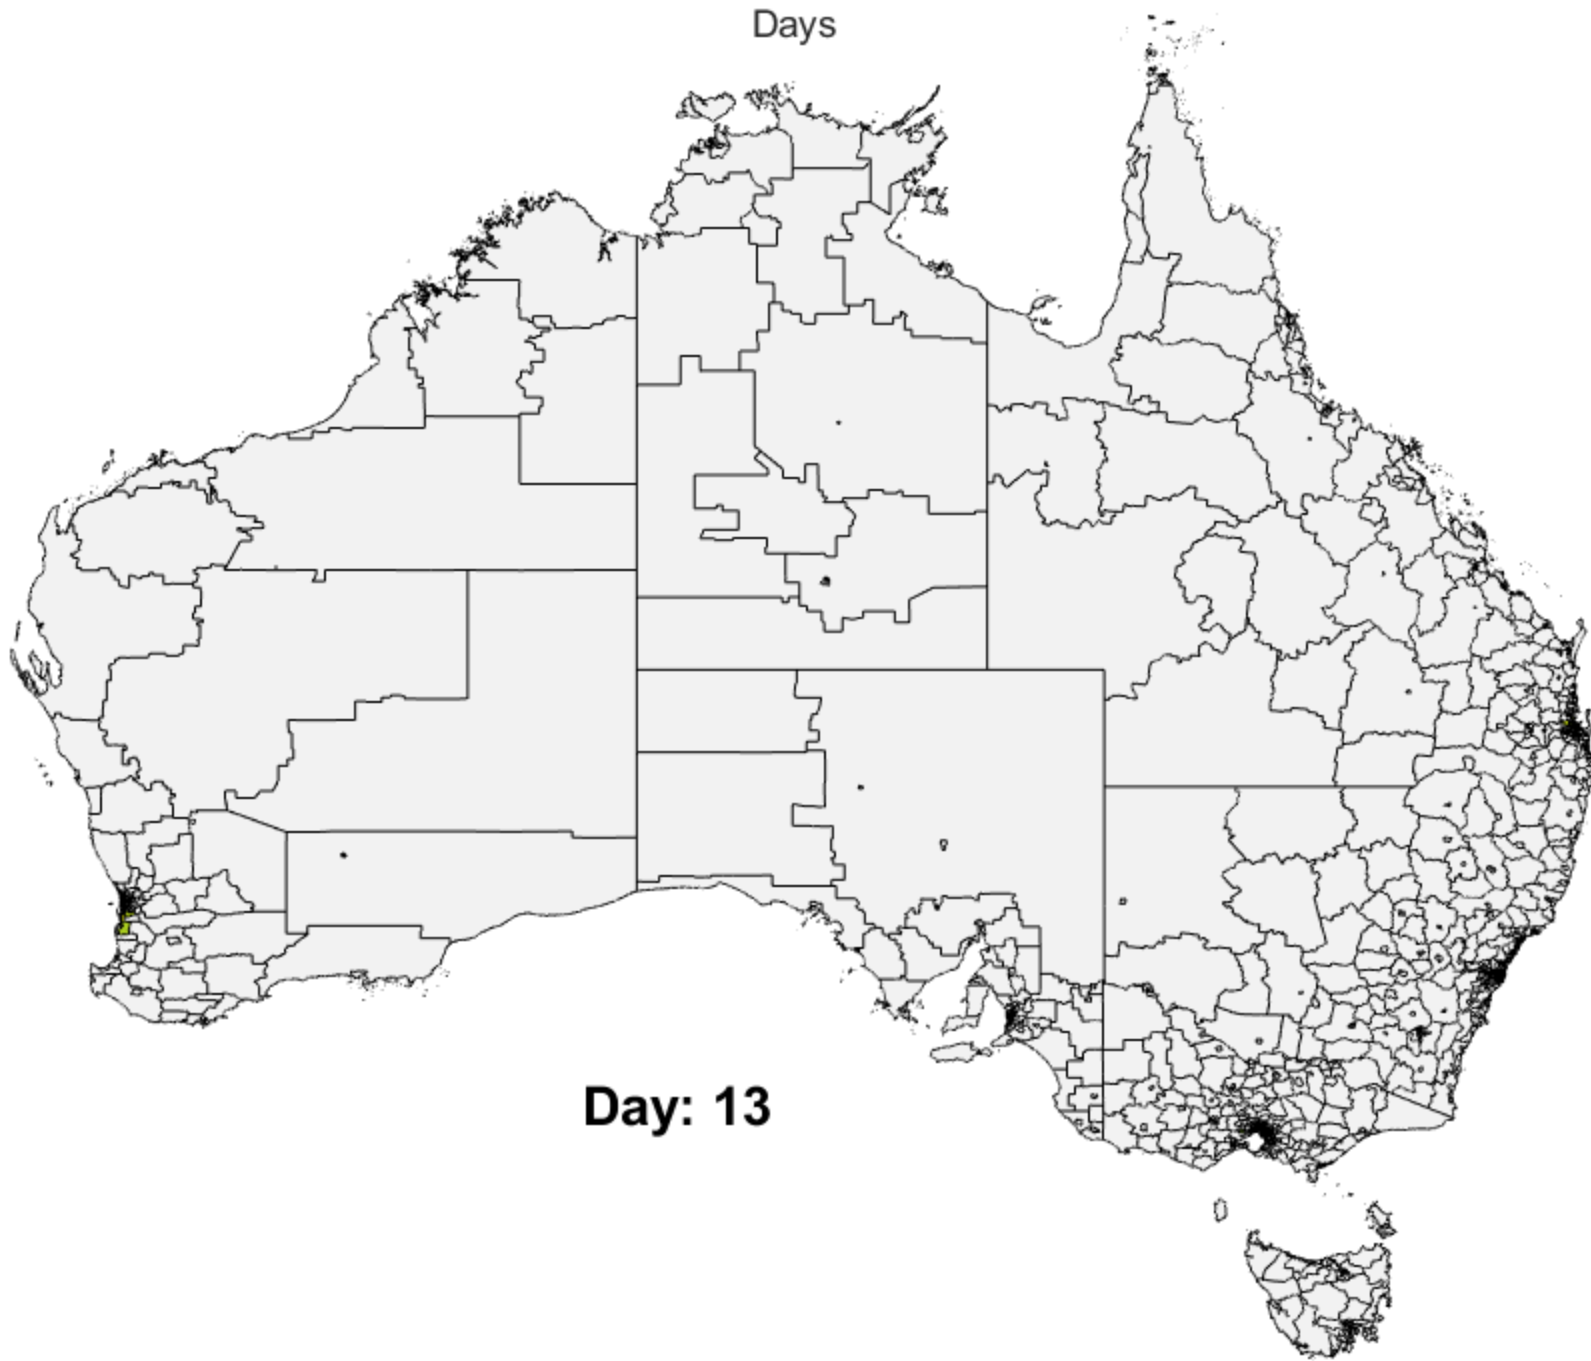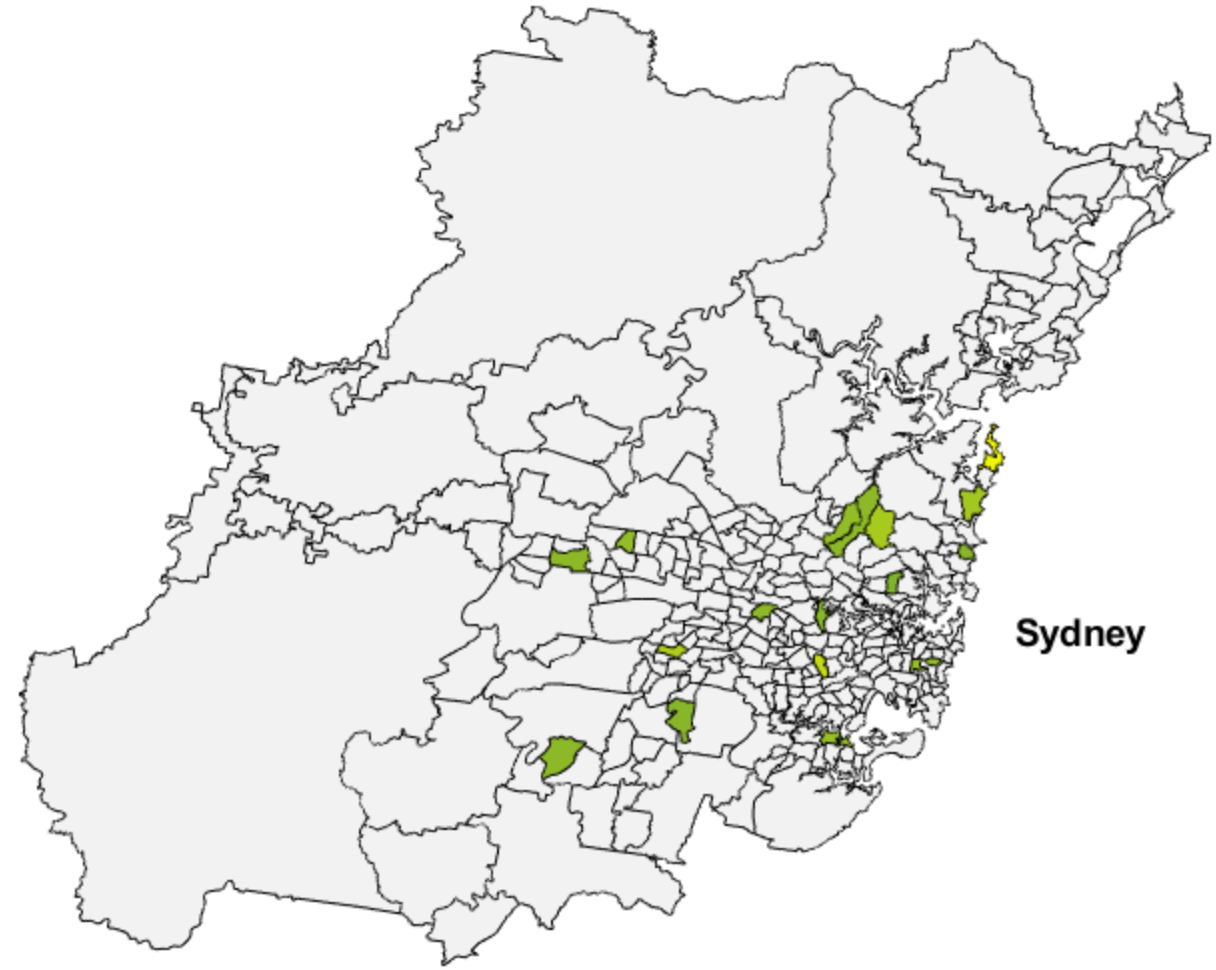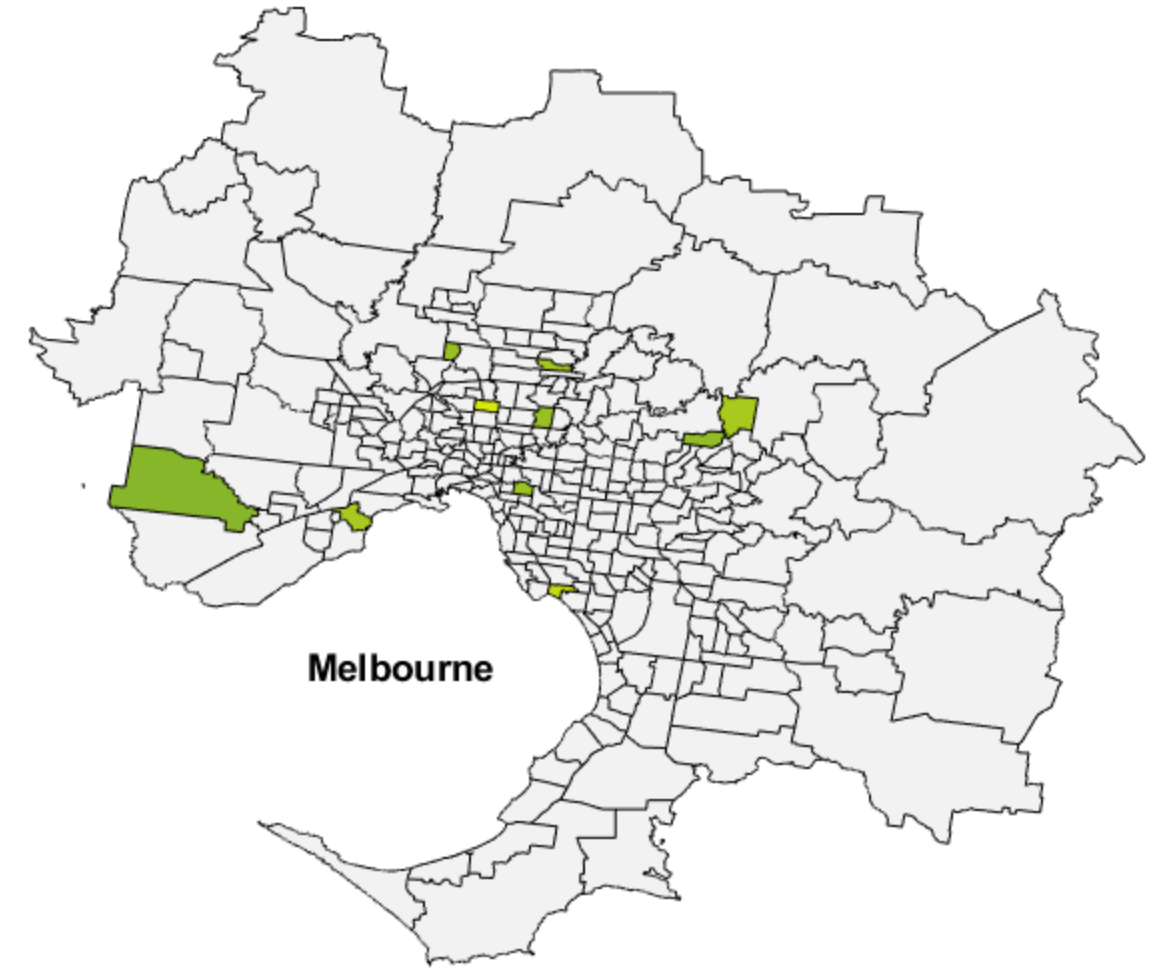

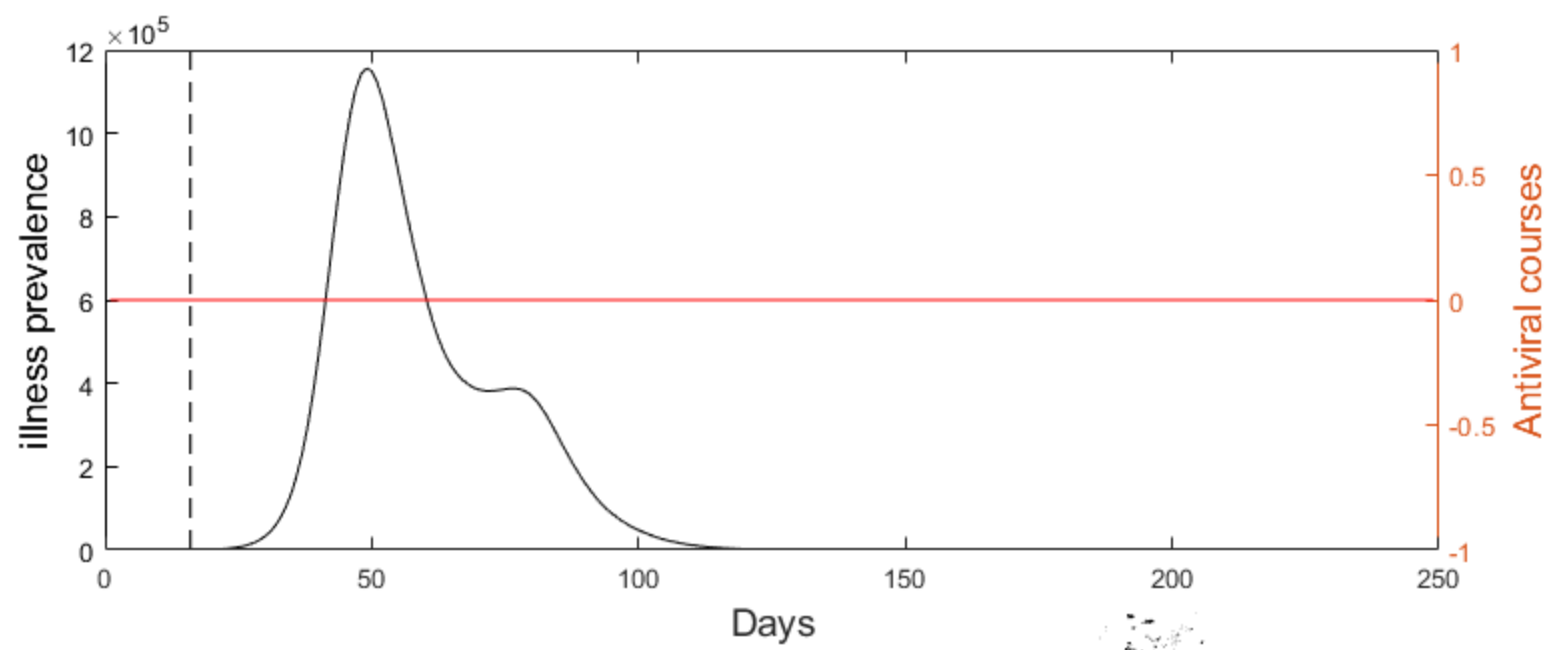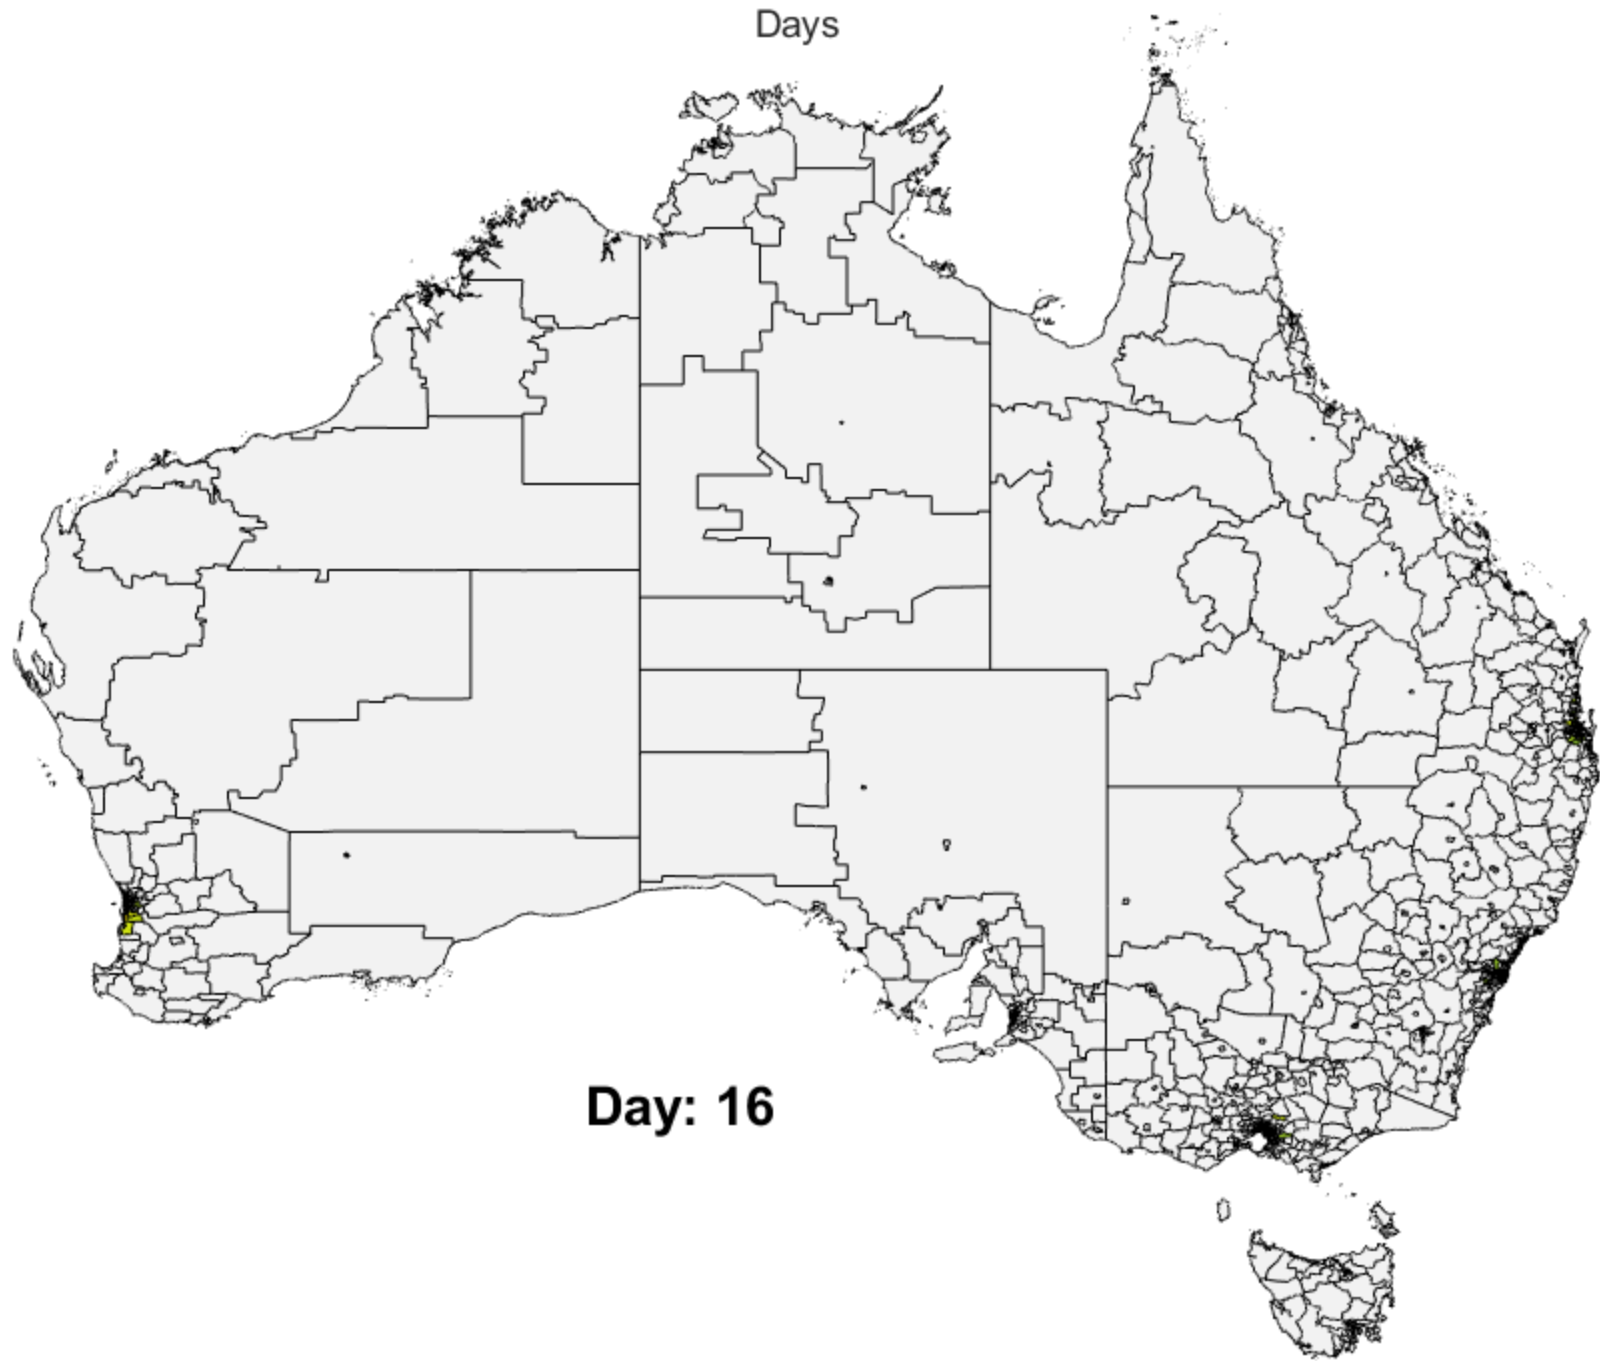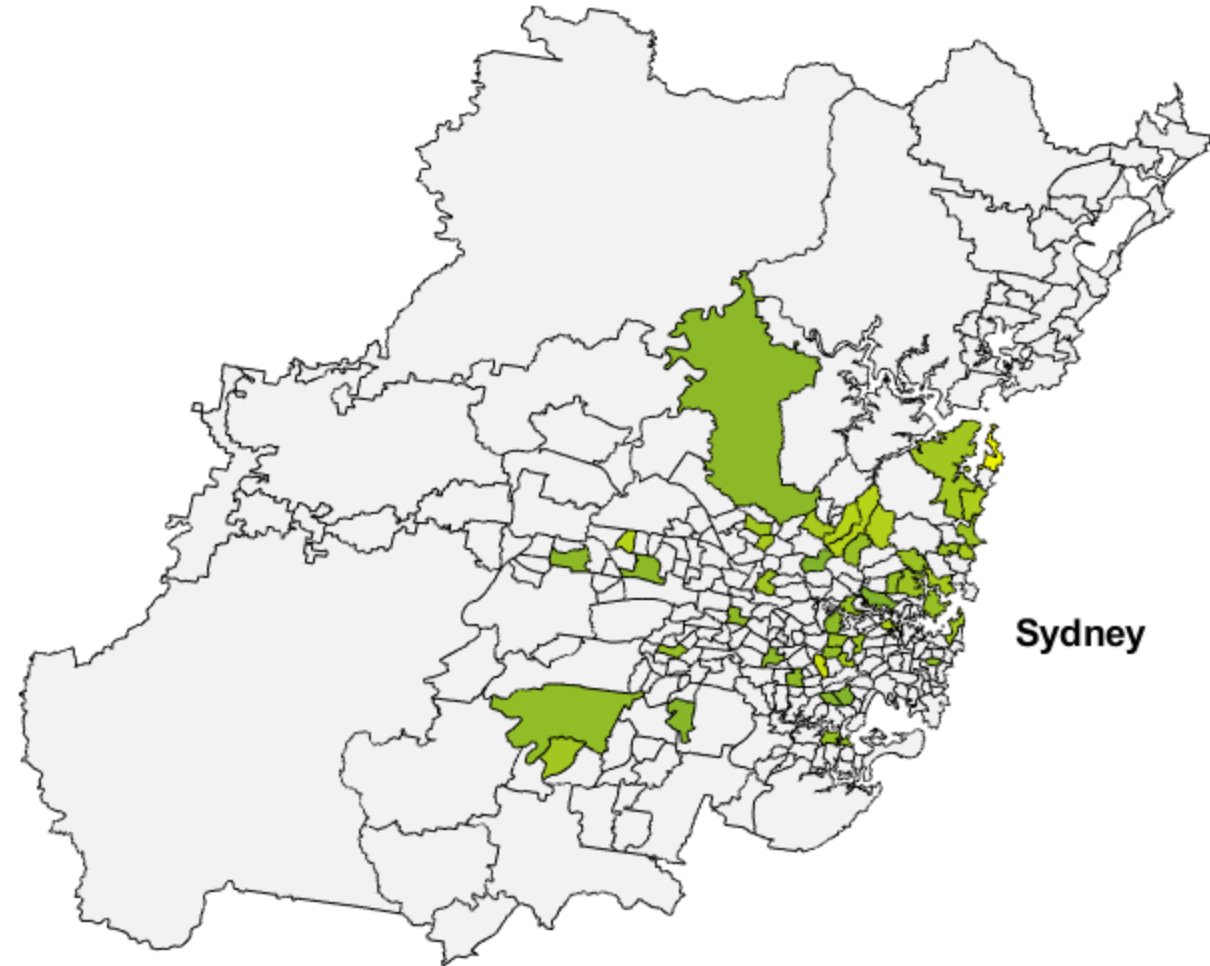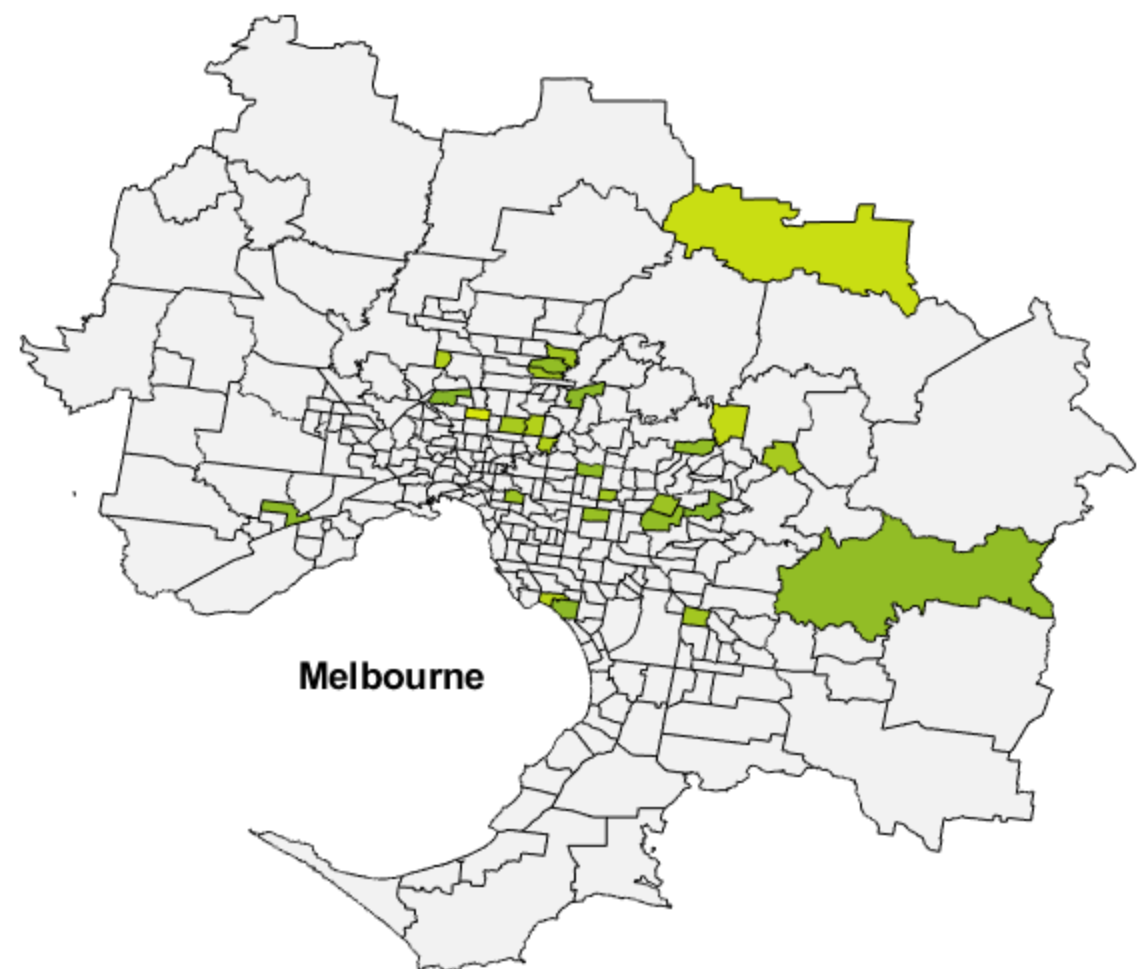

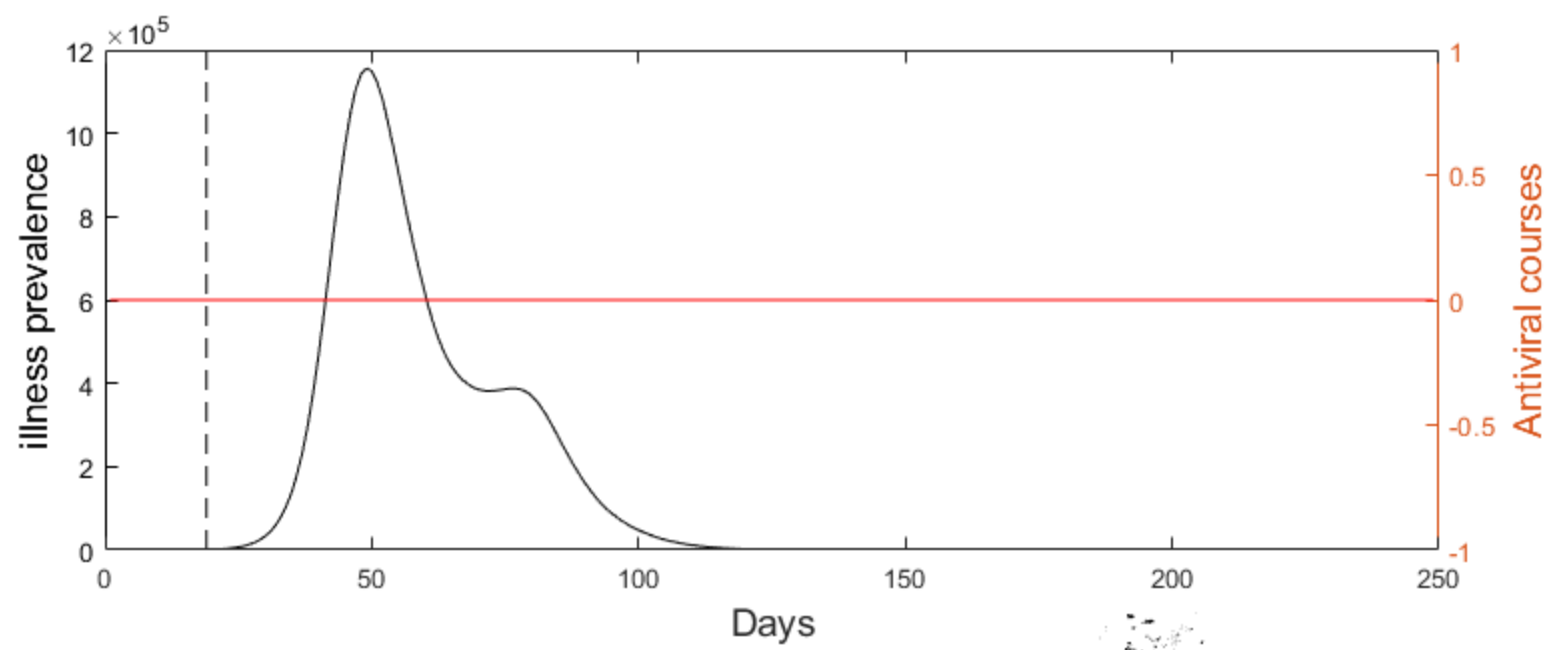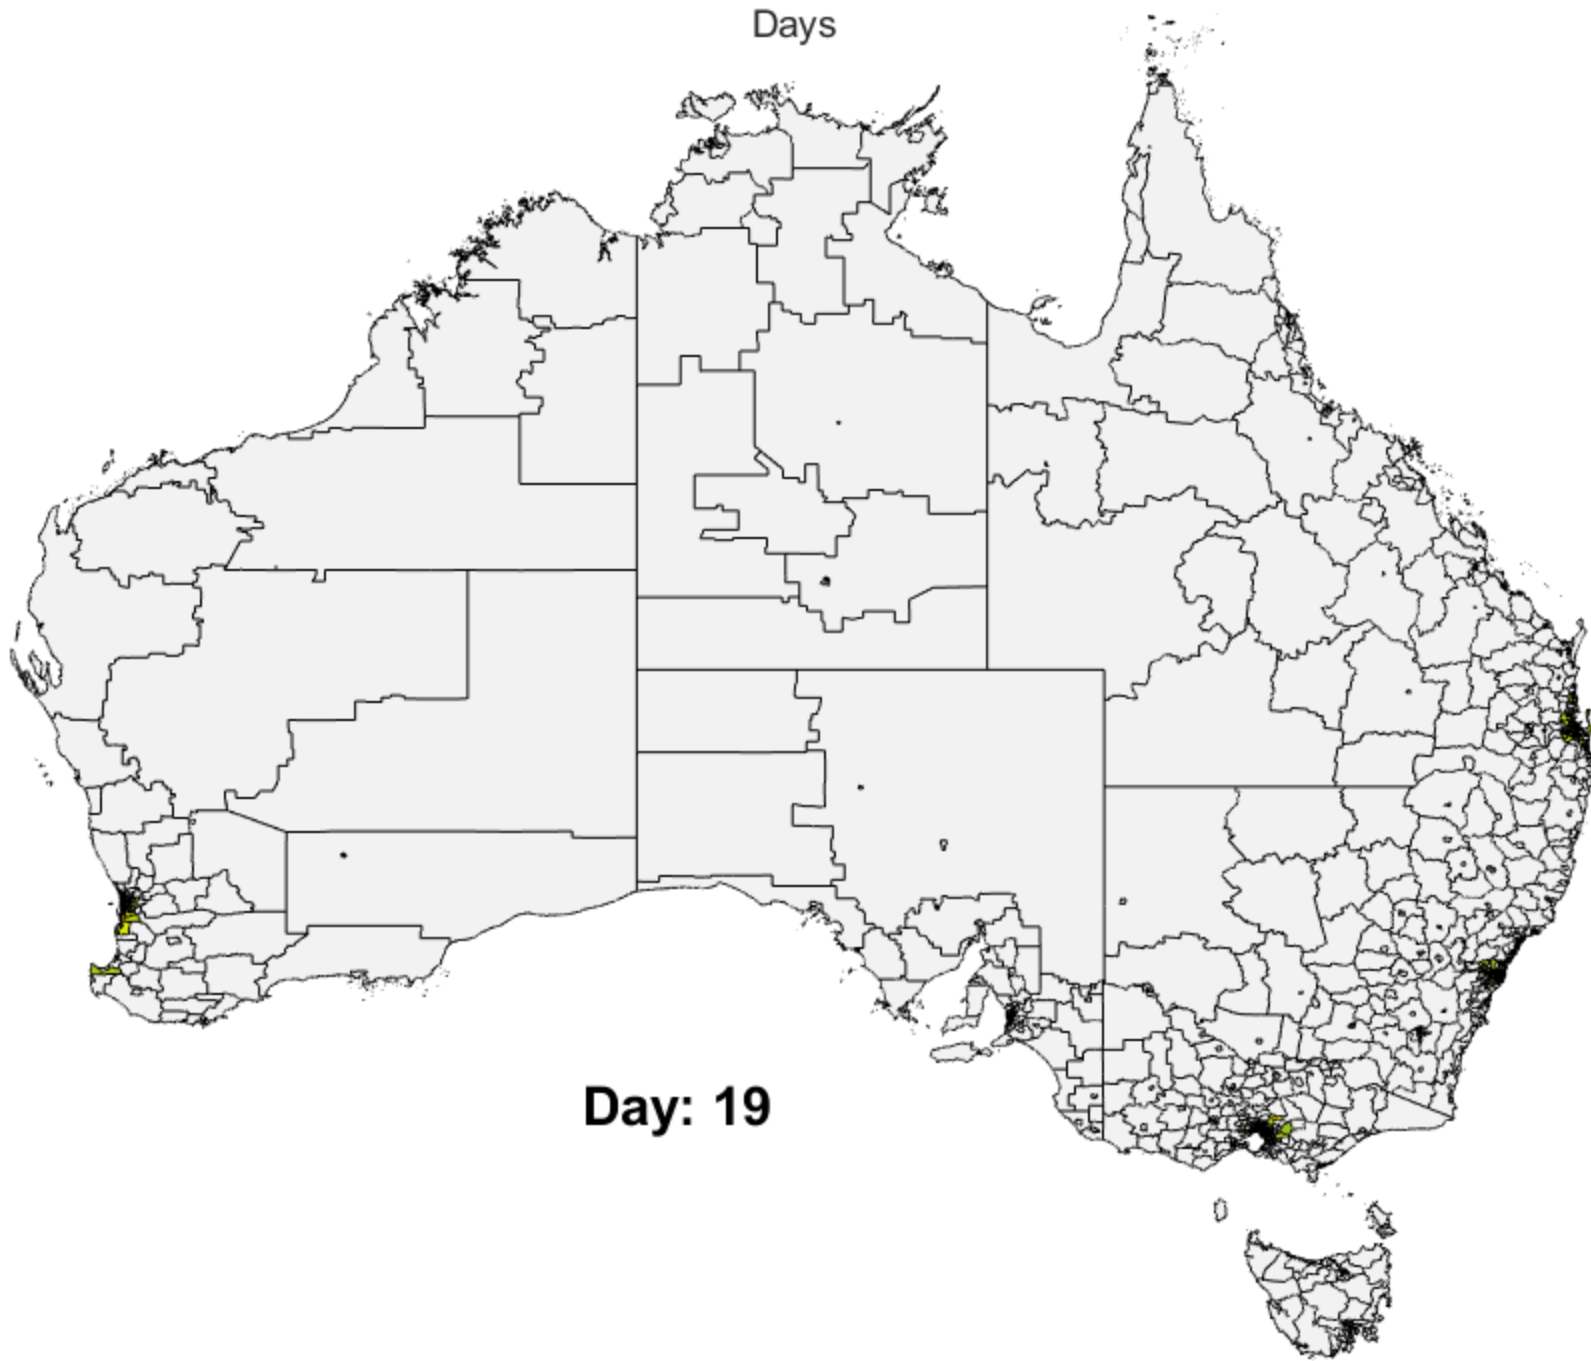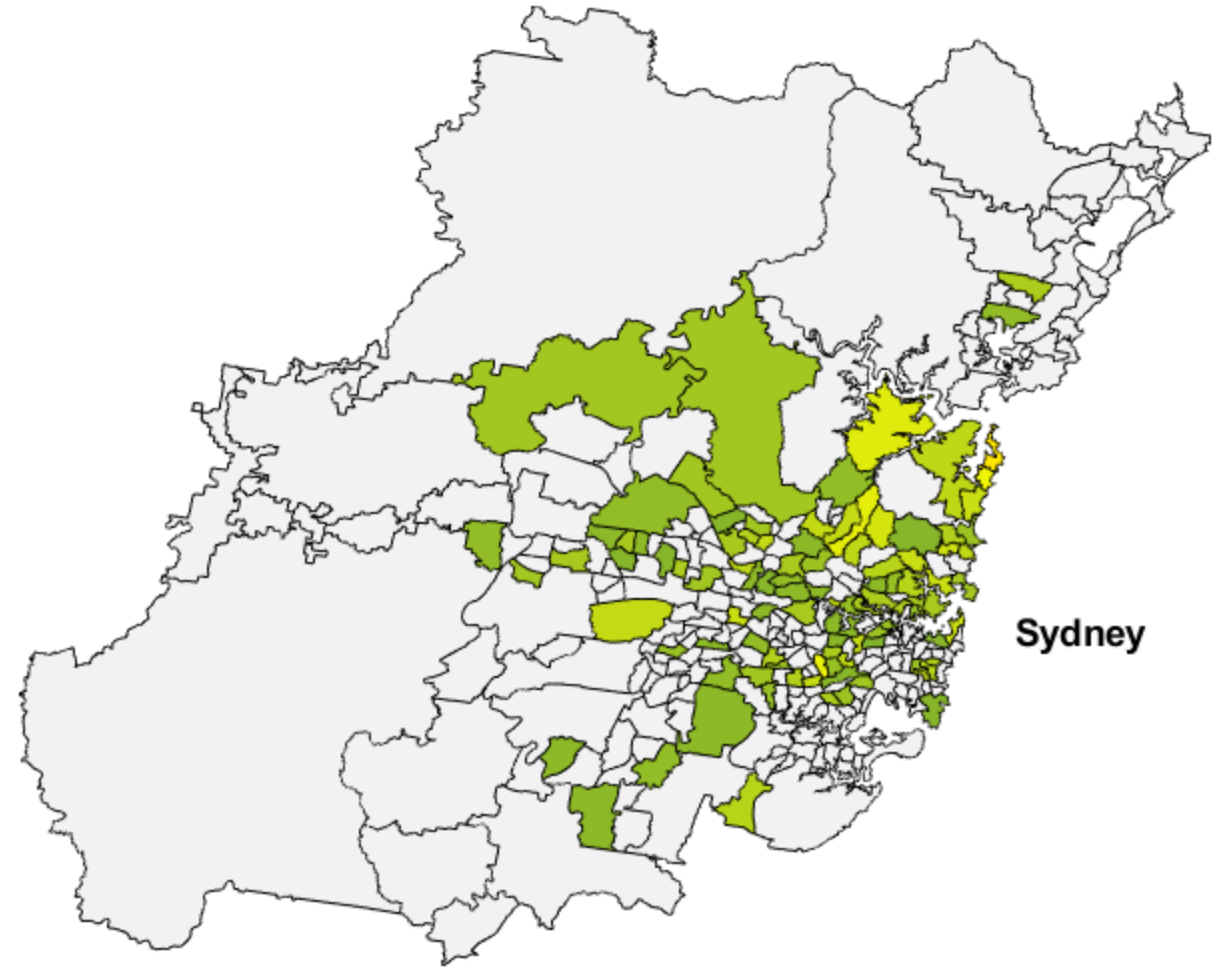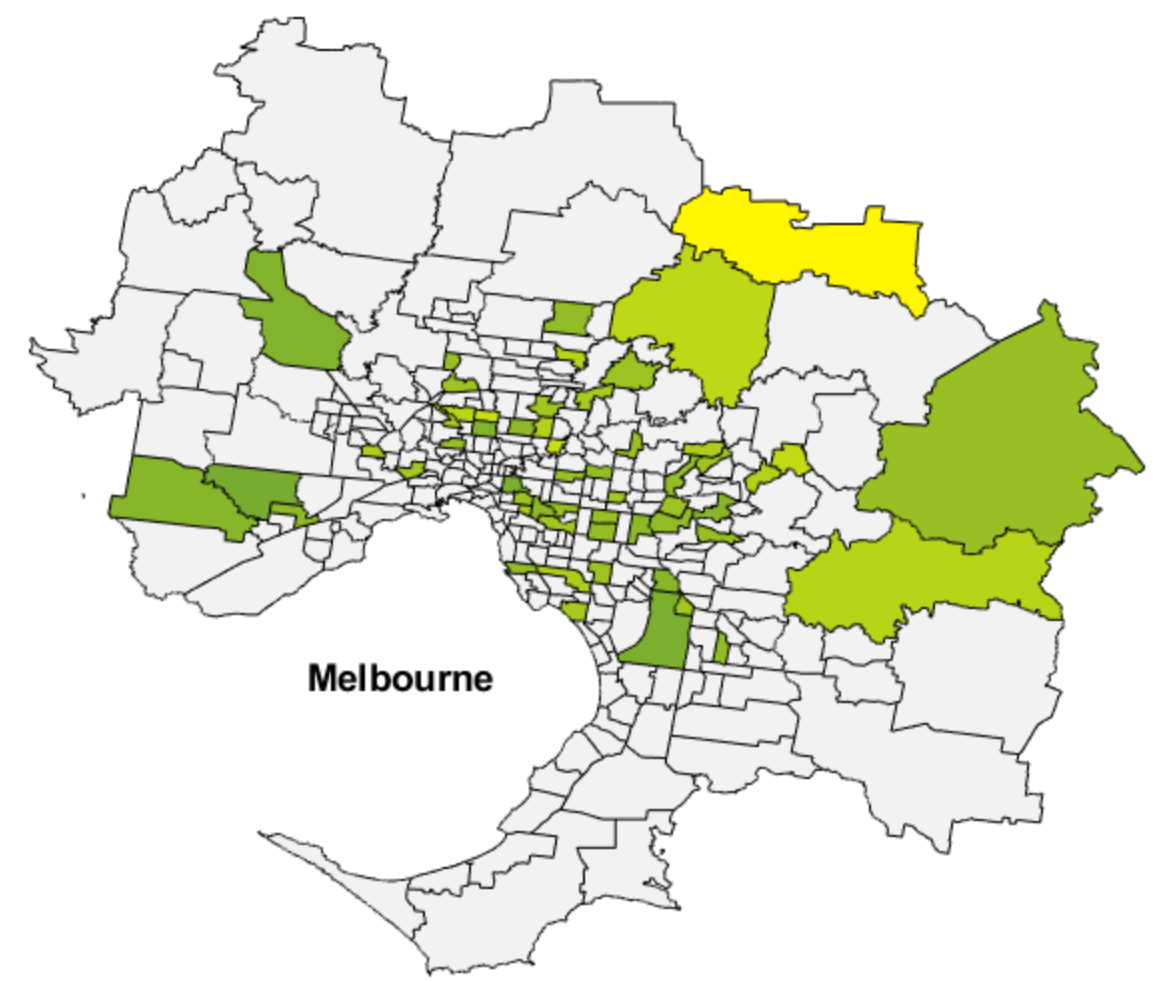



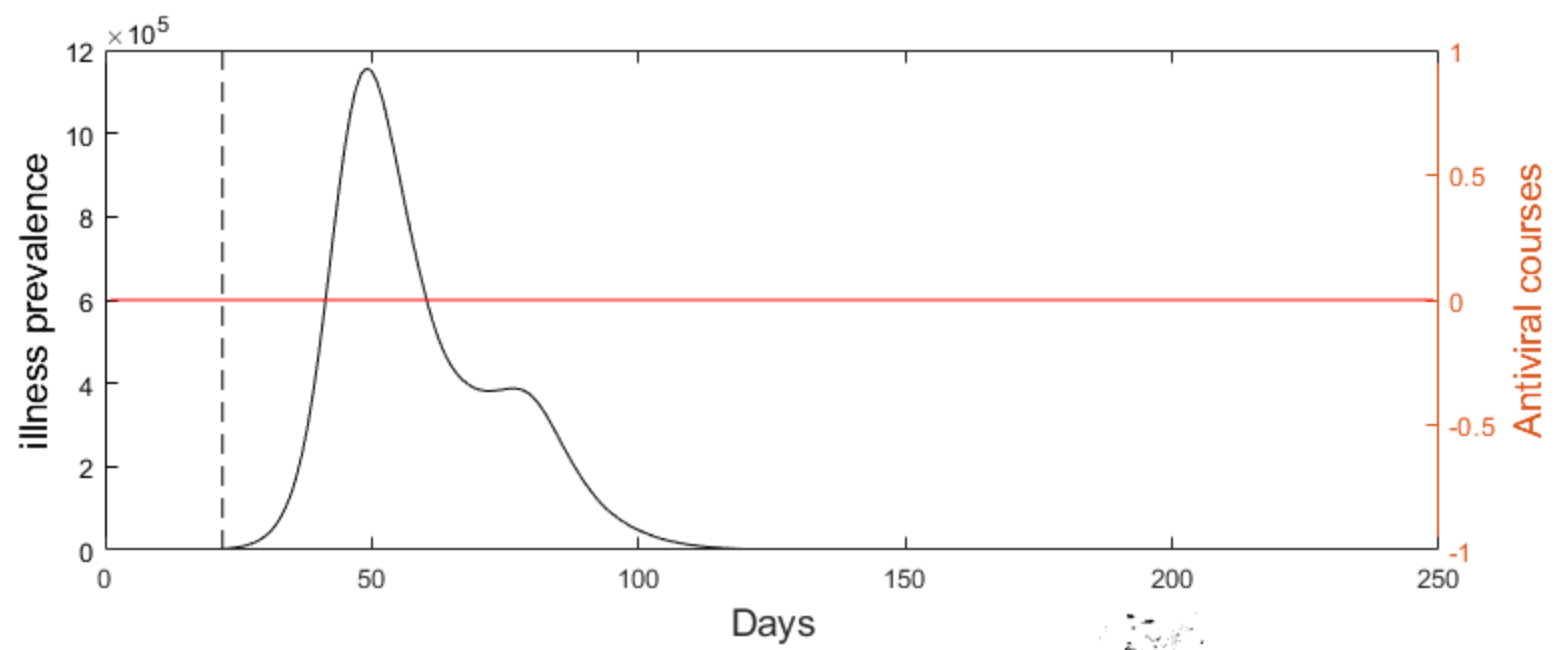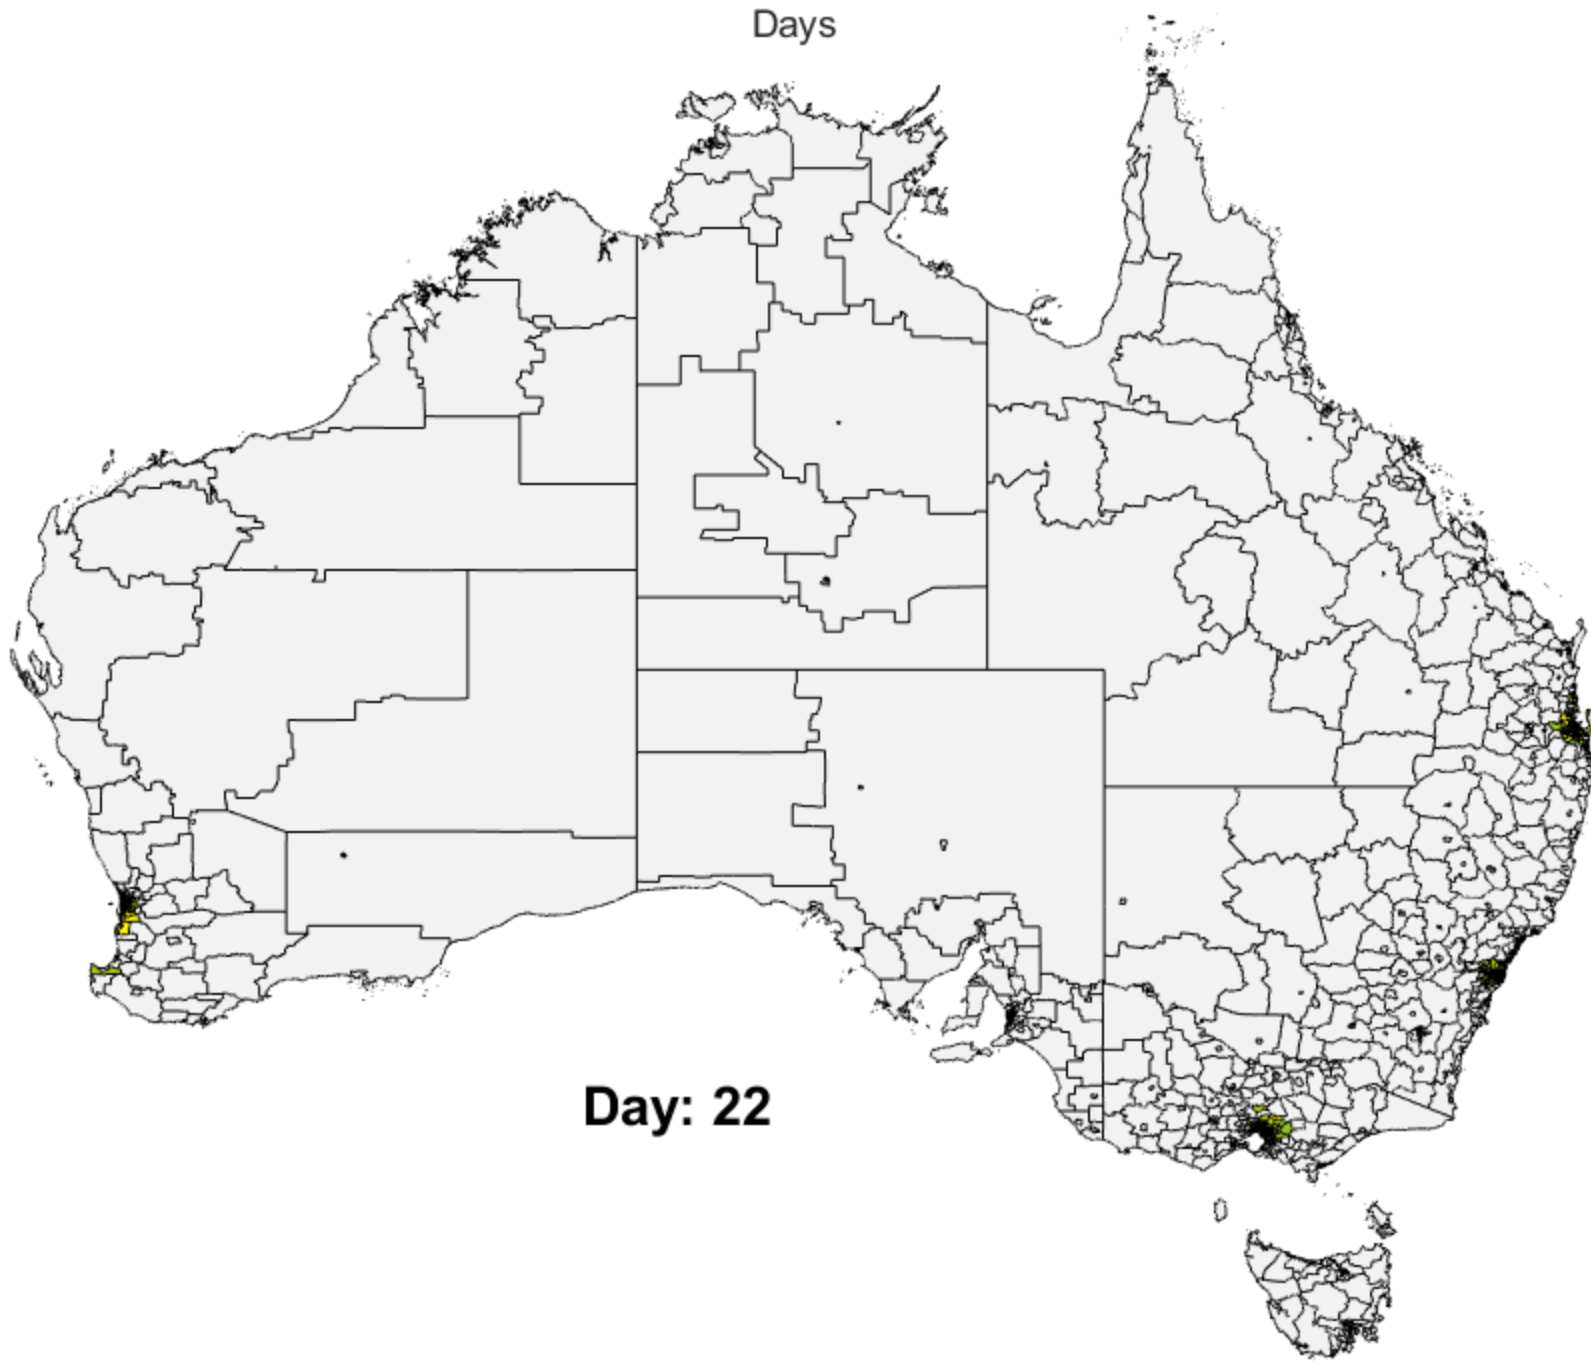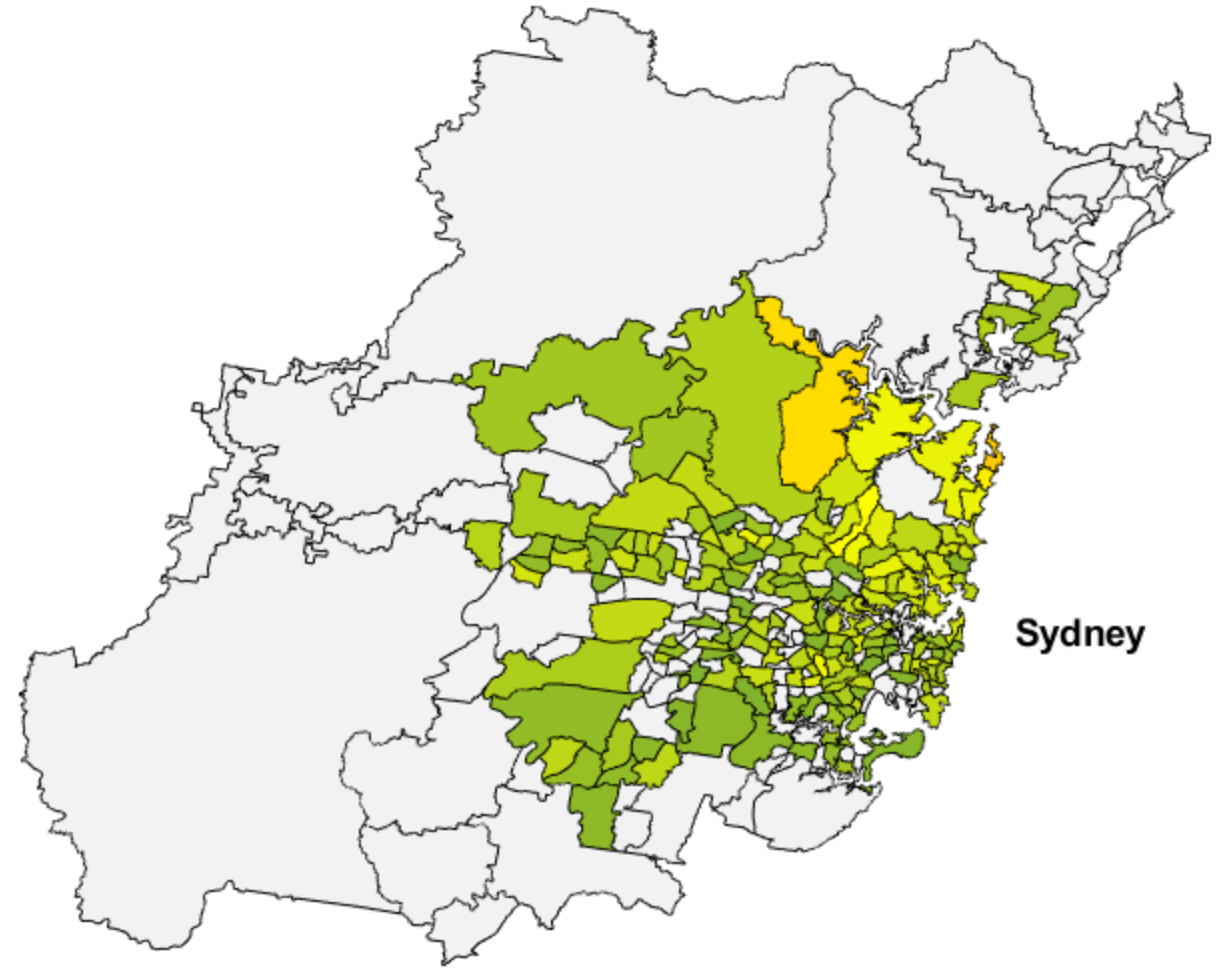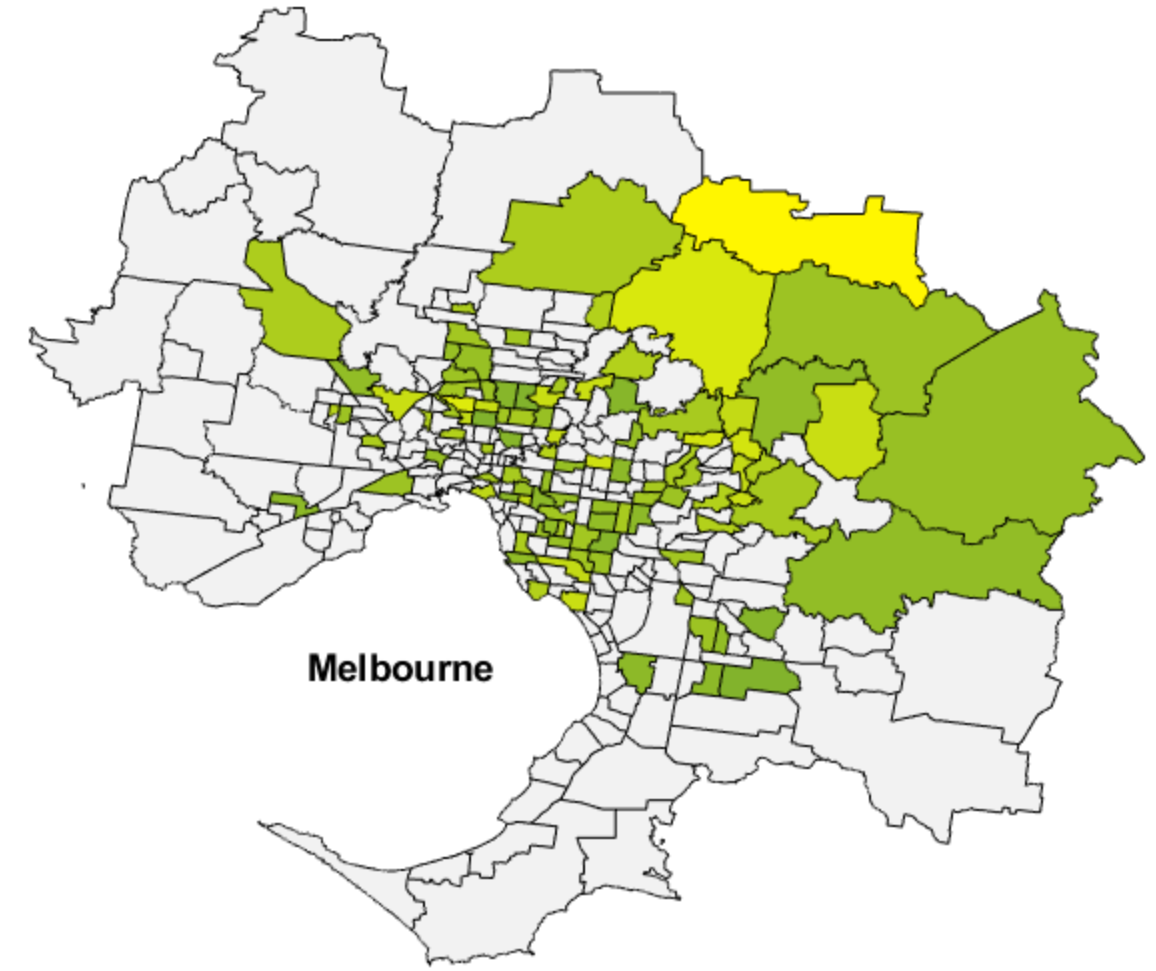

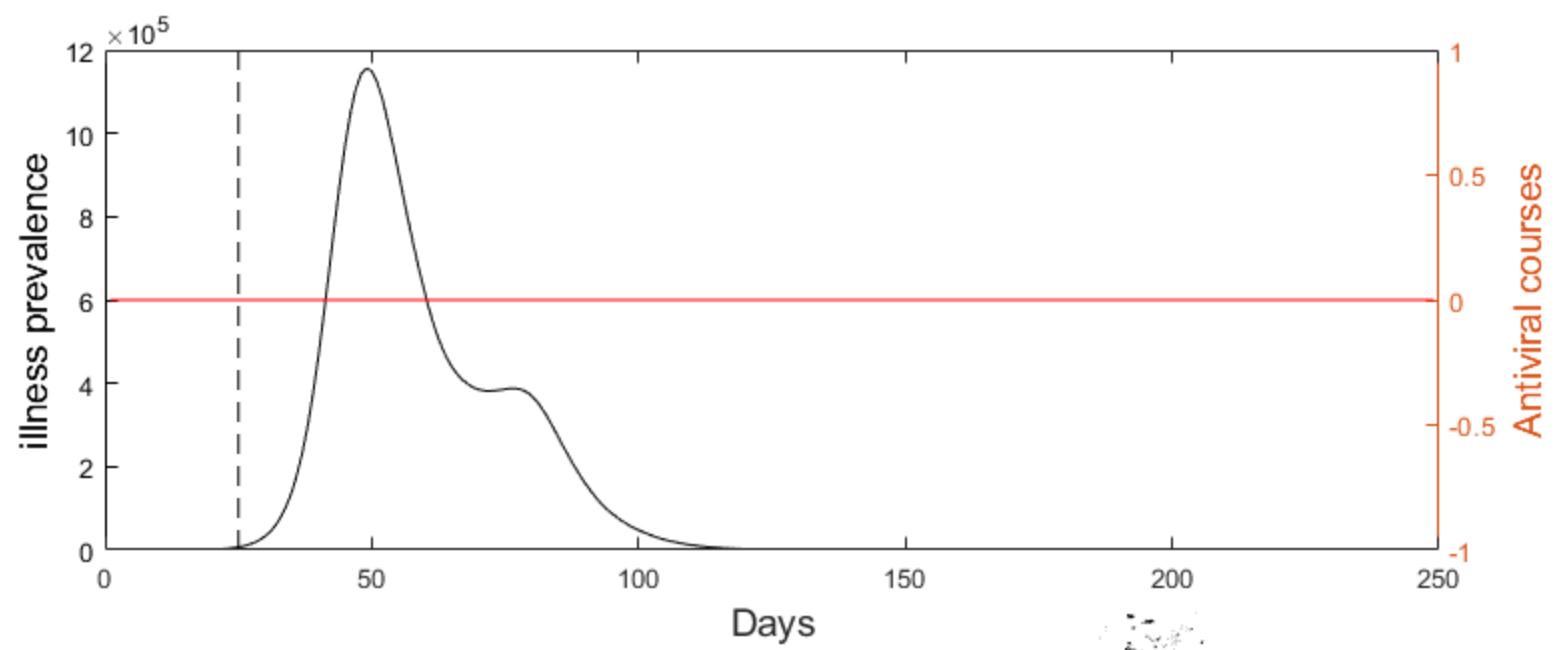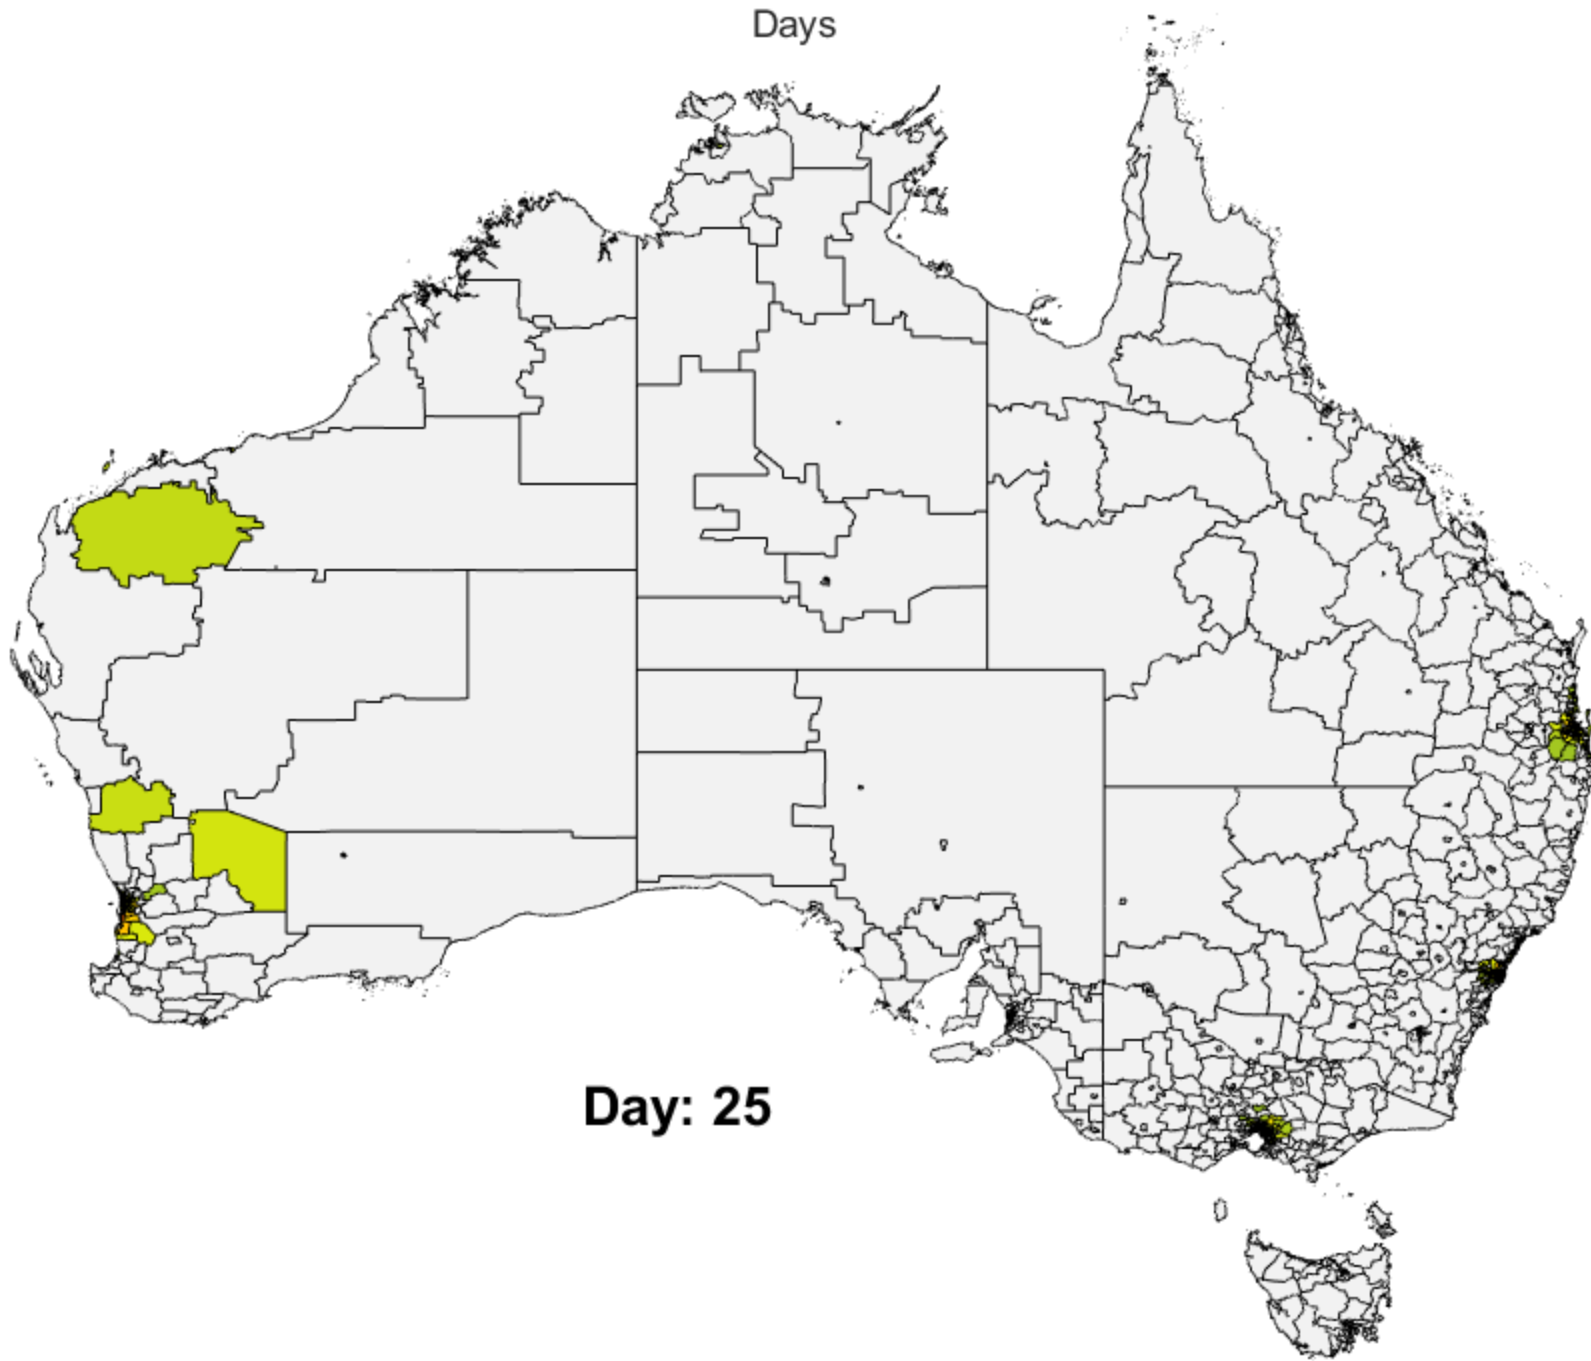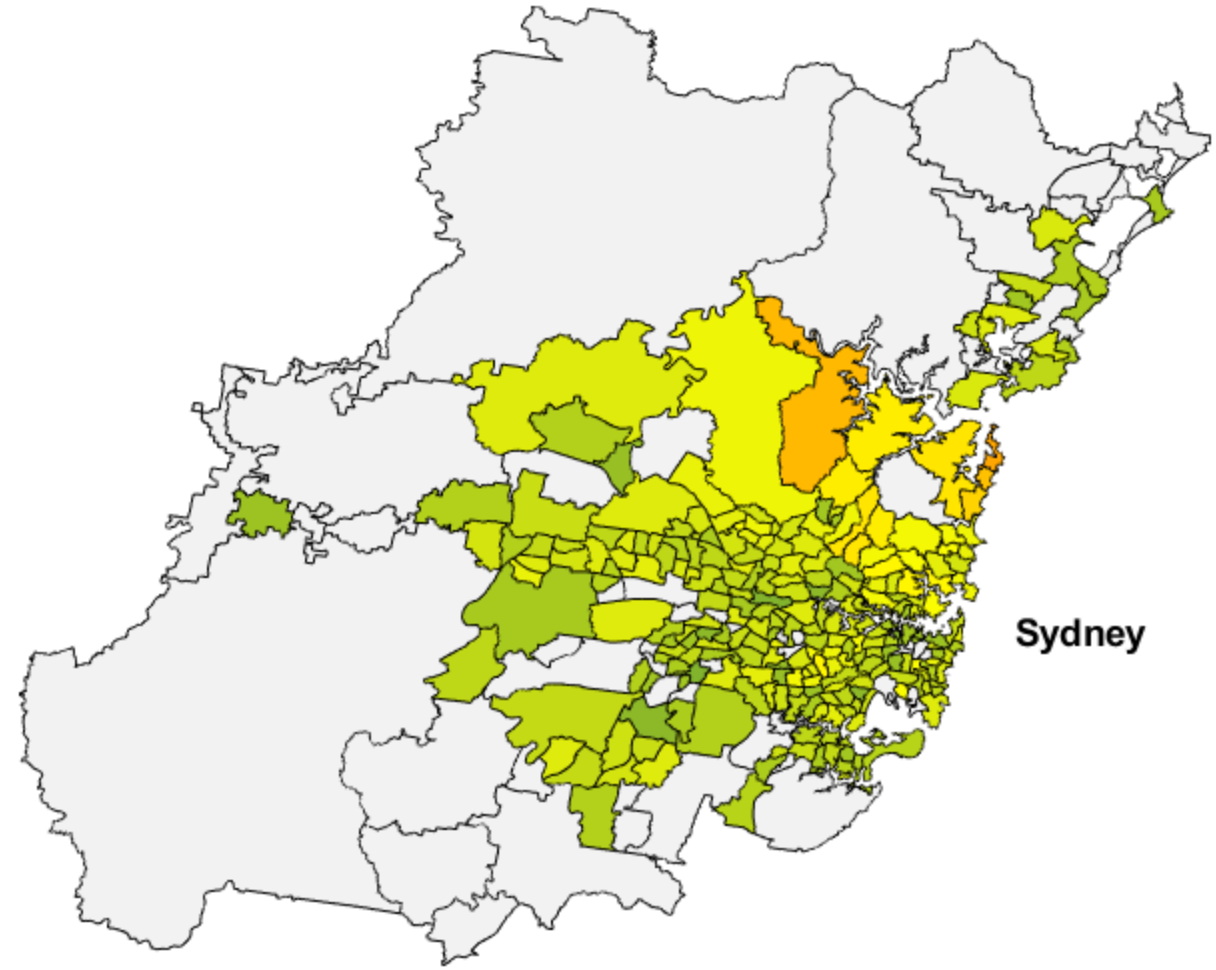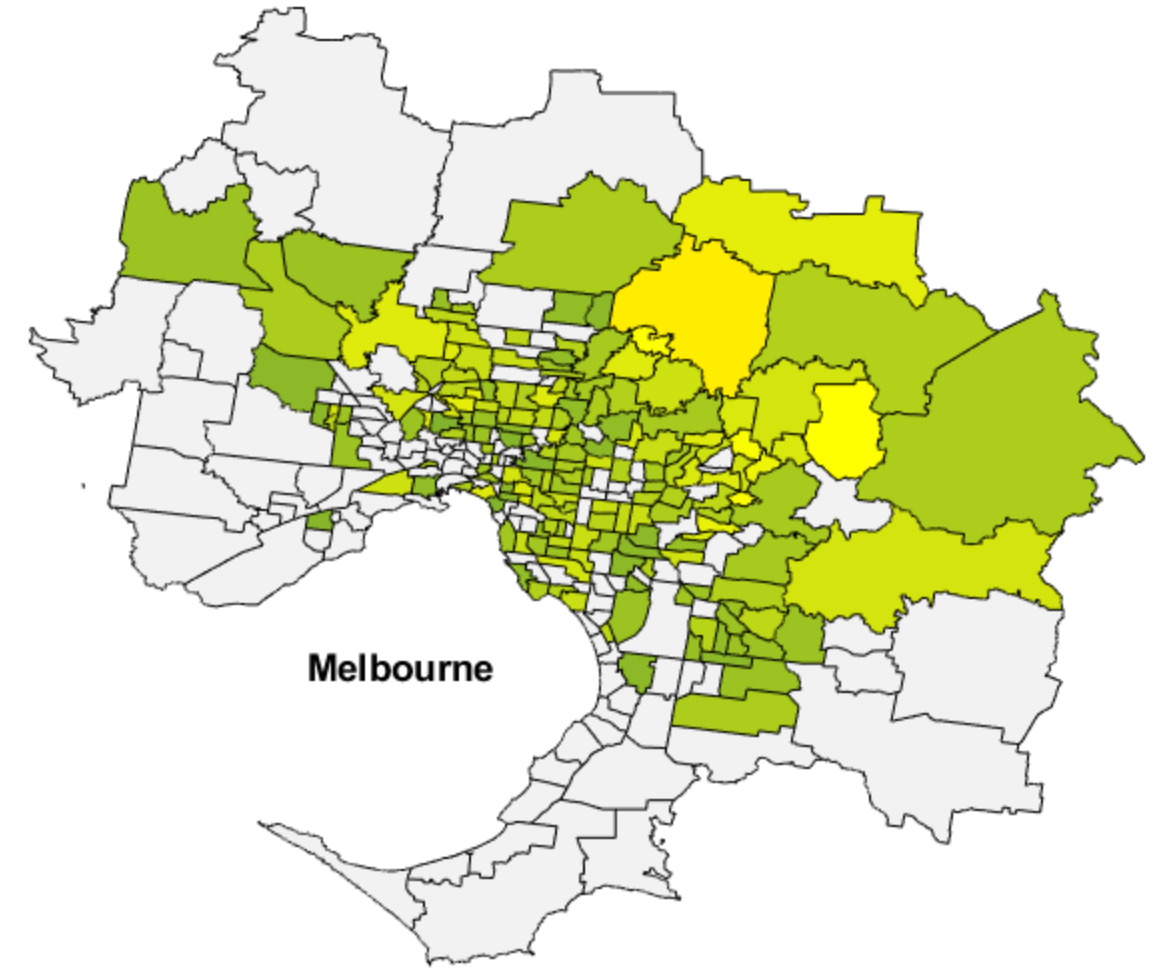

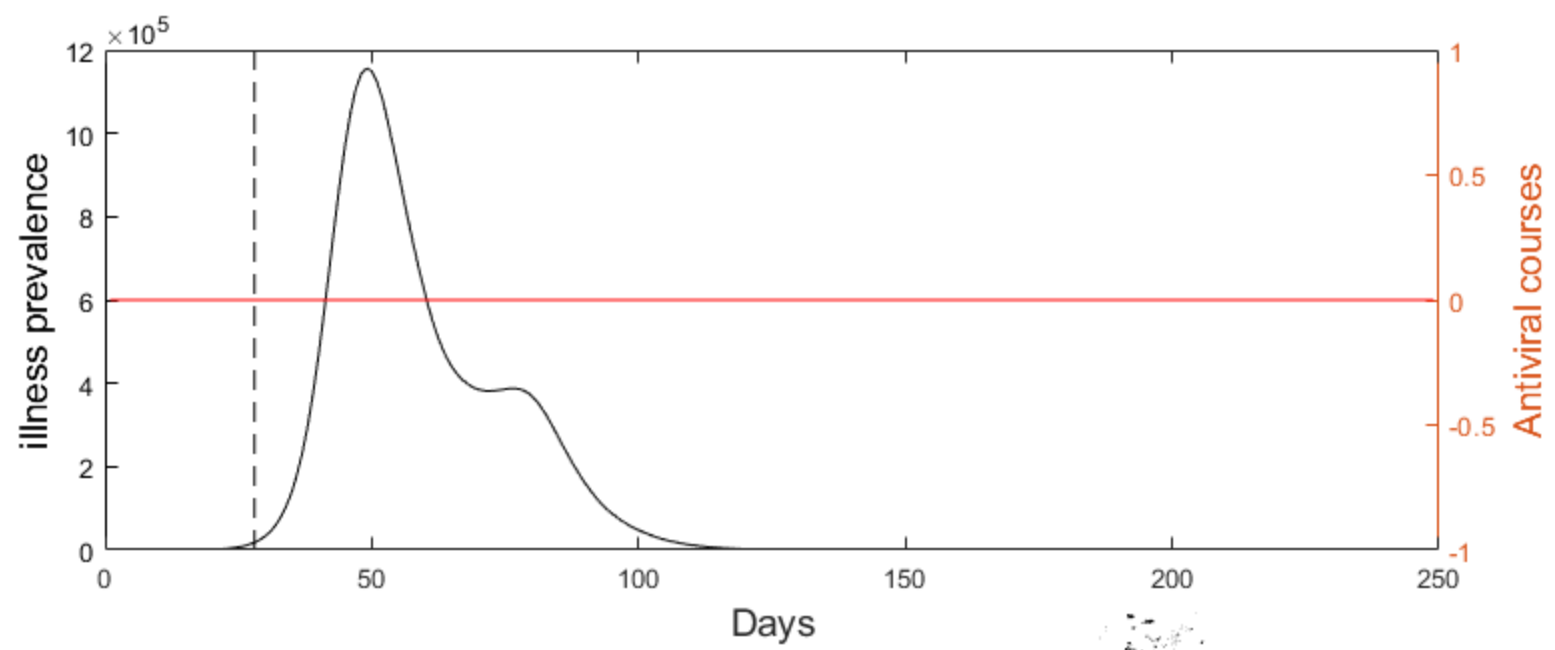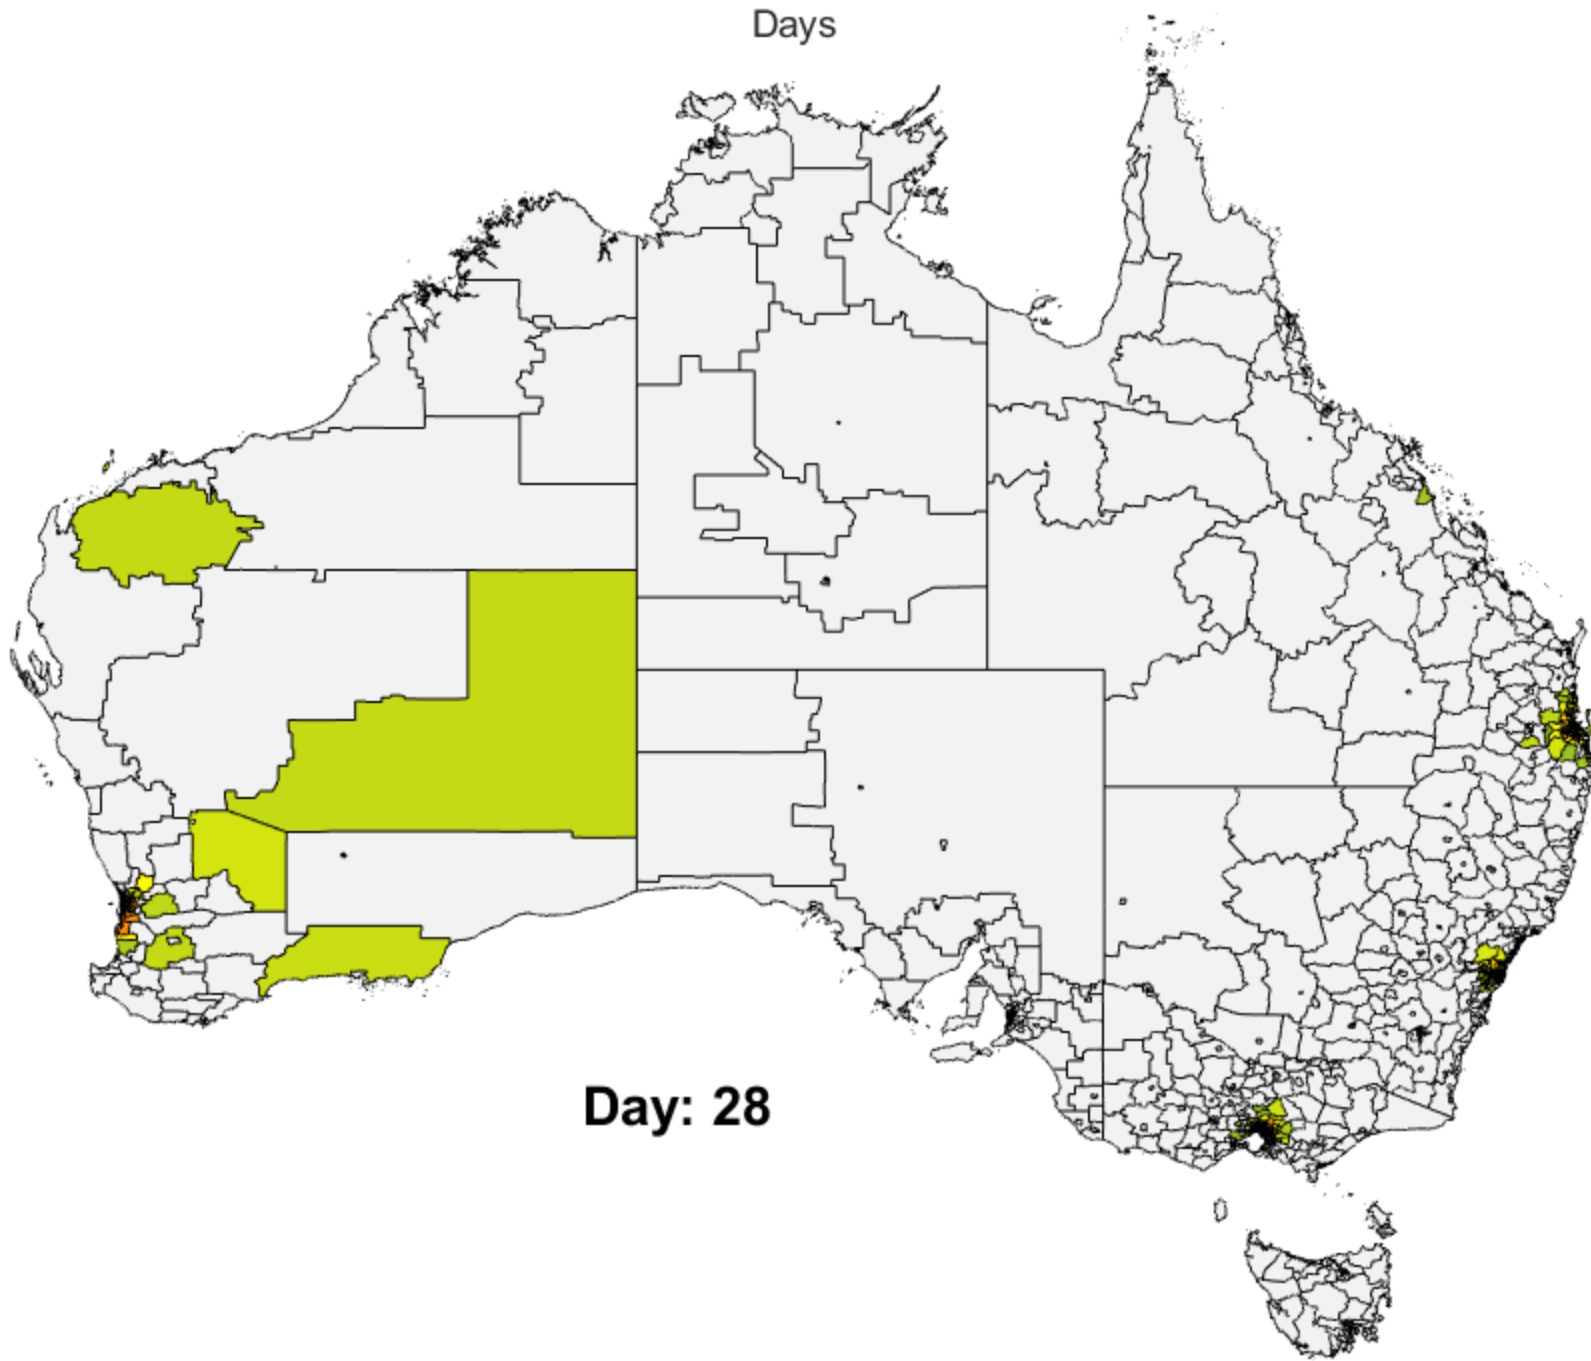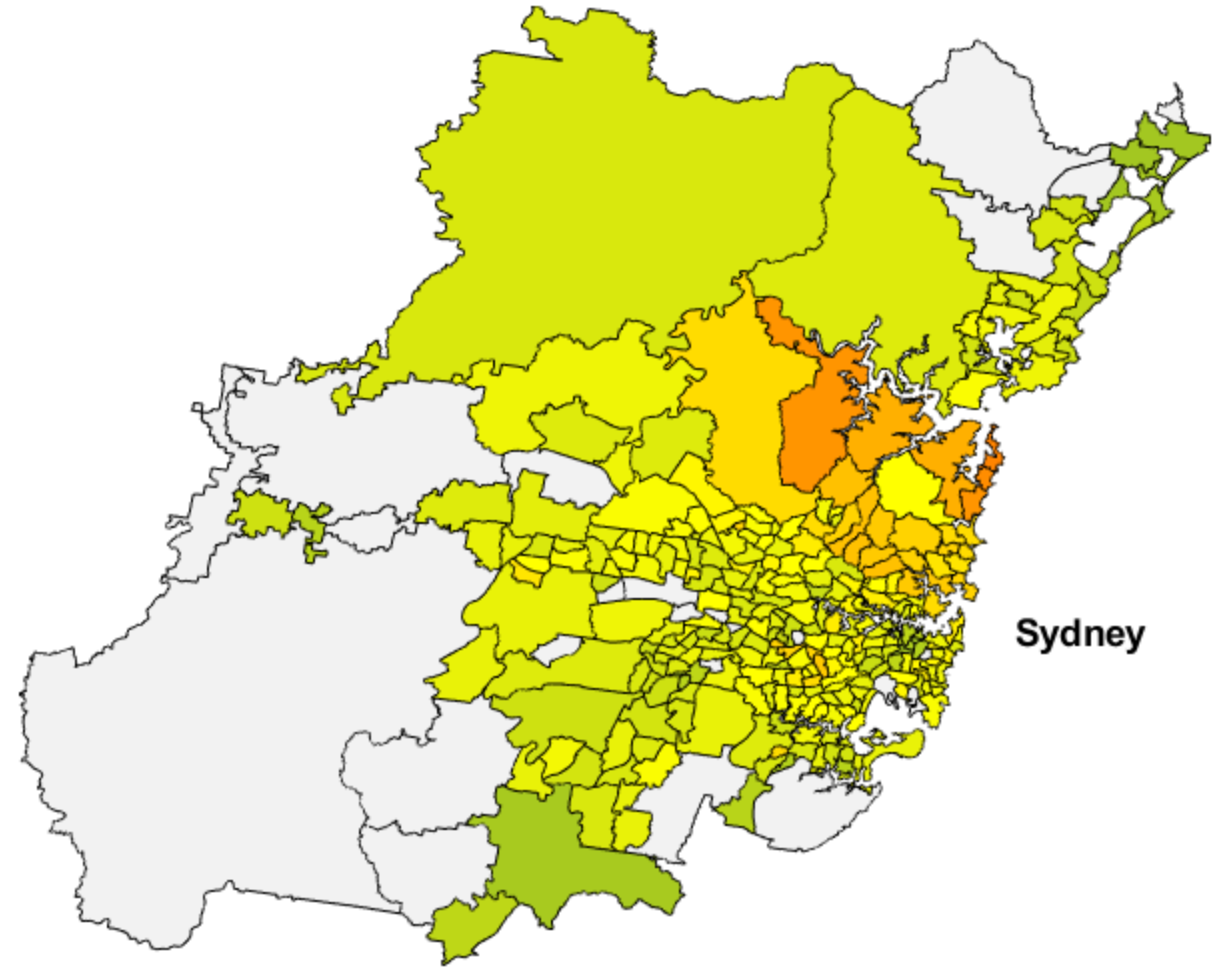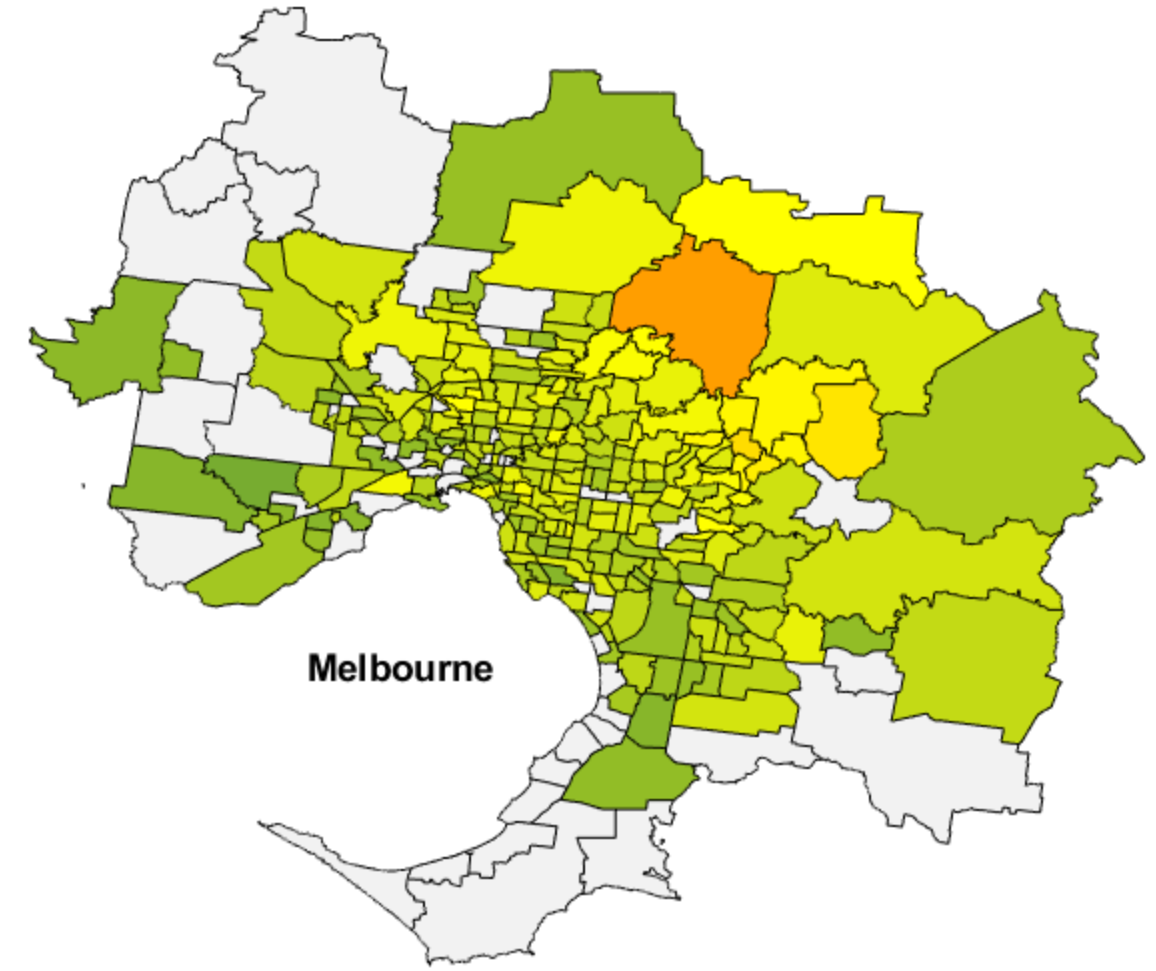



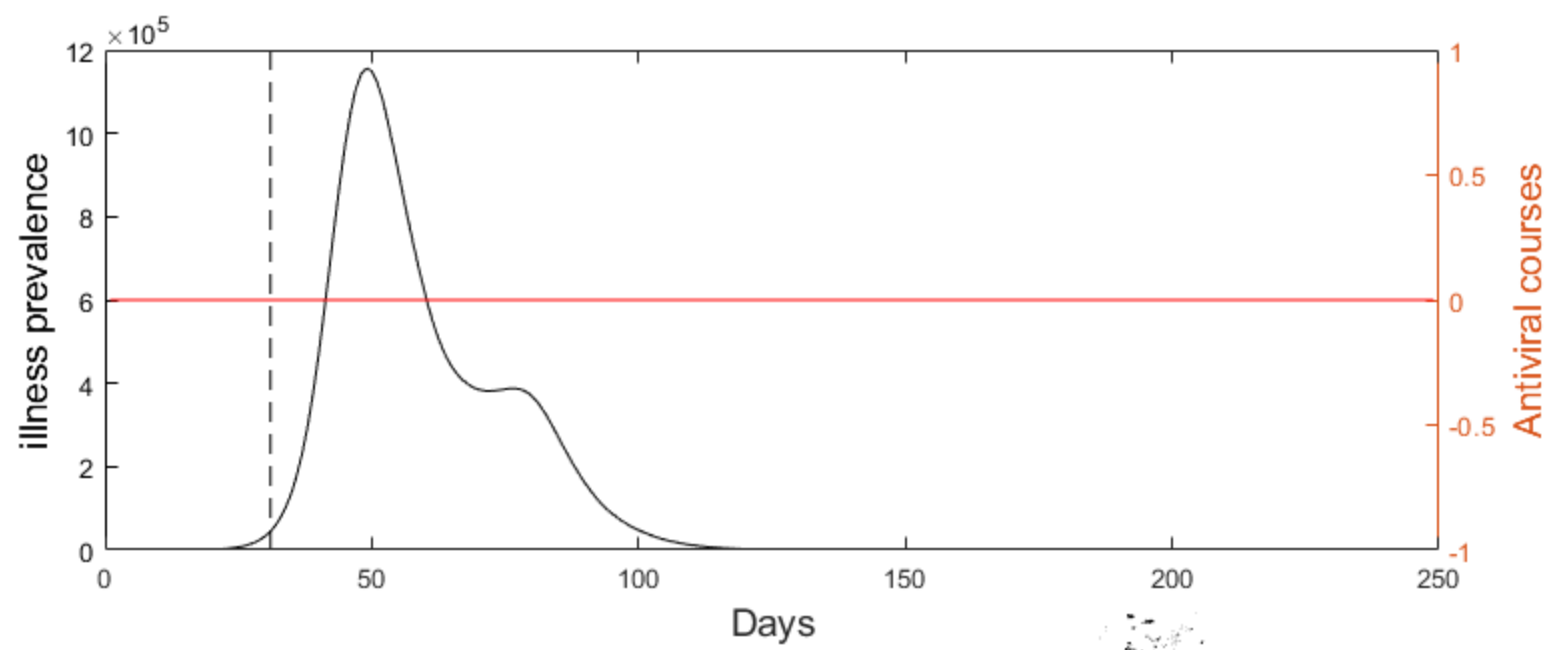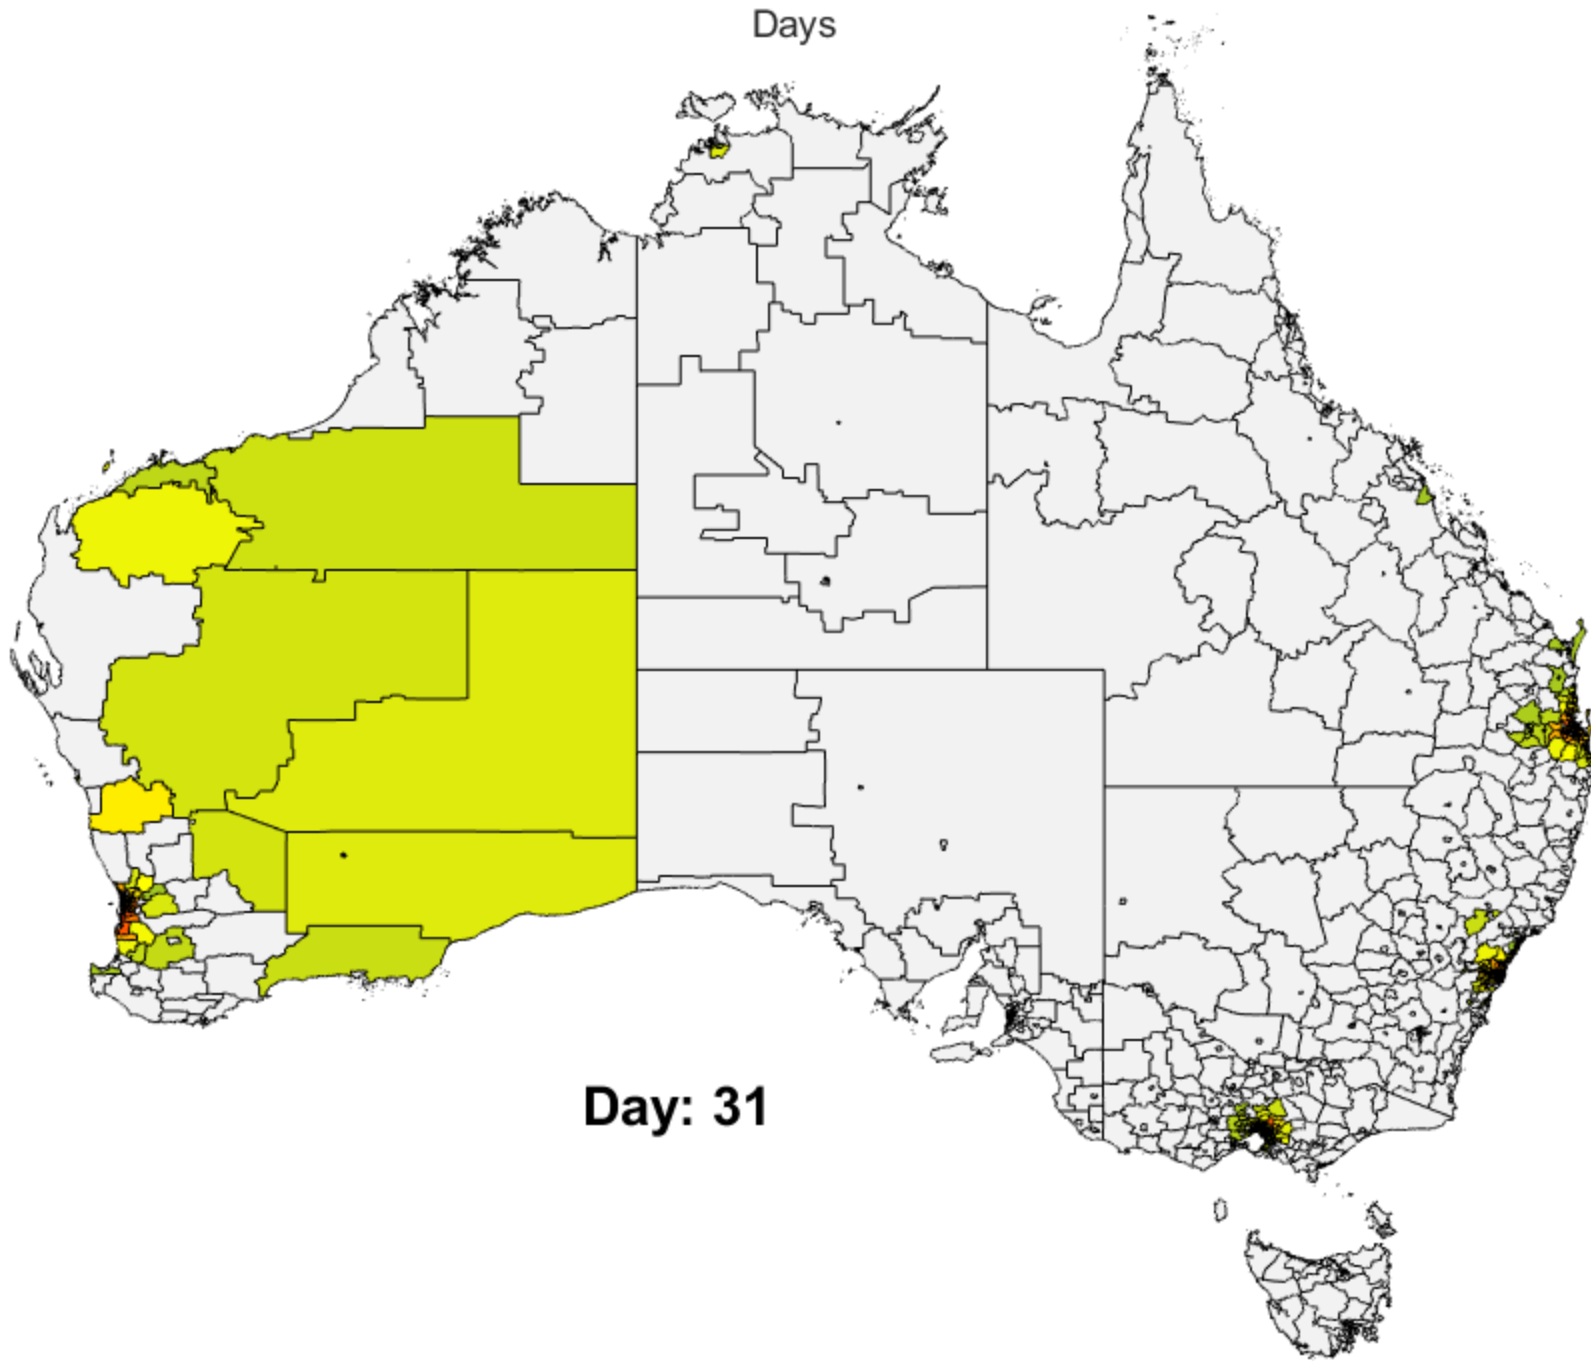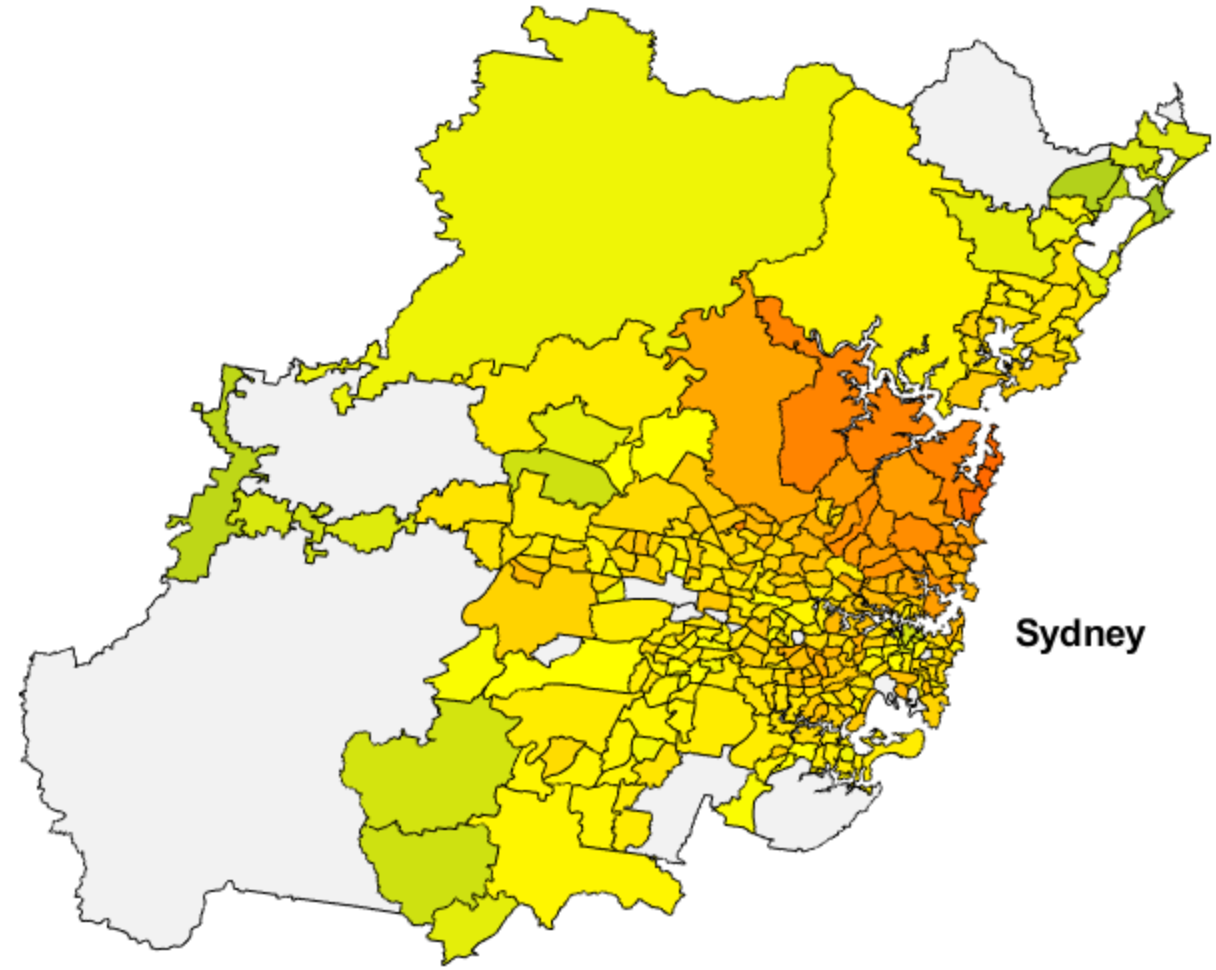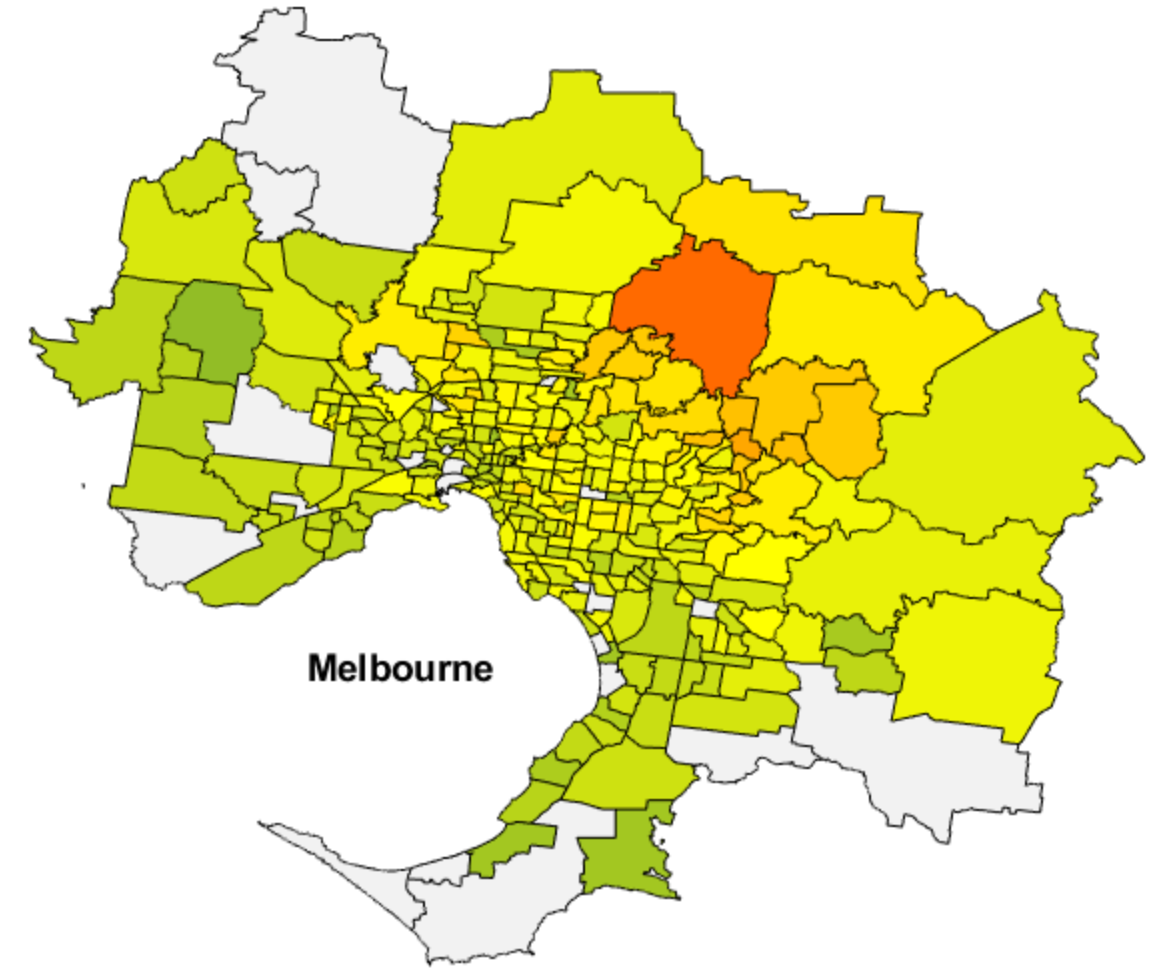

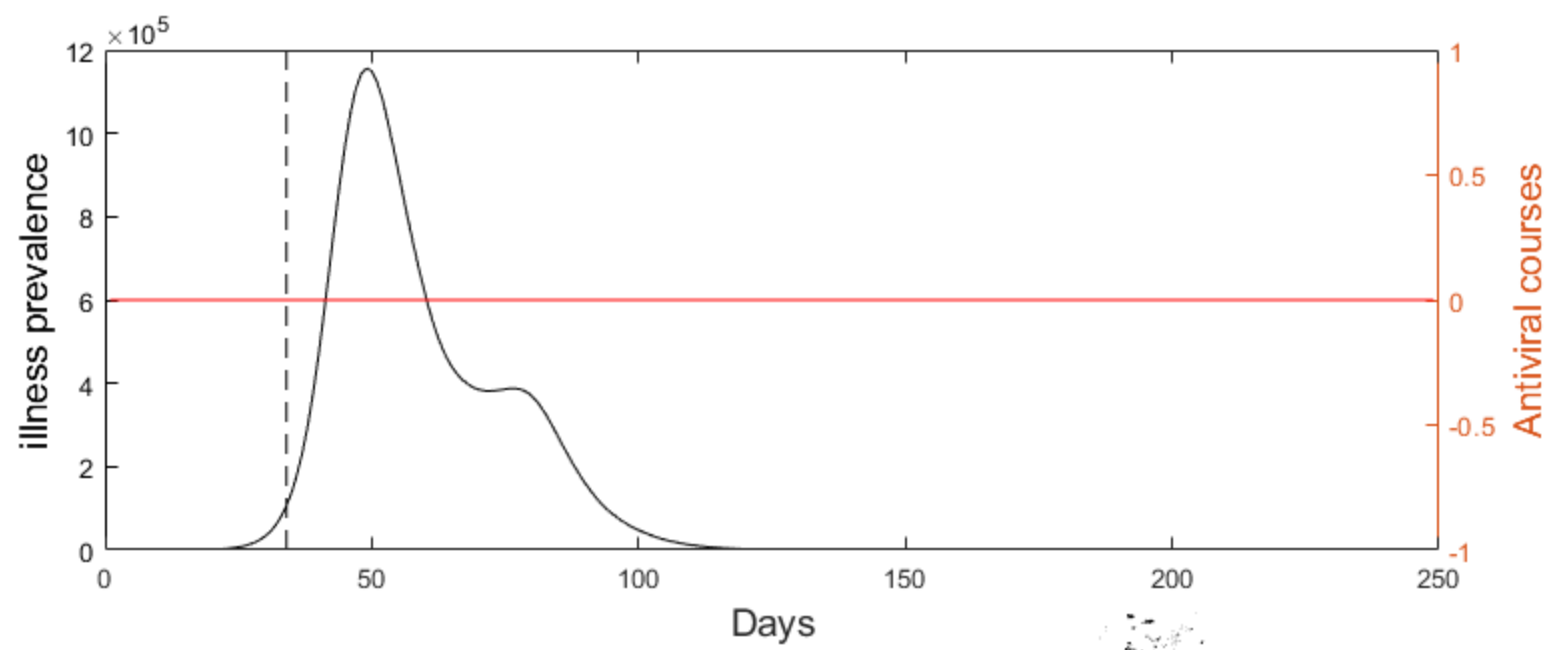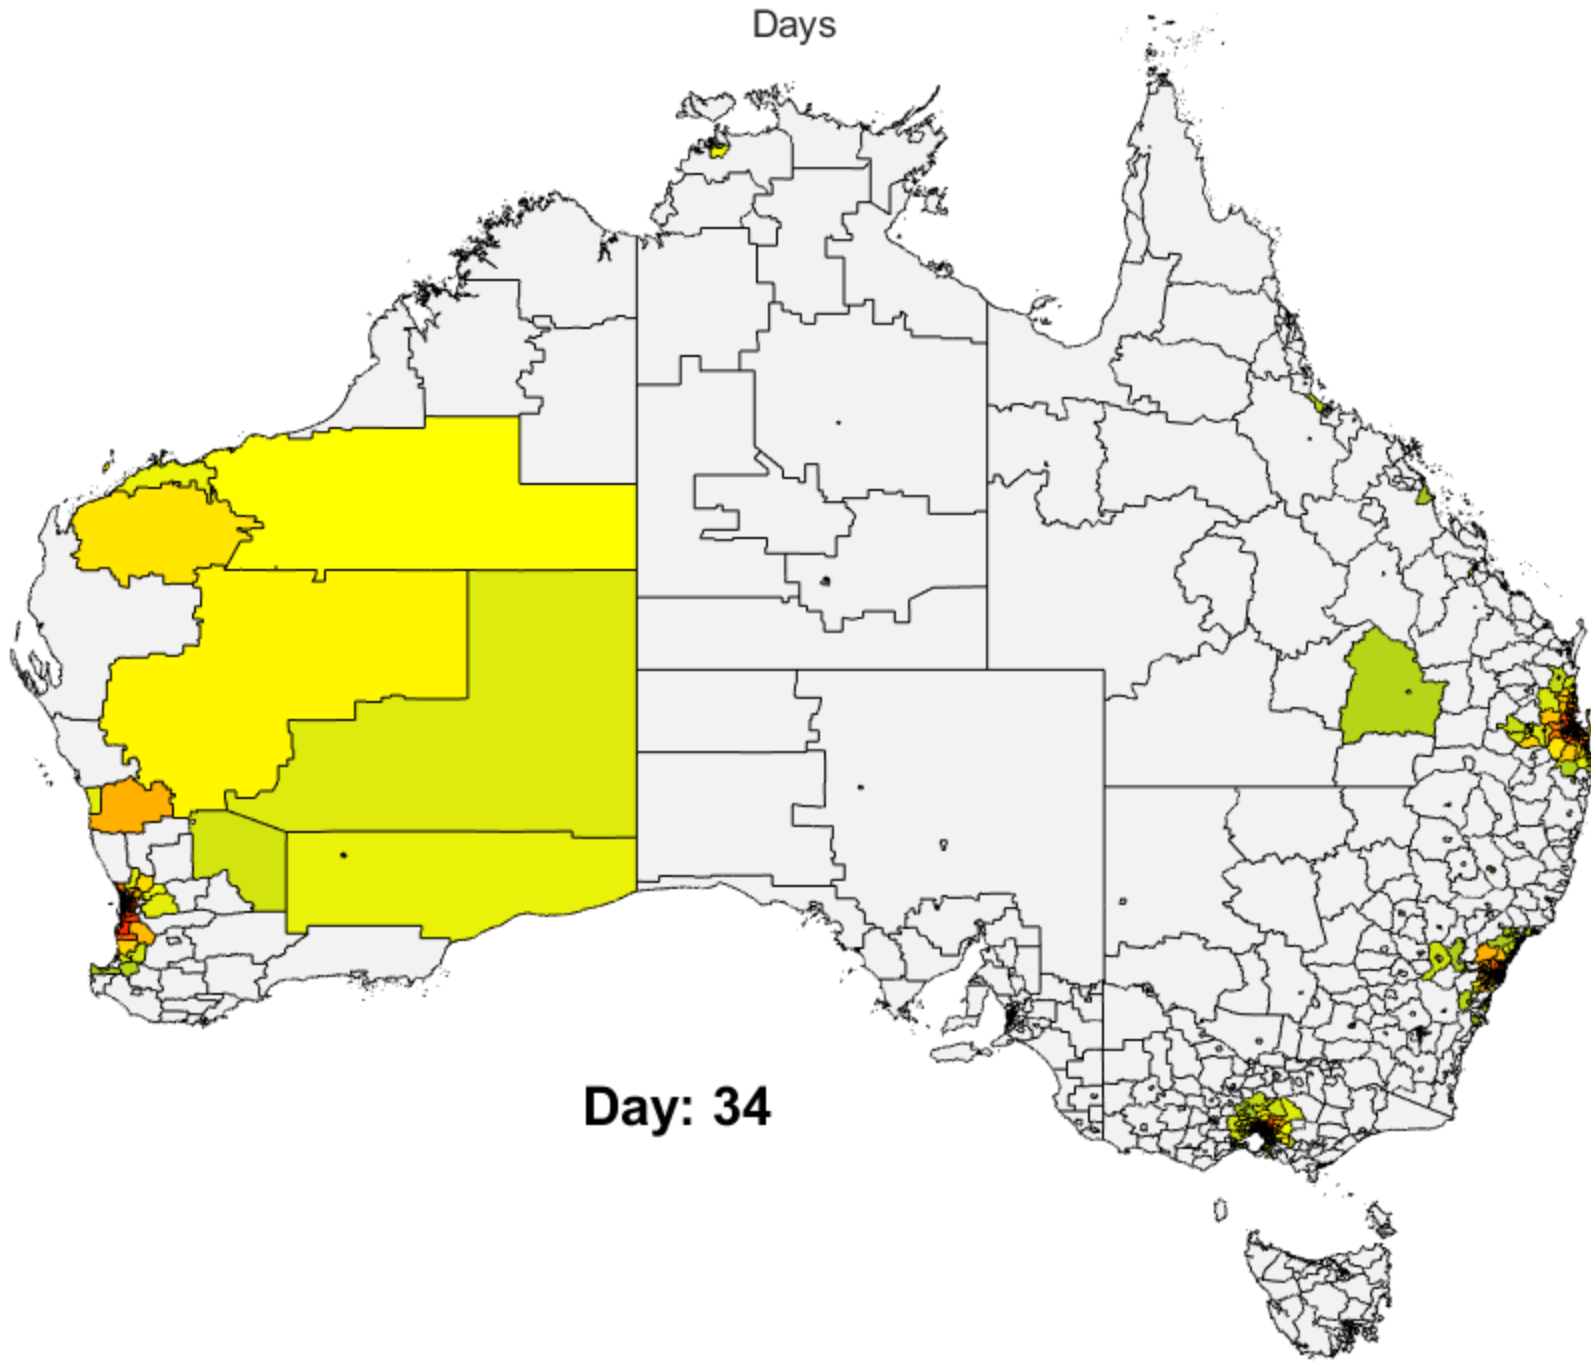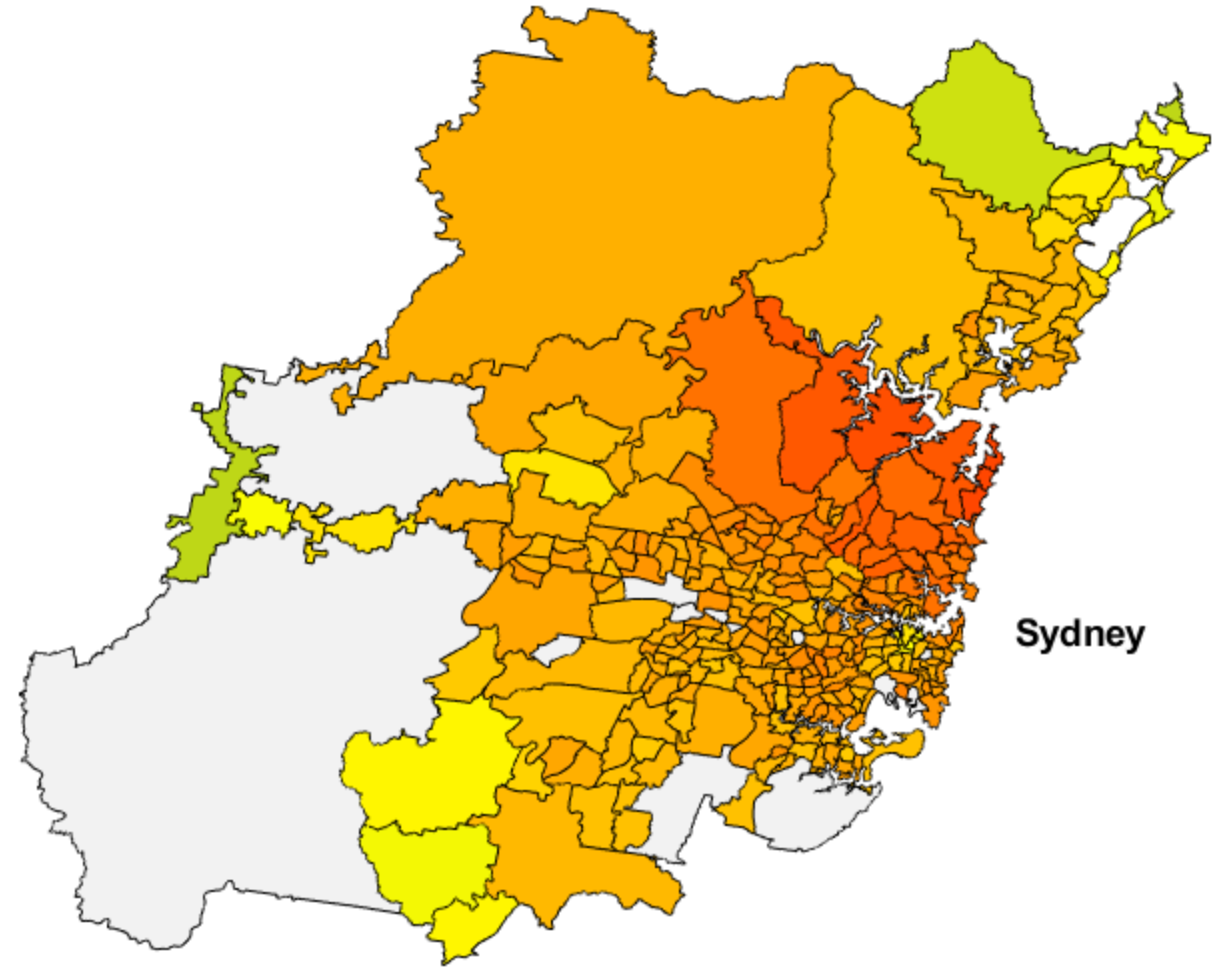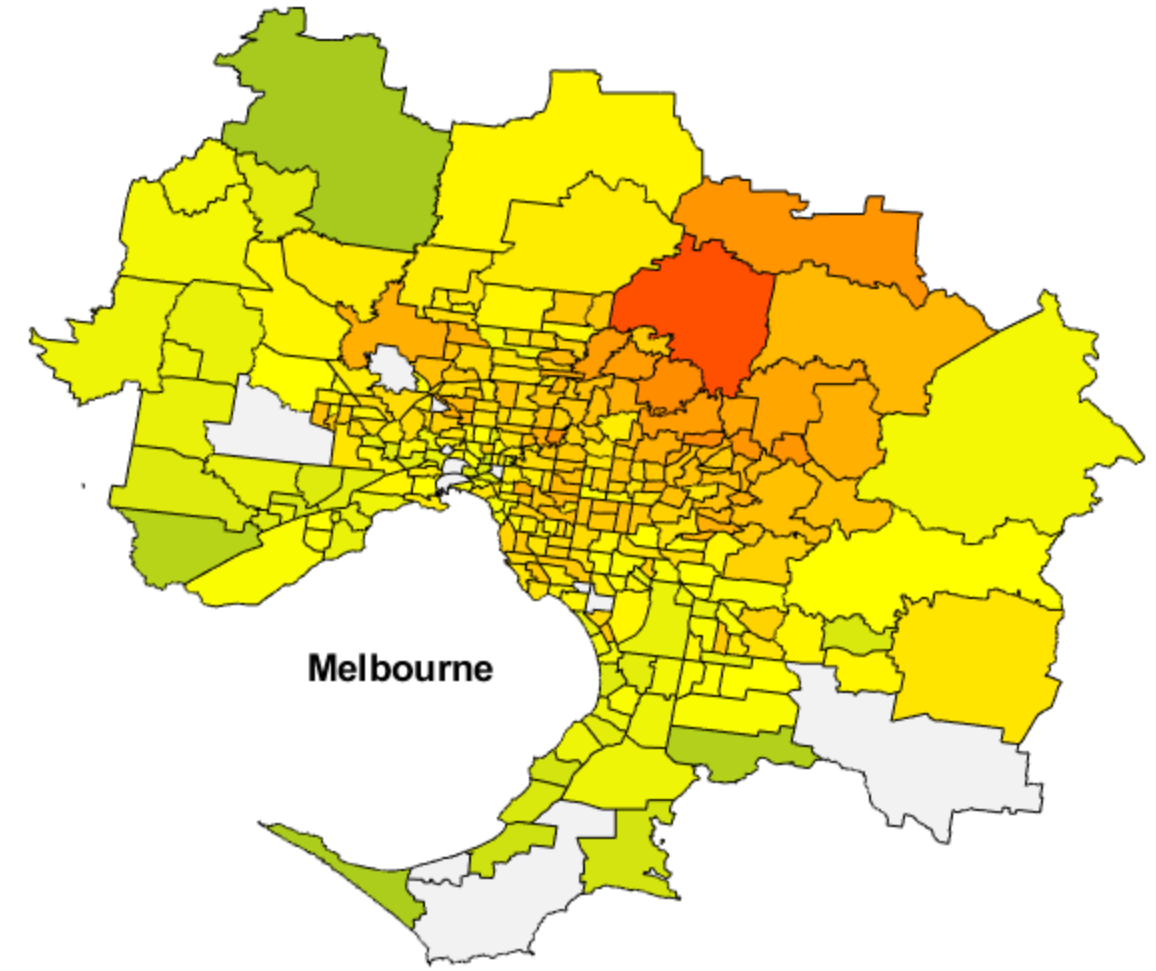

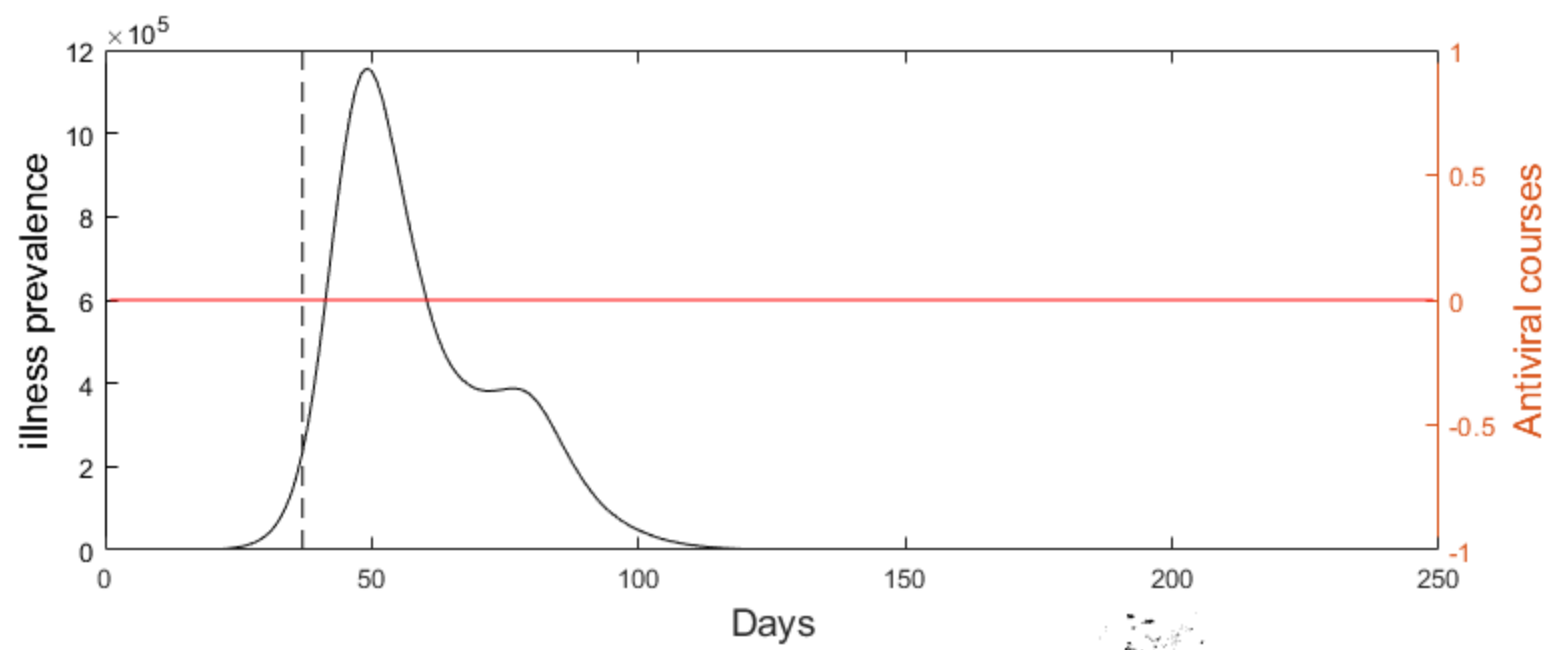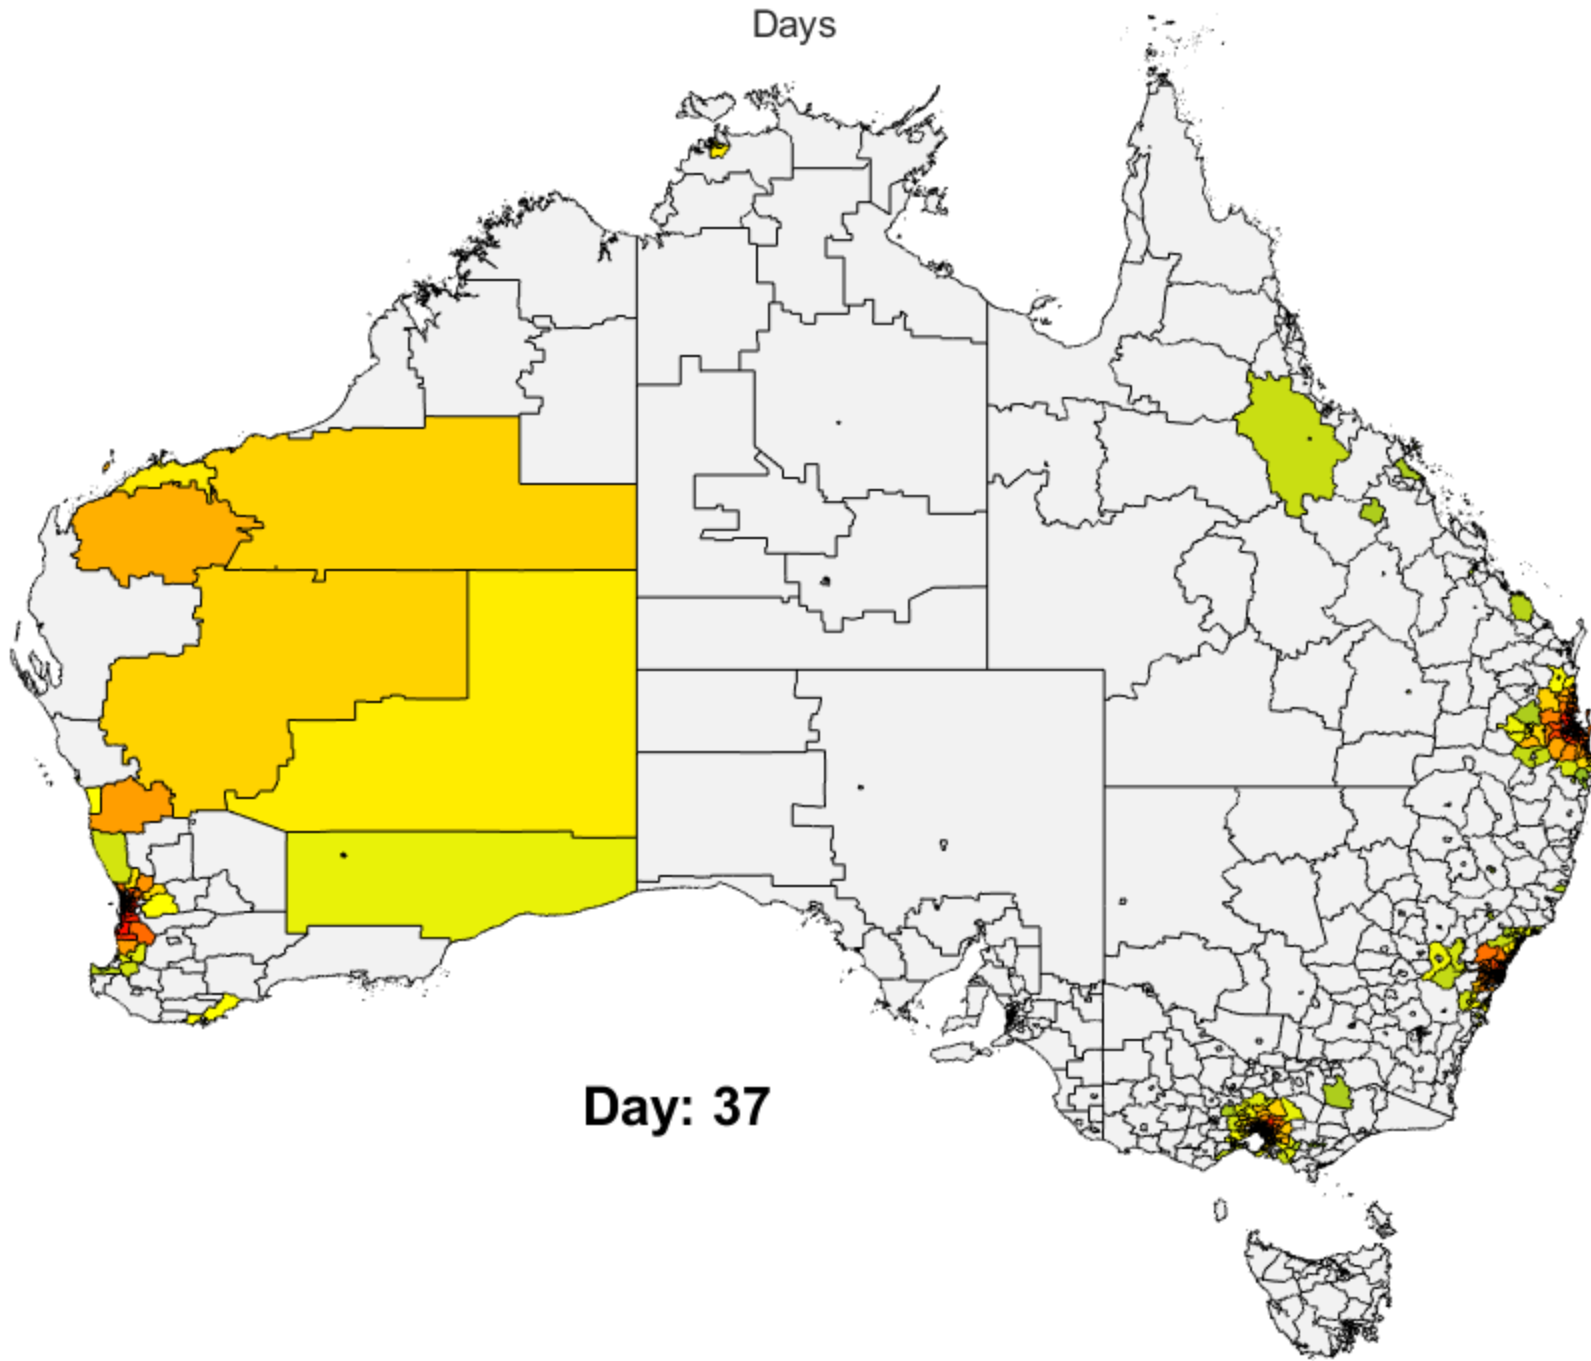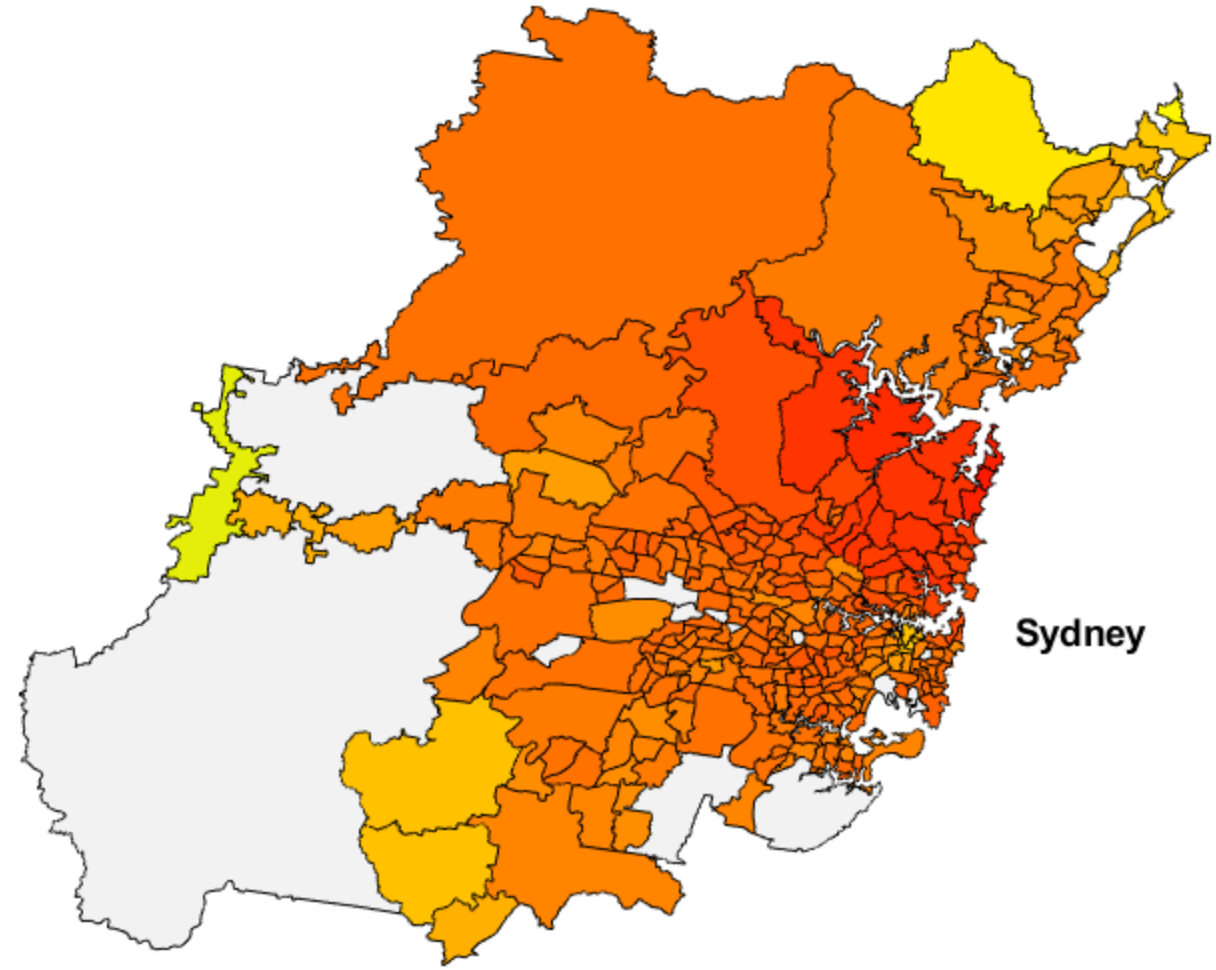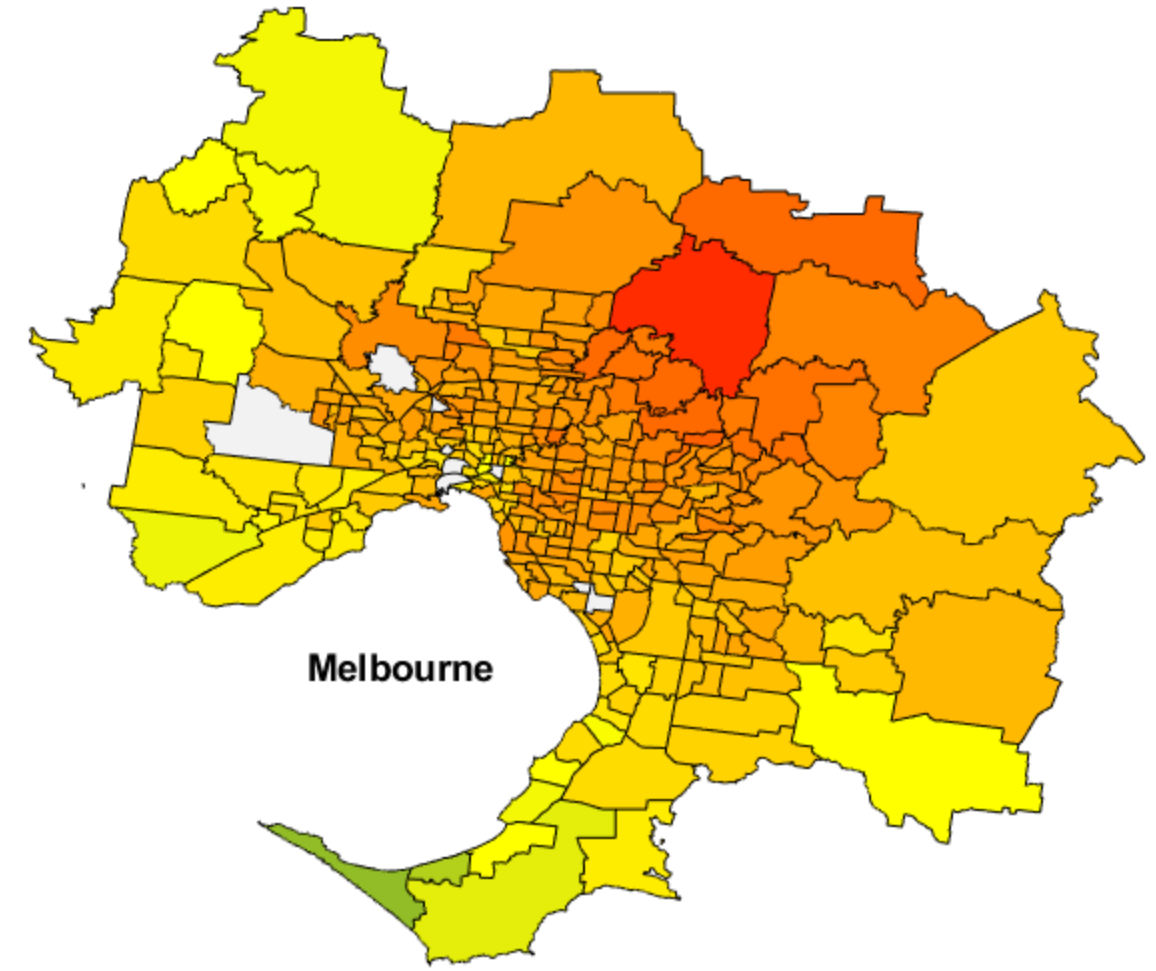



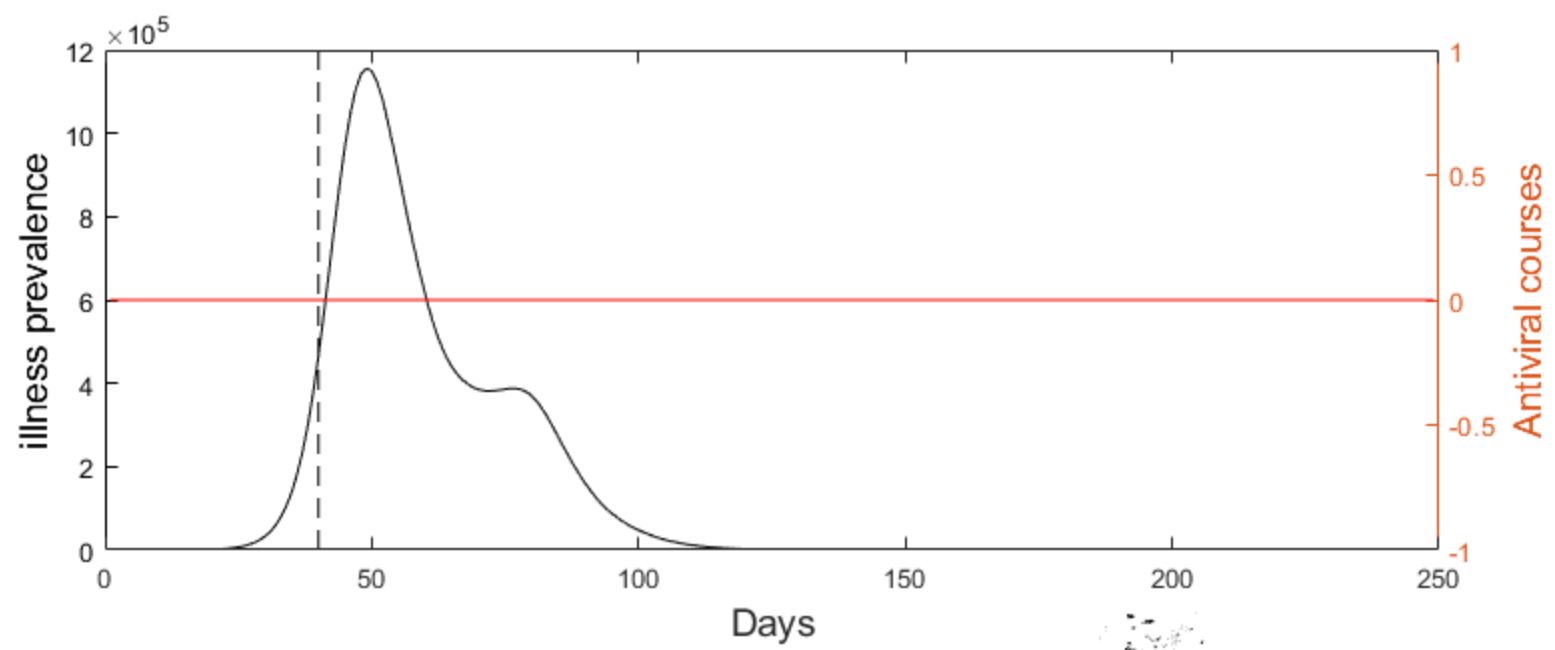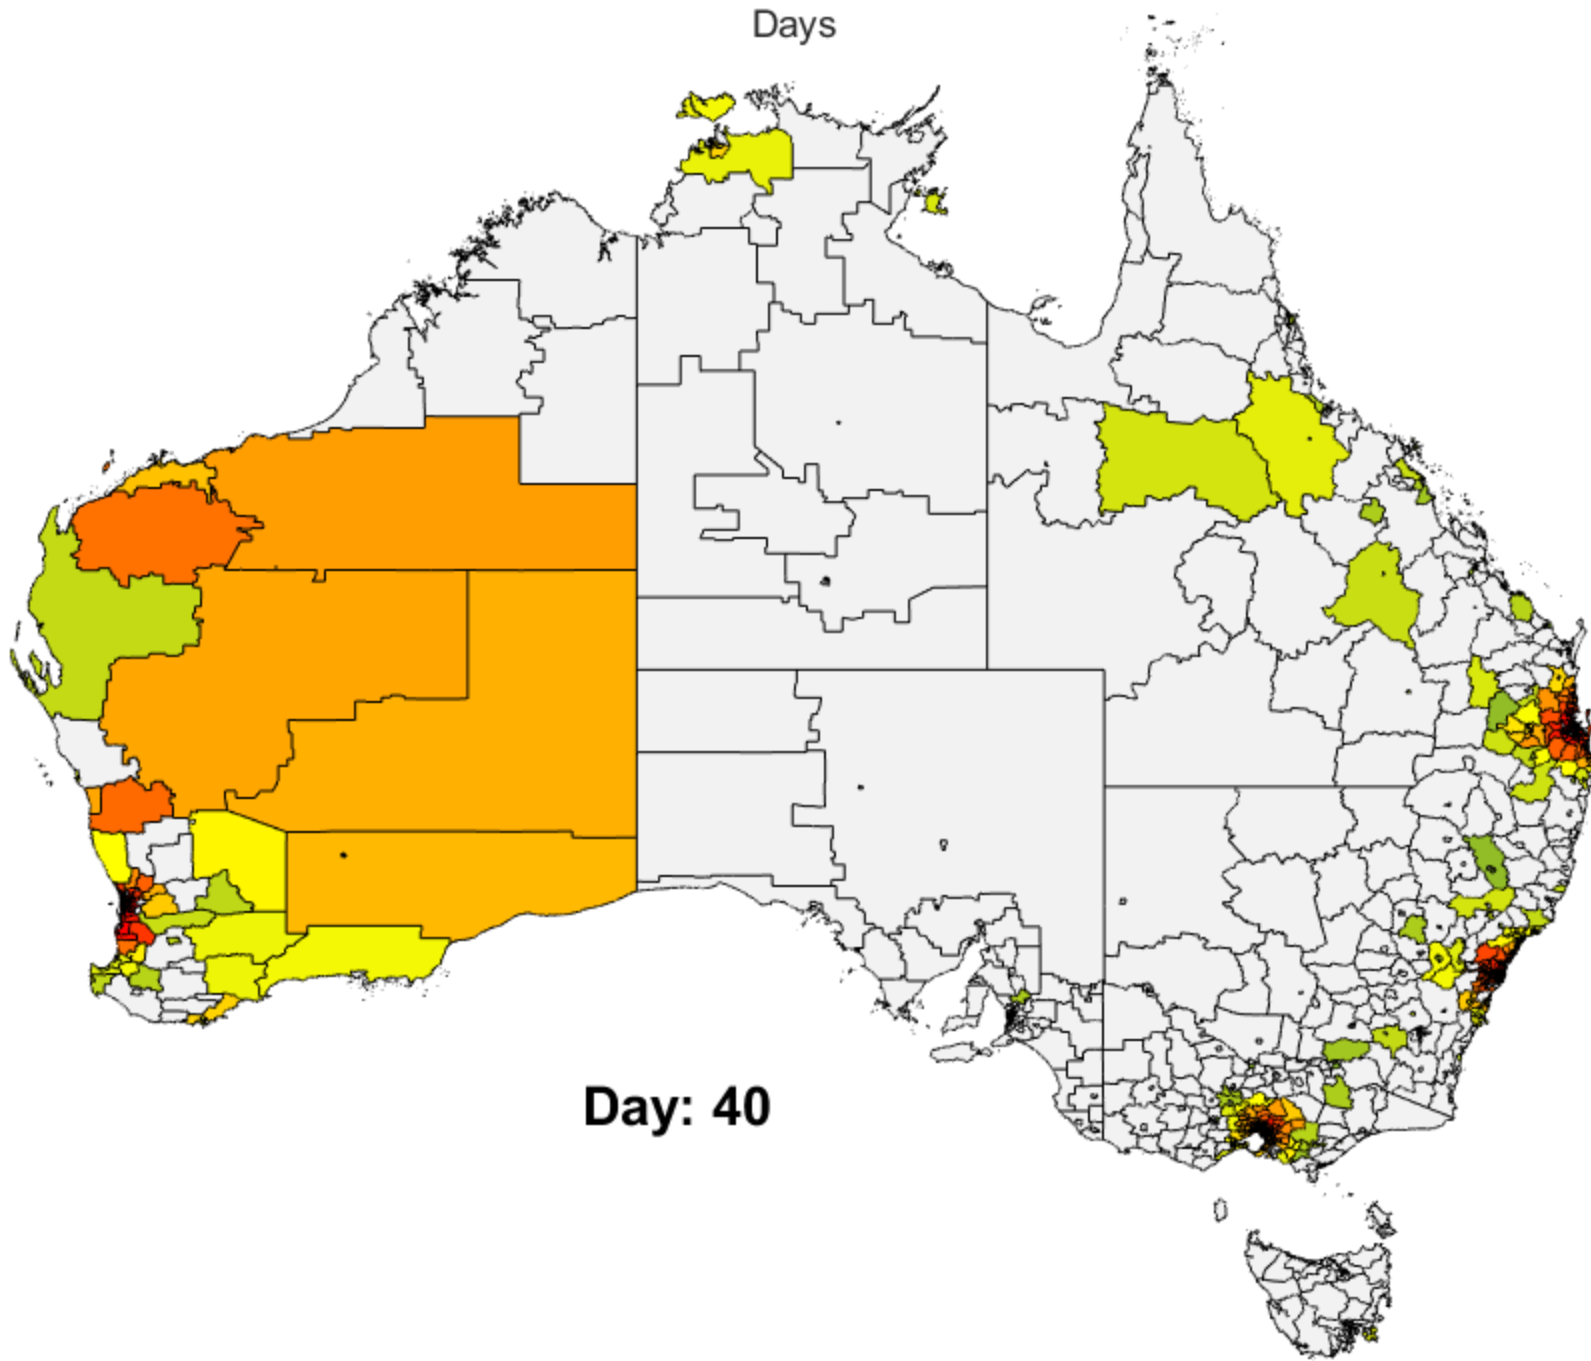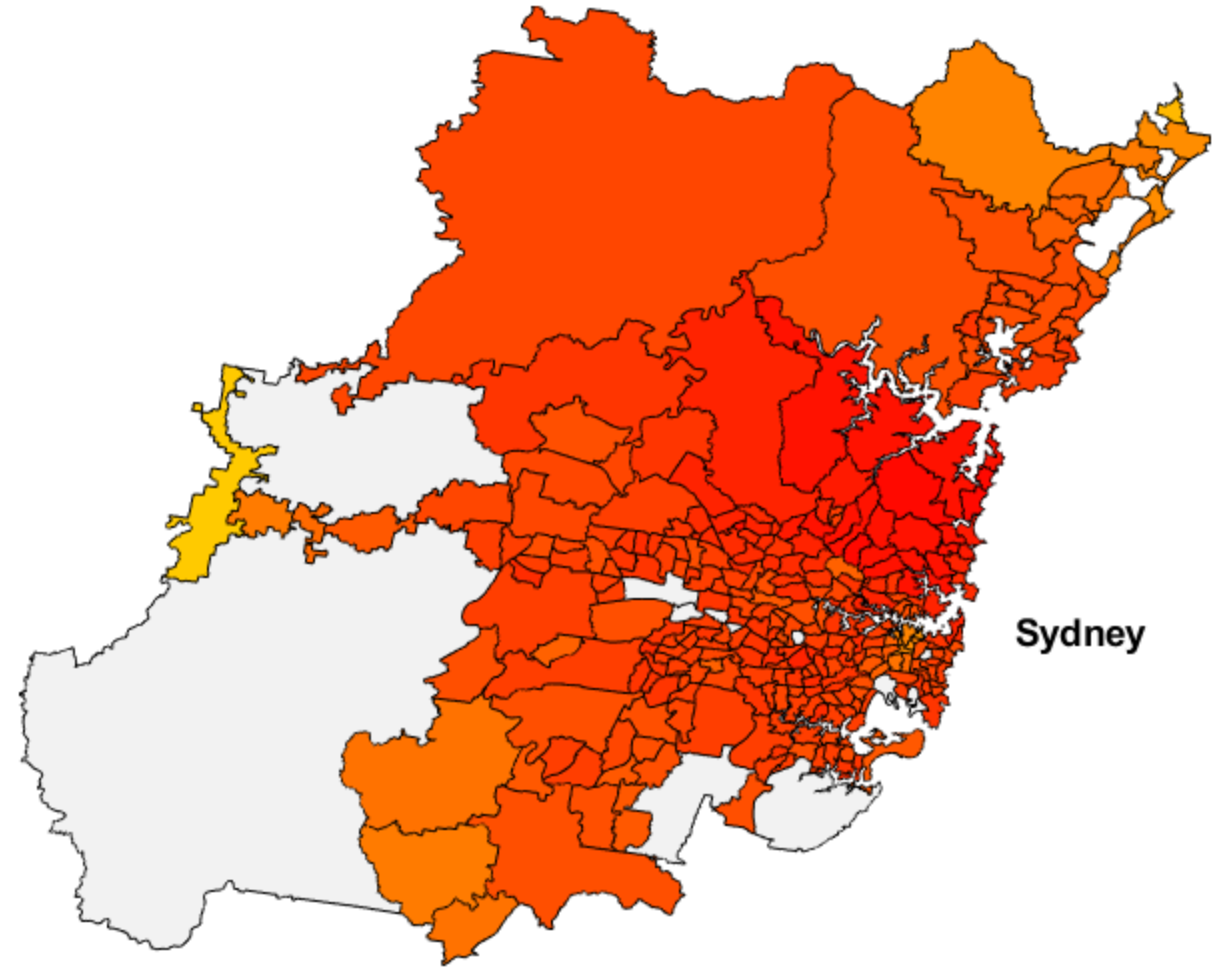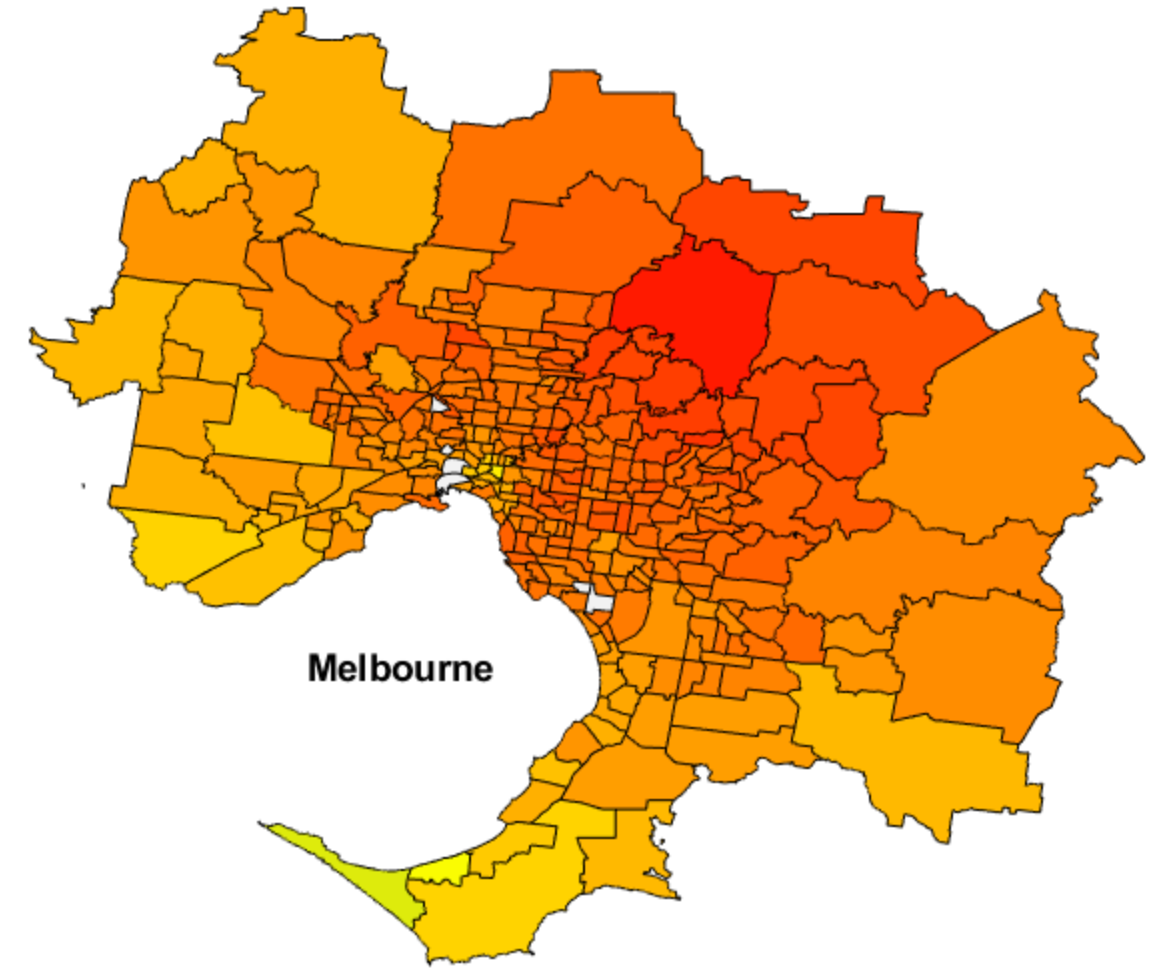

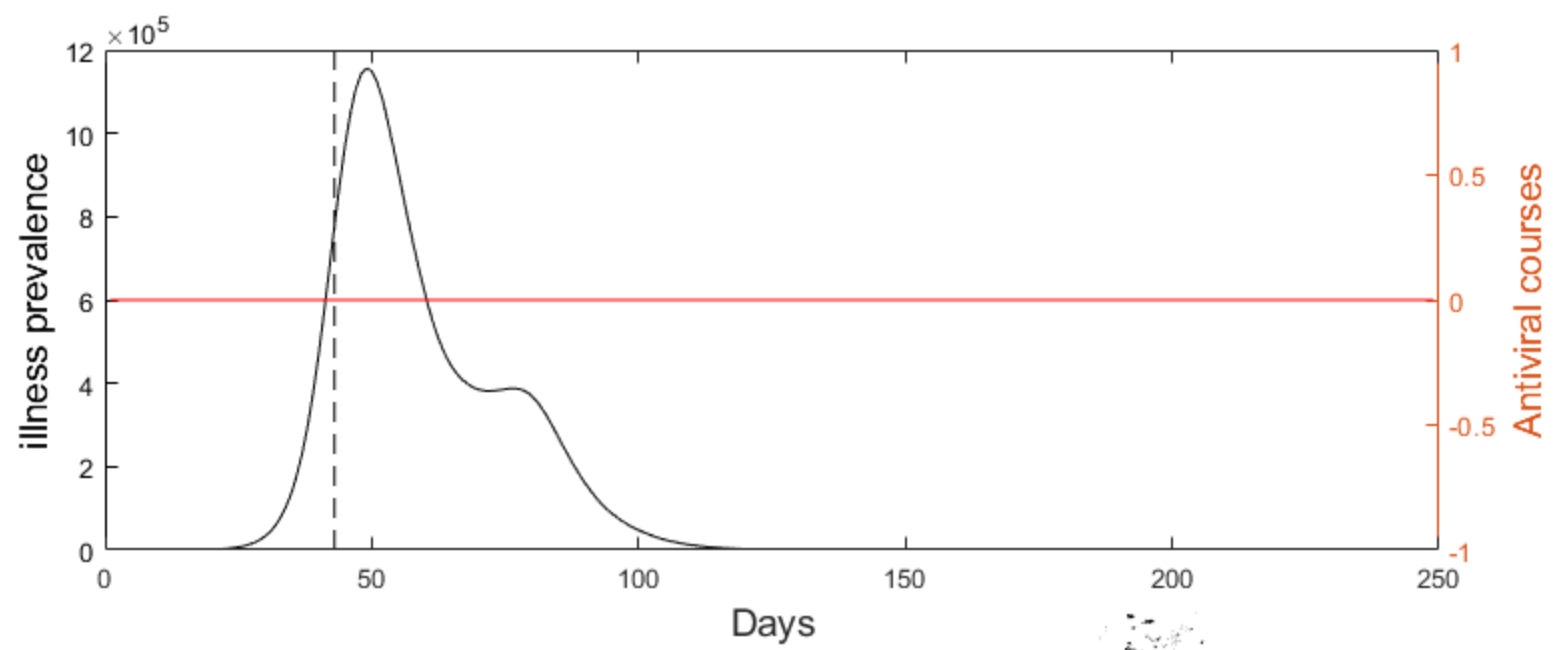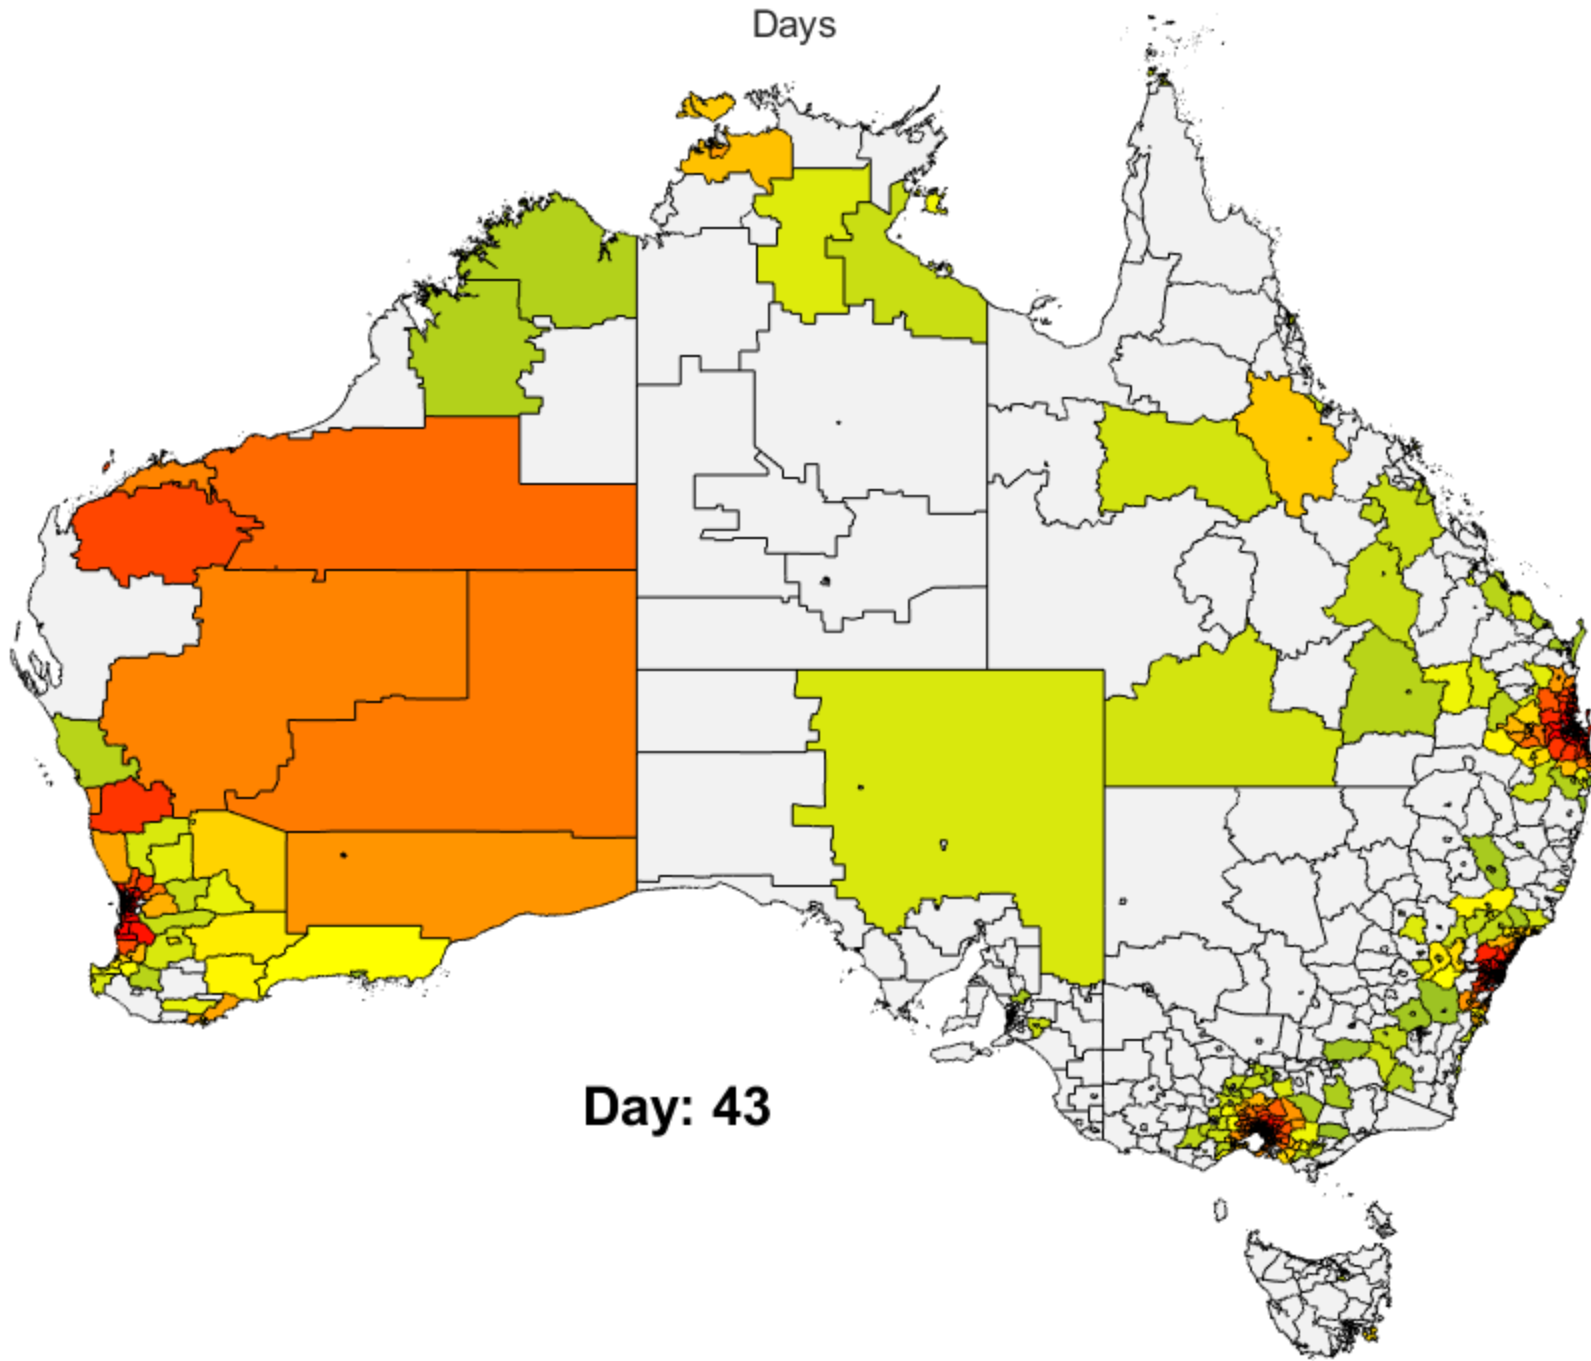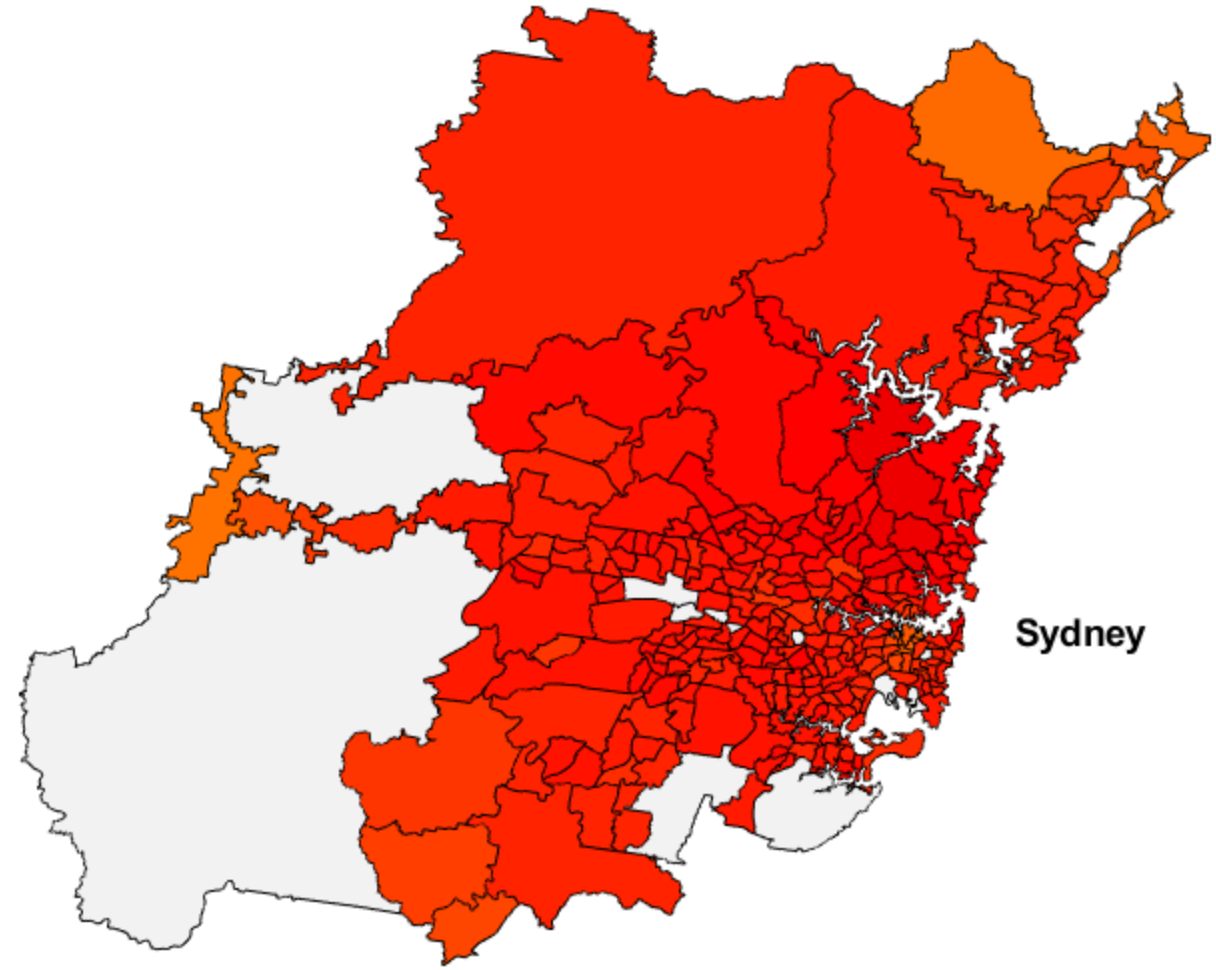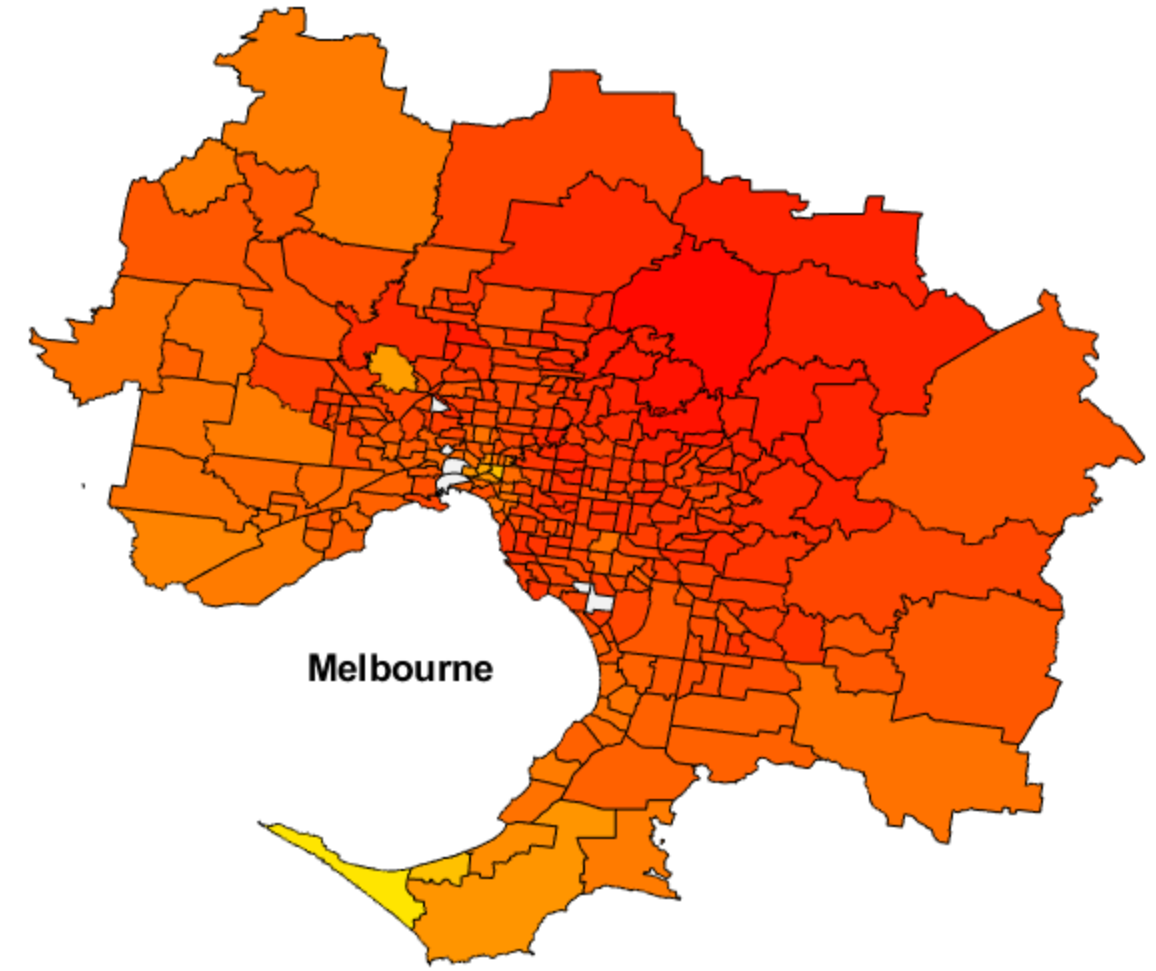

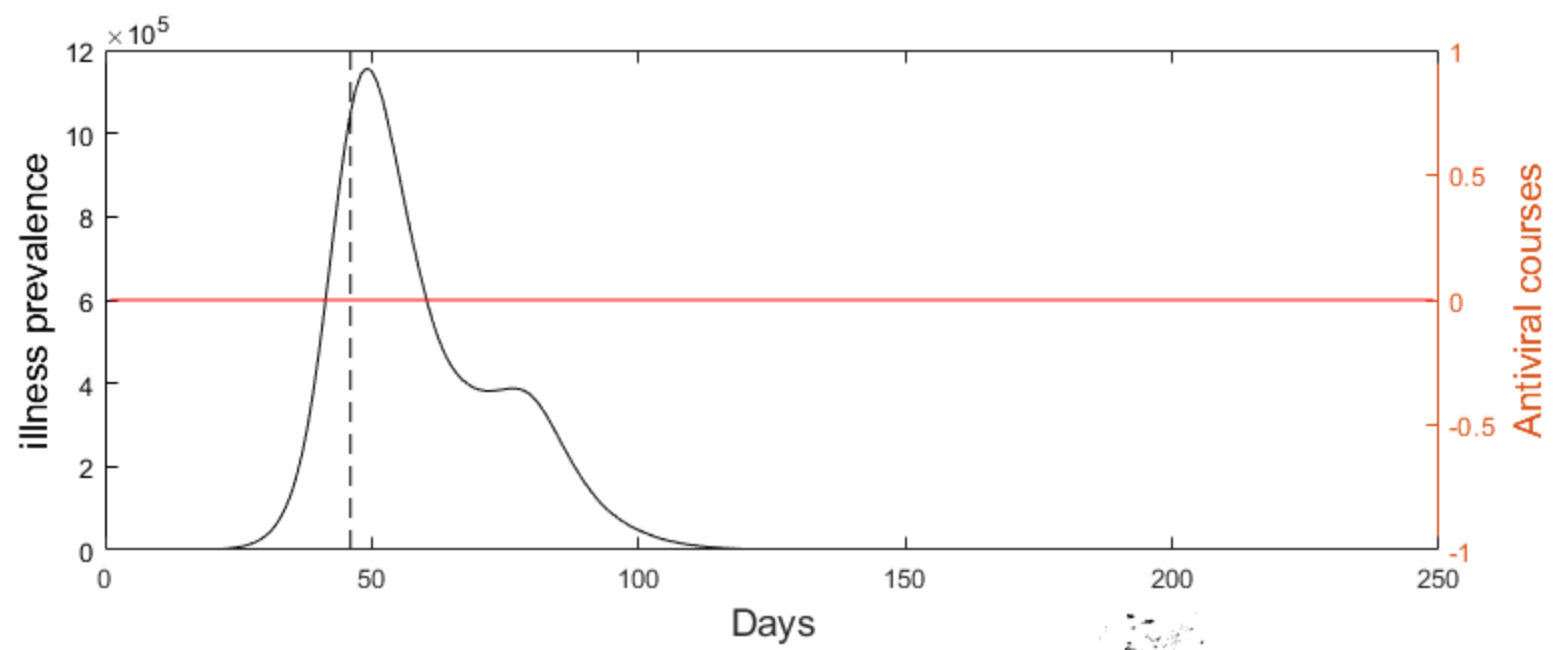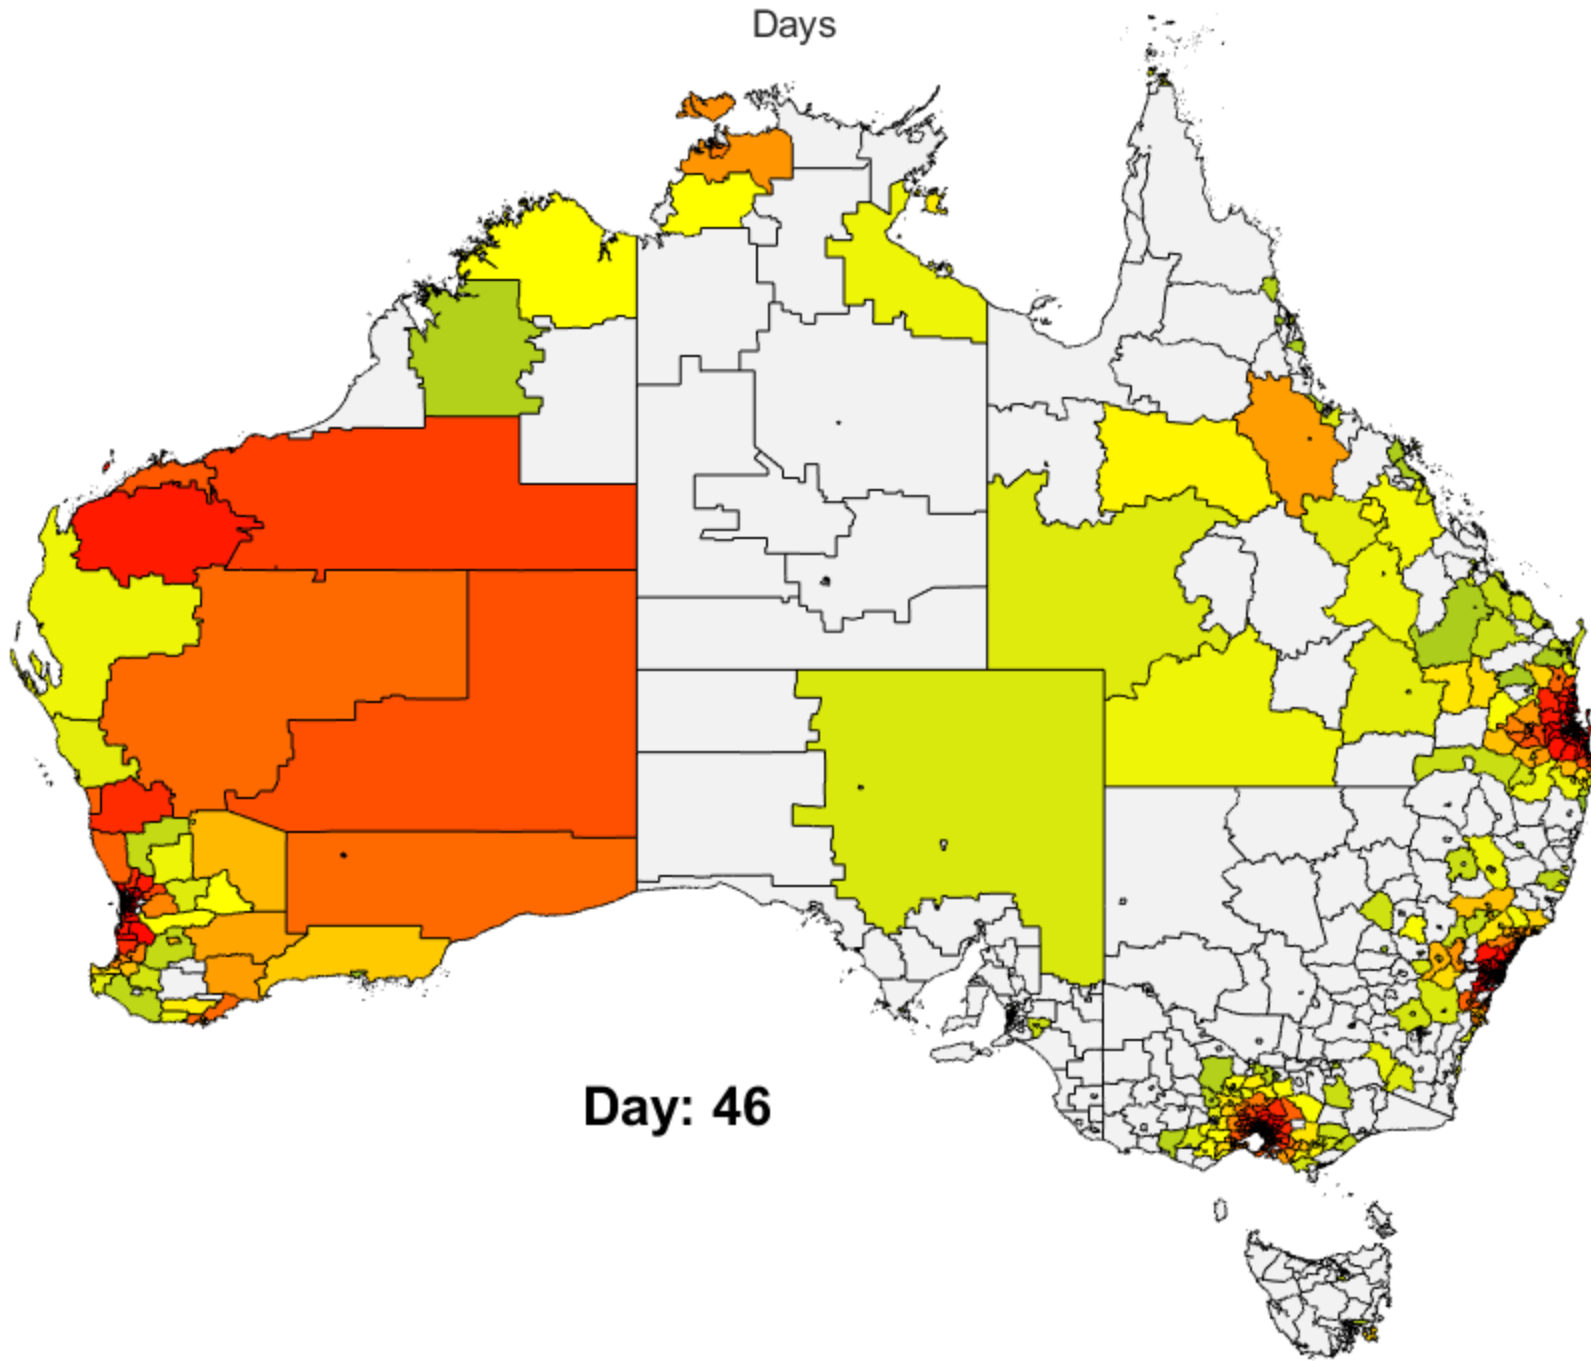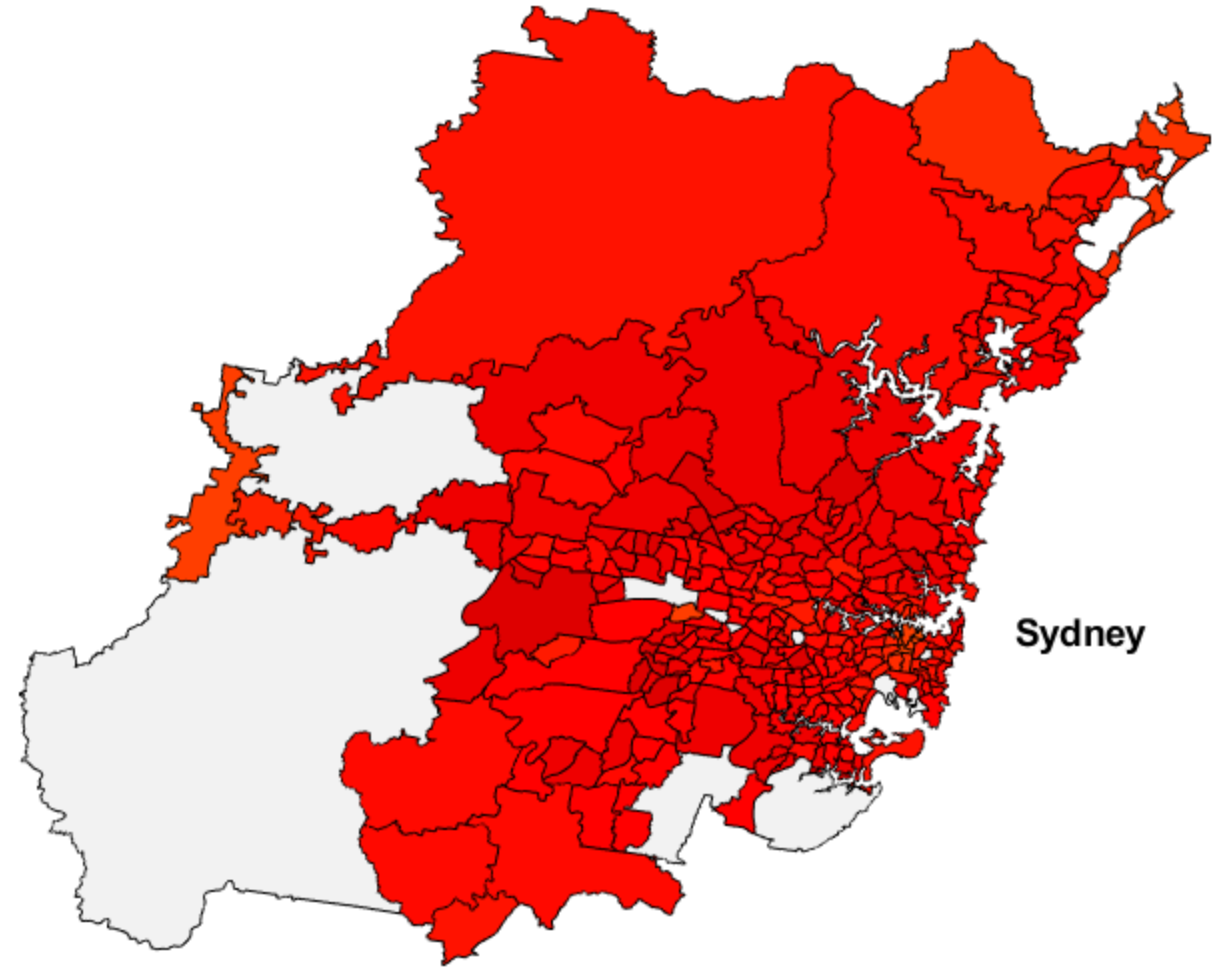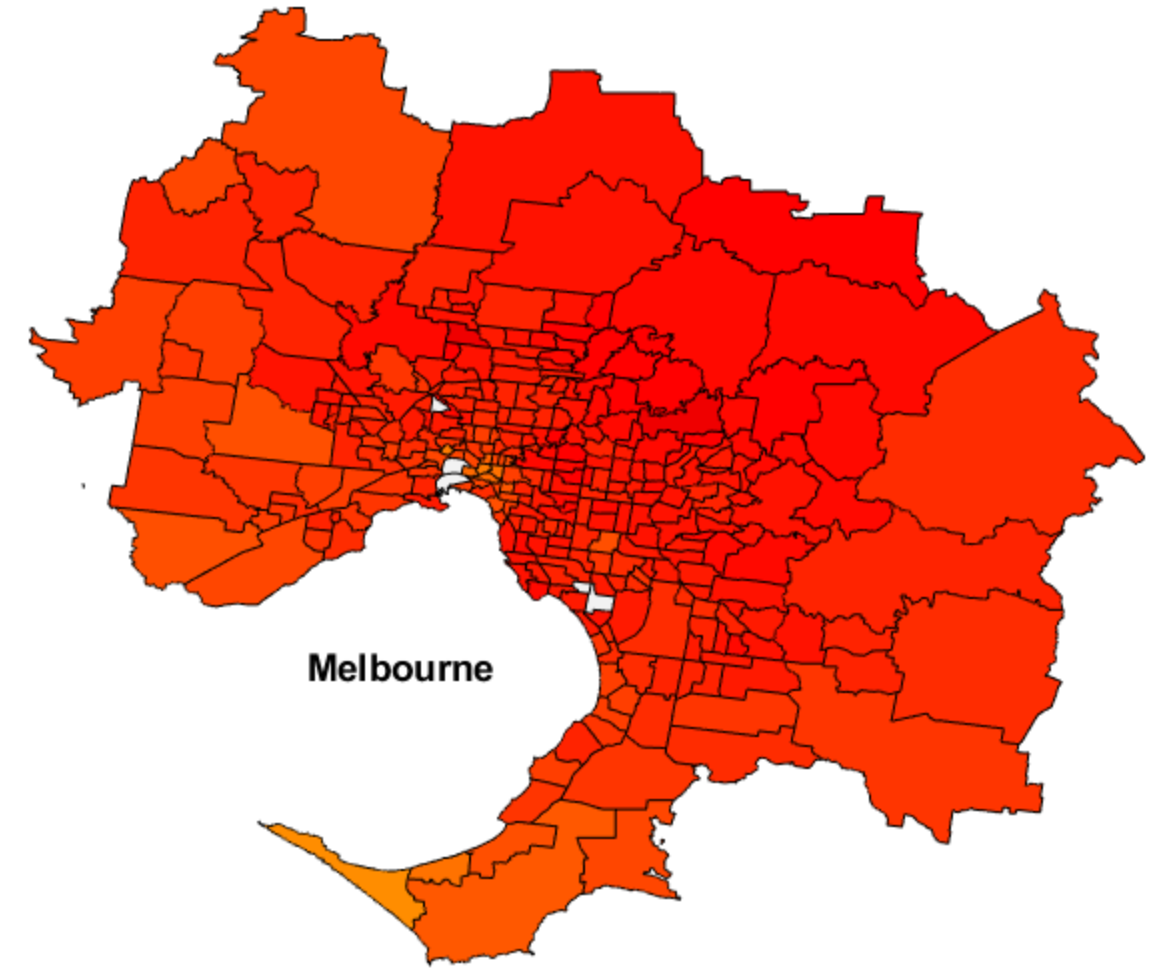



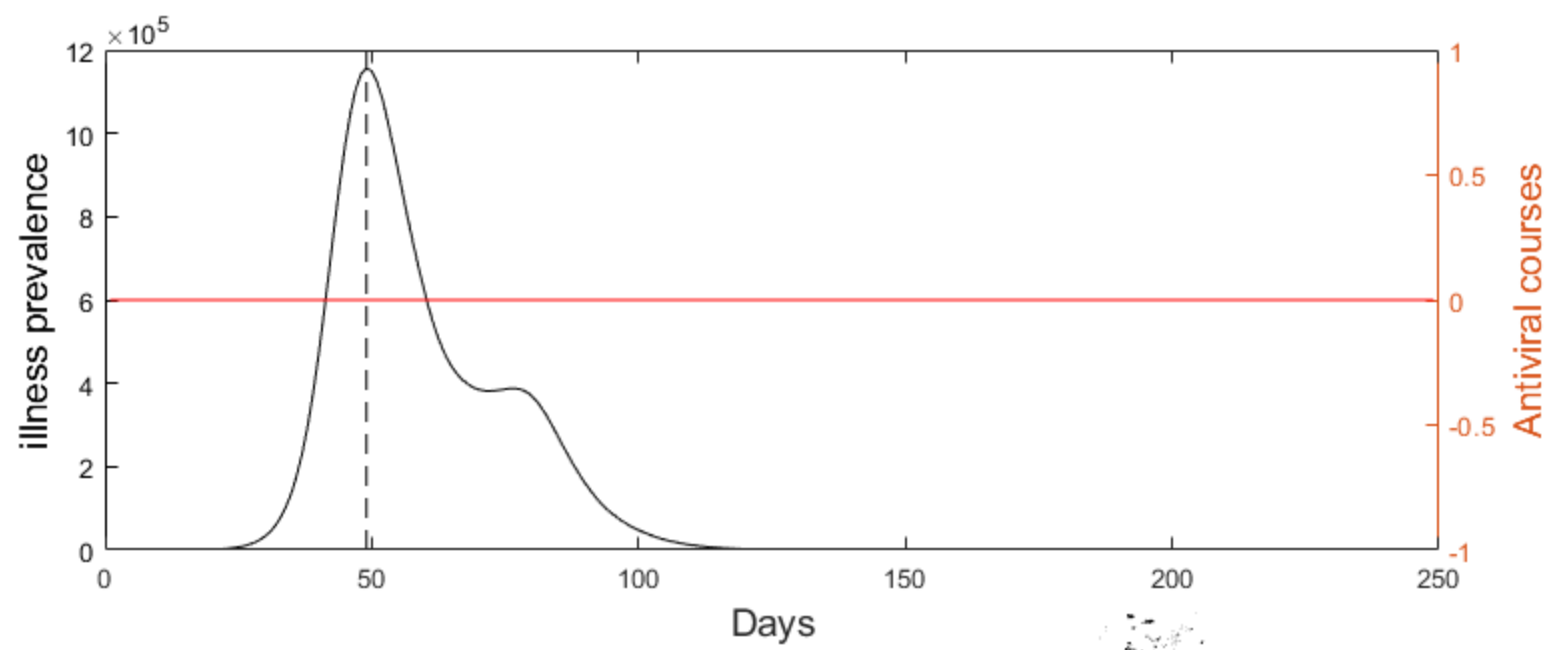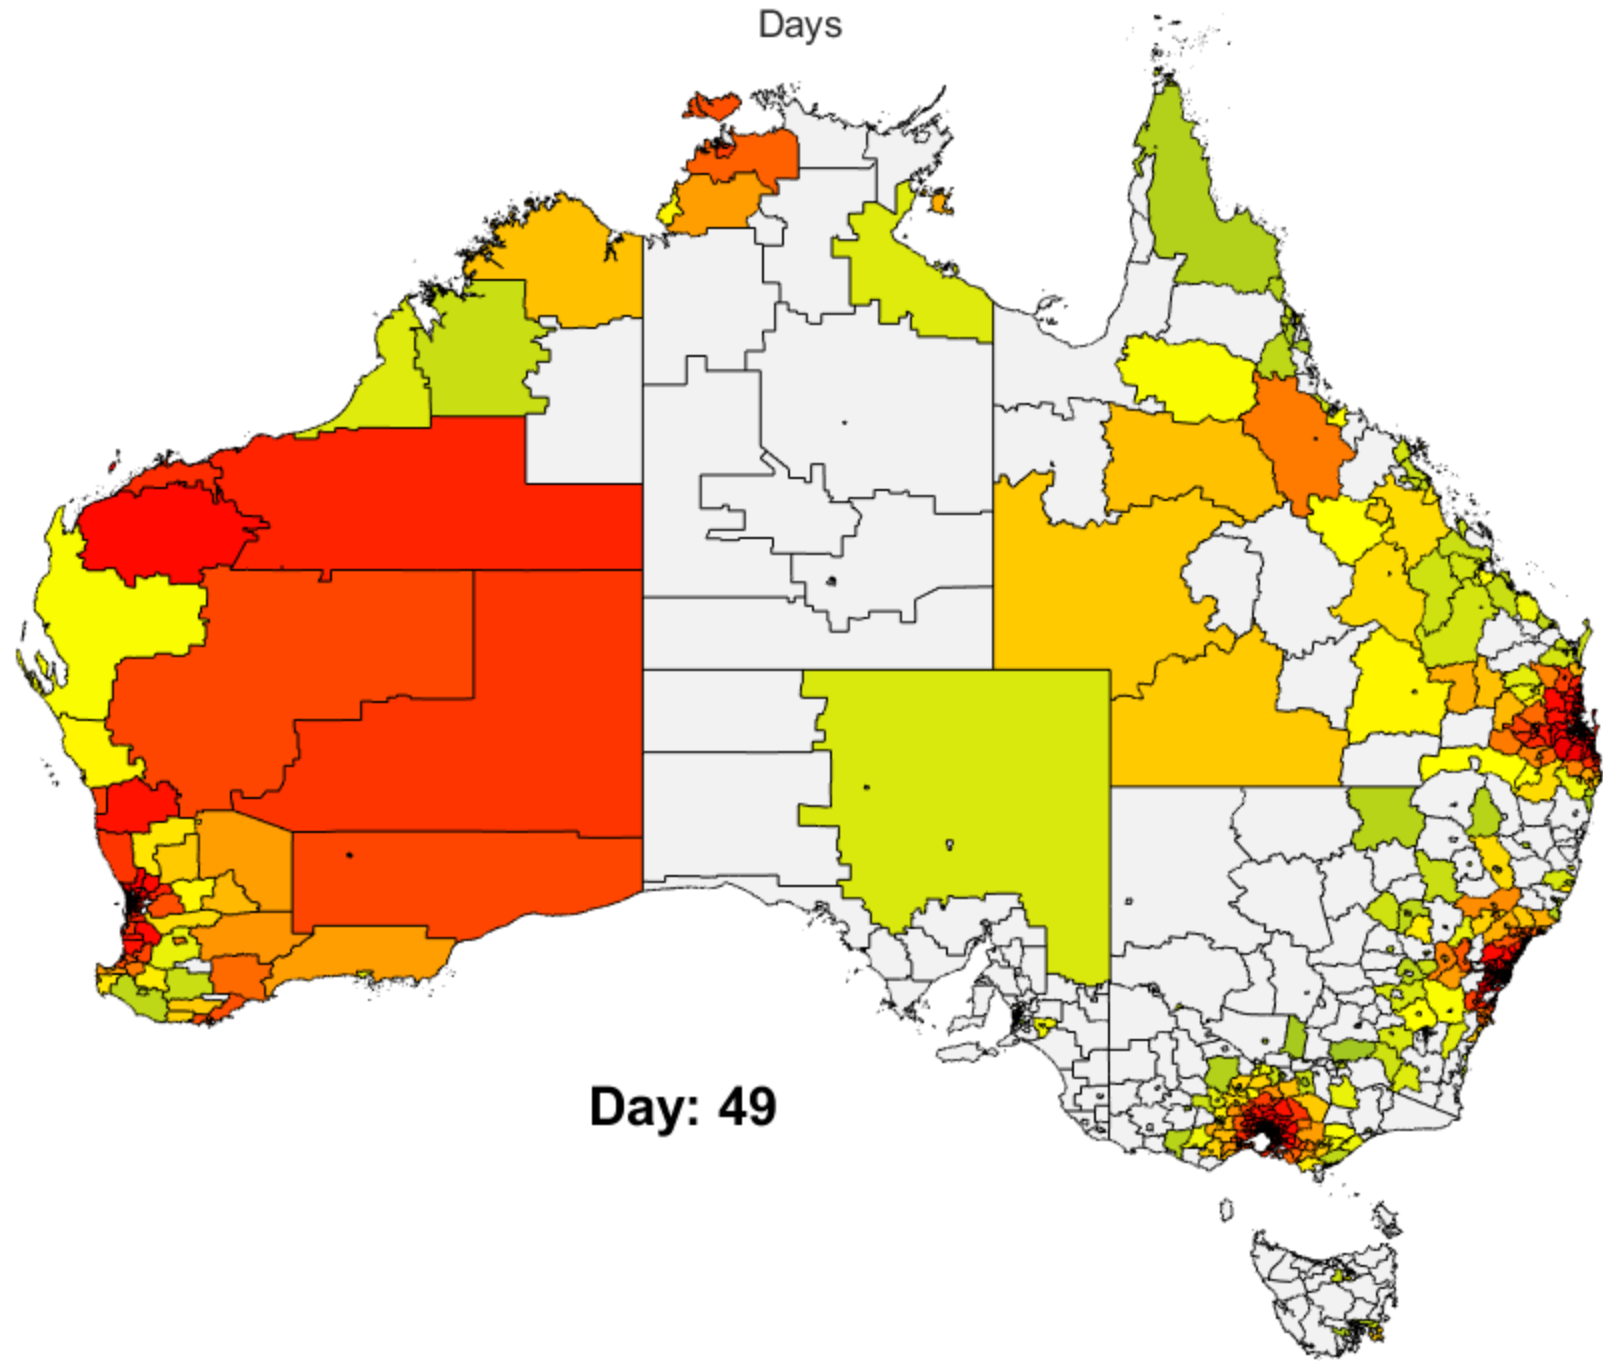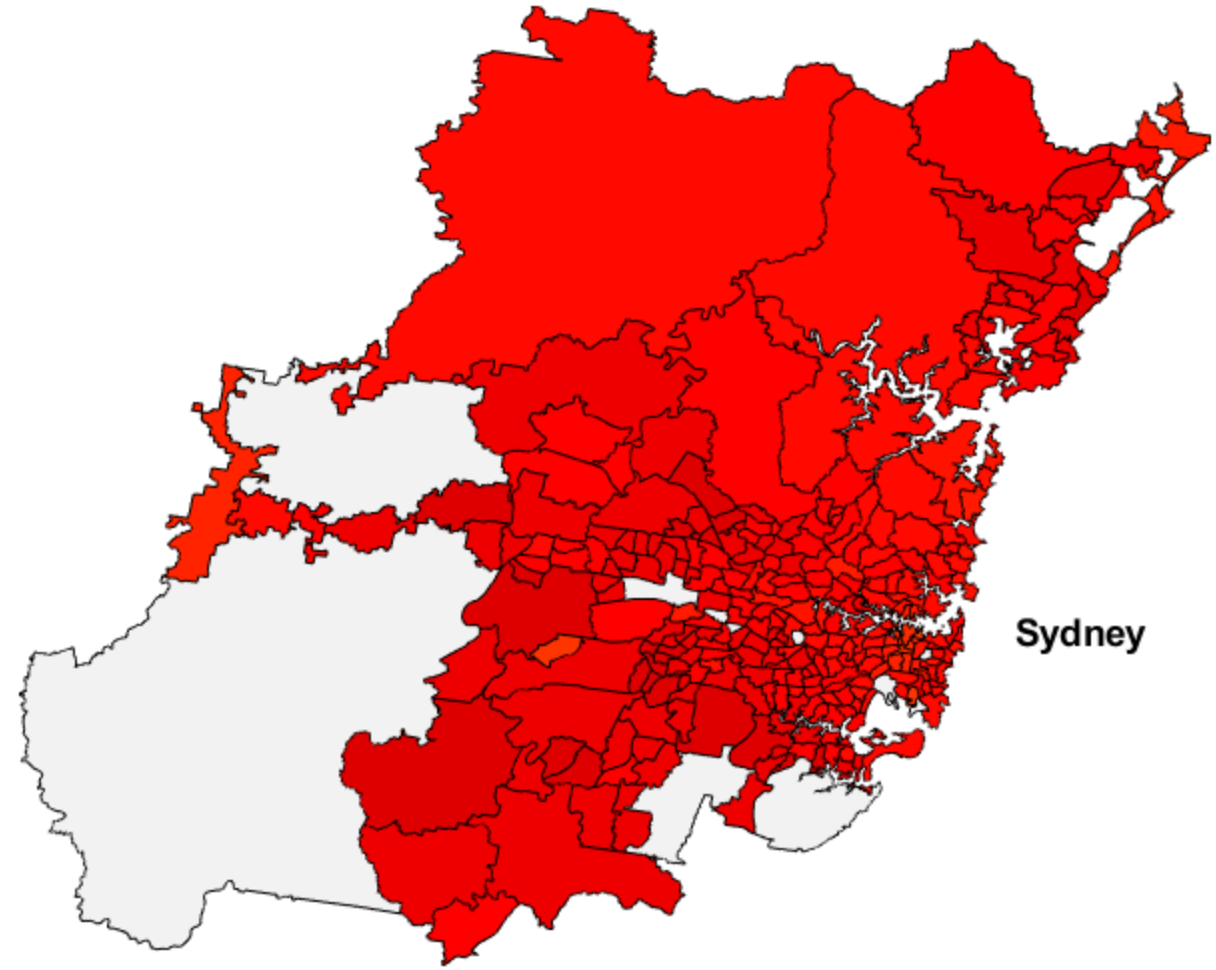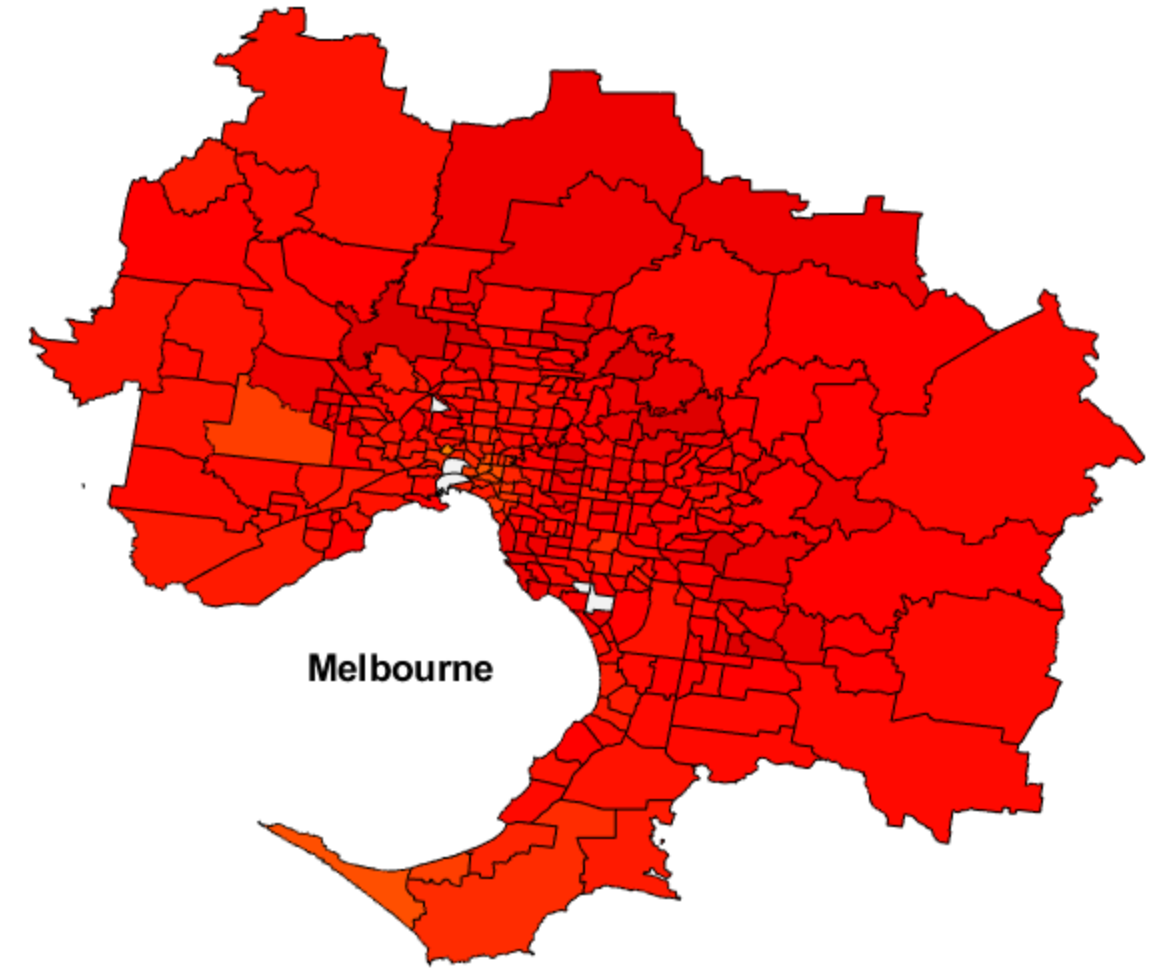

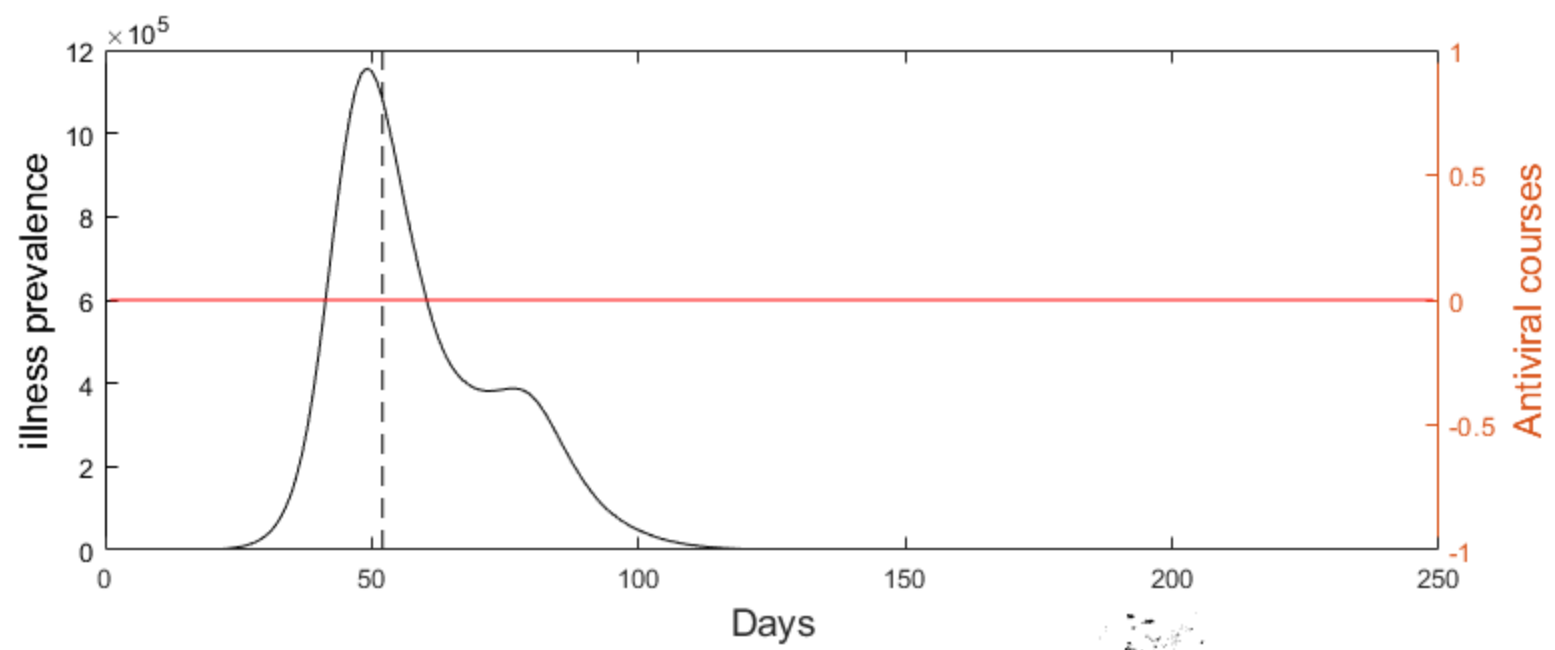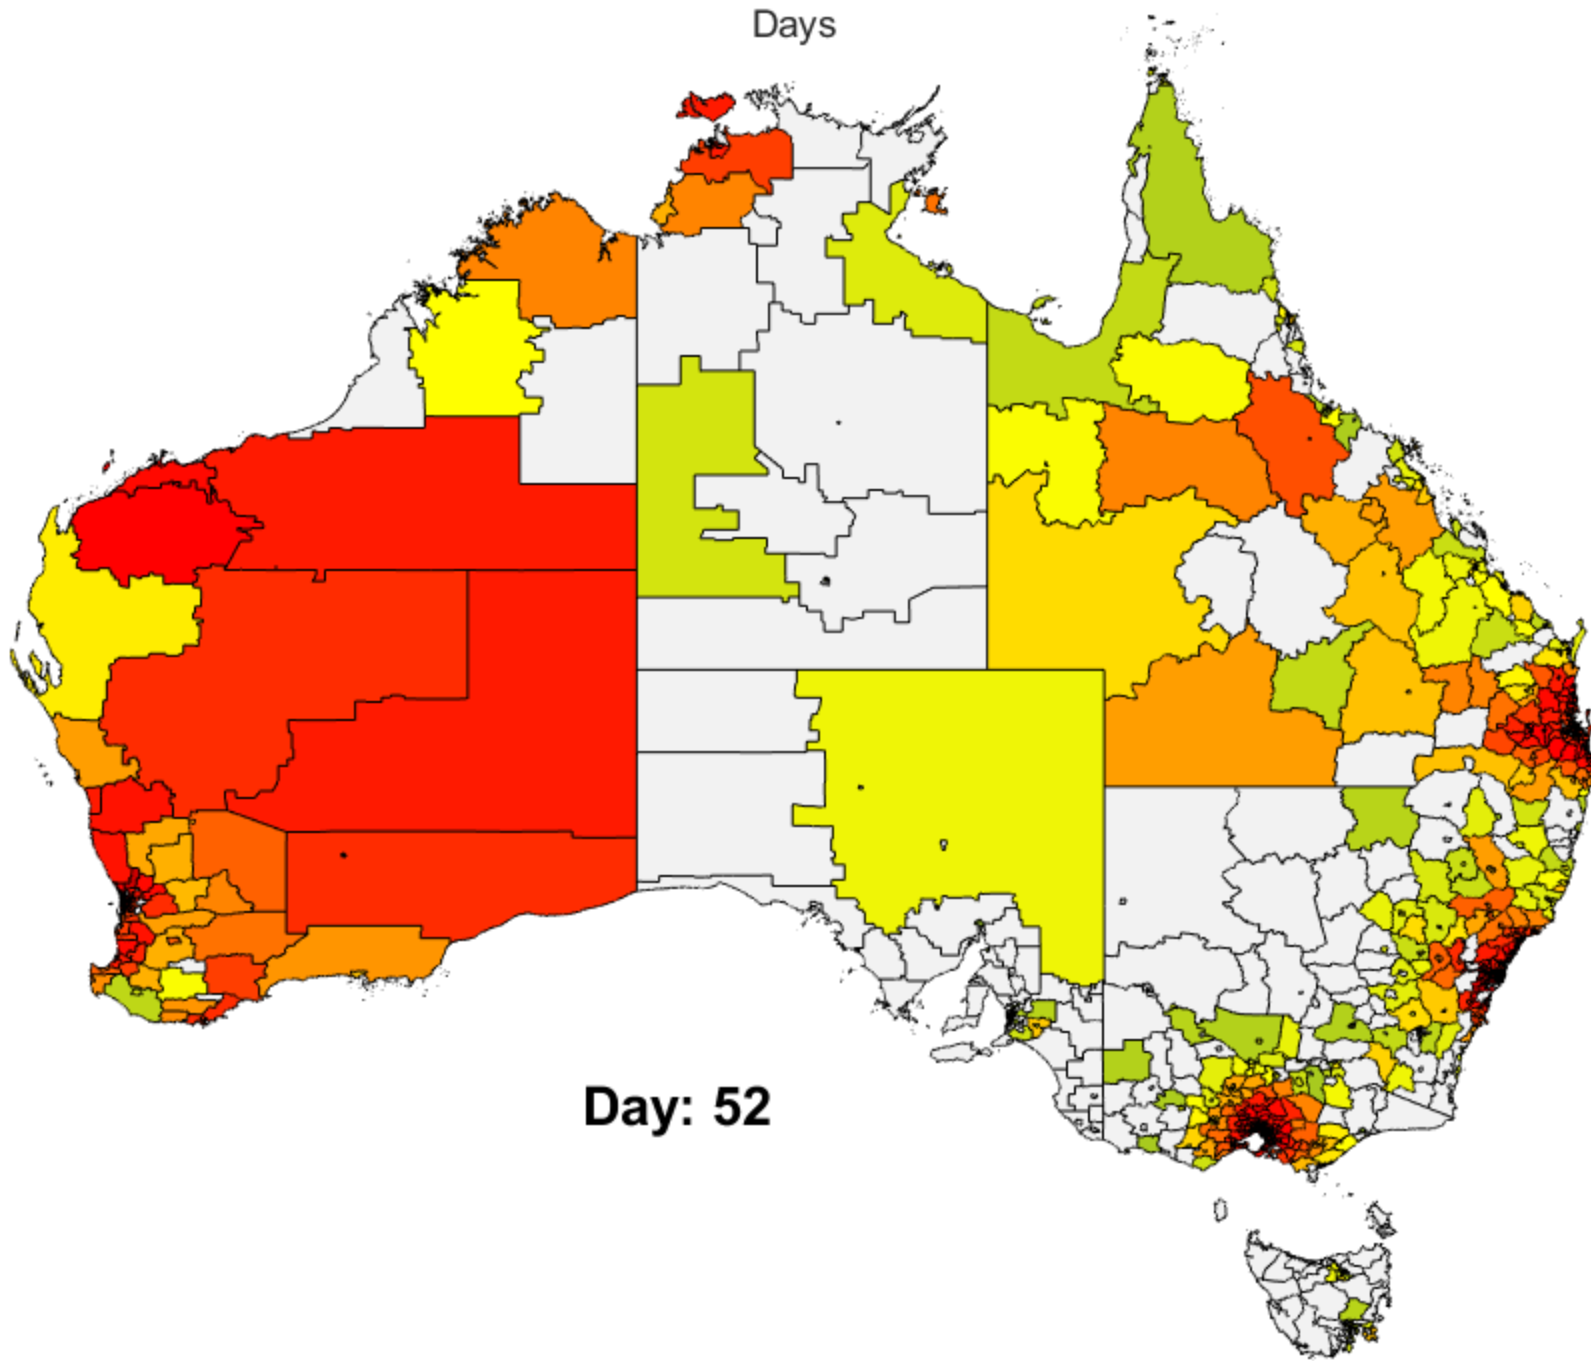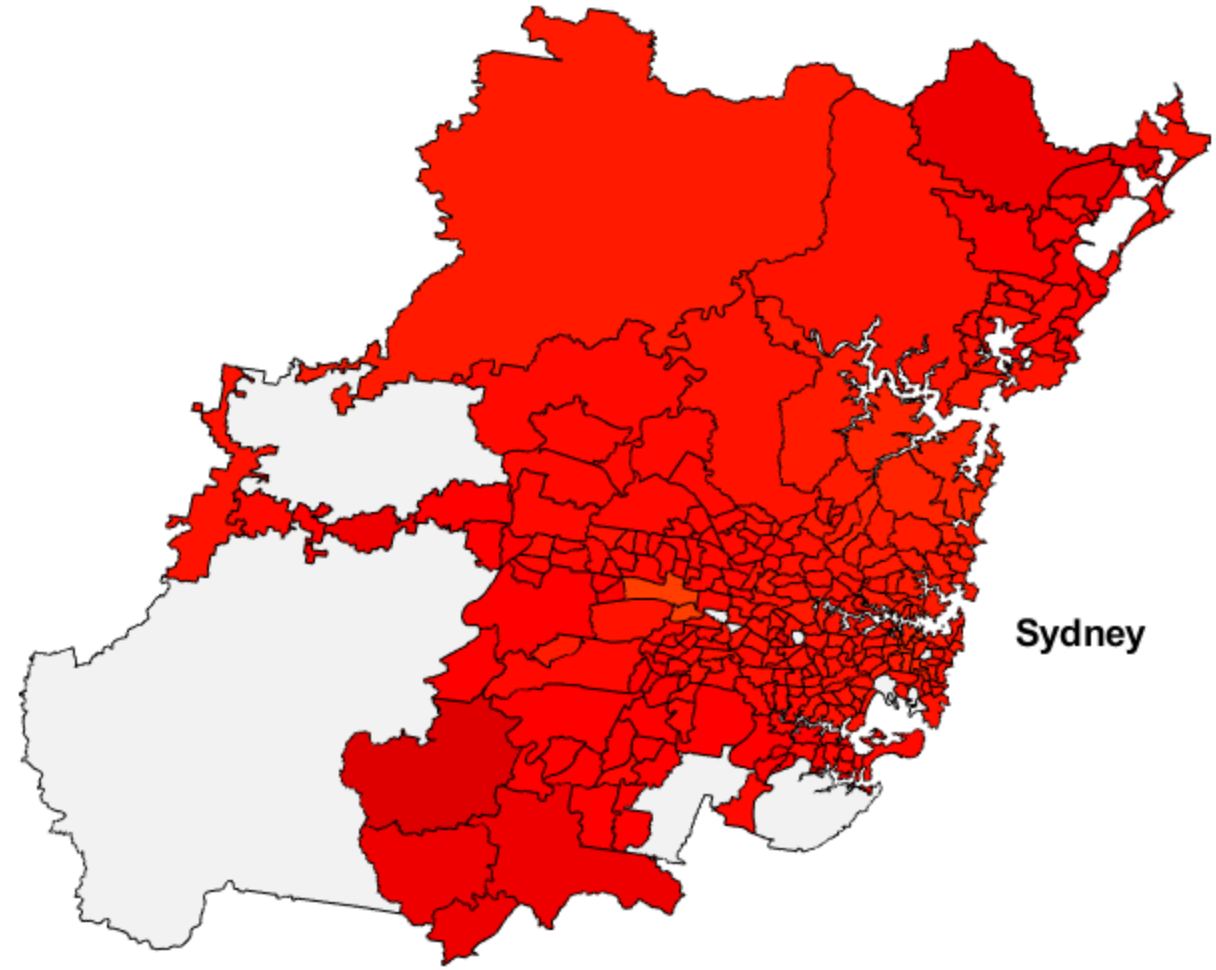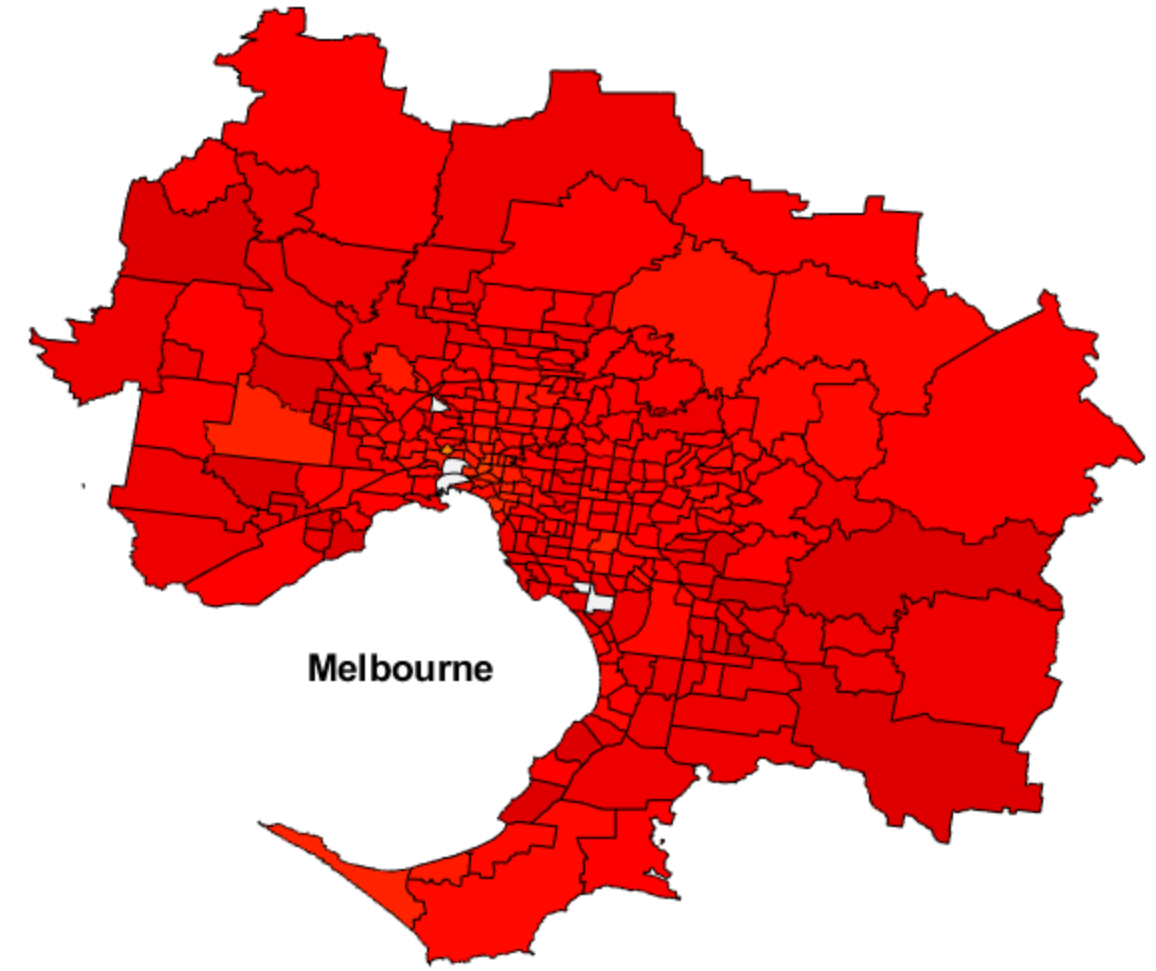

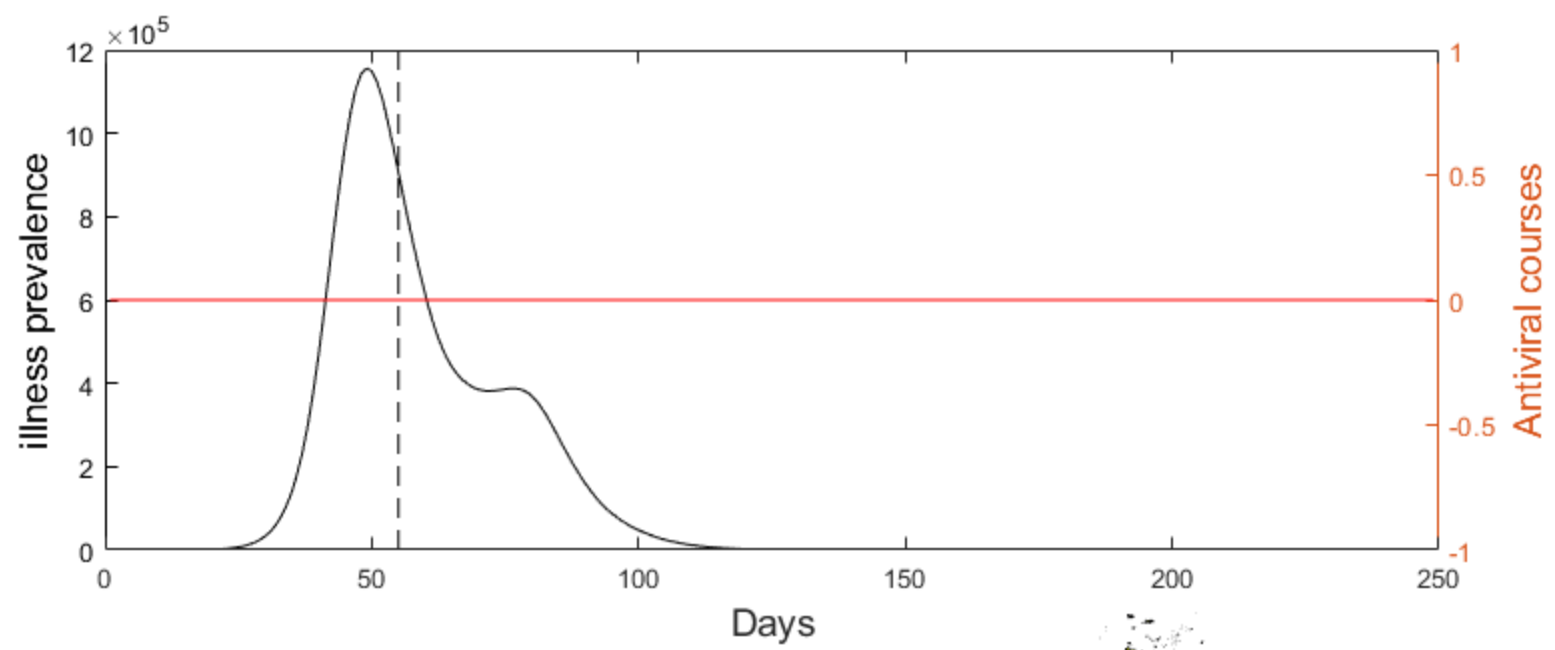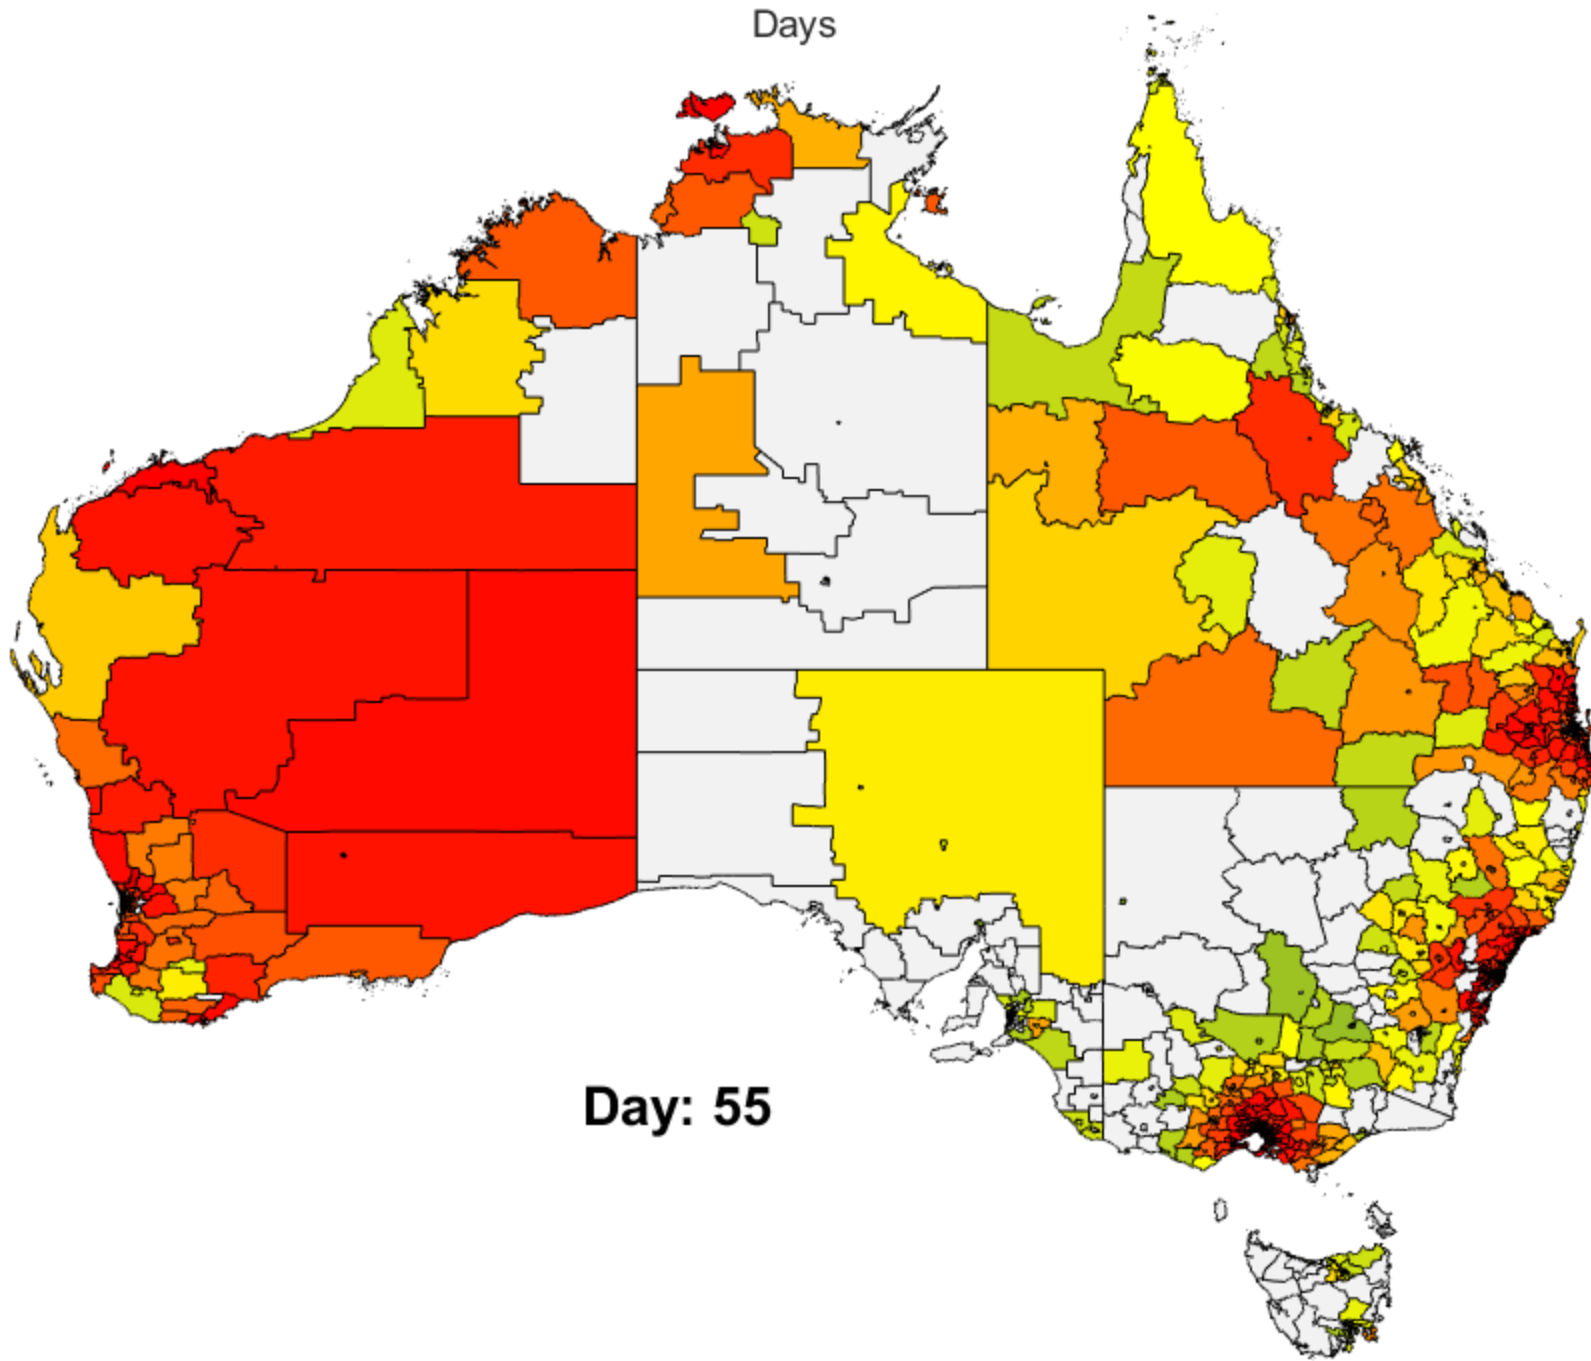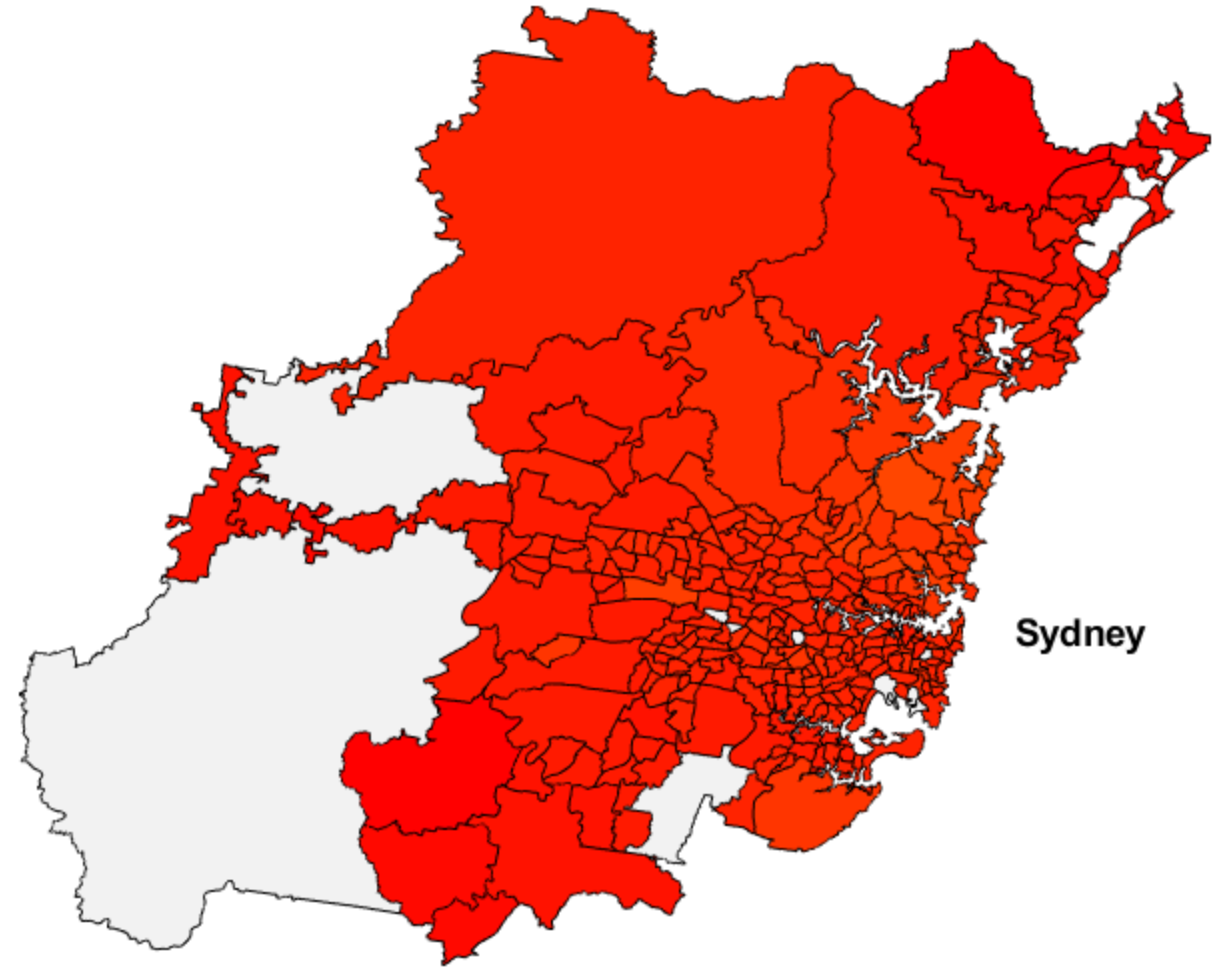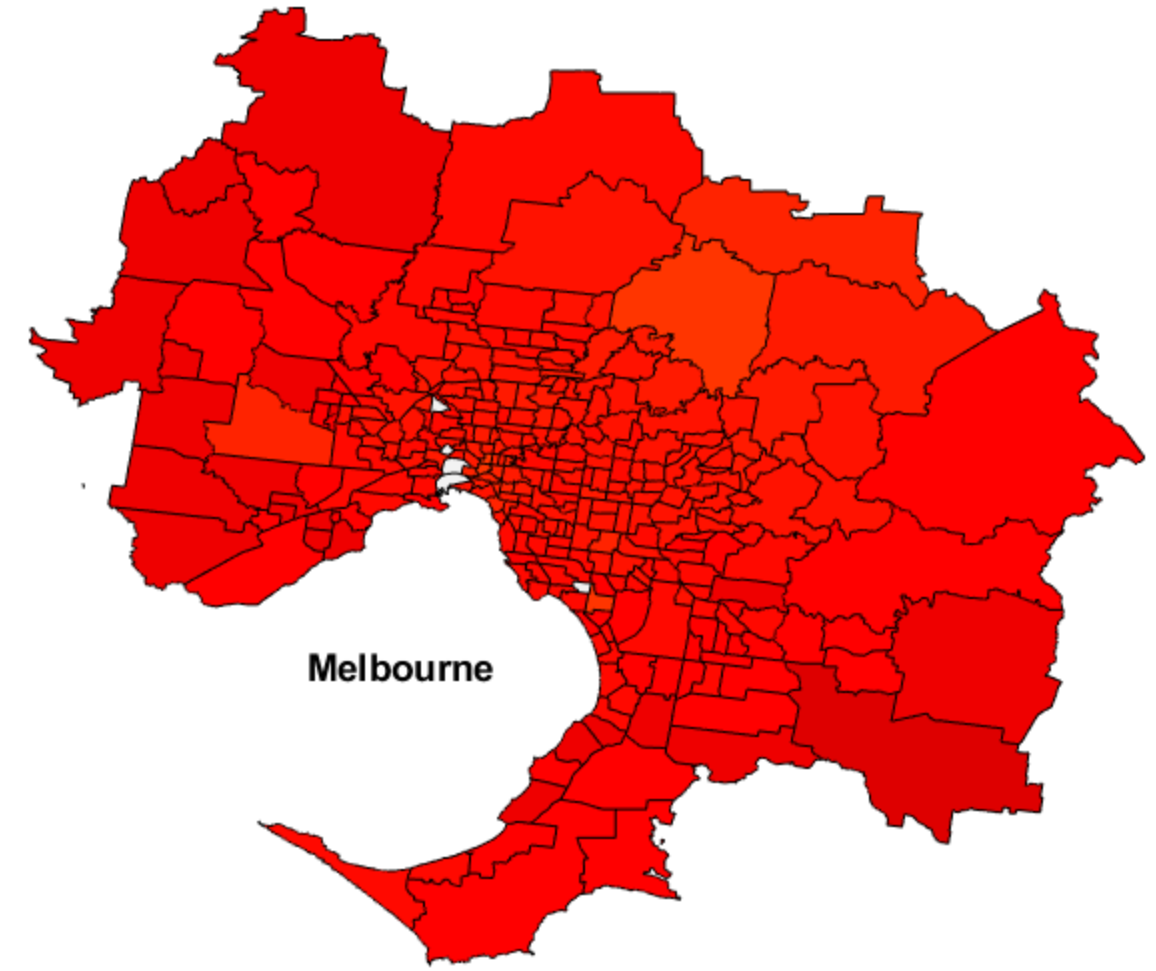



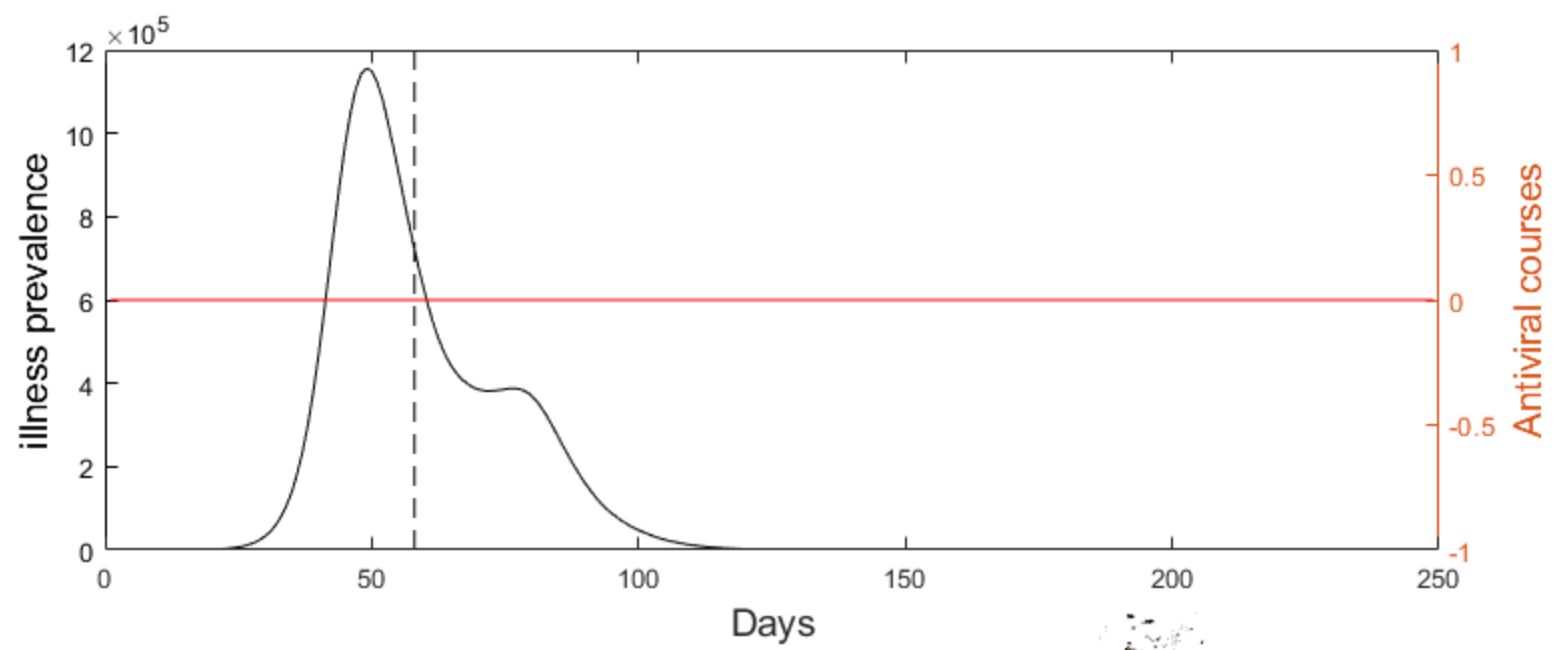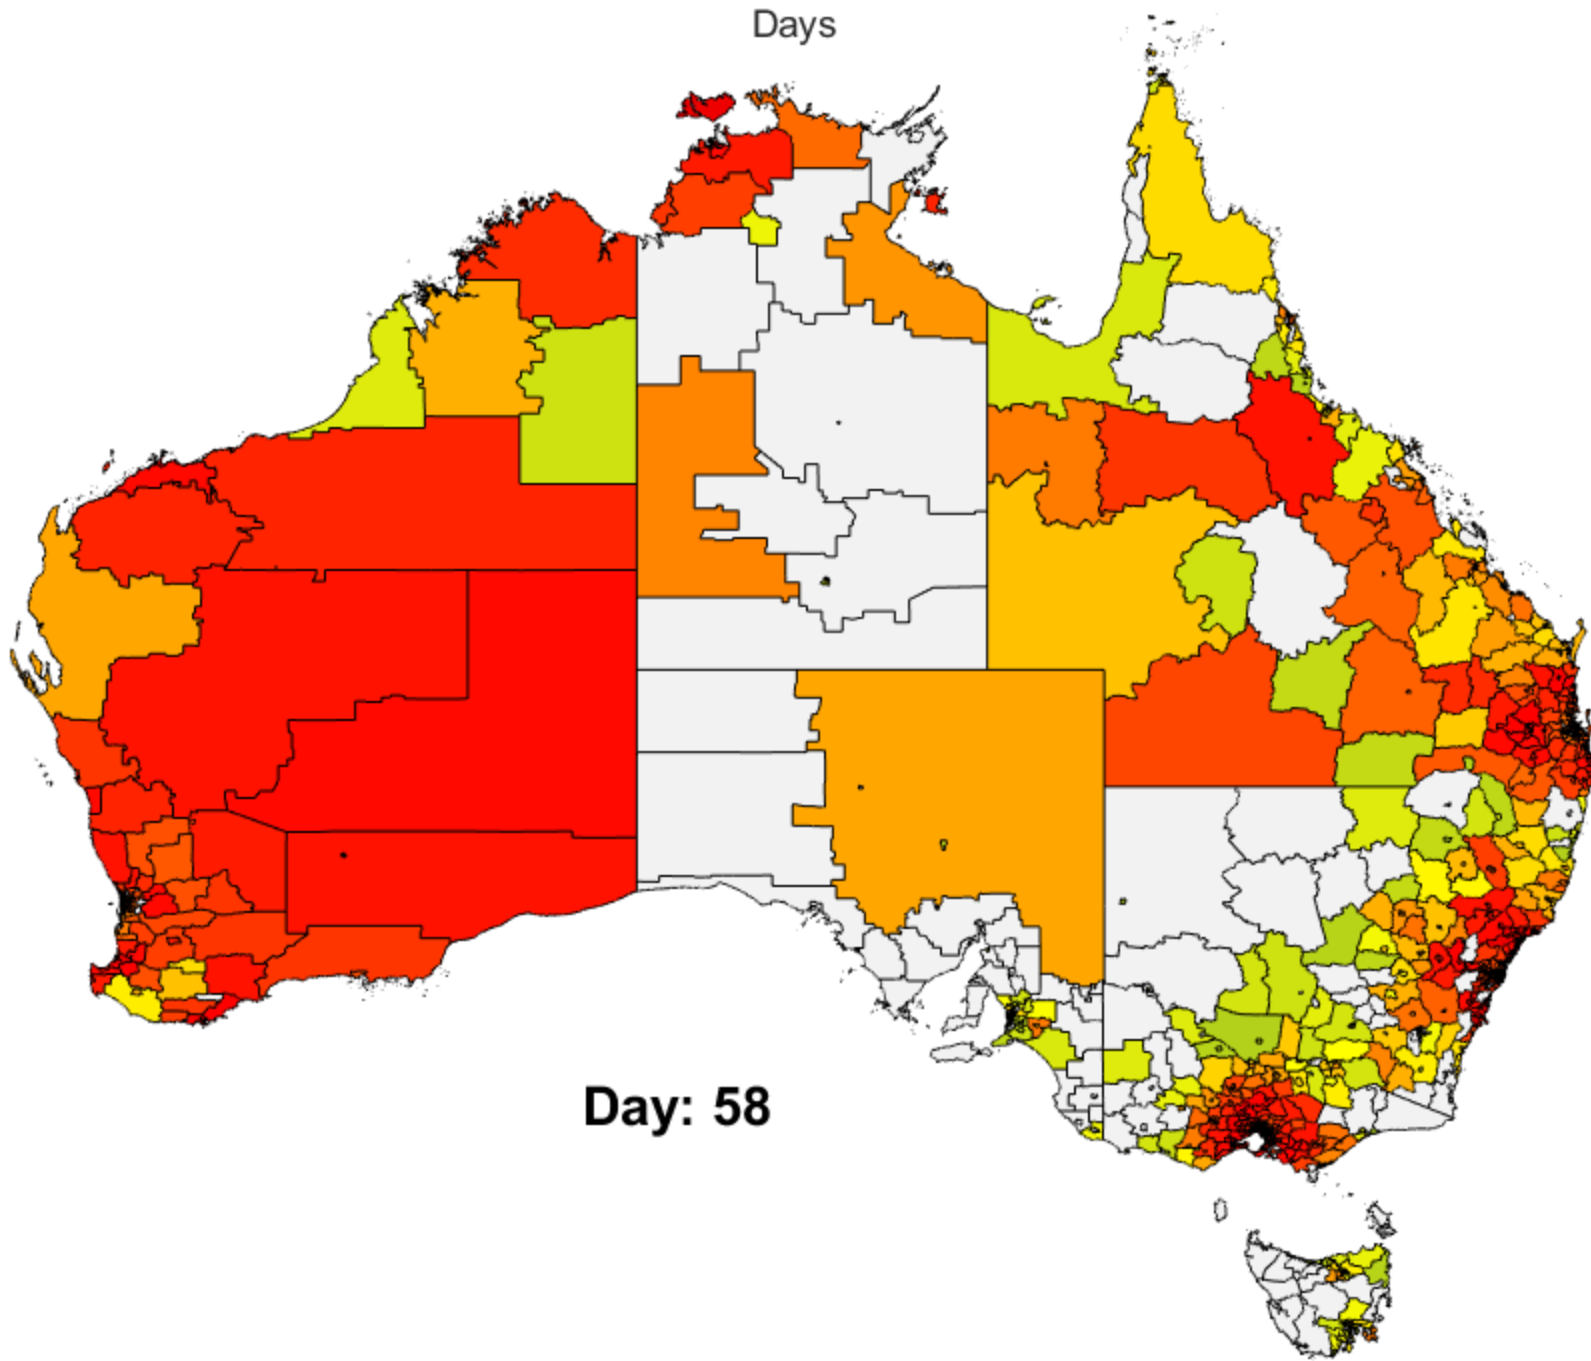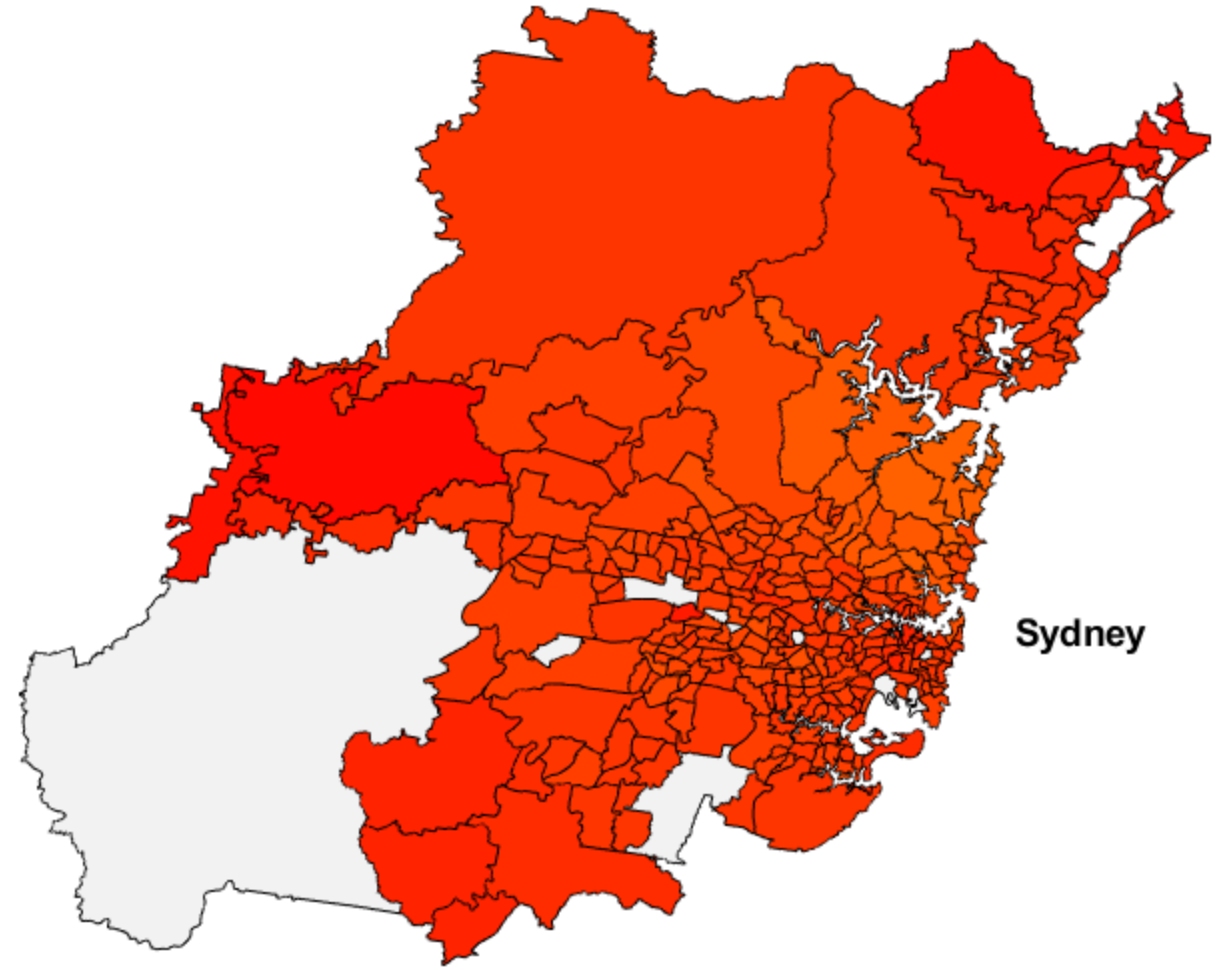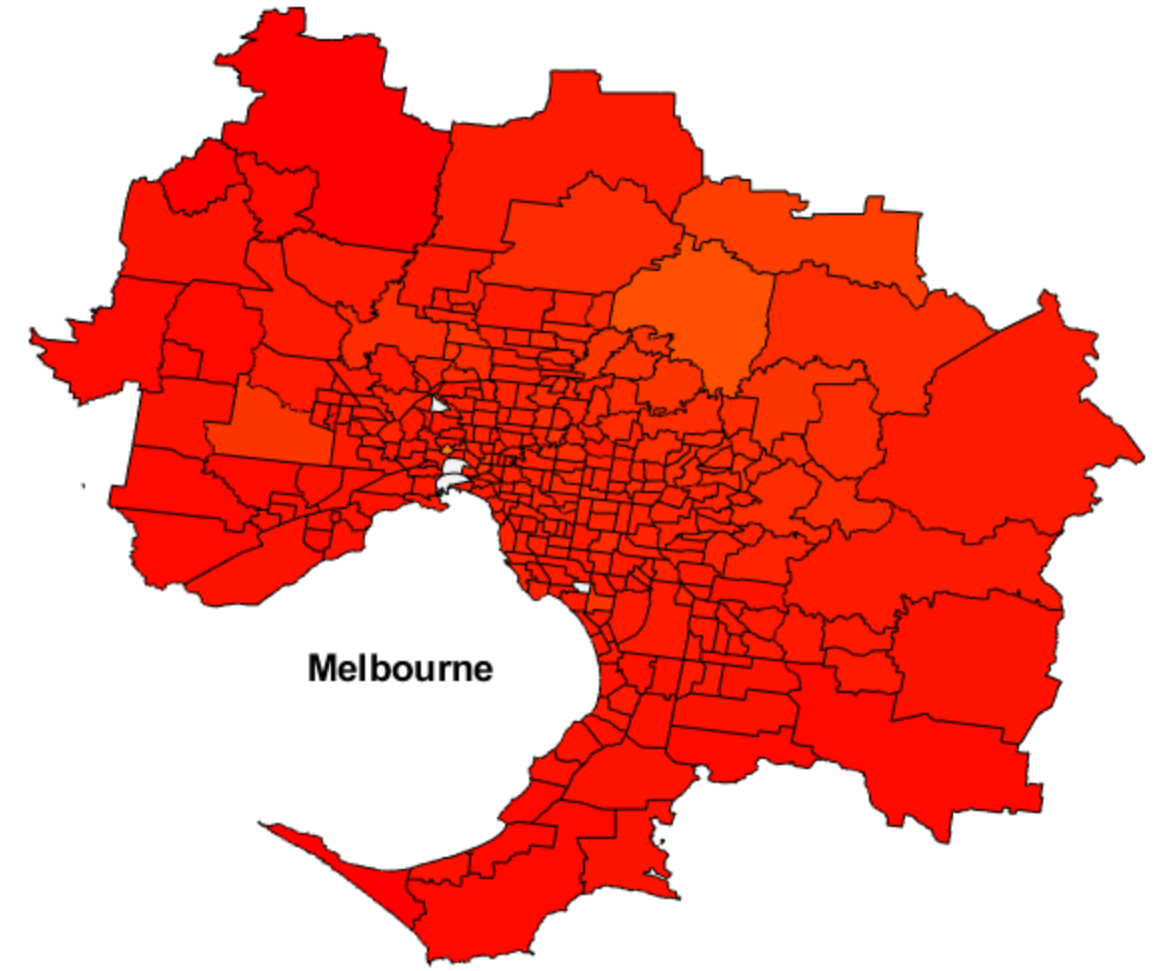

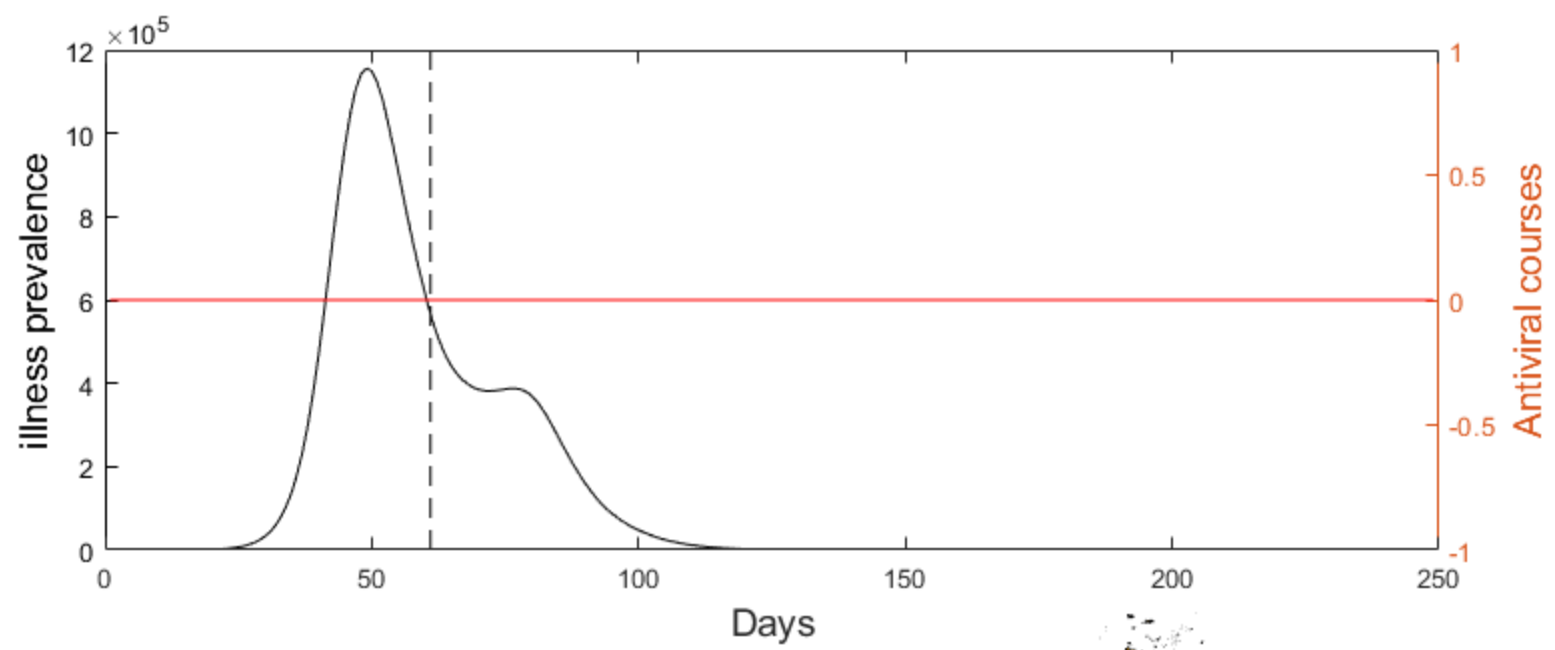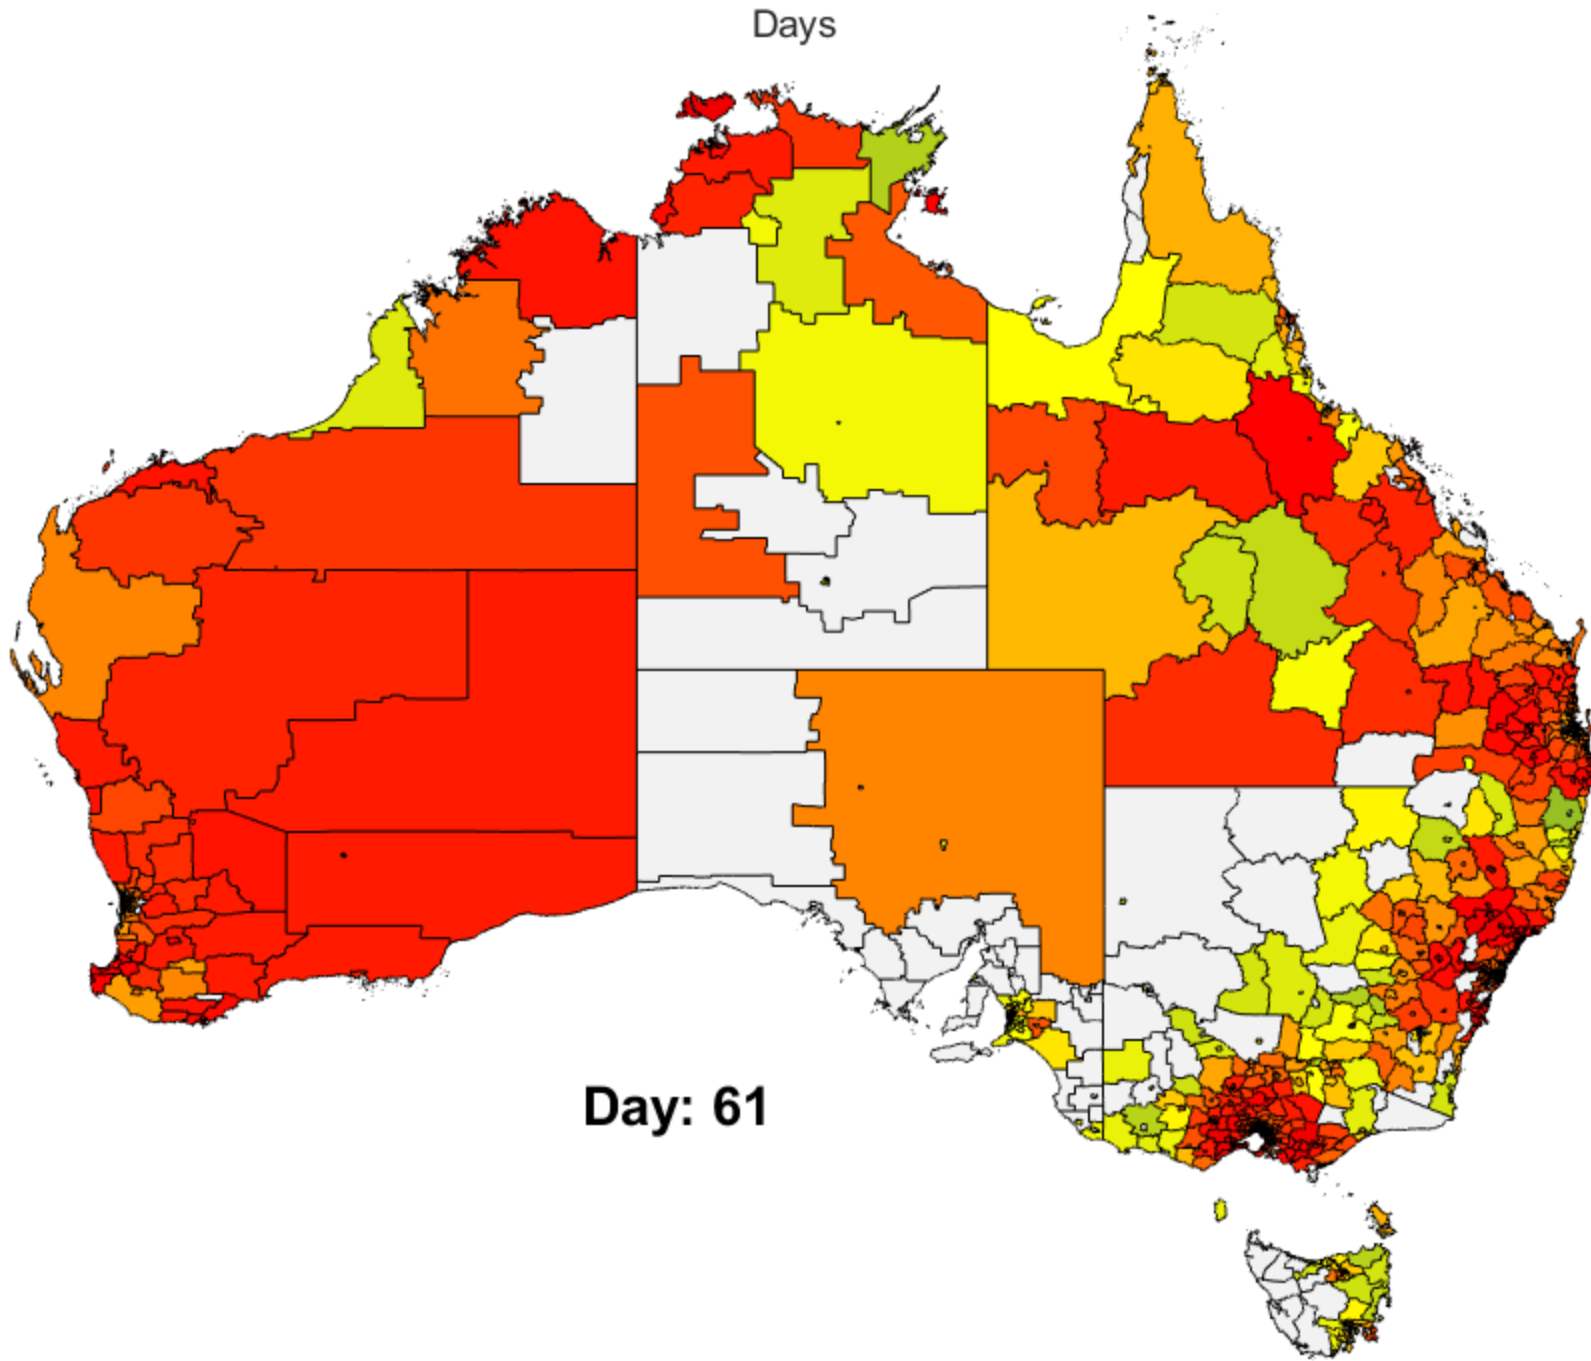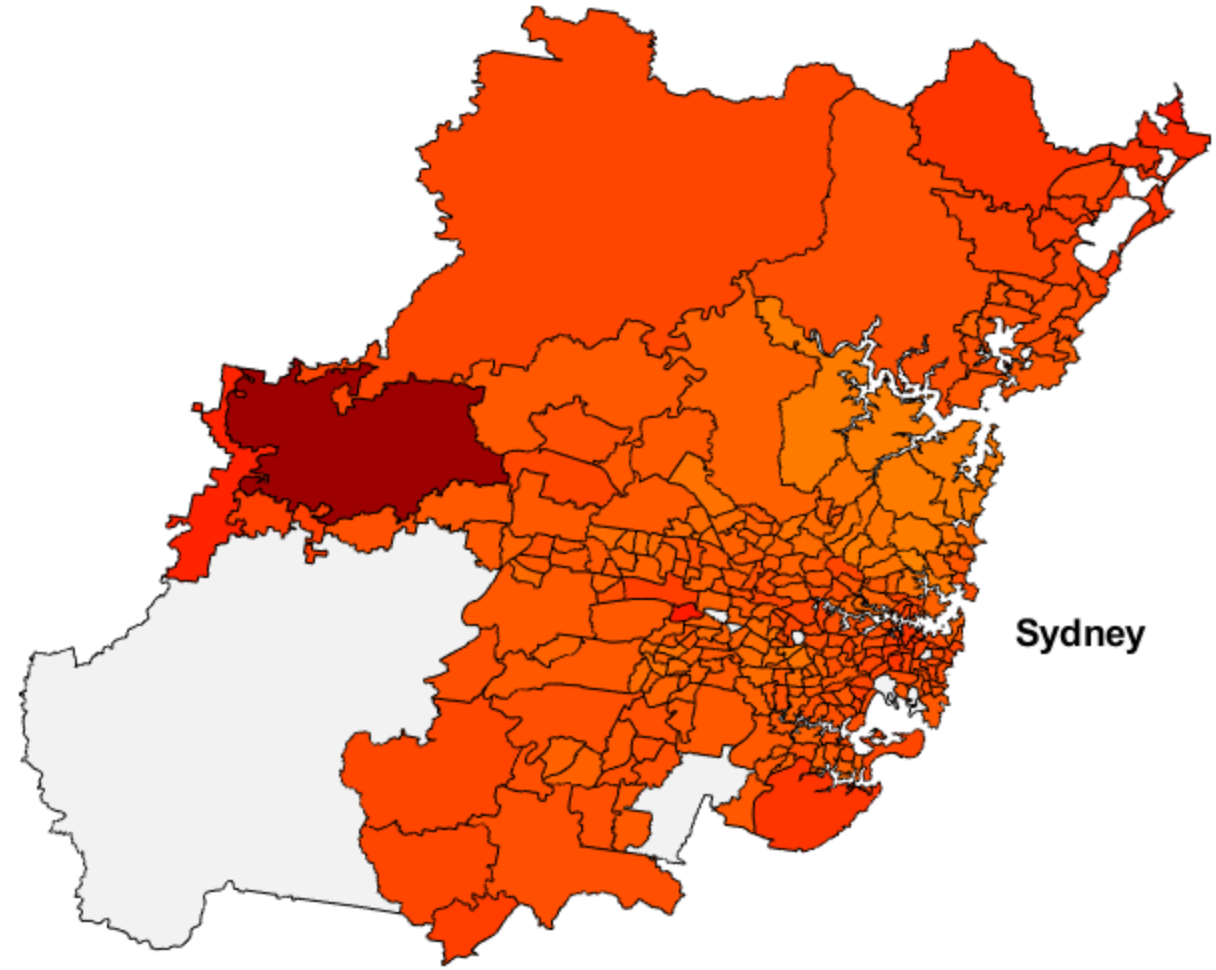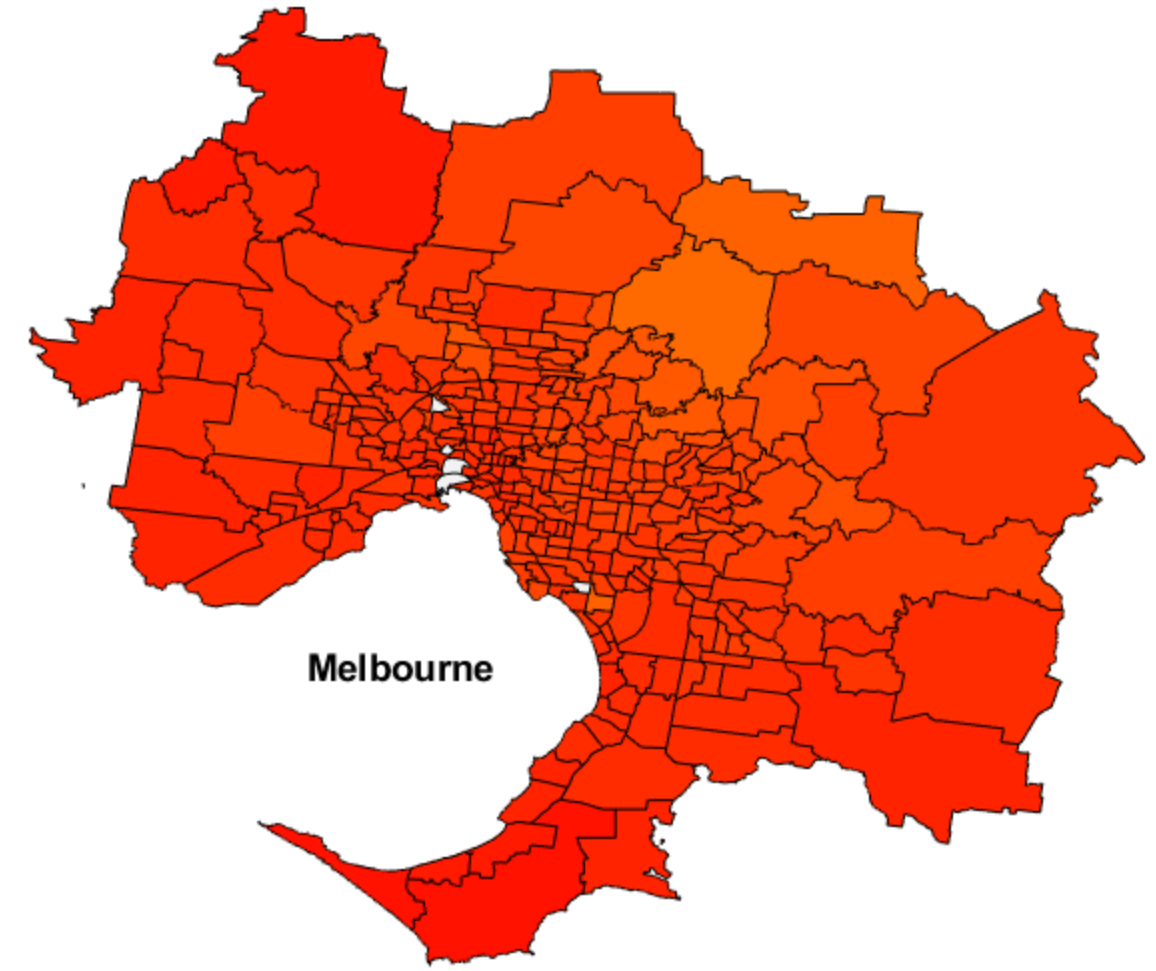

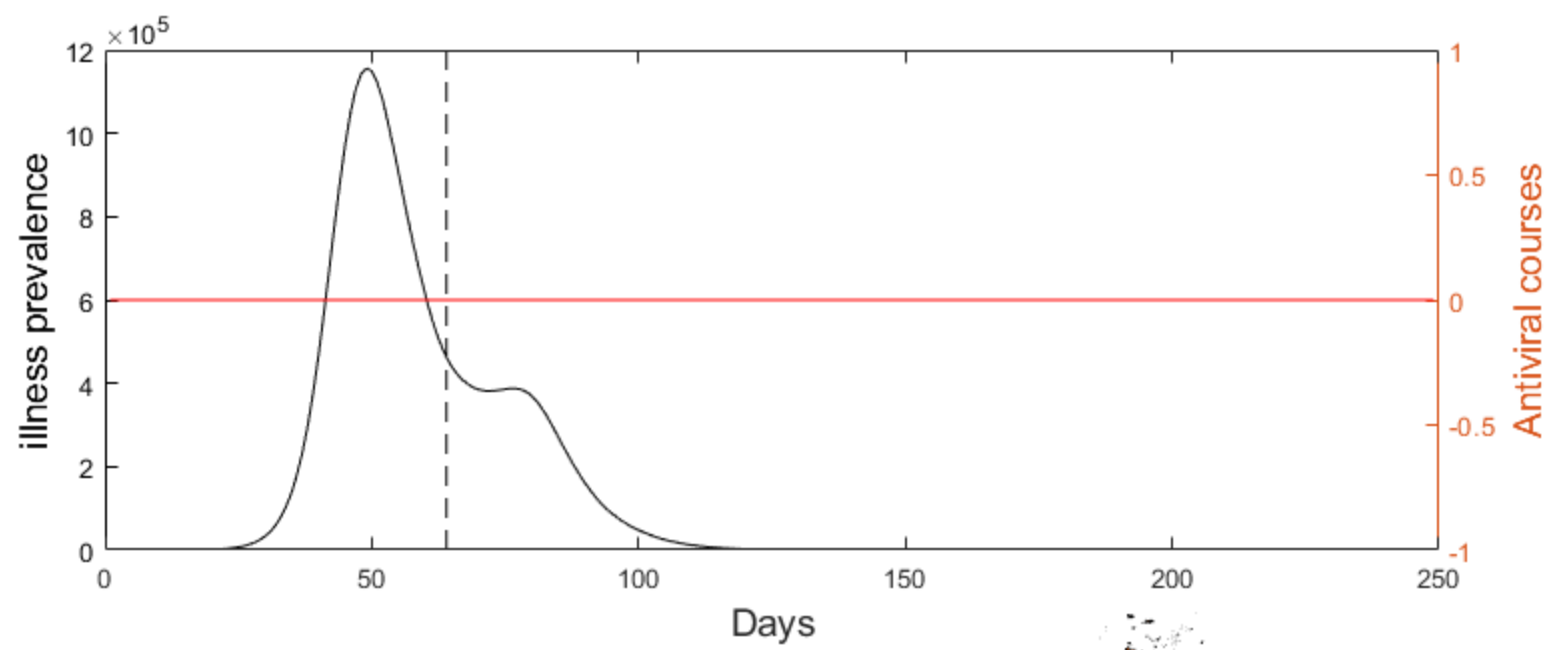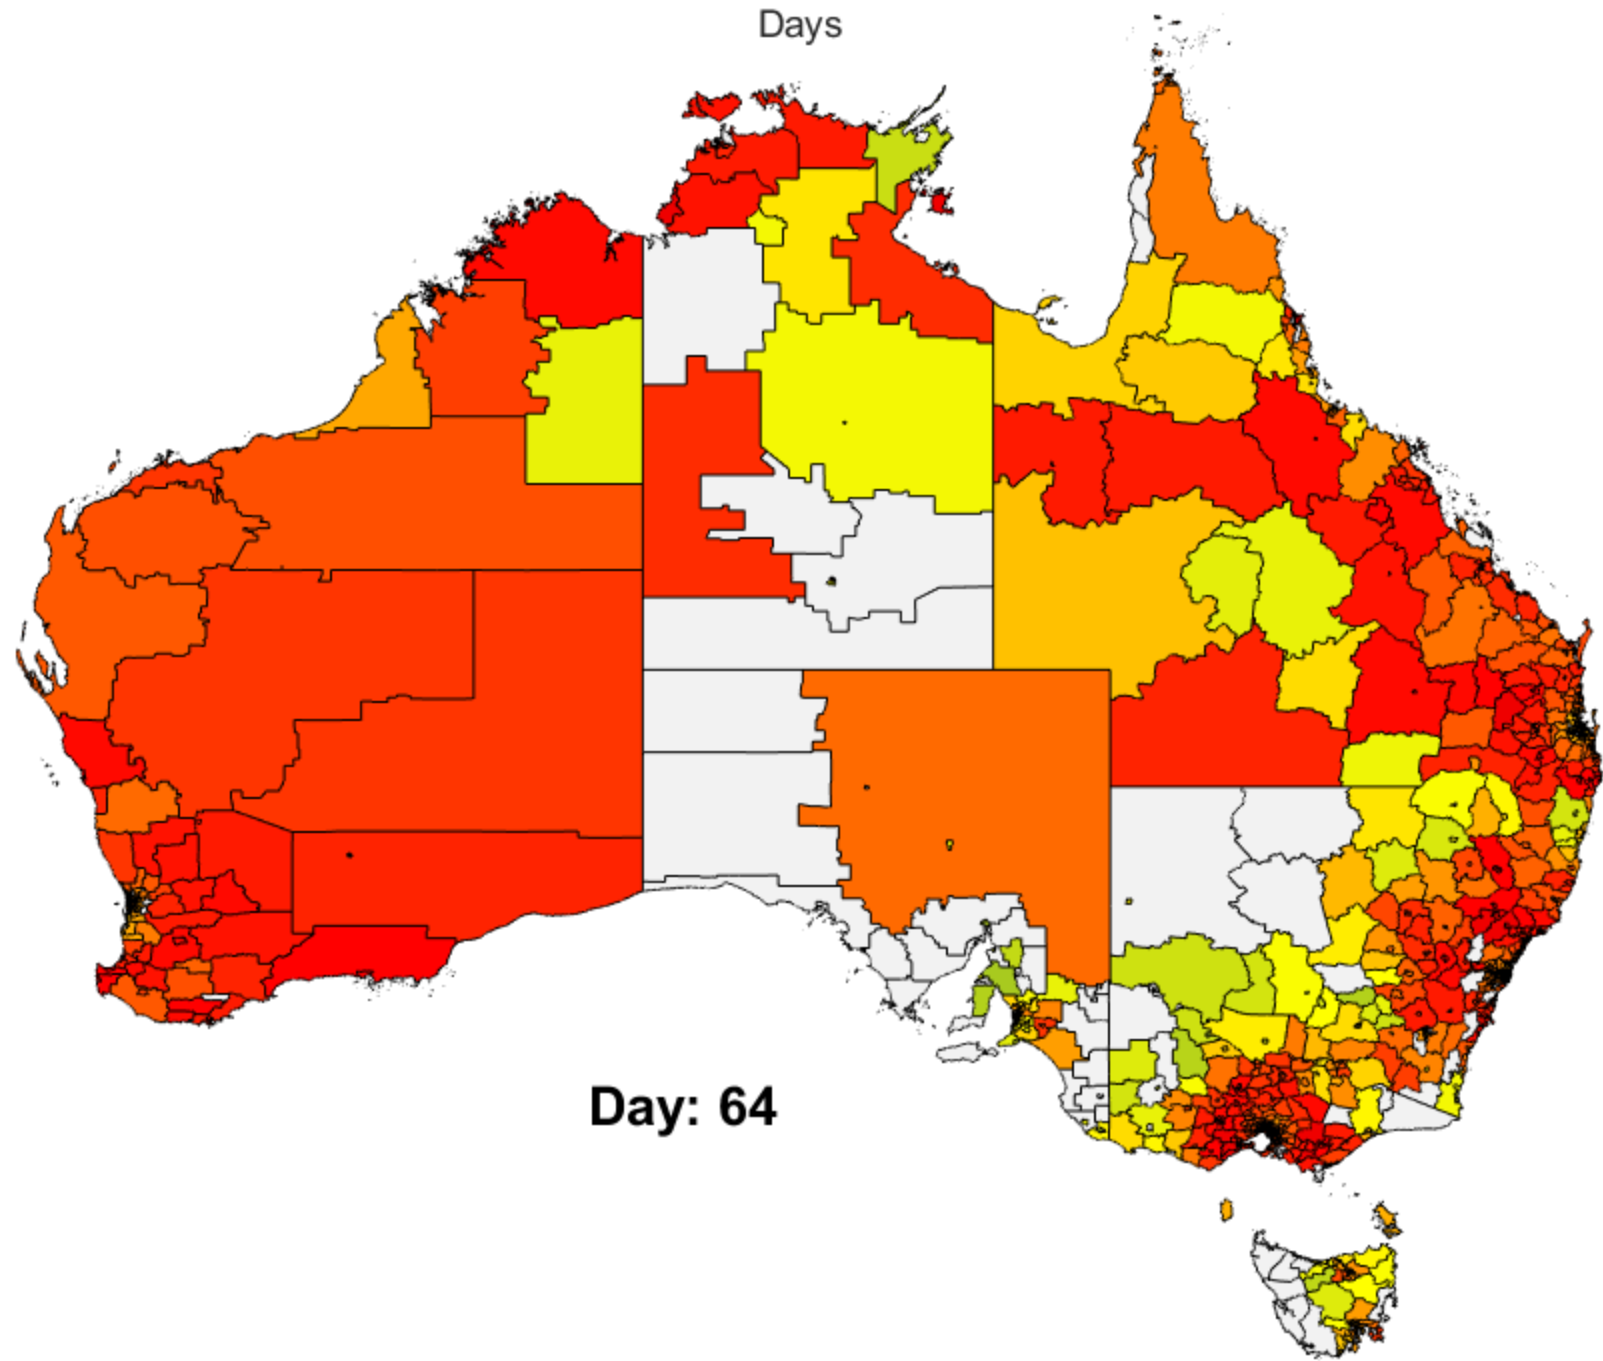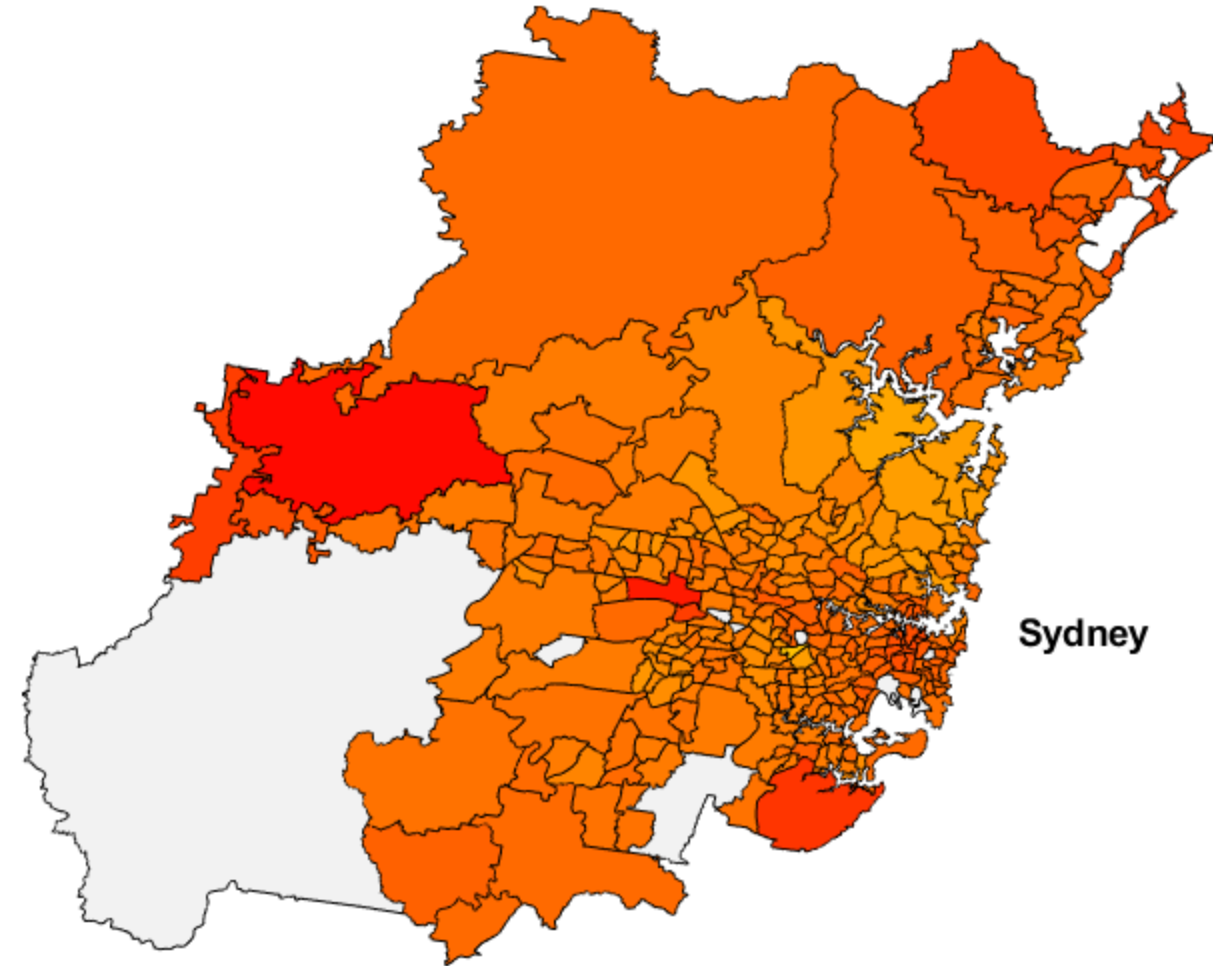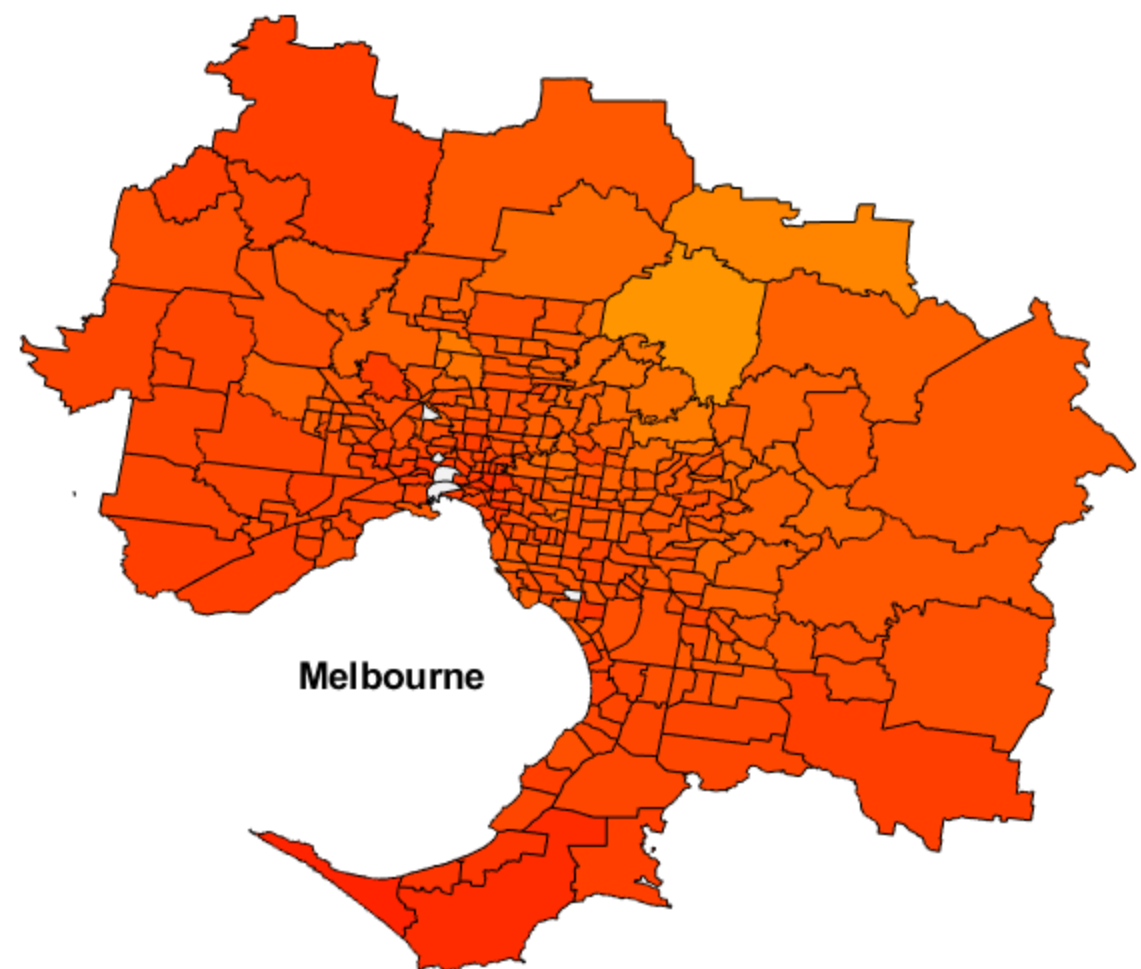



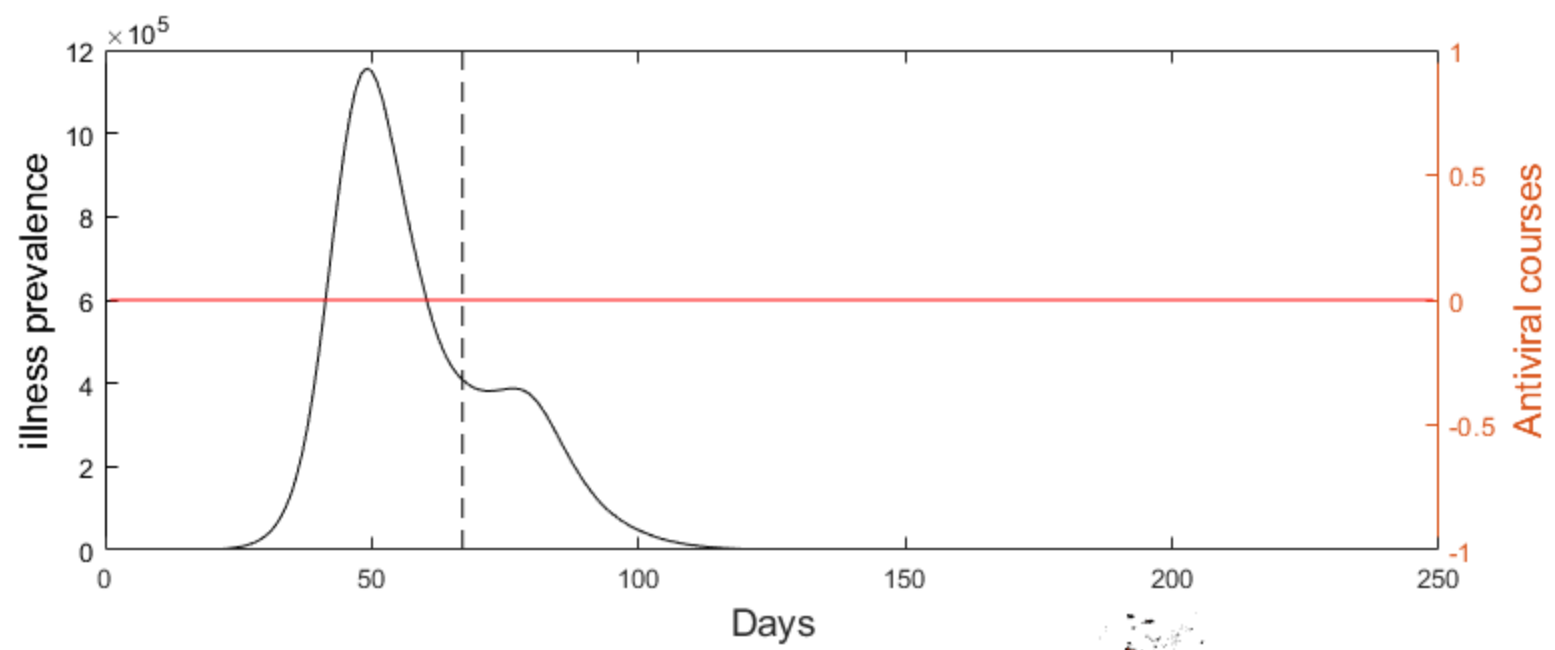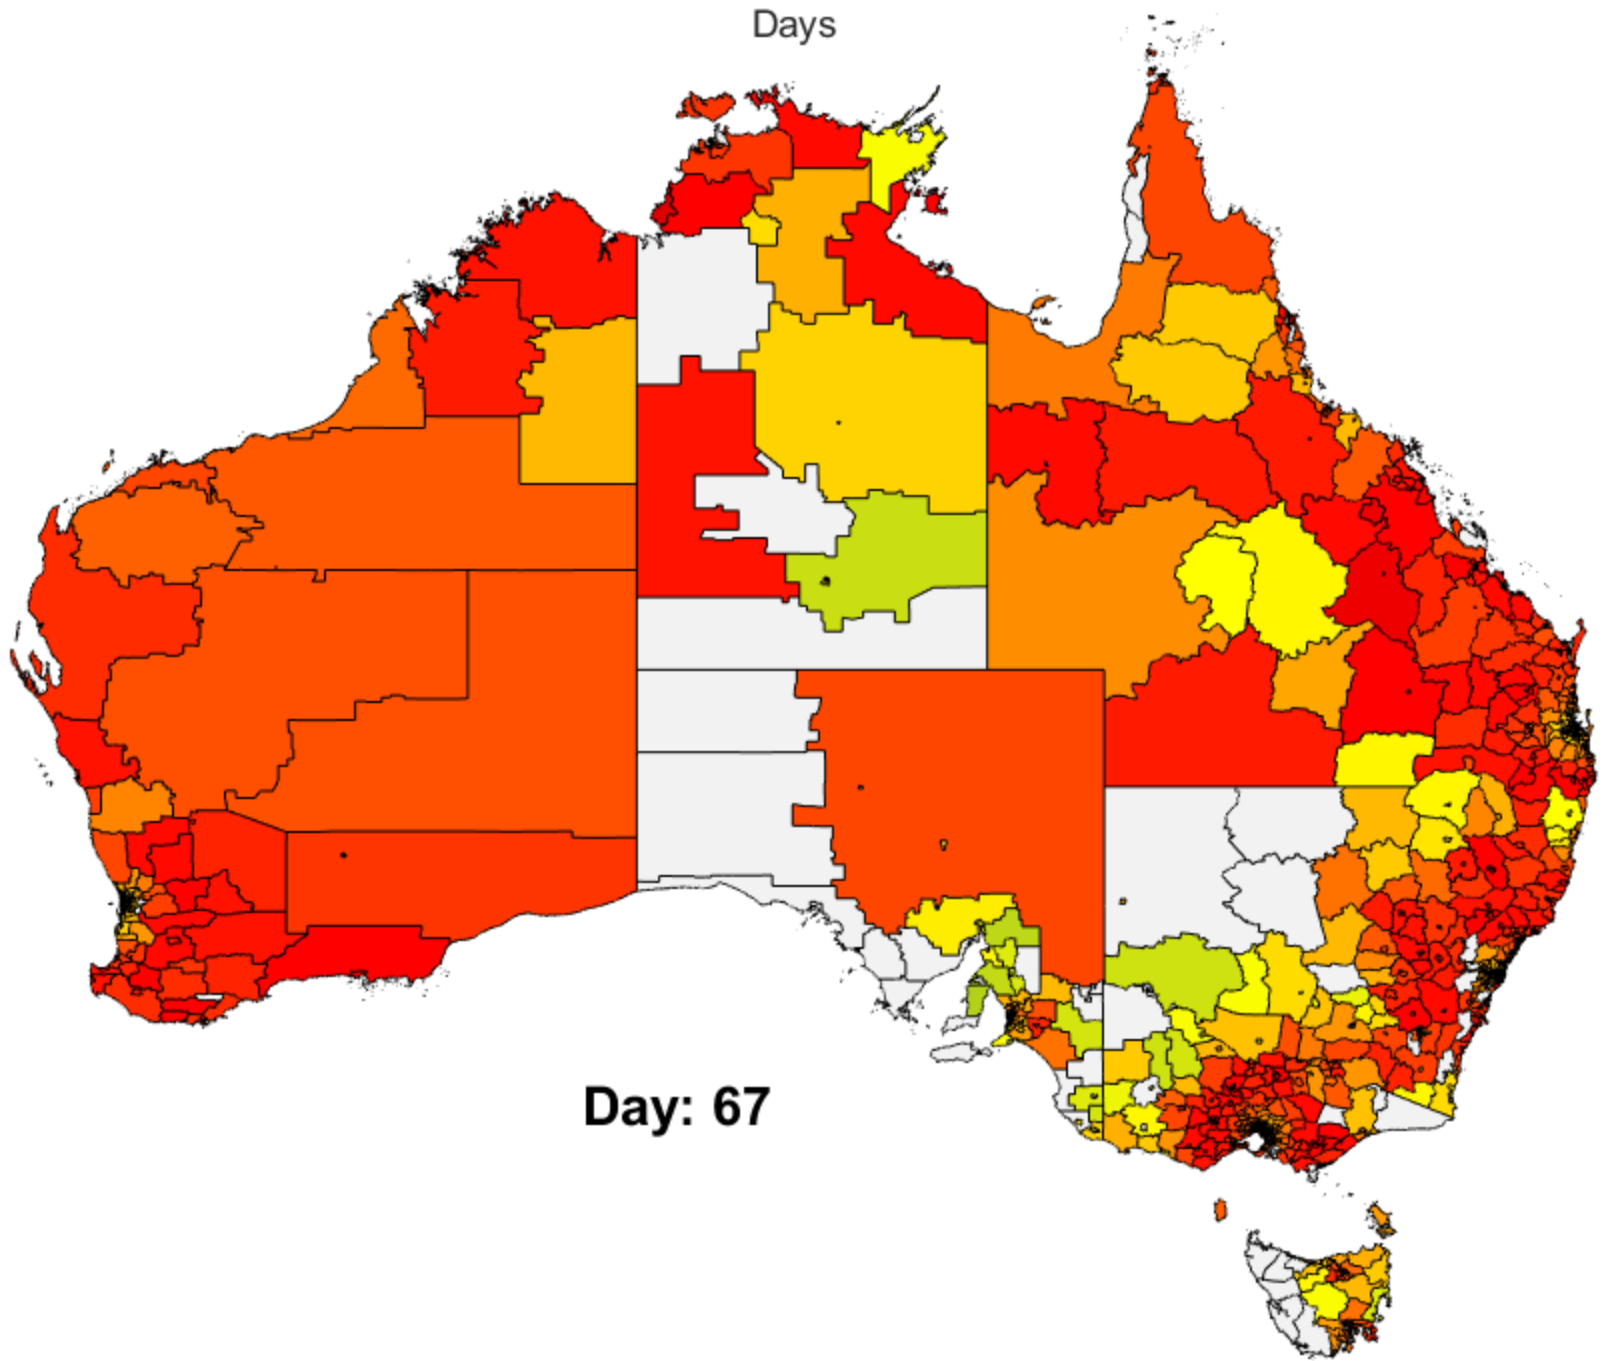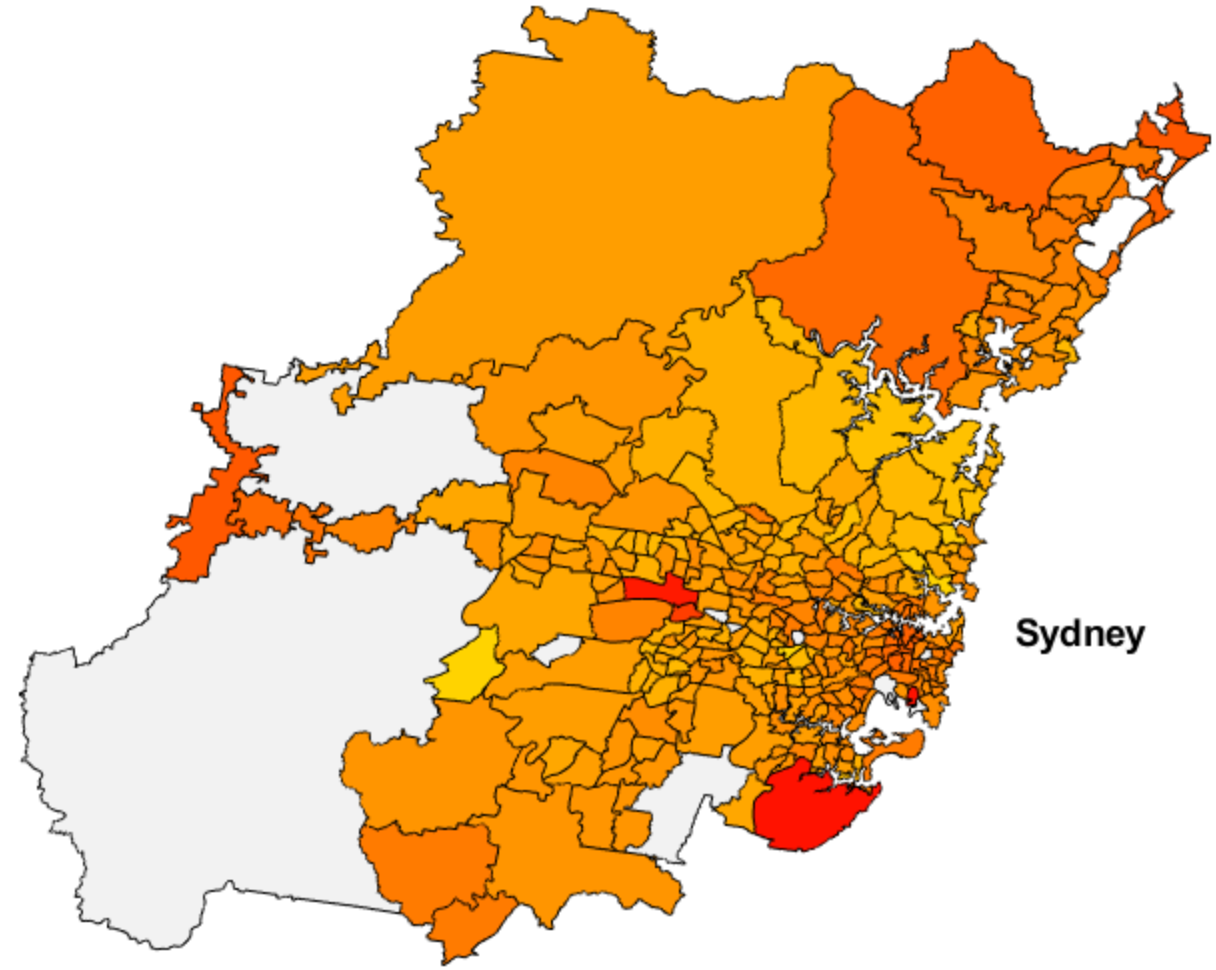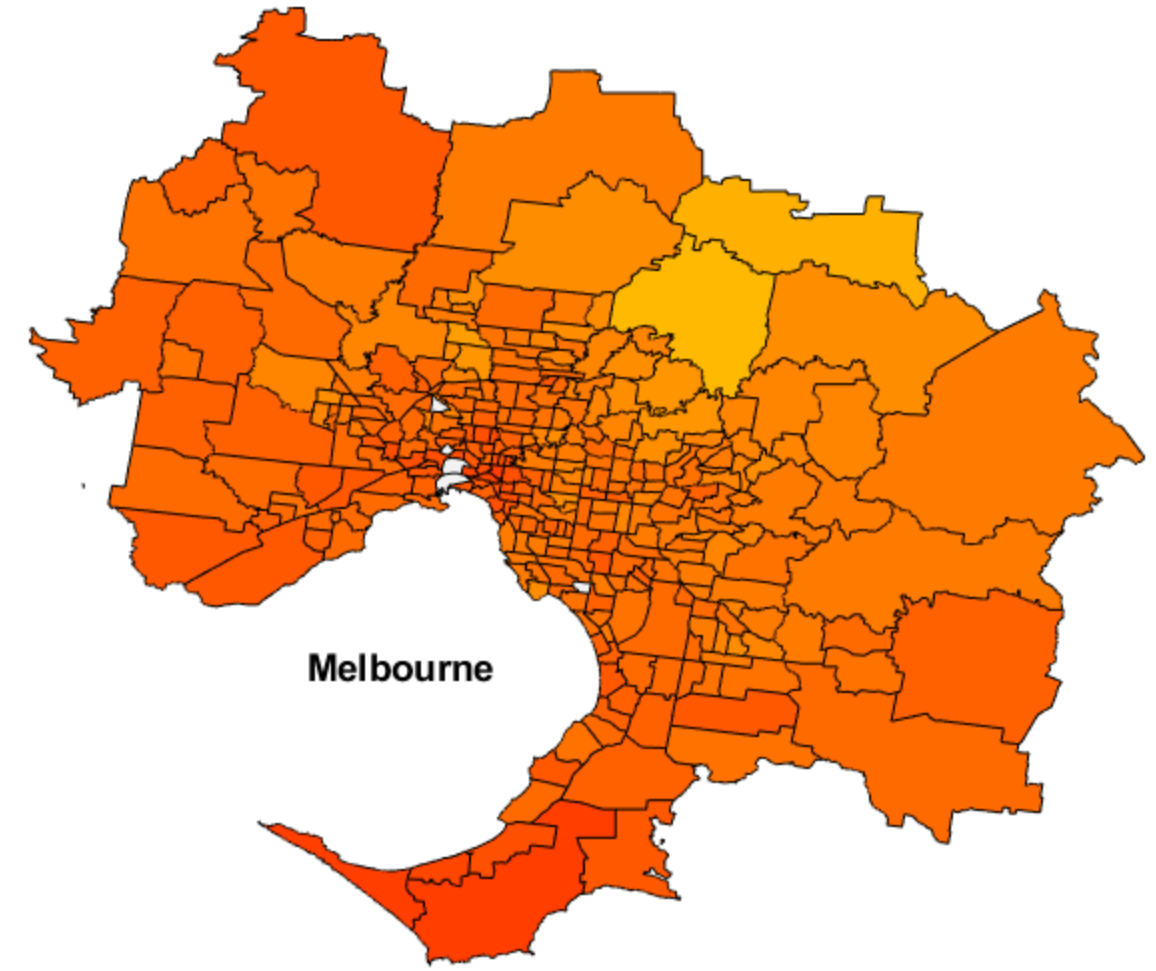

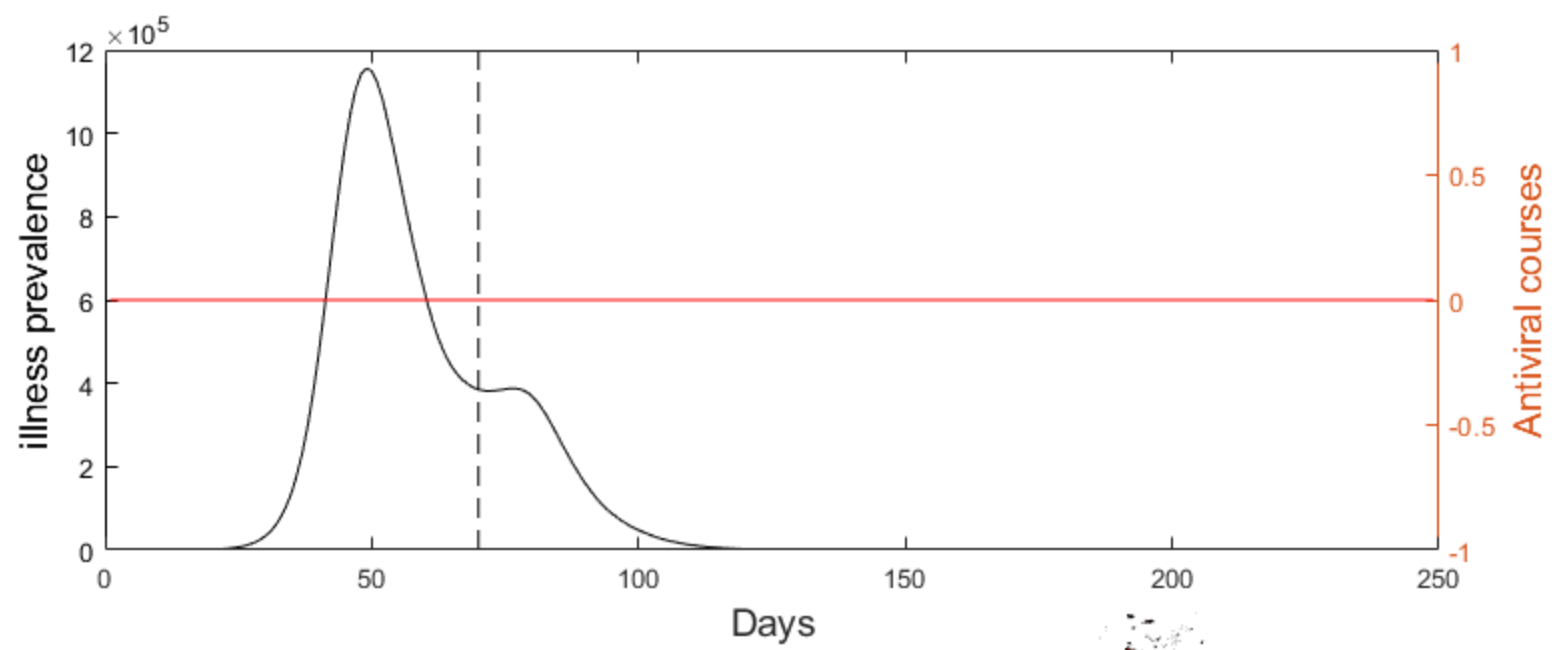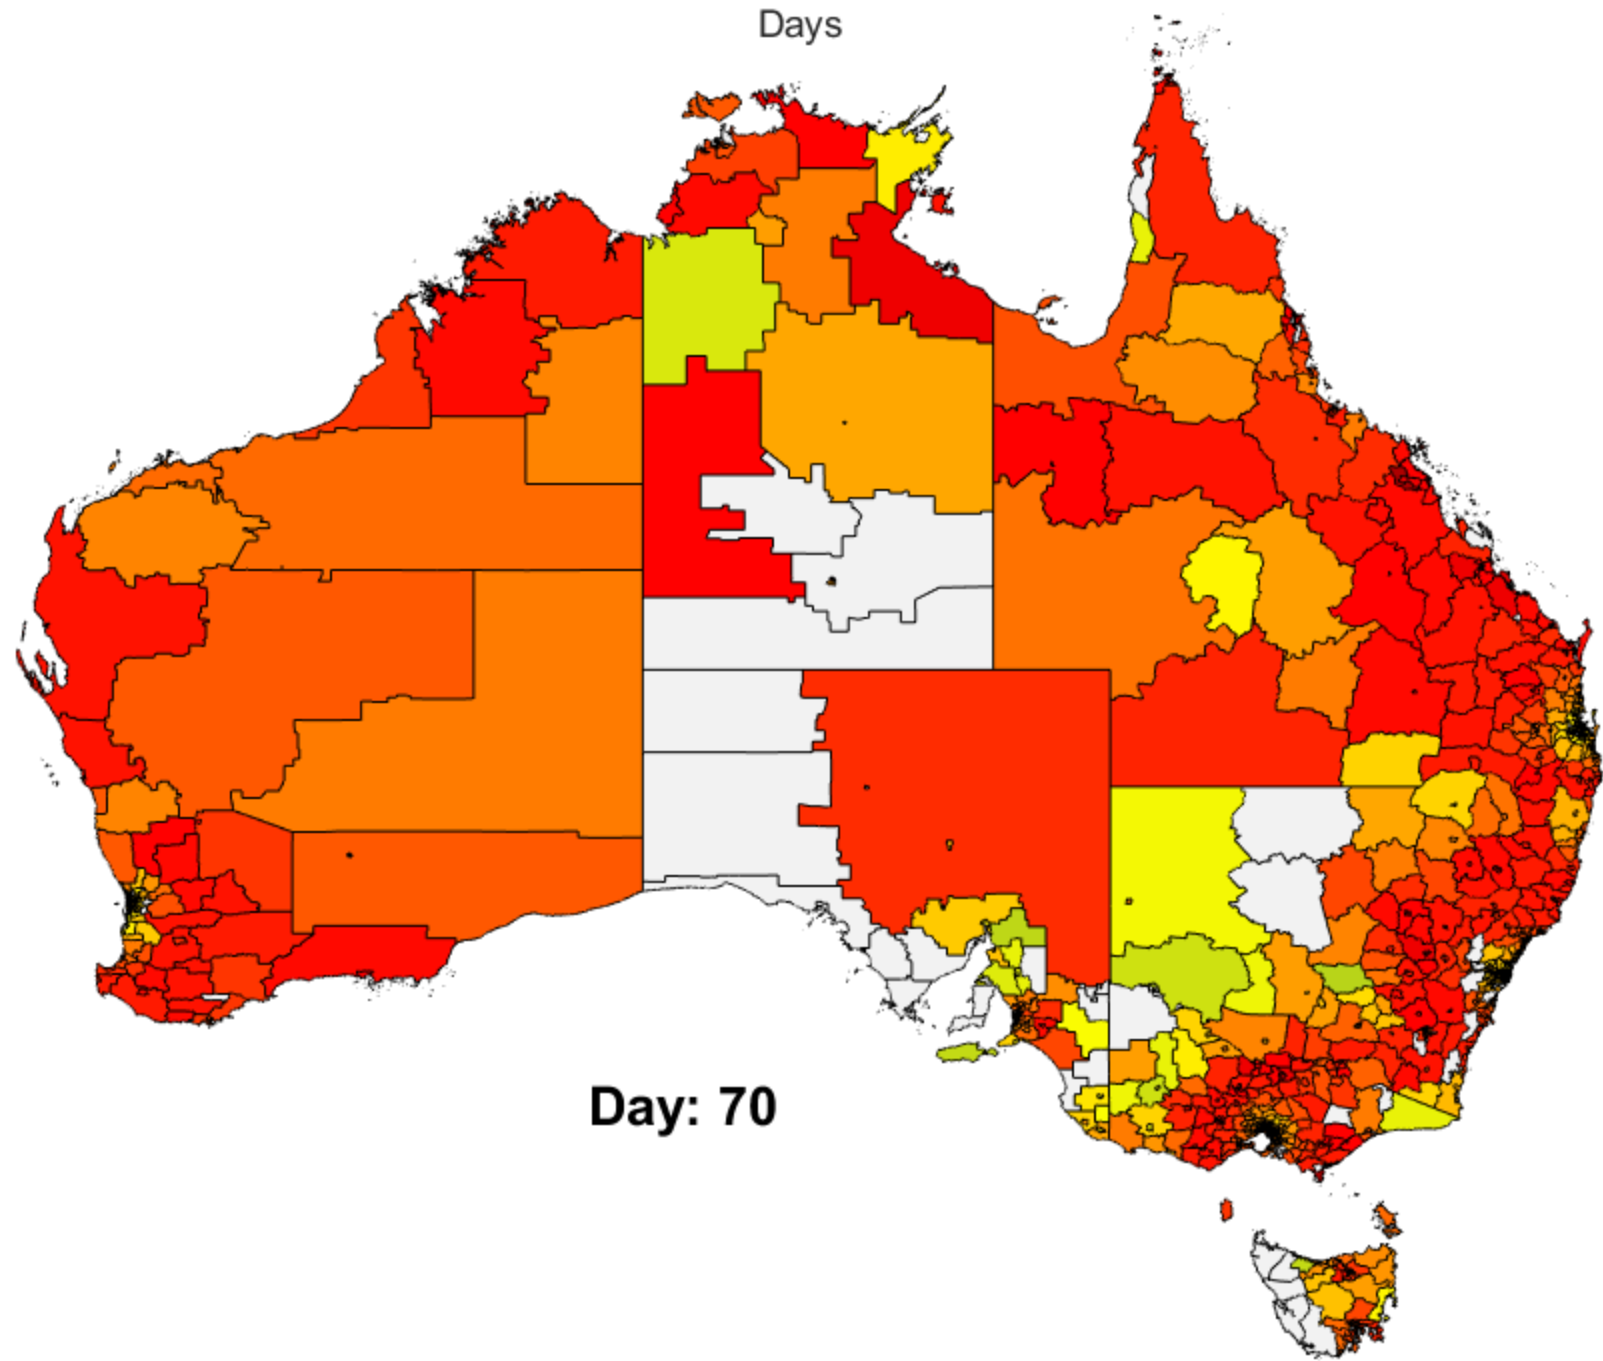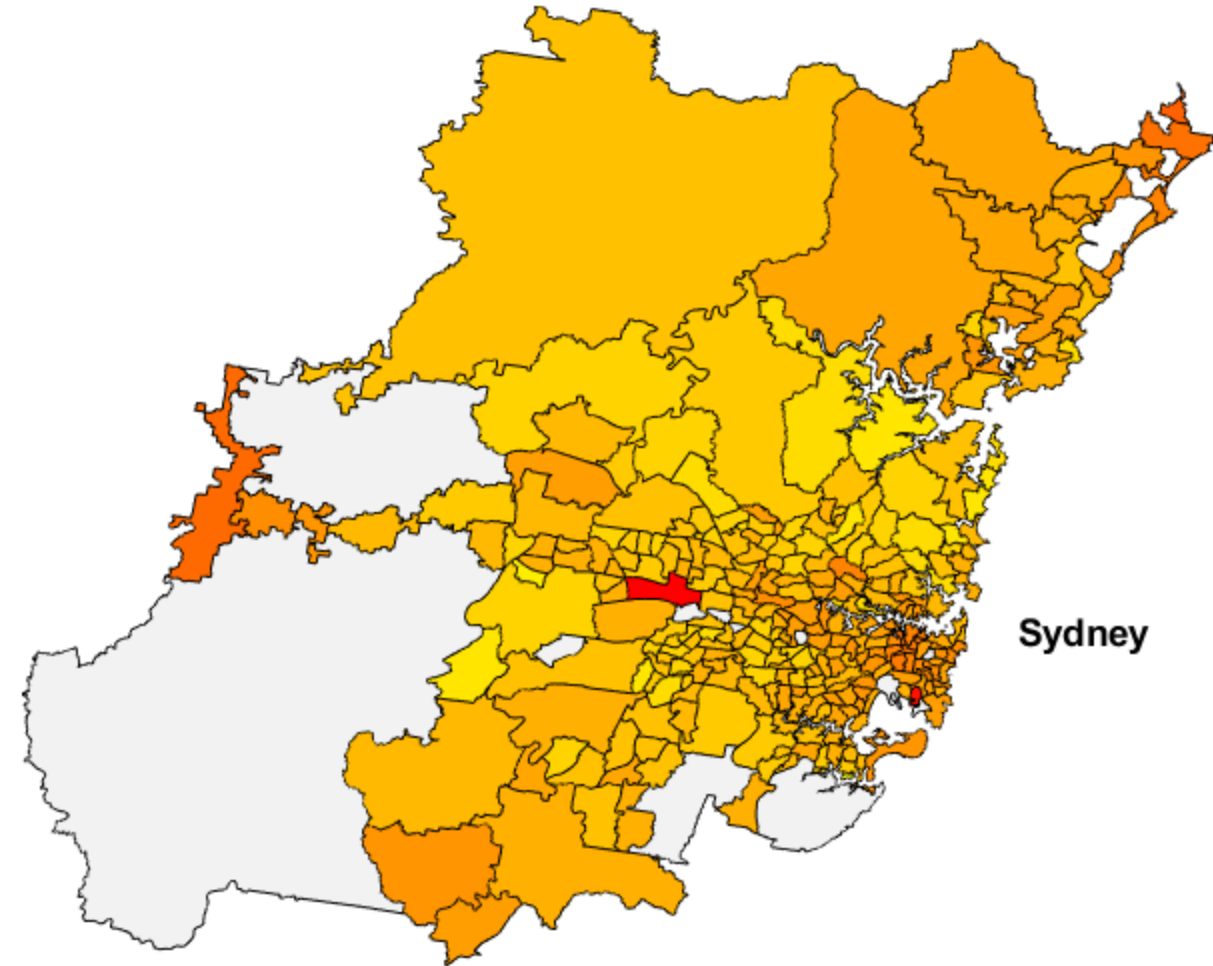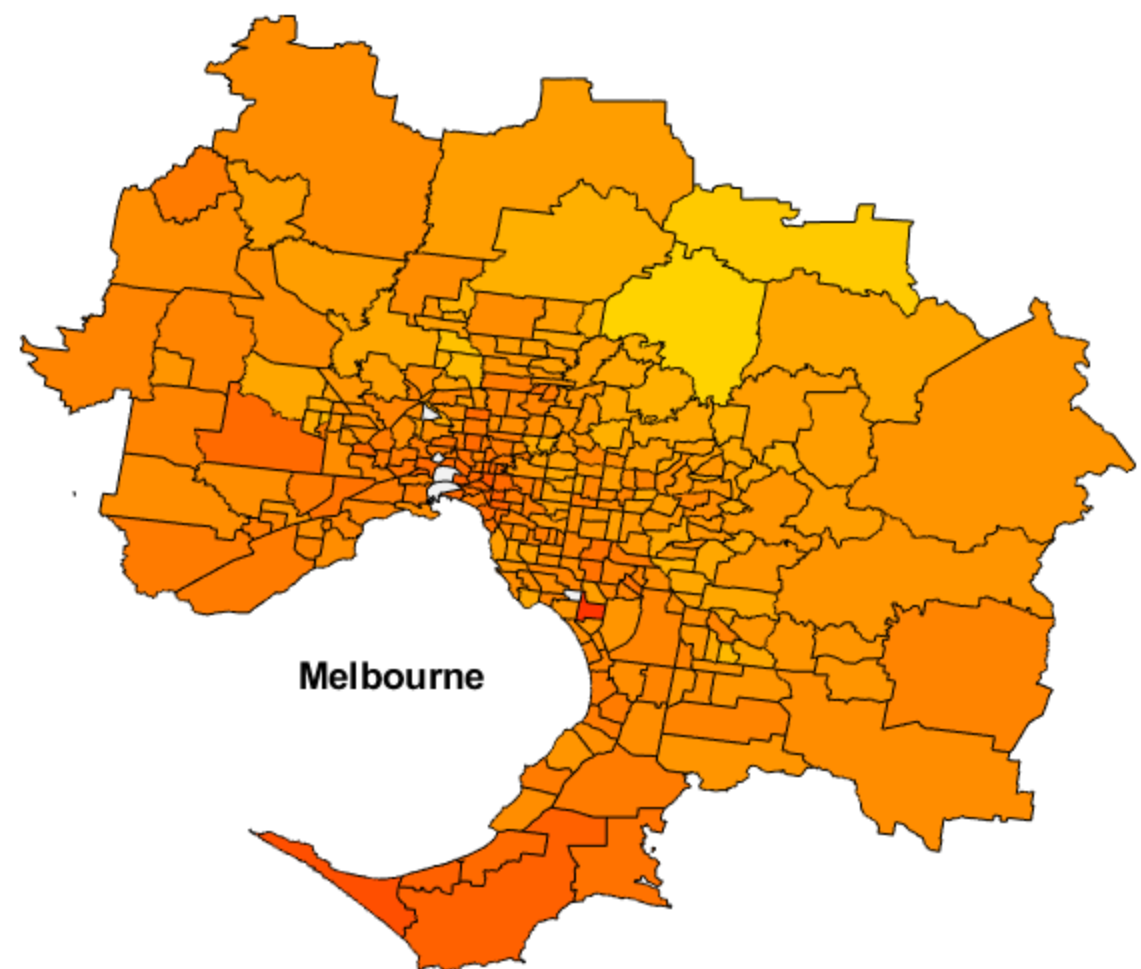

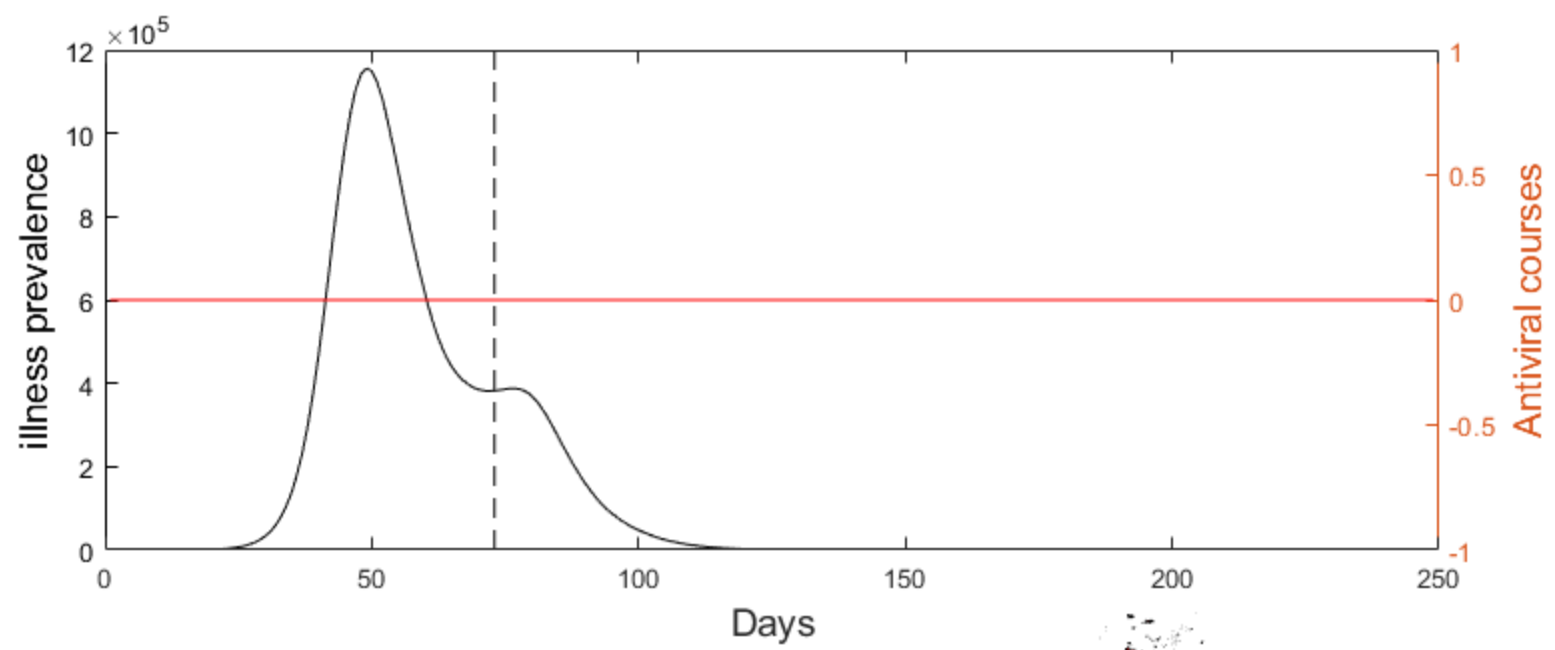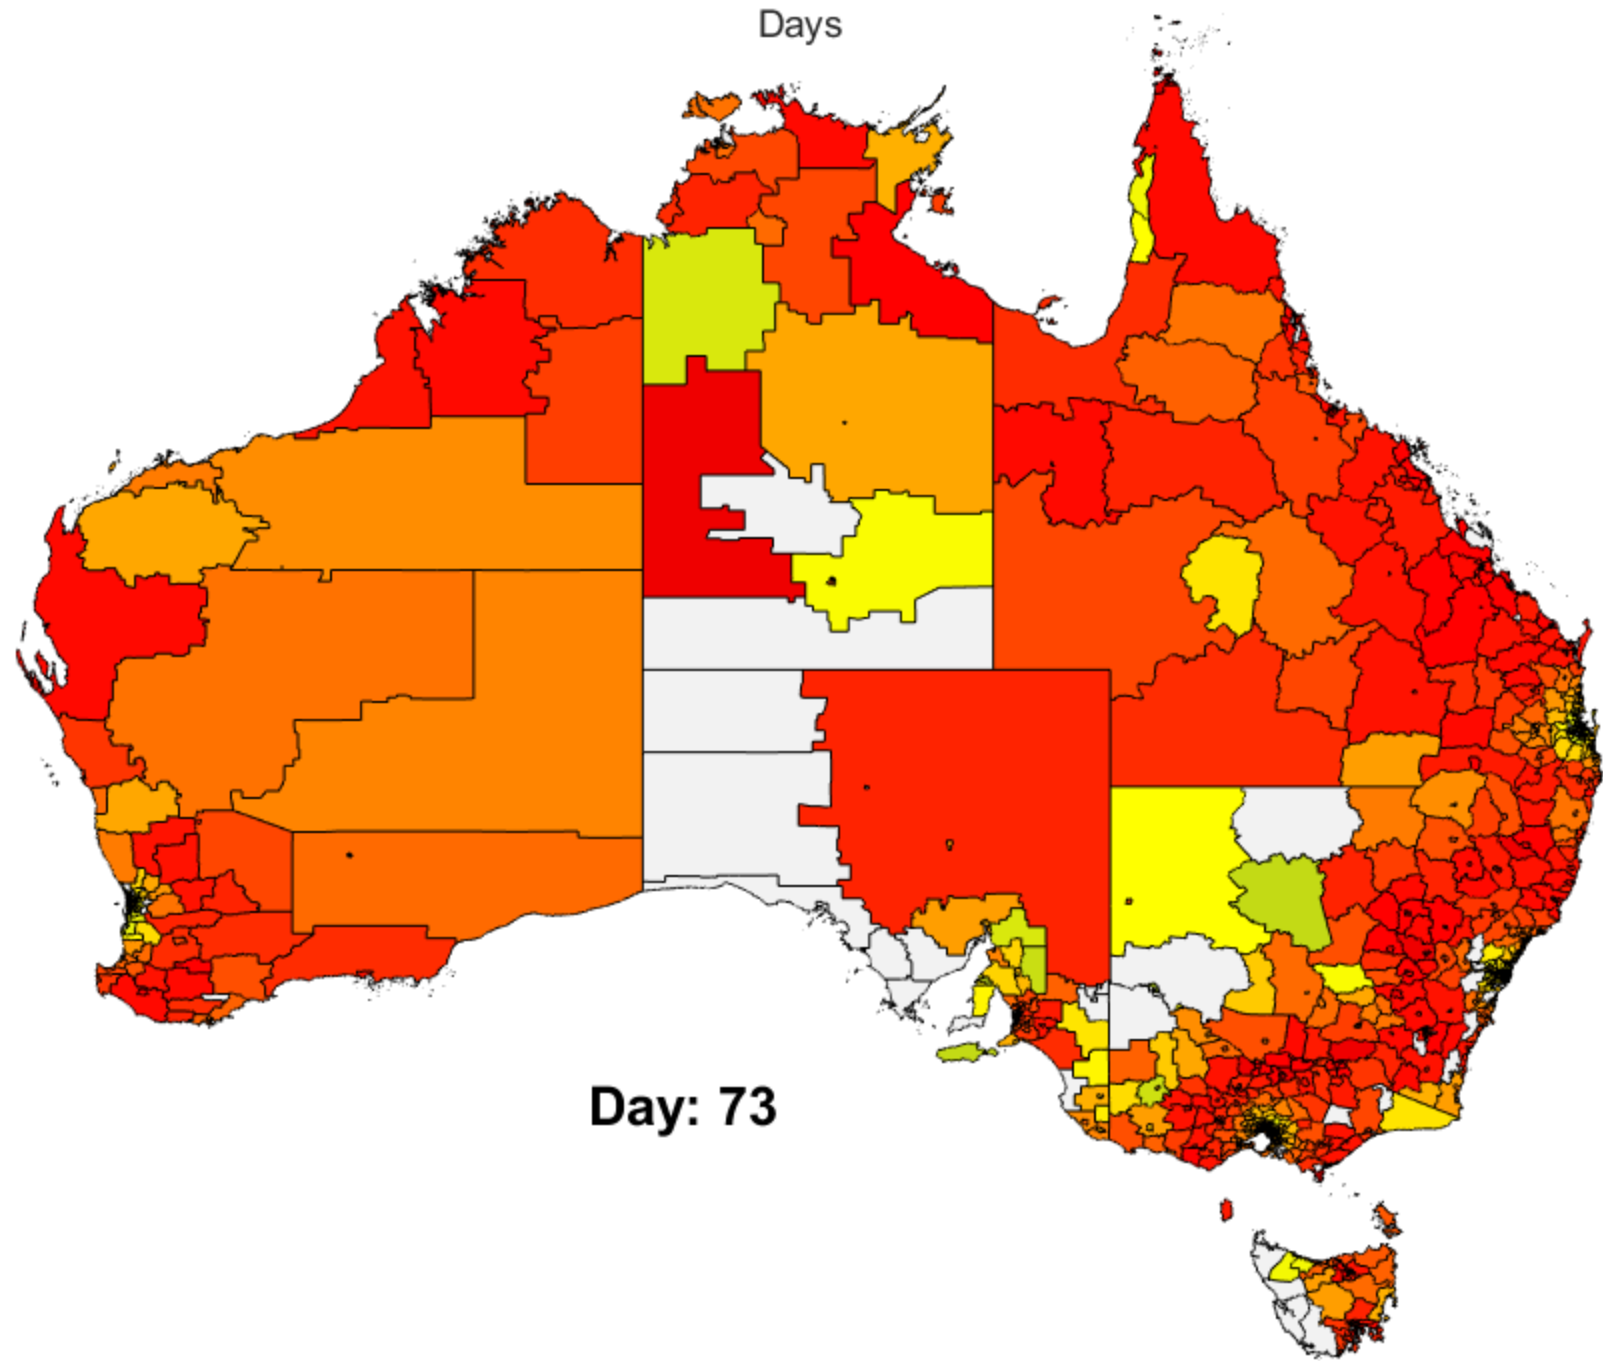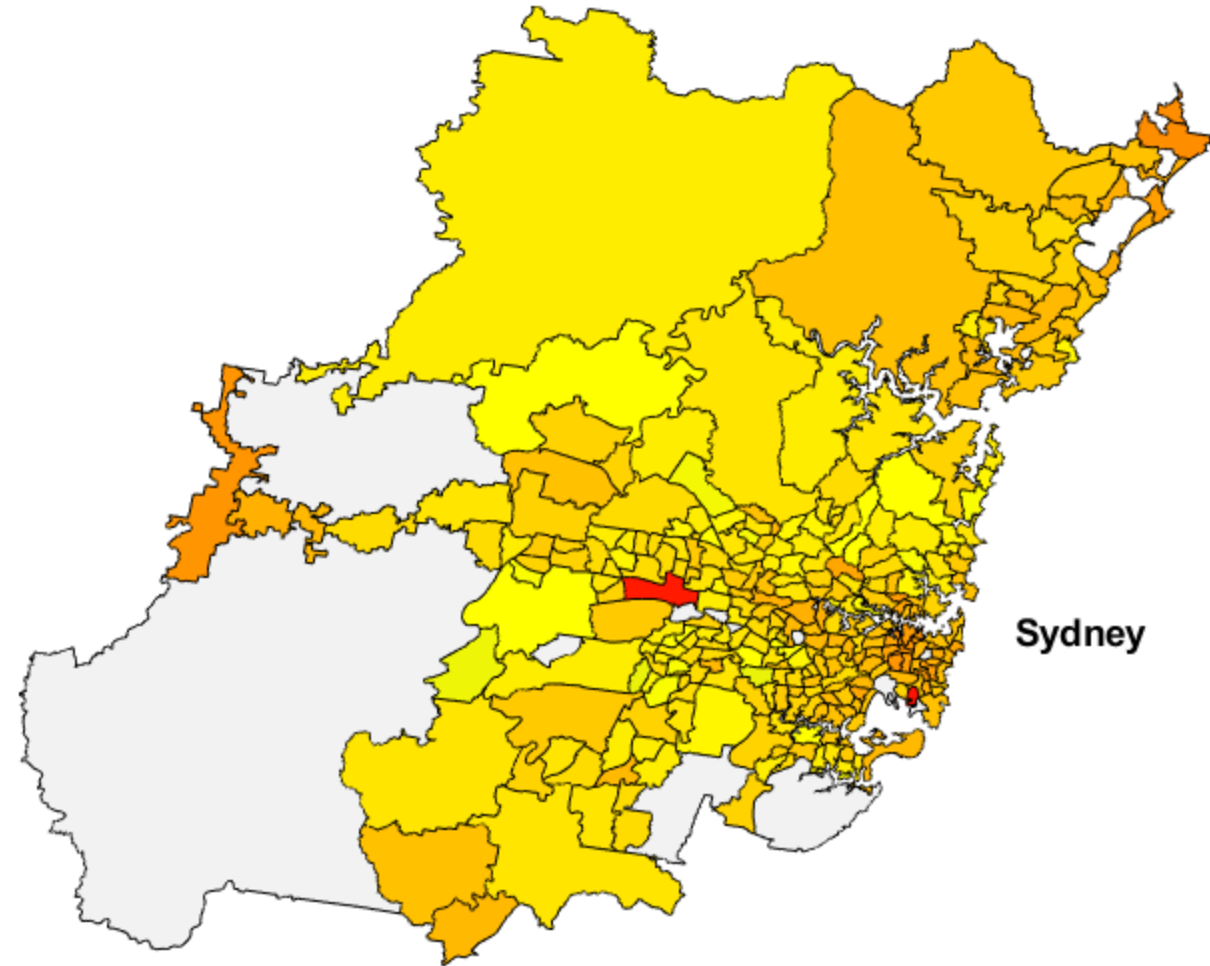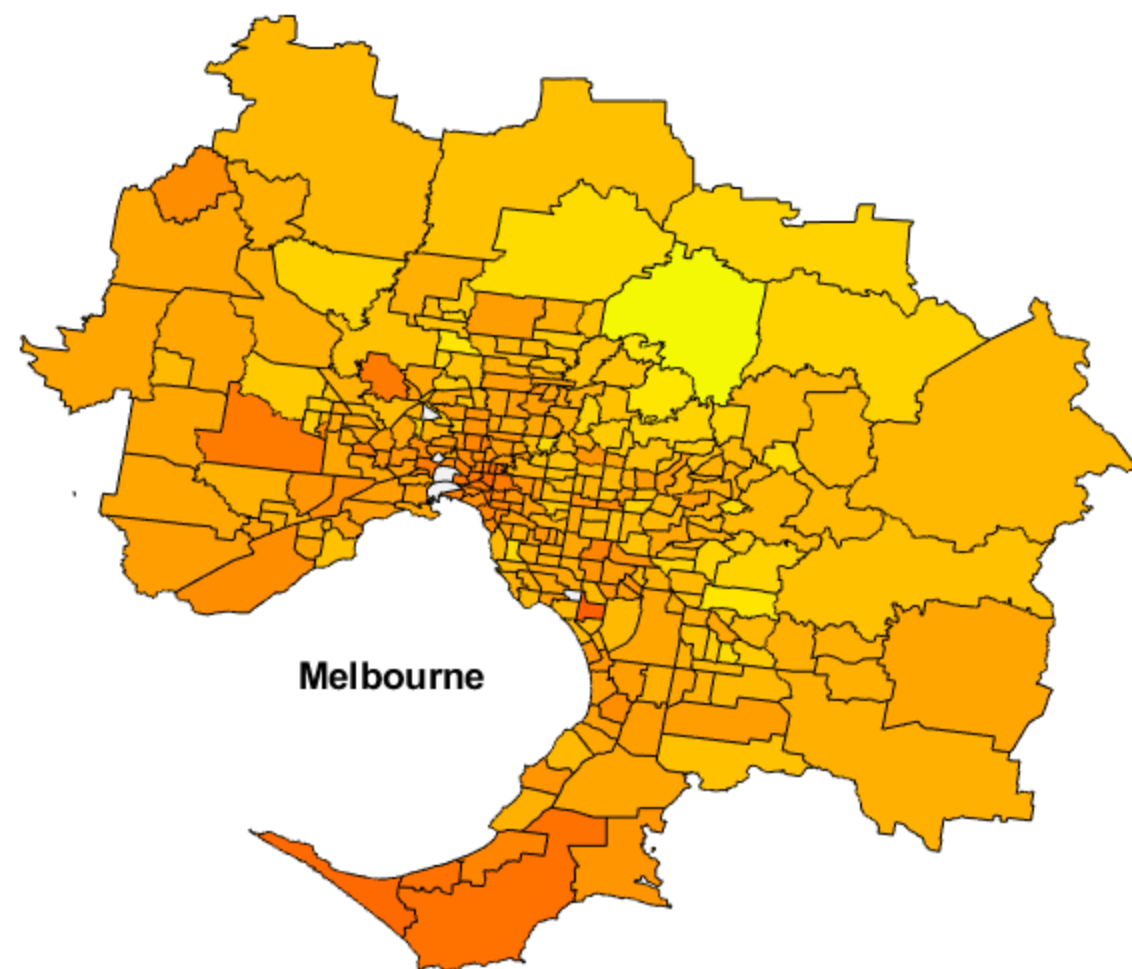



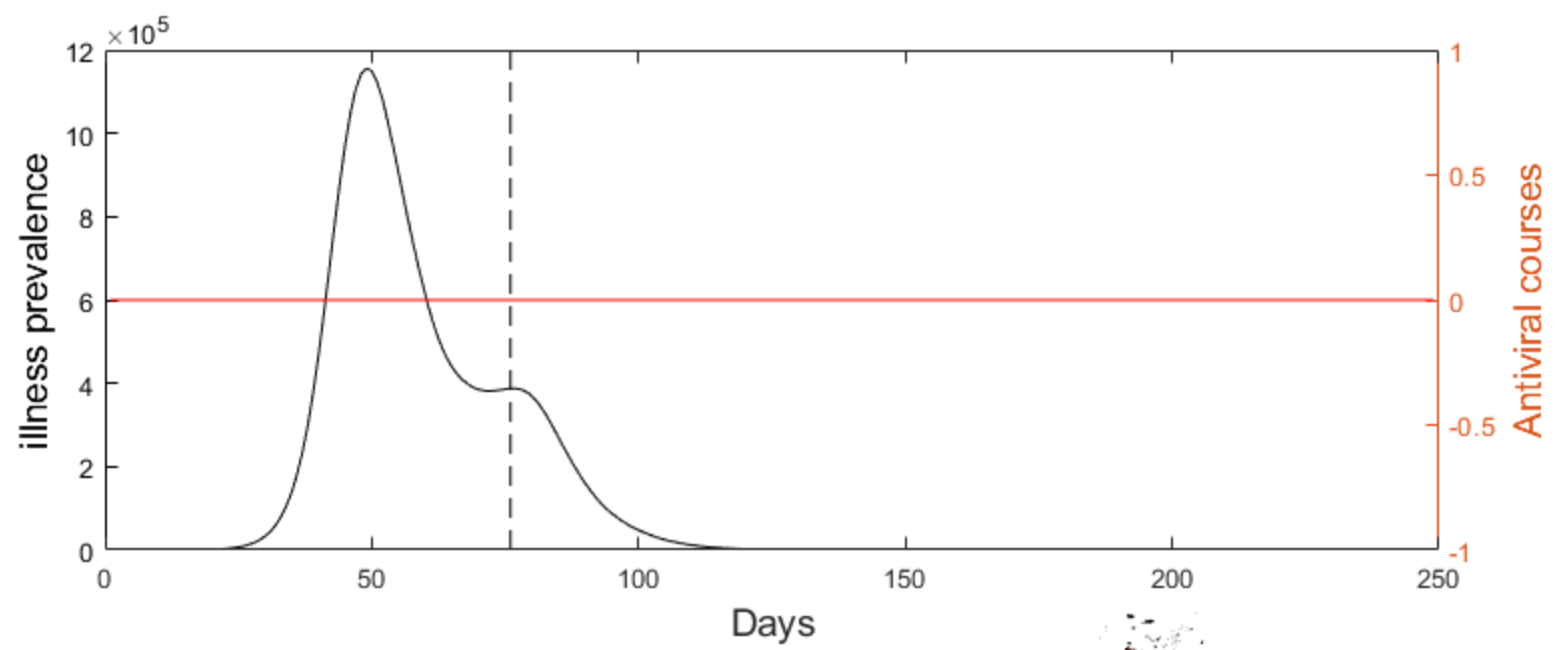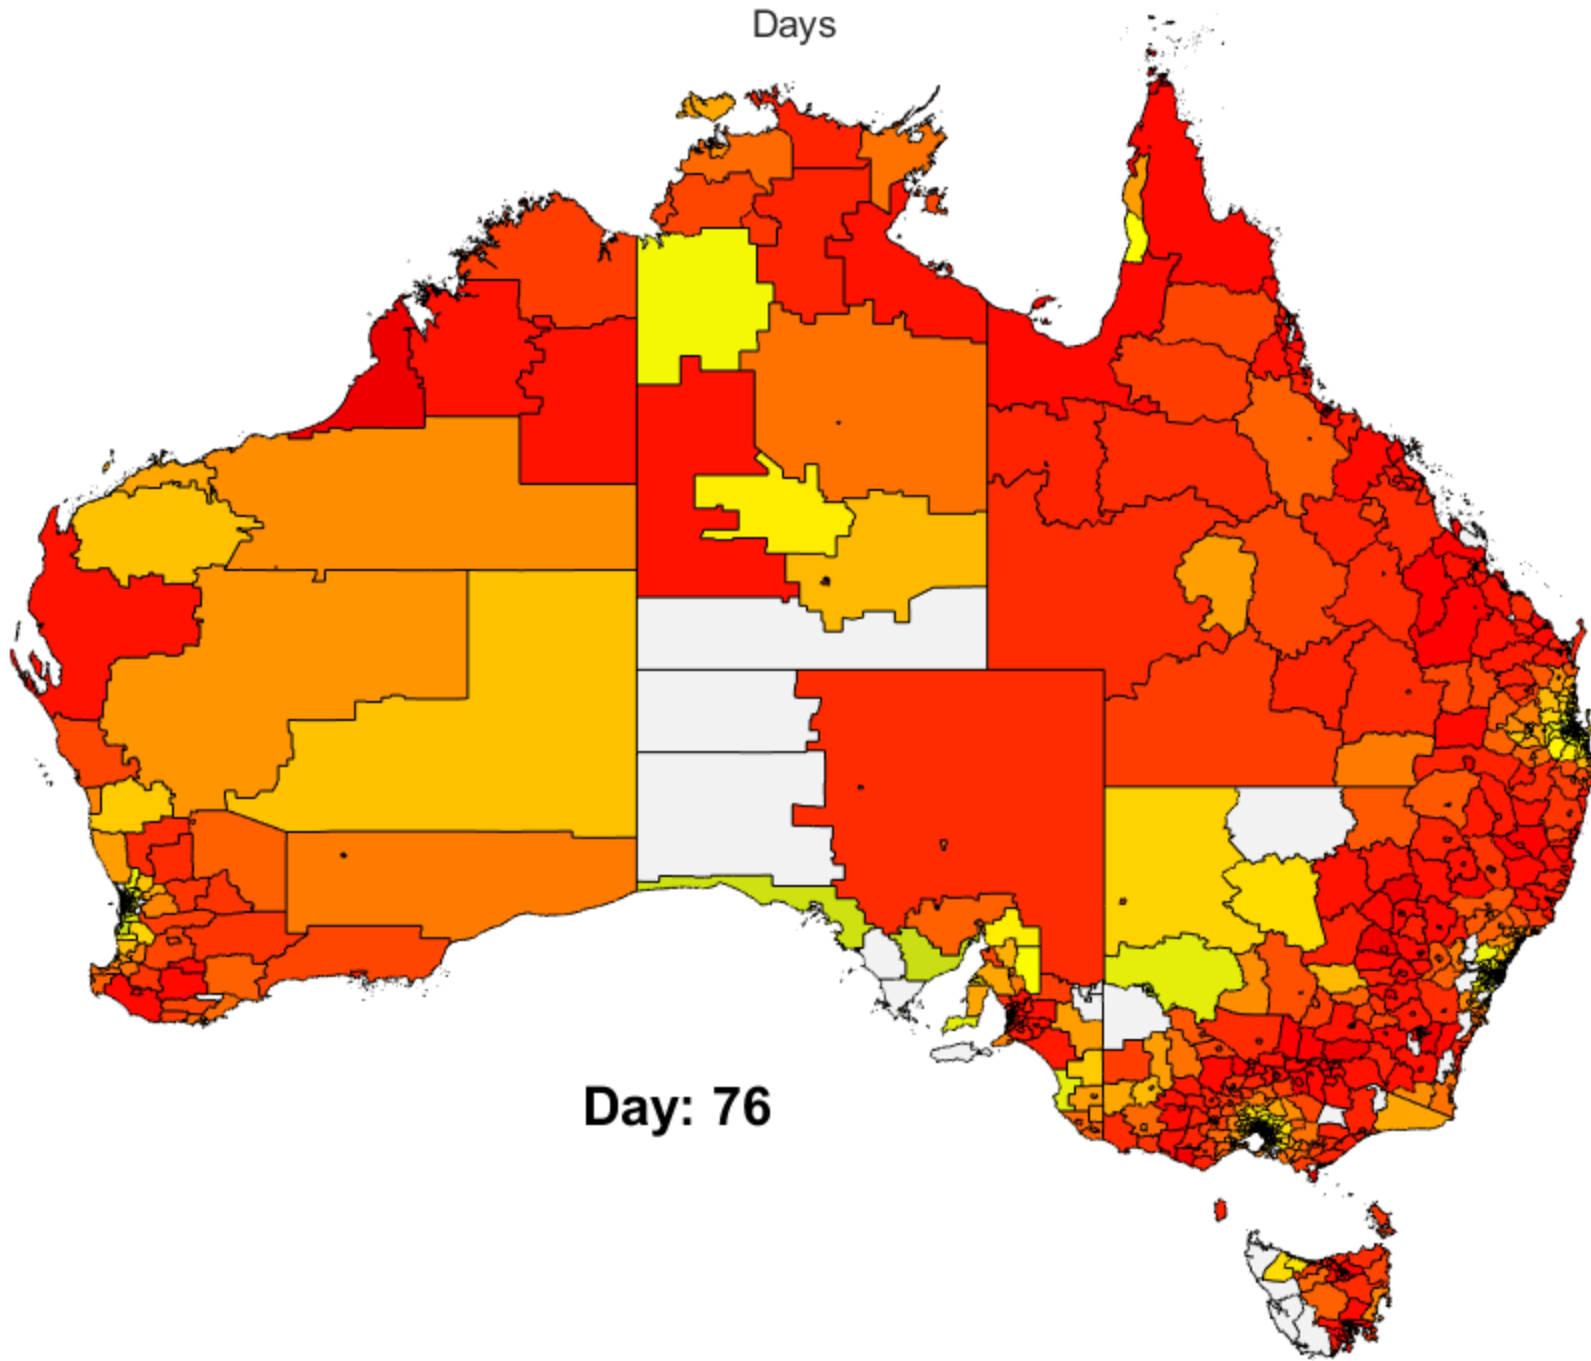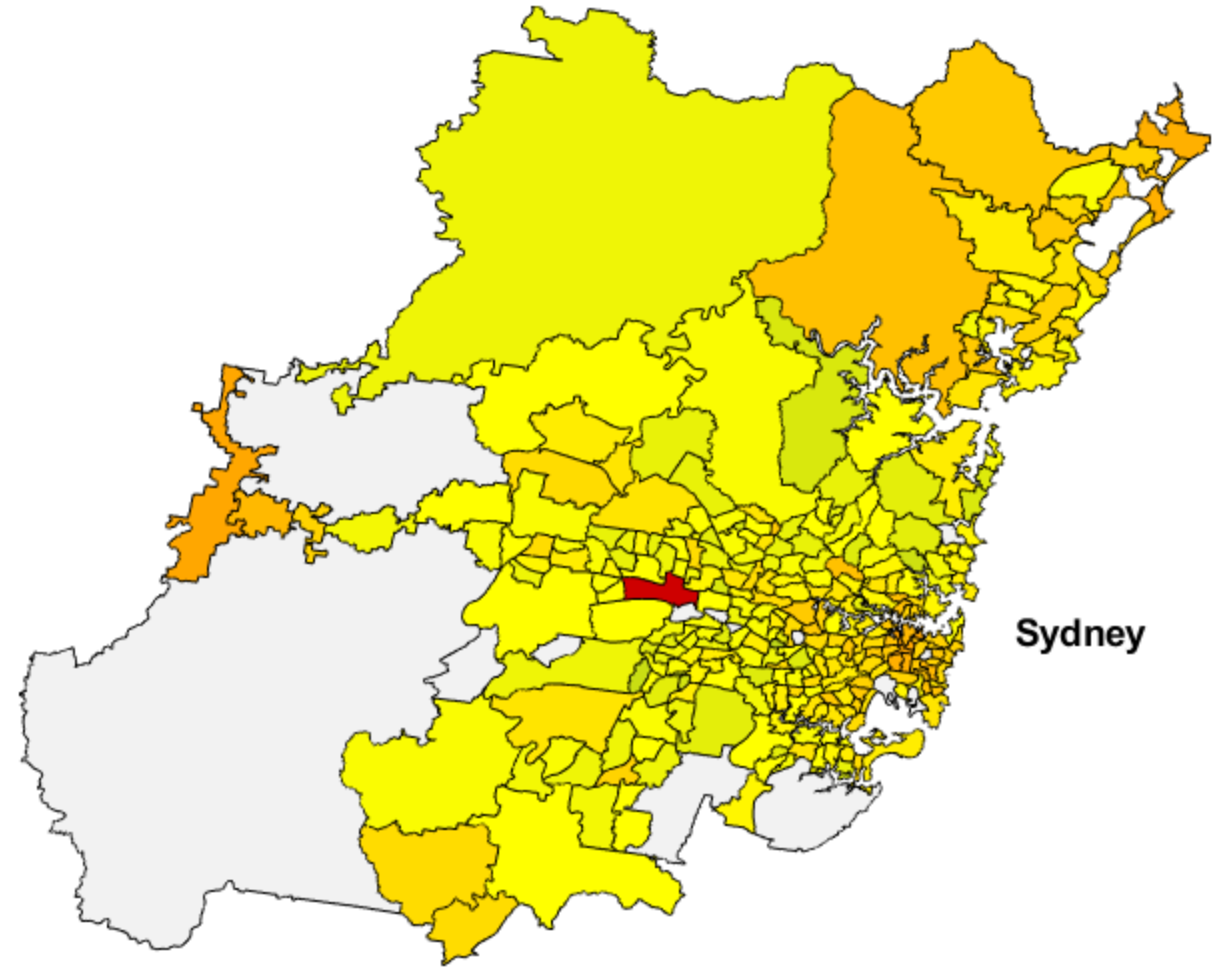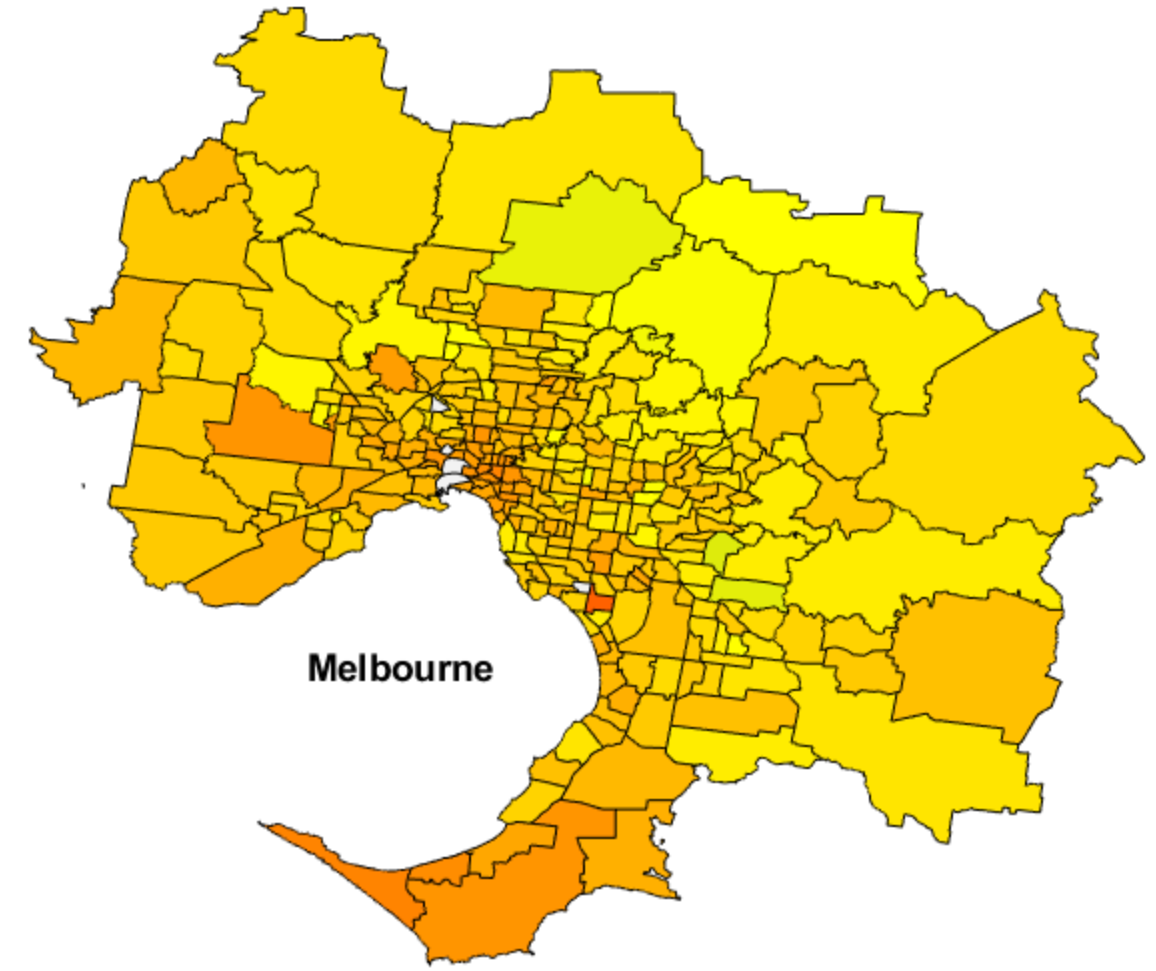

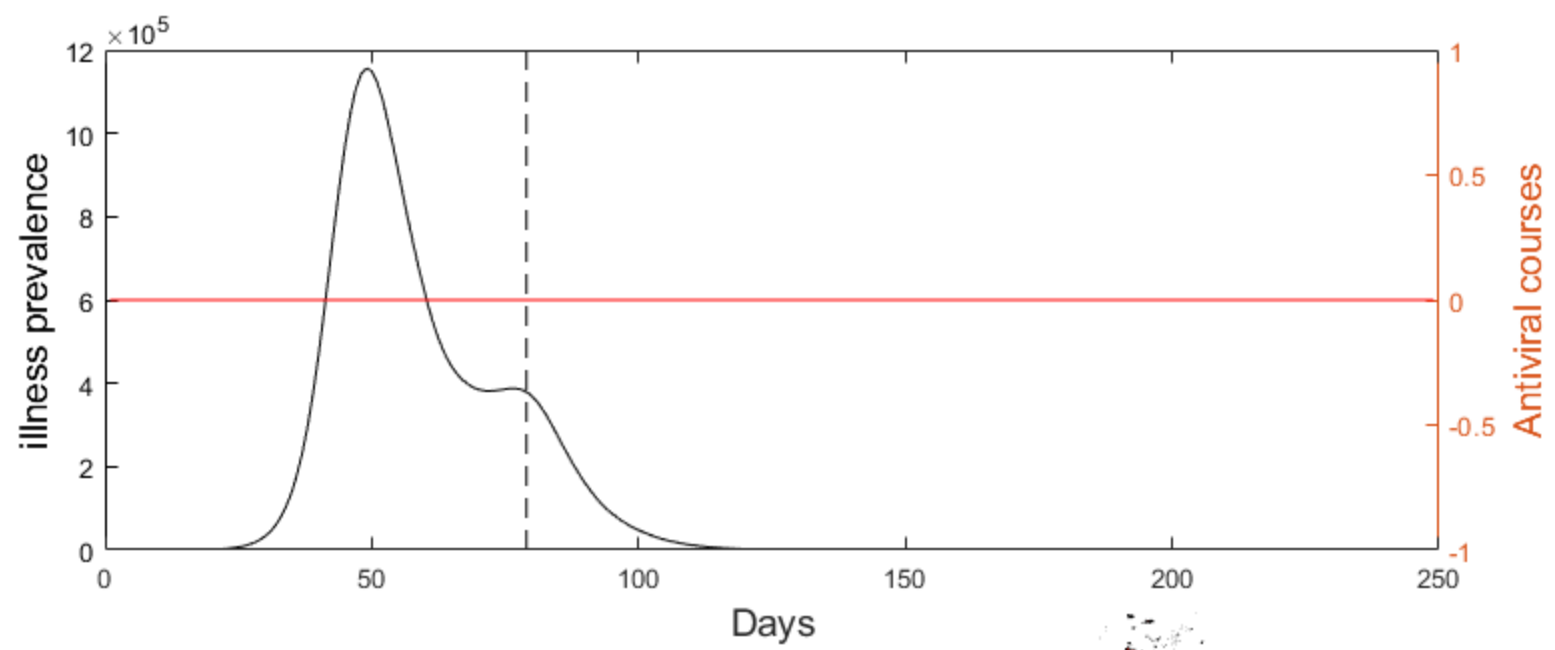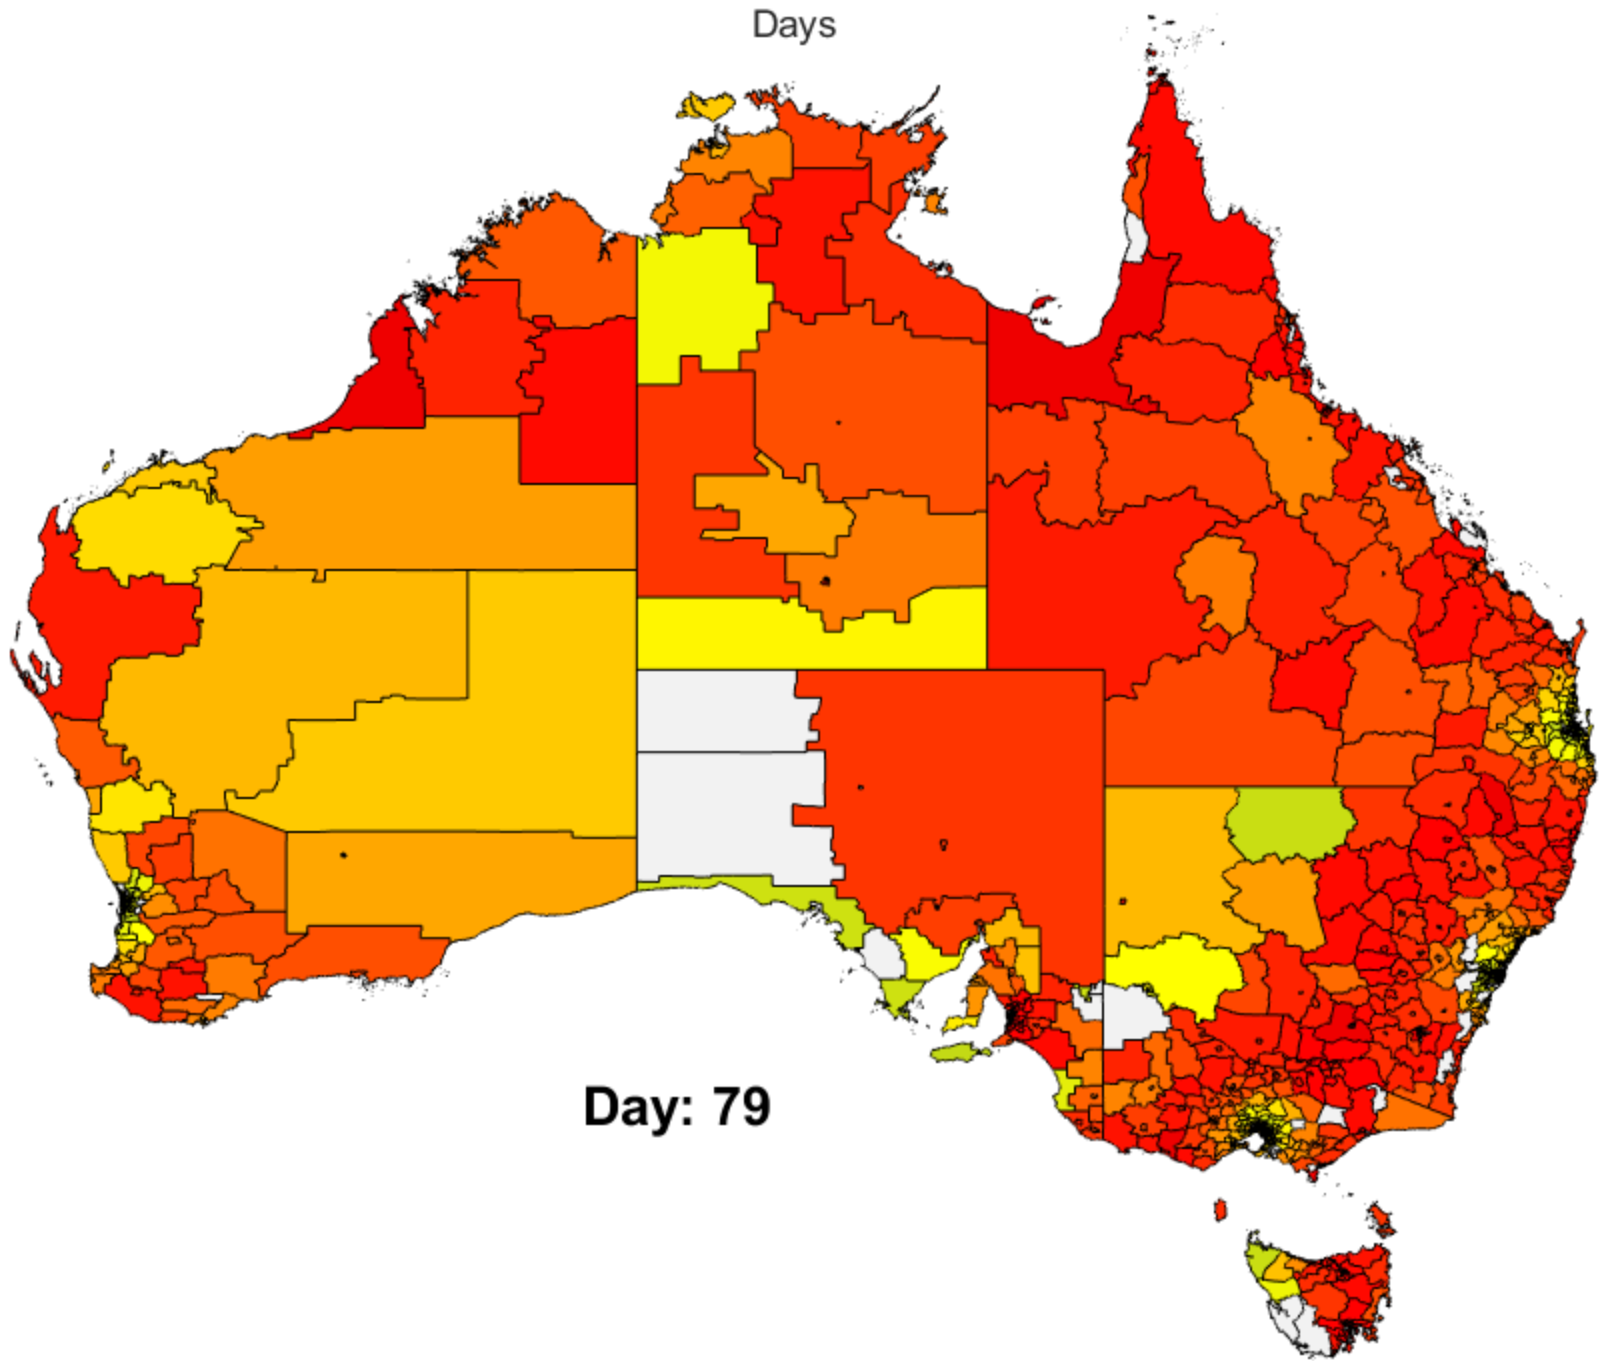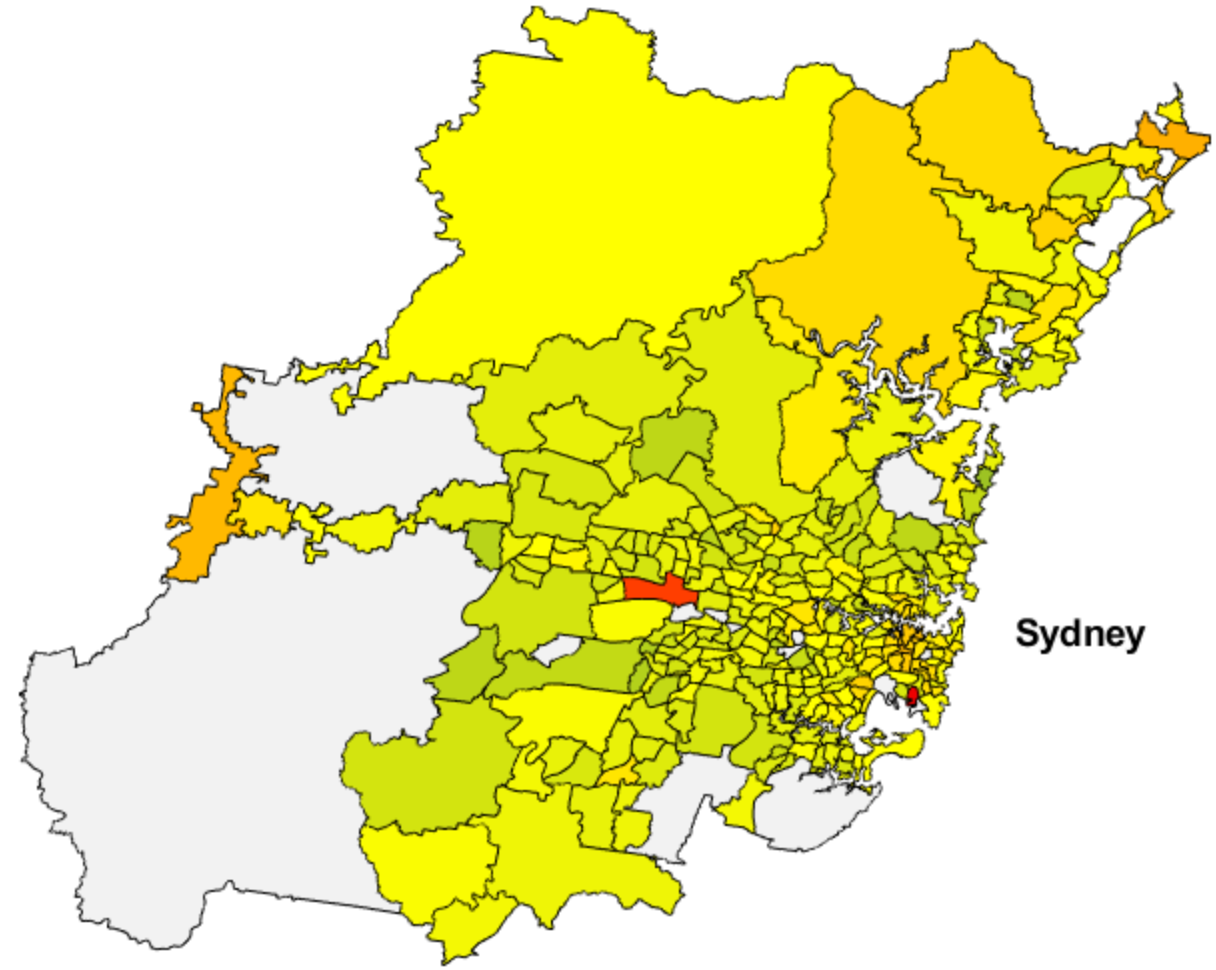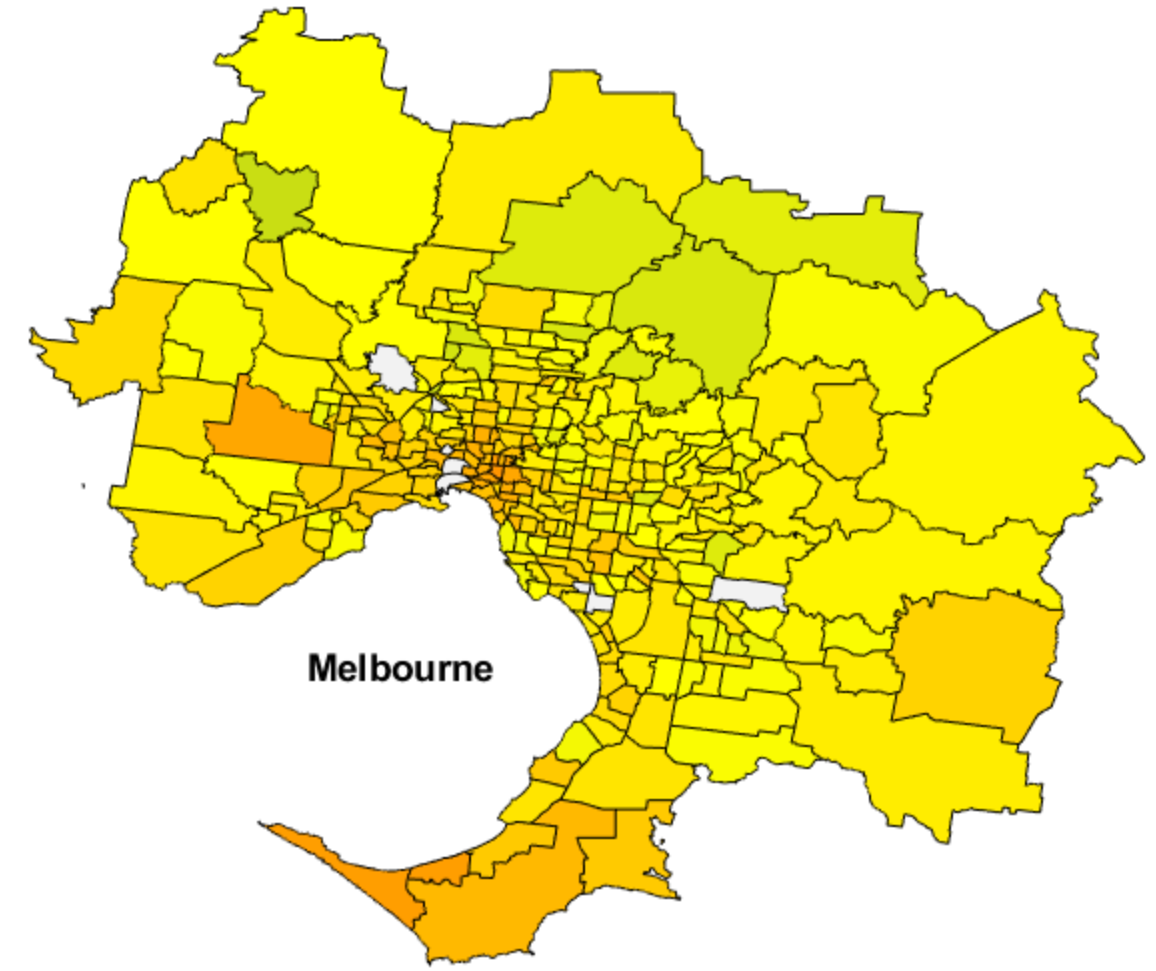

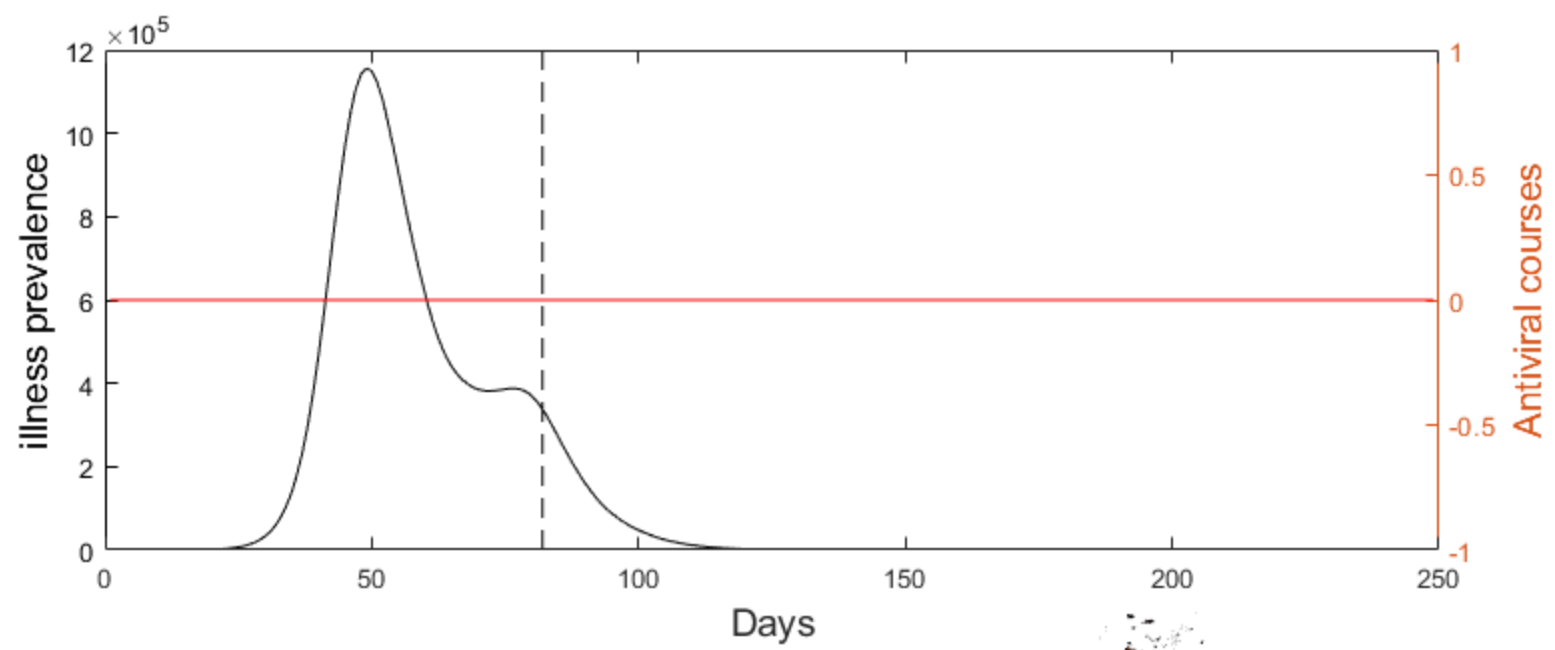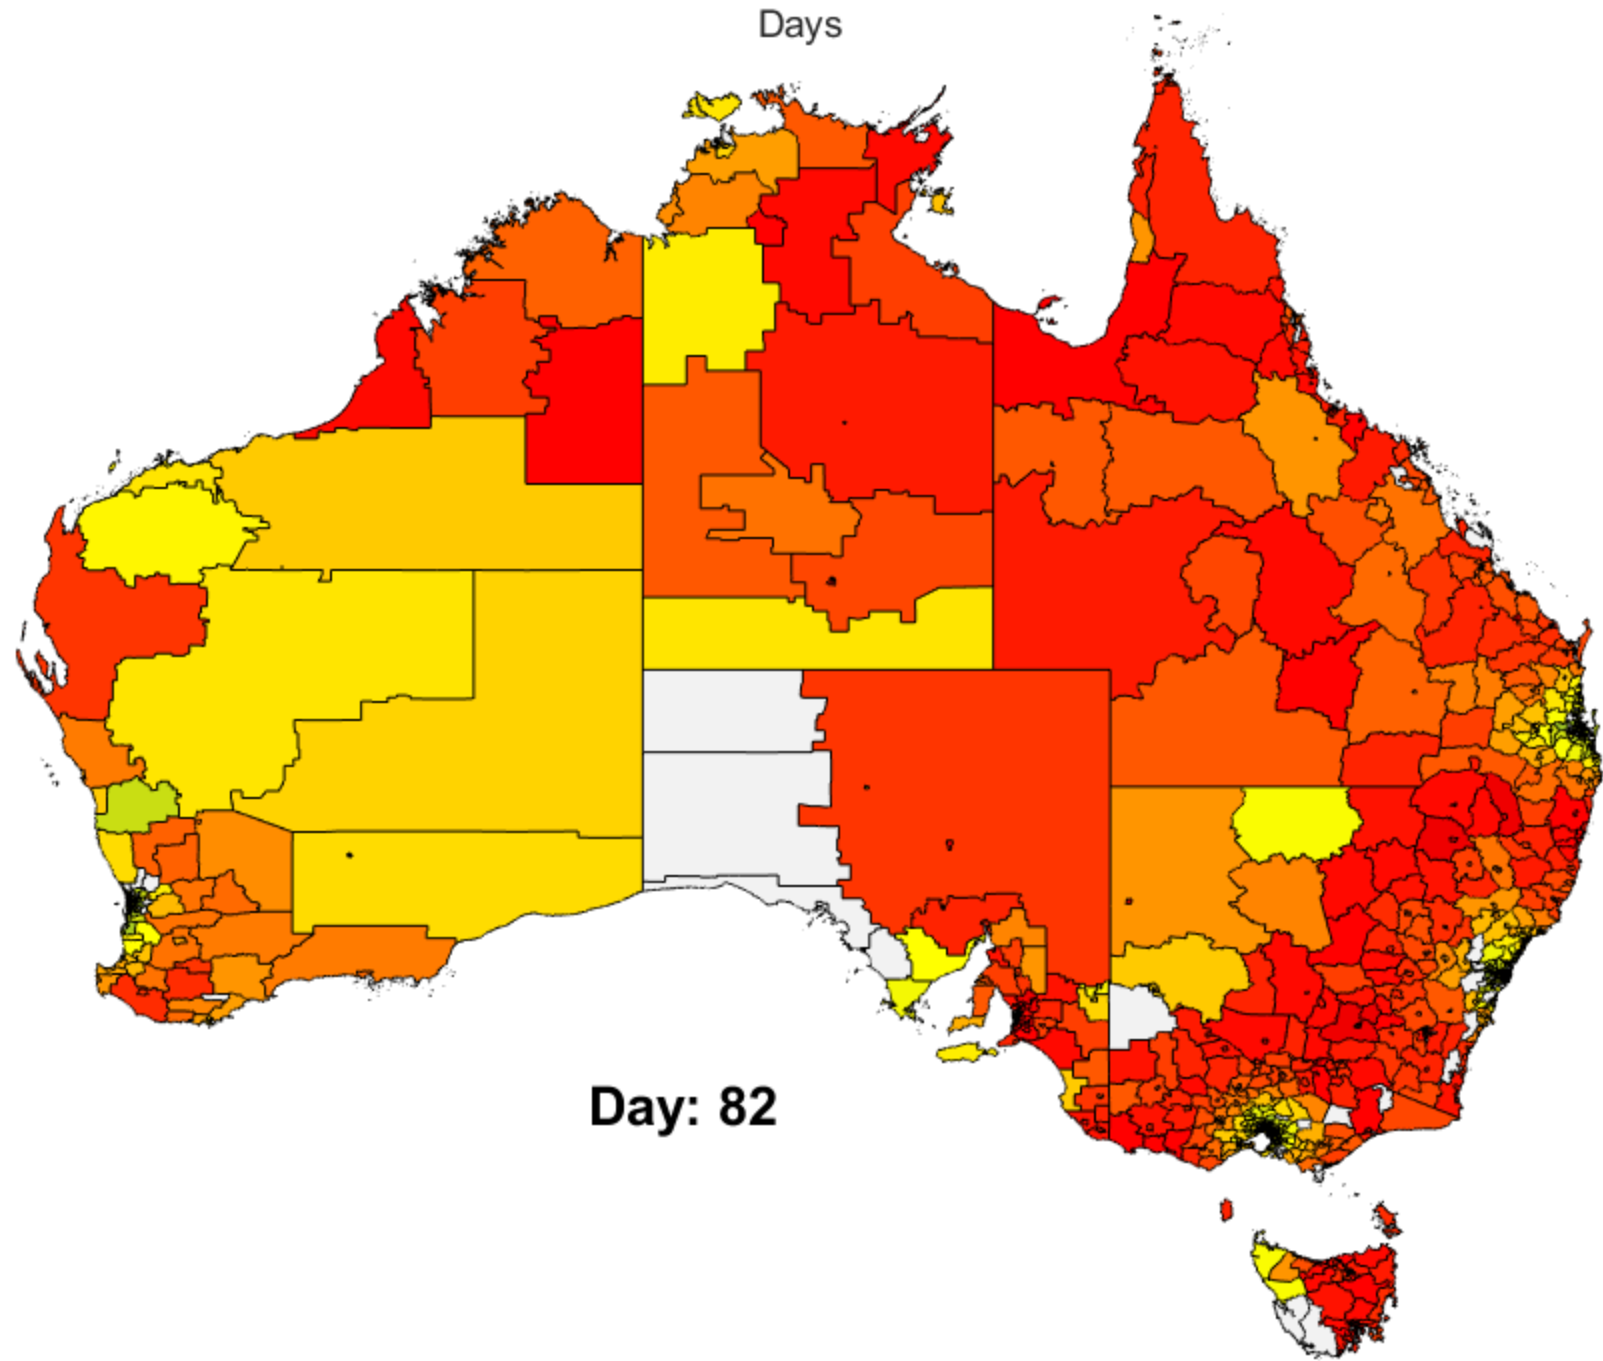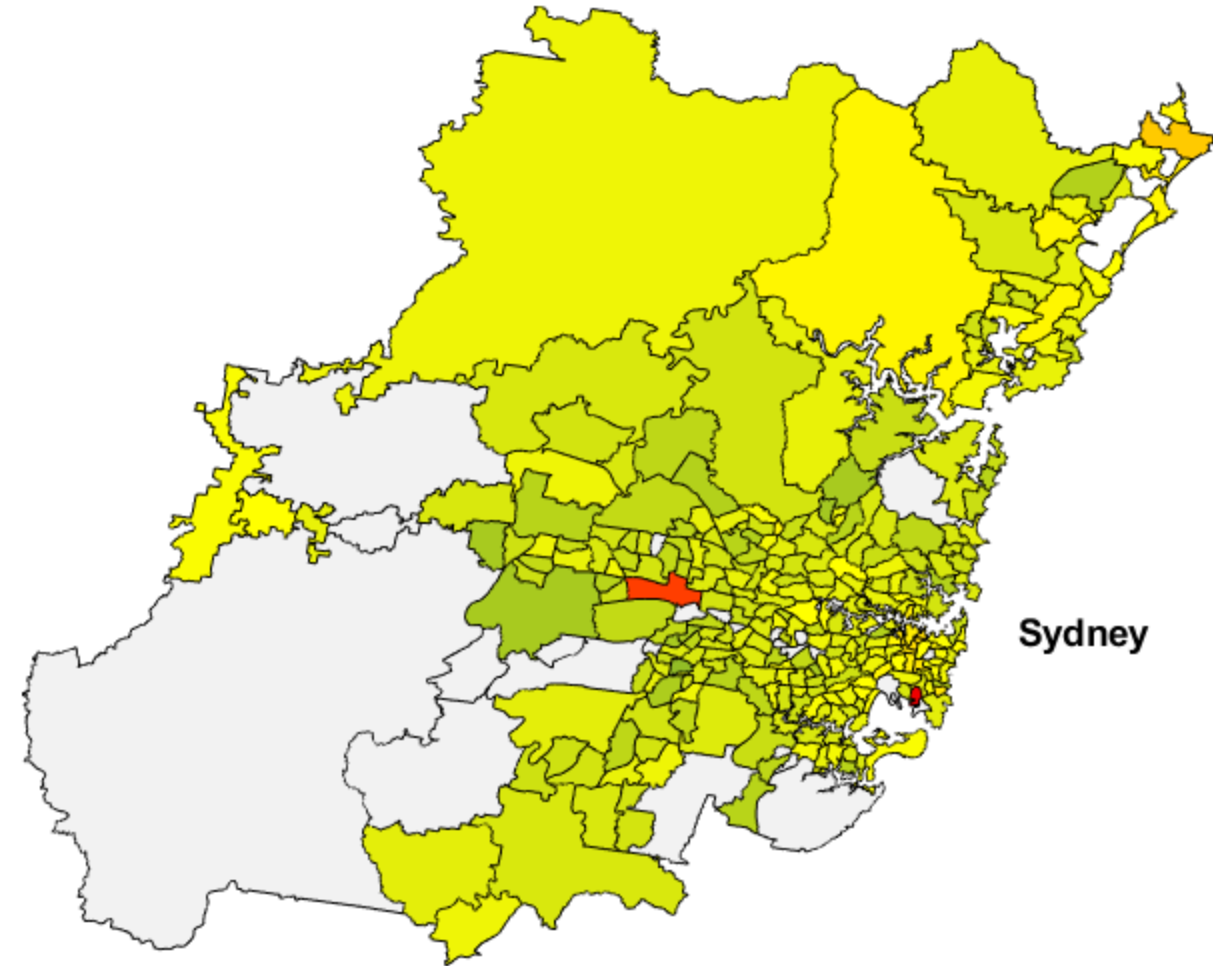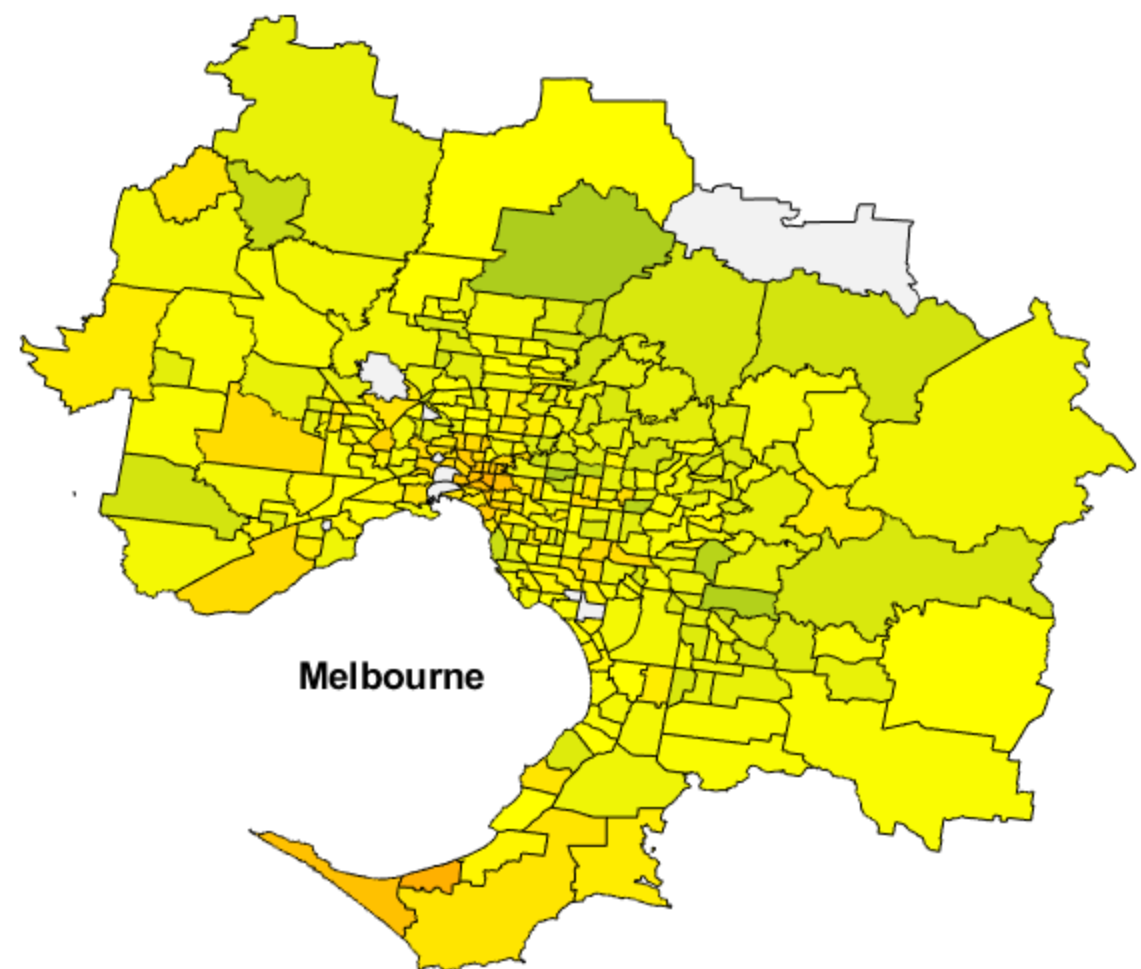



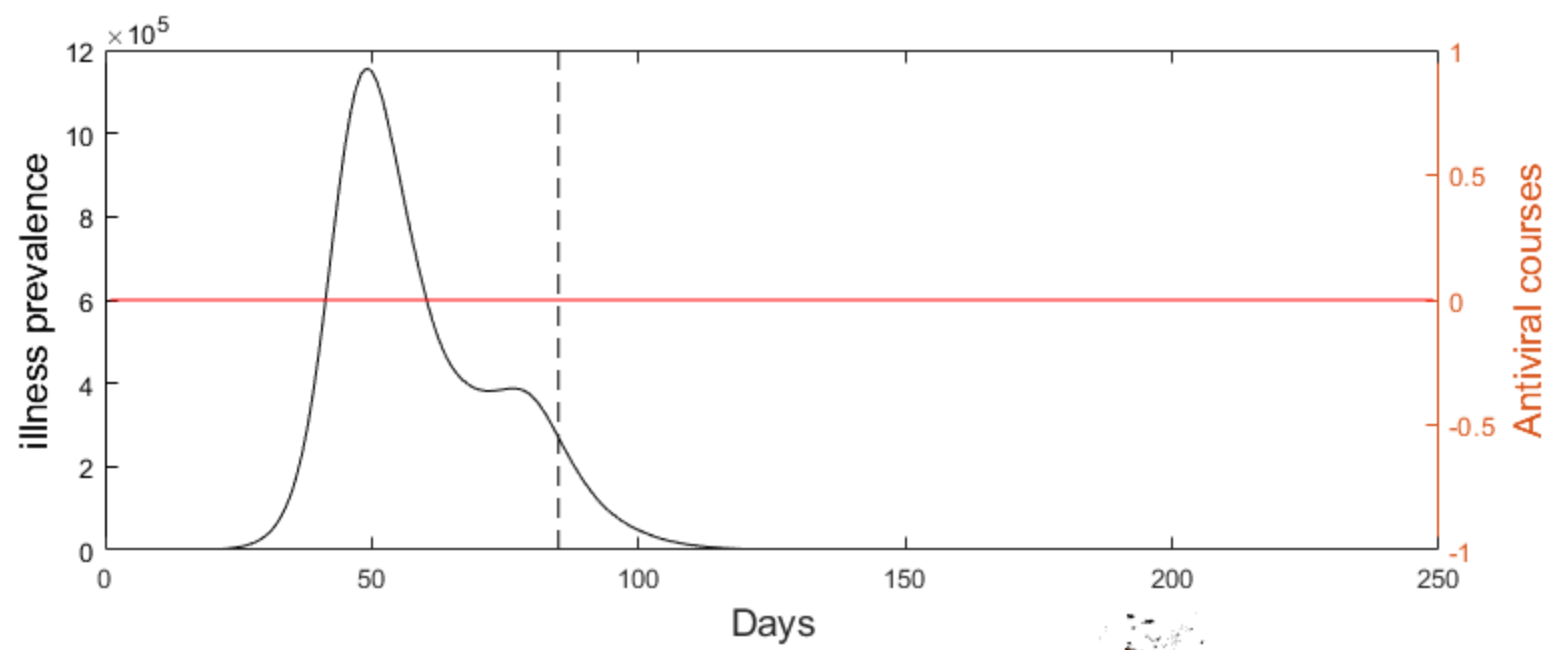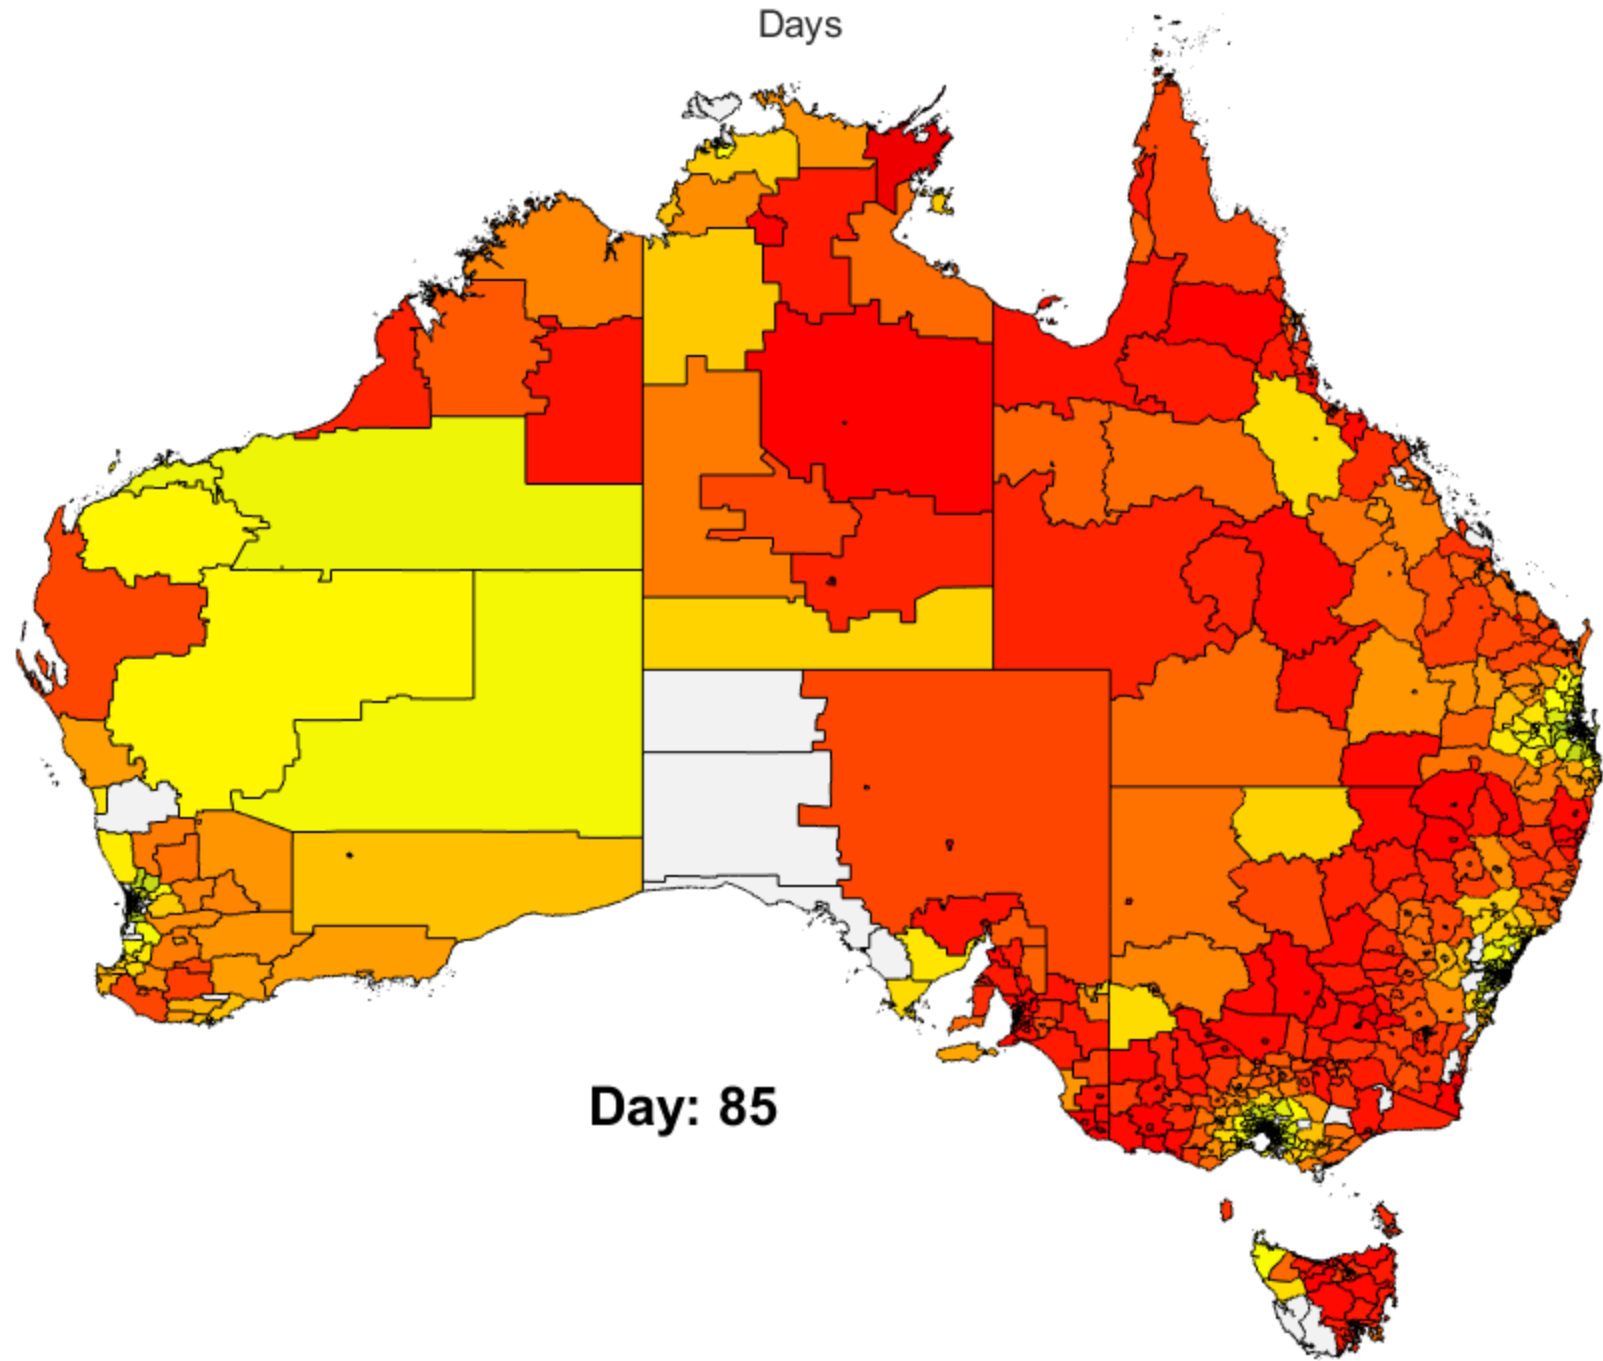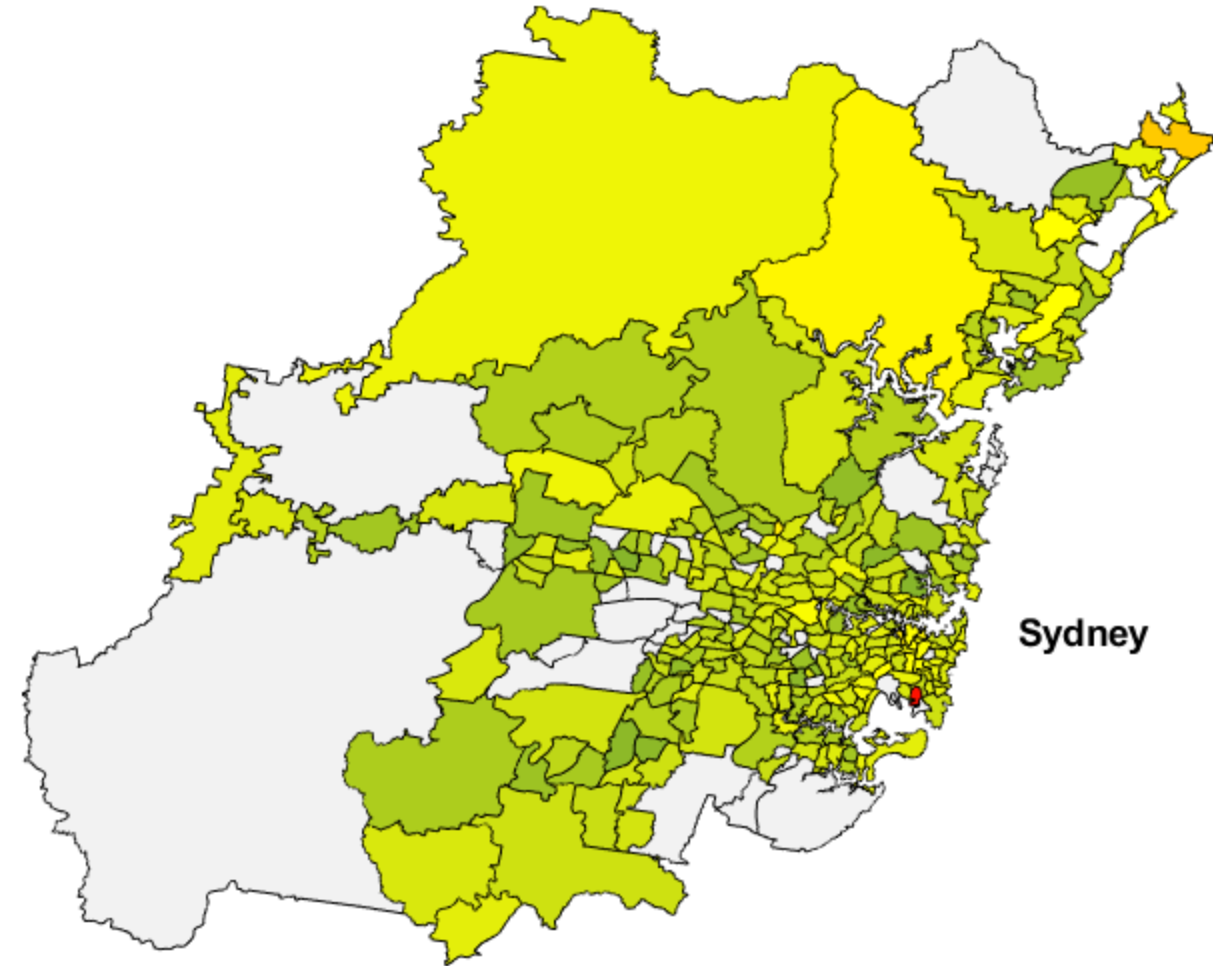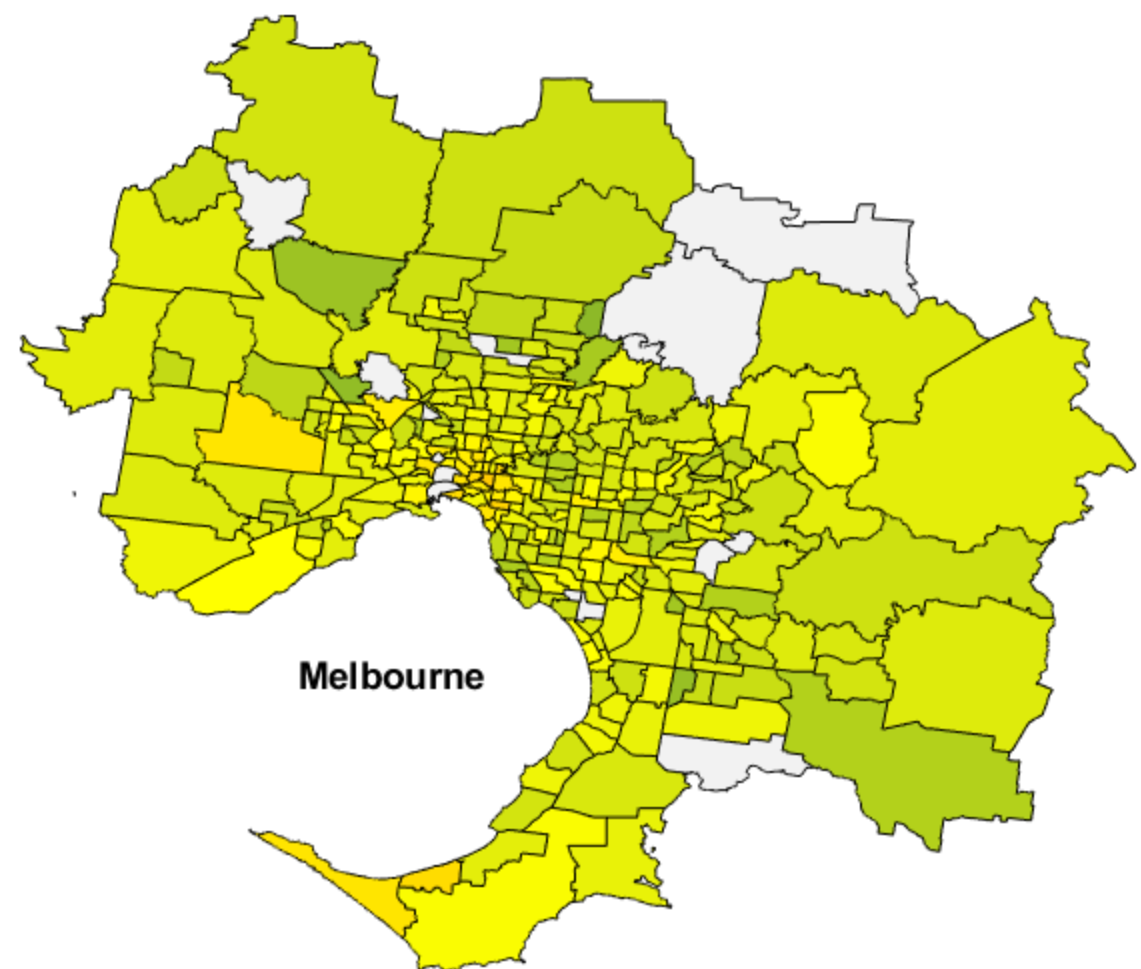

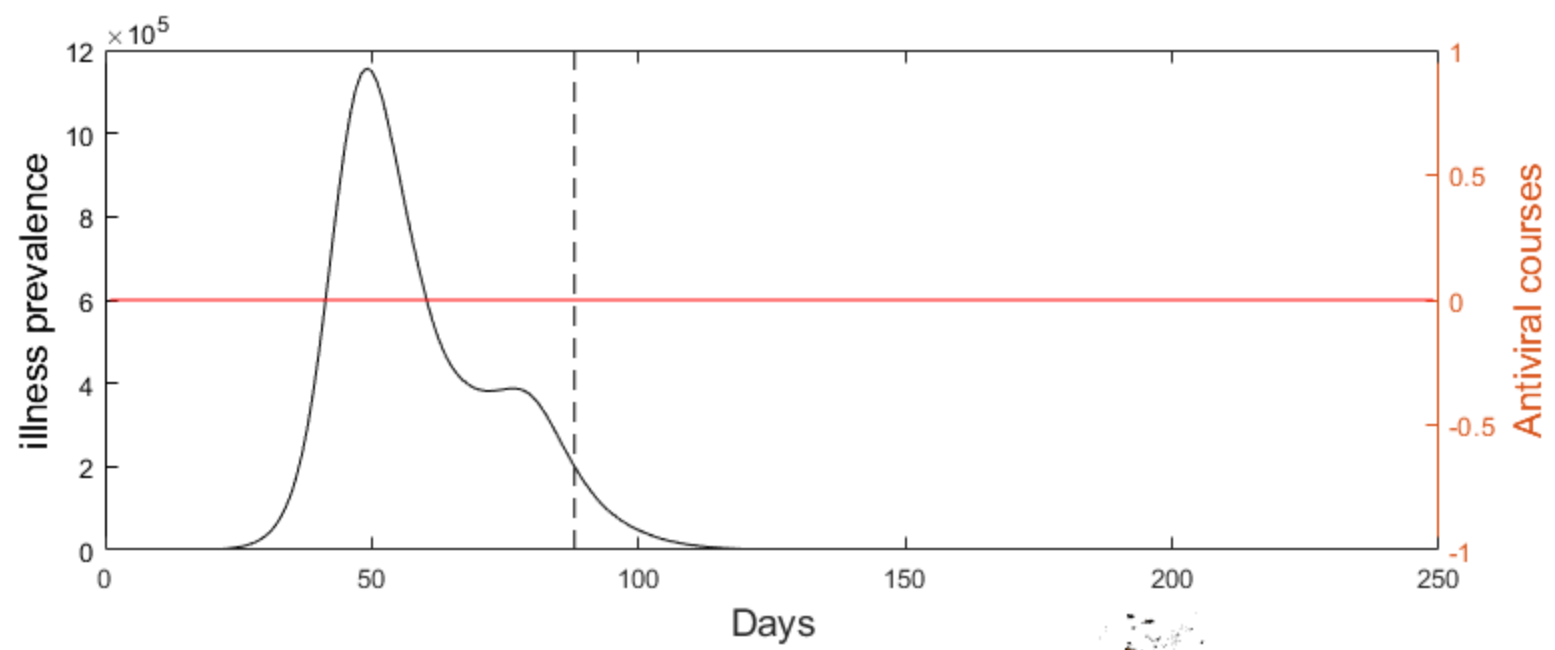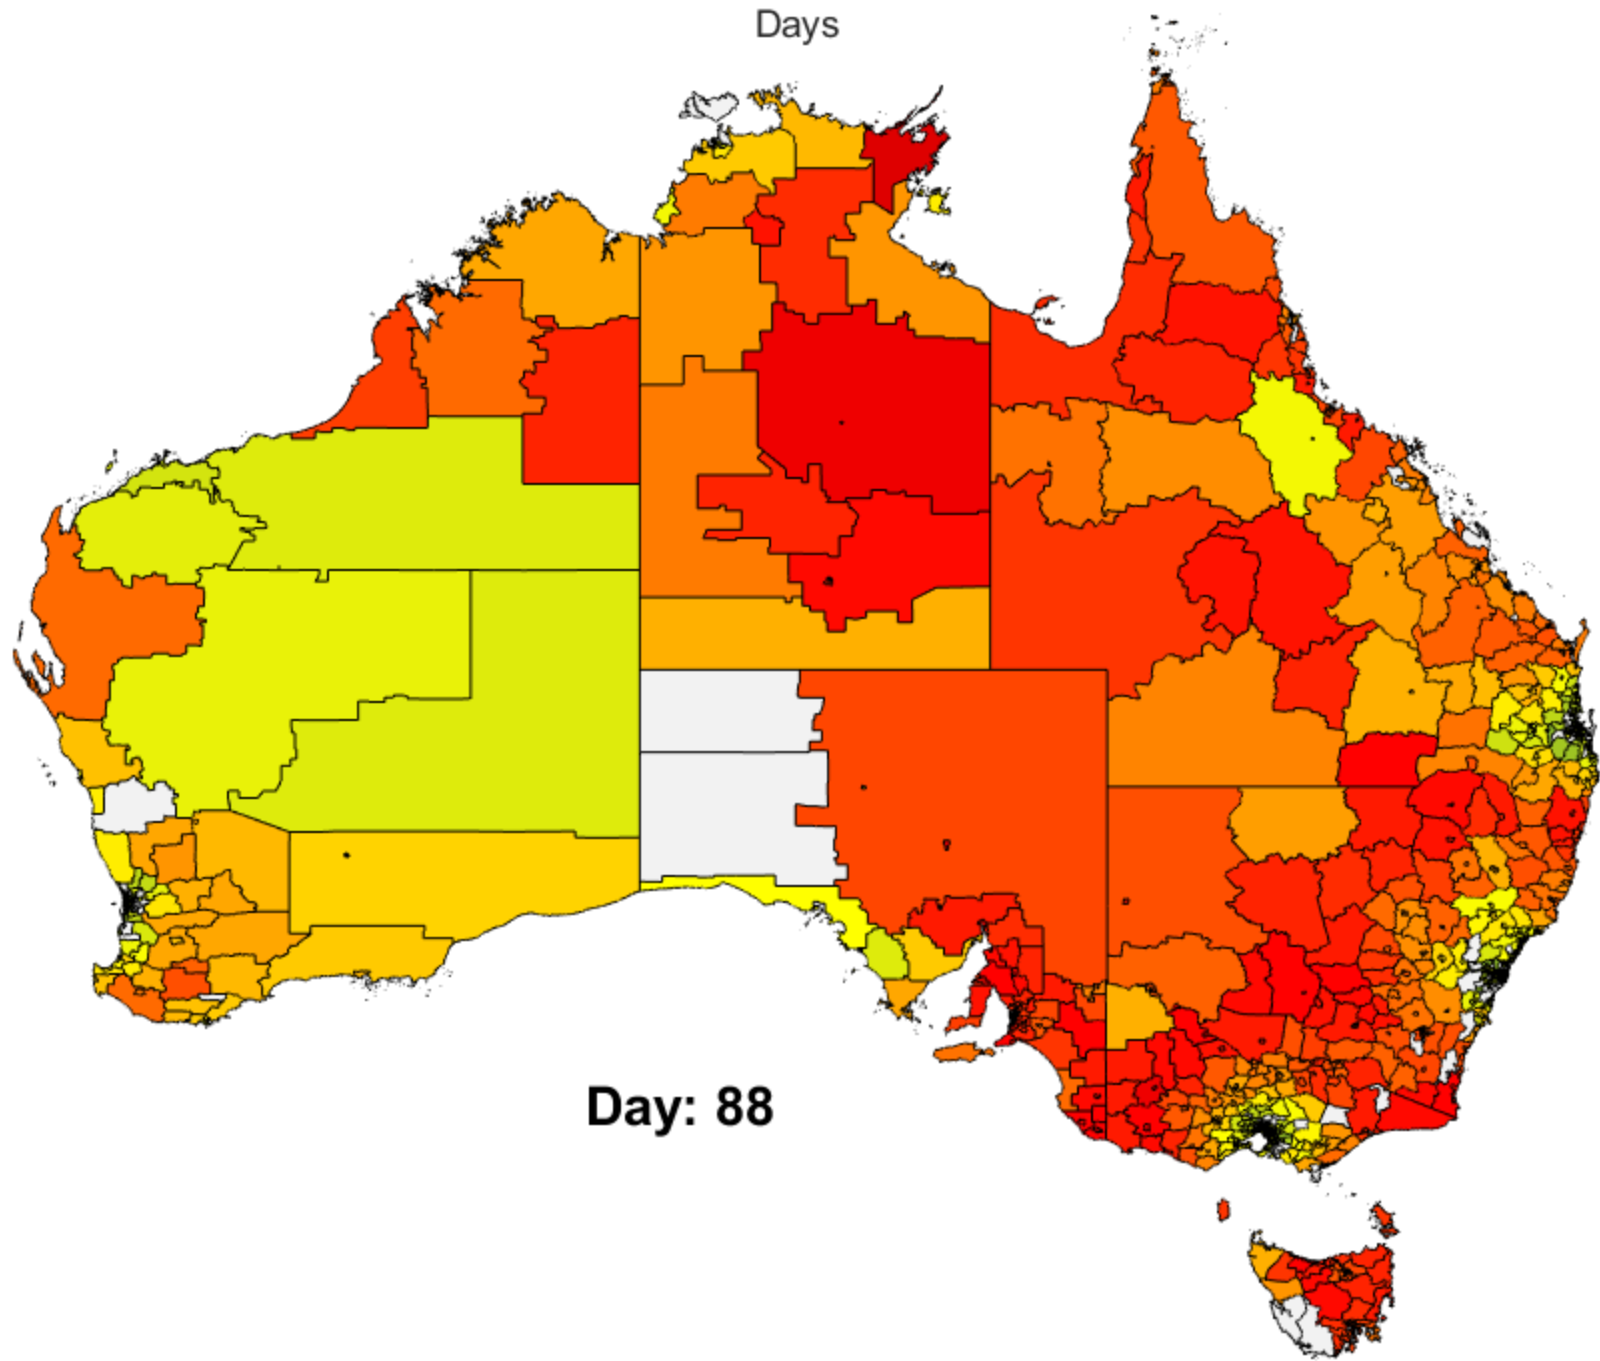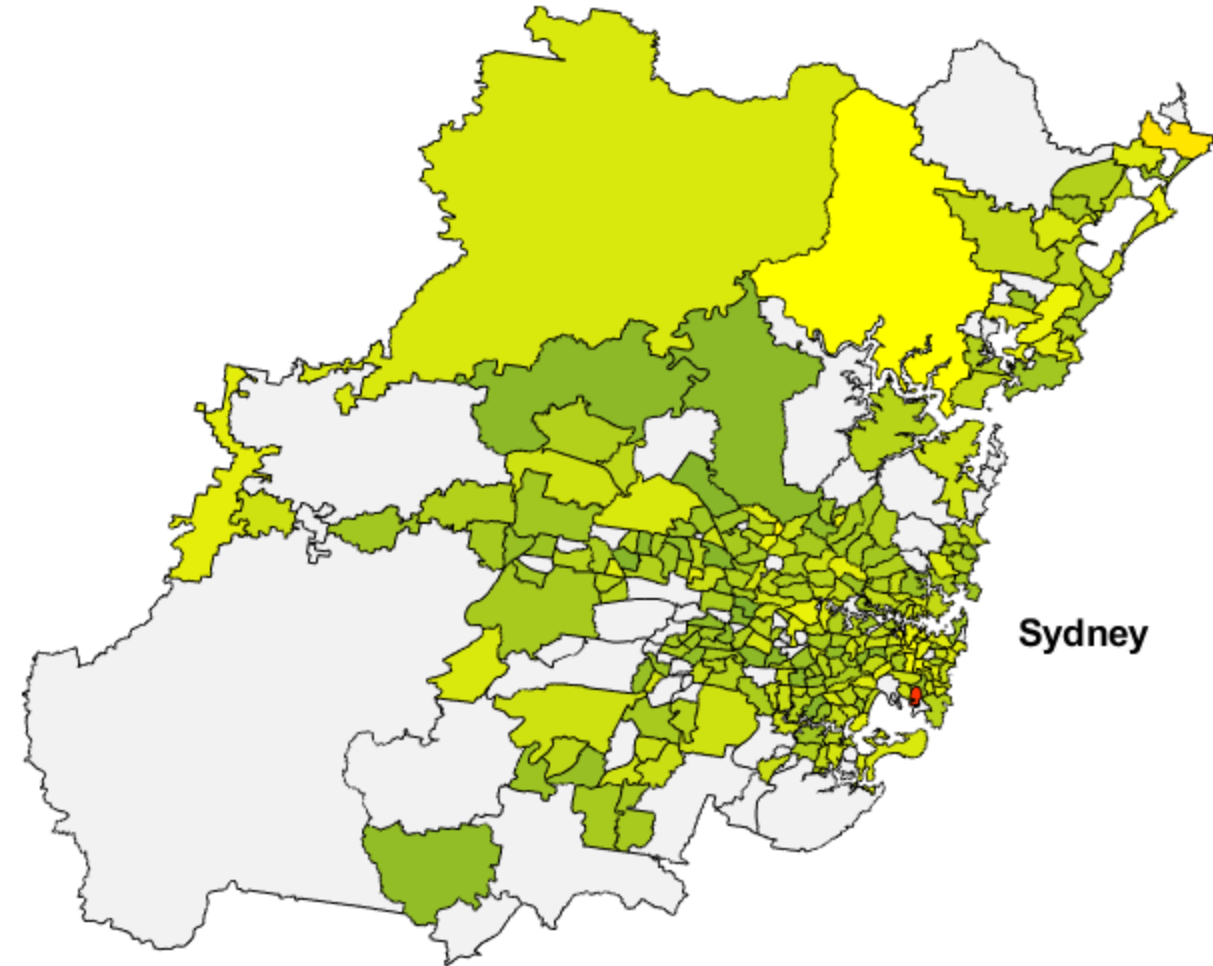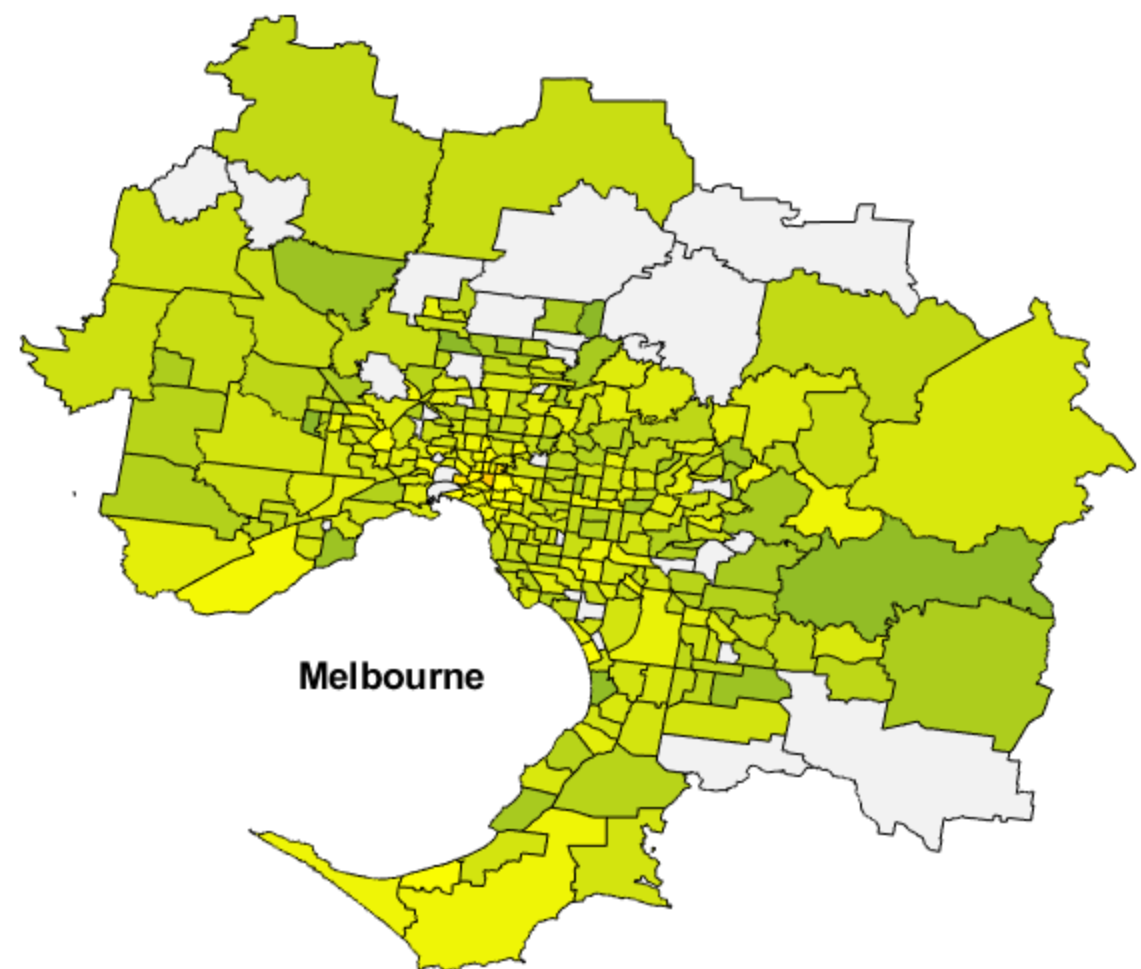

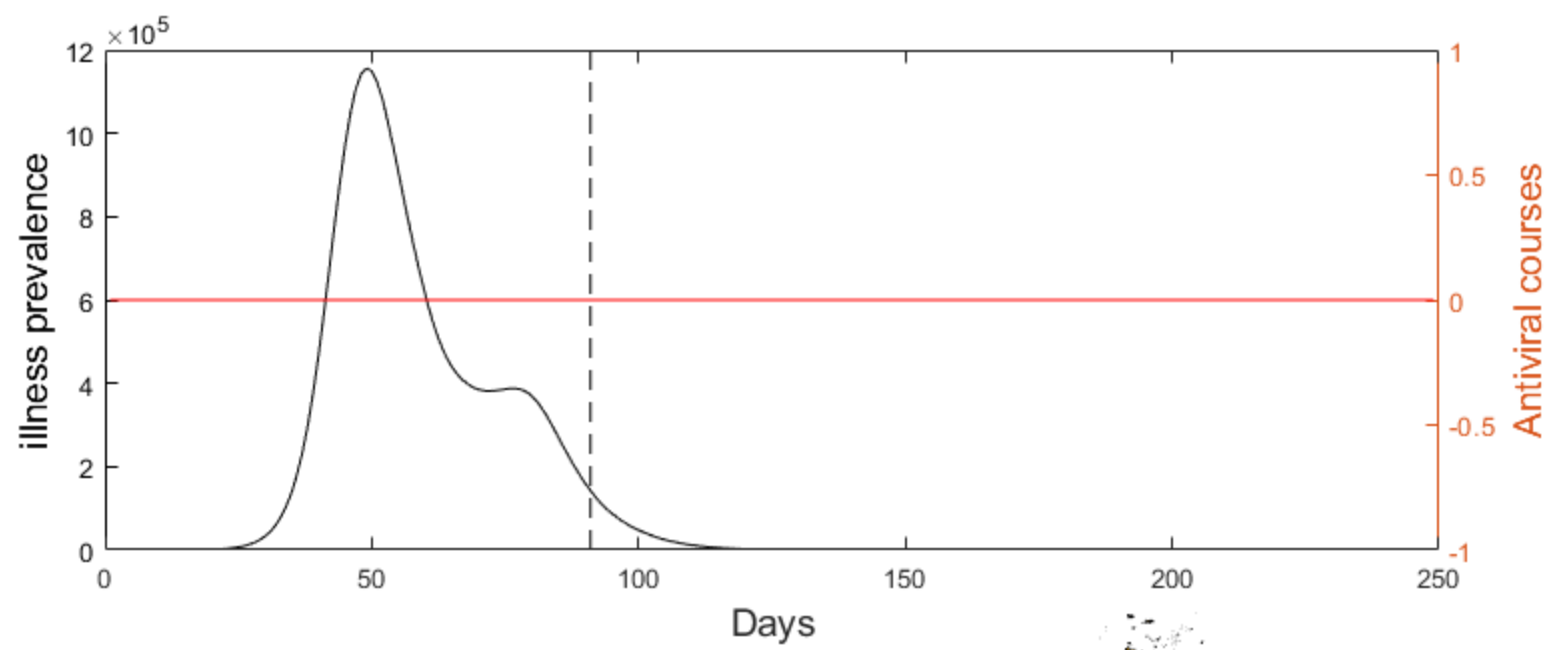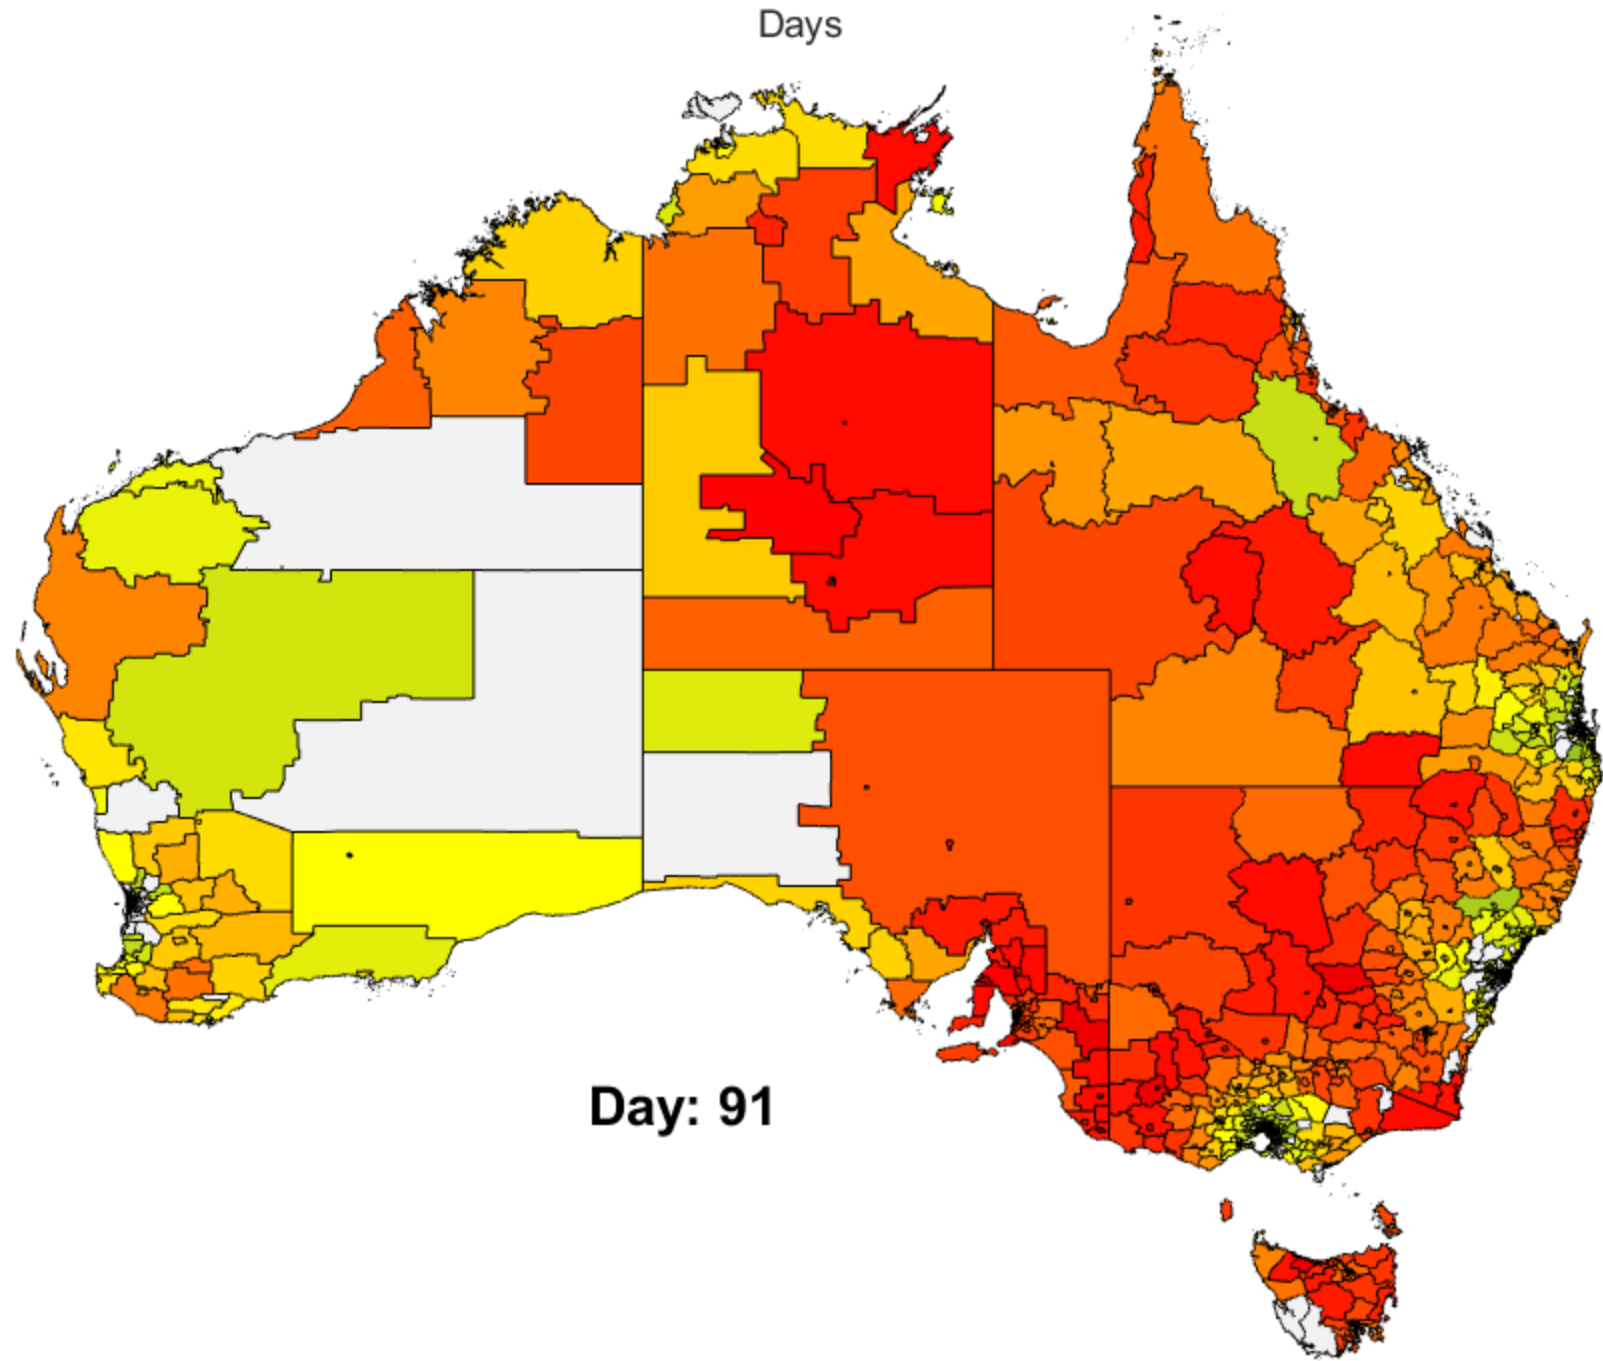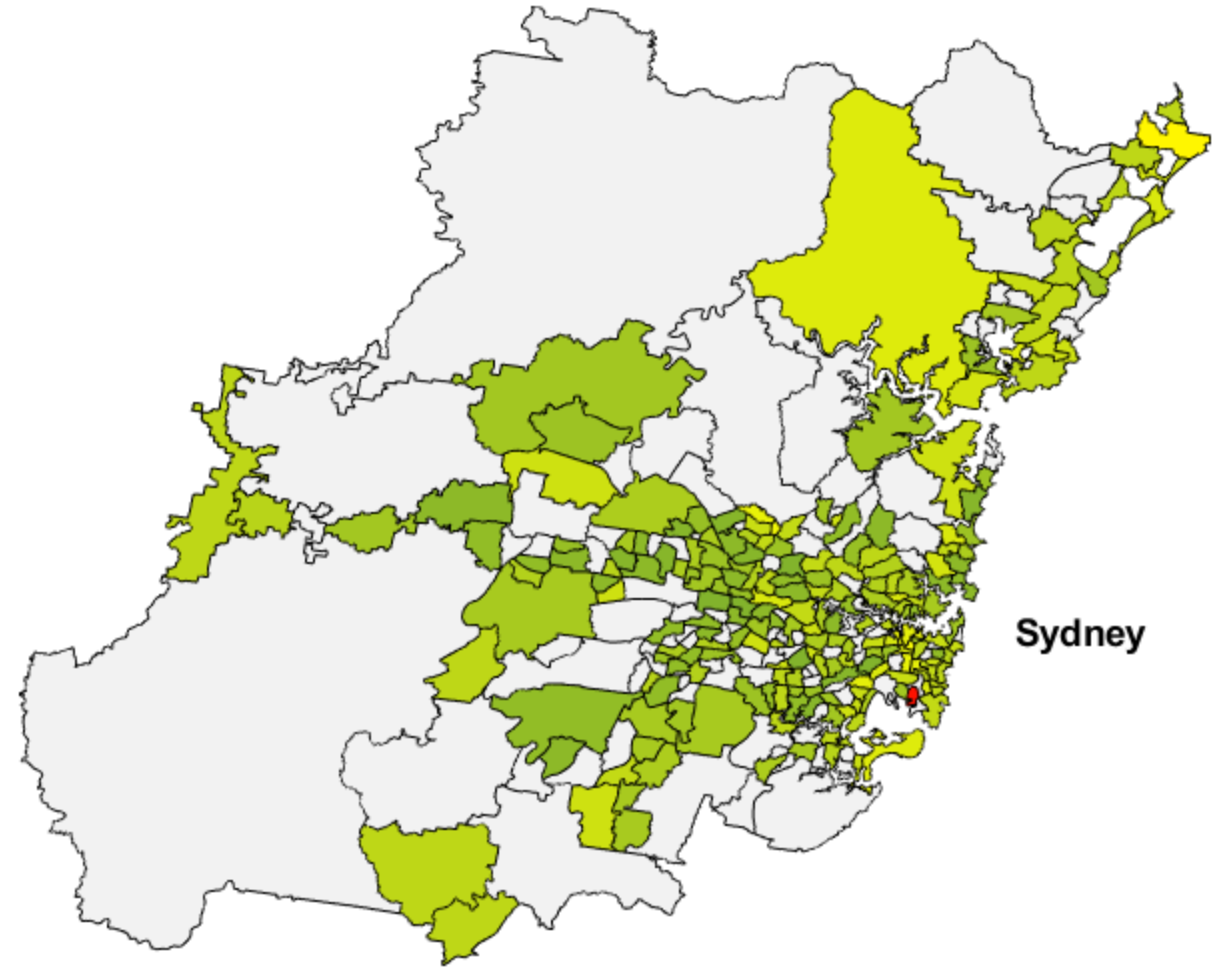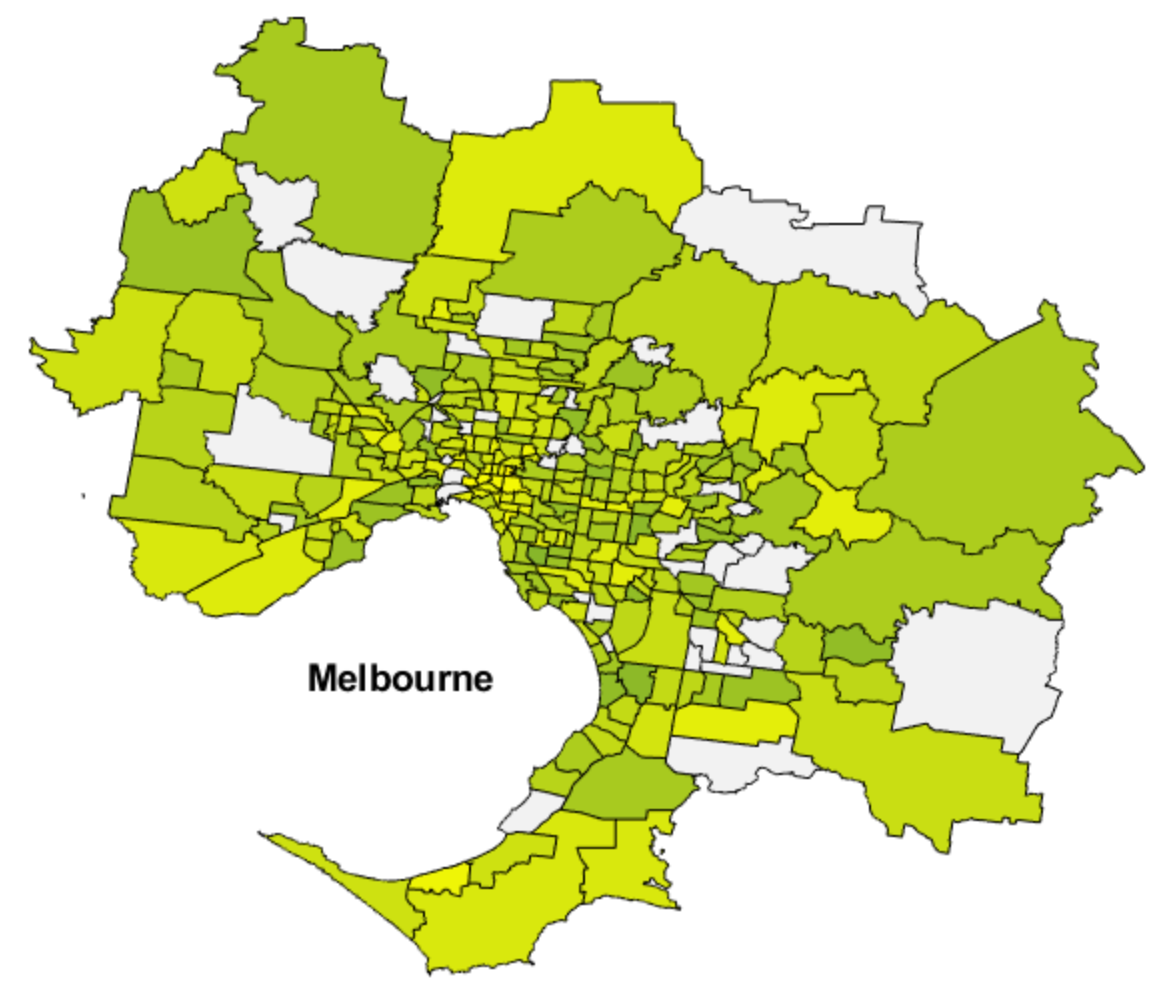



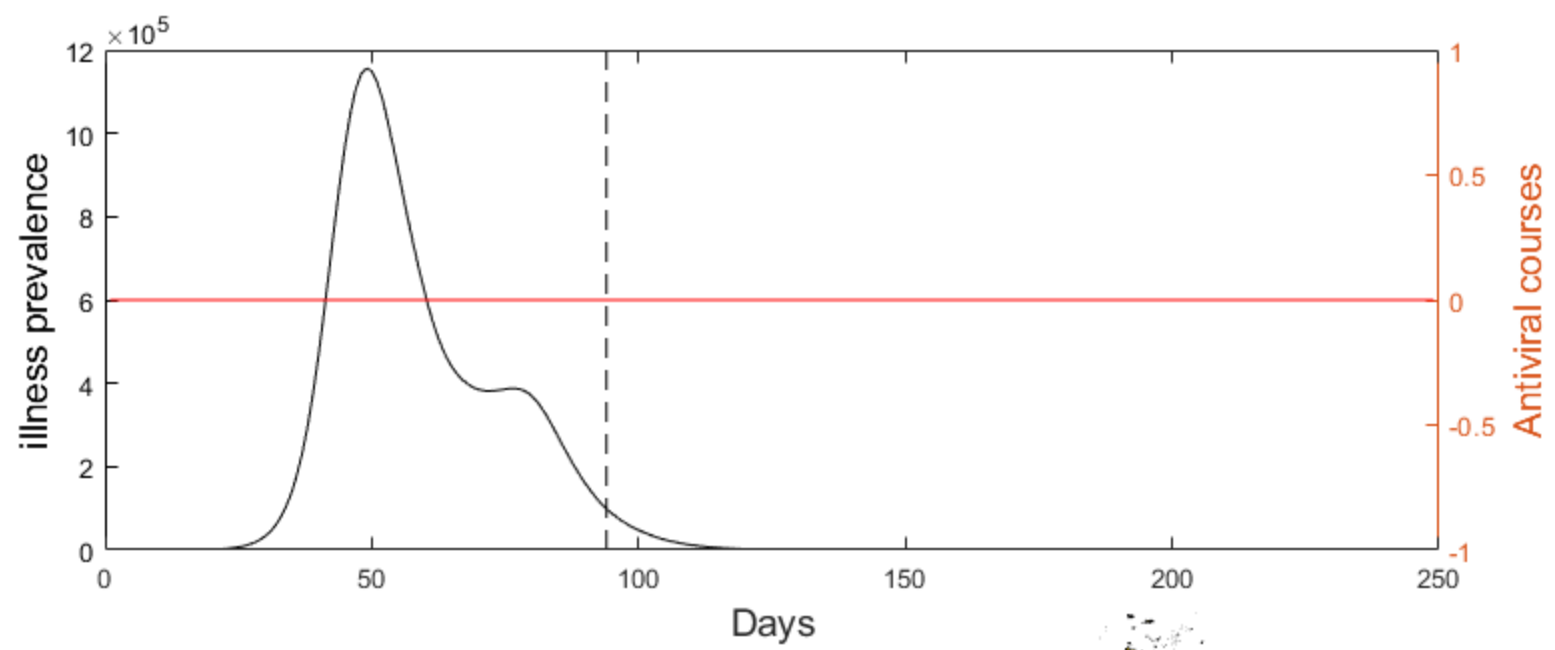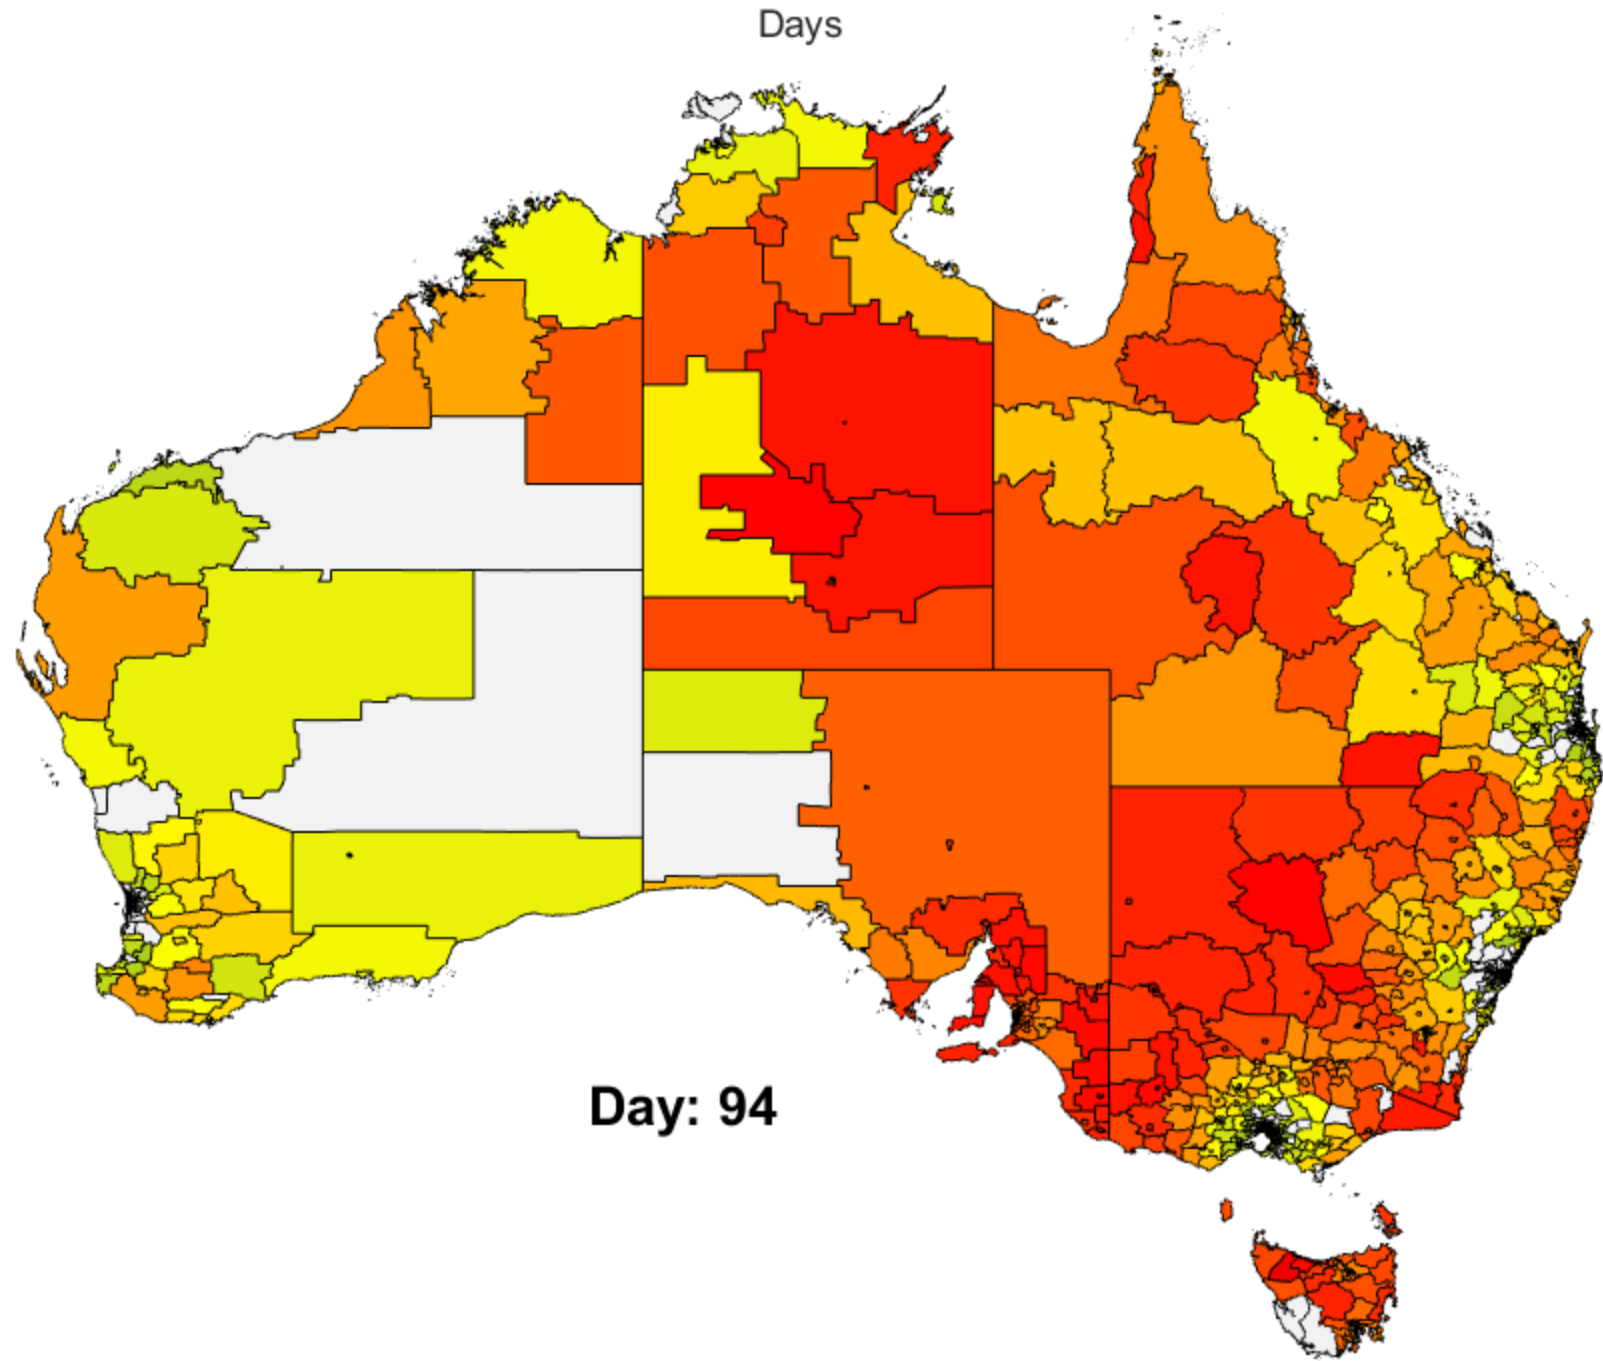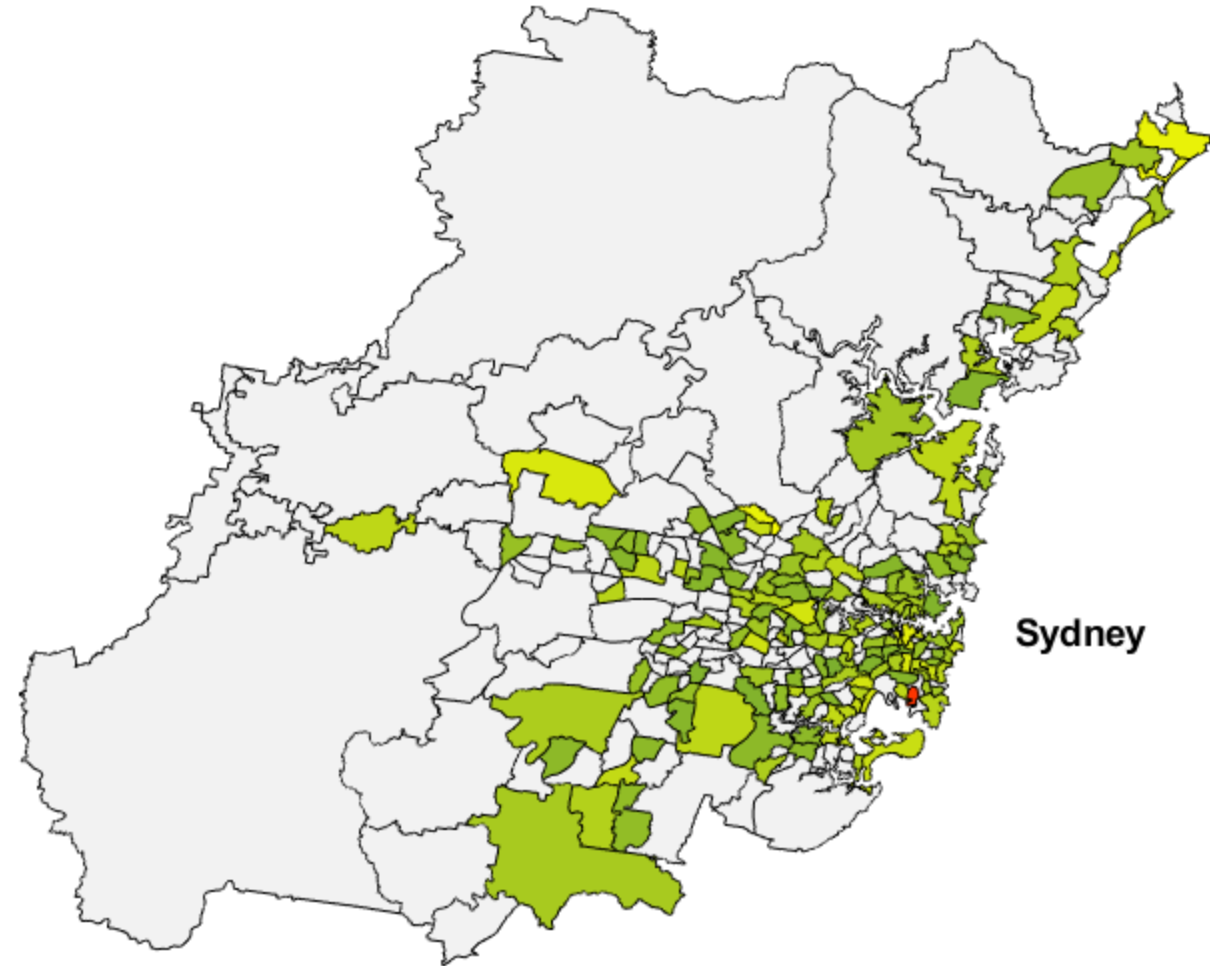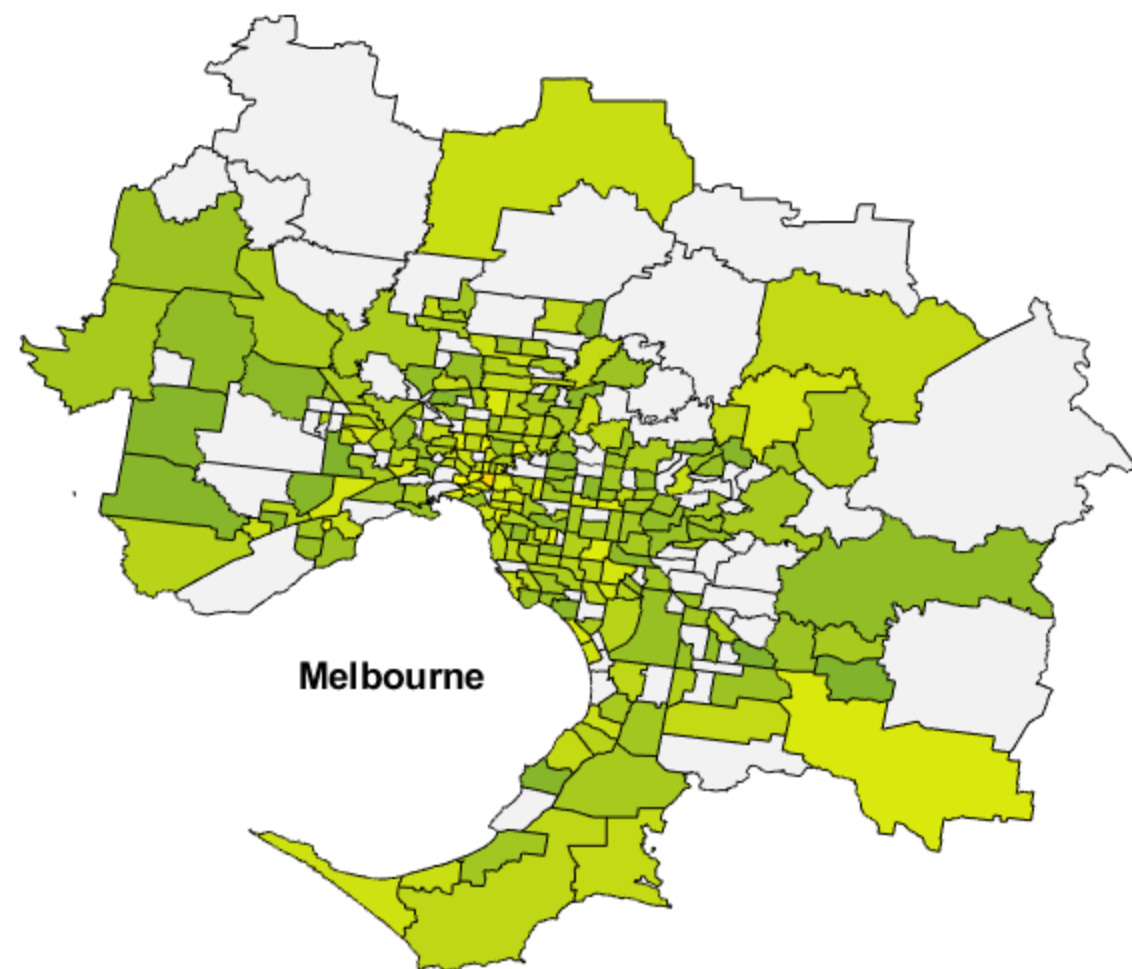

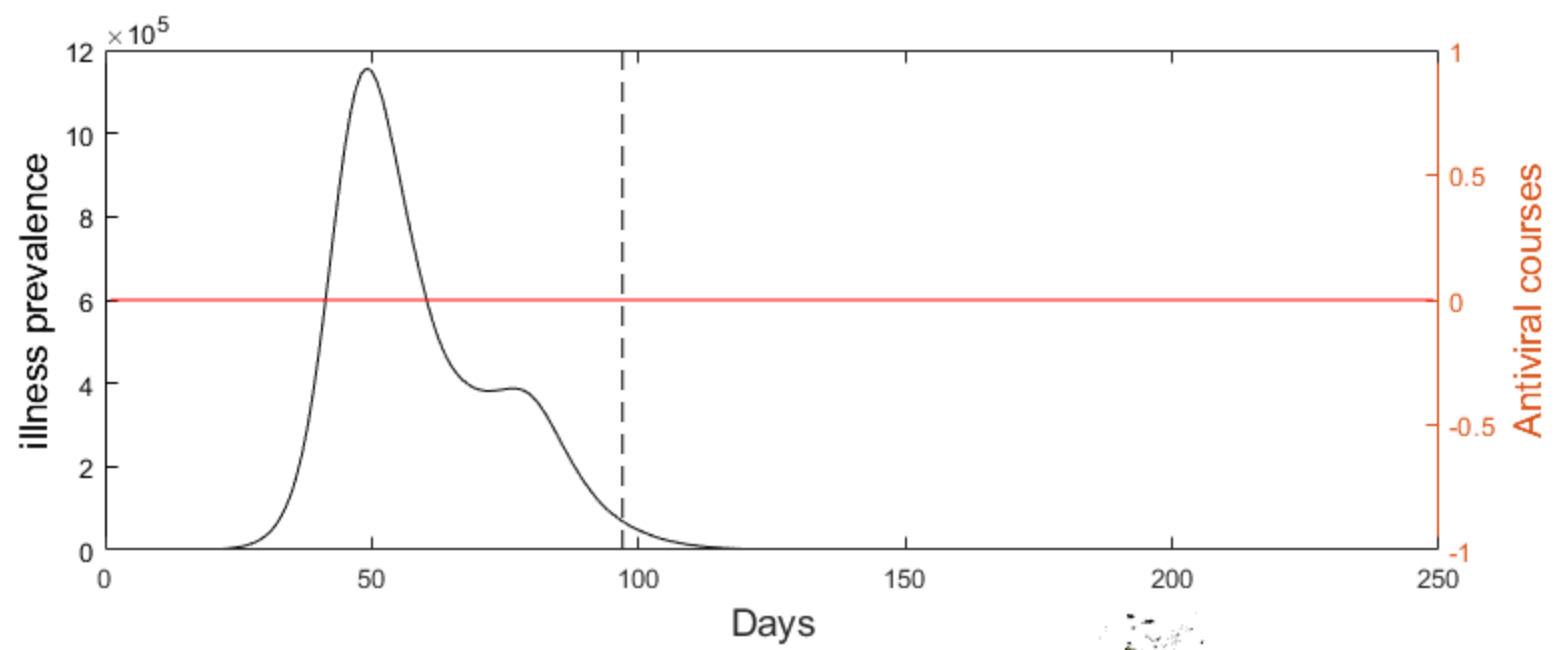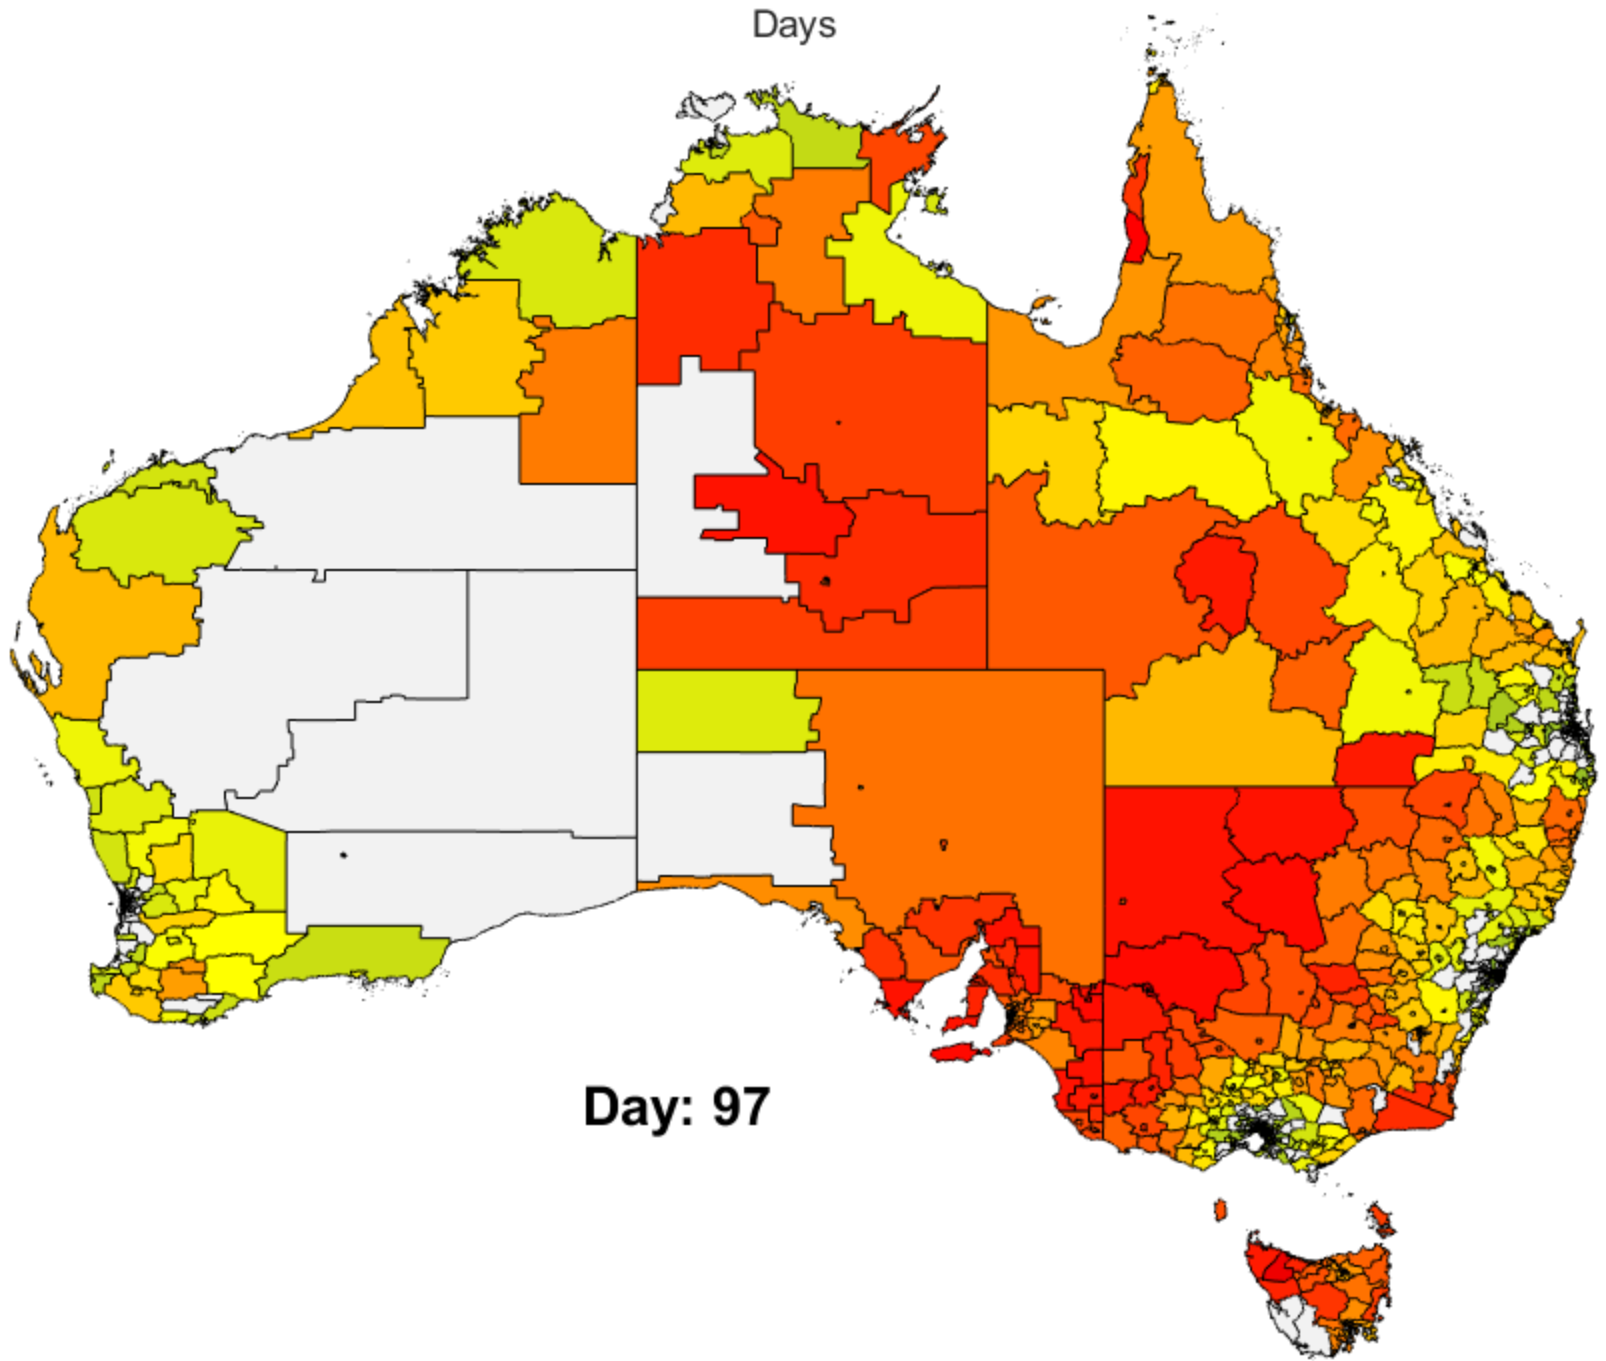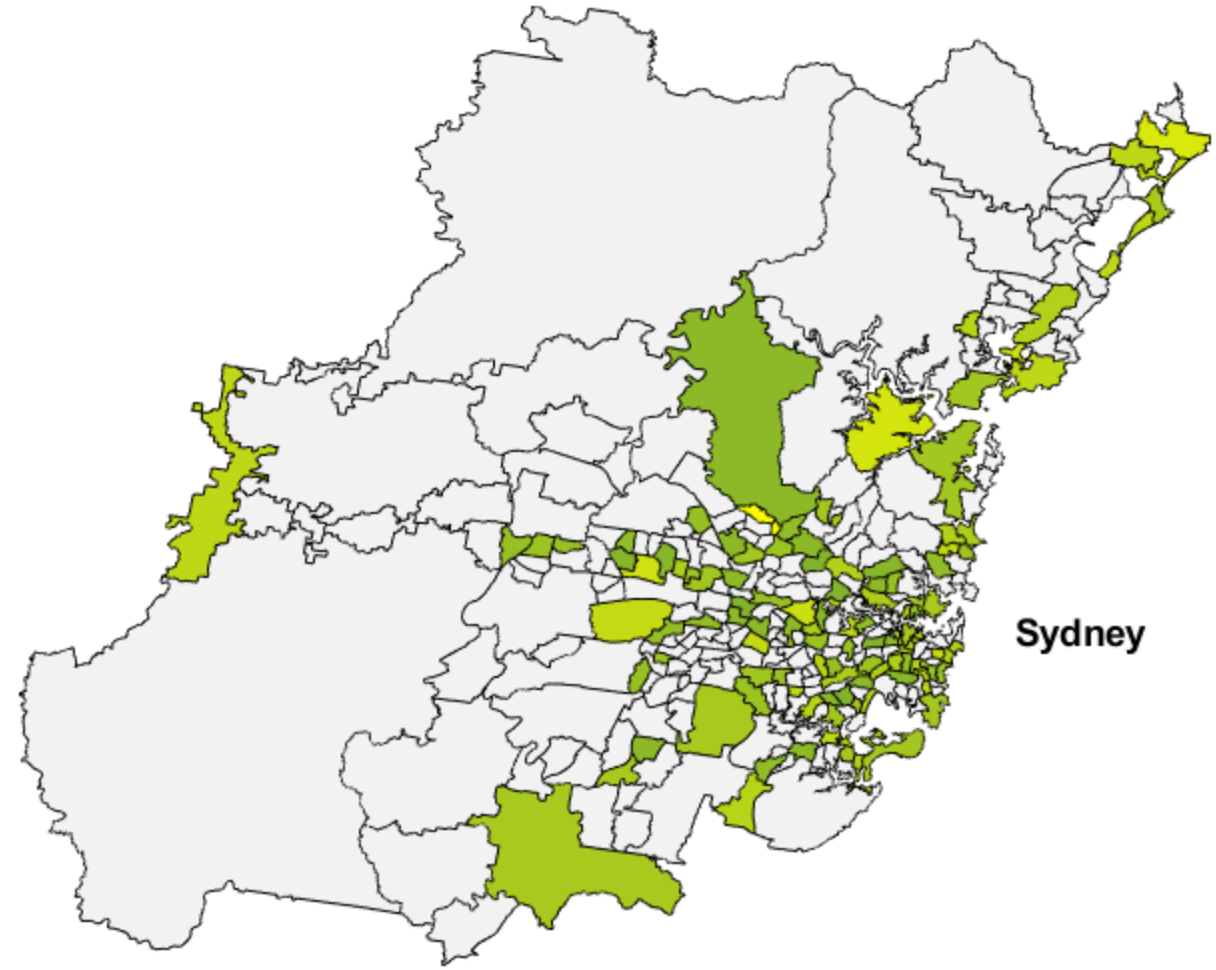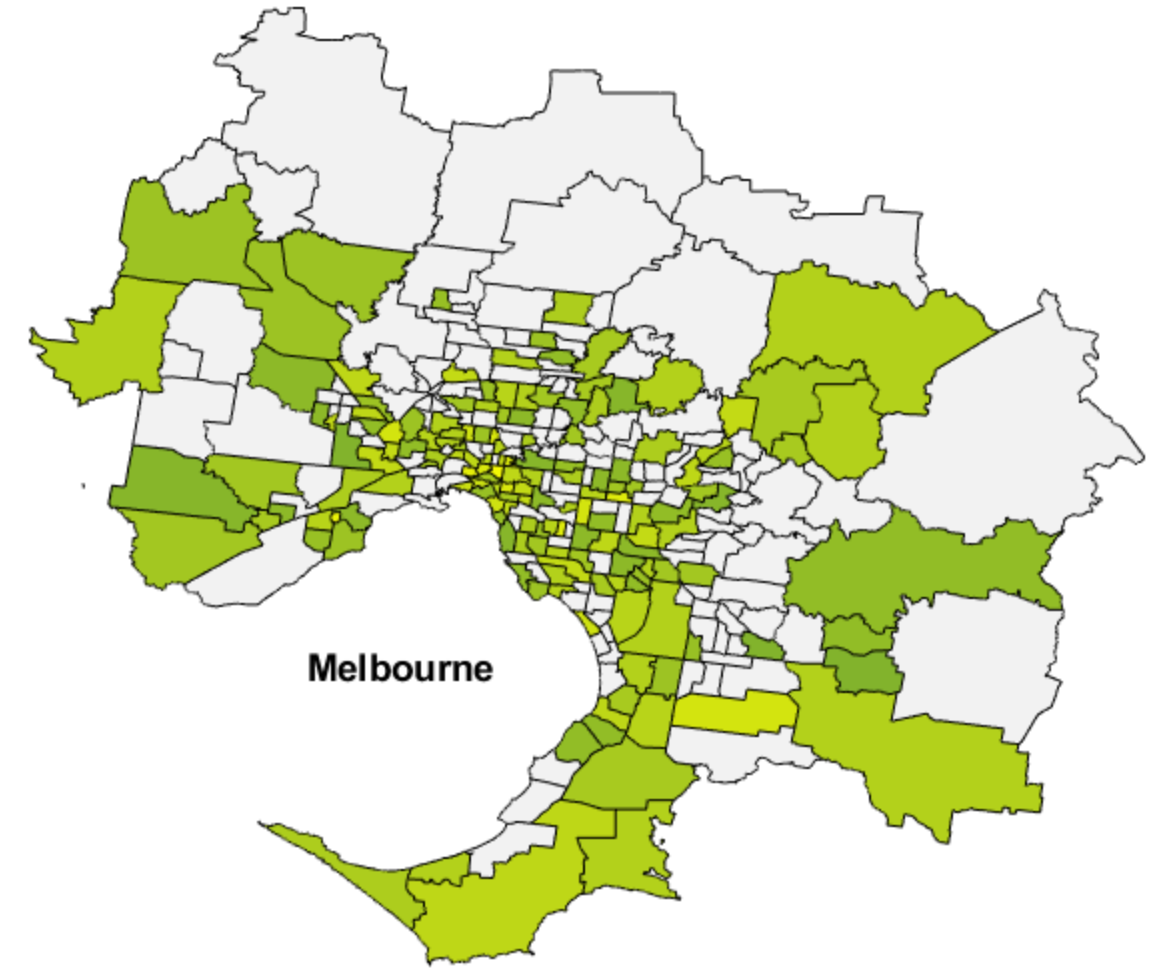

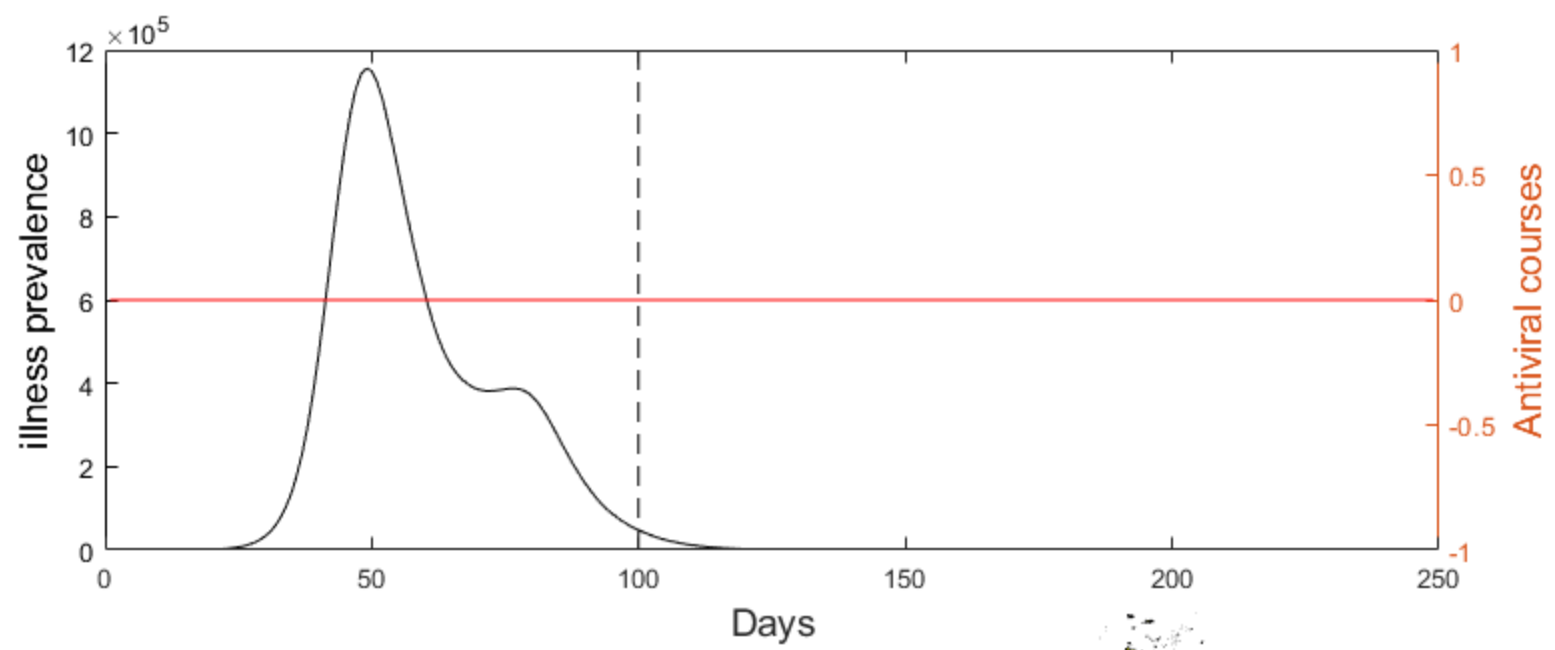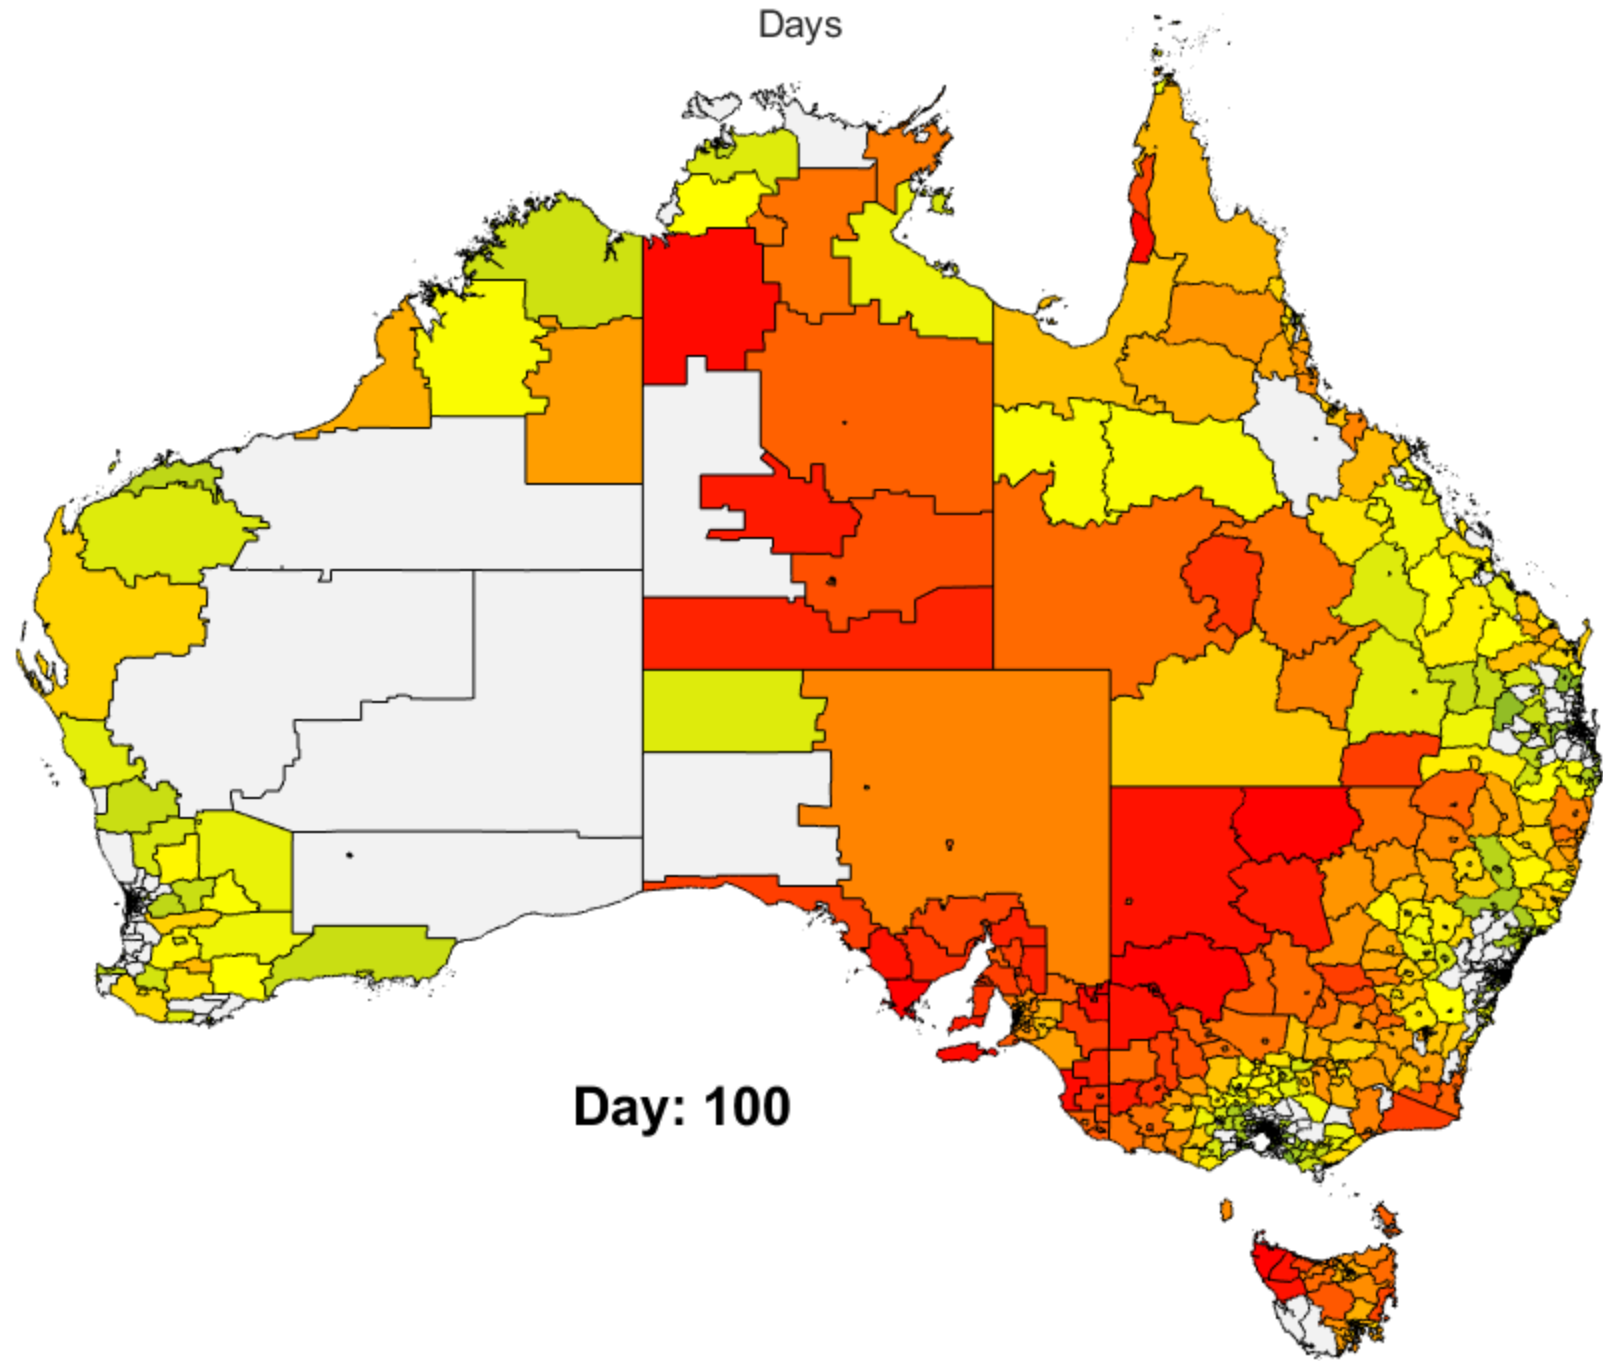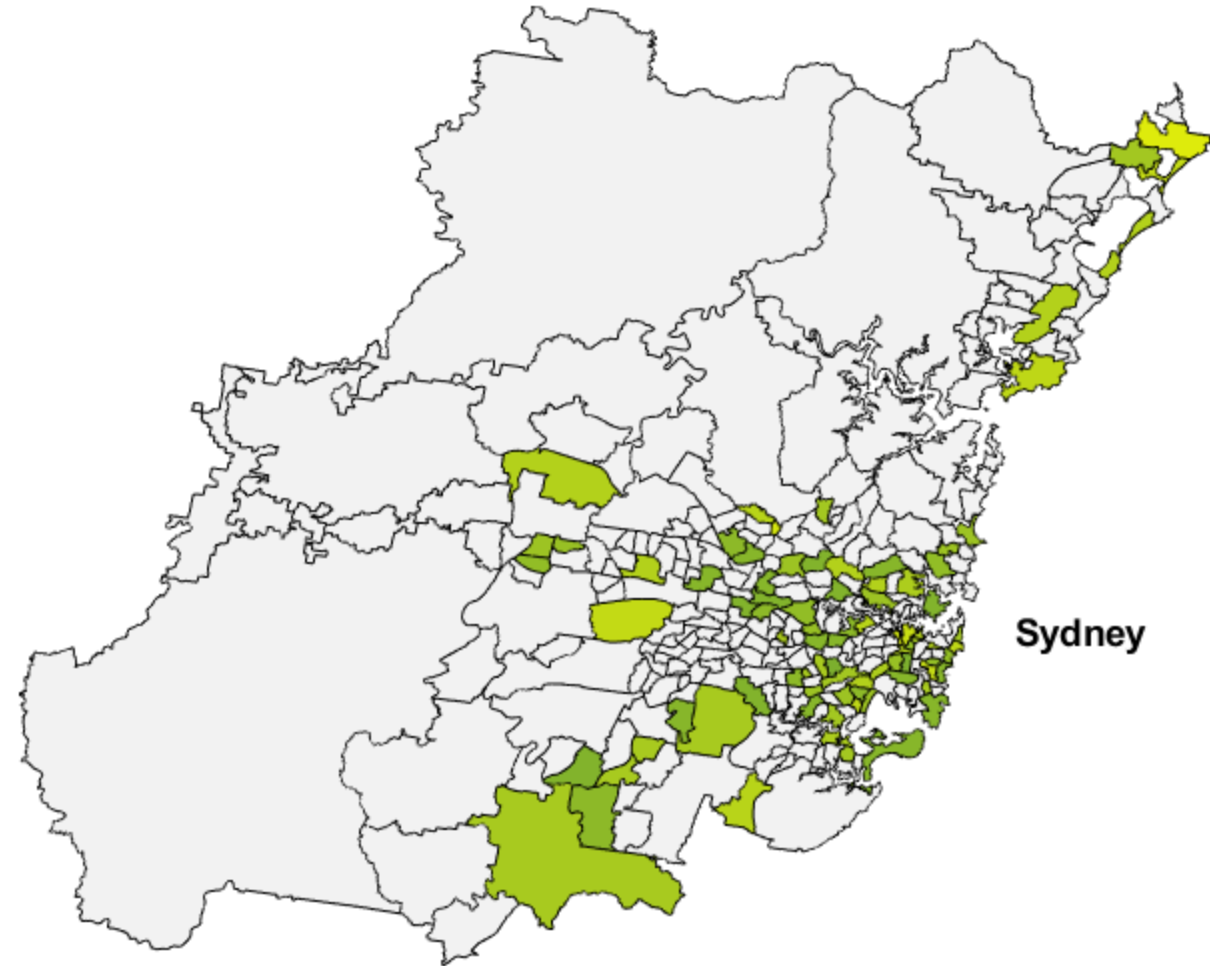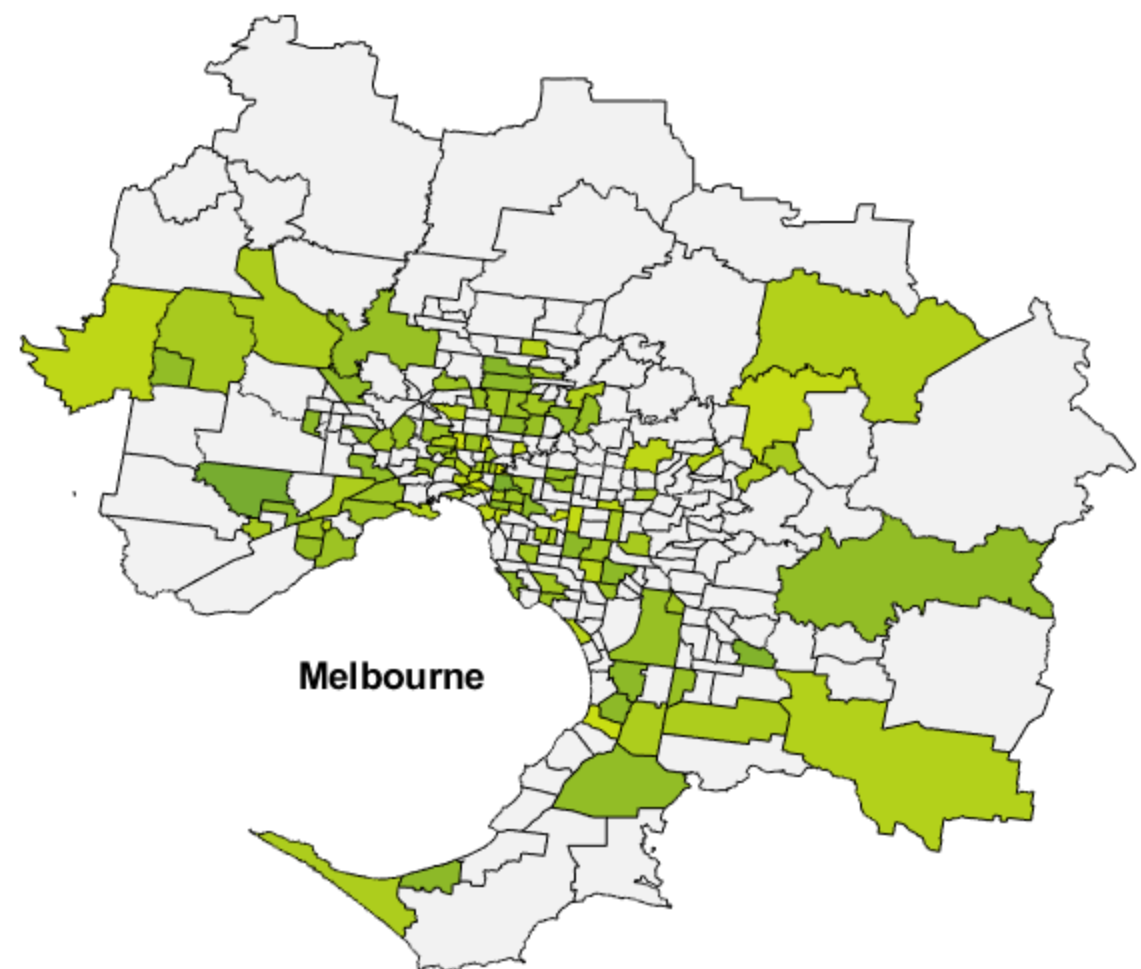



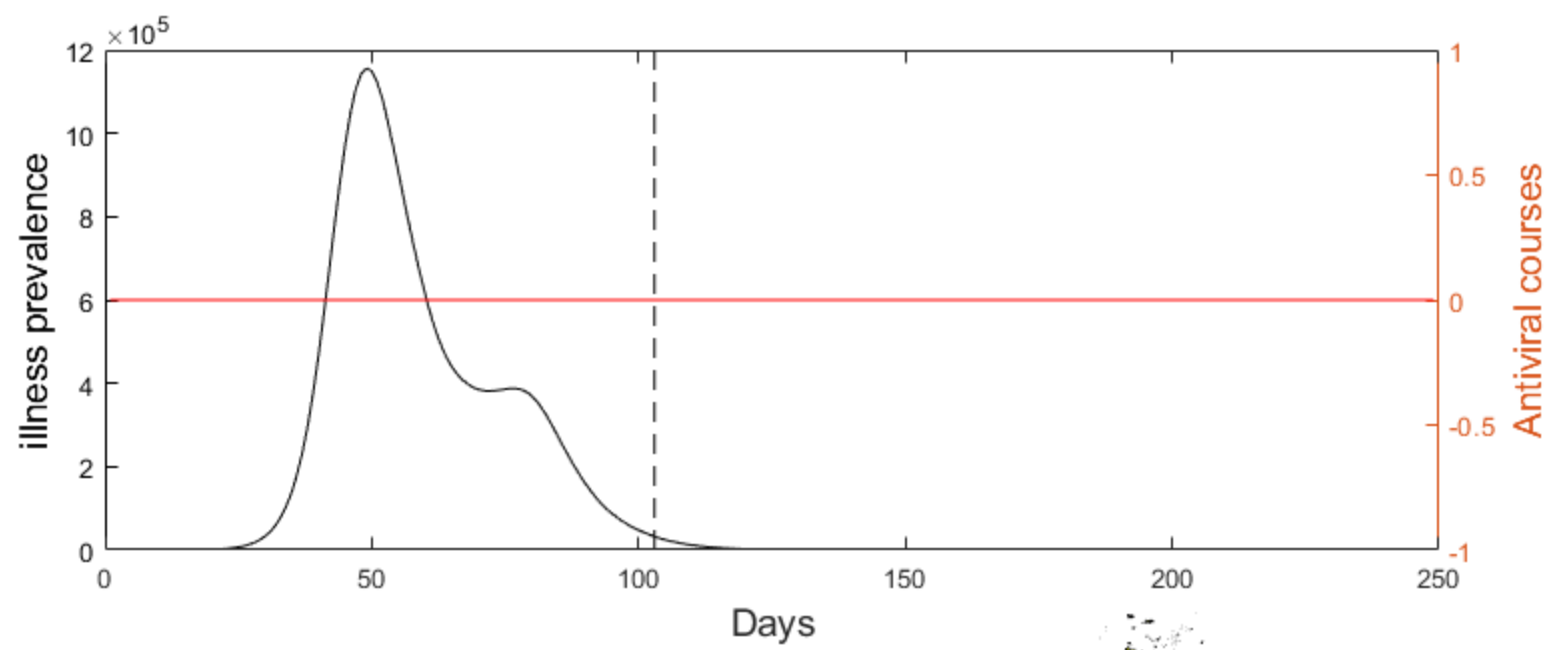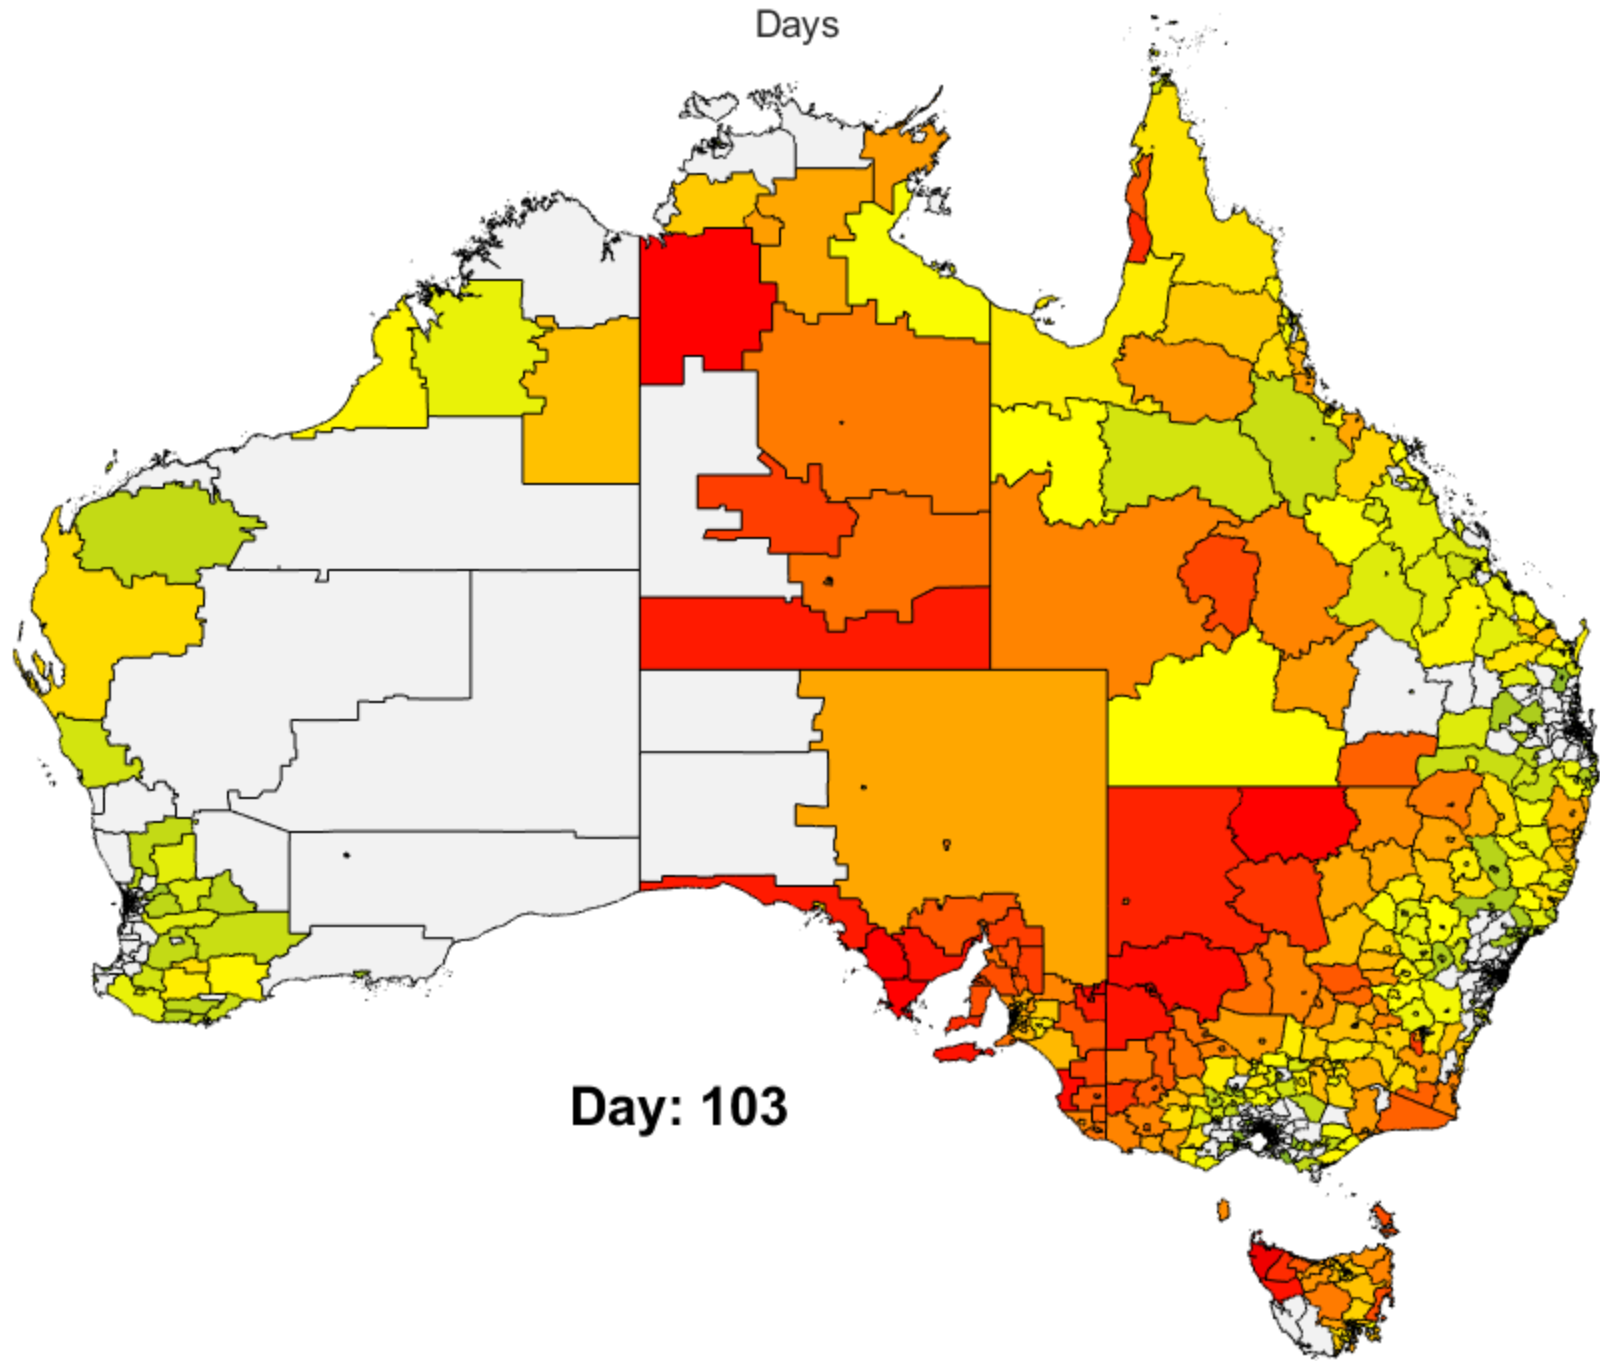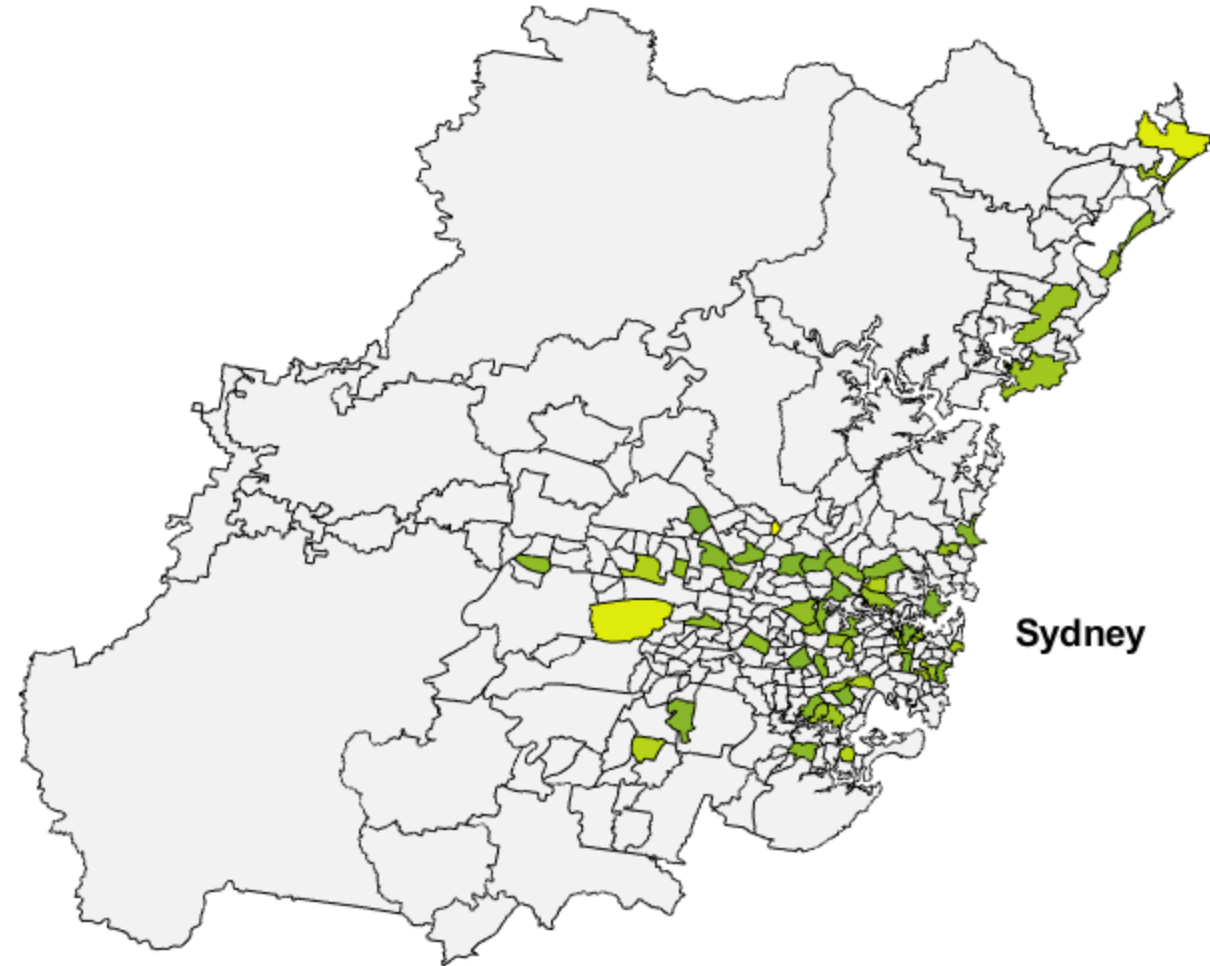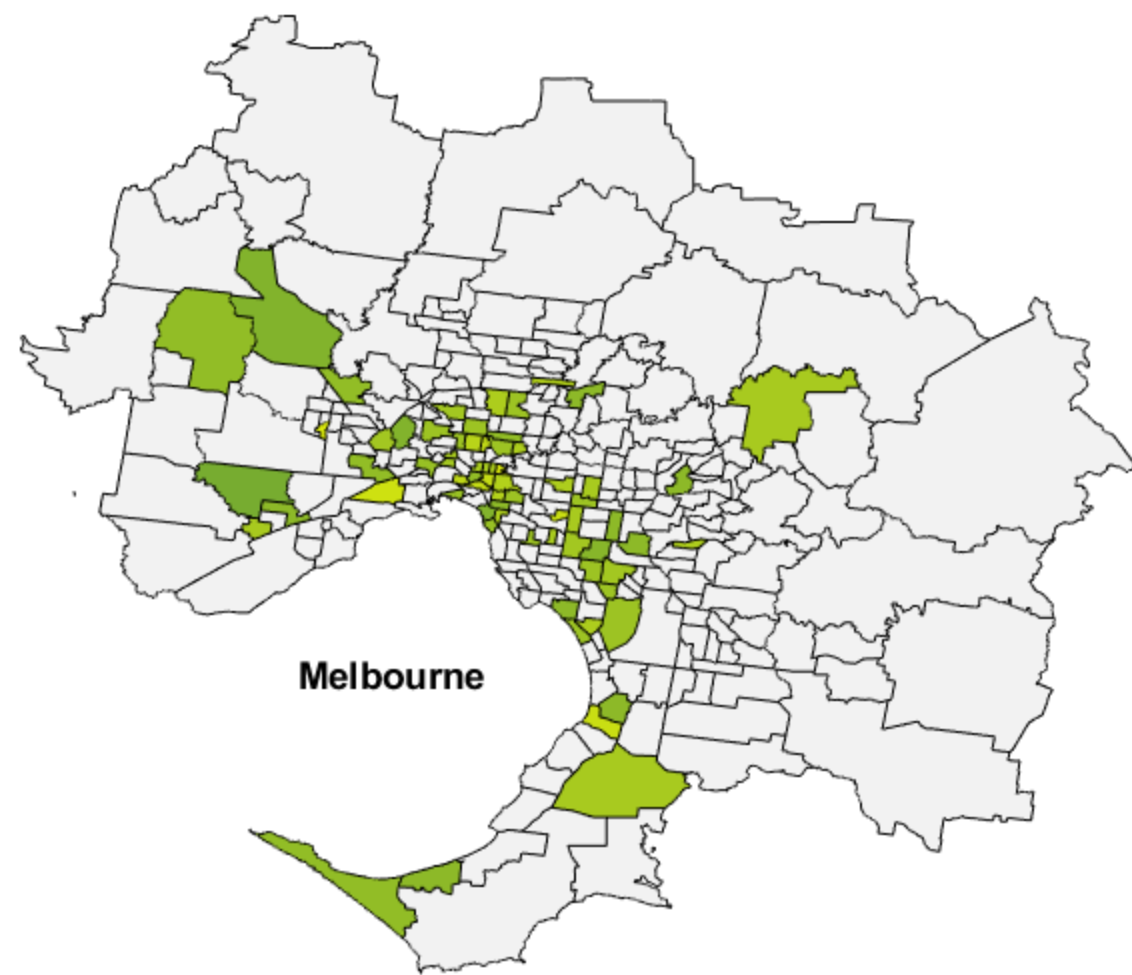

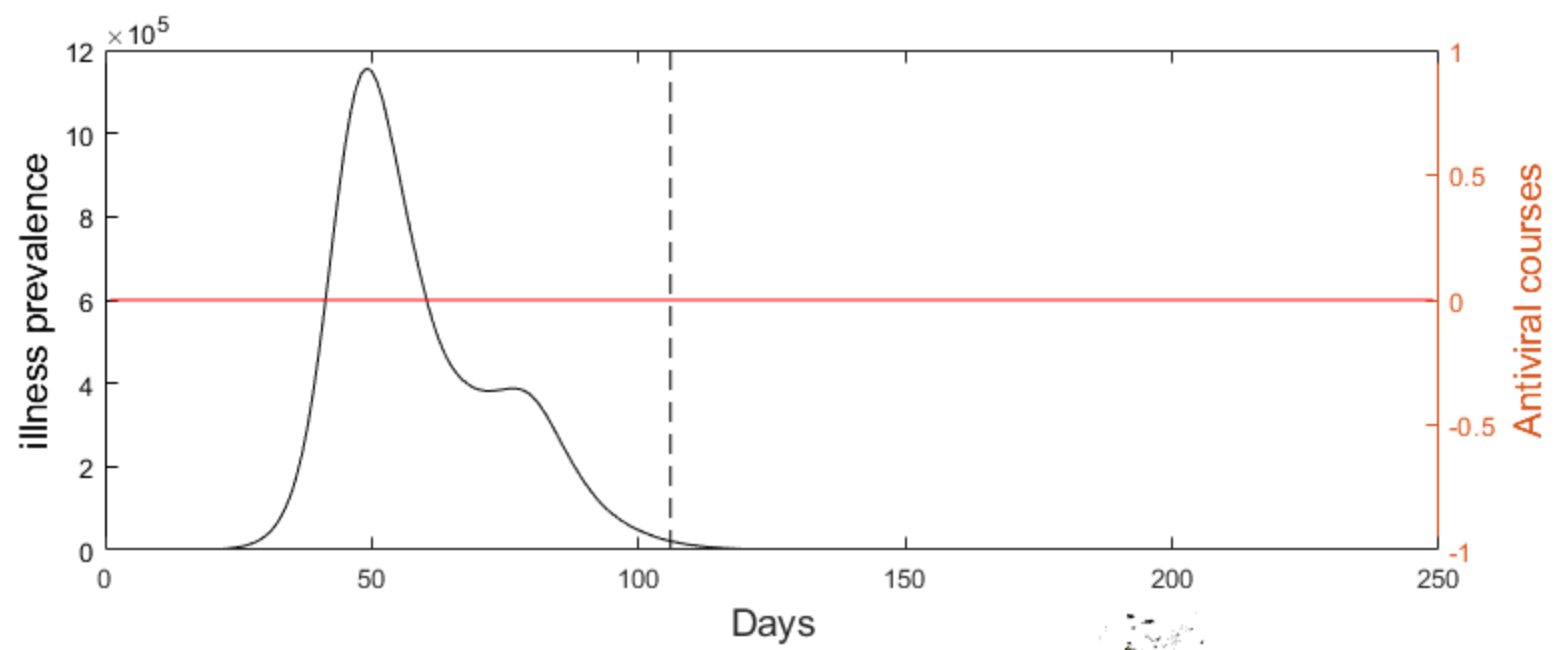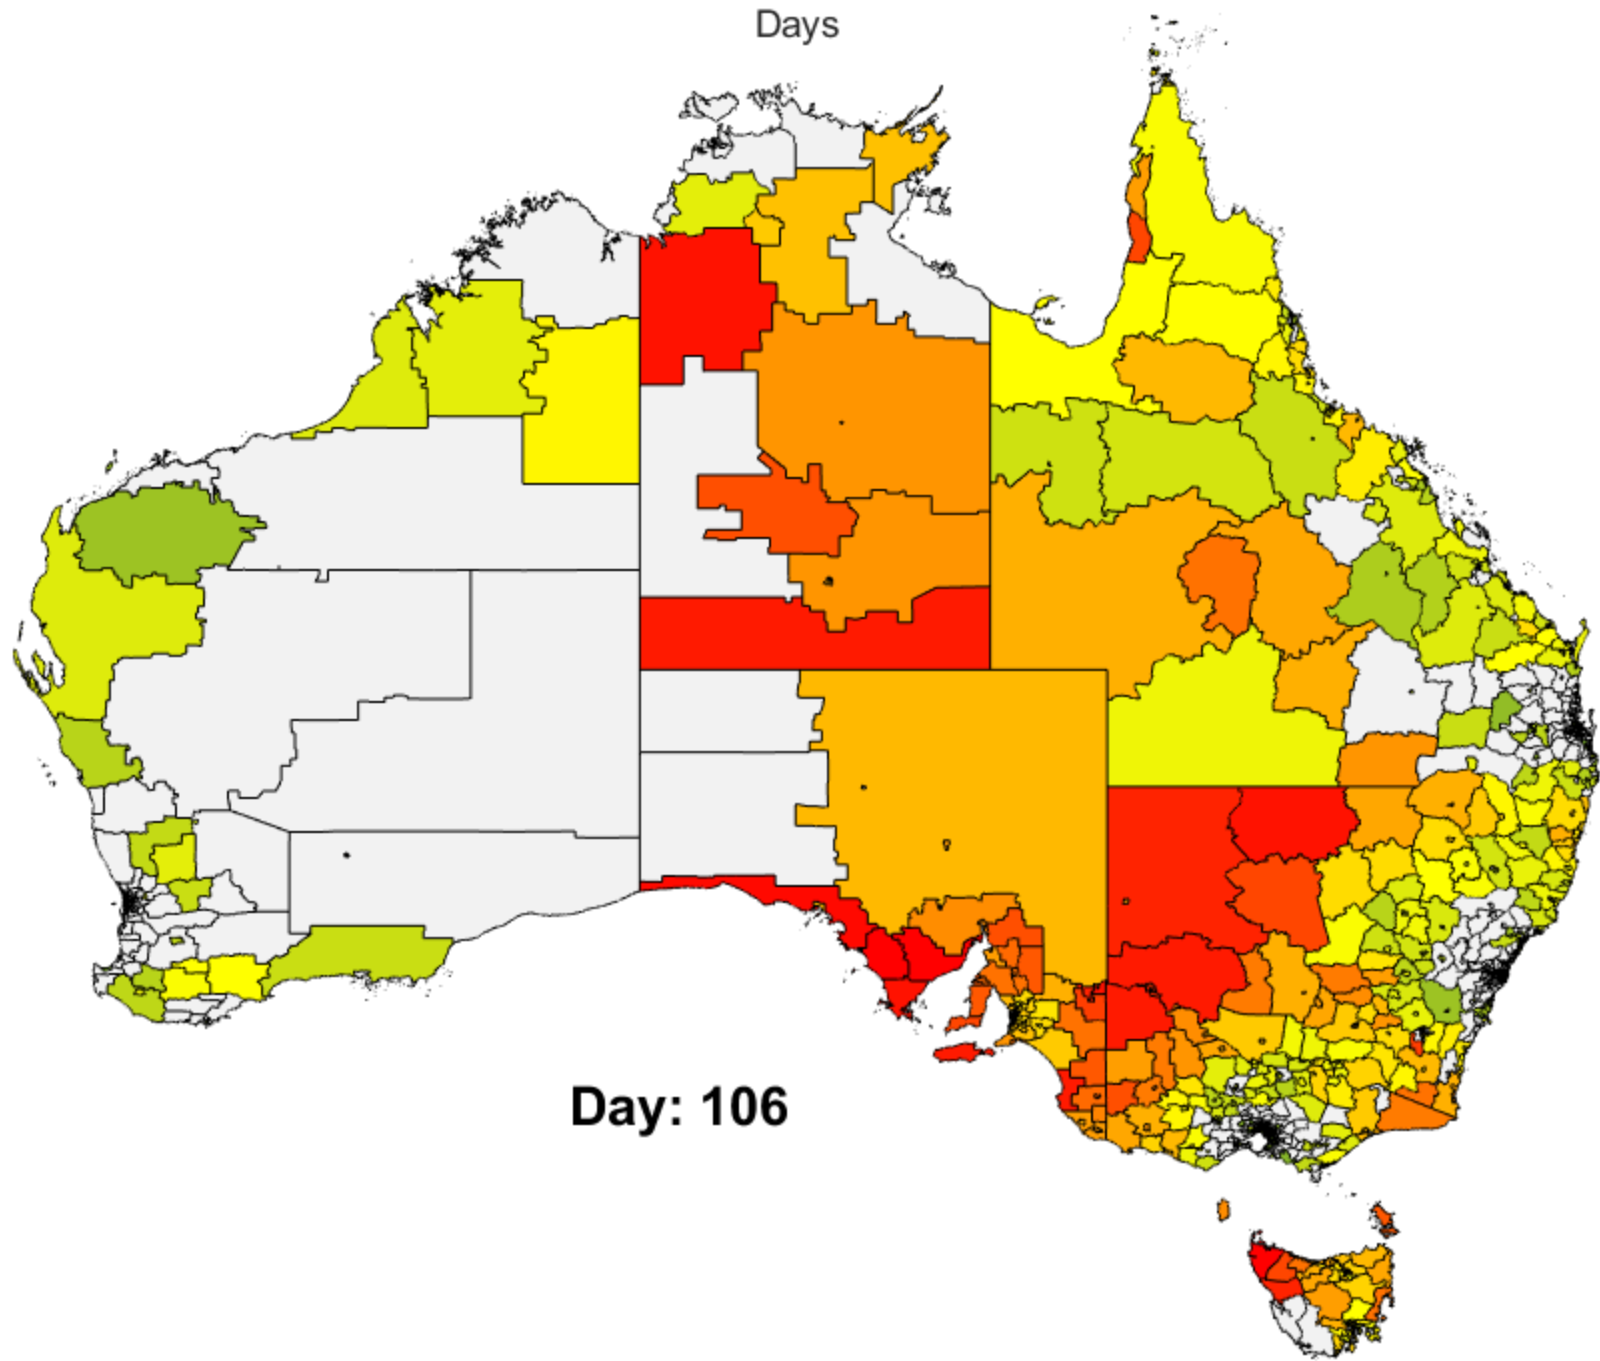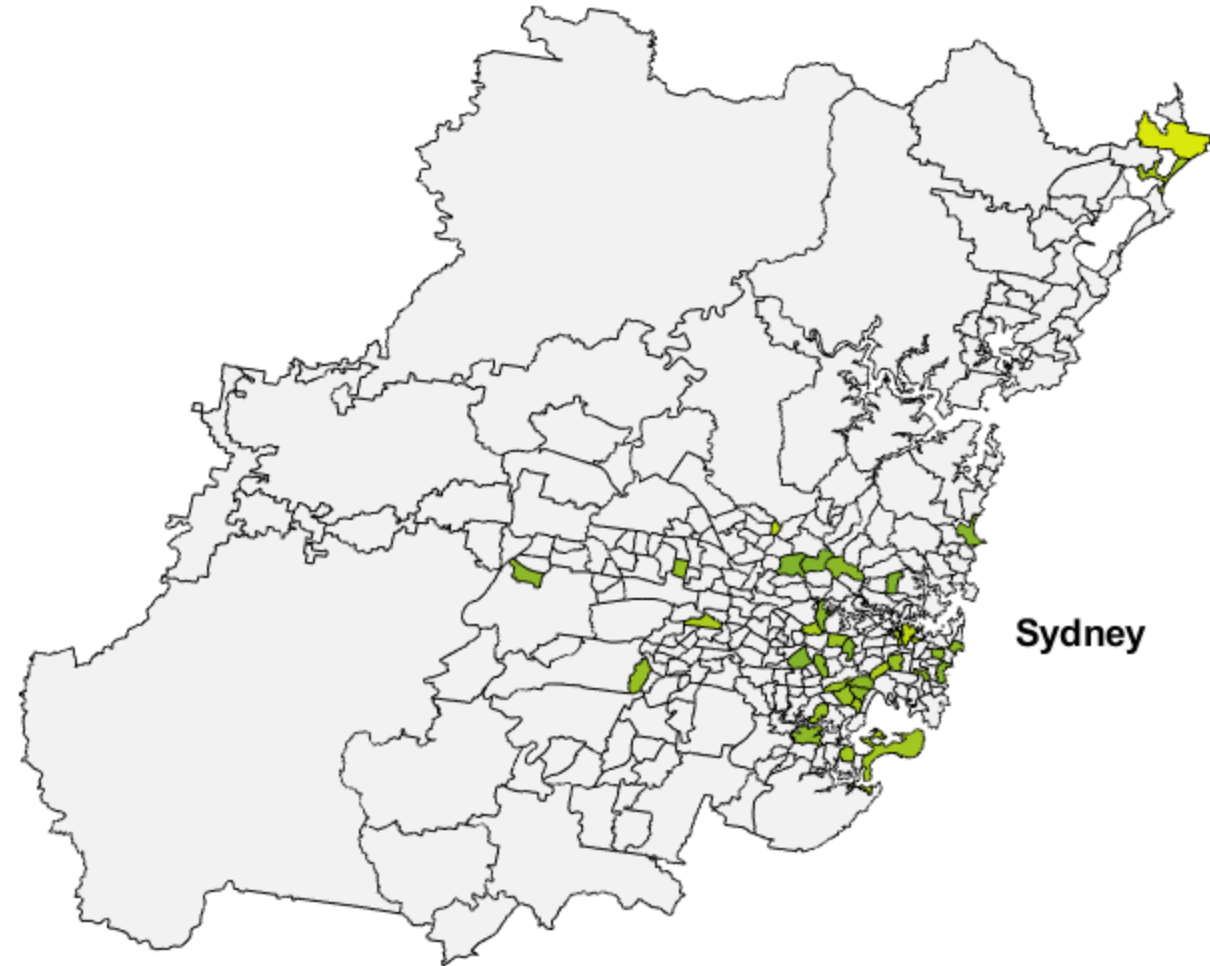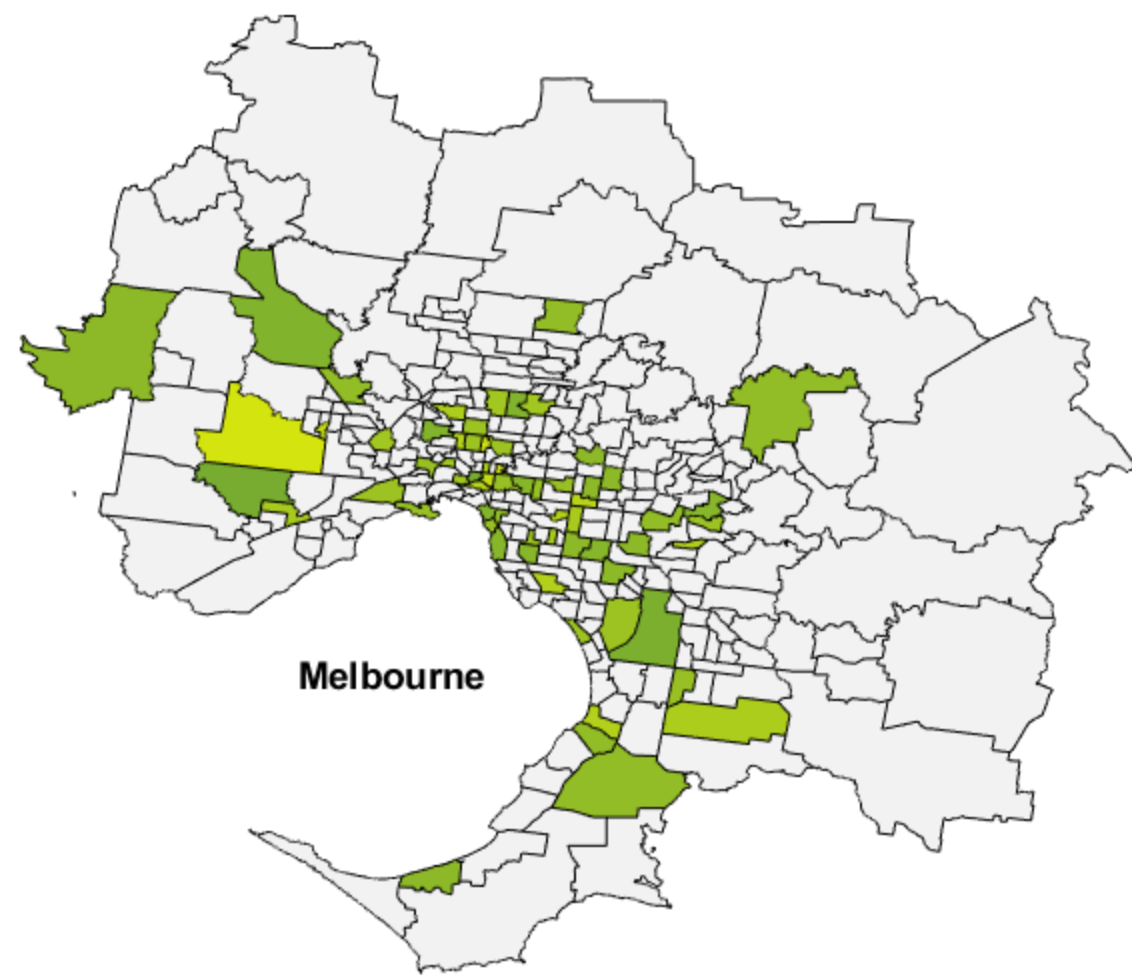

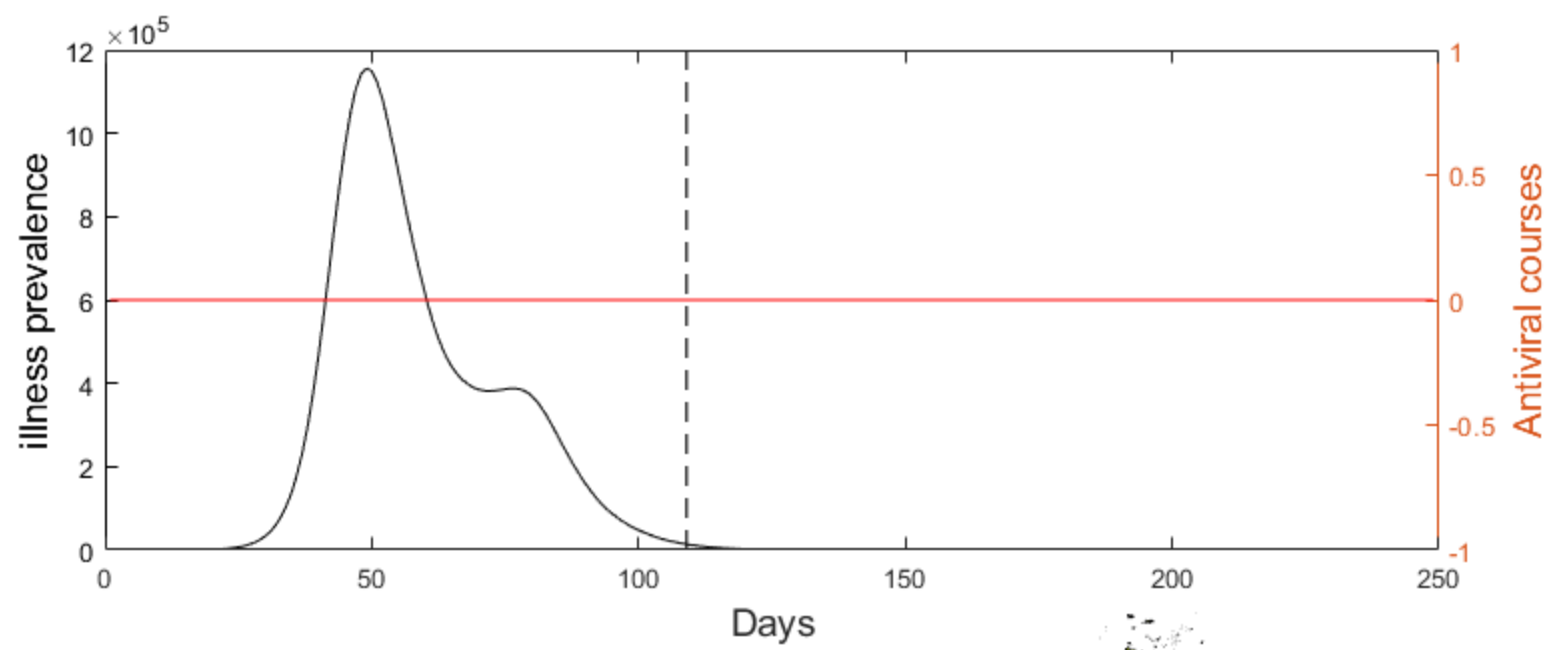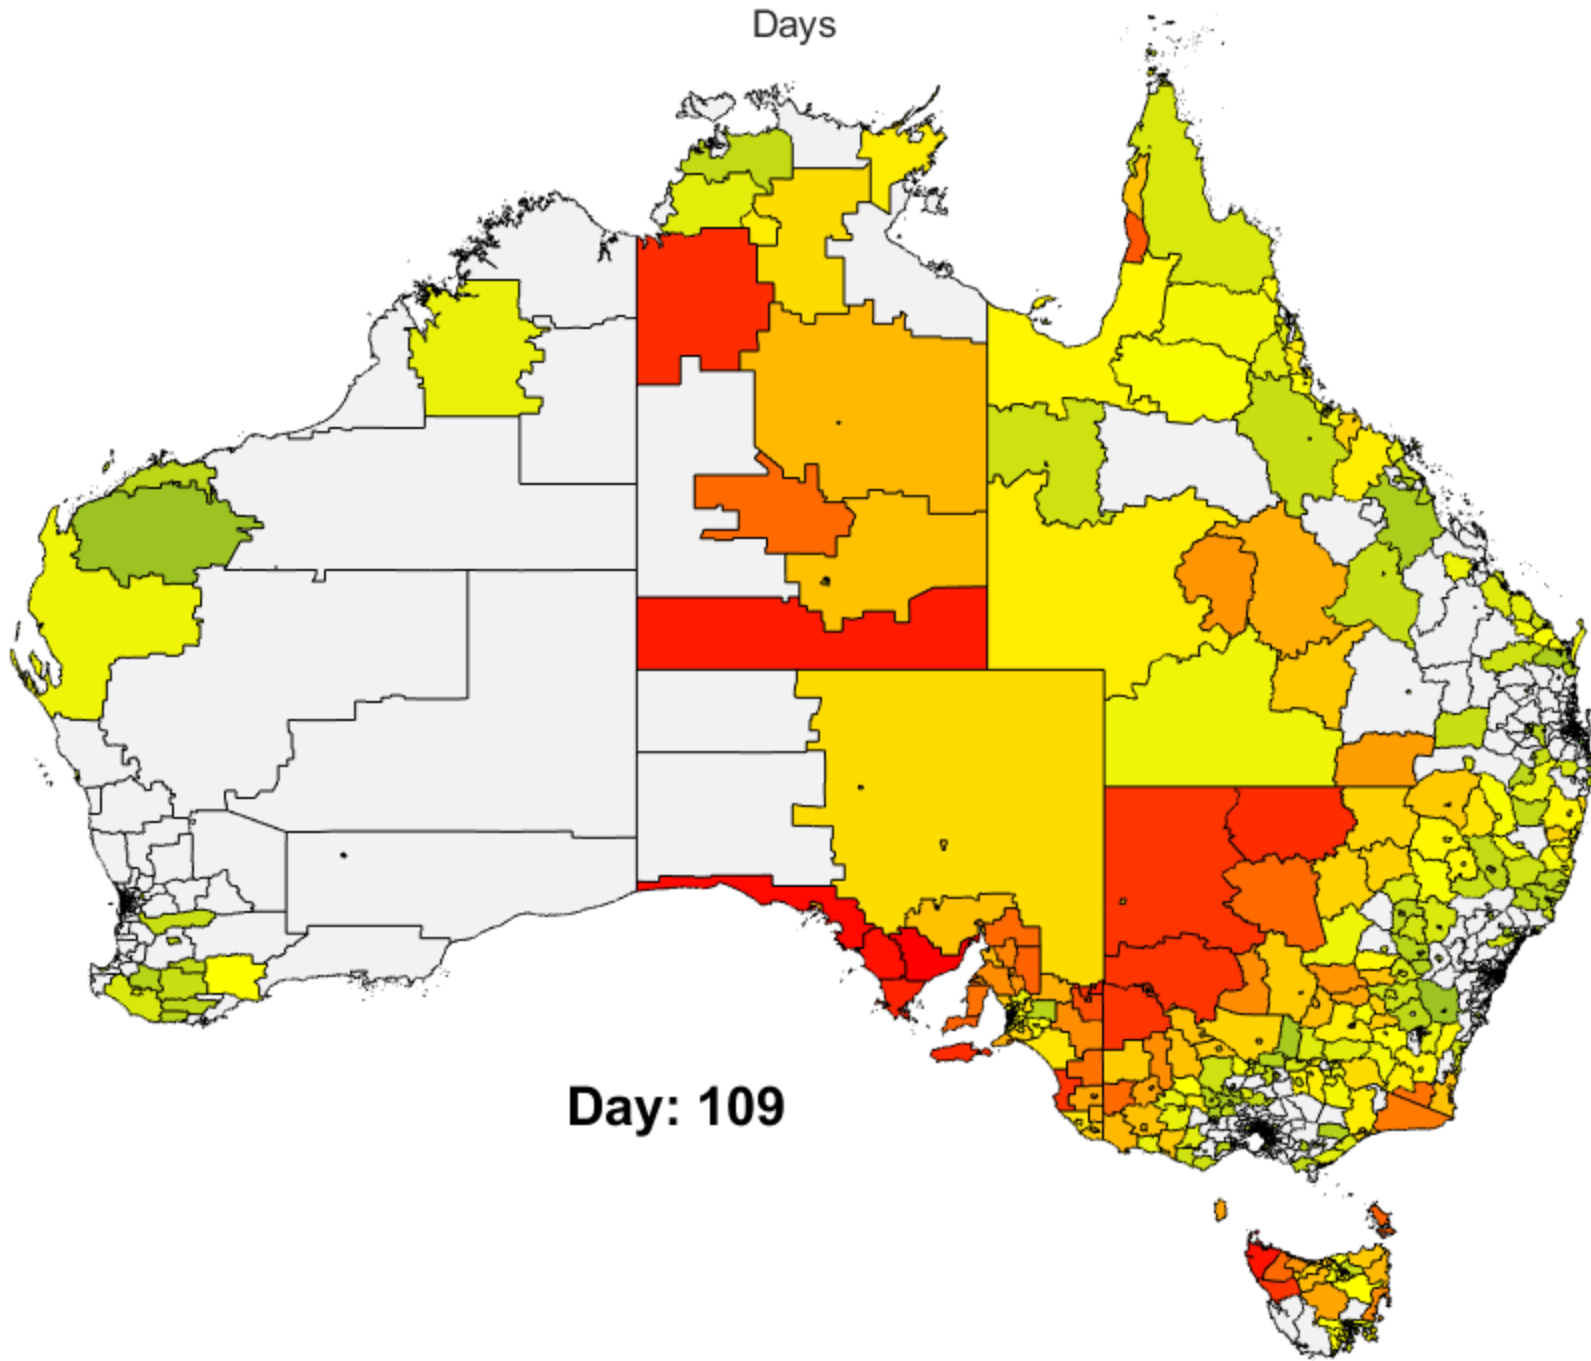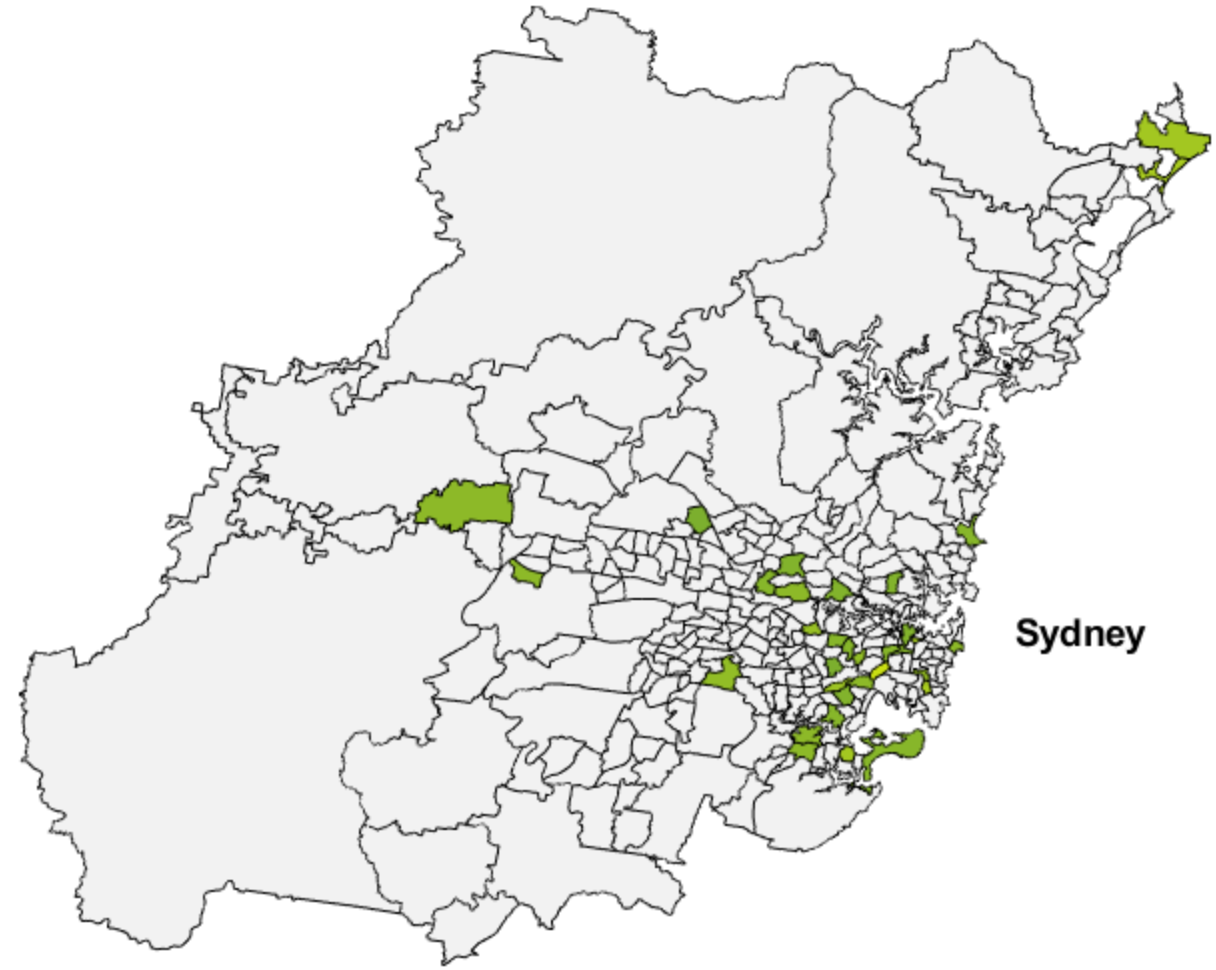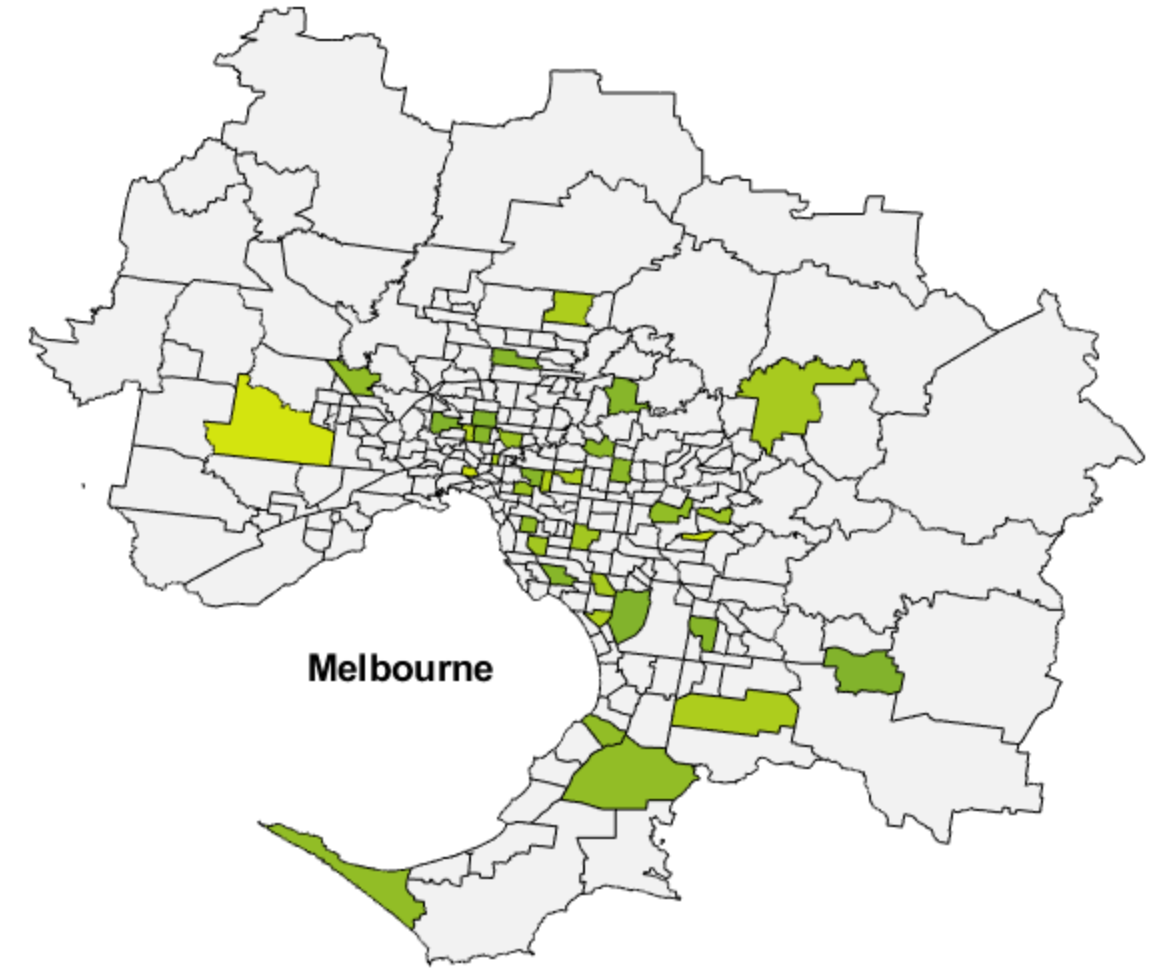



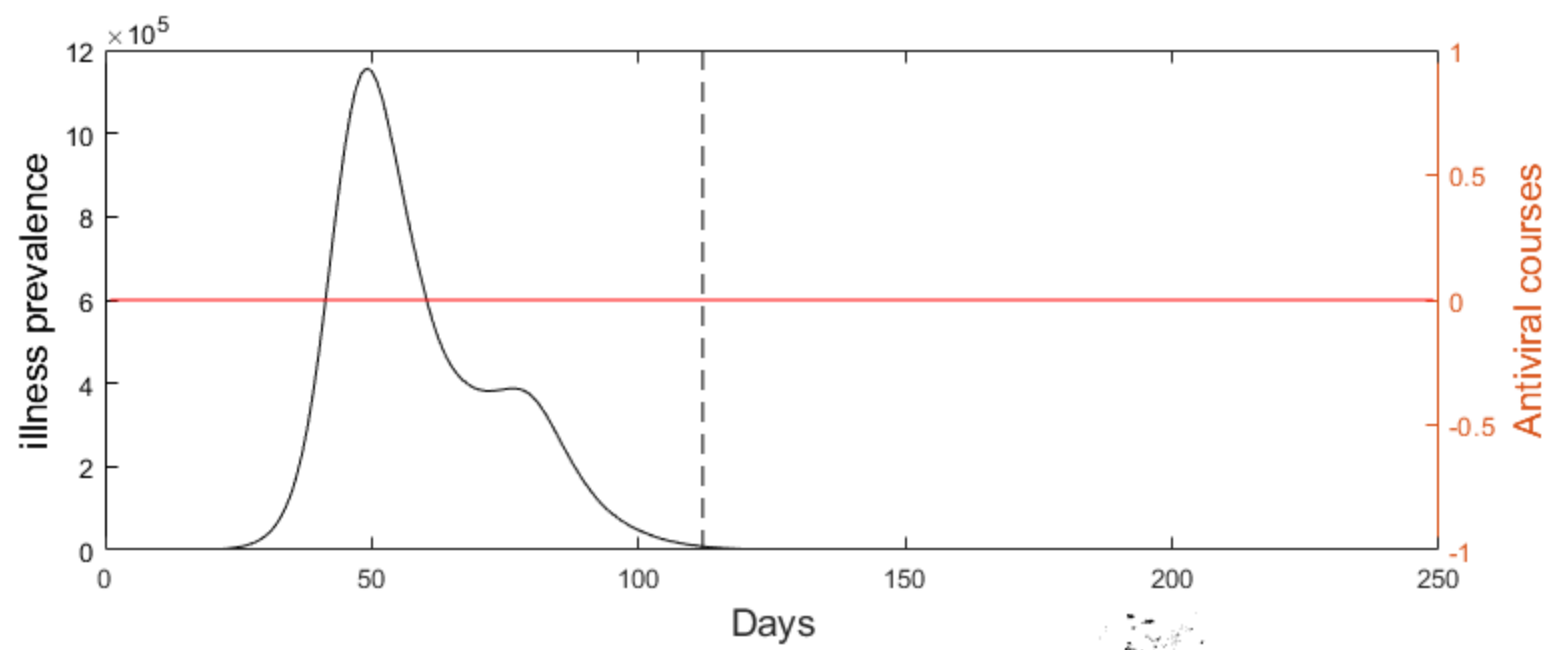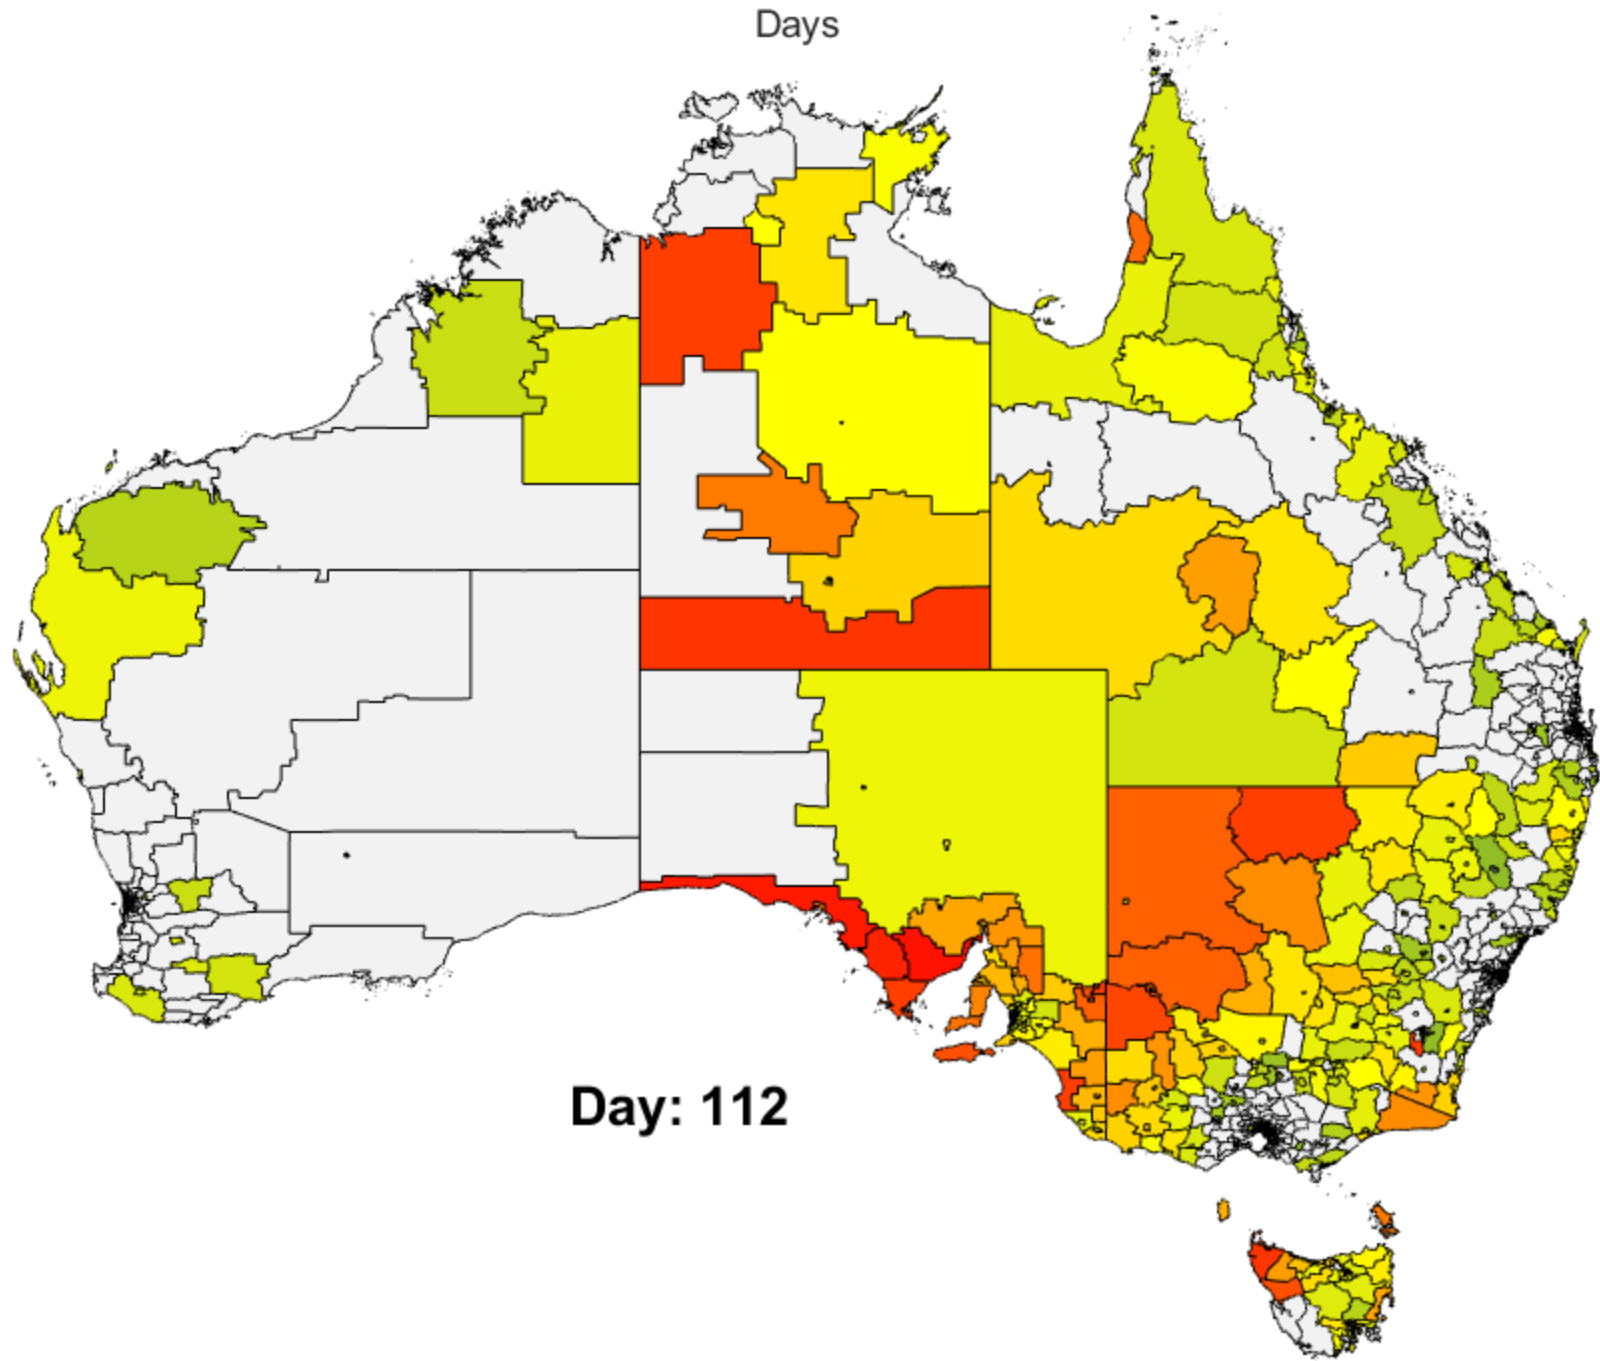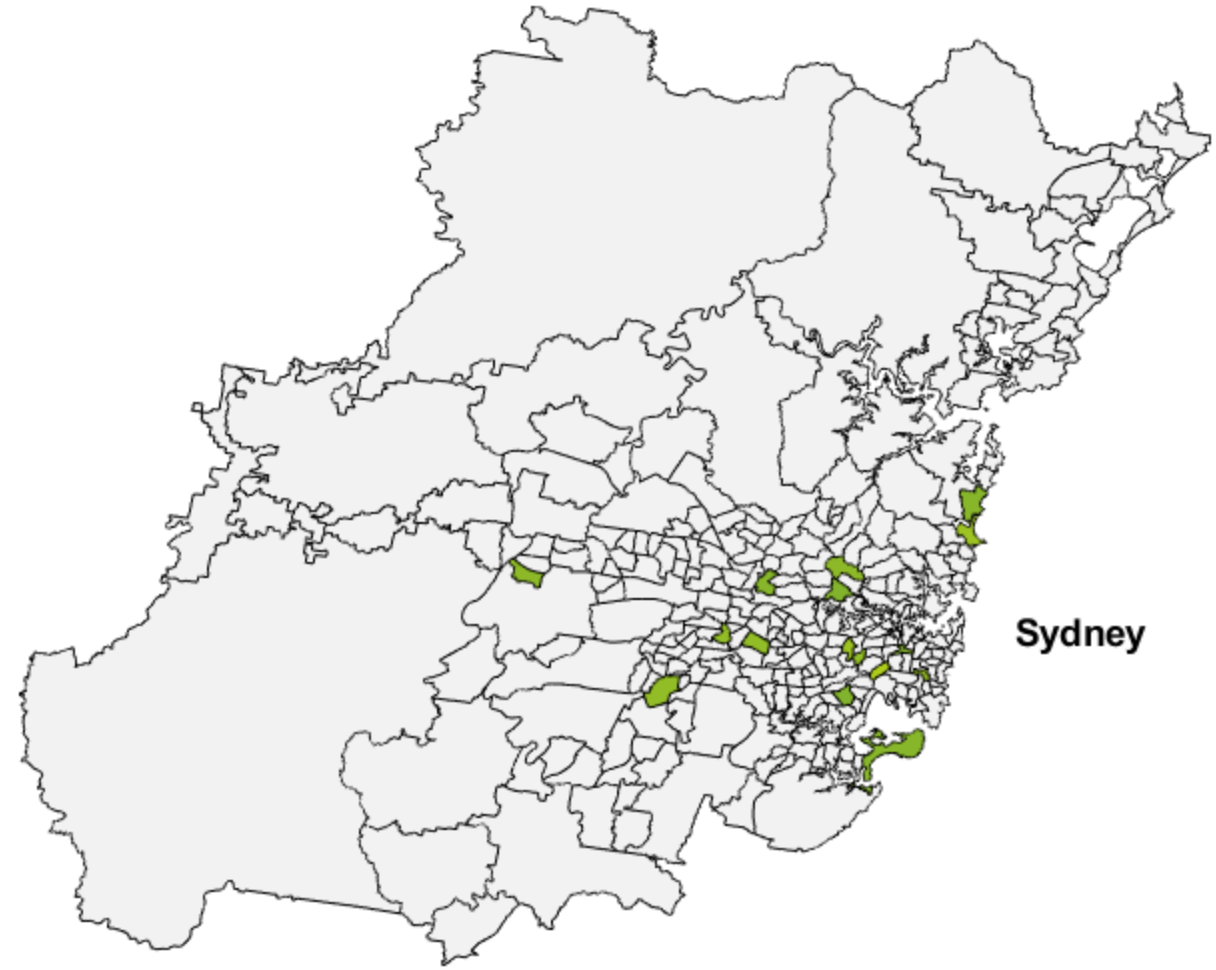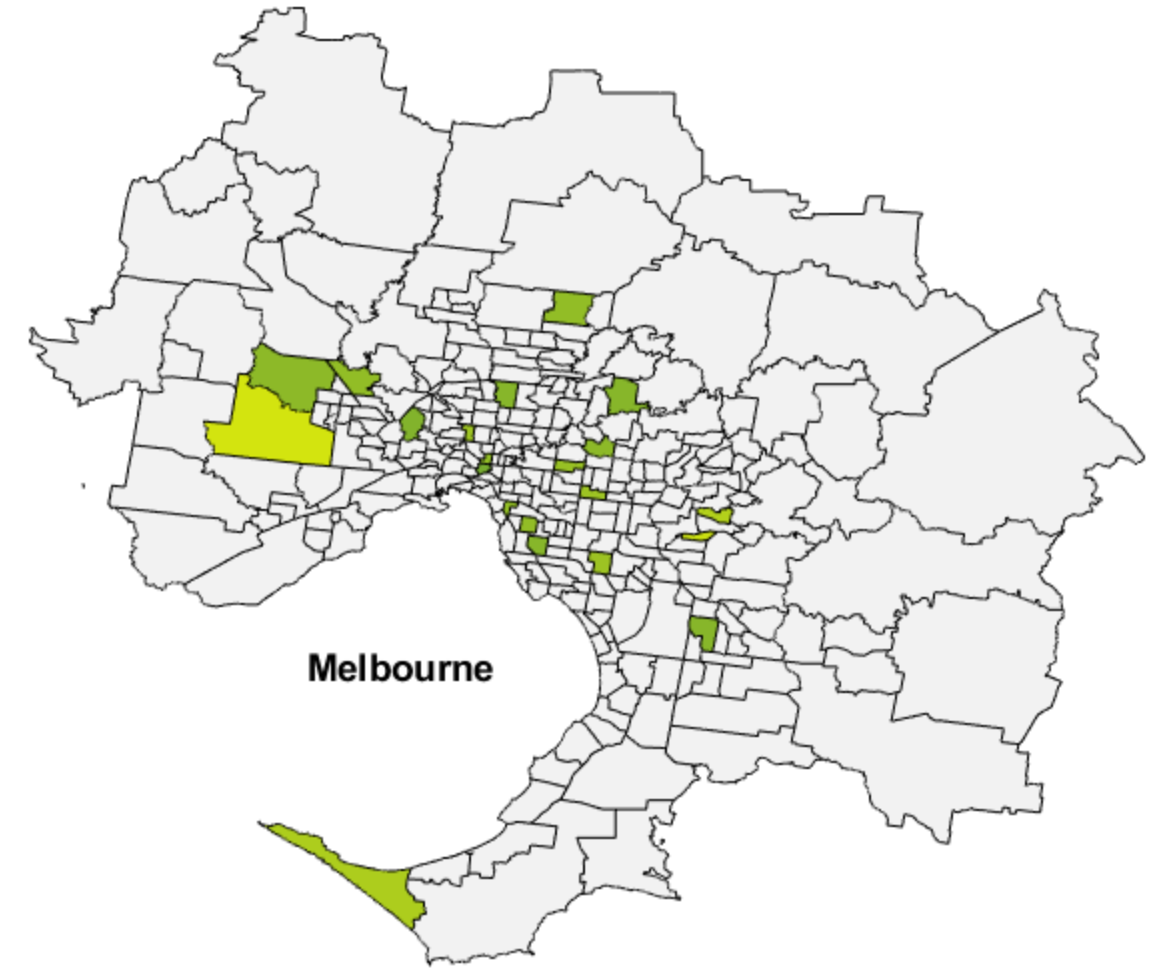

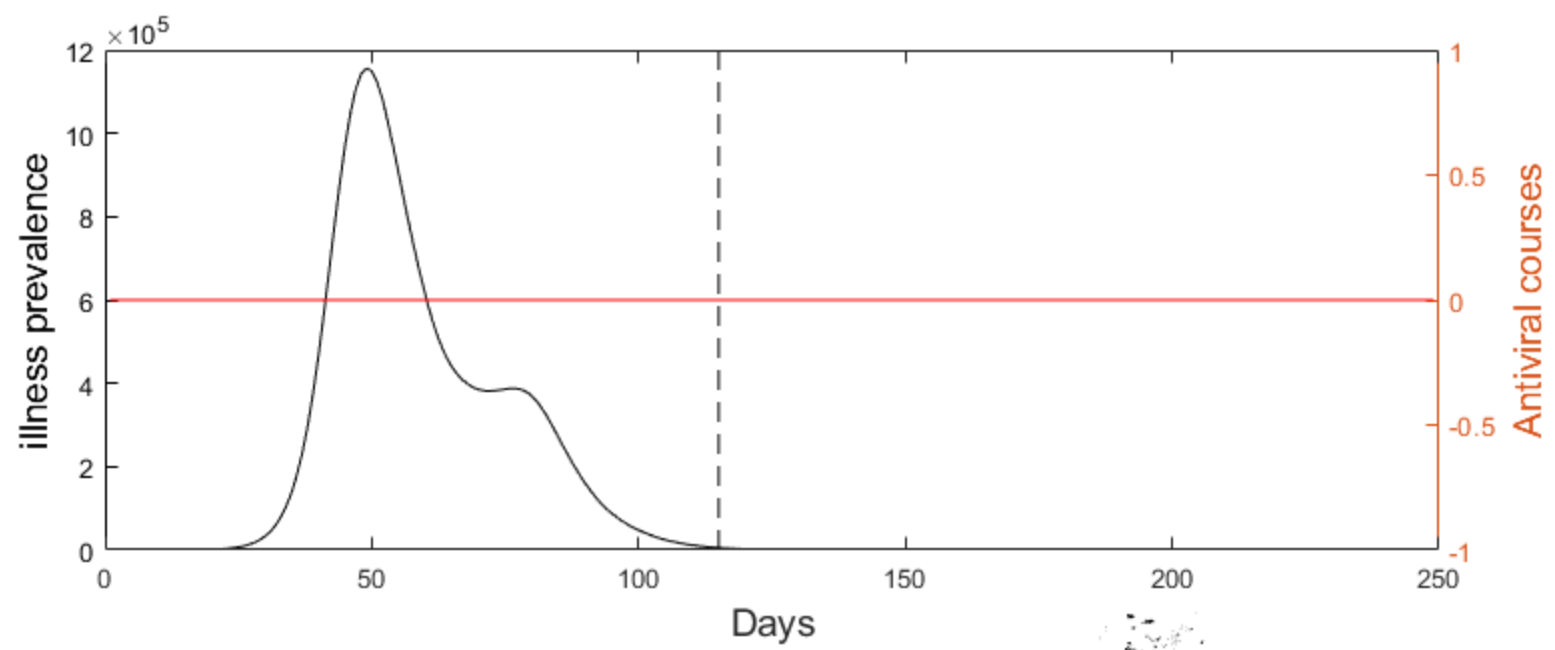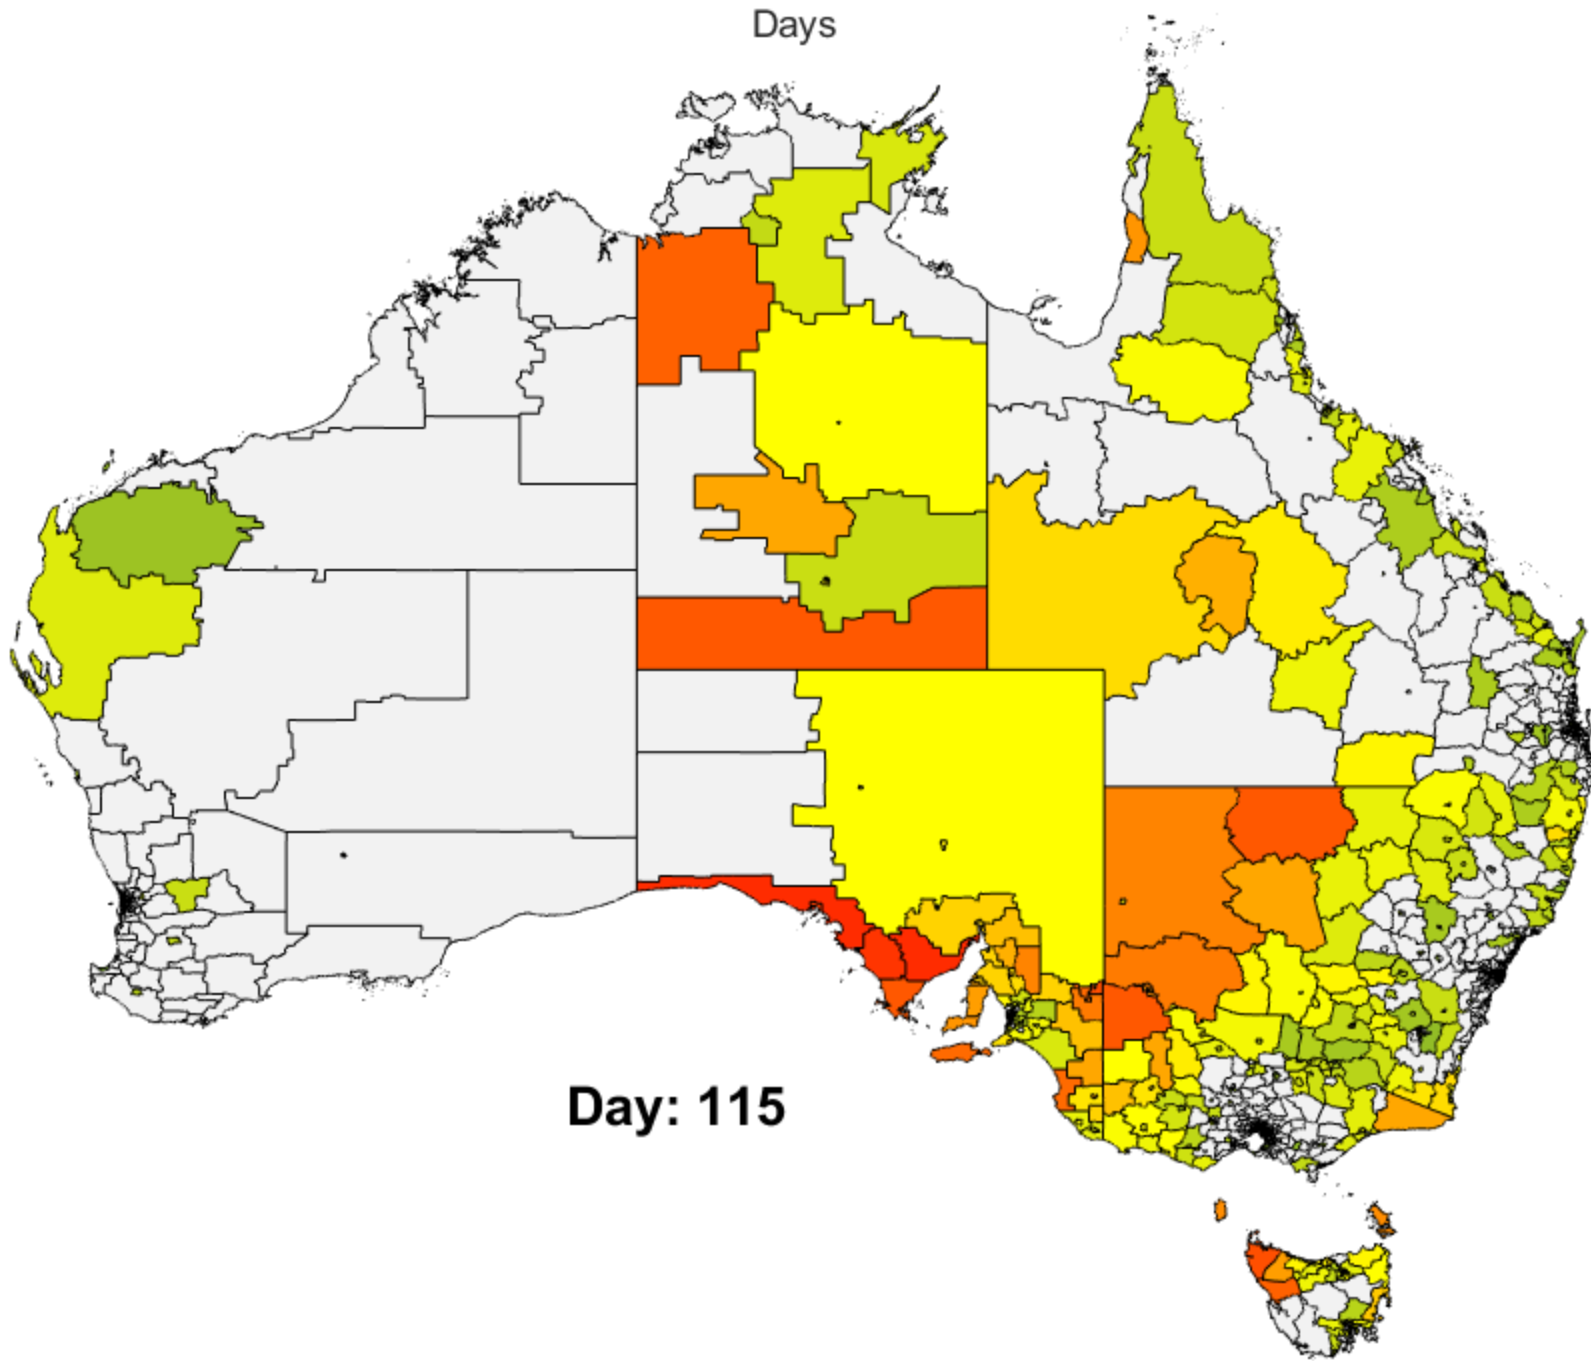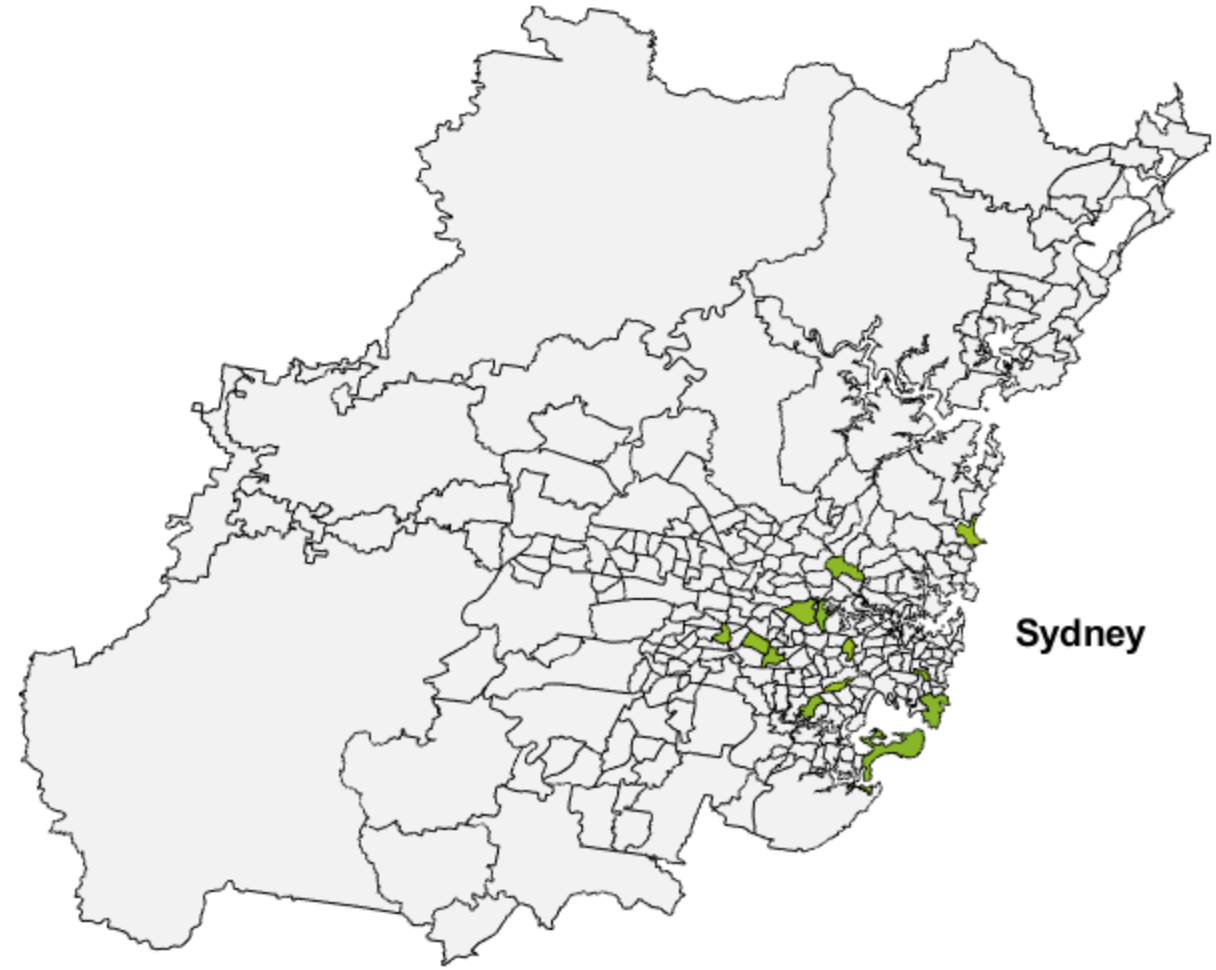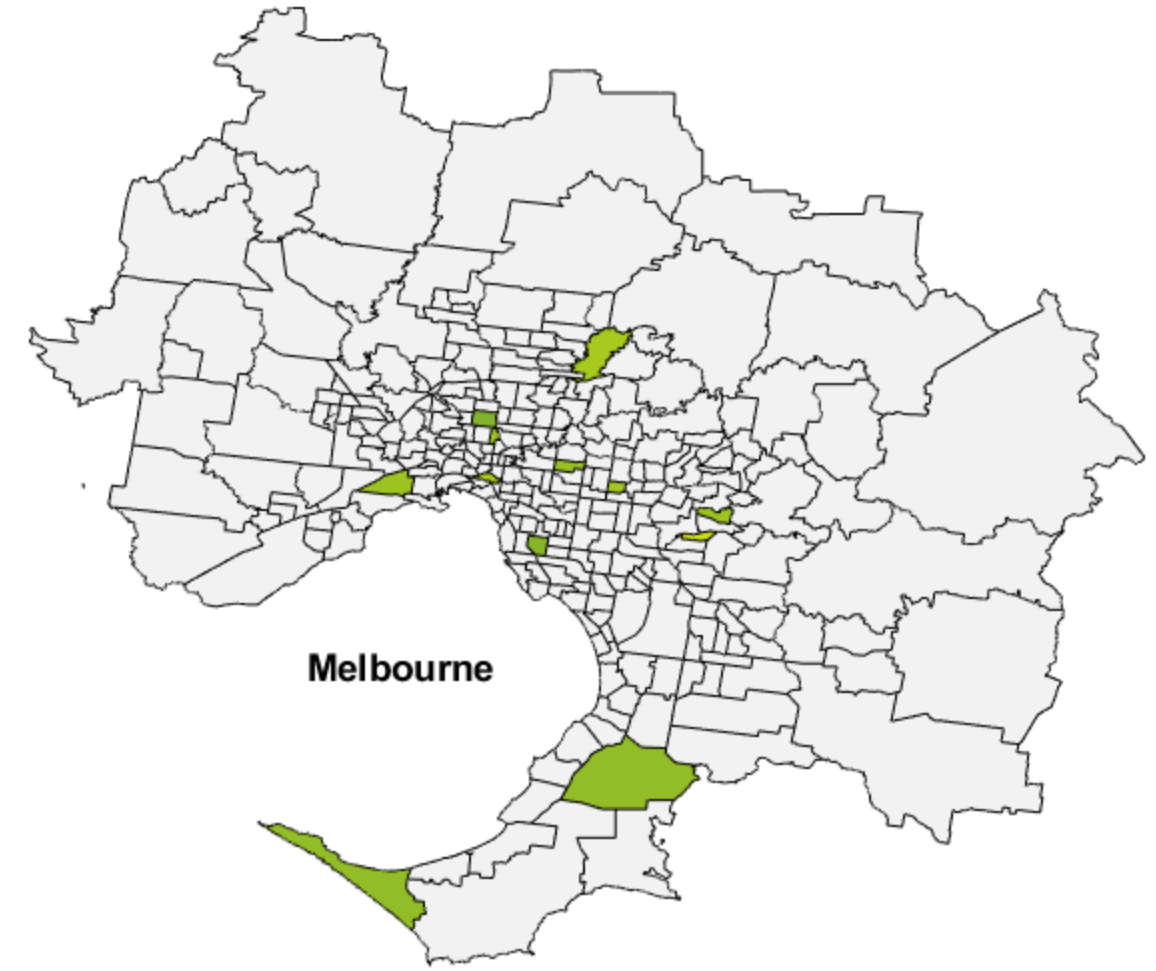

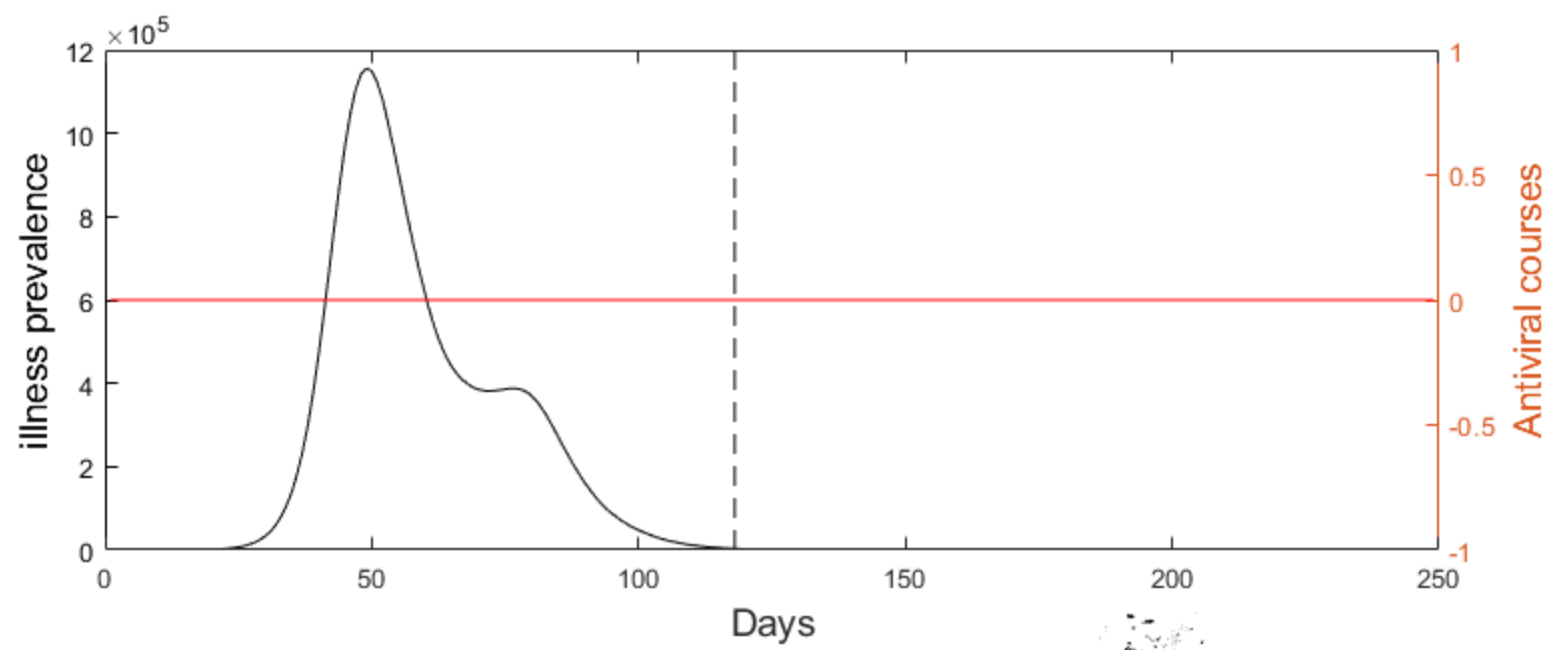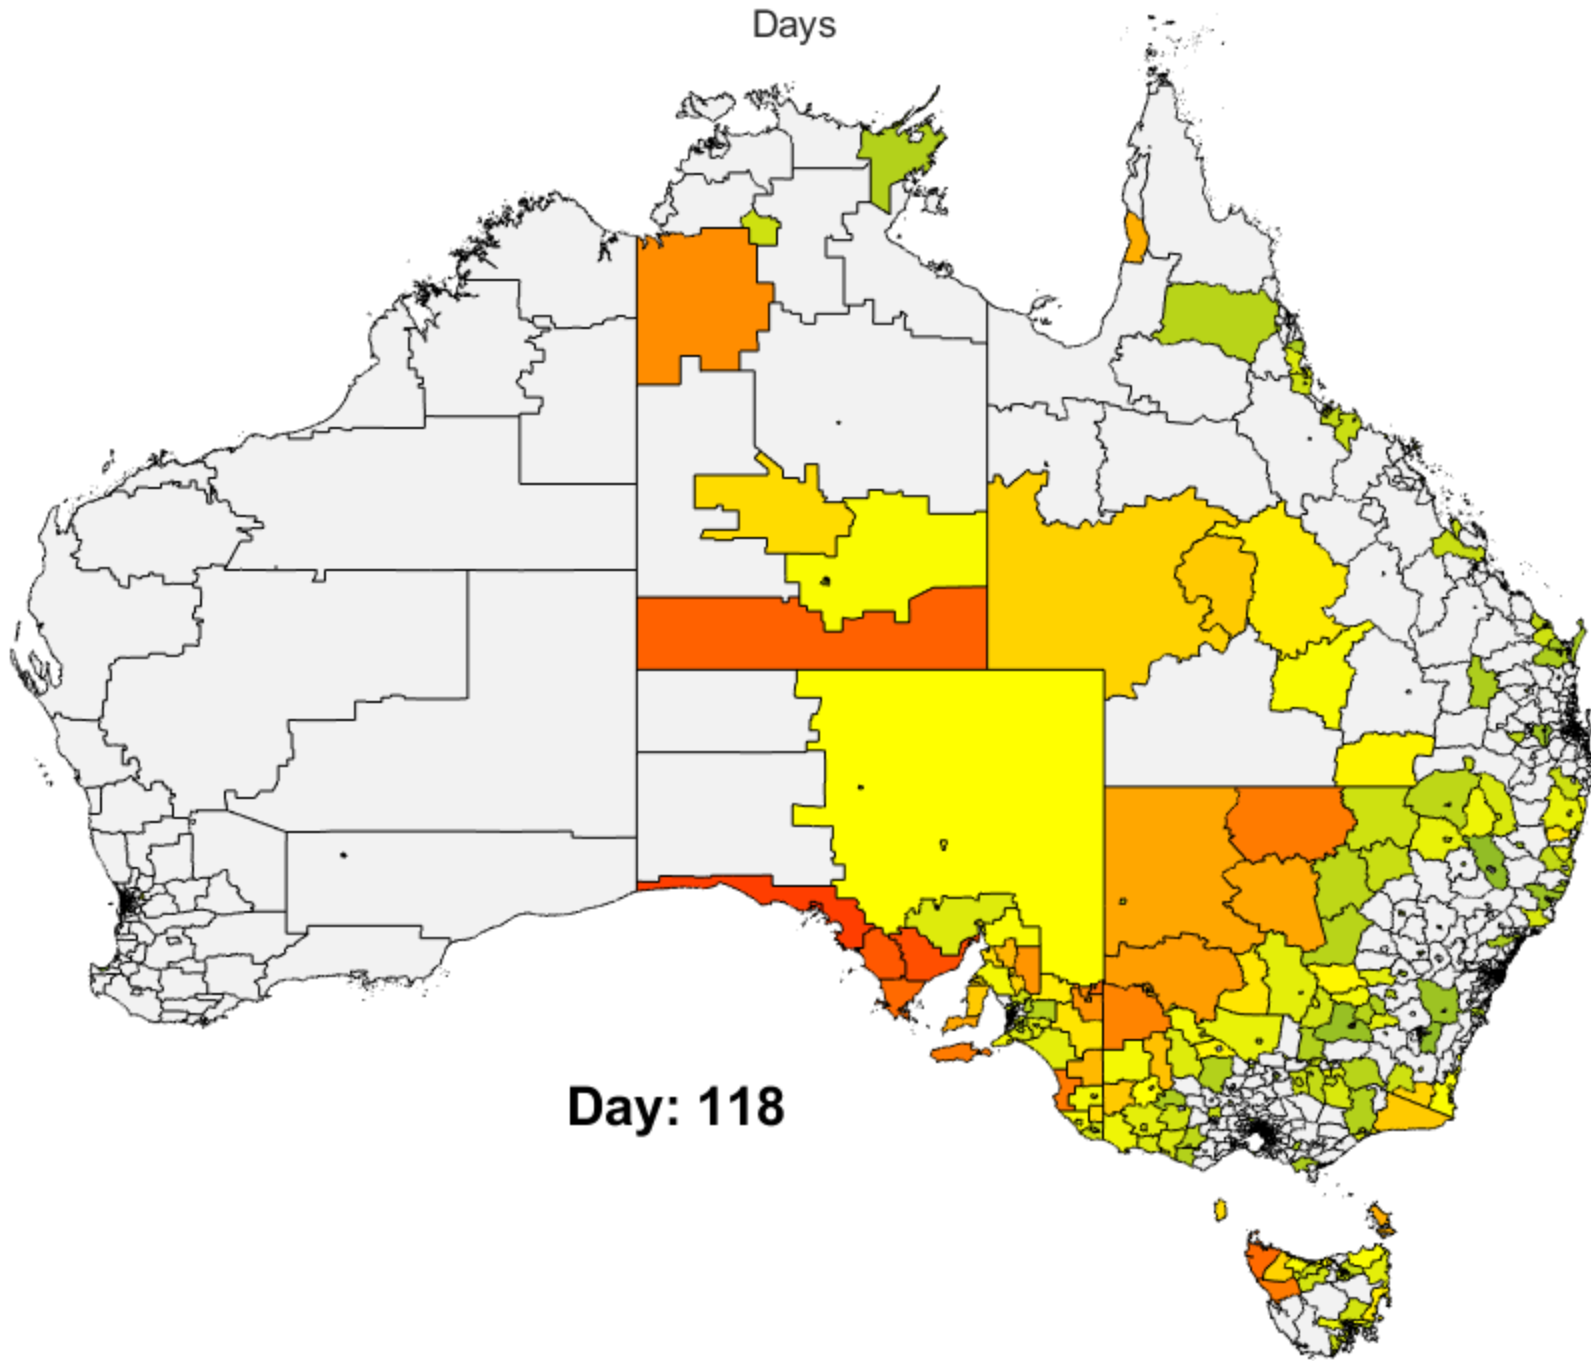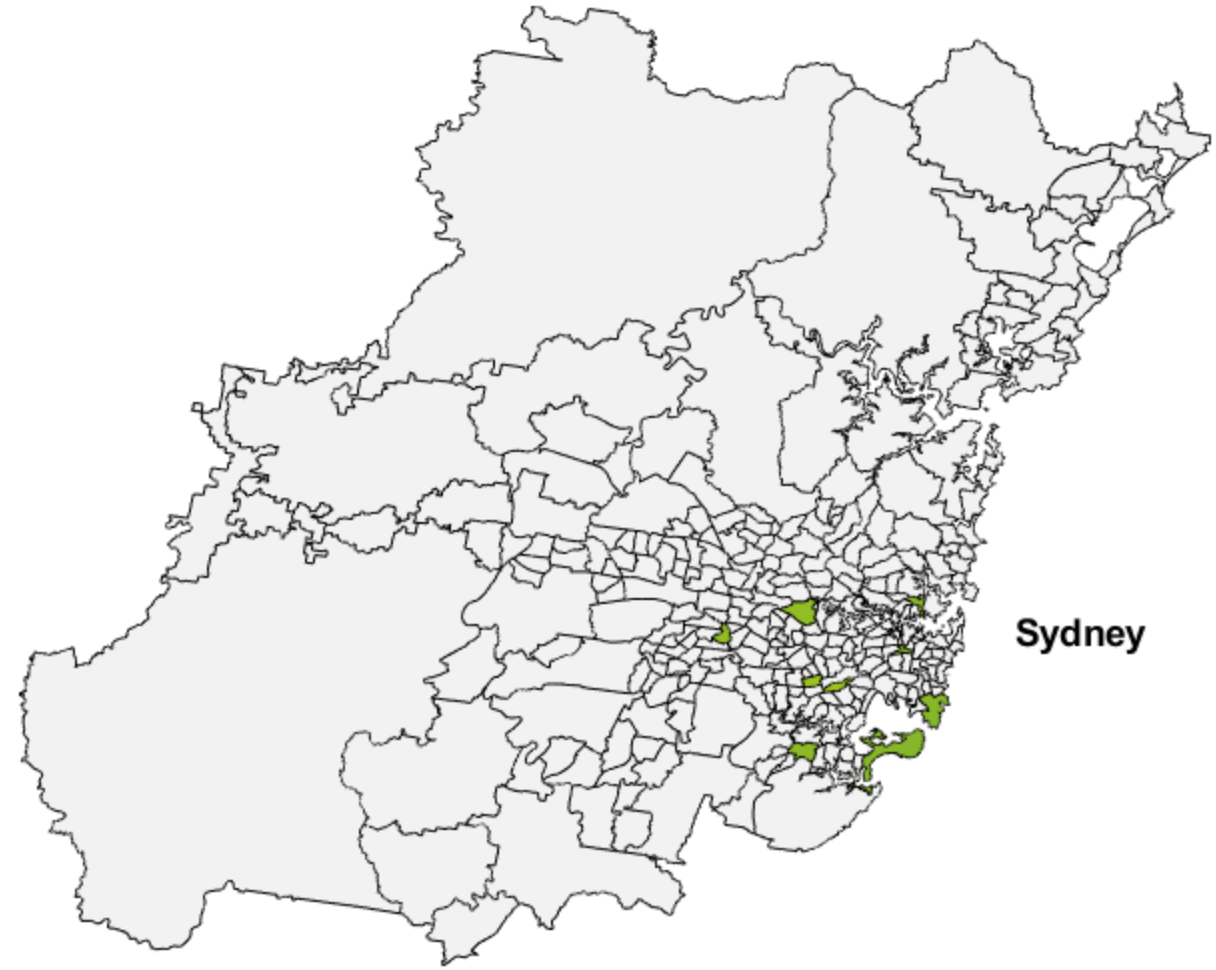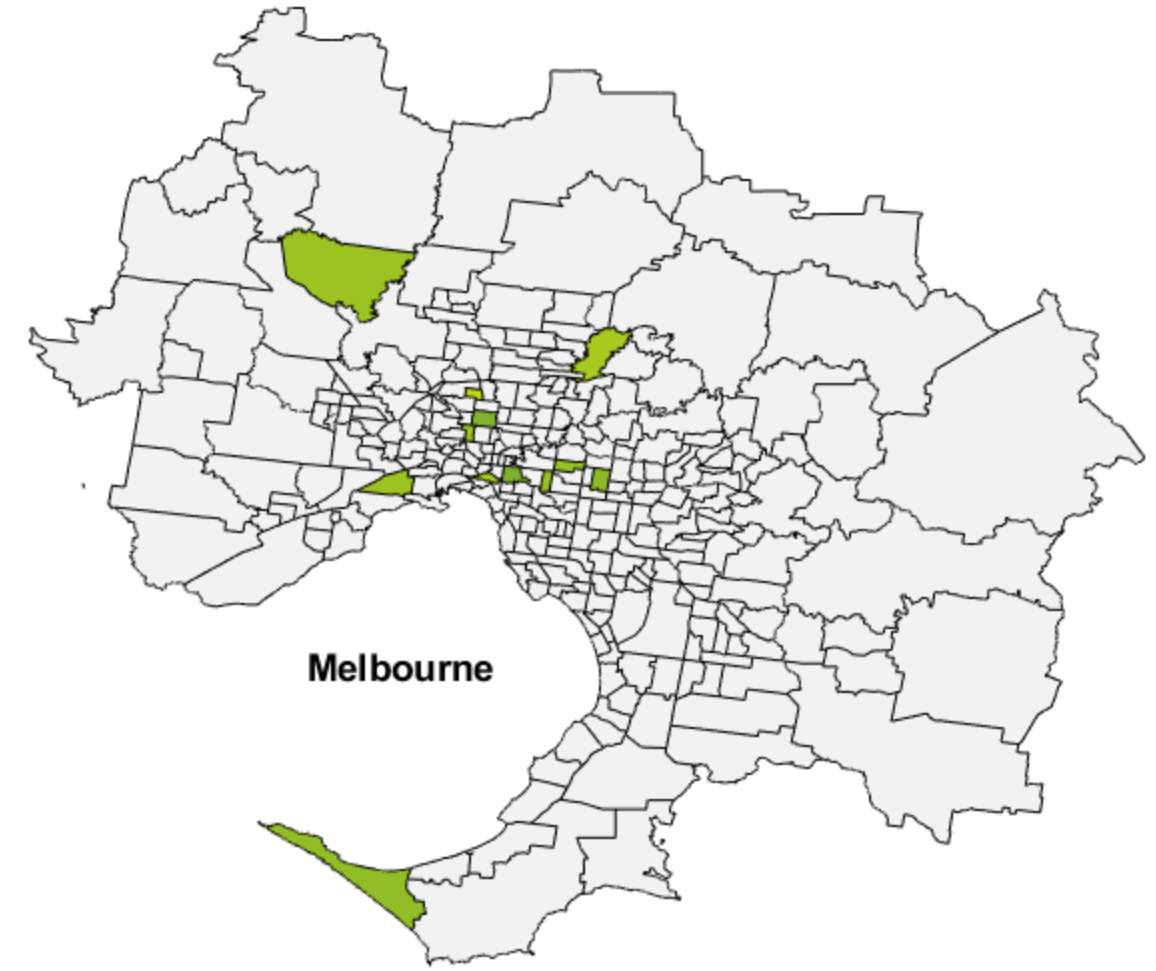



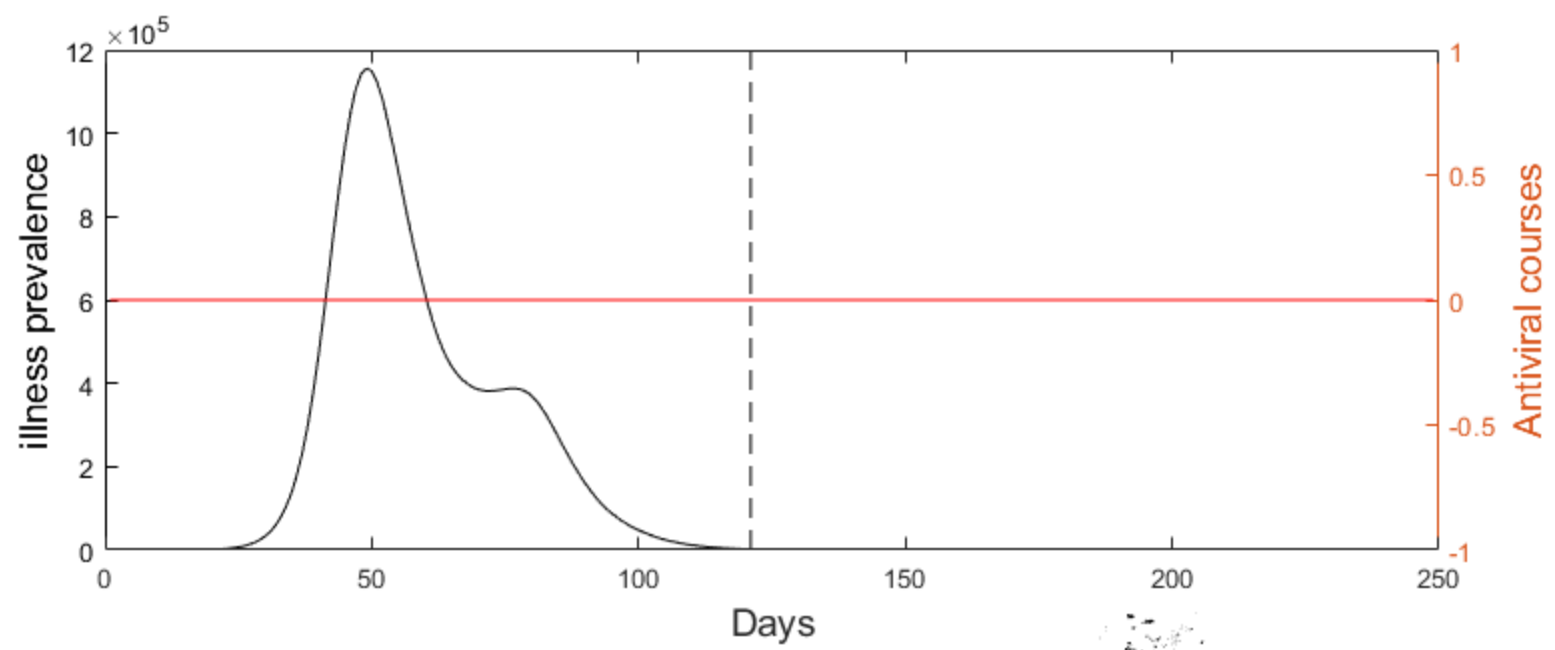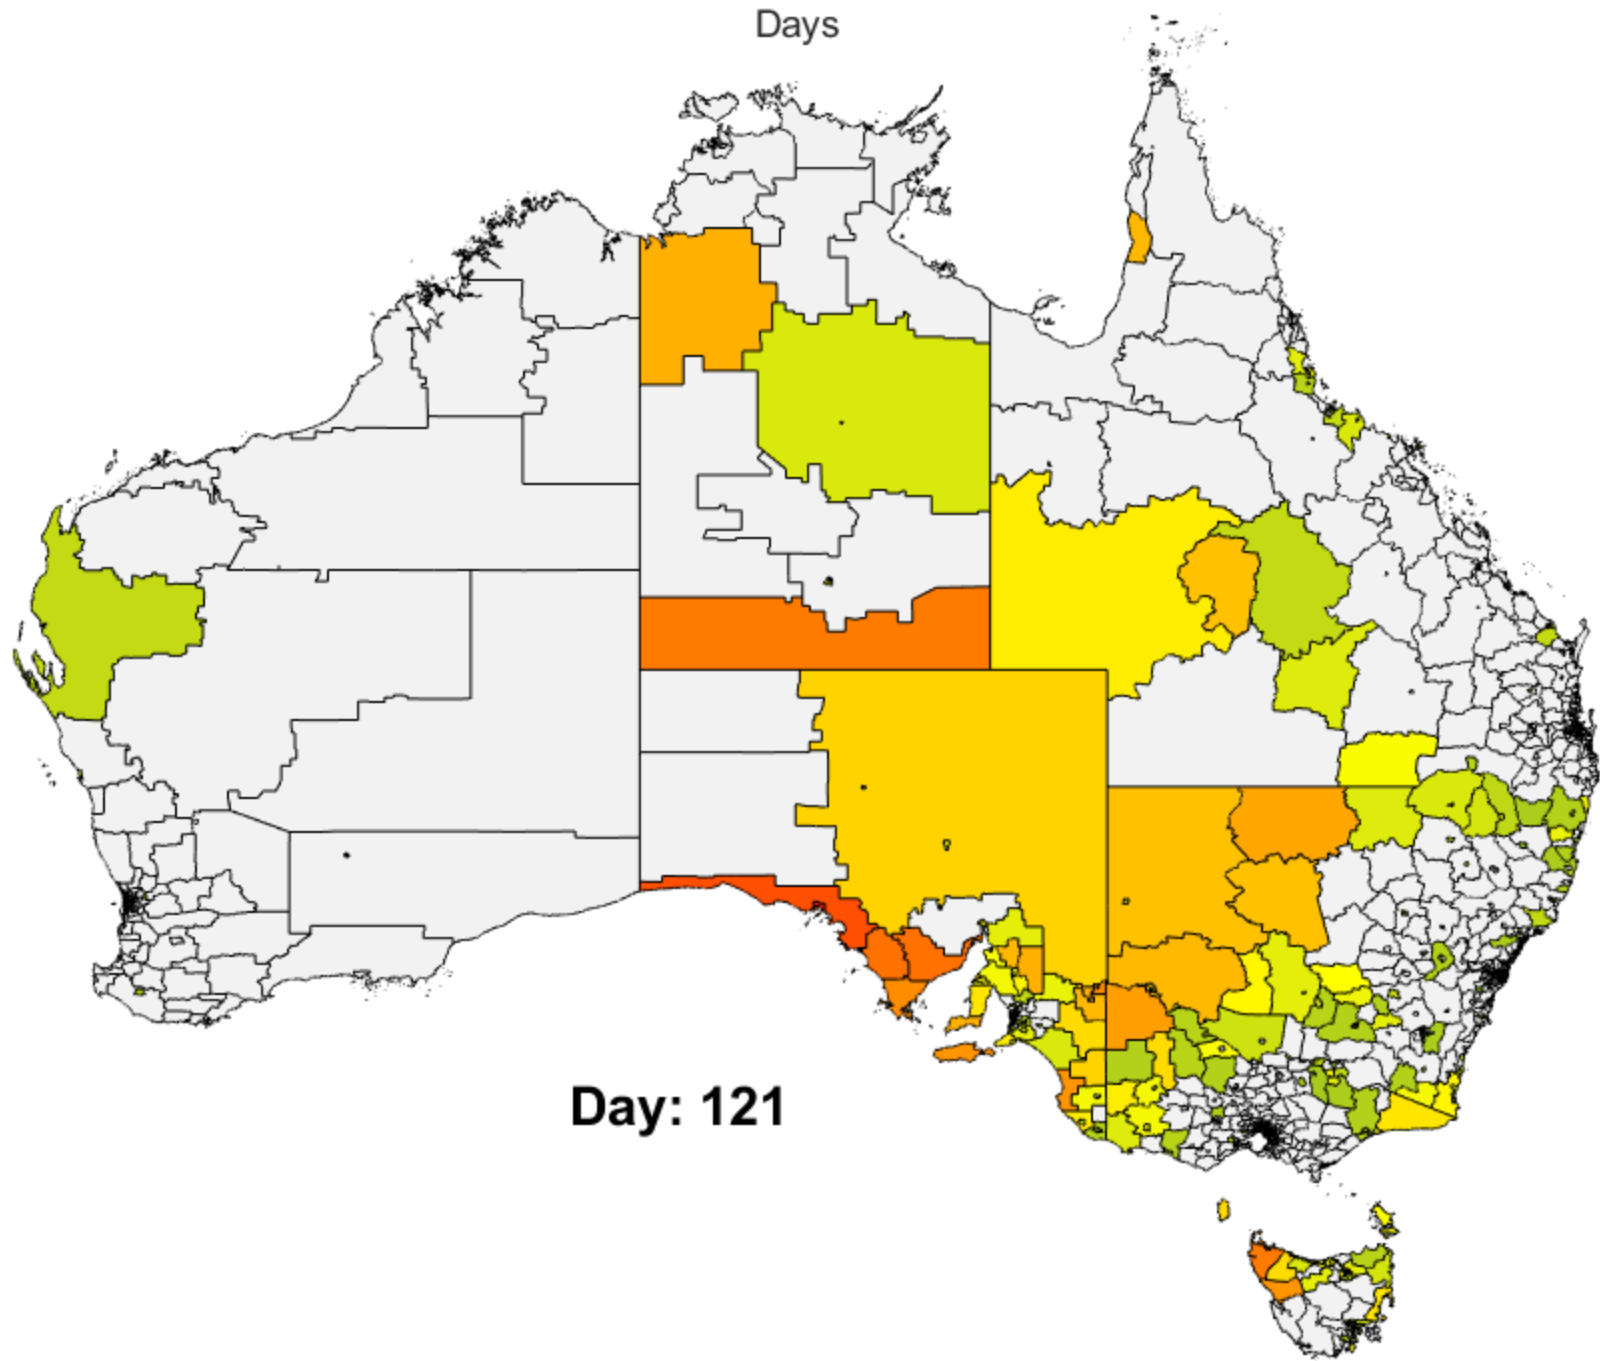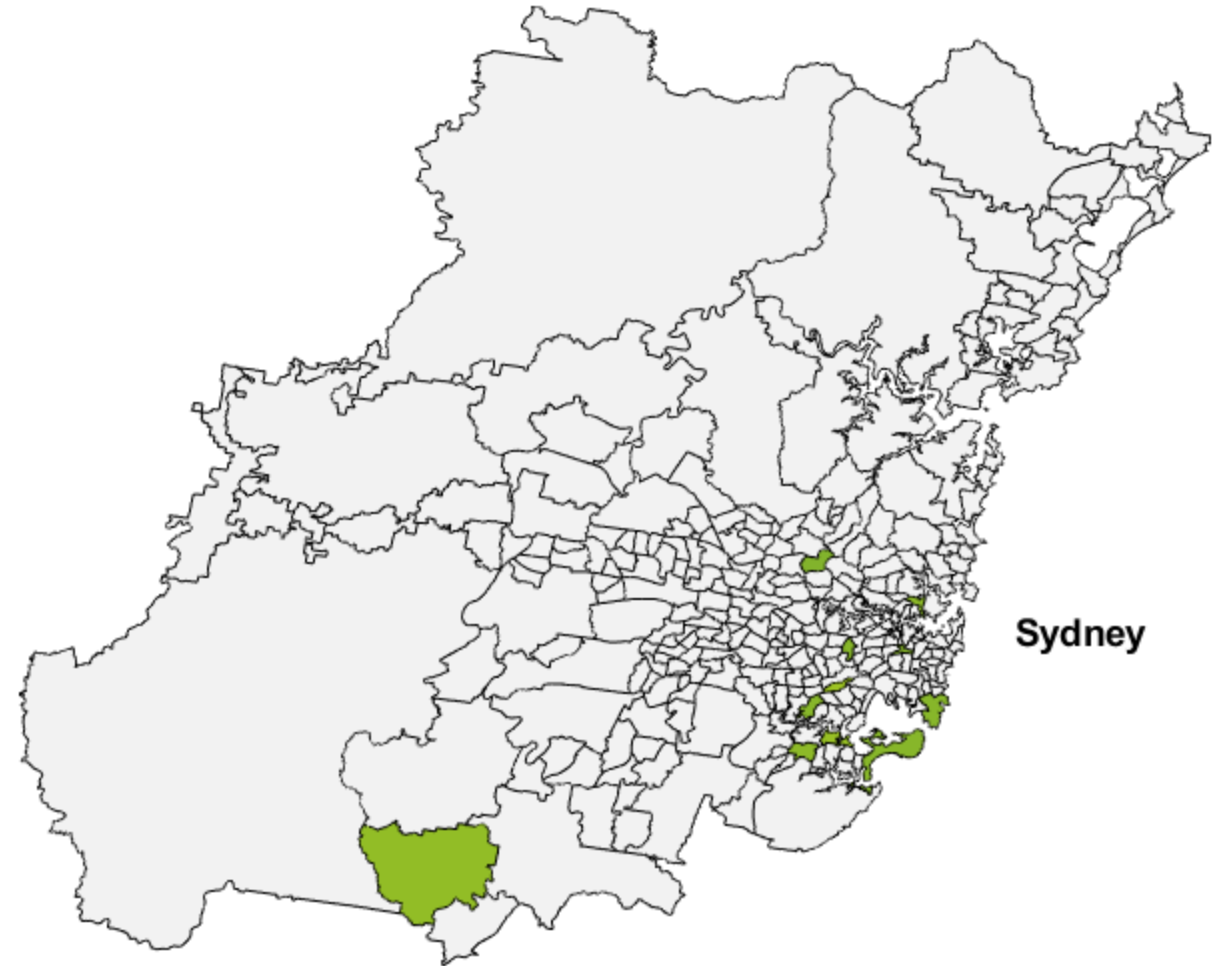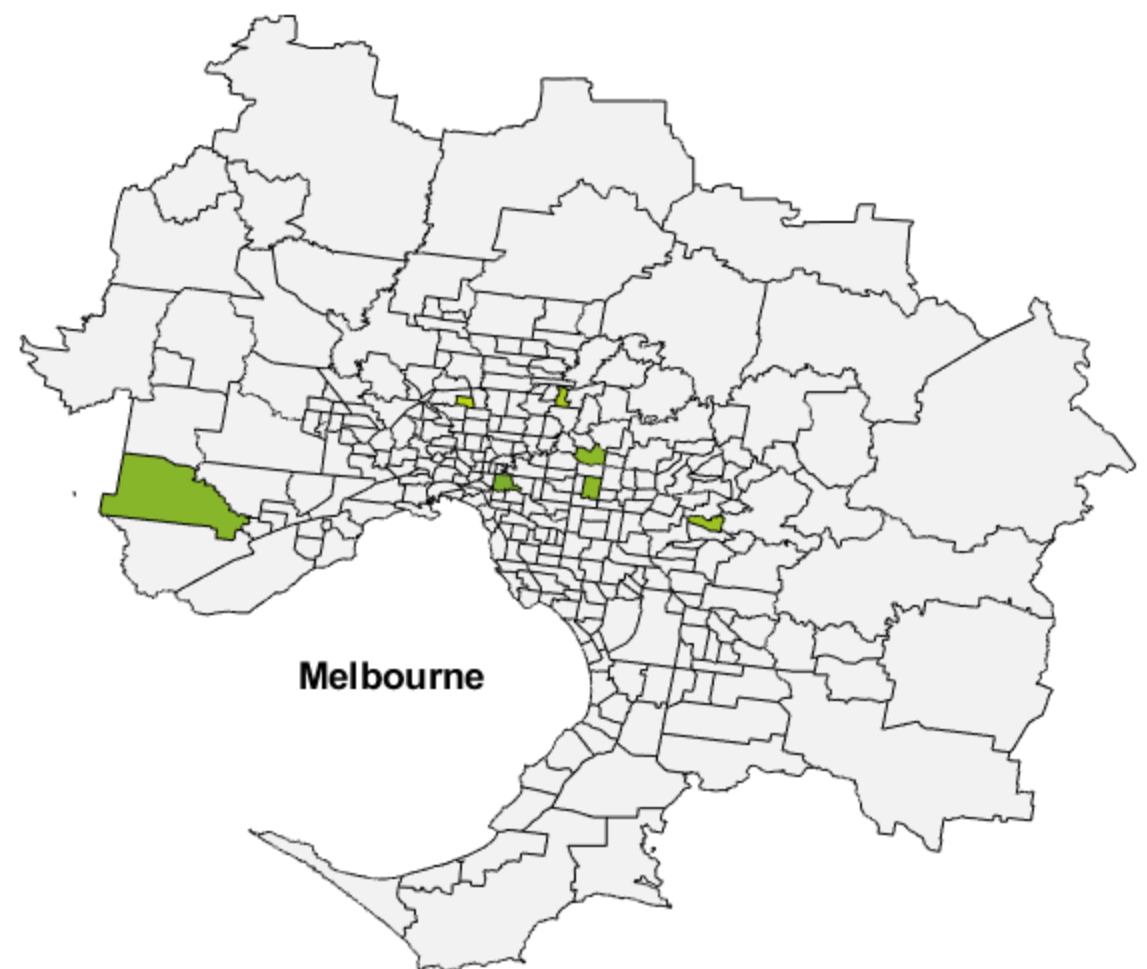

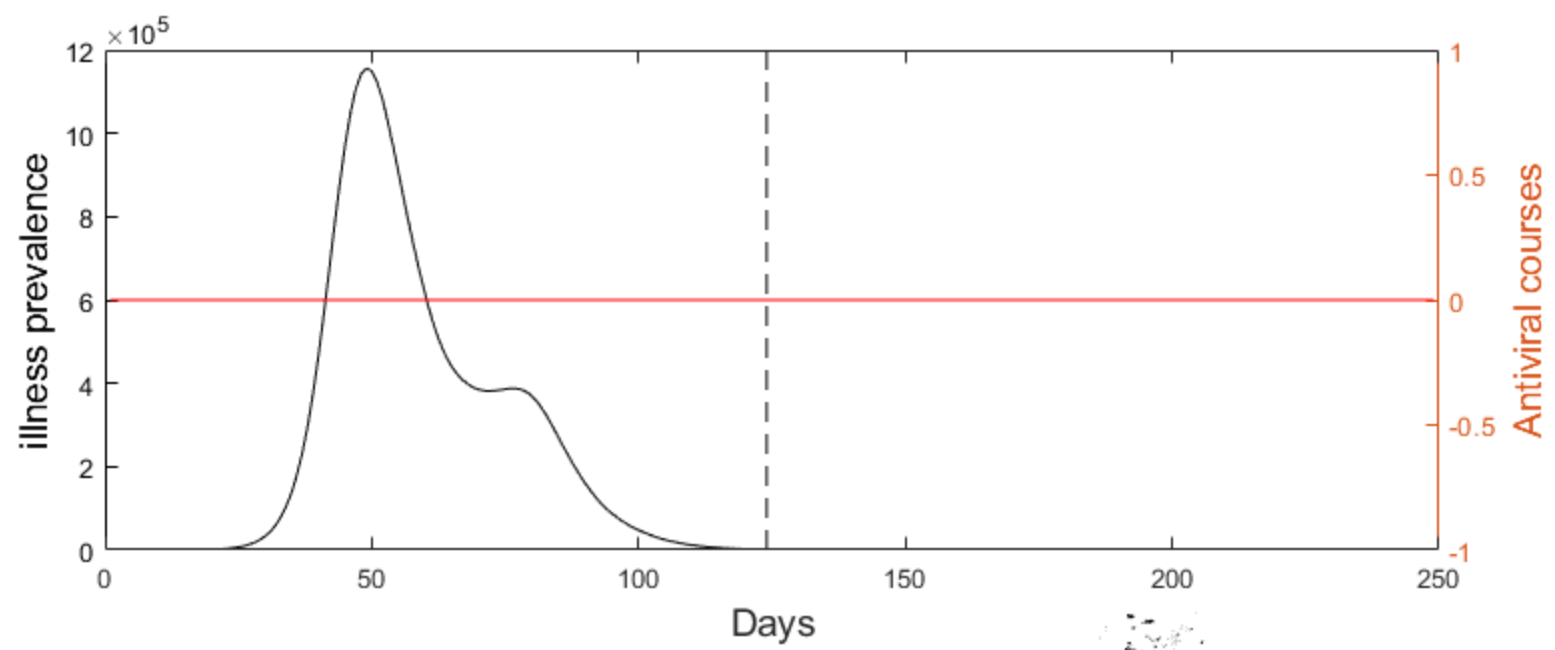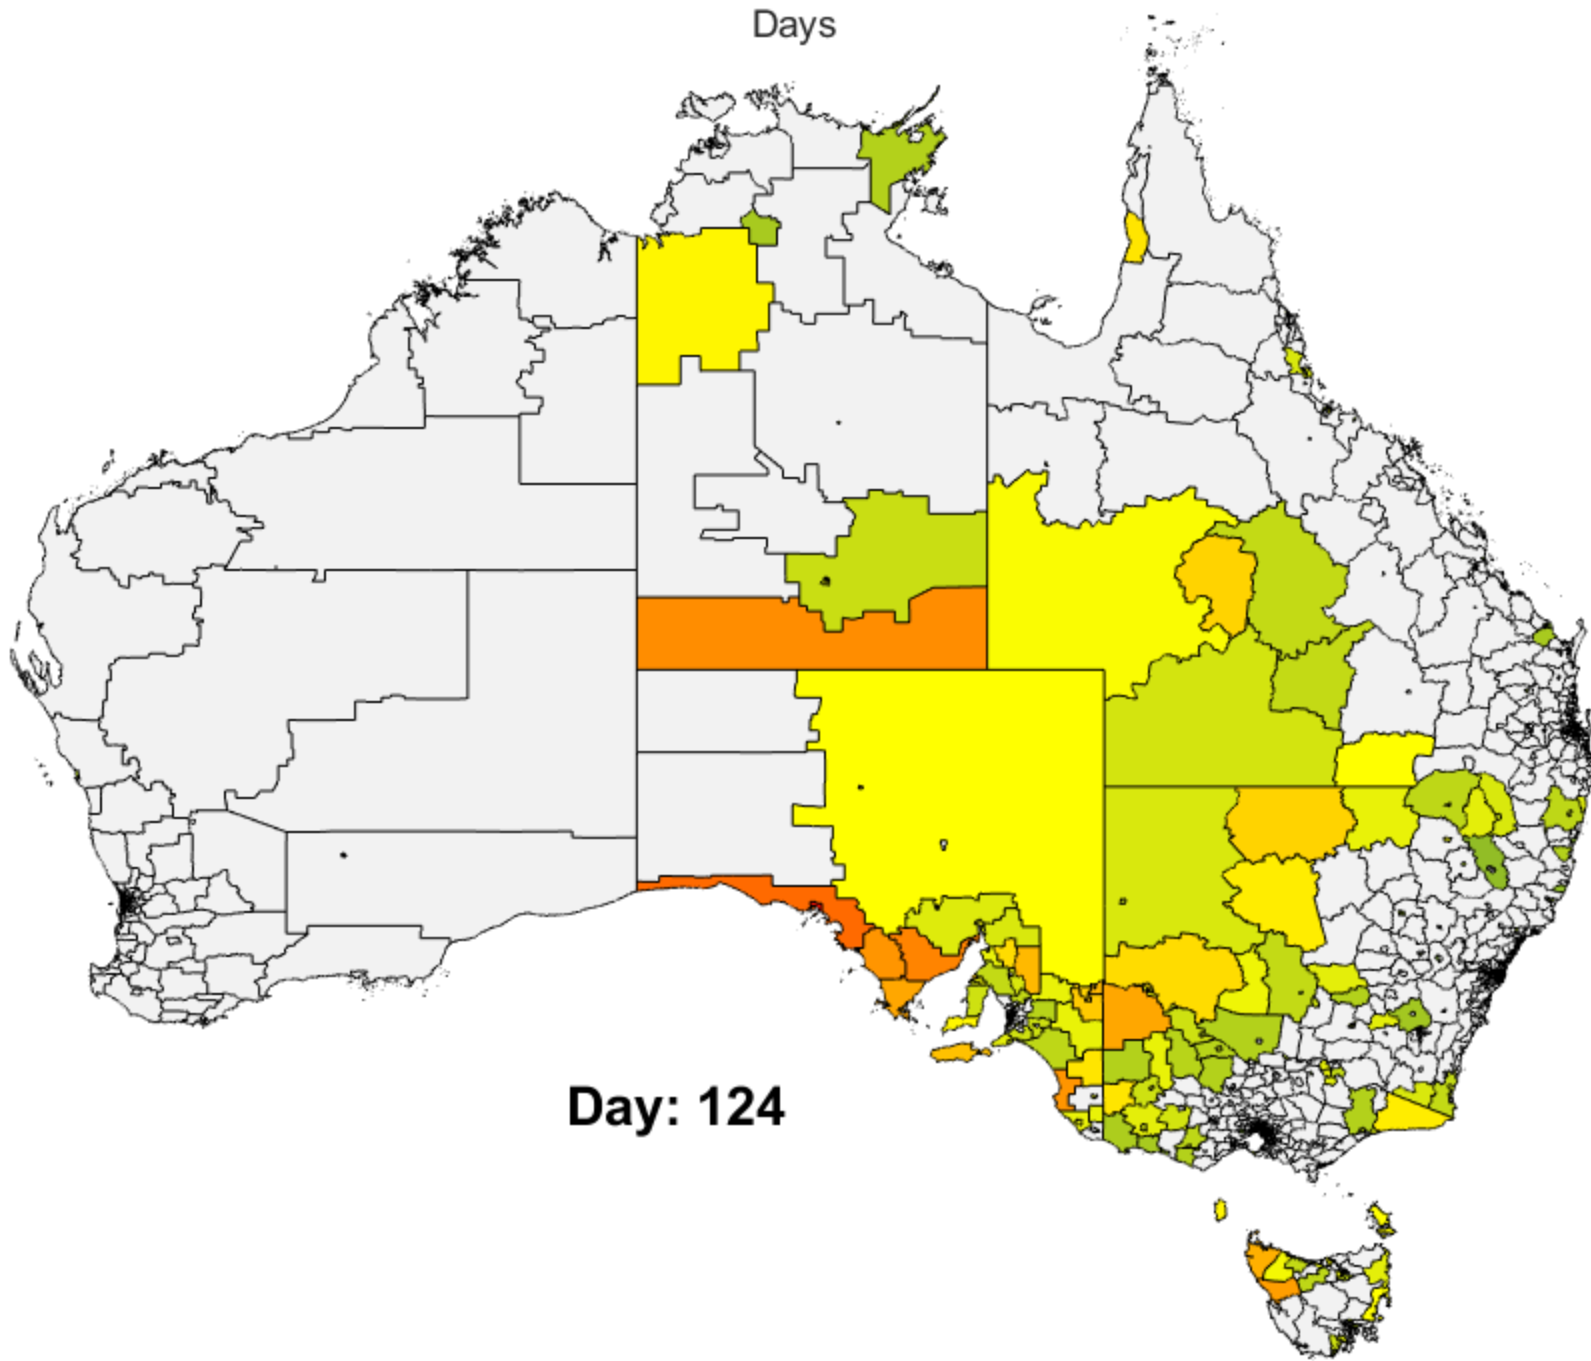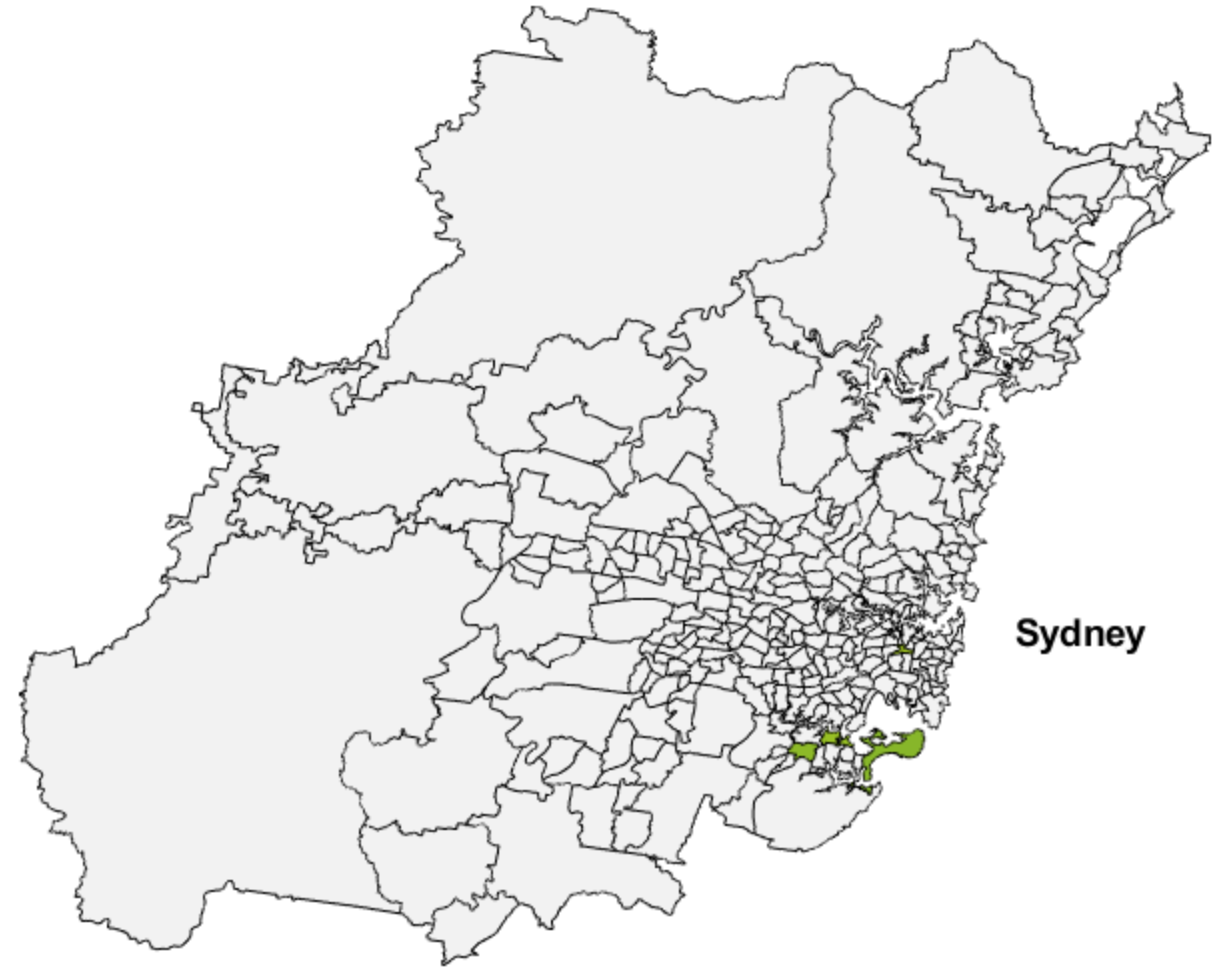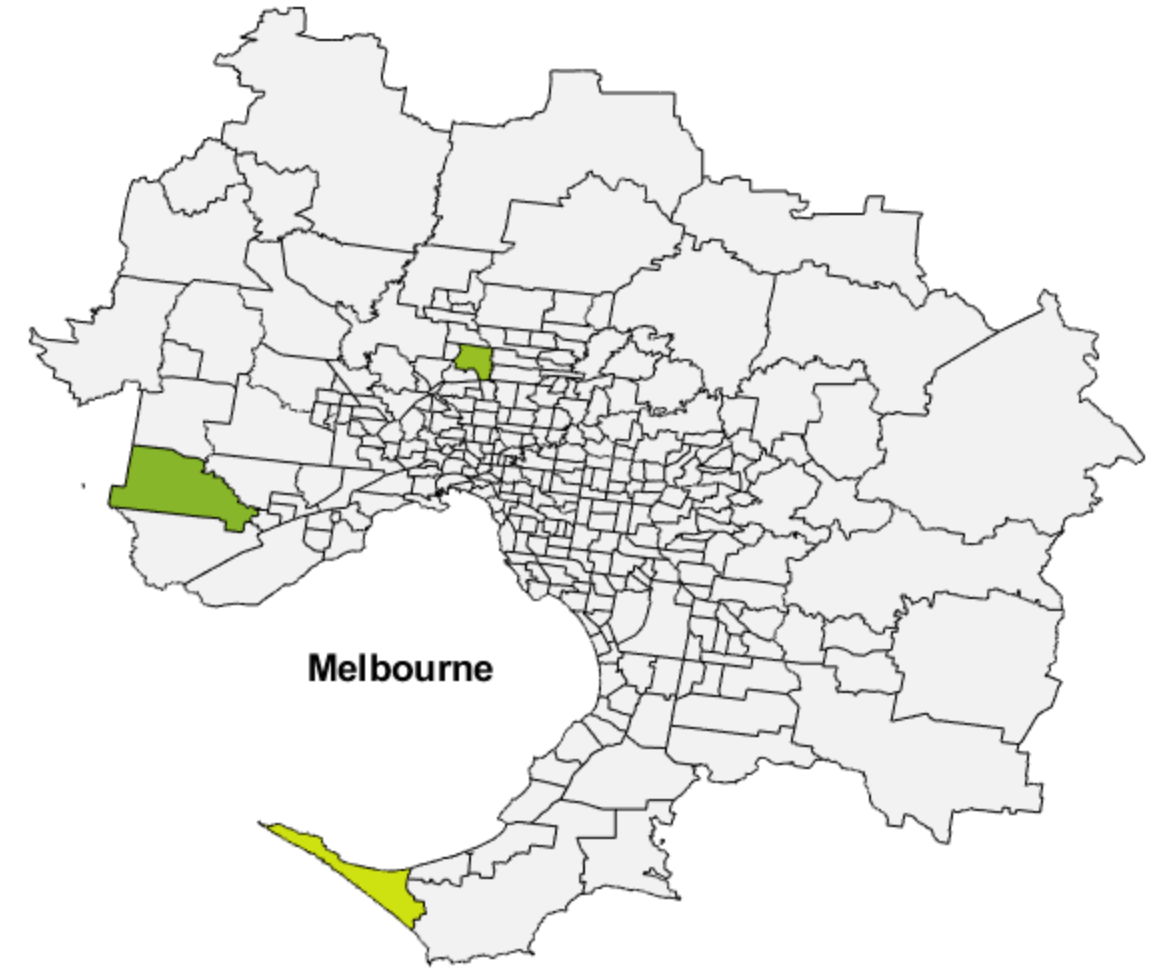

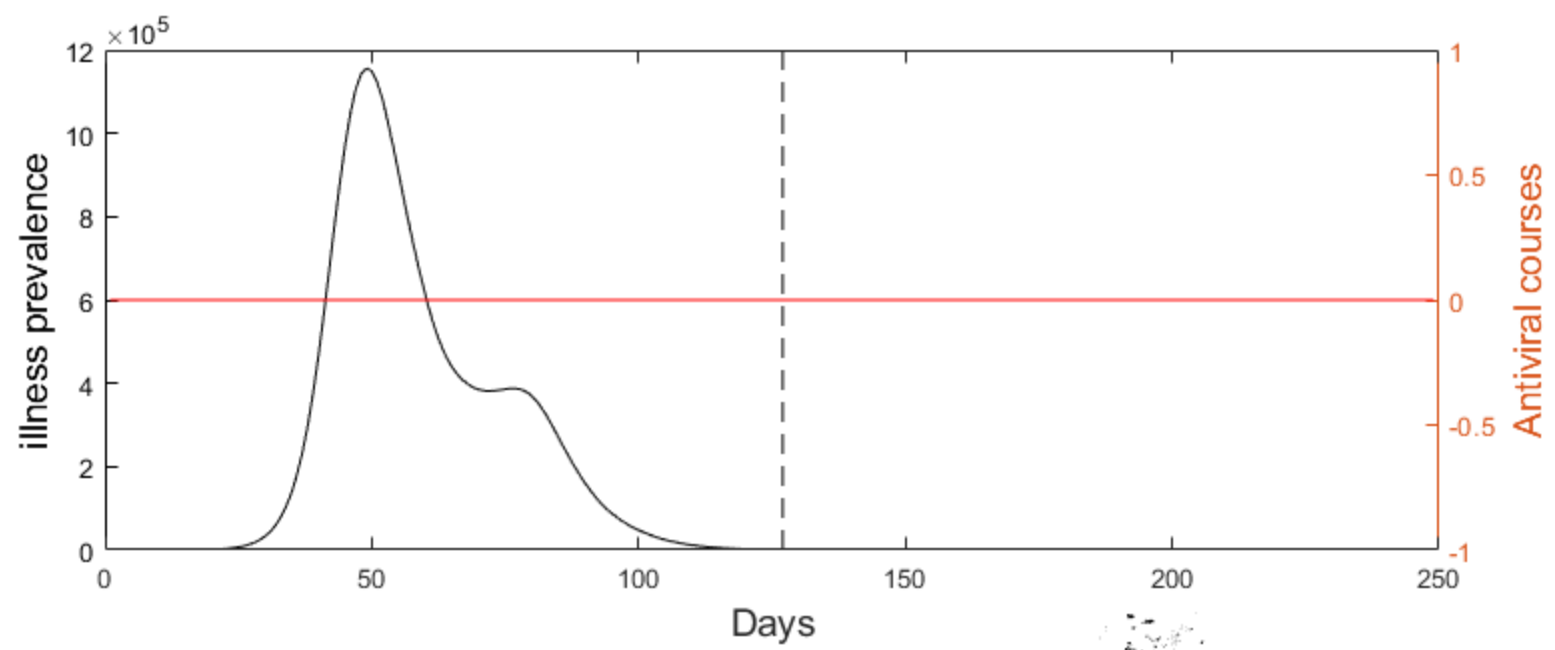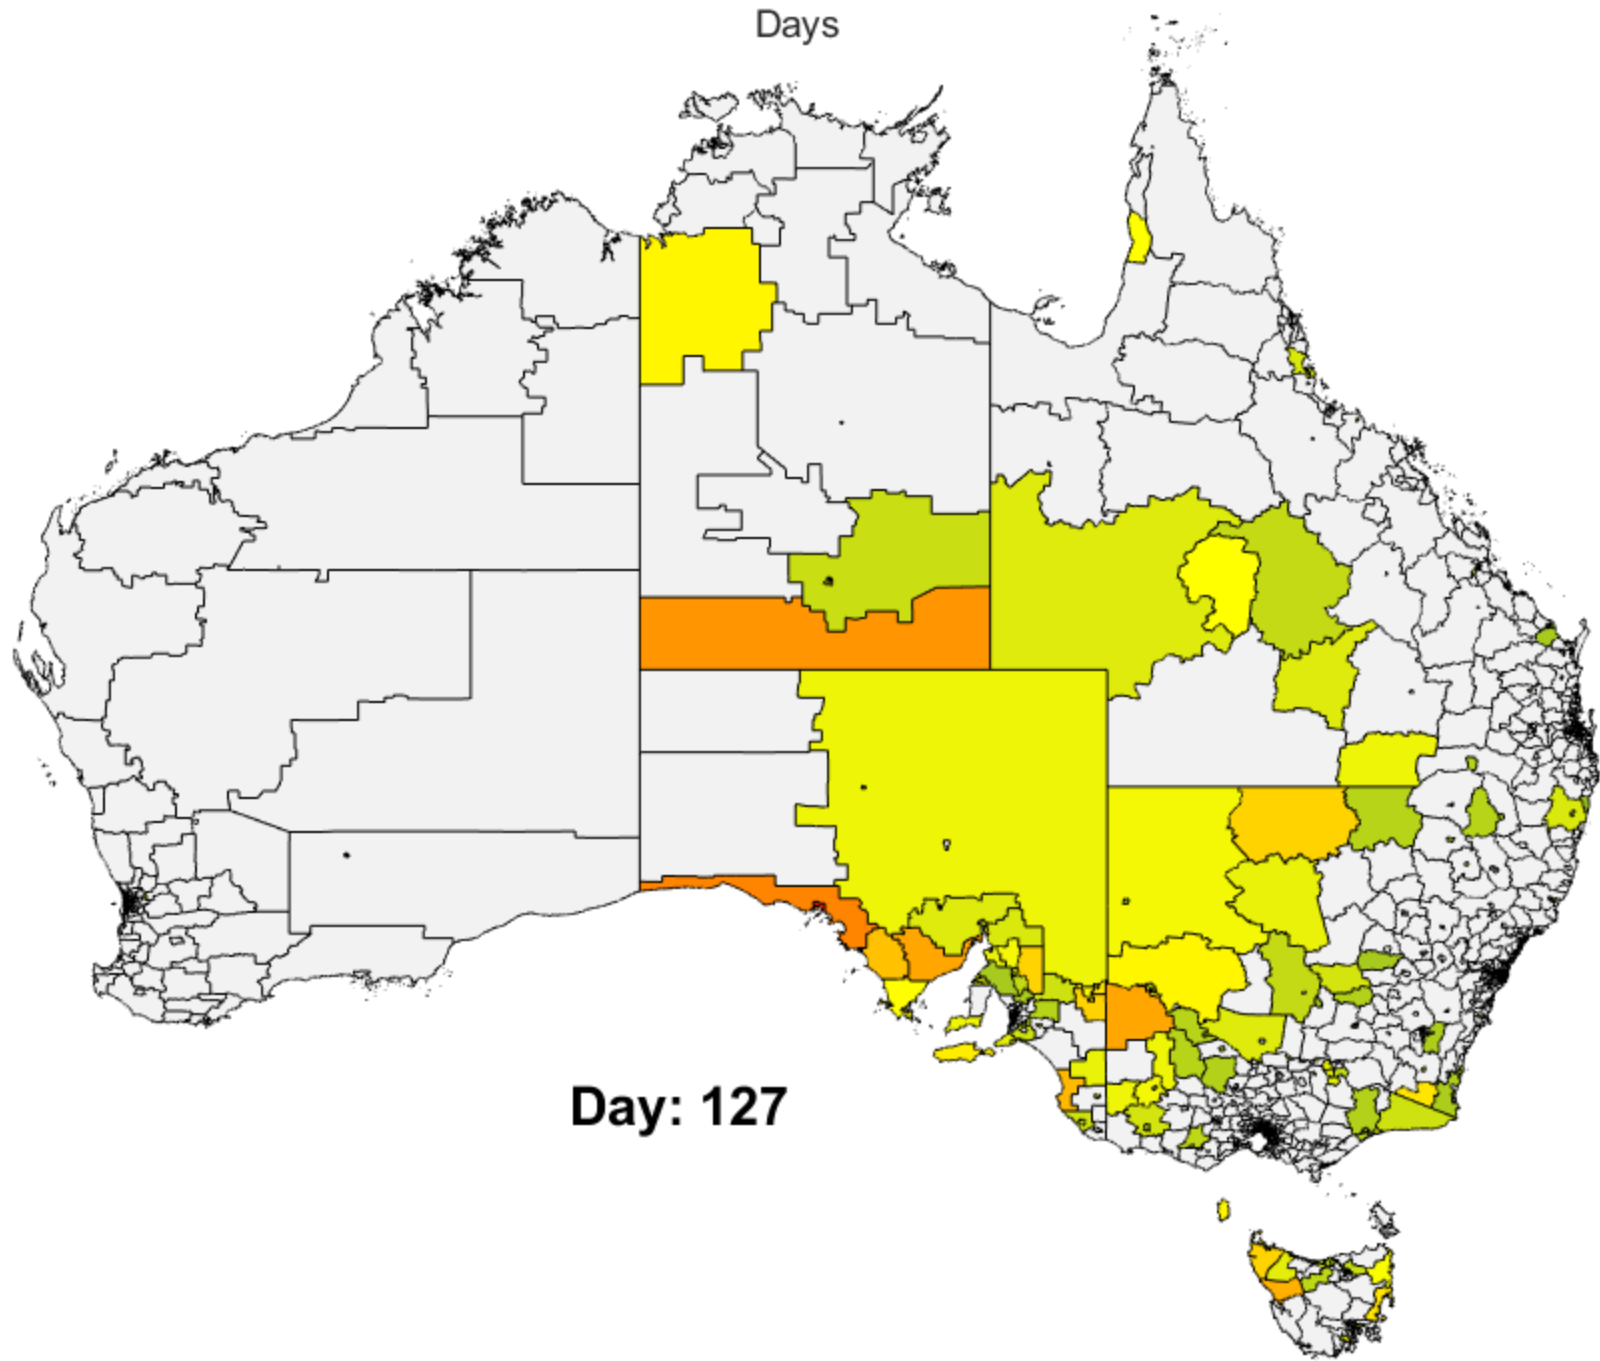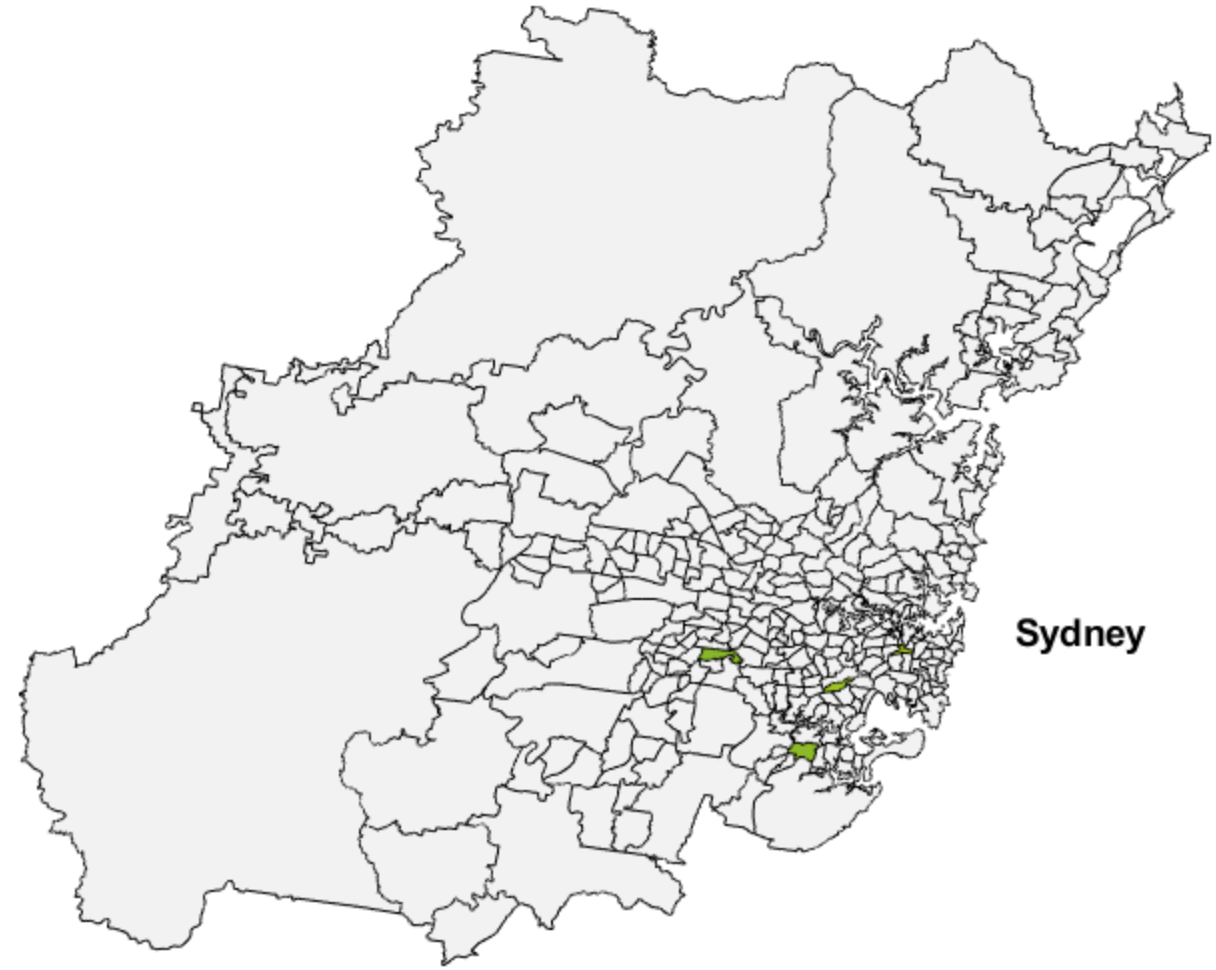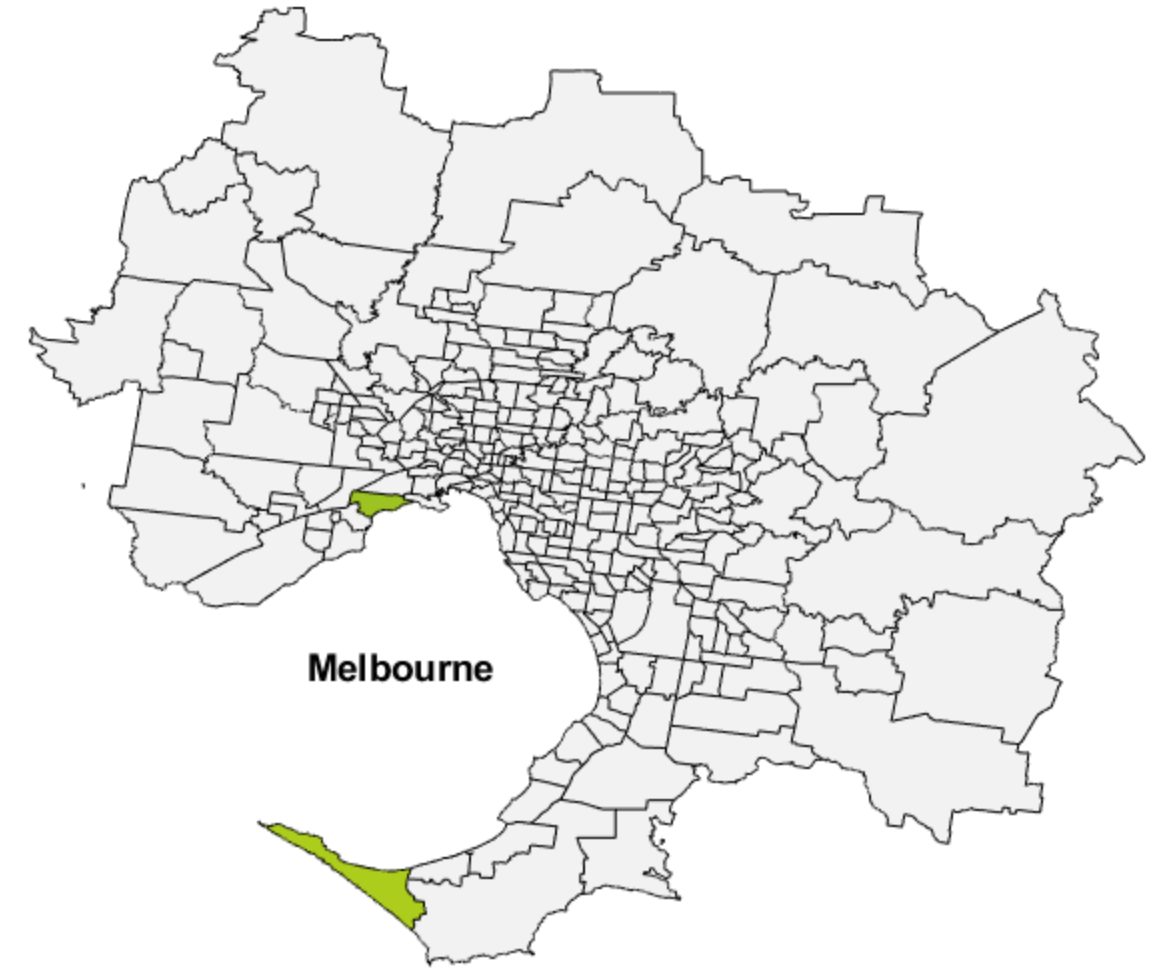



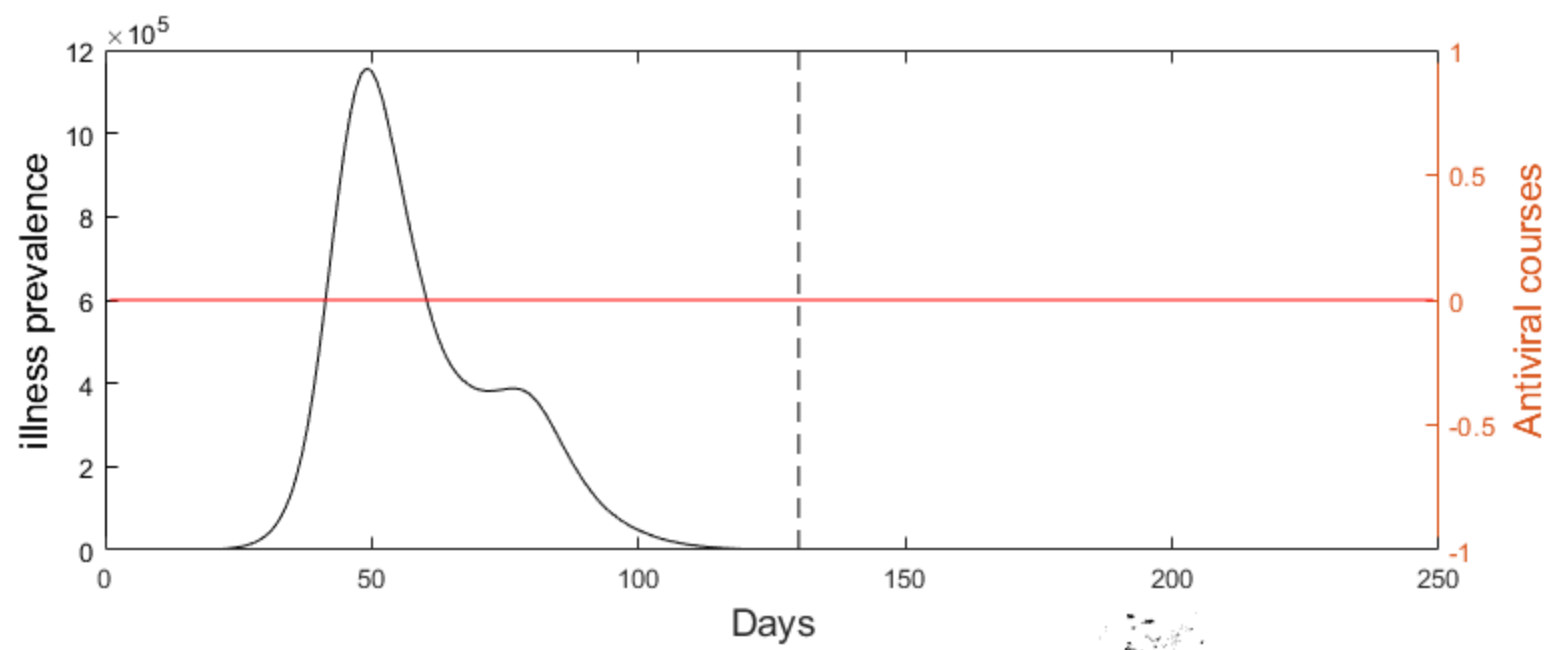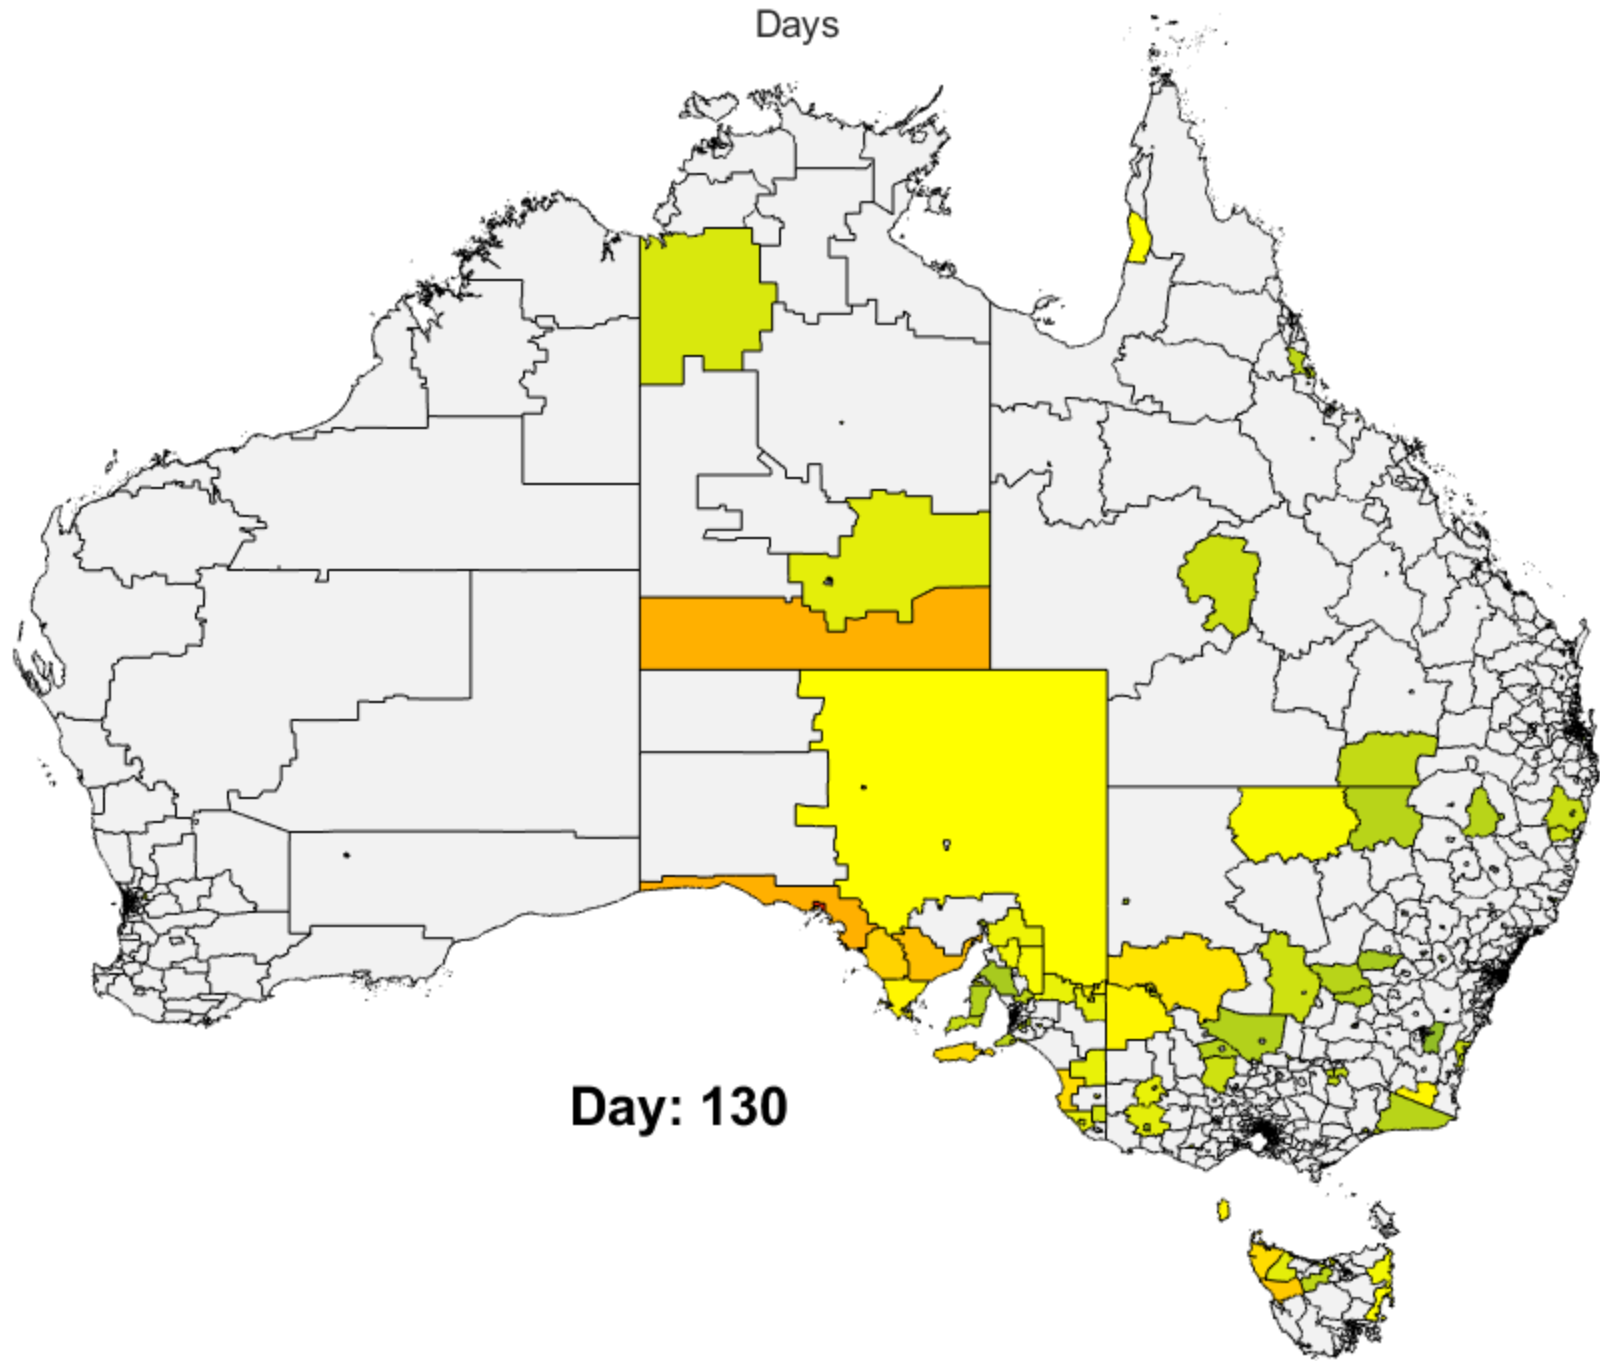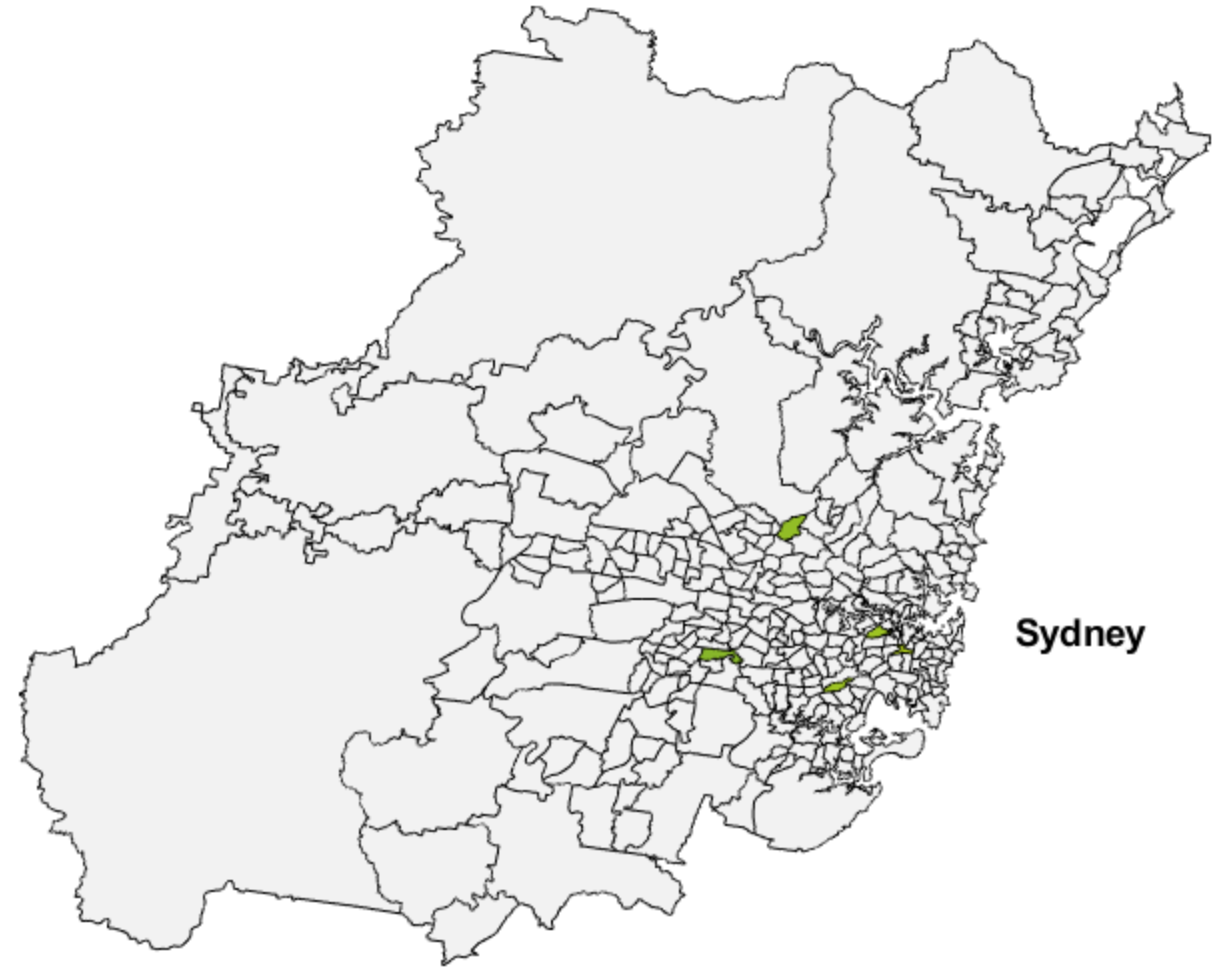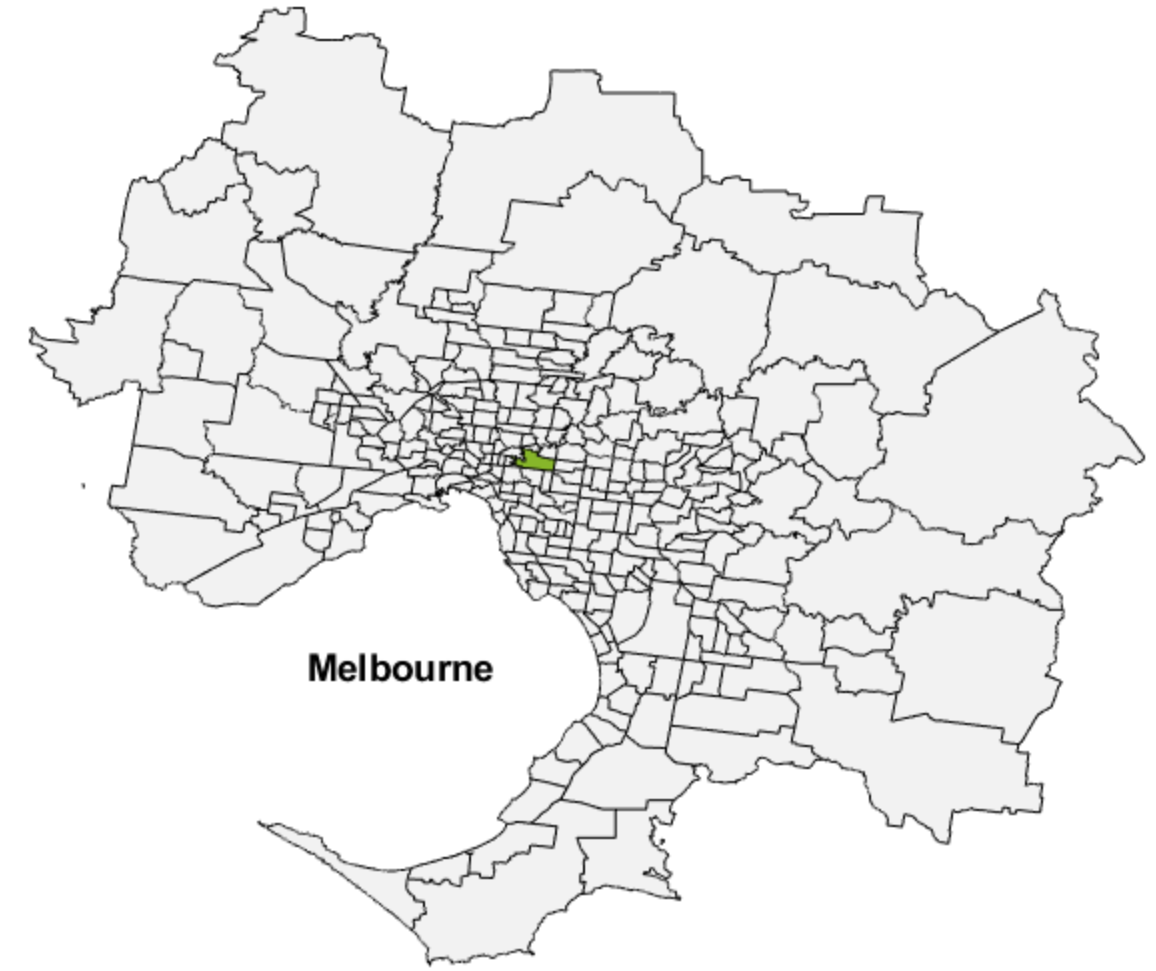

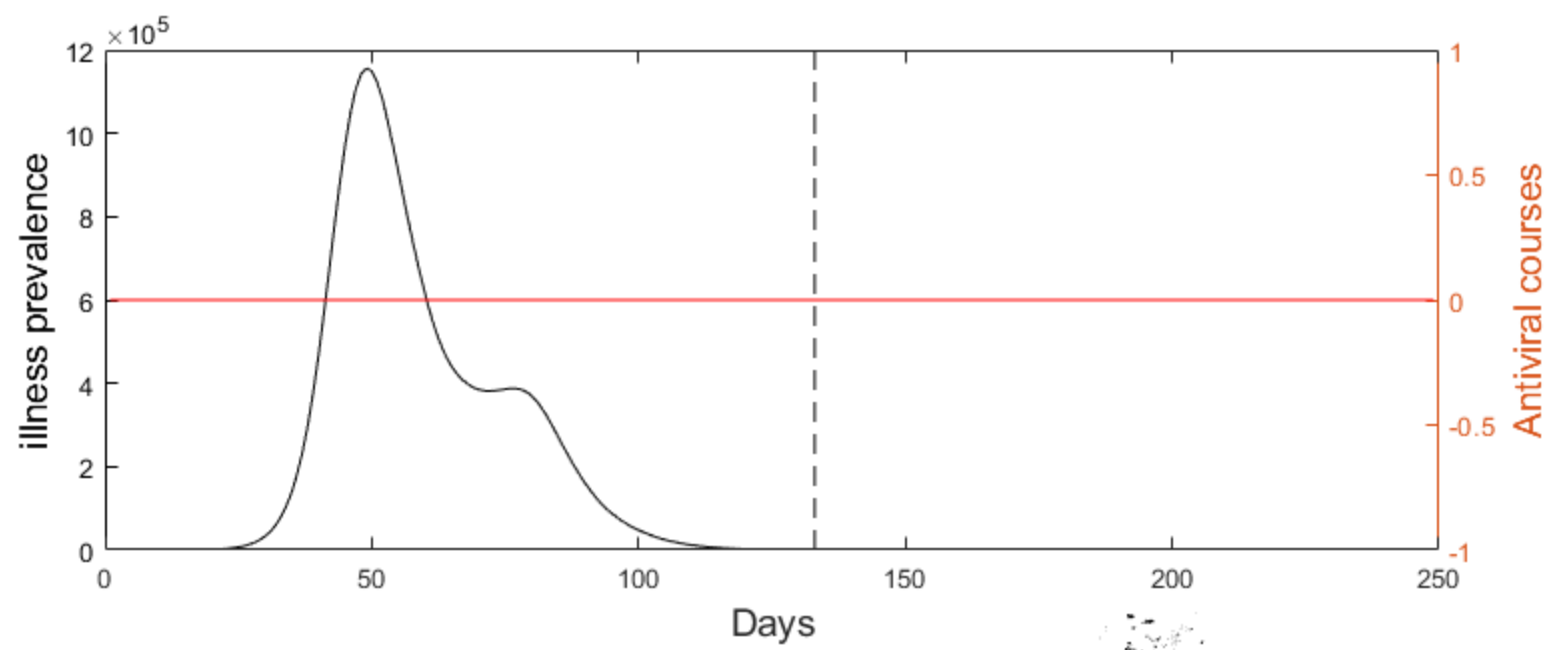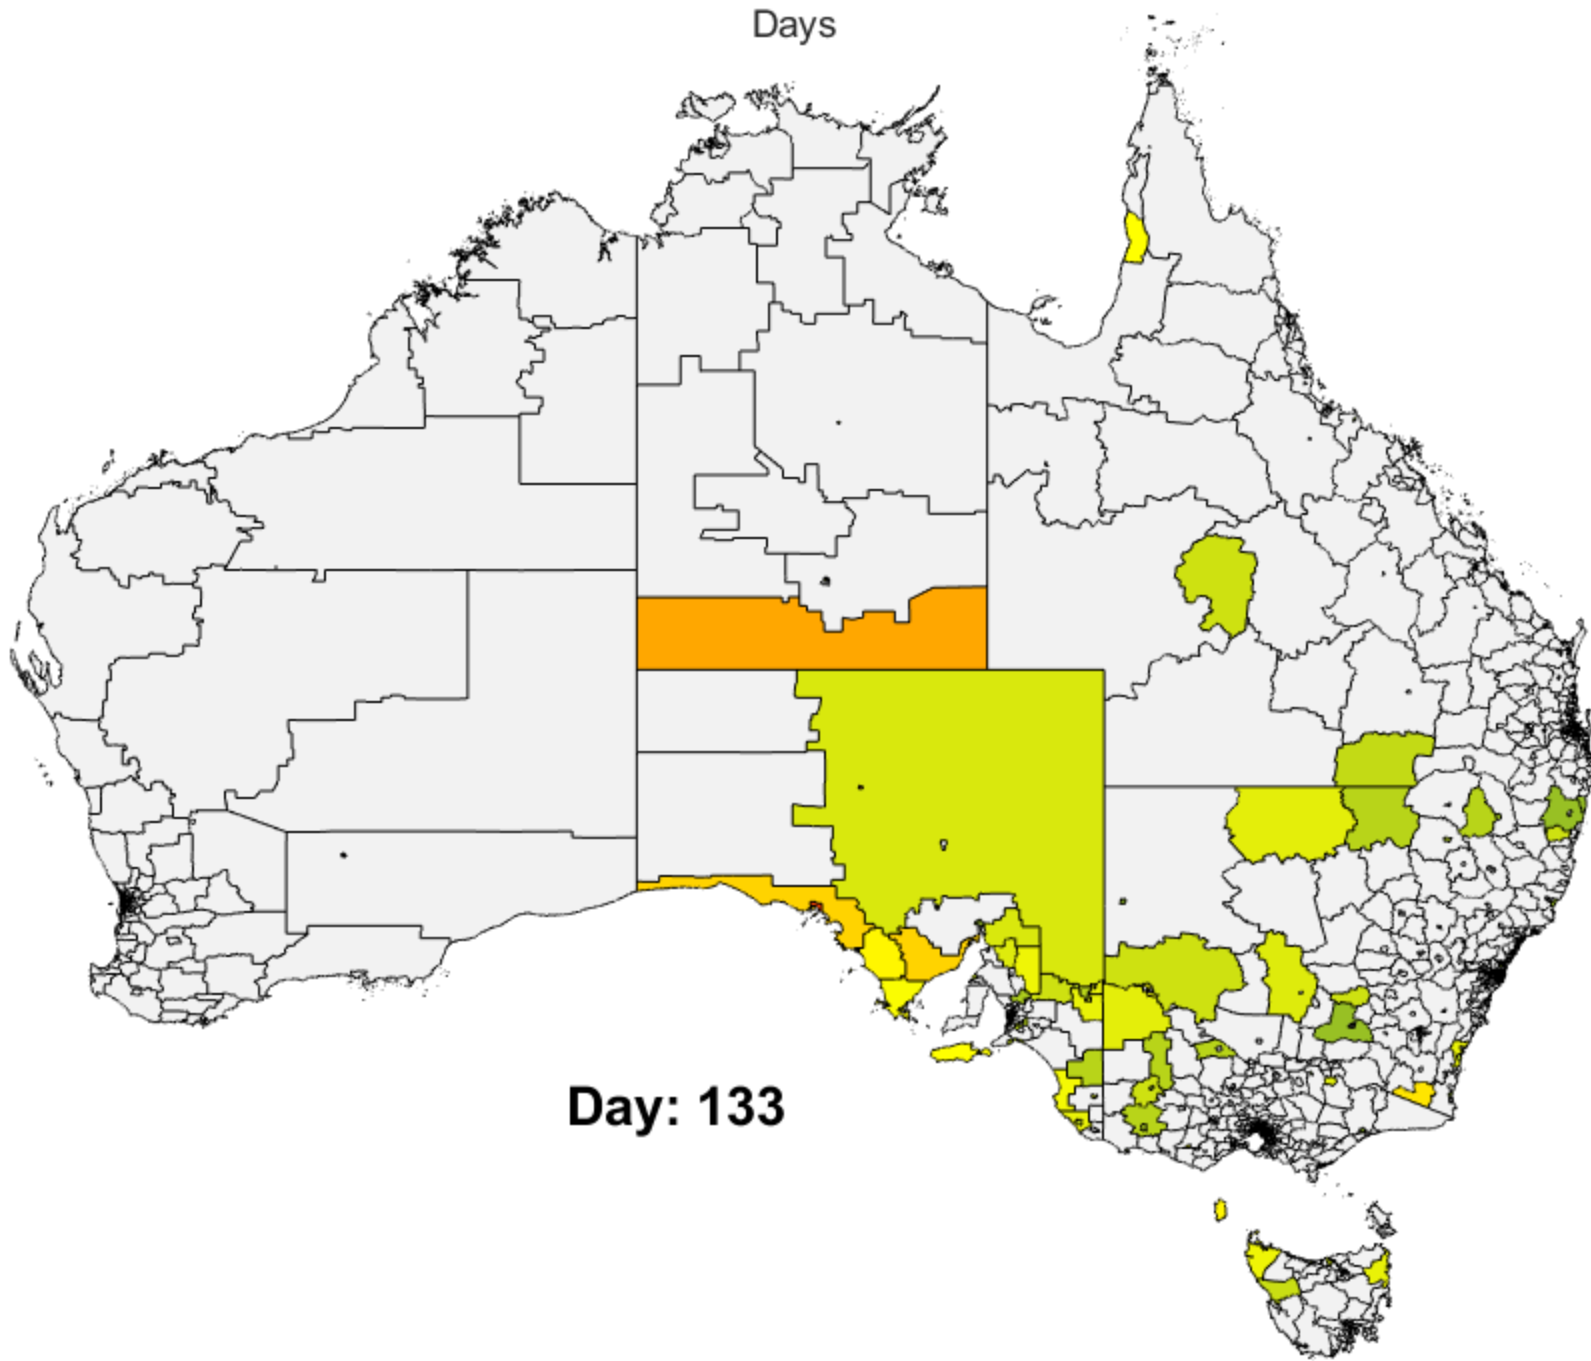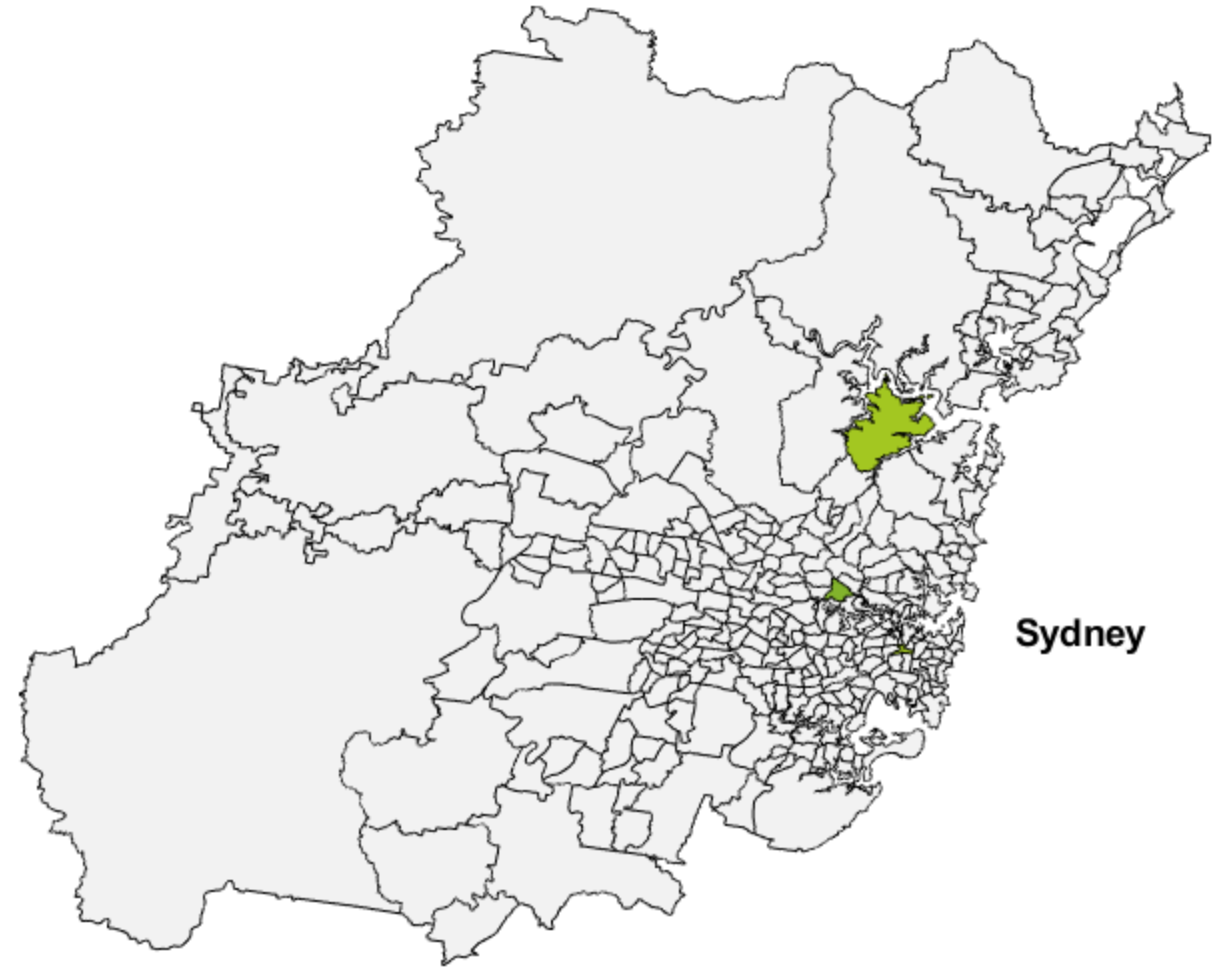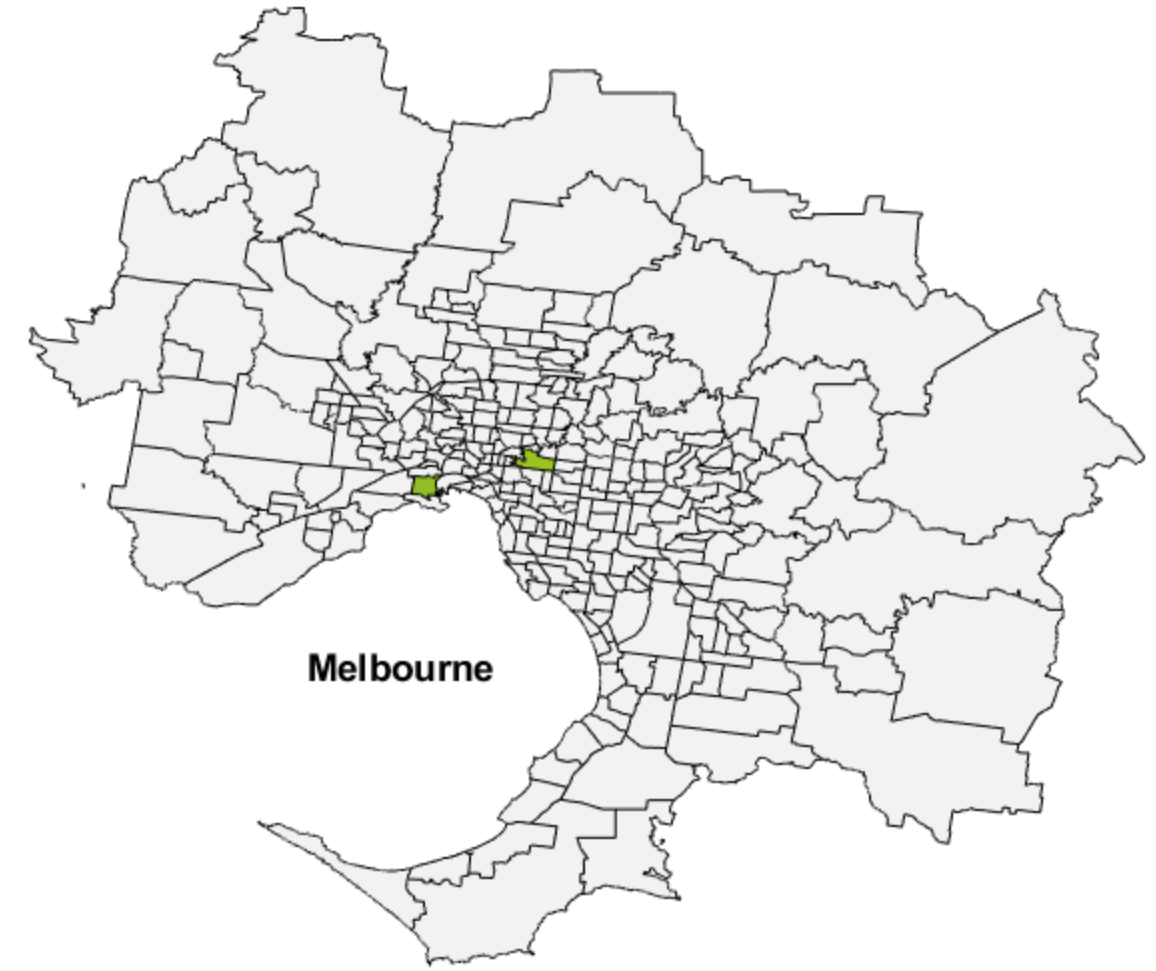

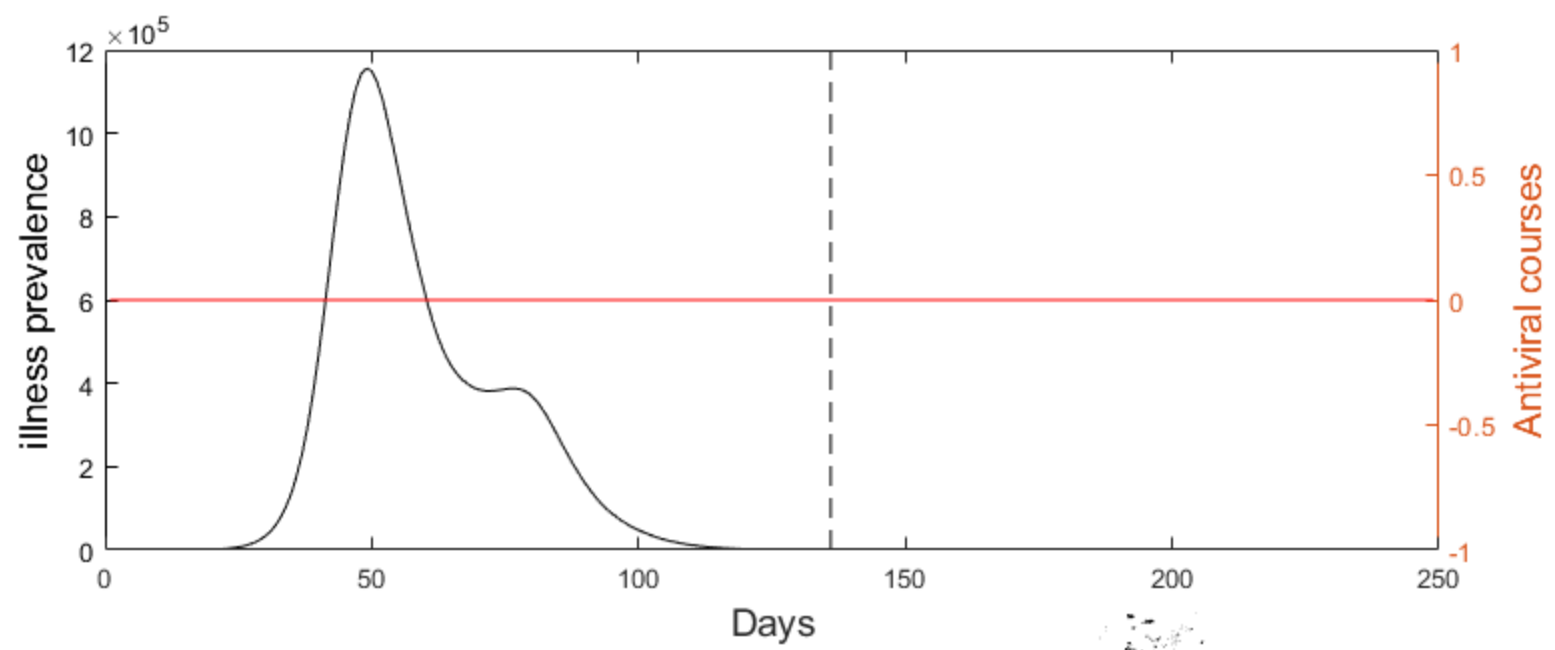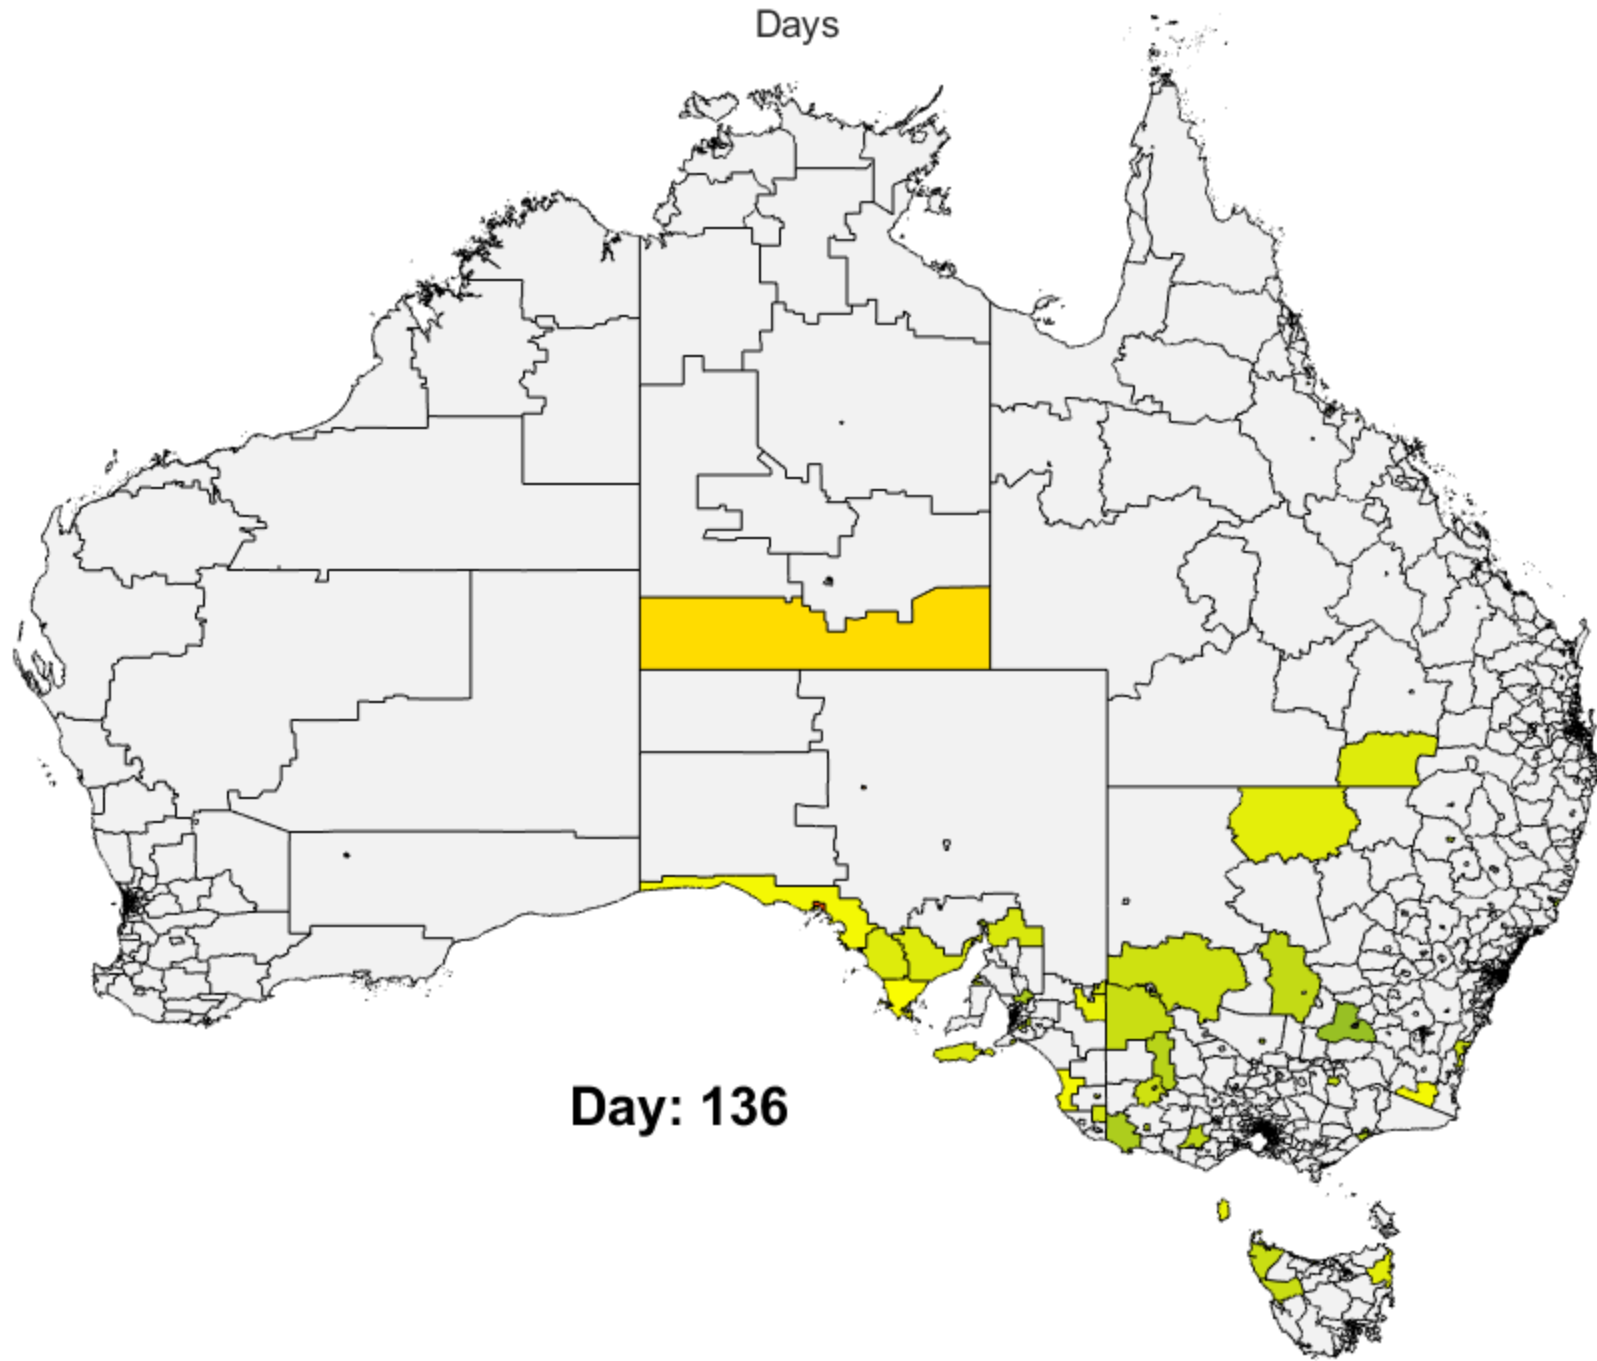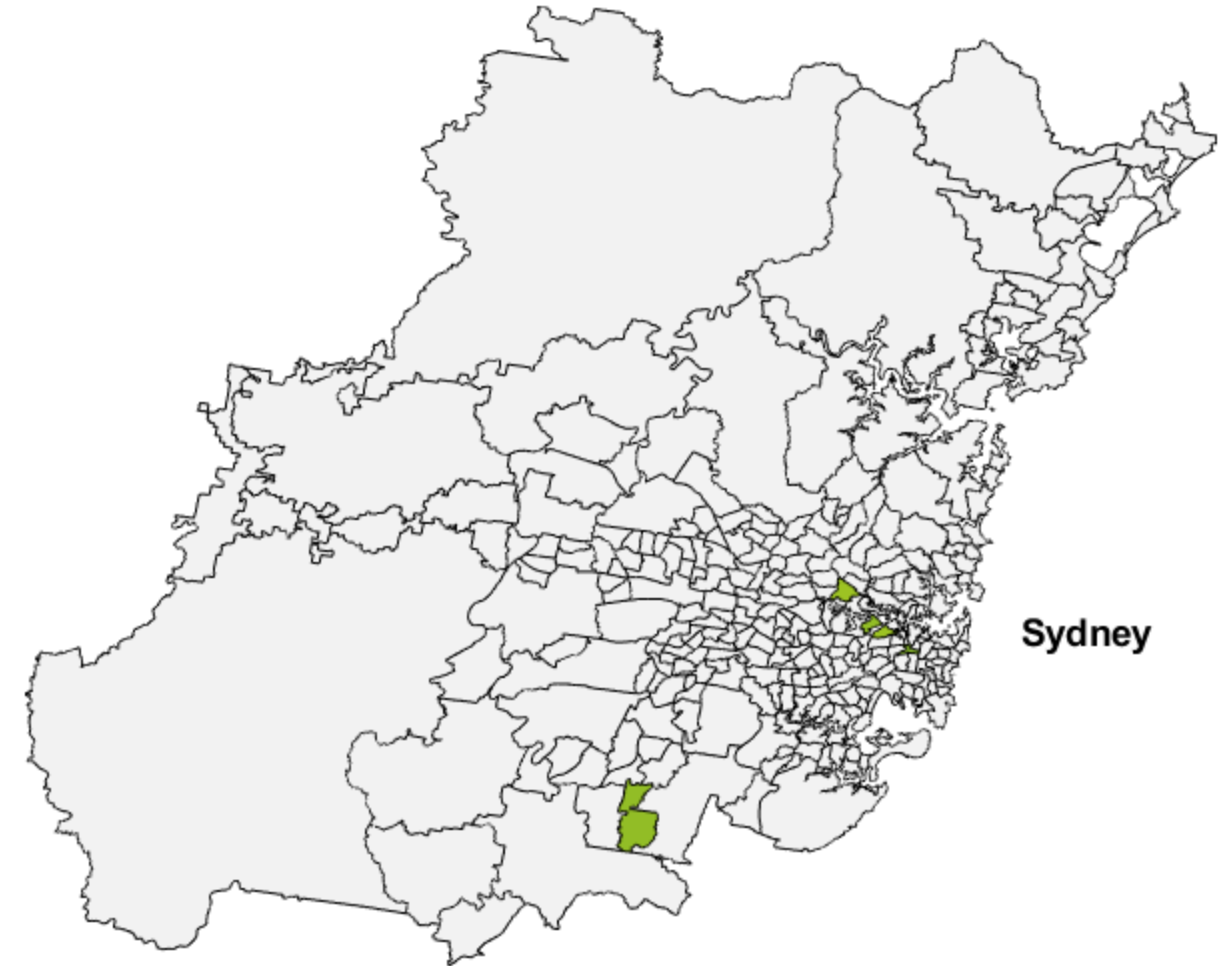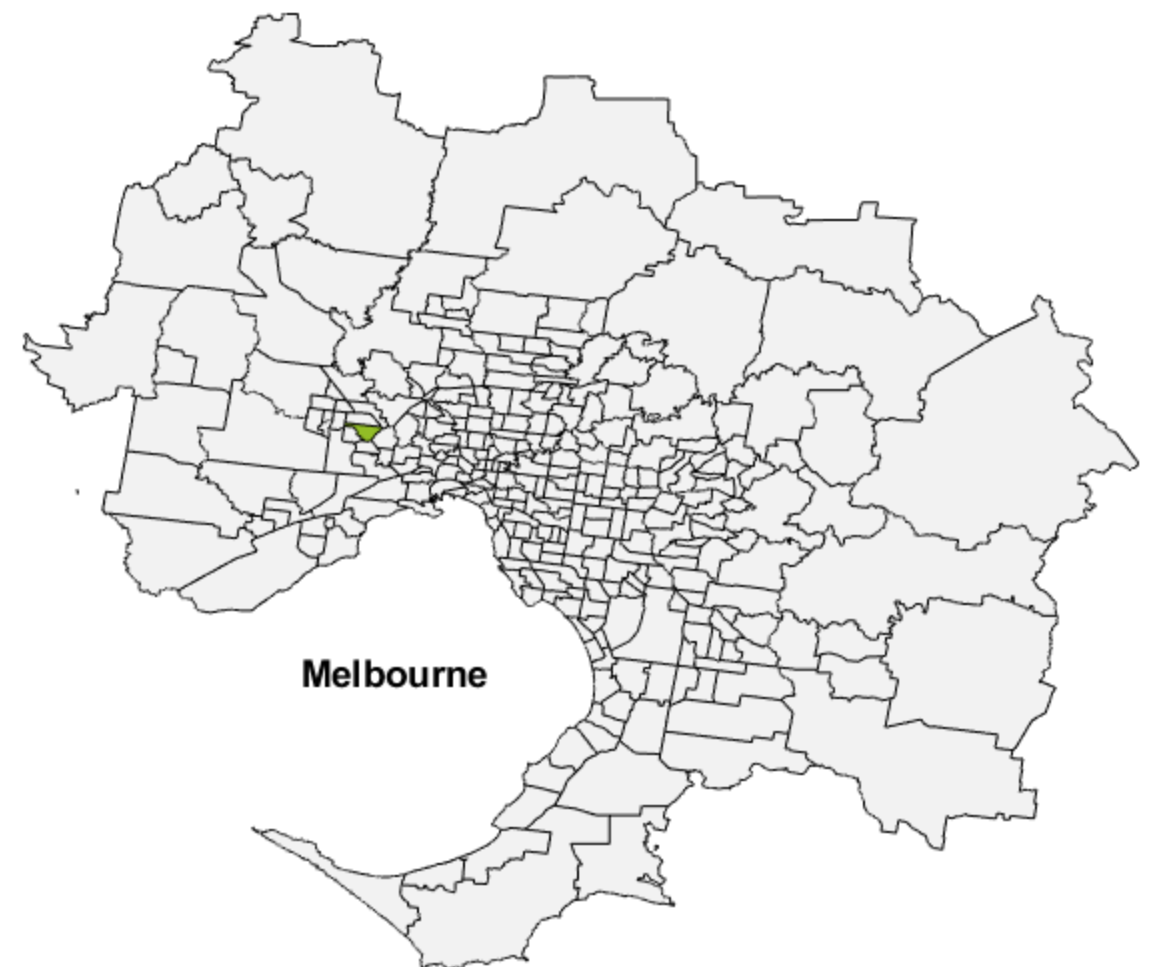



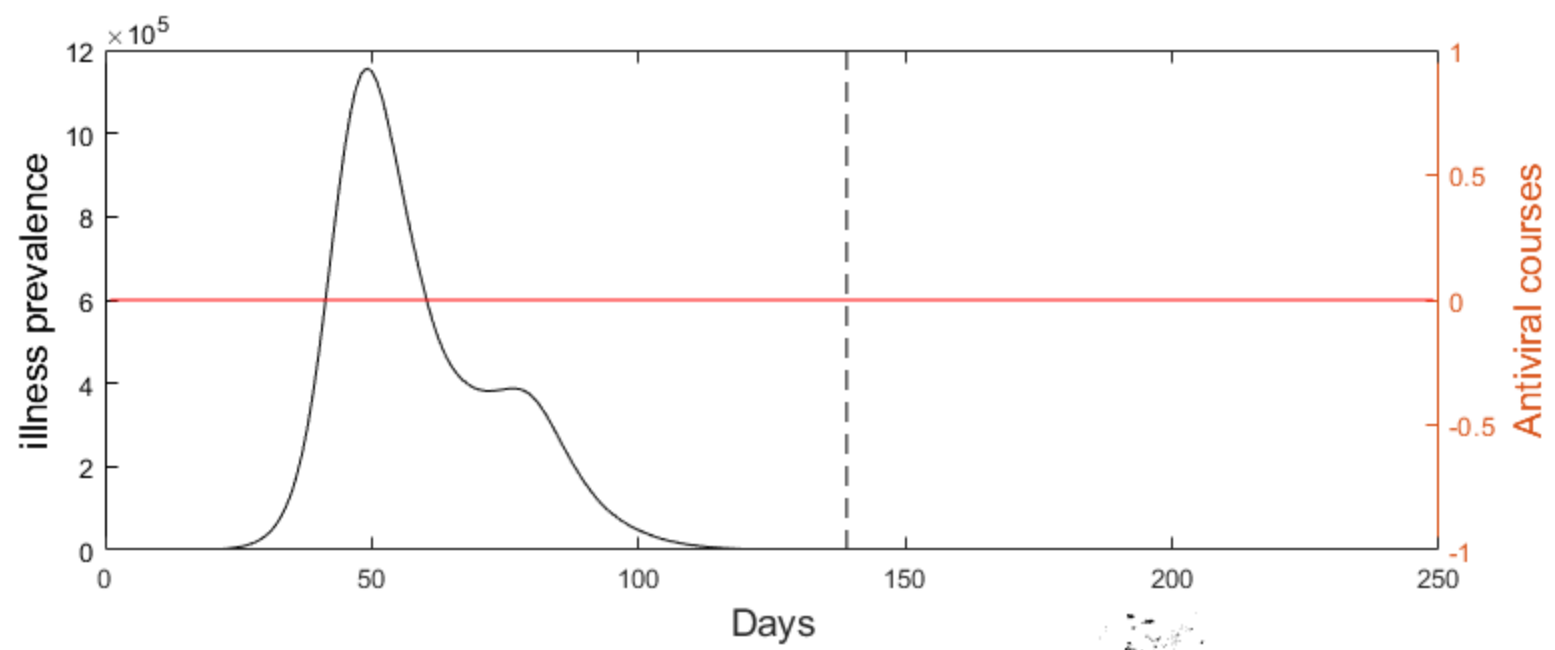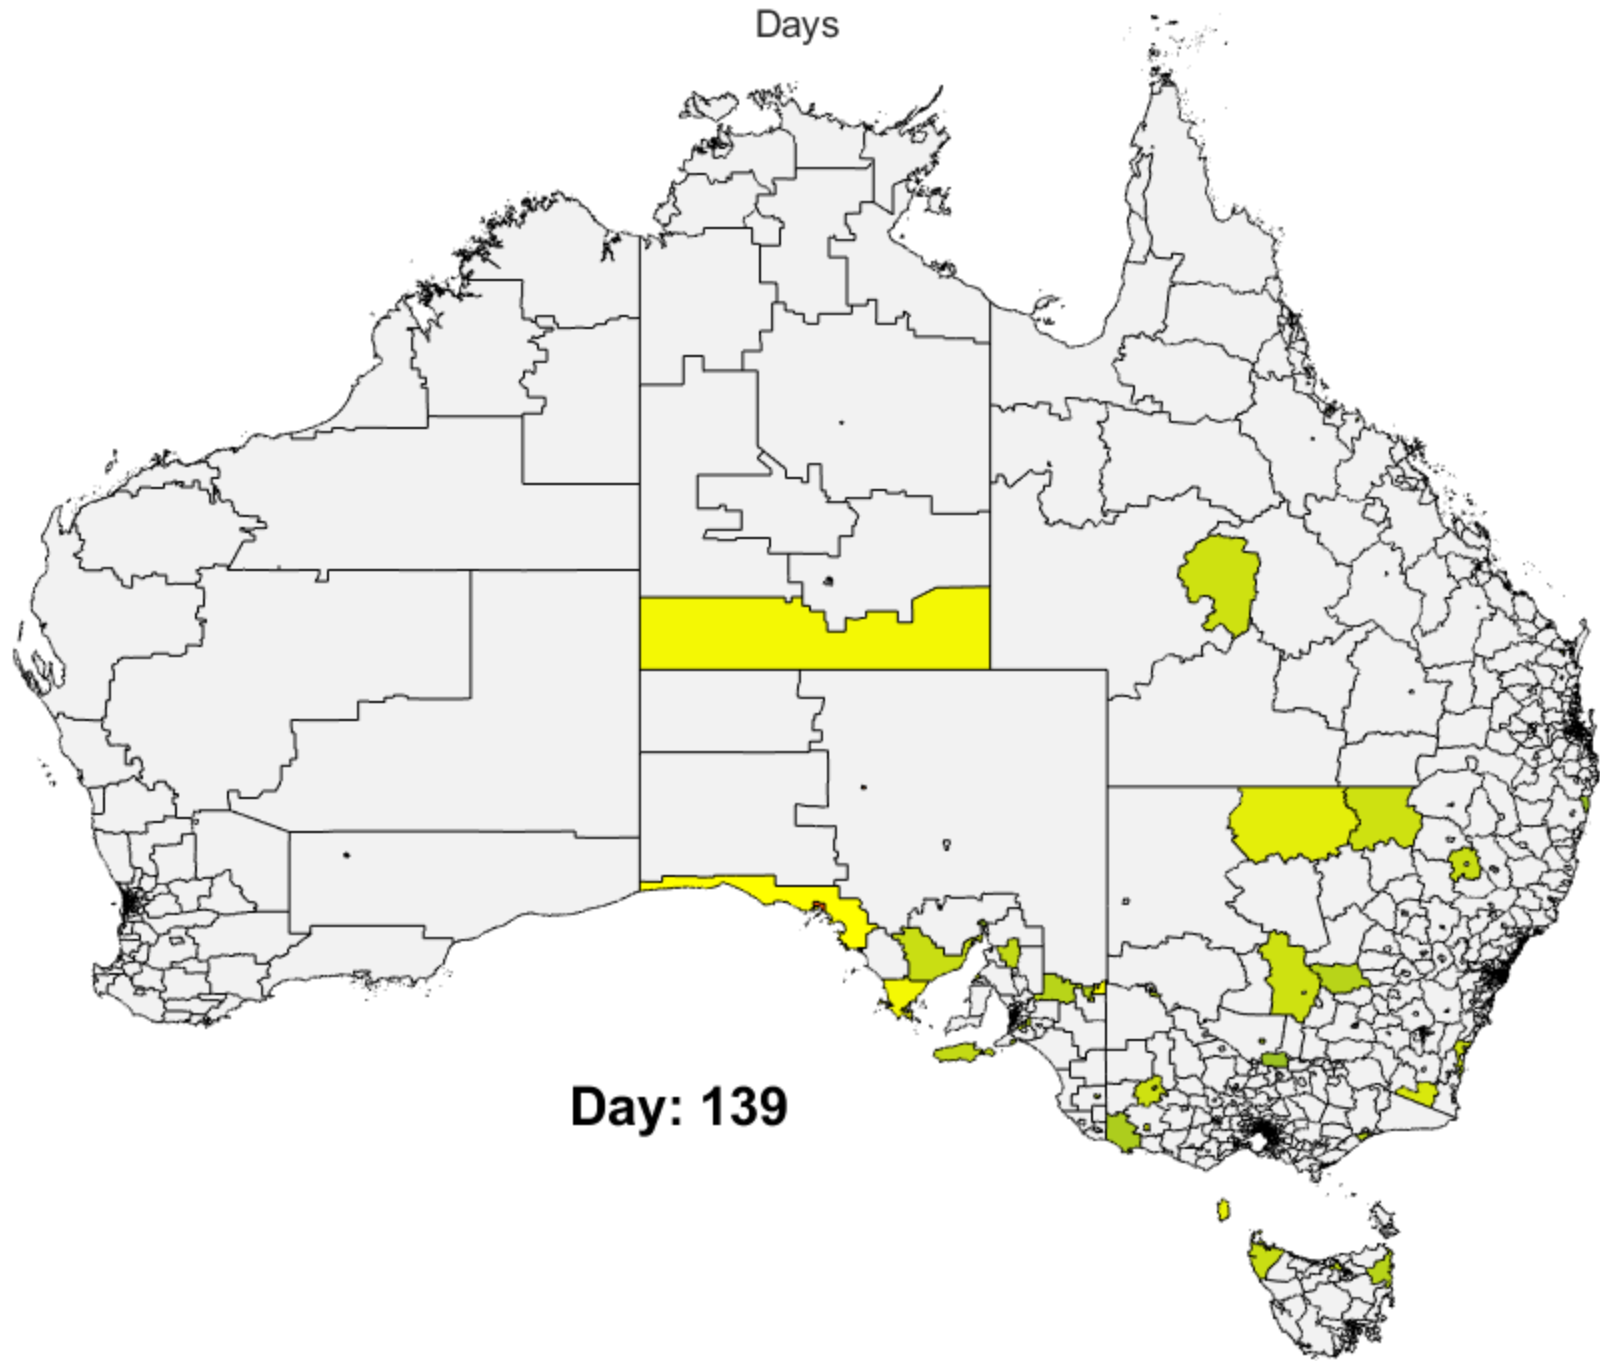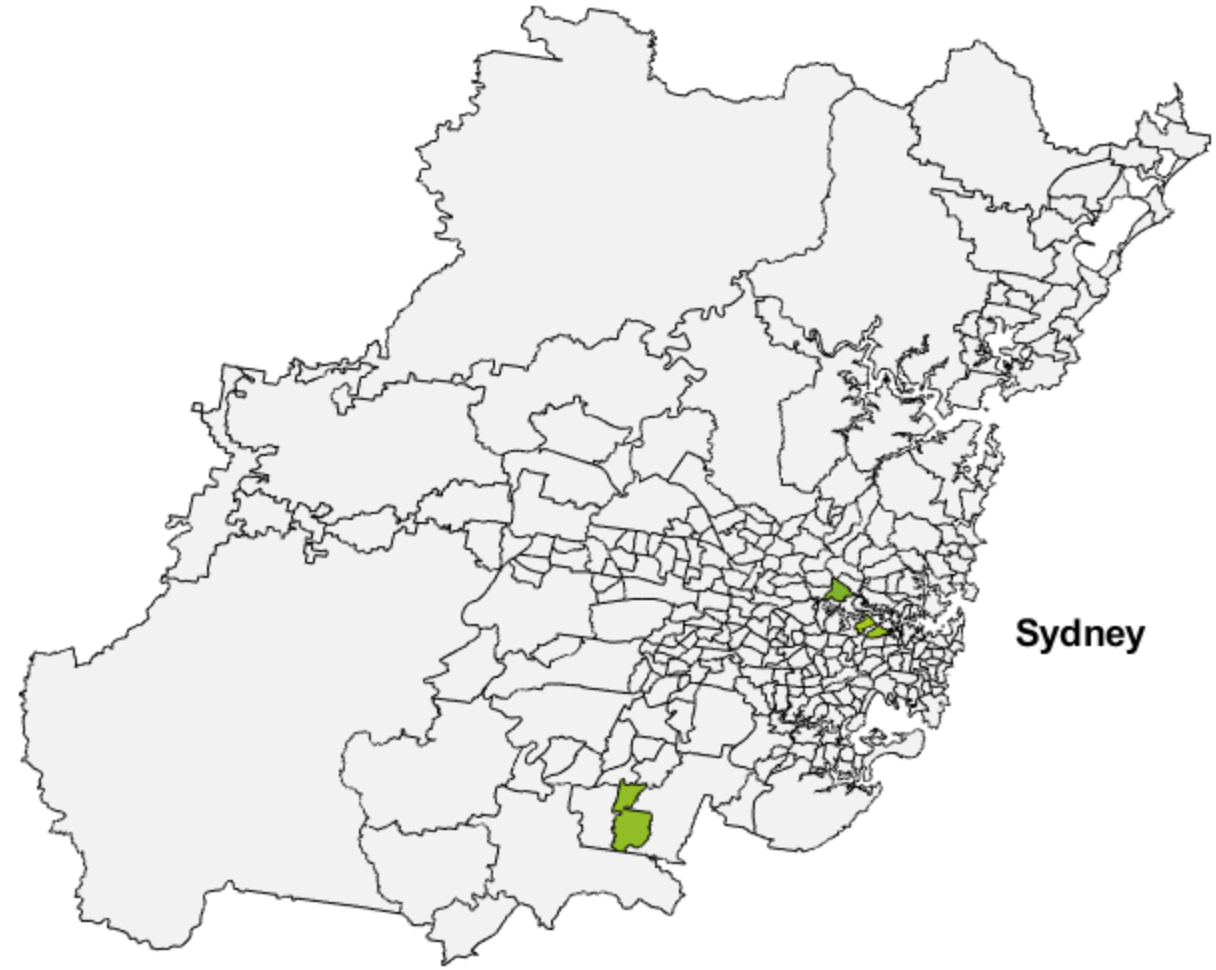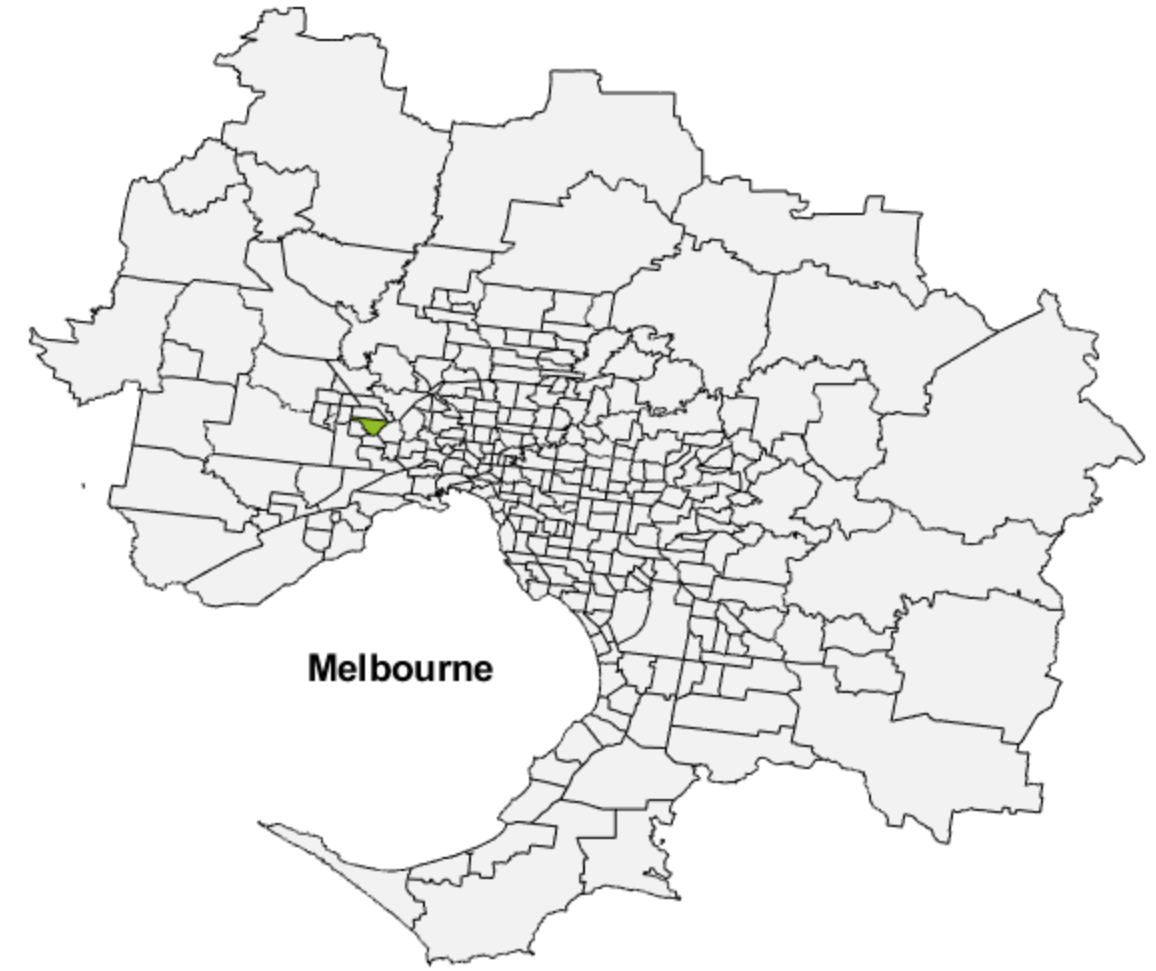

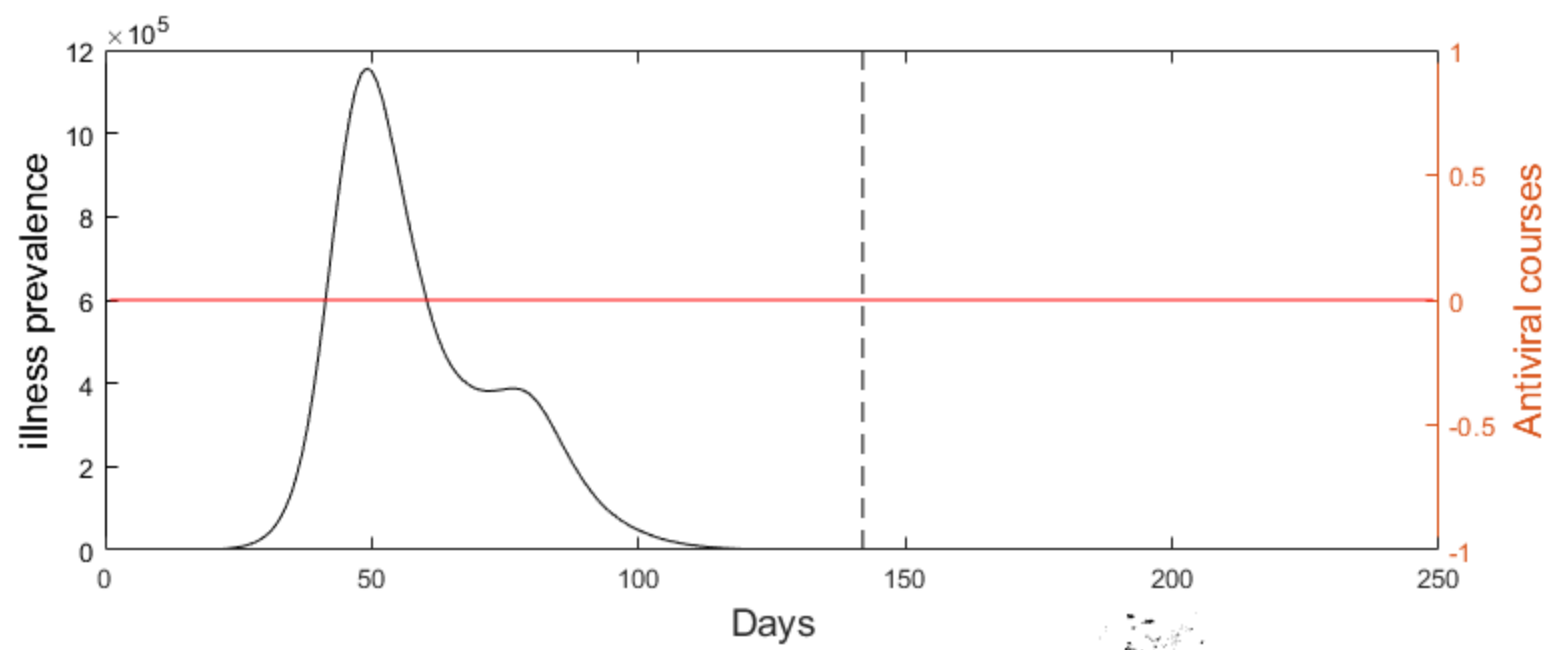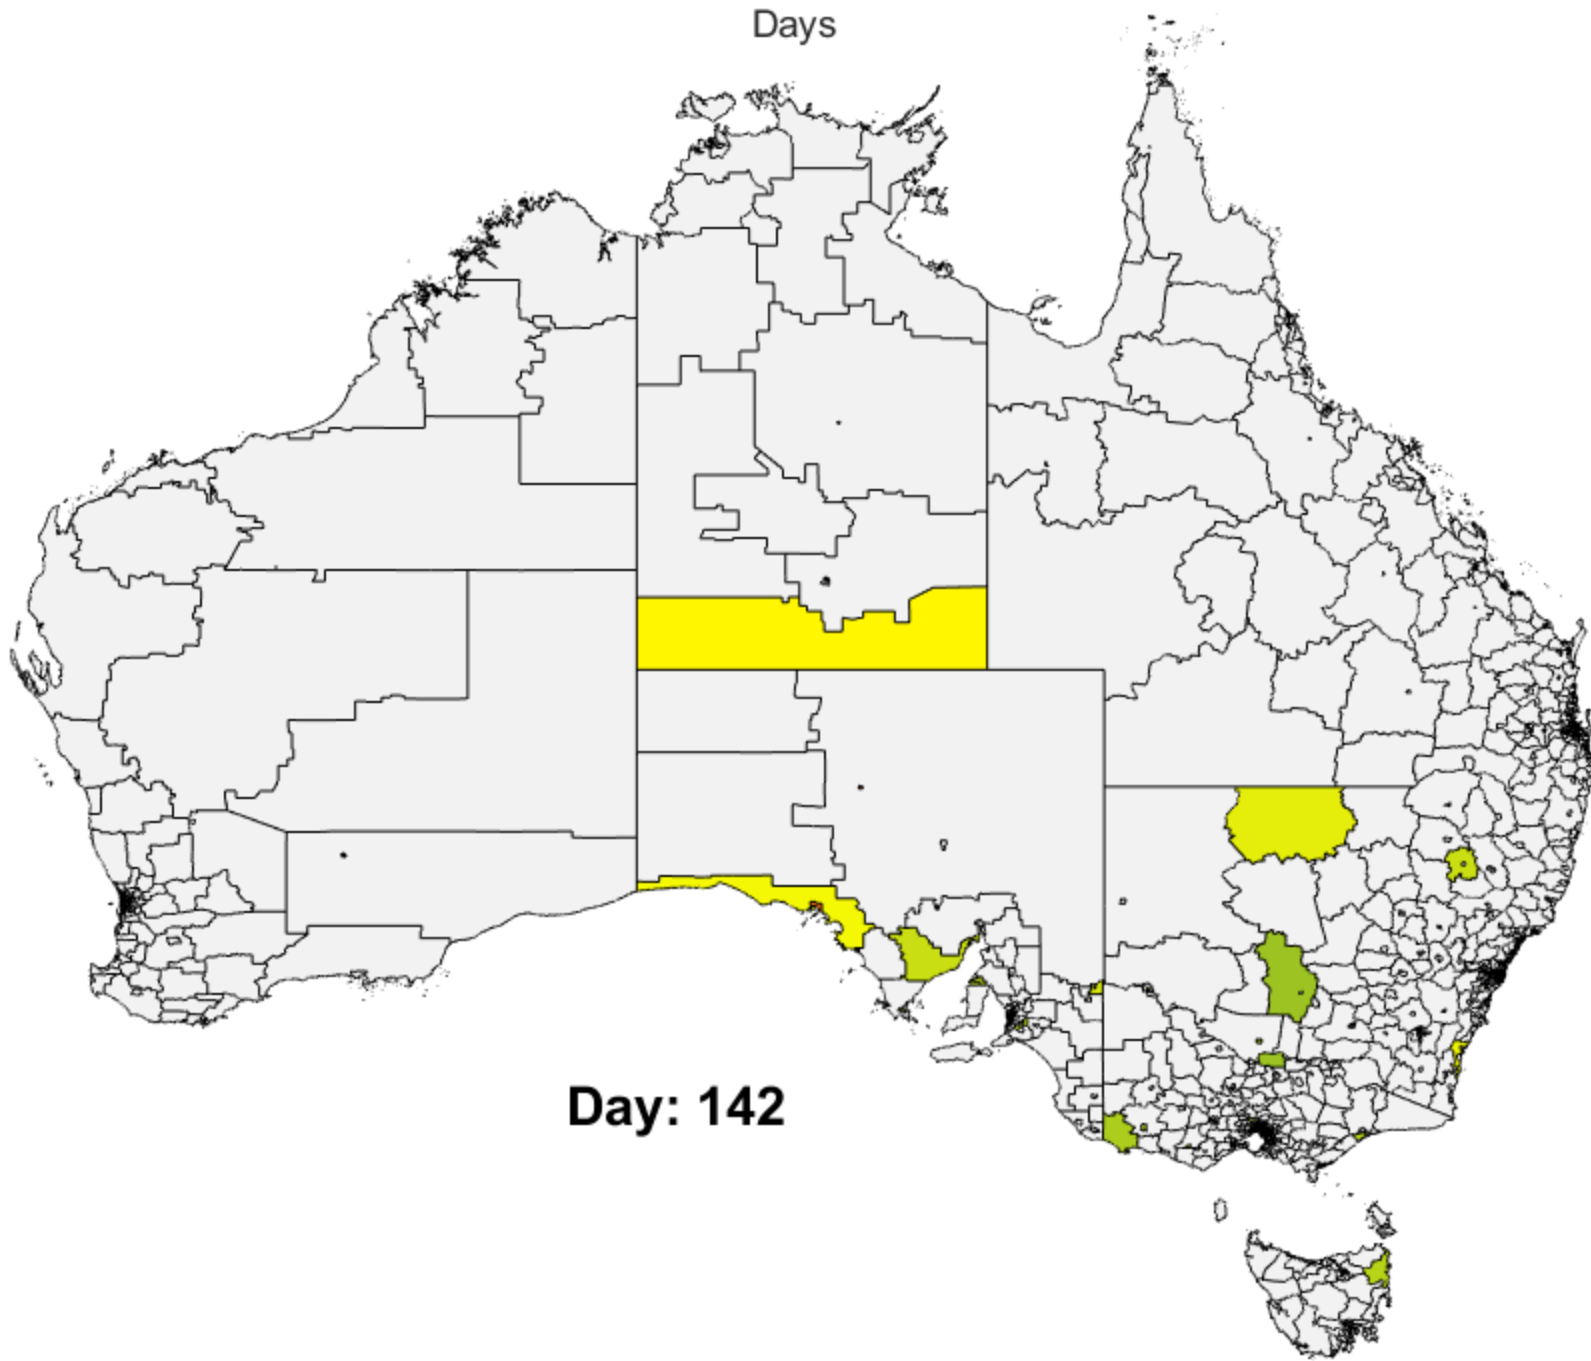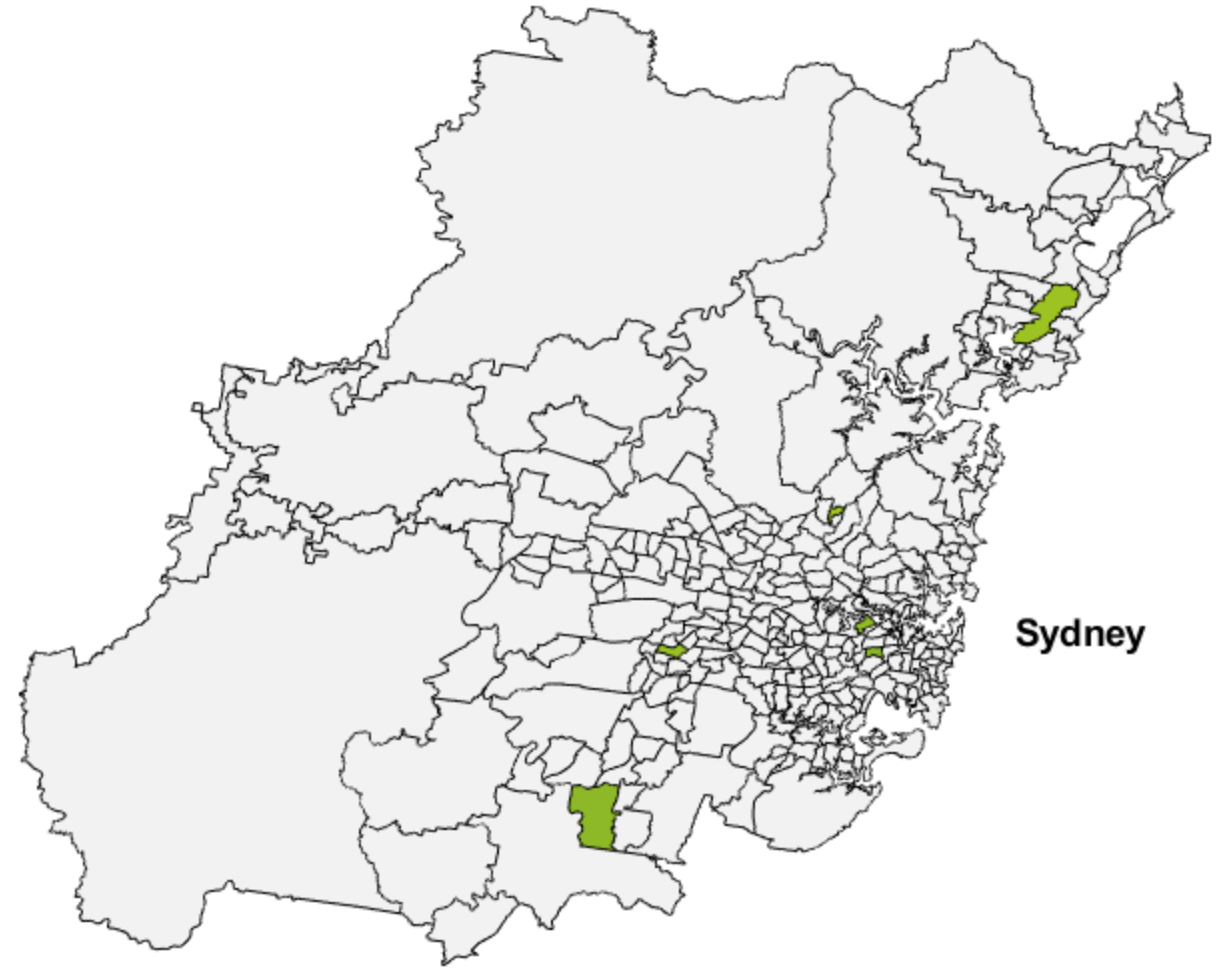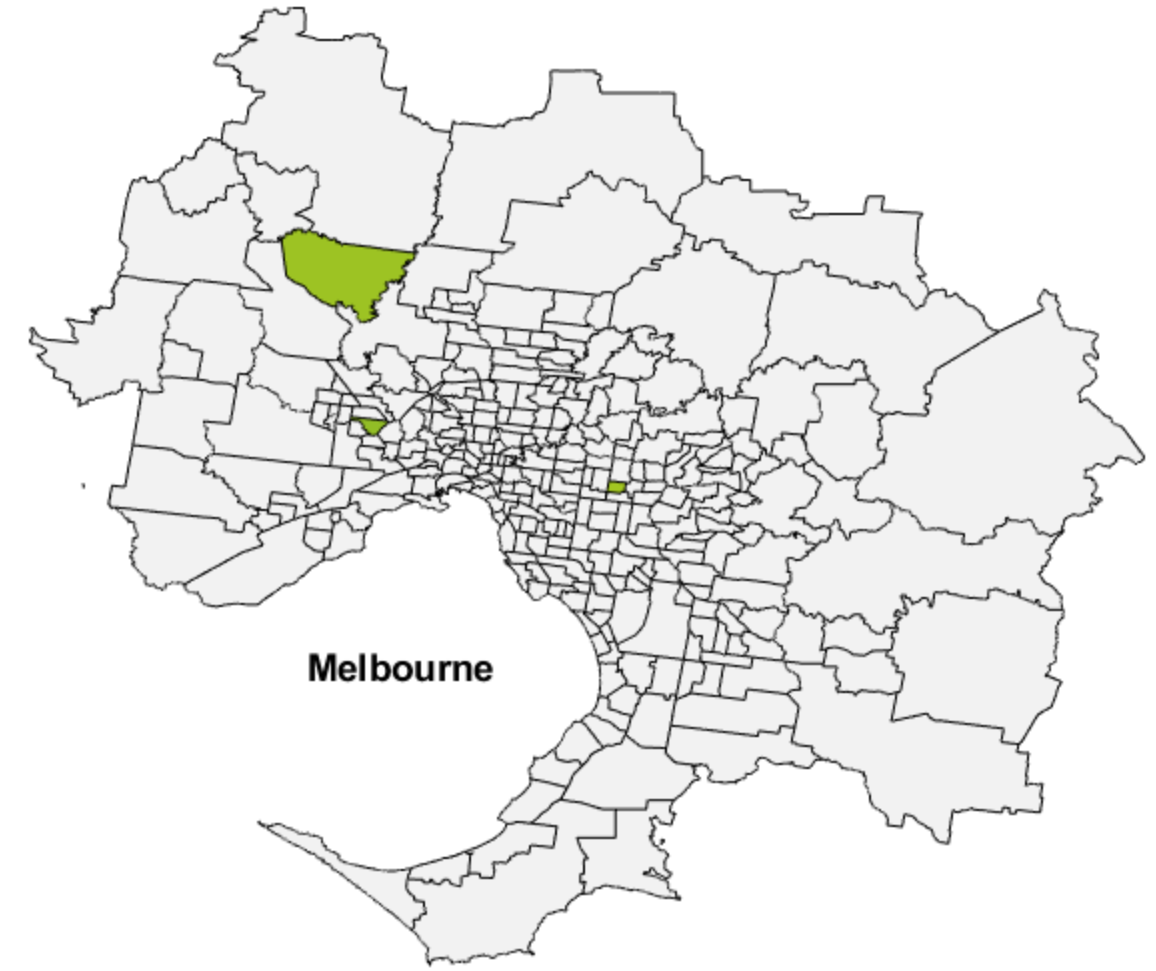

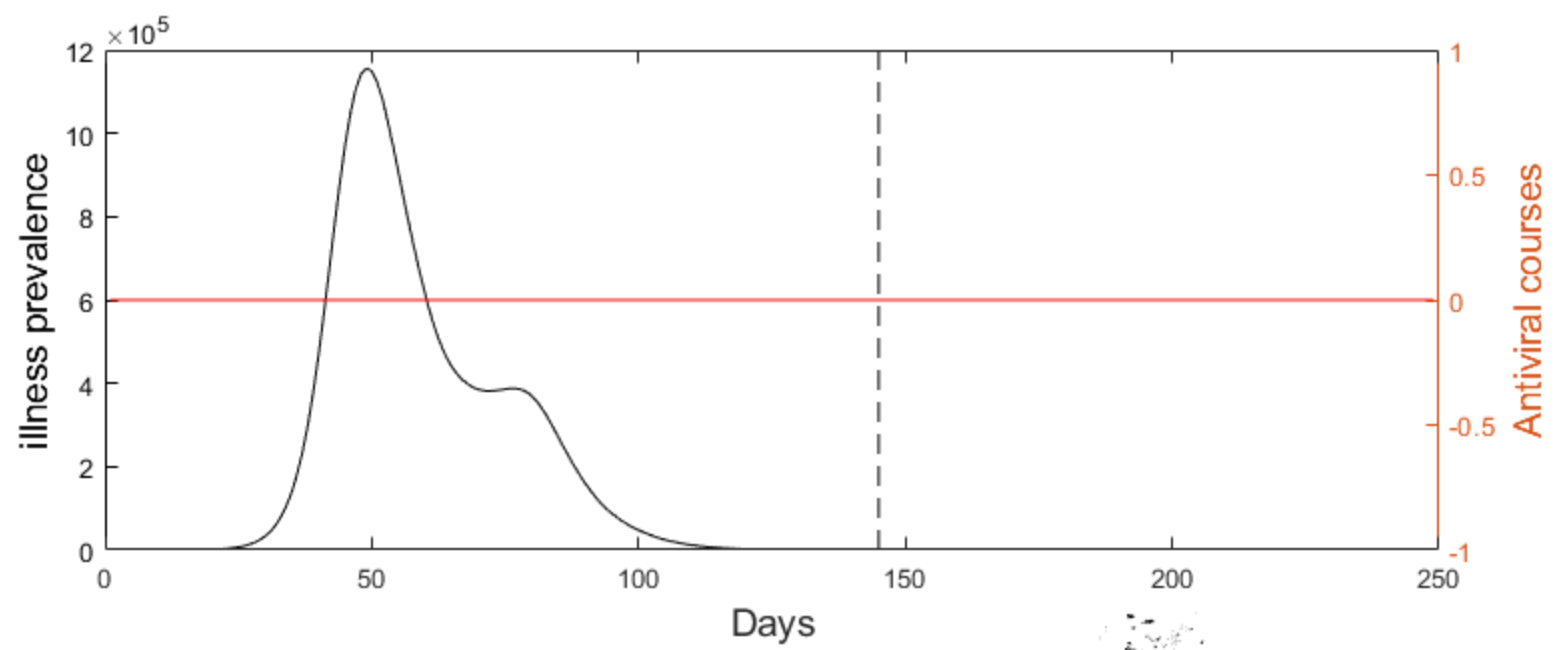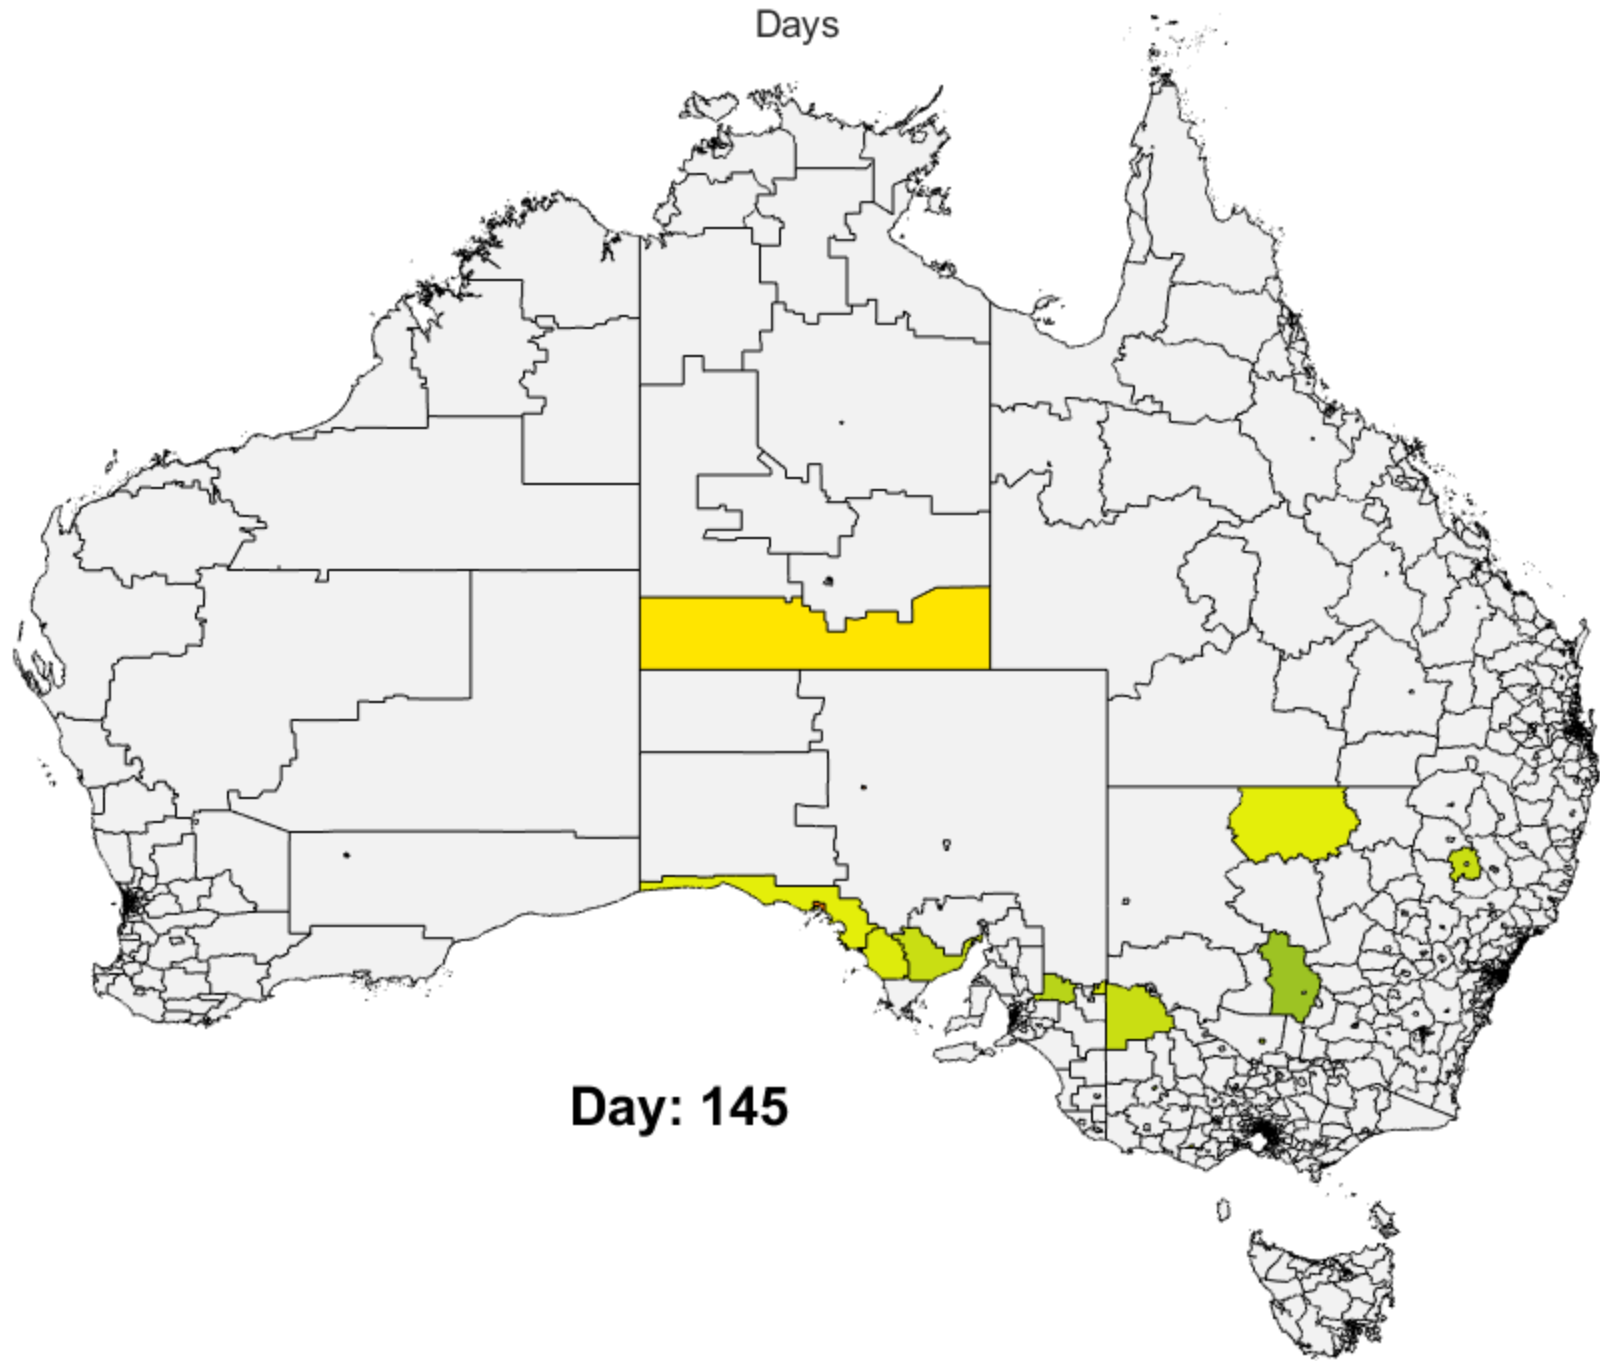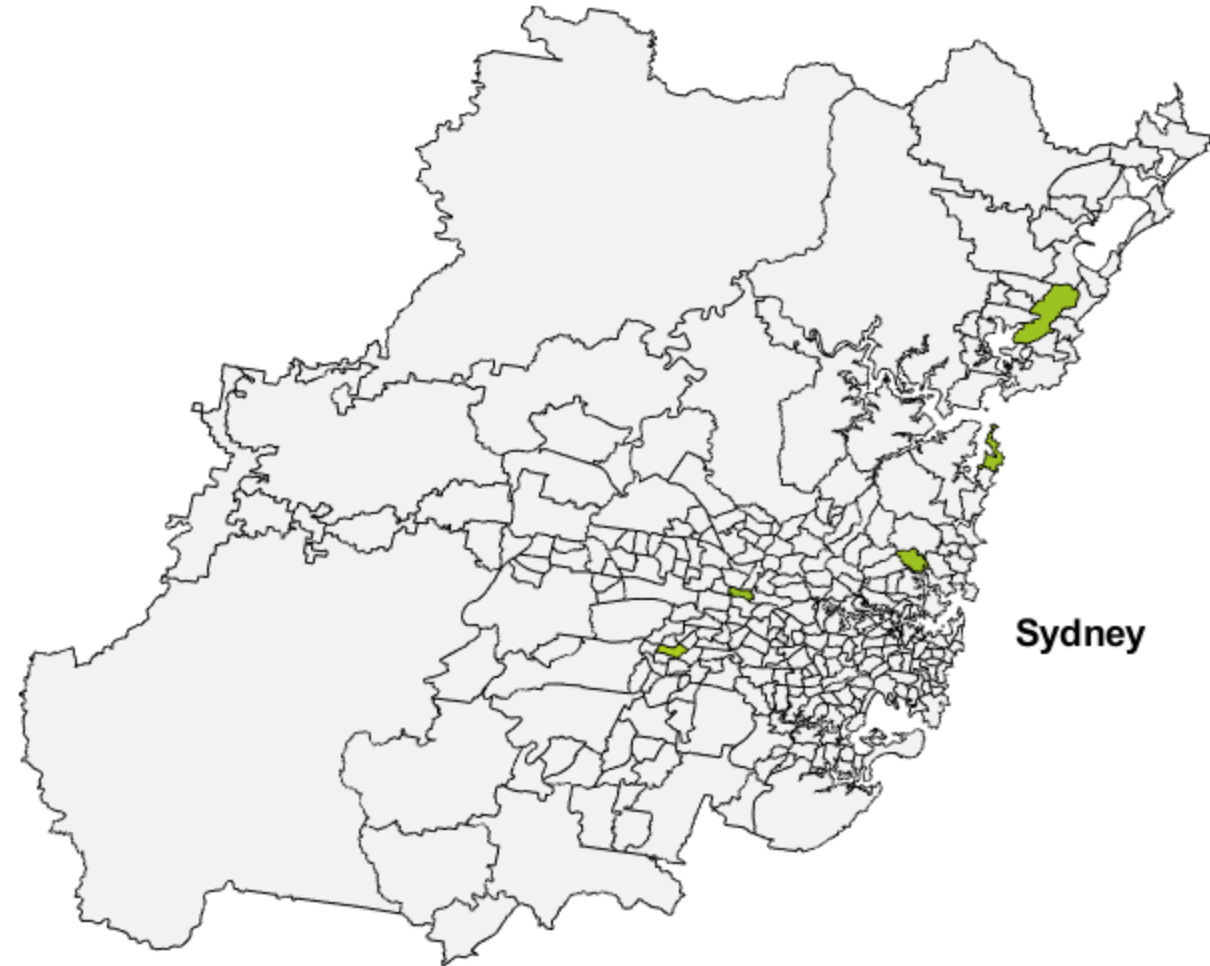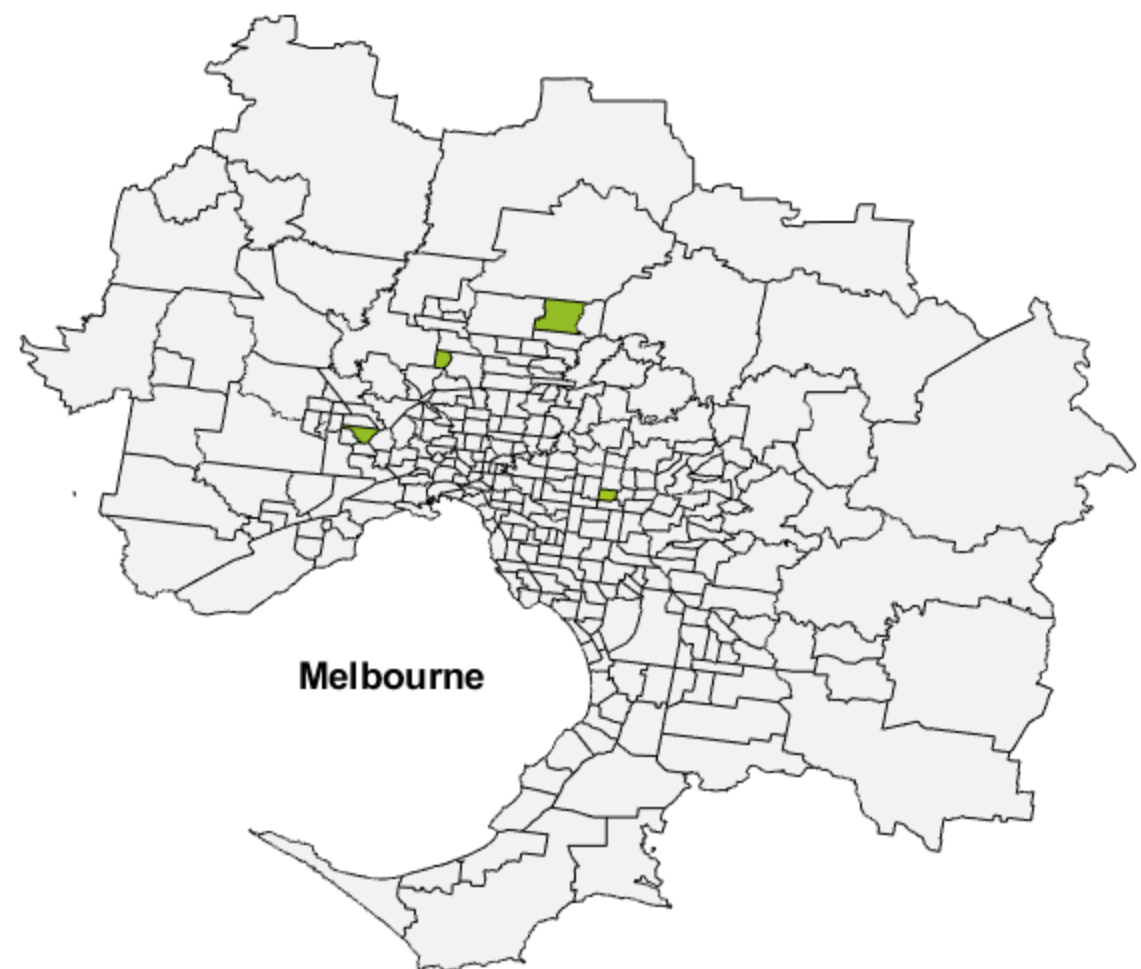



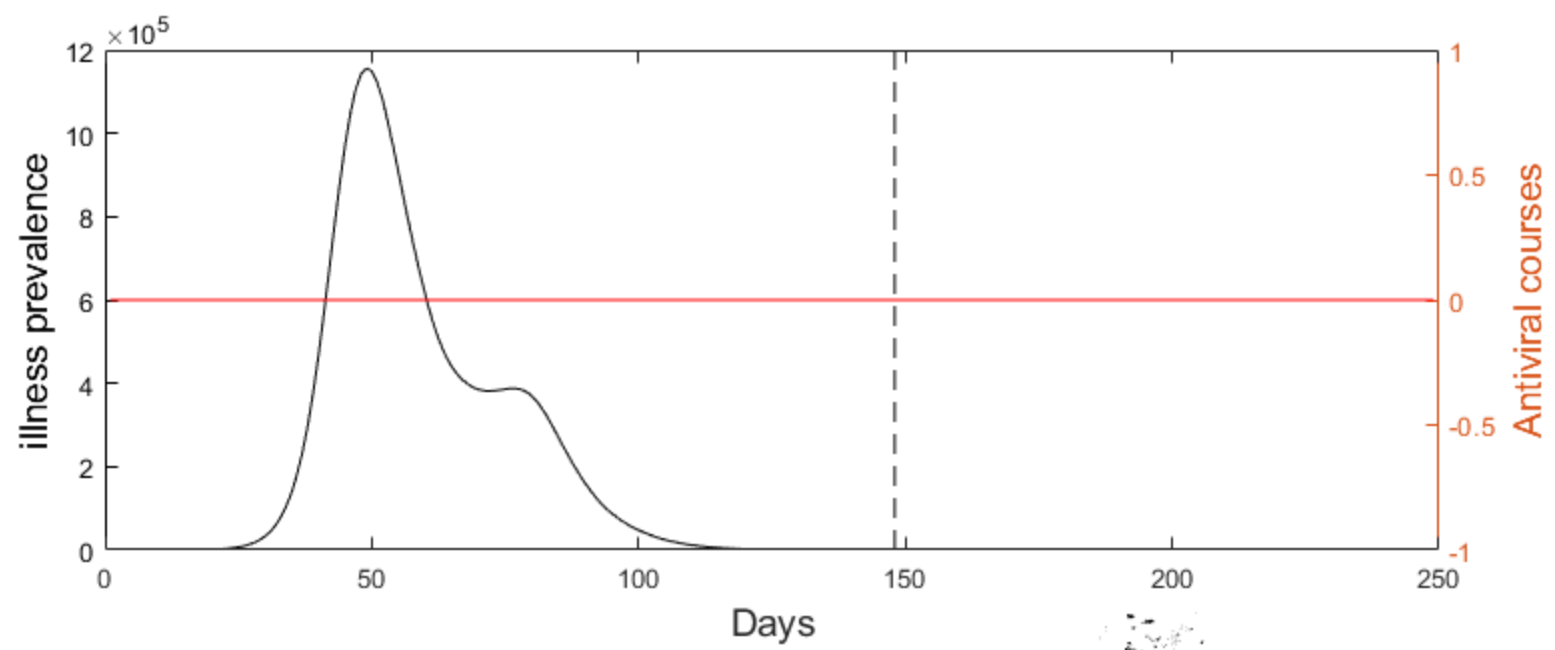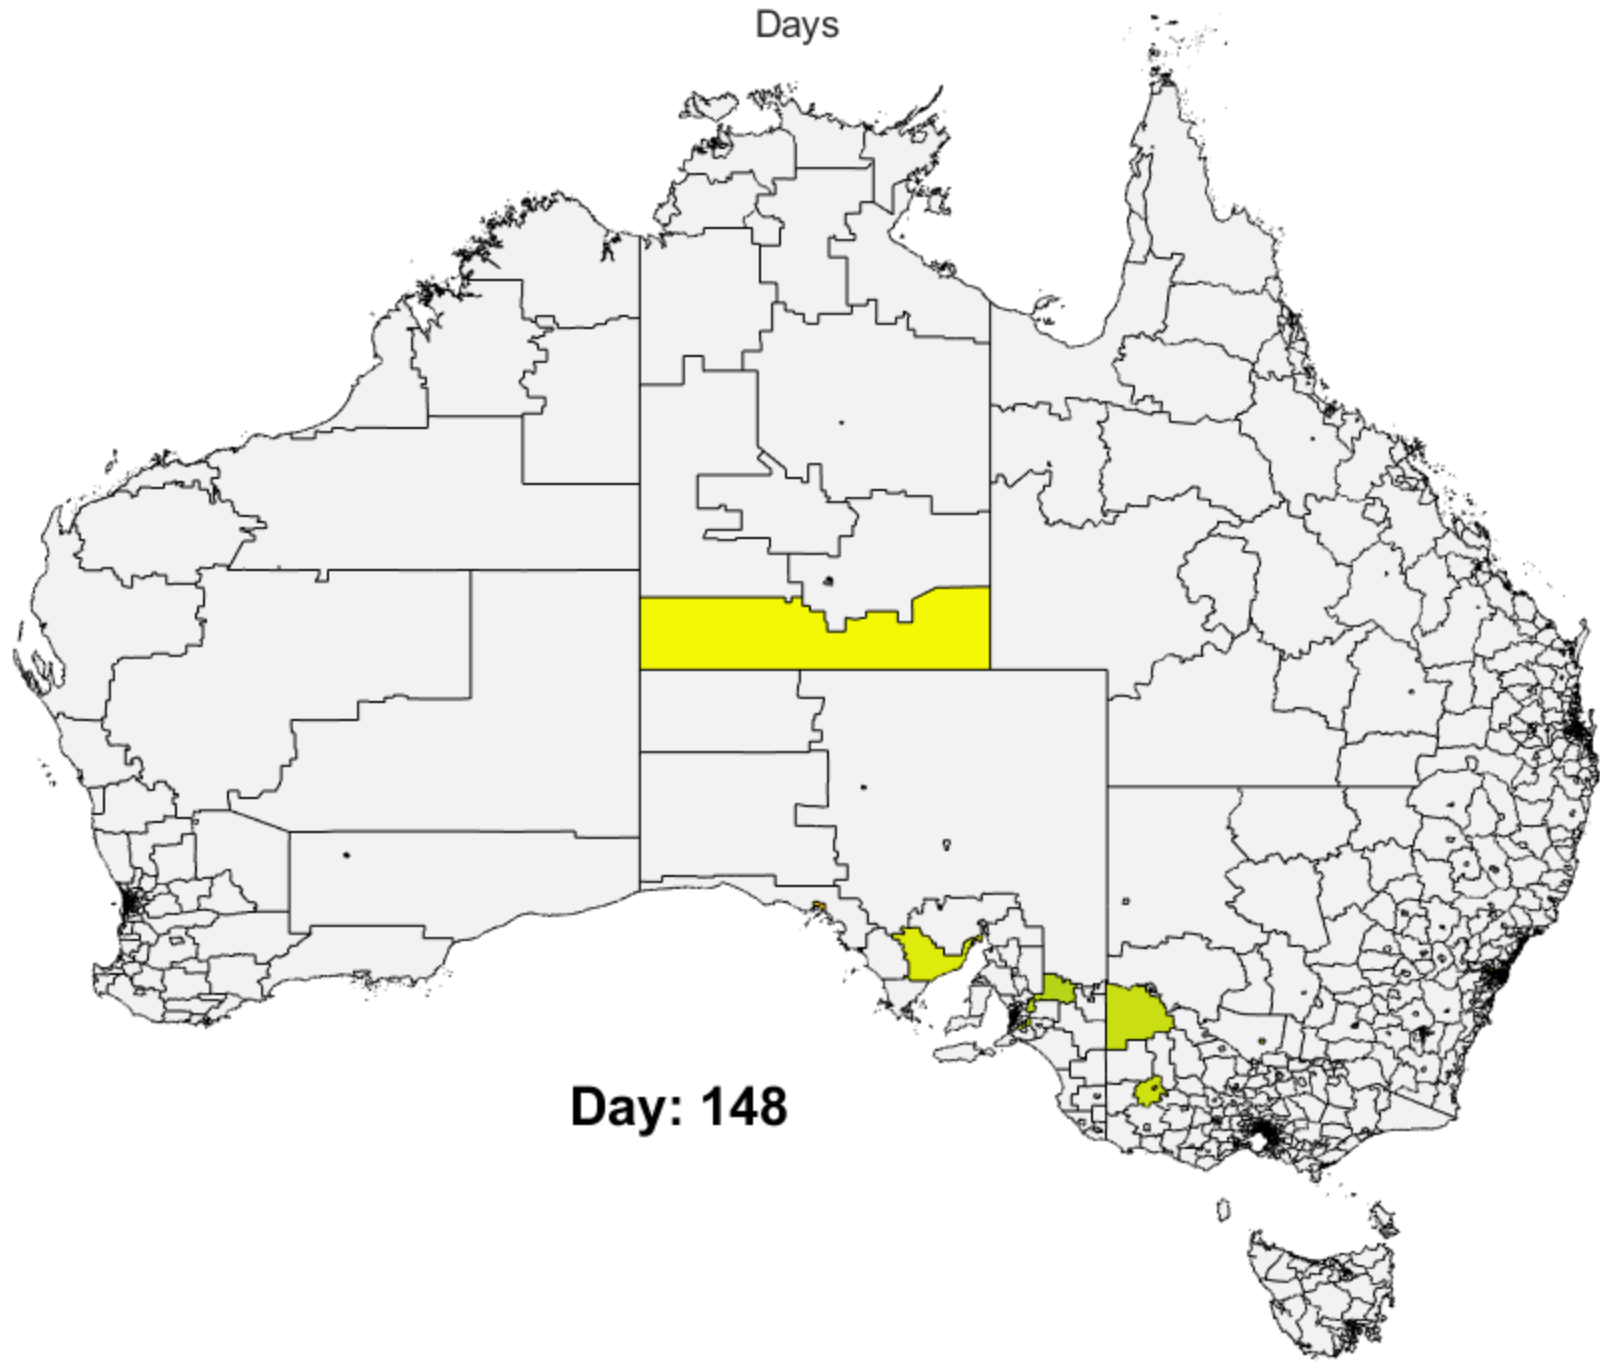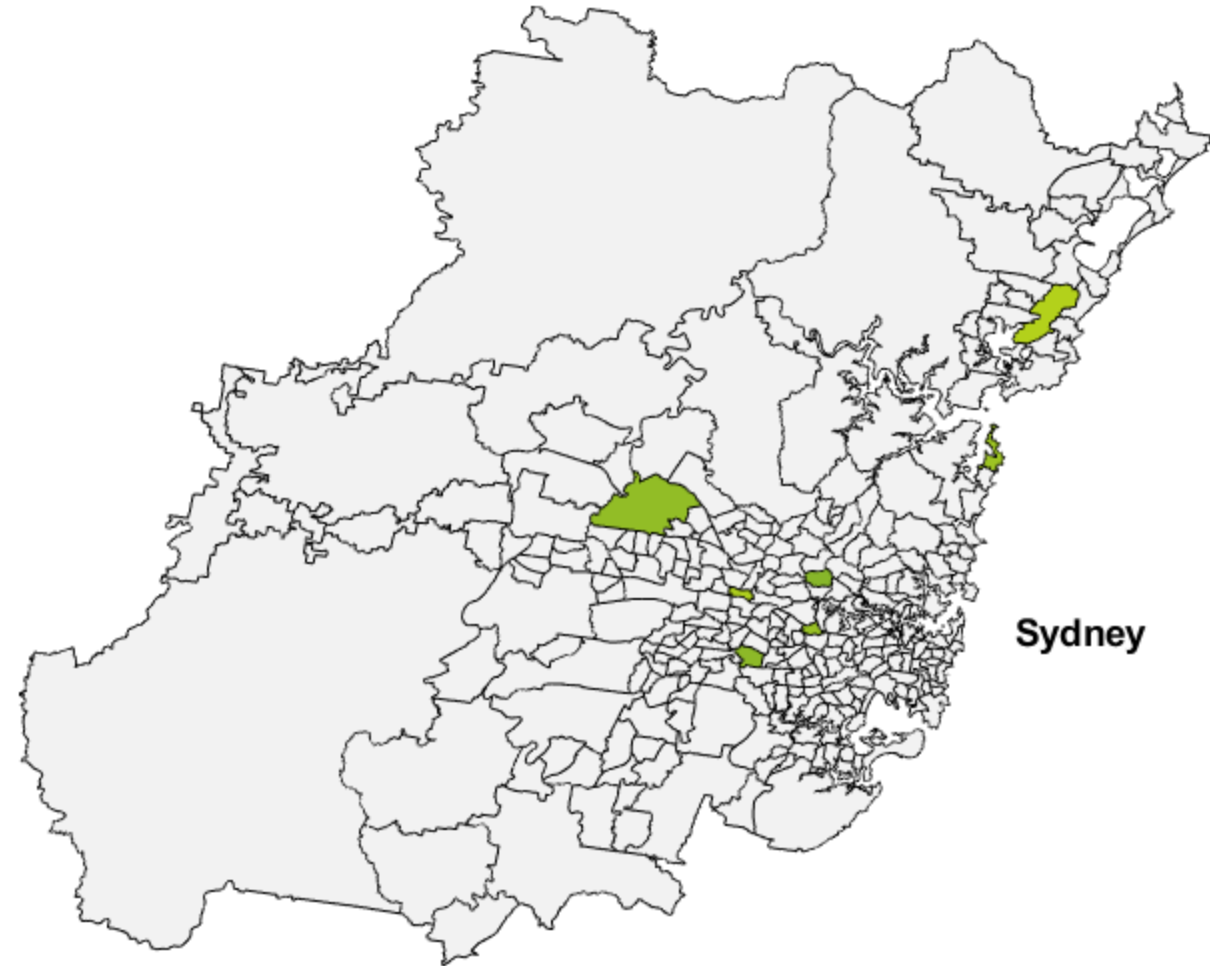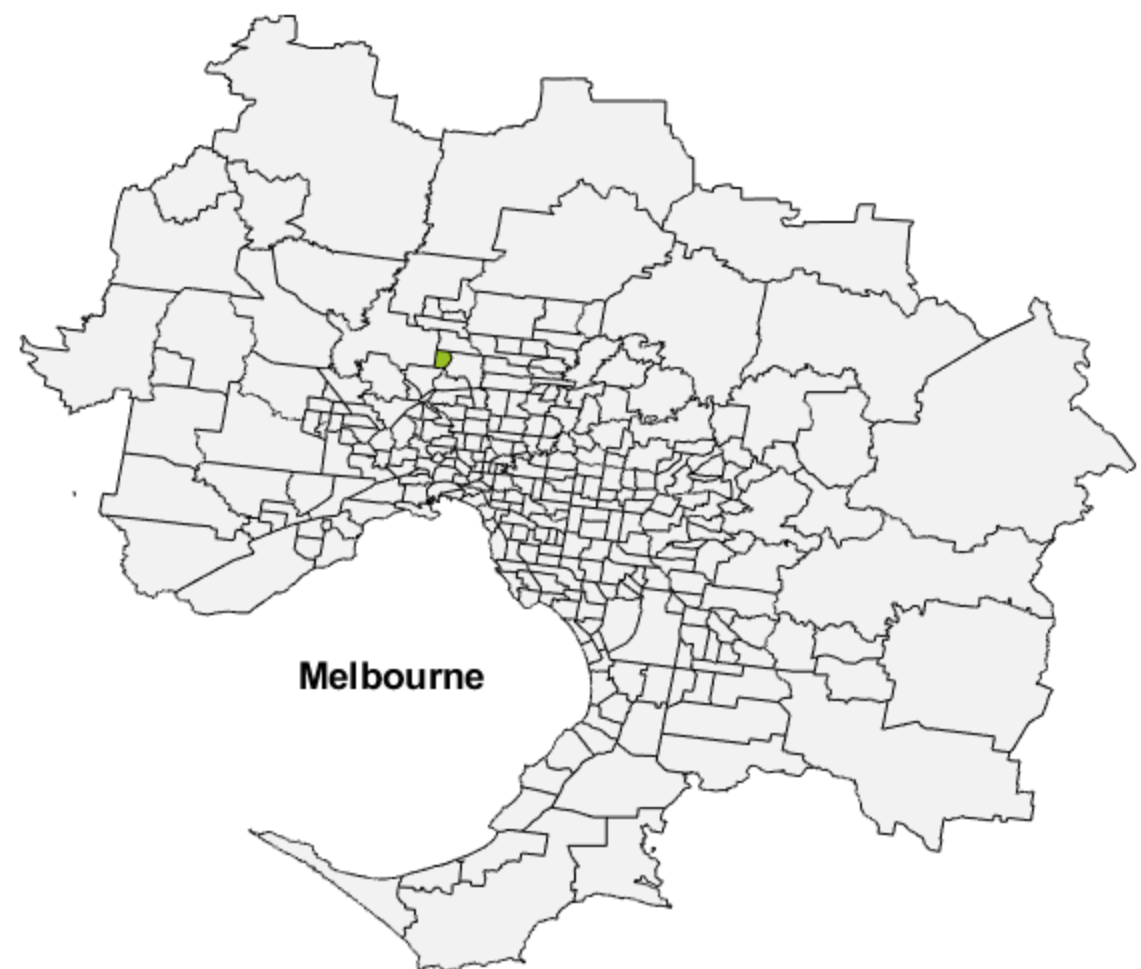

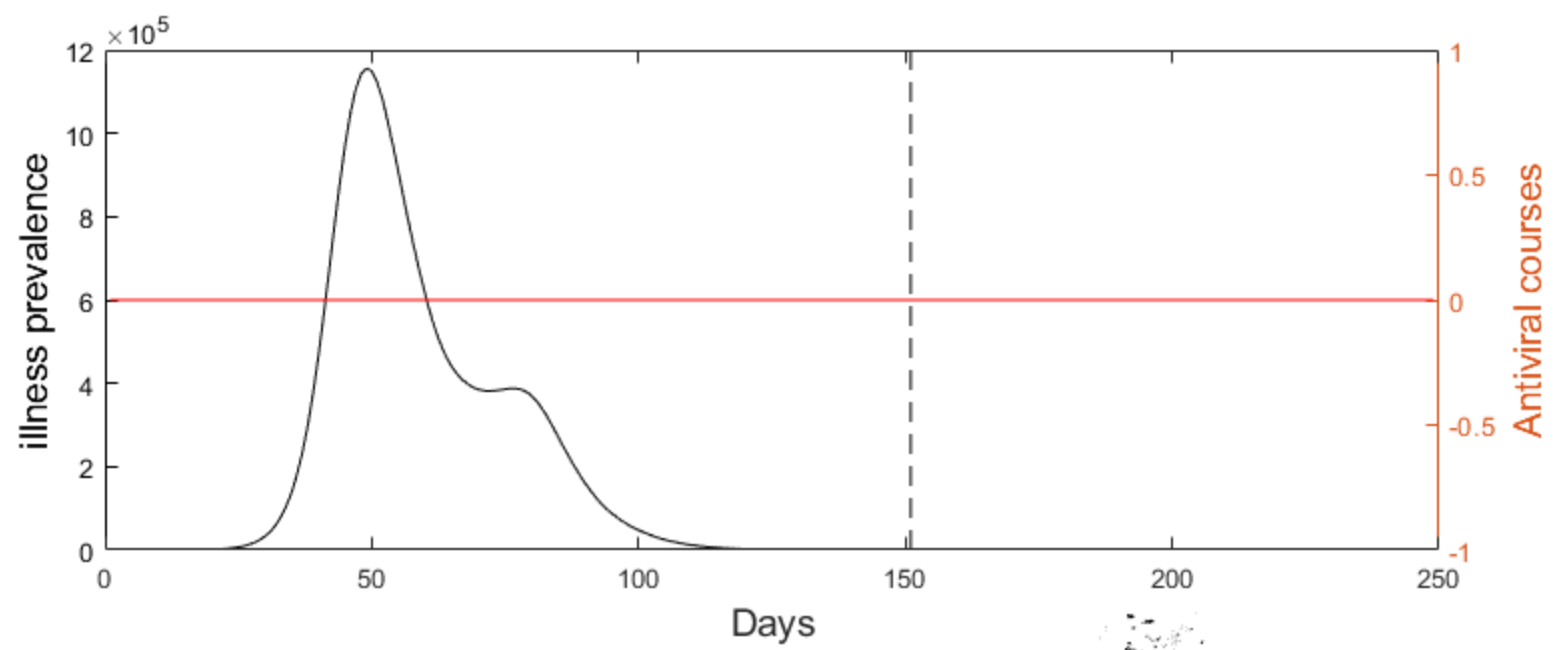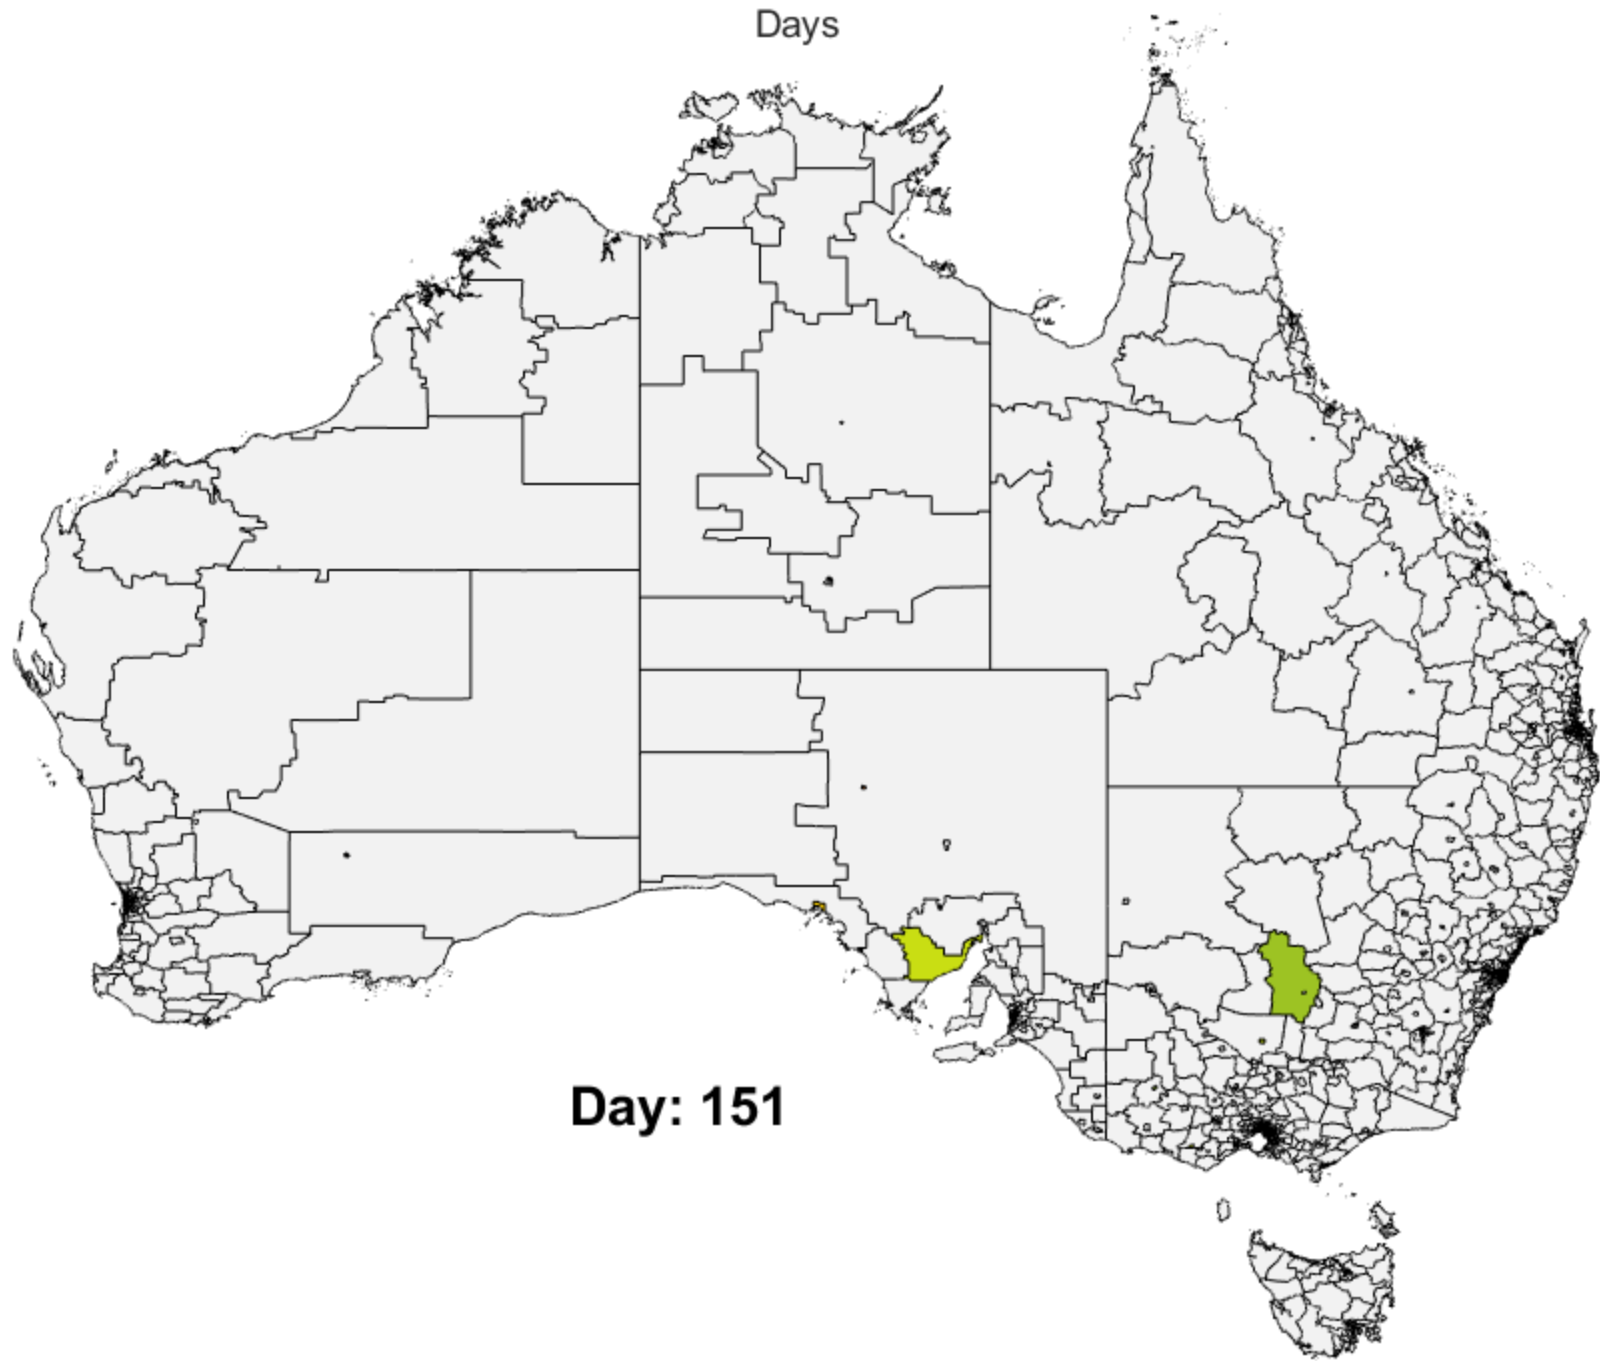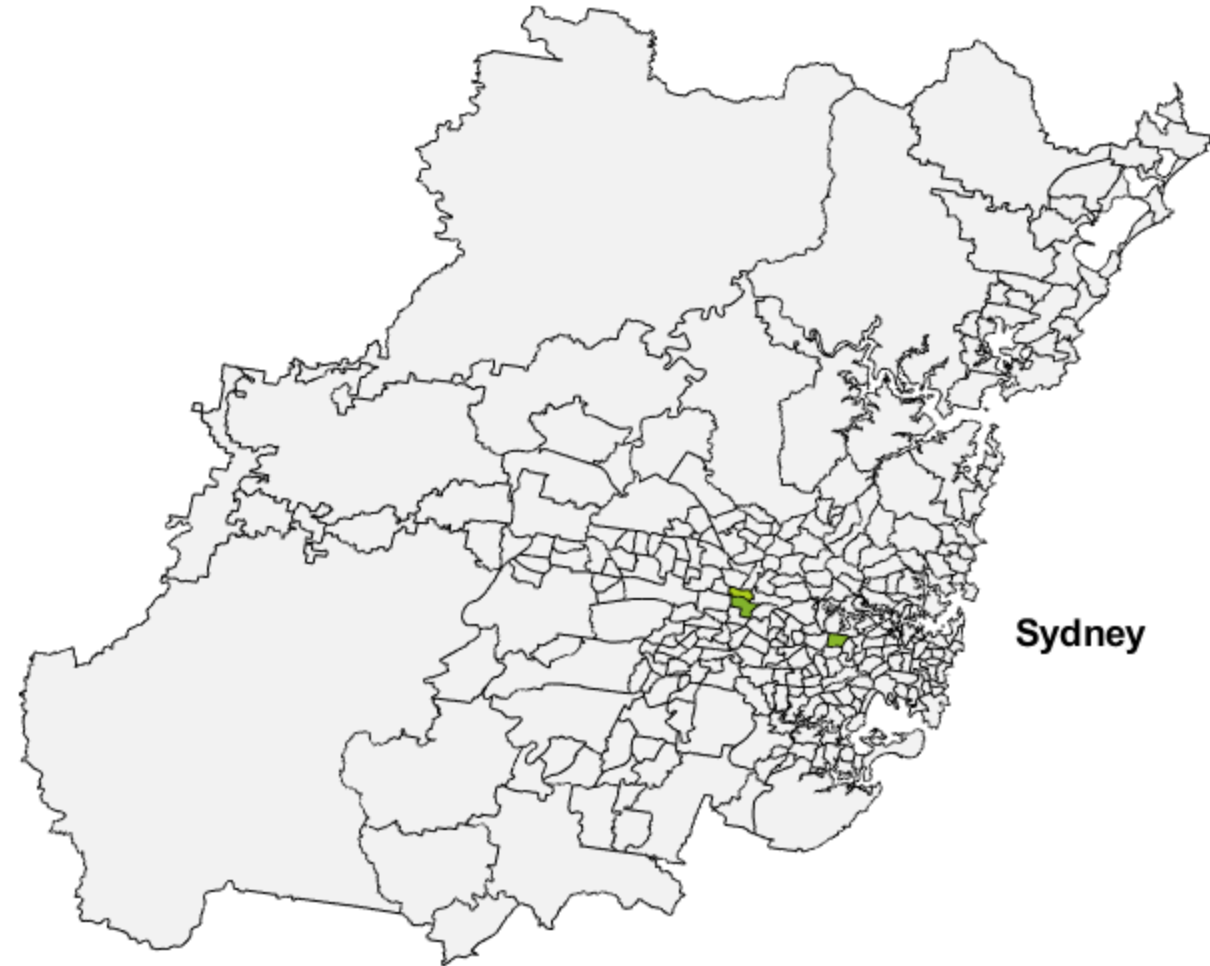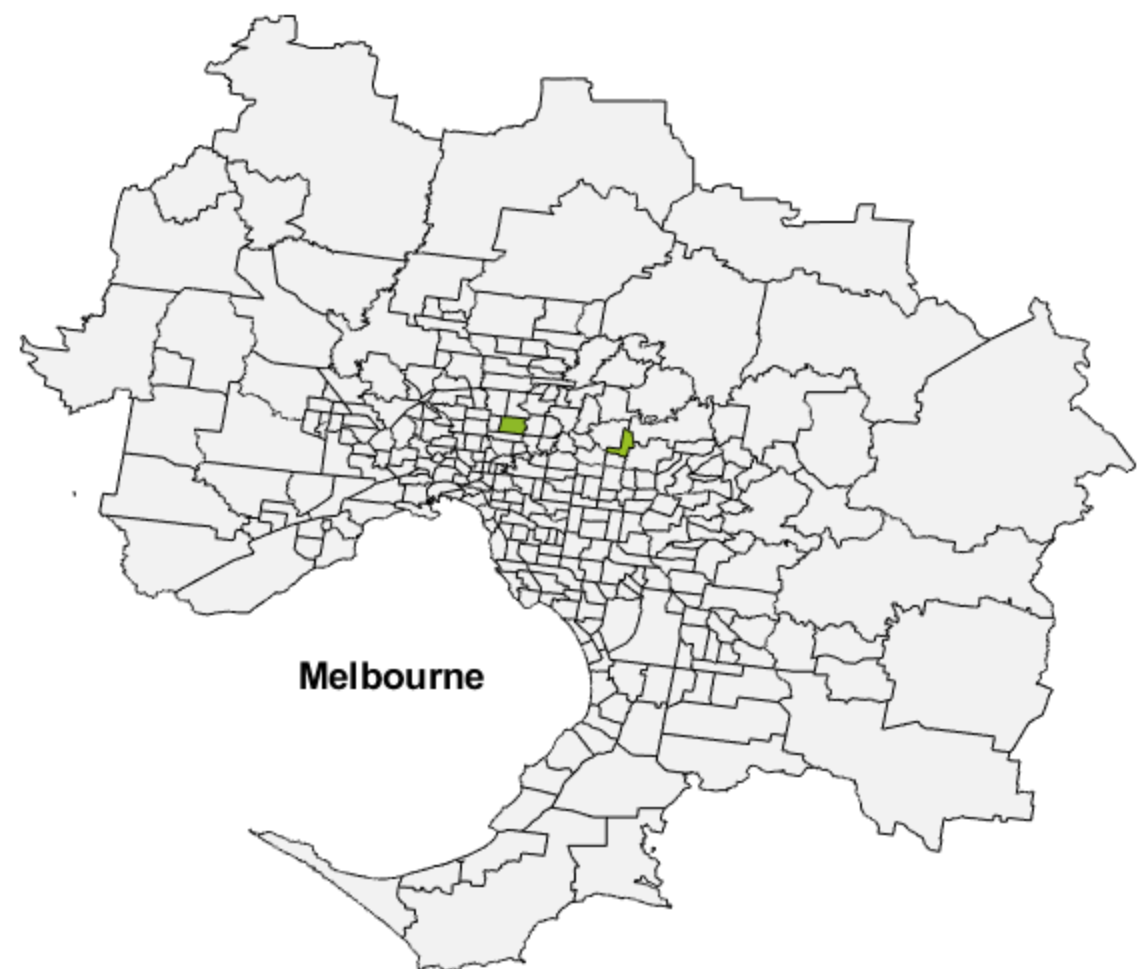

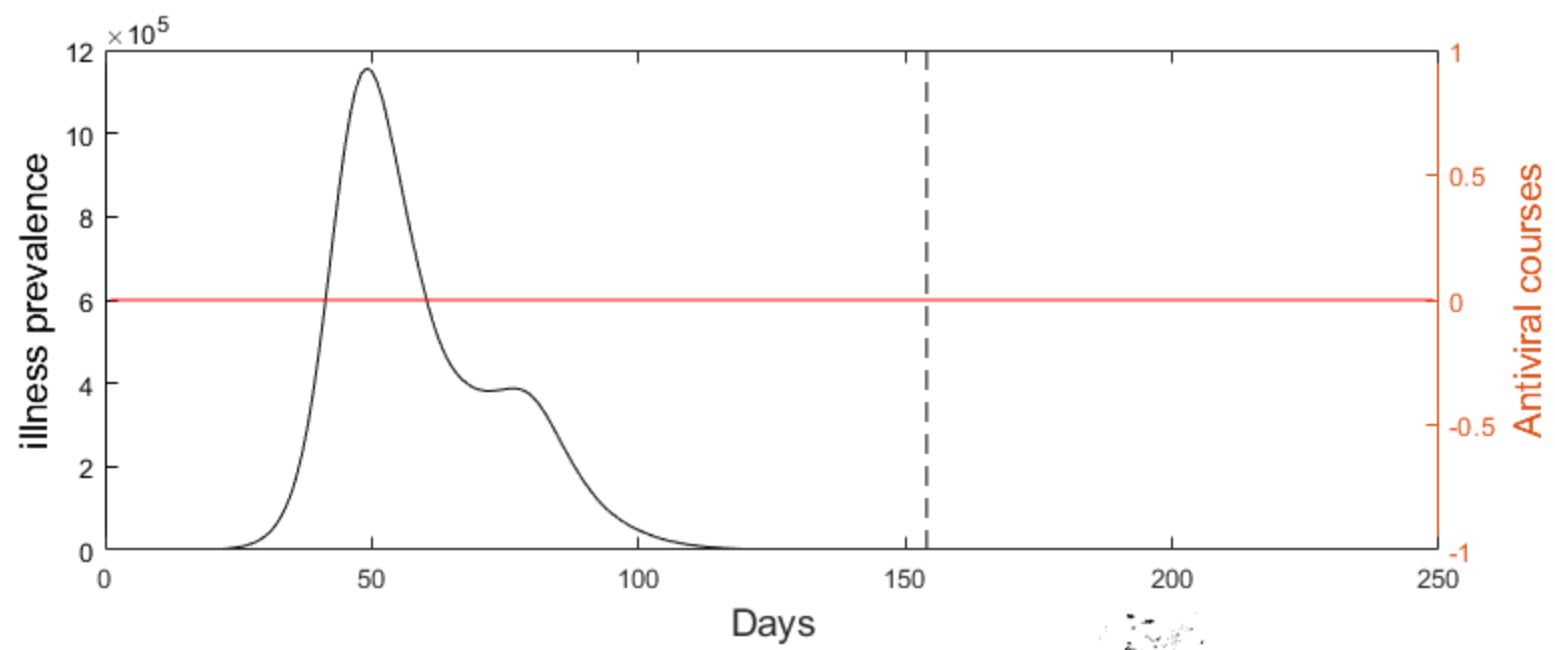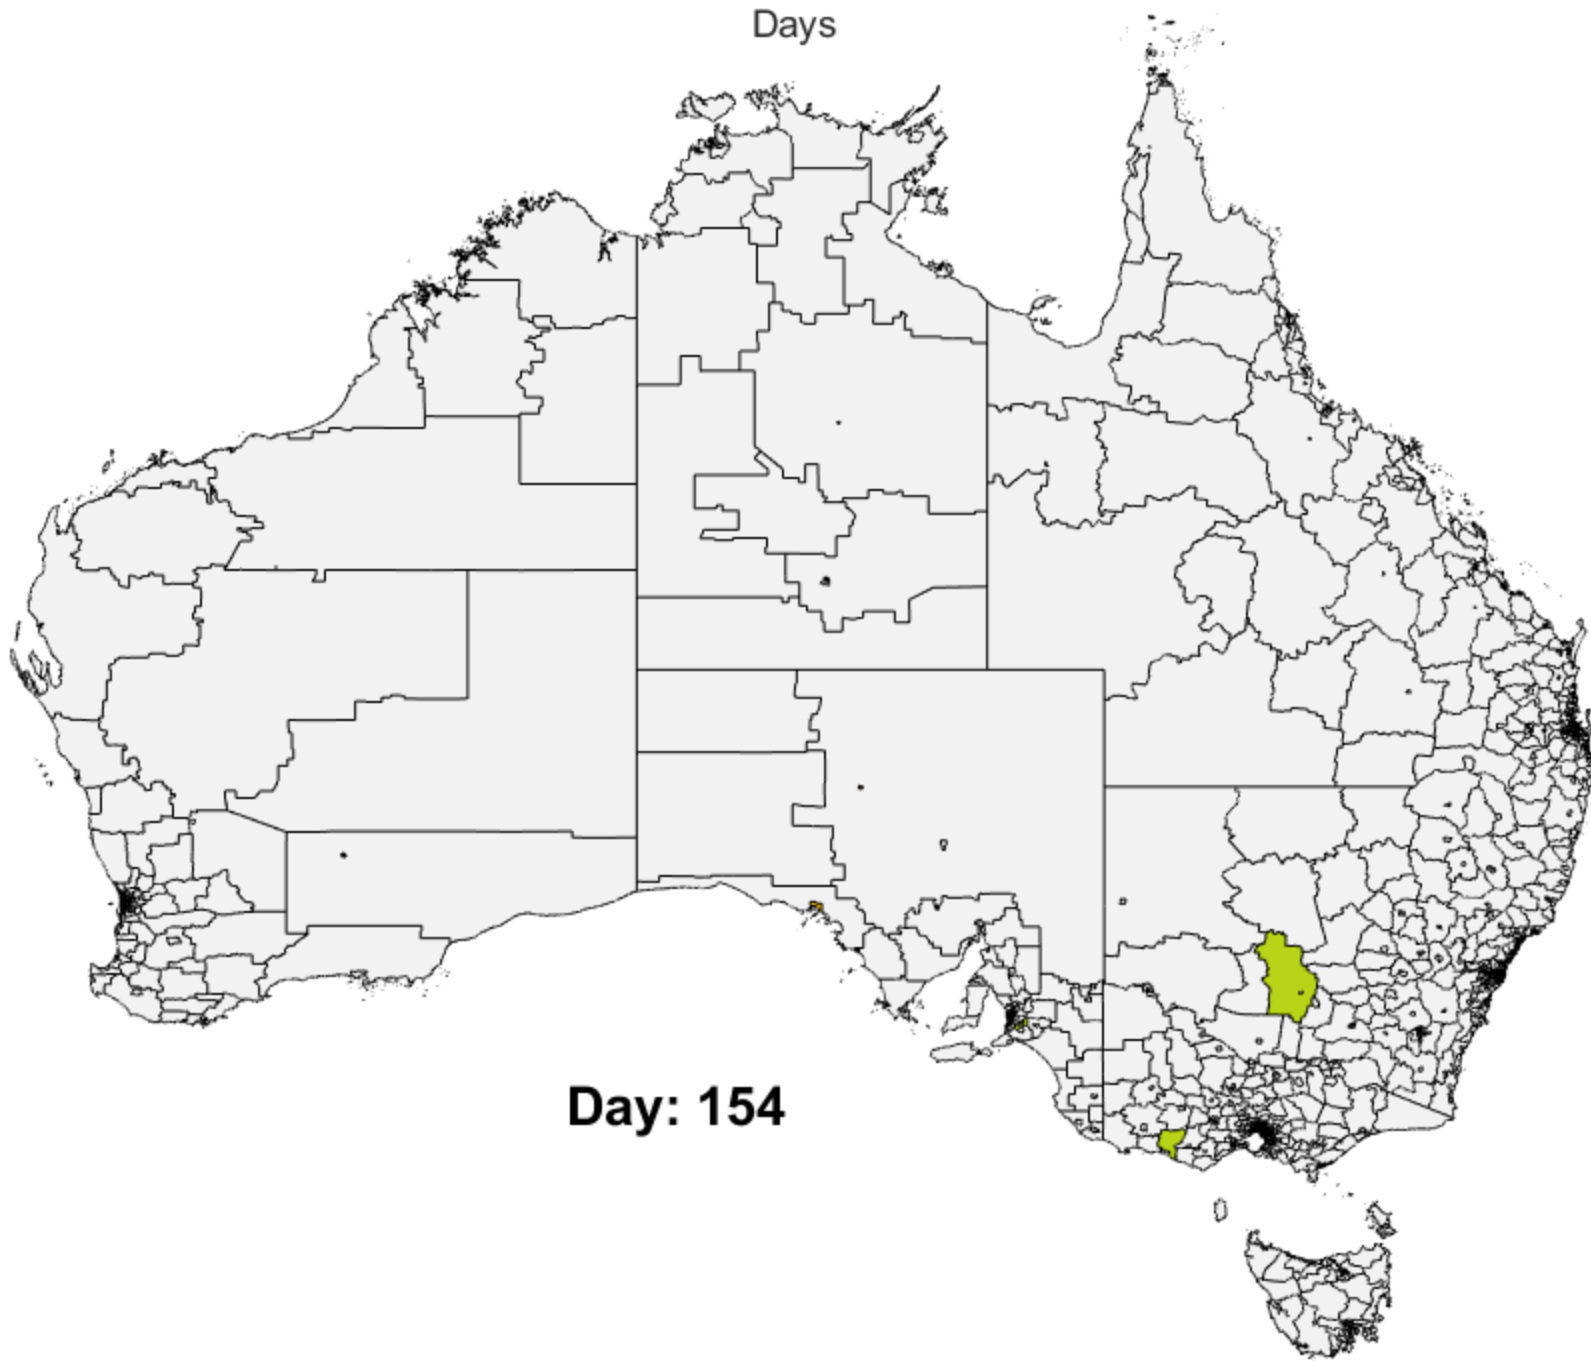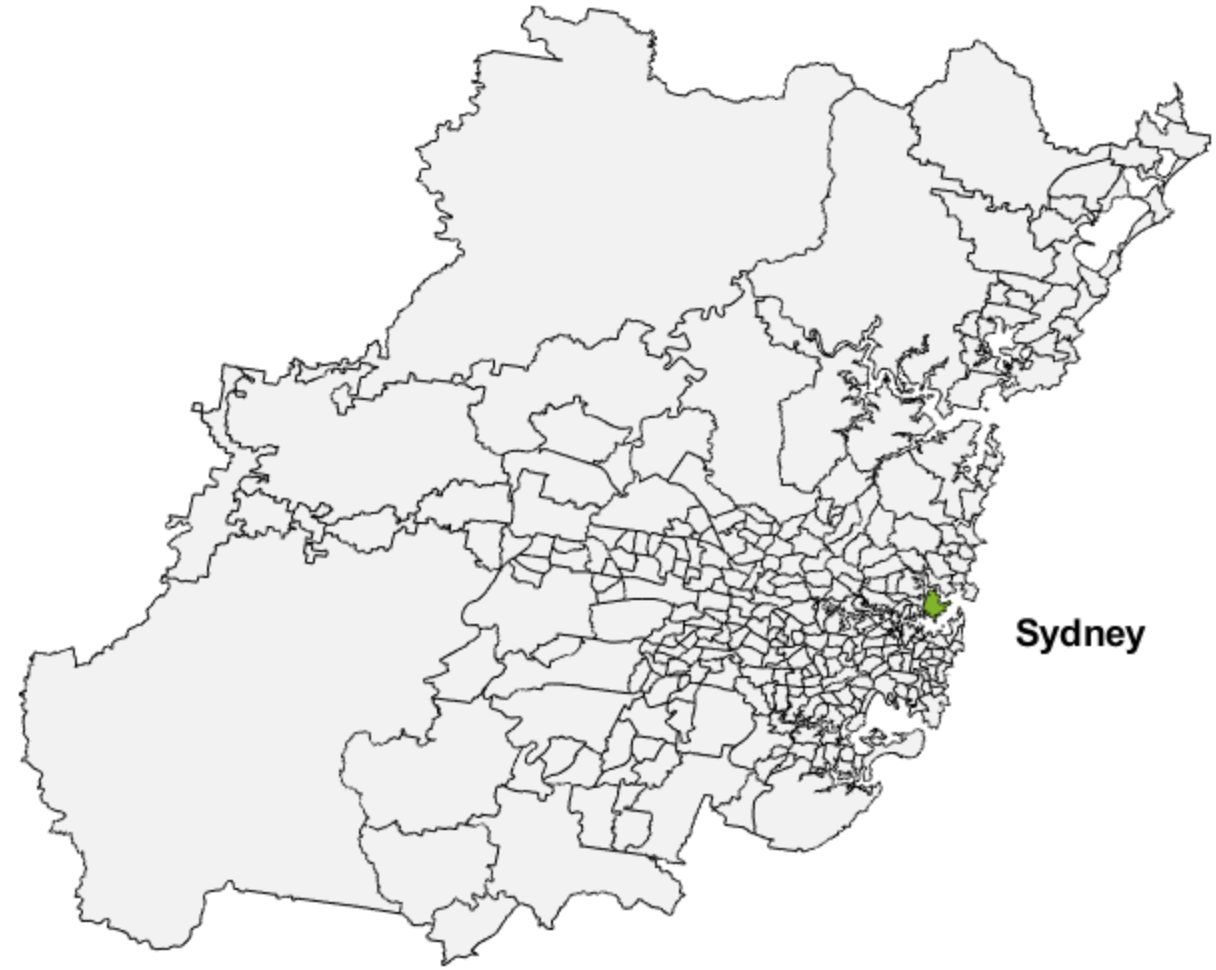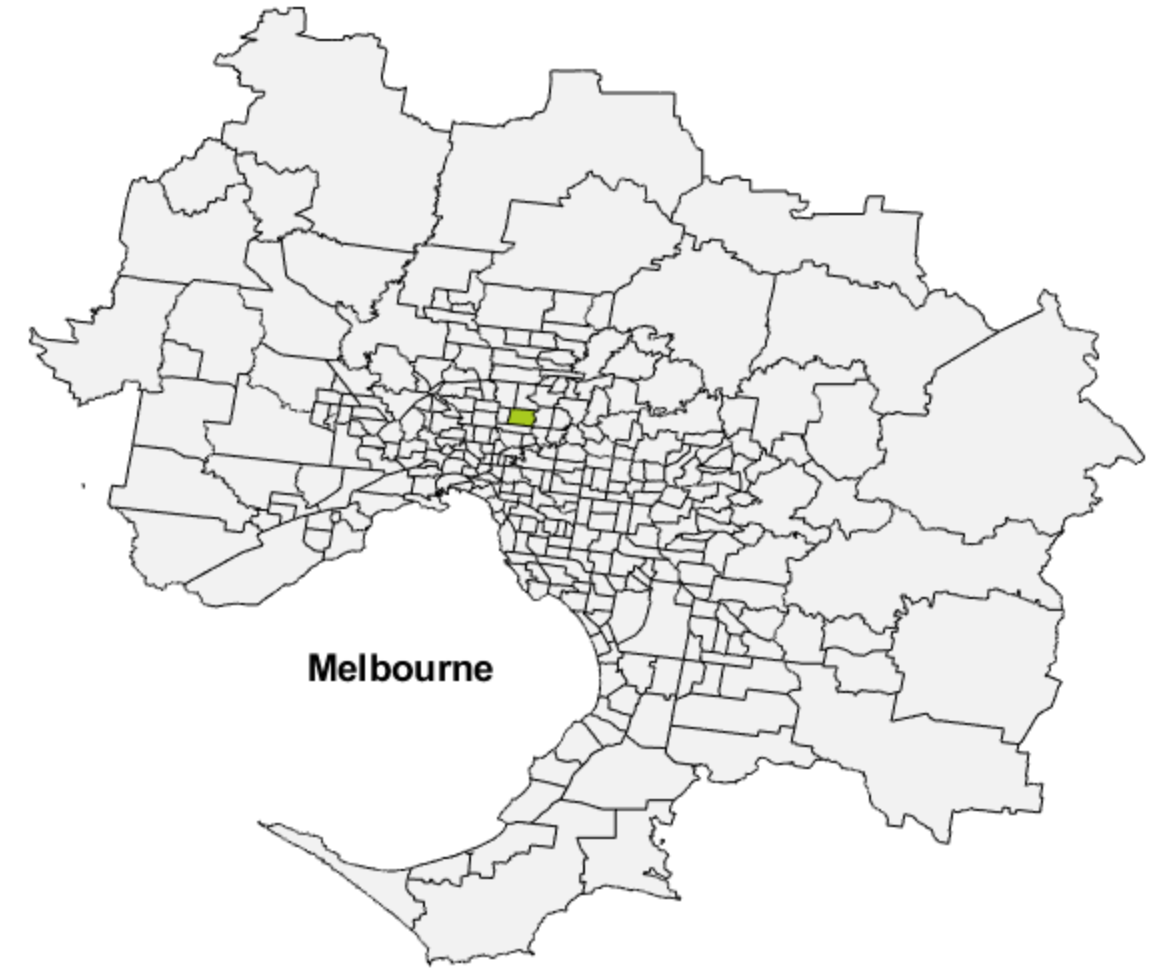



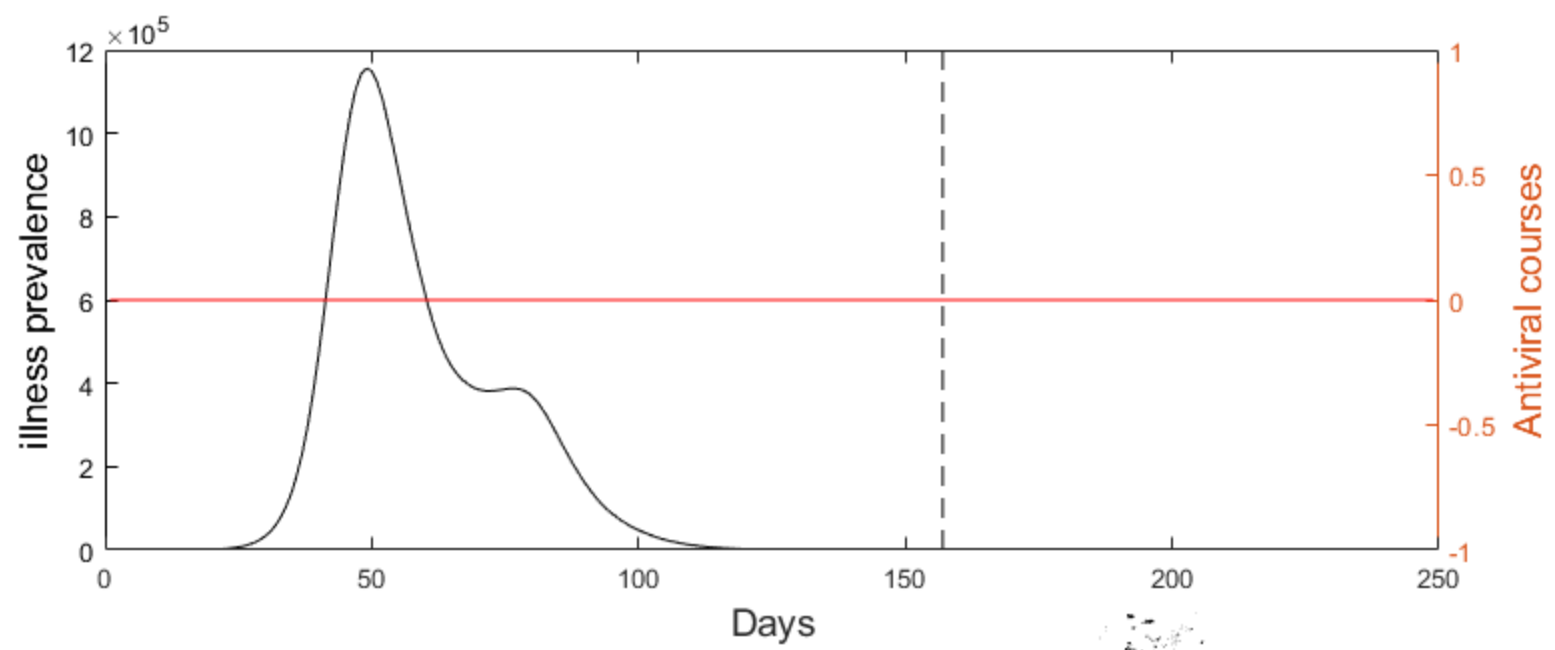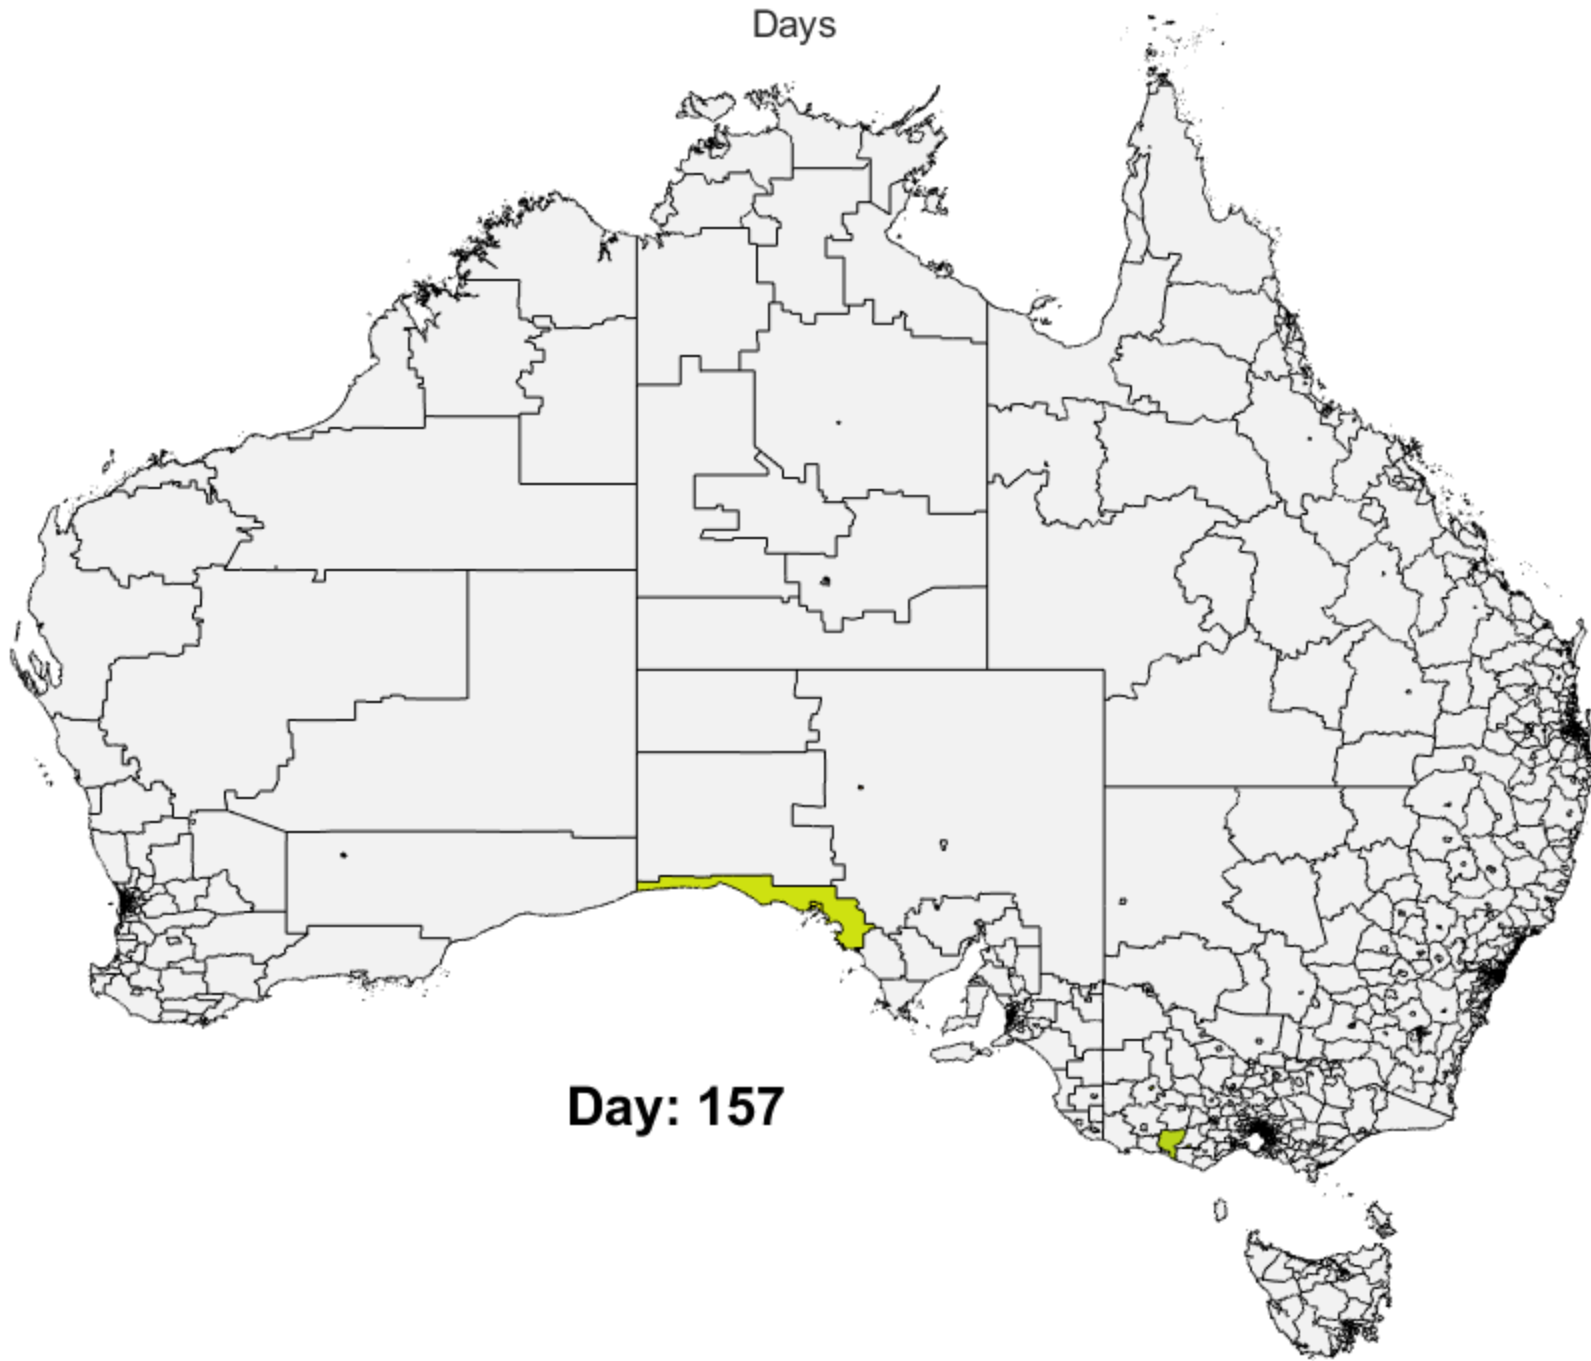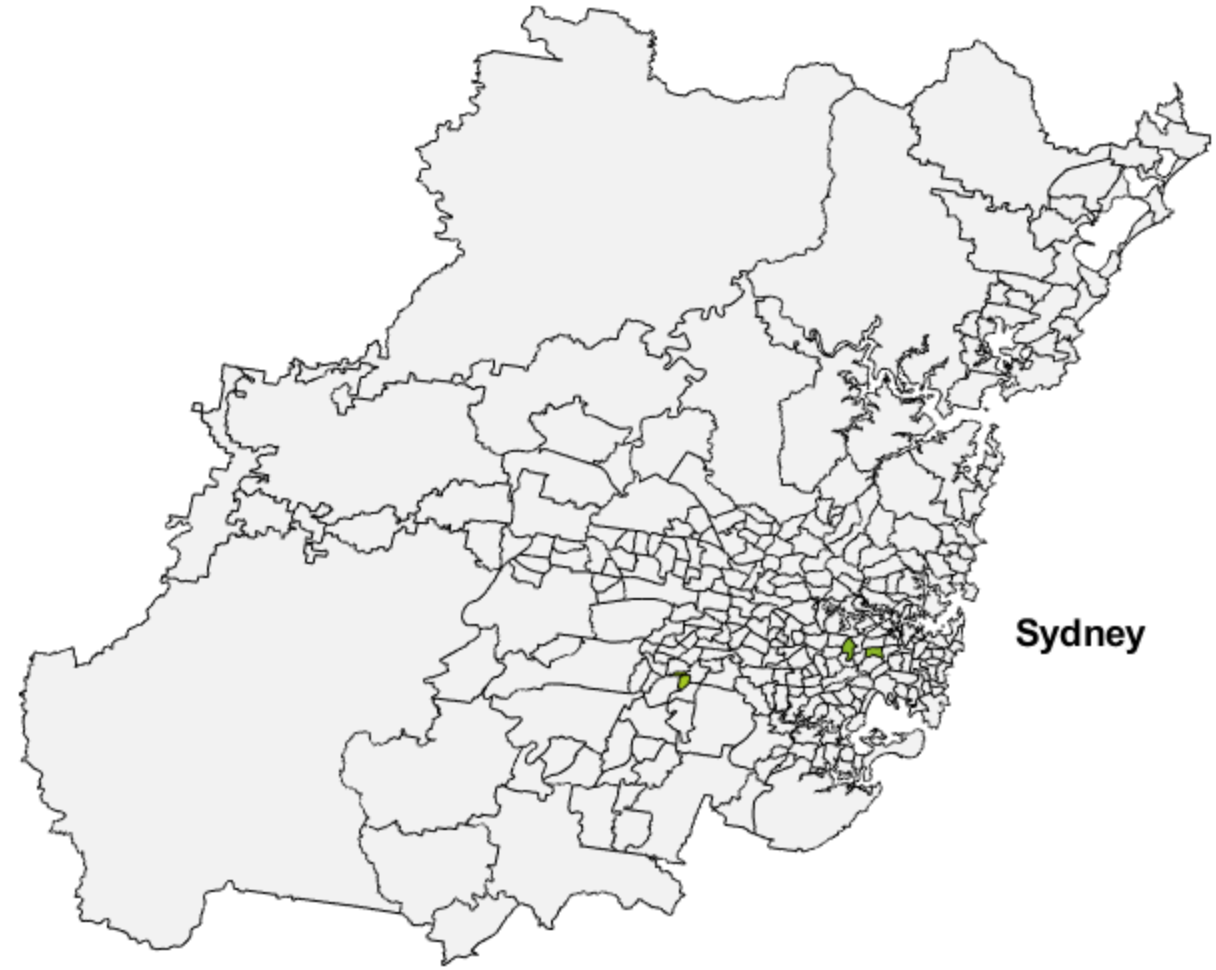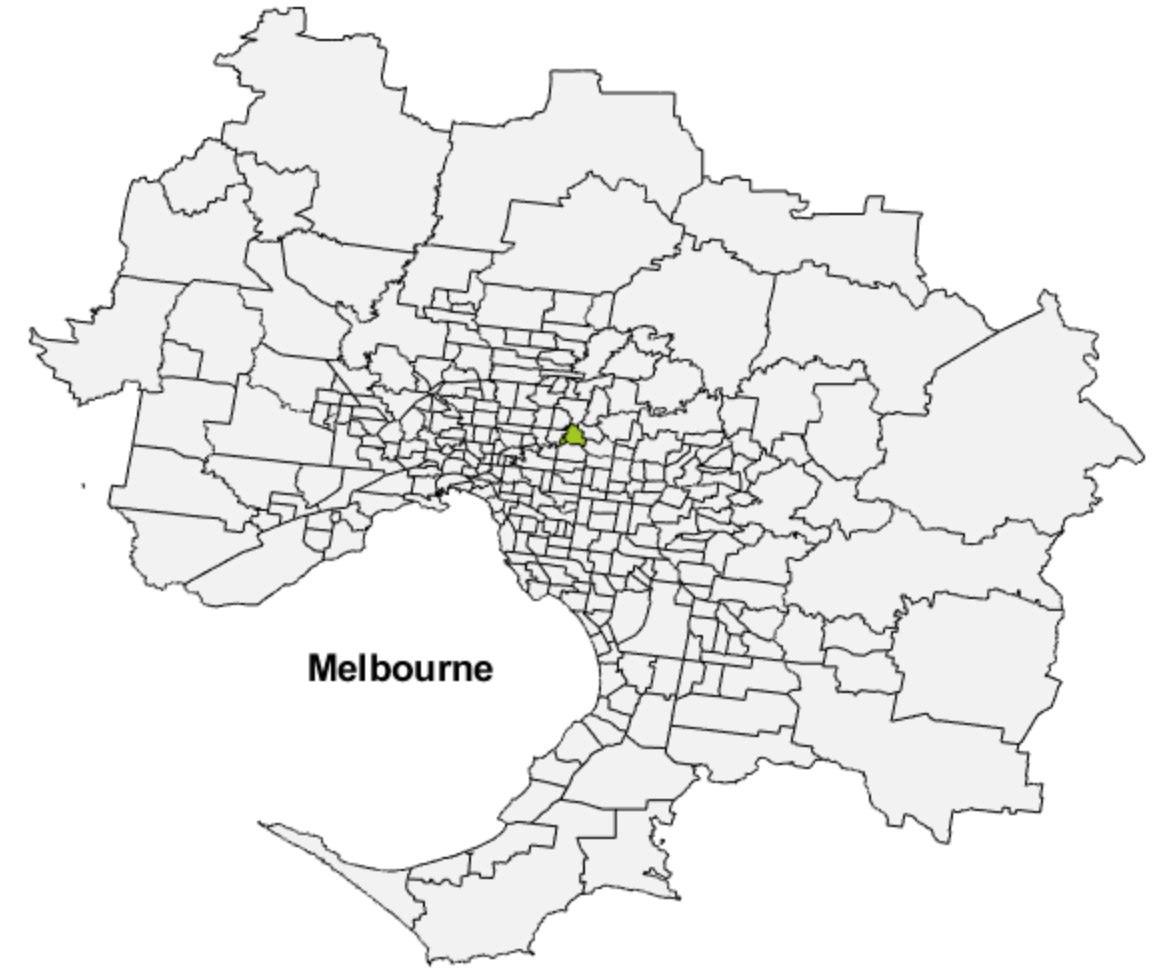

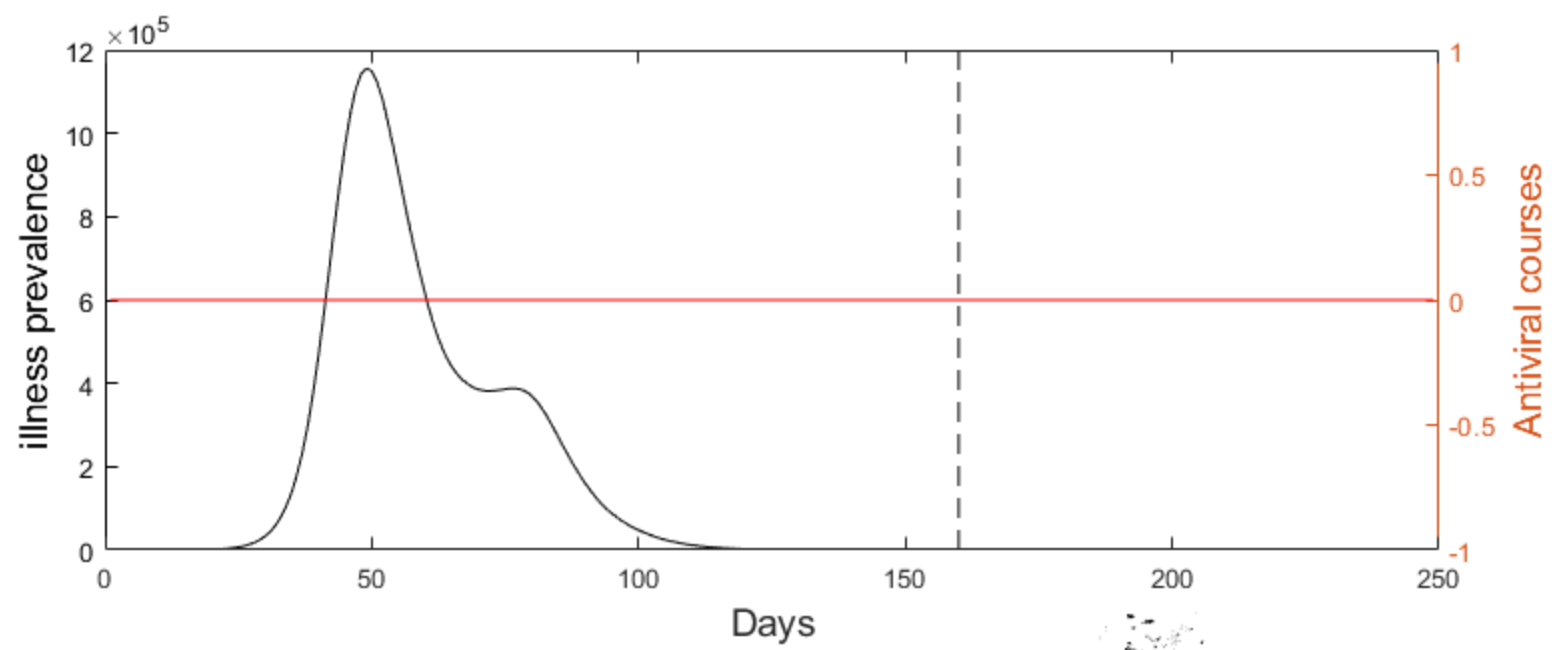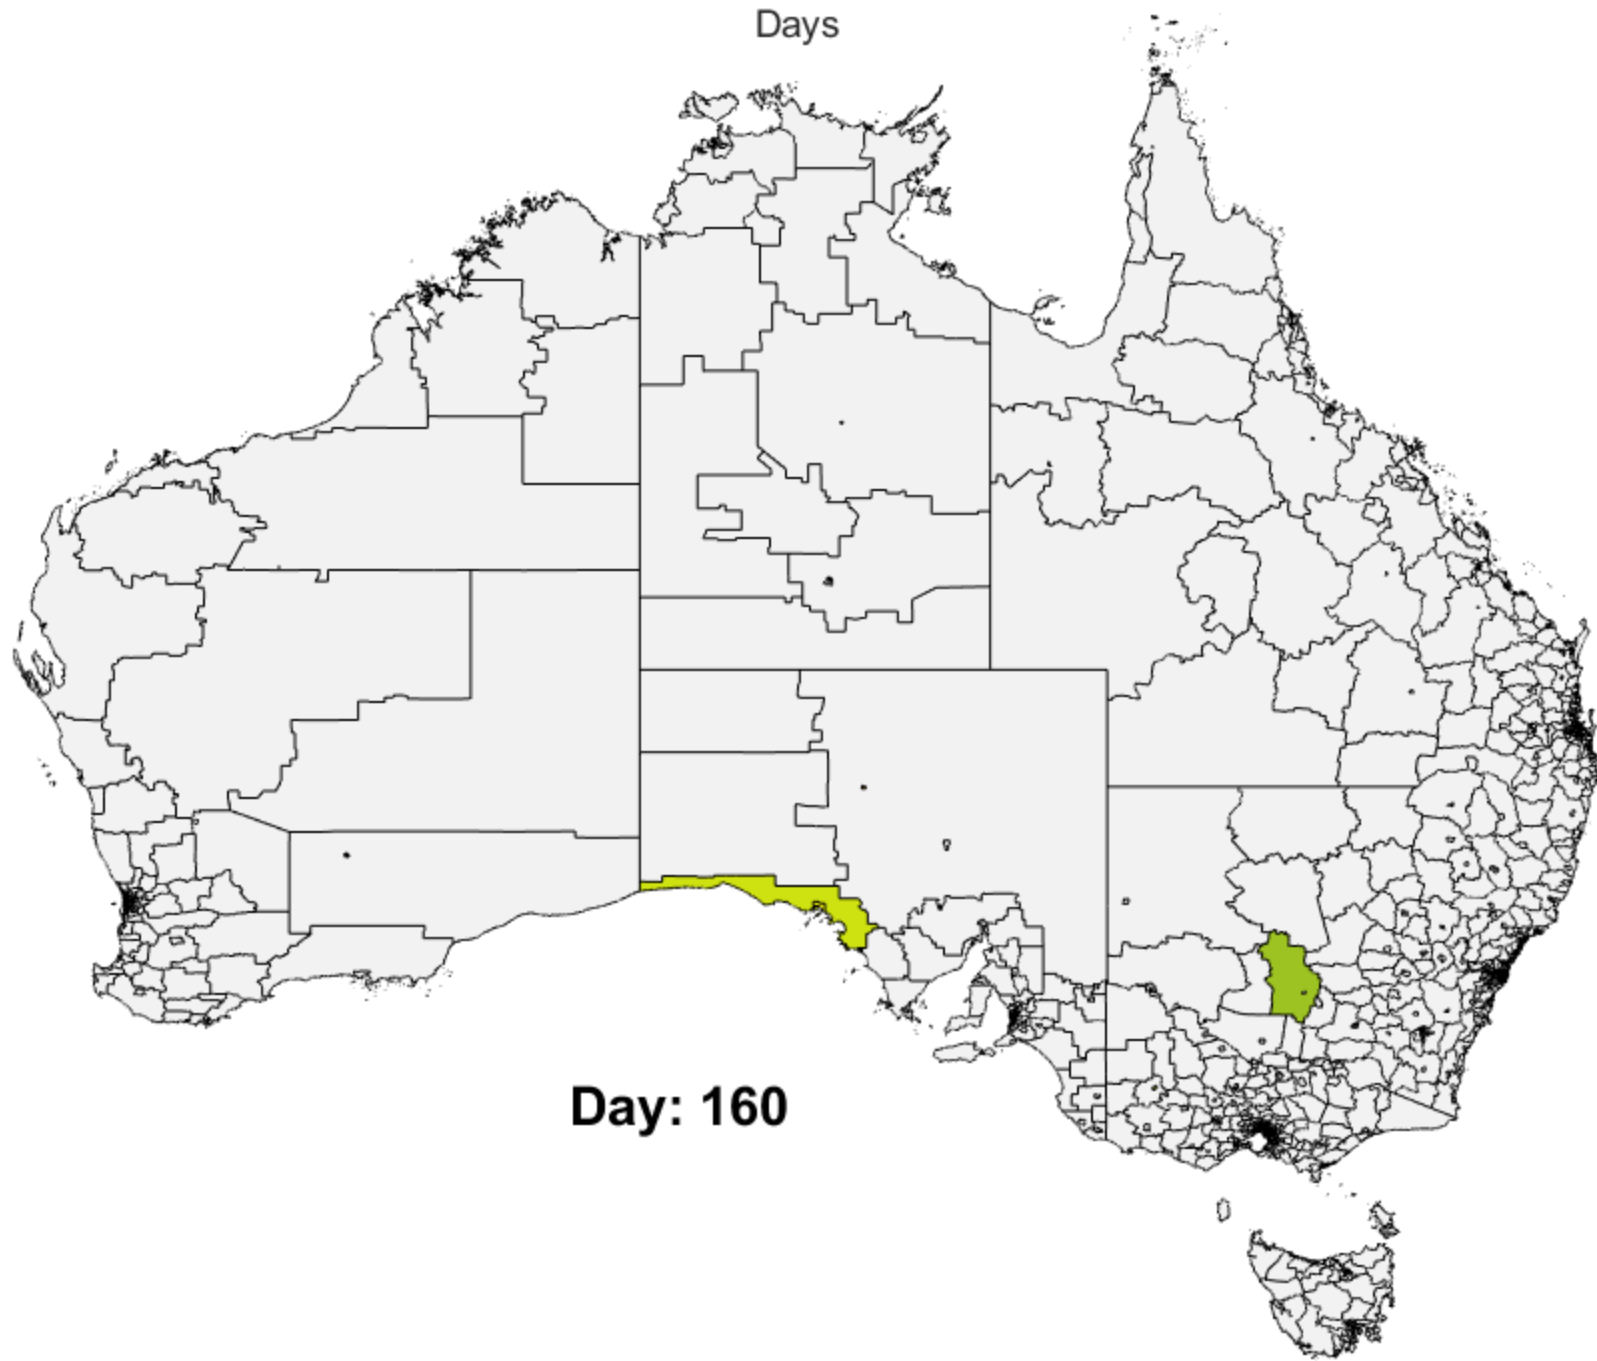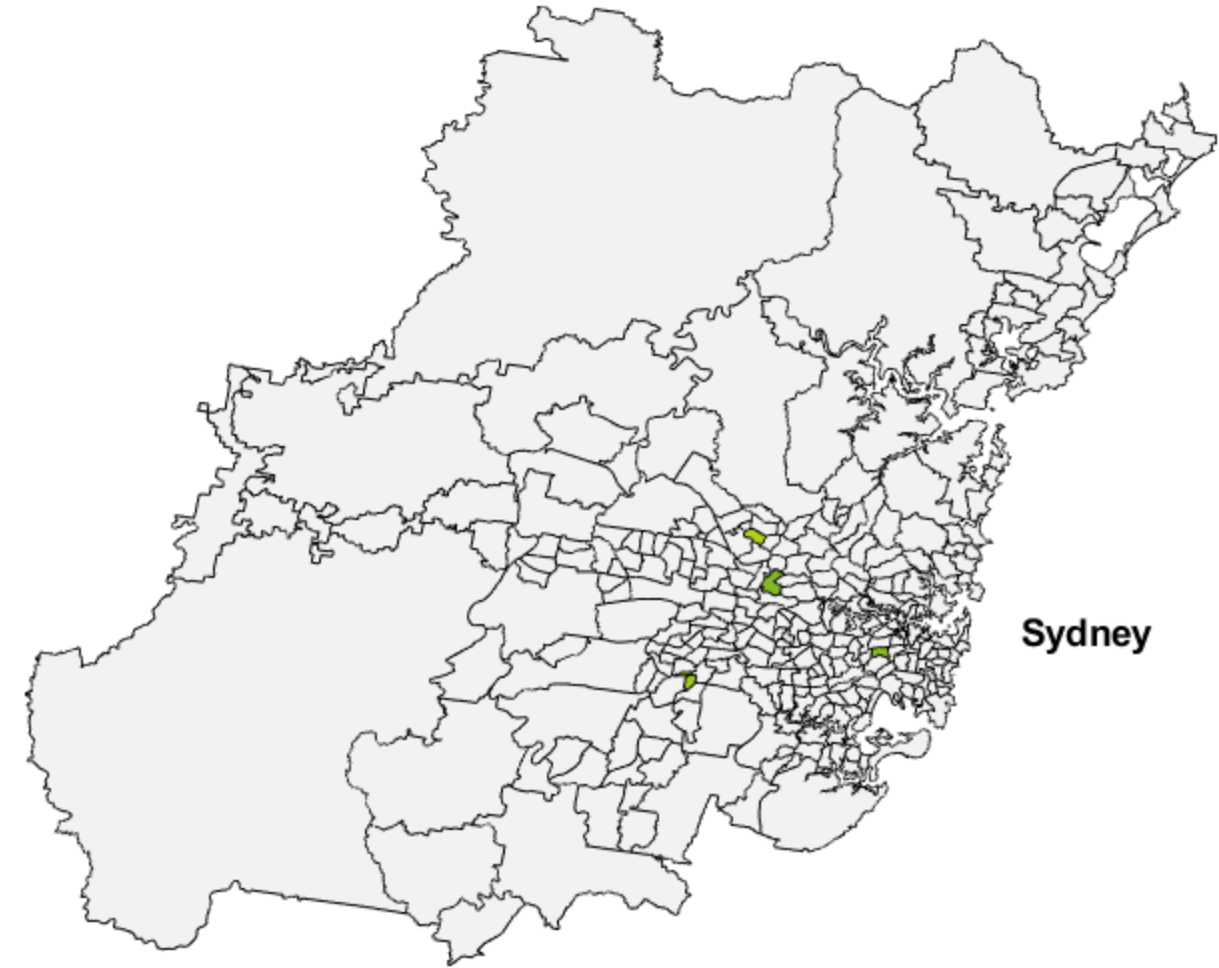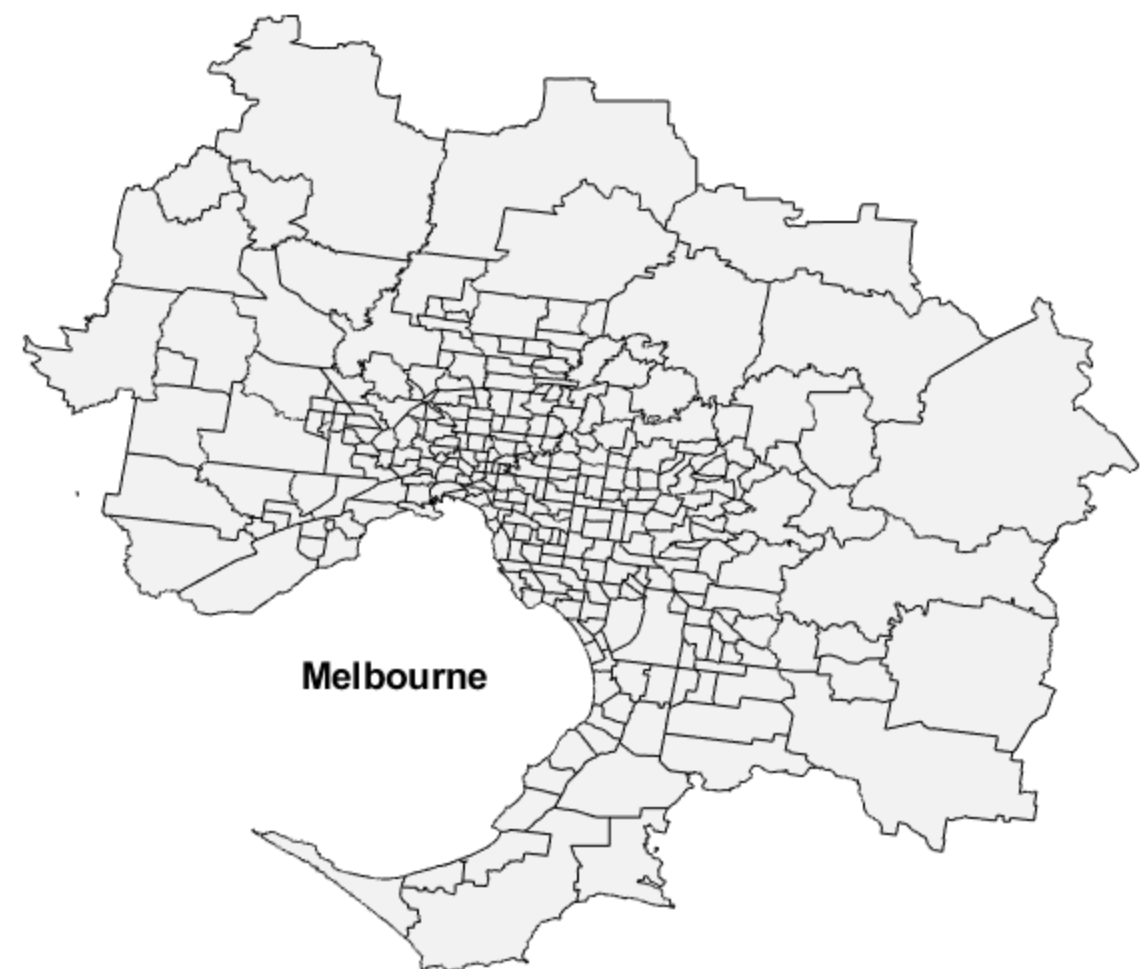

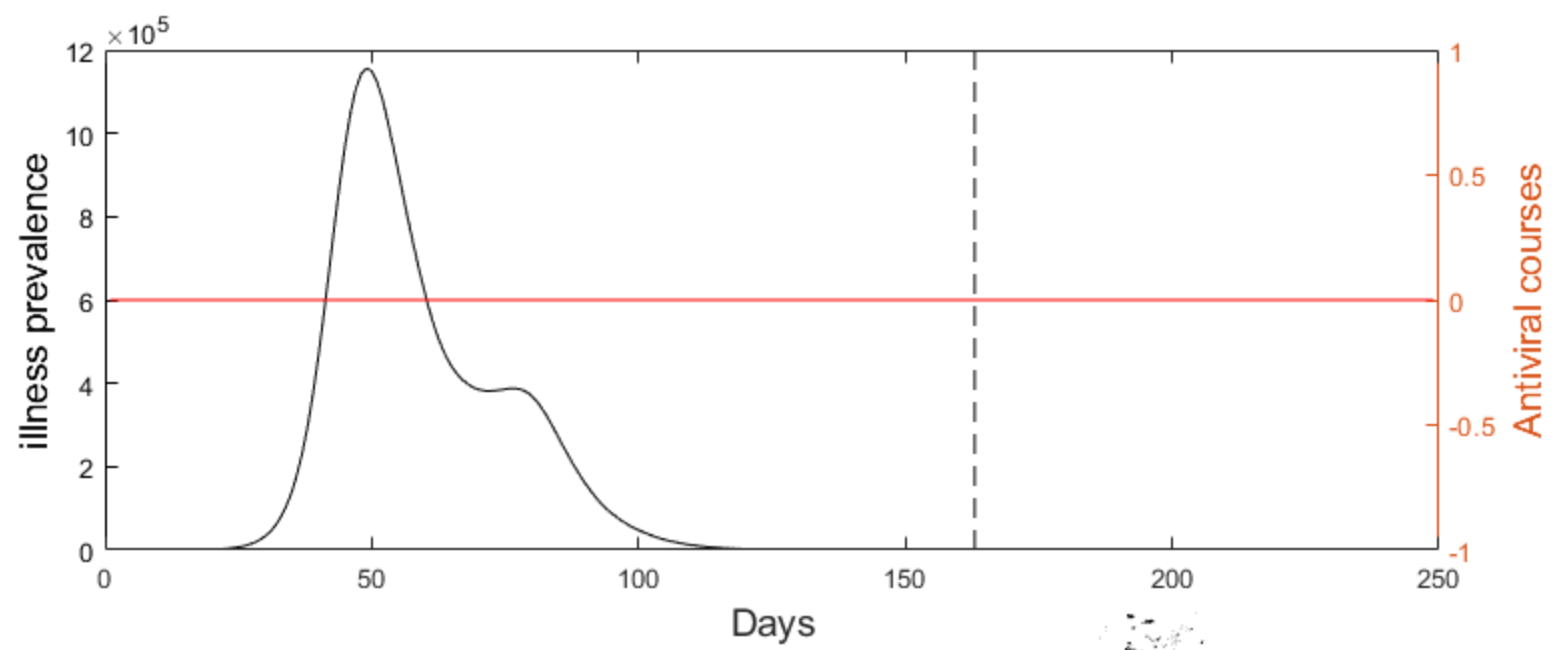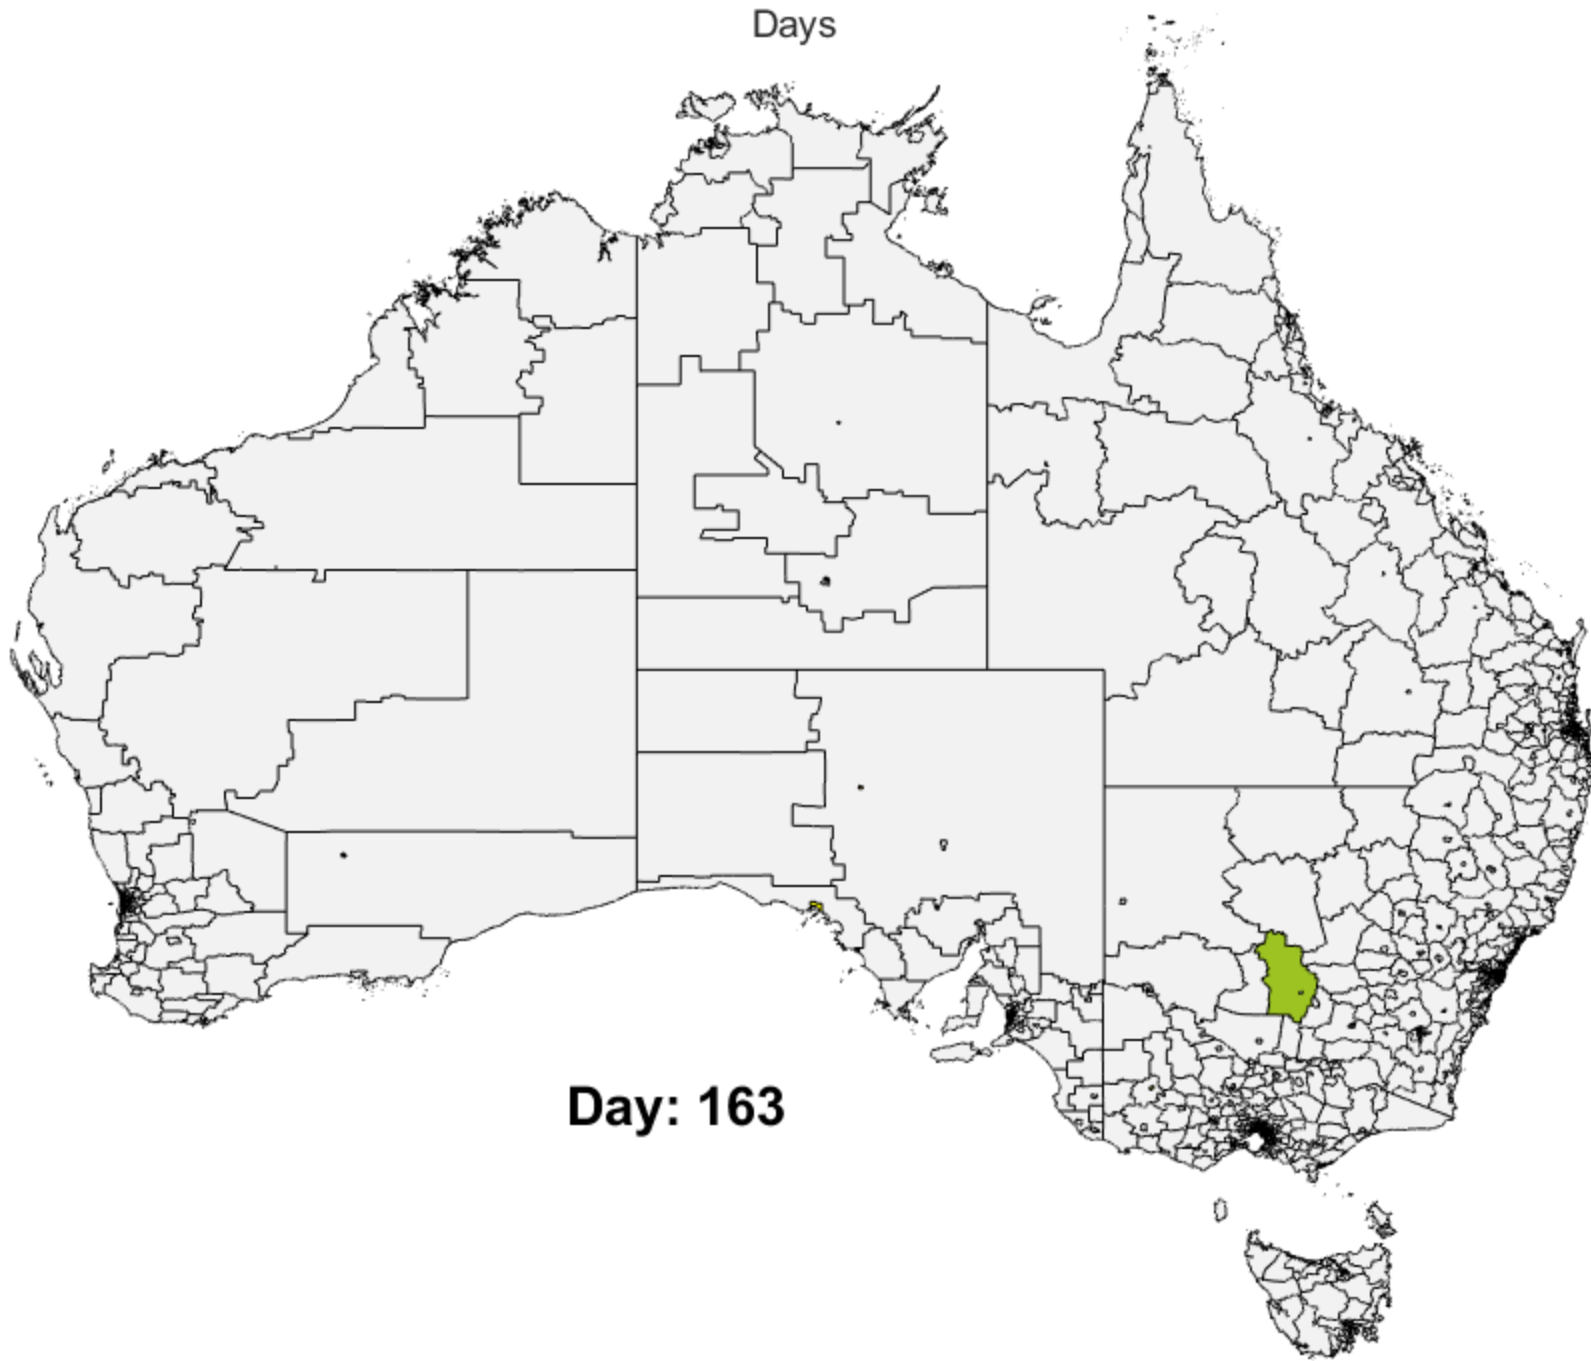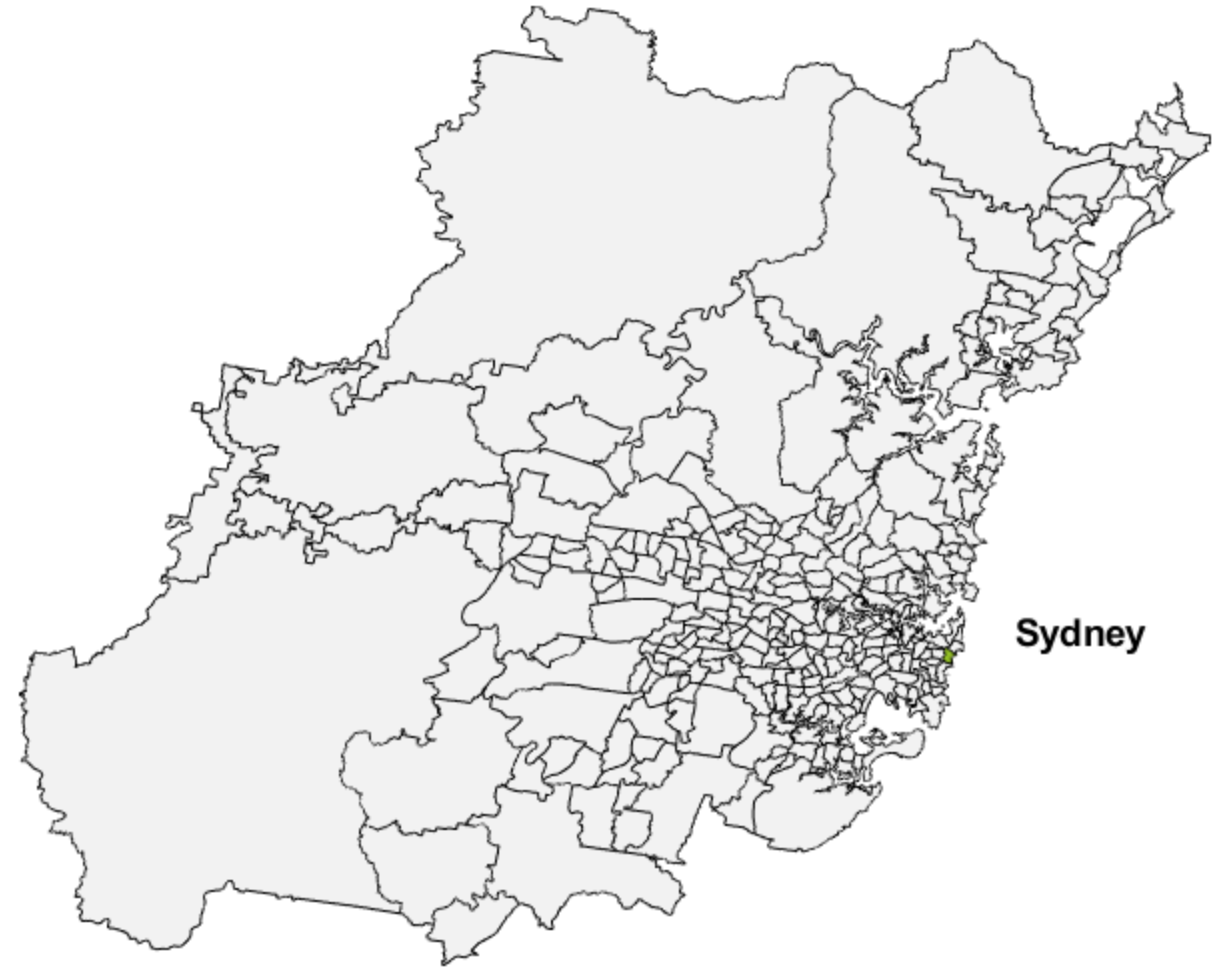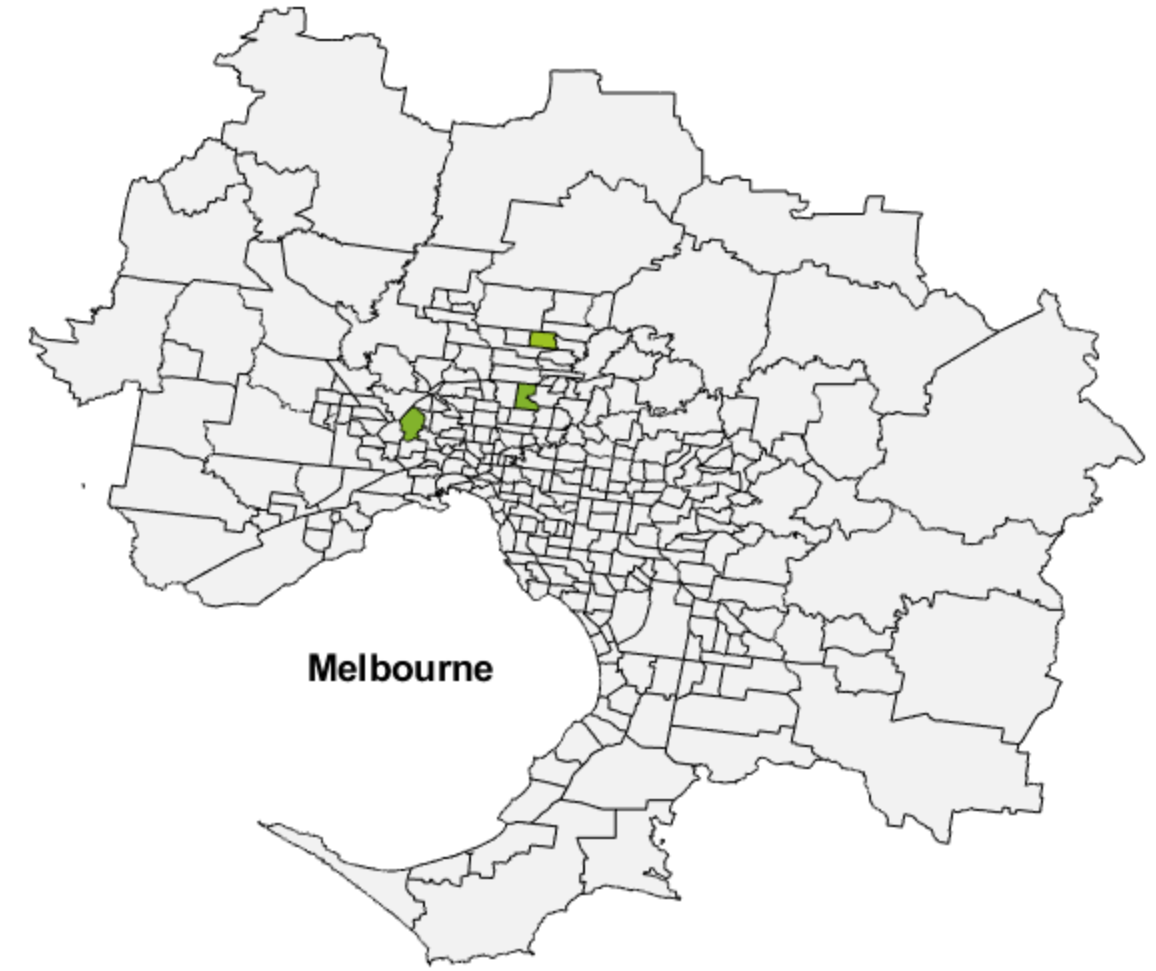



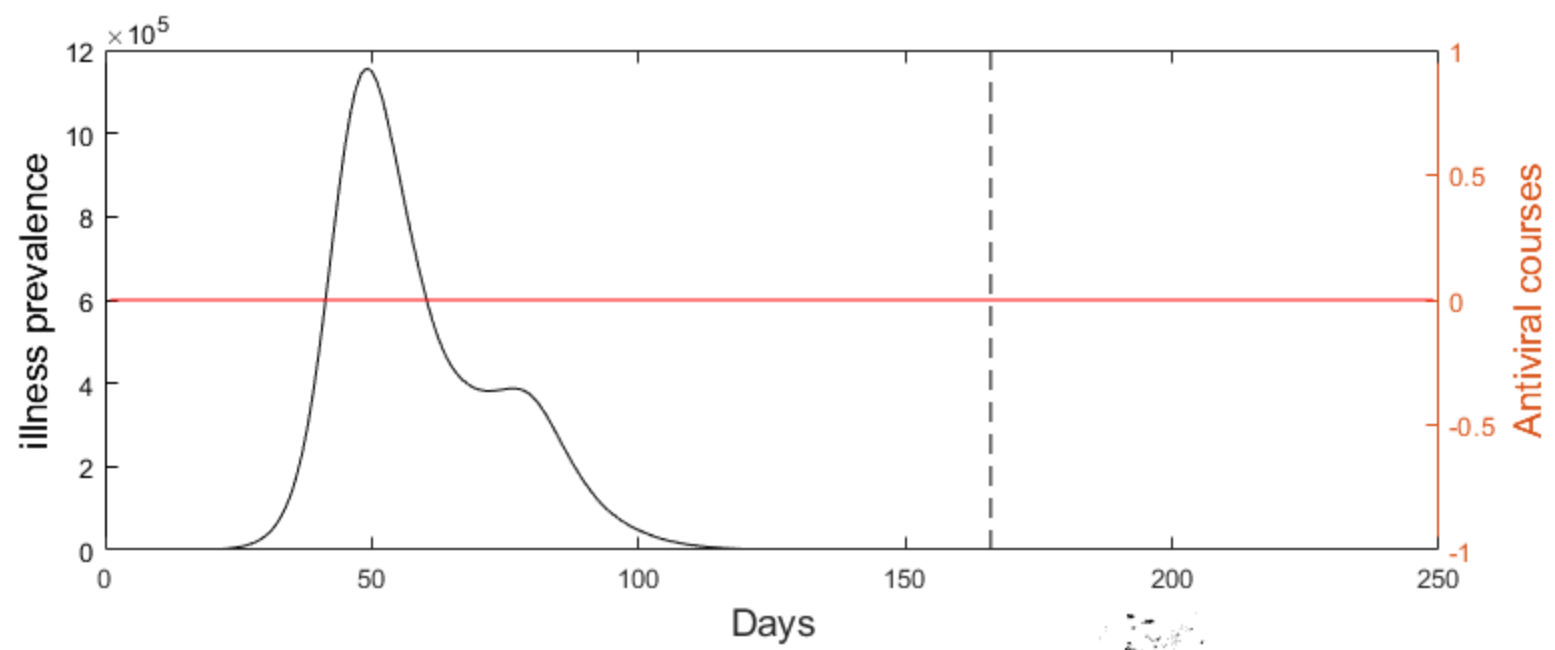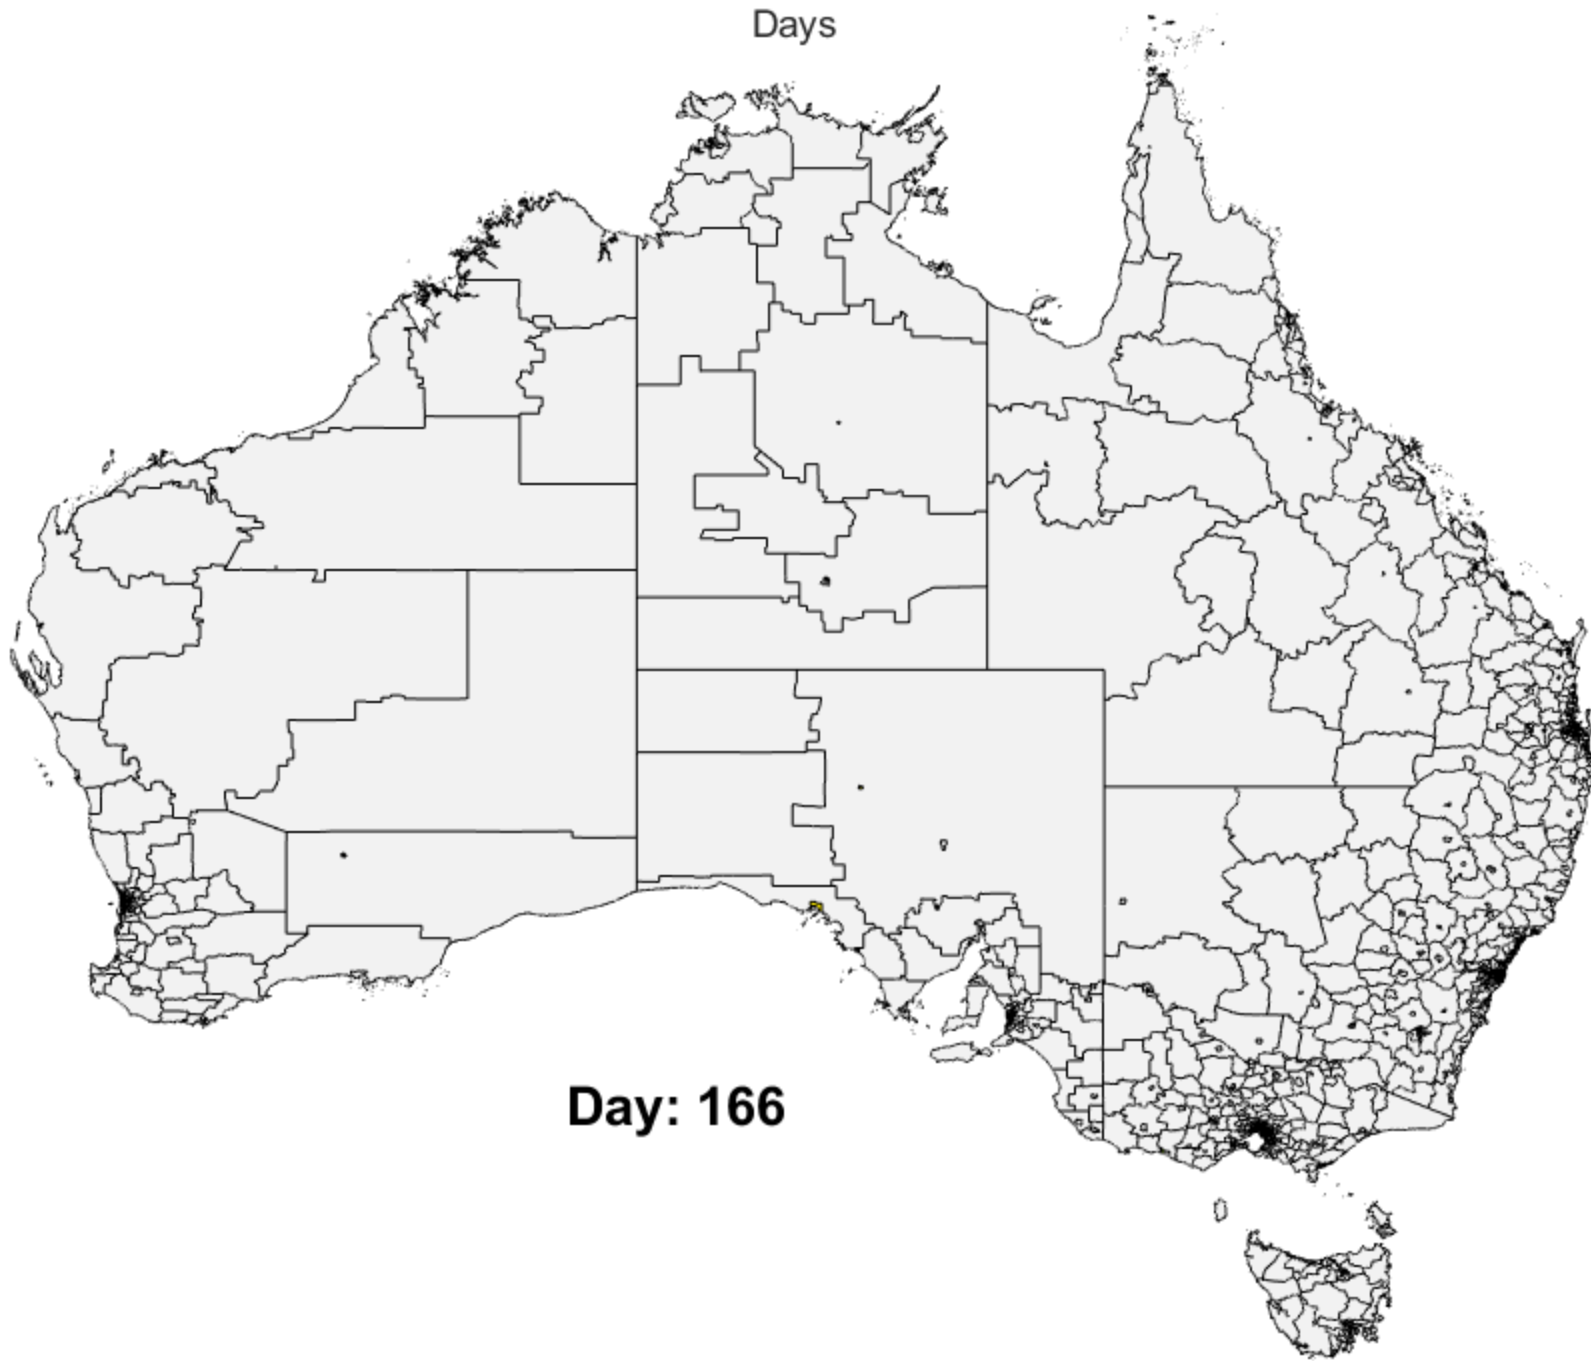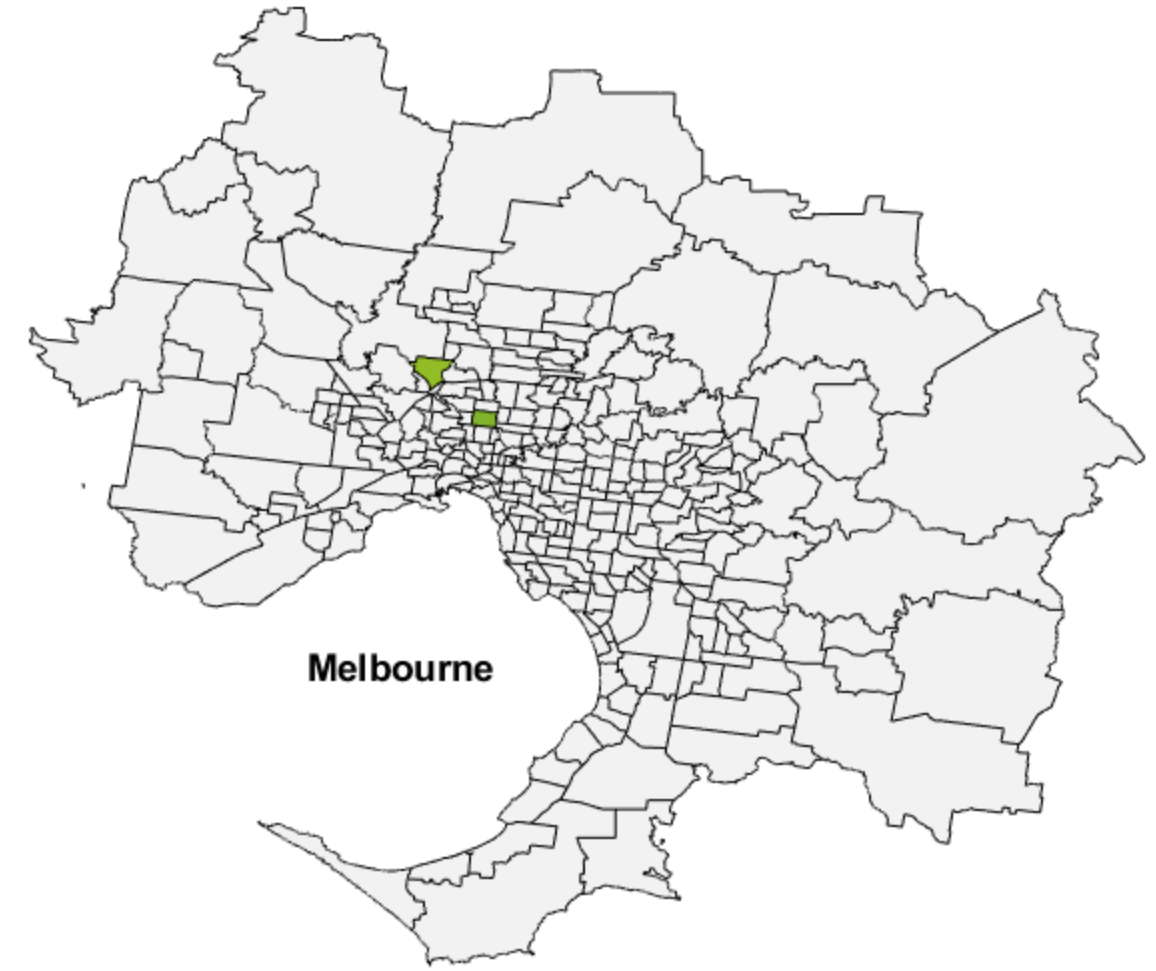

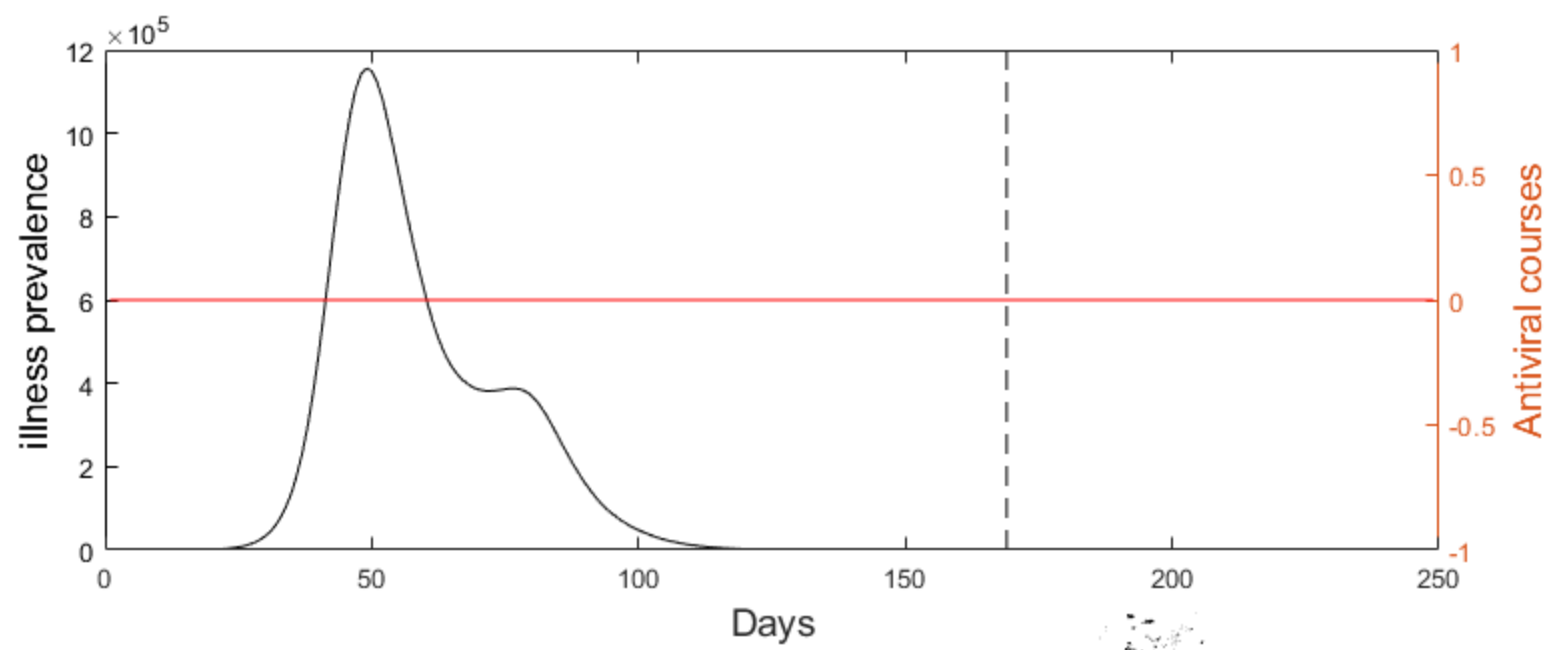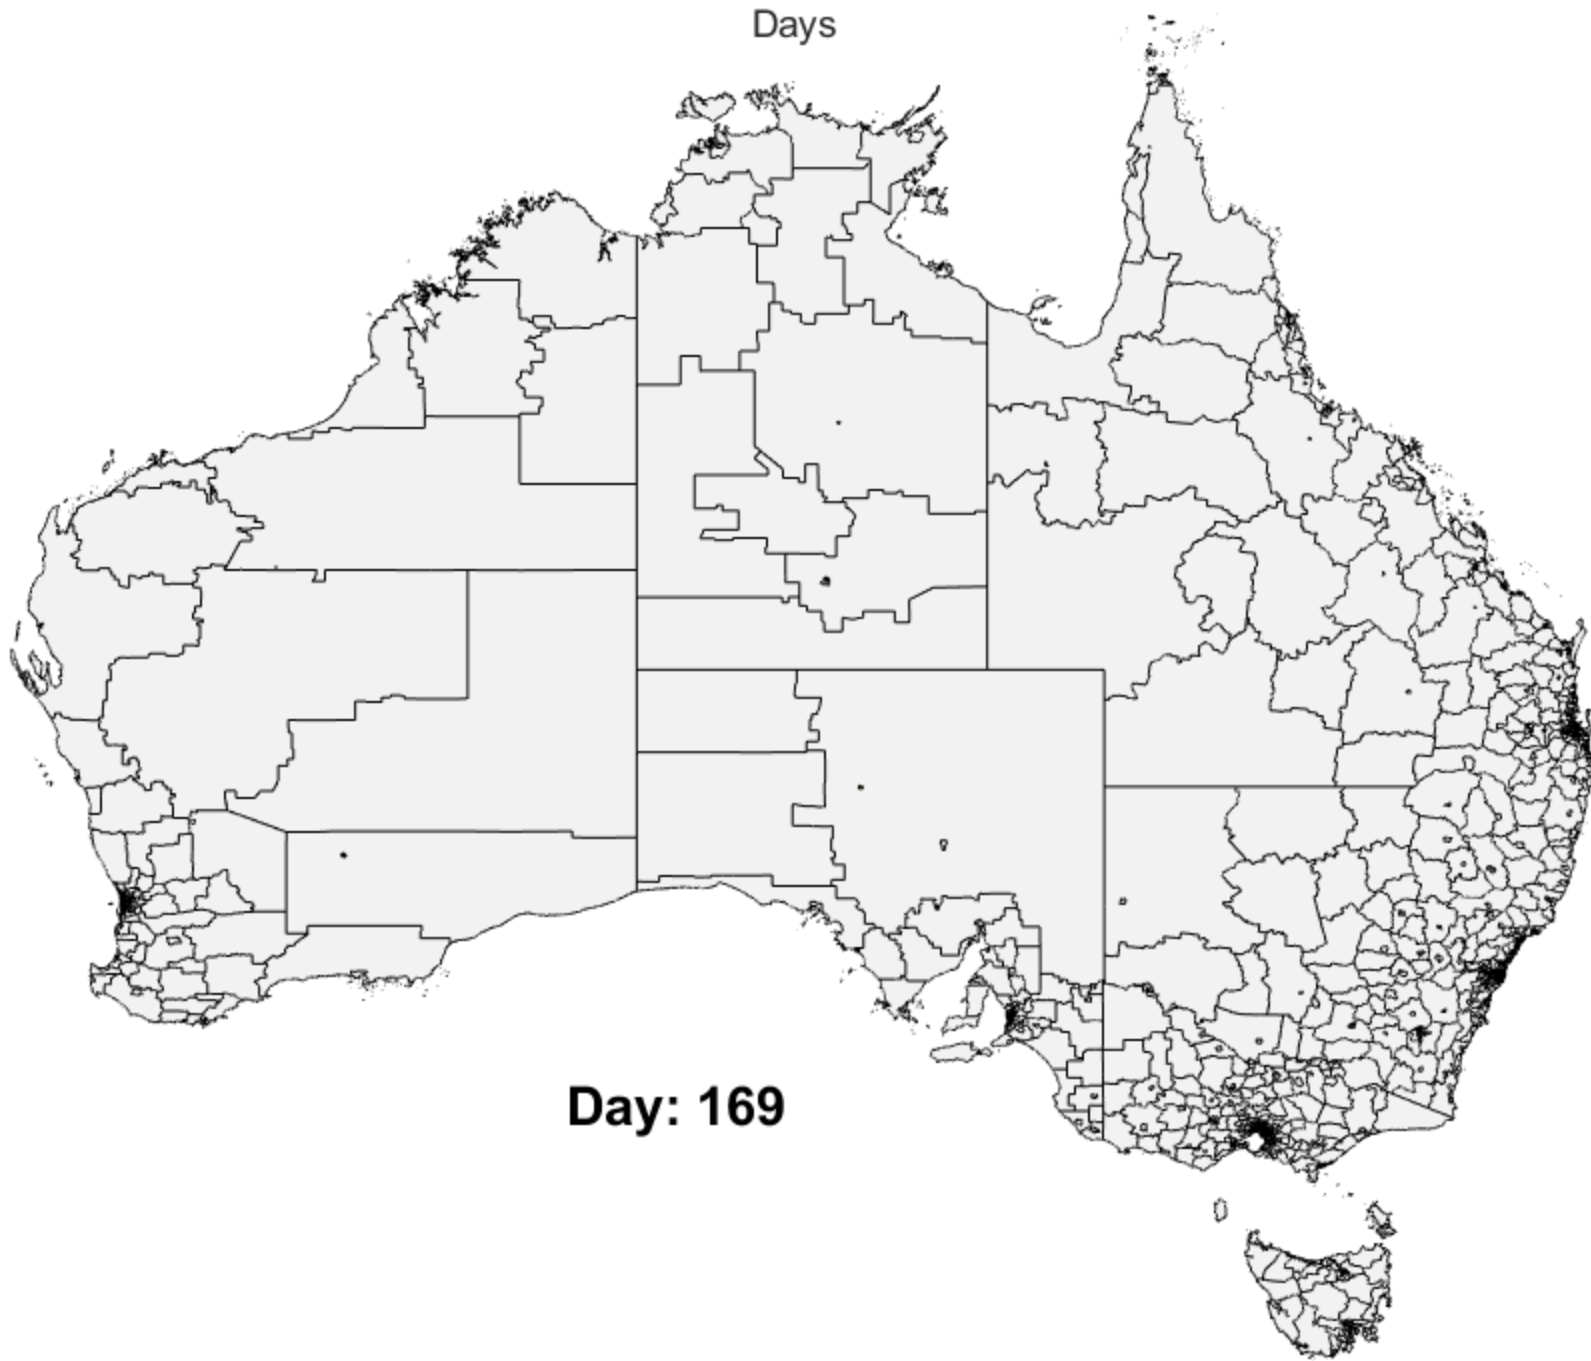

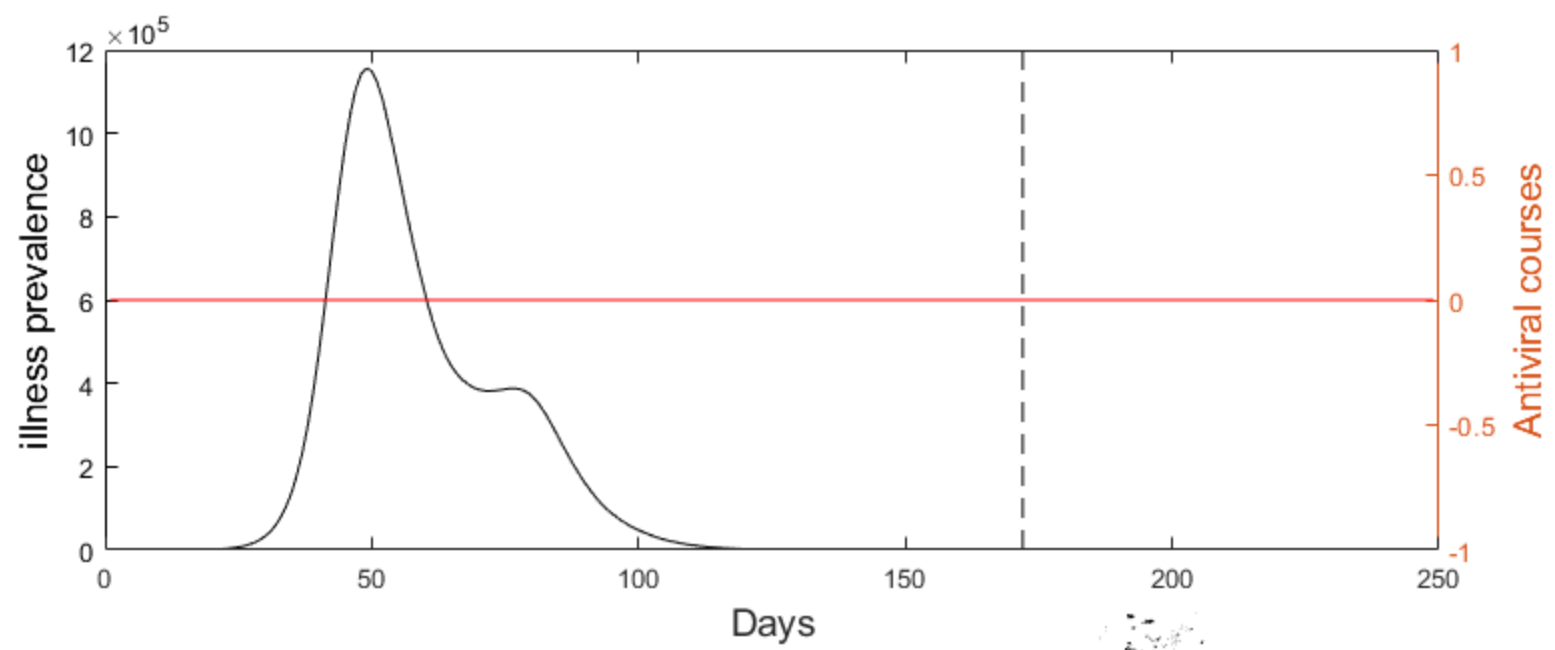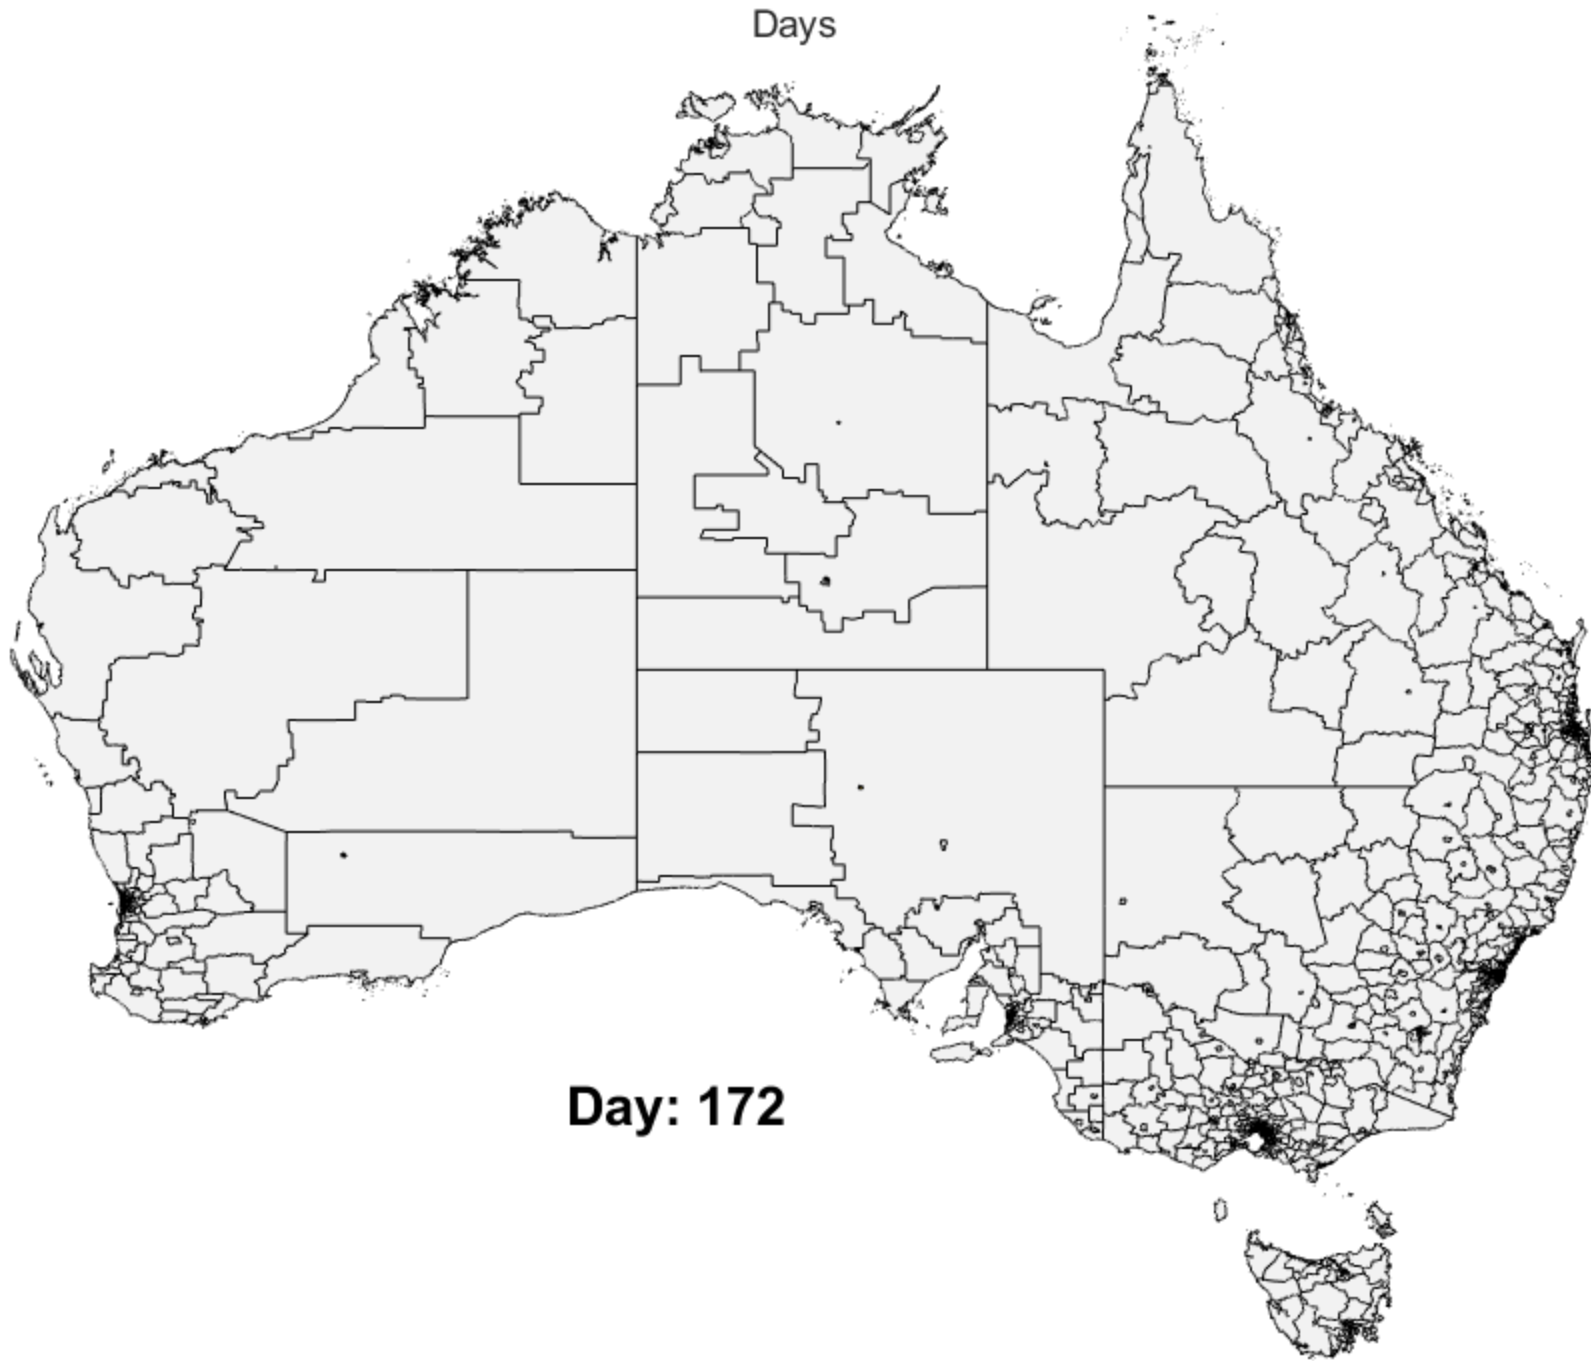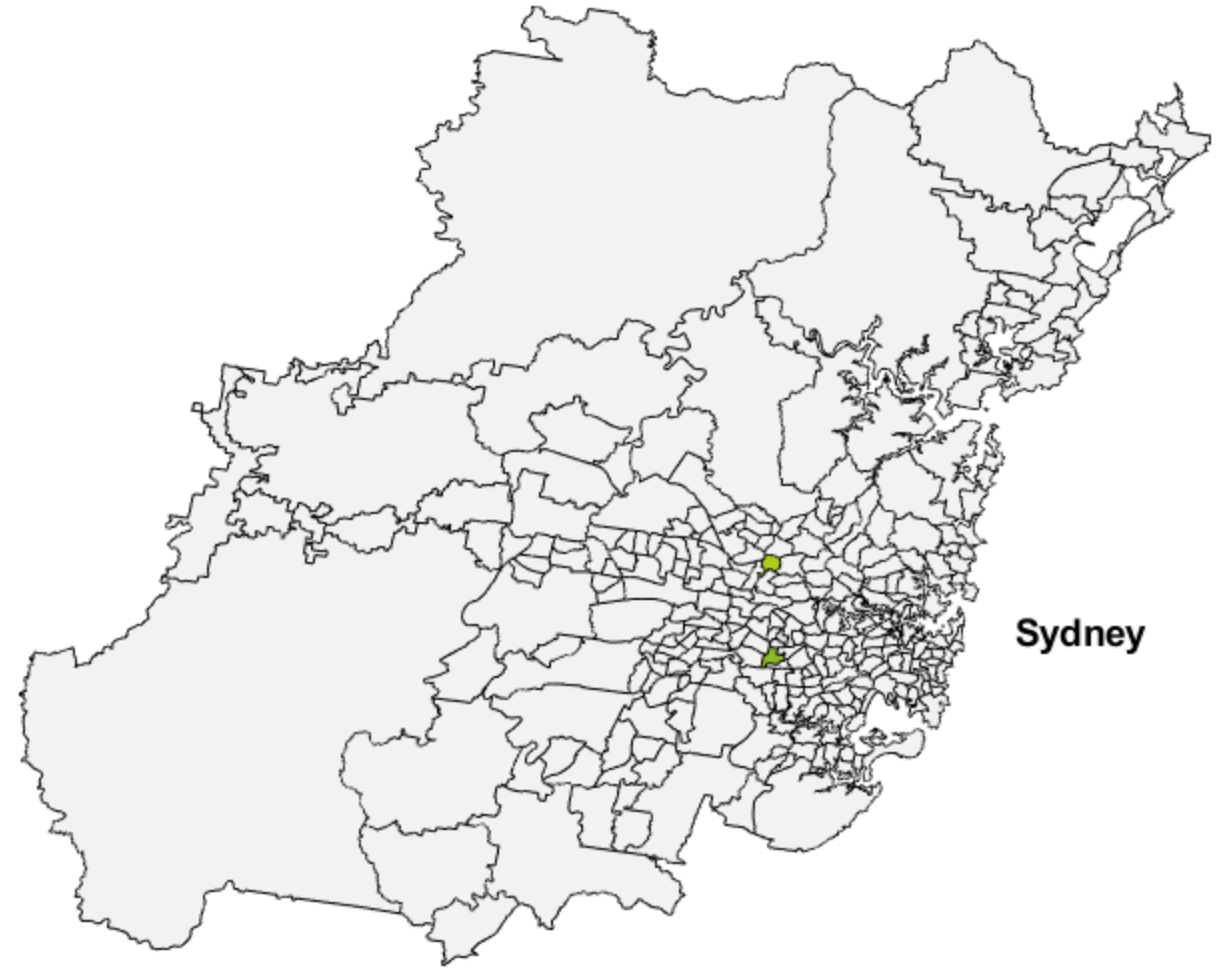



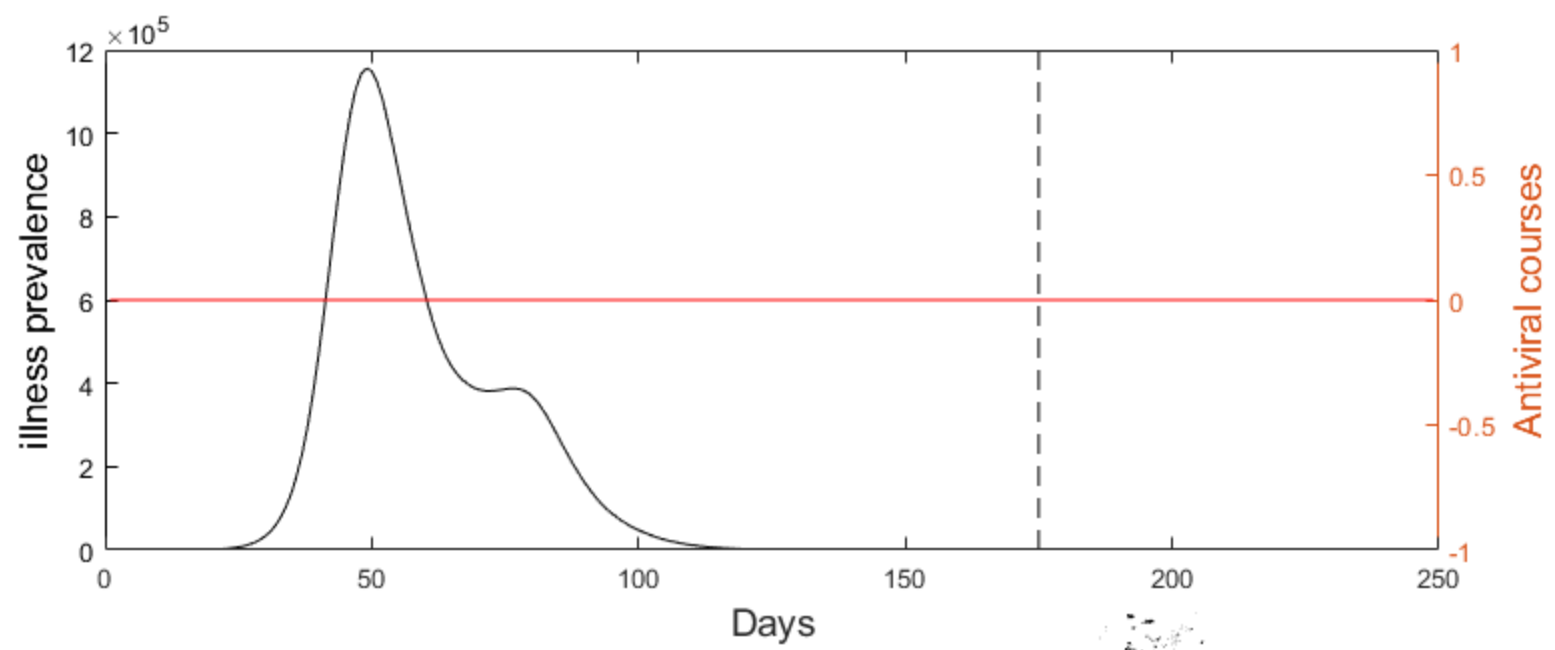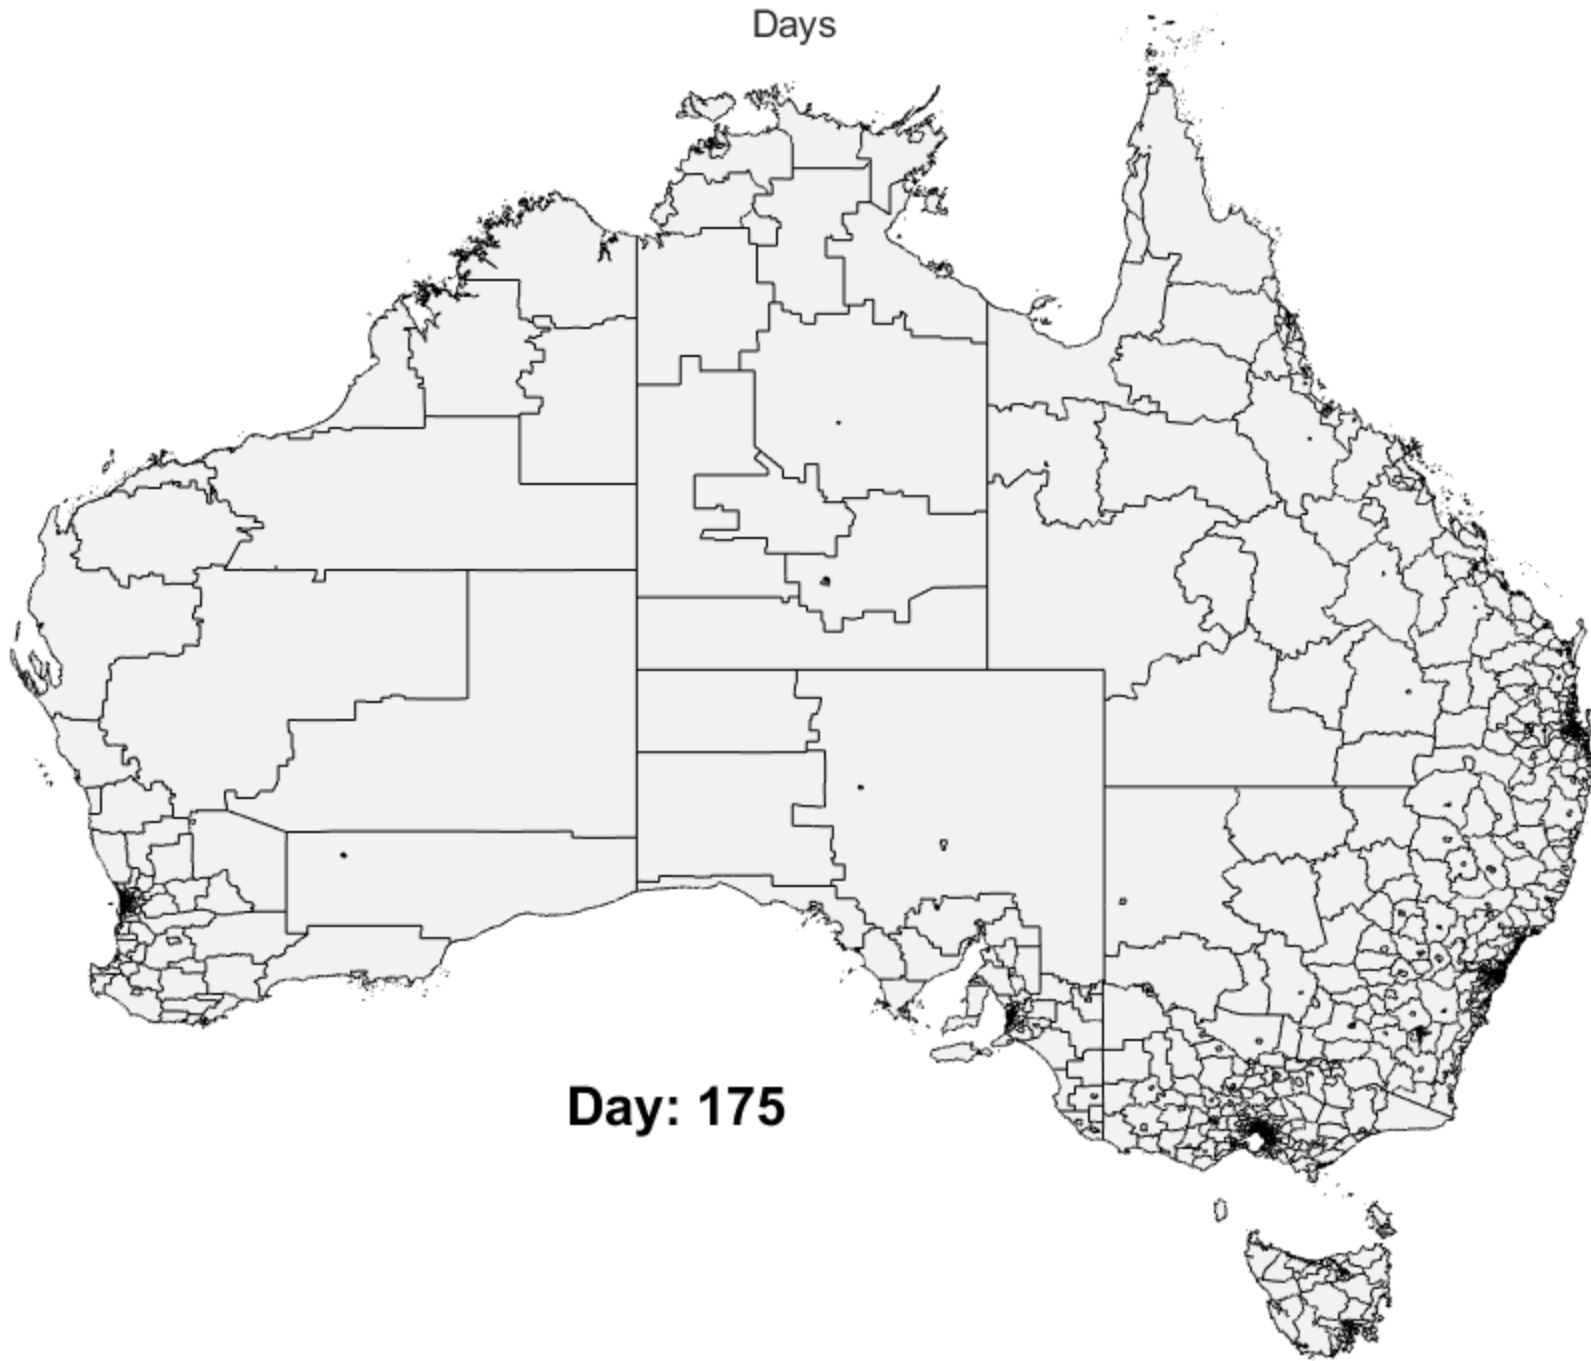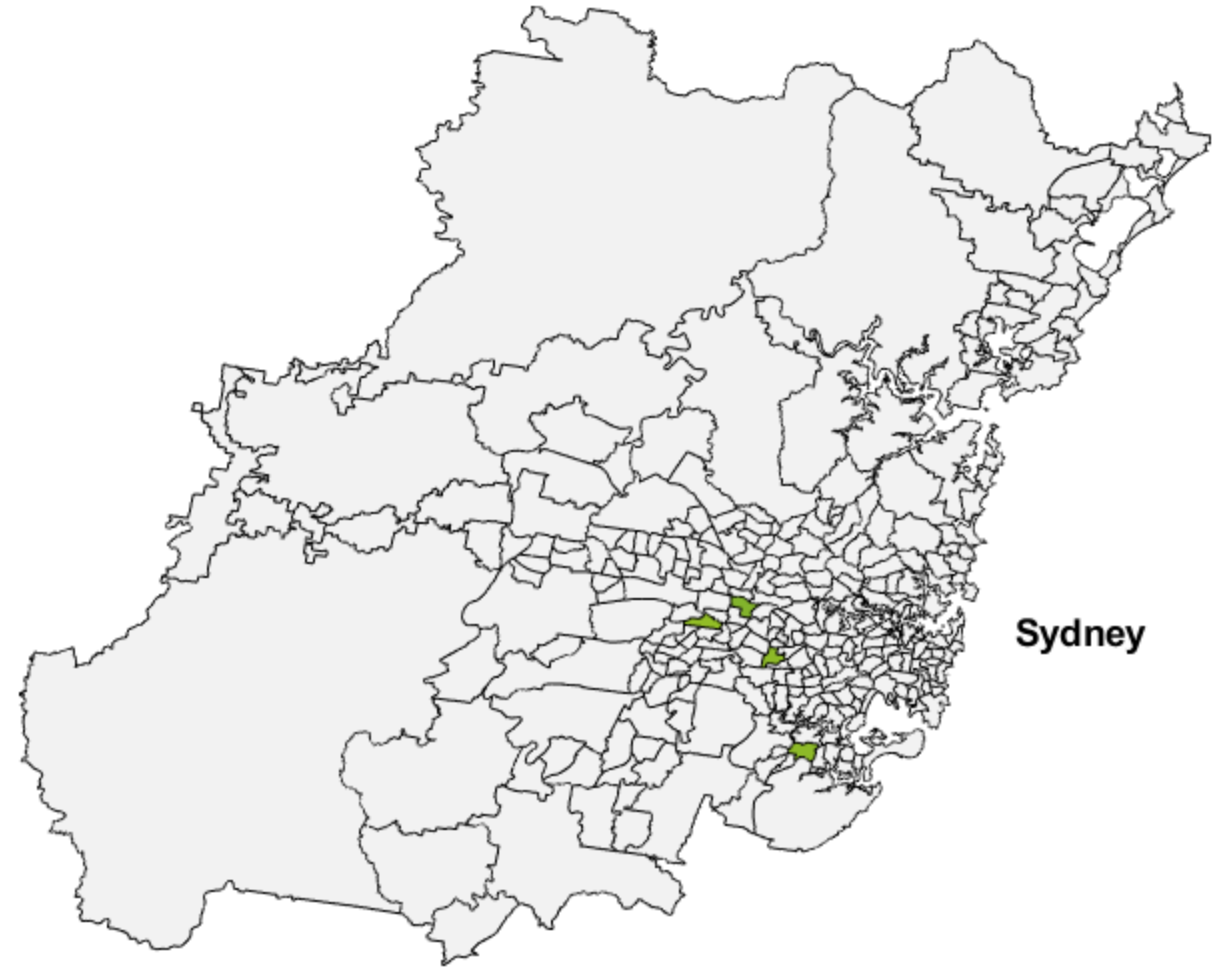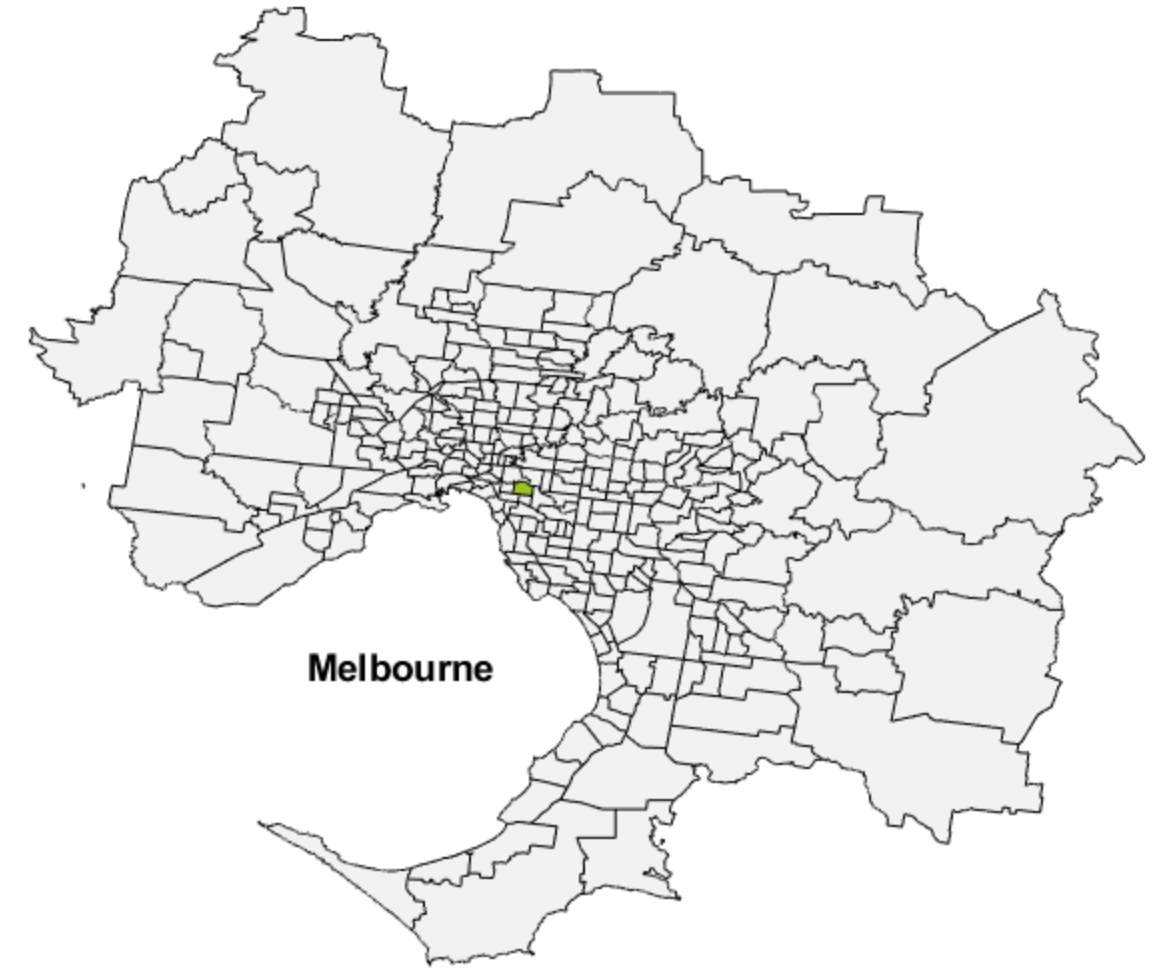

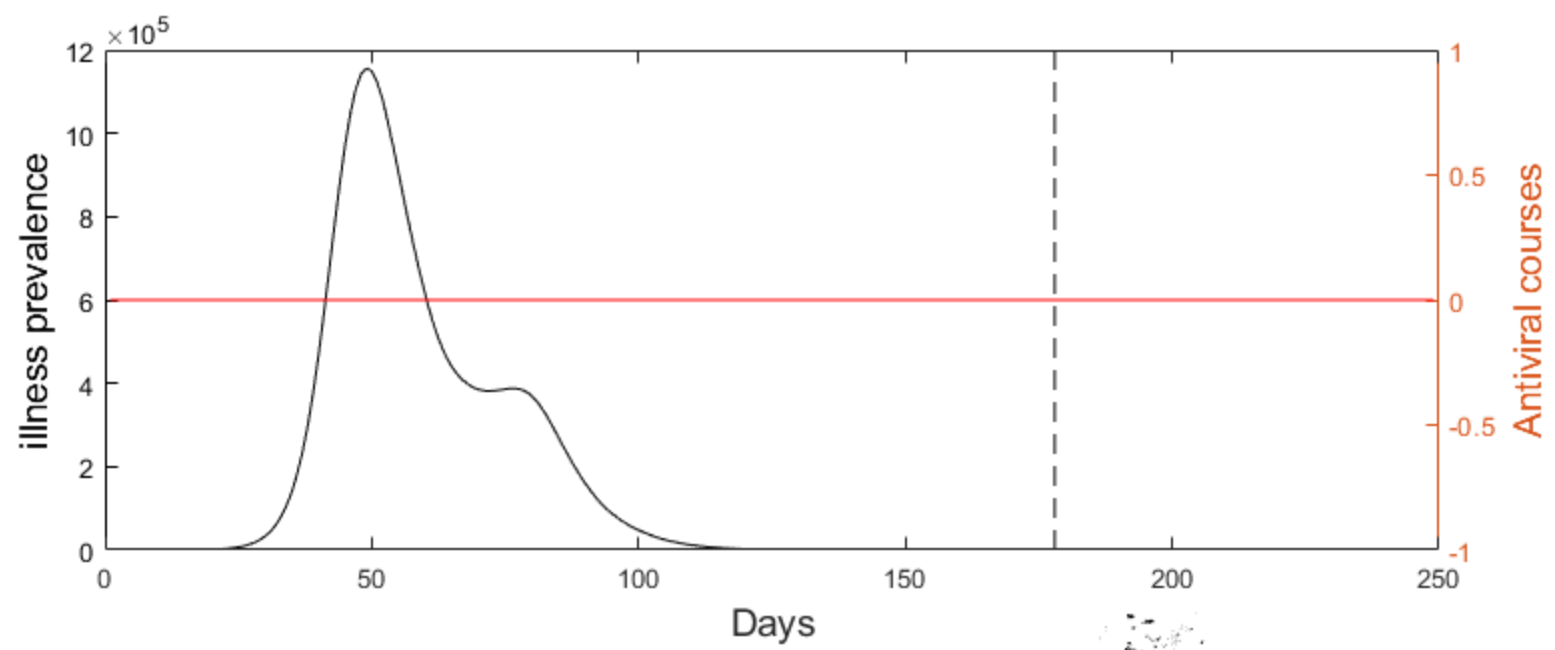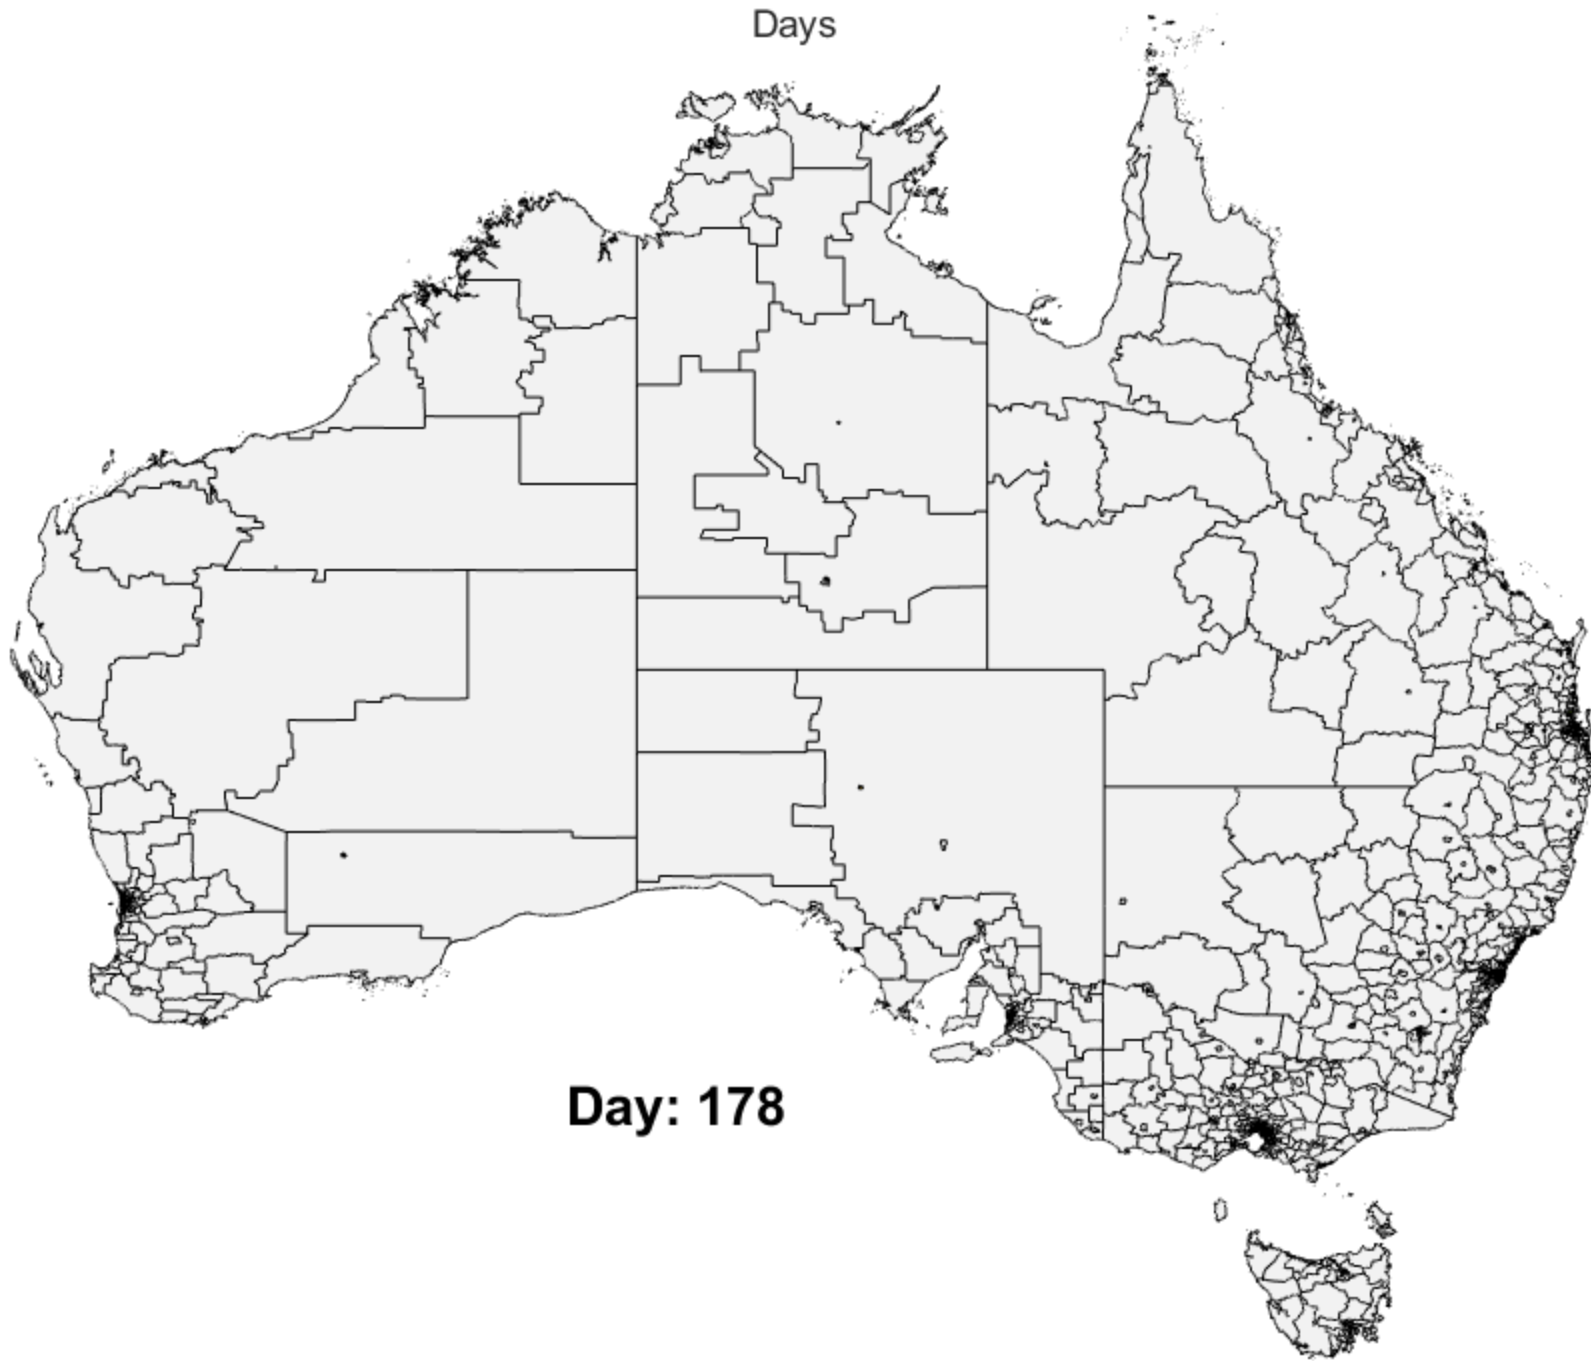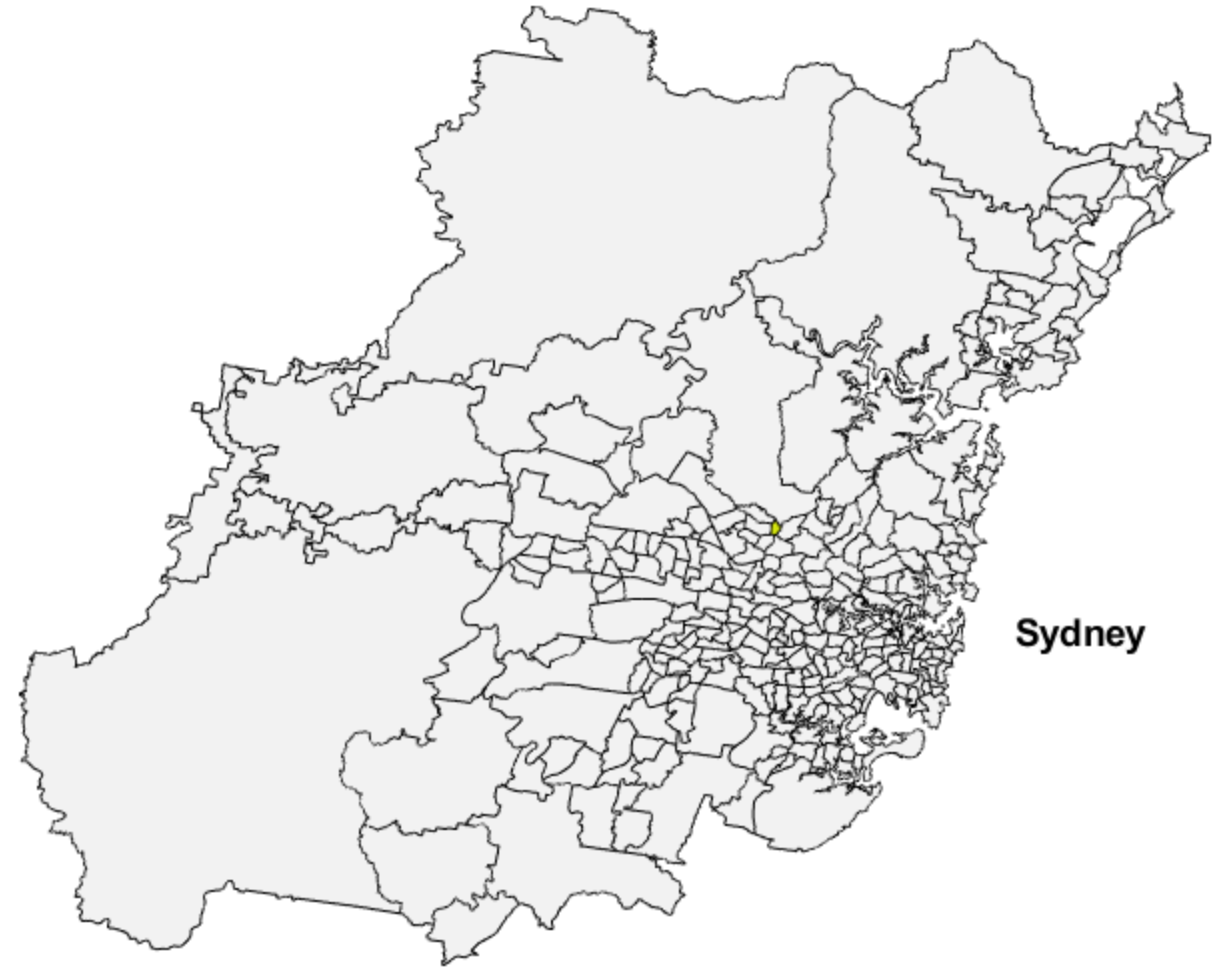

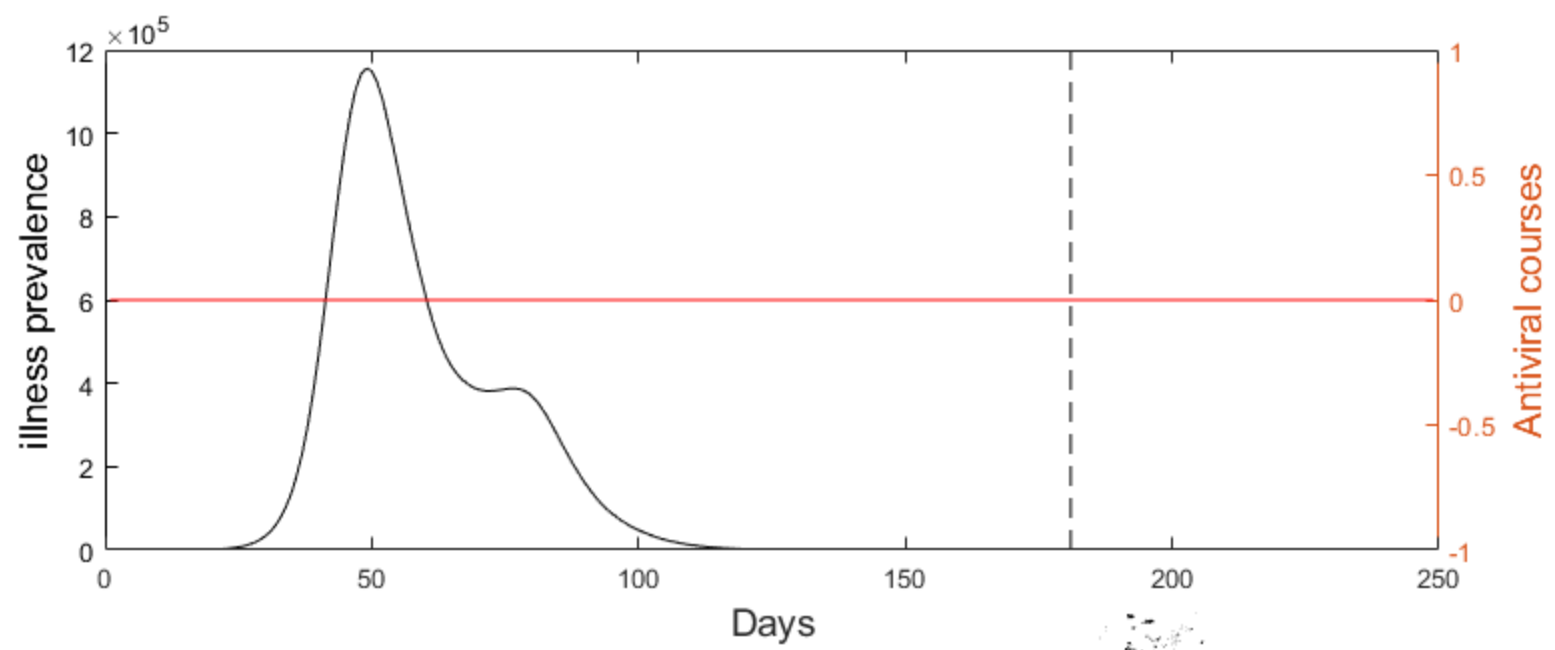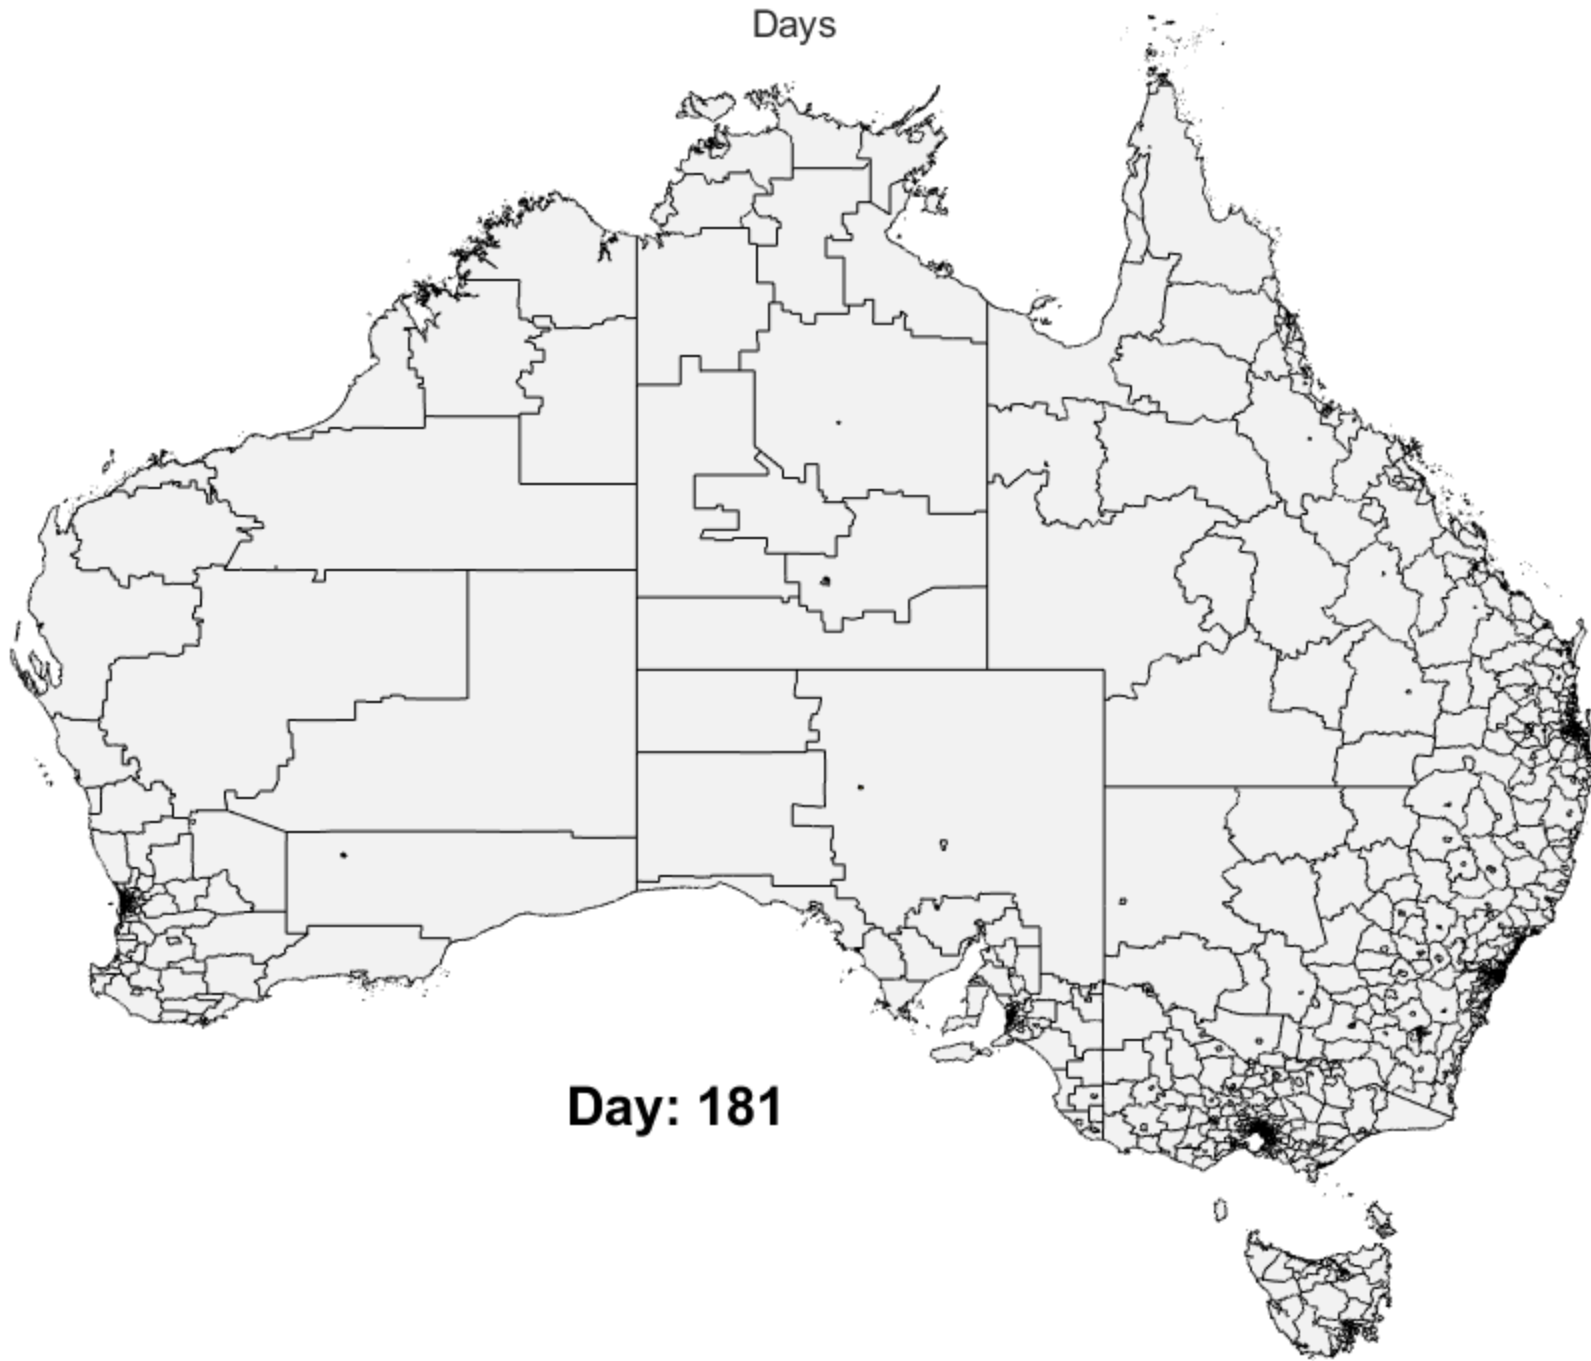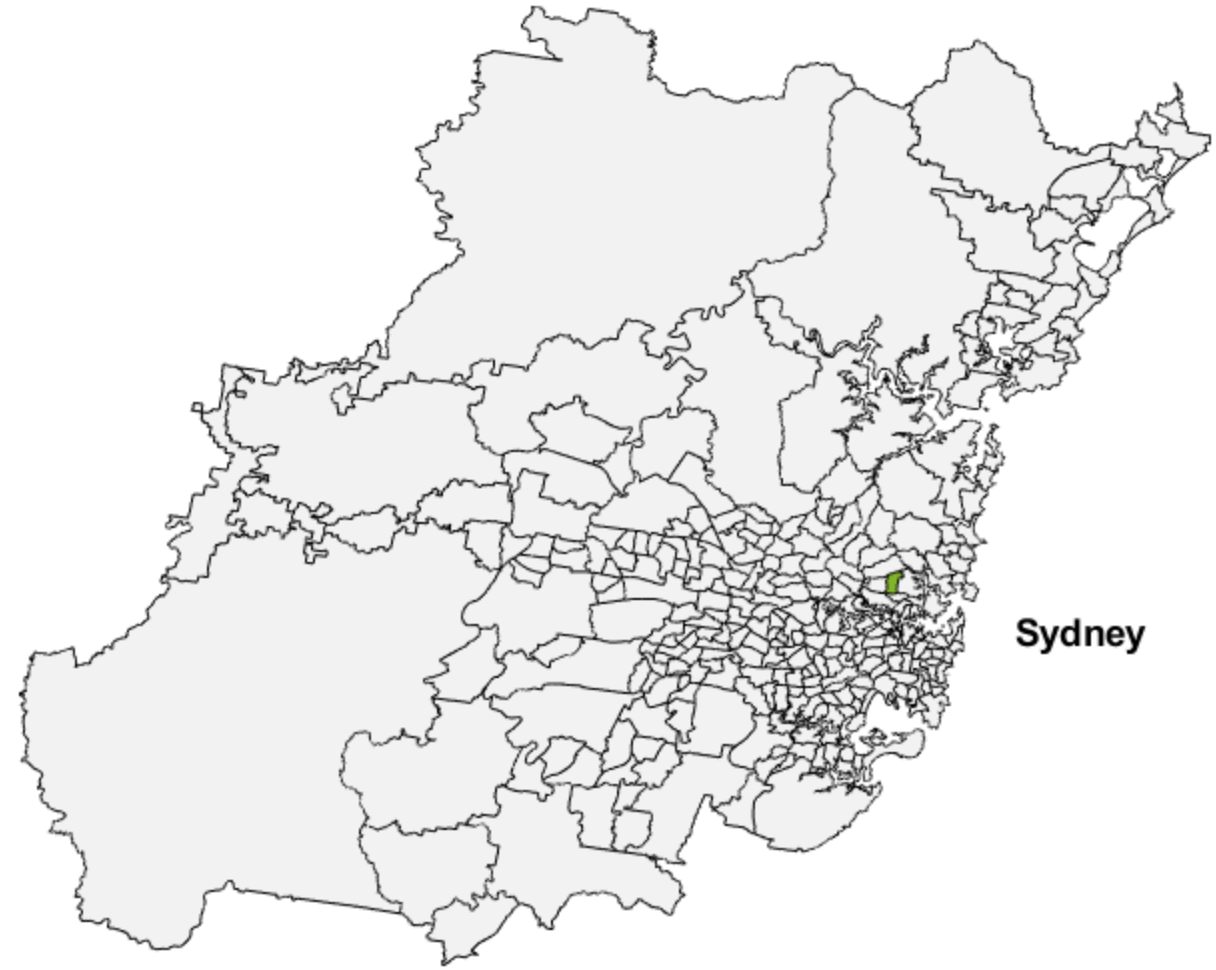



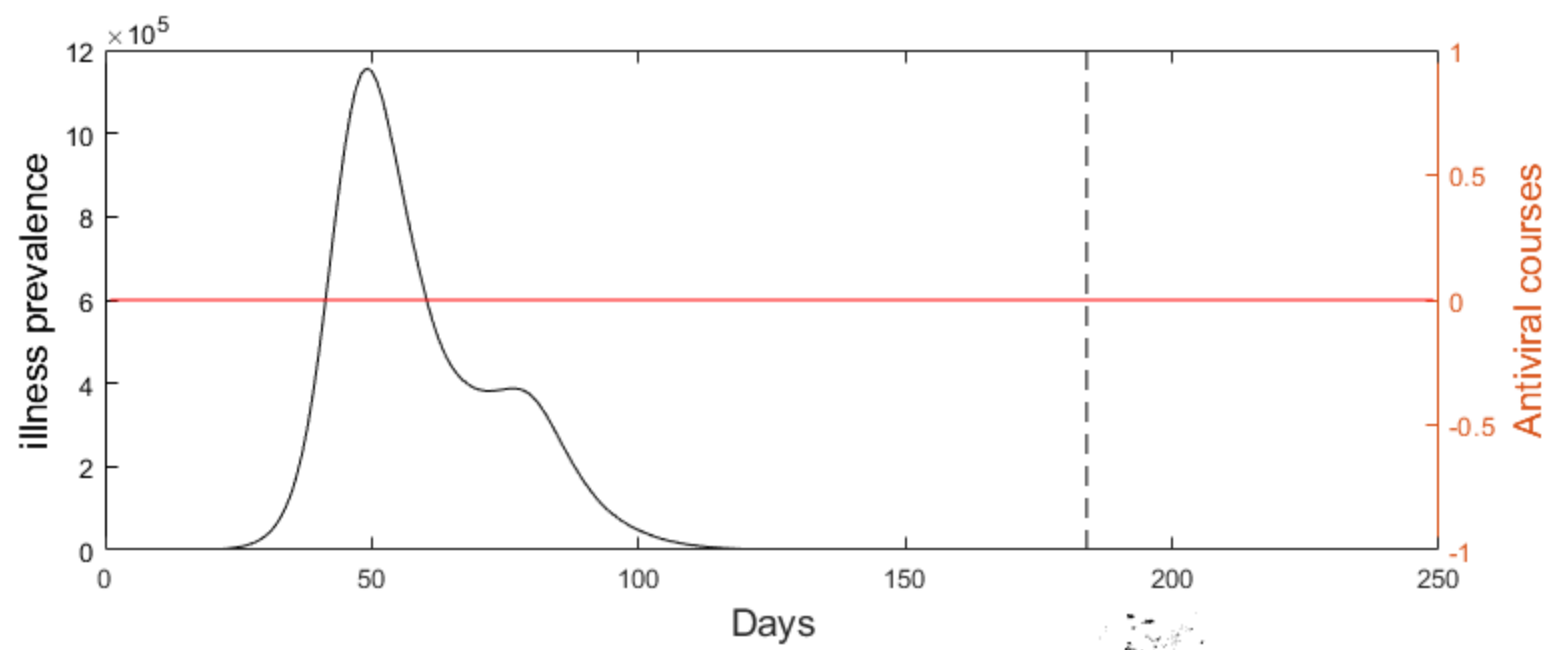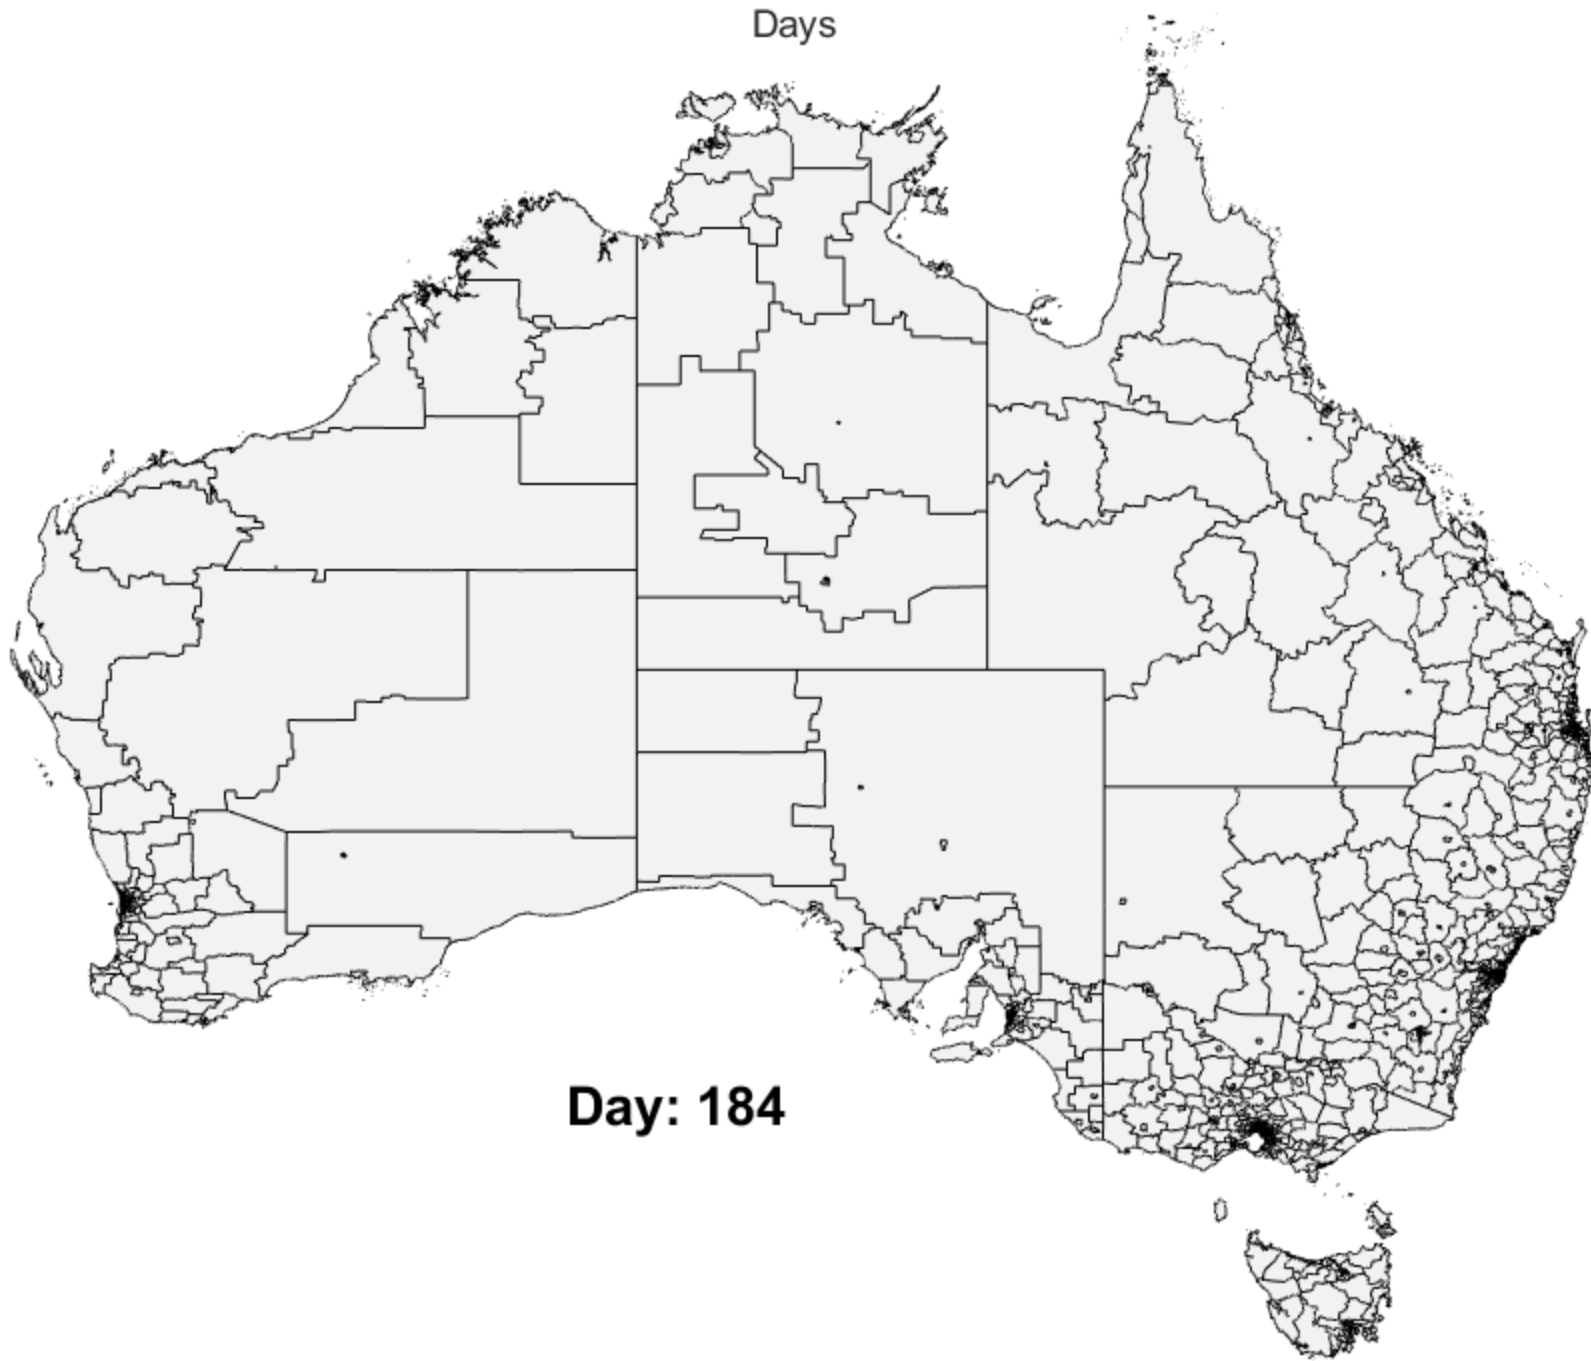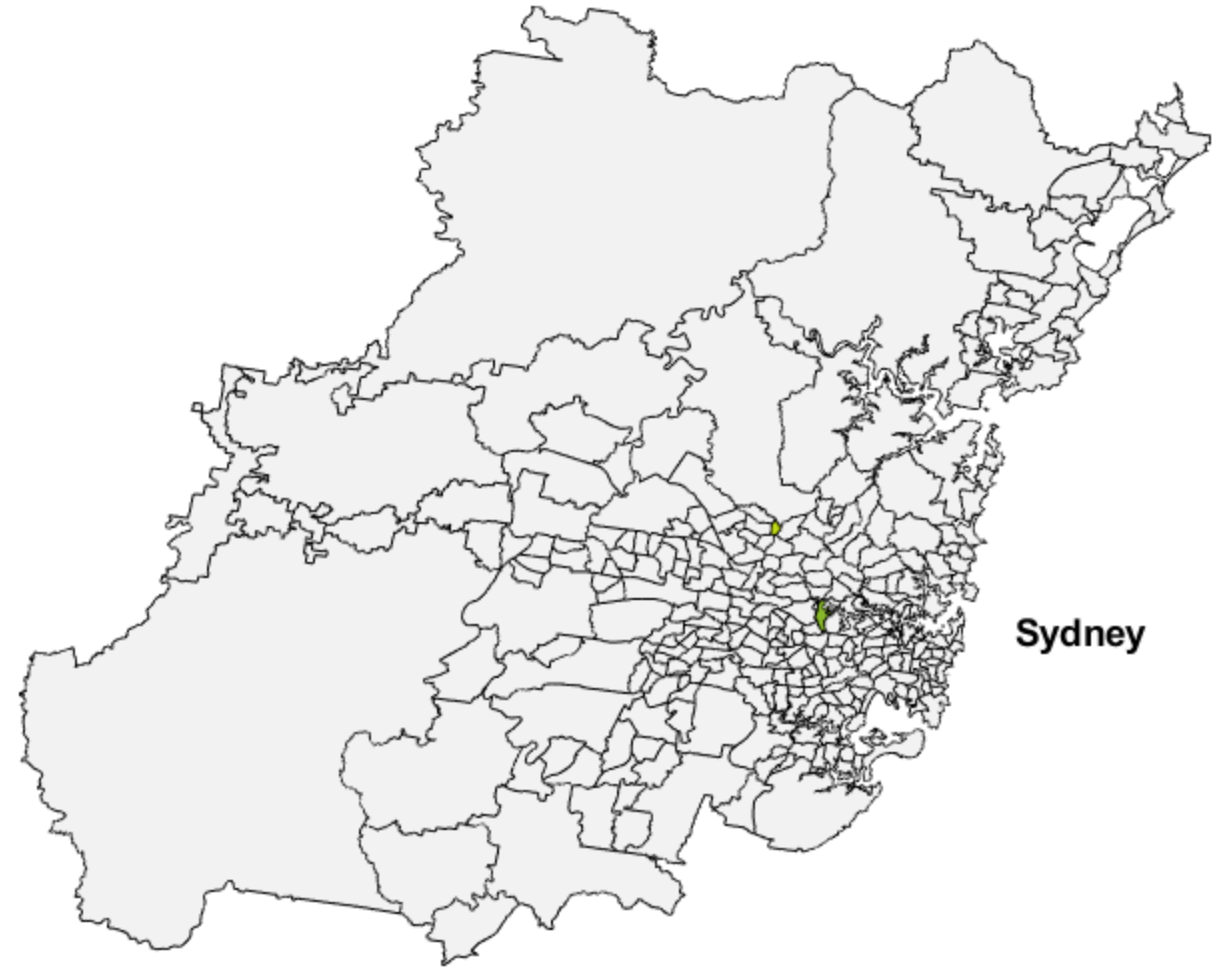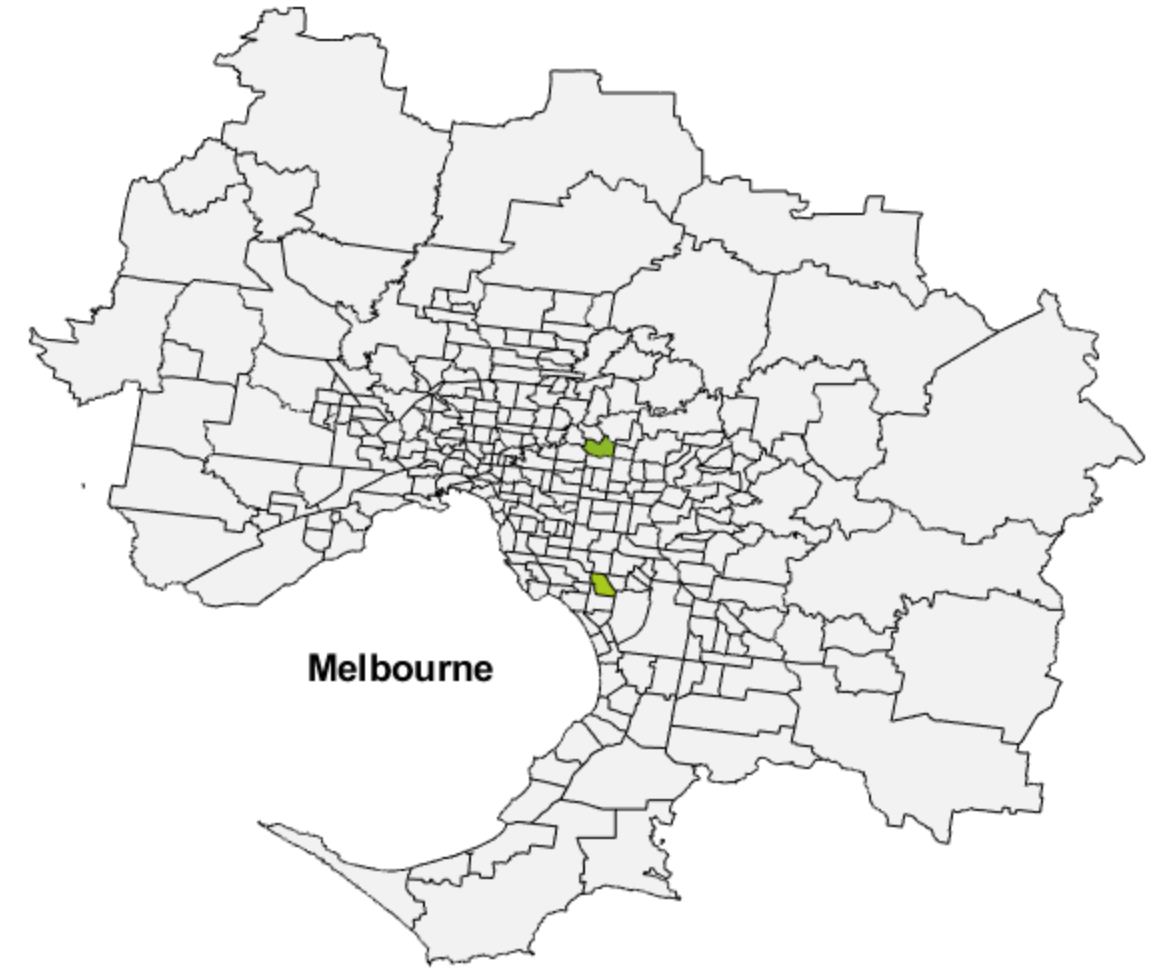

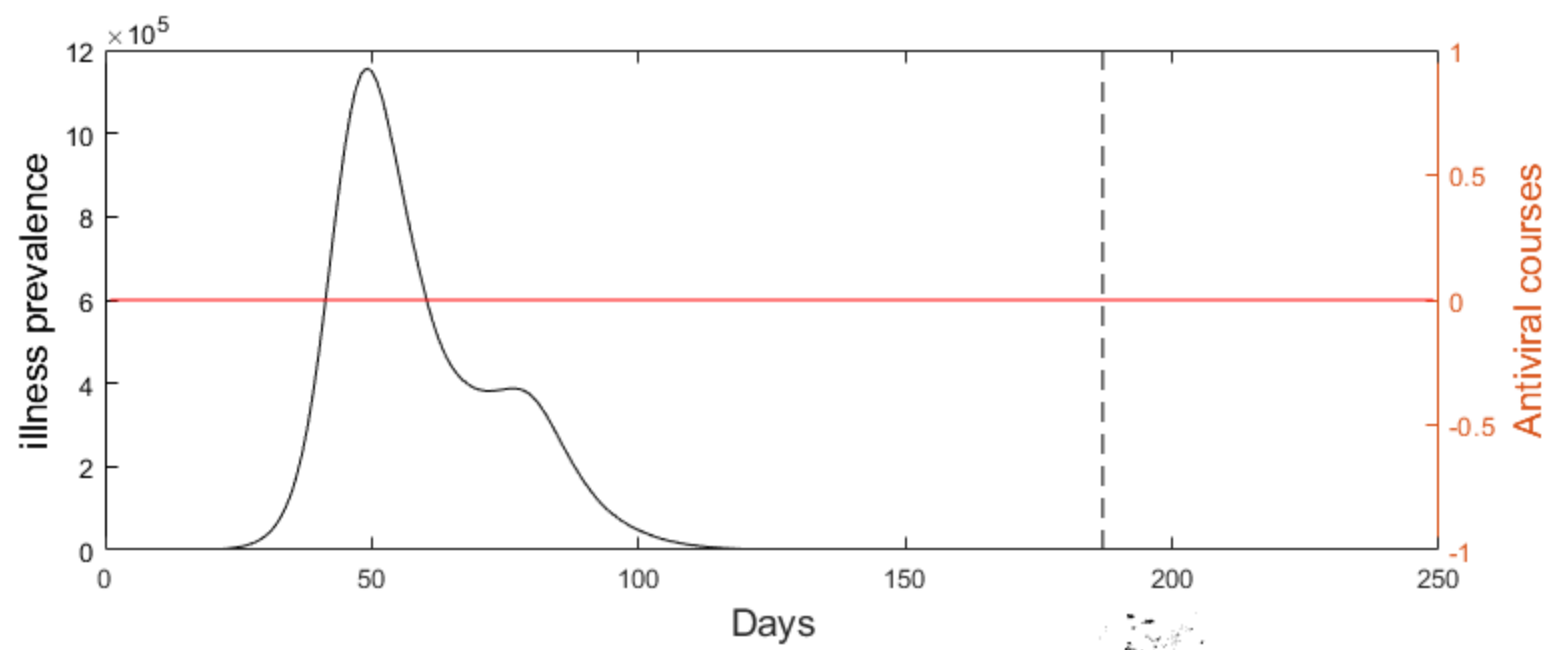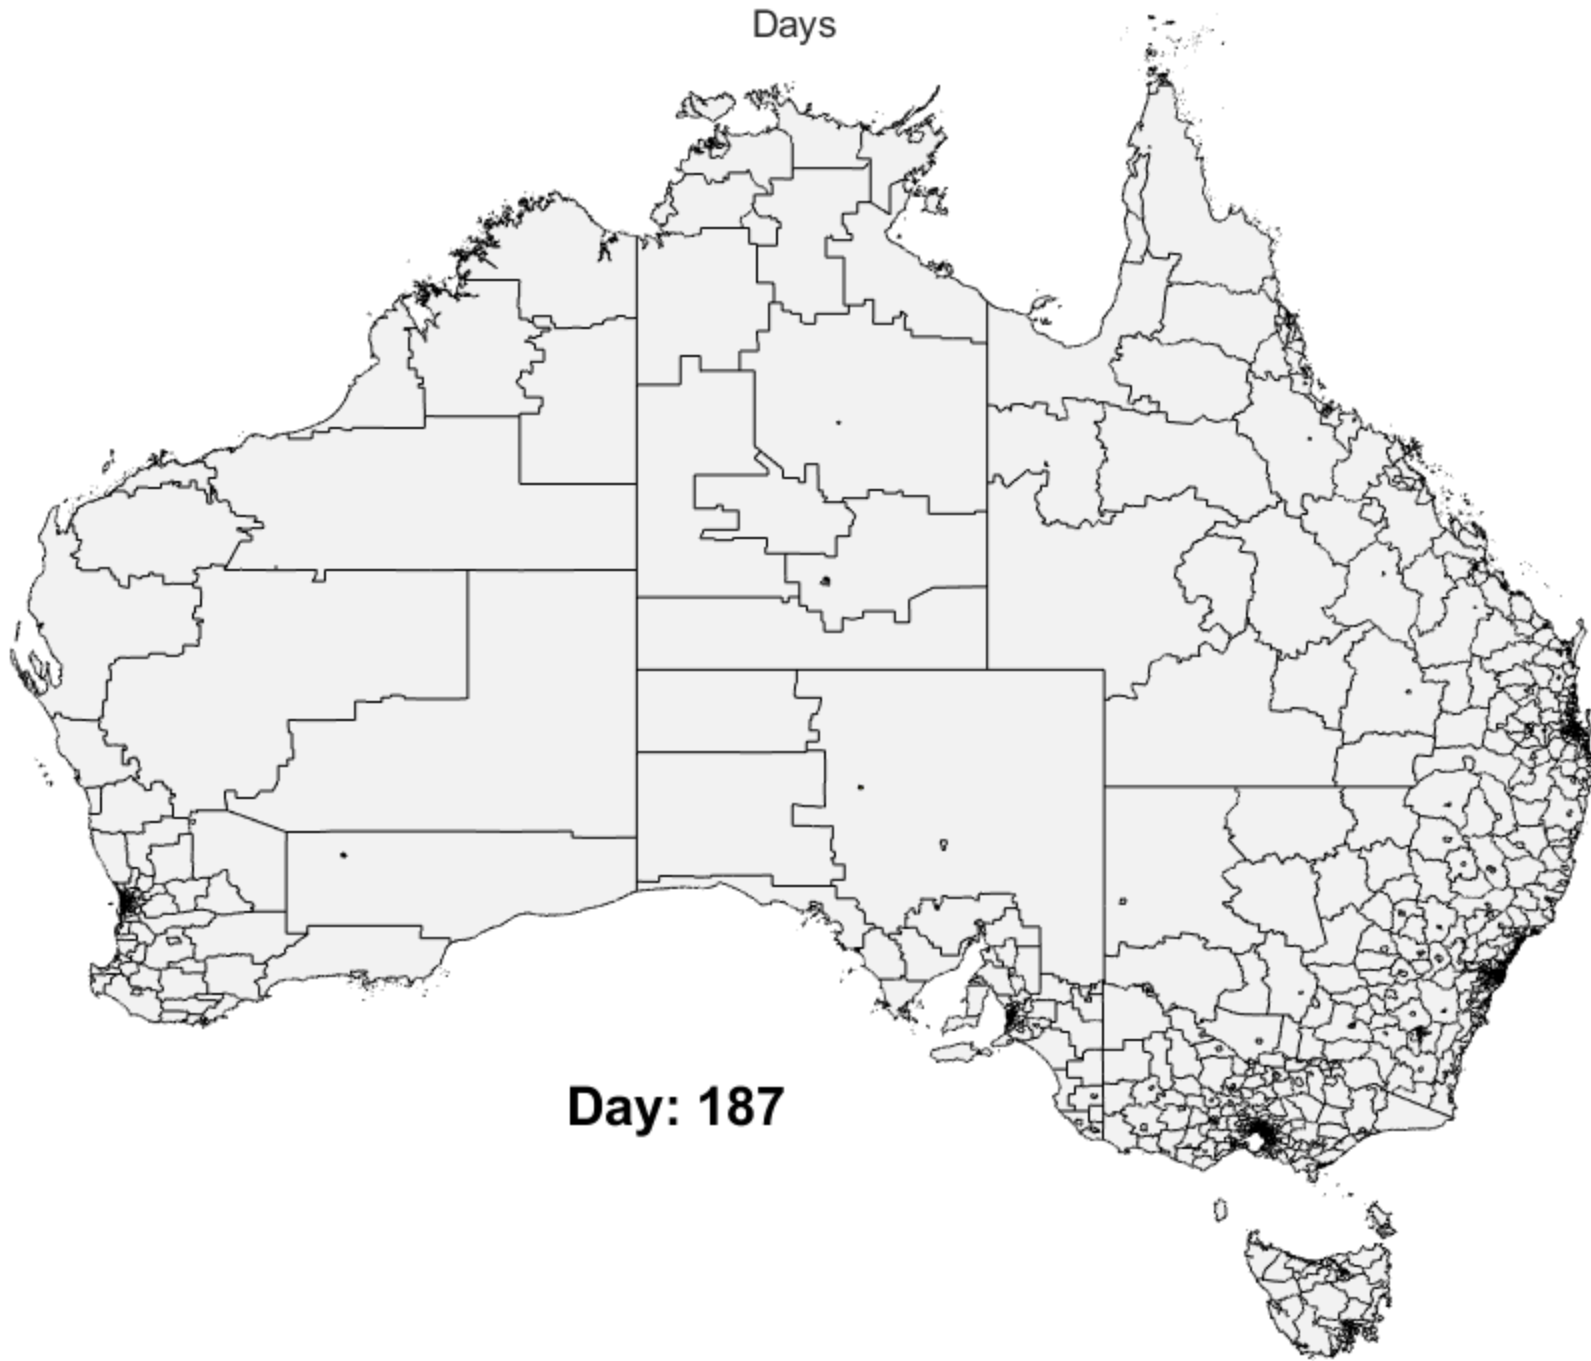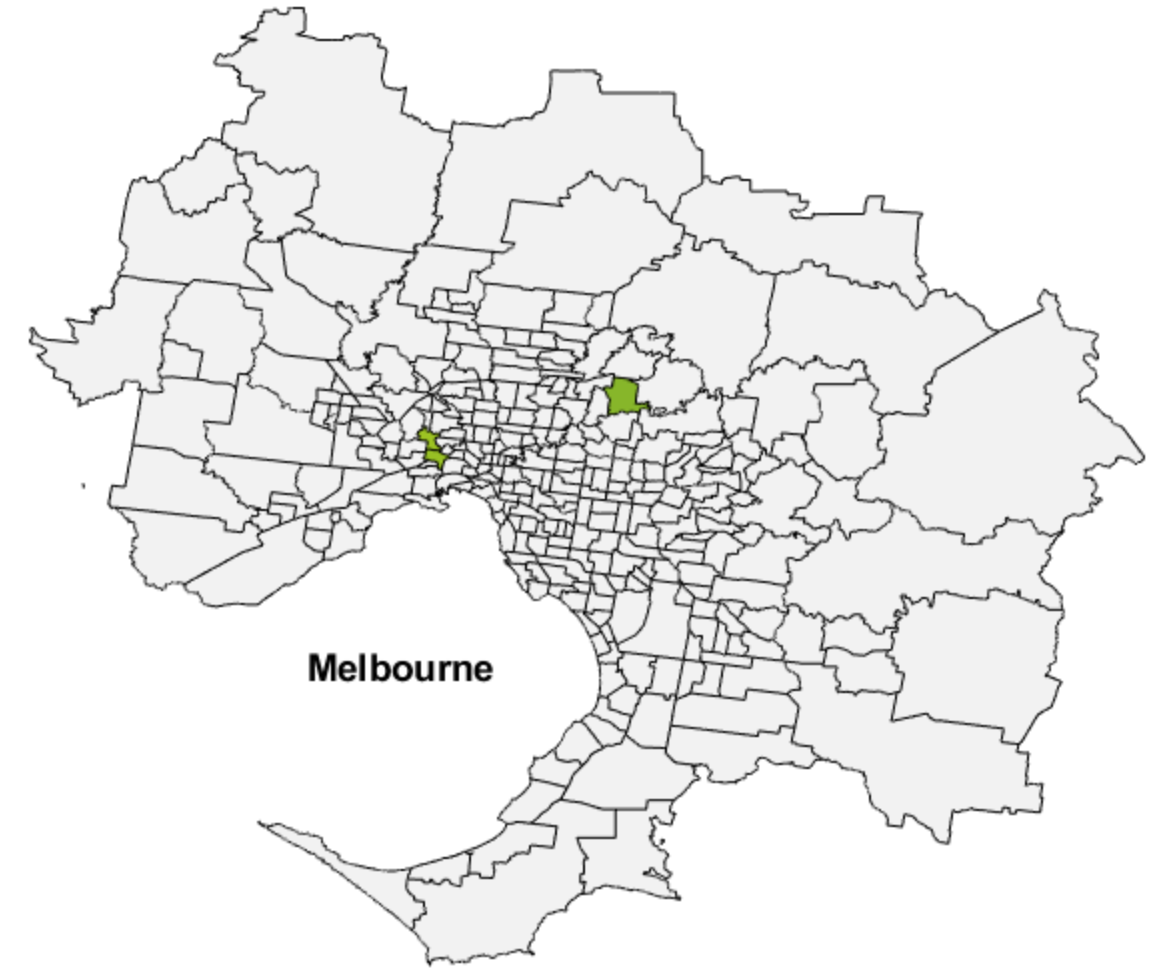

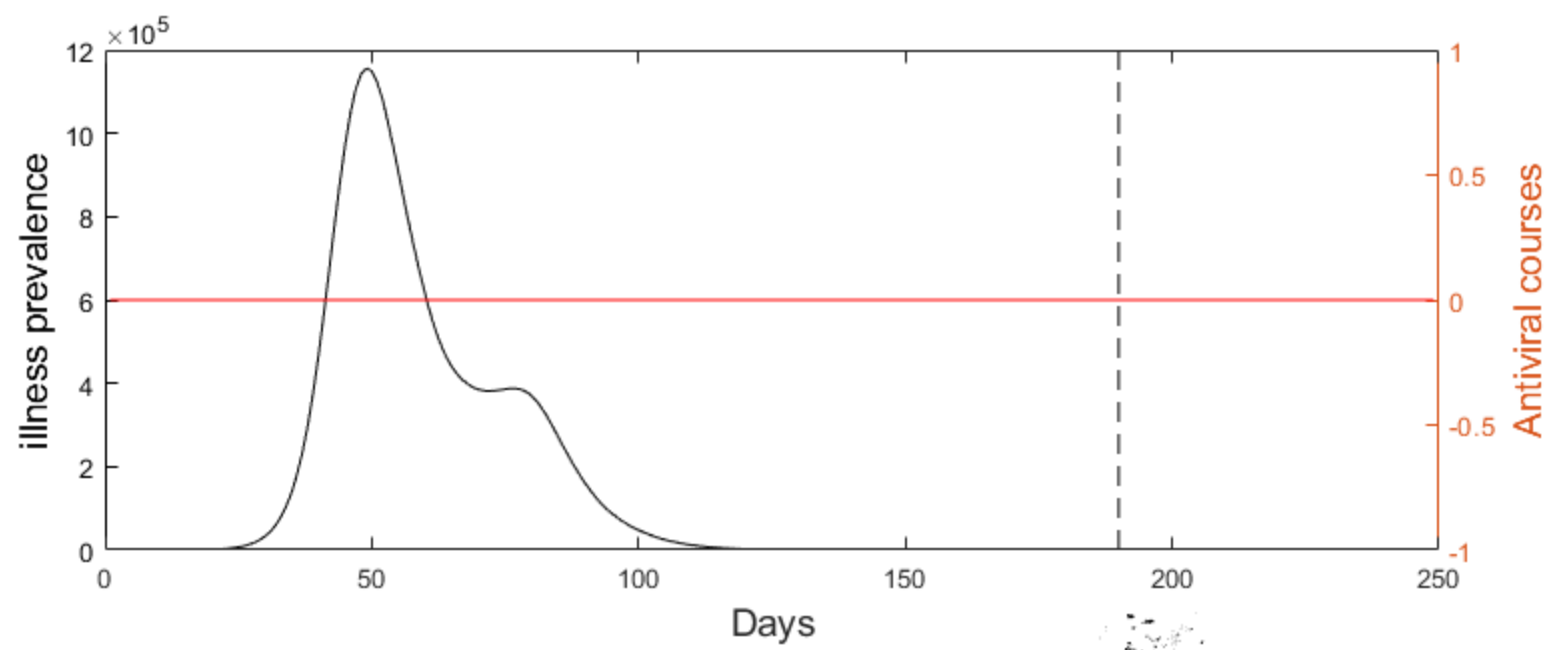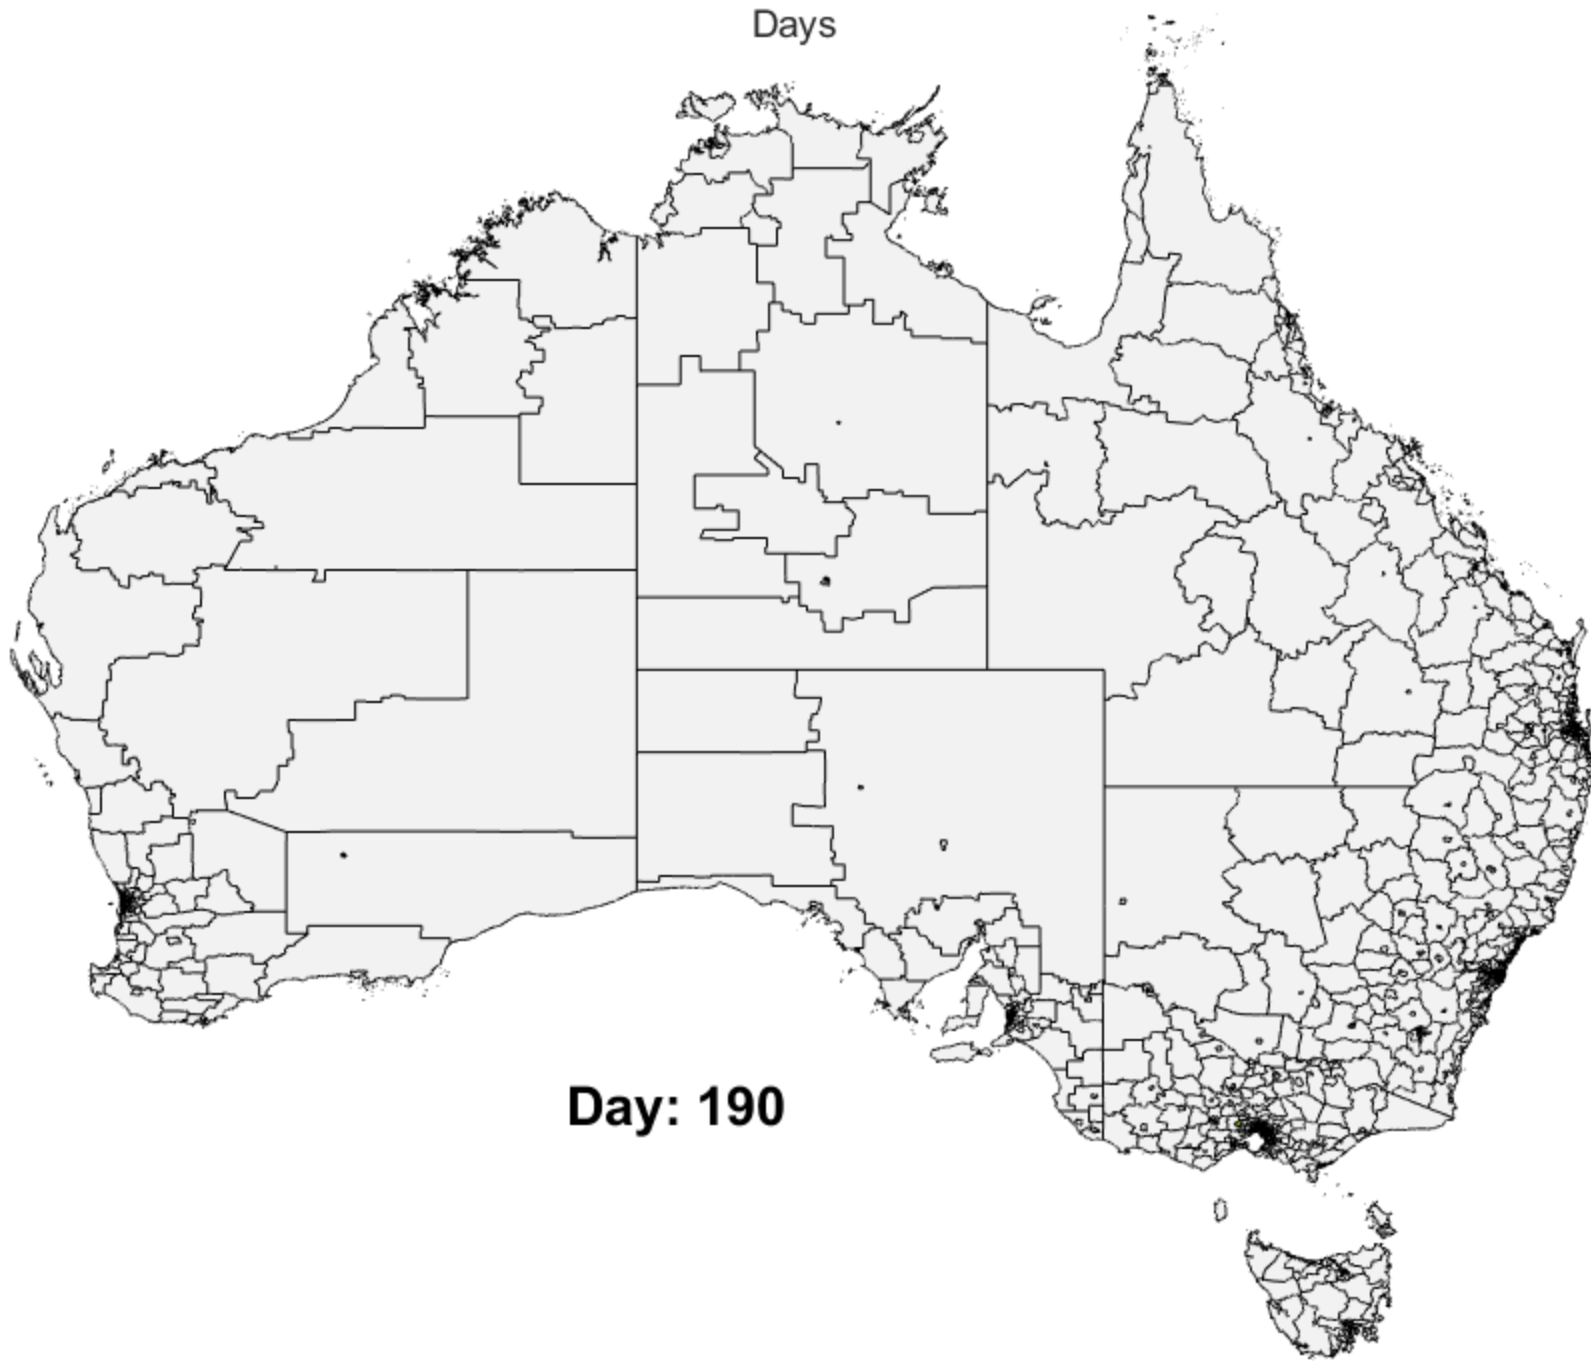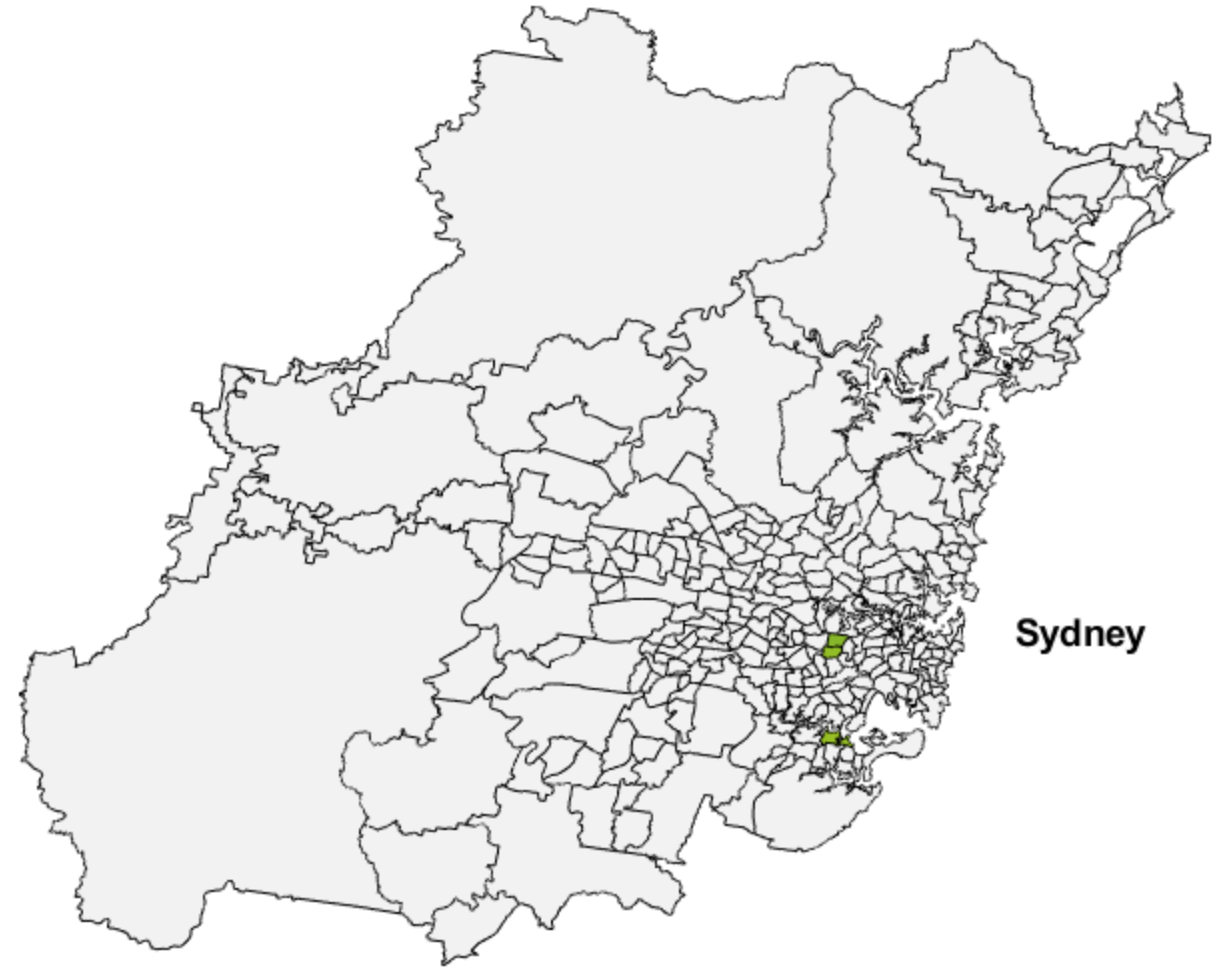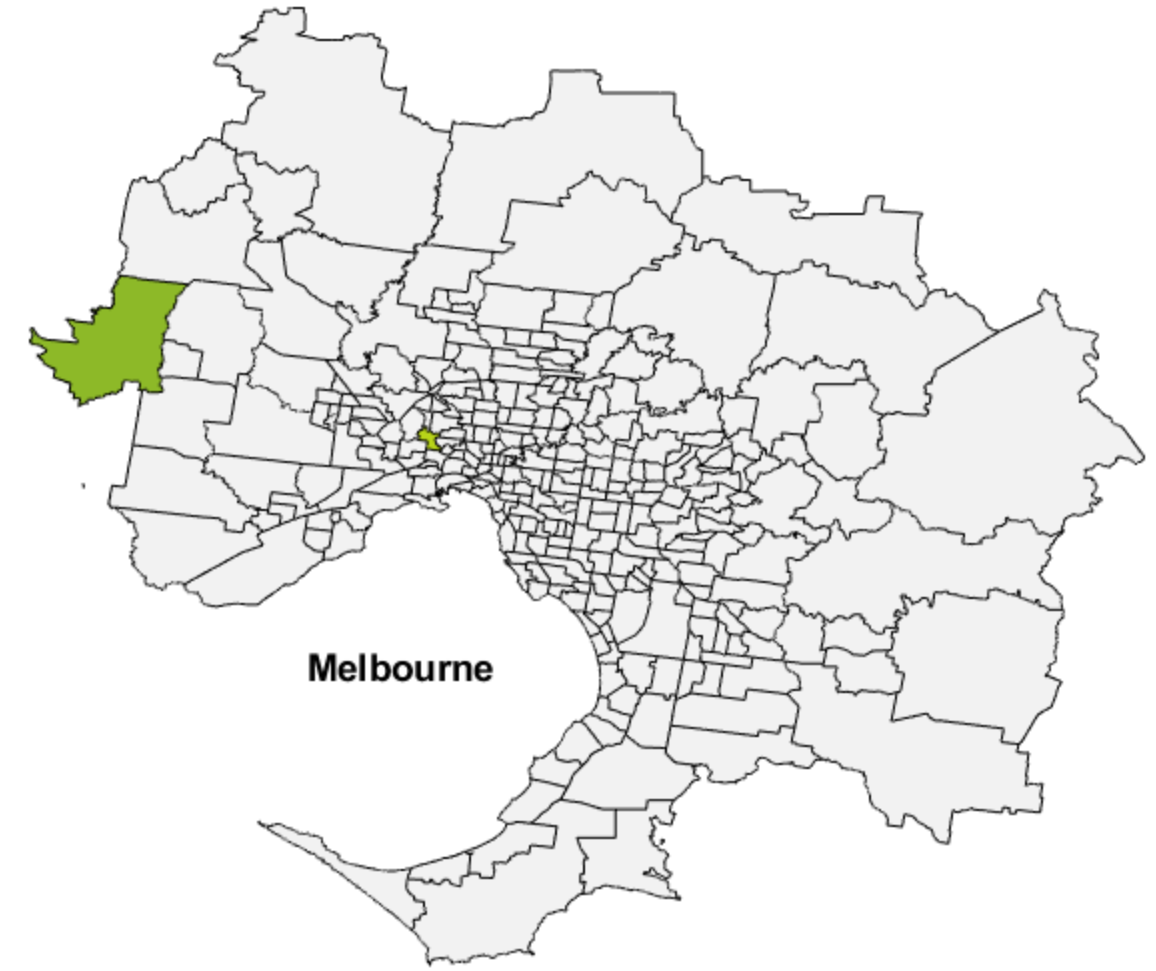



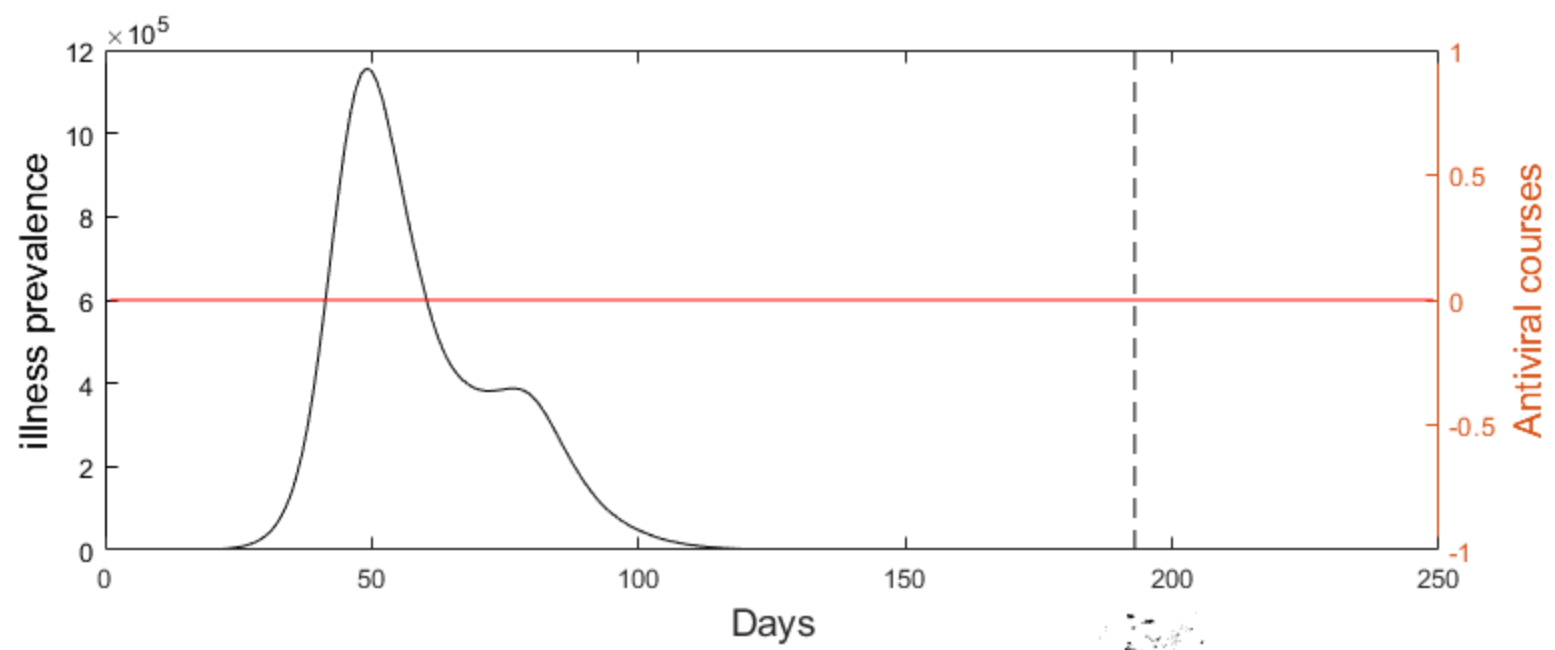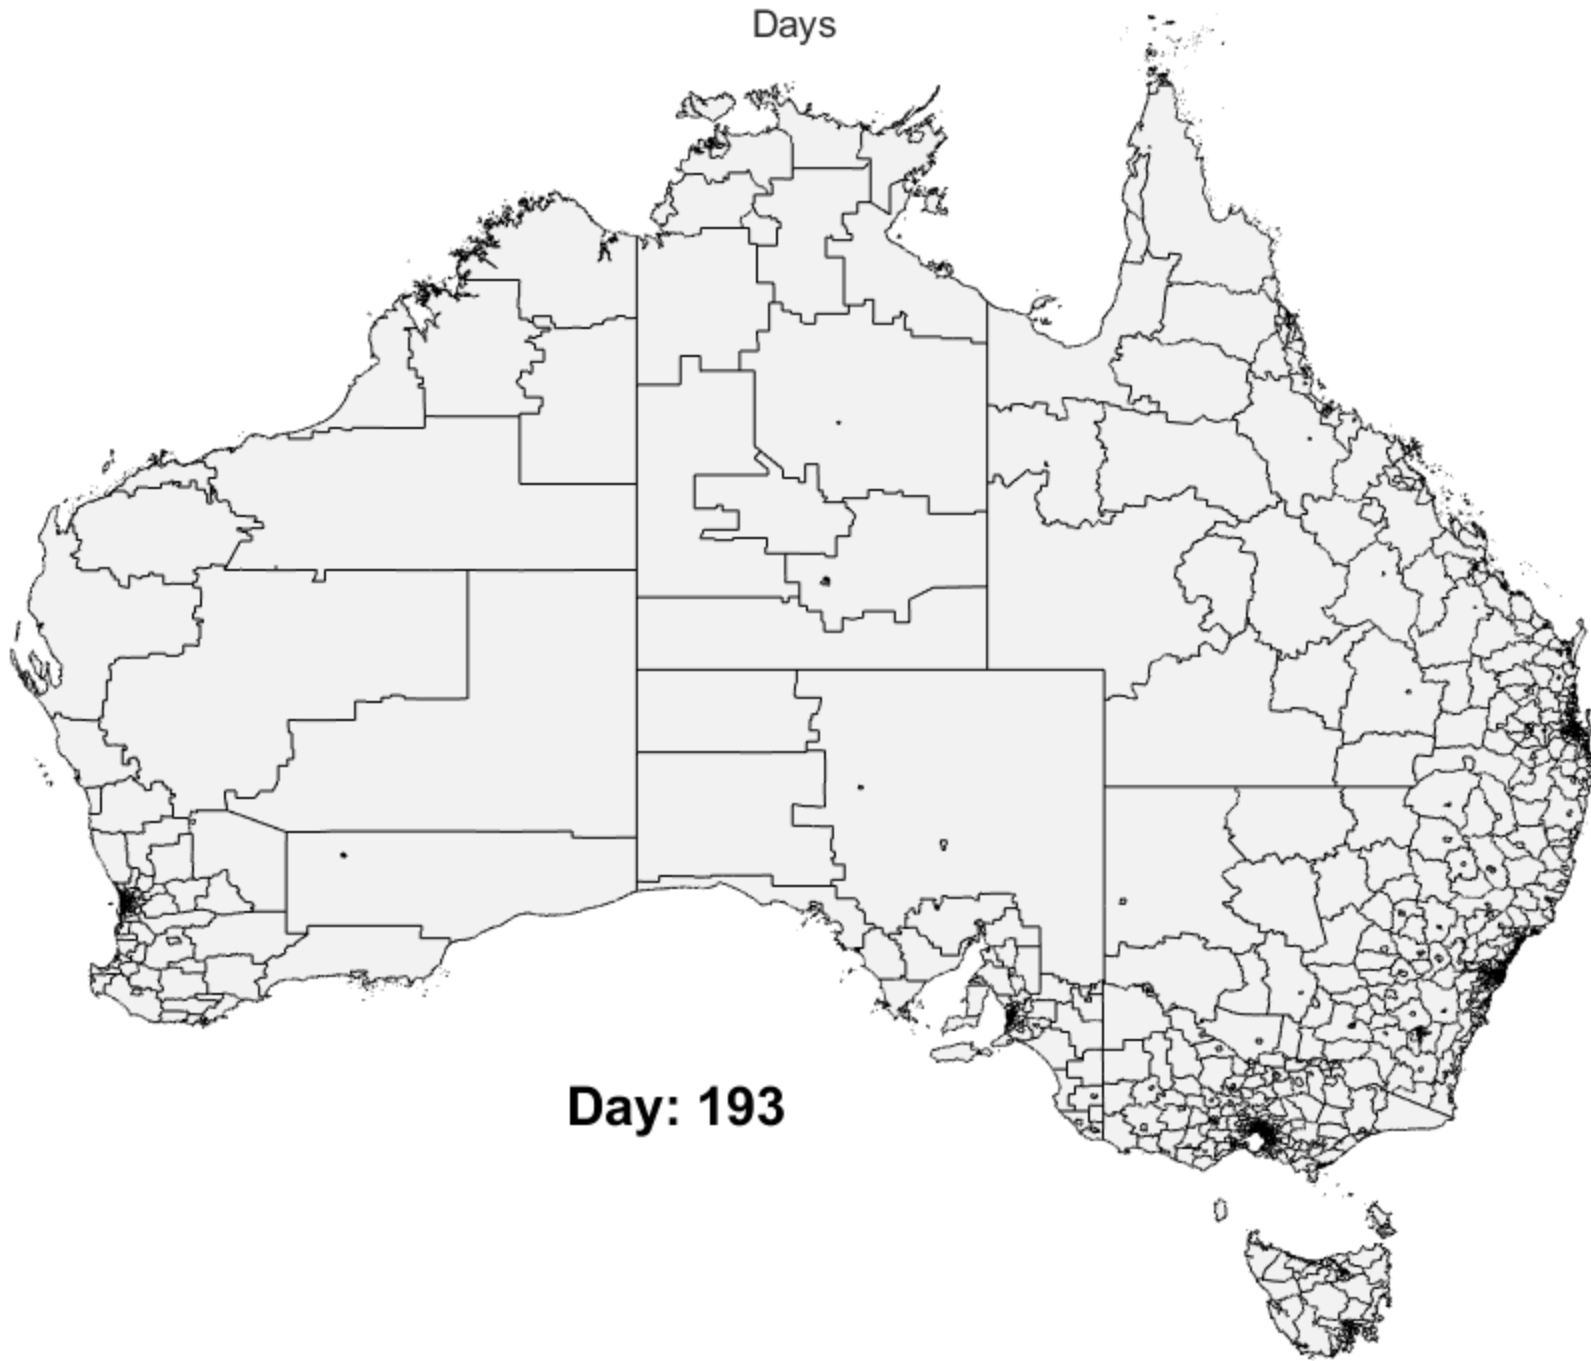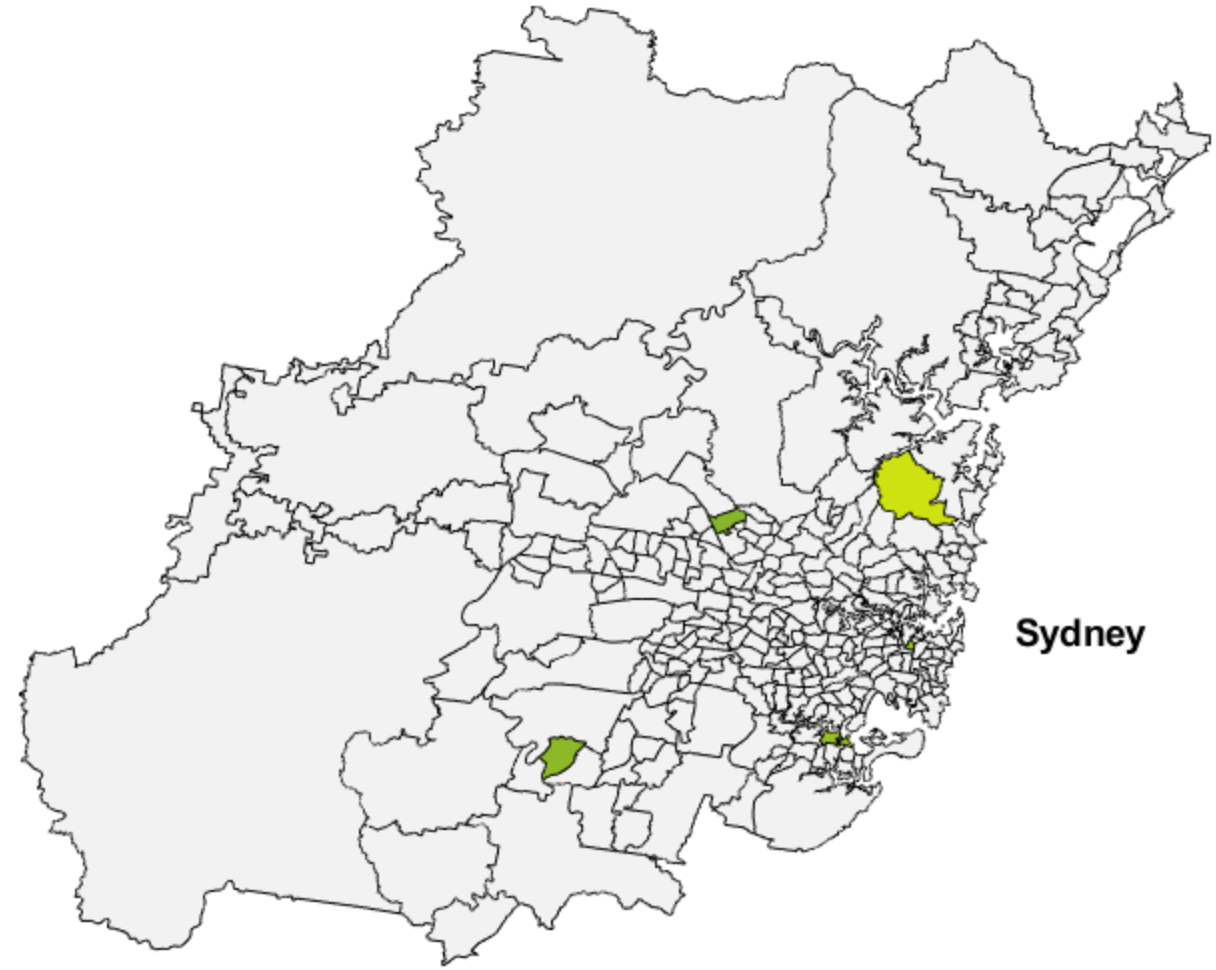

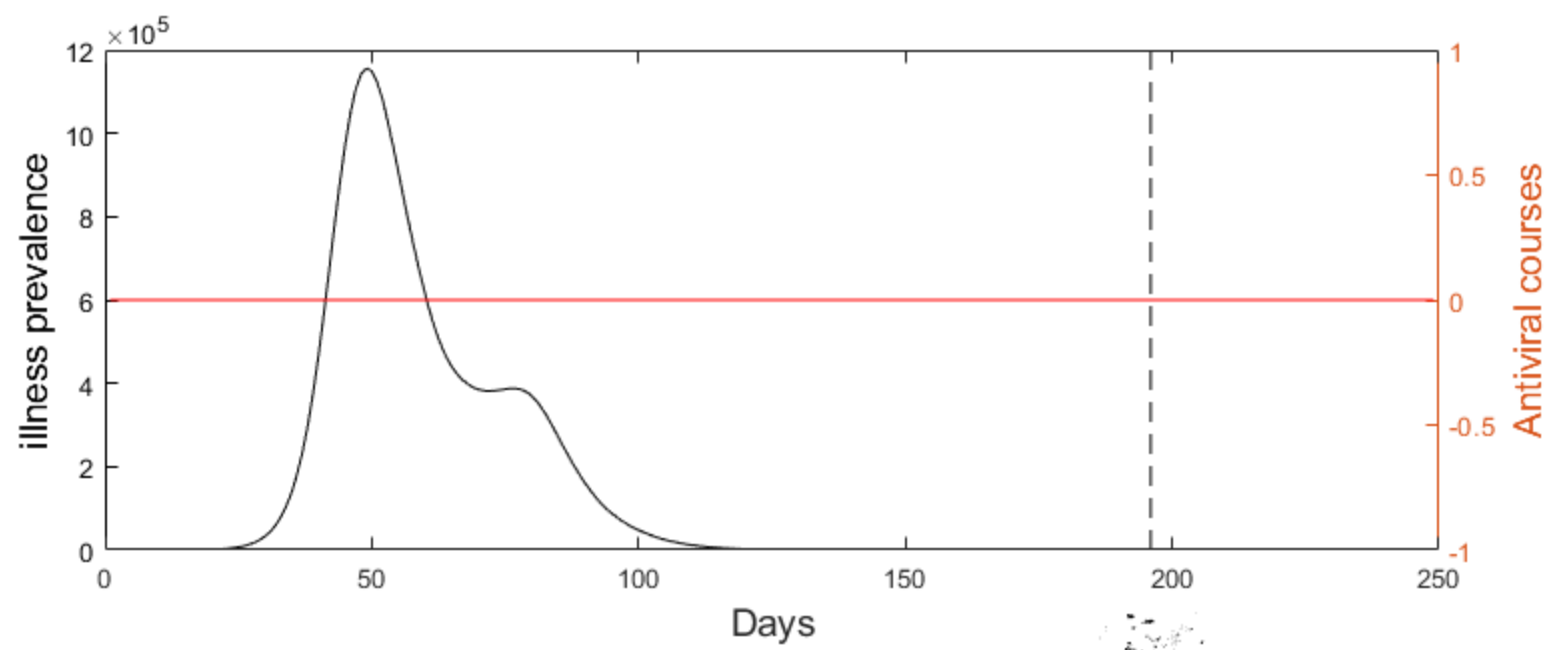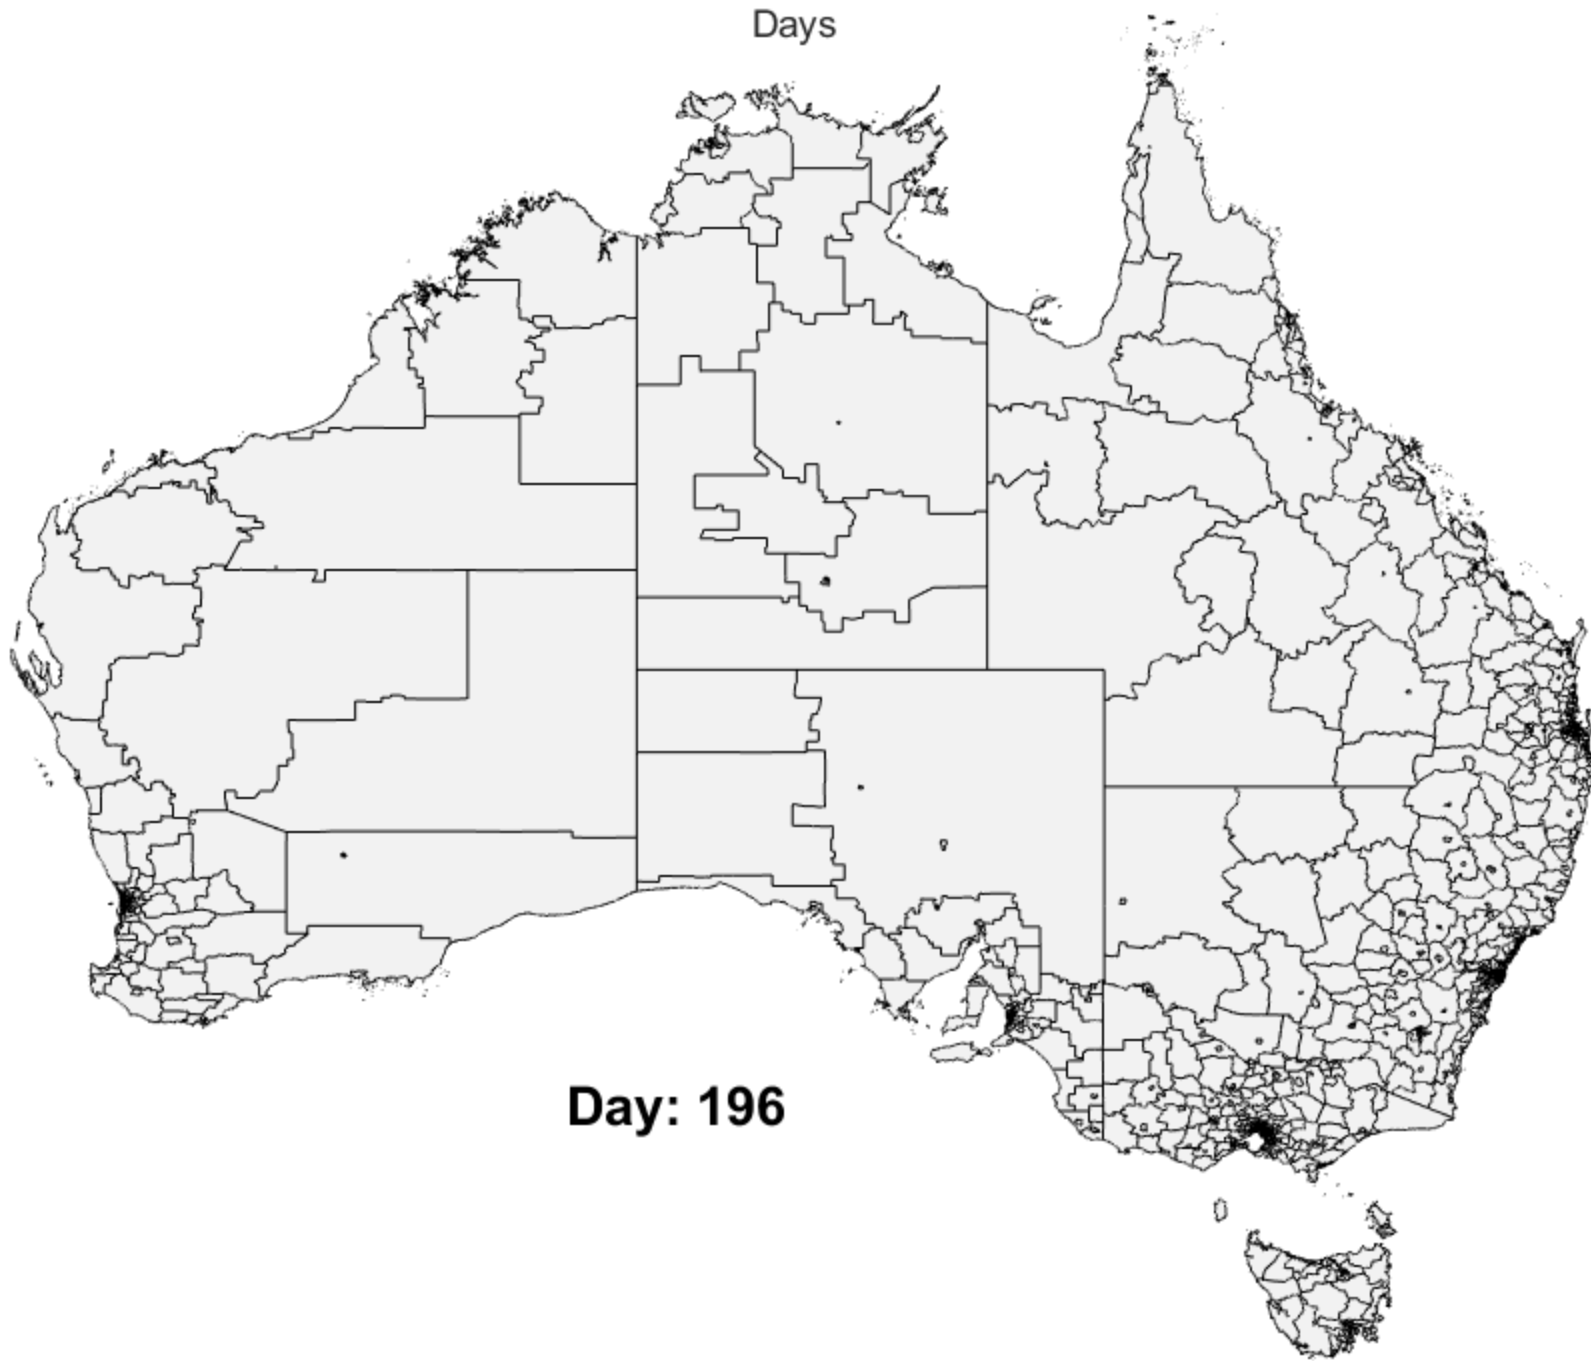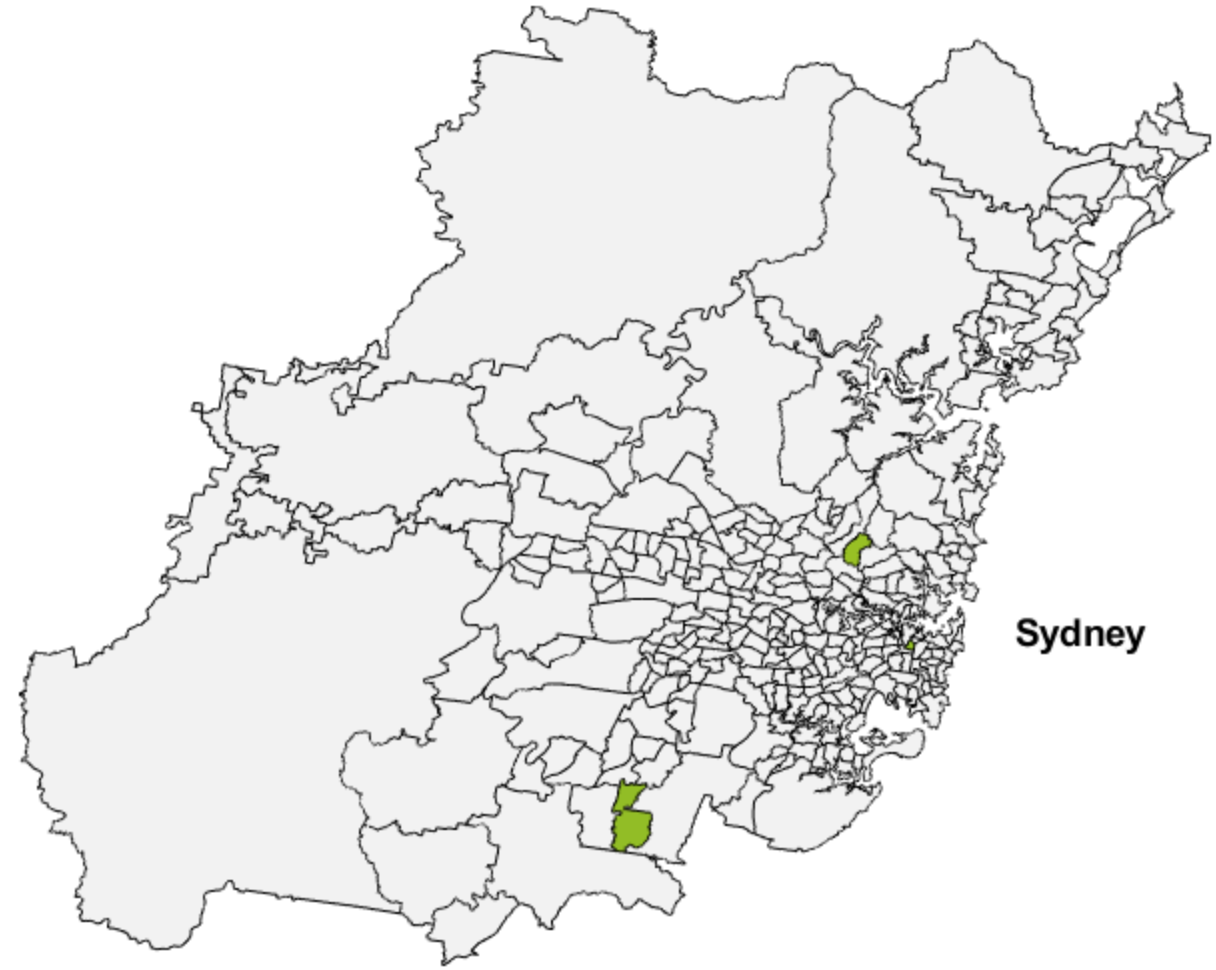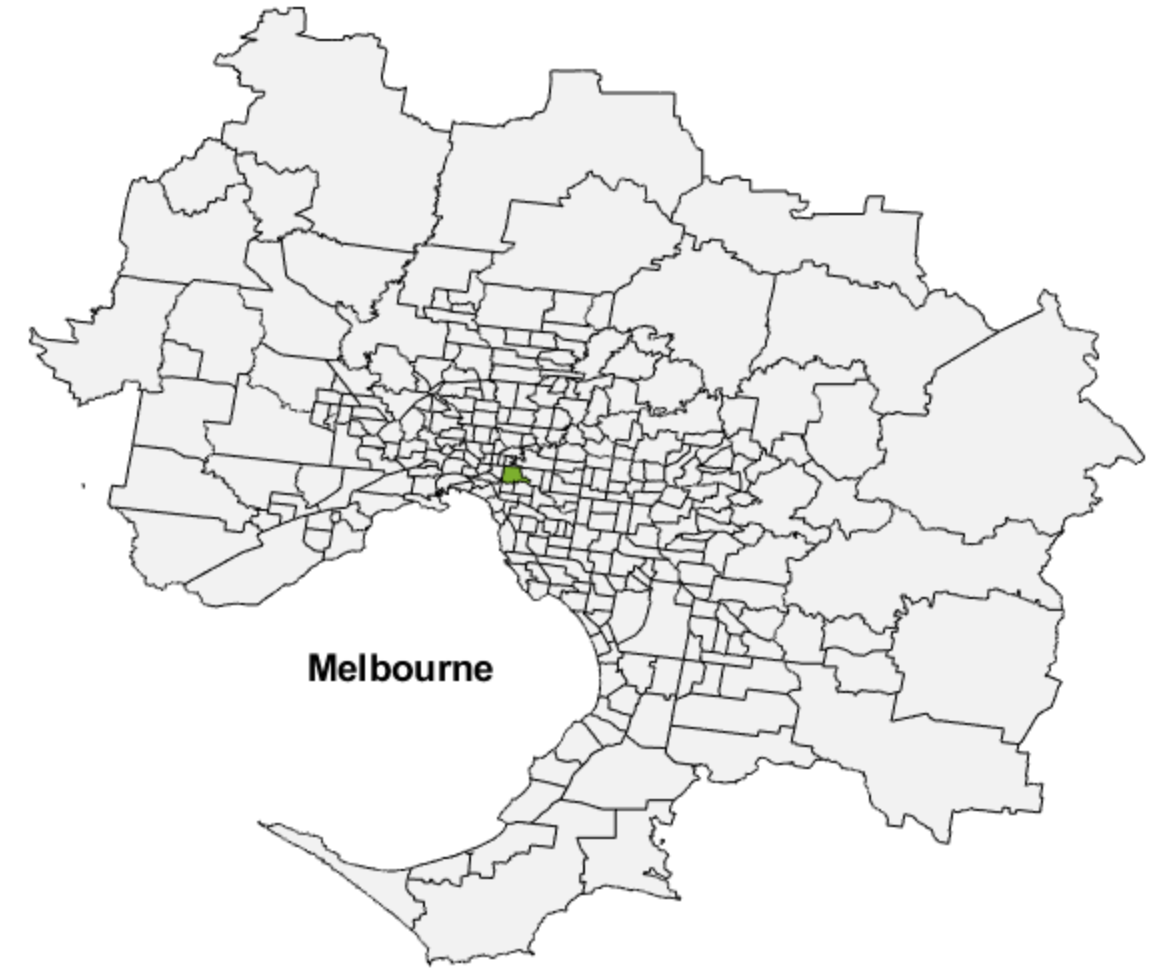

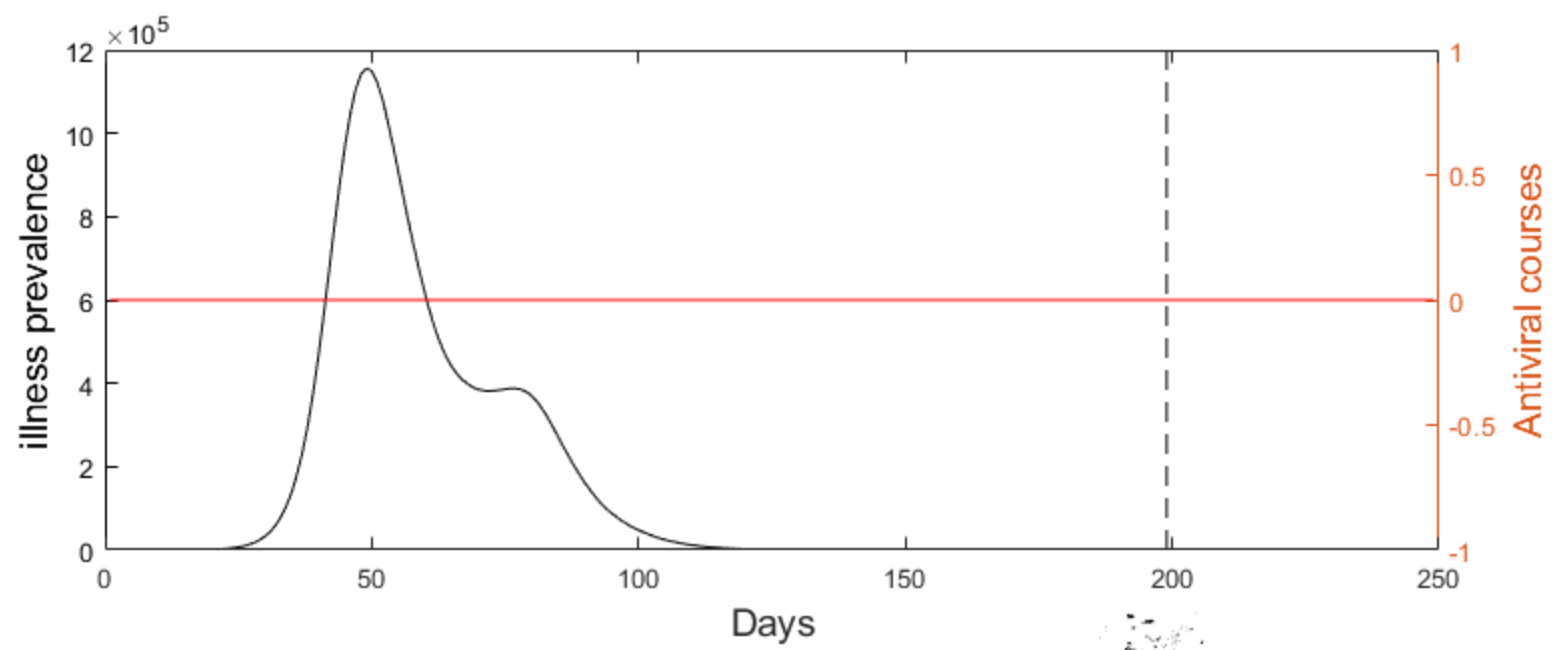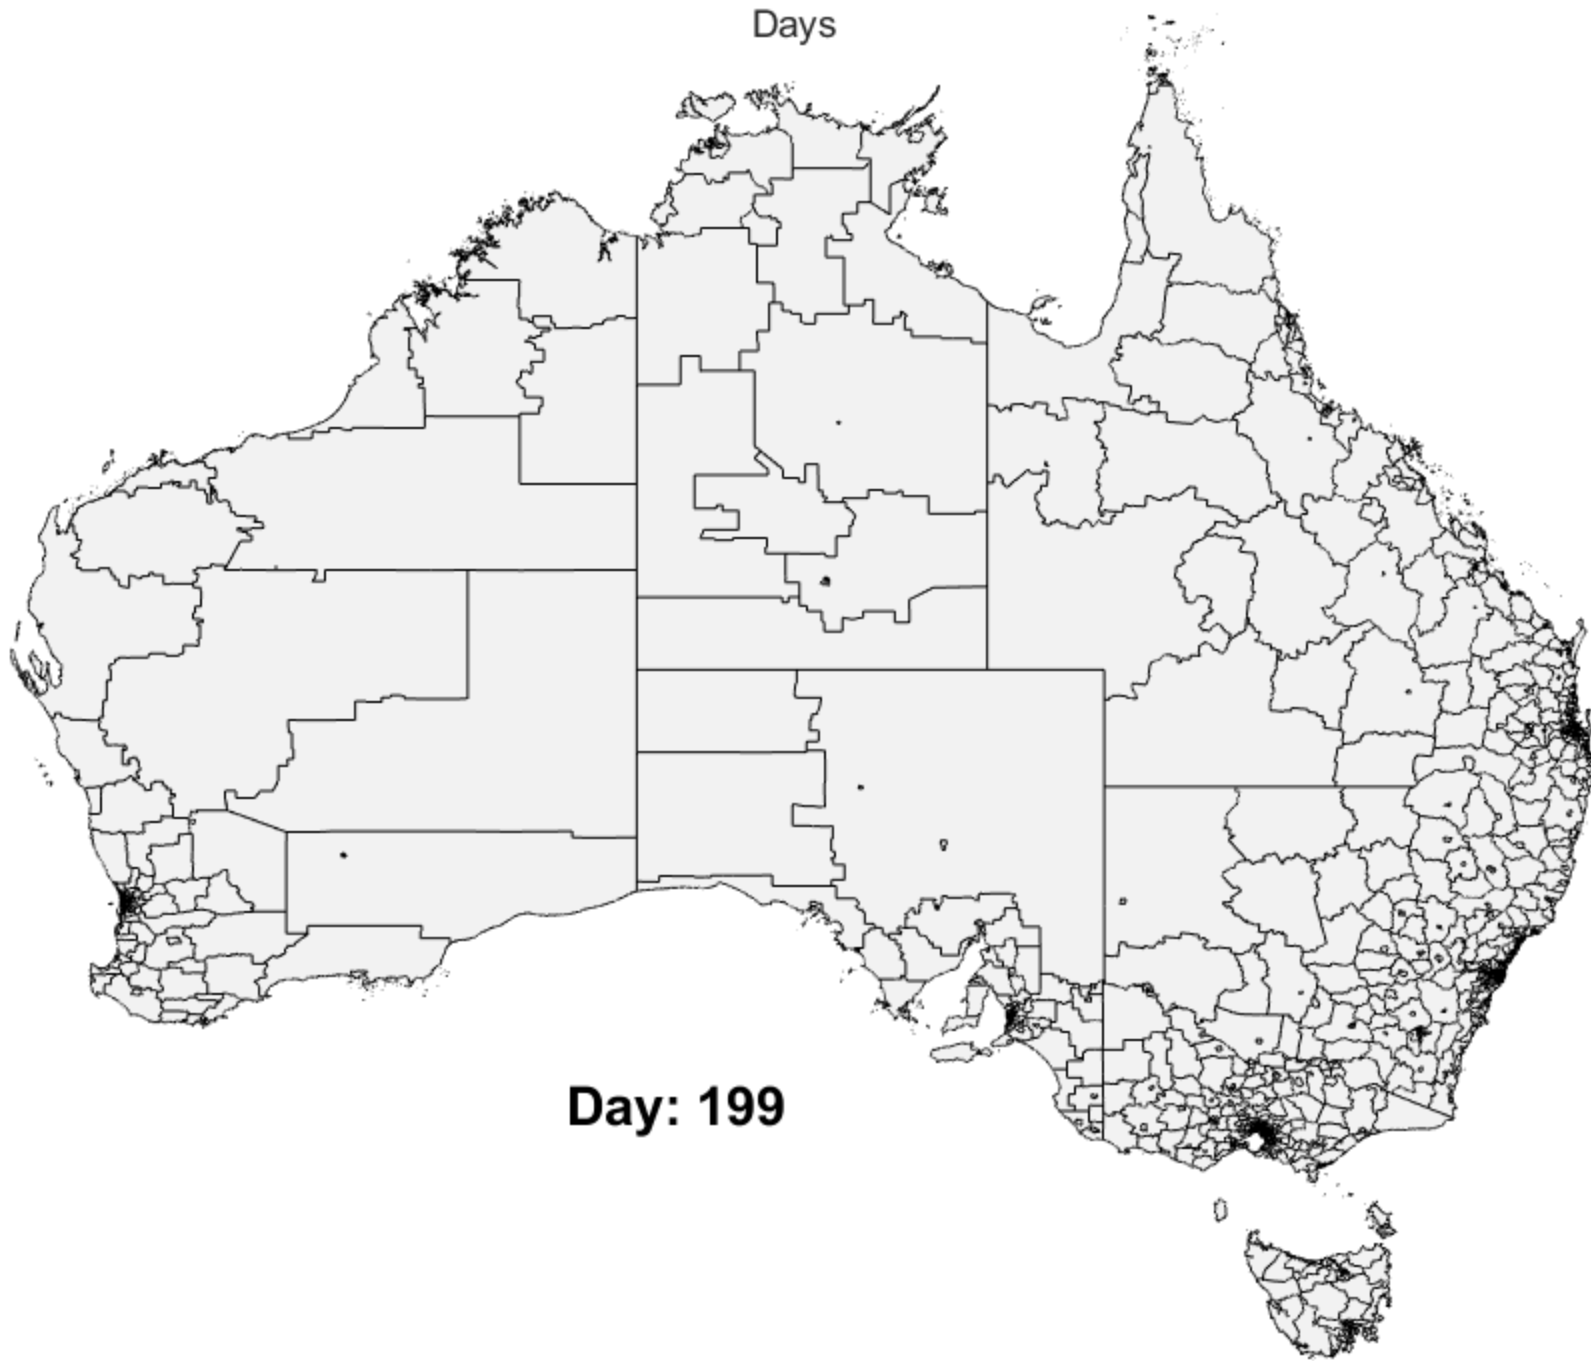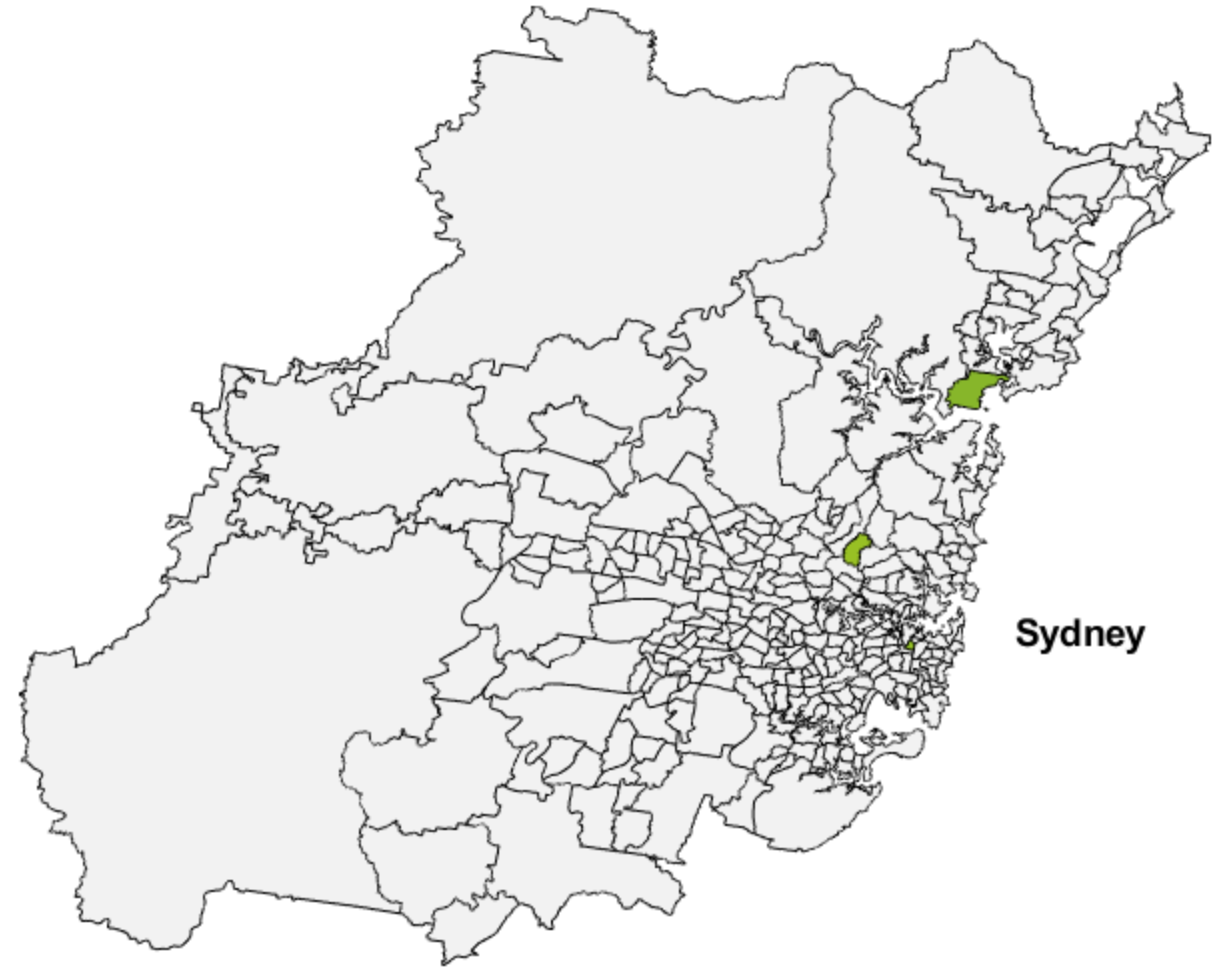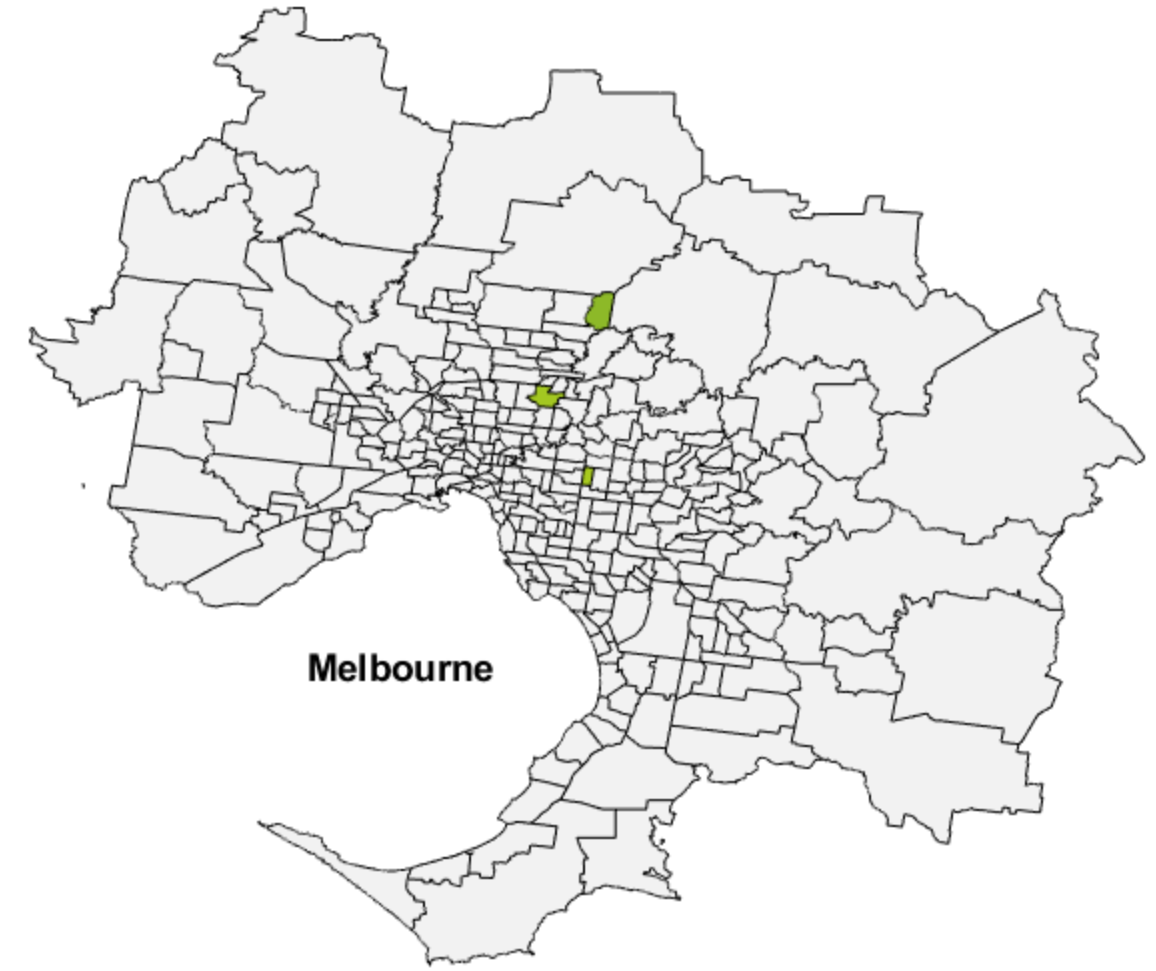



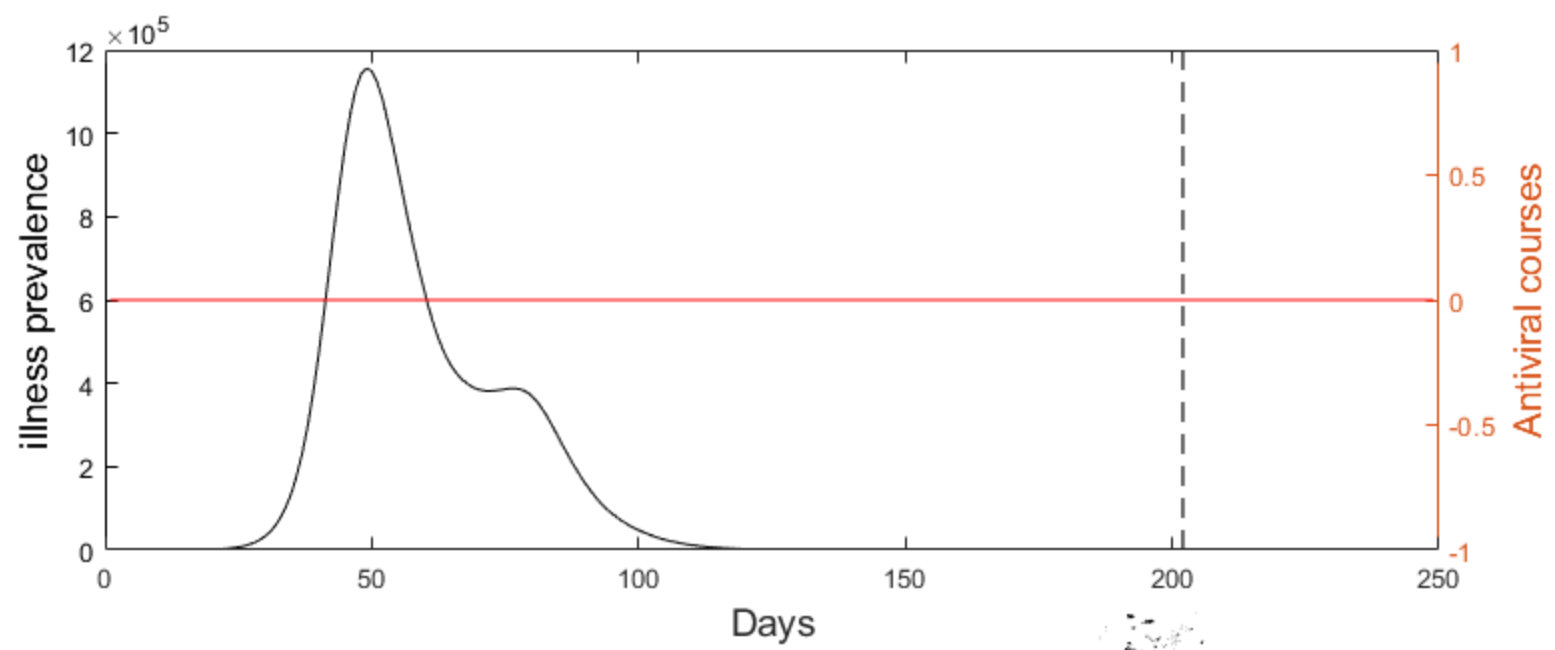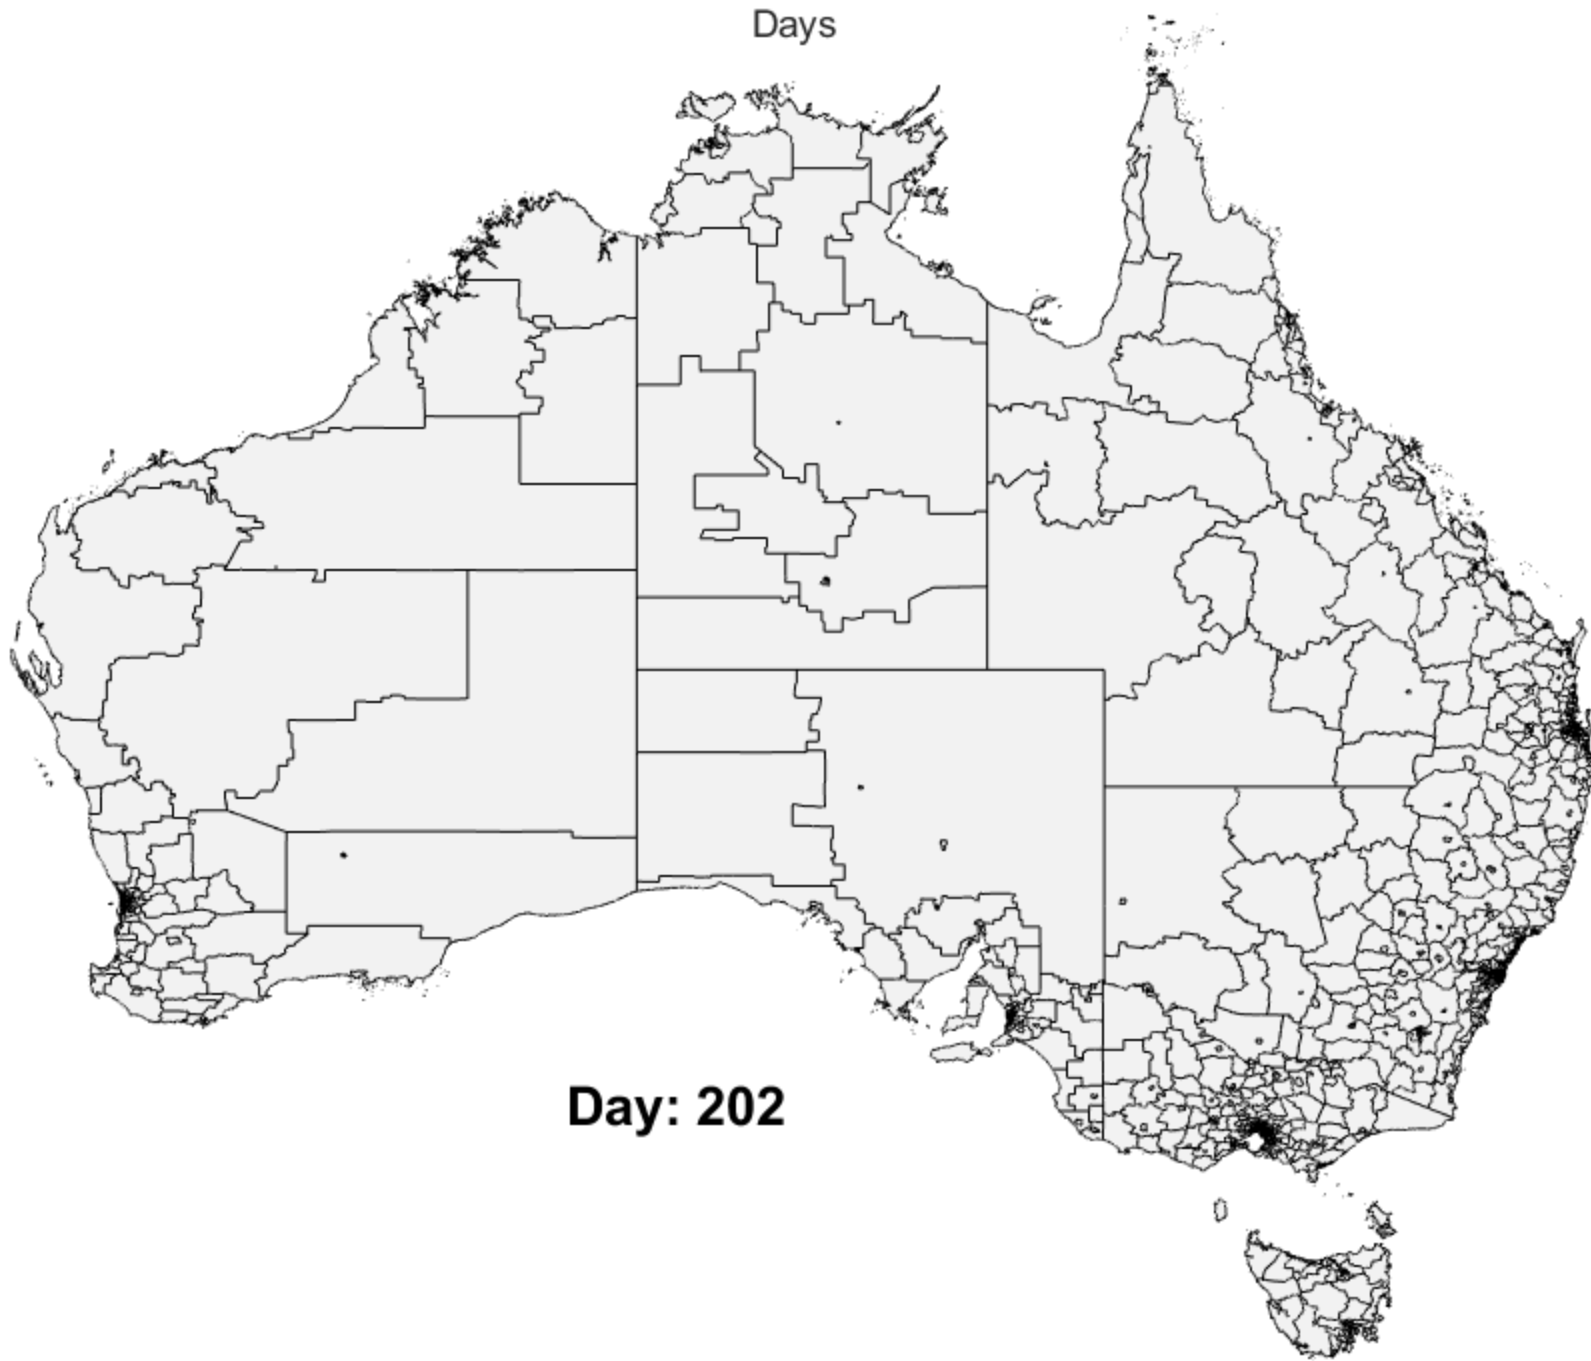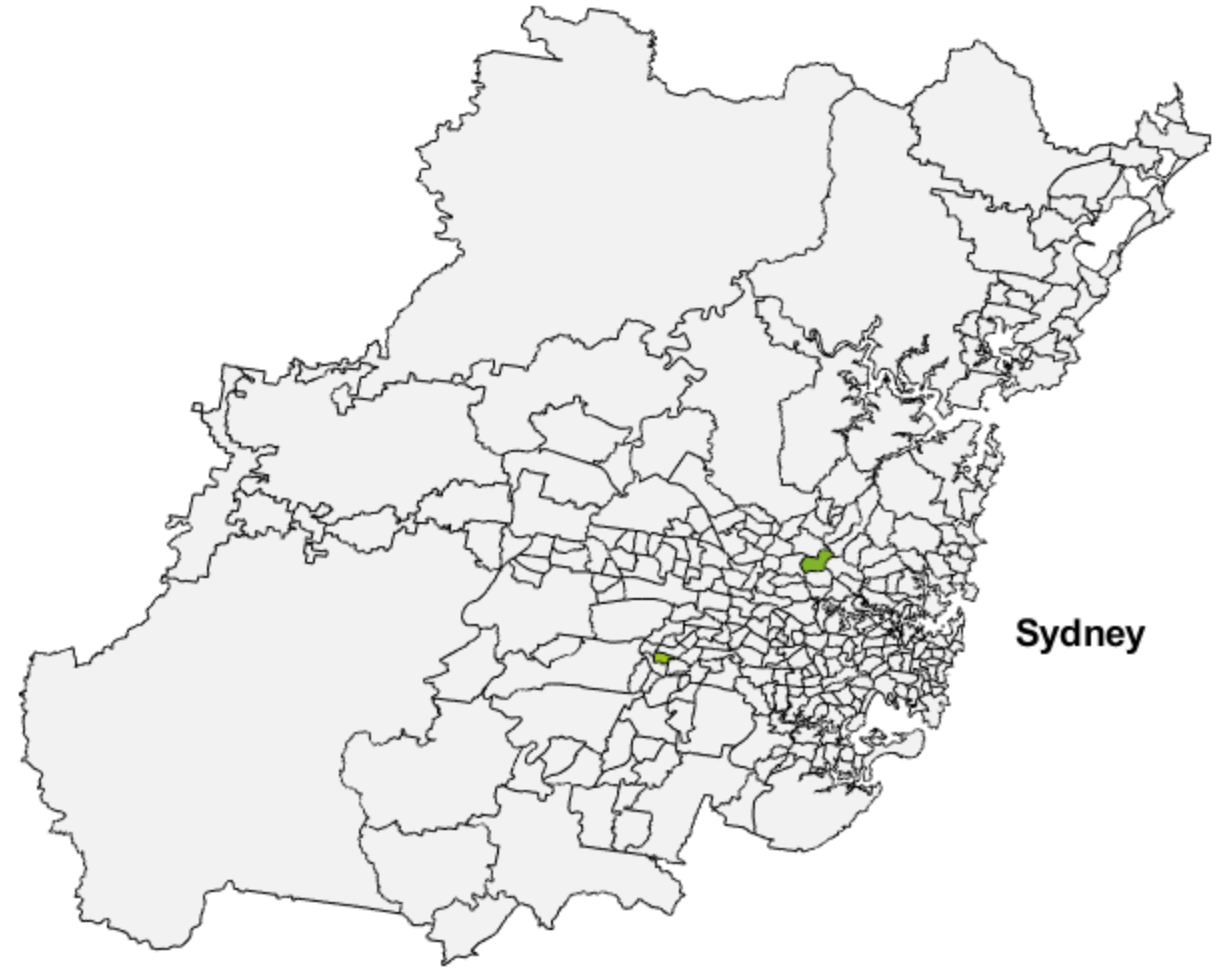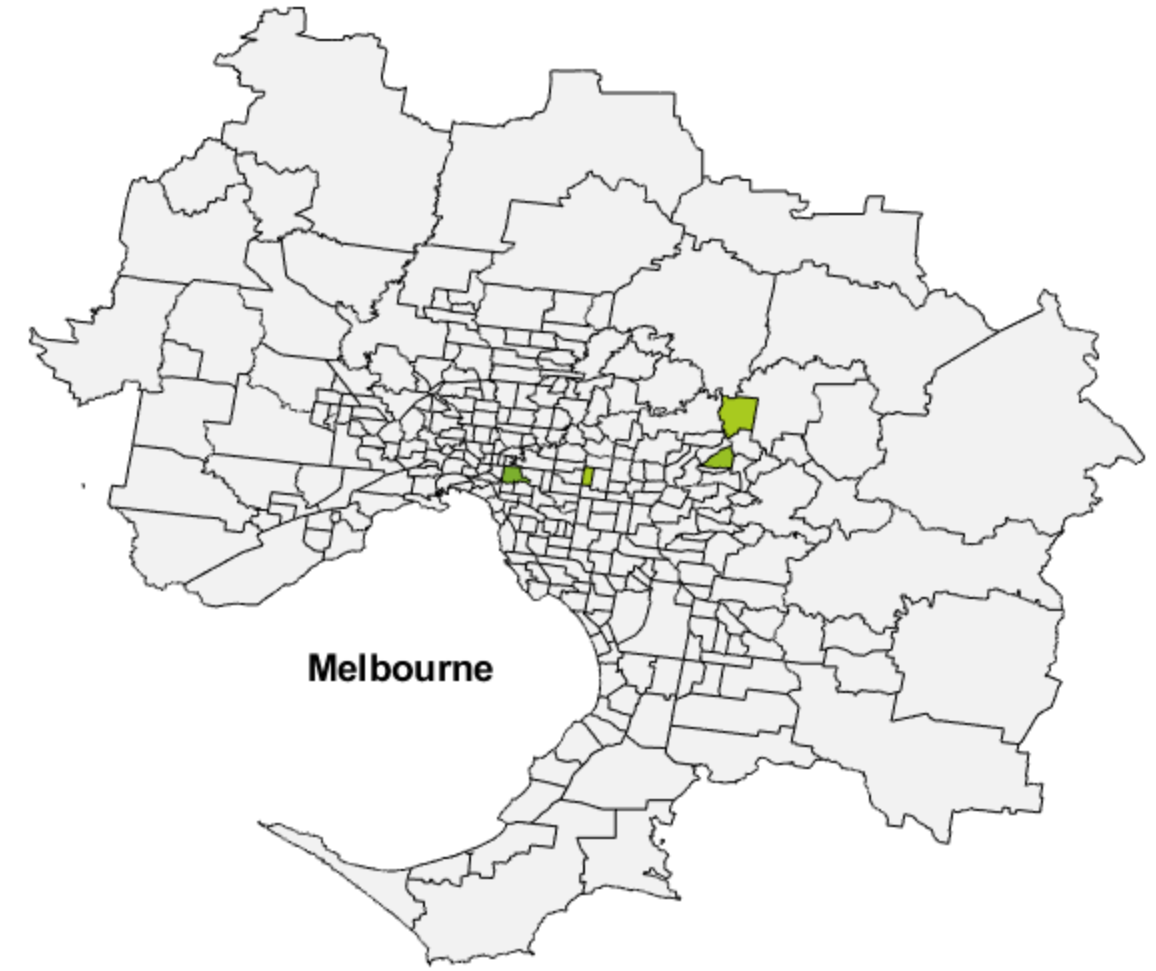

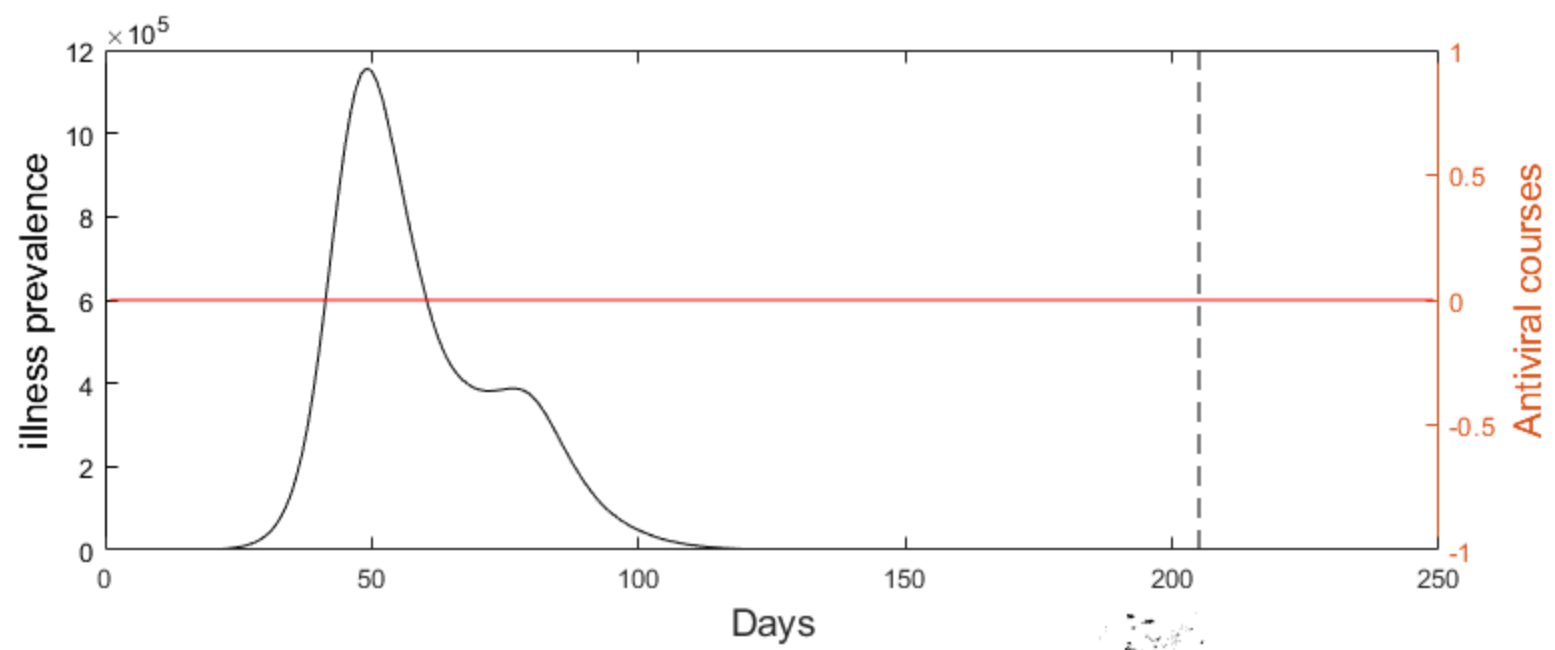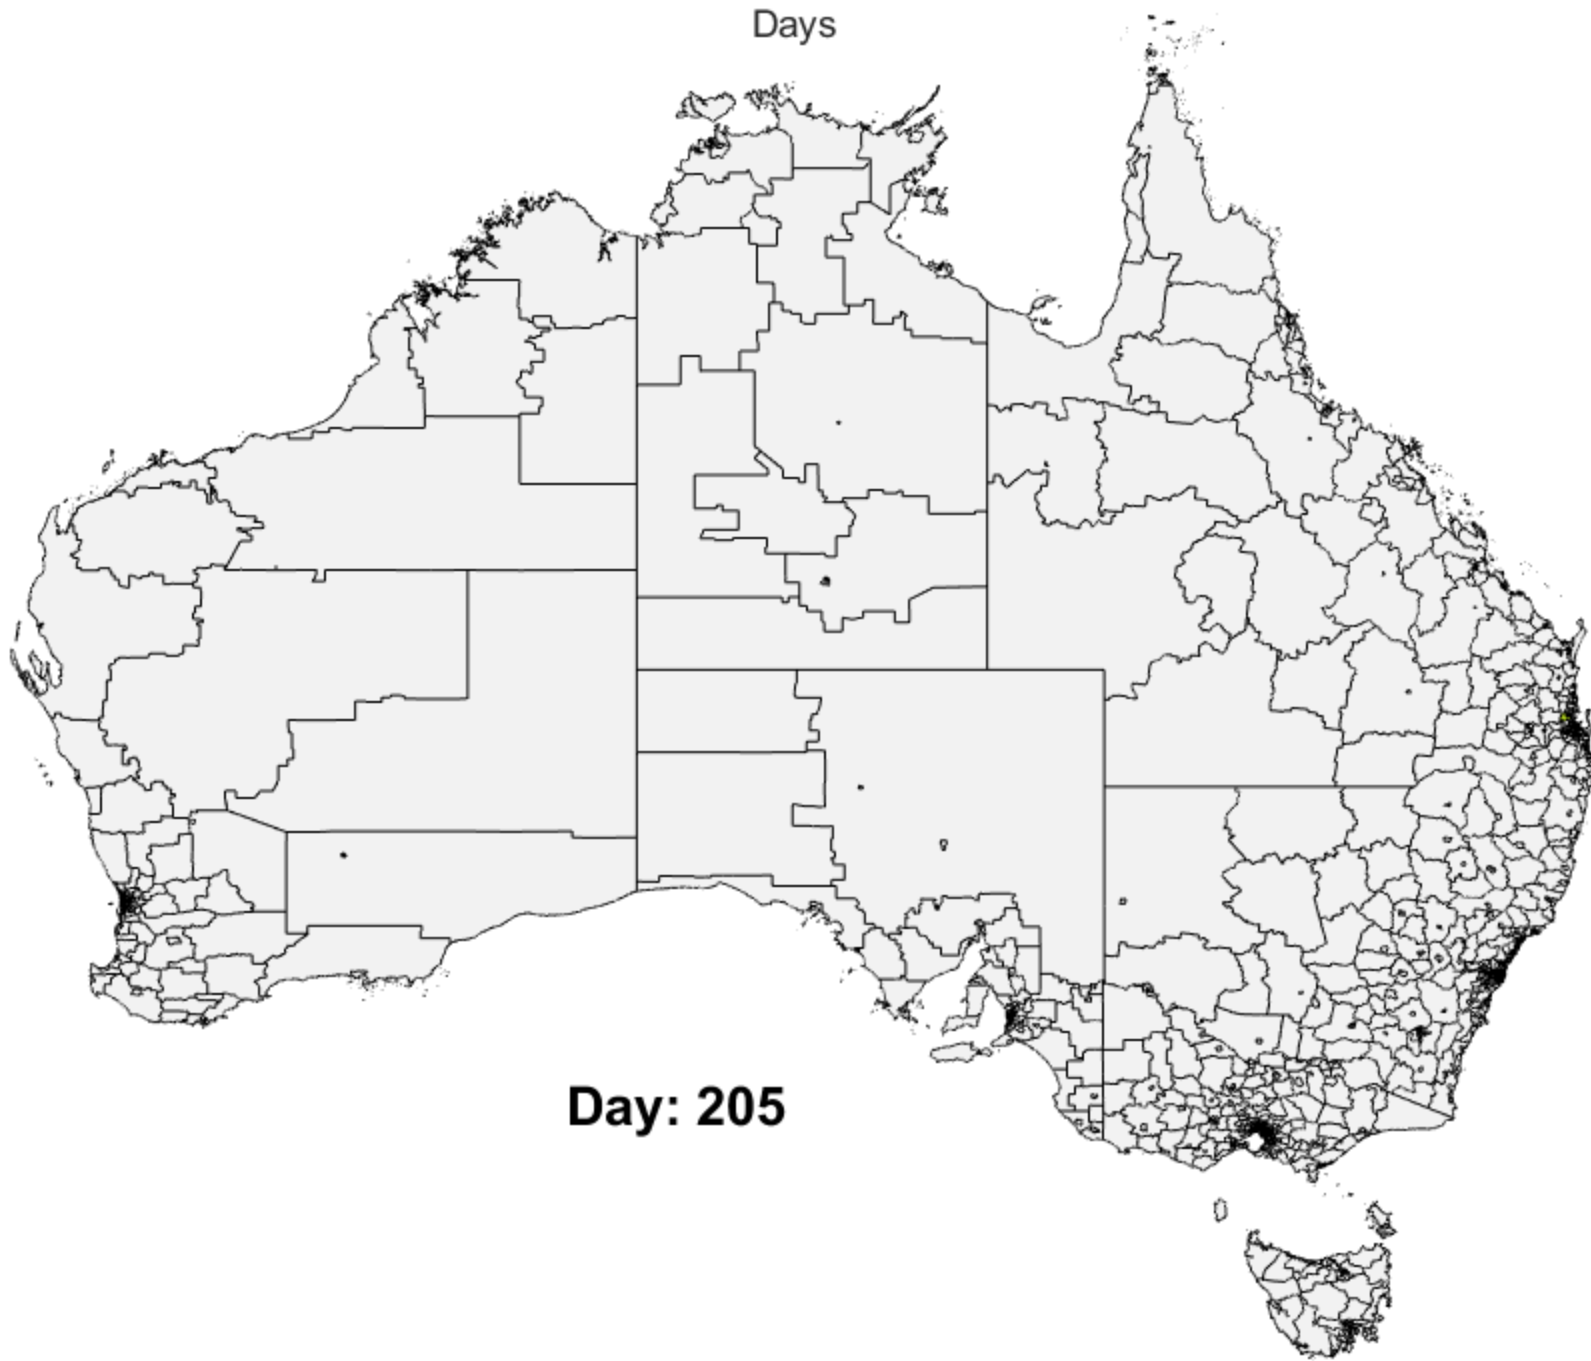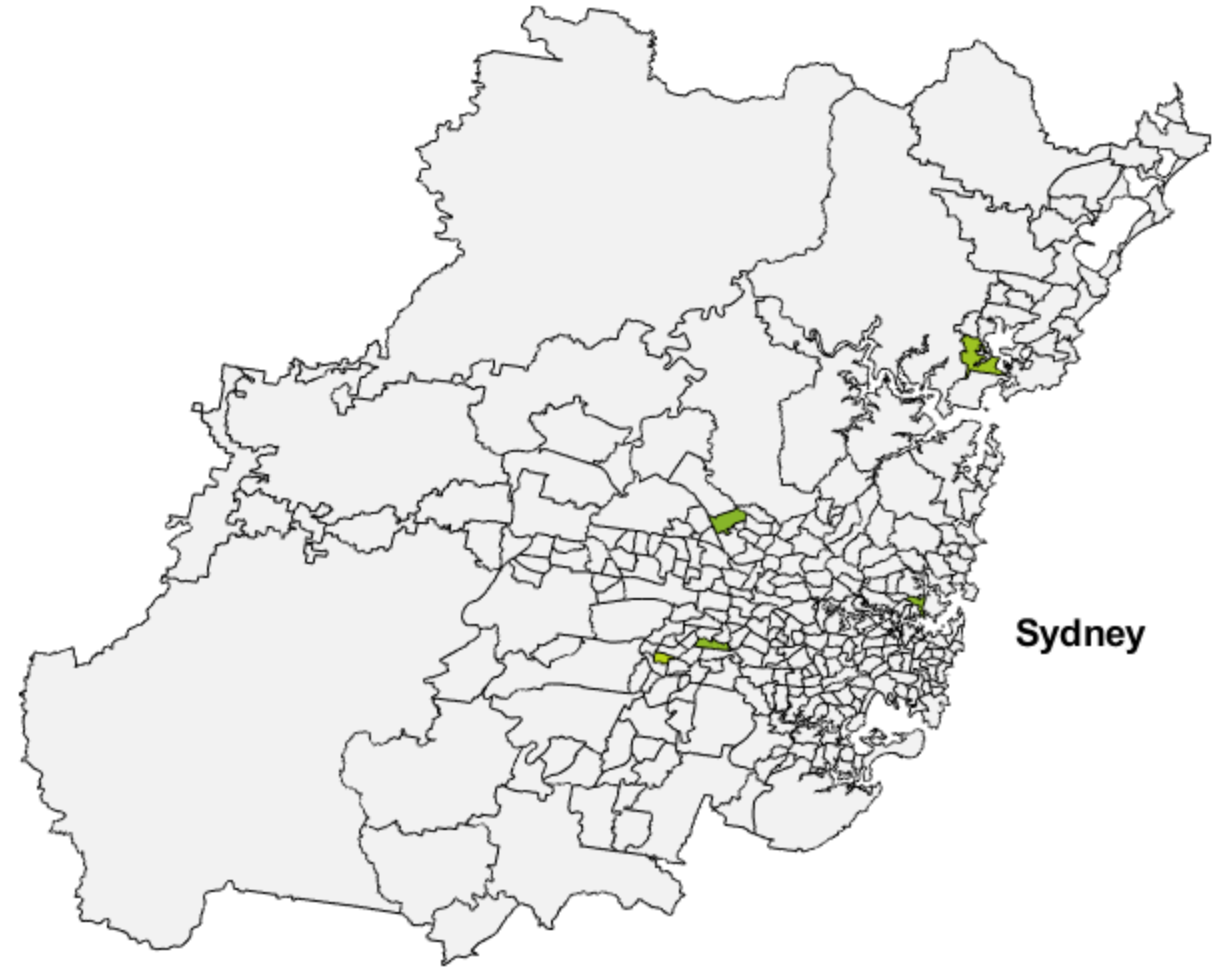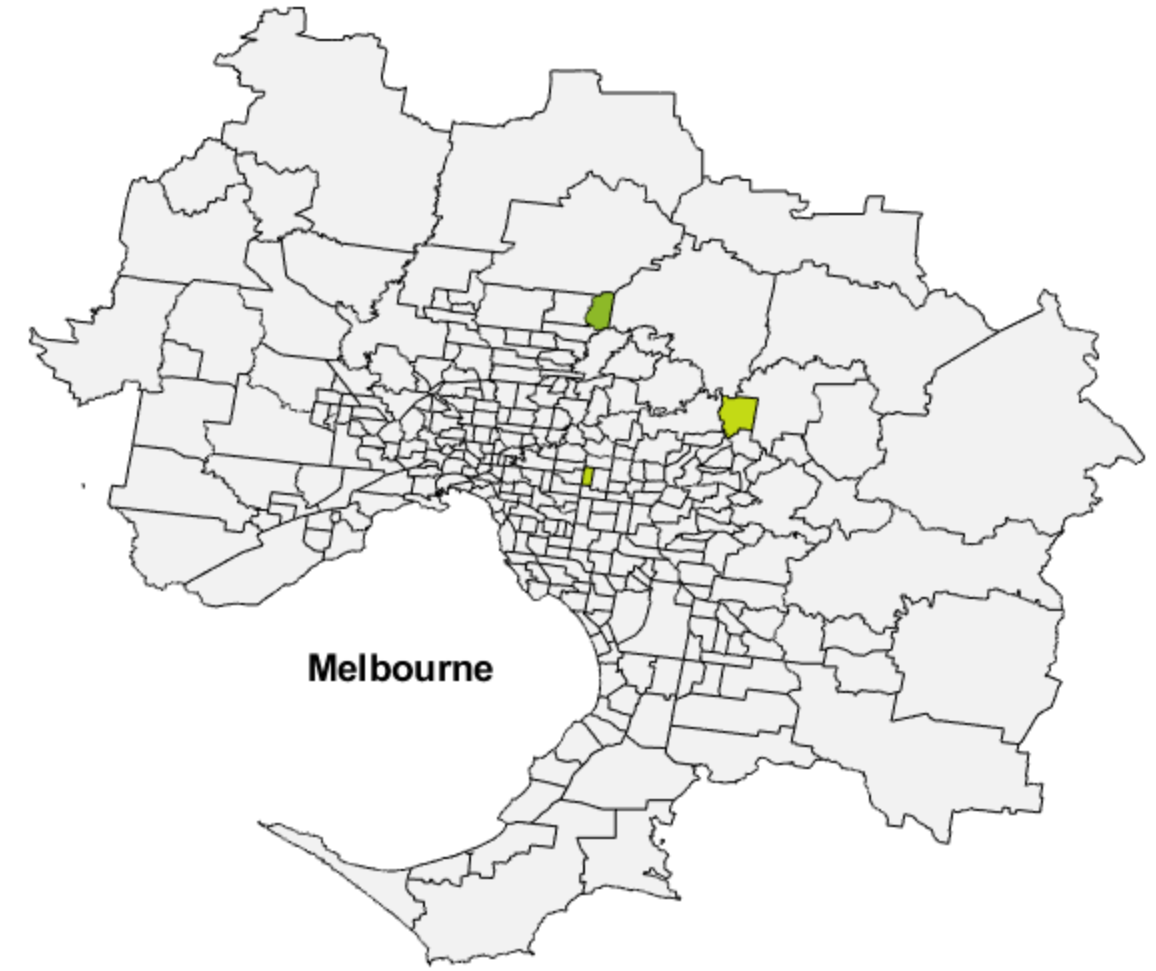

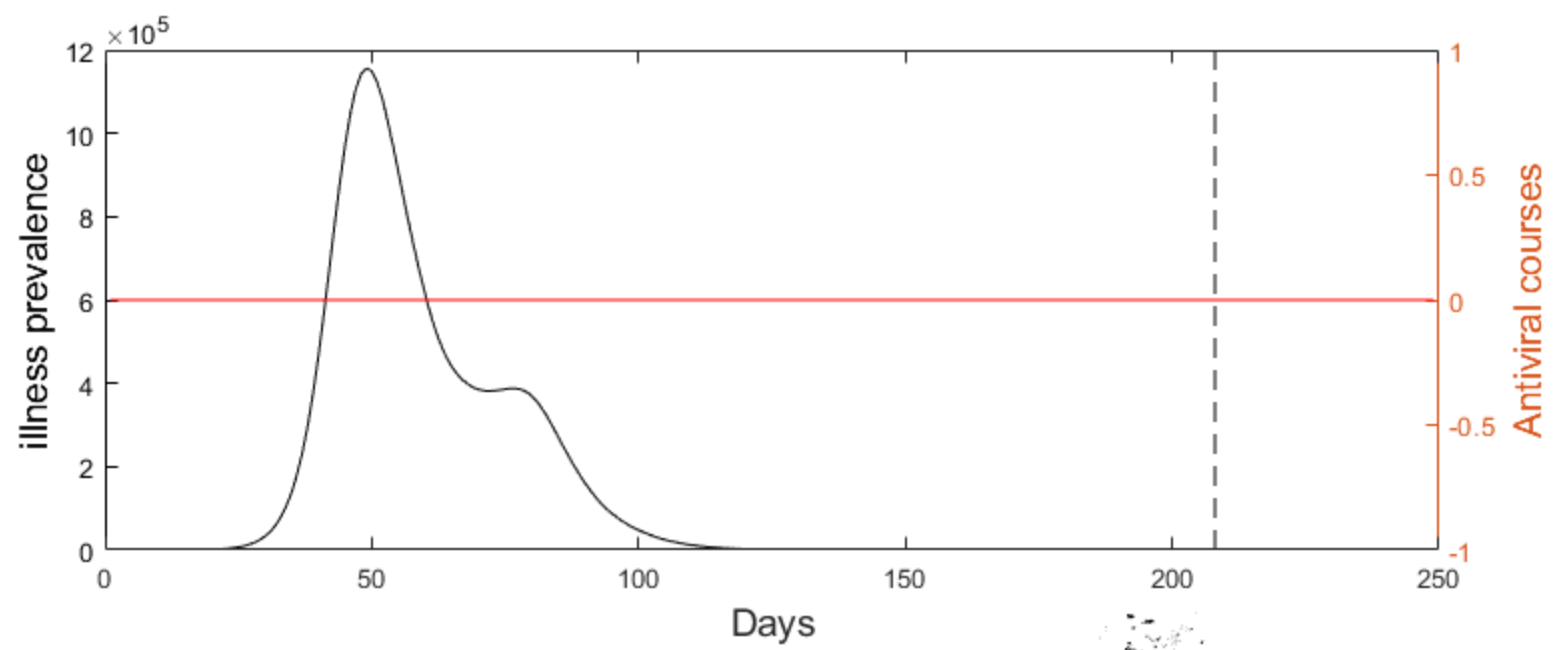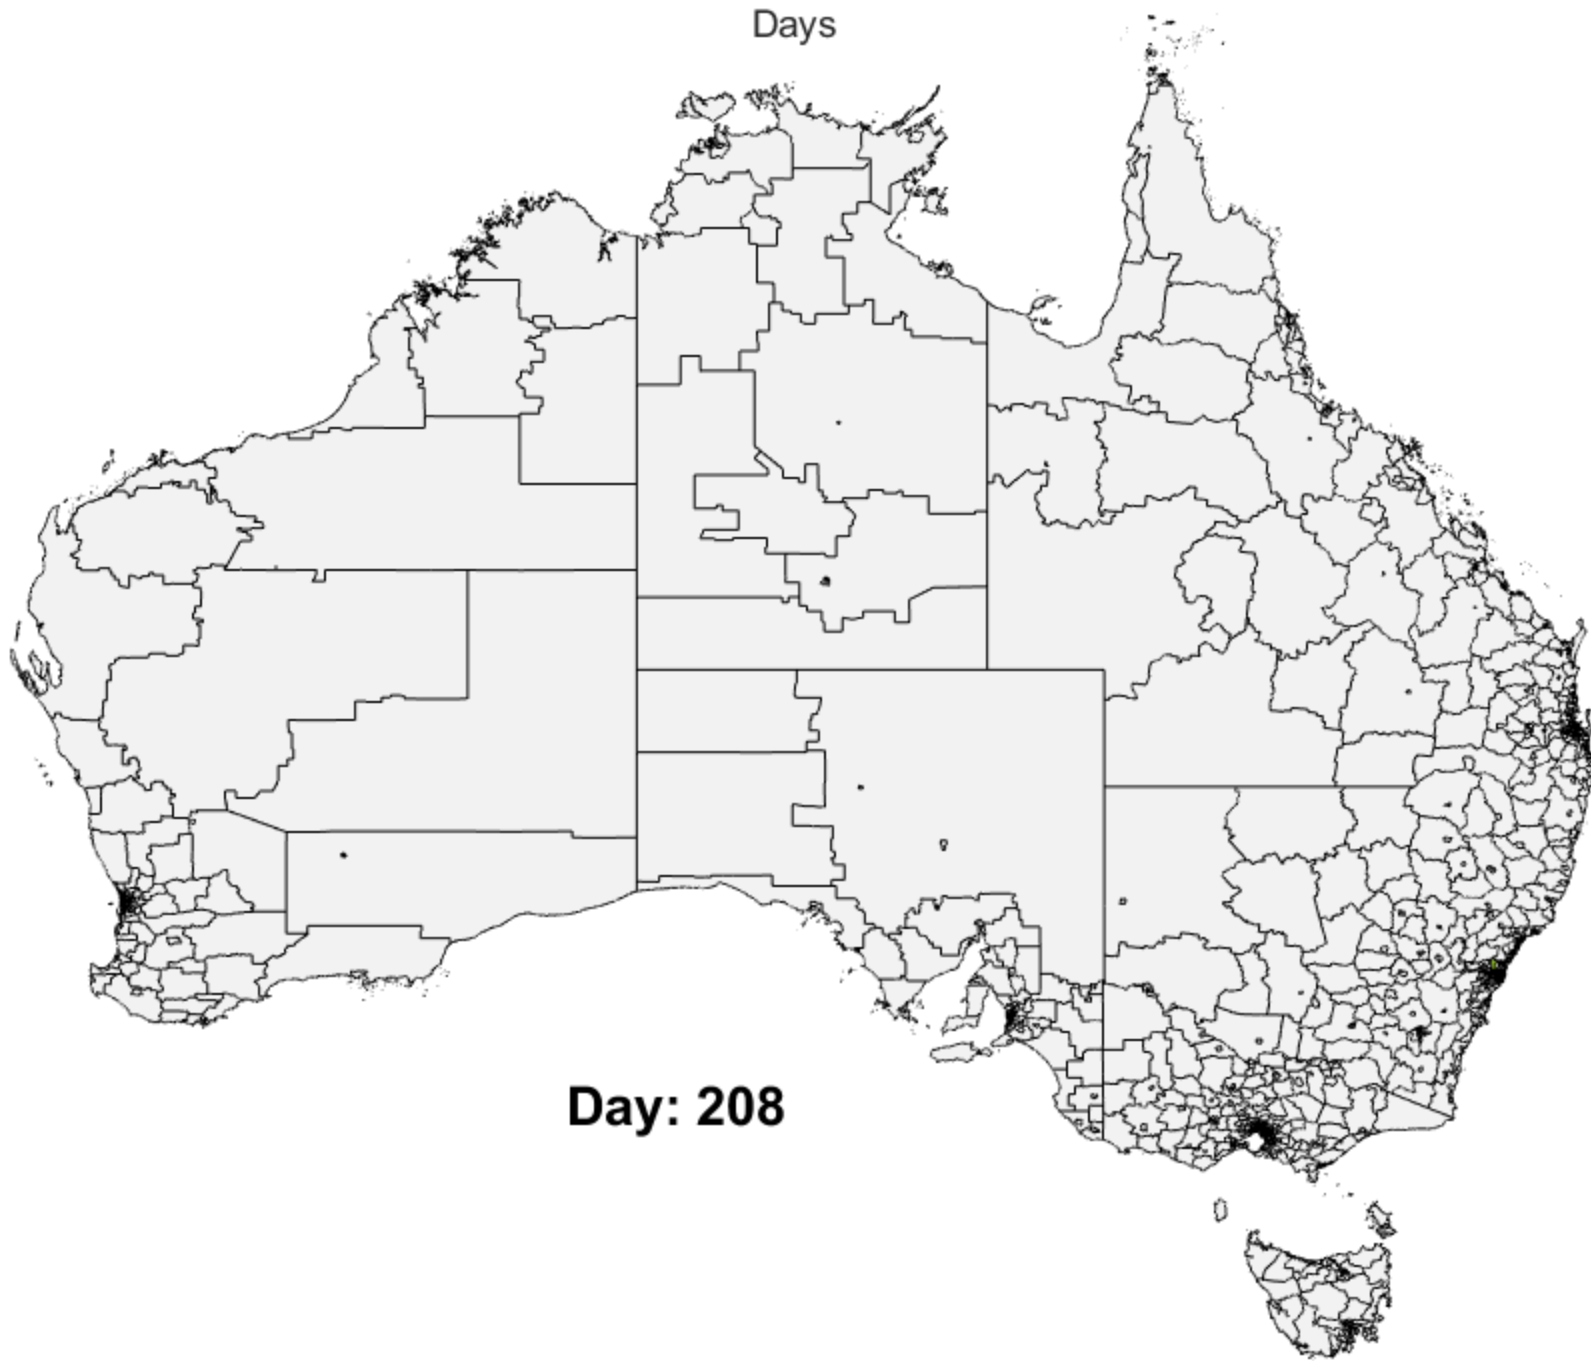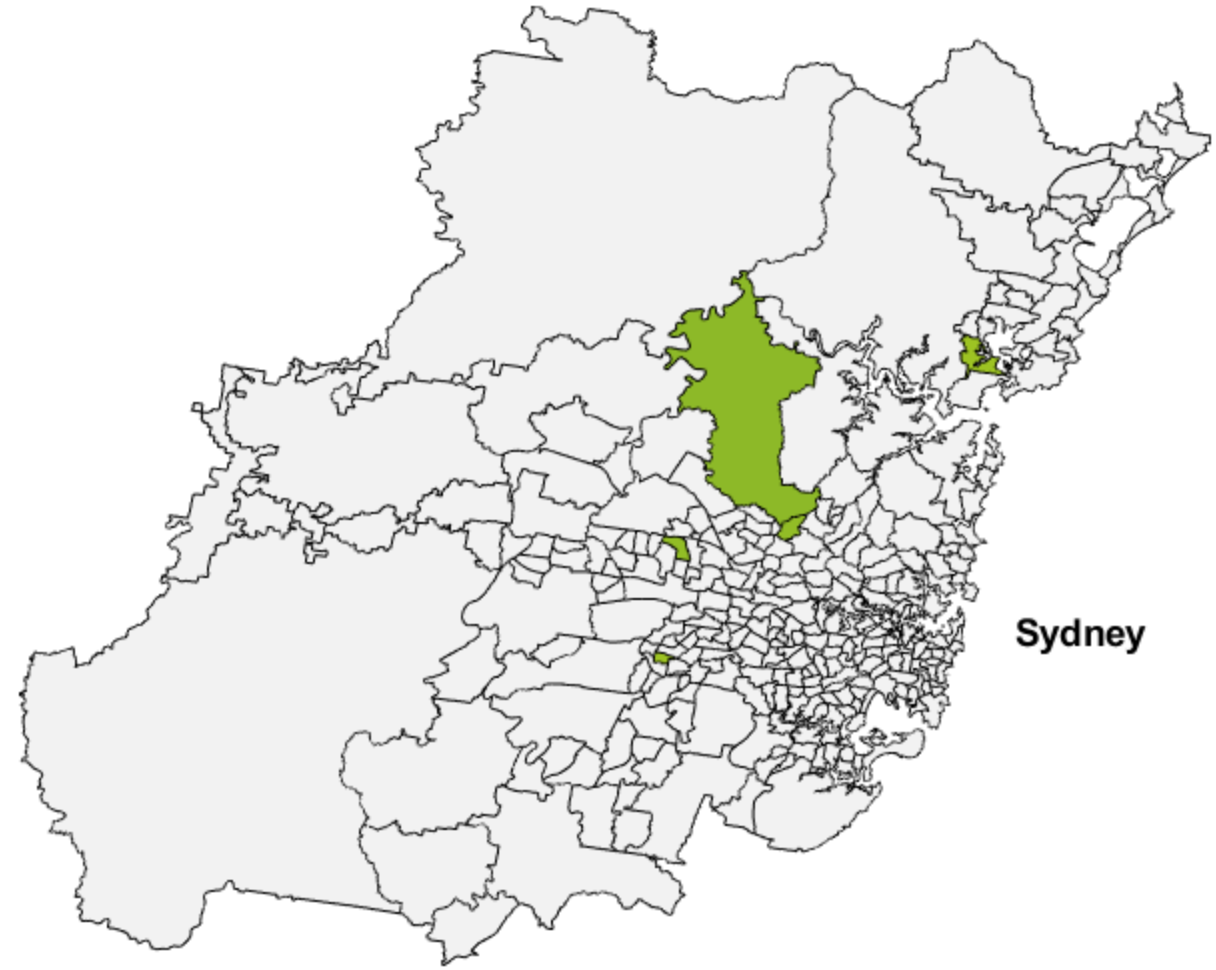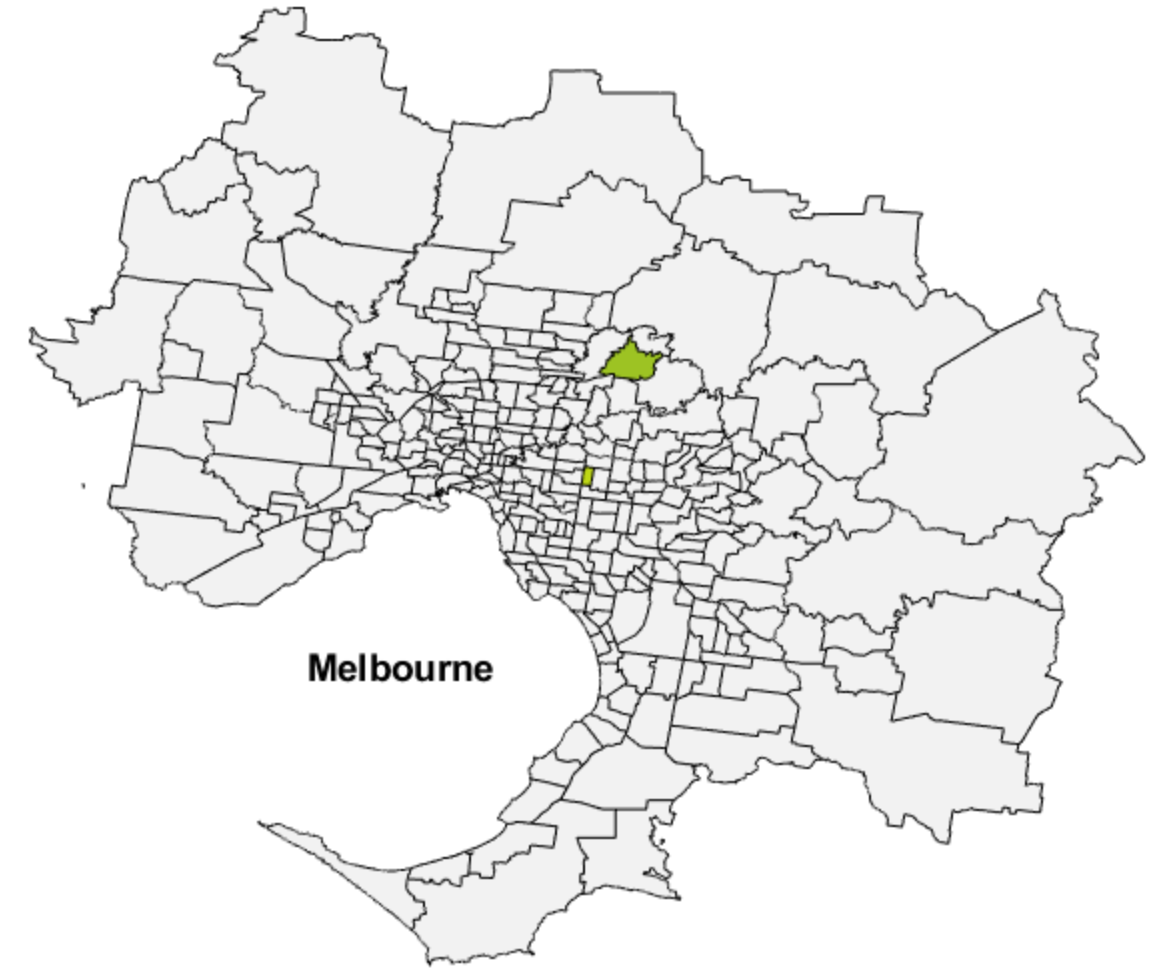



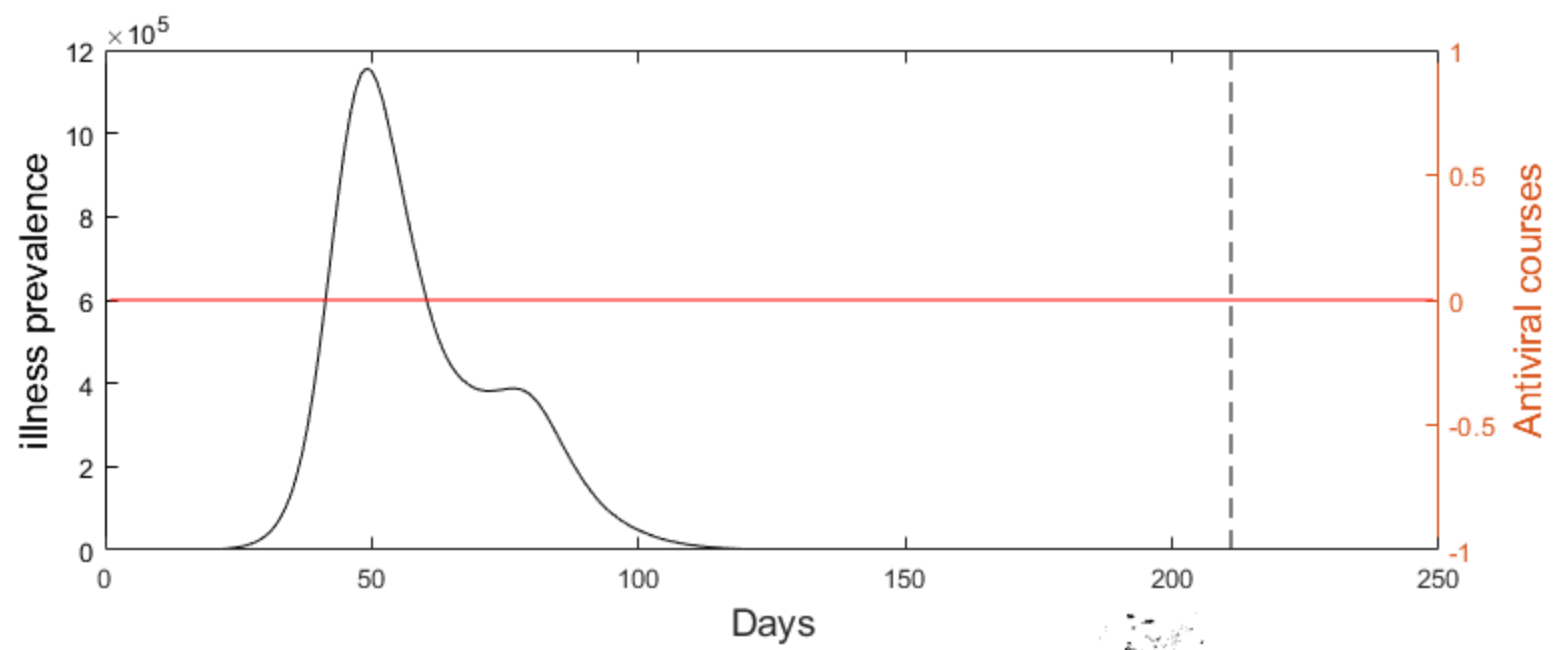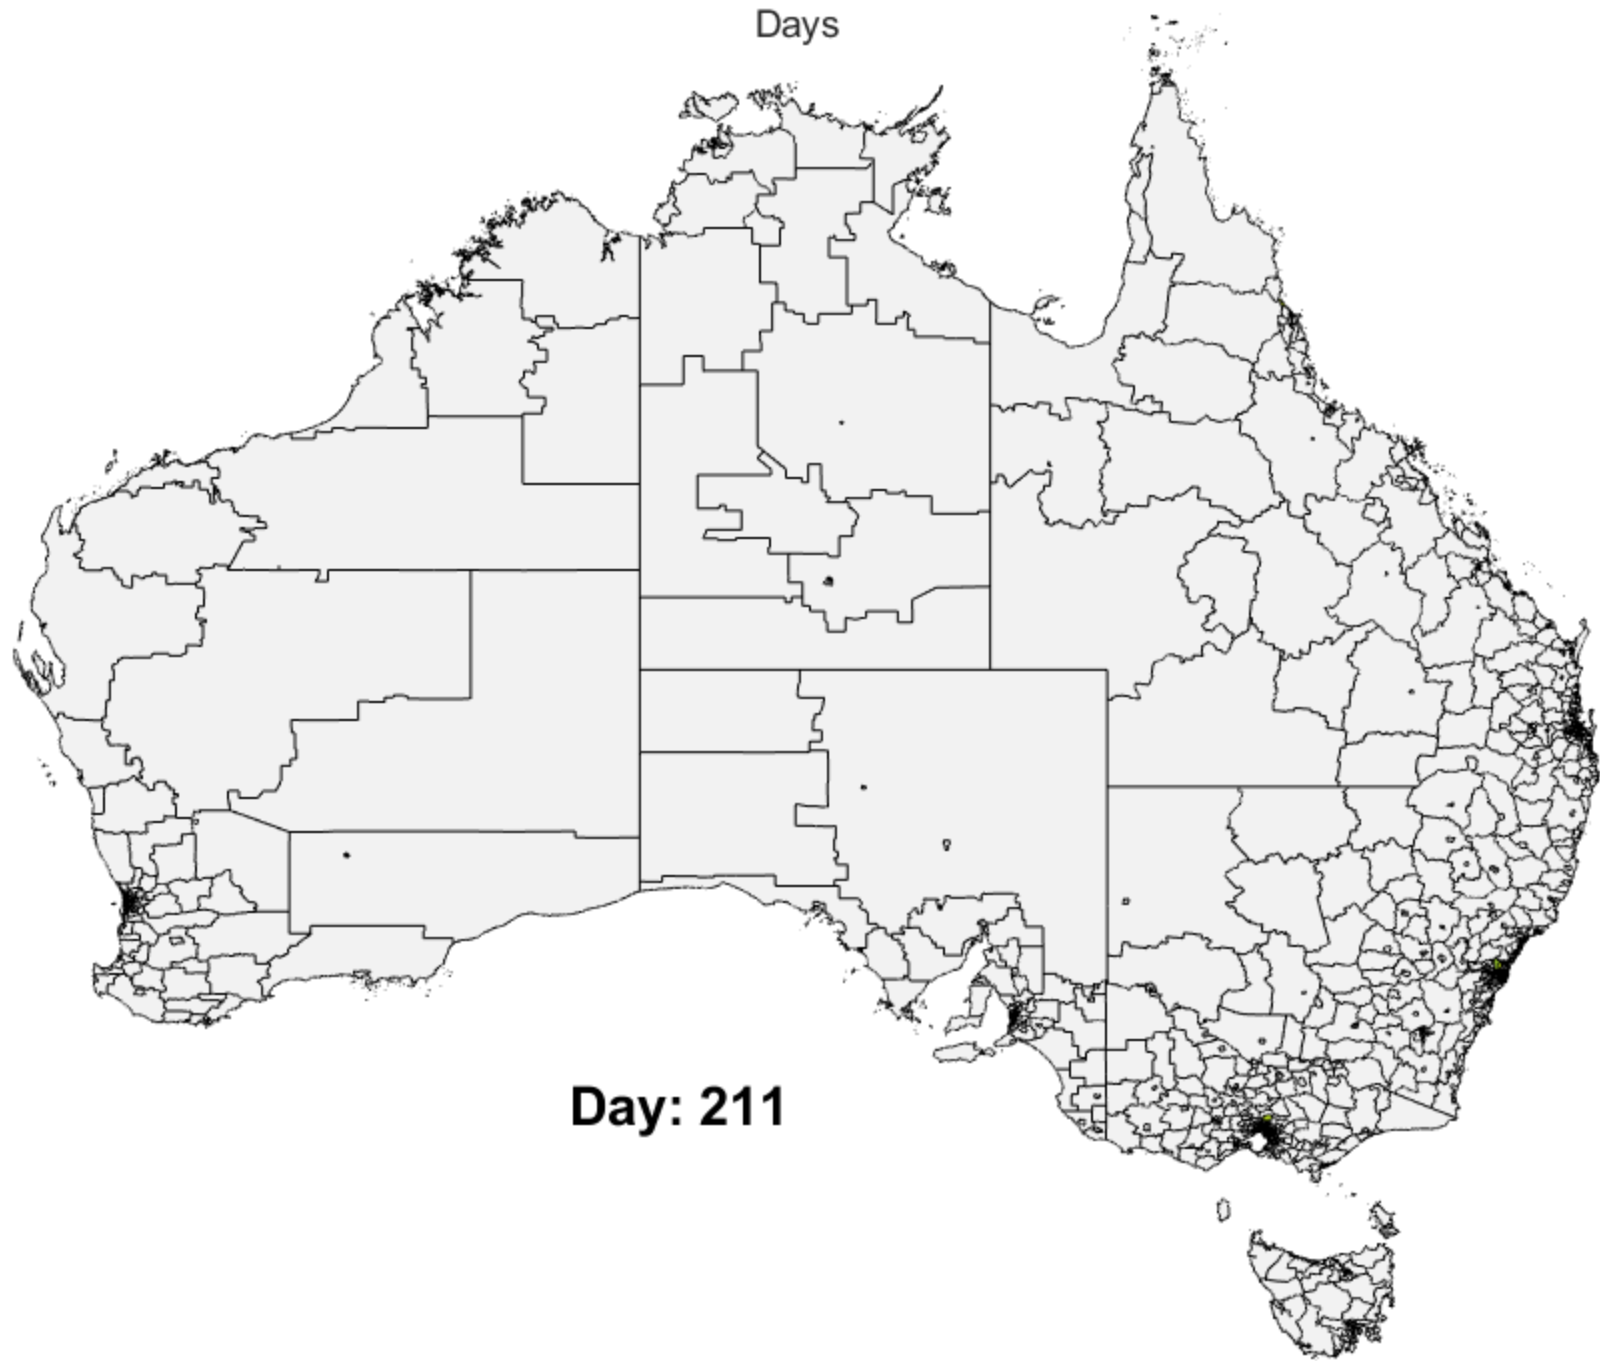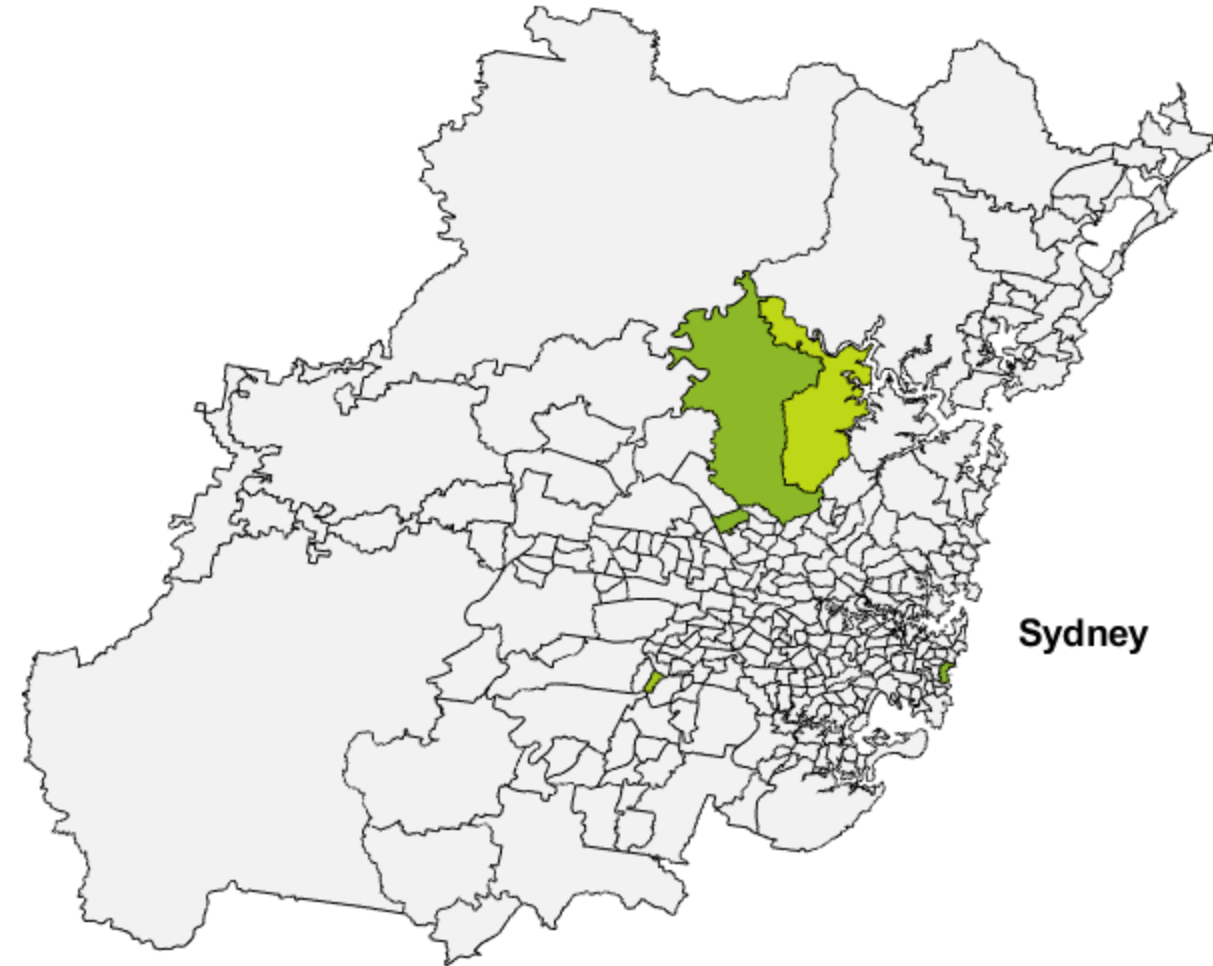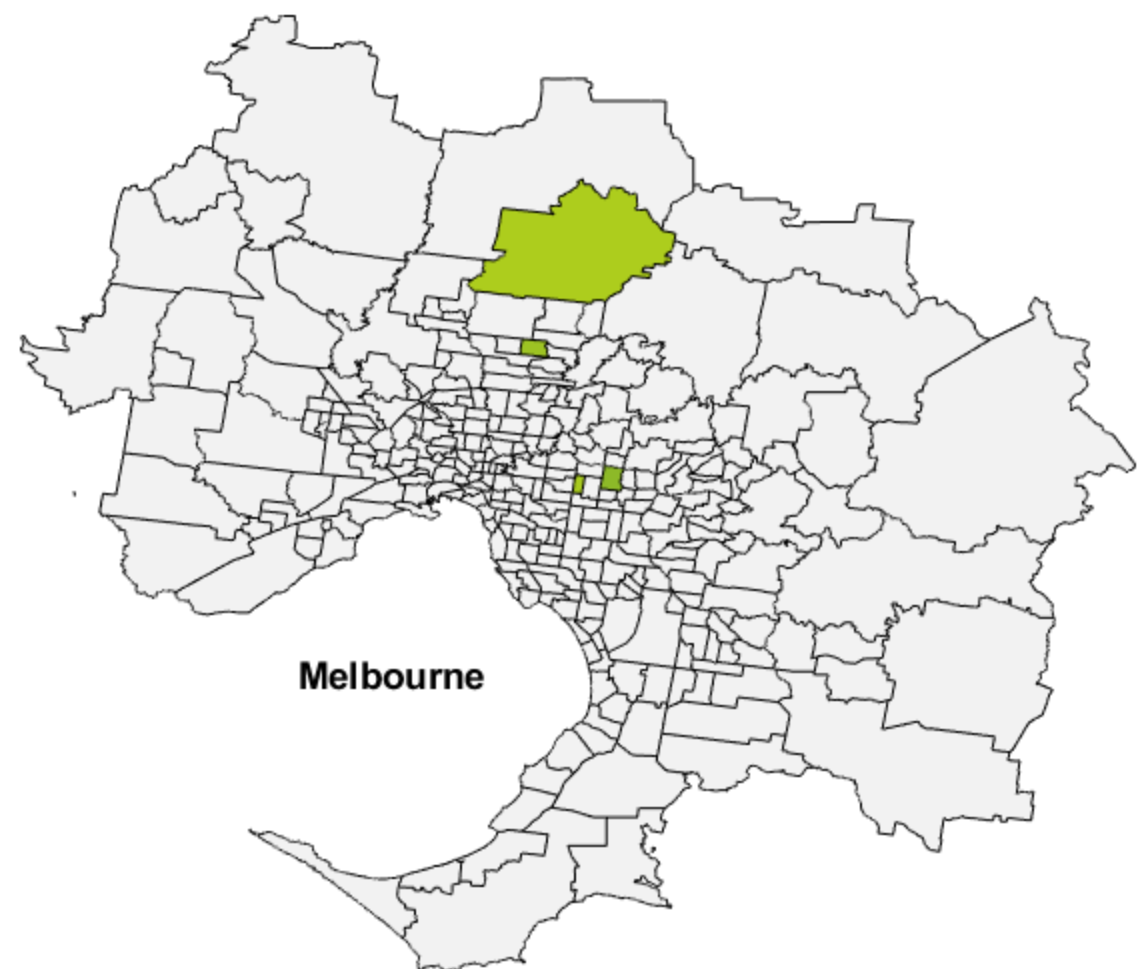

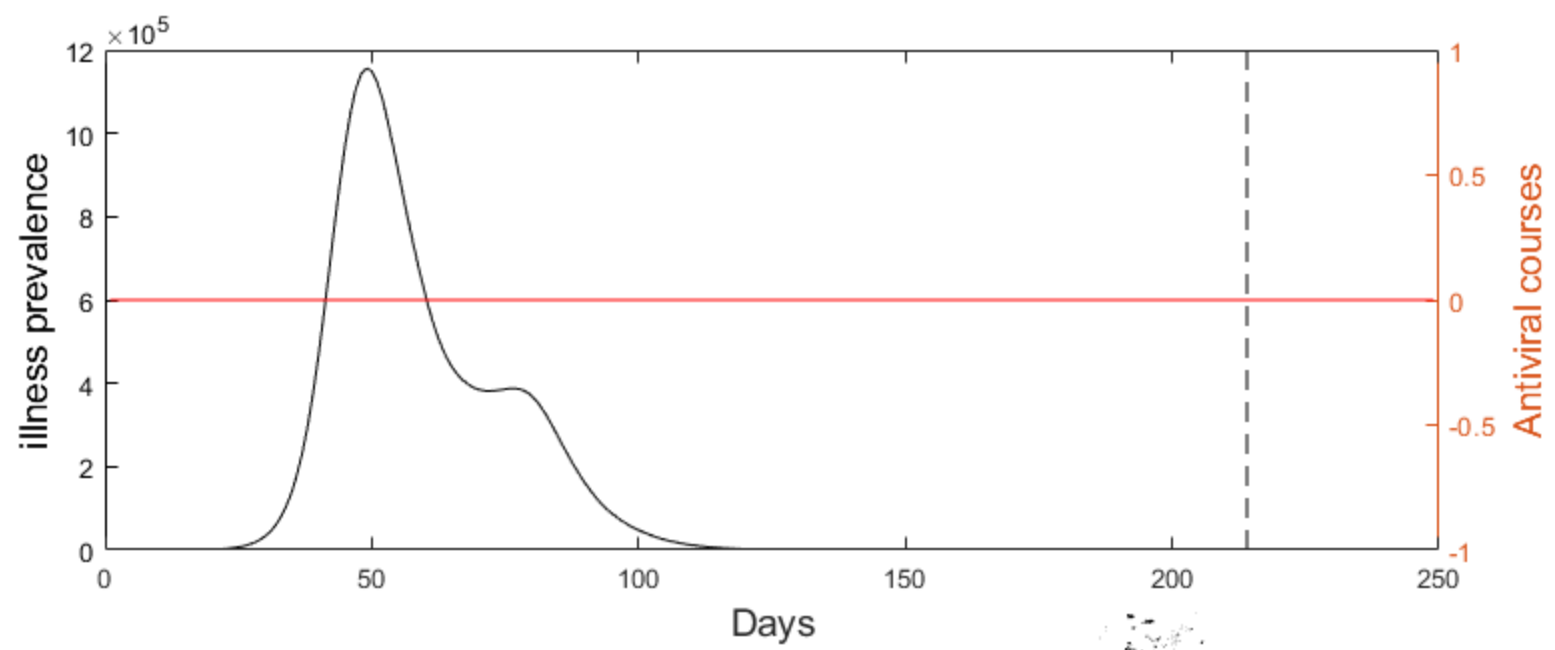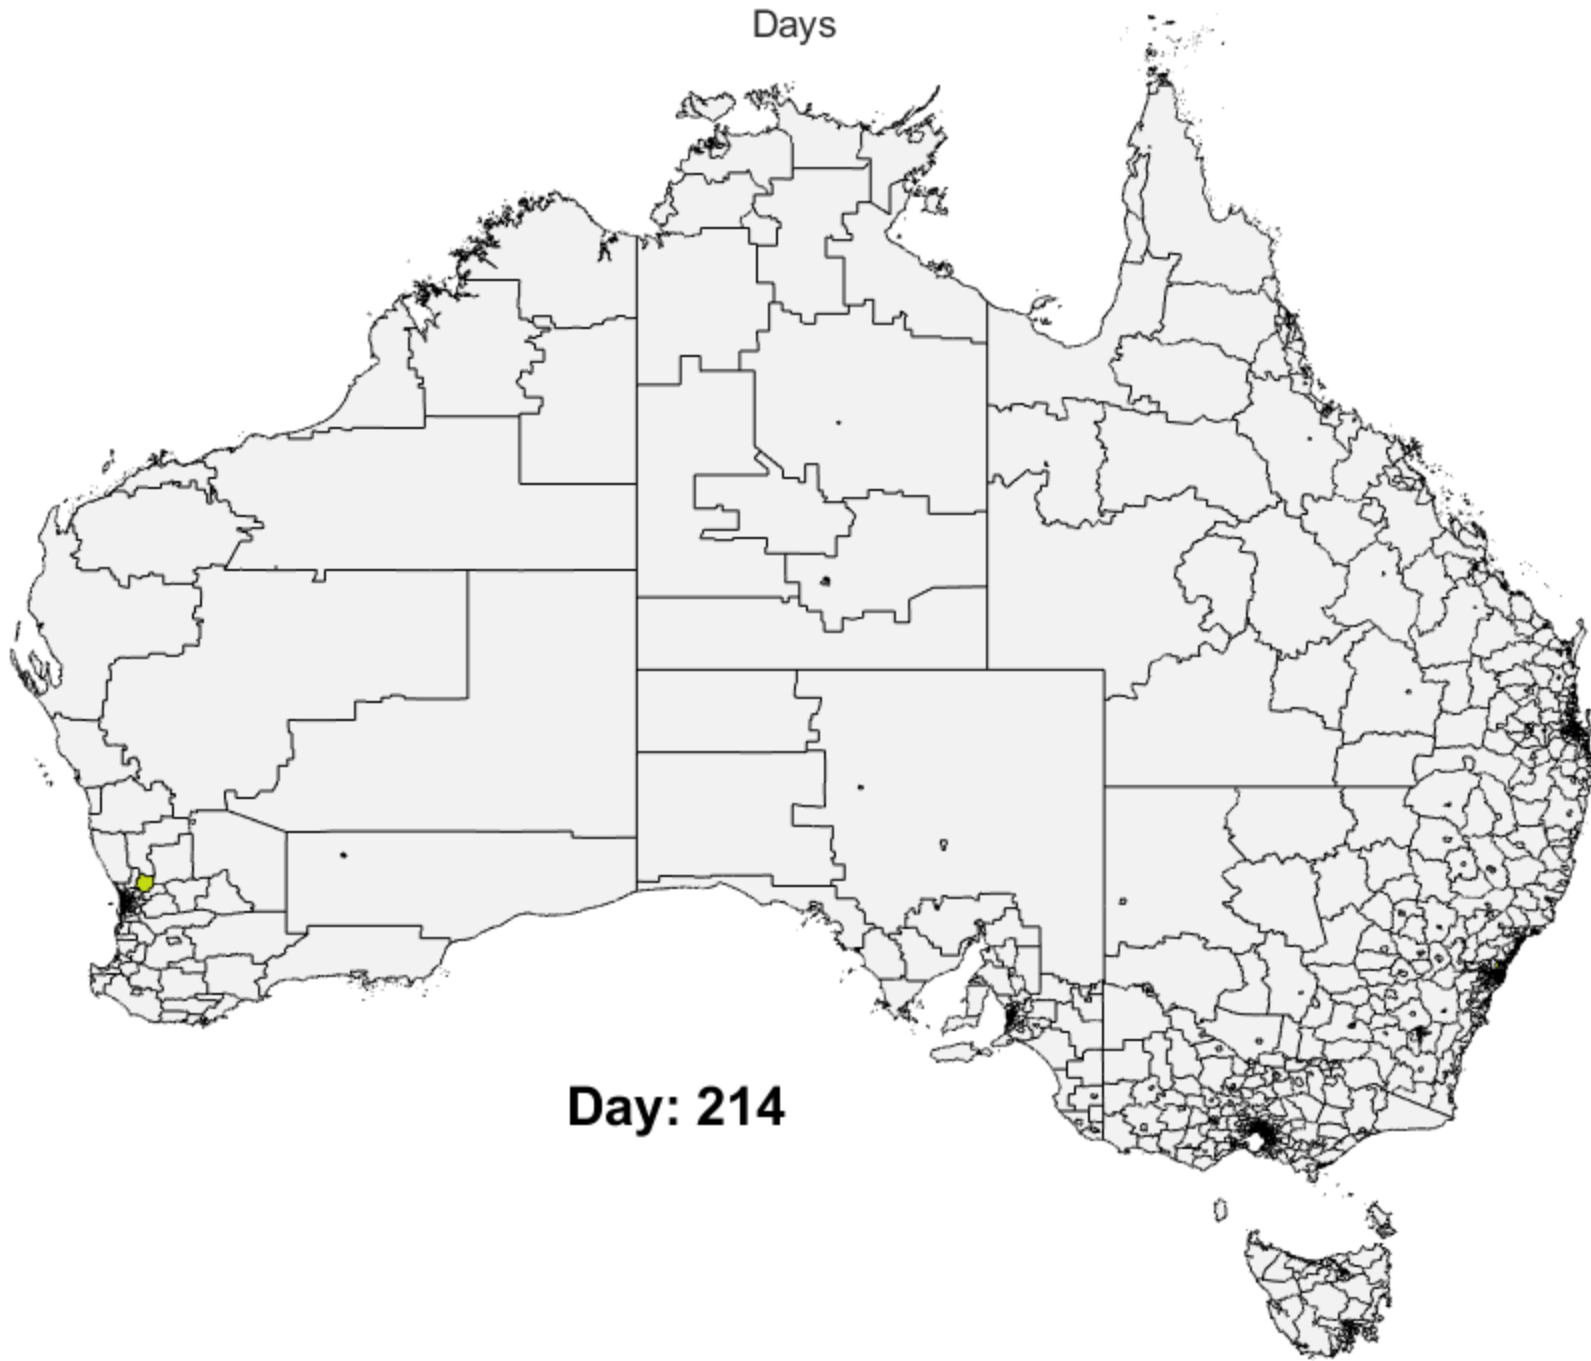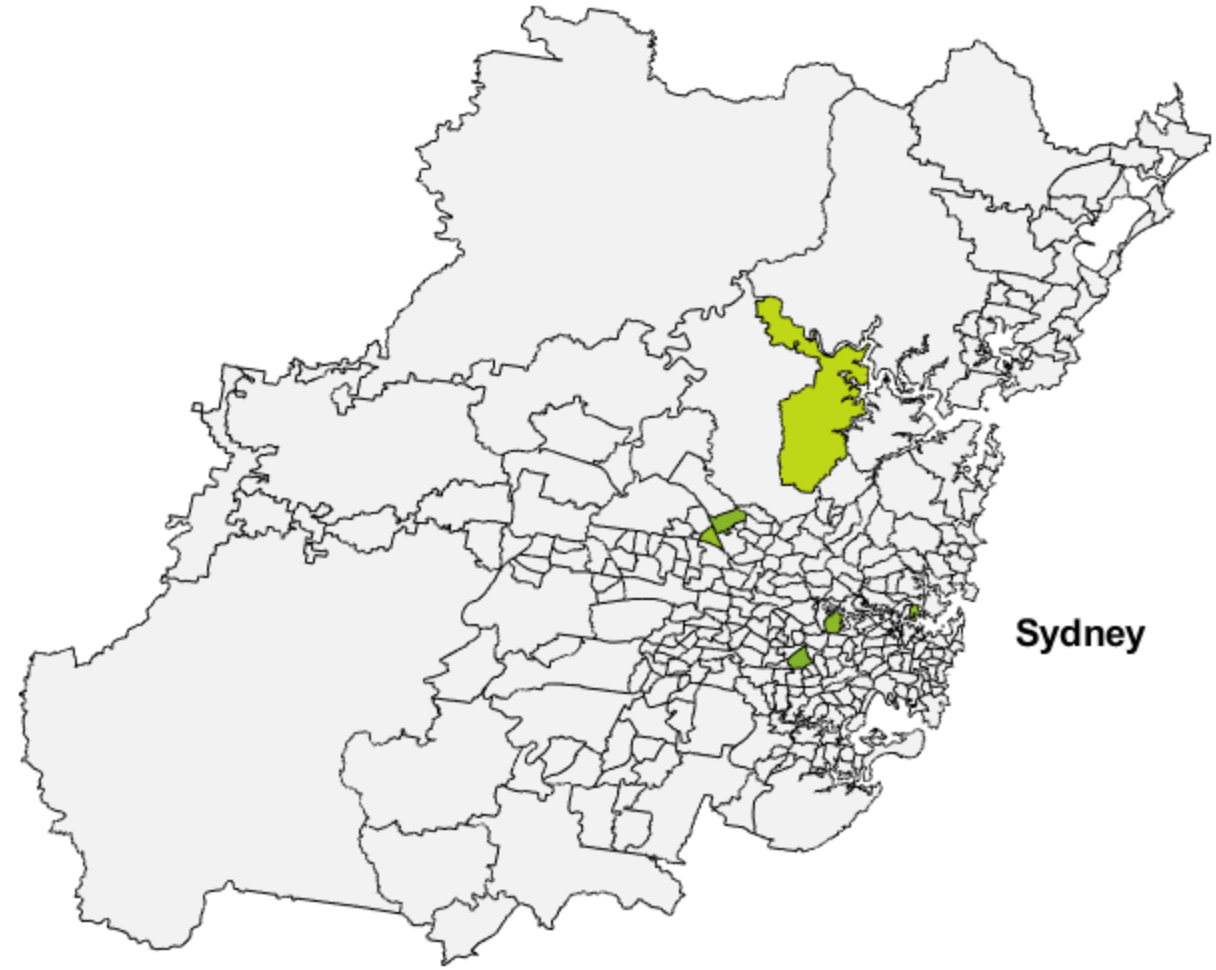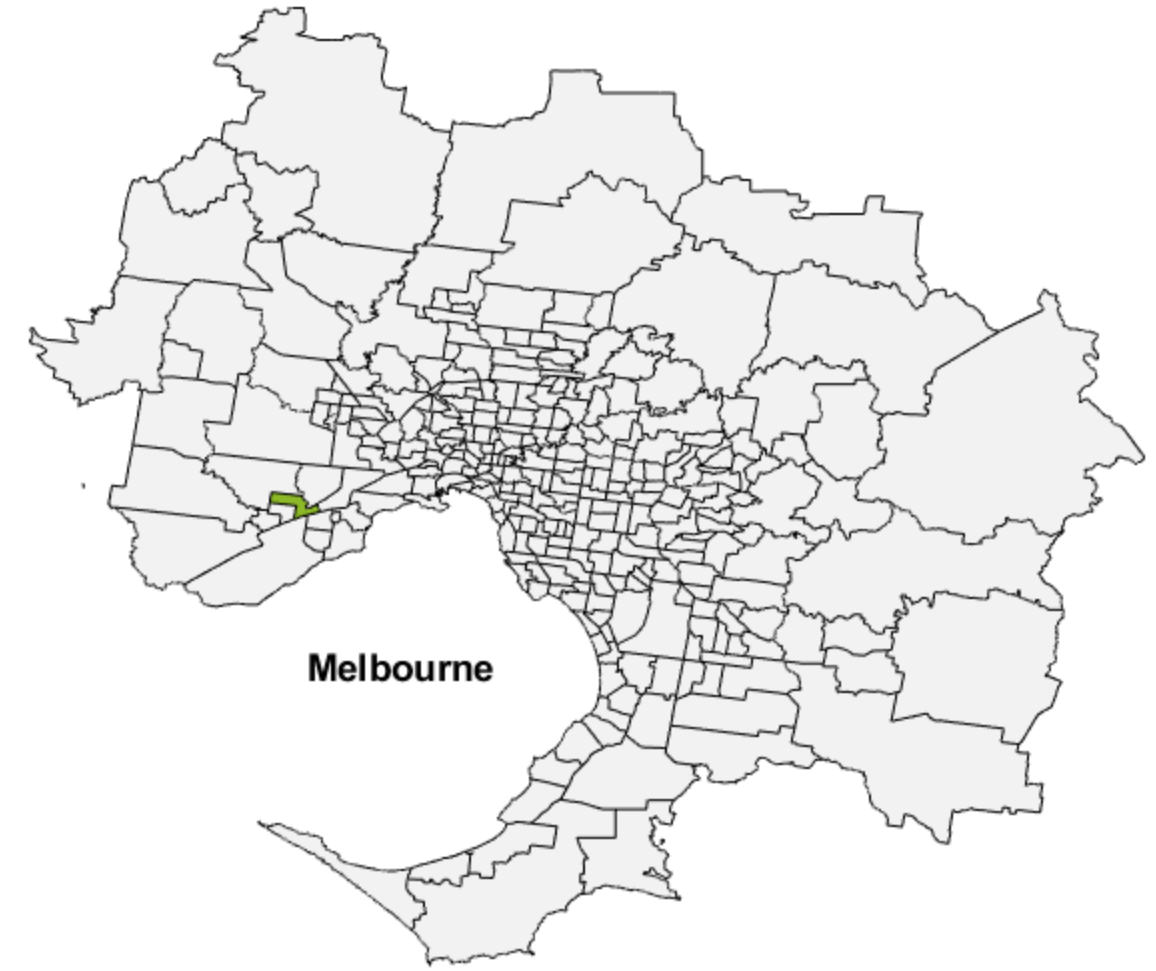

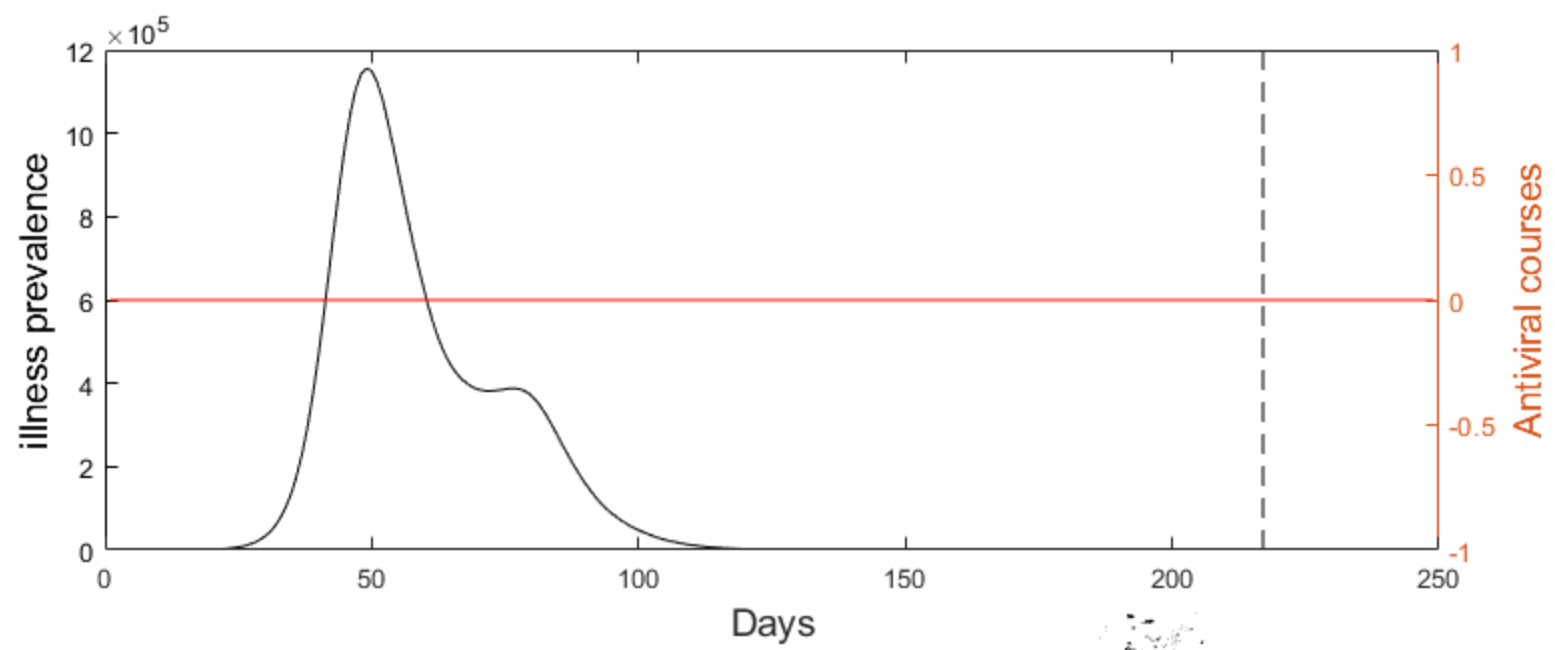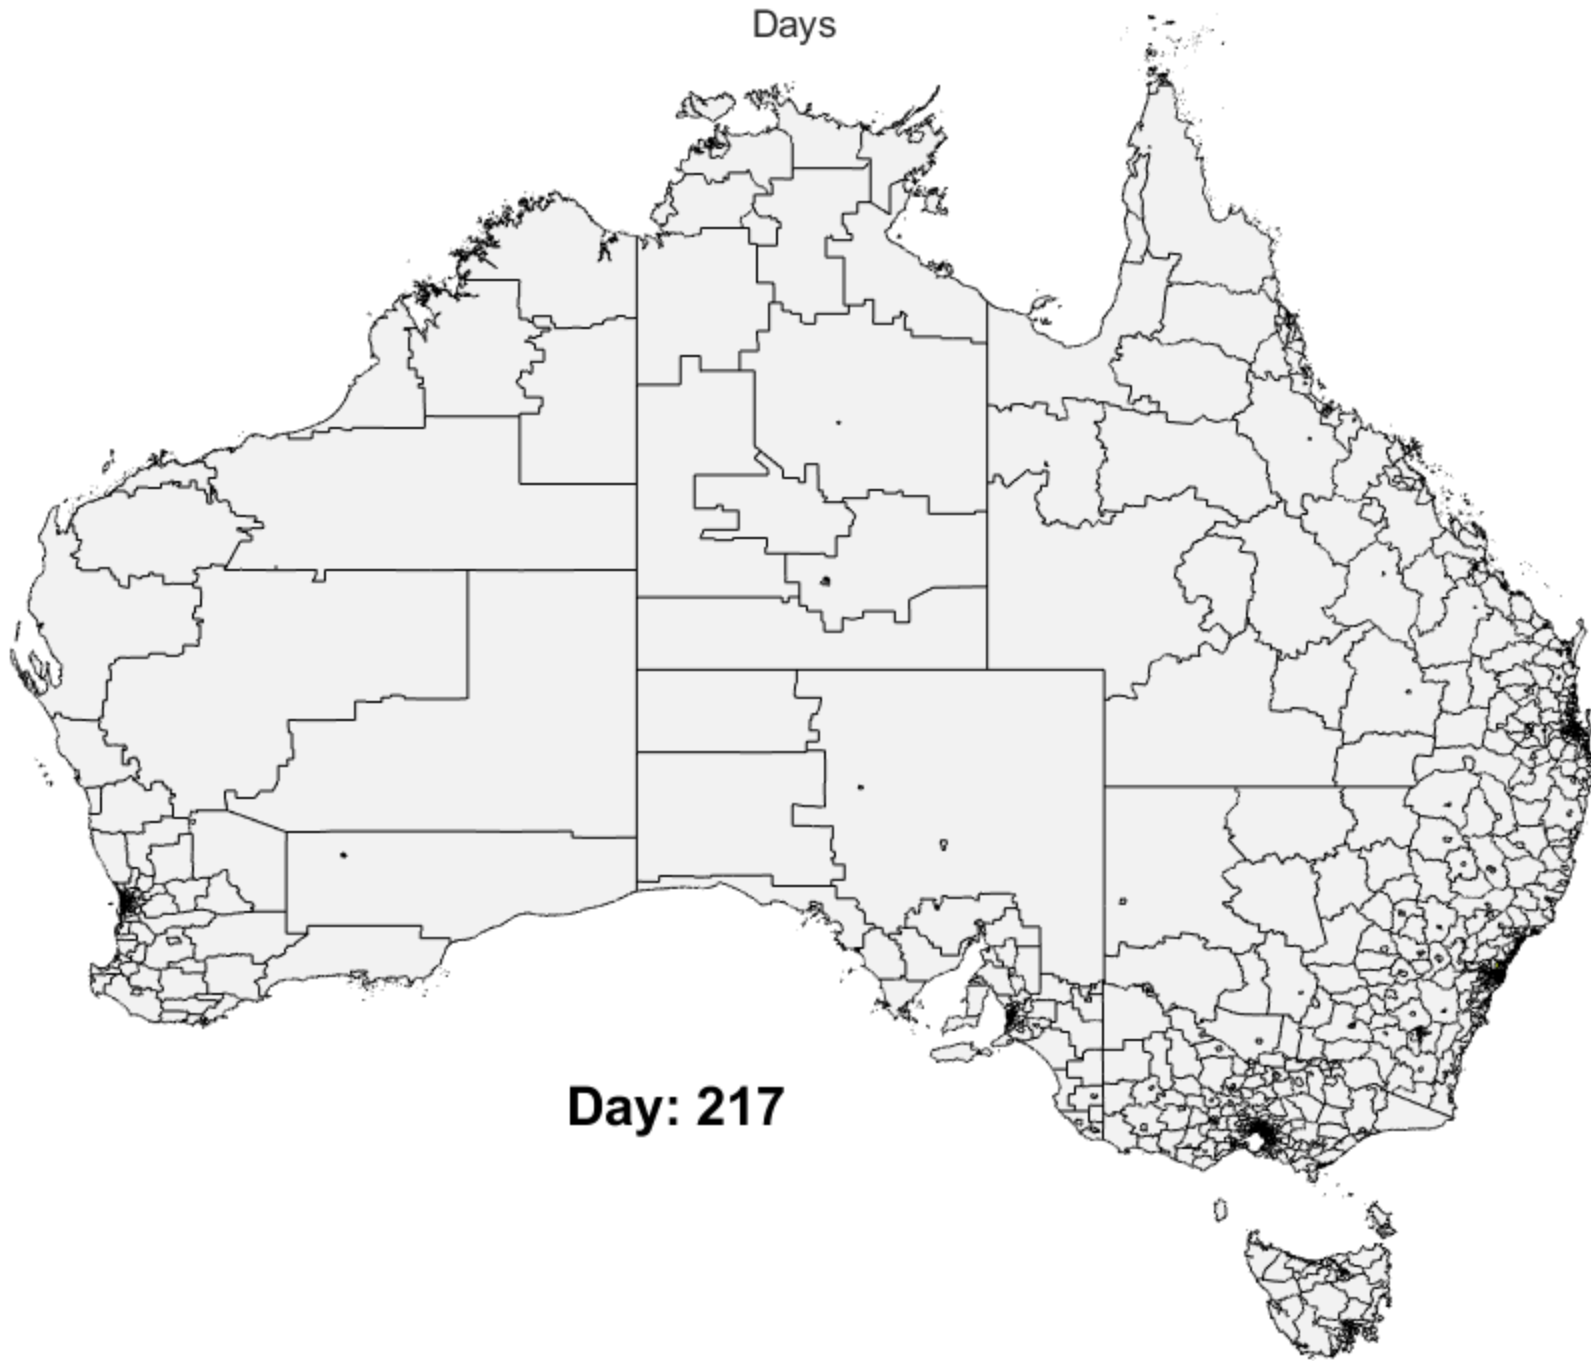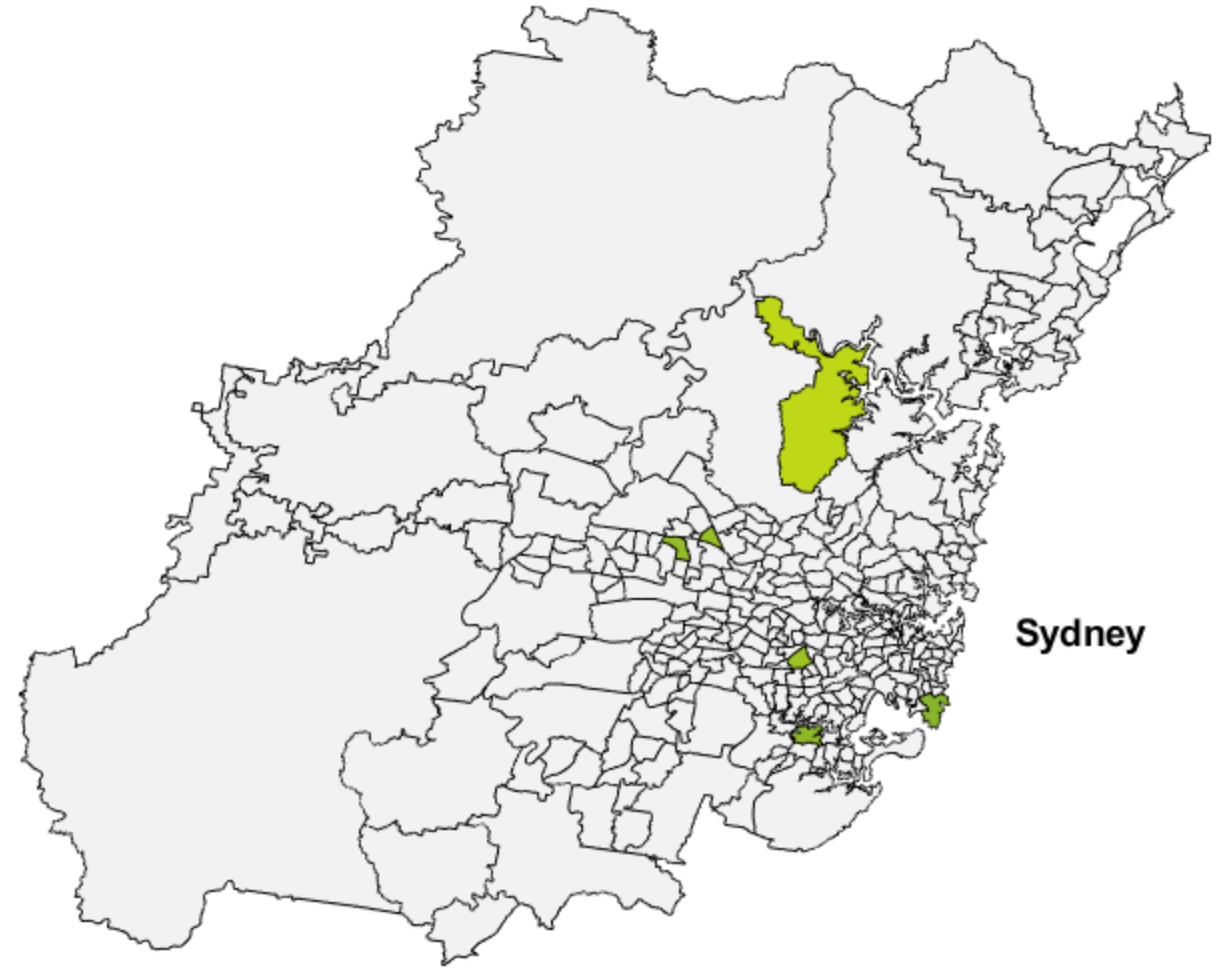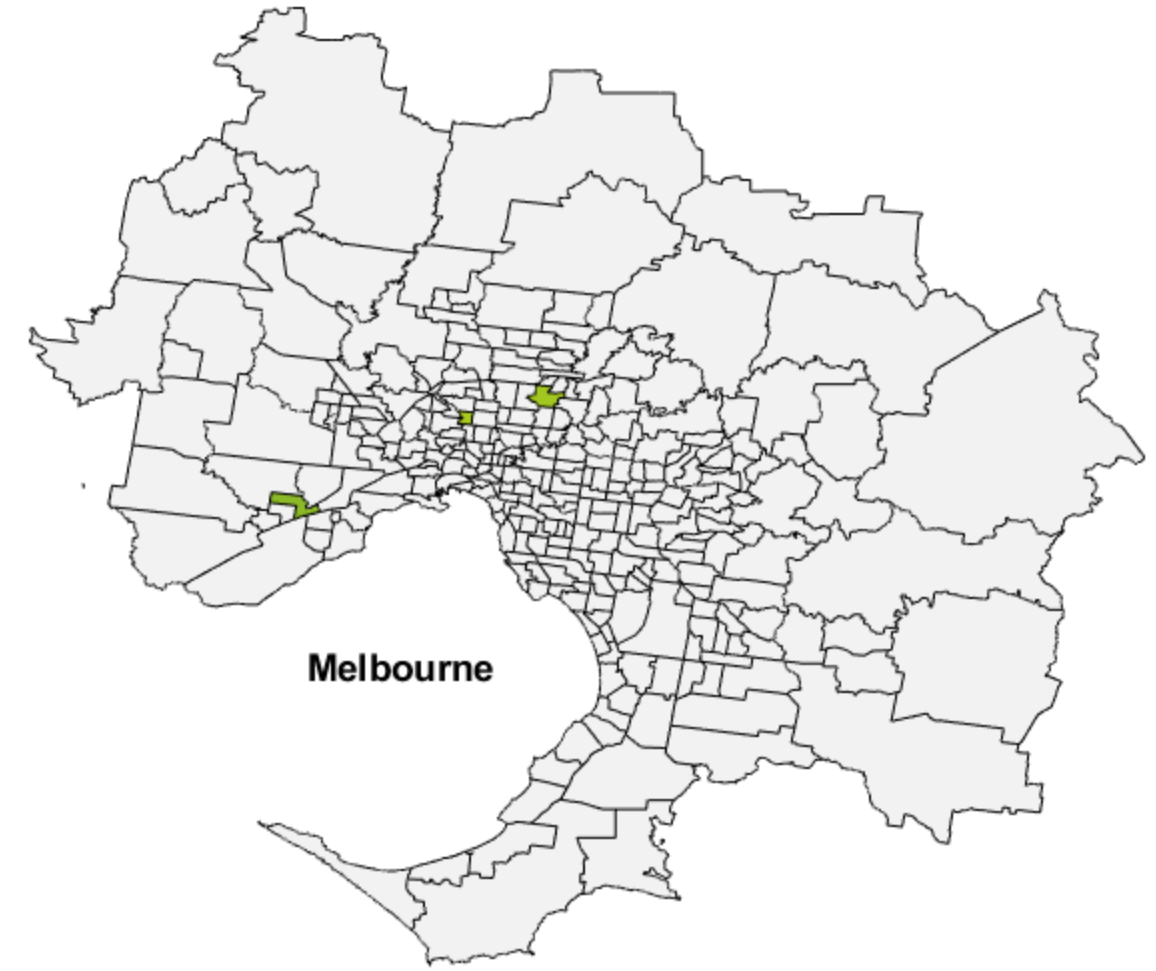



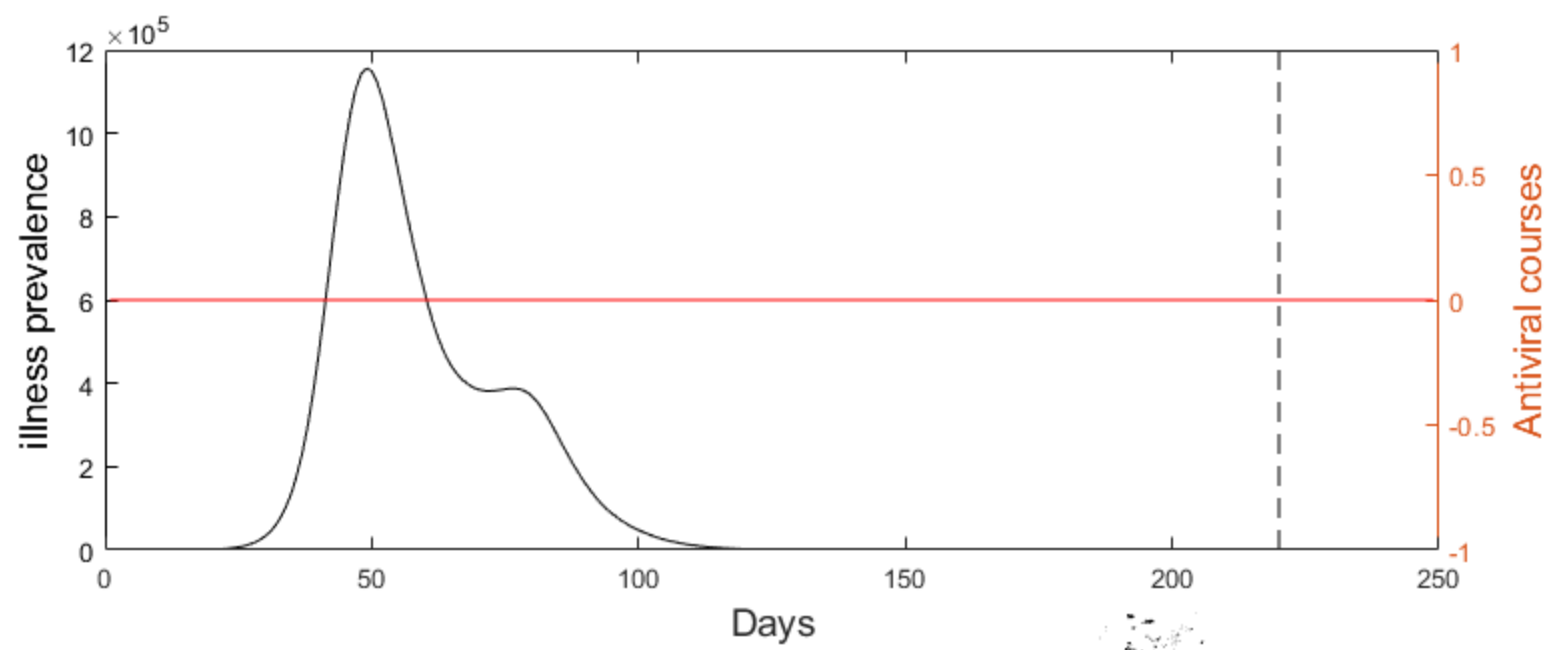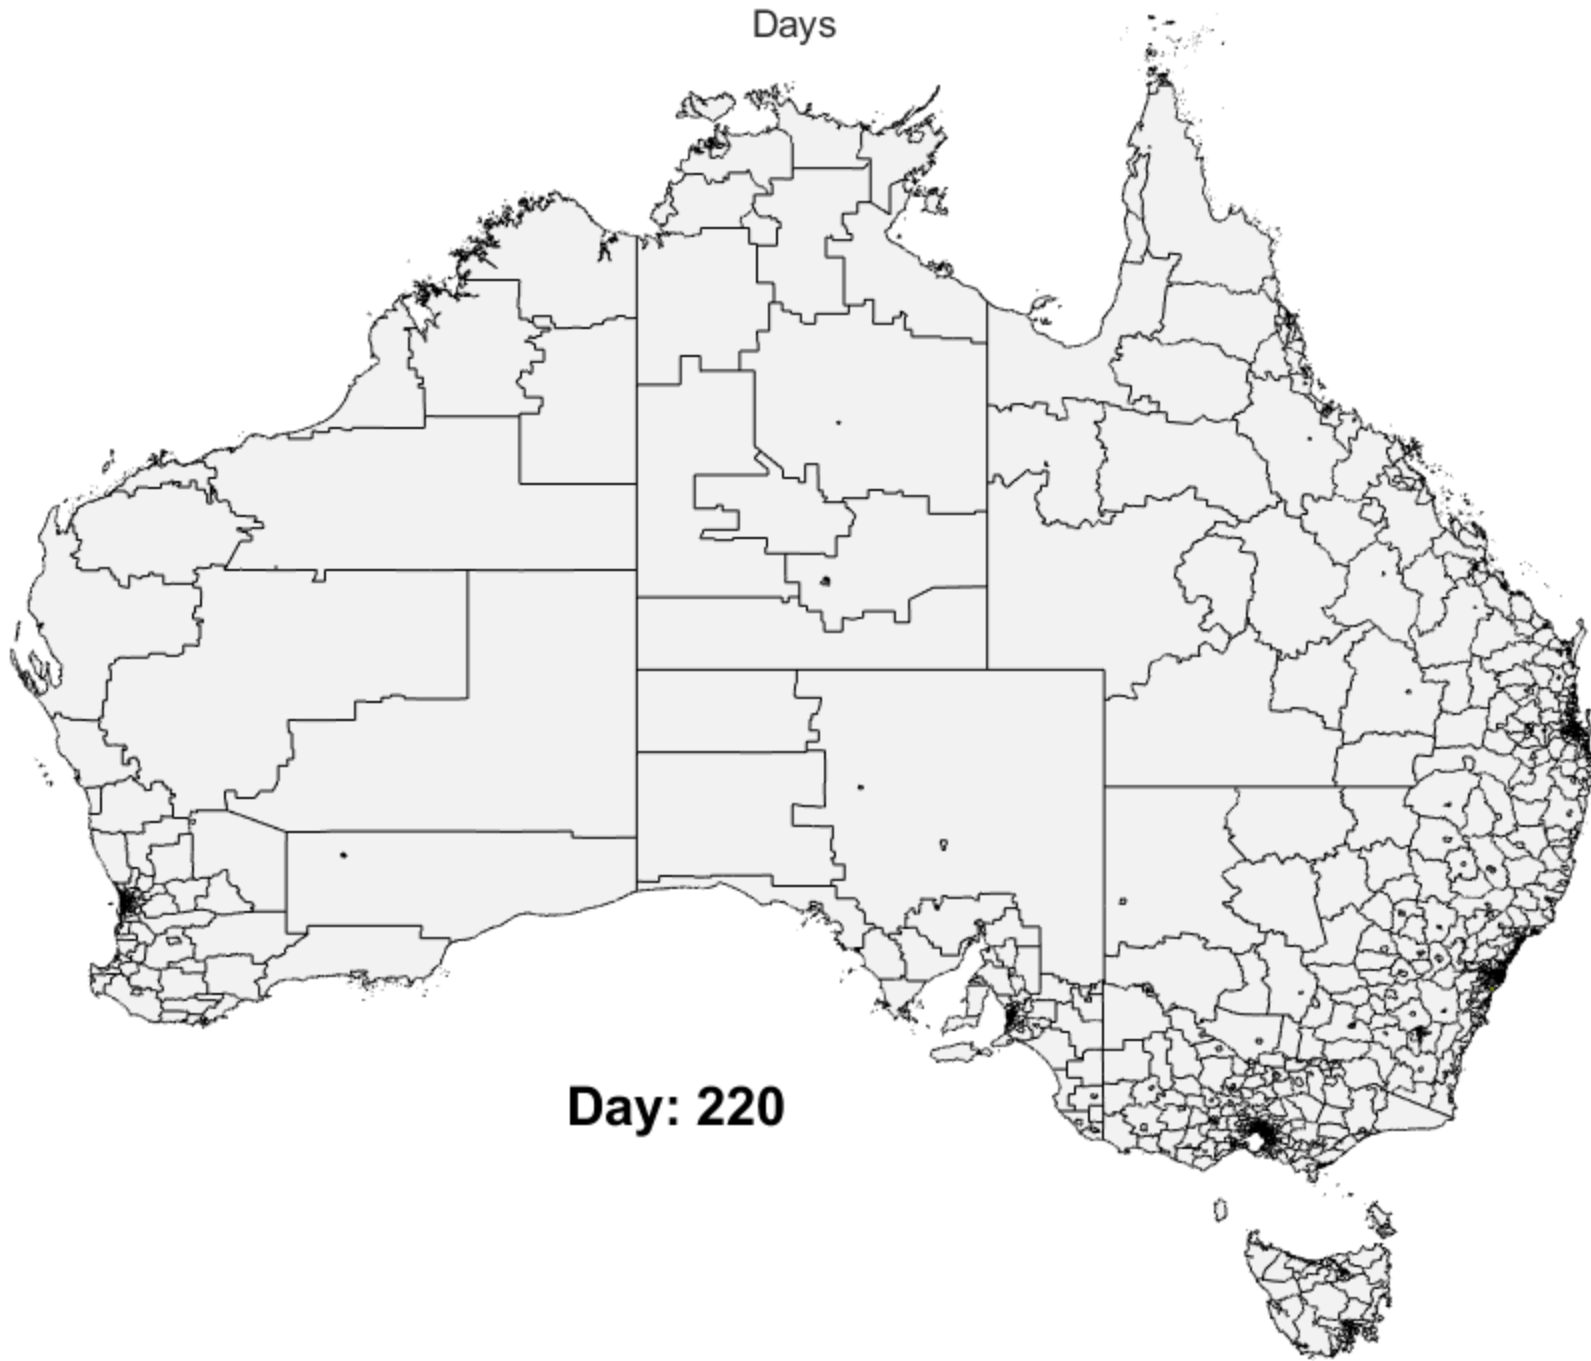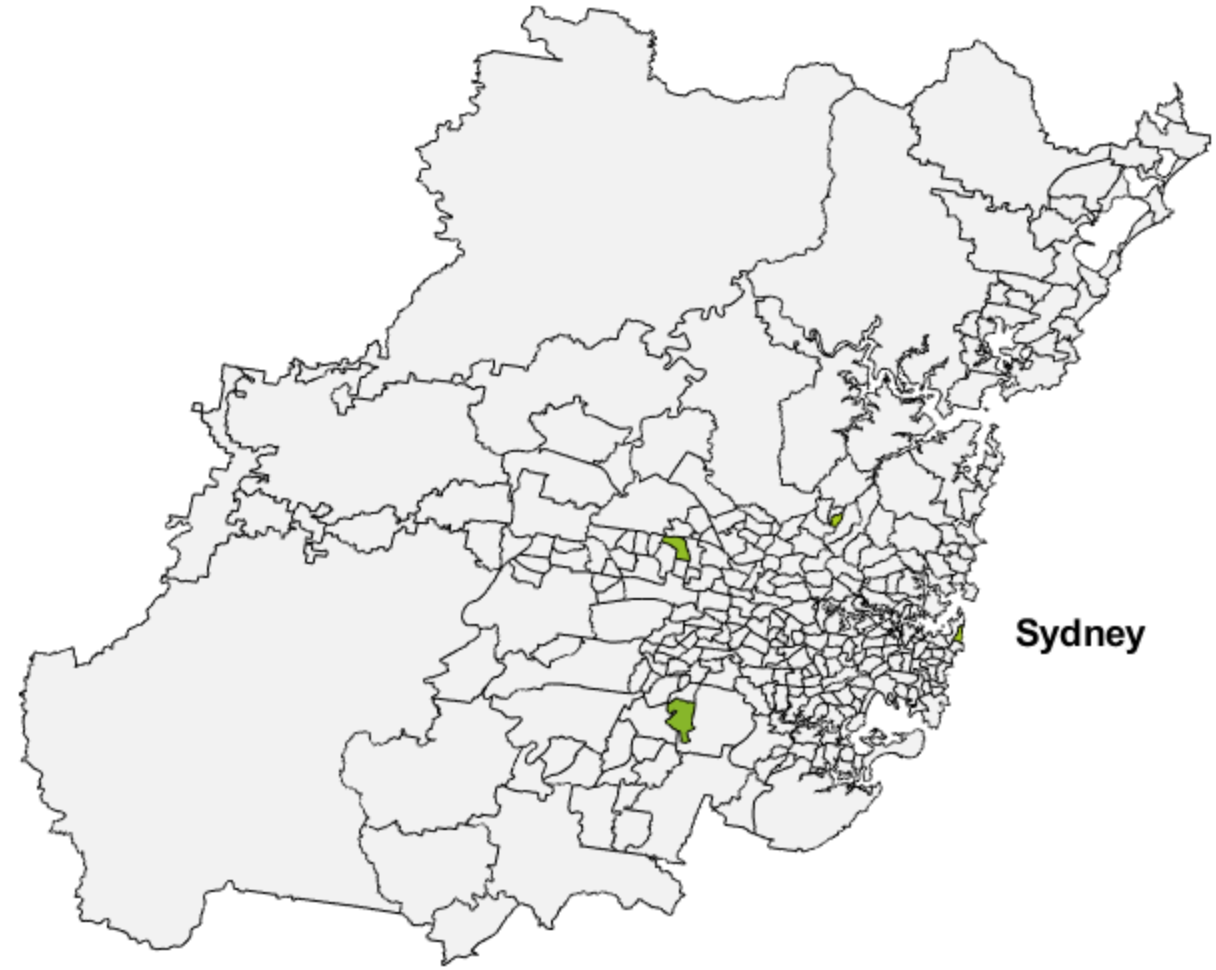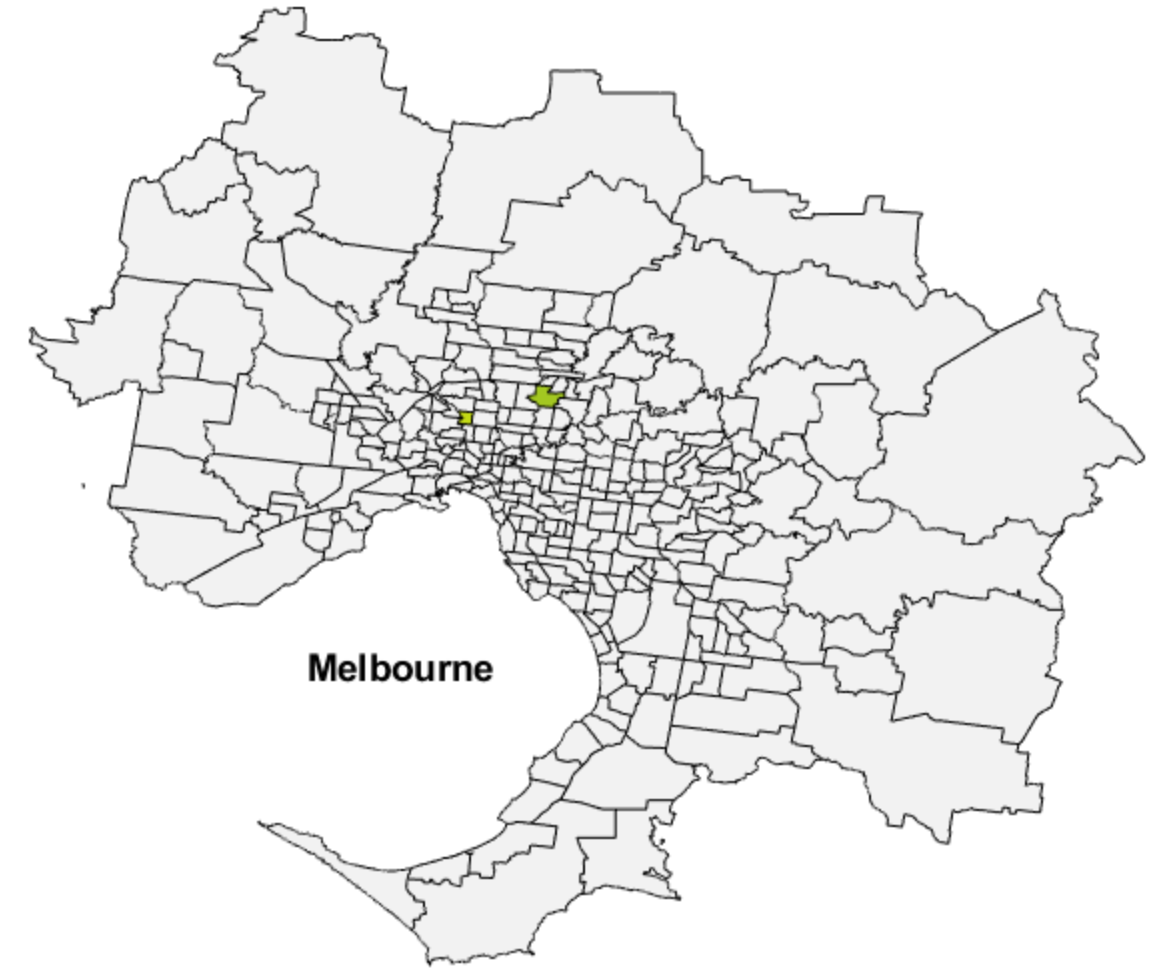

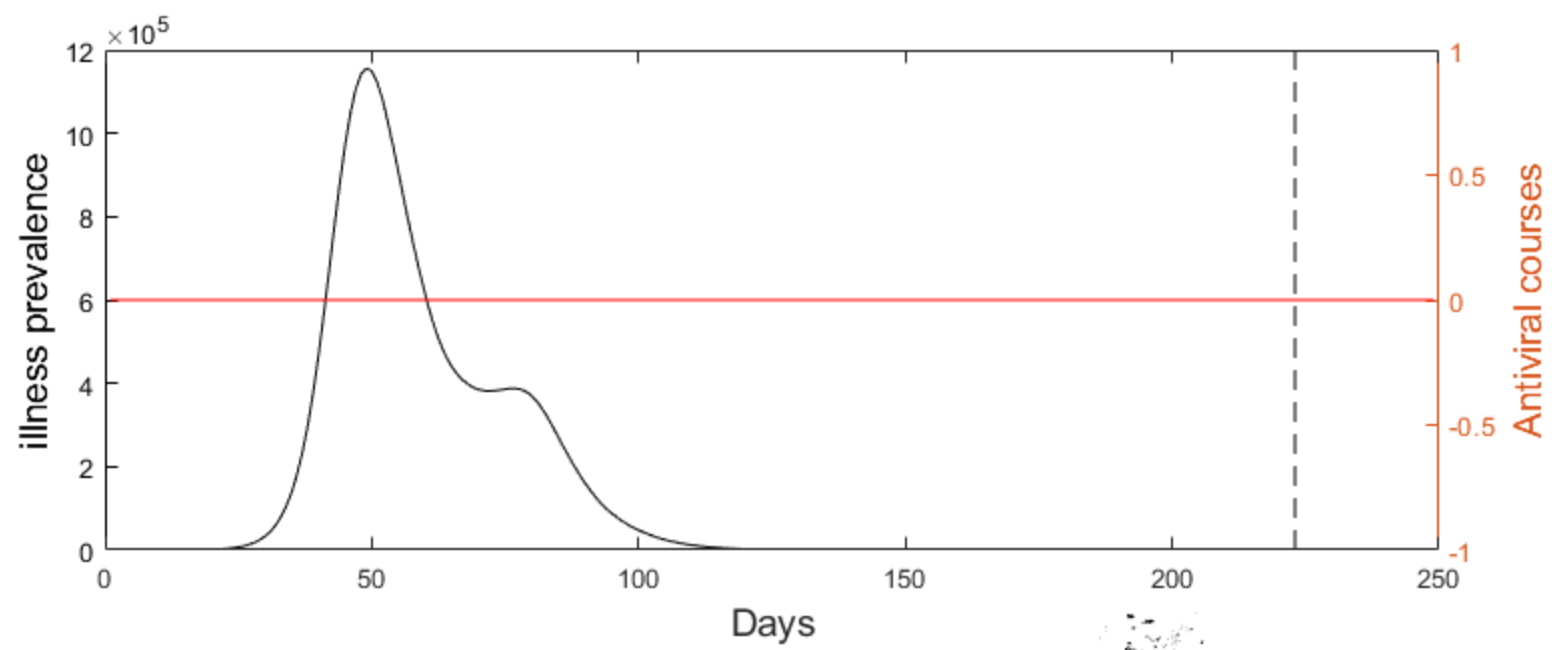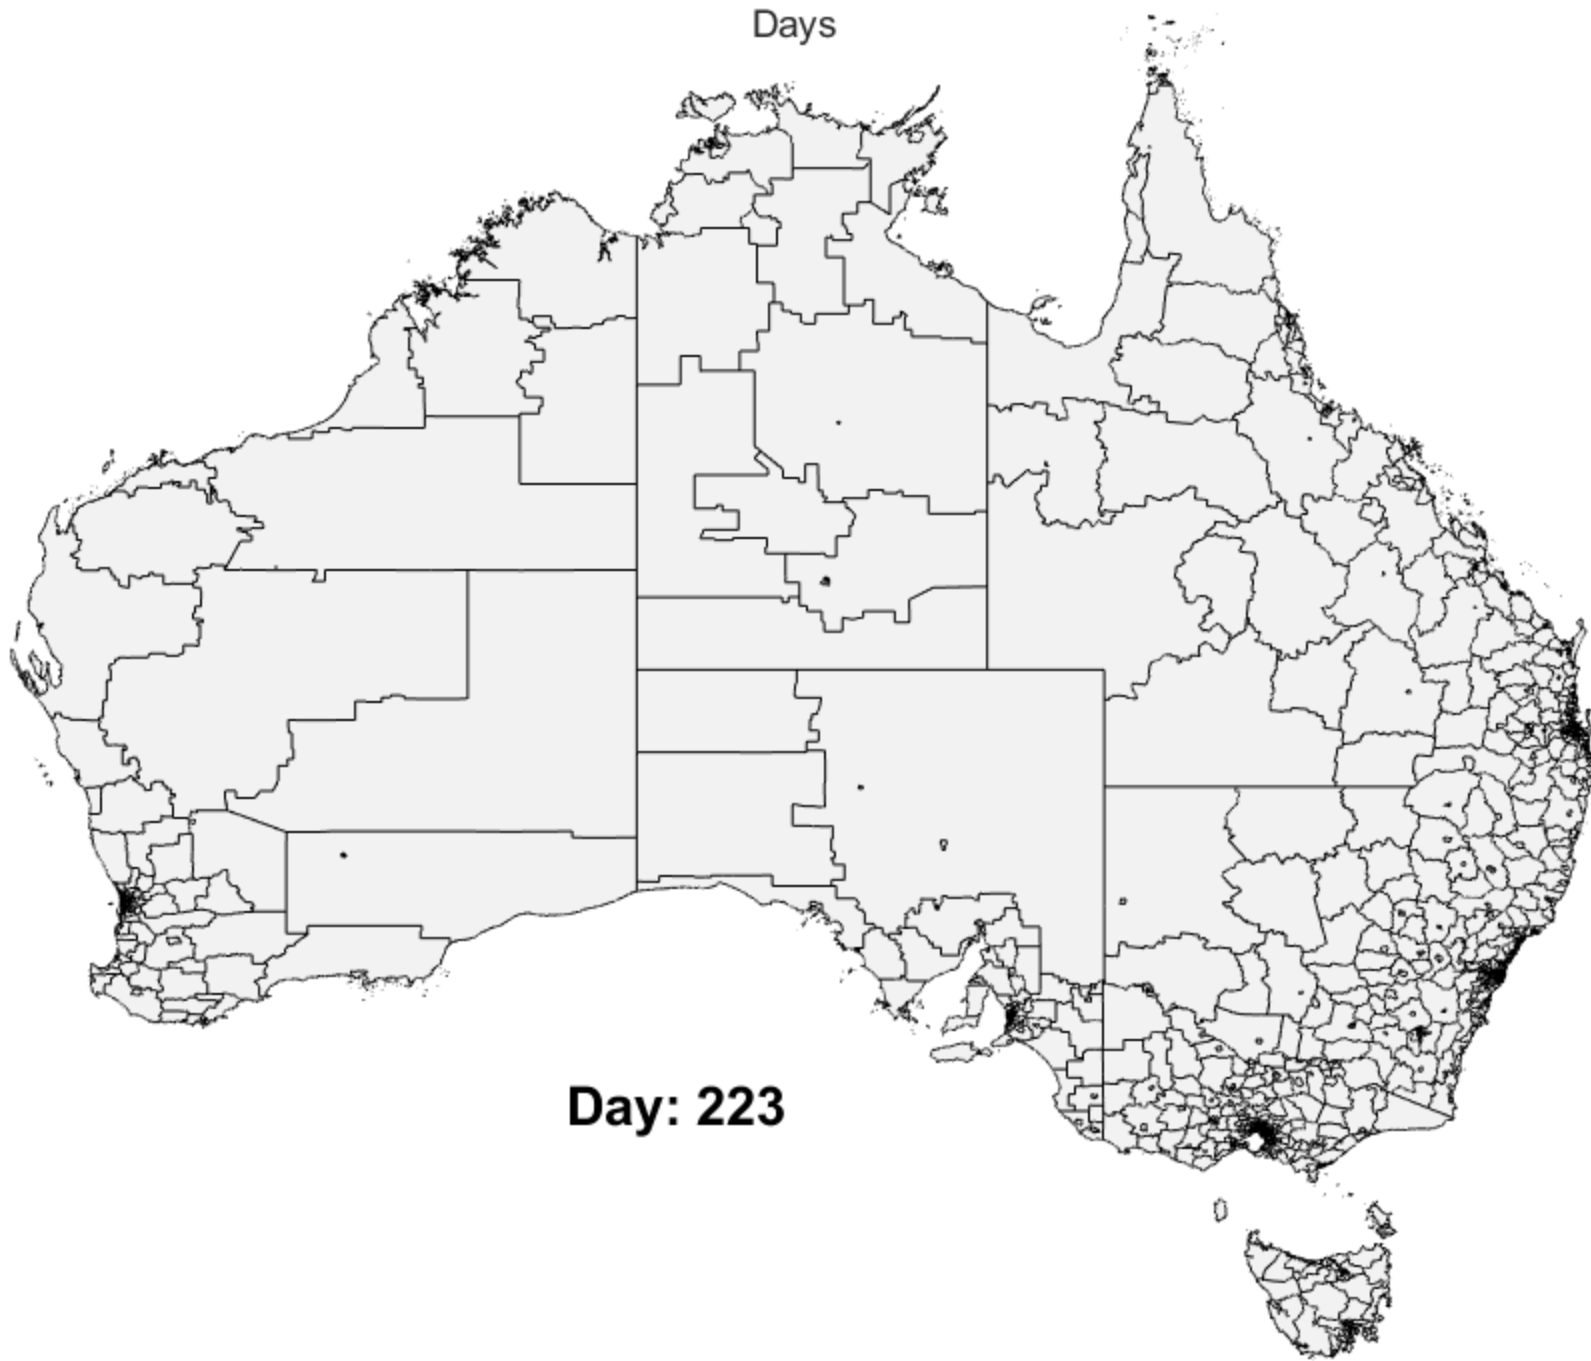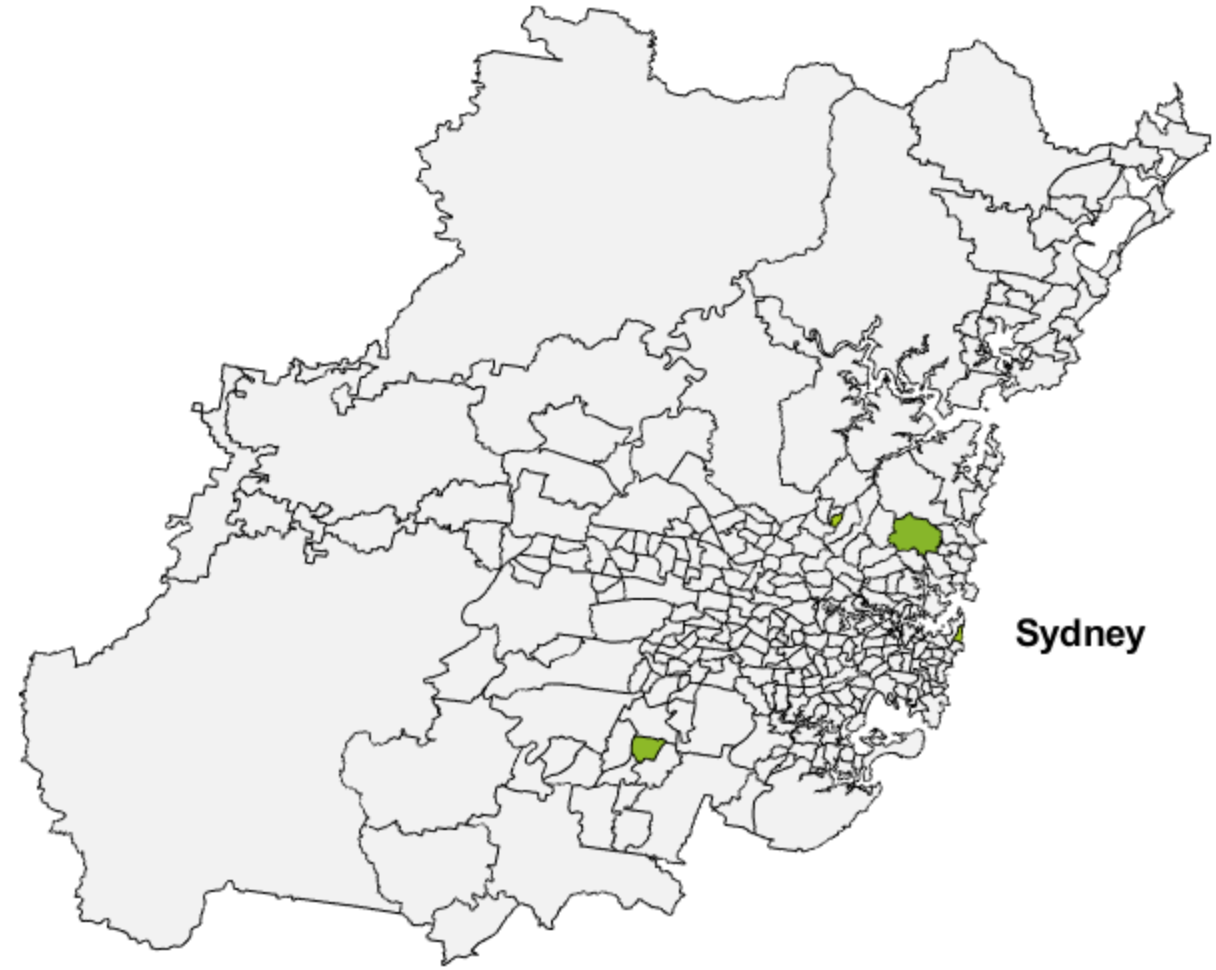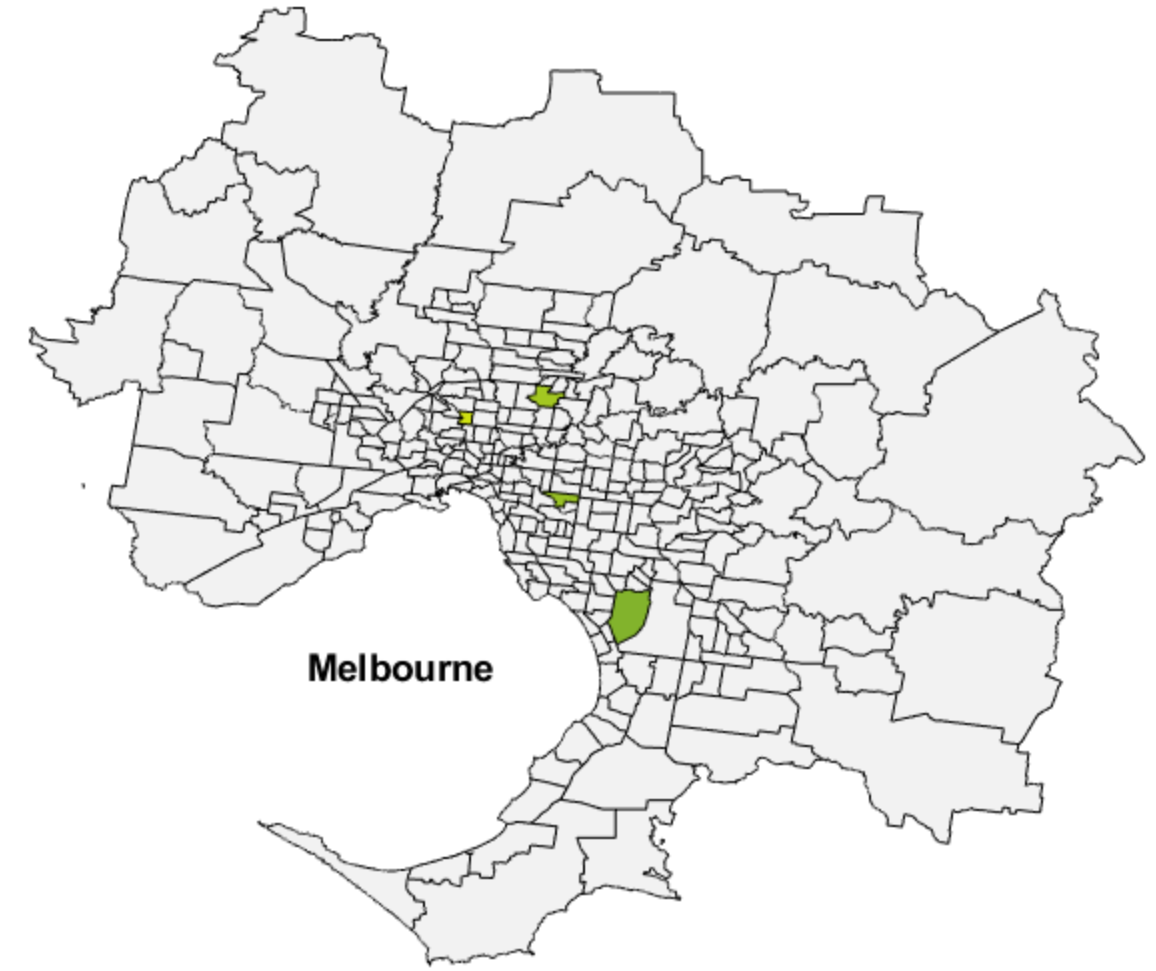

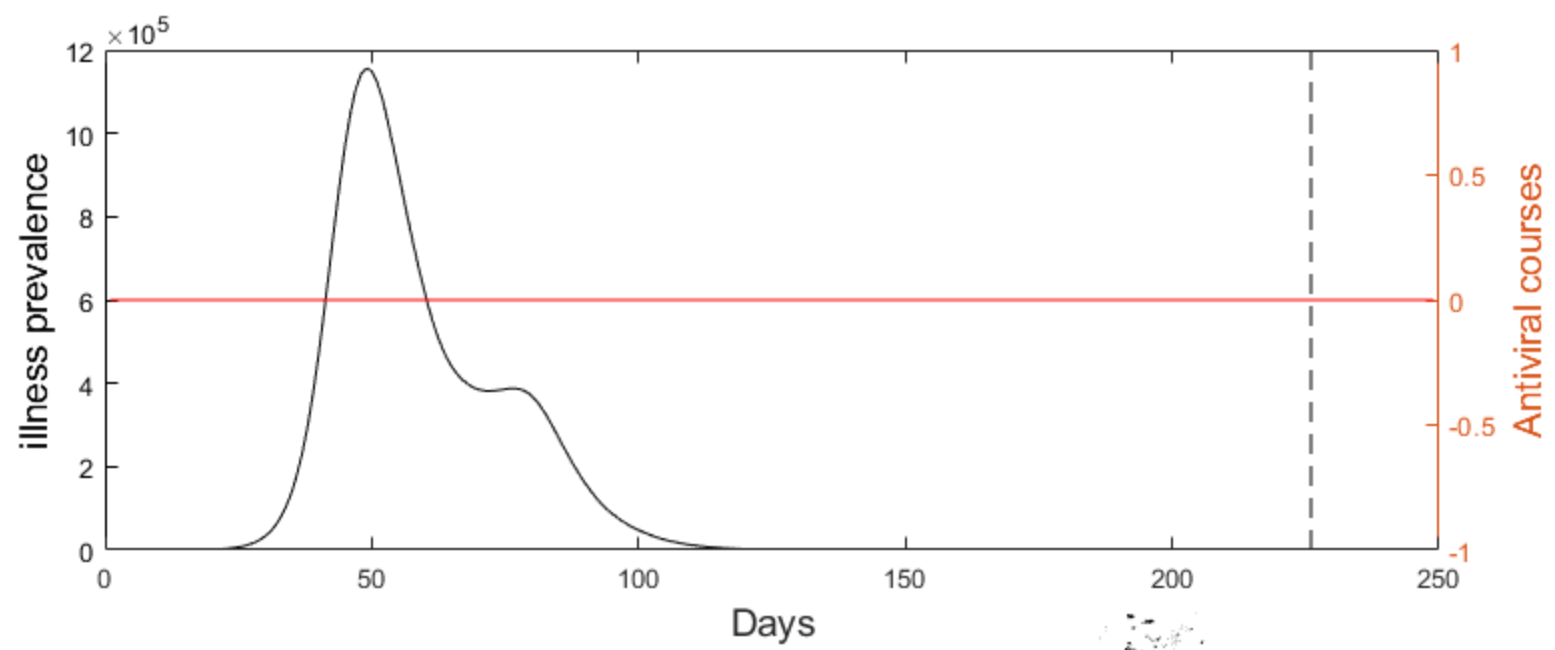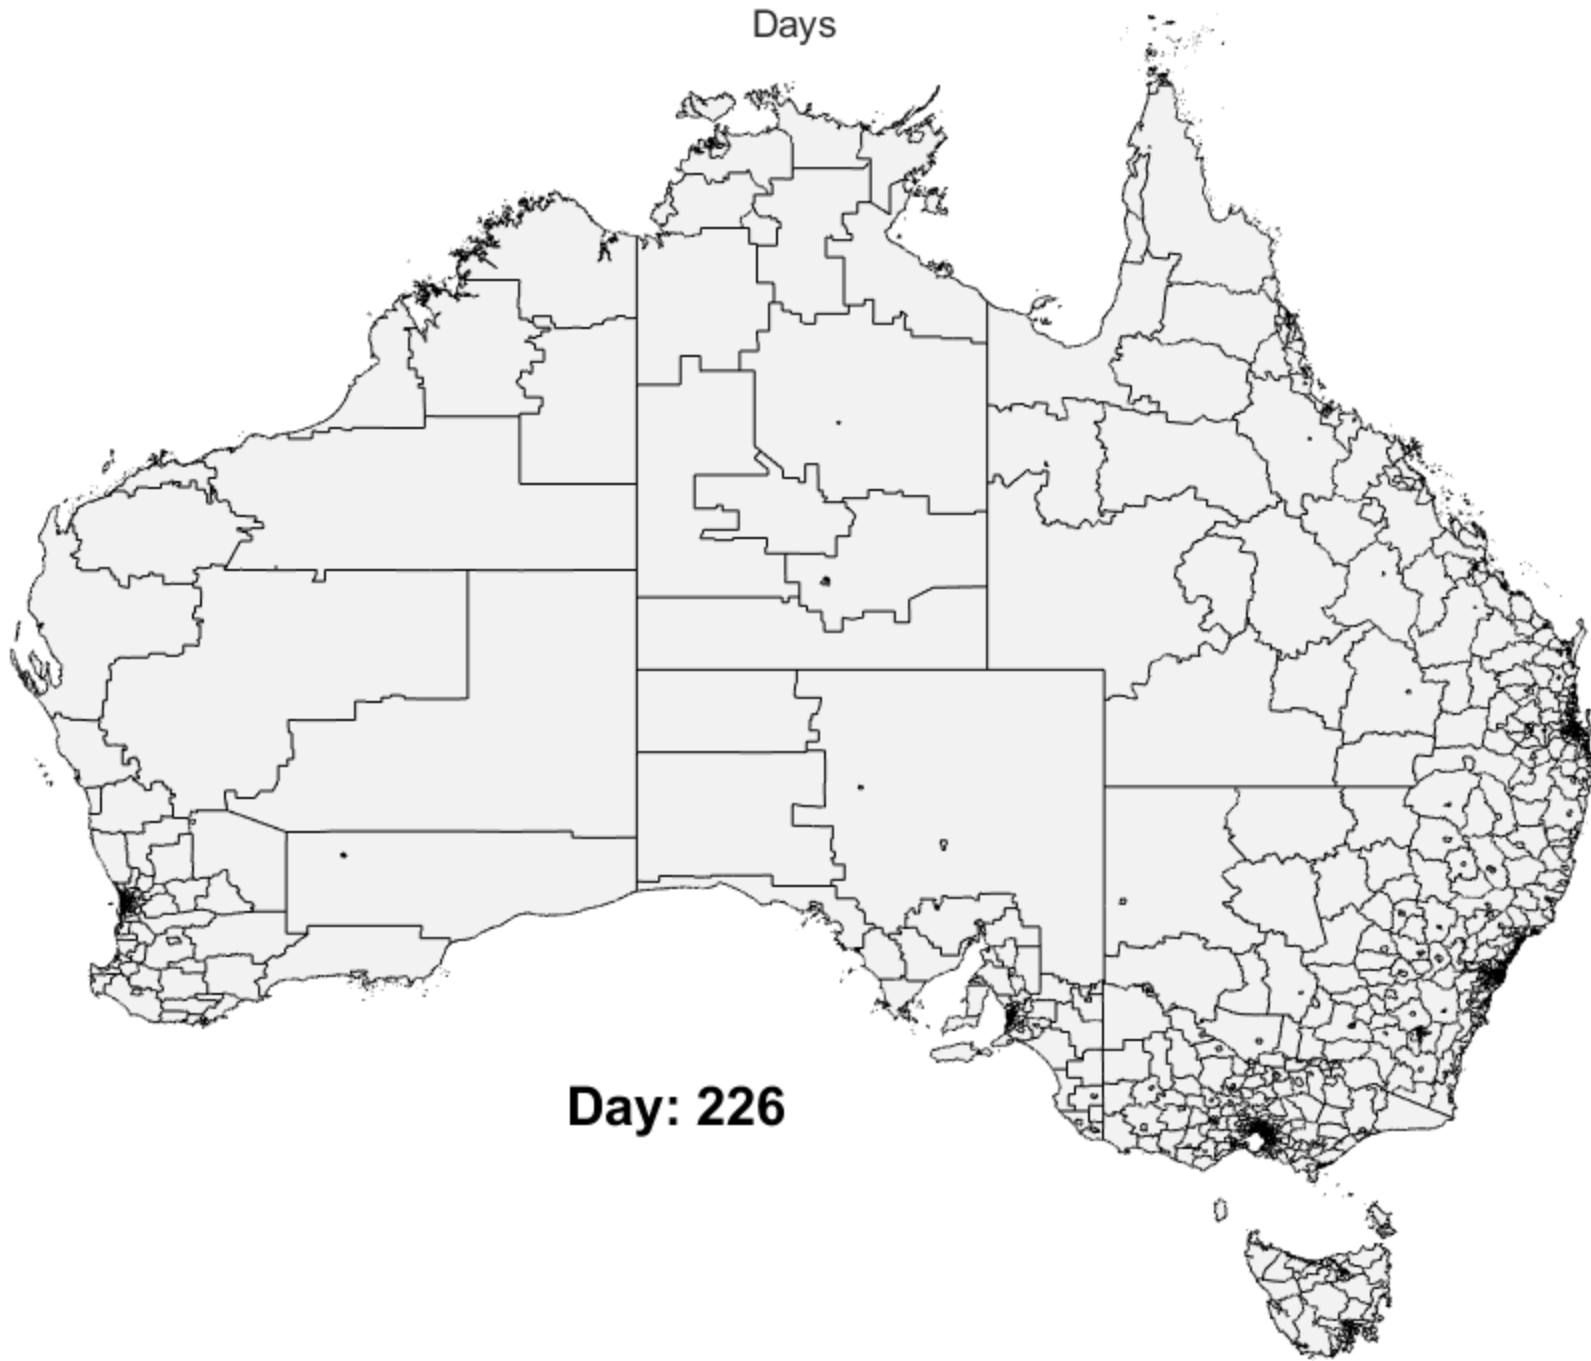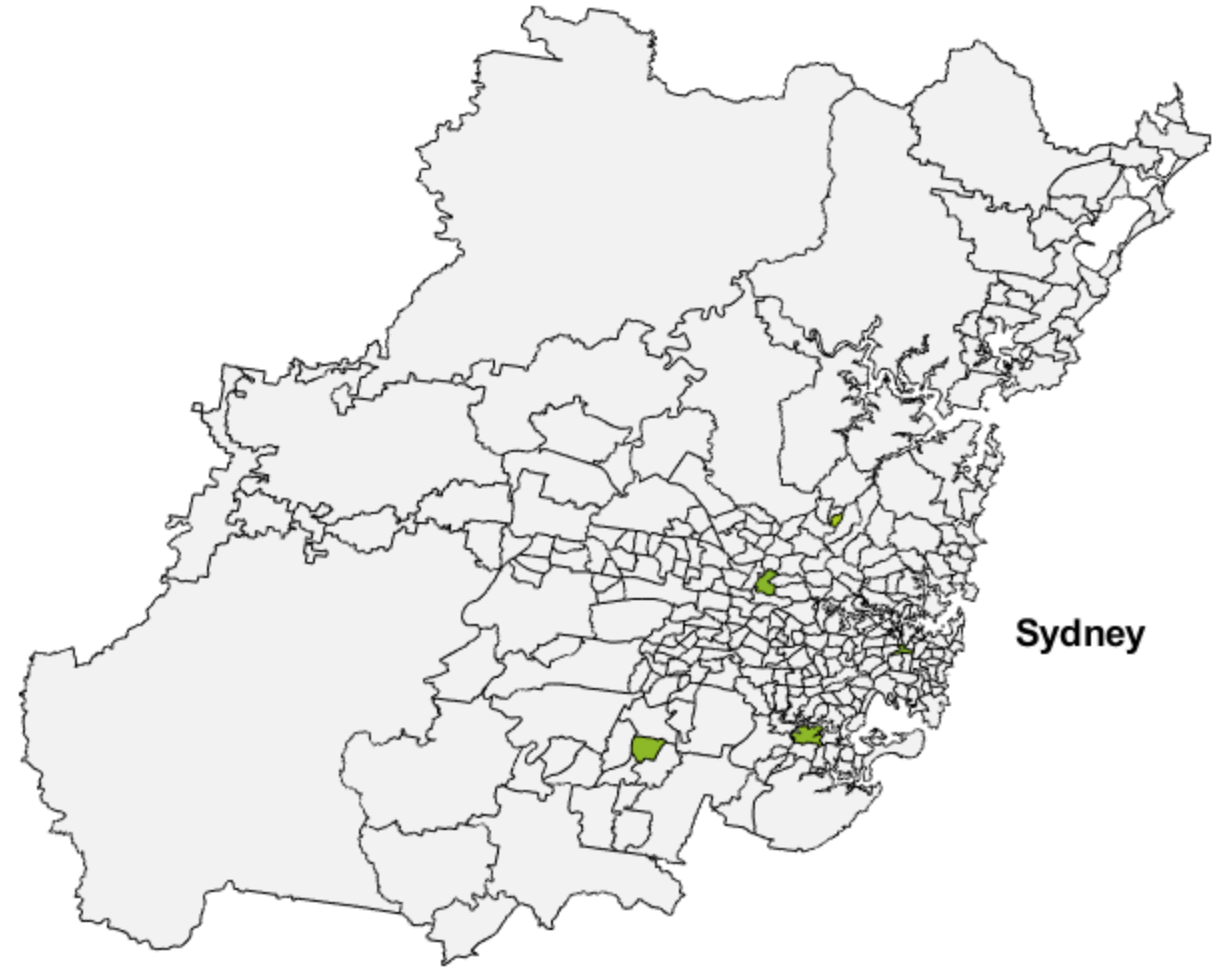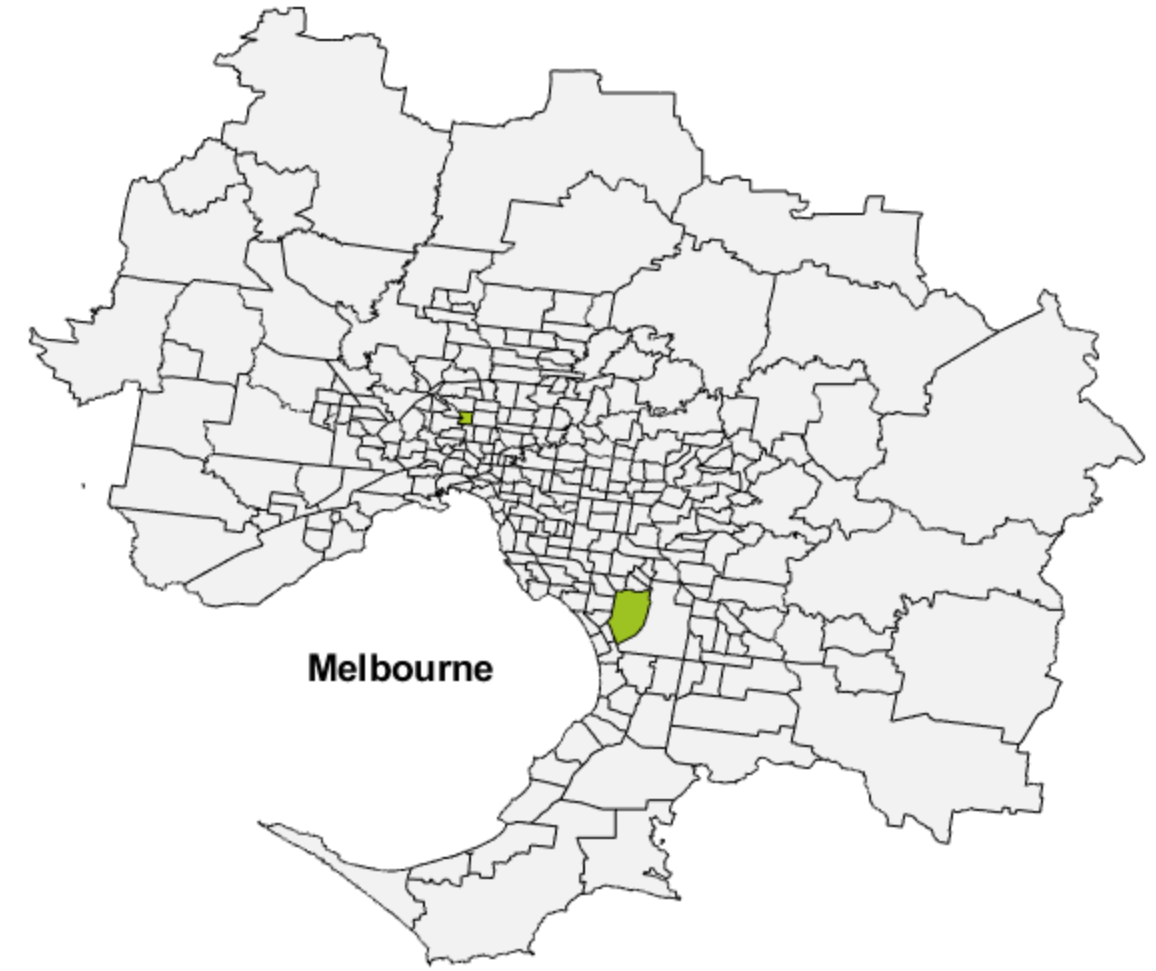



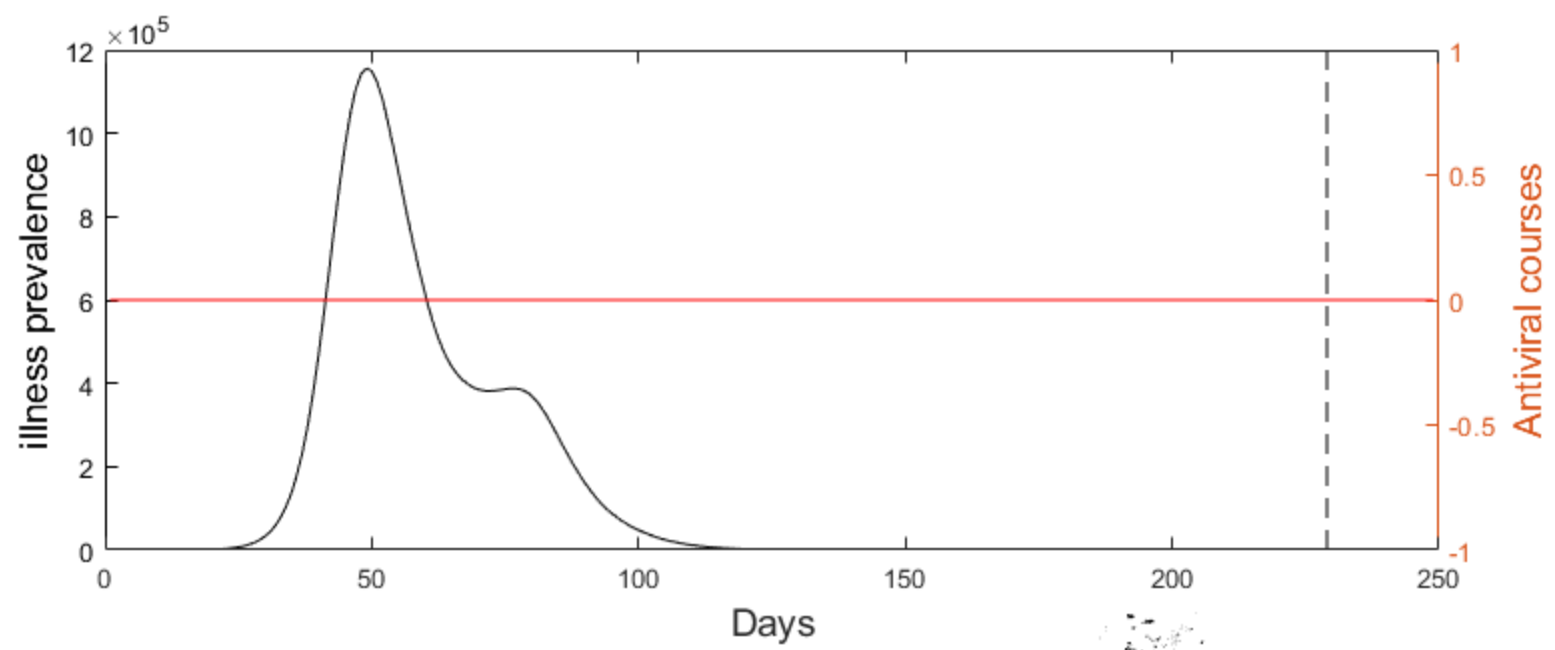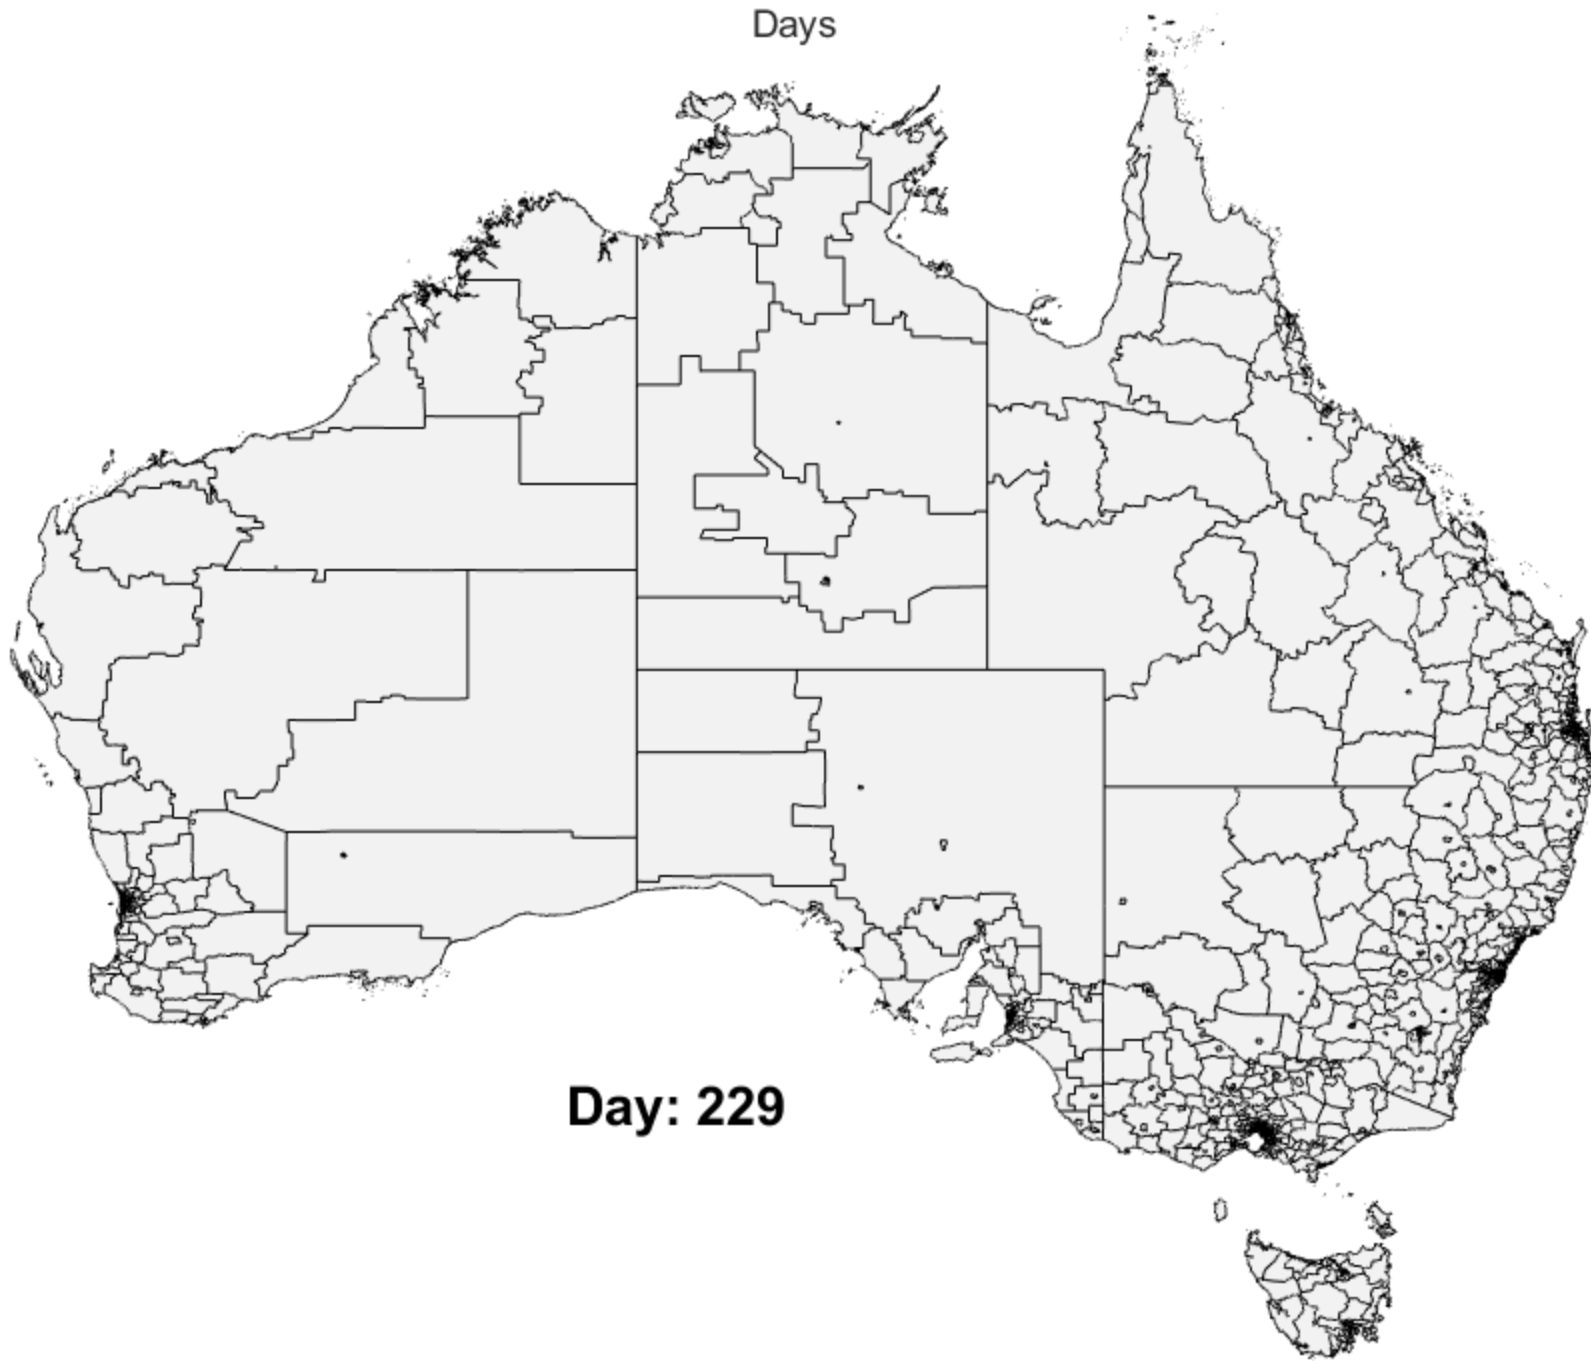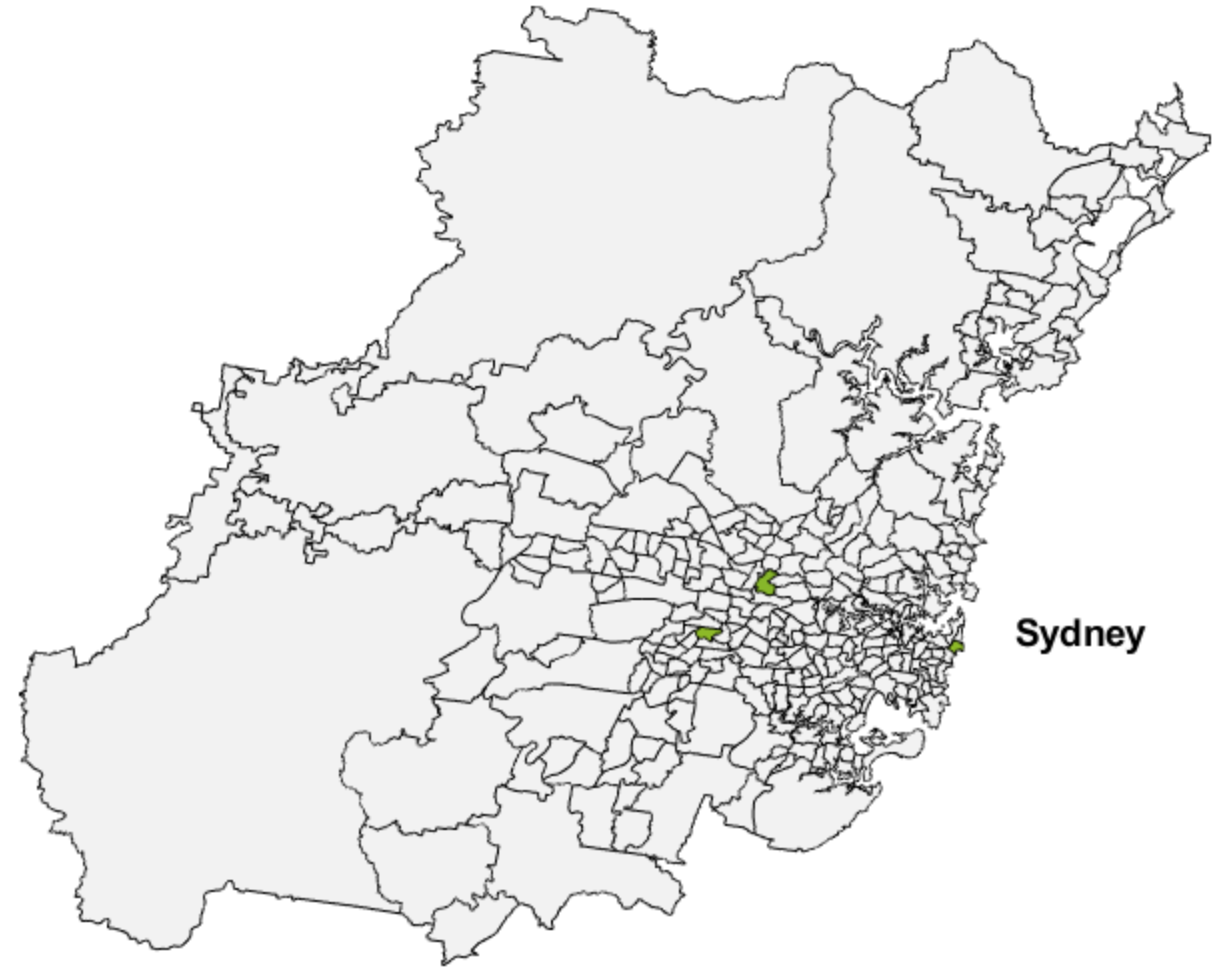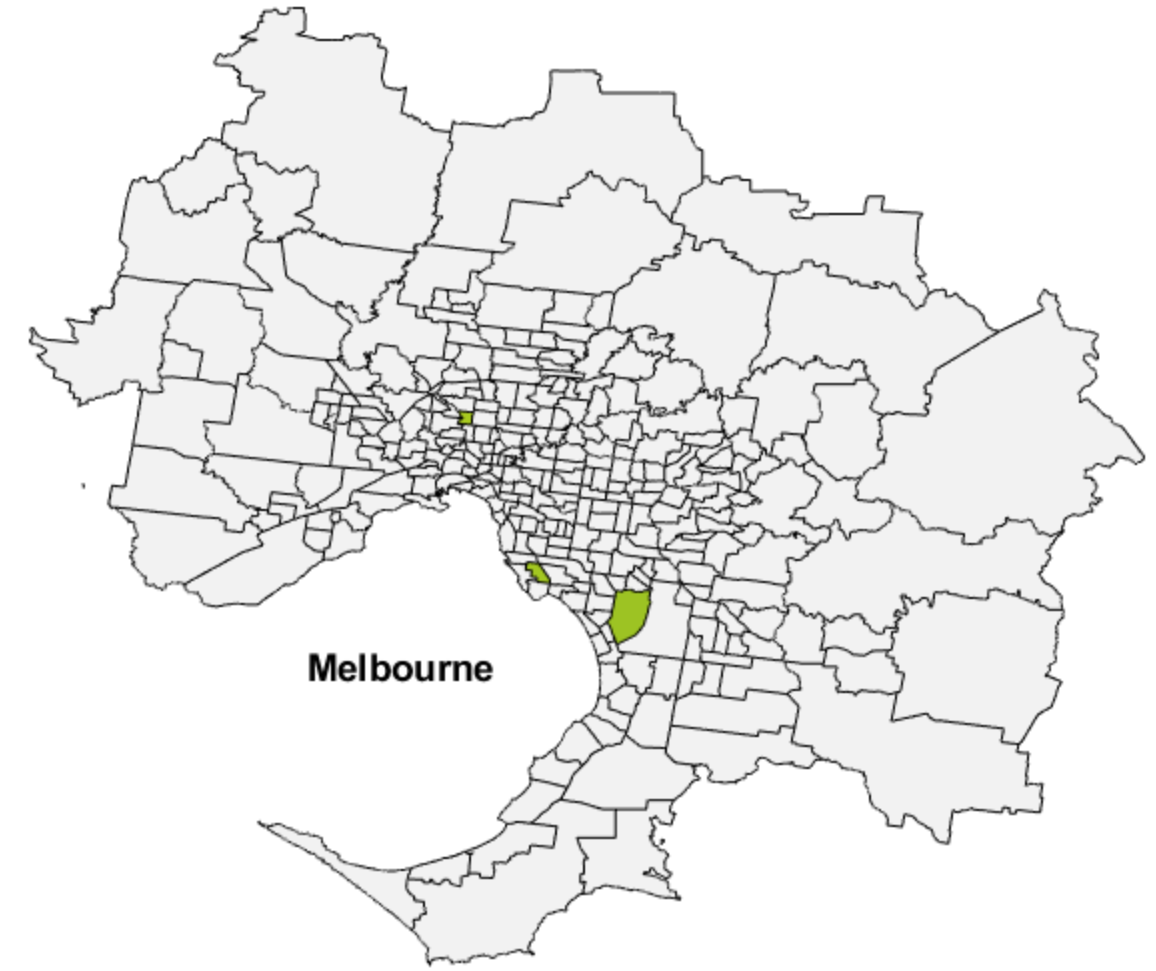

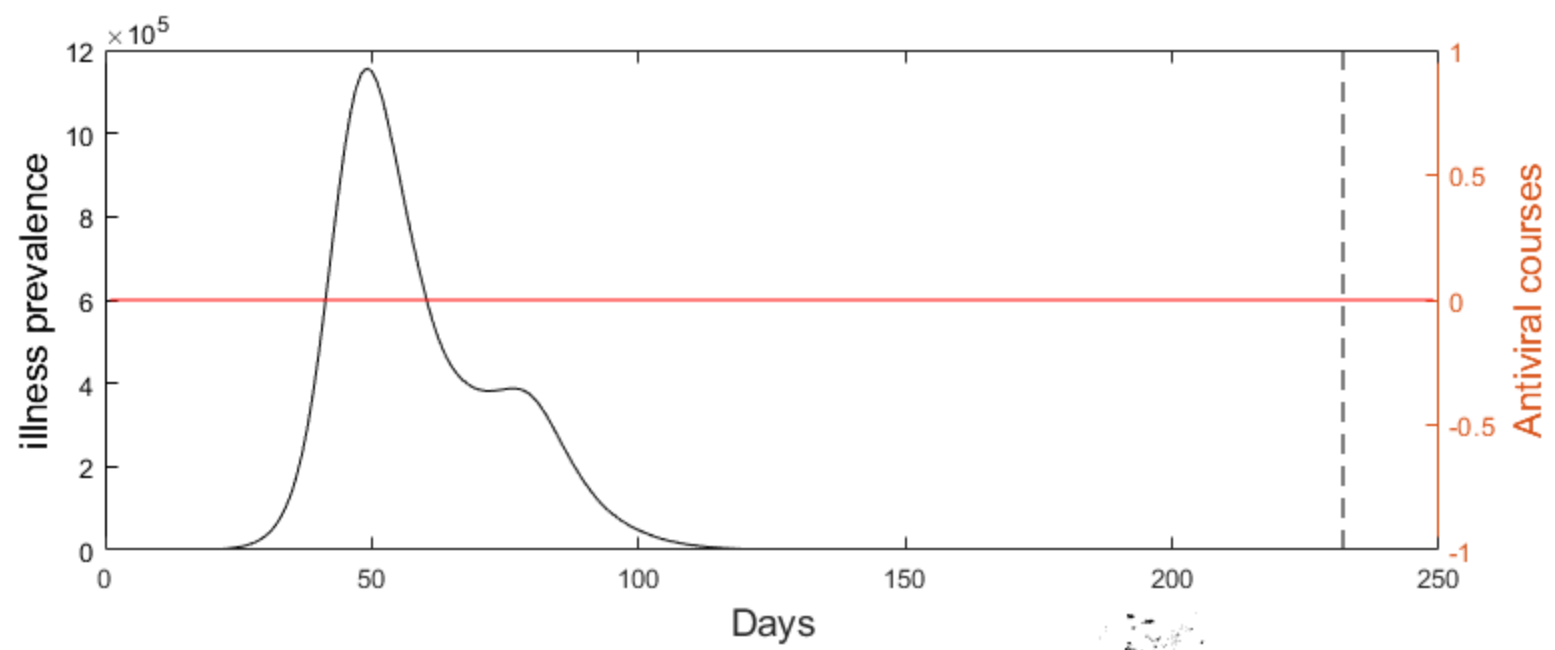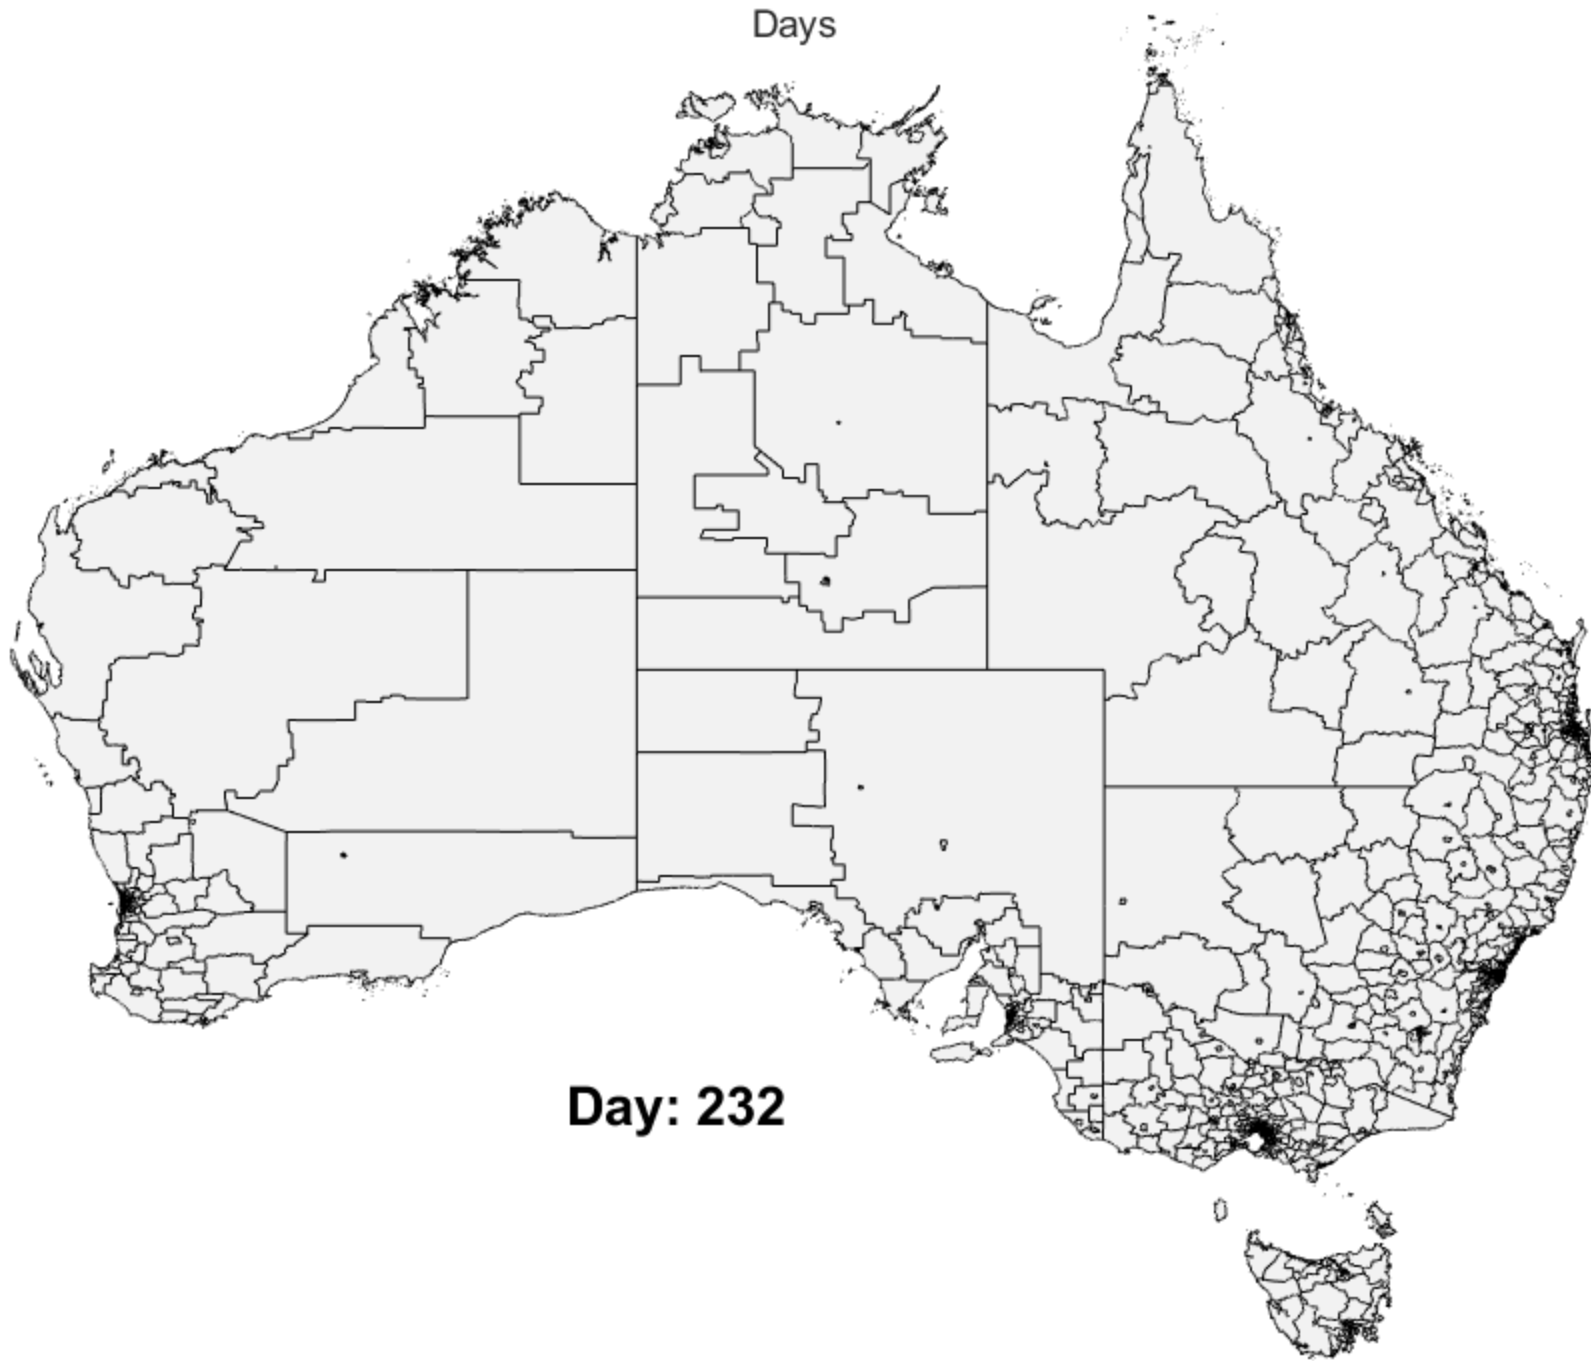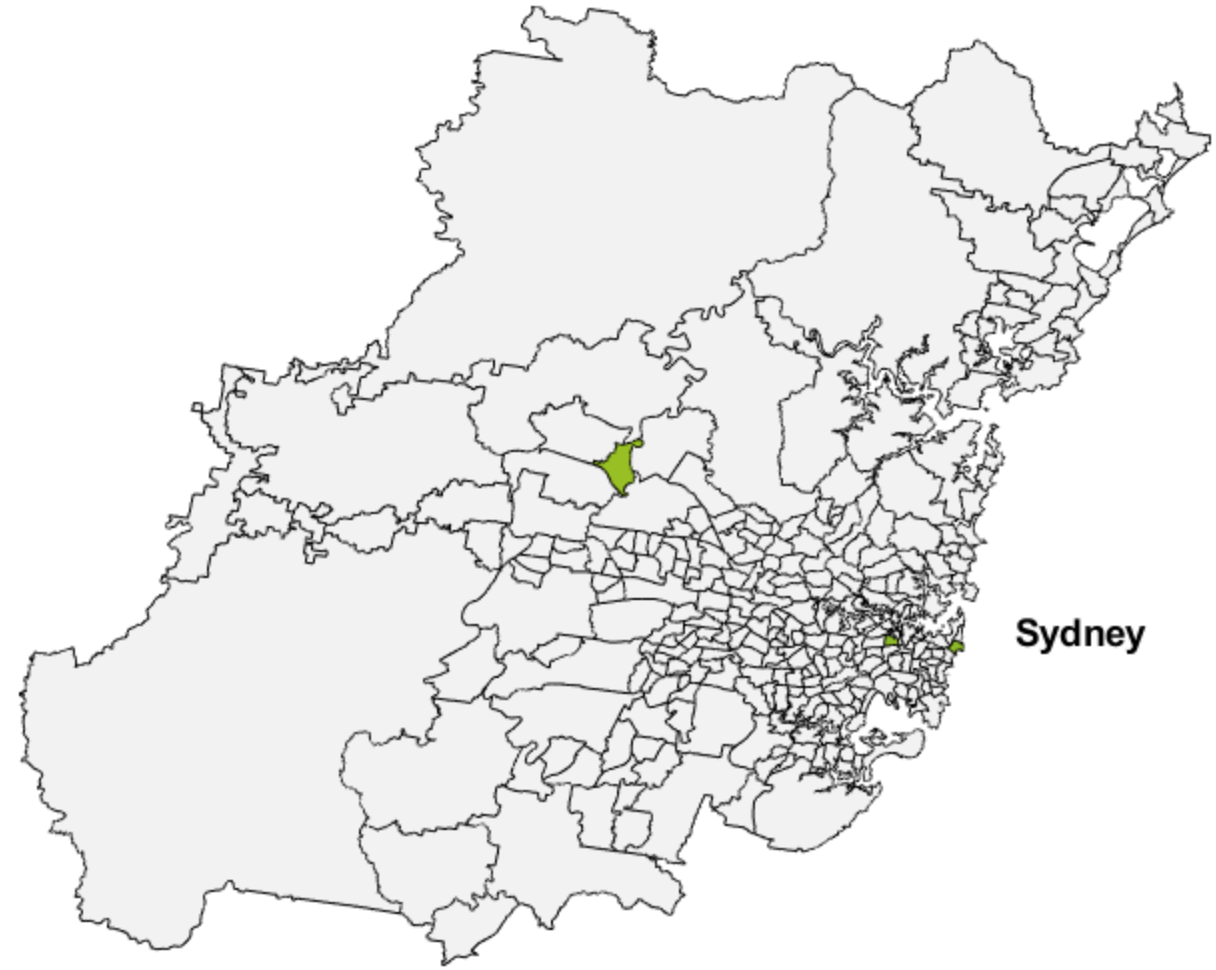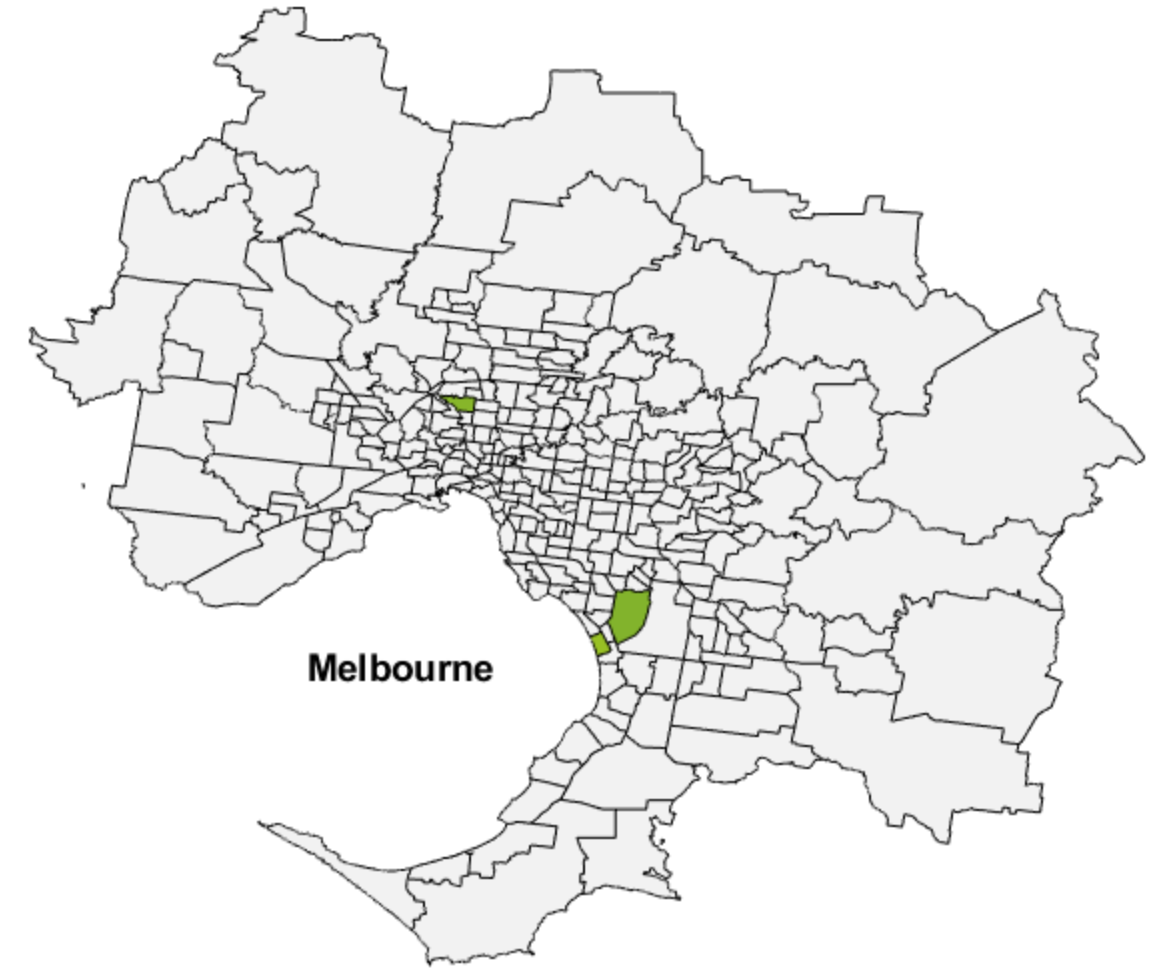

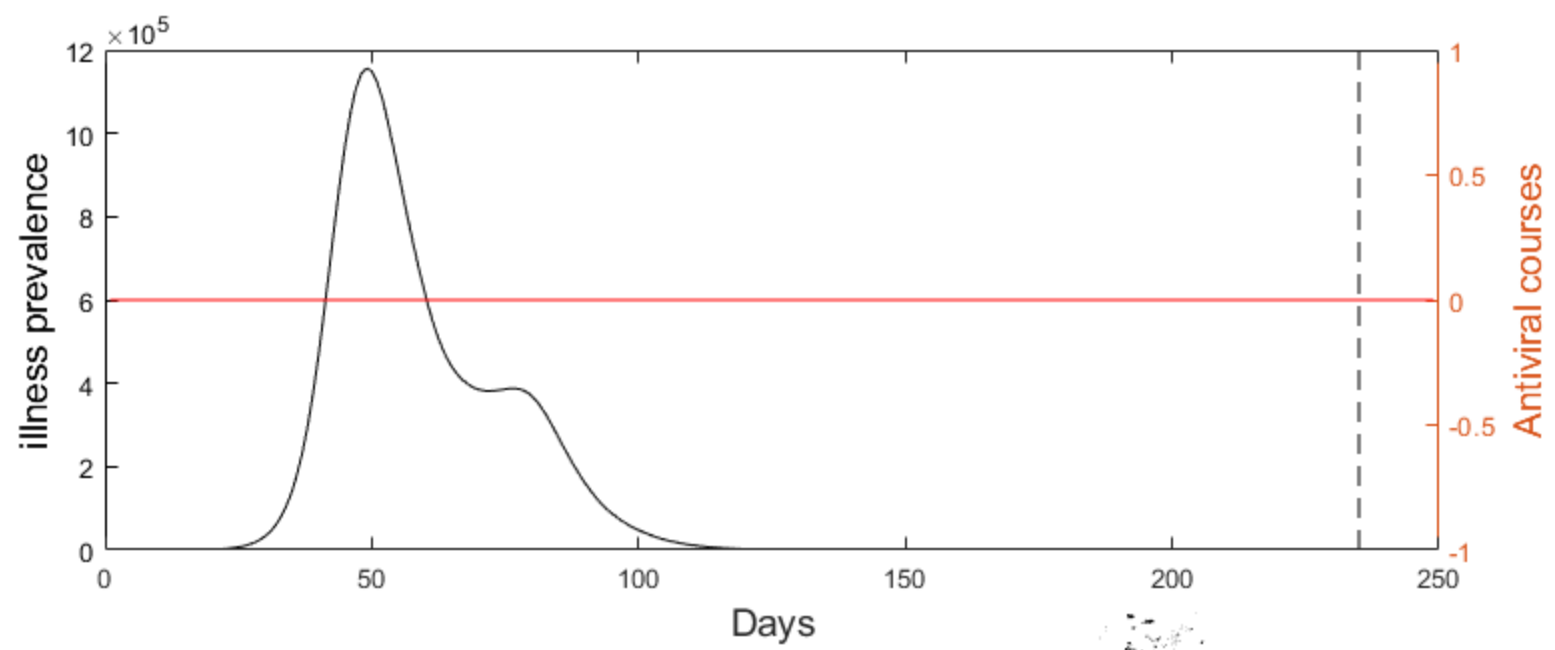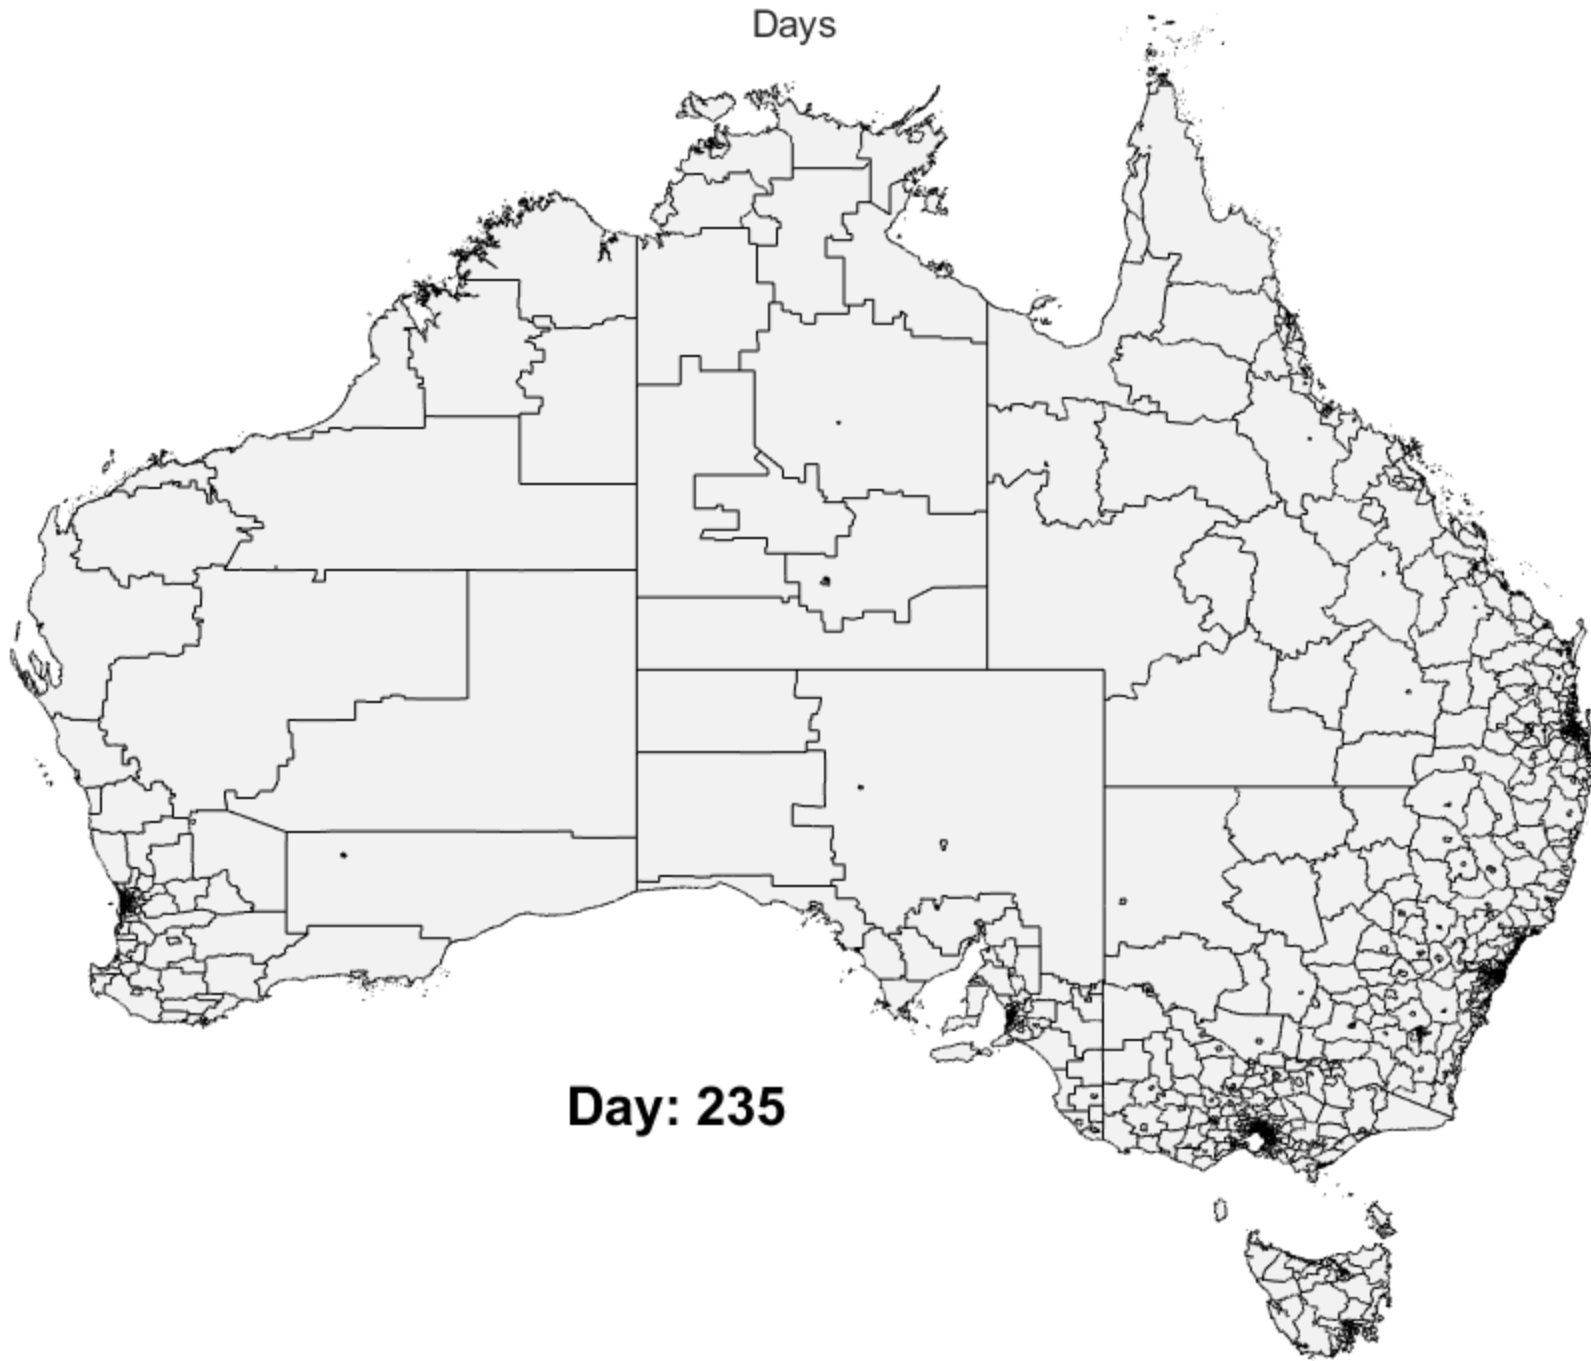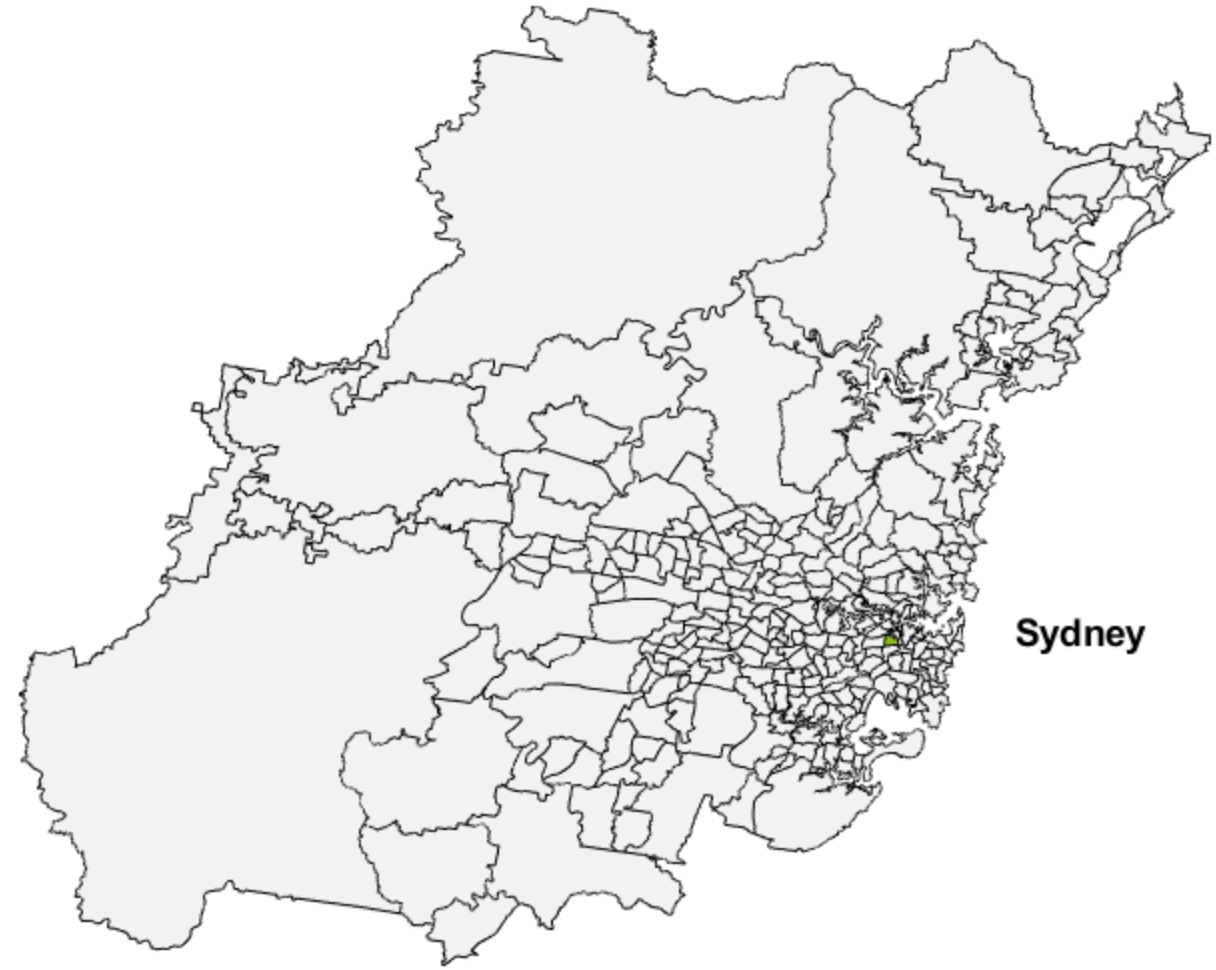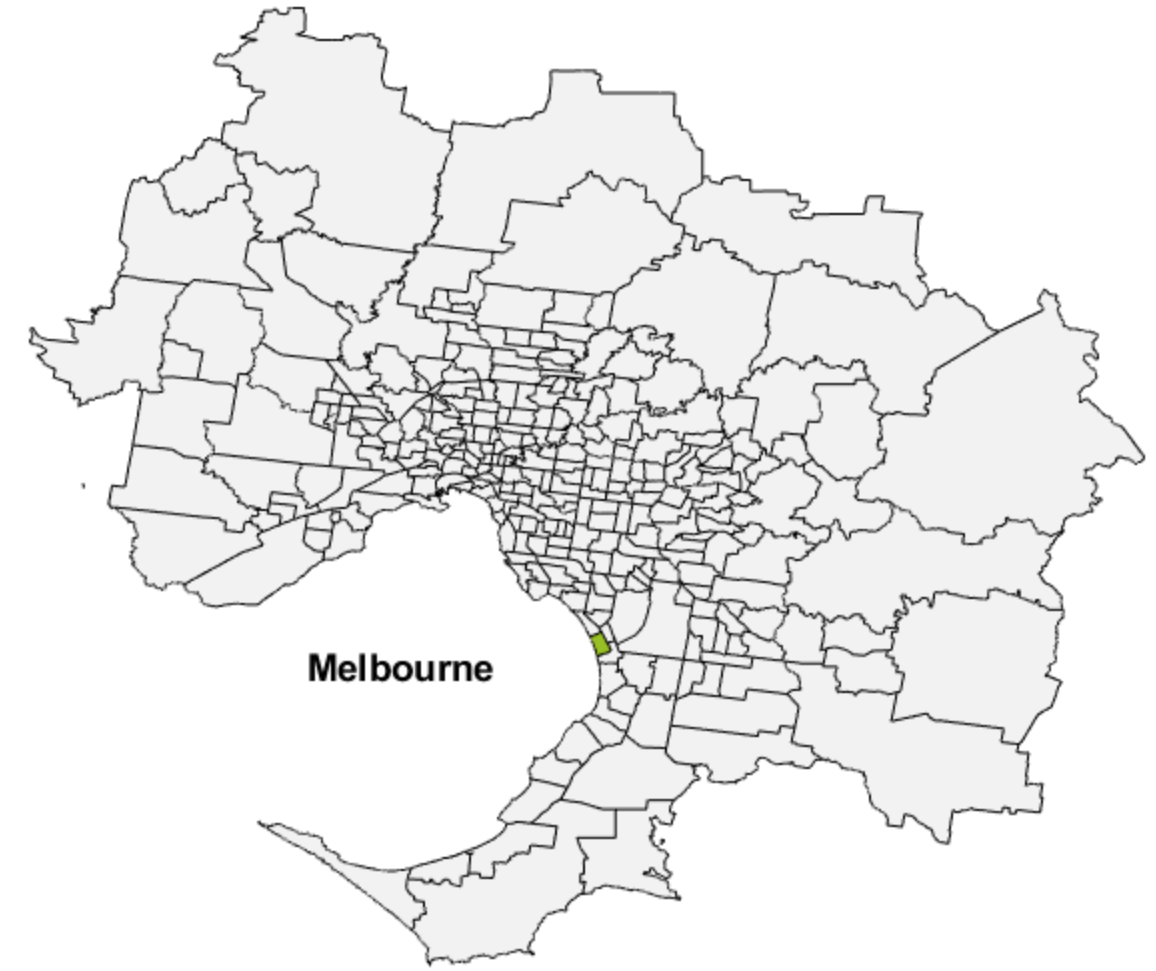



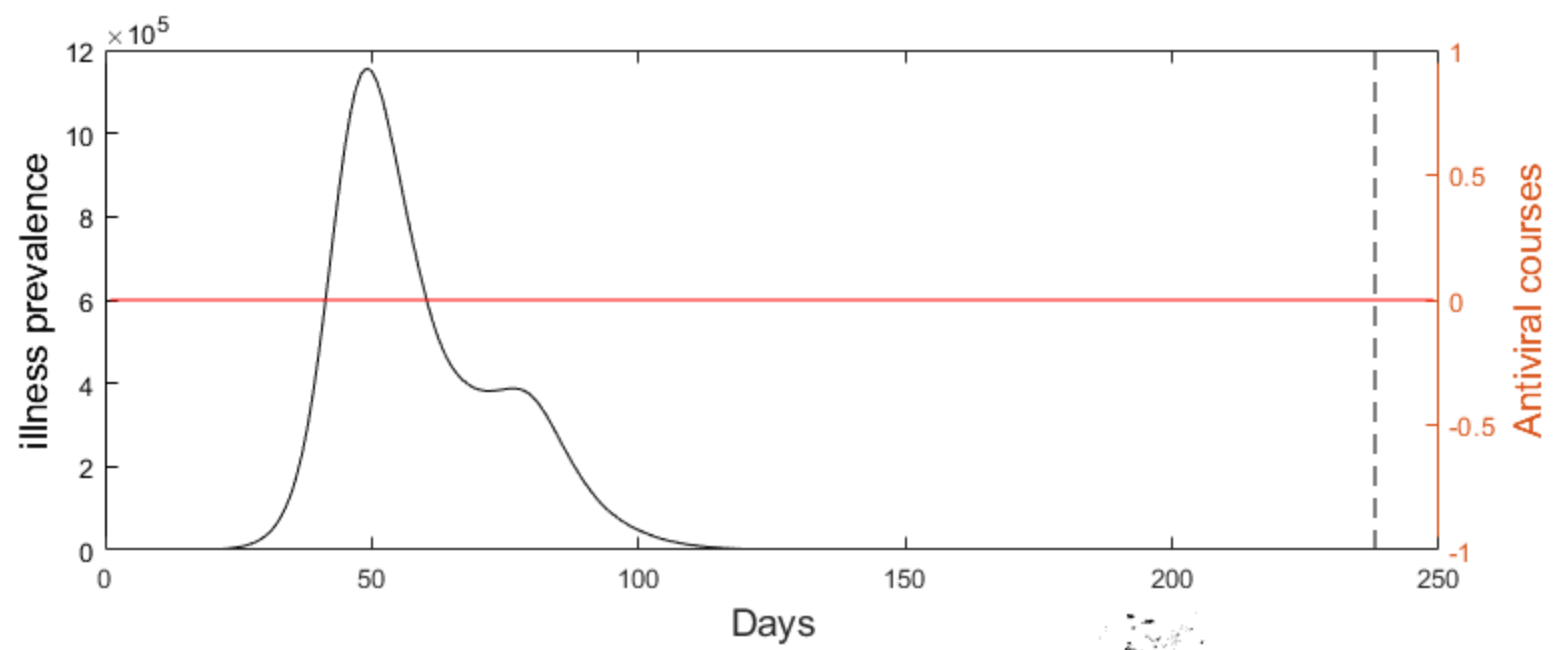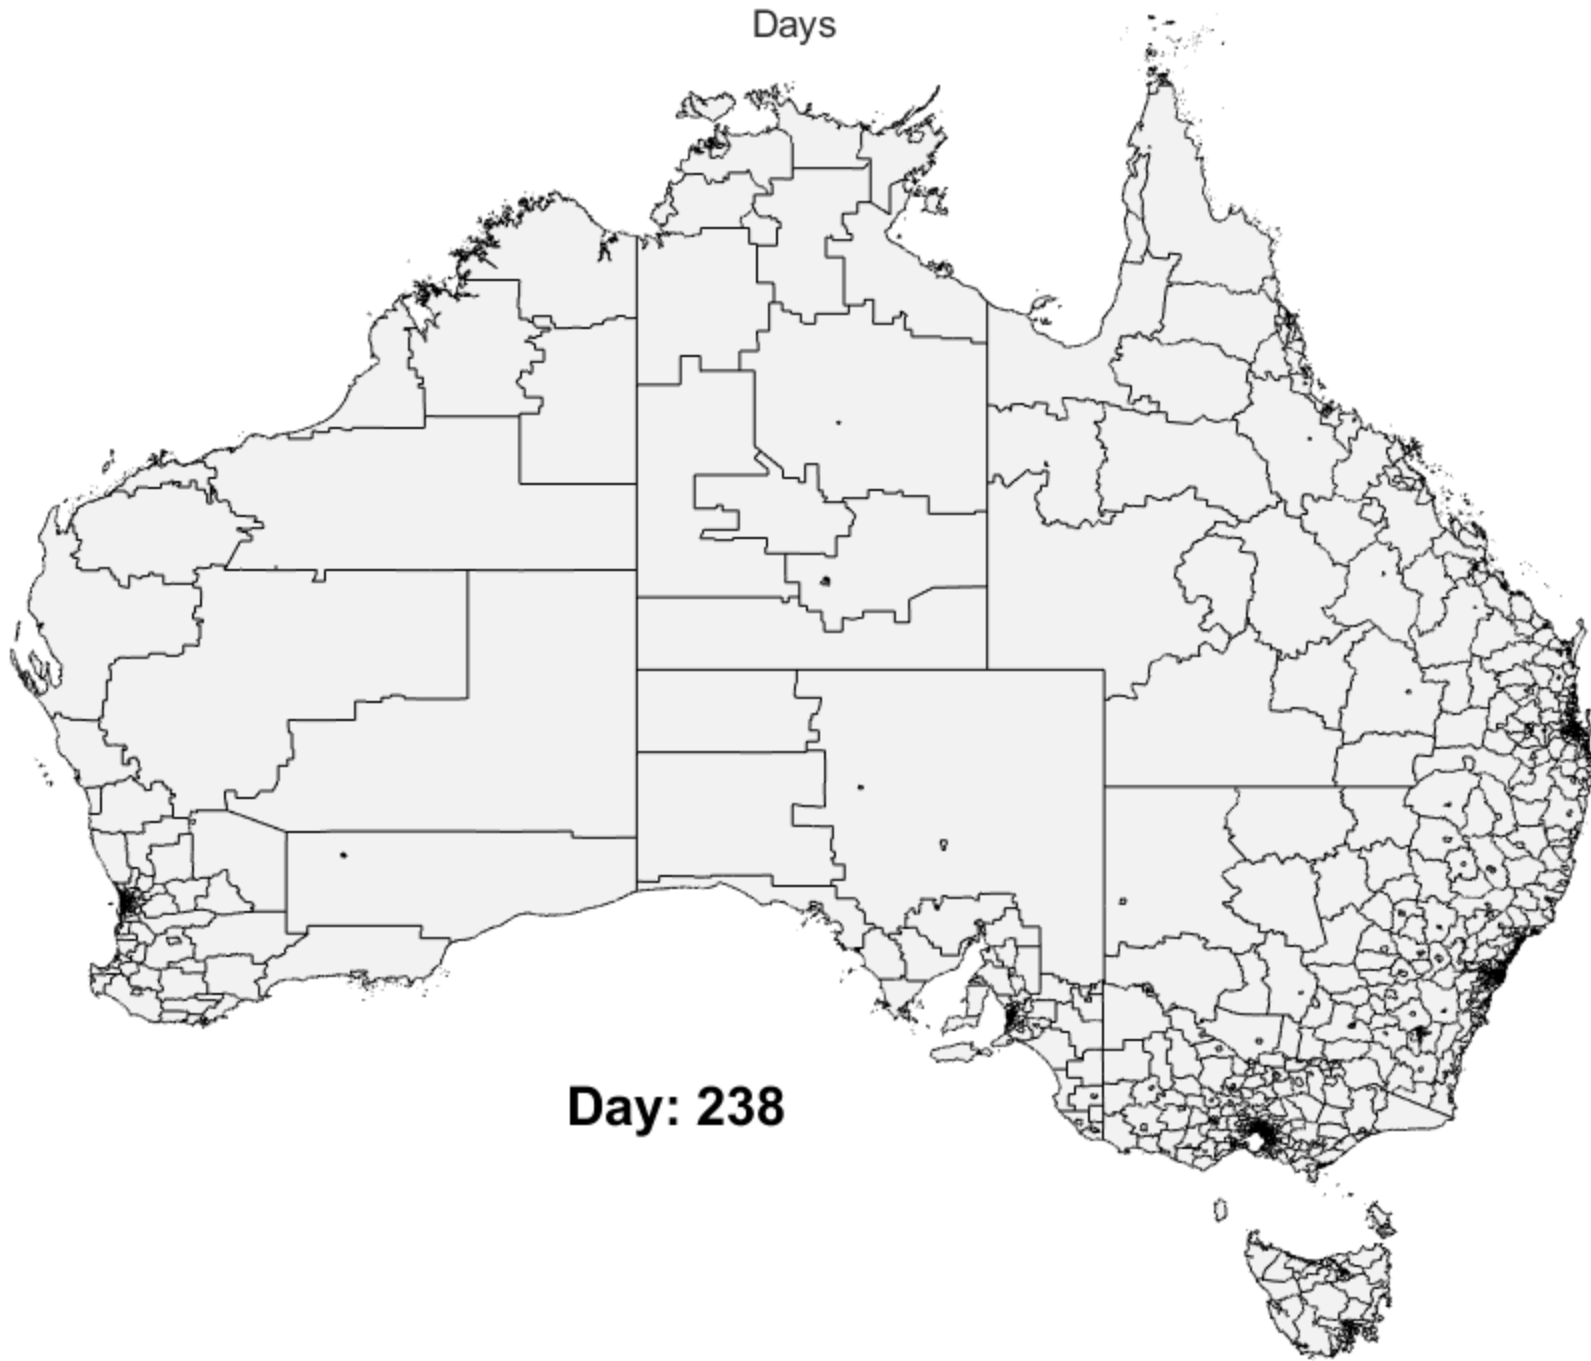

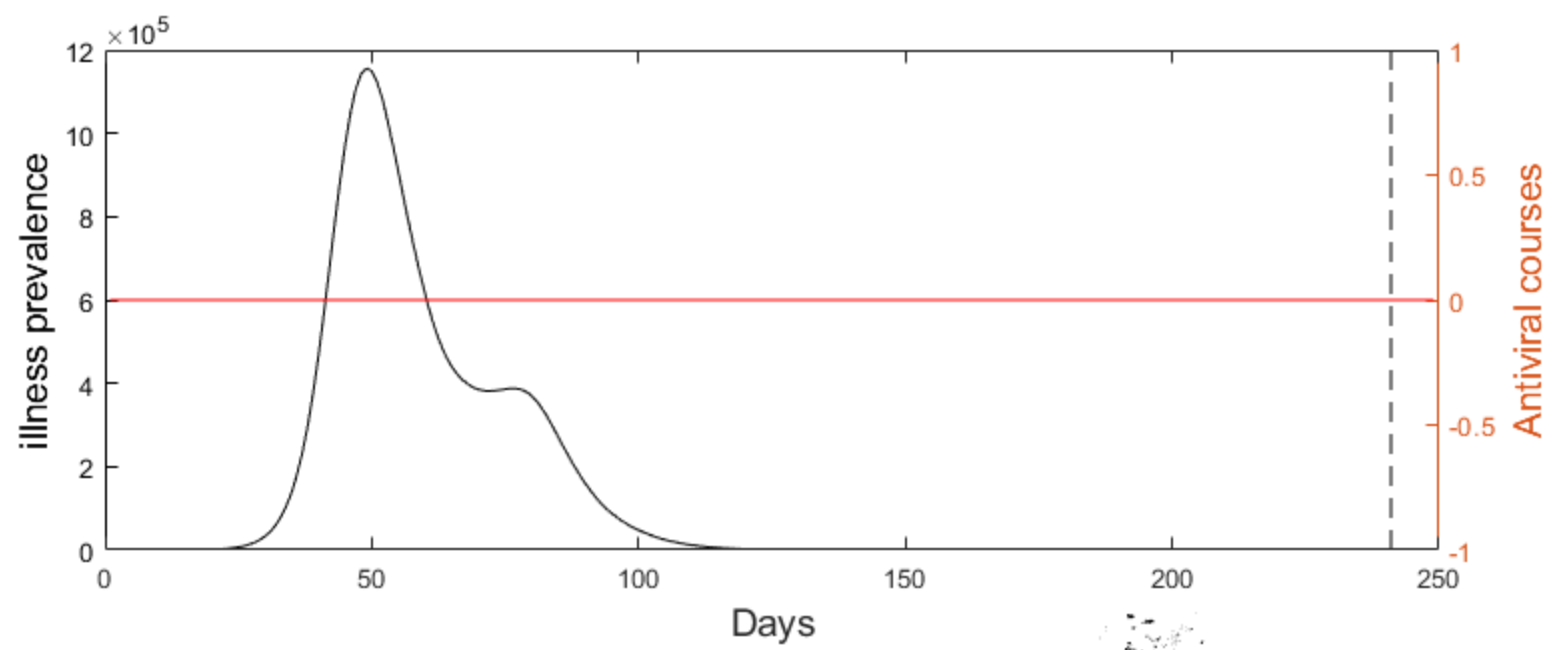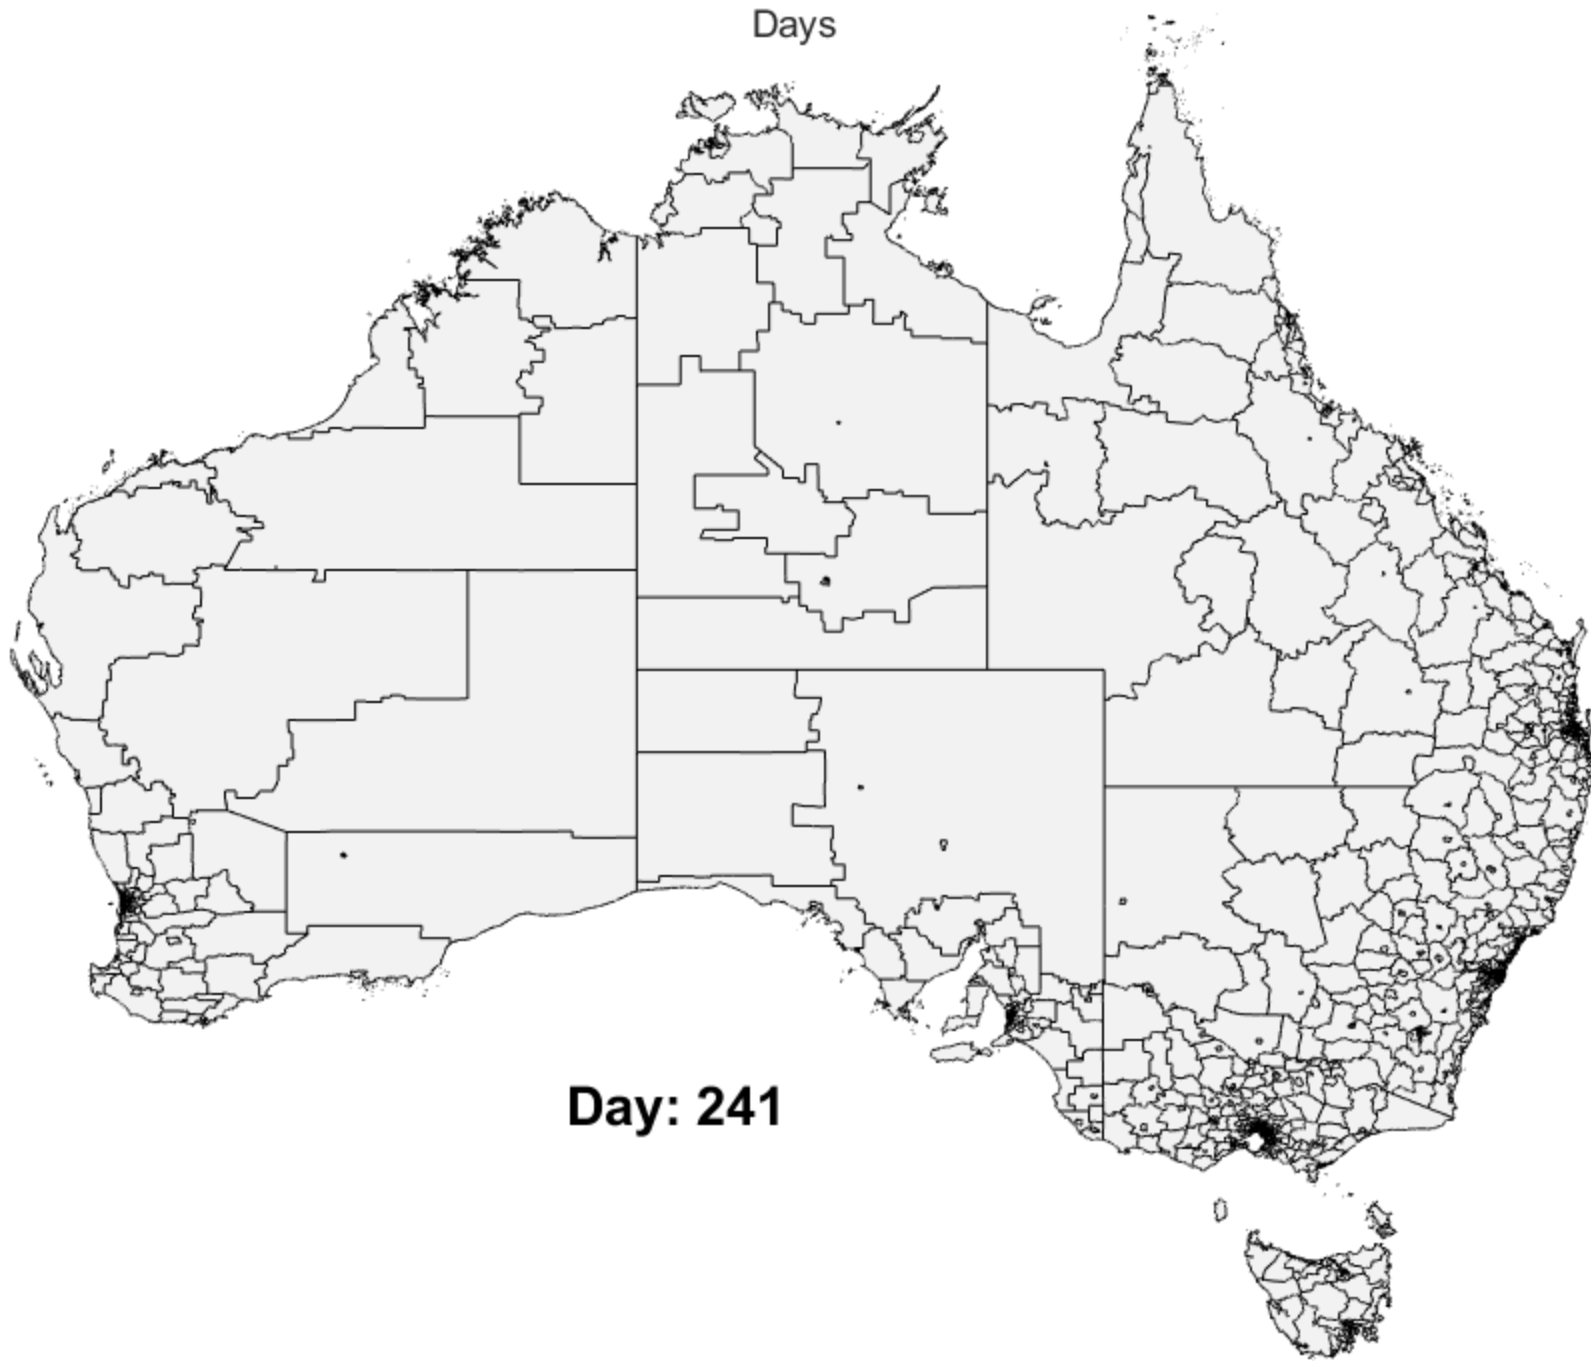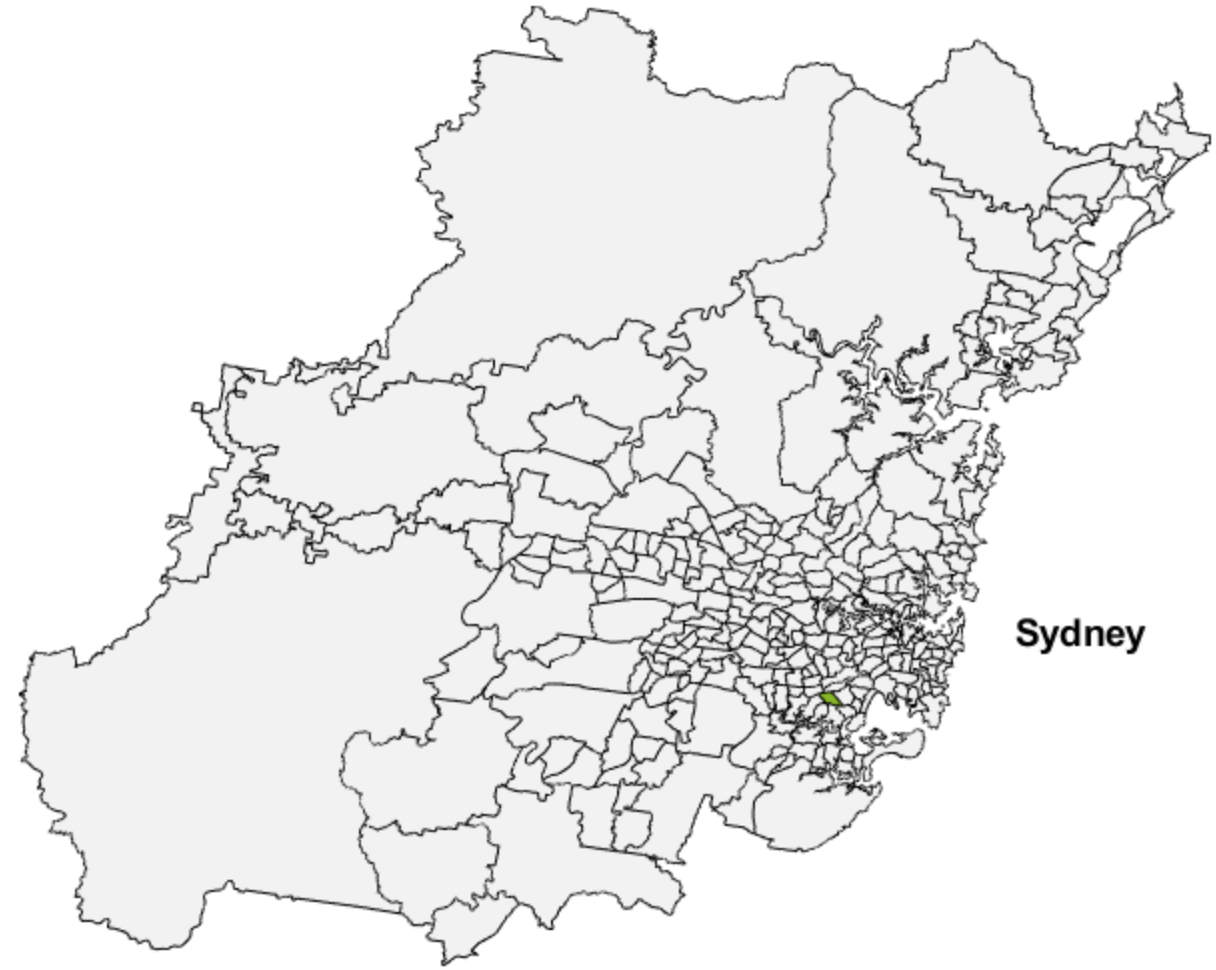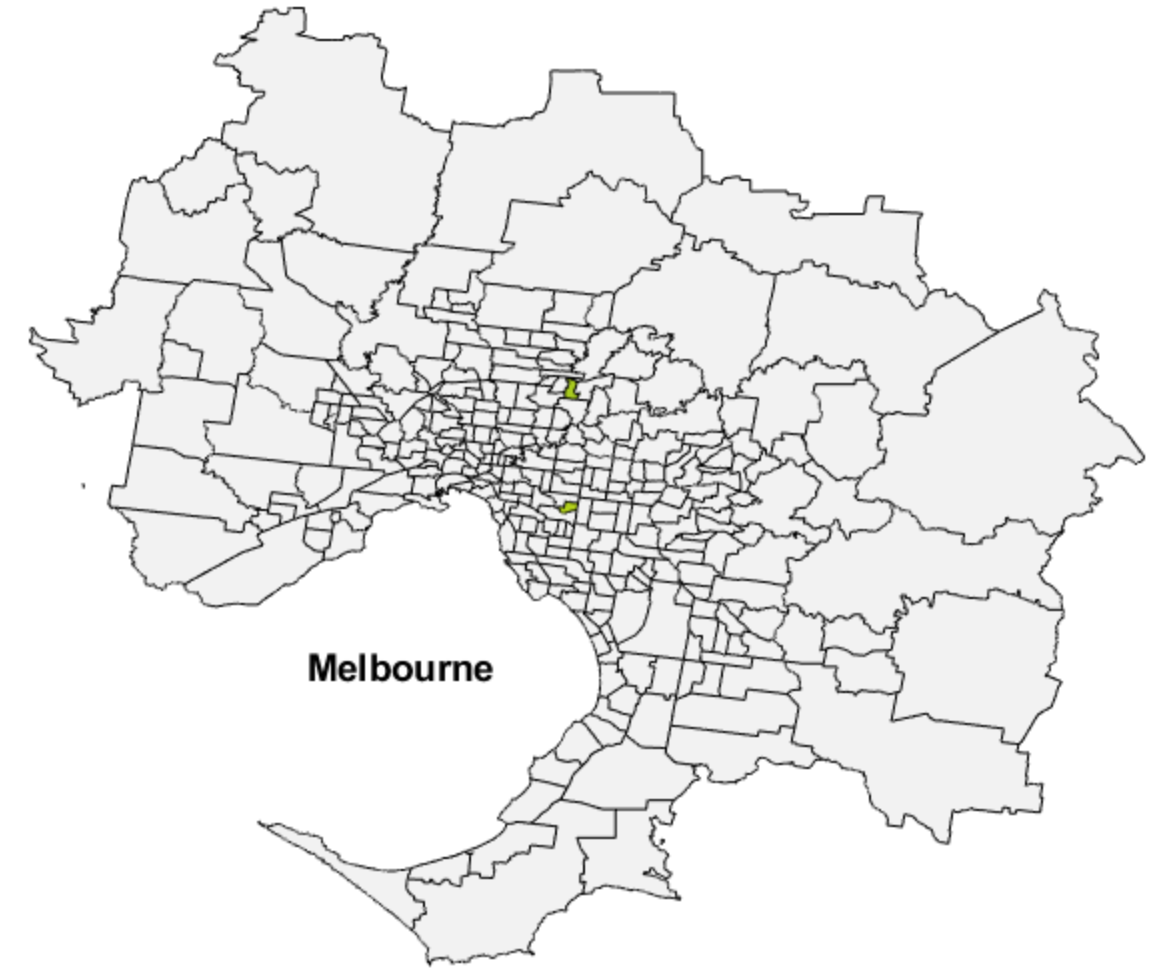

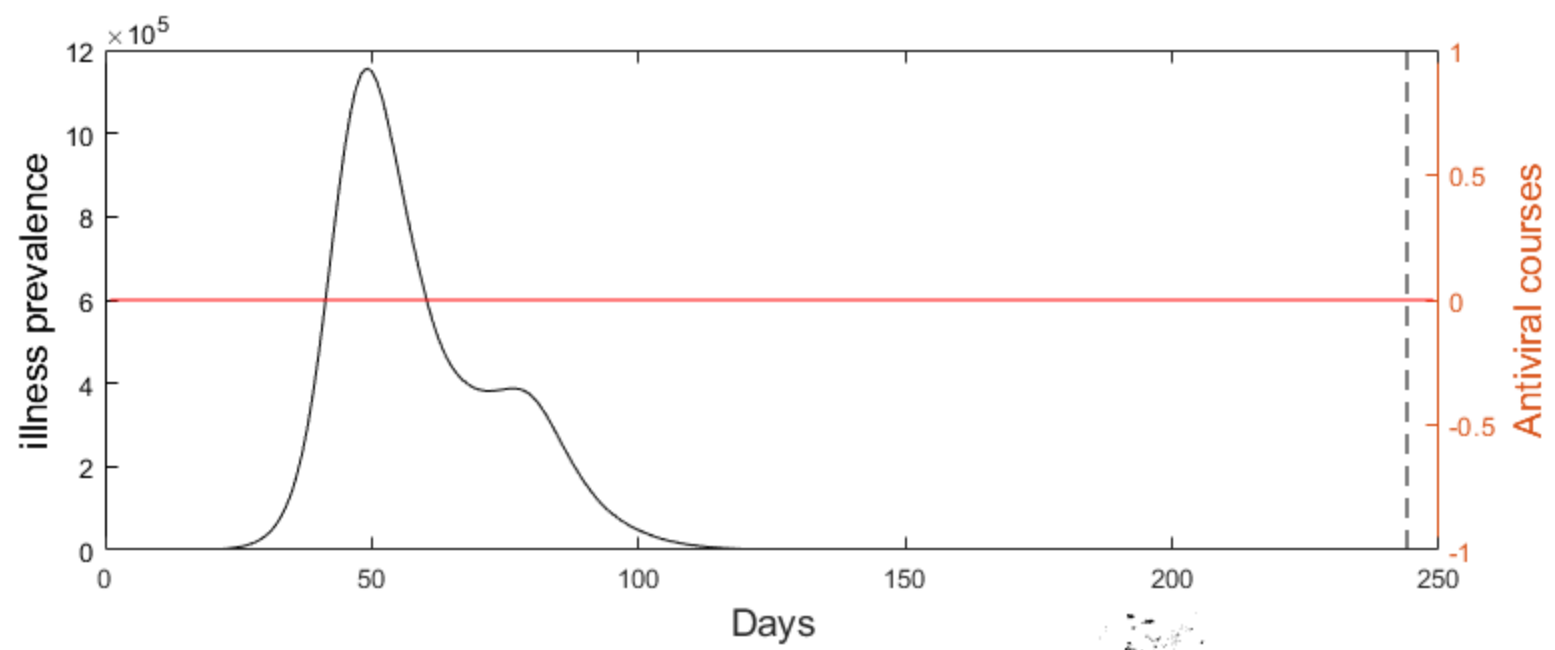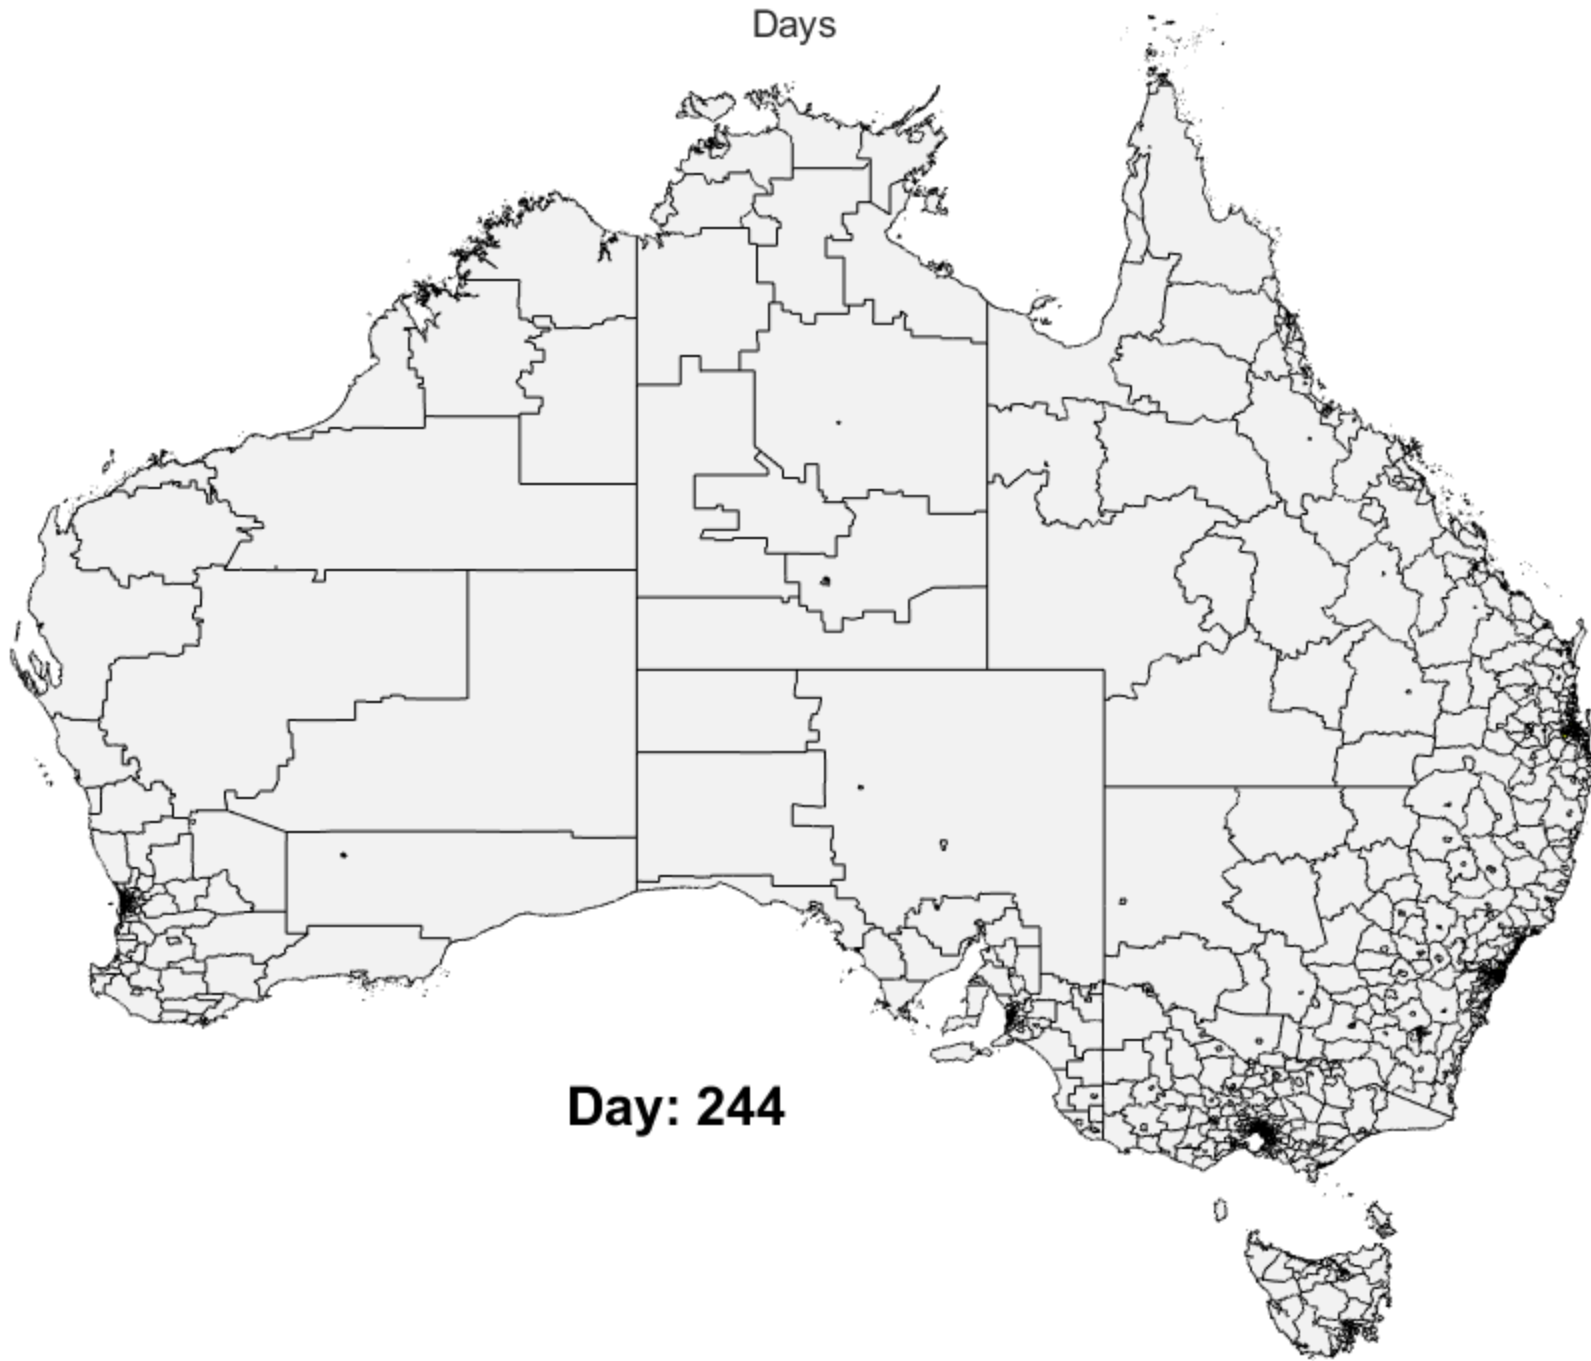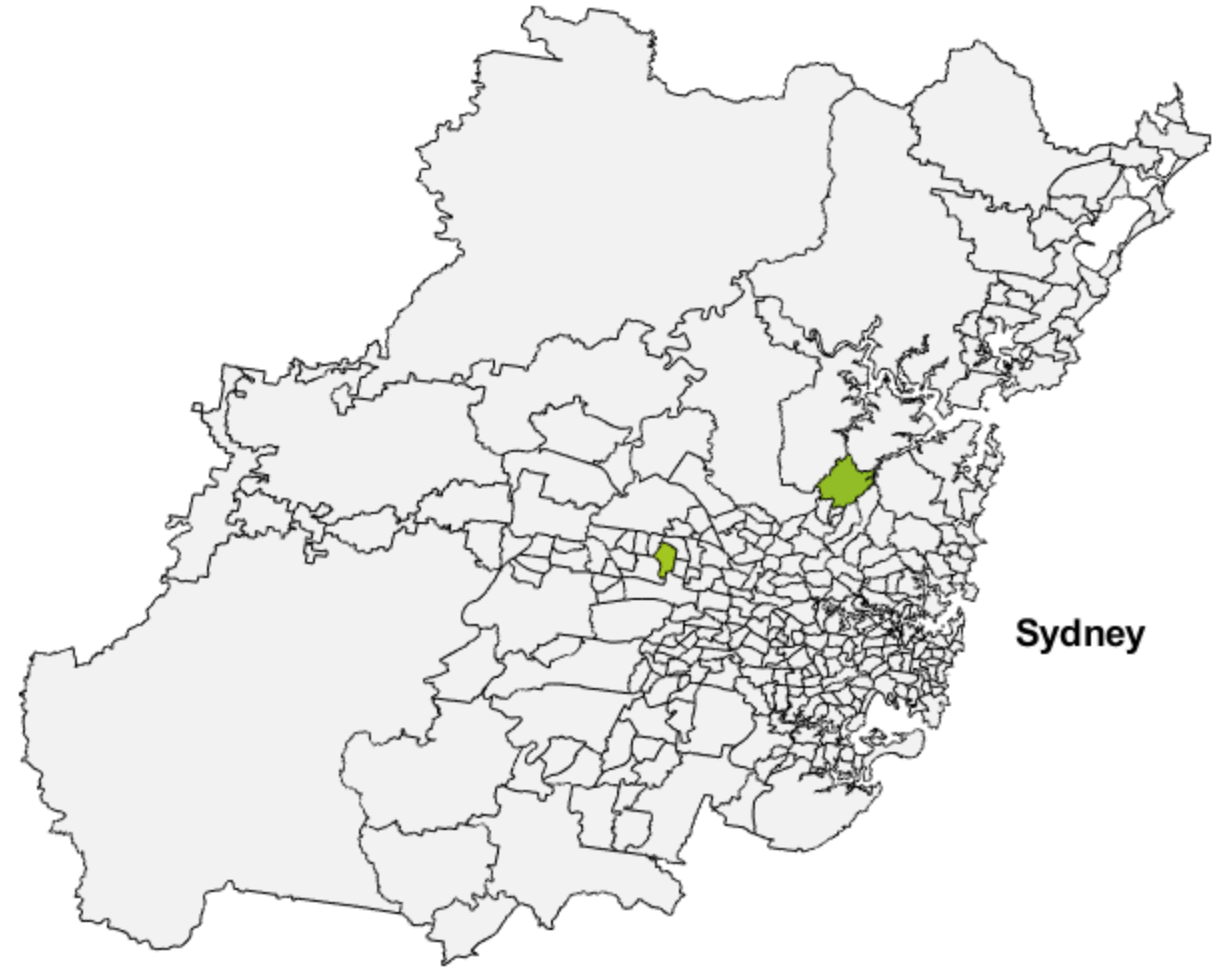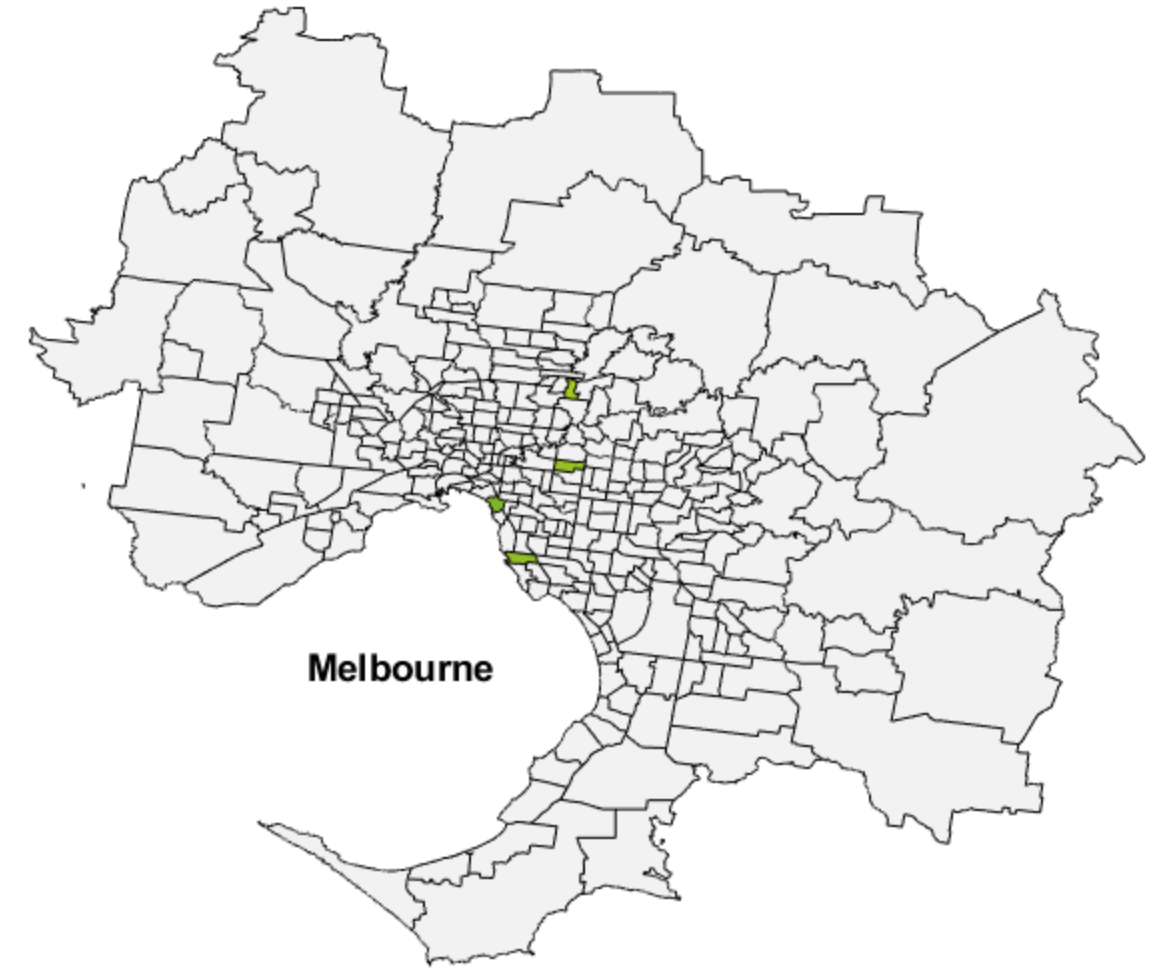



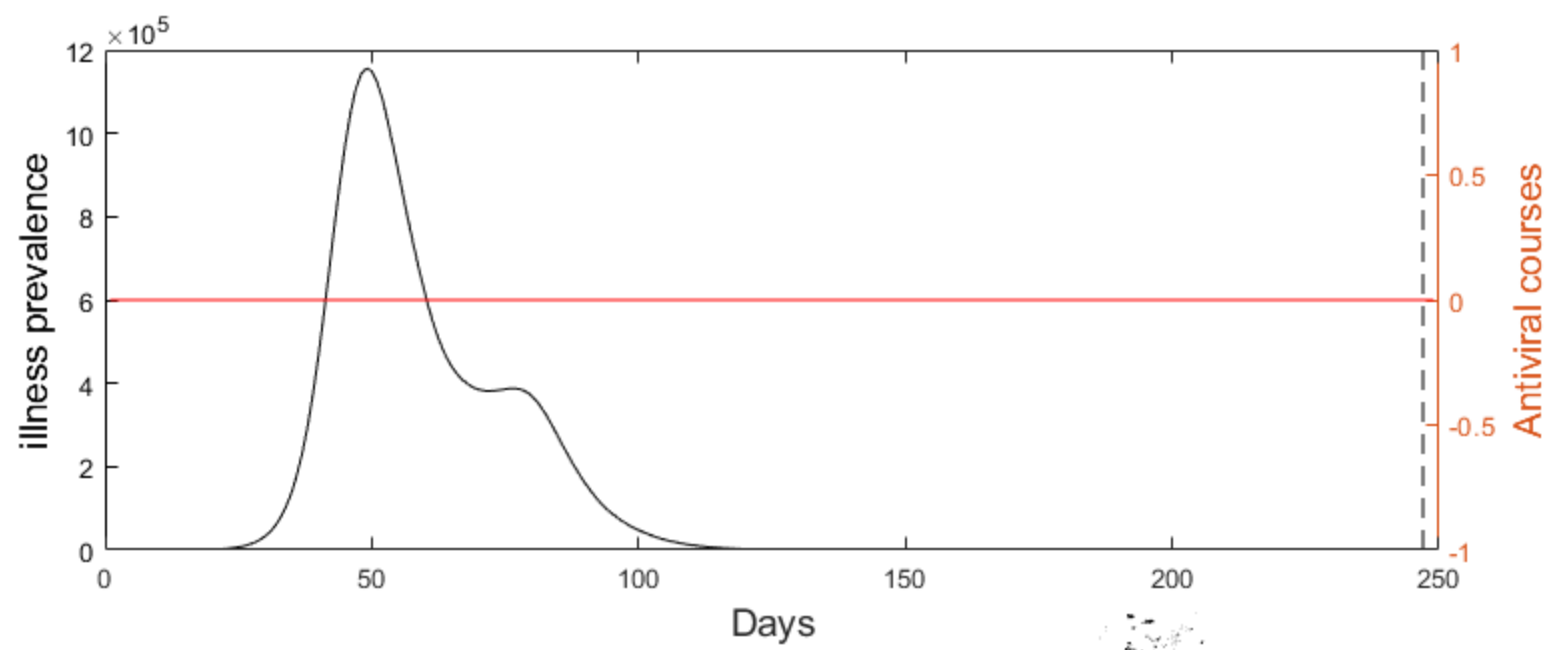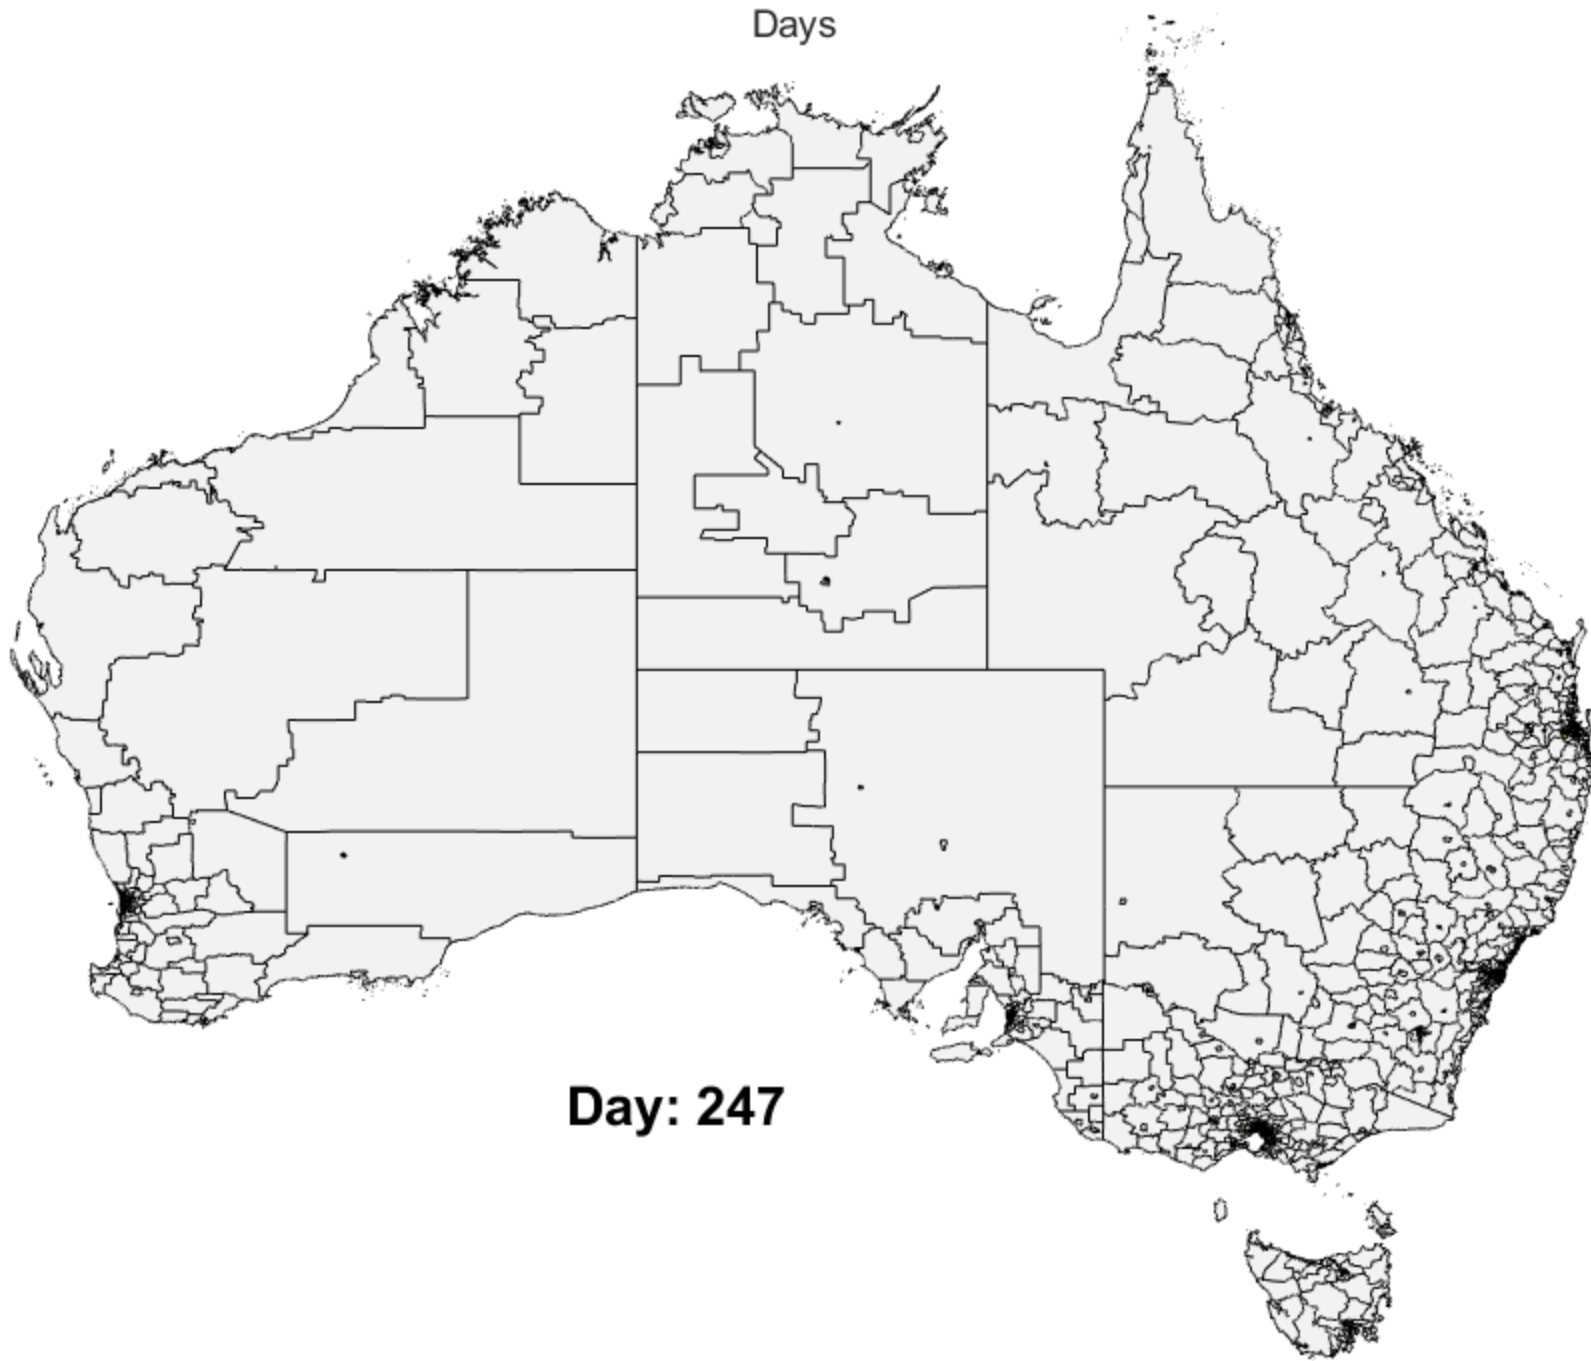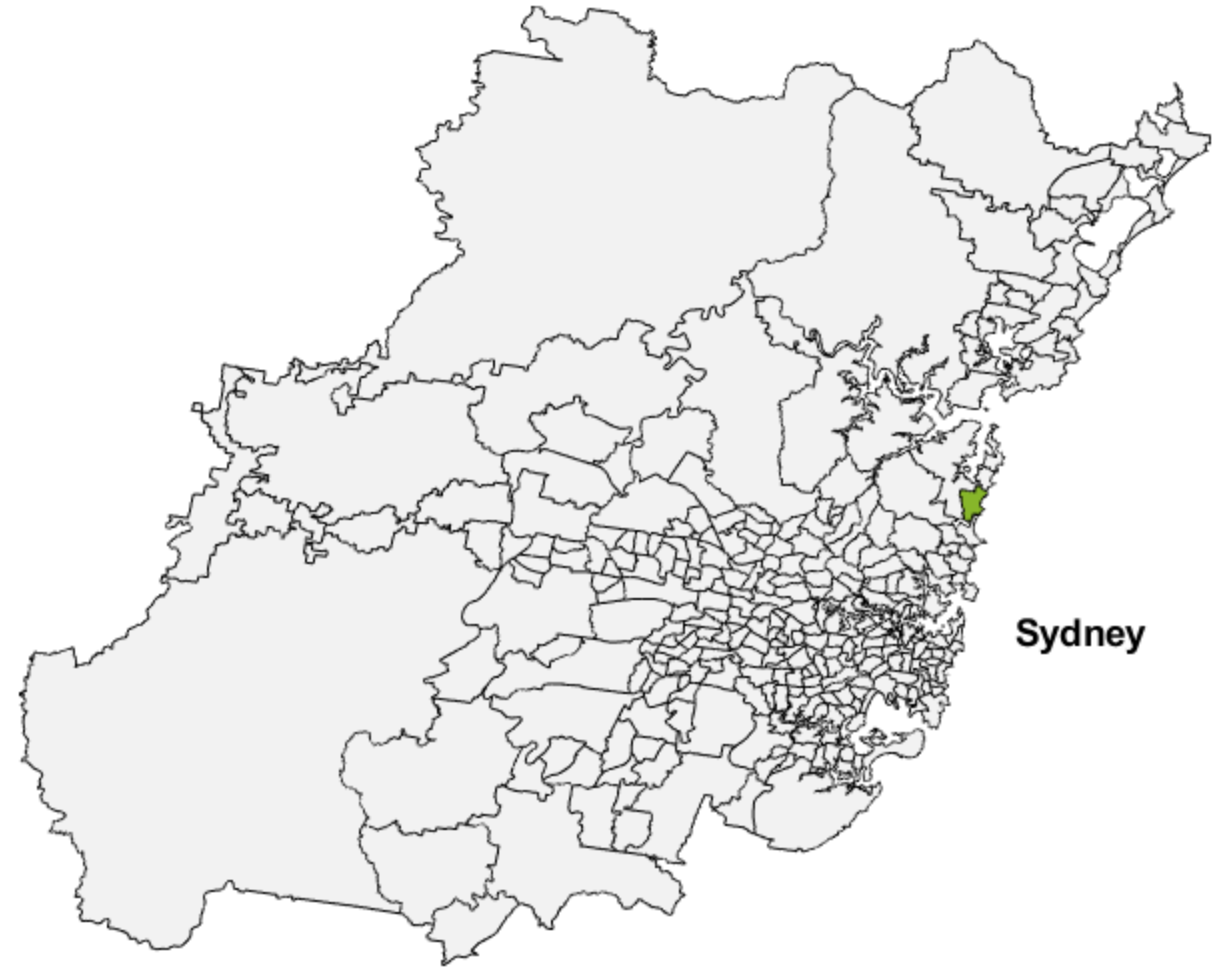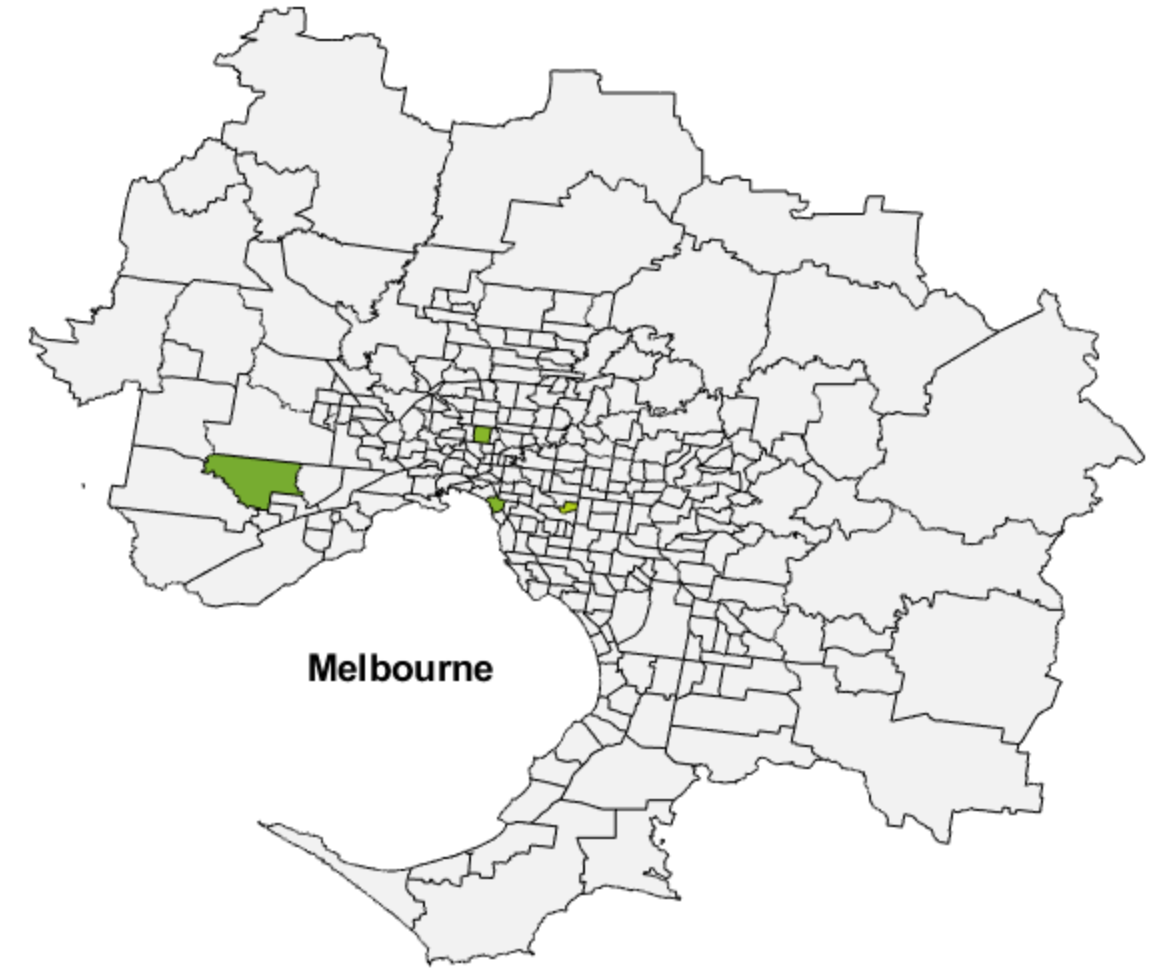

Supplement: rsif20190728supp2.pdf [file rsif20190728supp2.pdf]

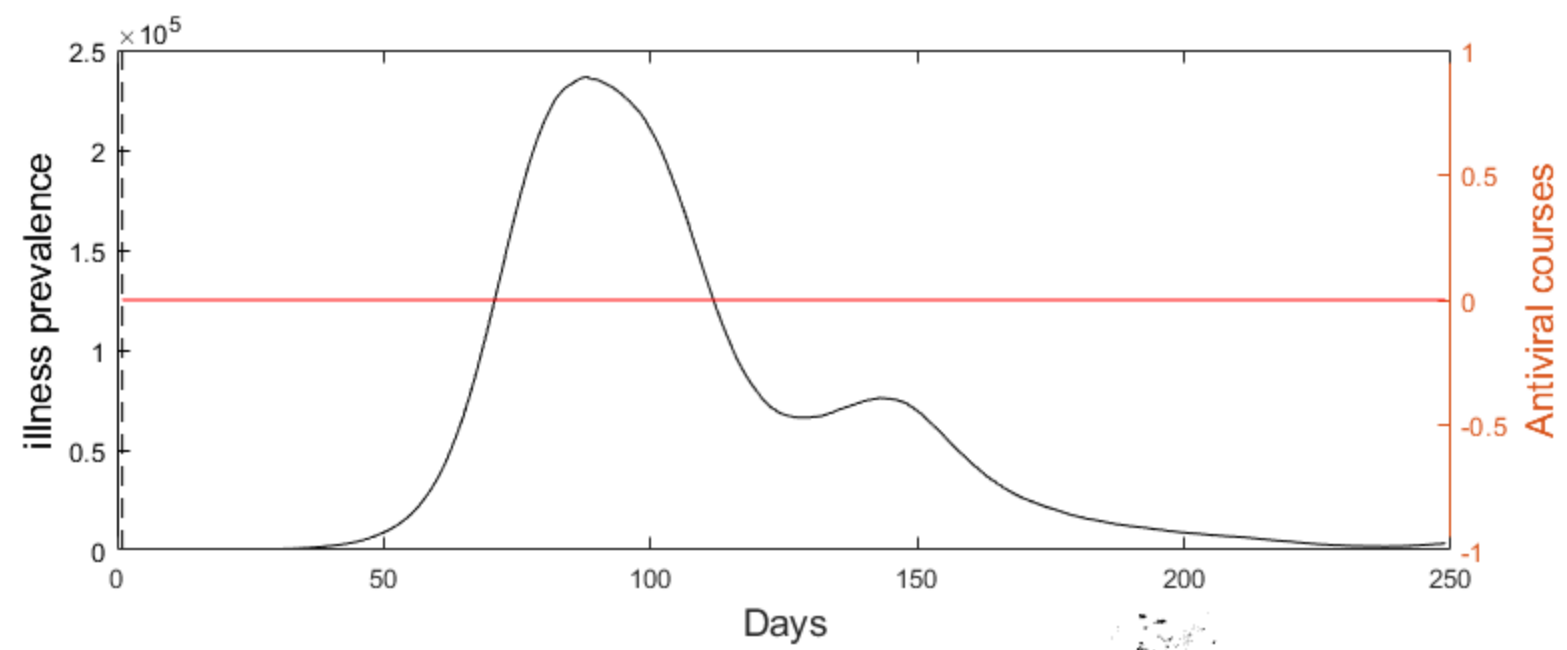

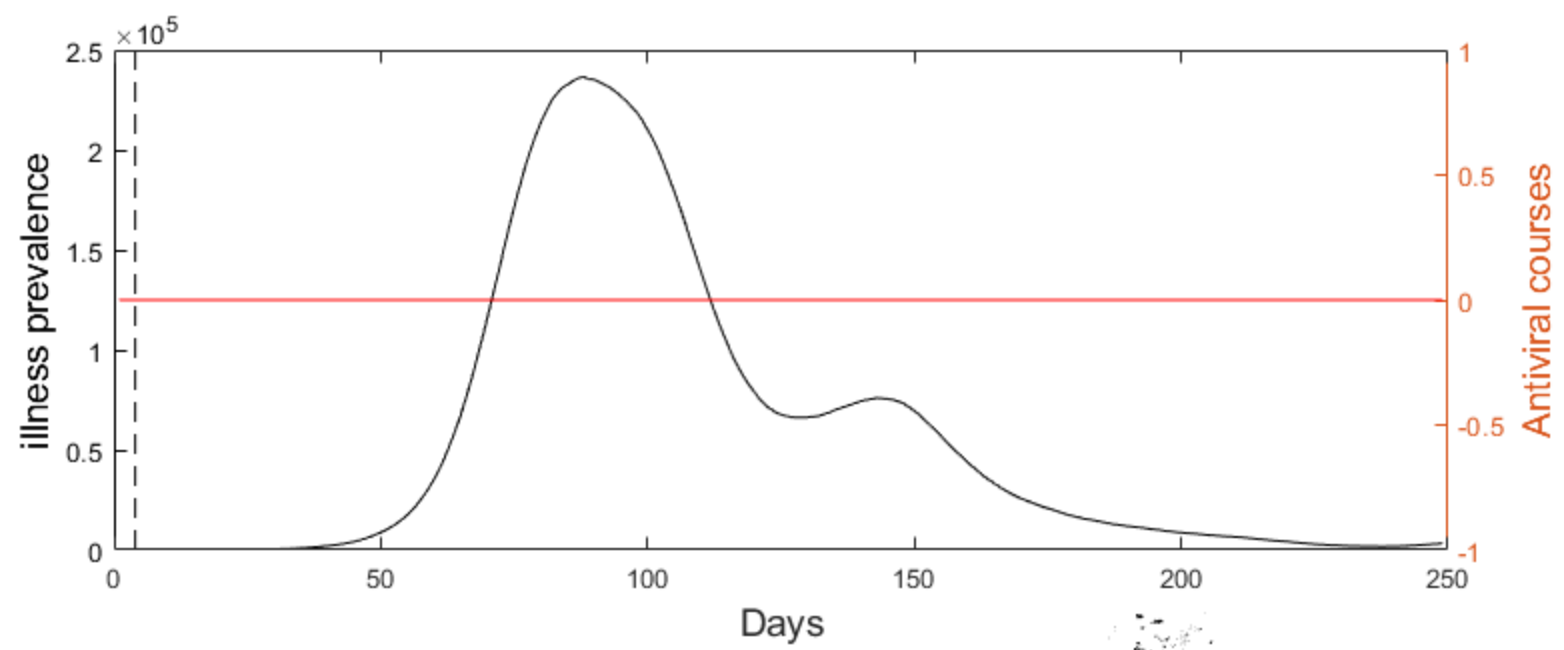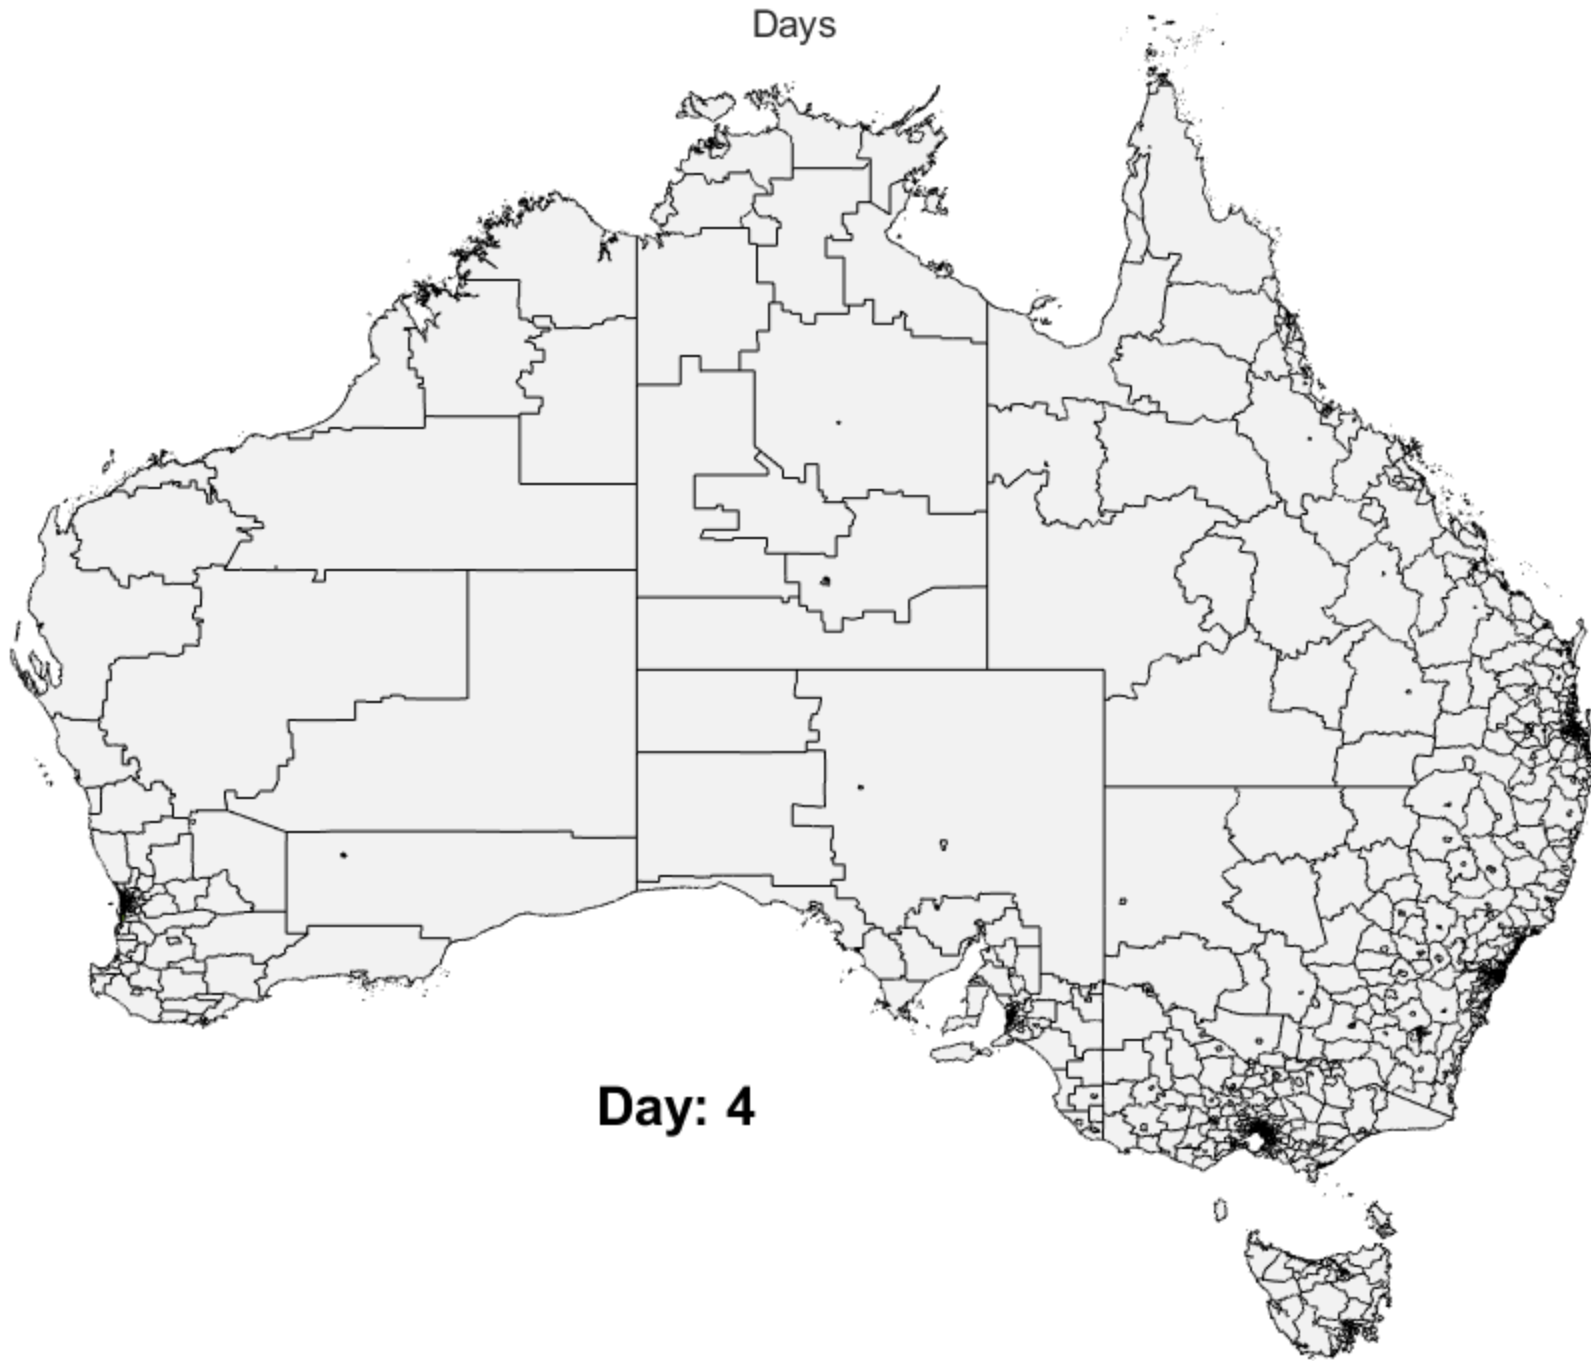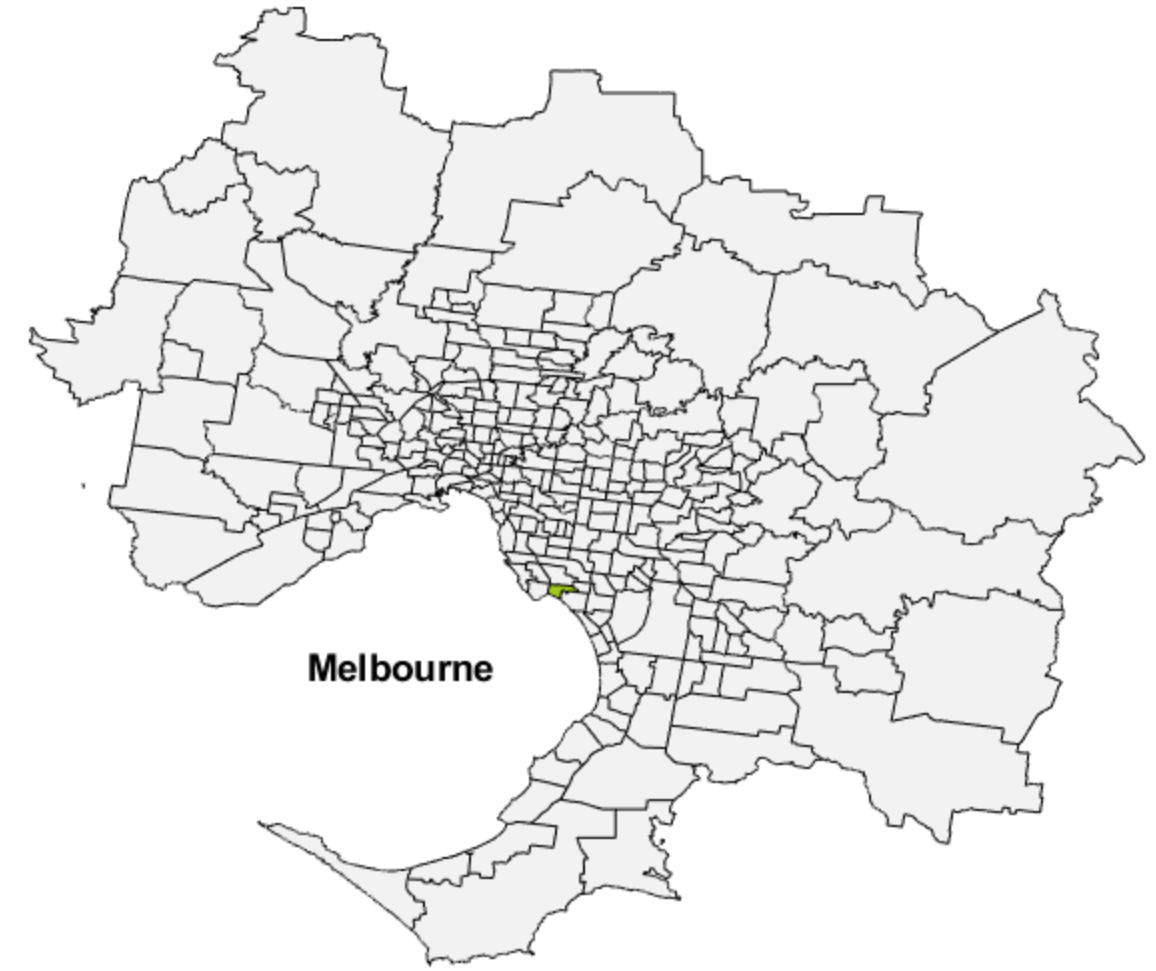

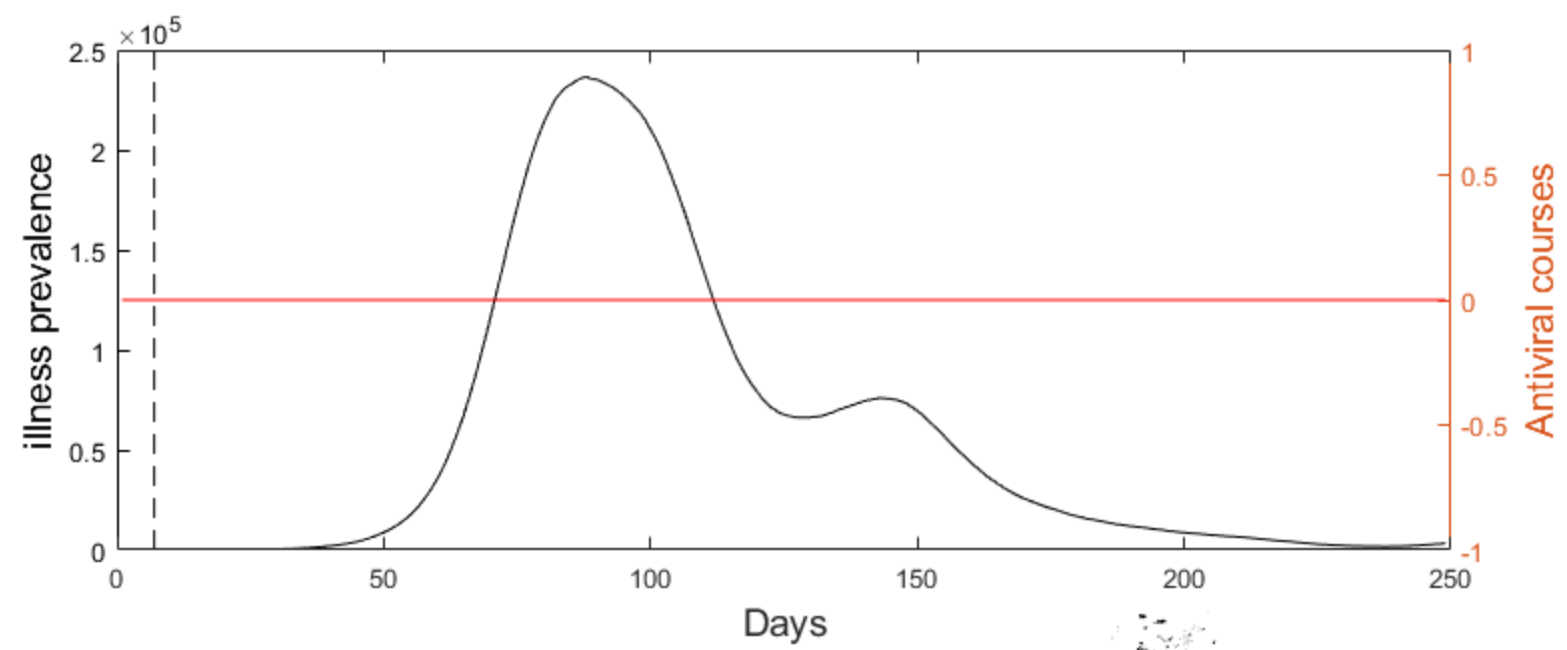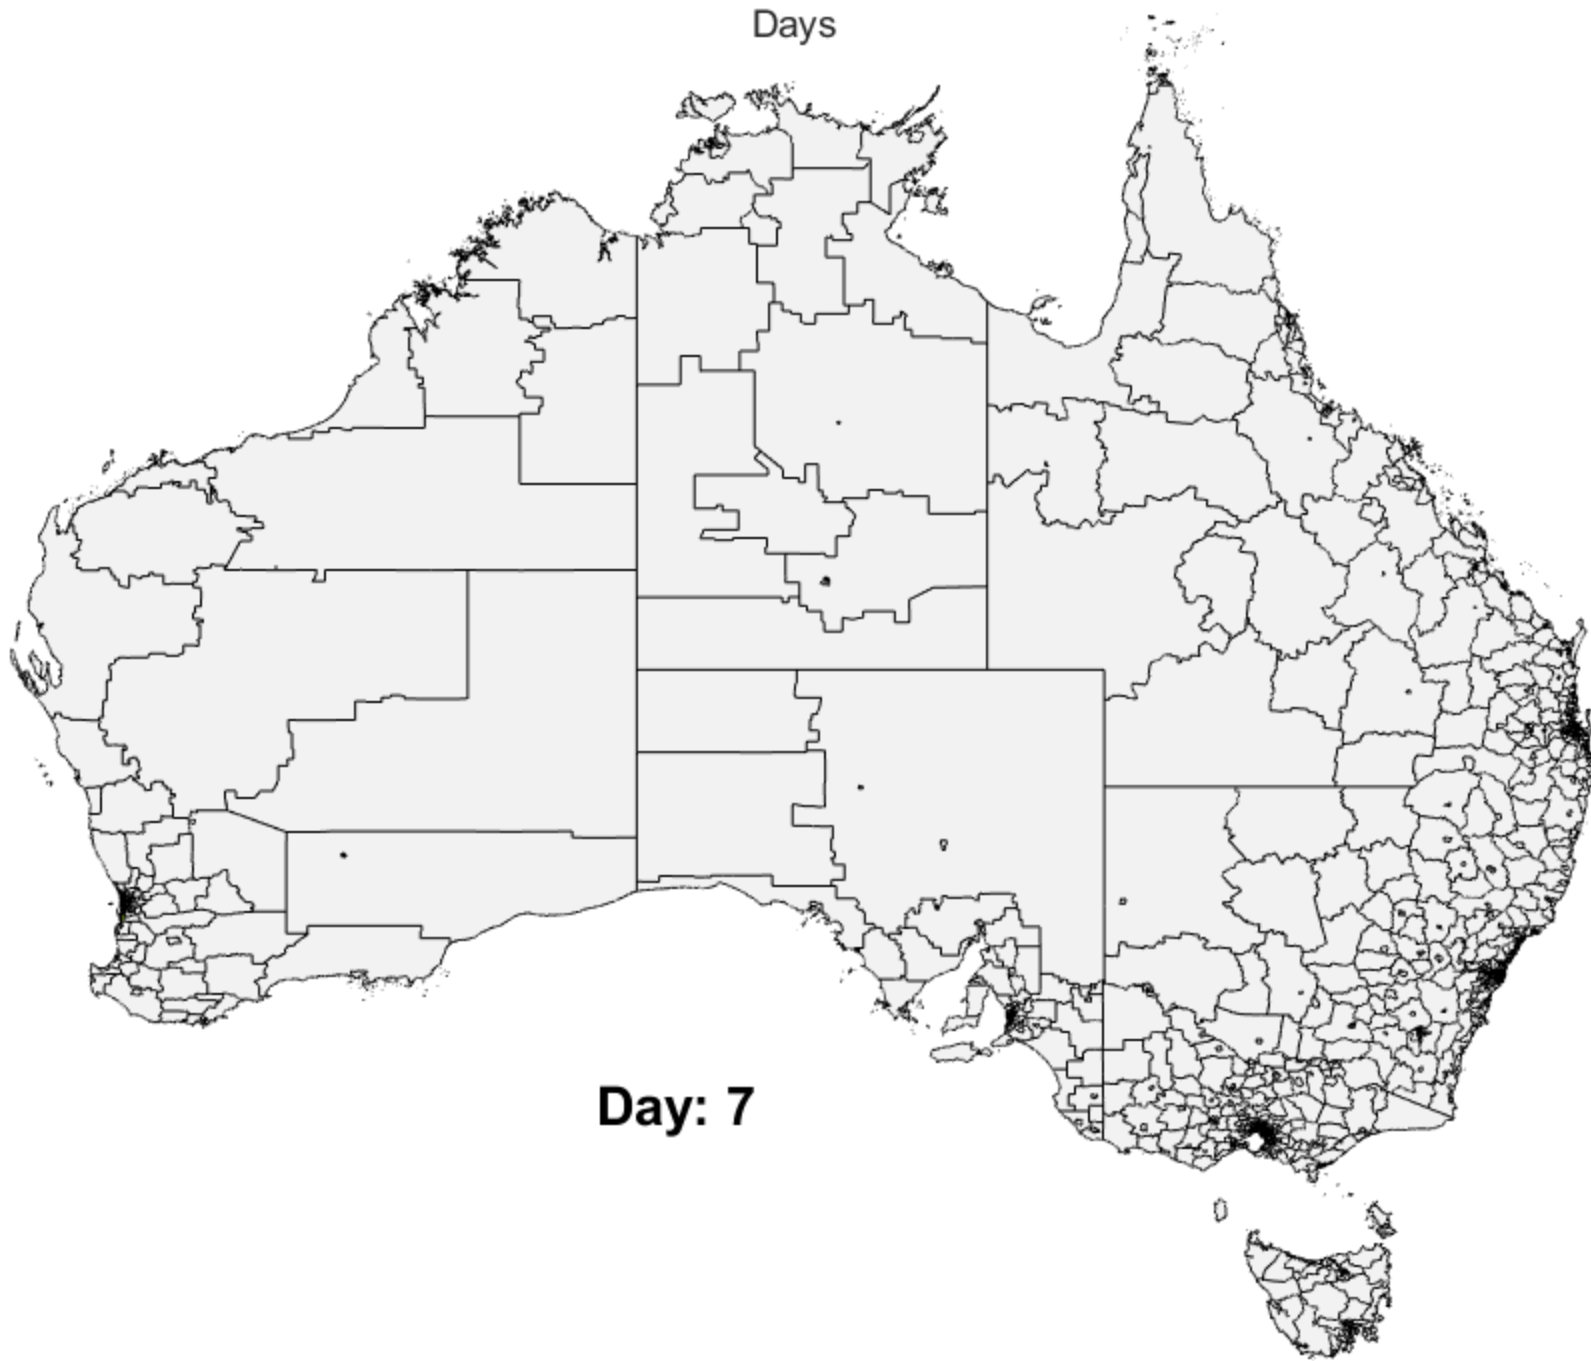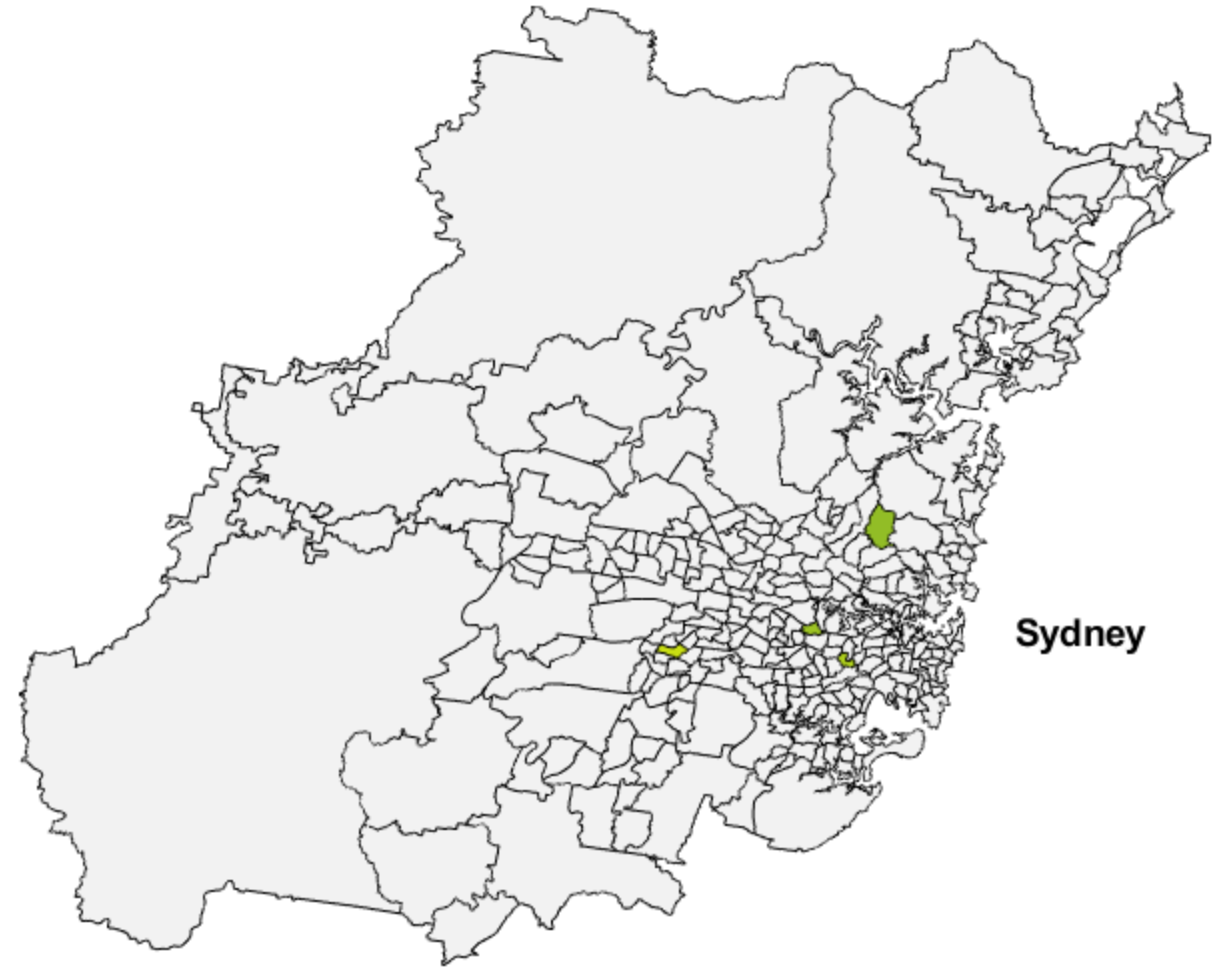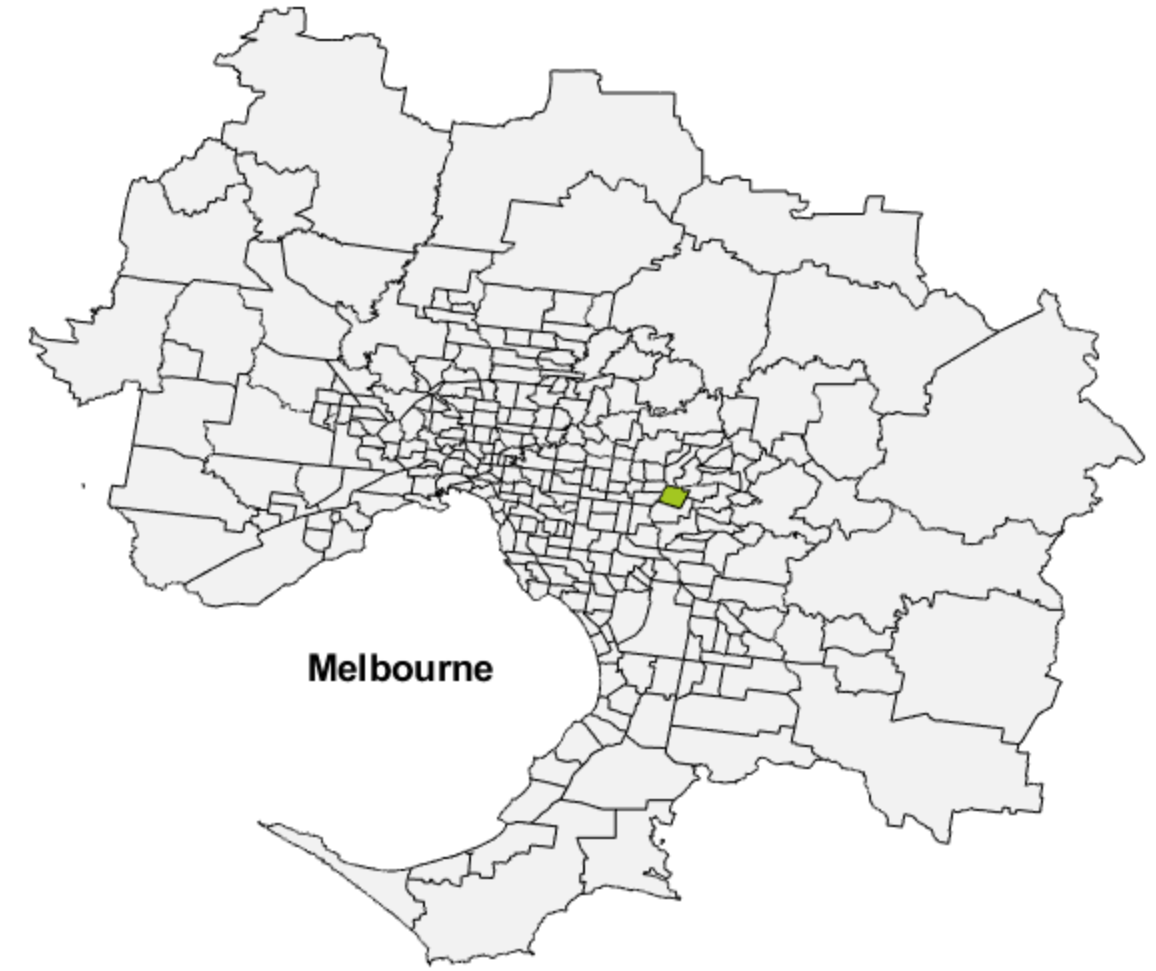



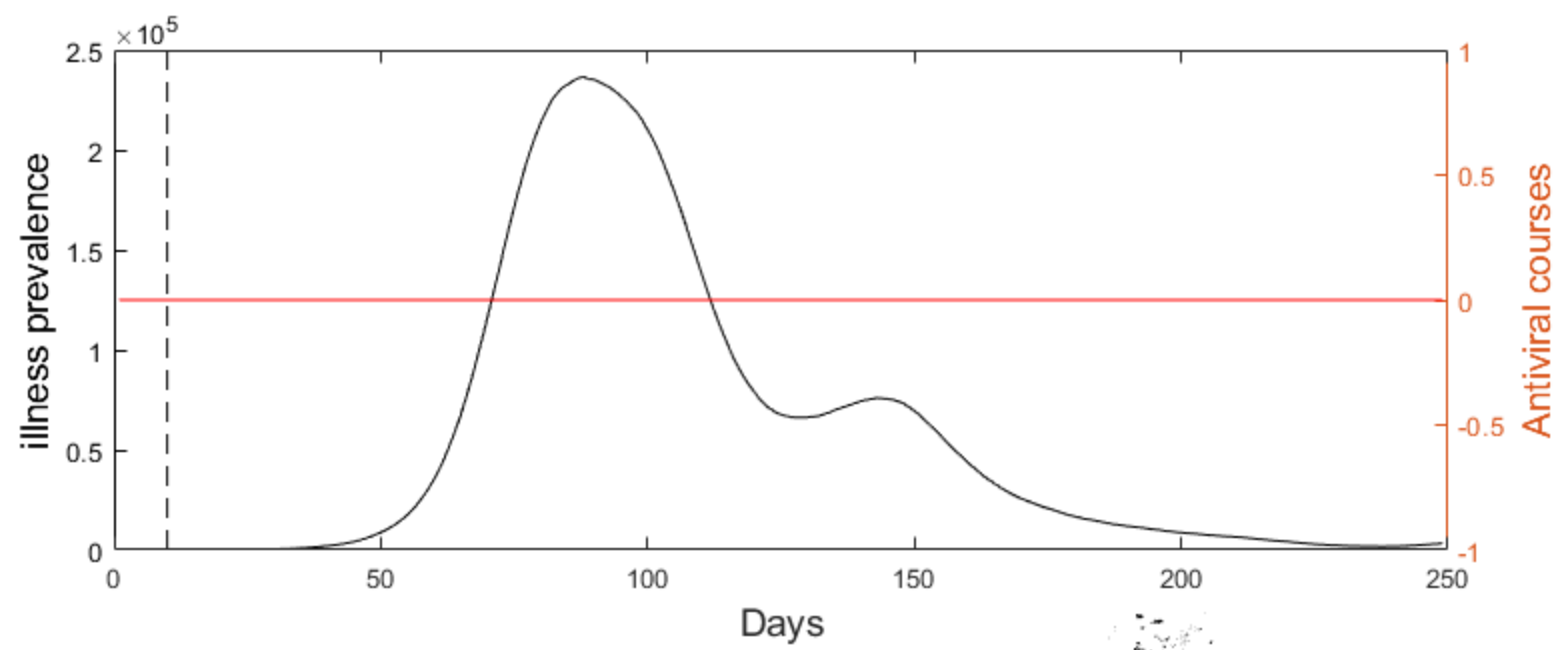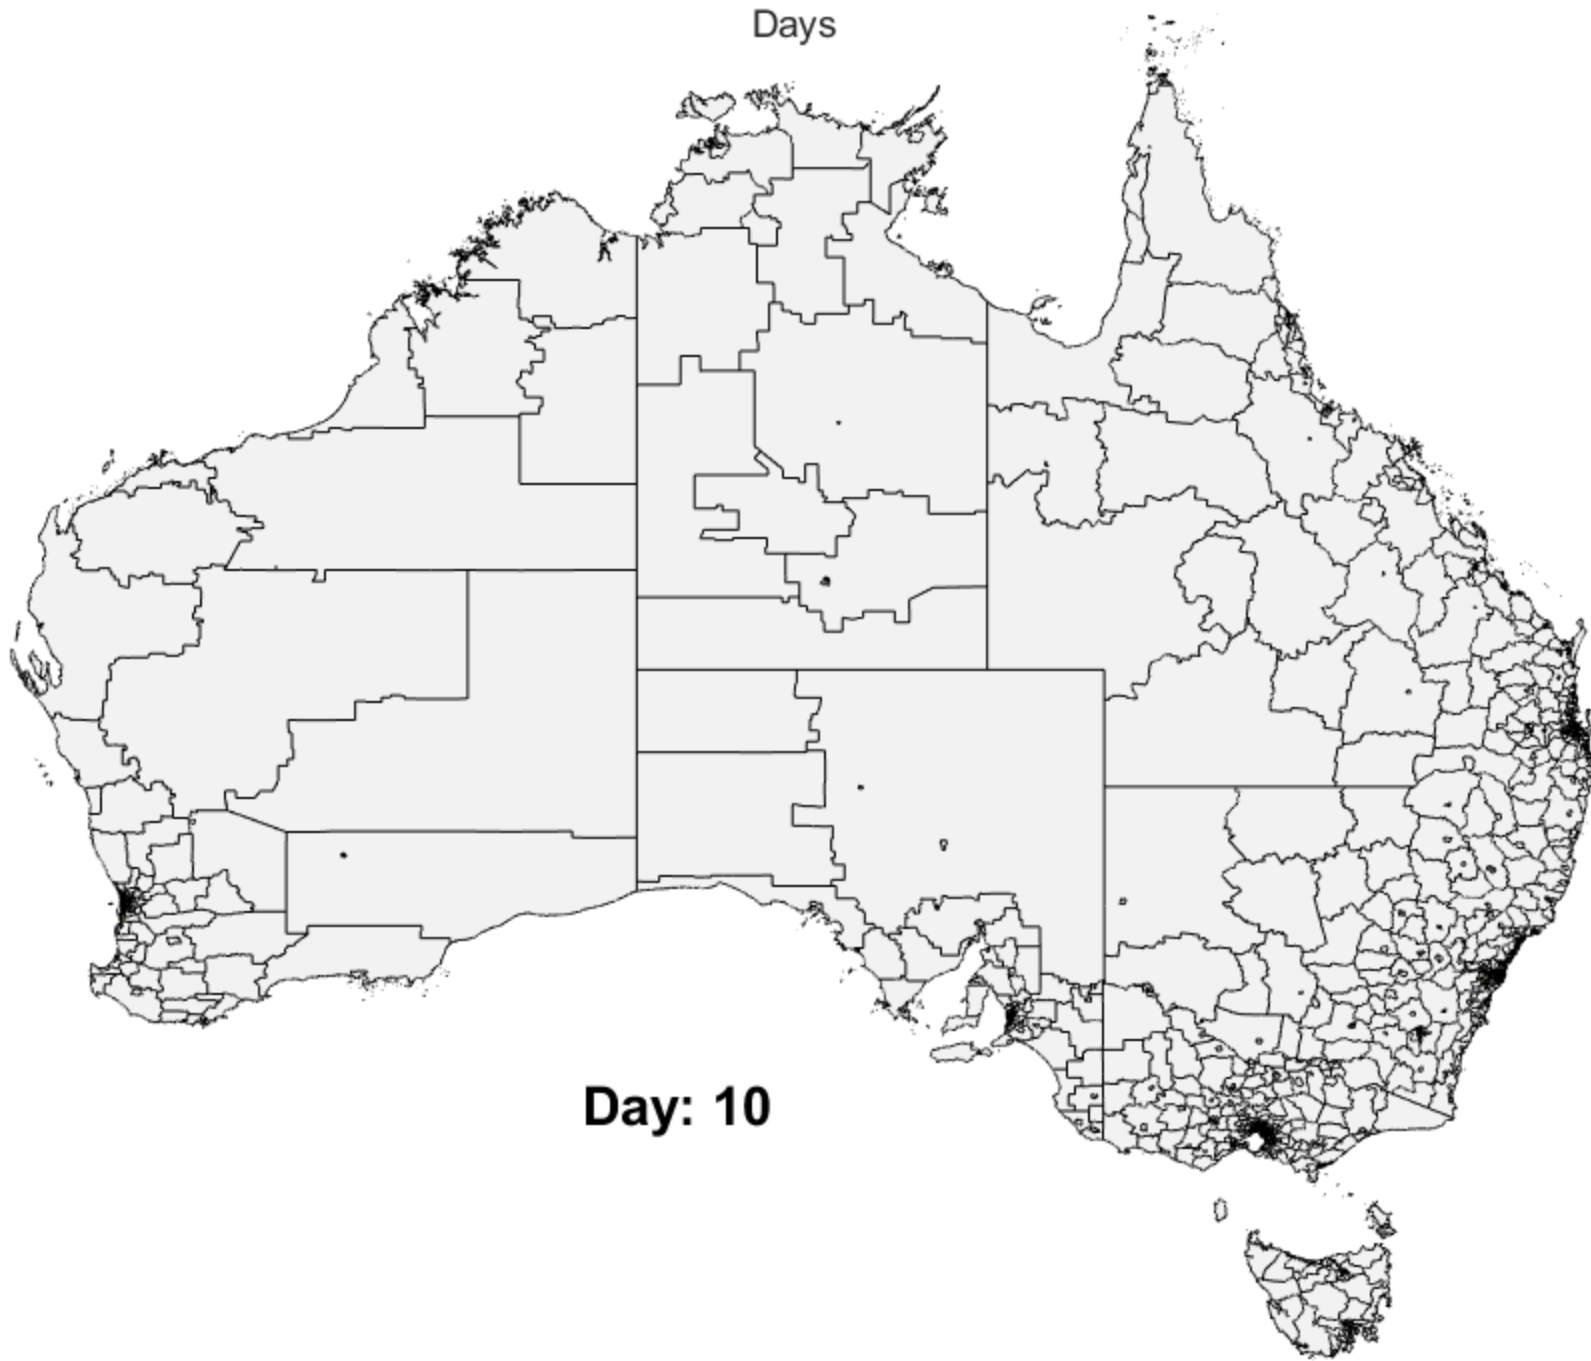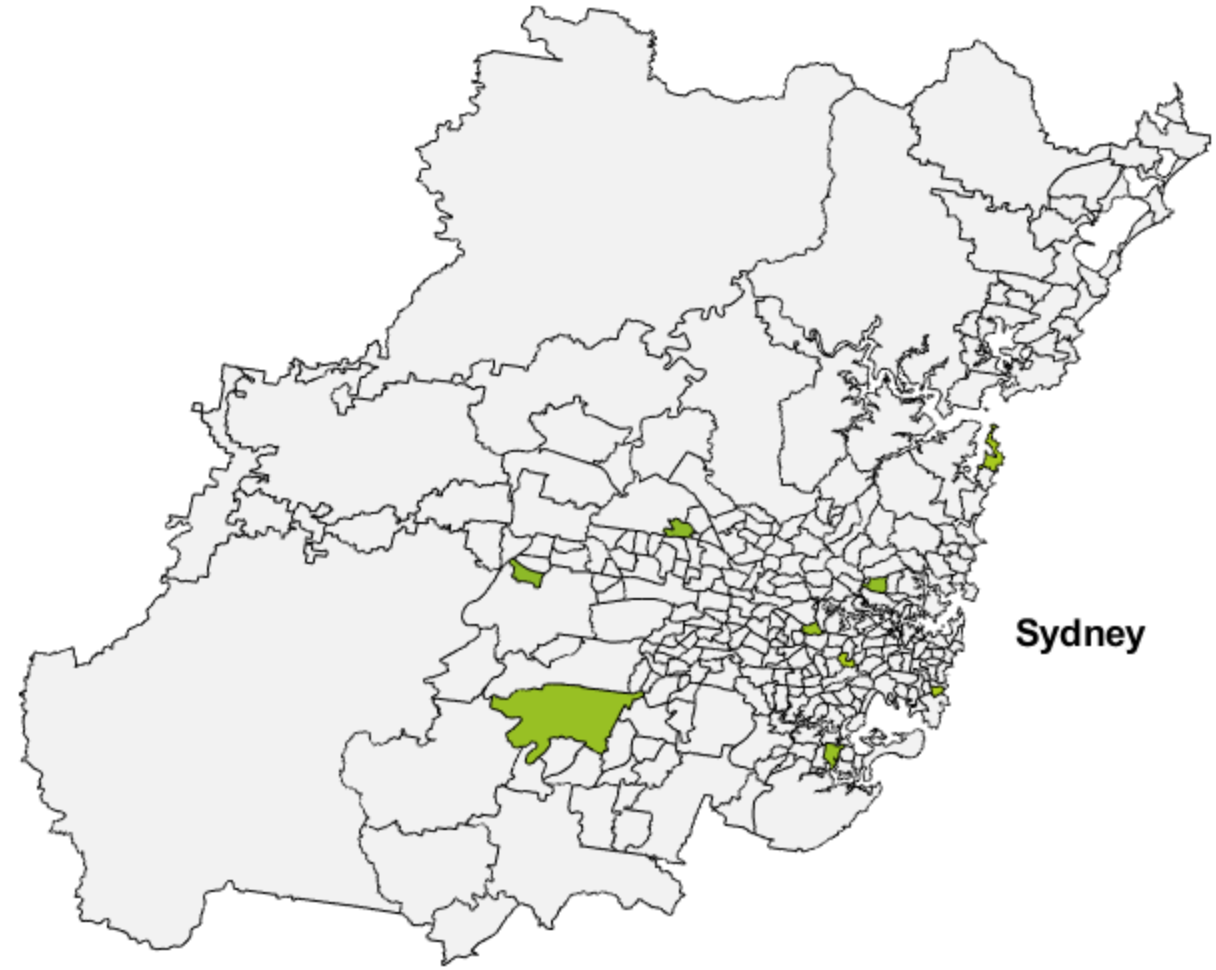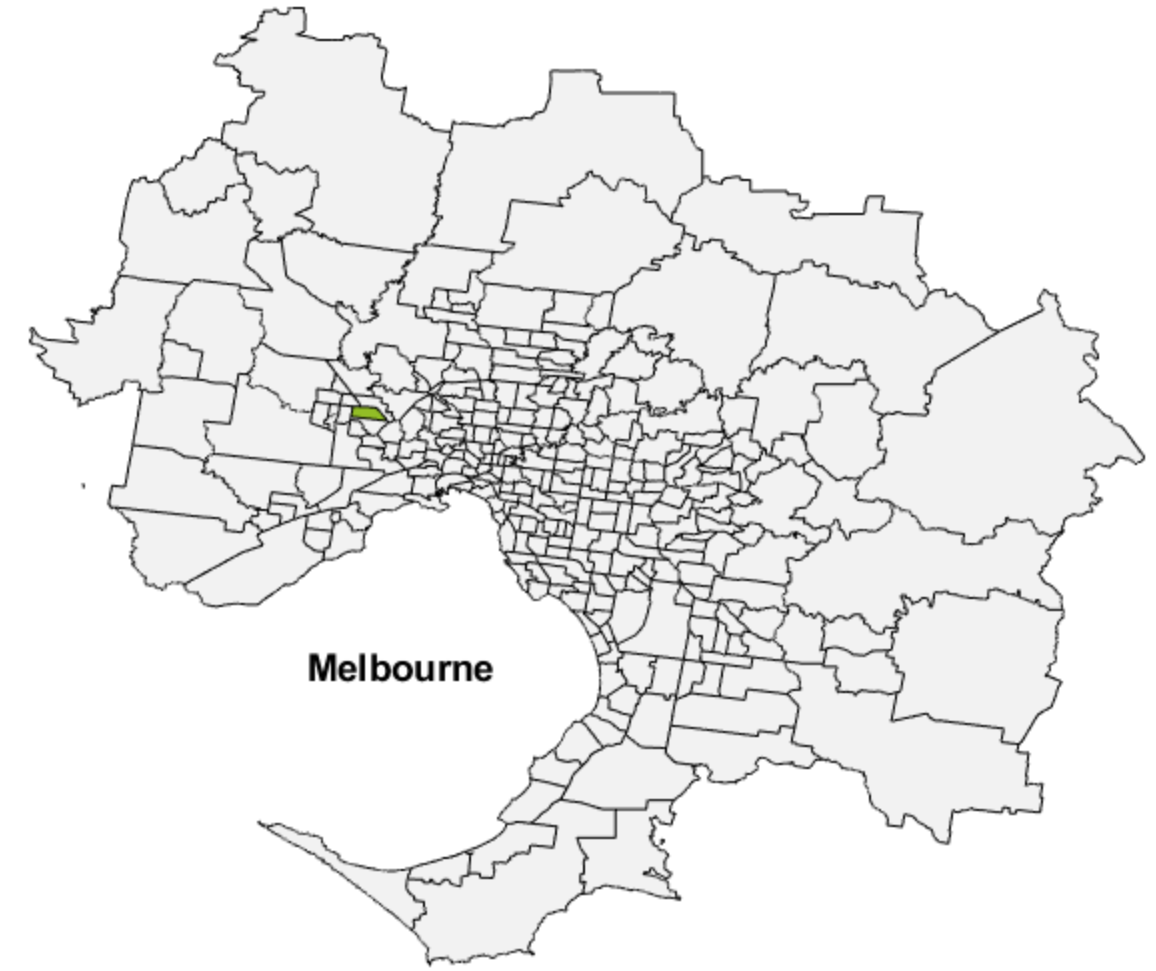



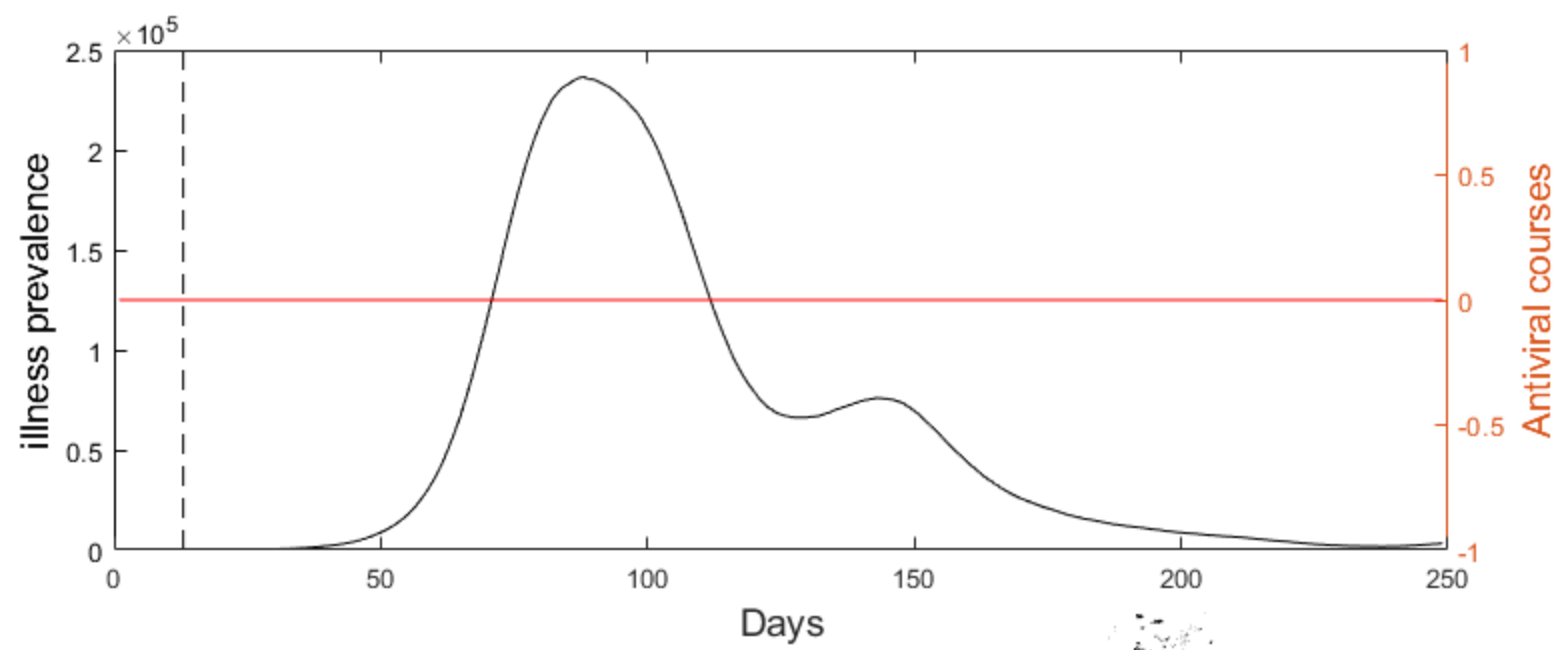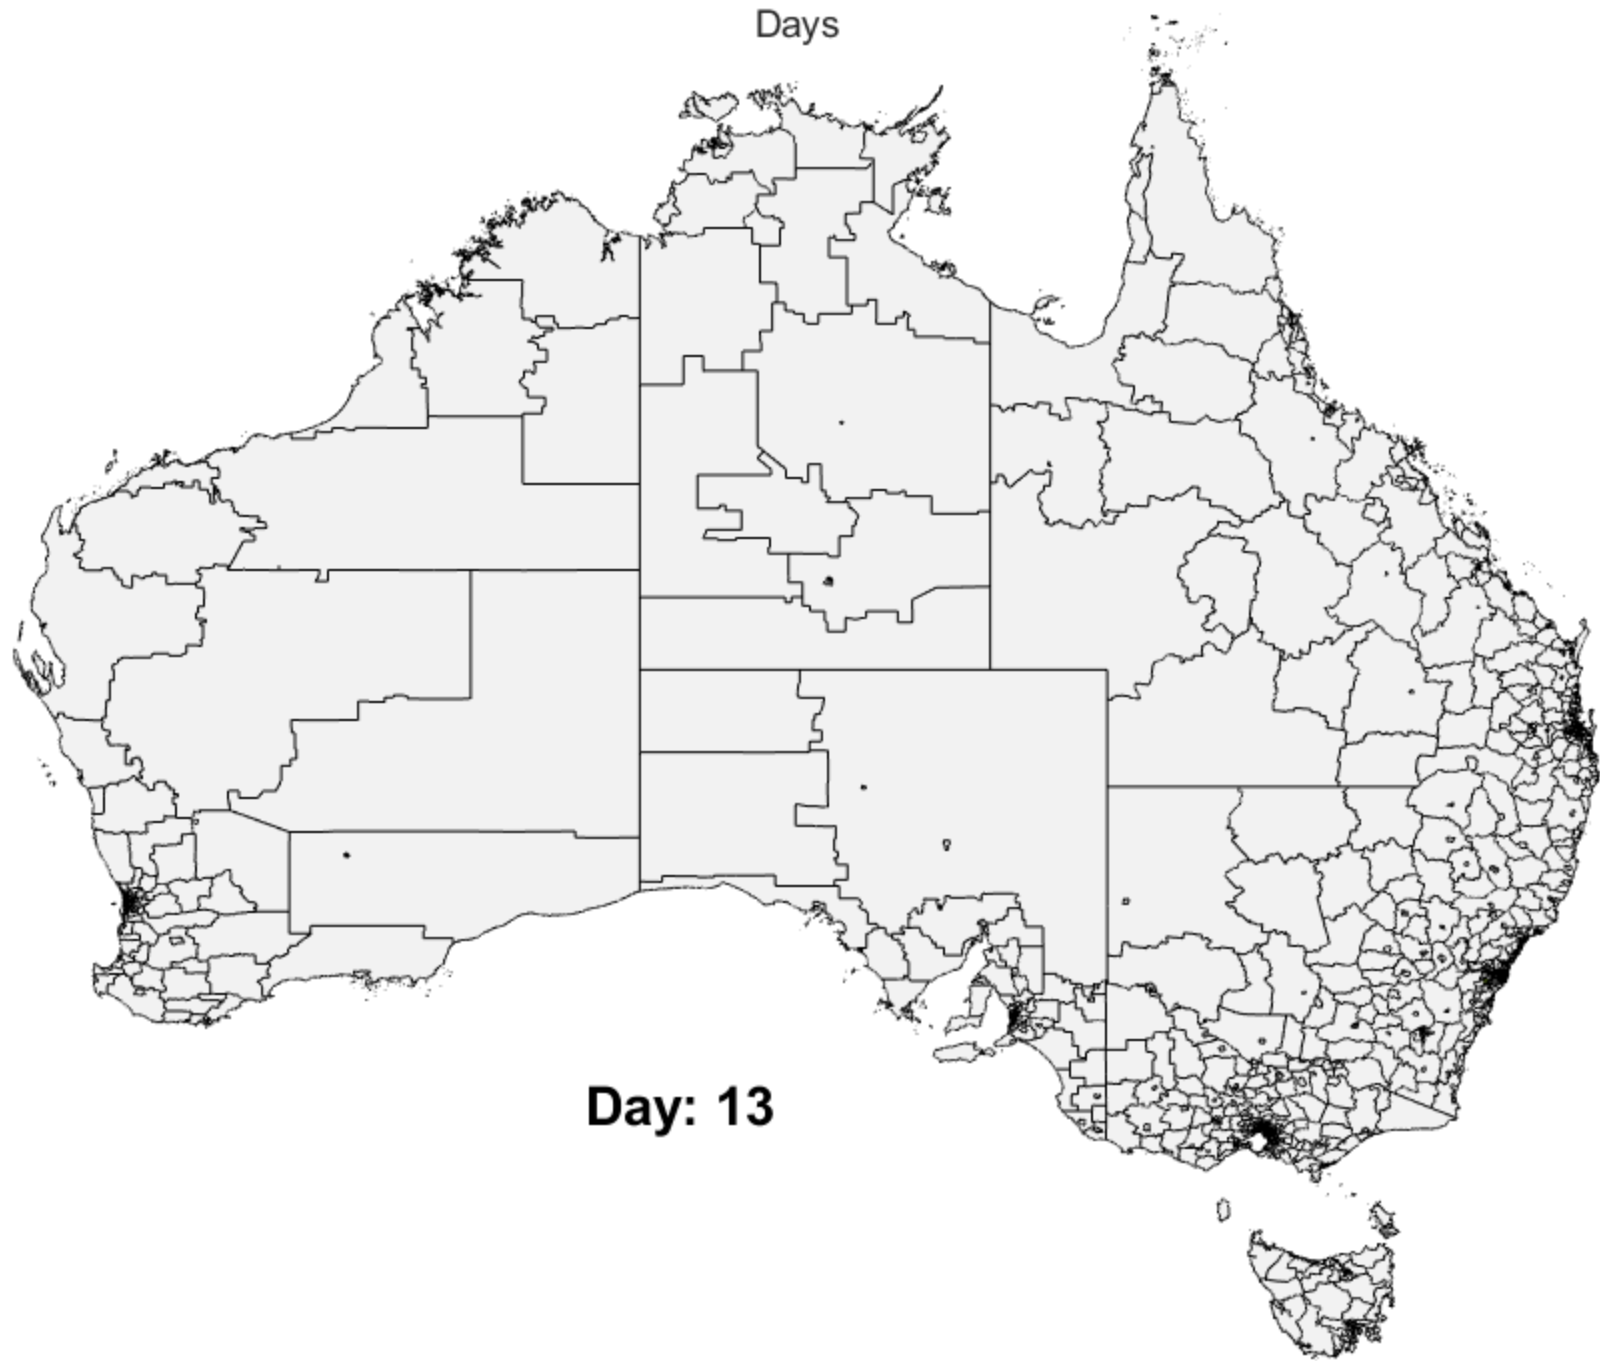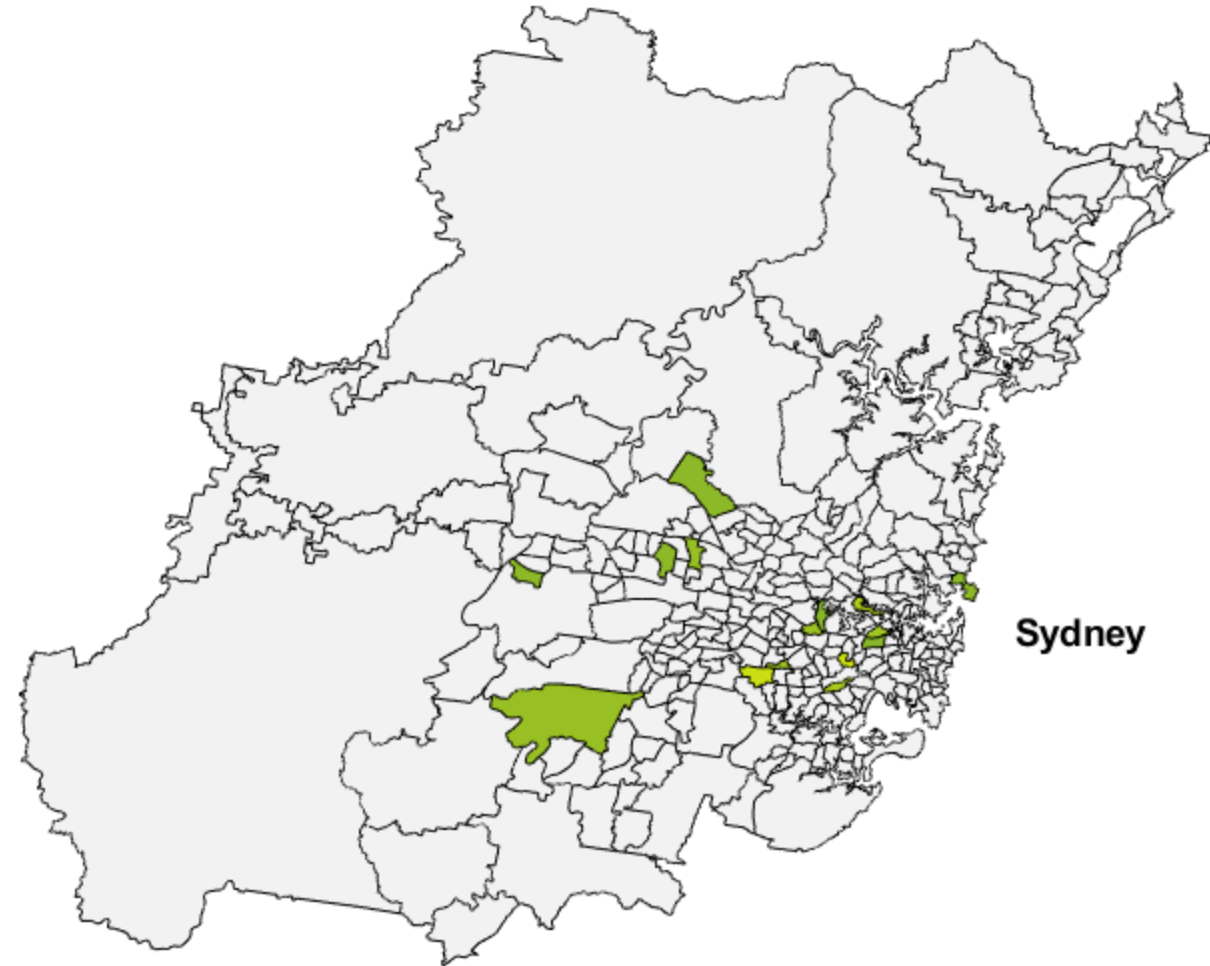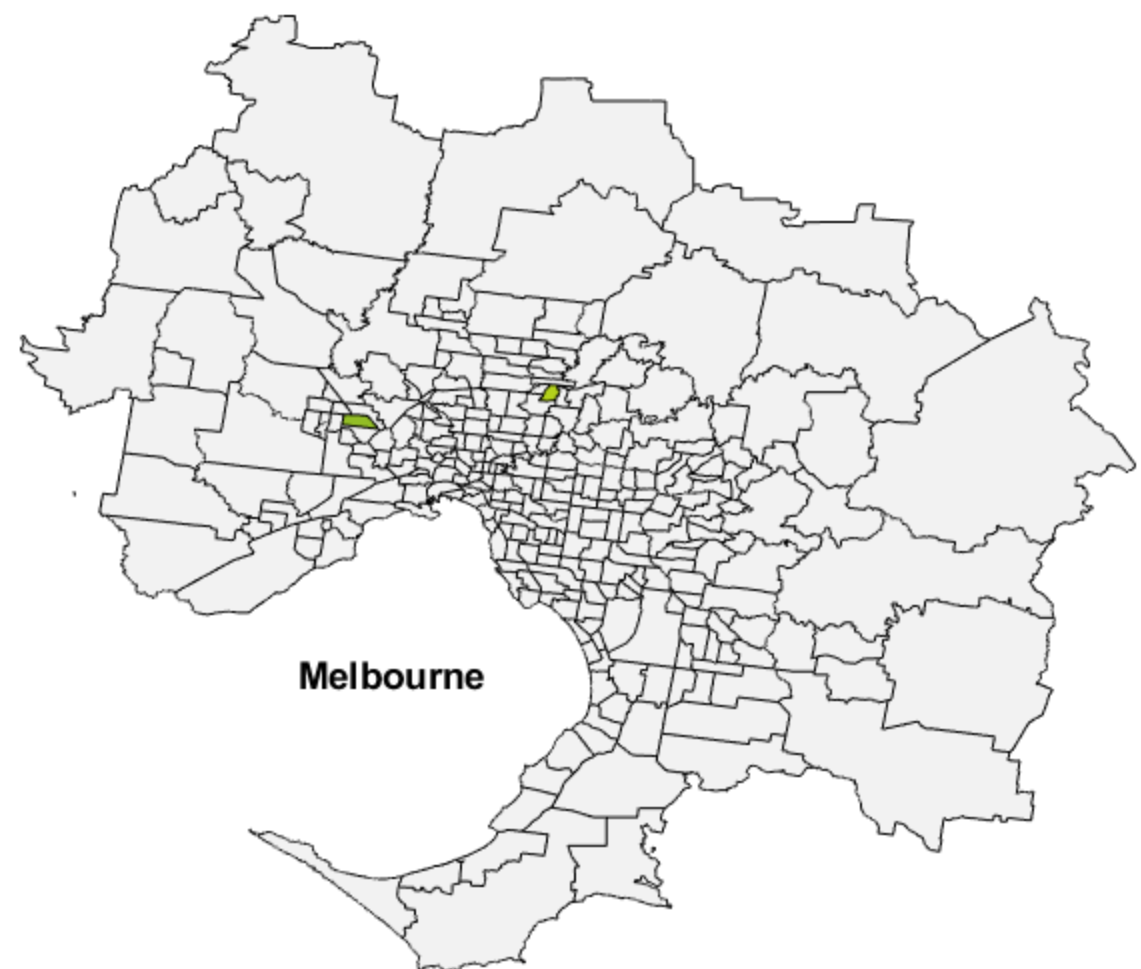

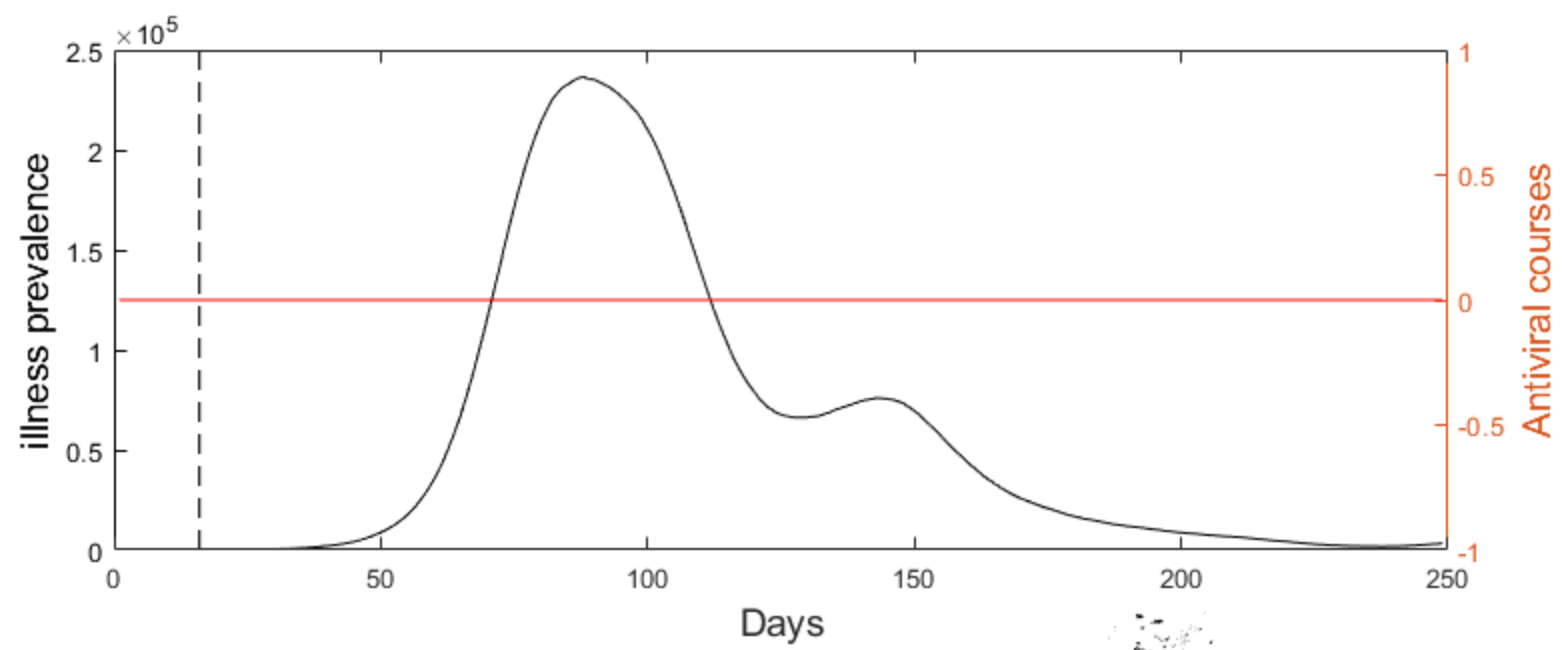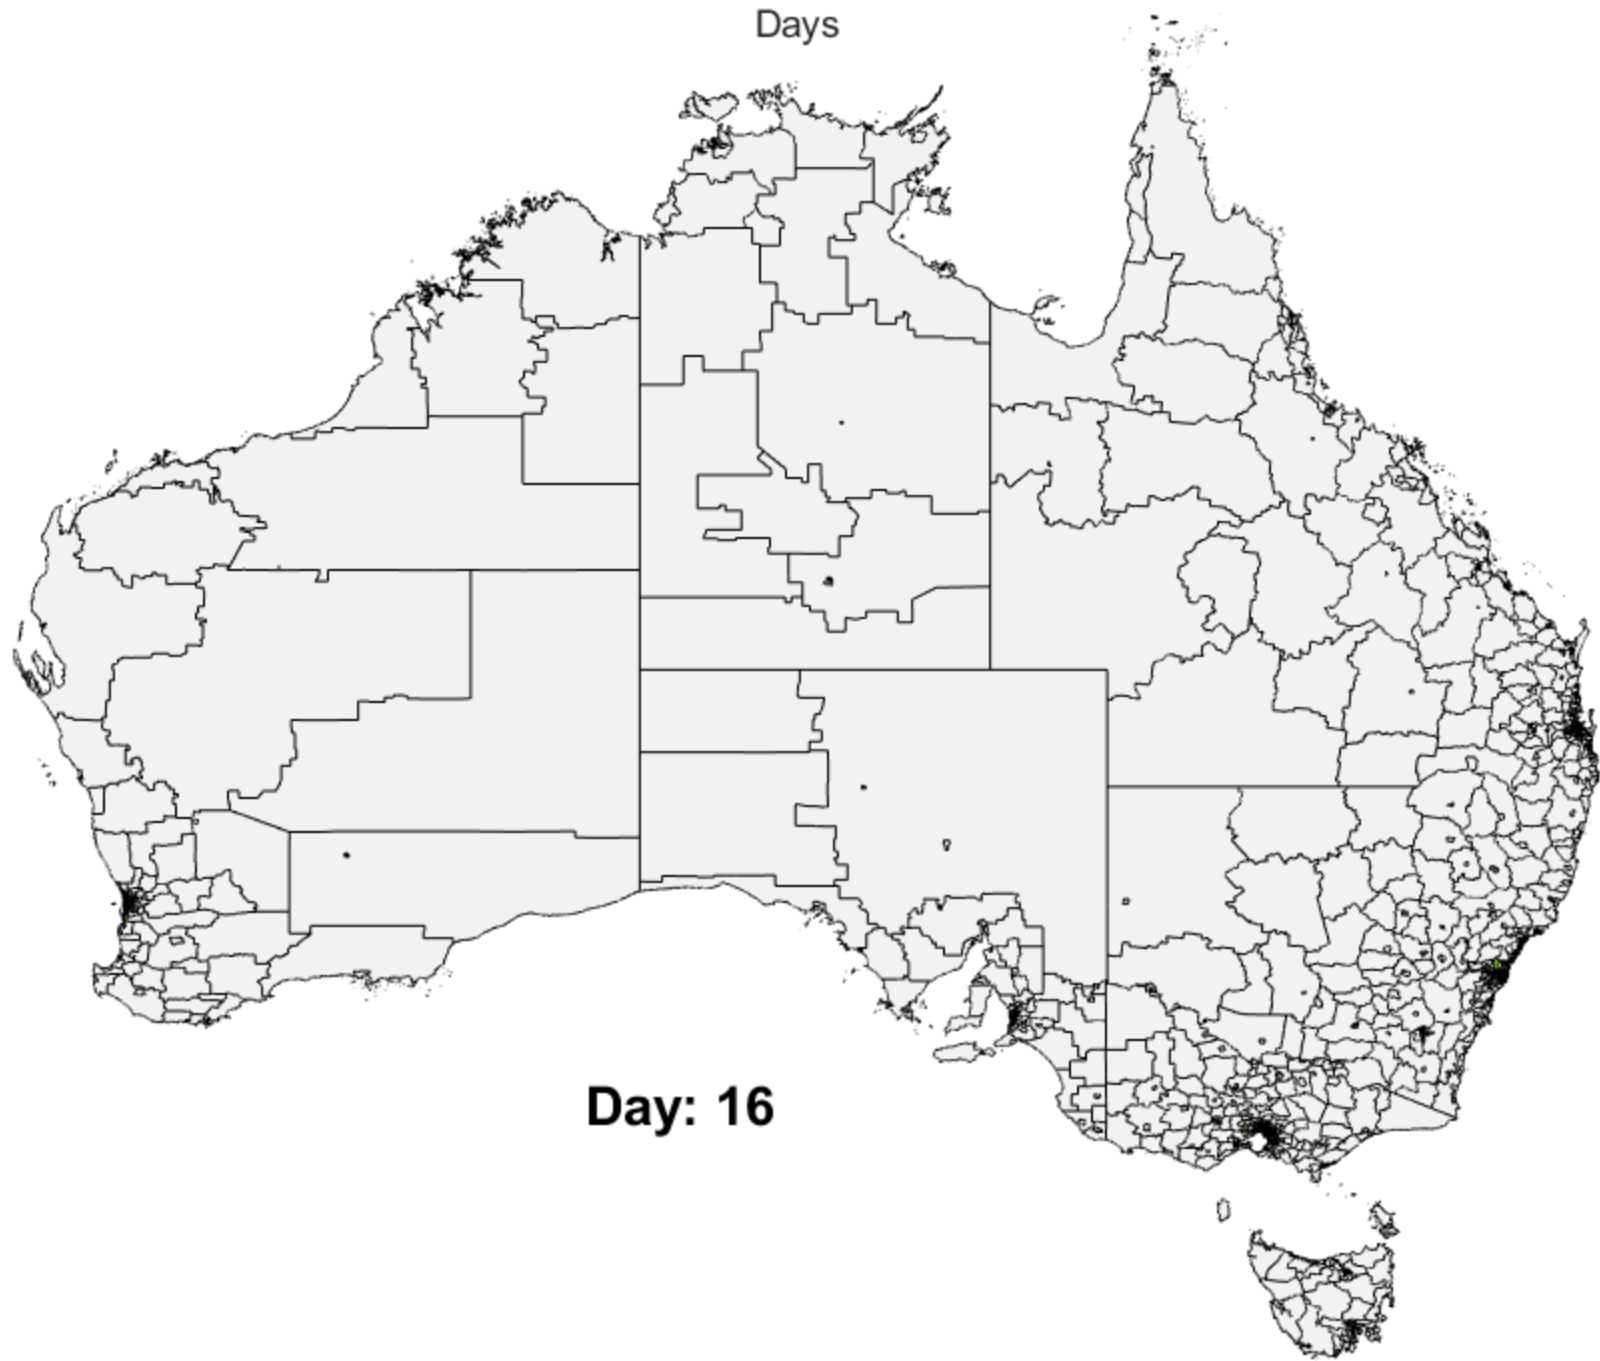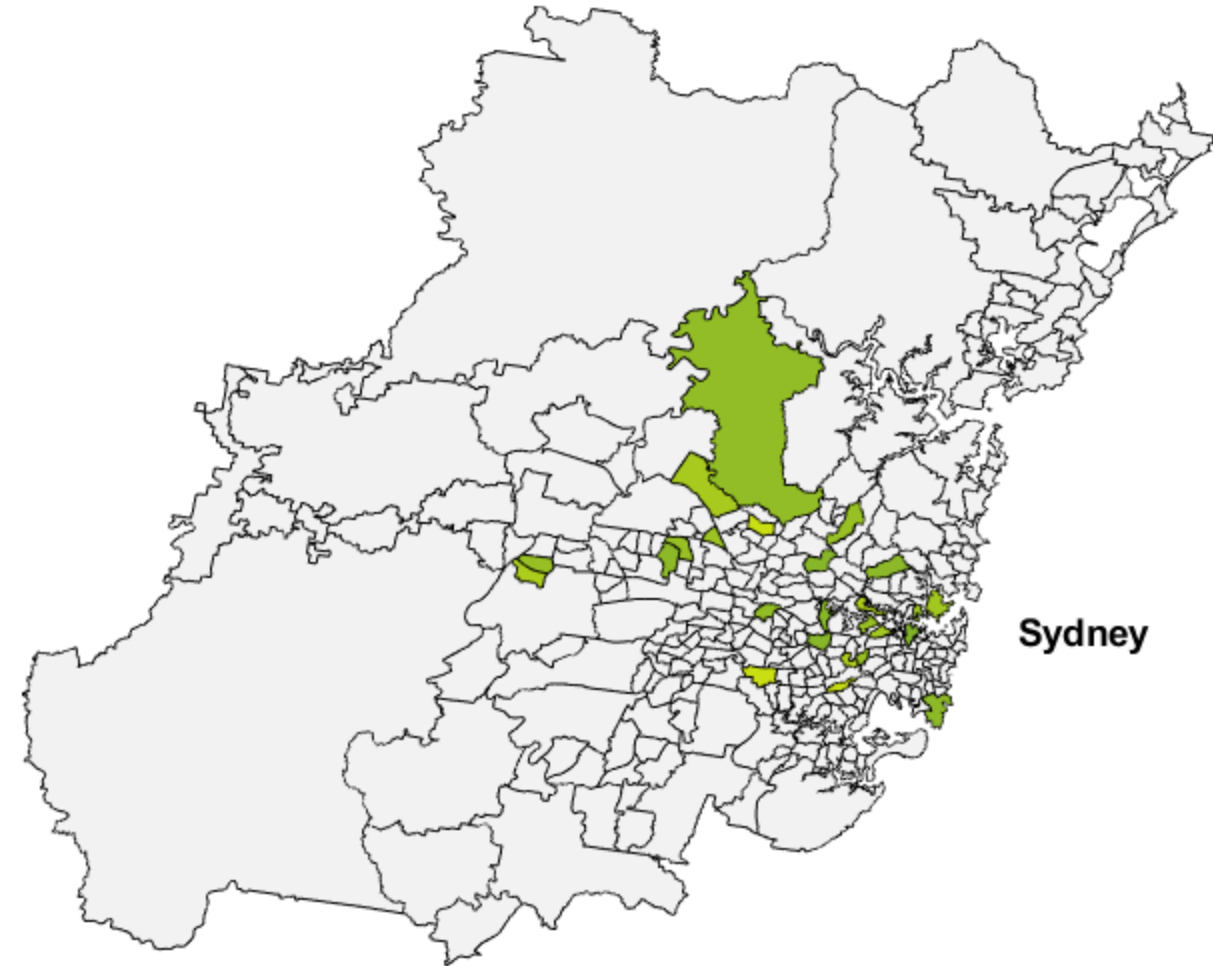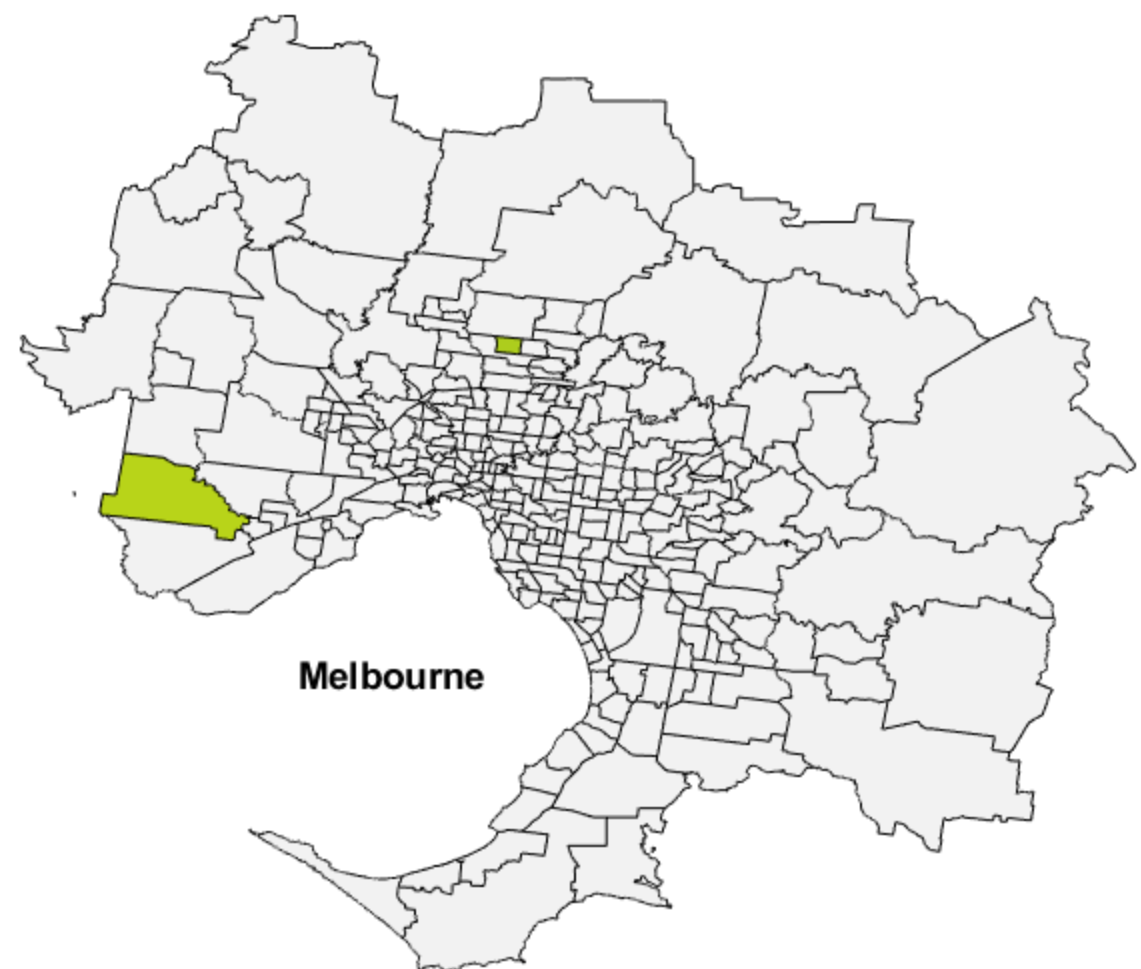

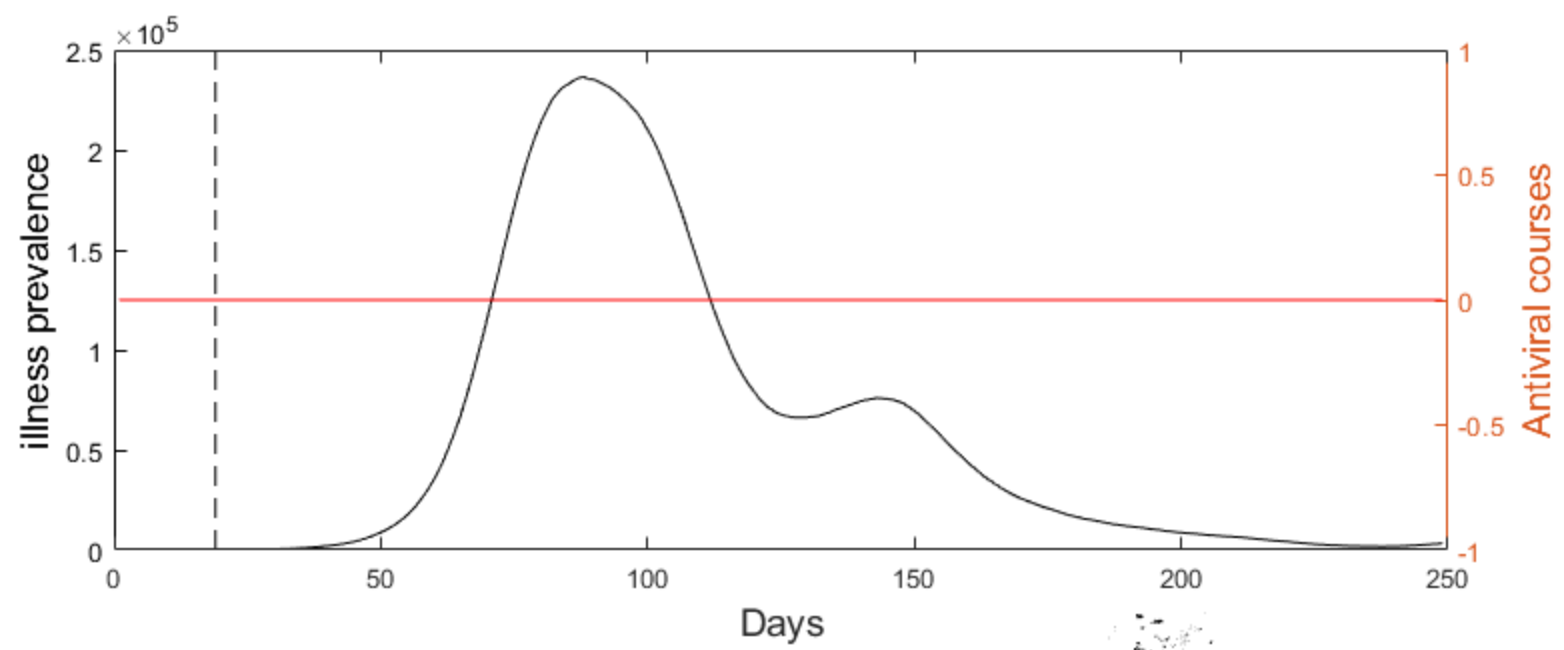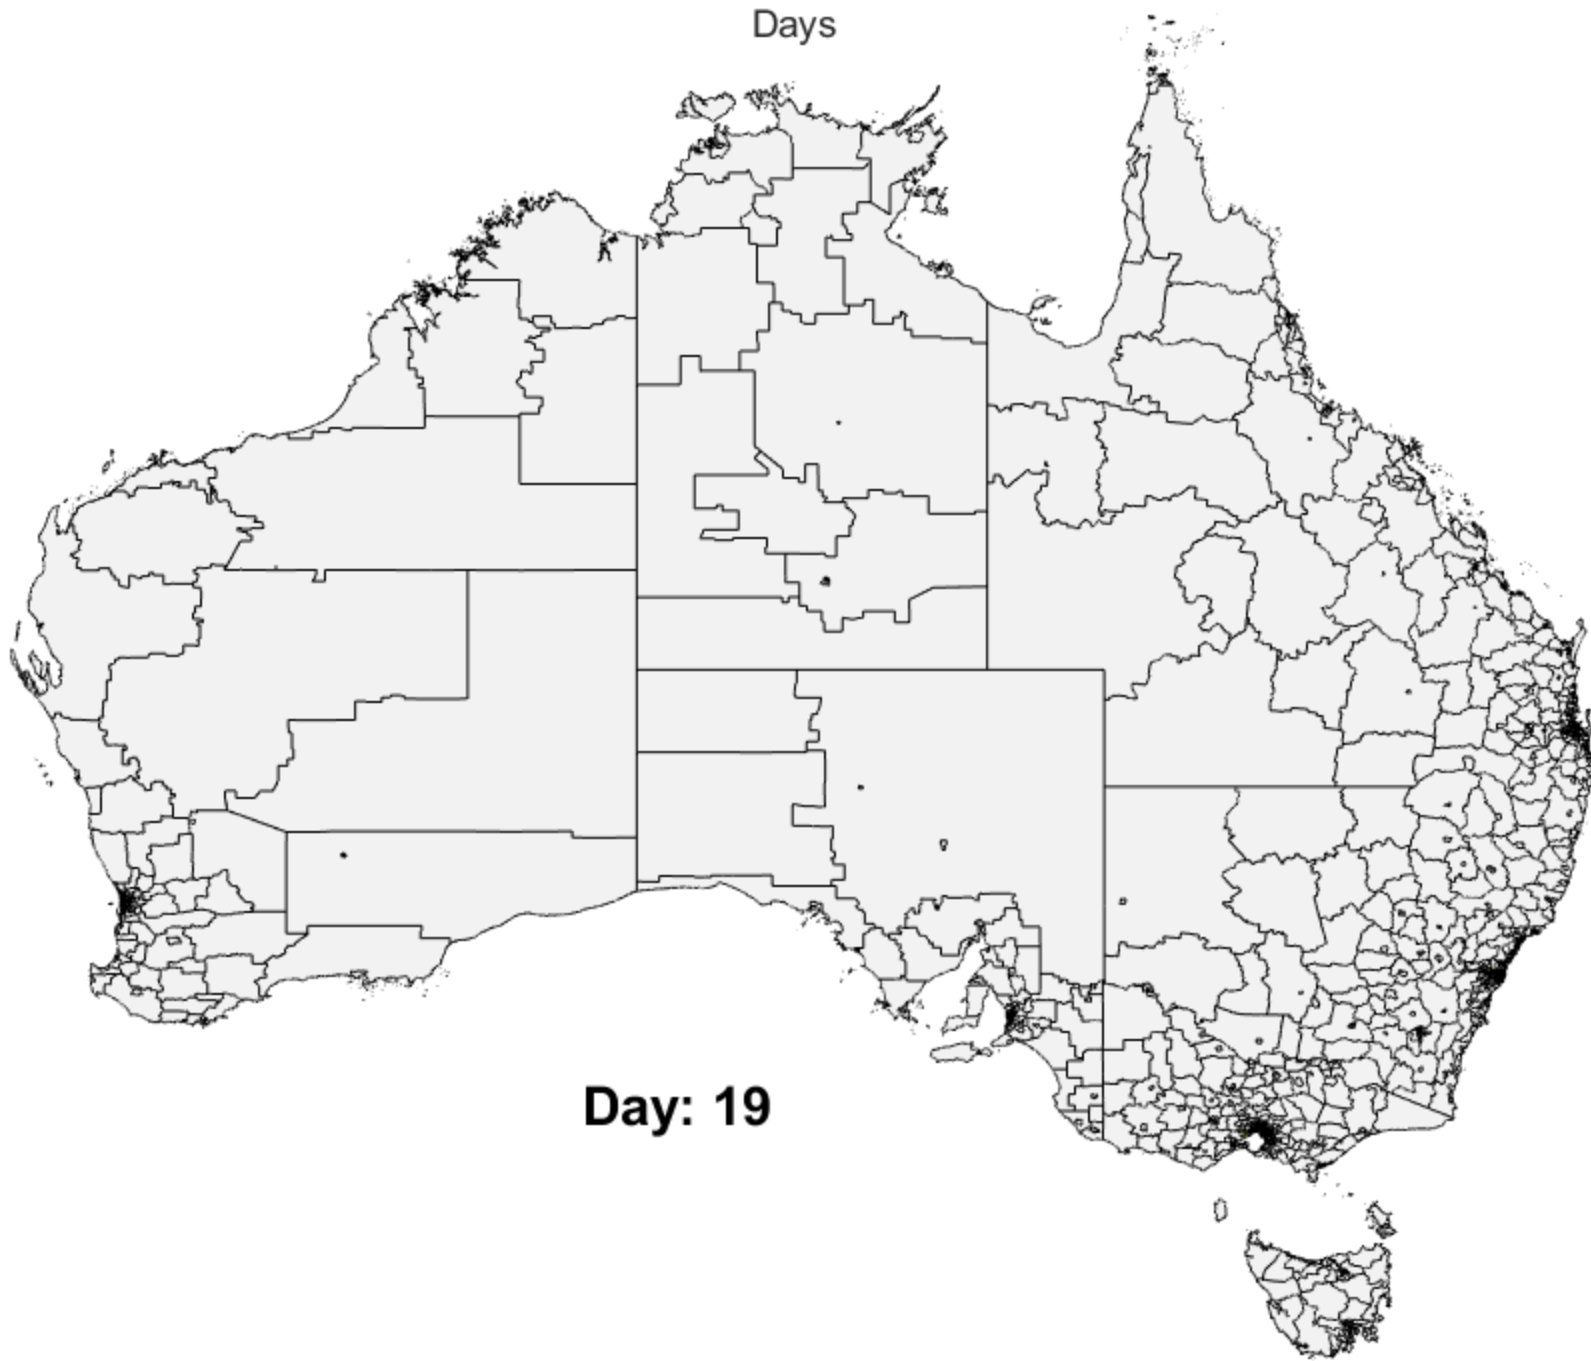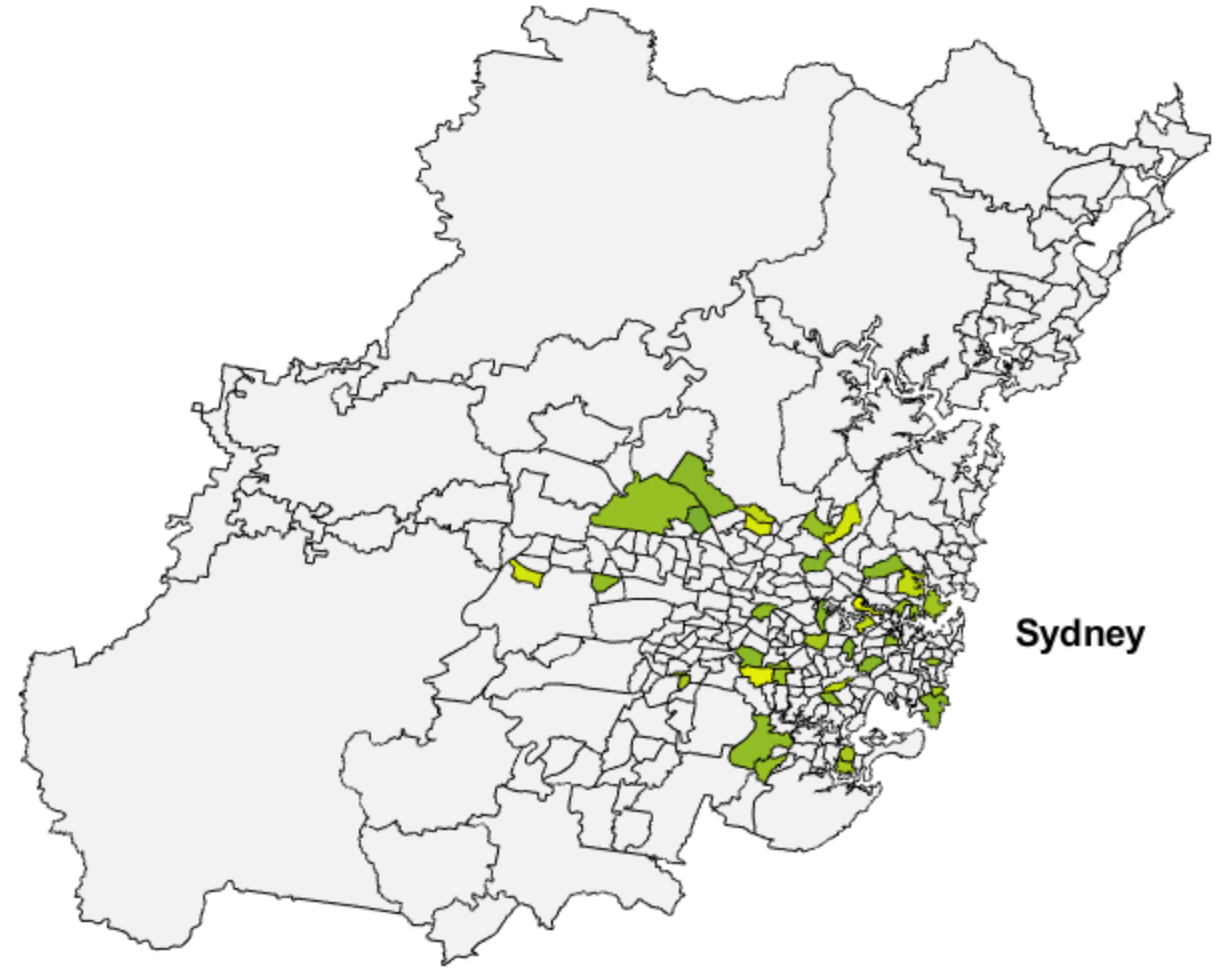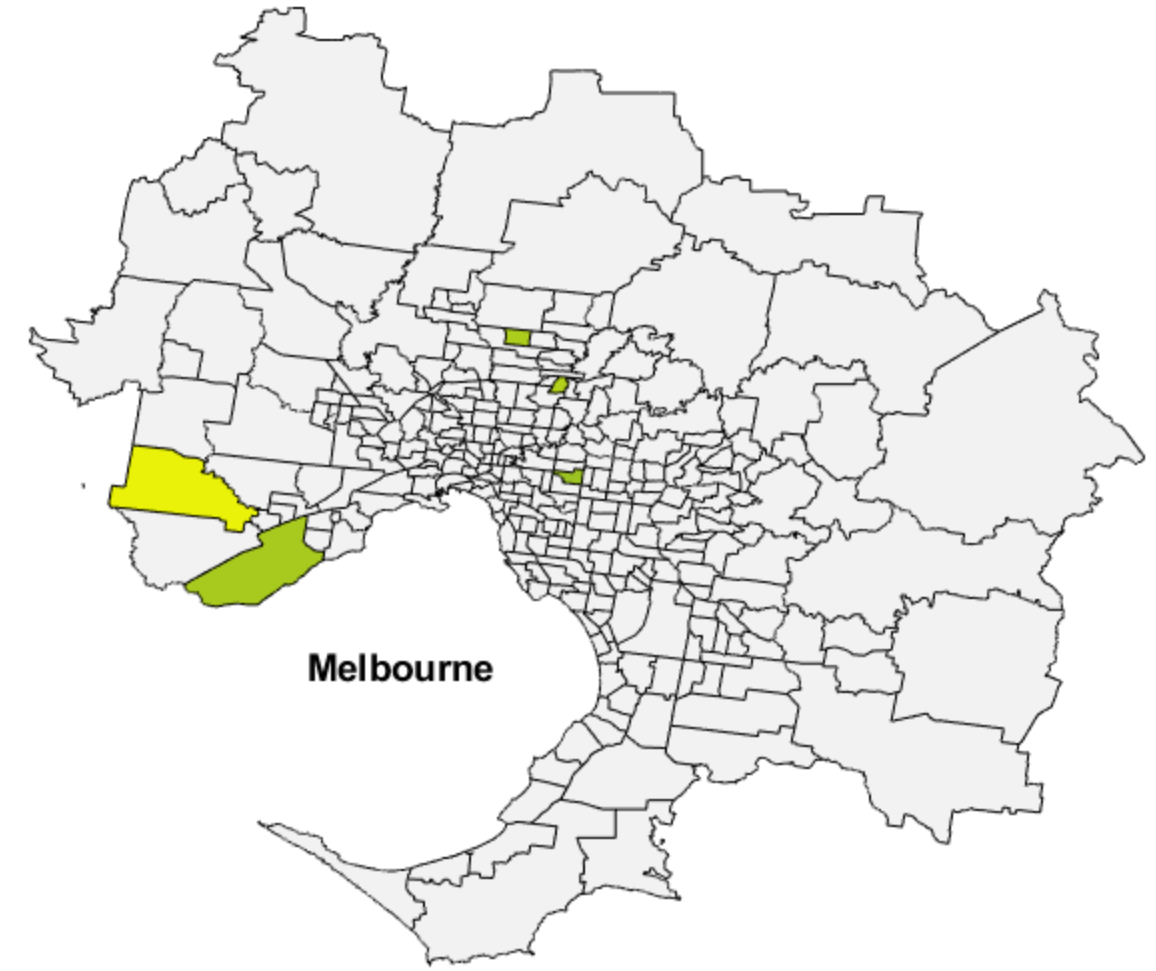



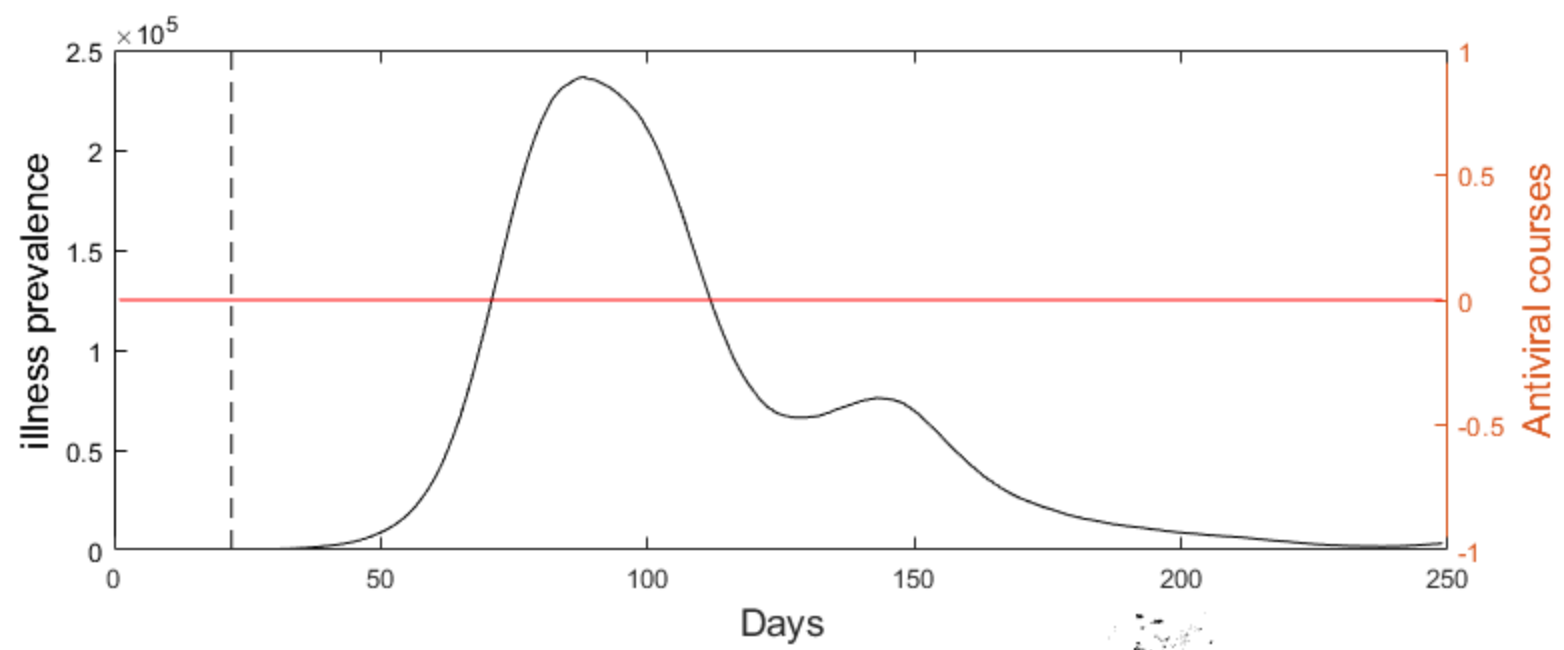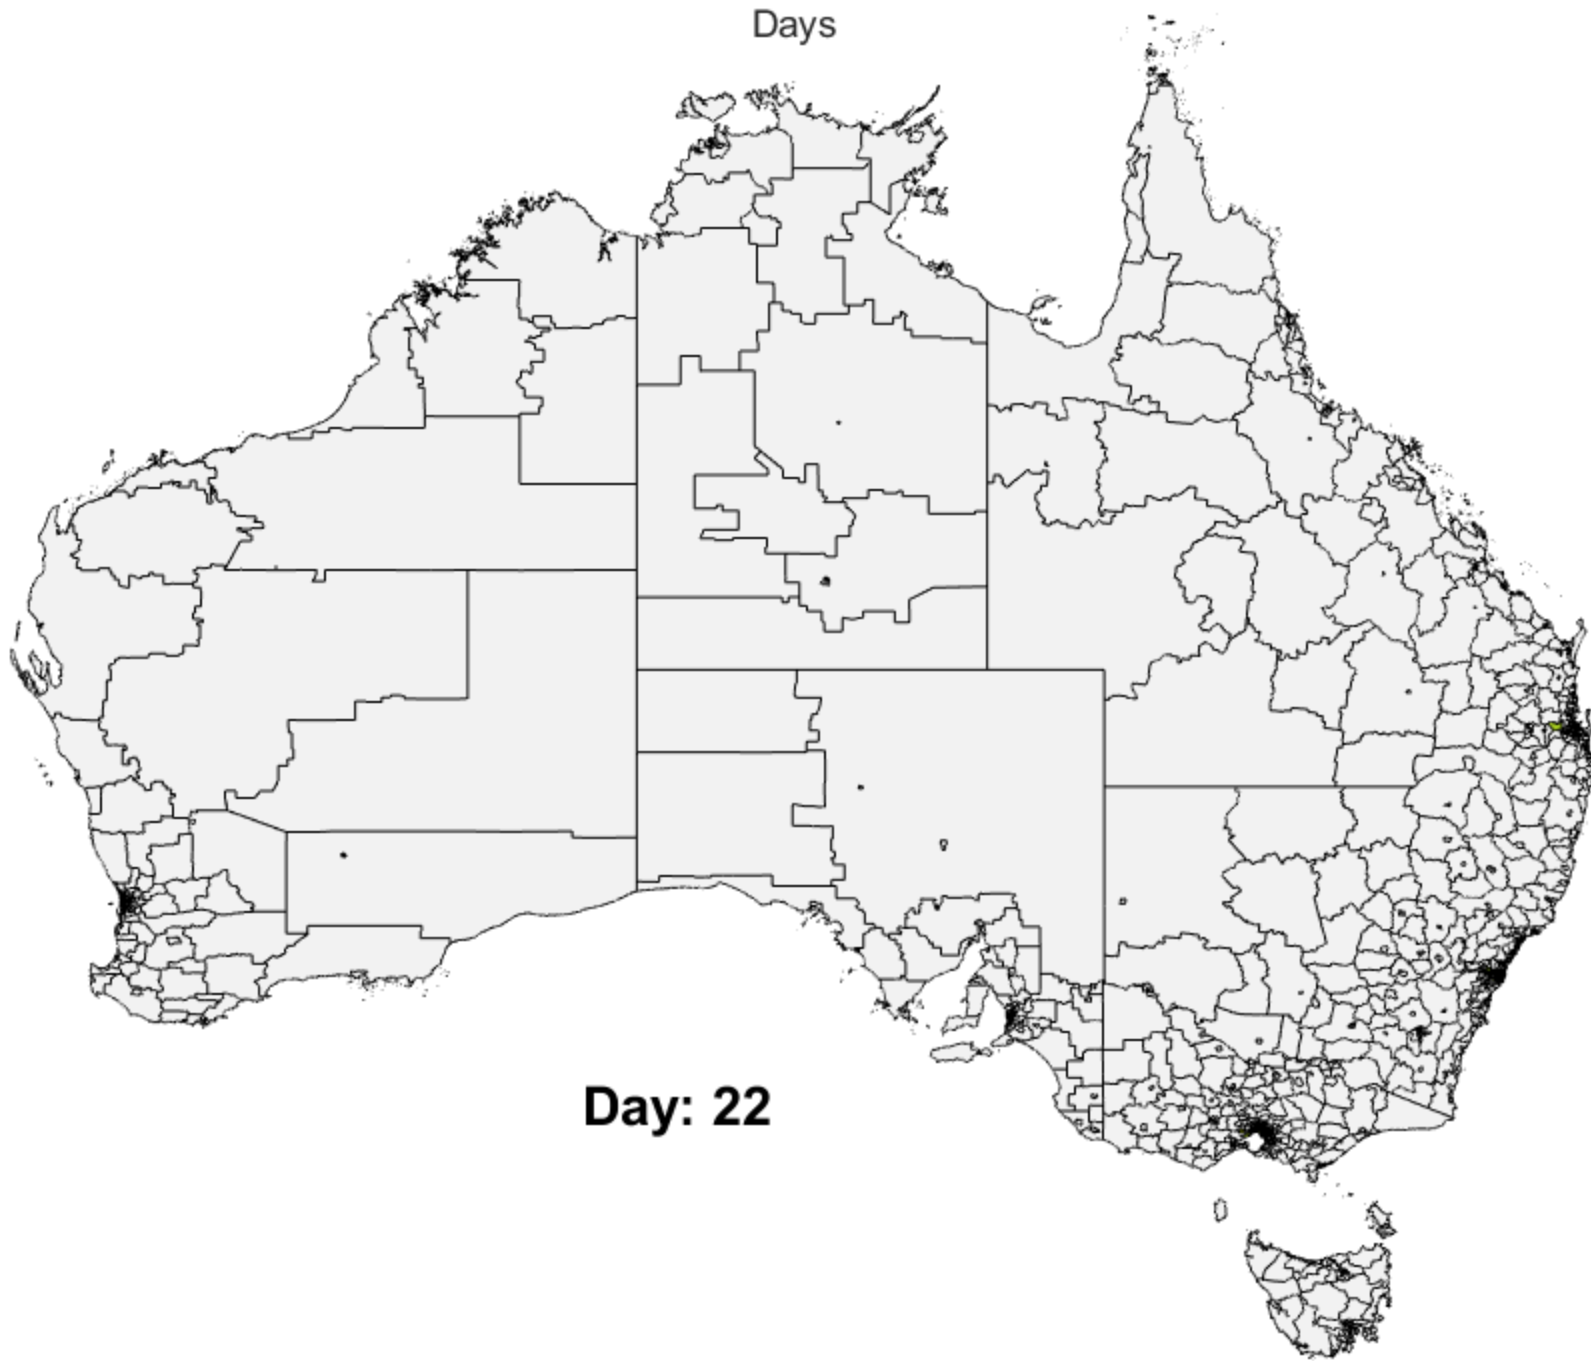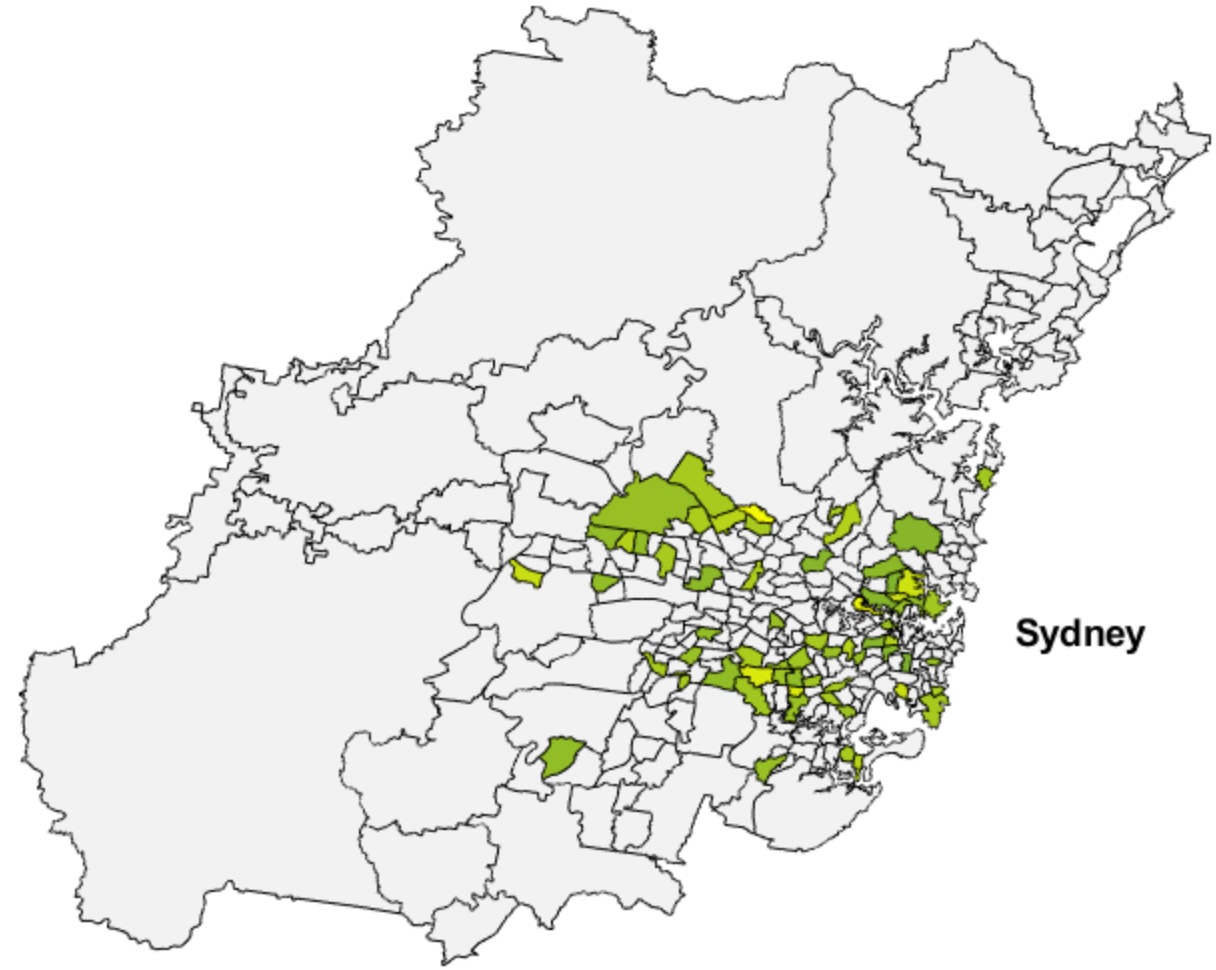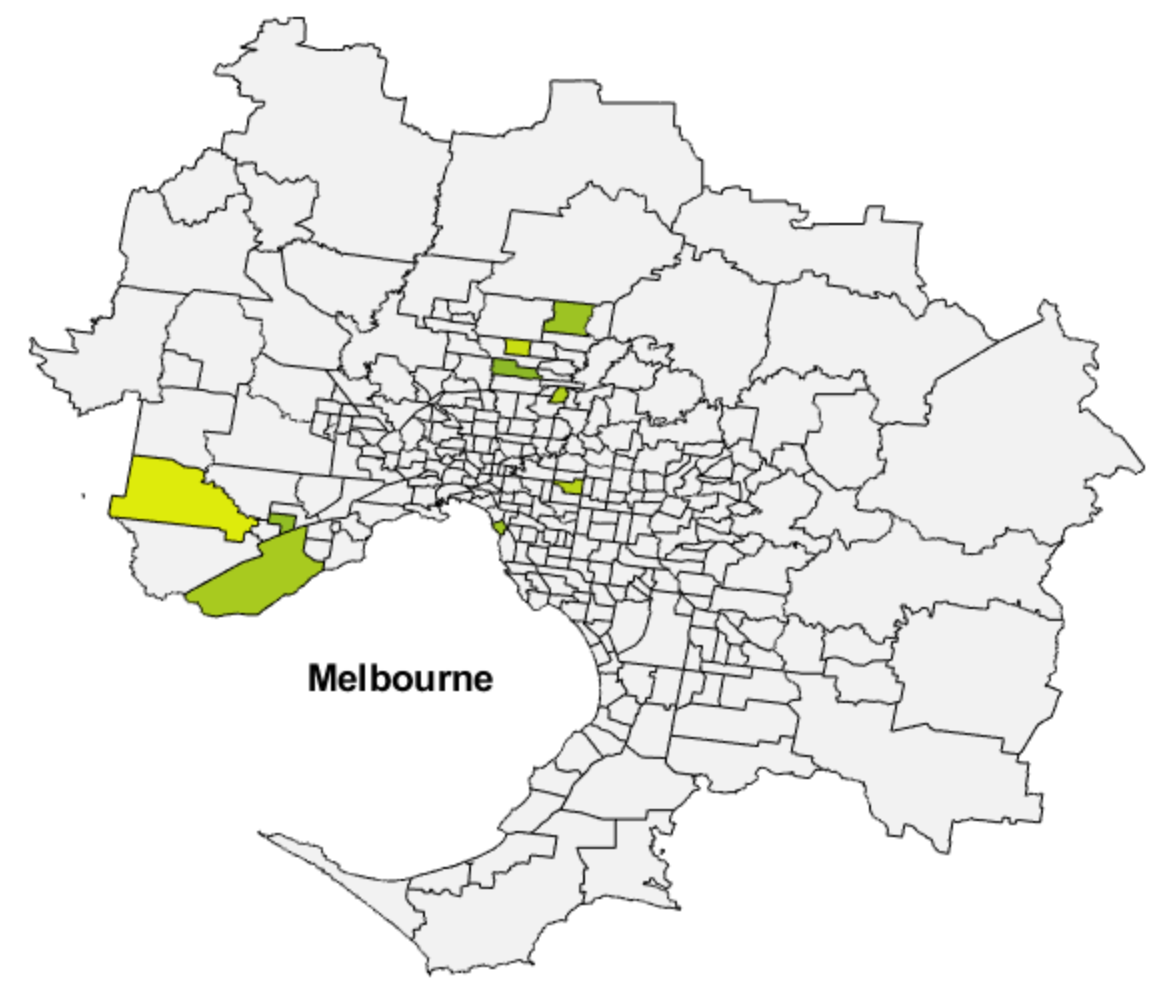

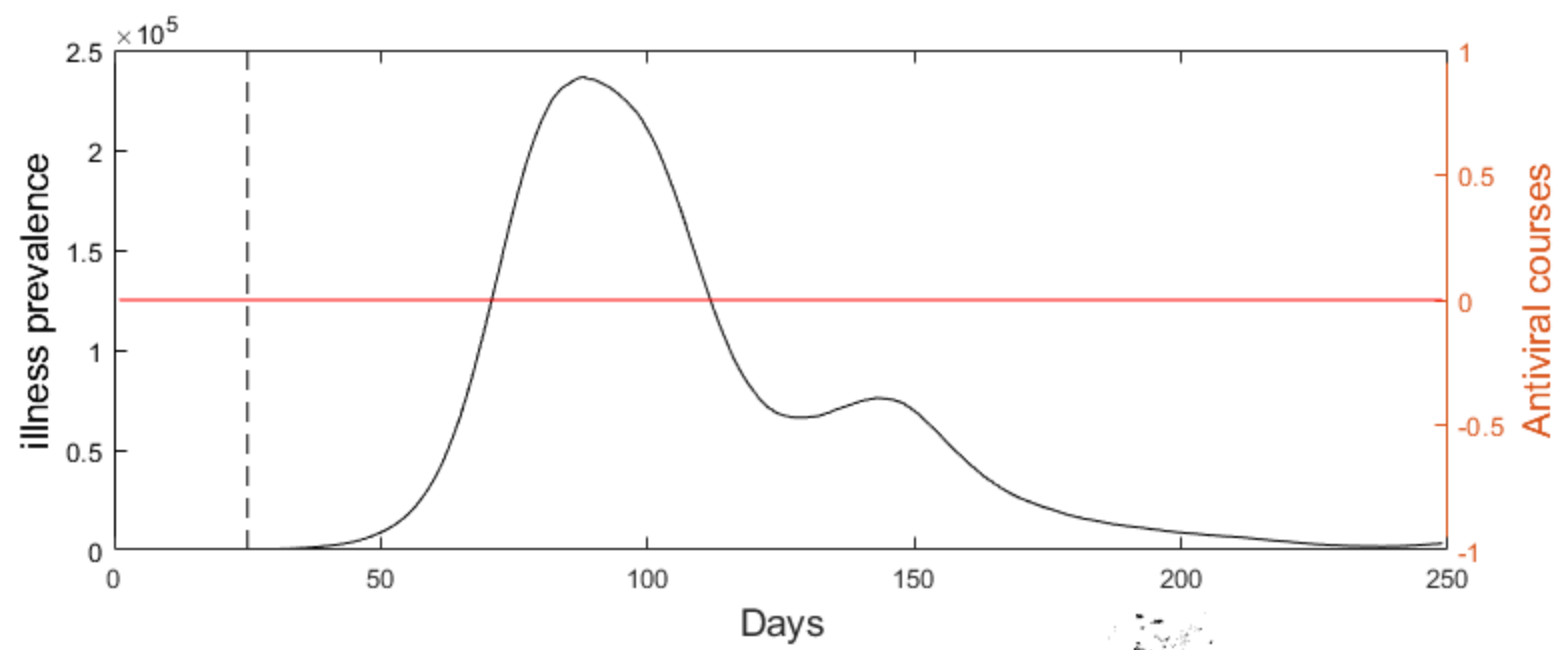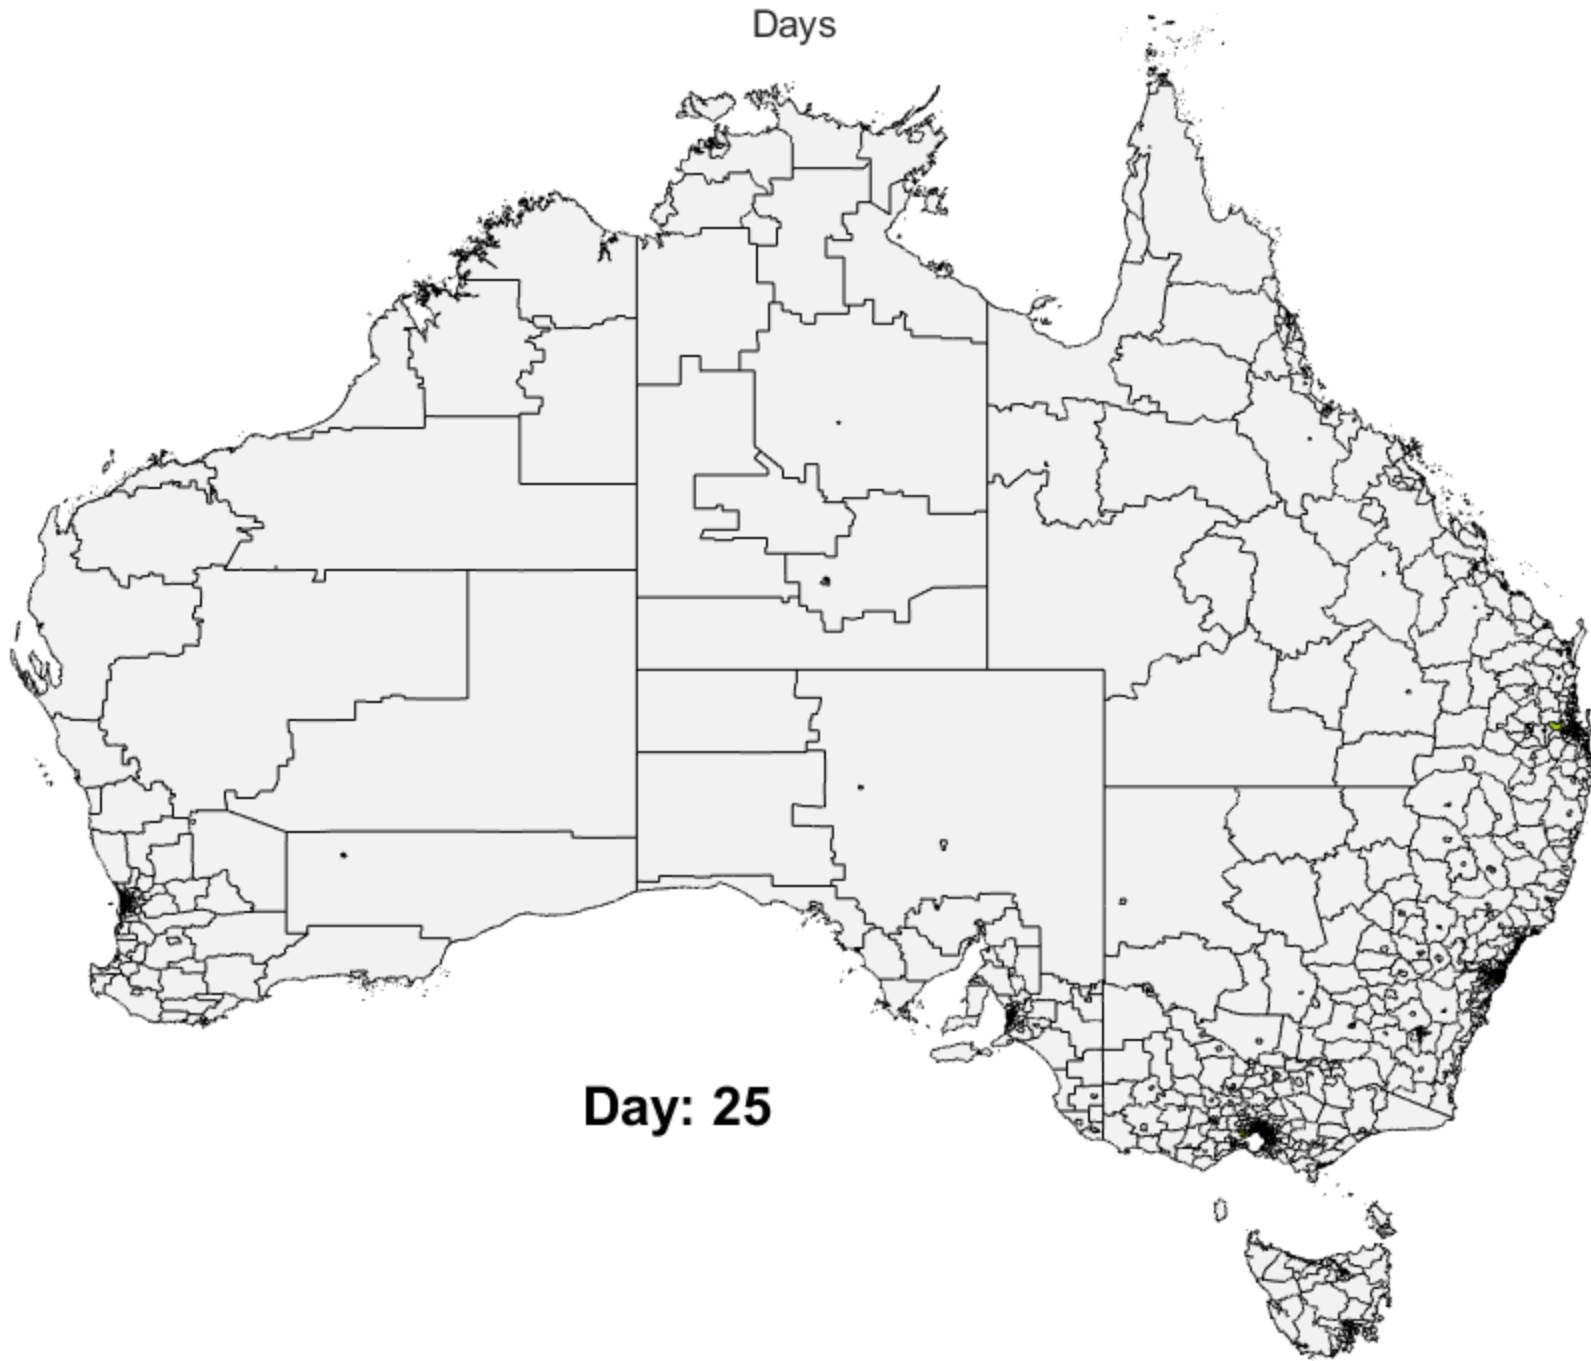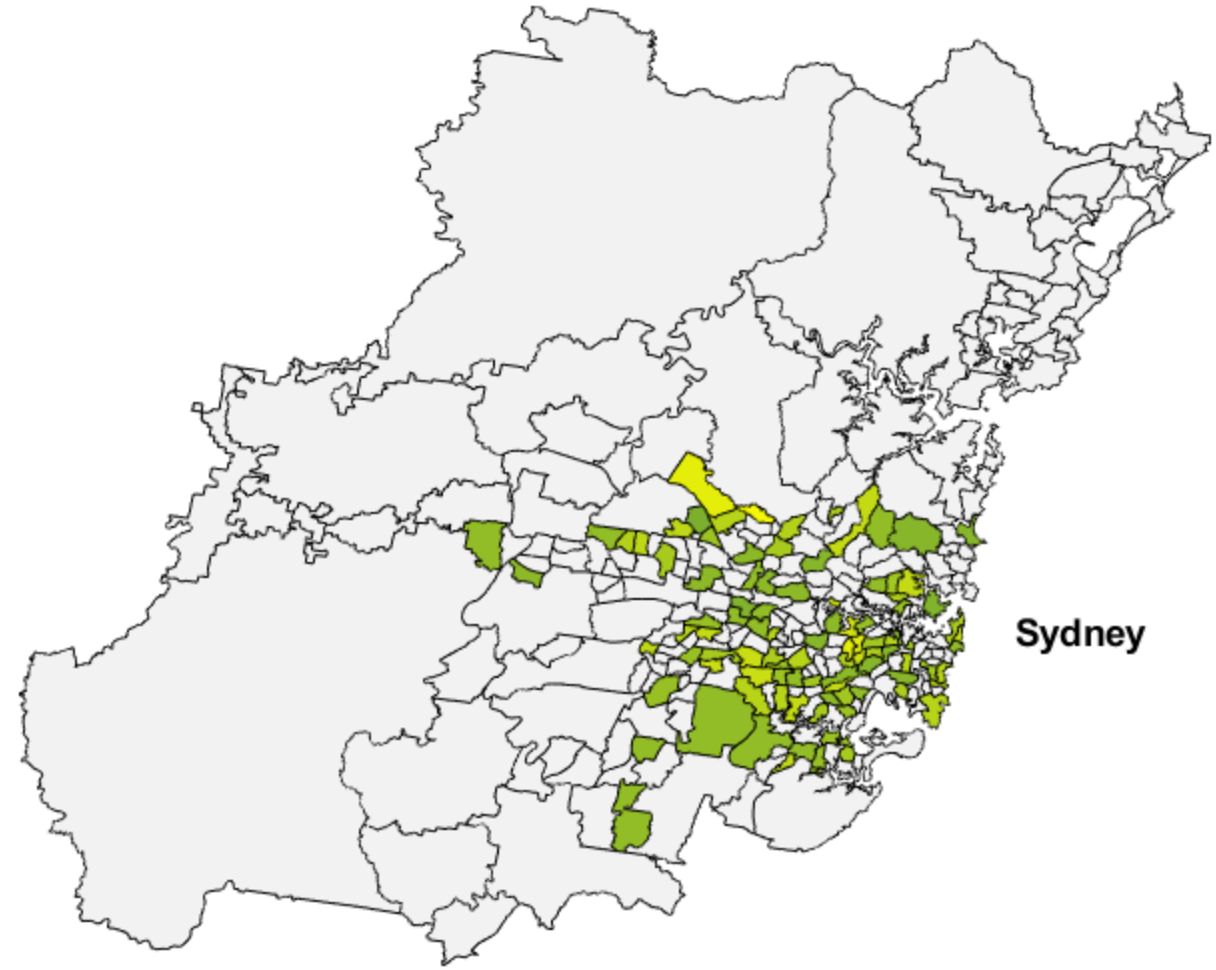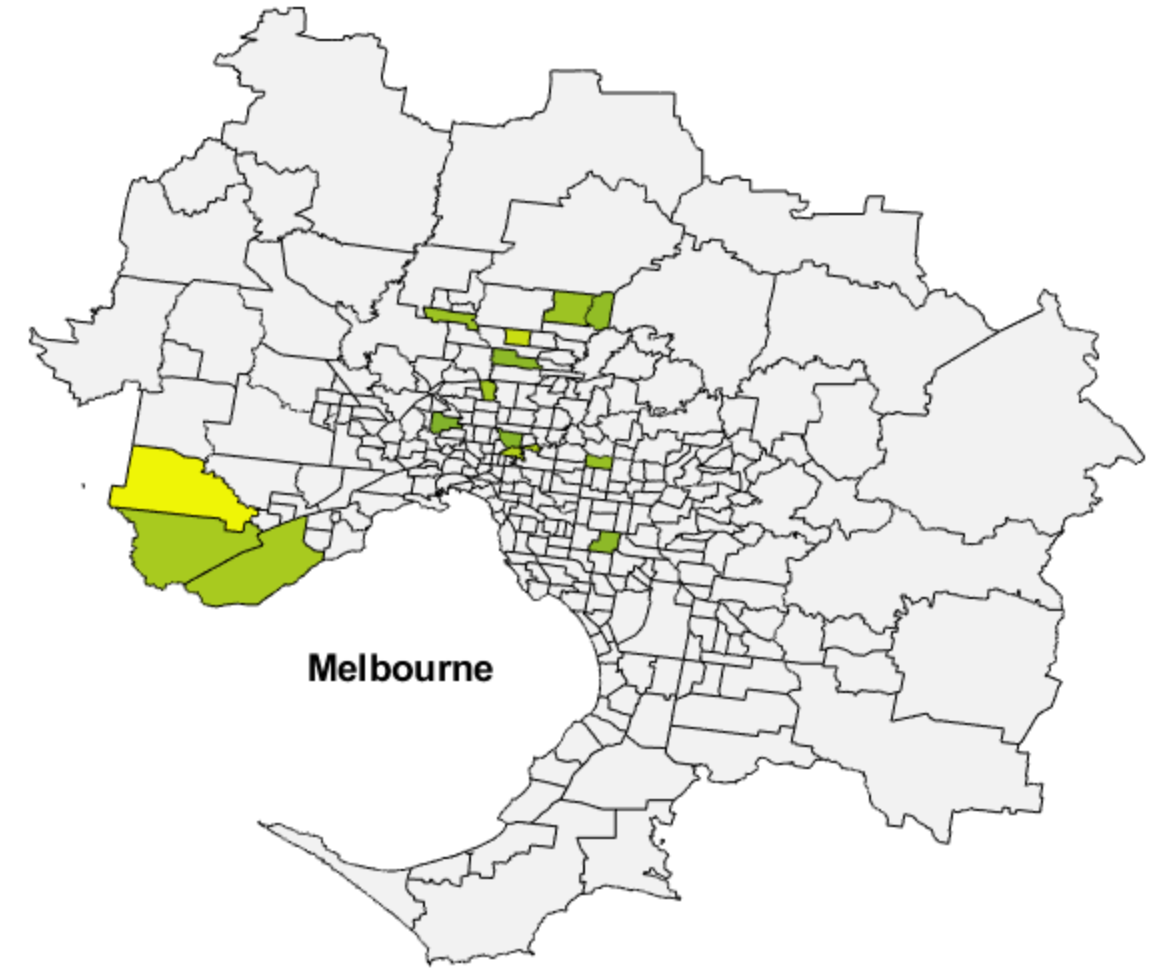

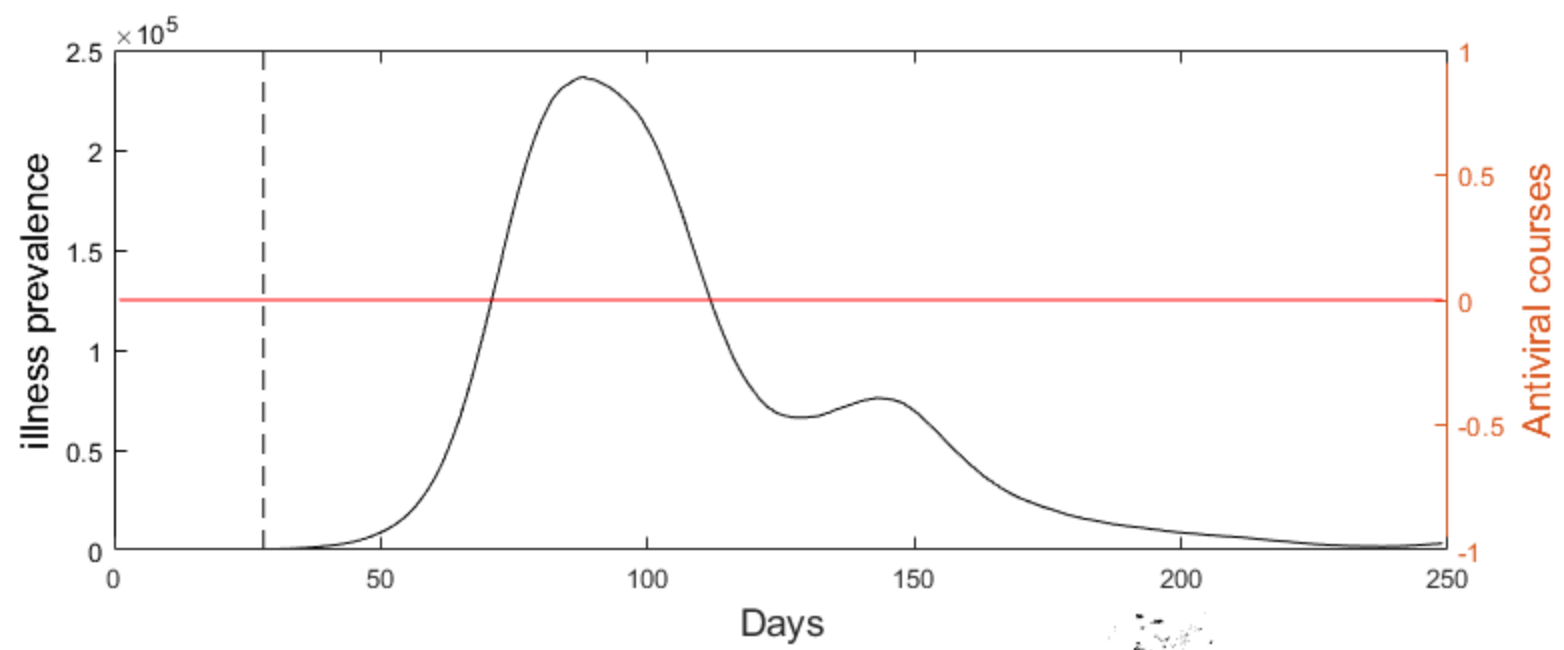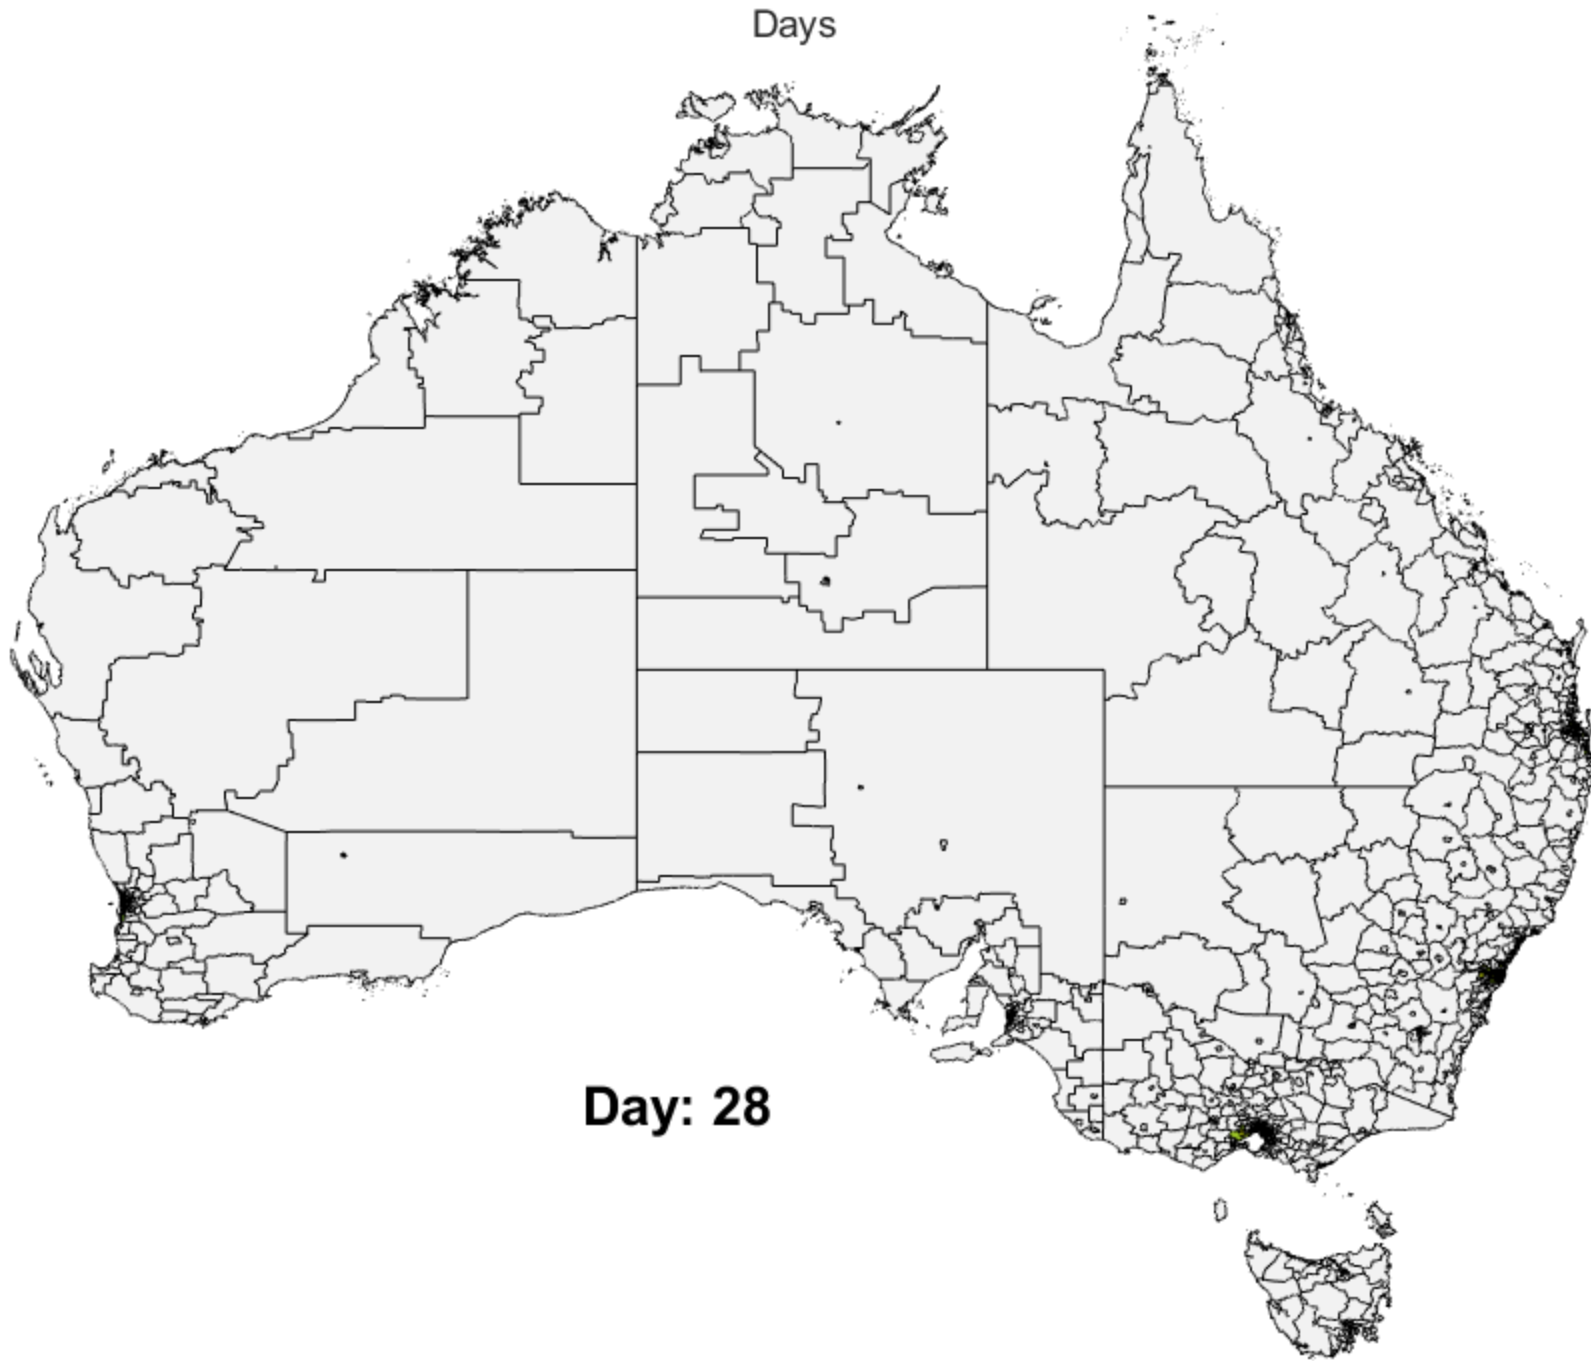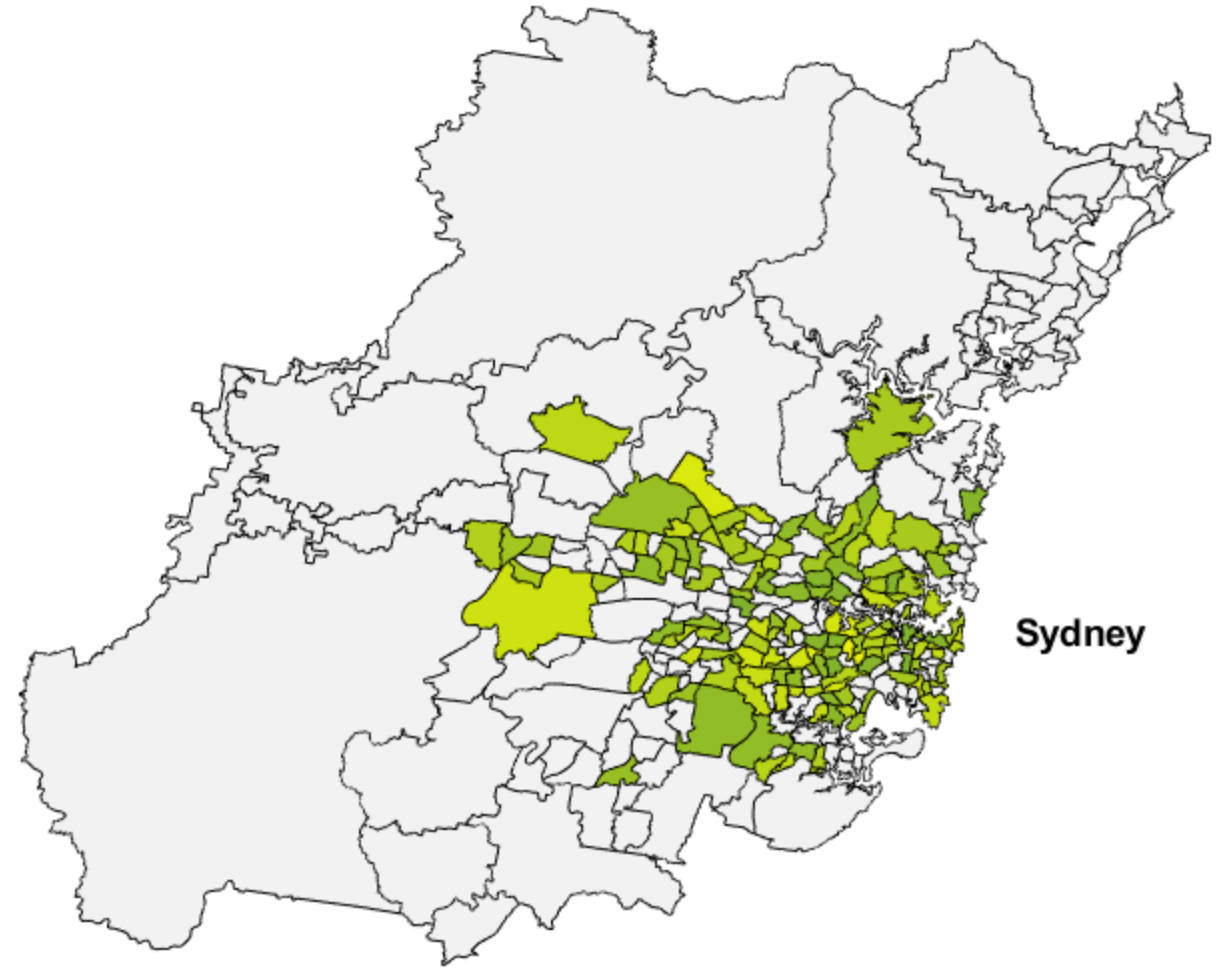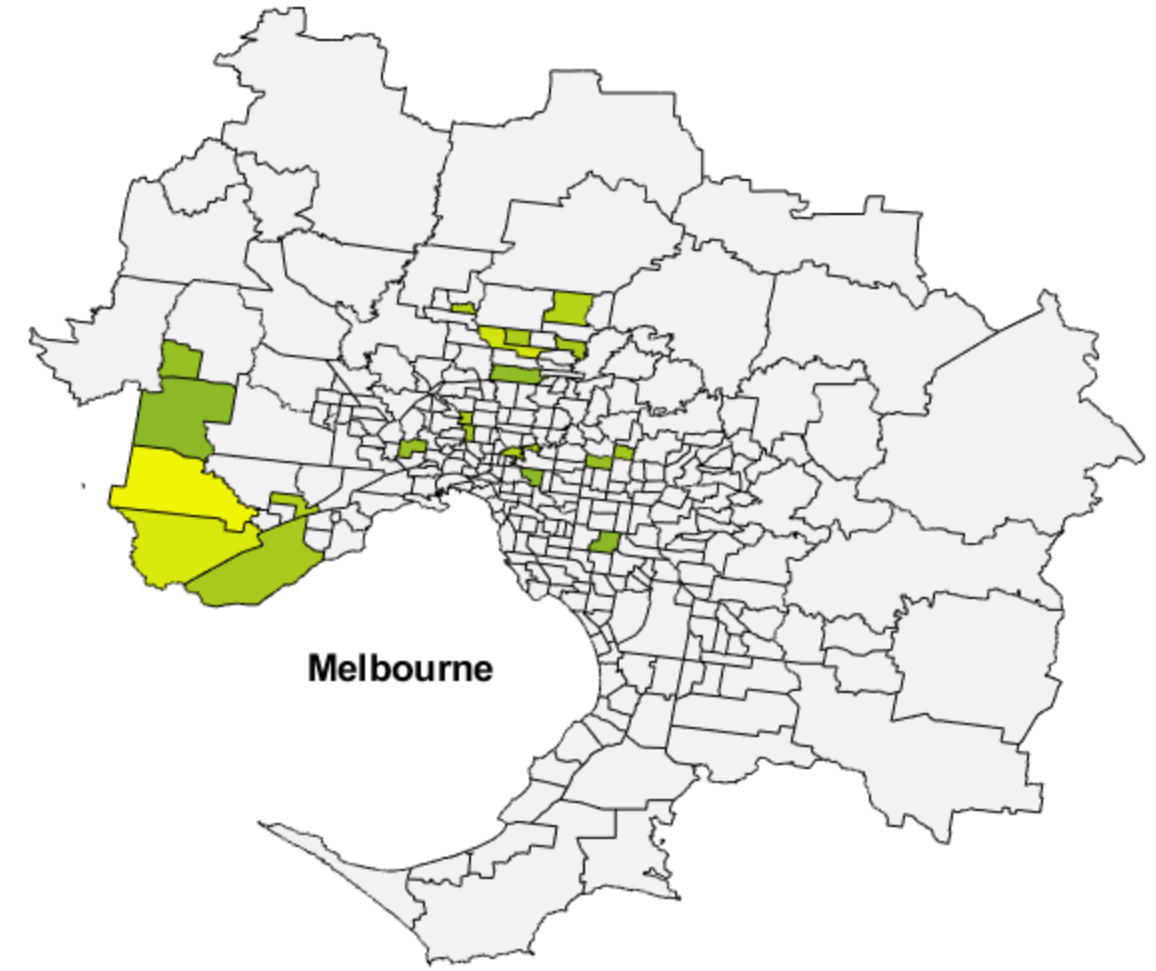



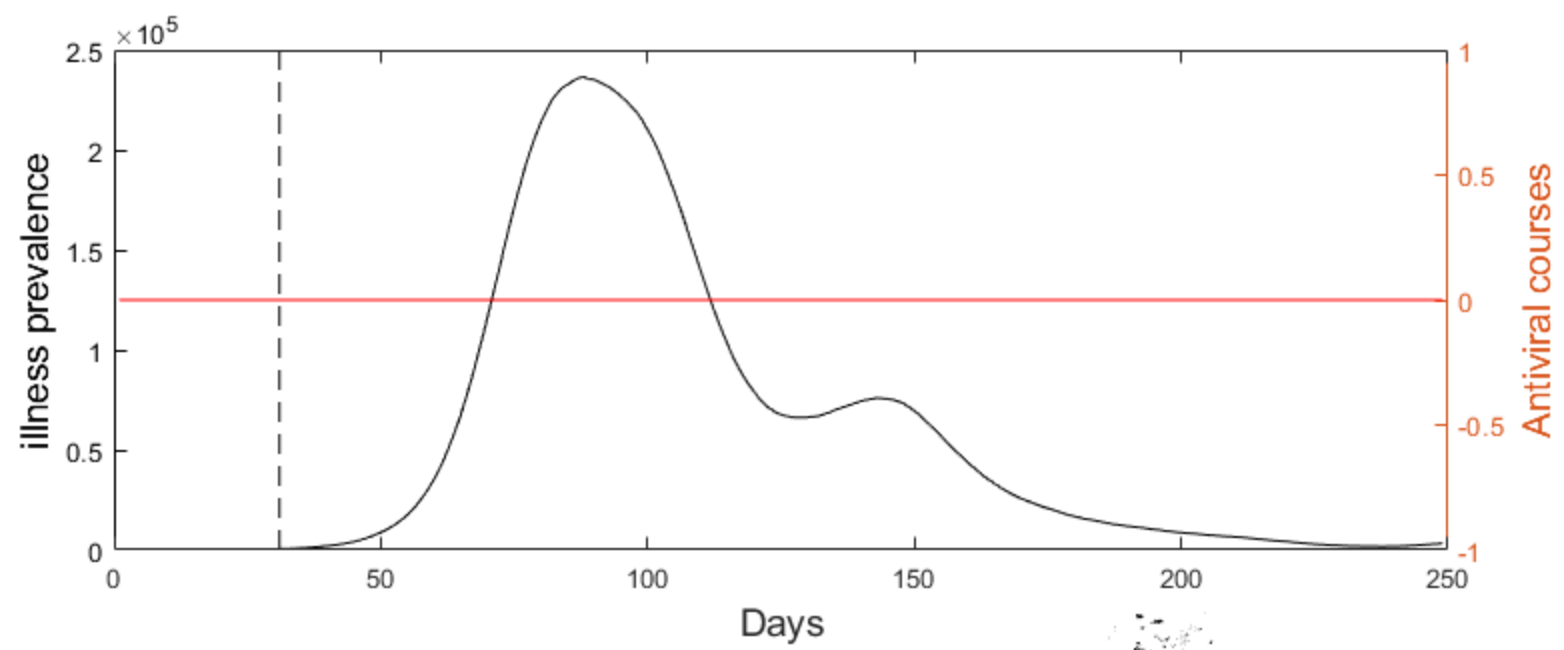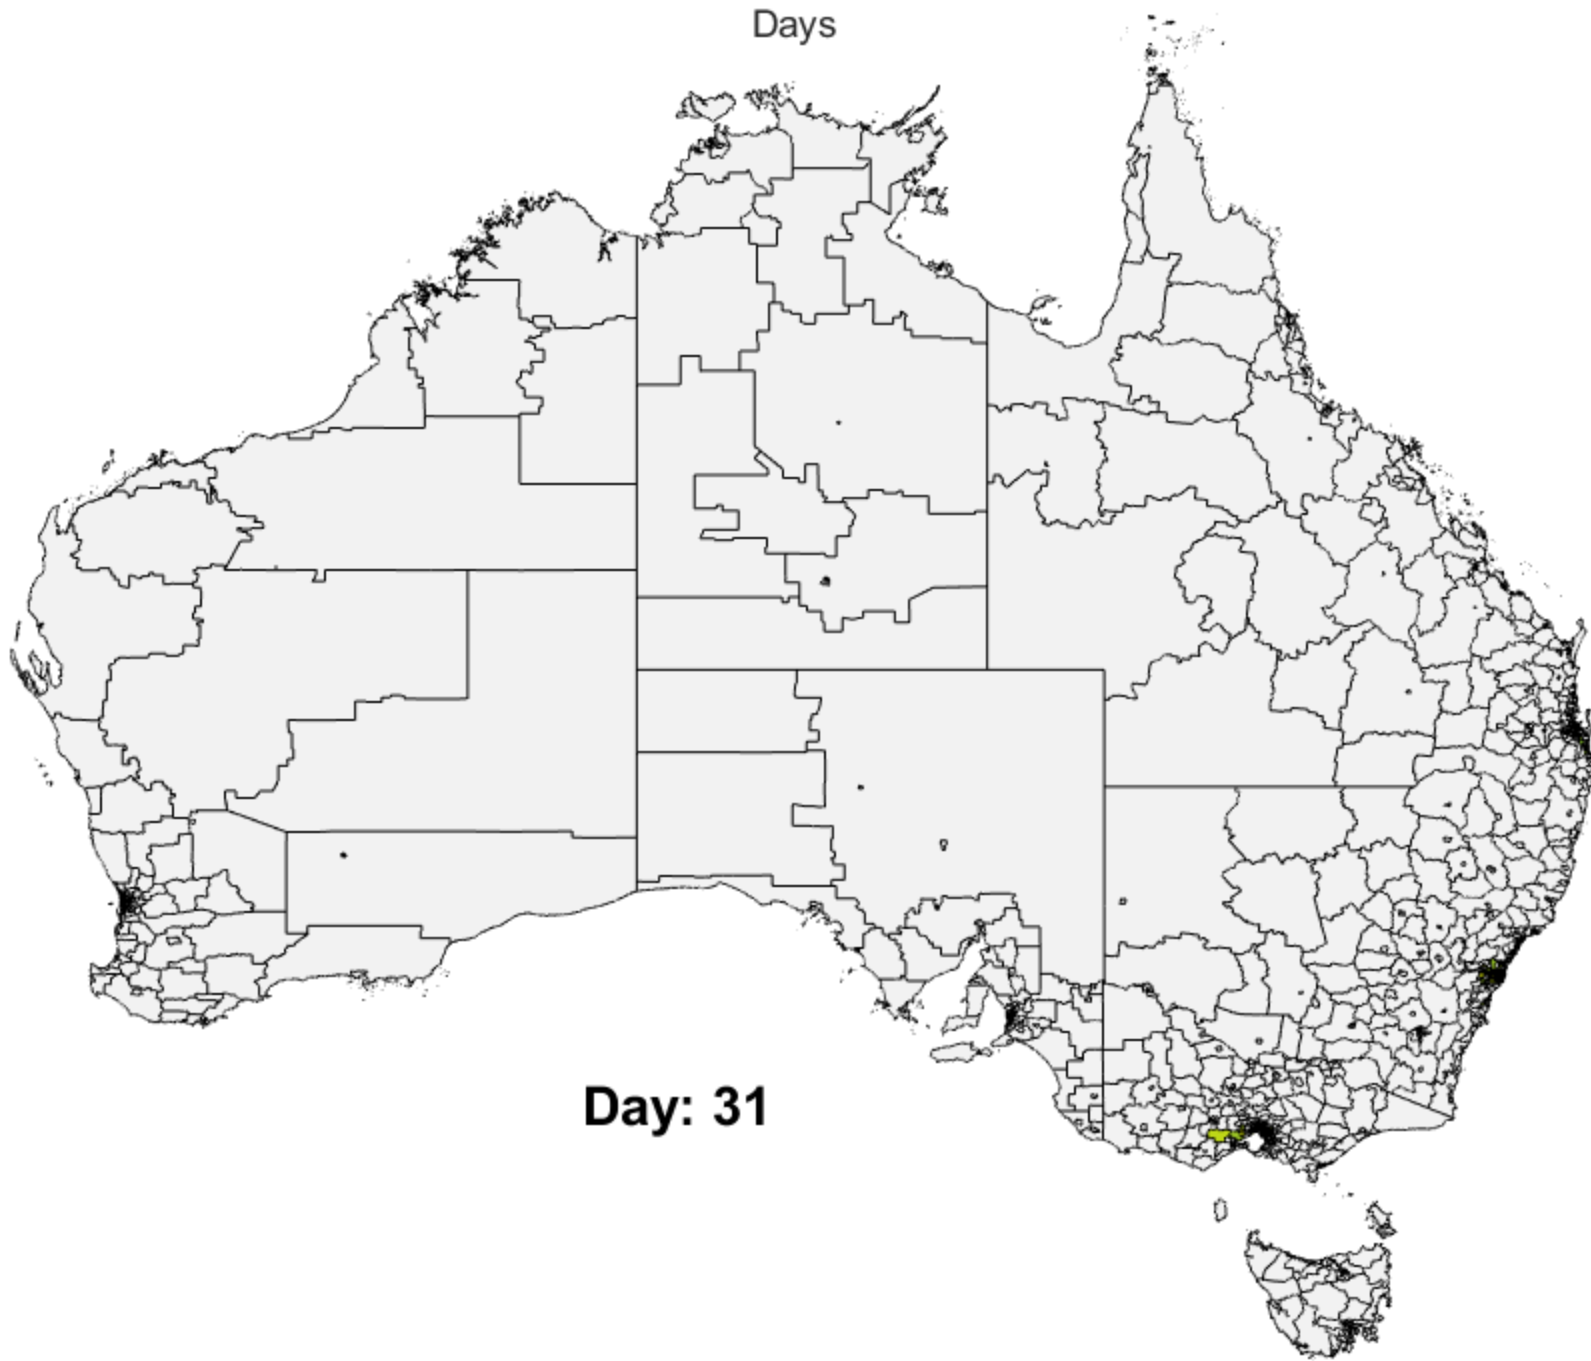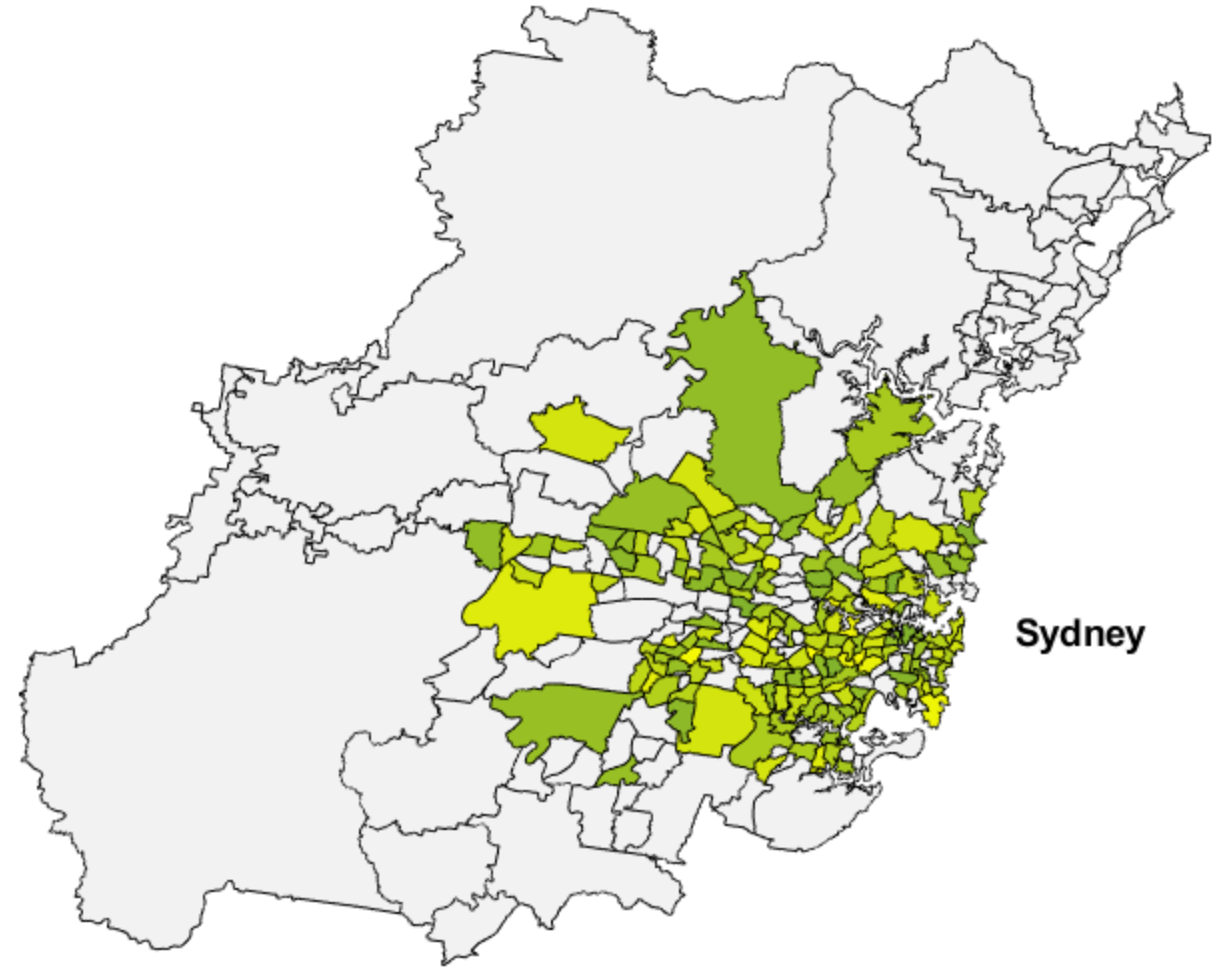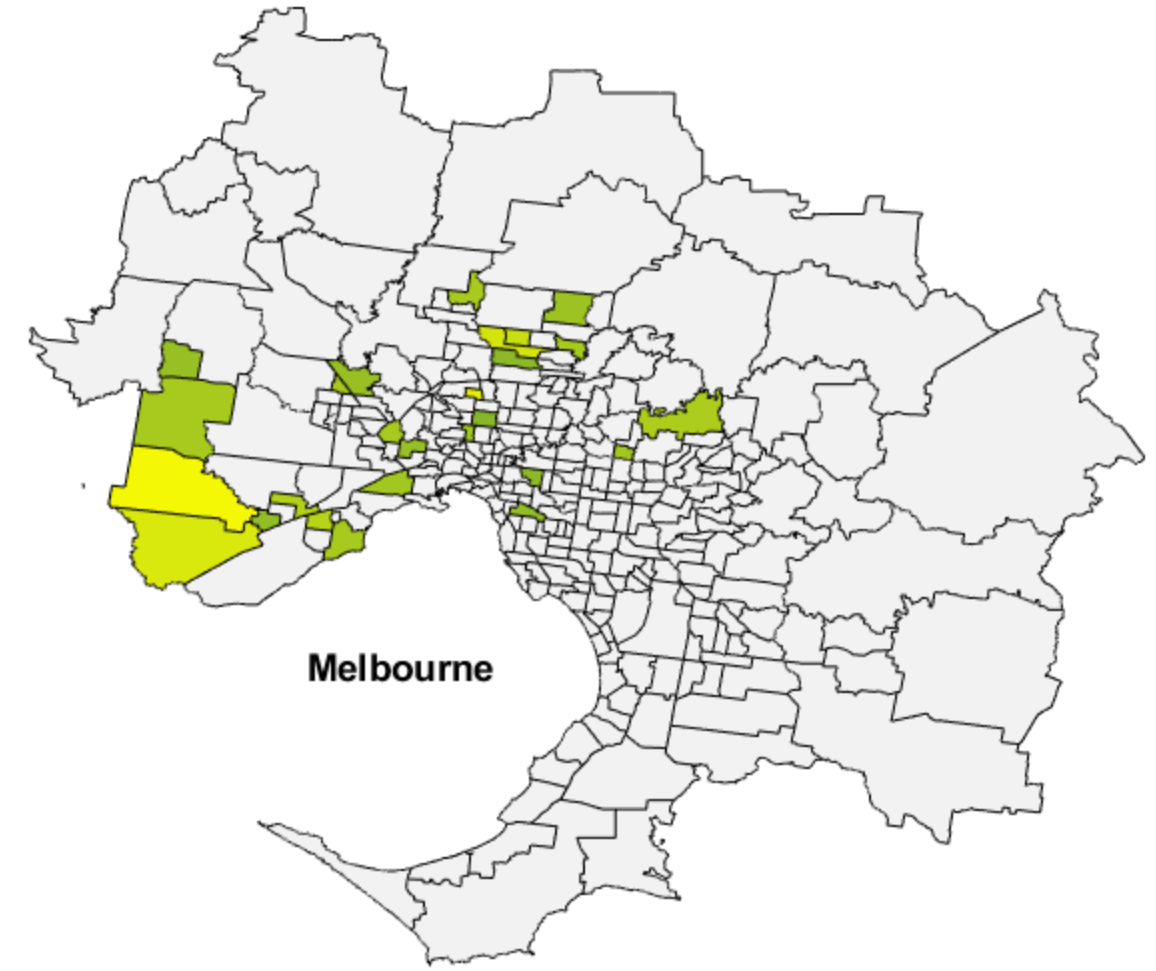

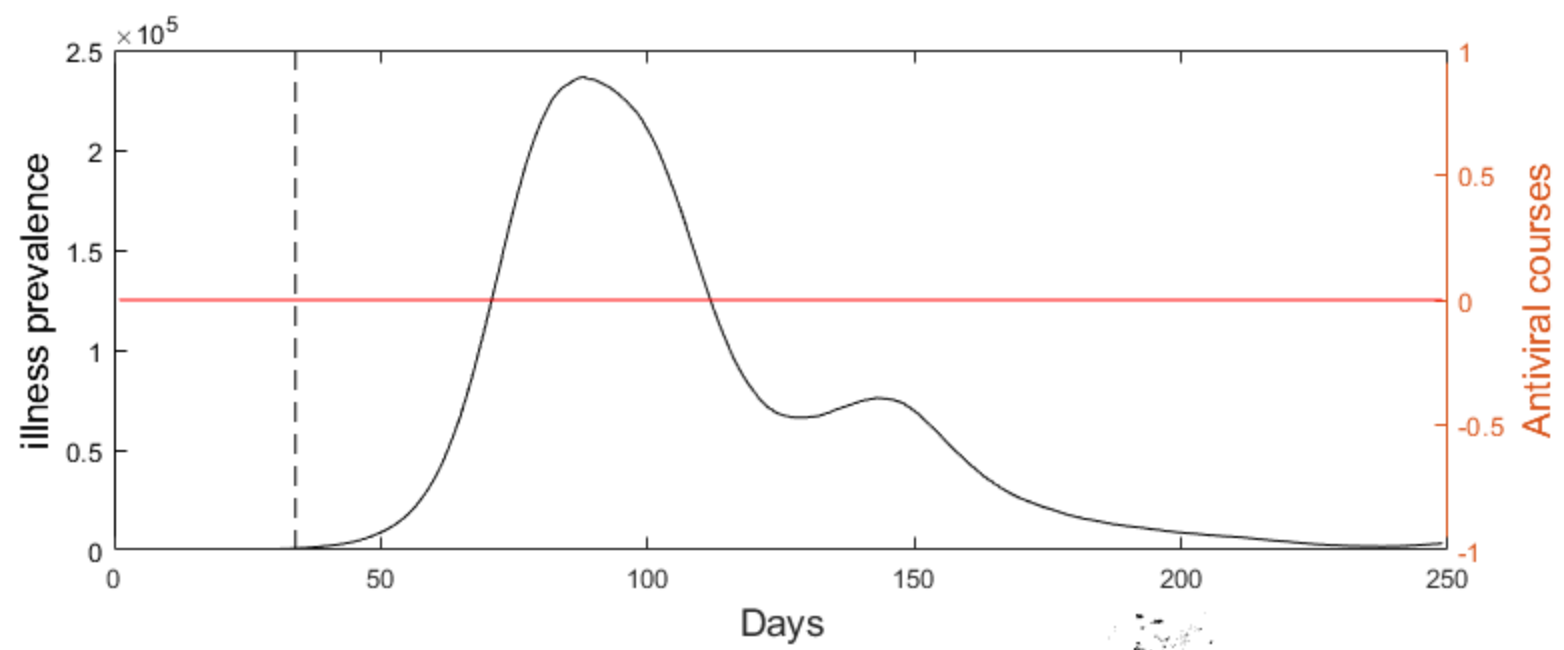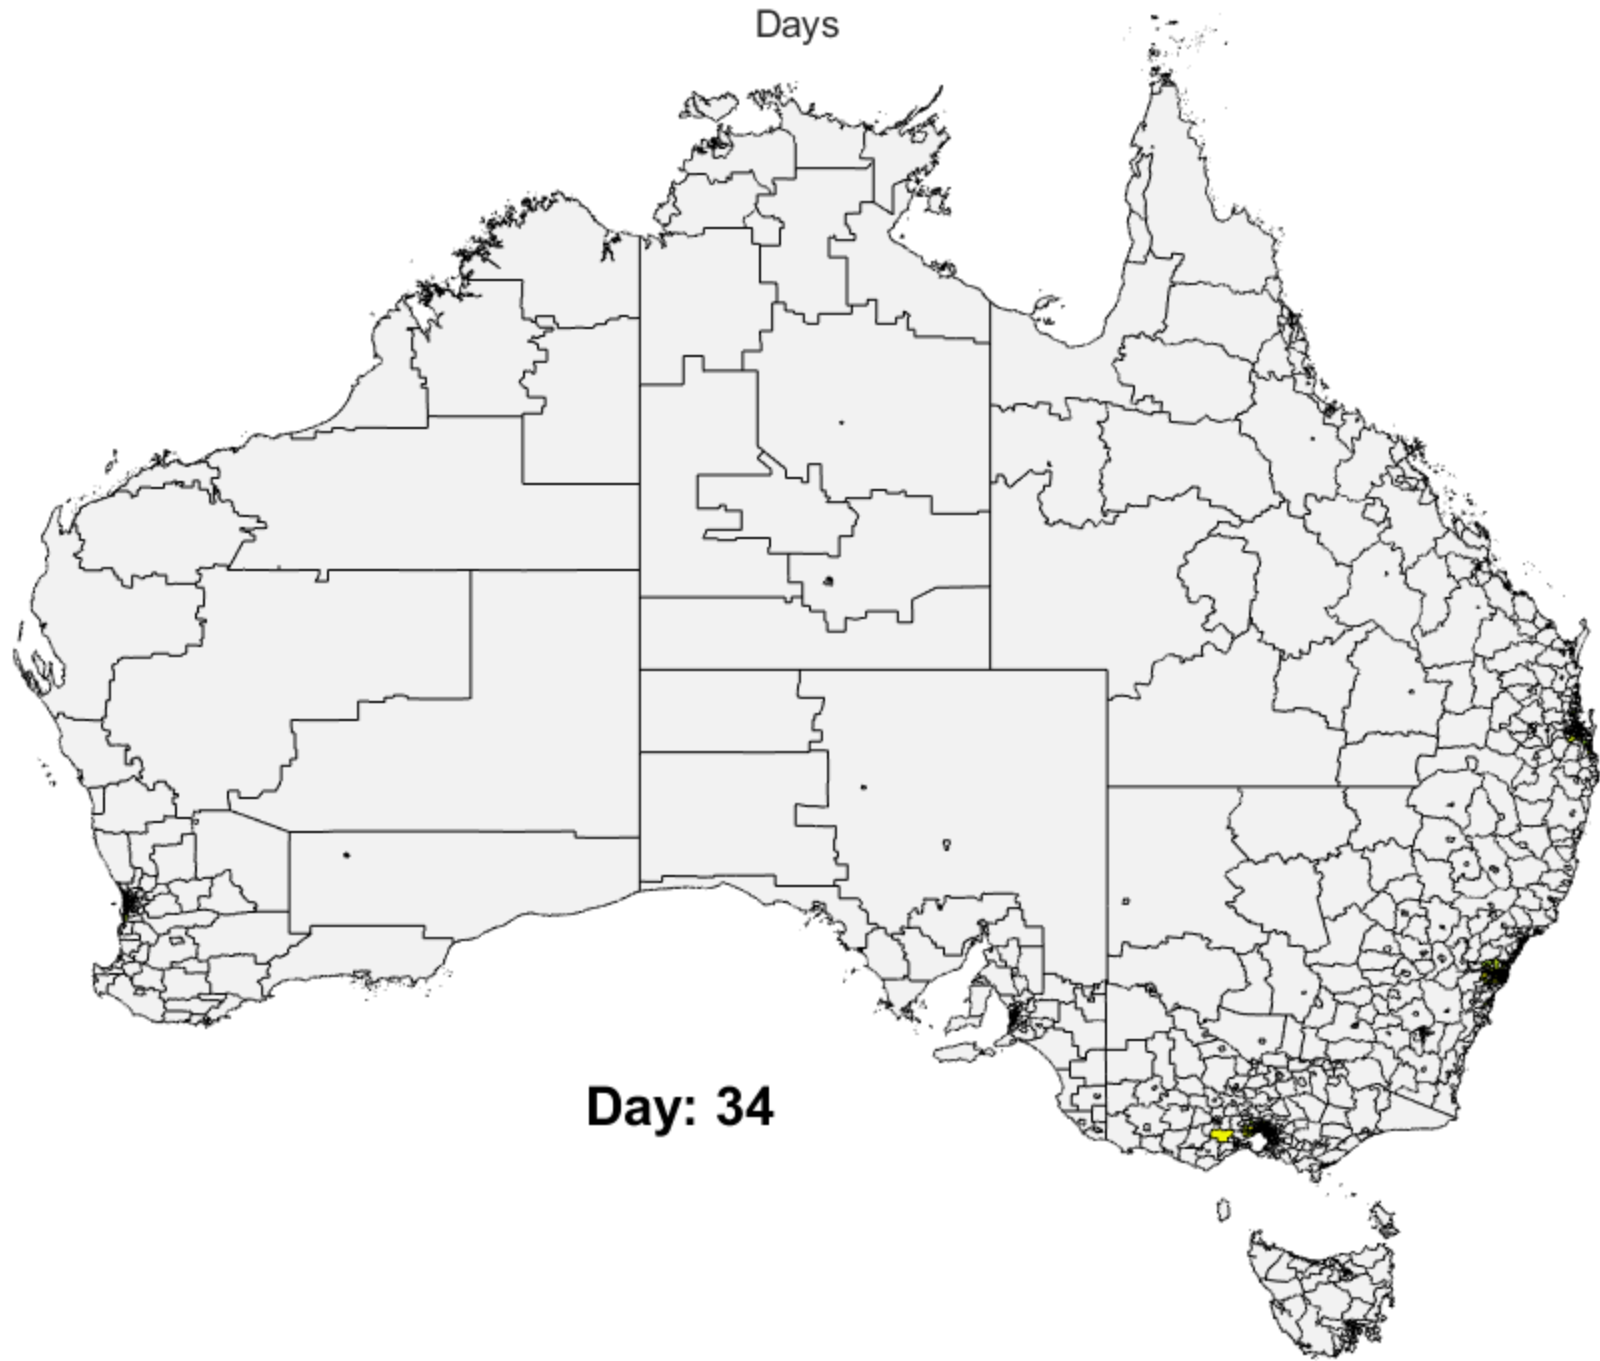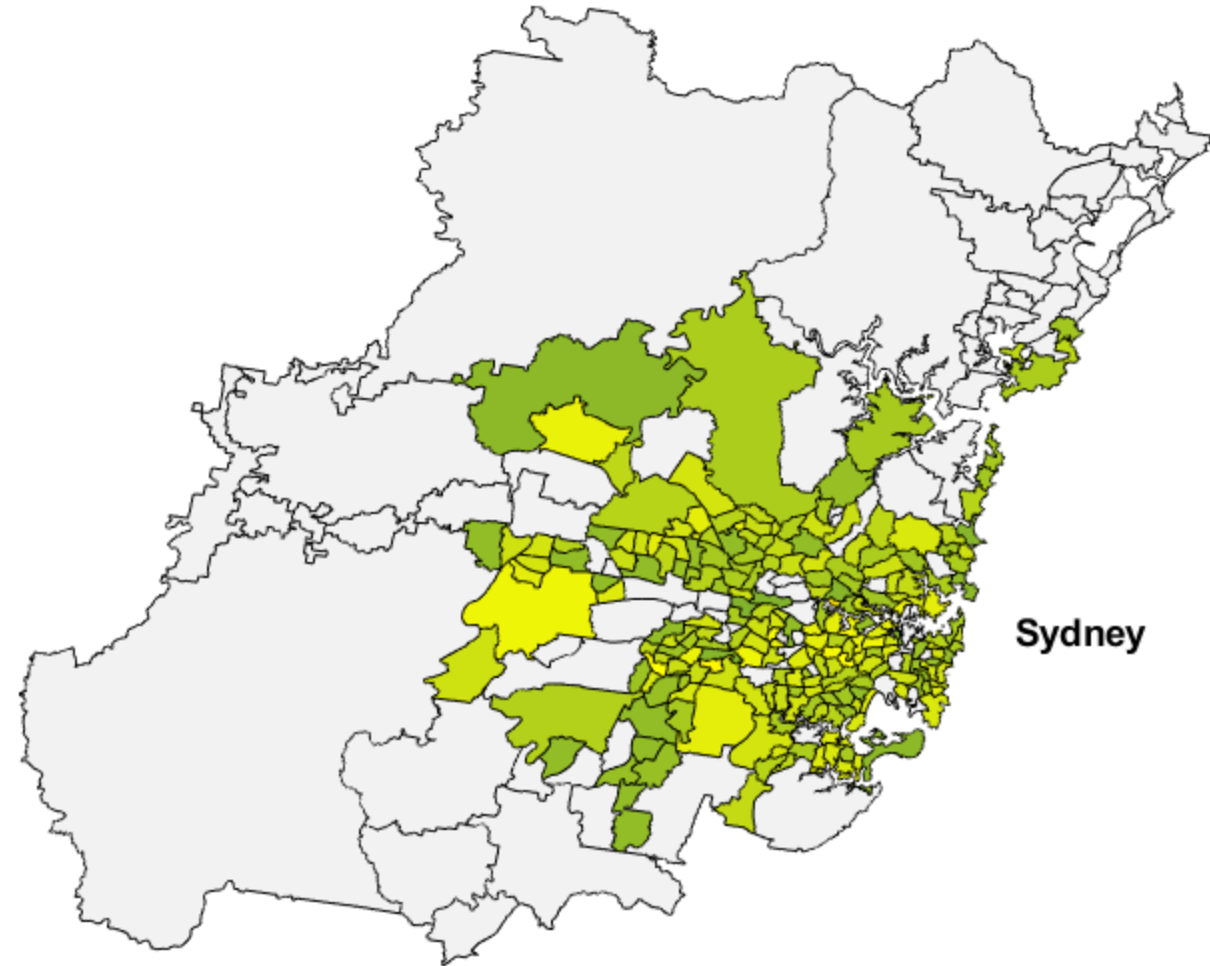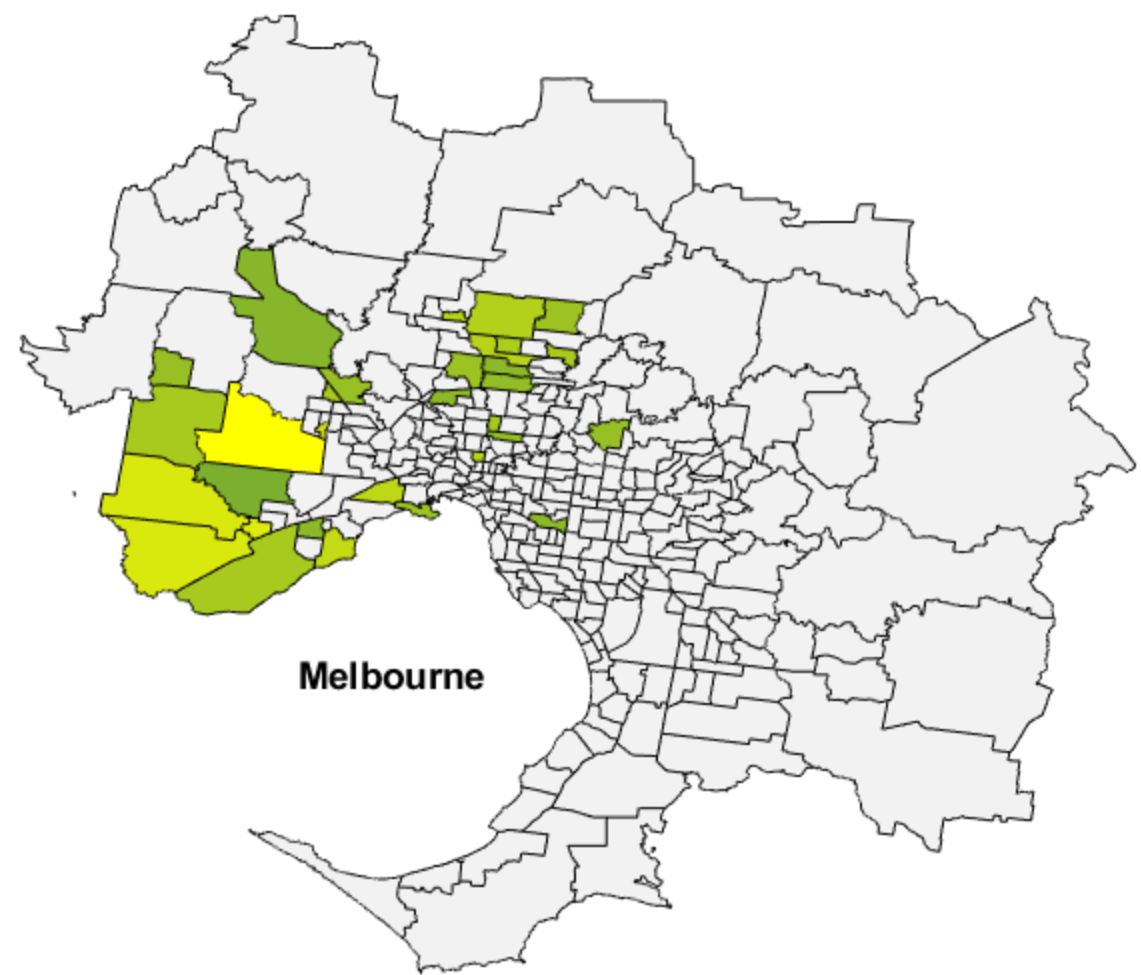

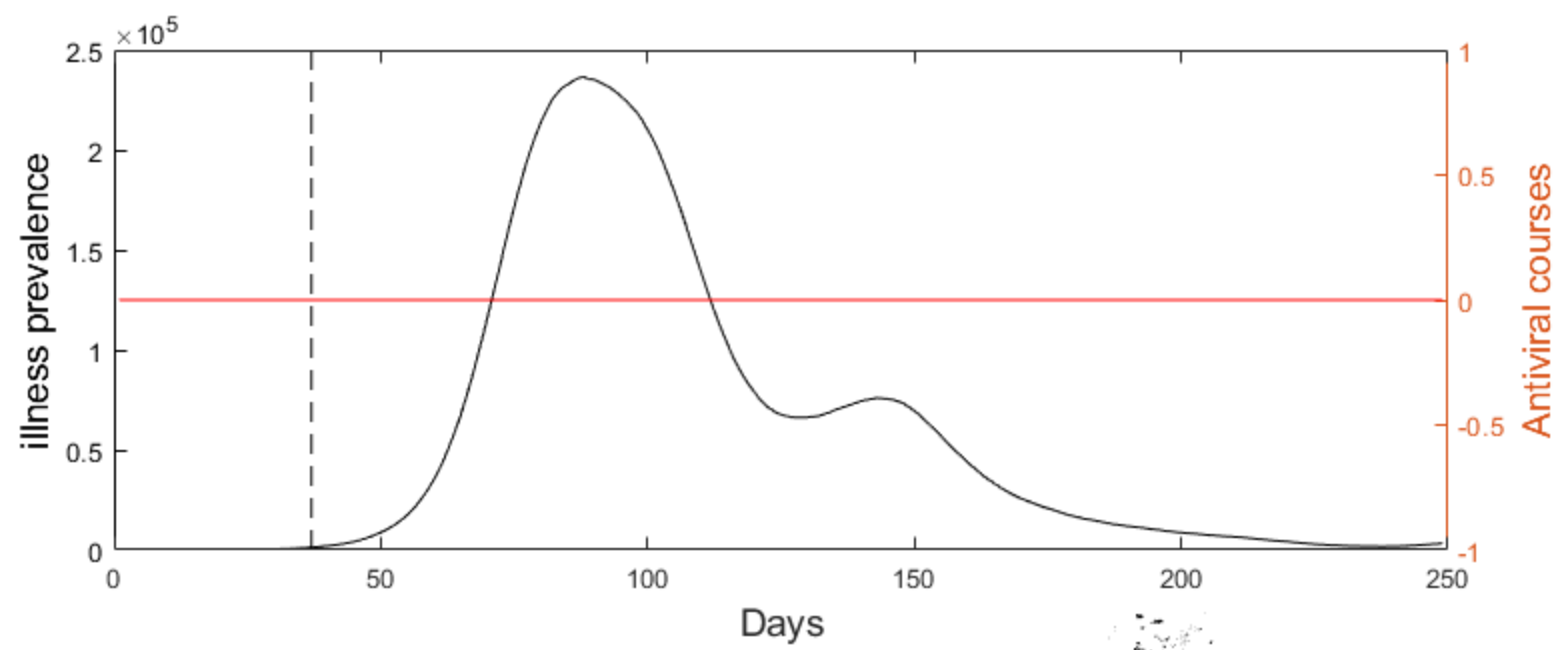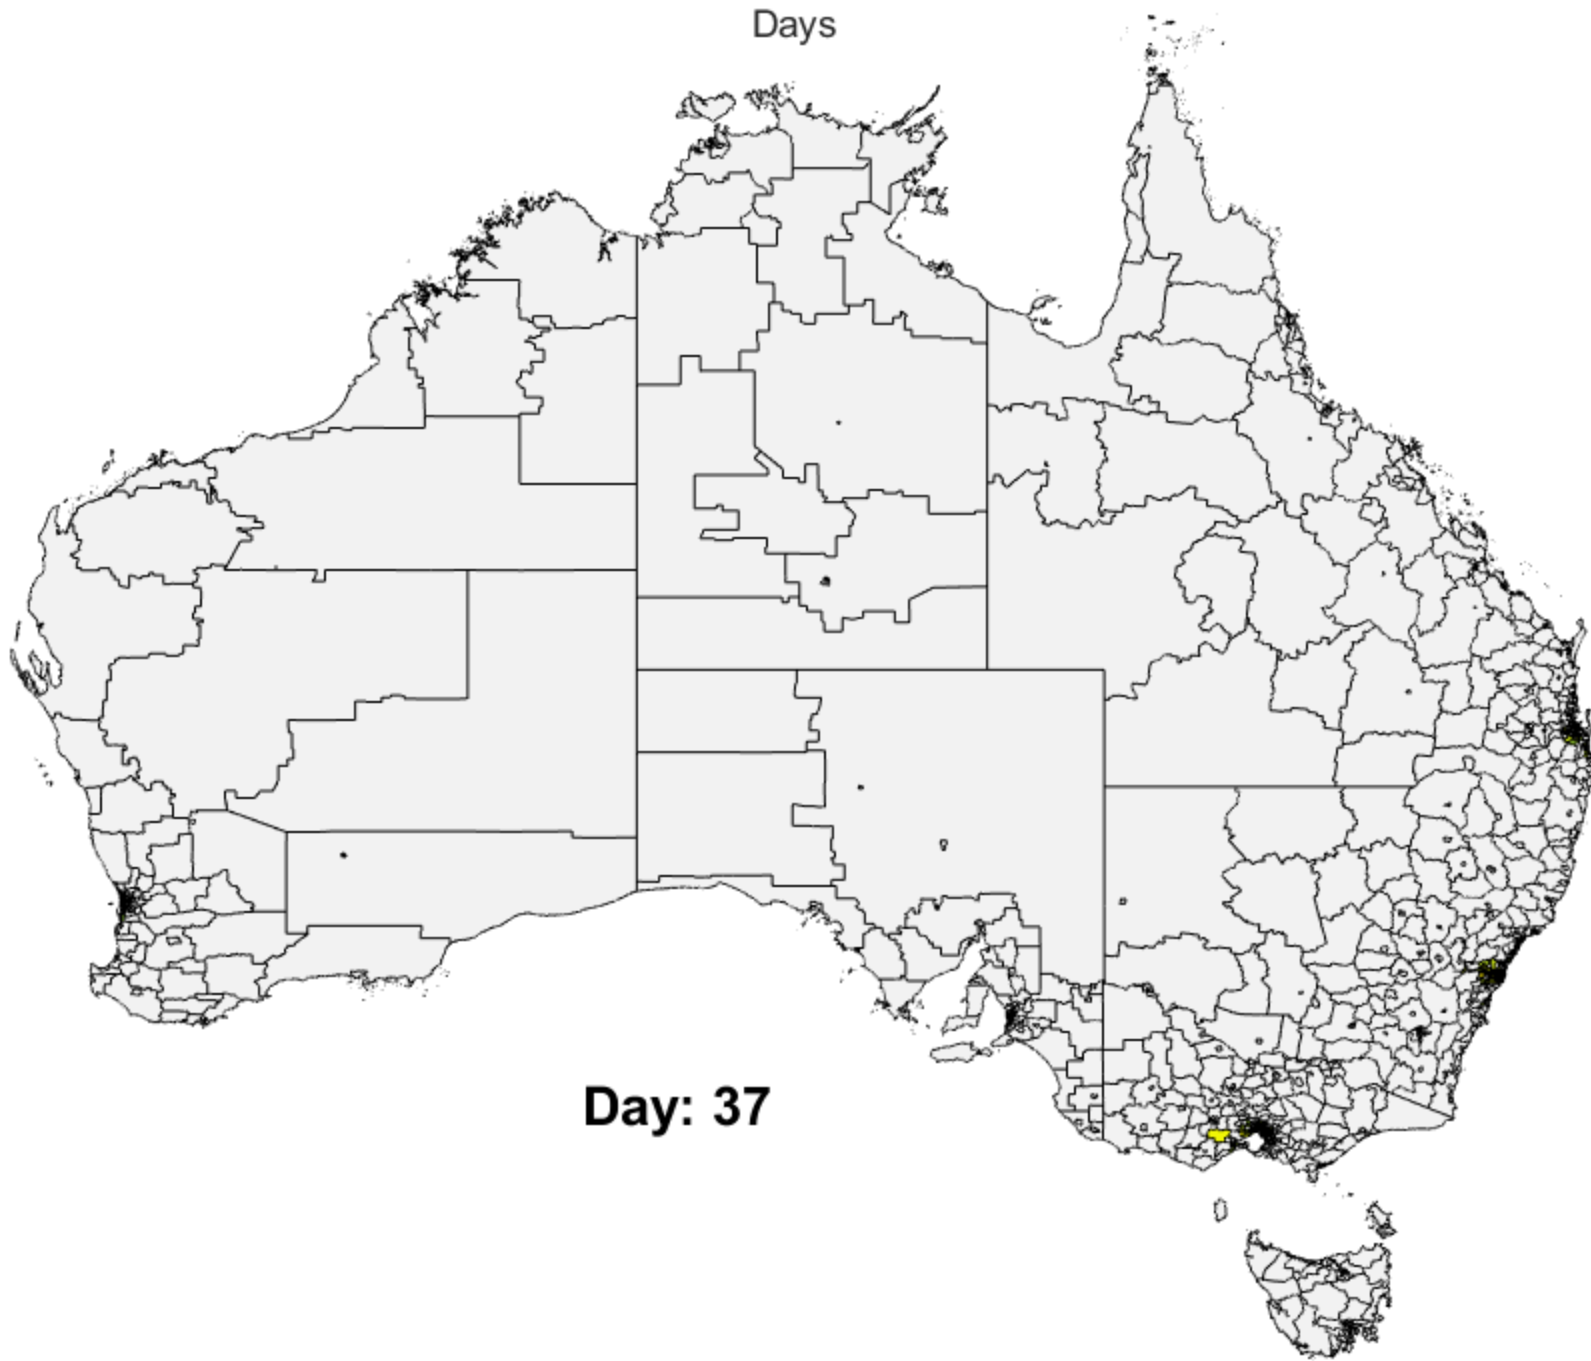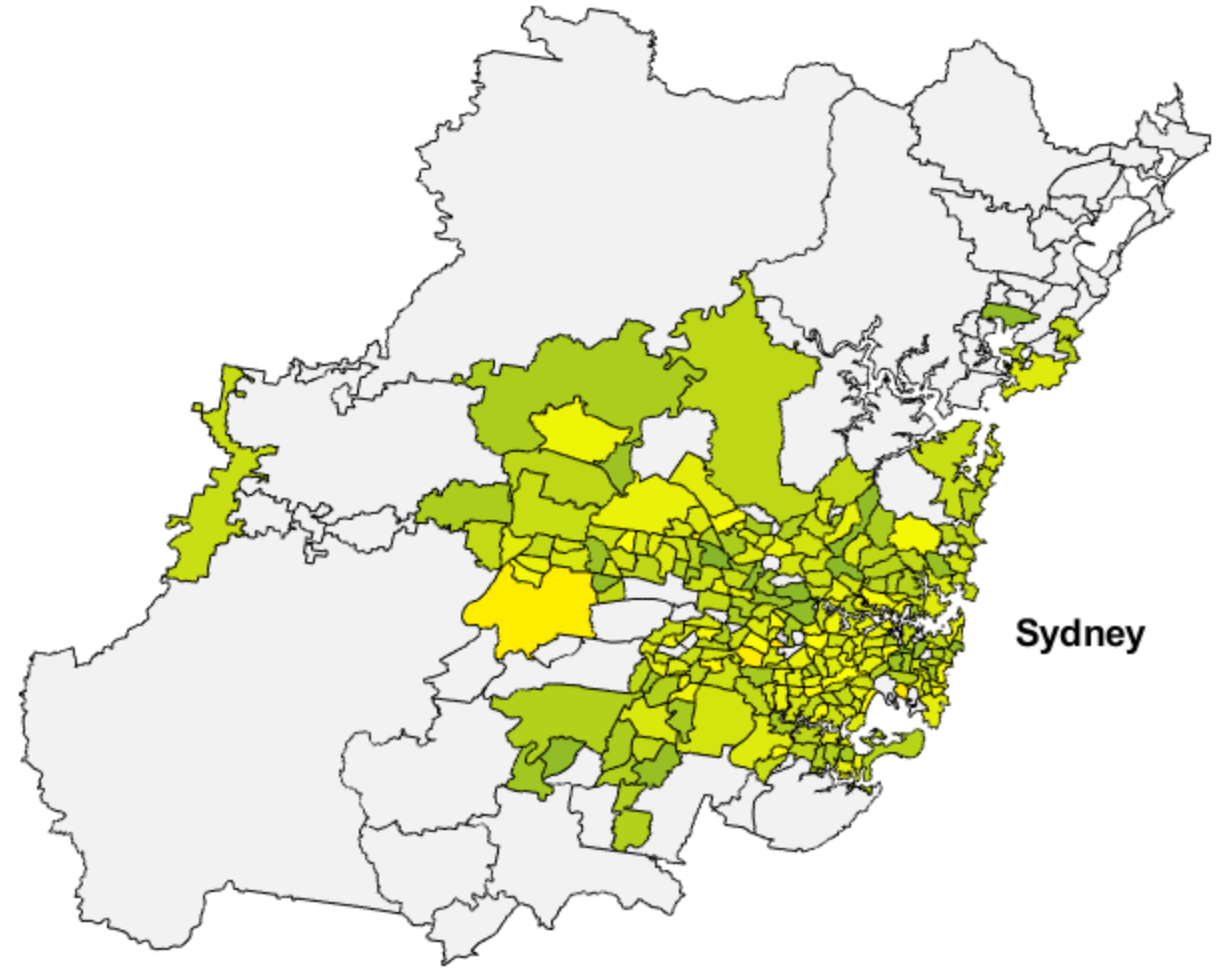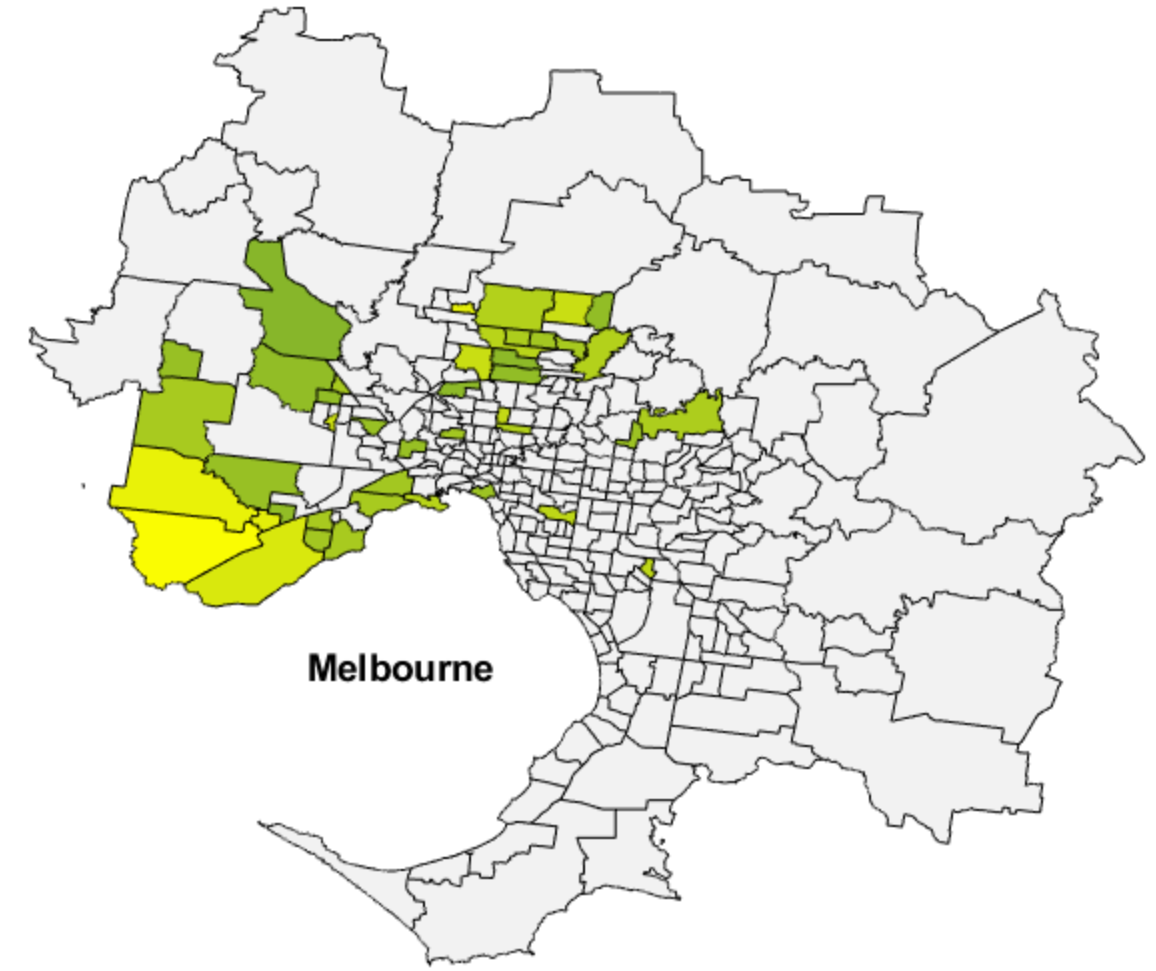



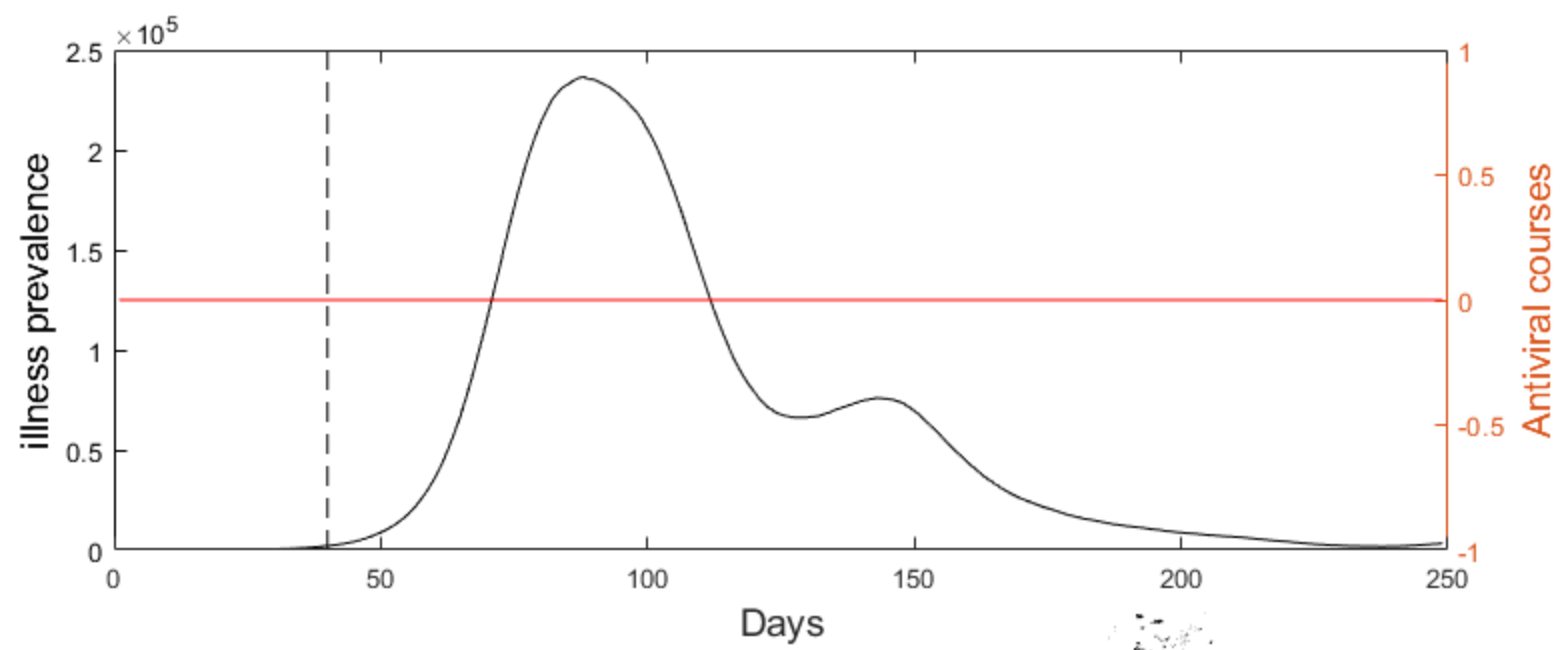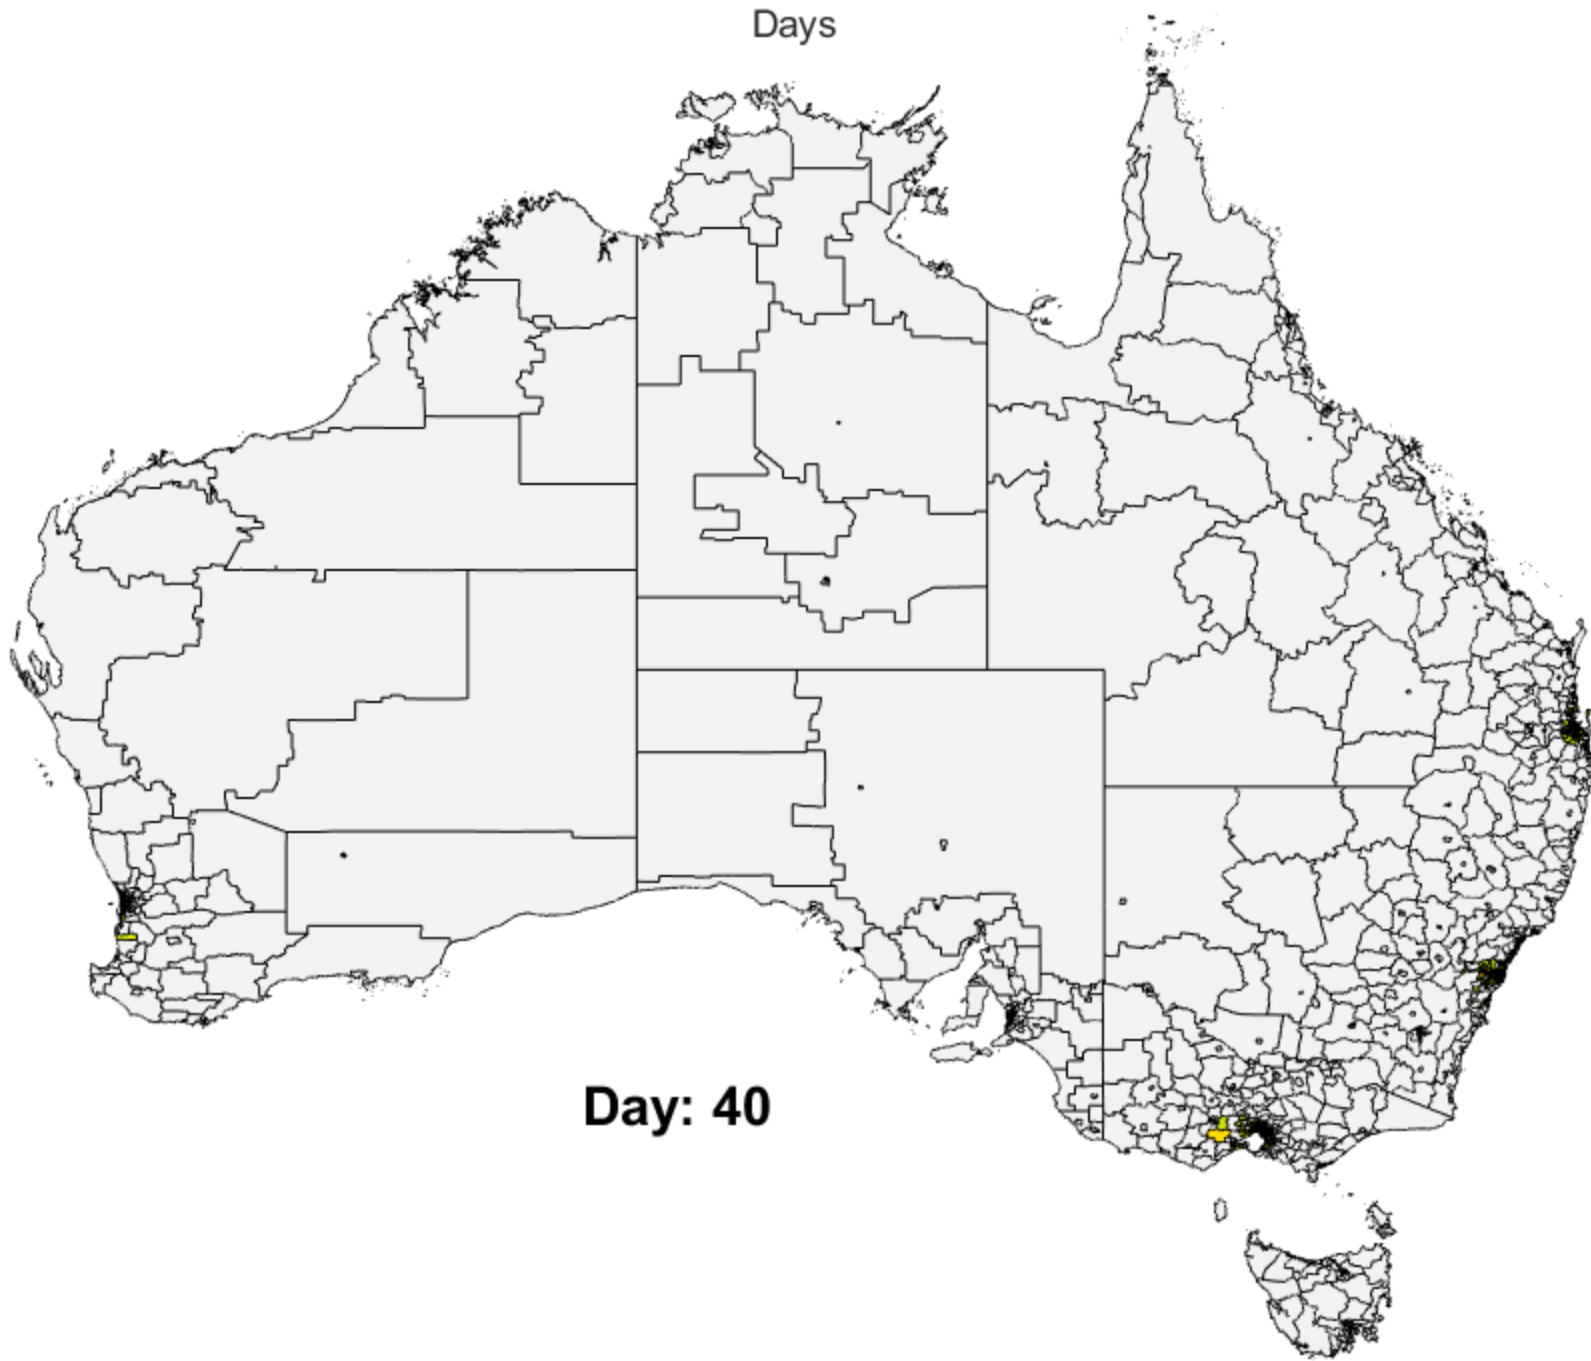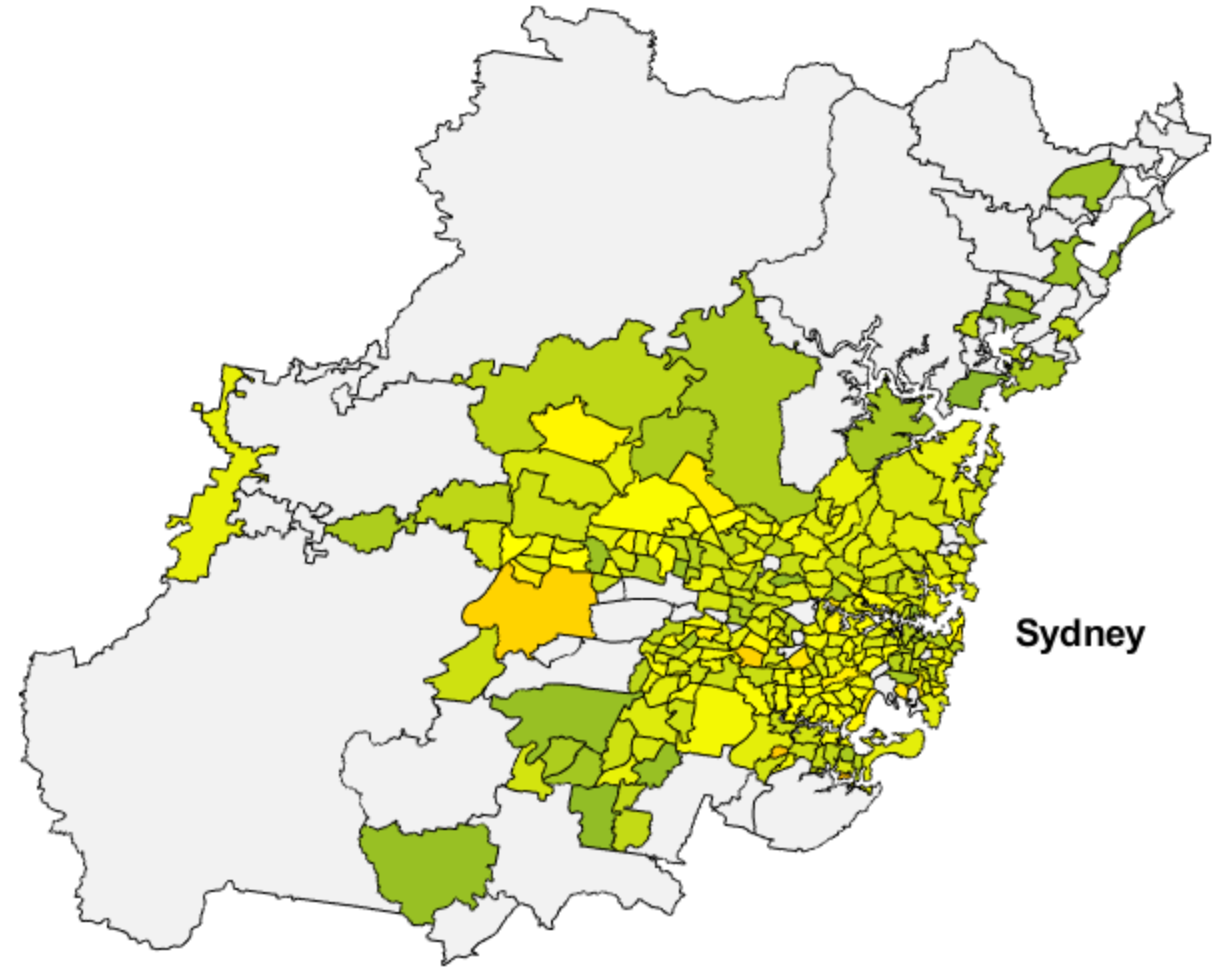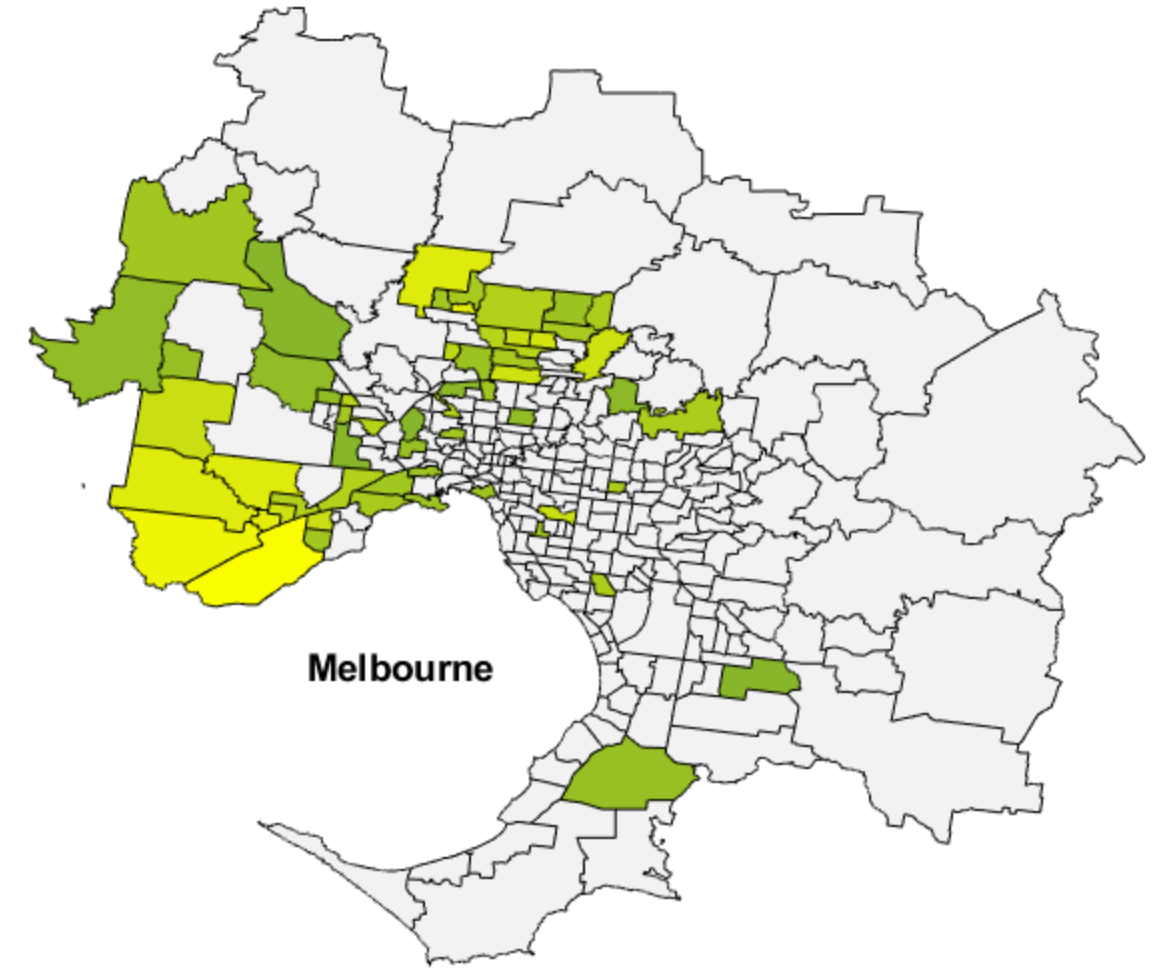

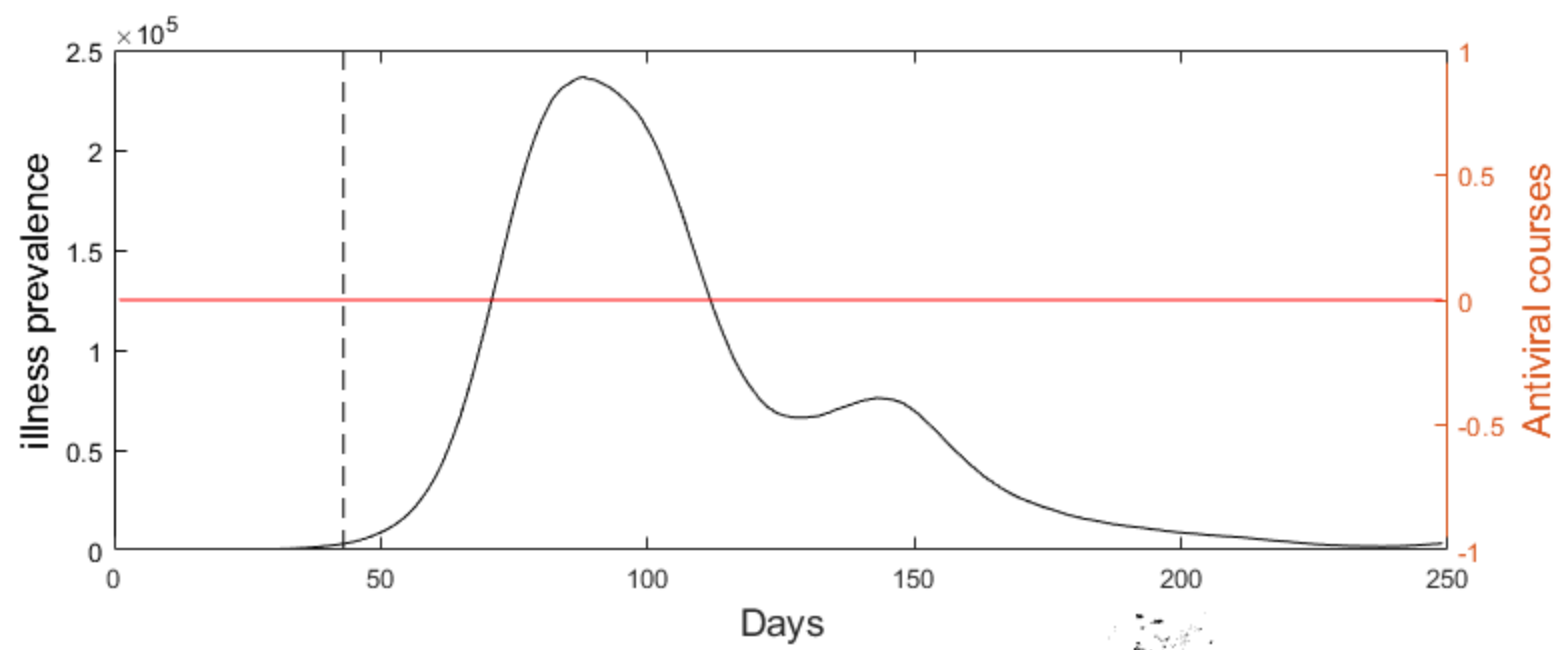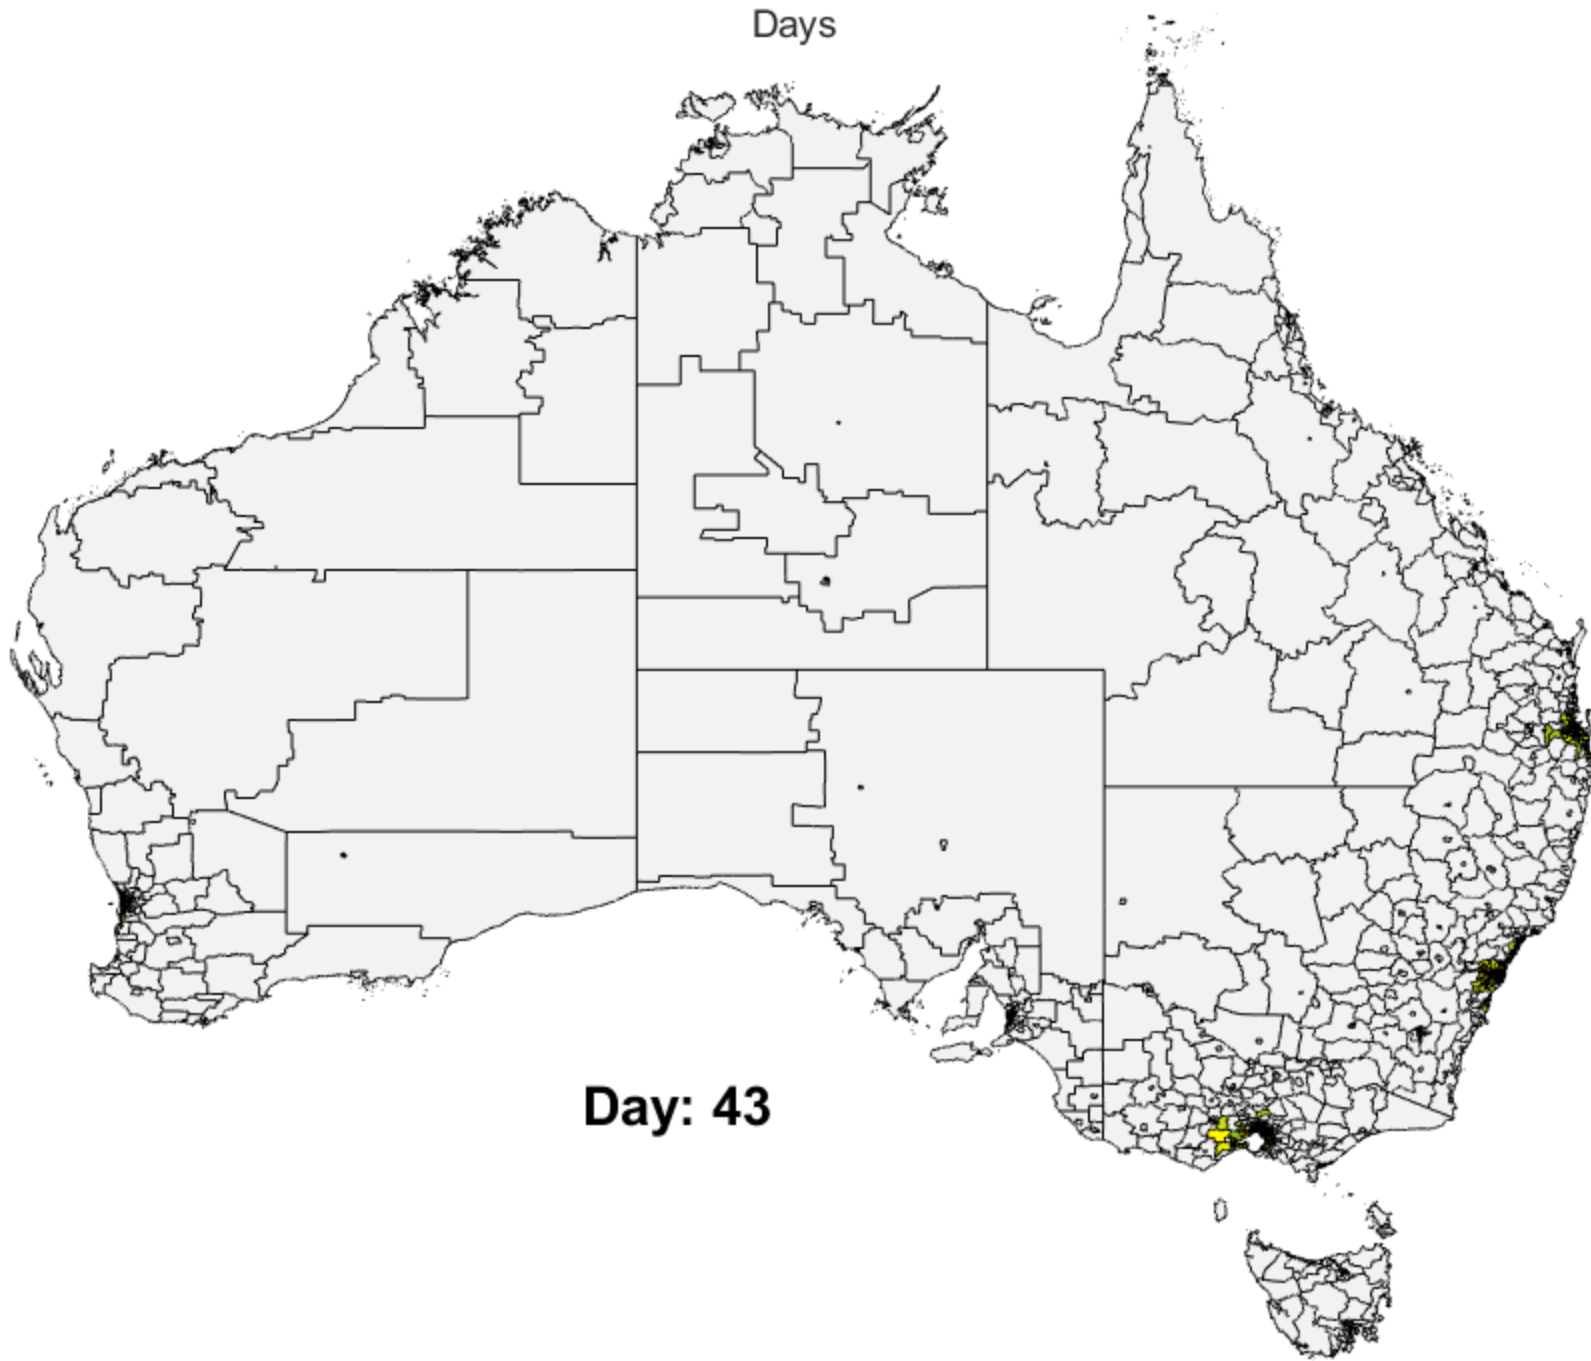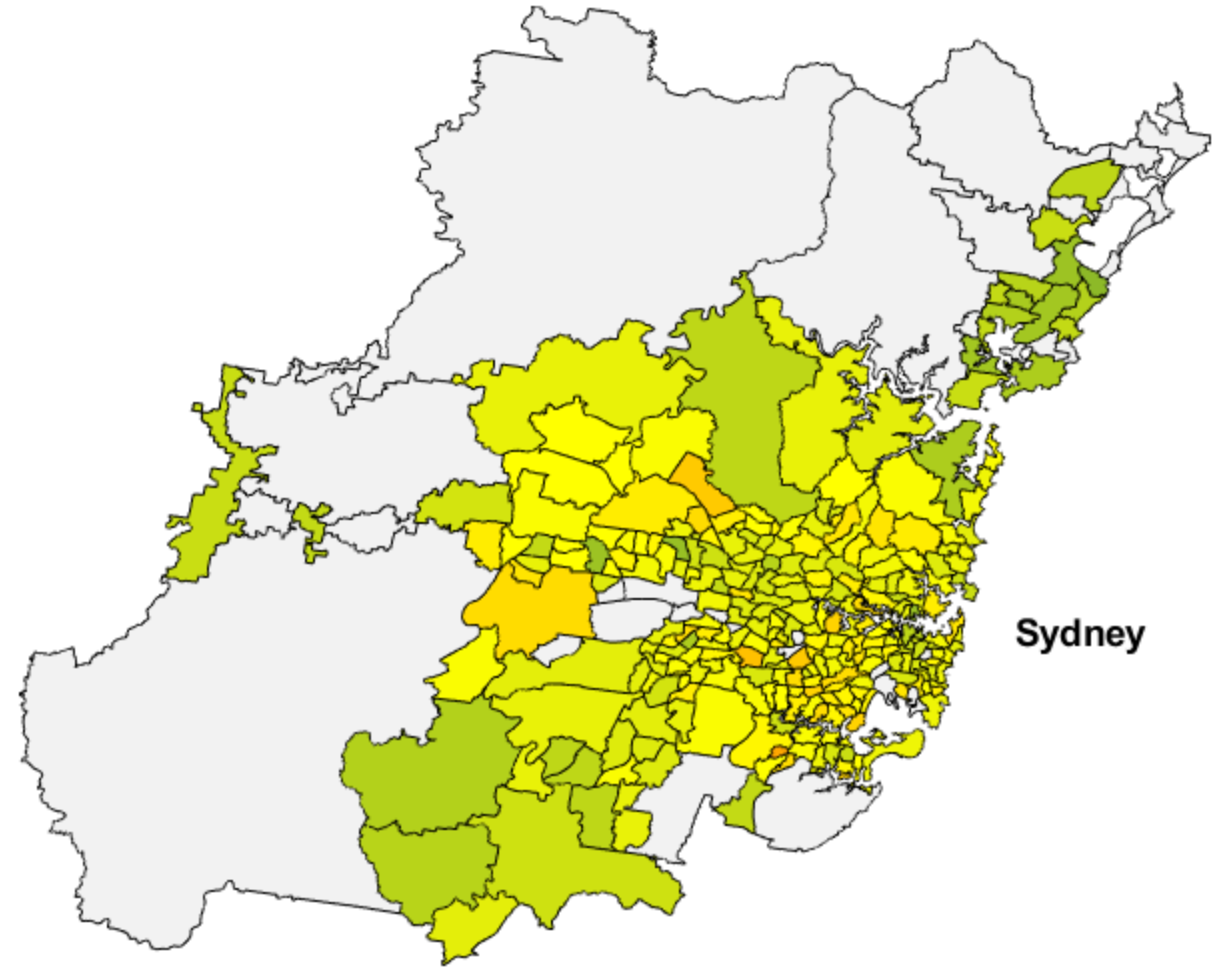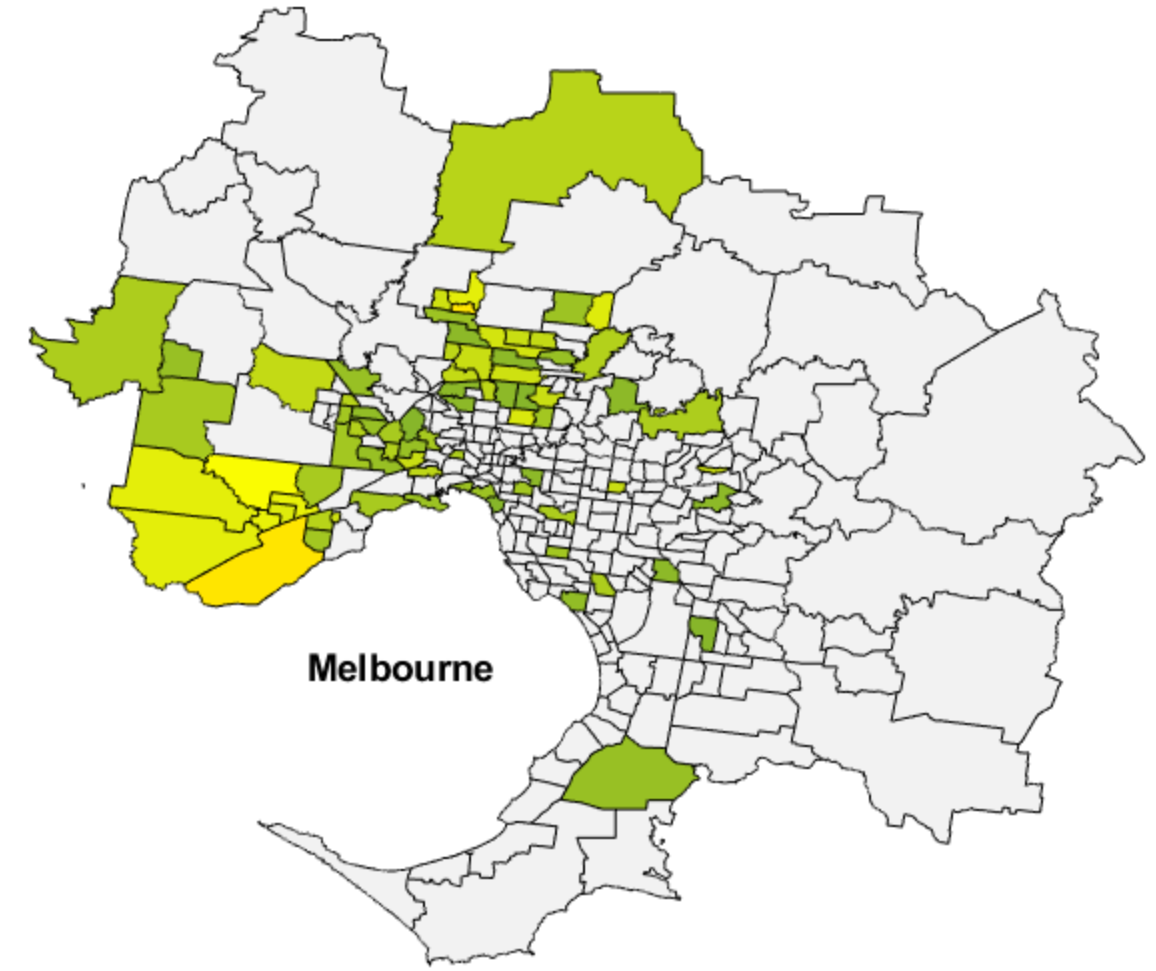

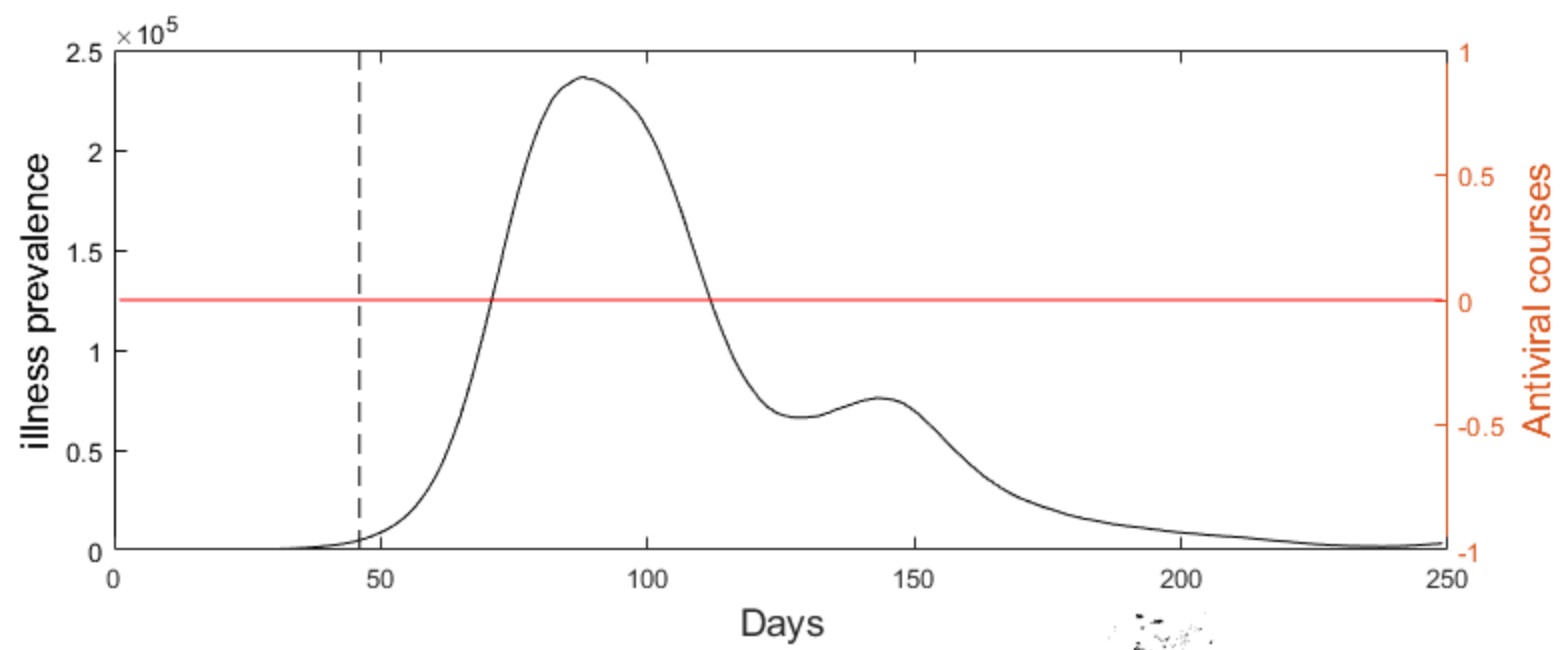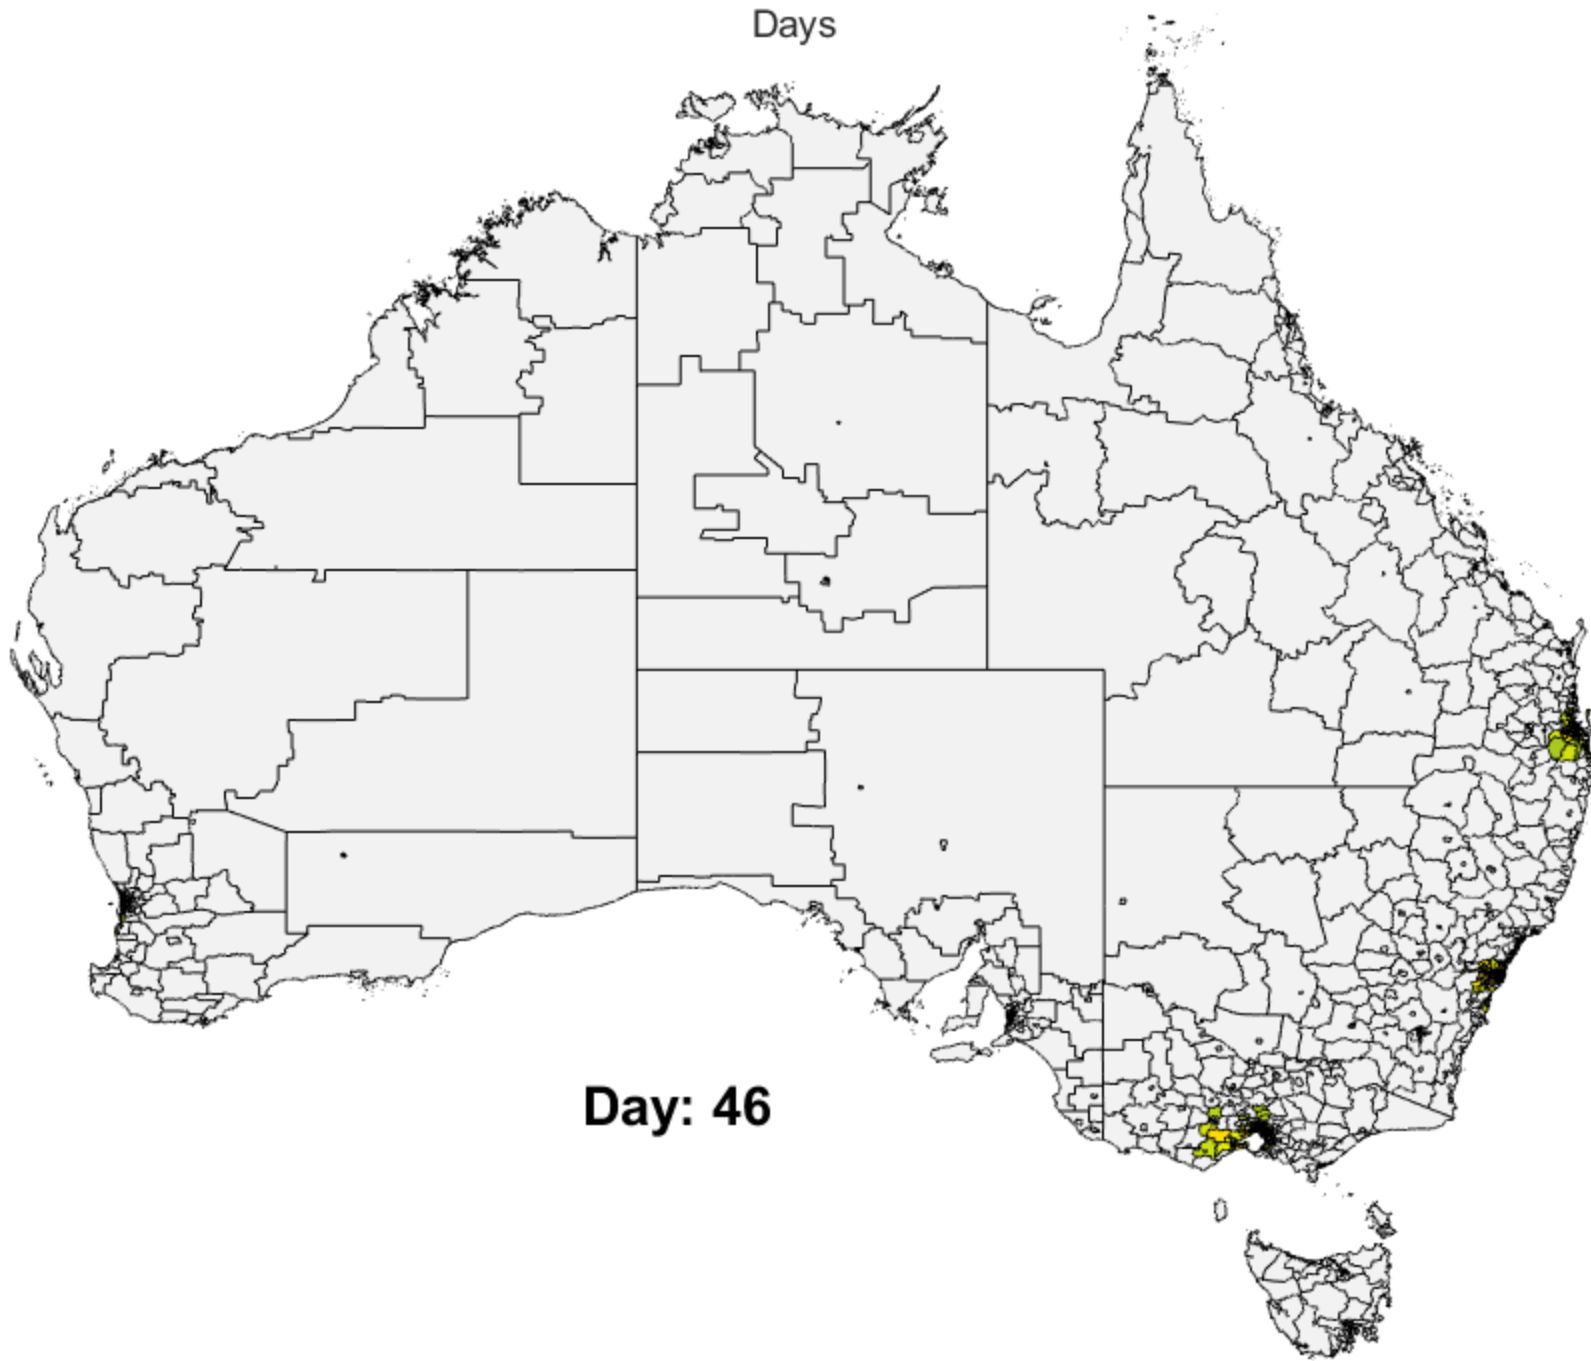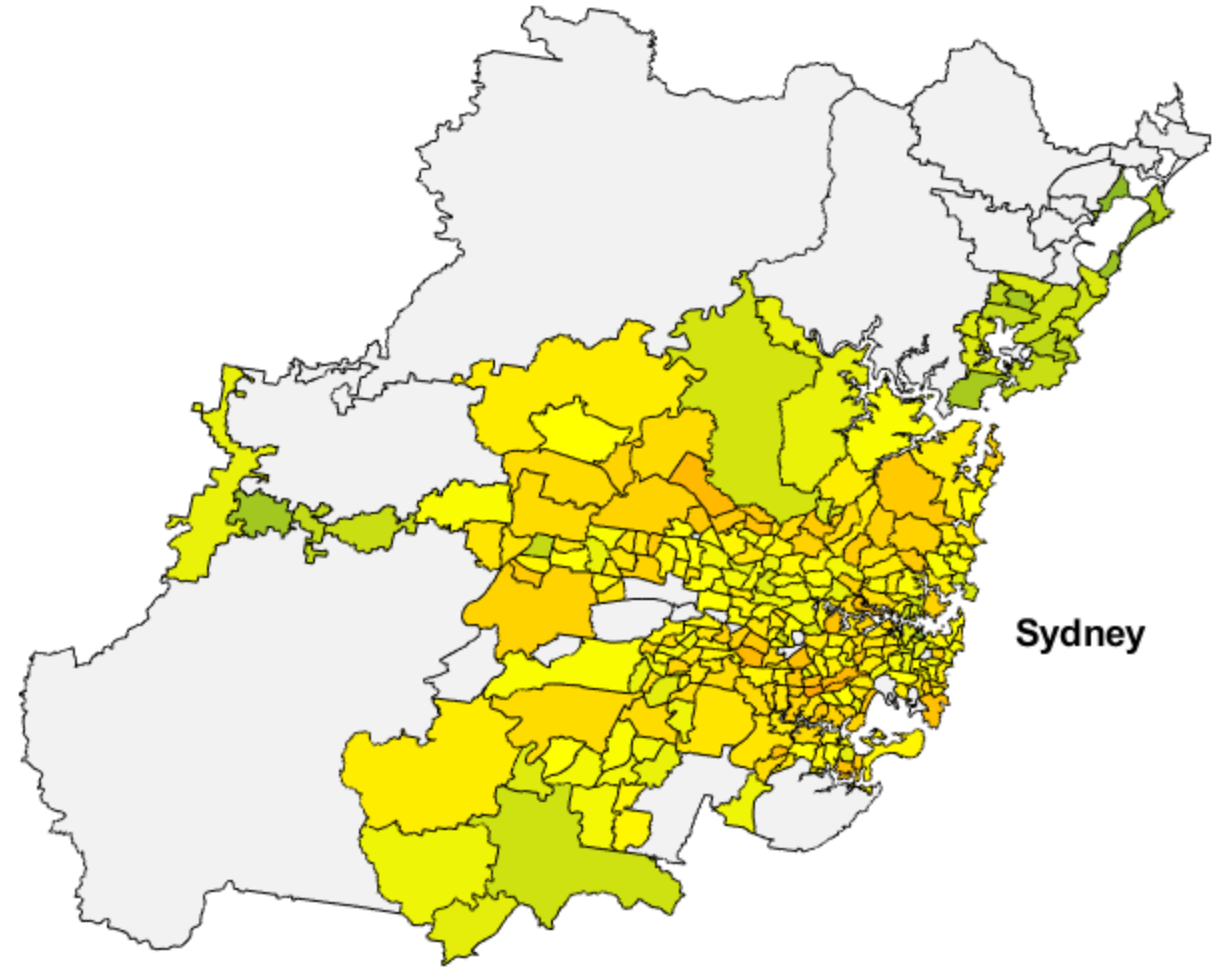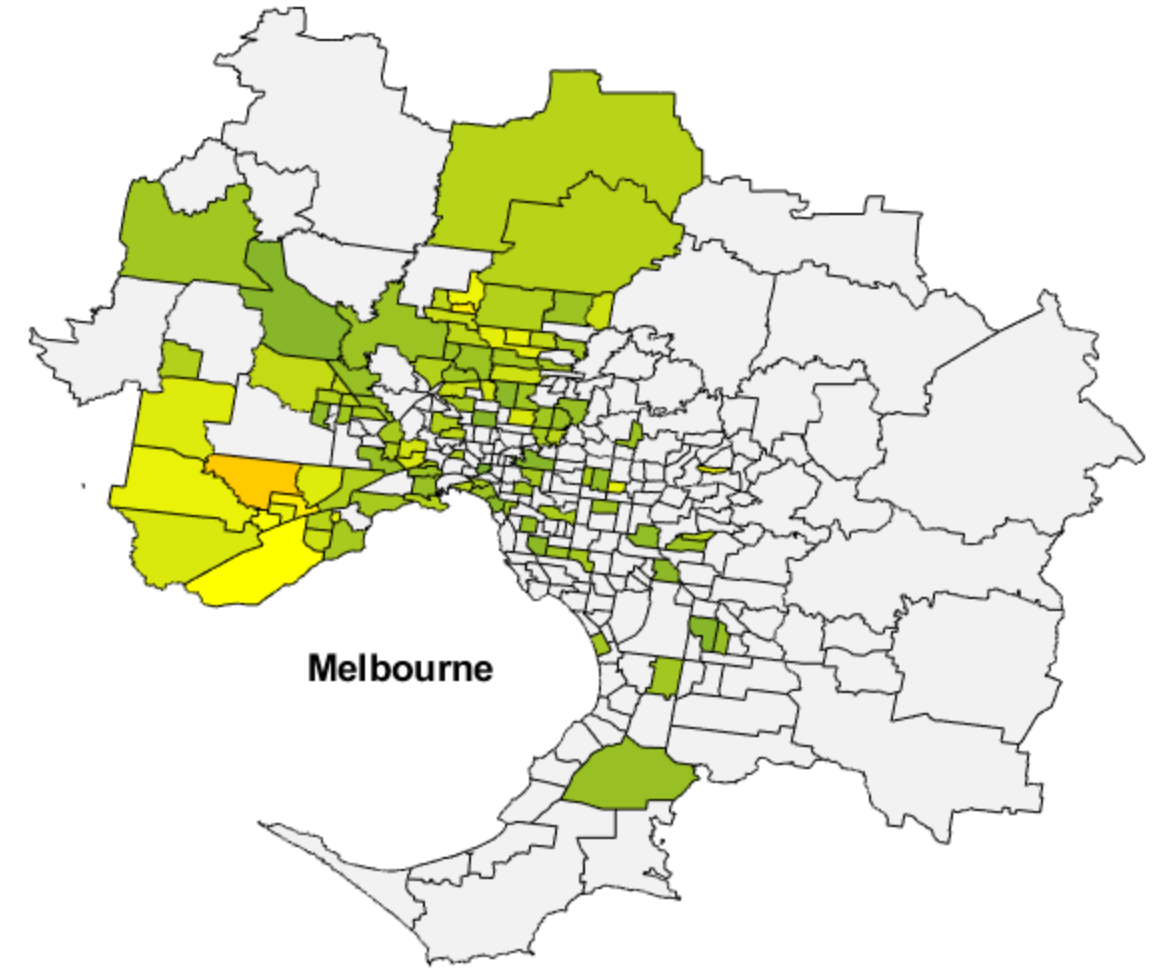



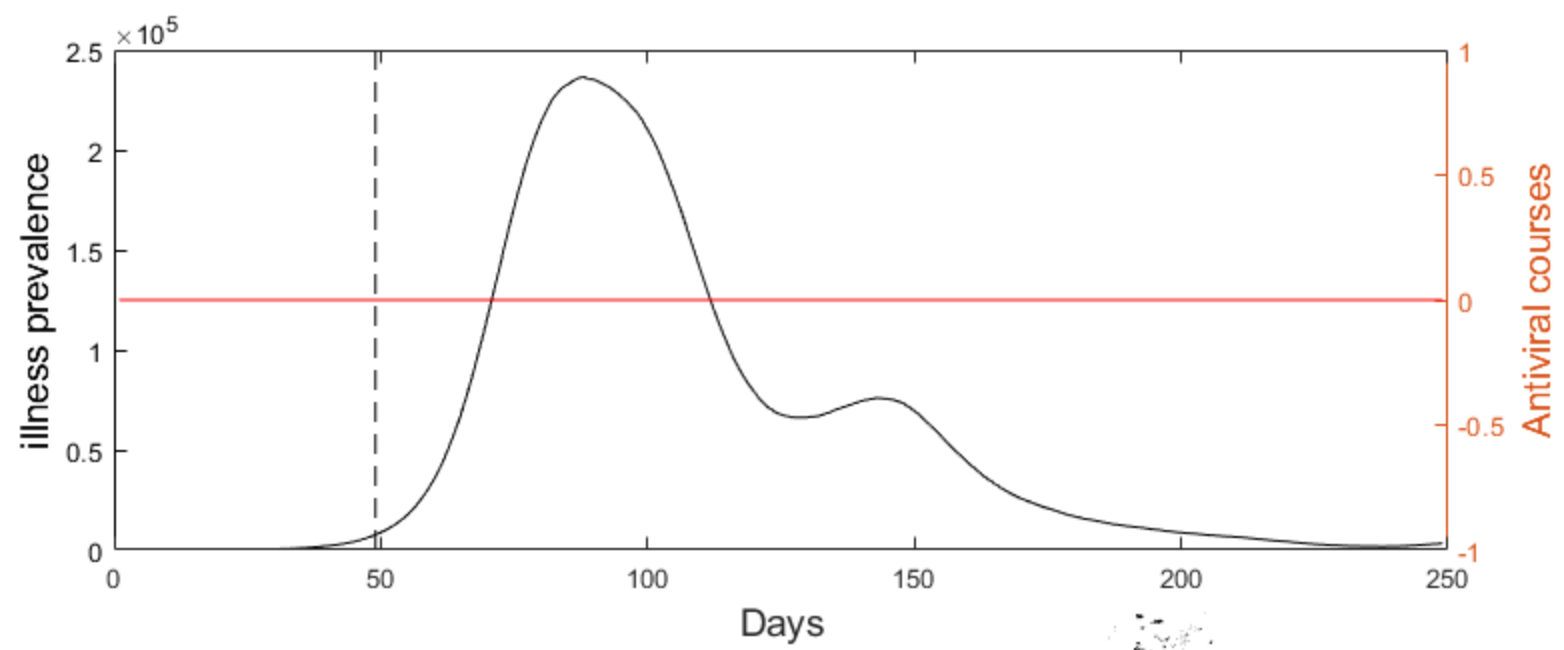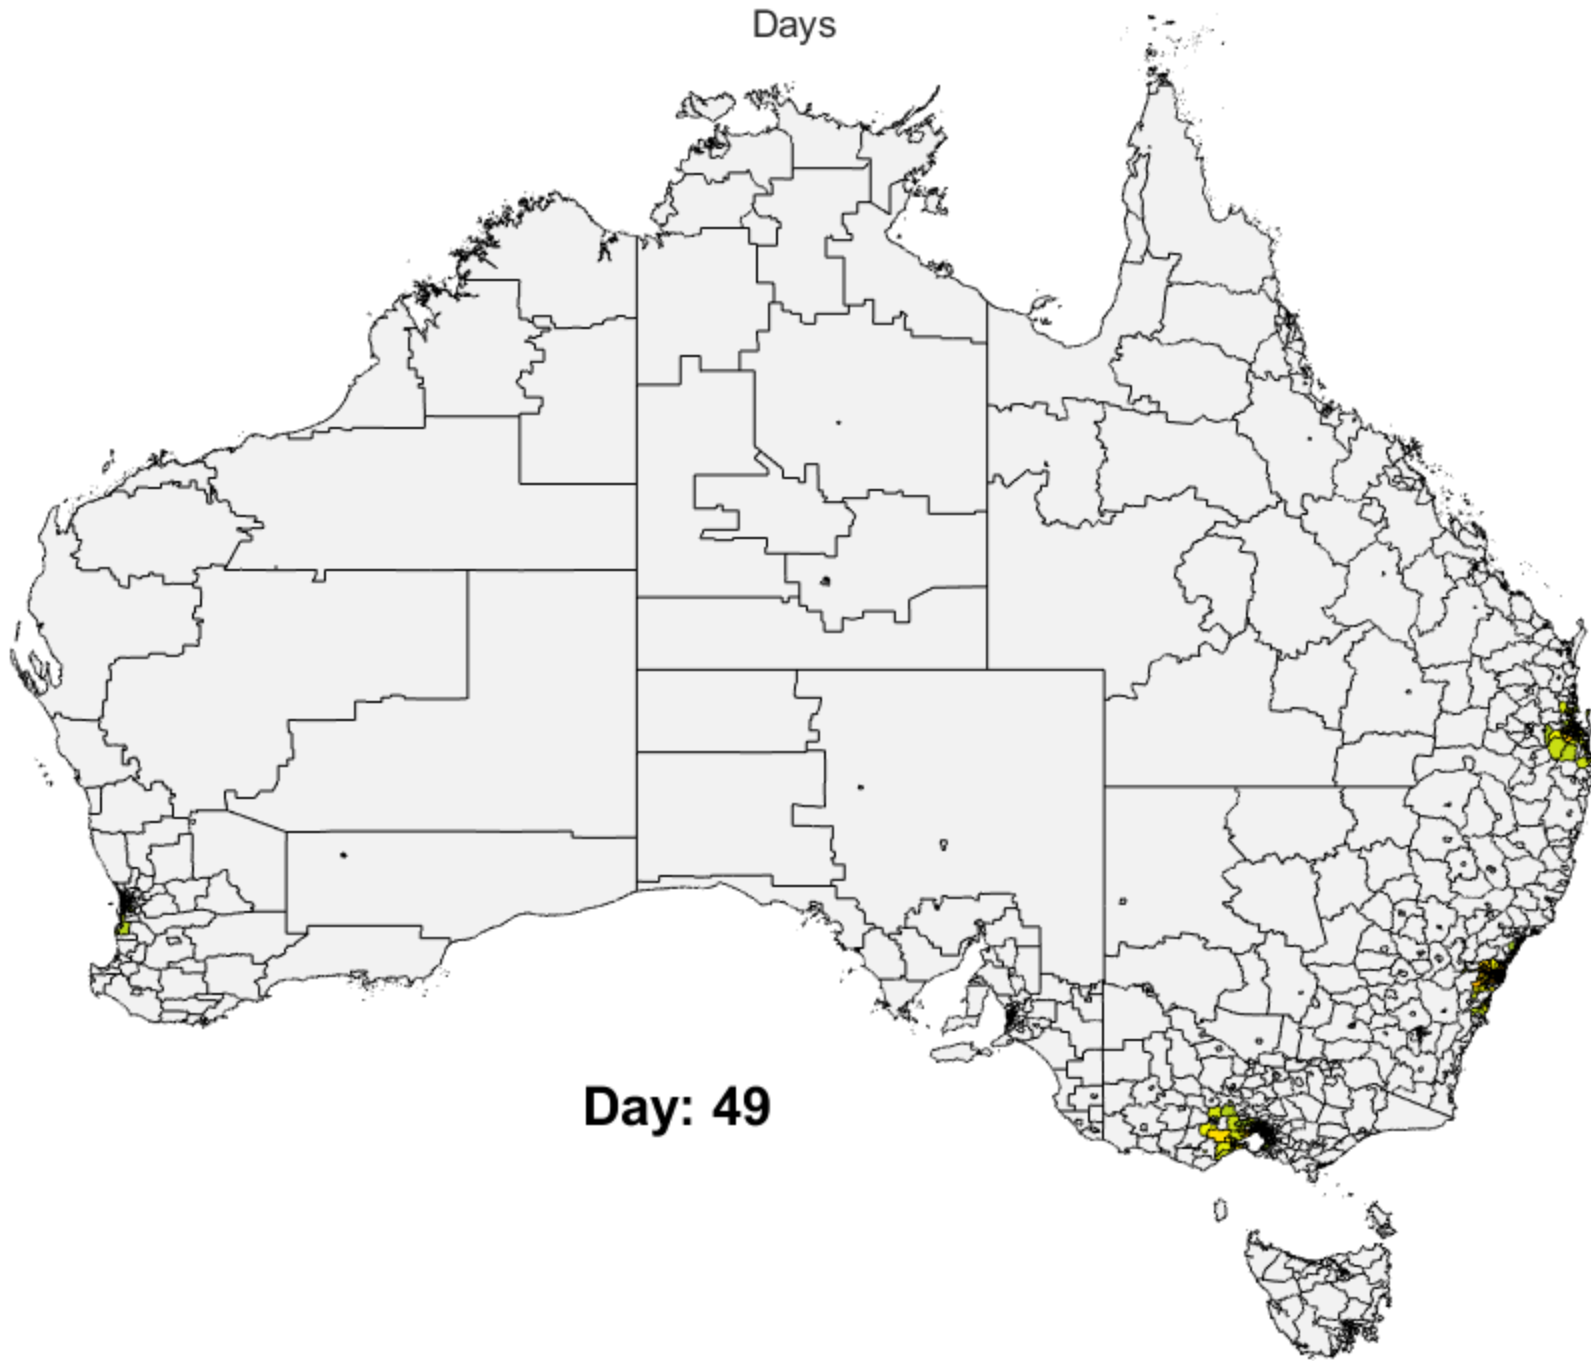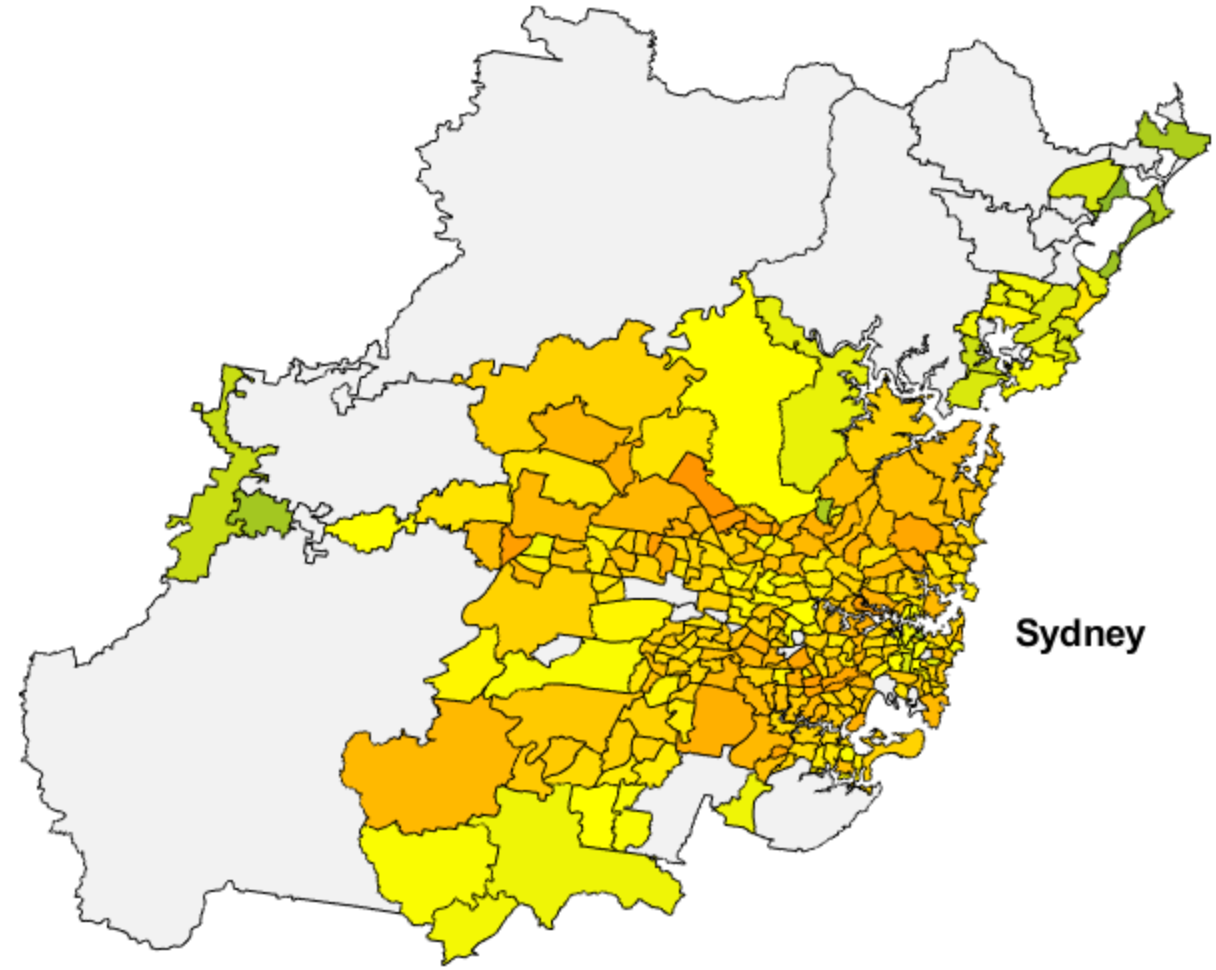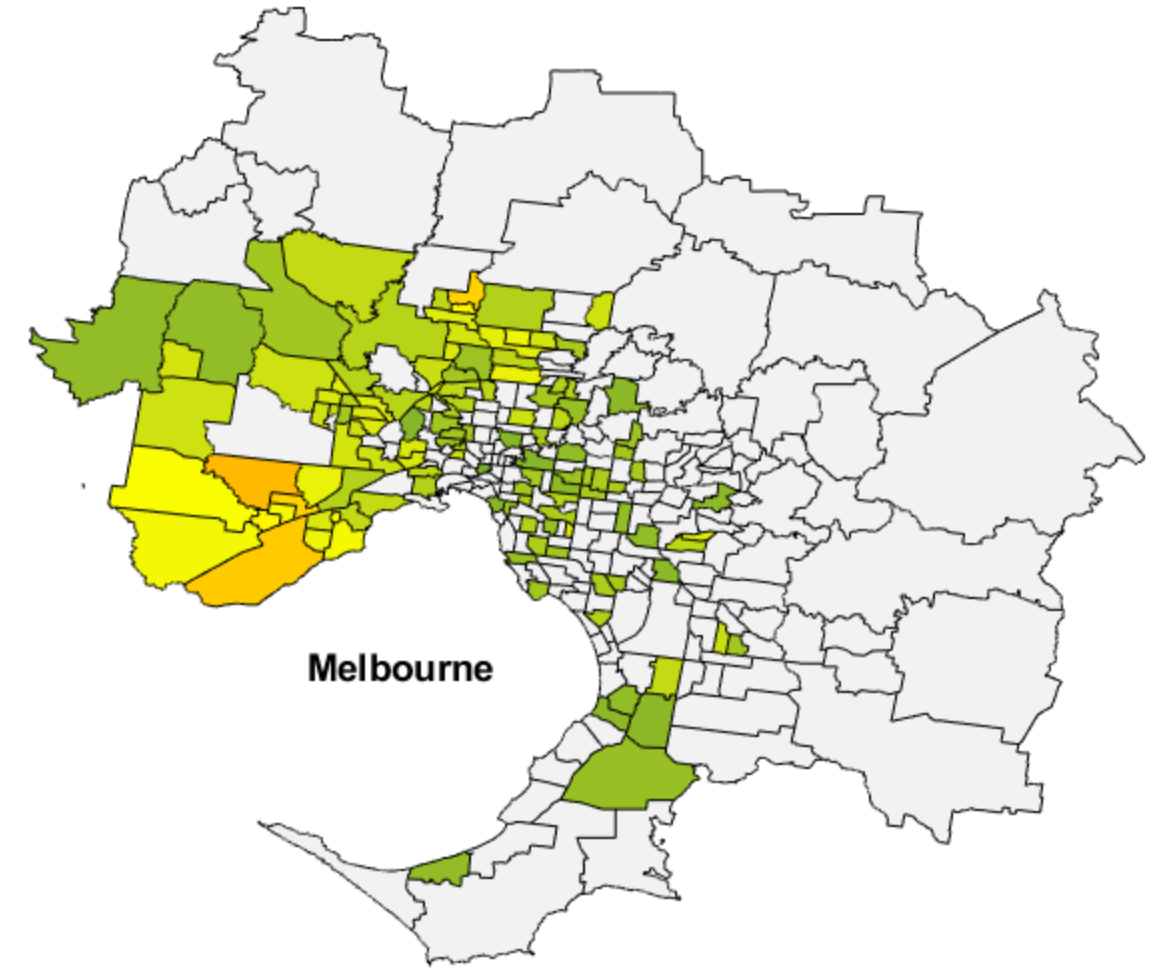

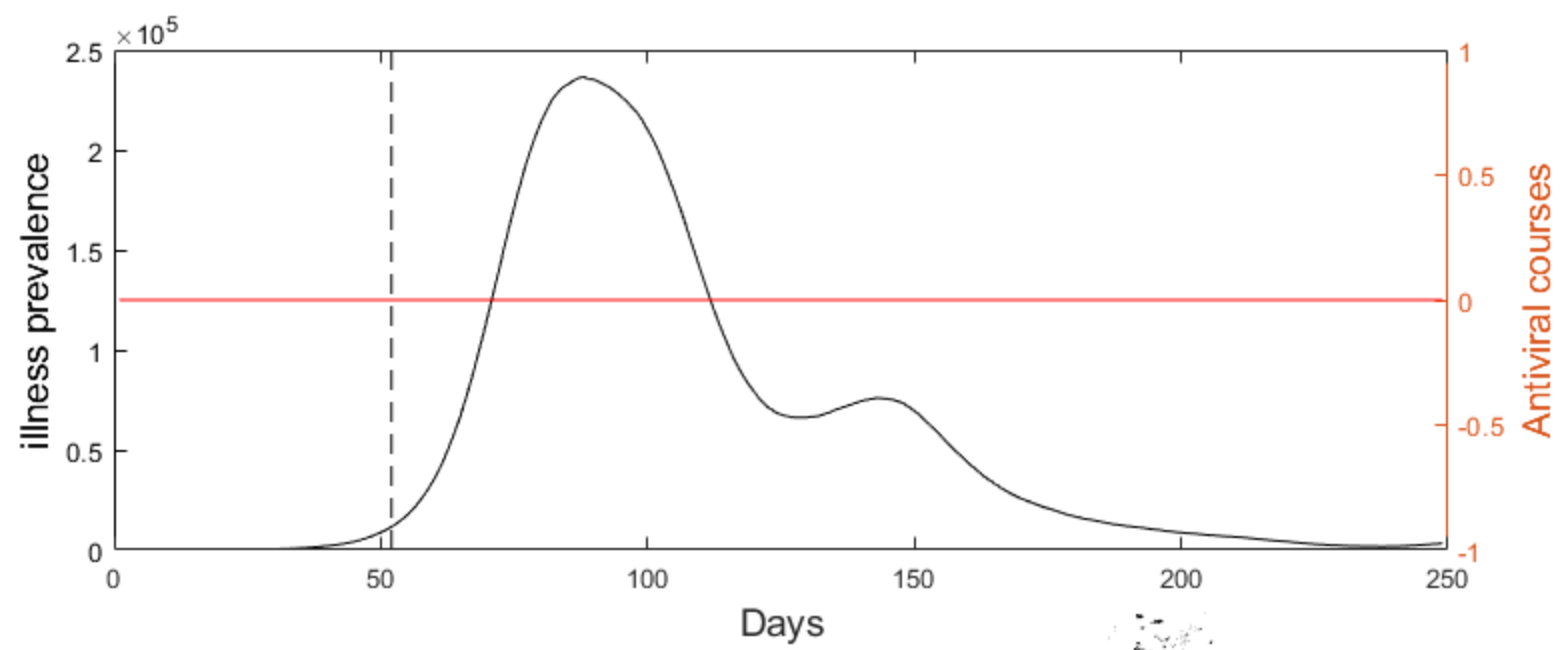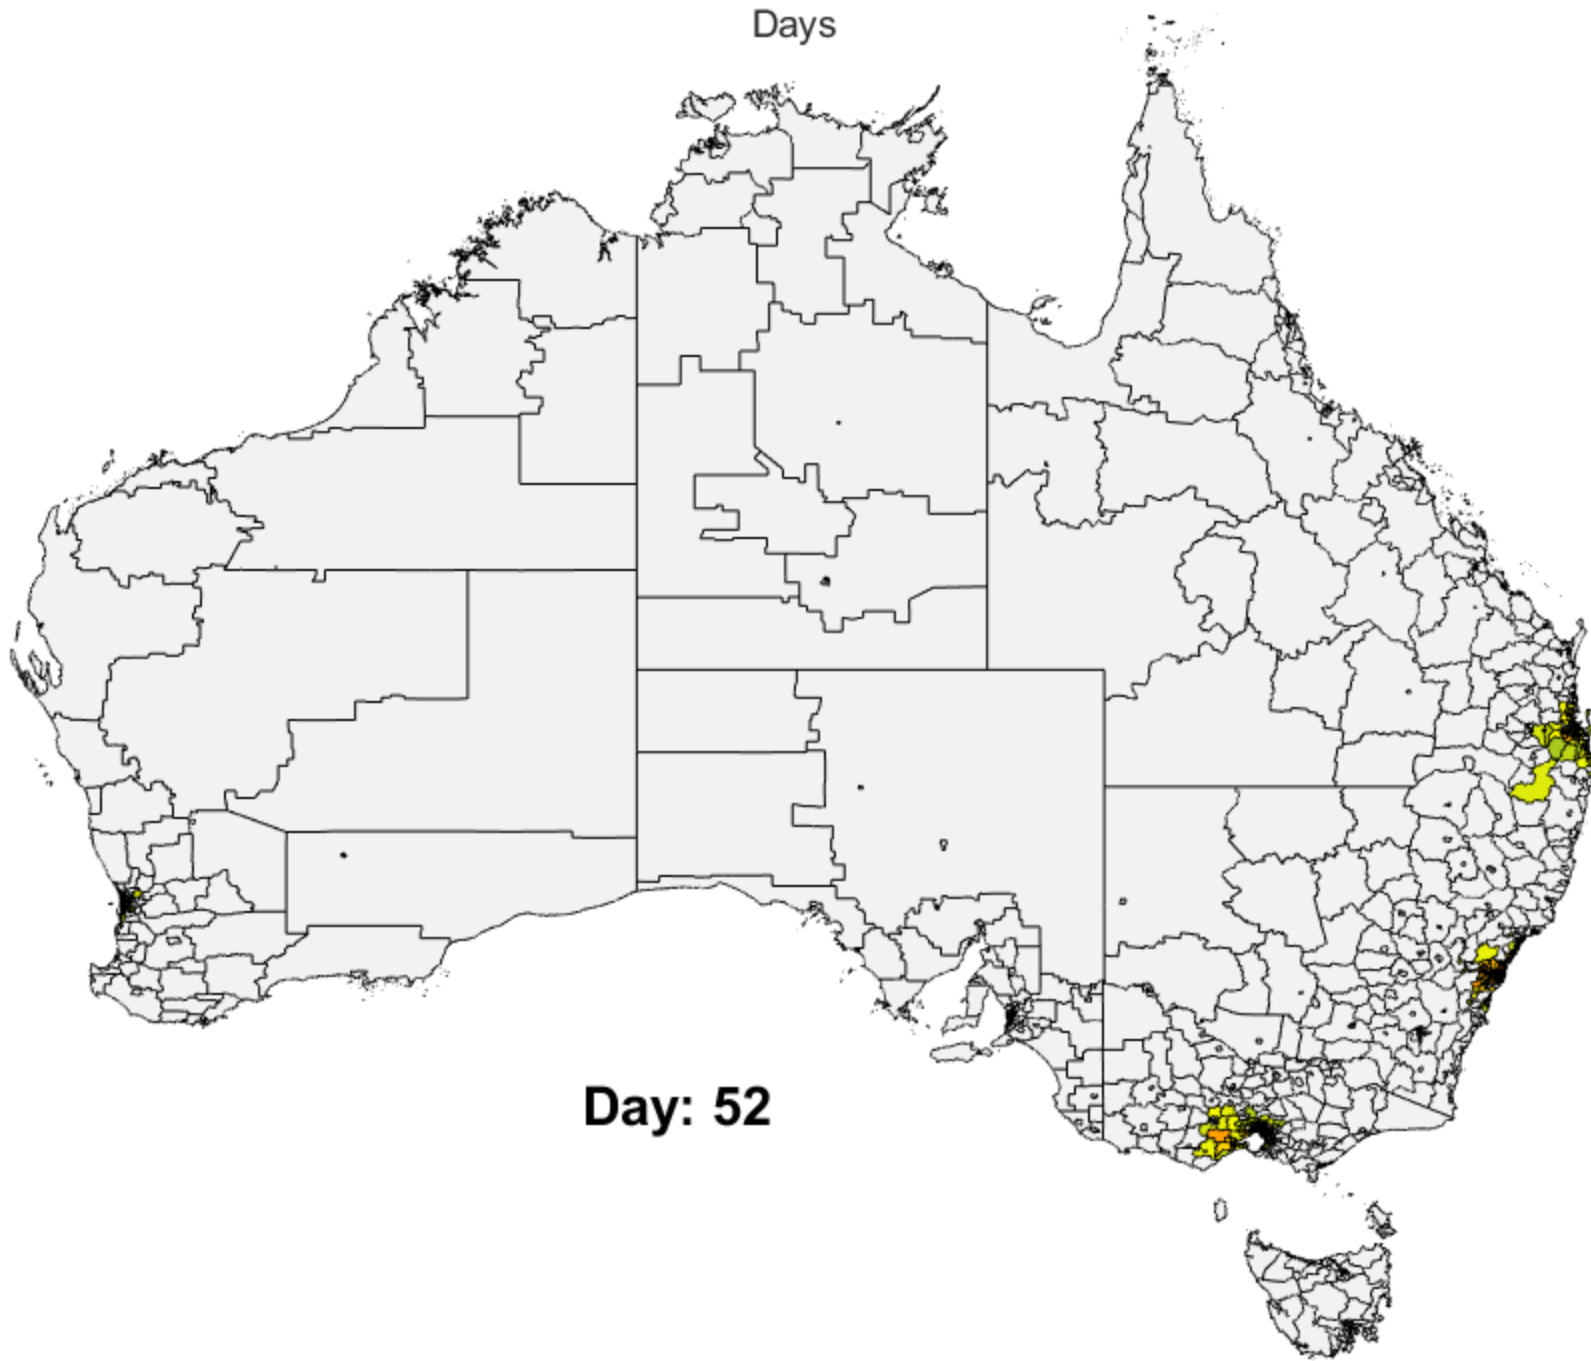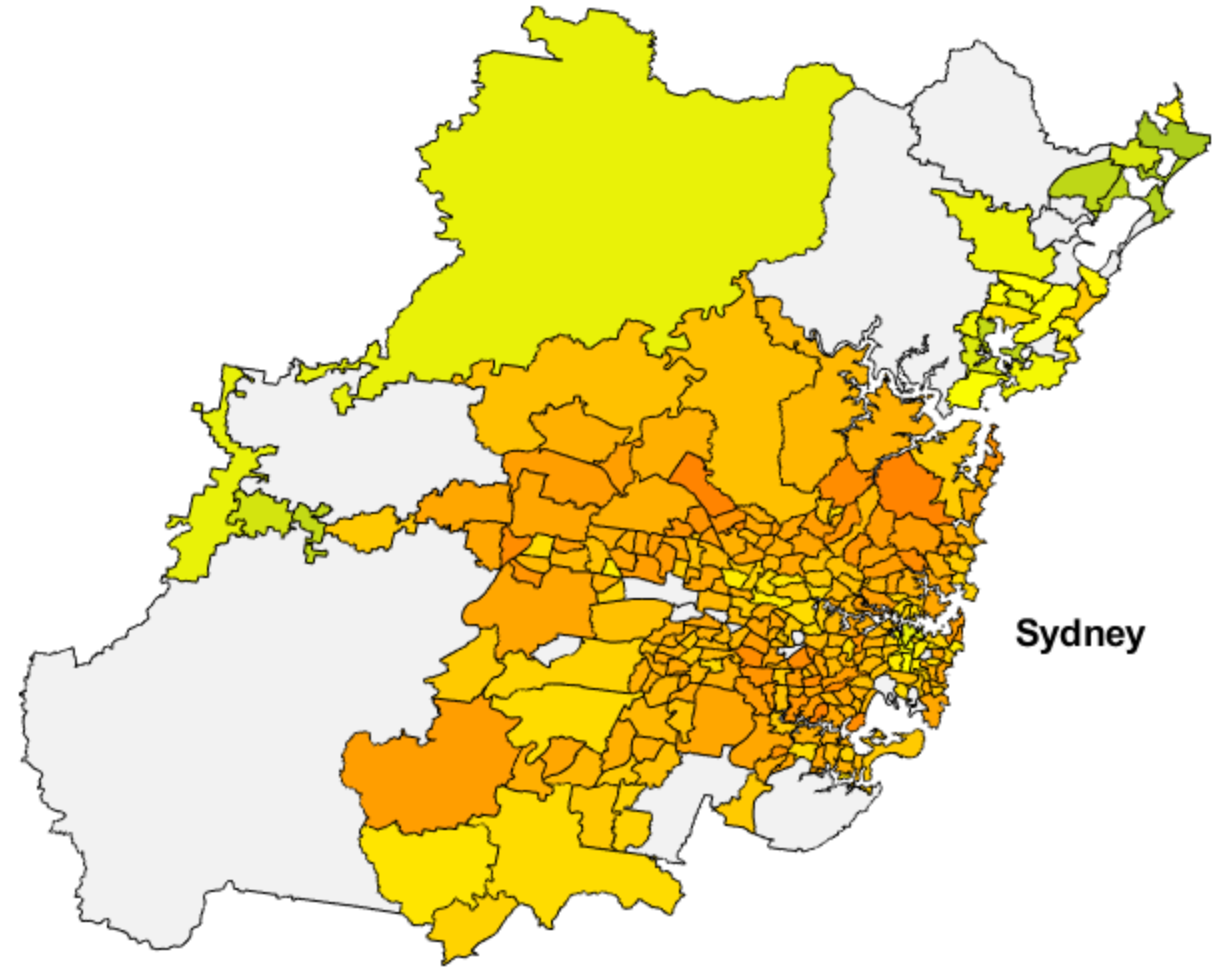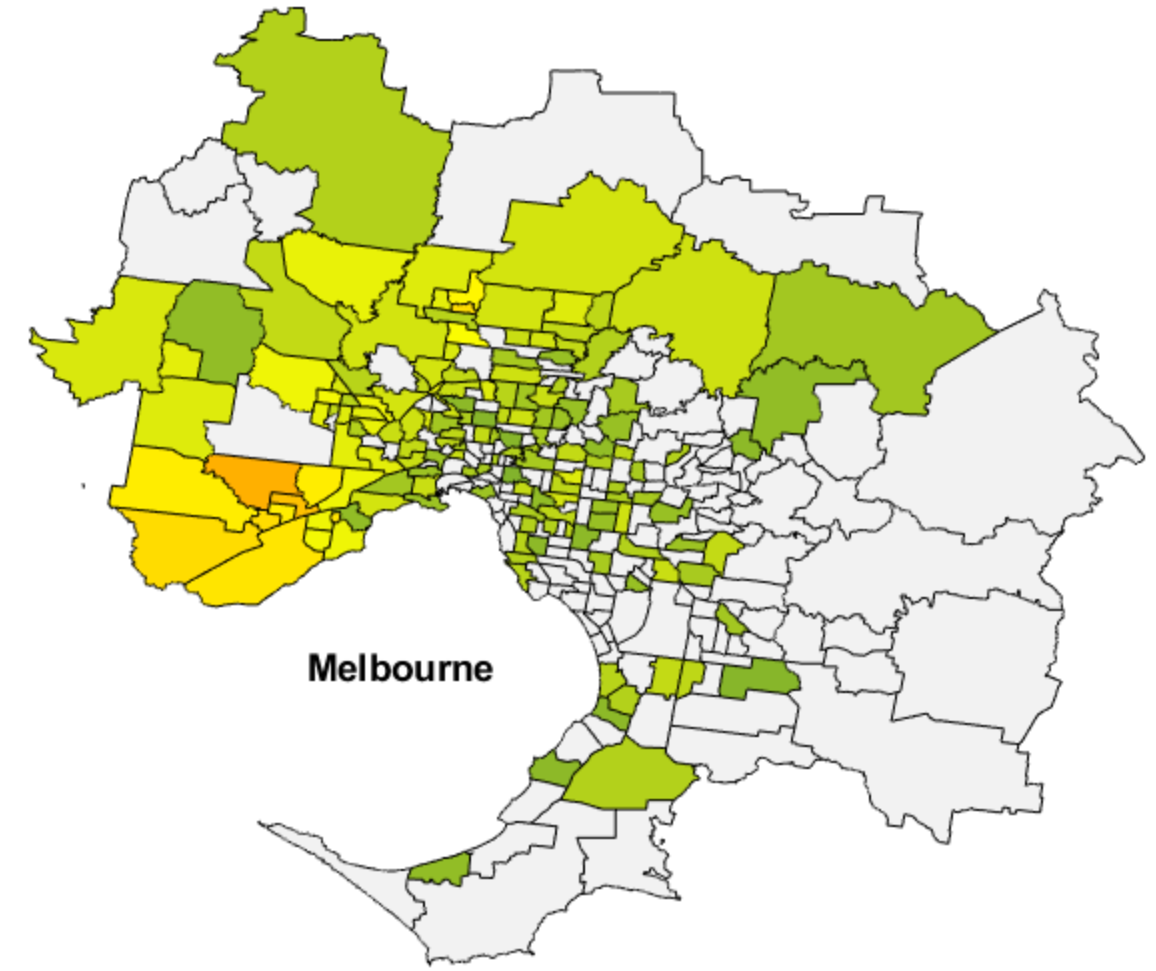

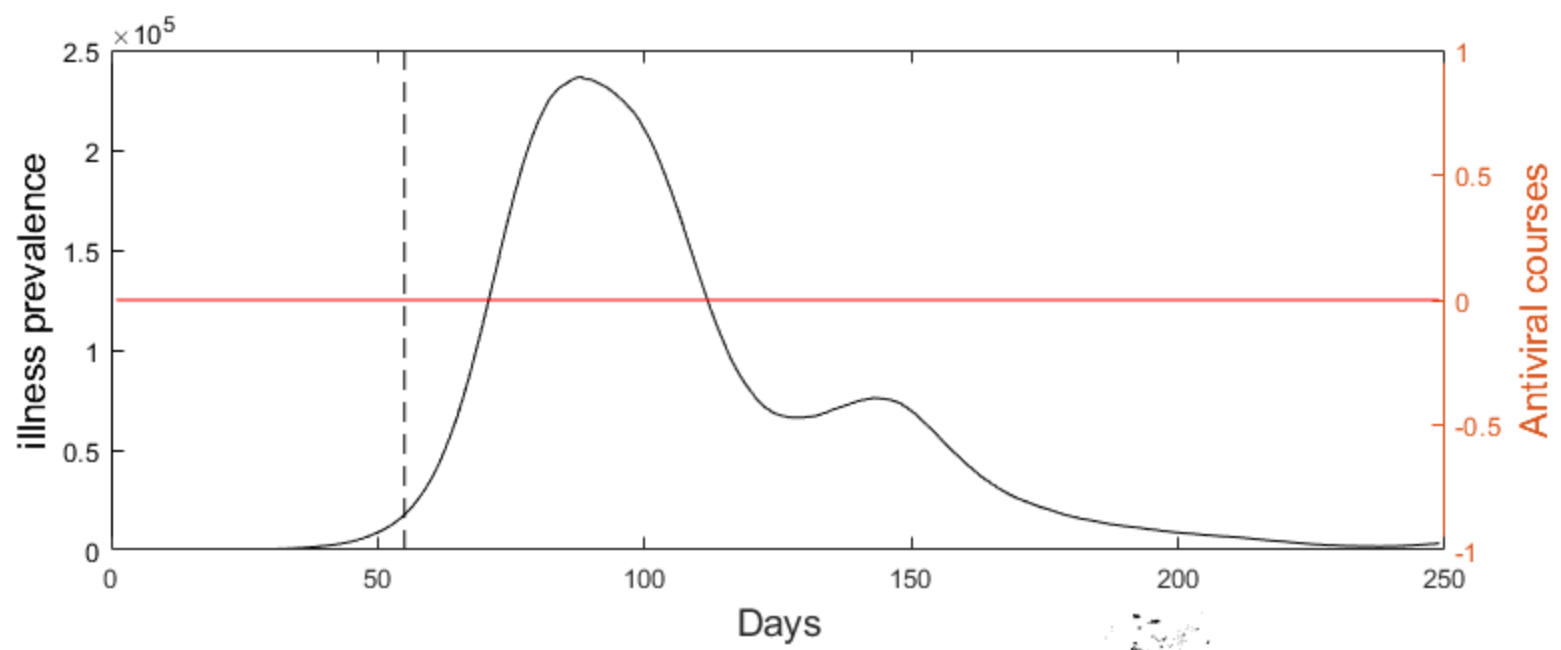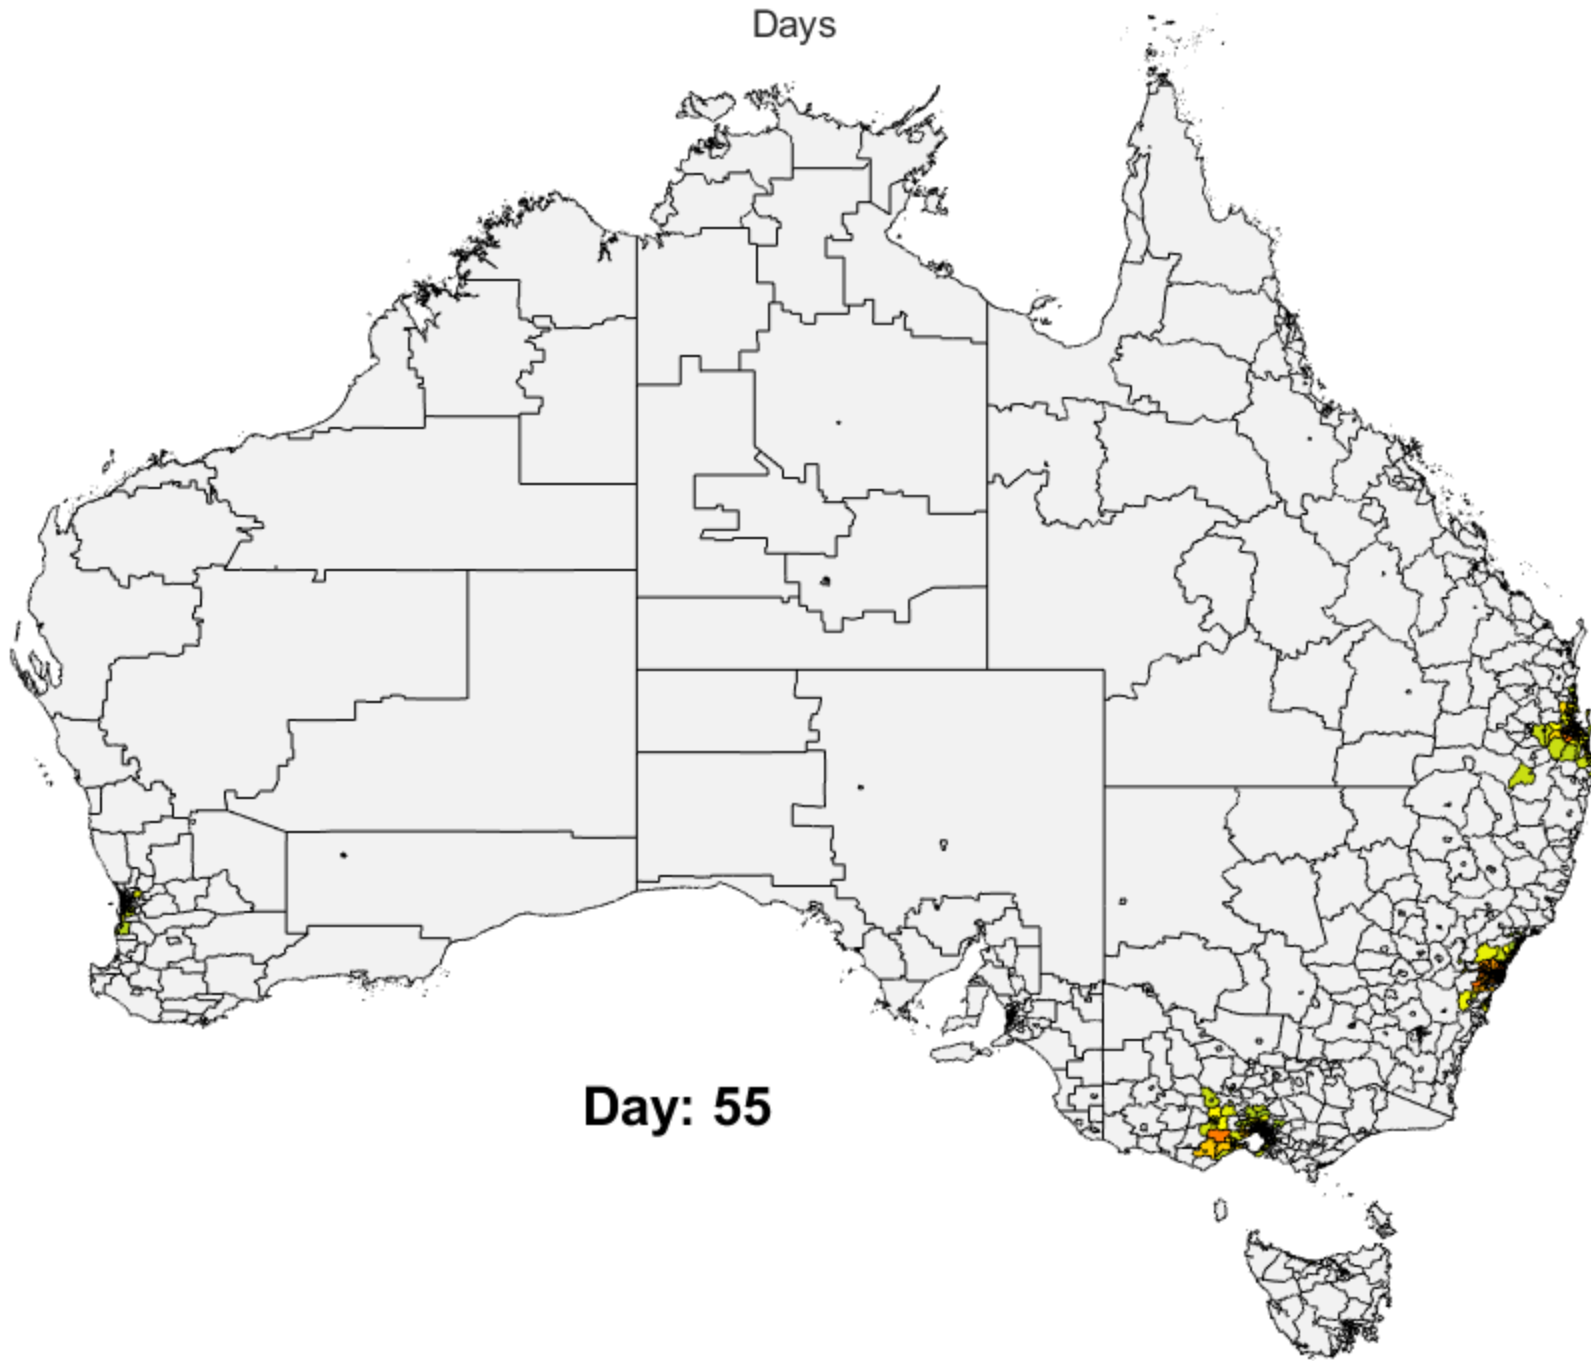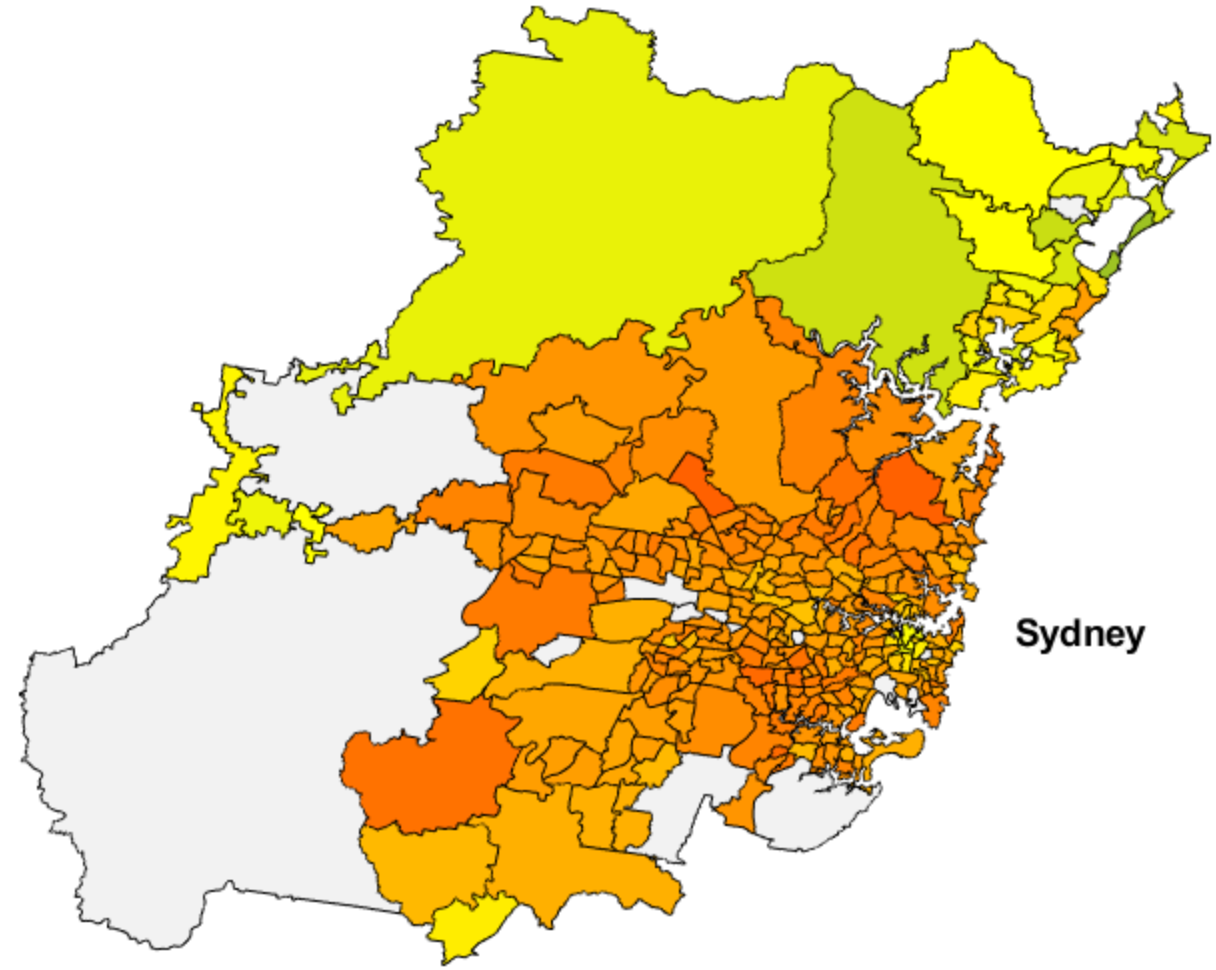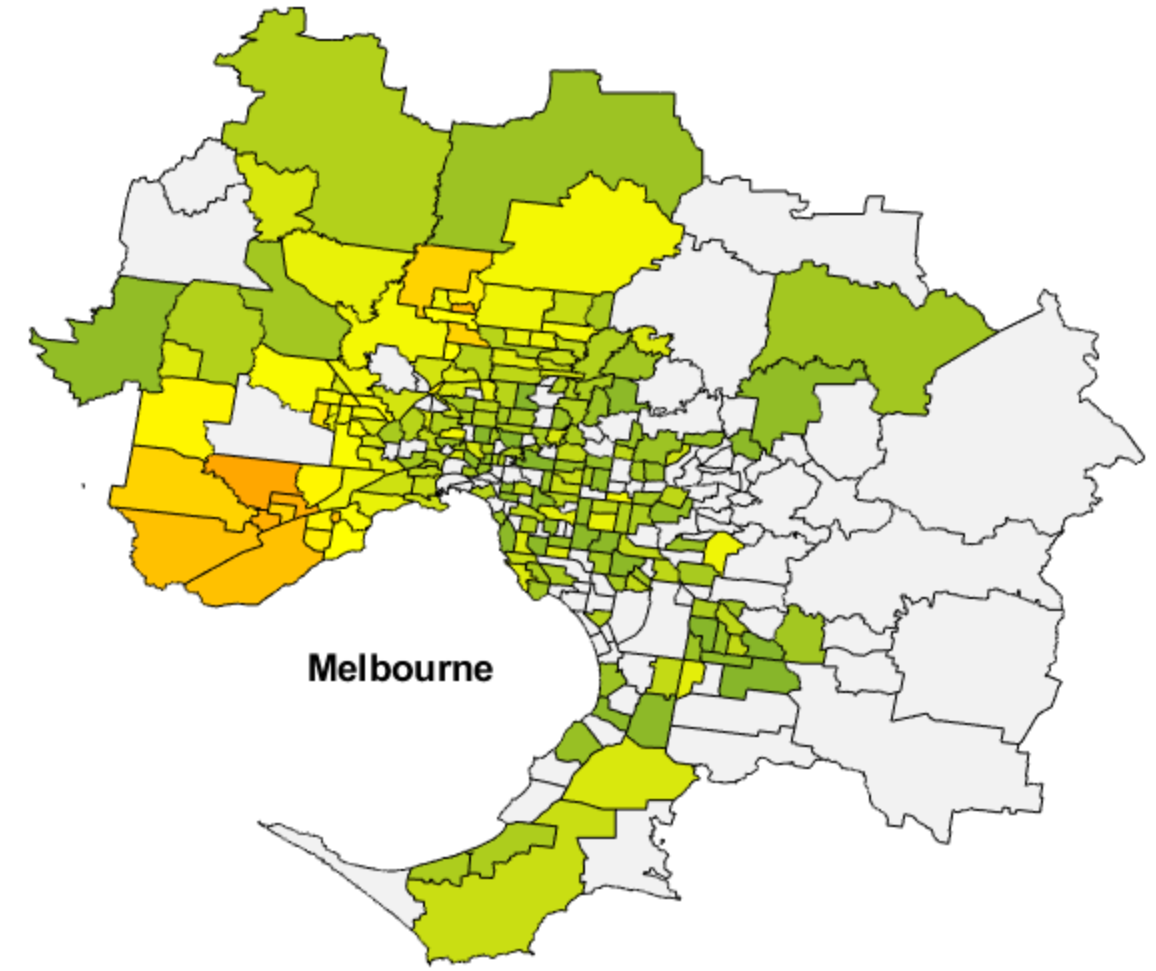



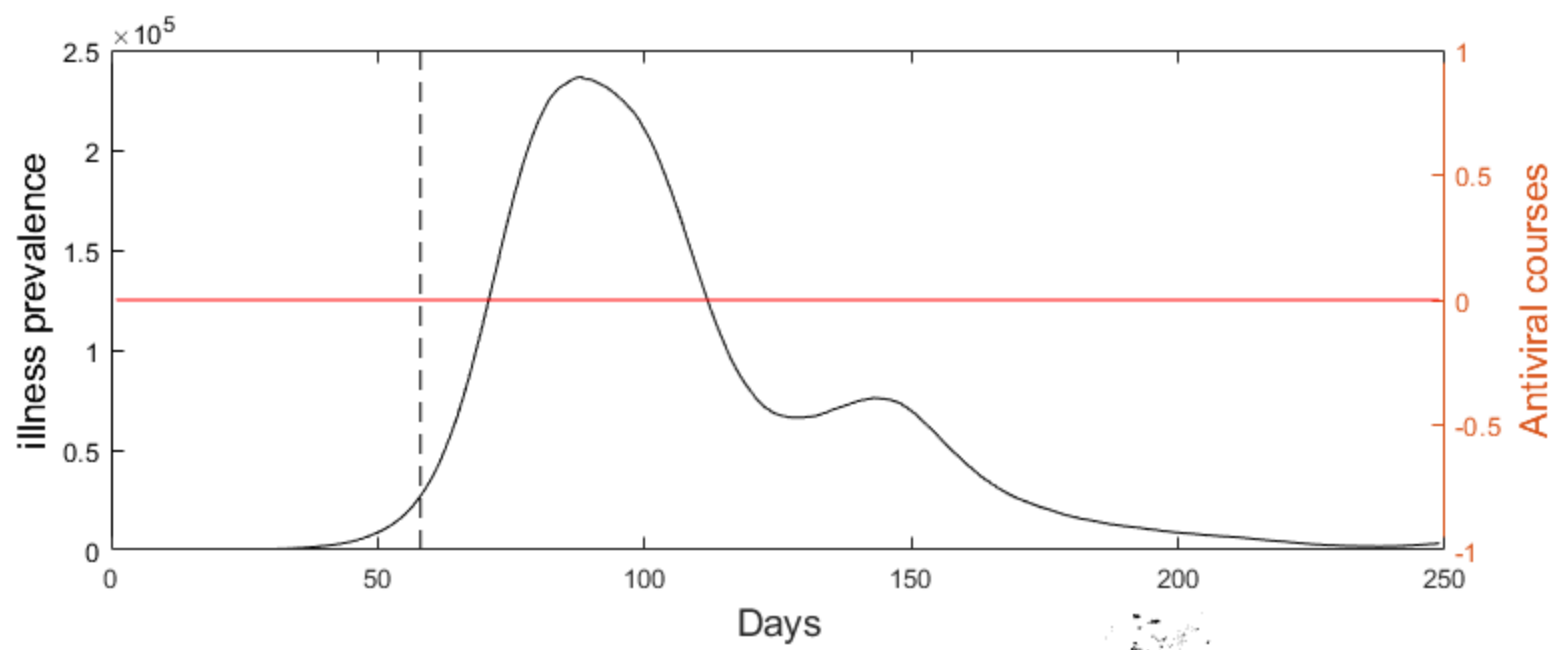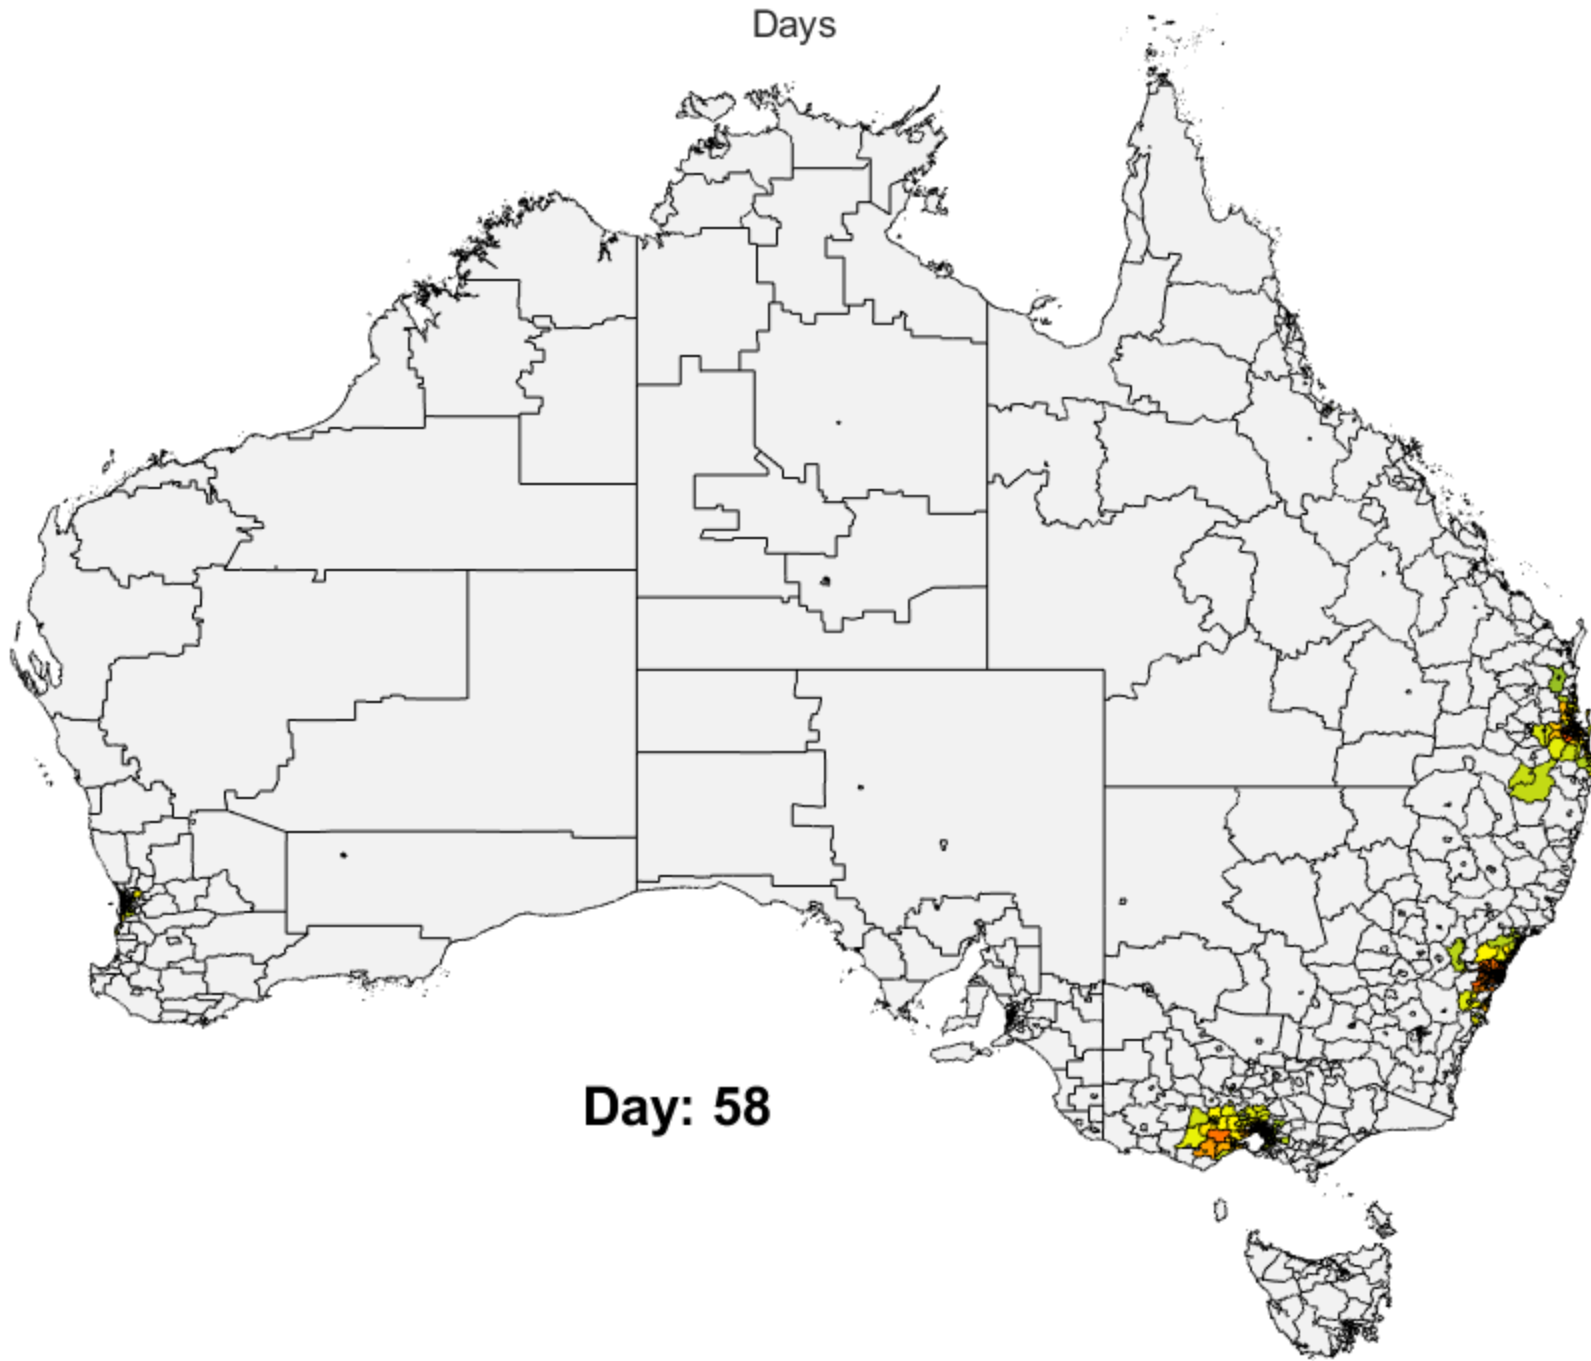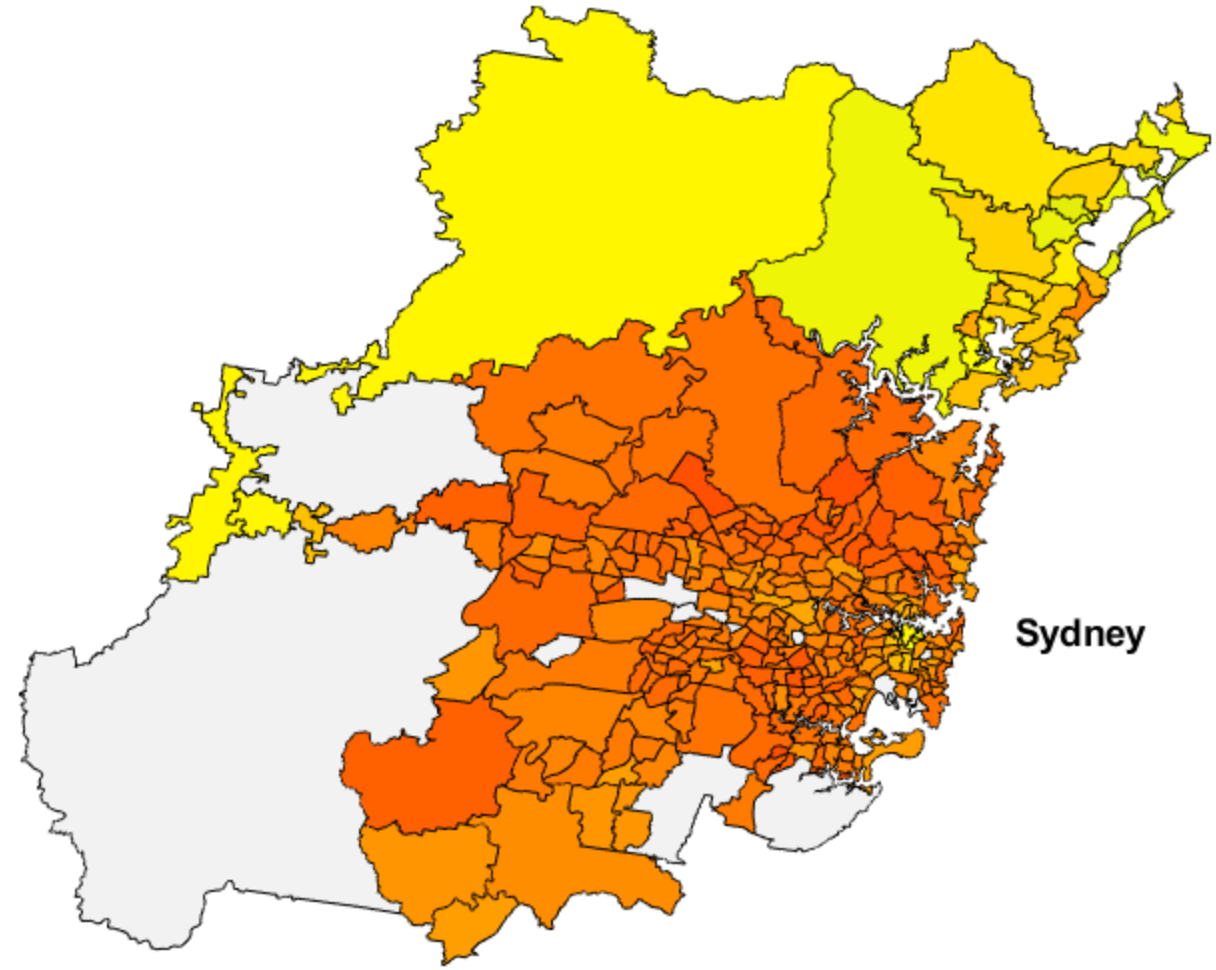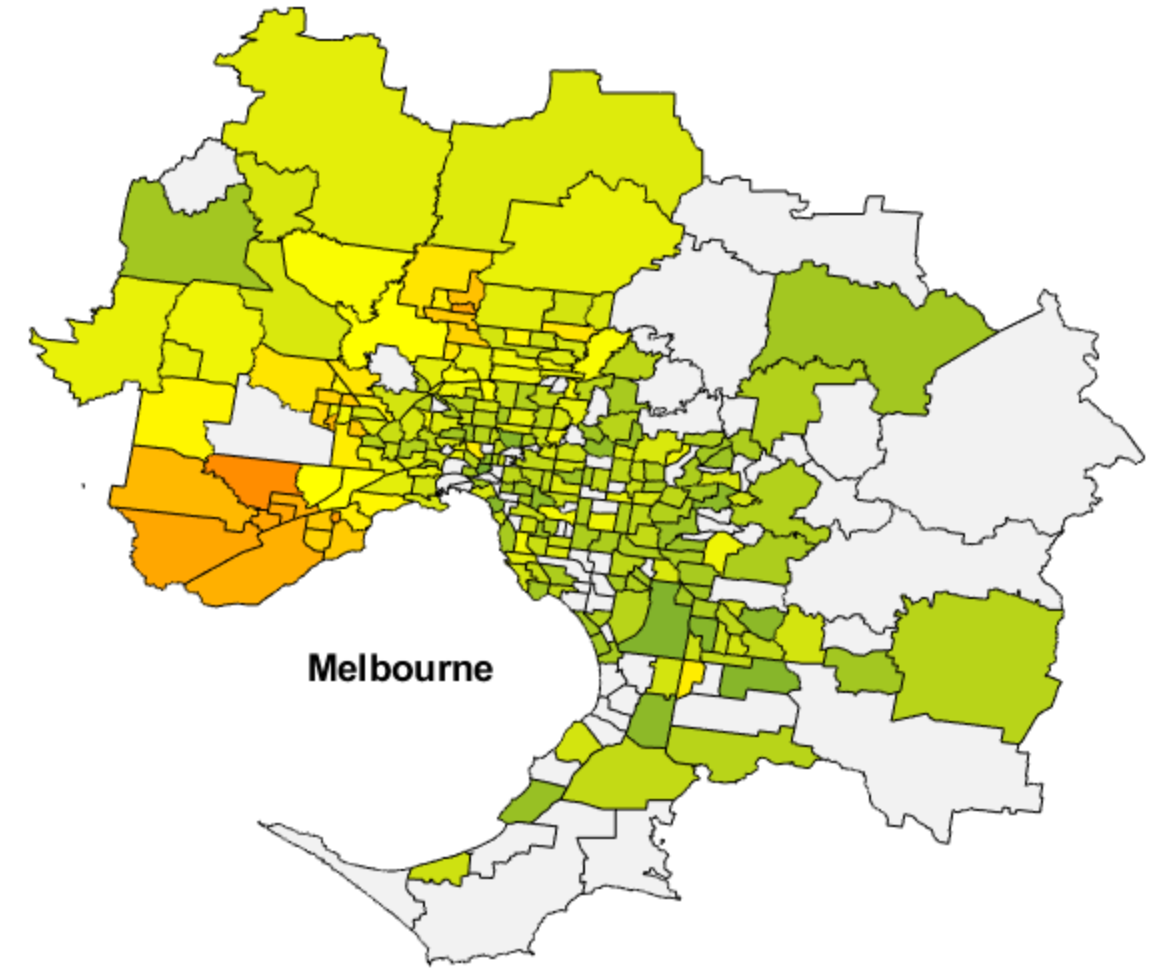

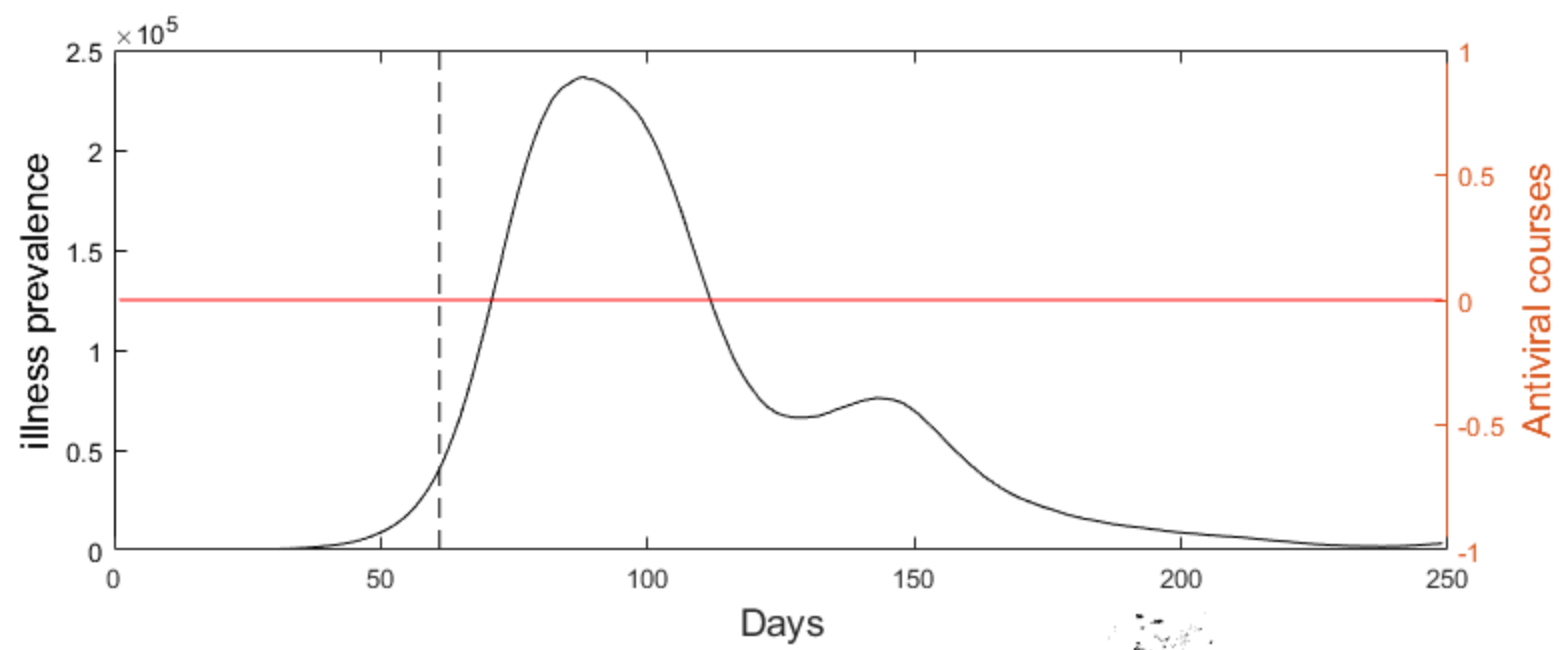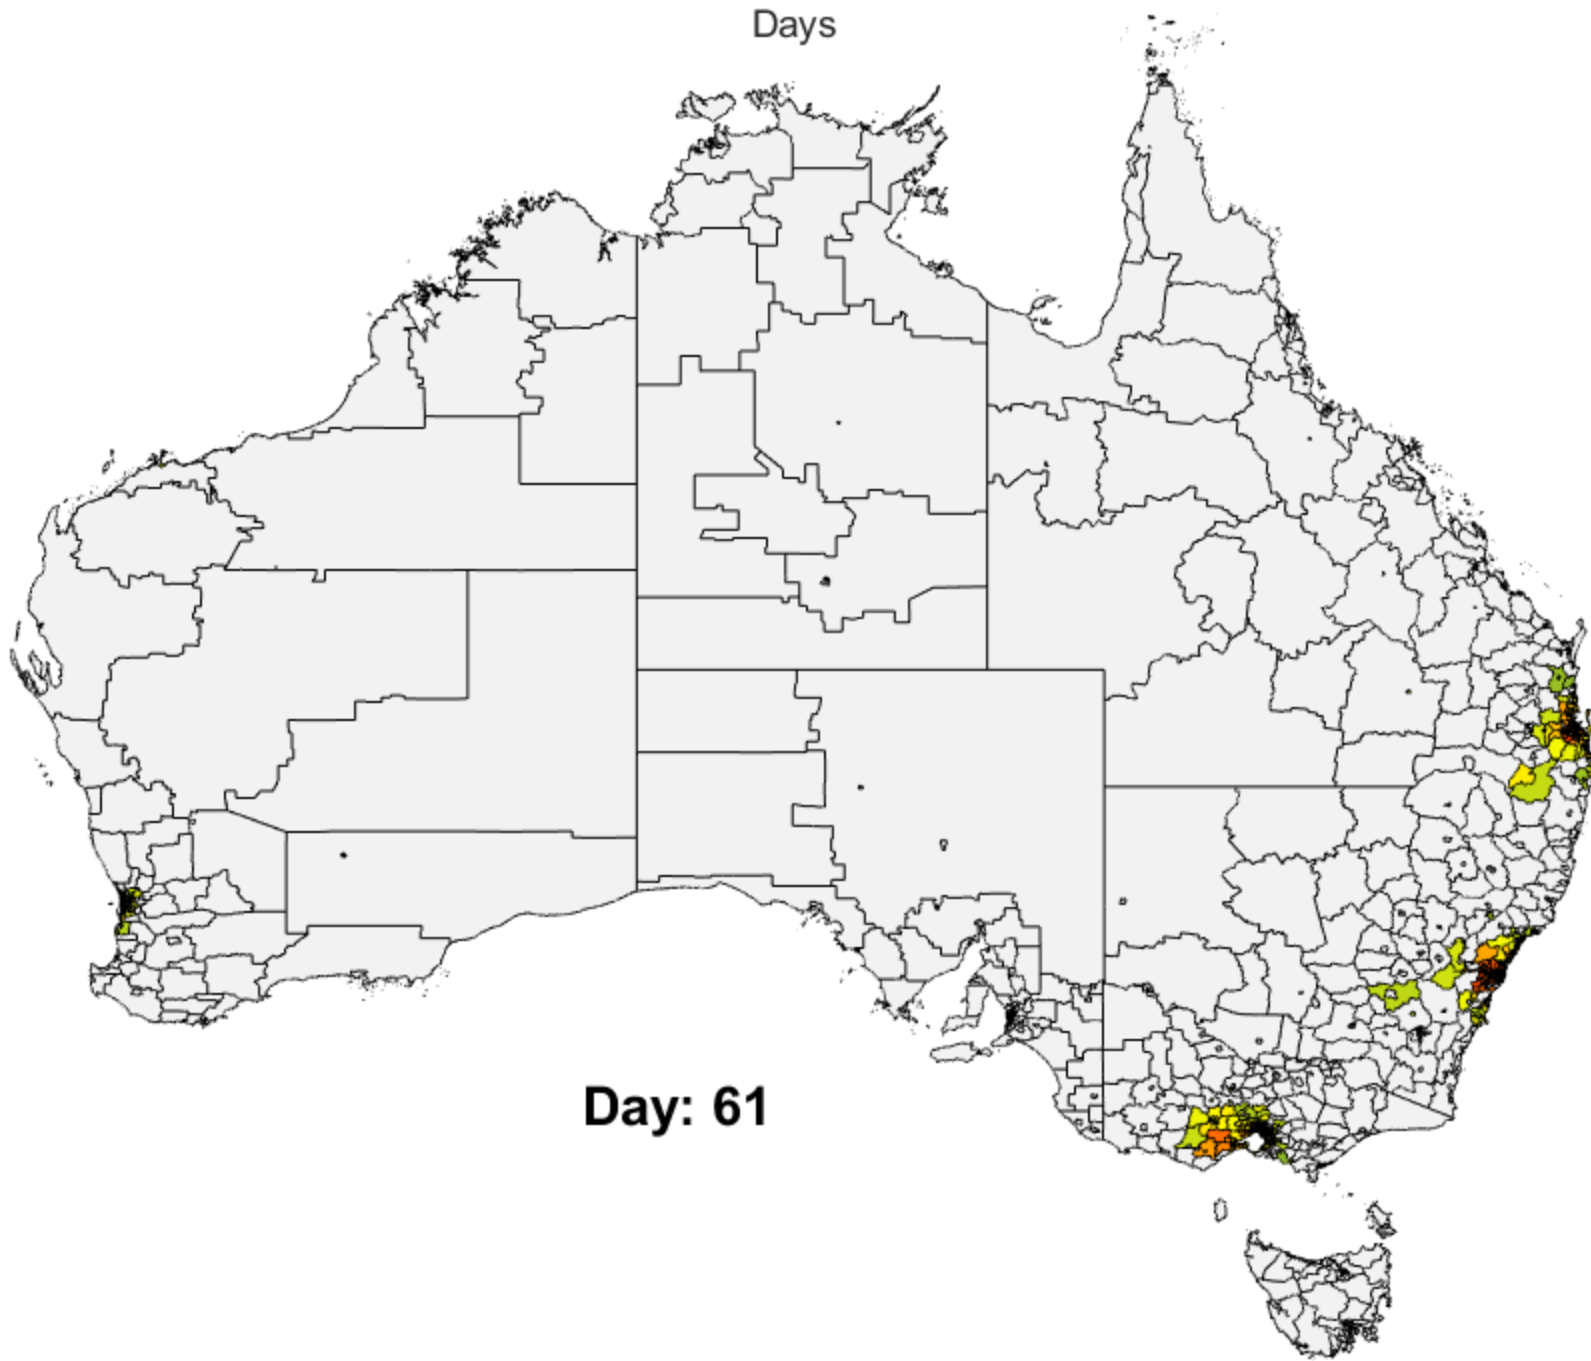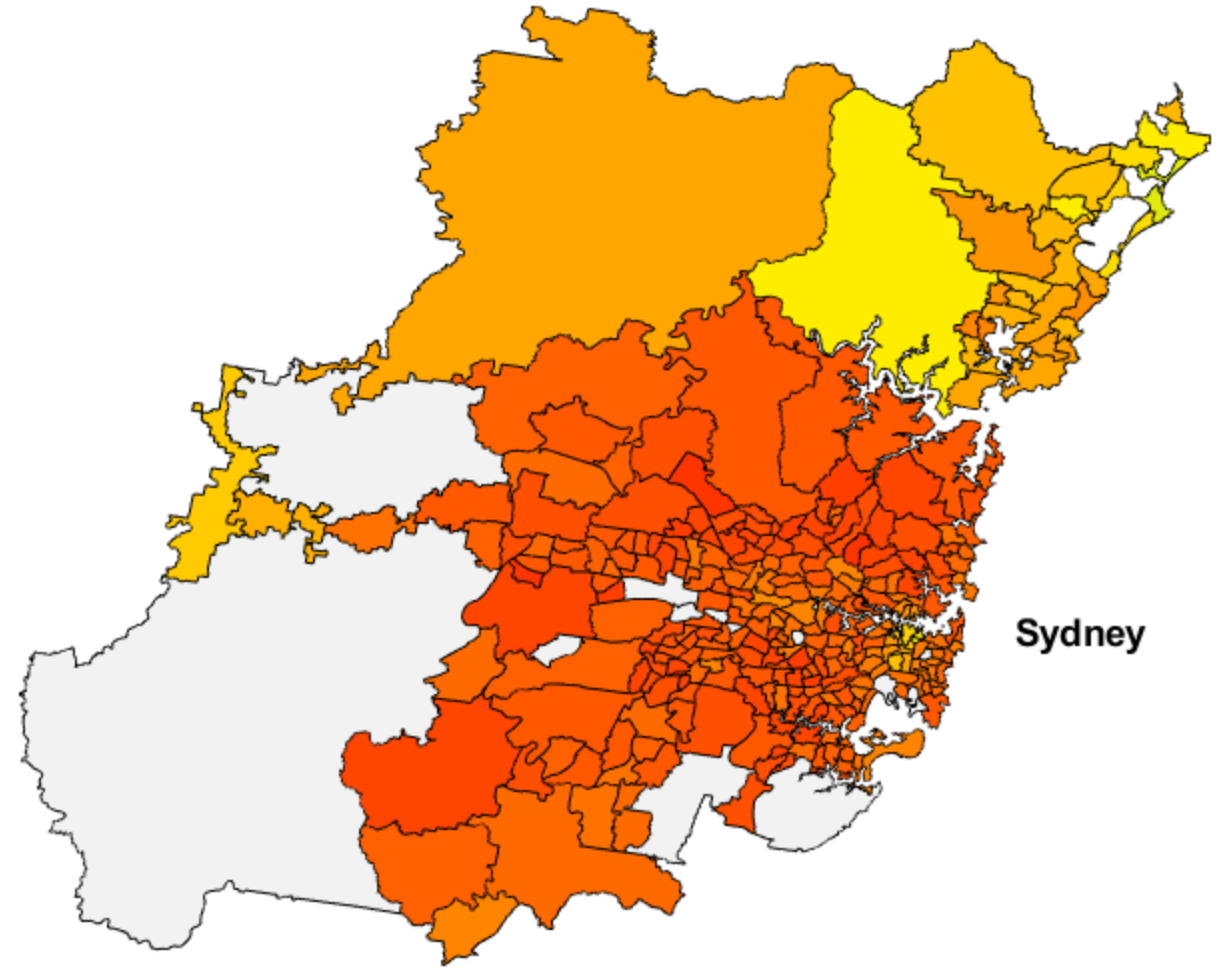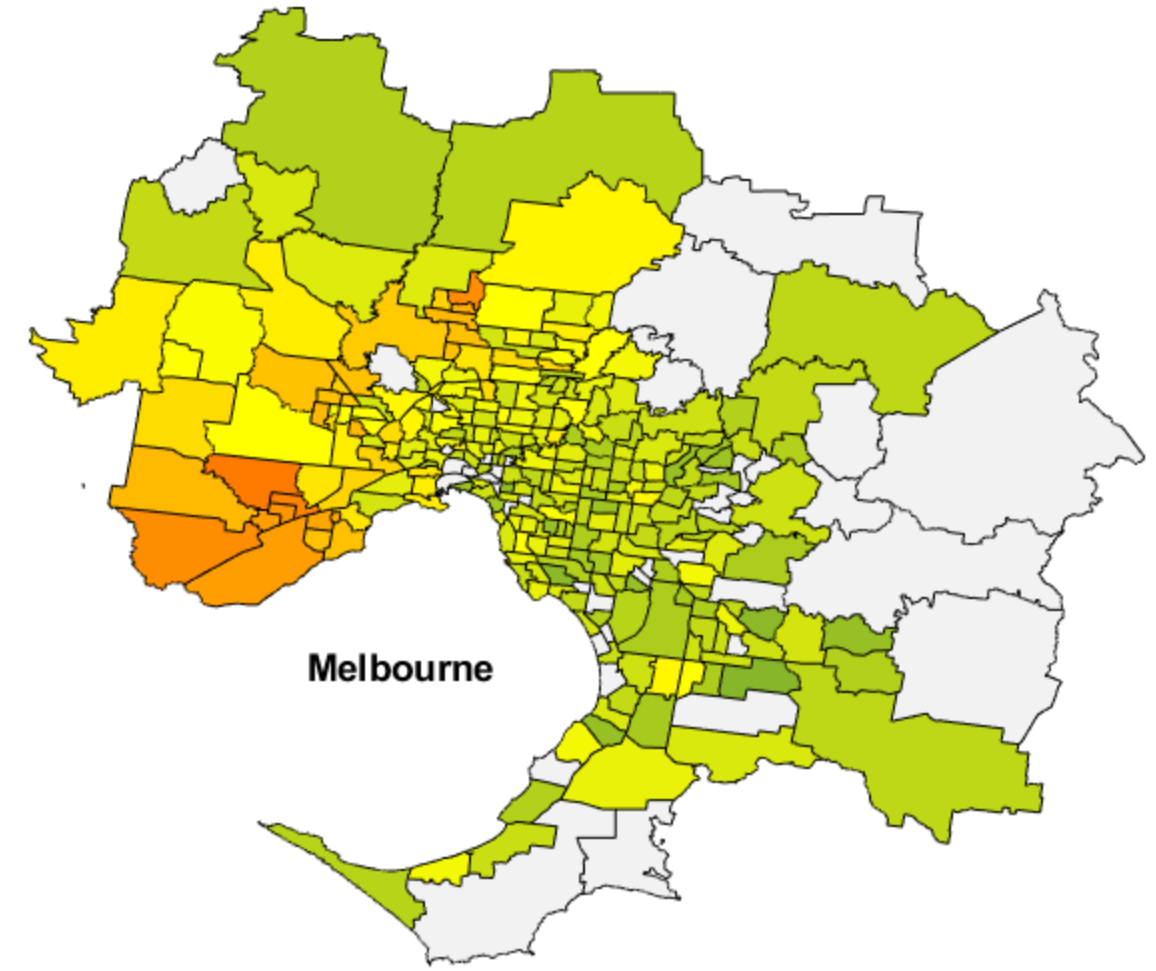

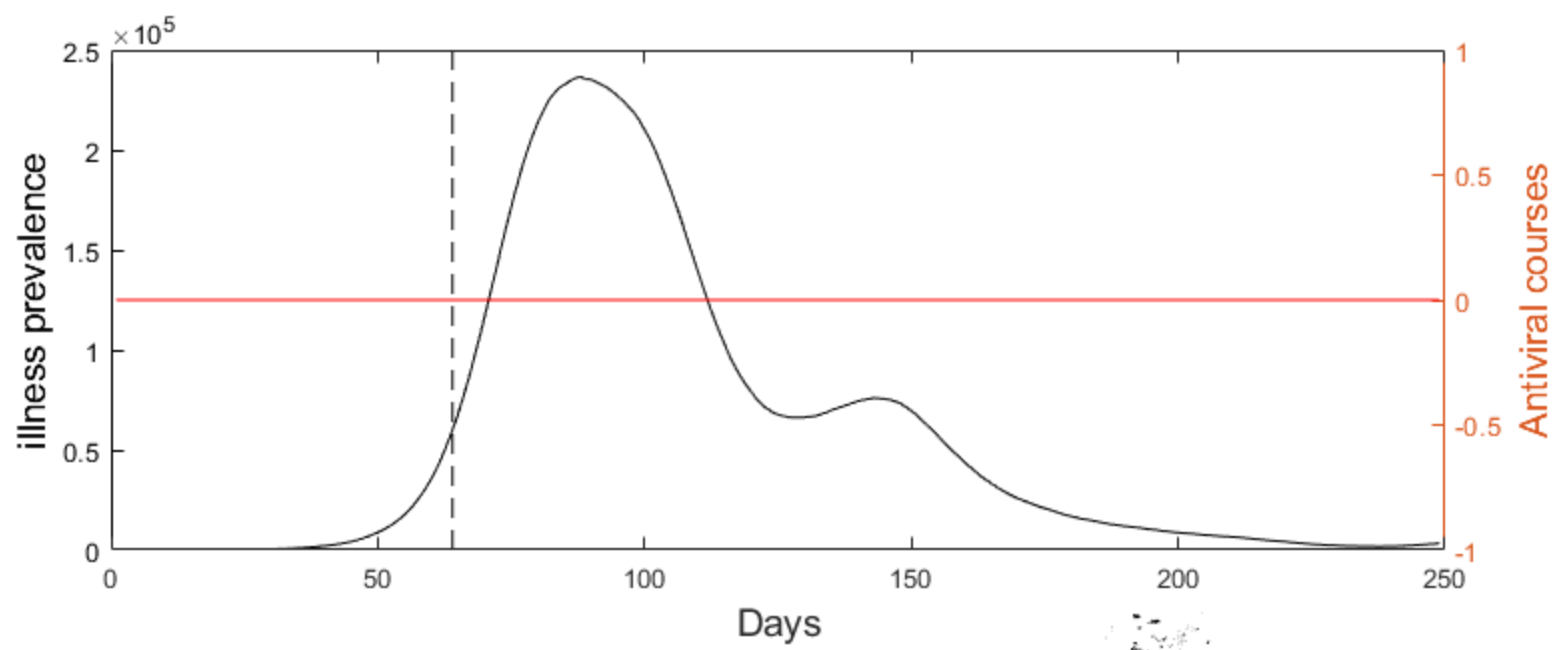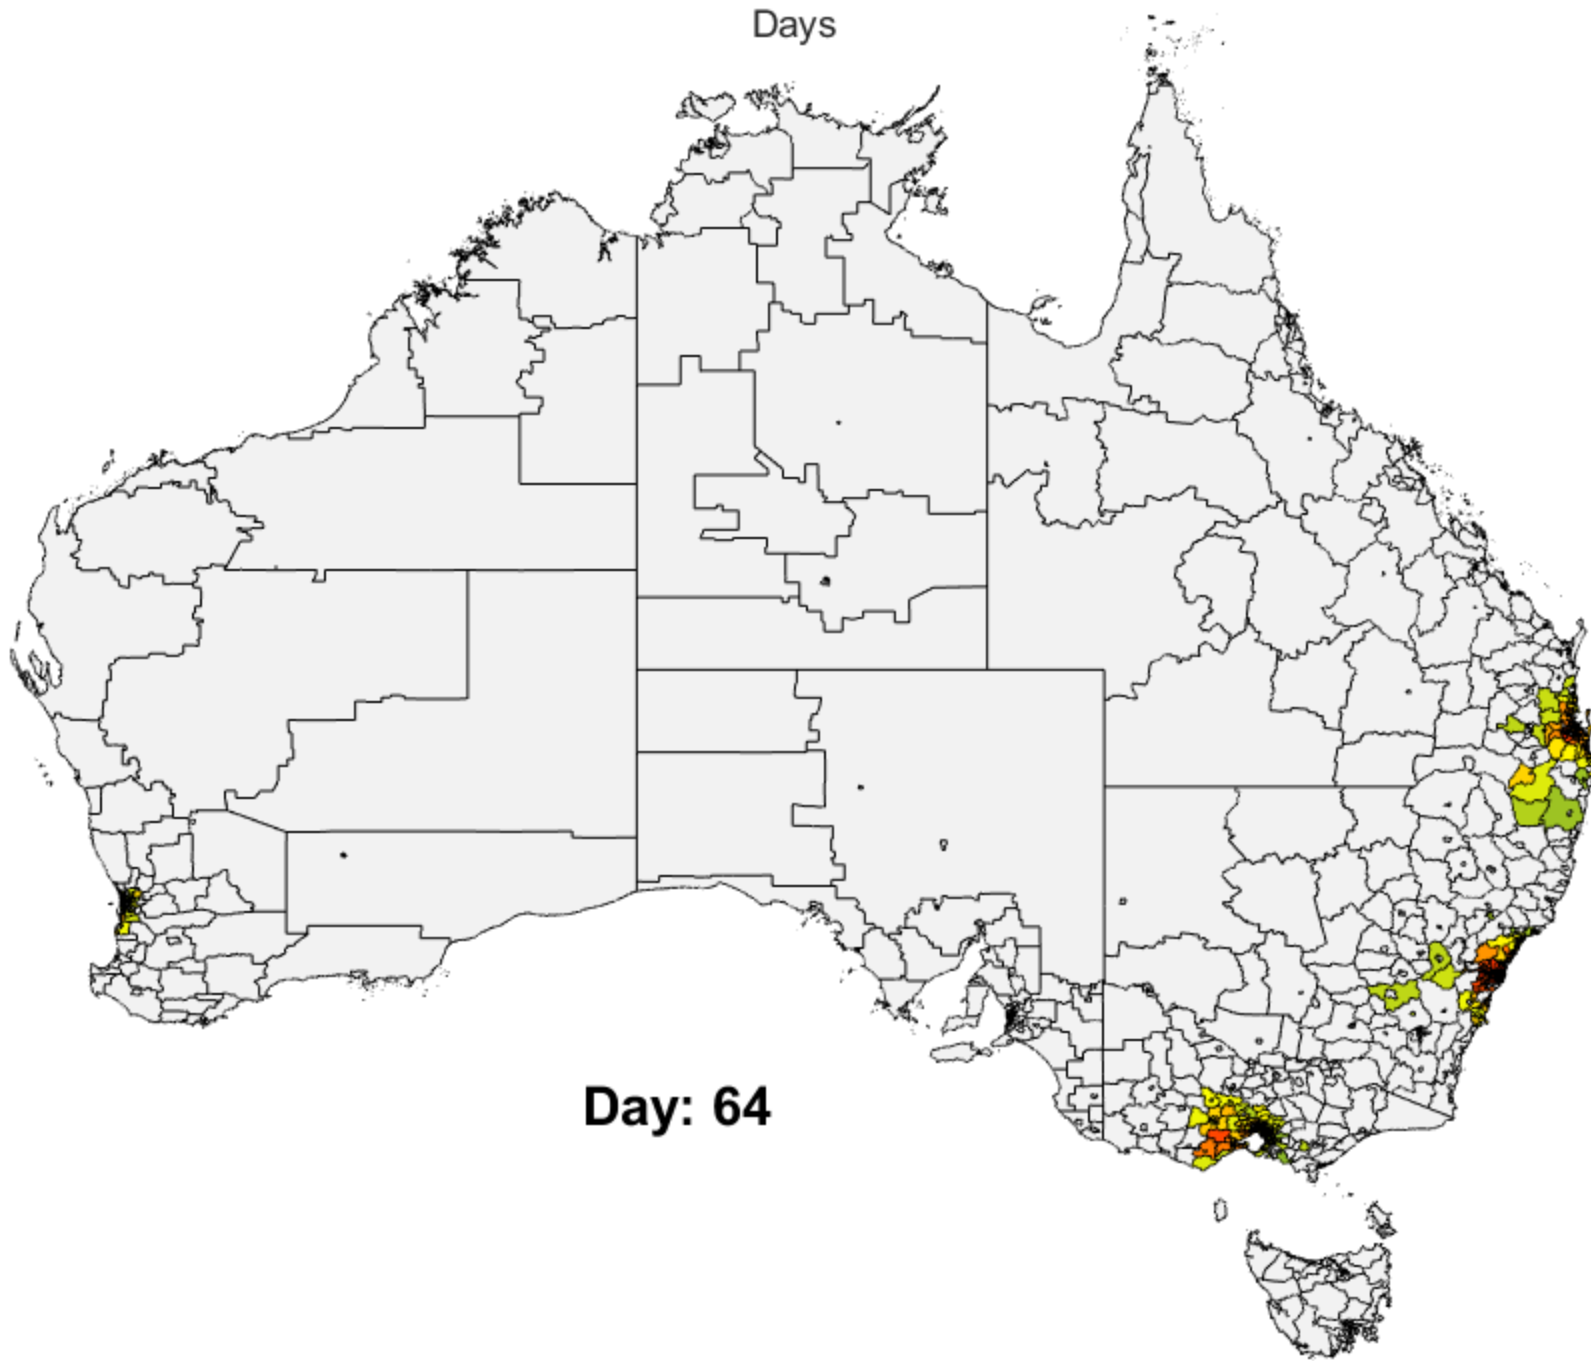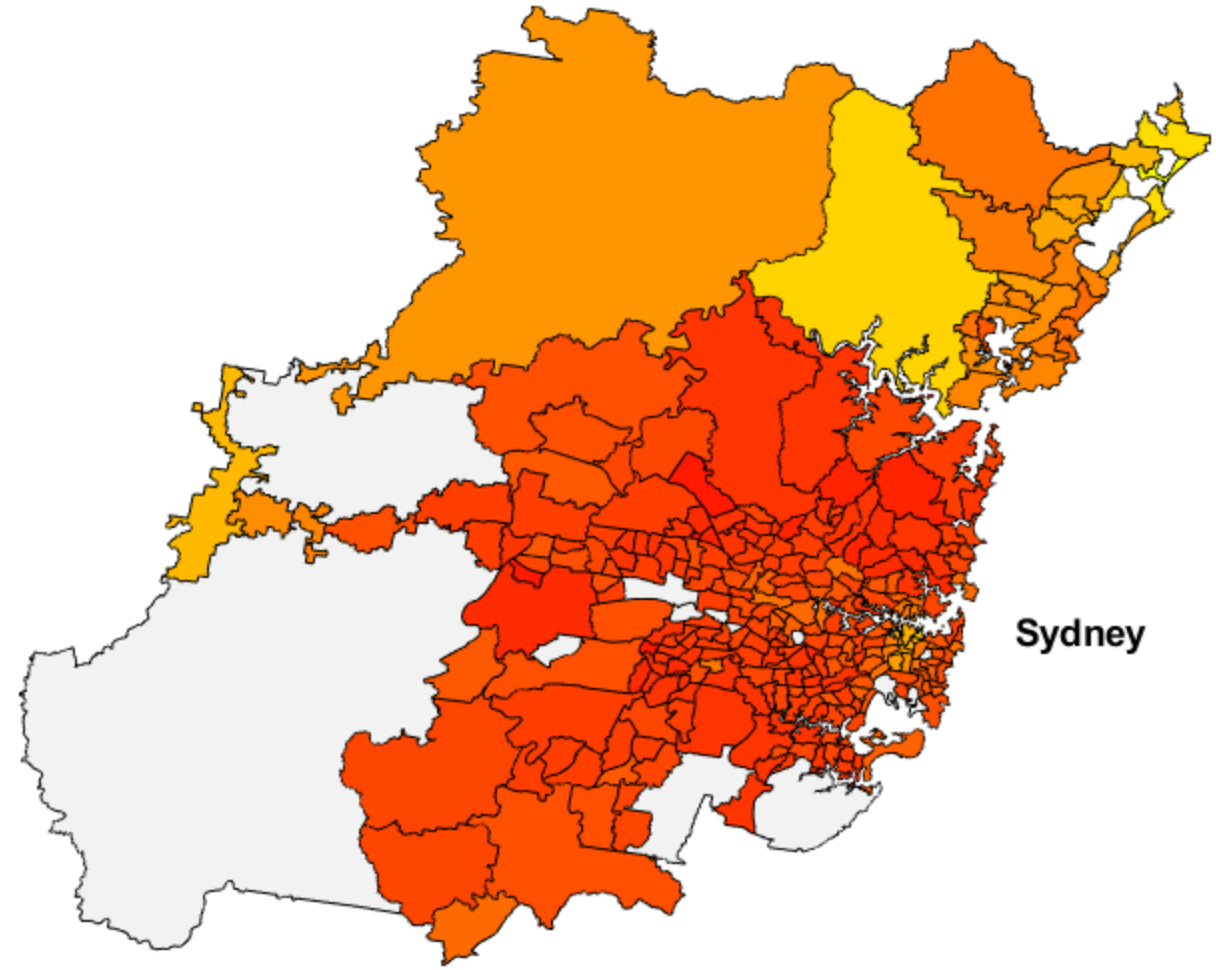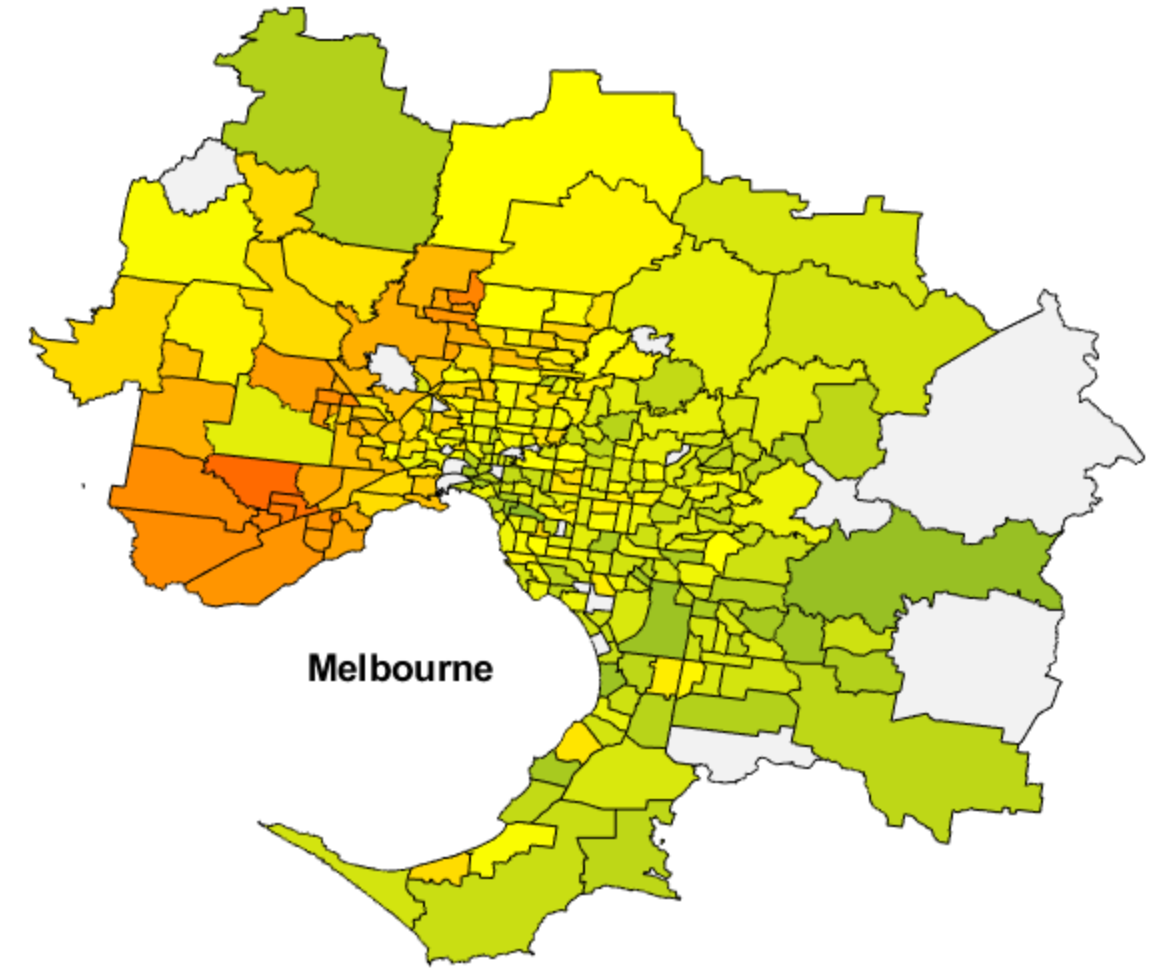



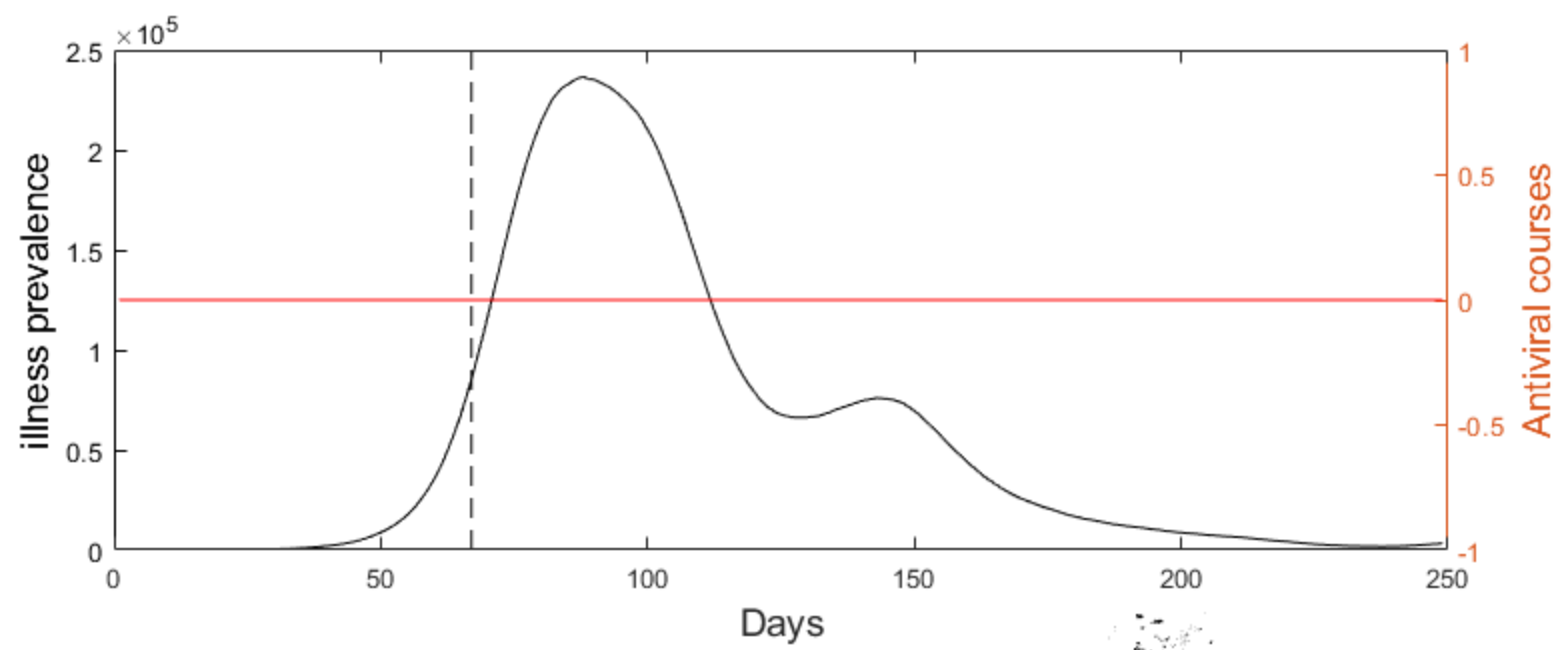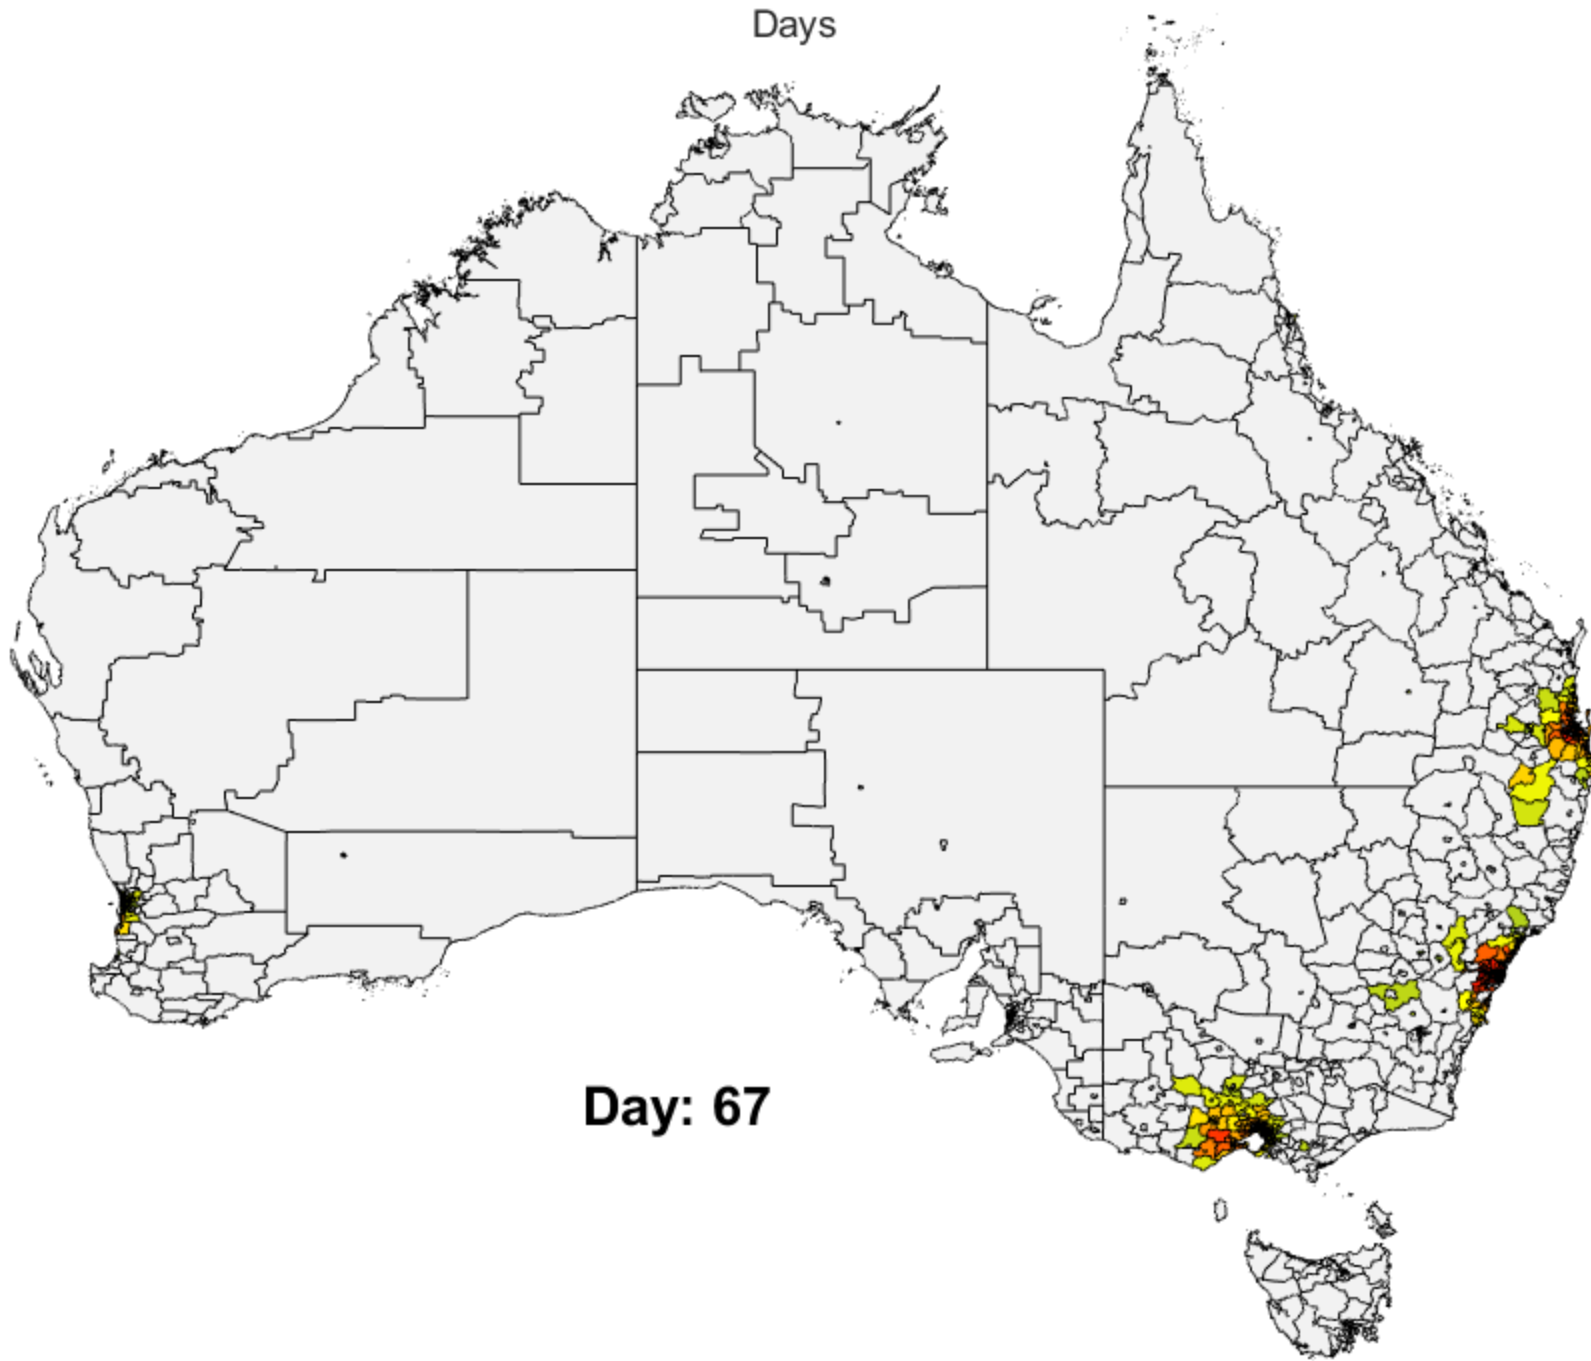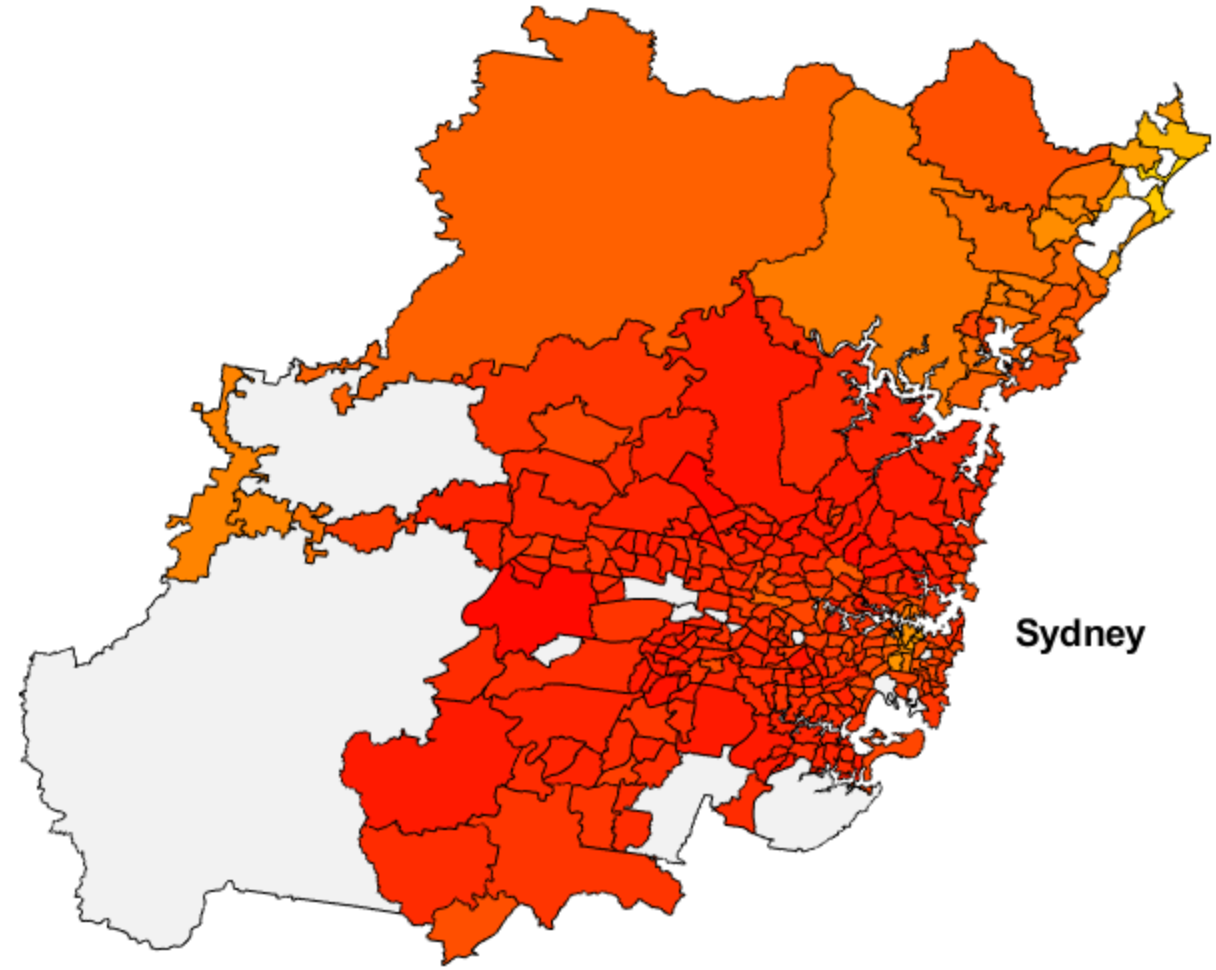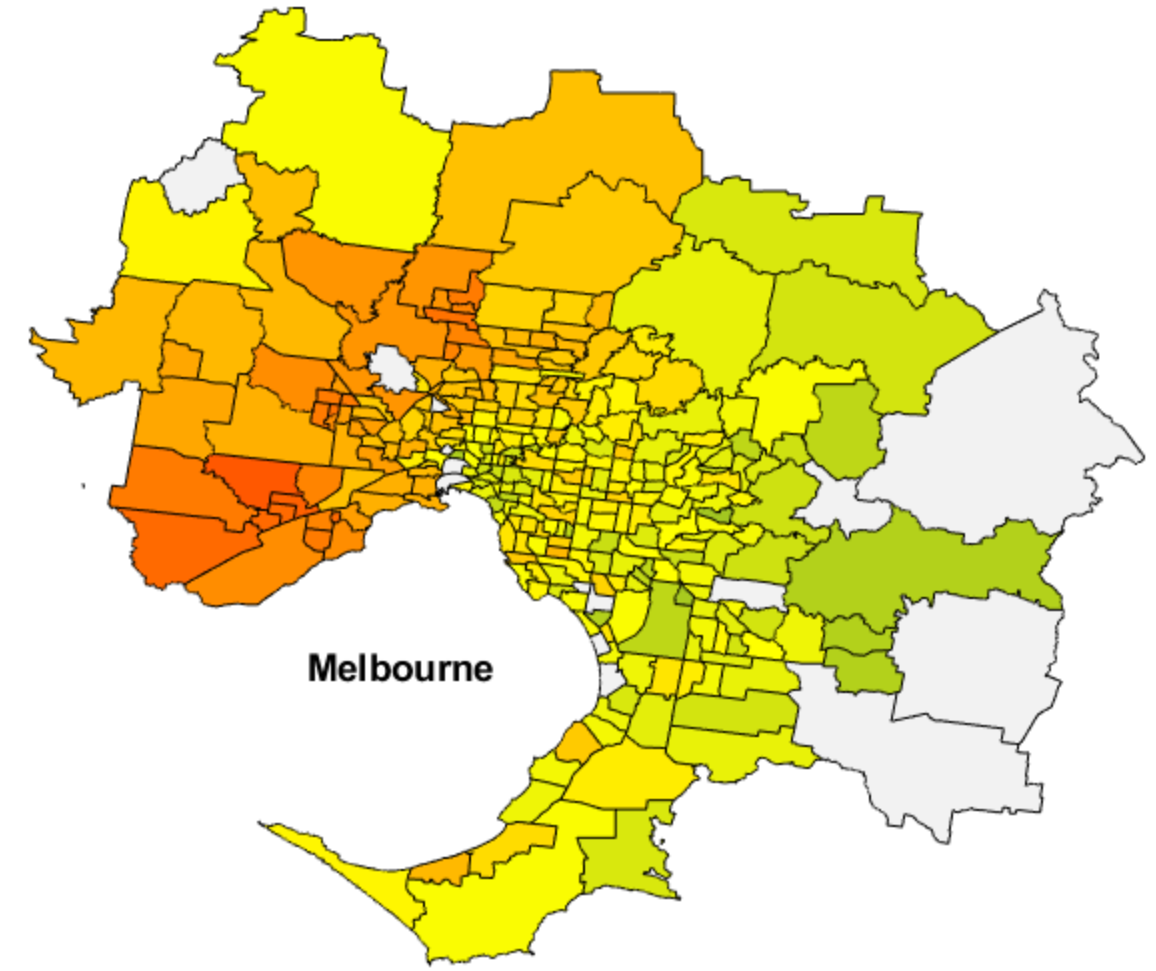

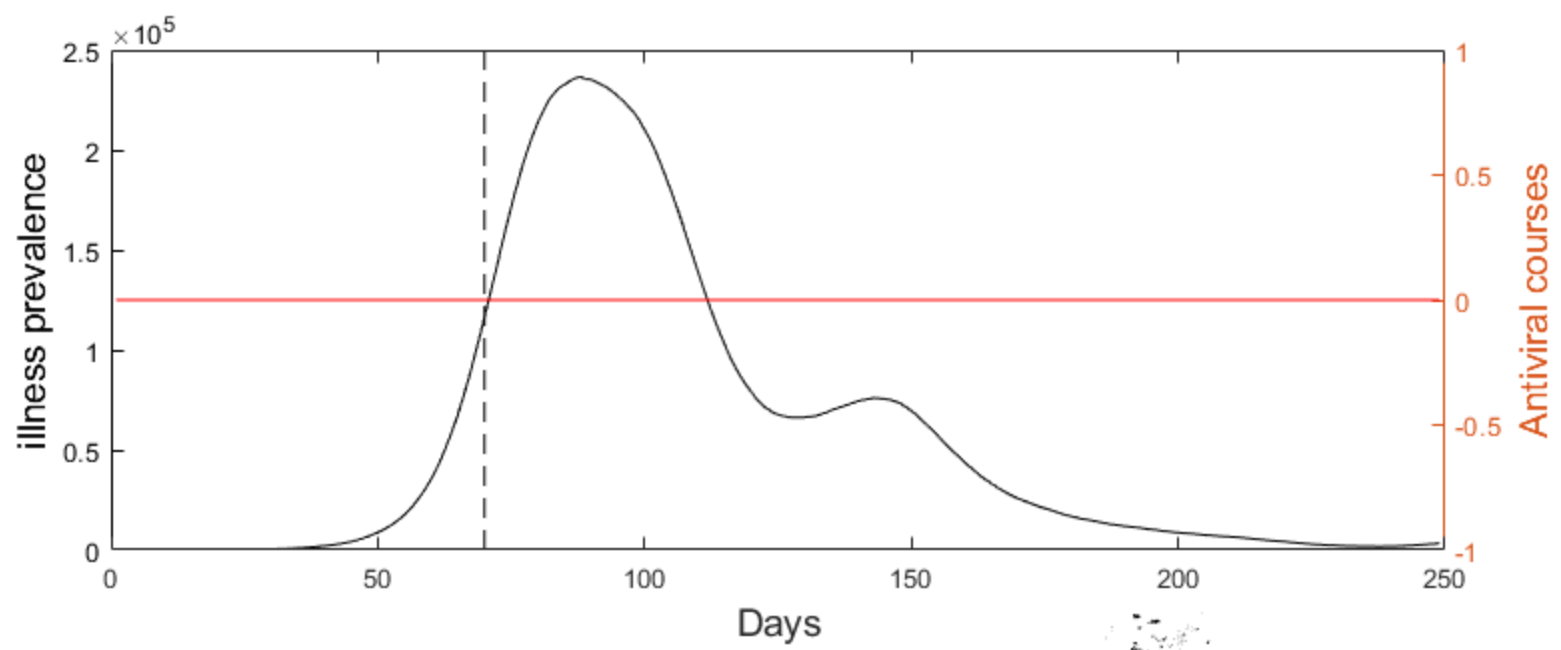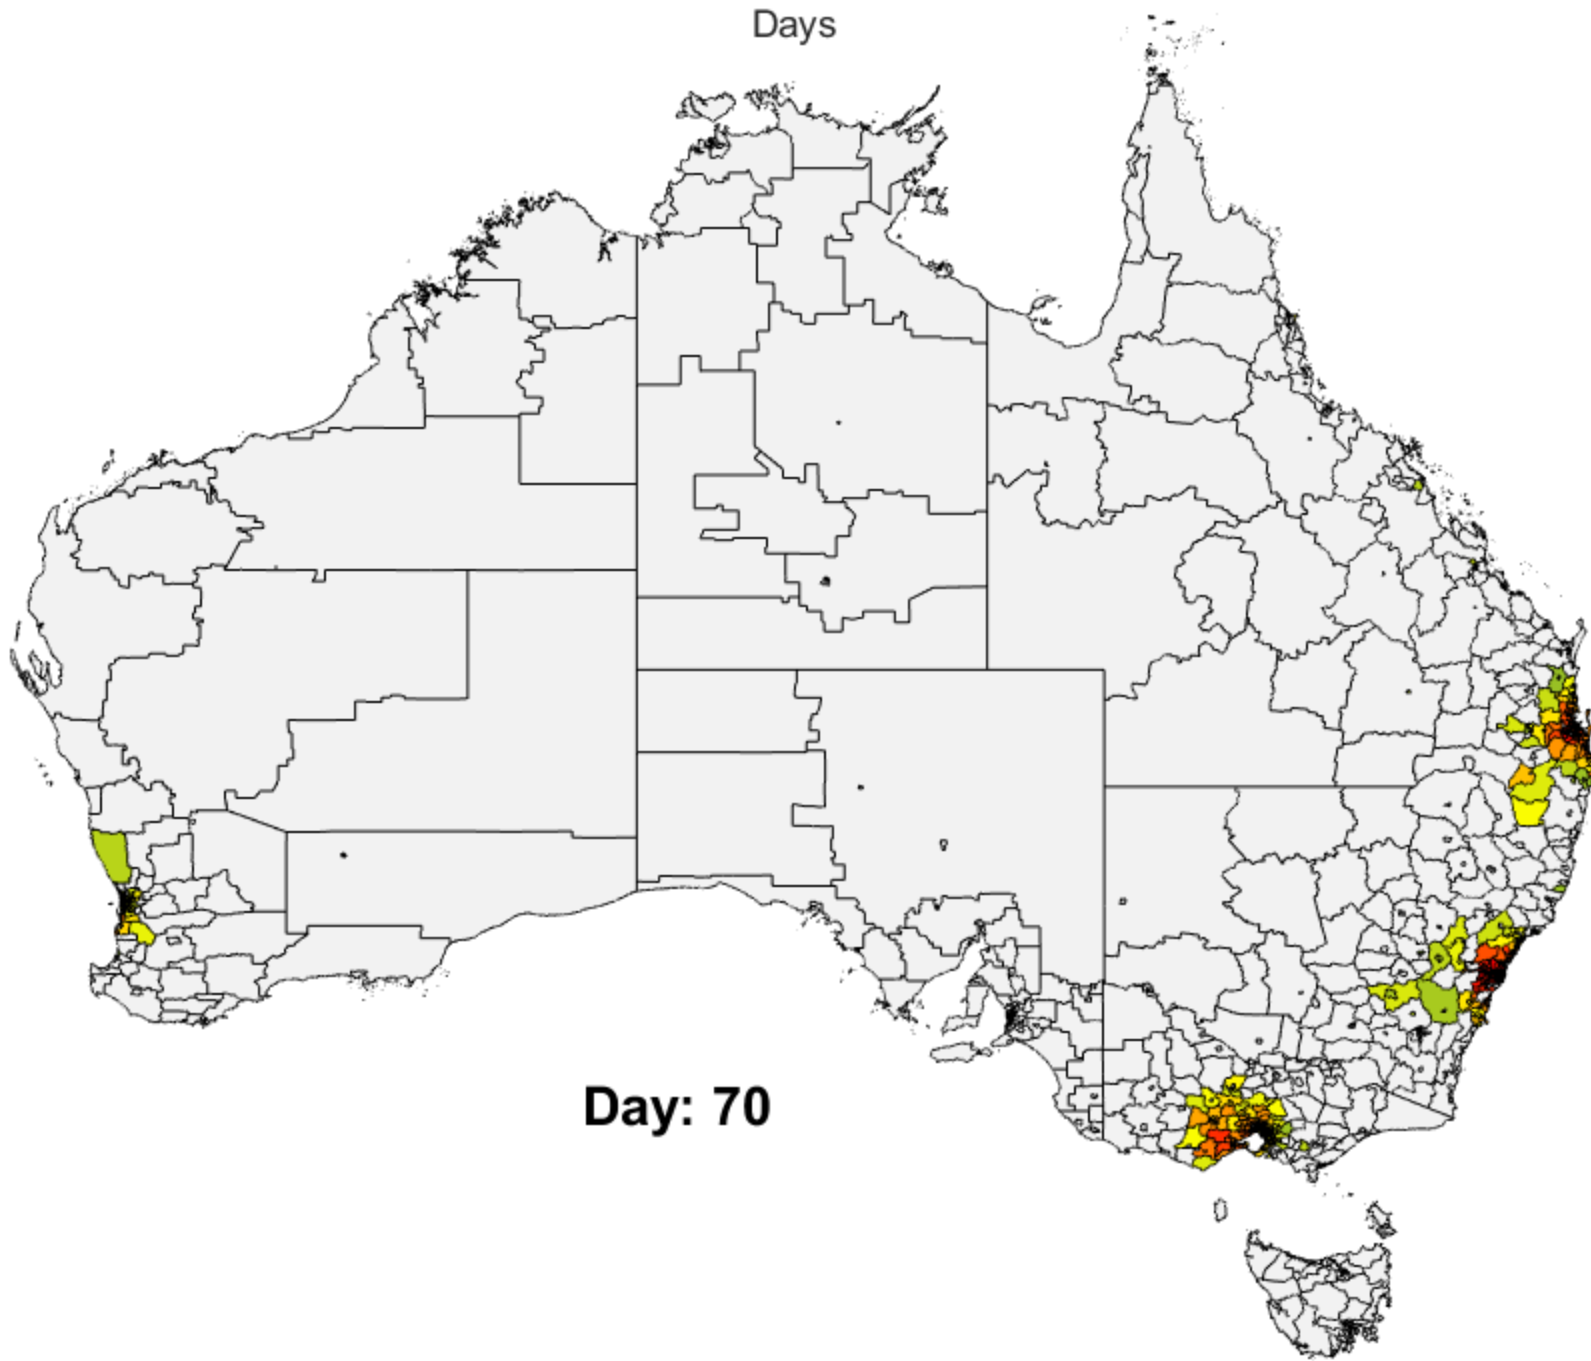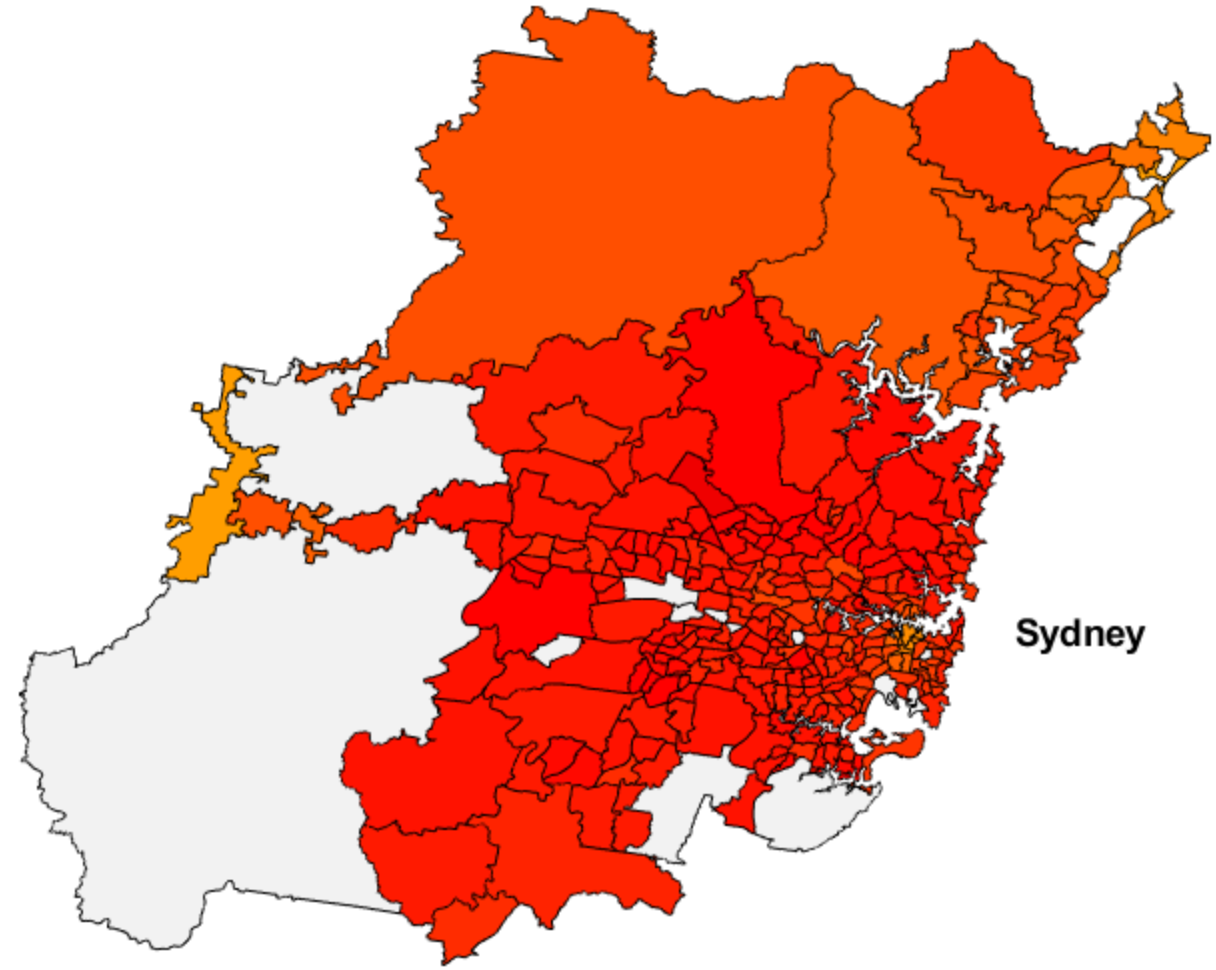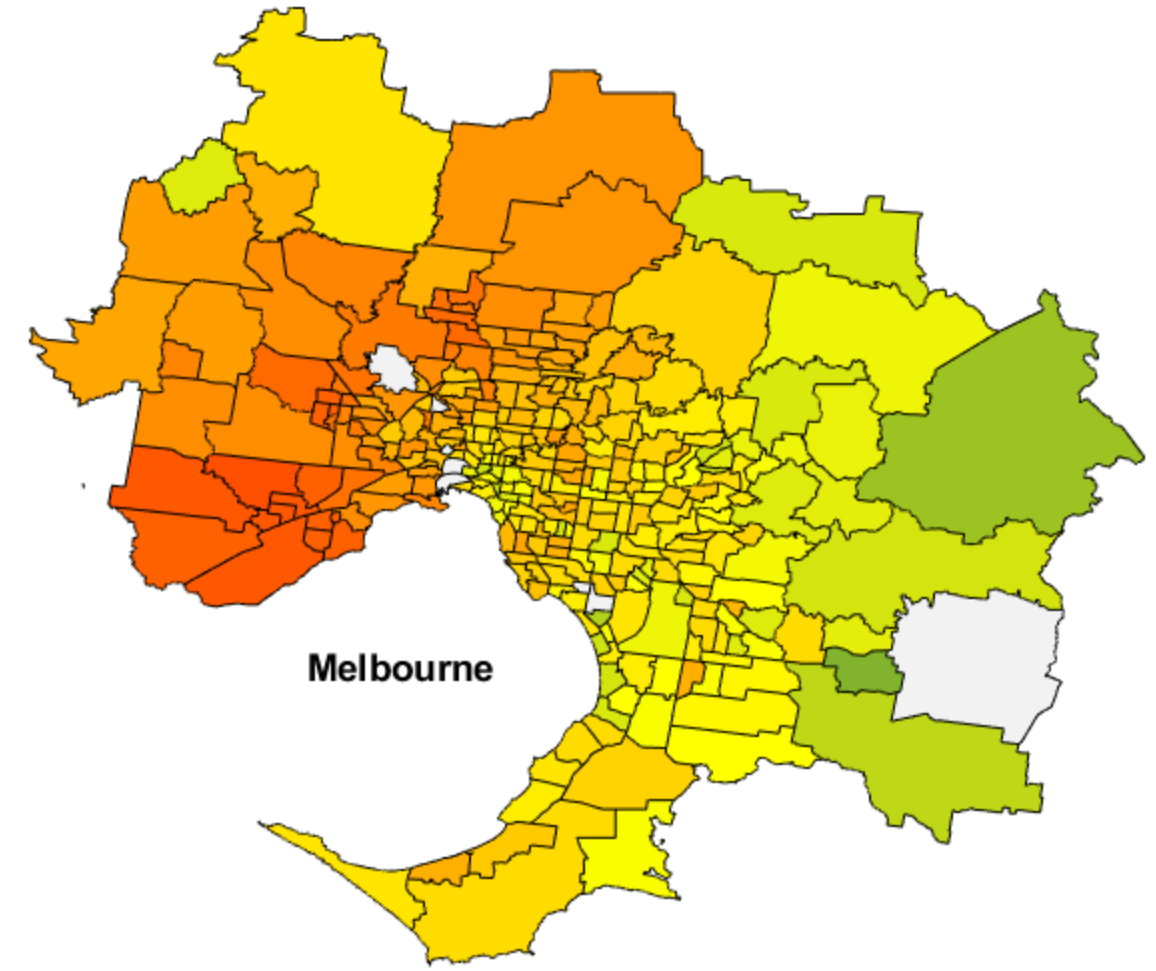

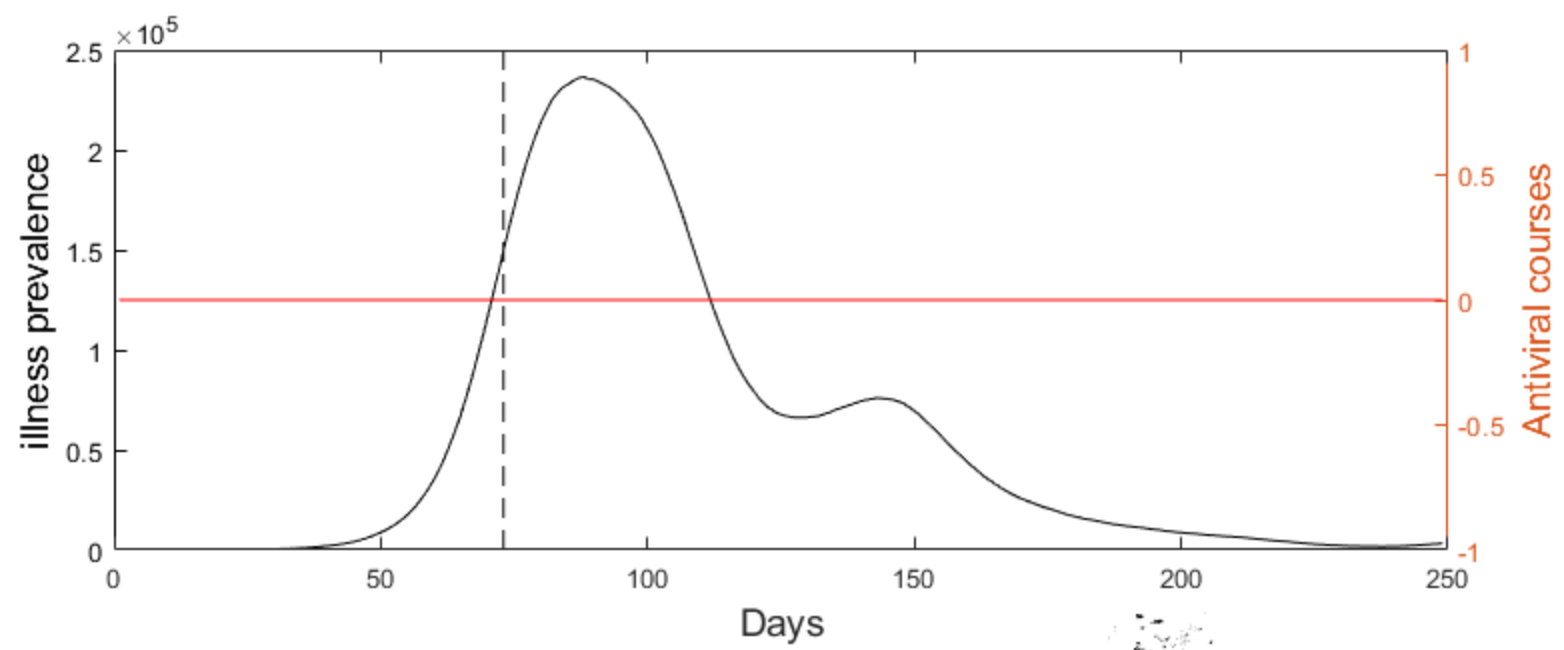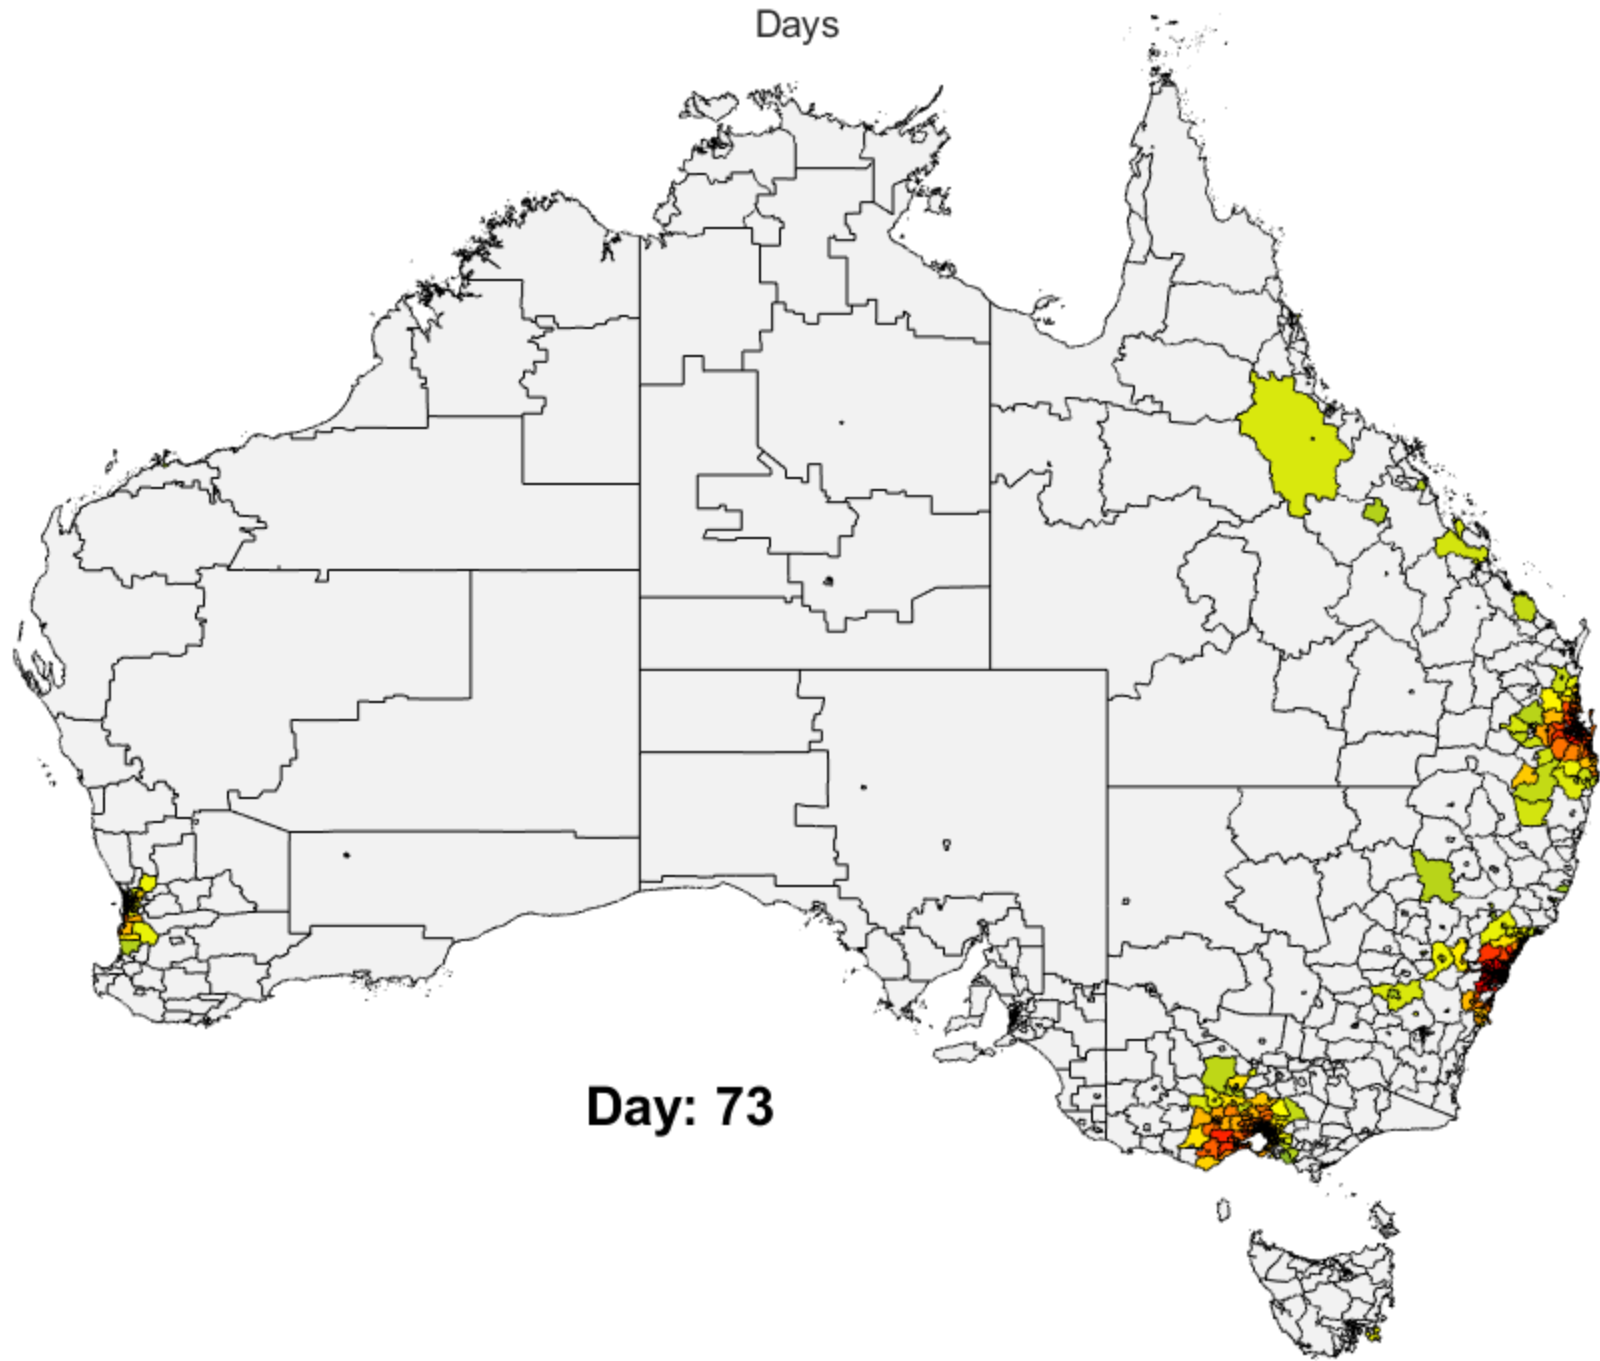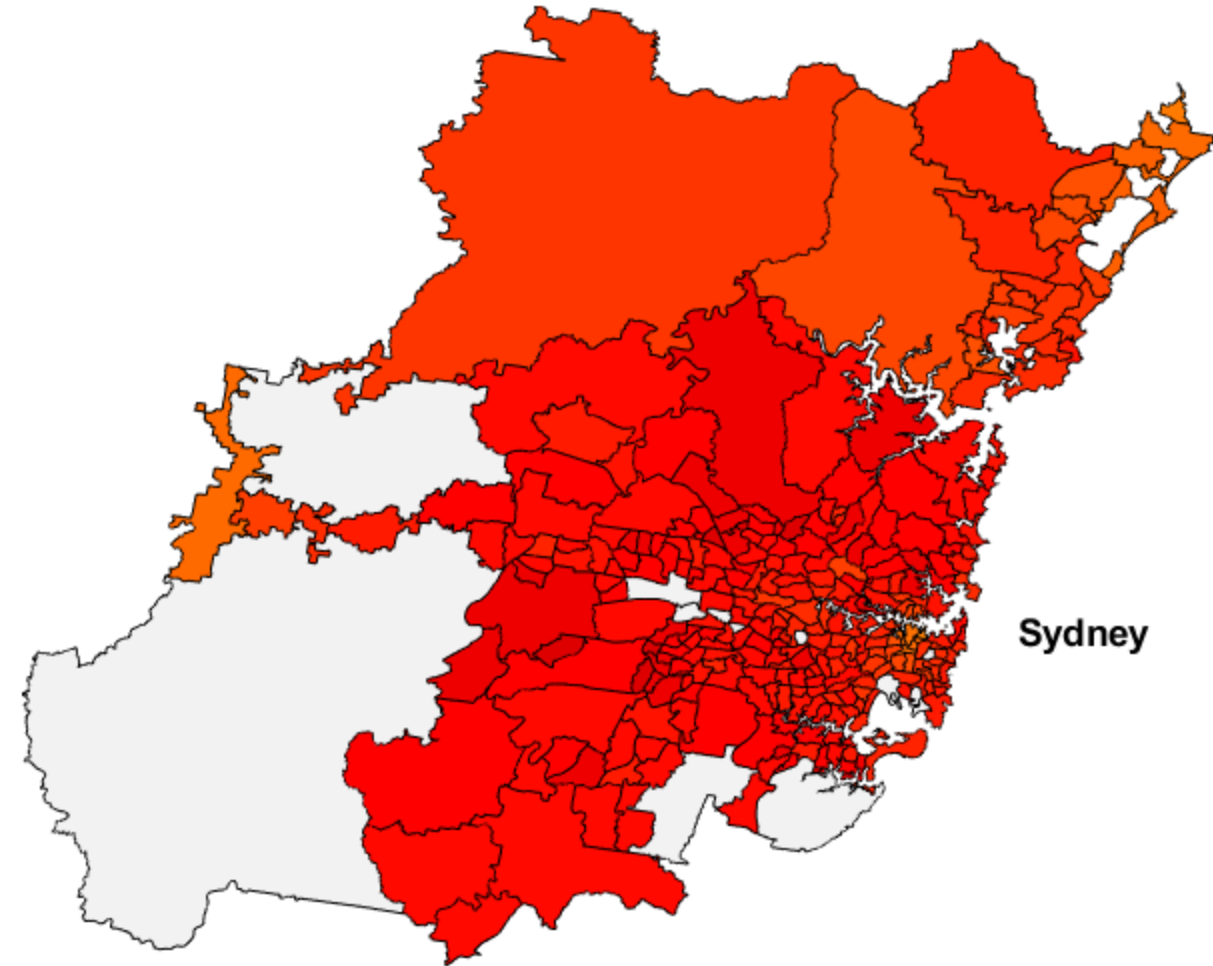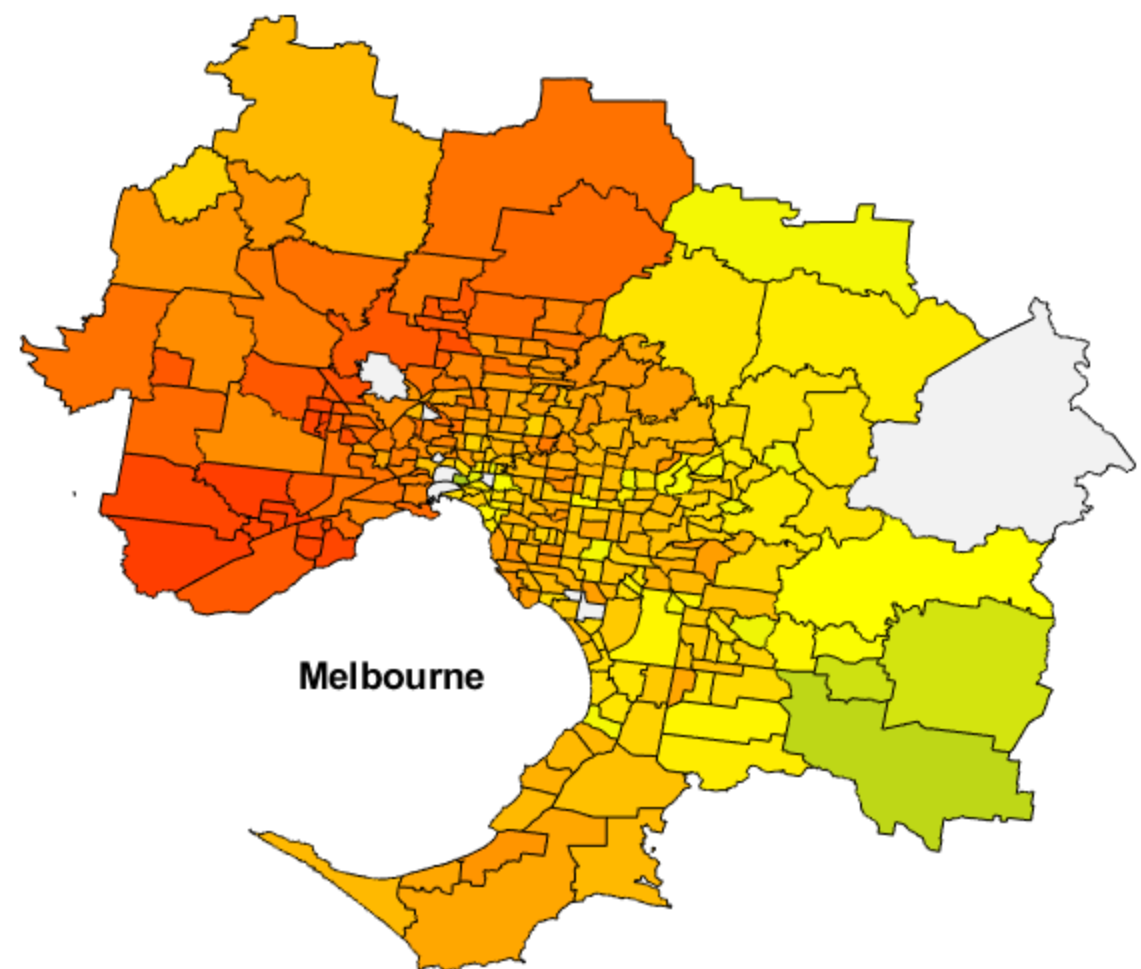



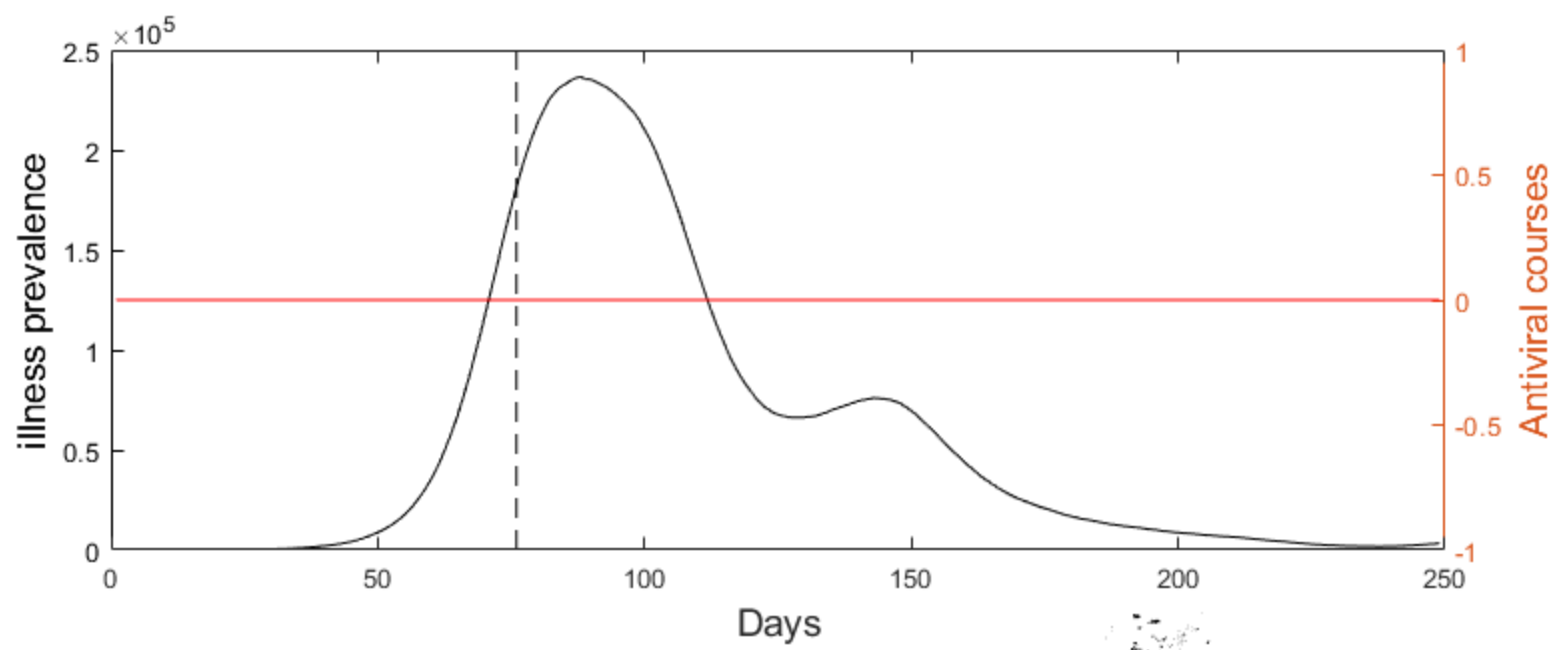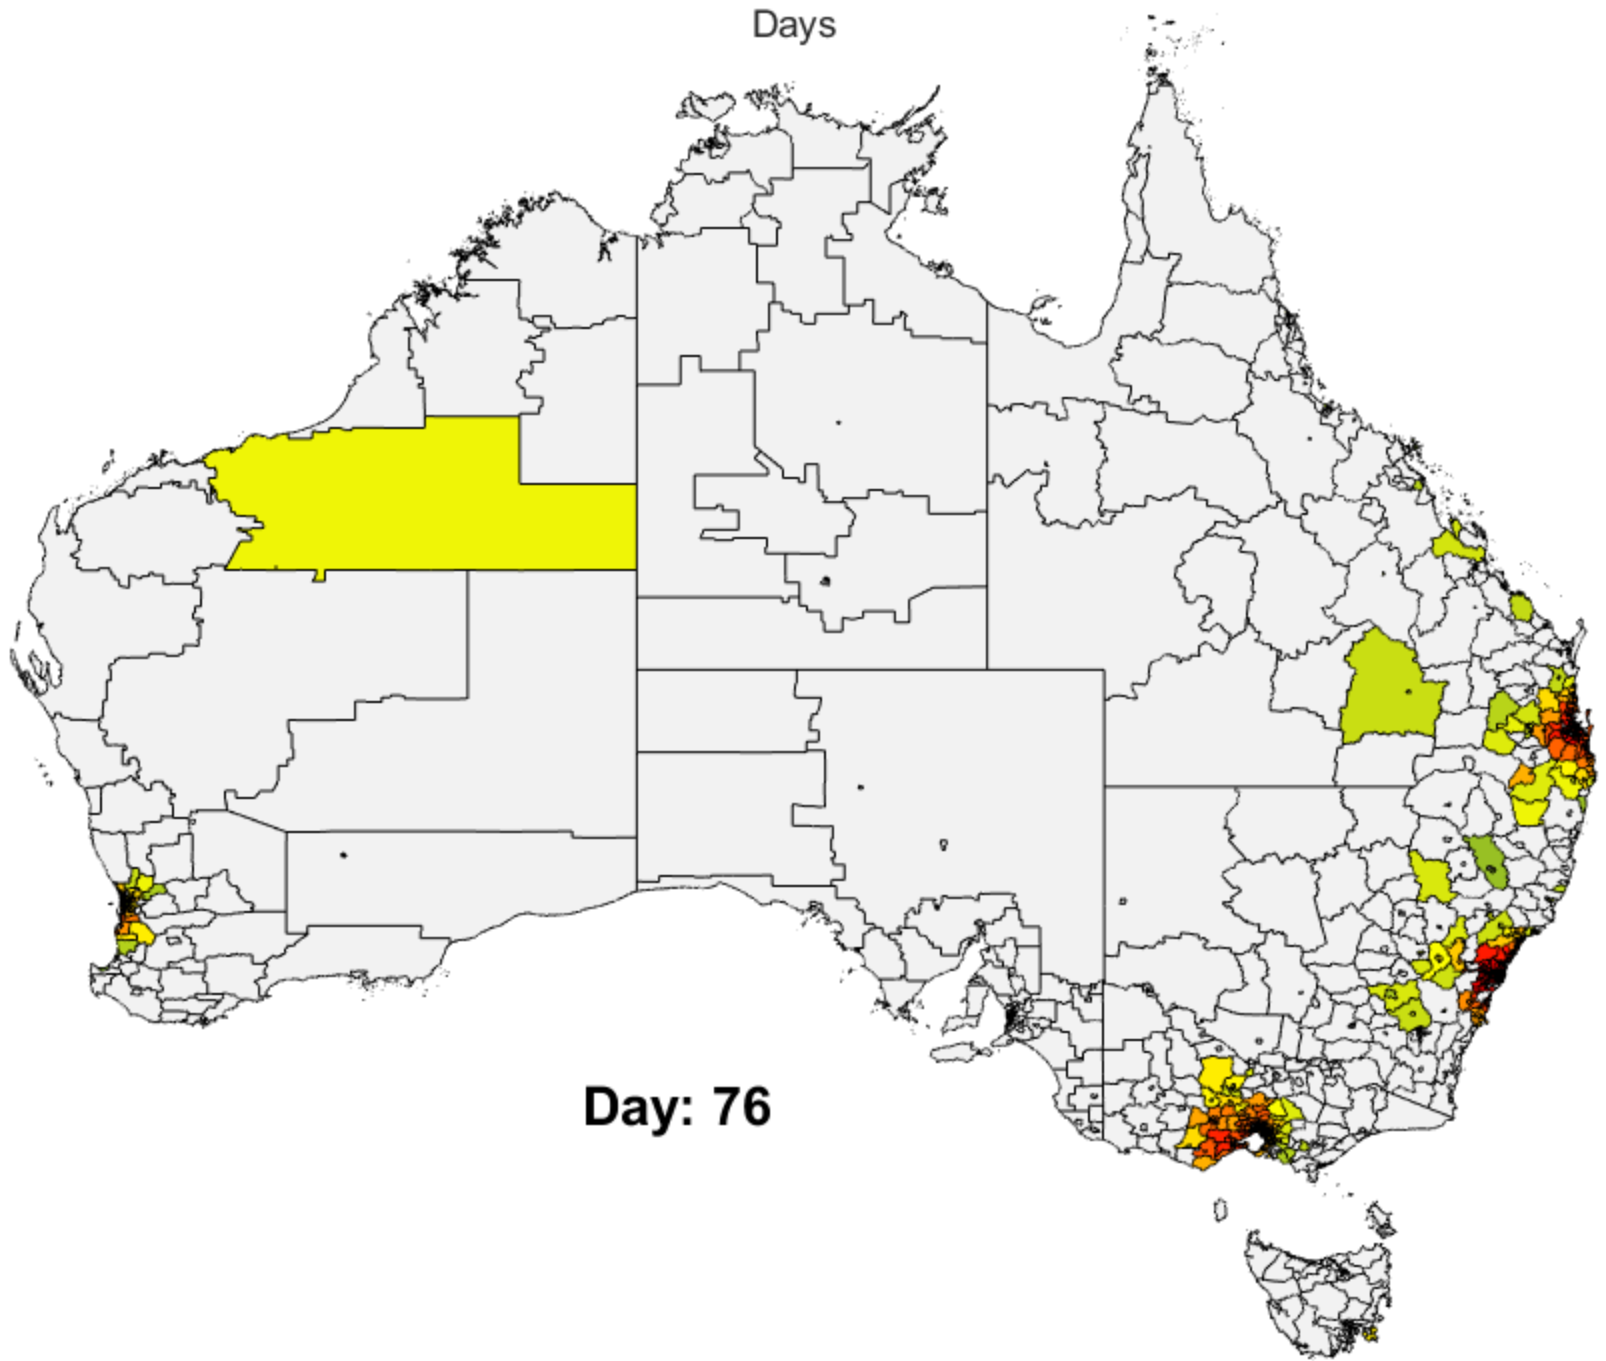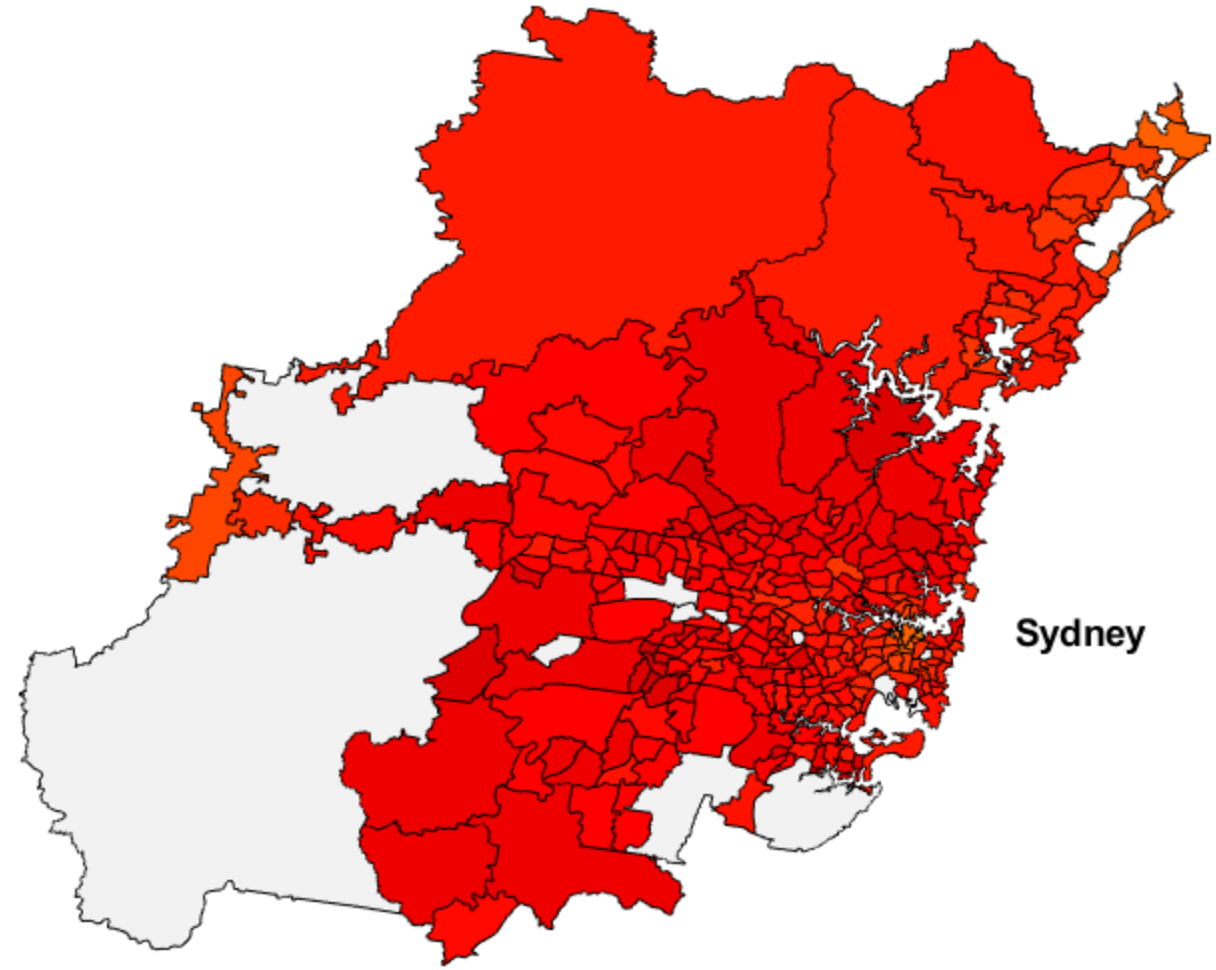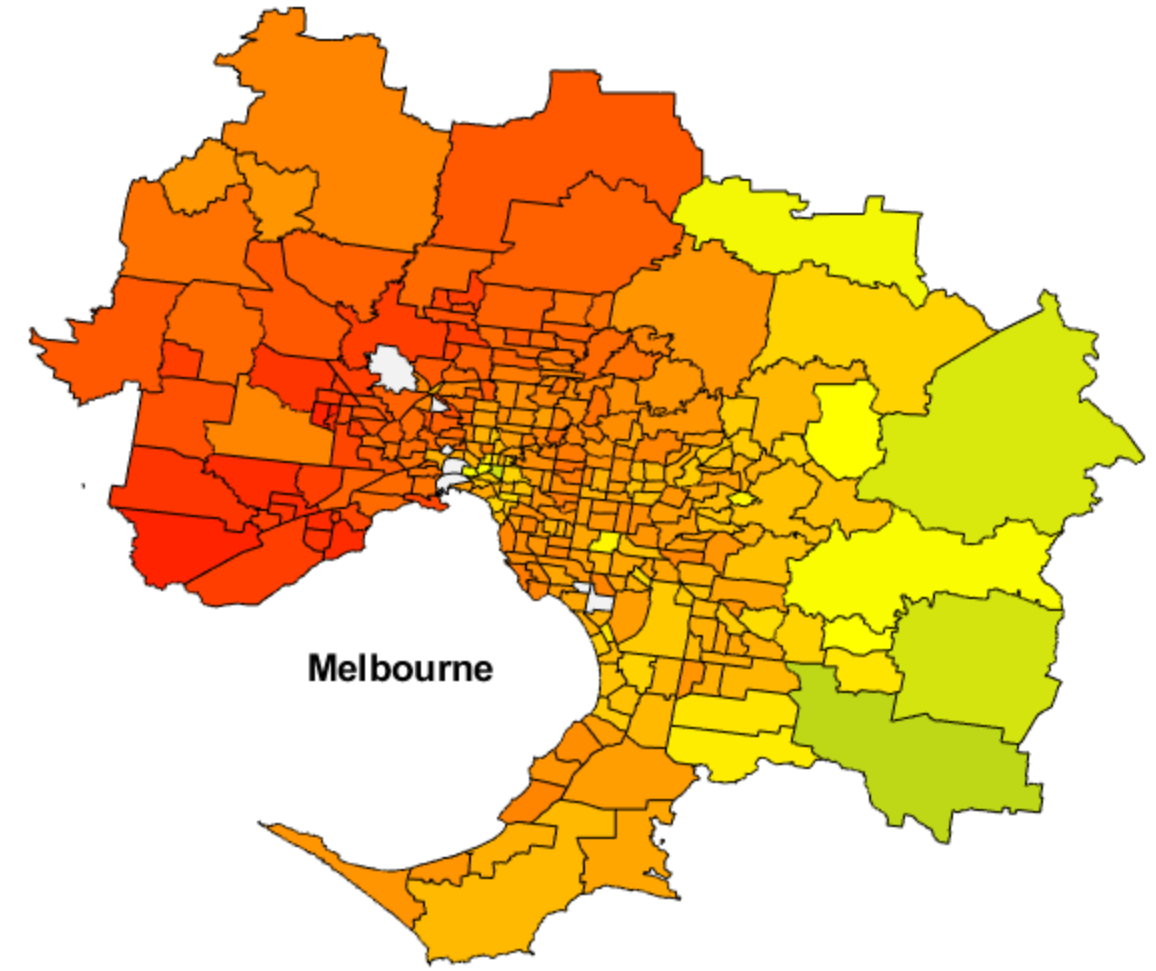

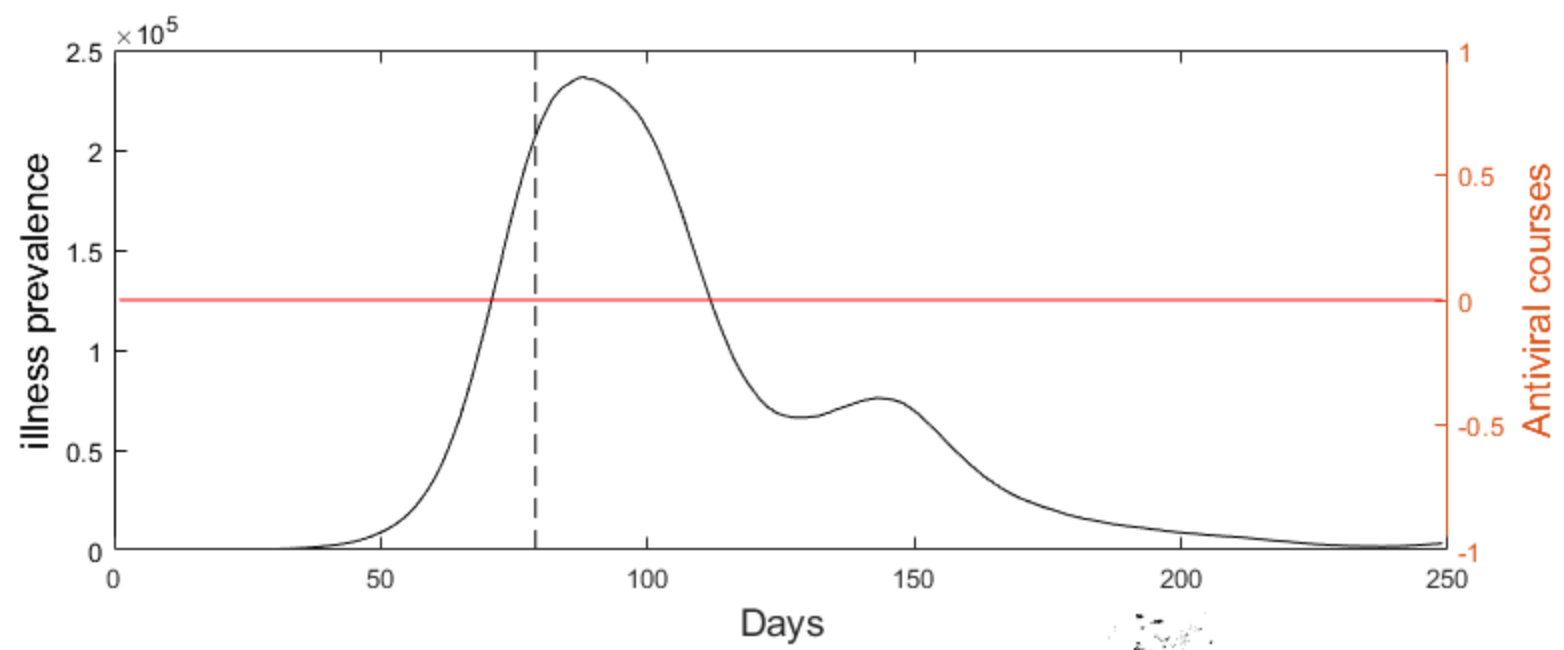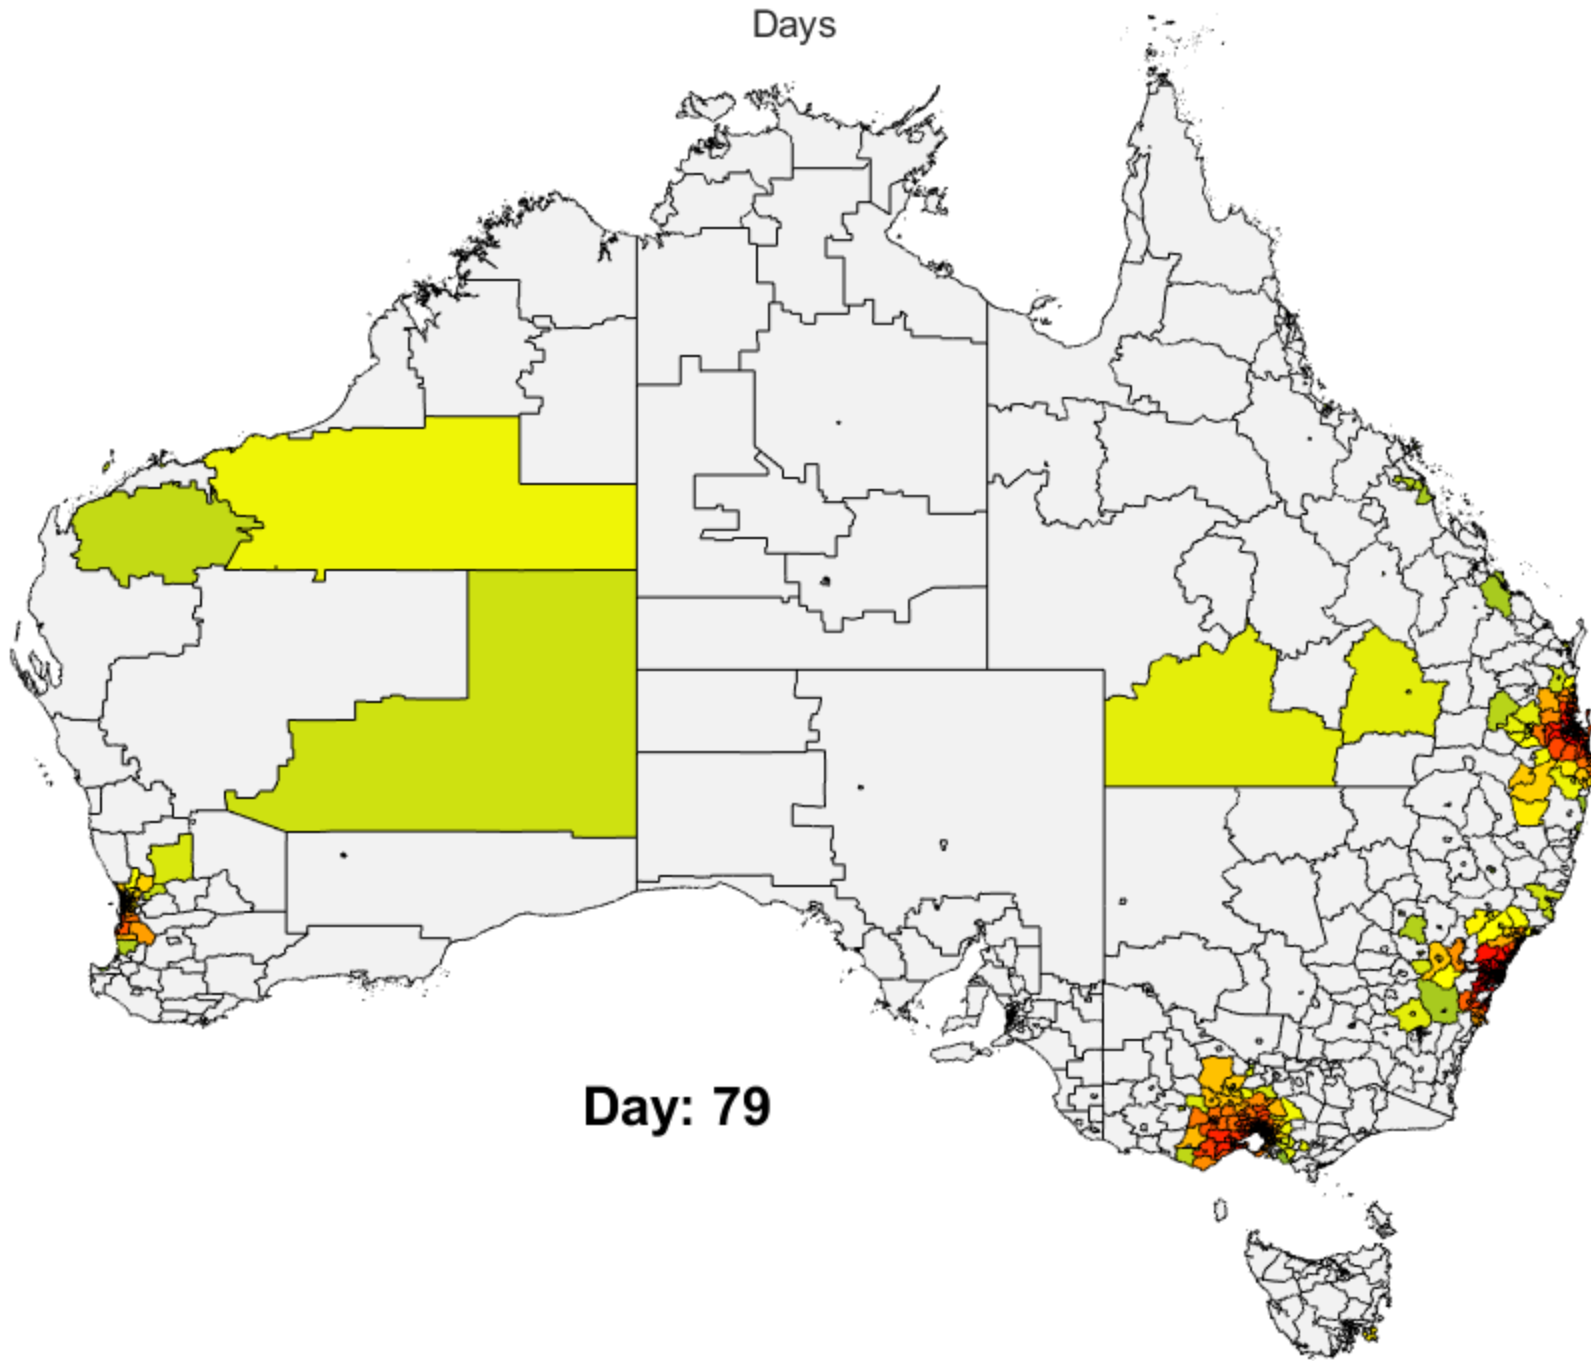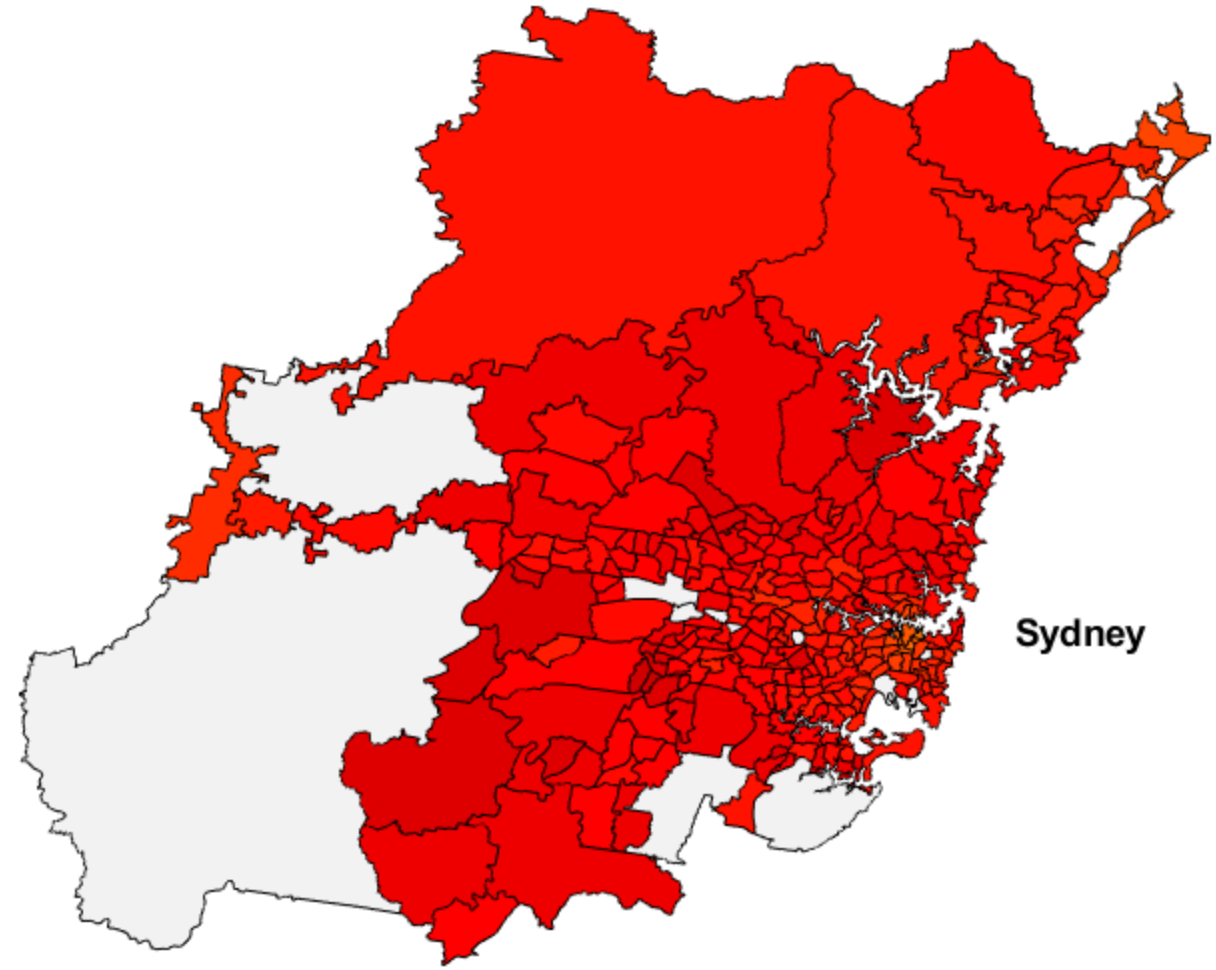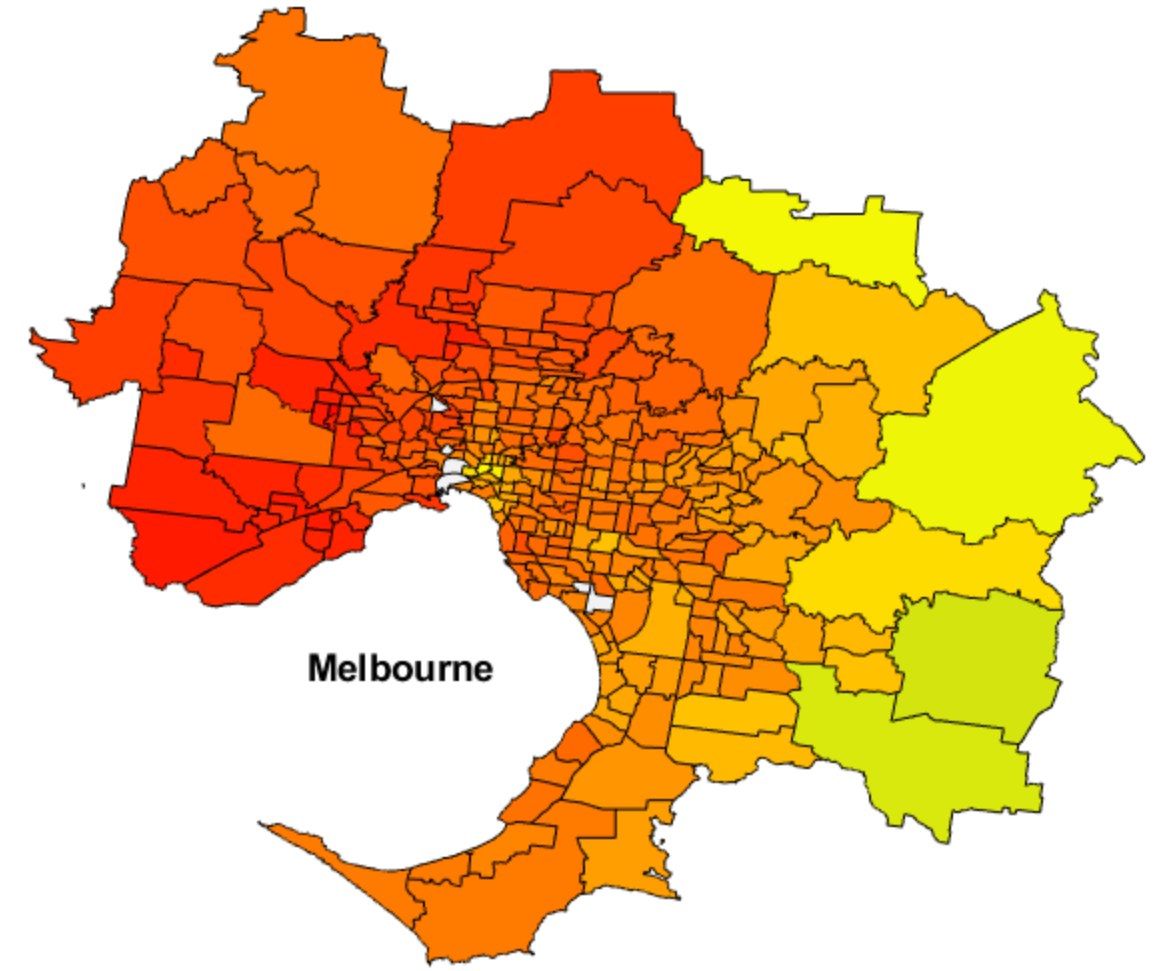

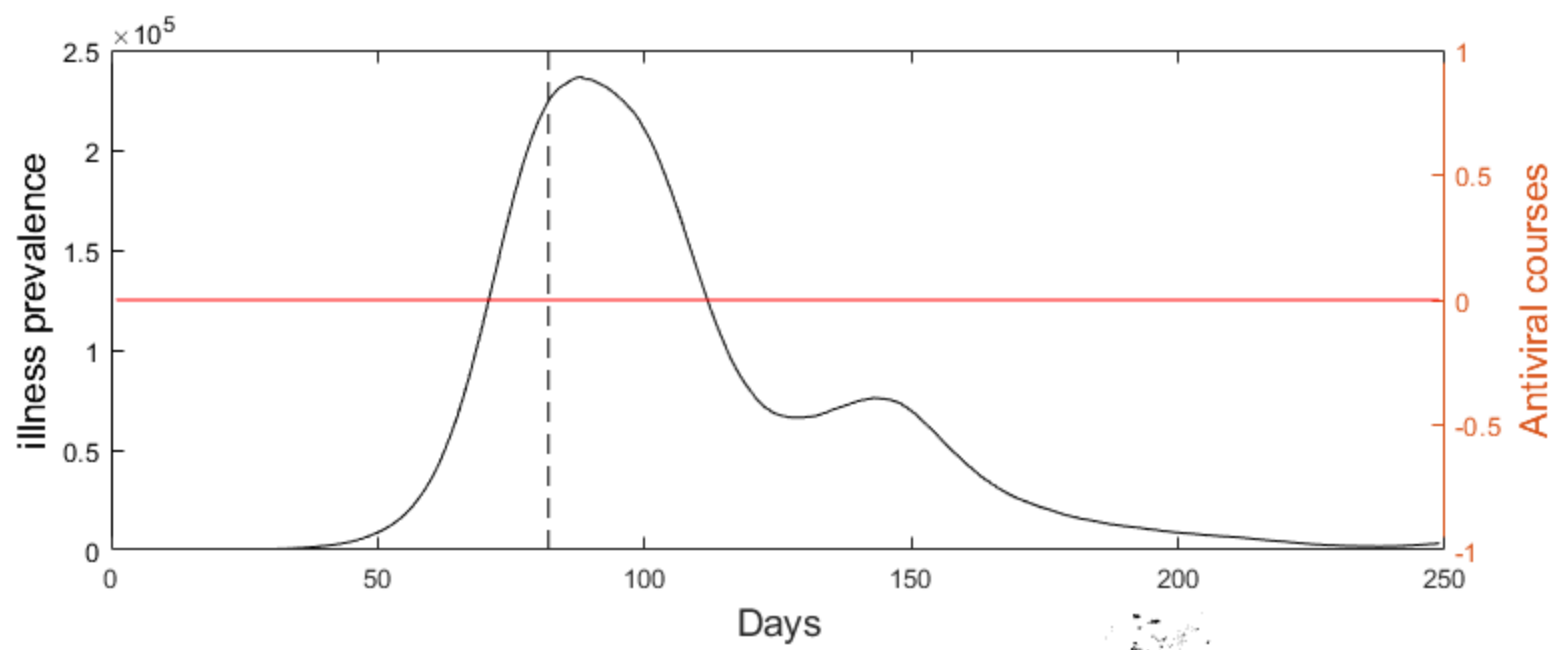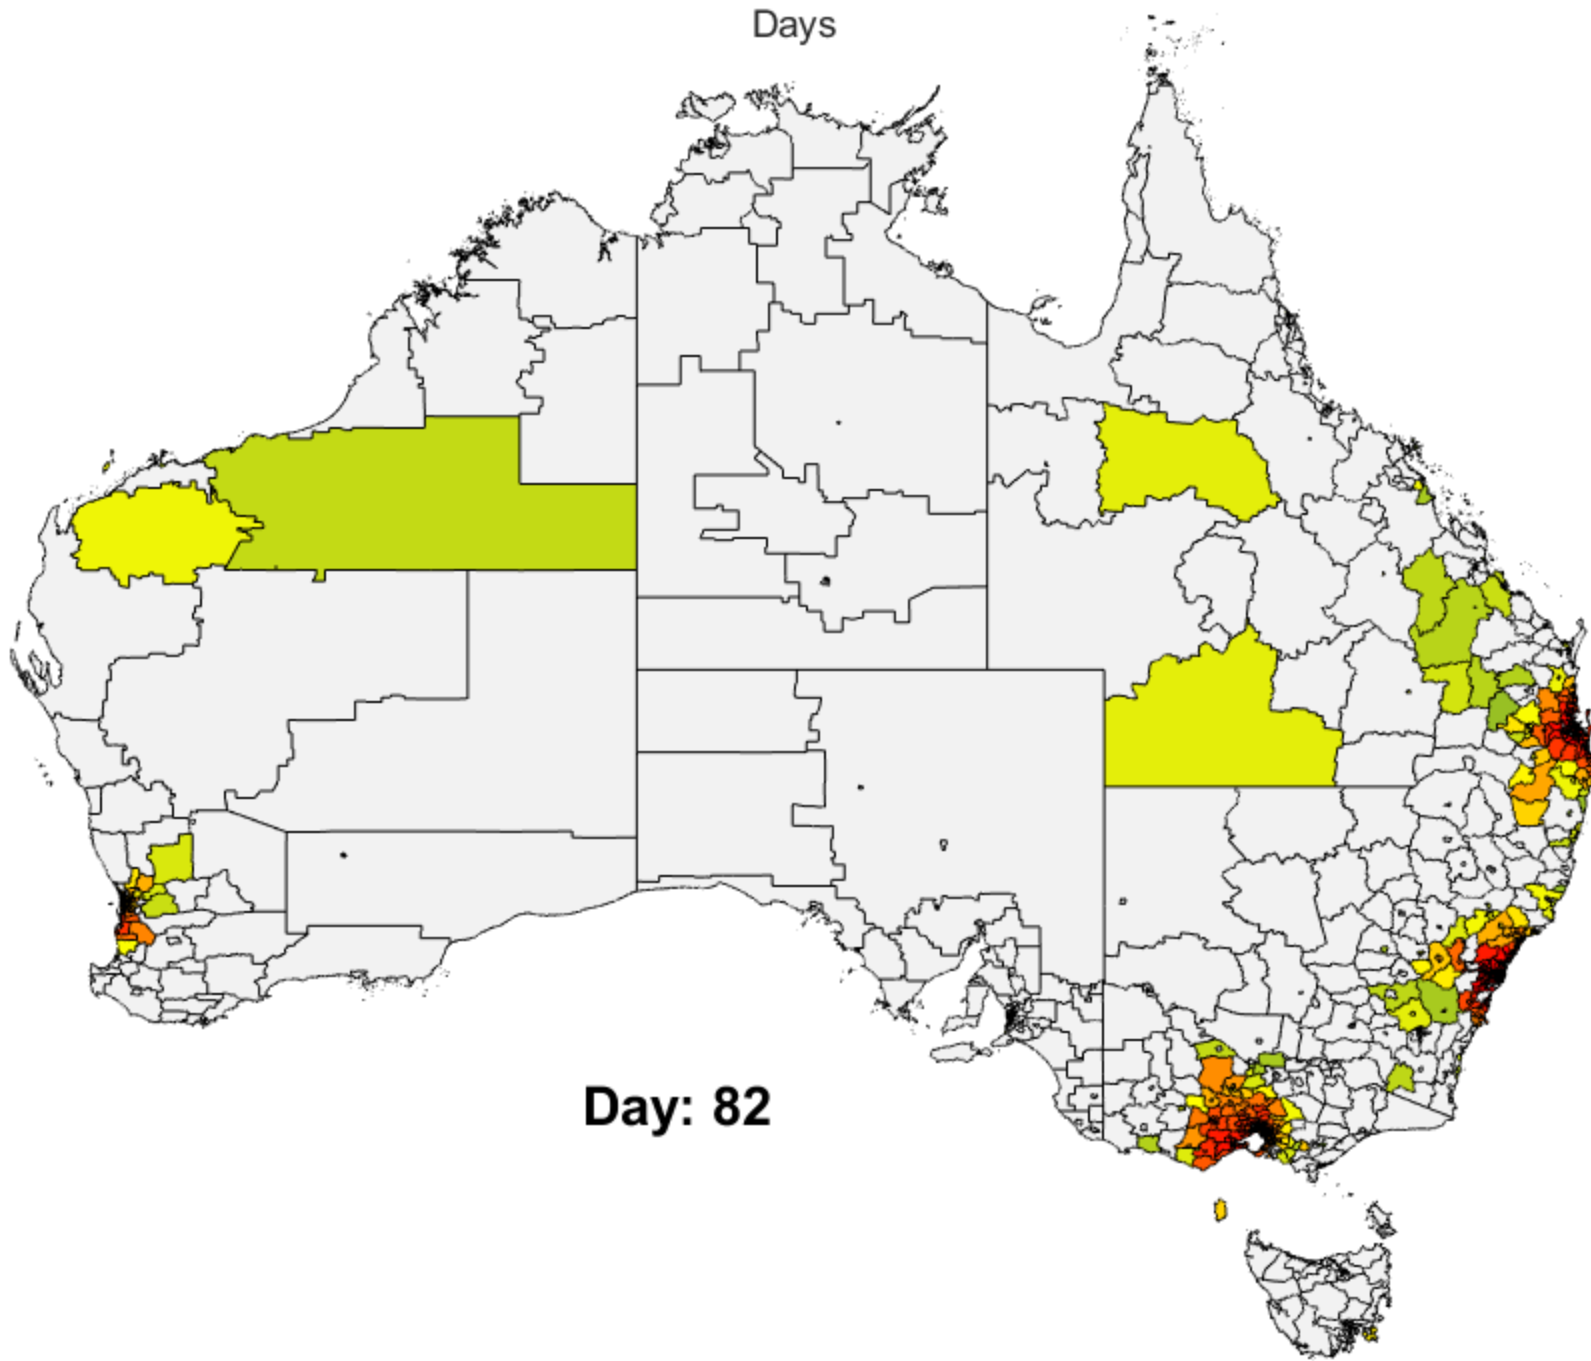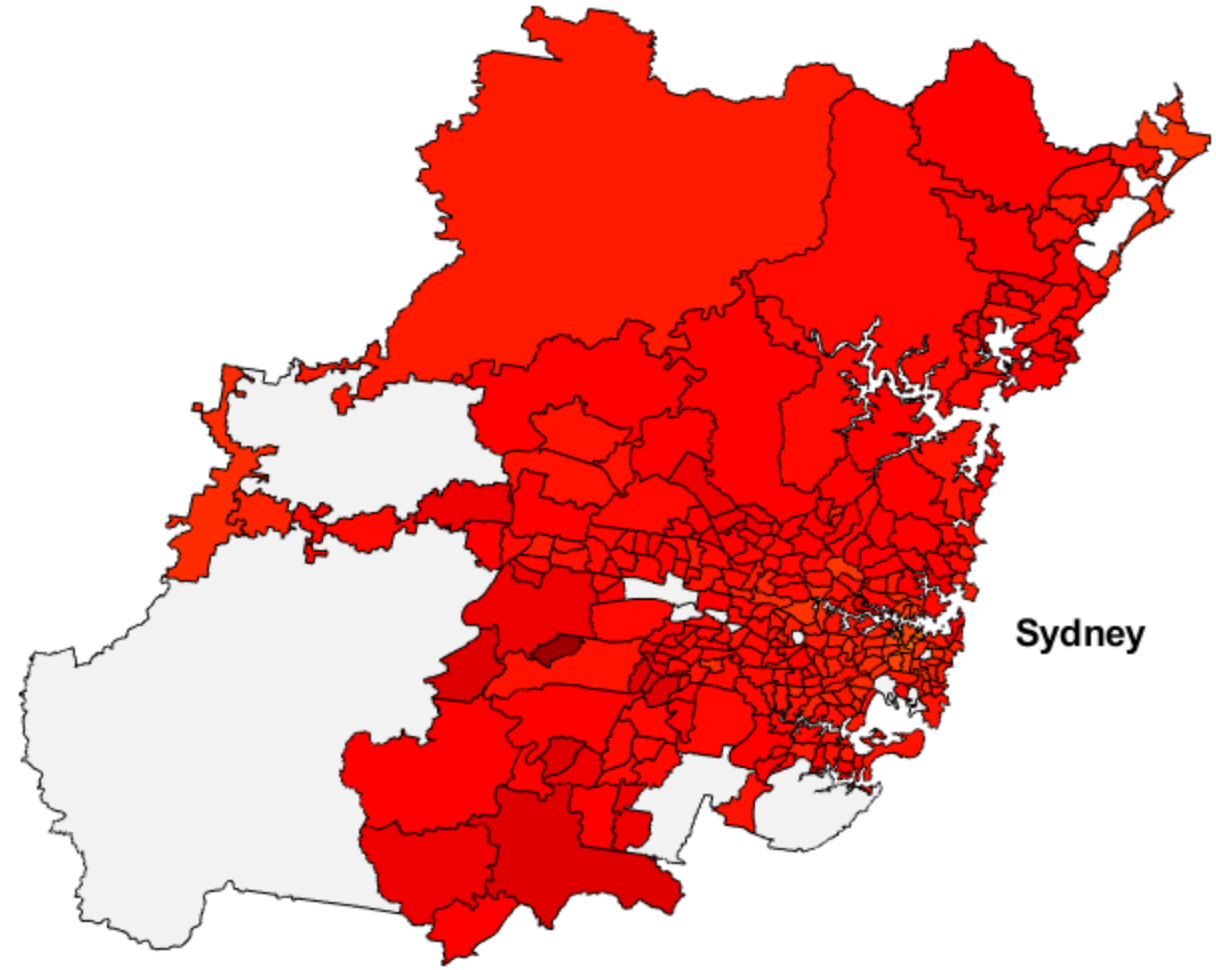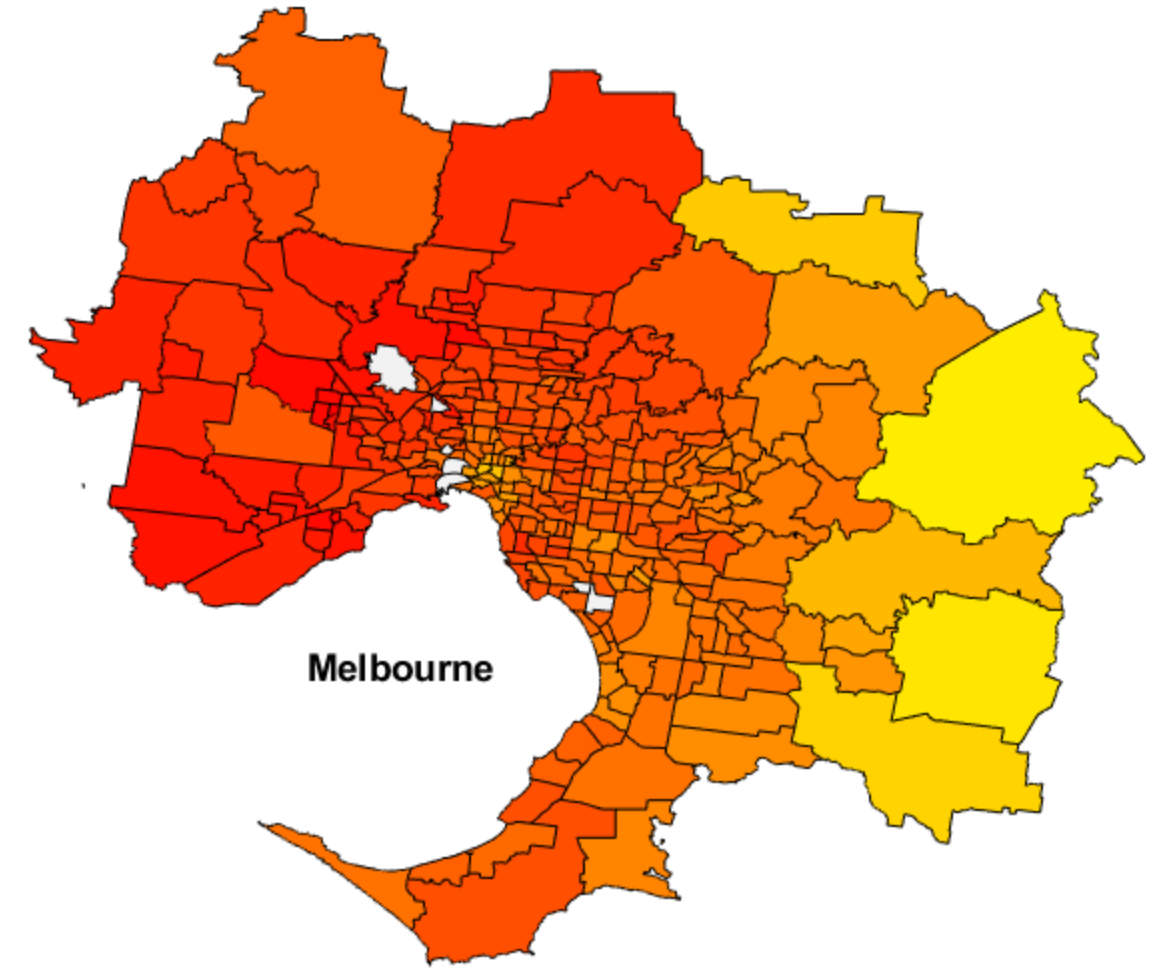



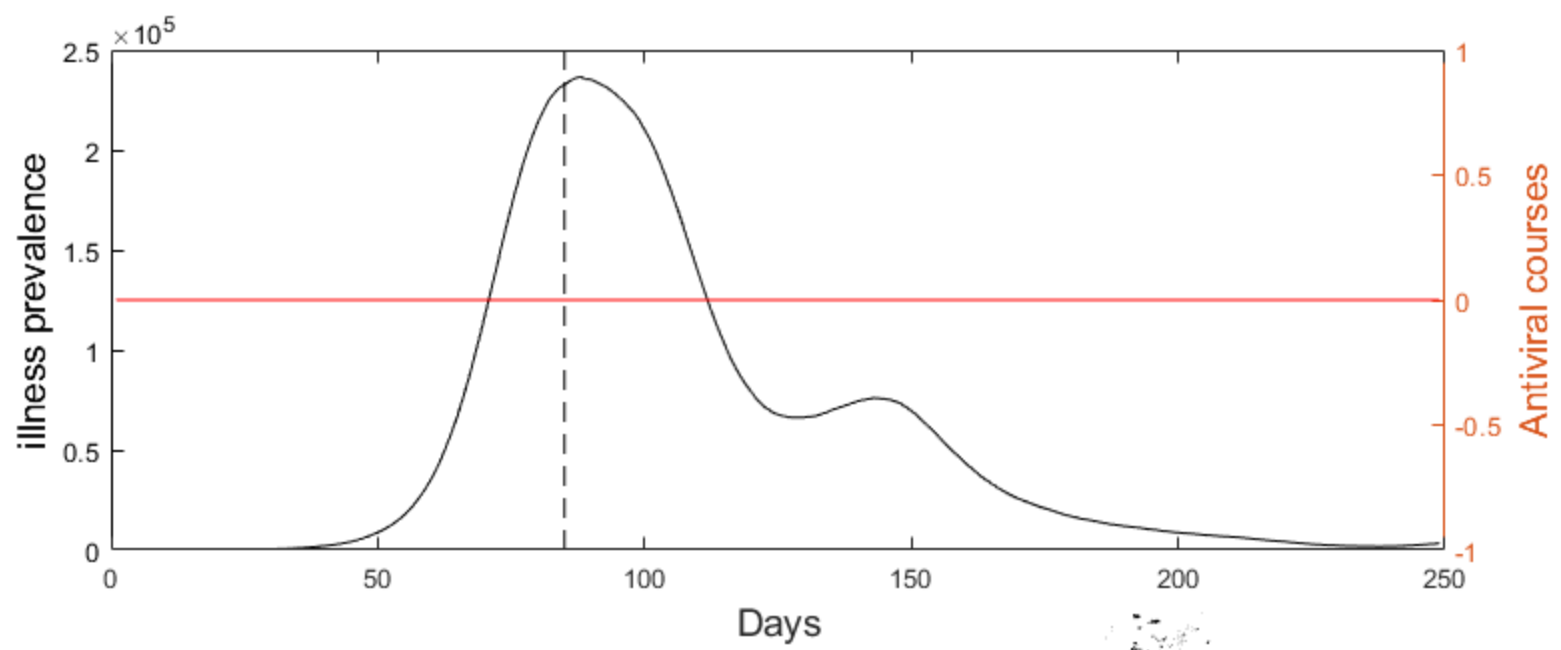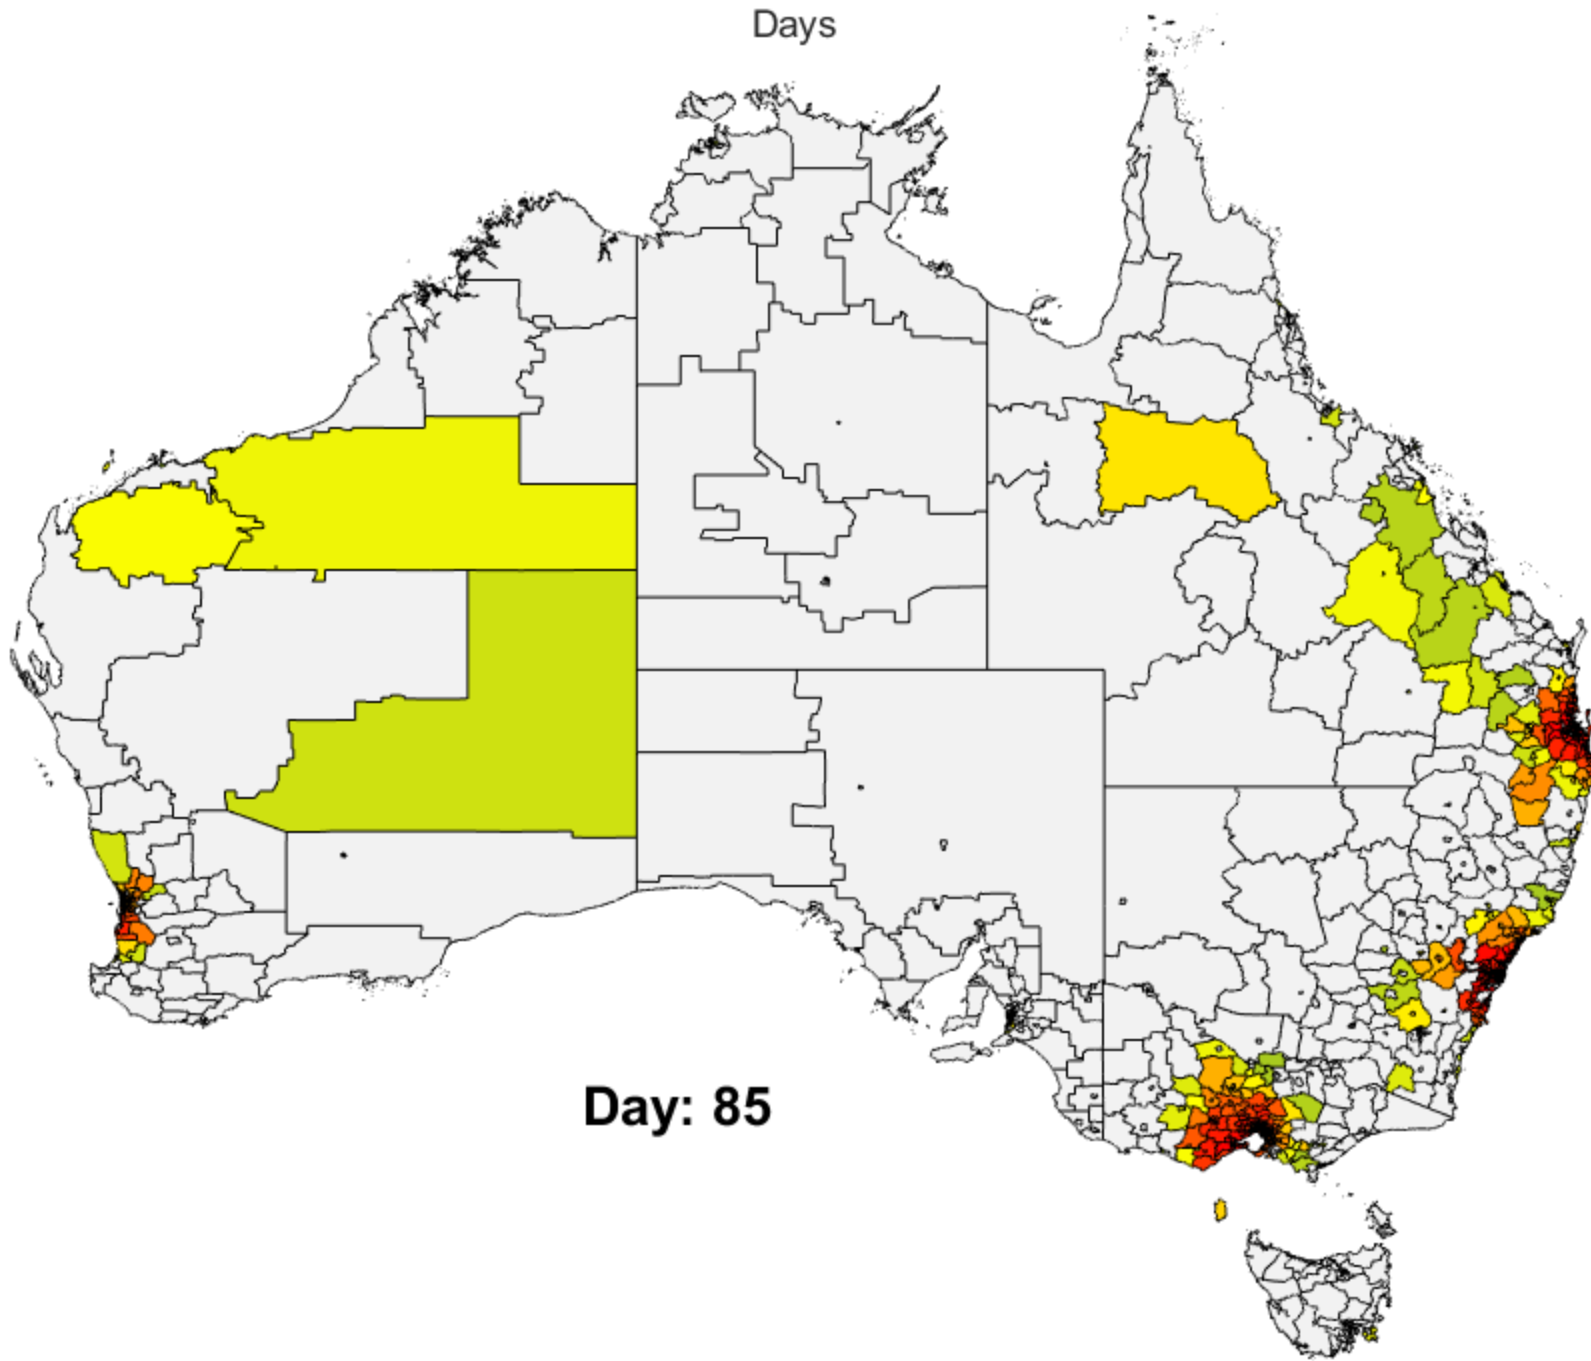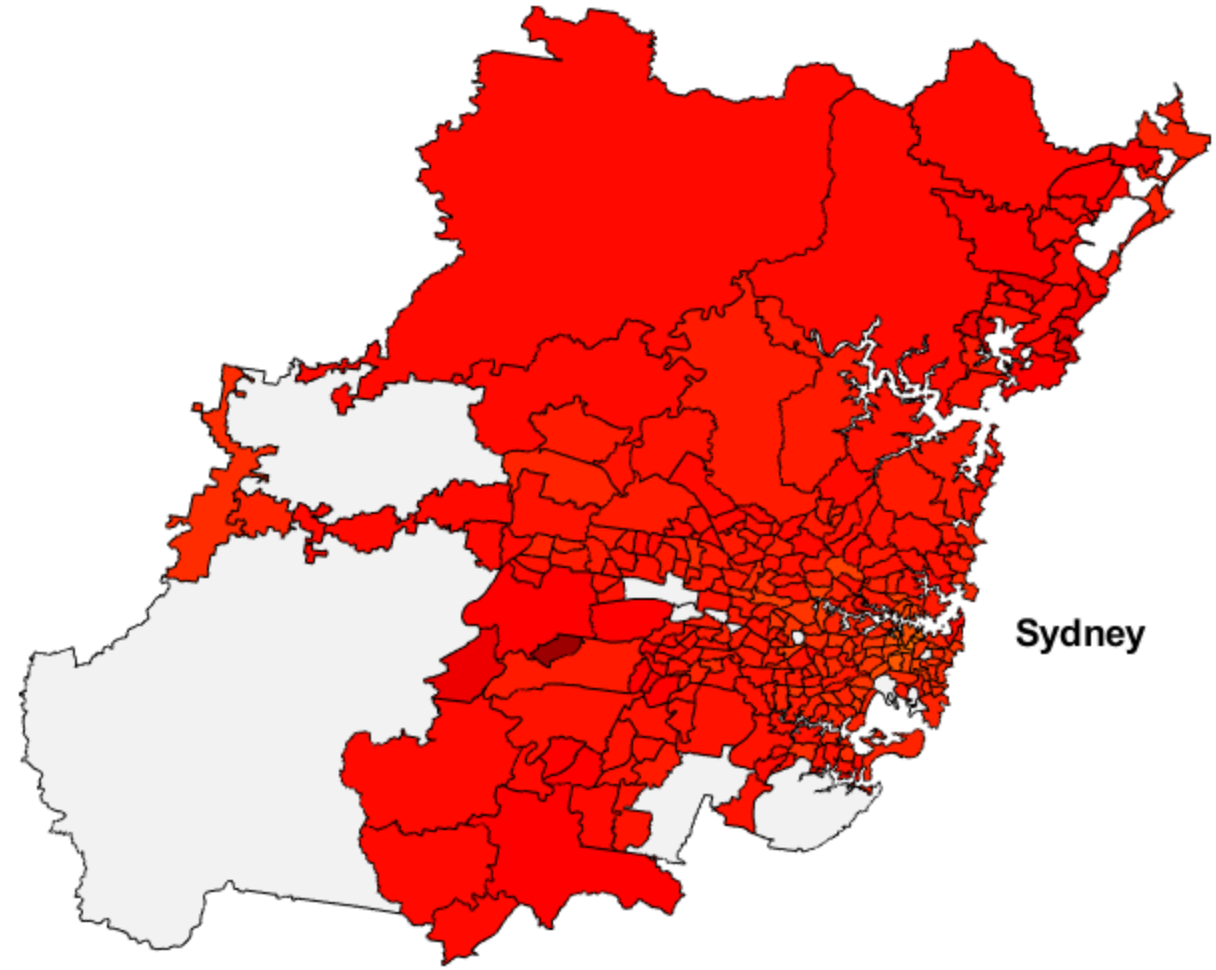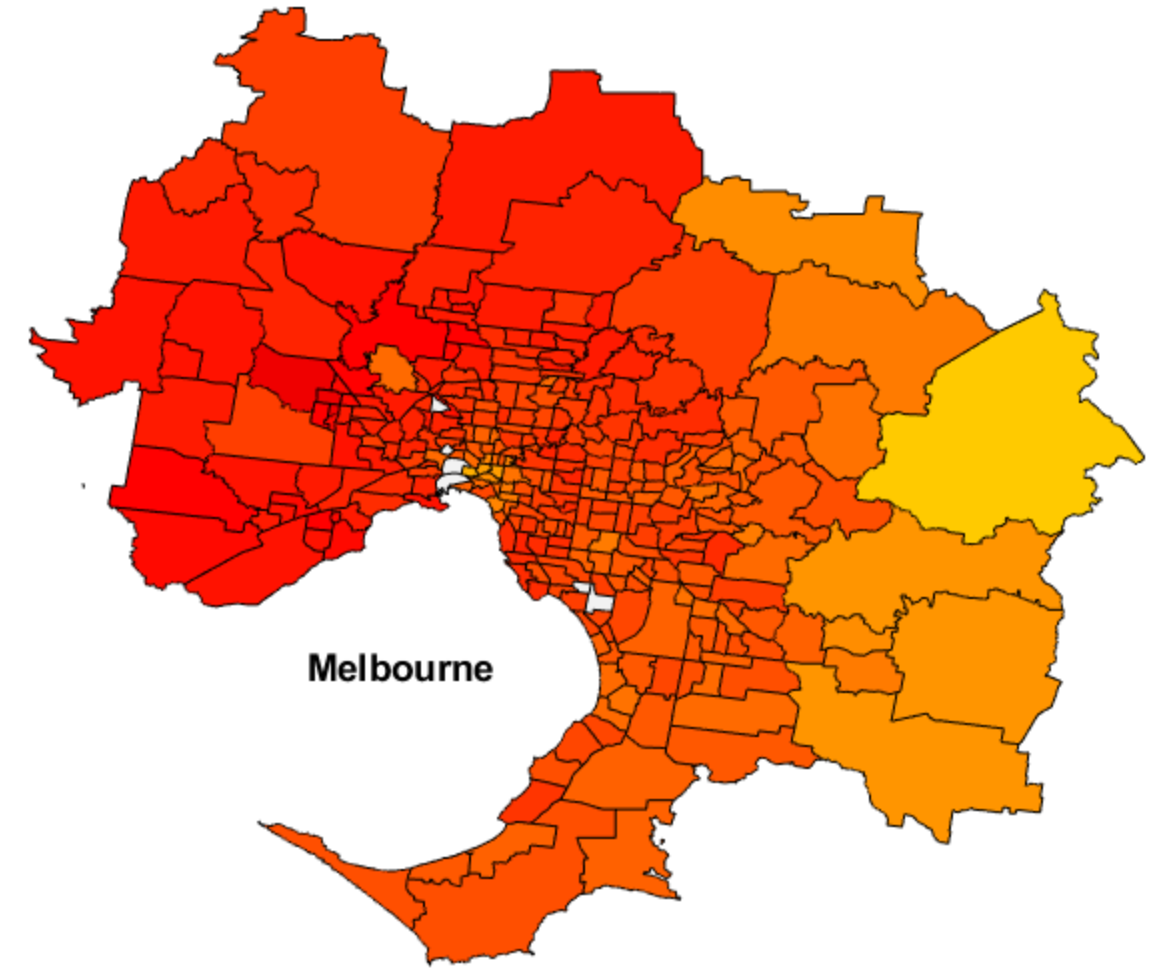

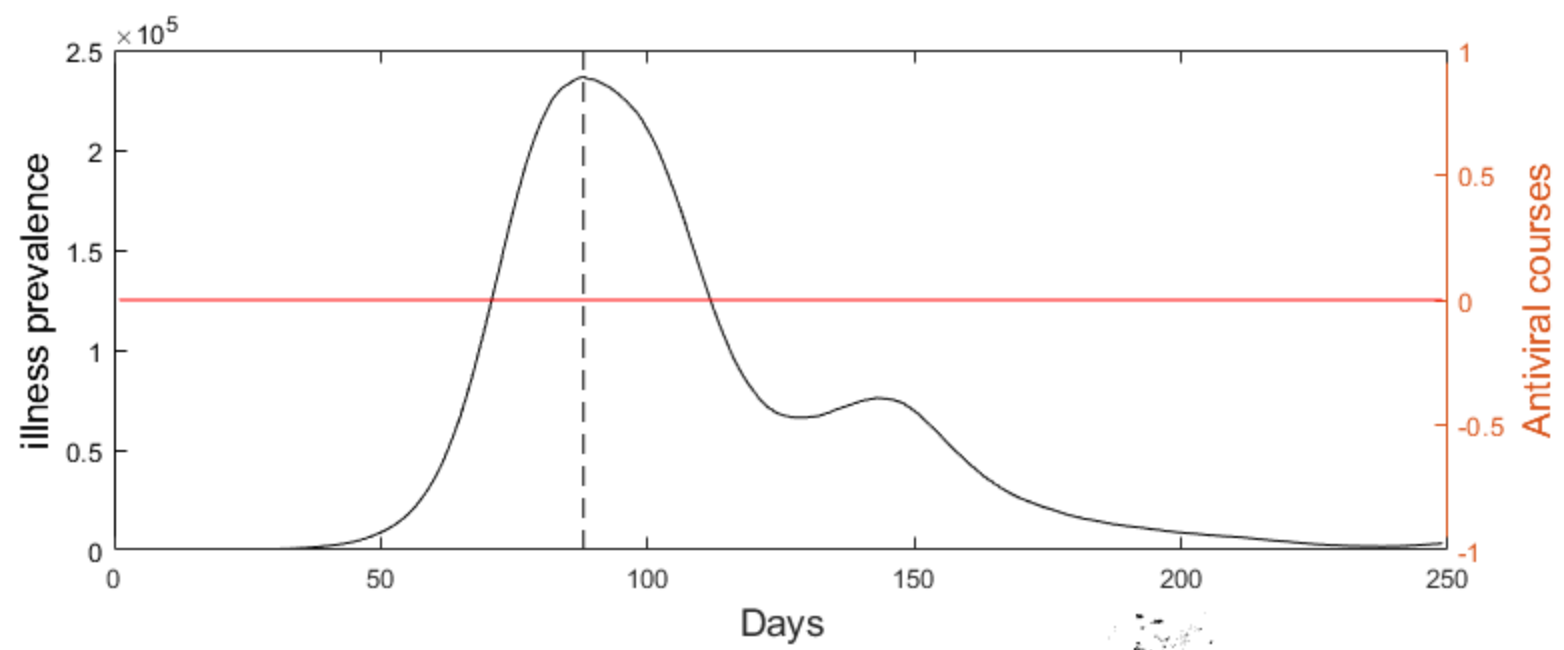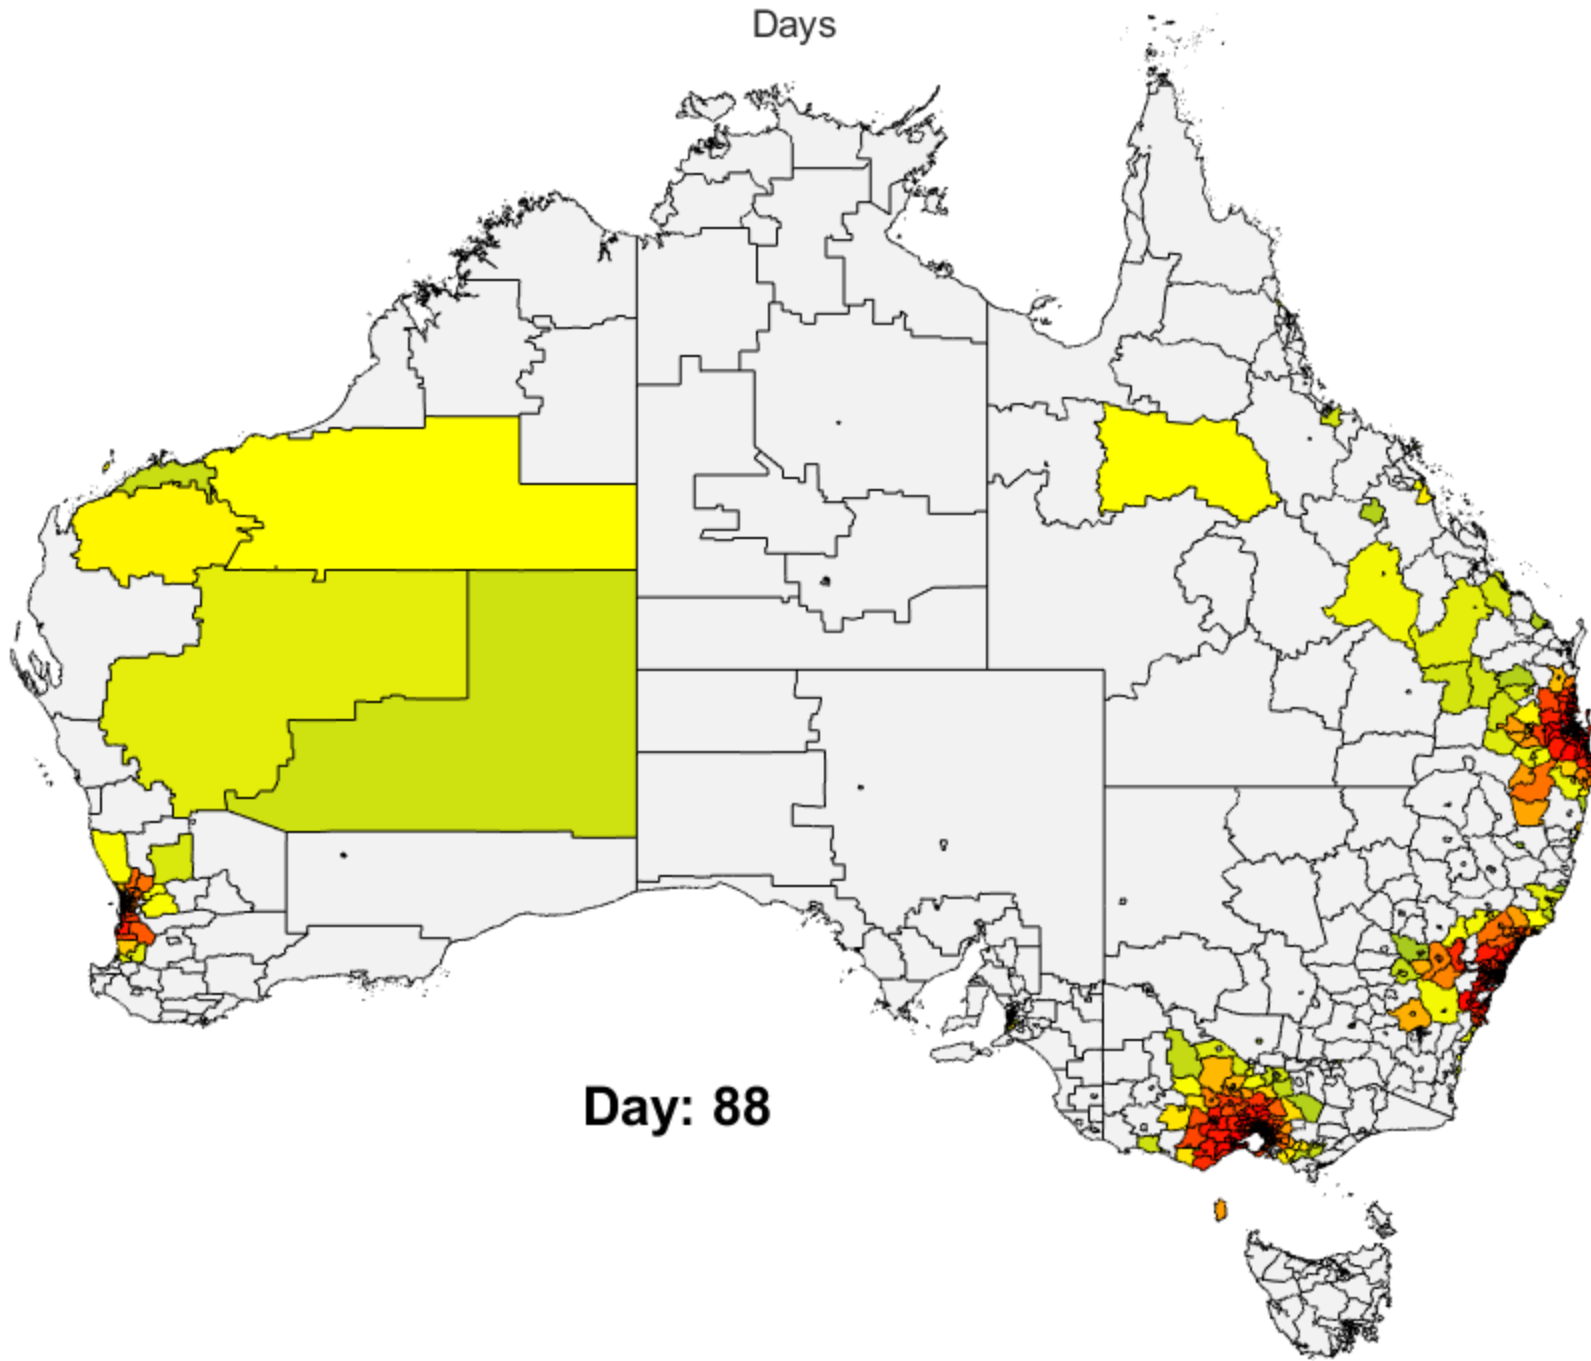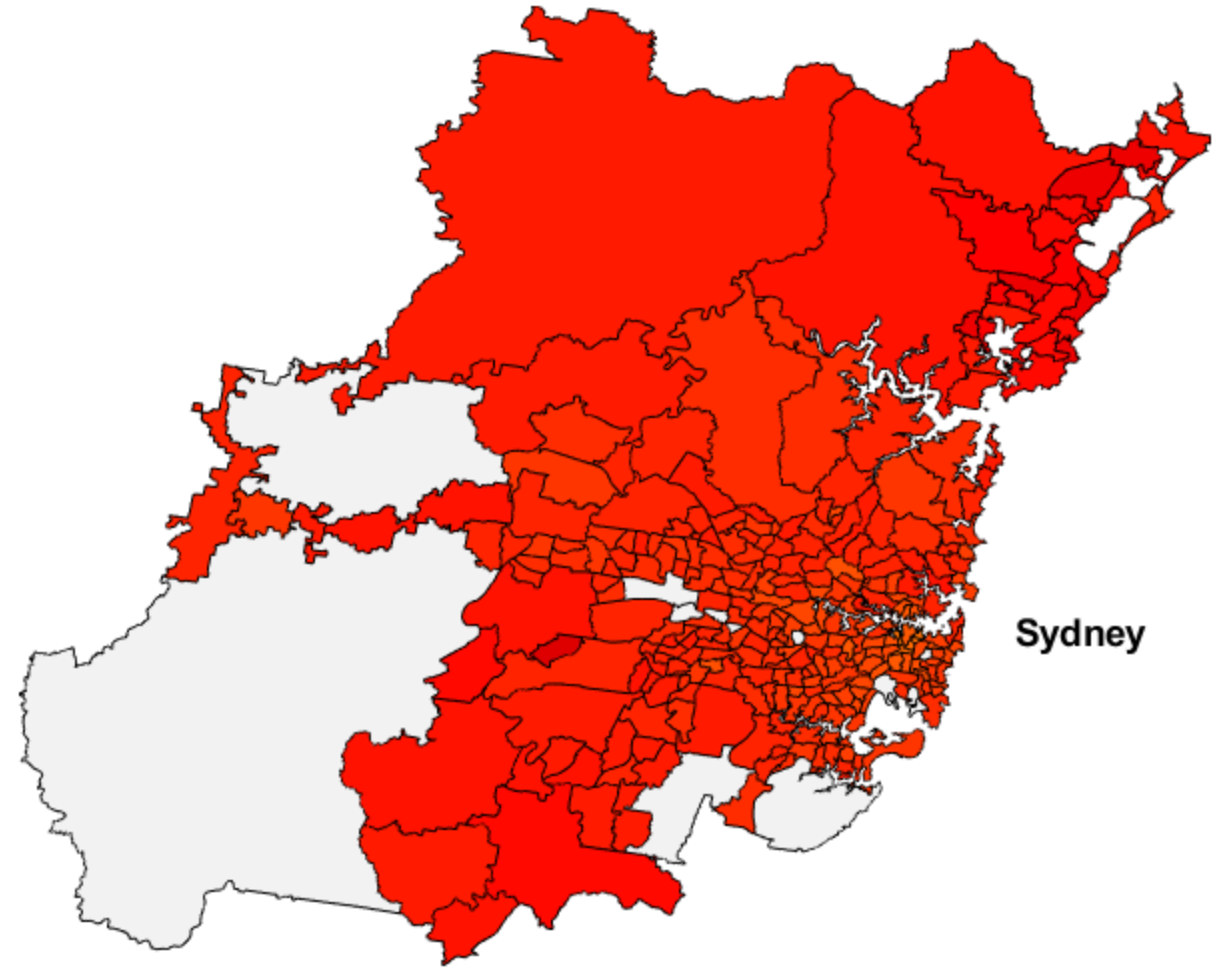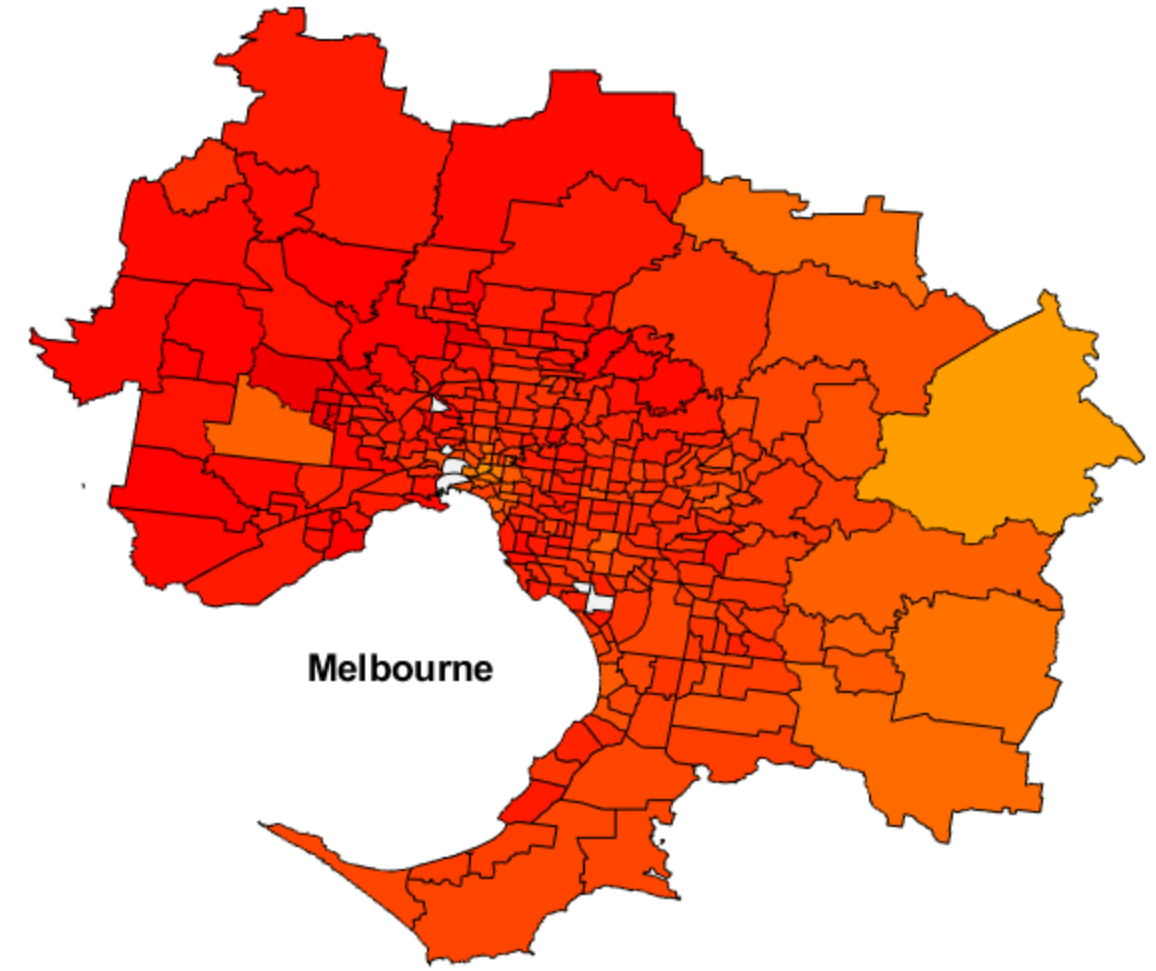

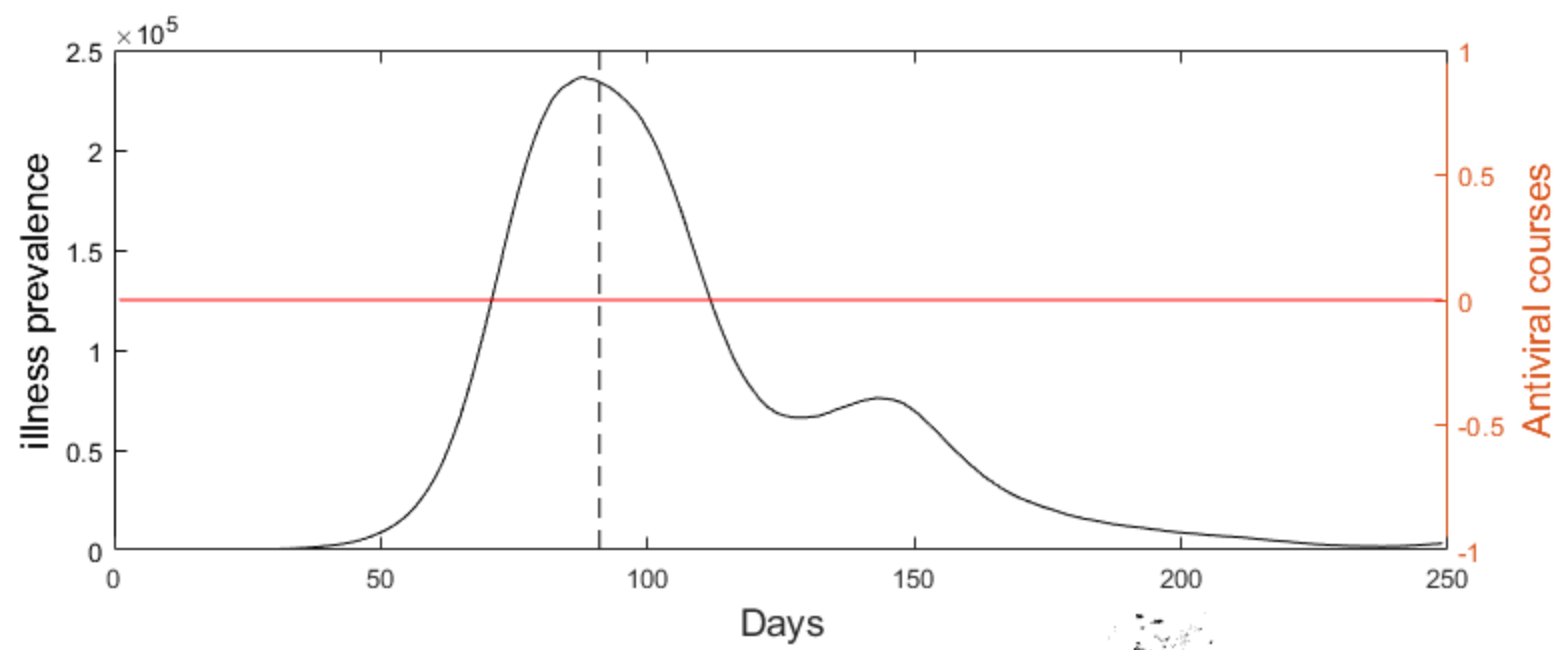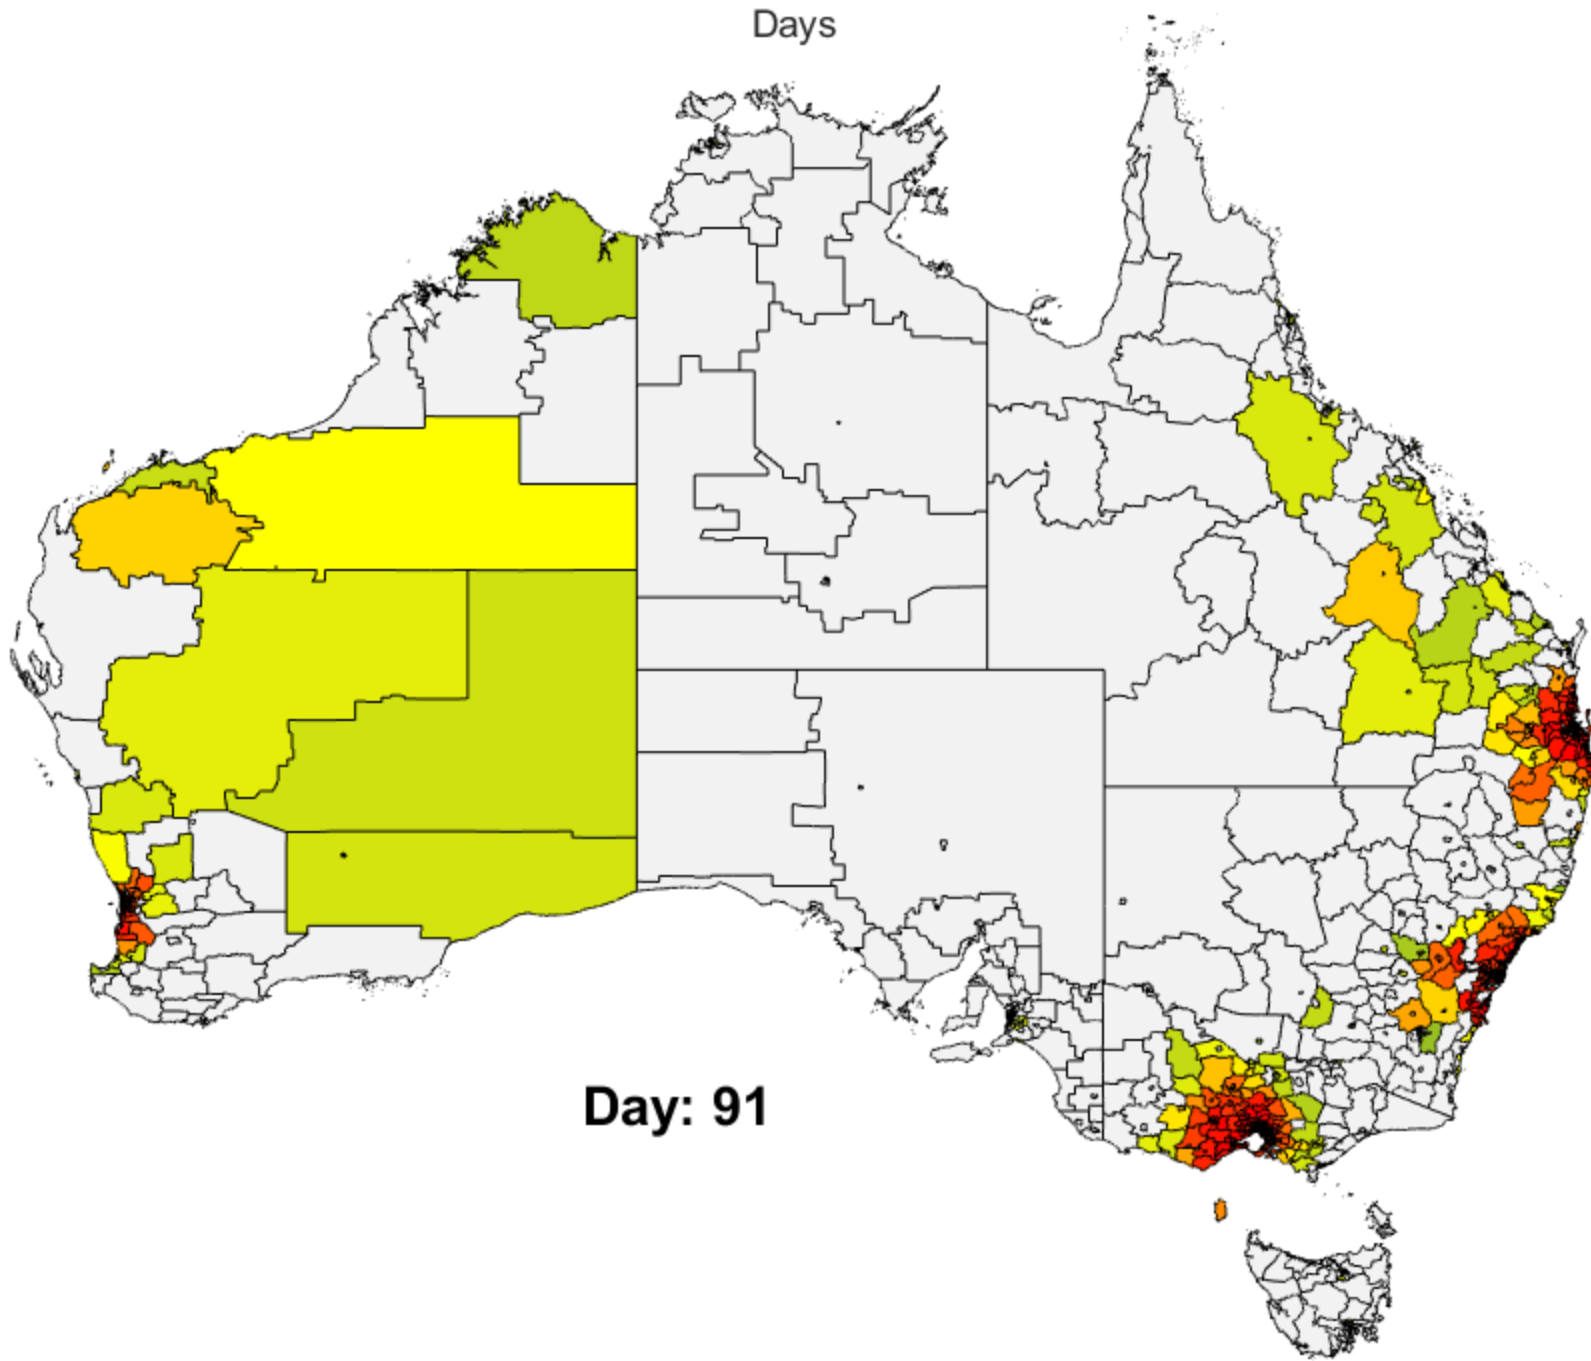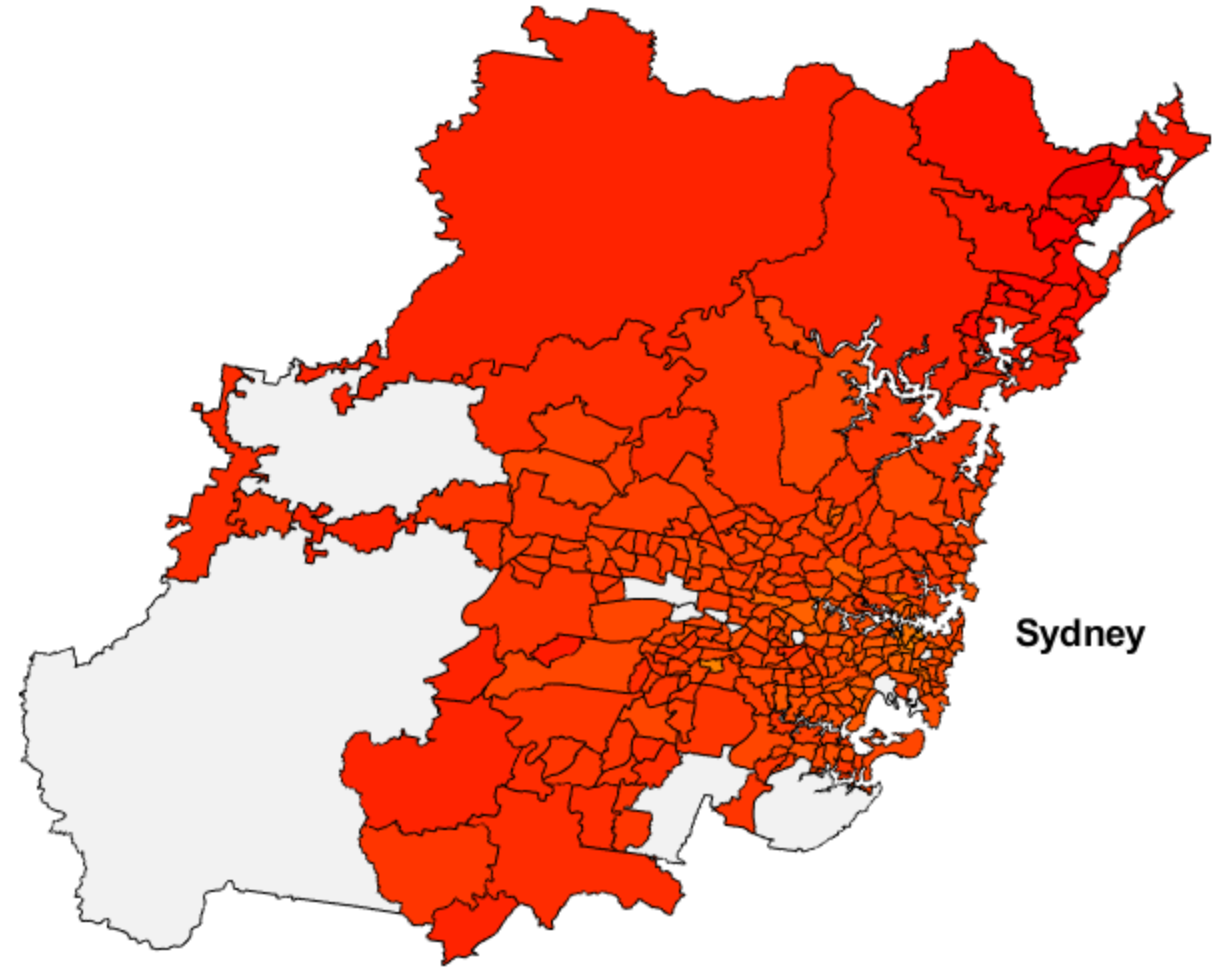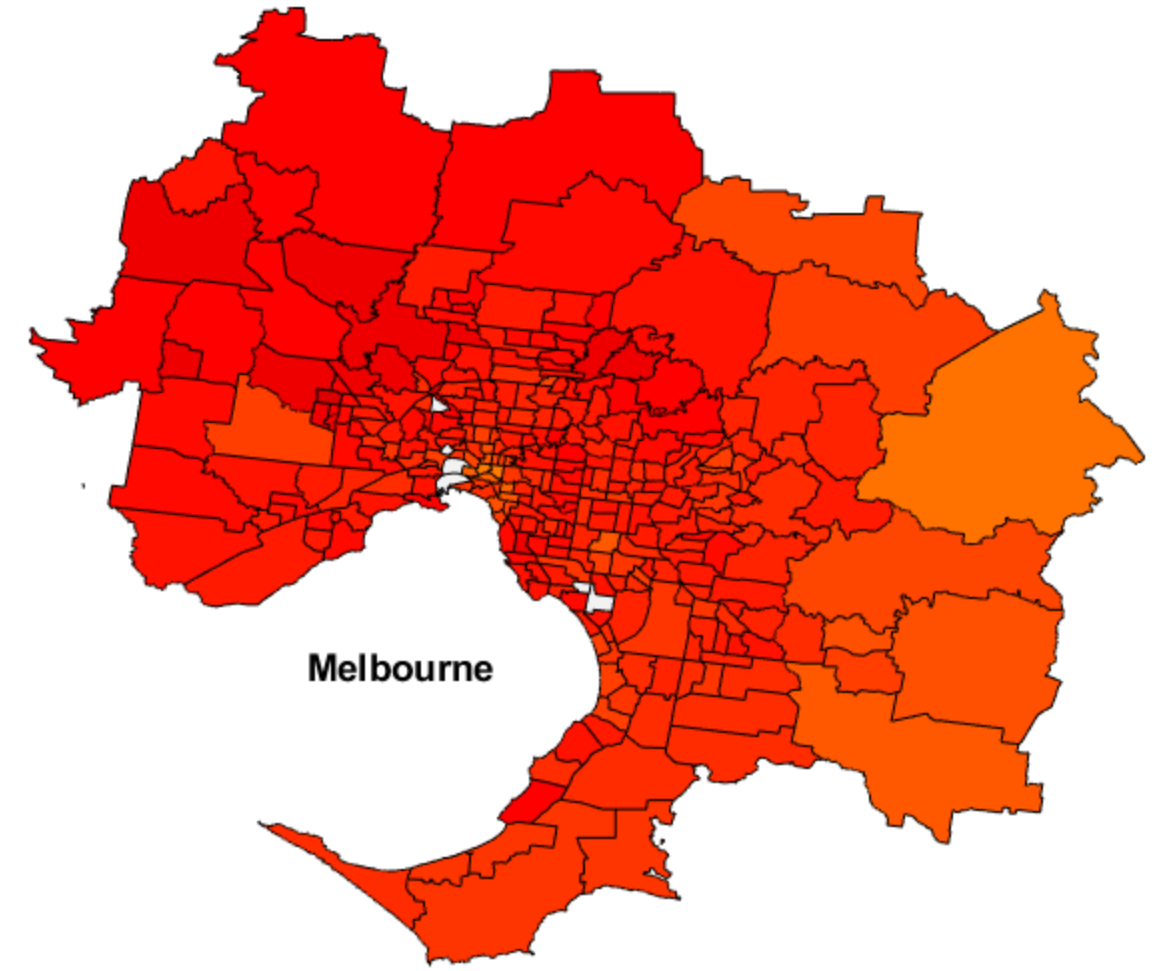



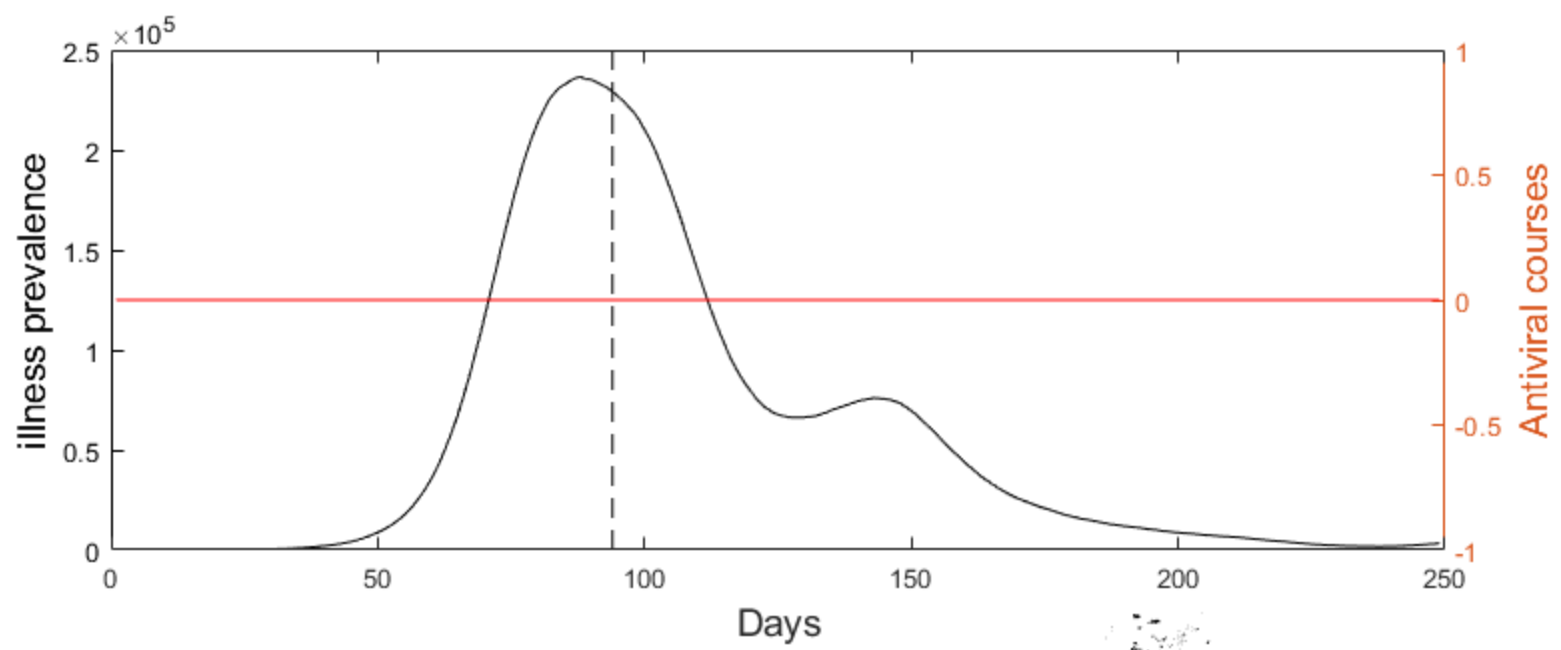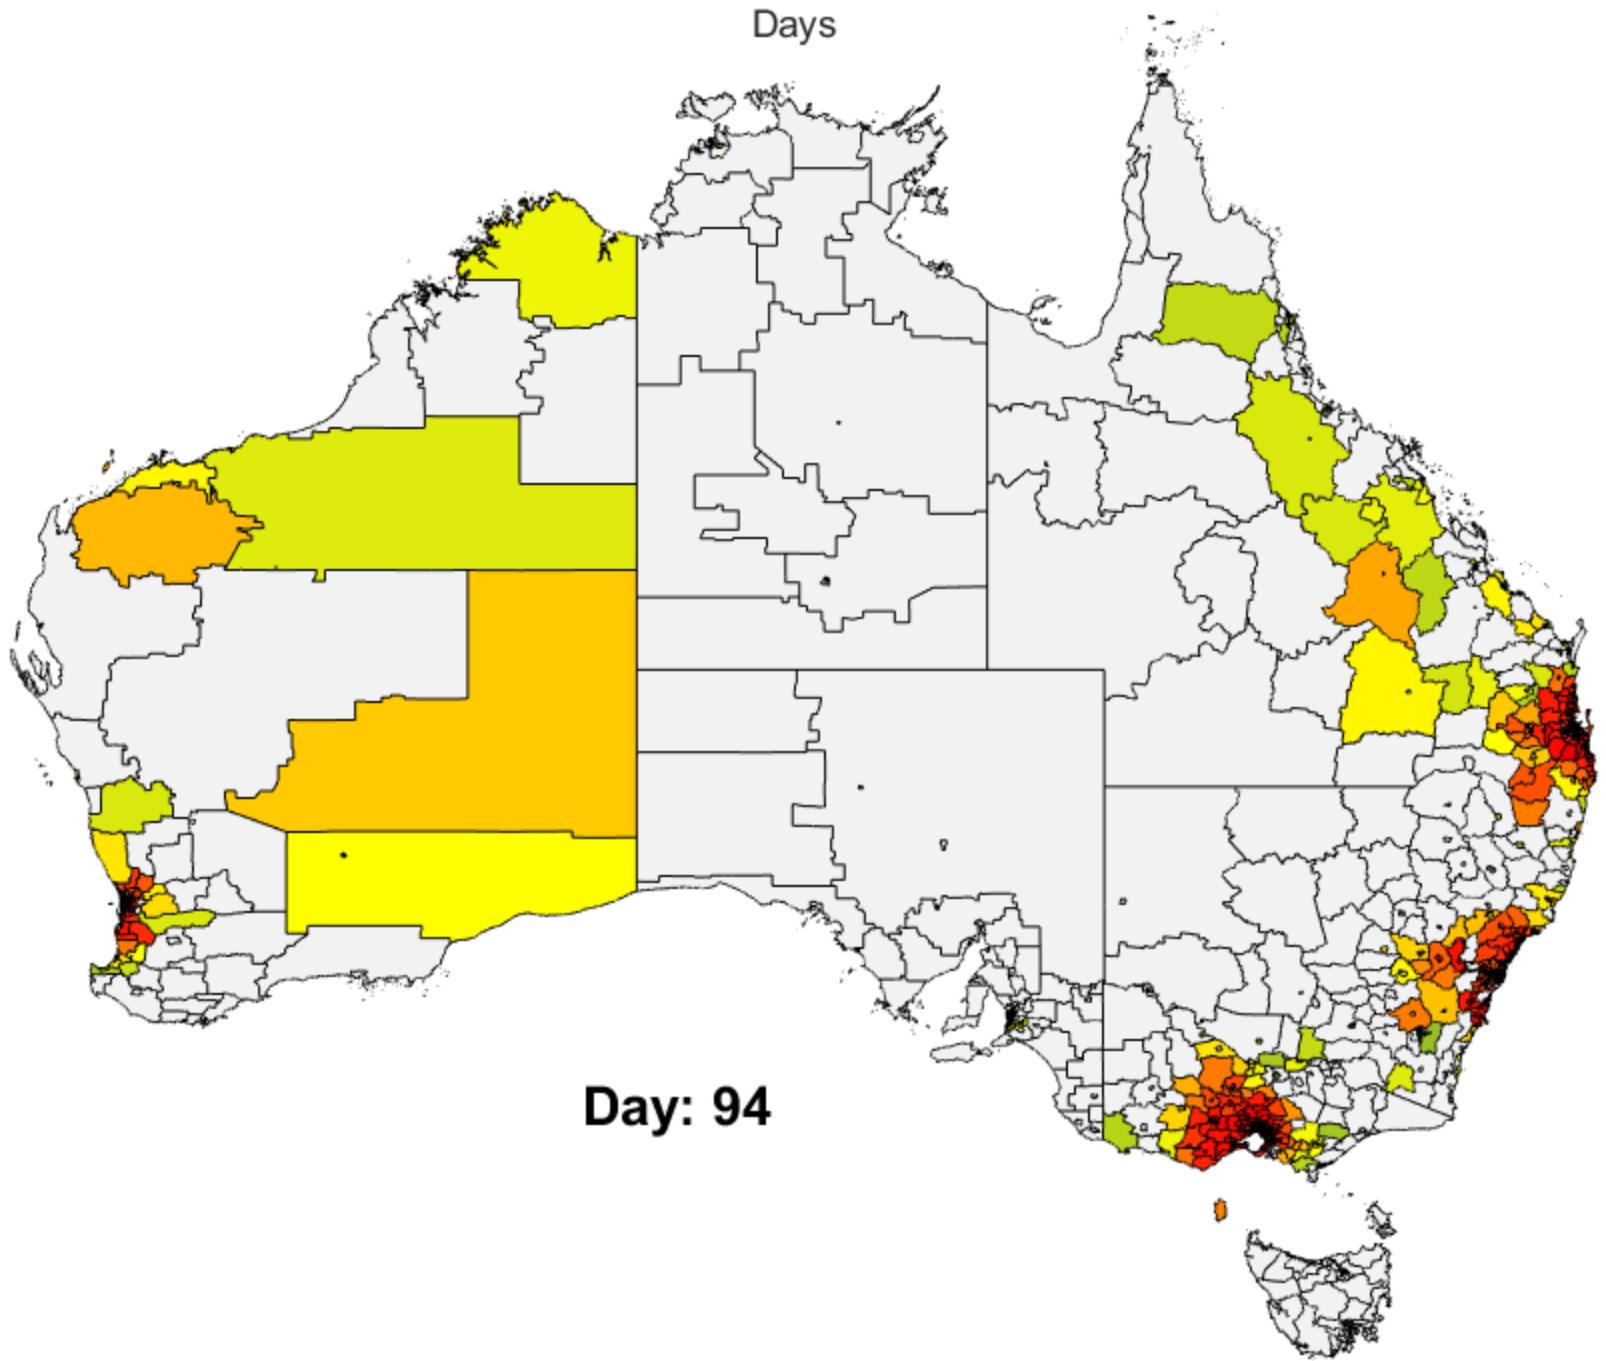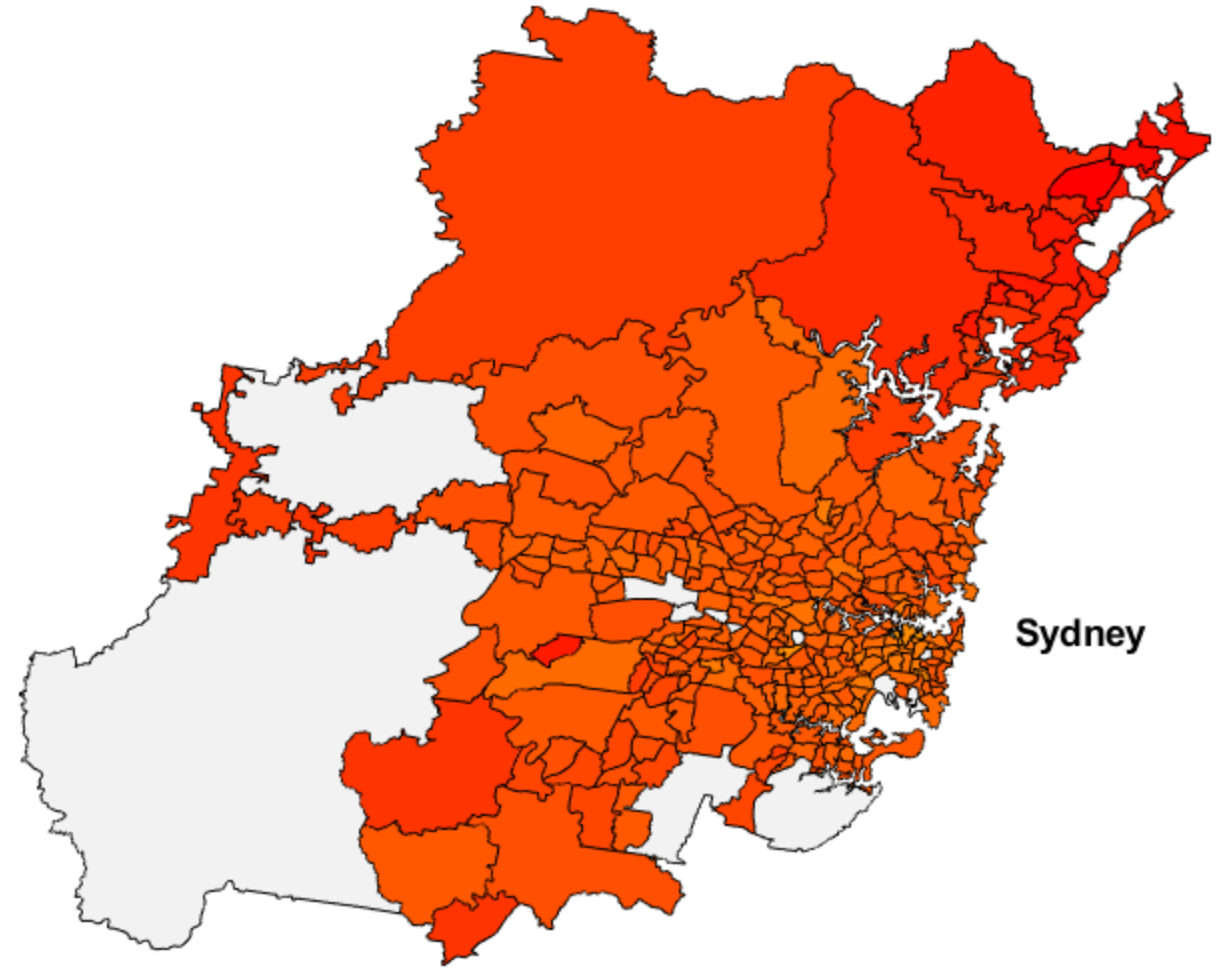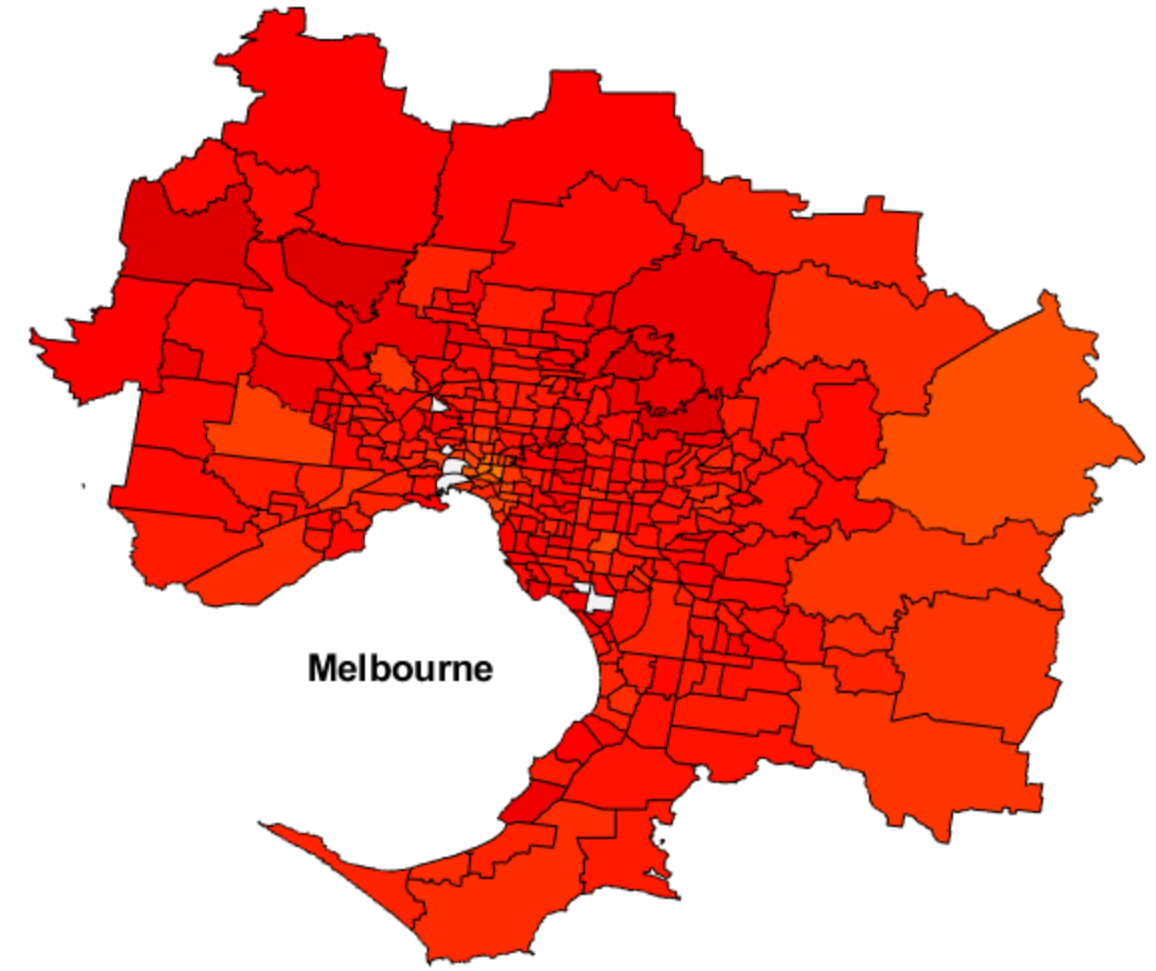

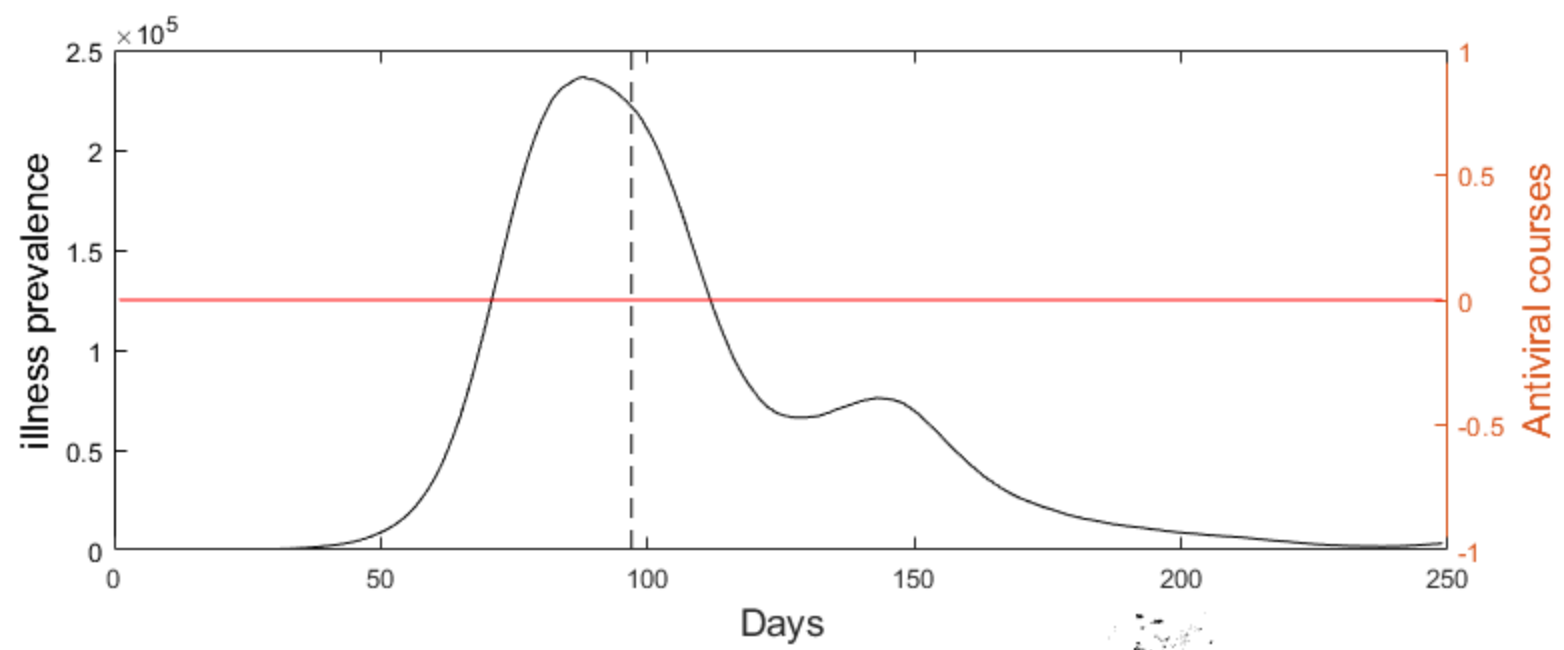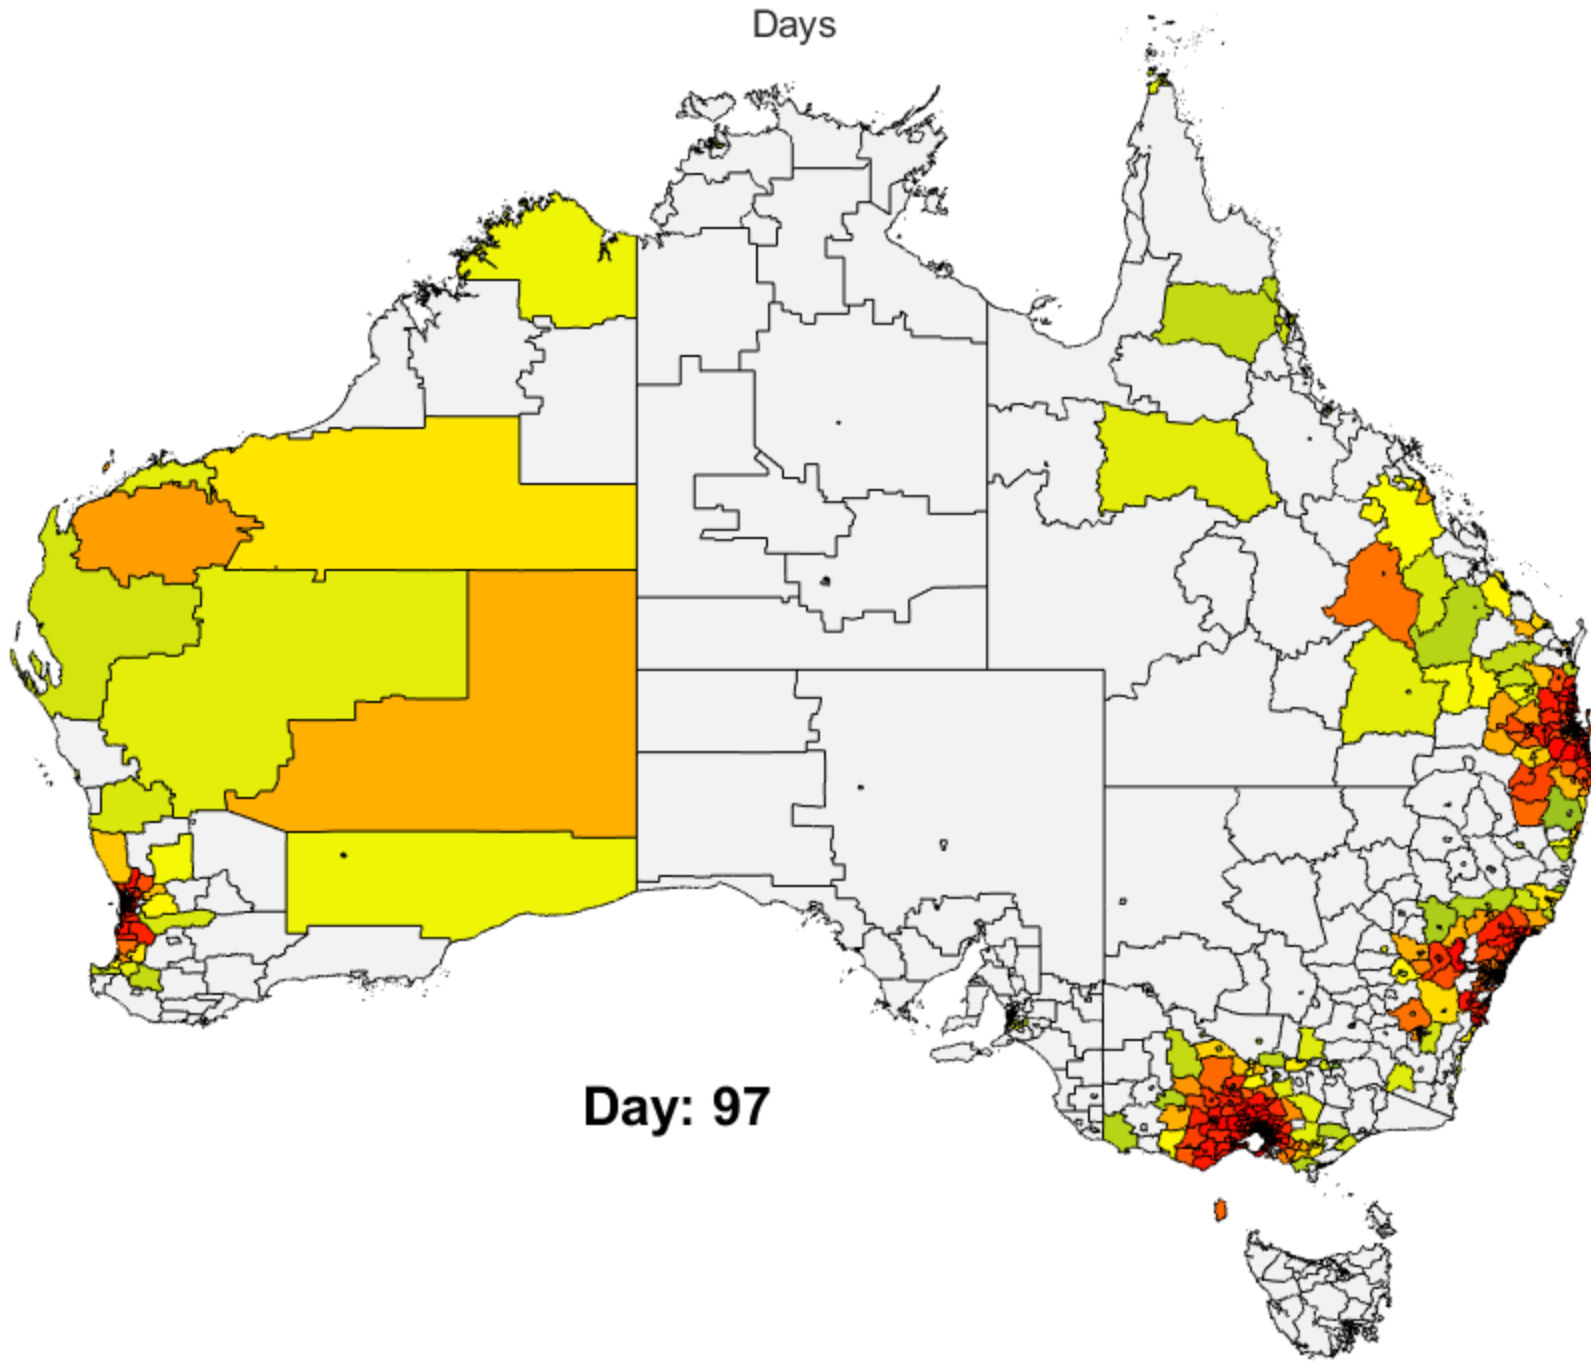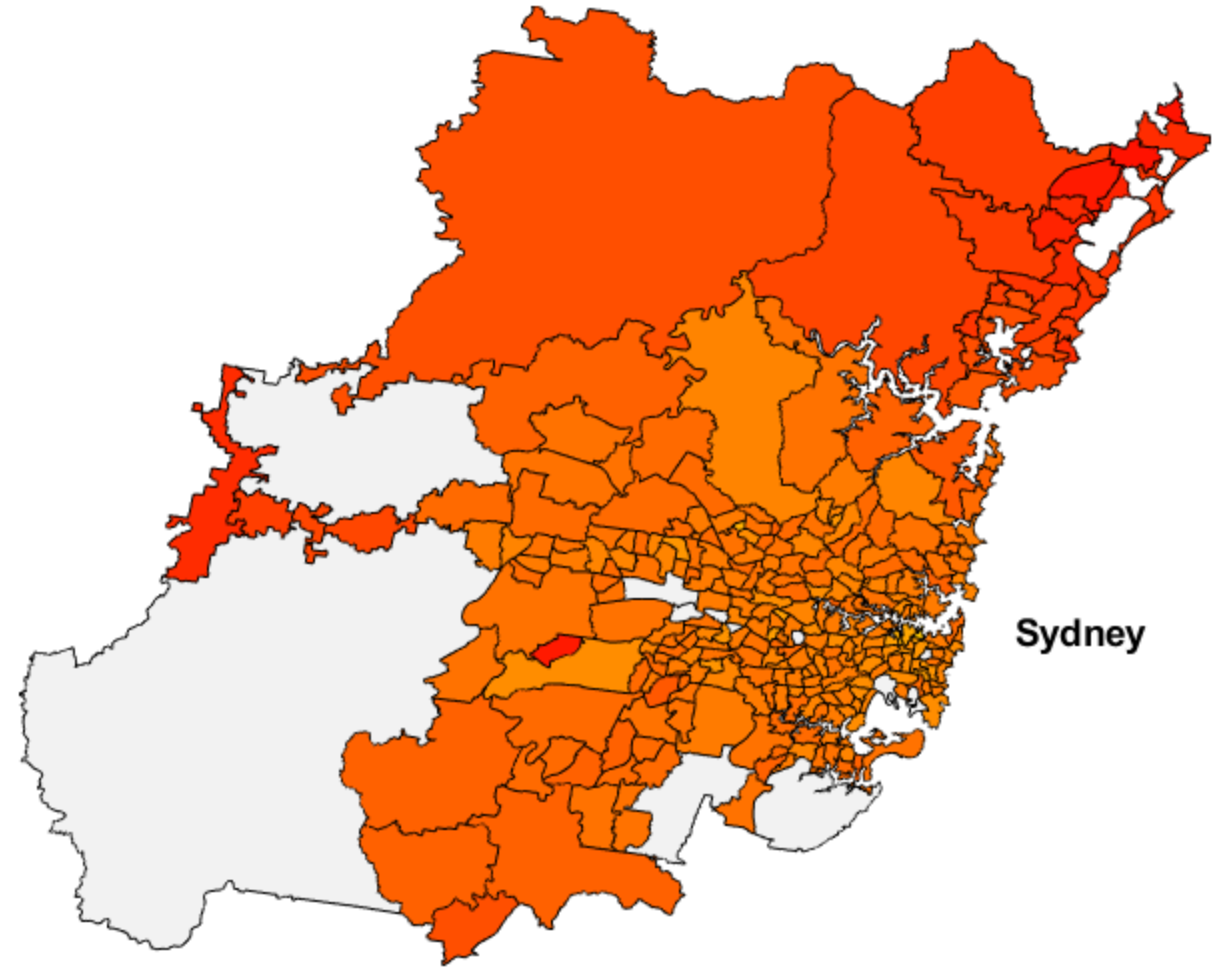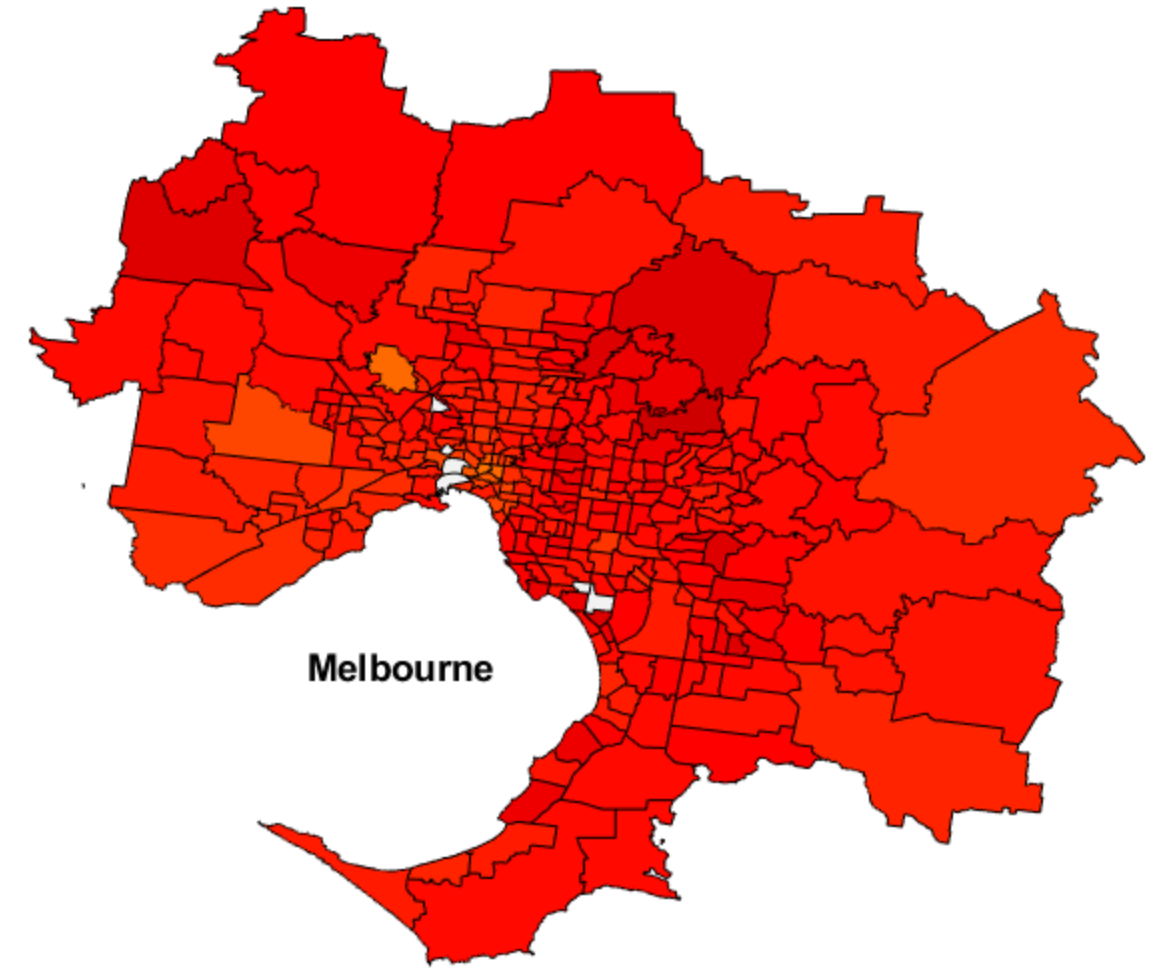

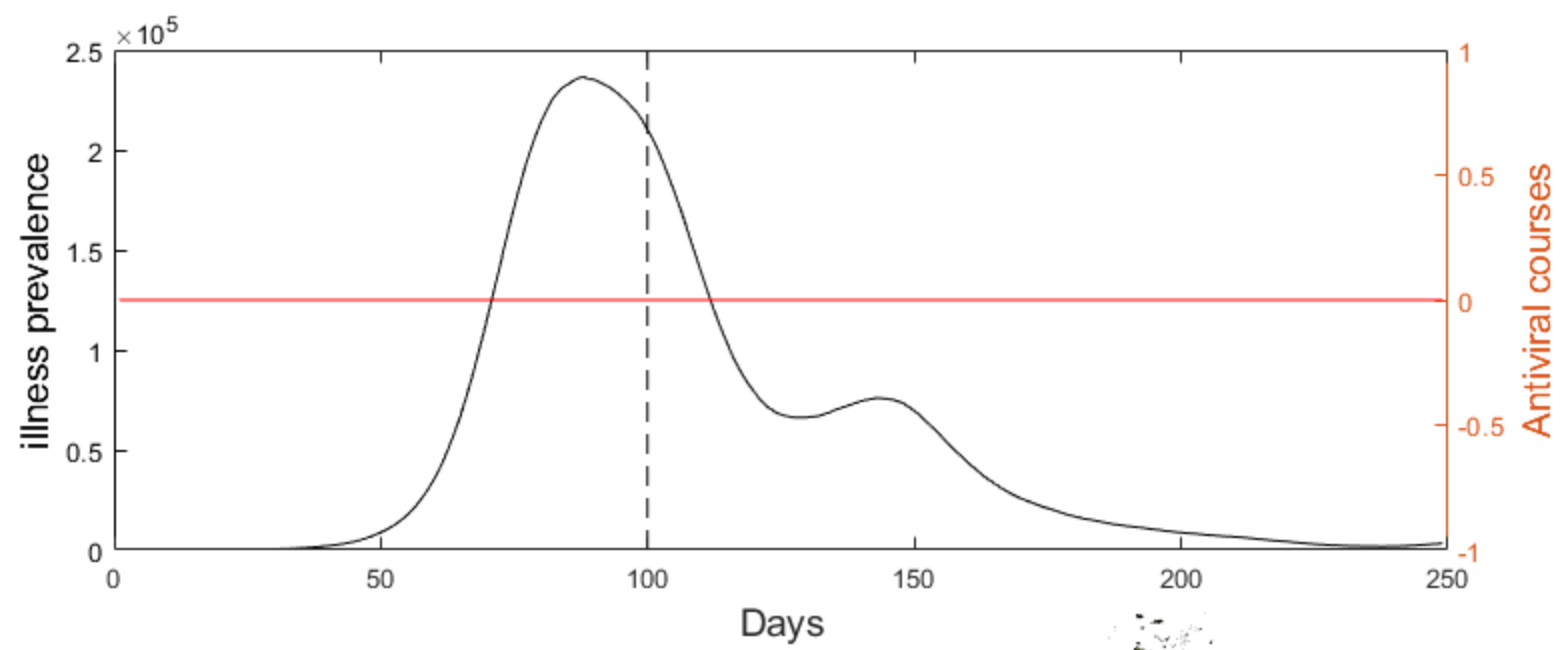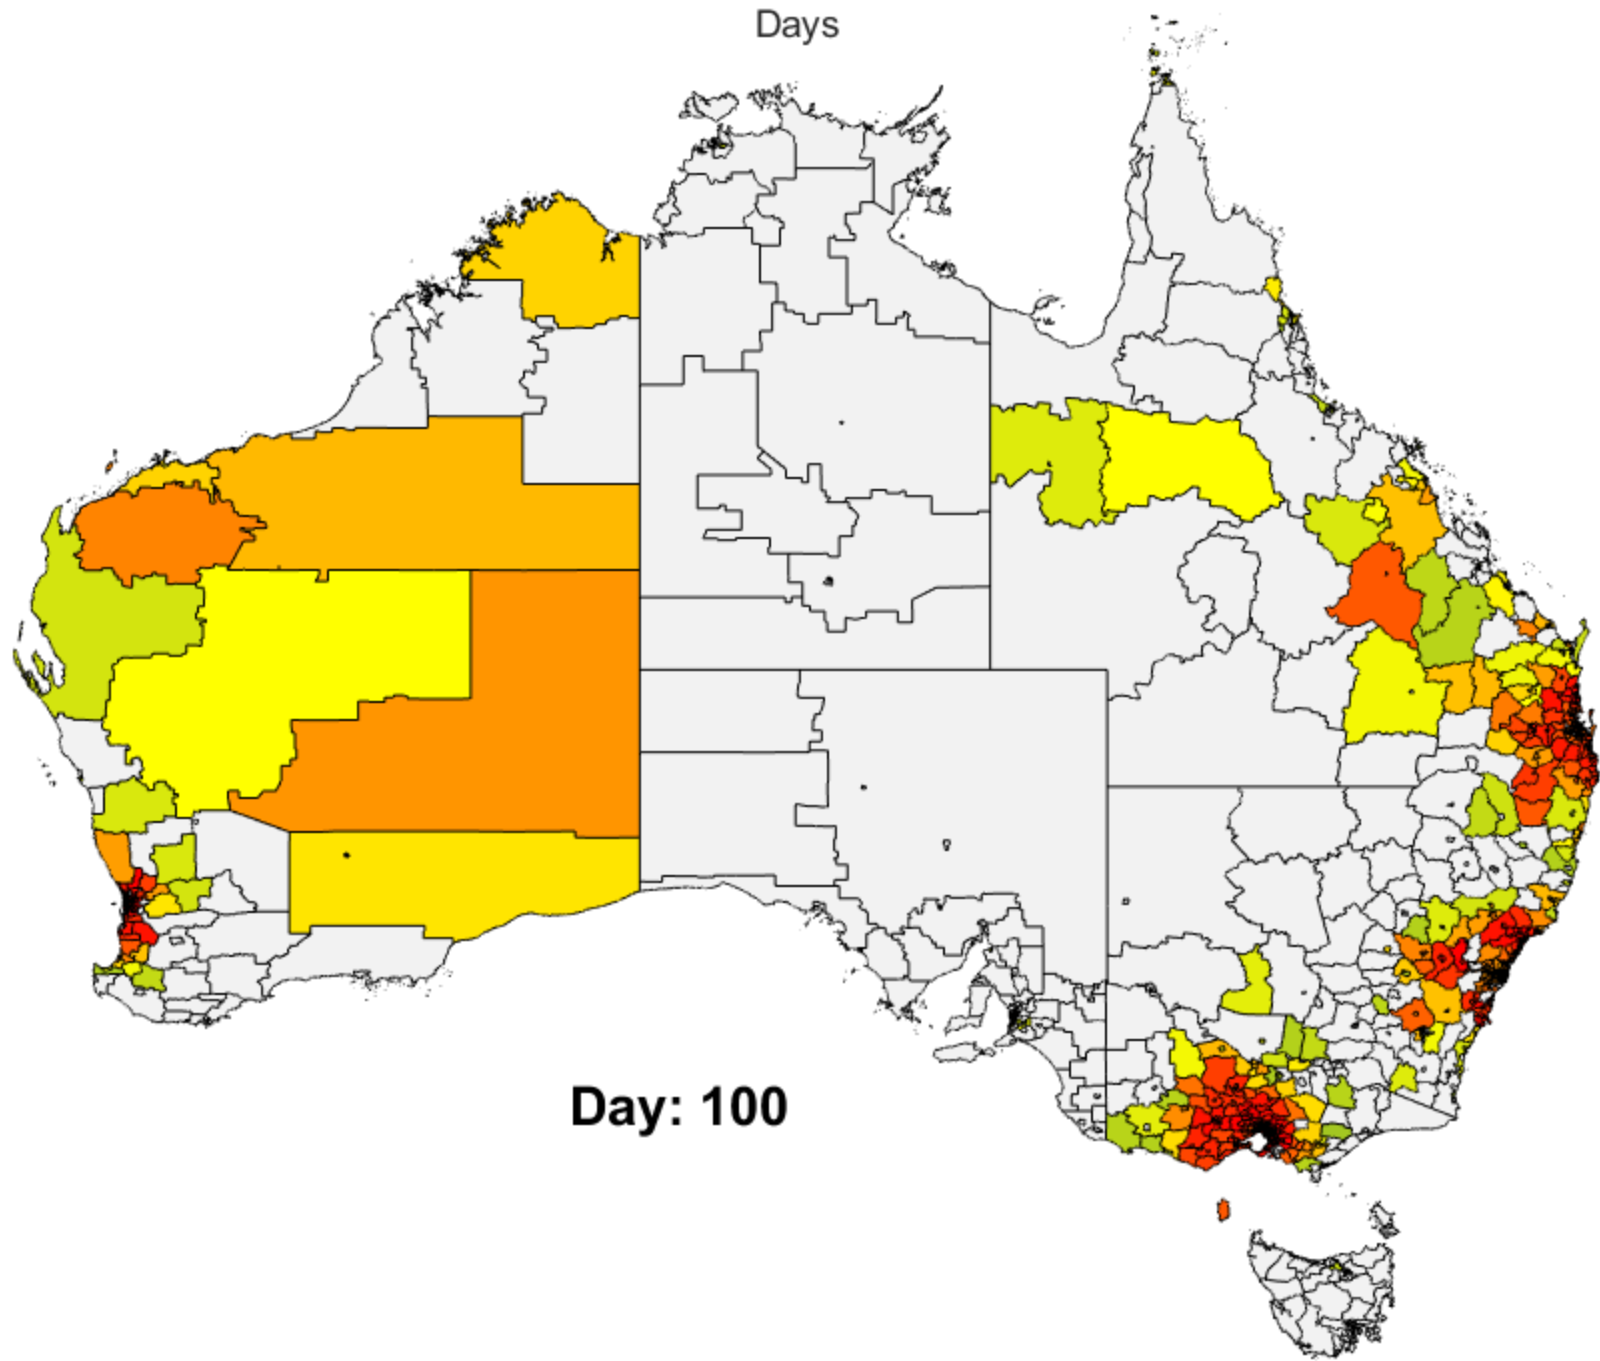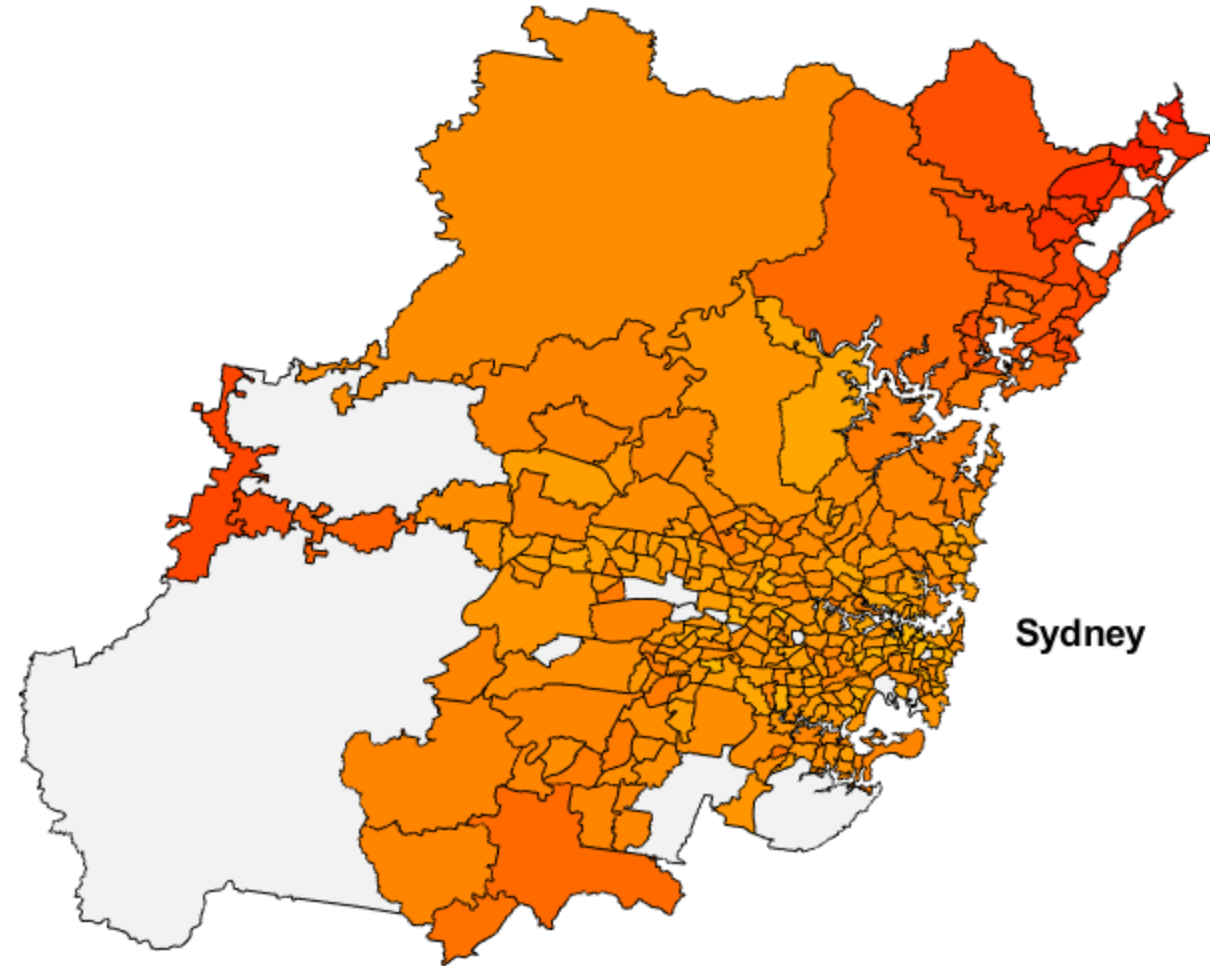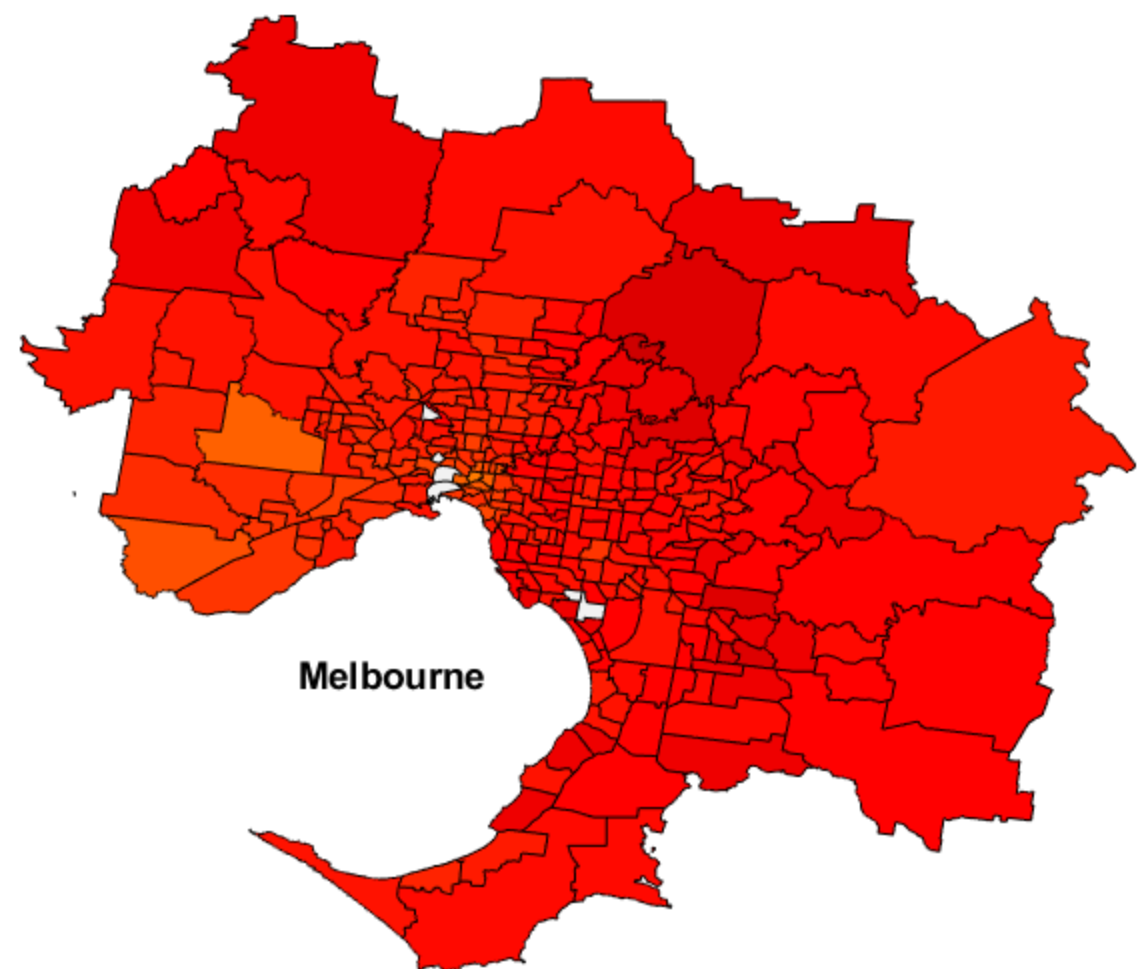



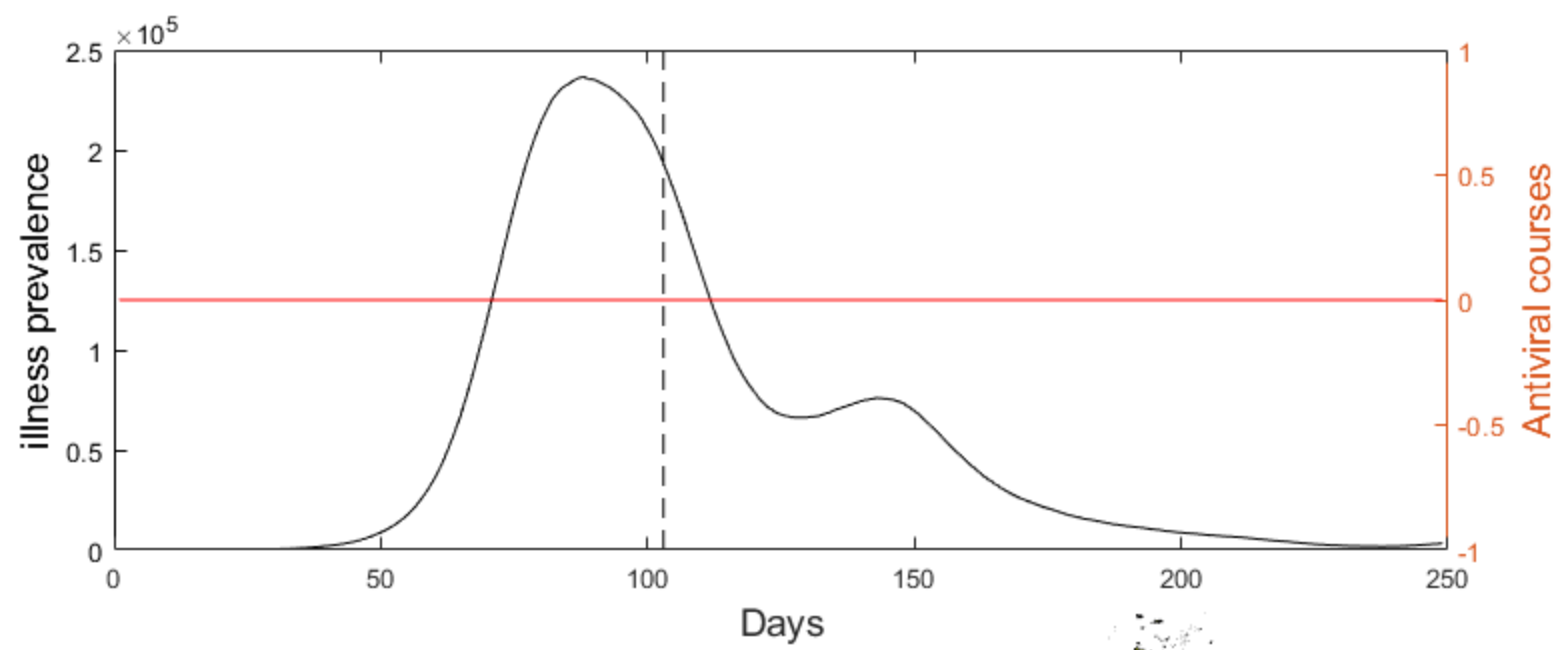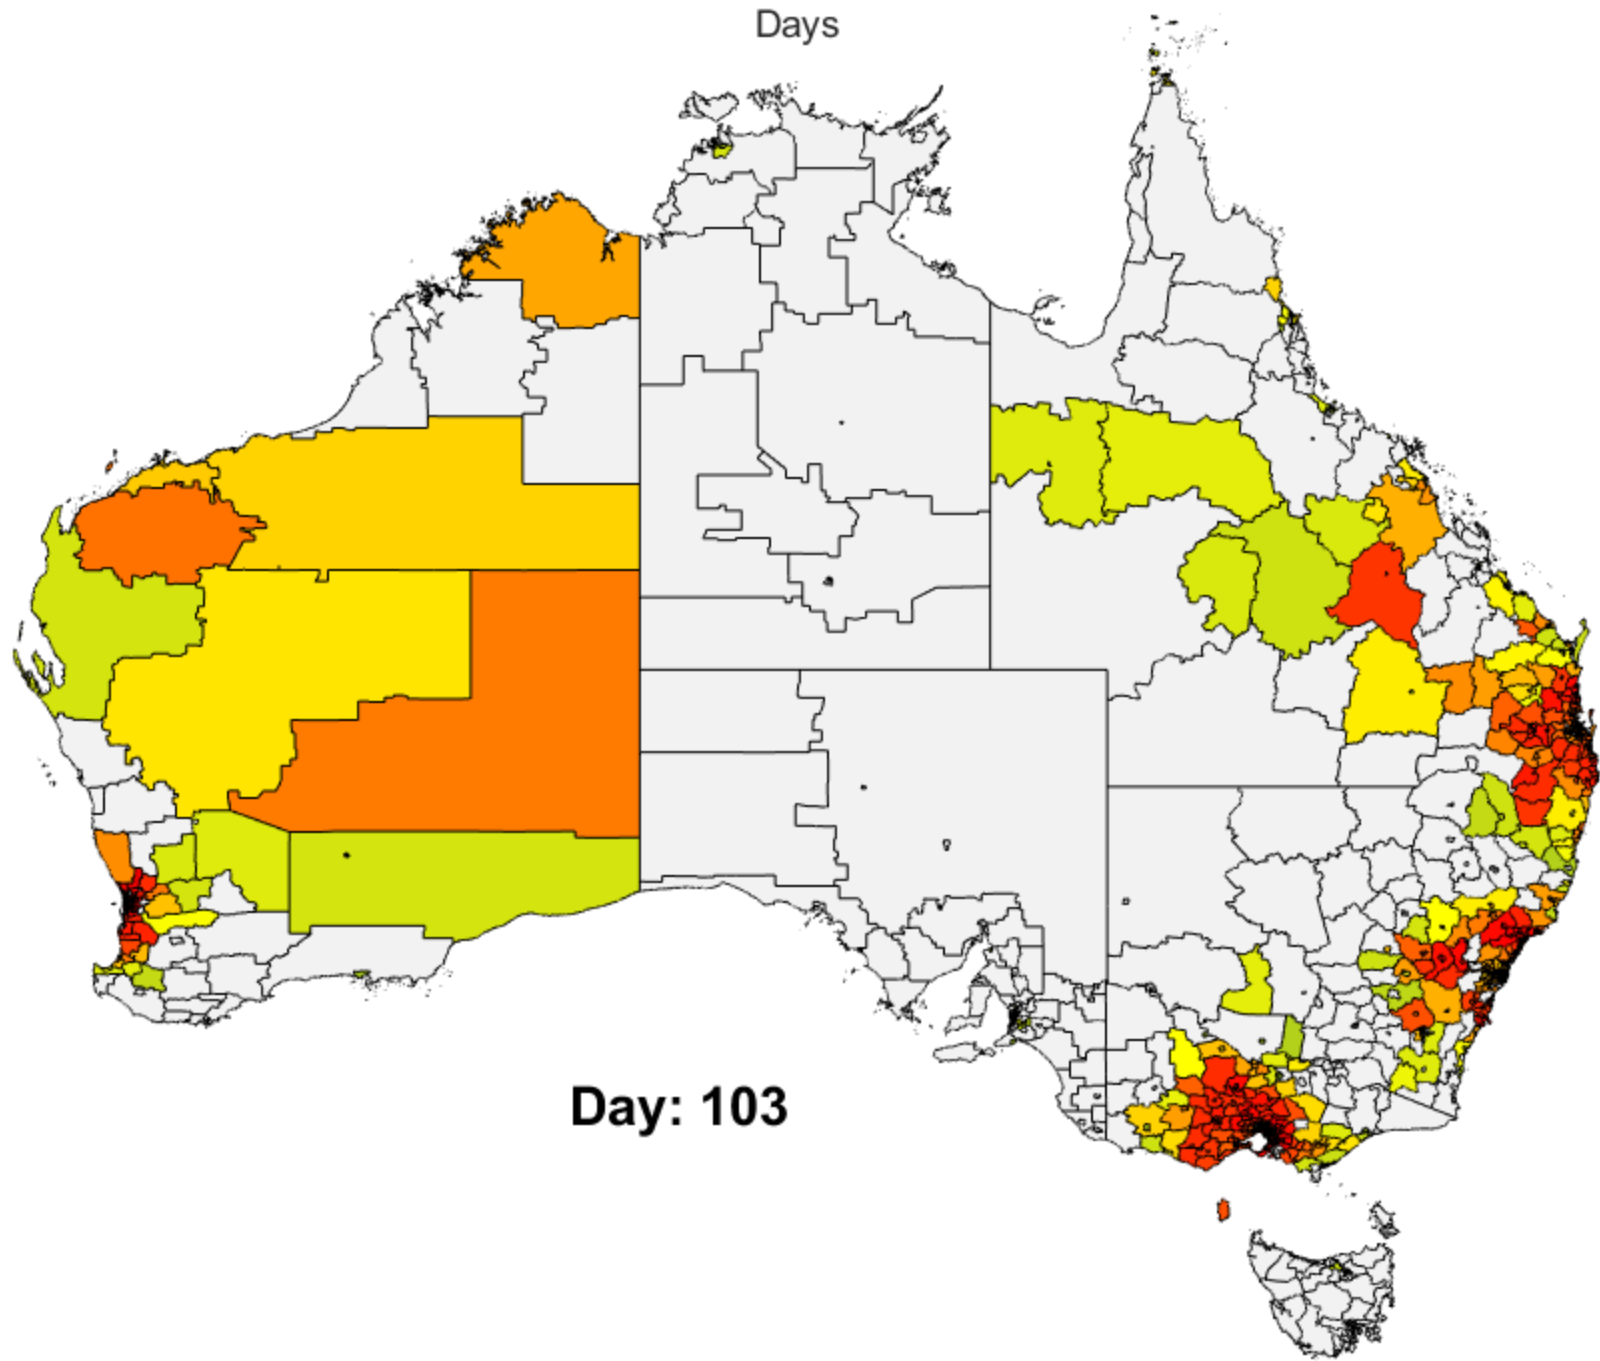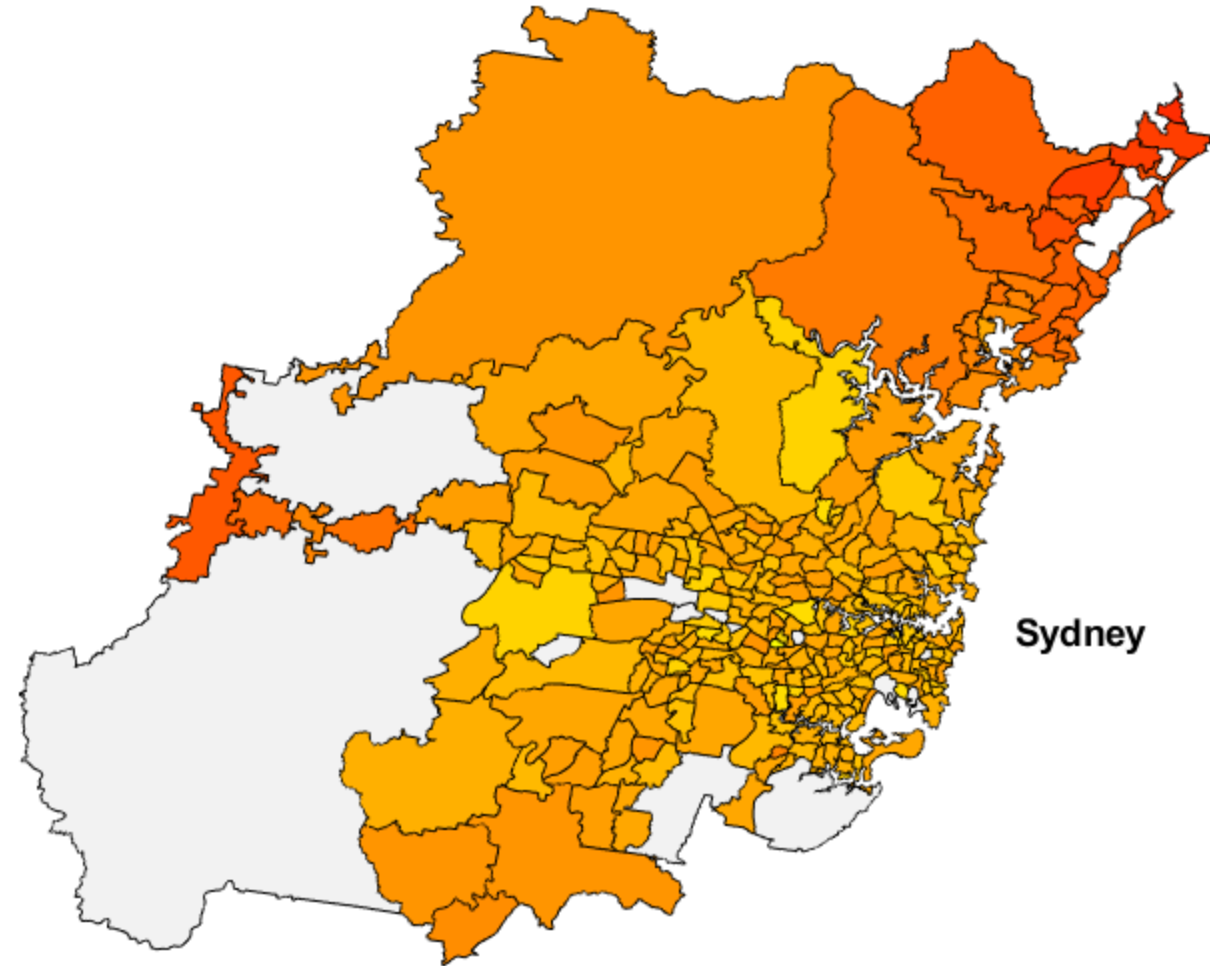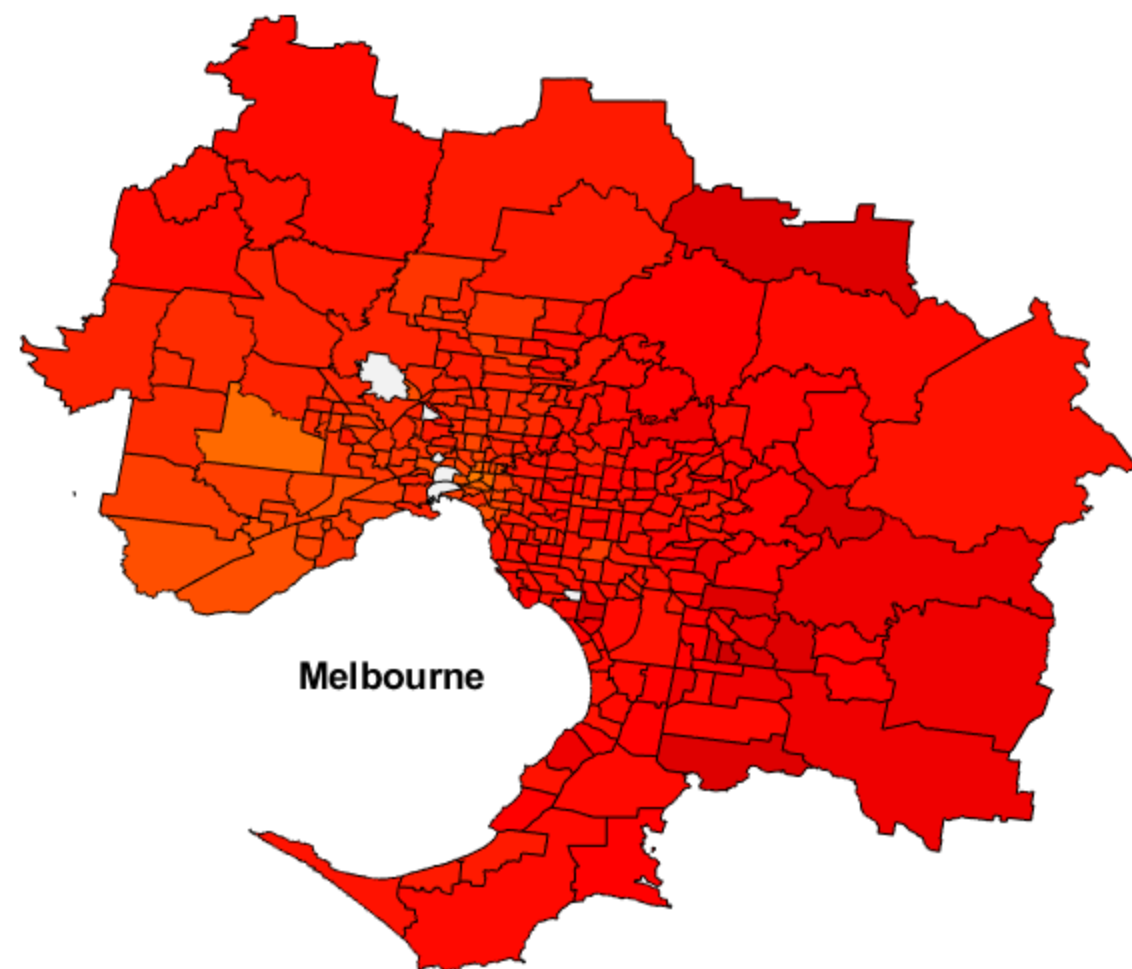

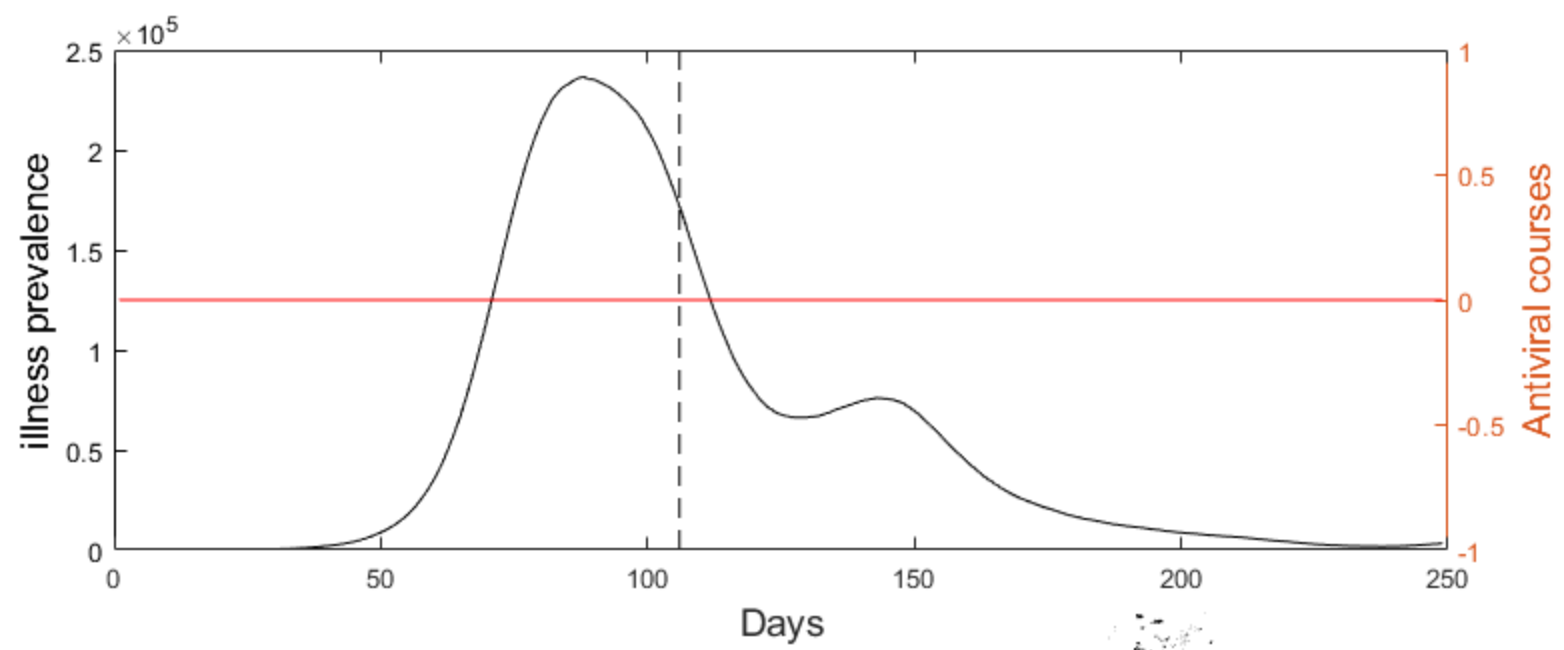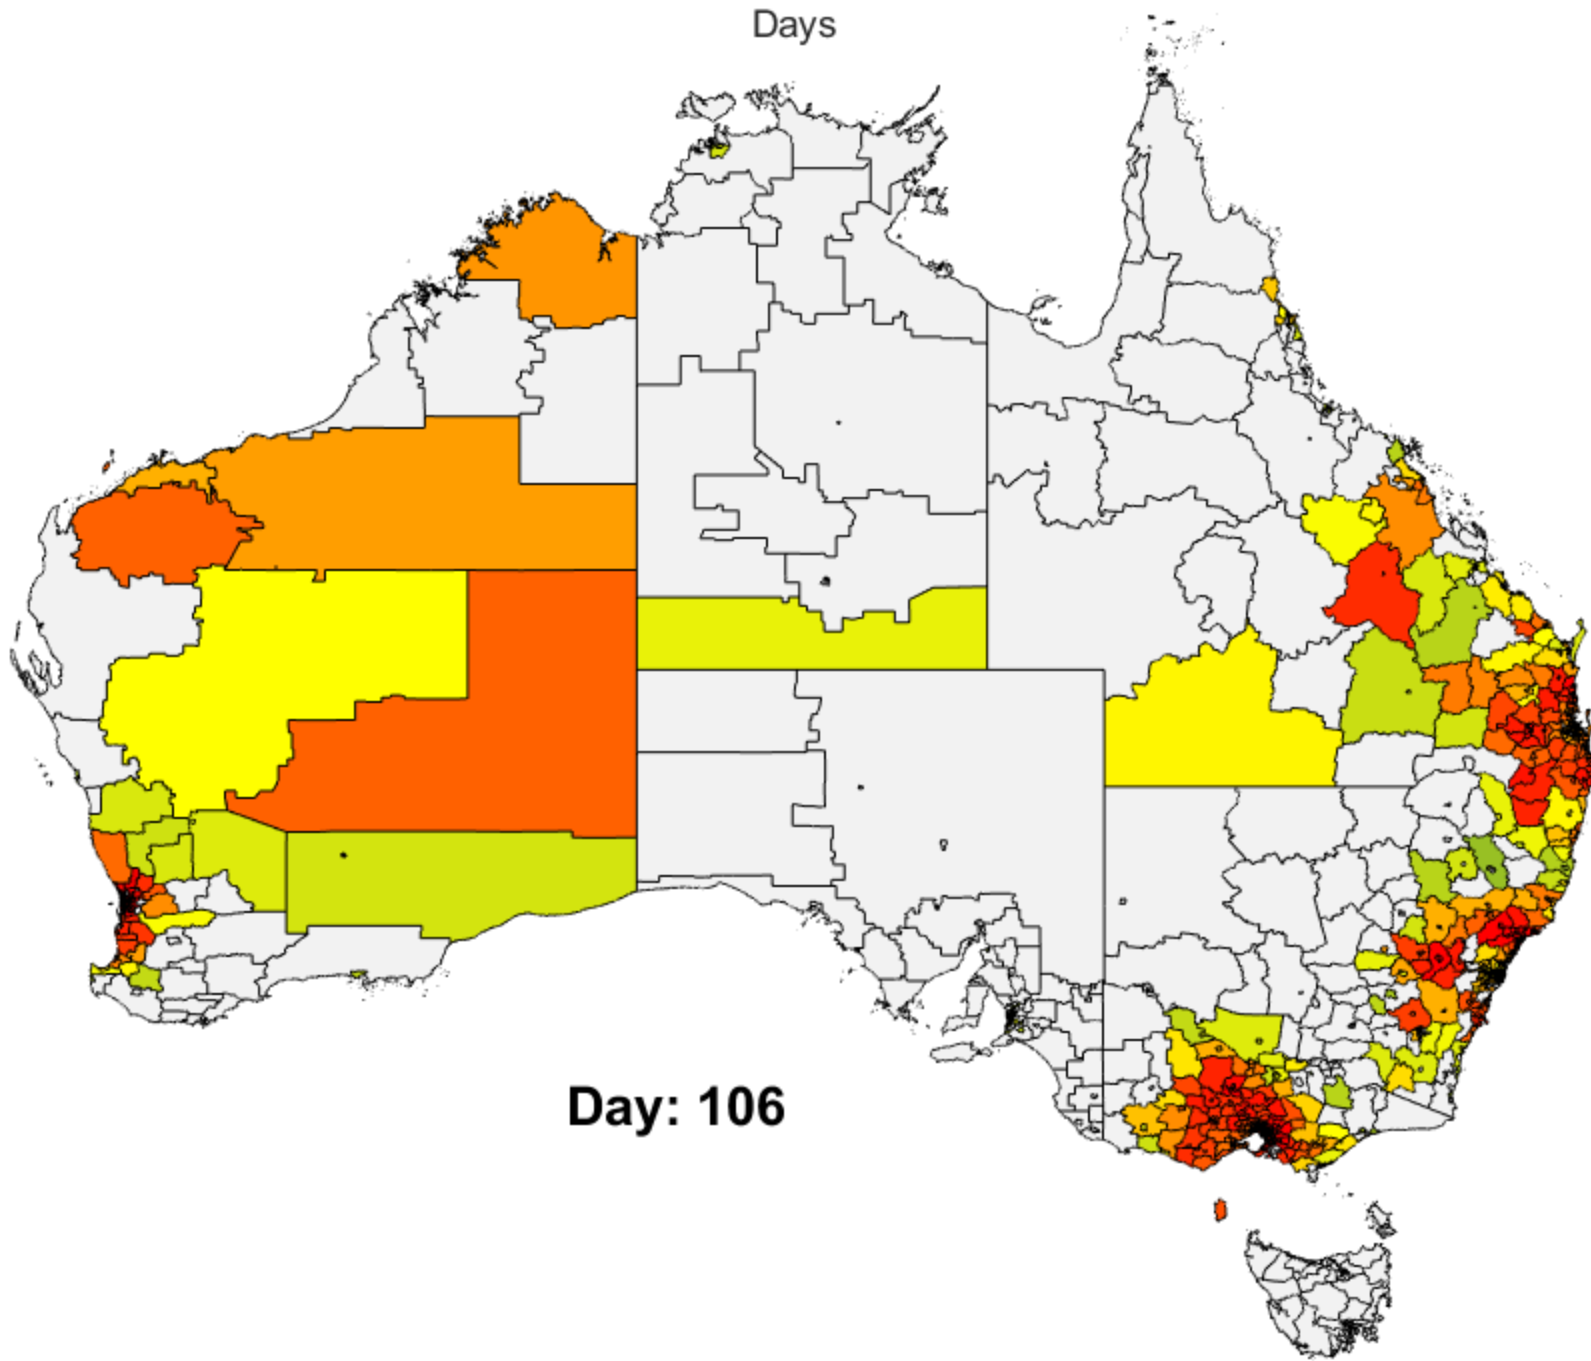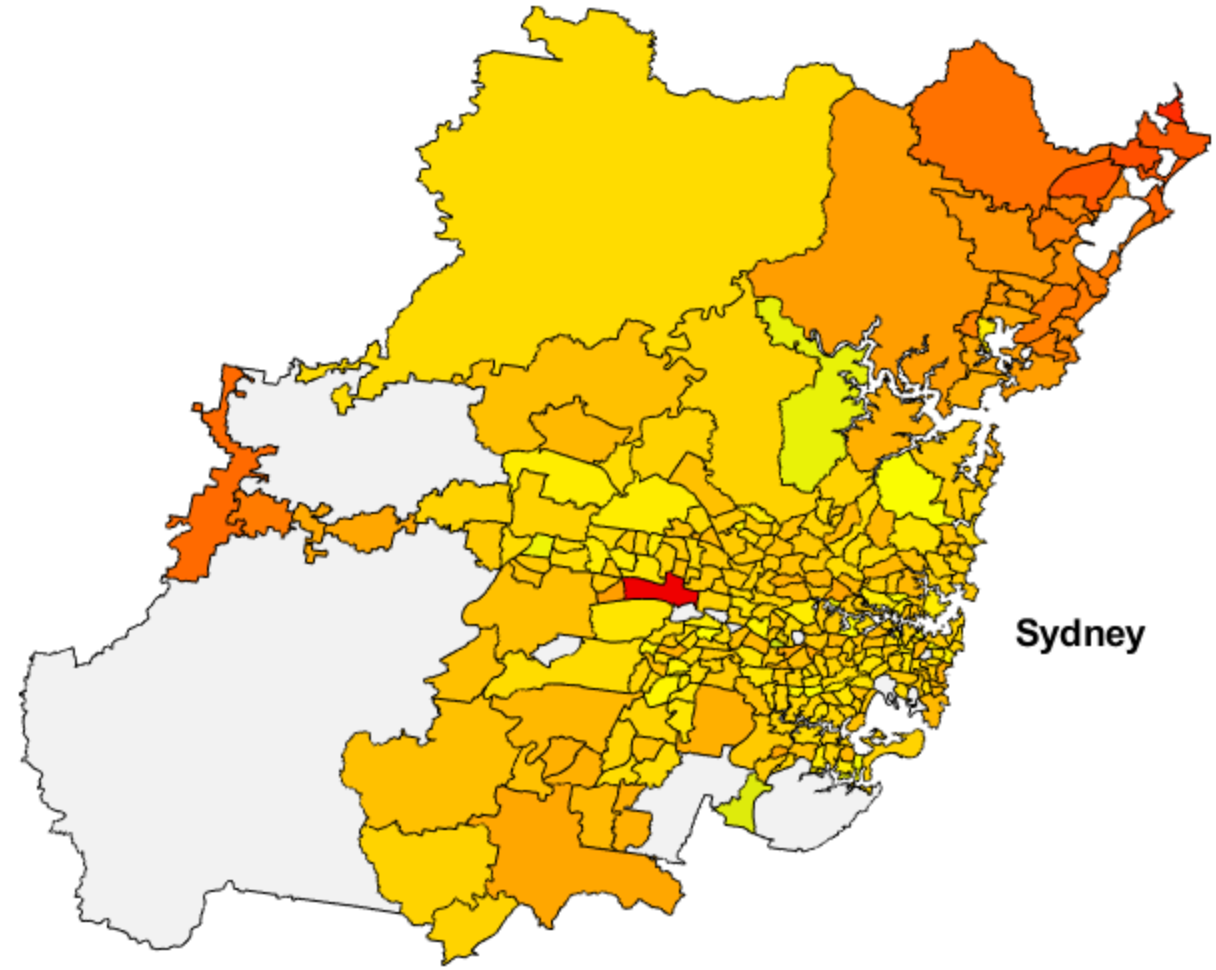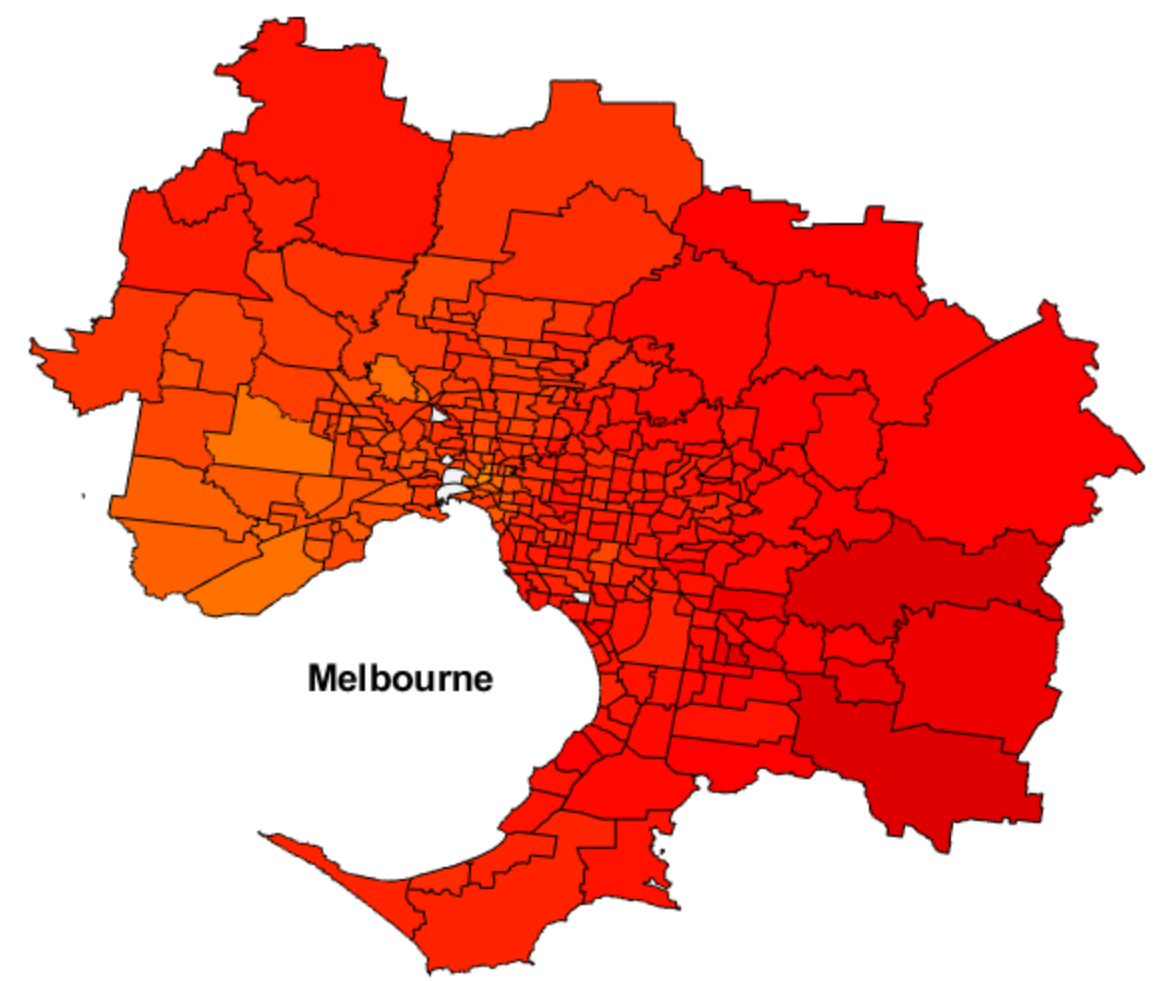

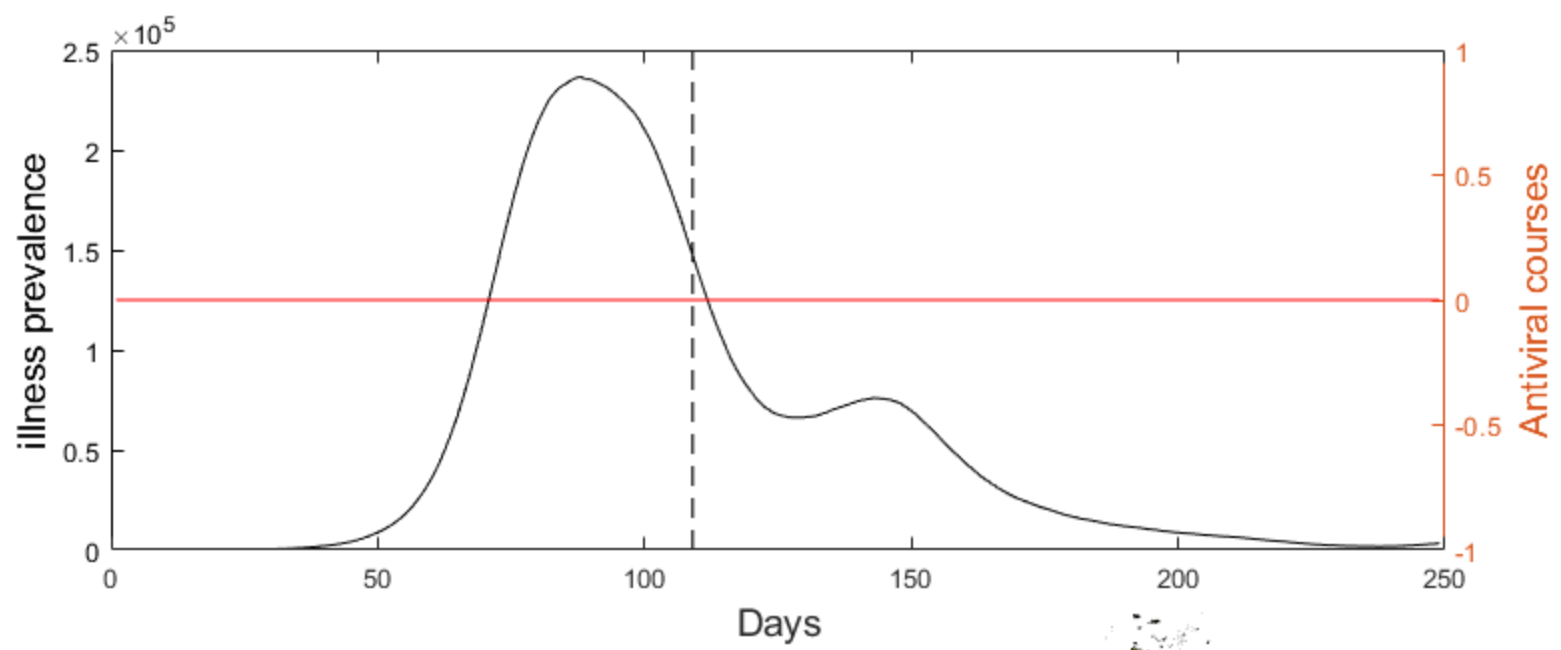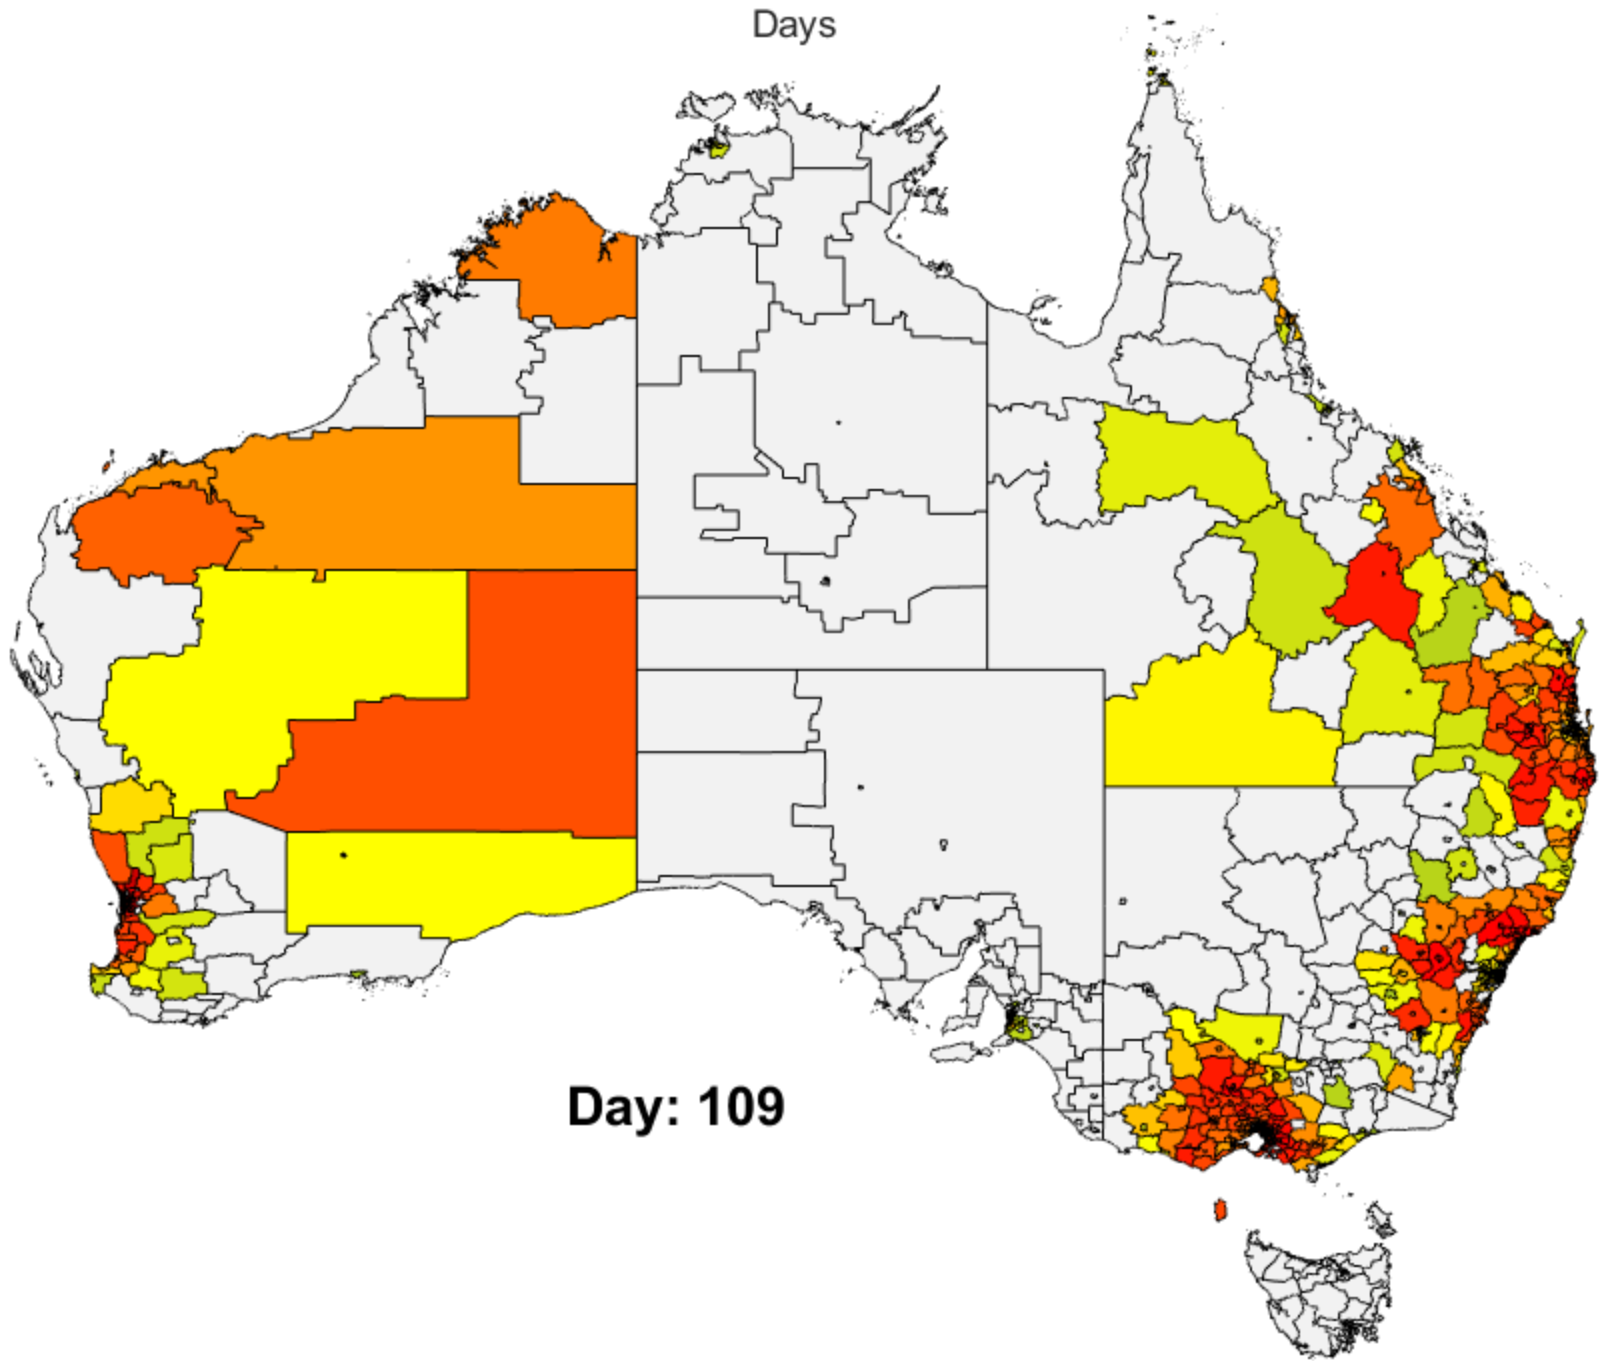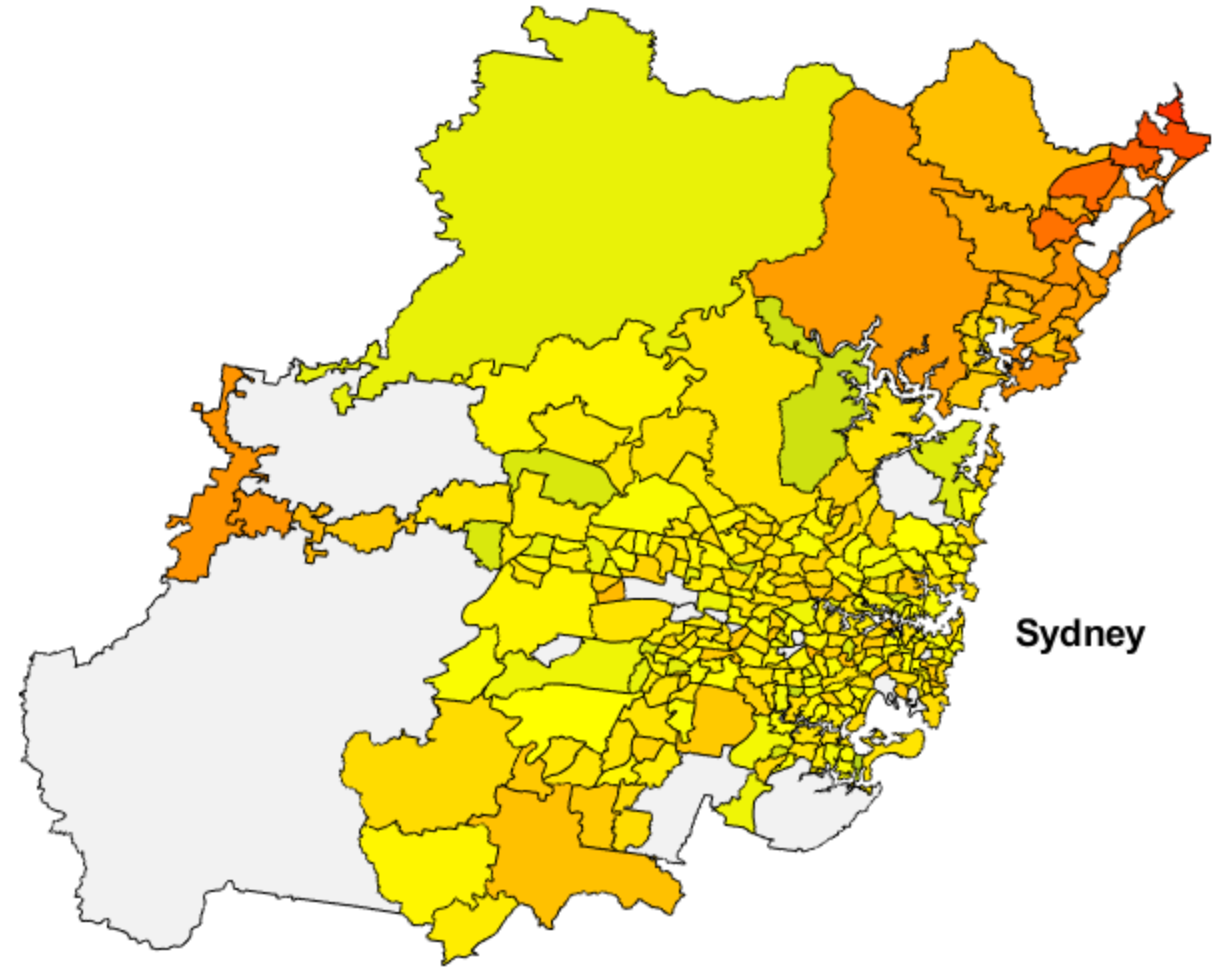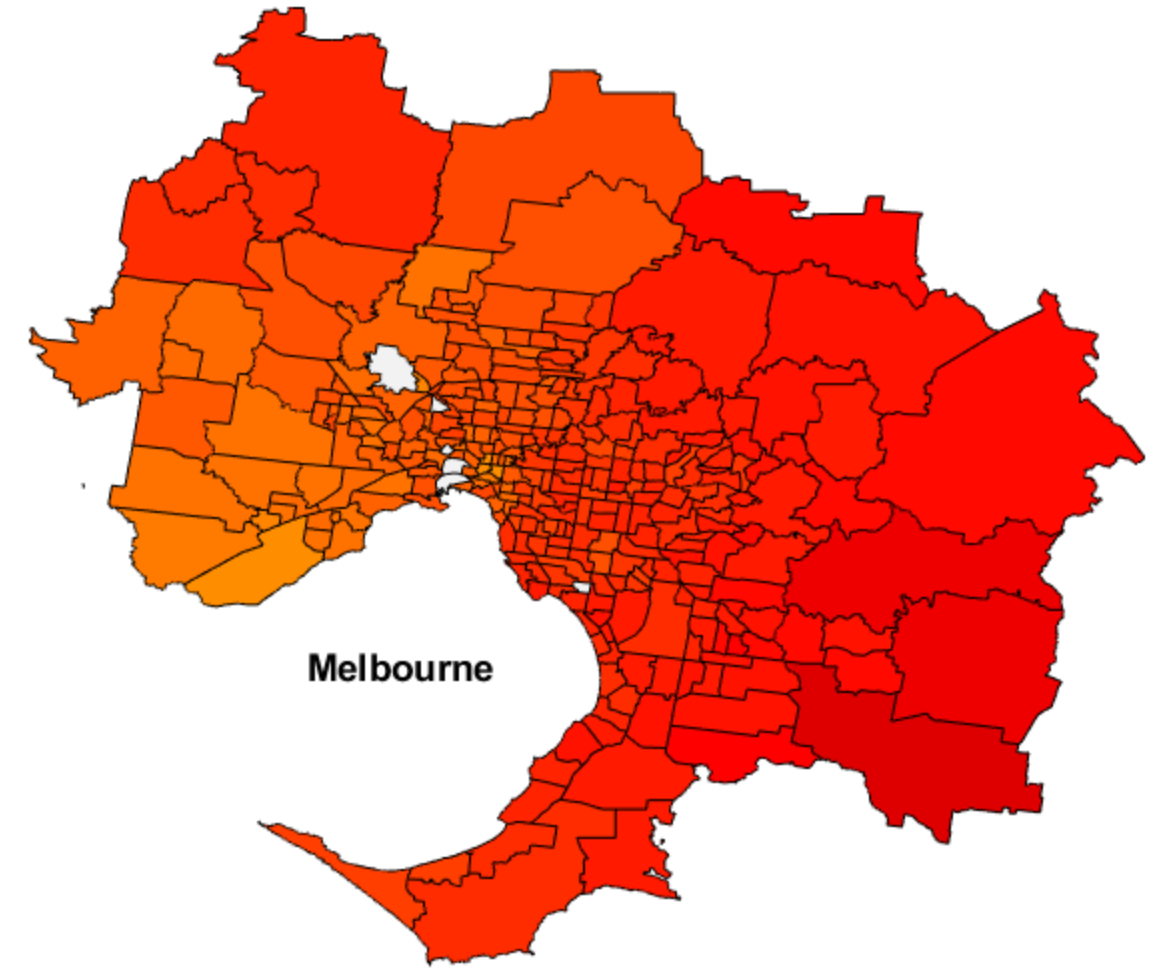



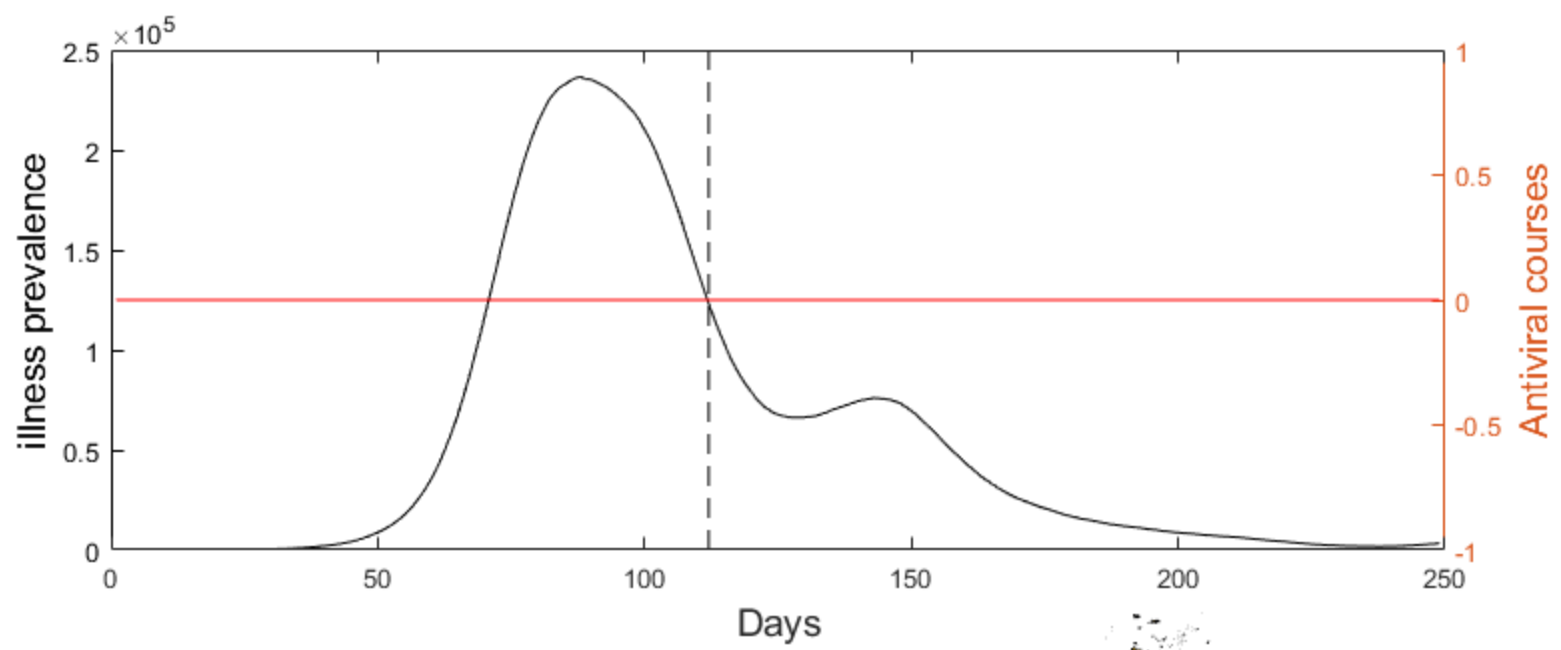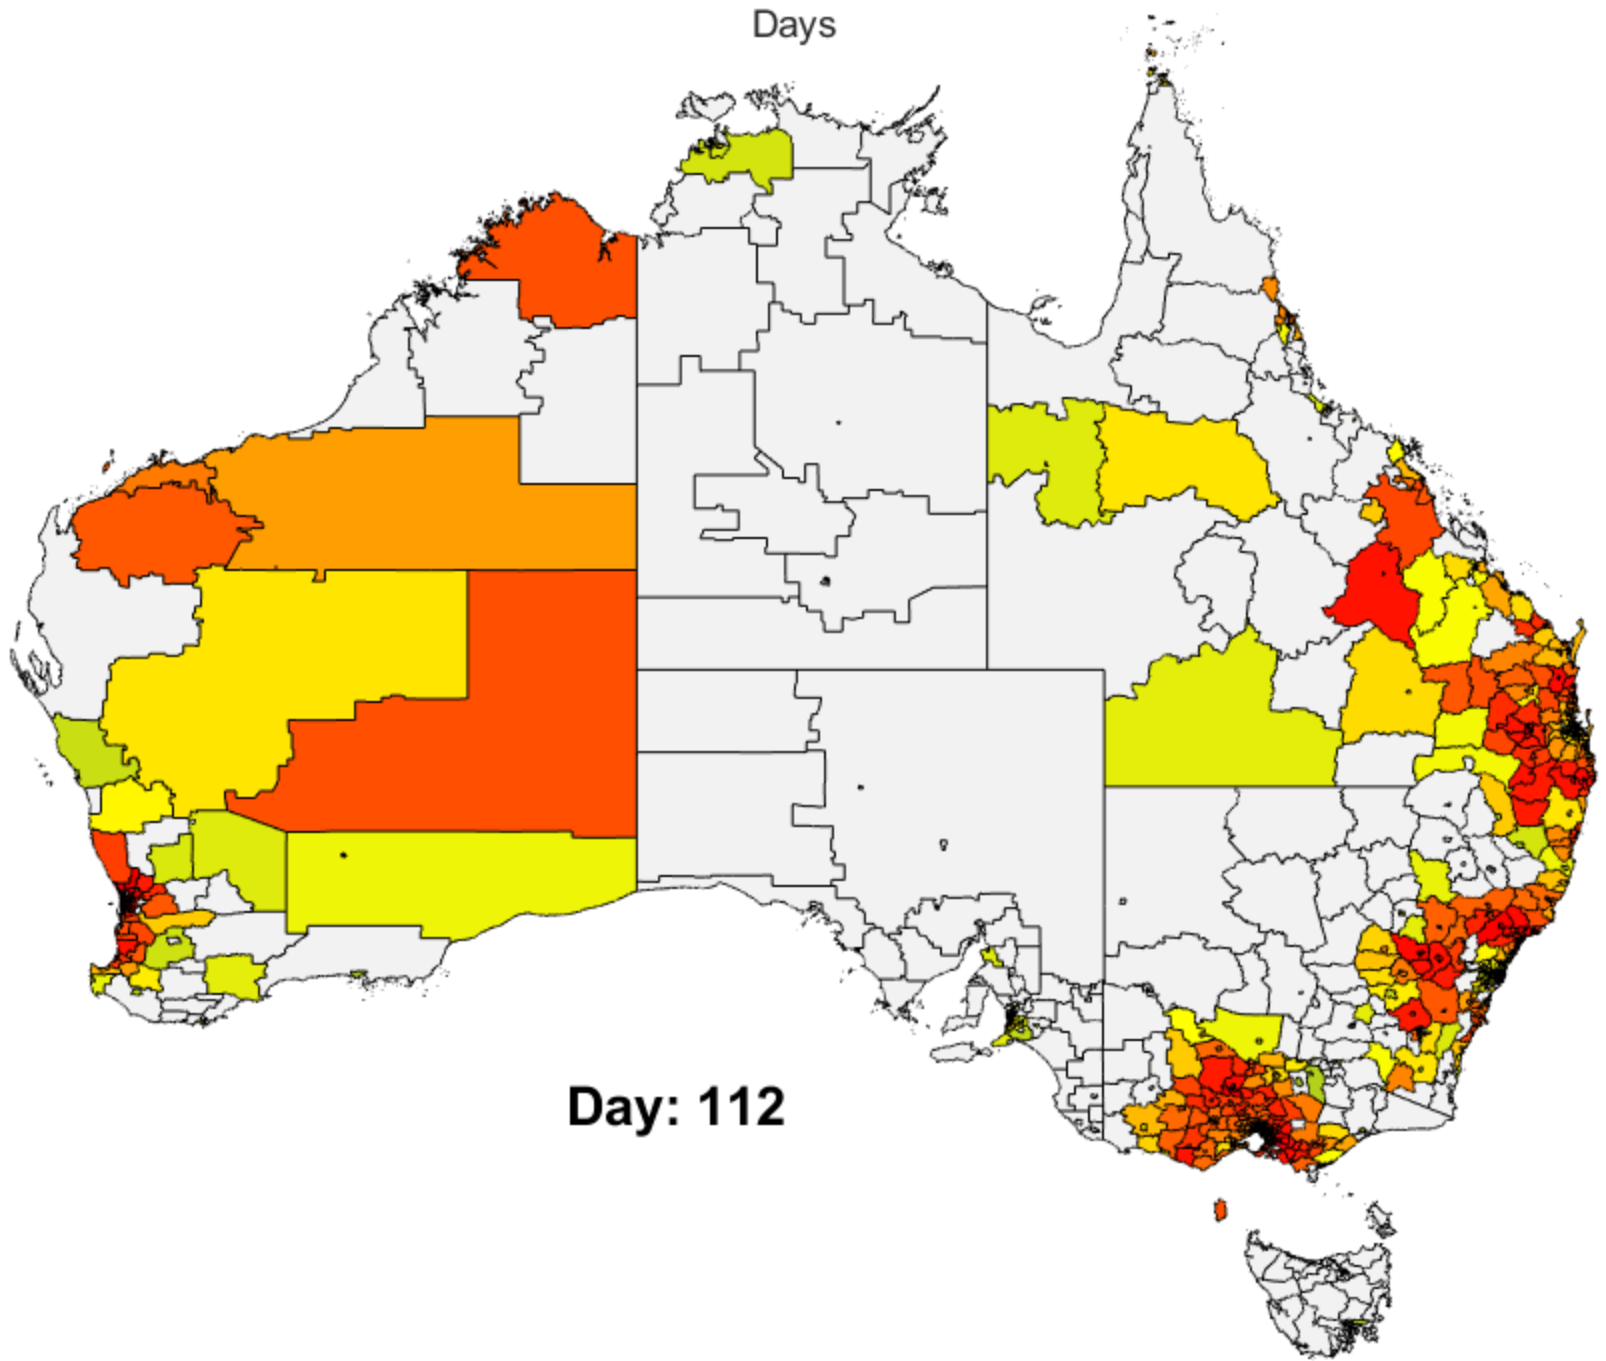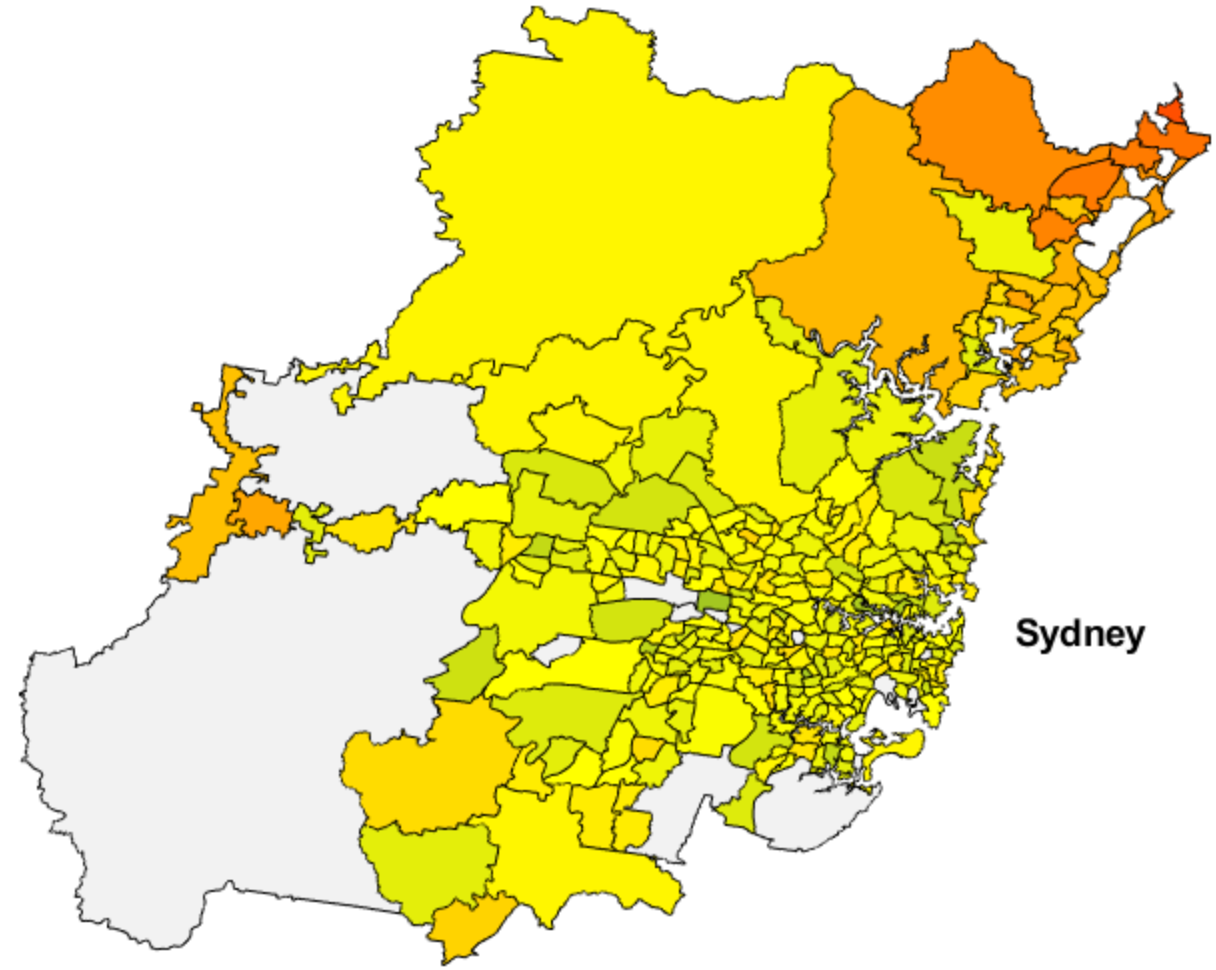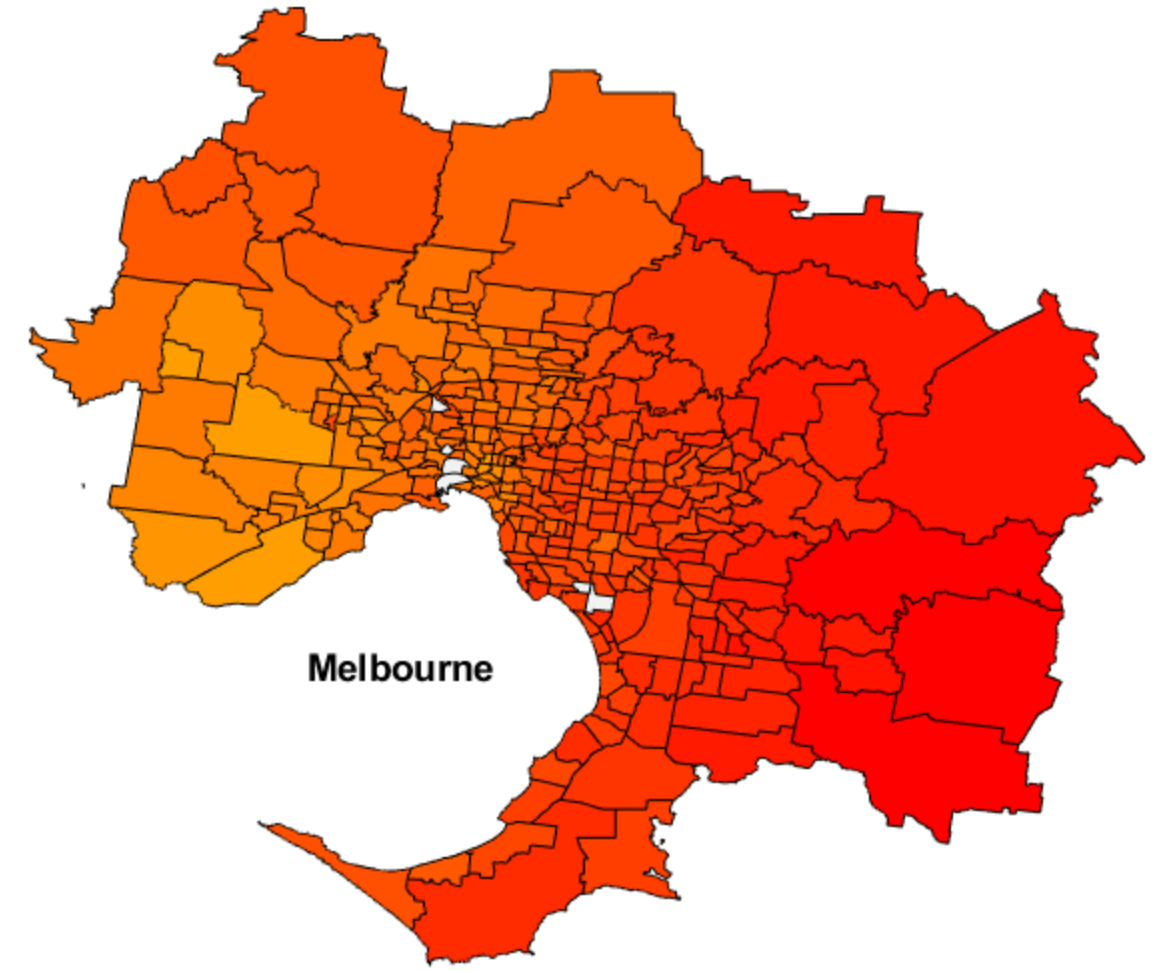

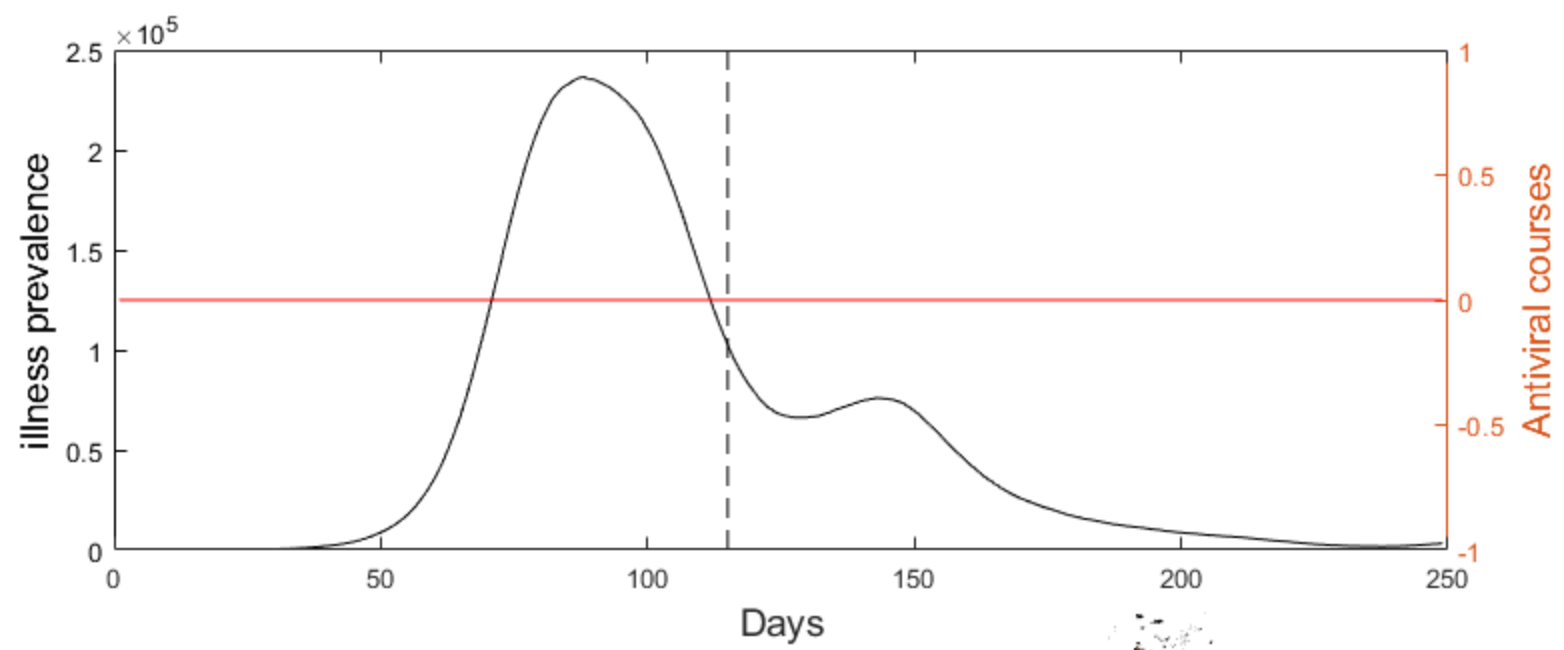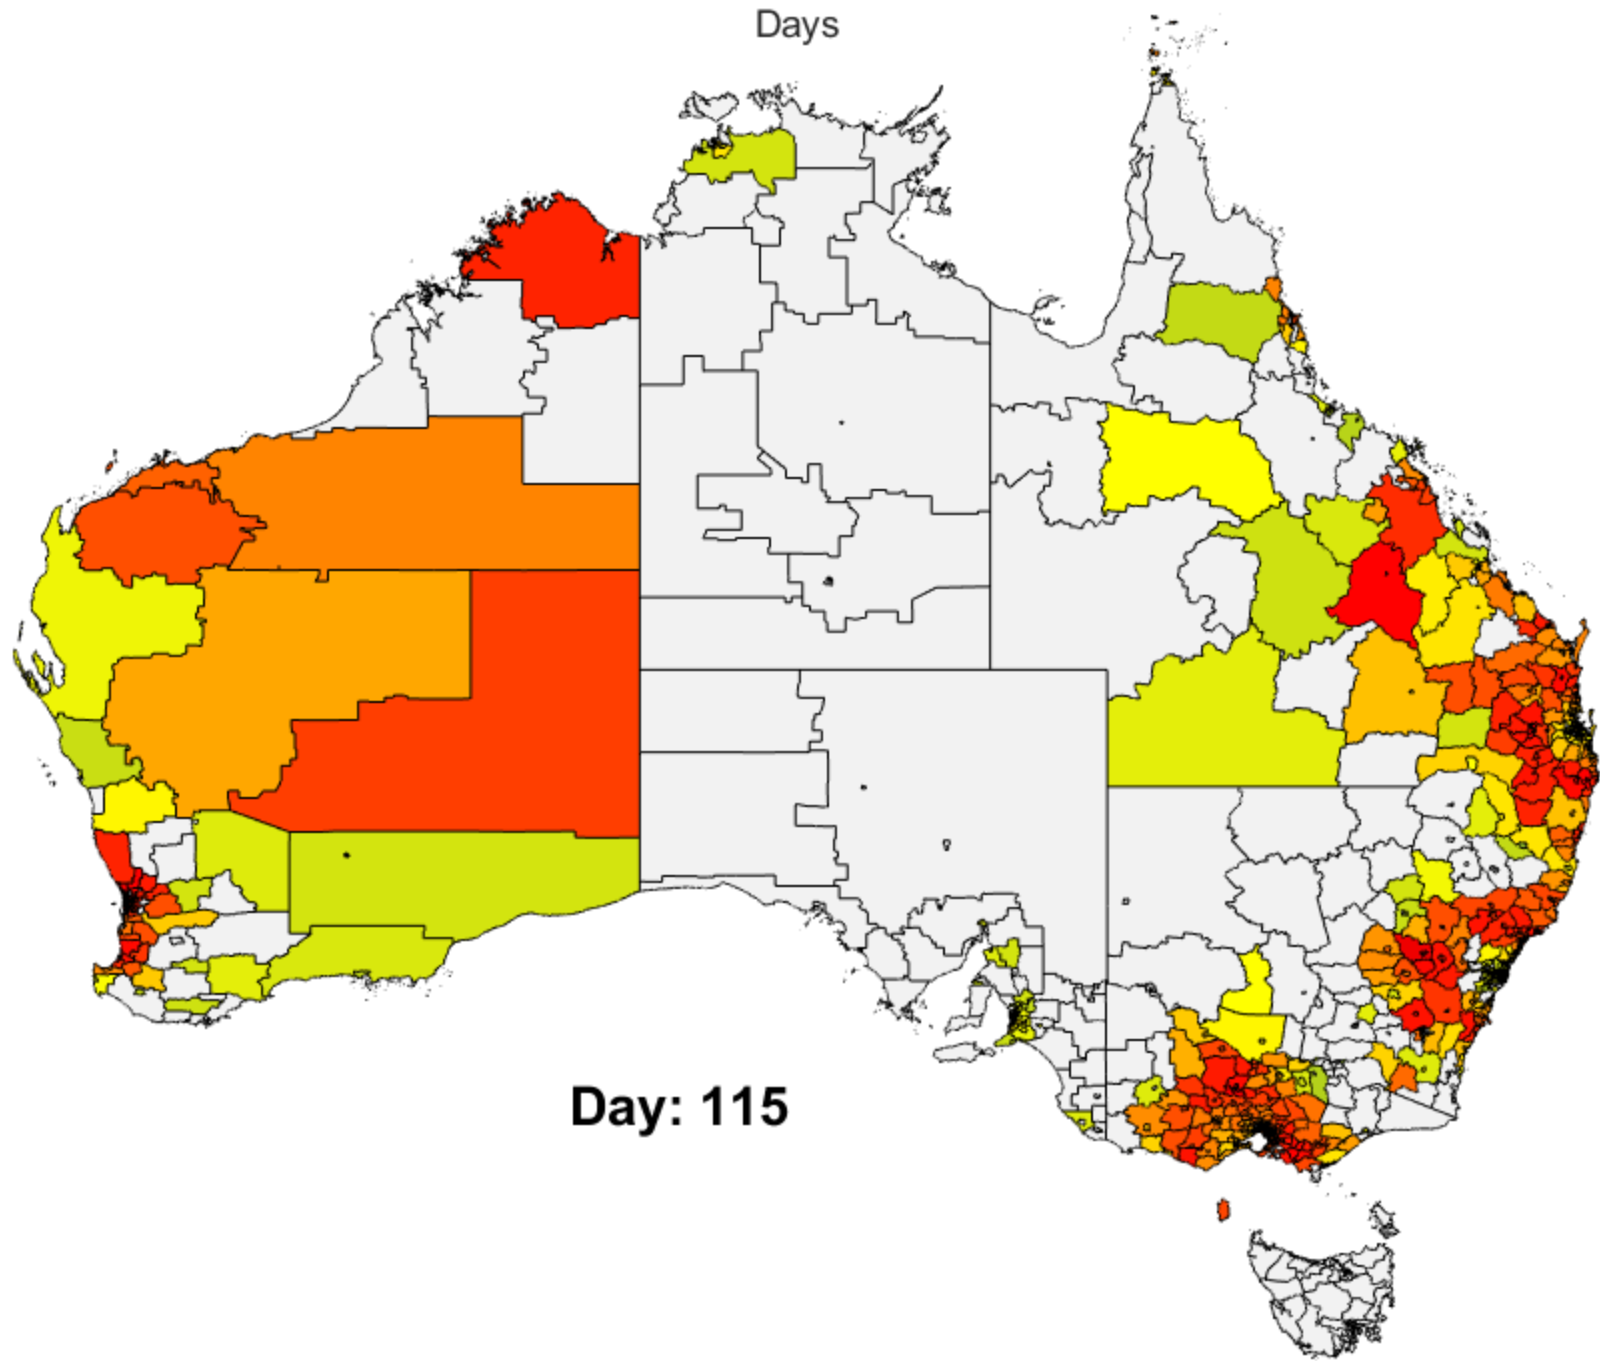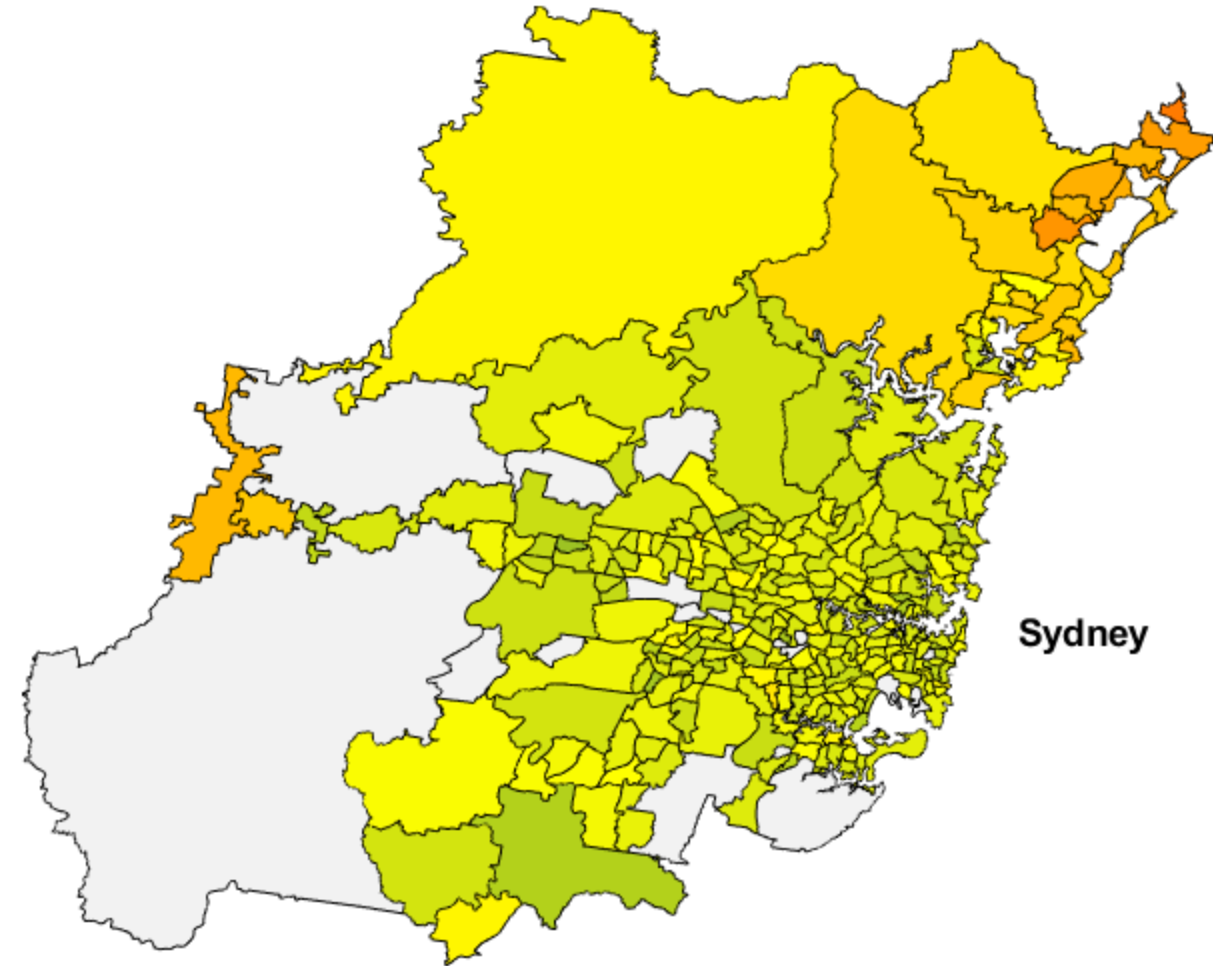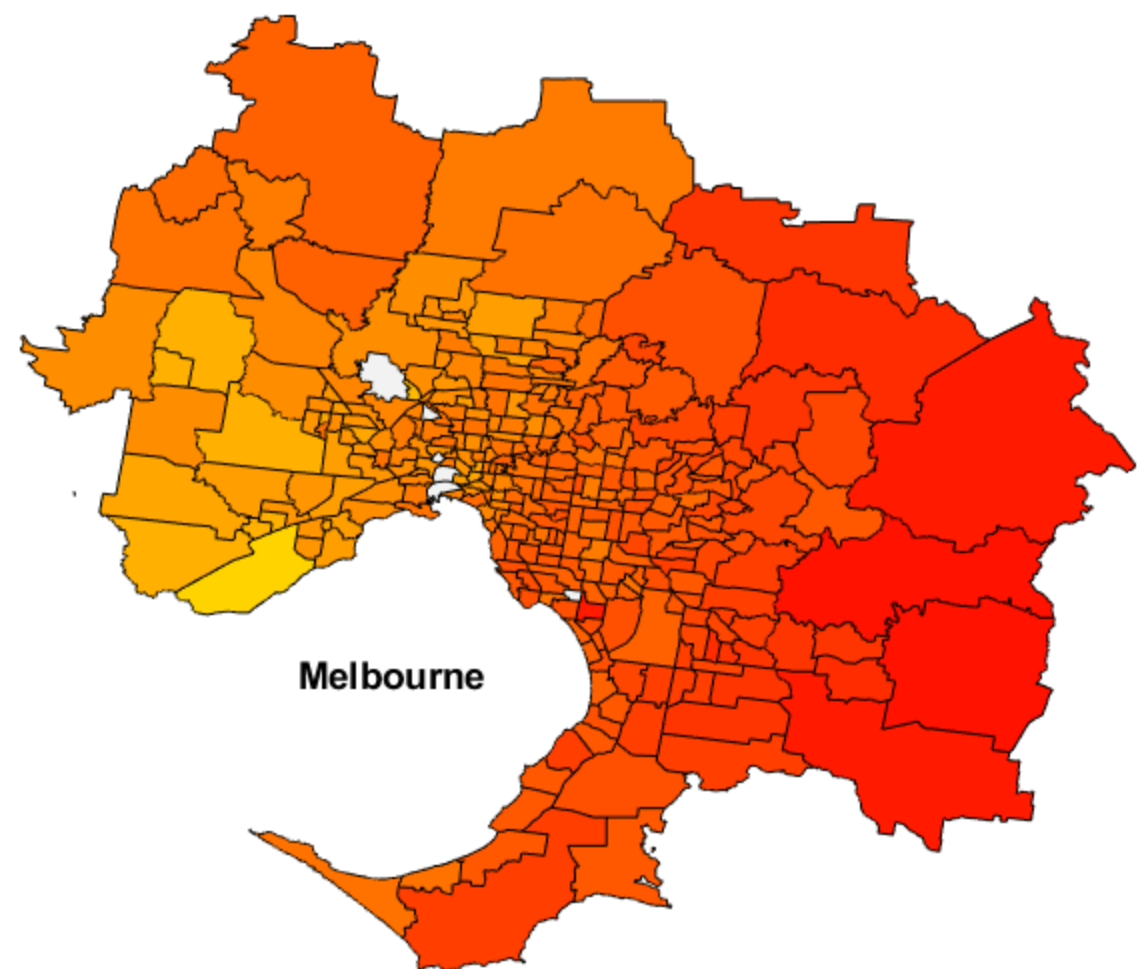

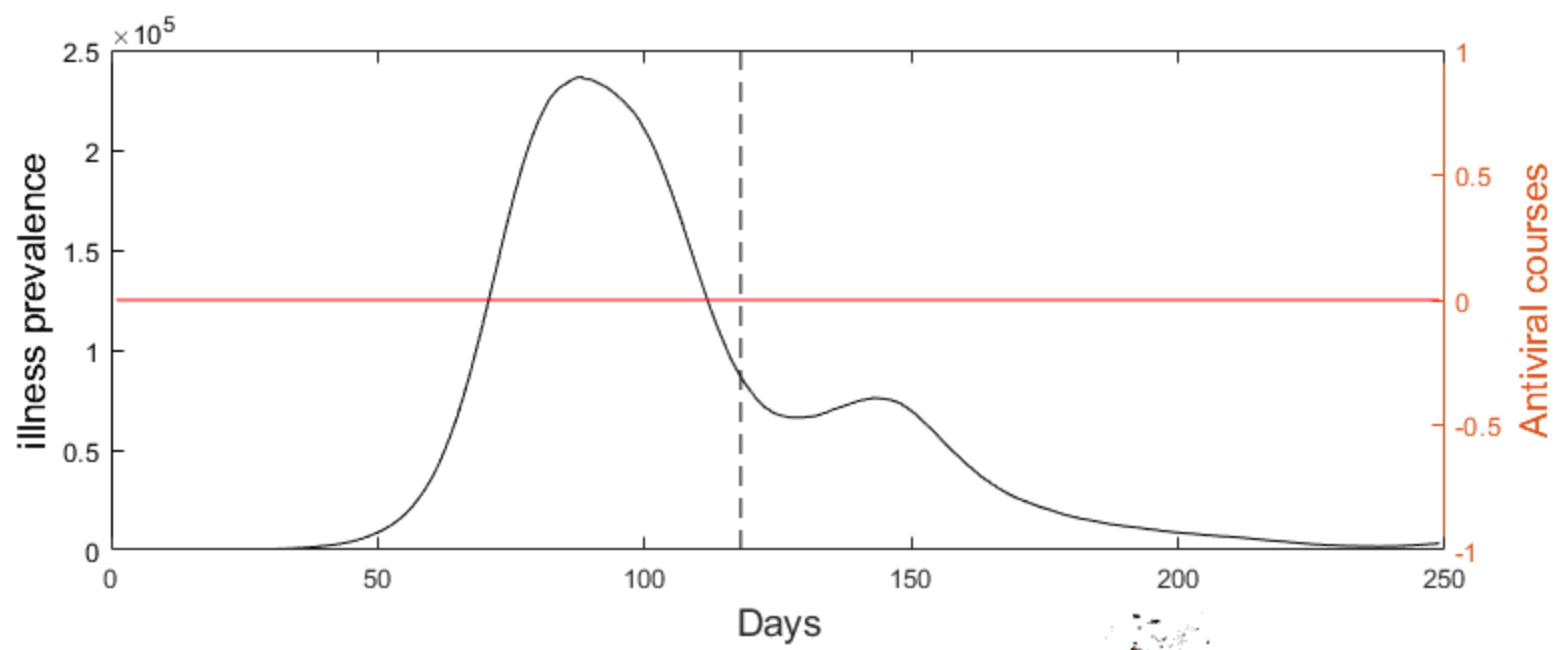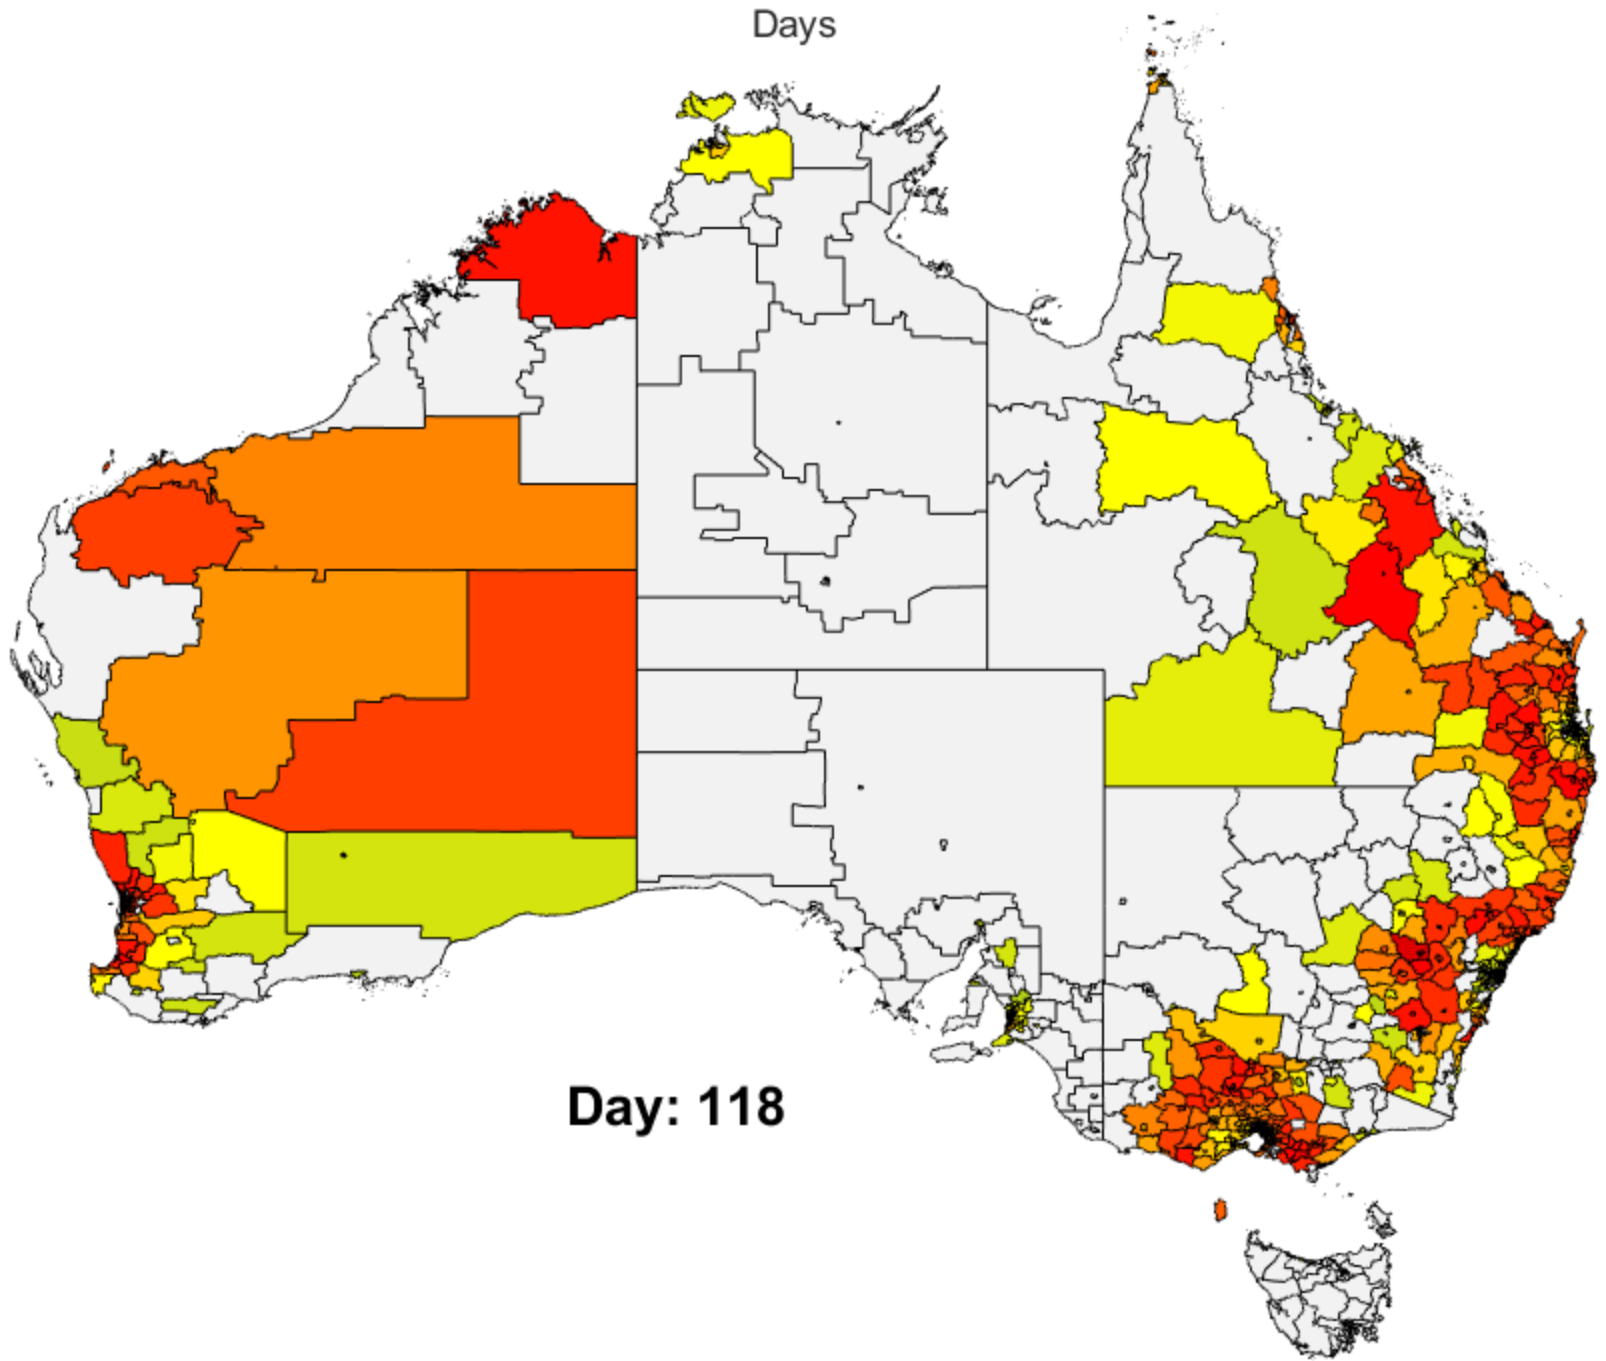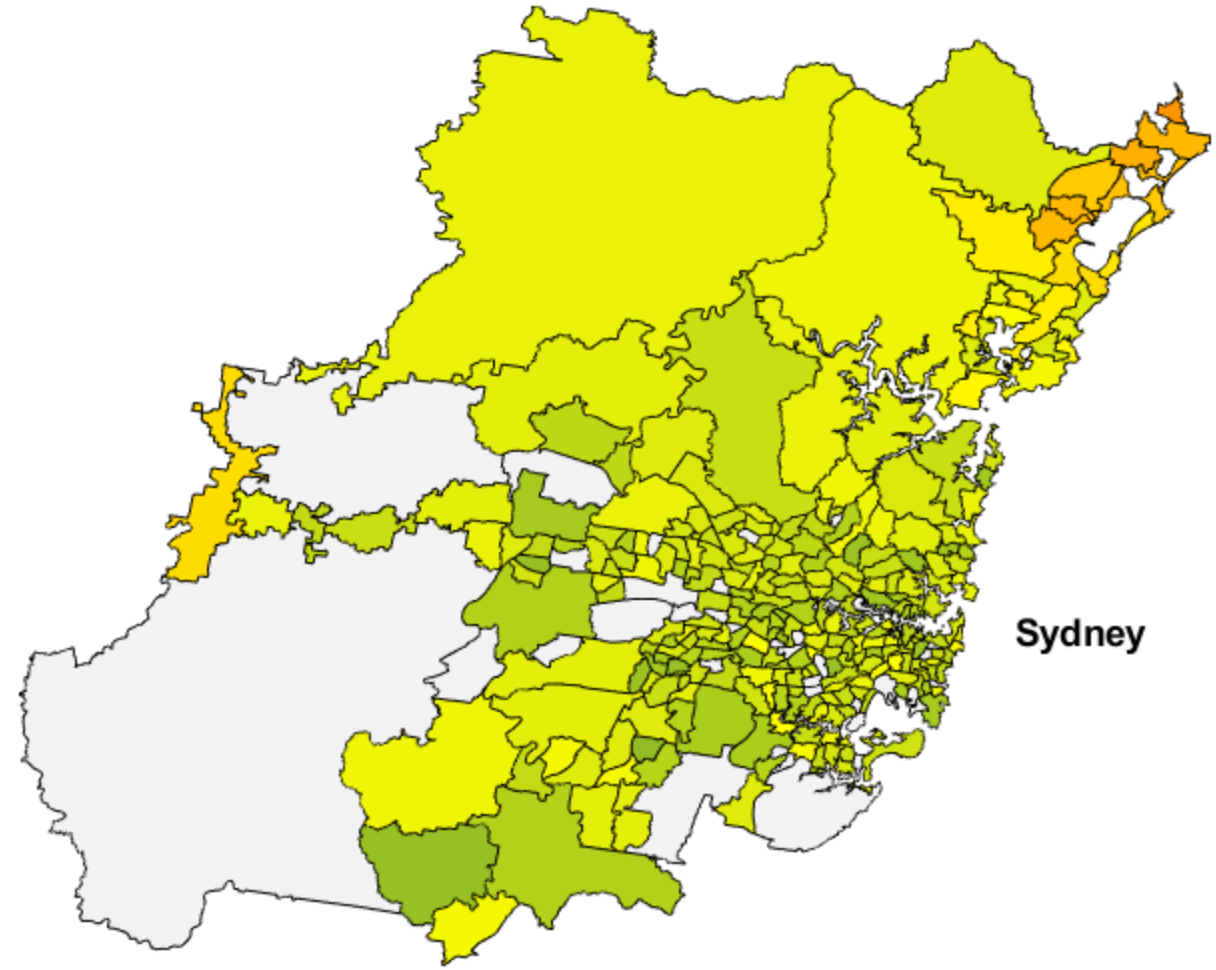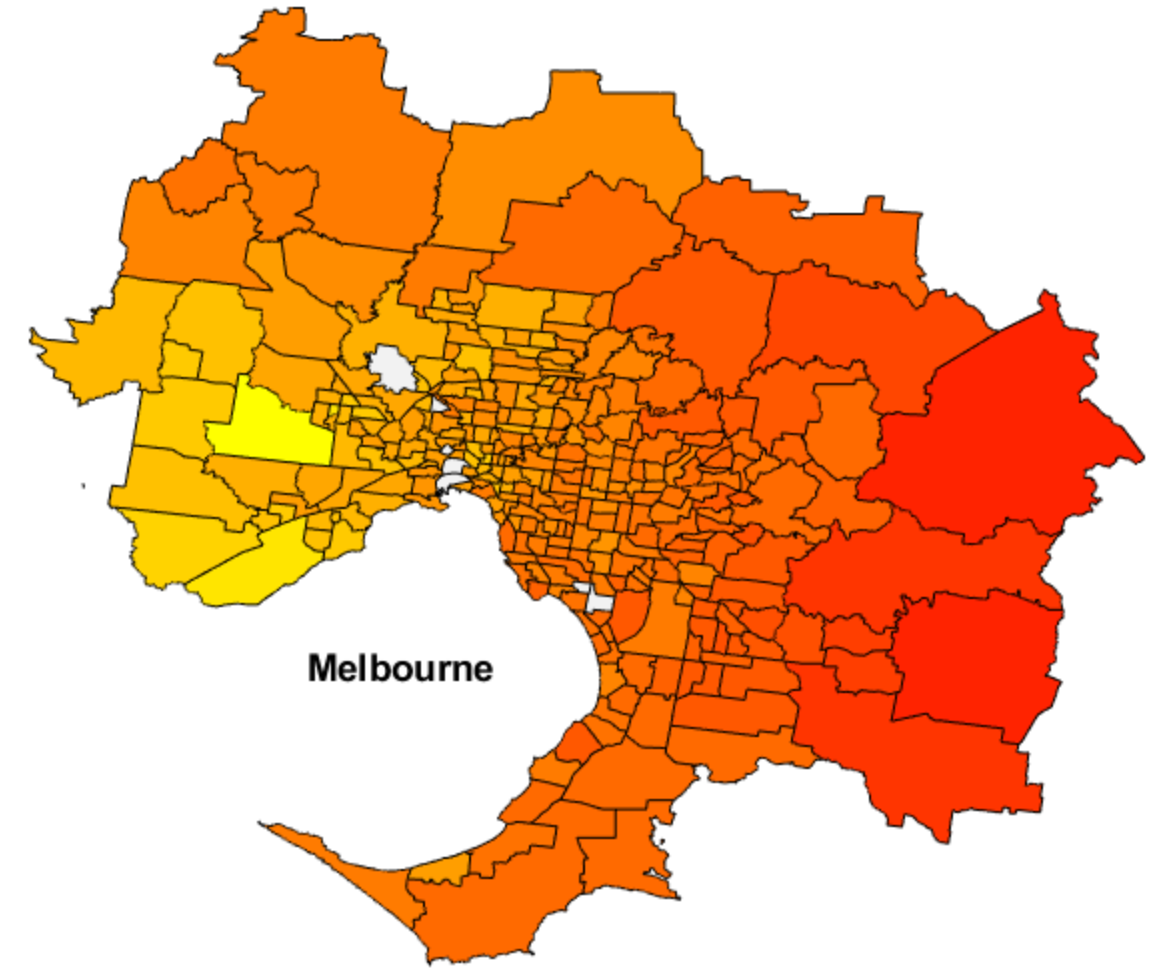



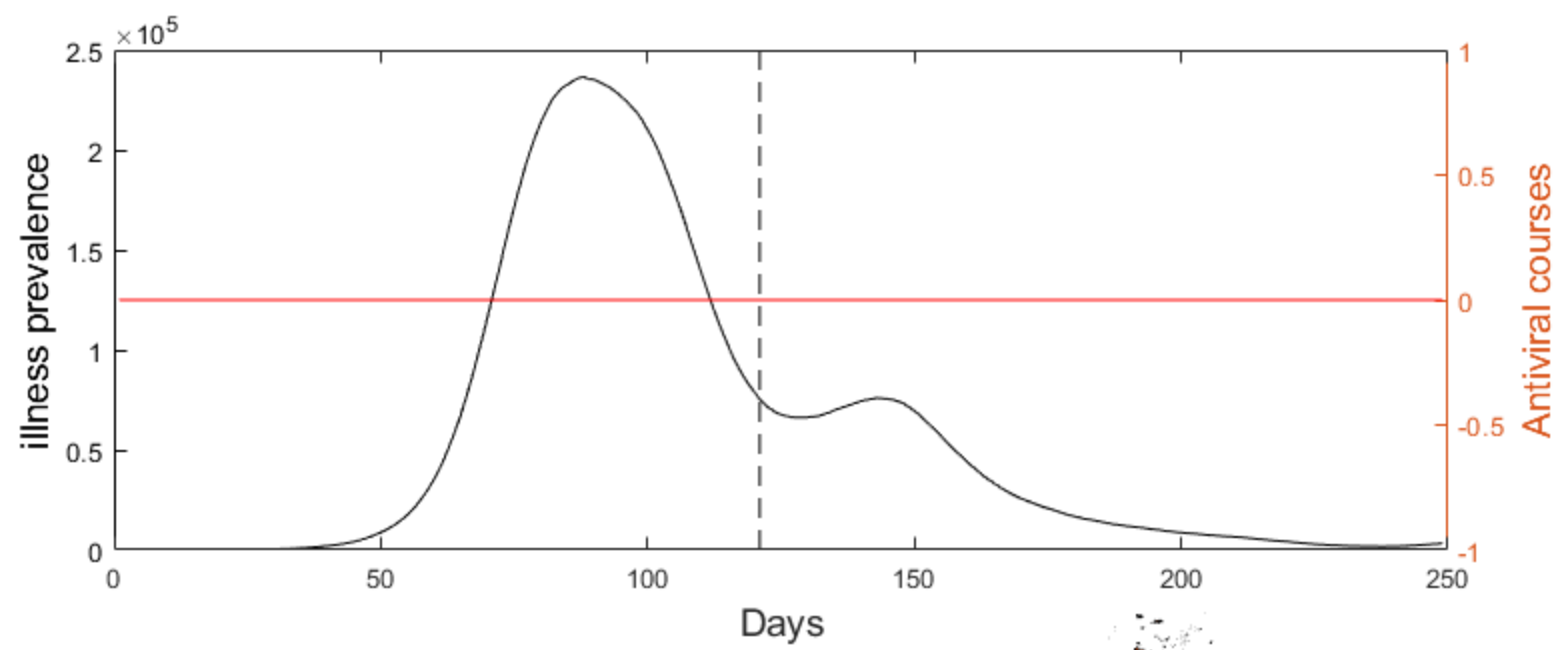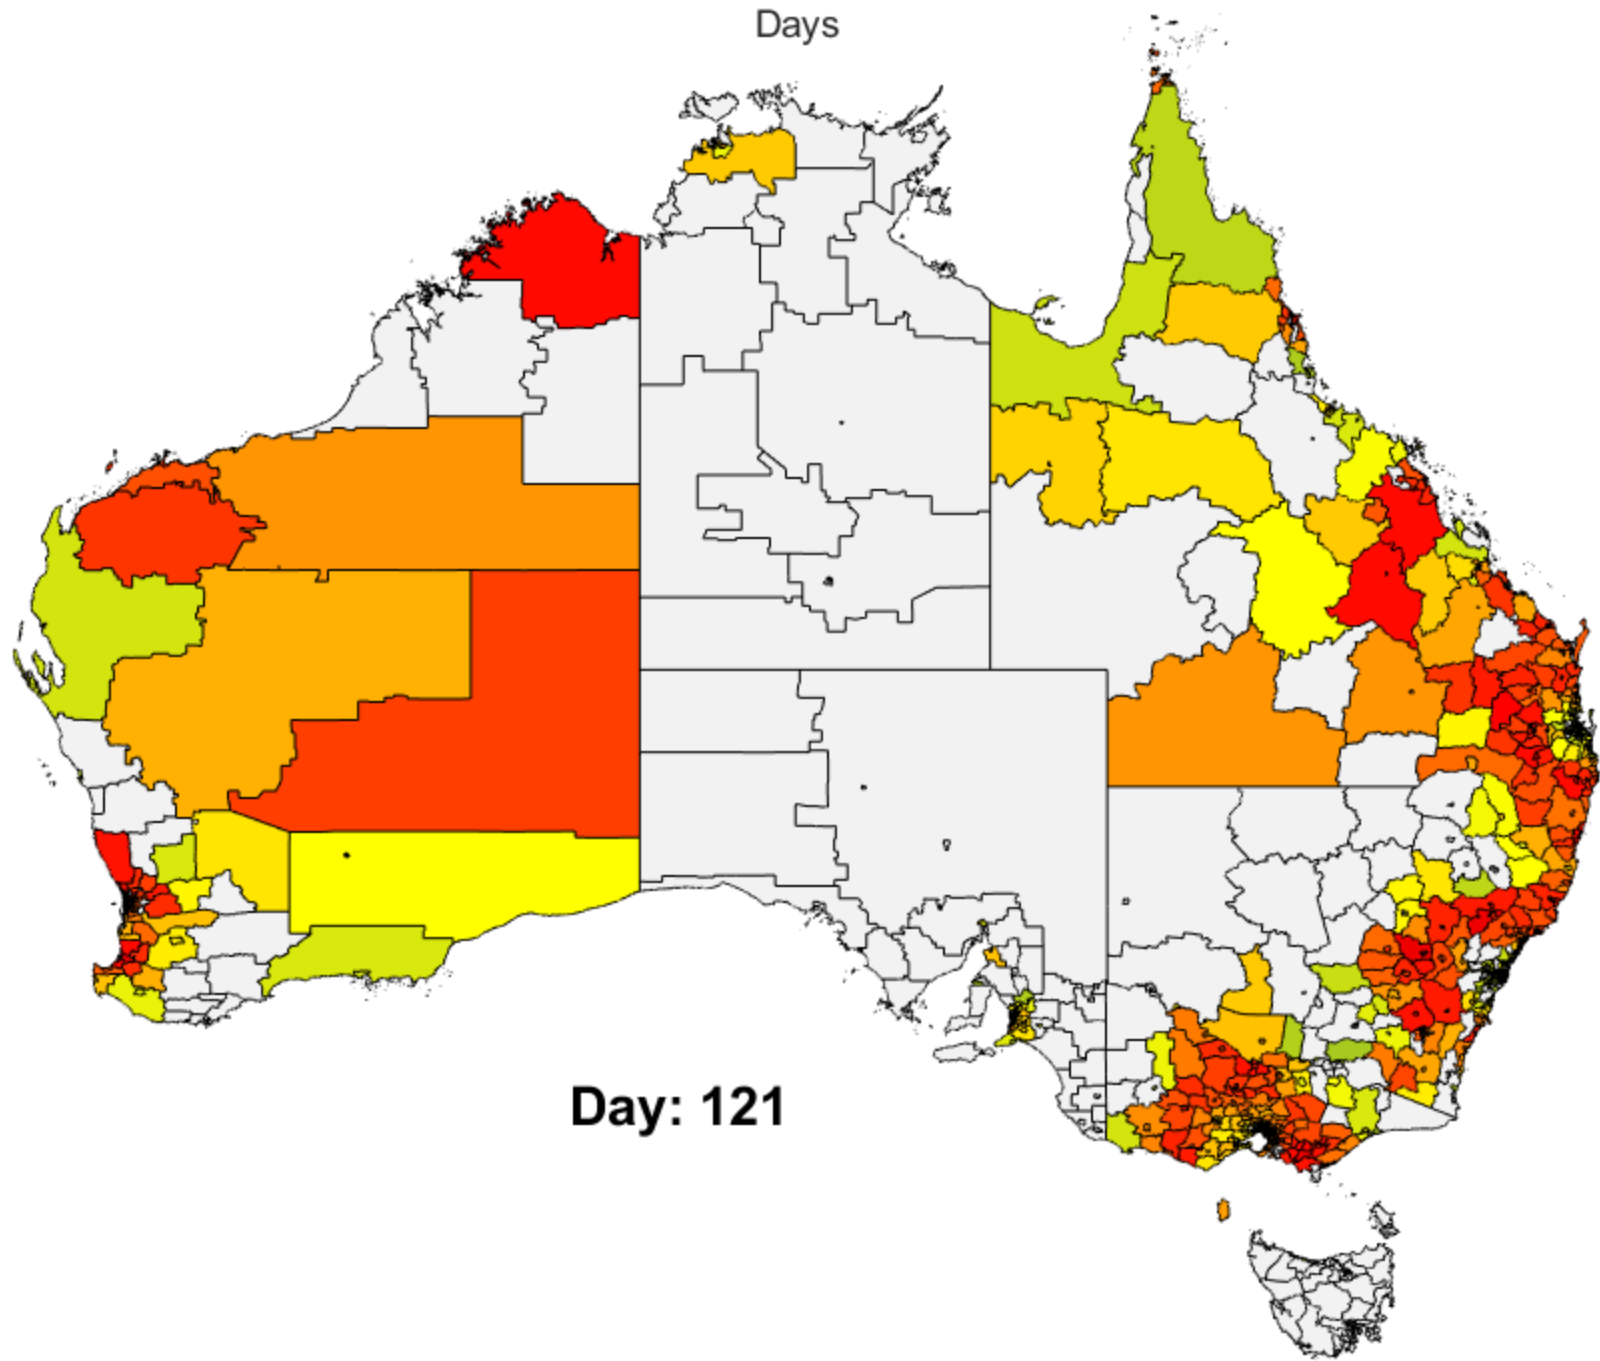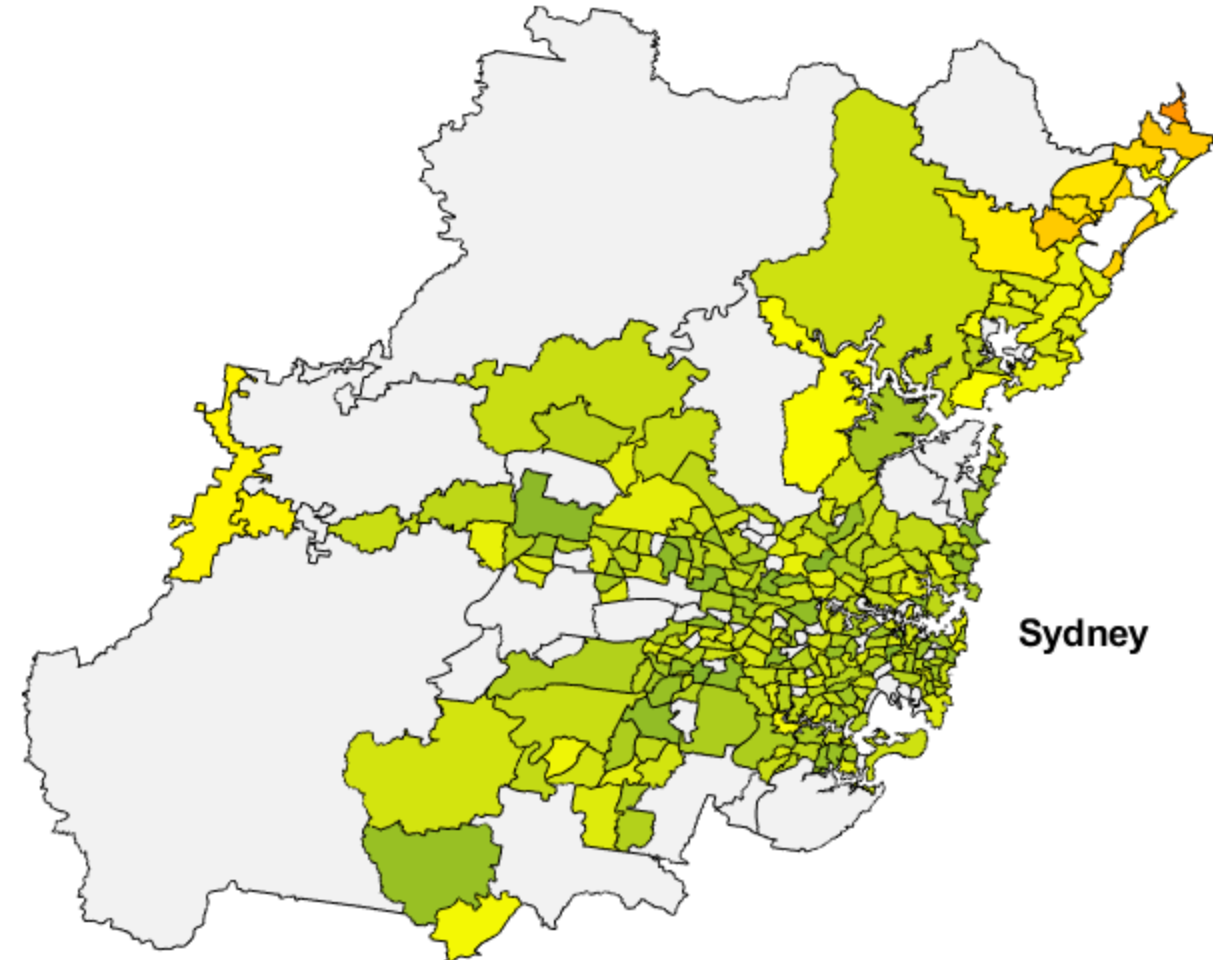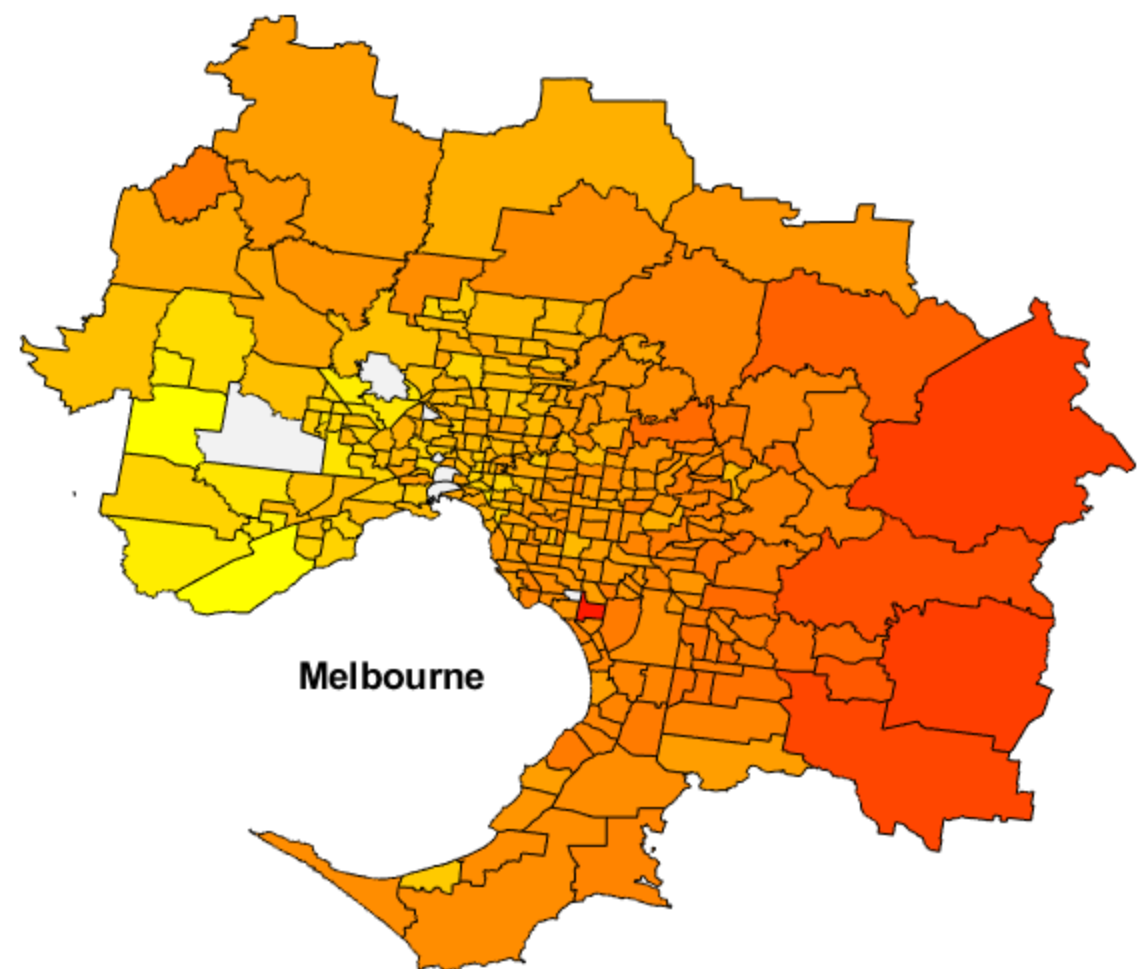

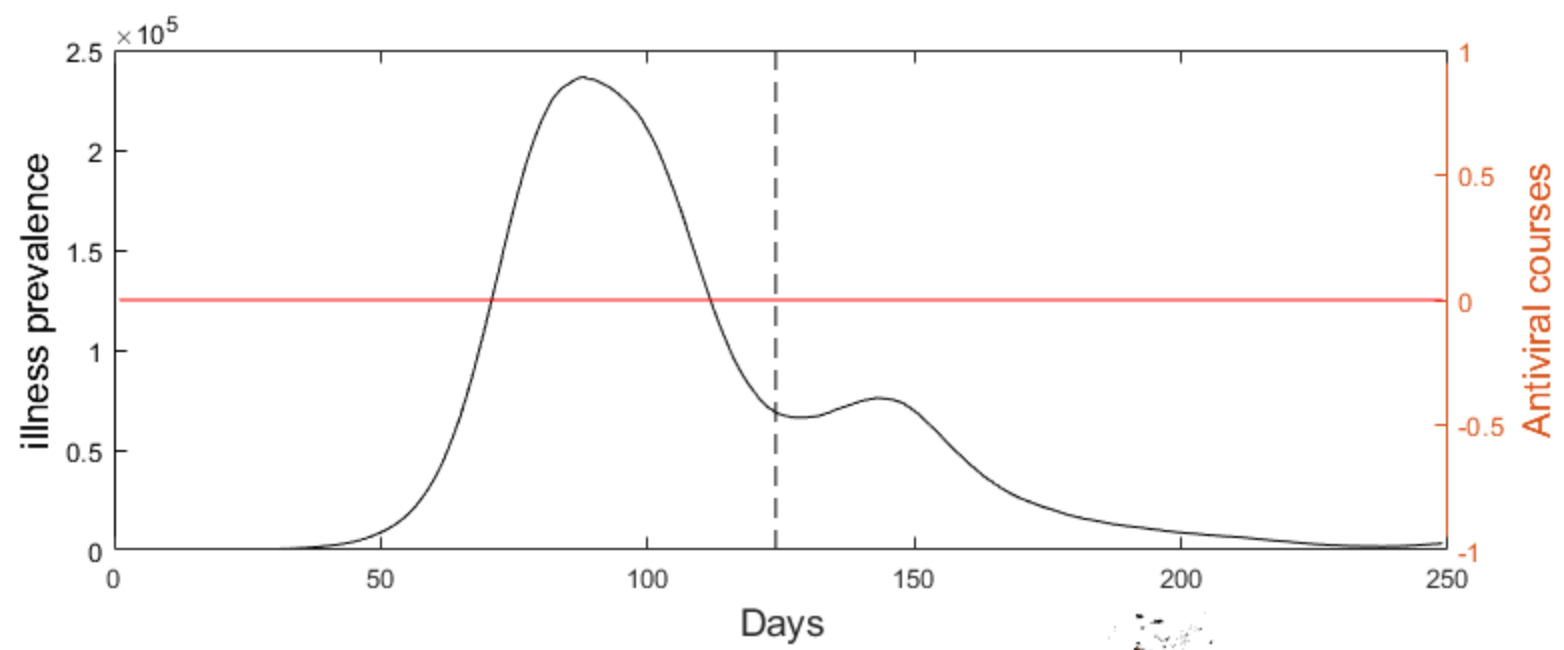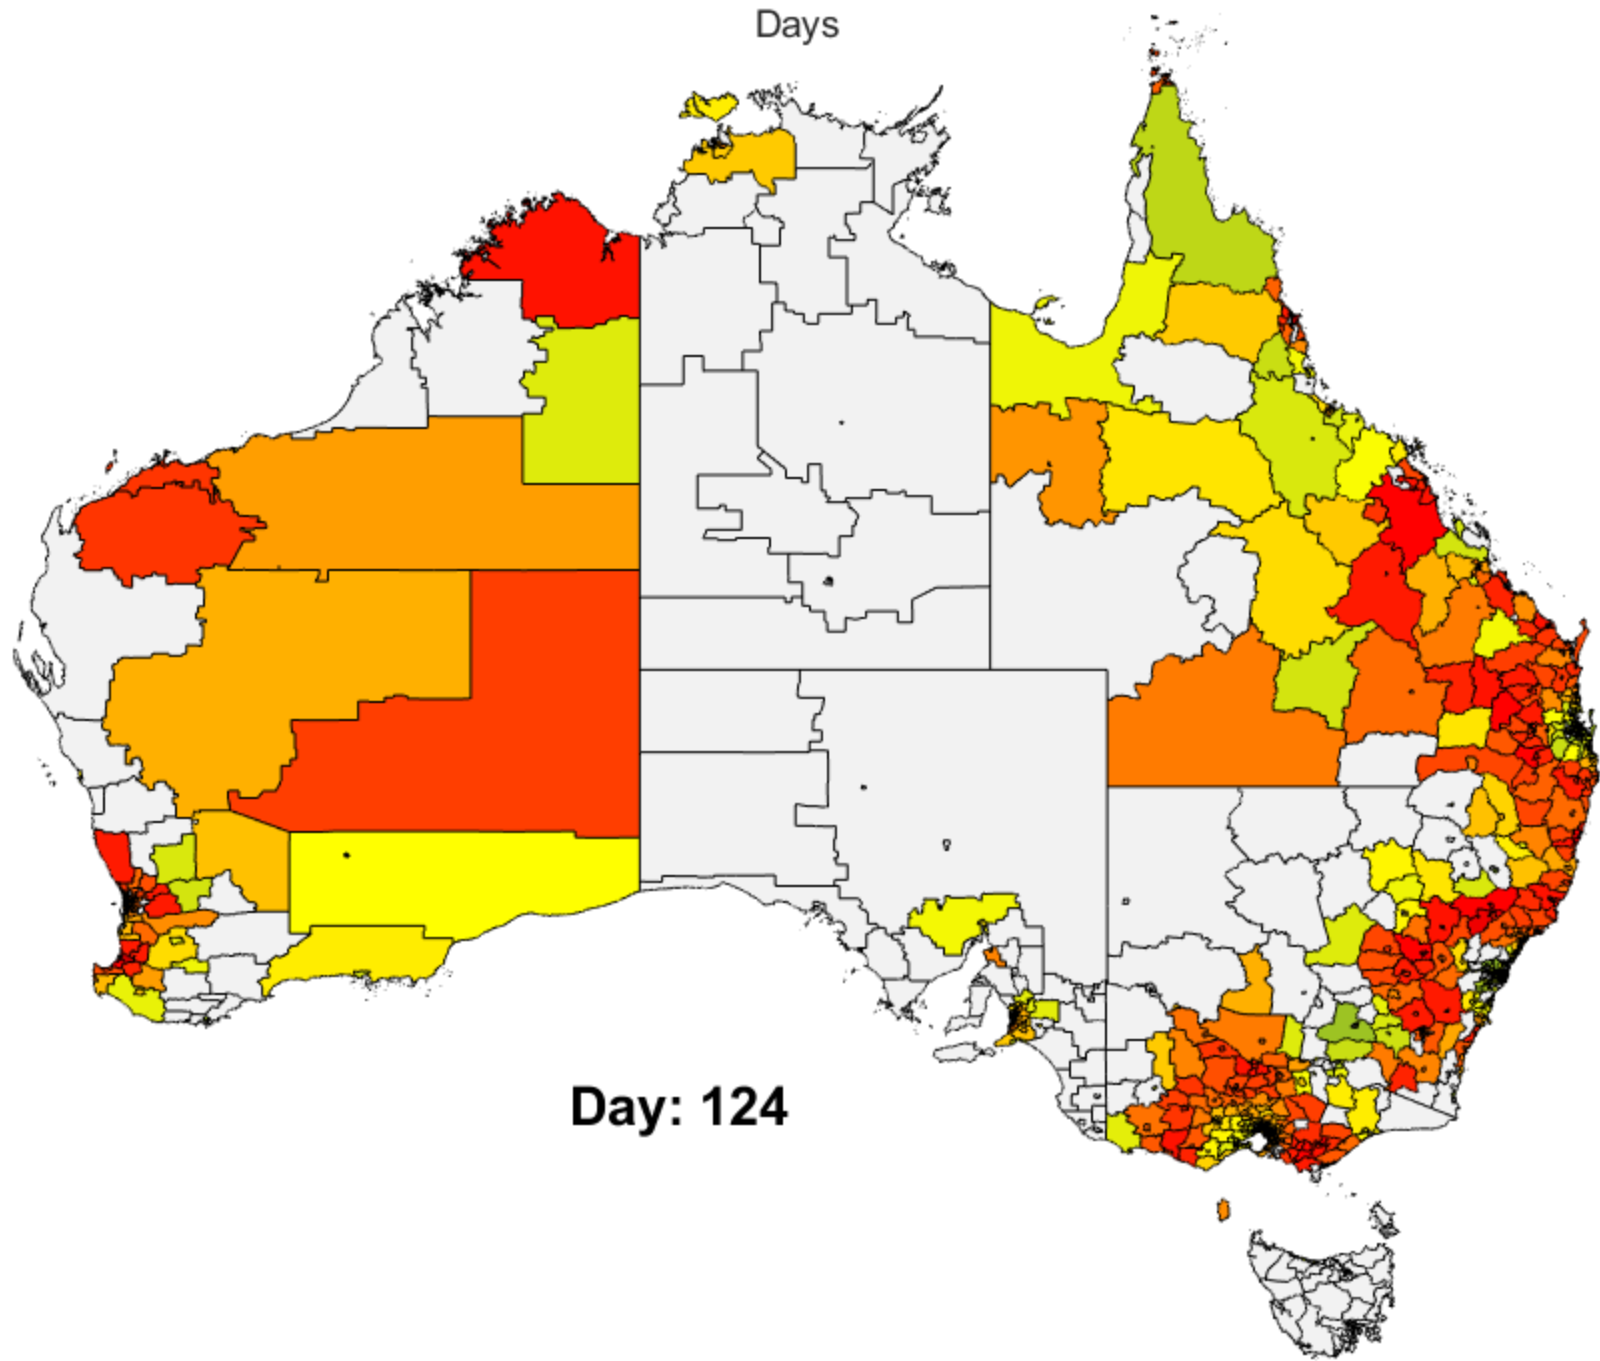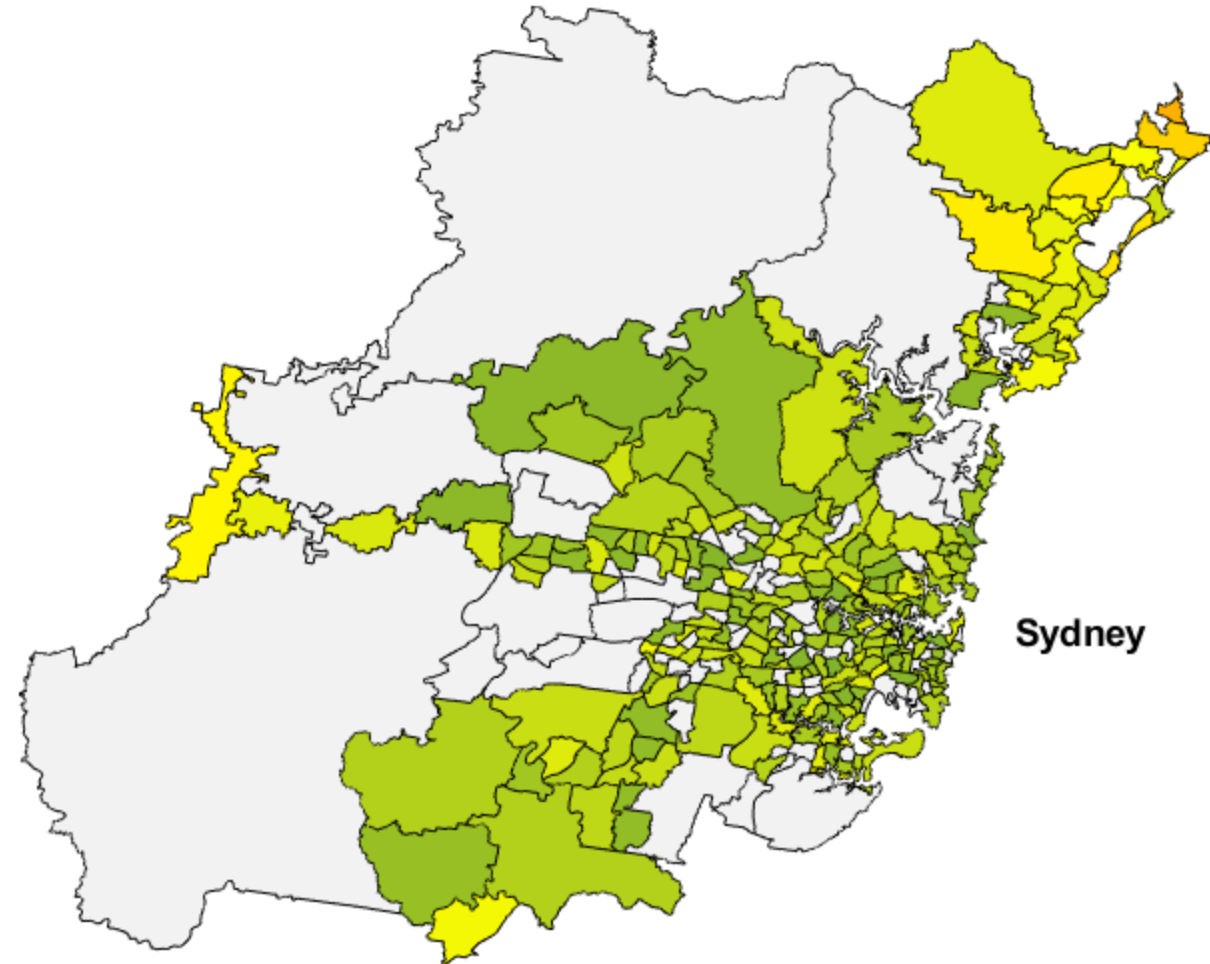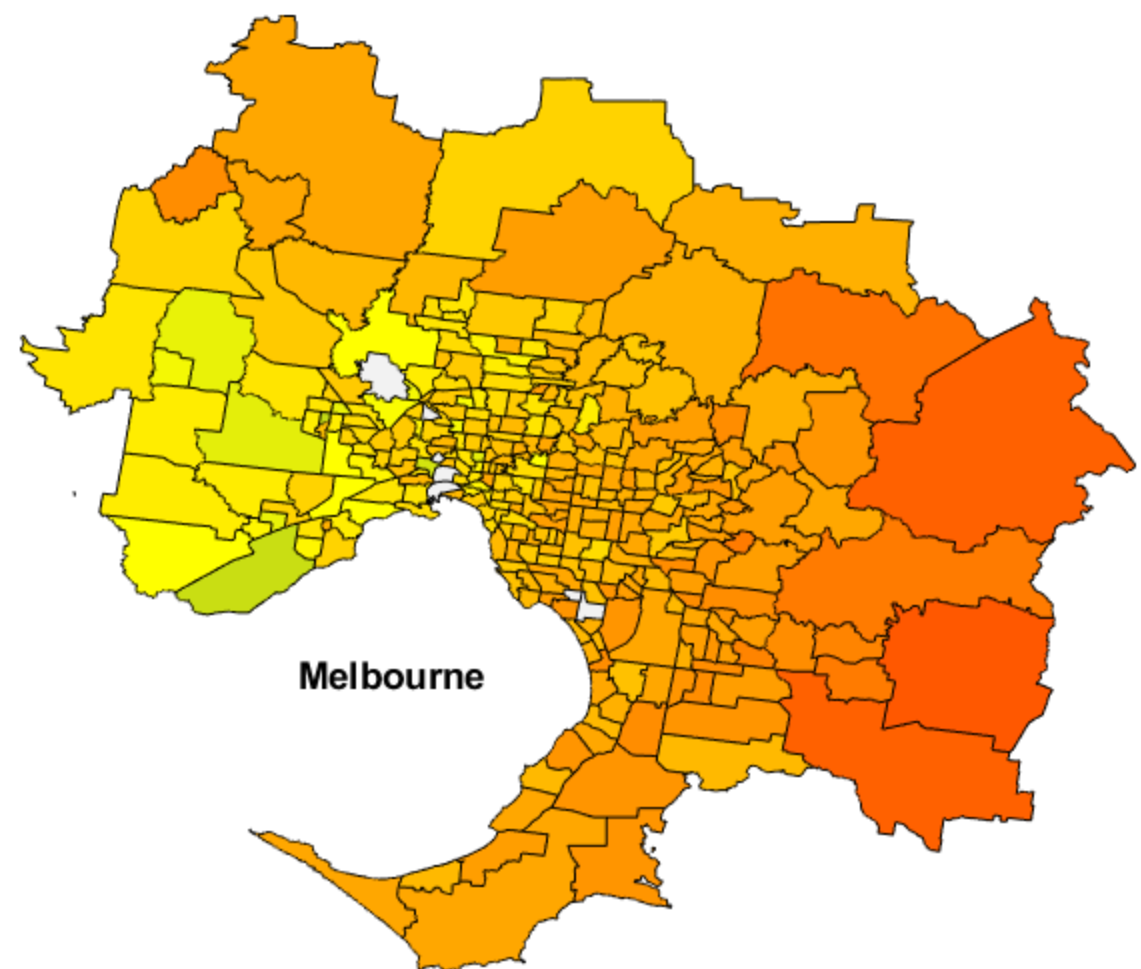

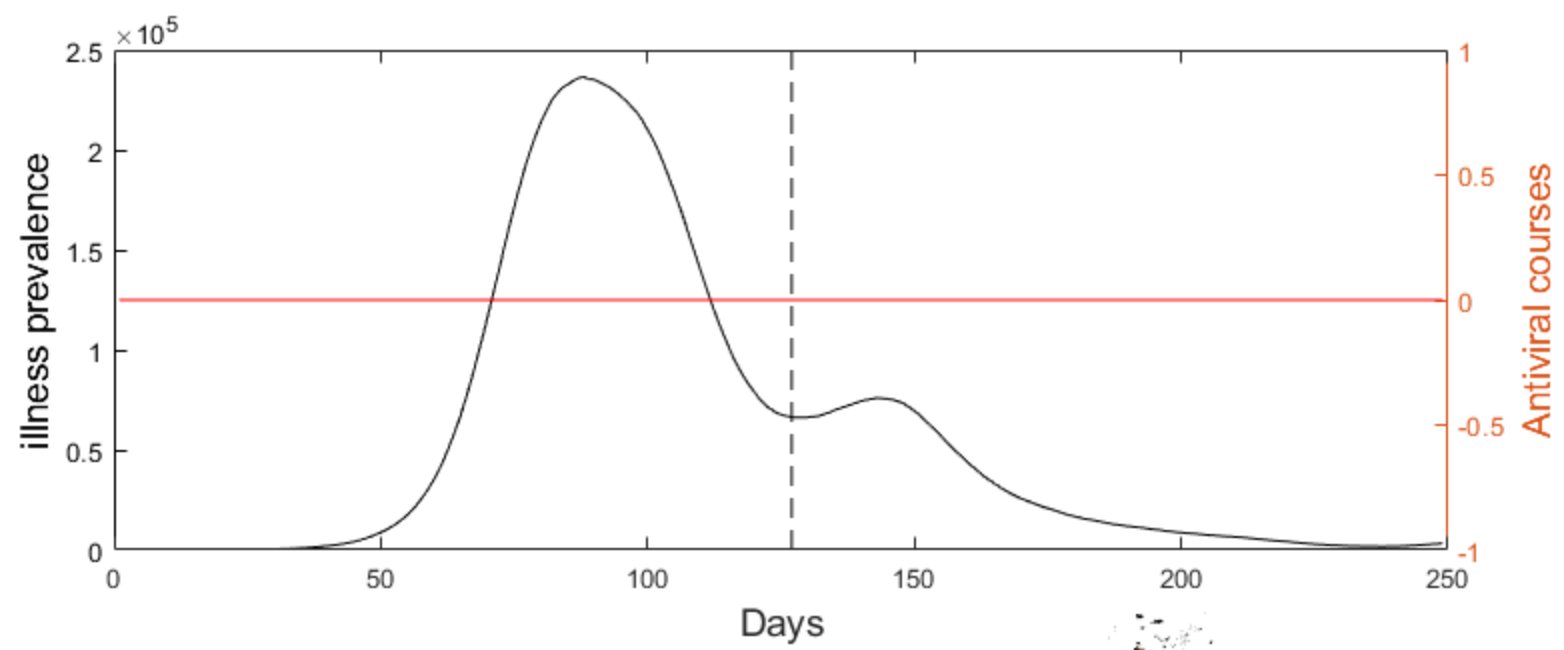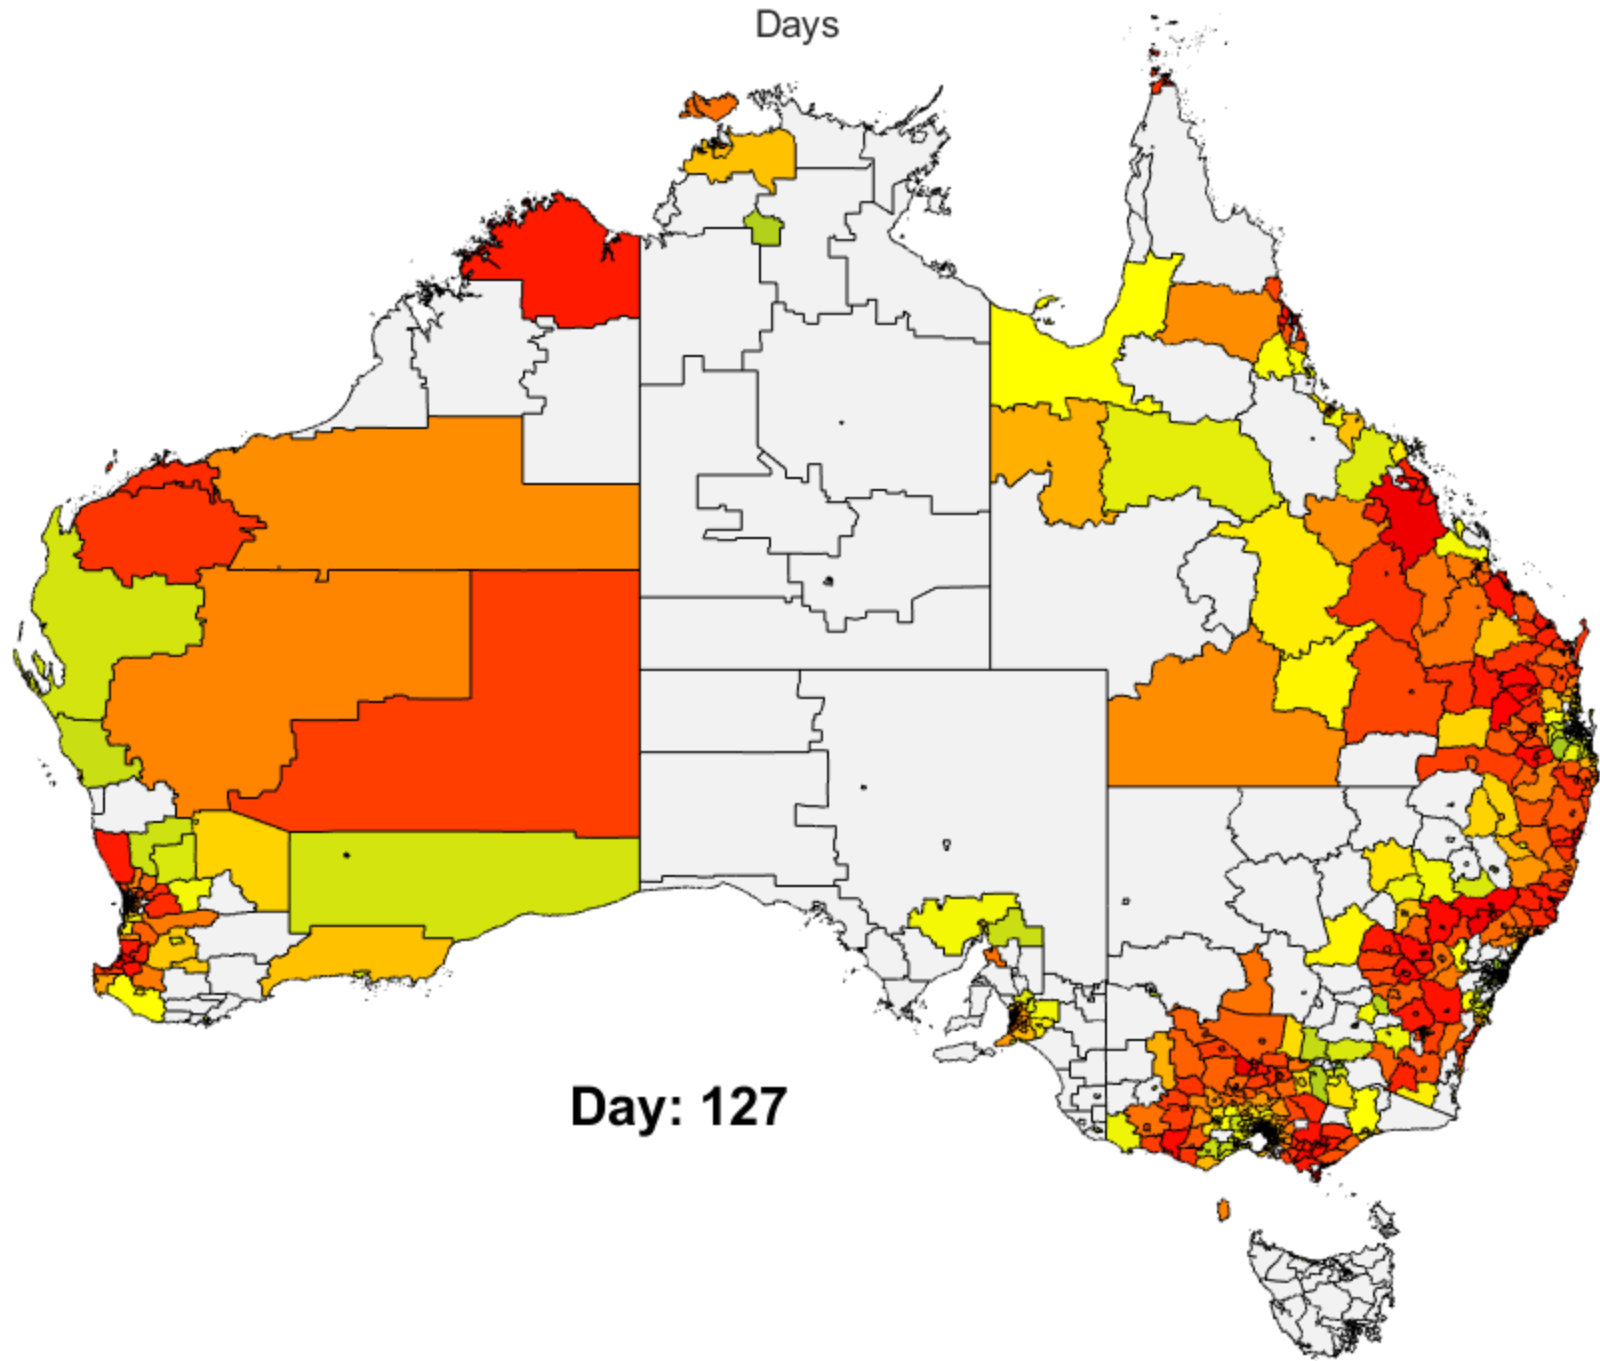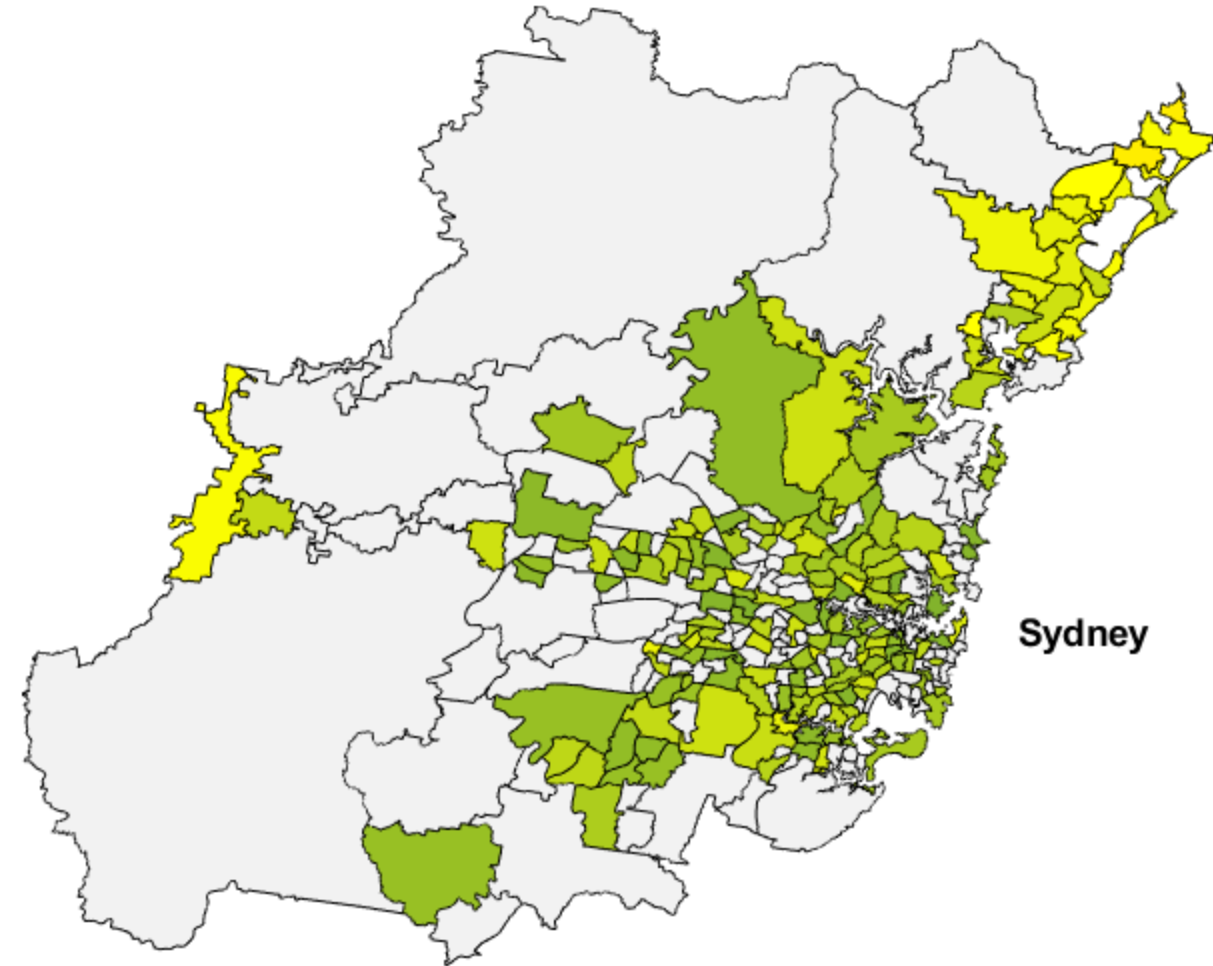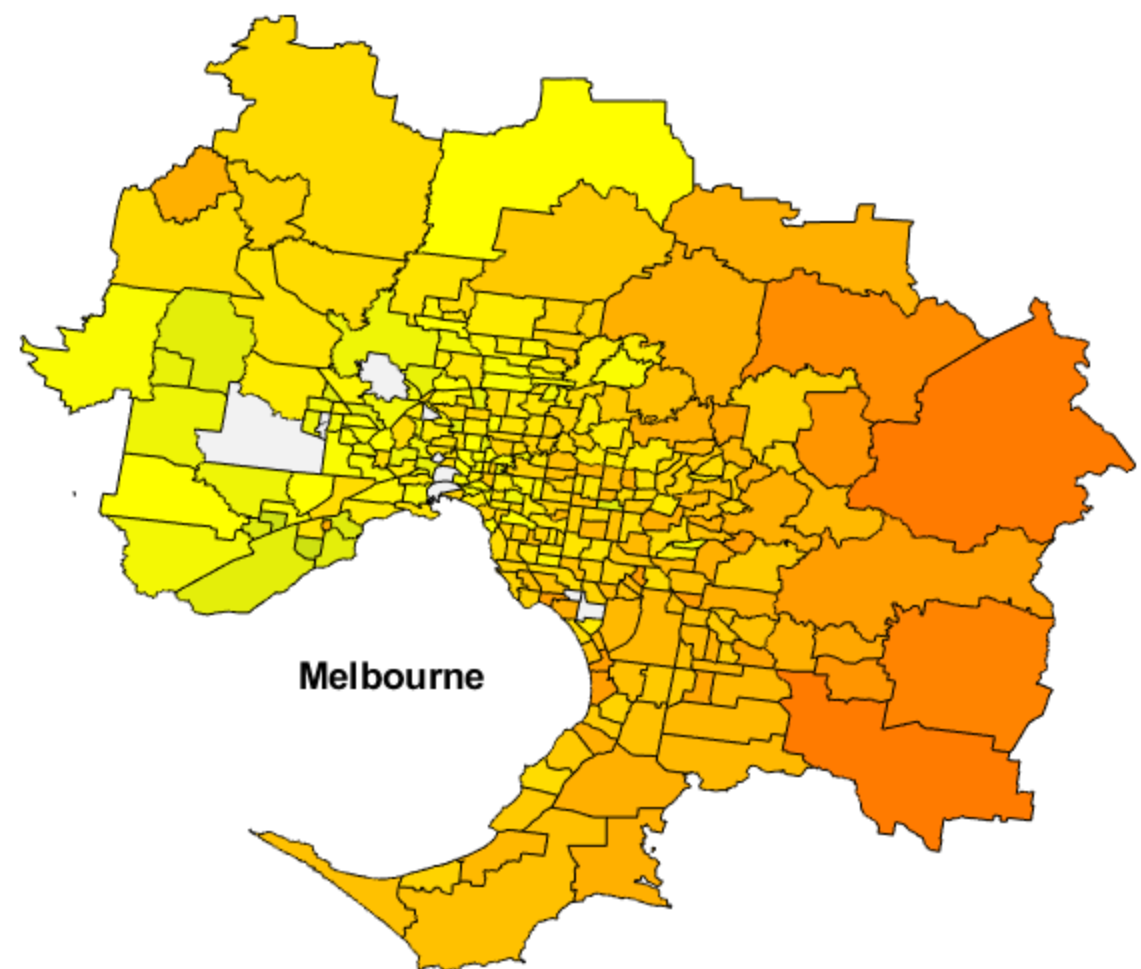



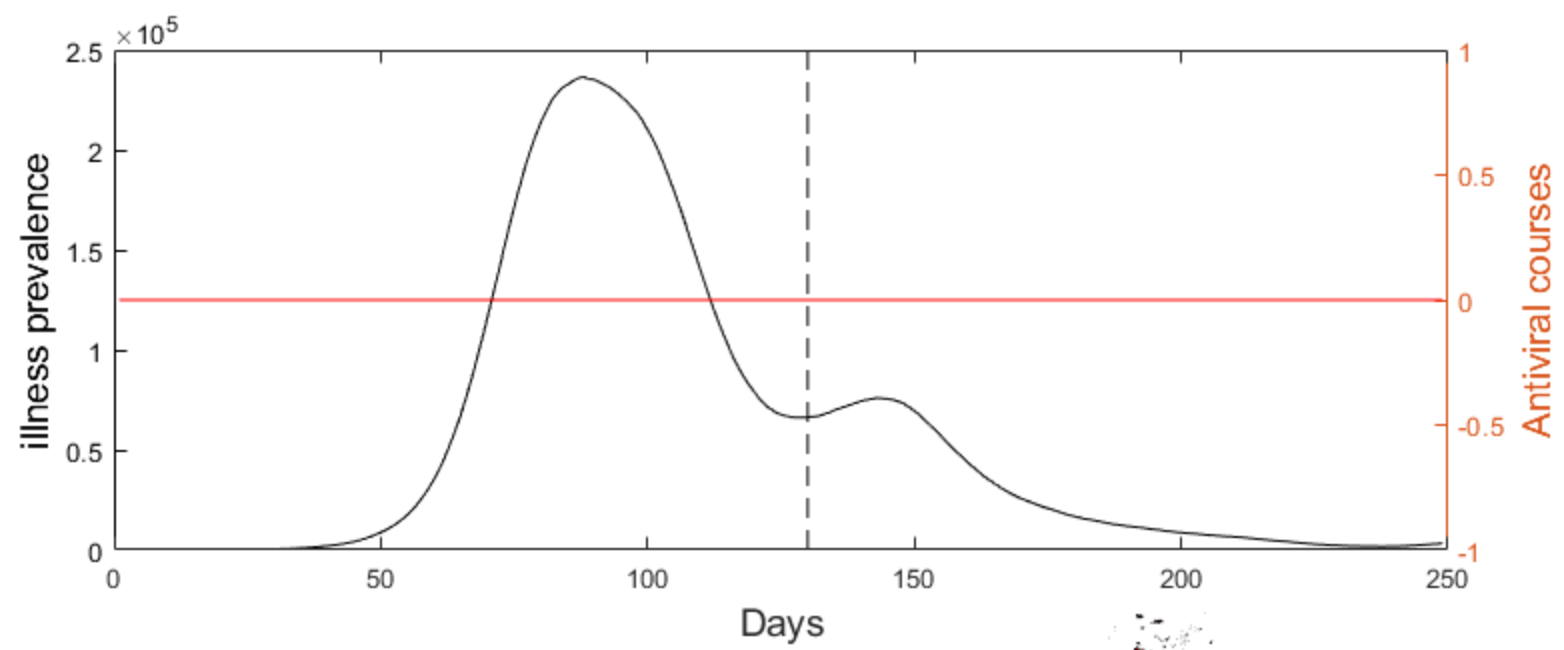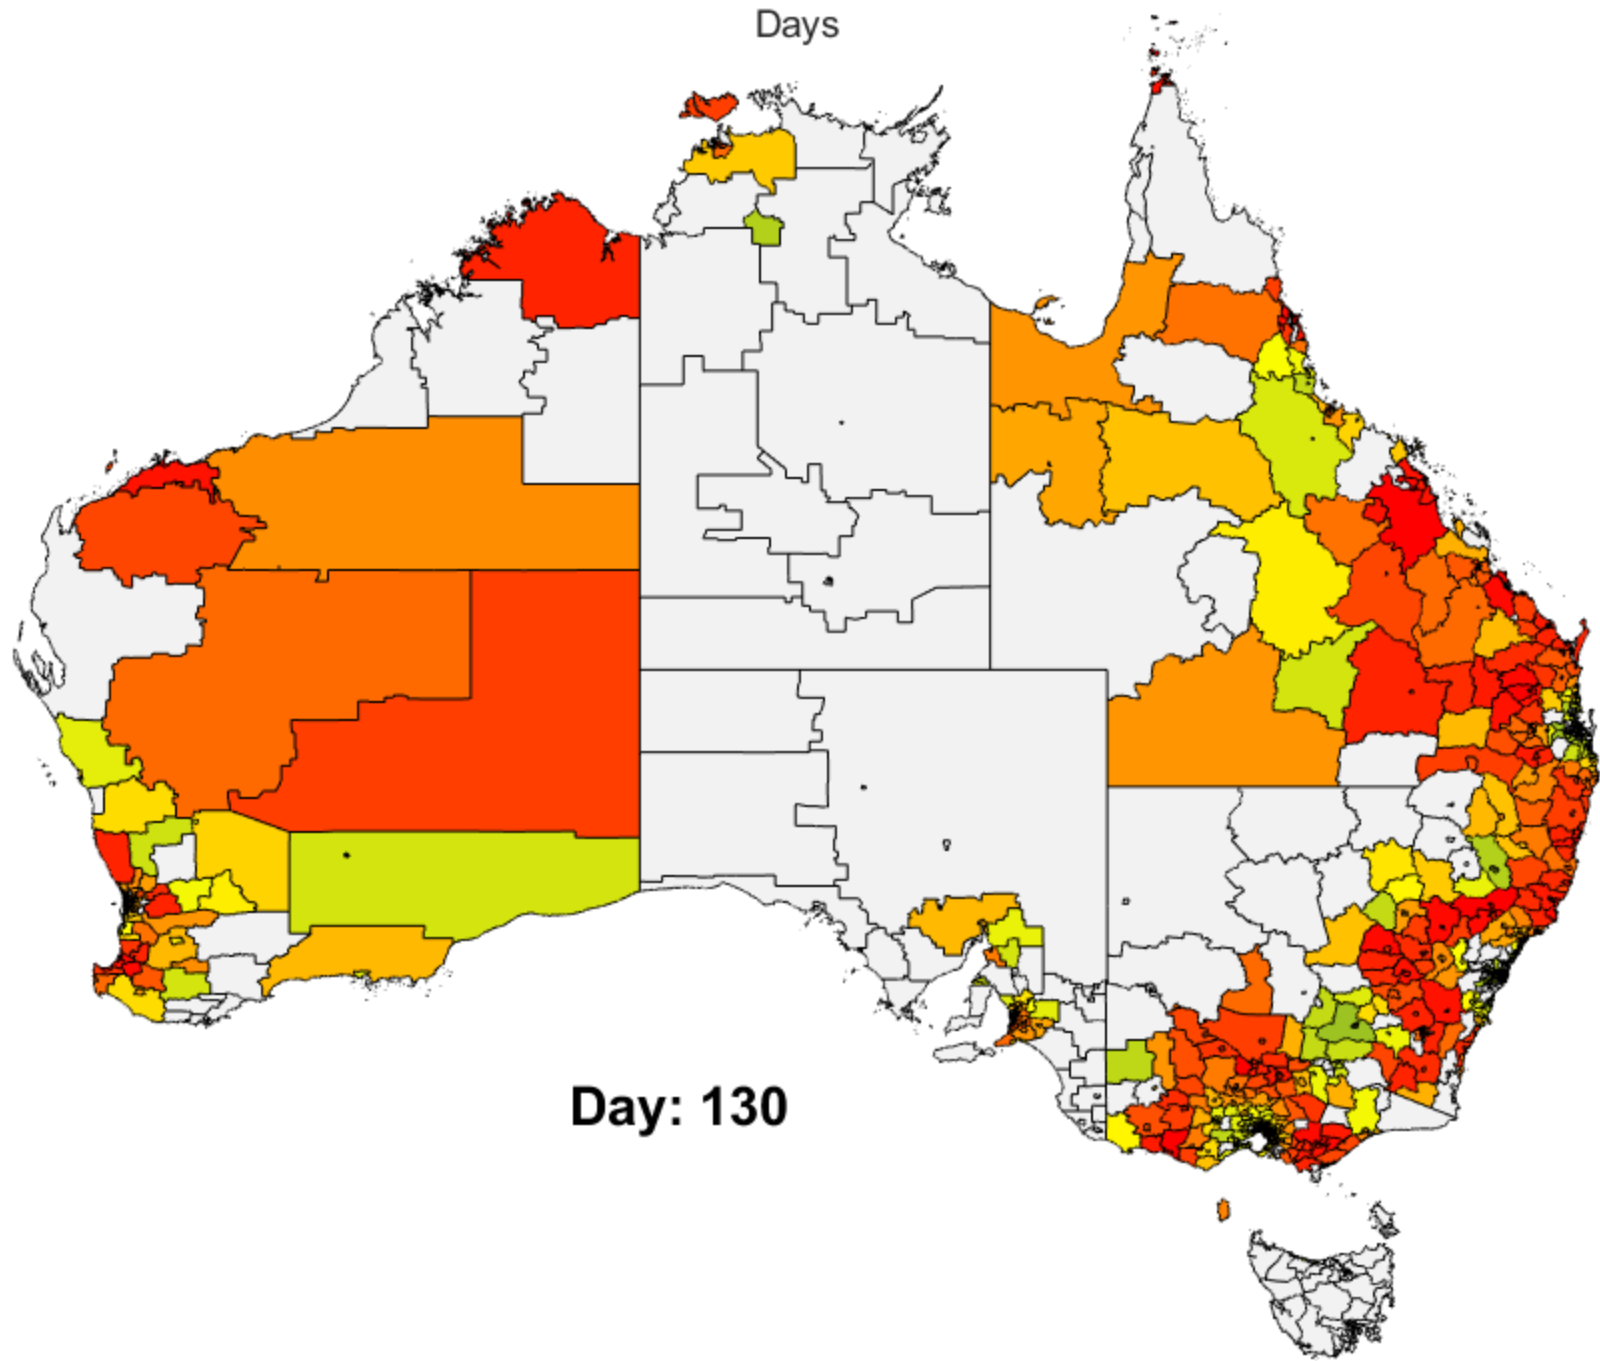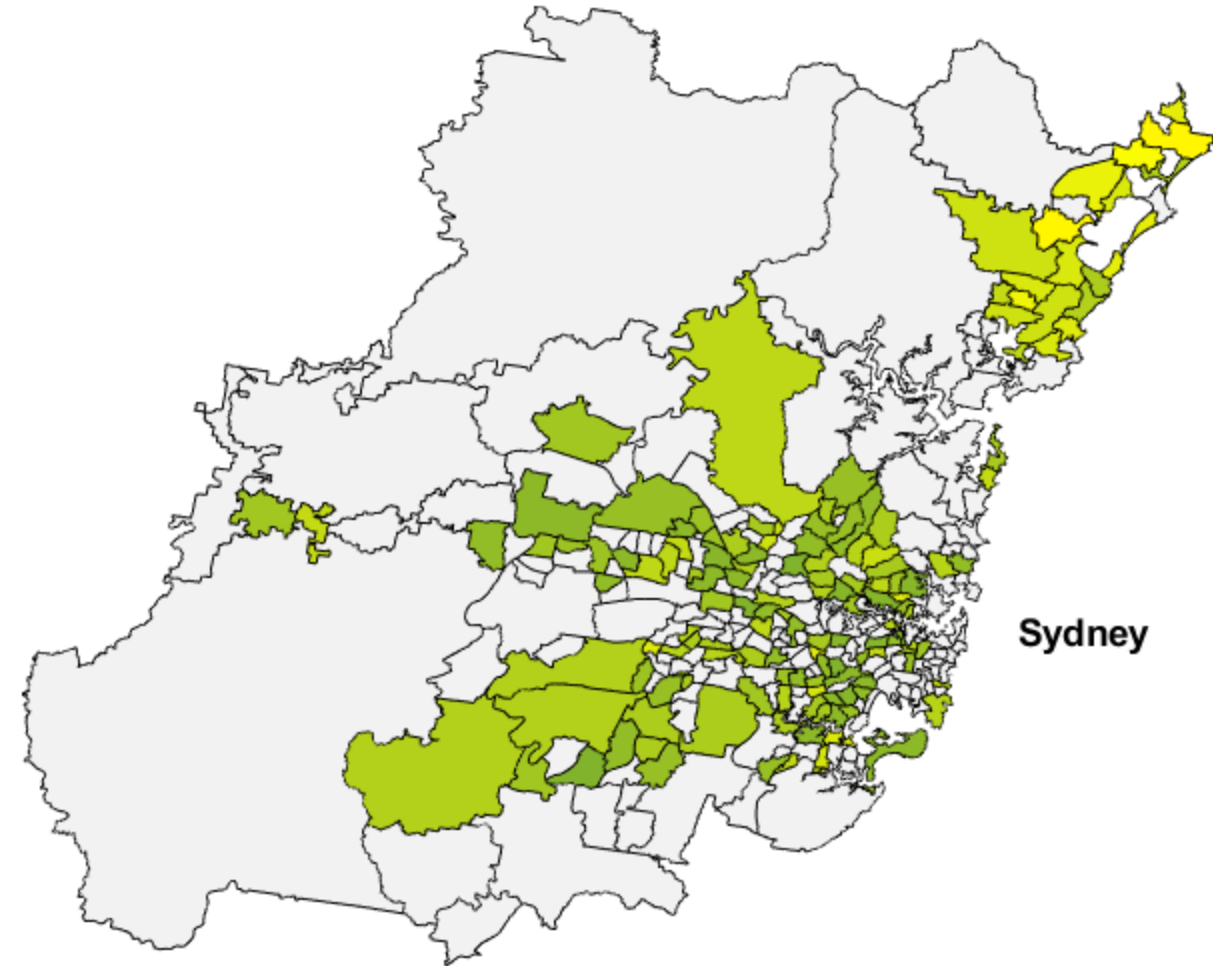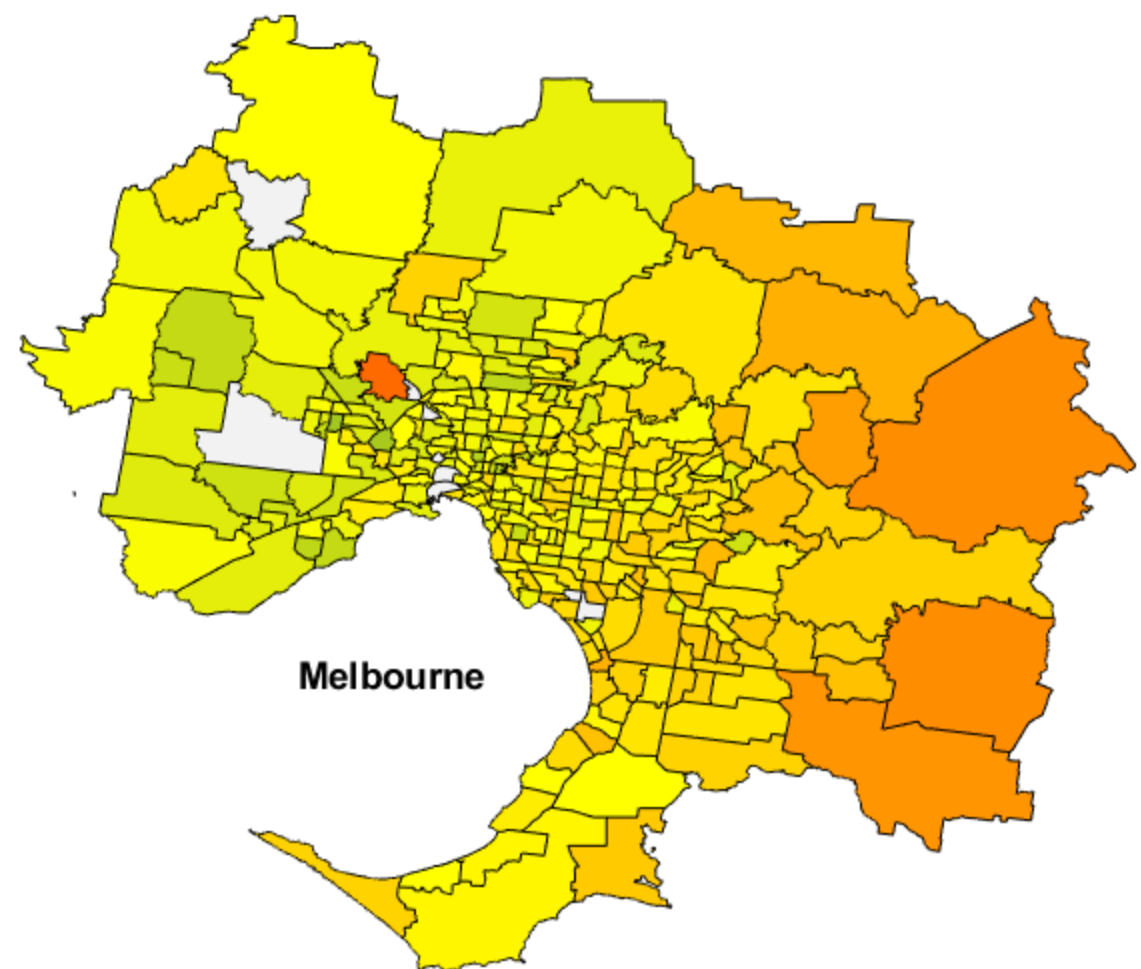

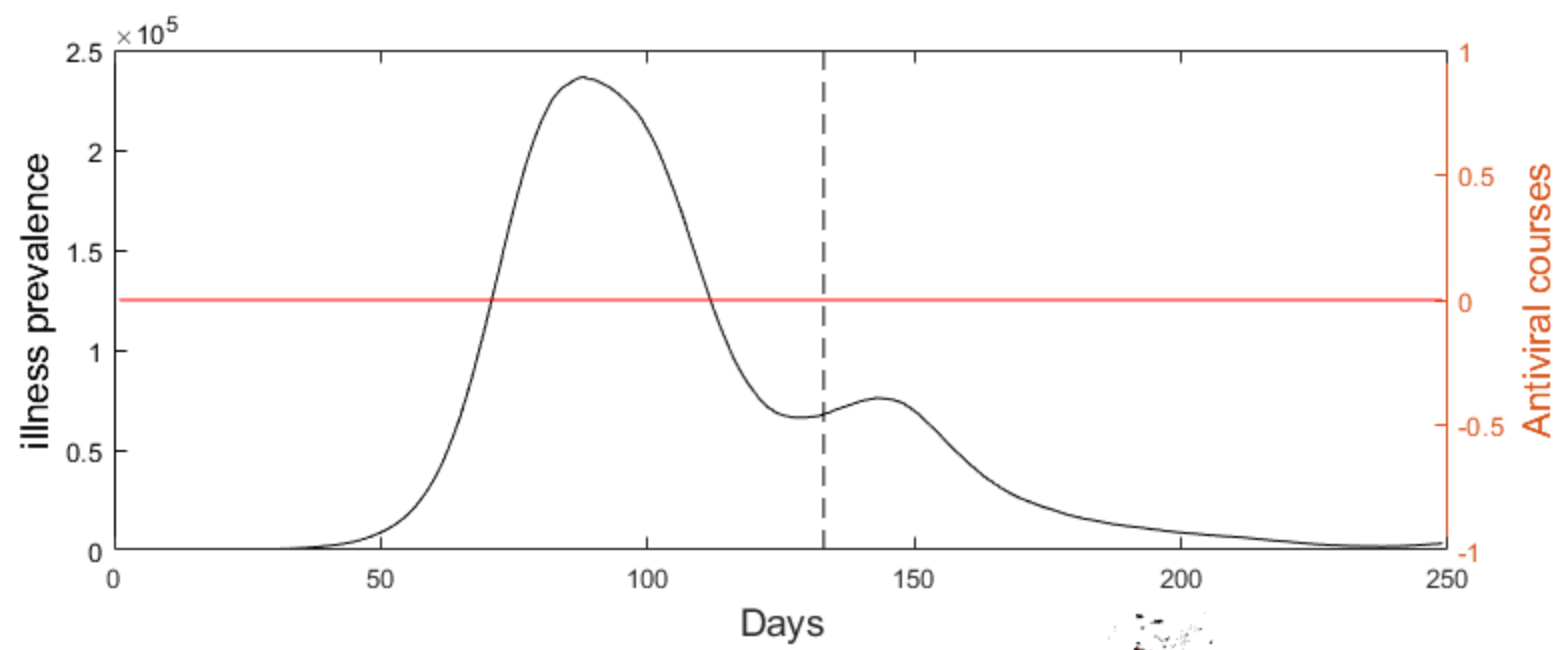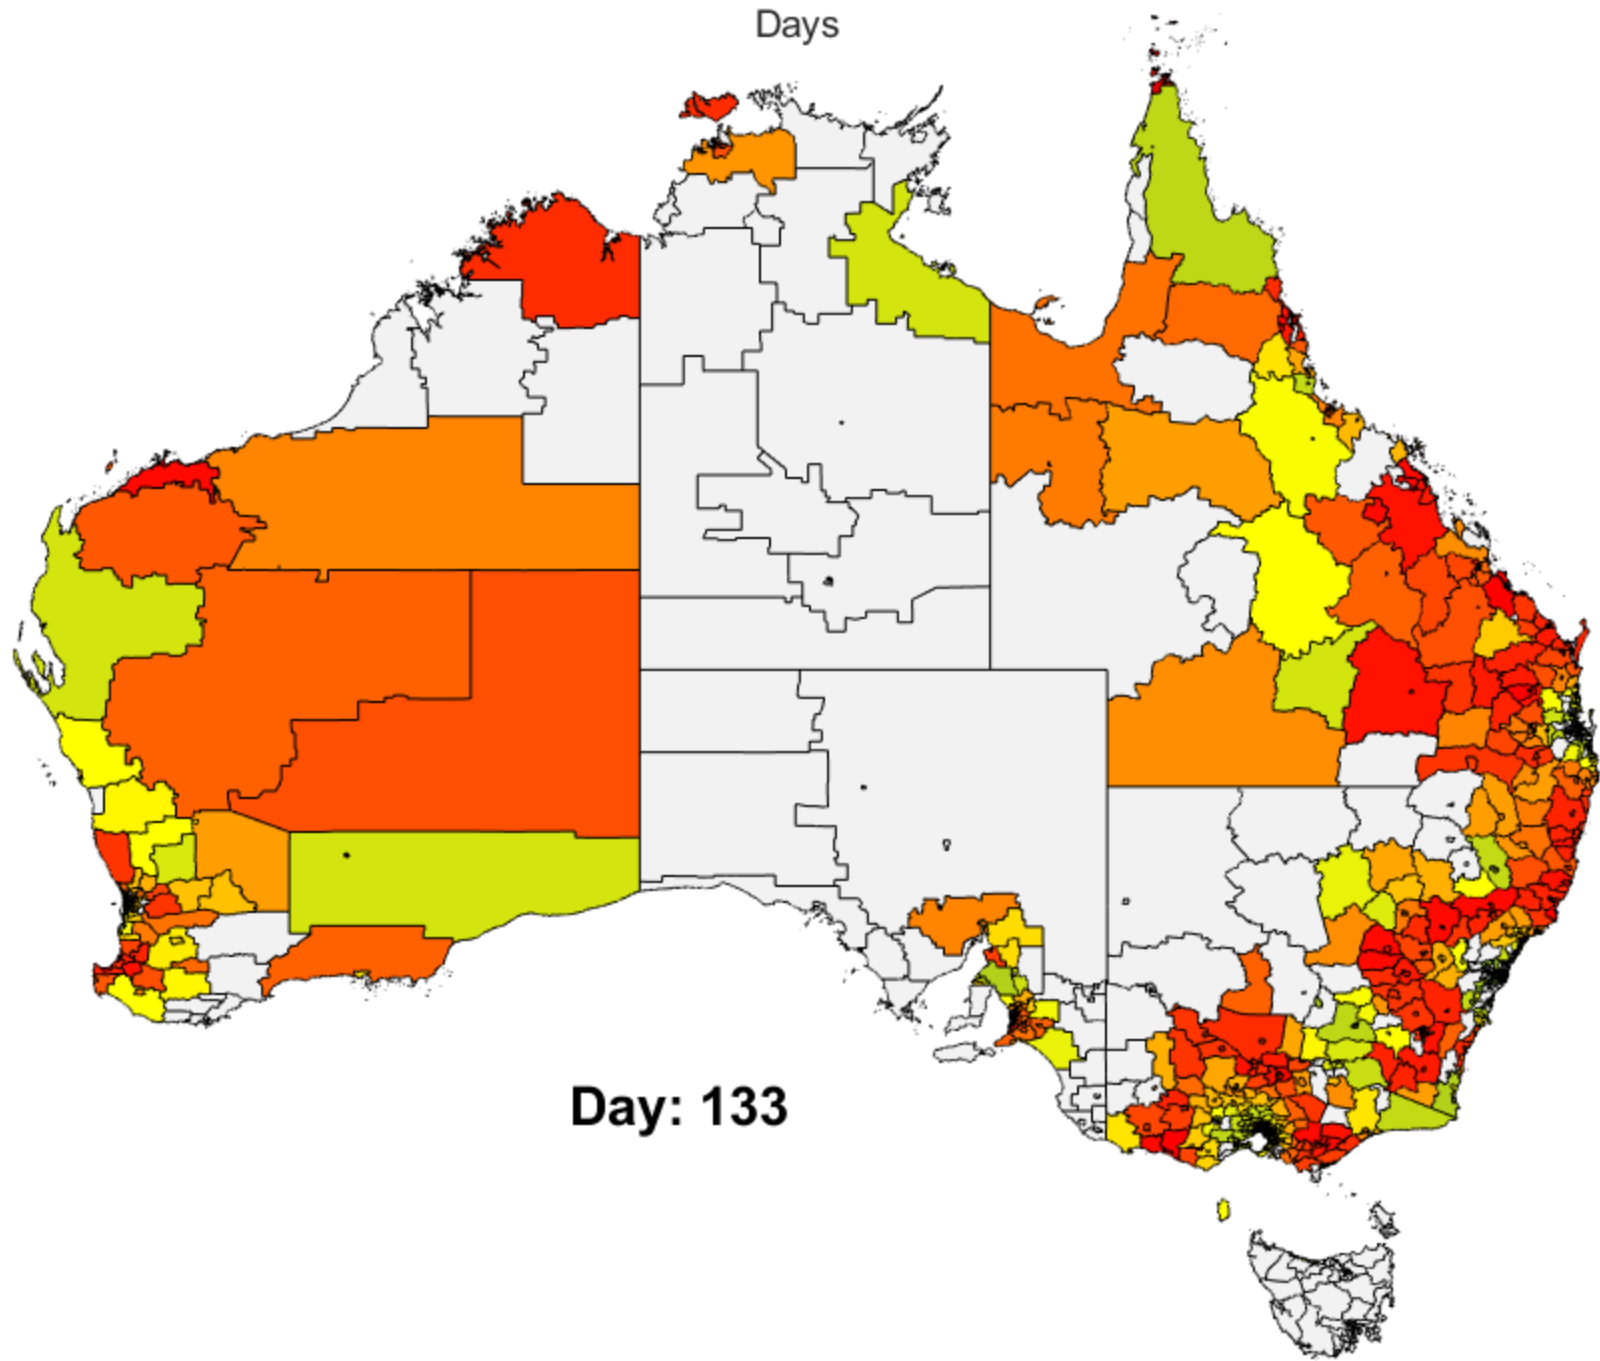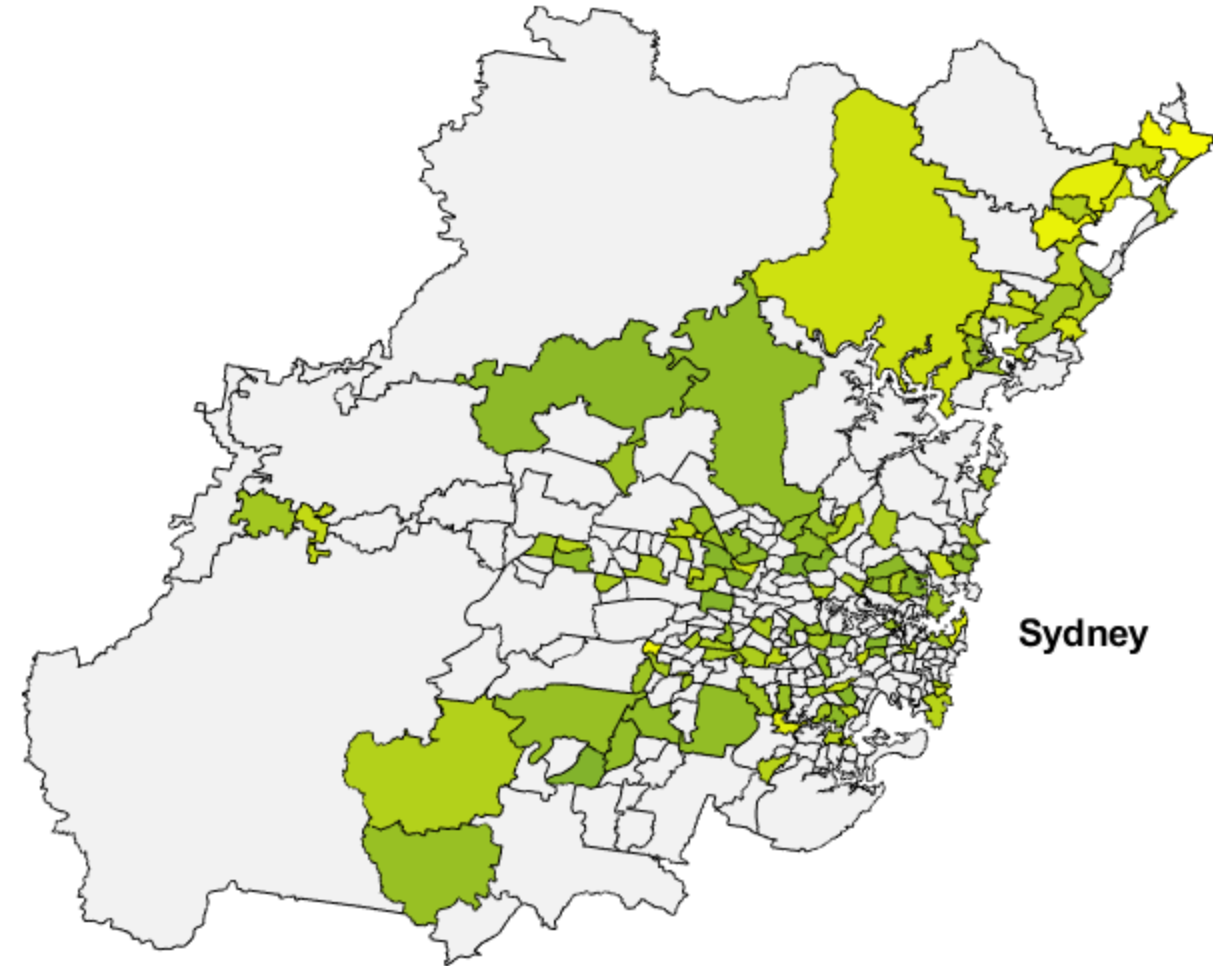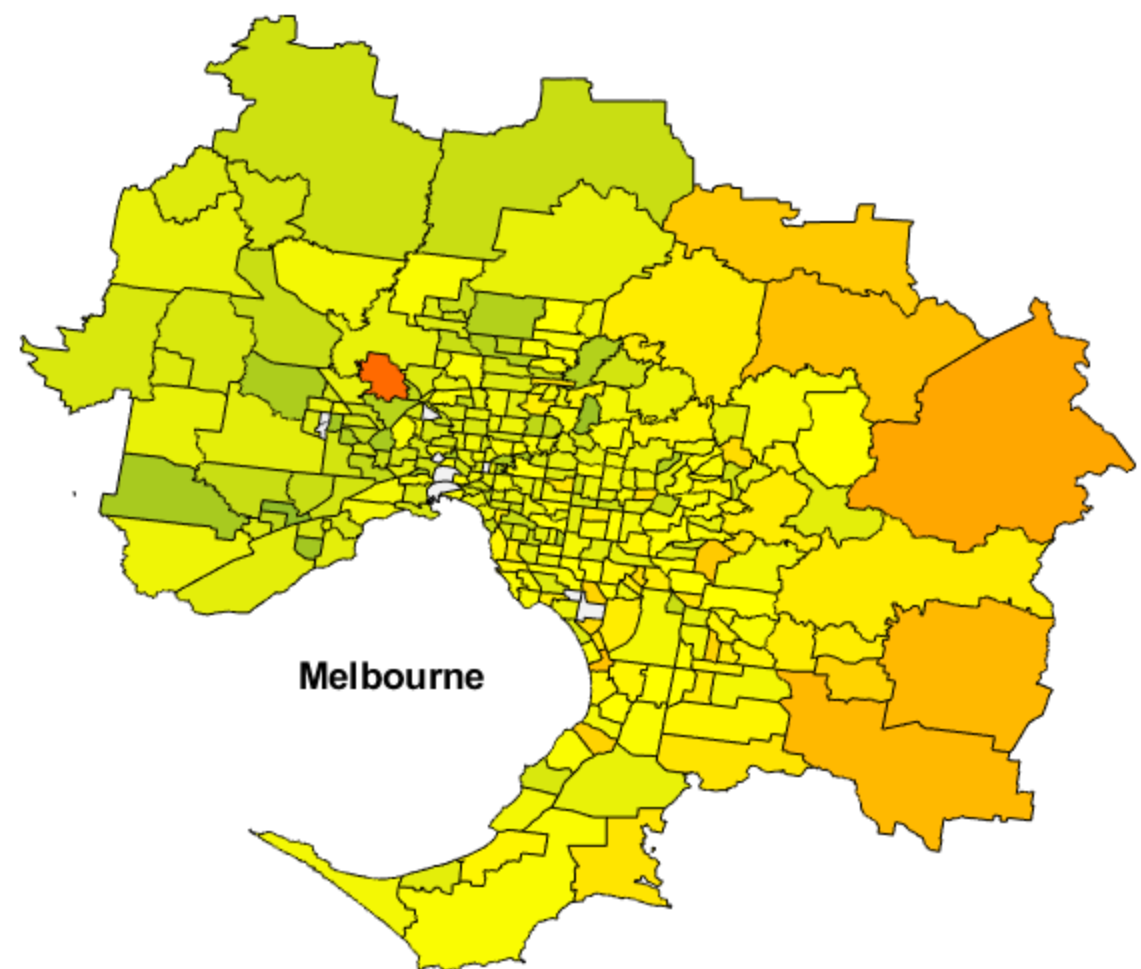

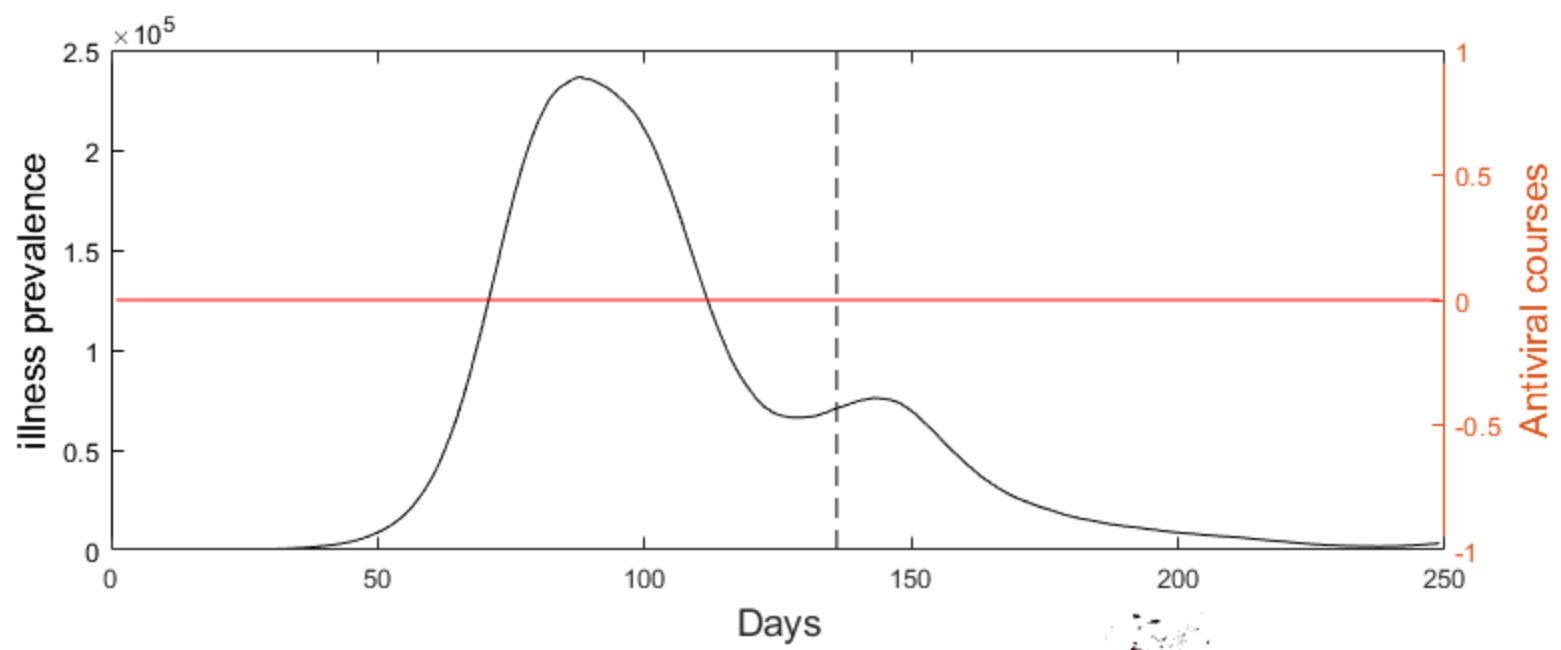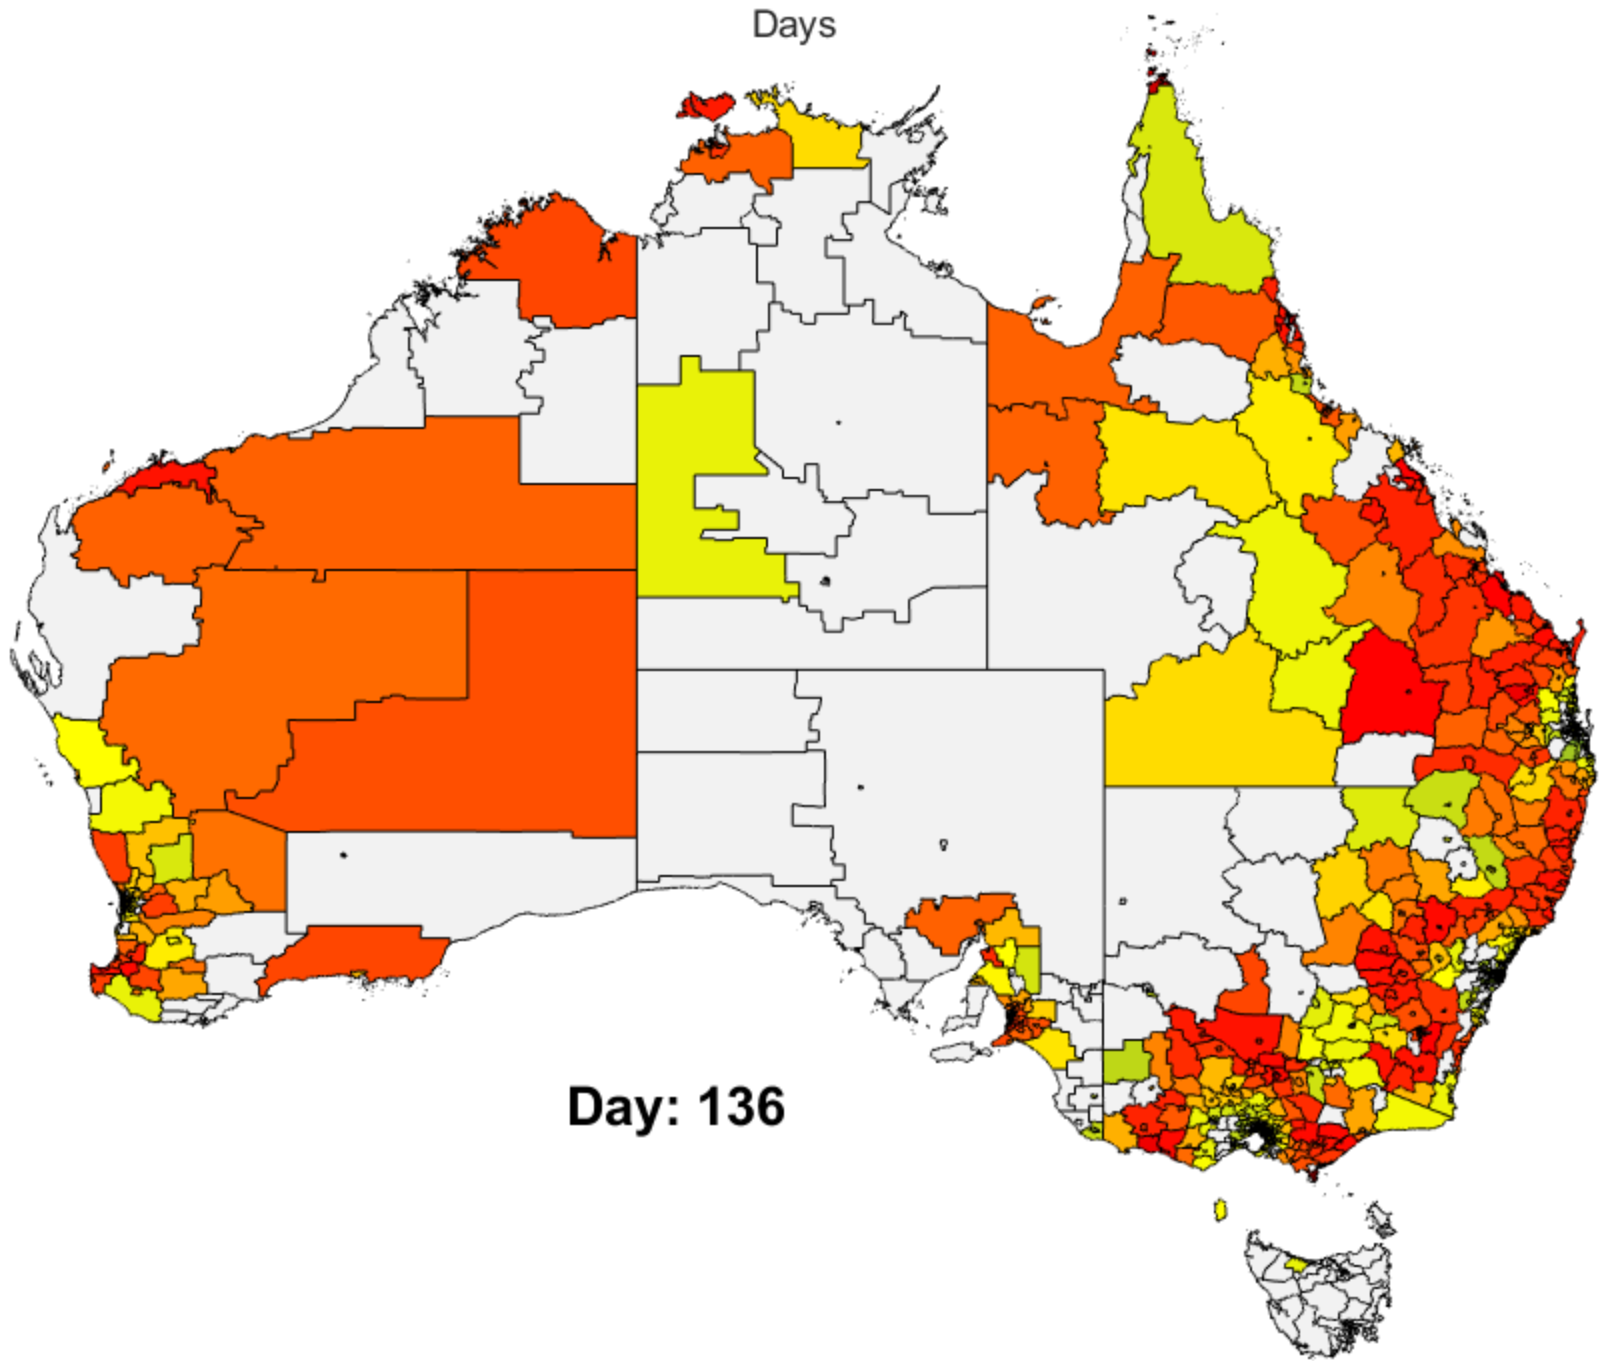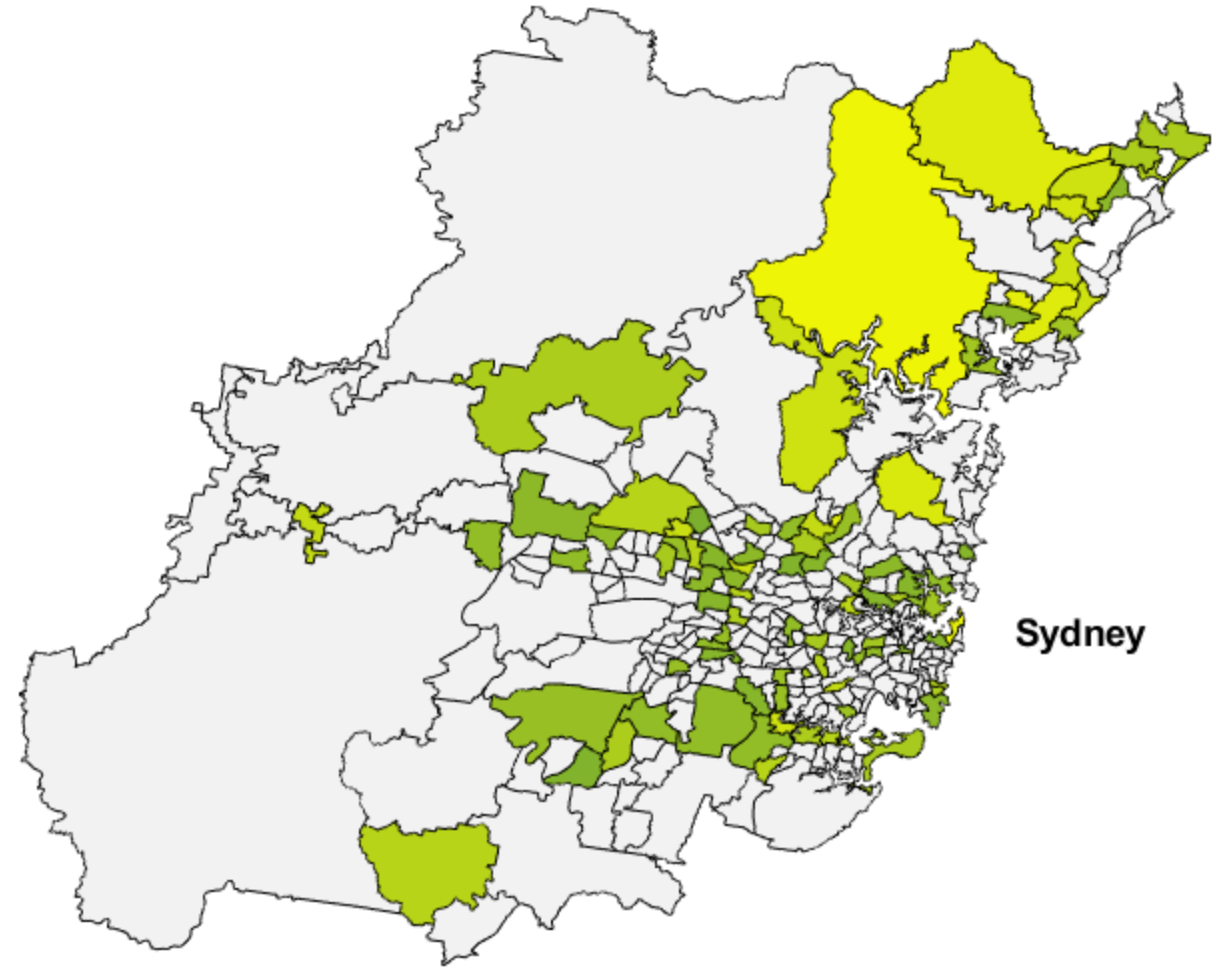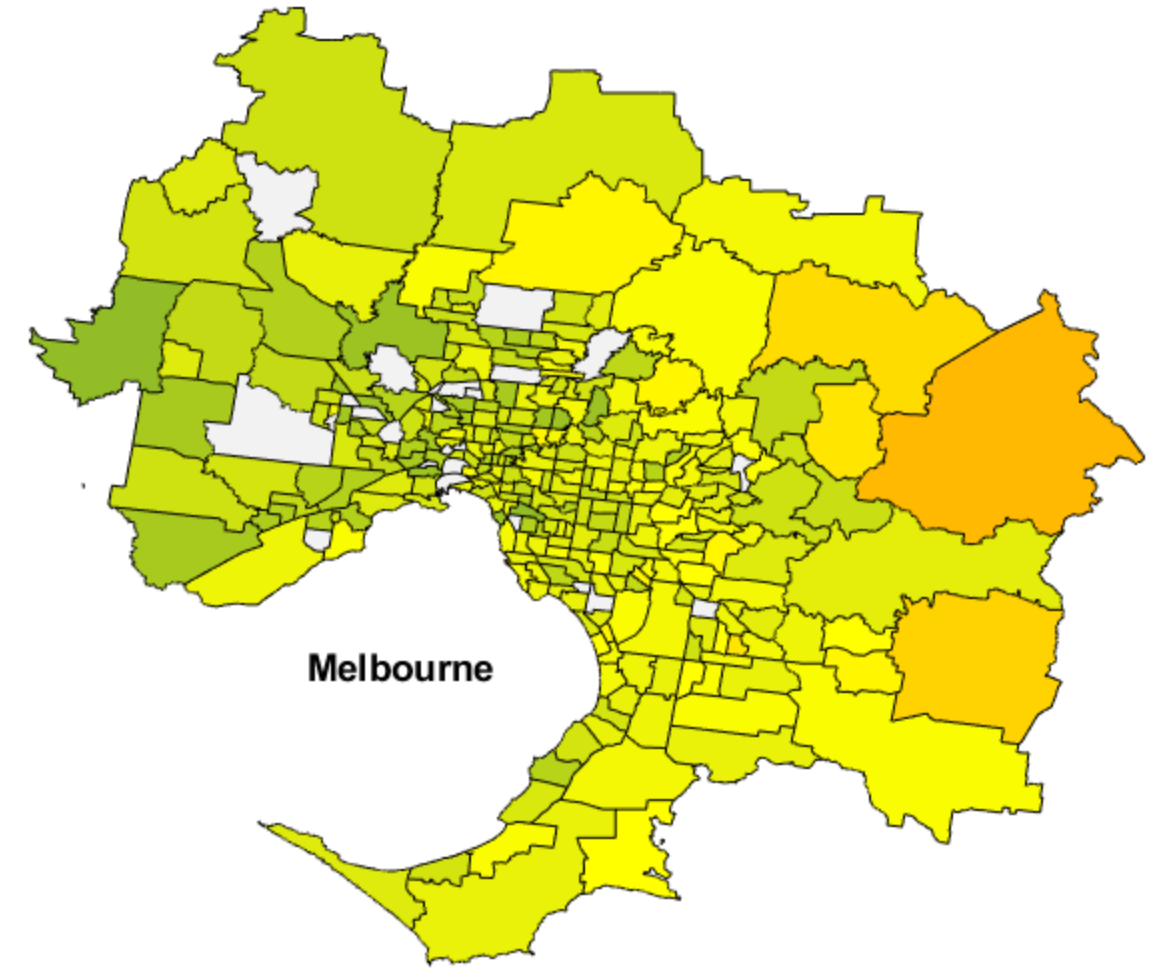



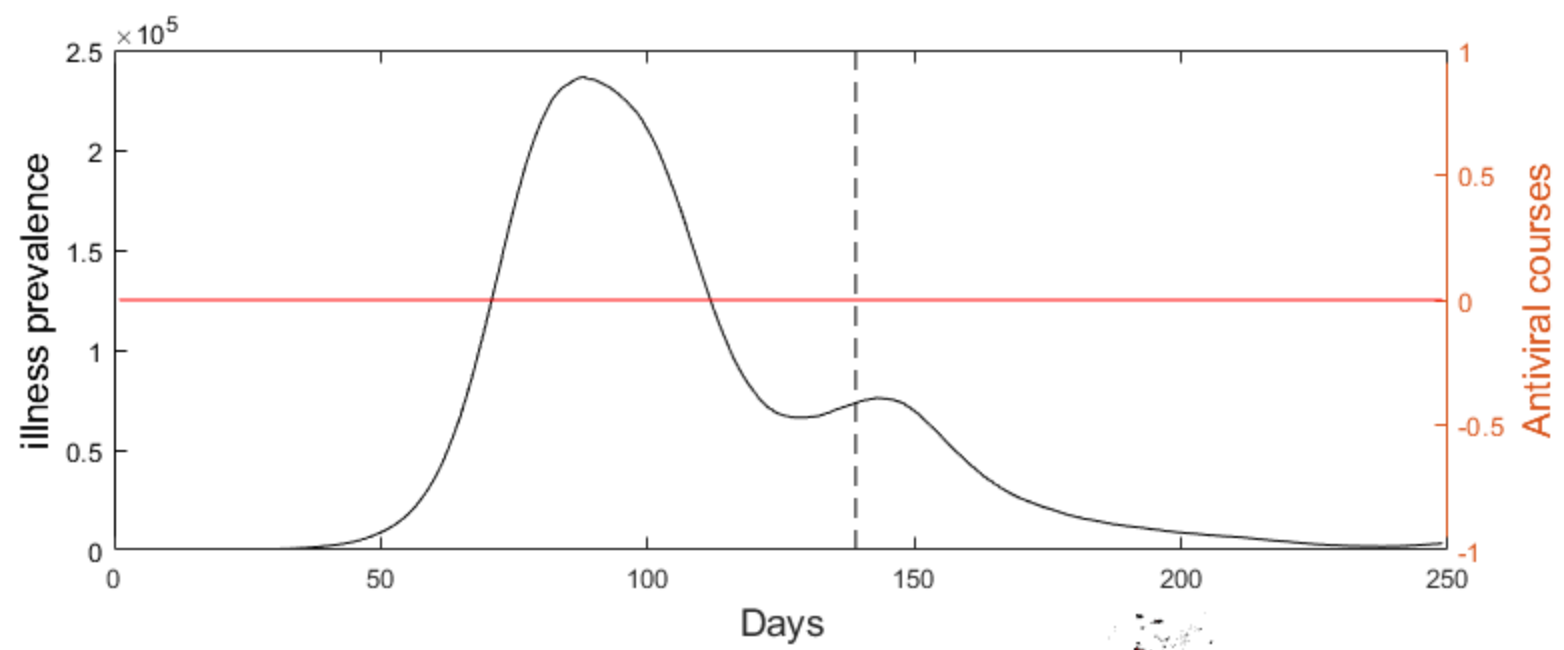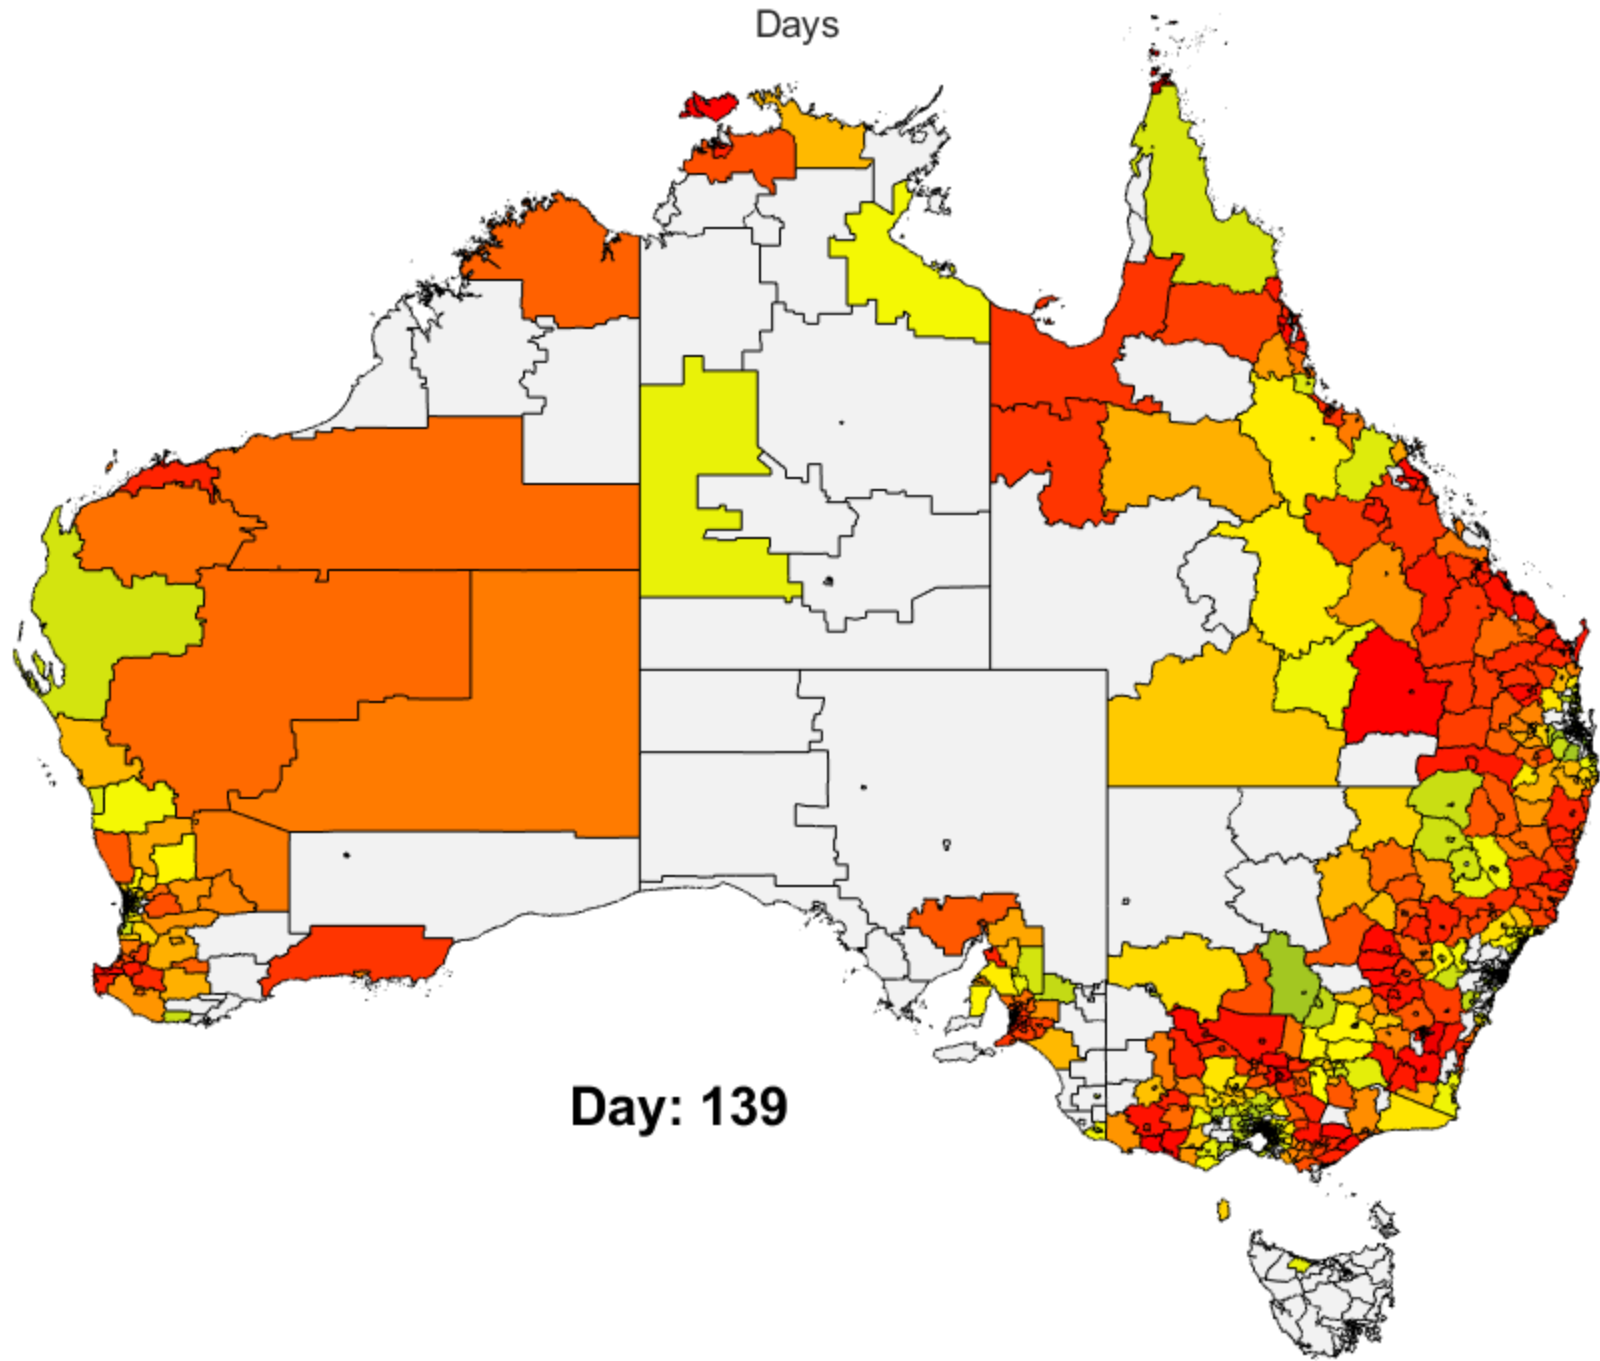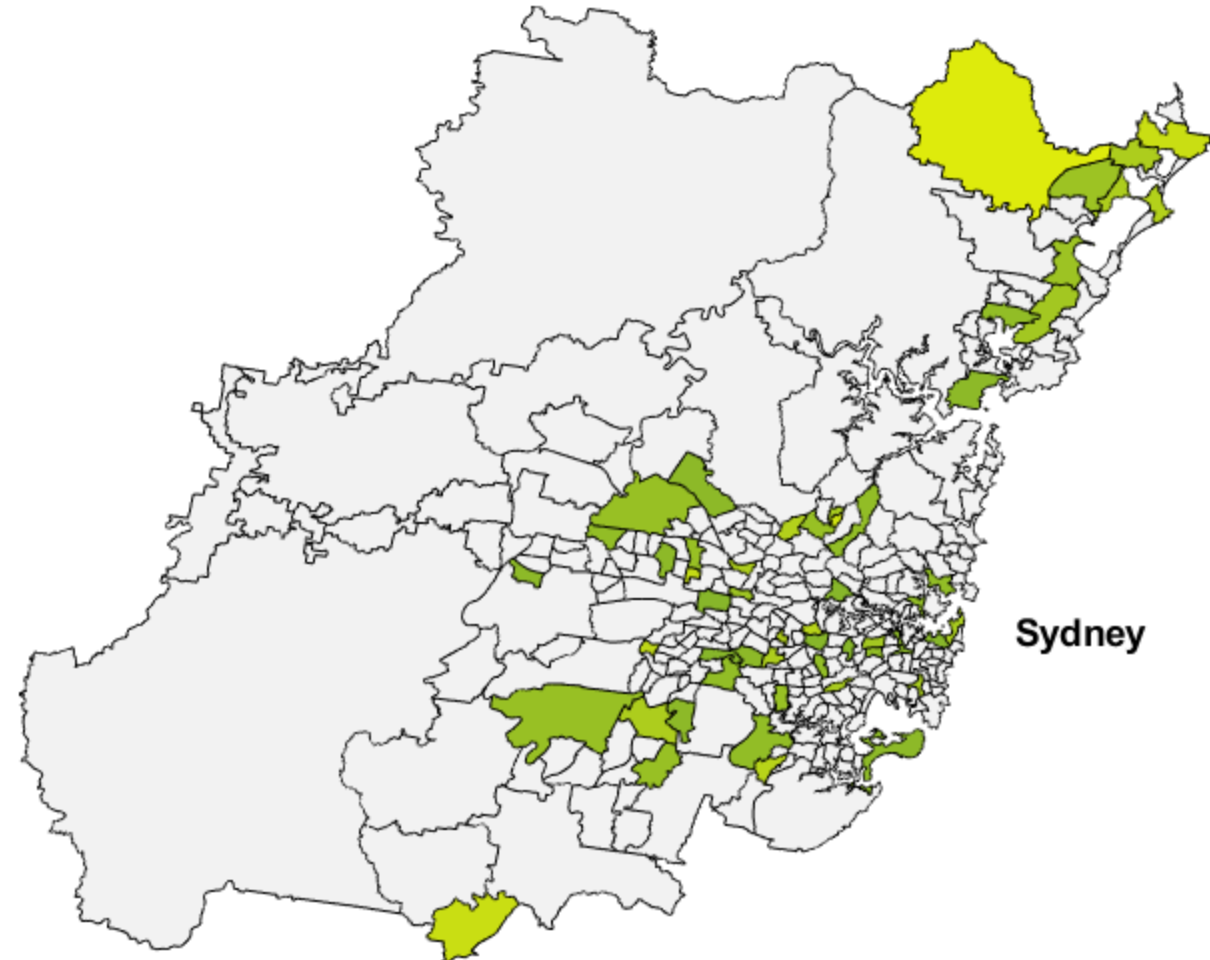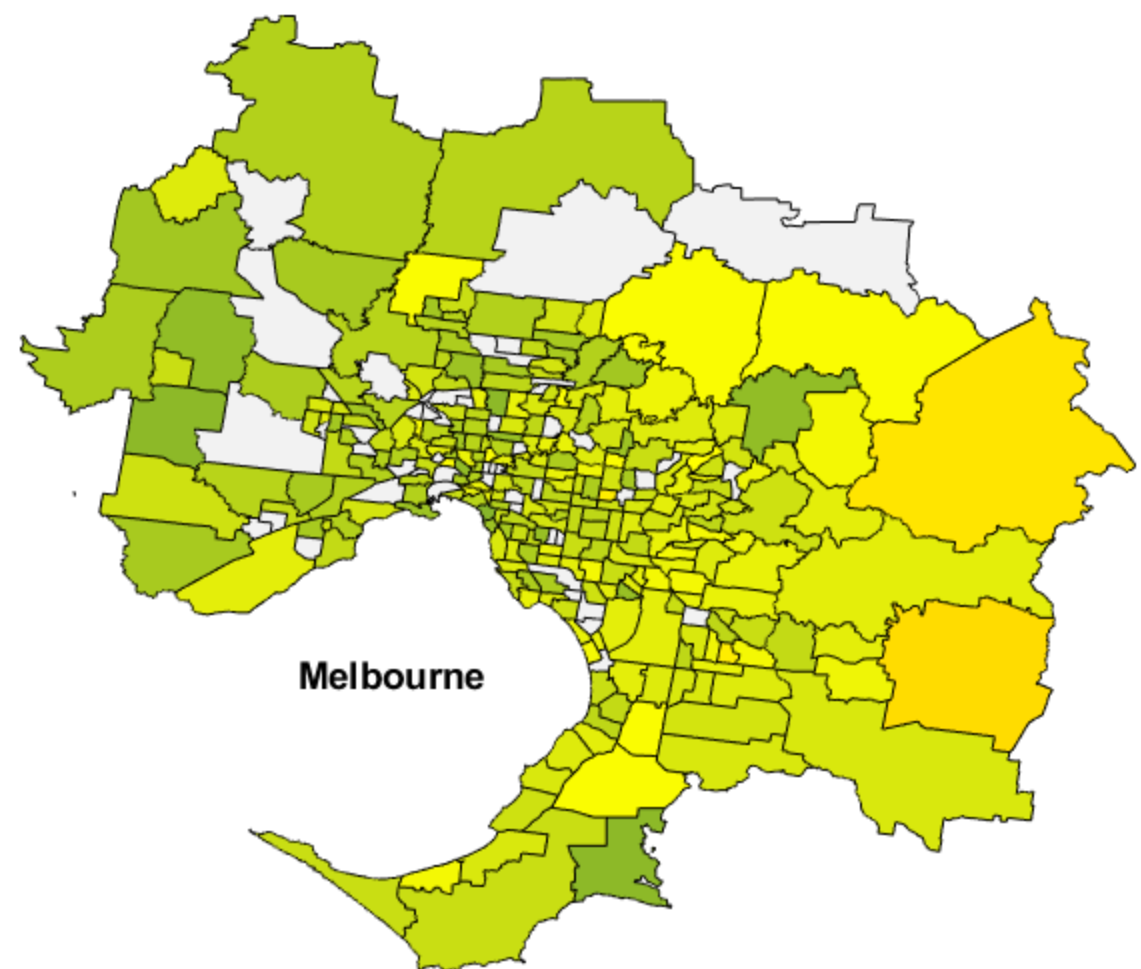

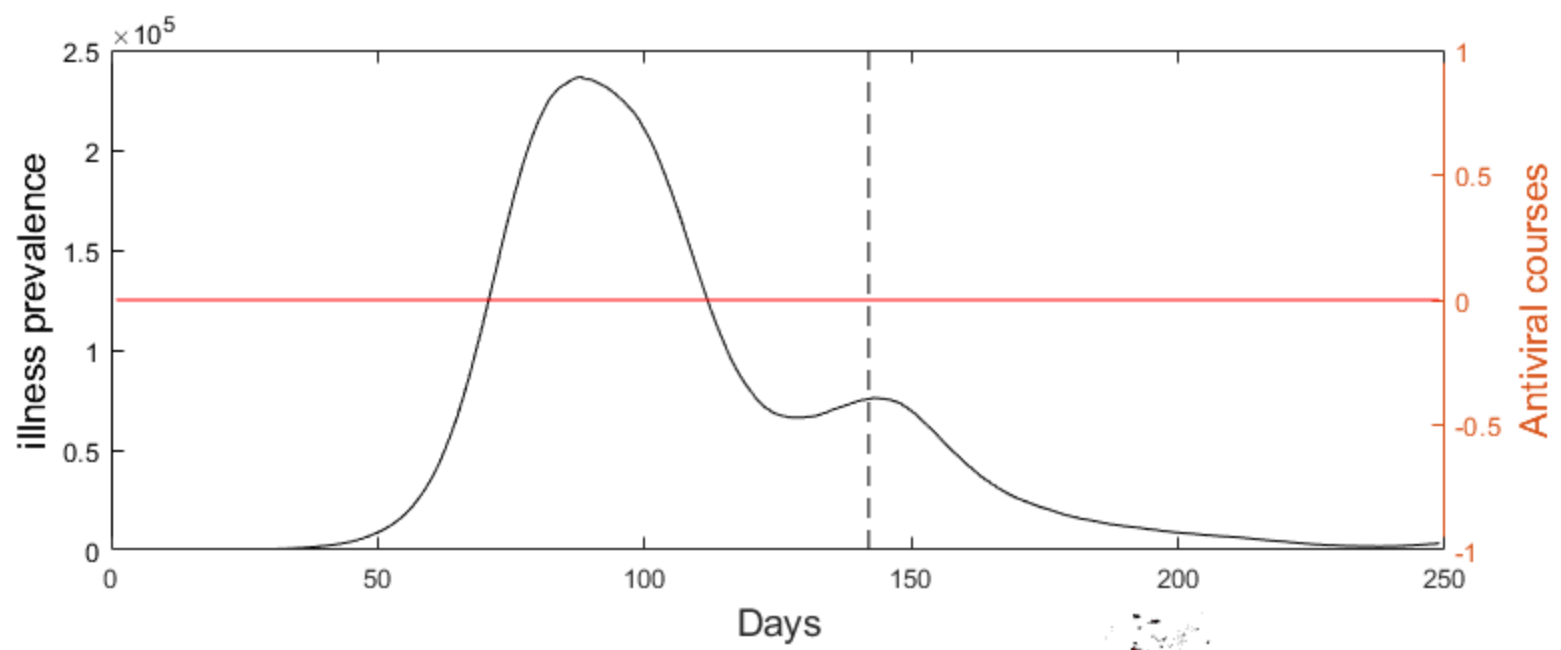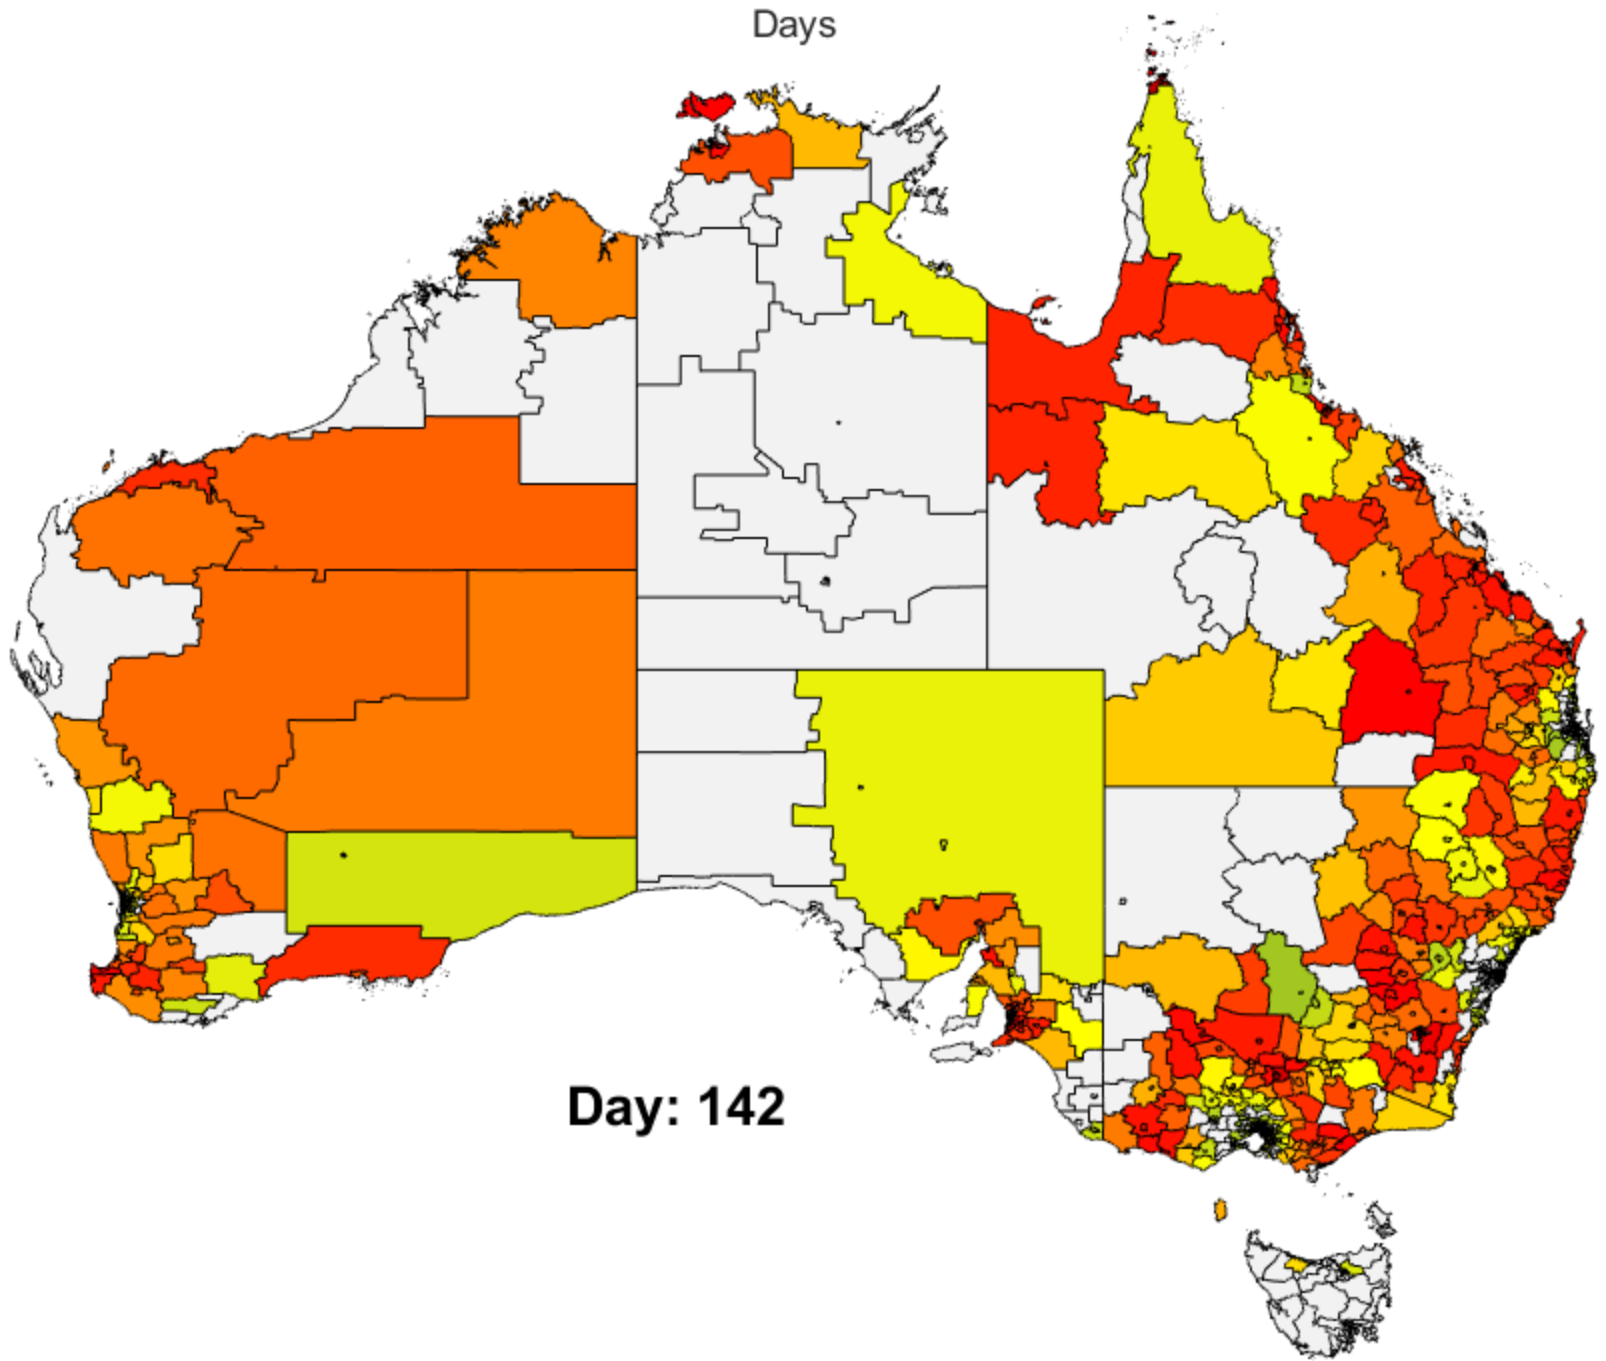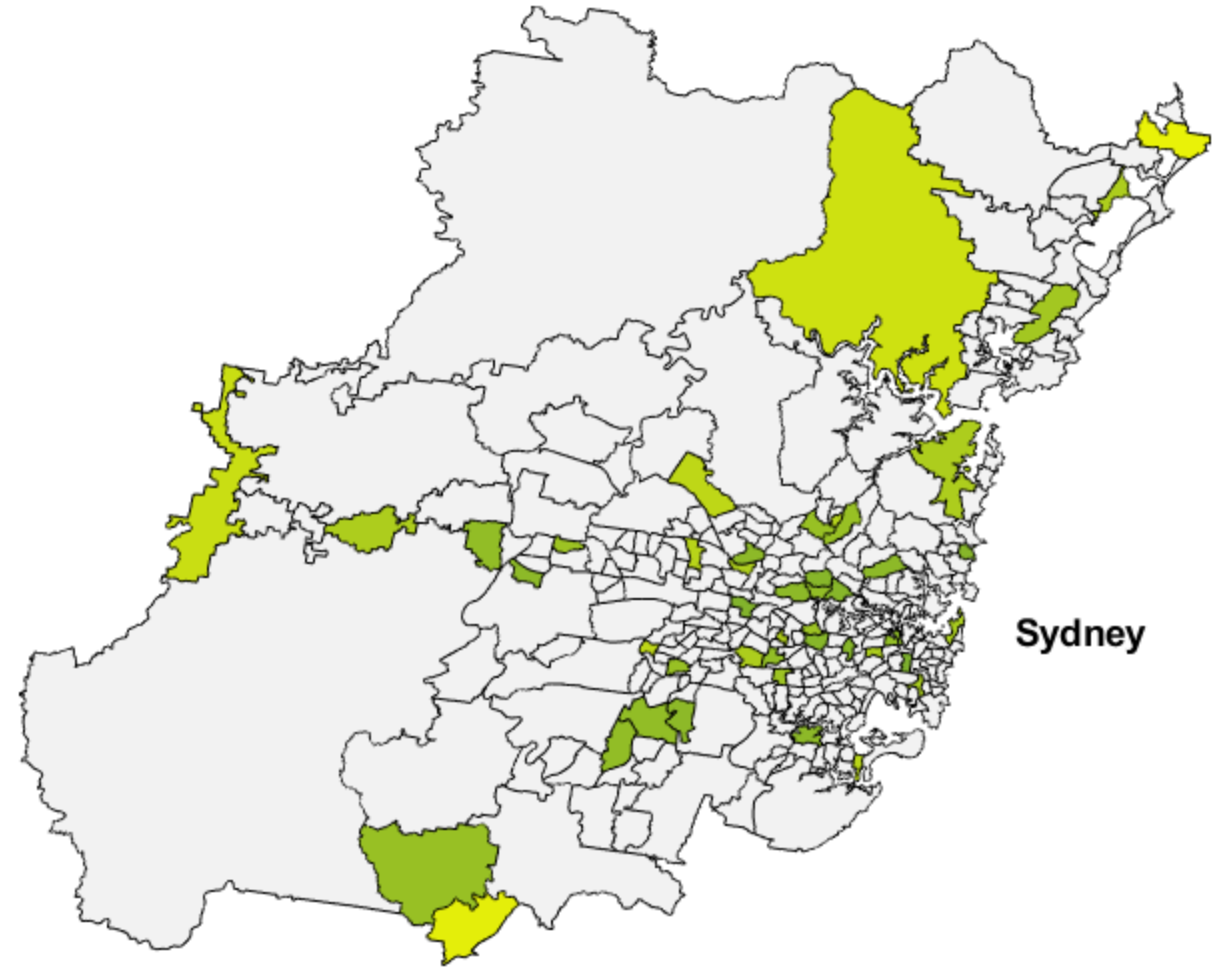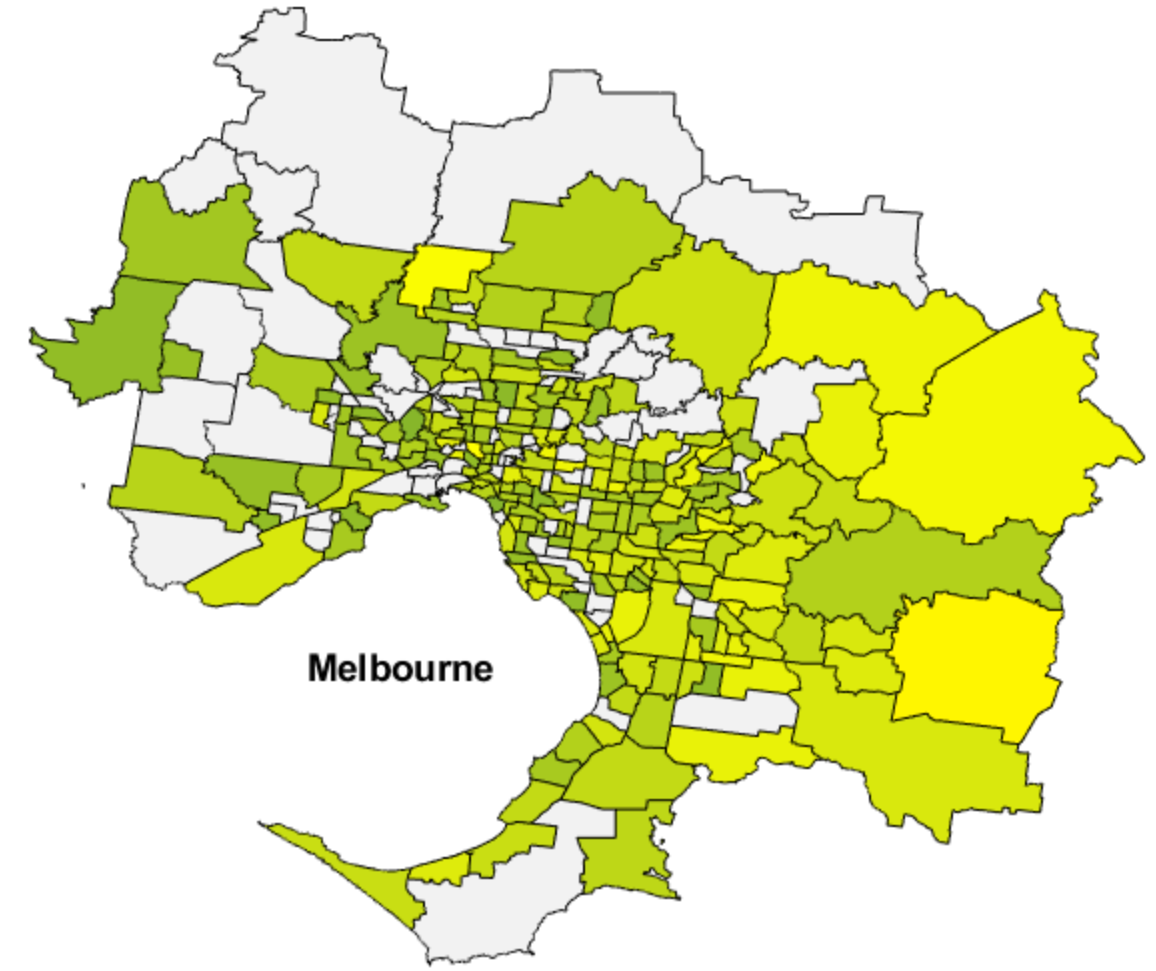

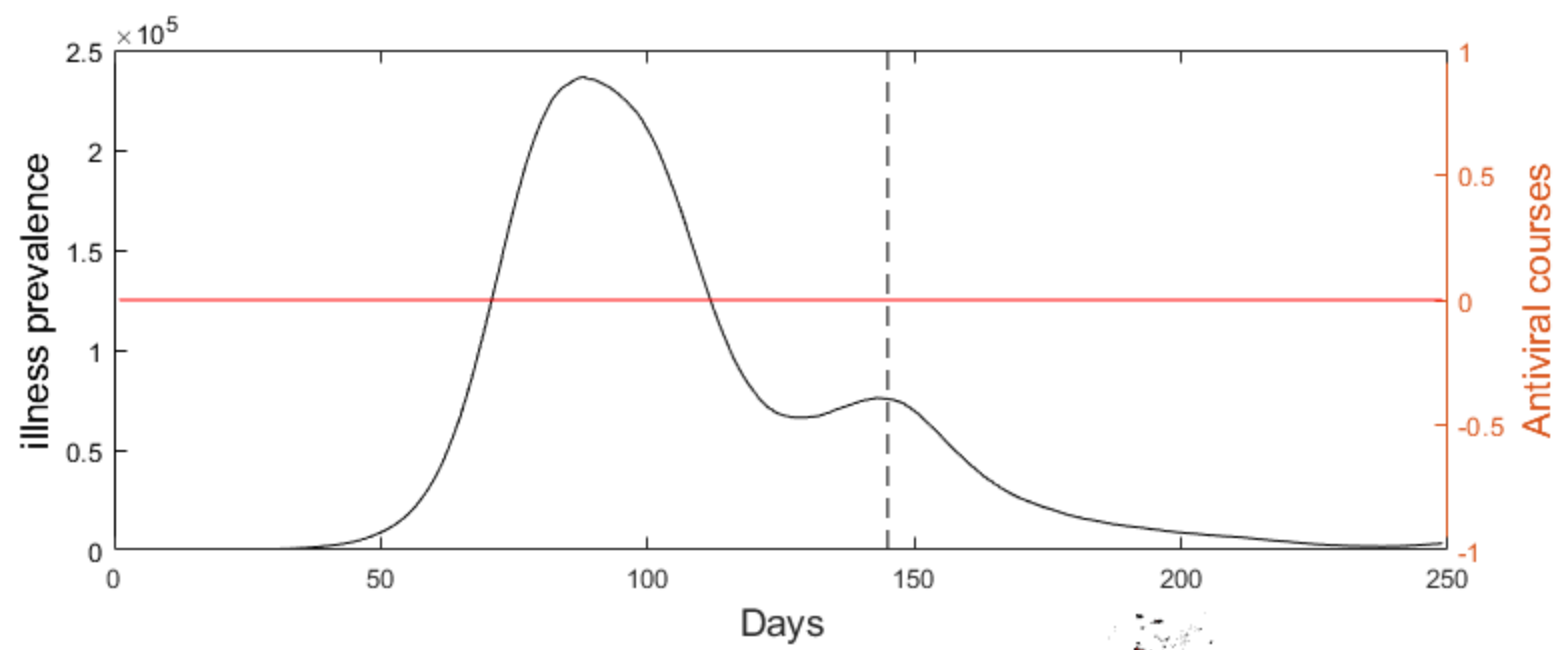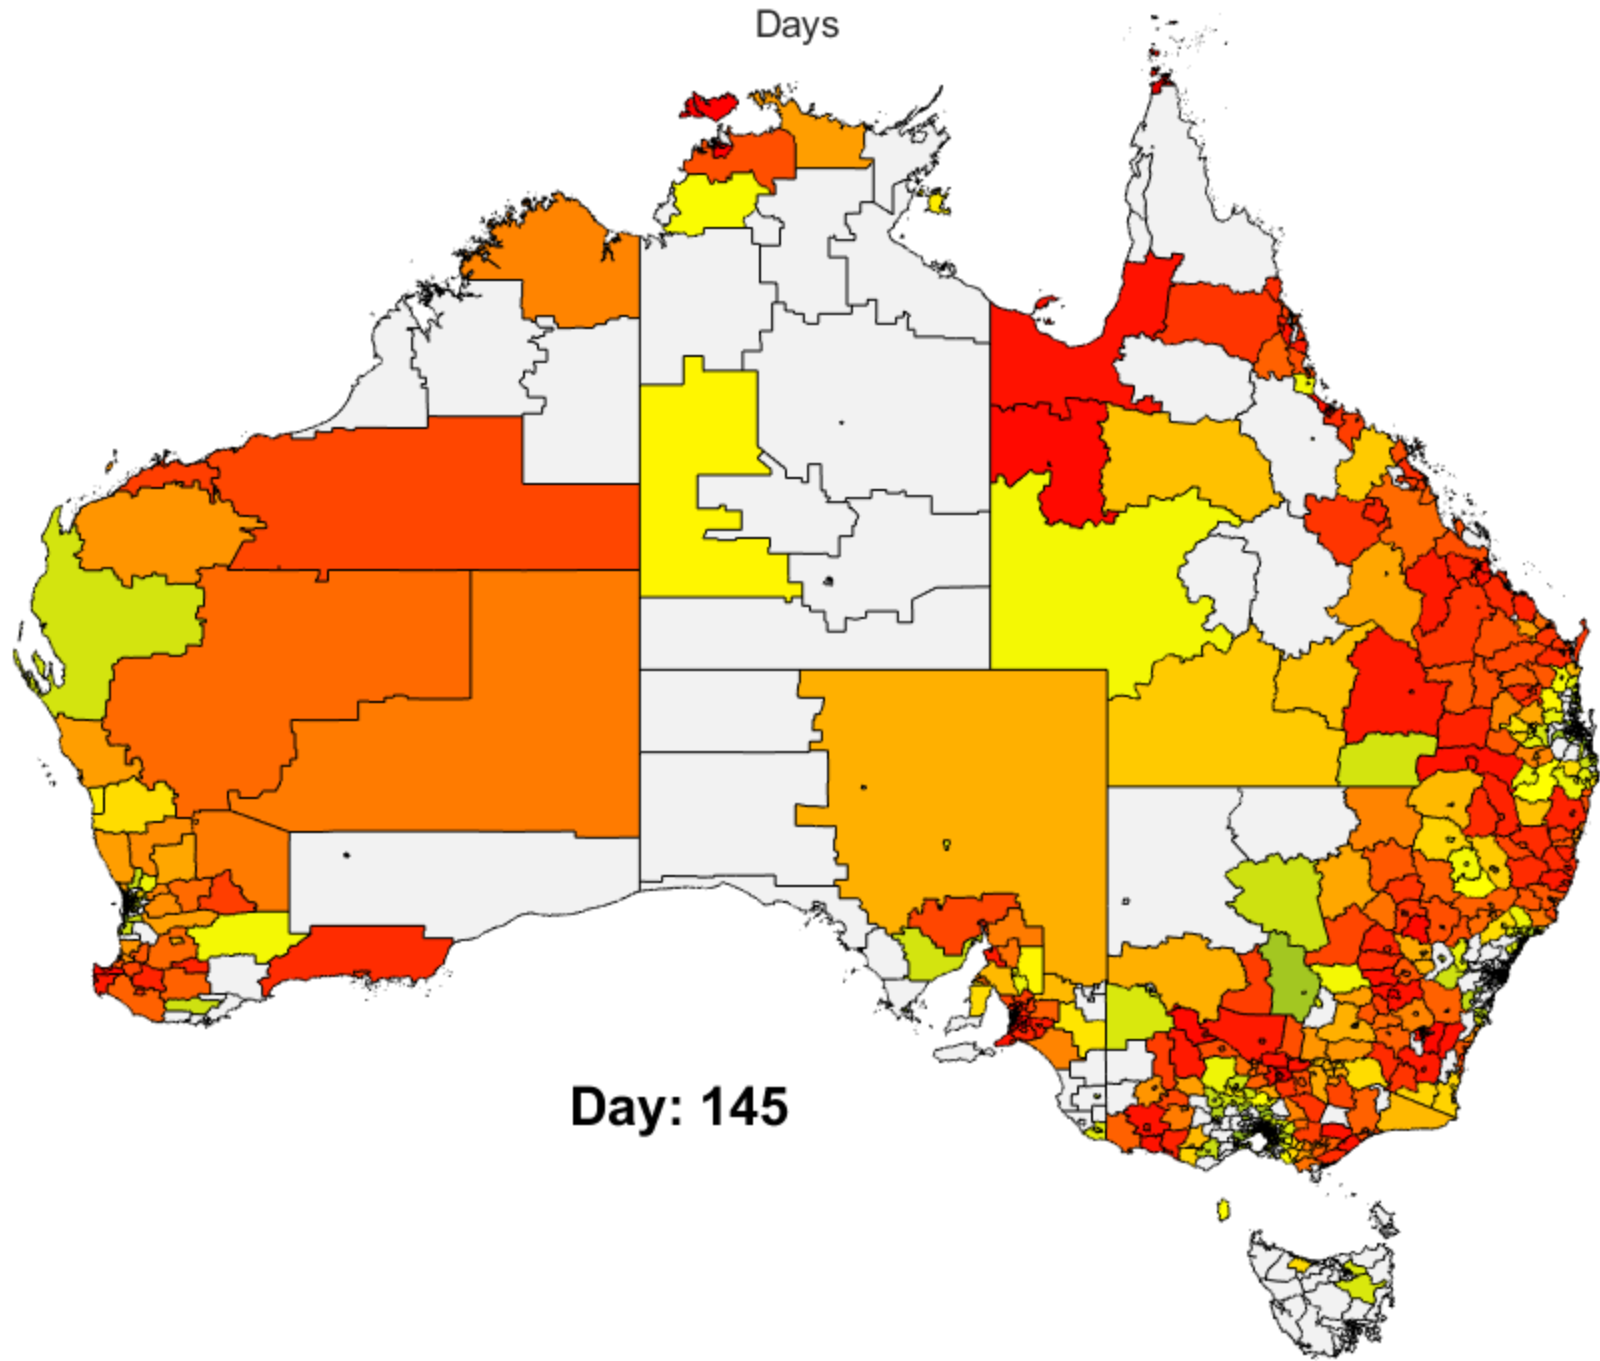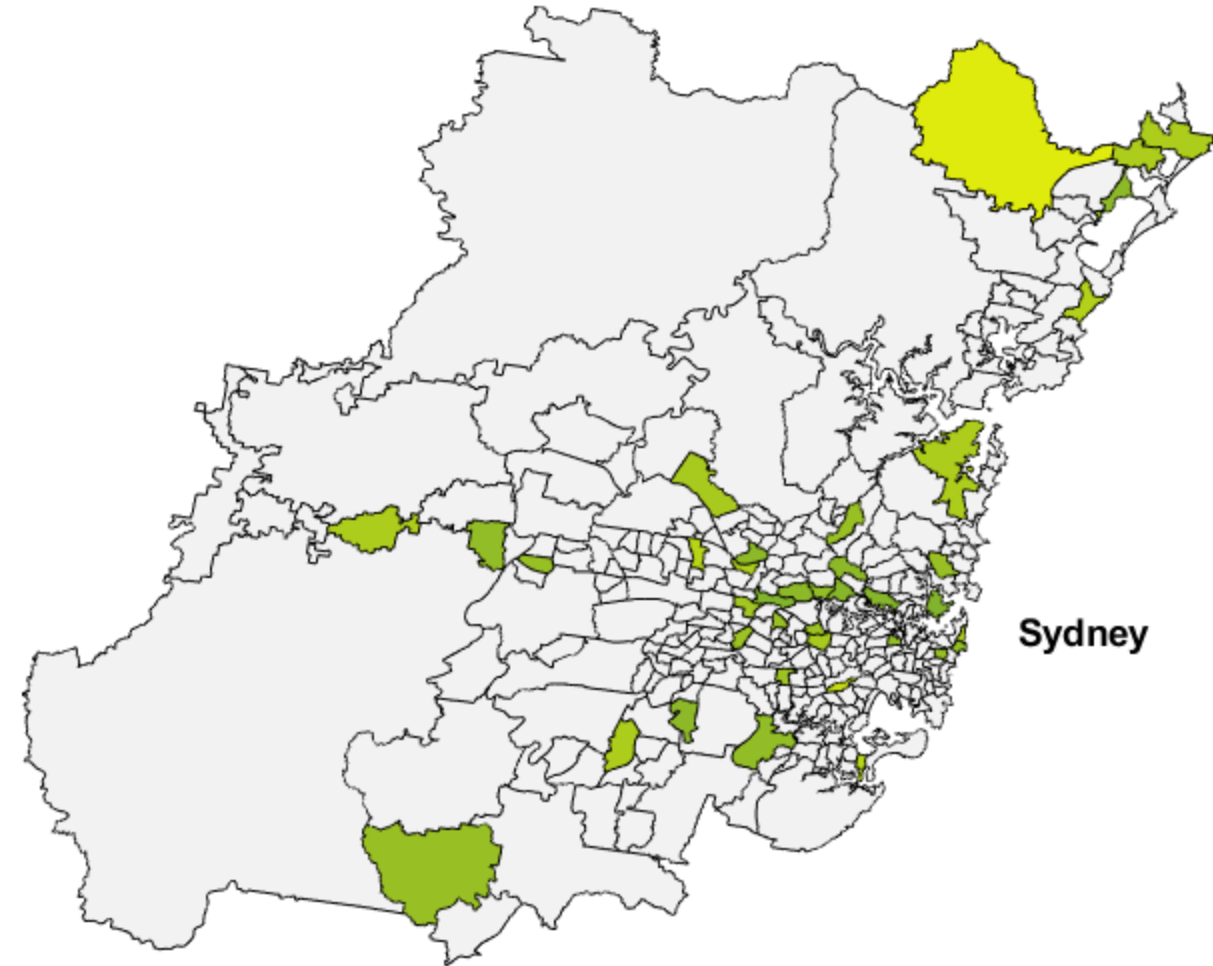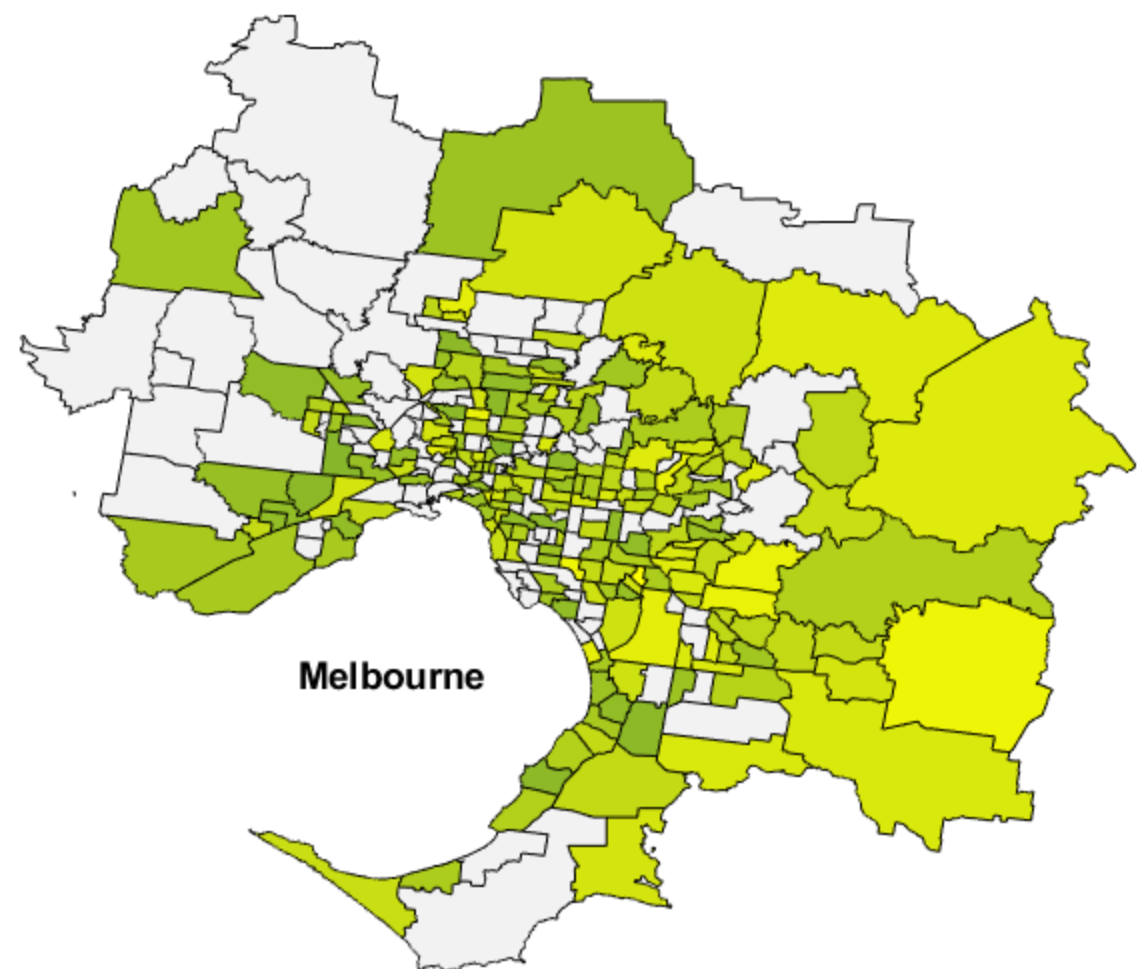



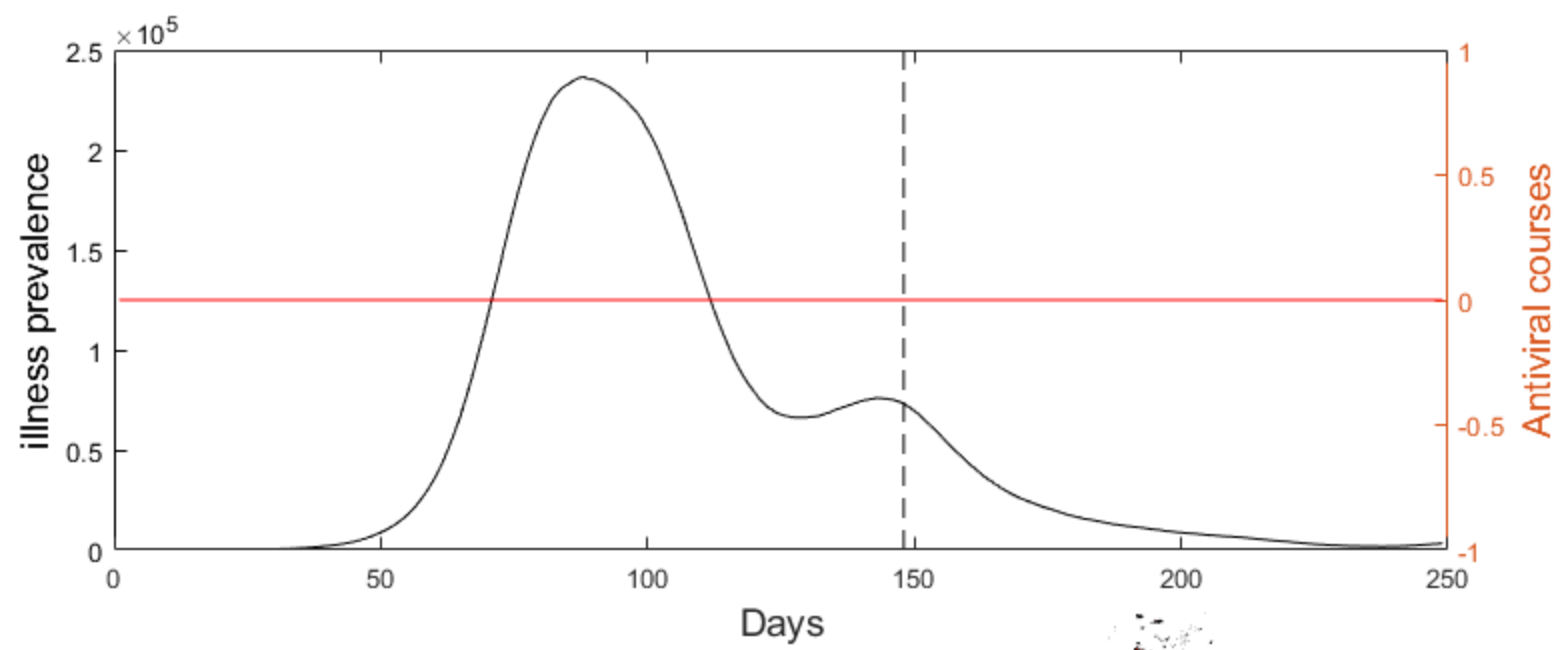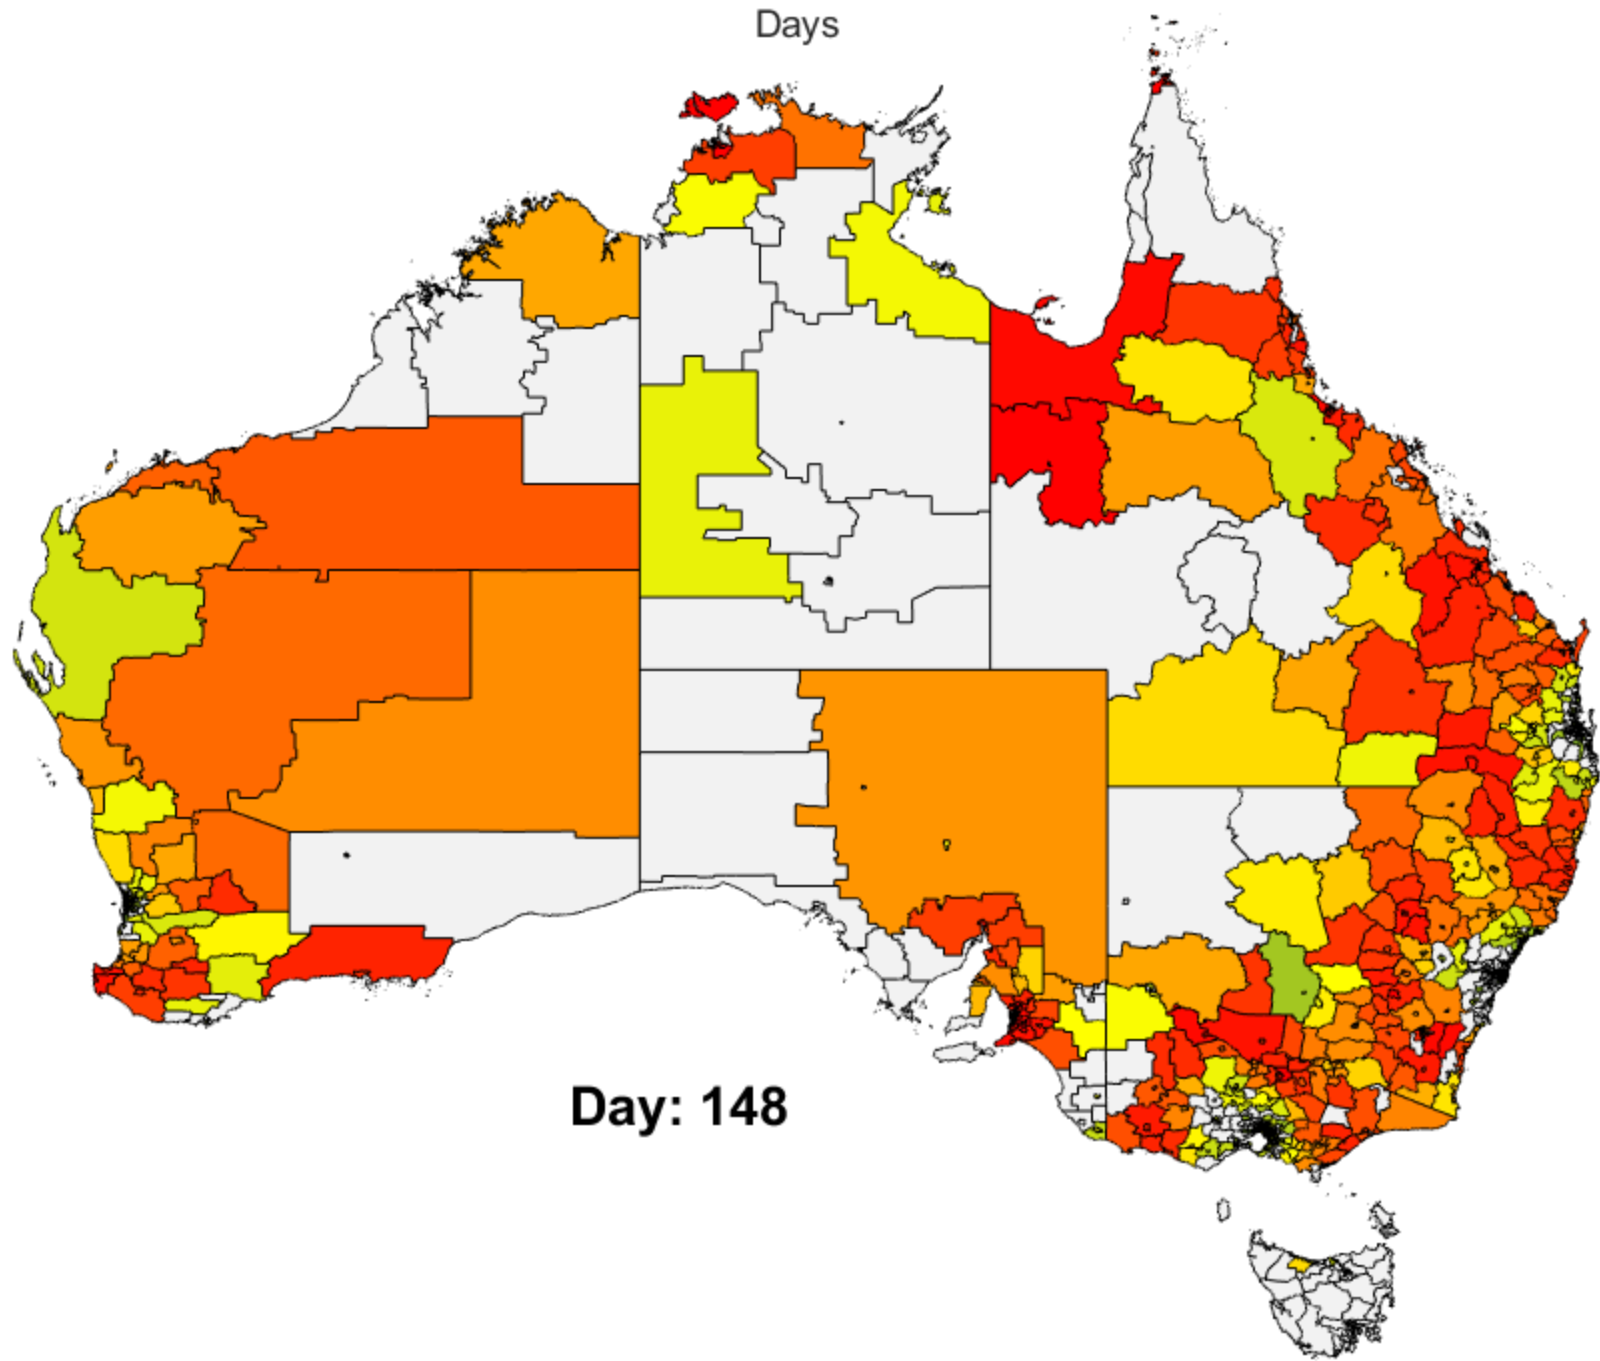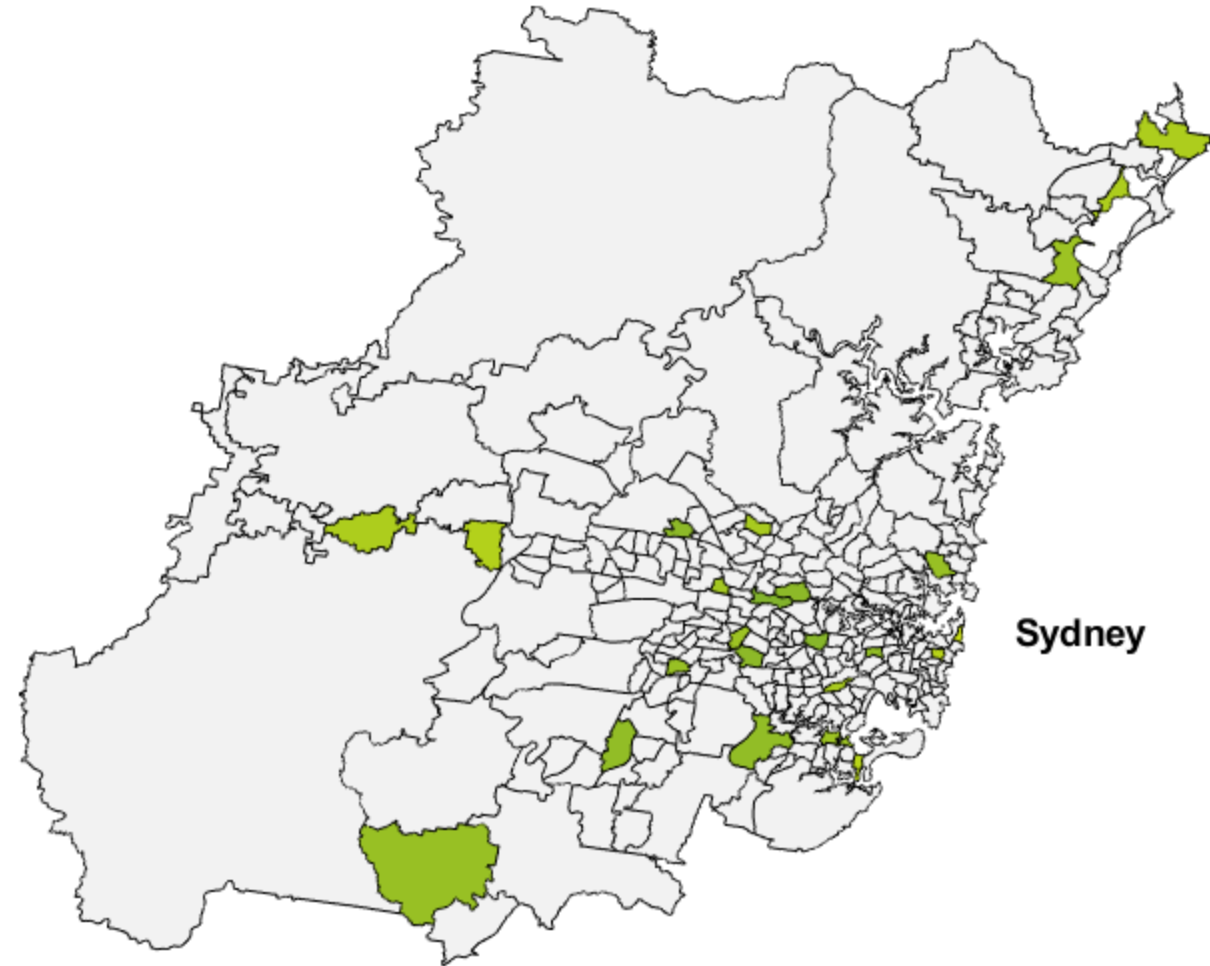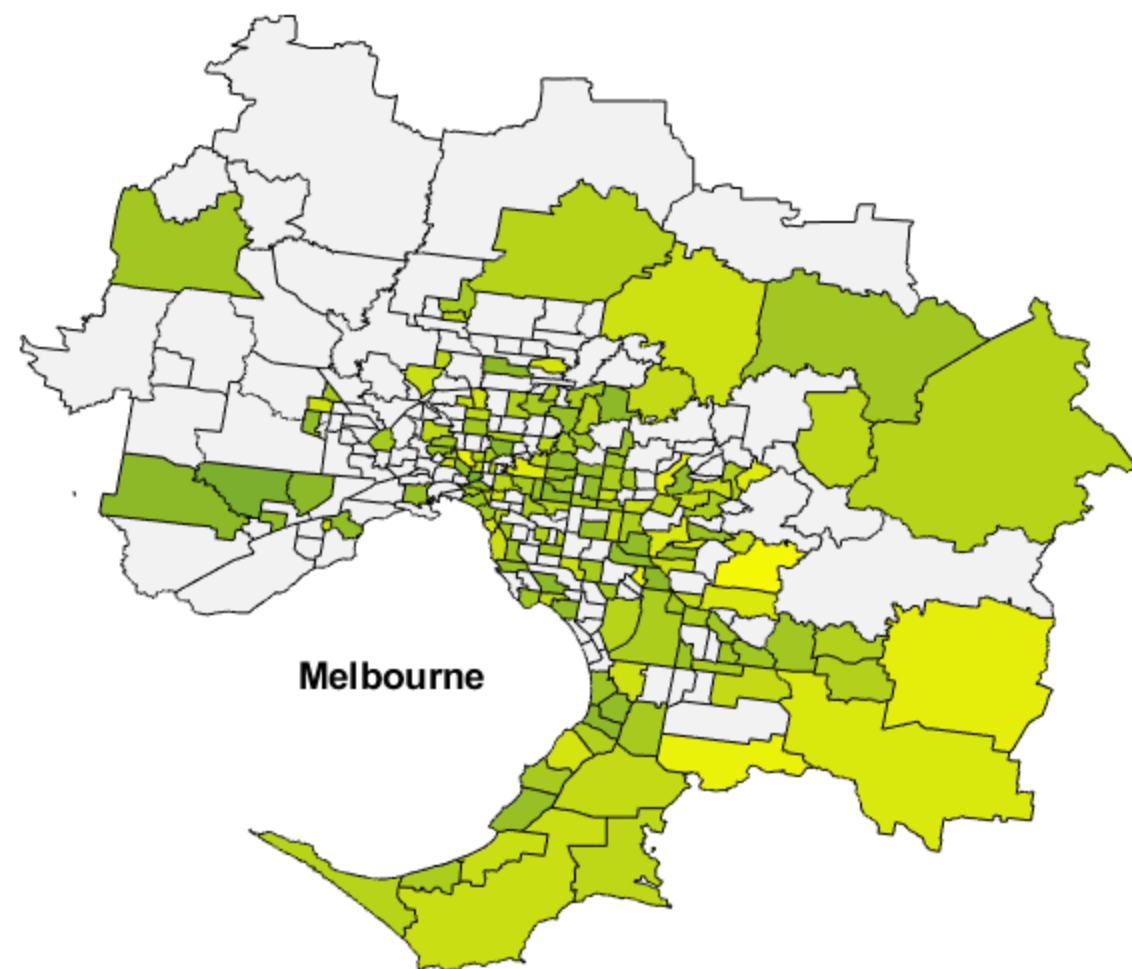

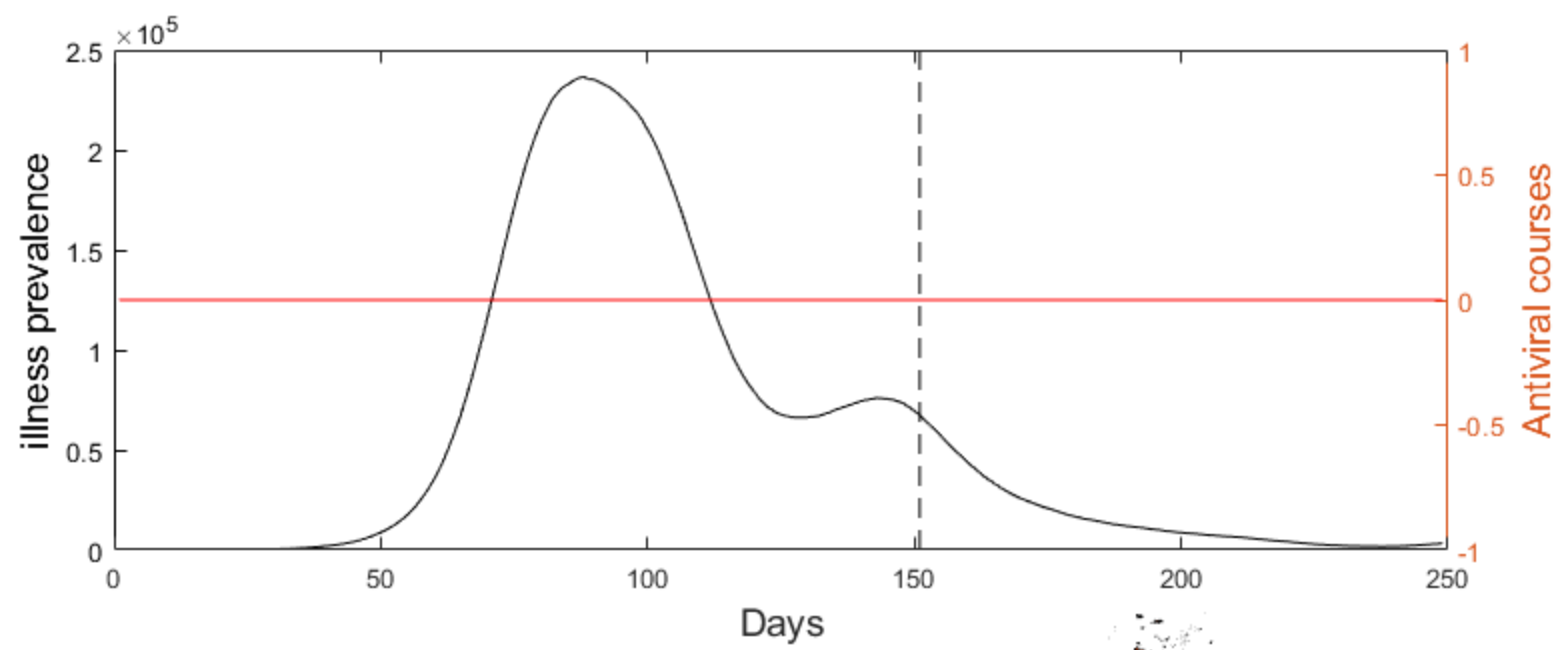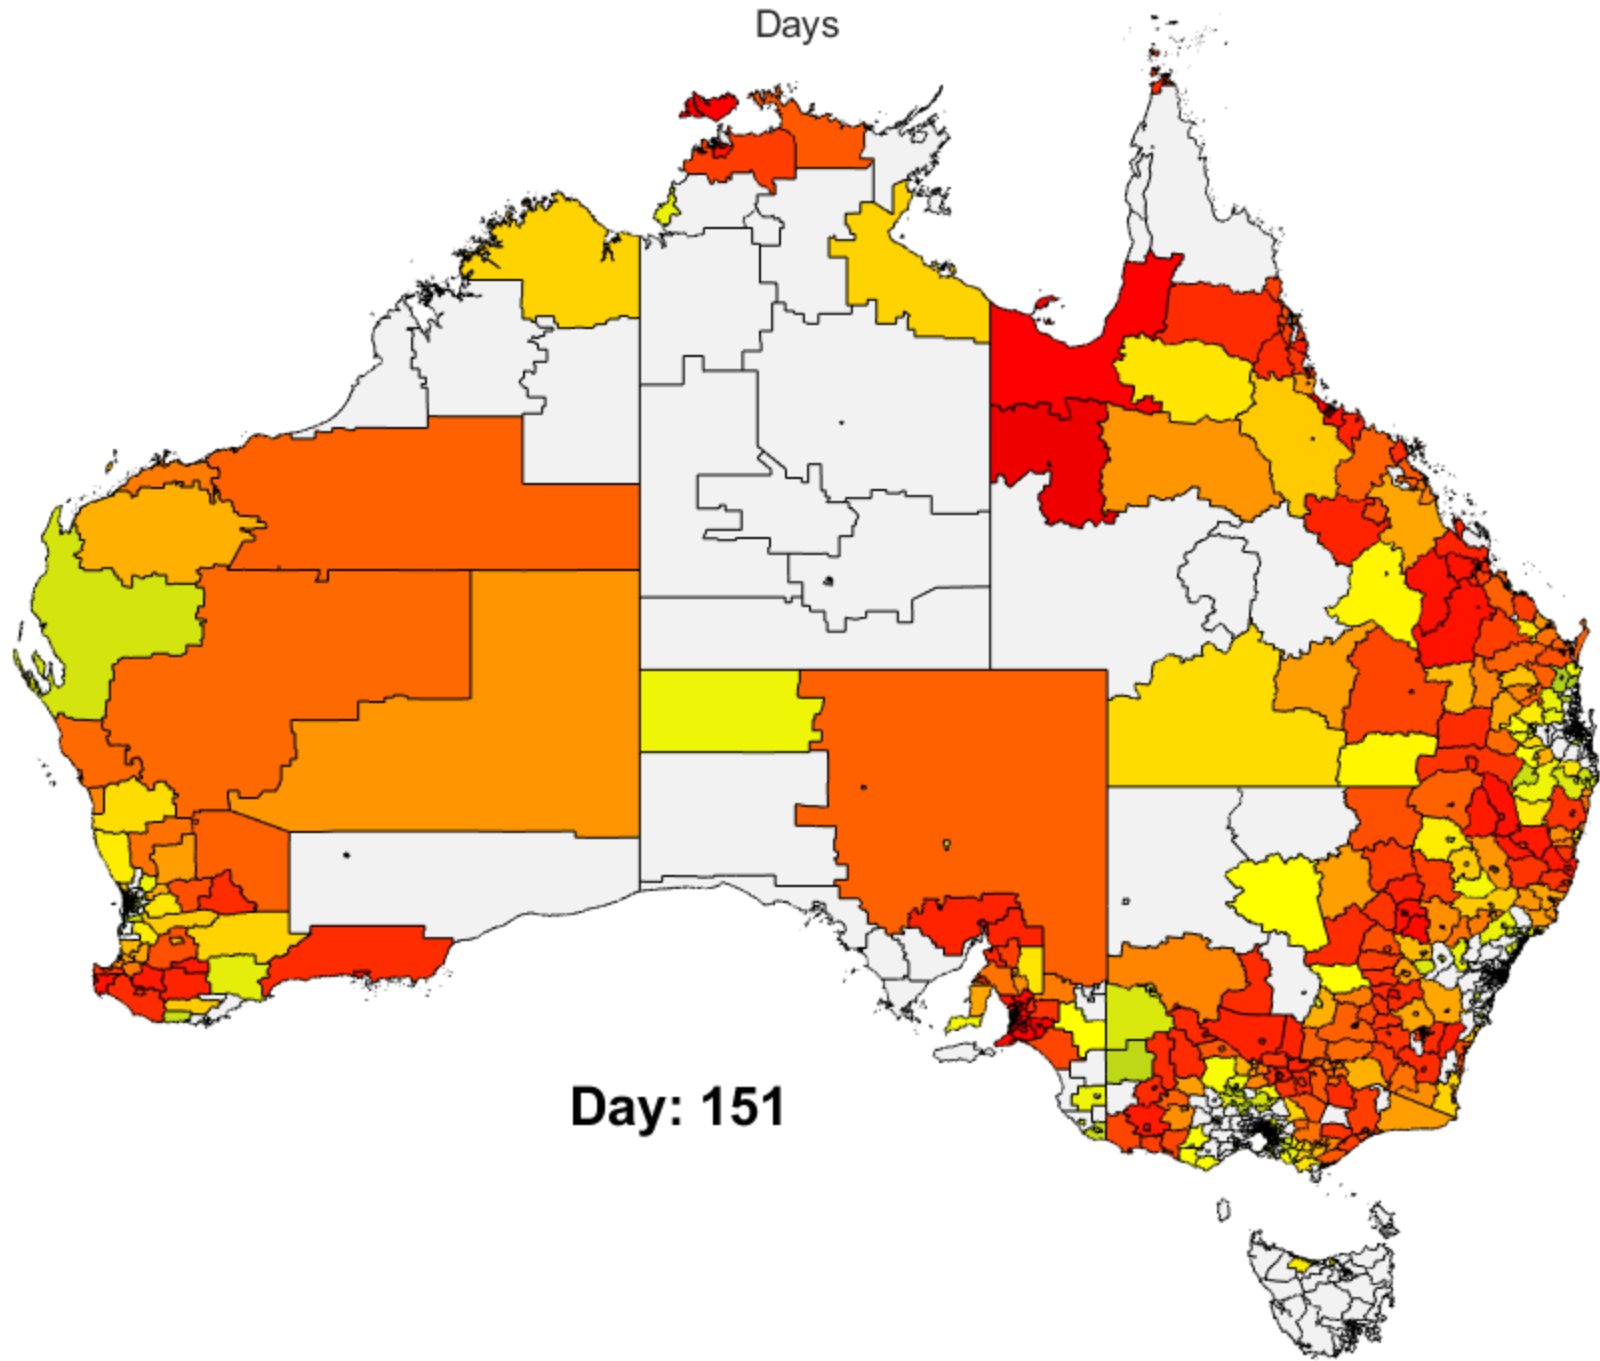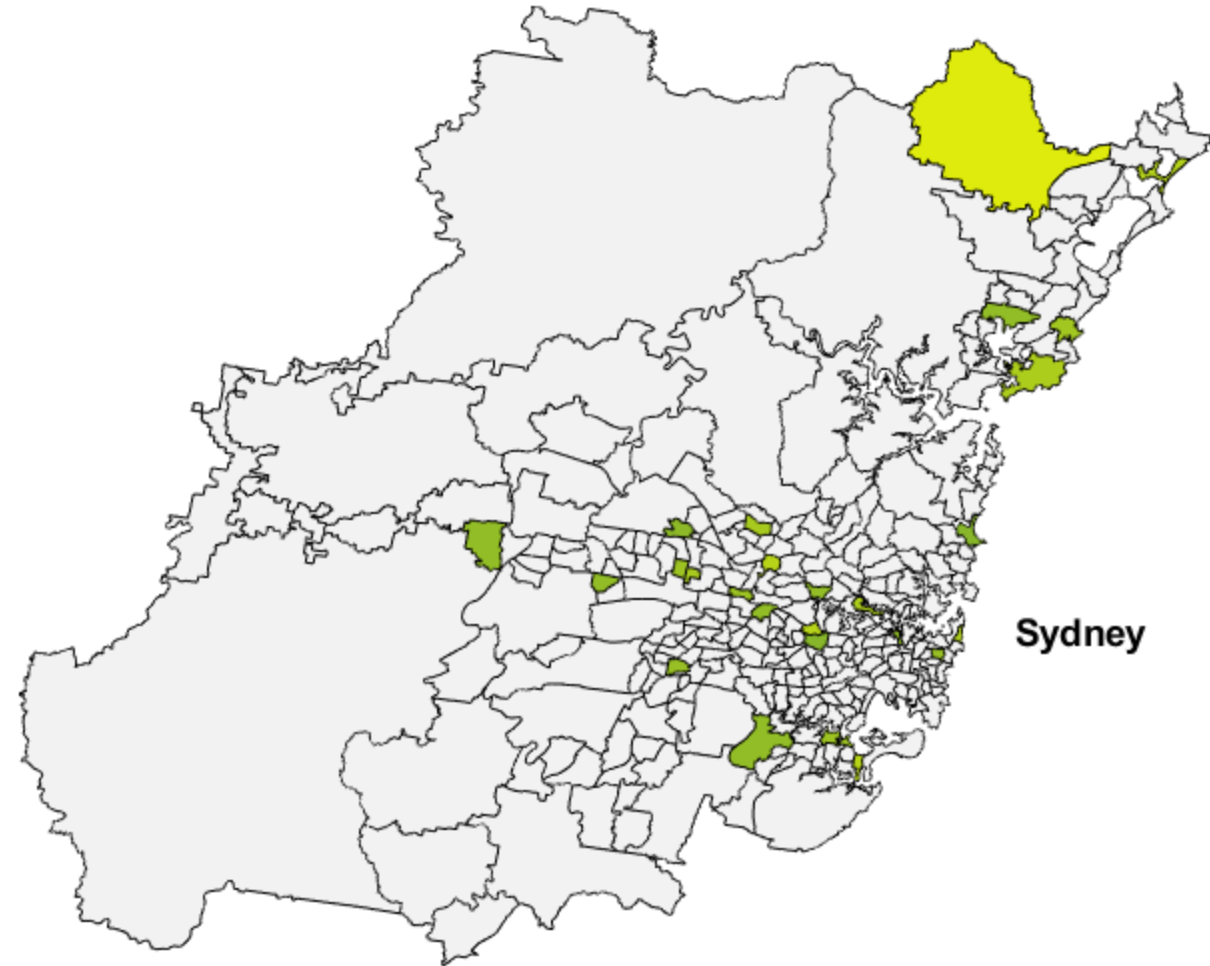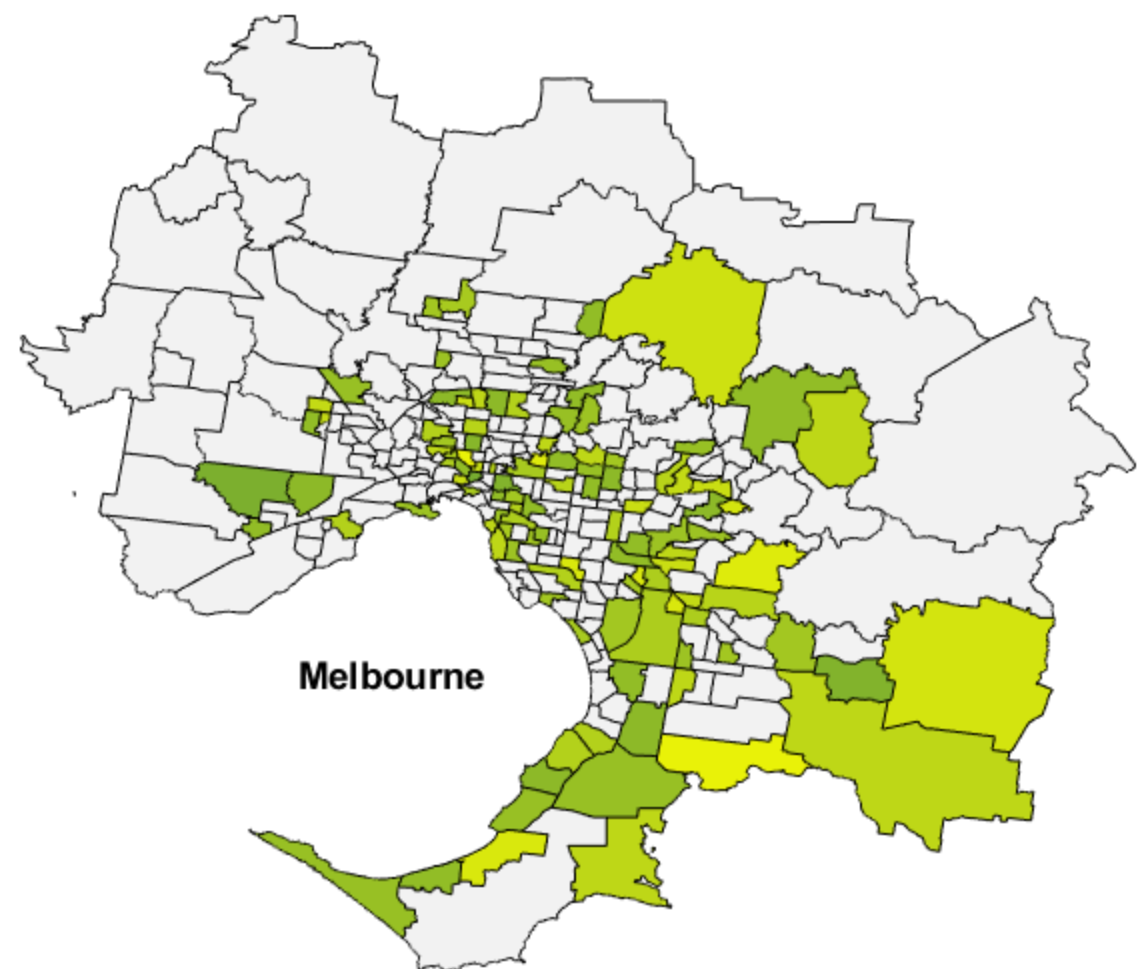

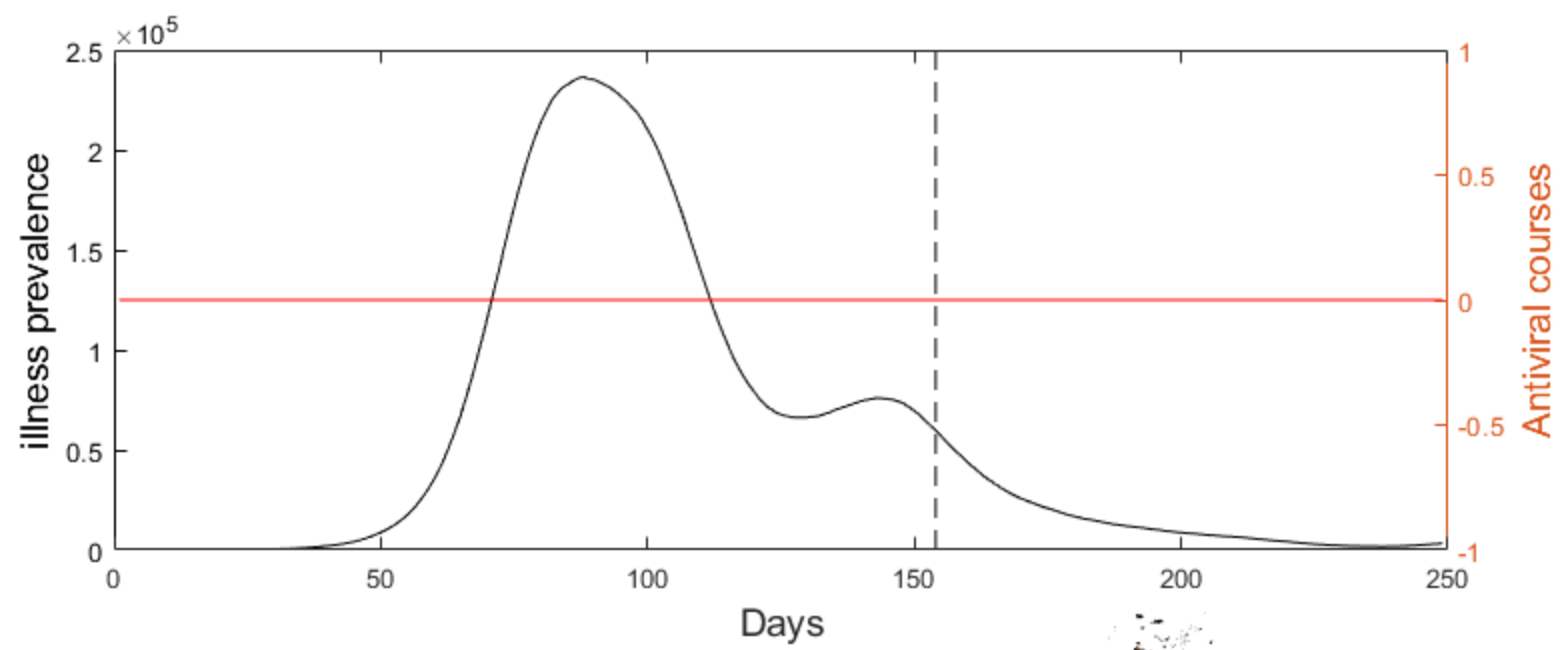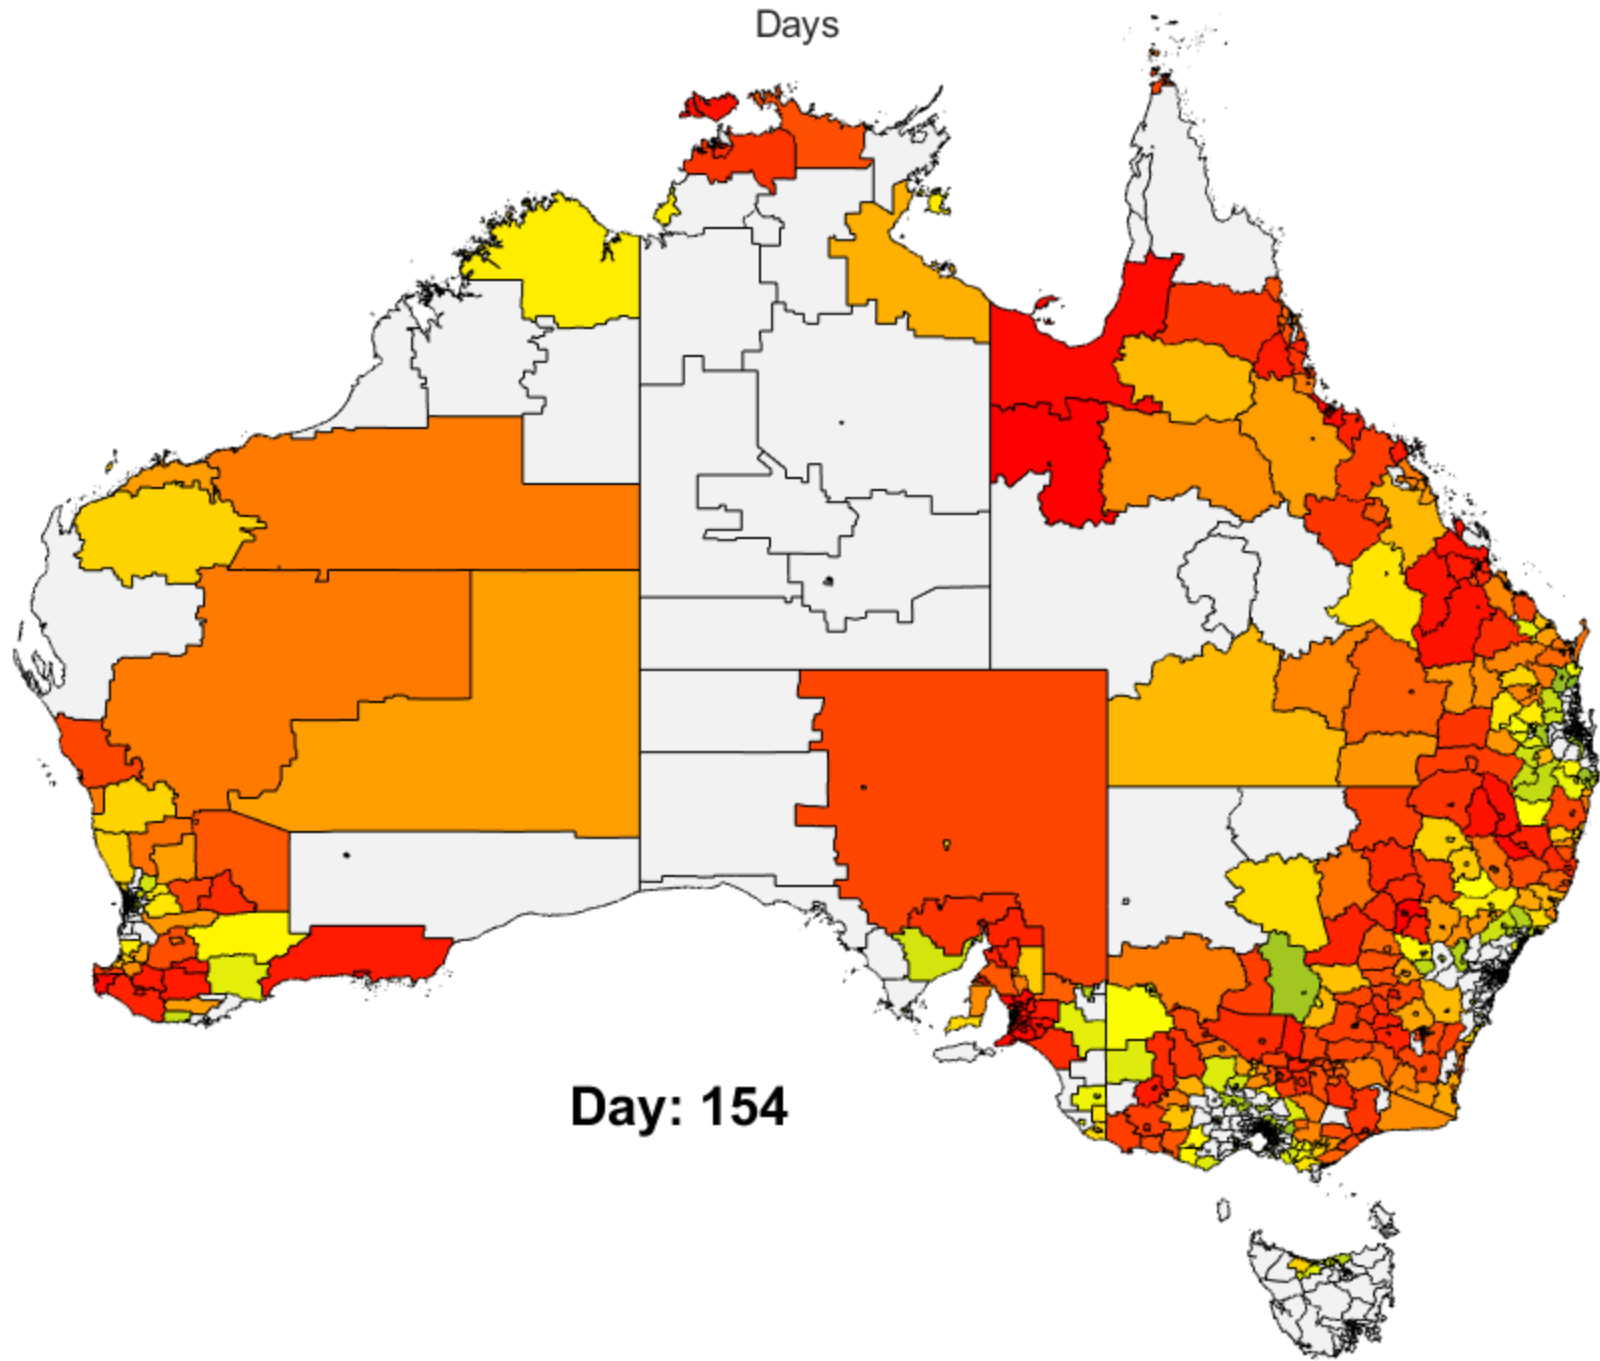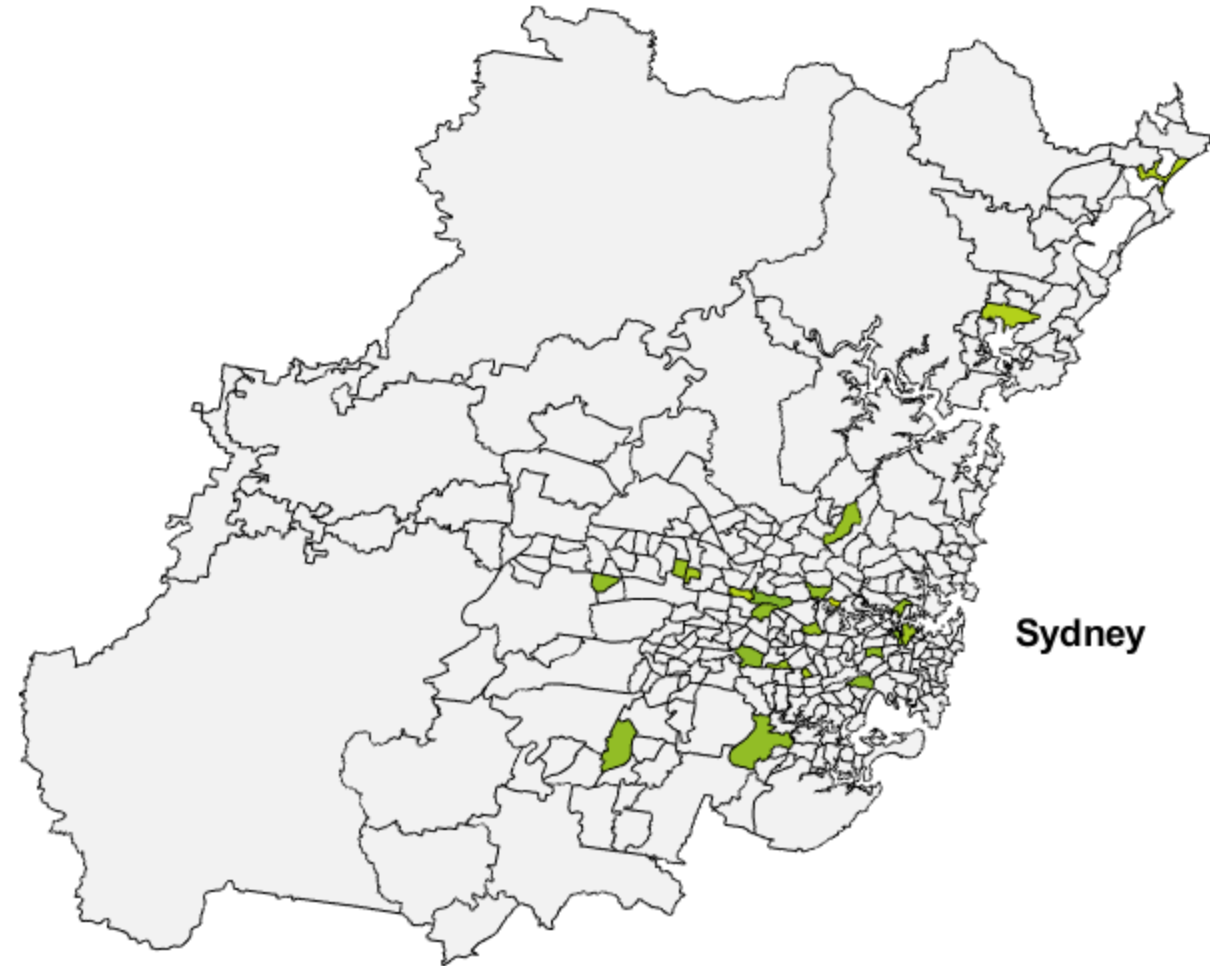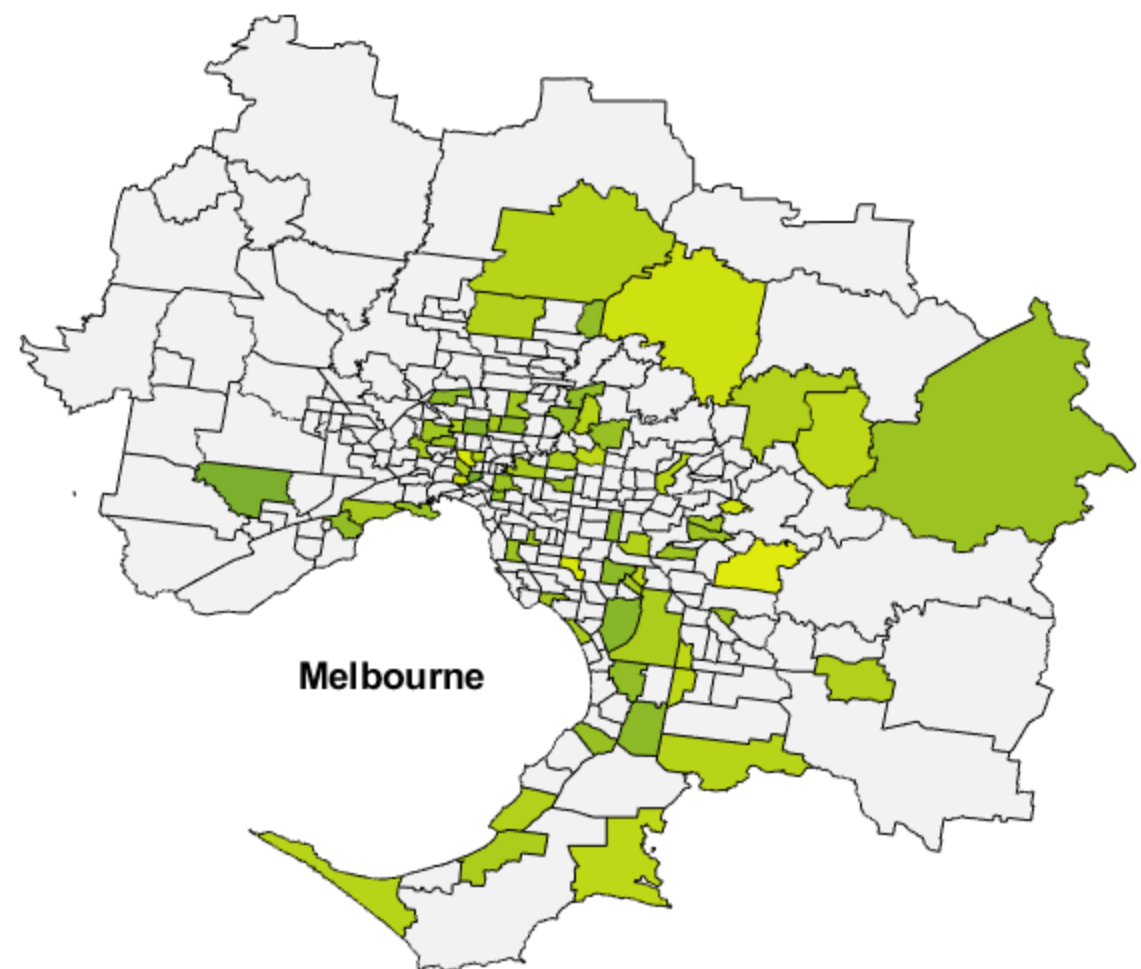



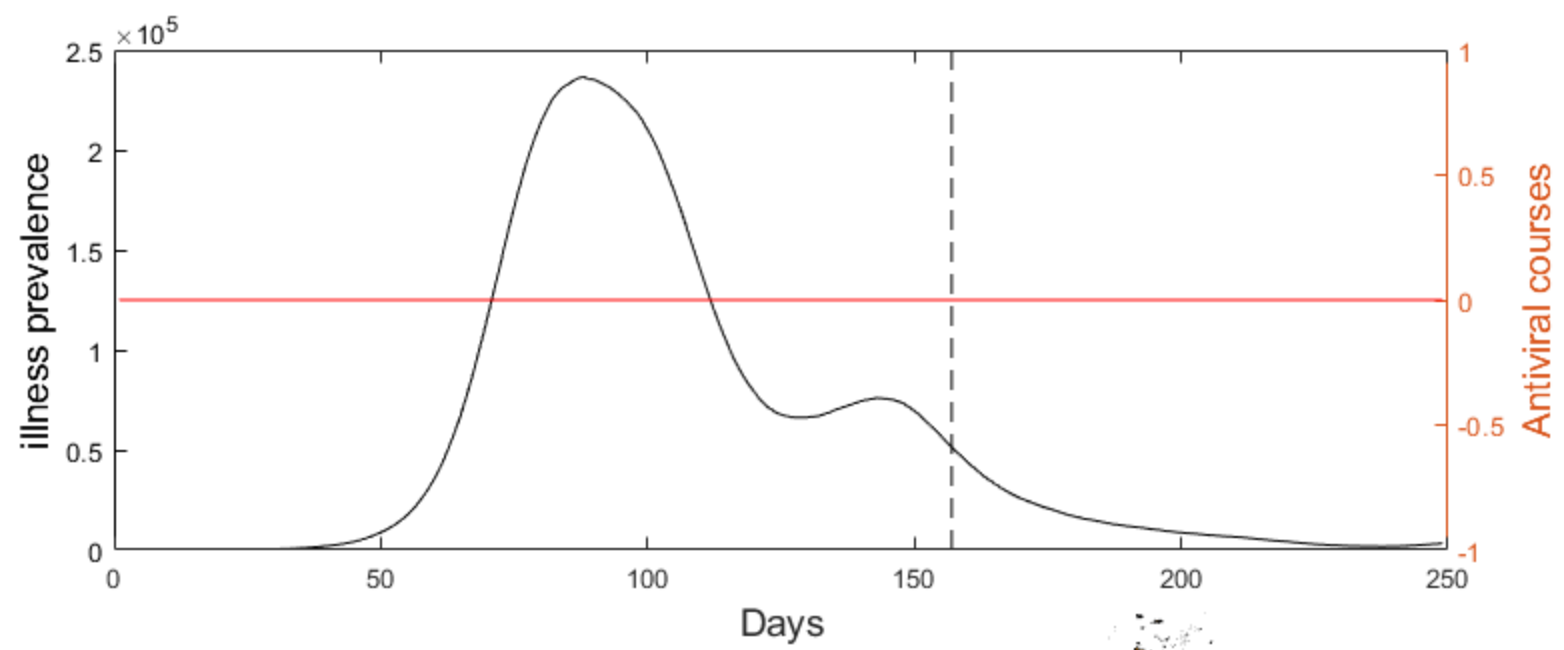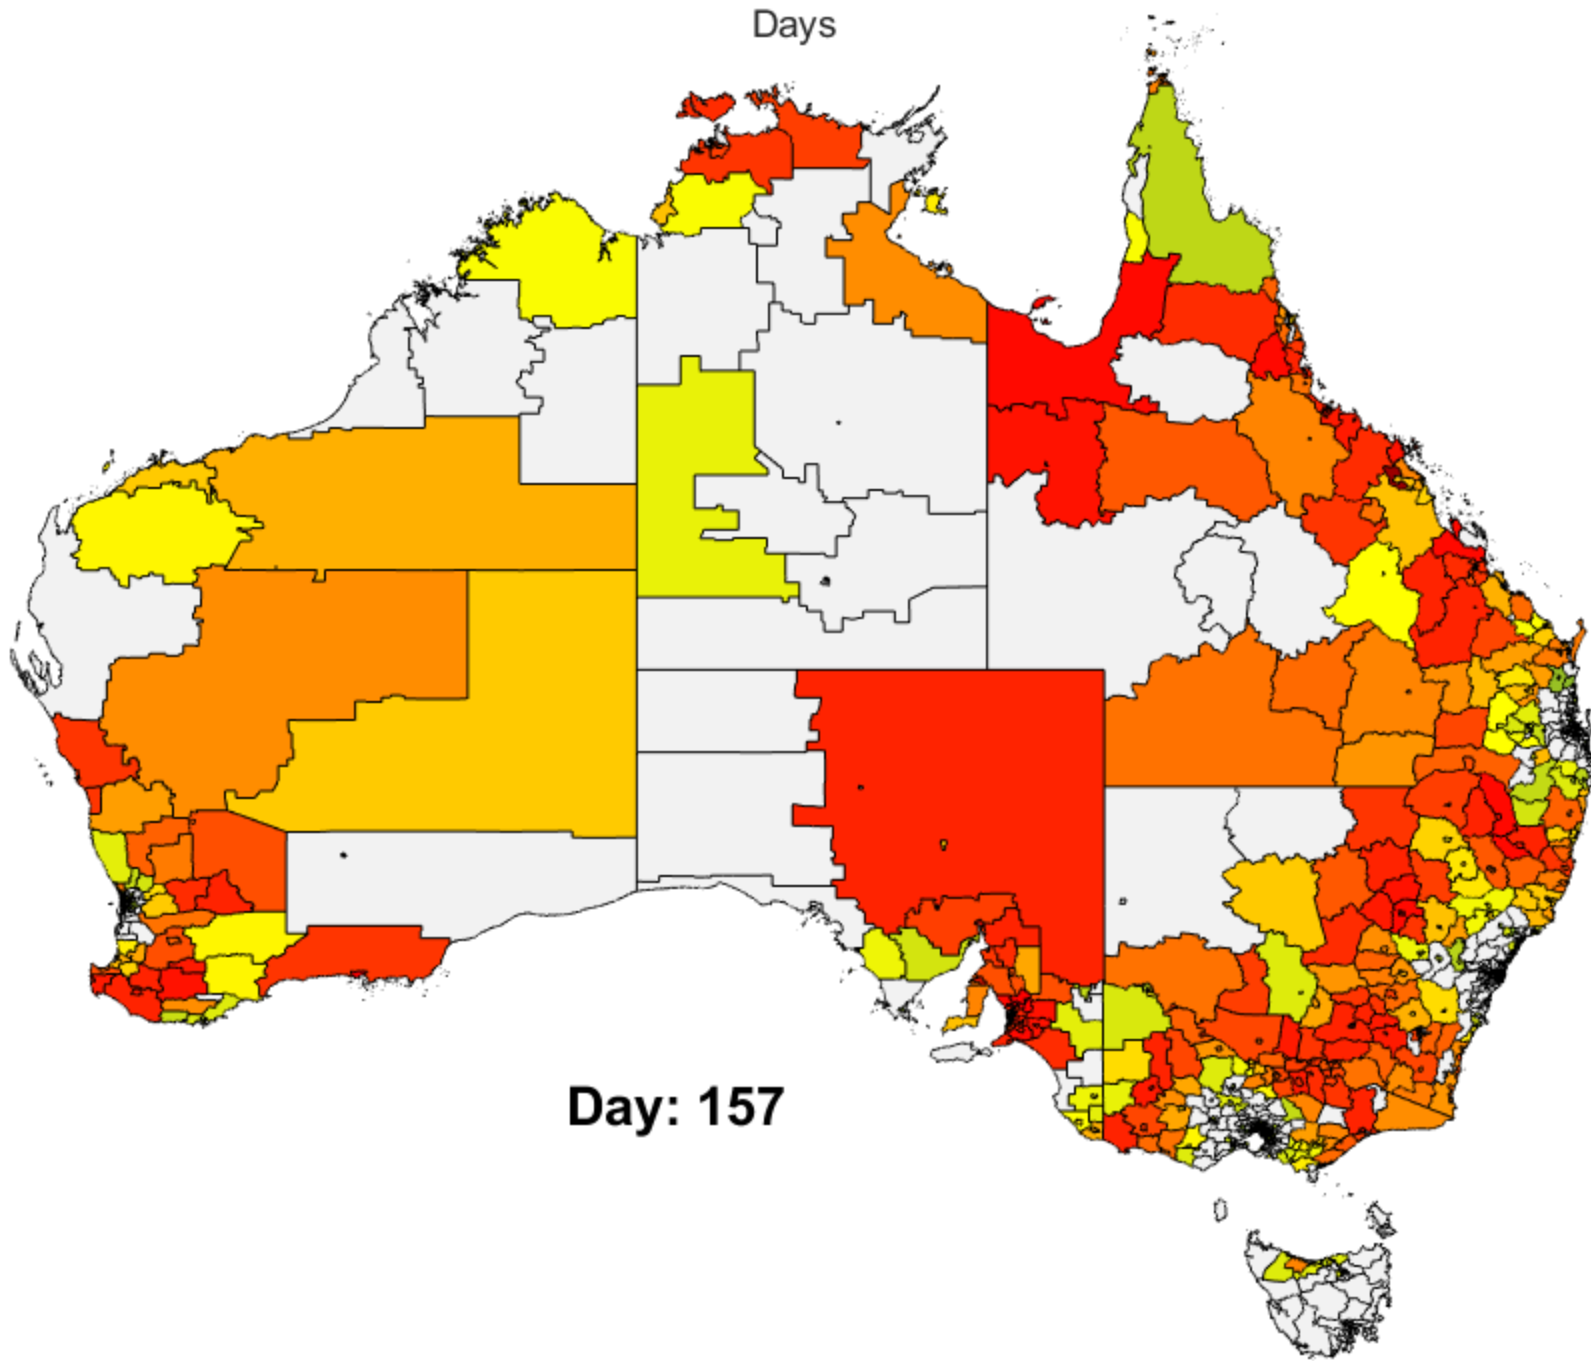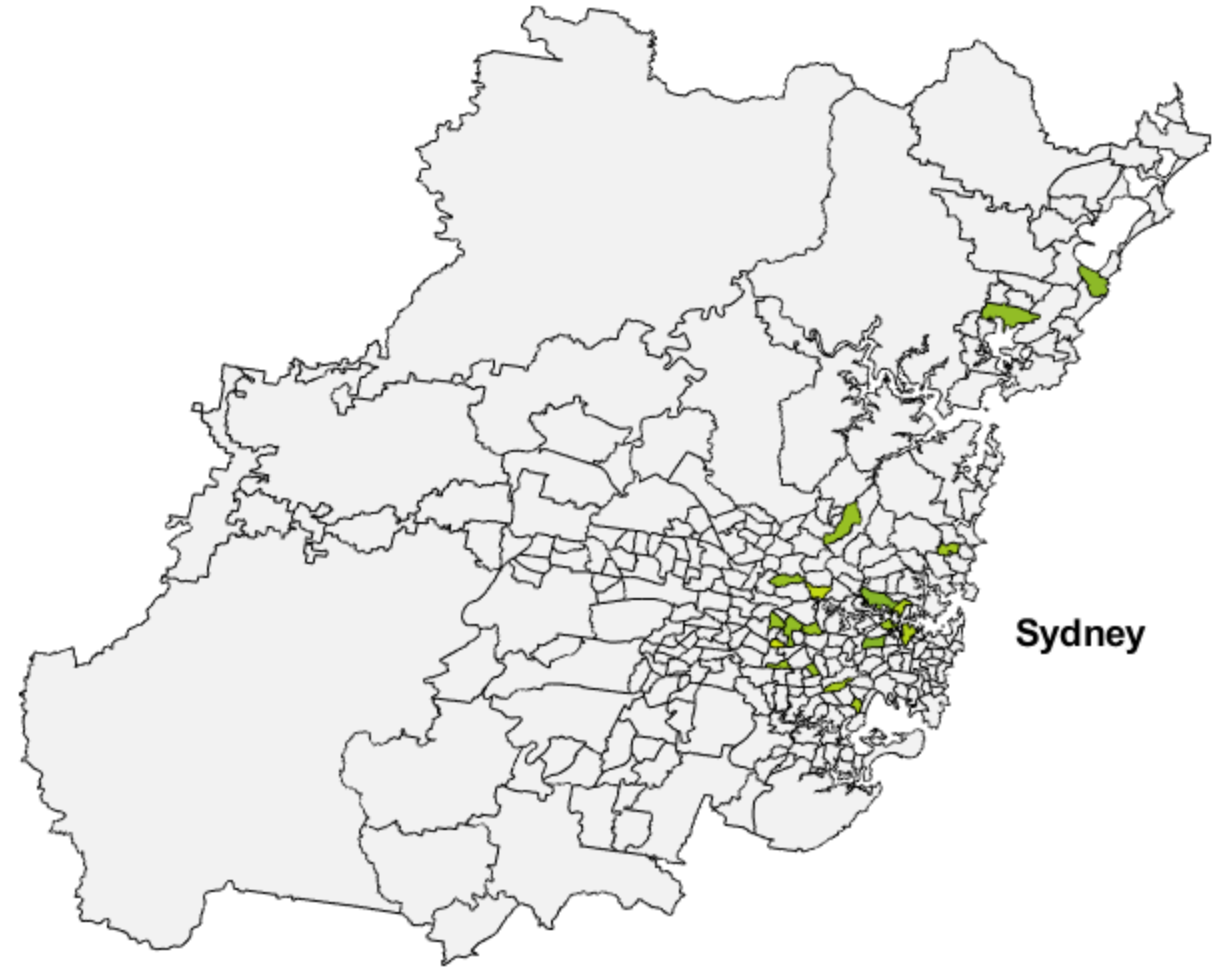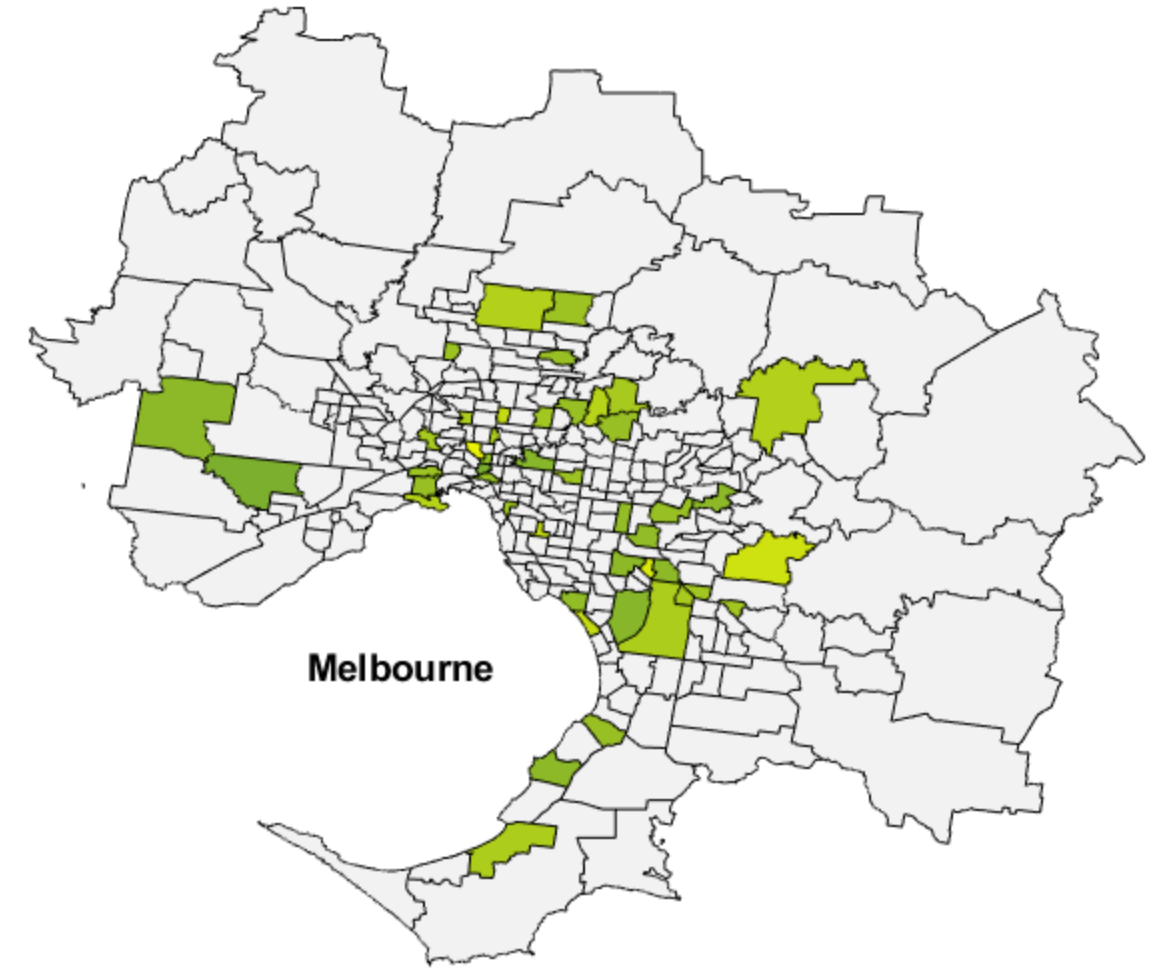

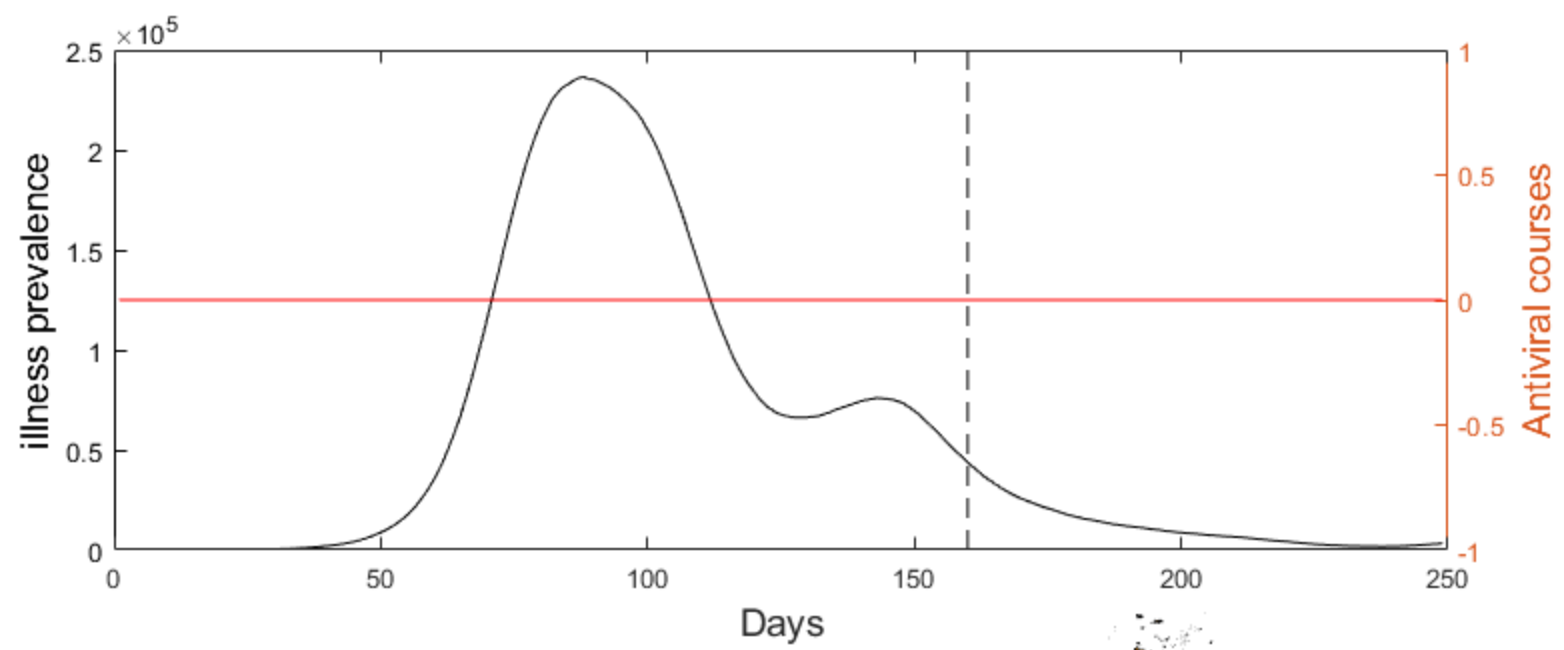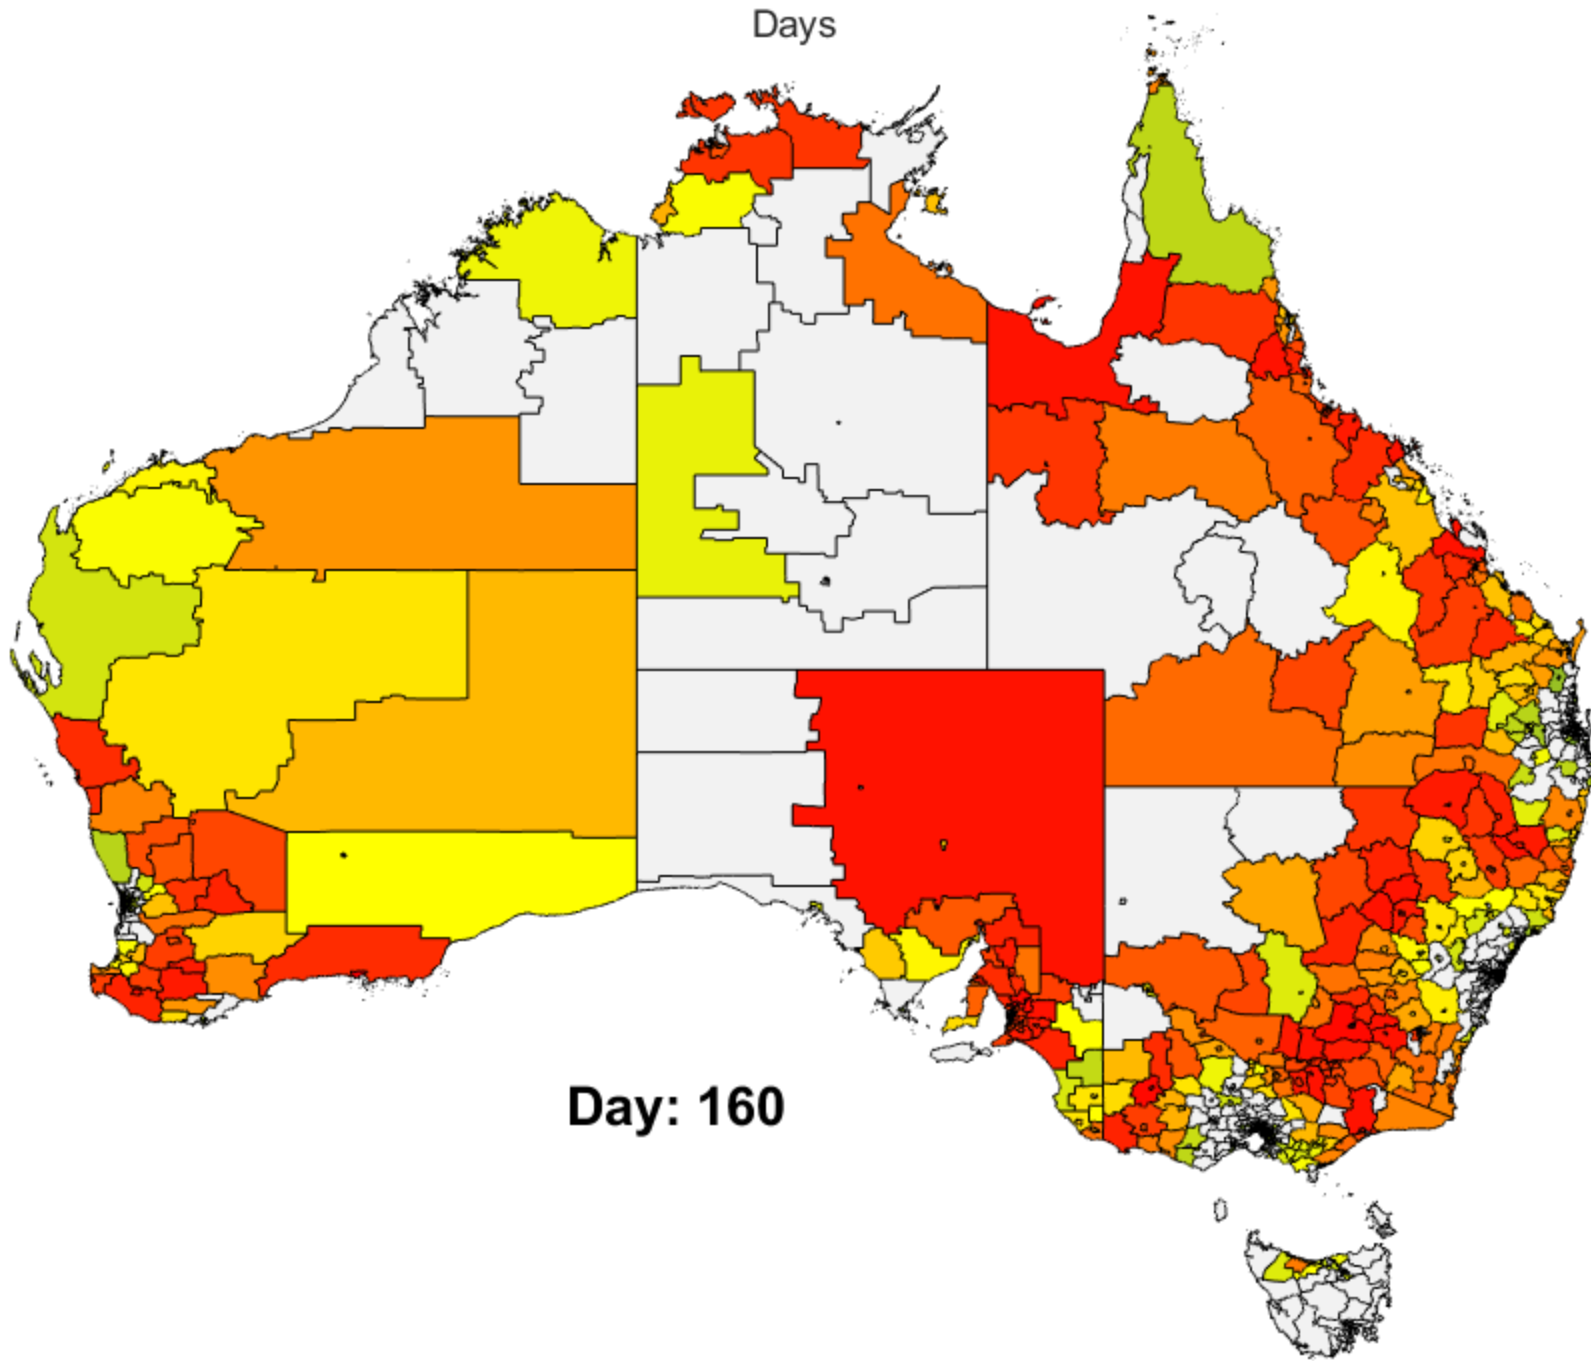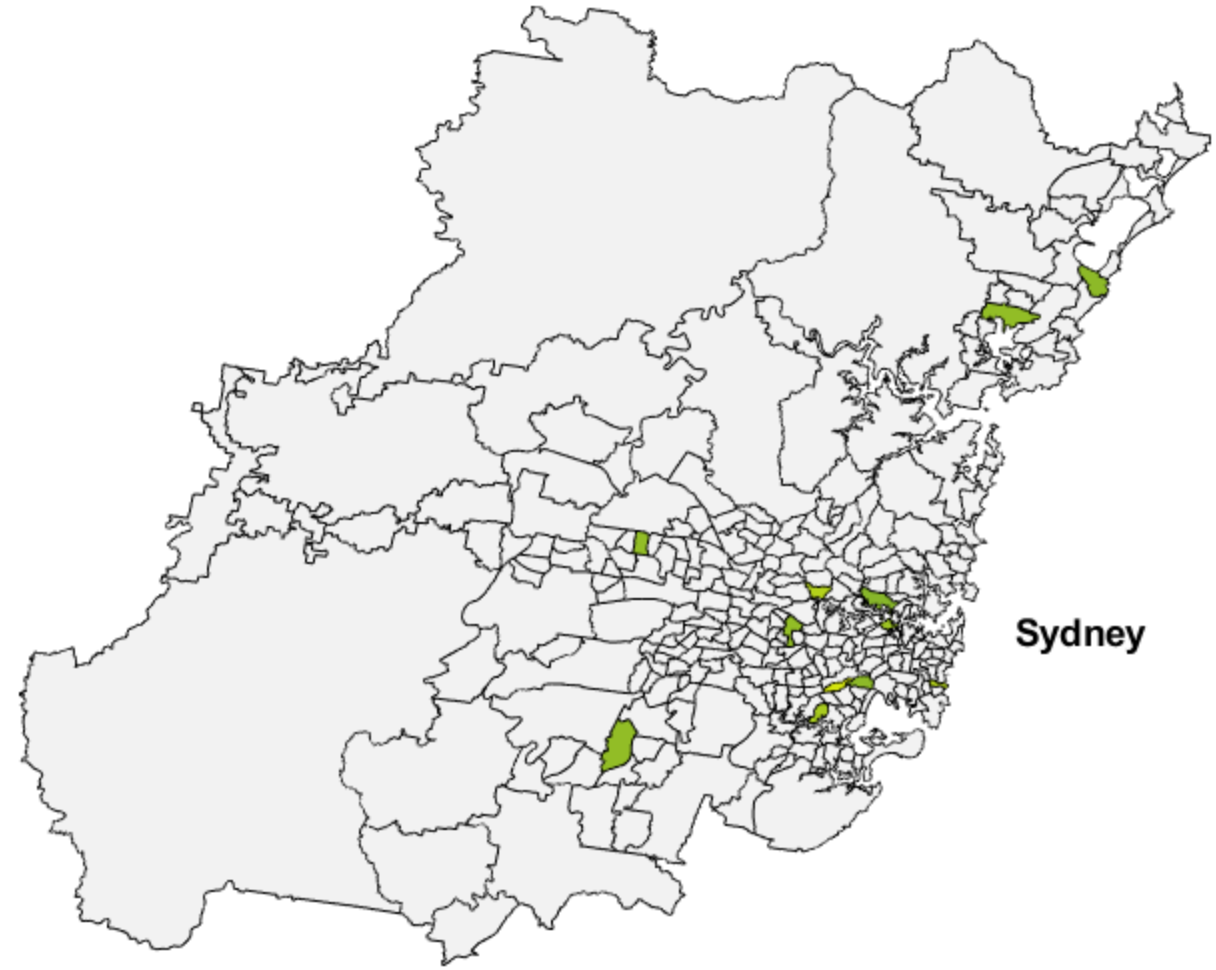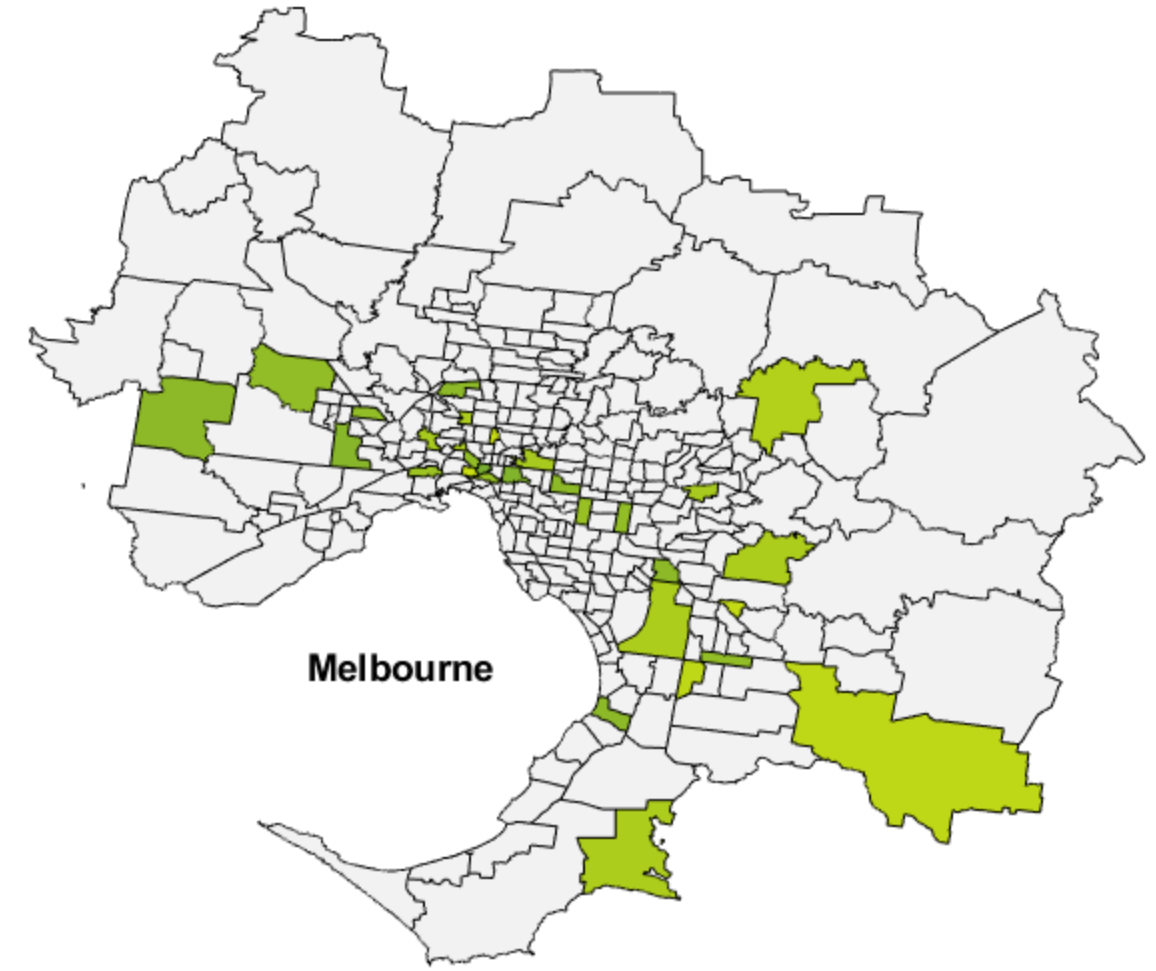

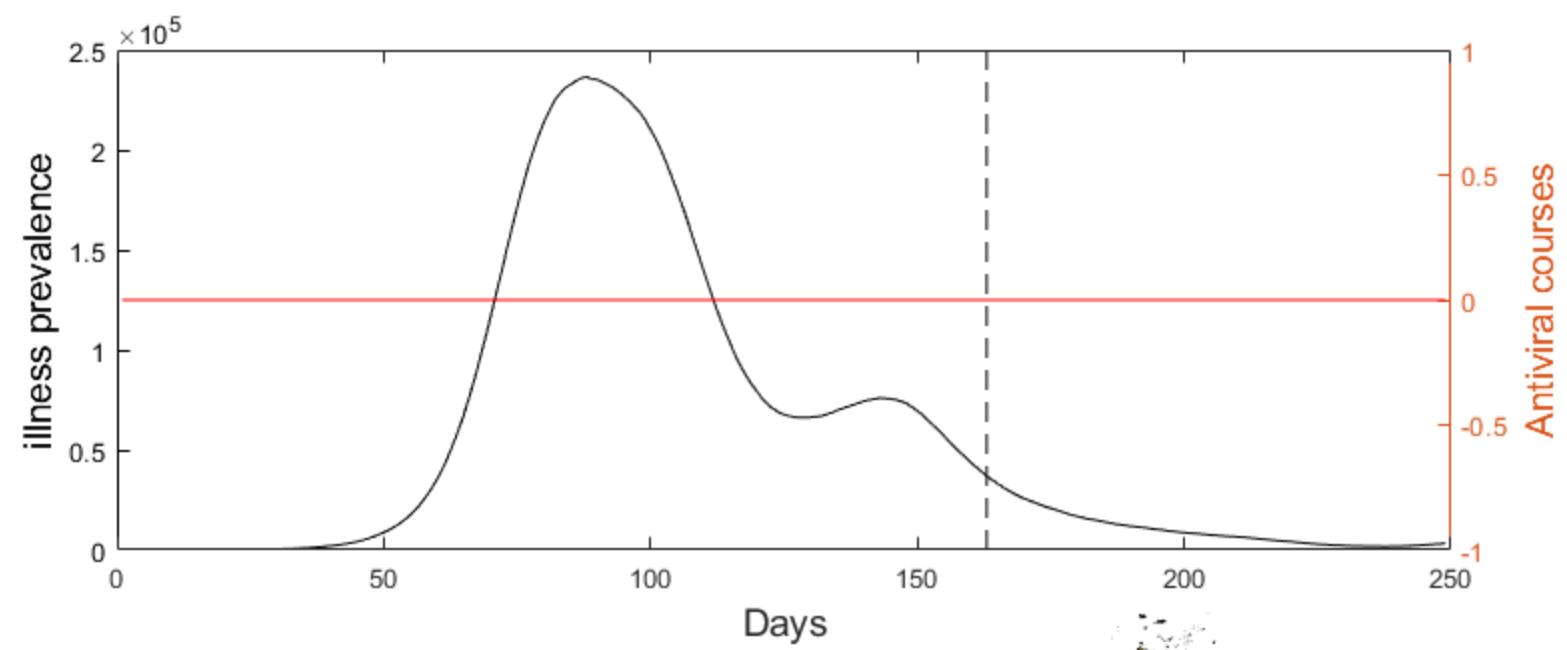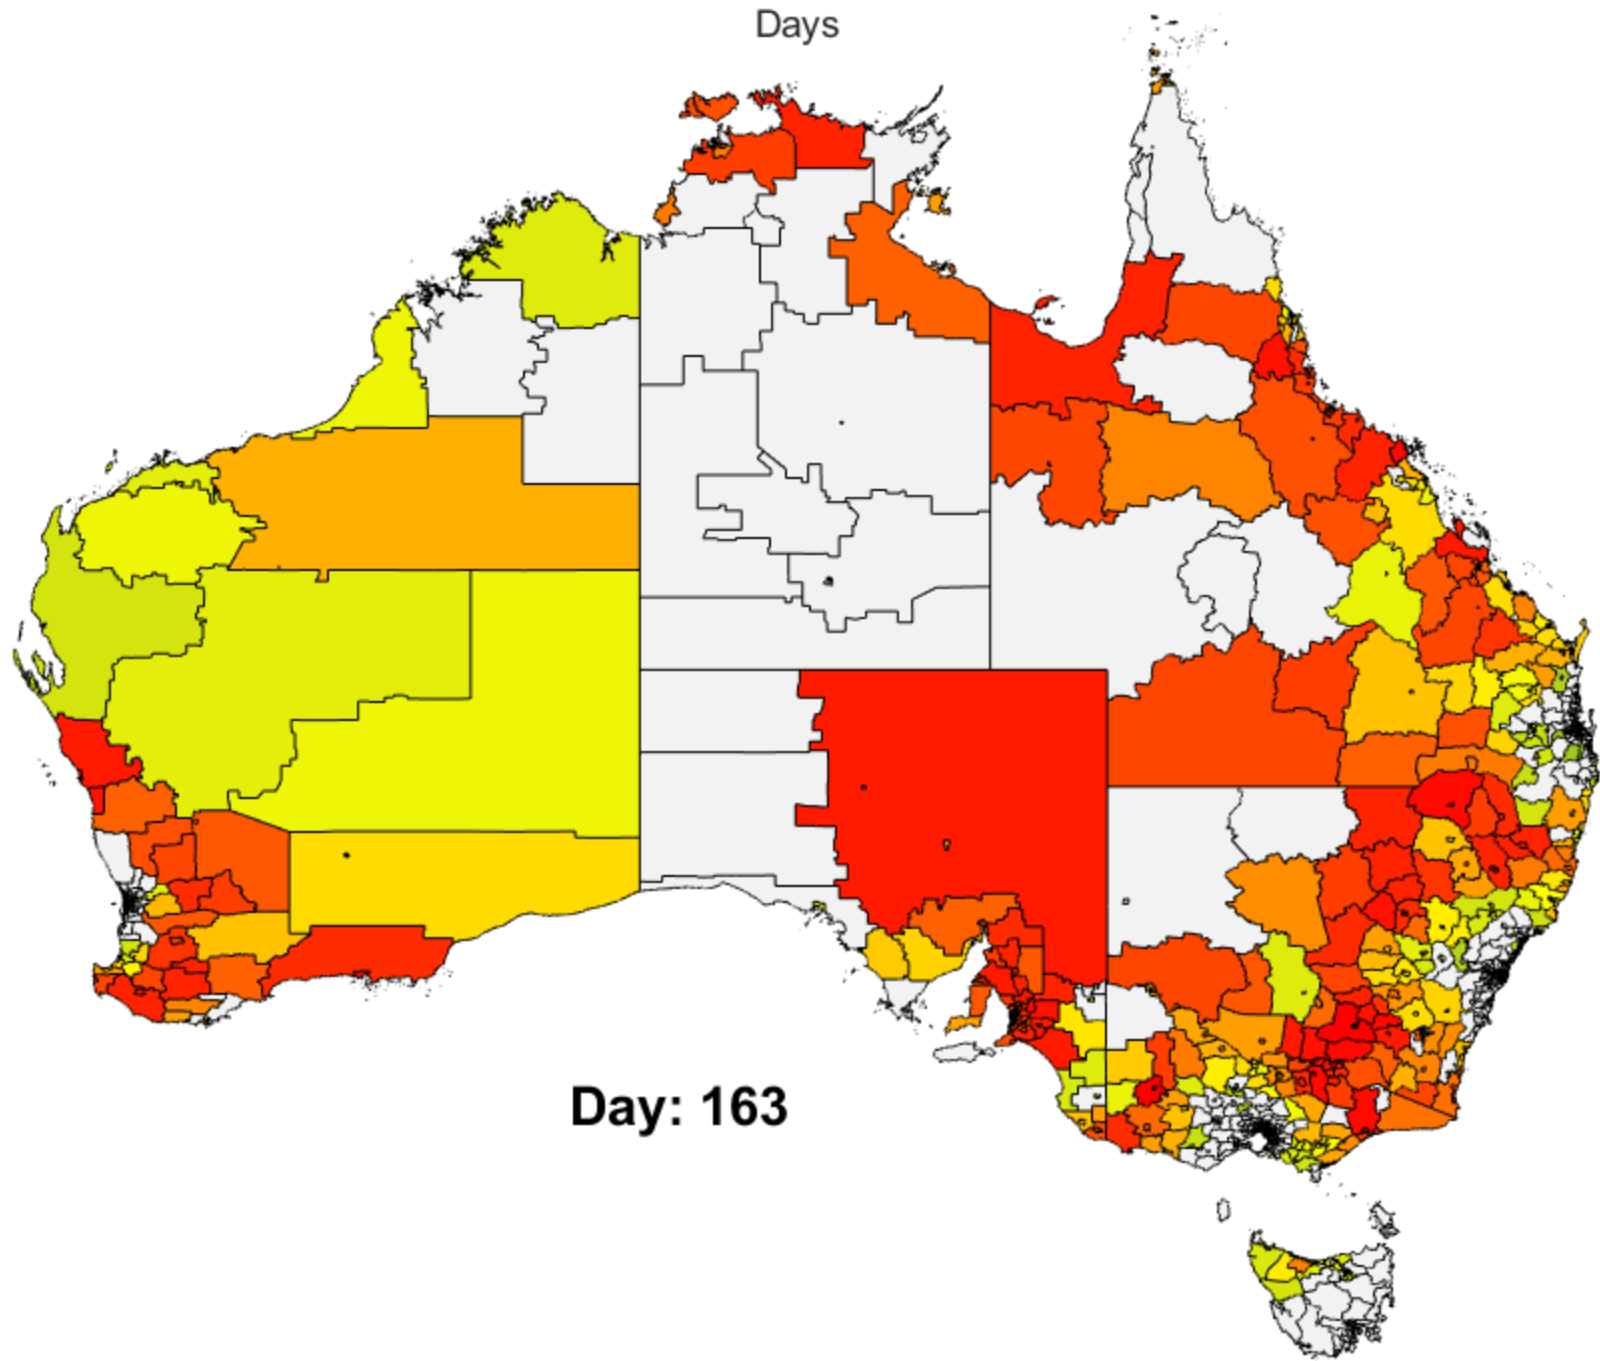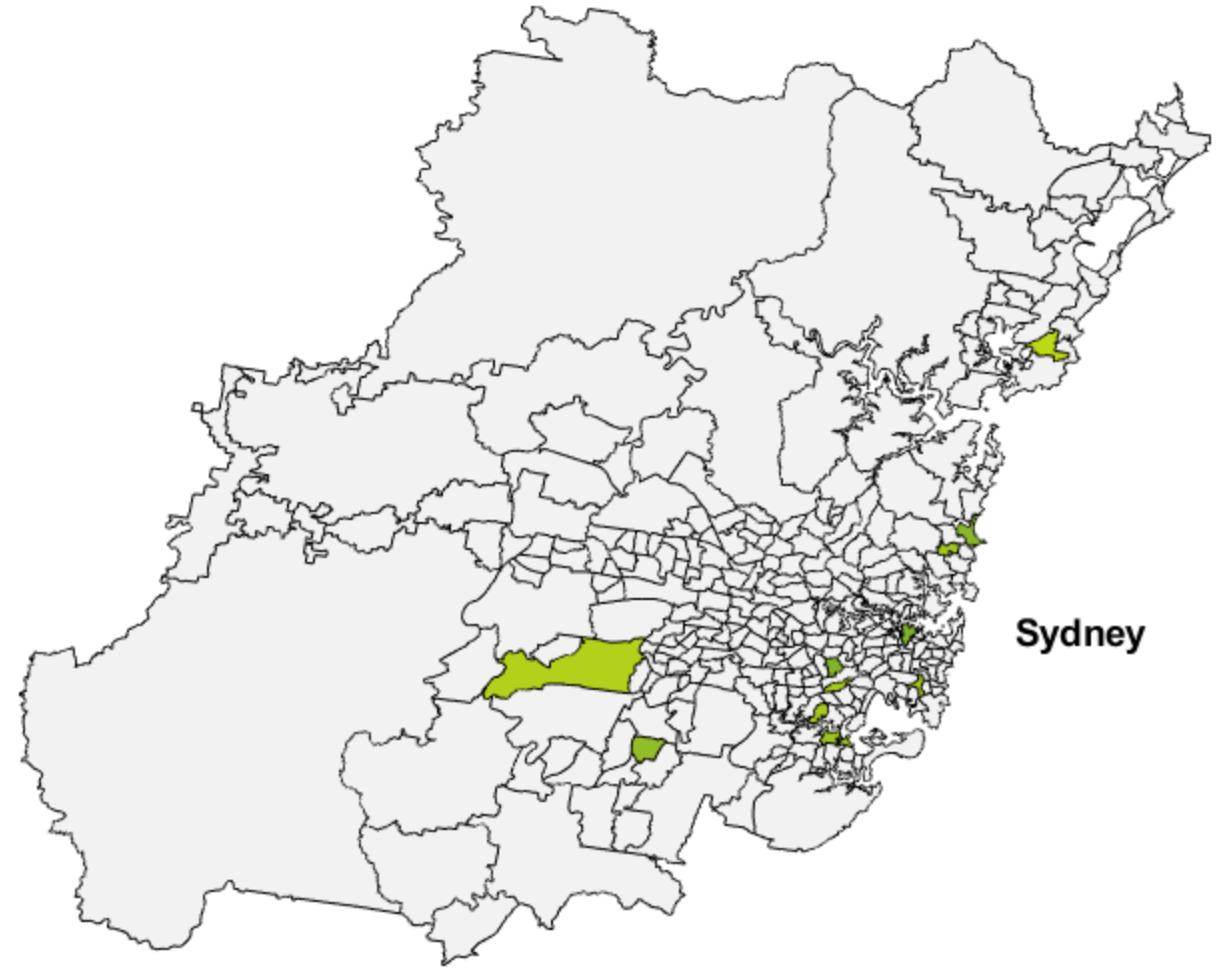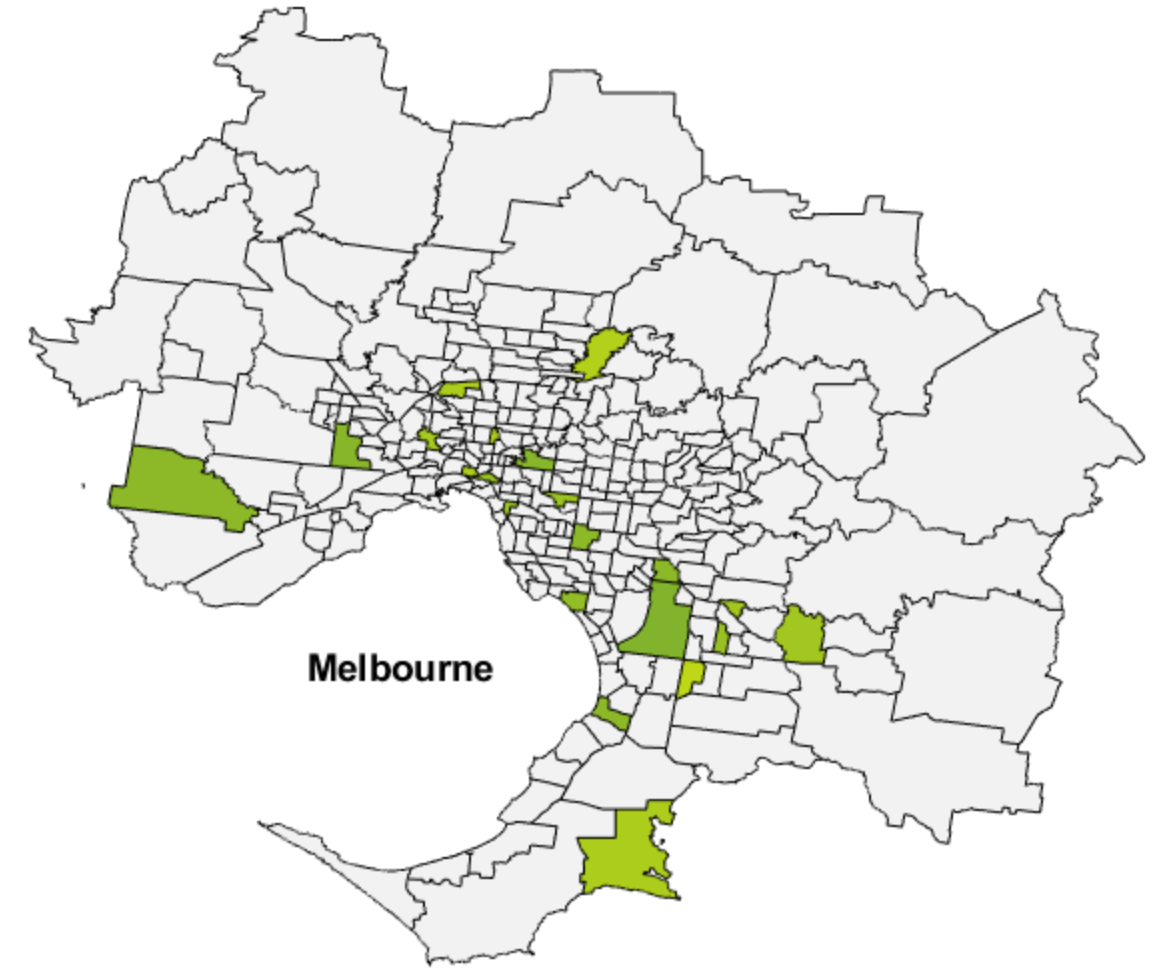



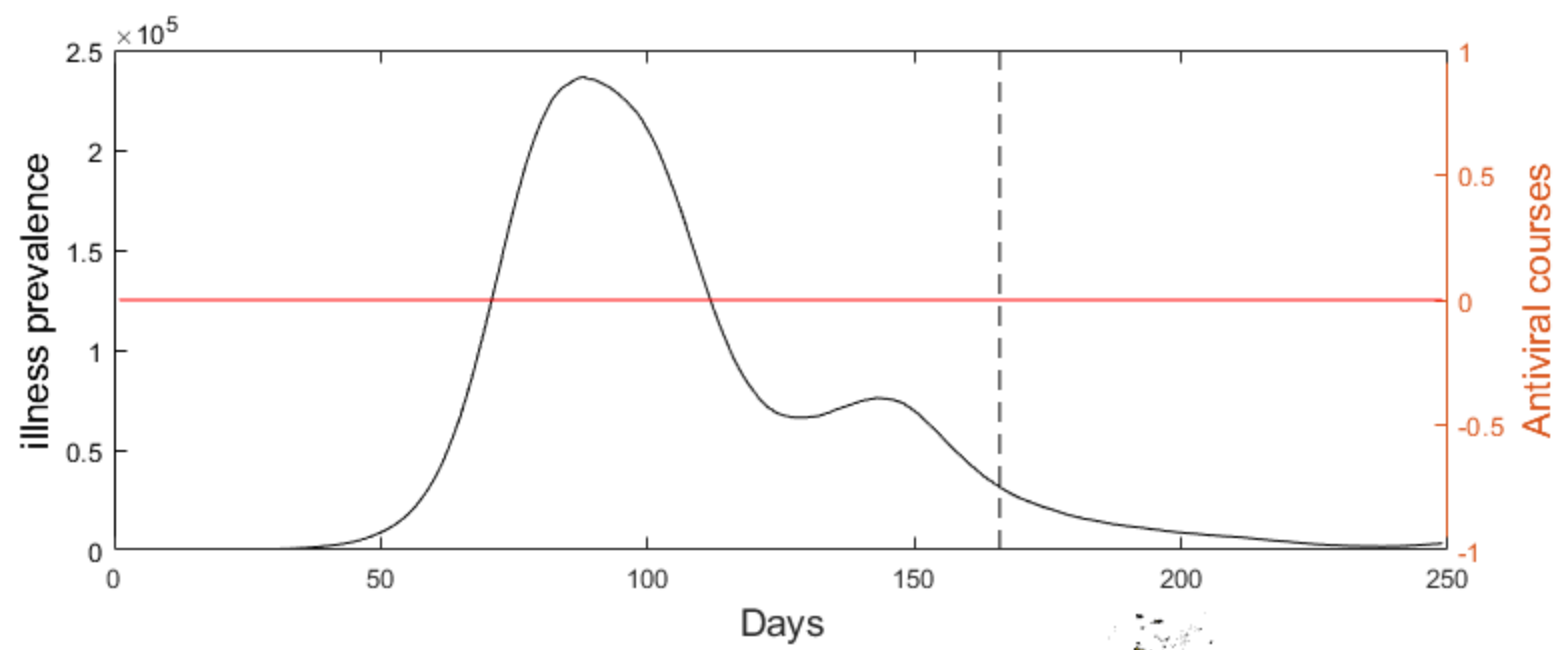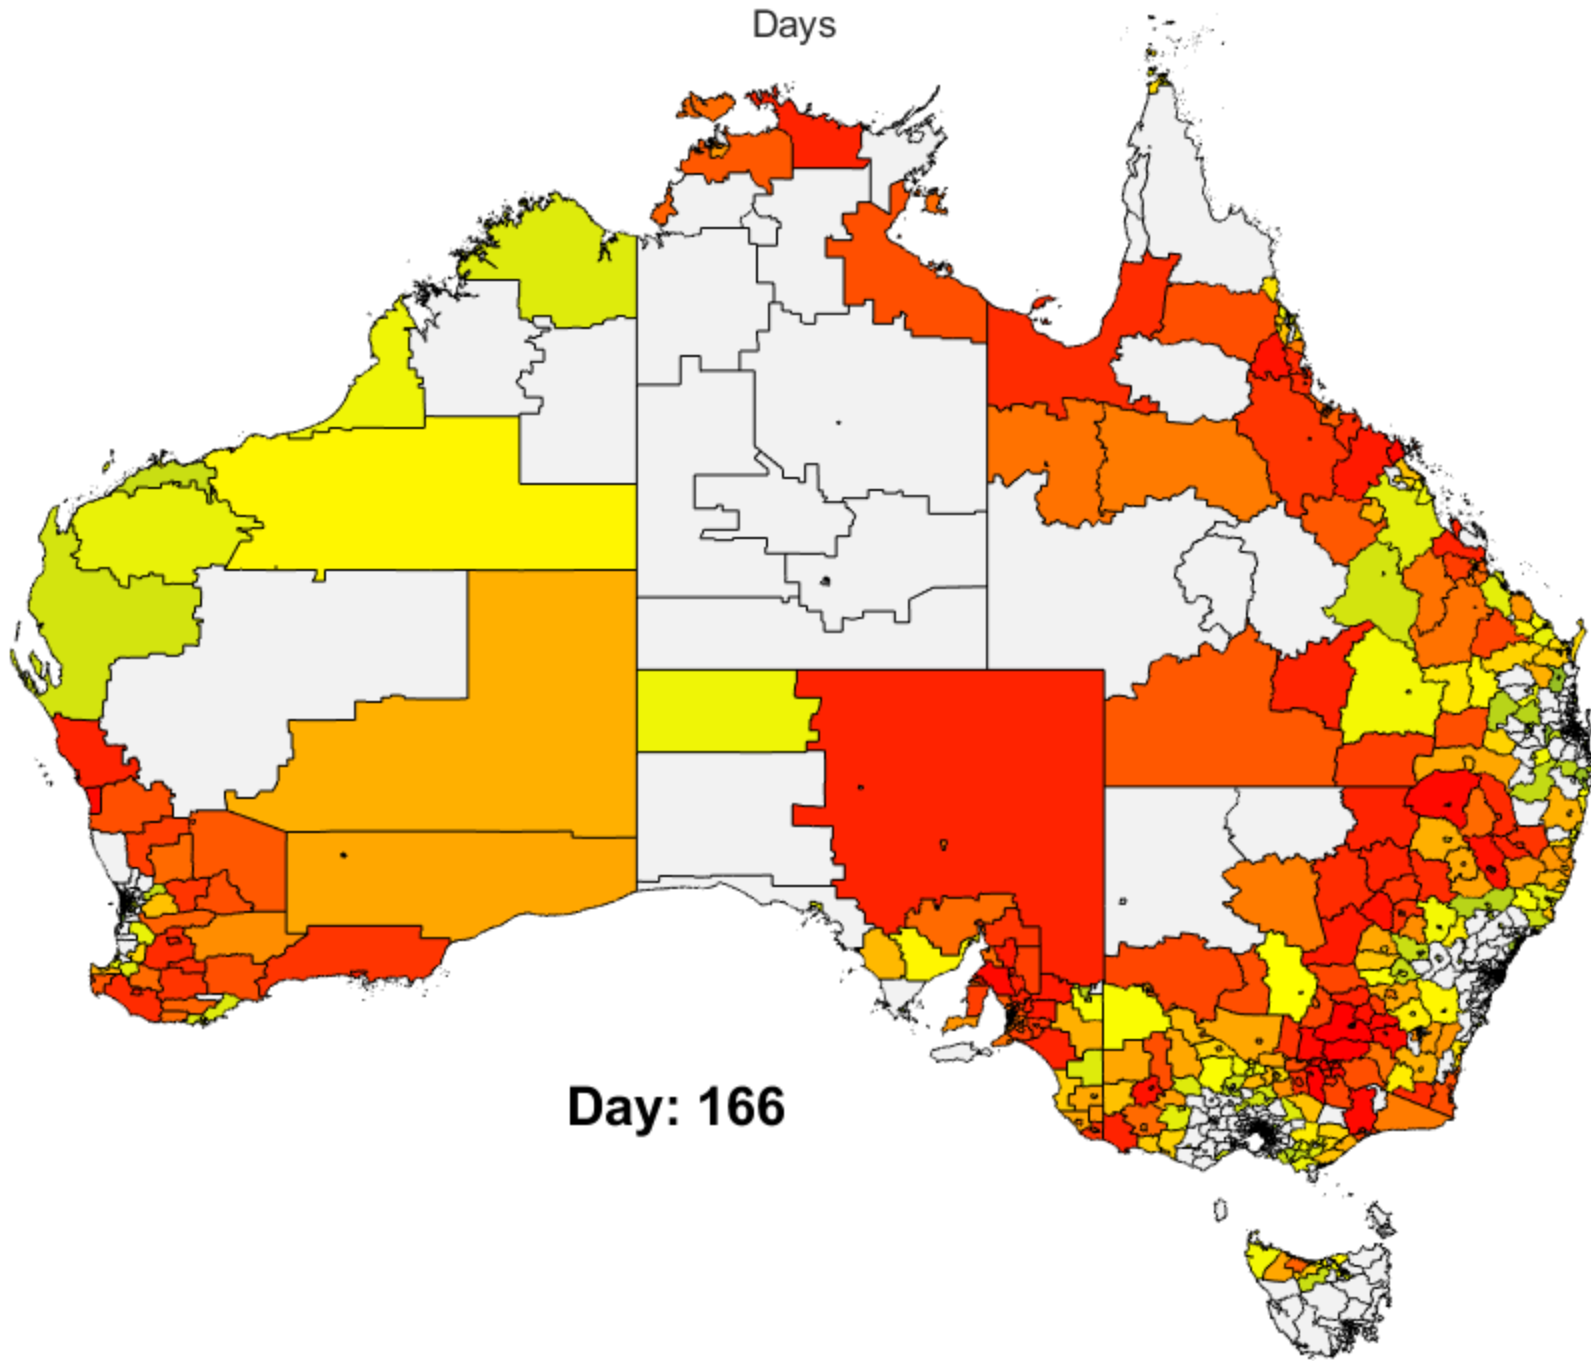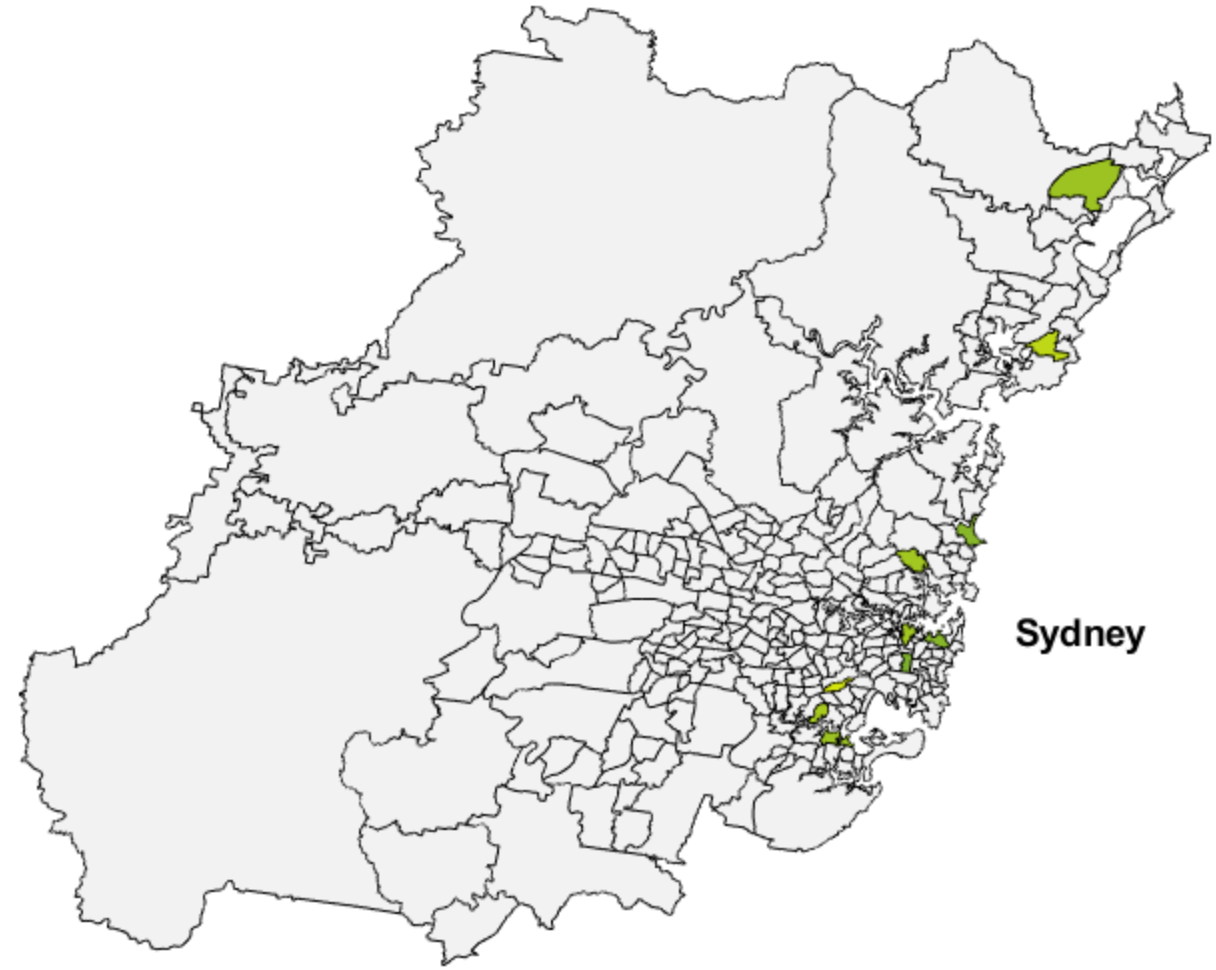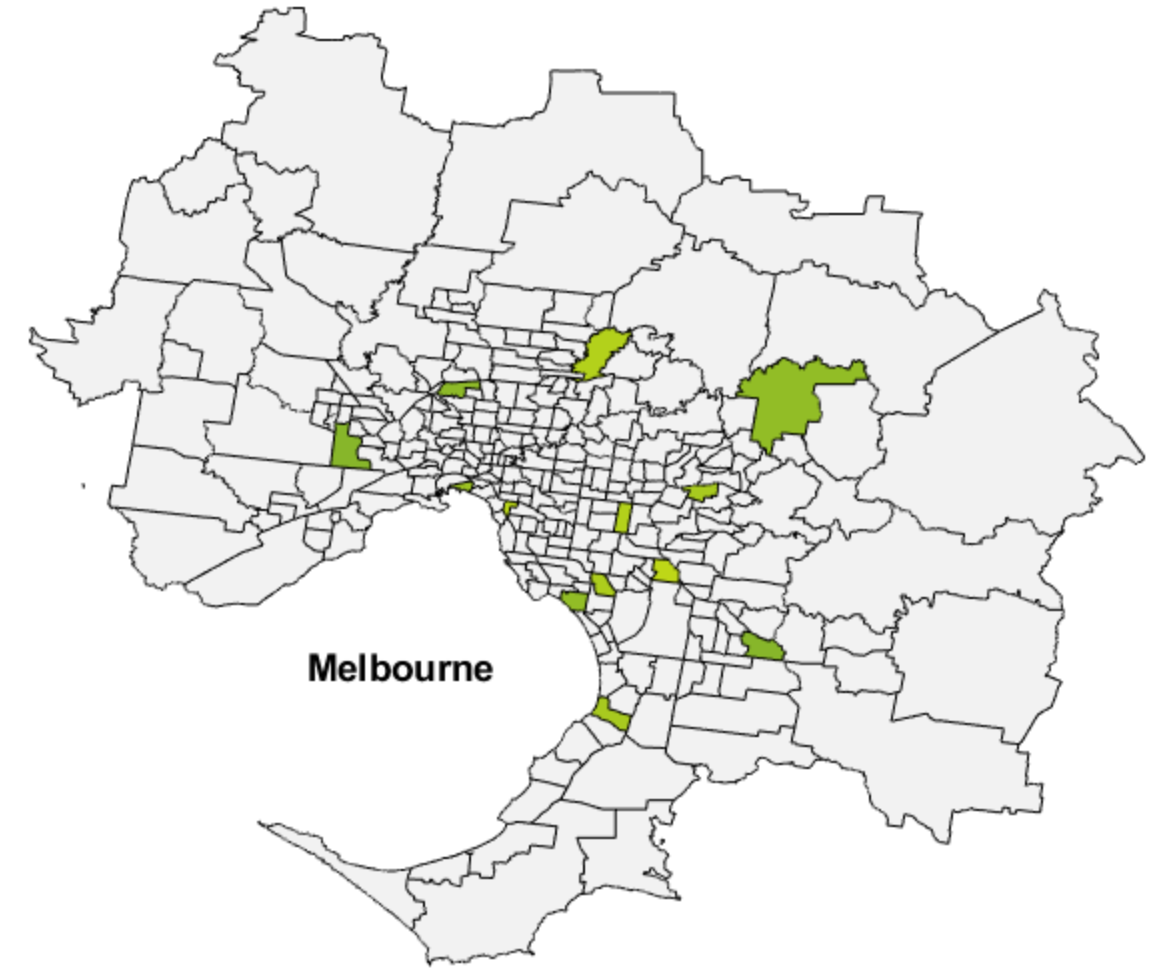

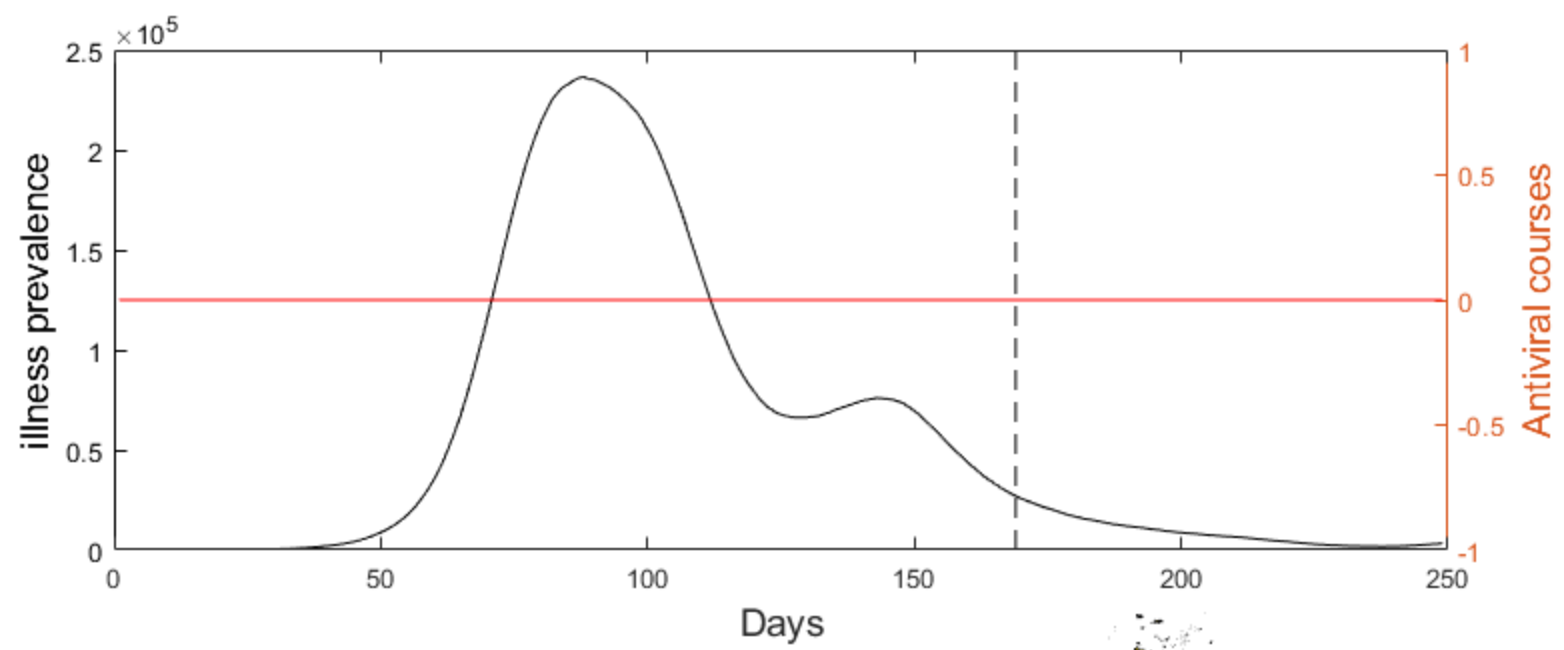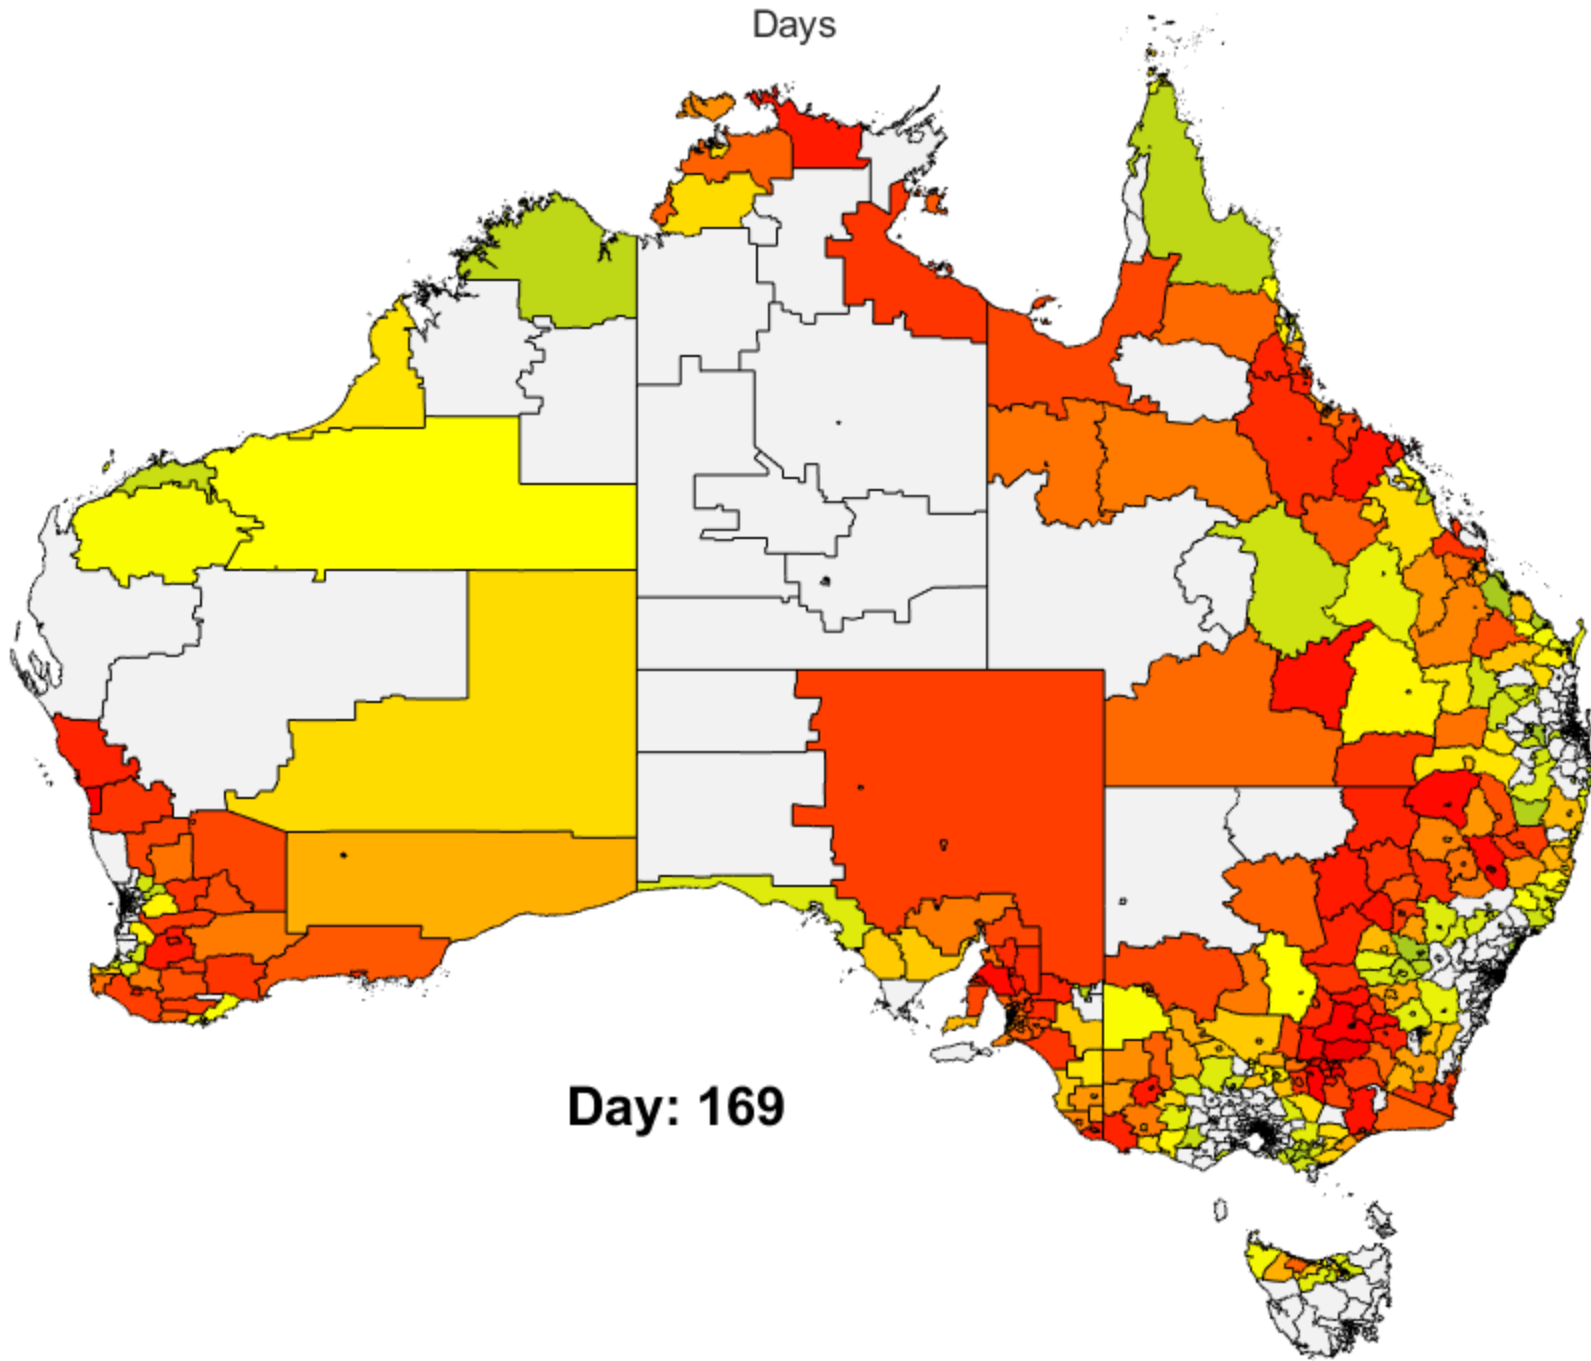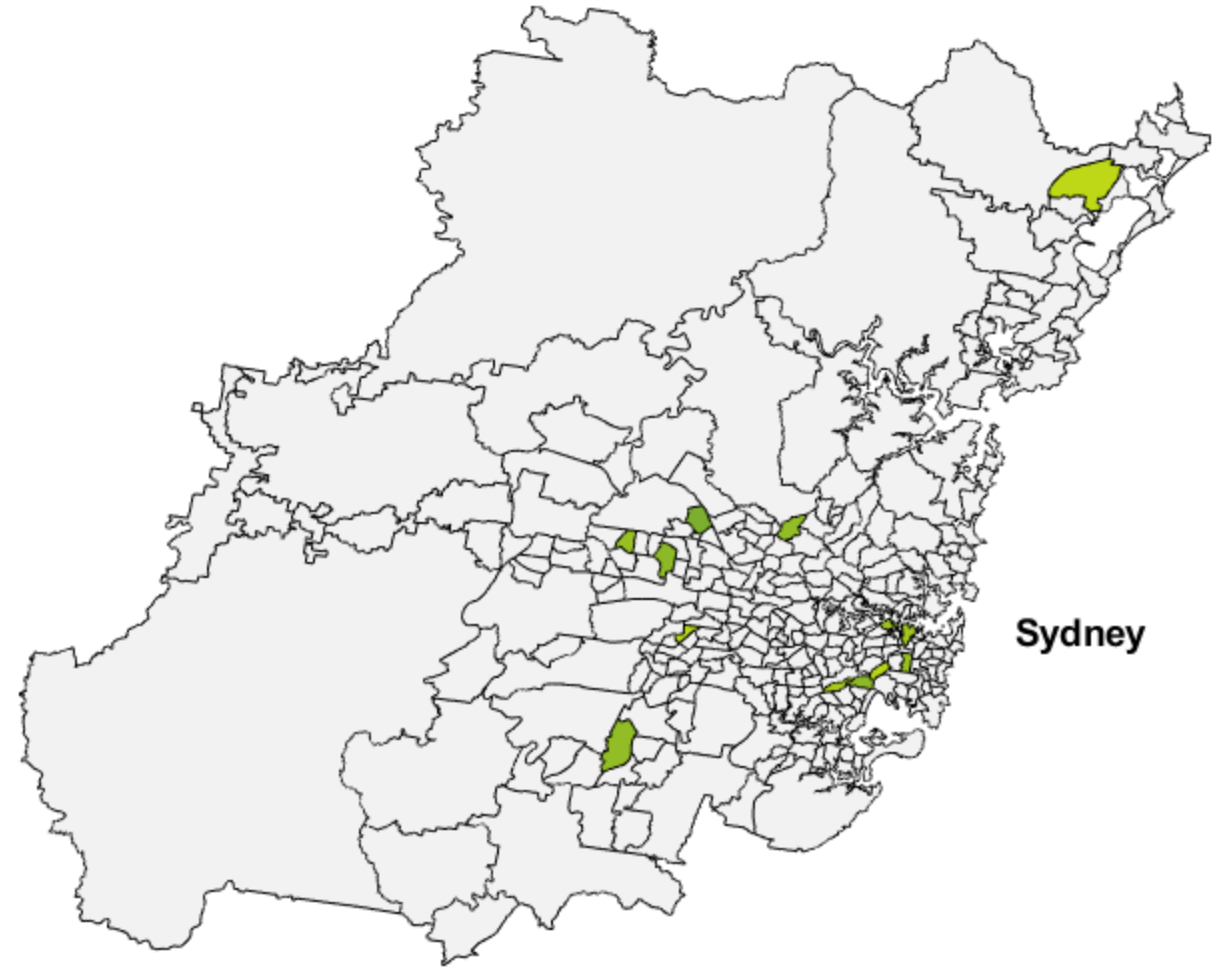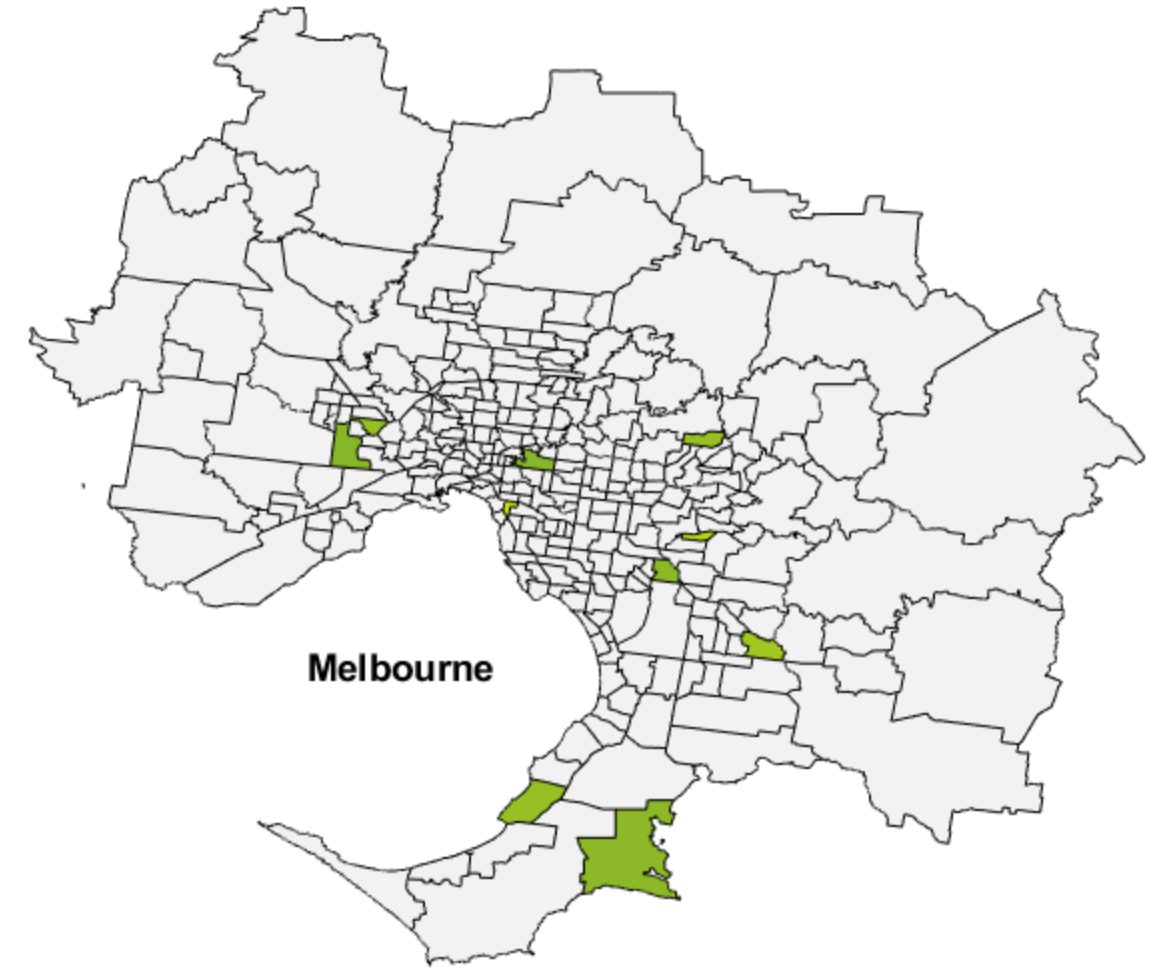

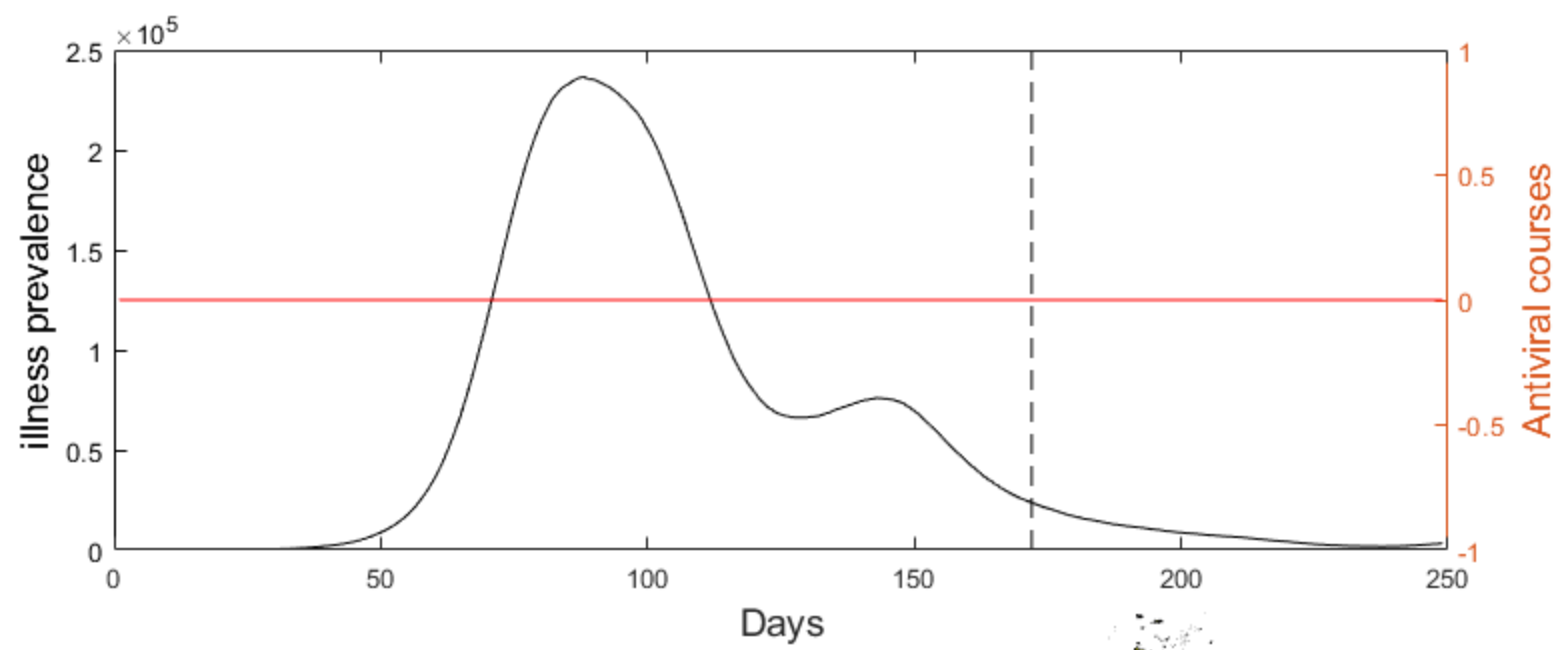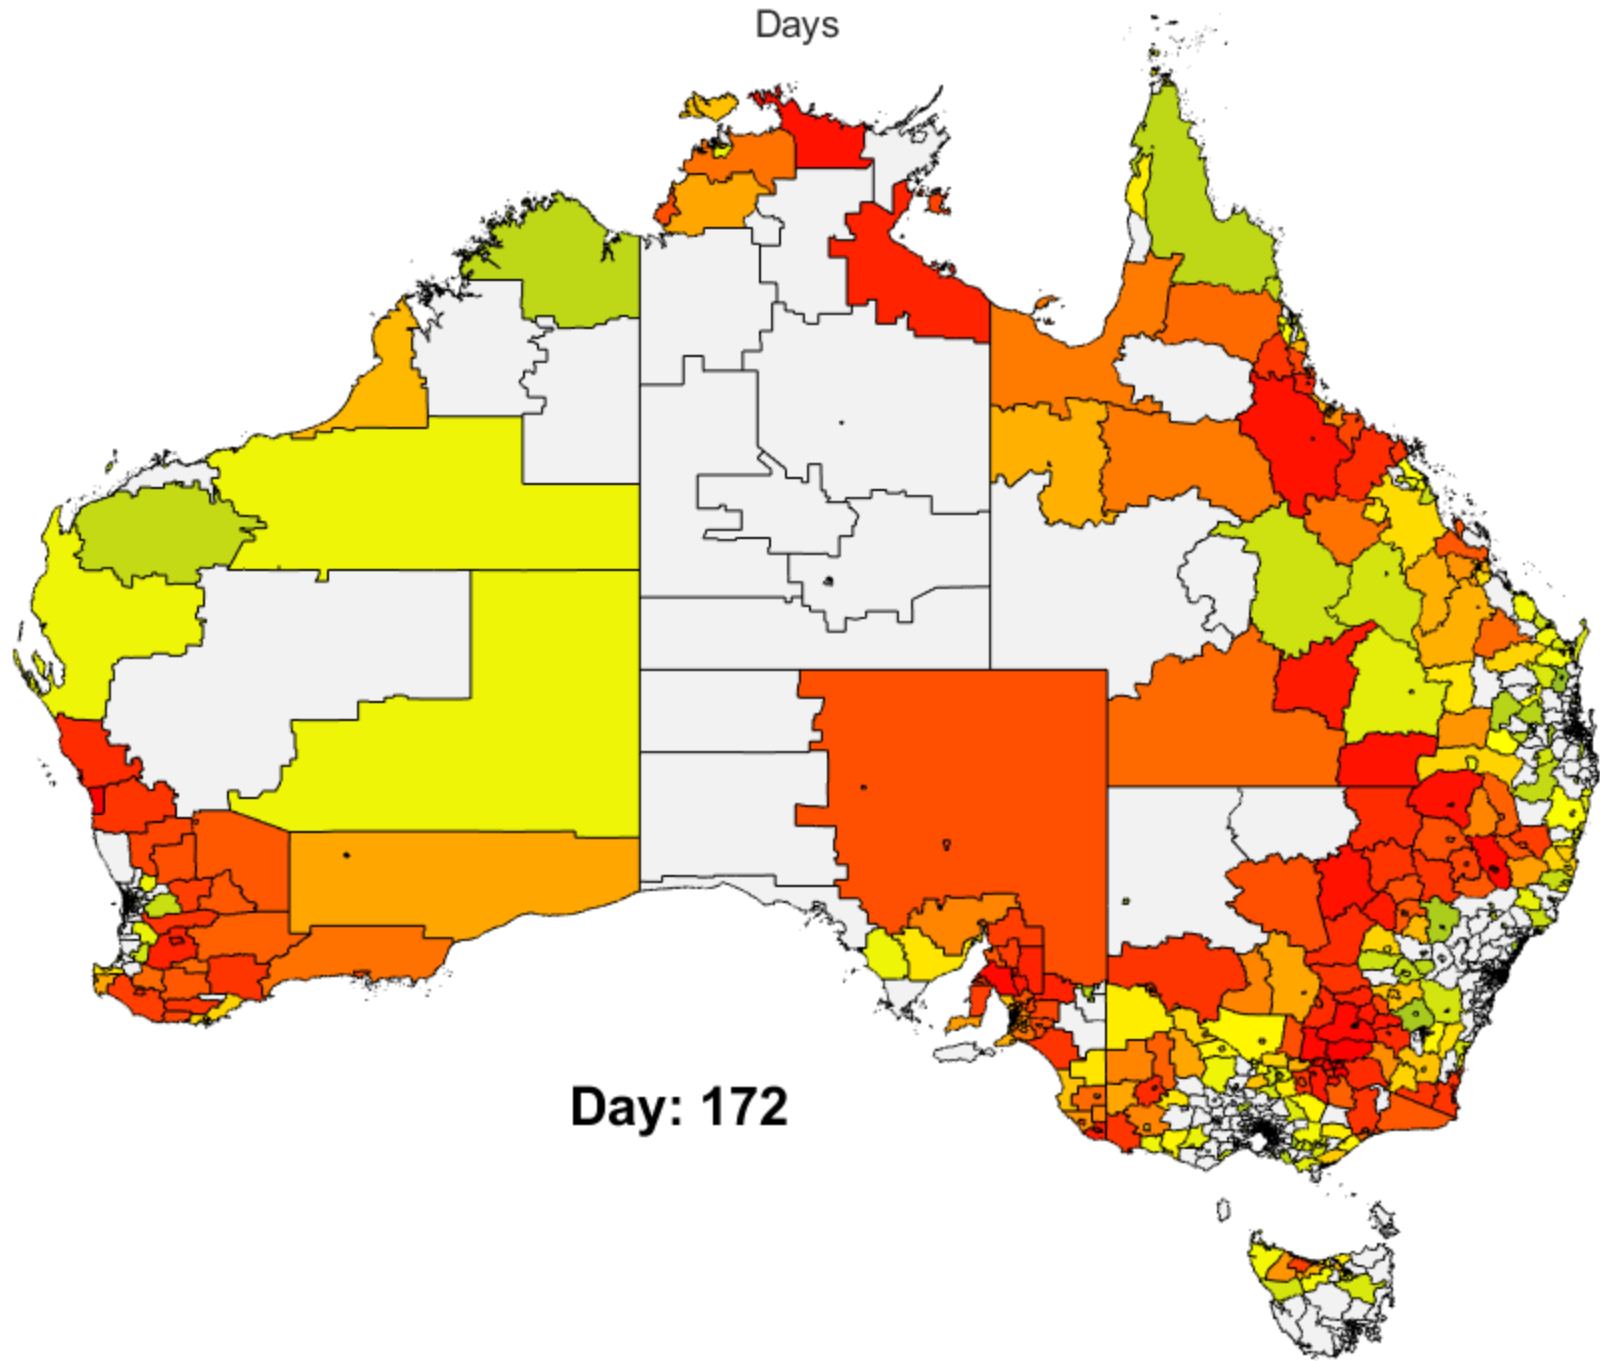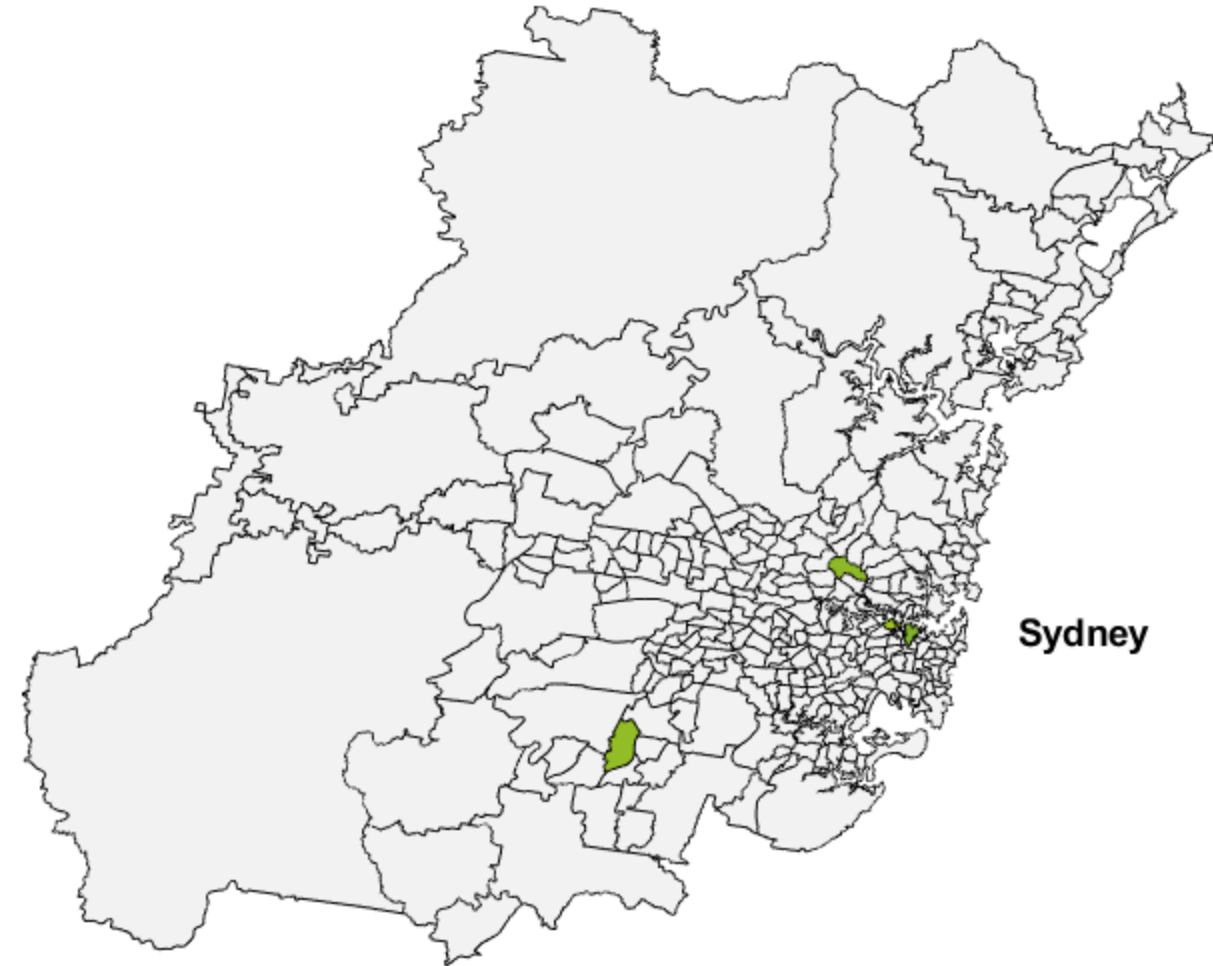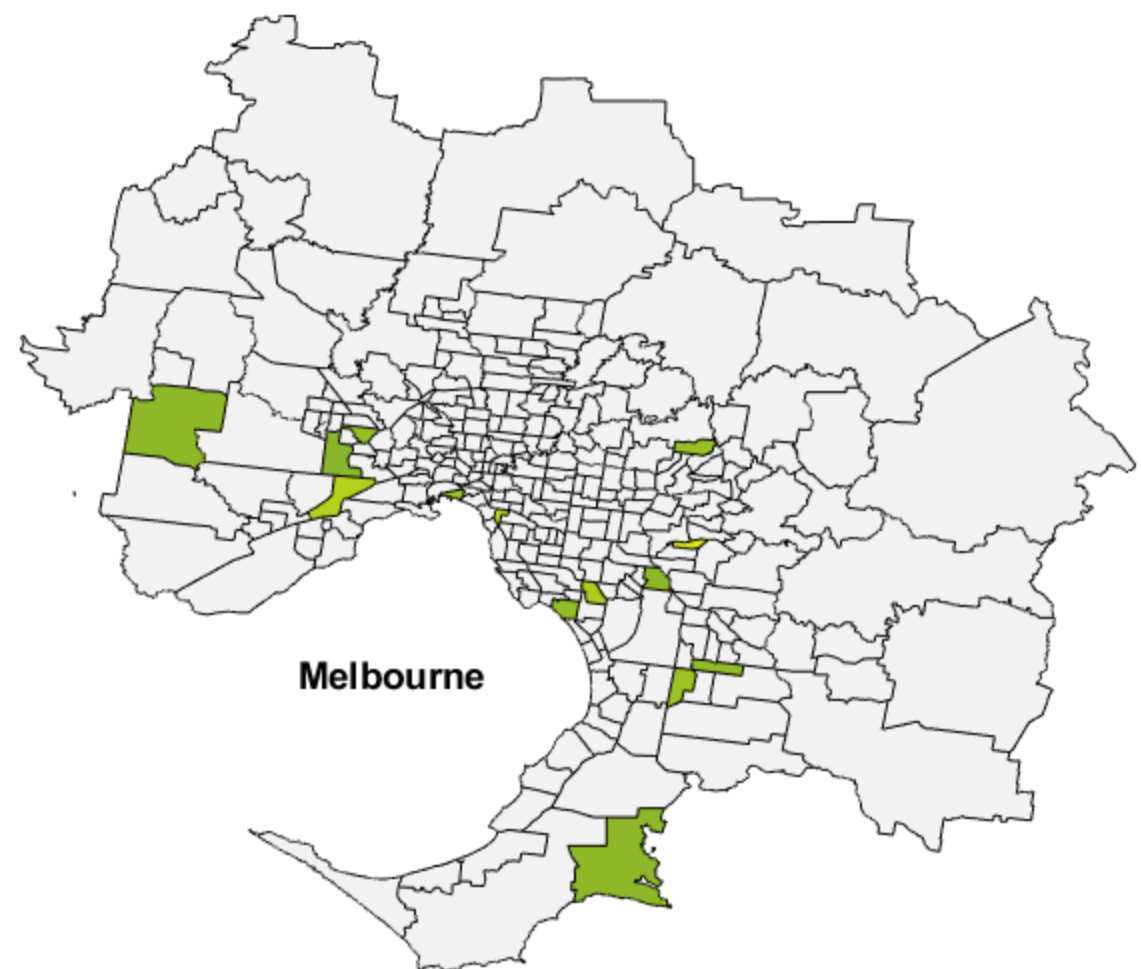



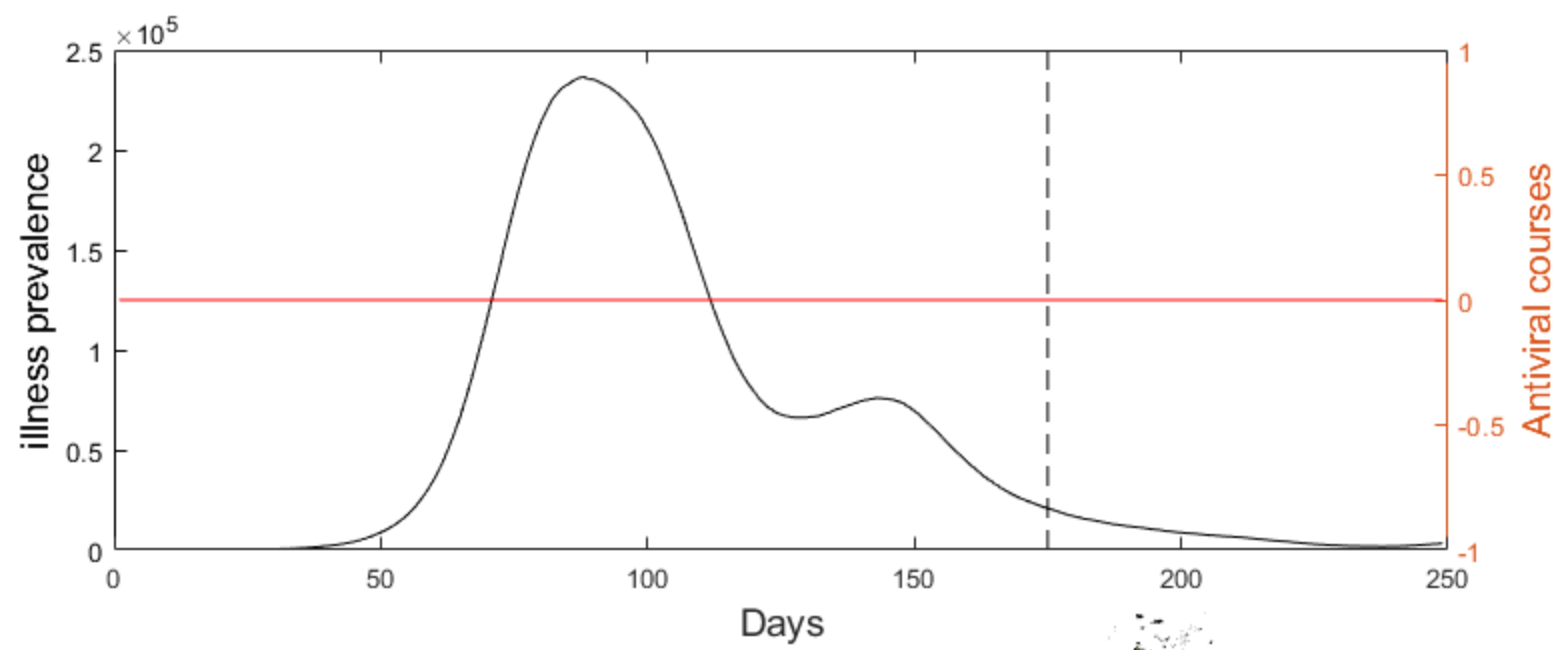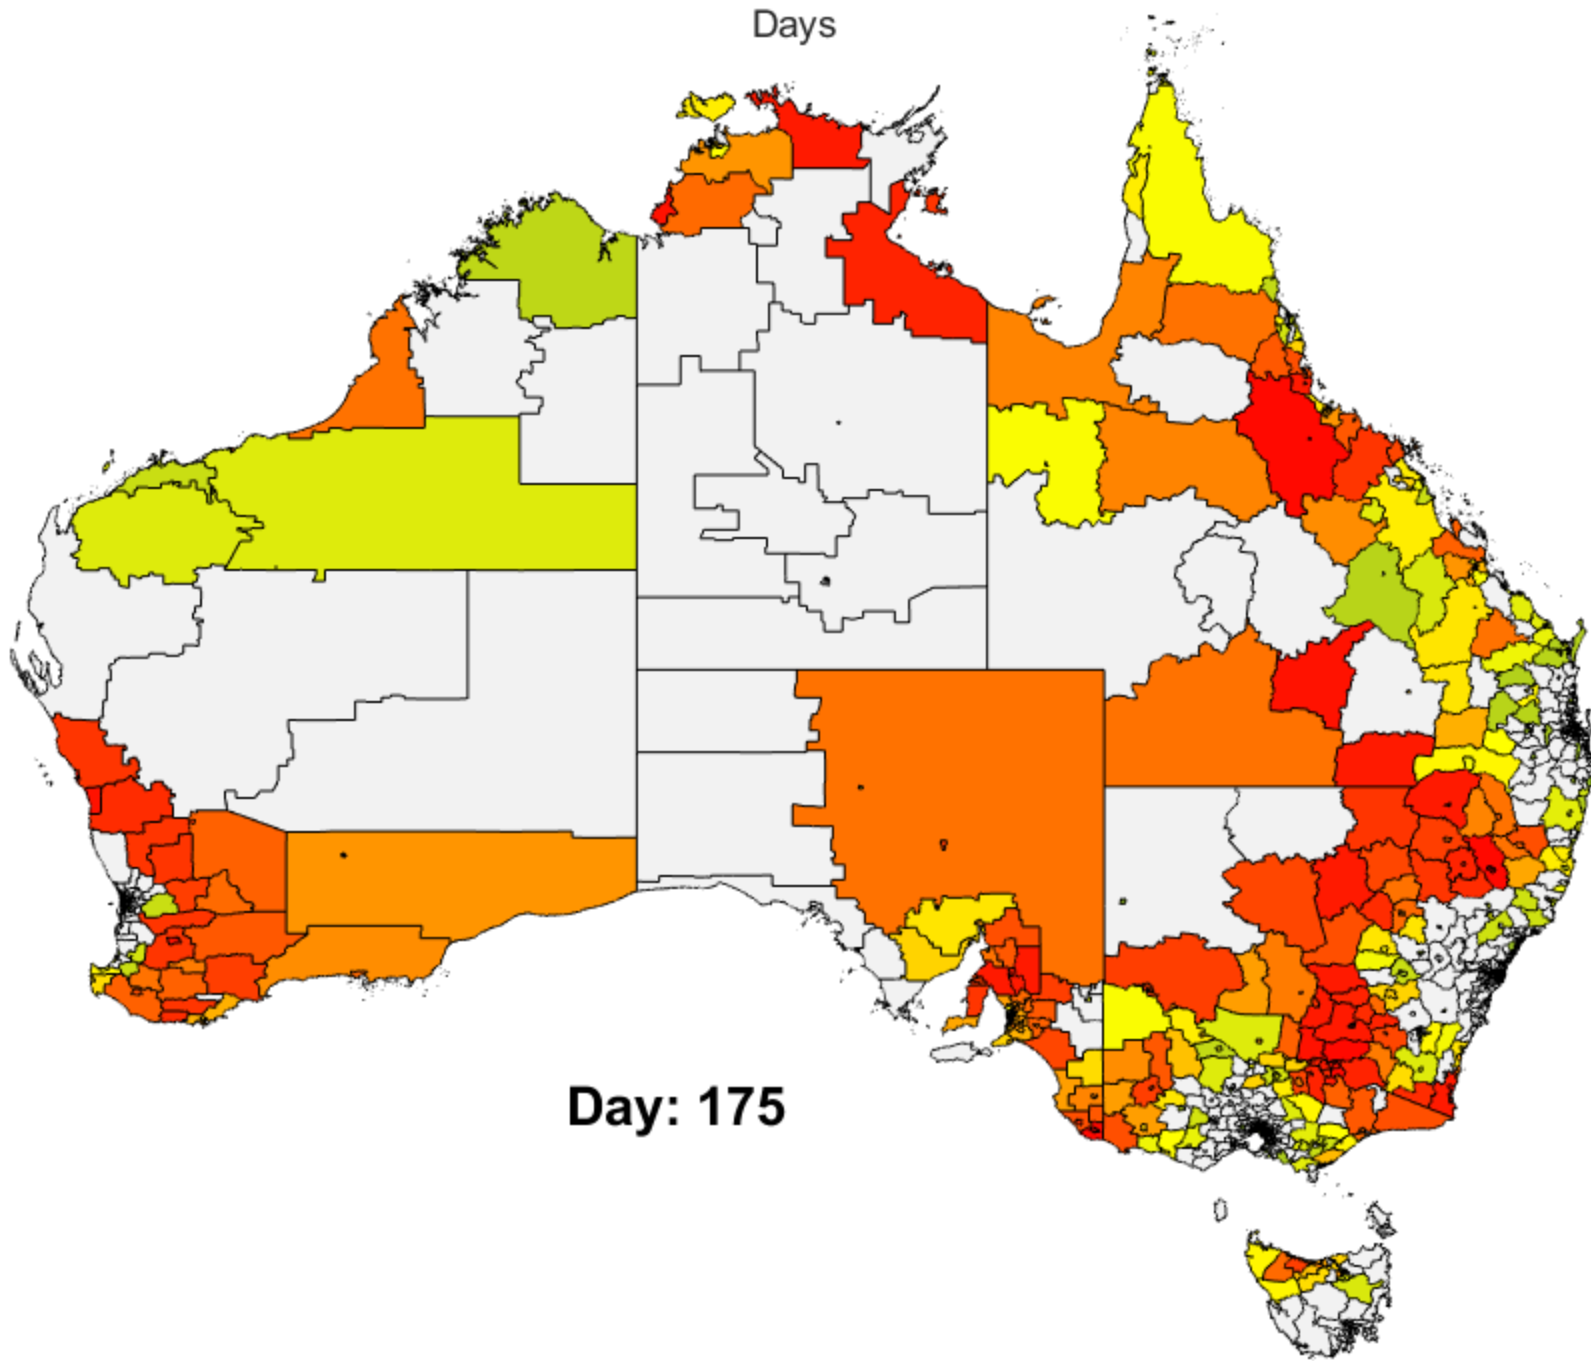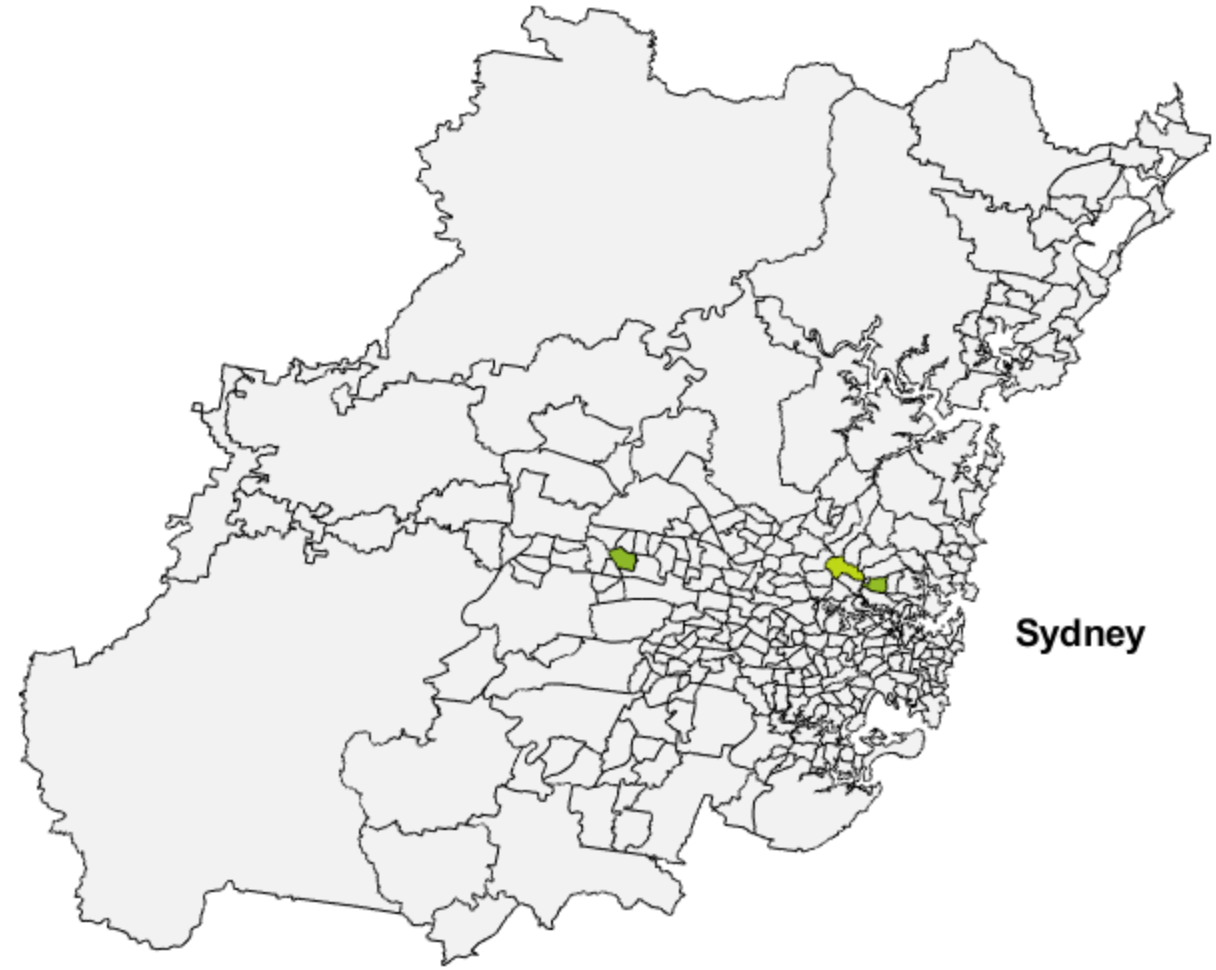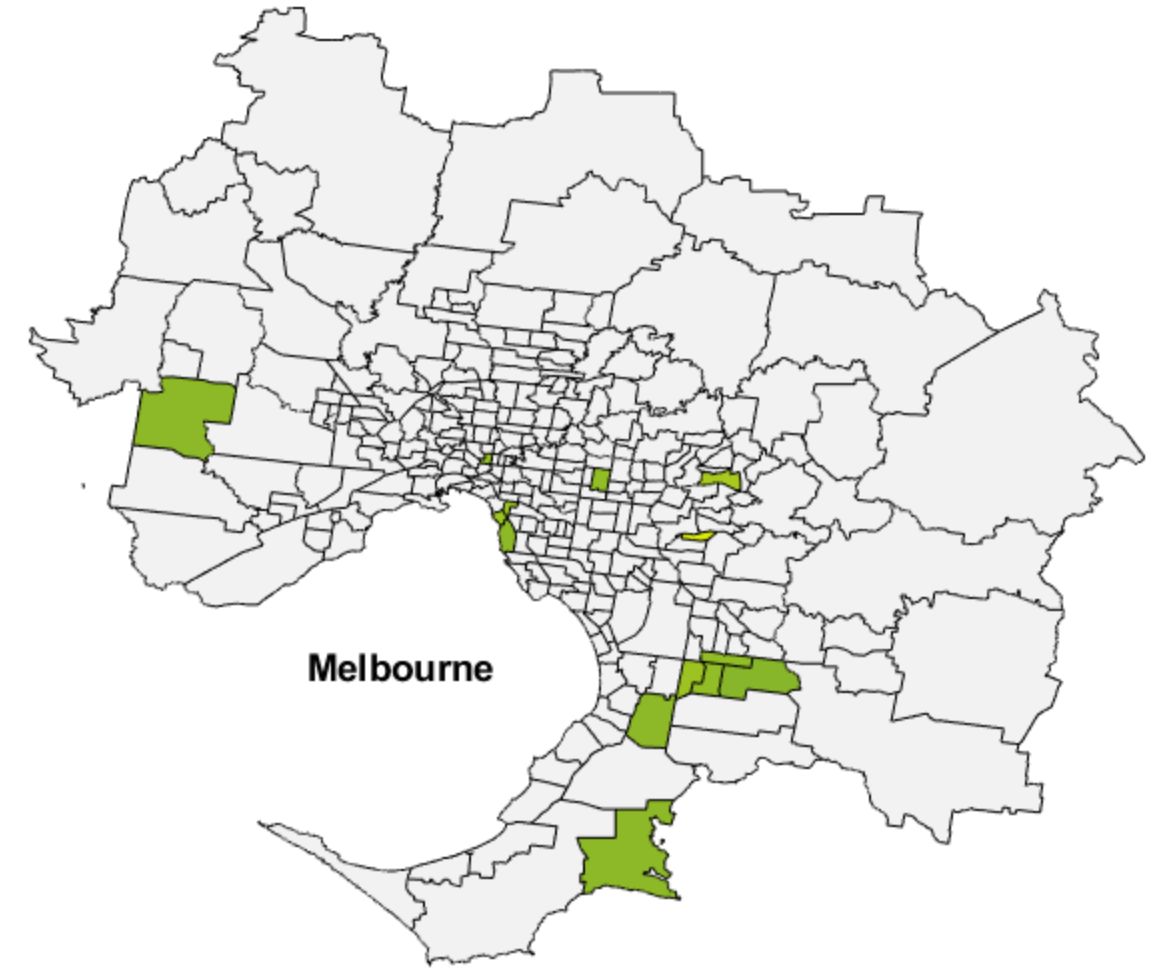

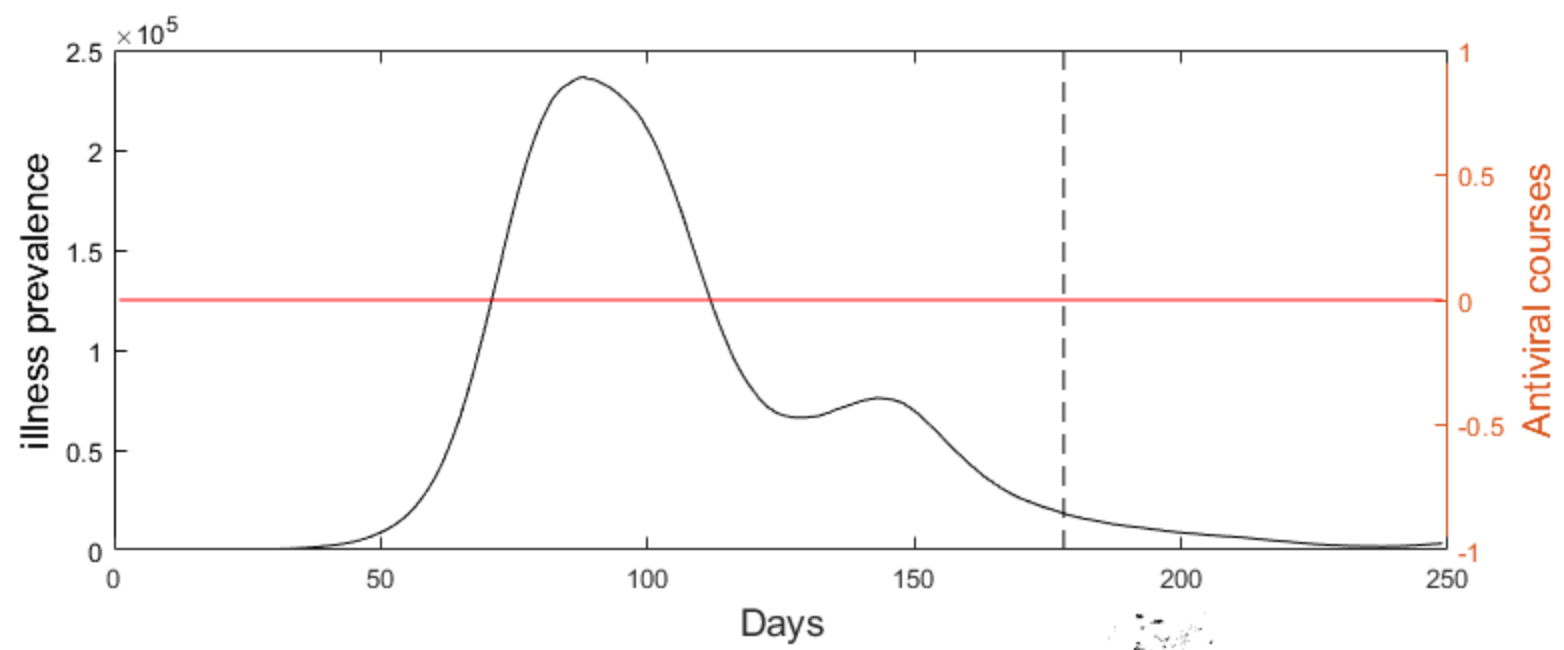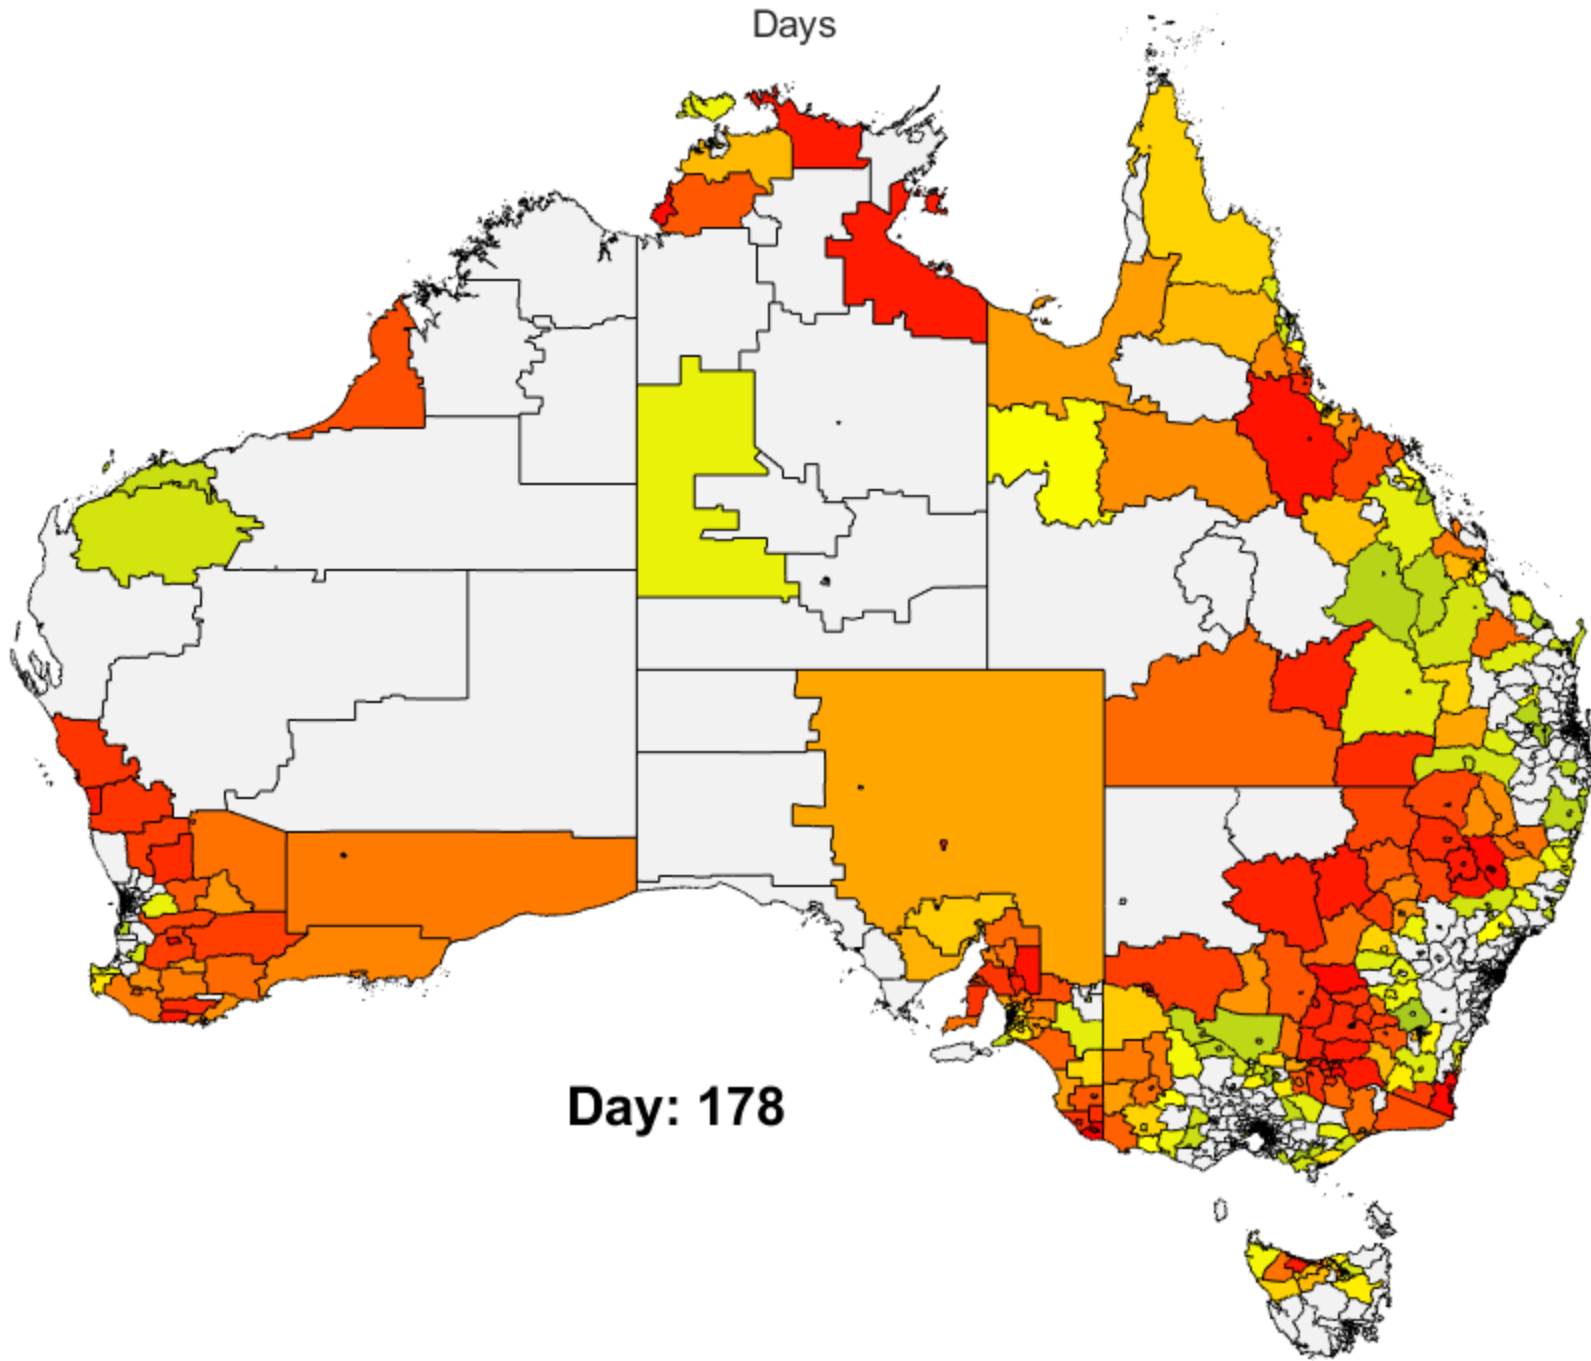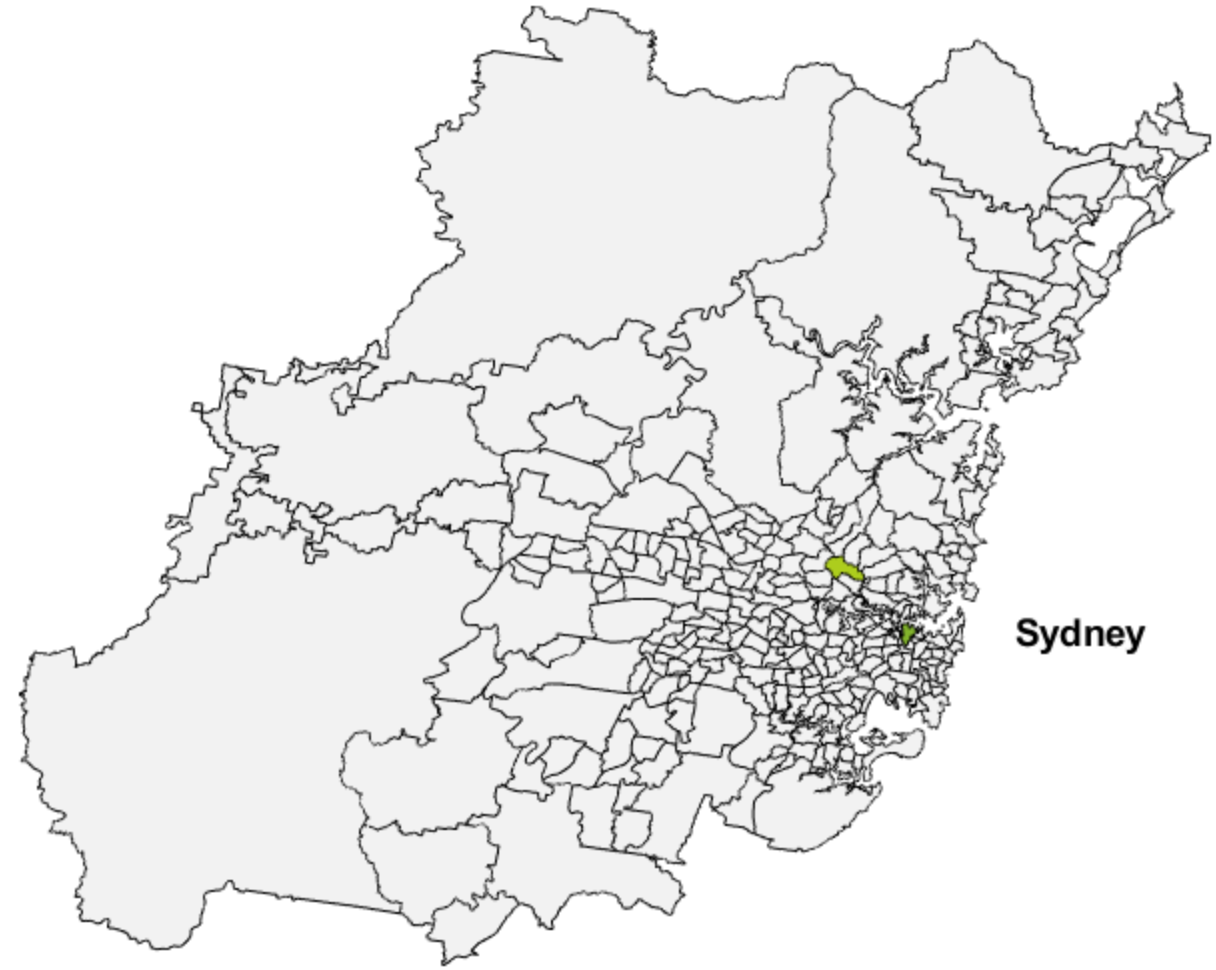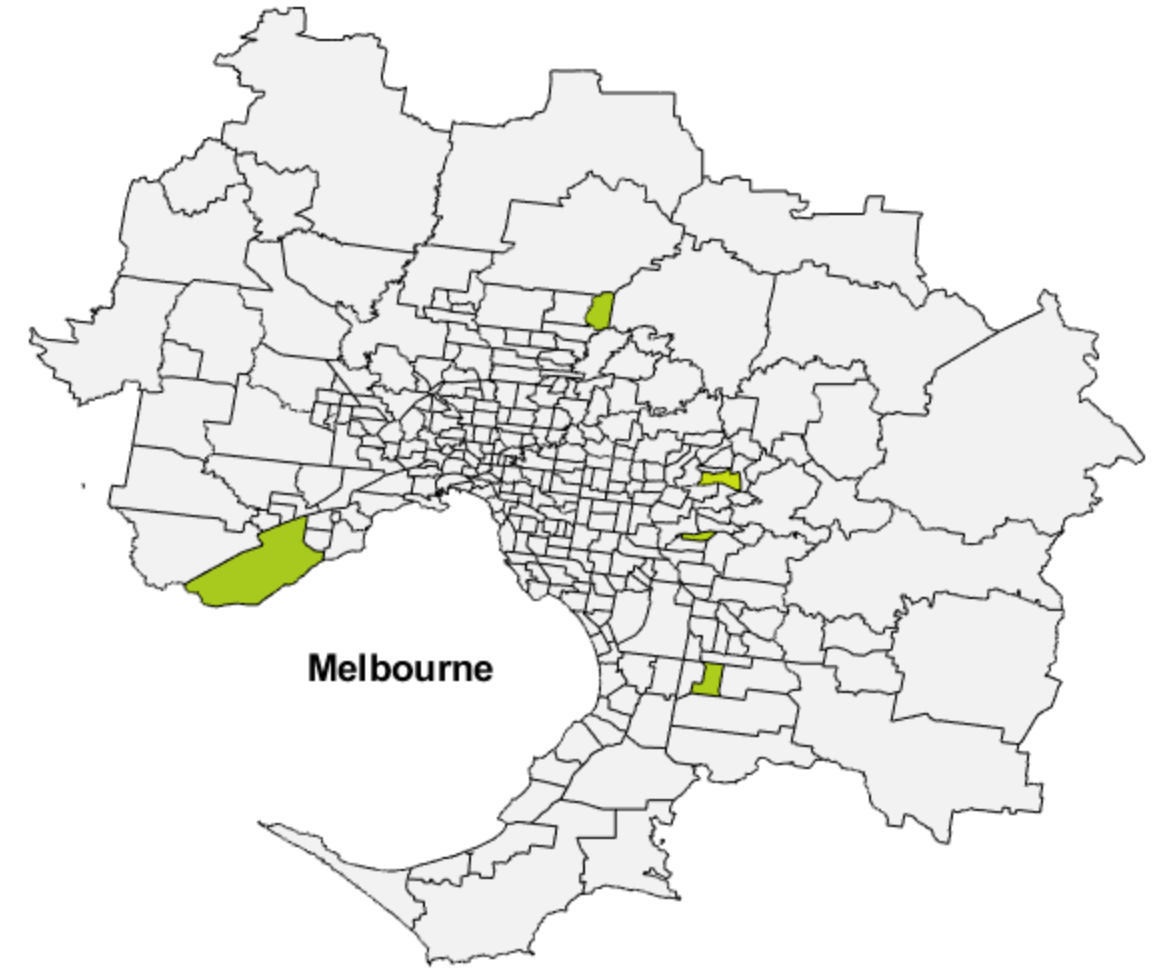

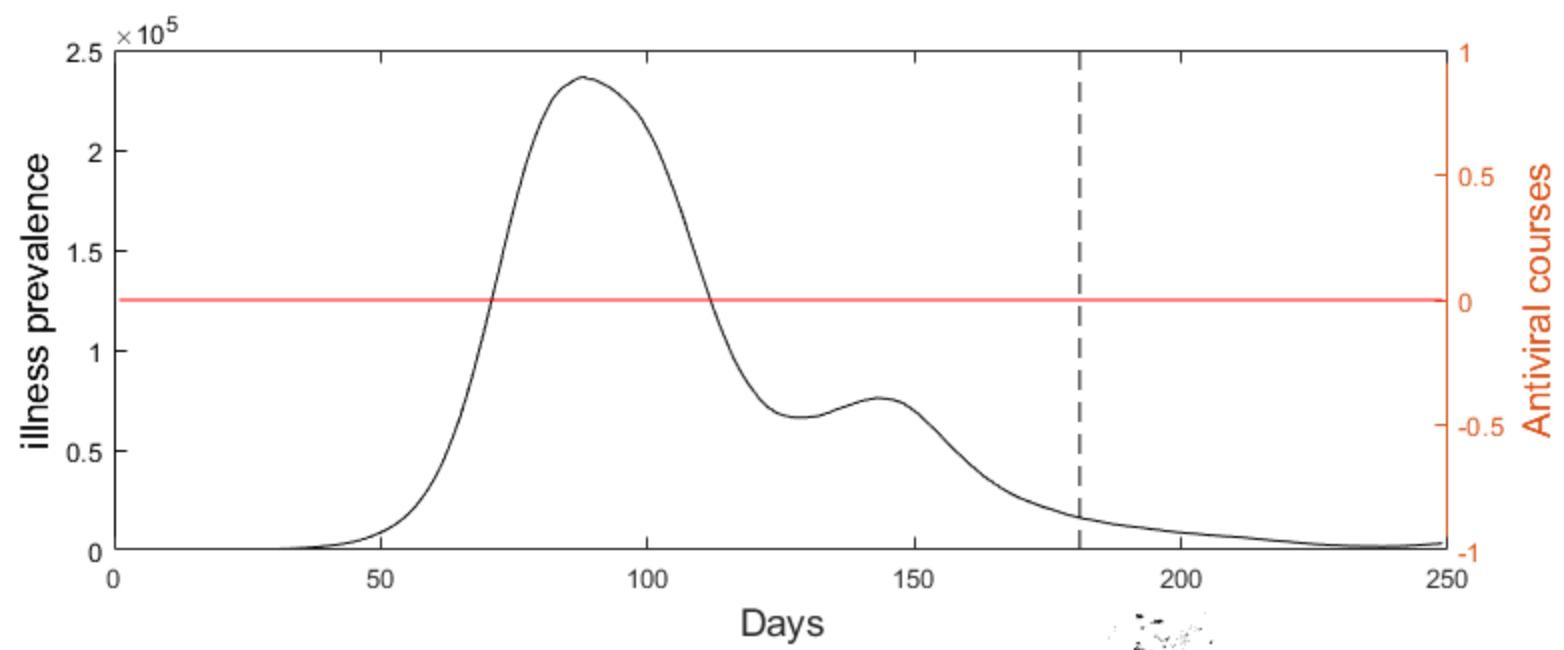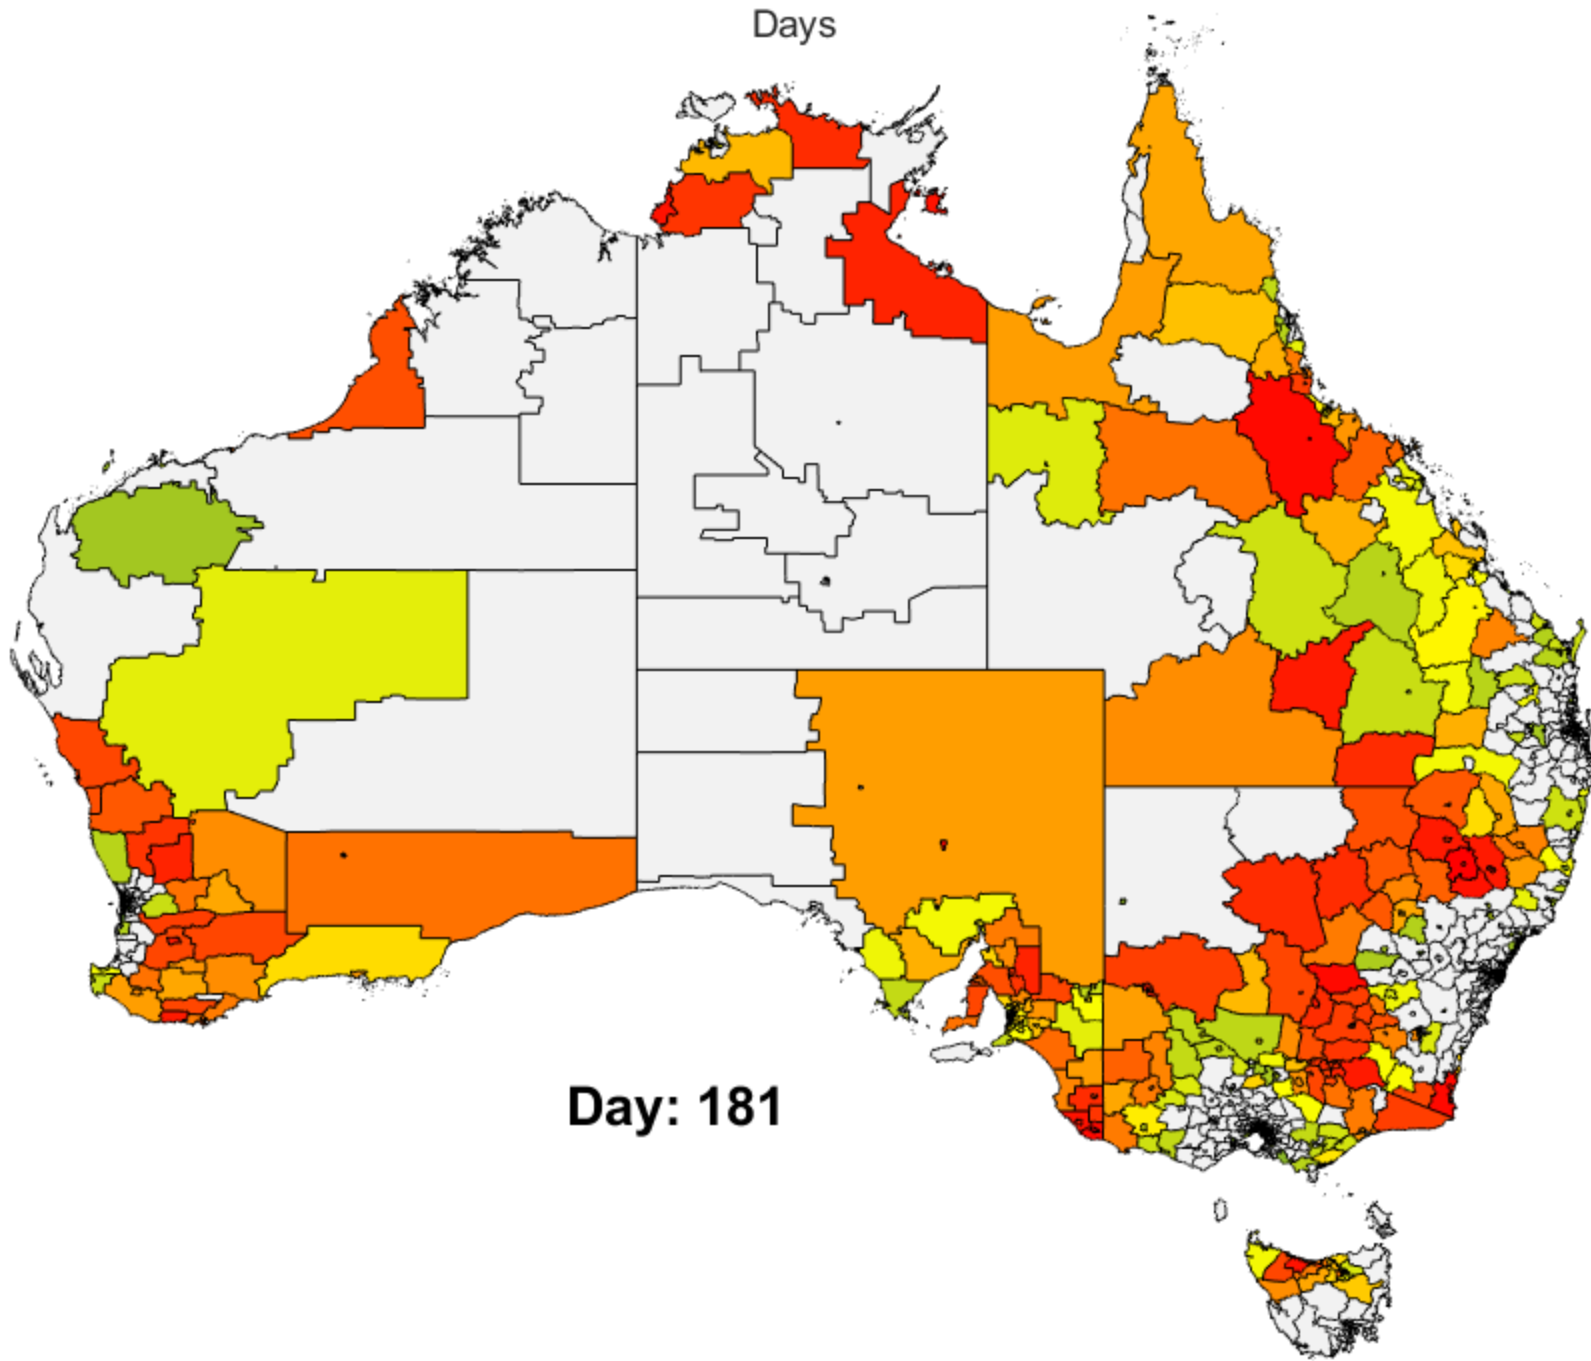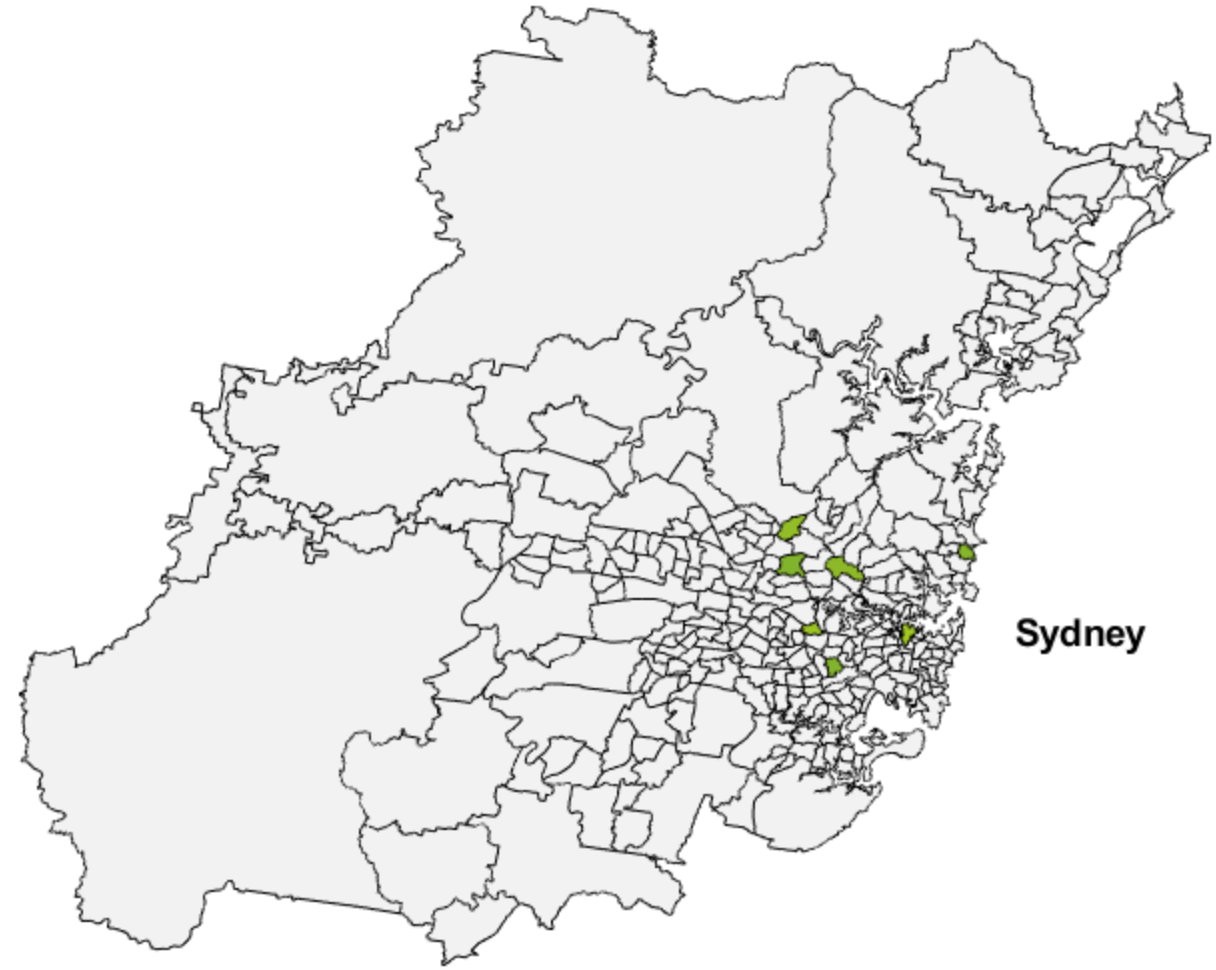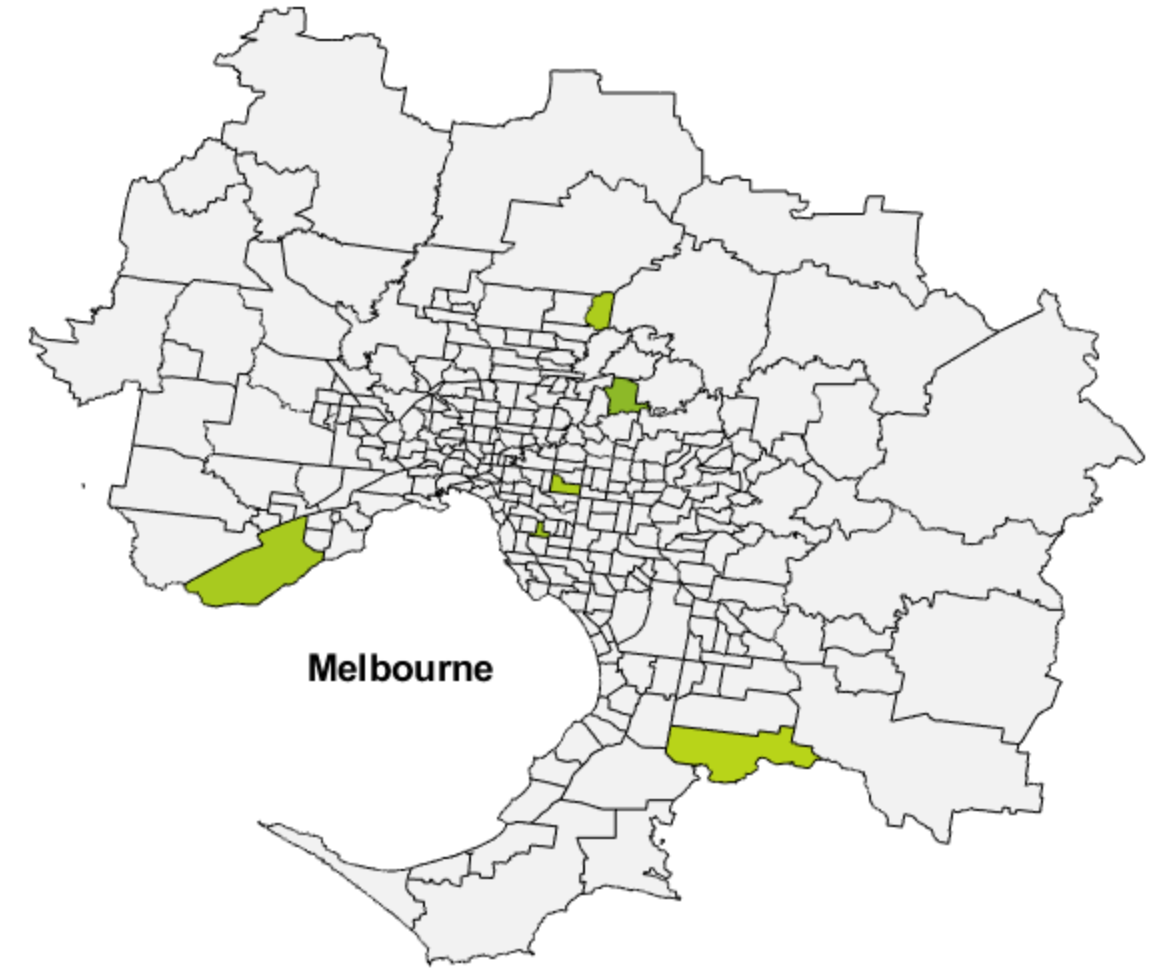



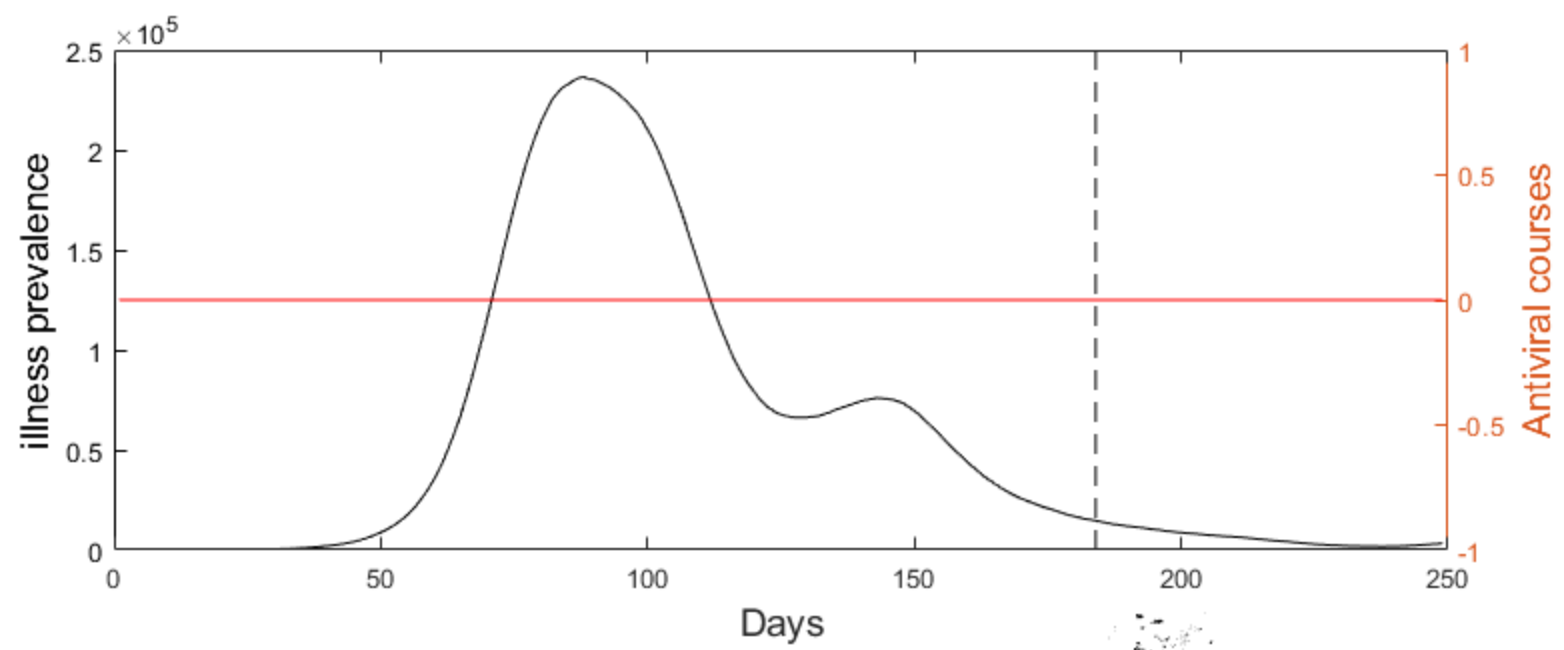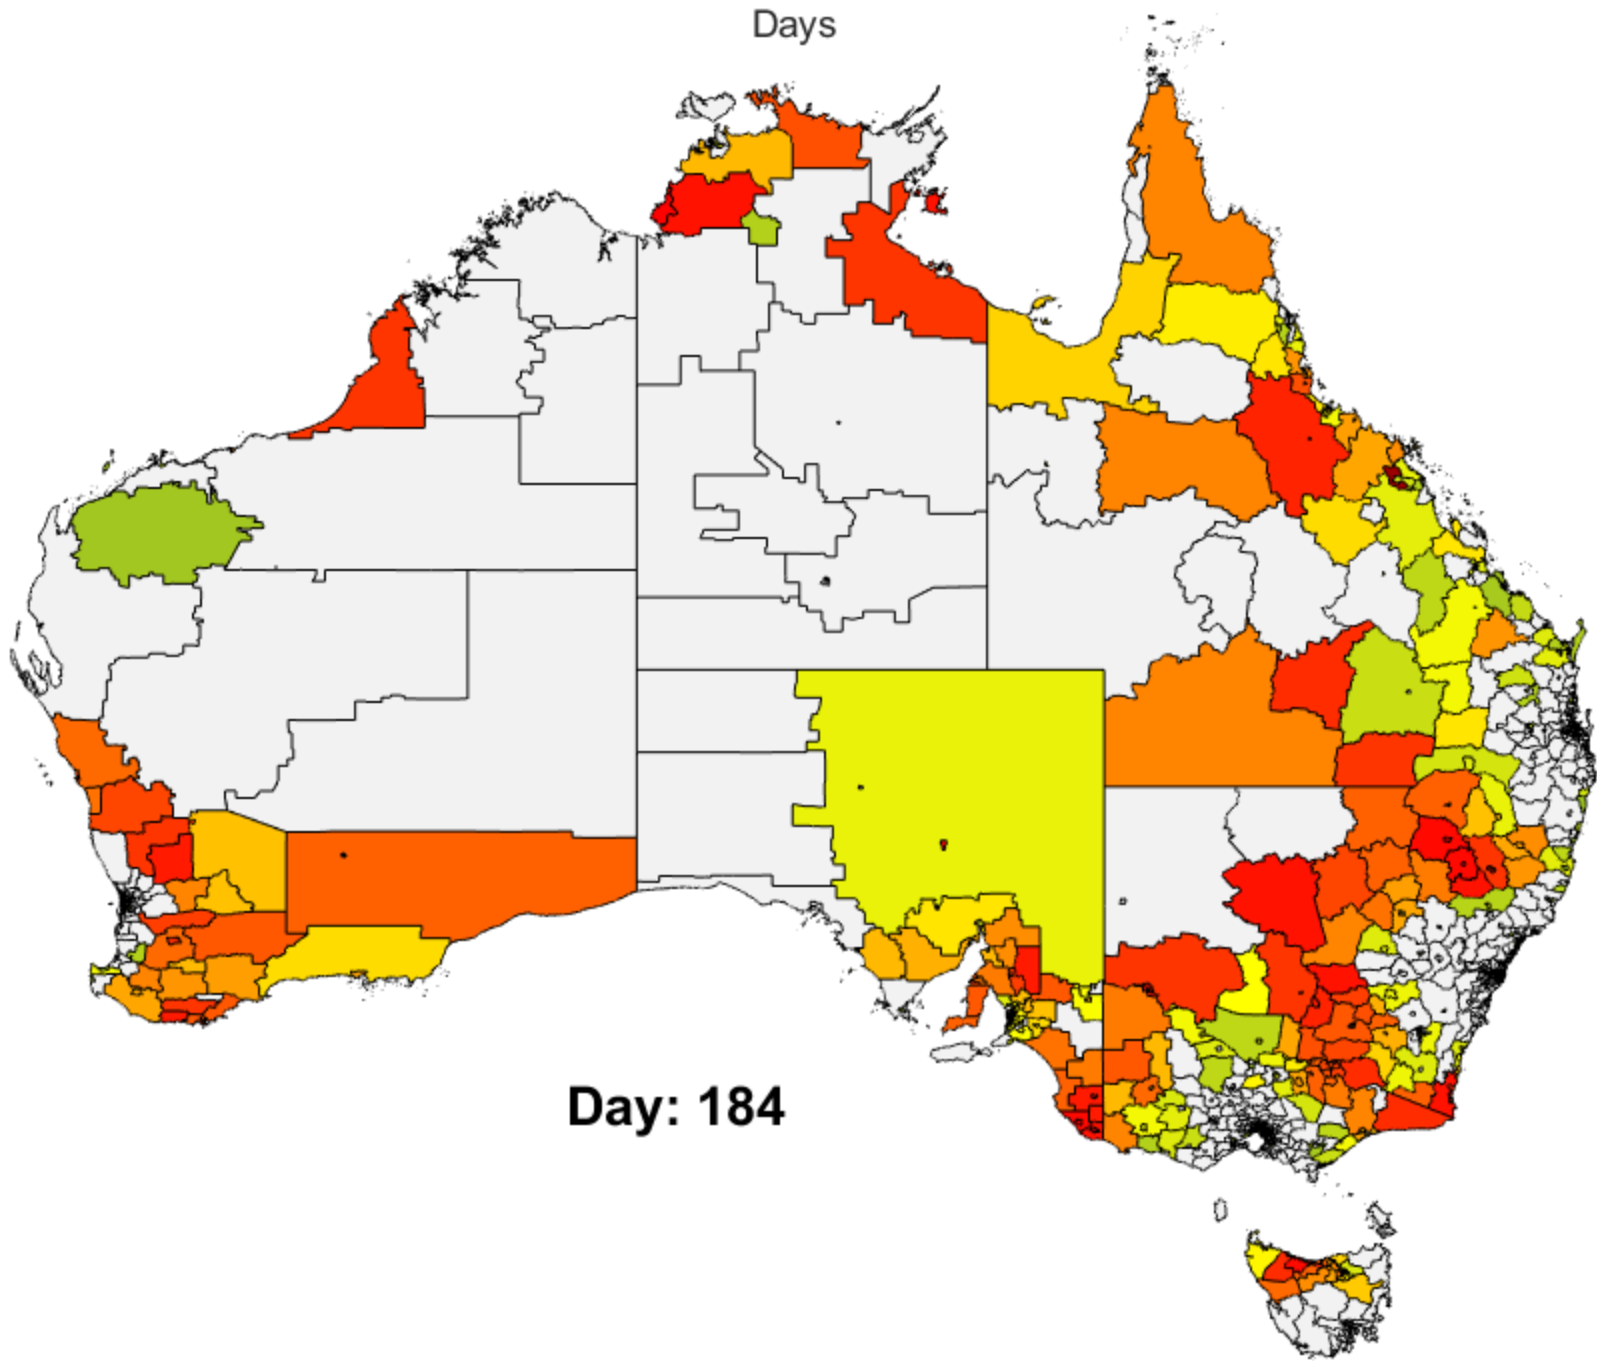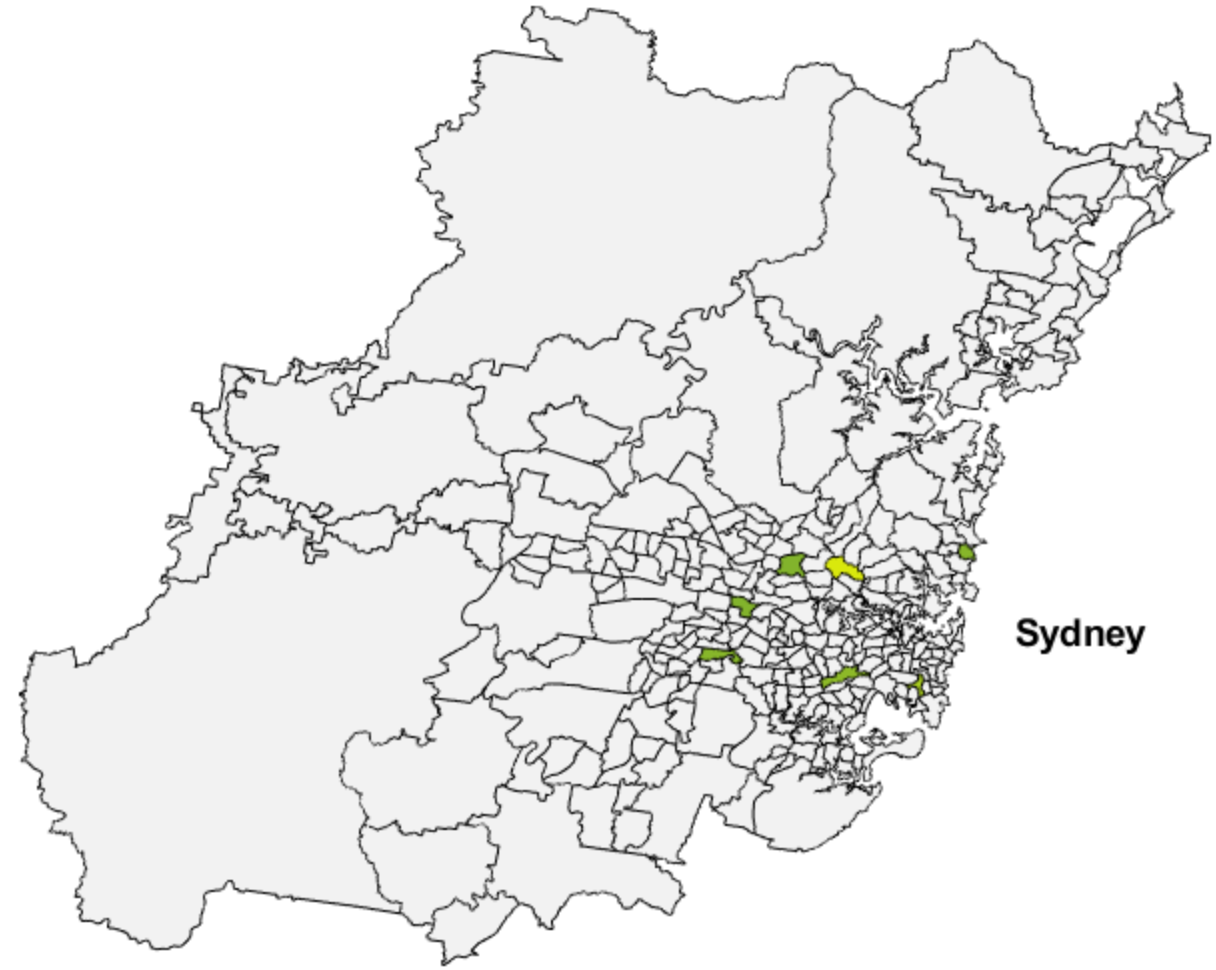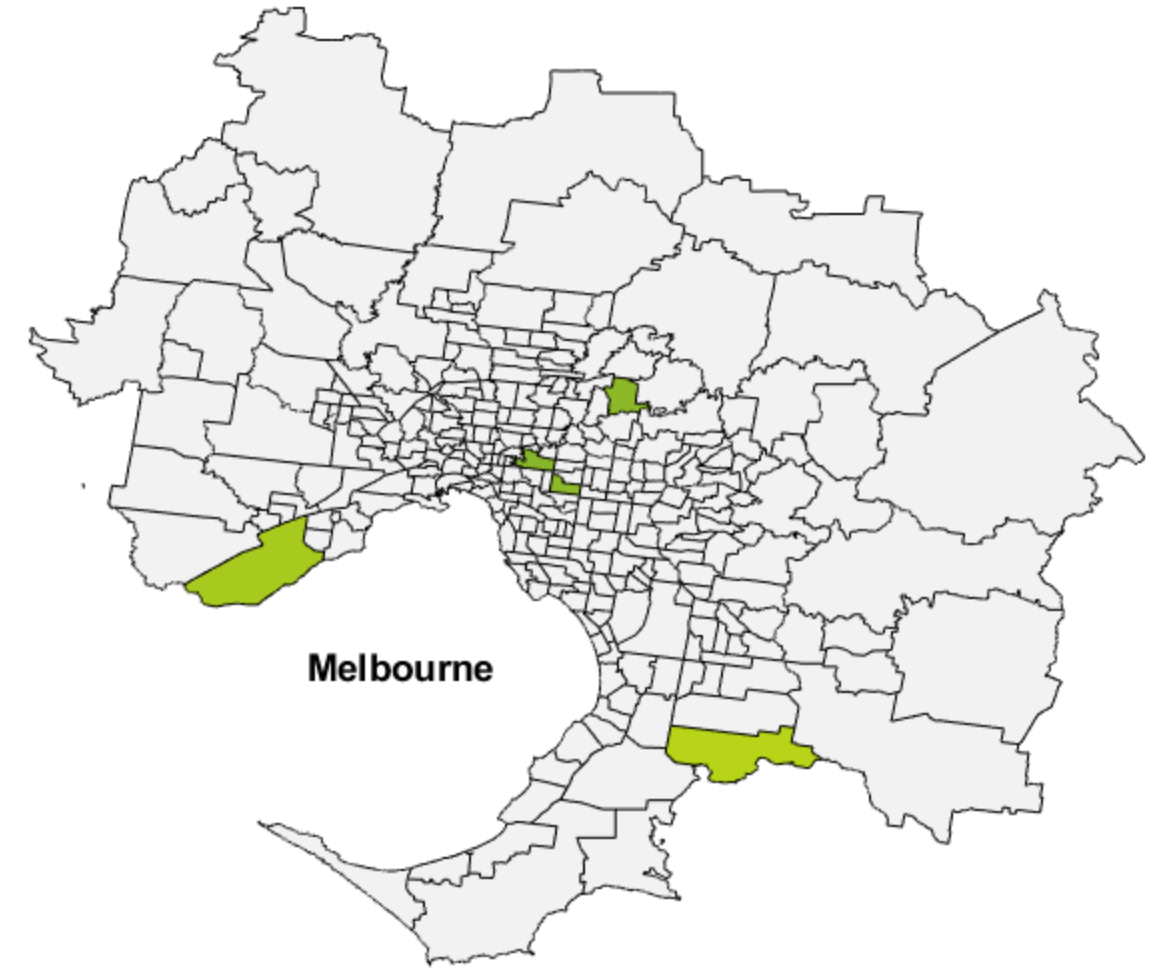

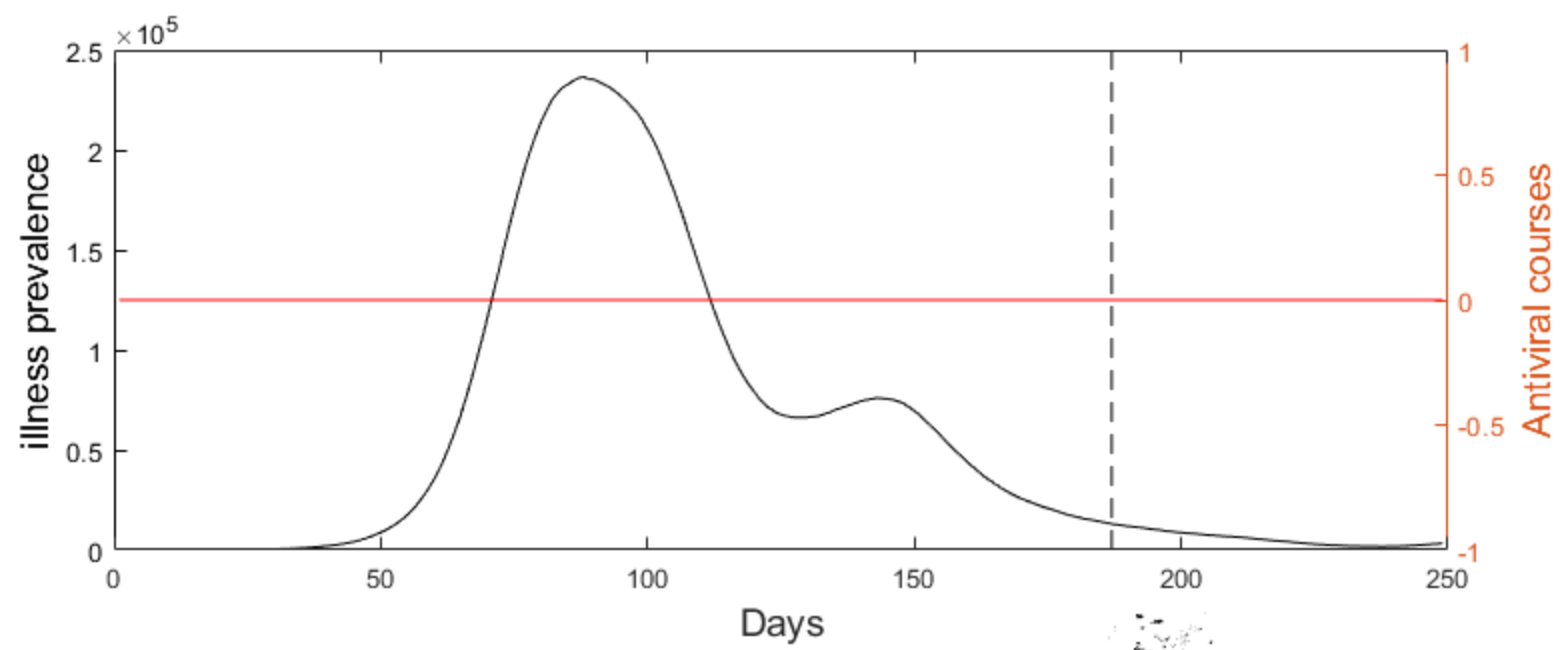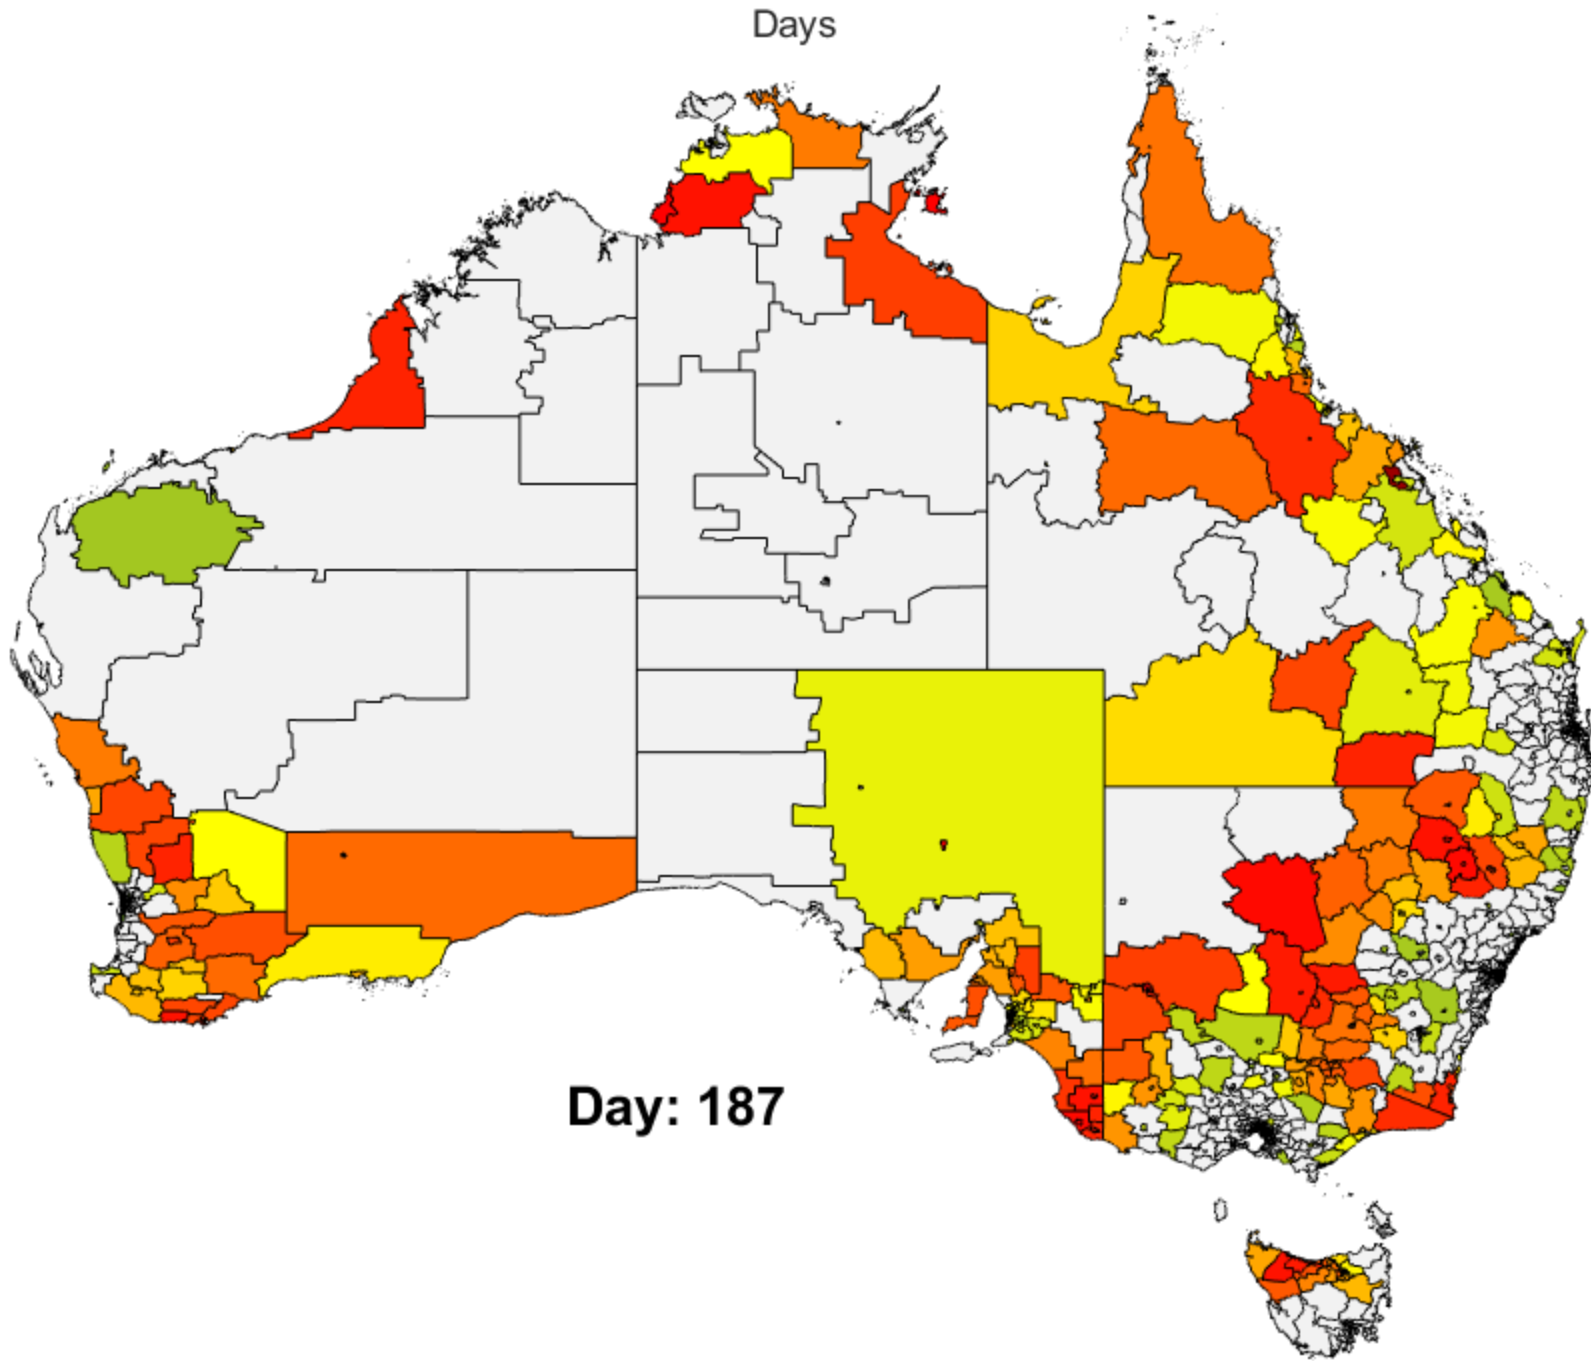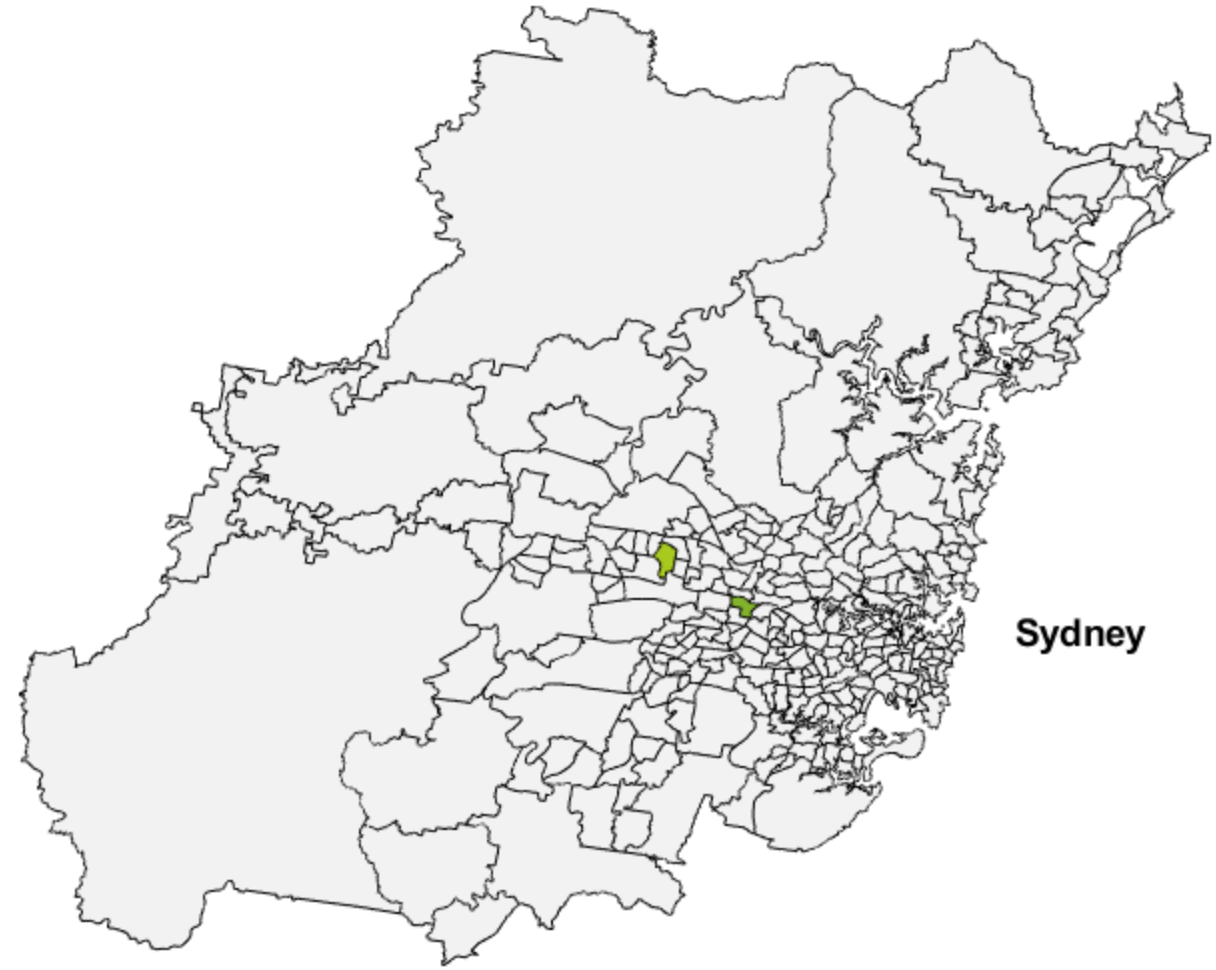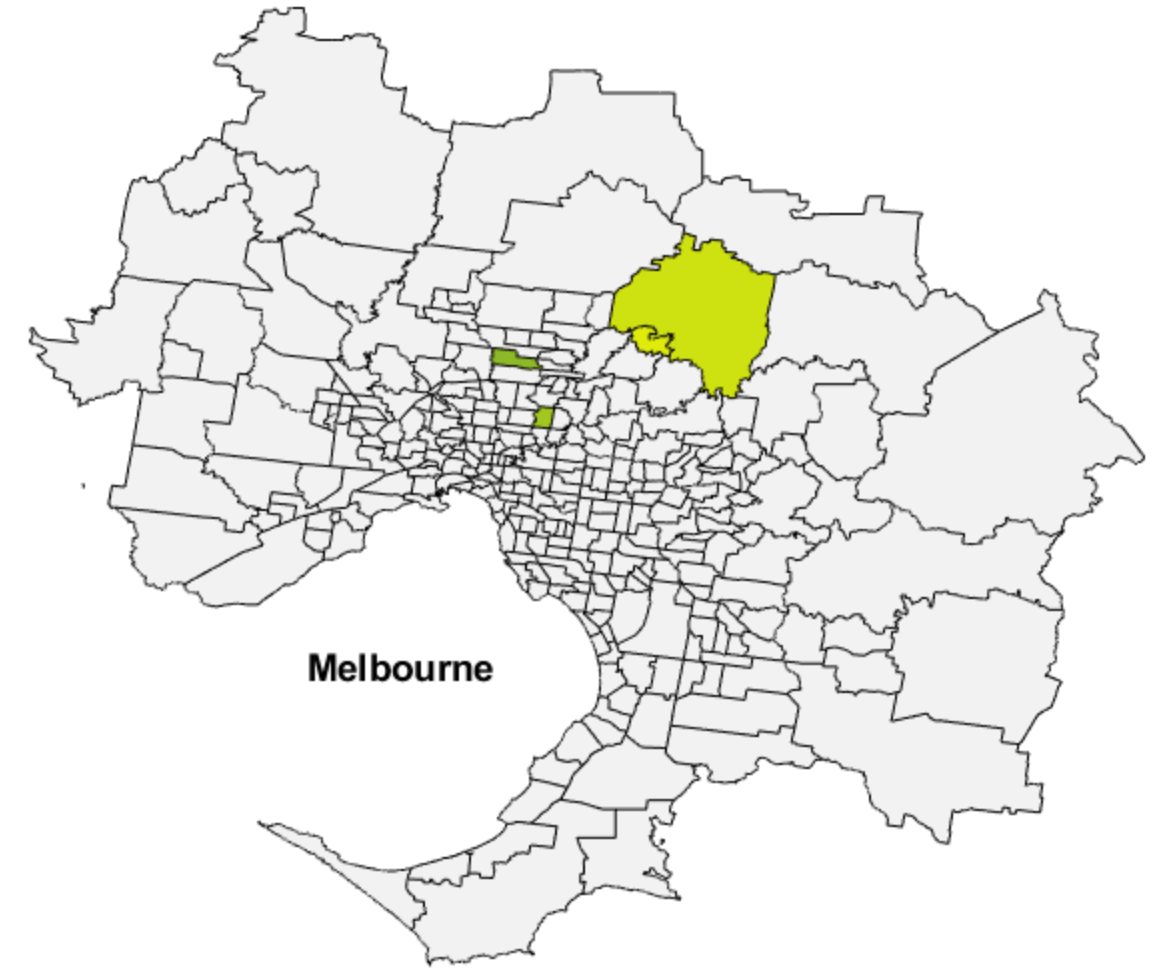

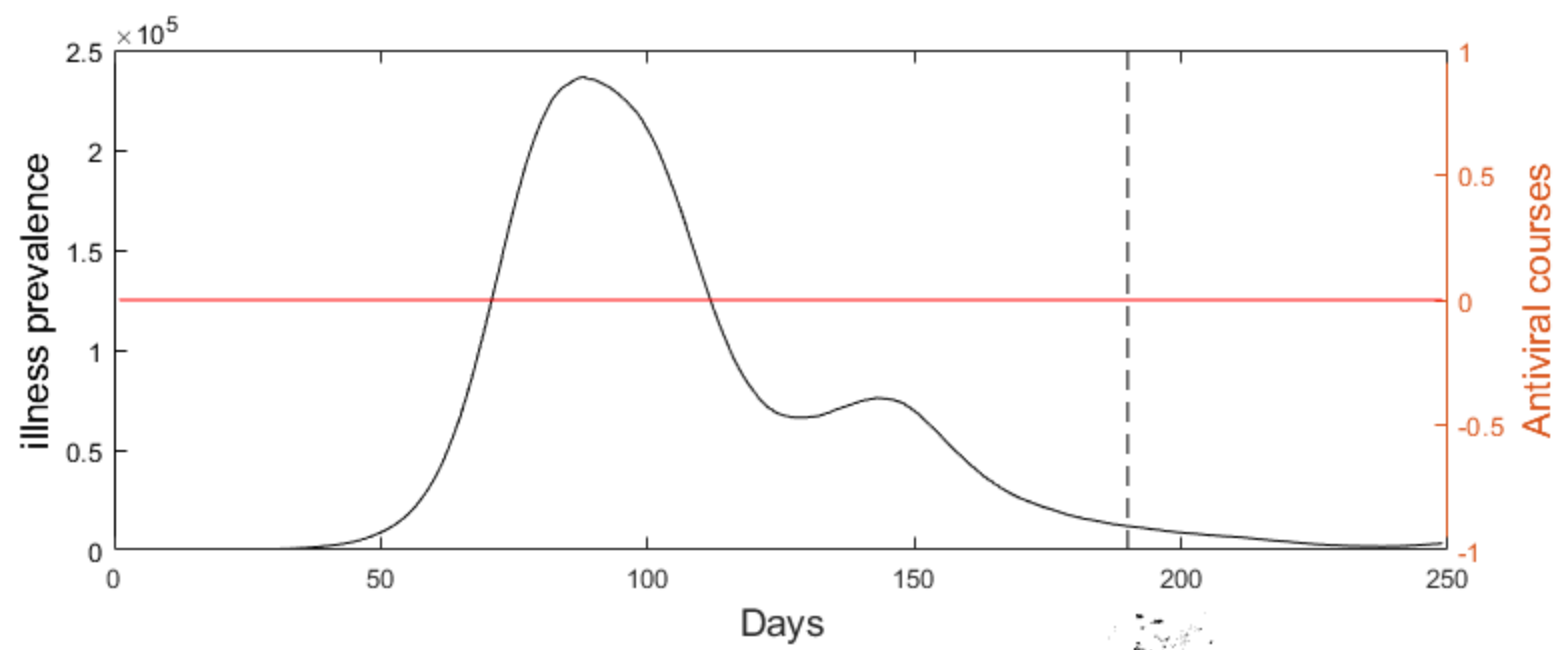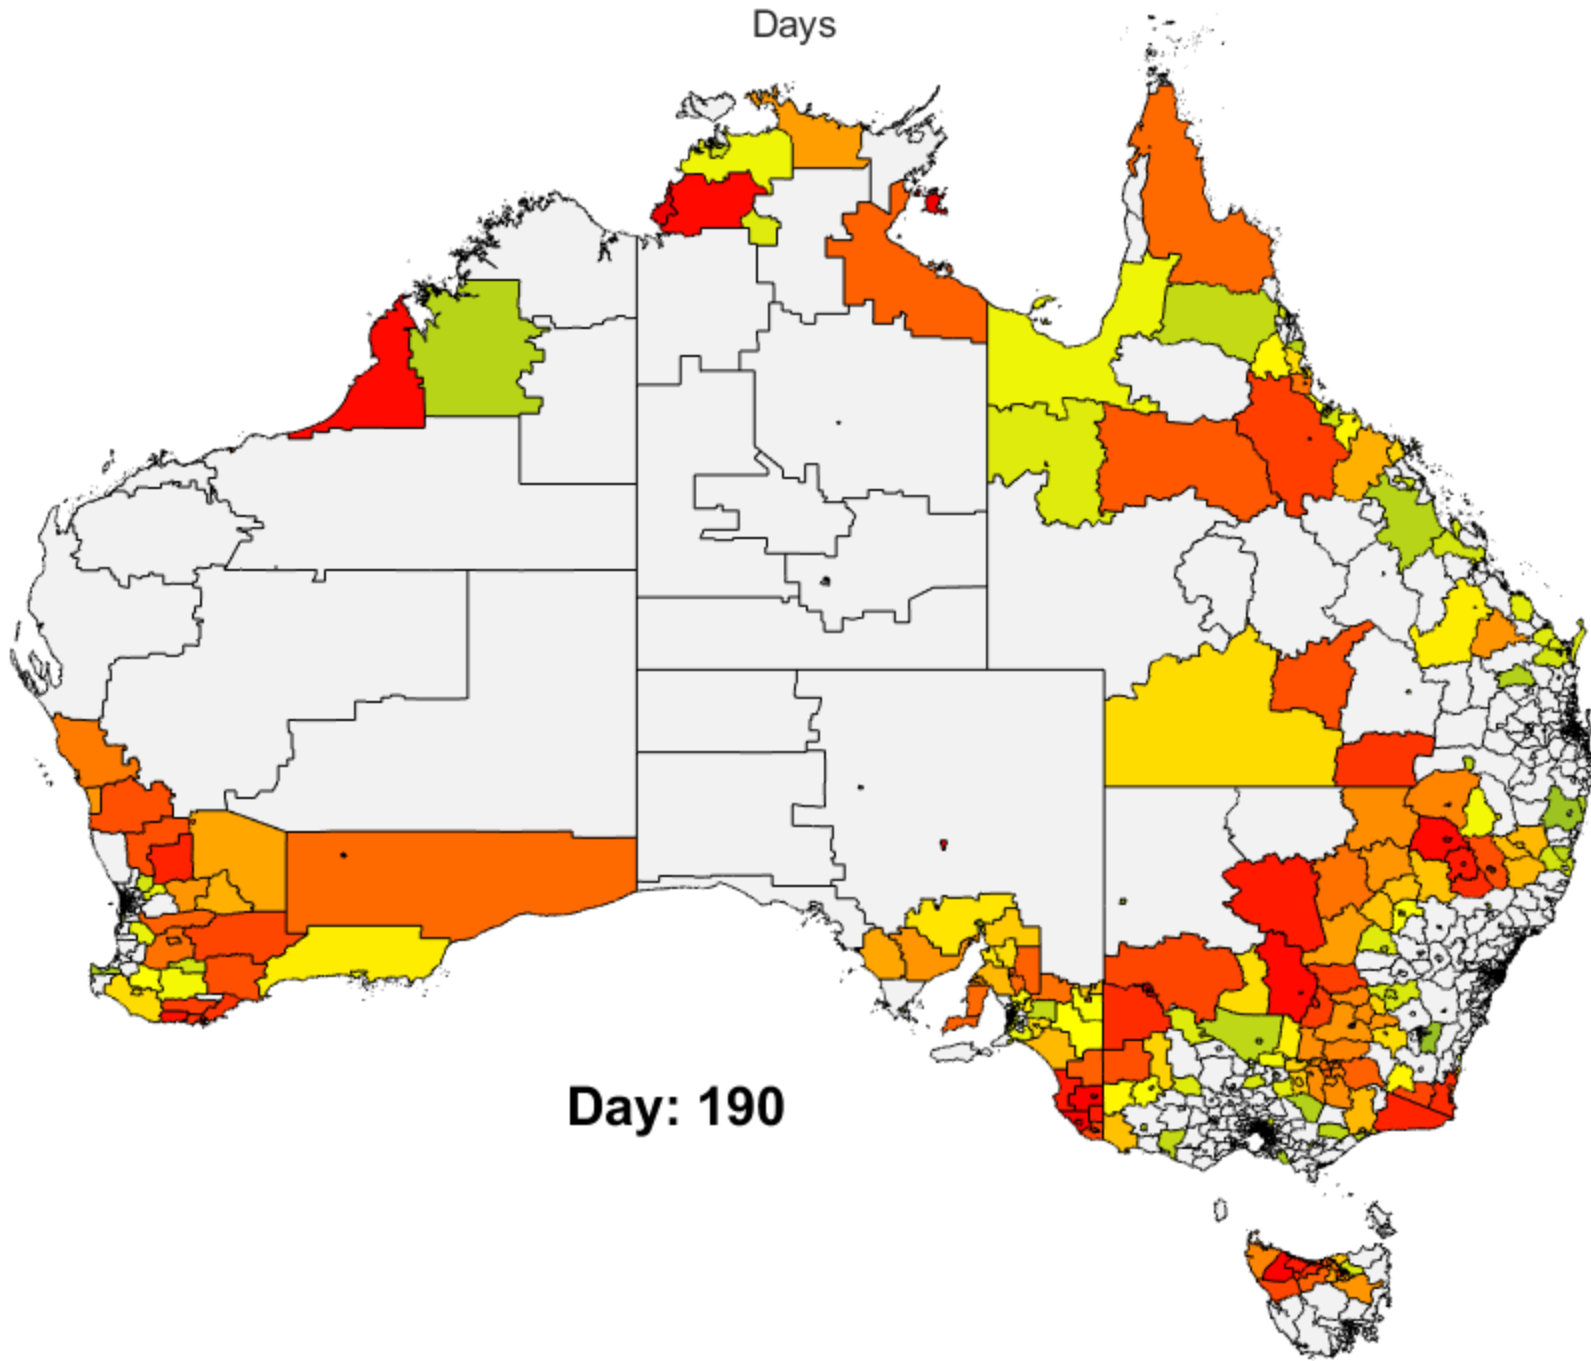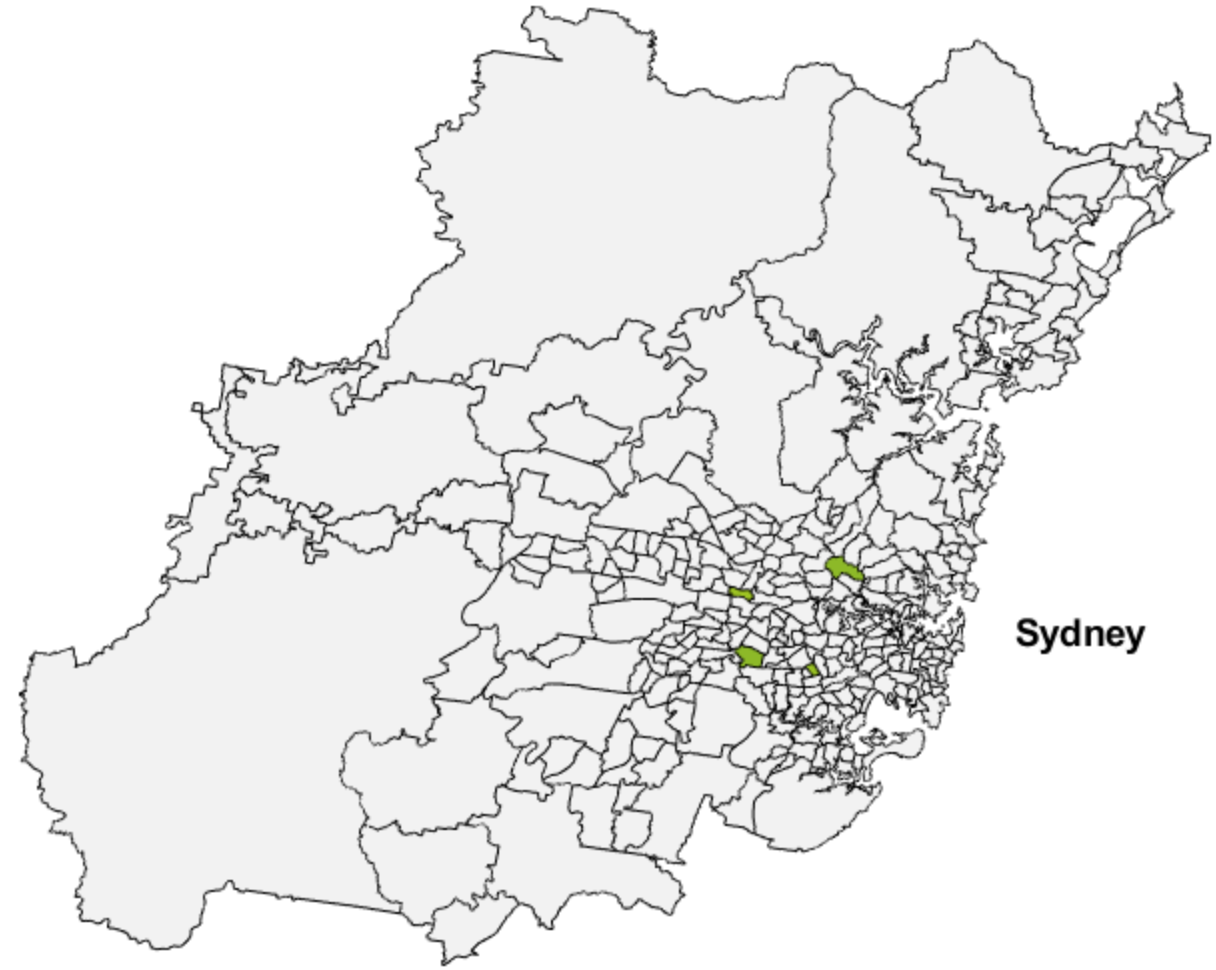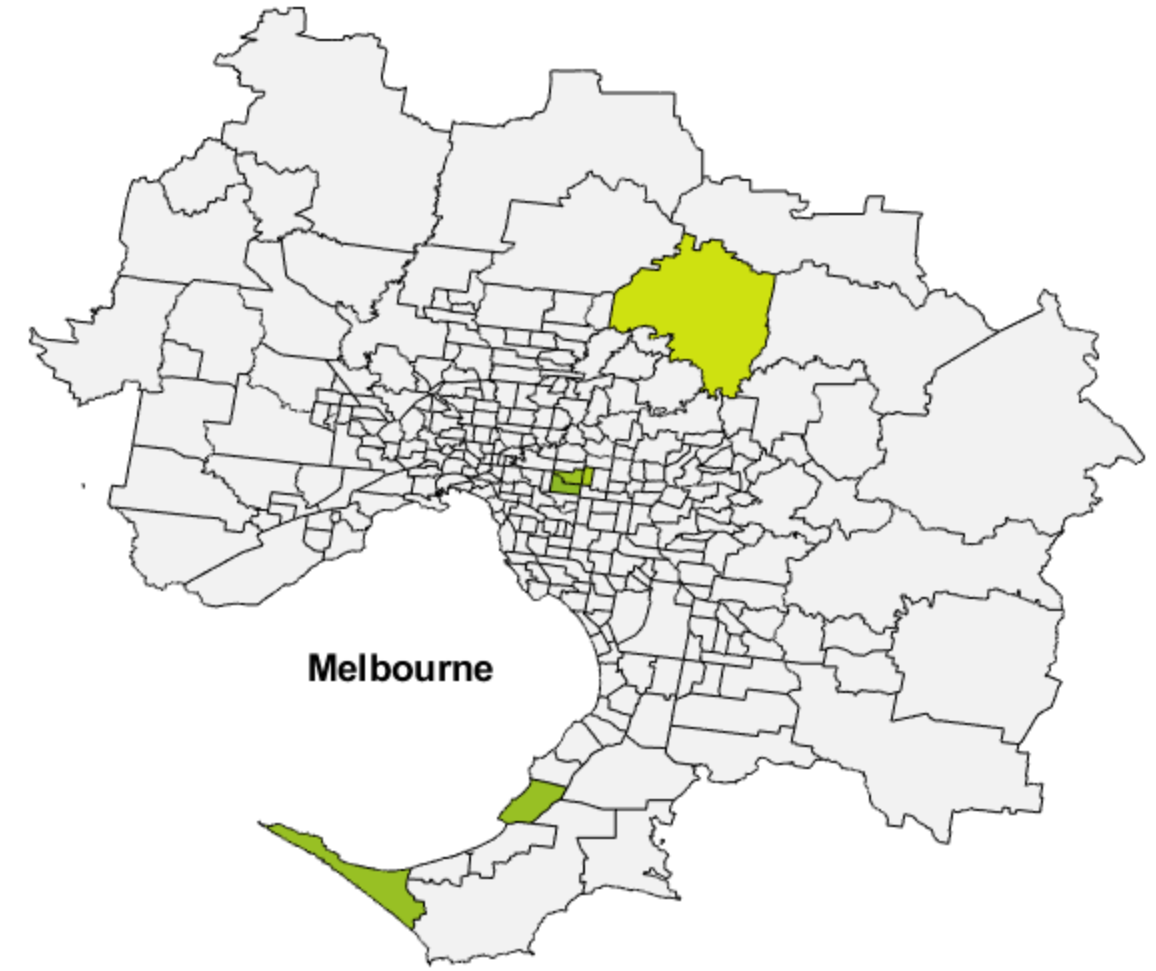



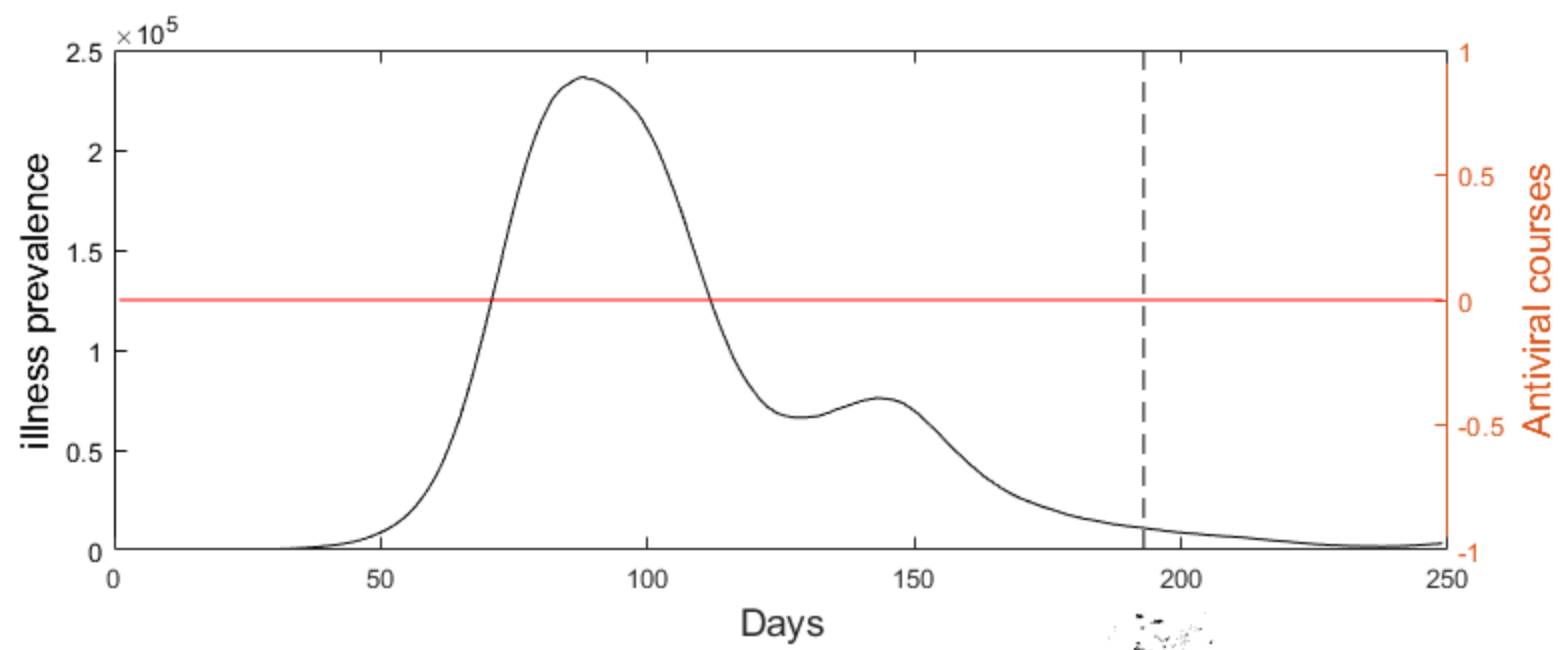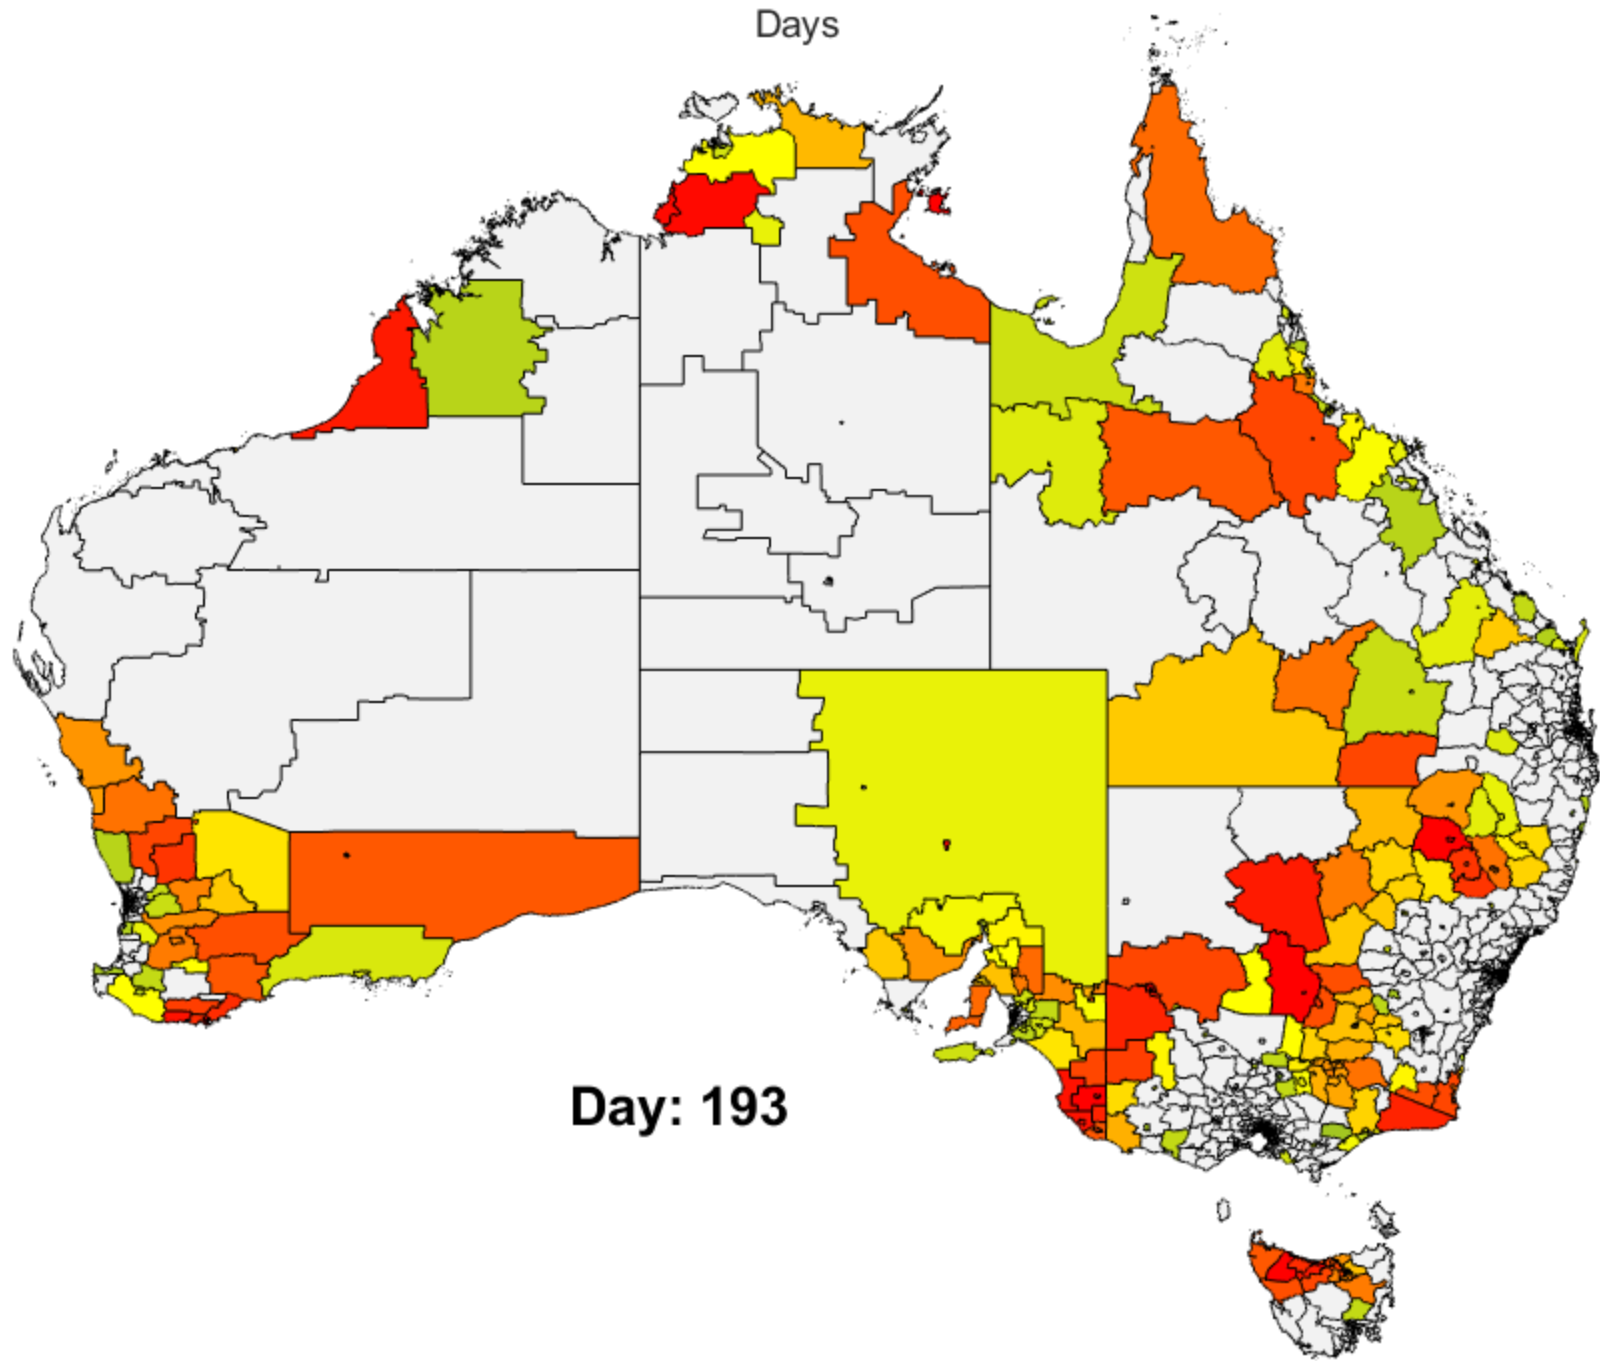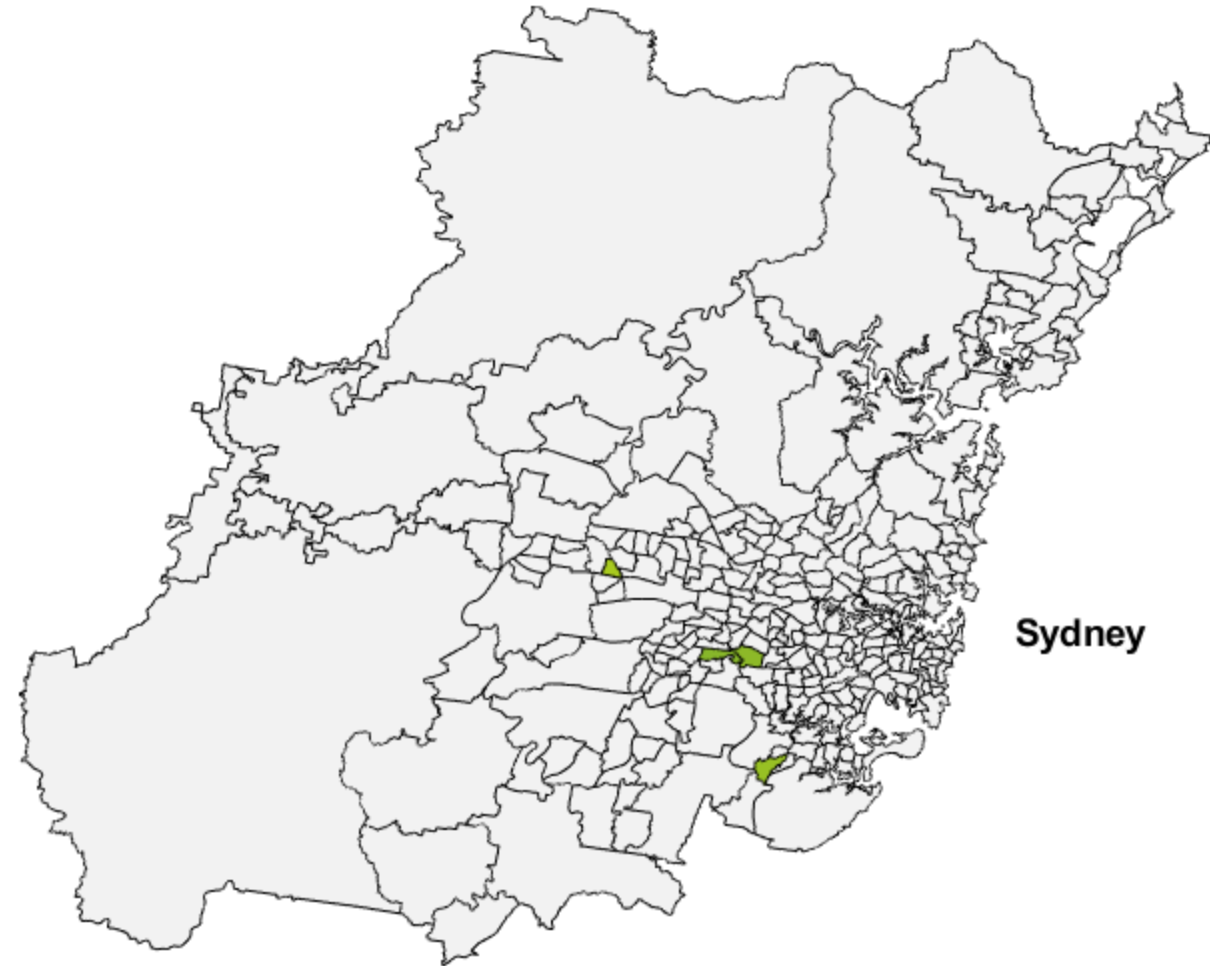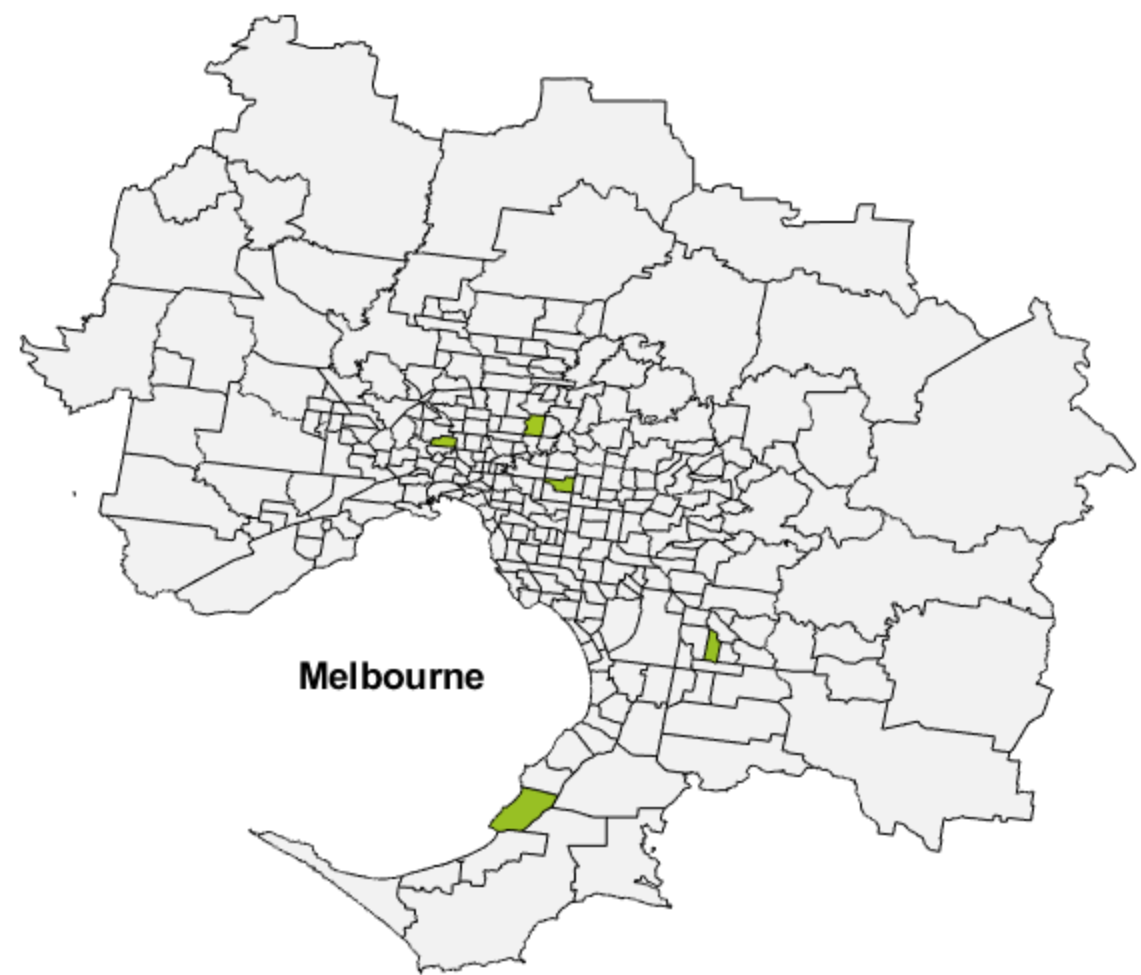

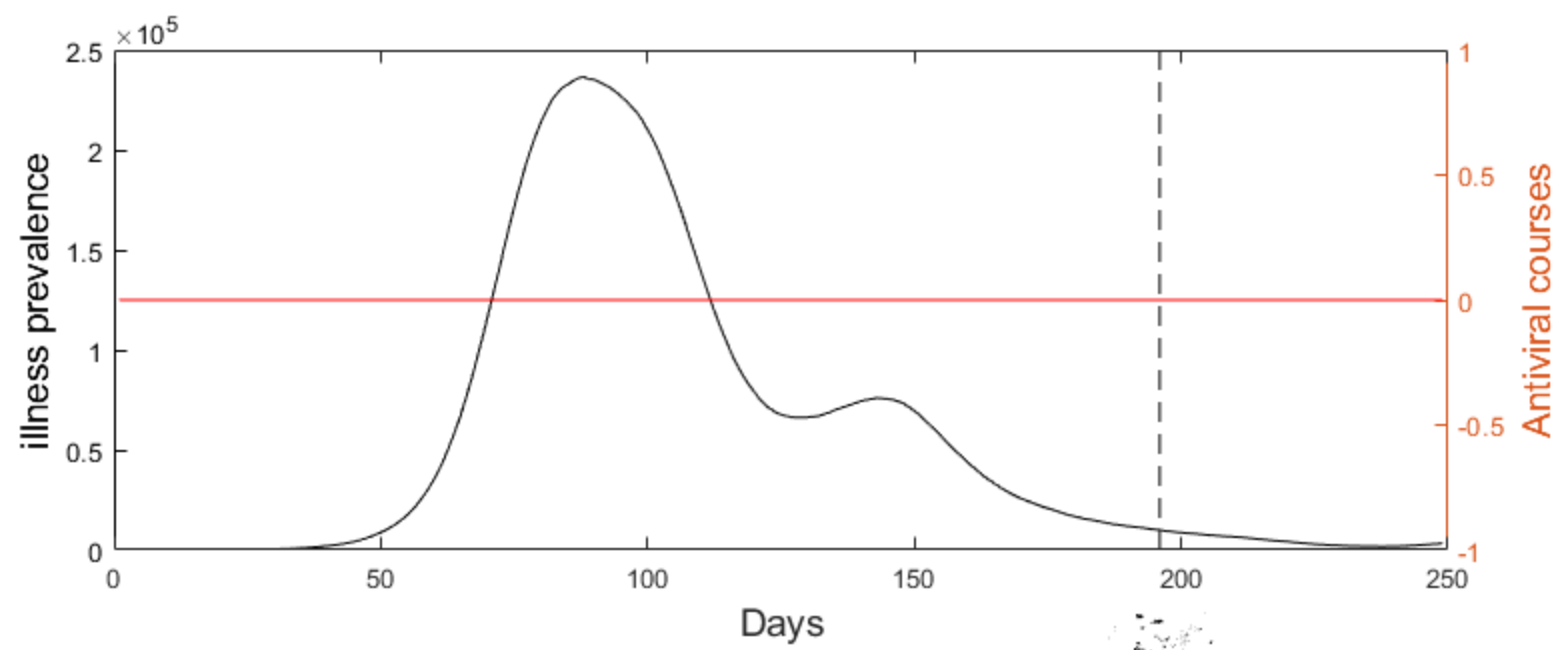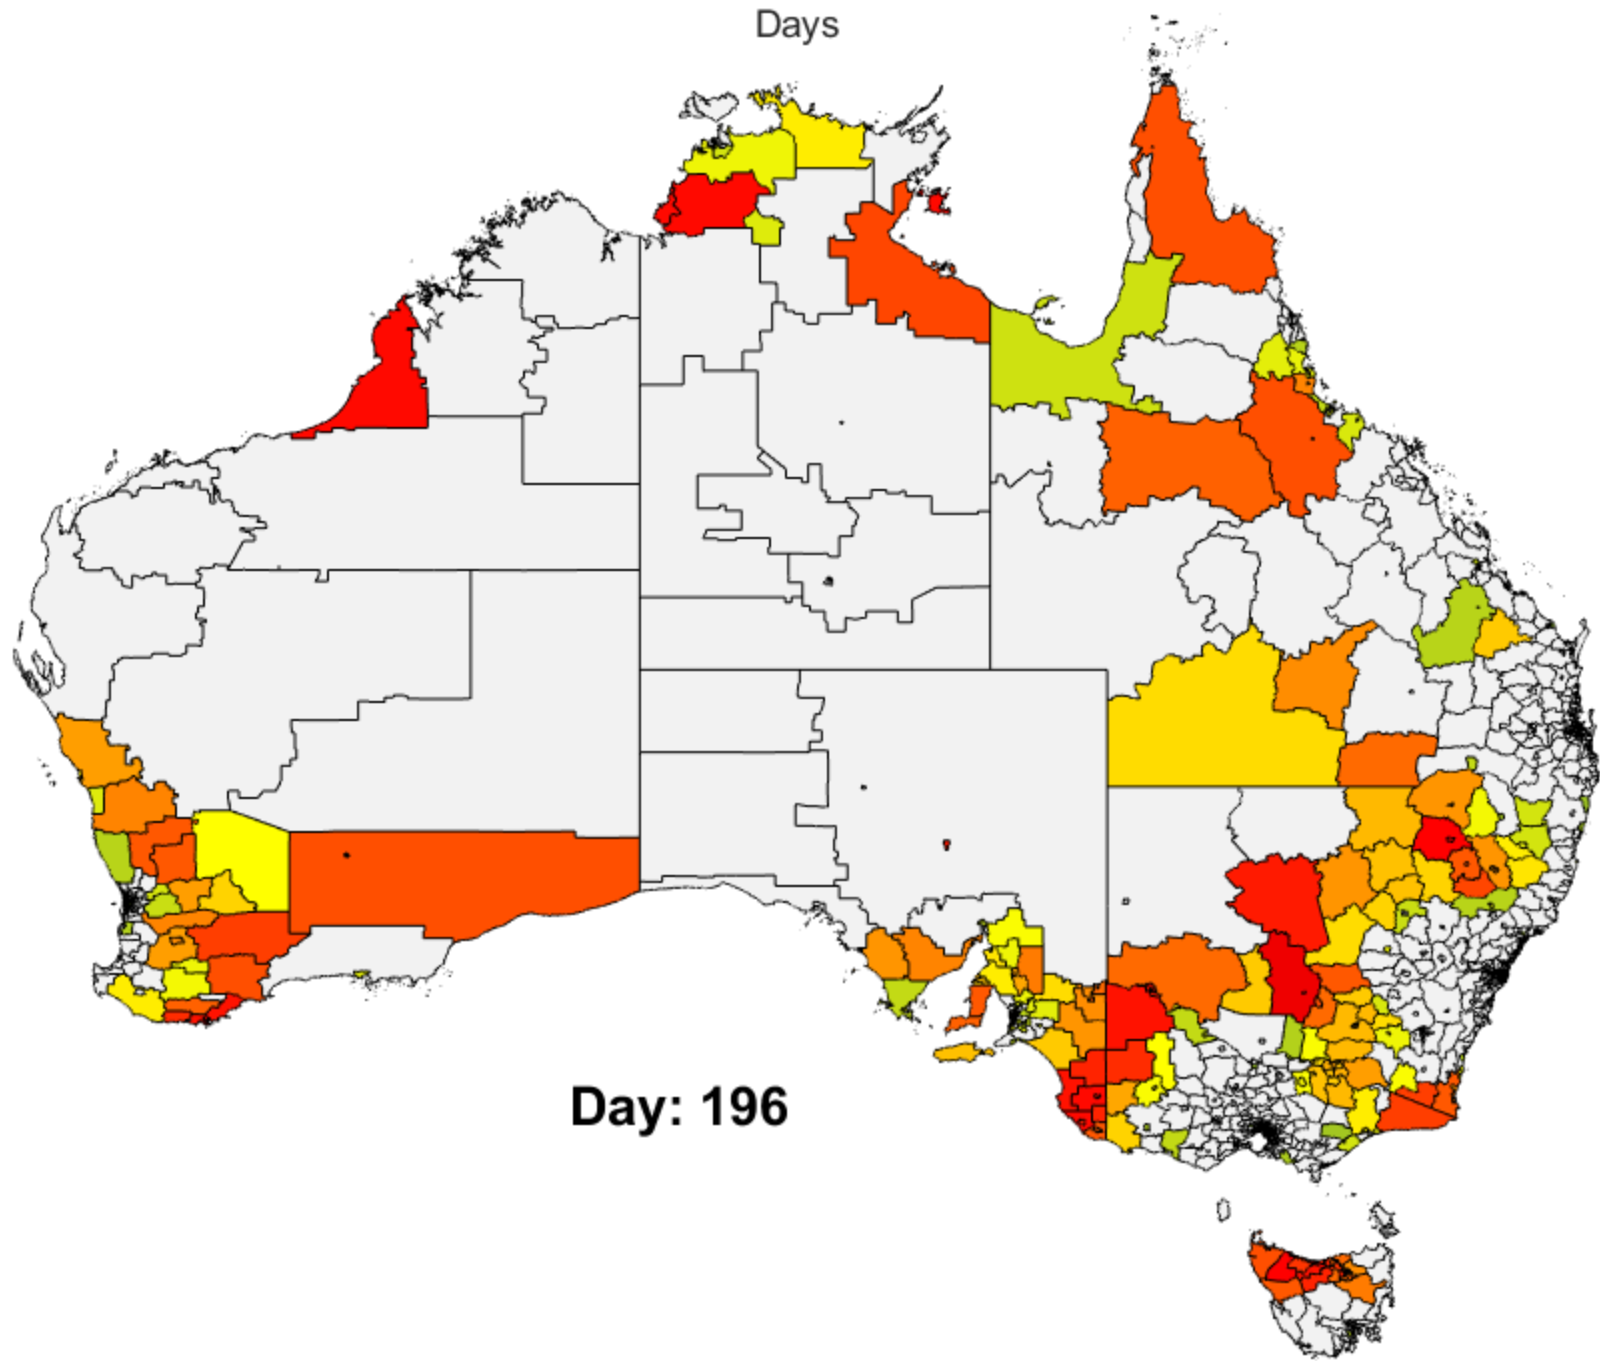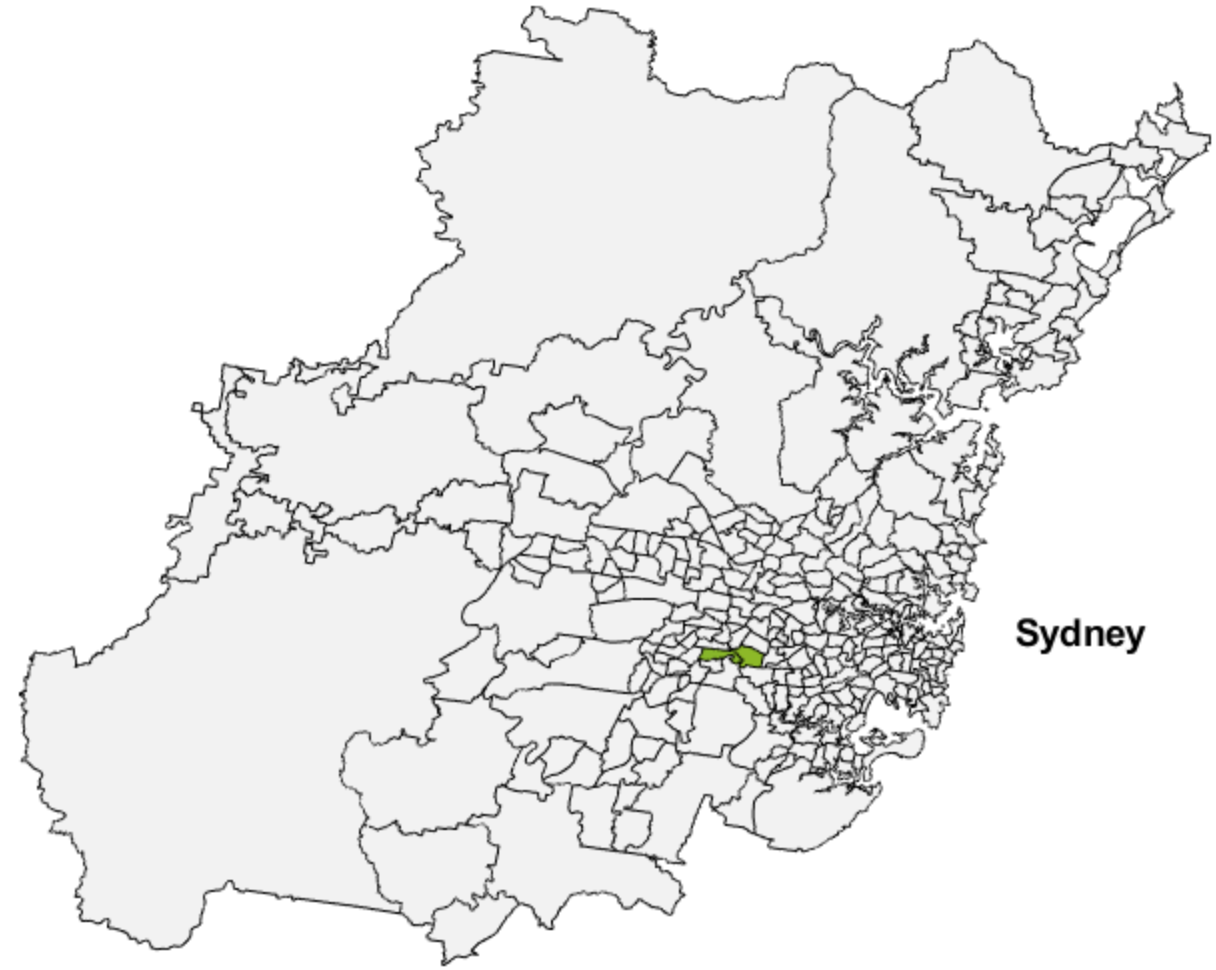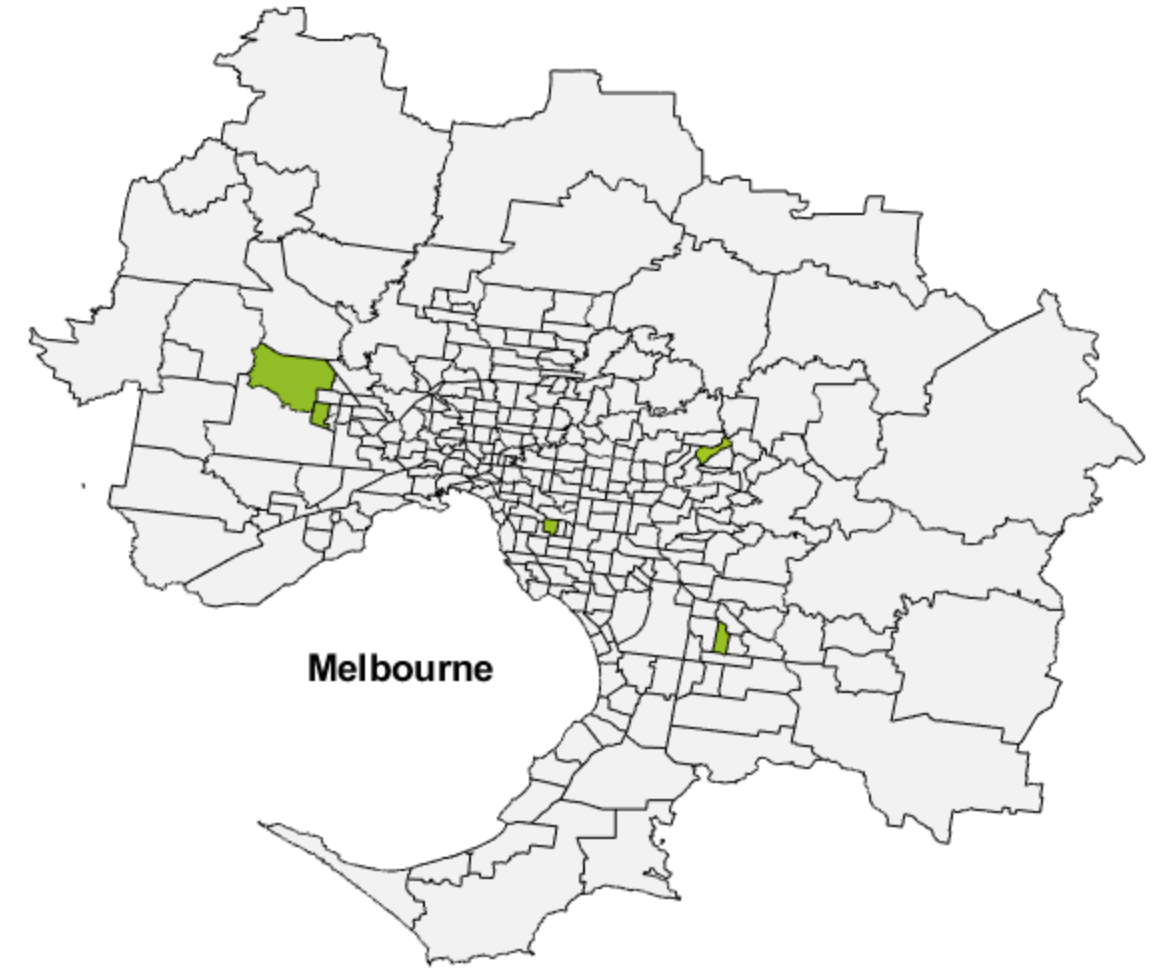

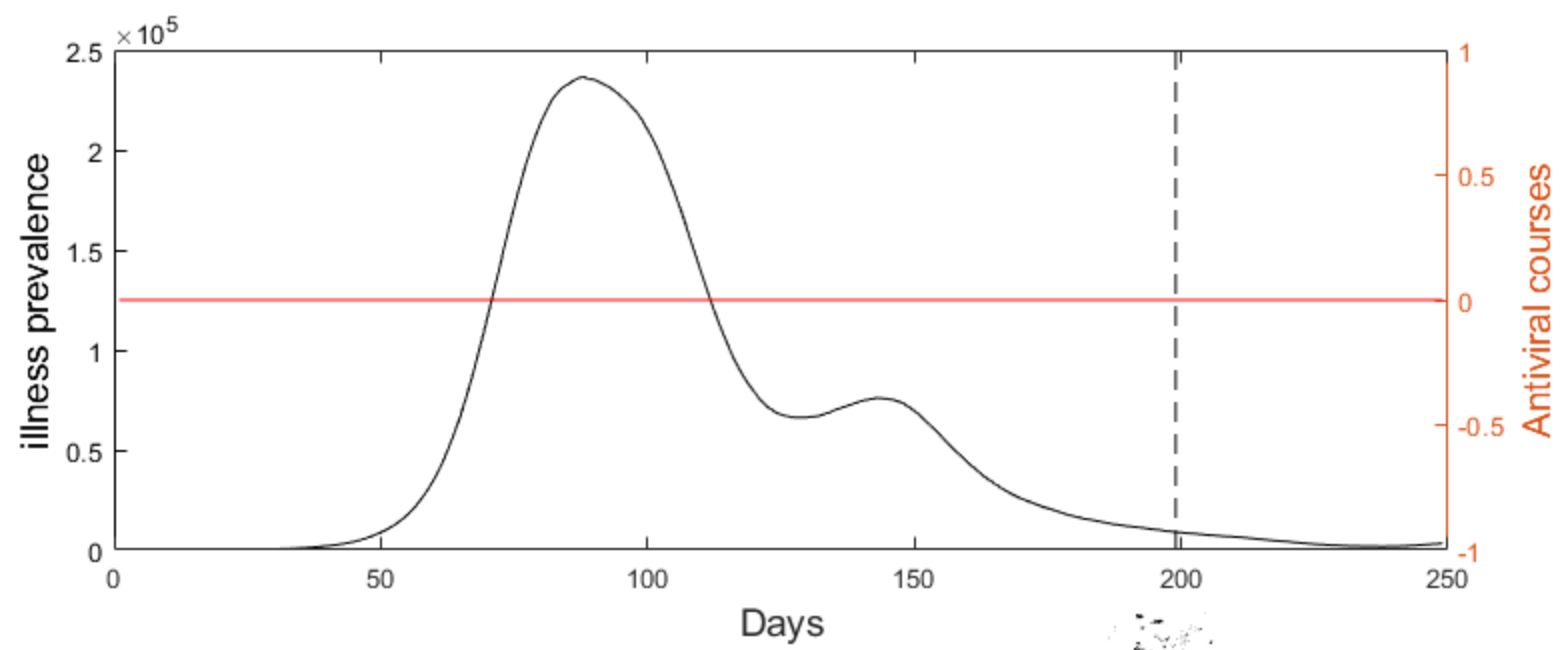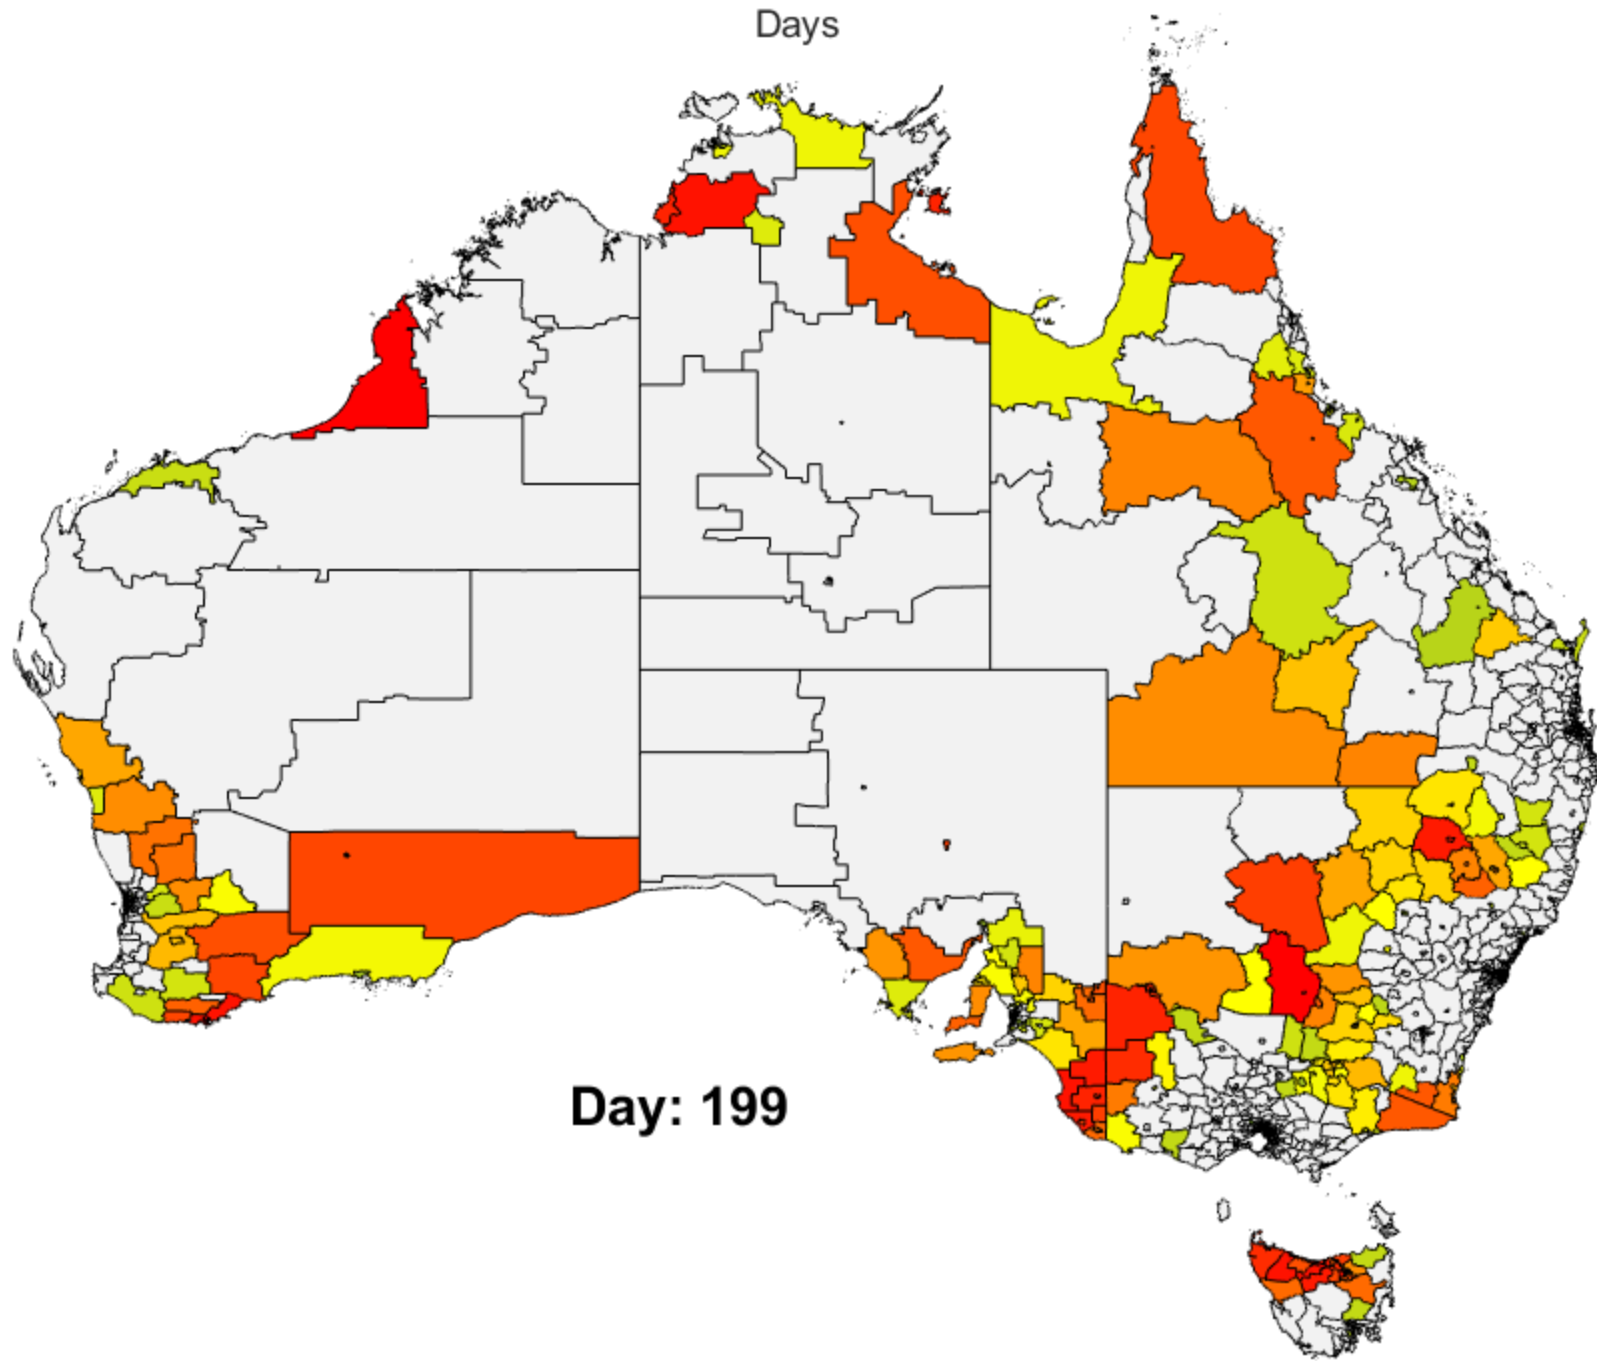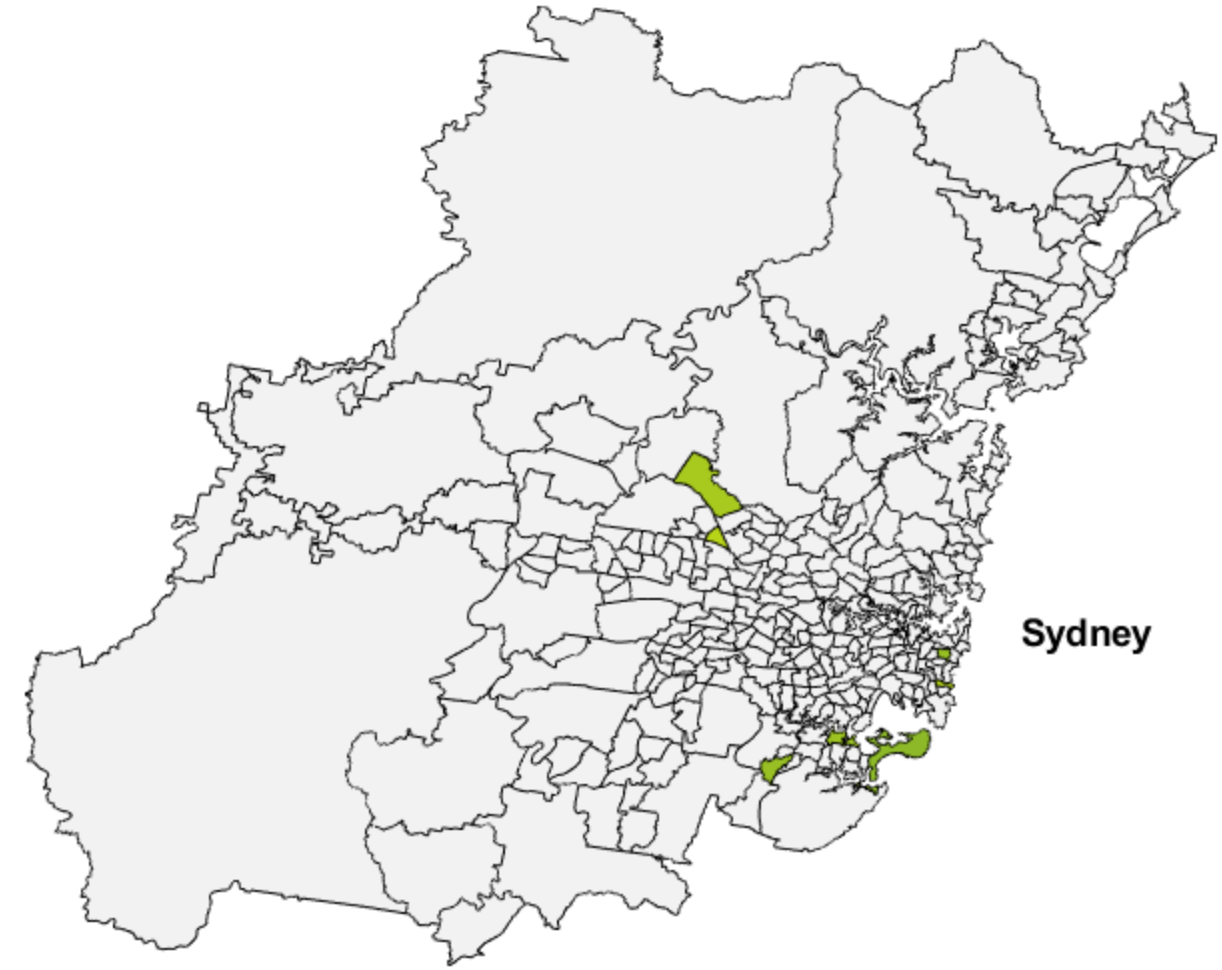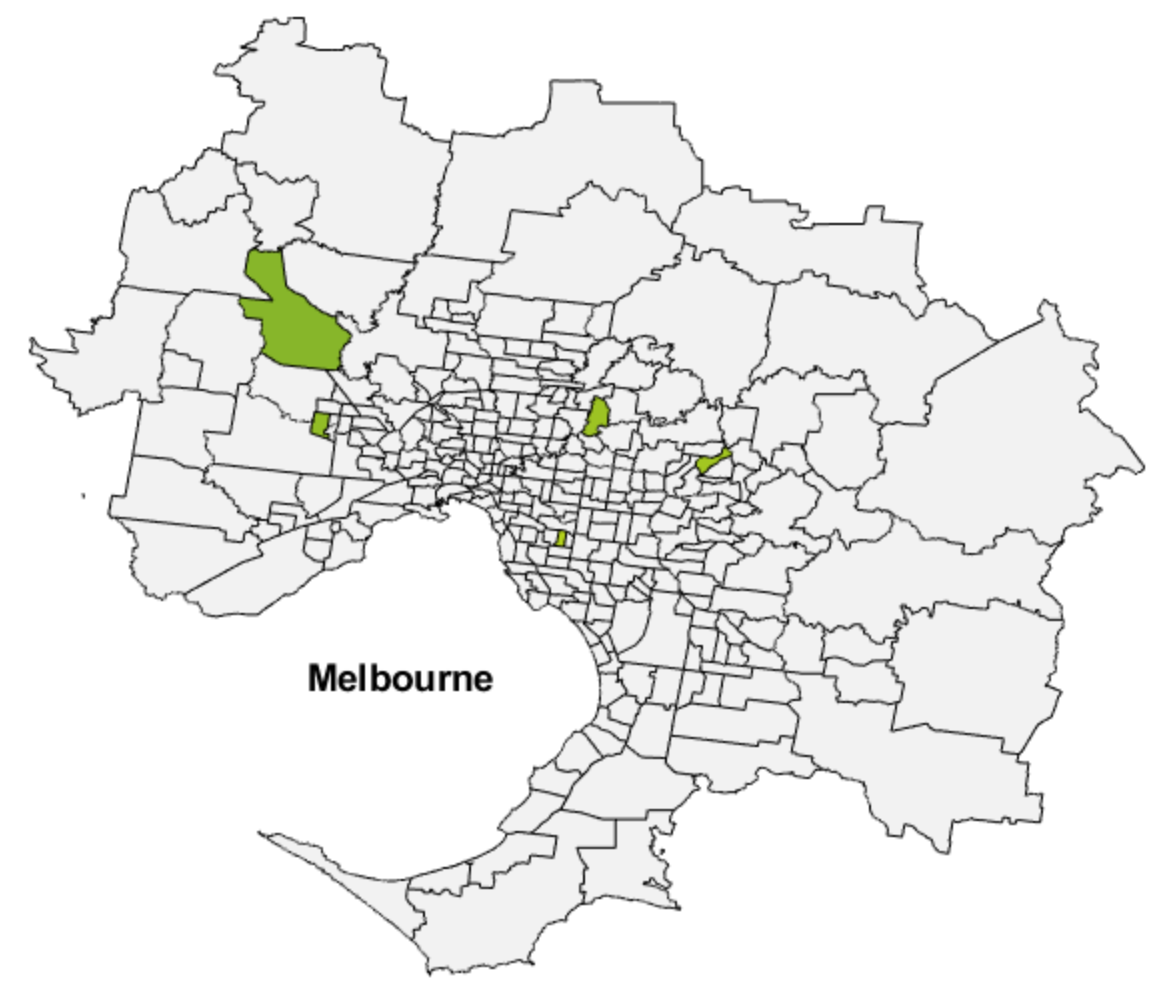



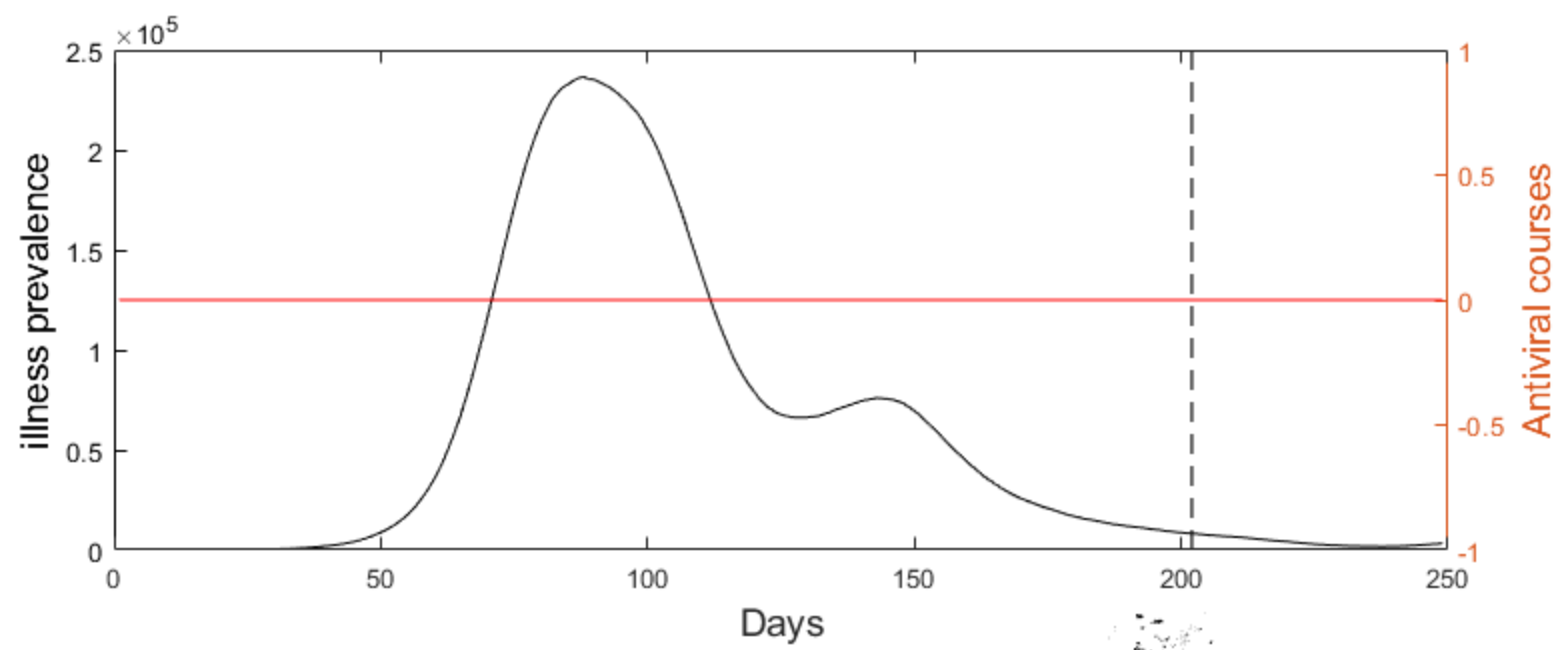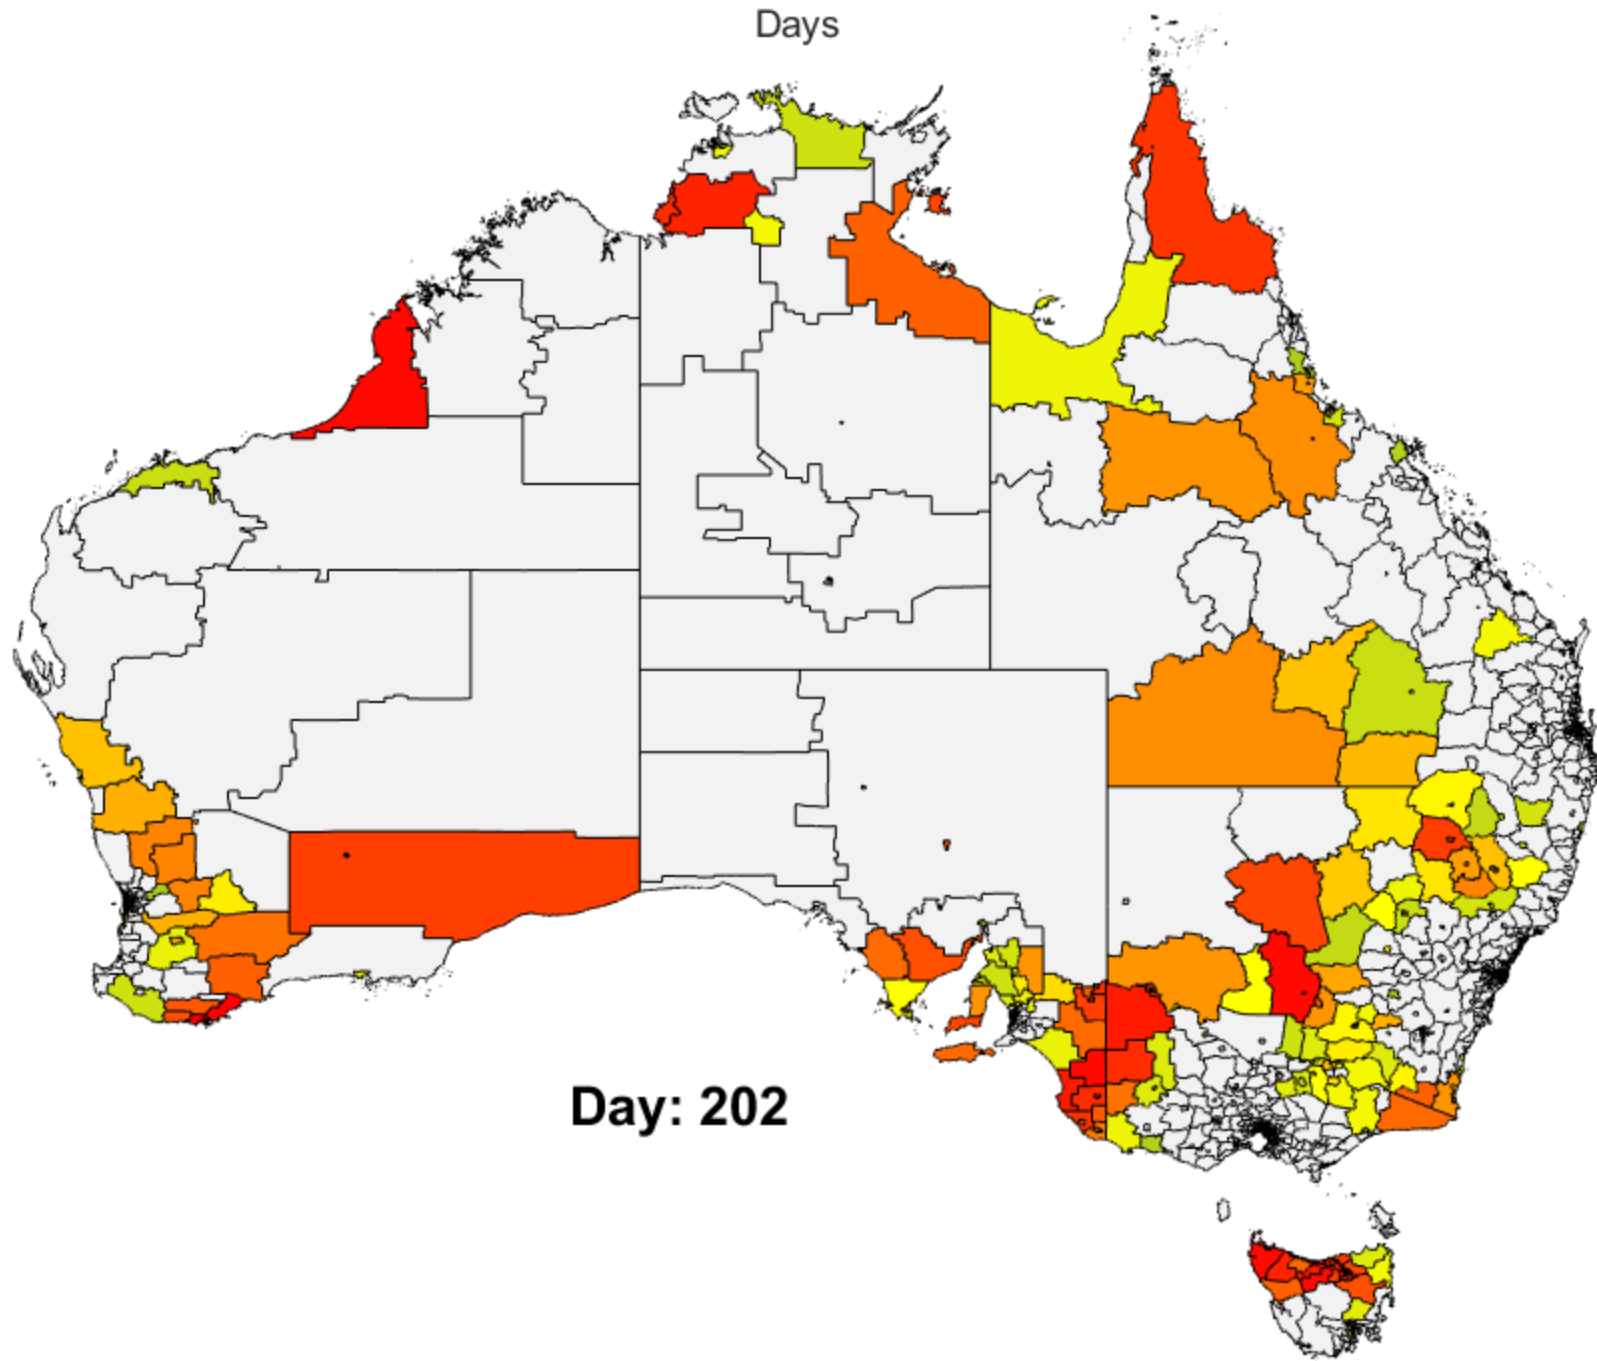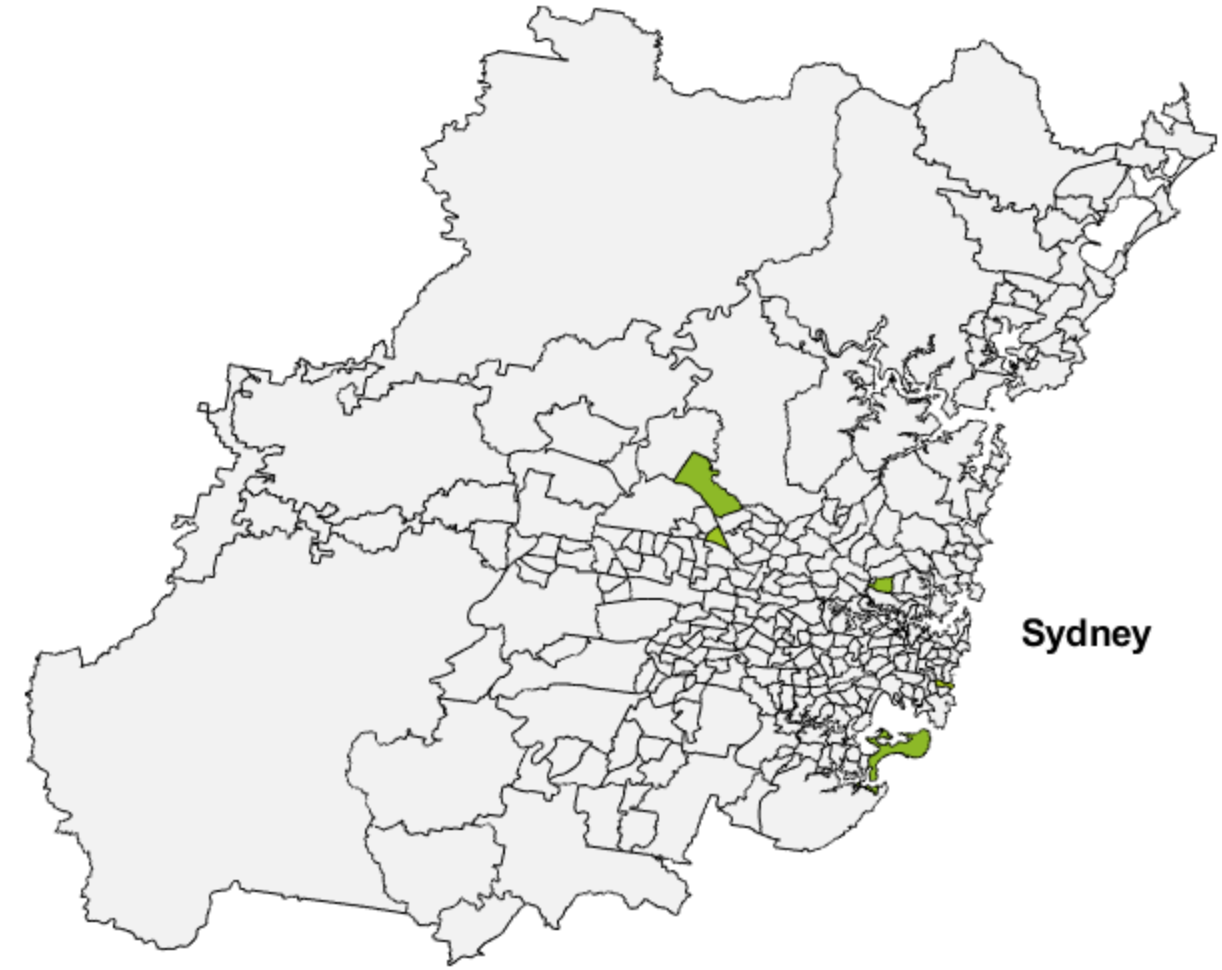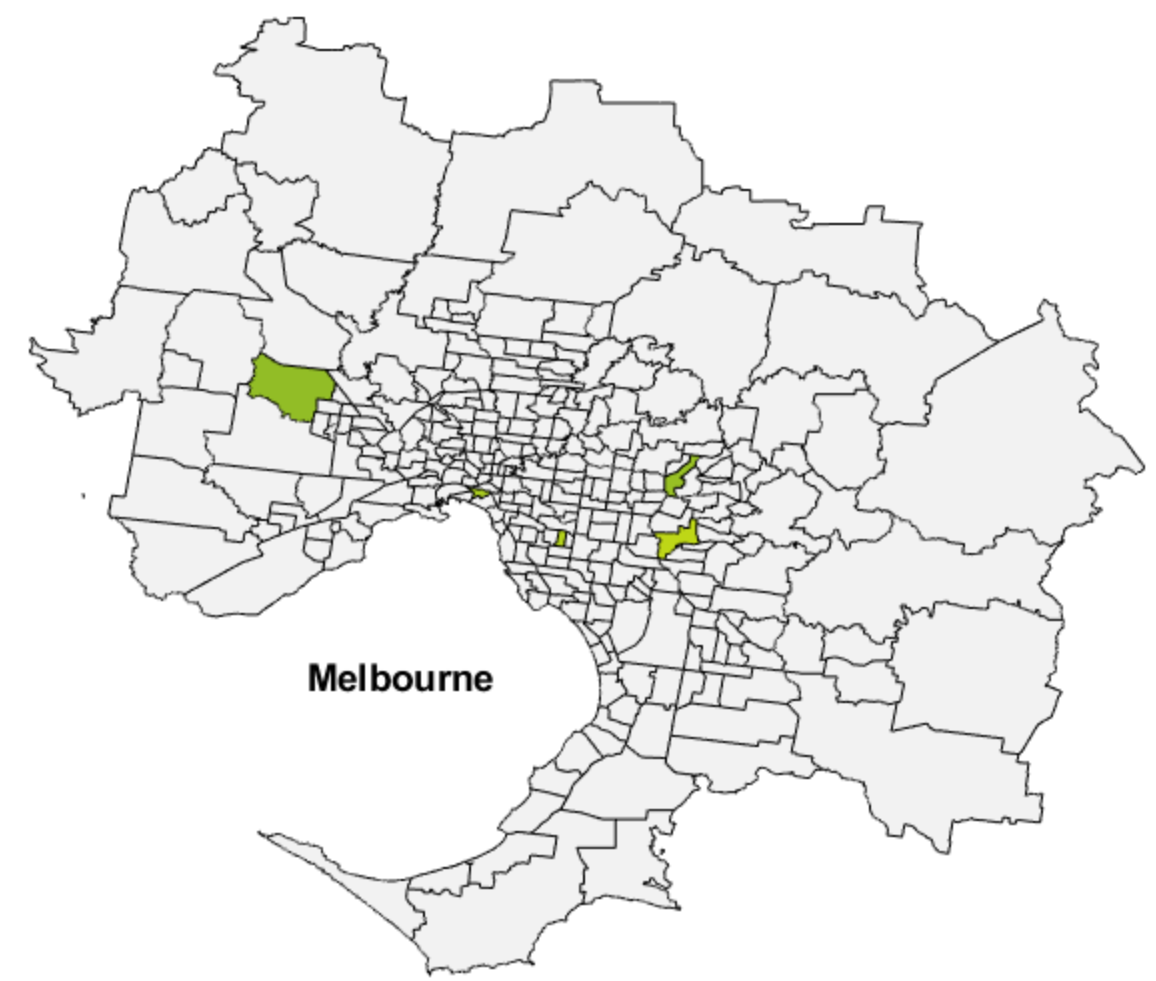

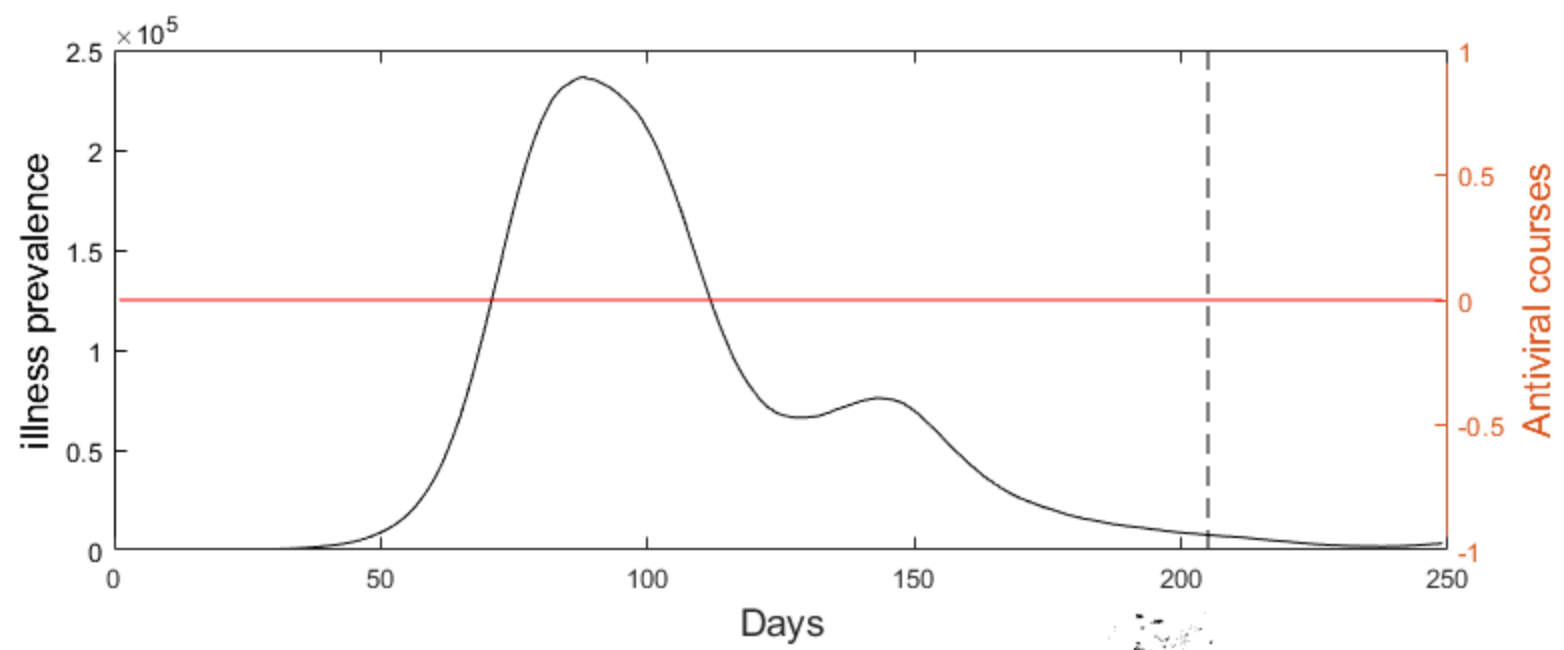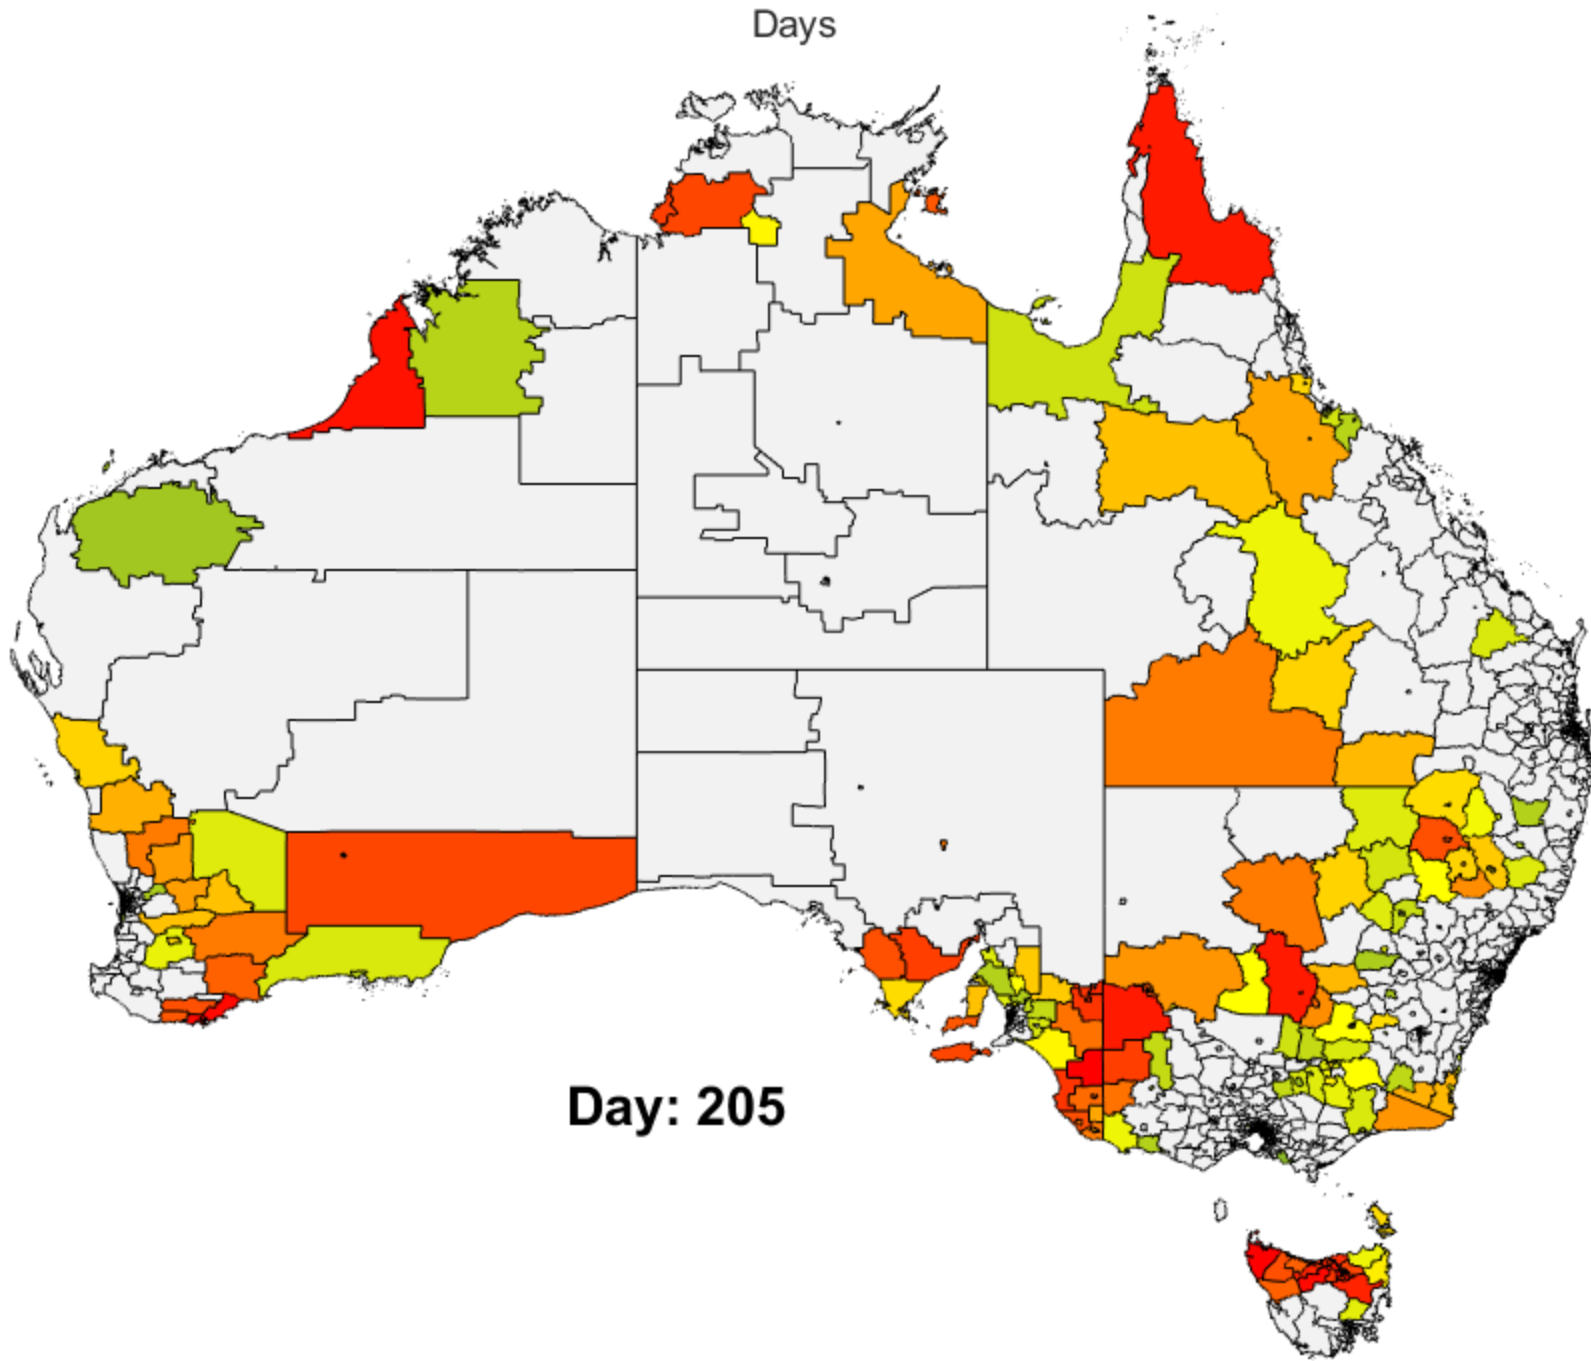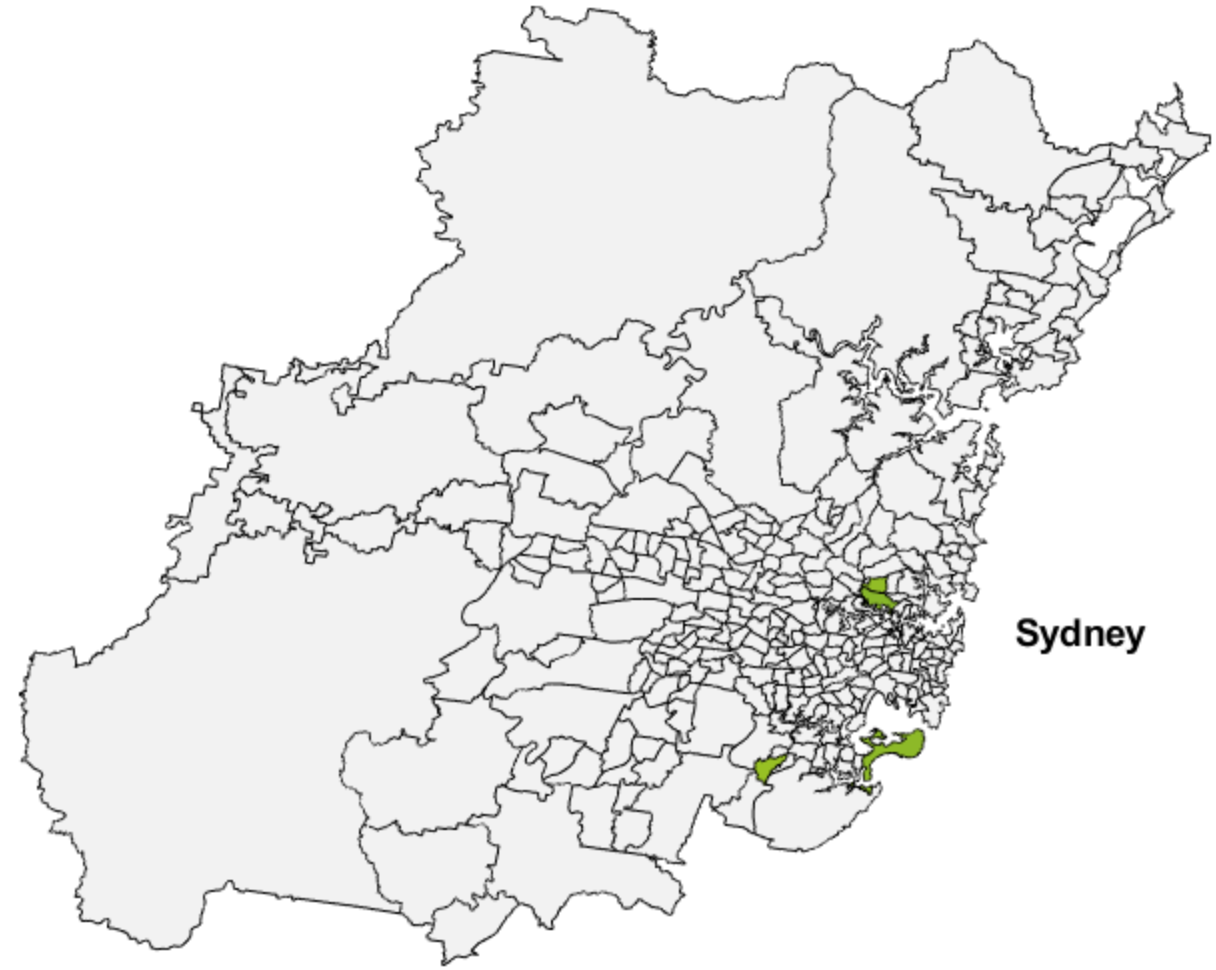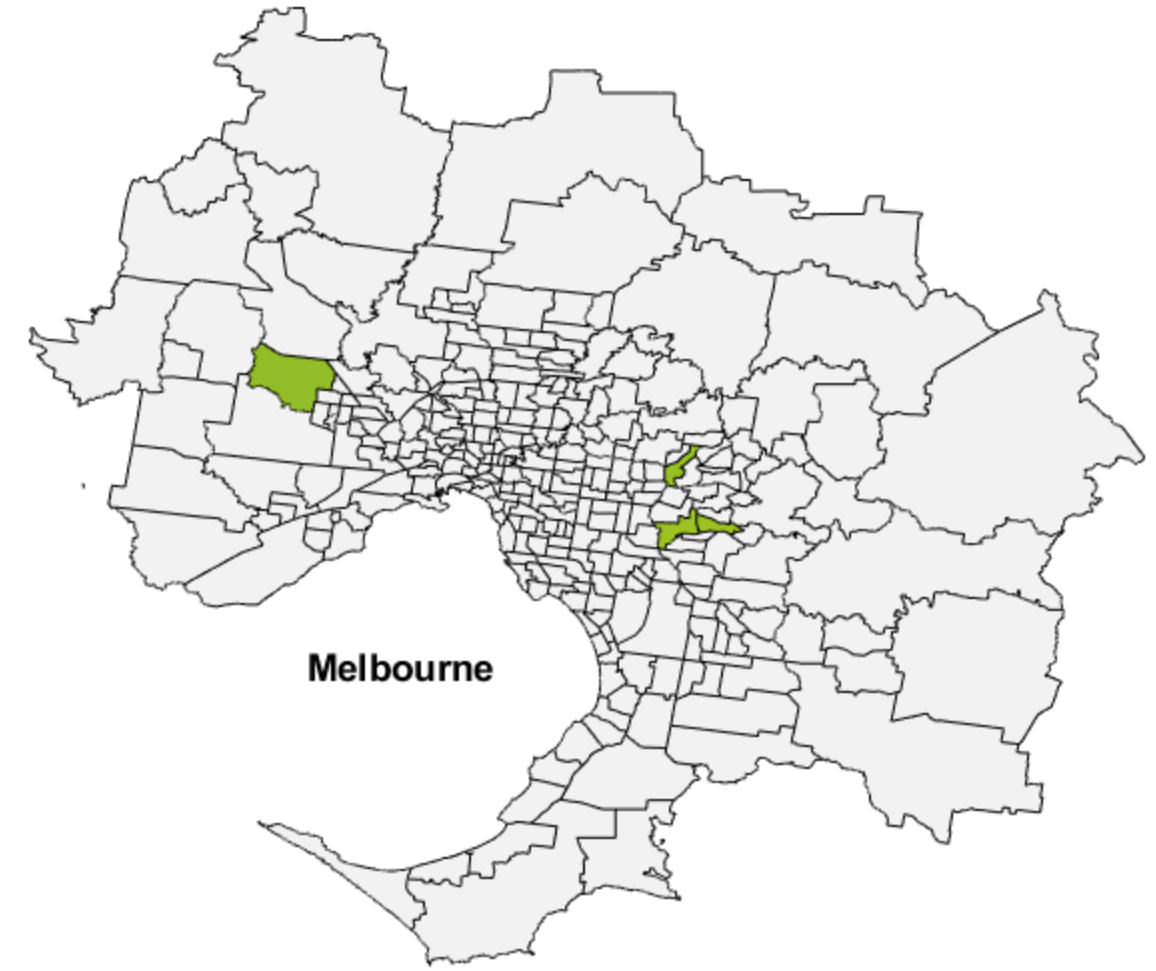

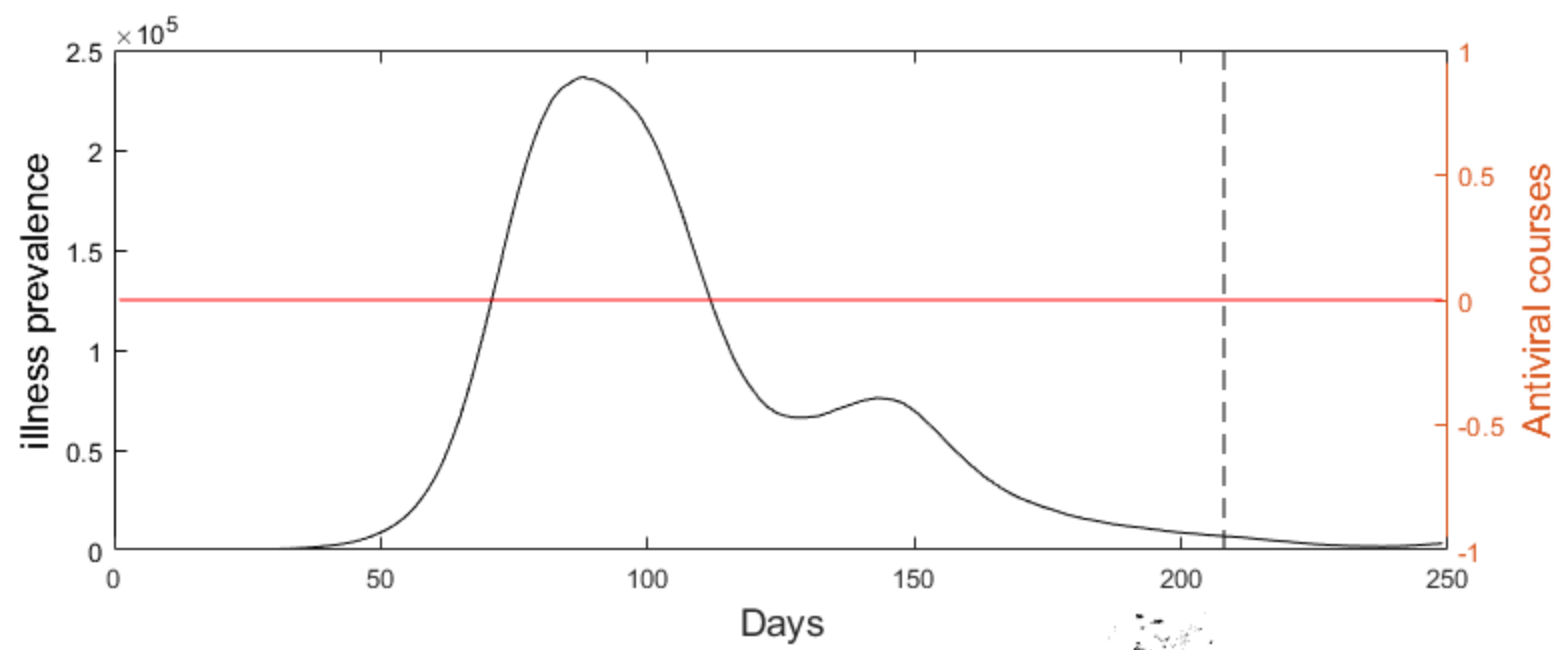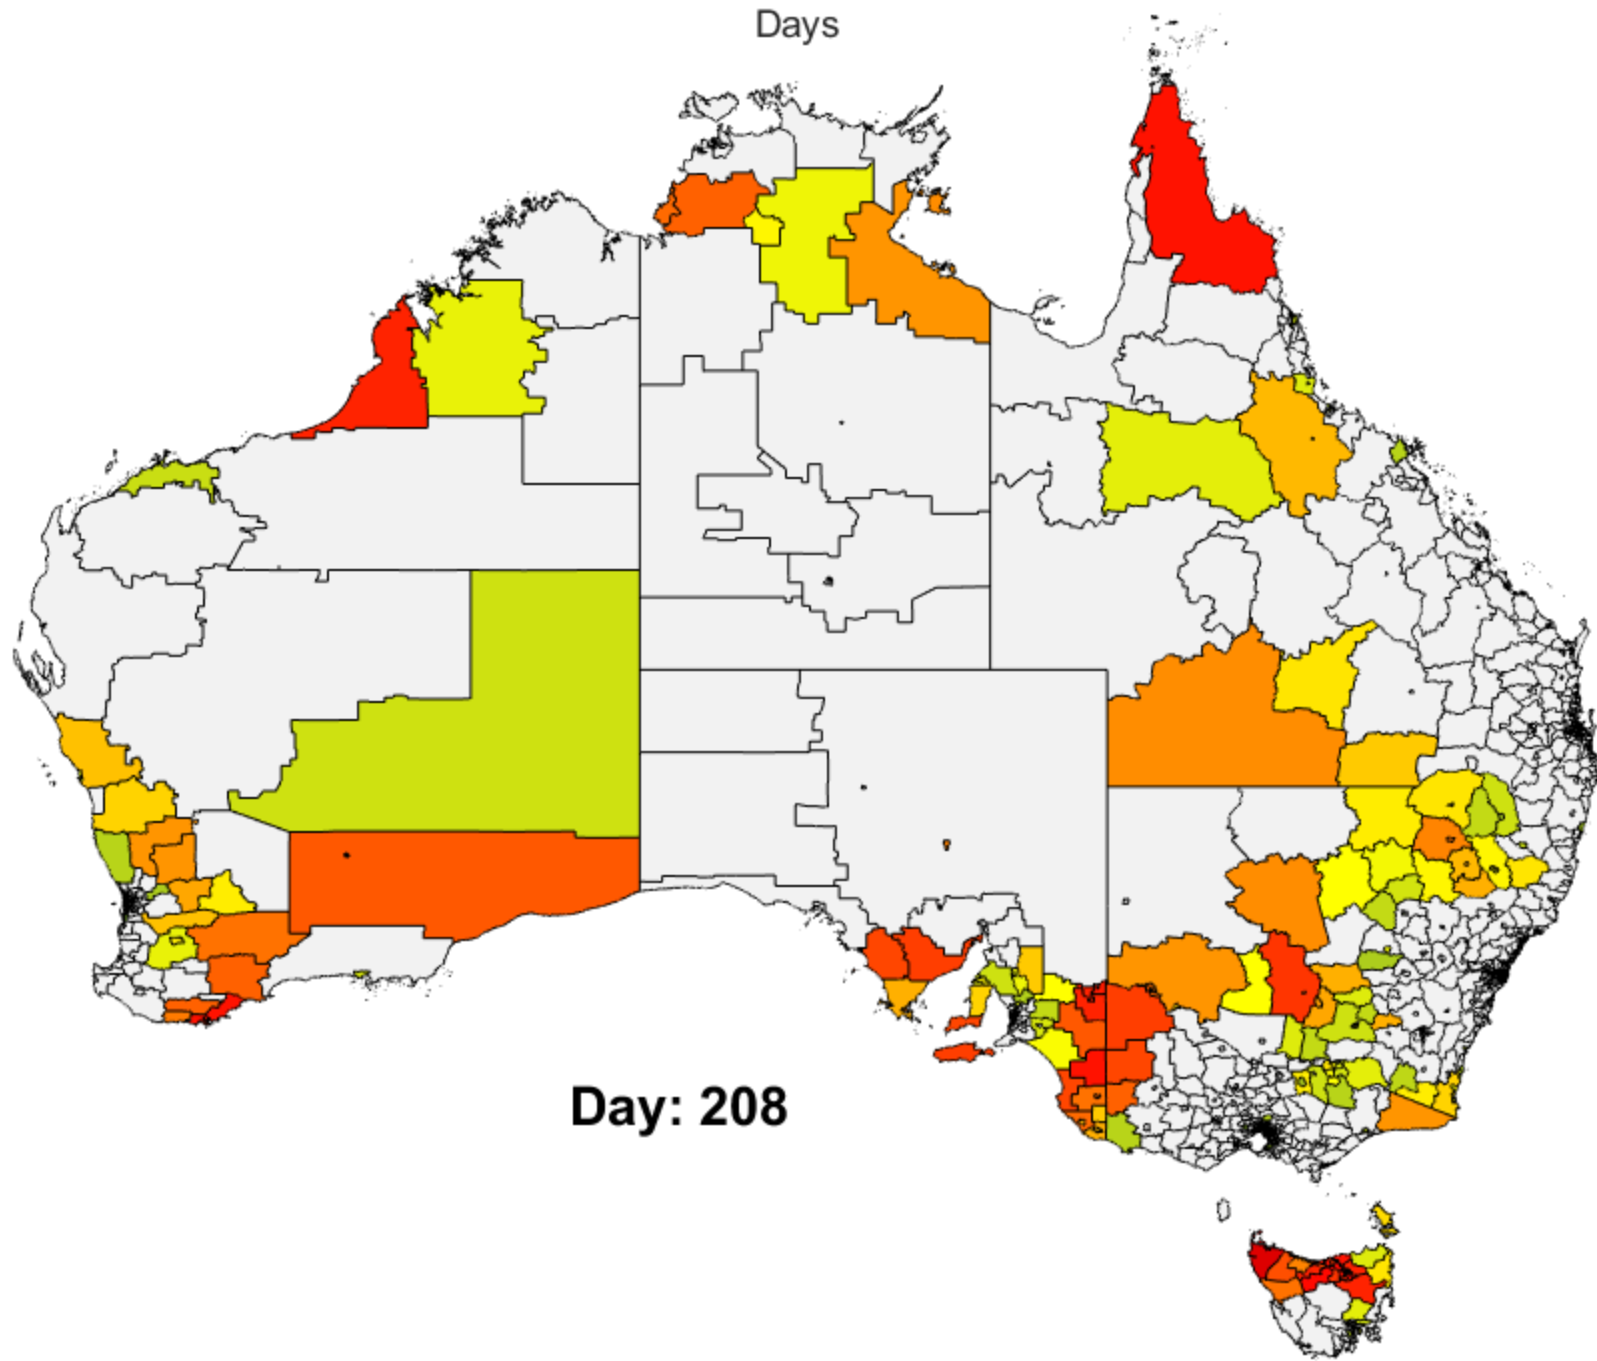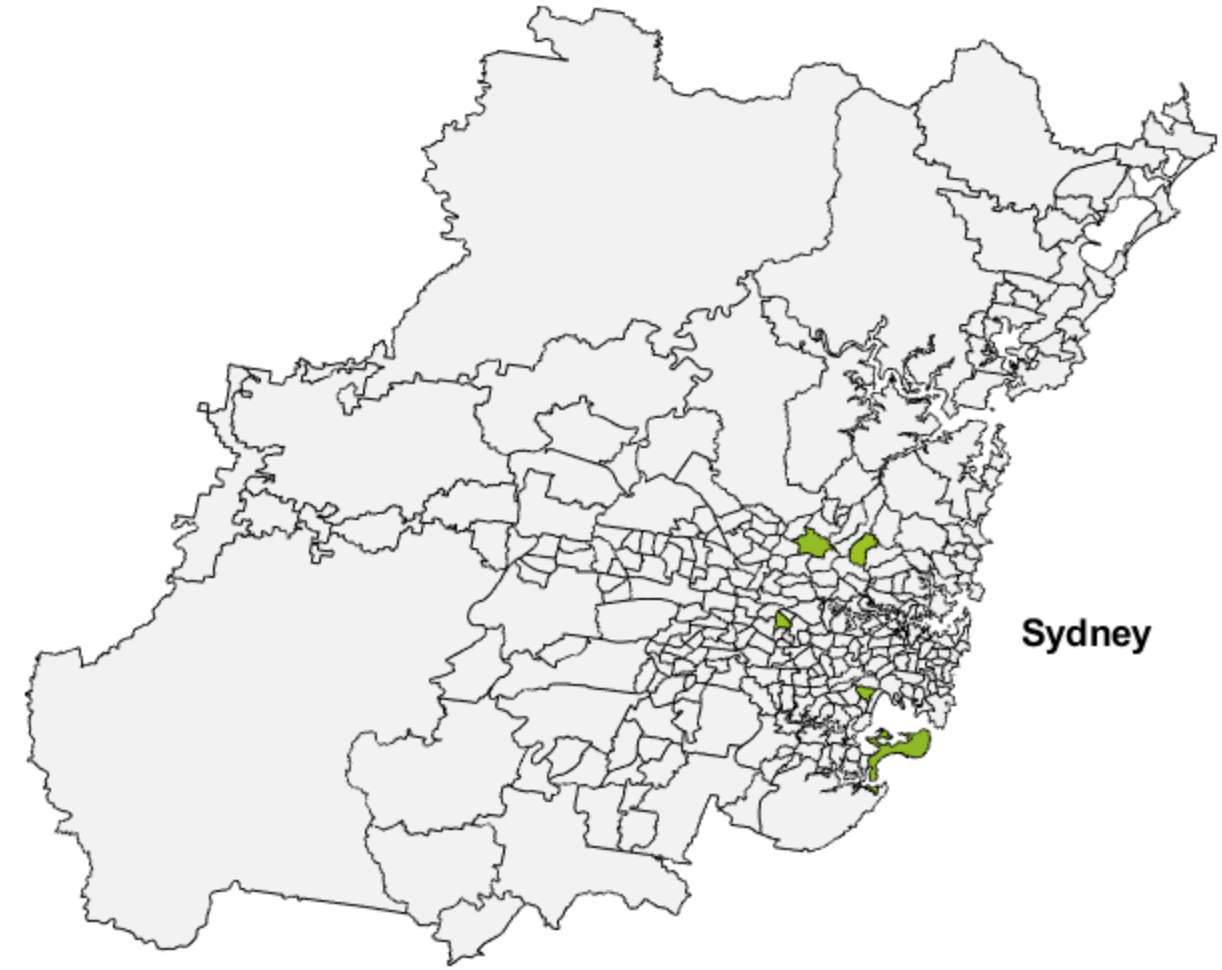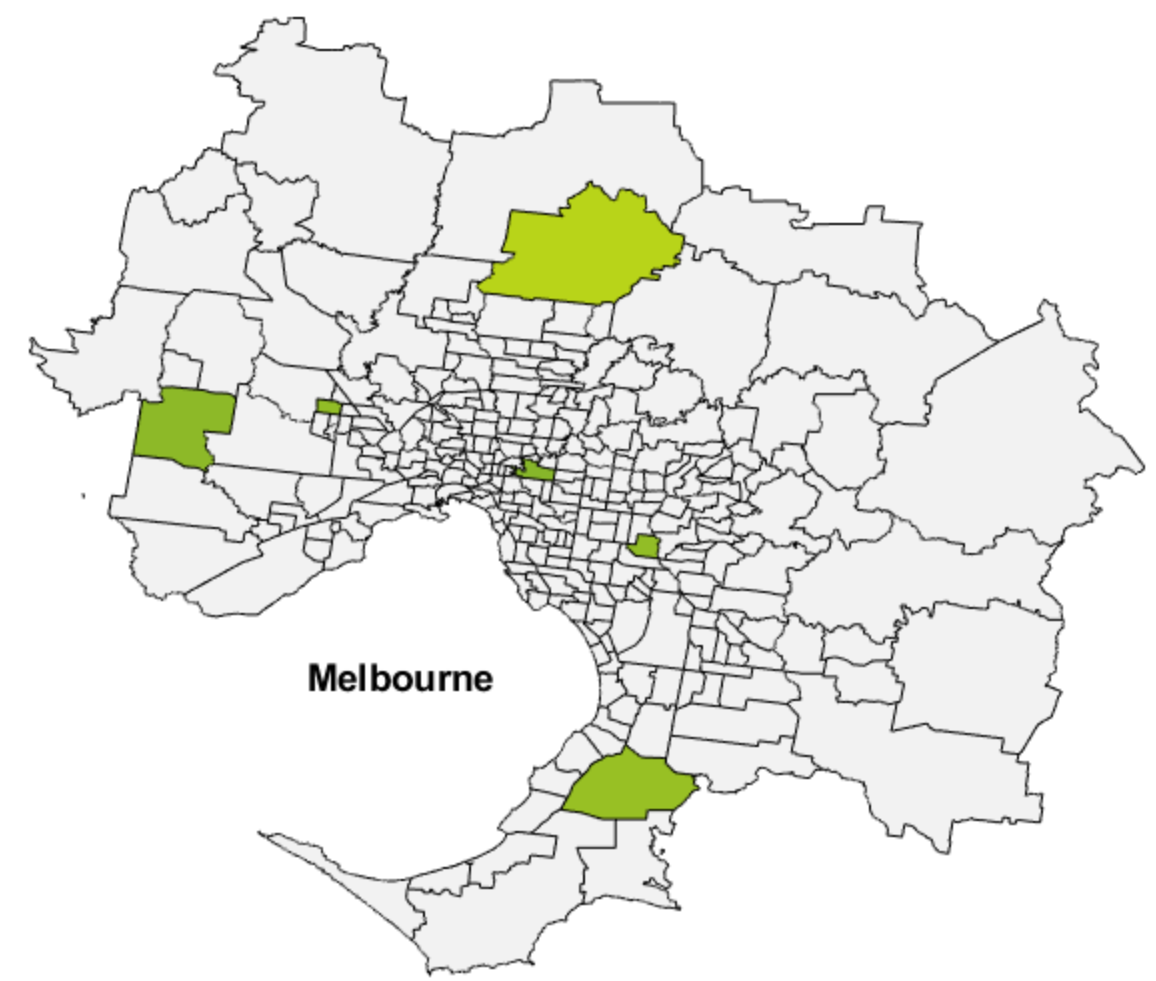



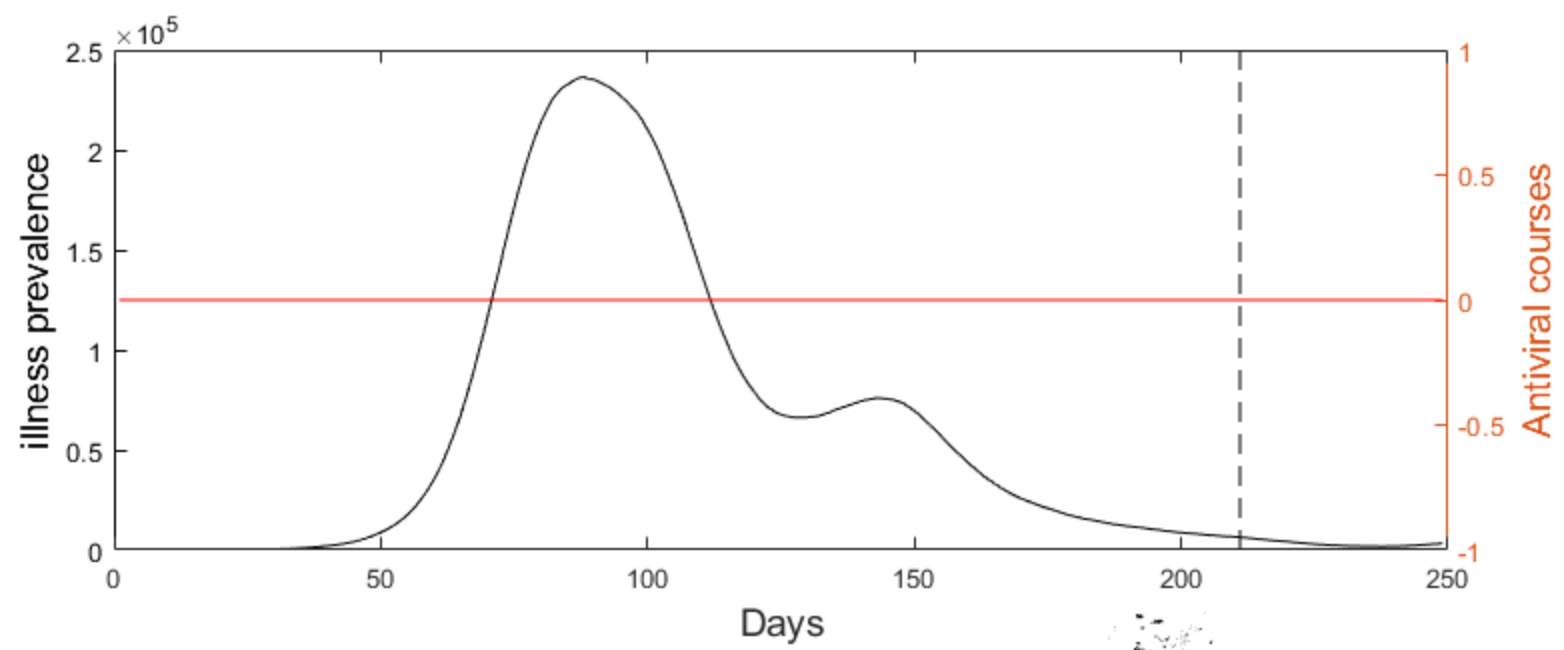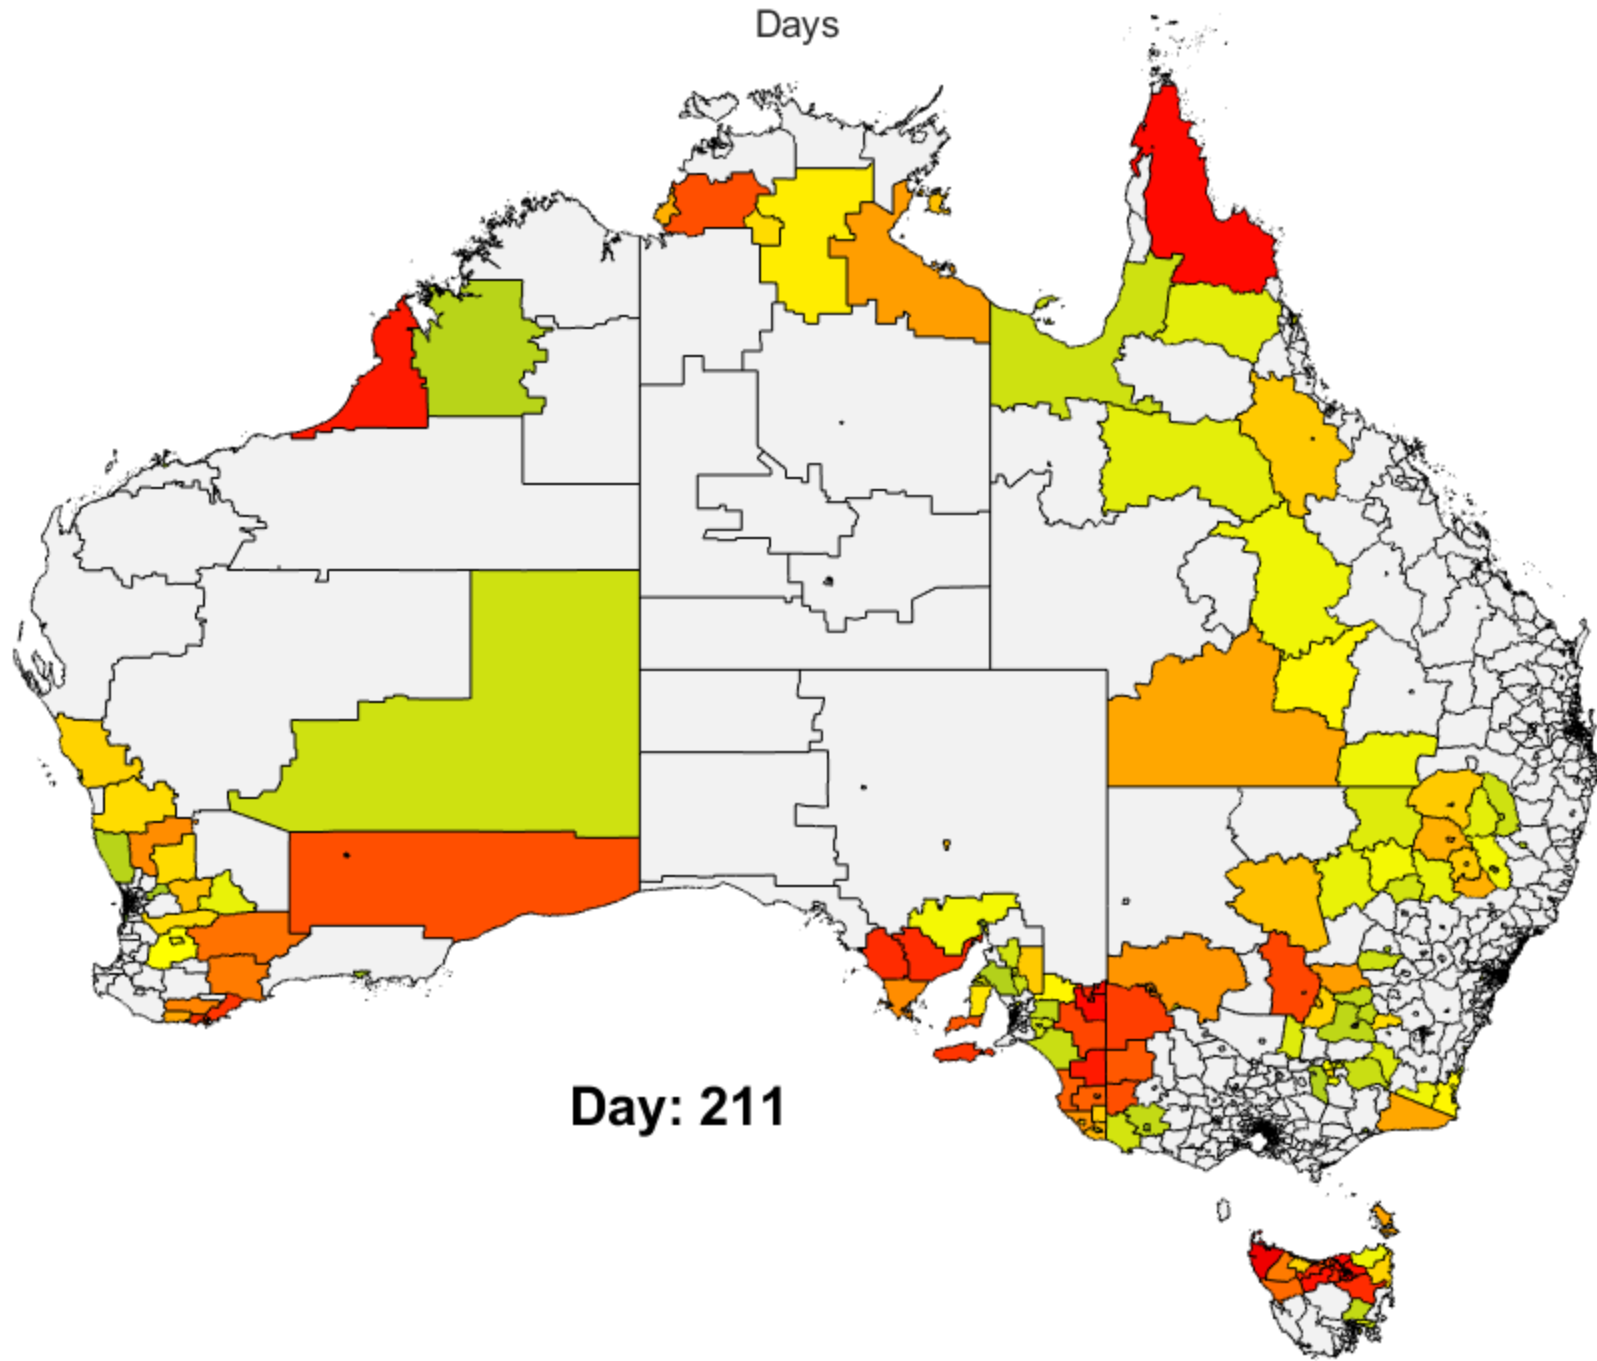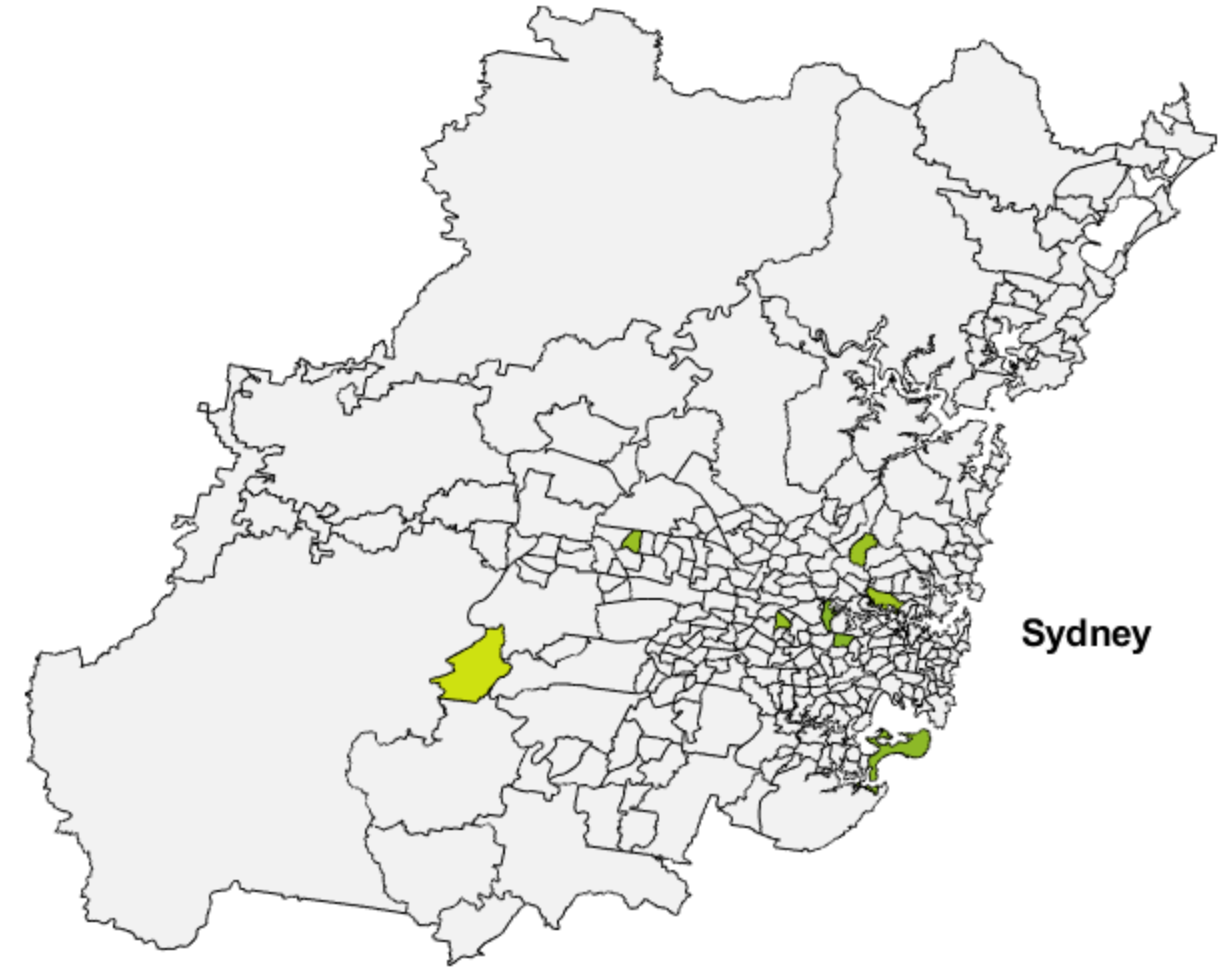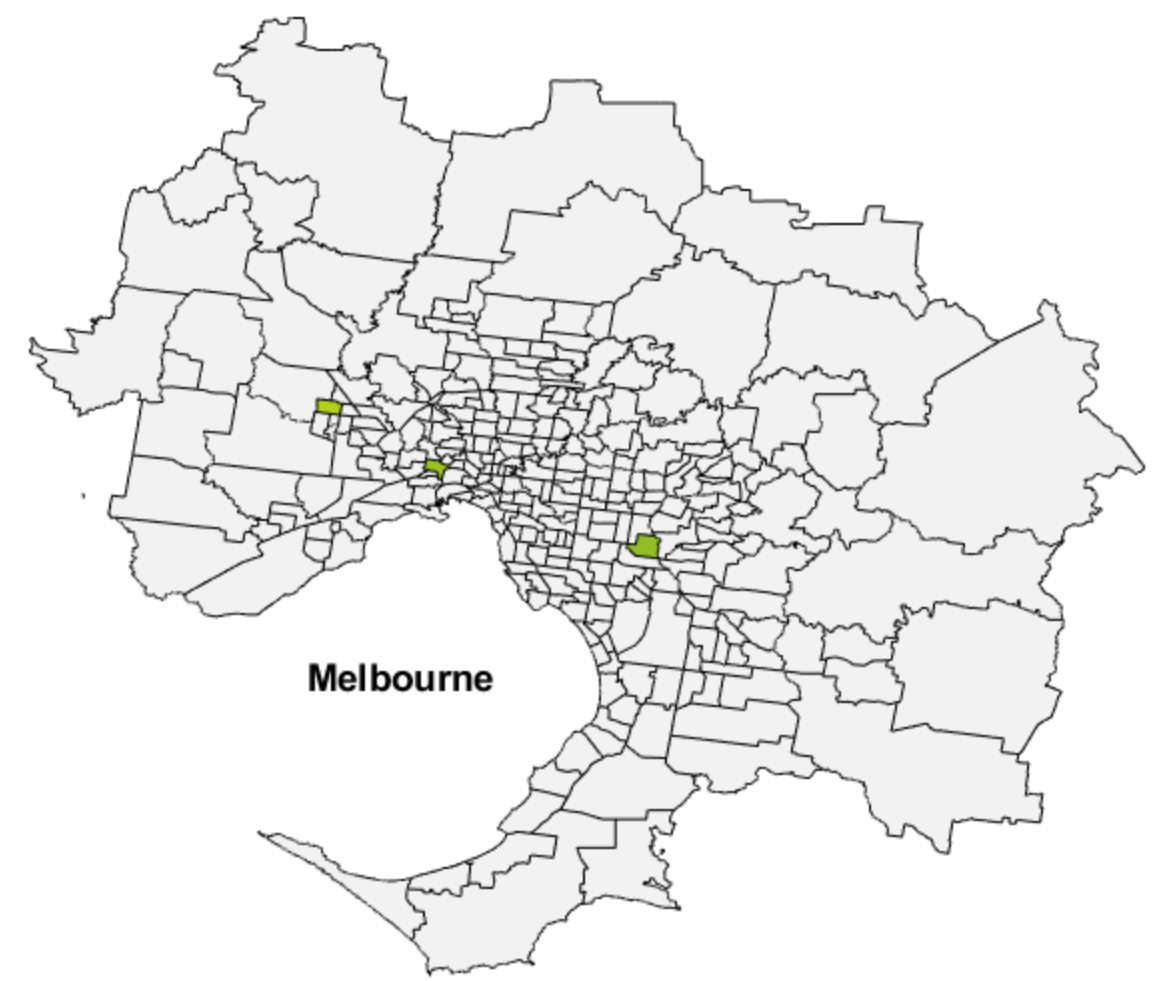

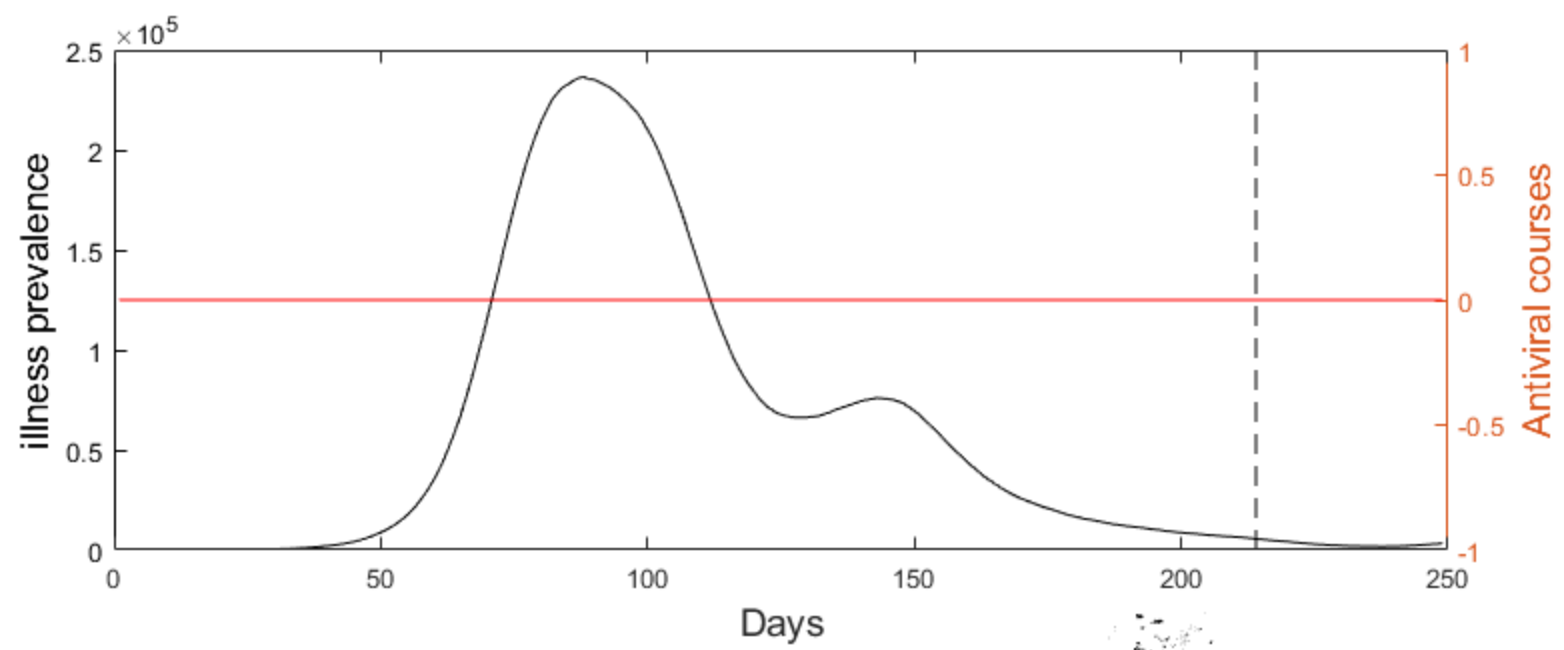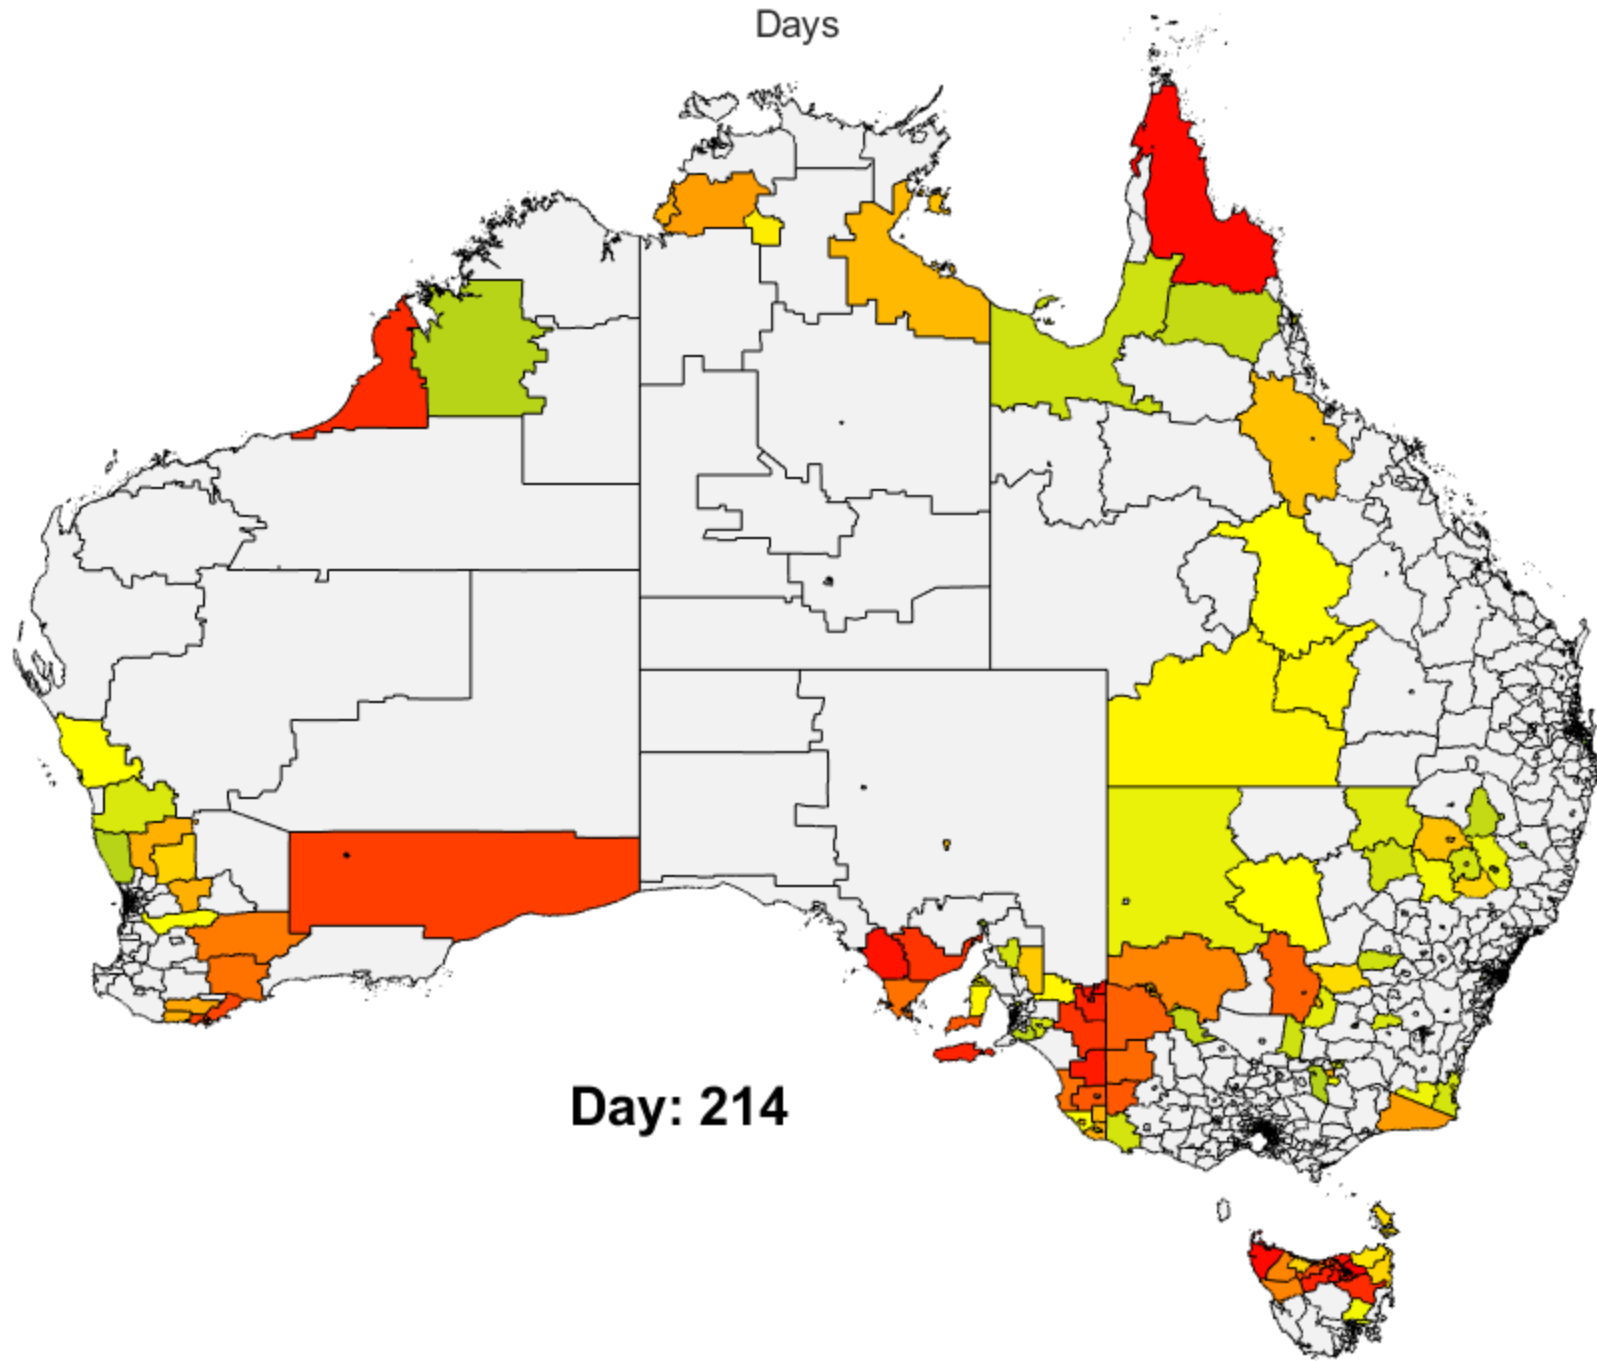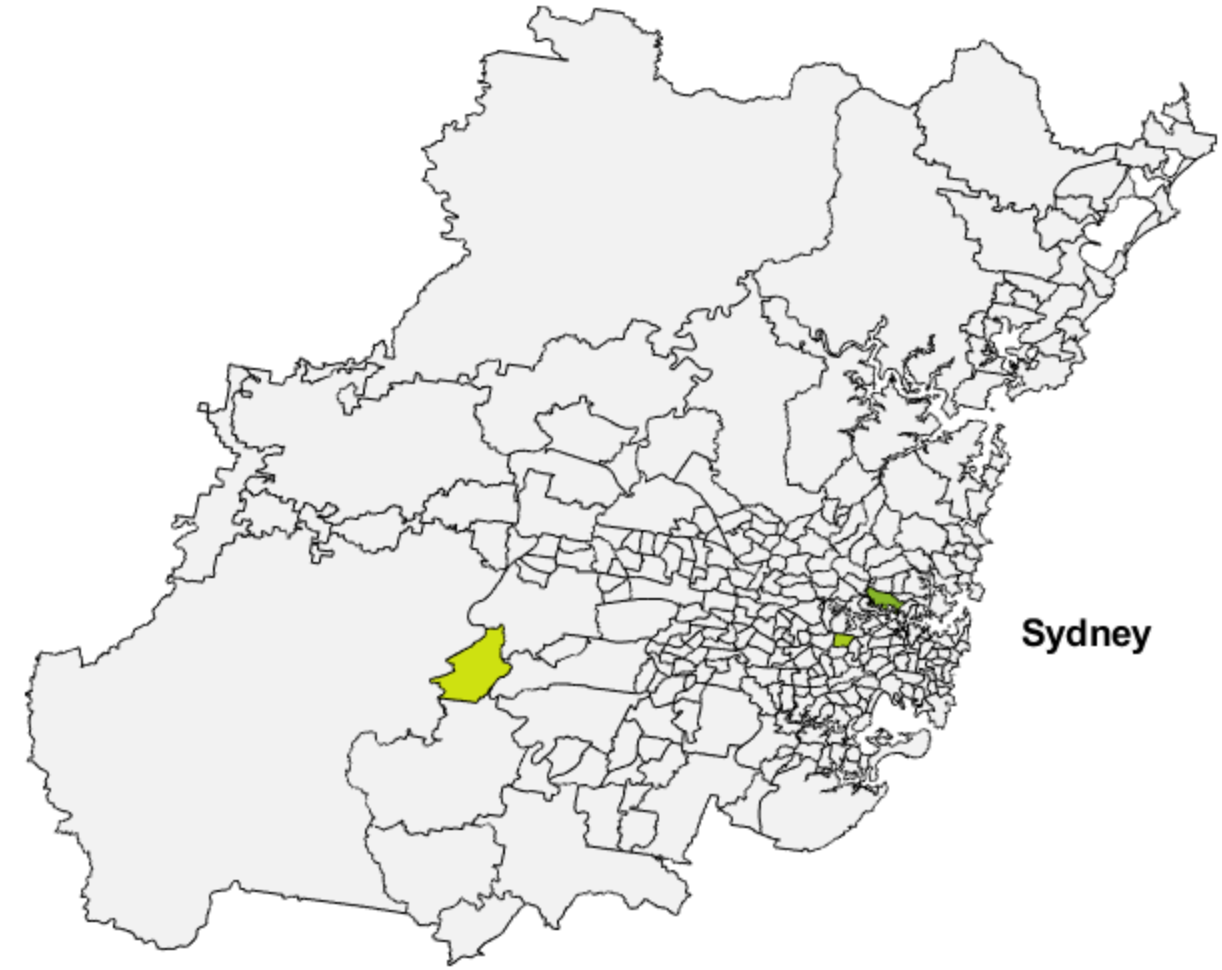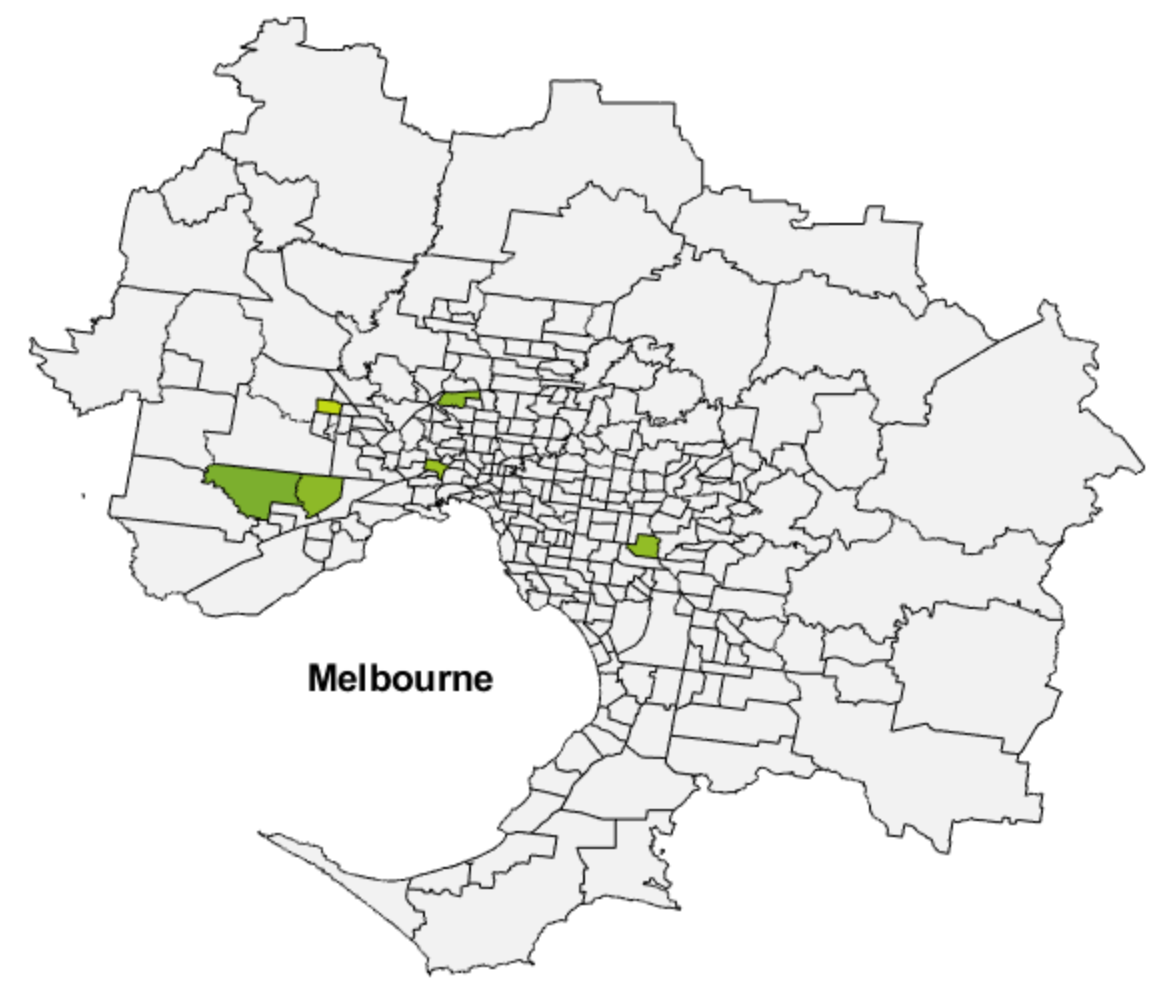

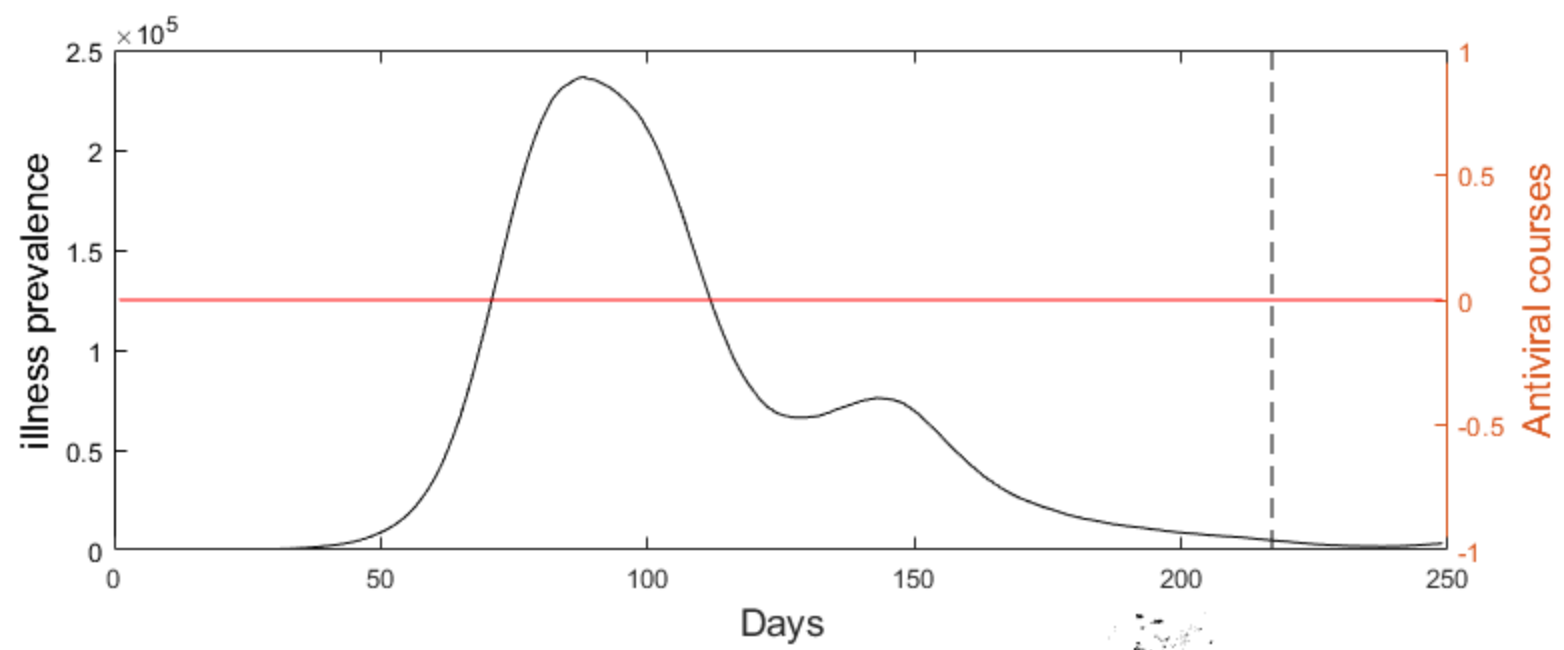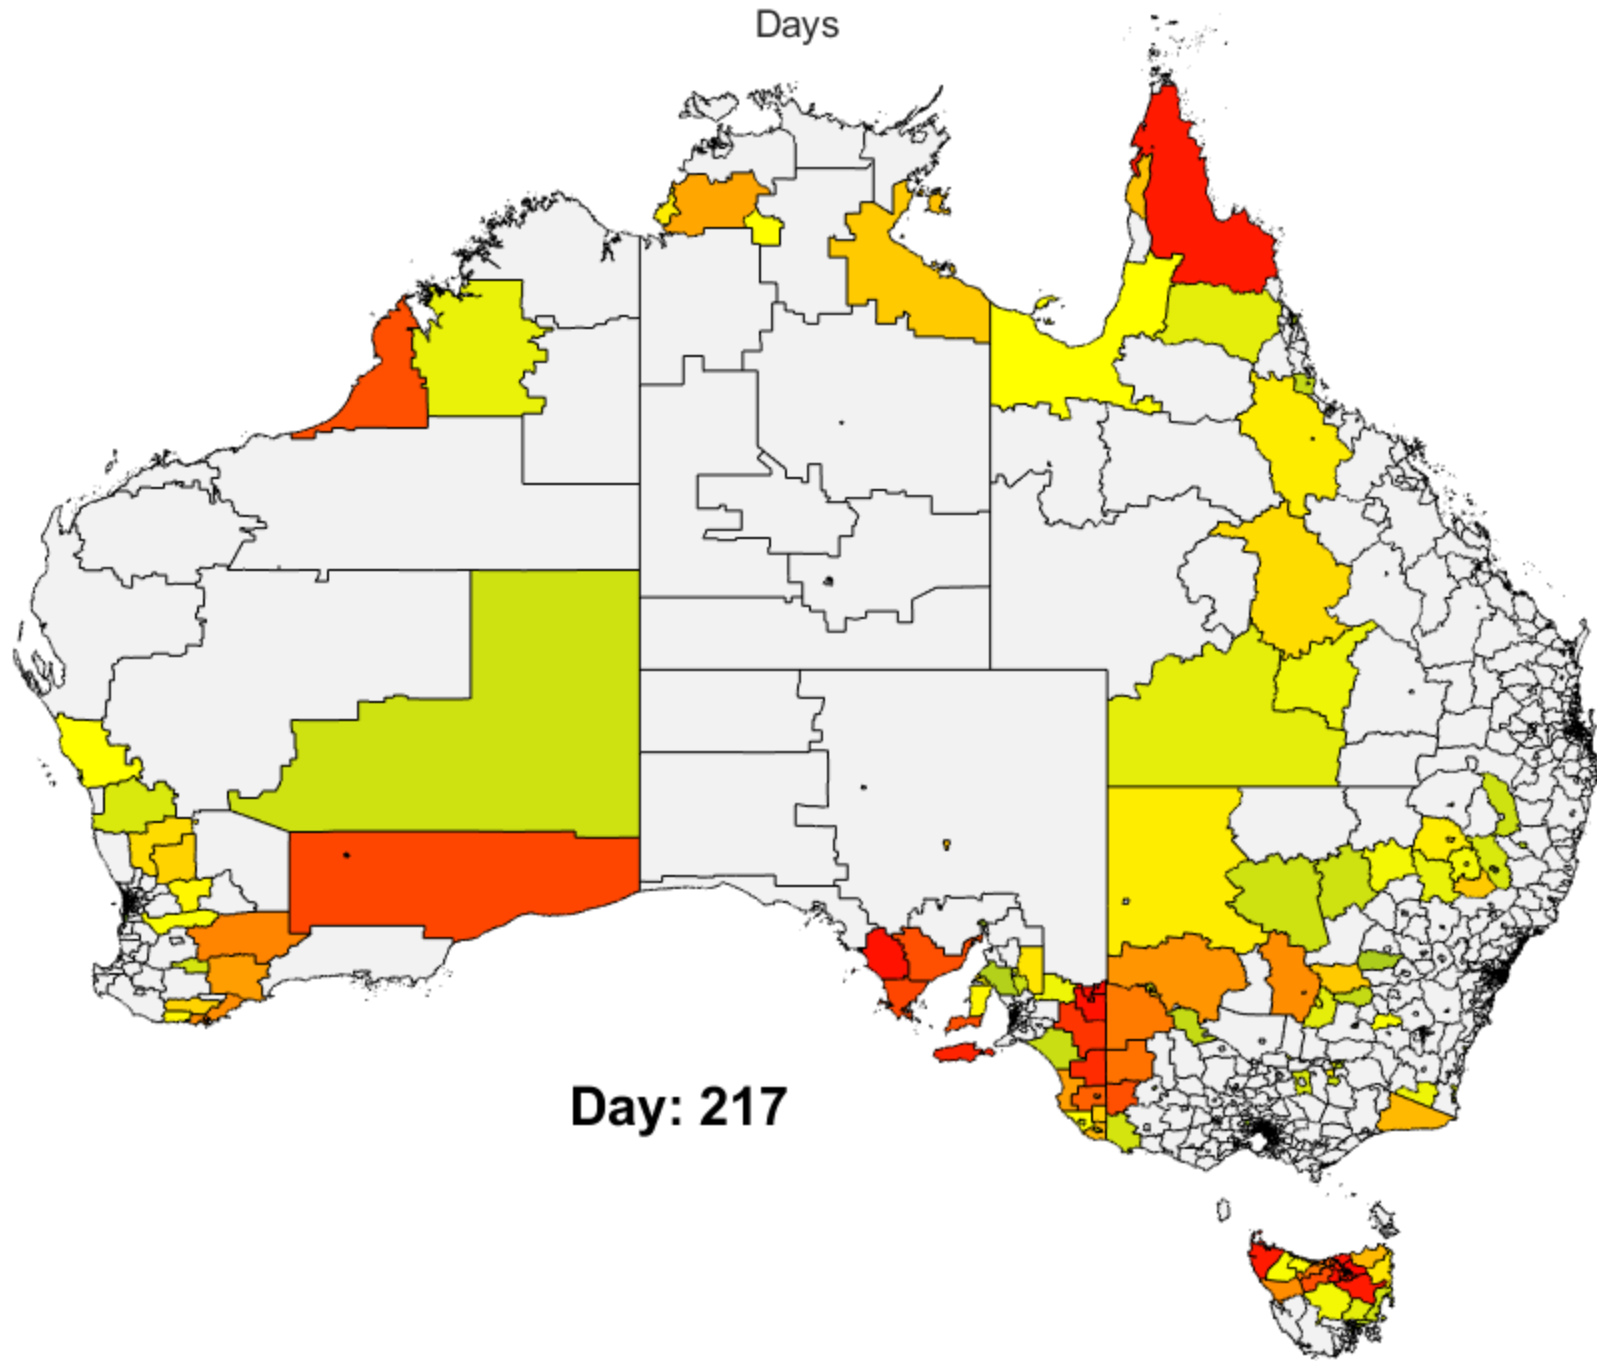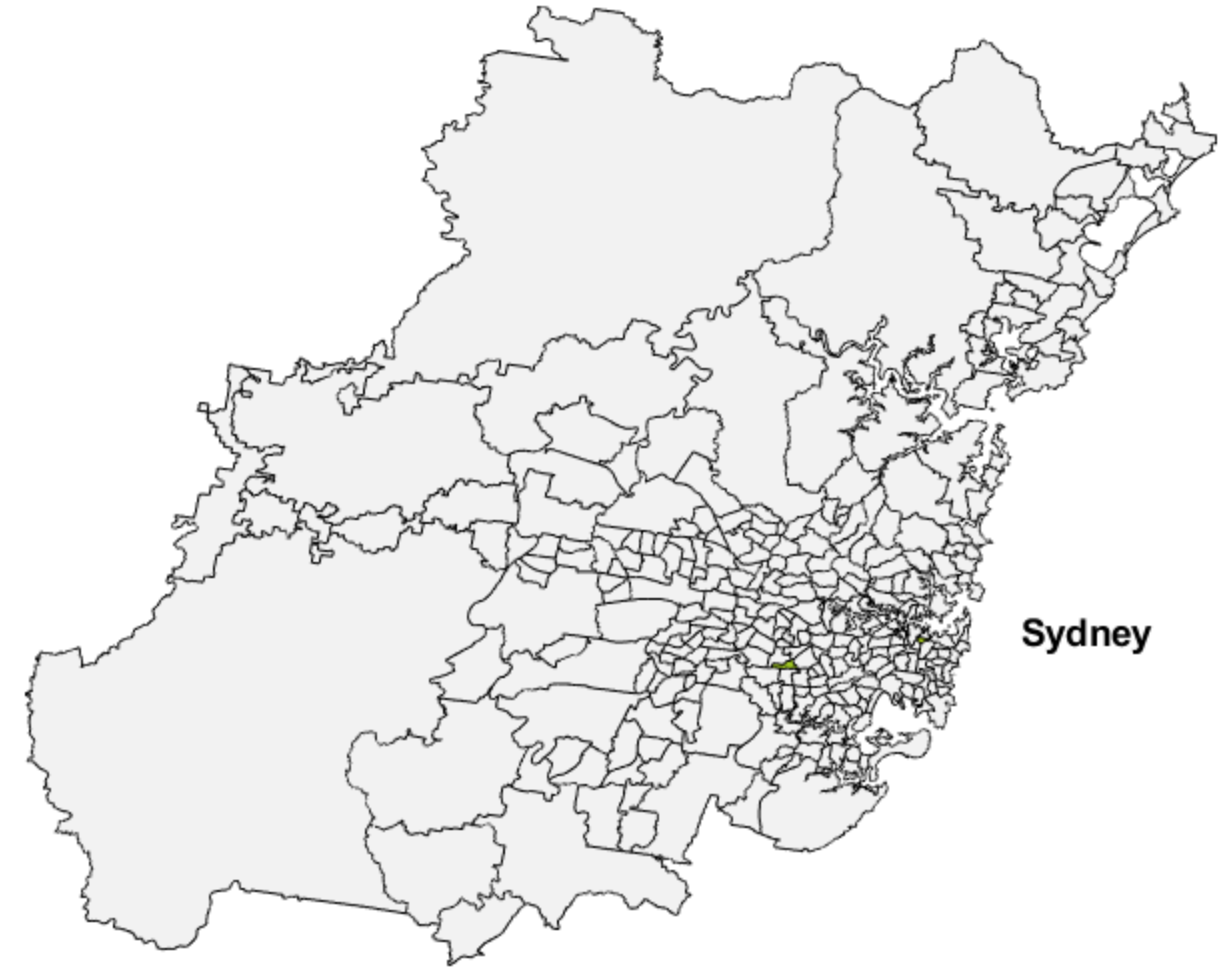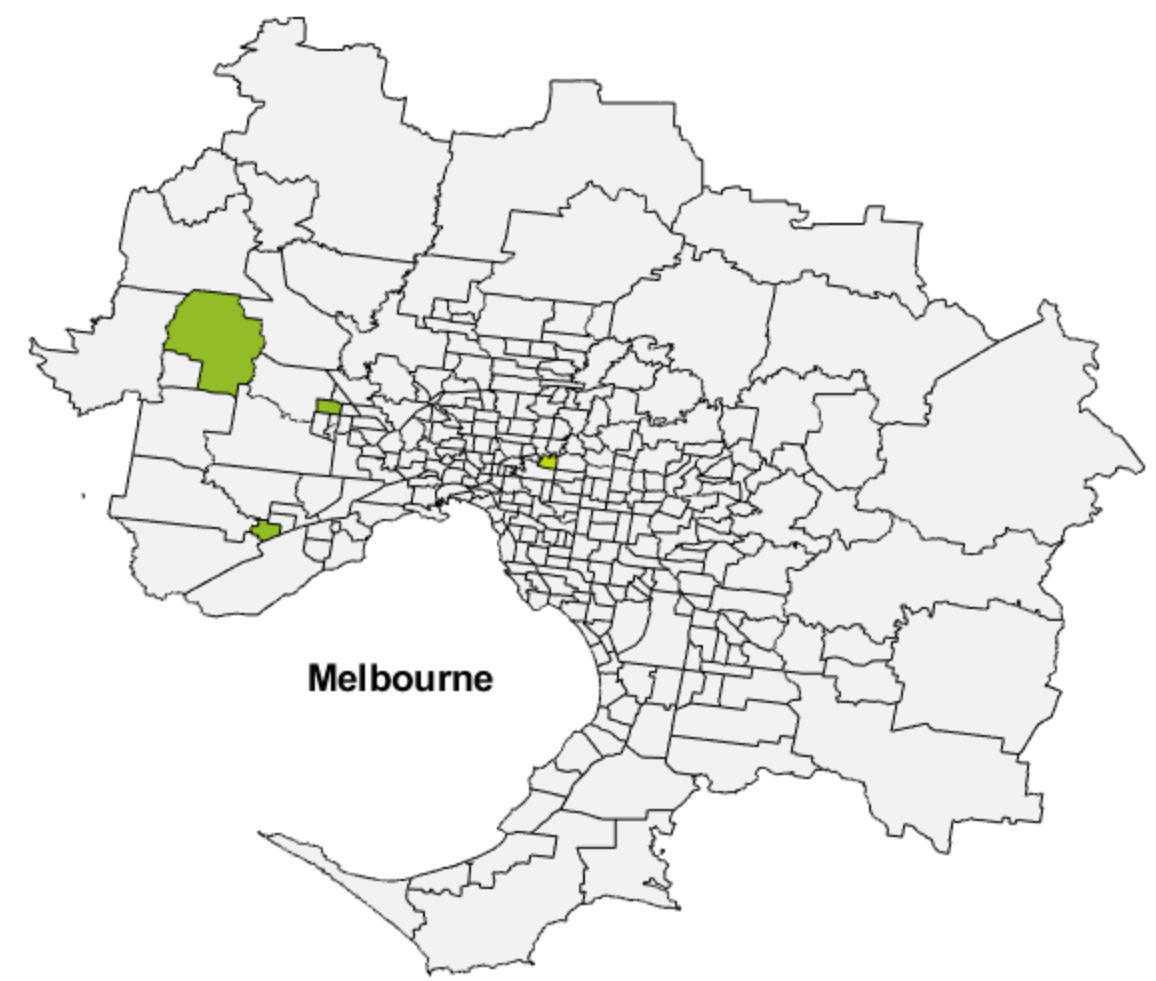



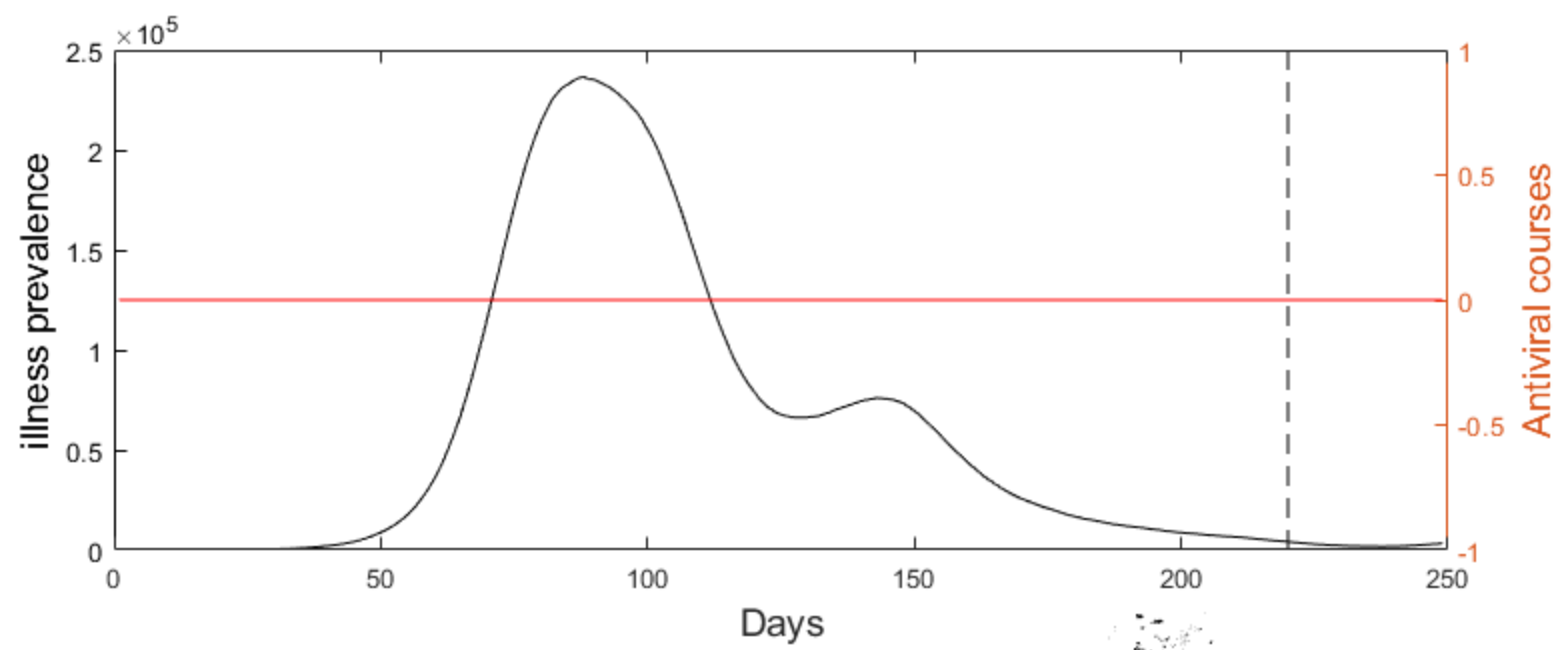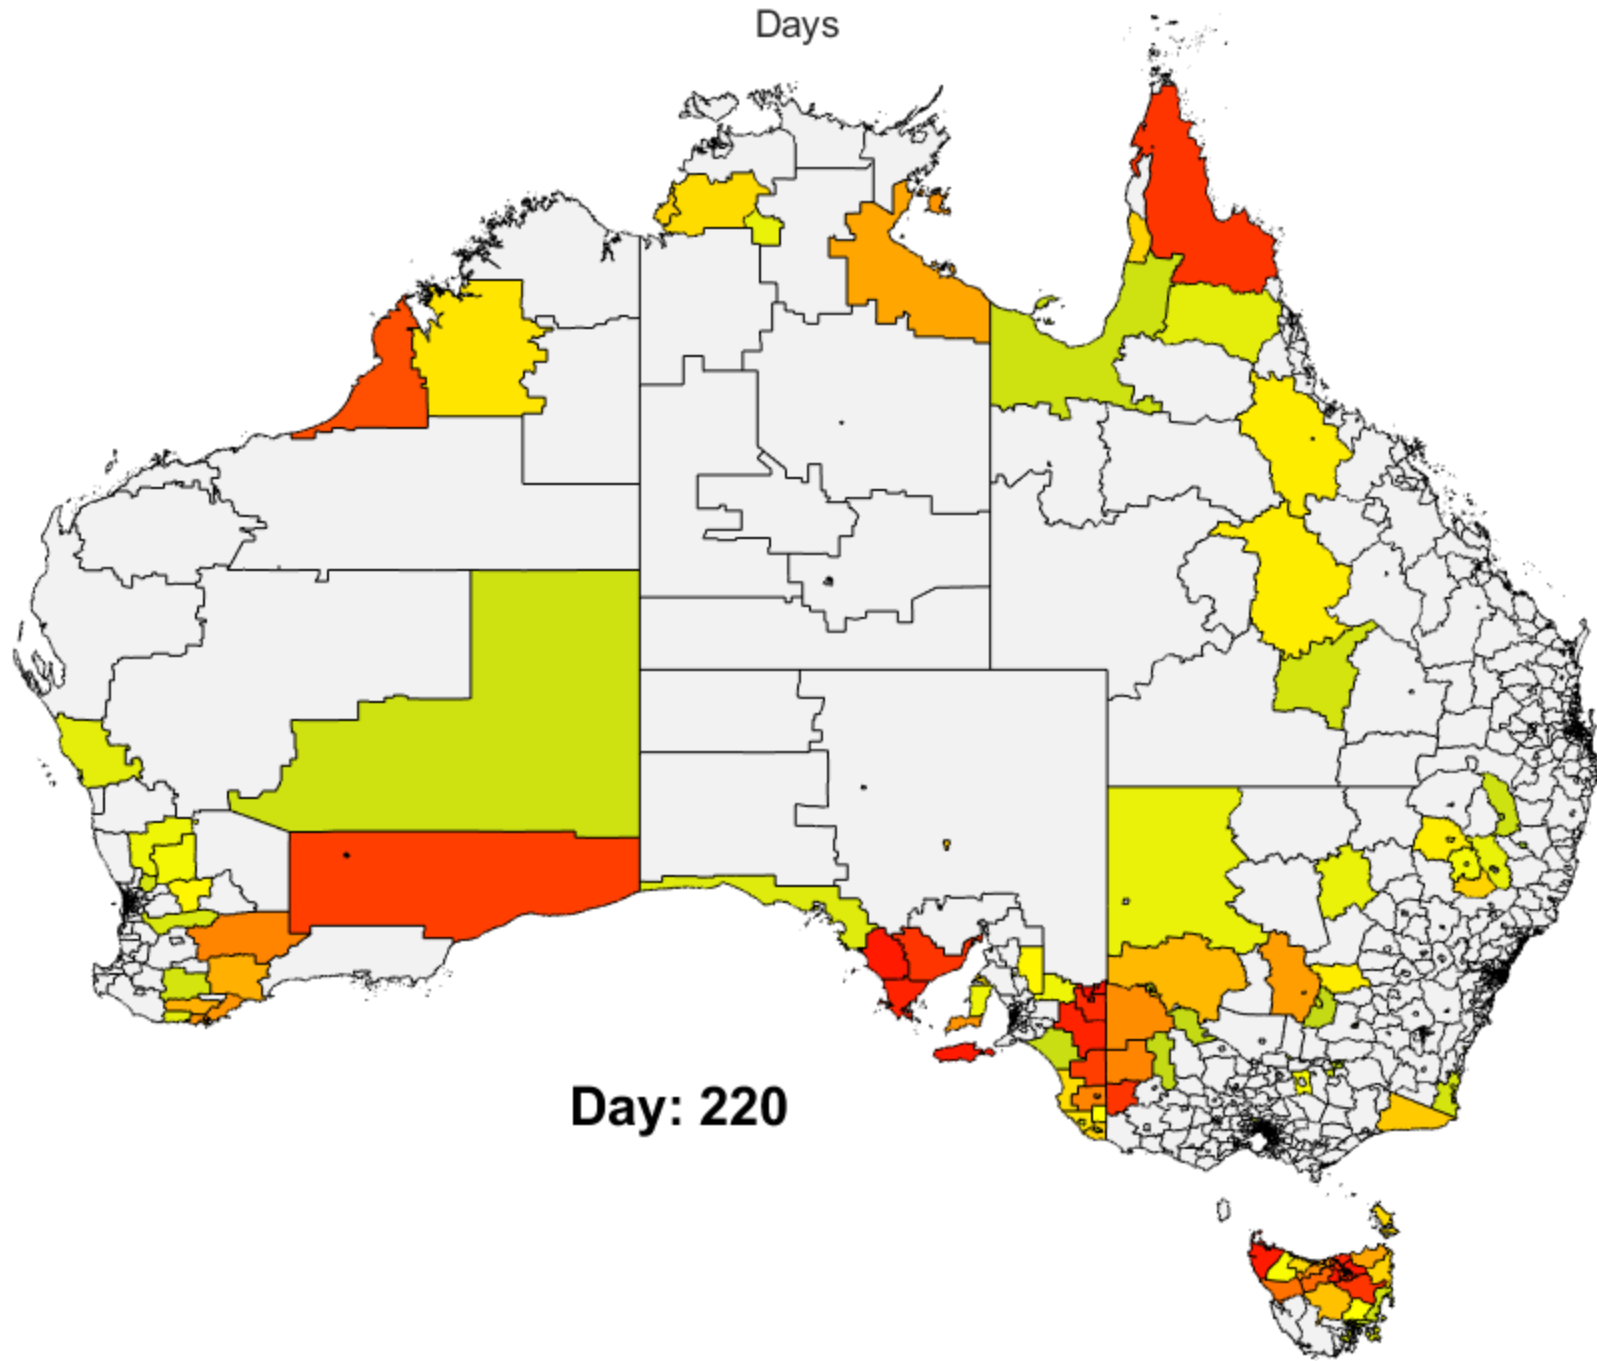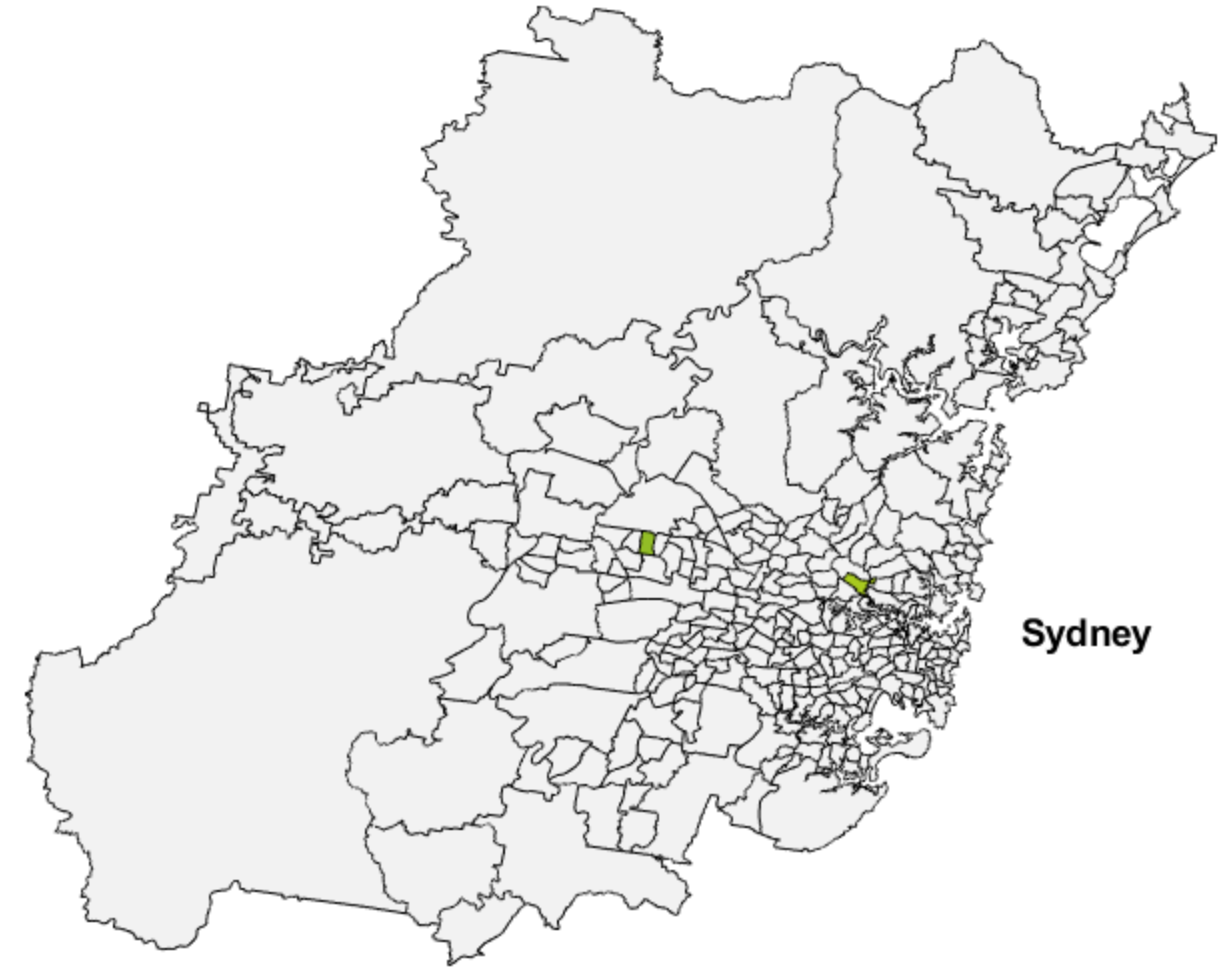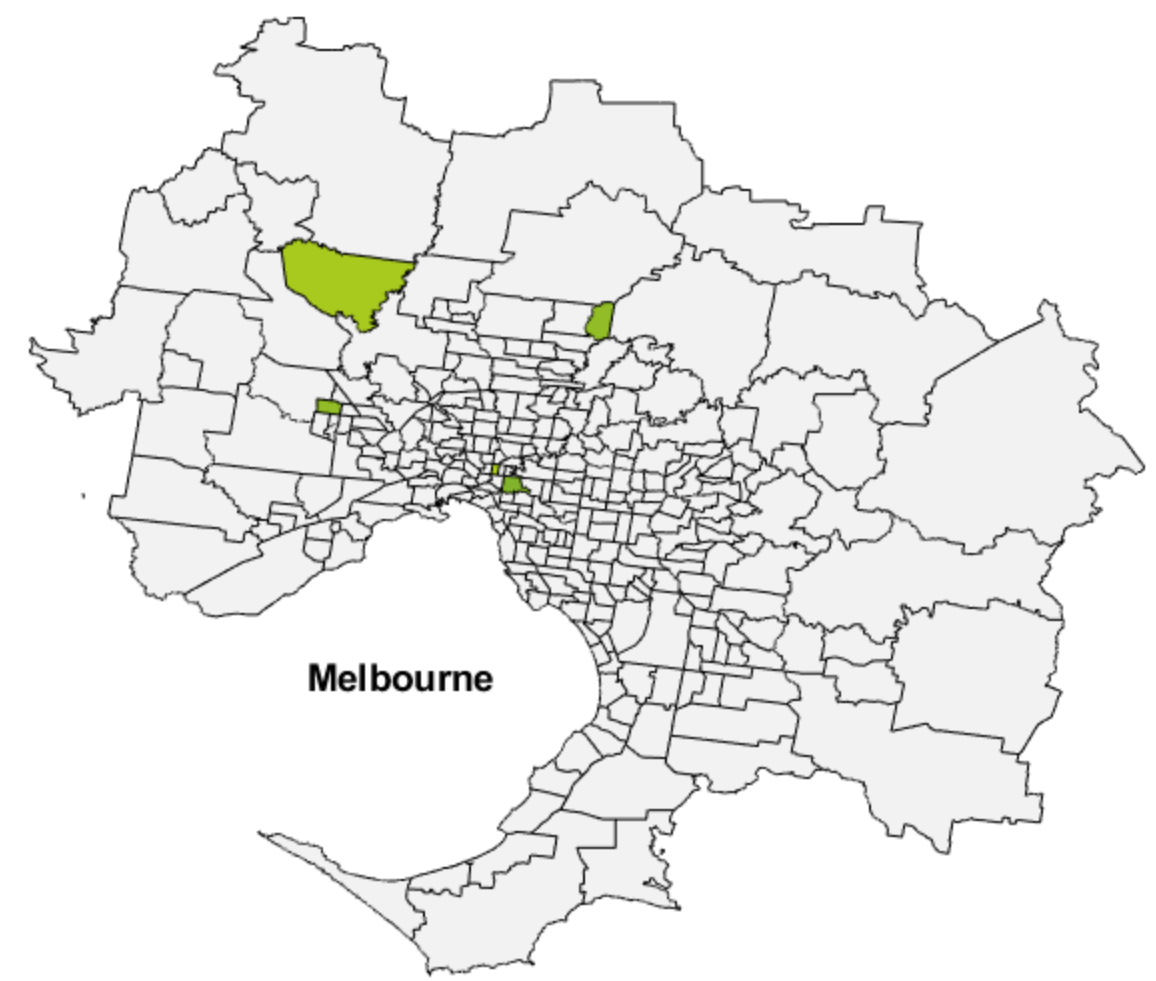

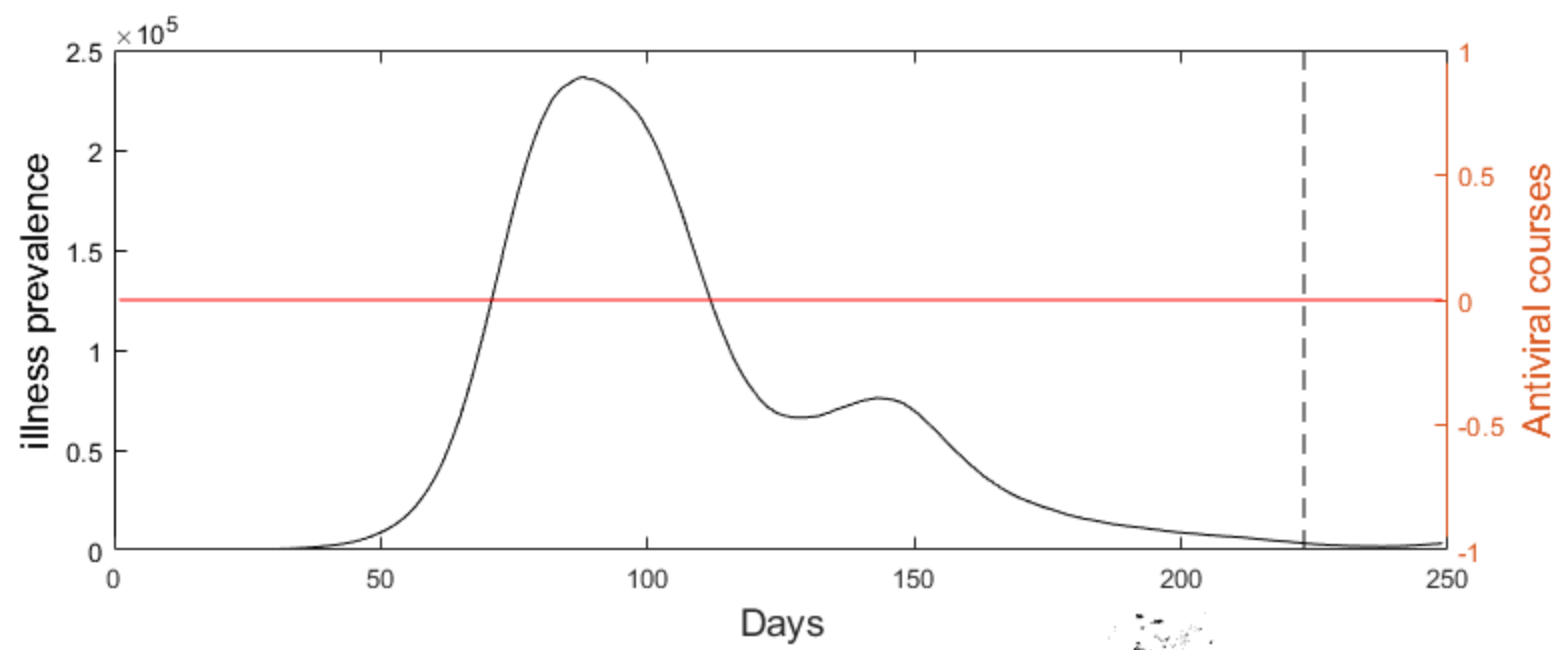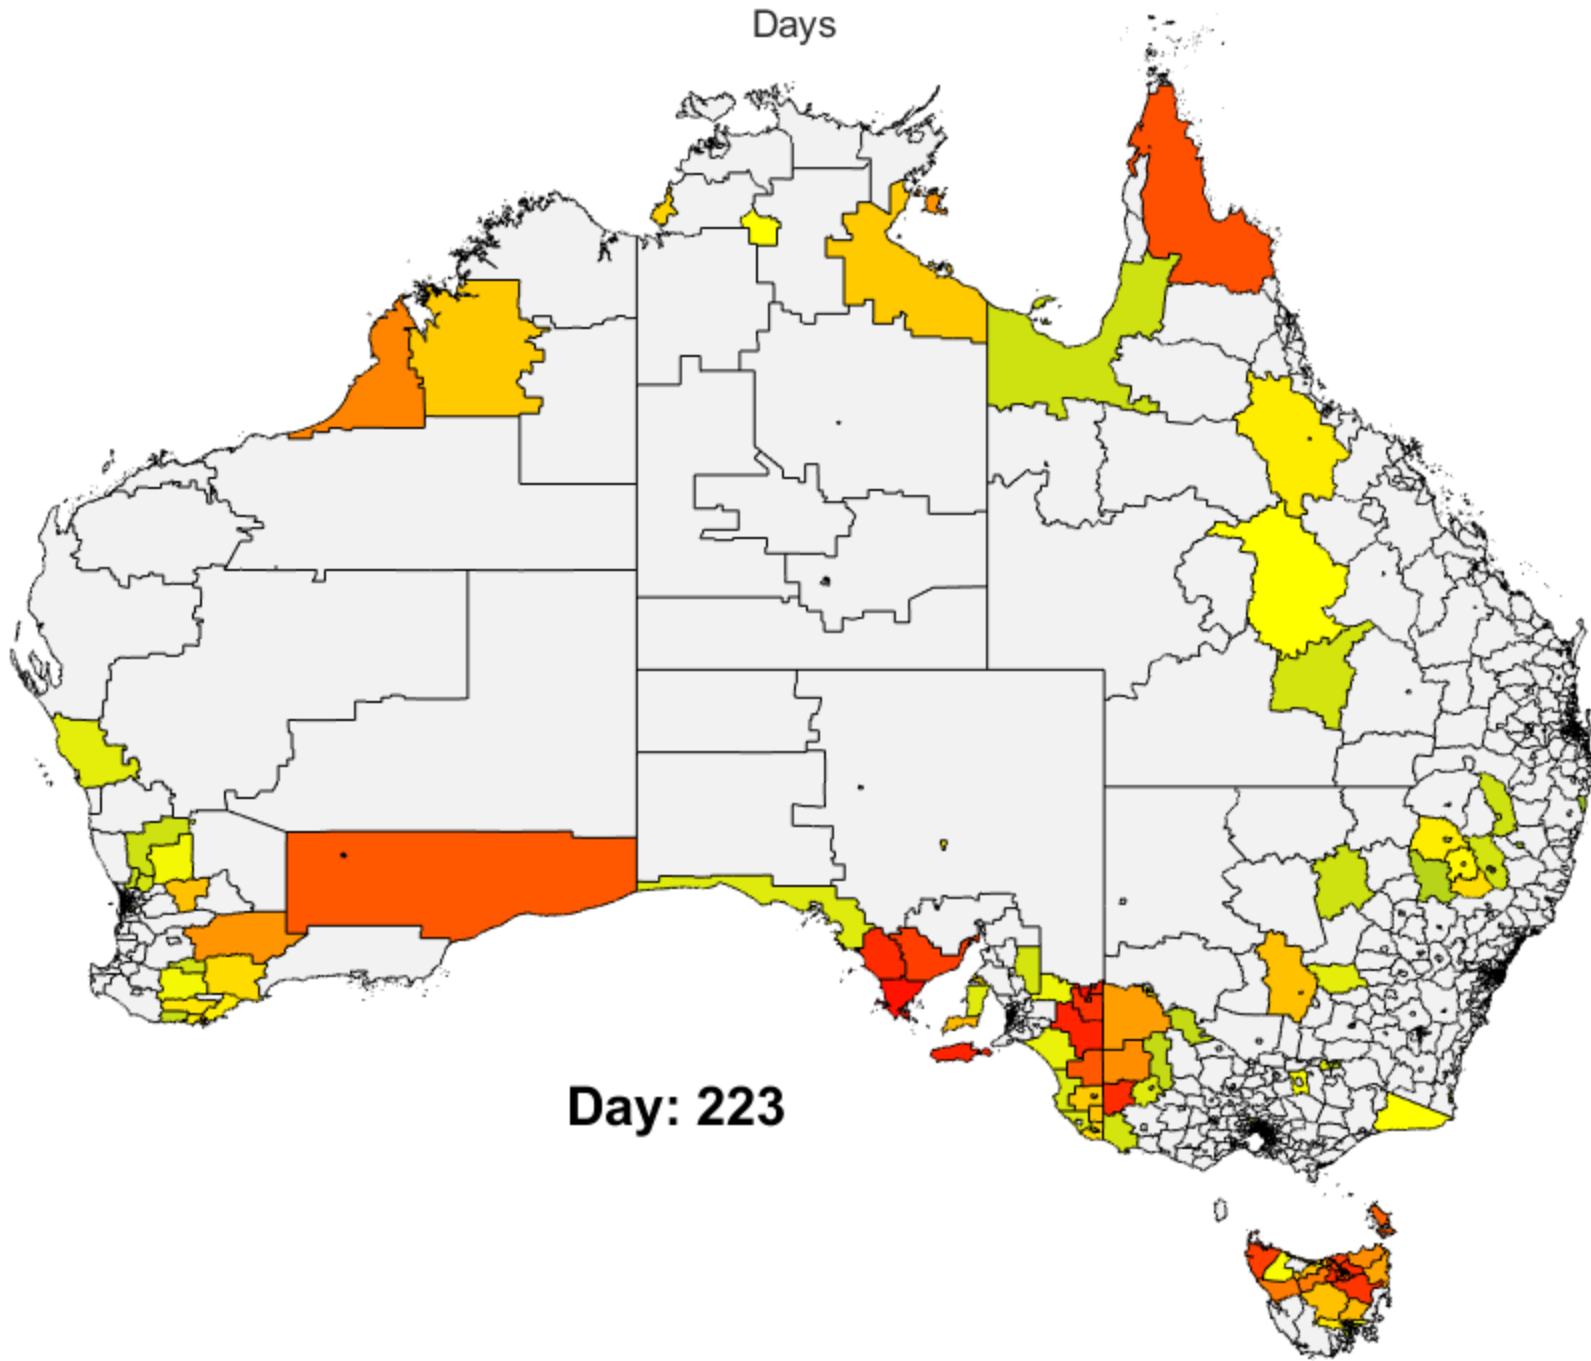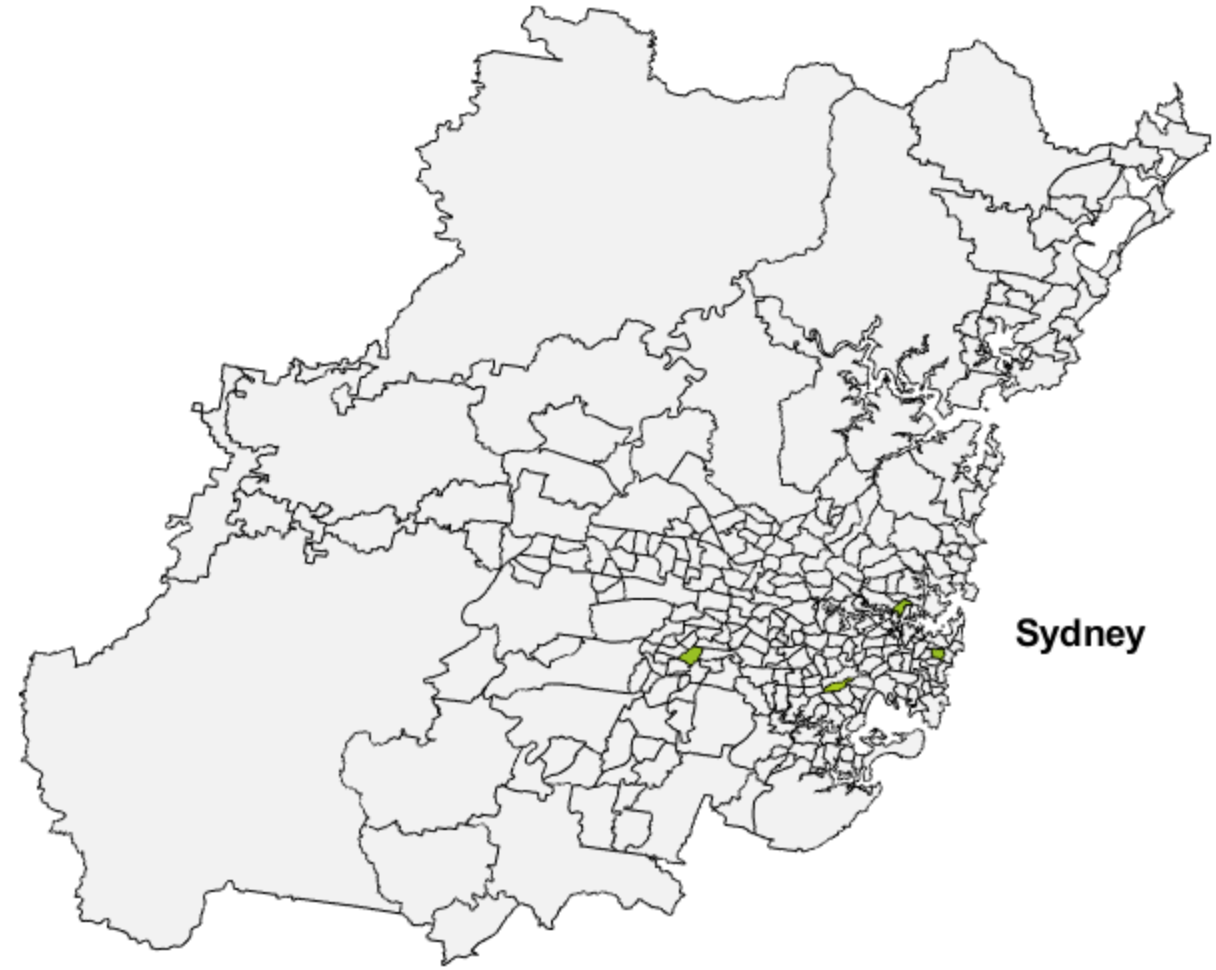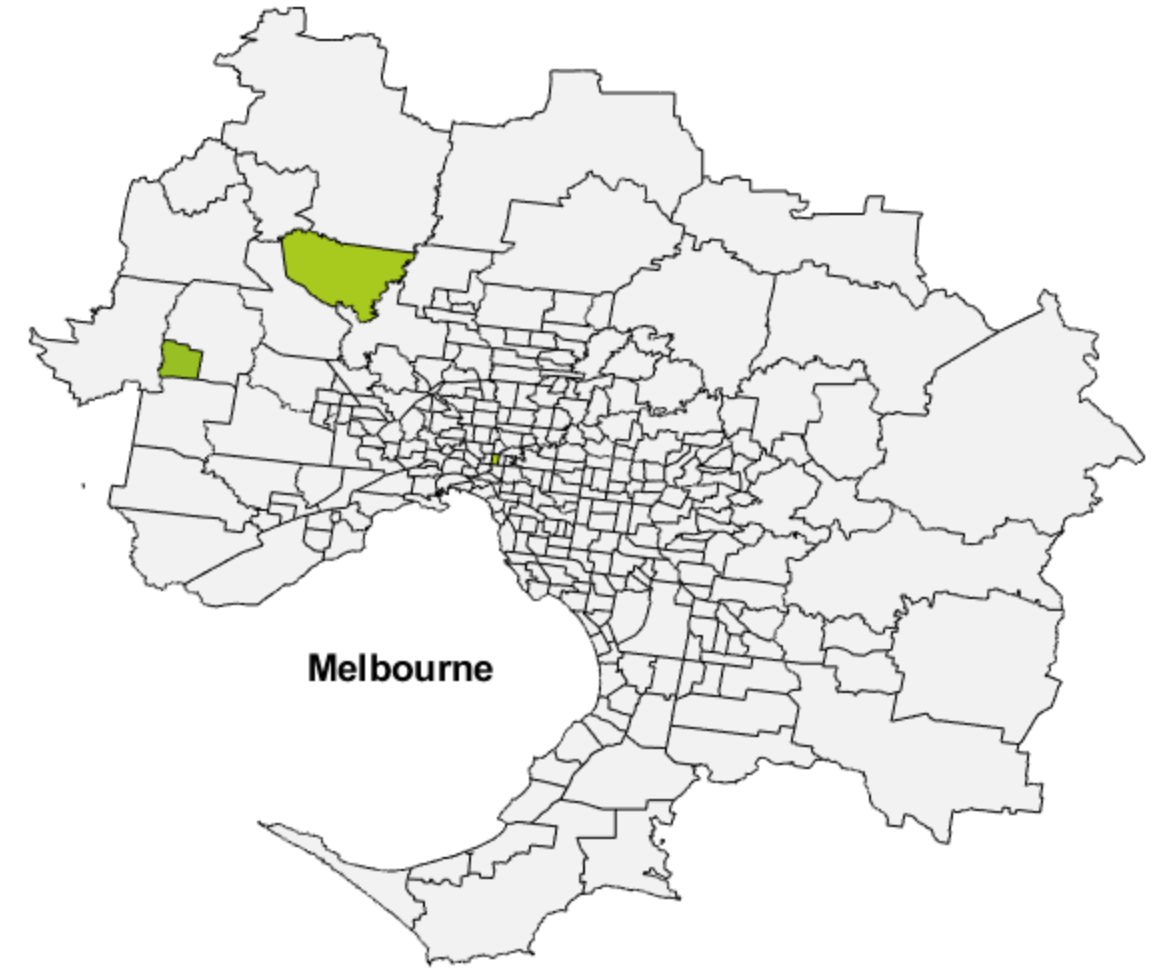

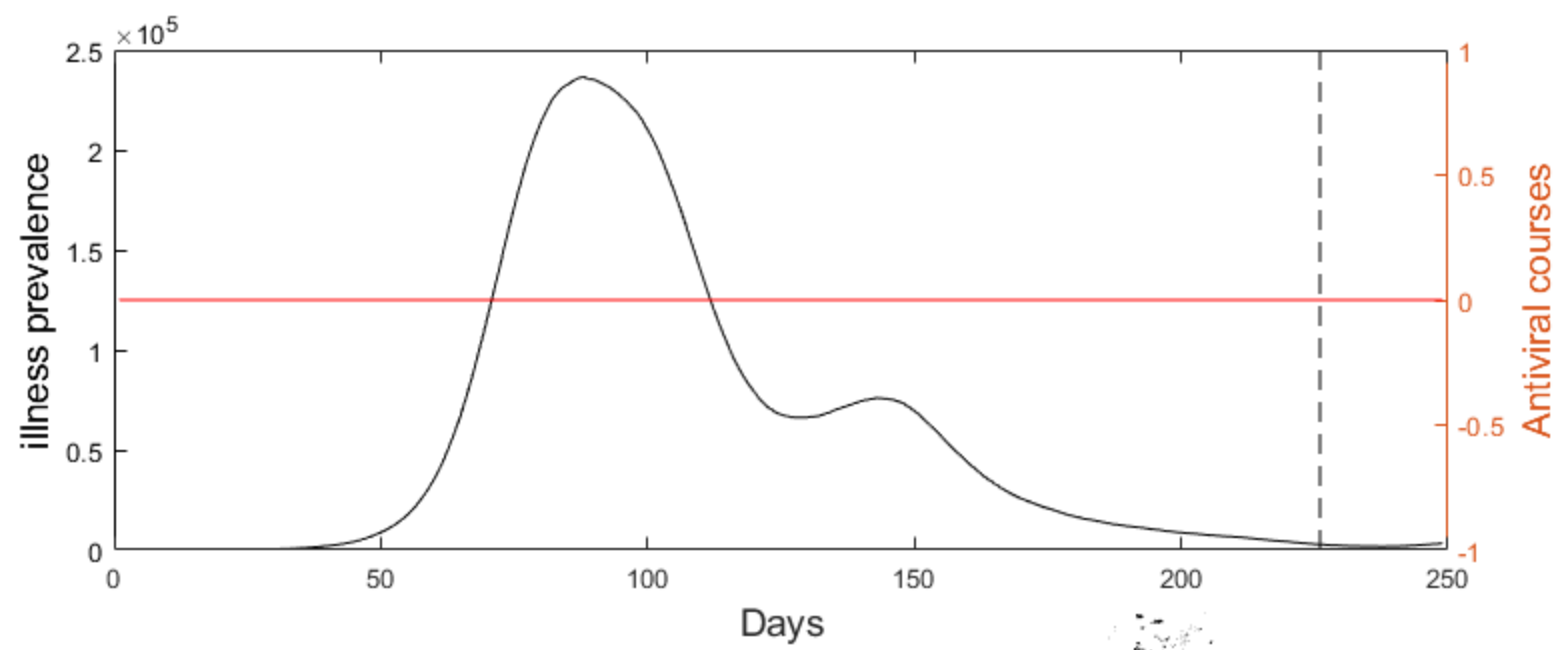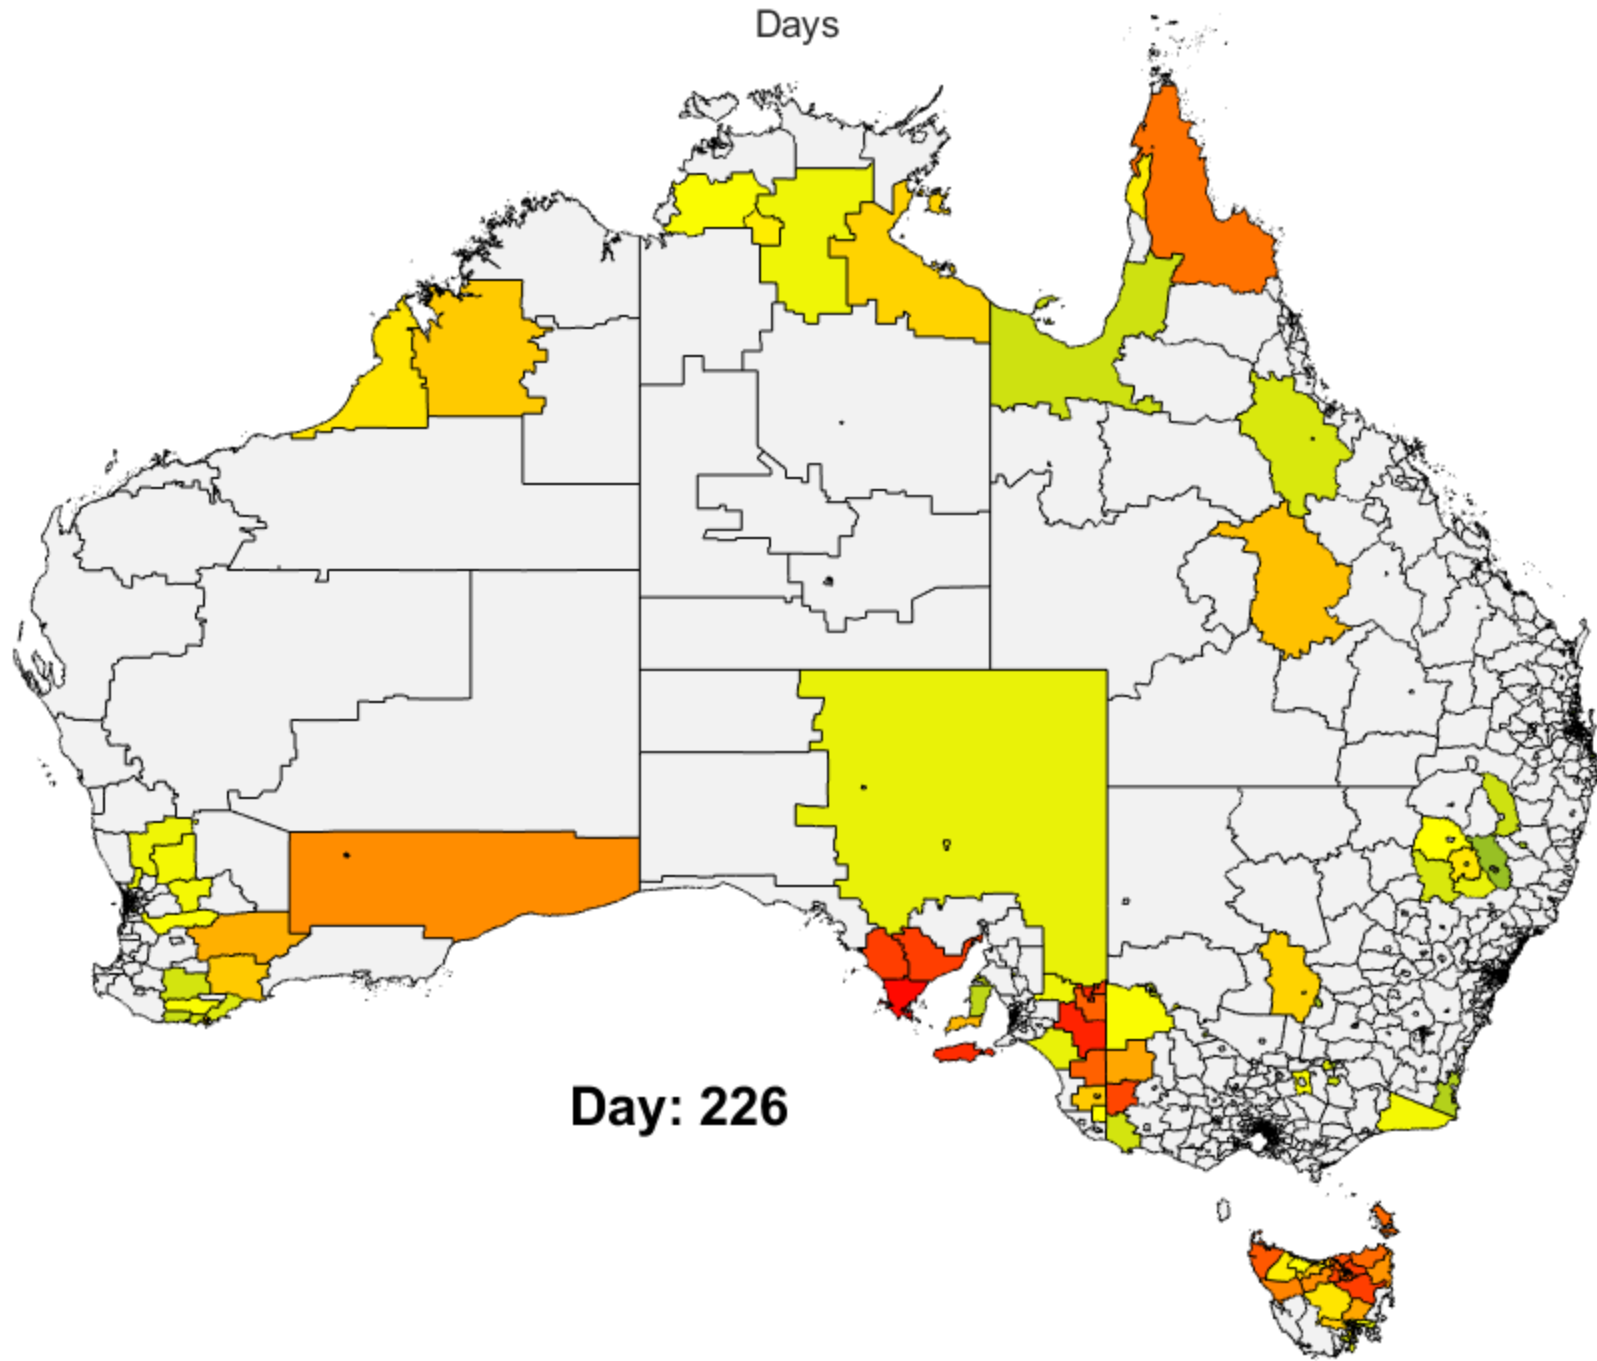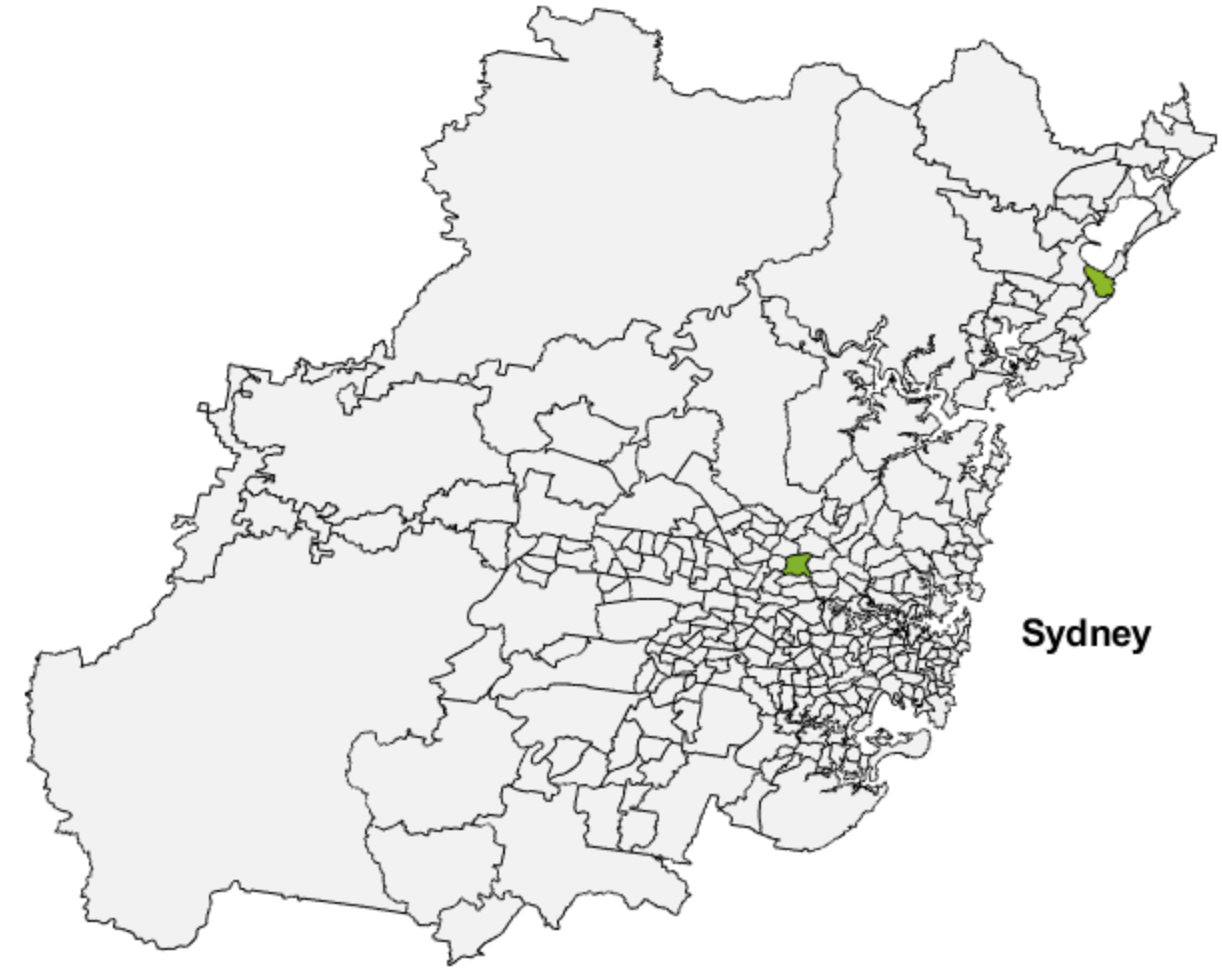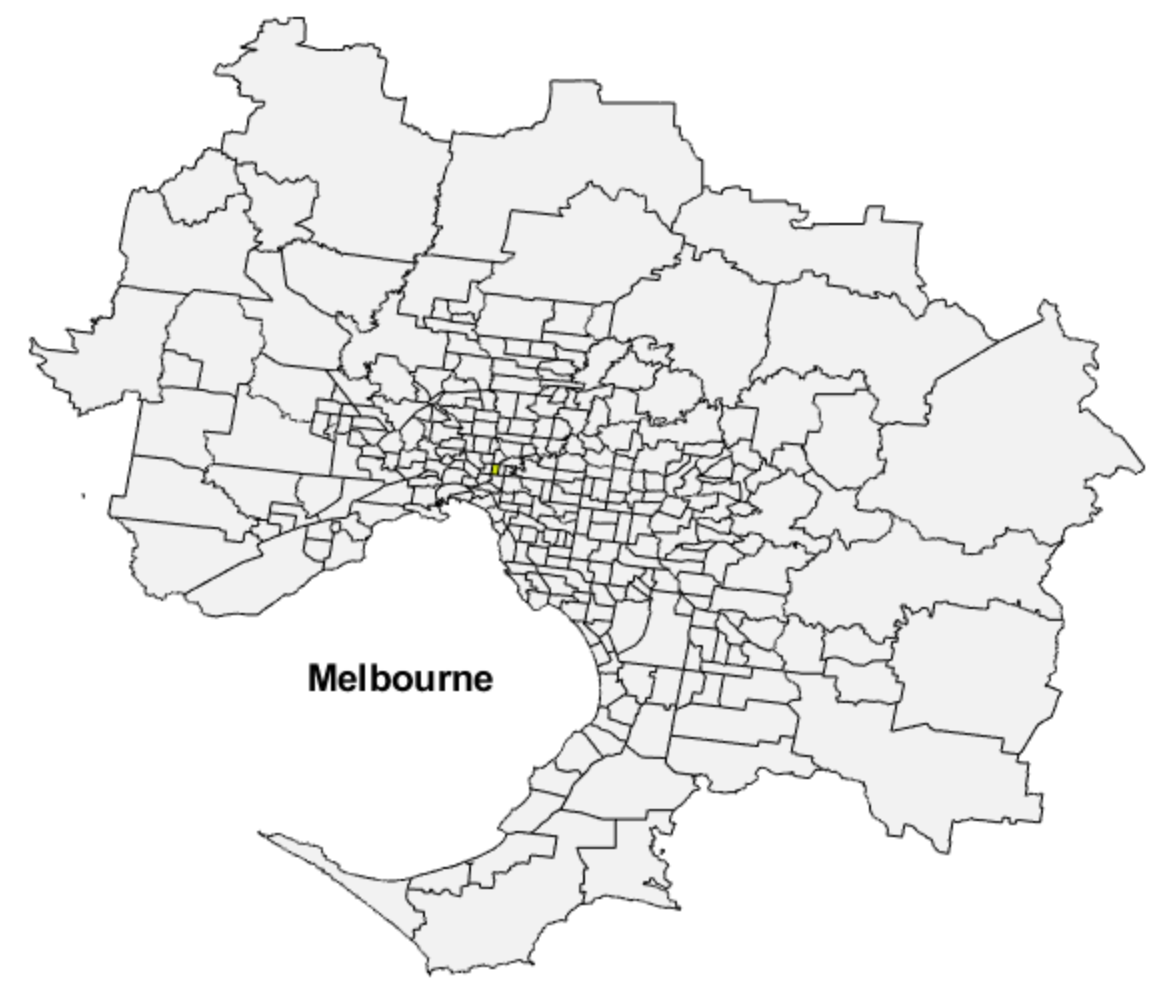



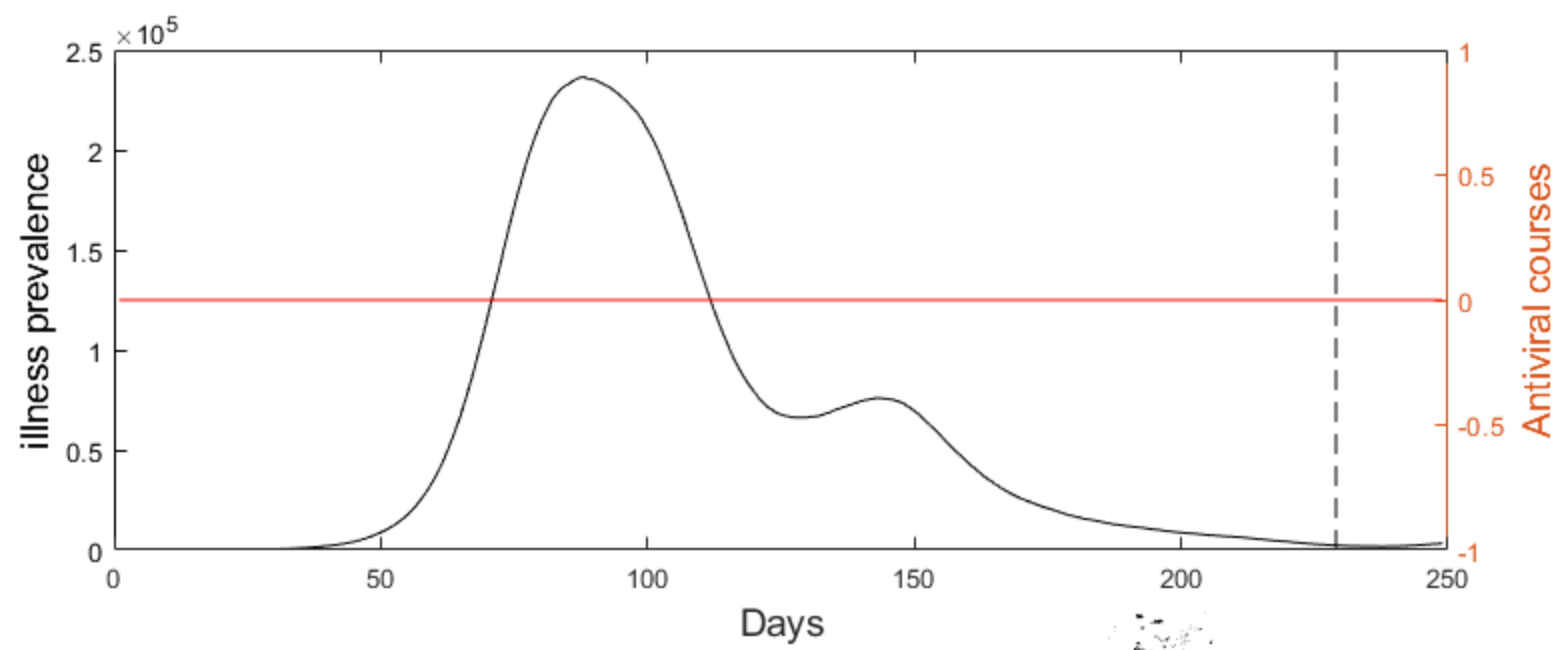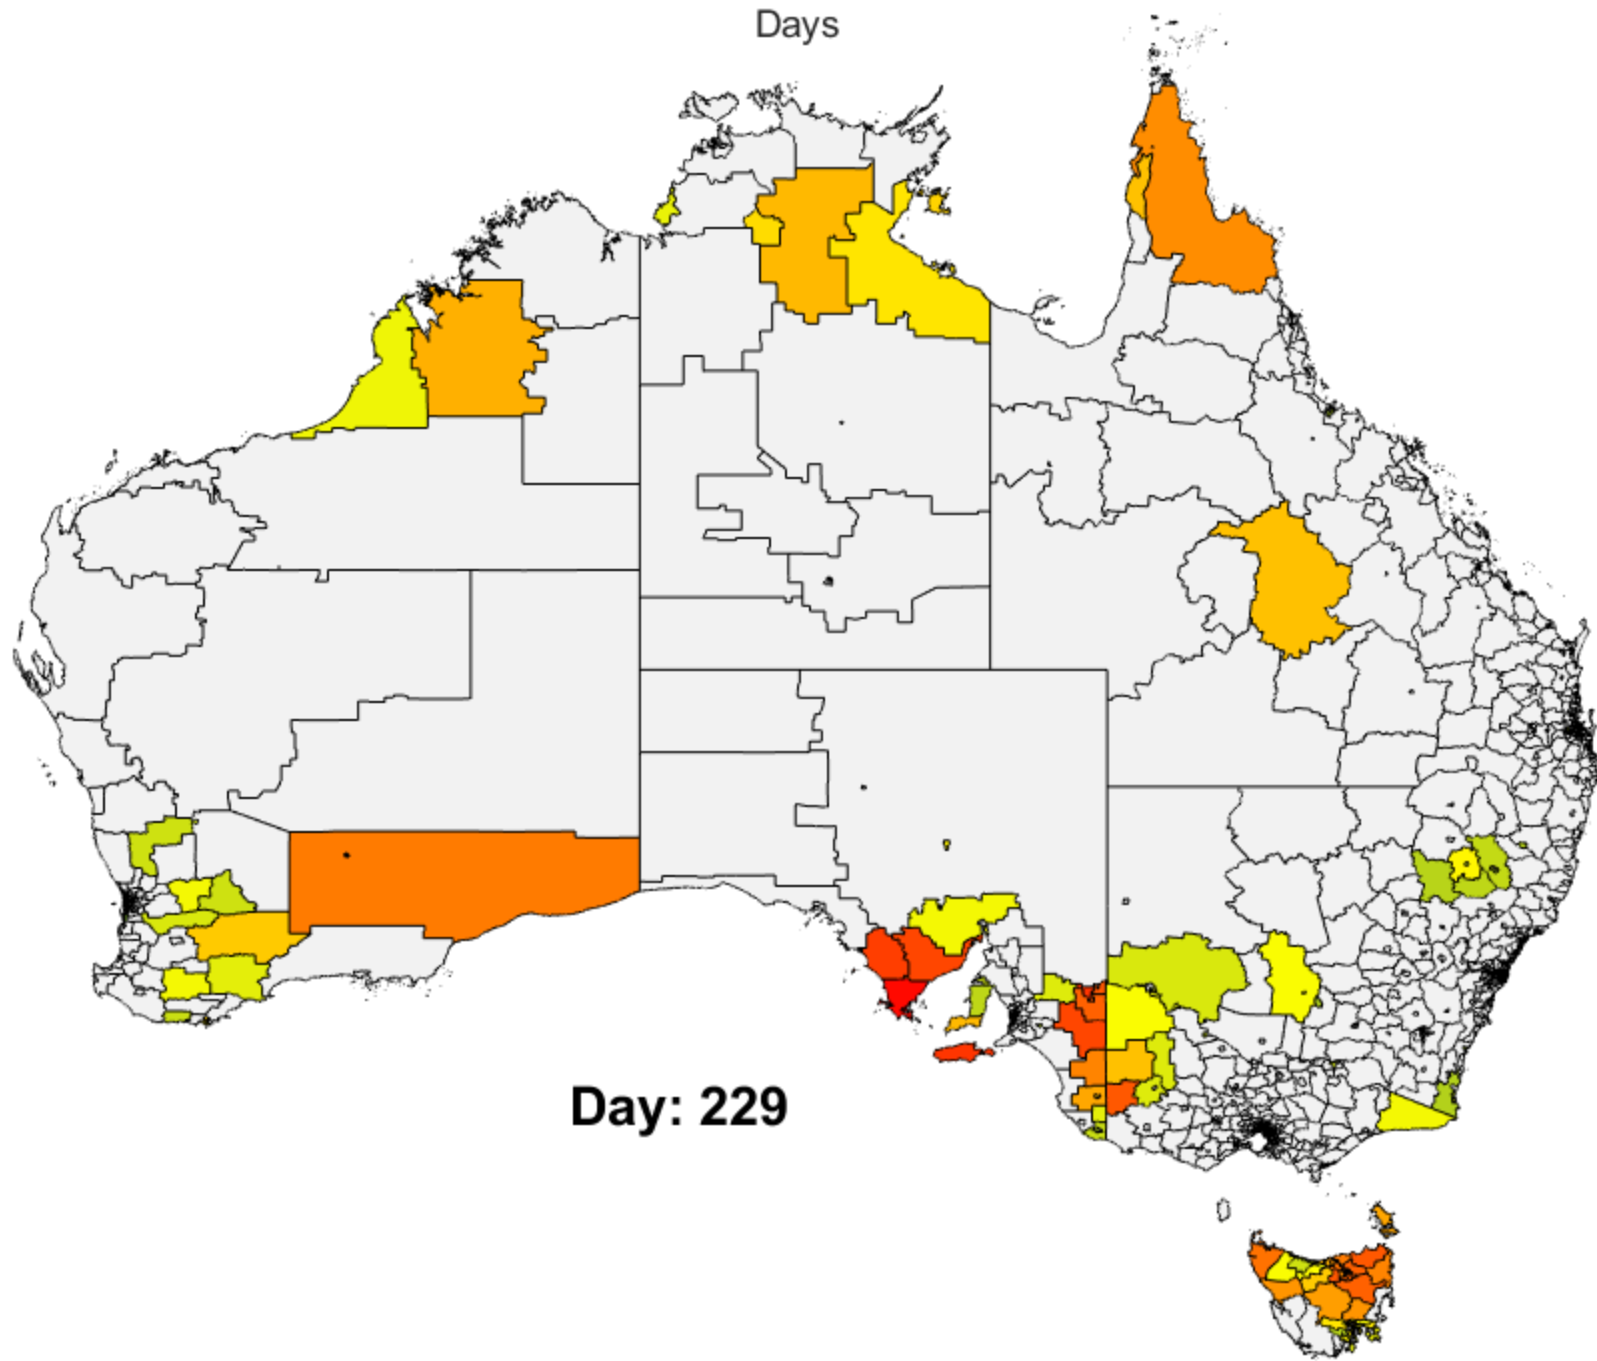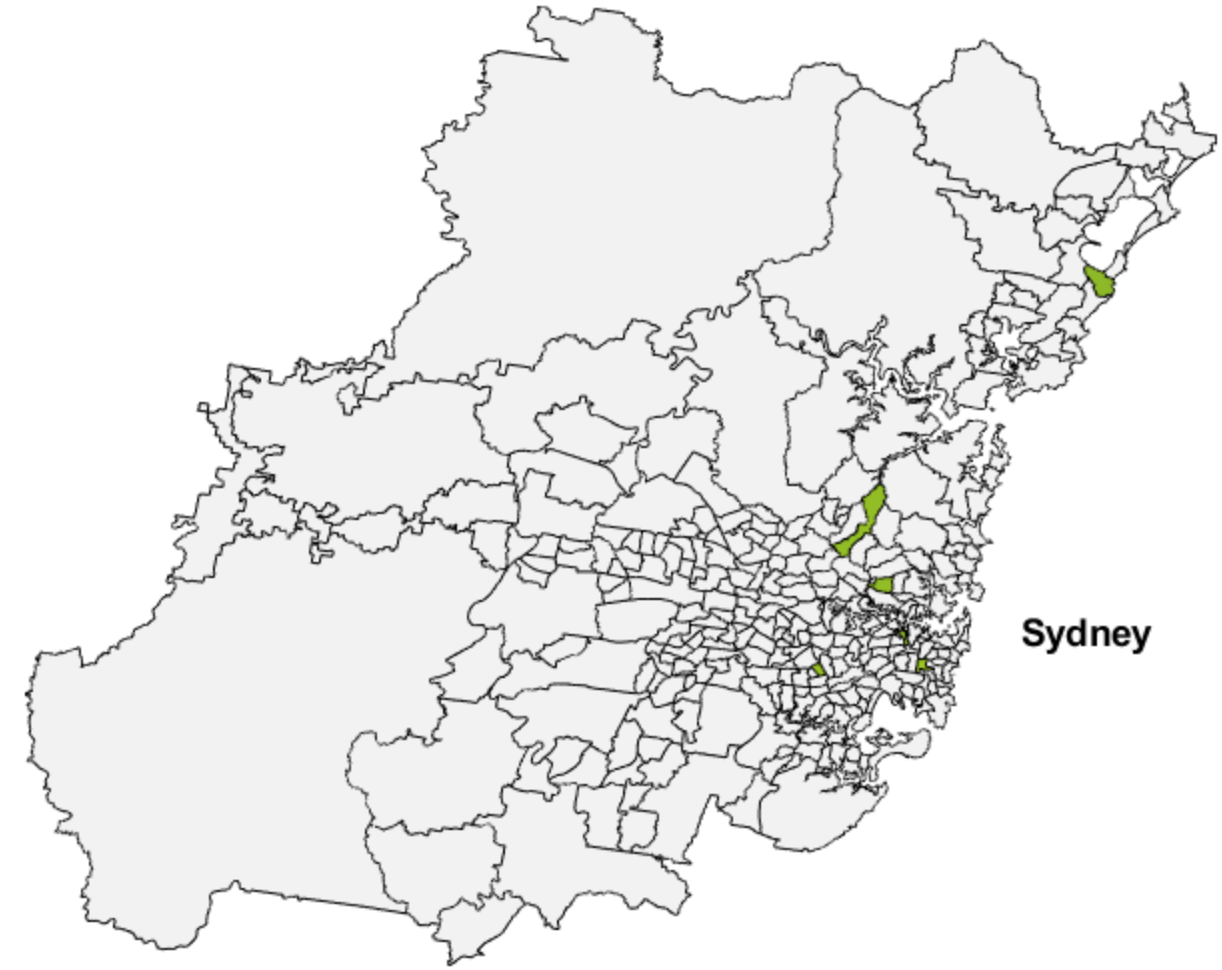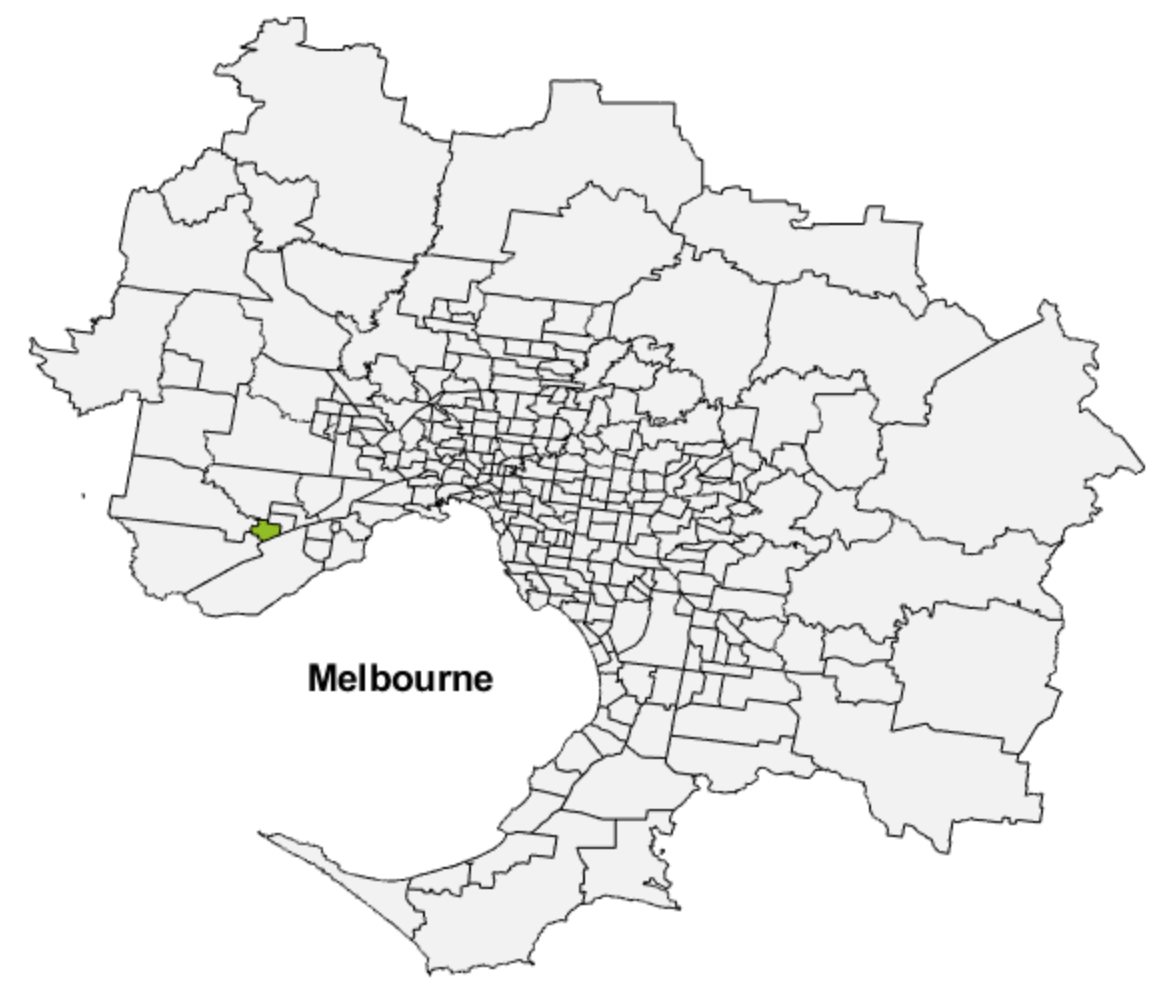

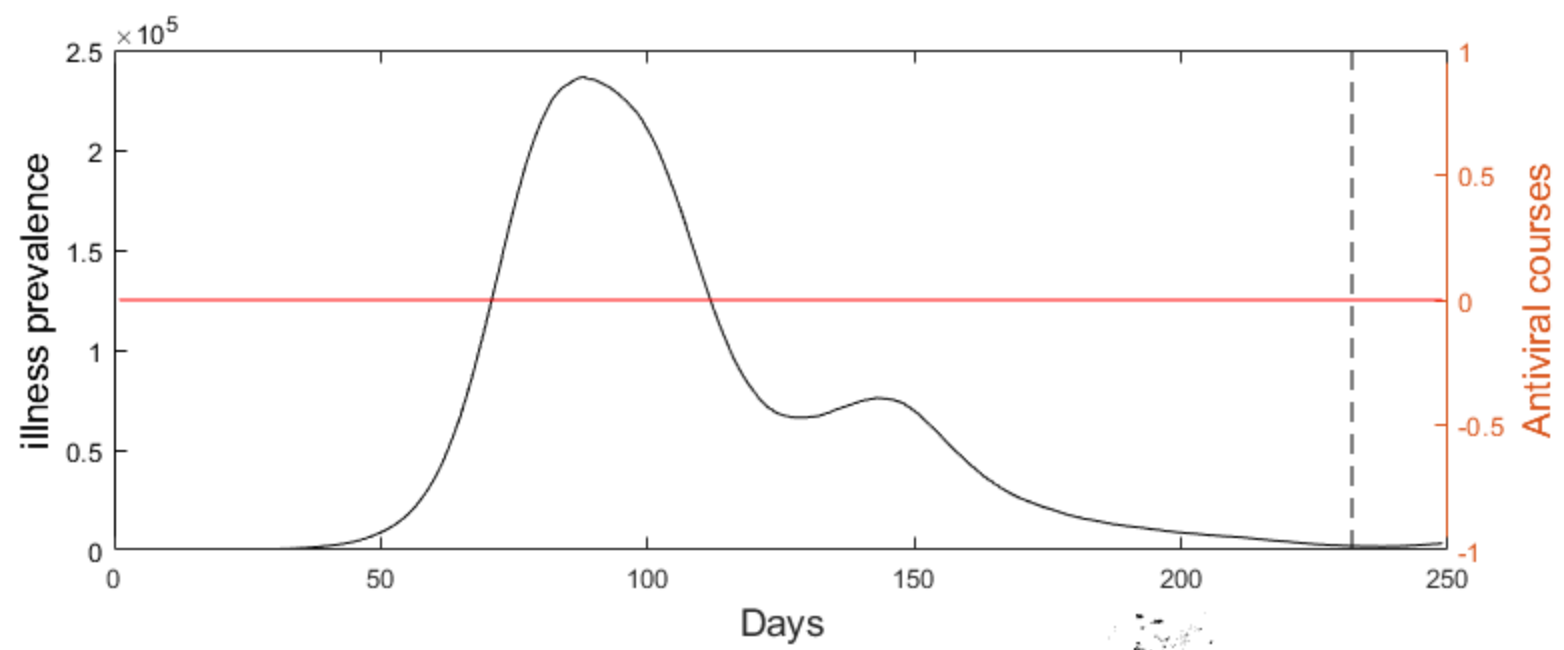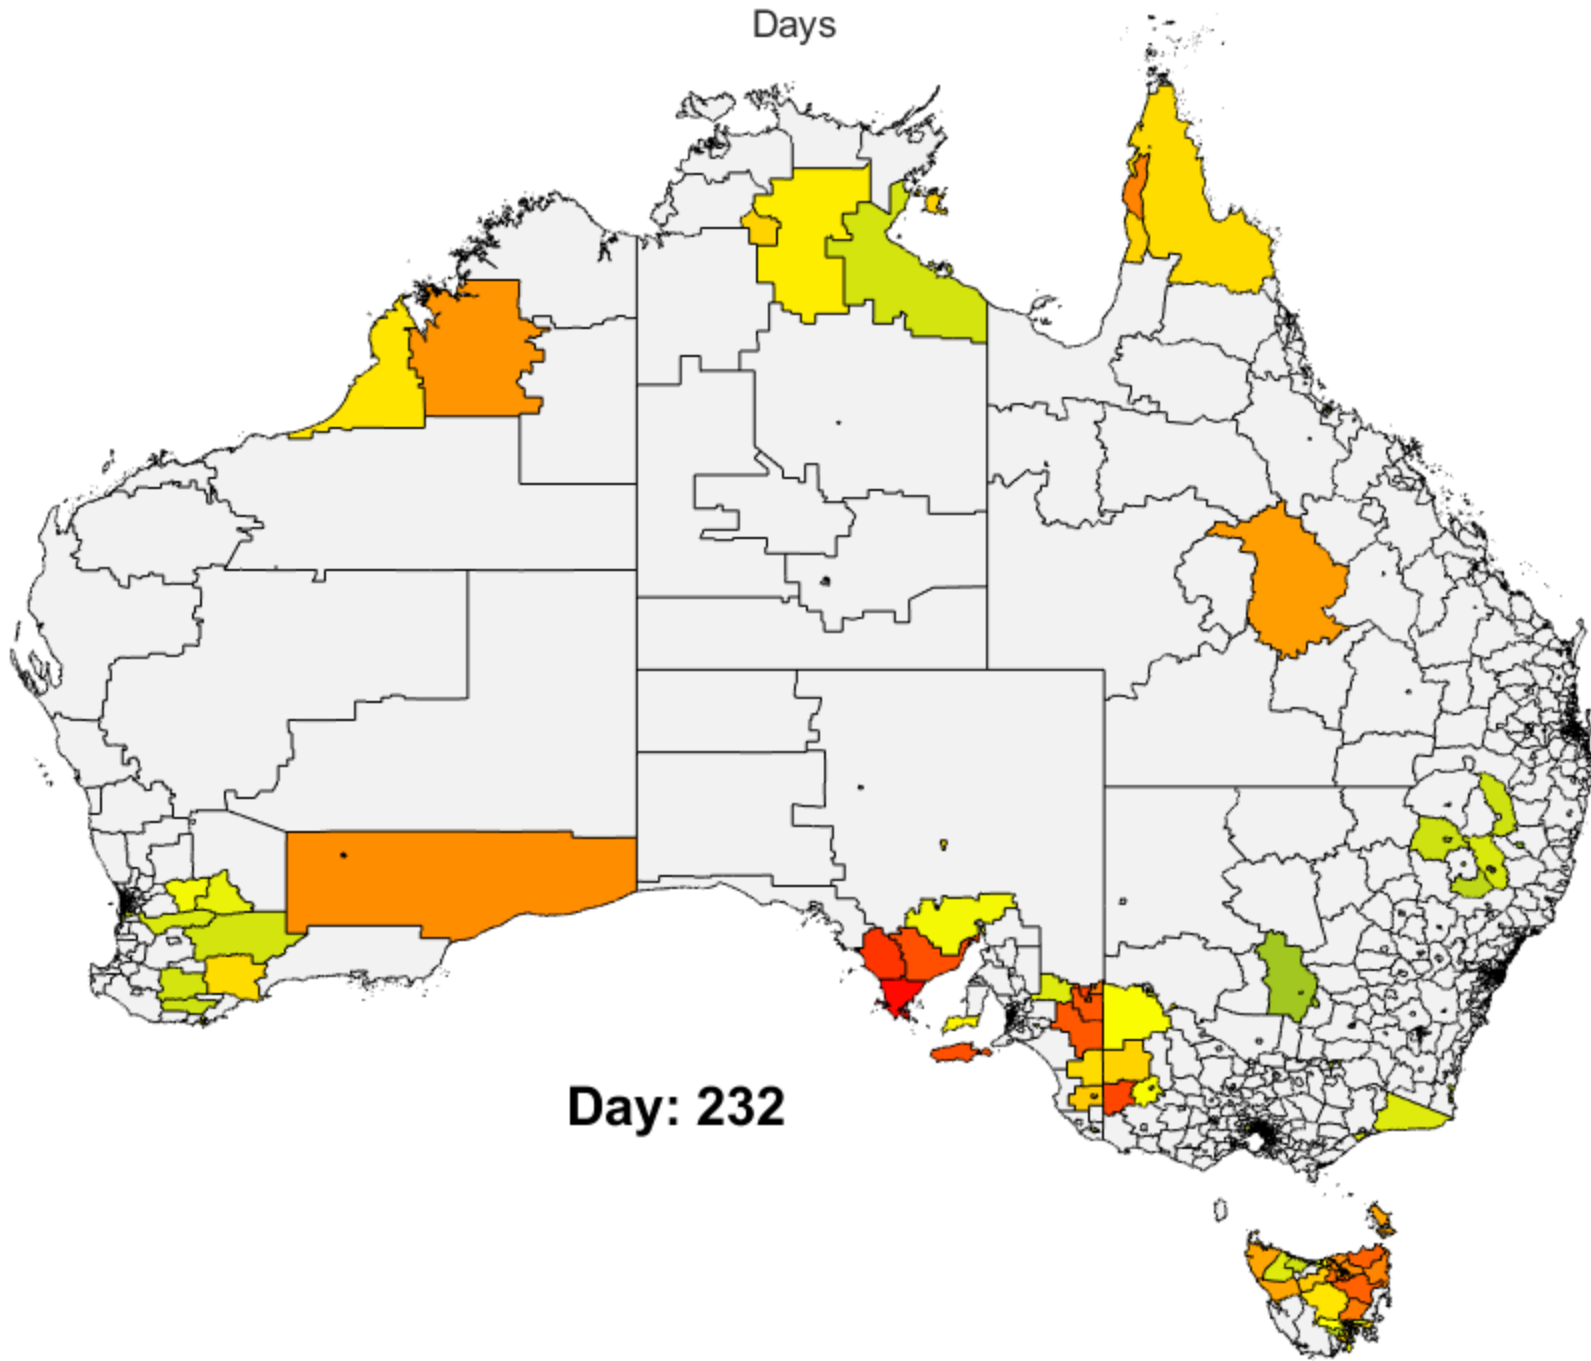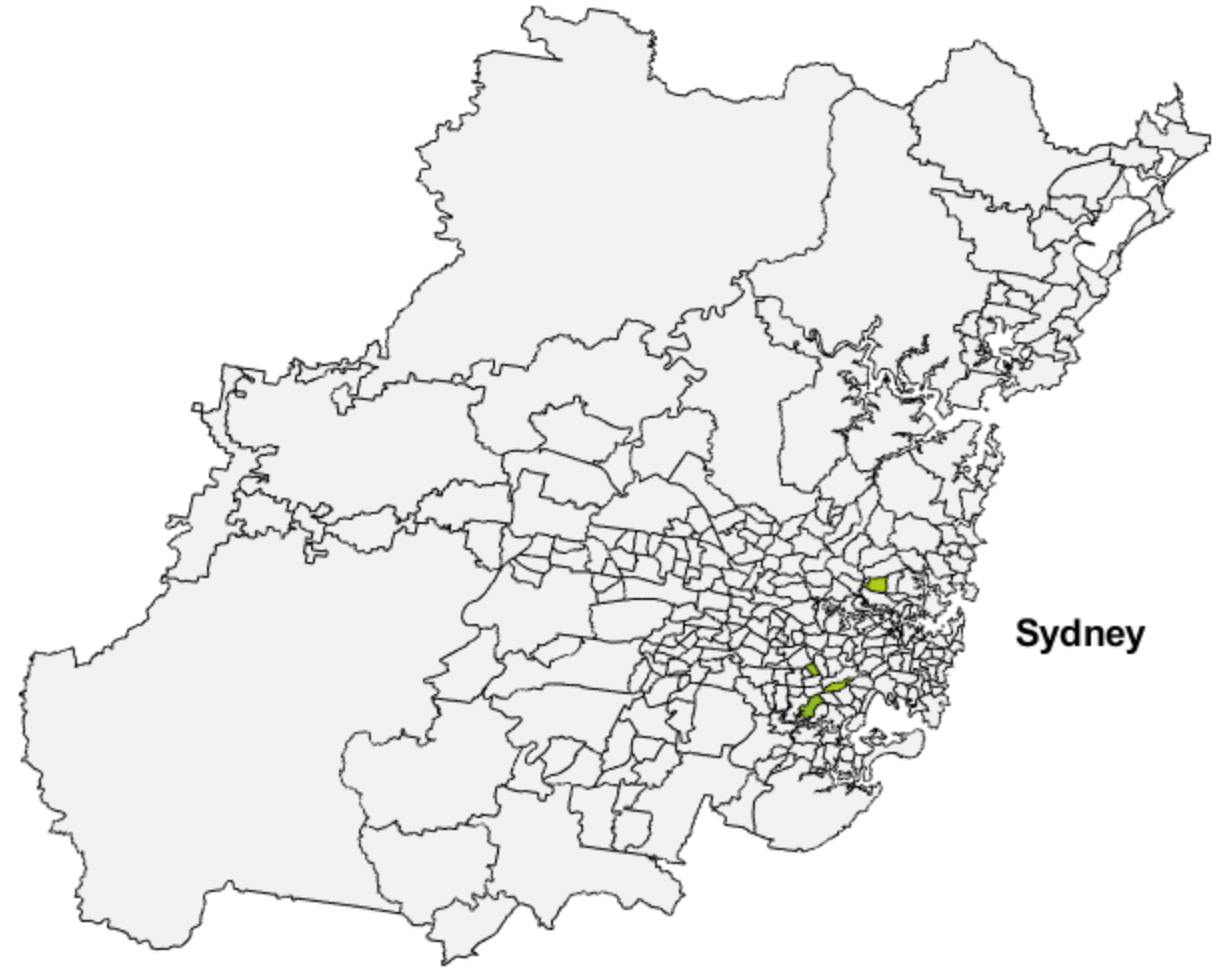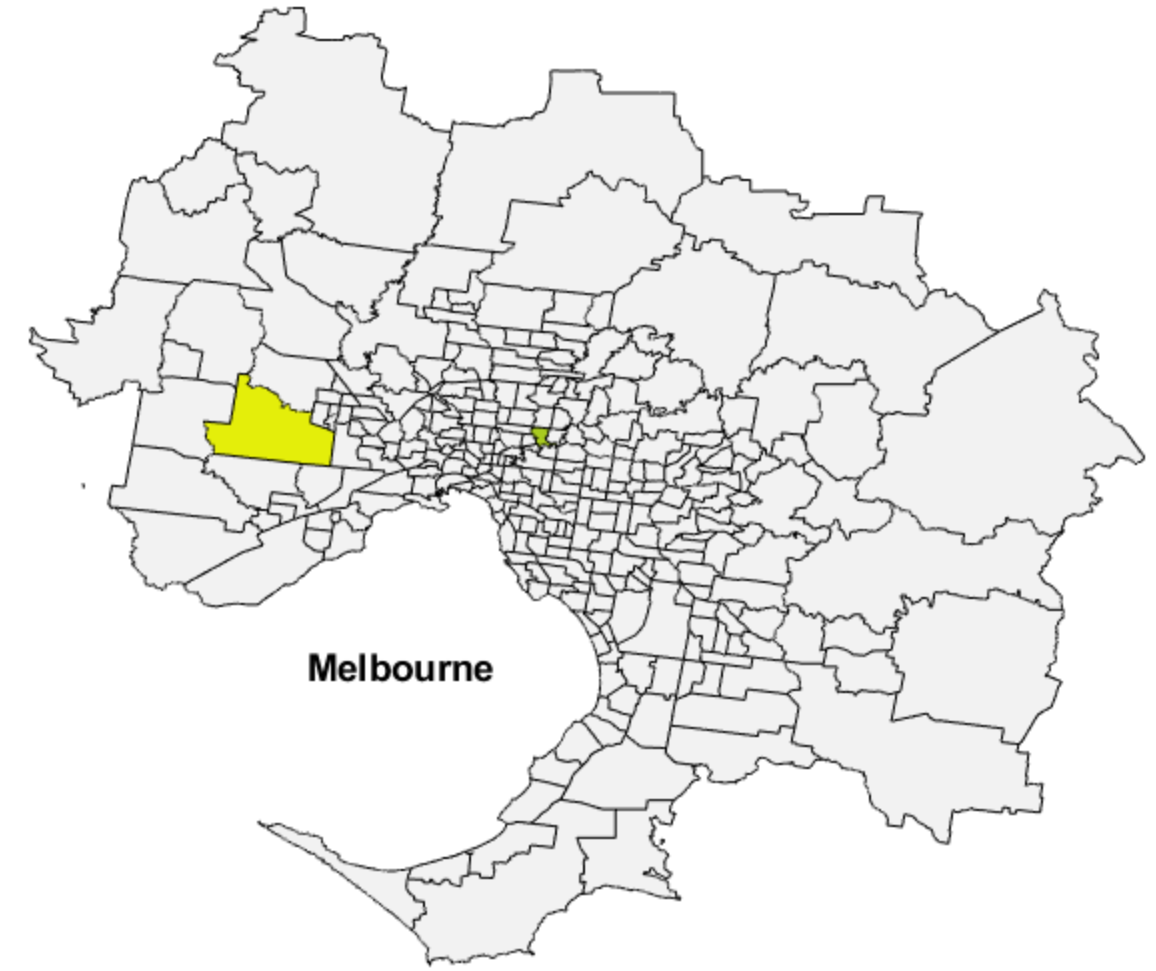

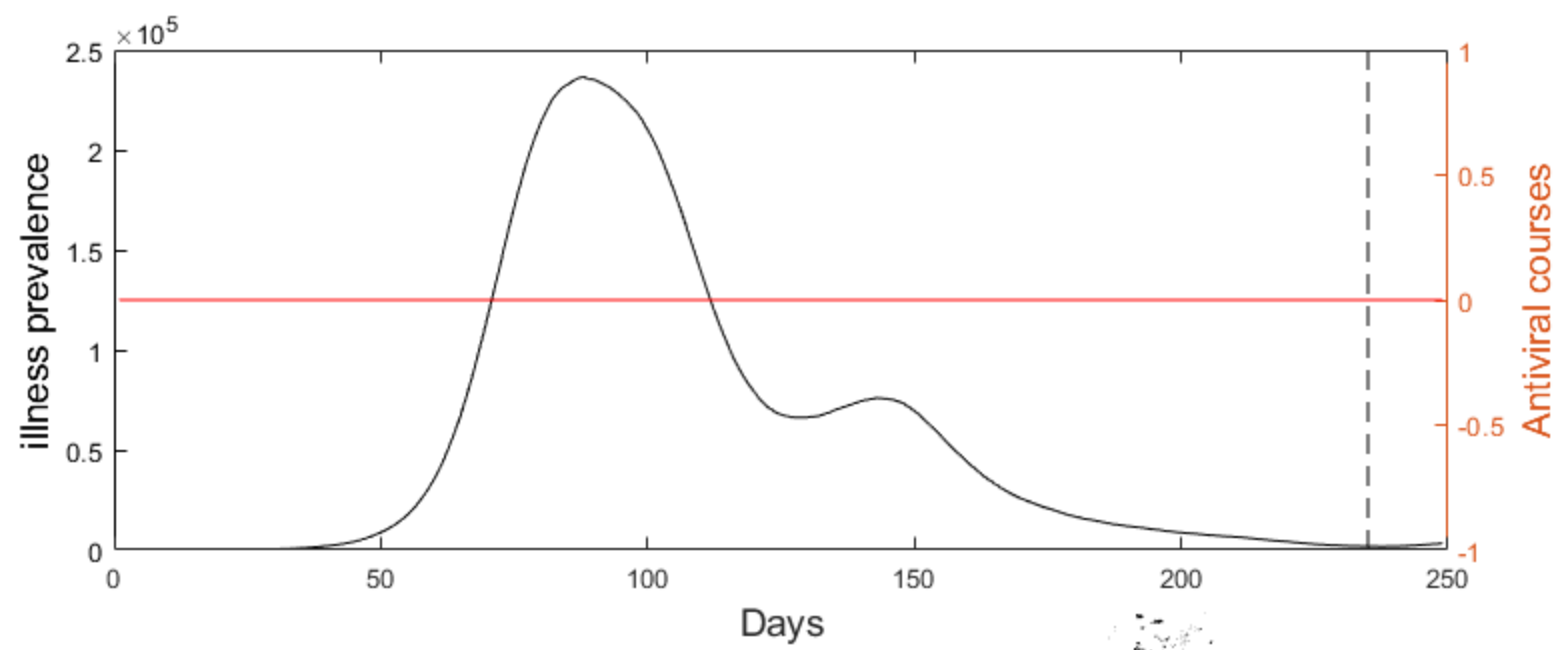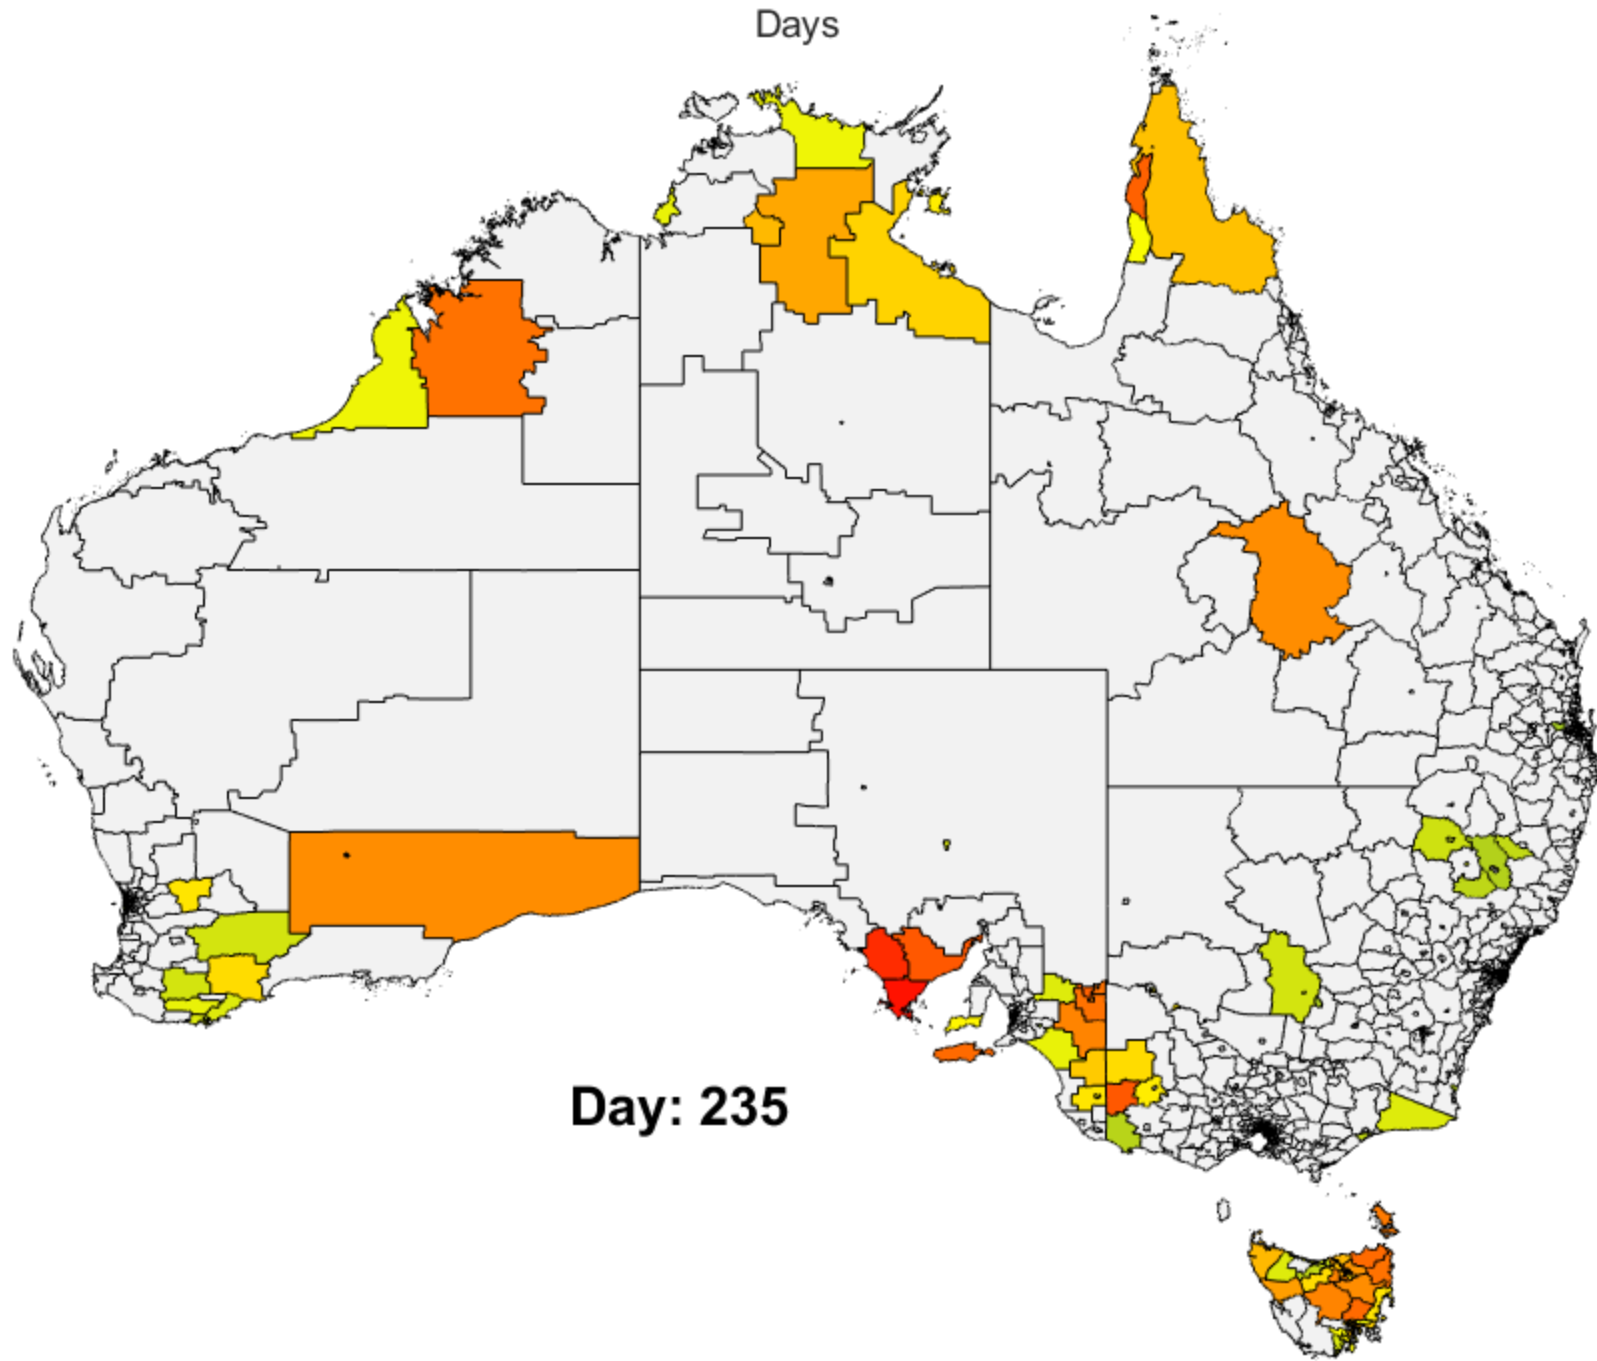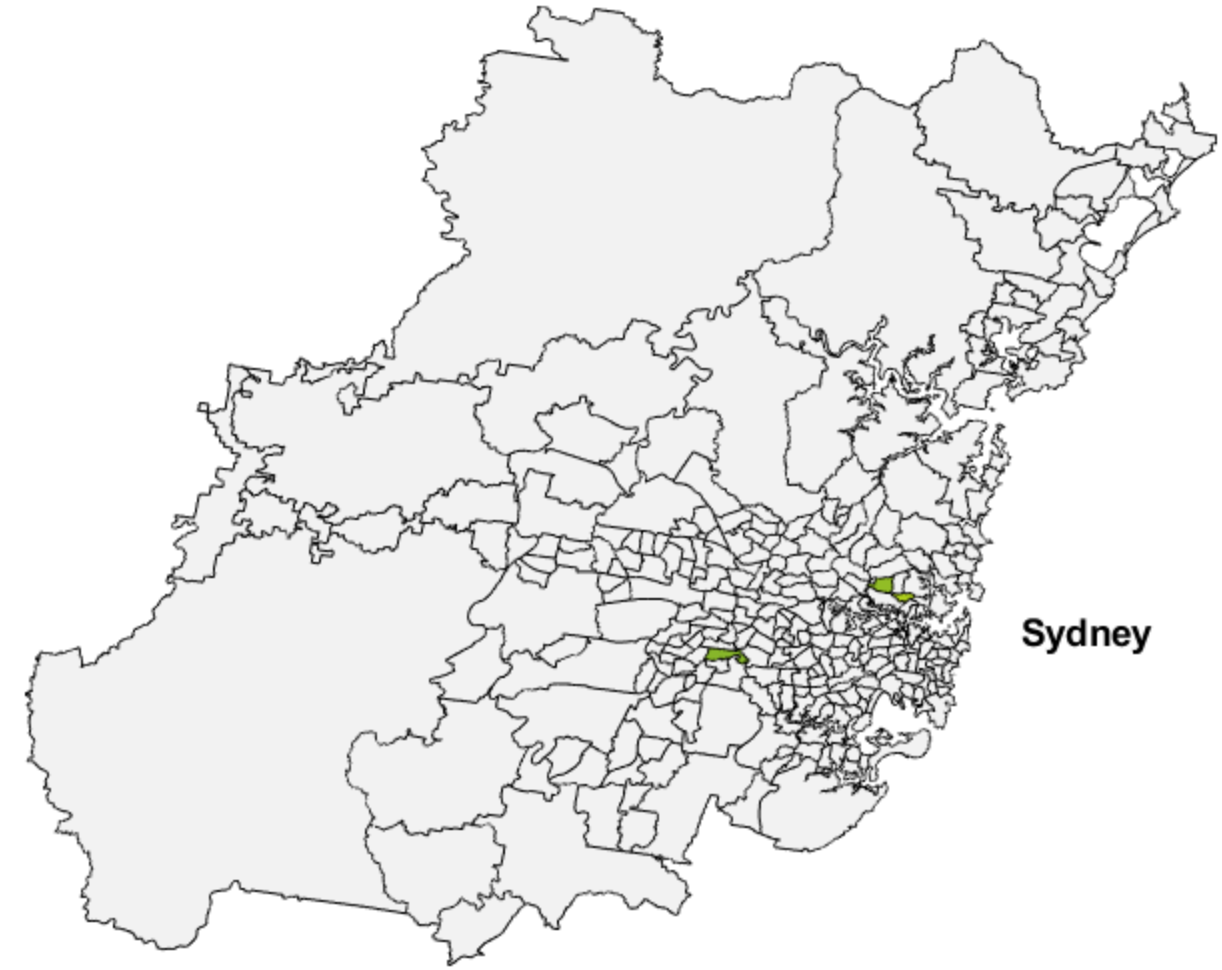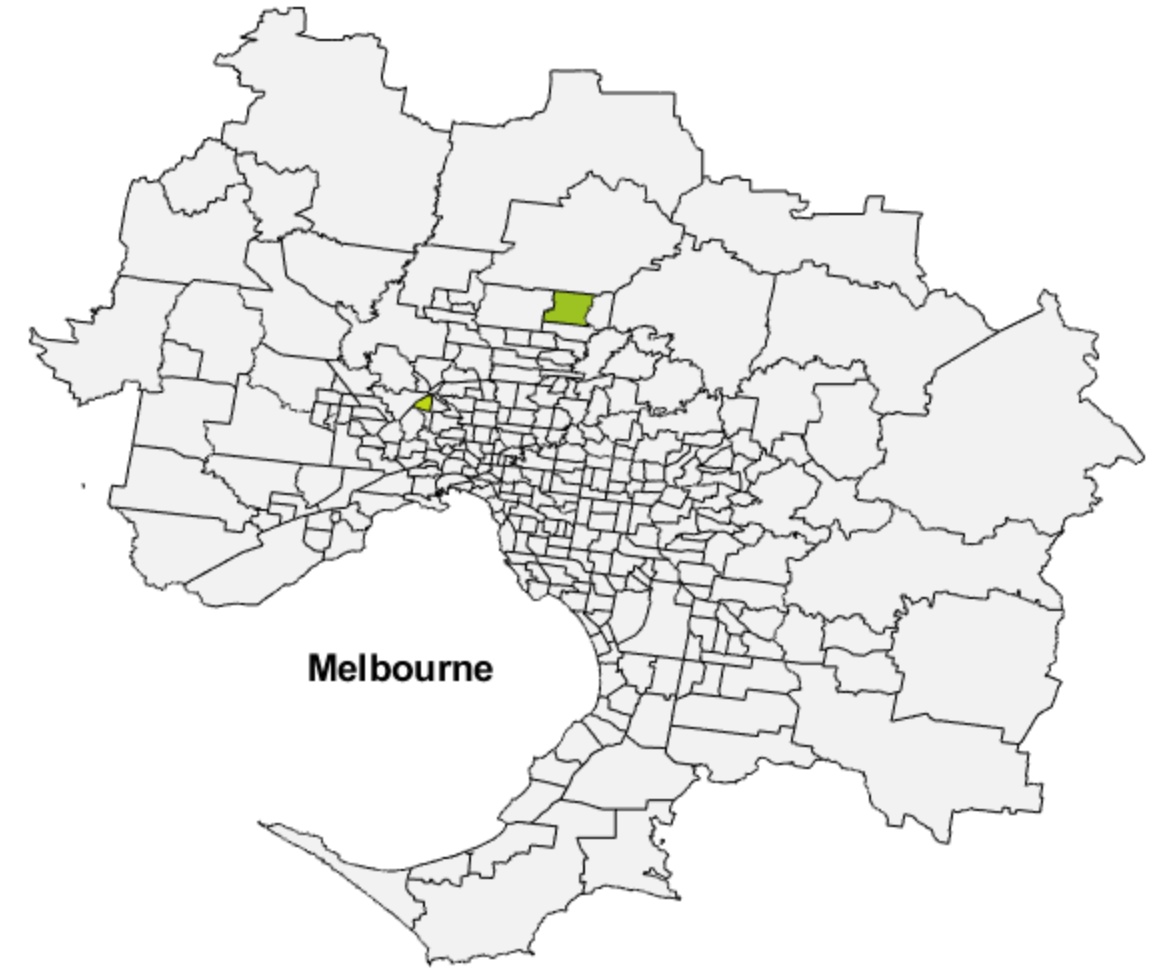



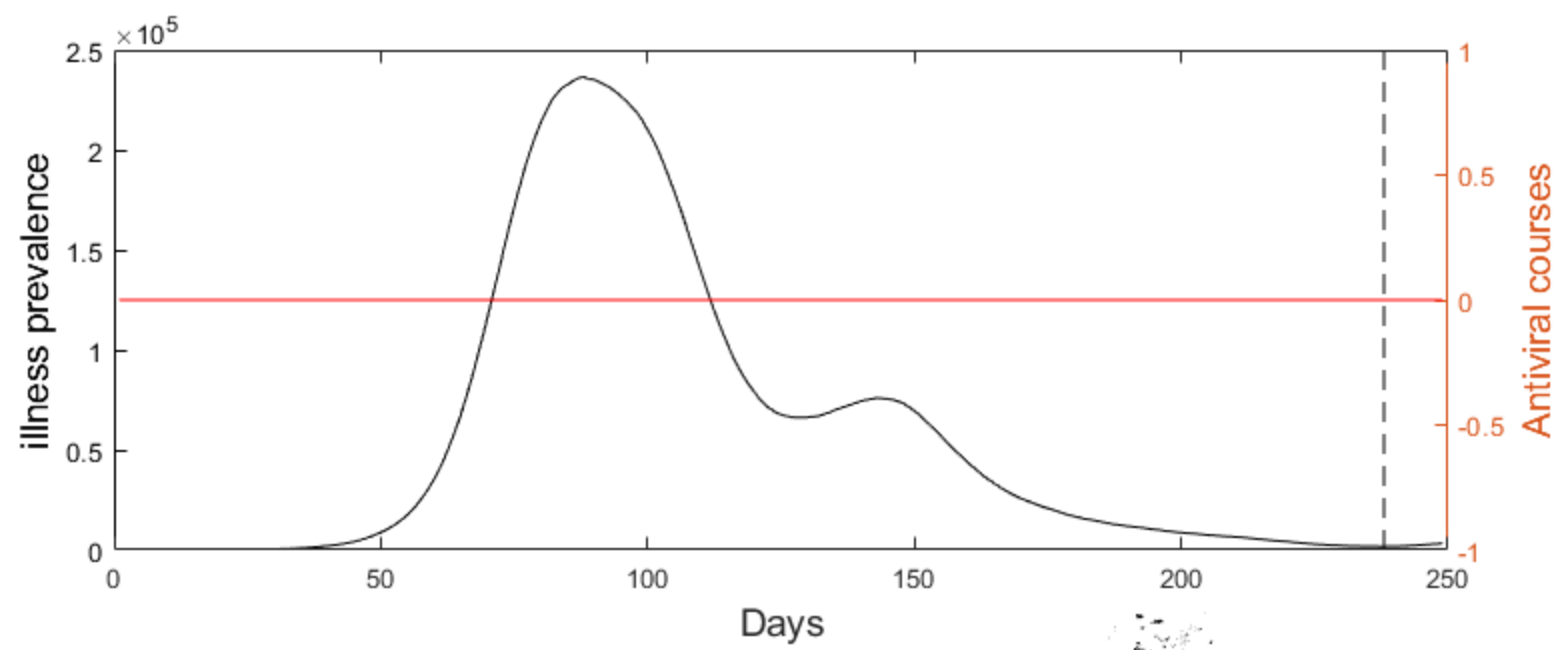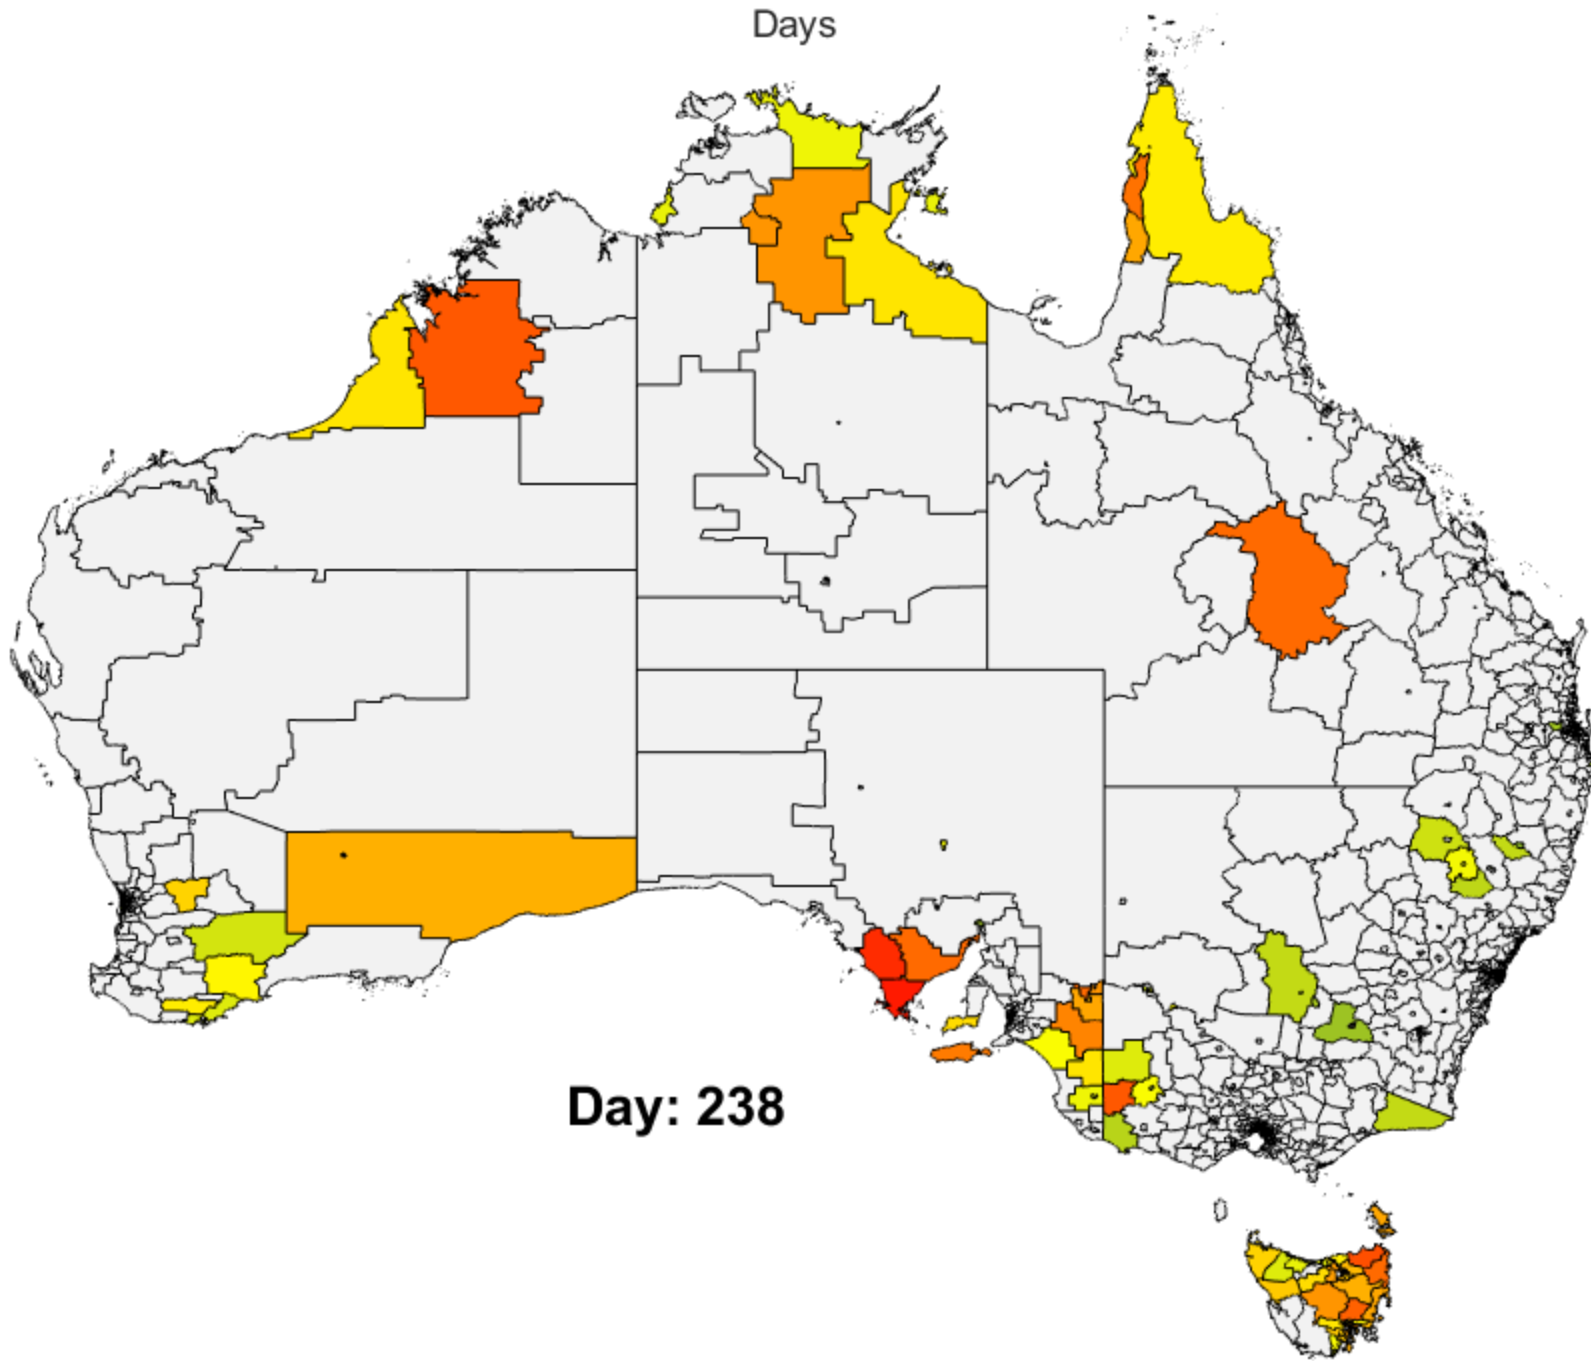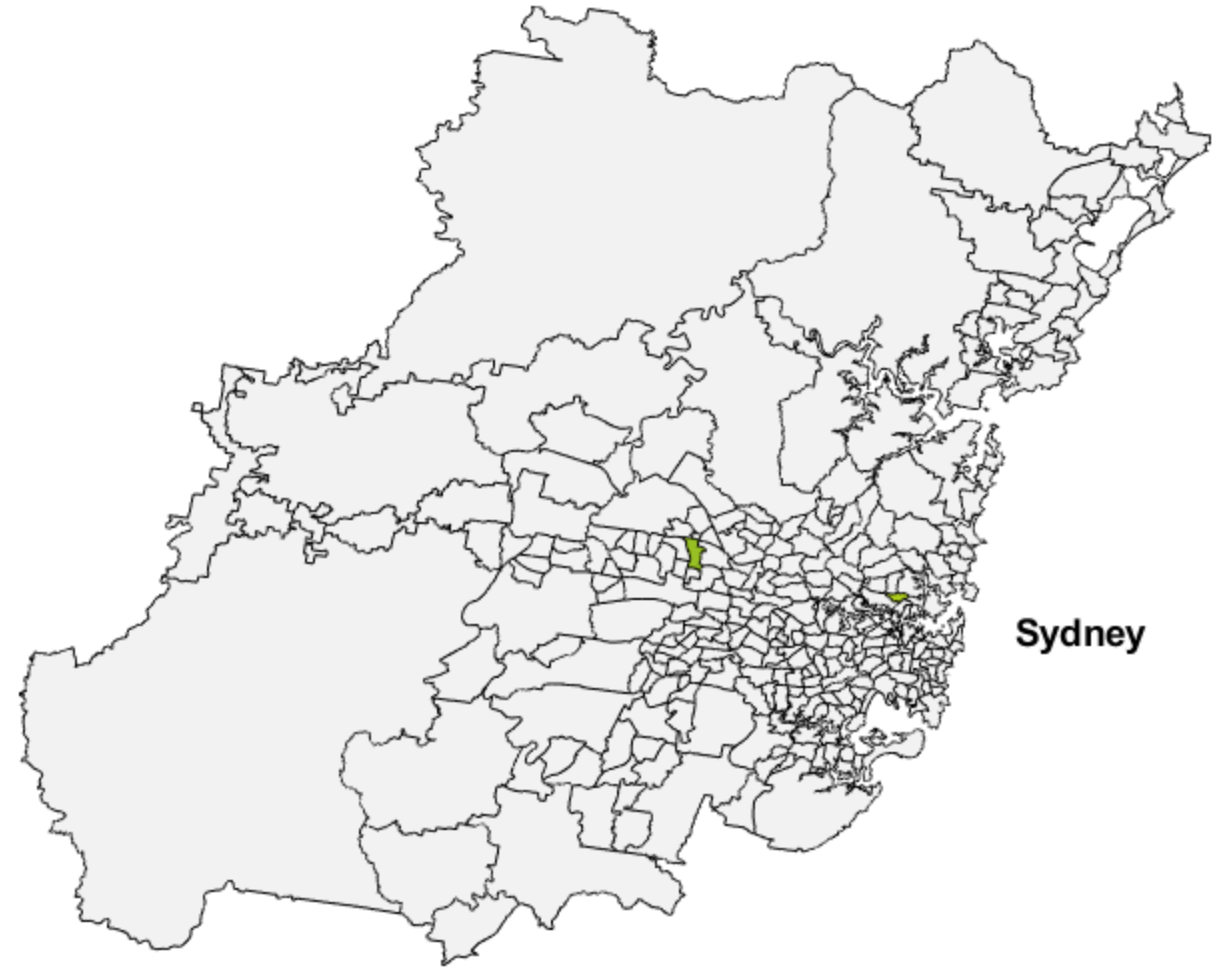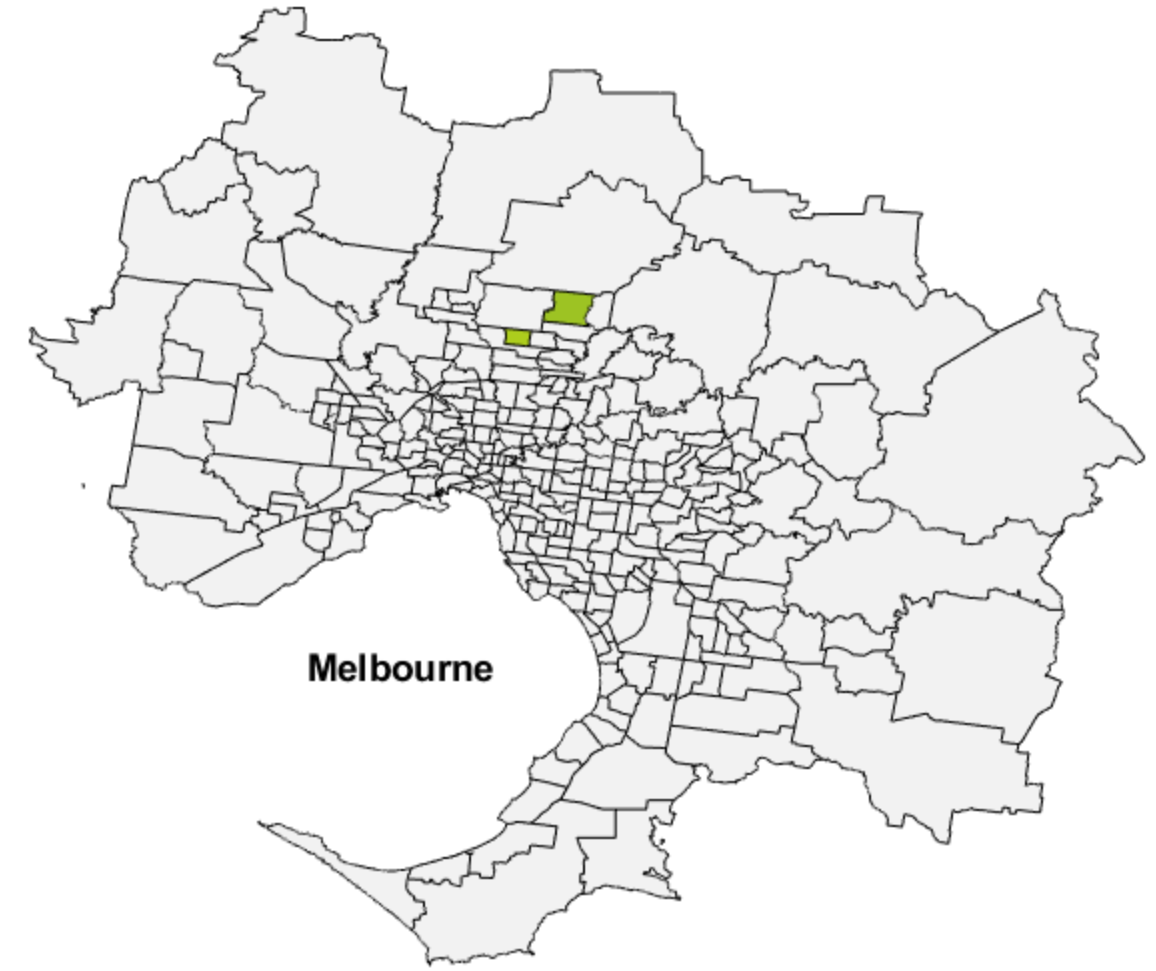

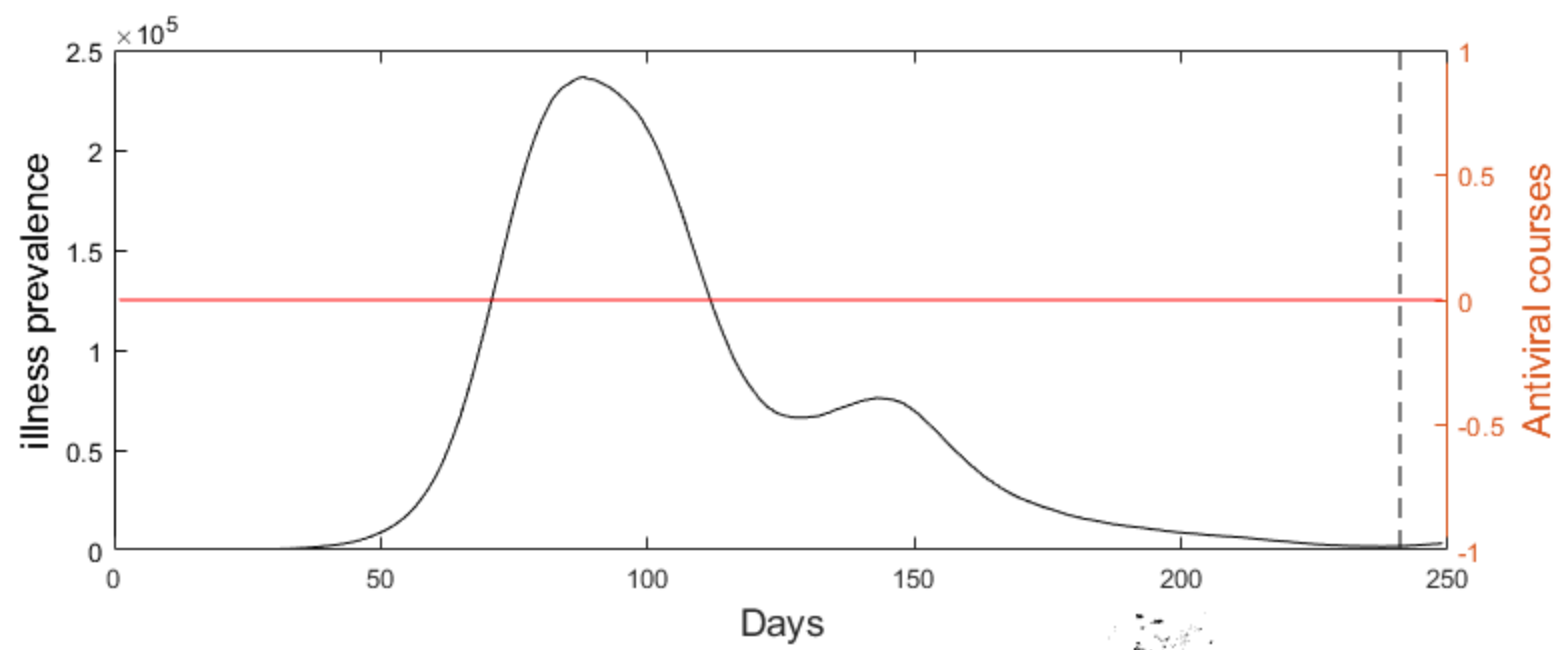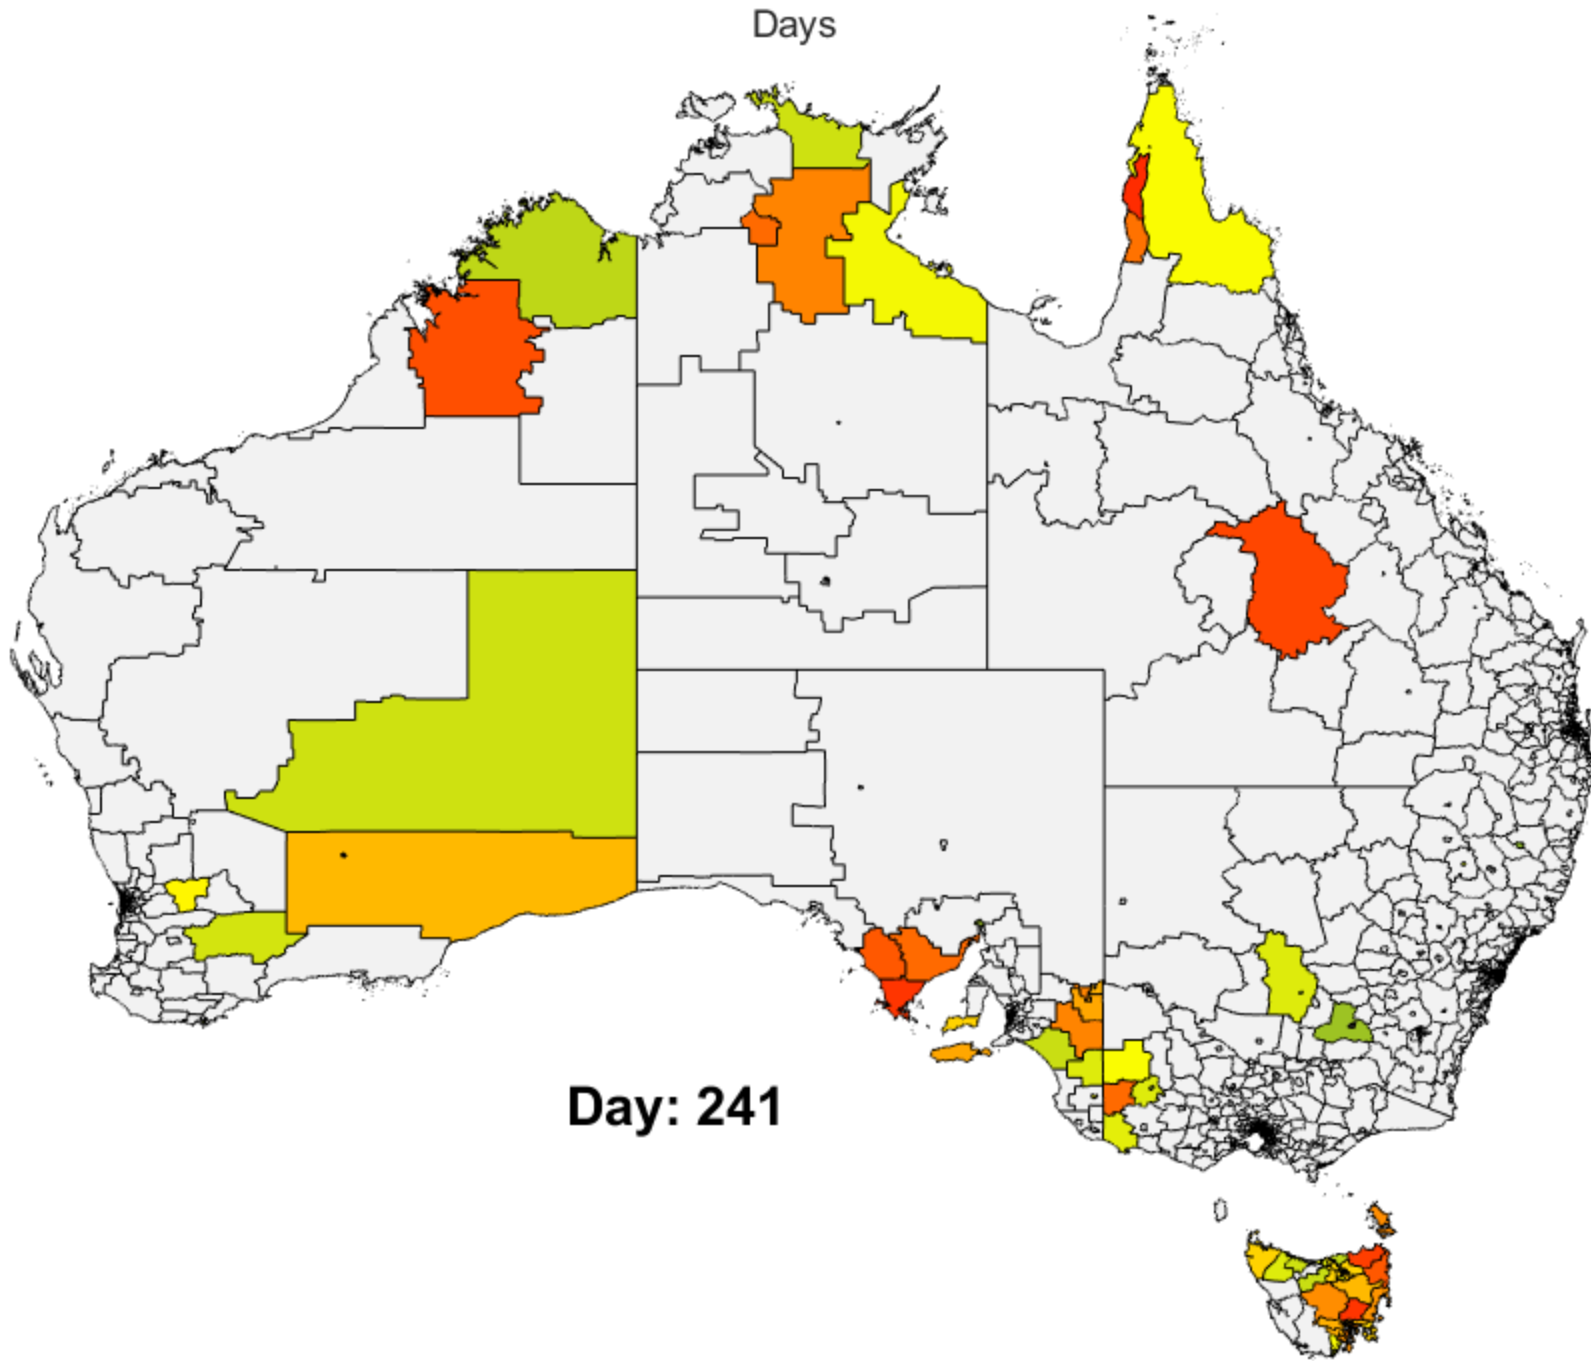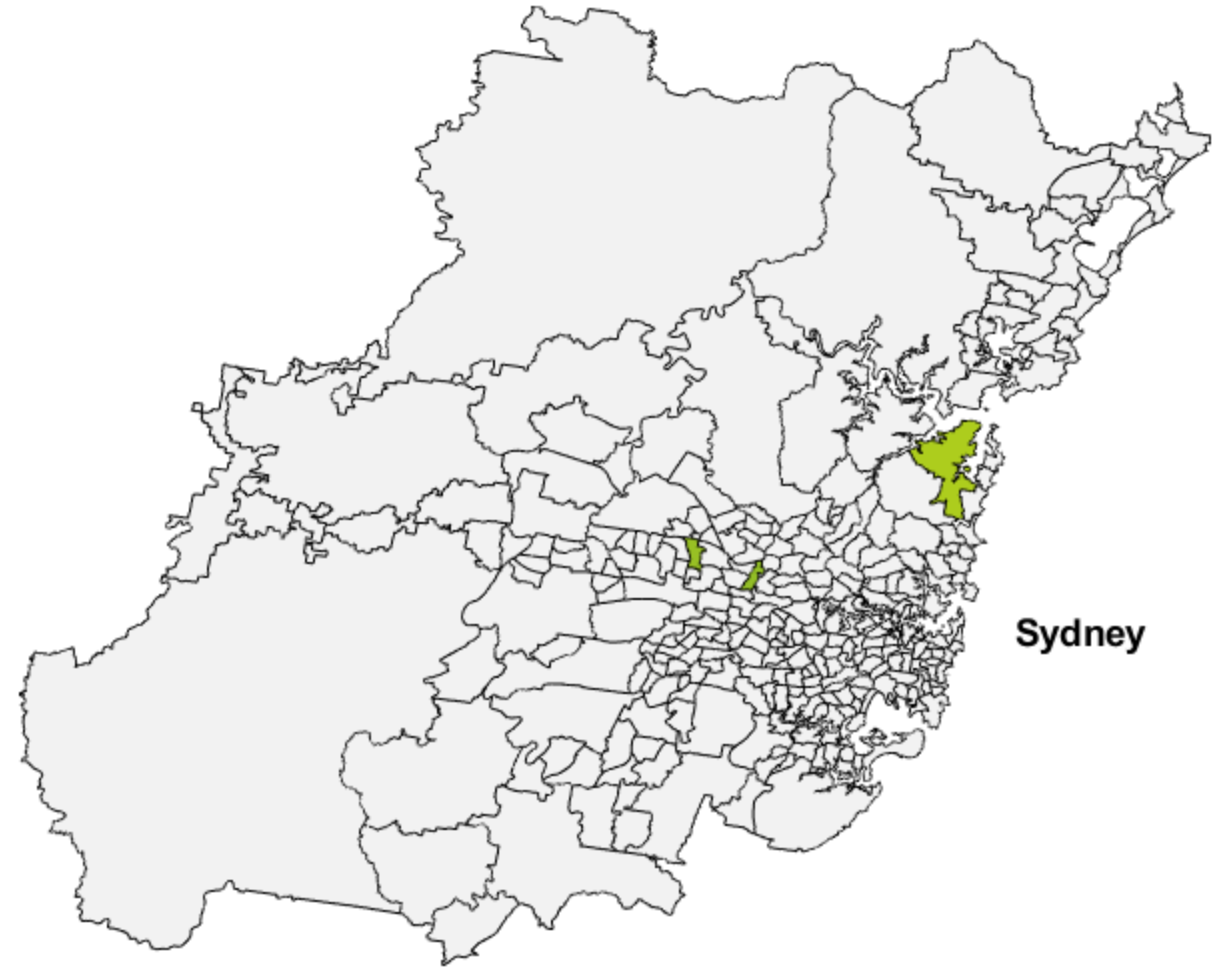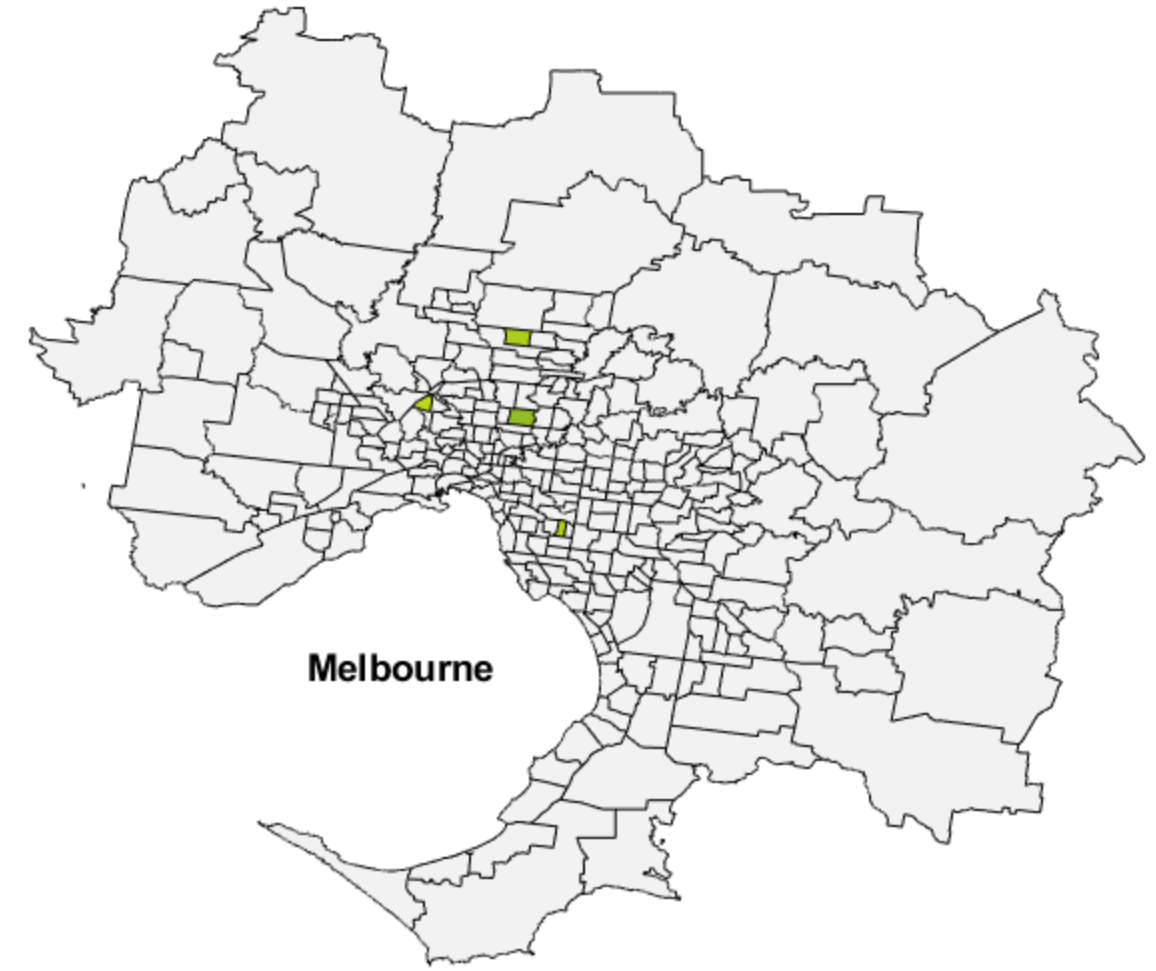

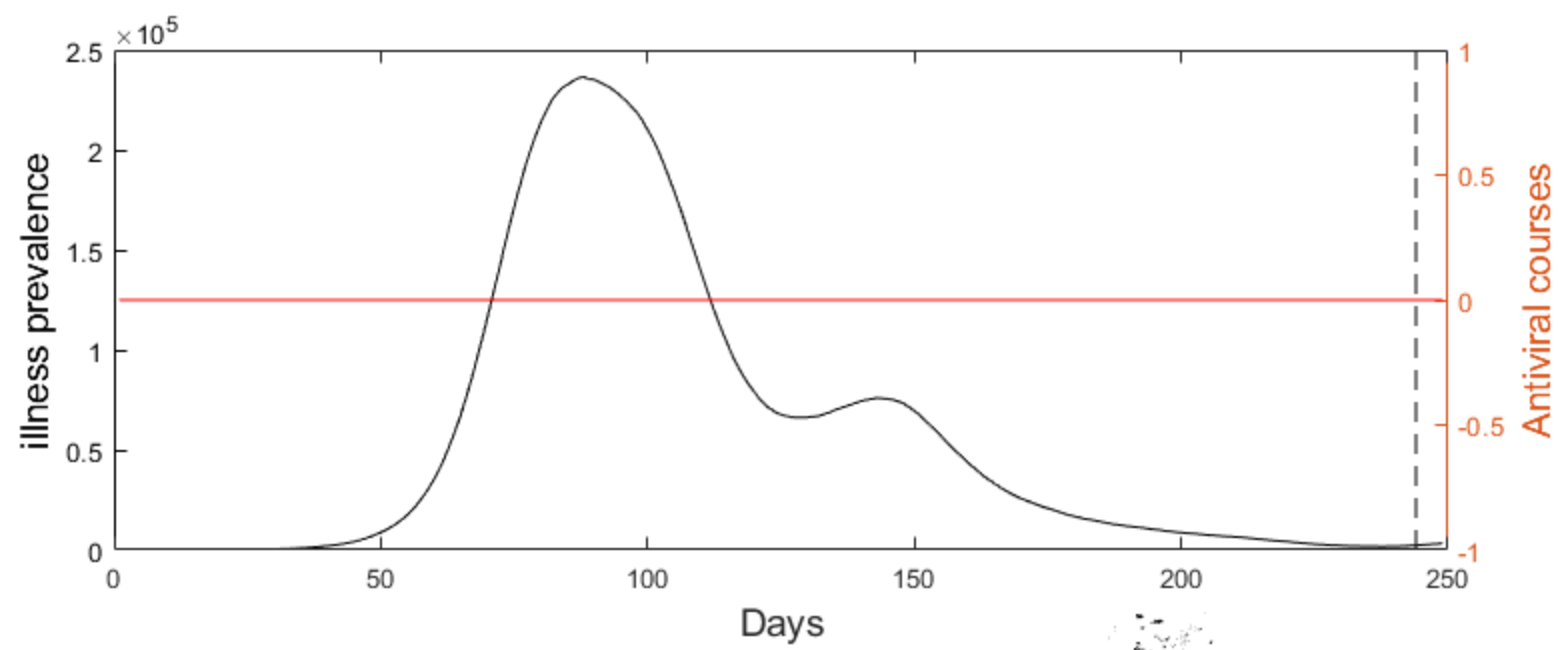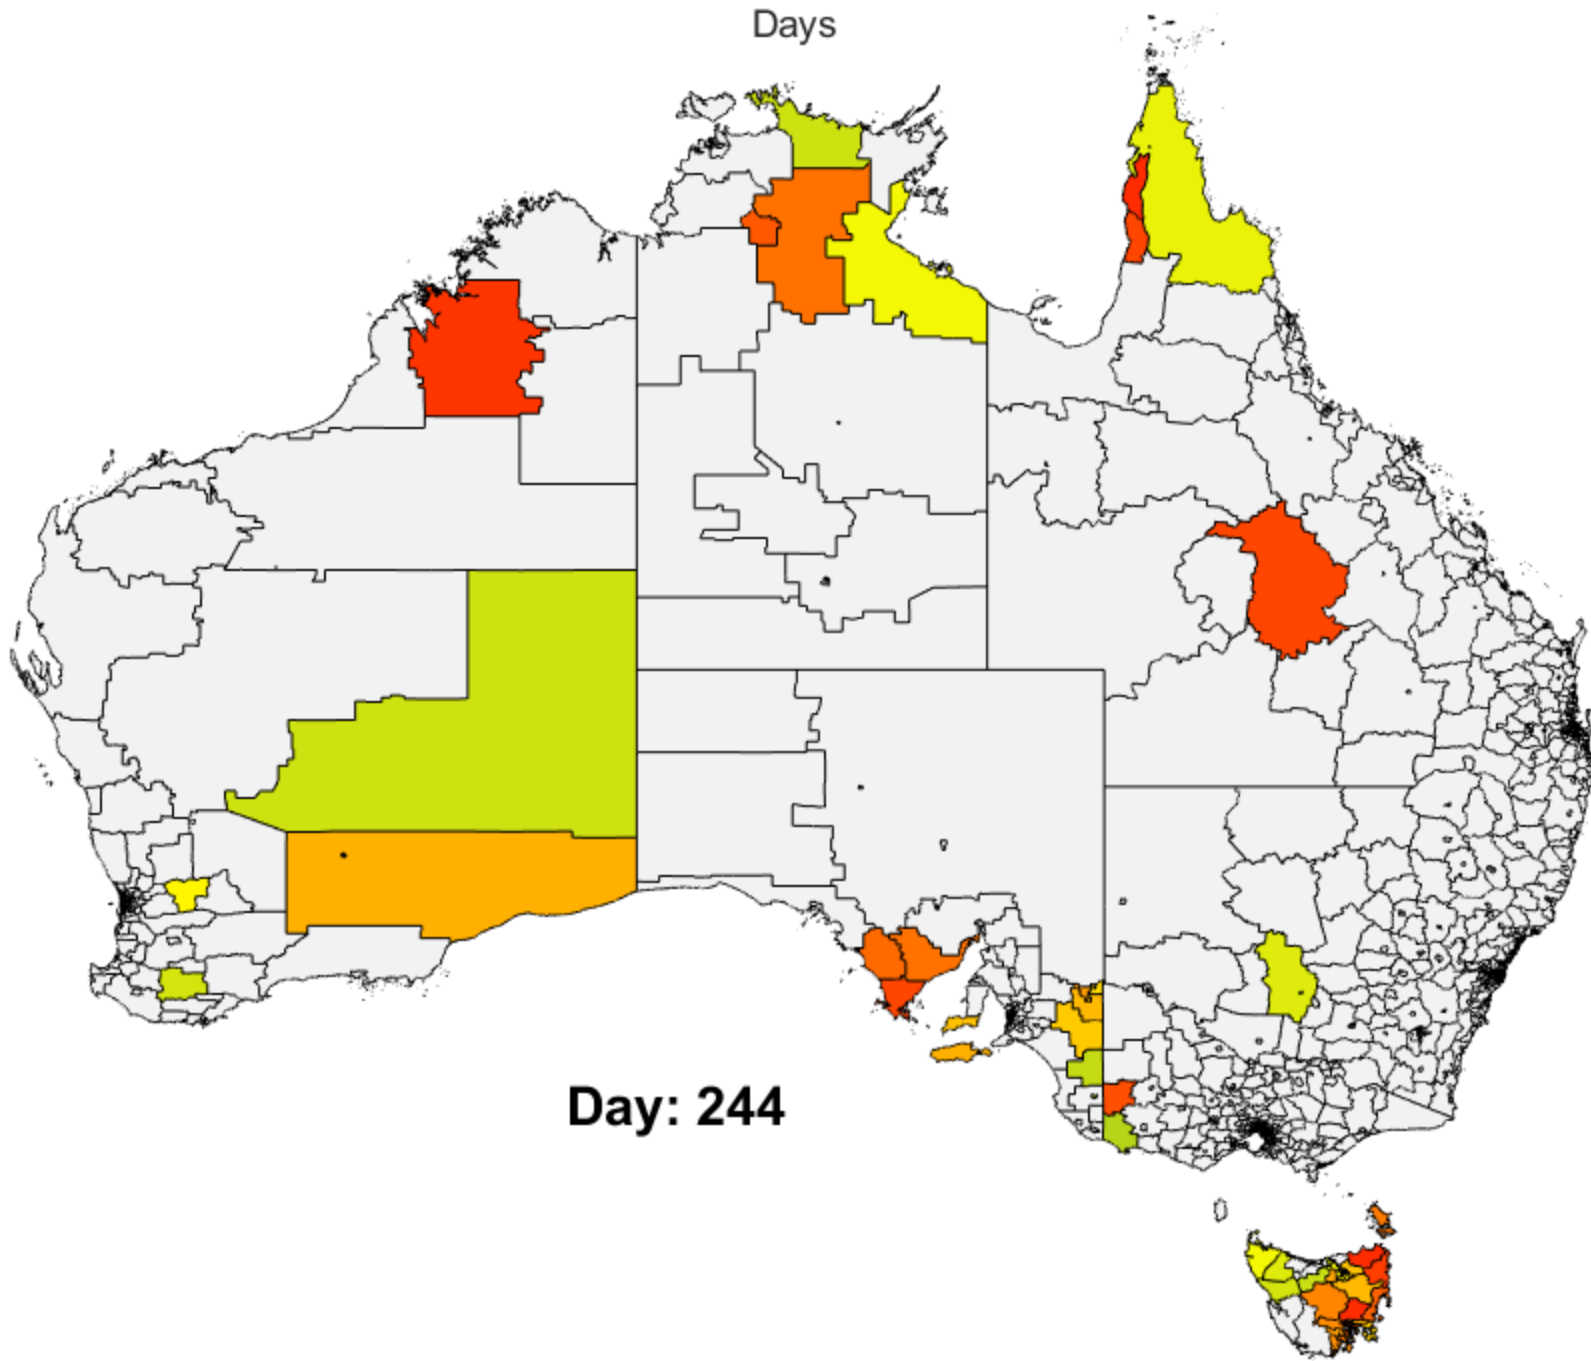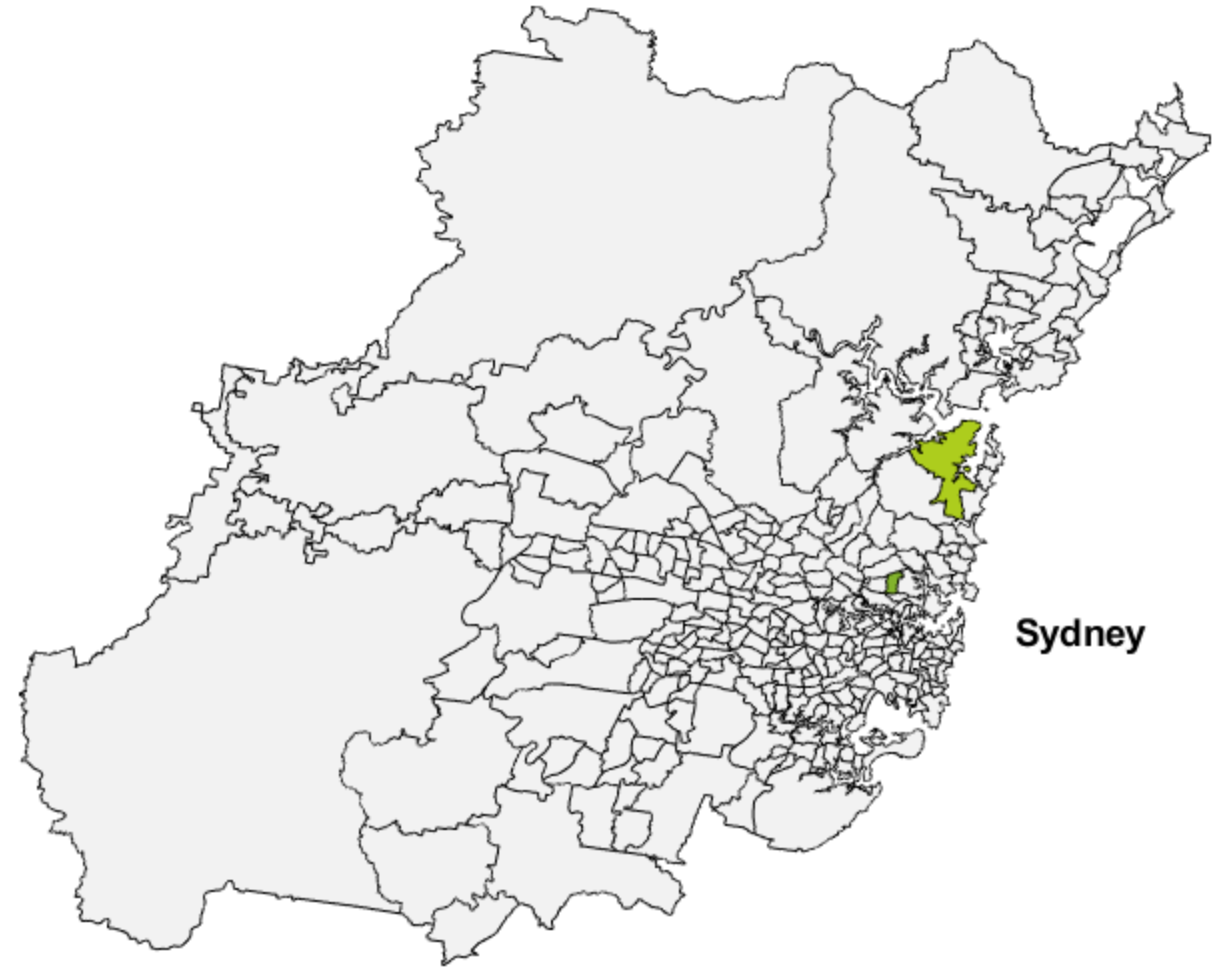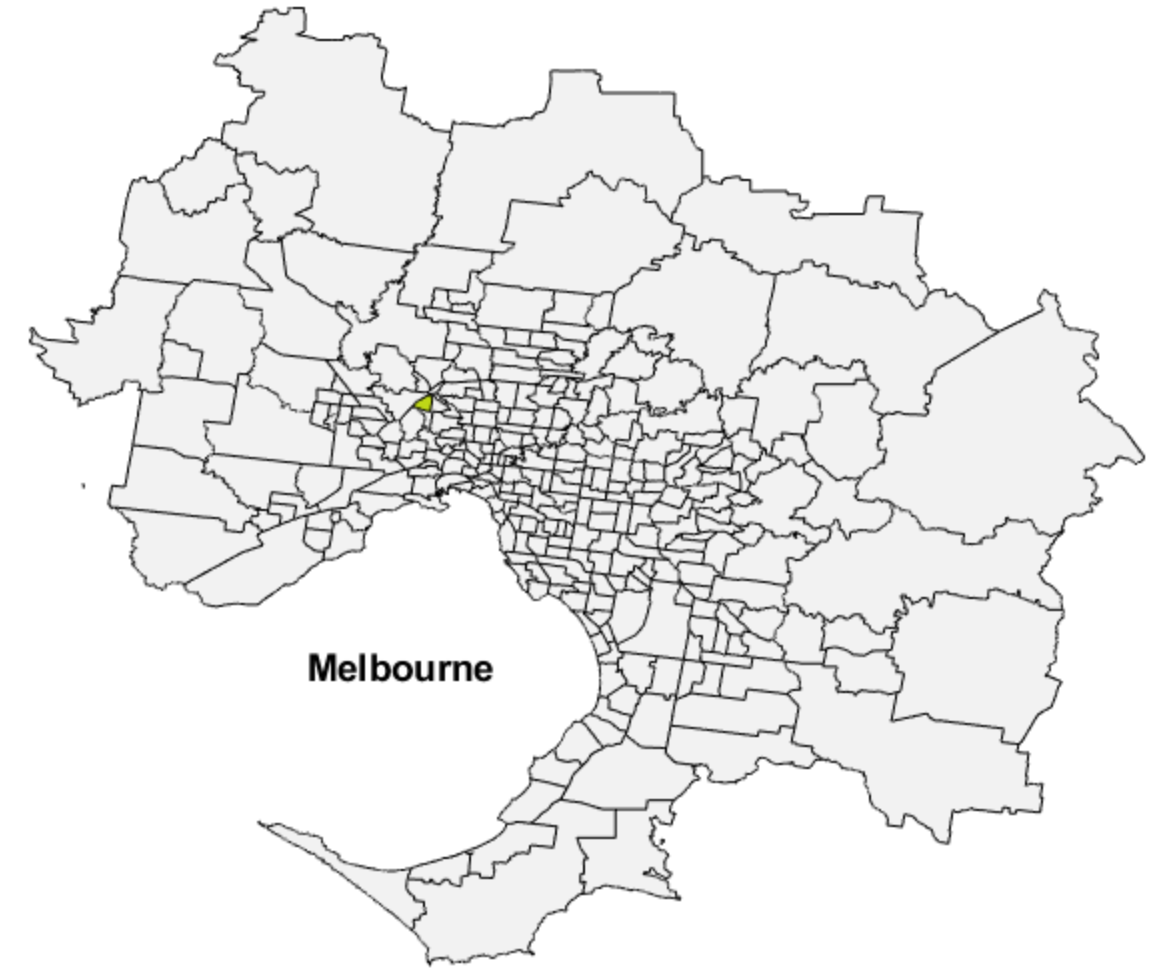



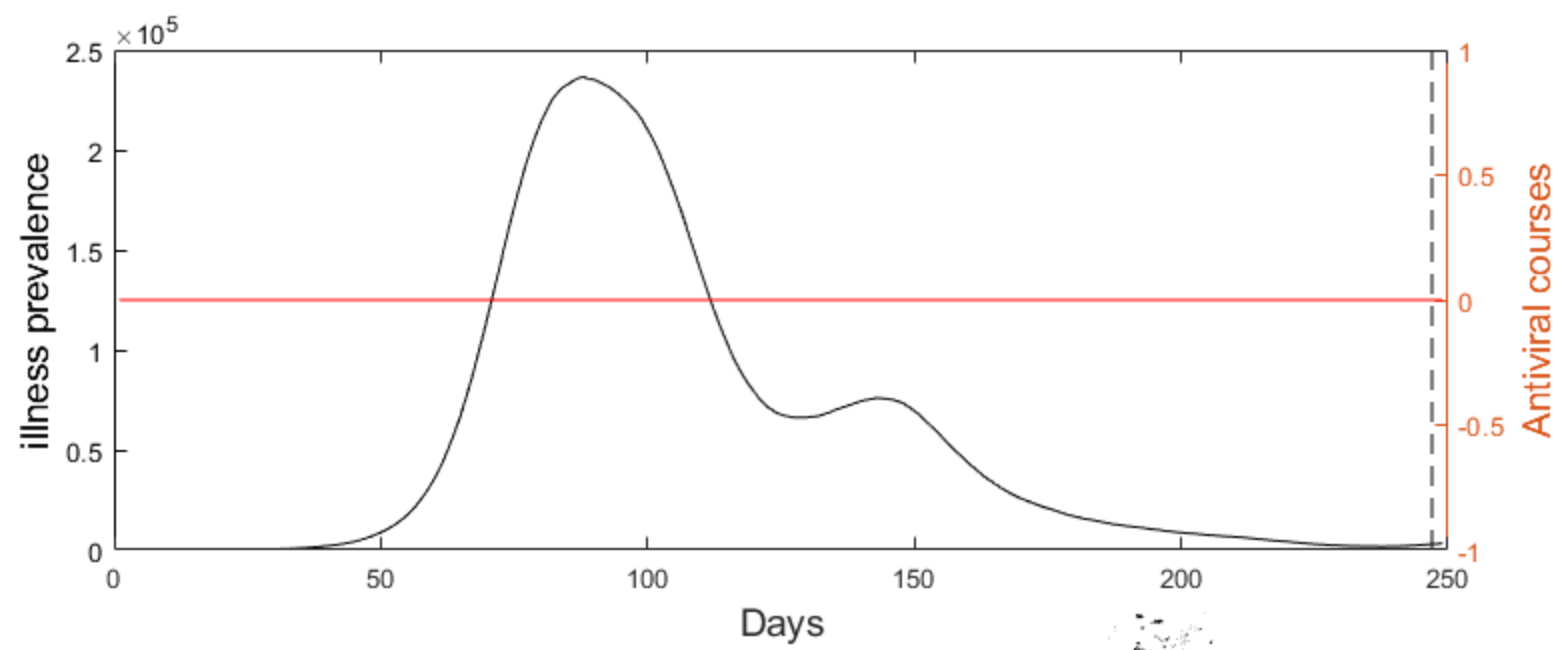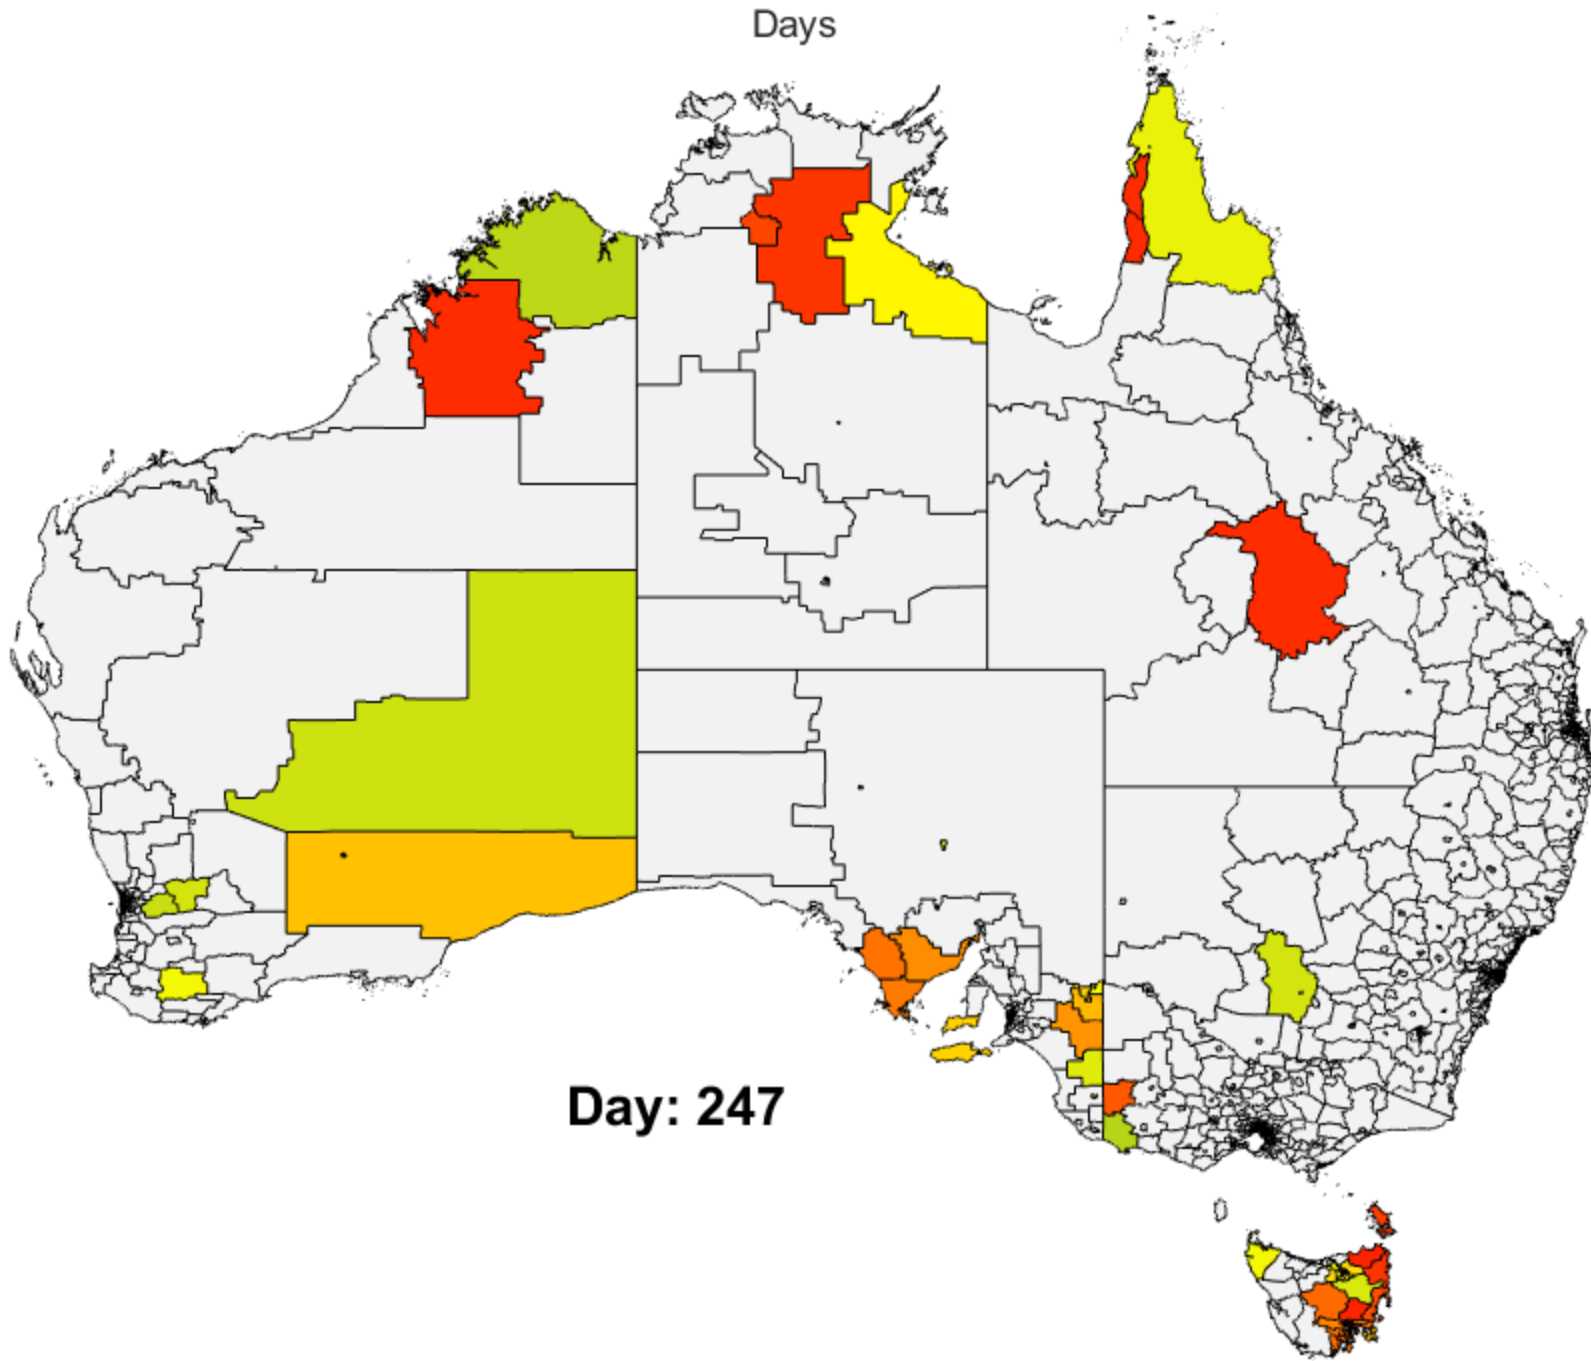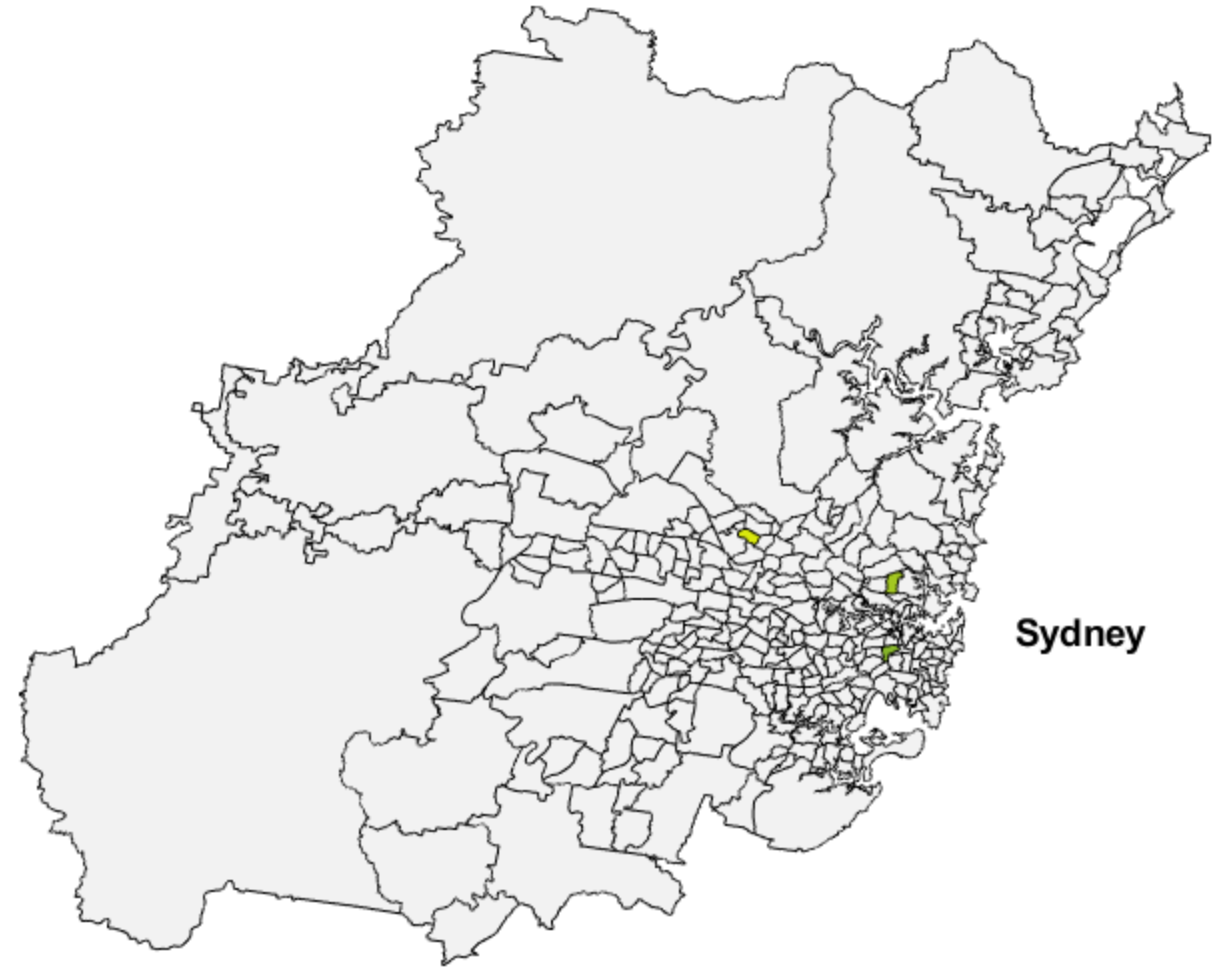

Supplement: rsif20190728supp3.pdf [file rsif20190728supp3.pdf]

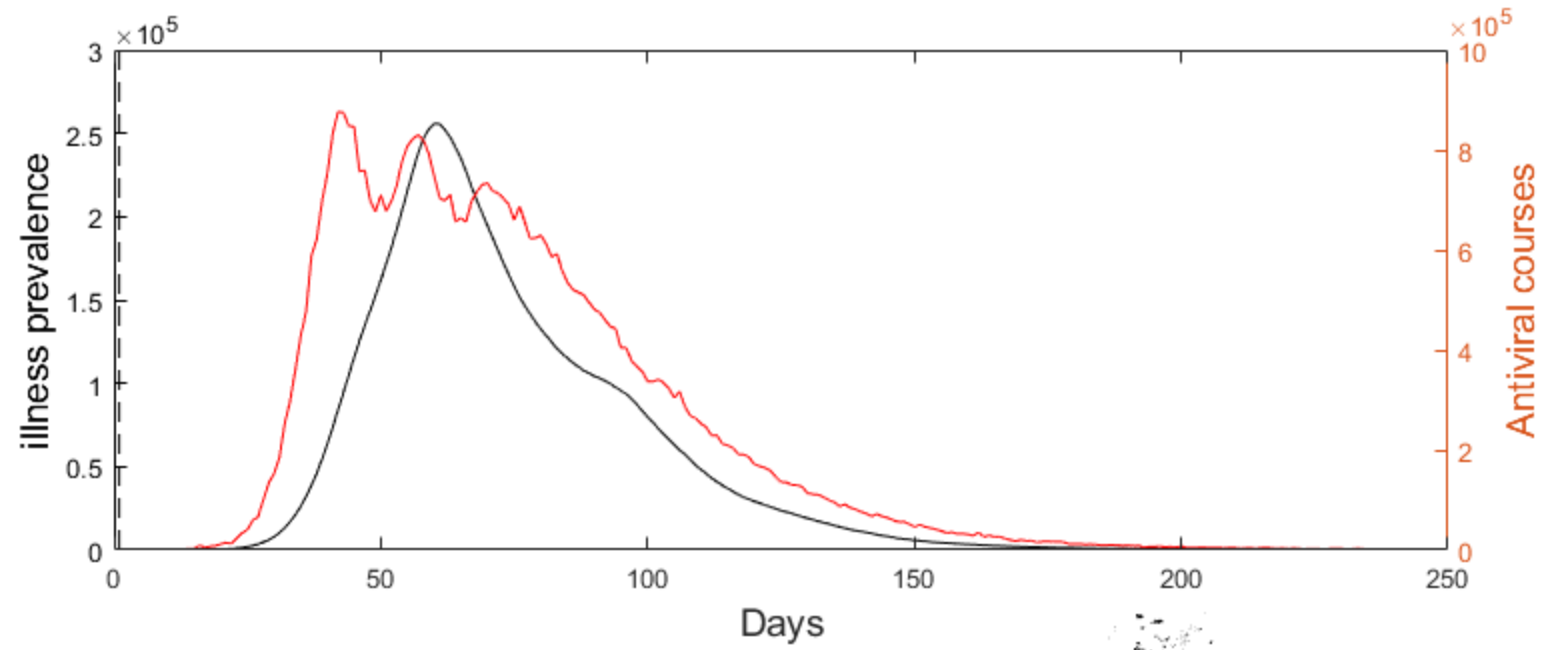

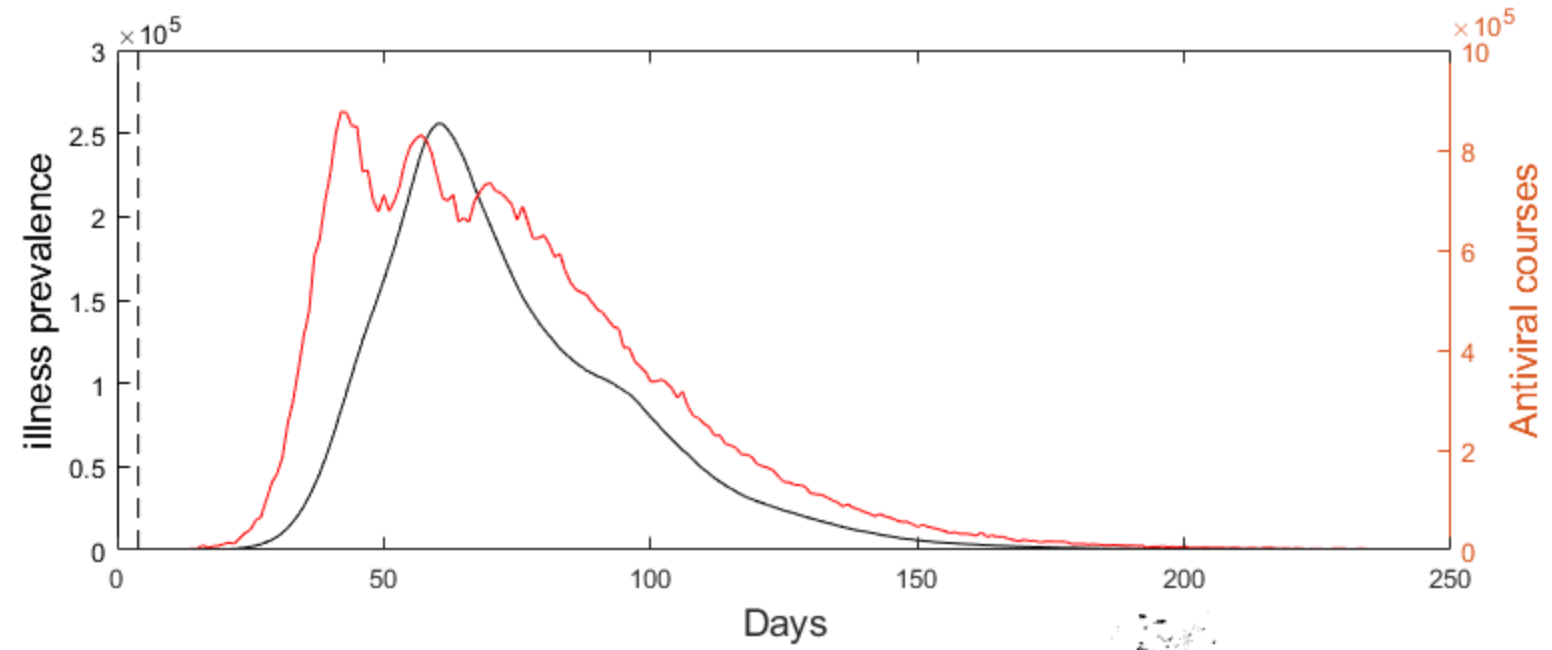

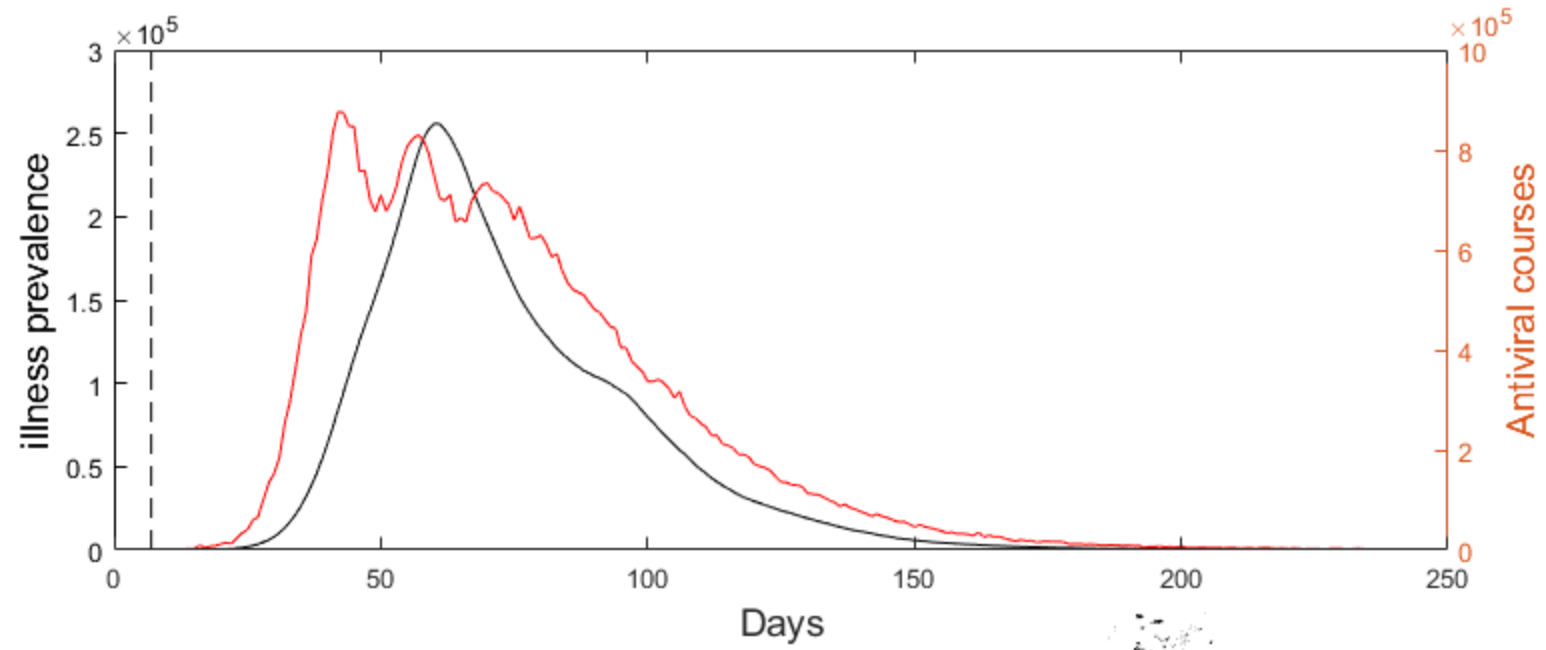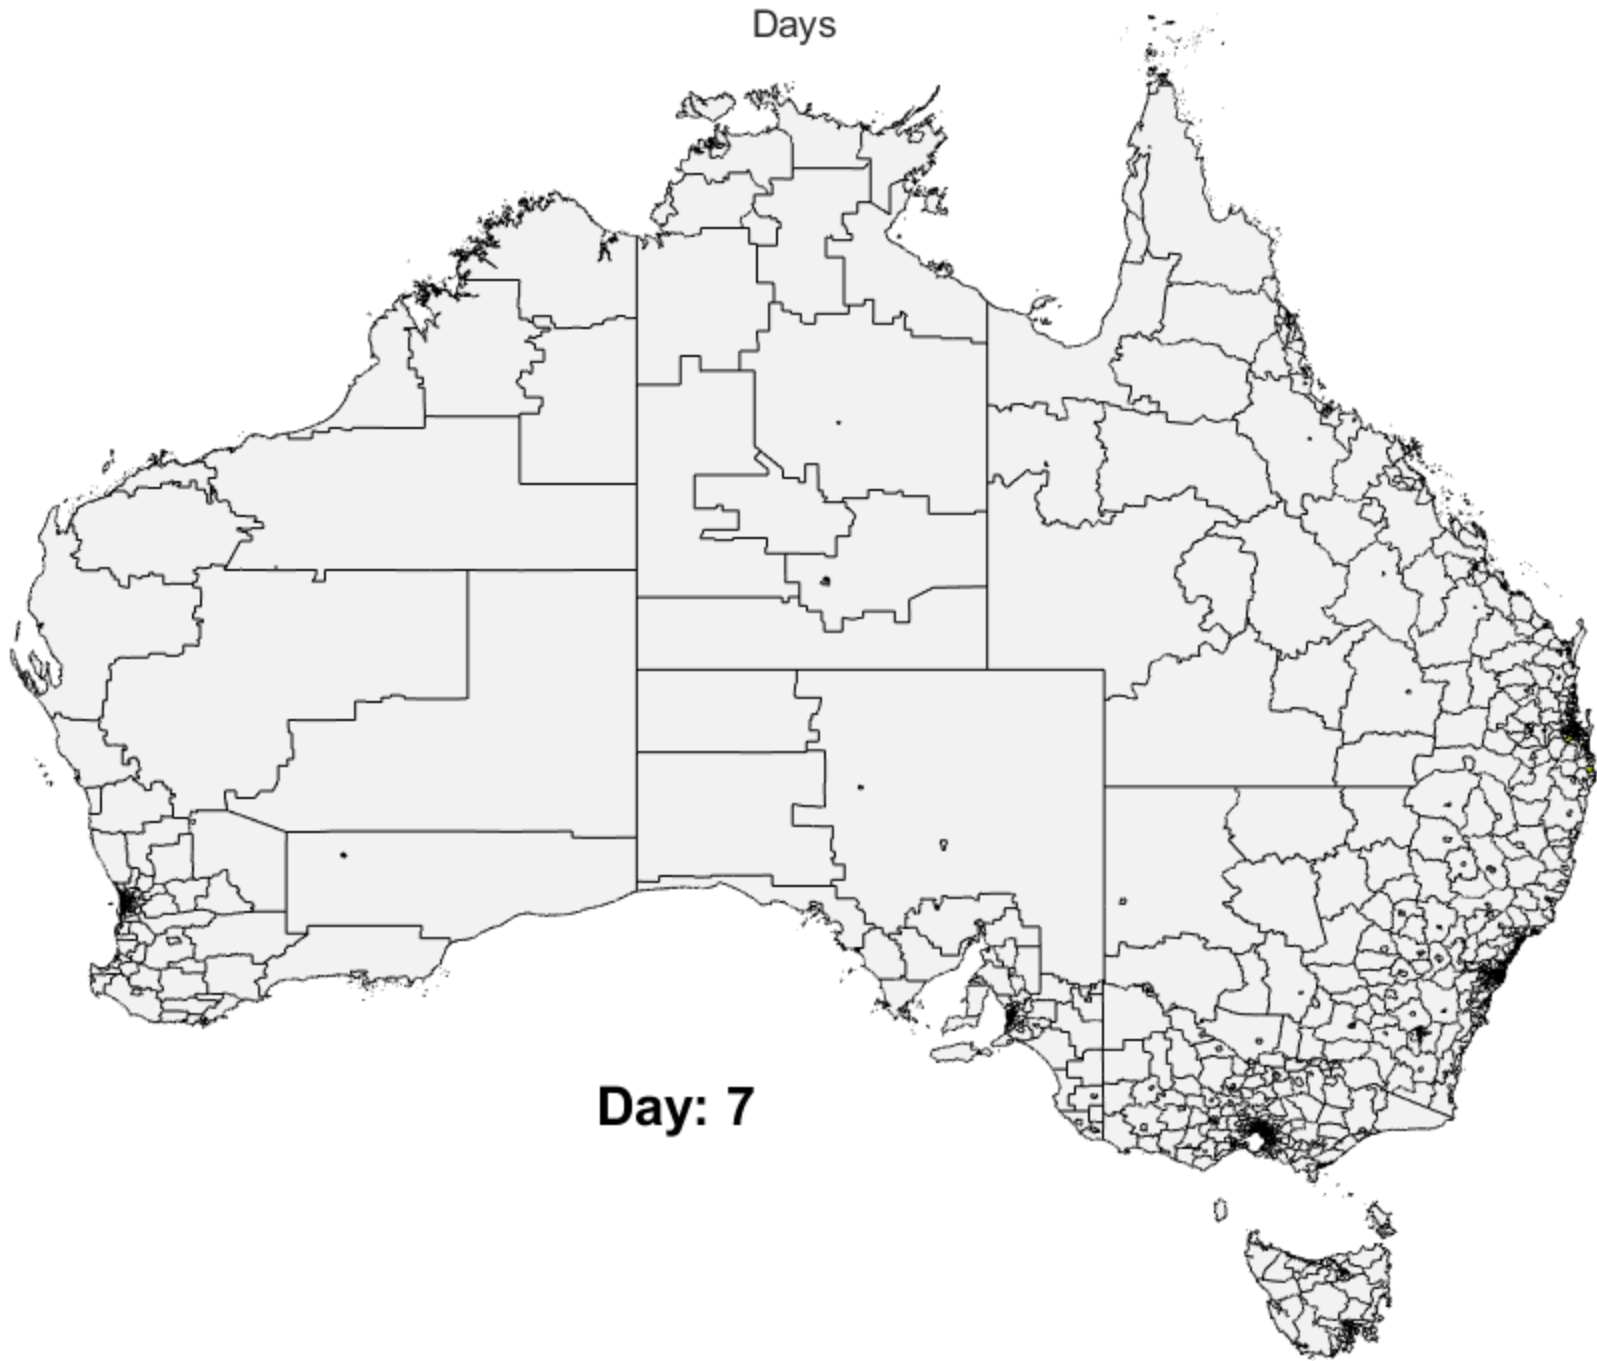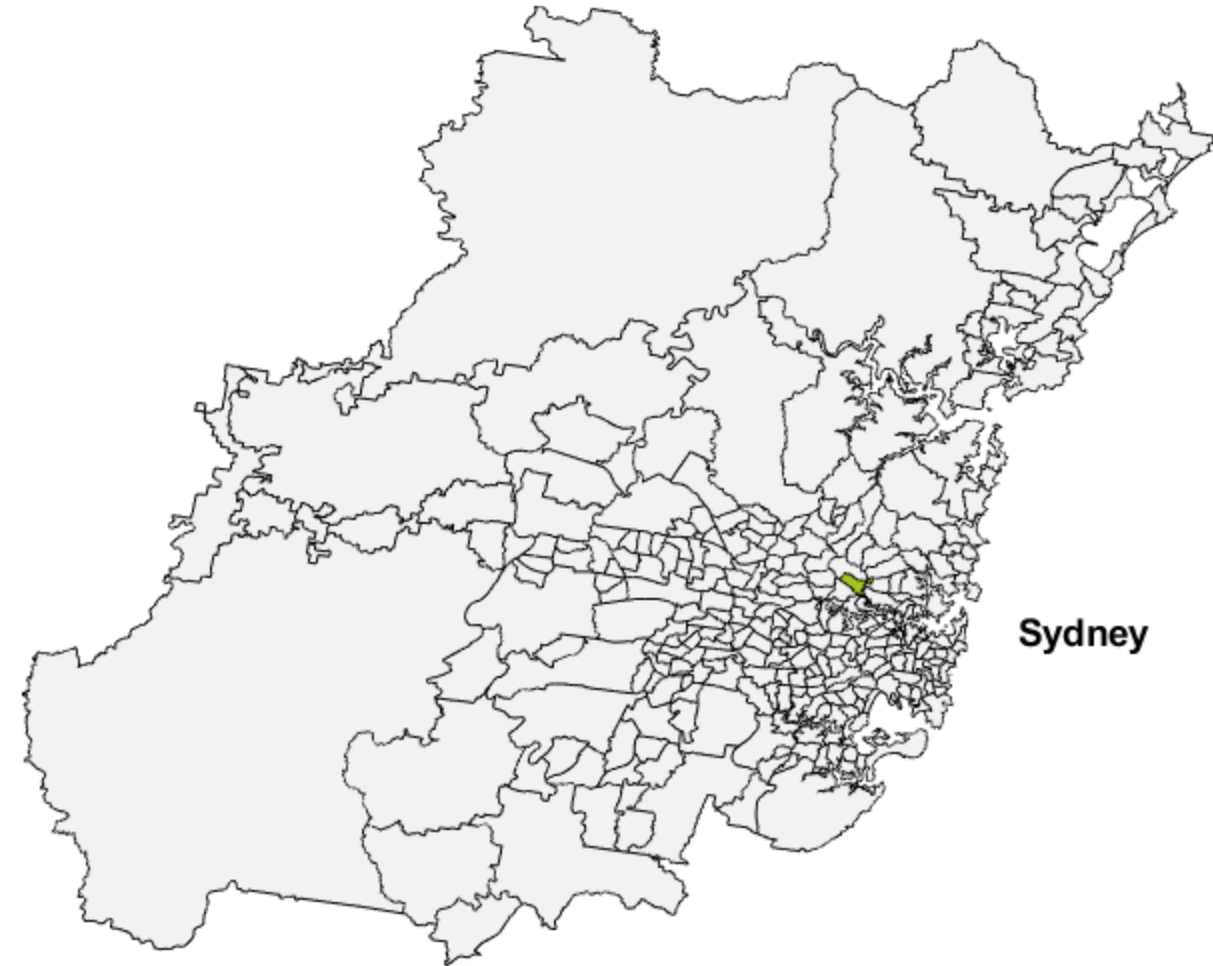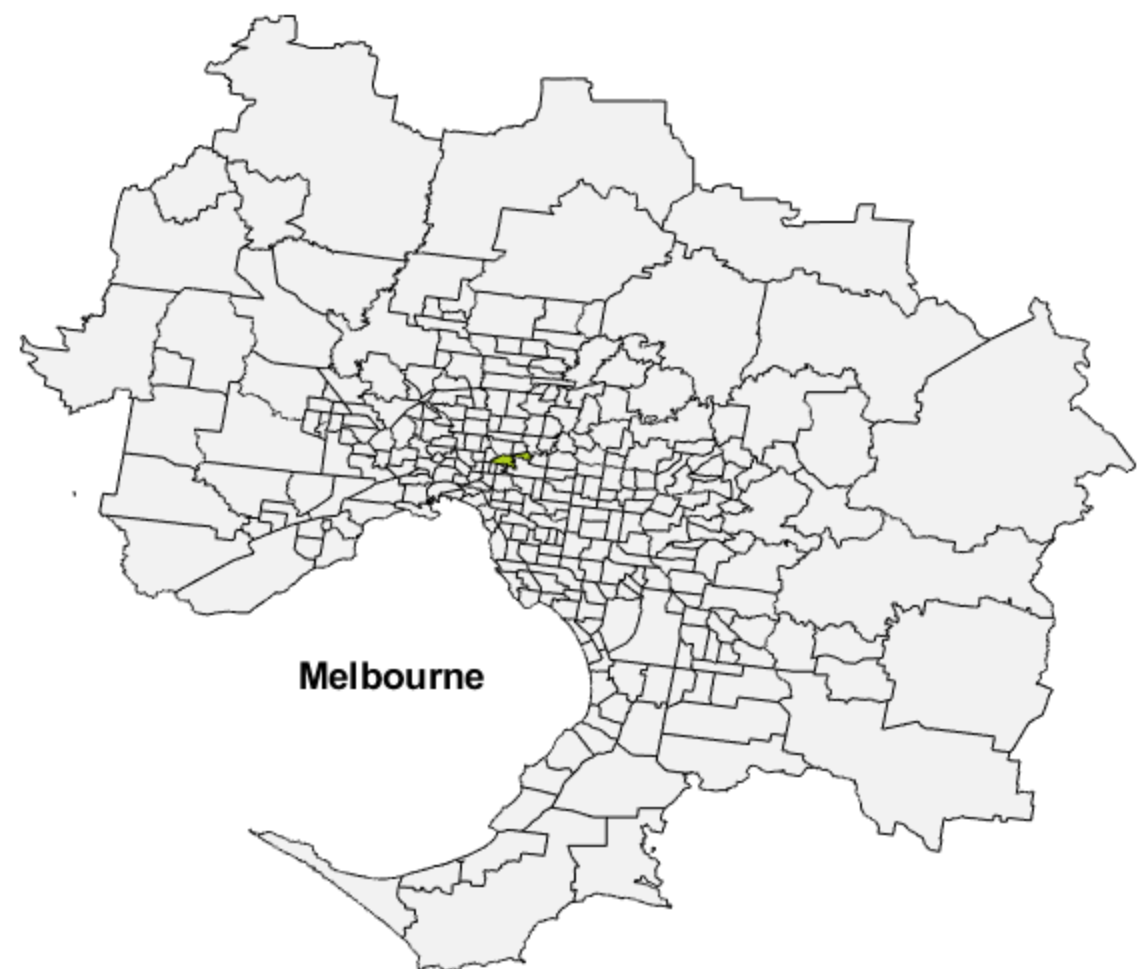



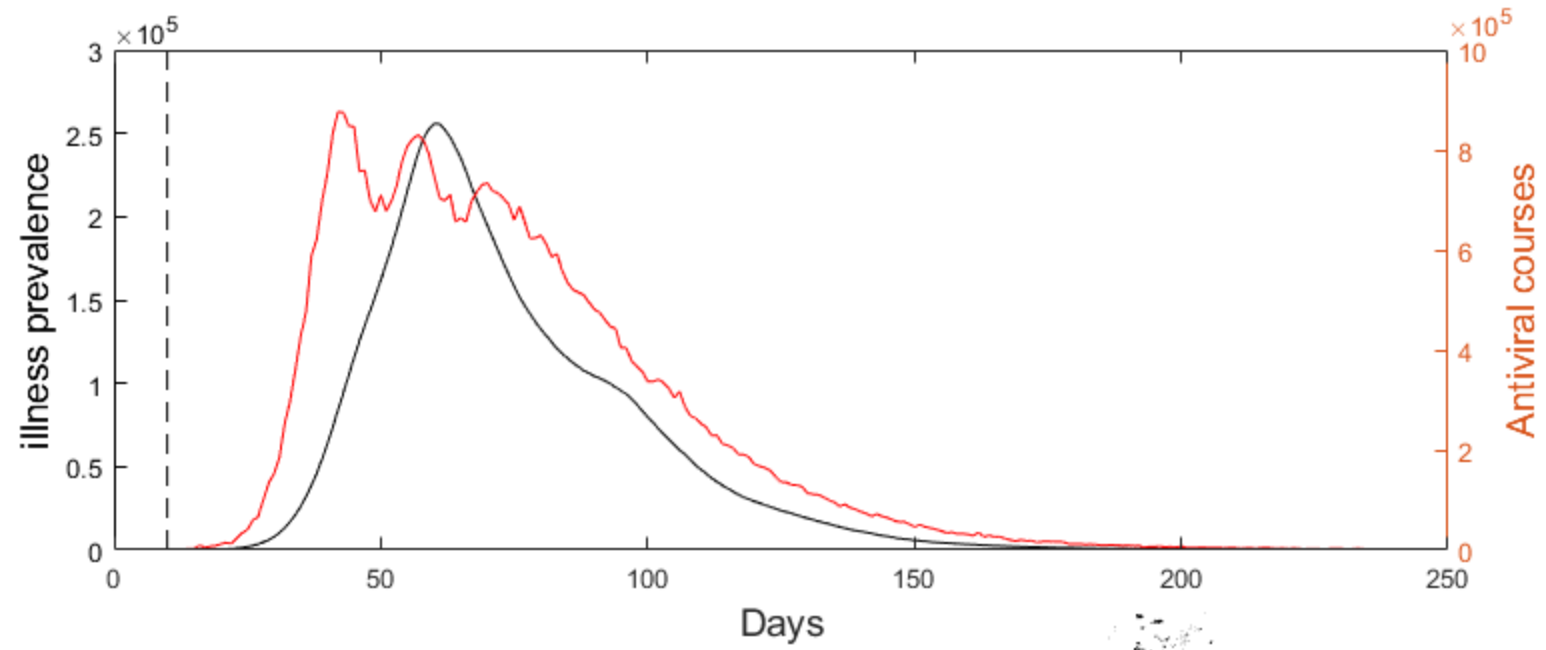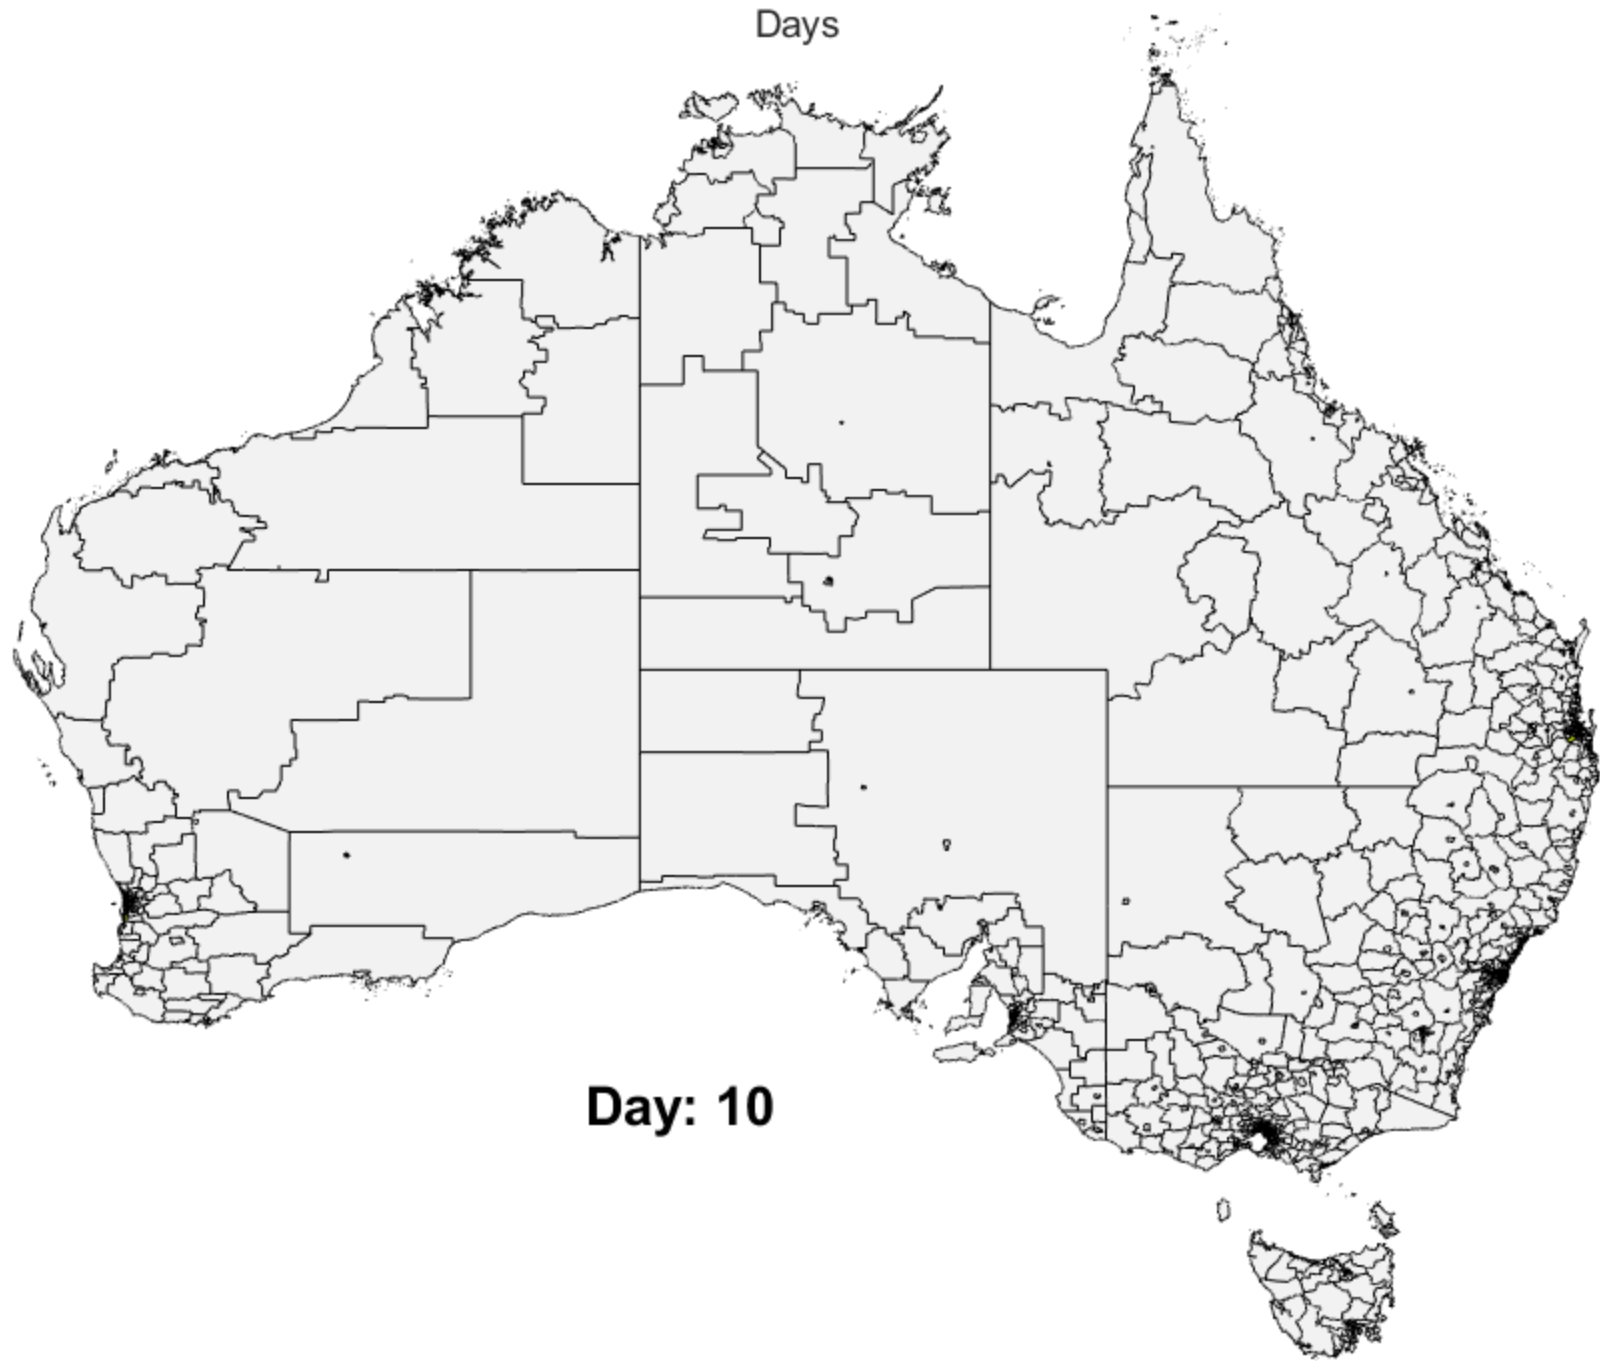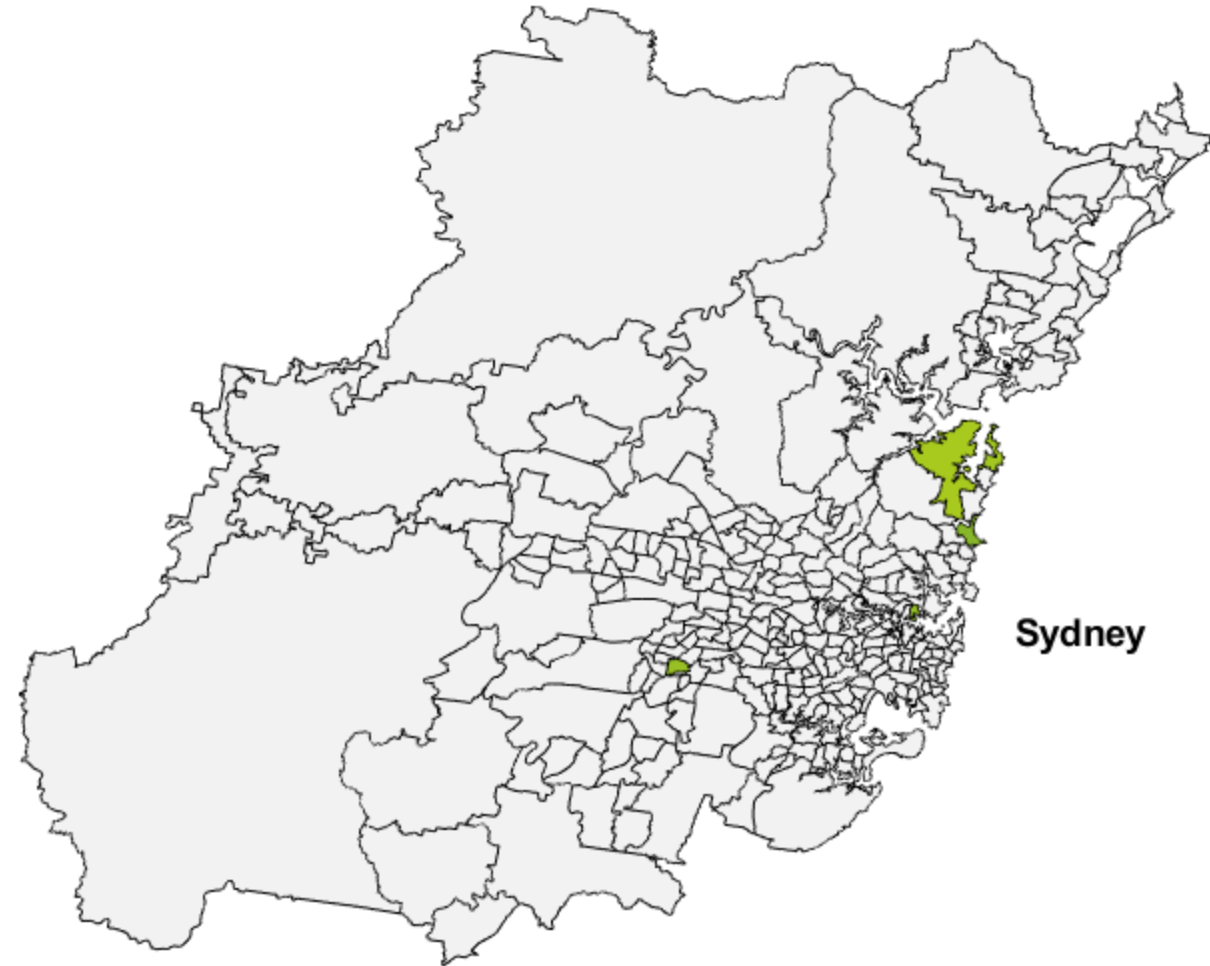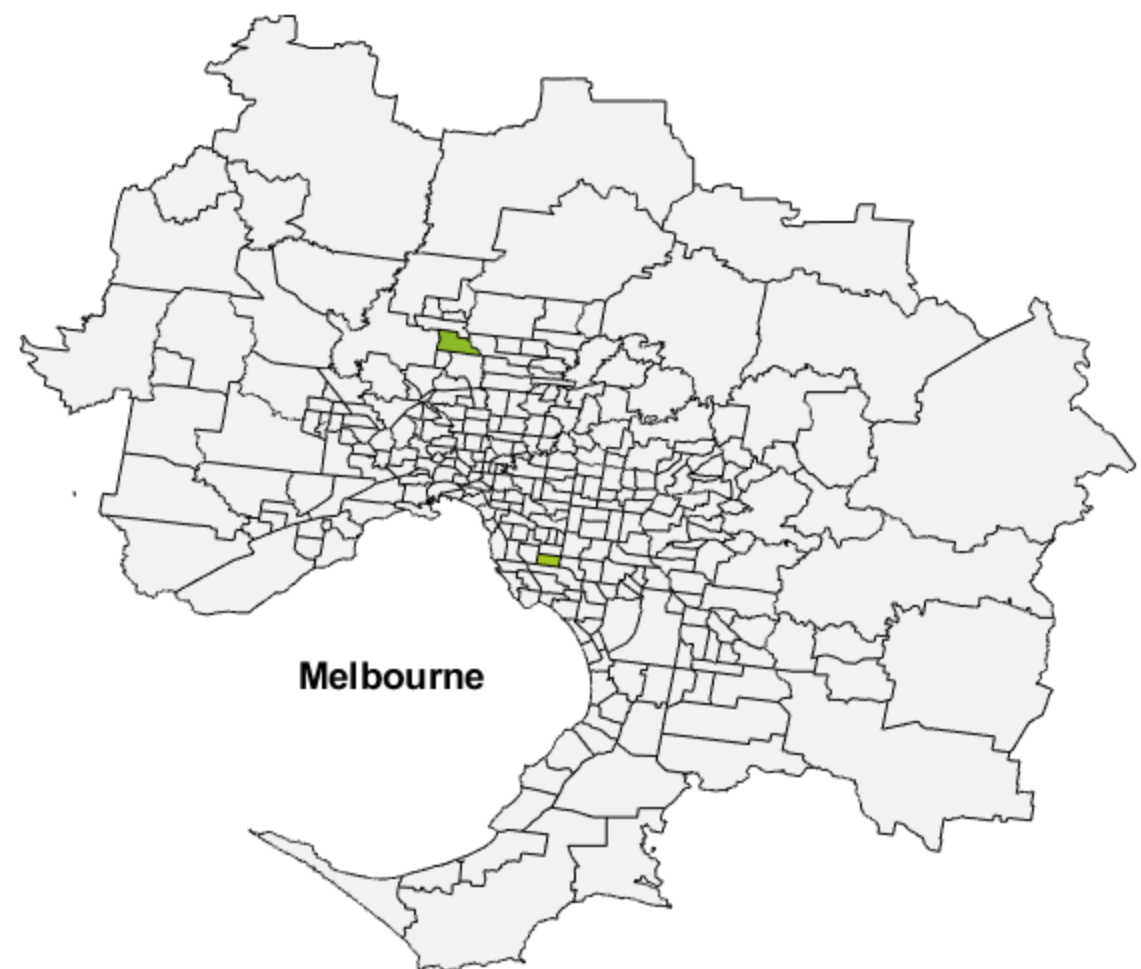



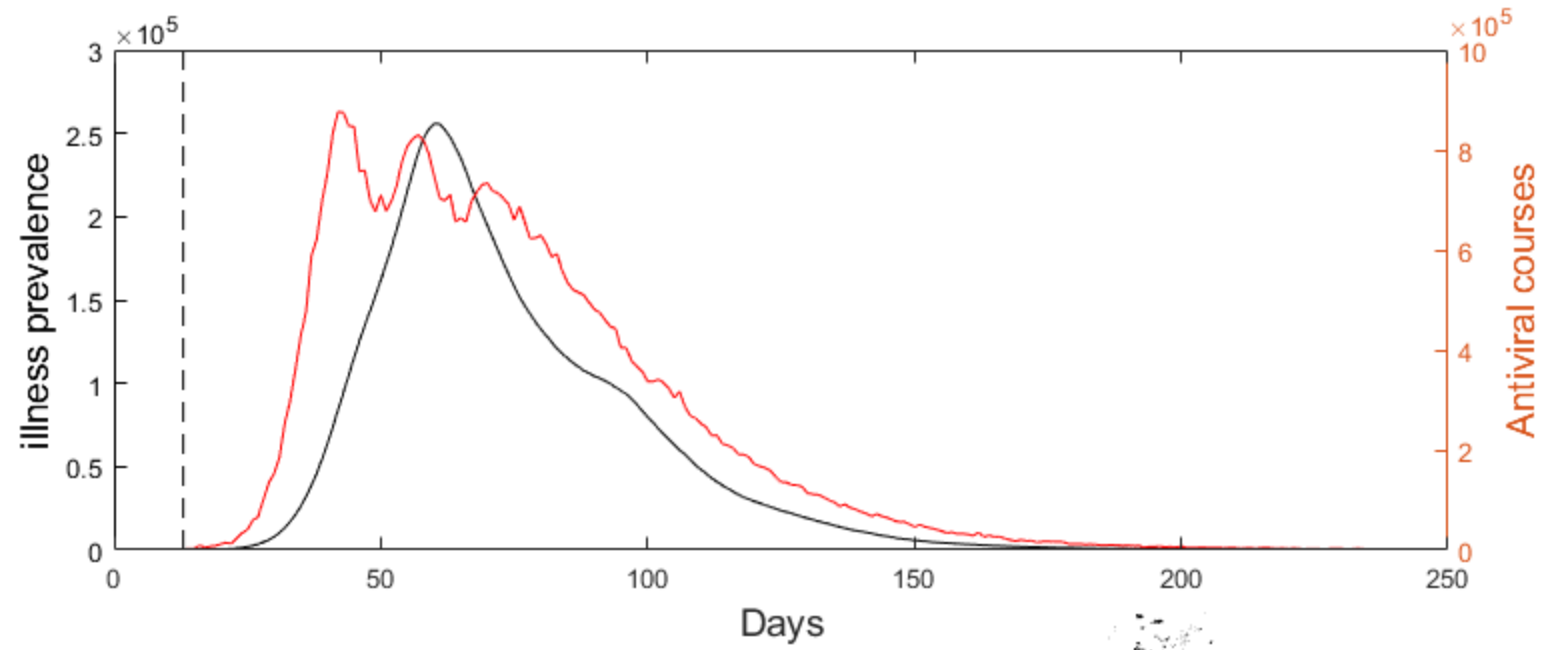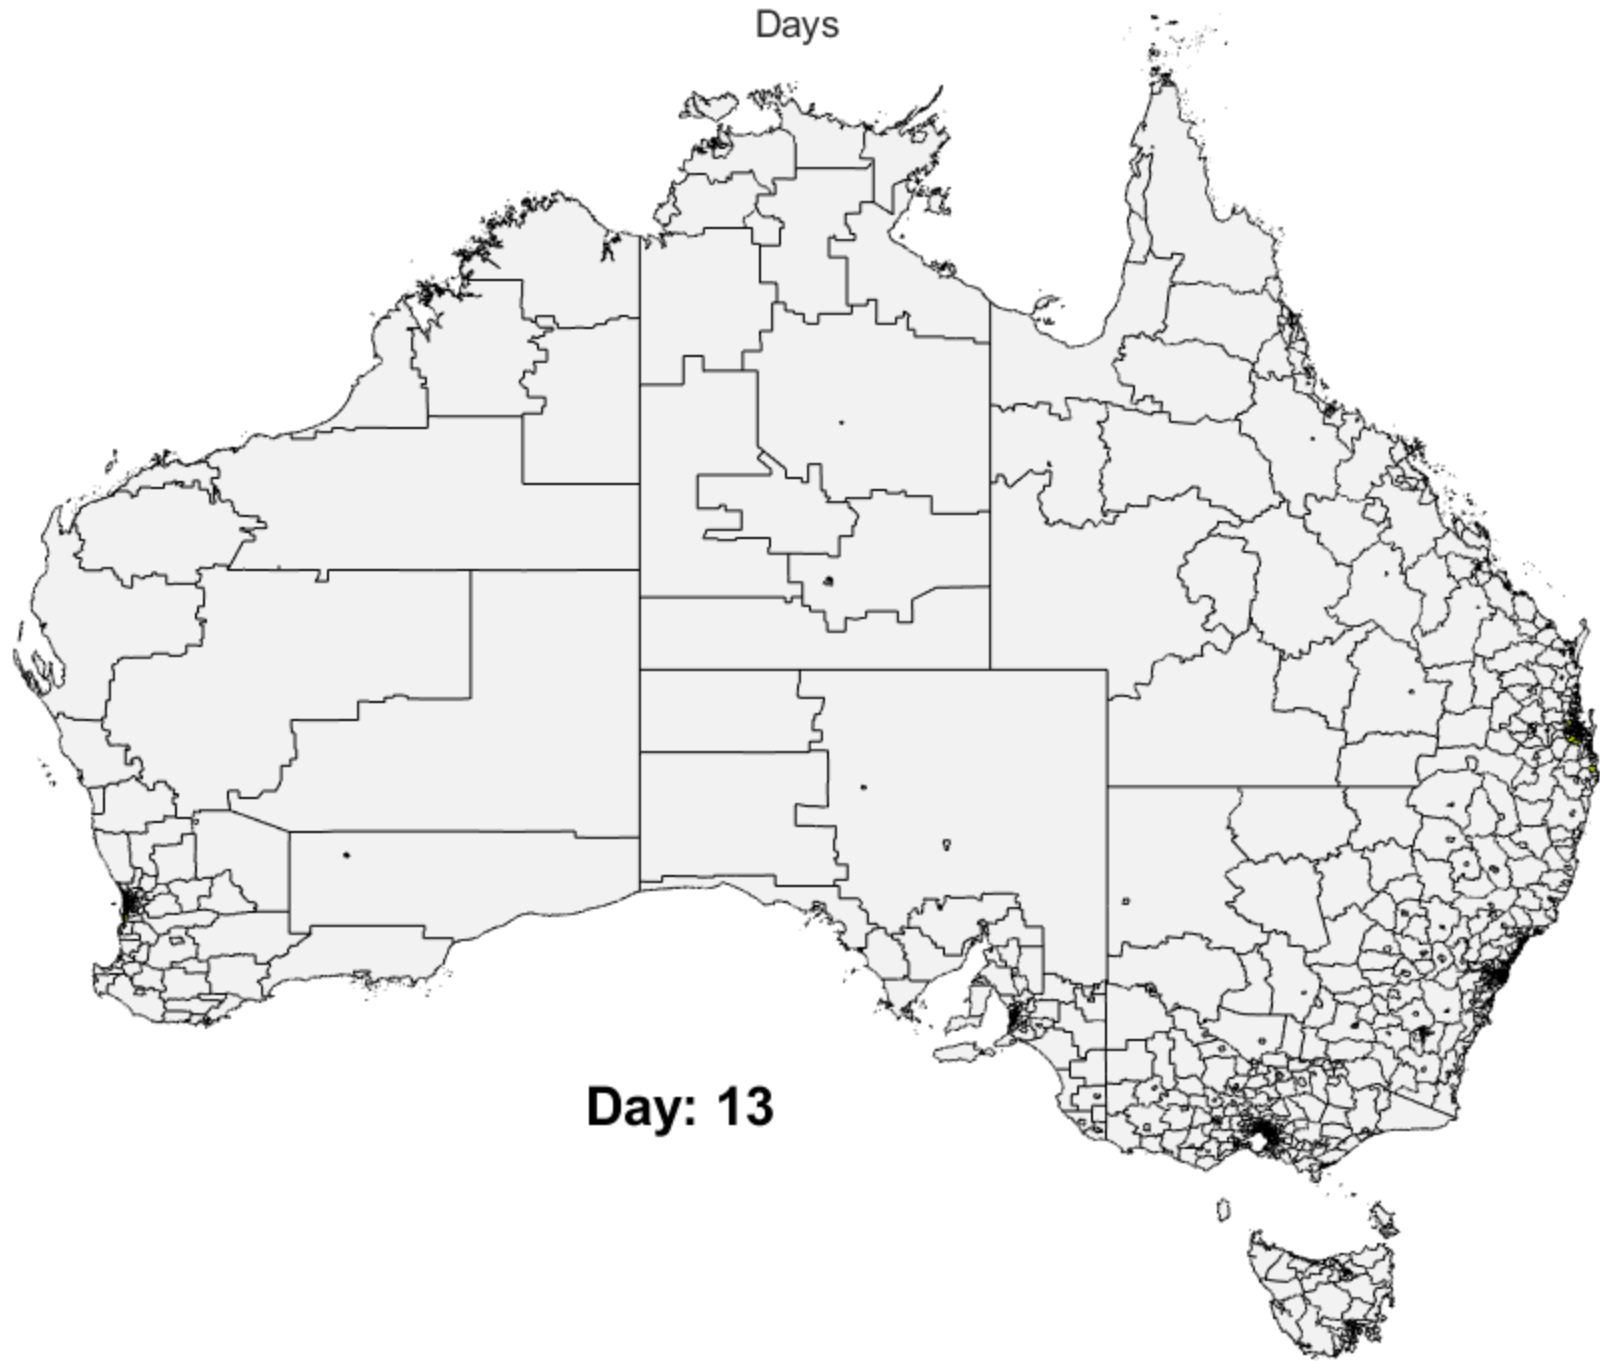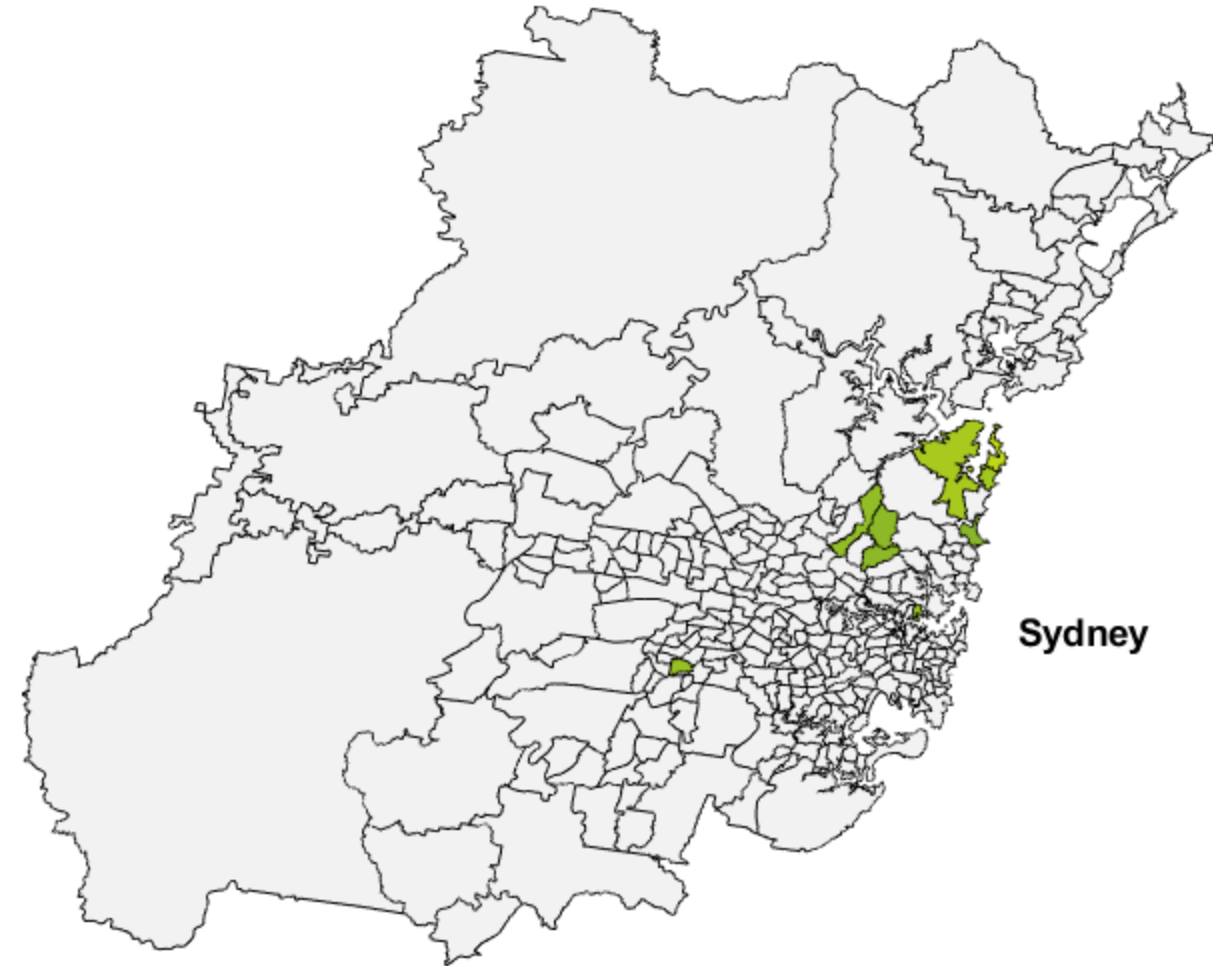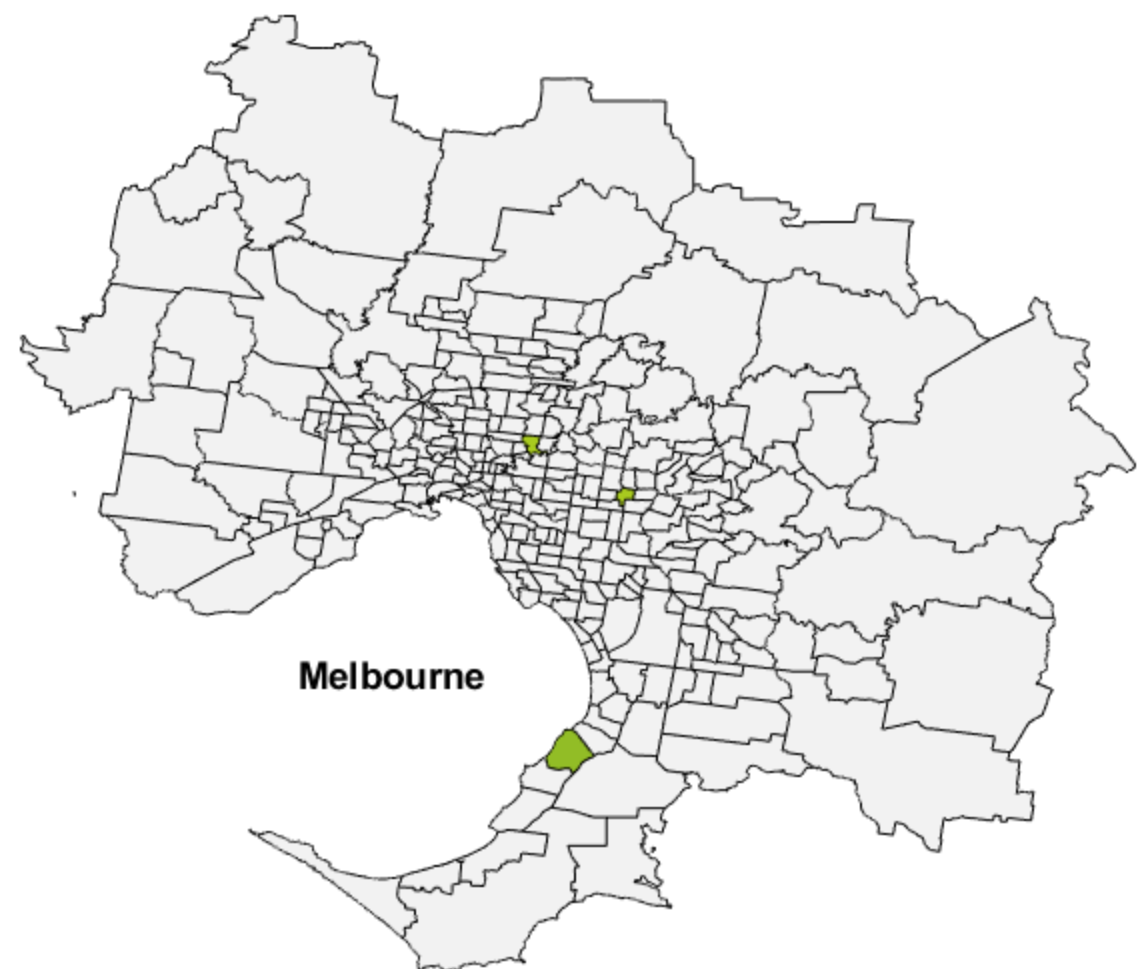

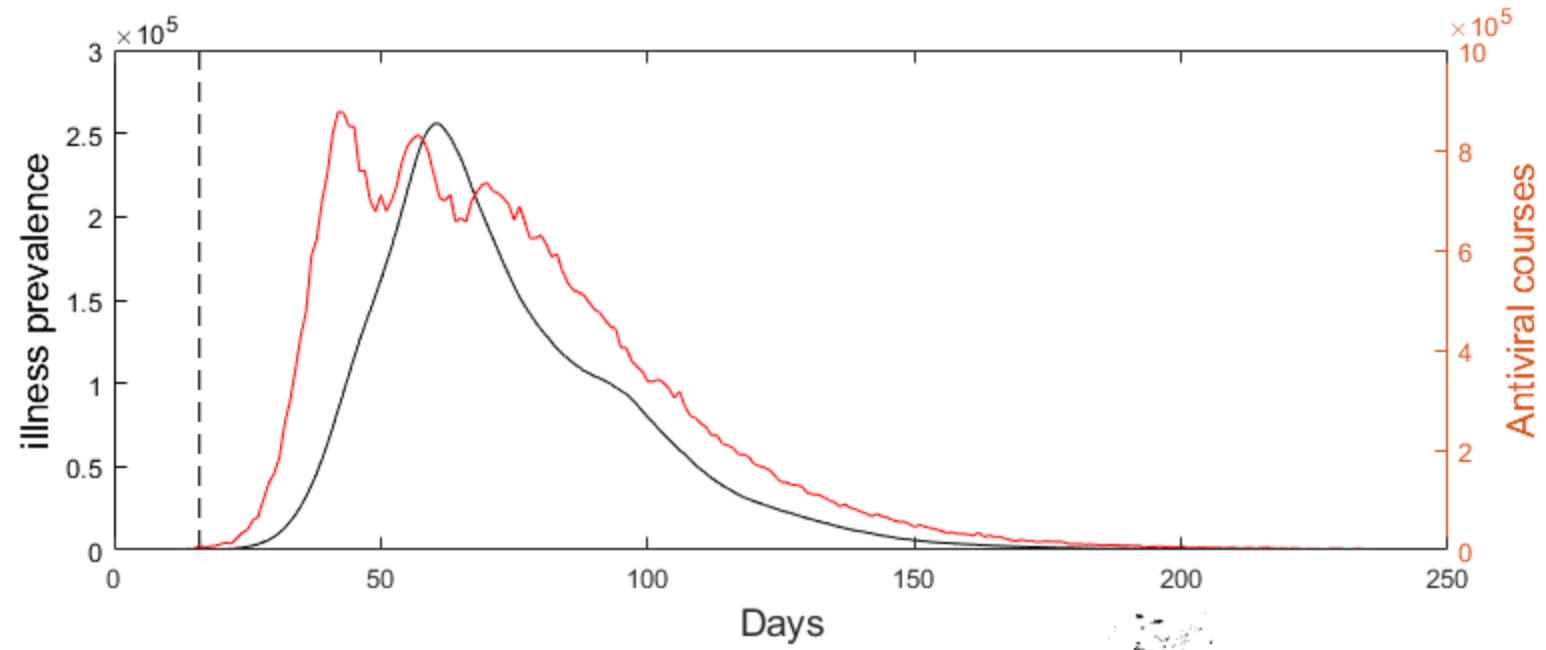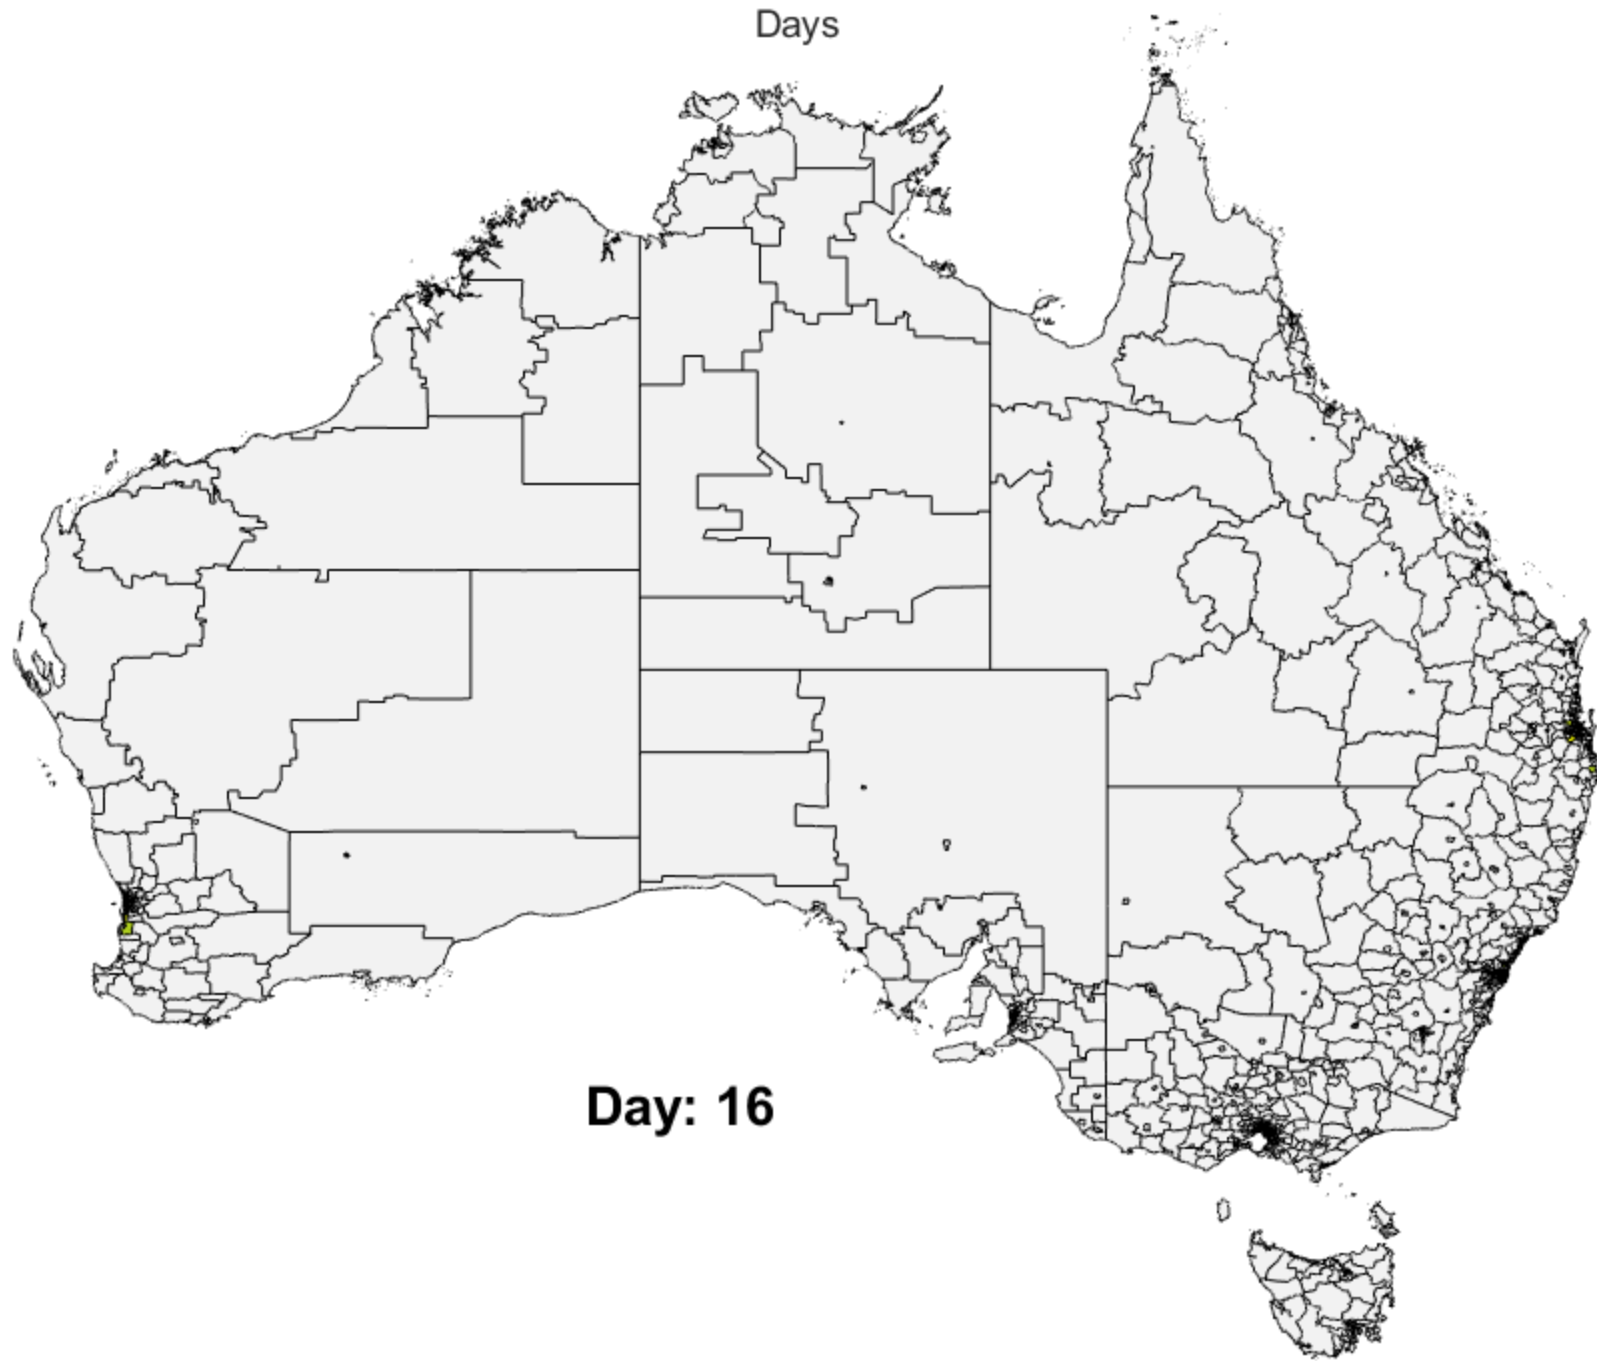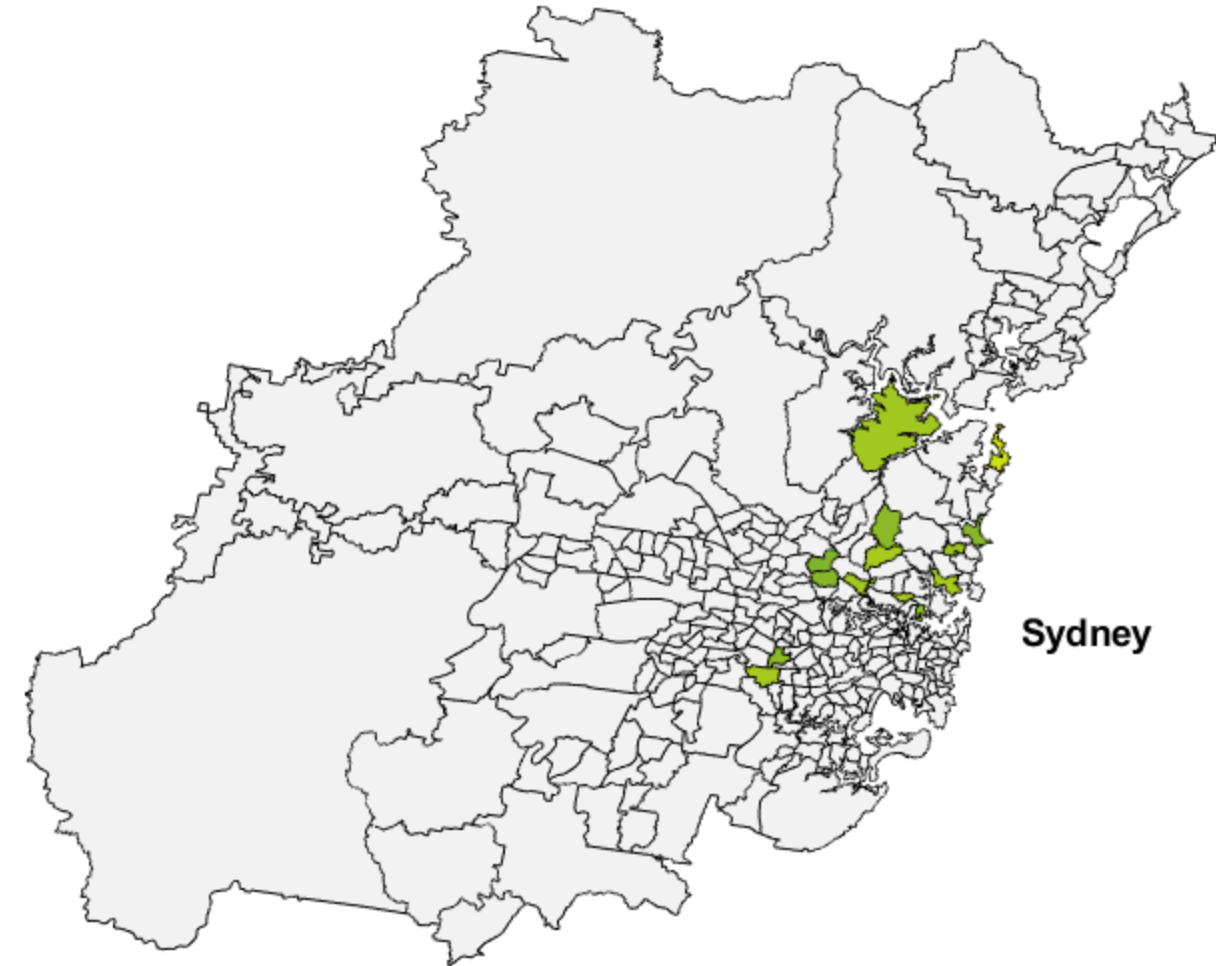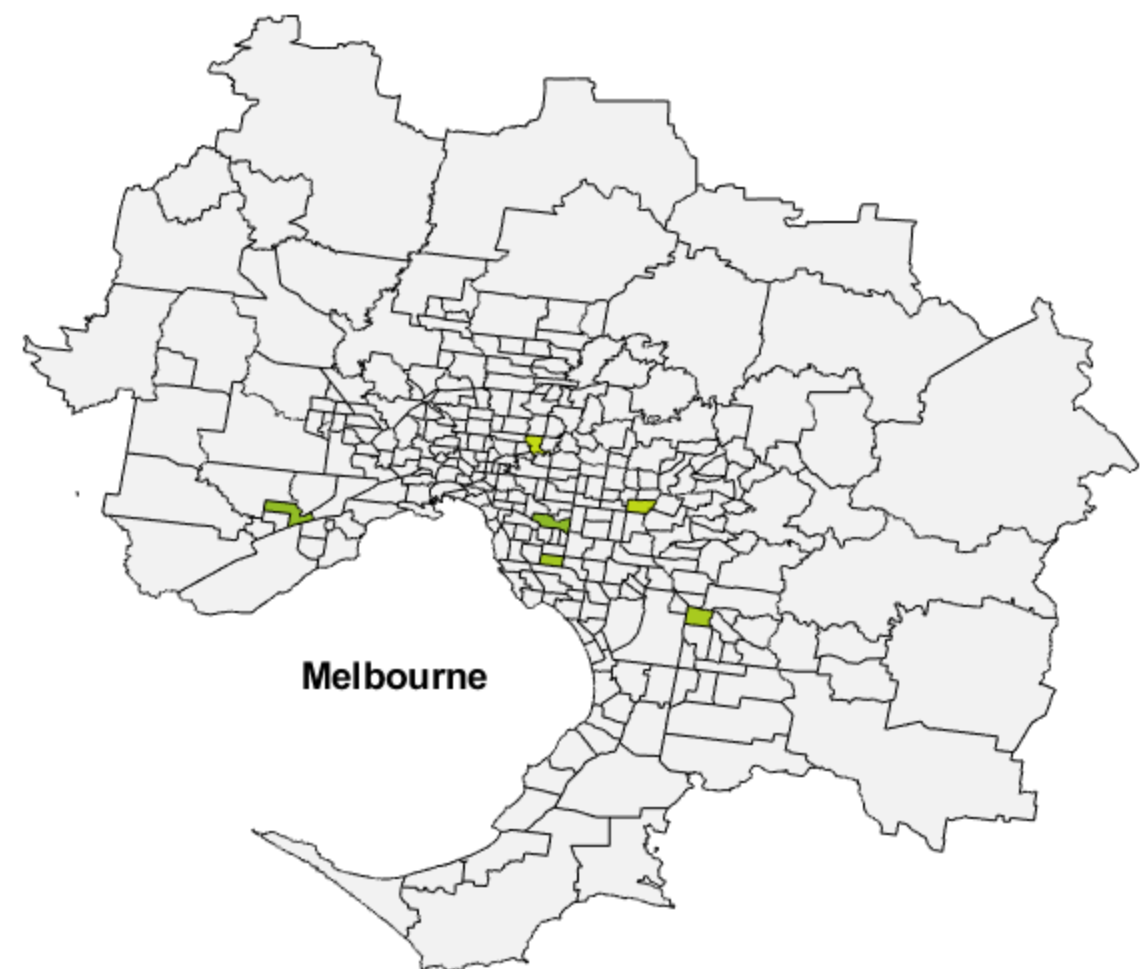

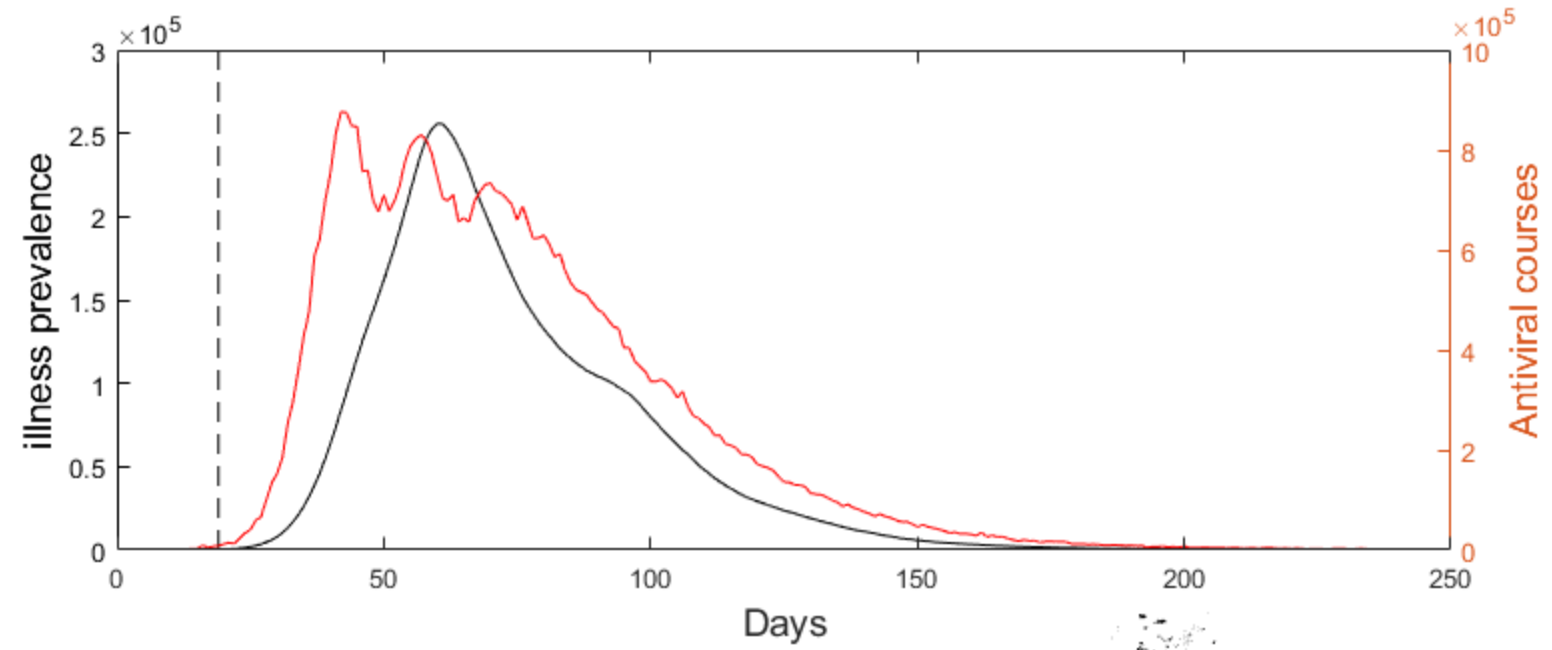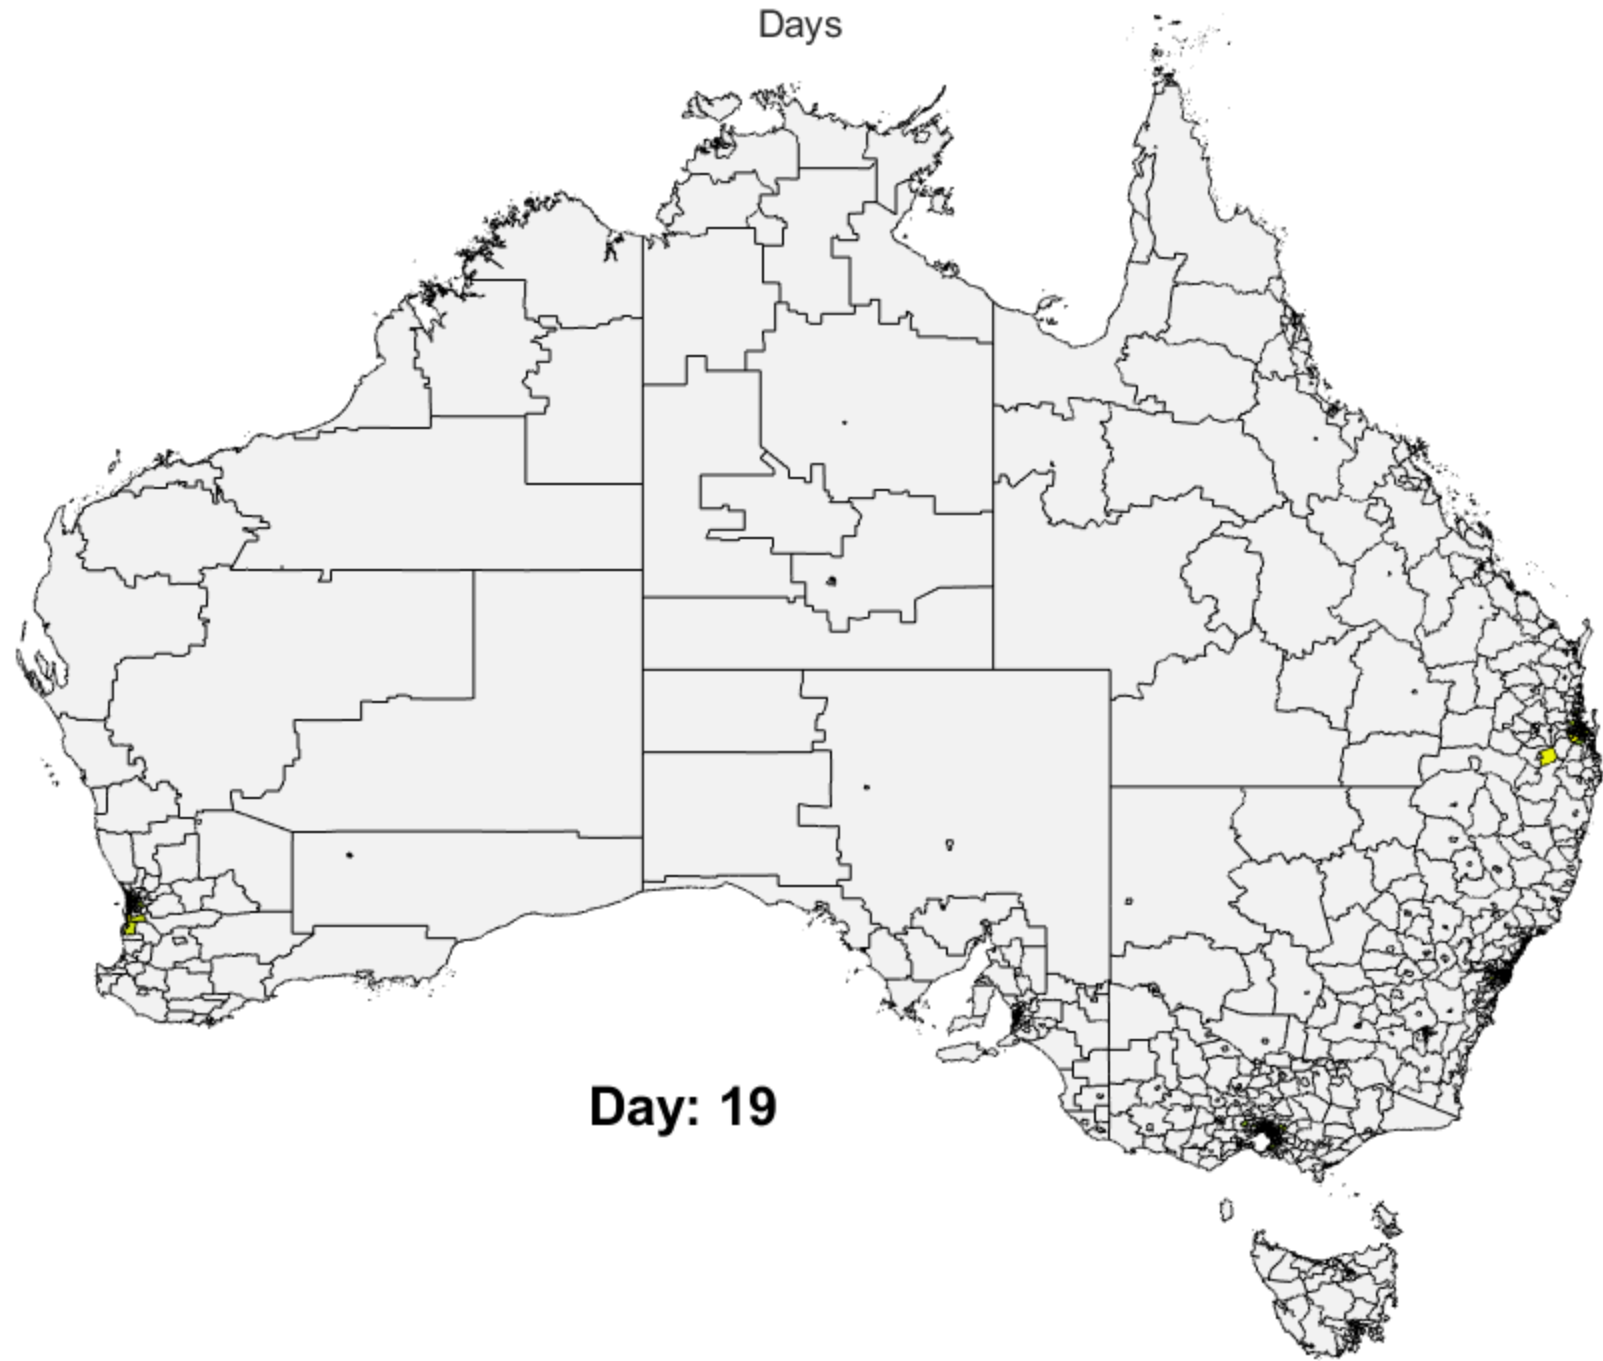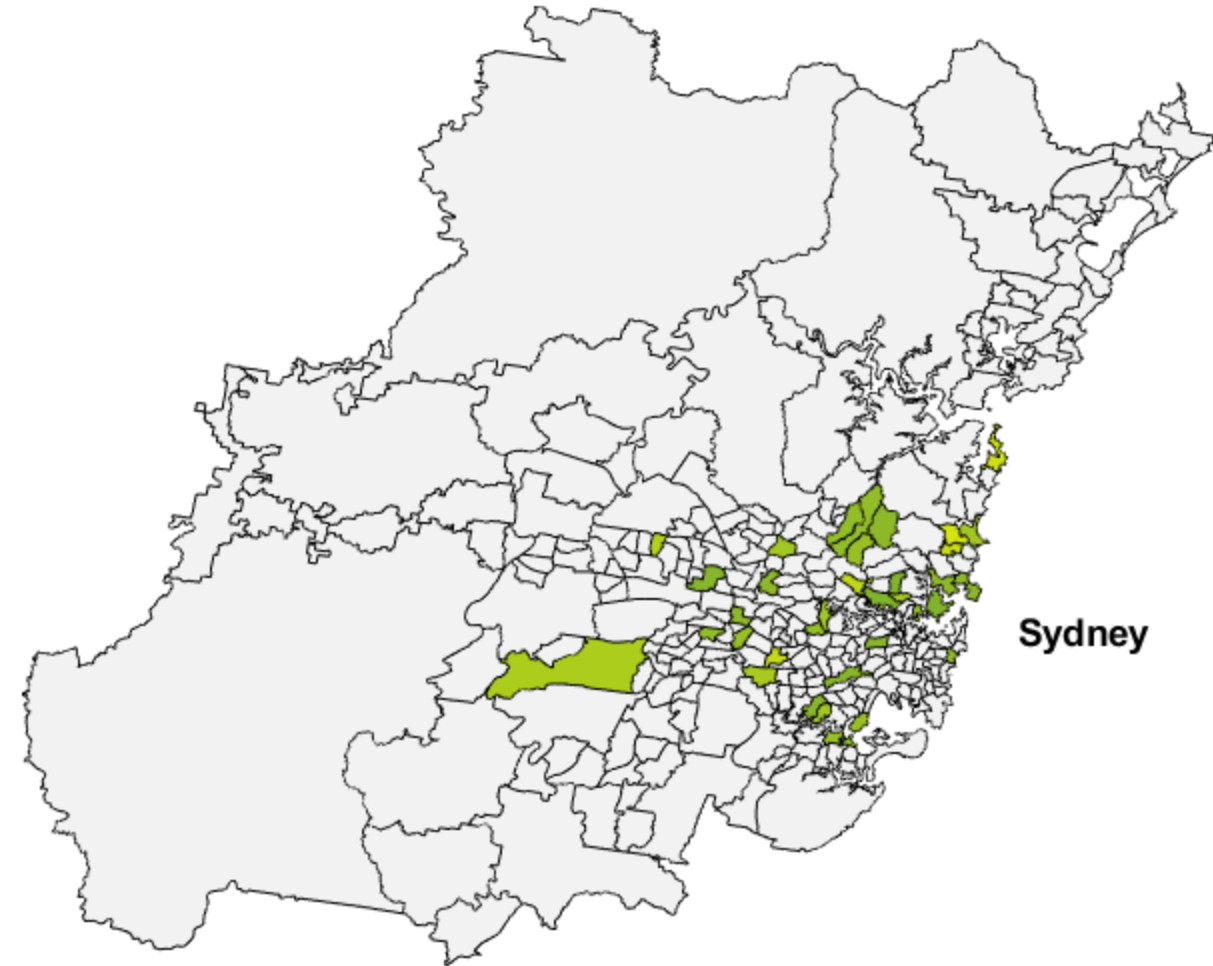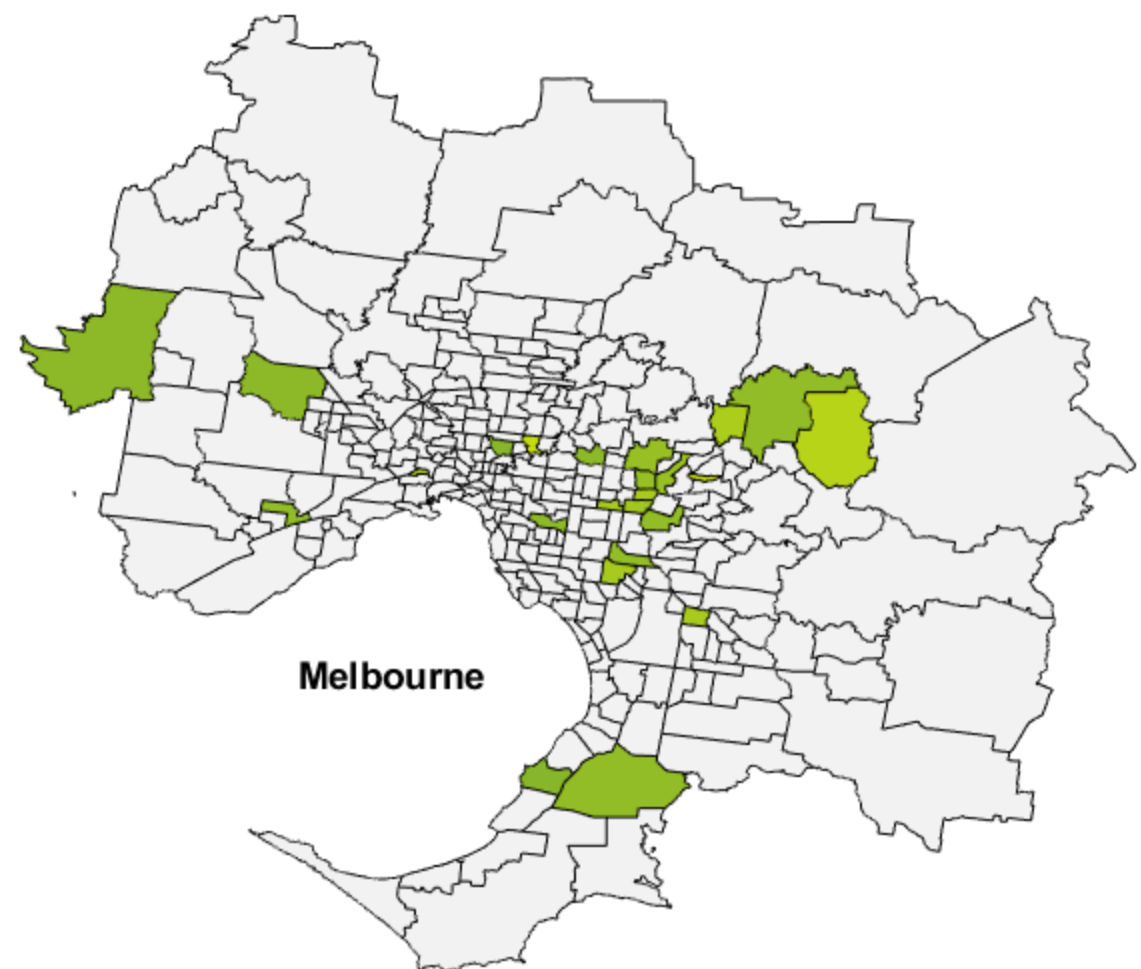



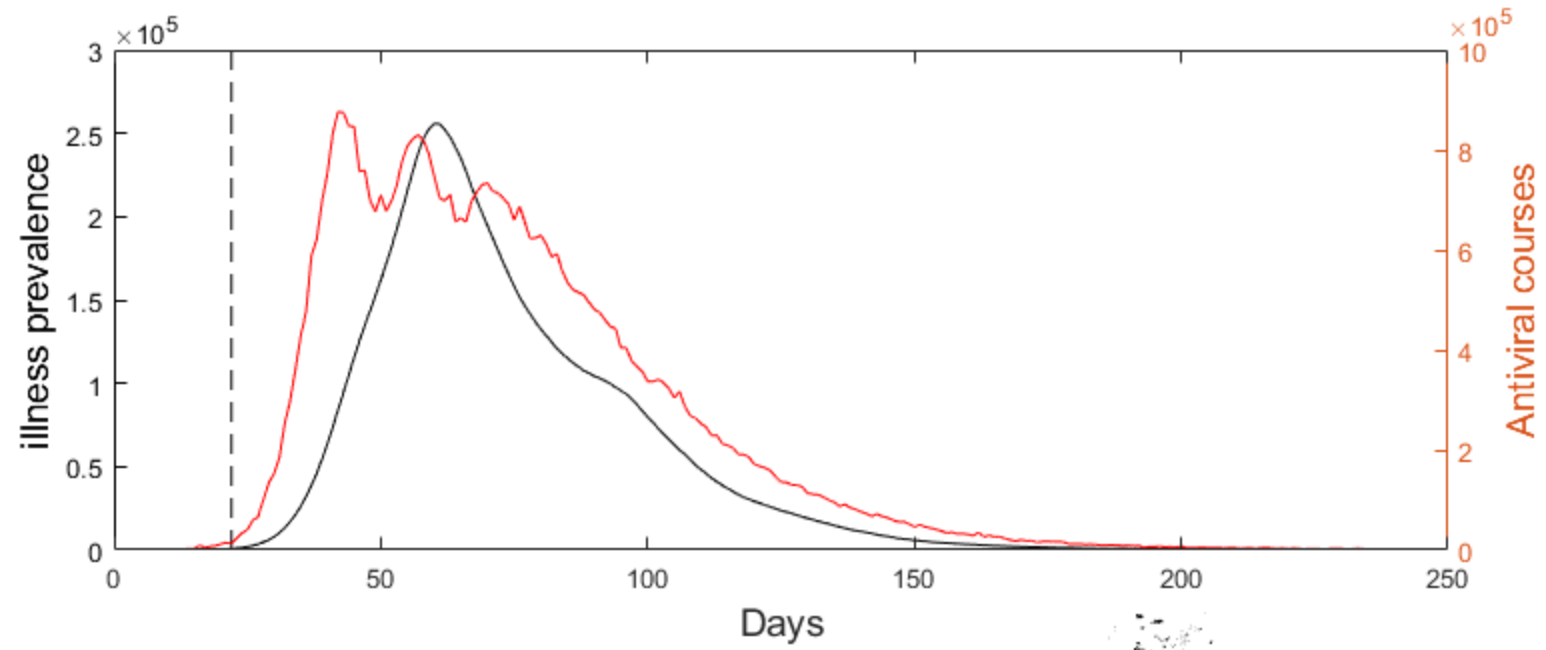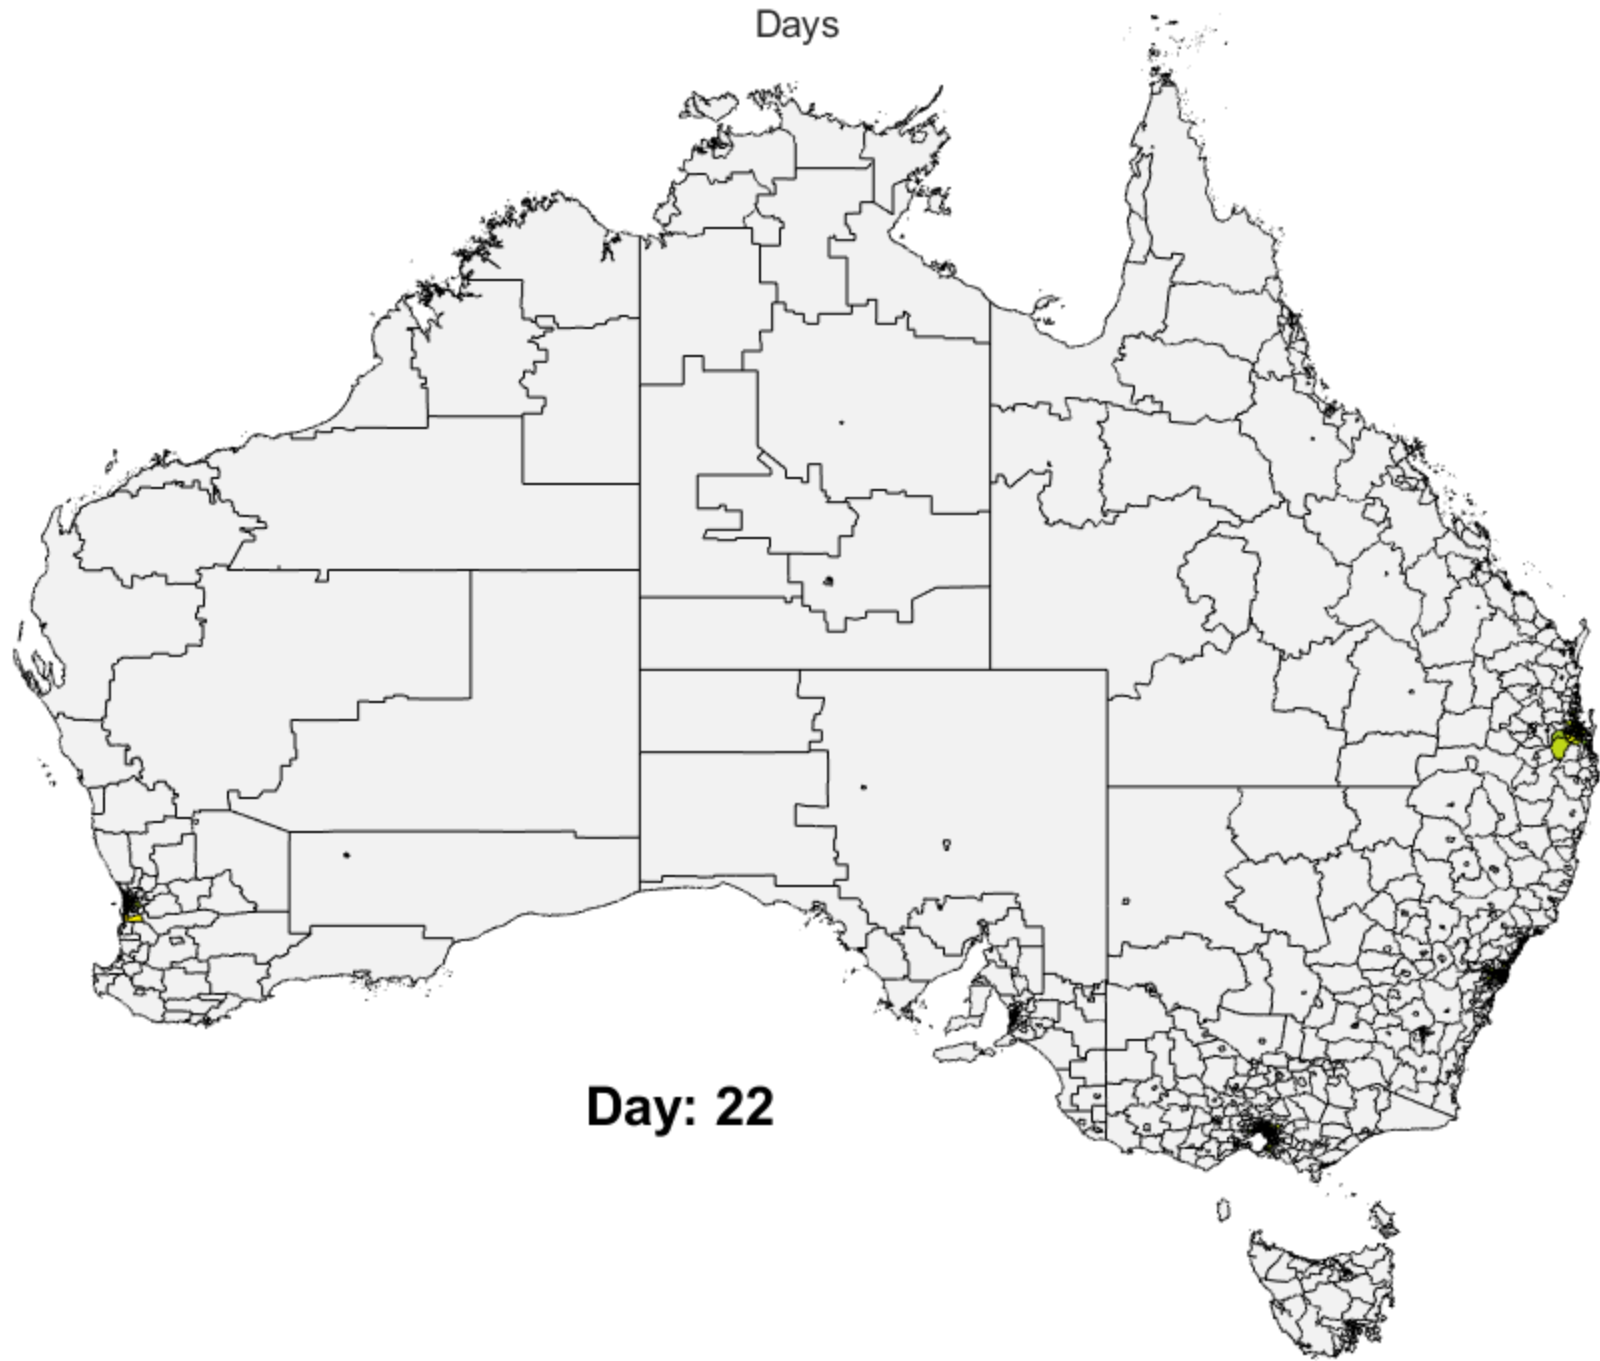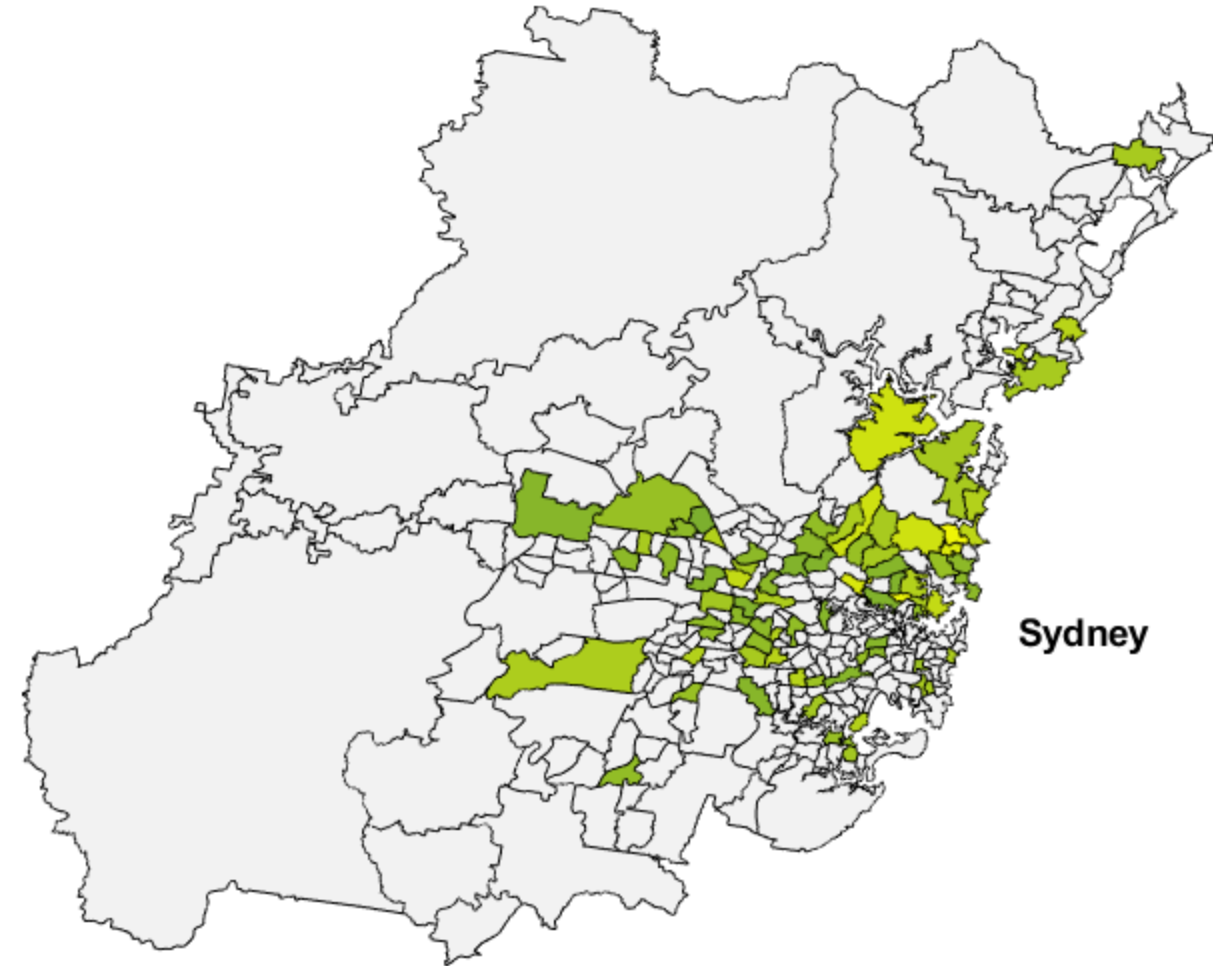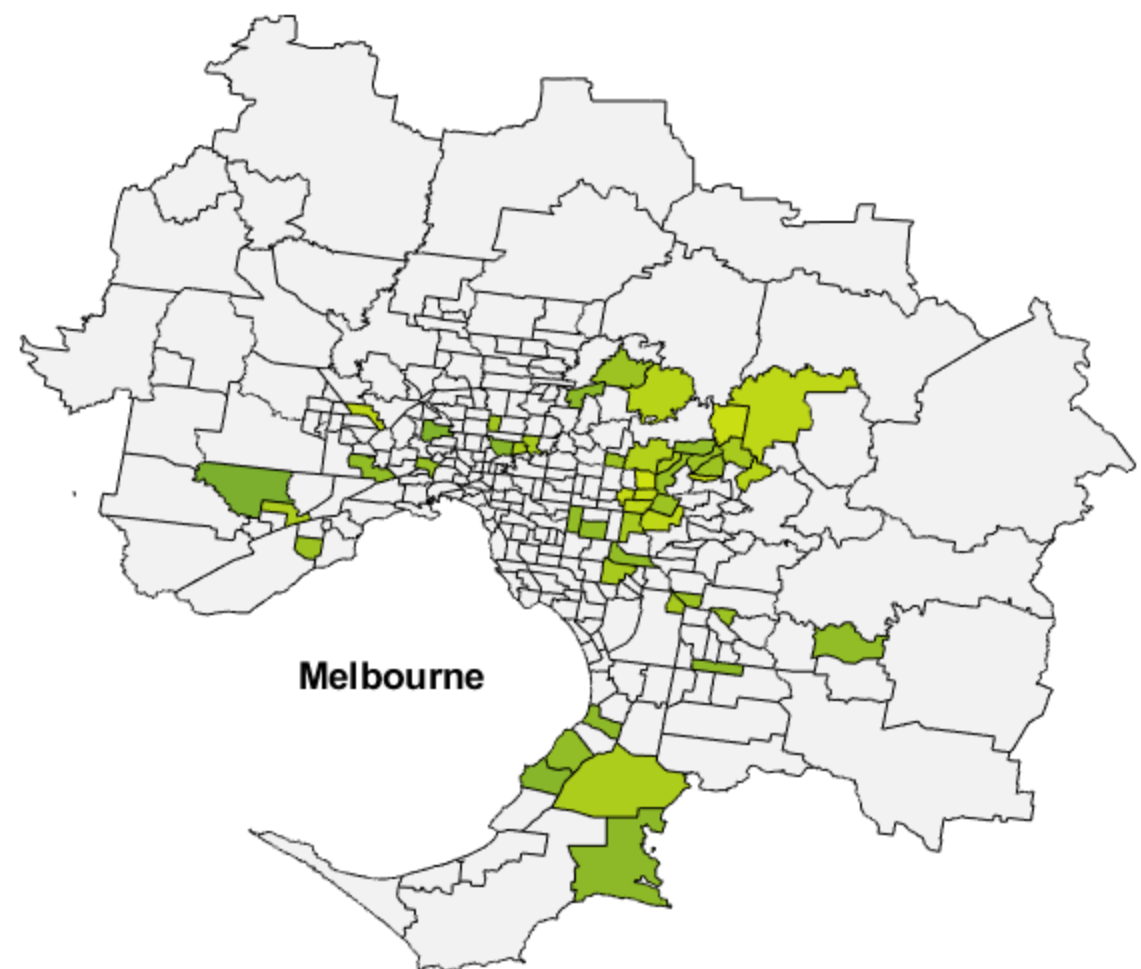

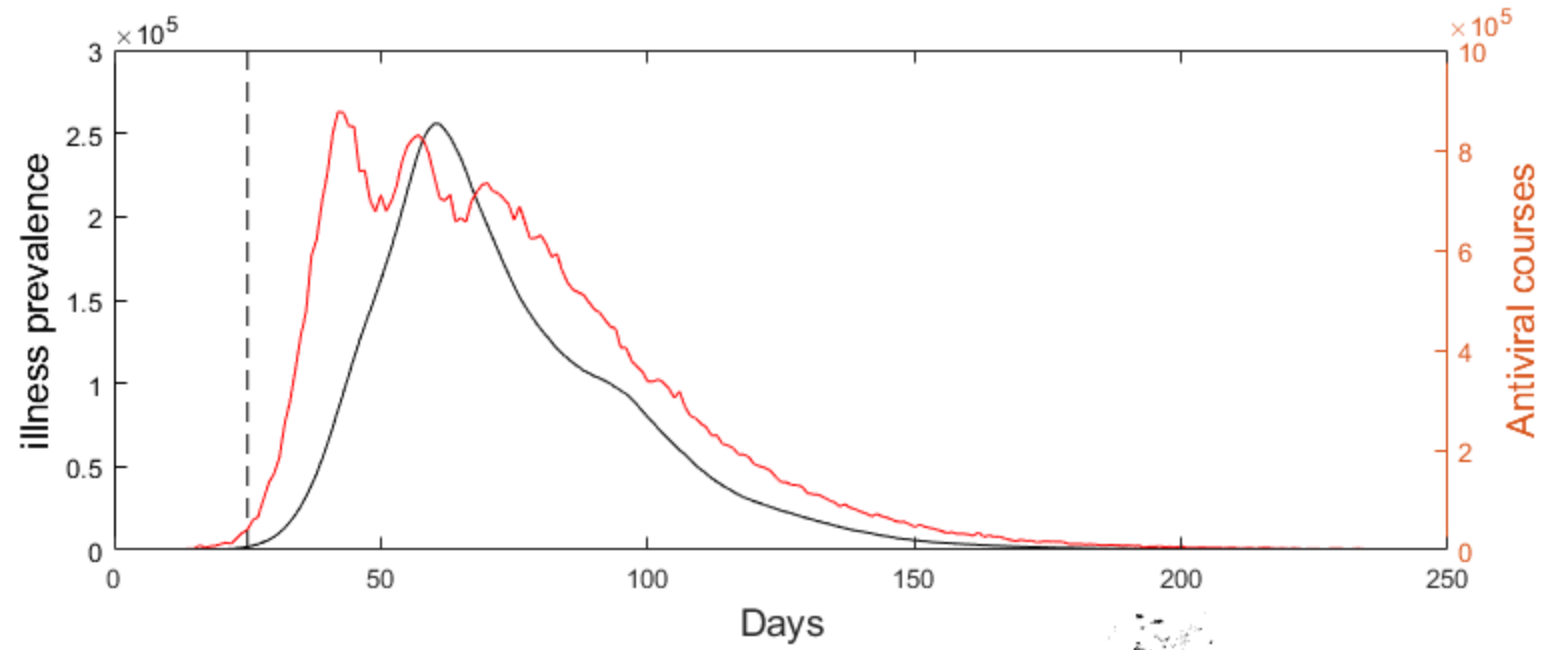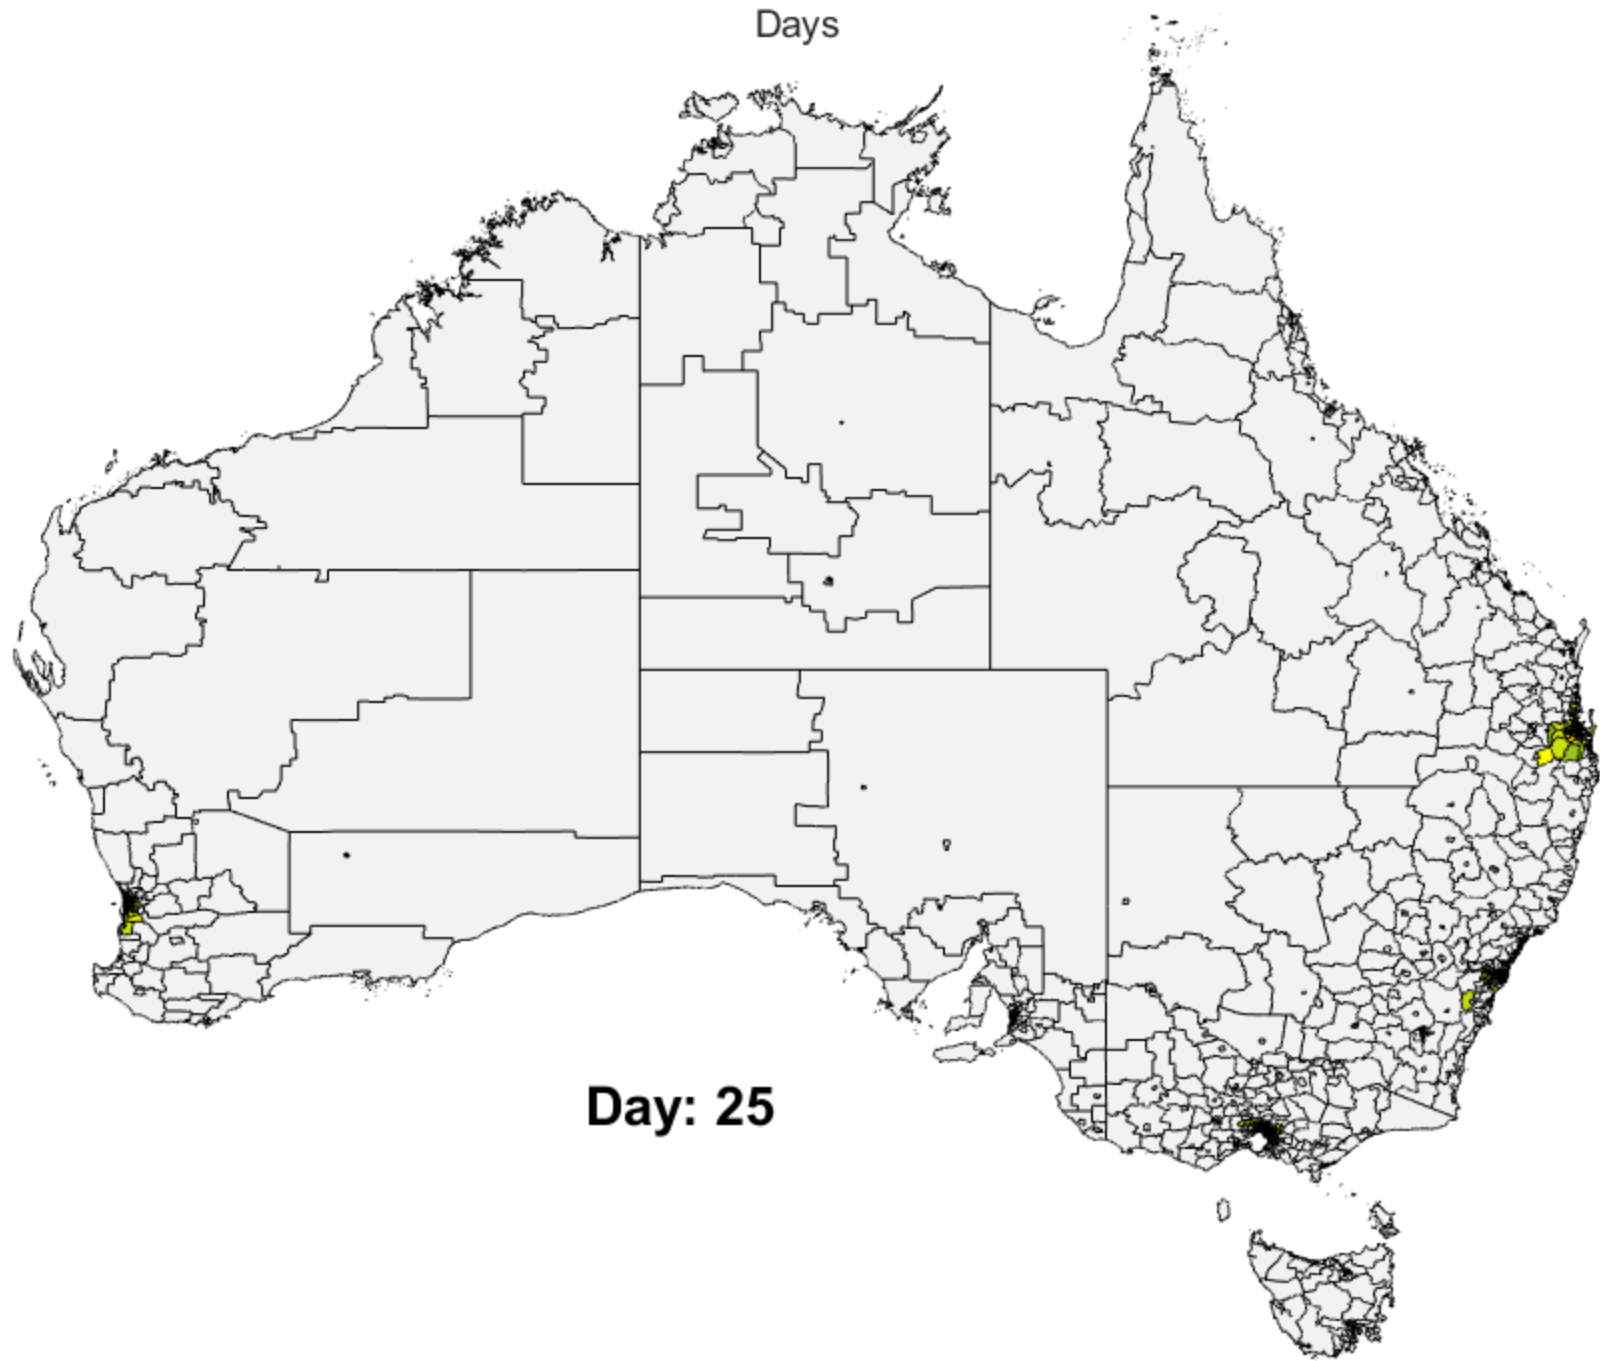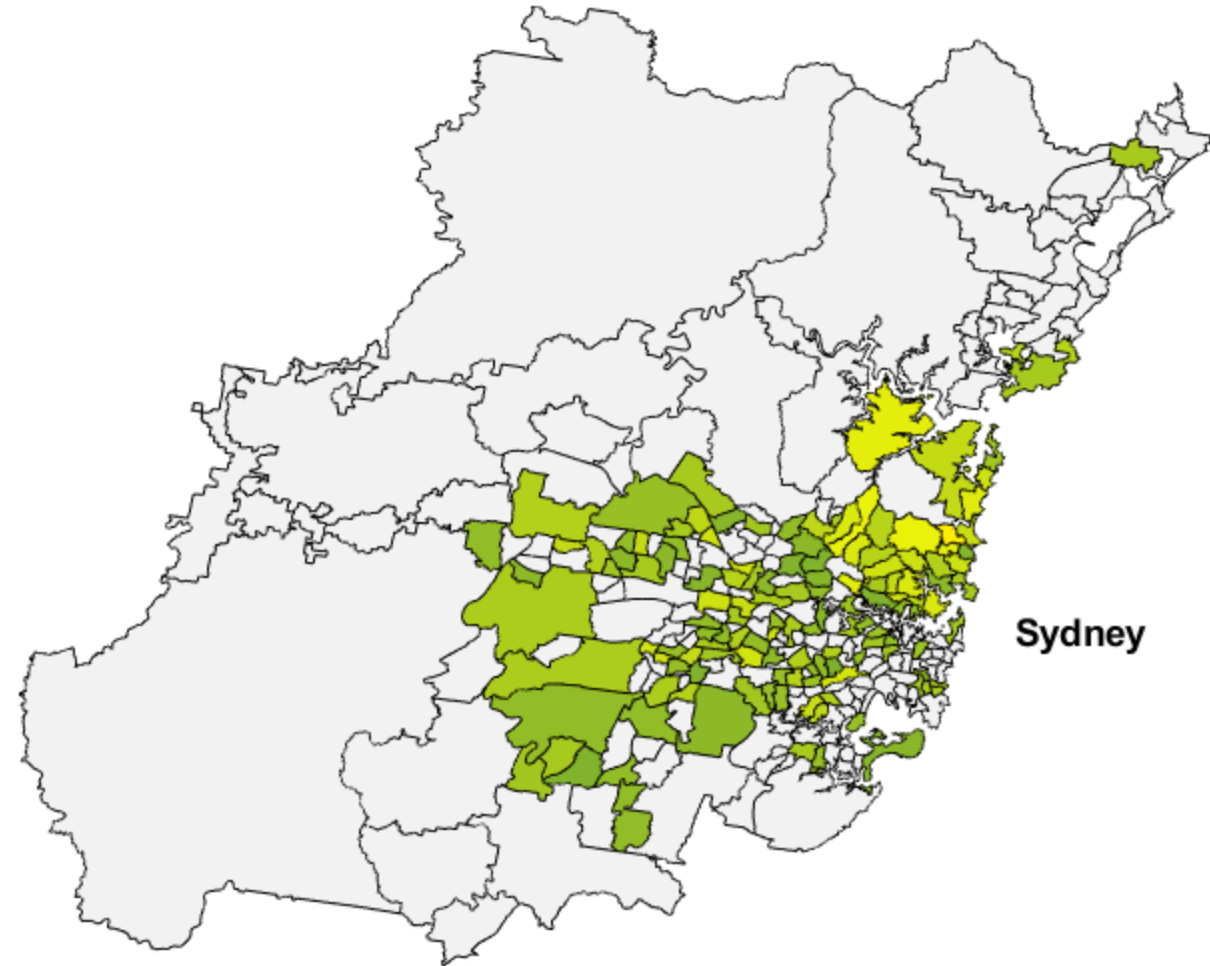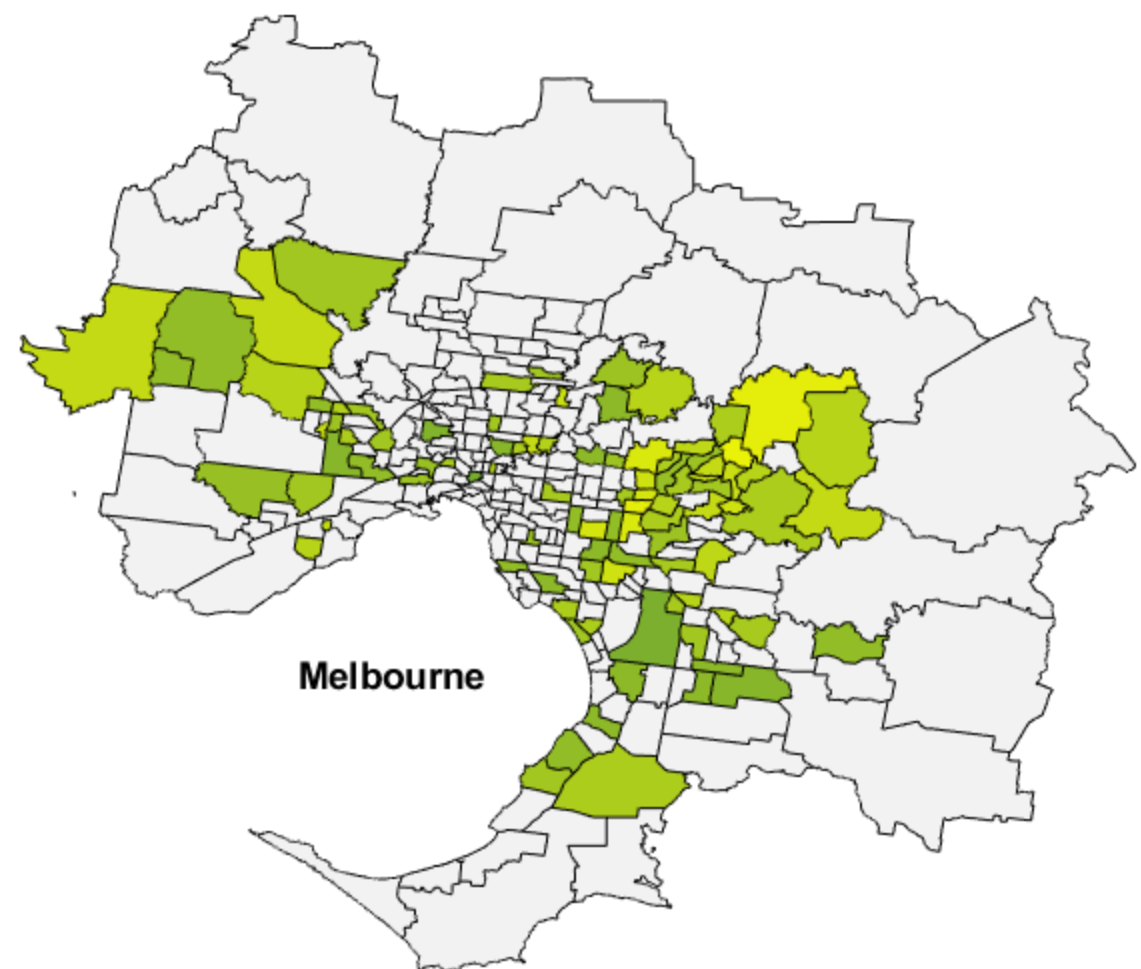

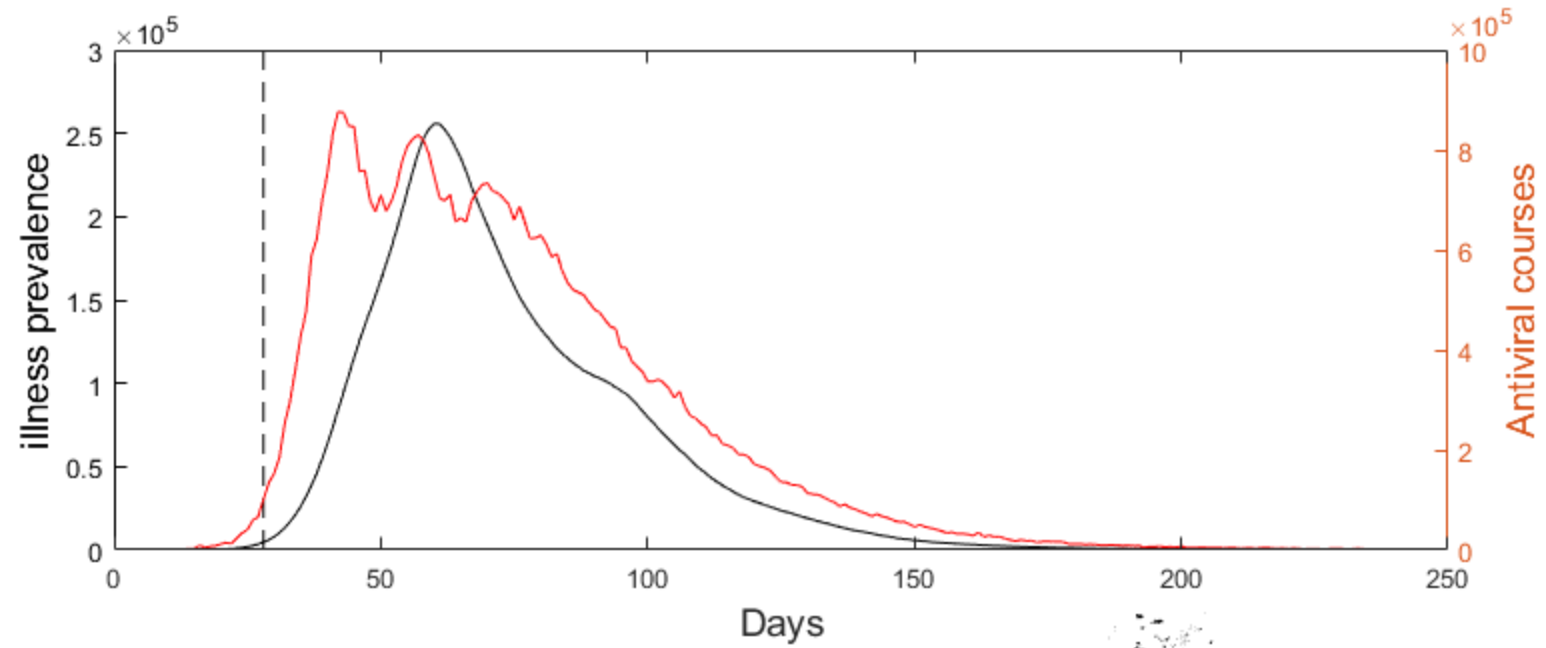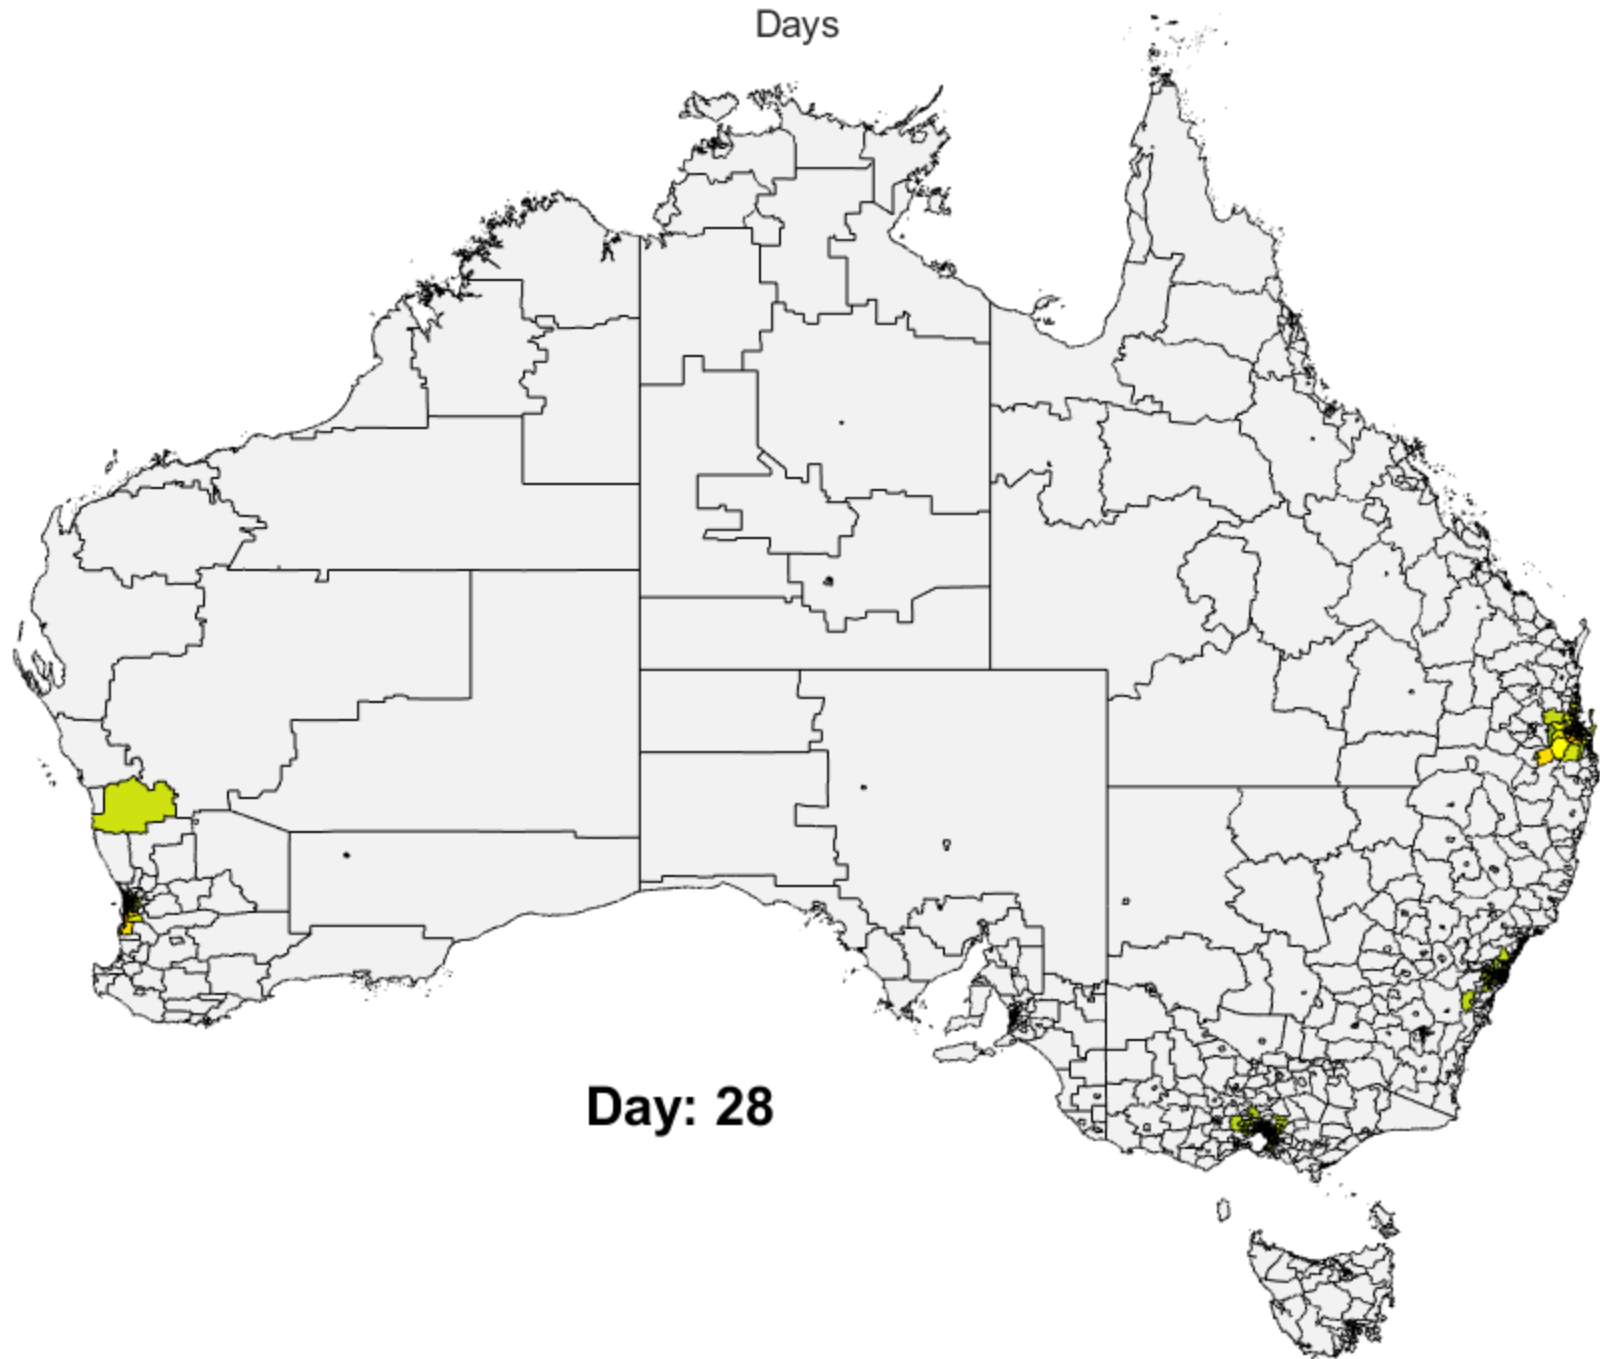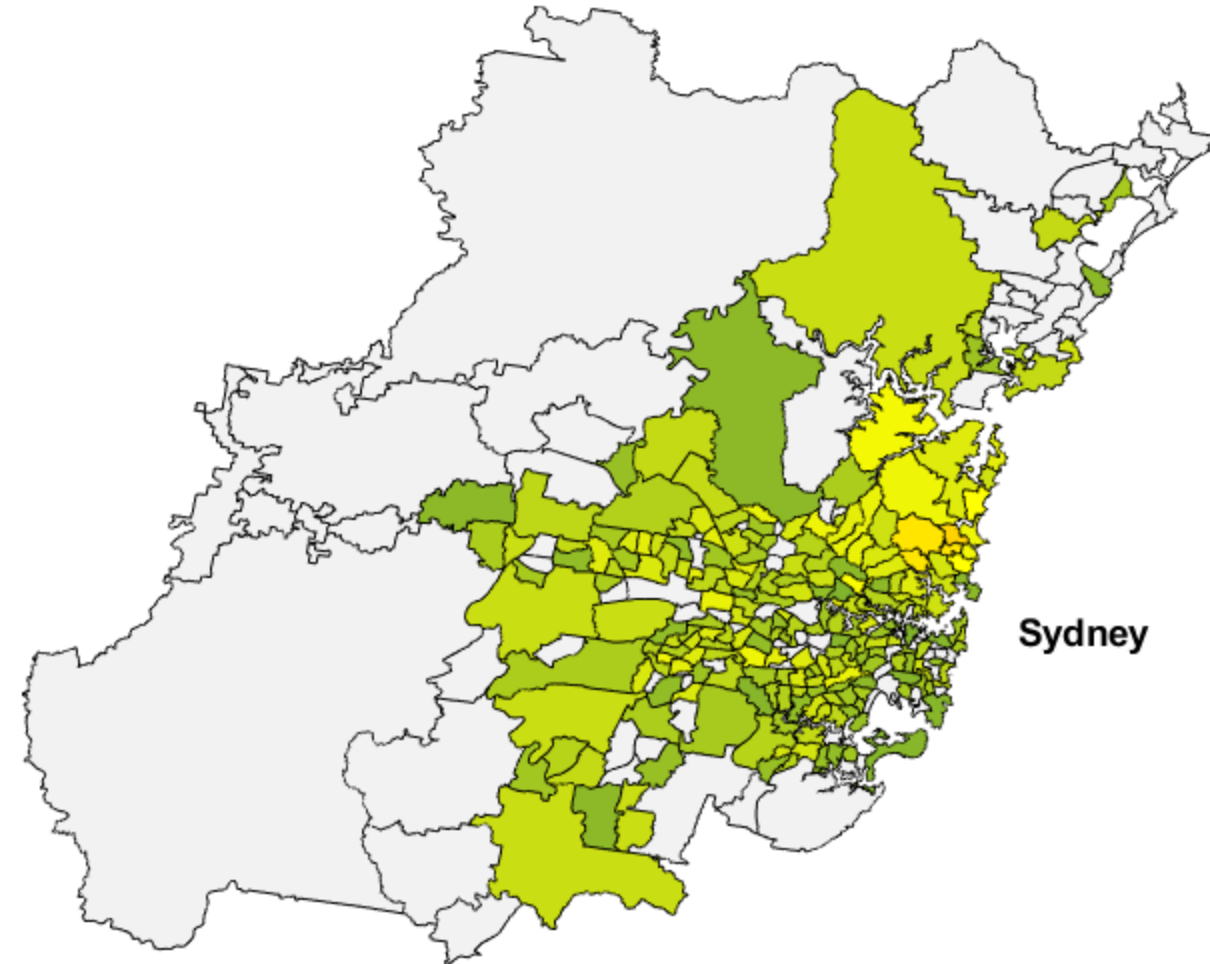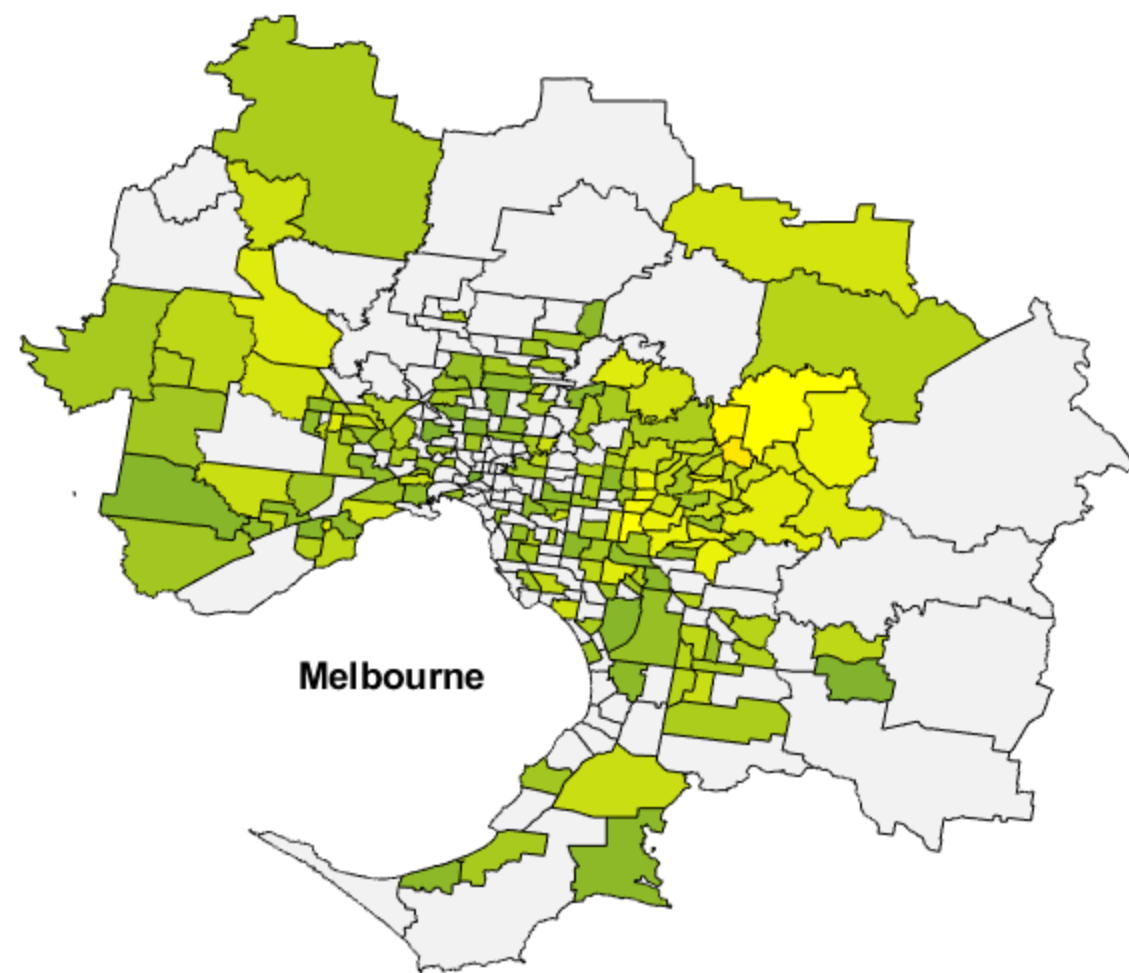



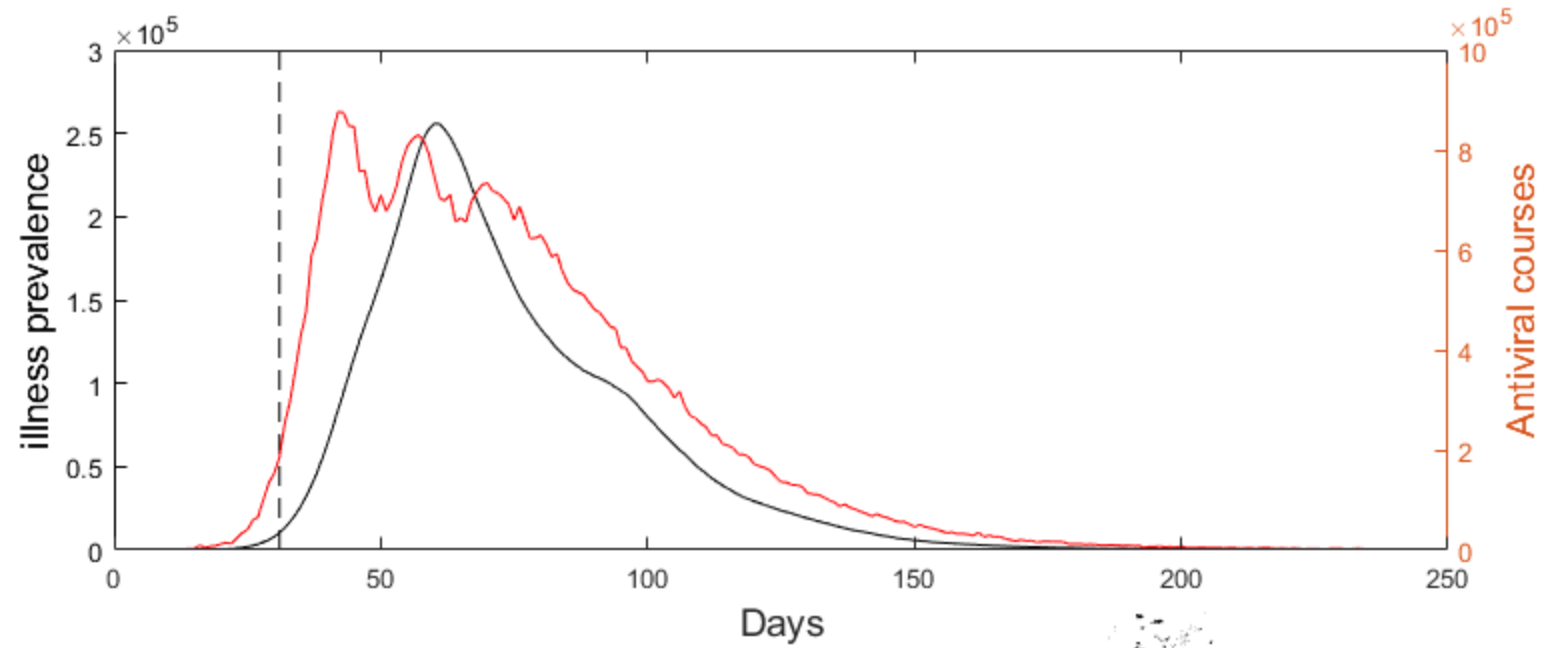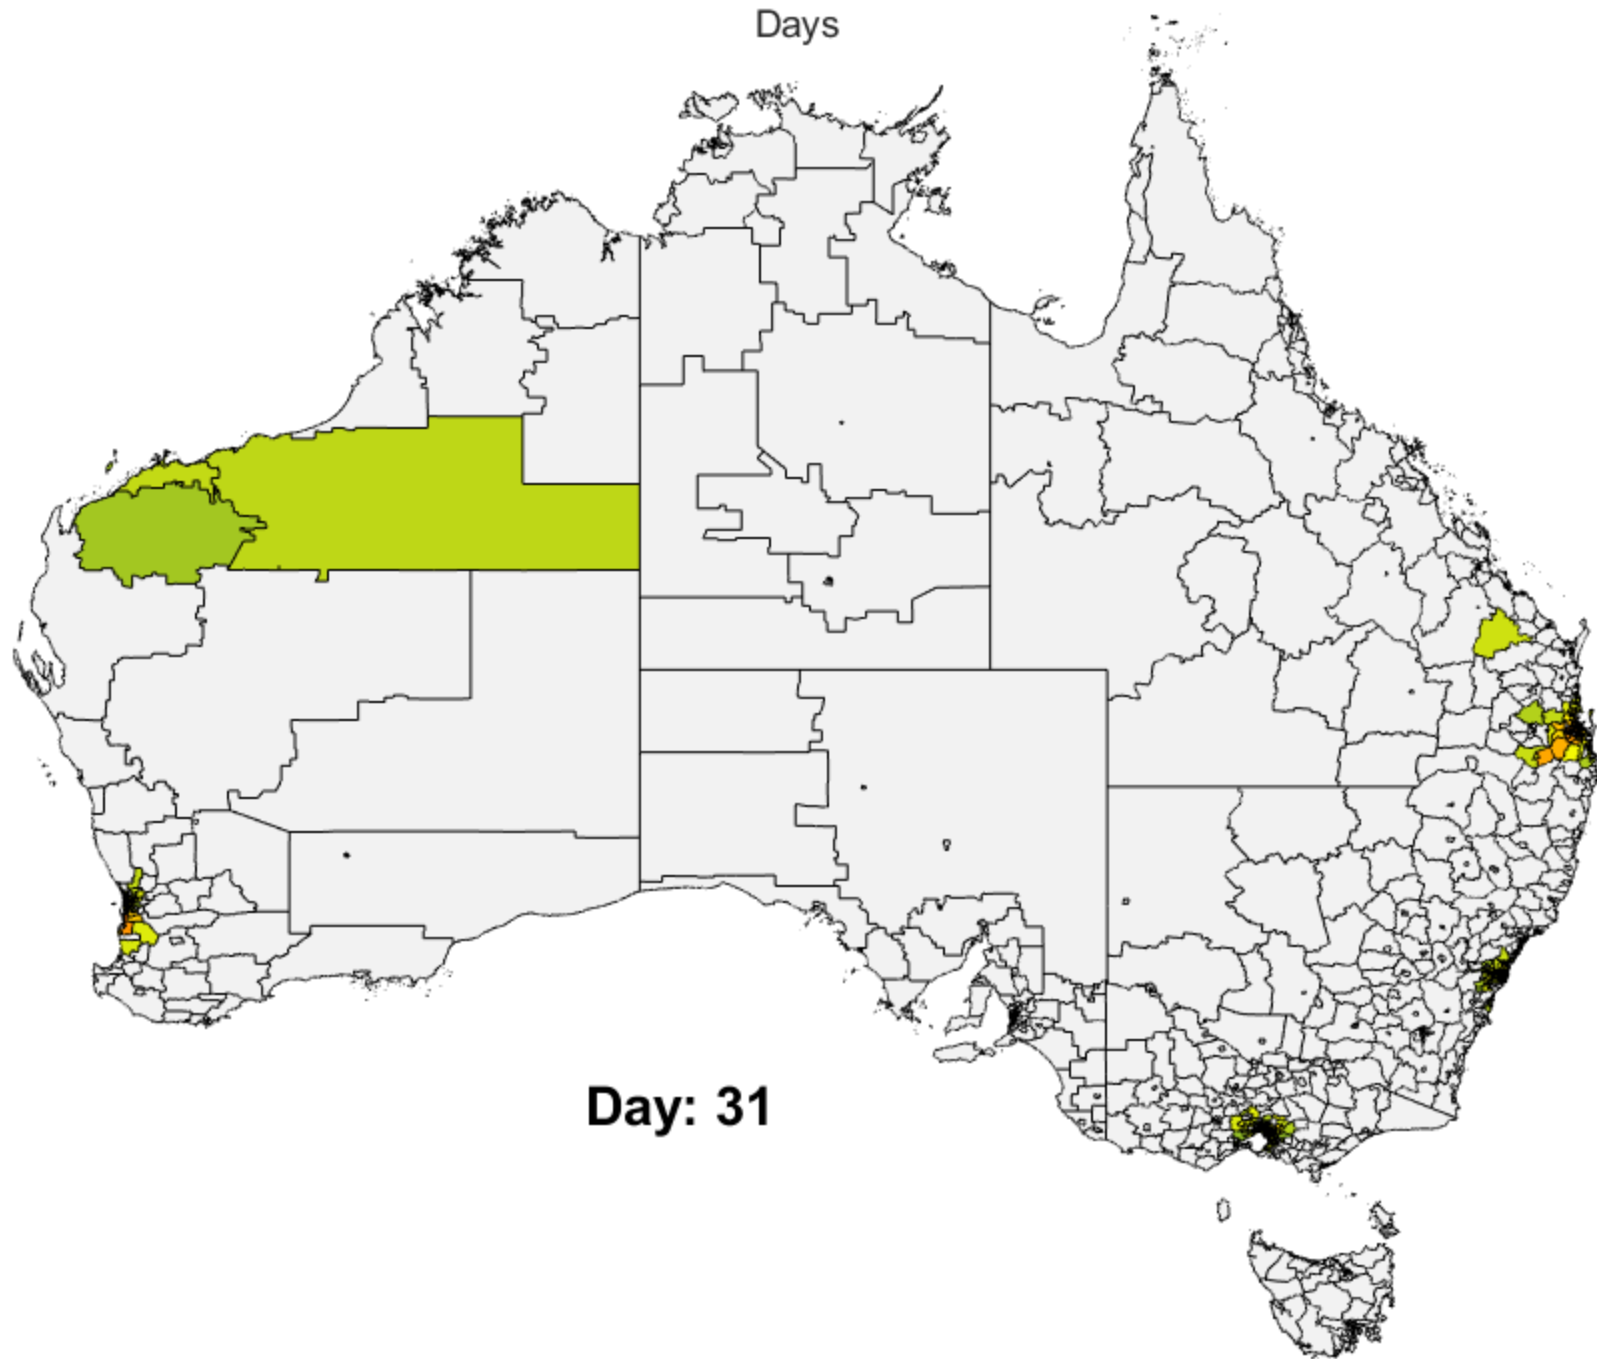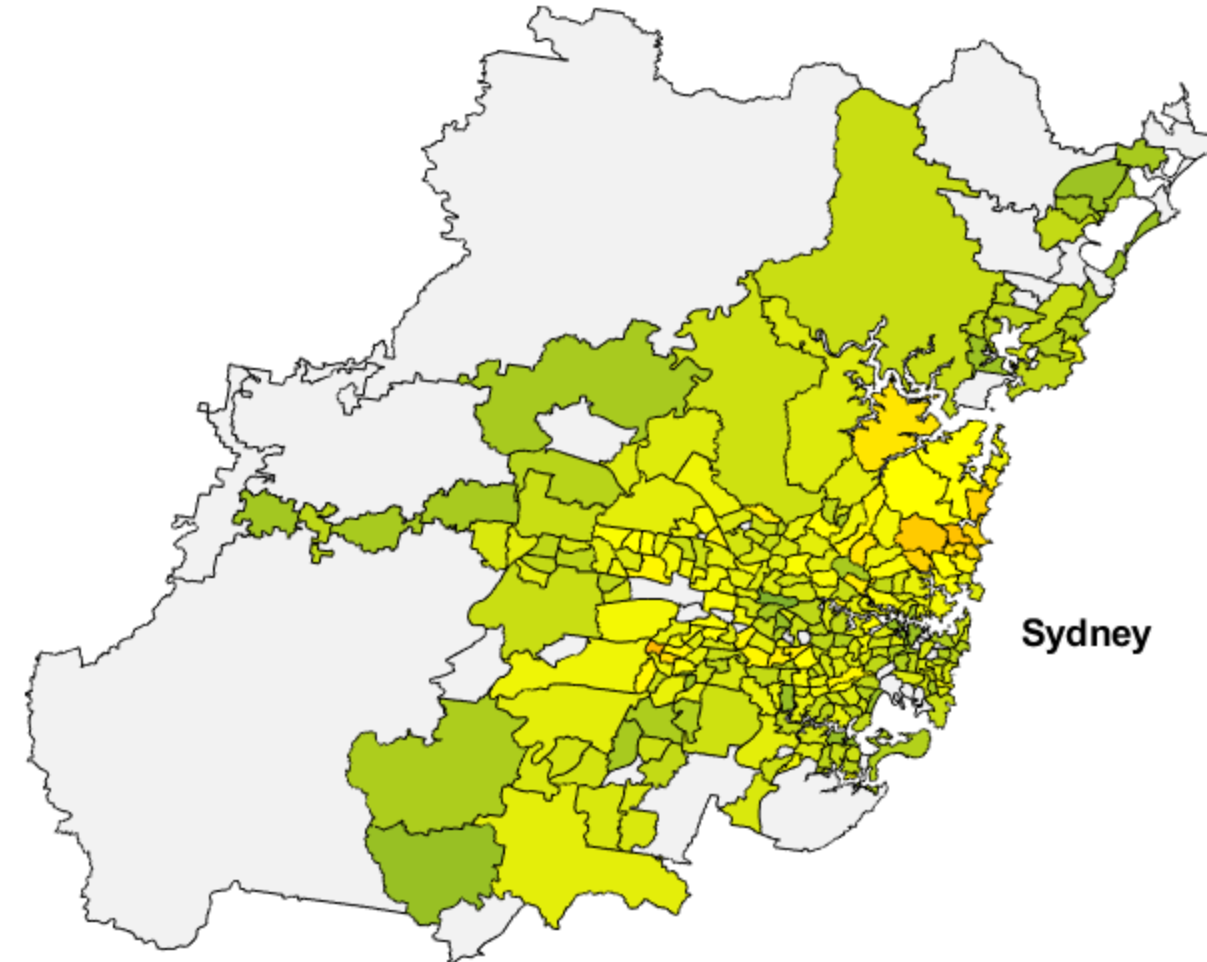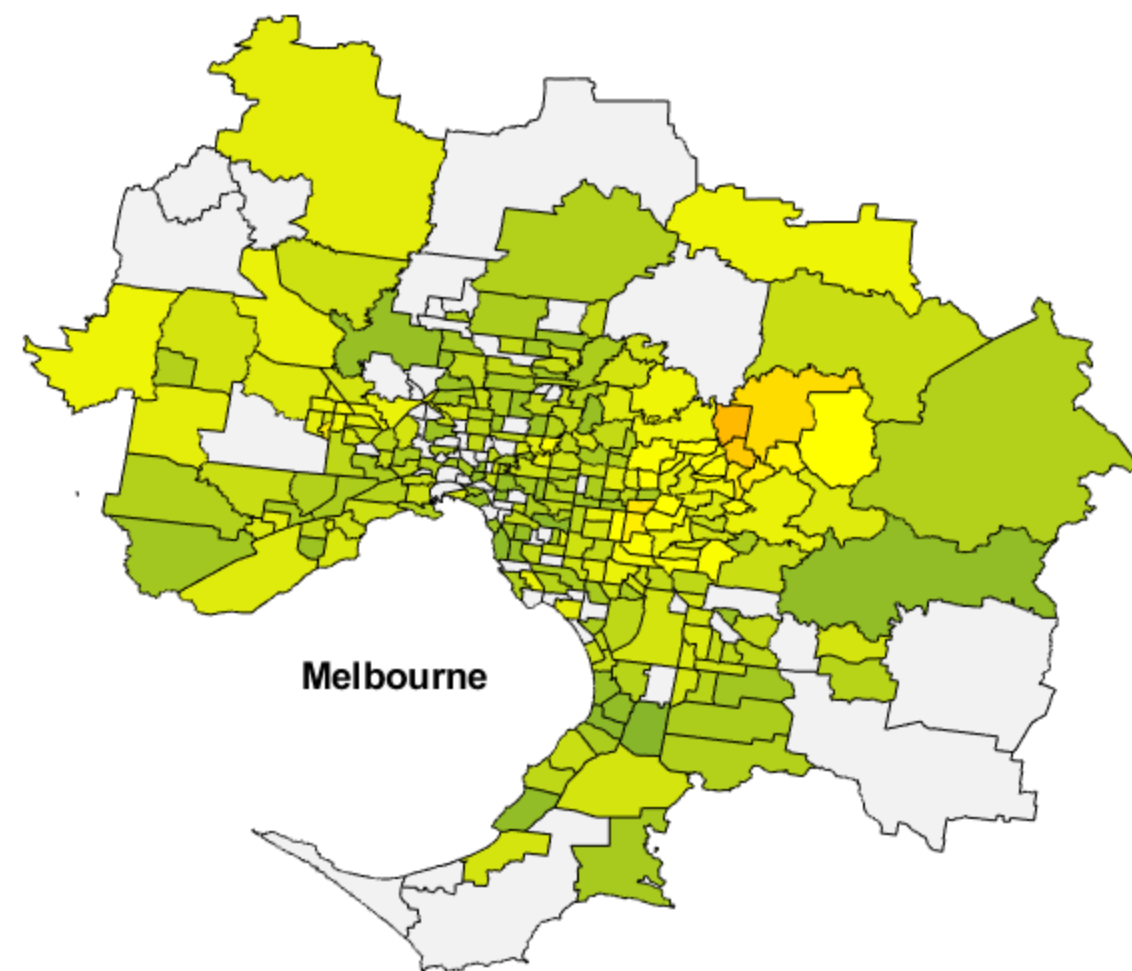

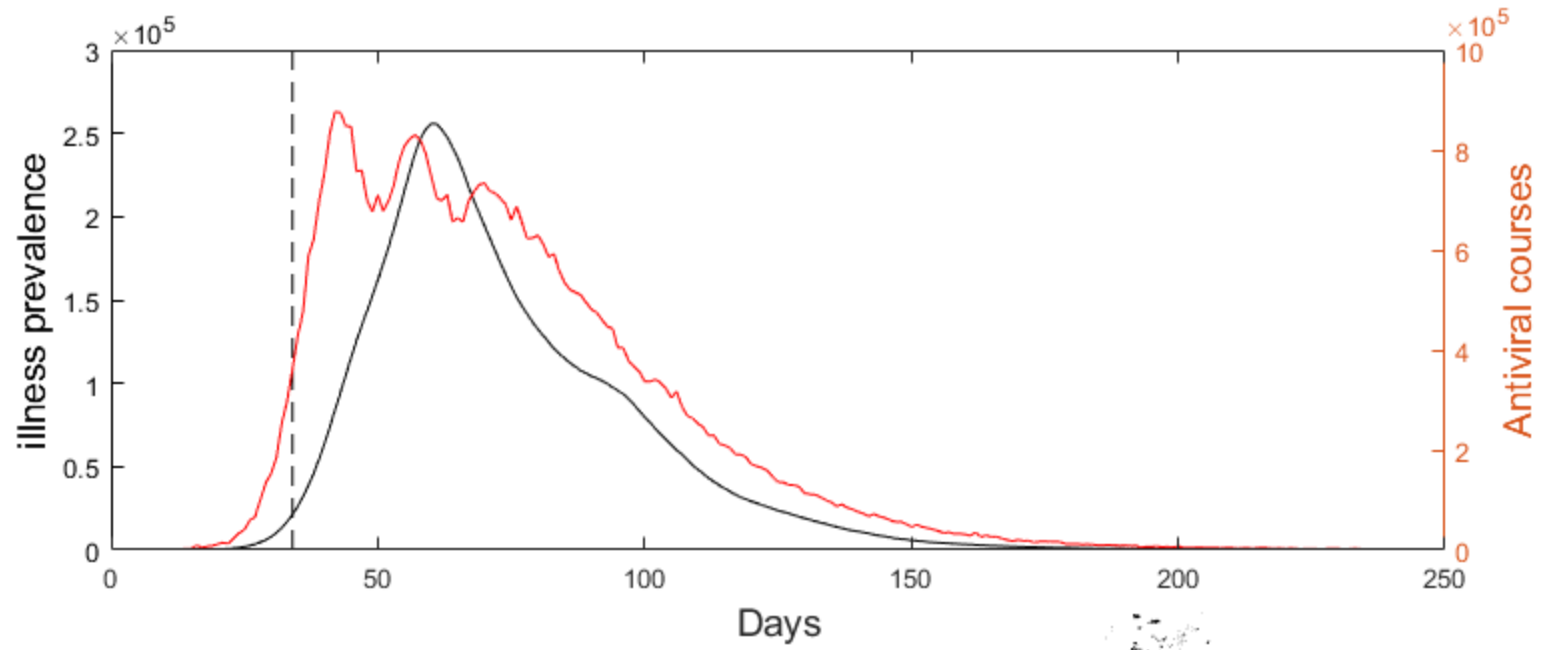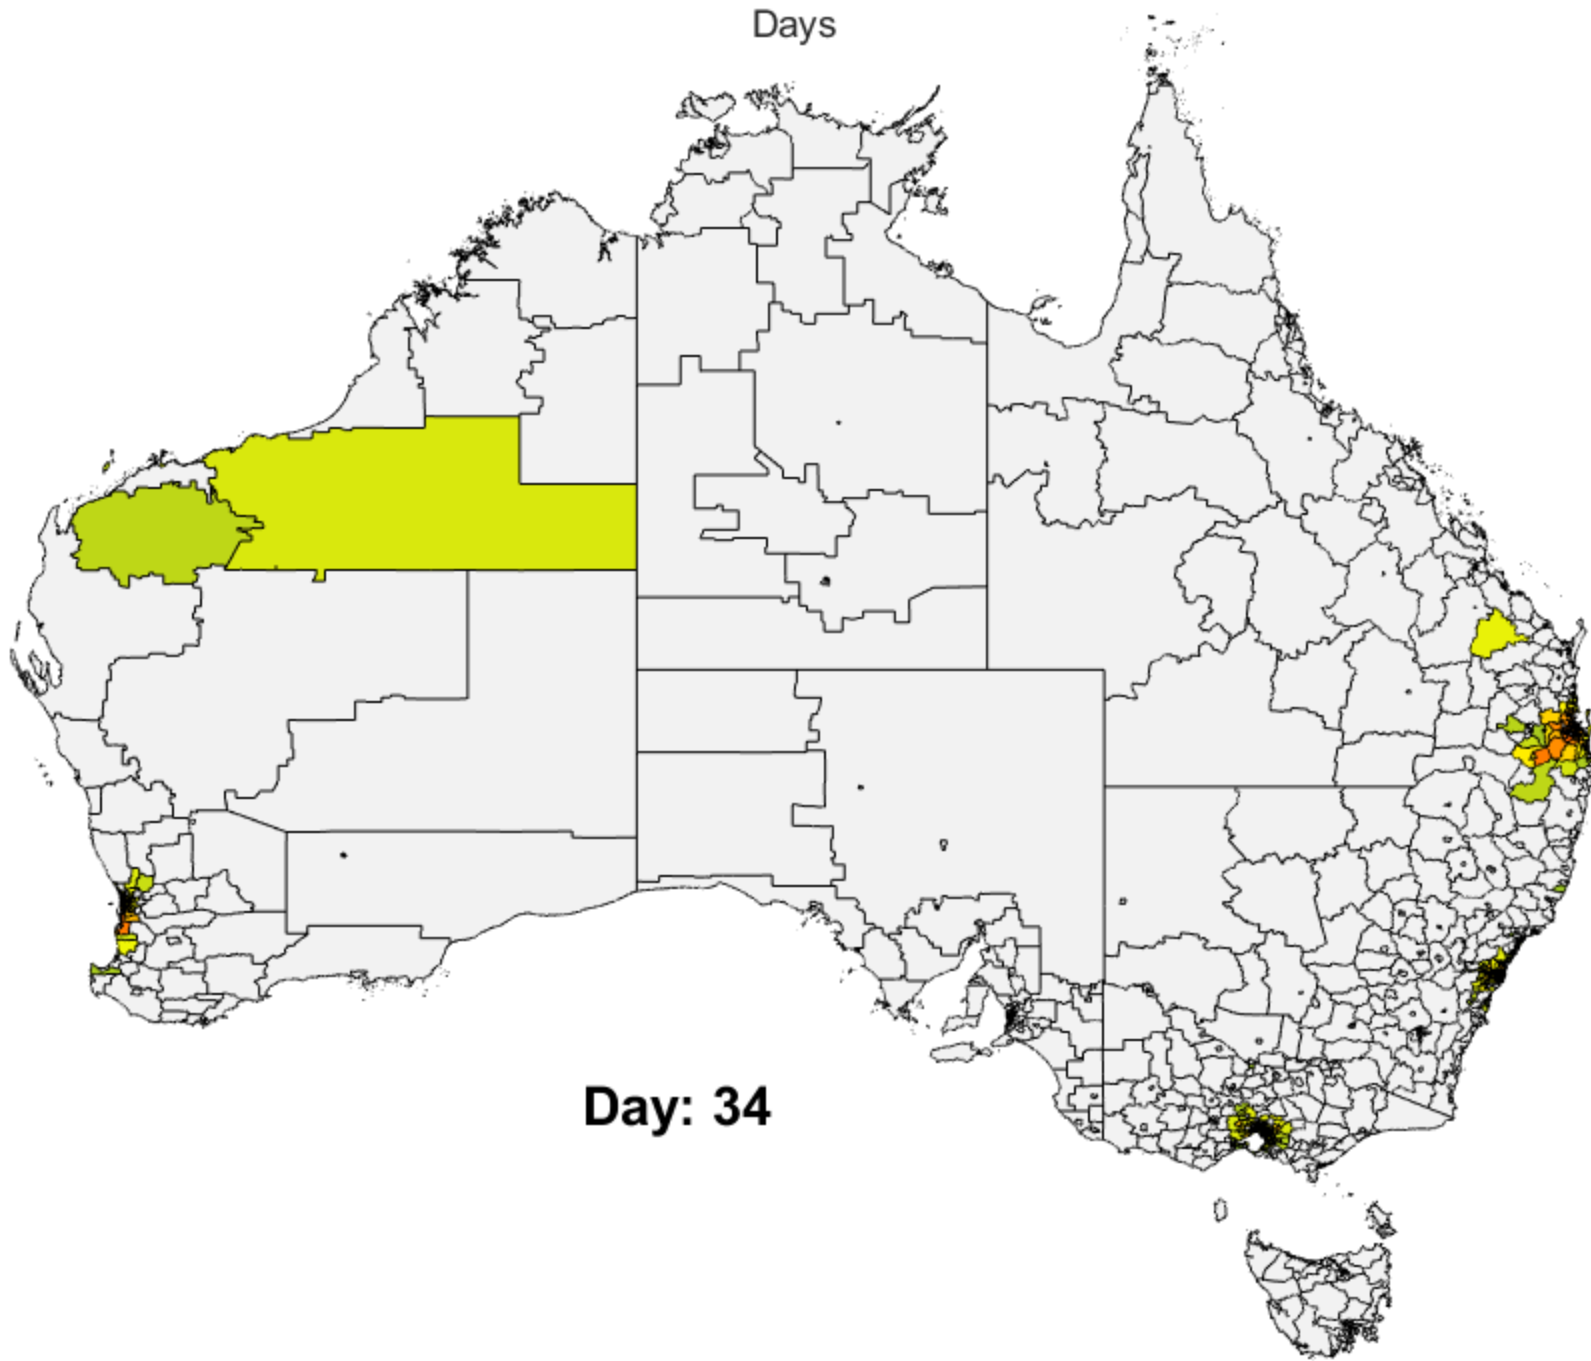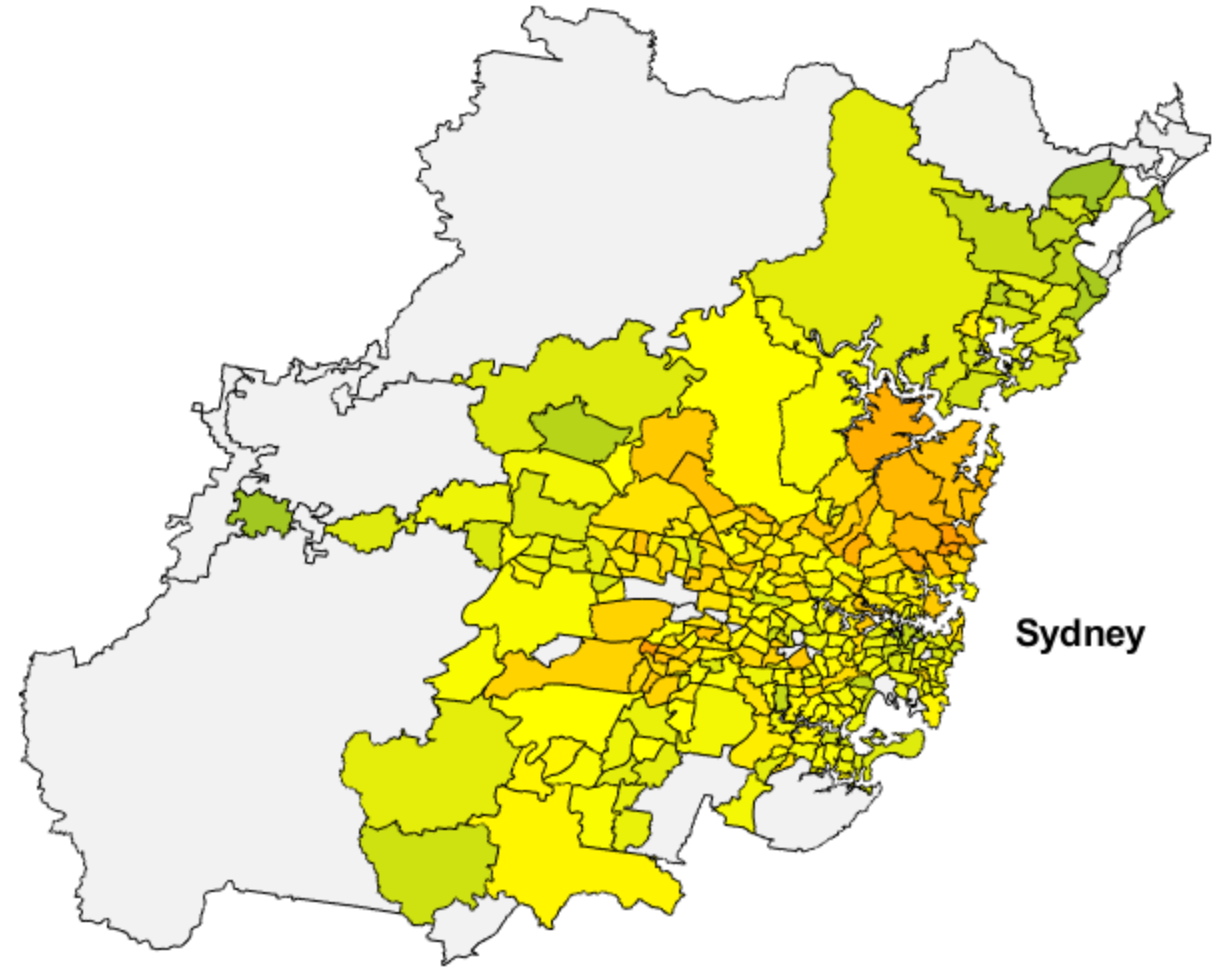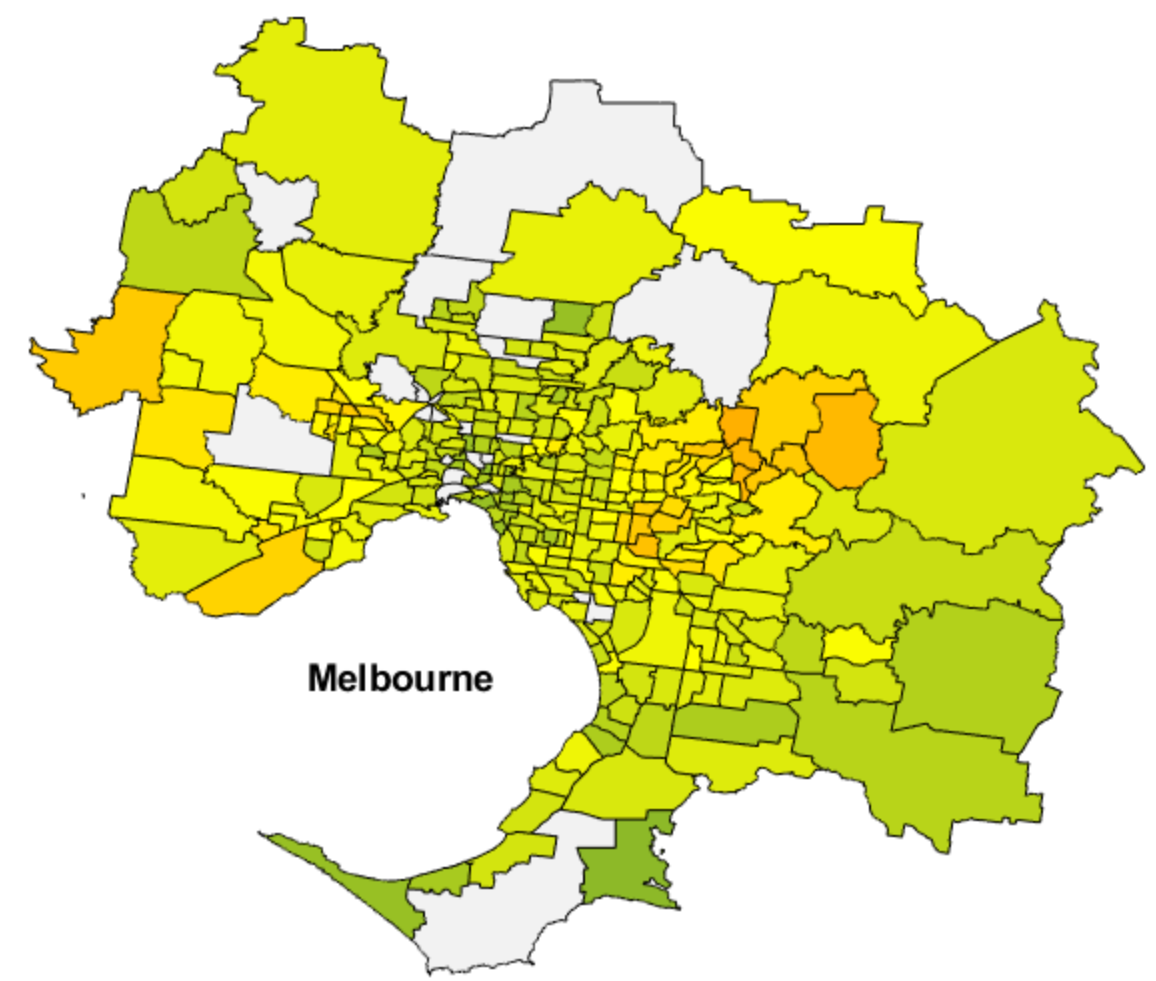

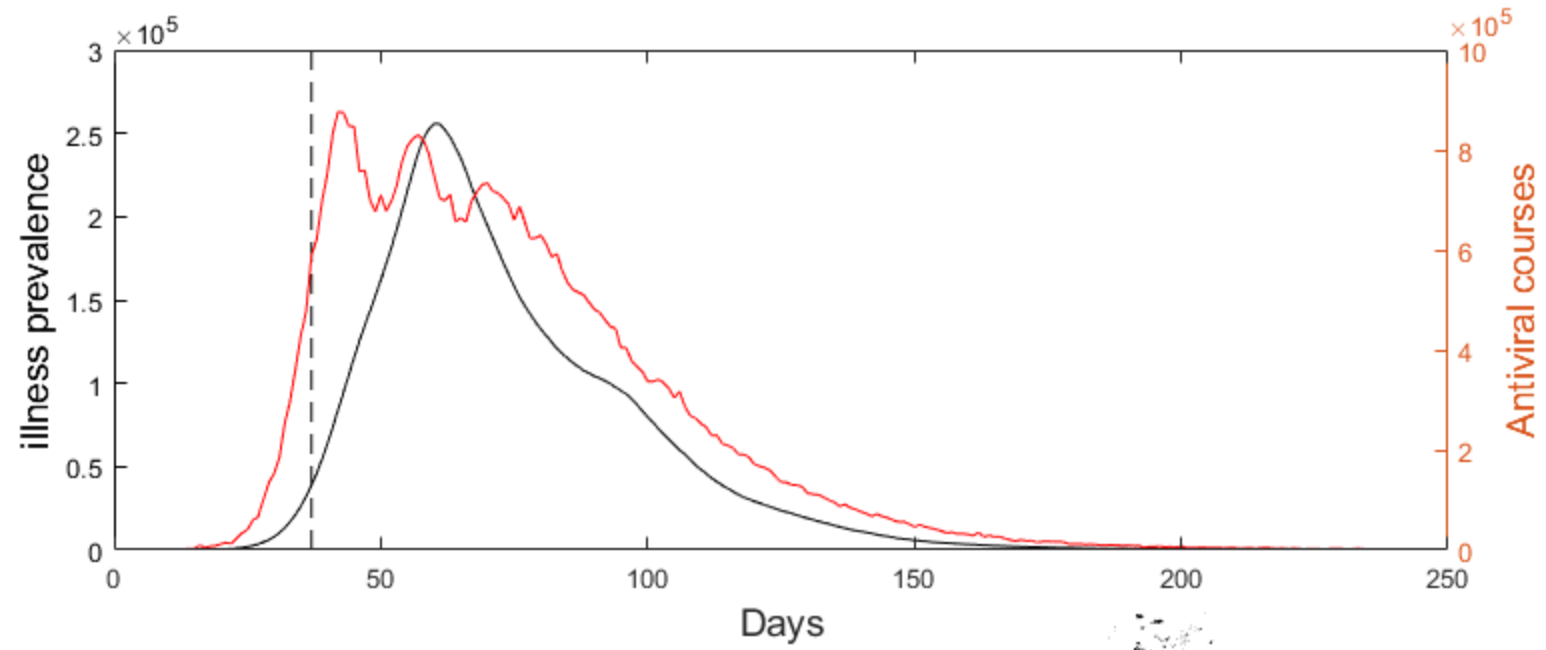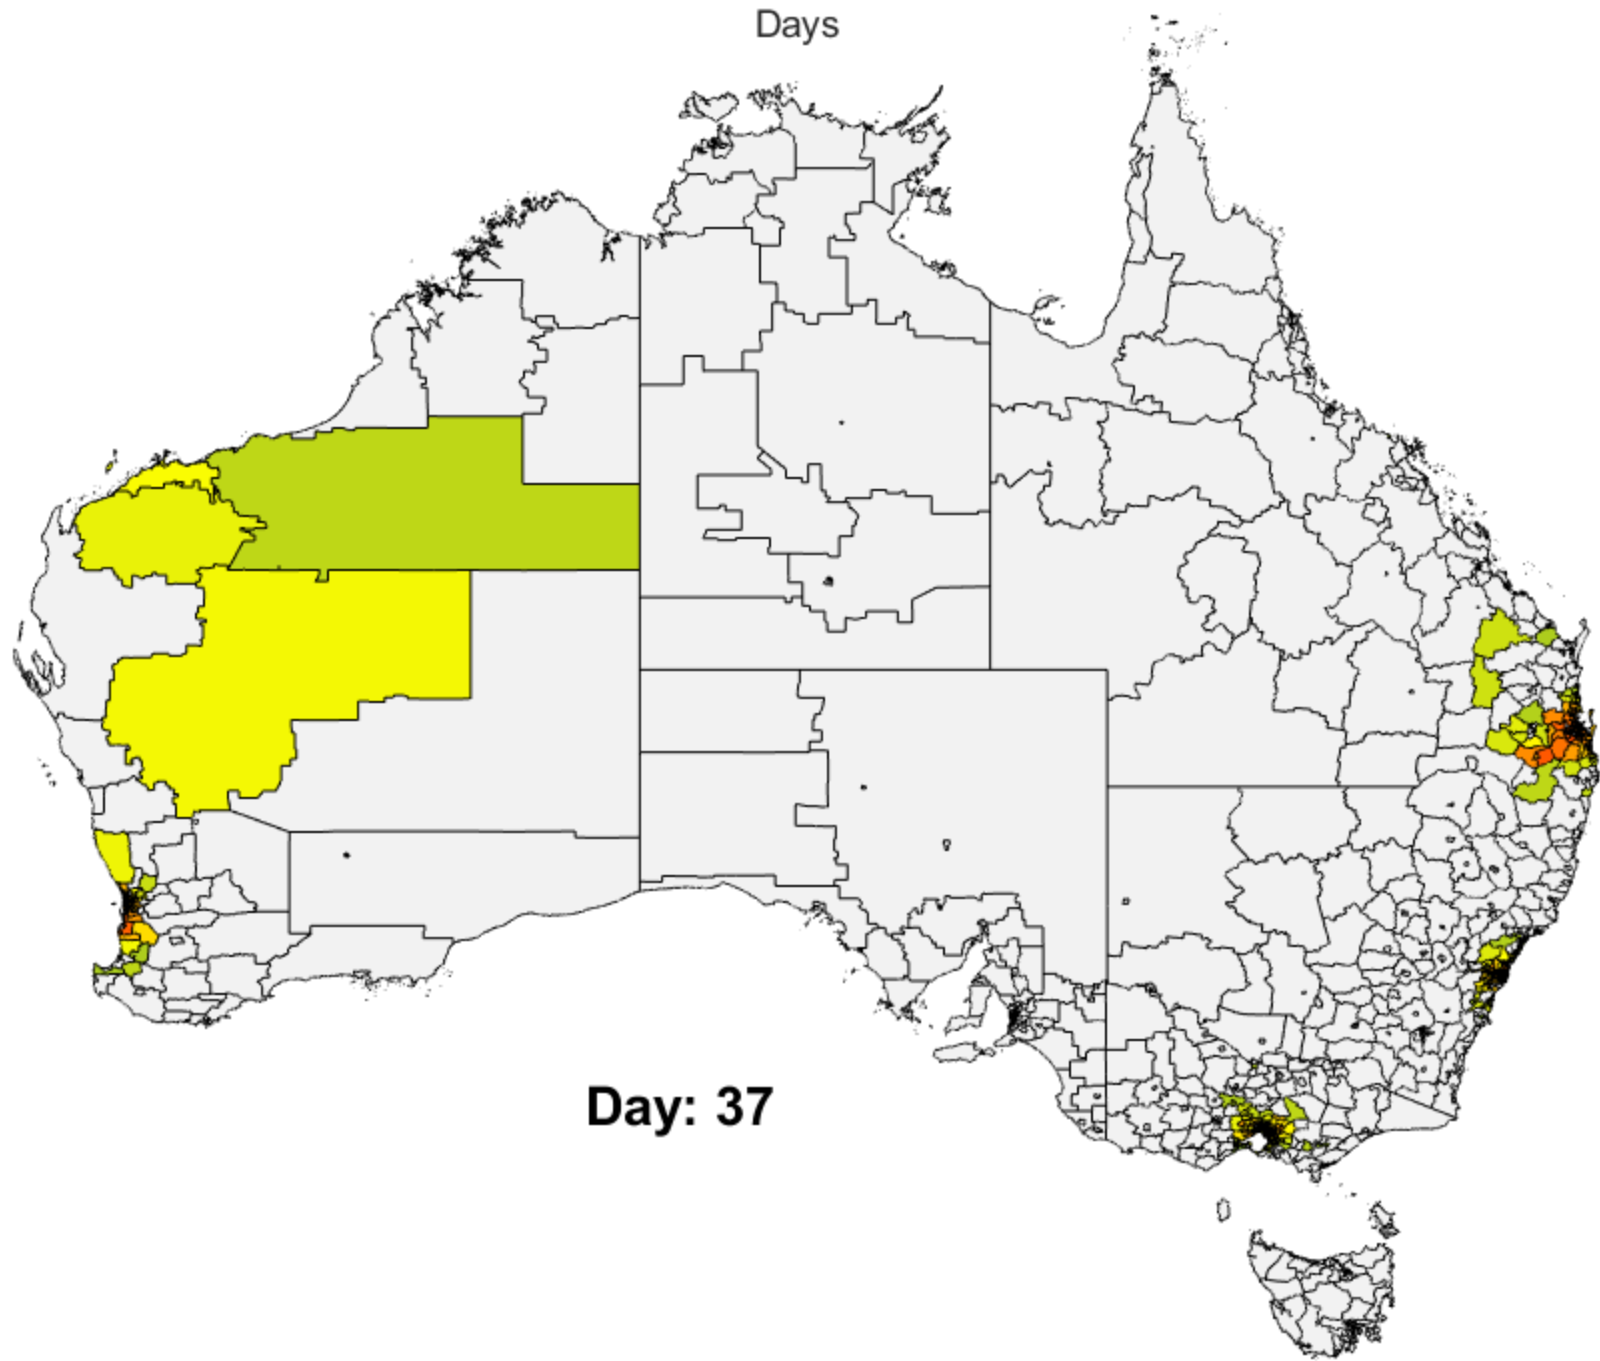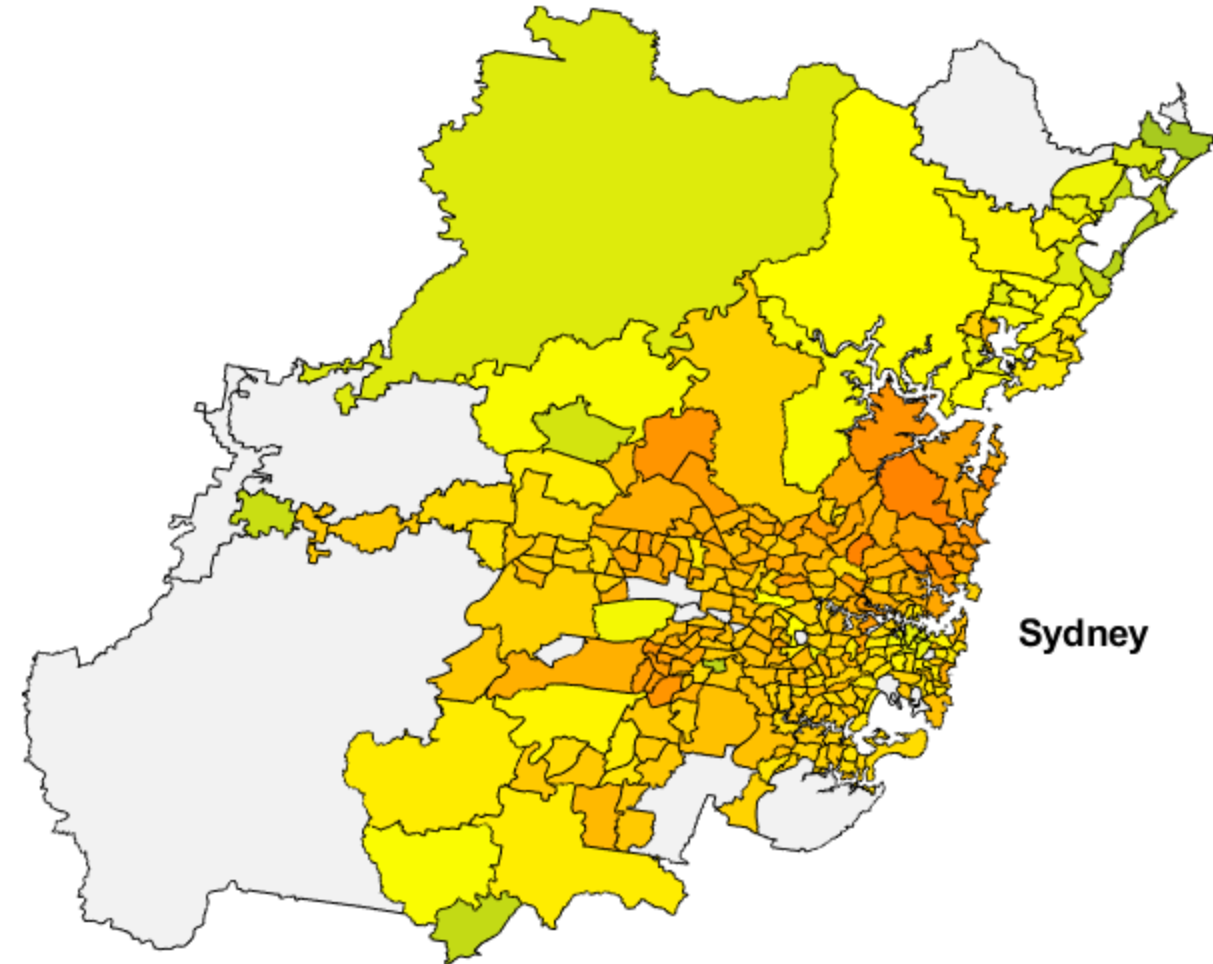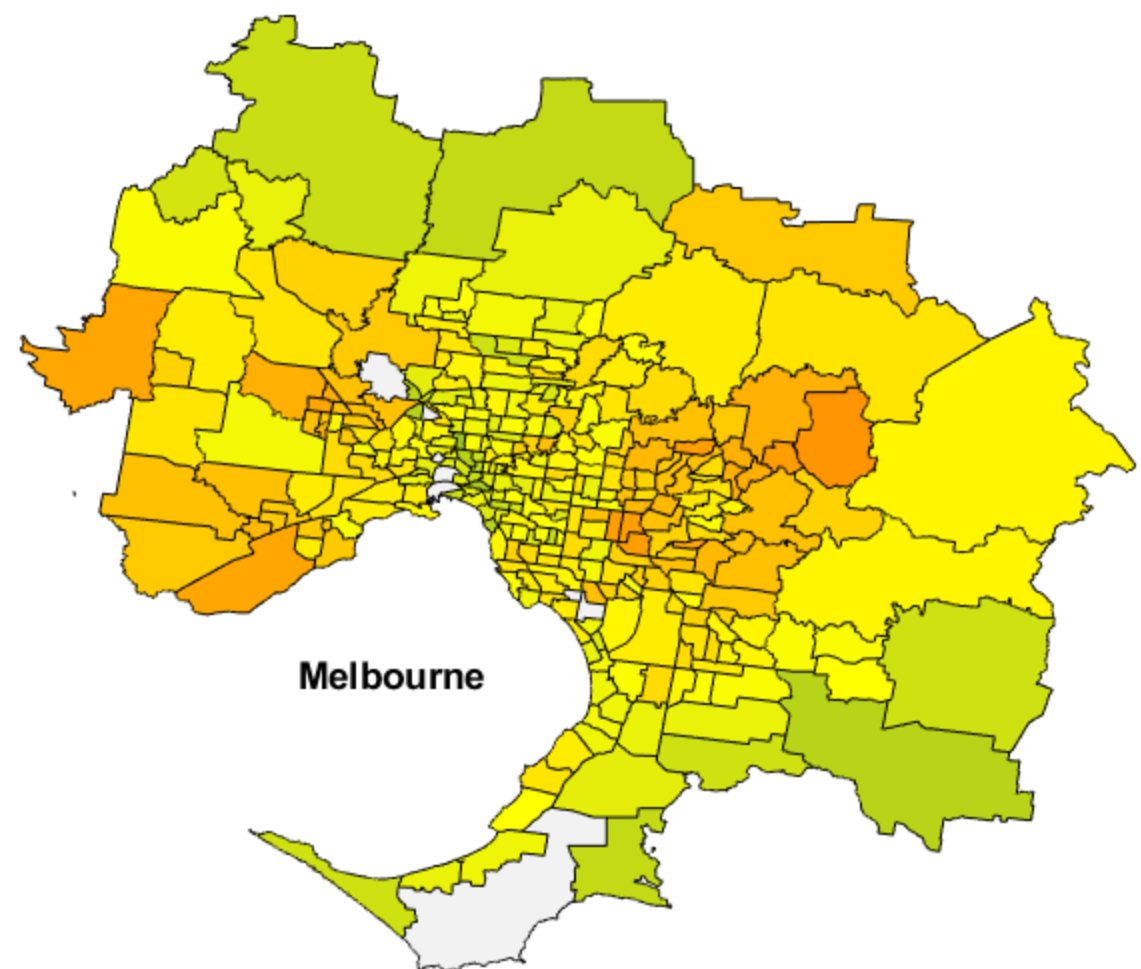



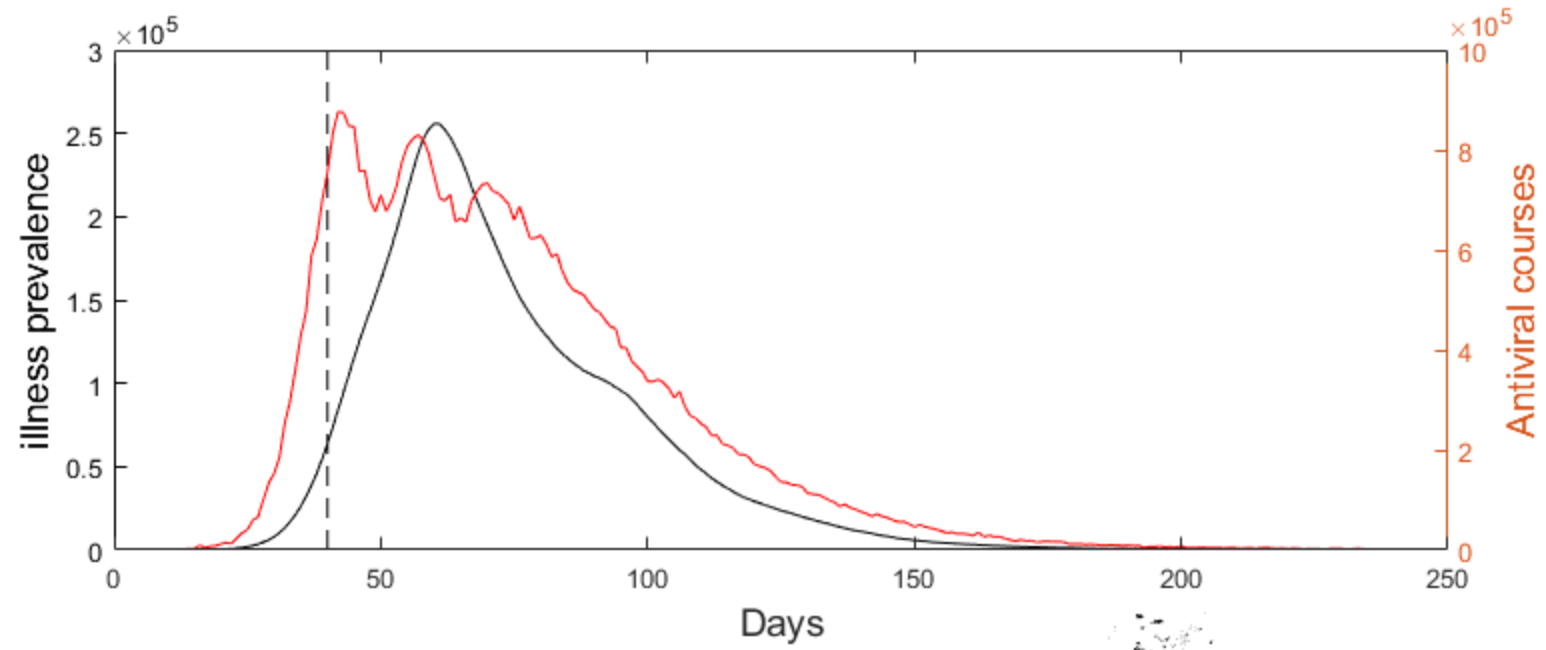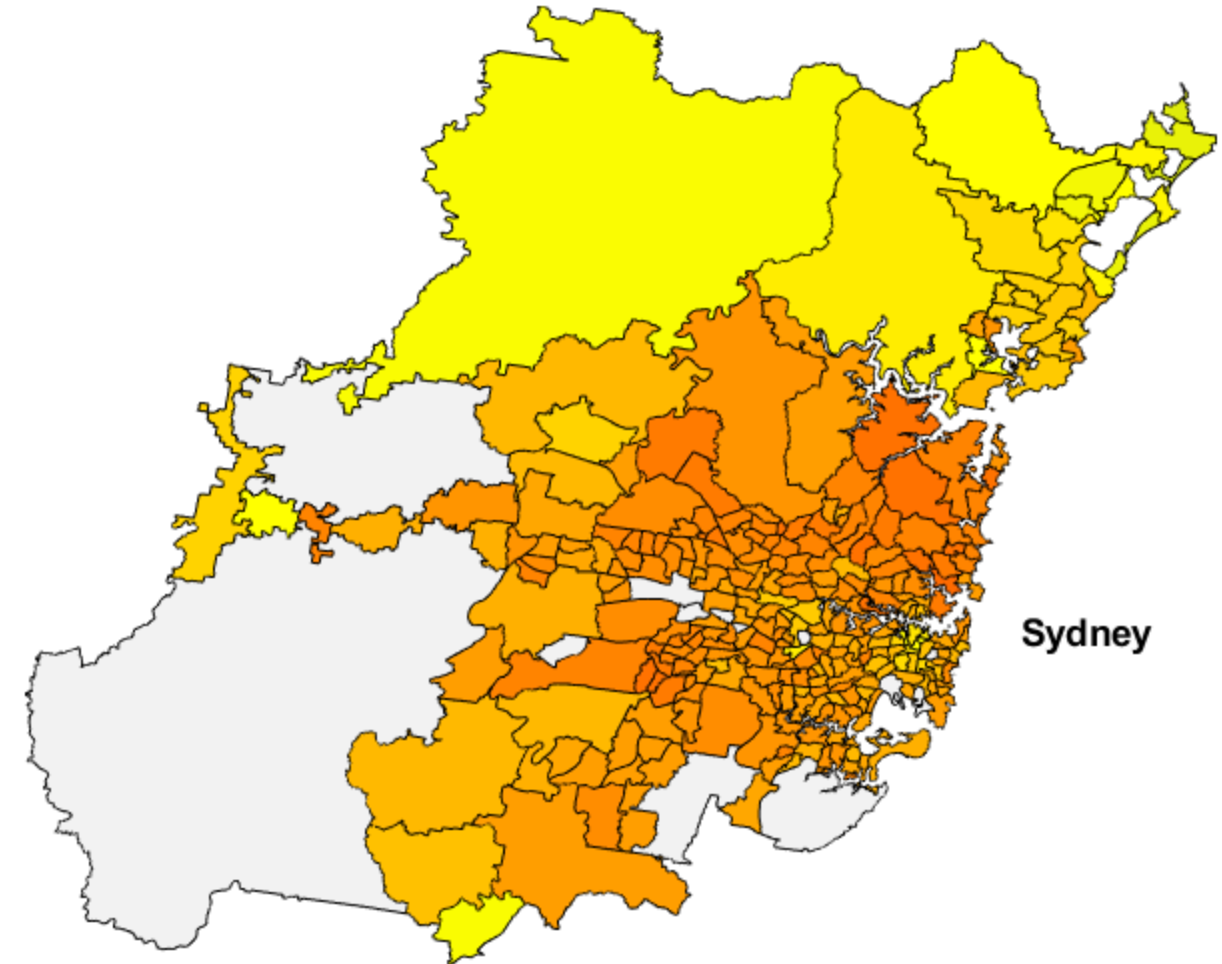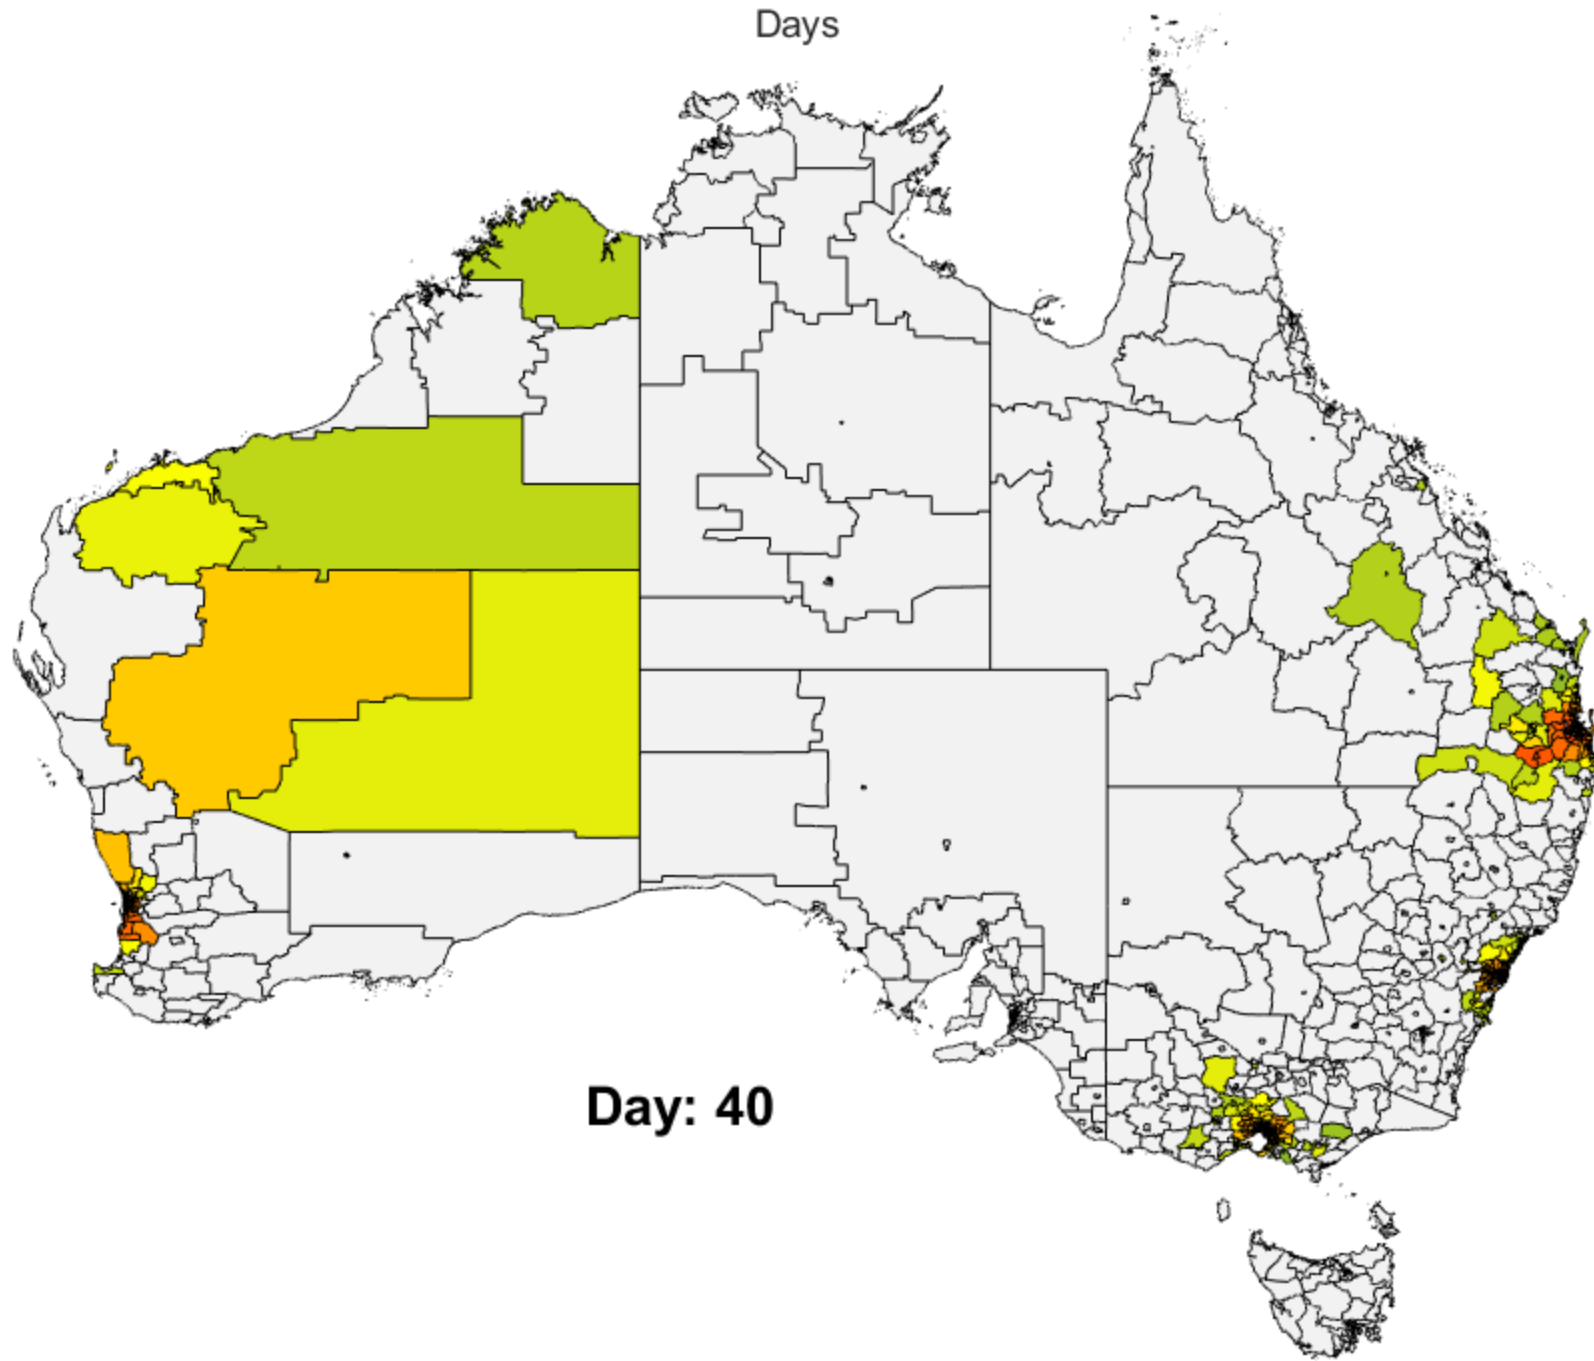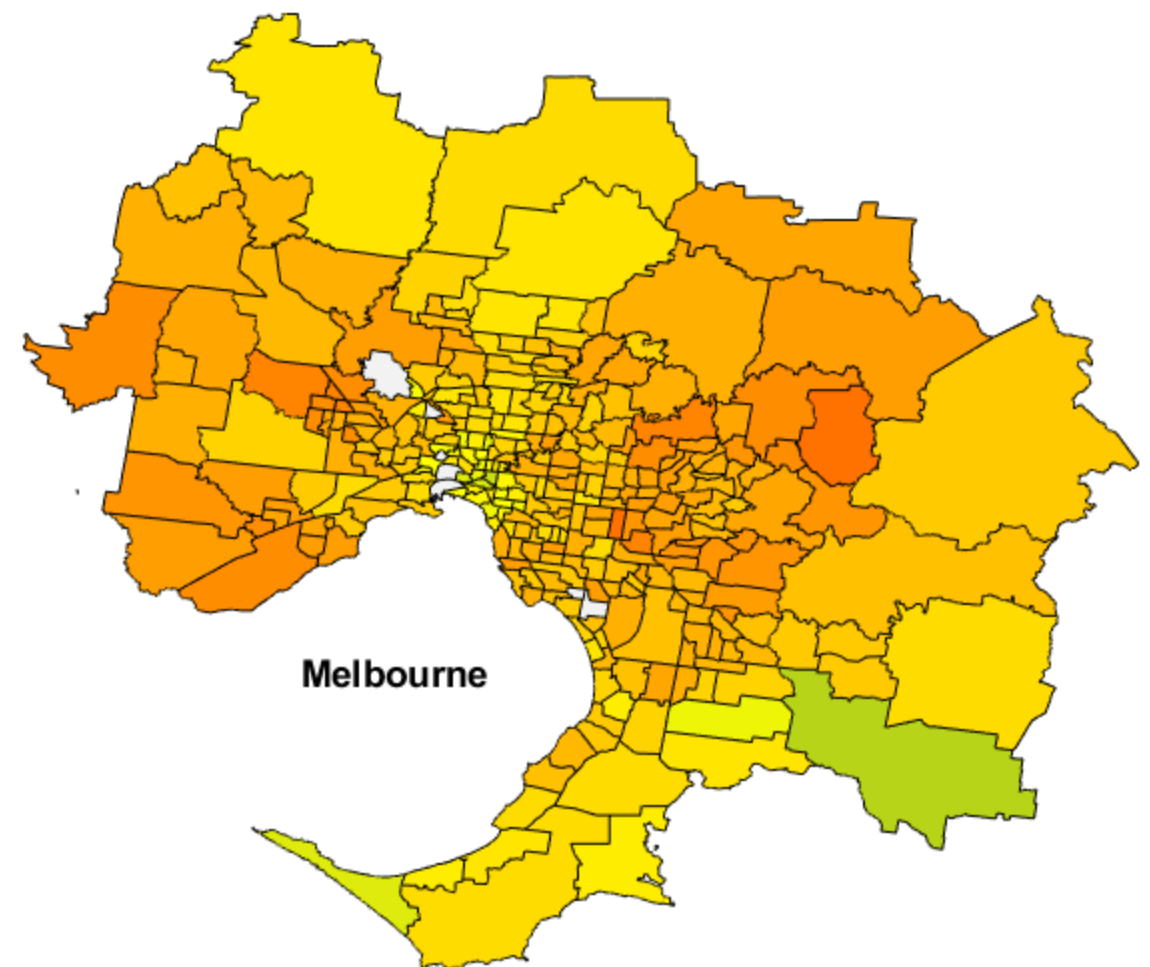

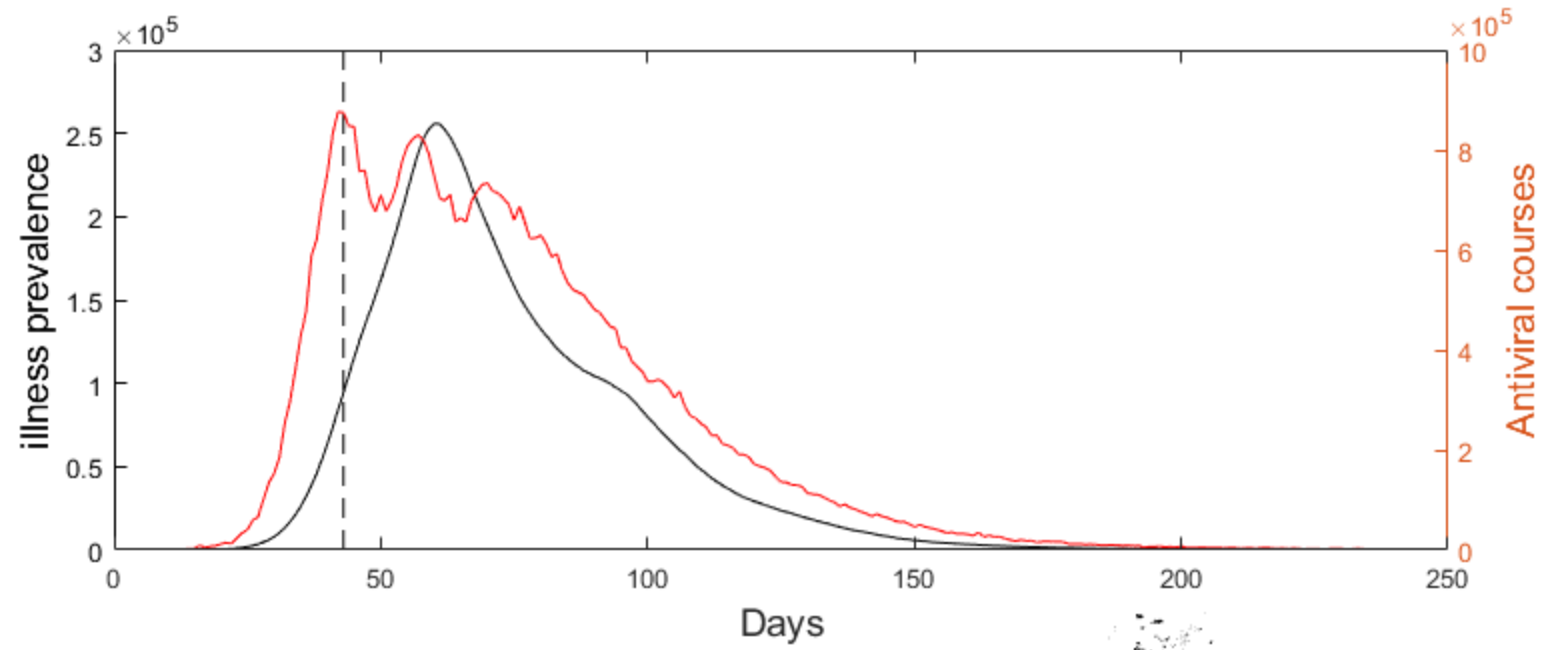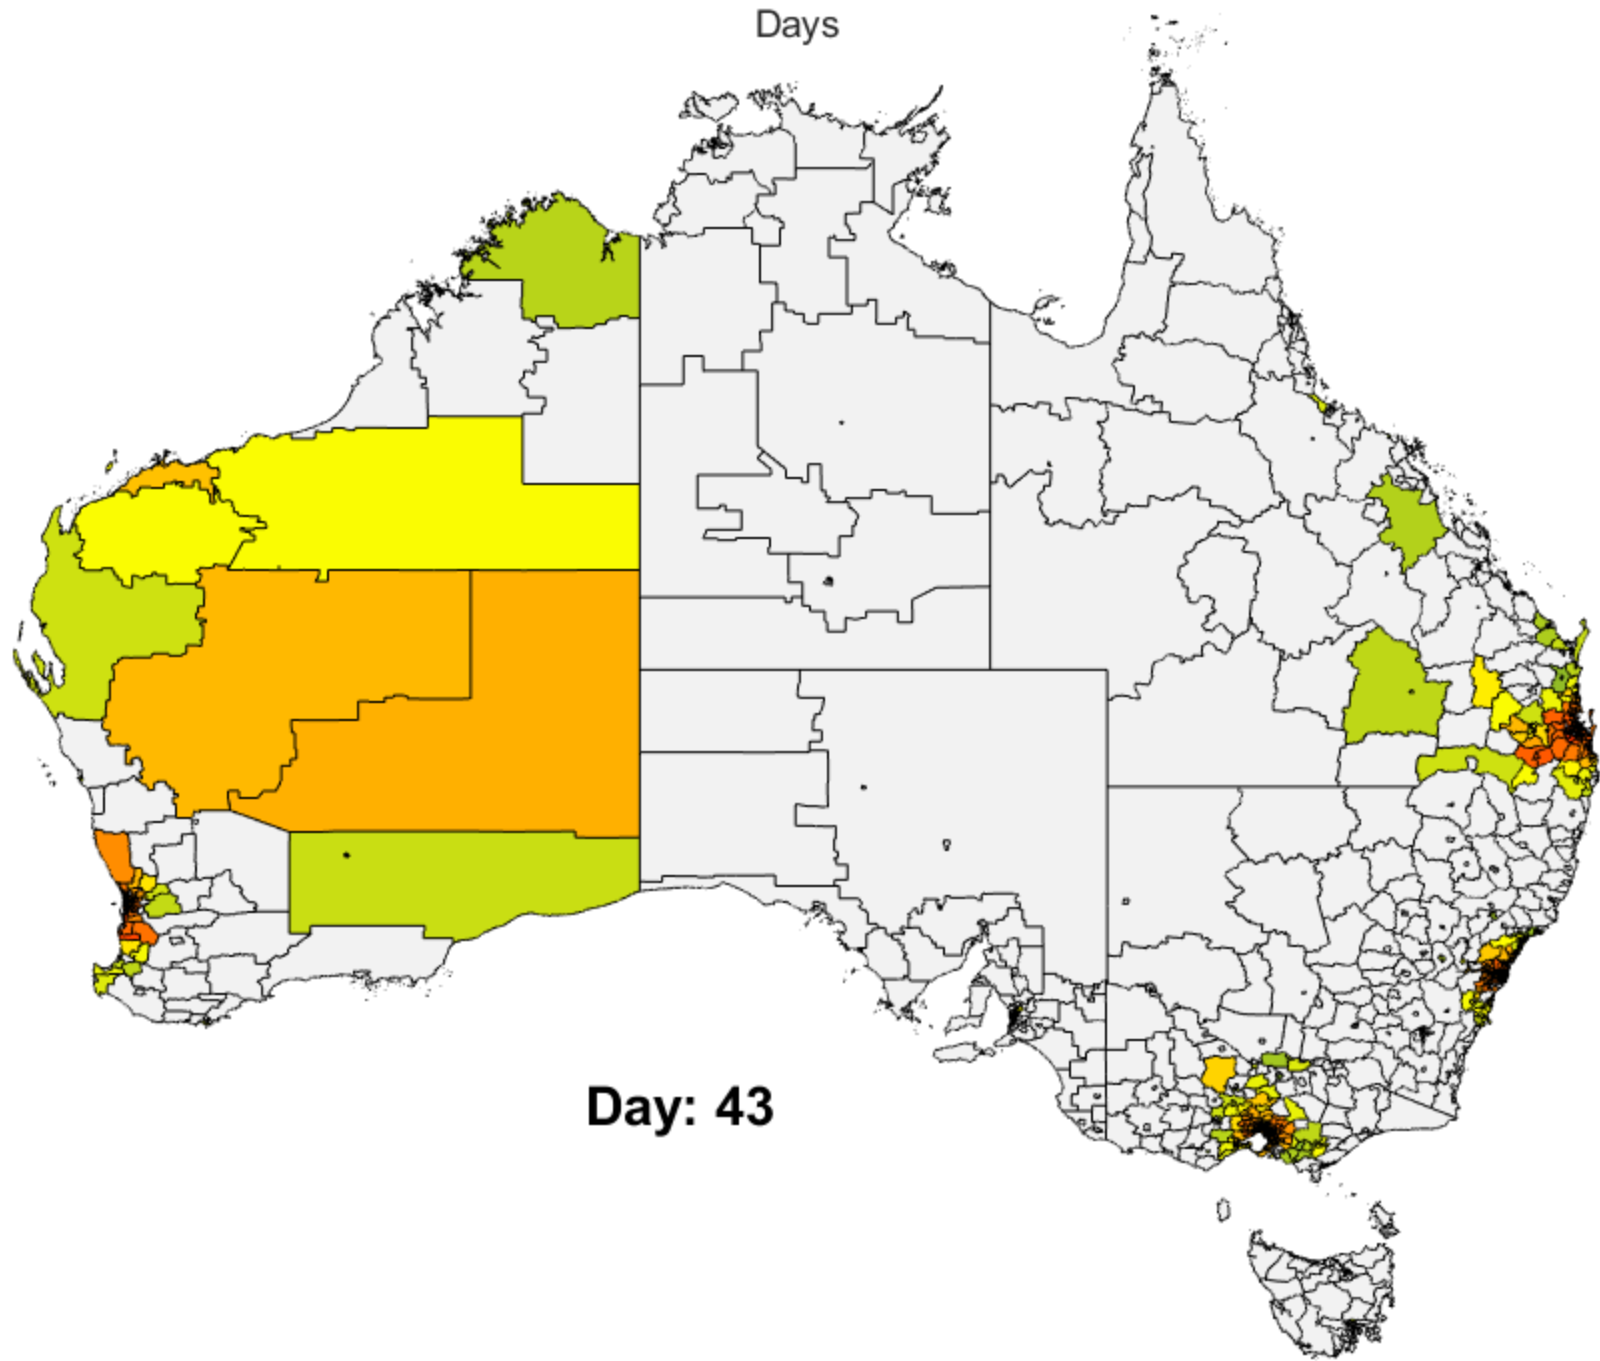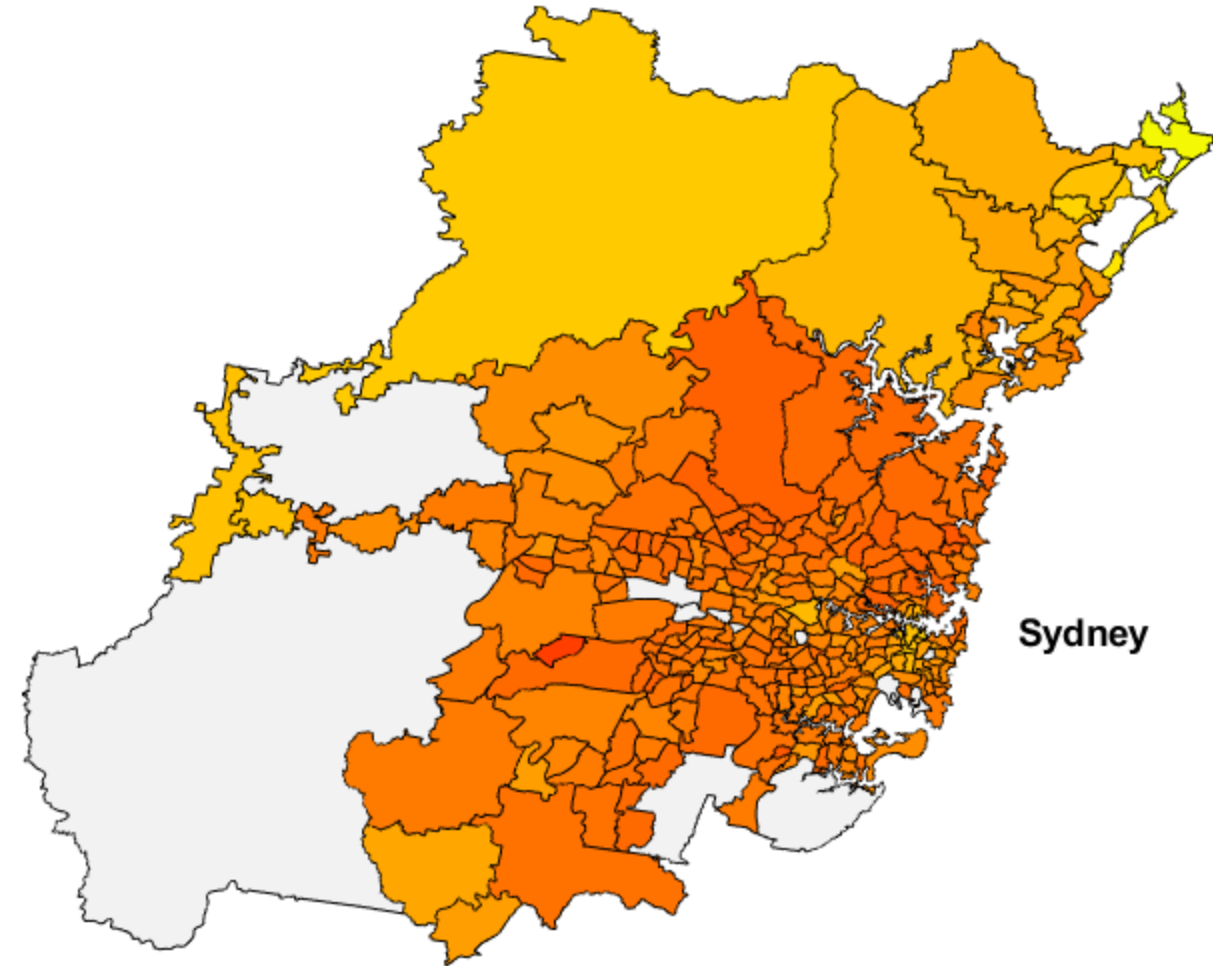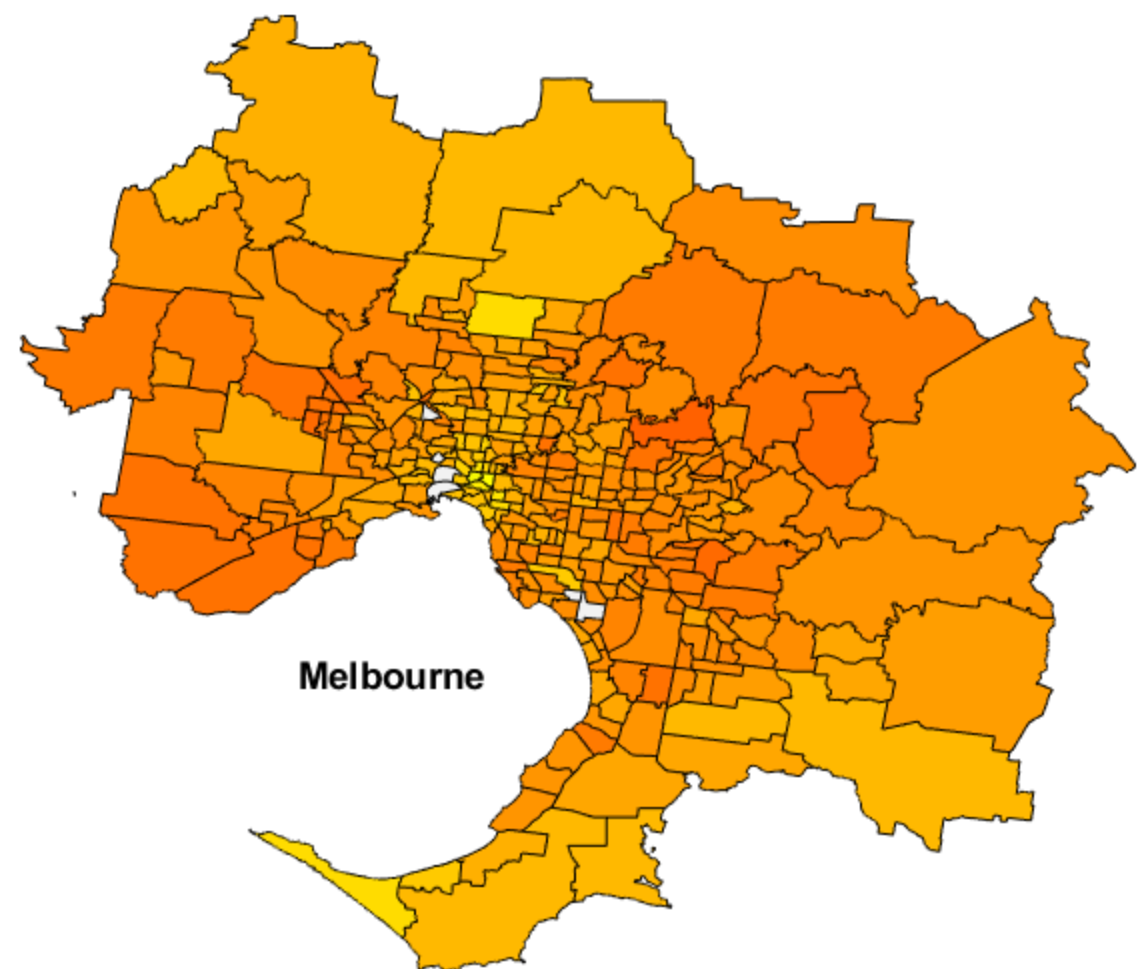

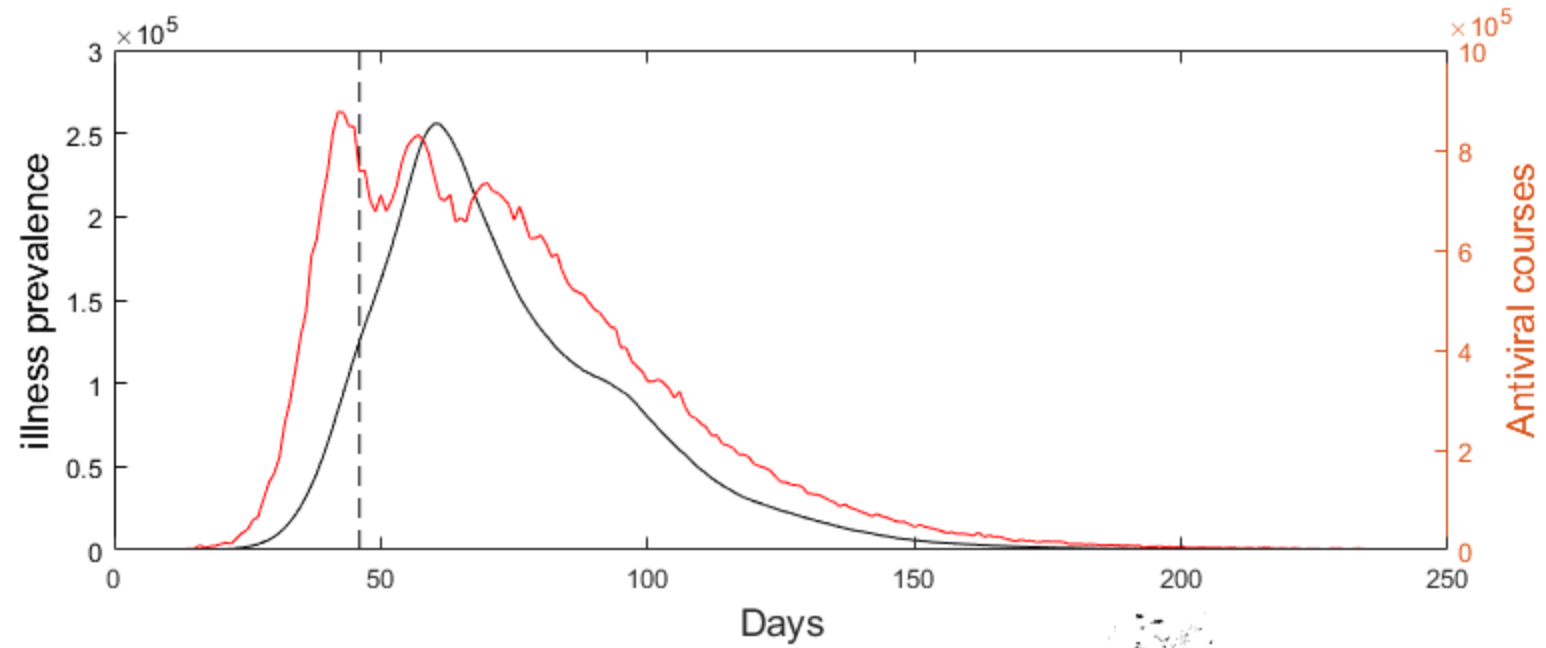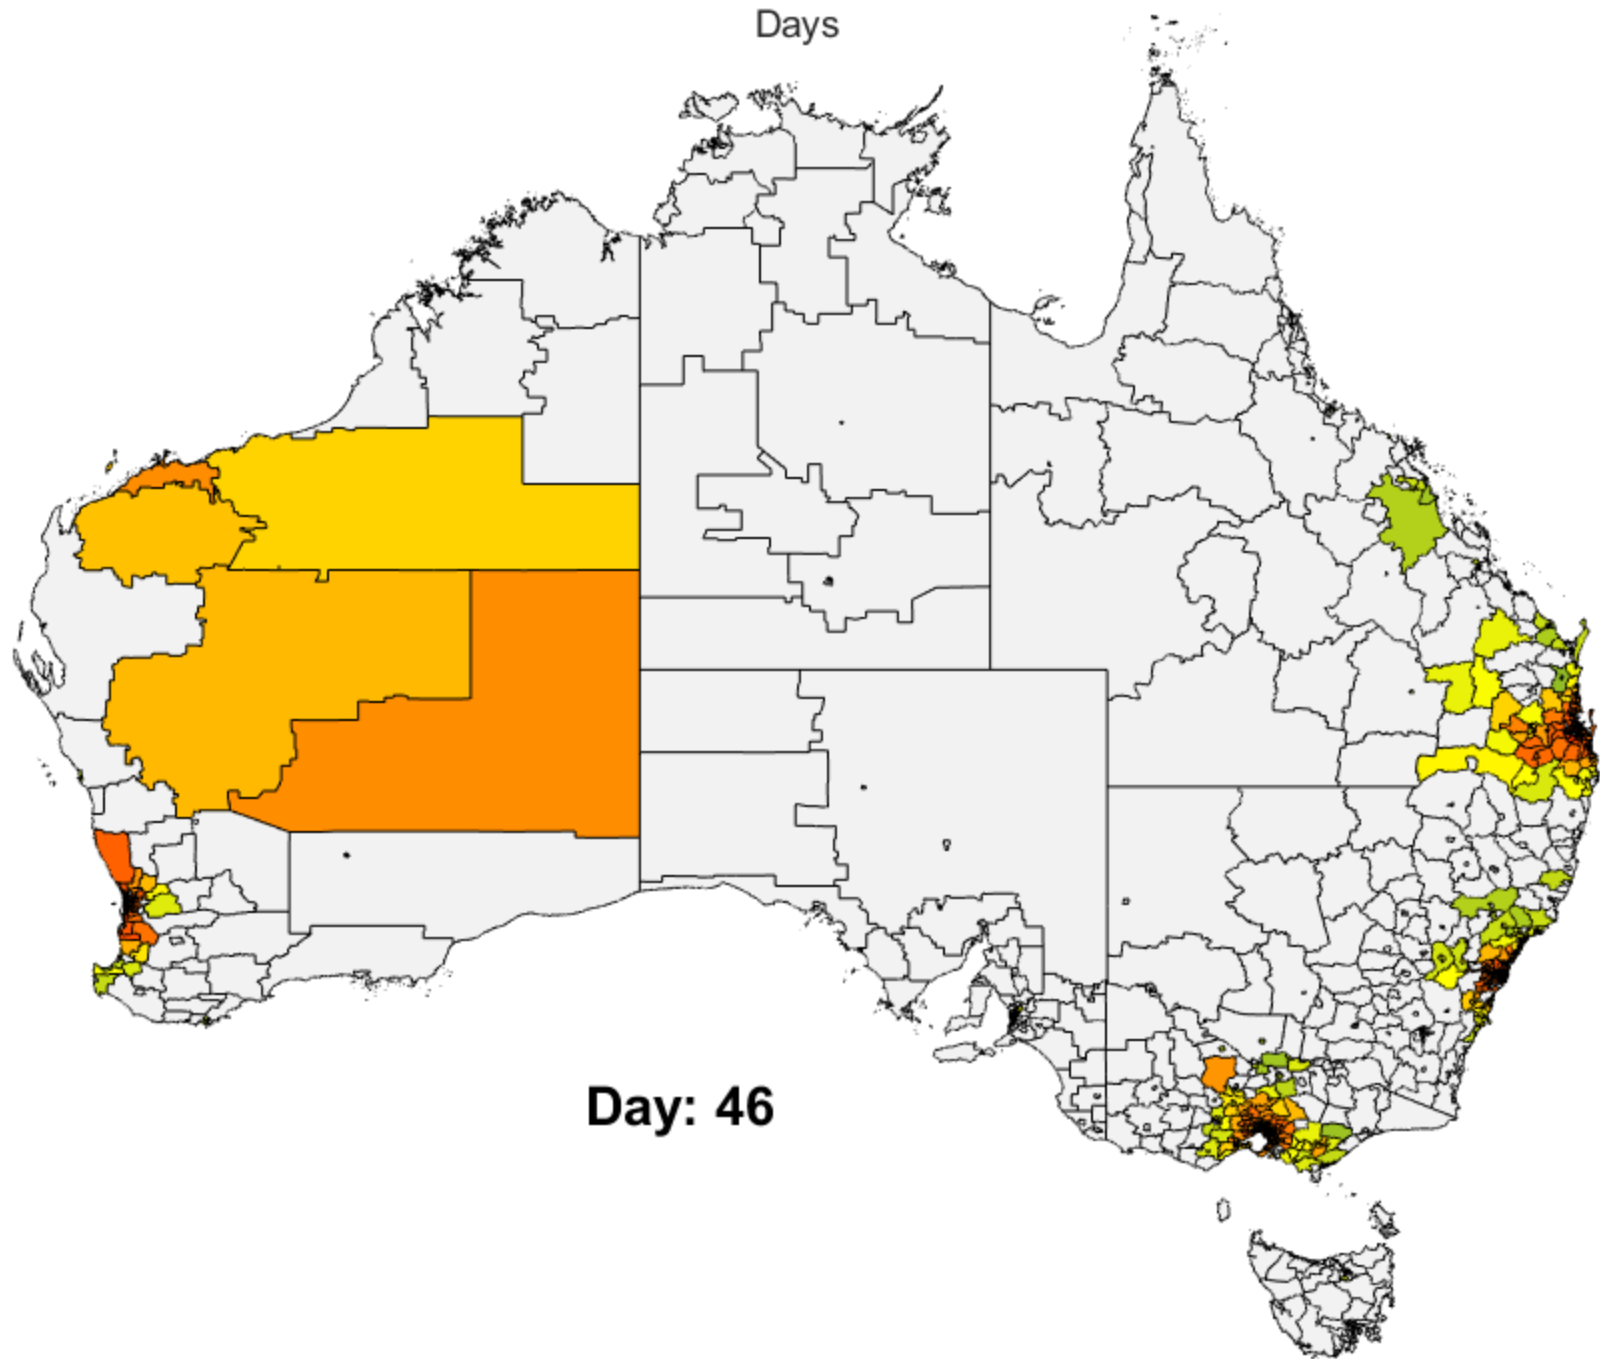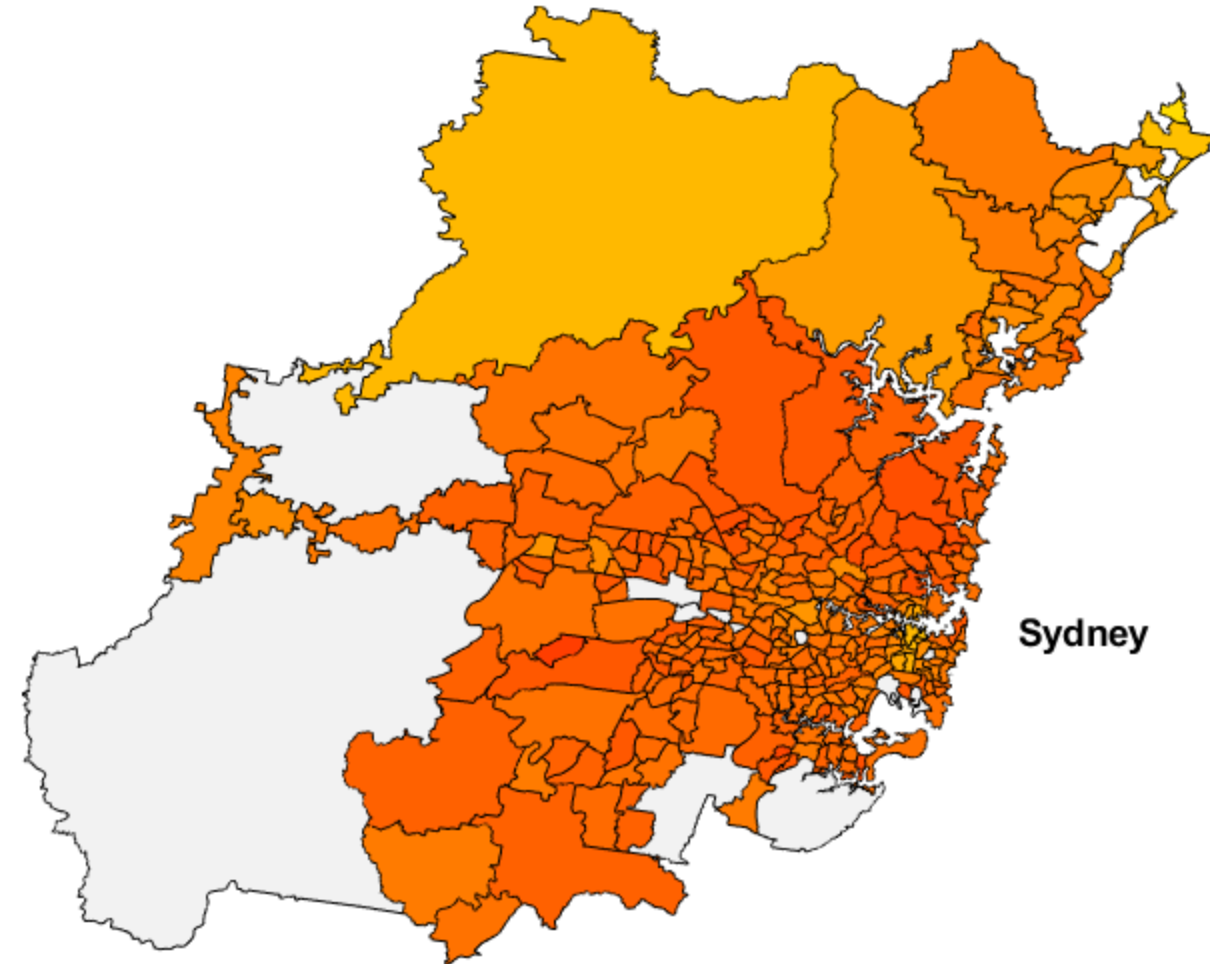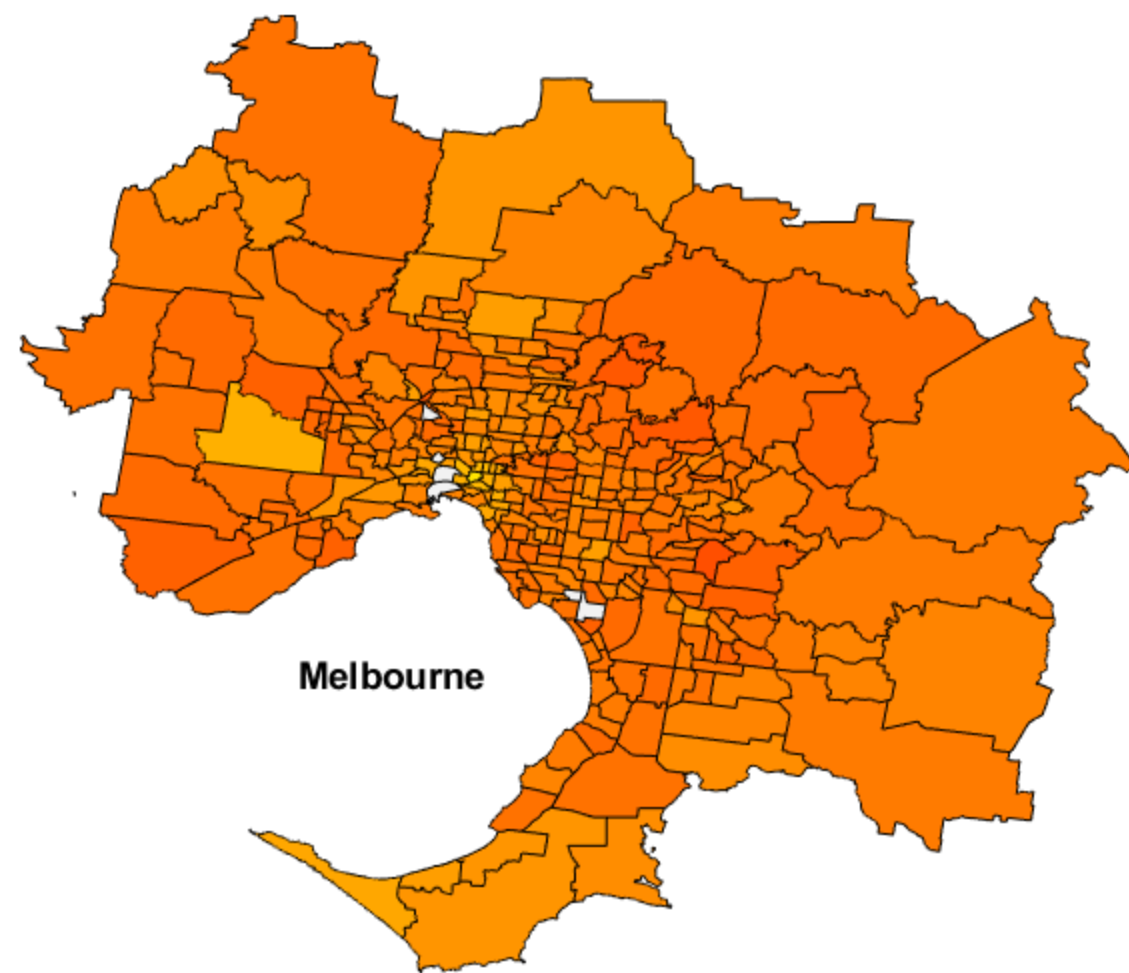



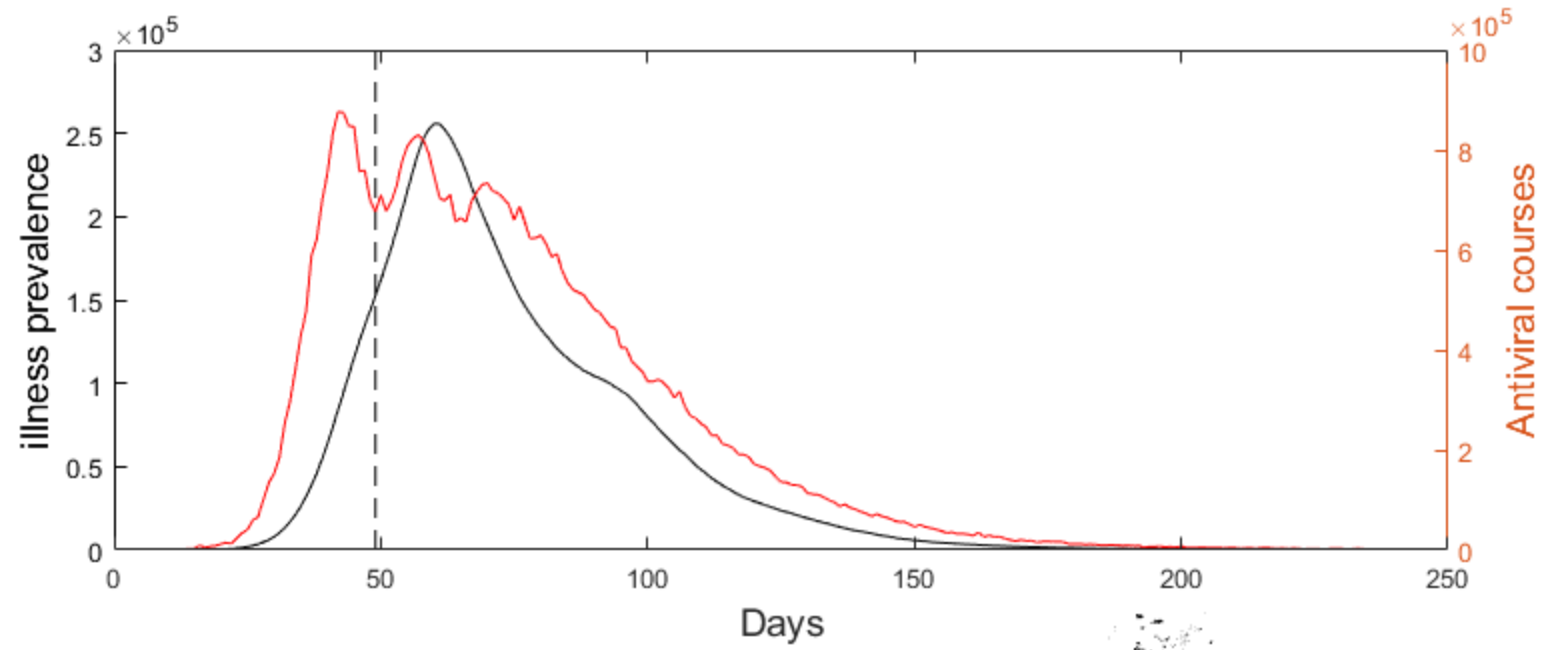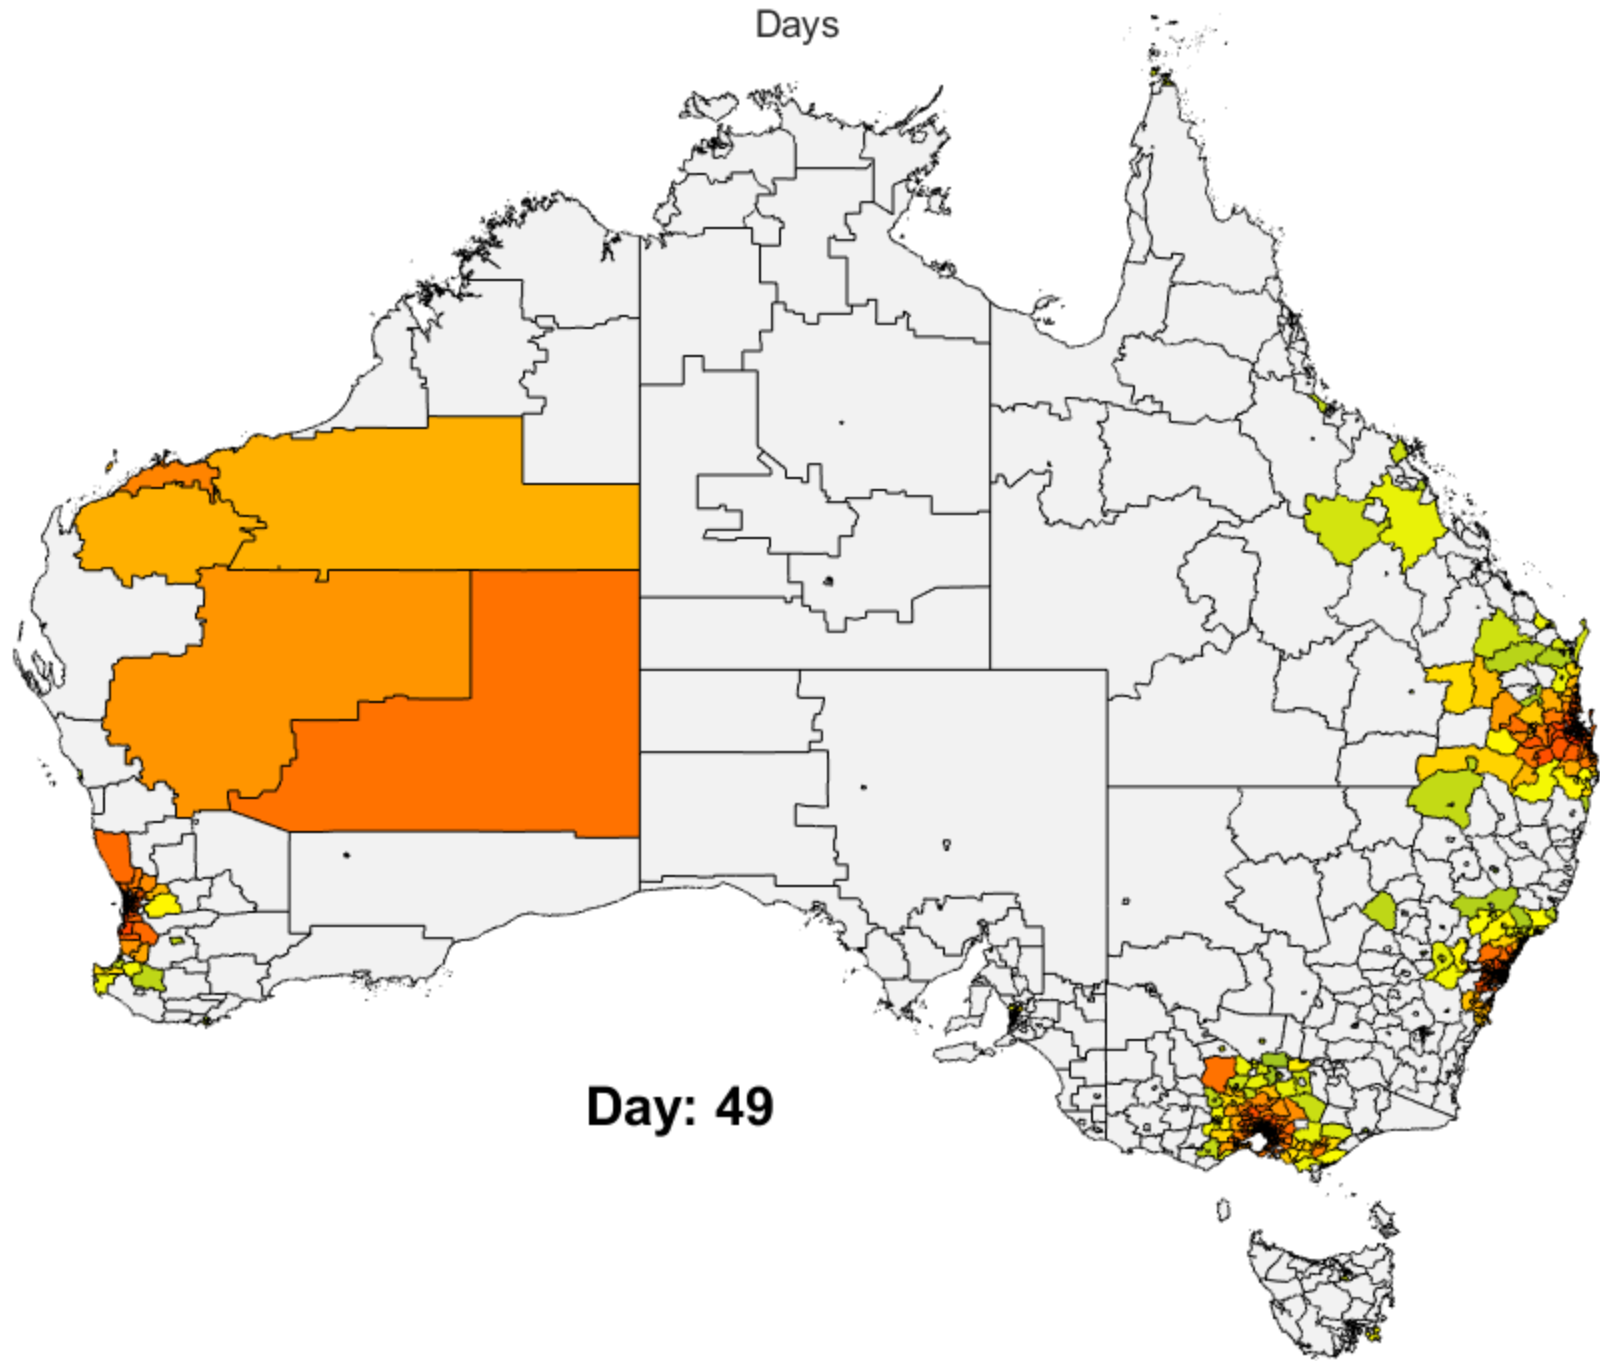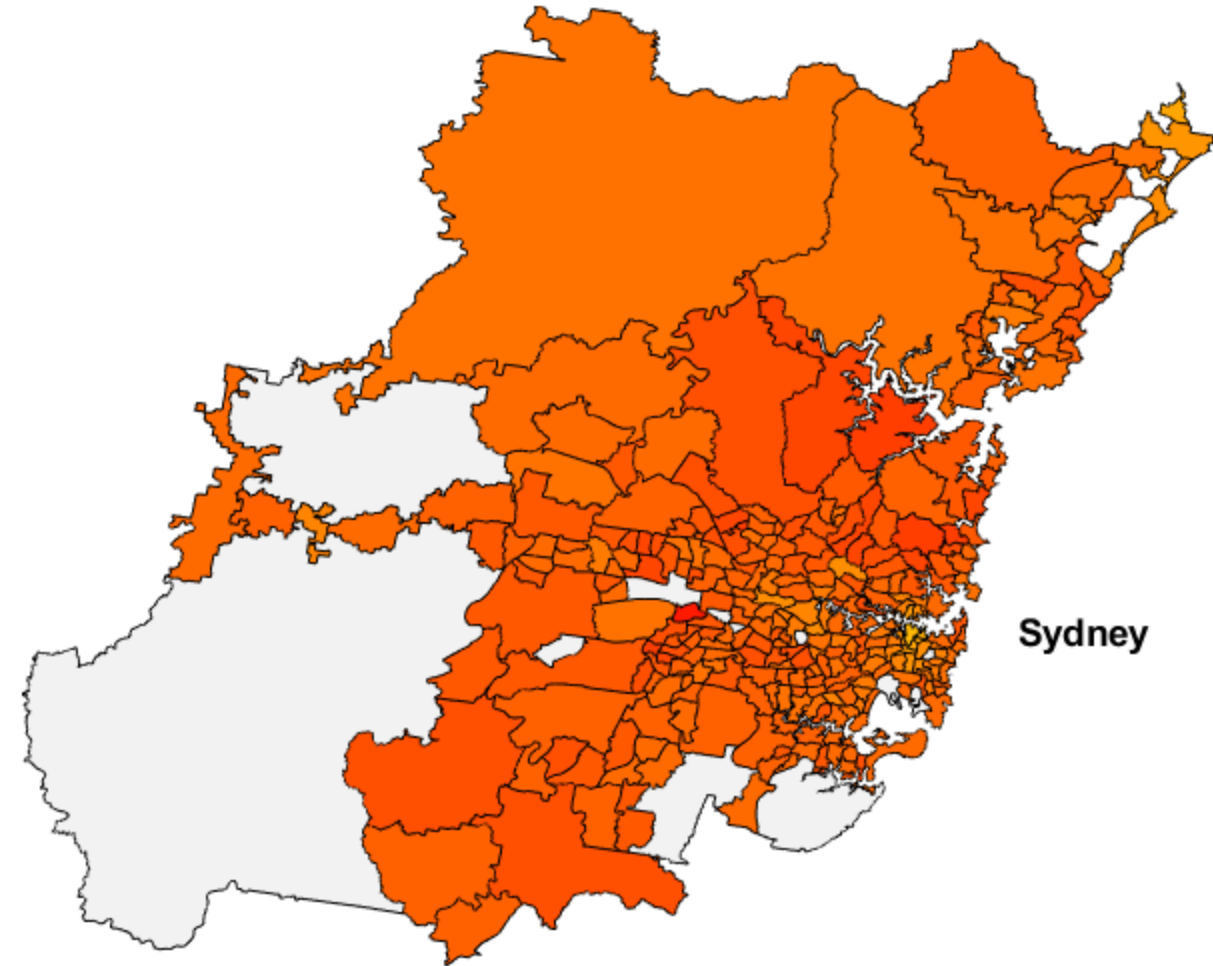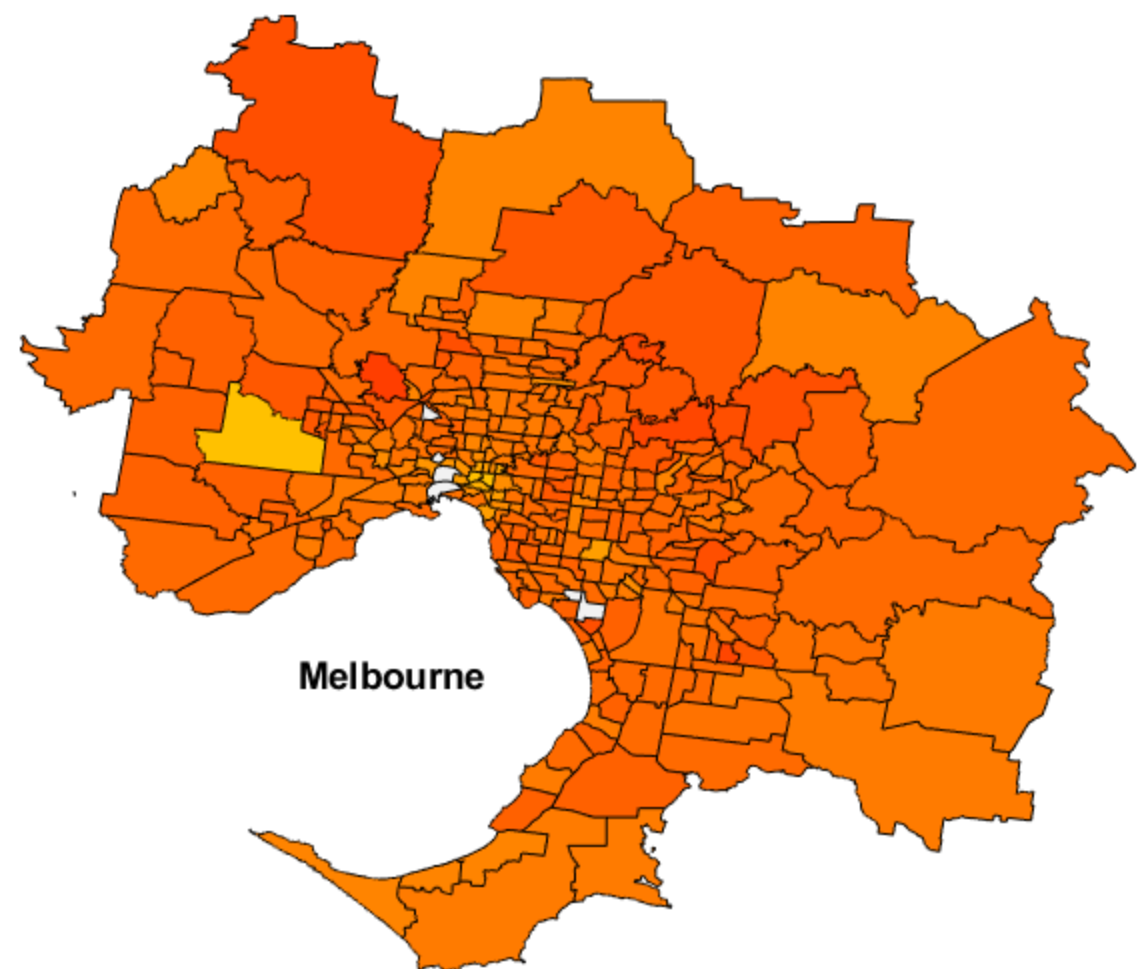

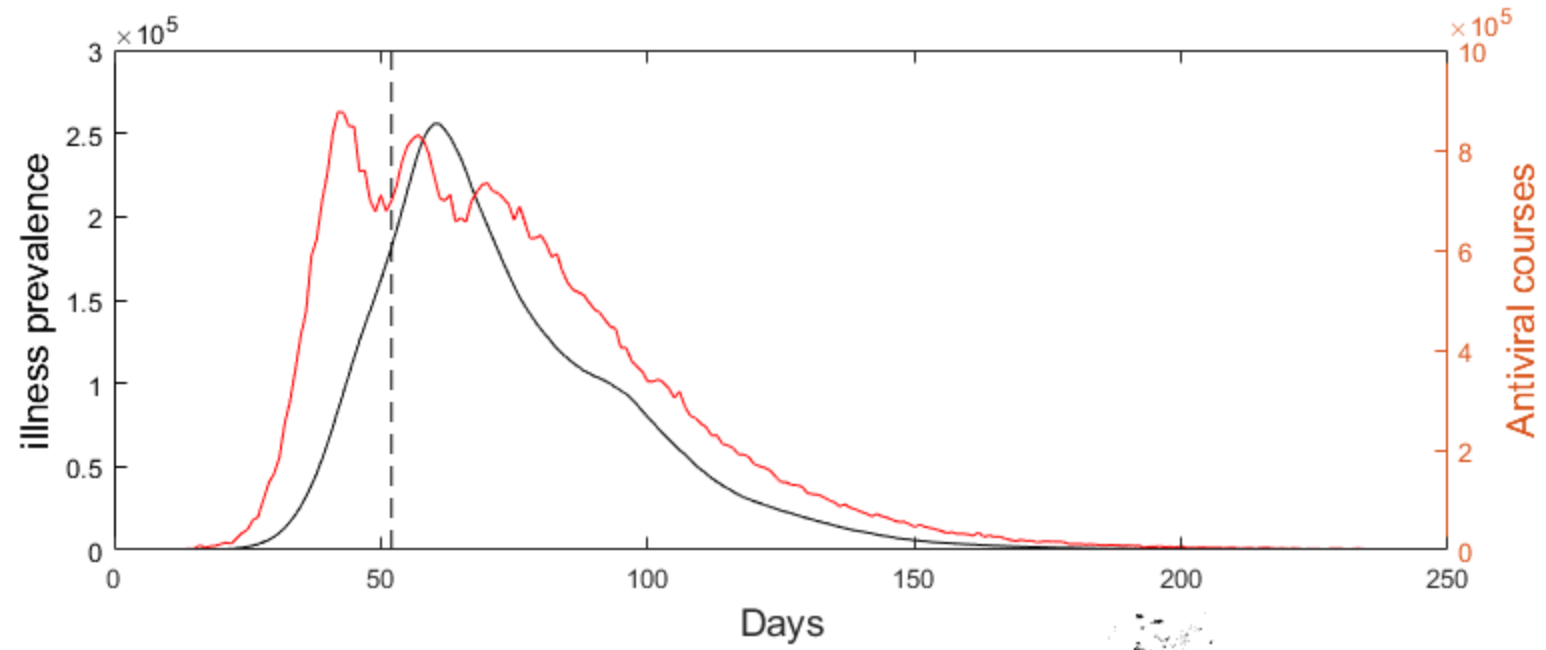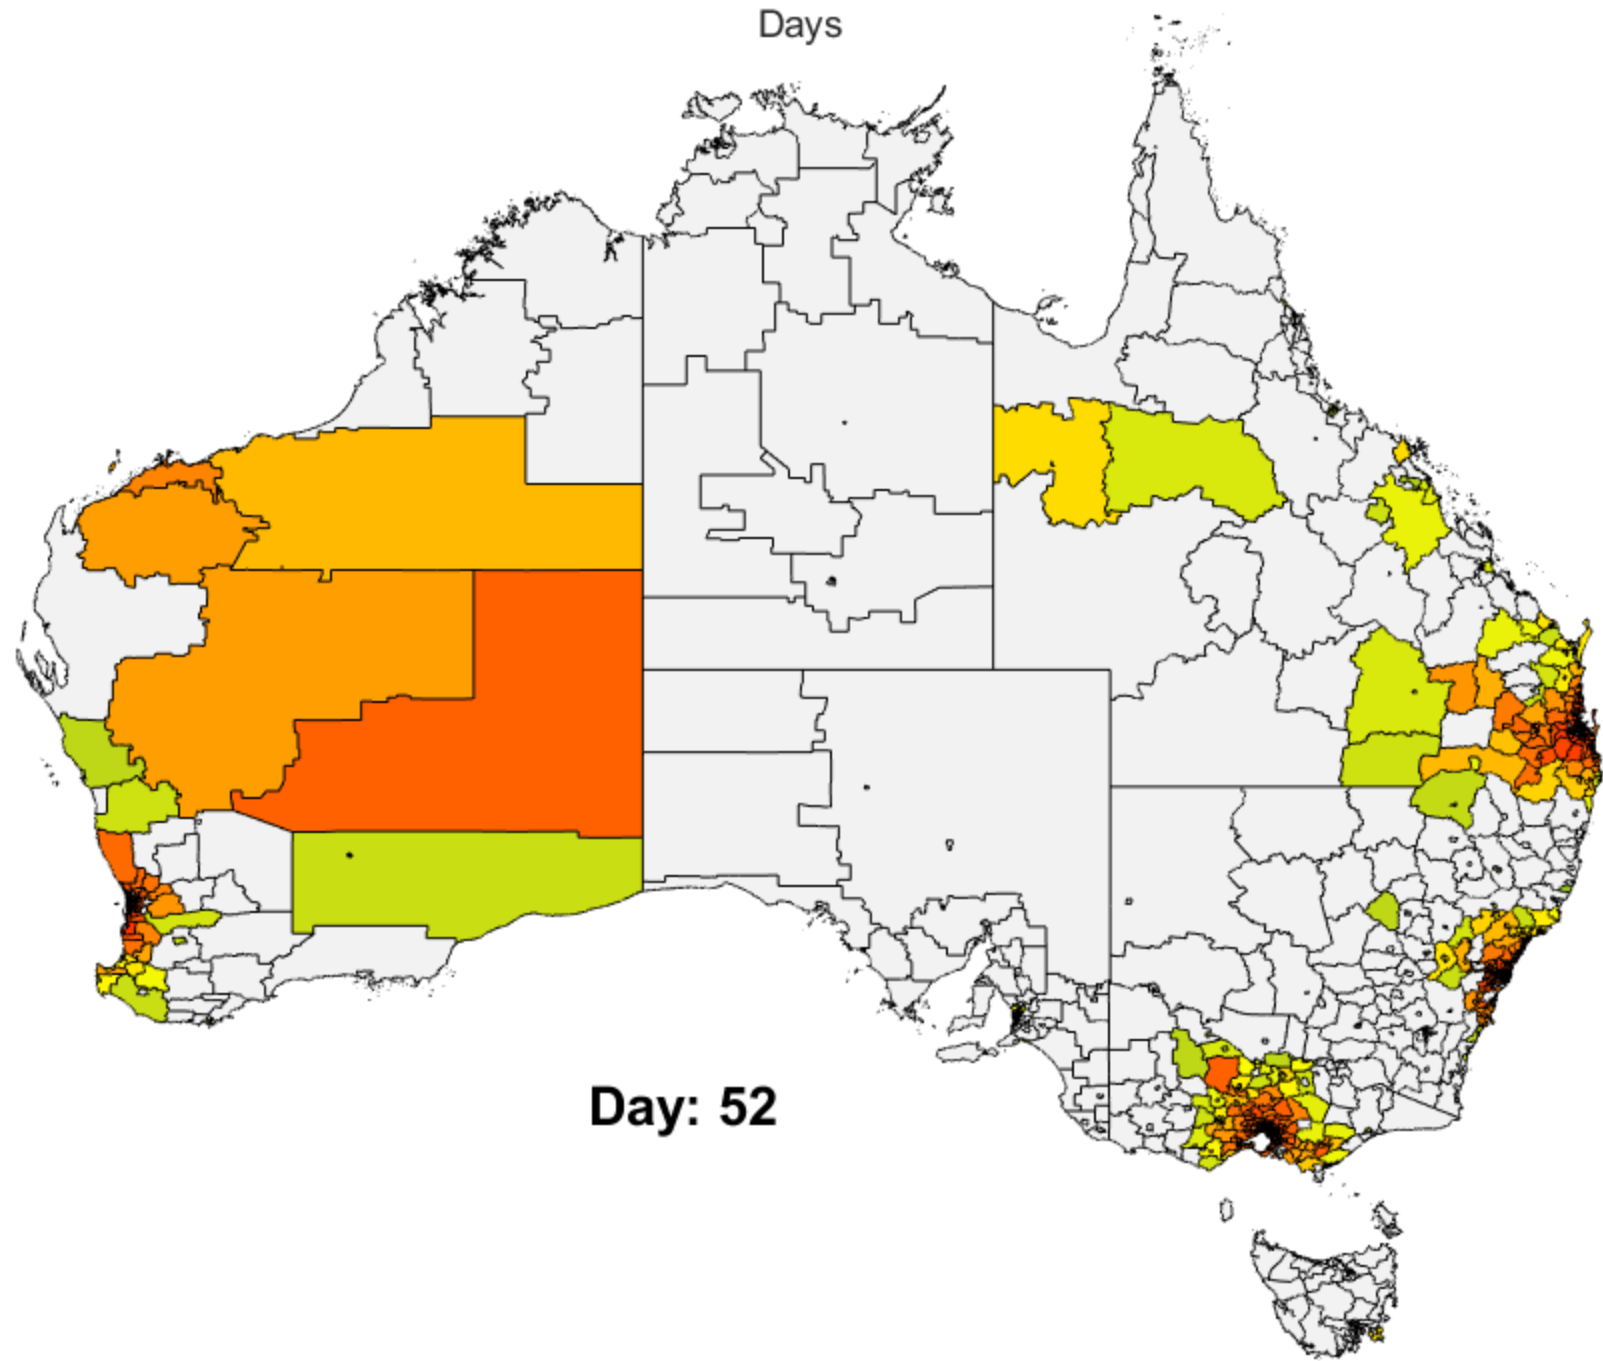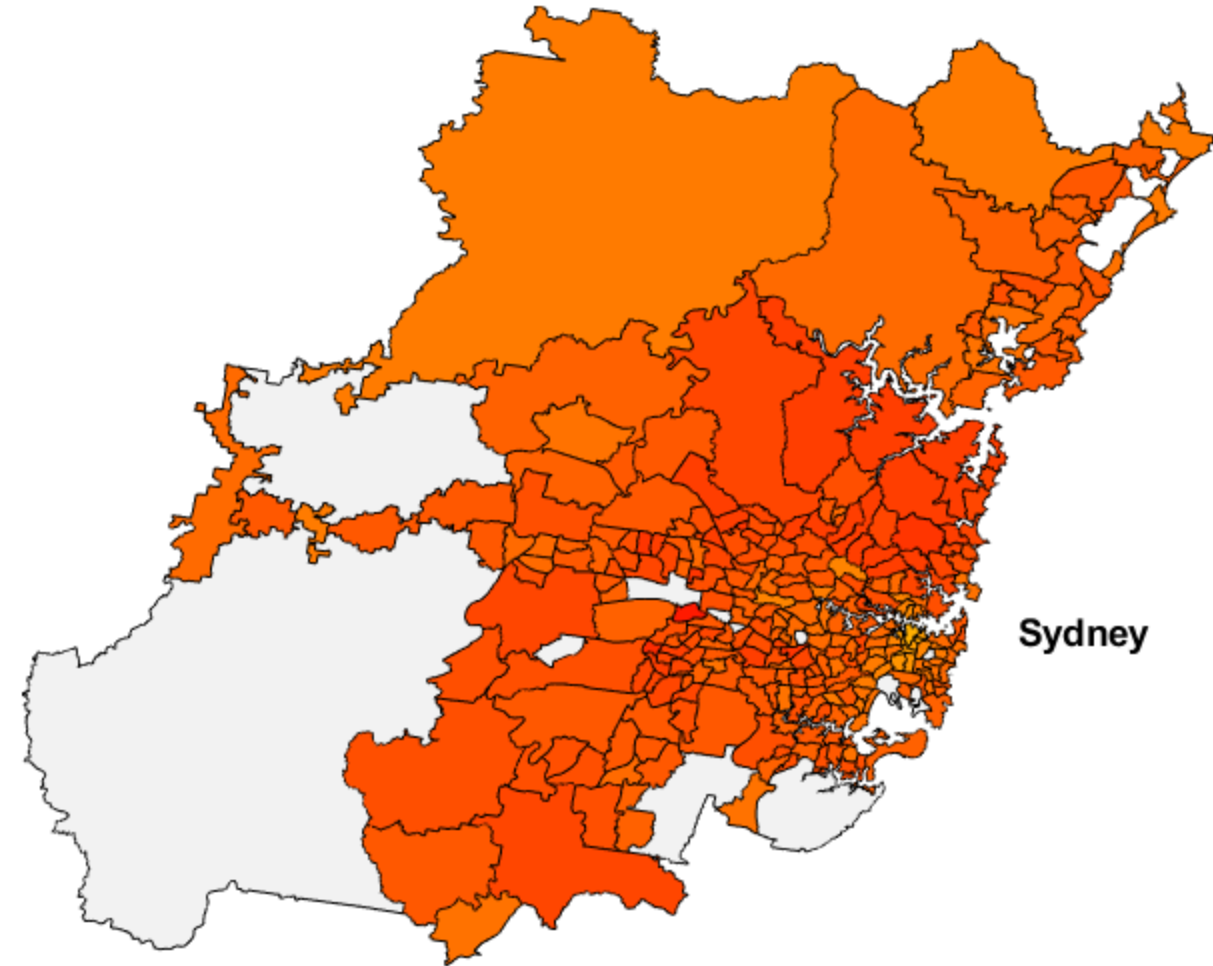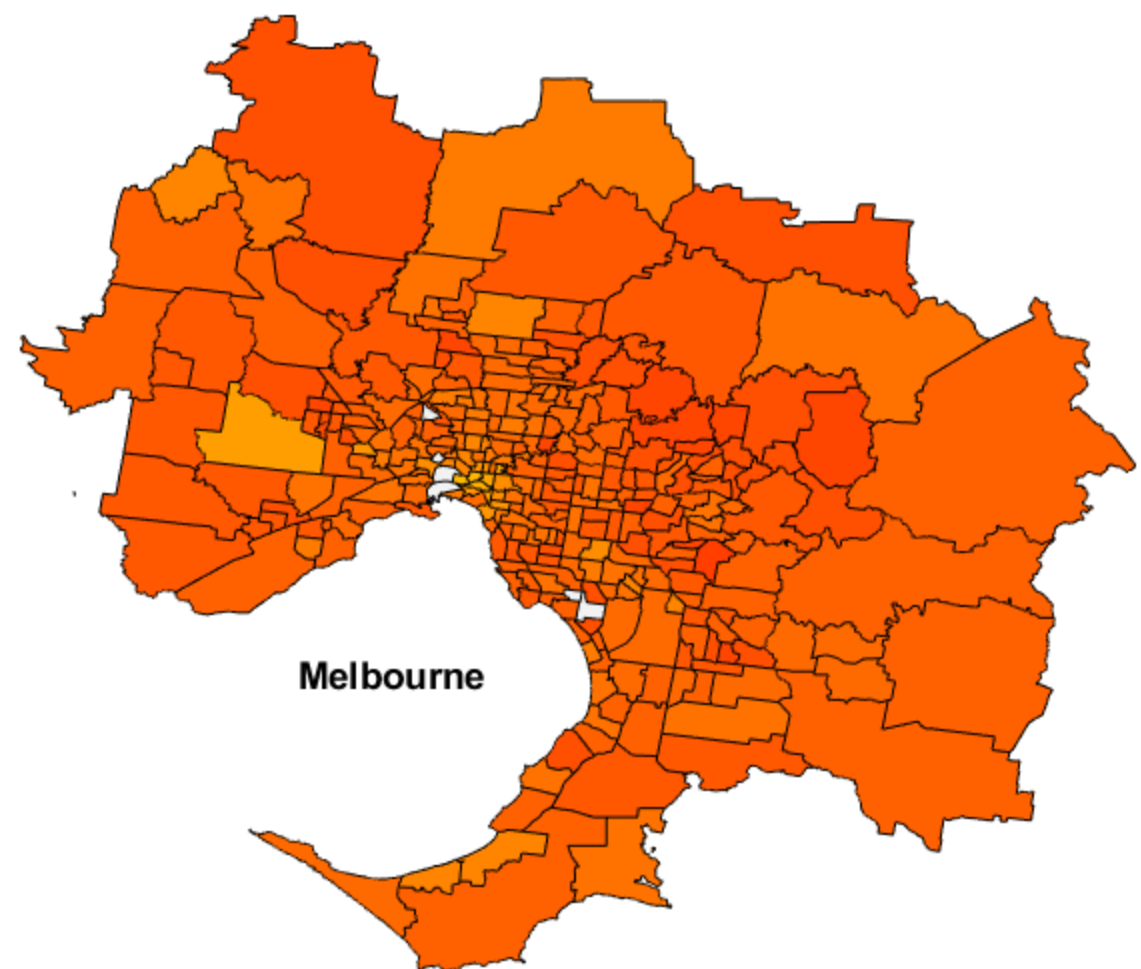

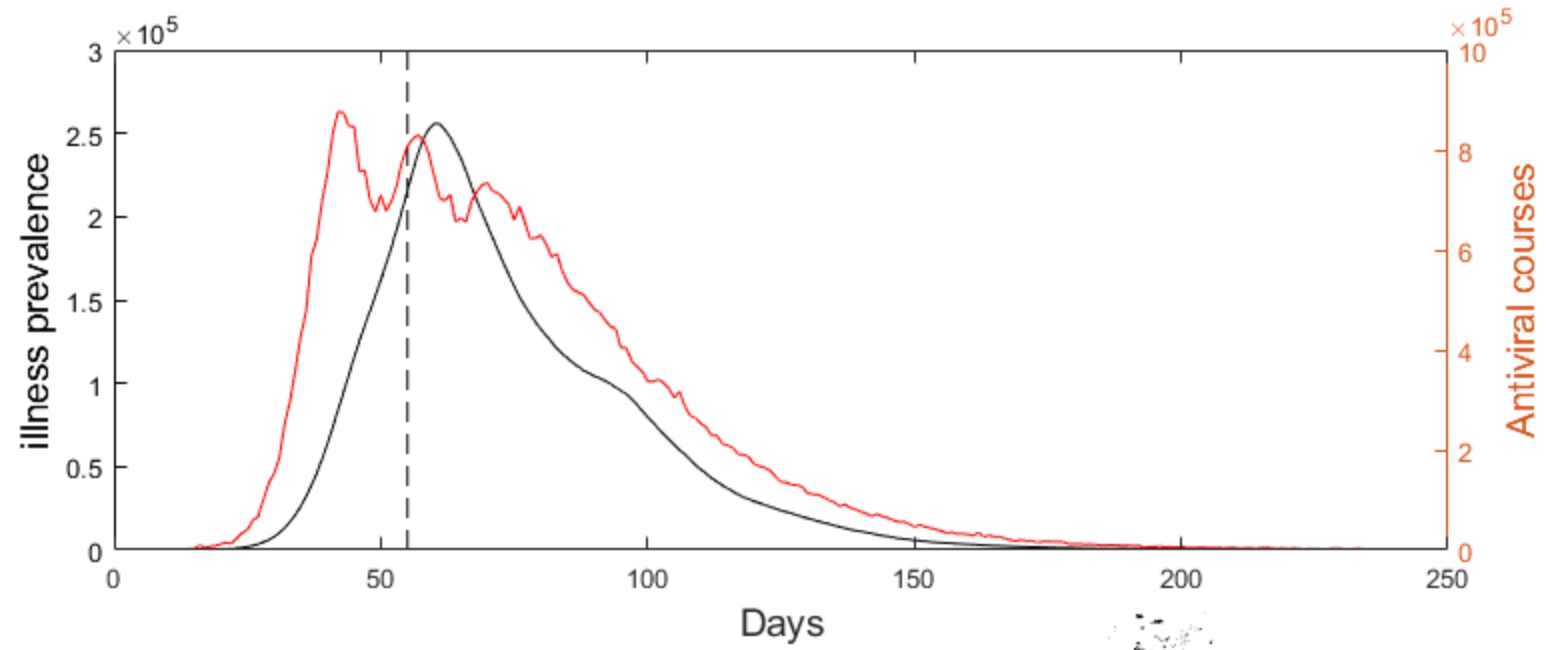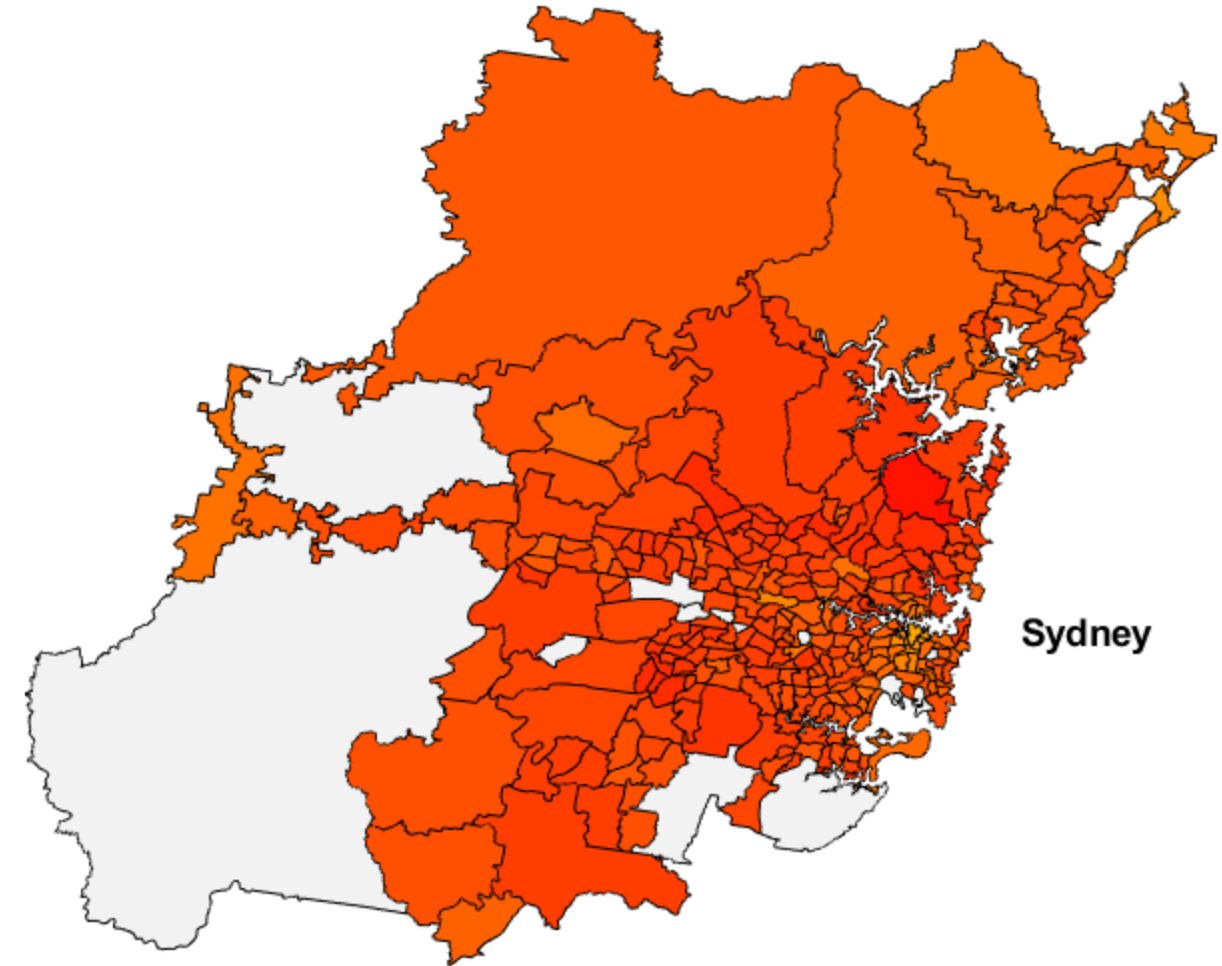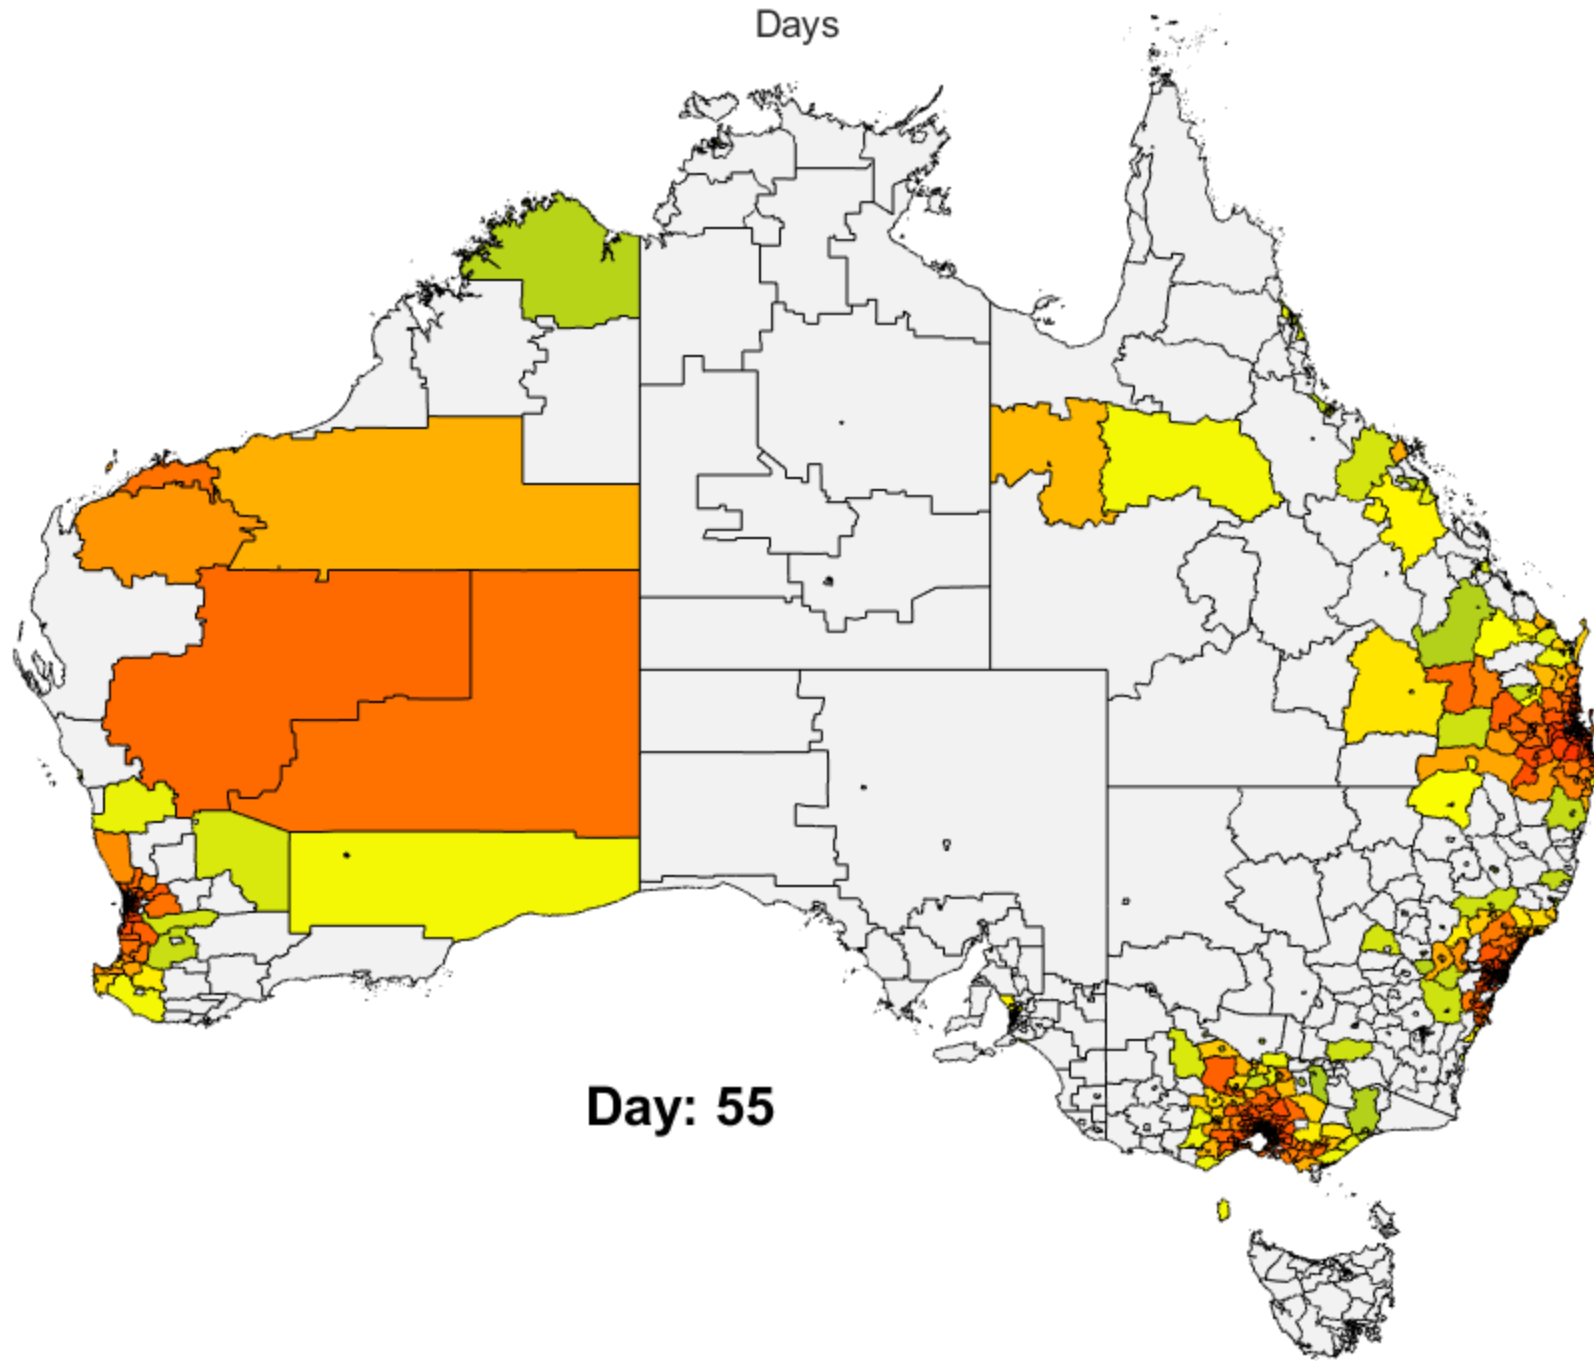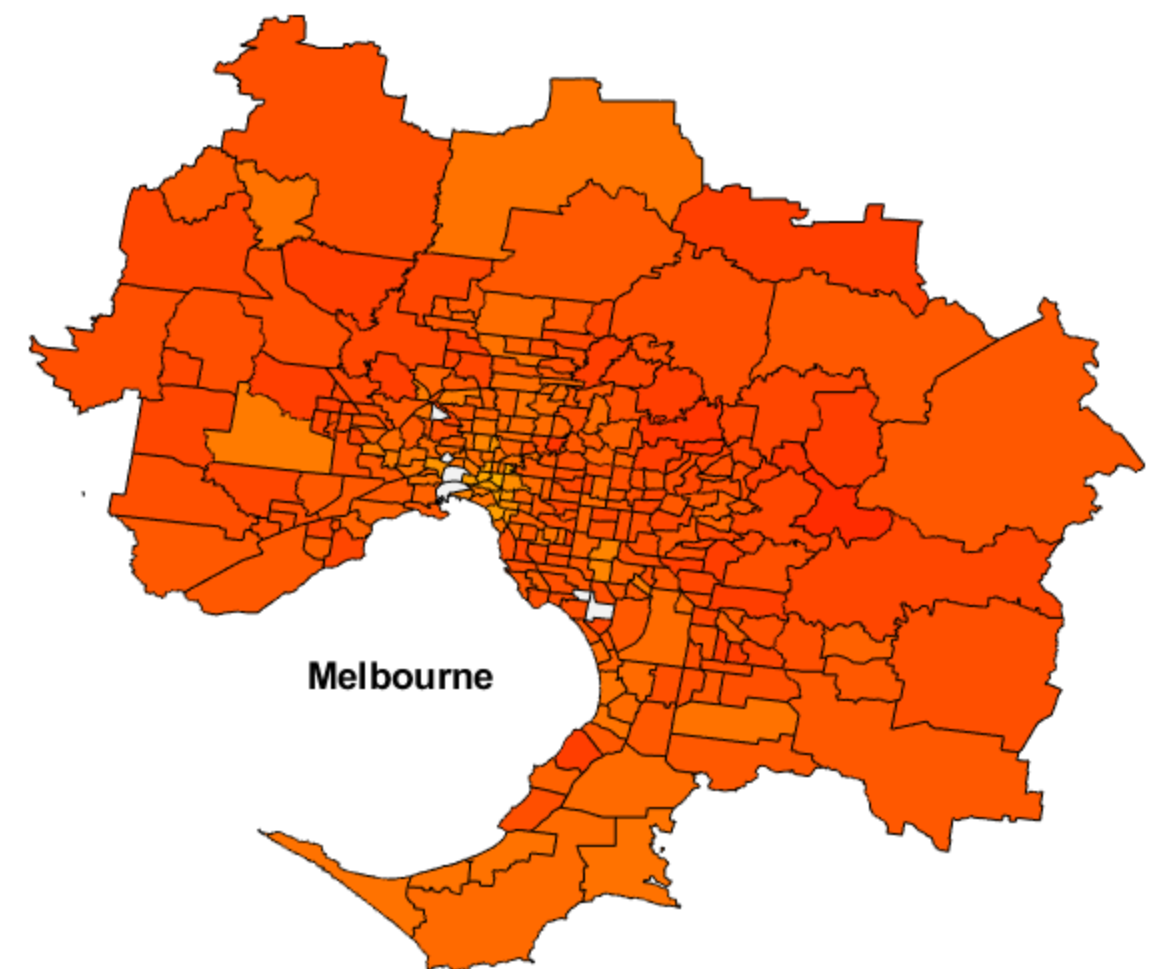



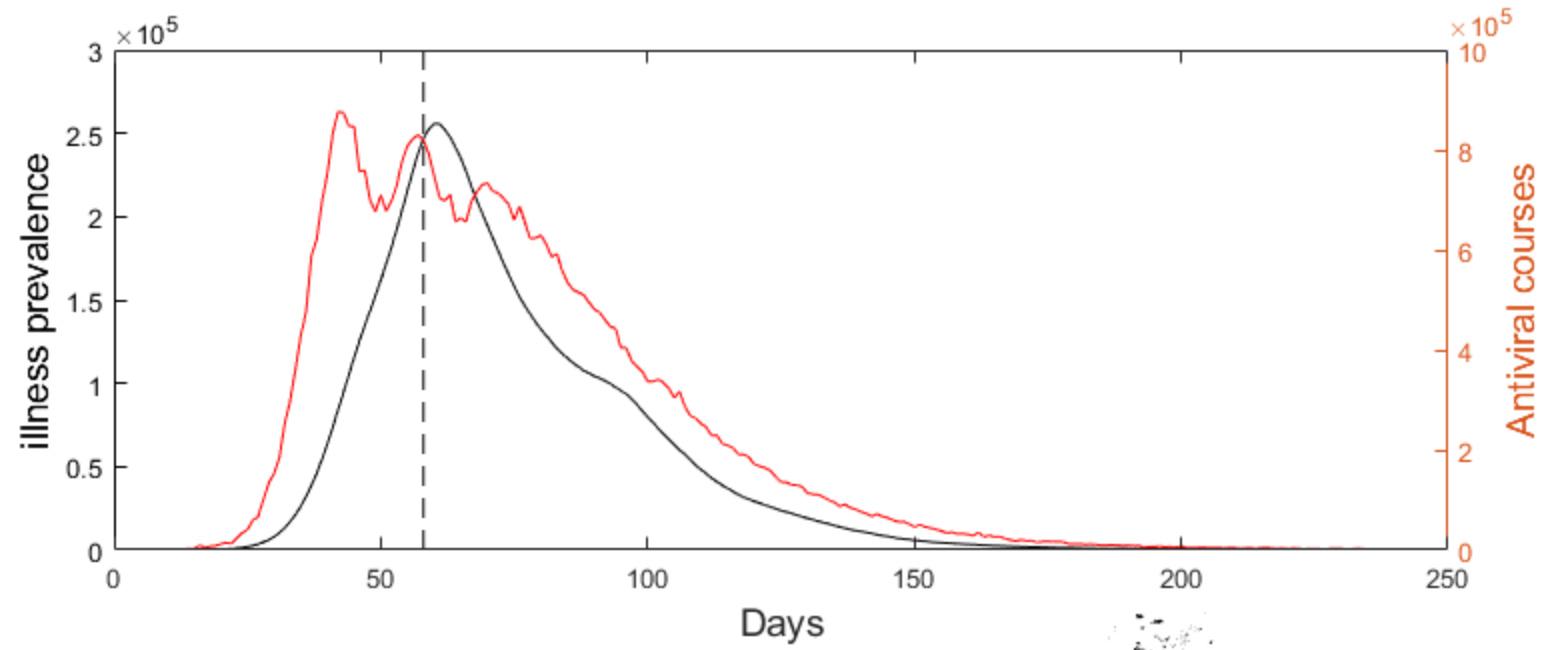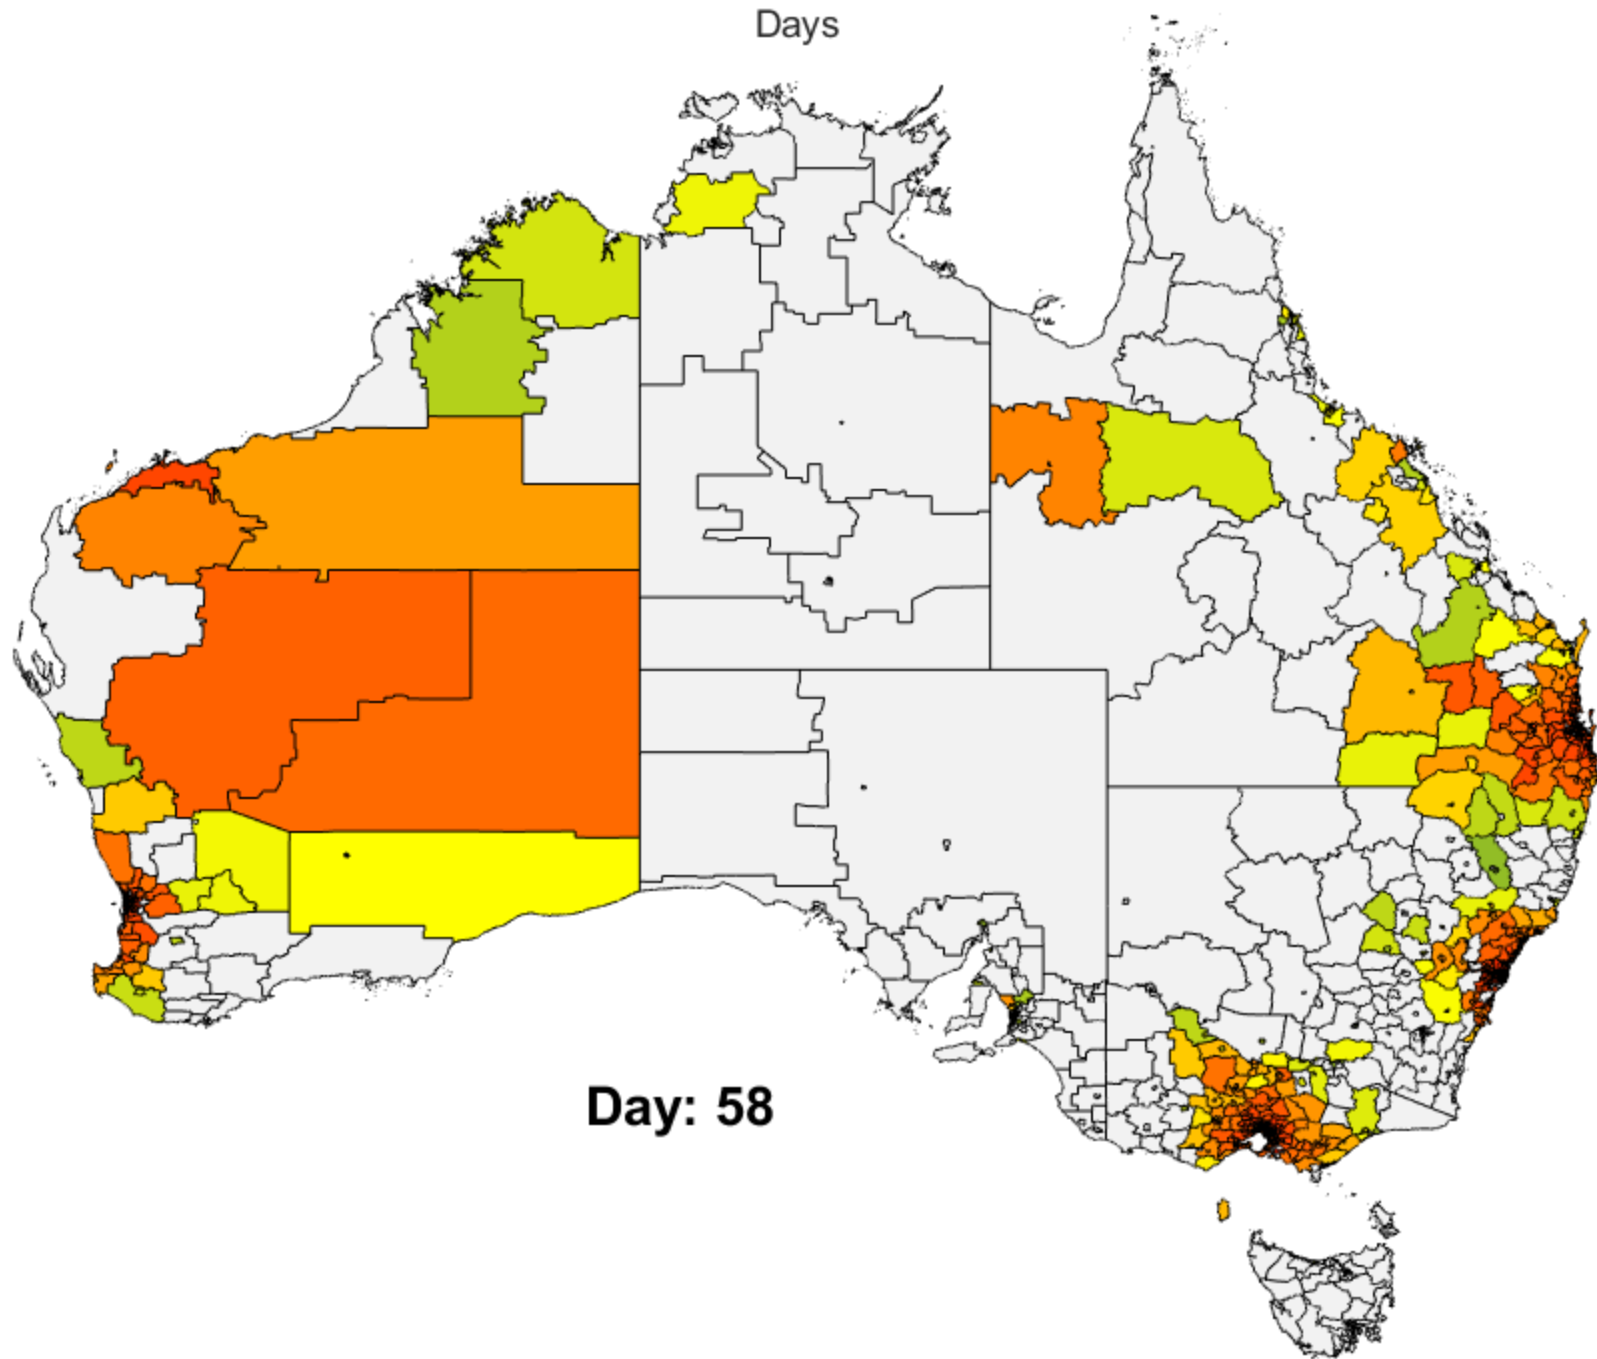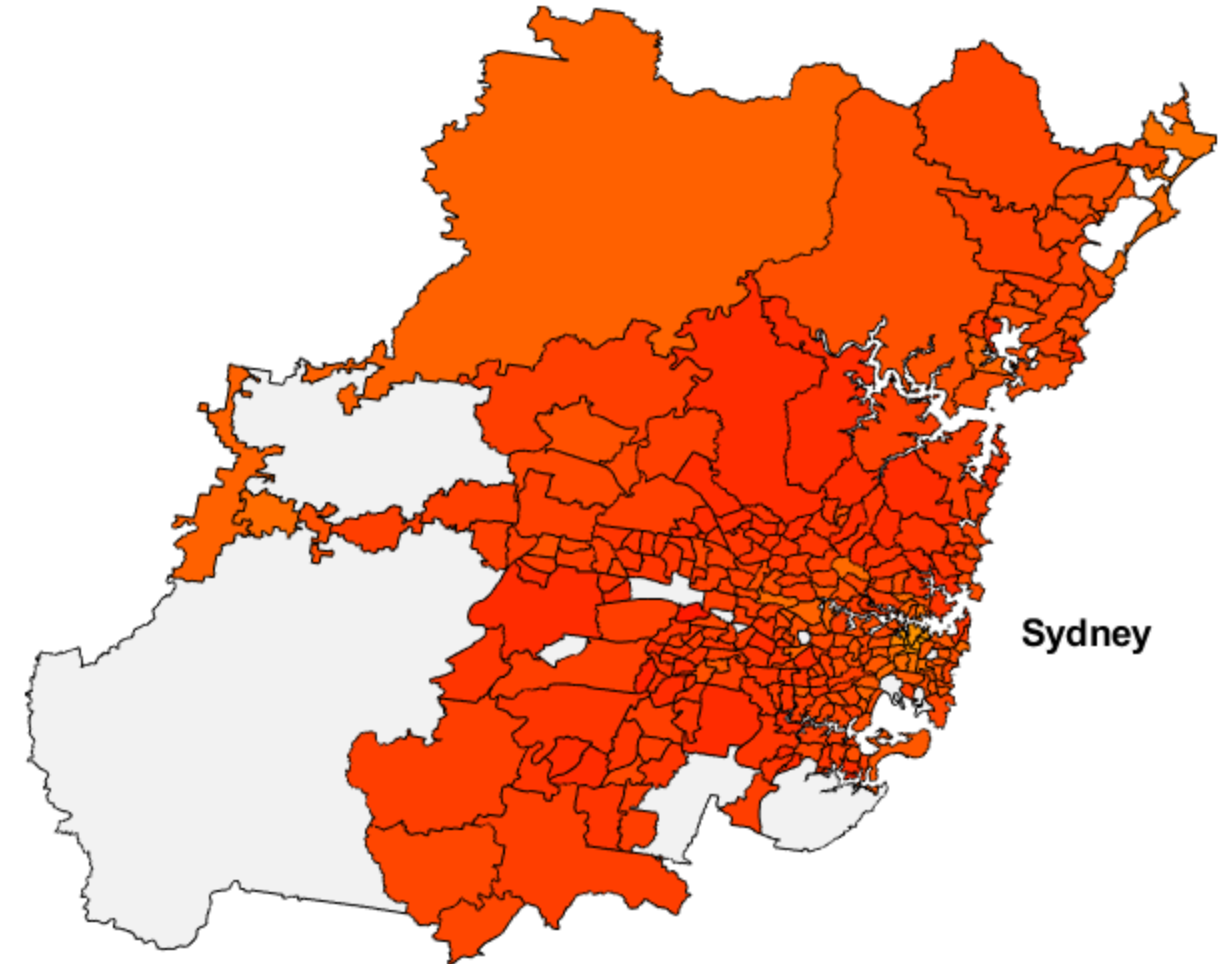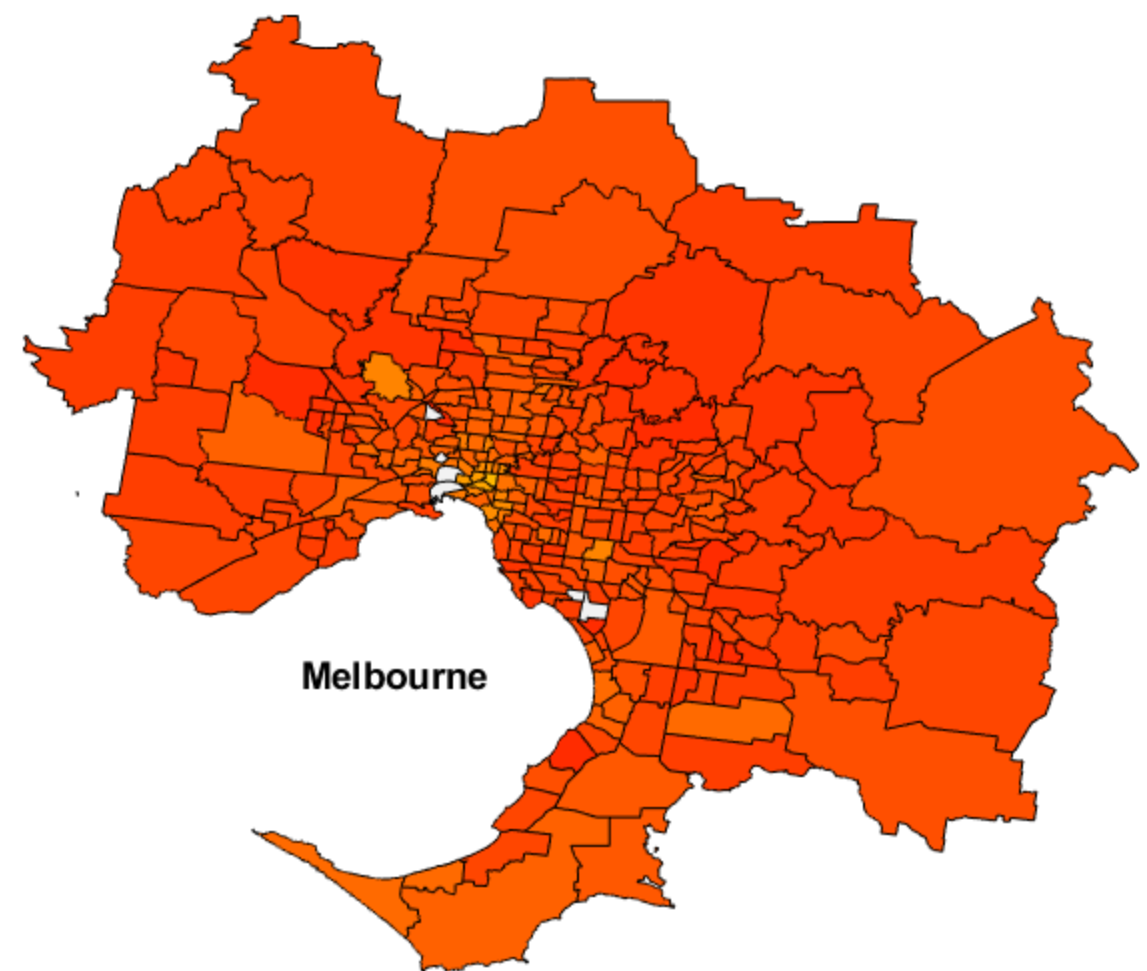

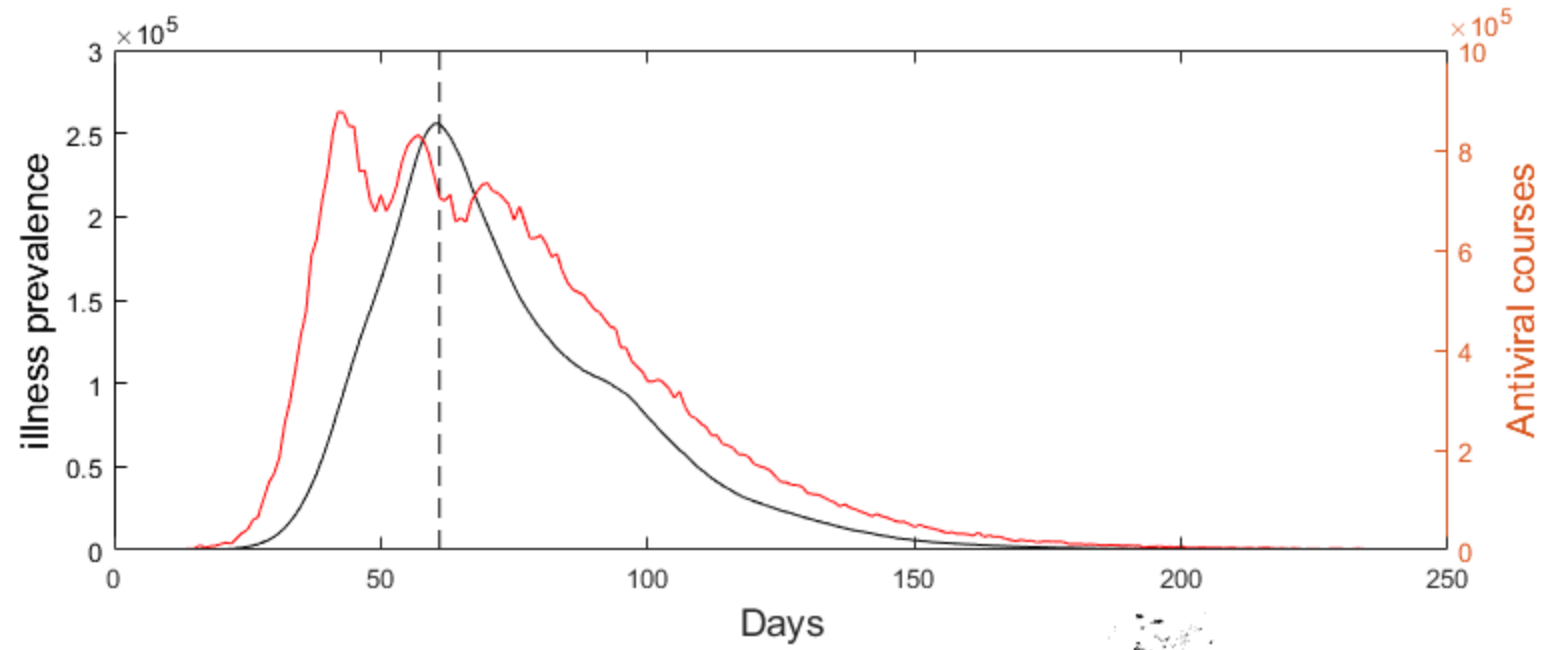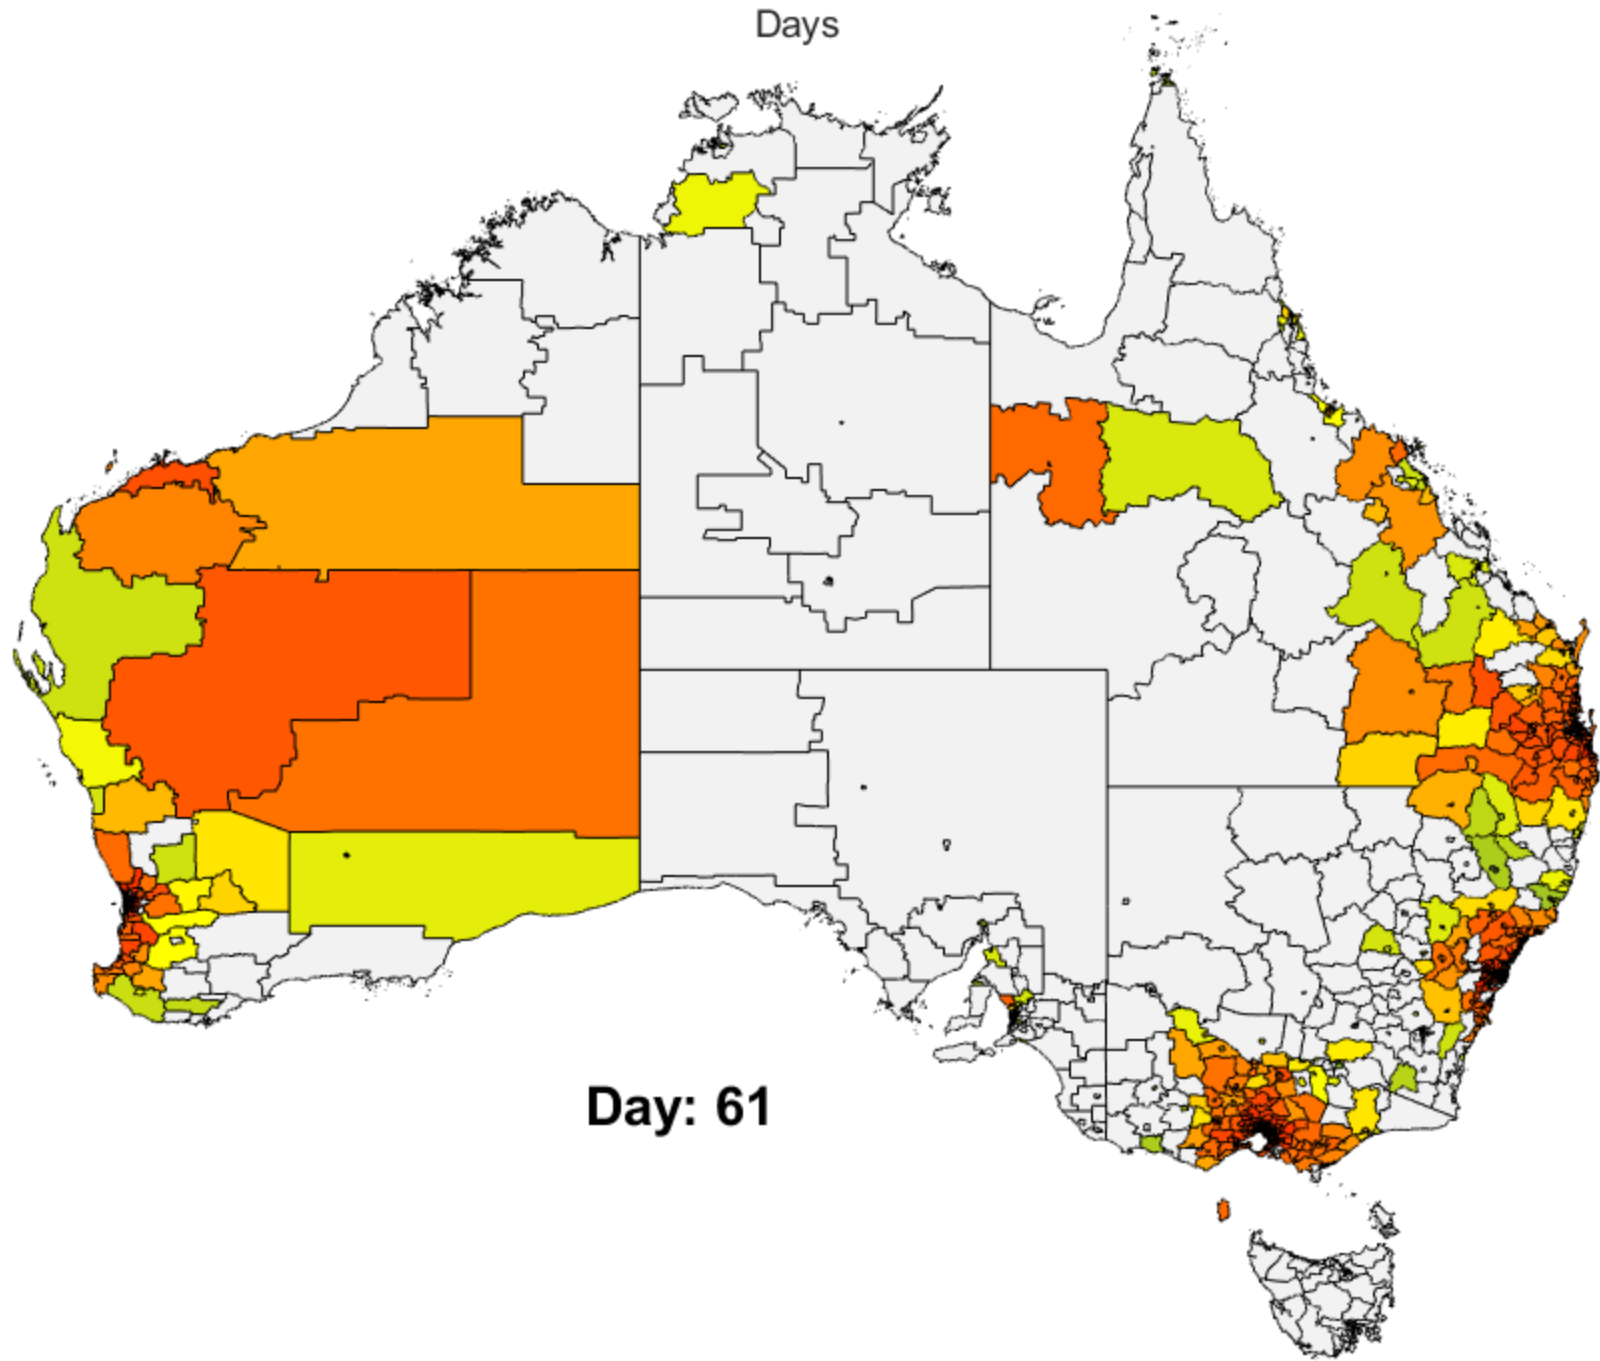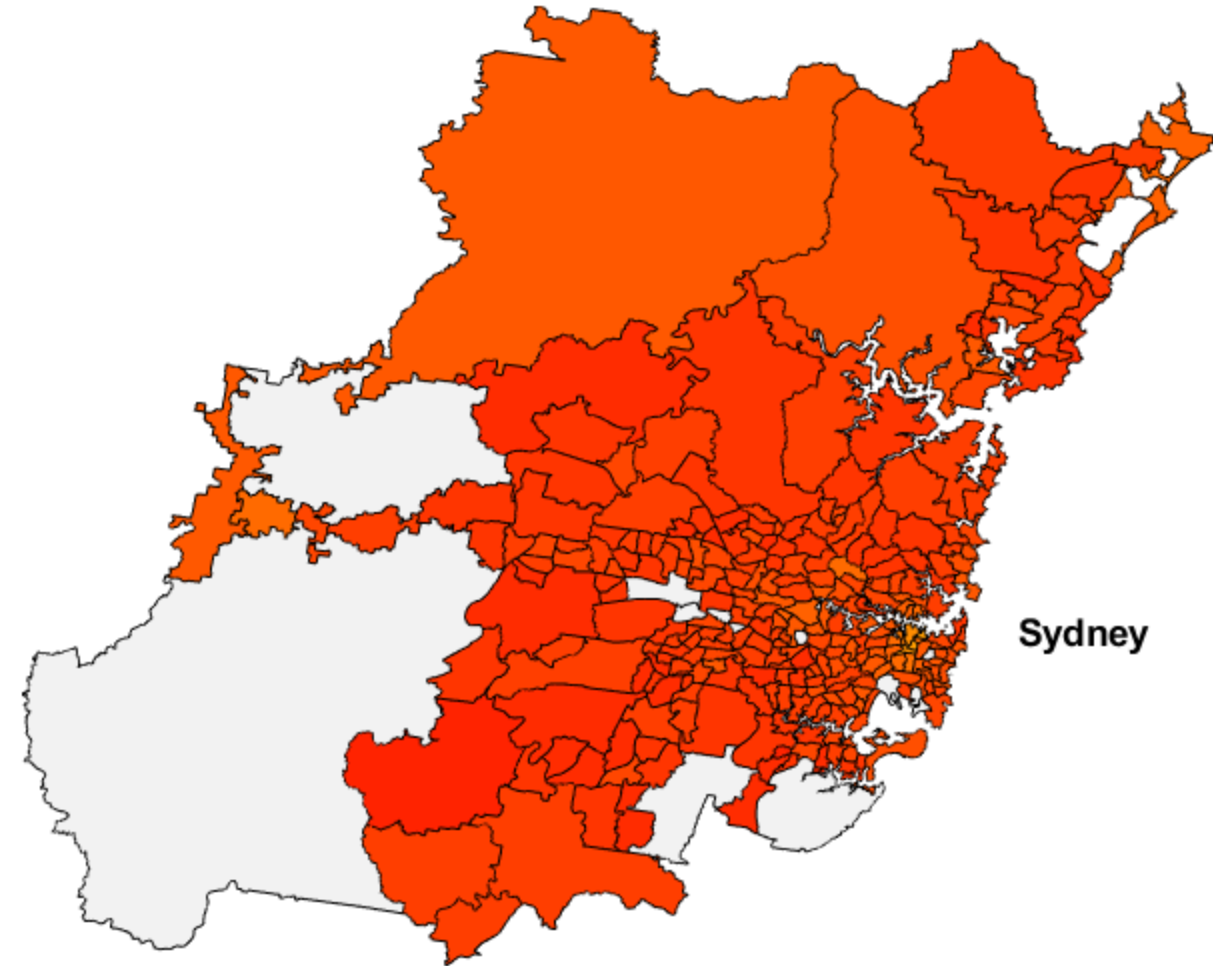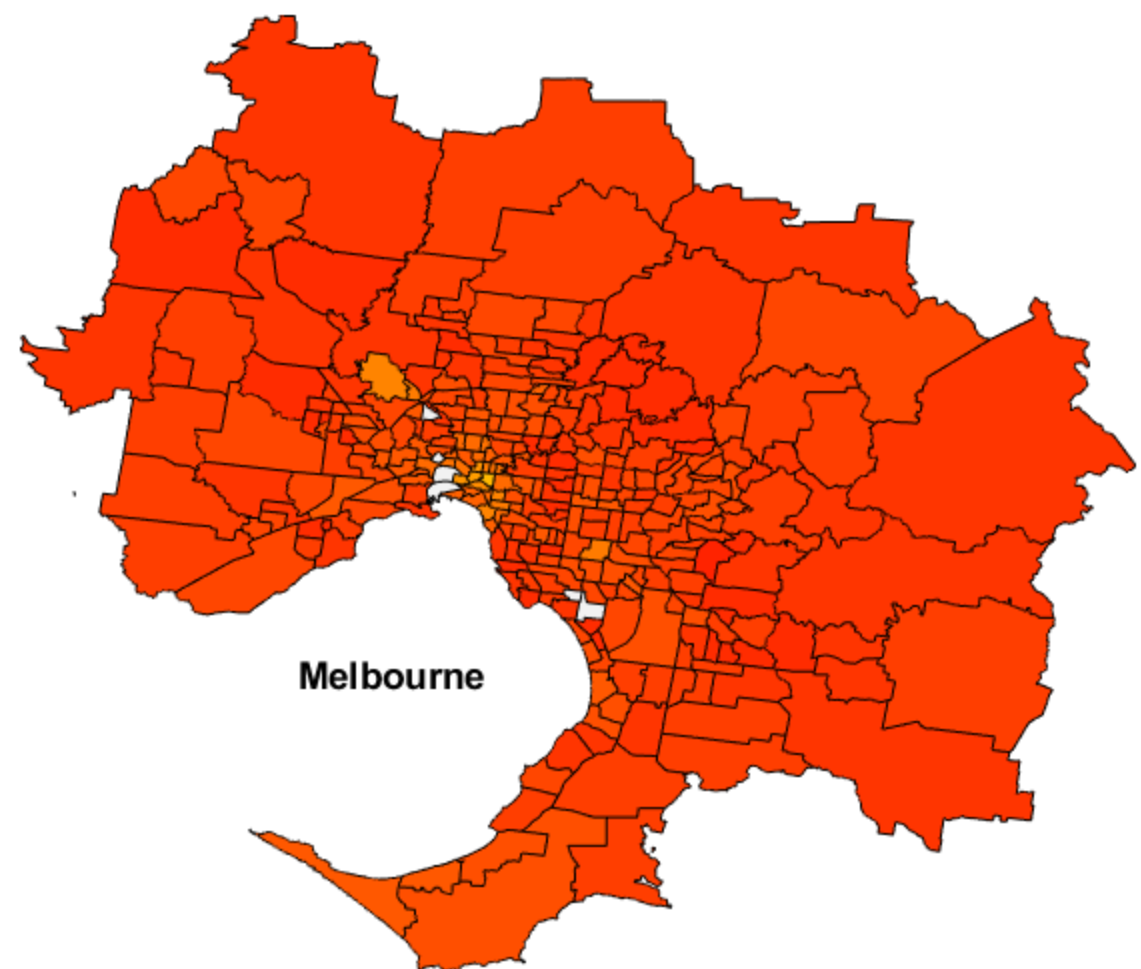

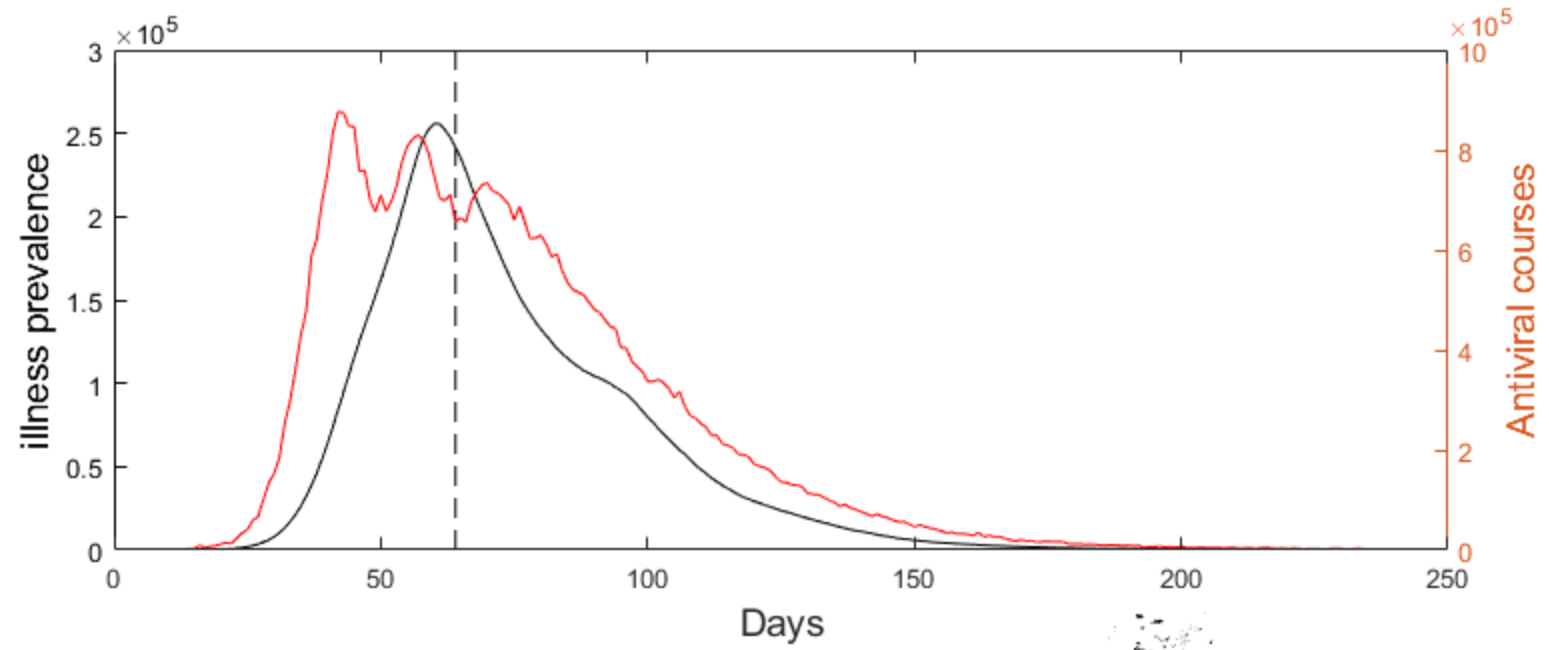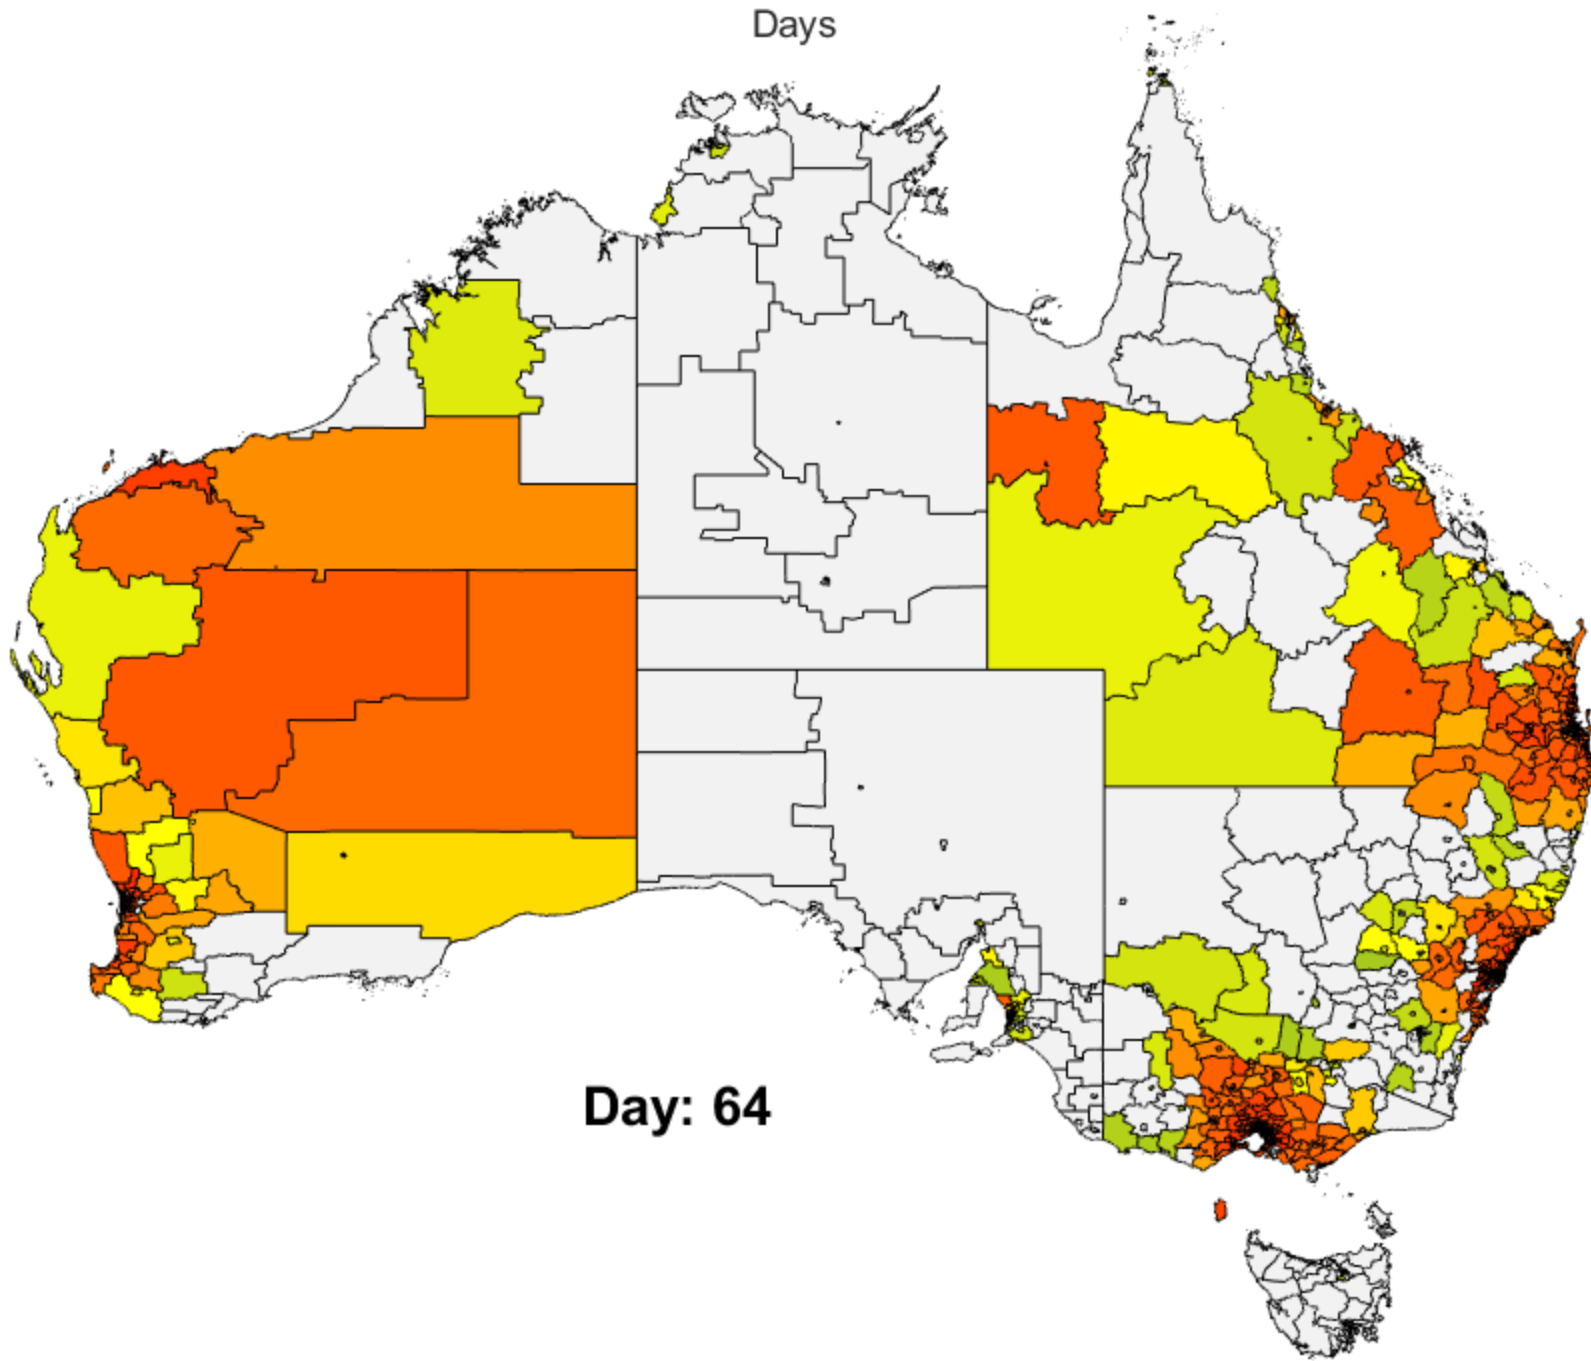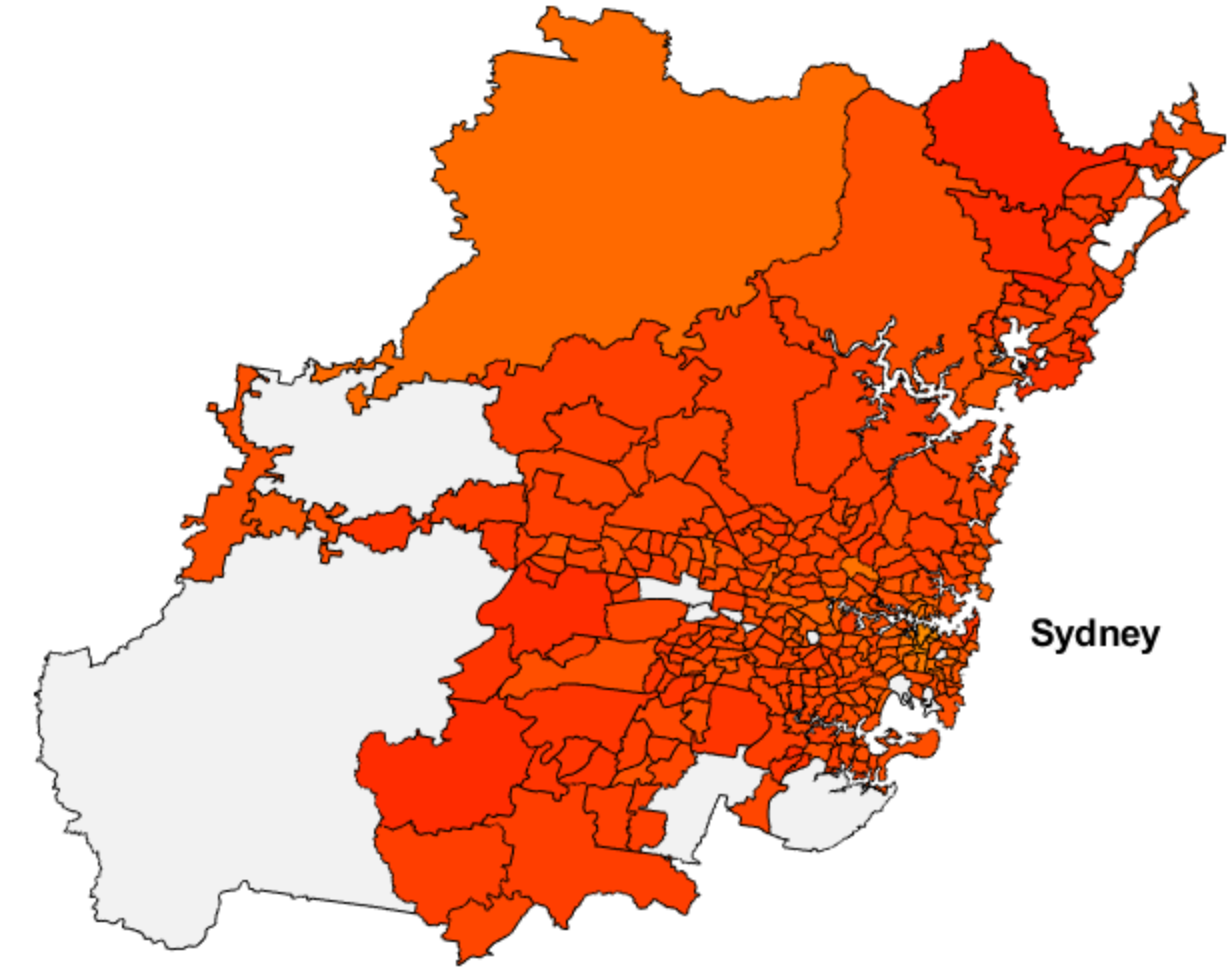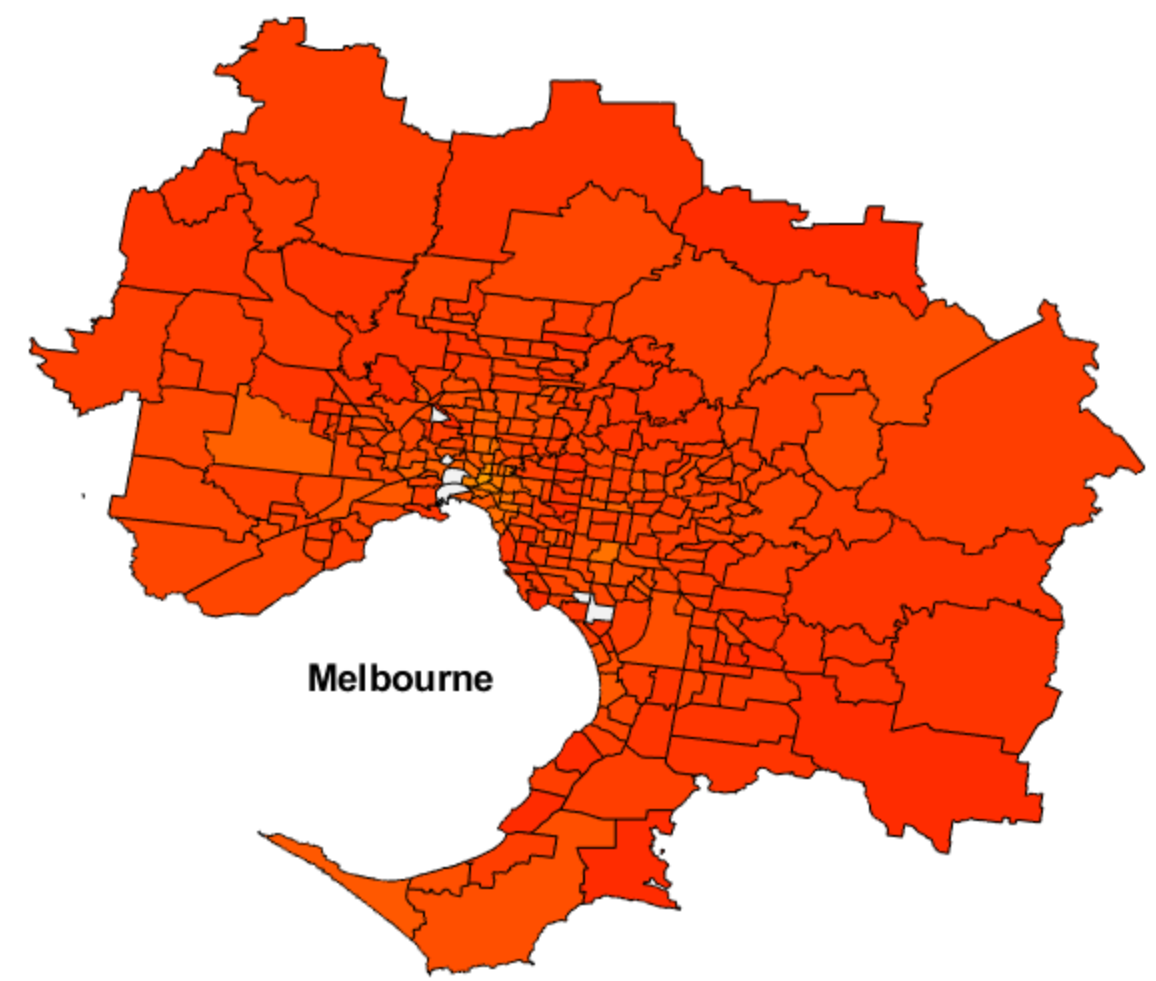



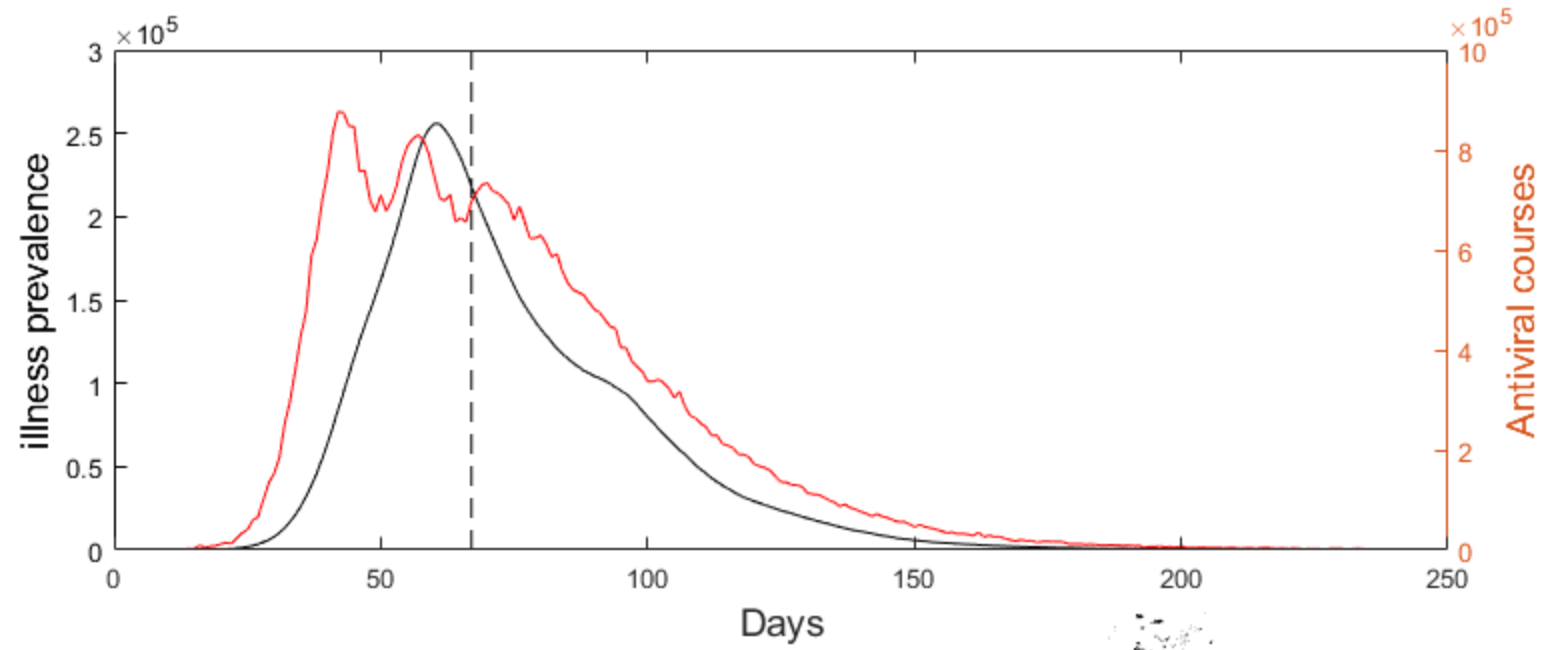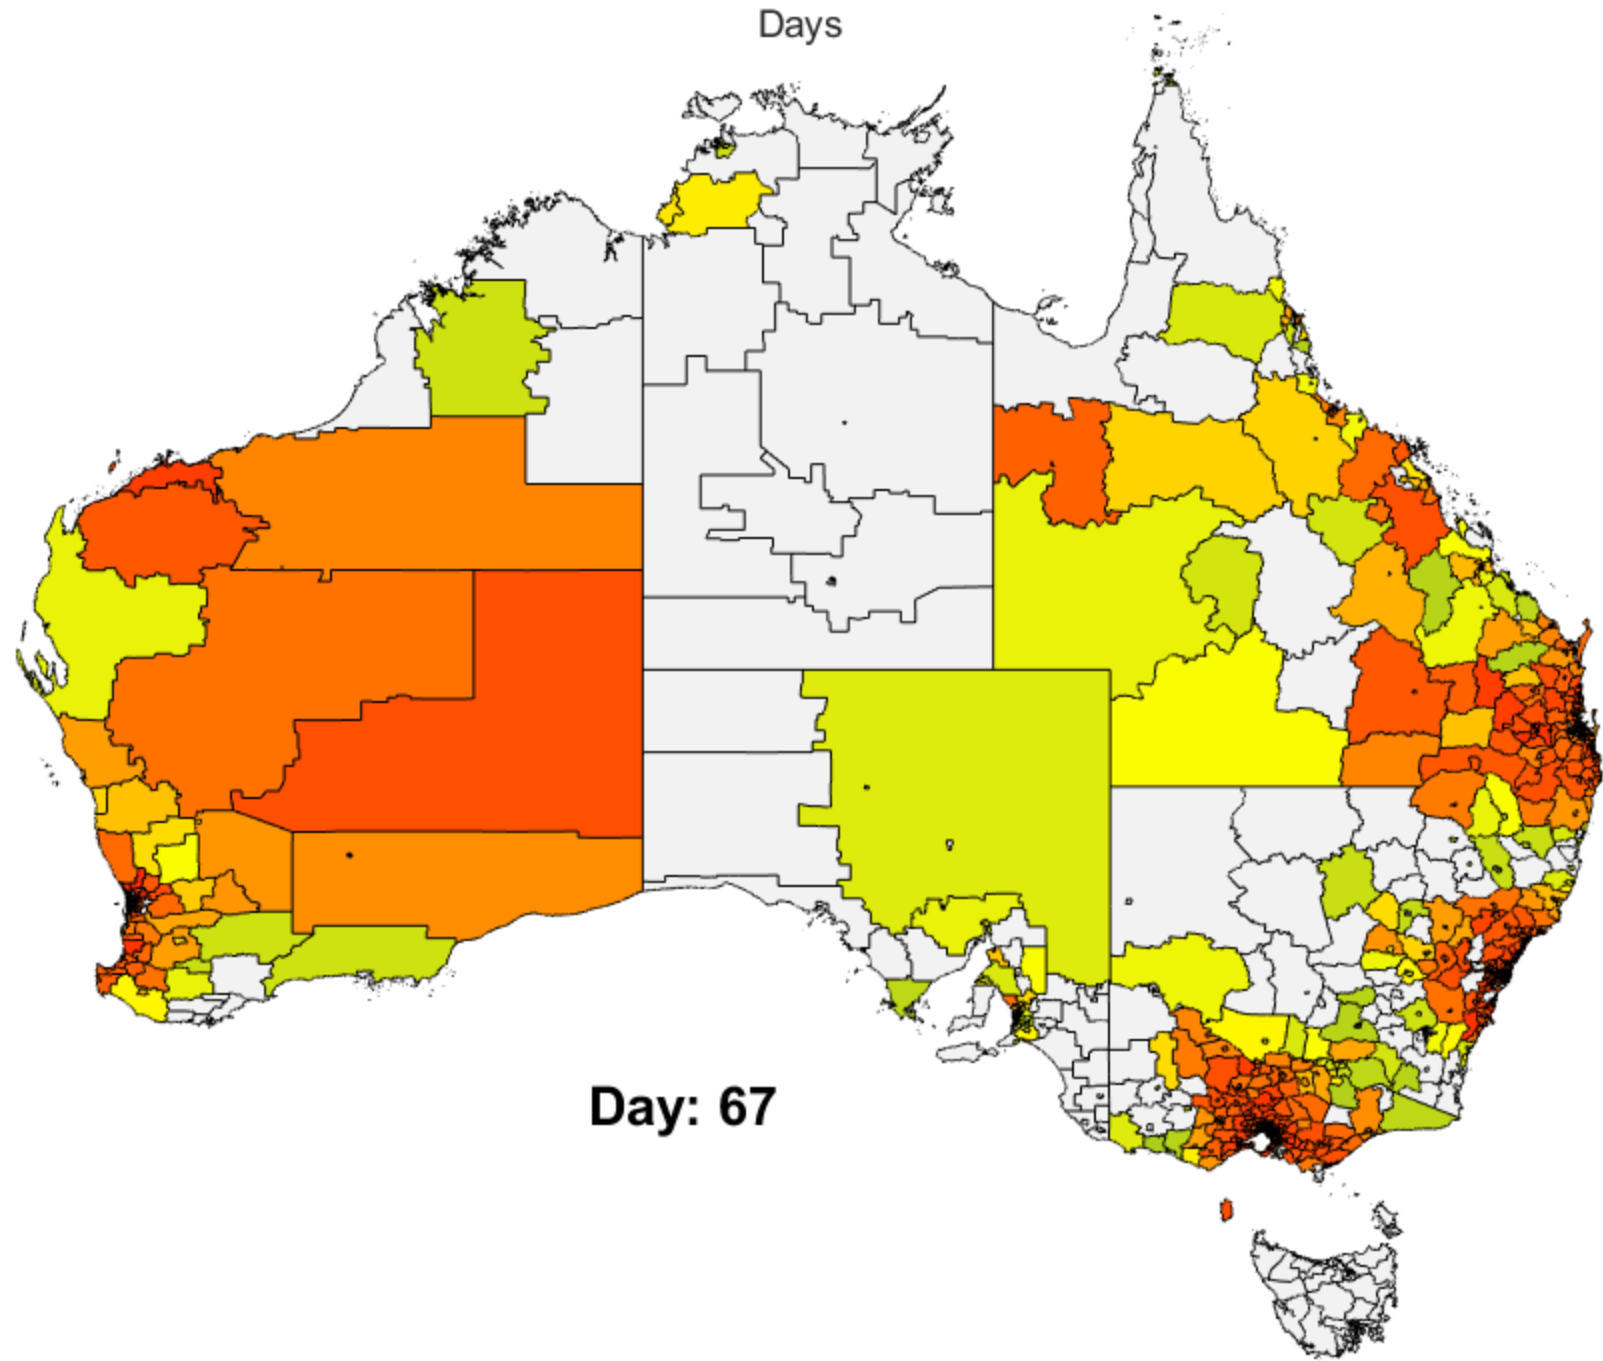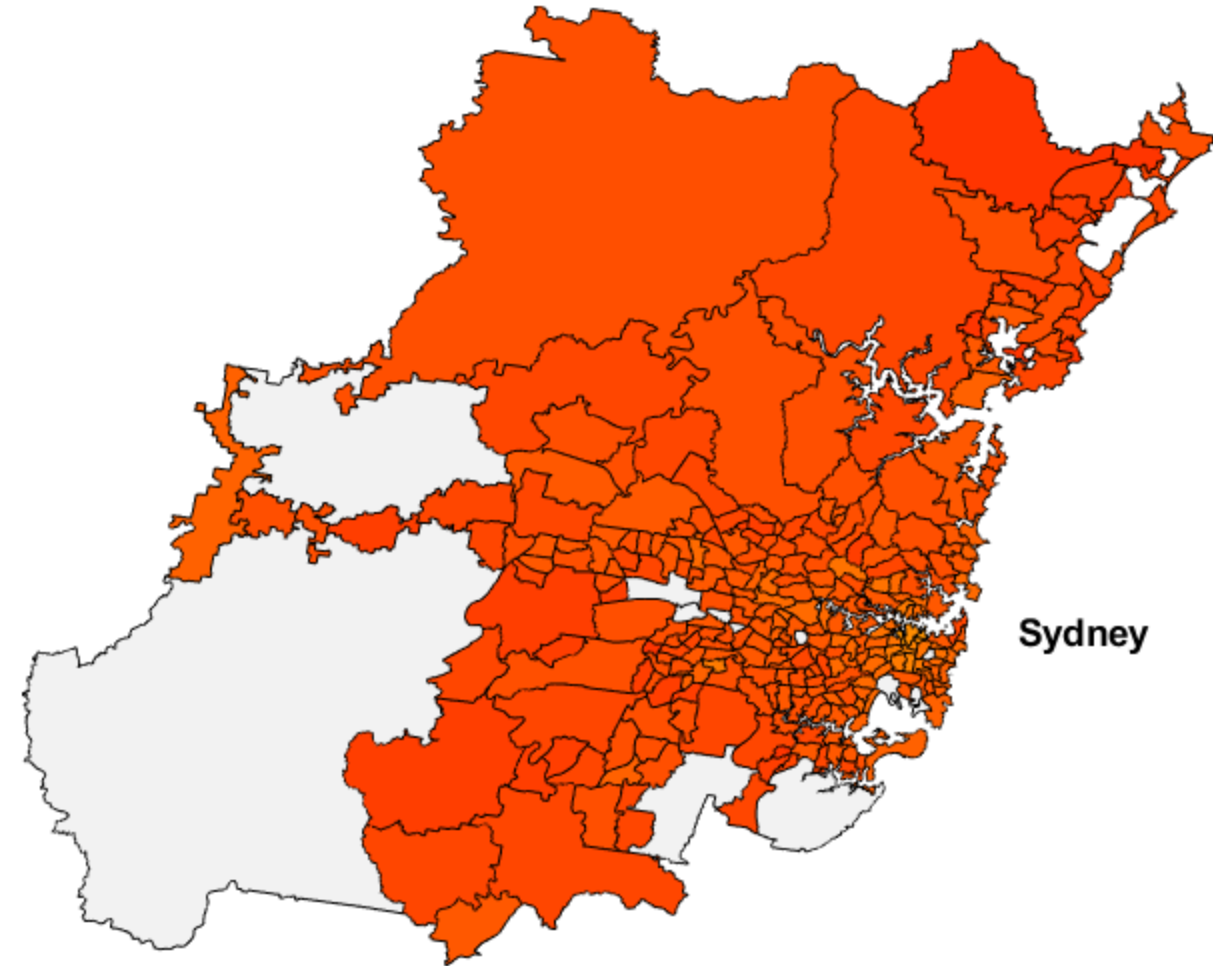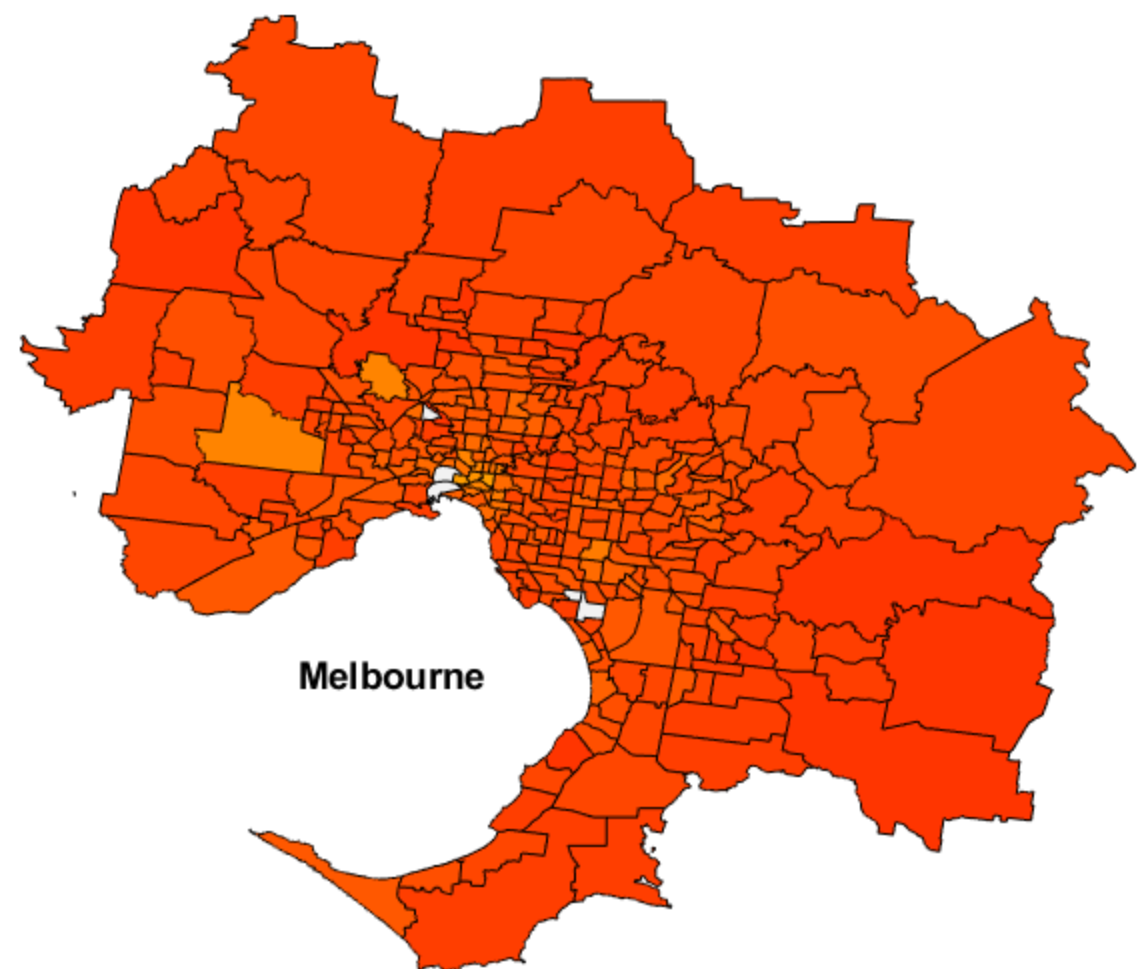

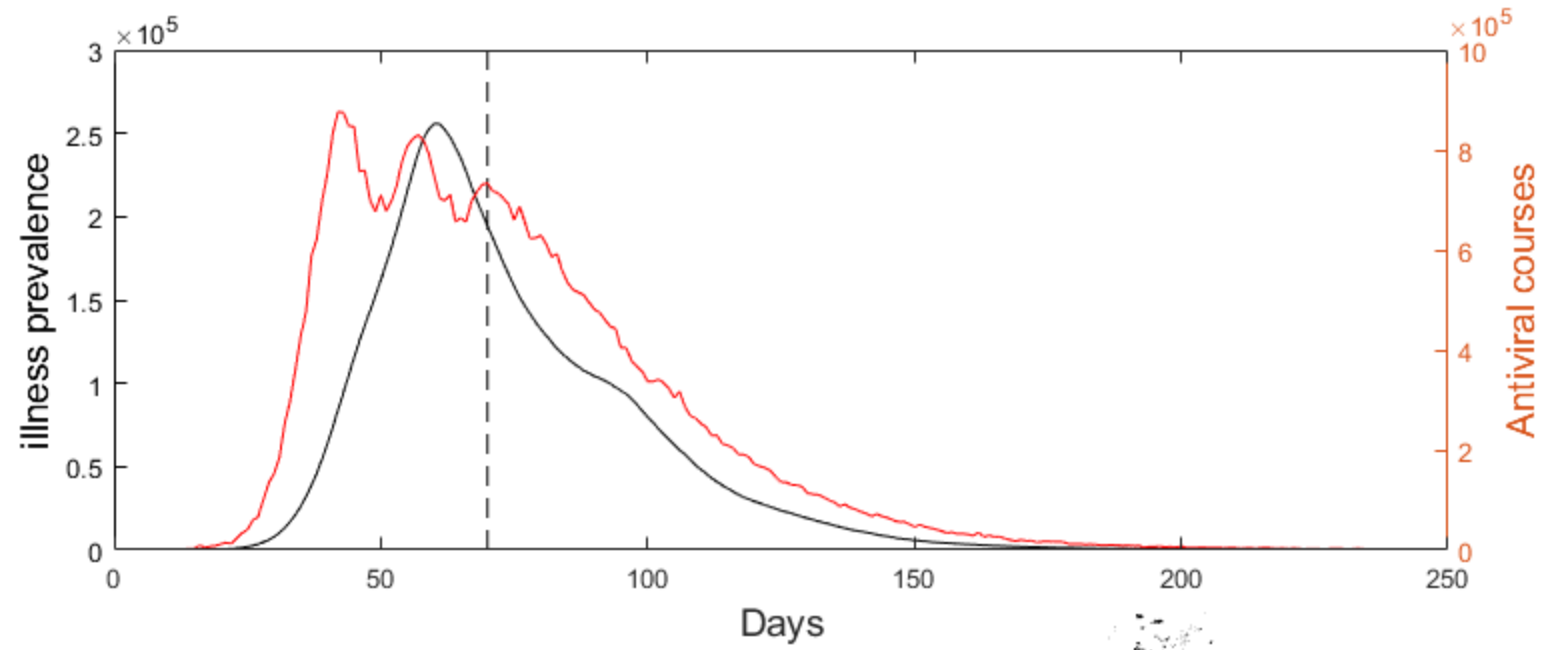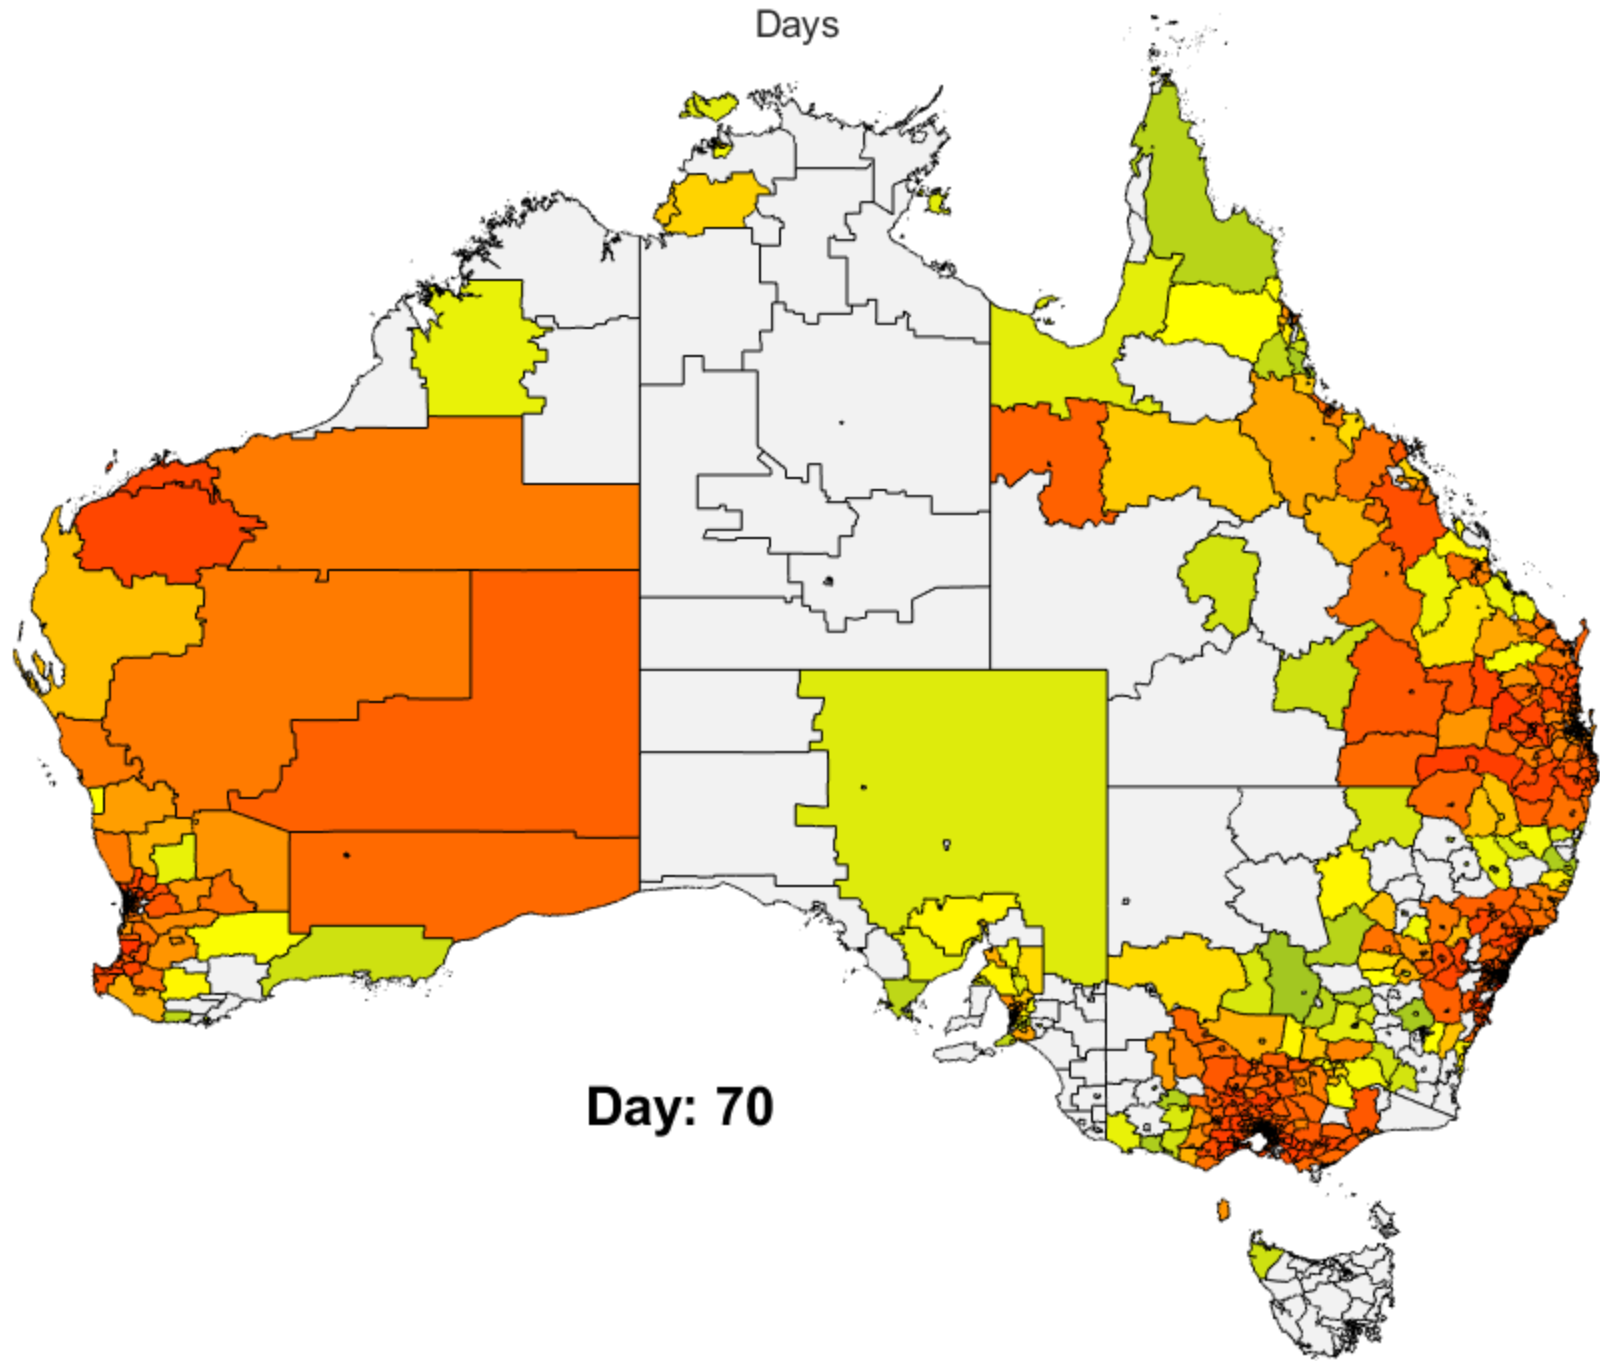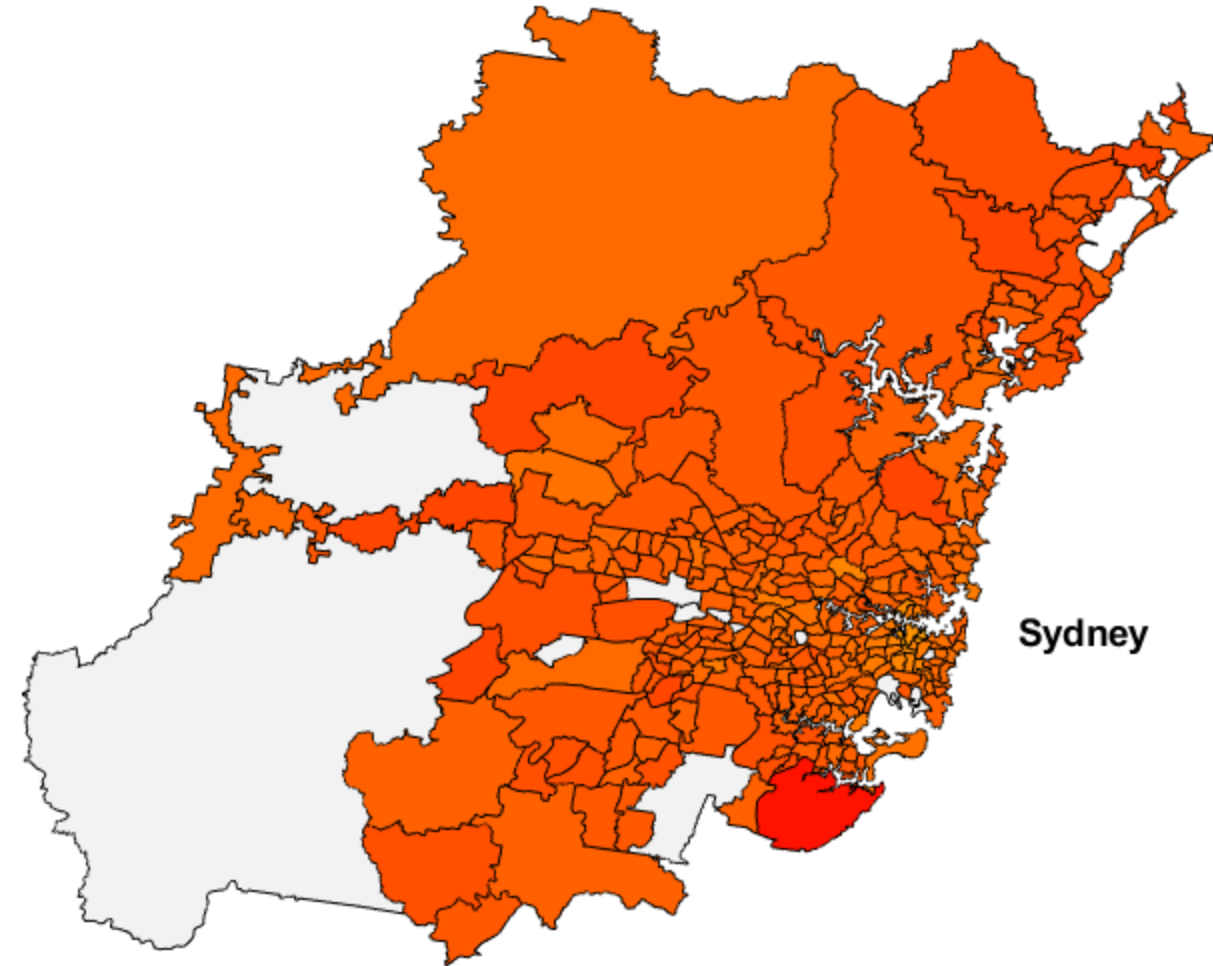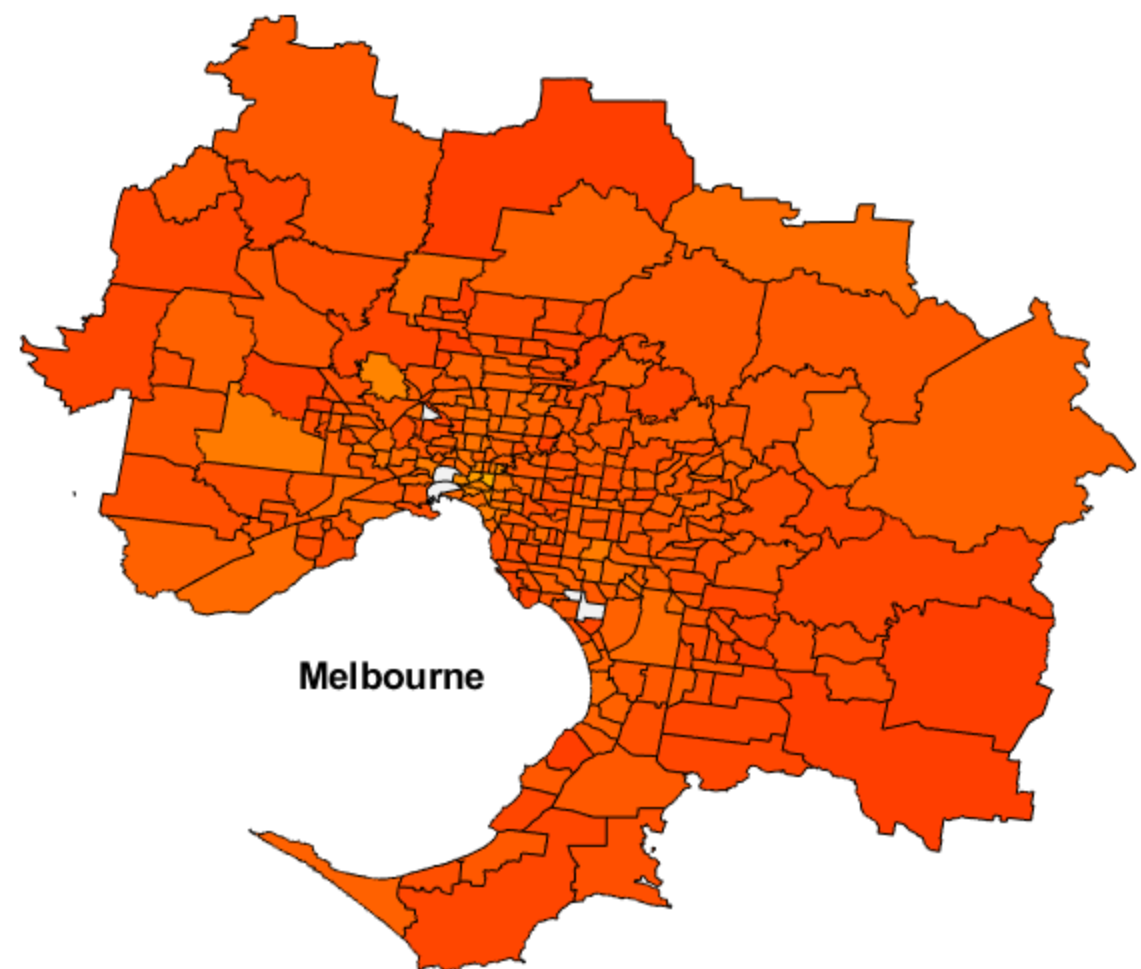

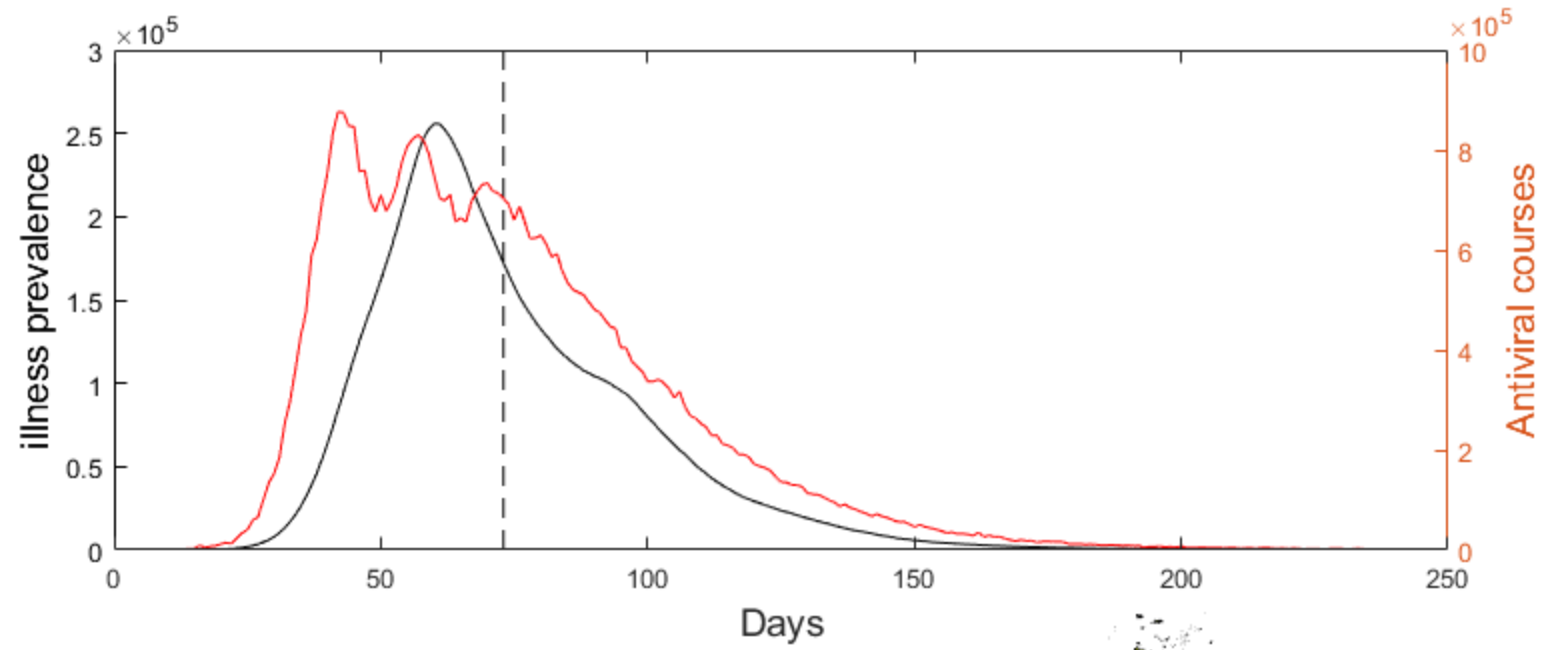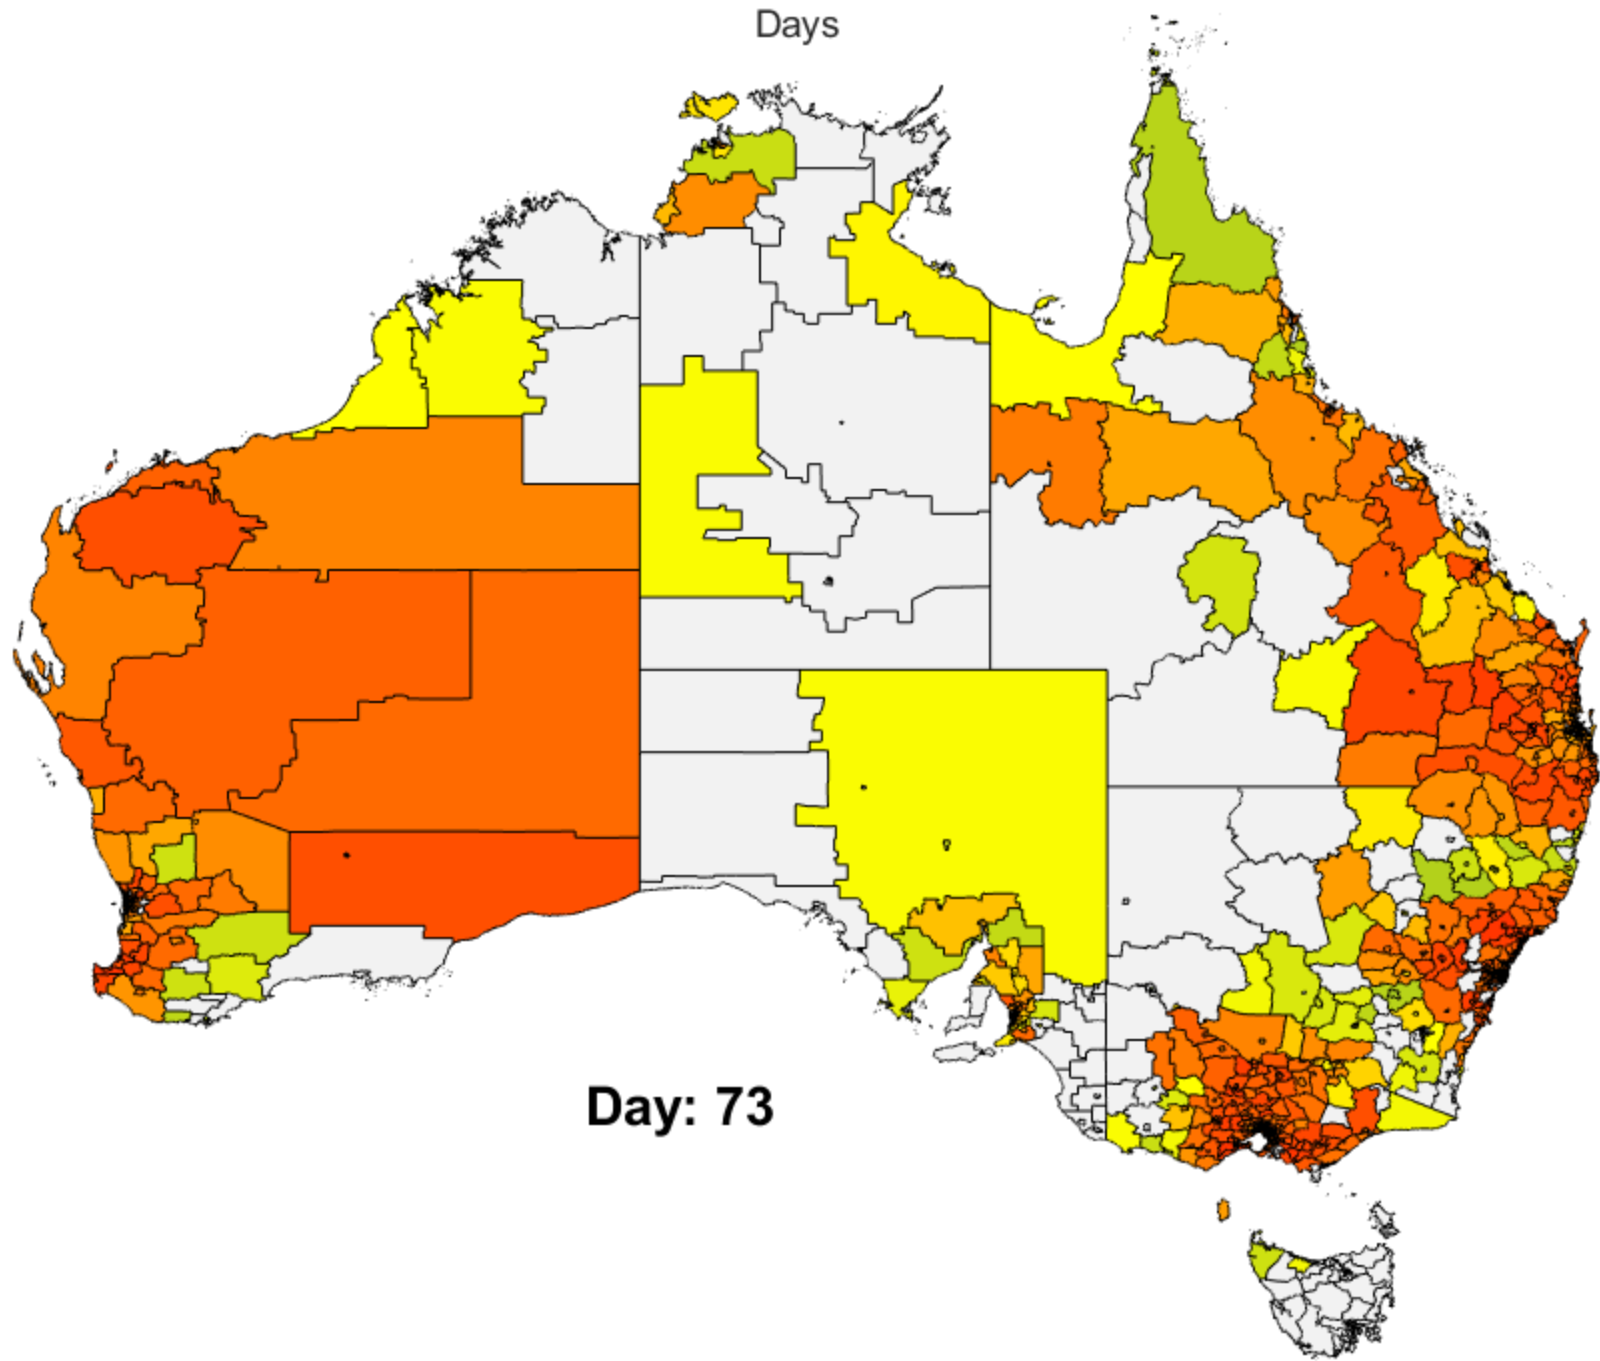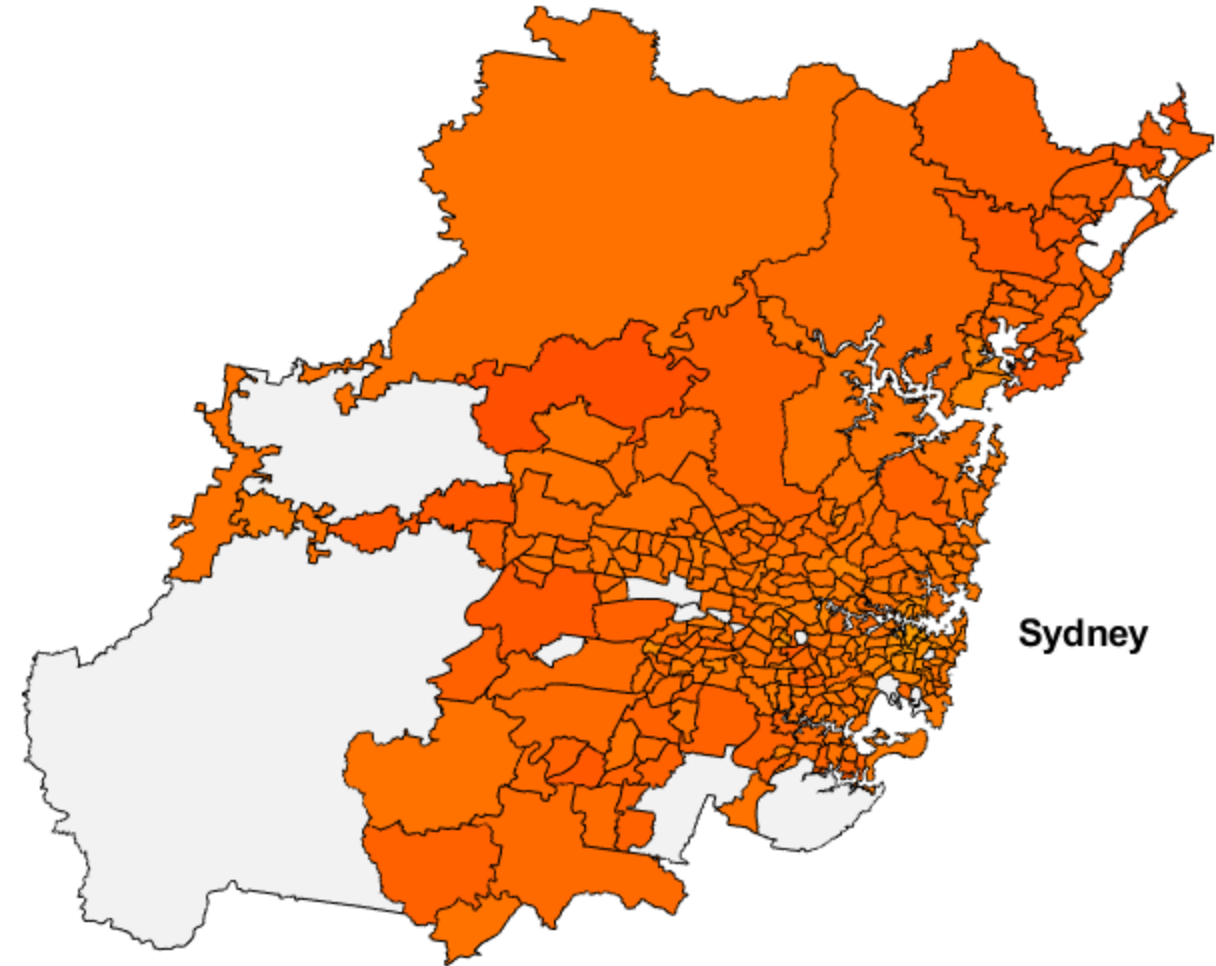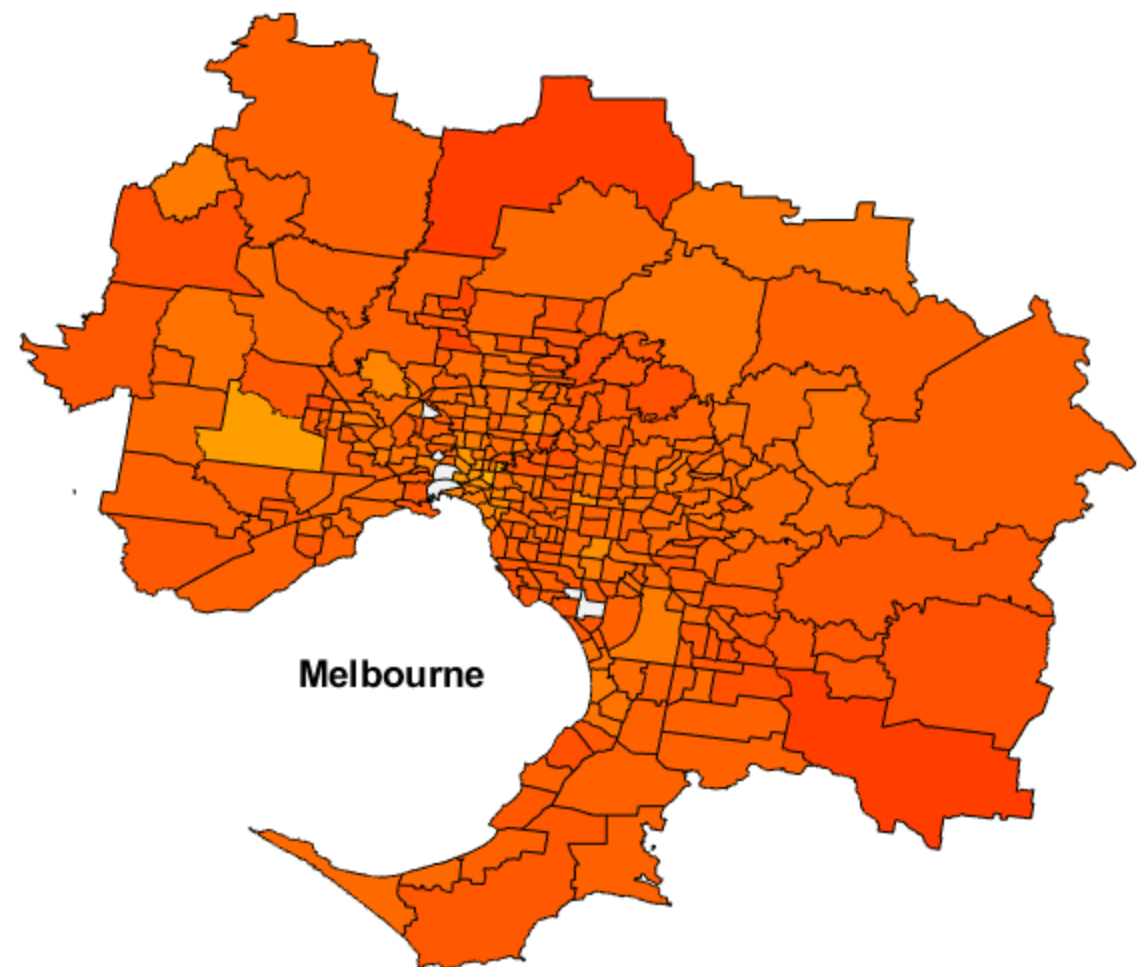



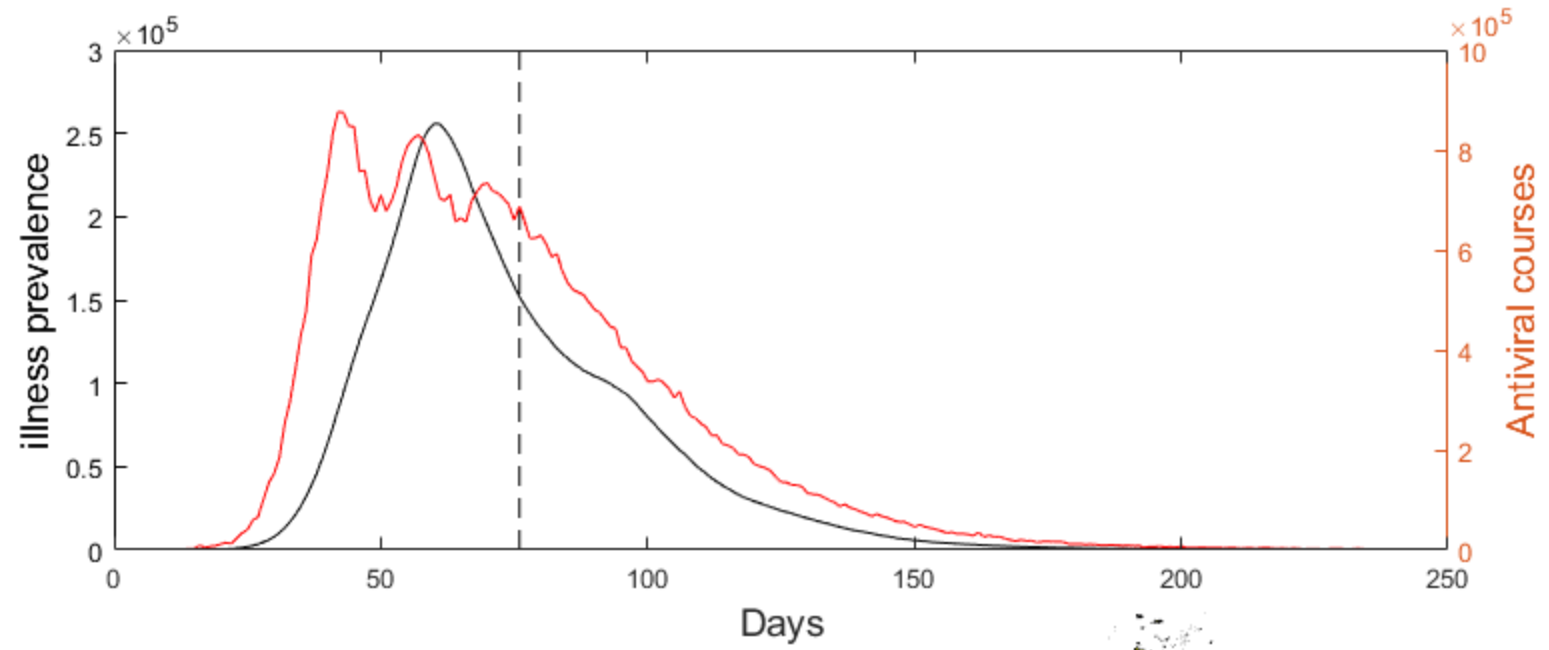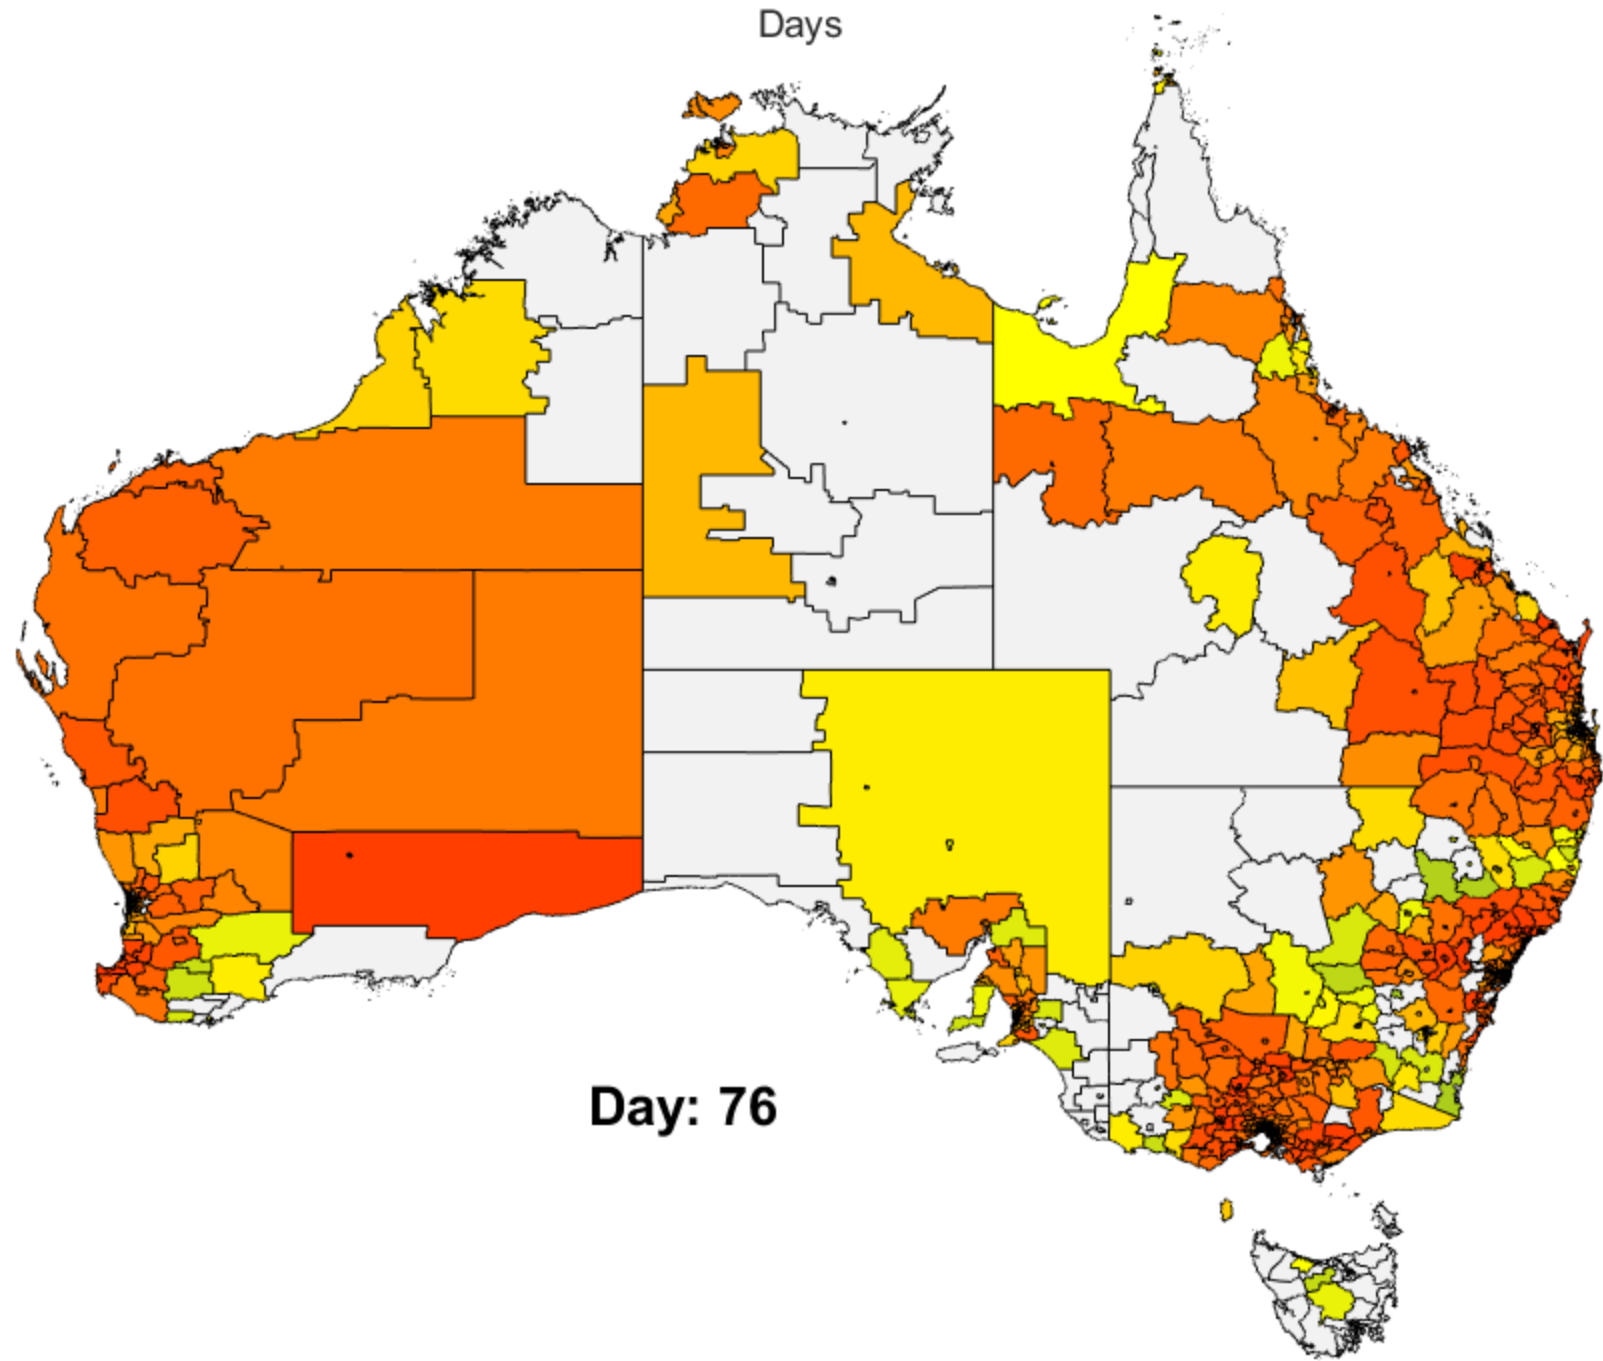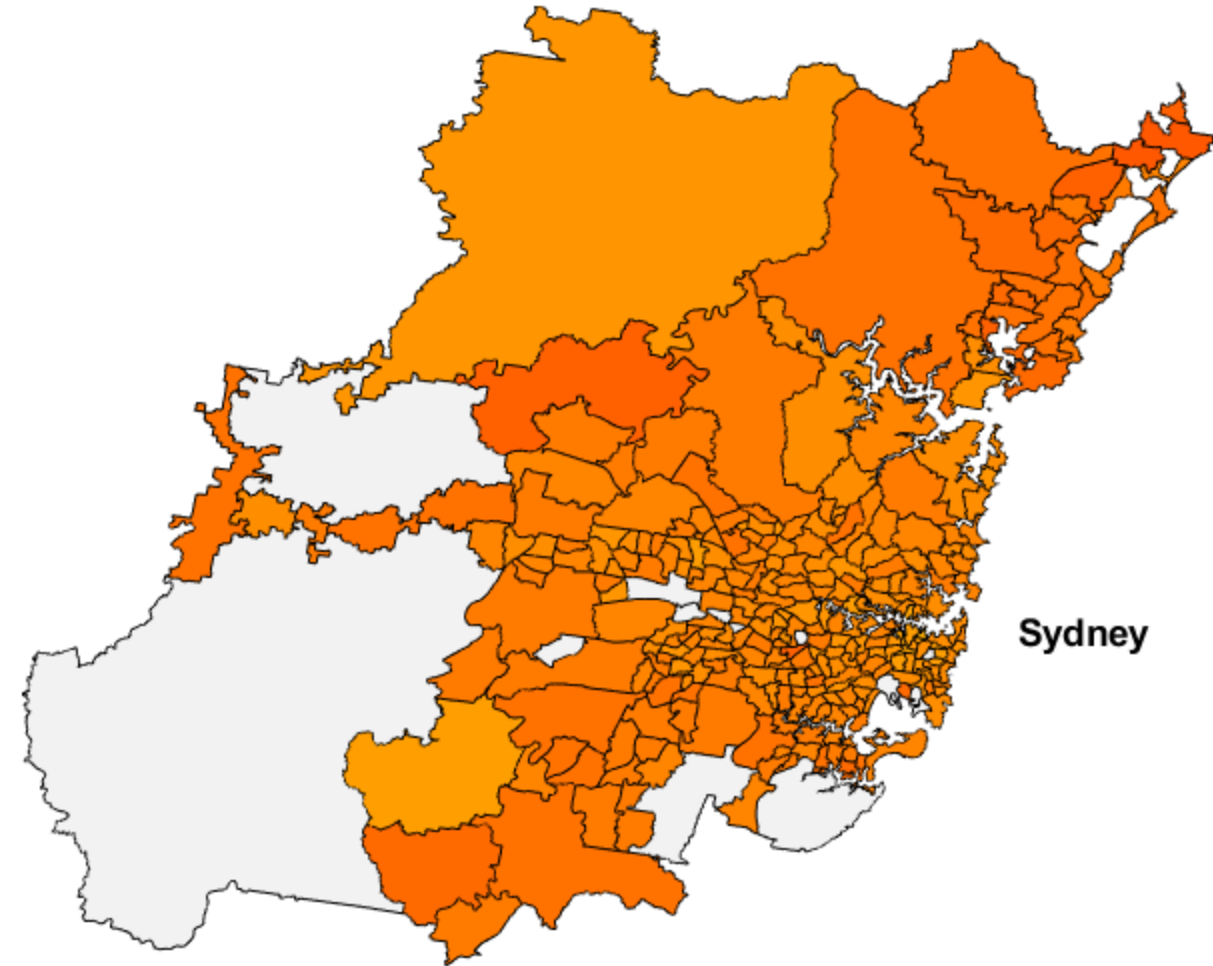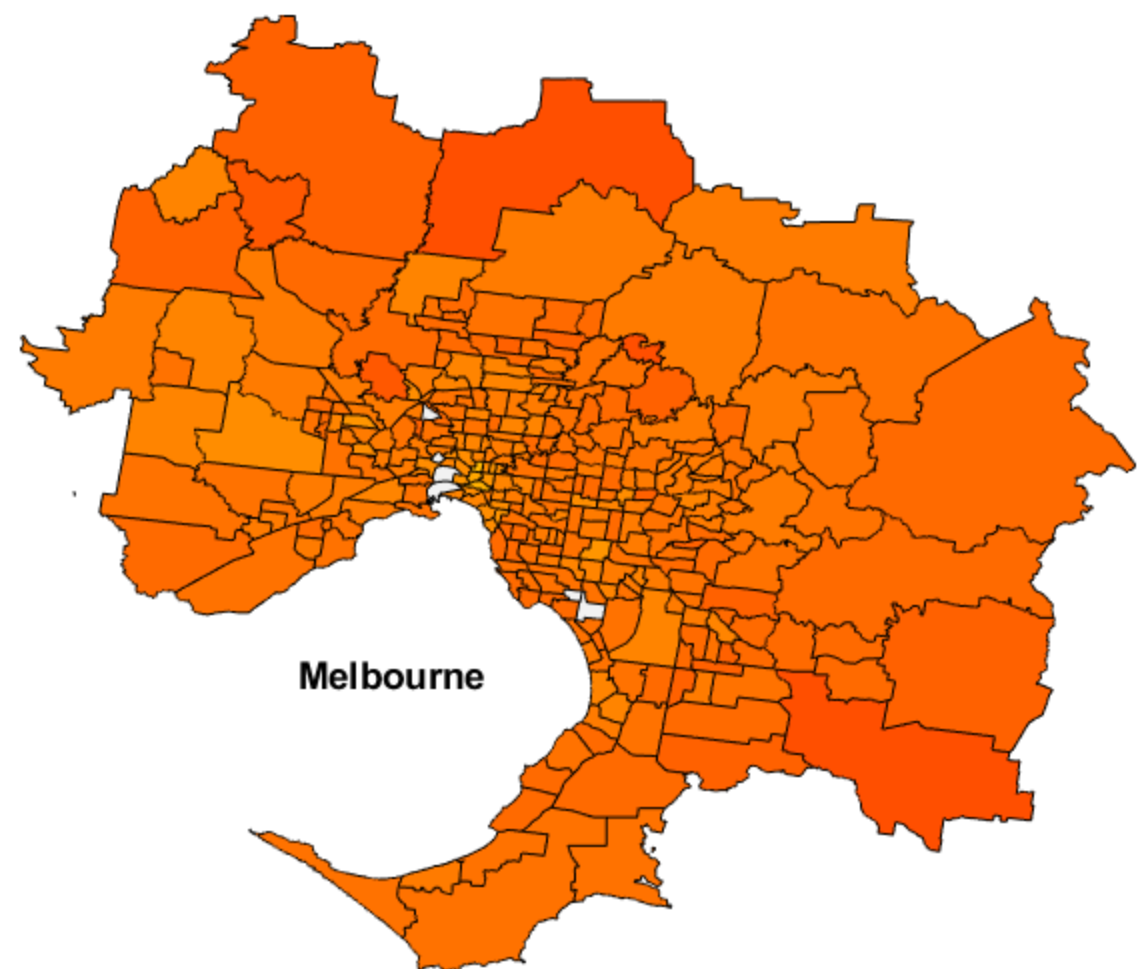

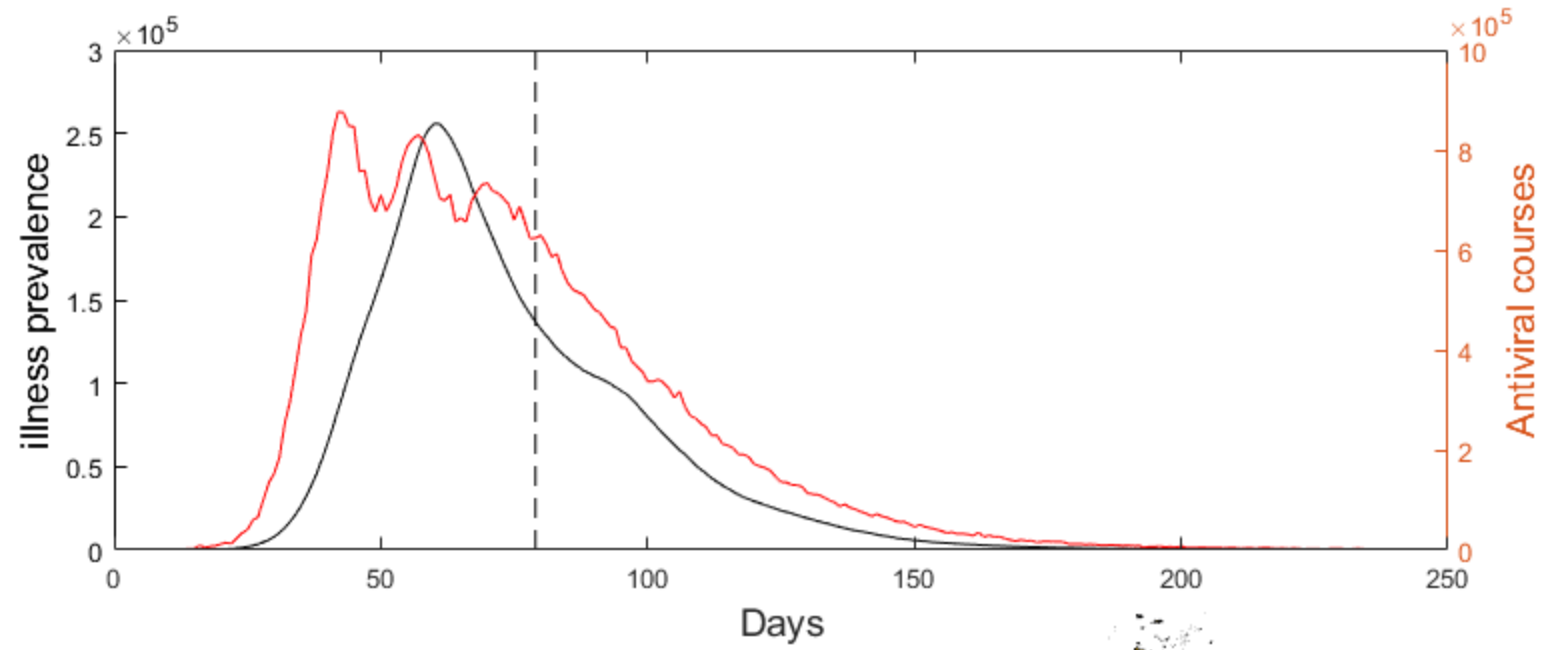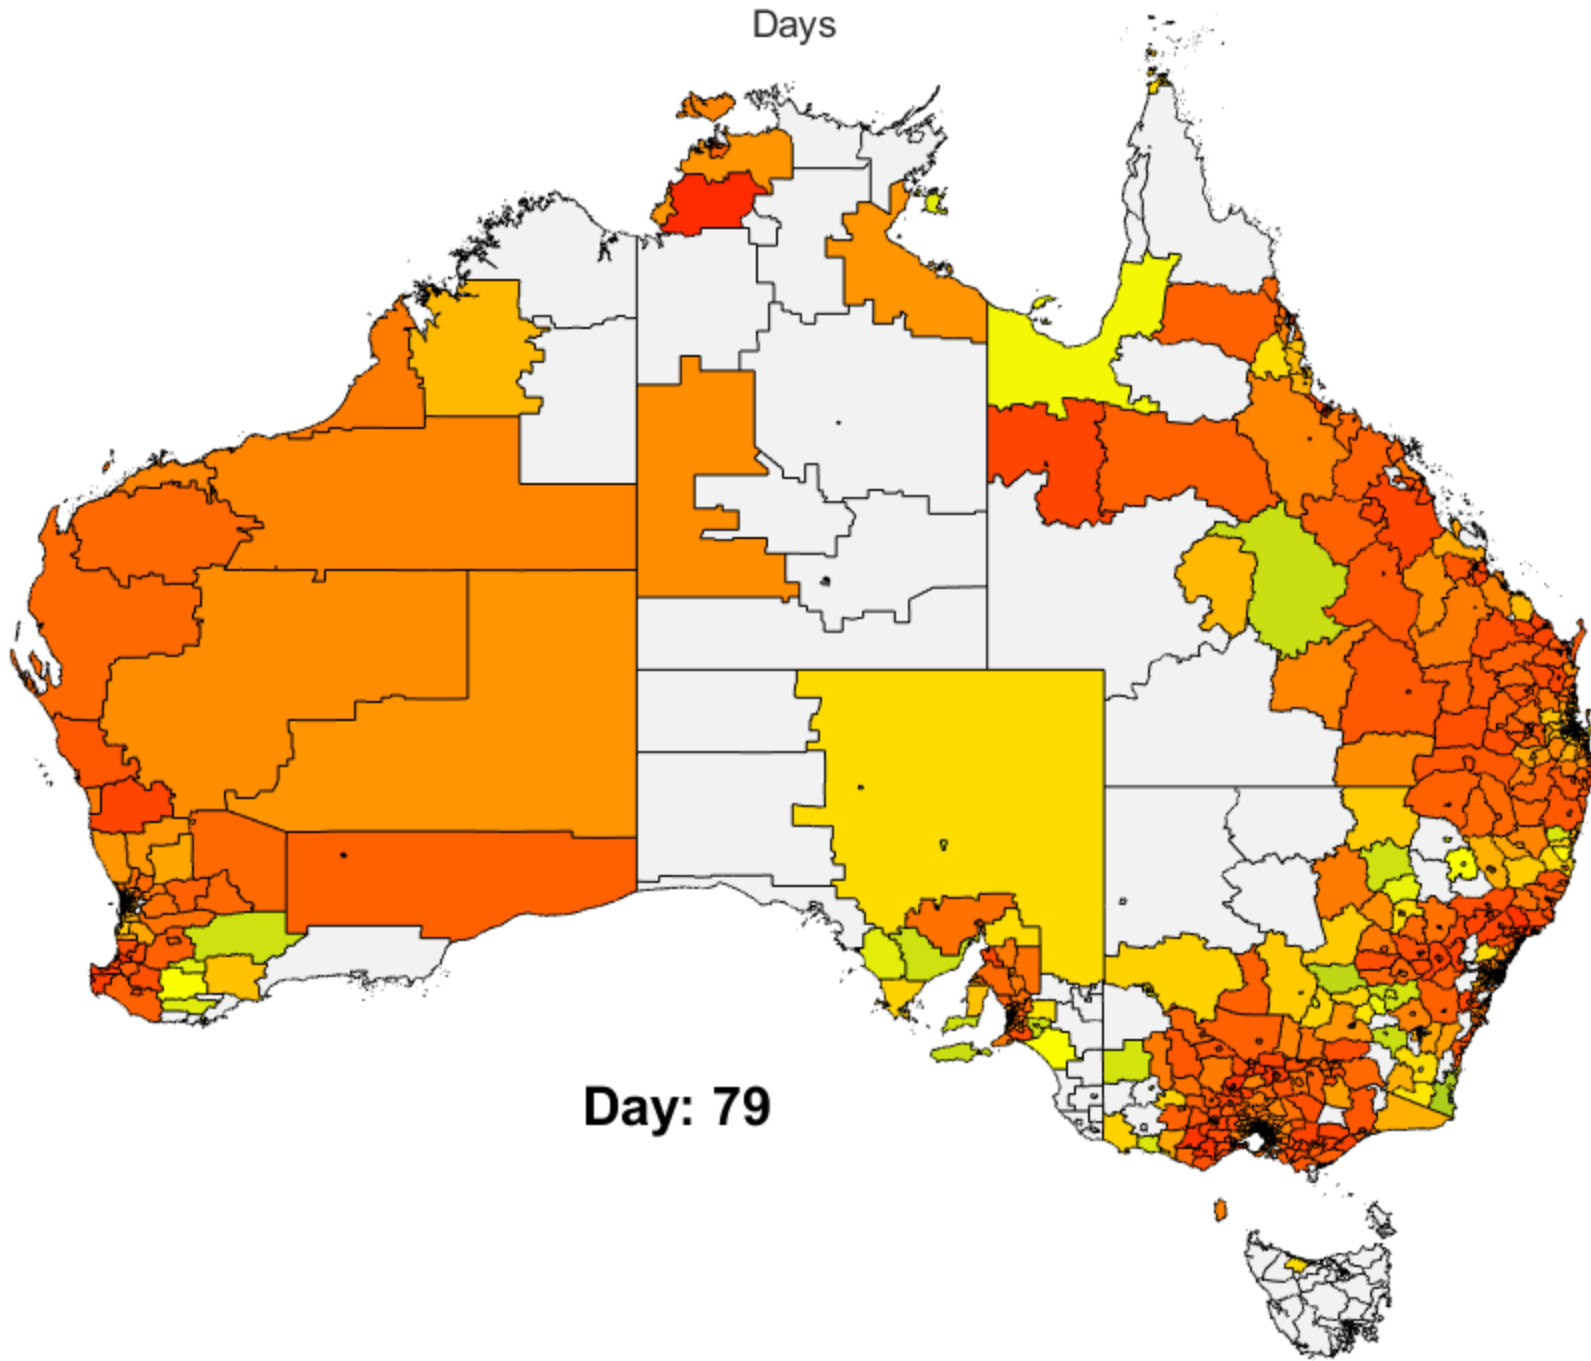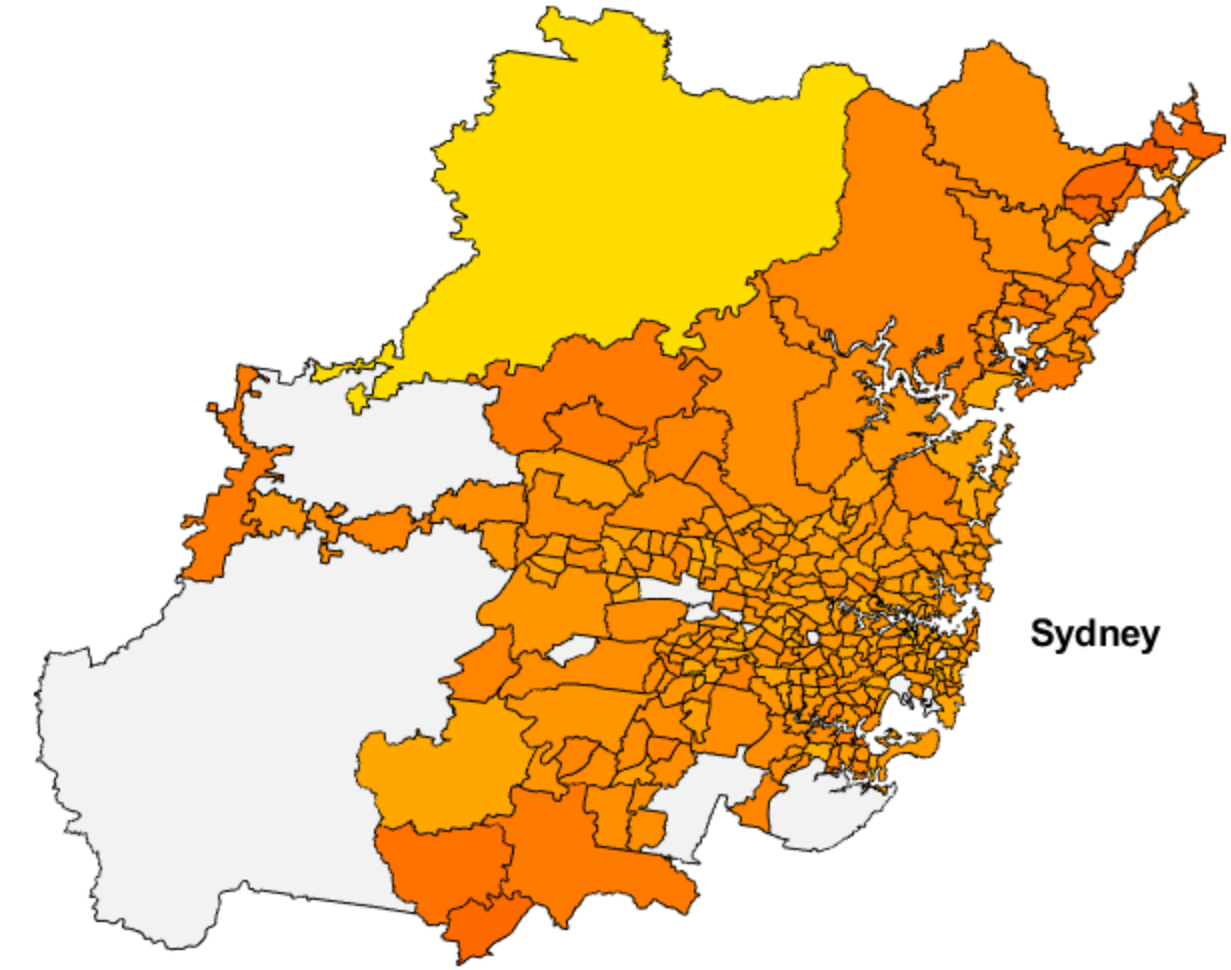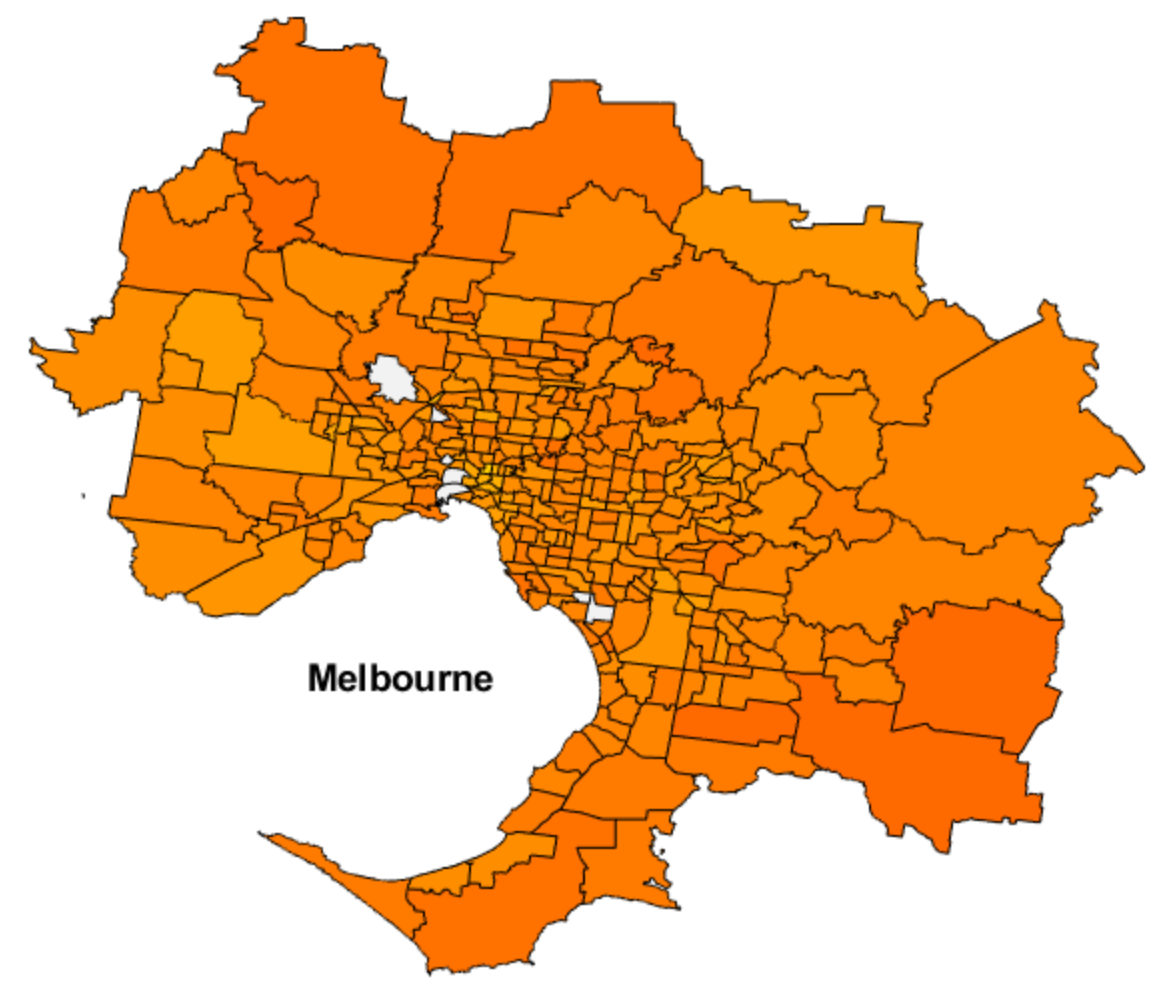

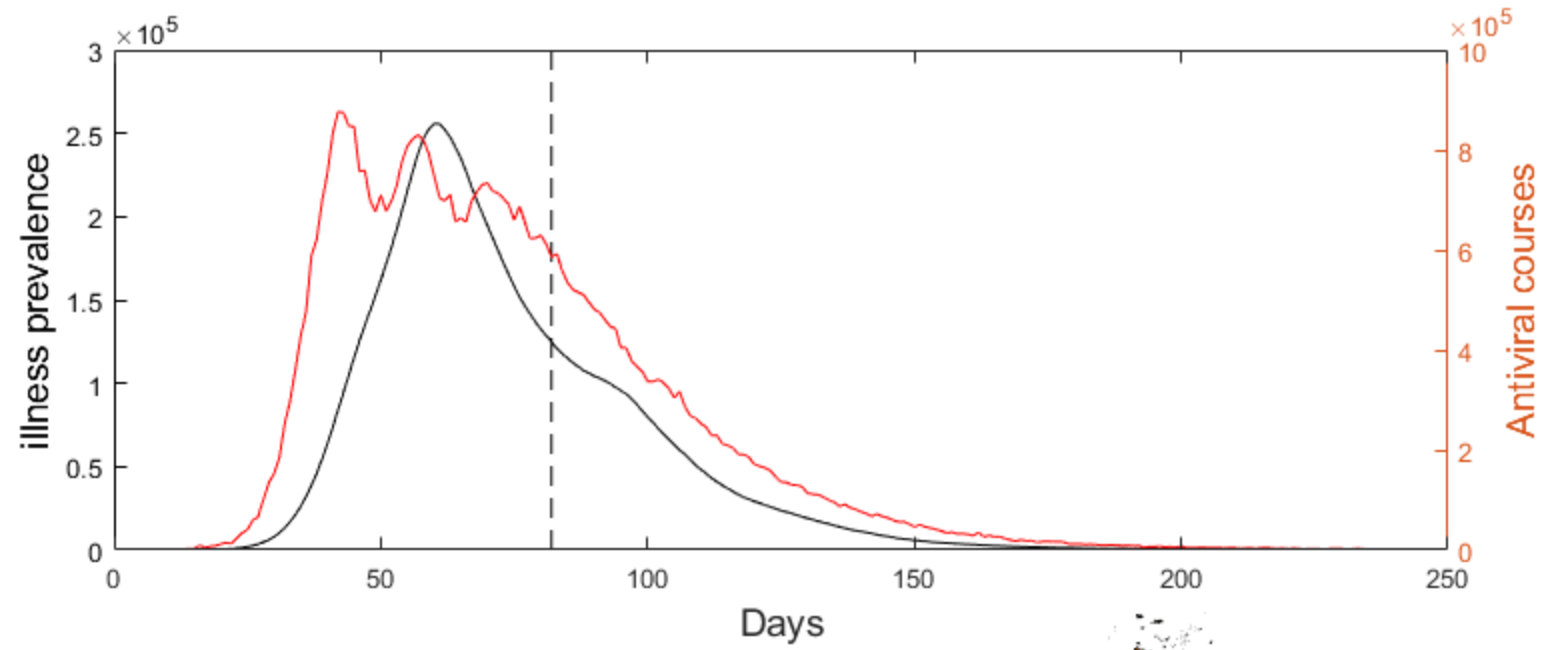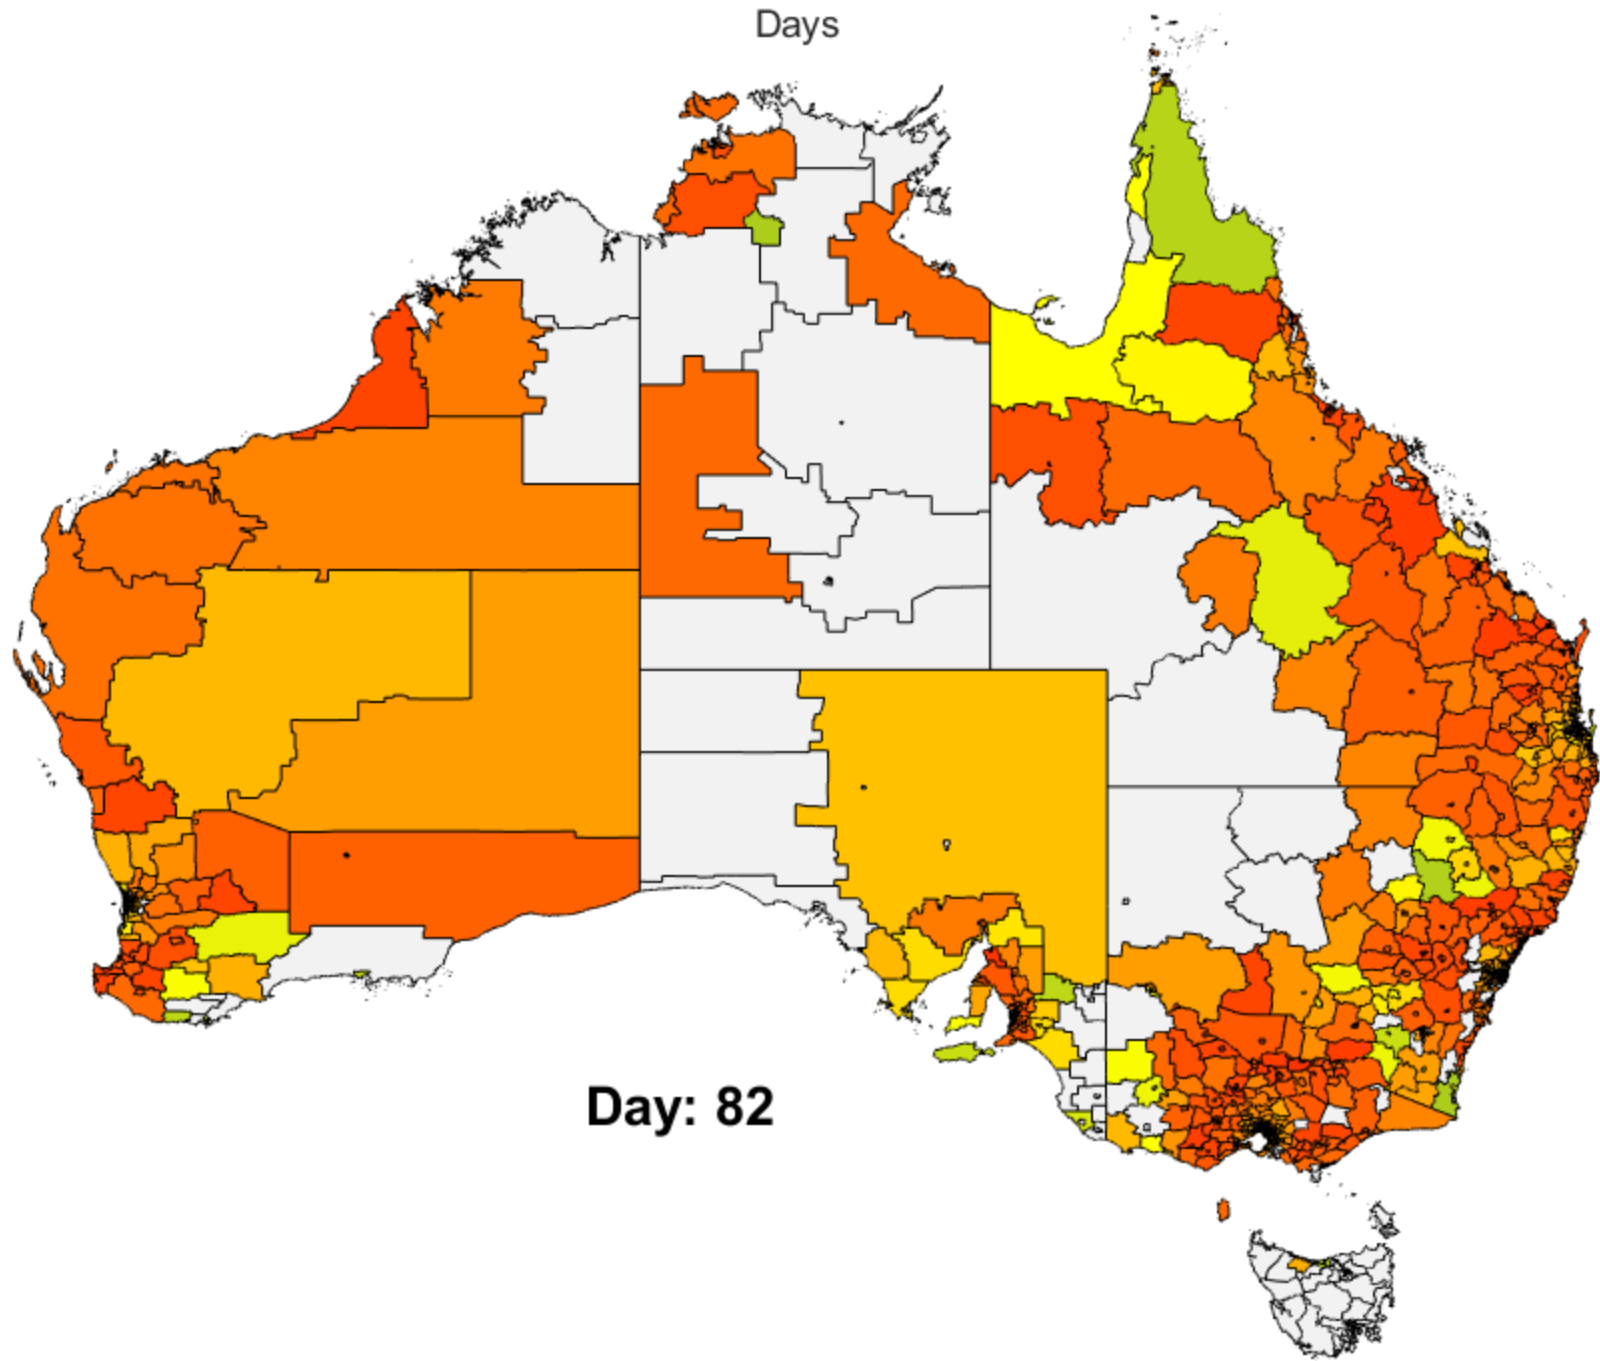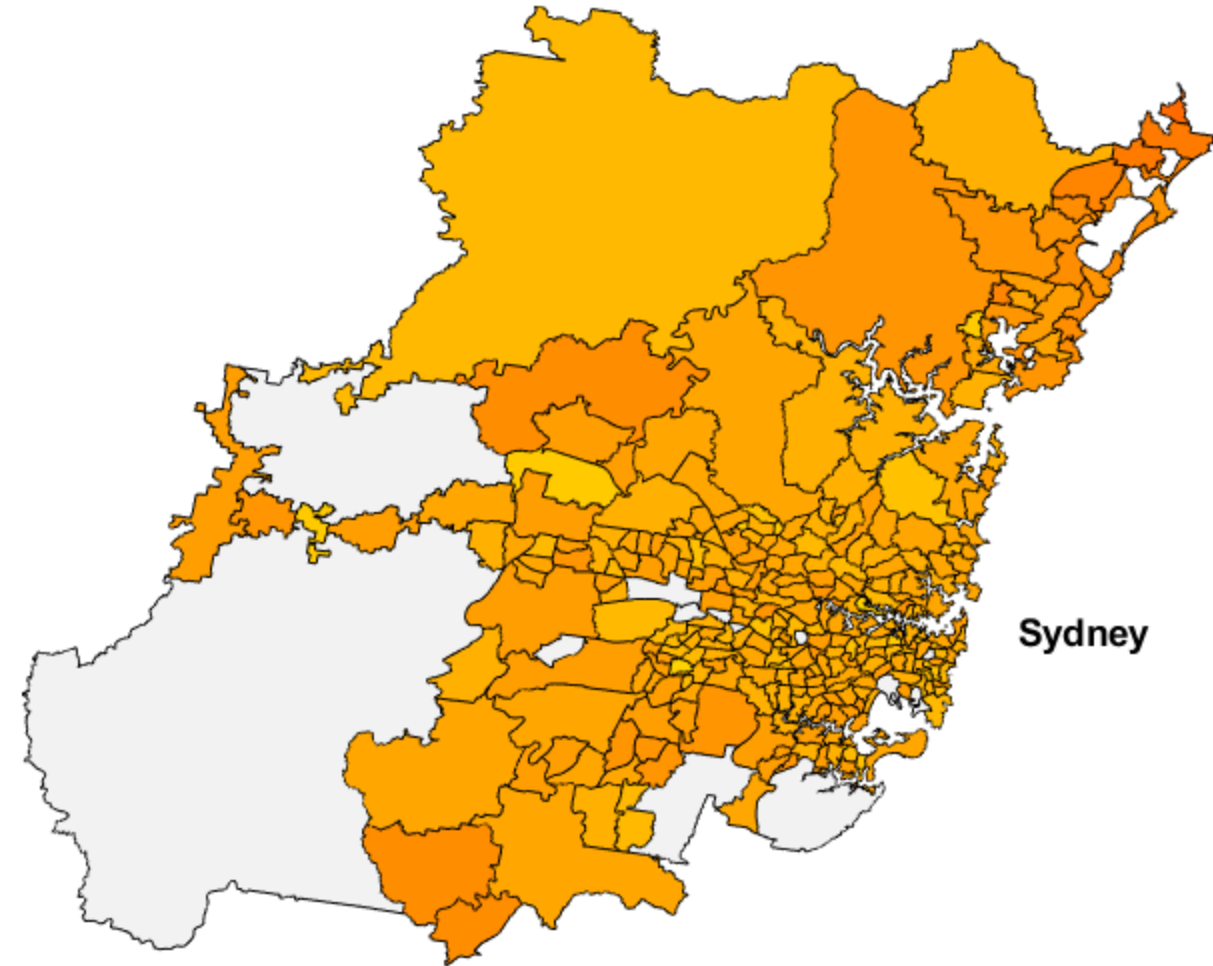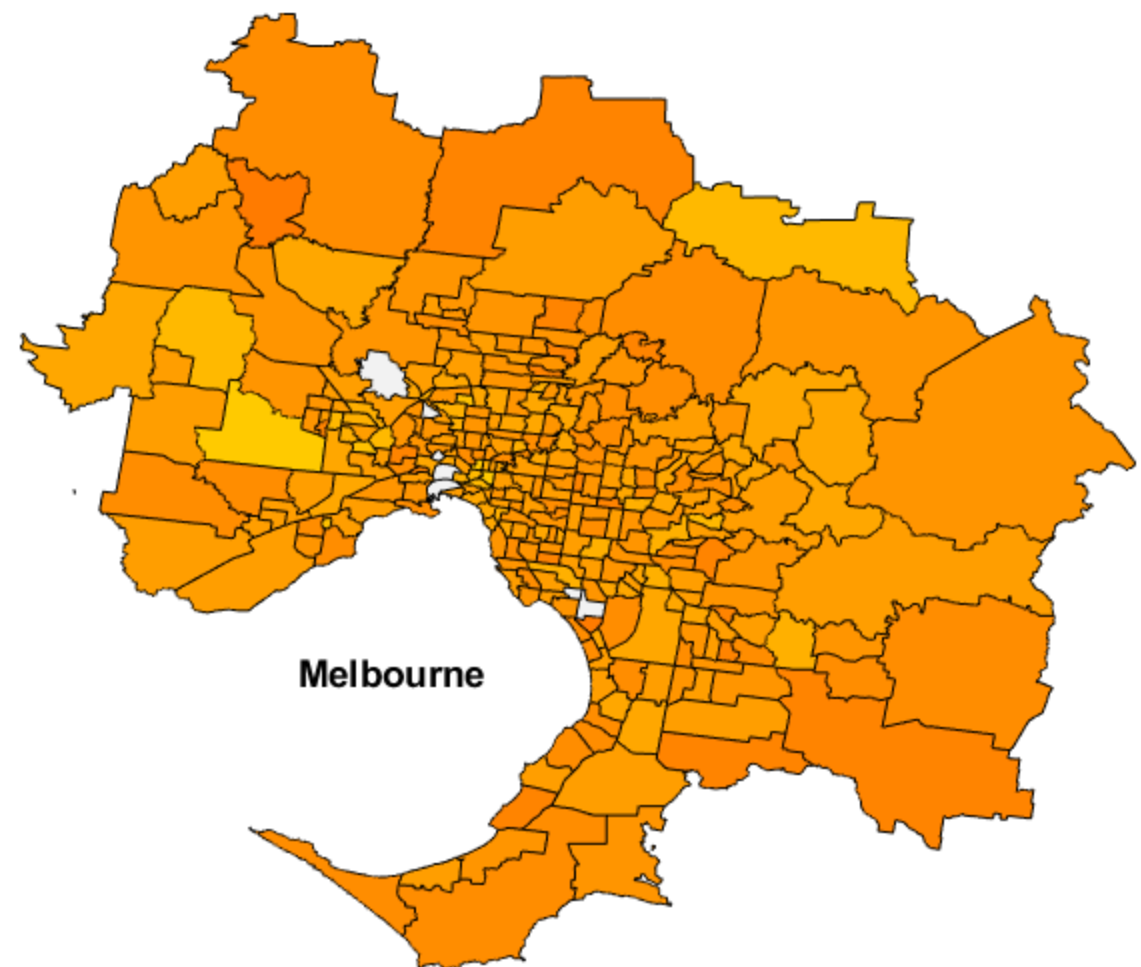



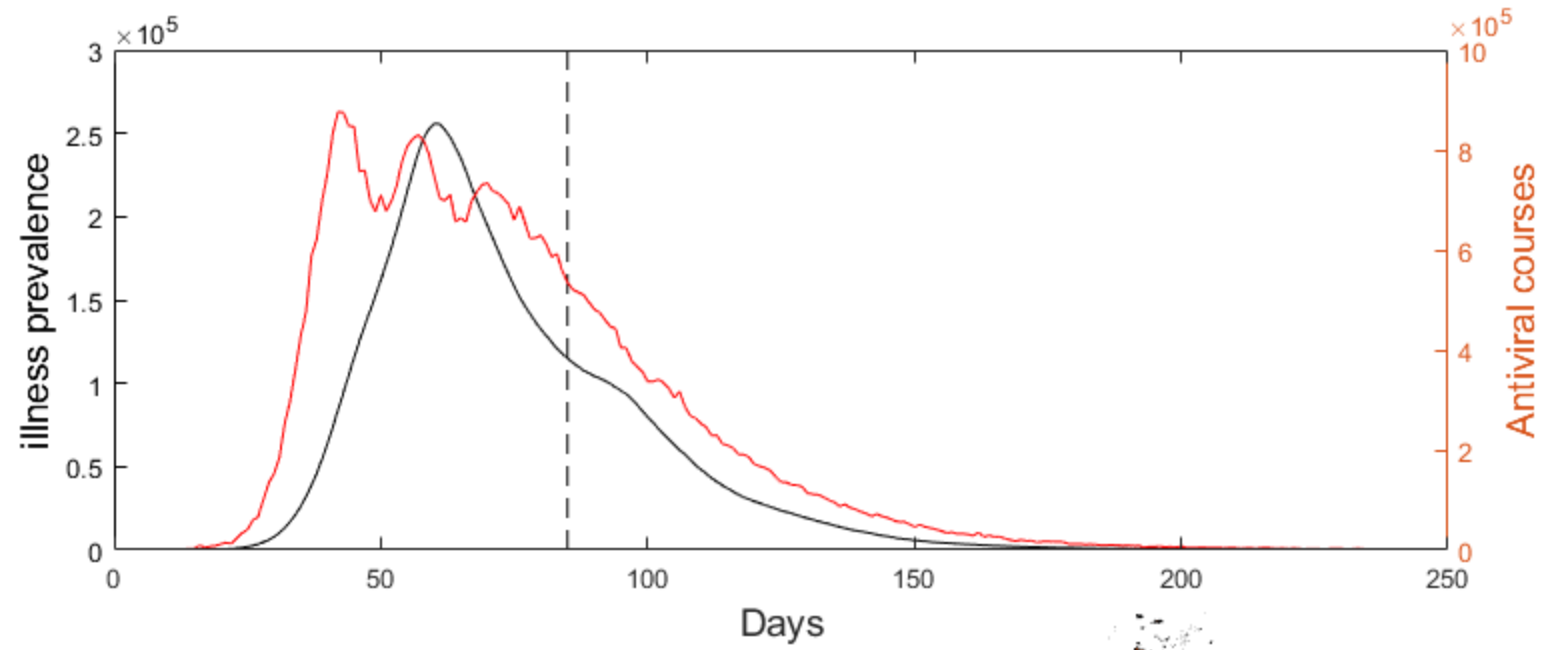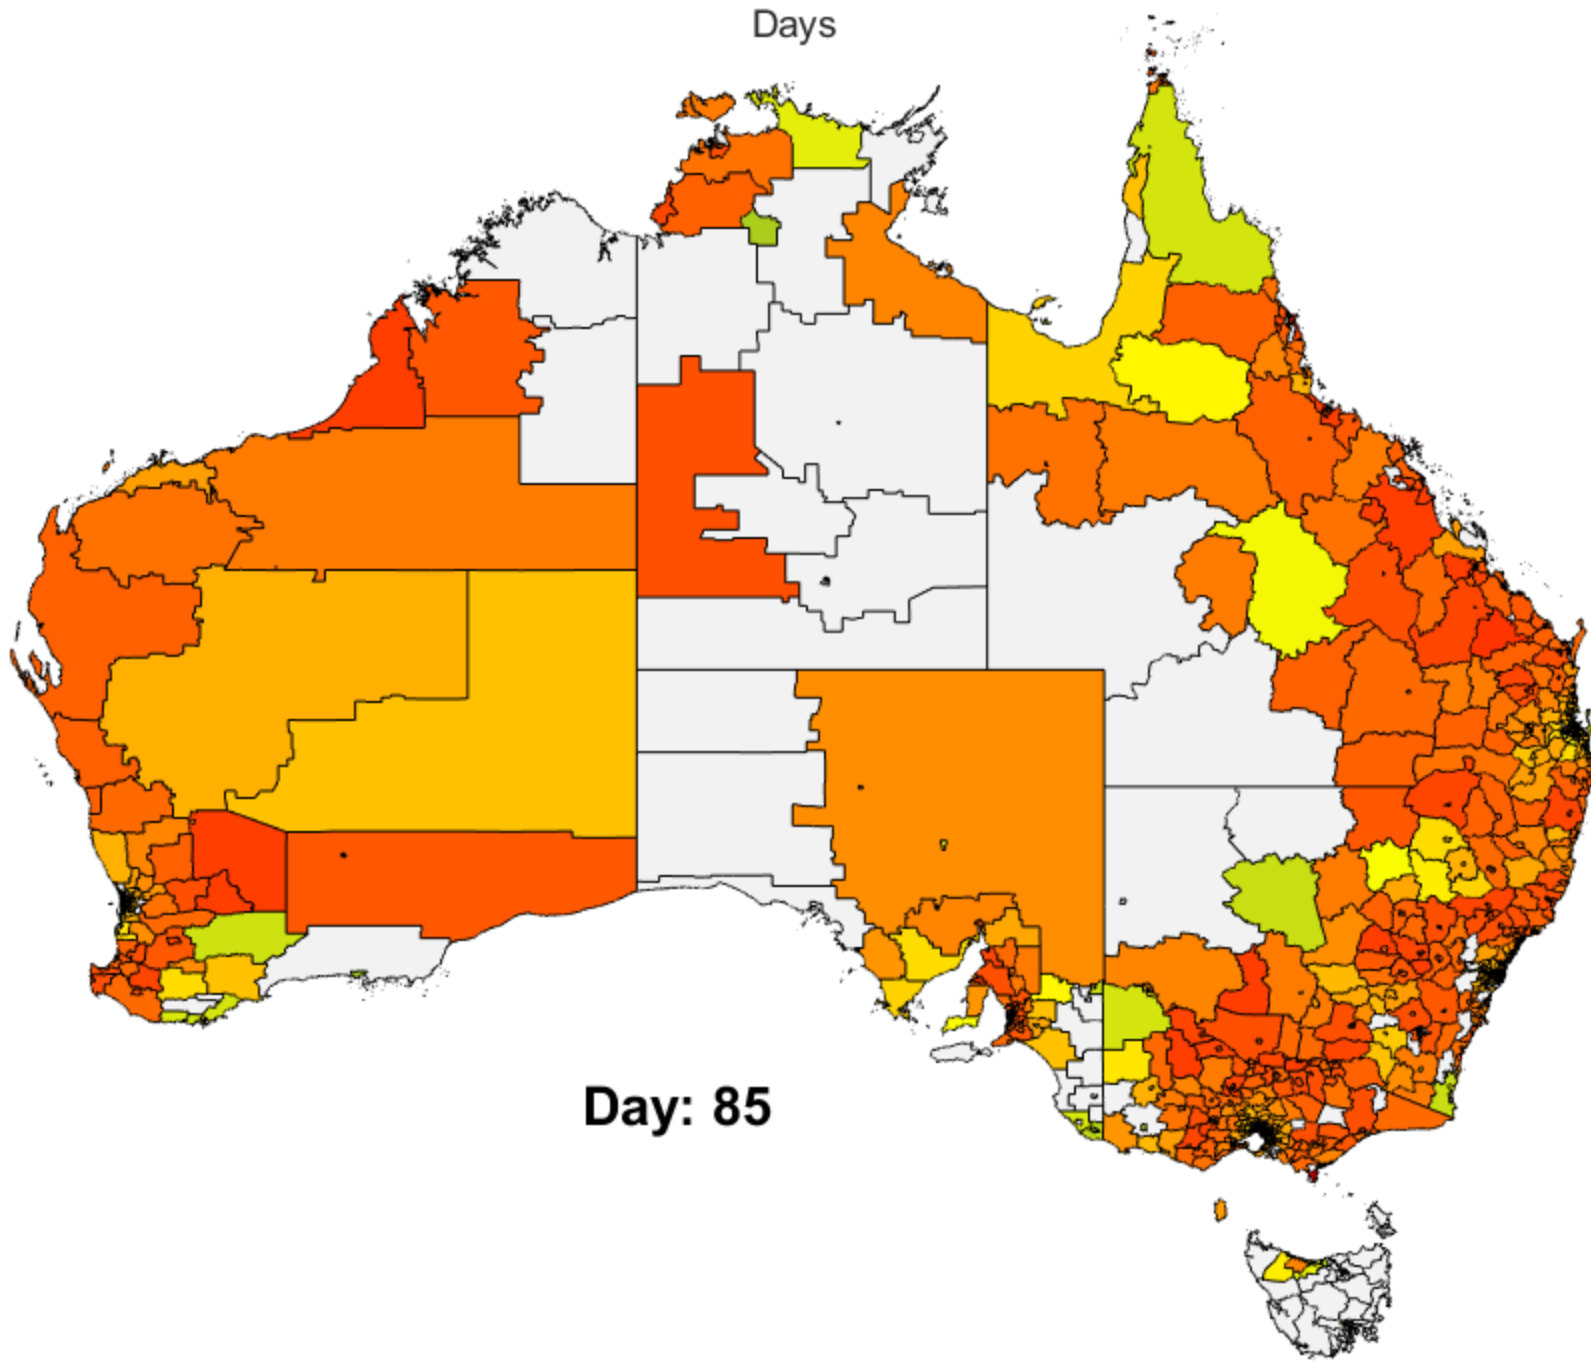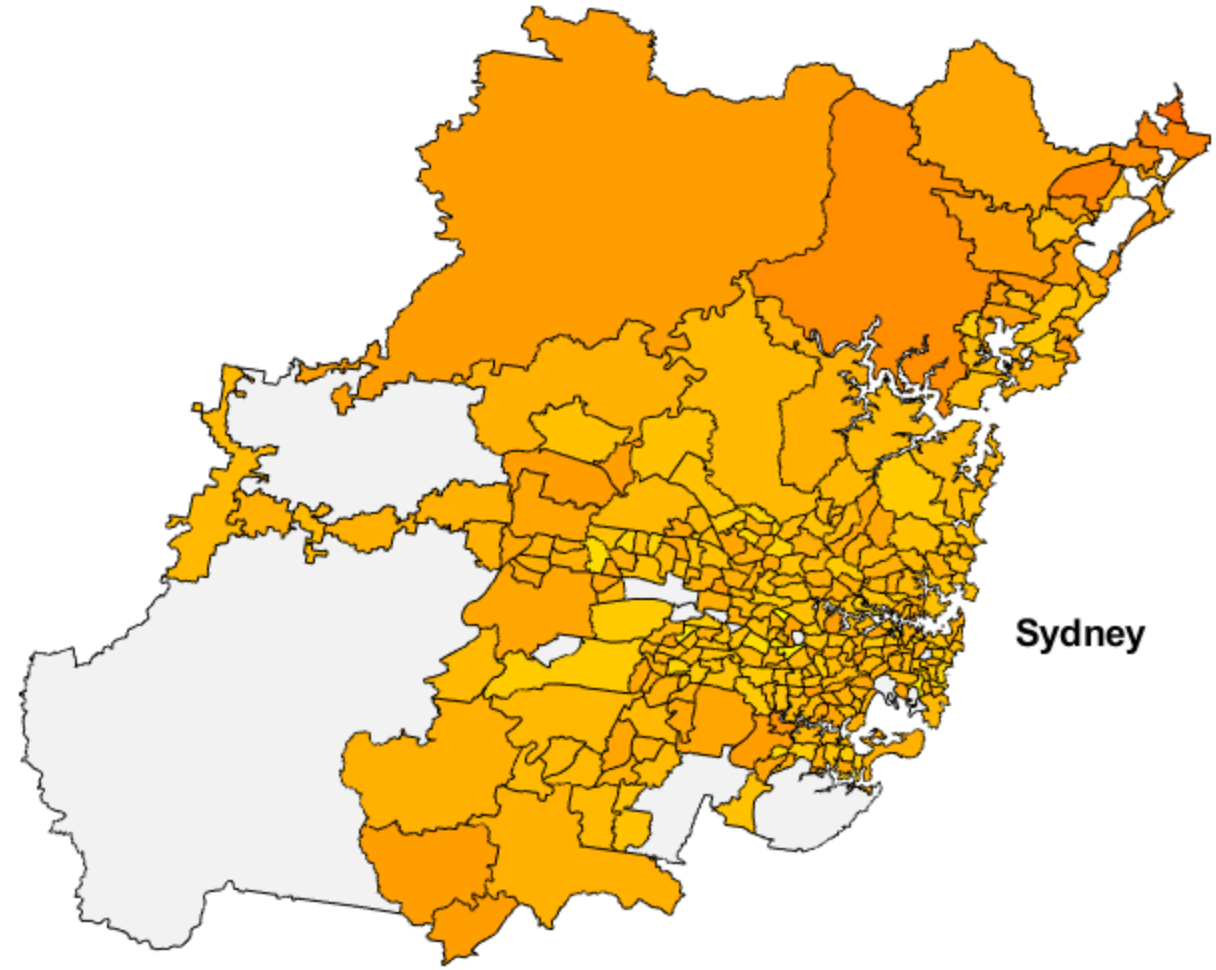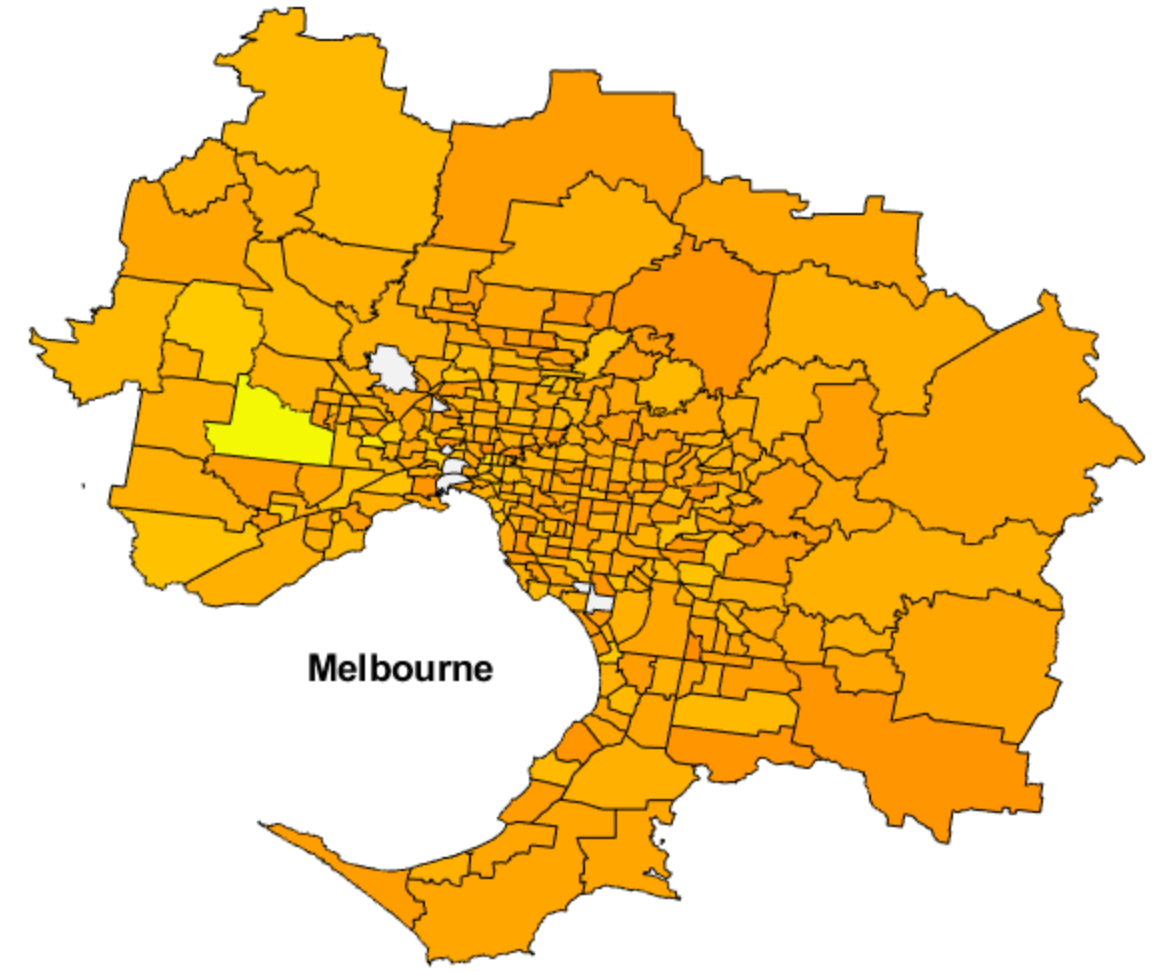

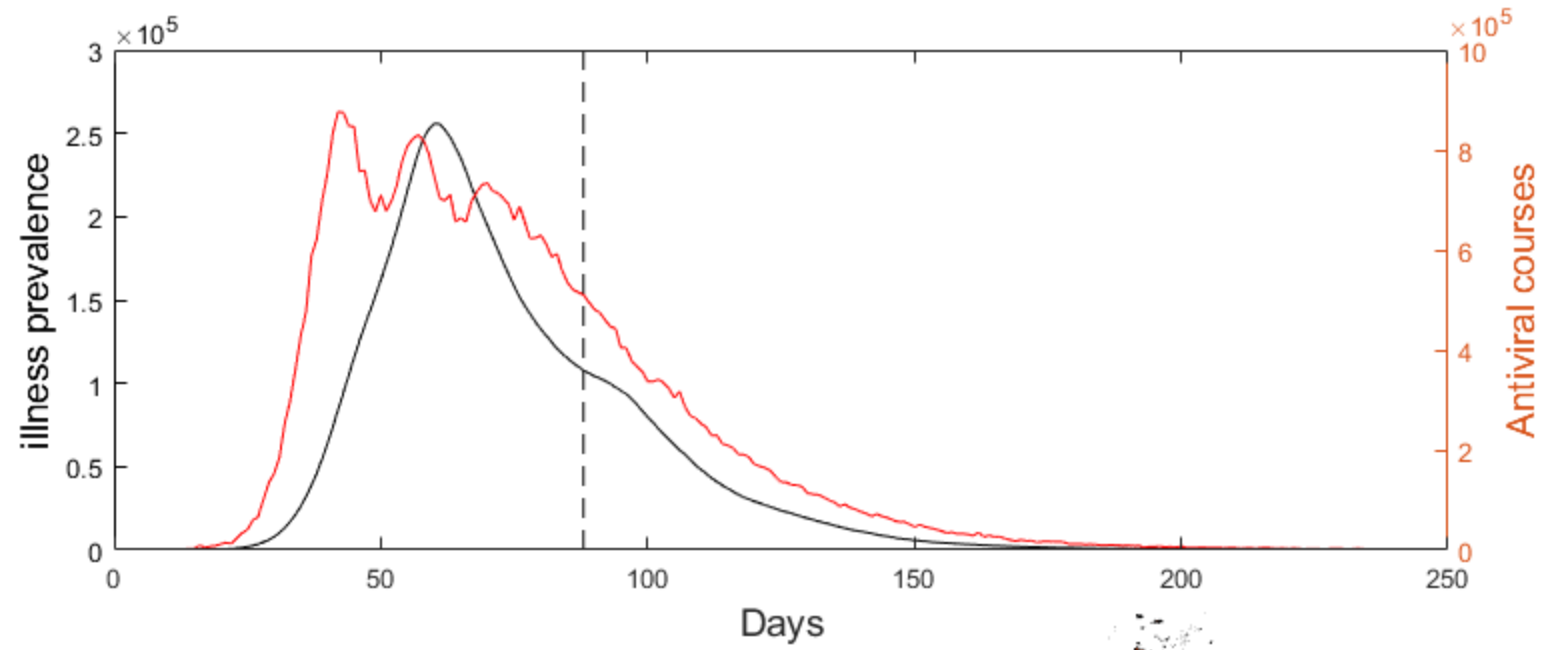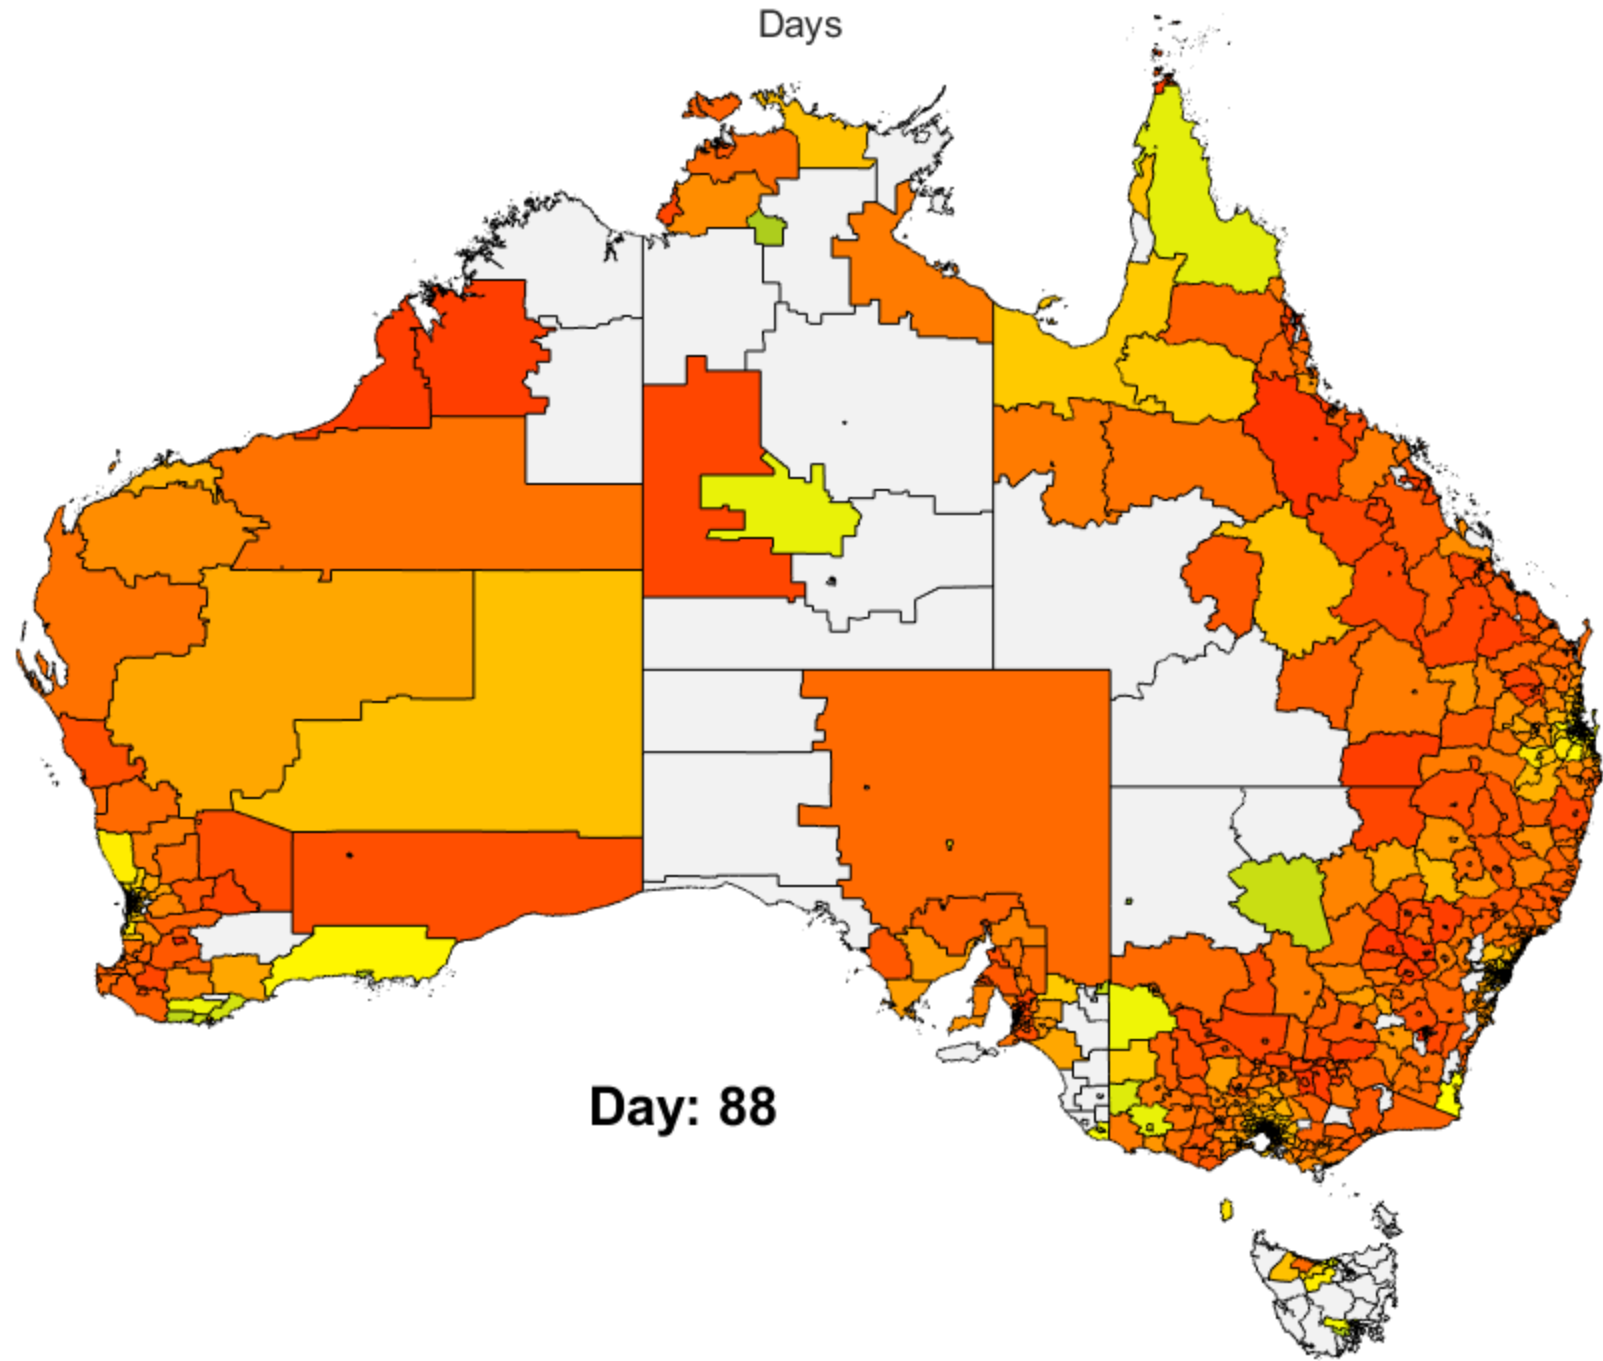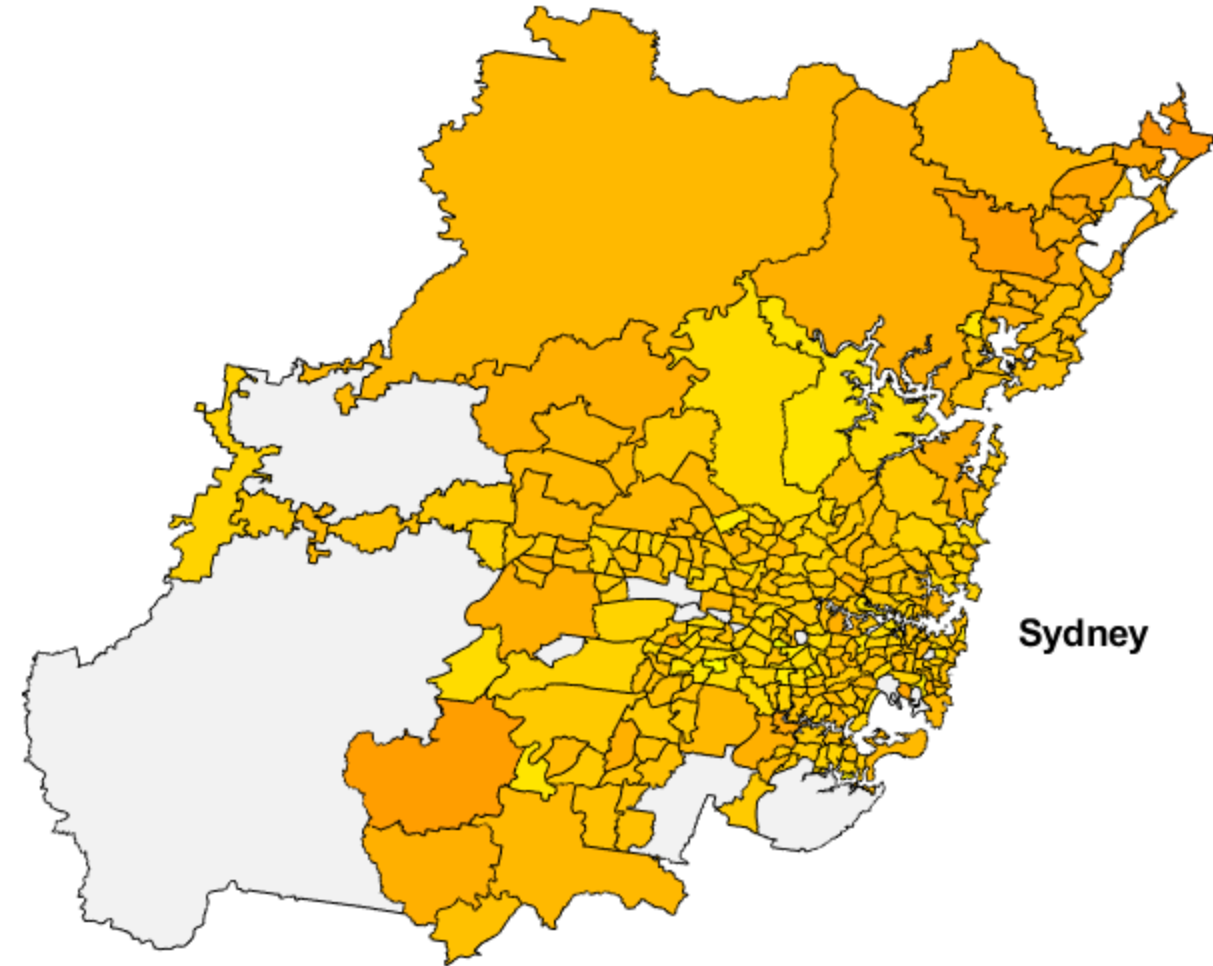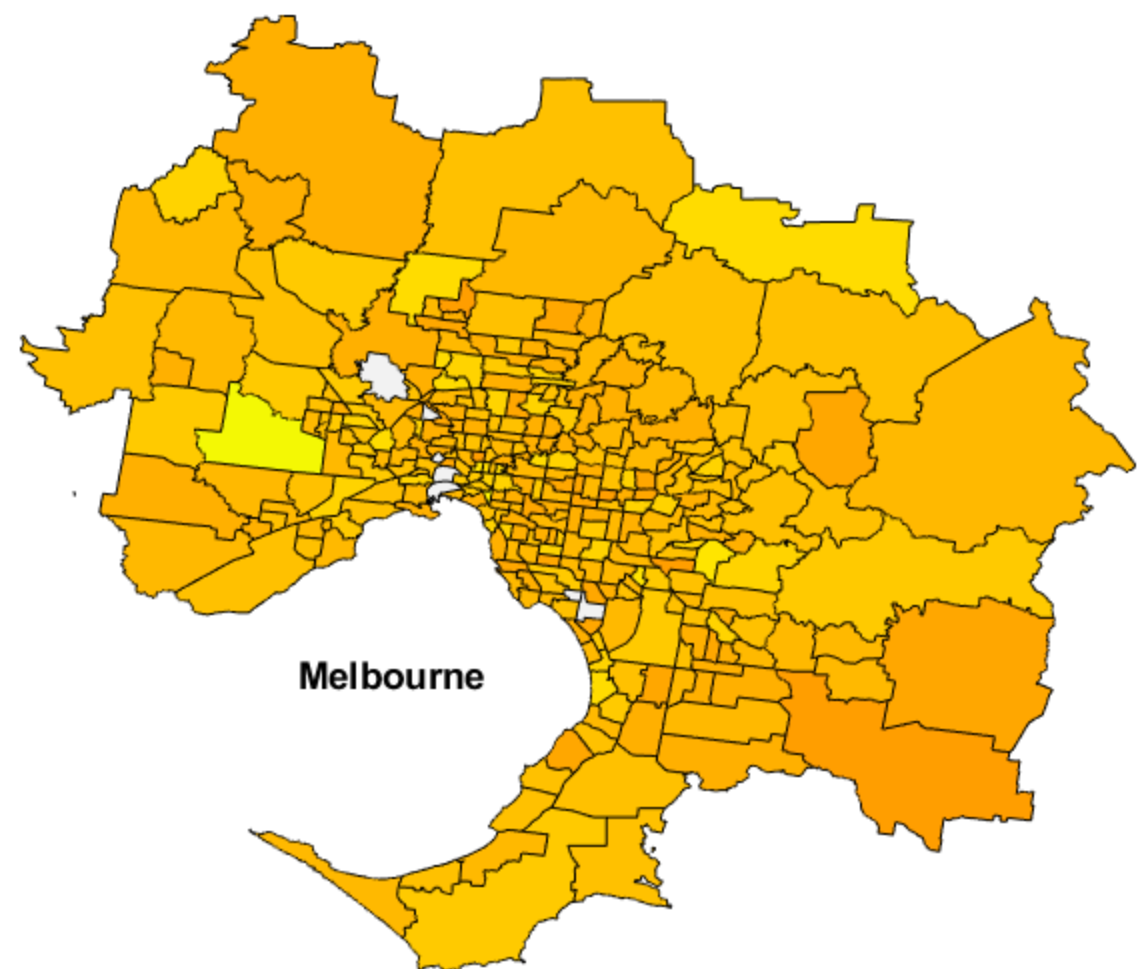

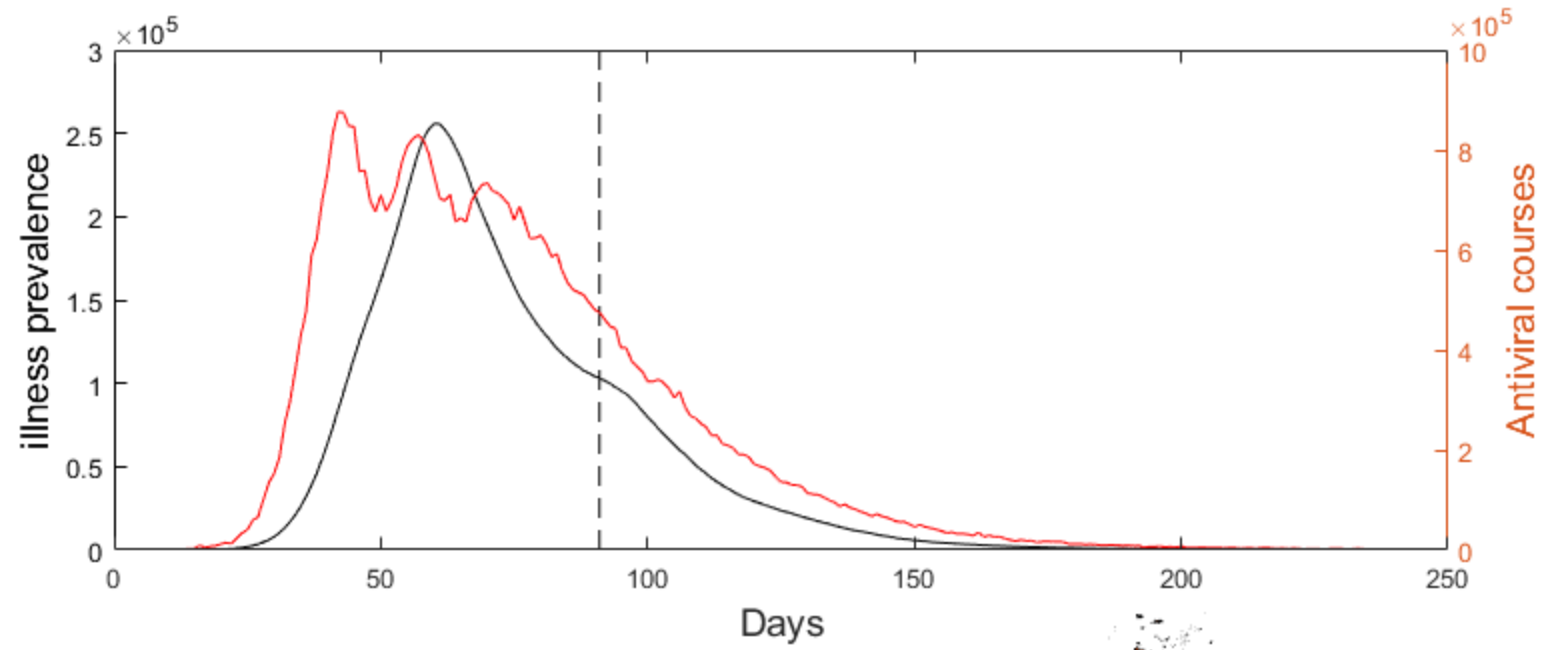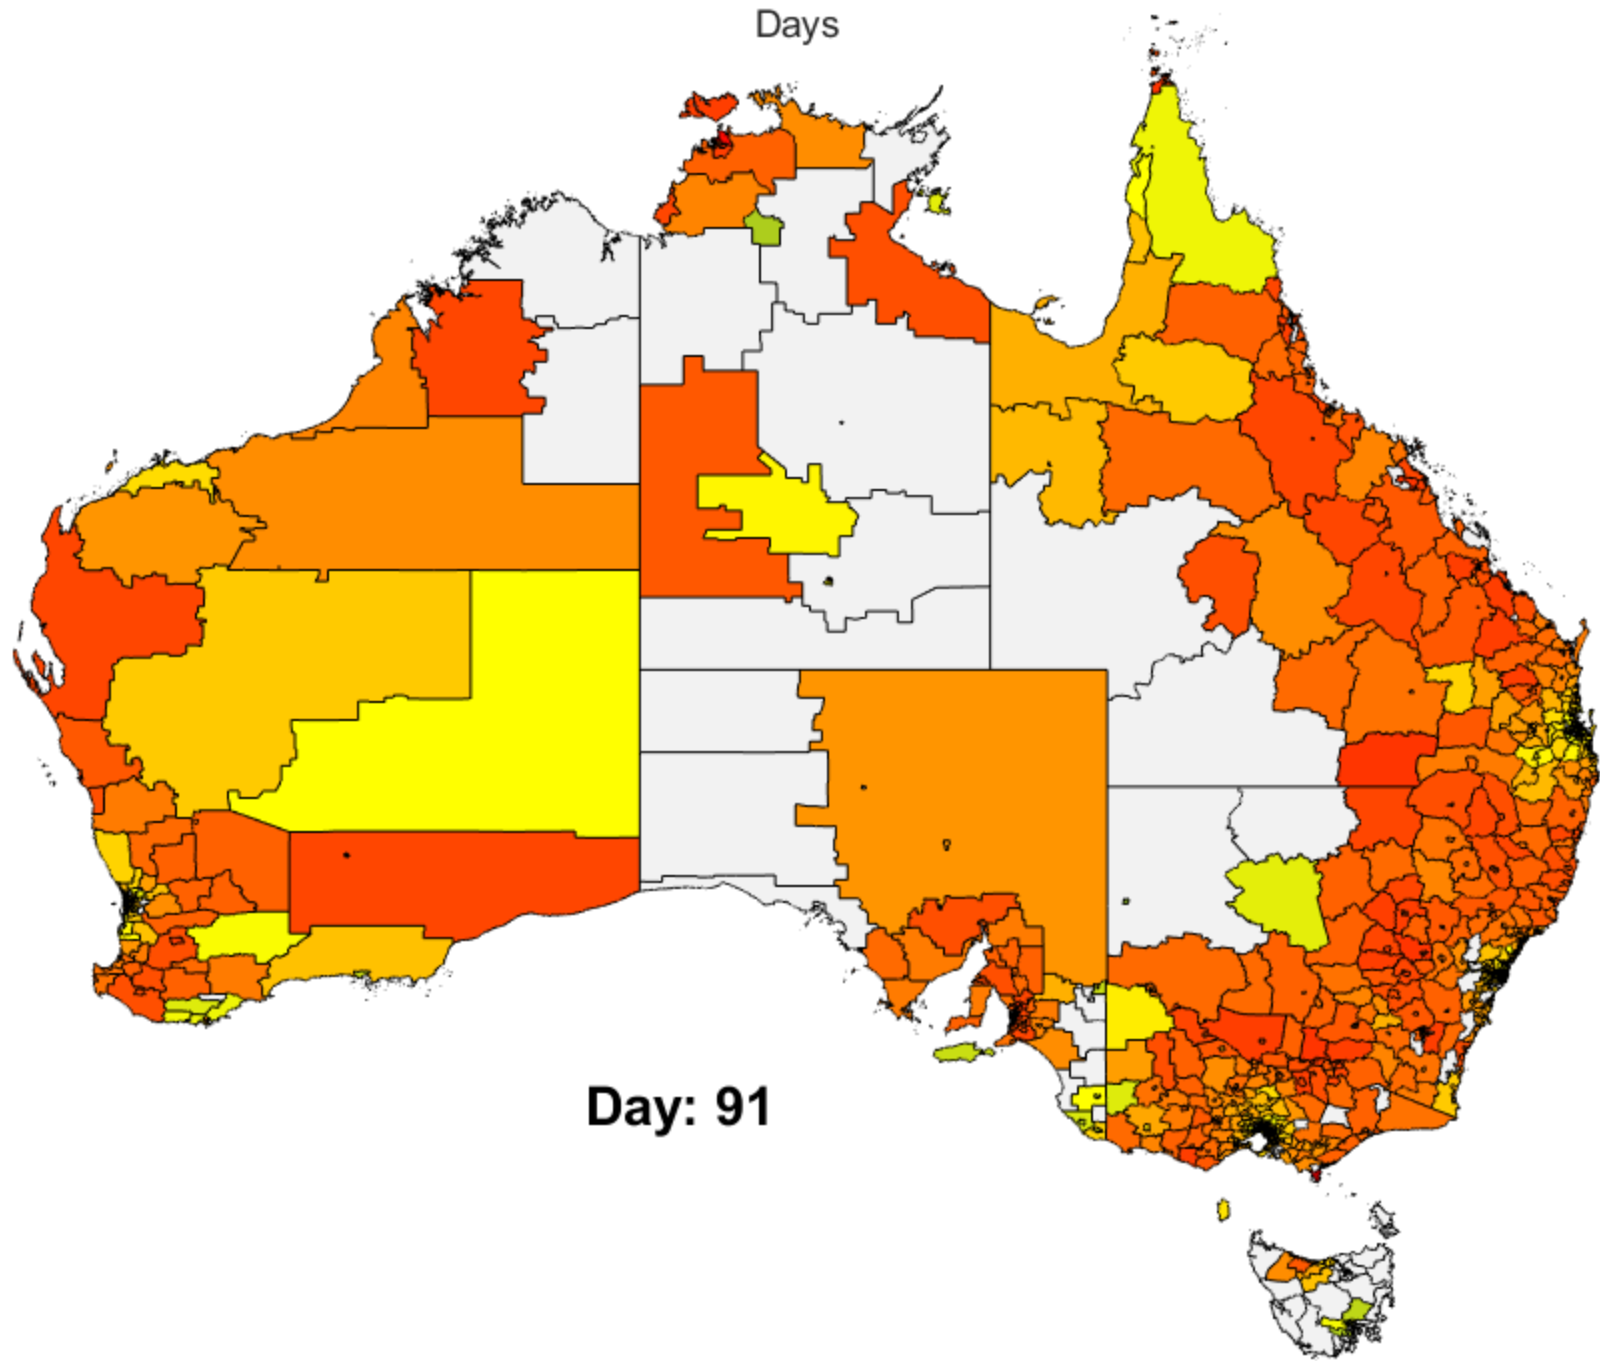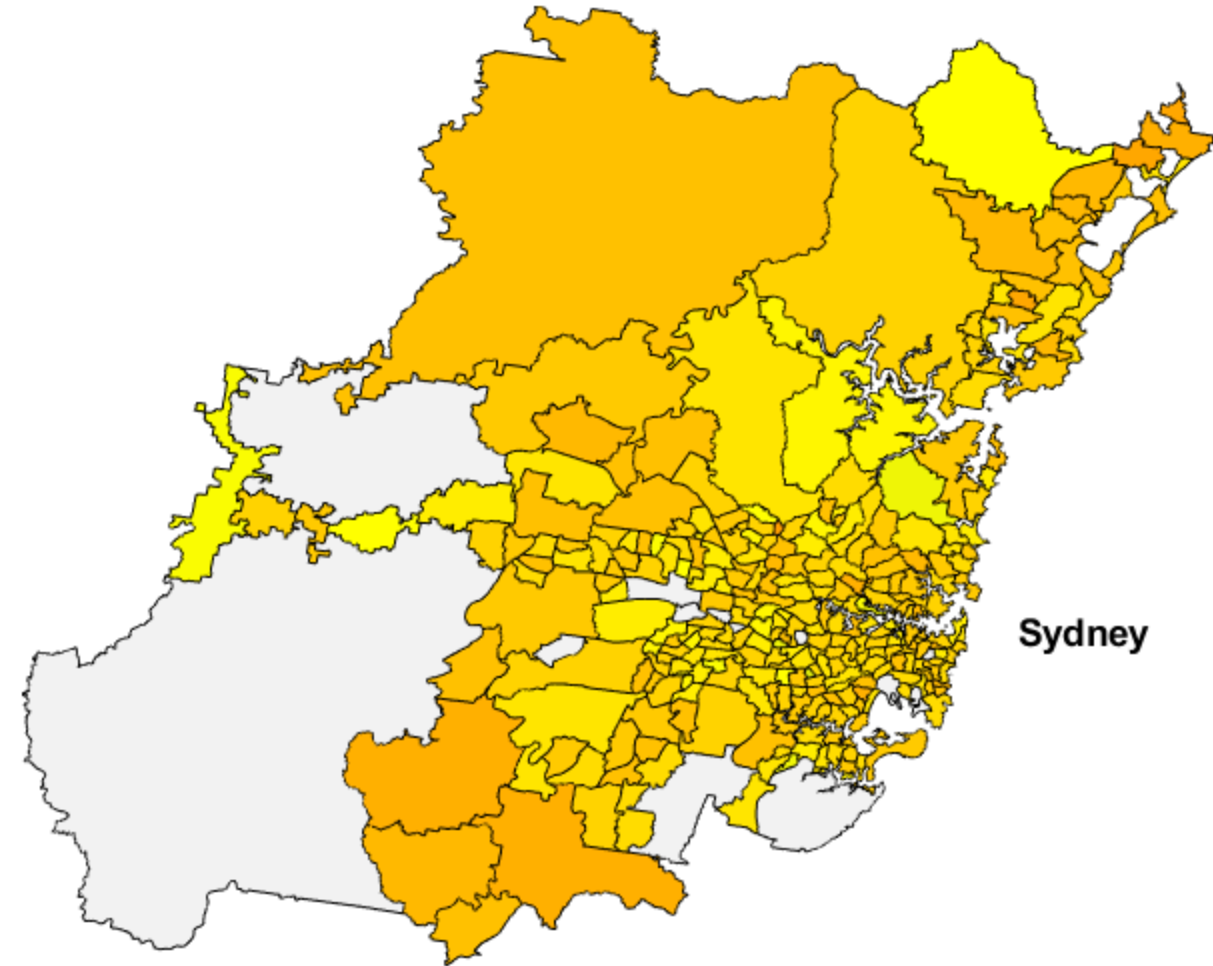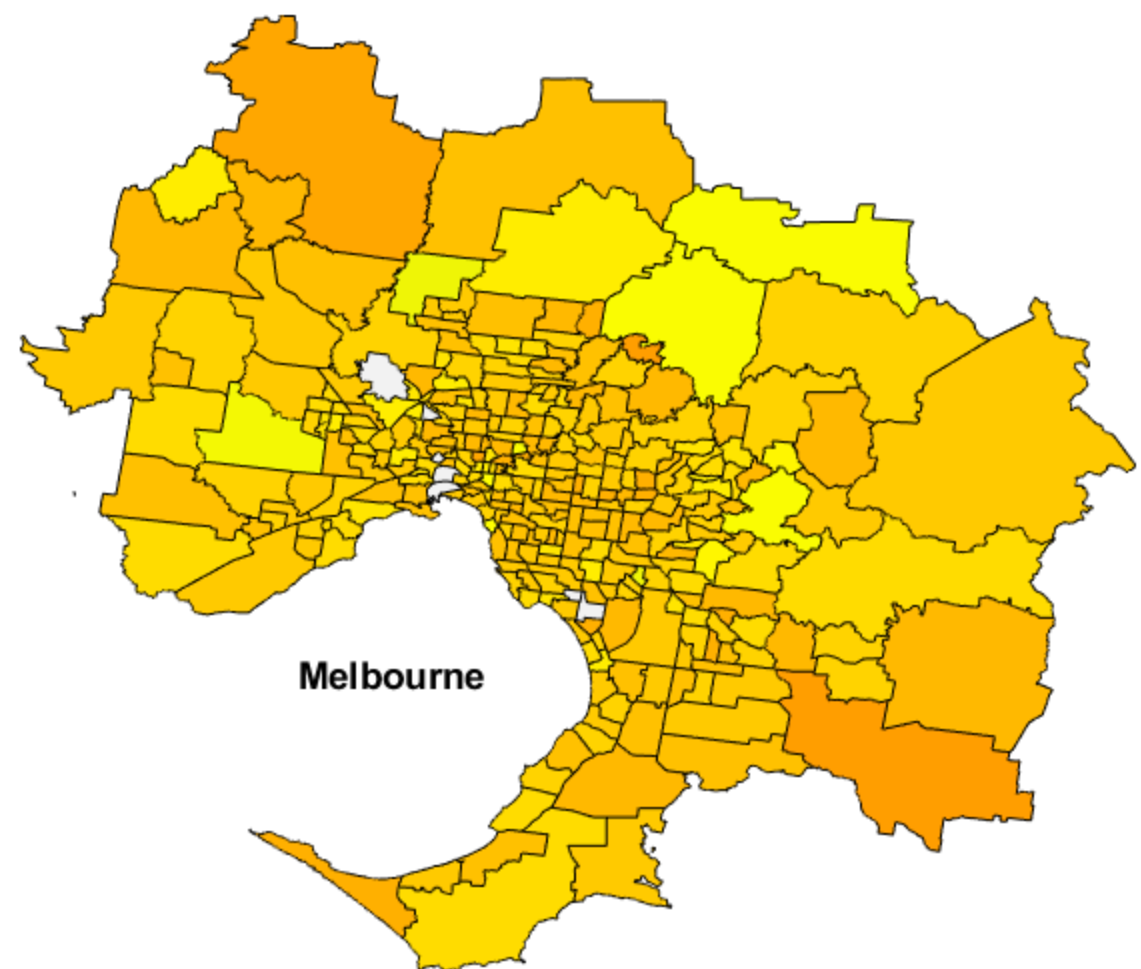



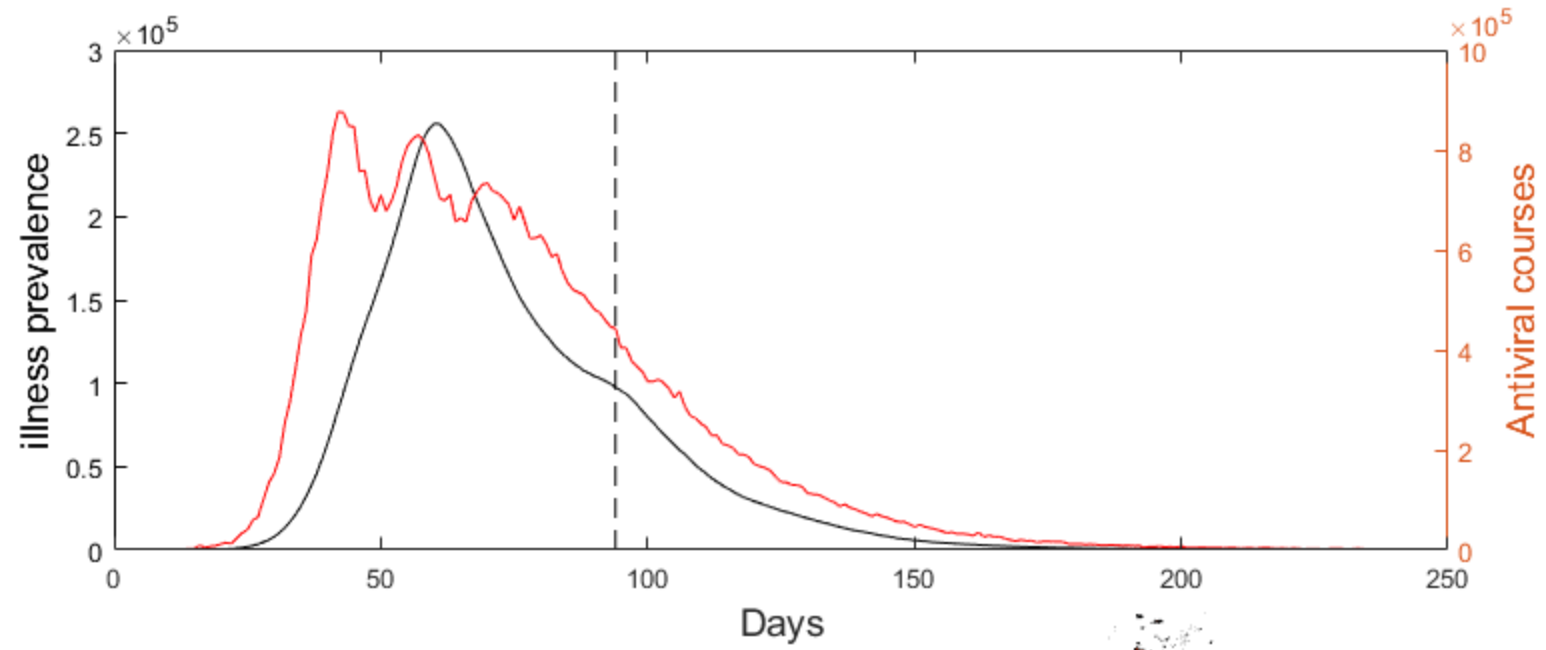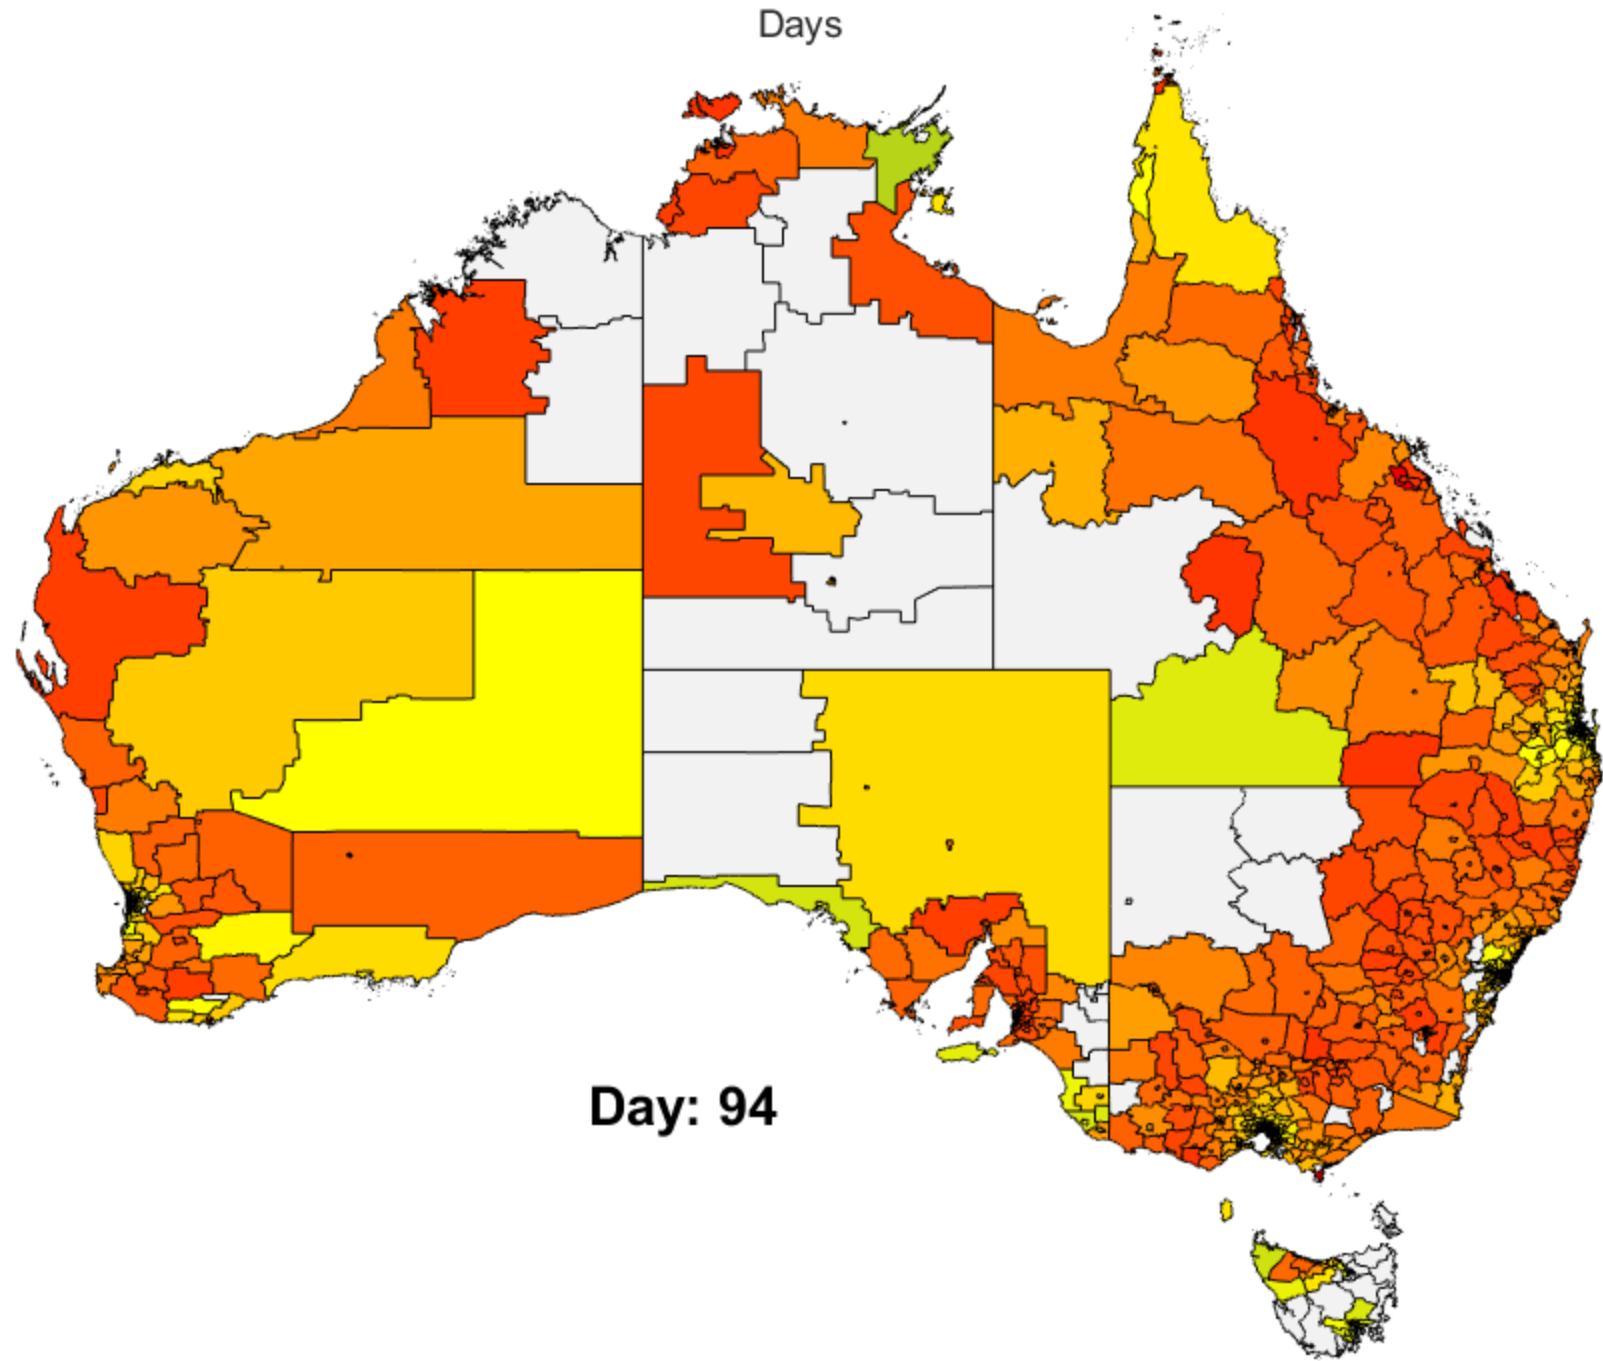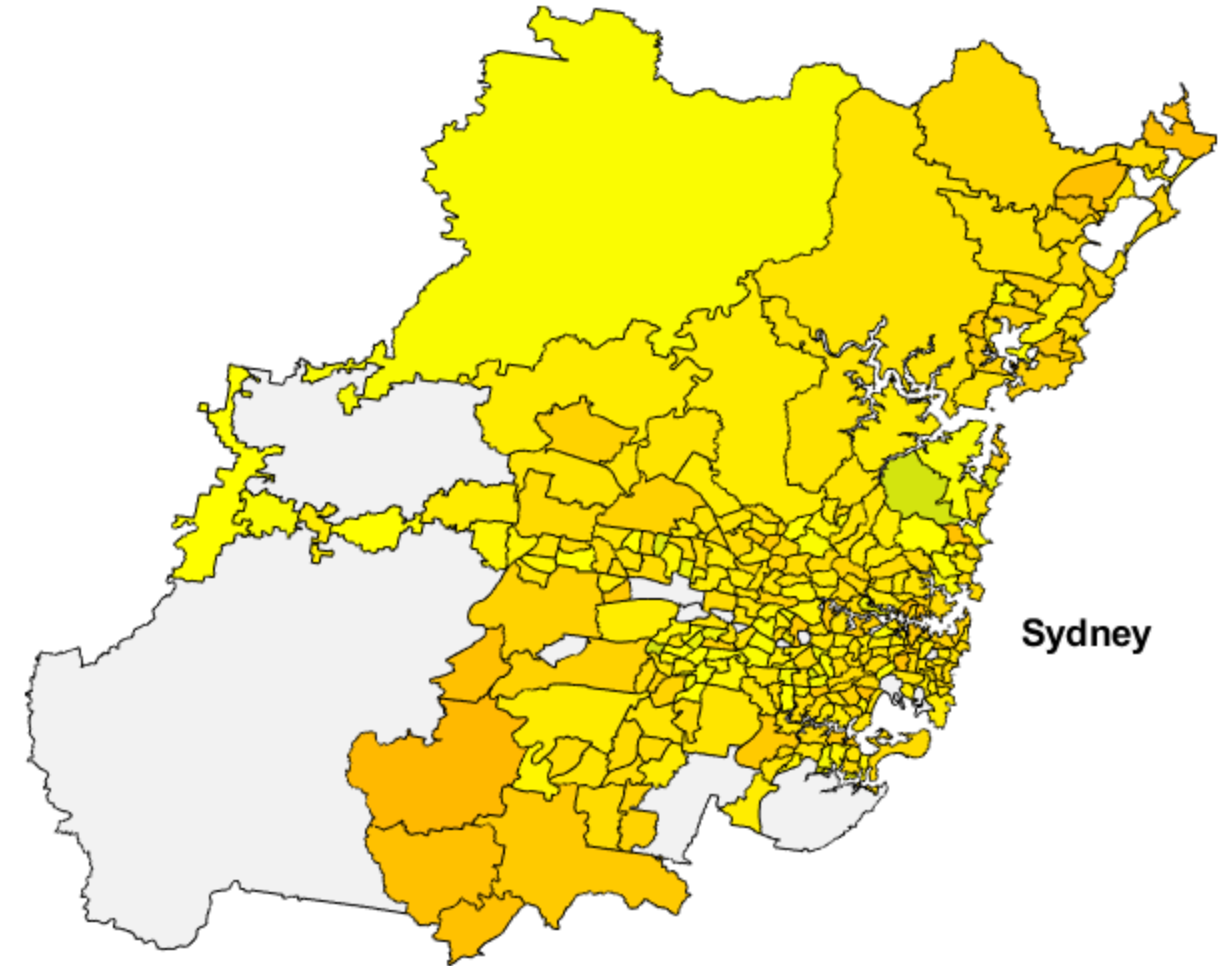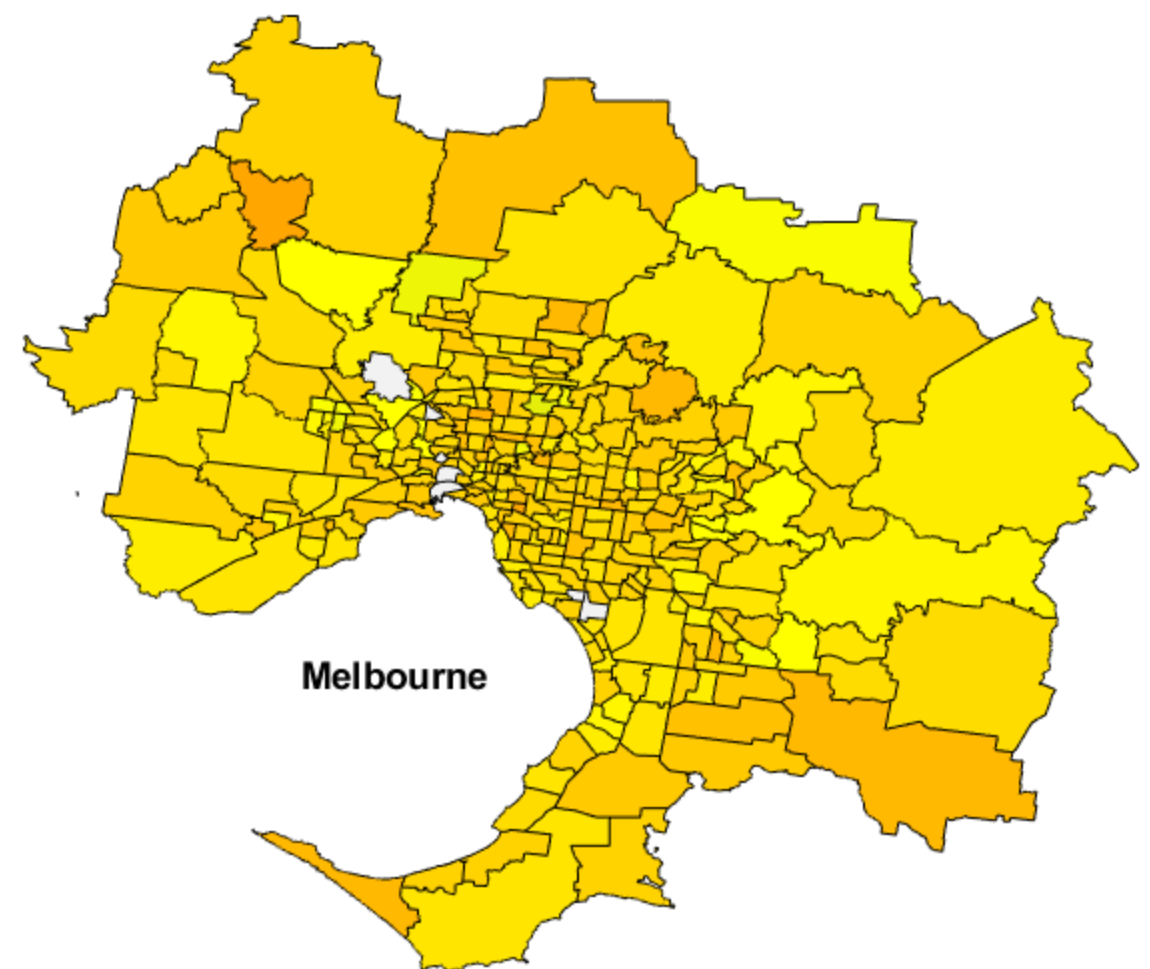

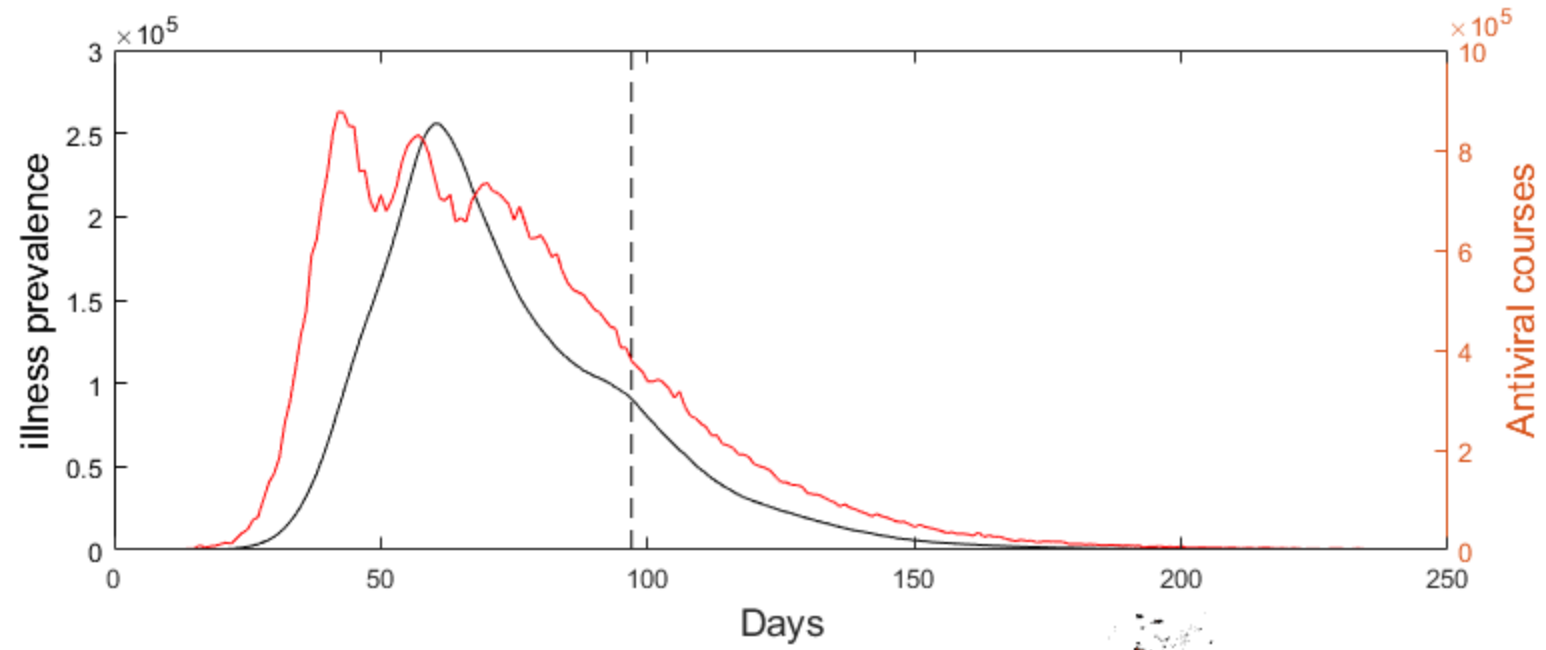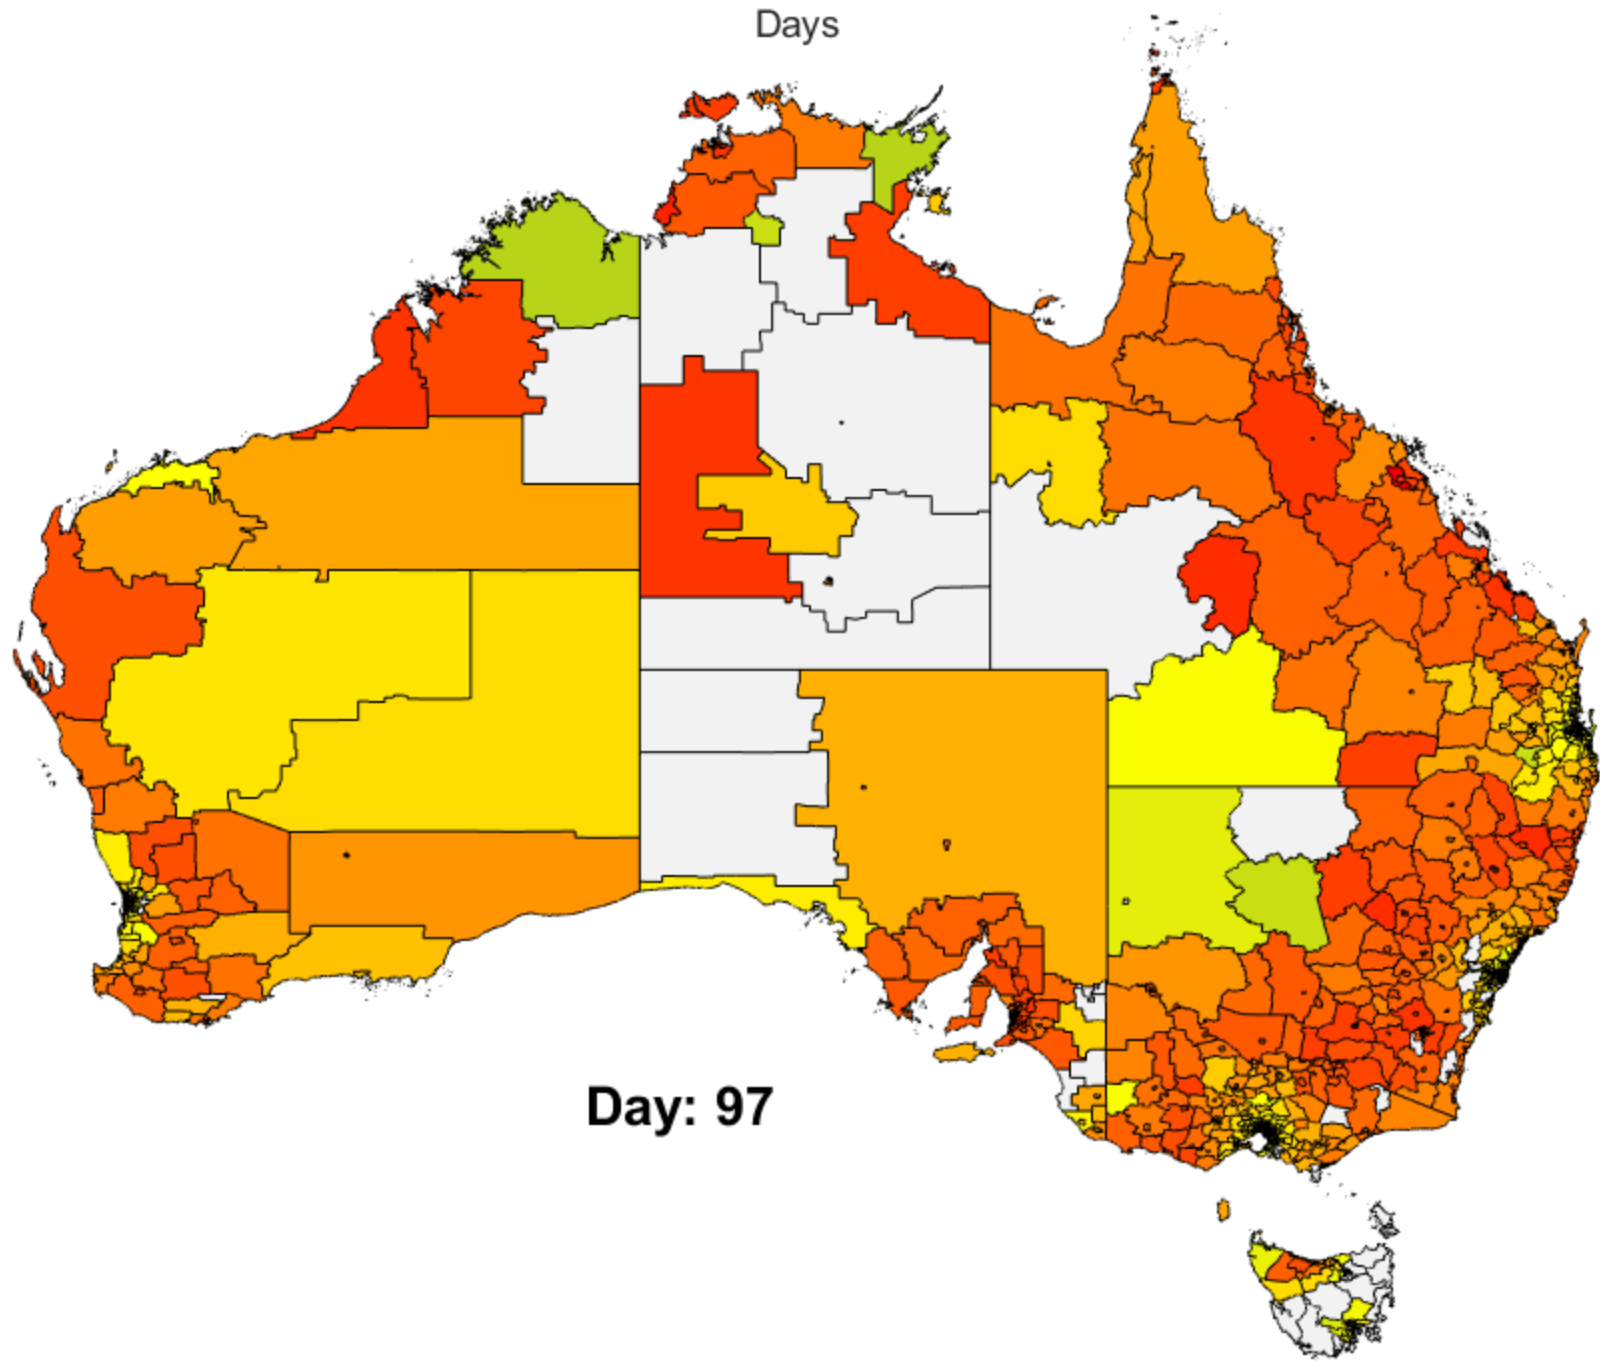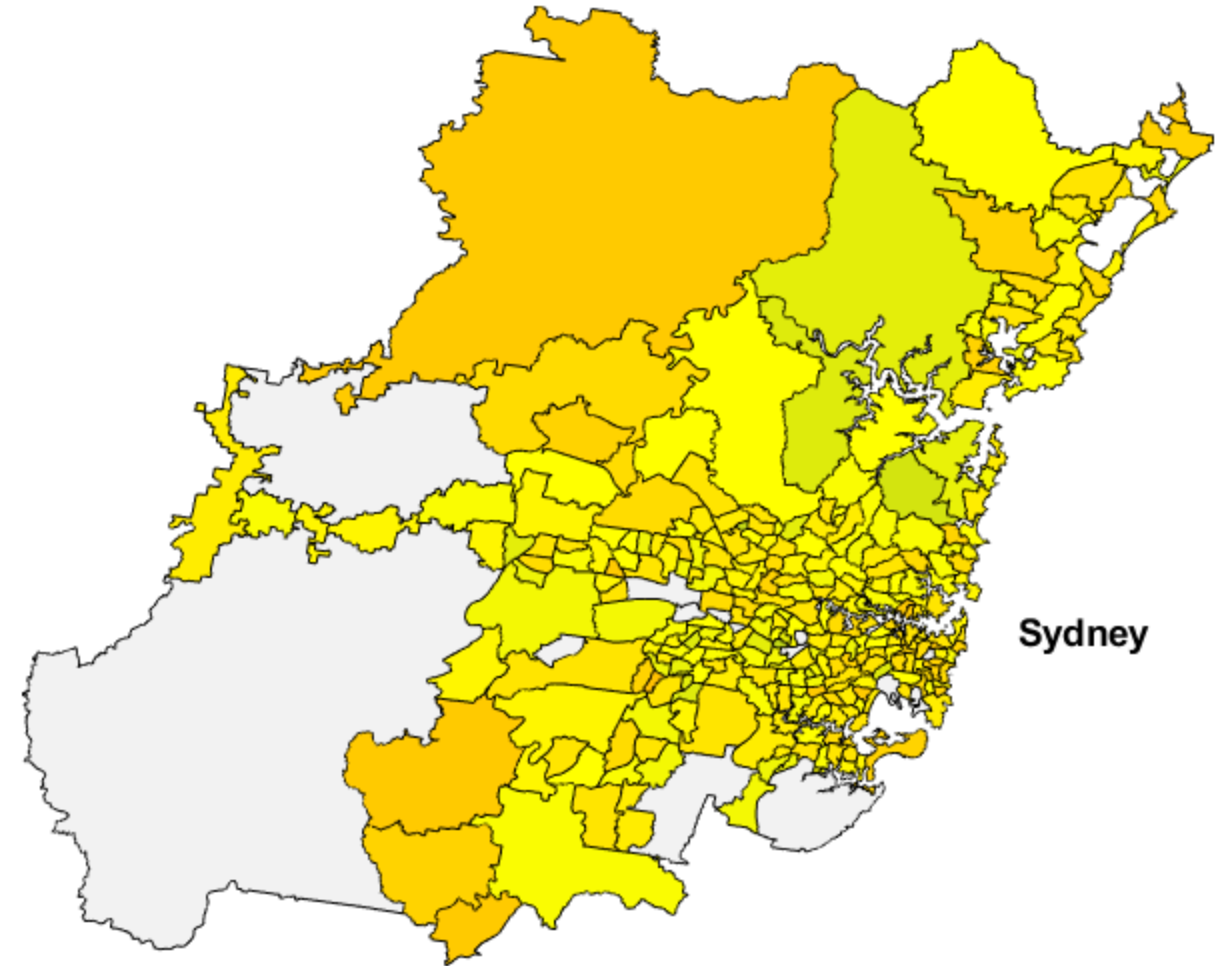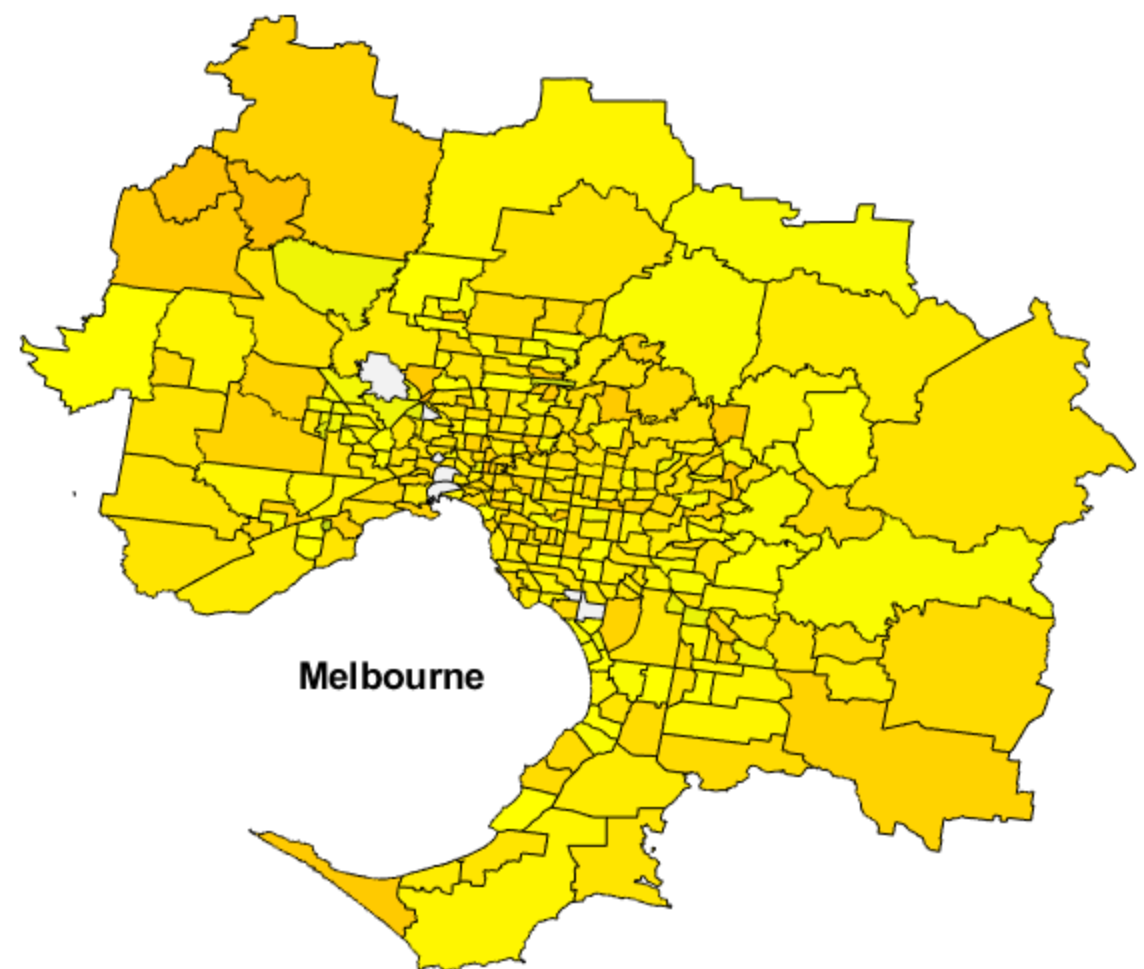

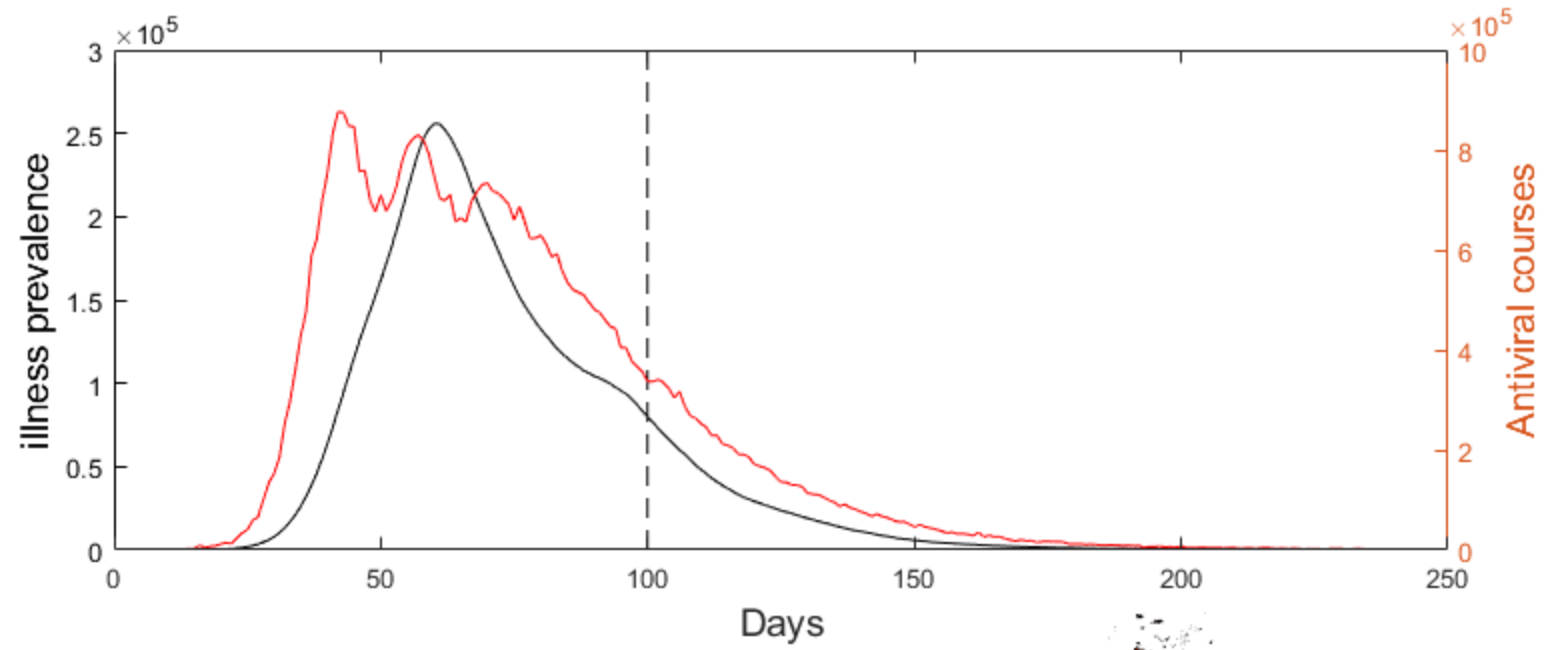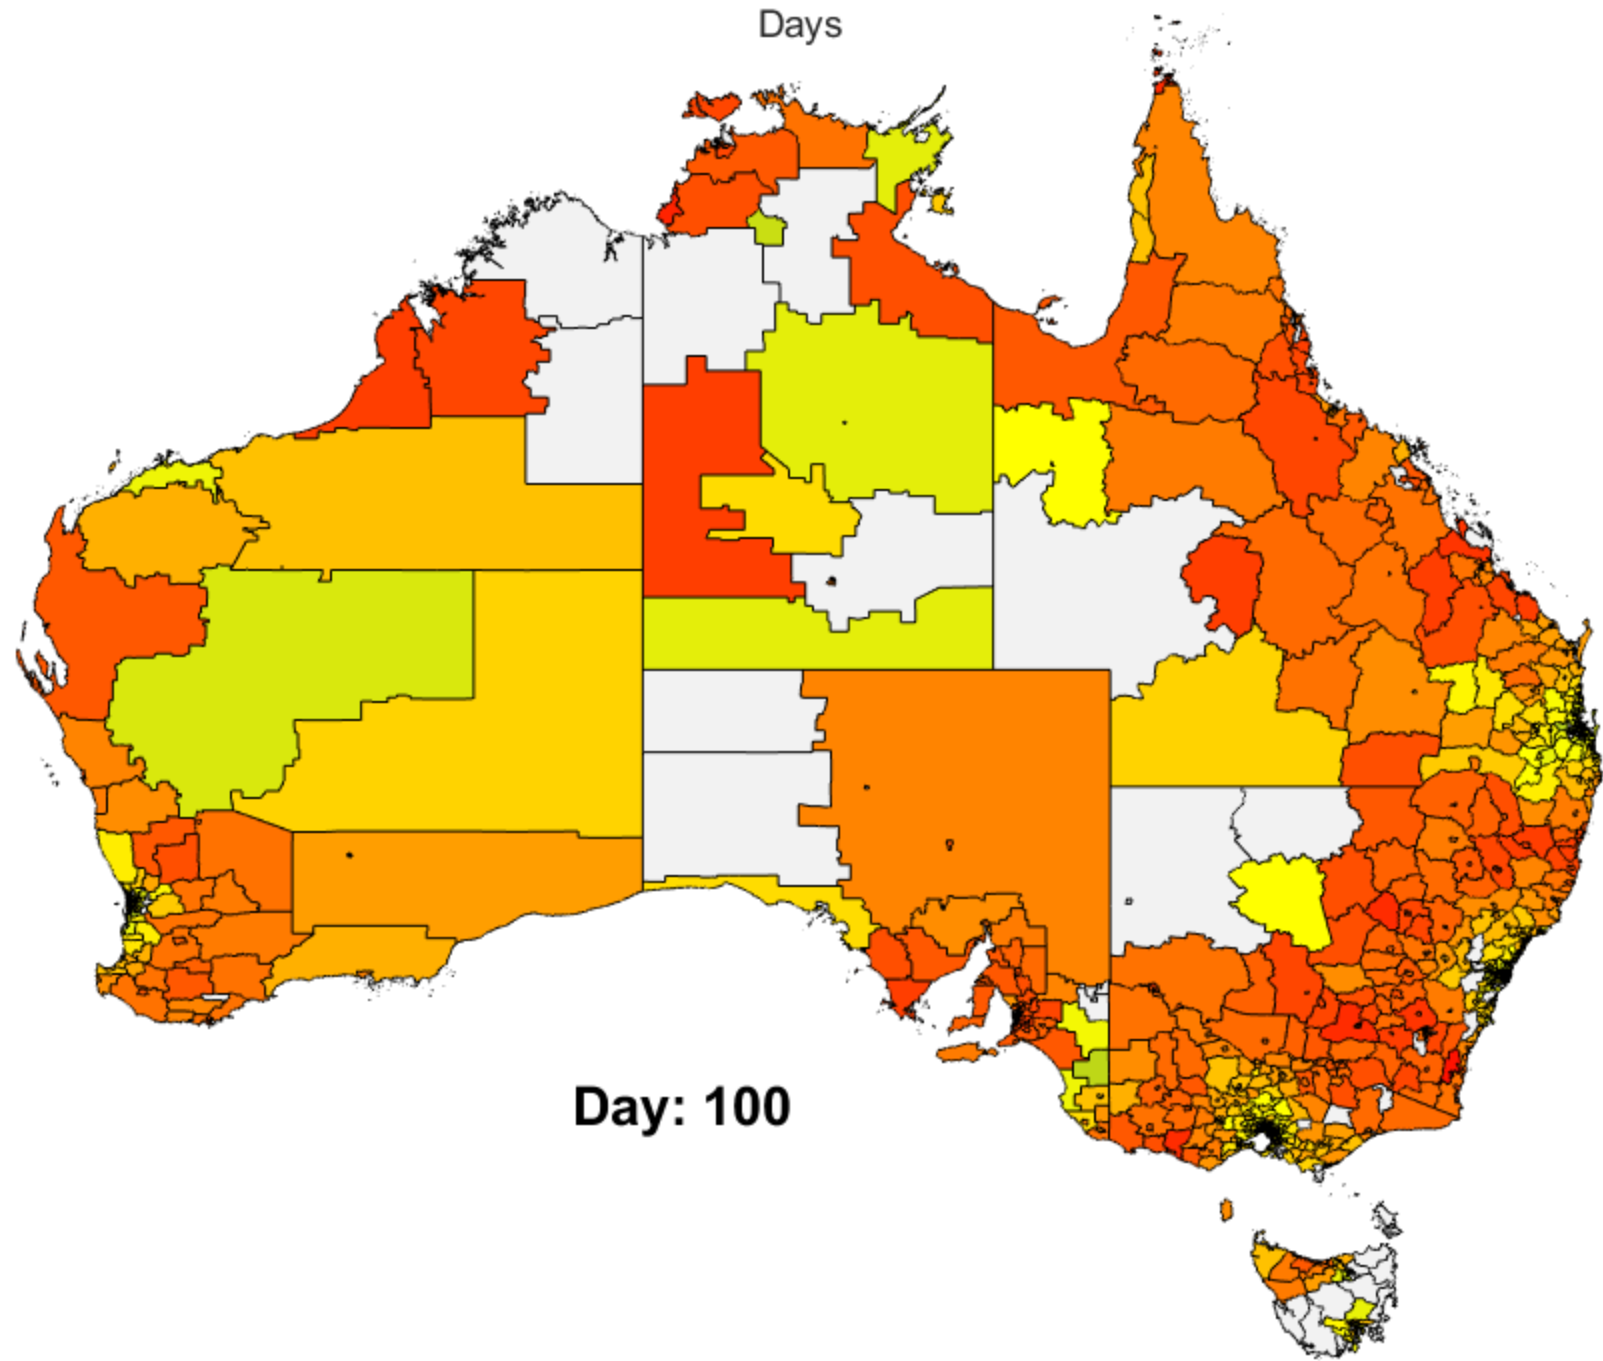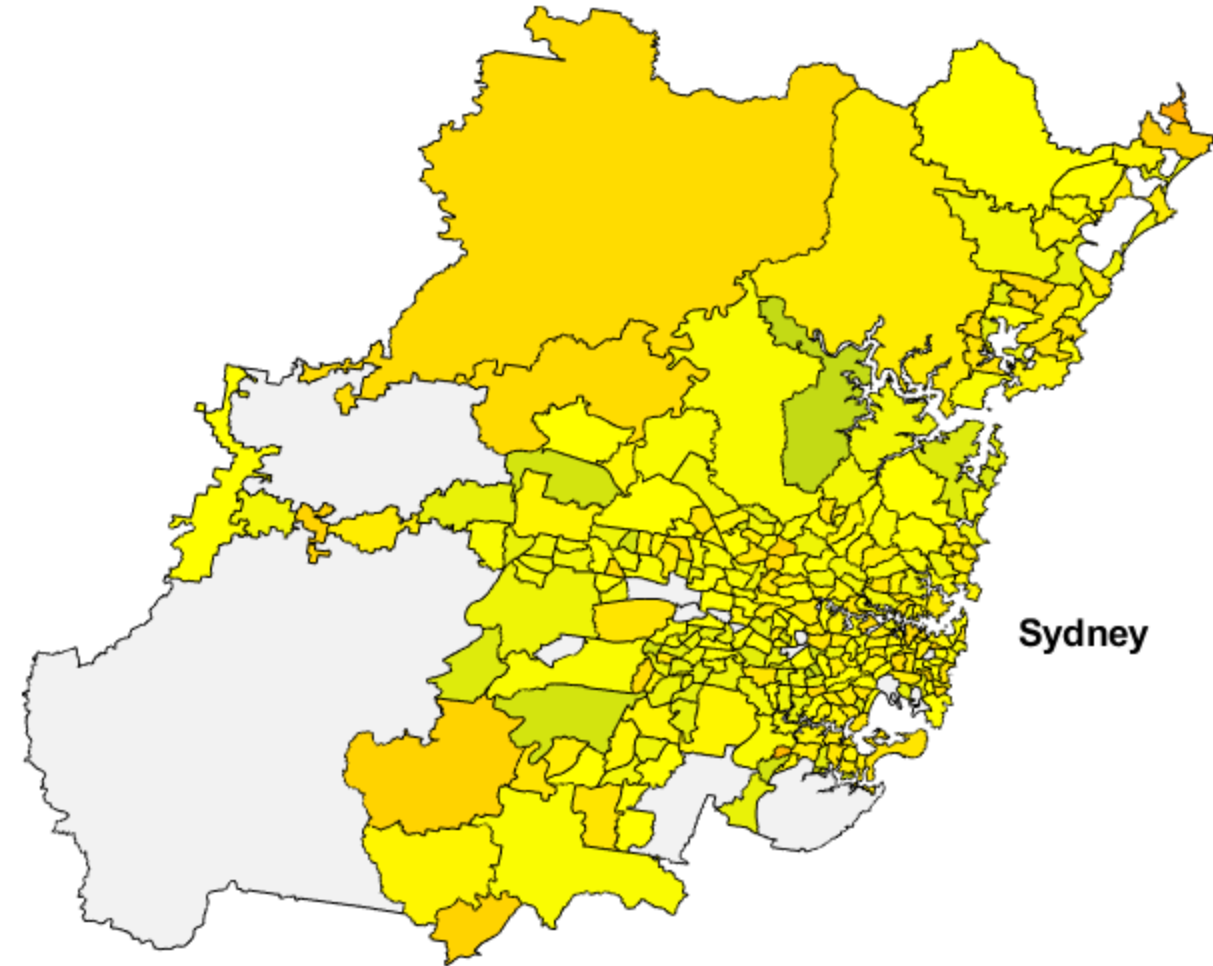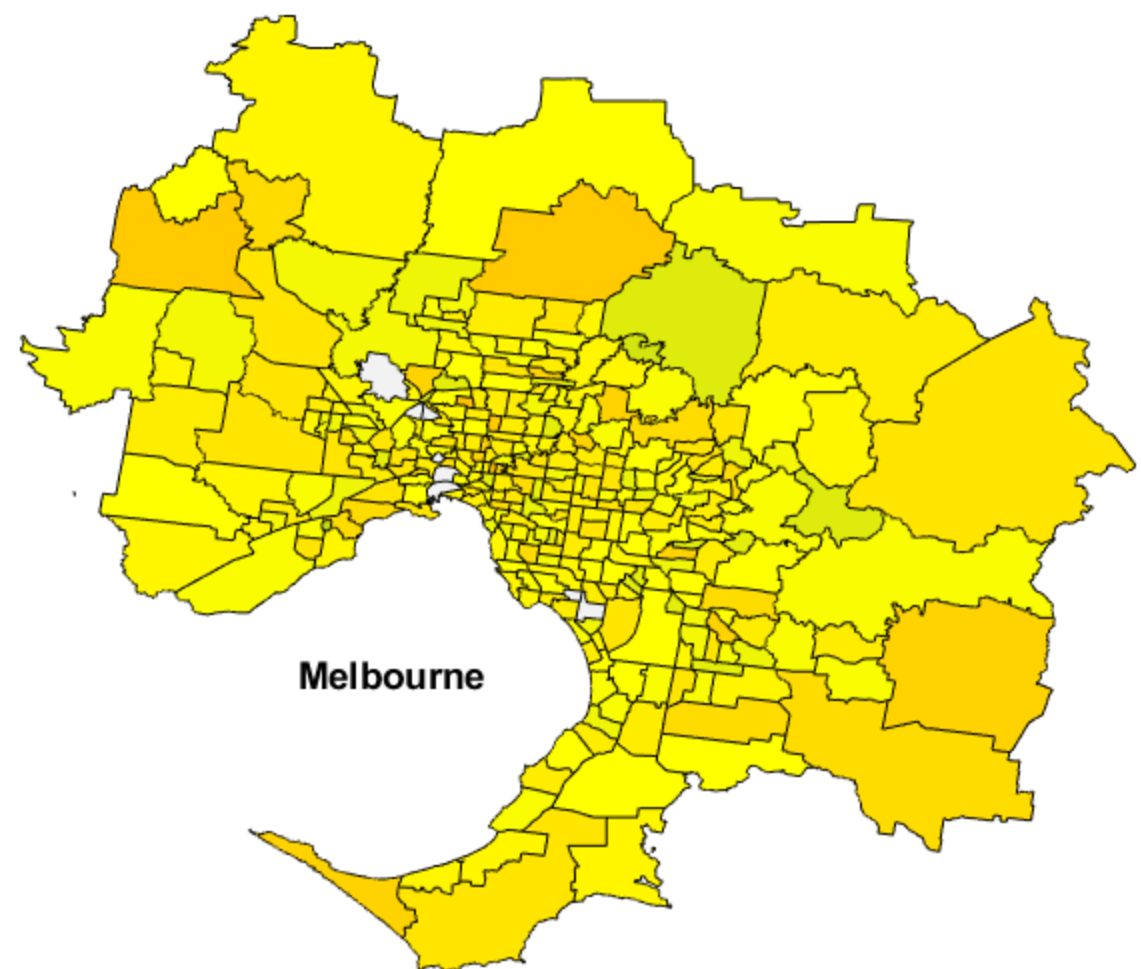



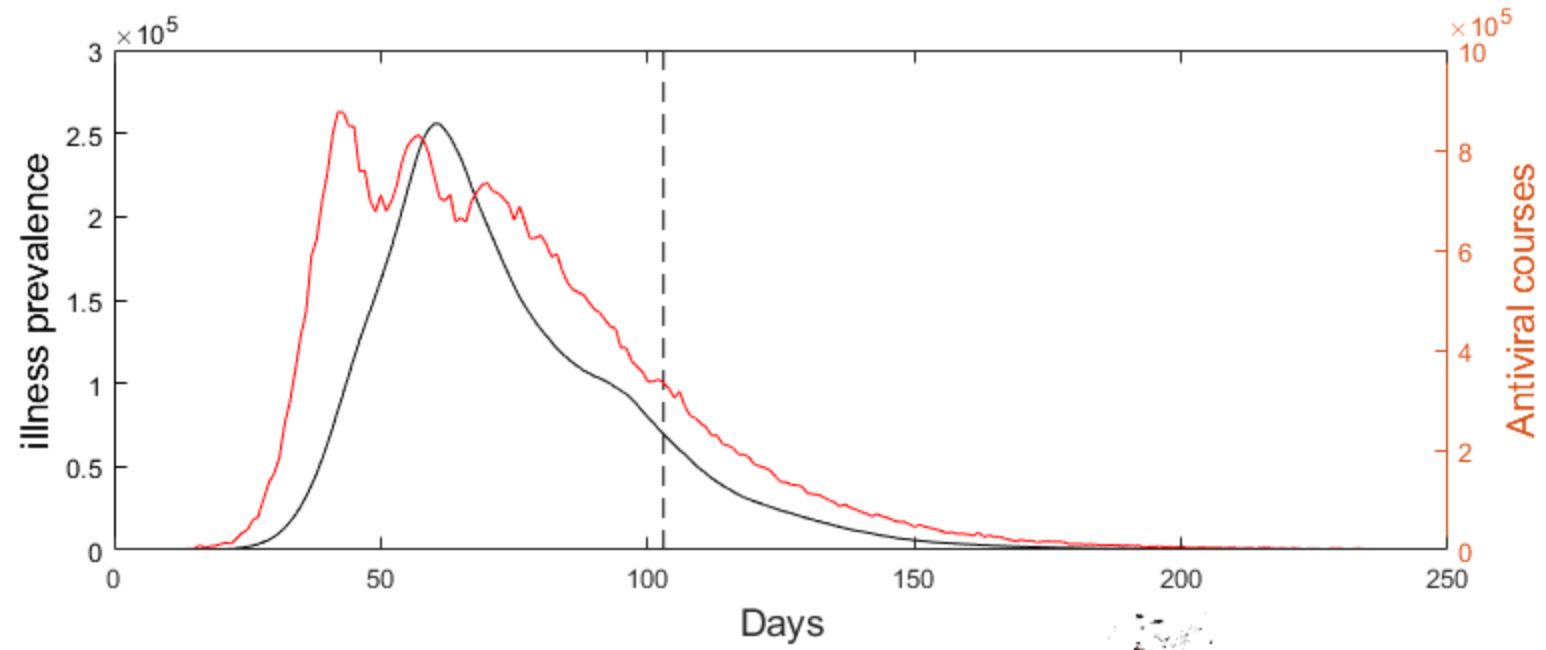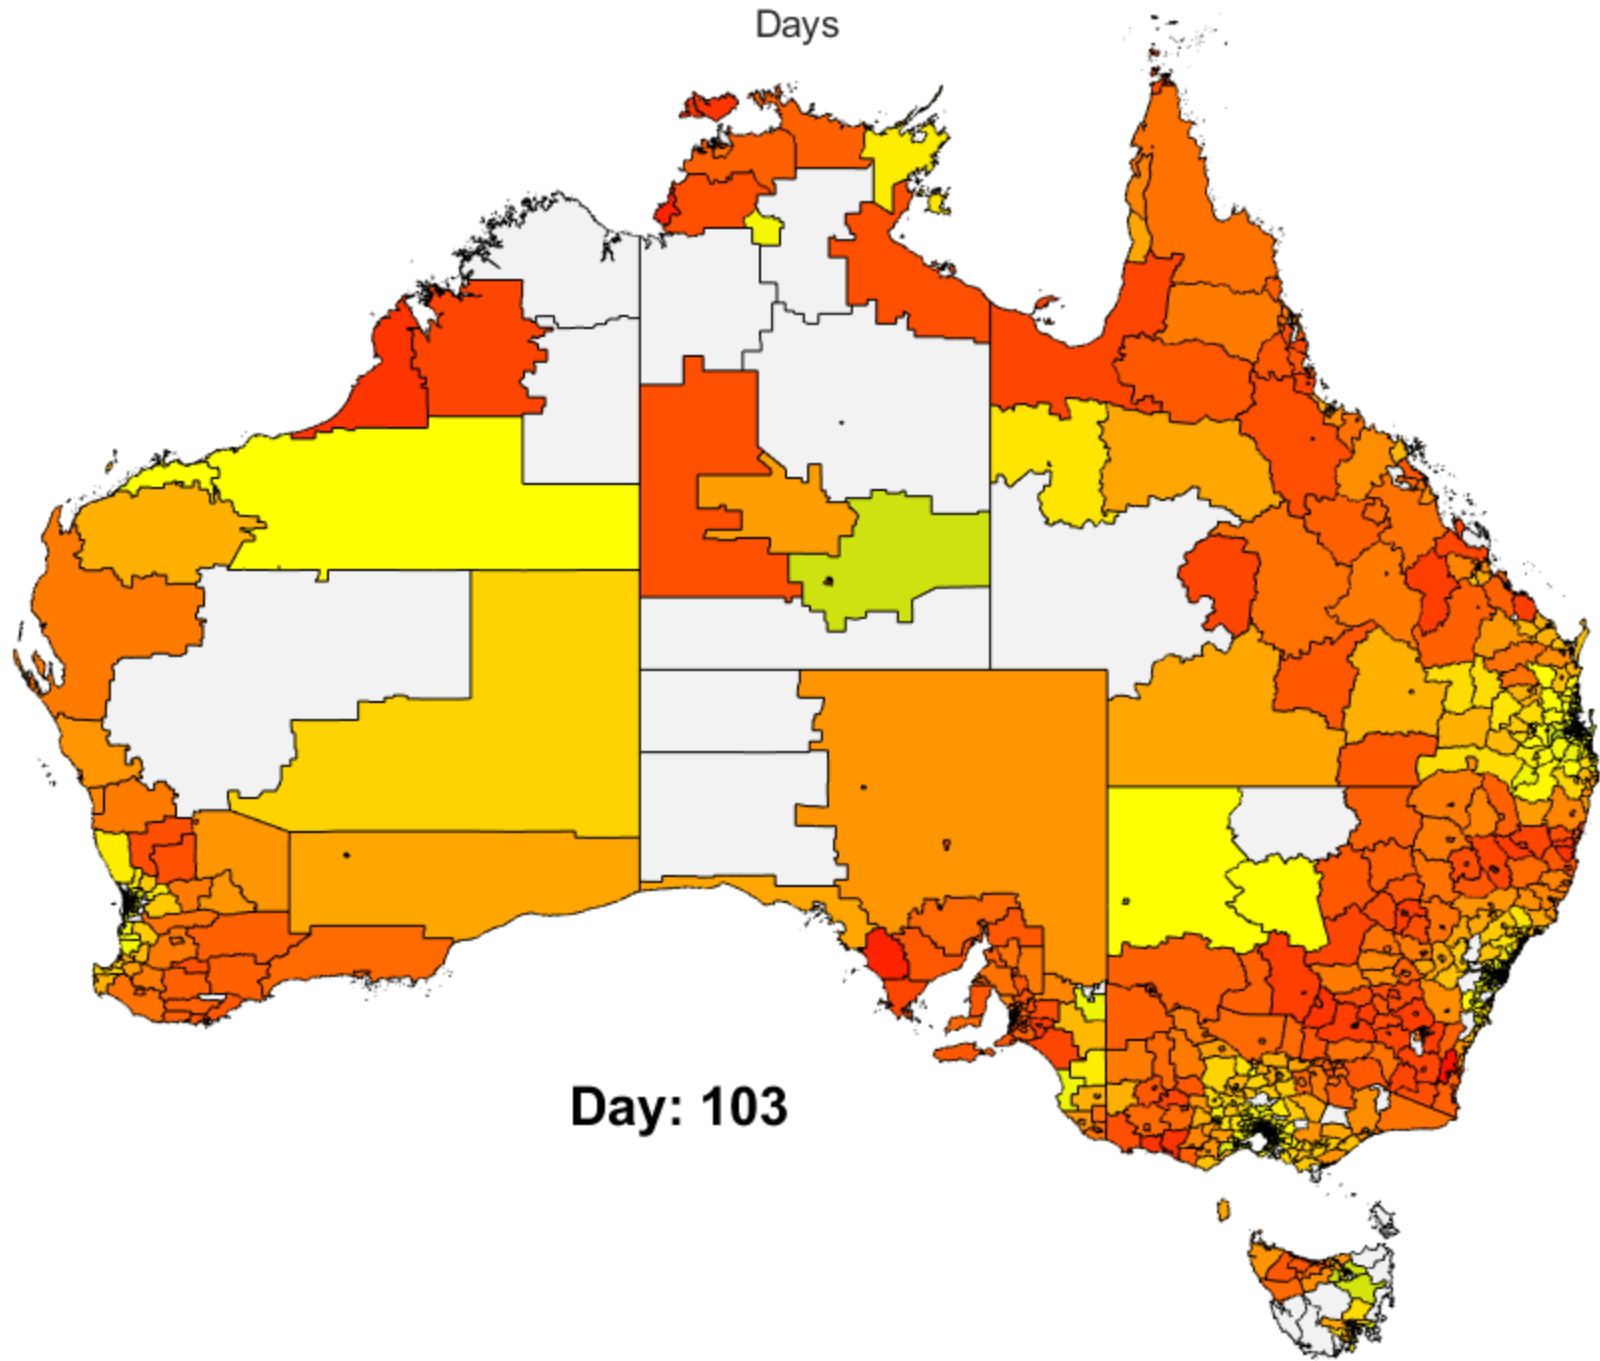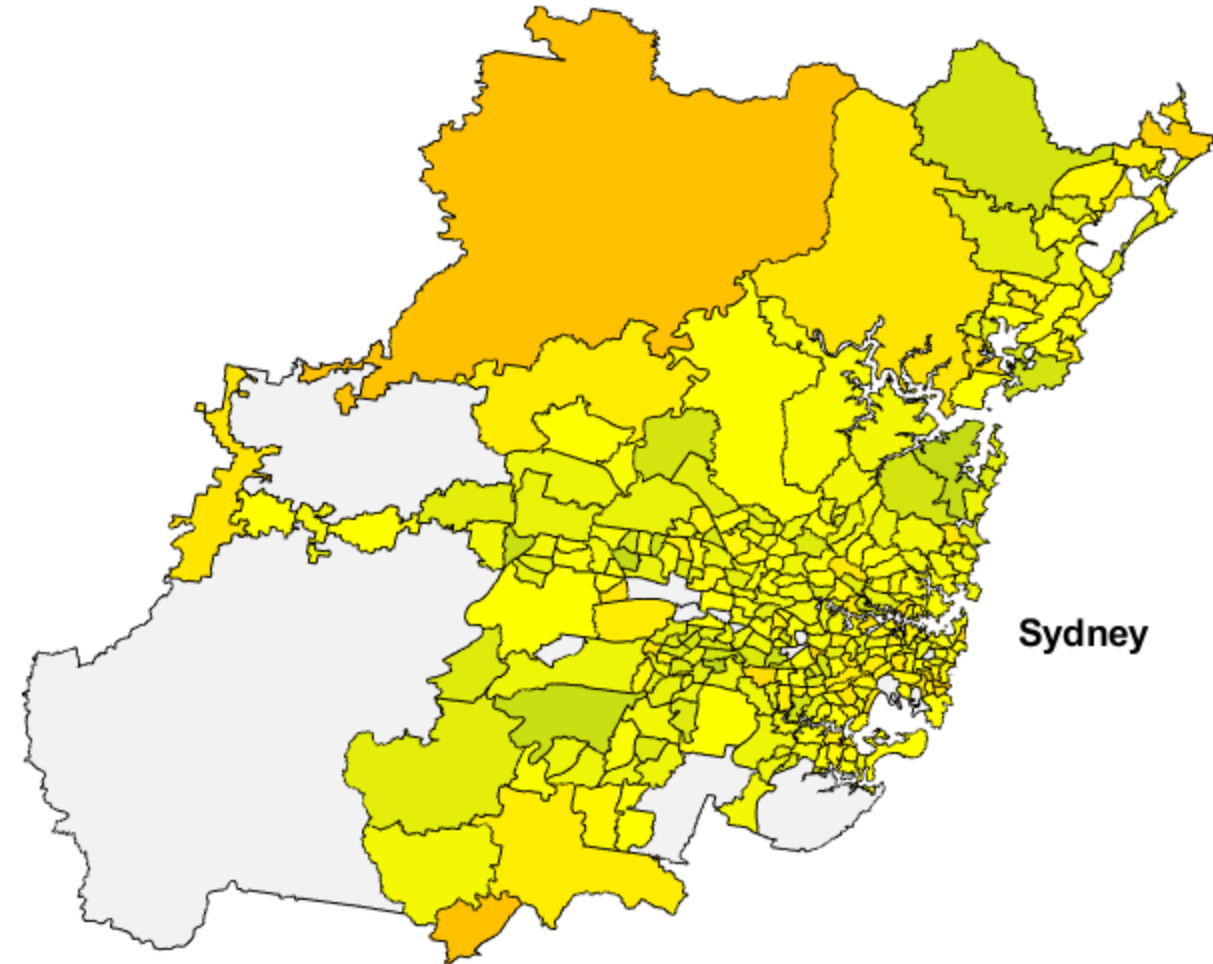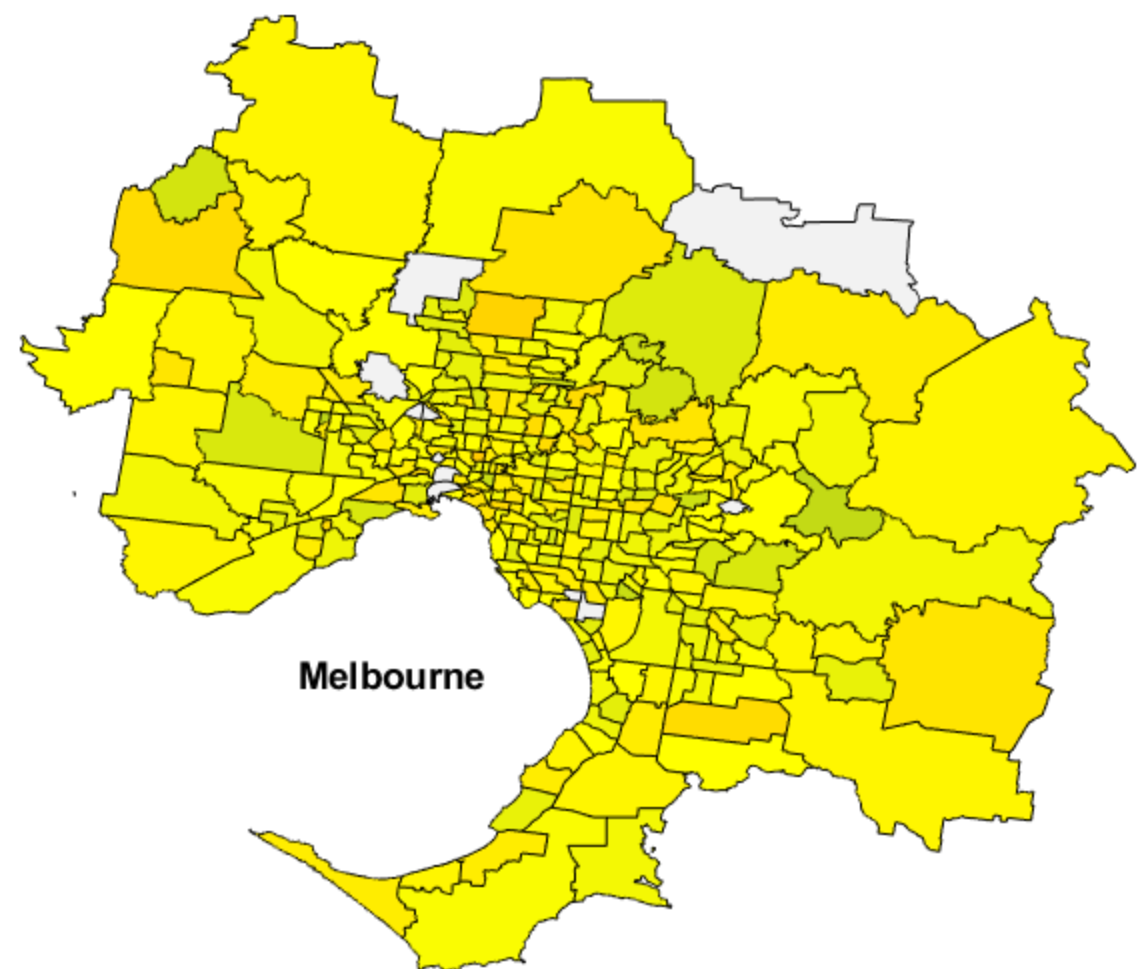

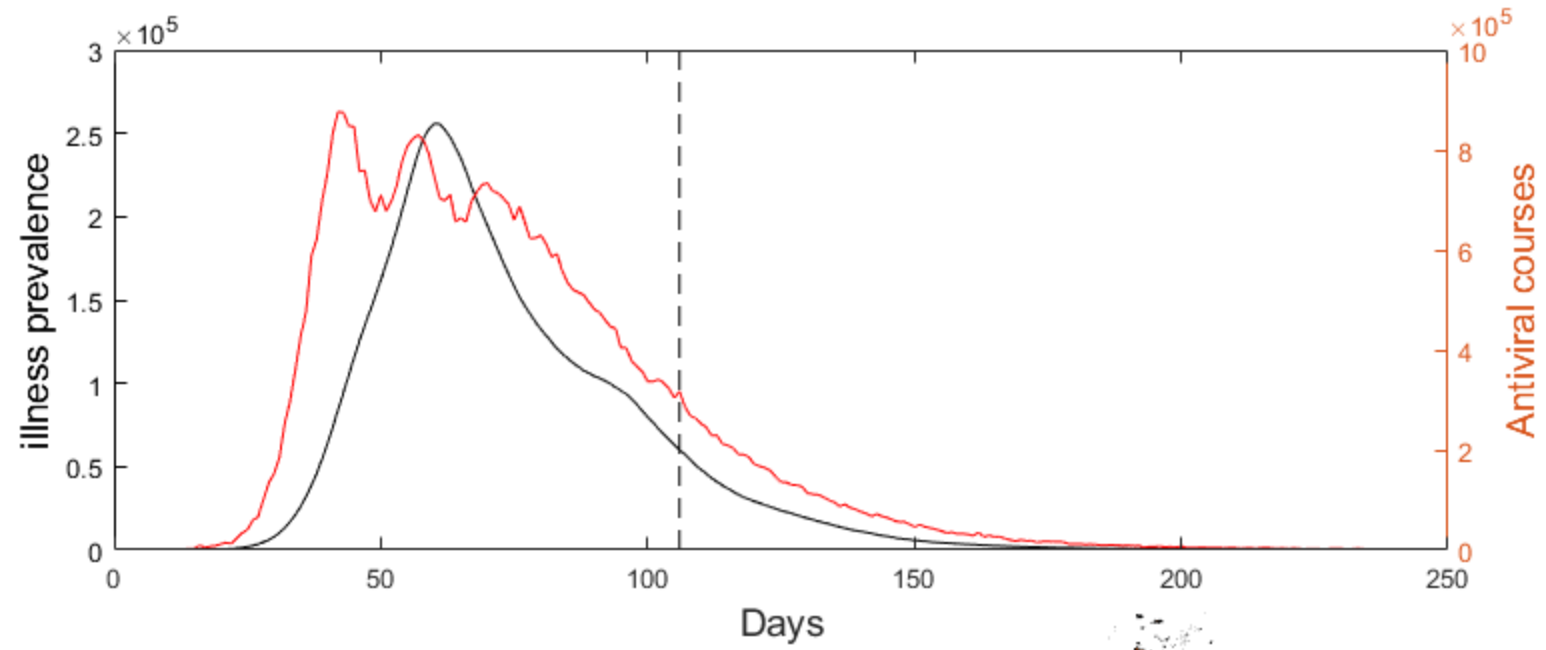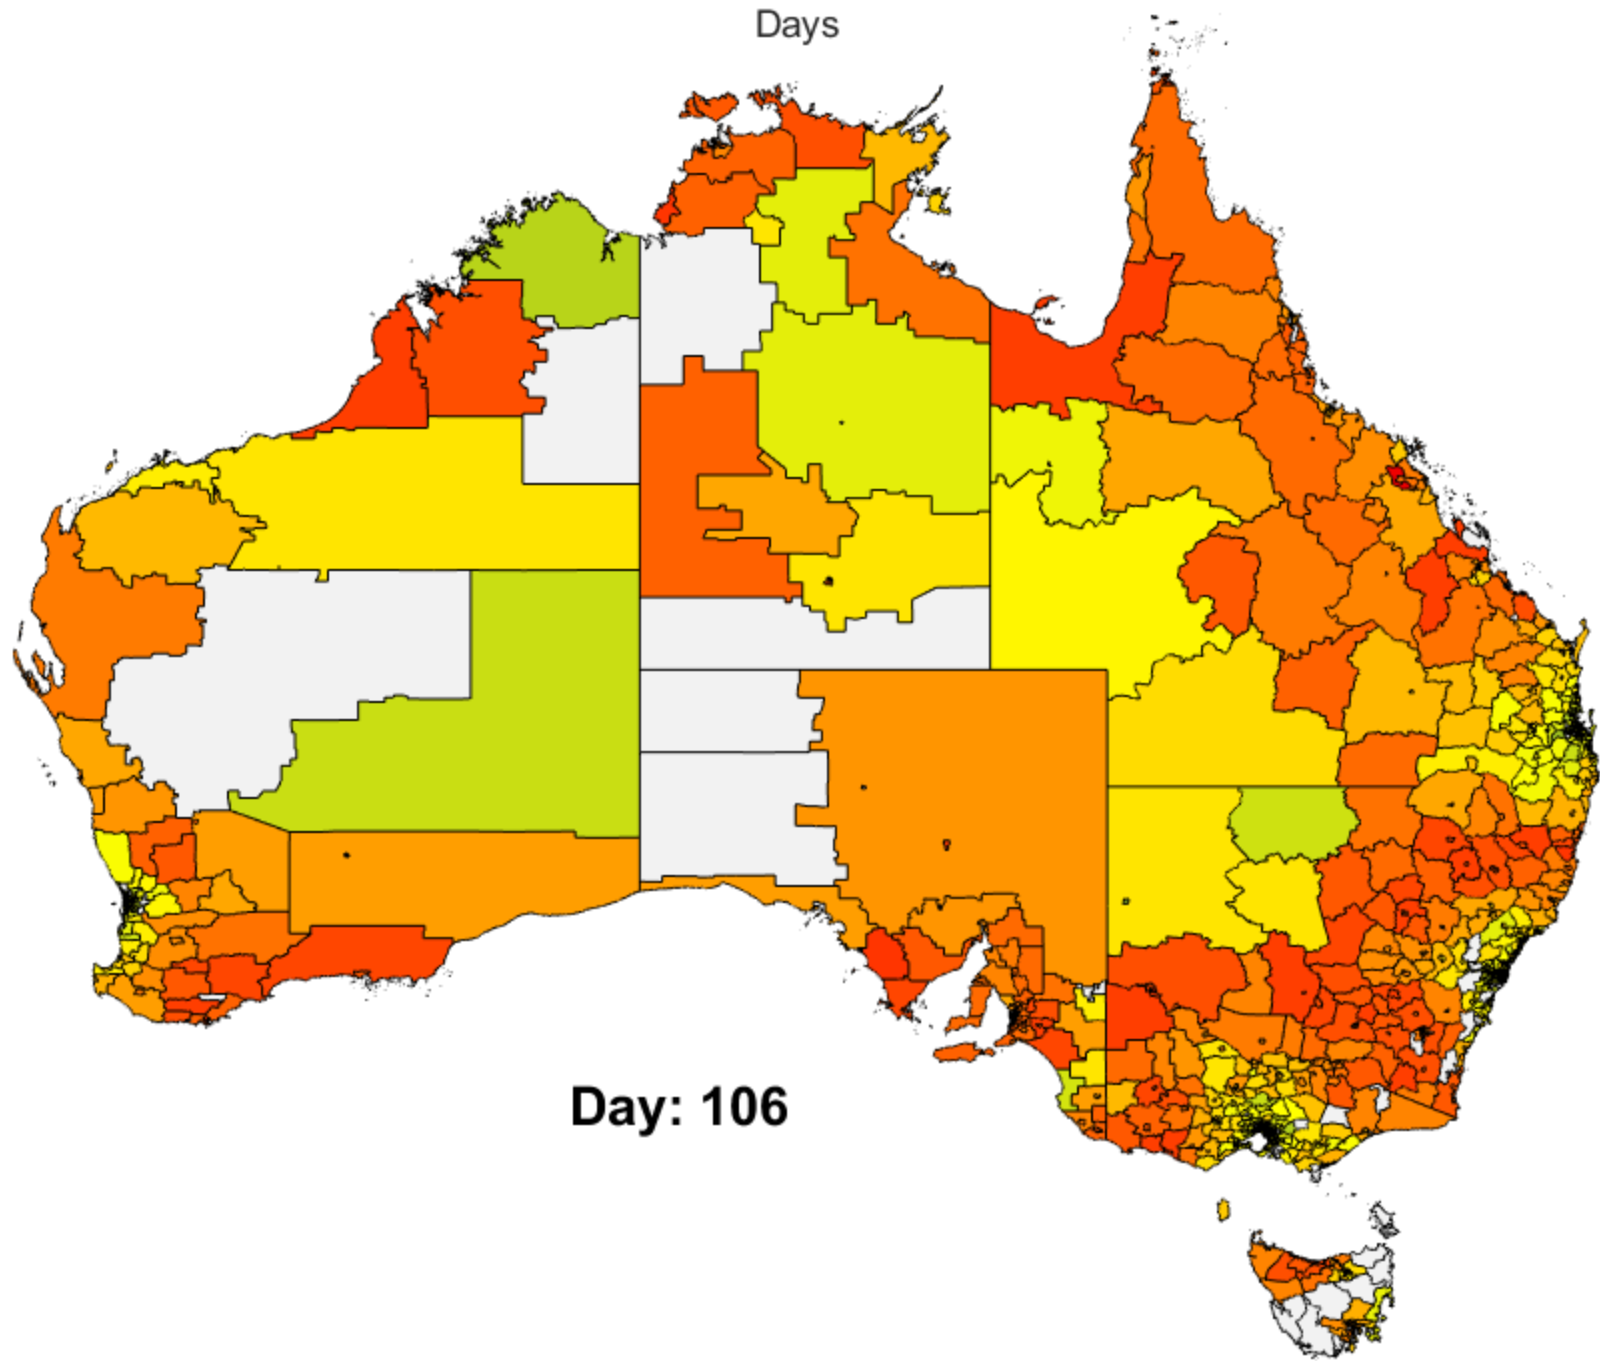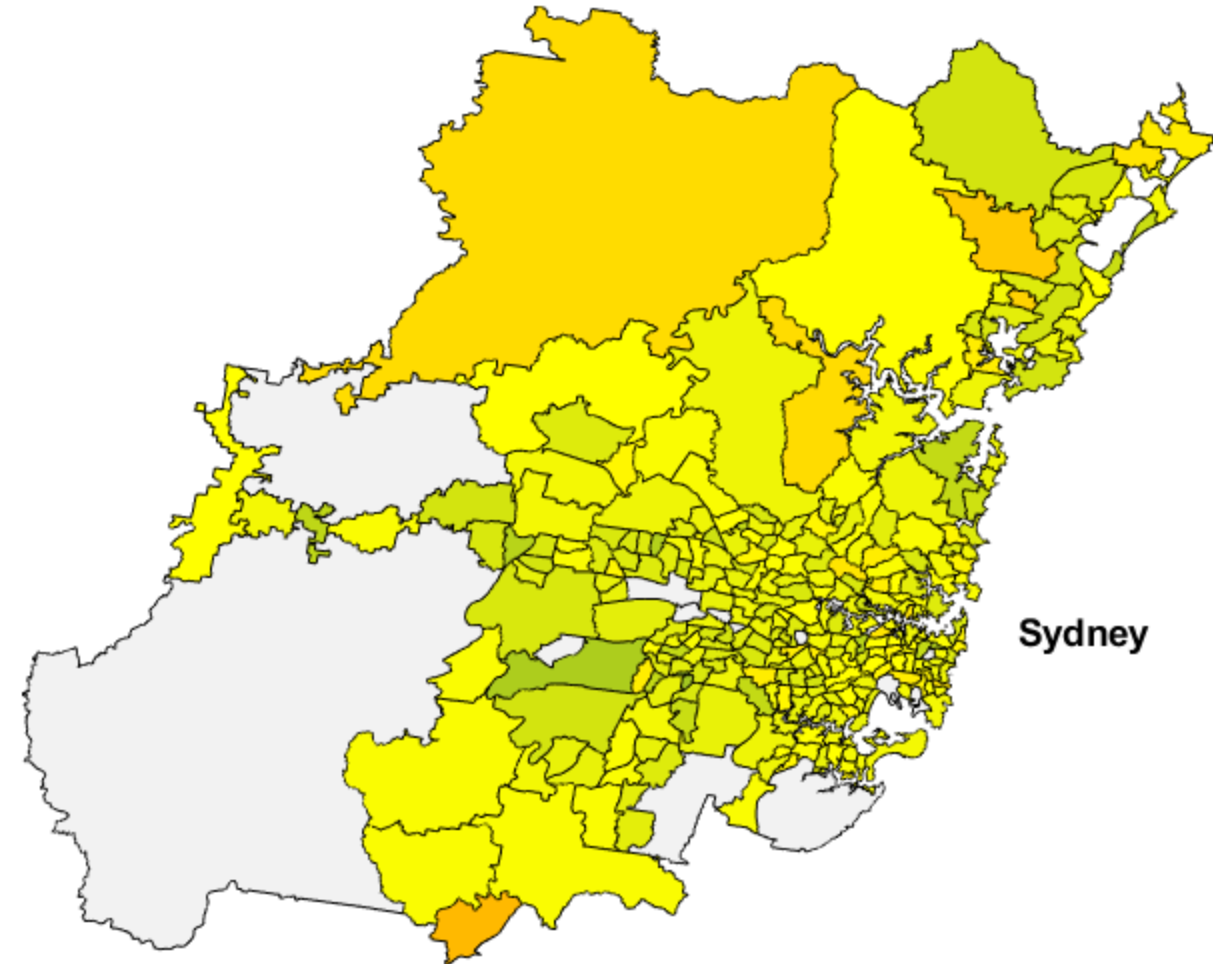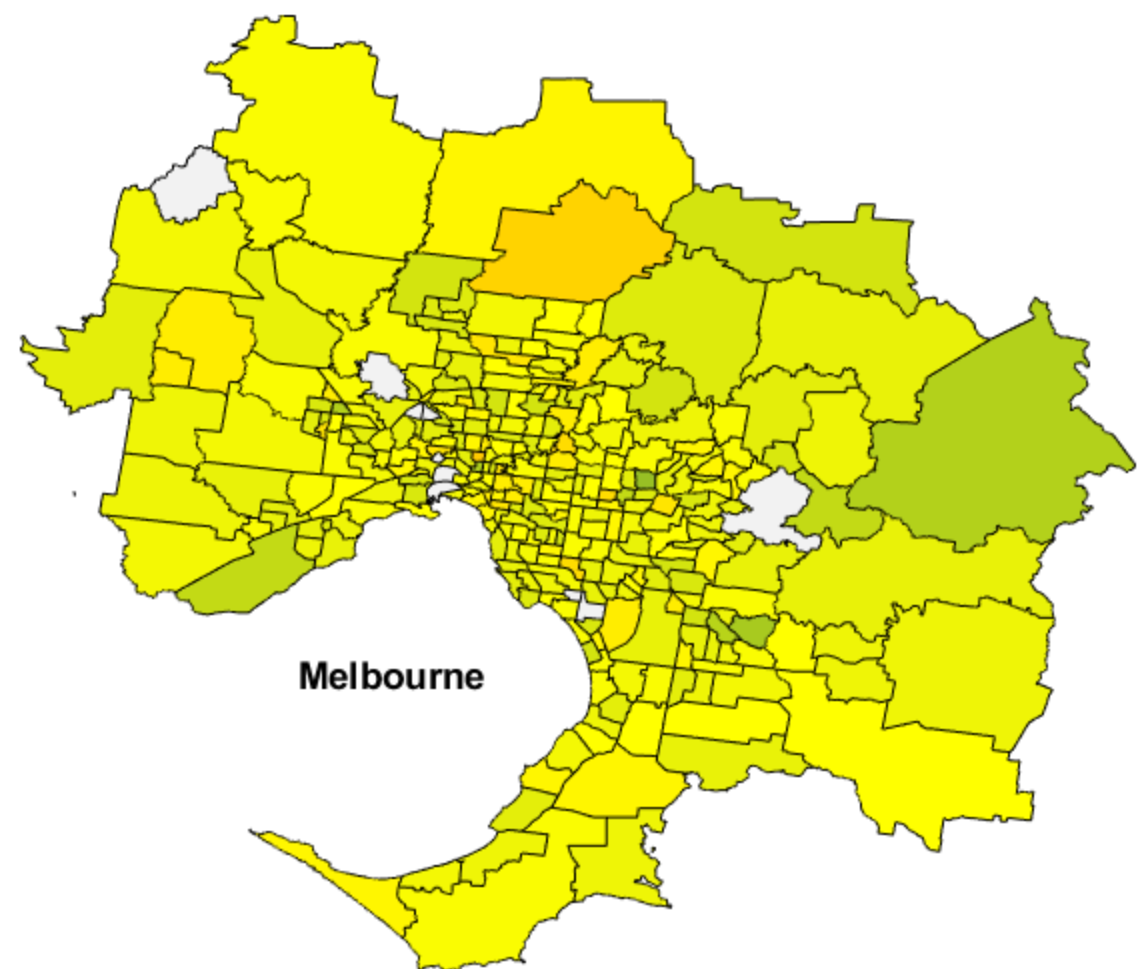

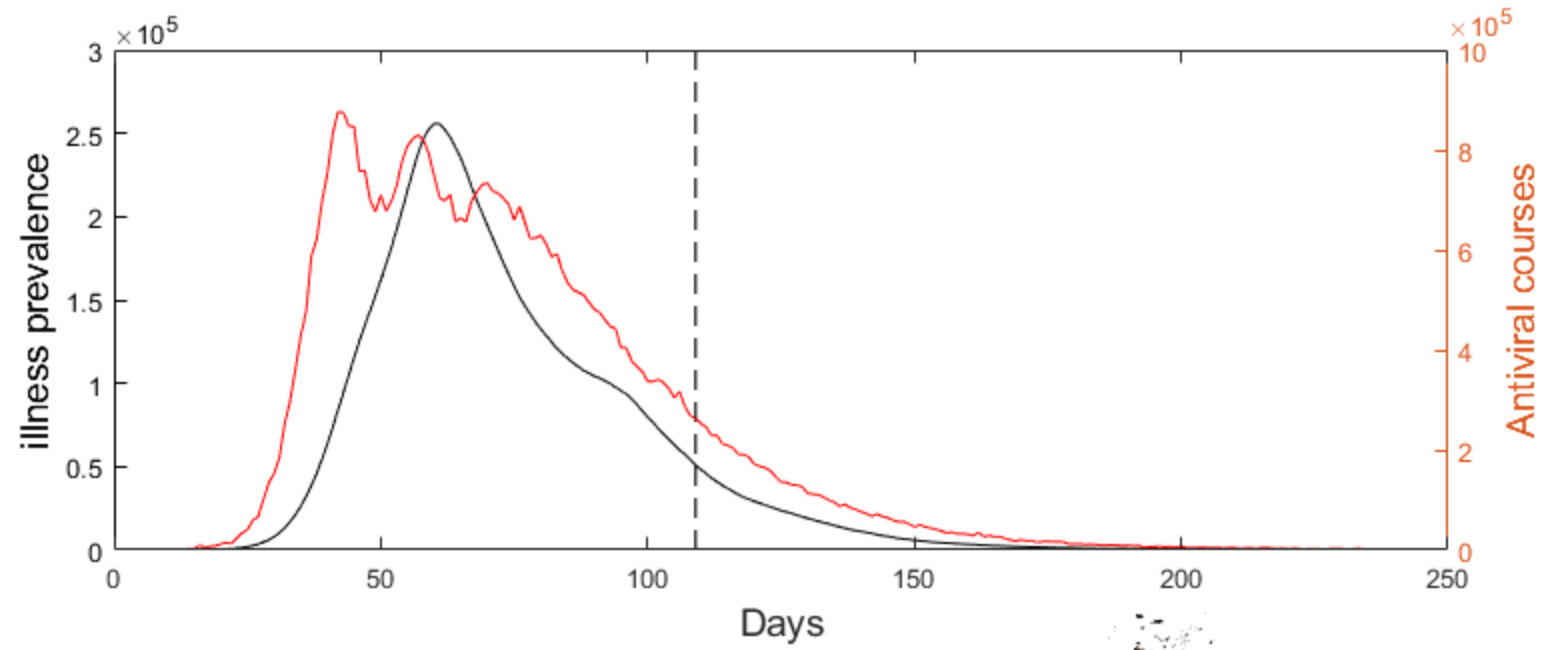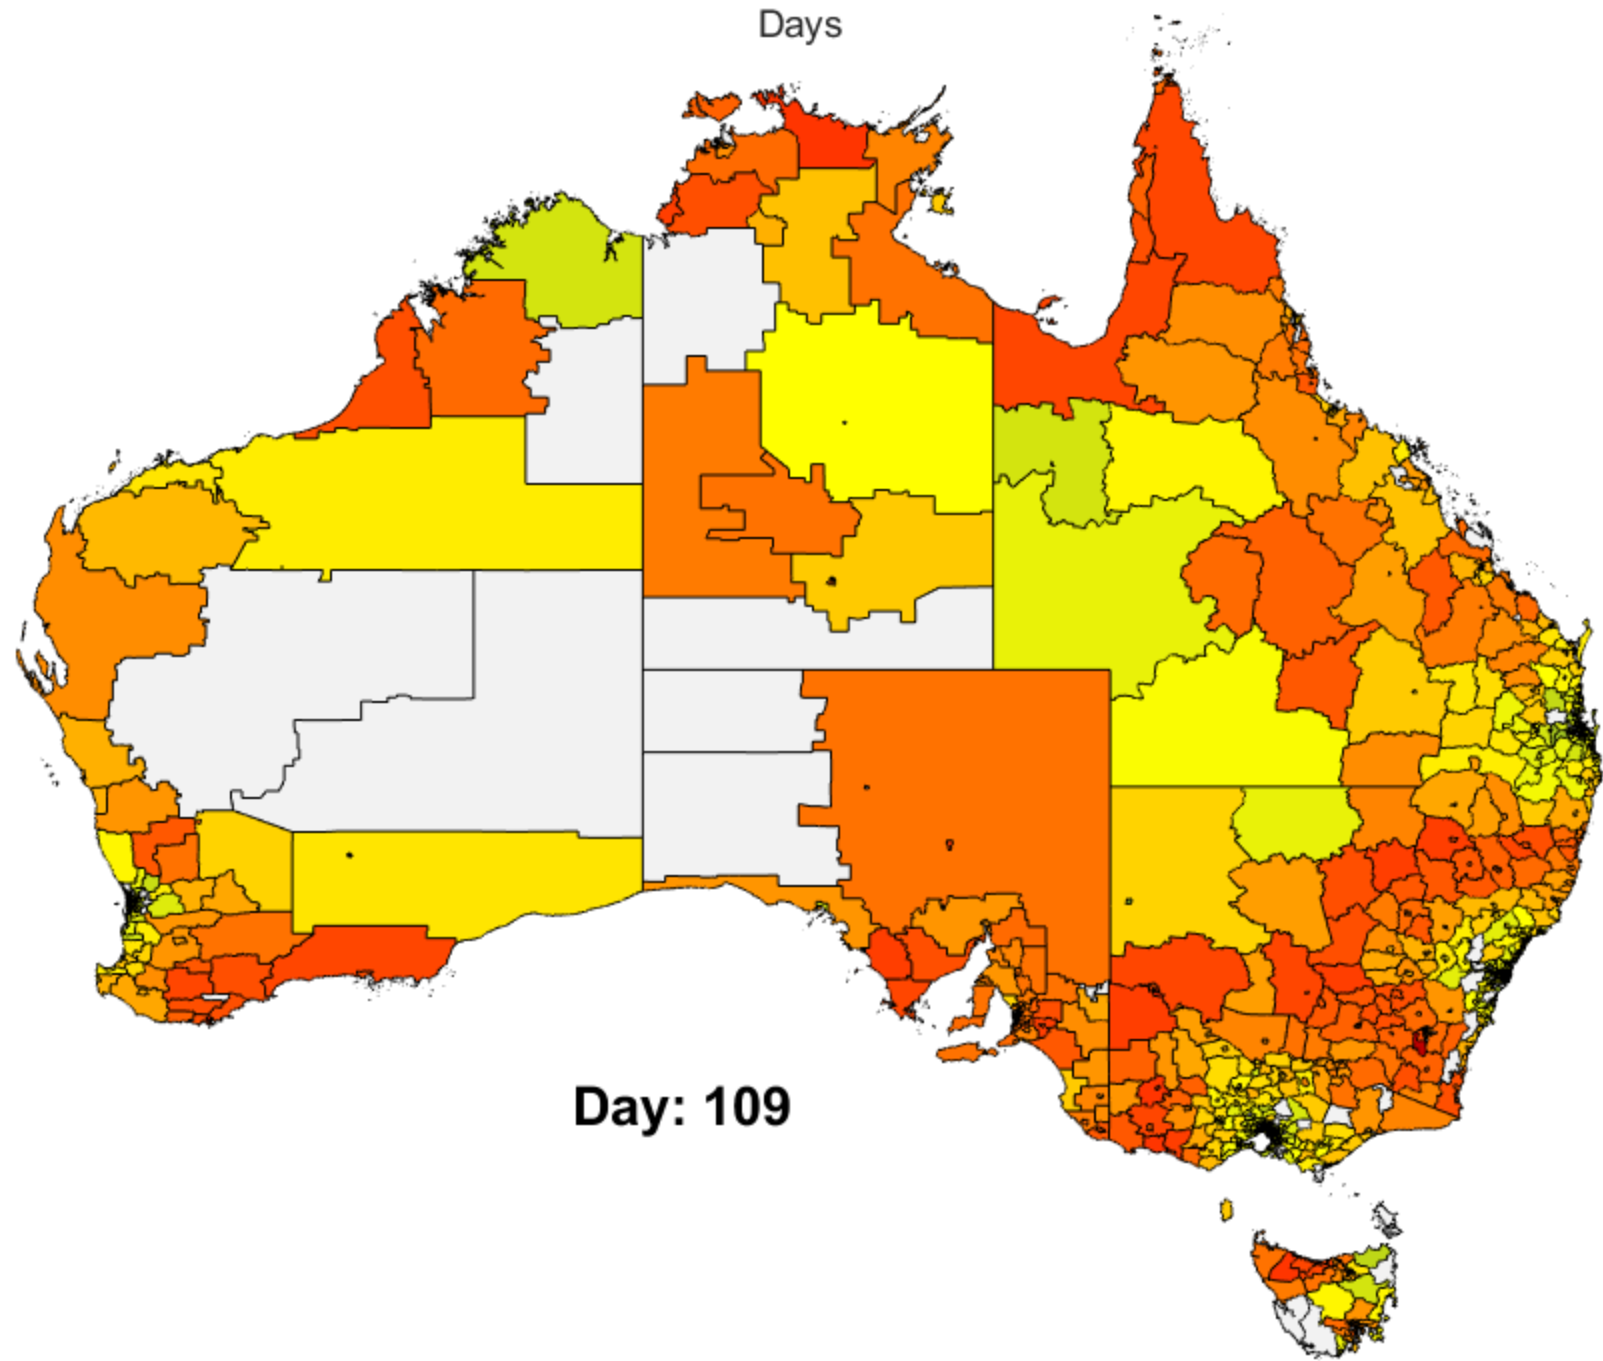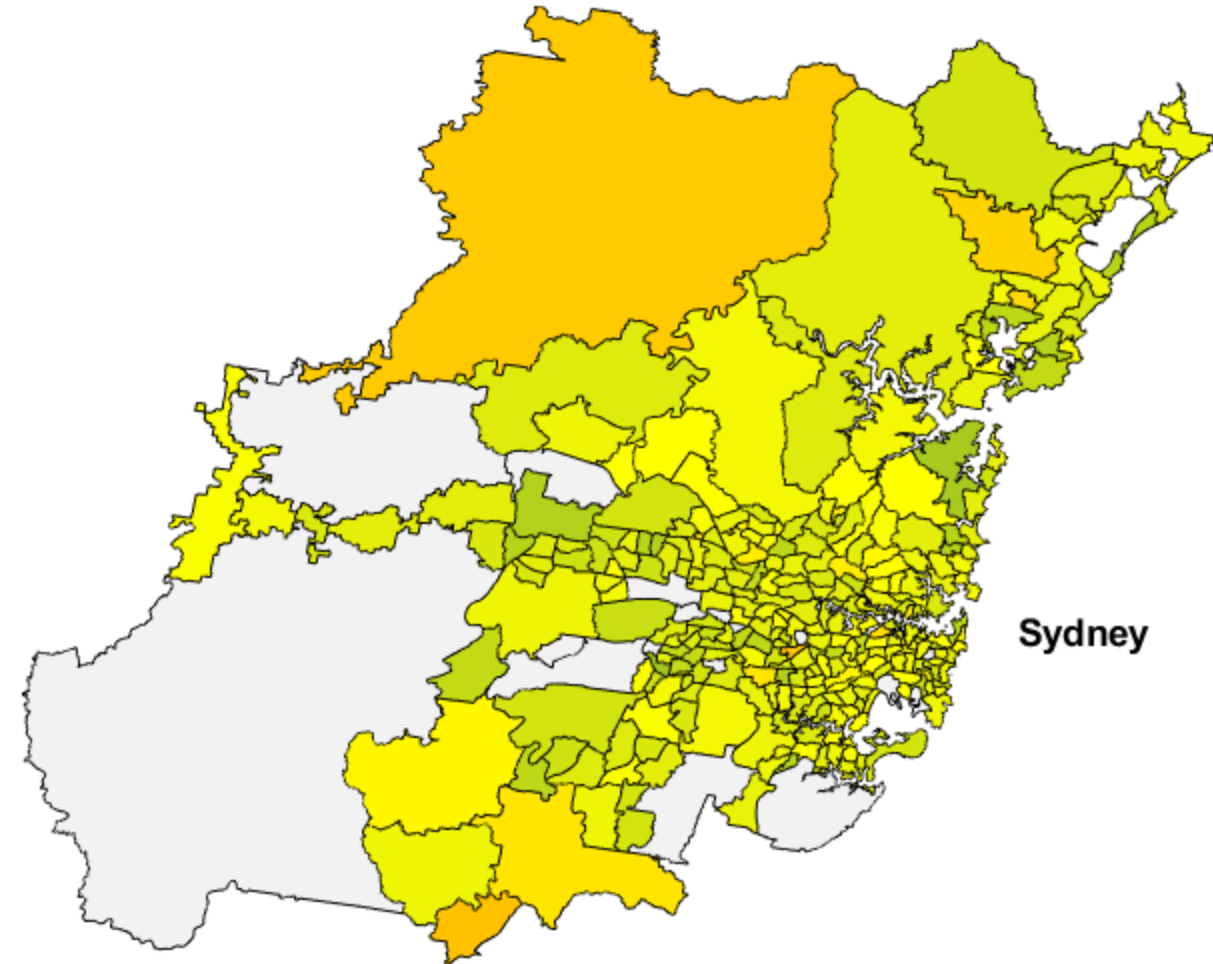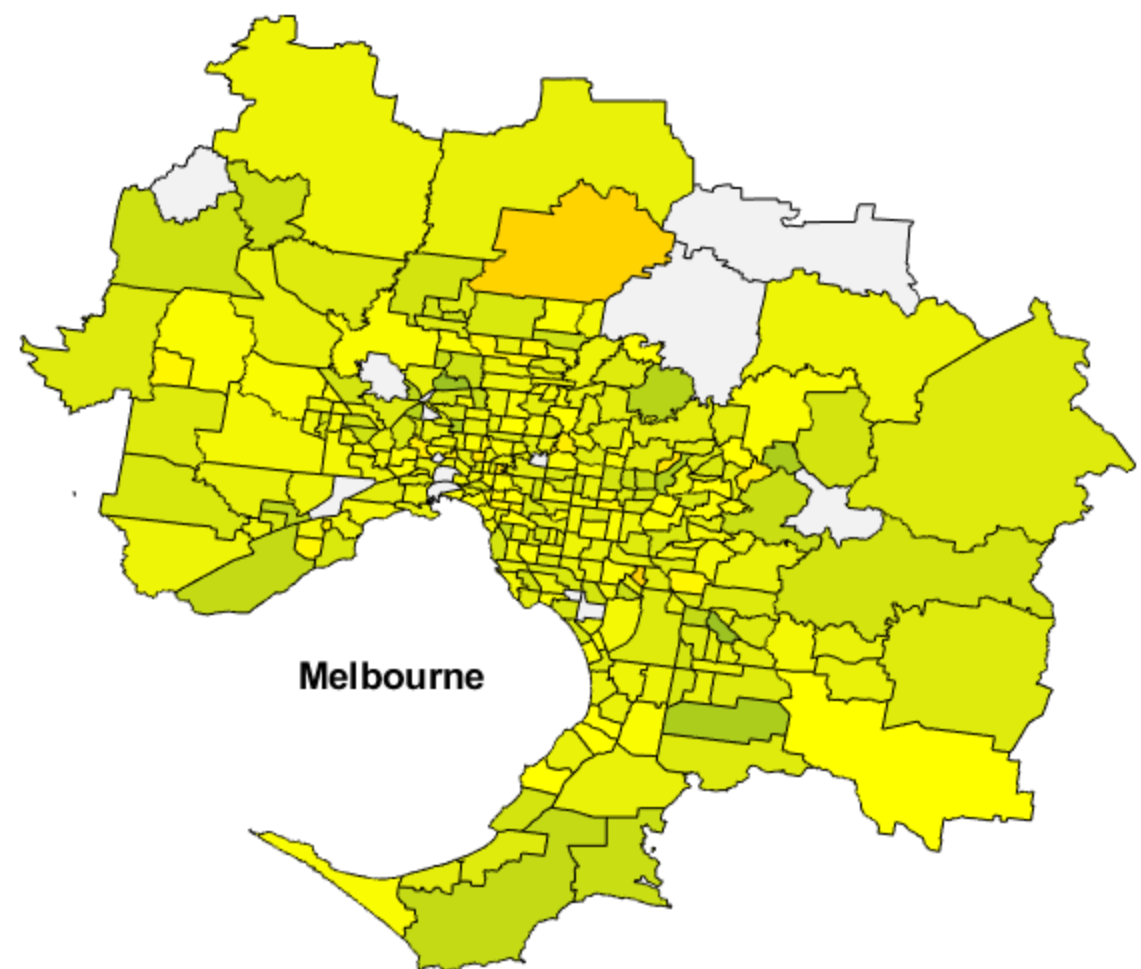



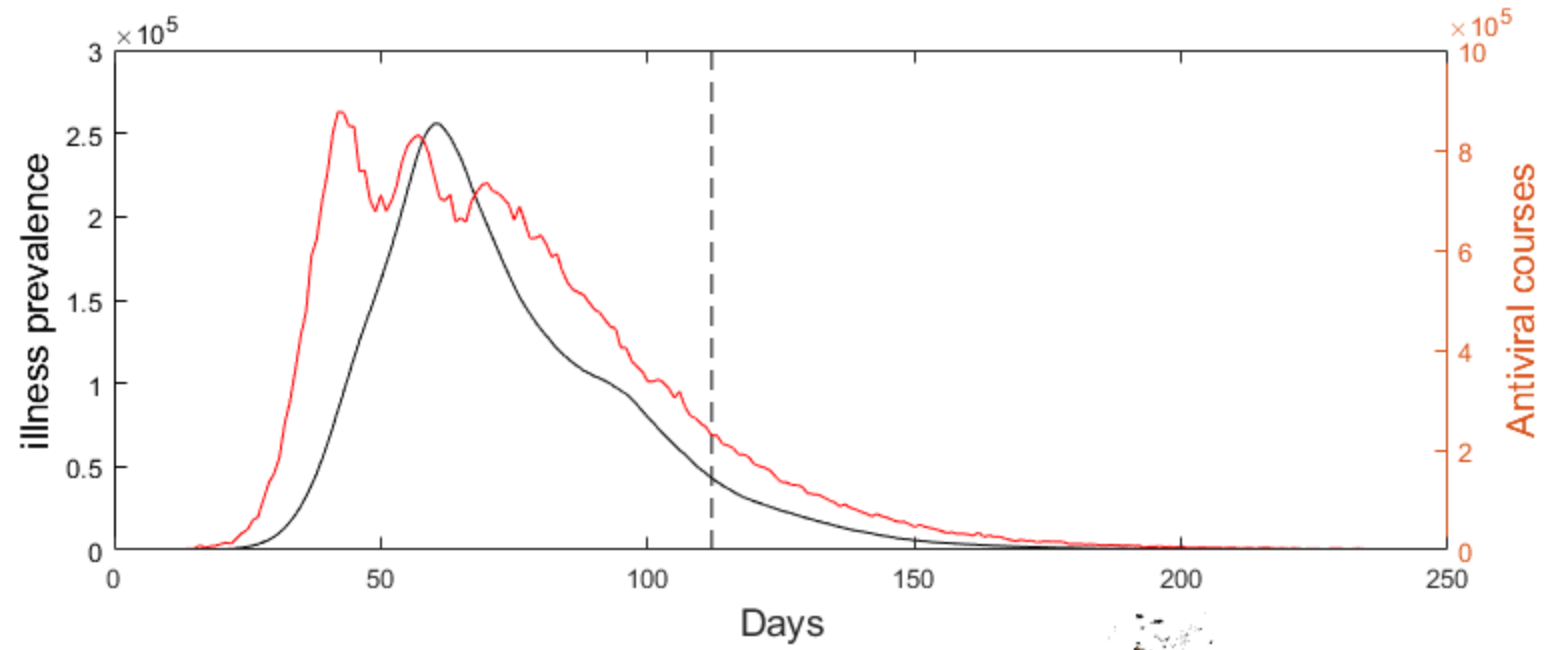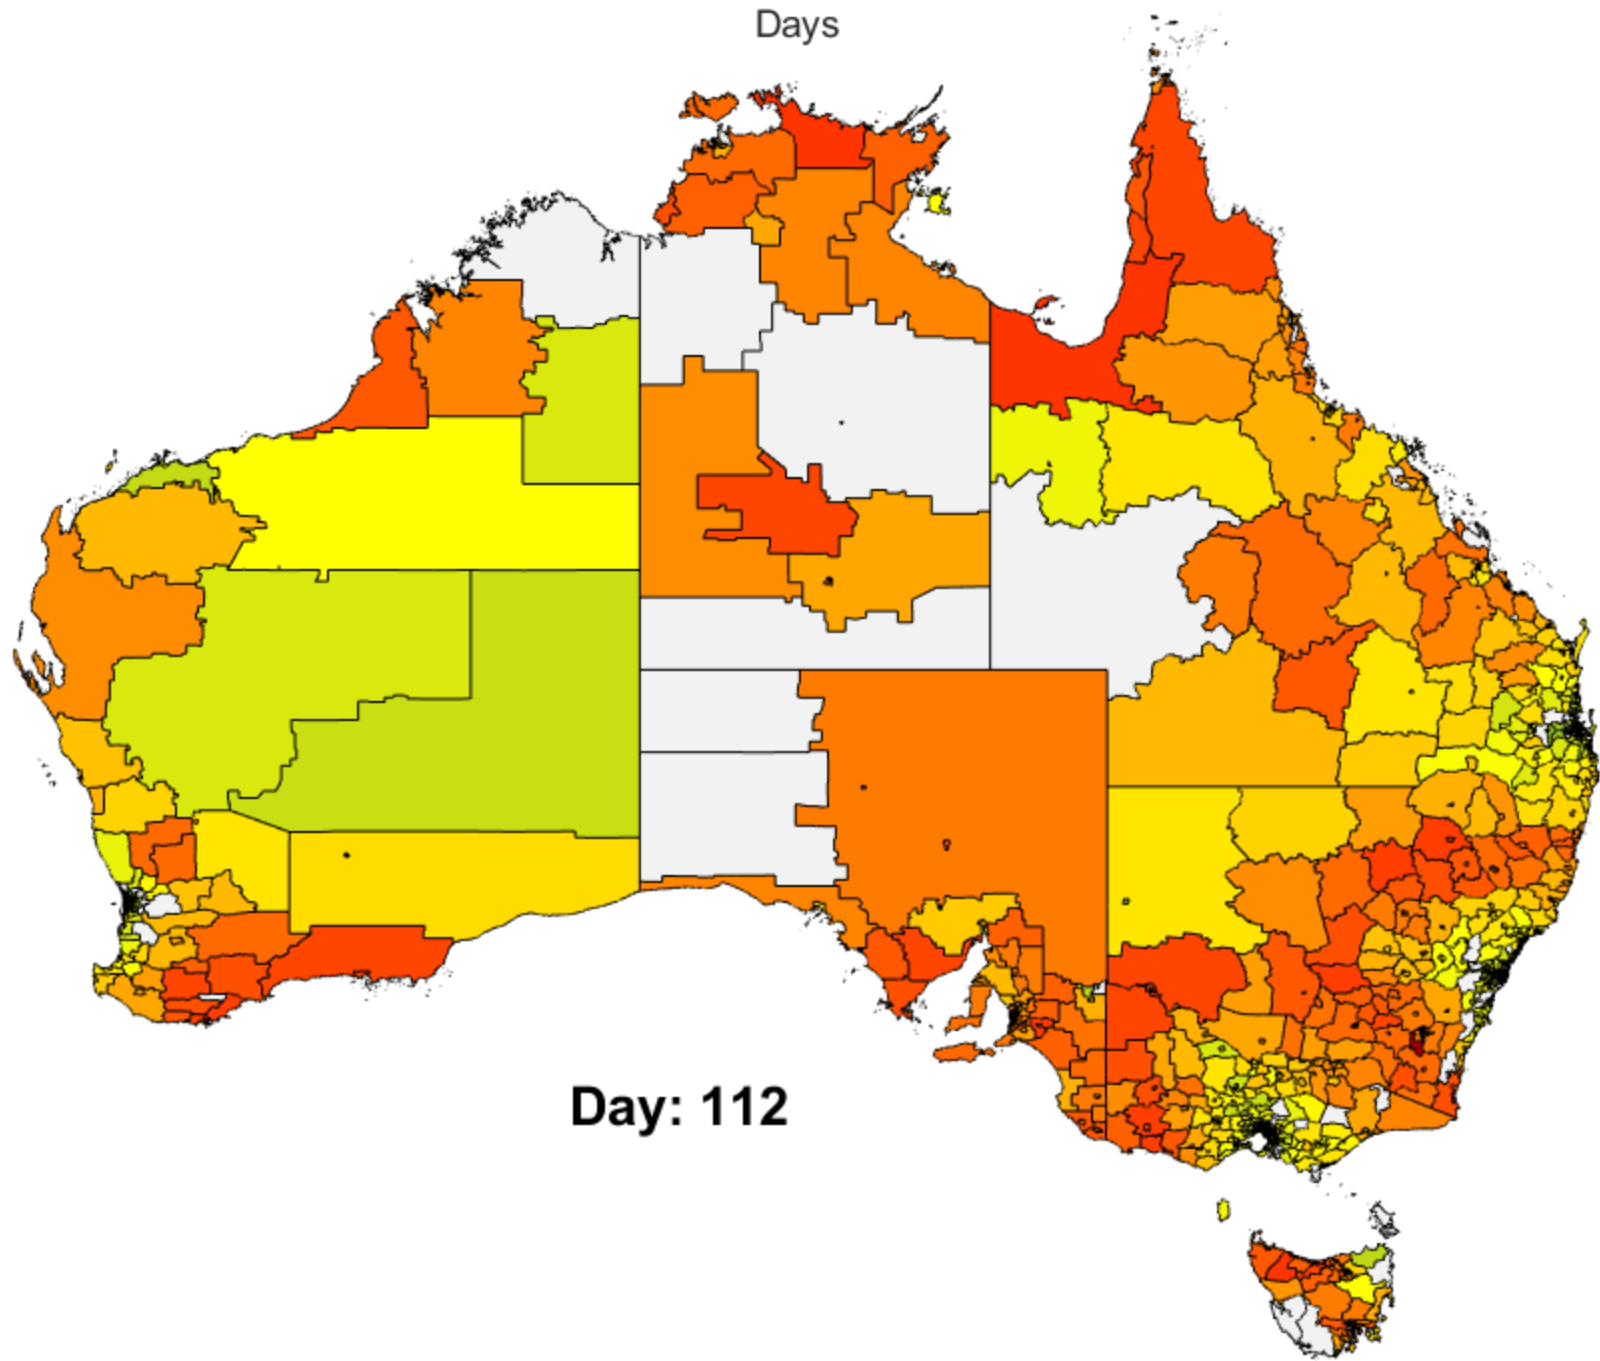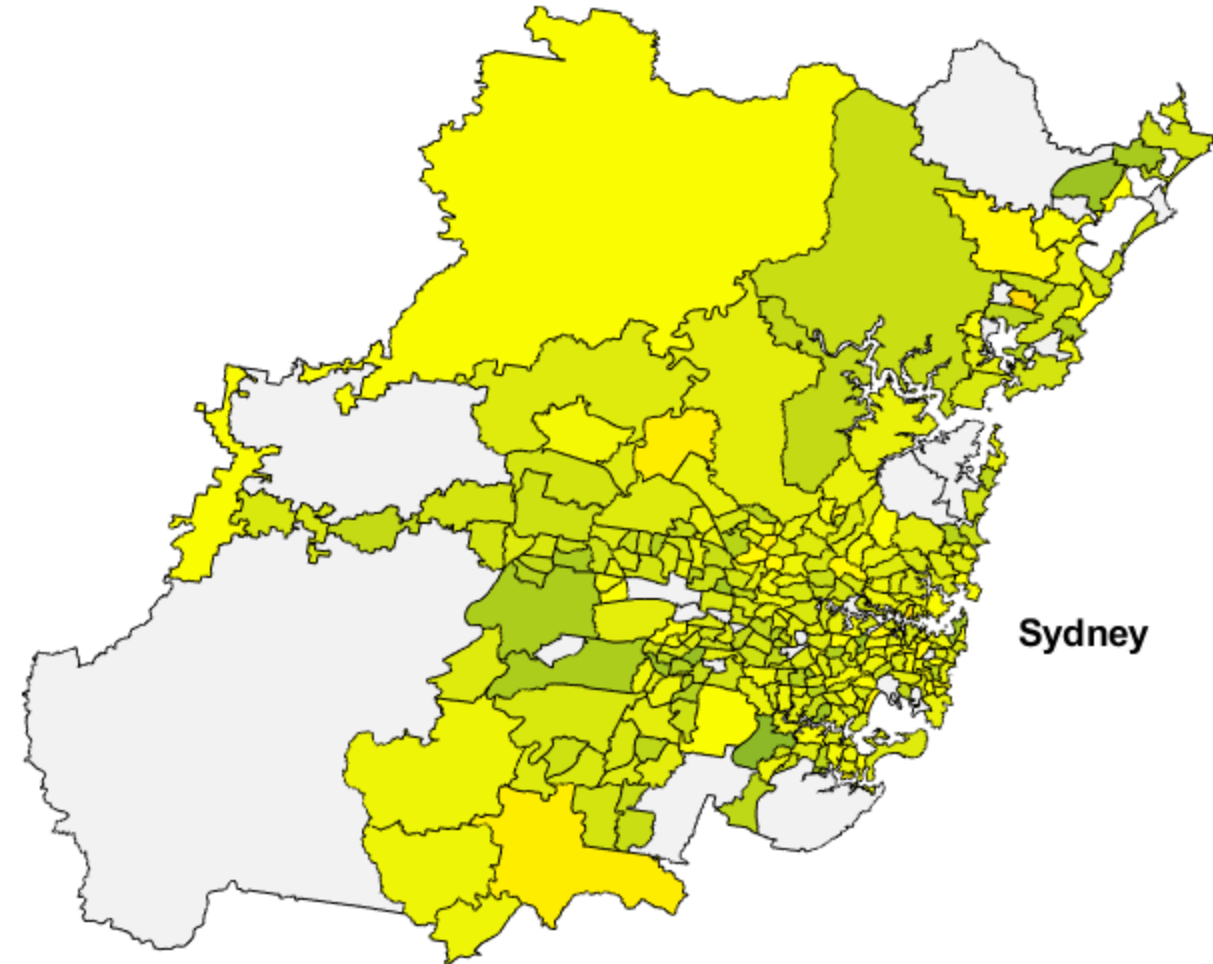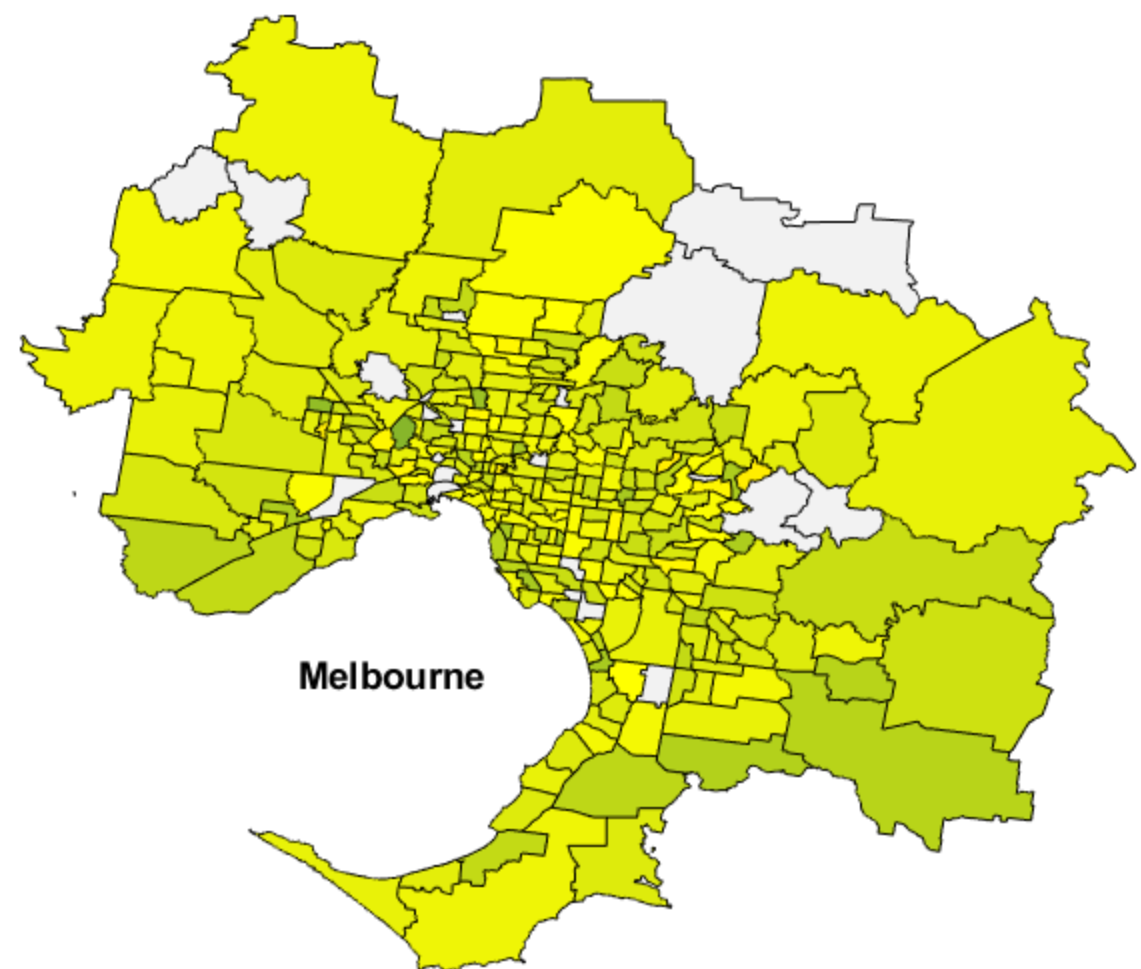

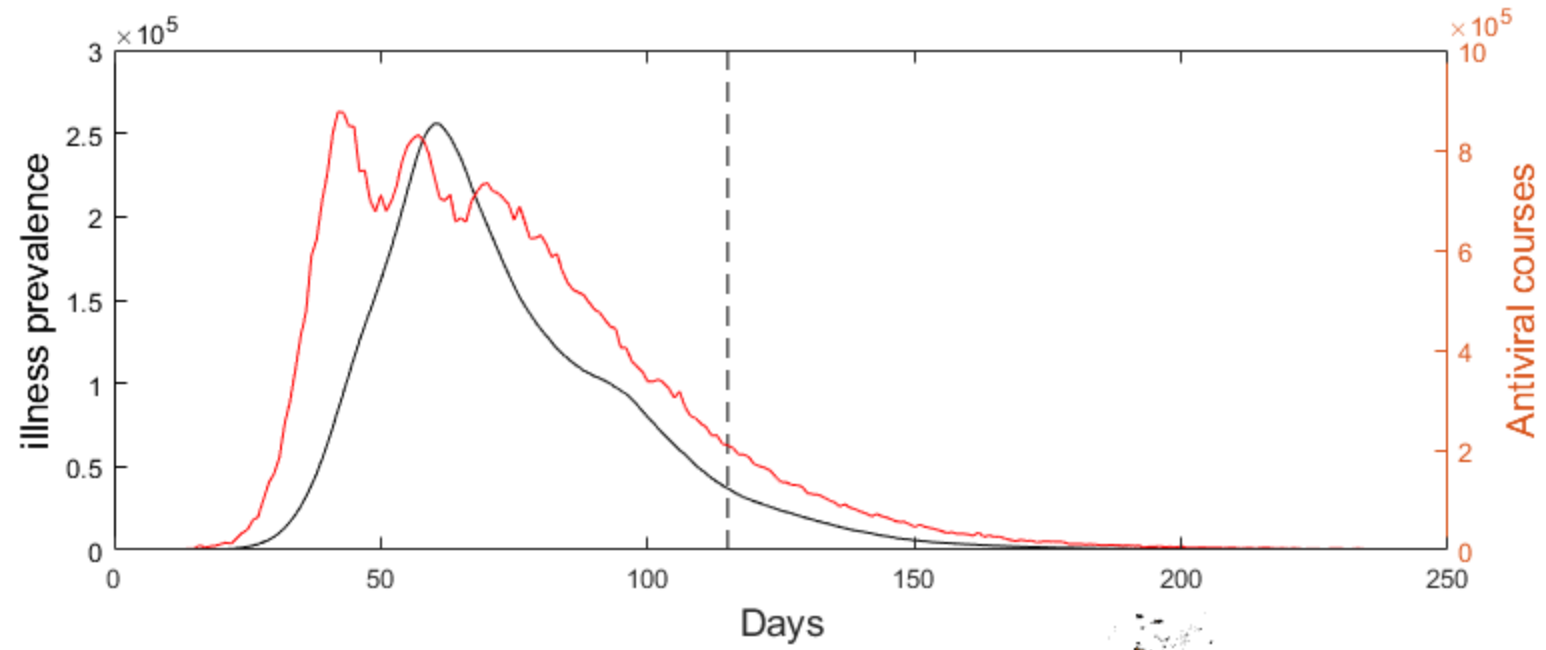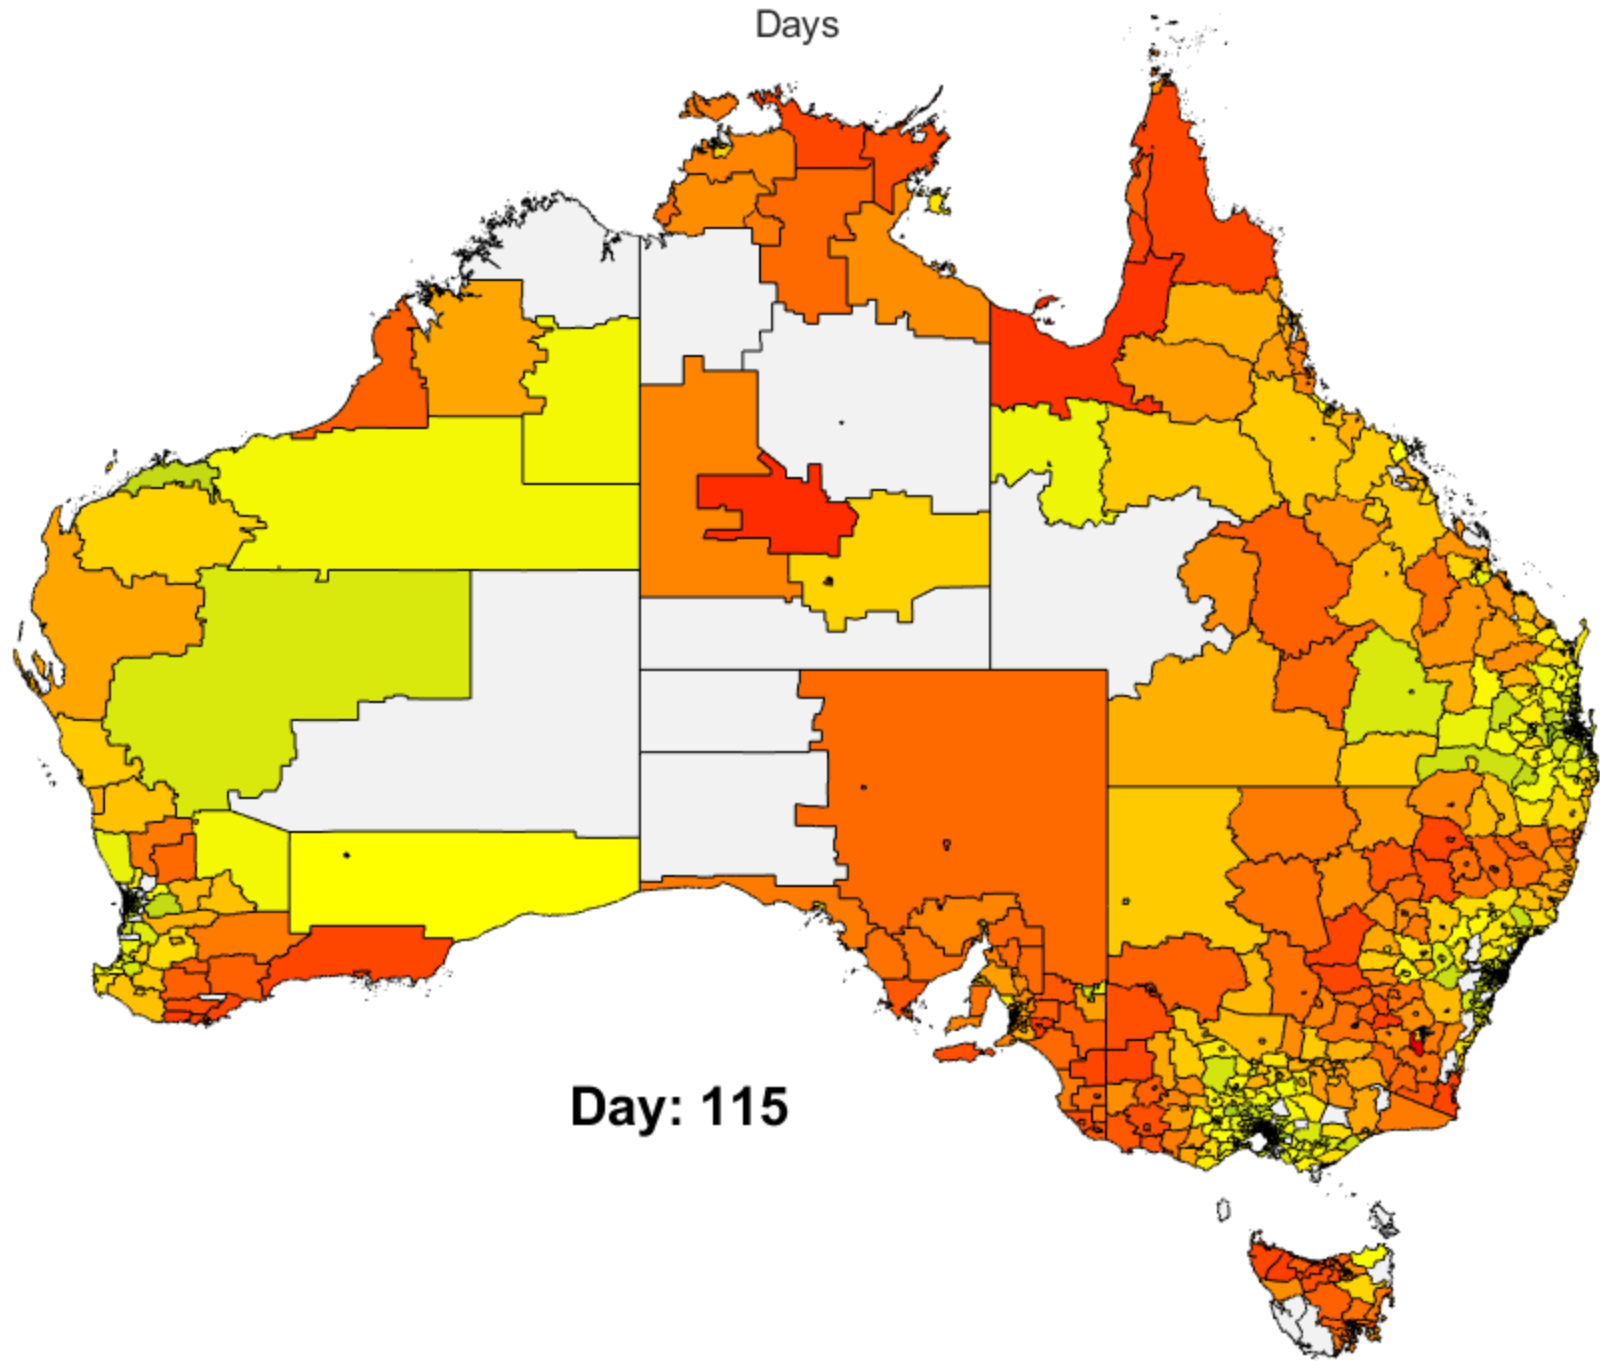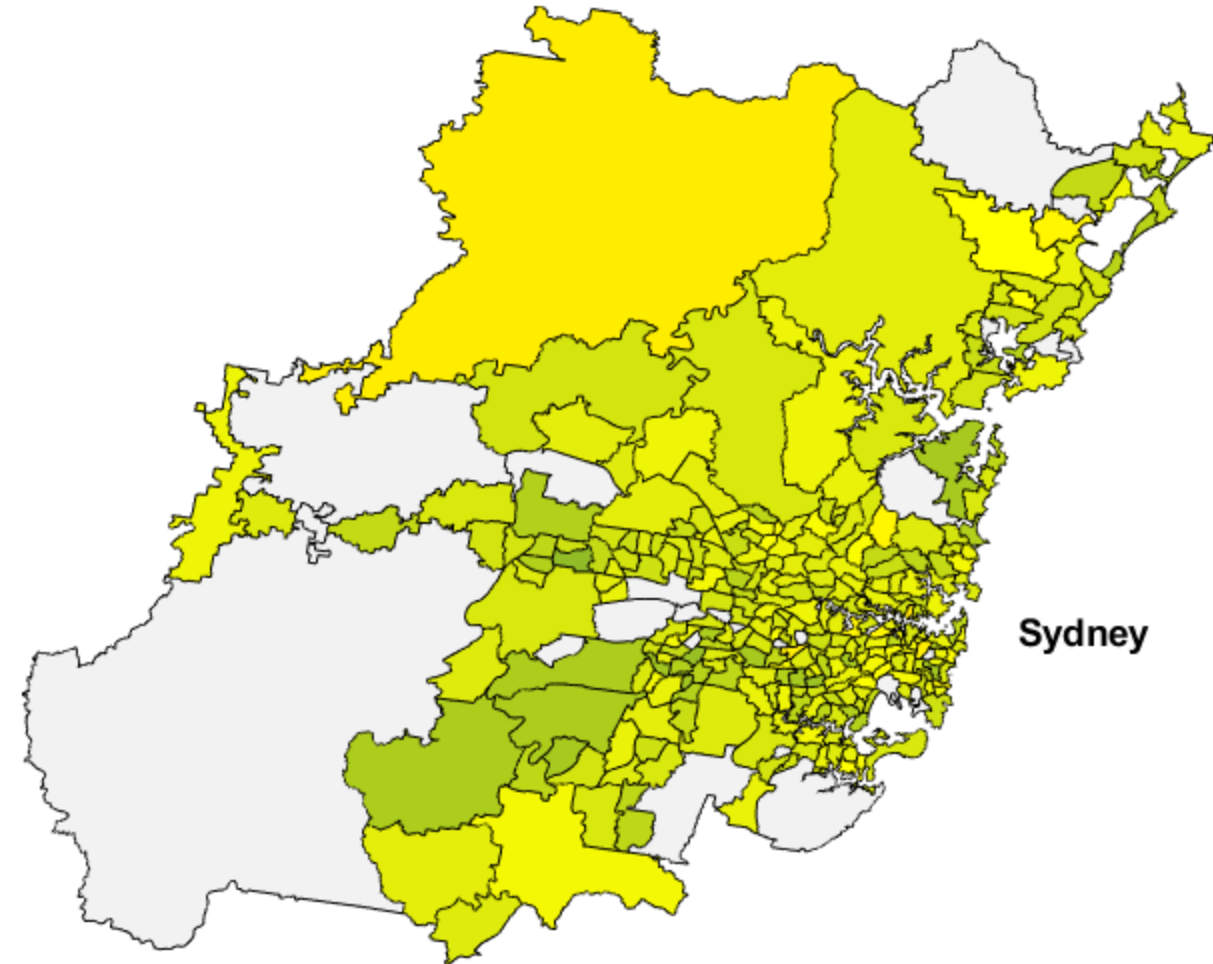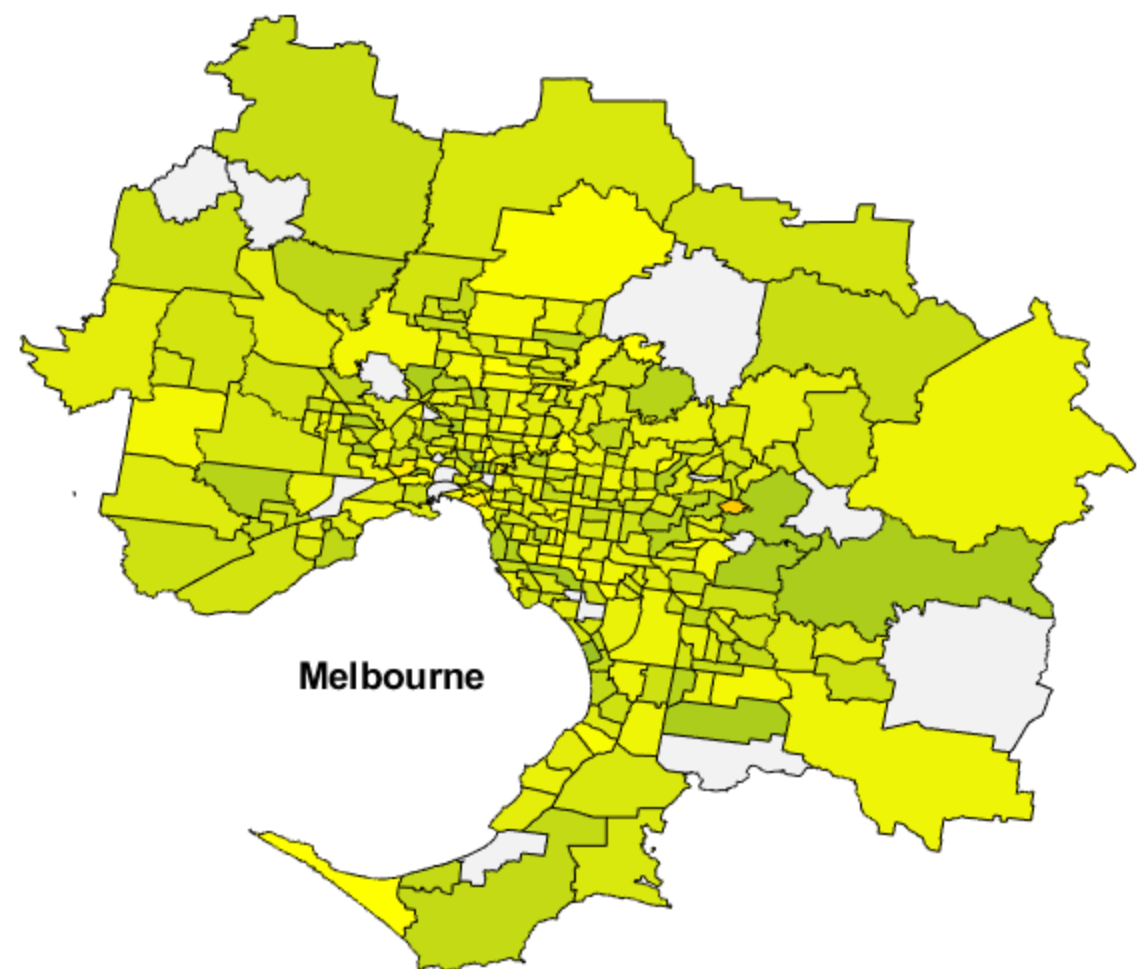

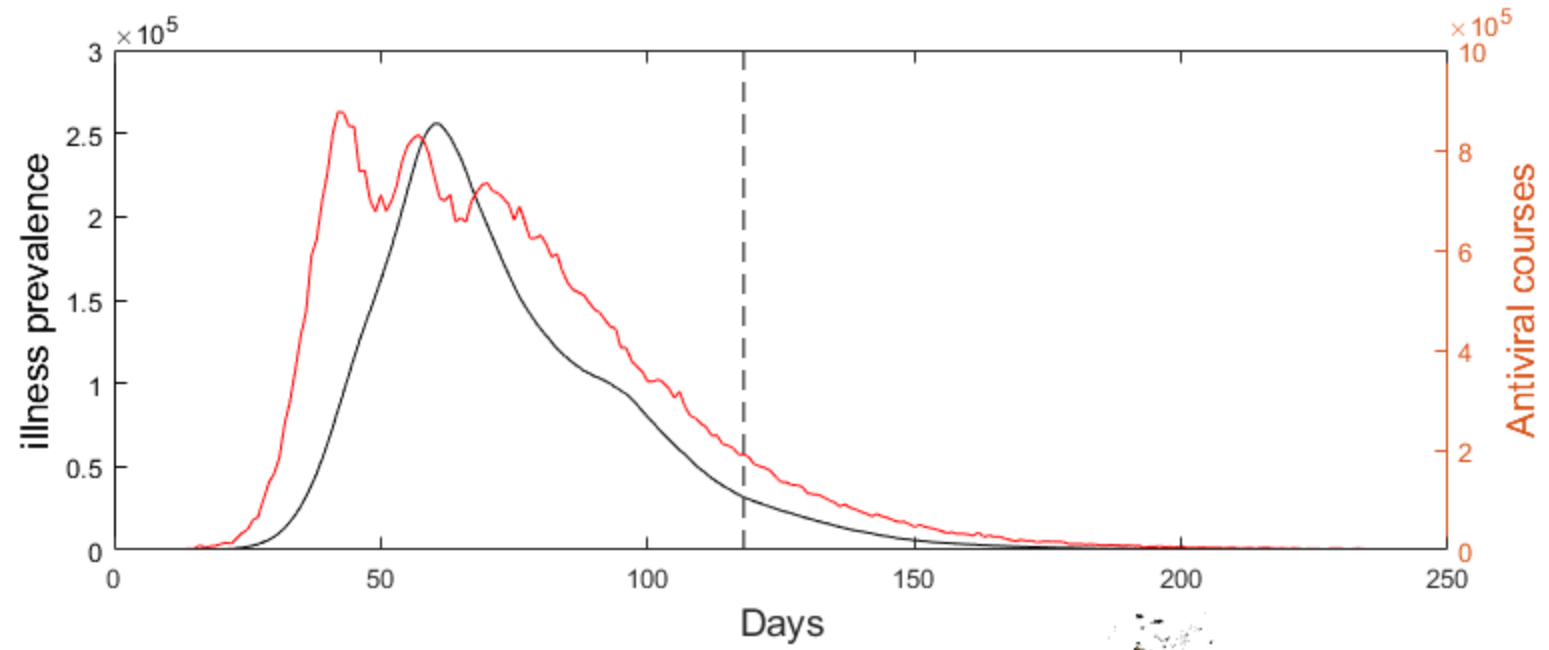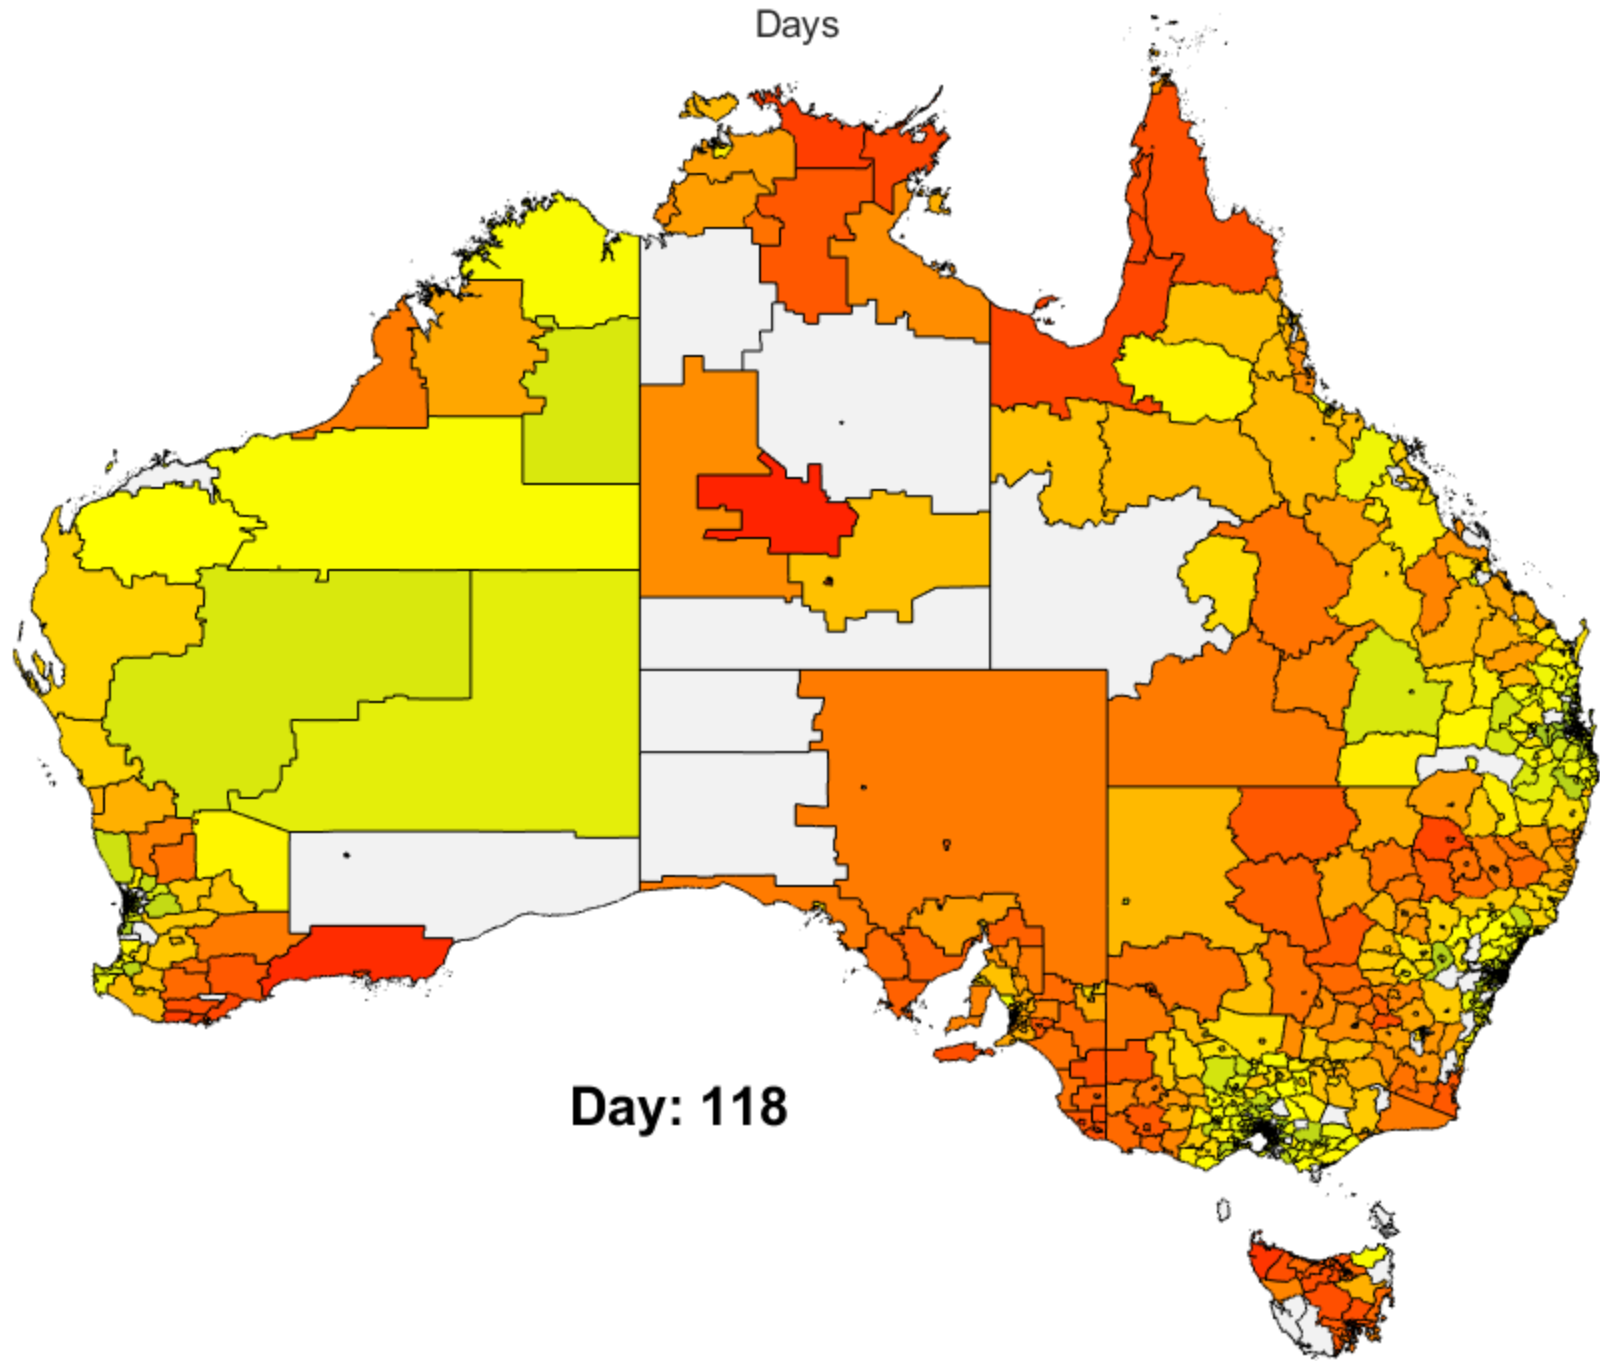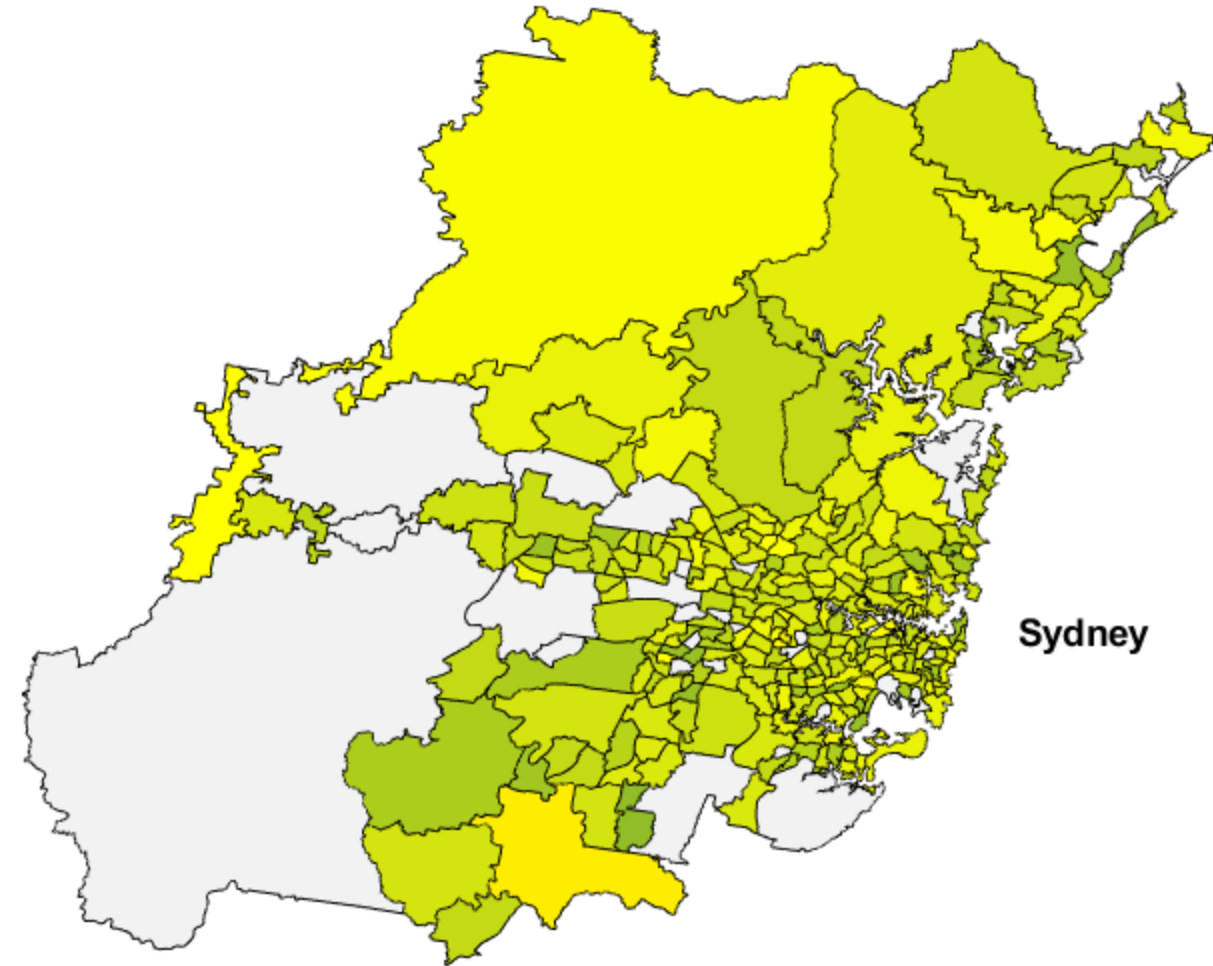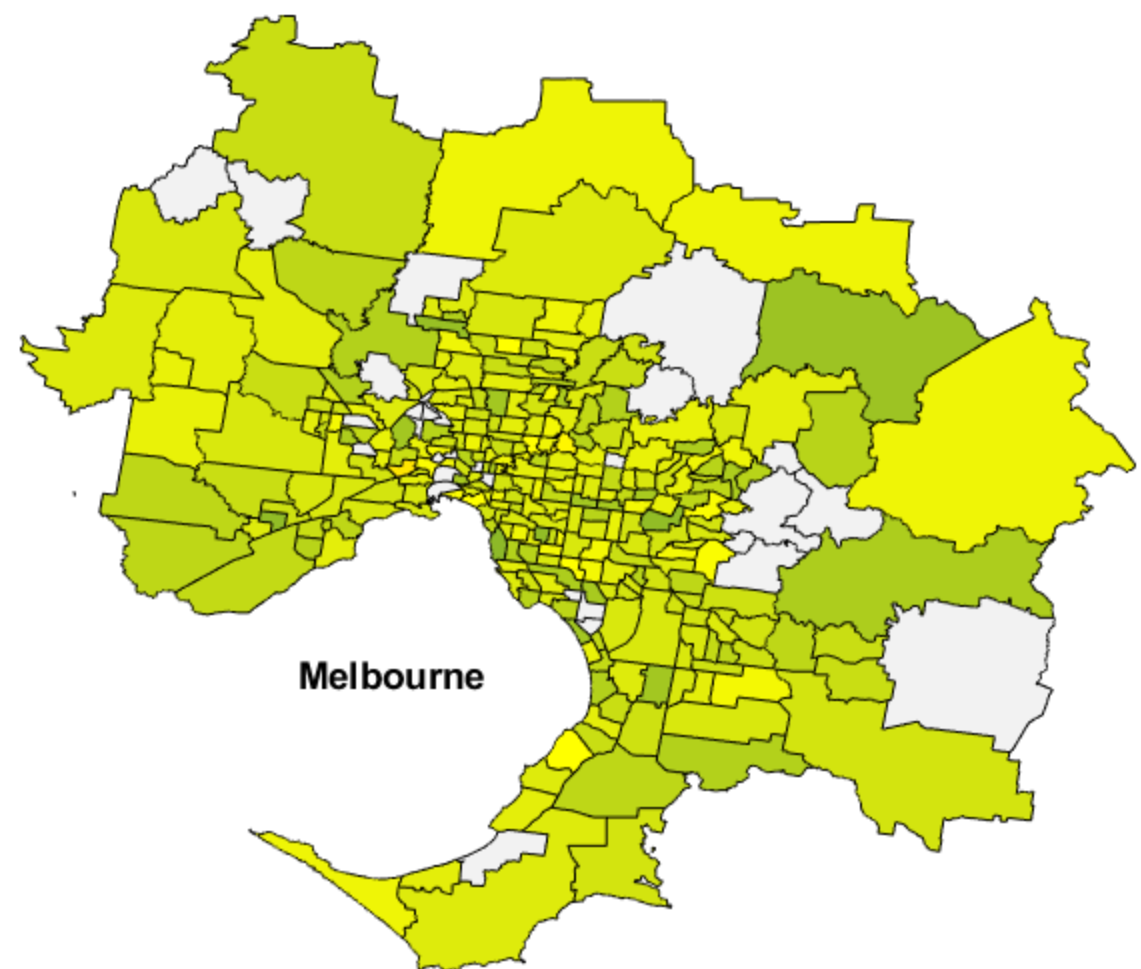



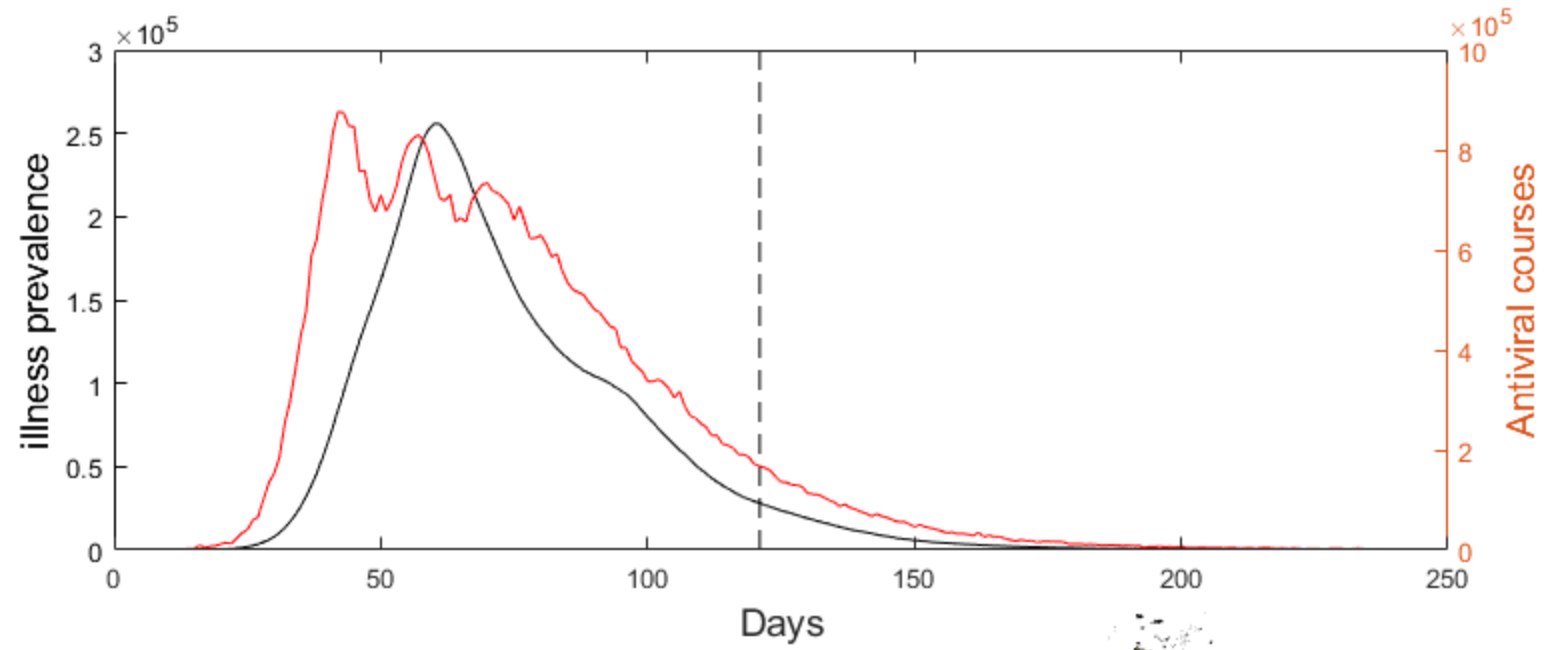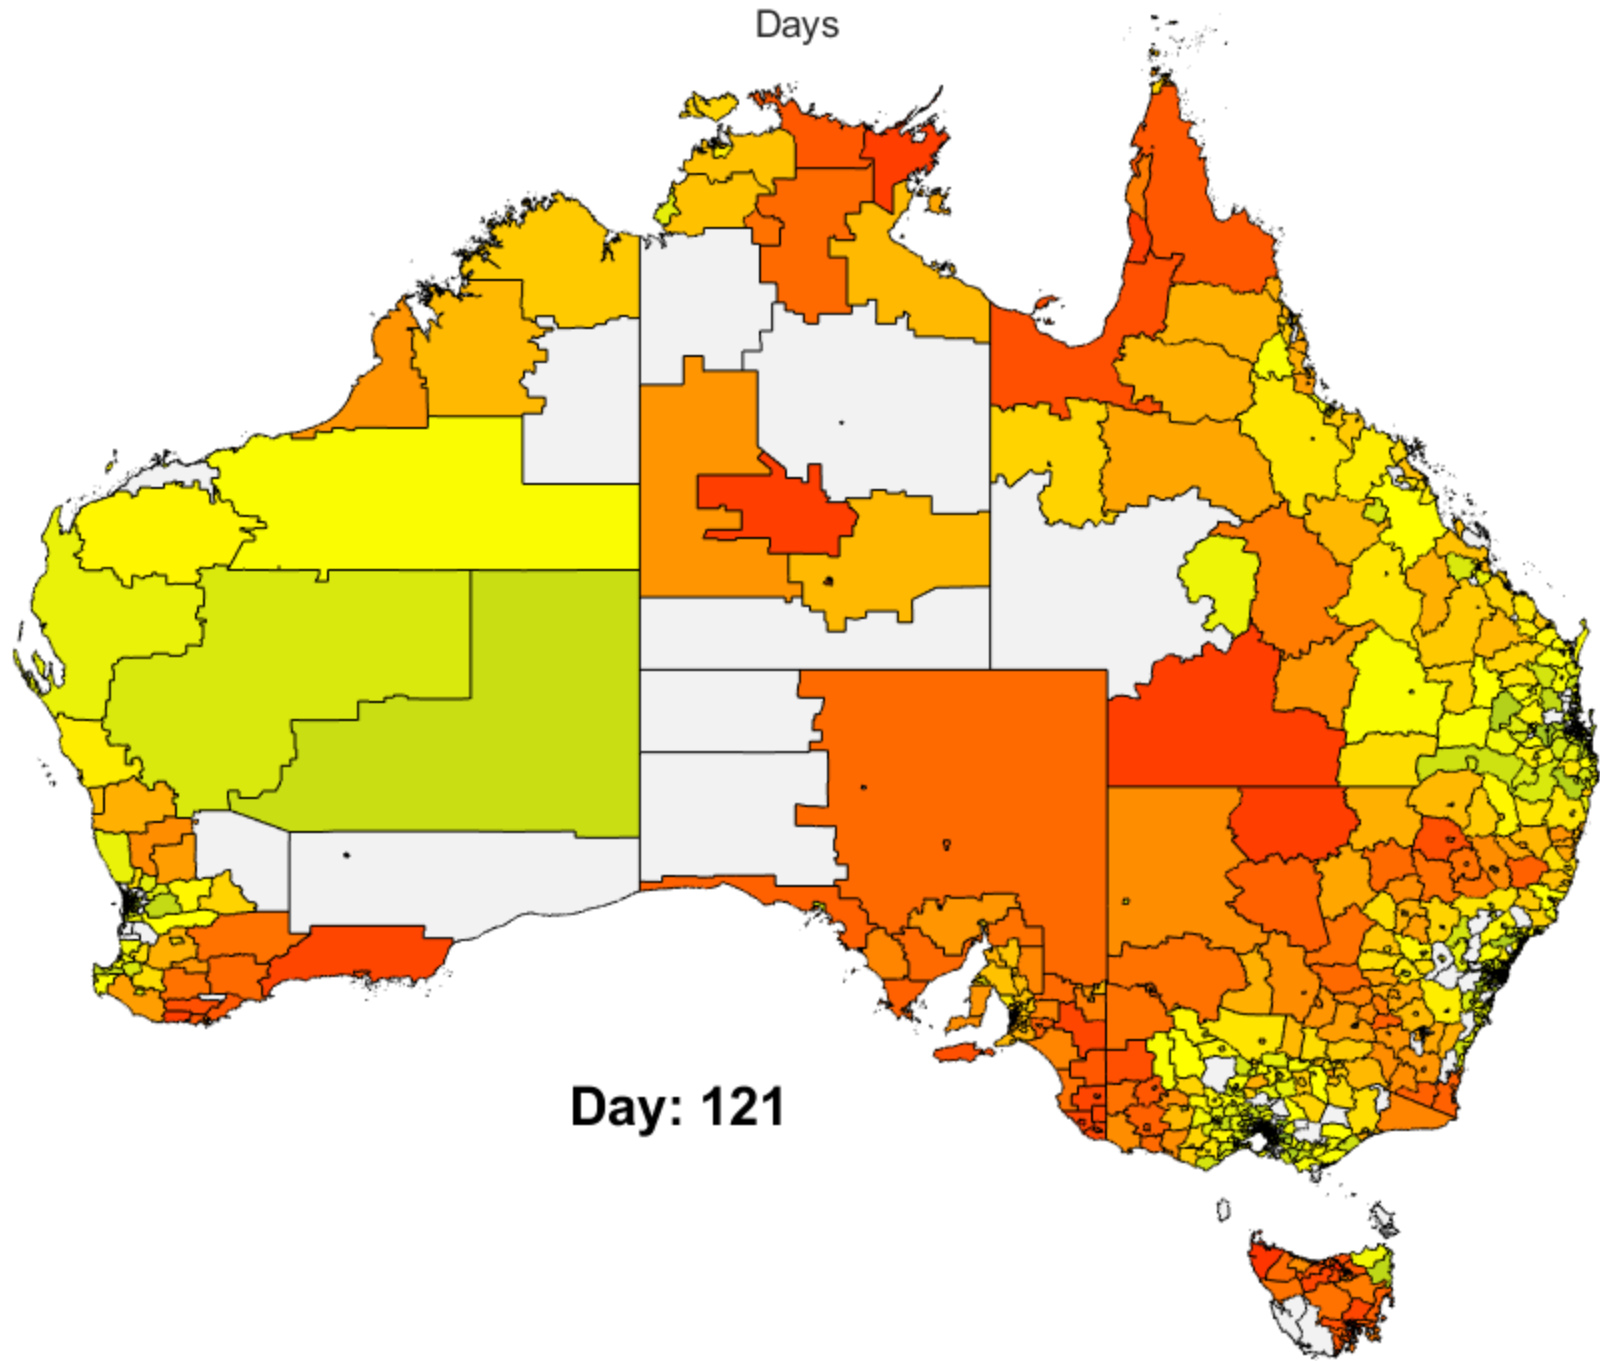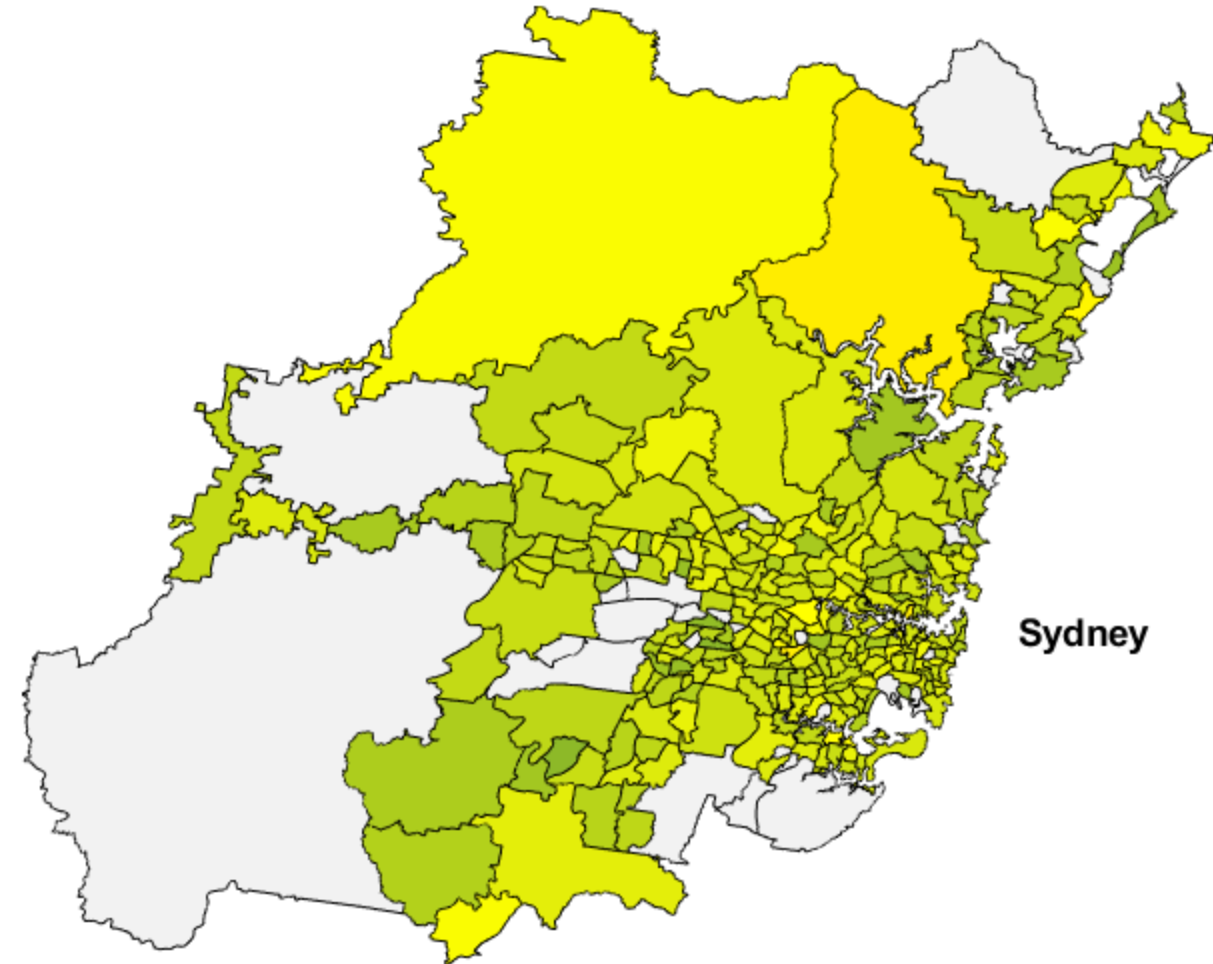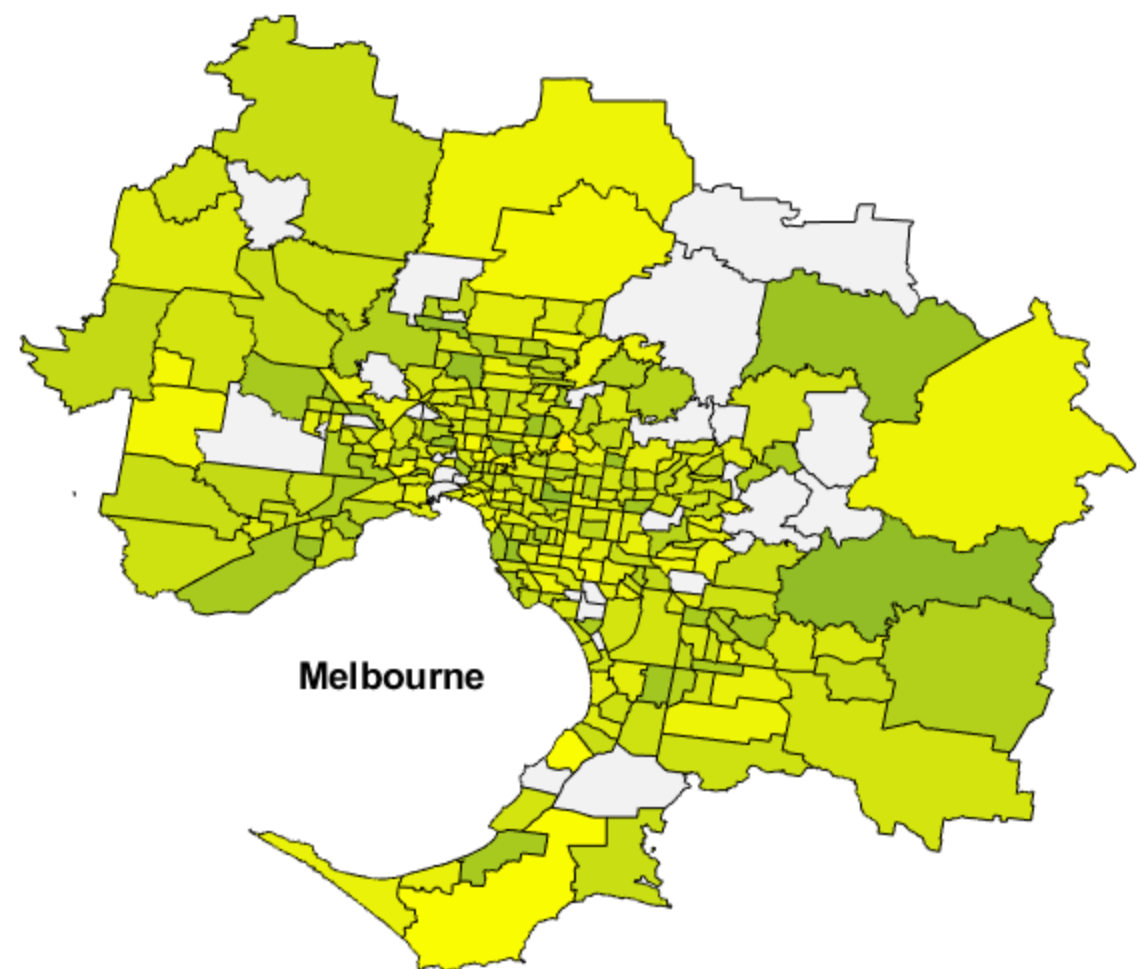

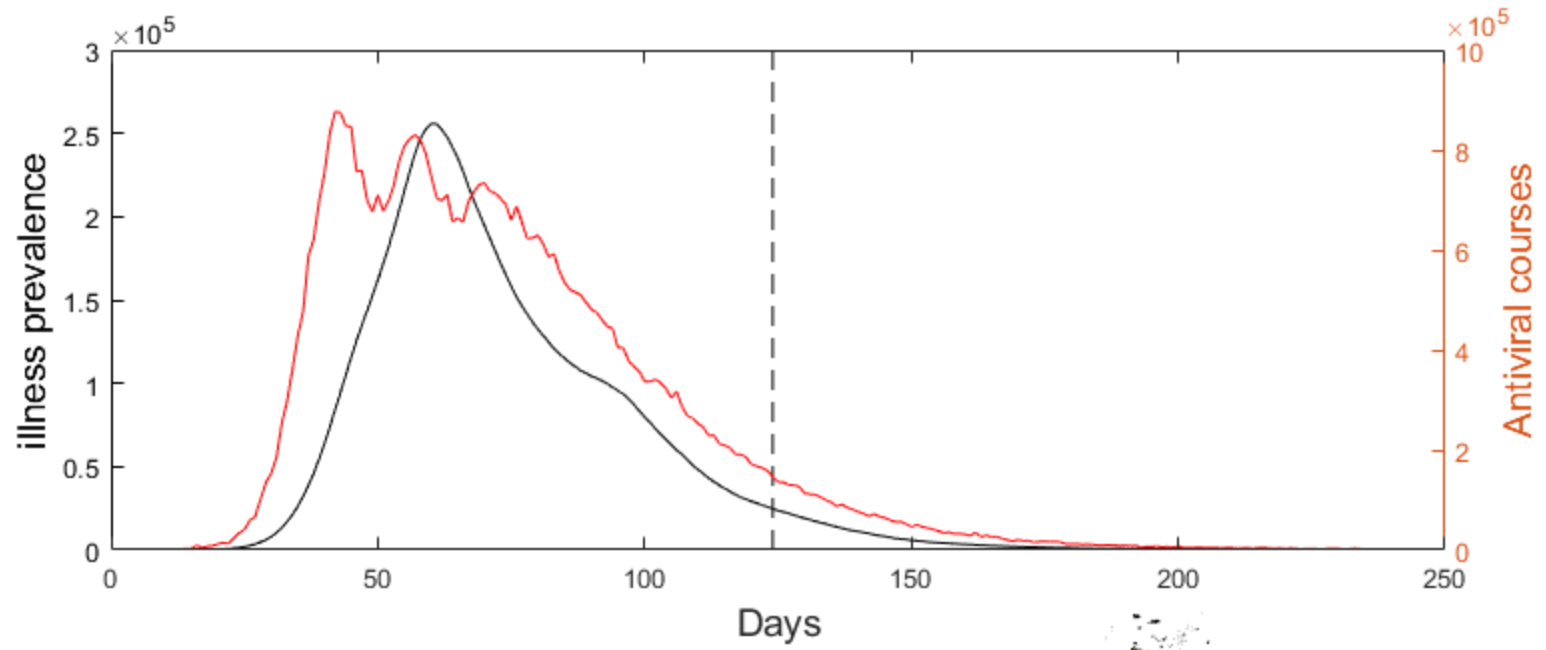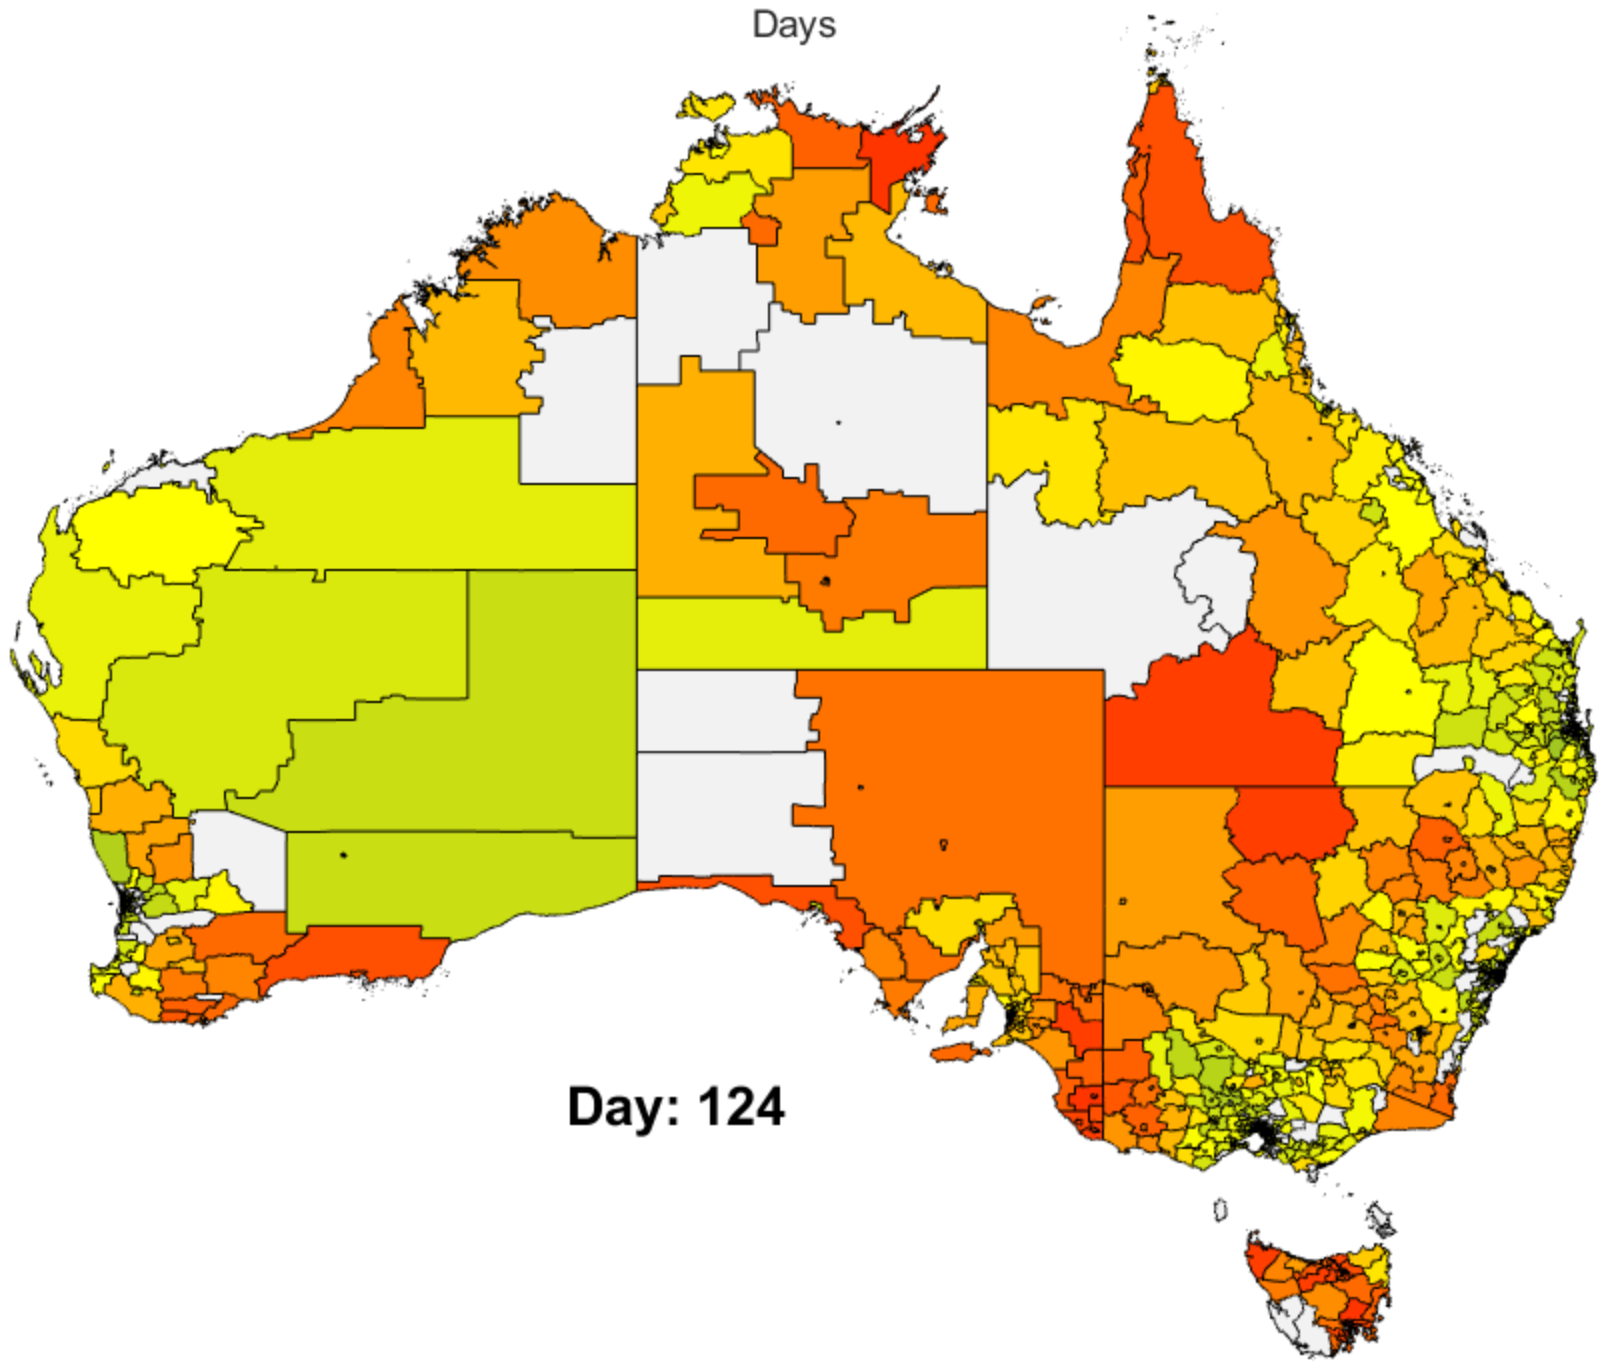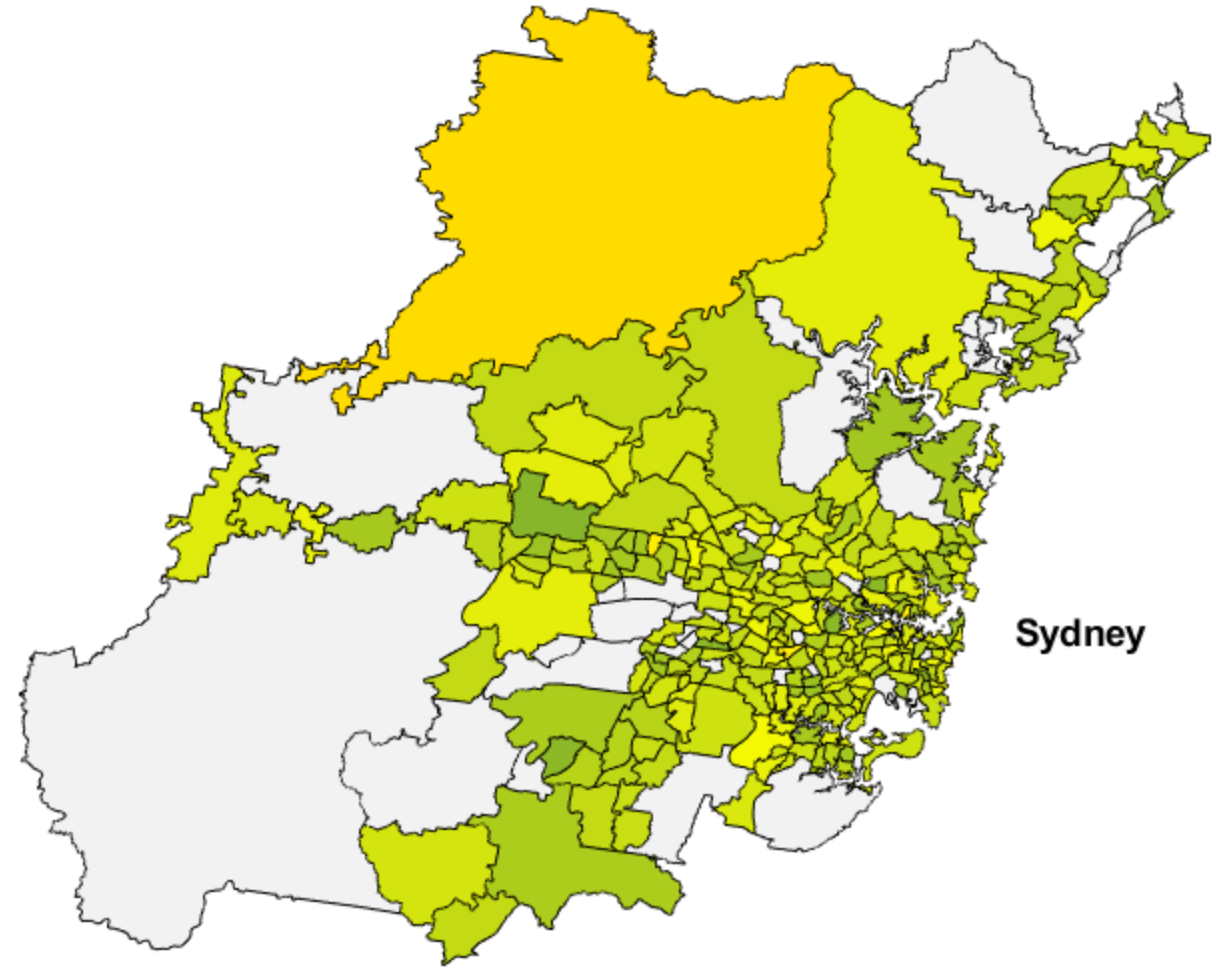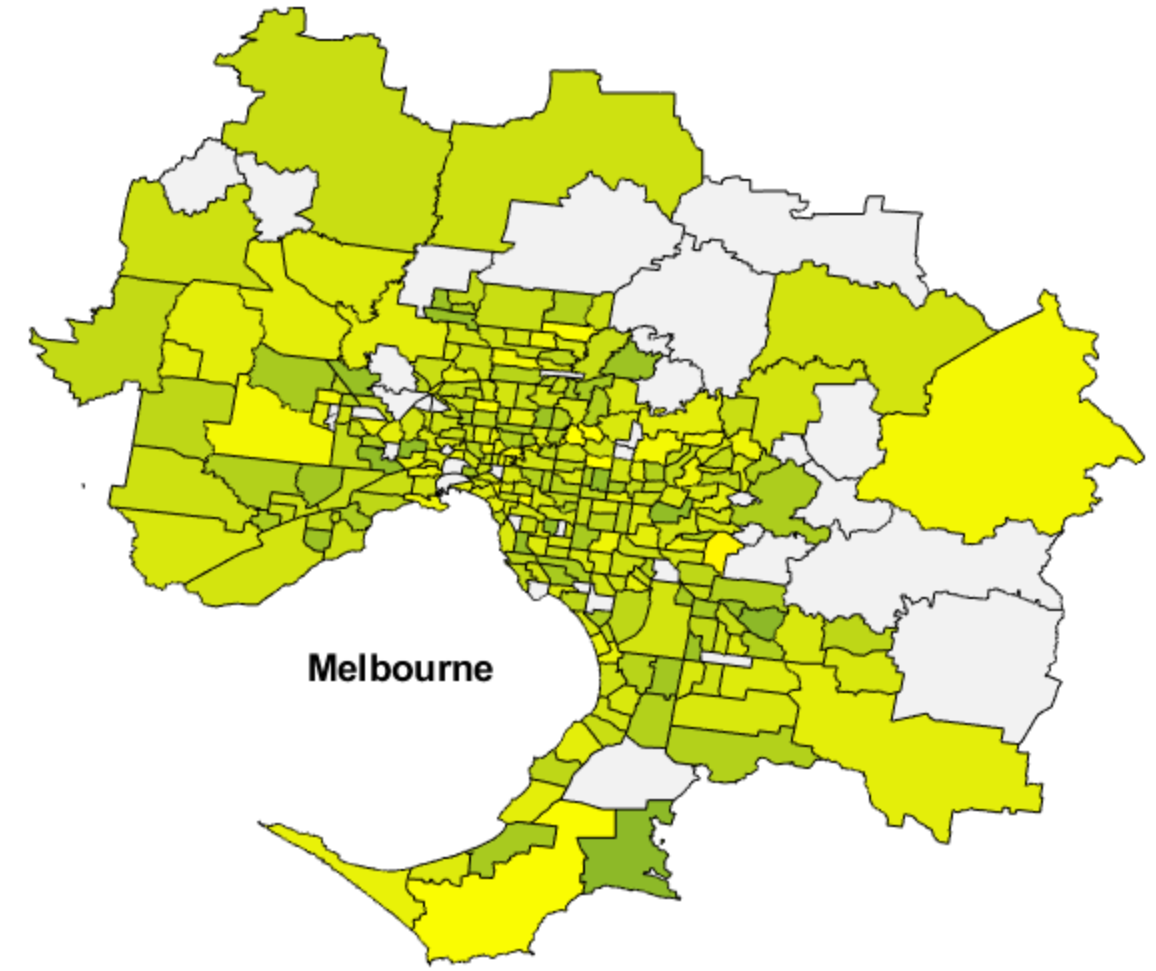



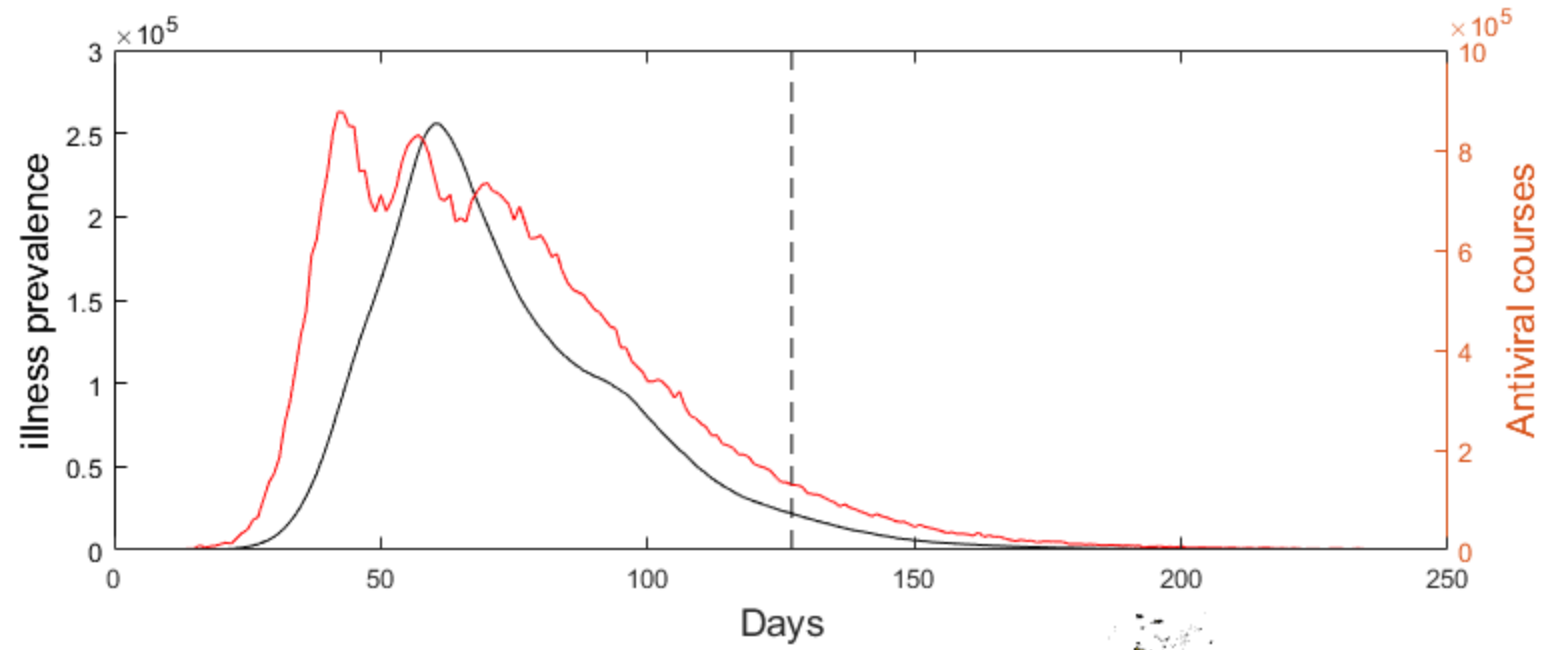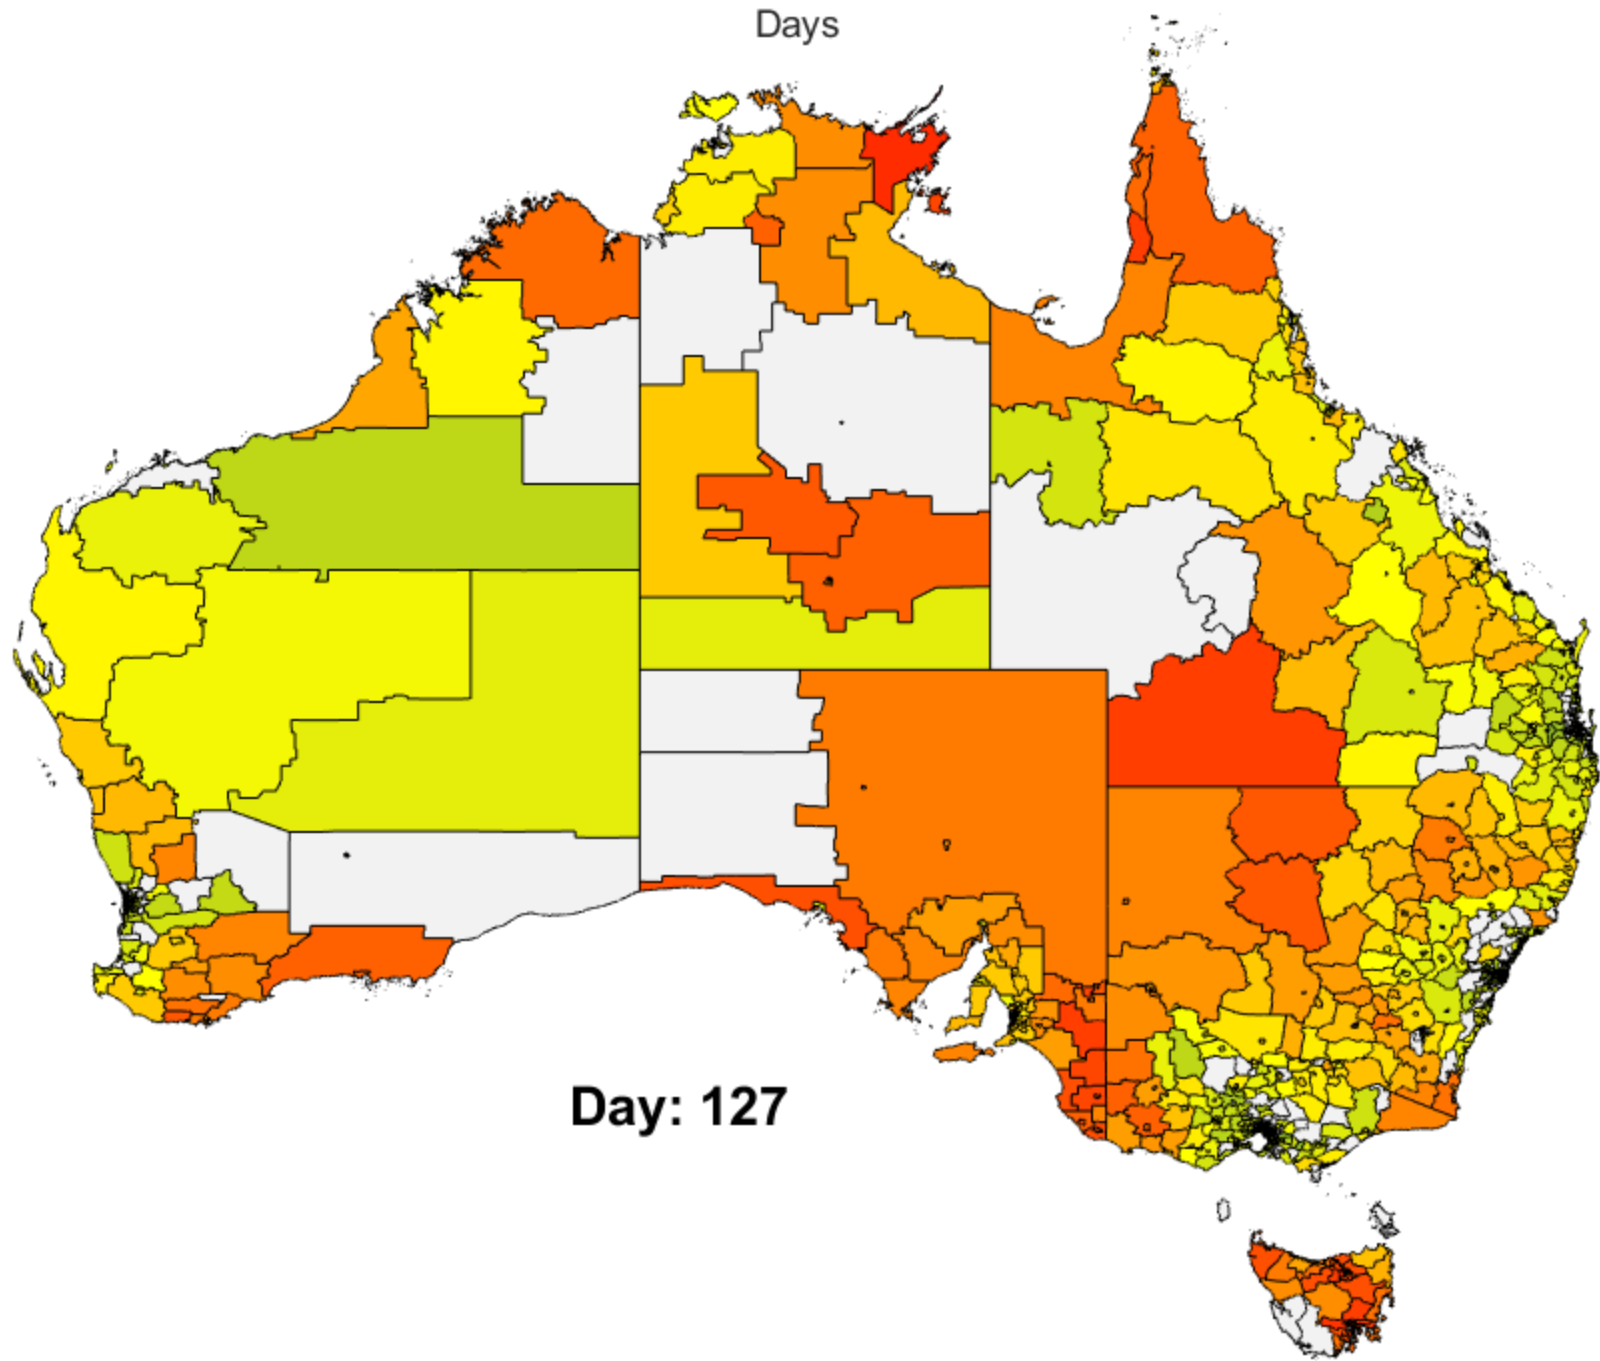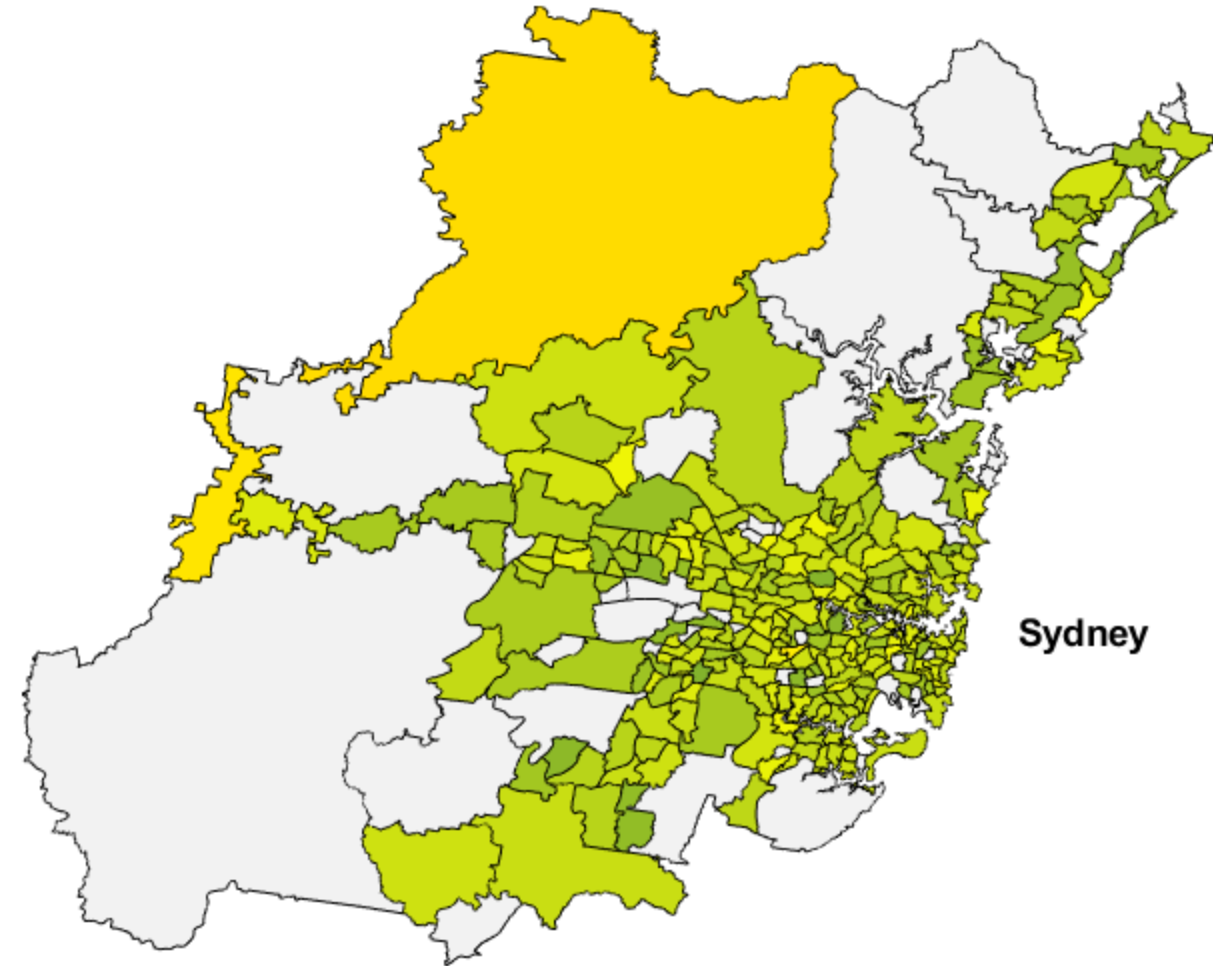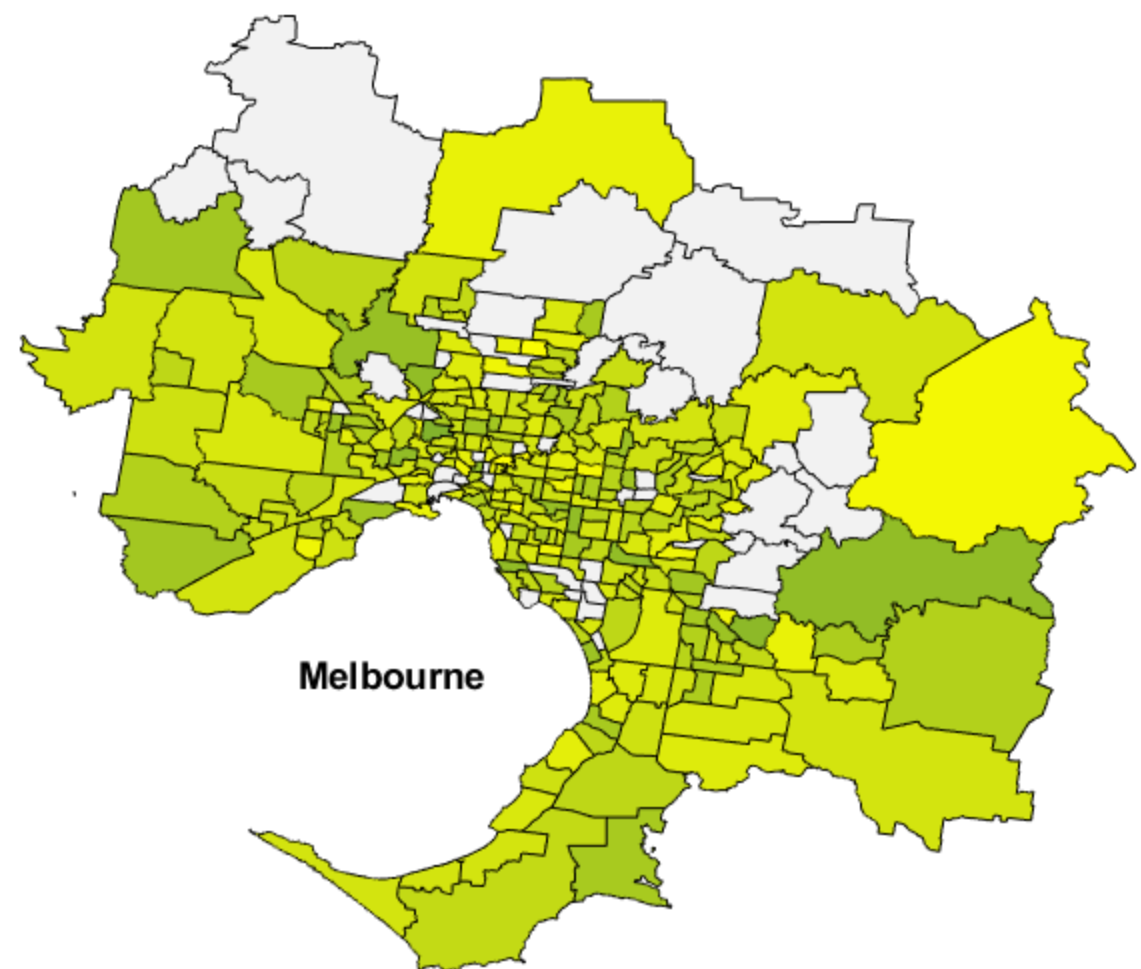



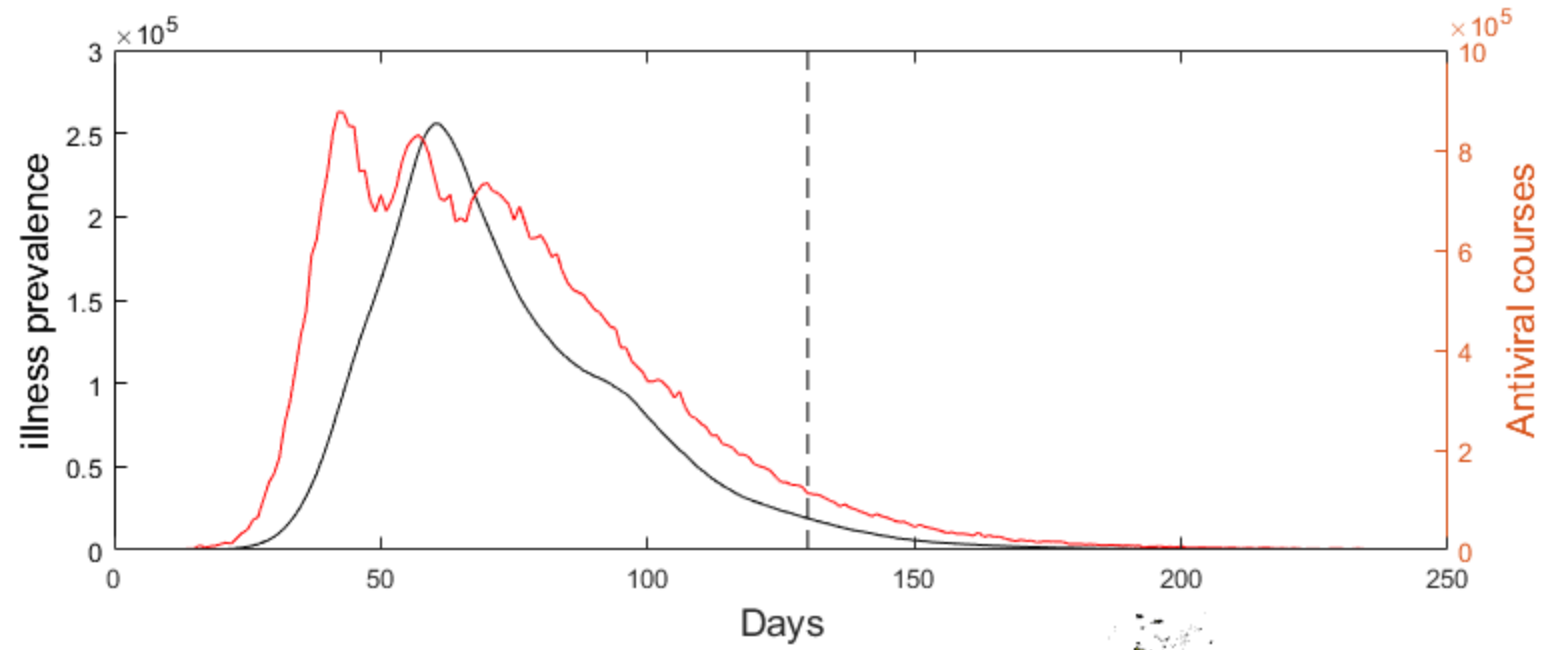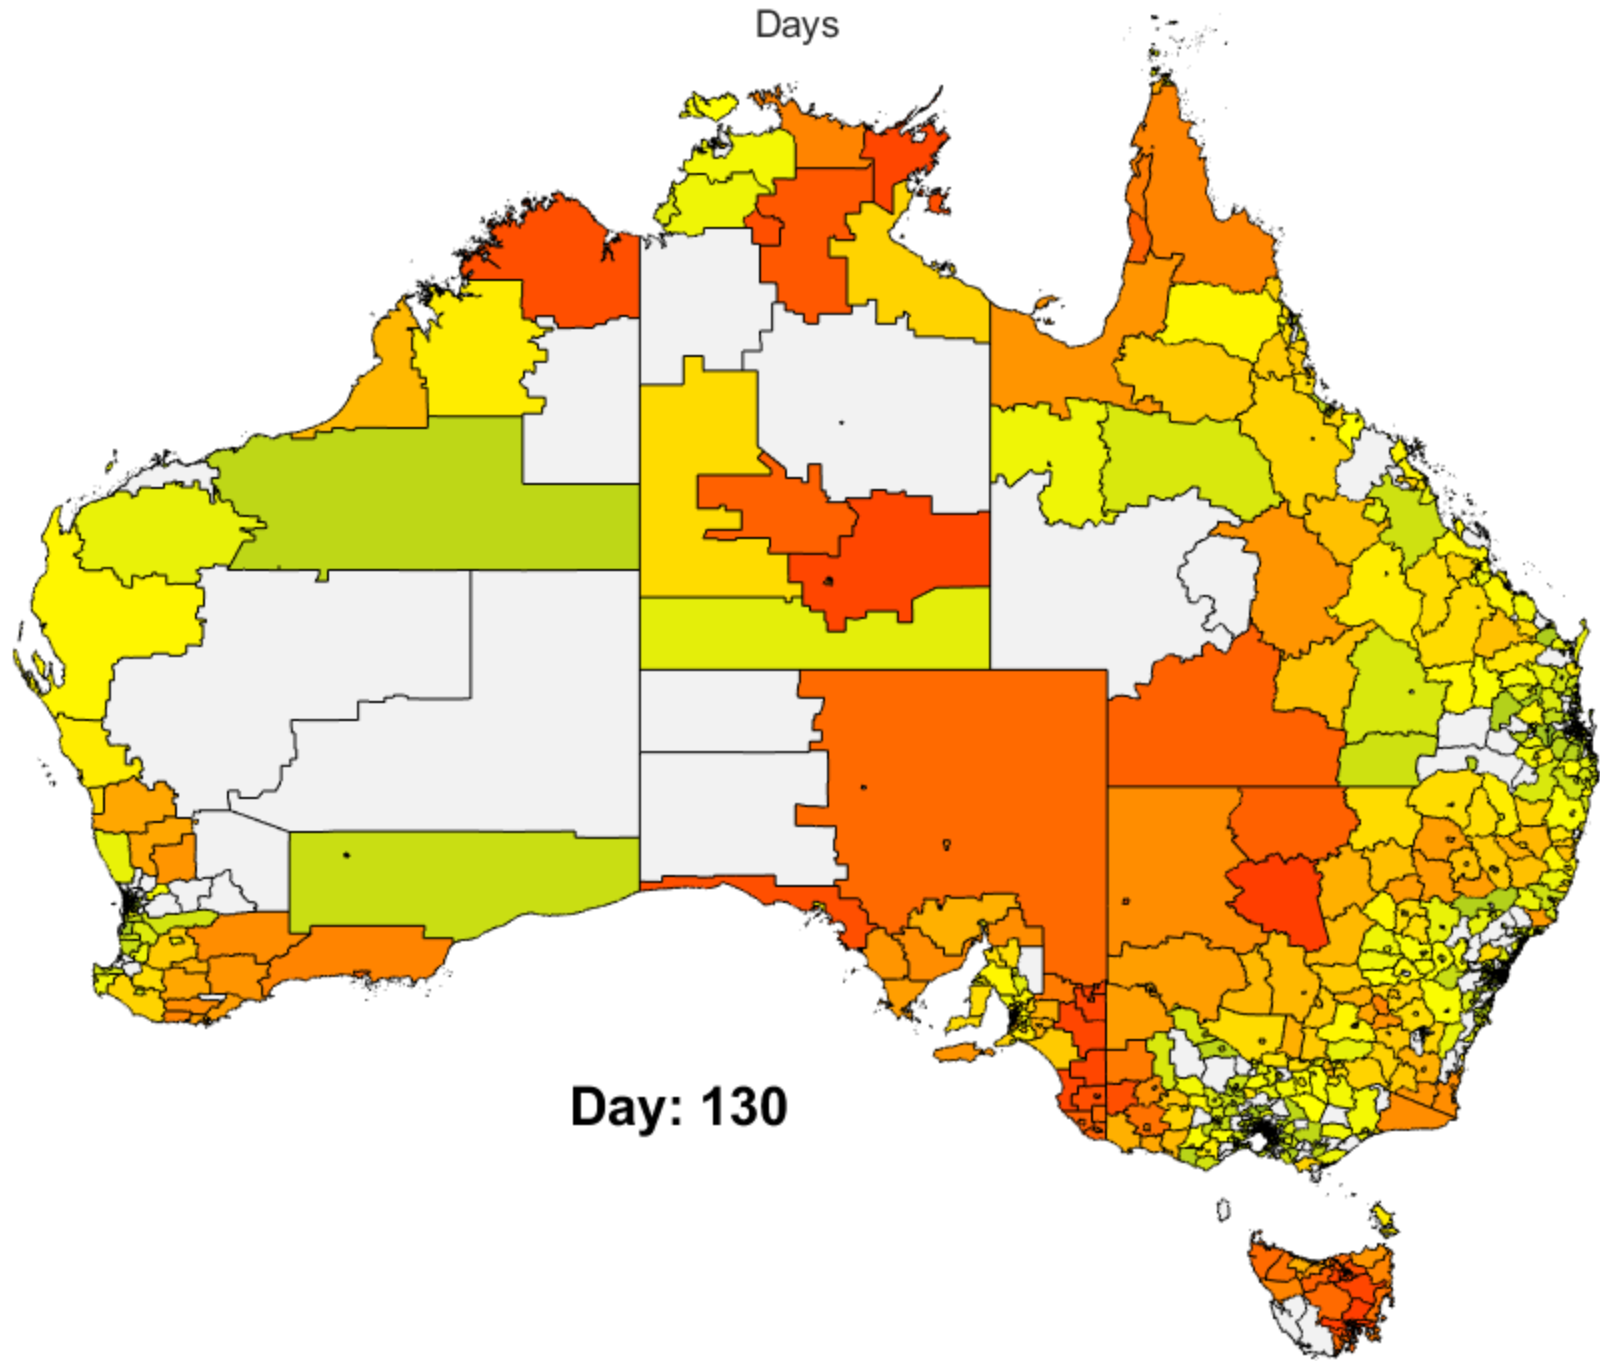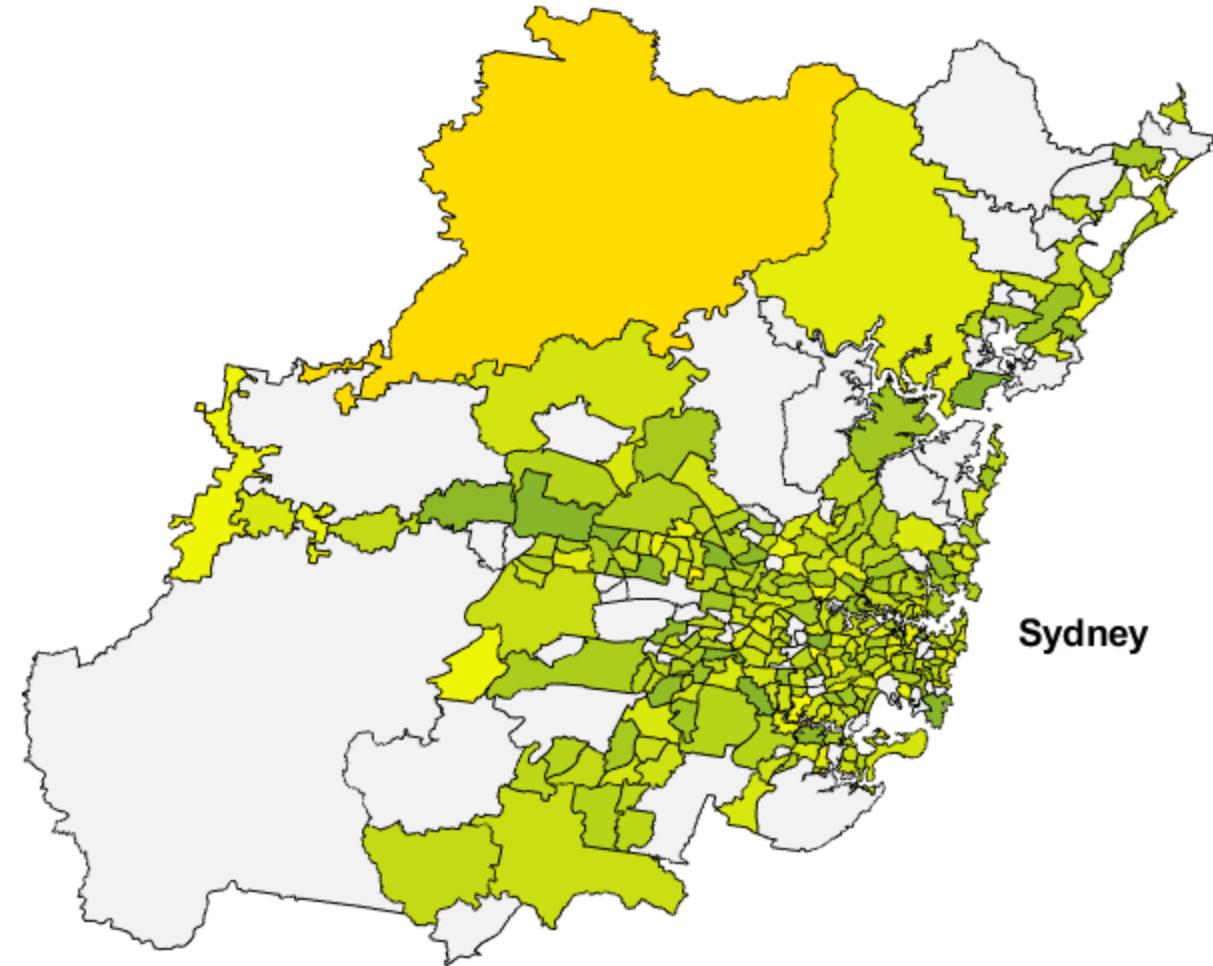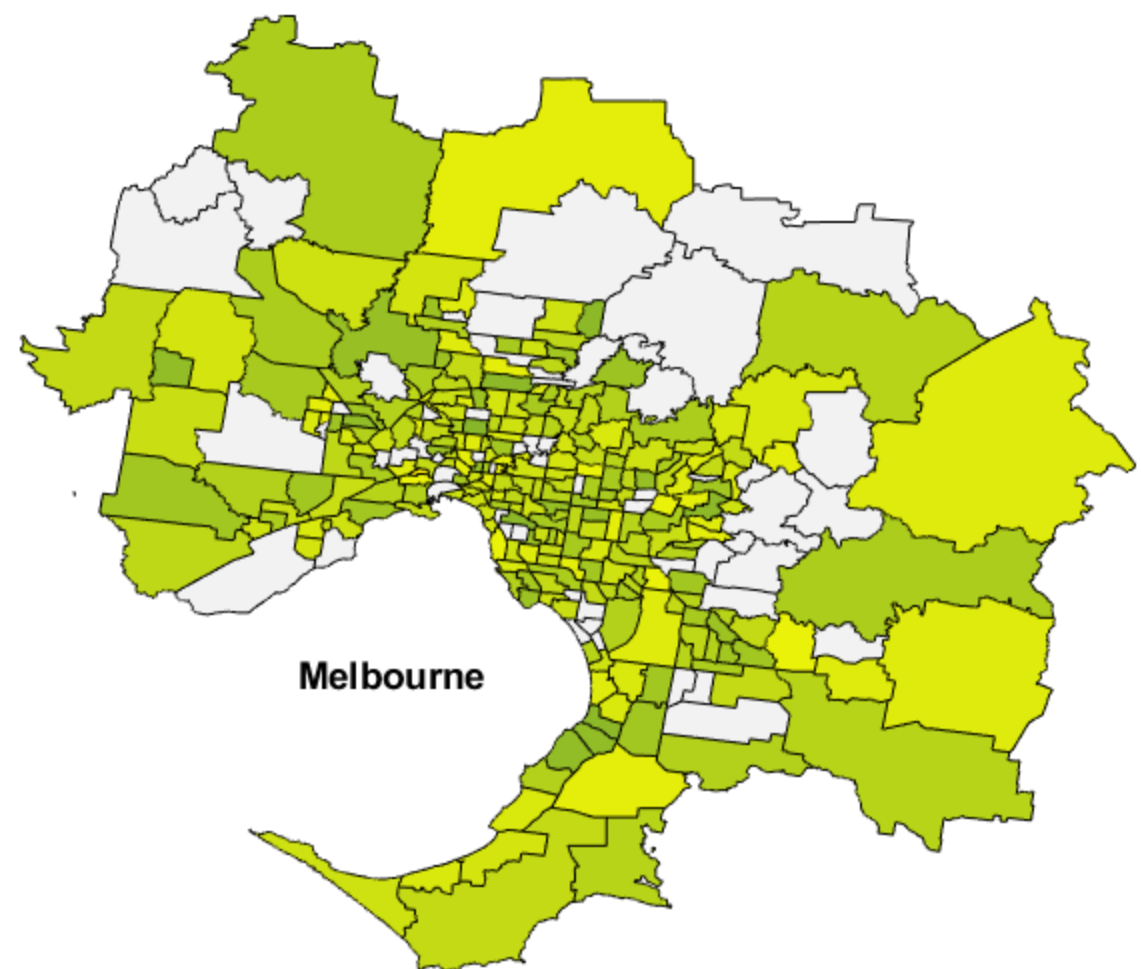

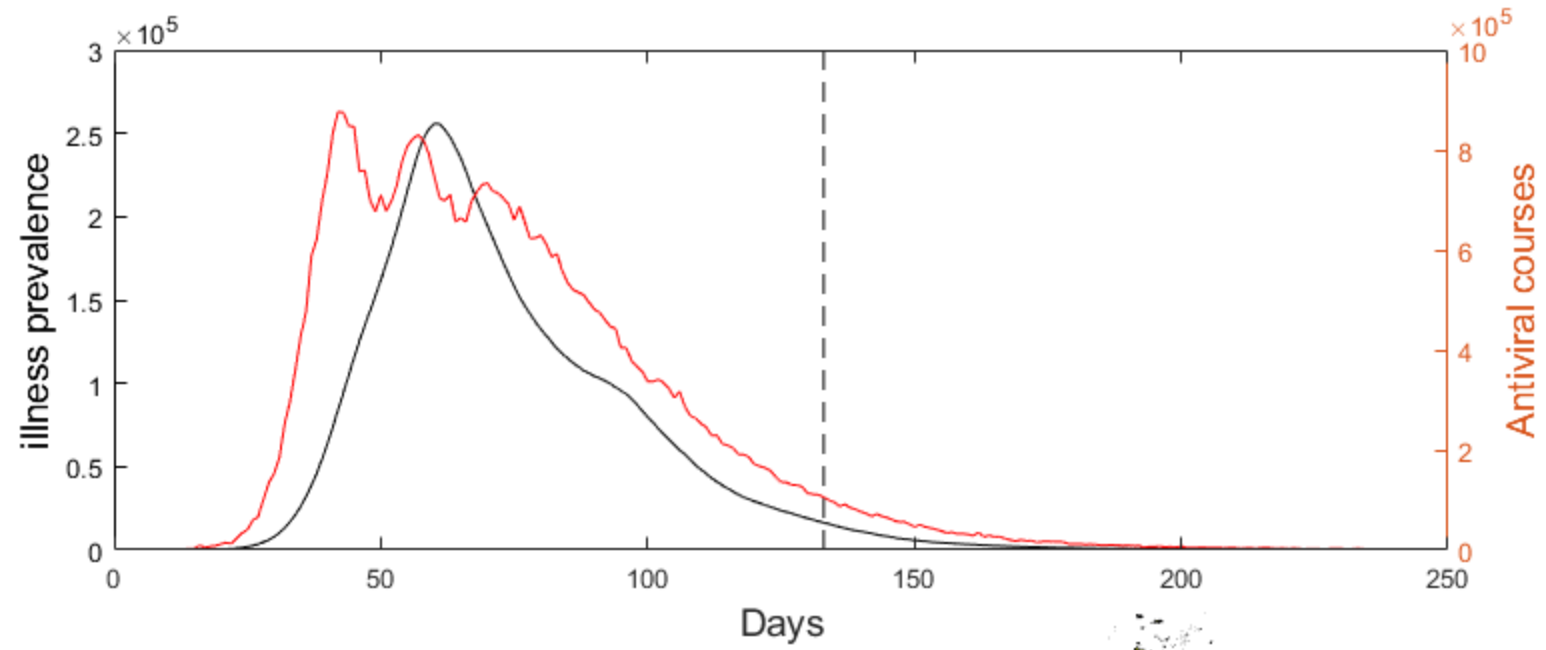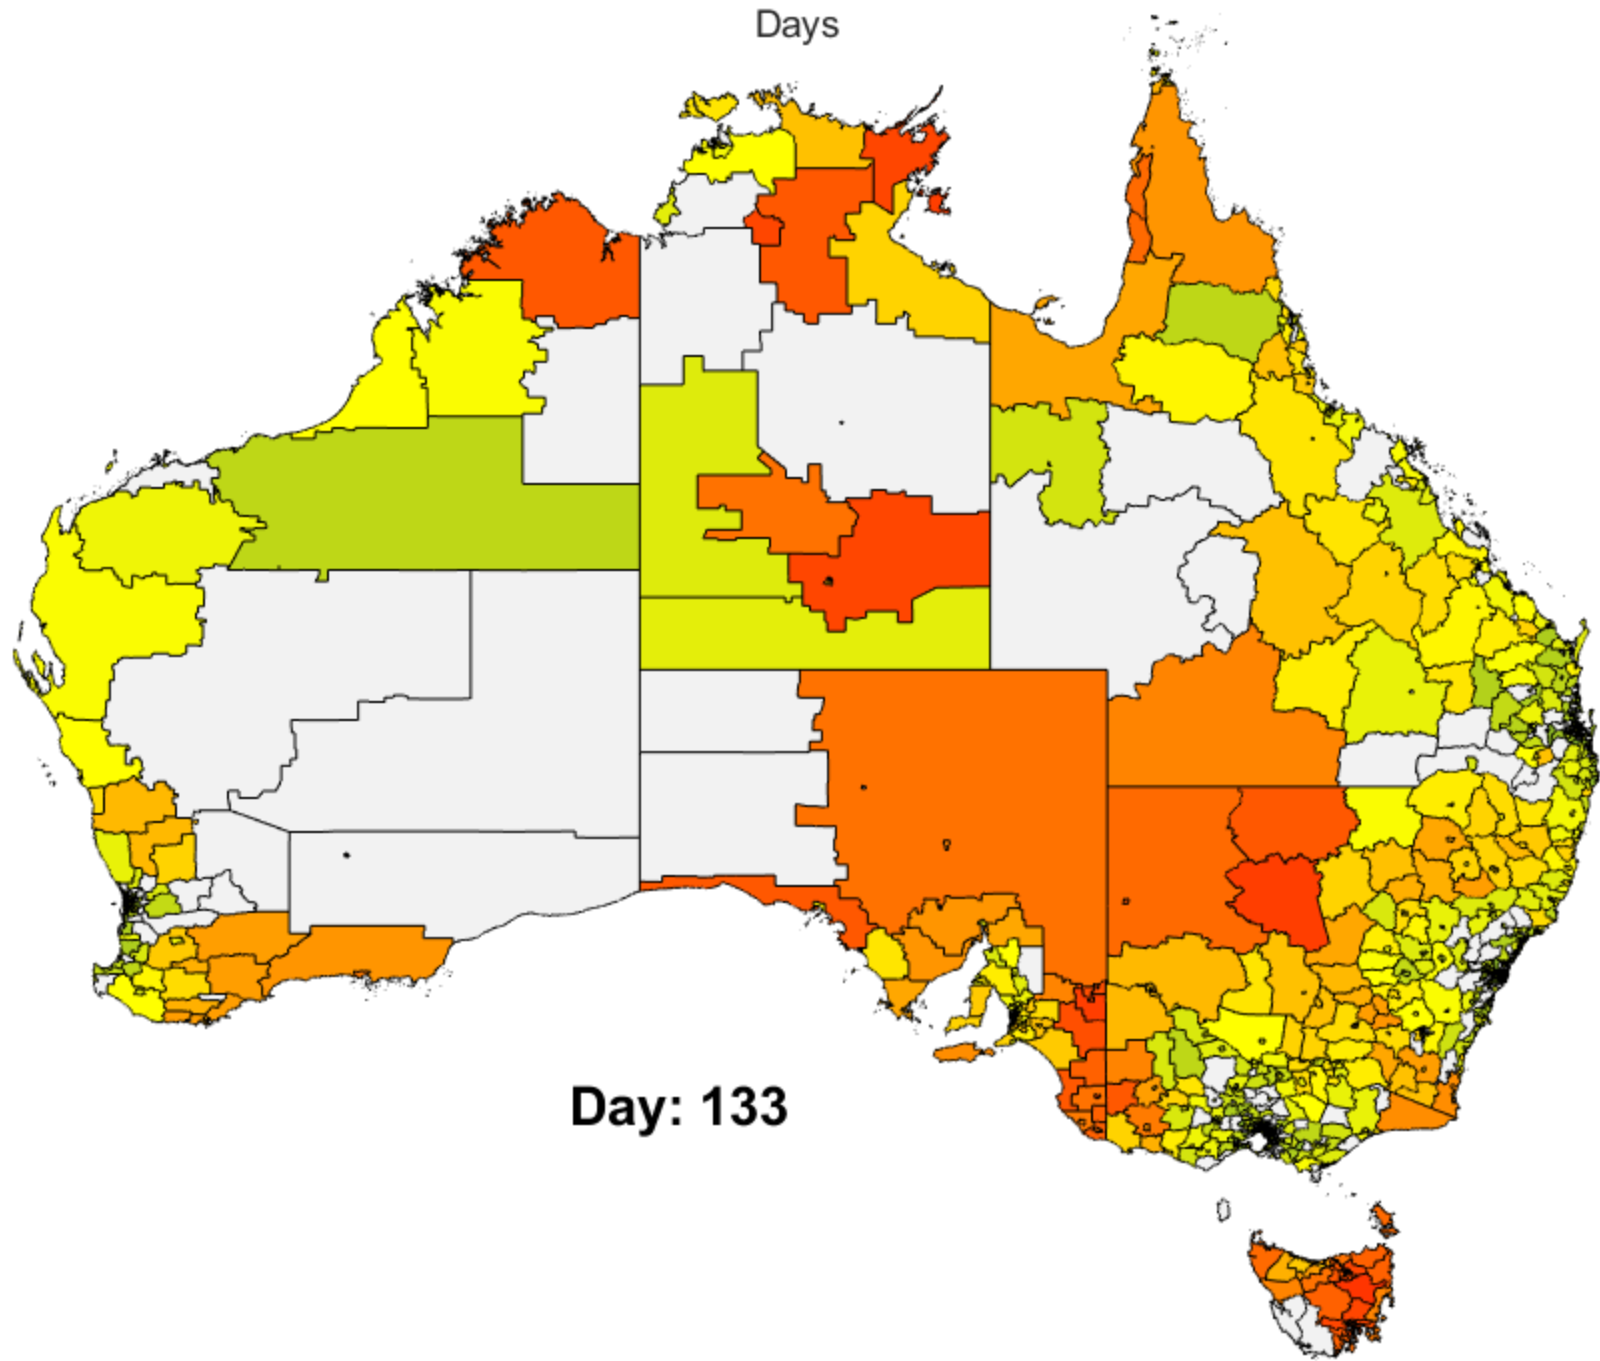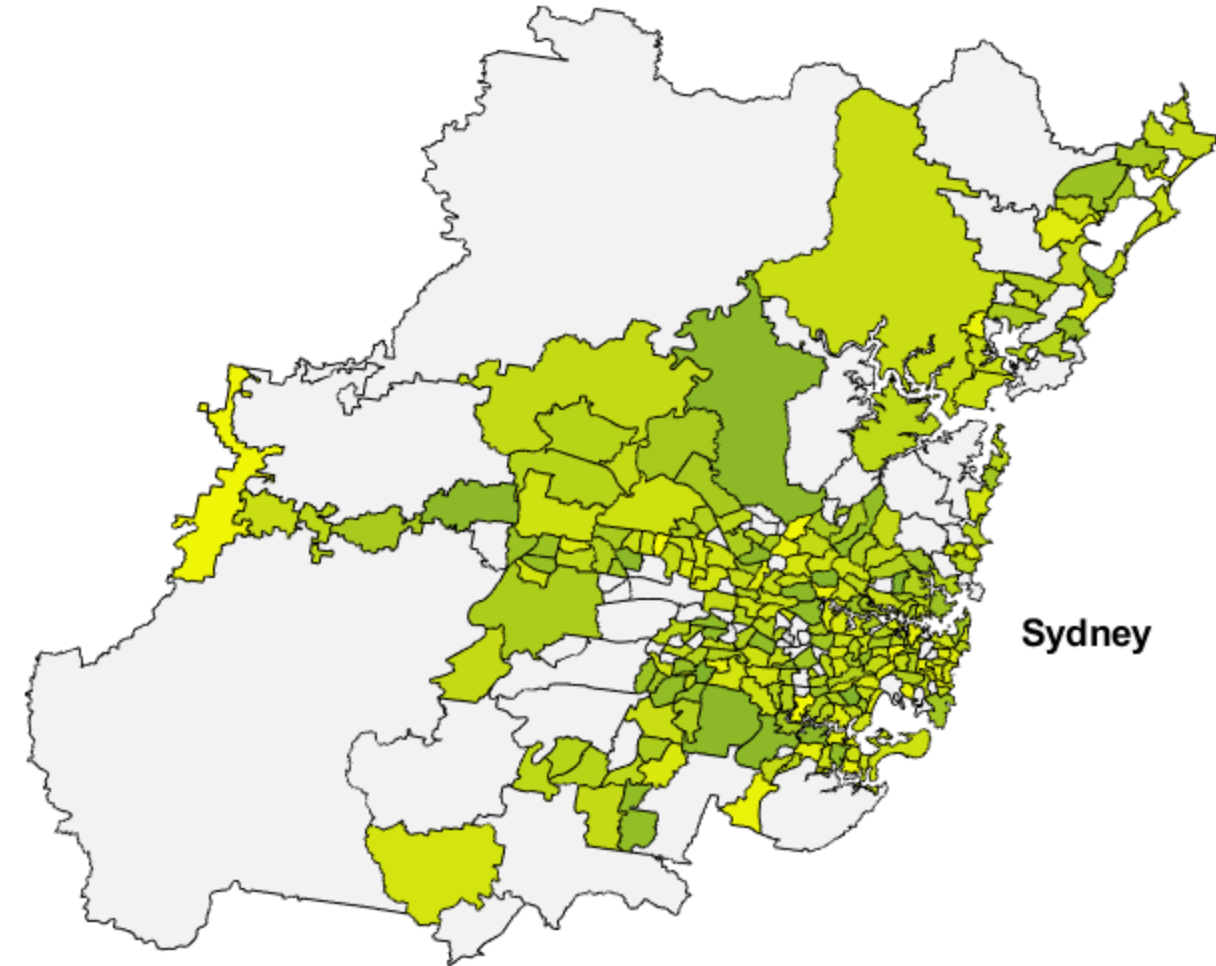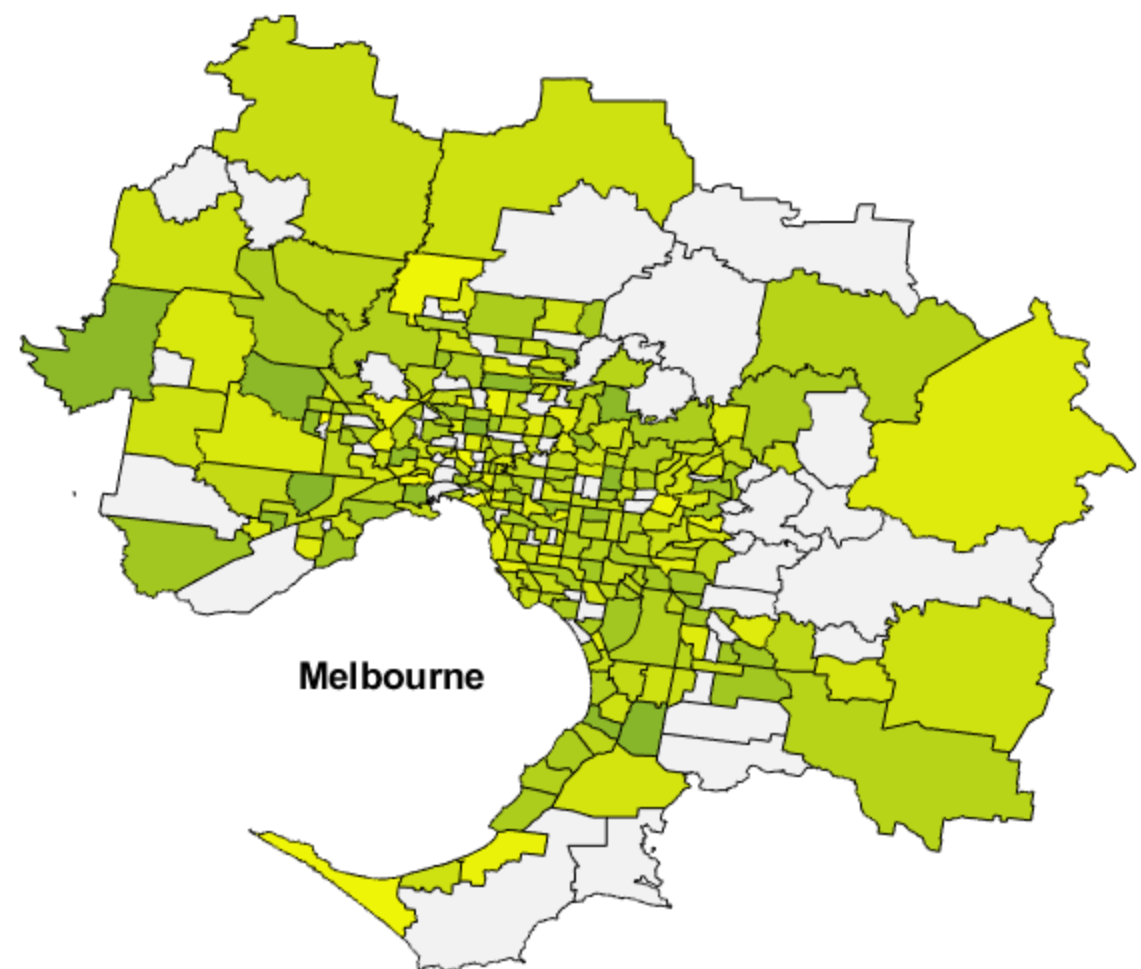



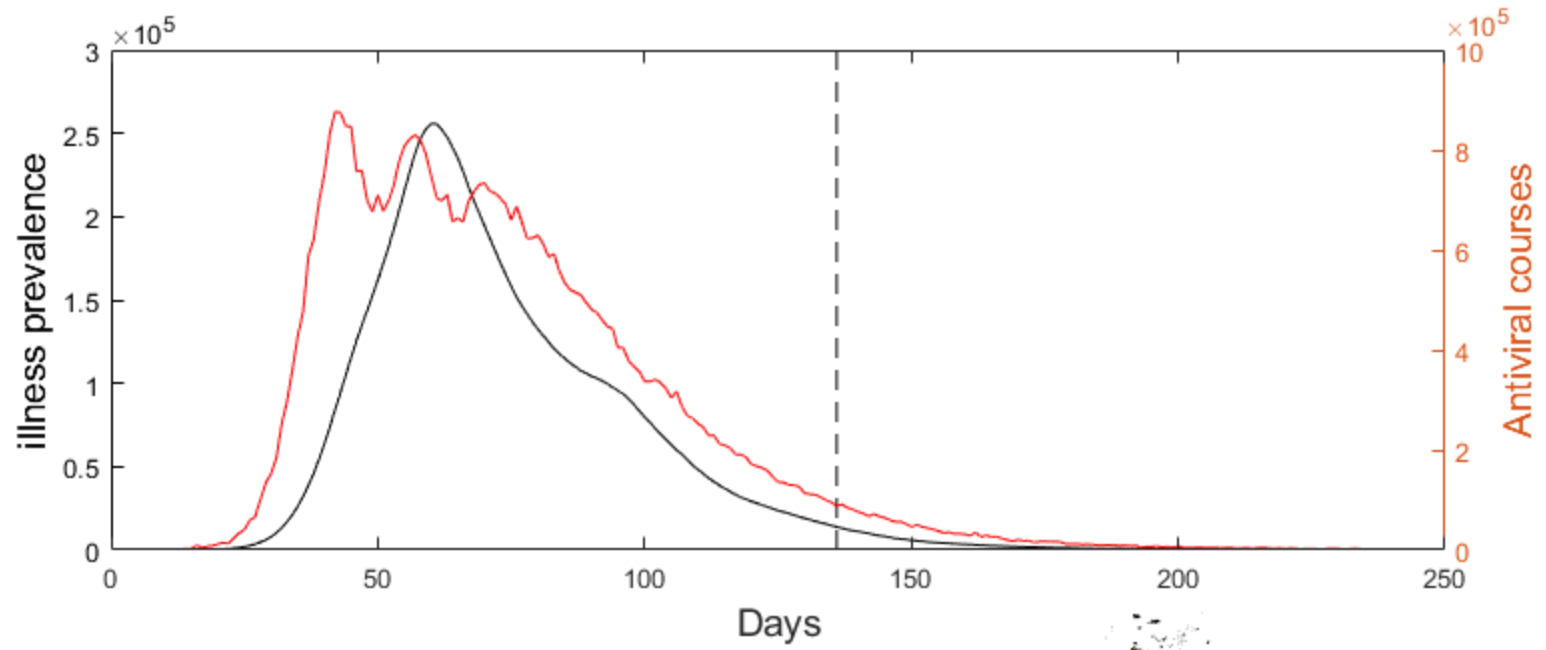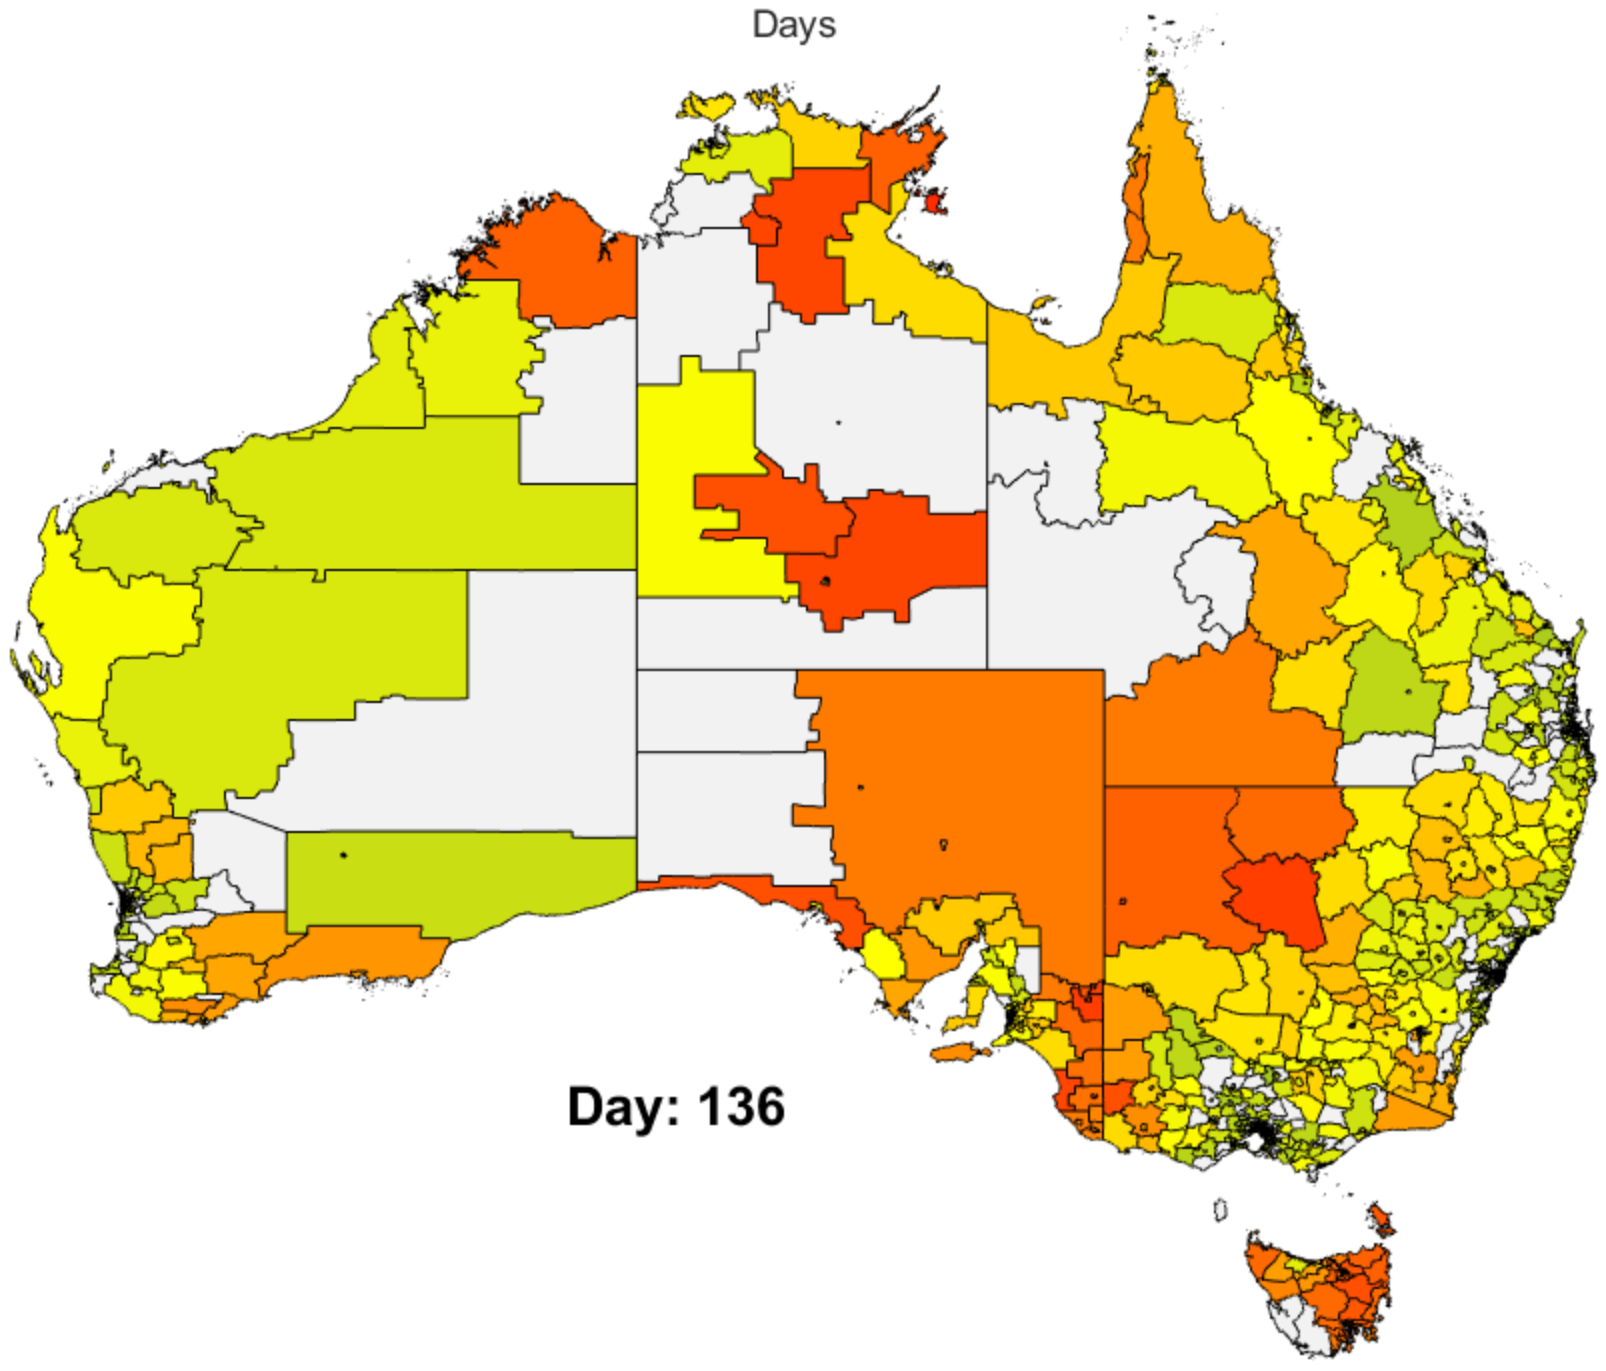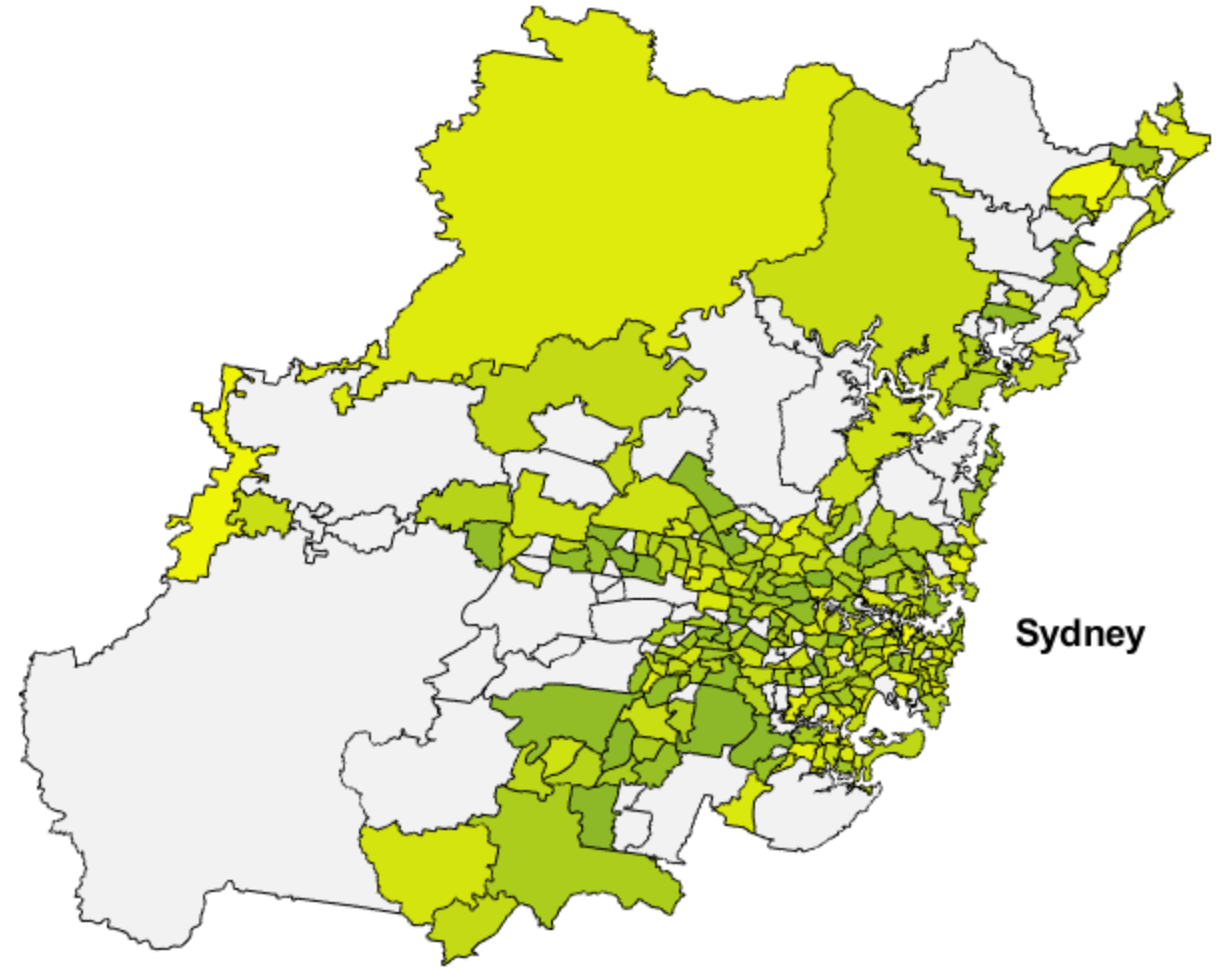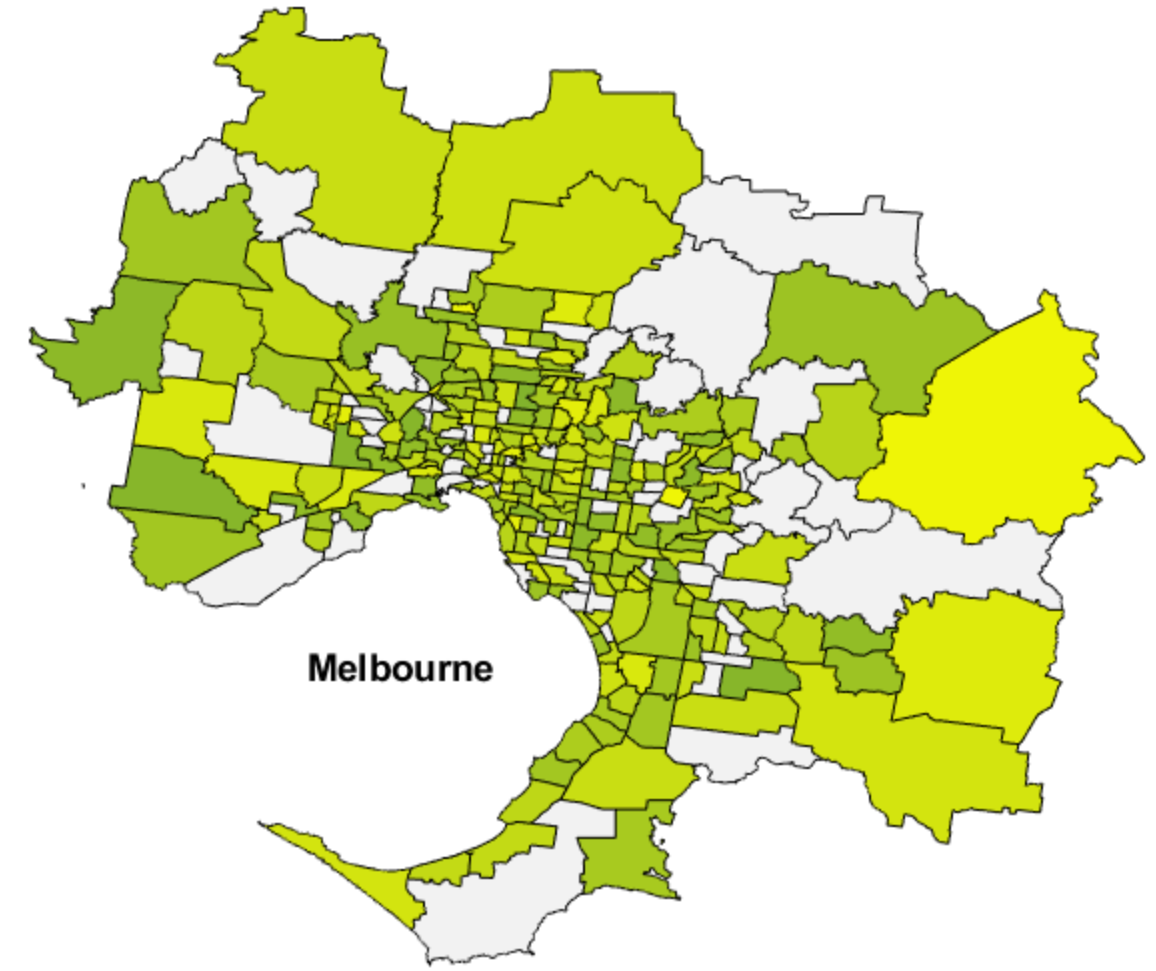



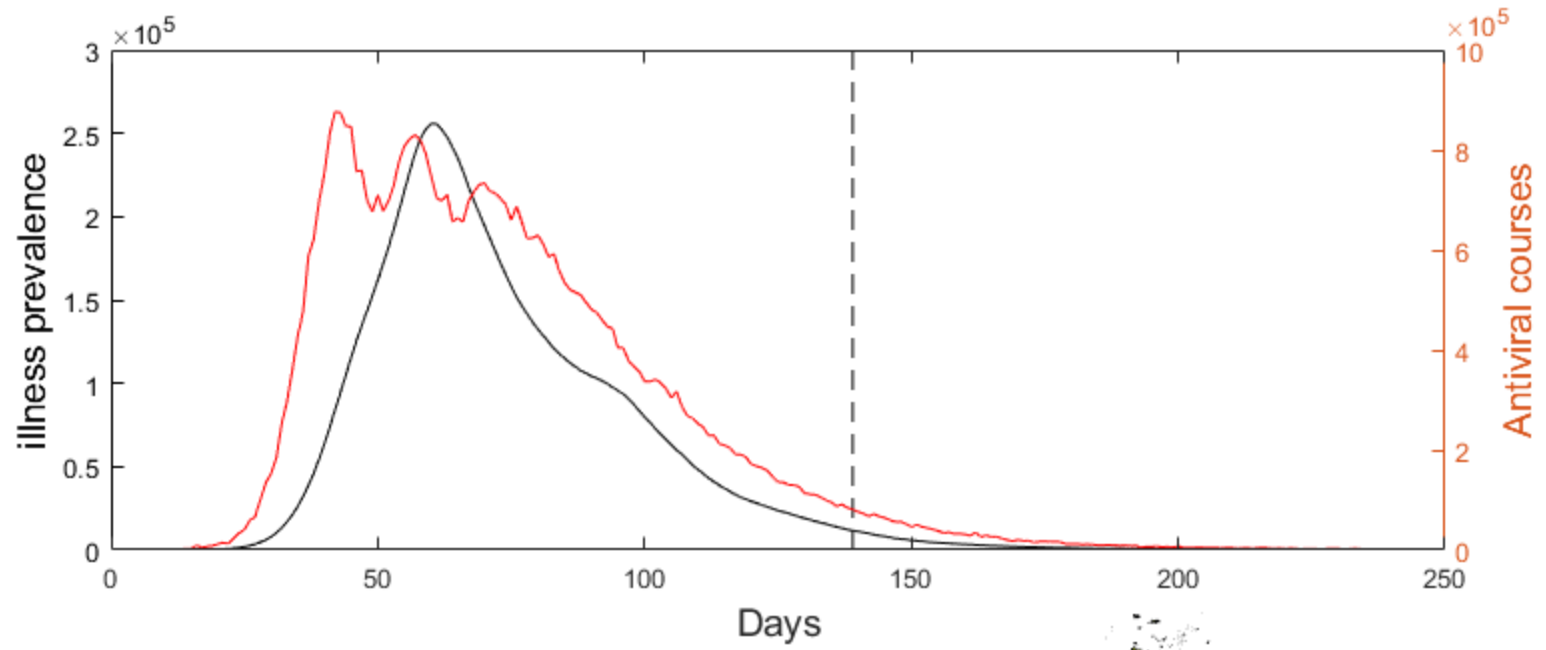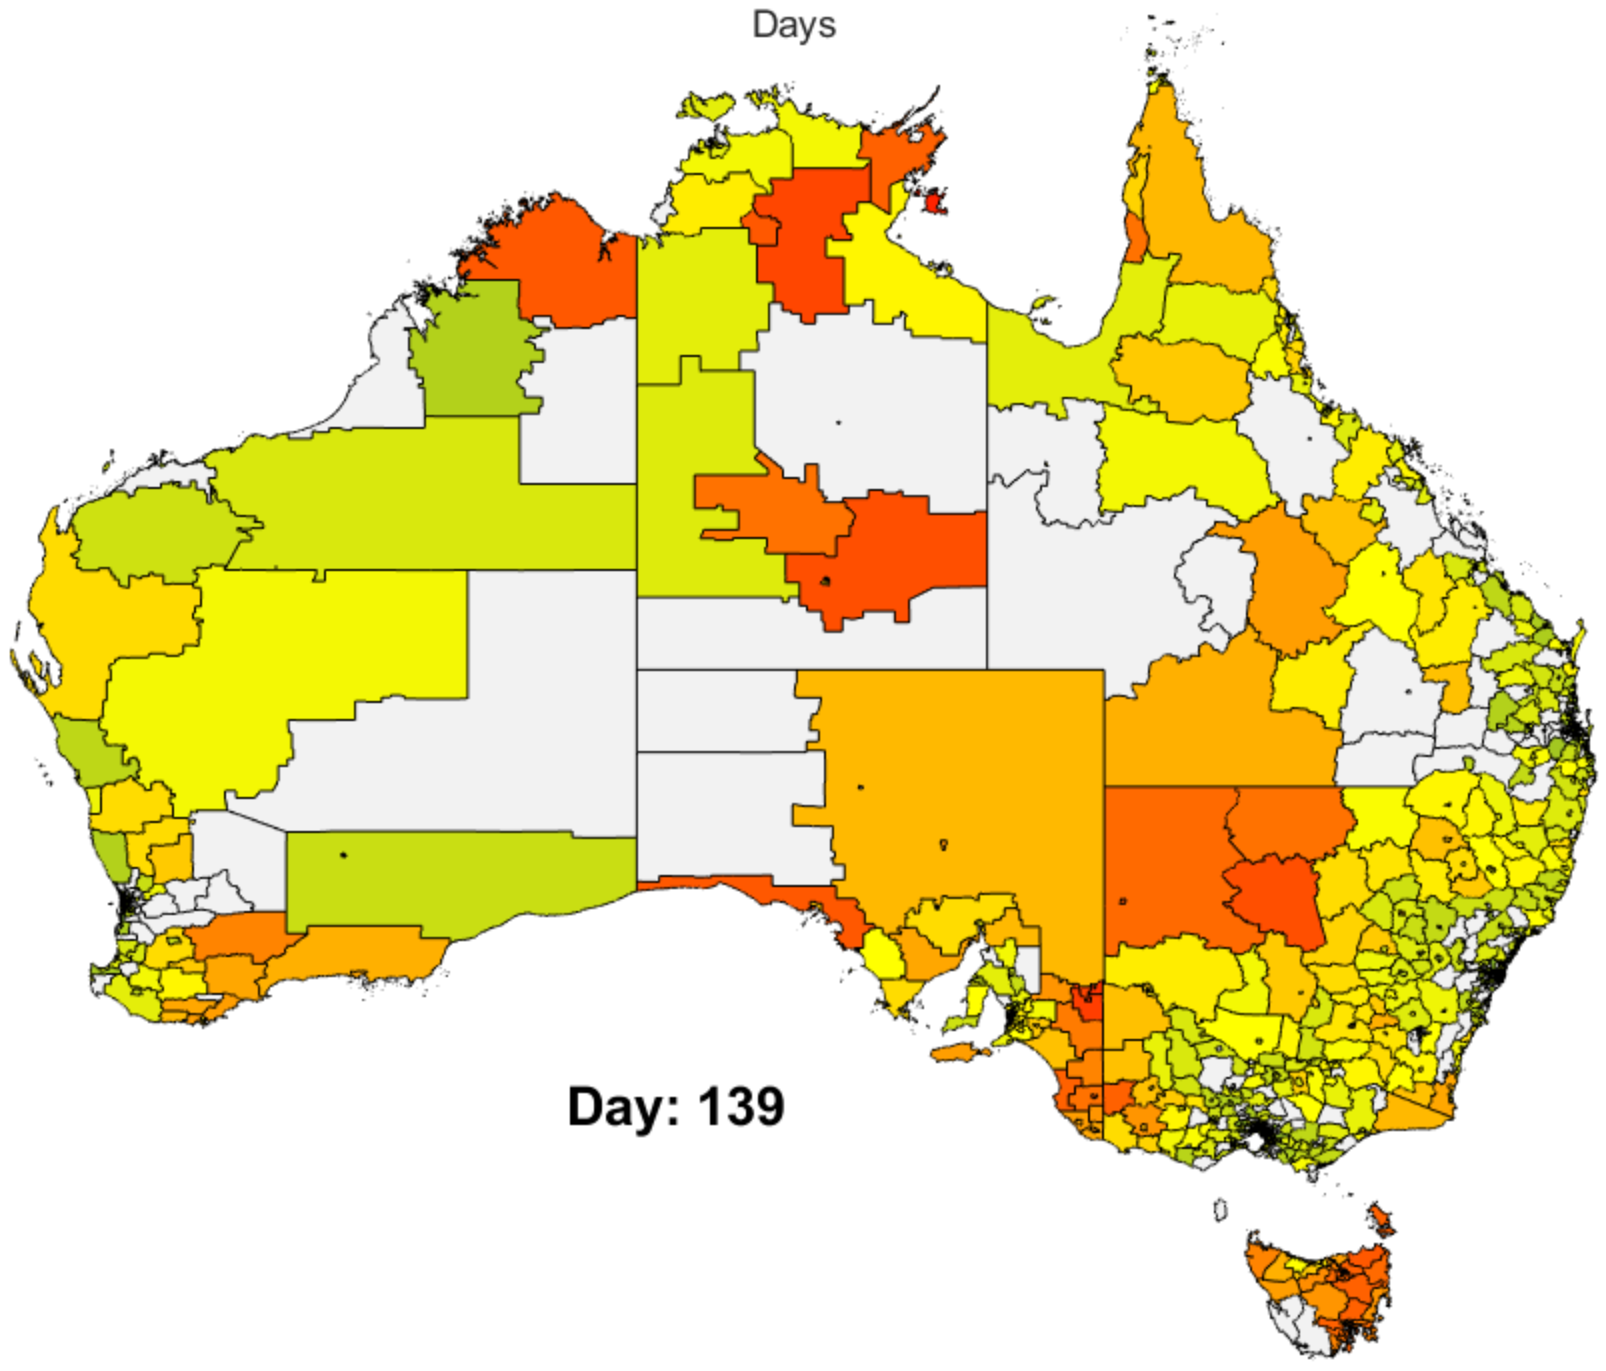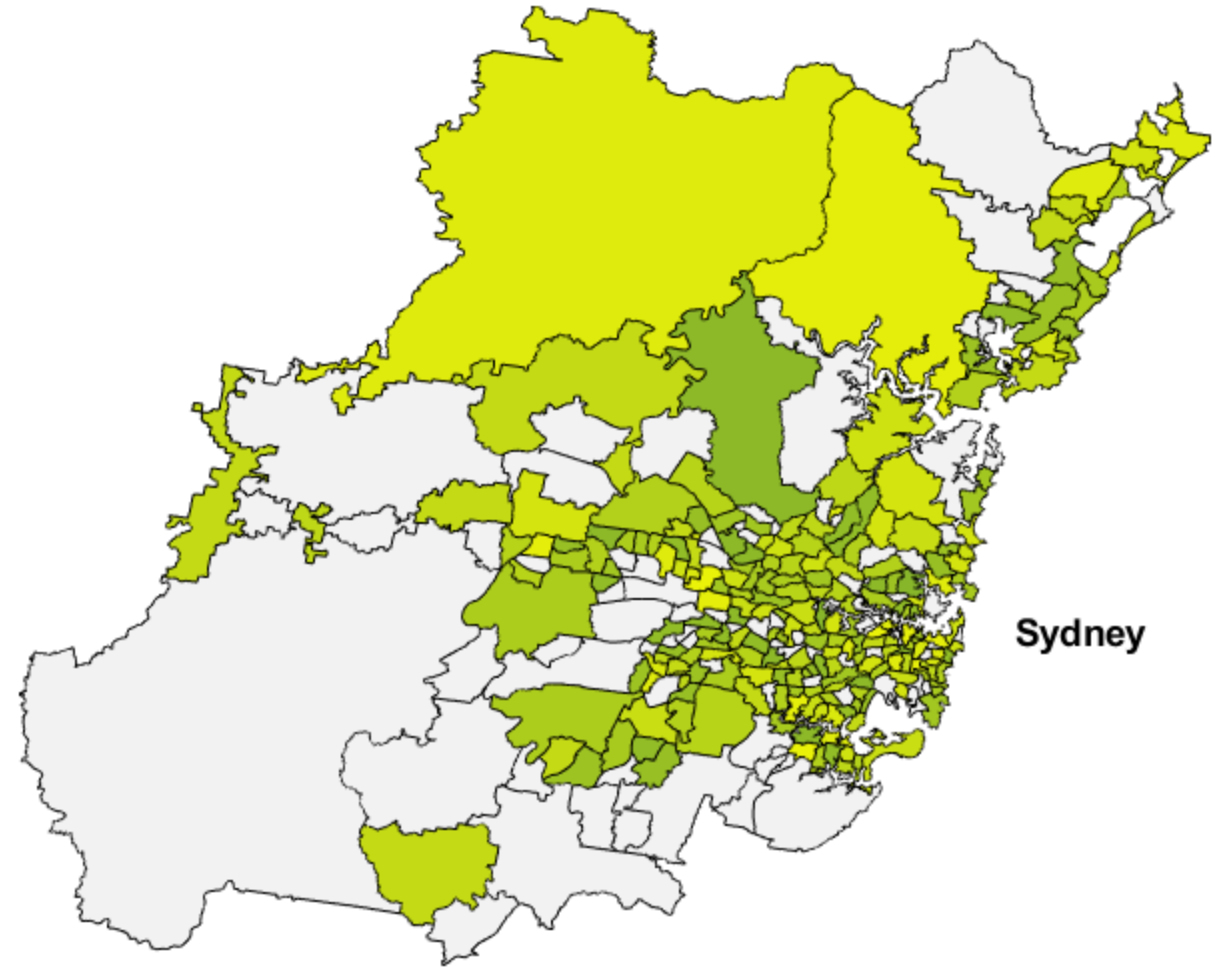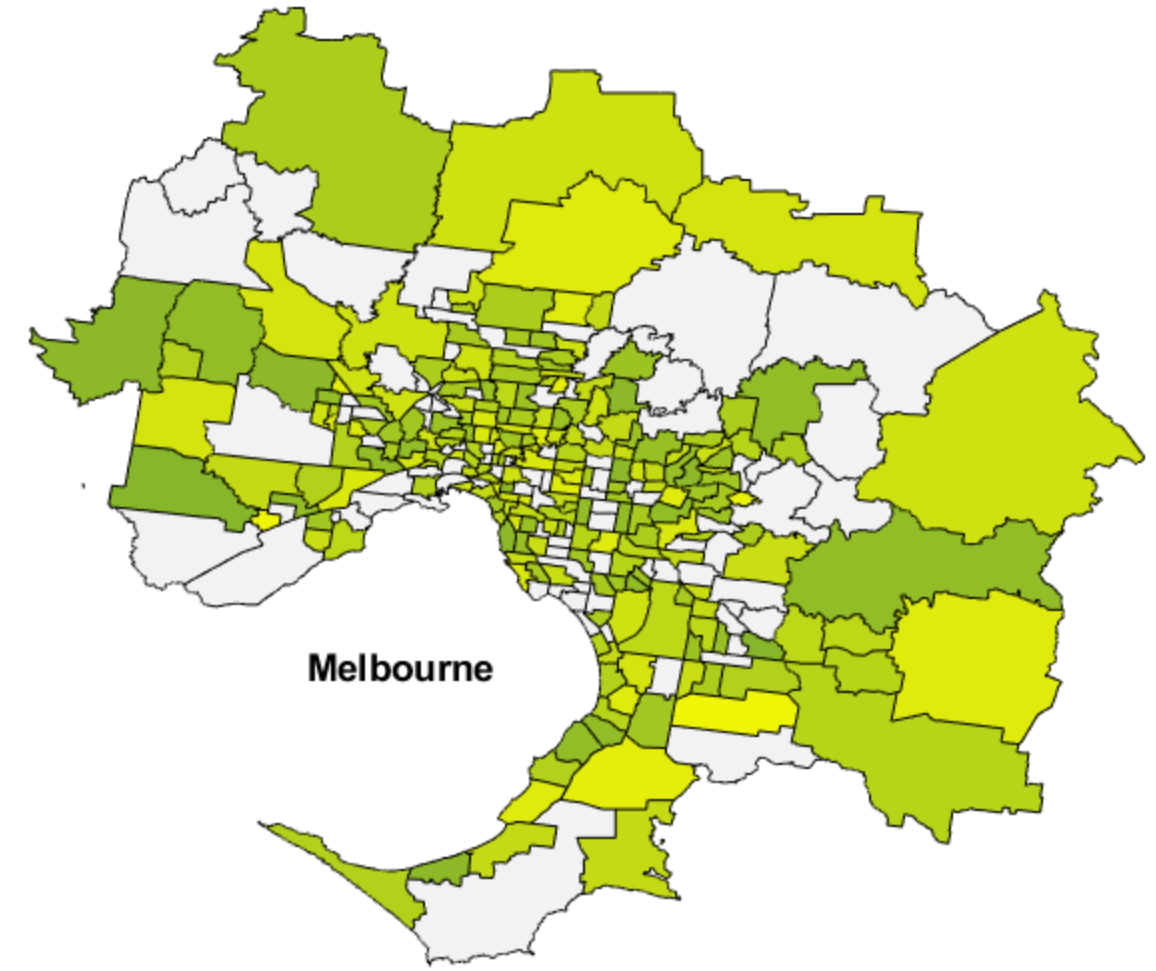

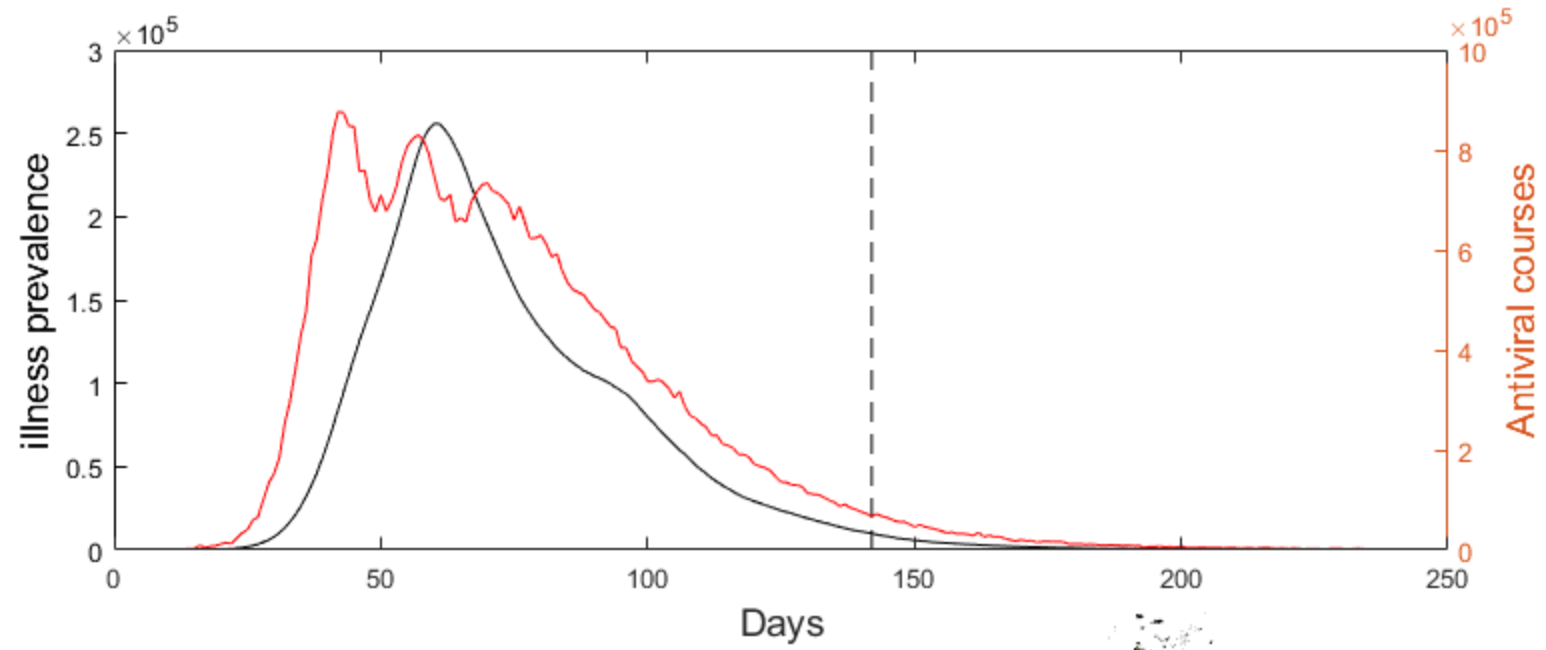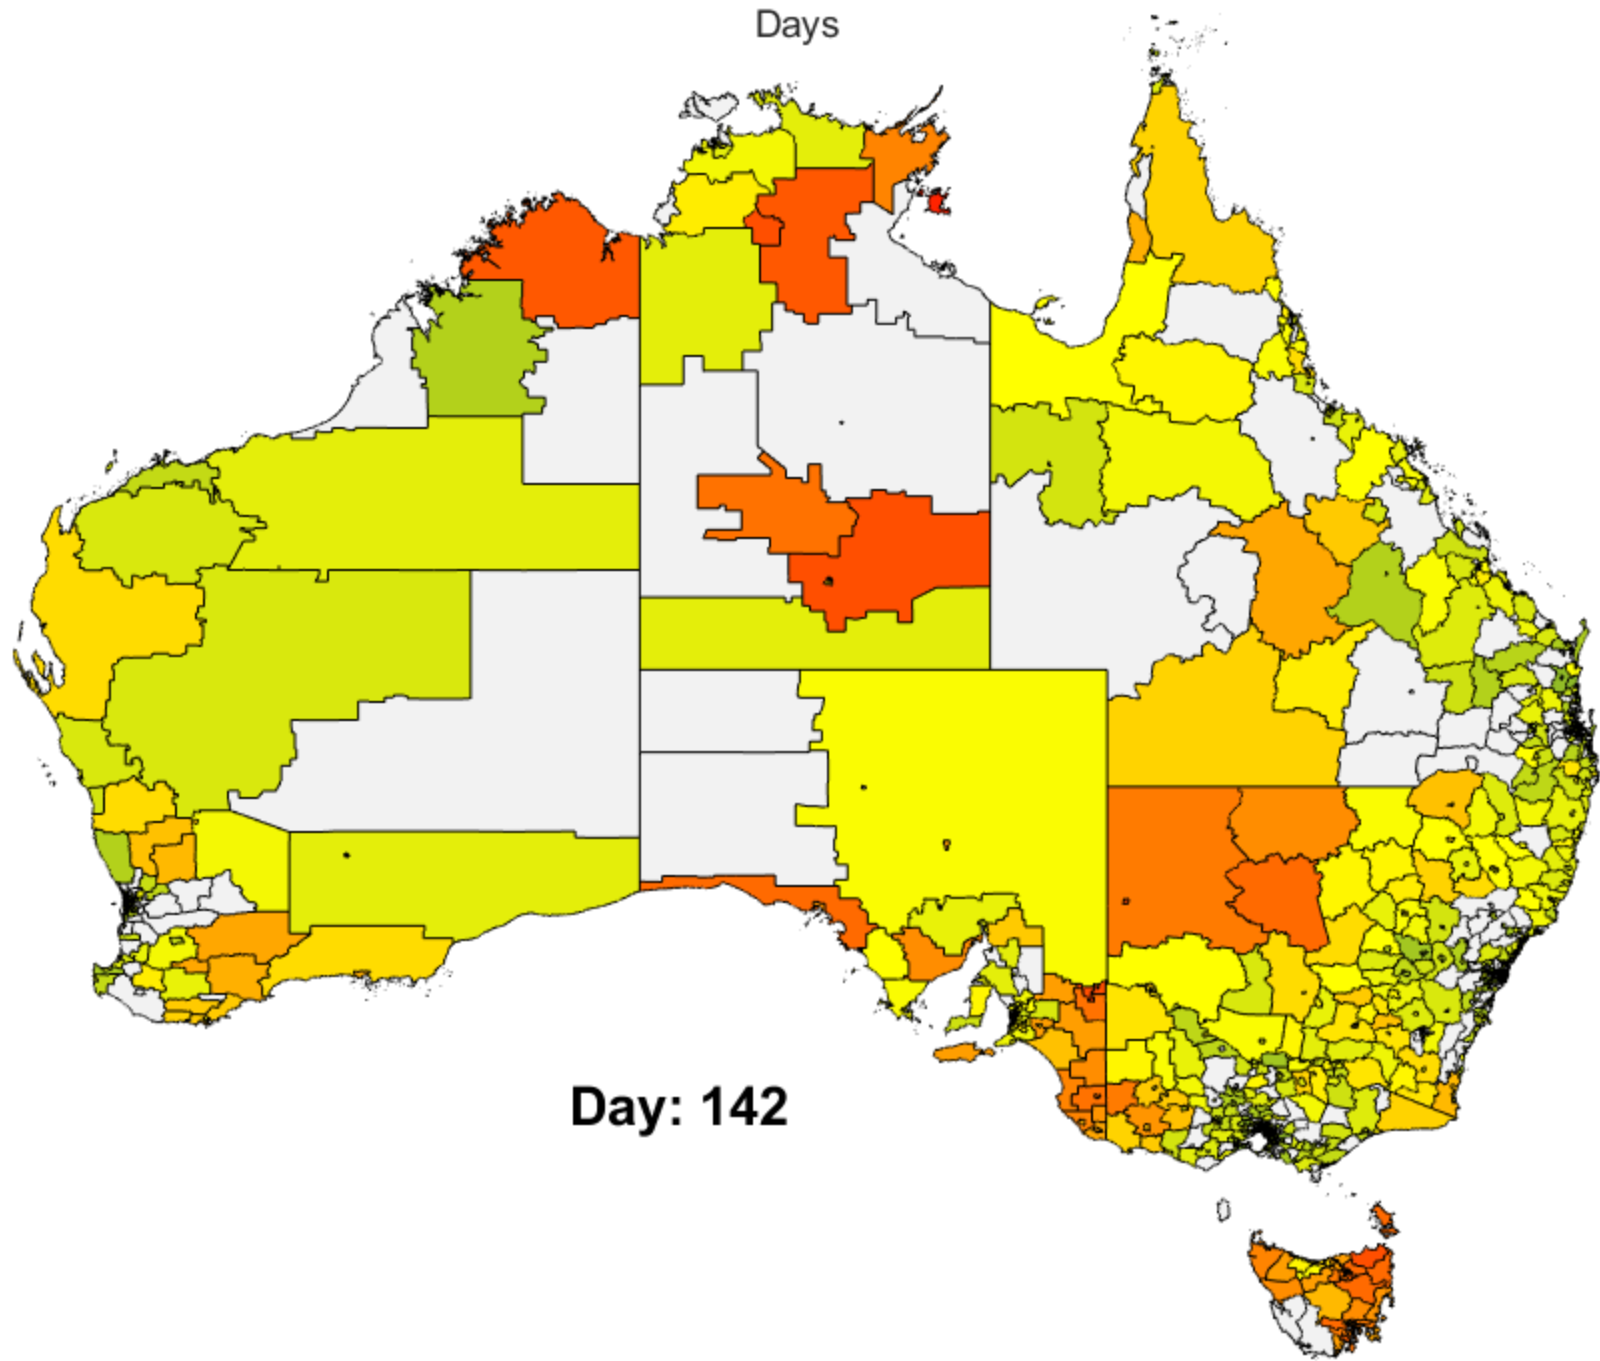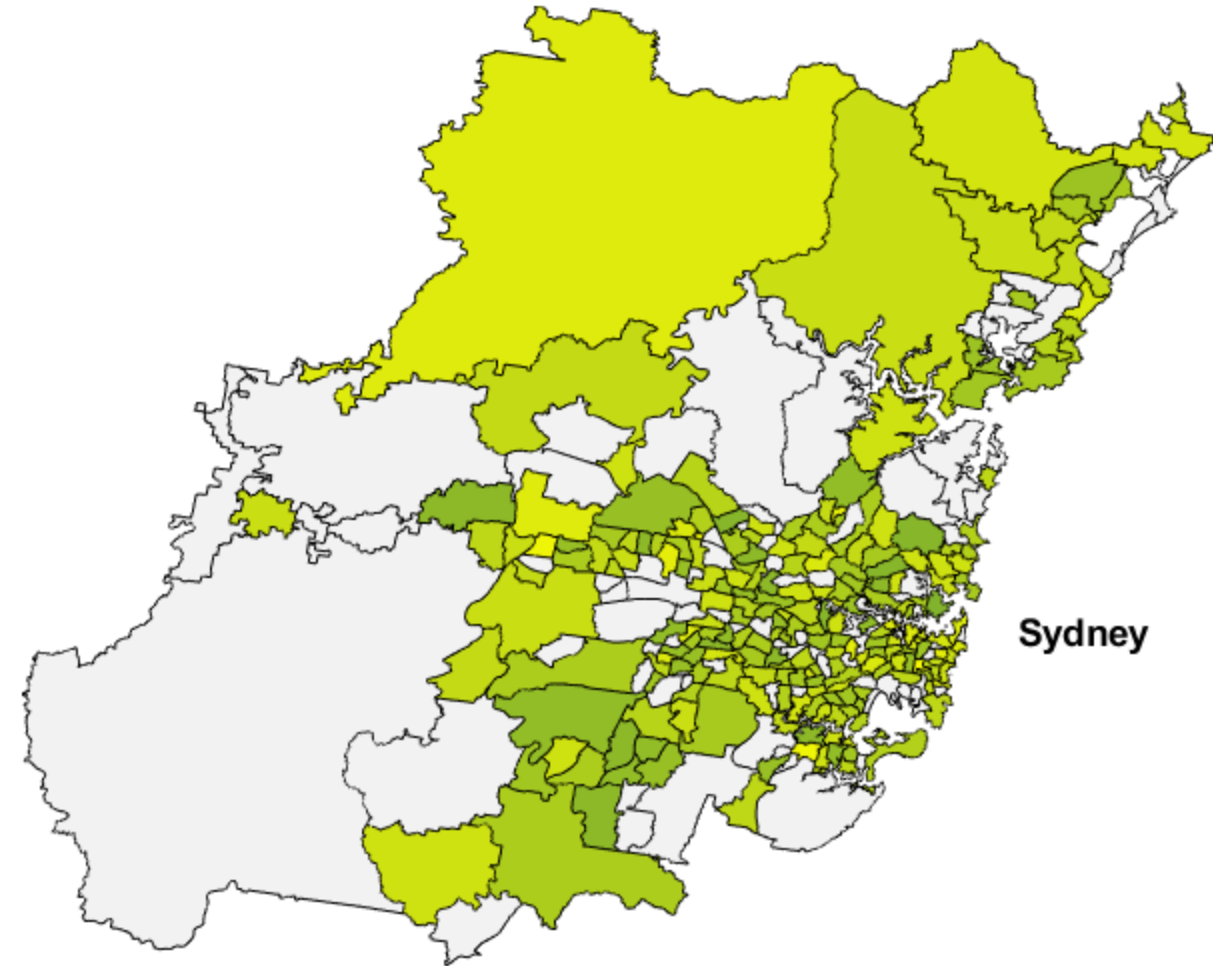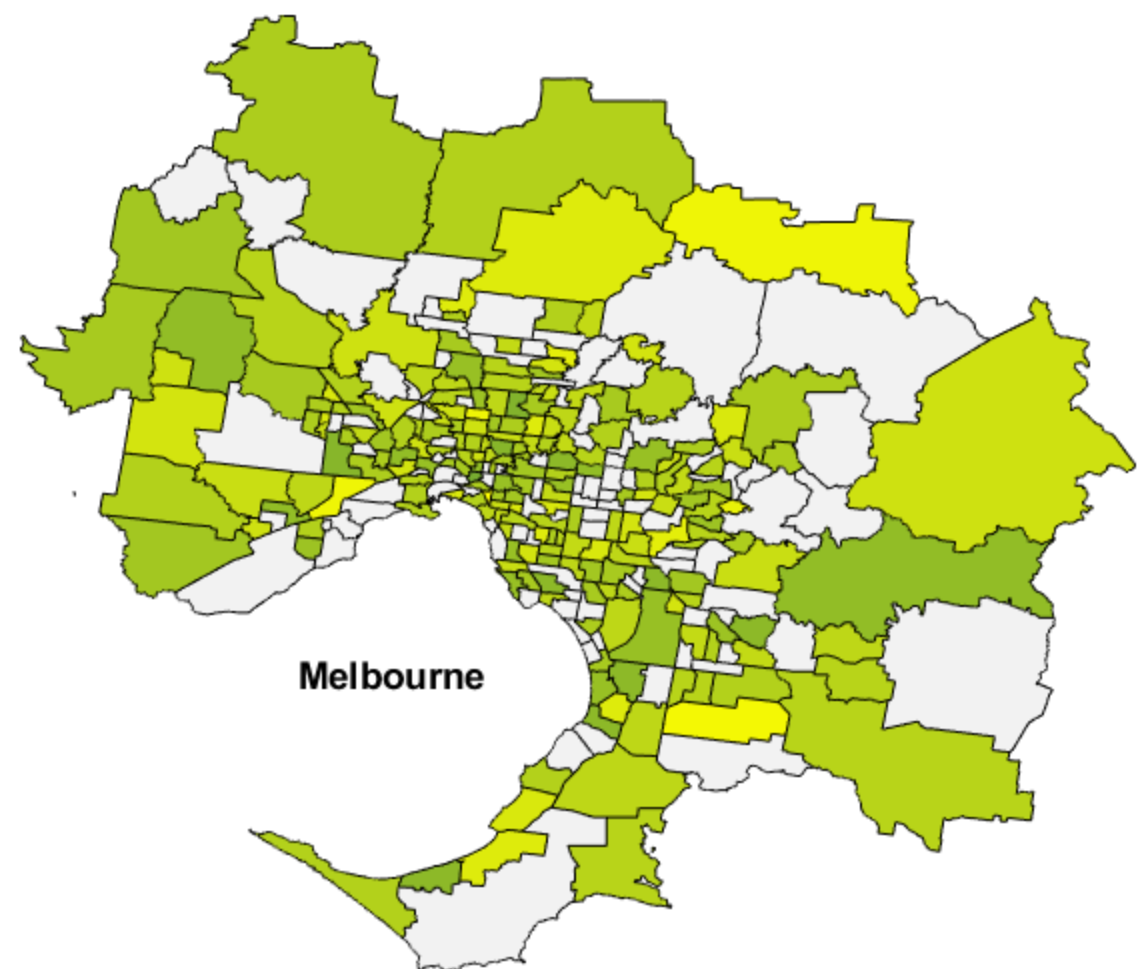



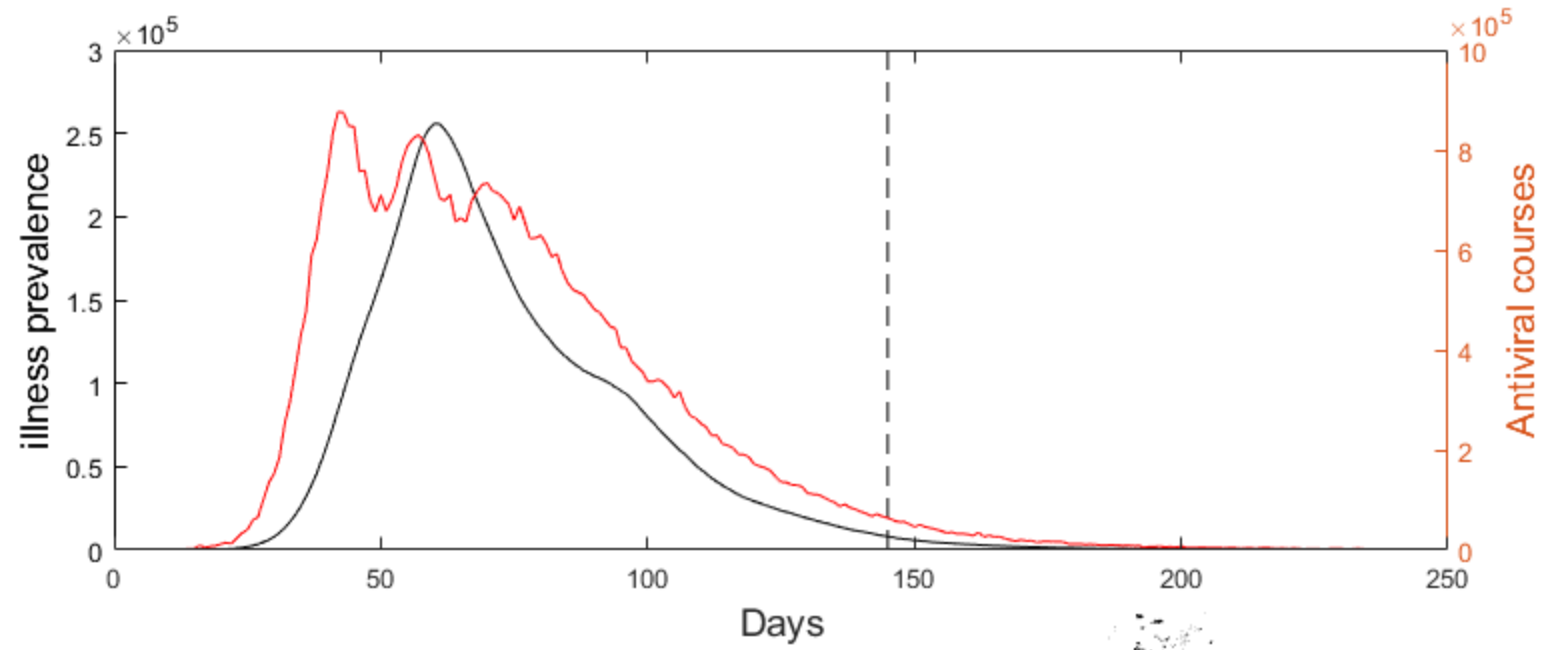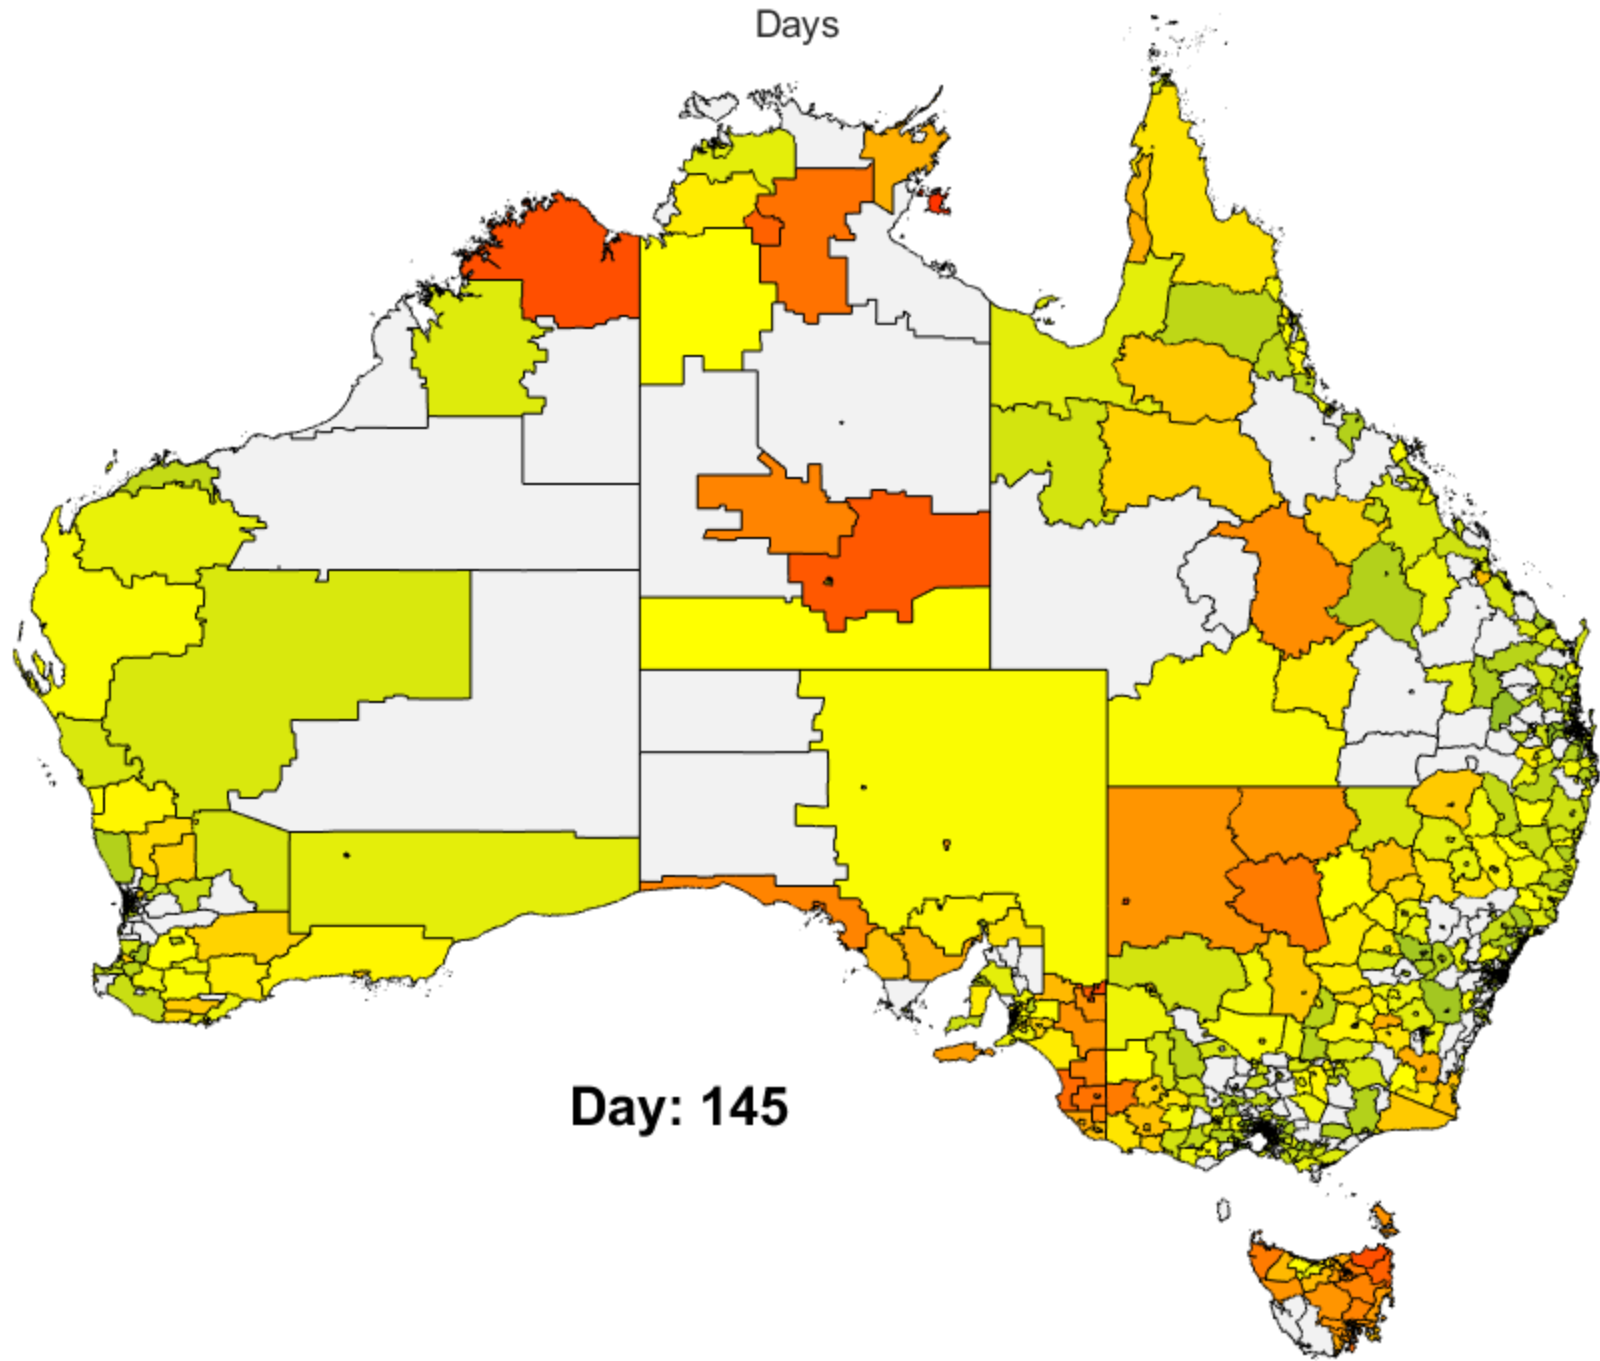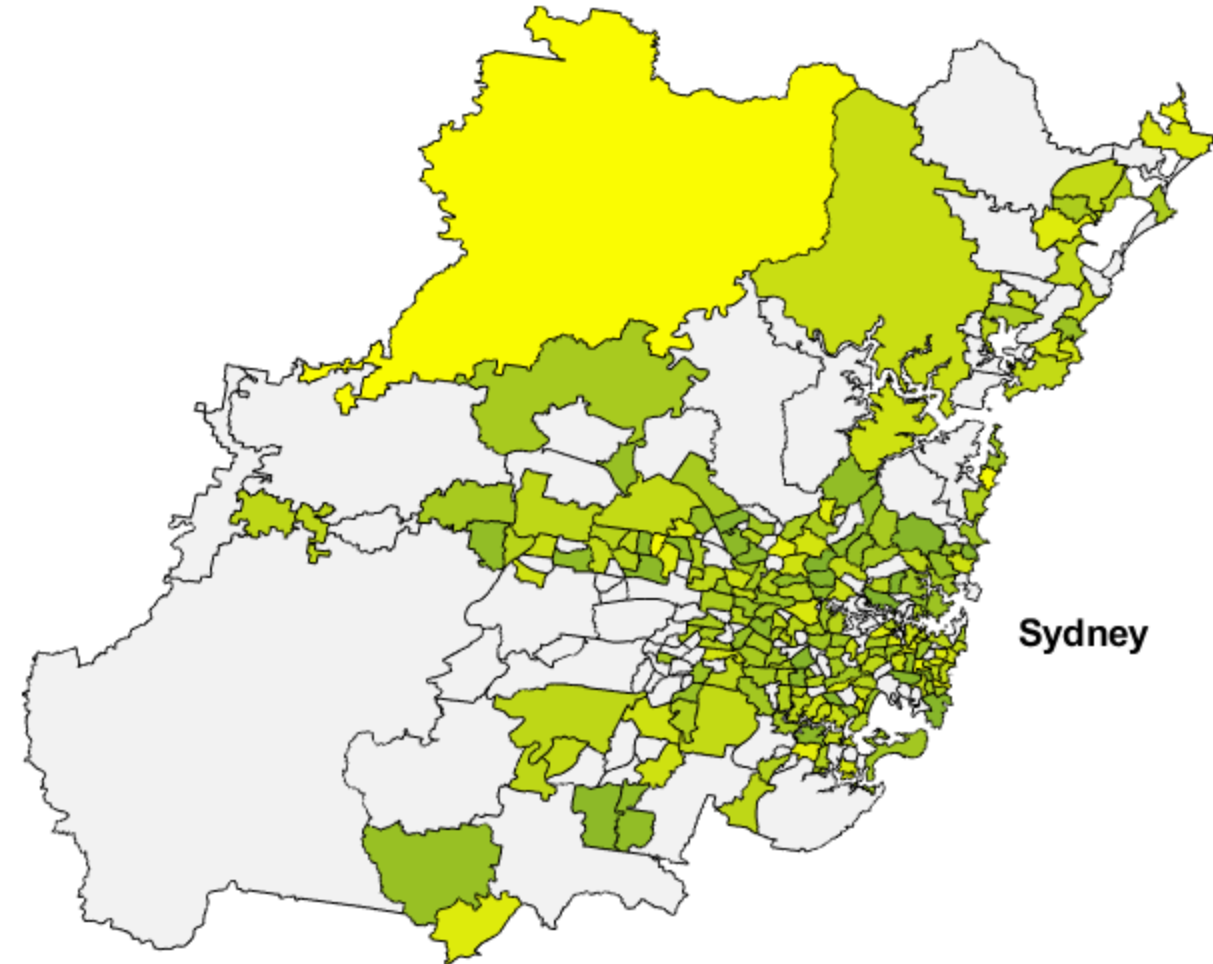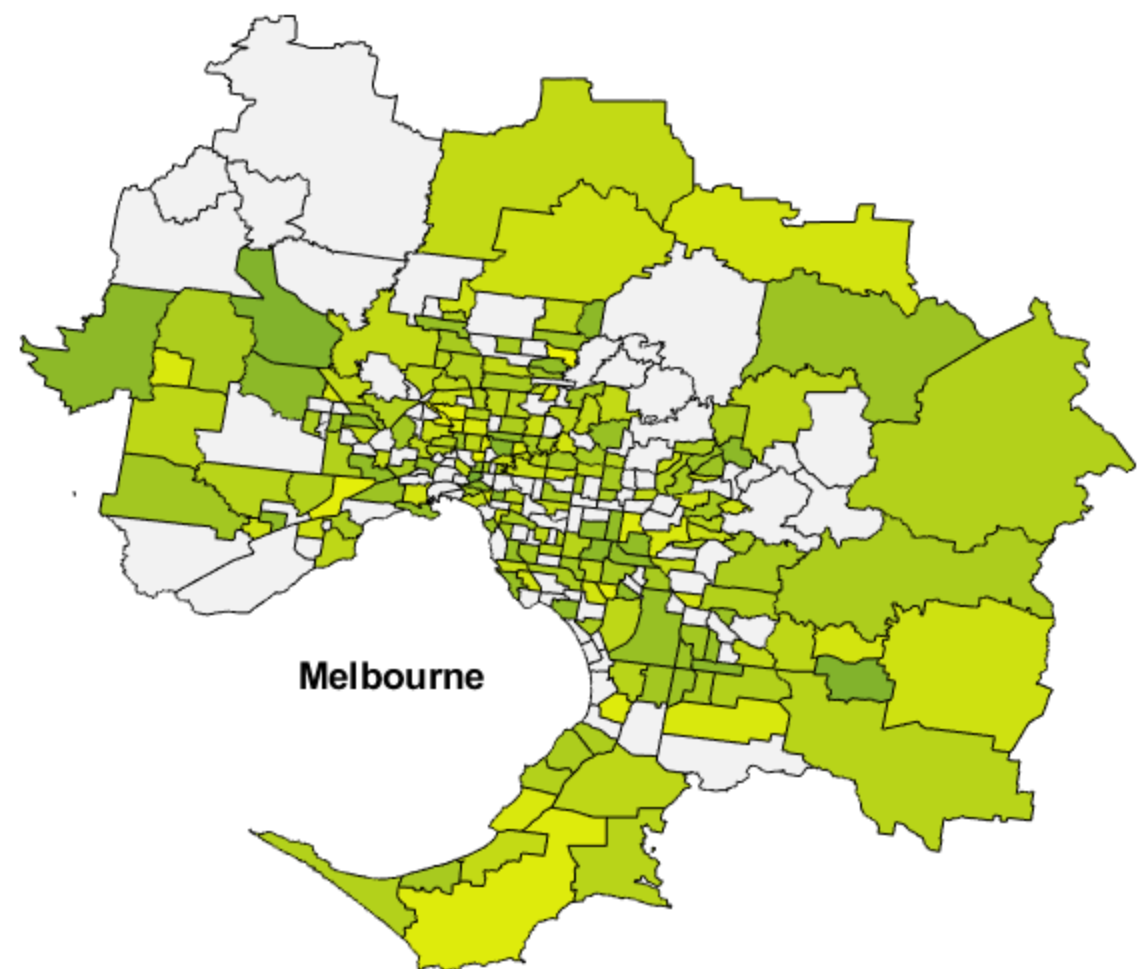



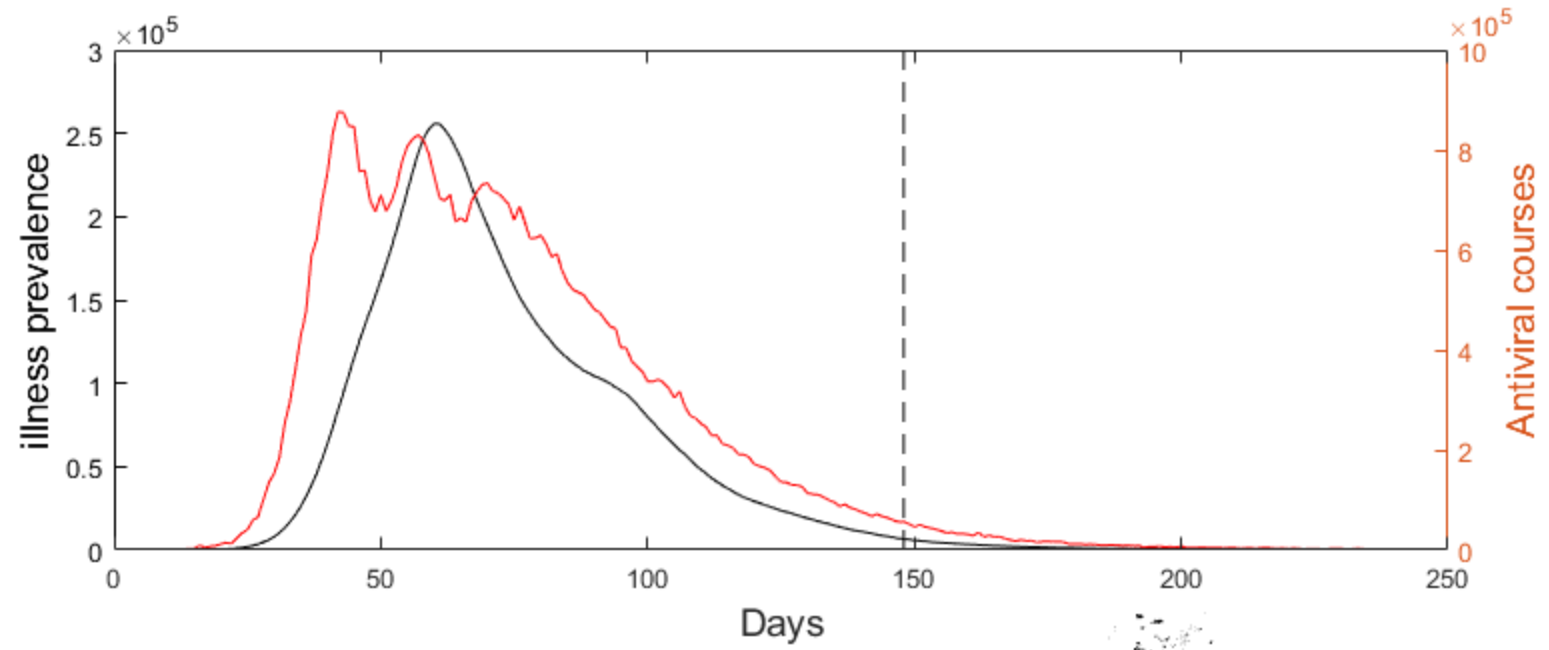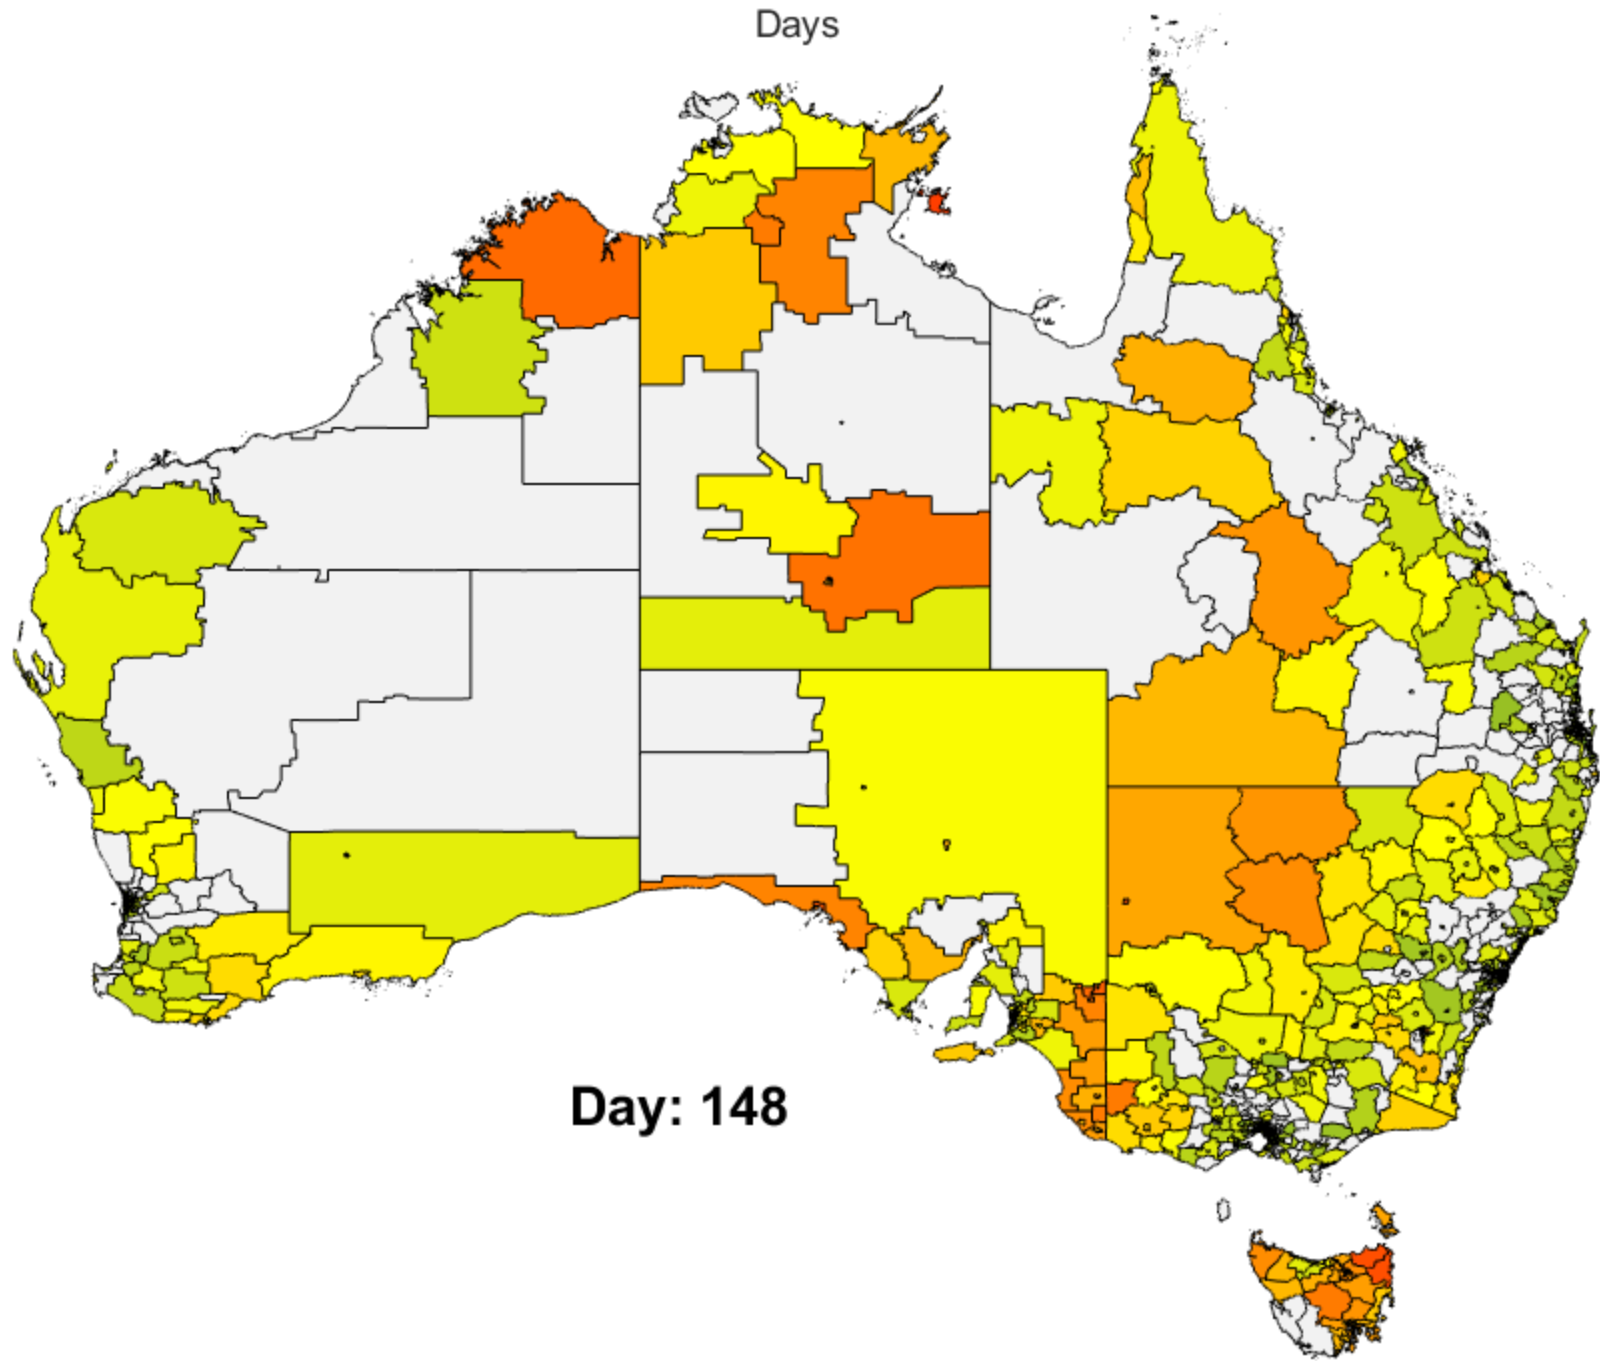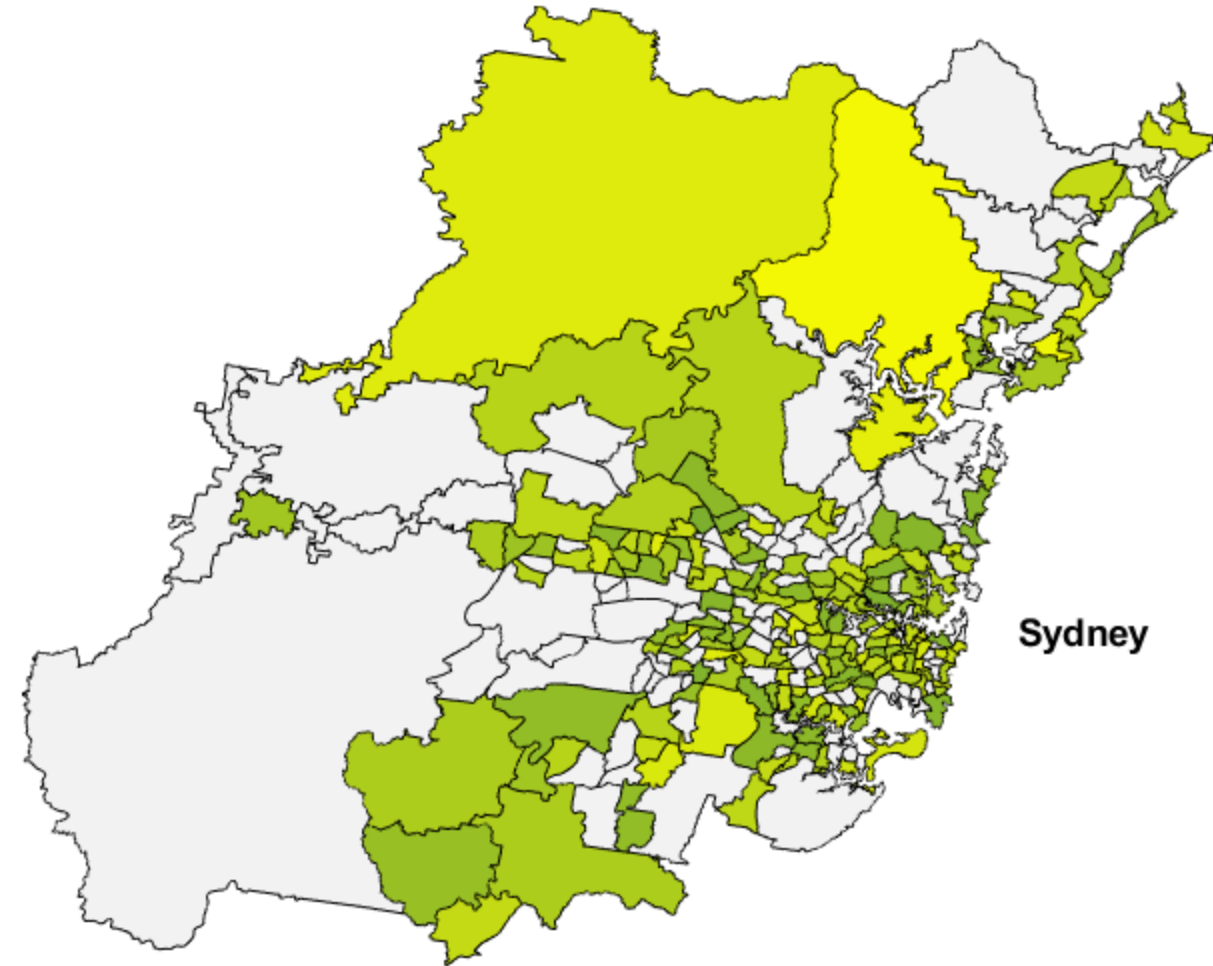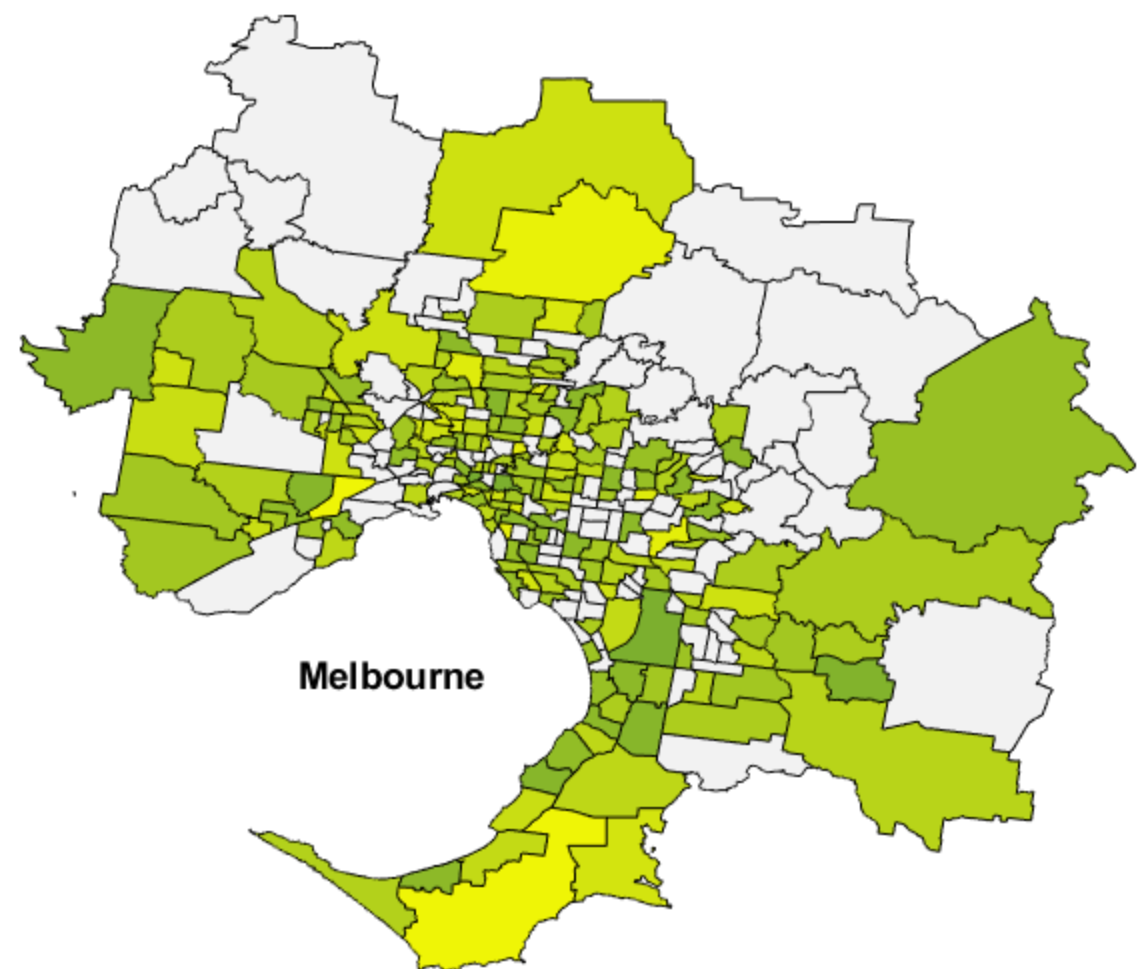

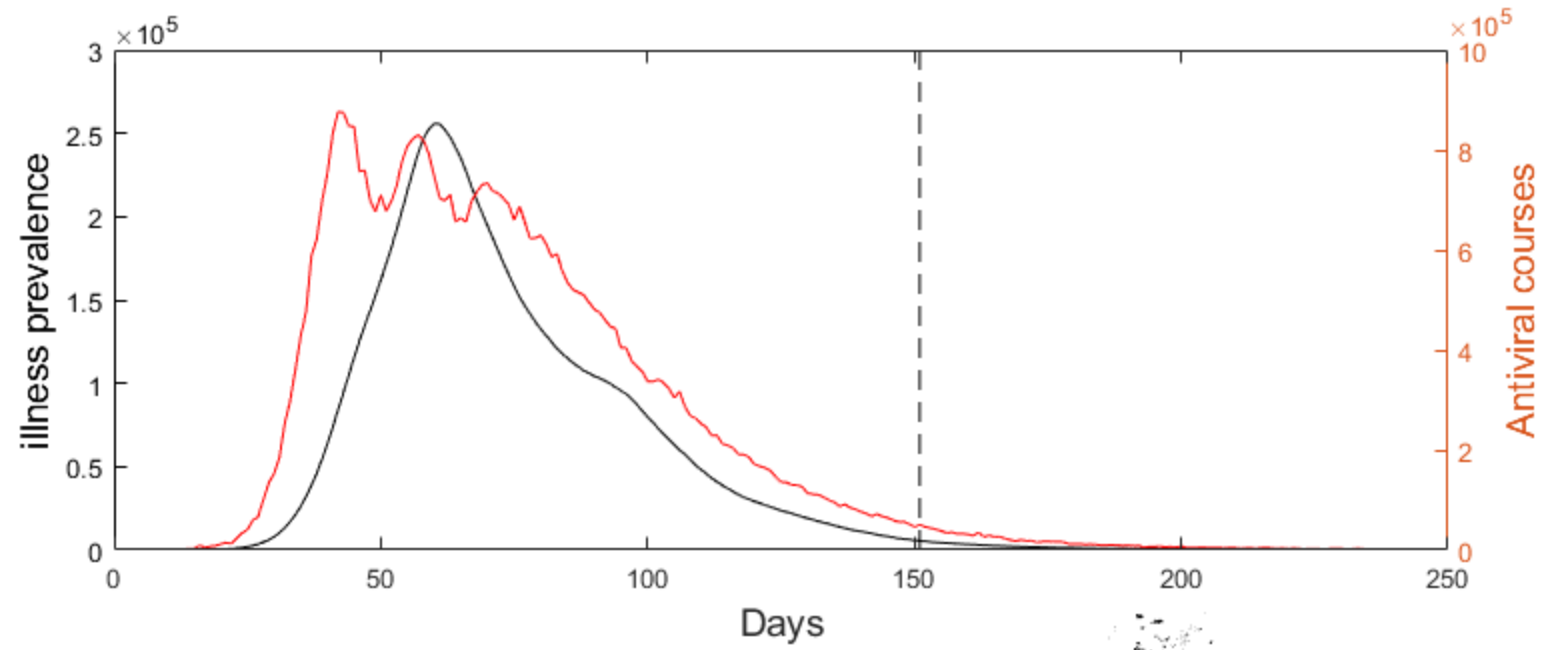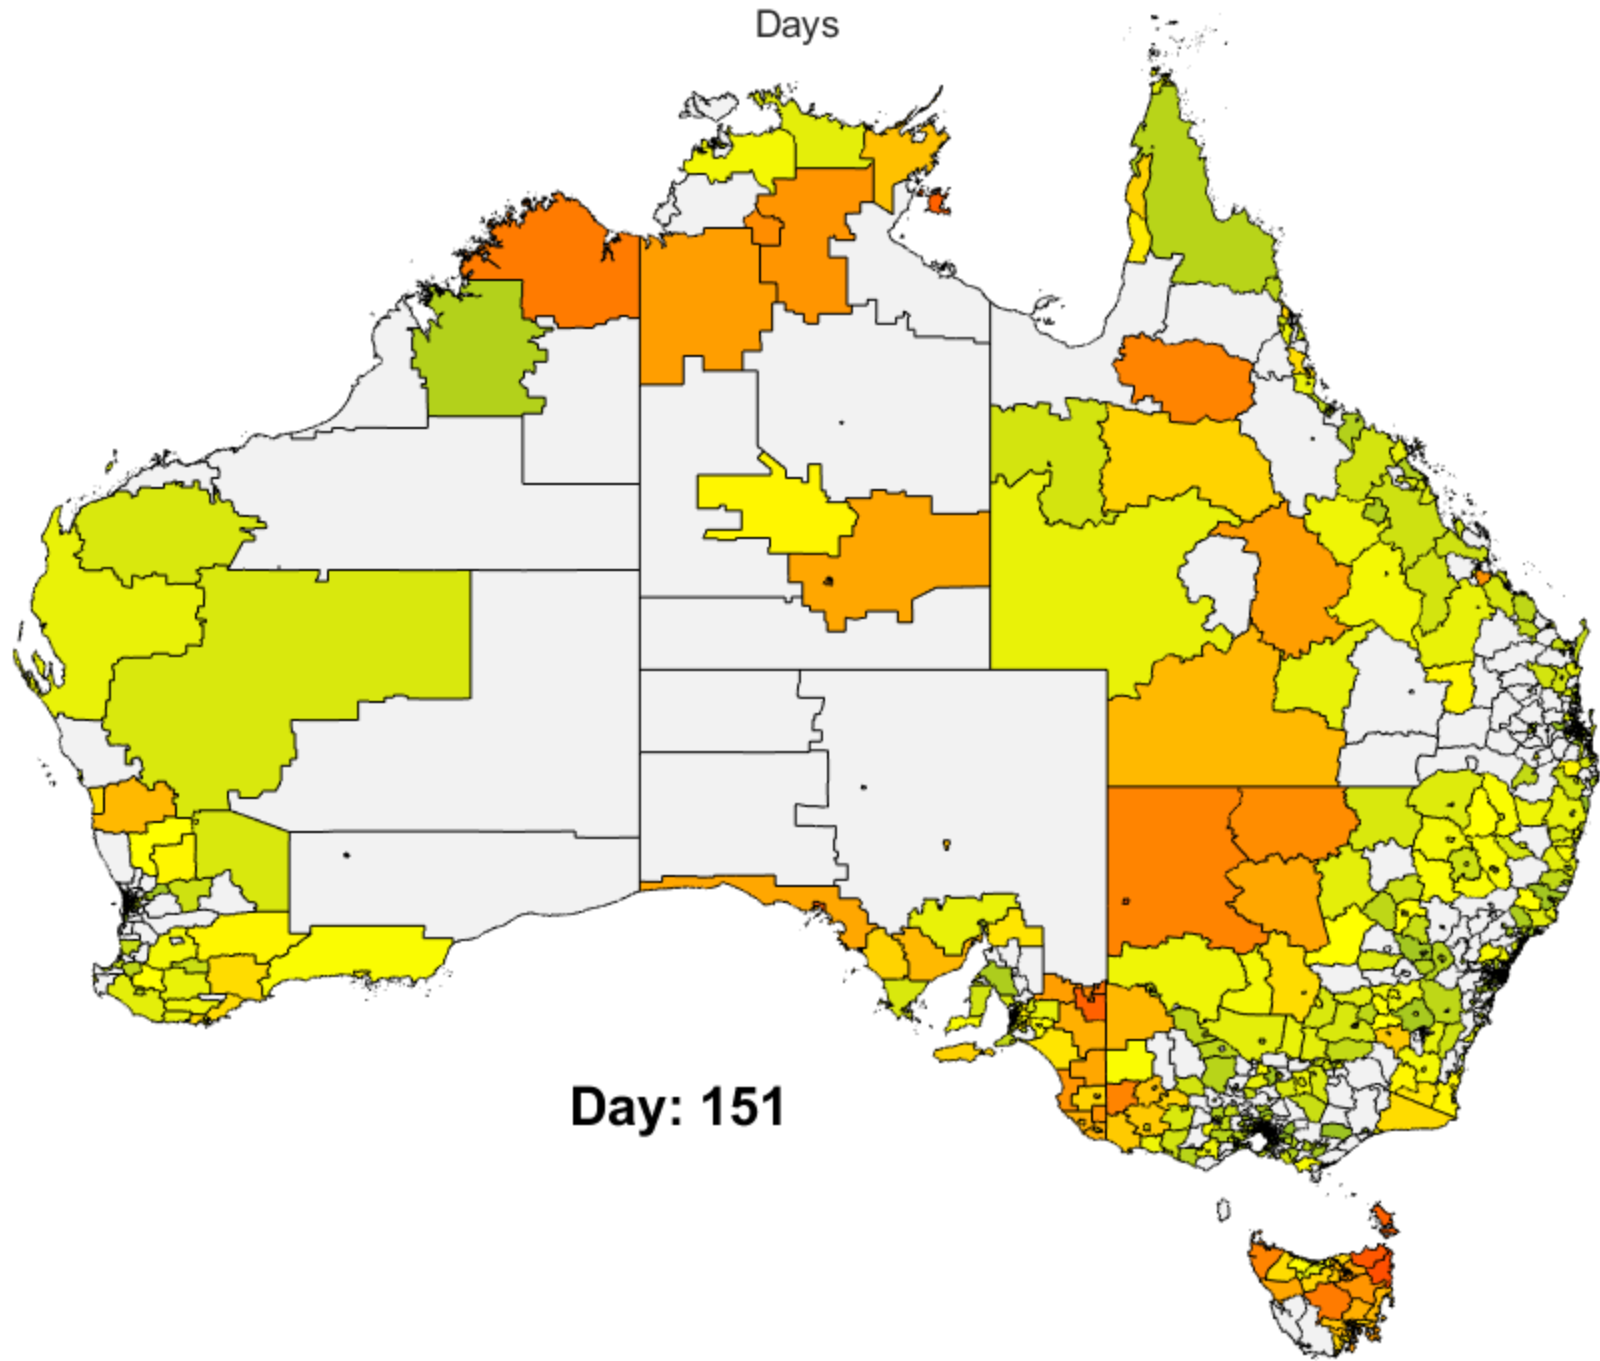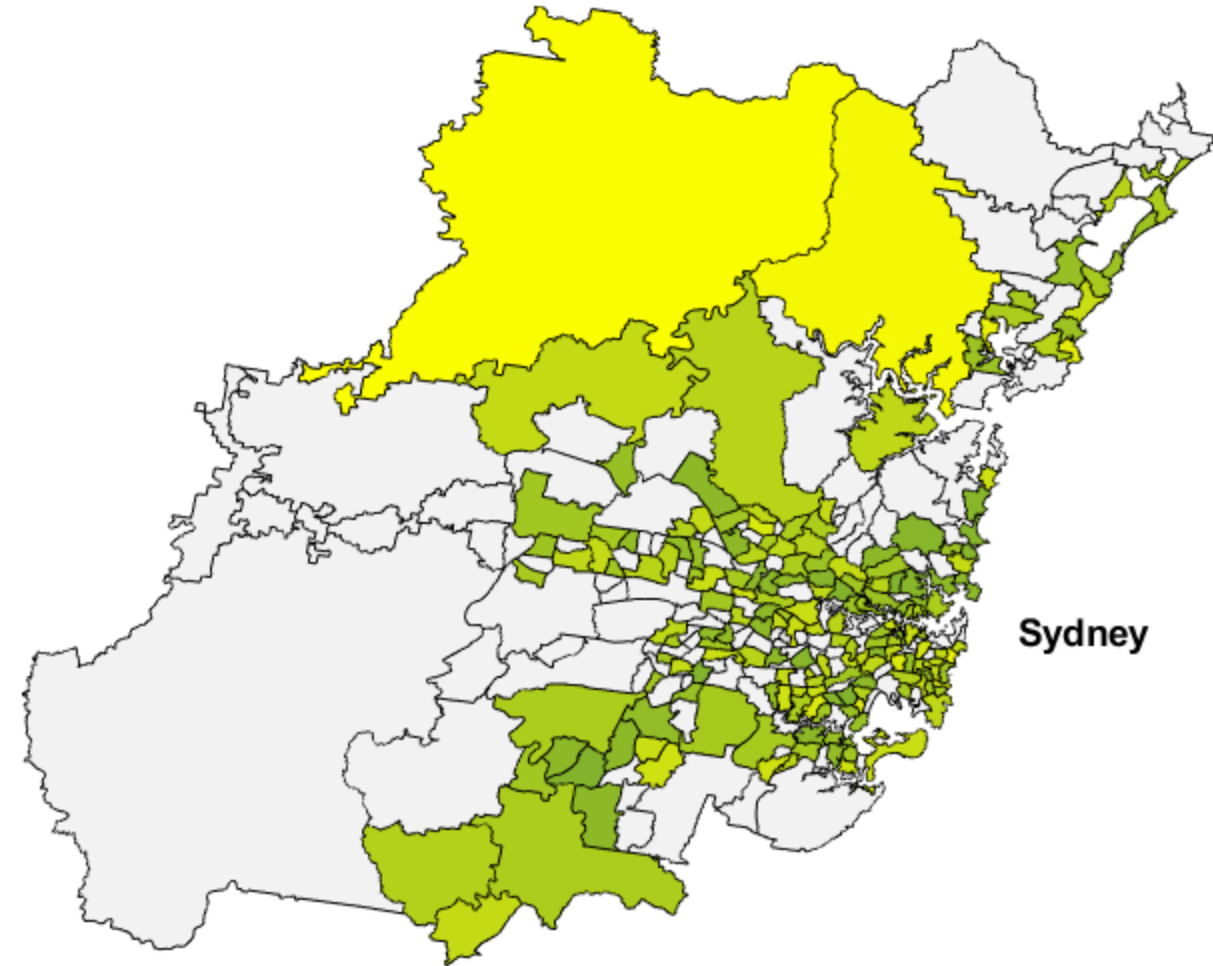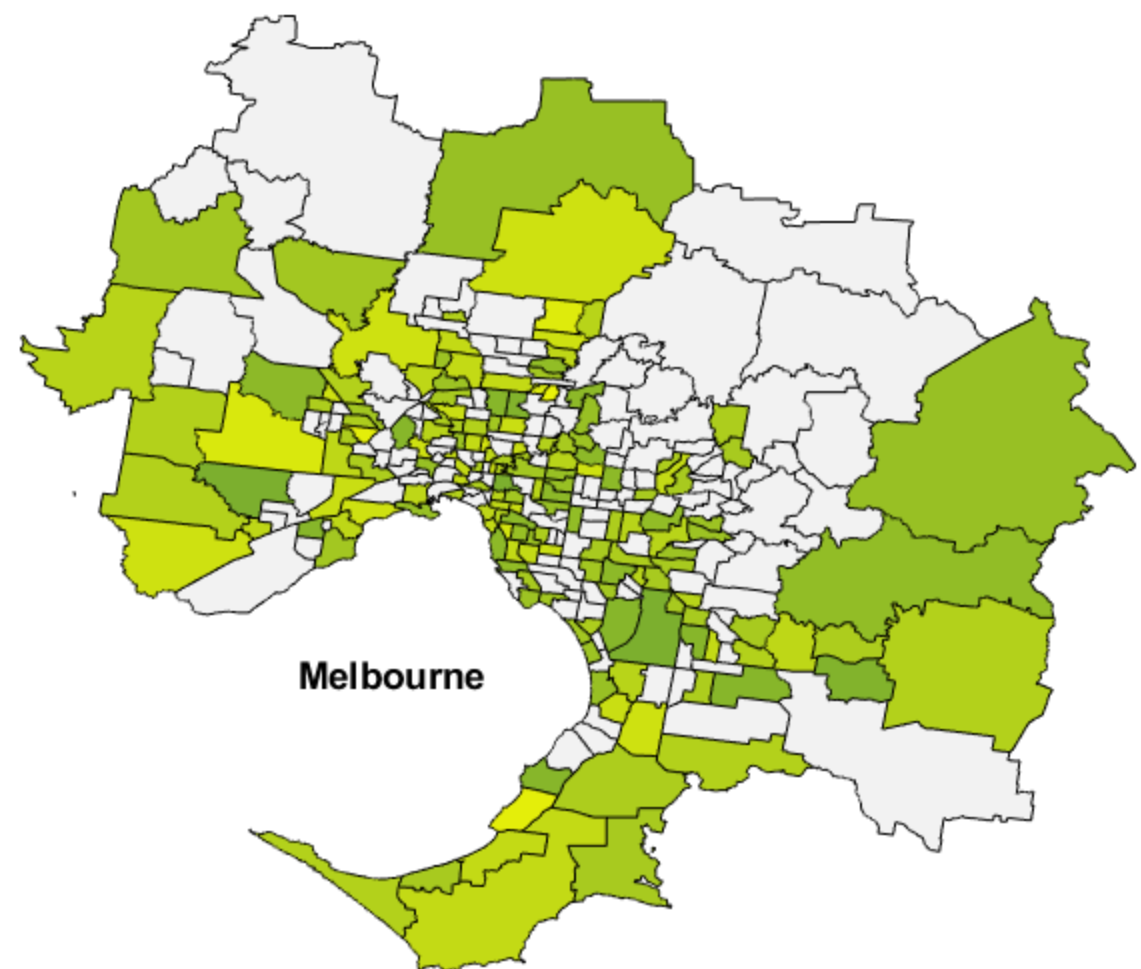



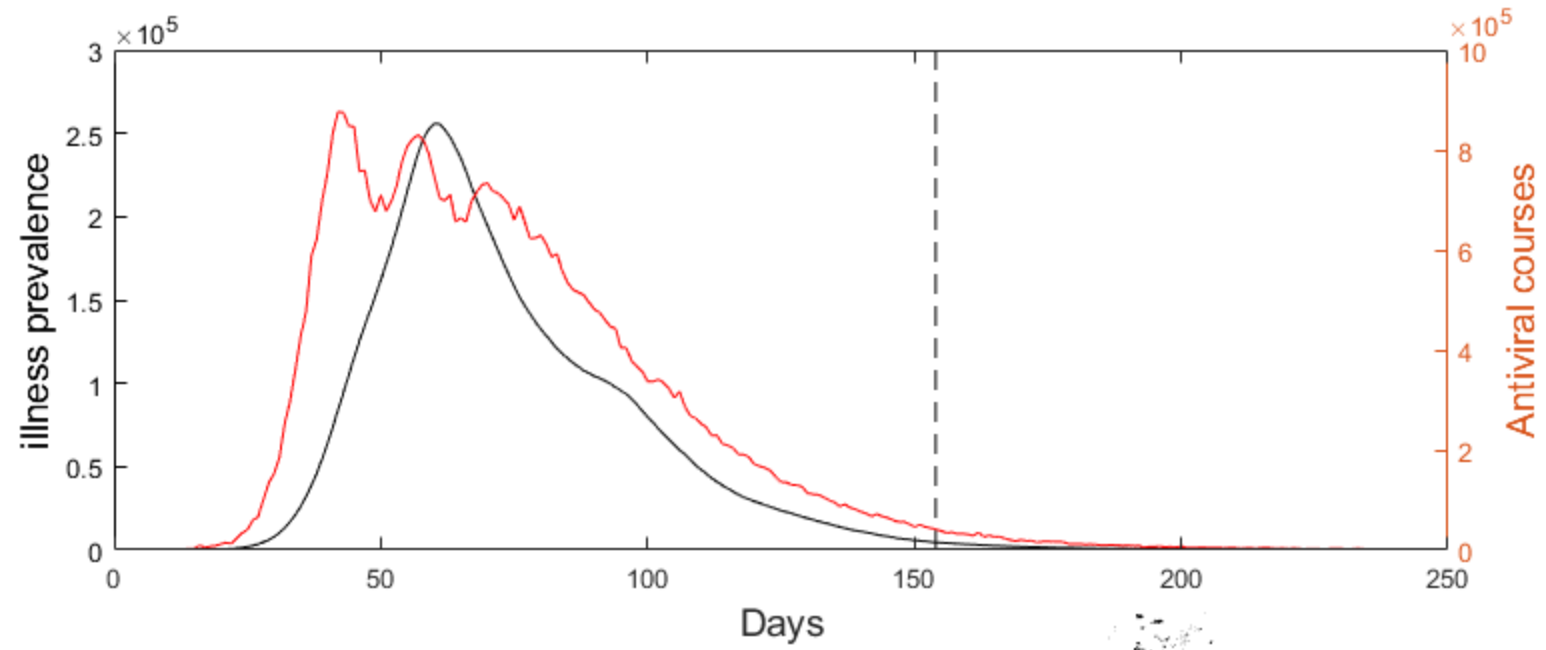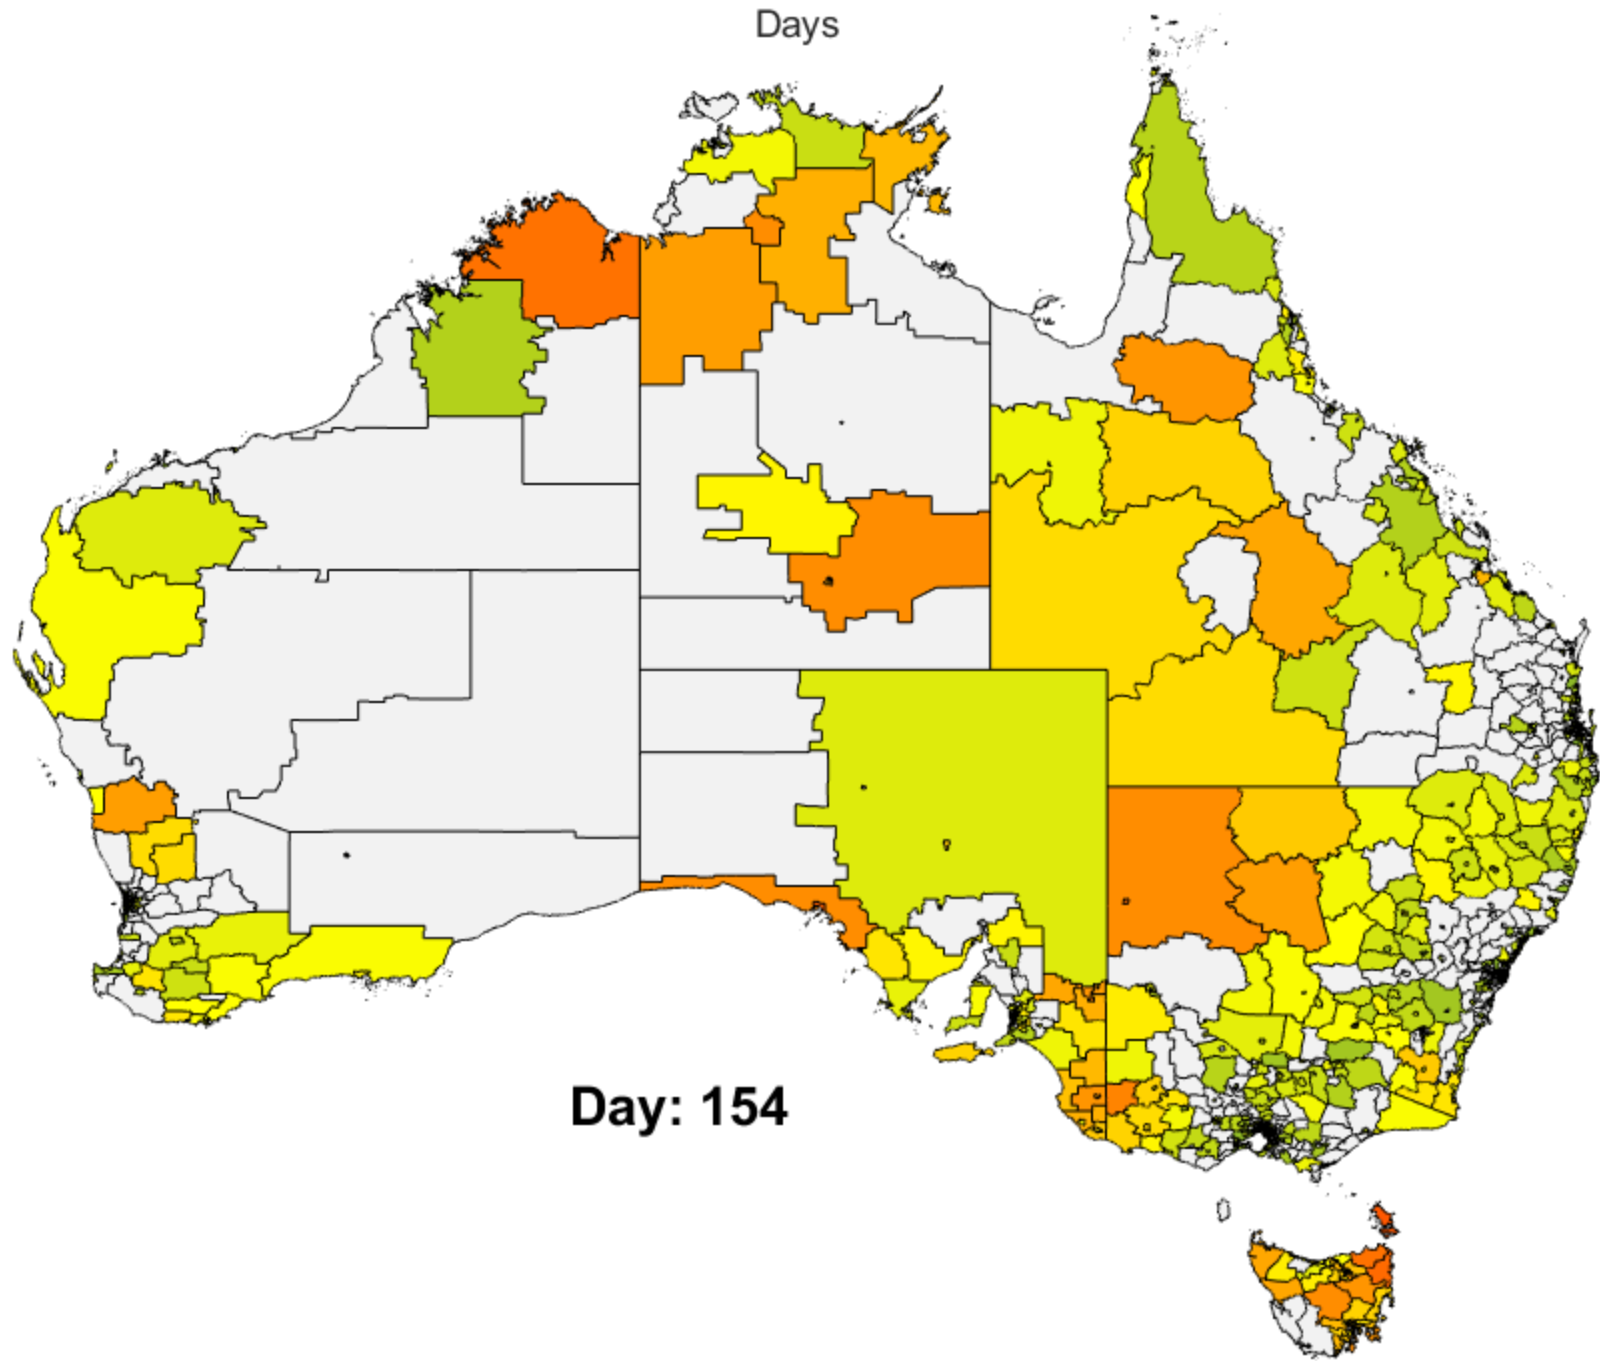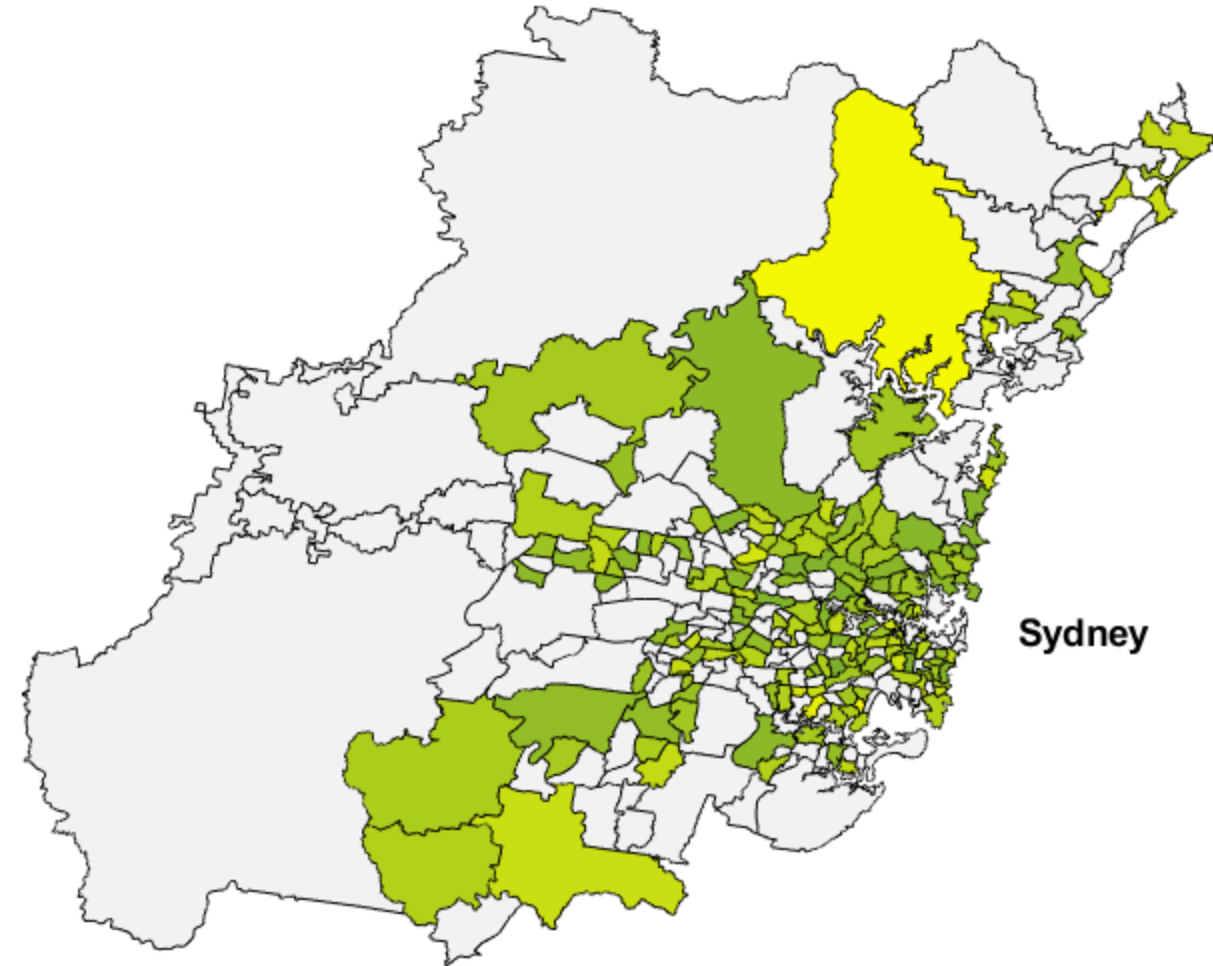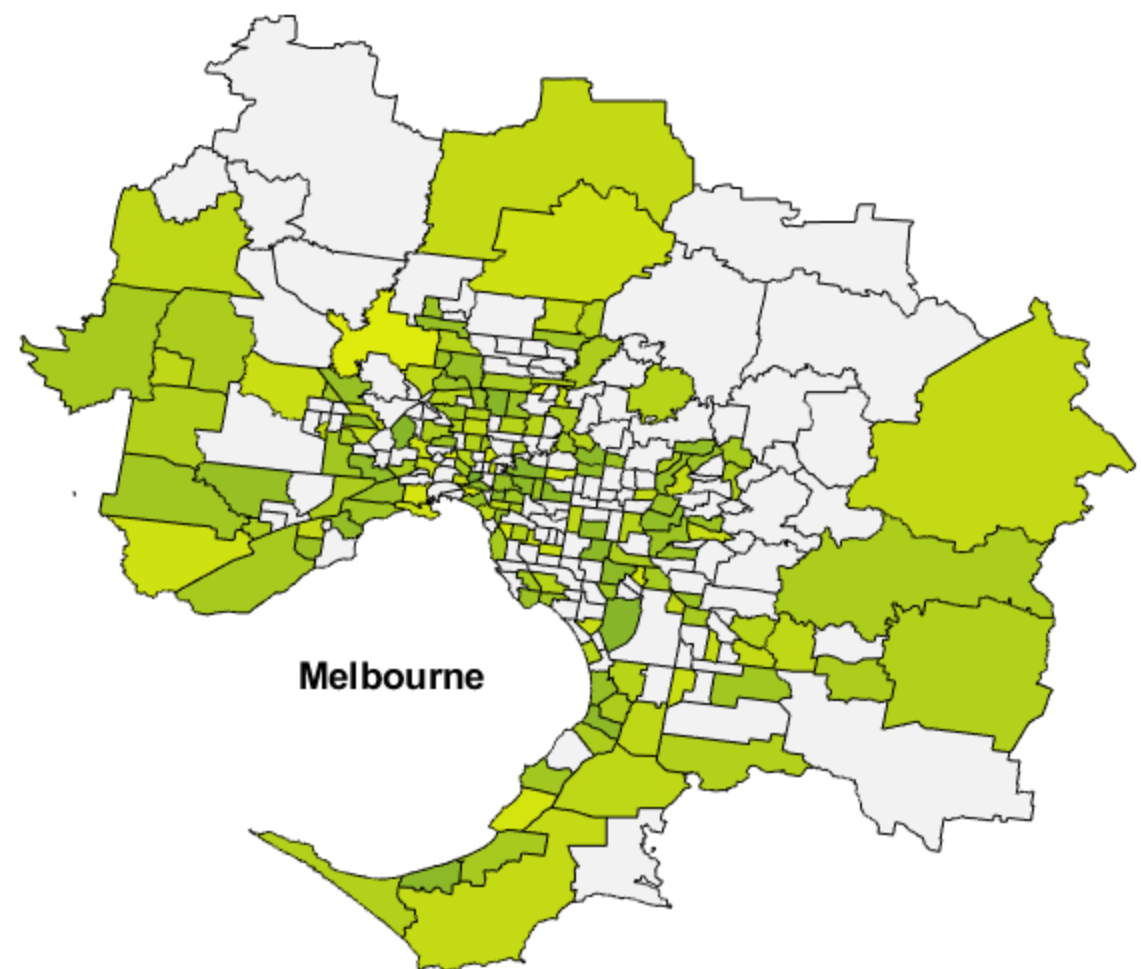



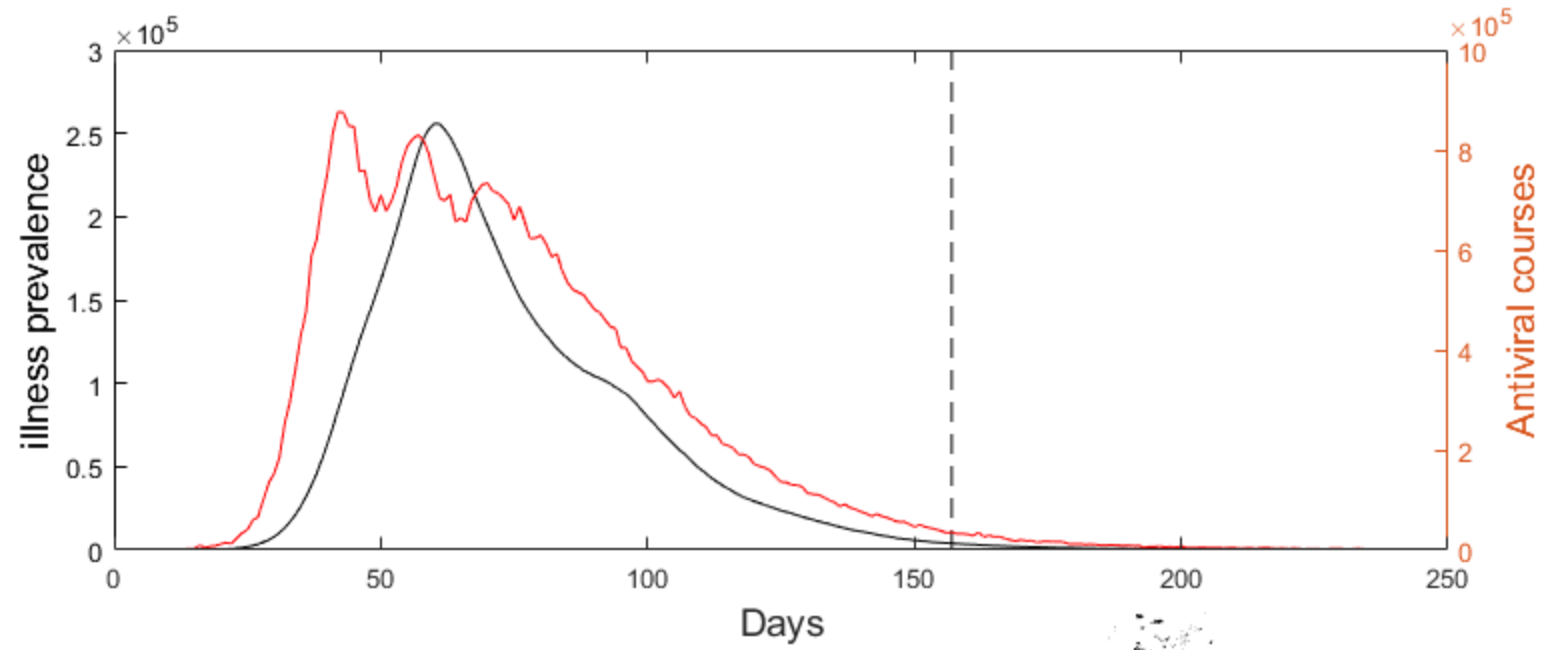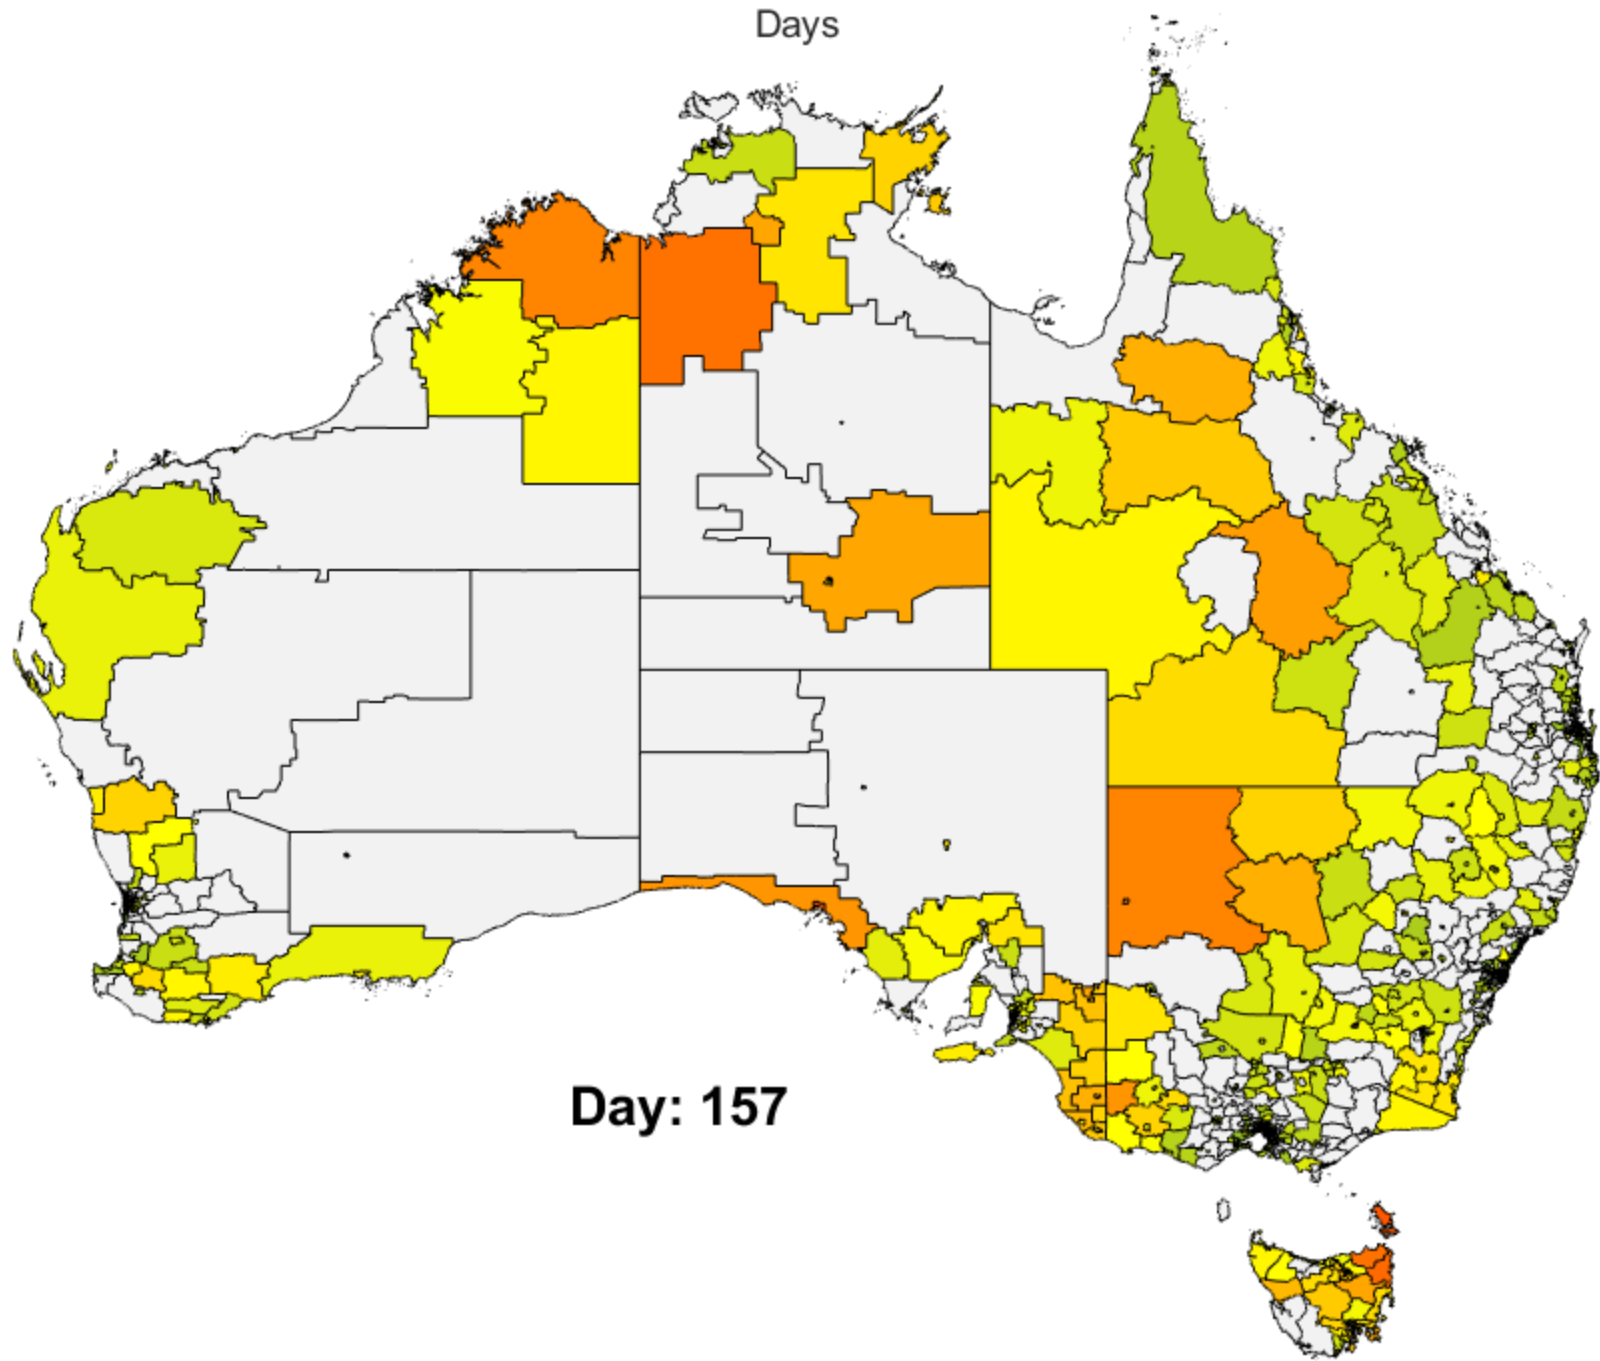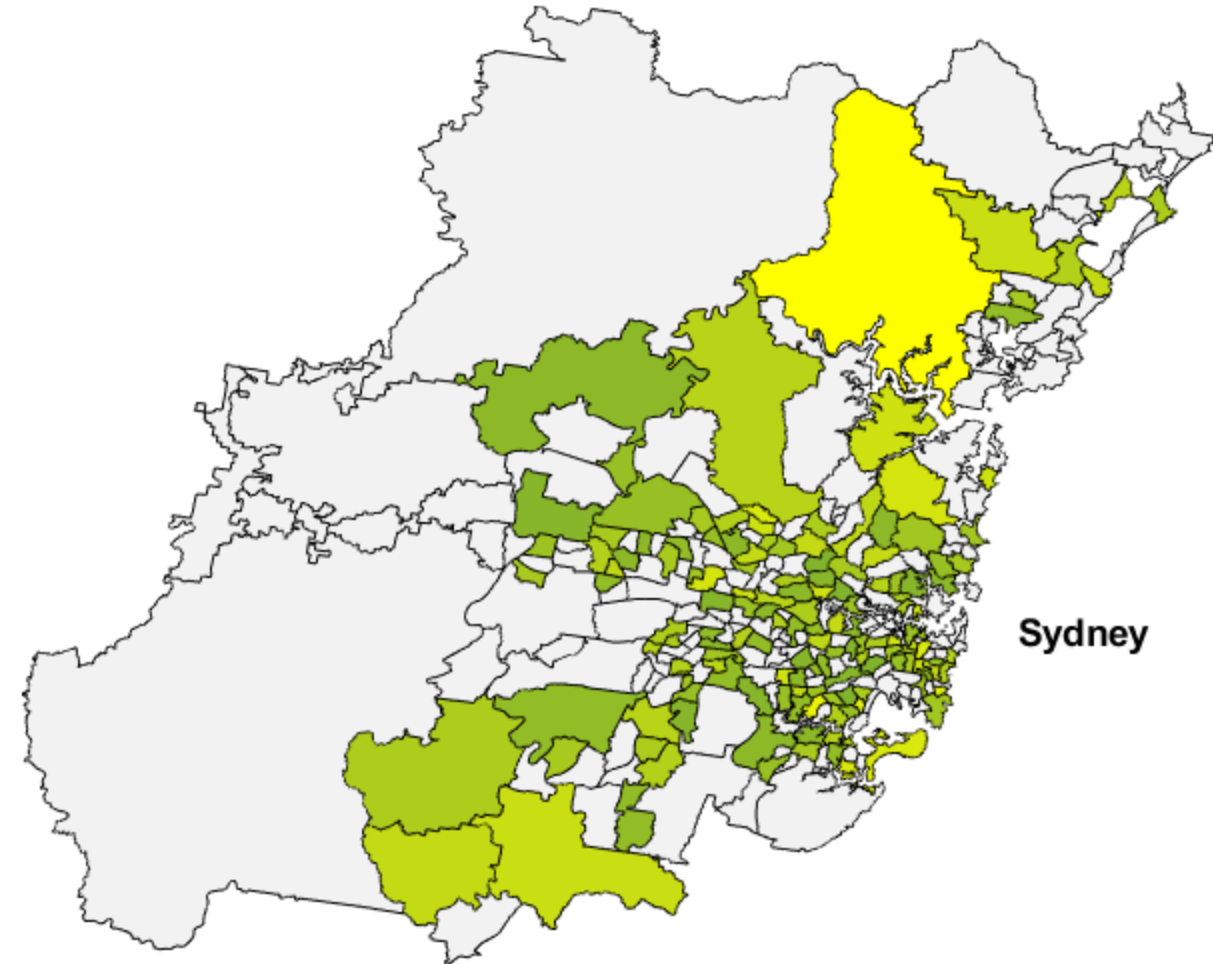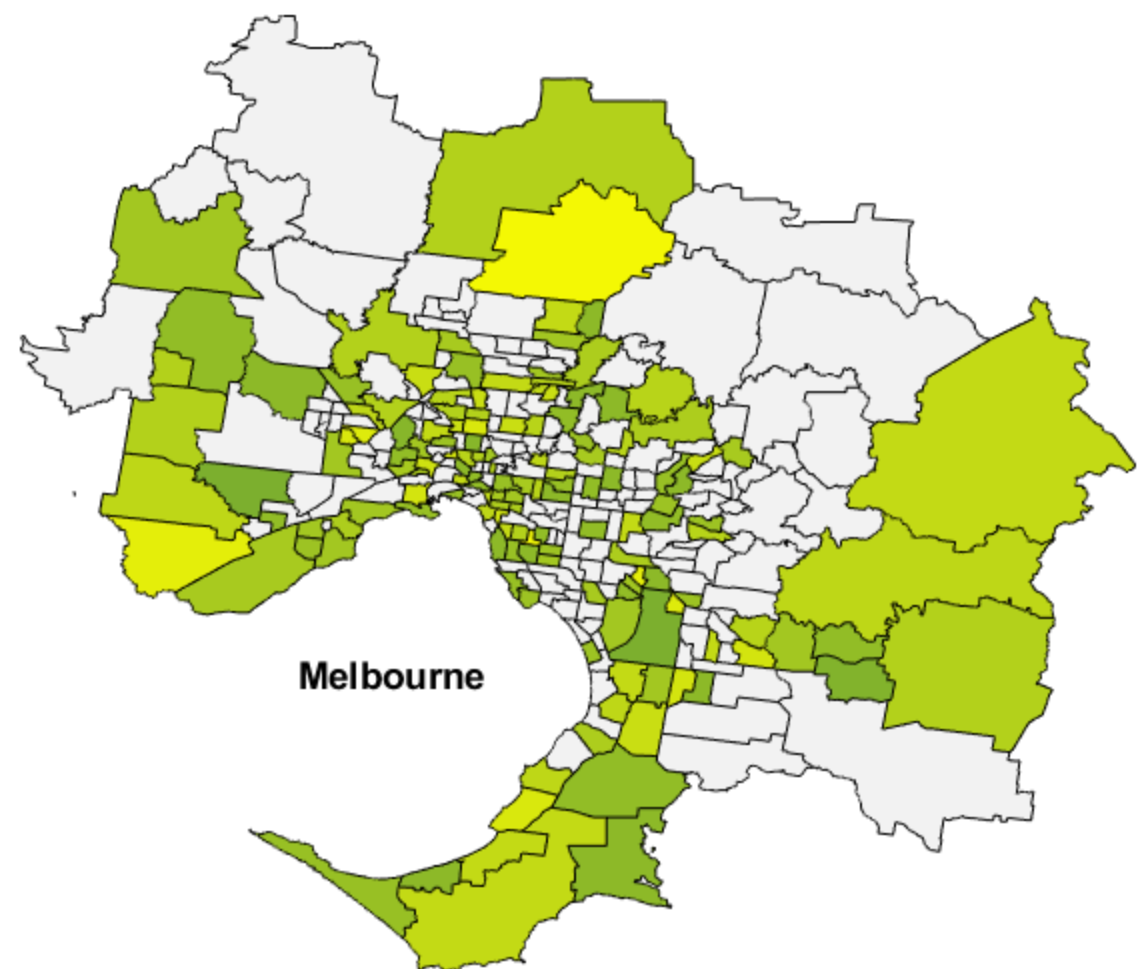

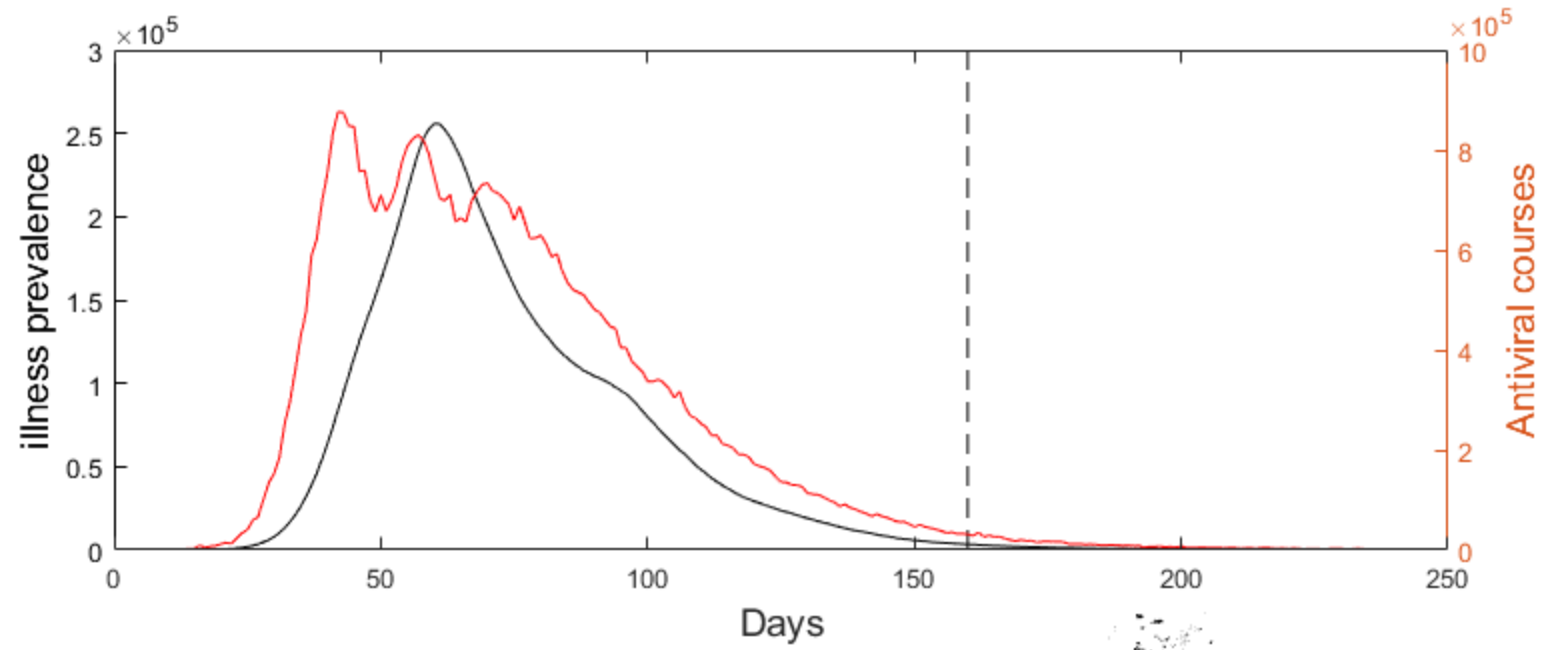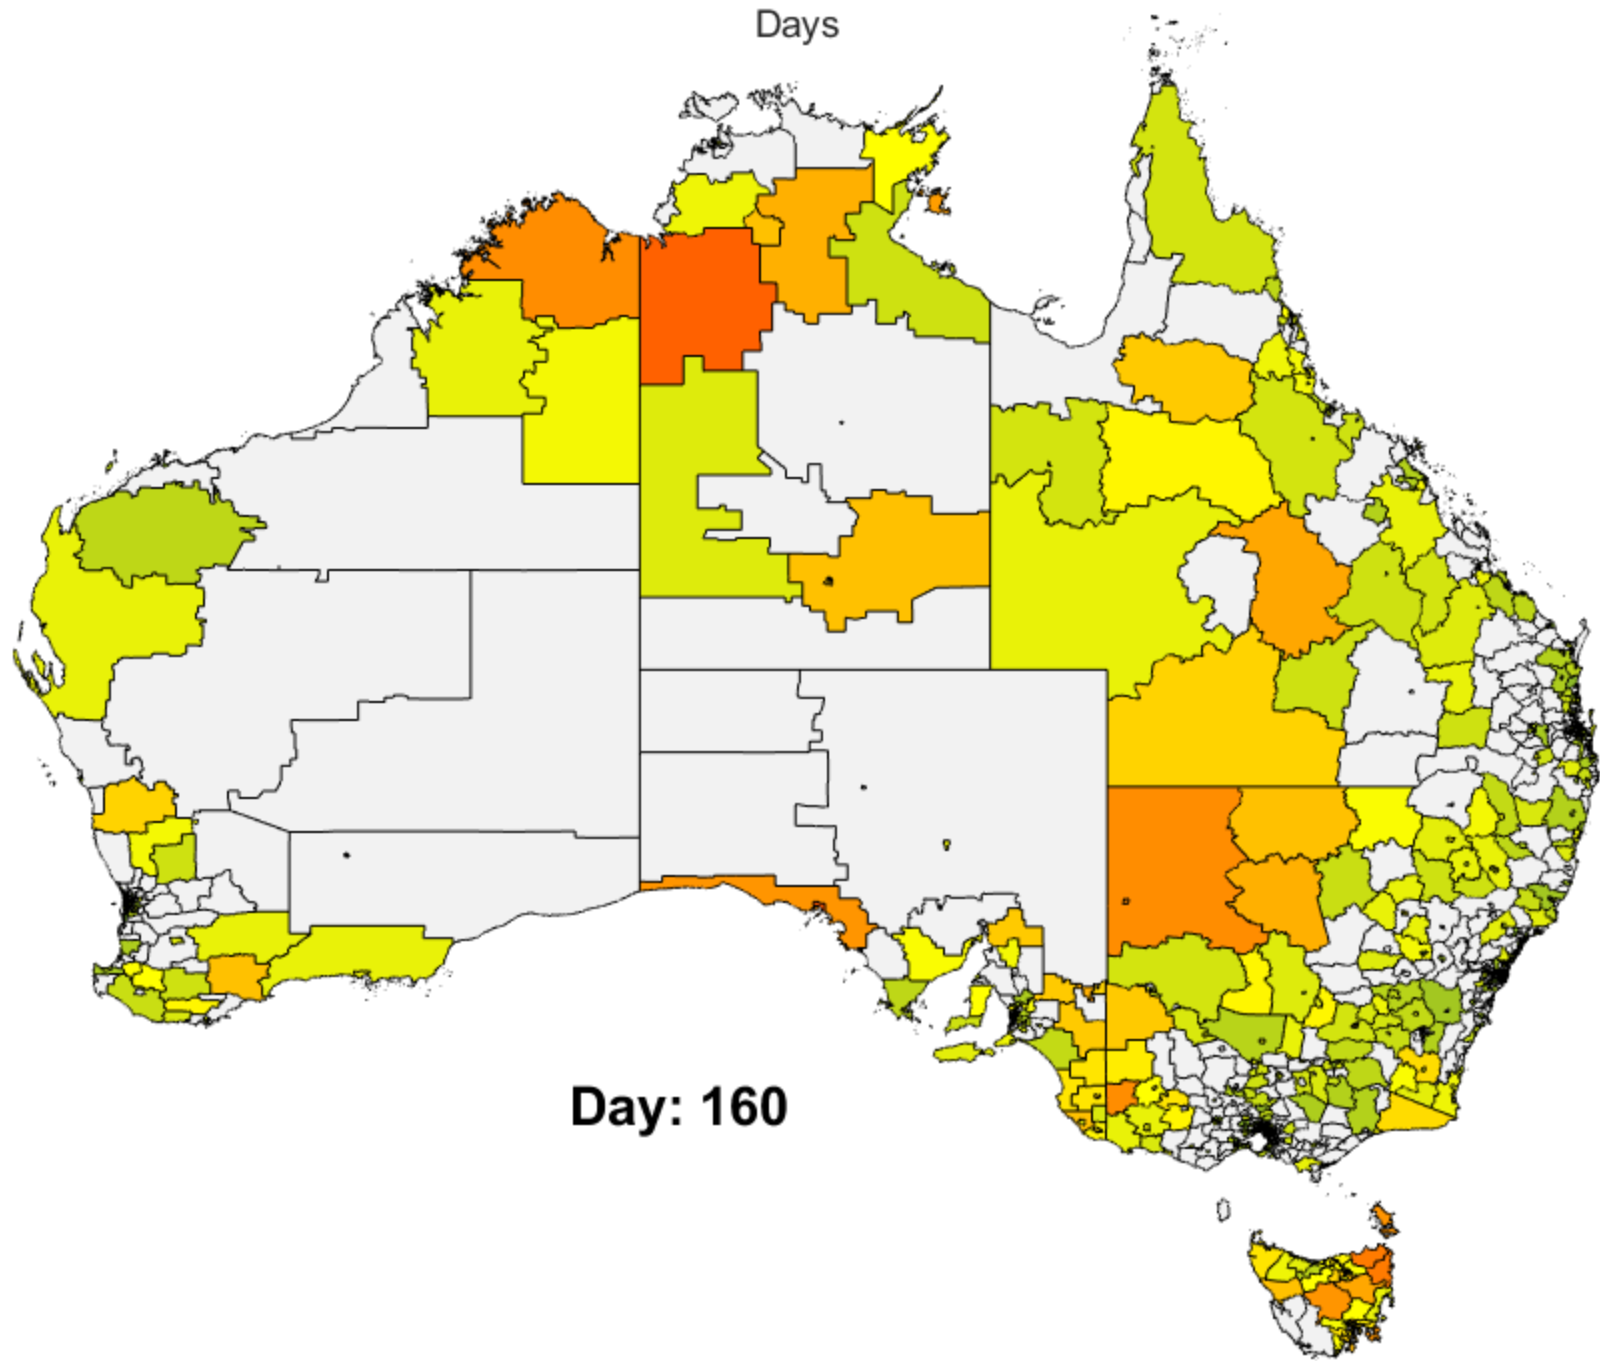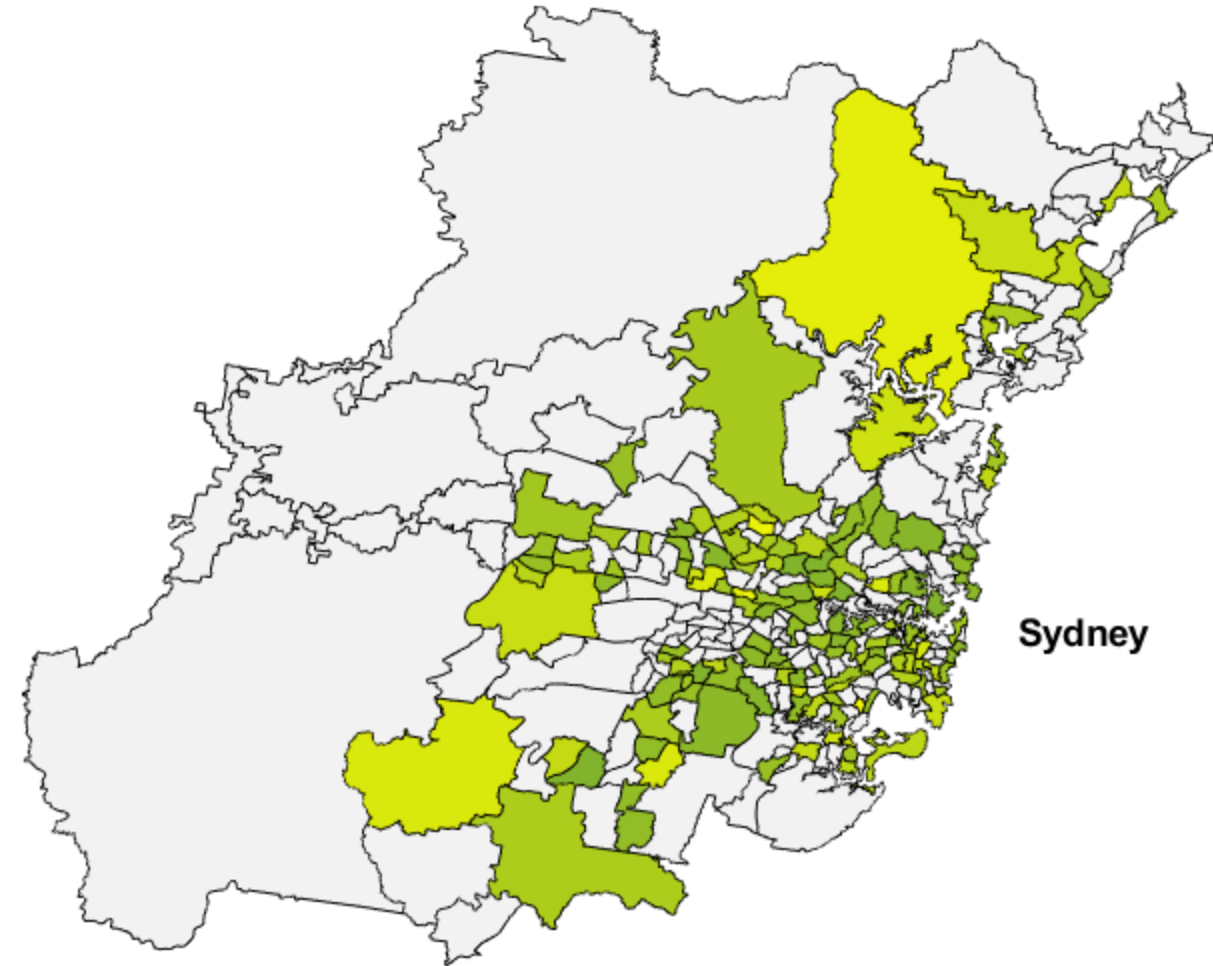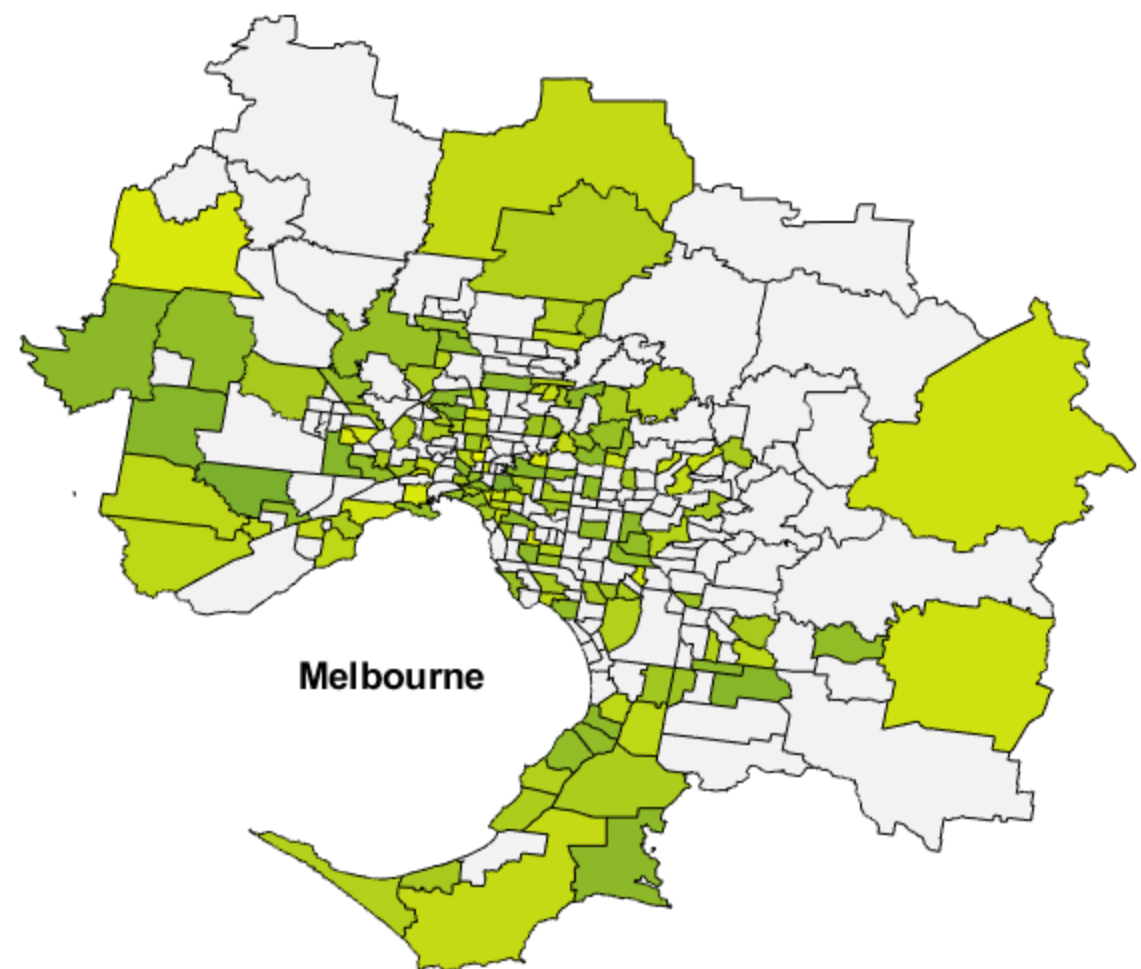



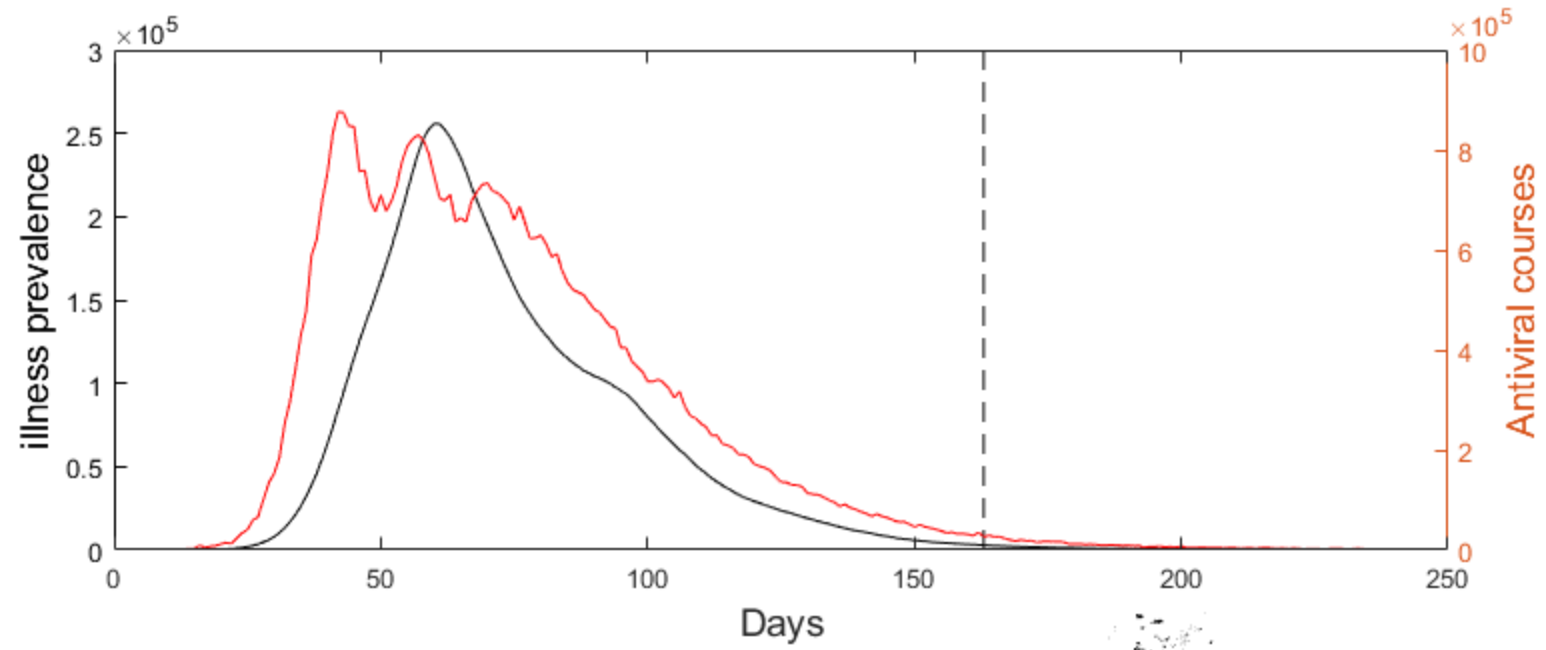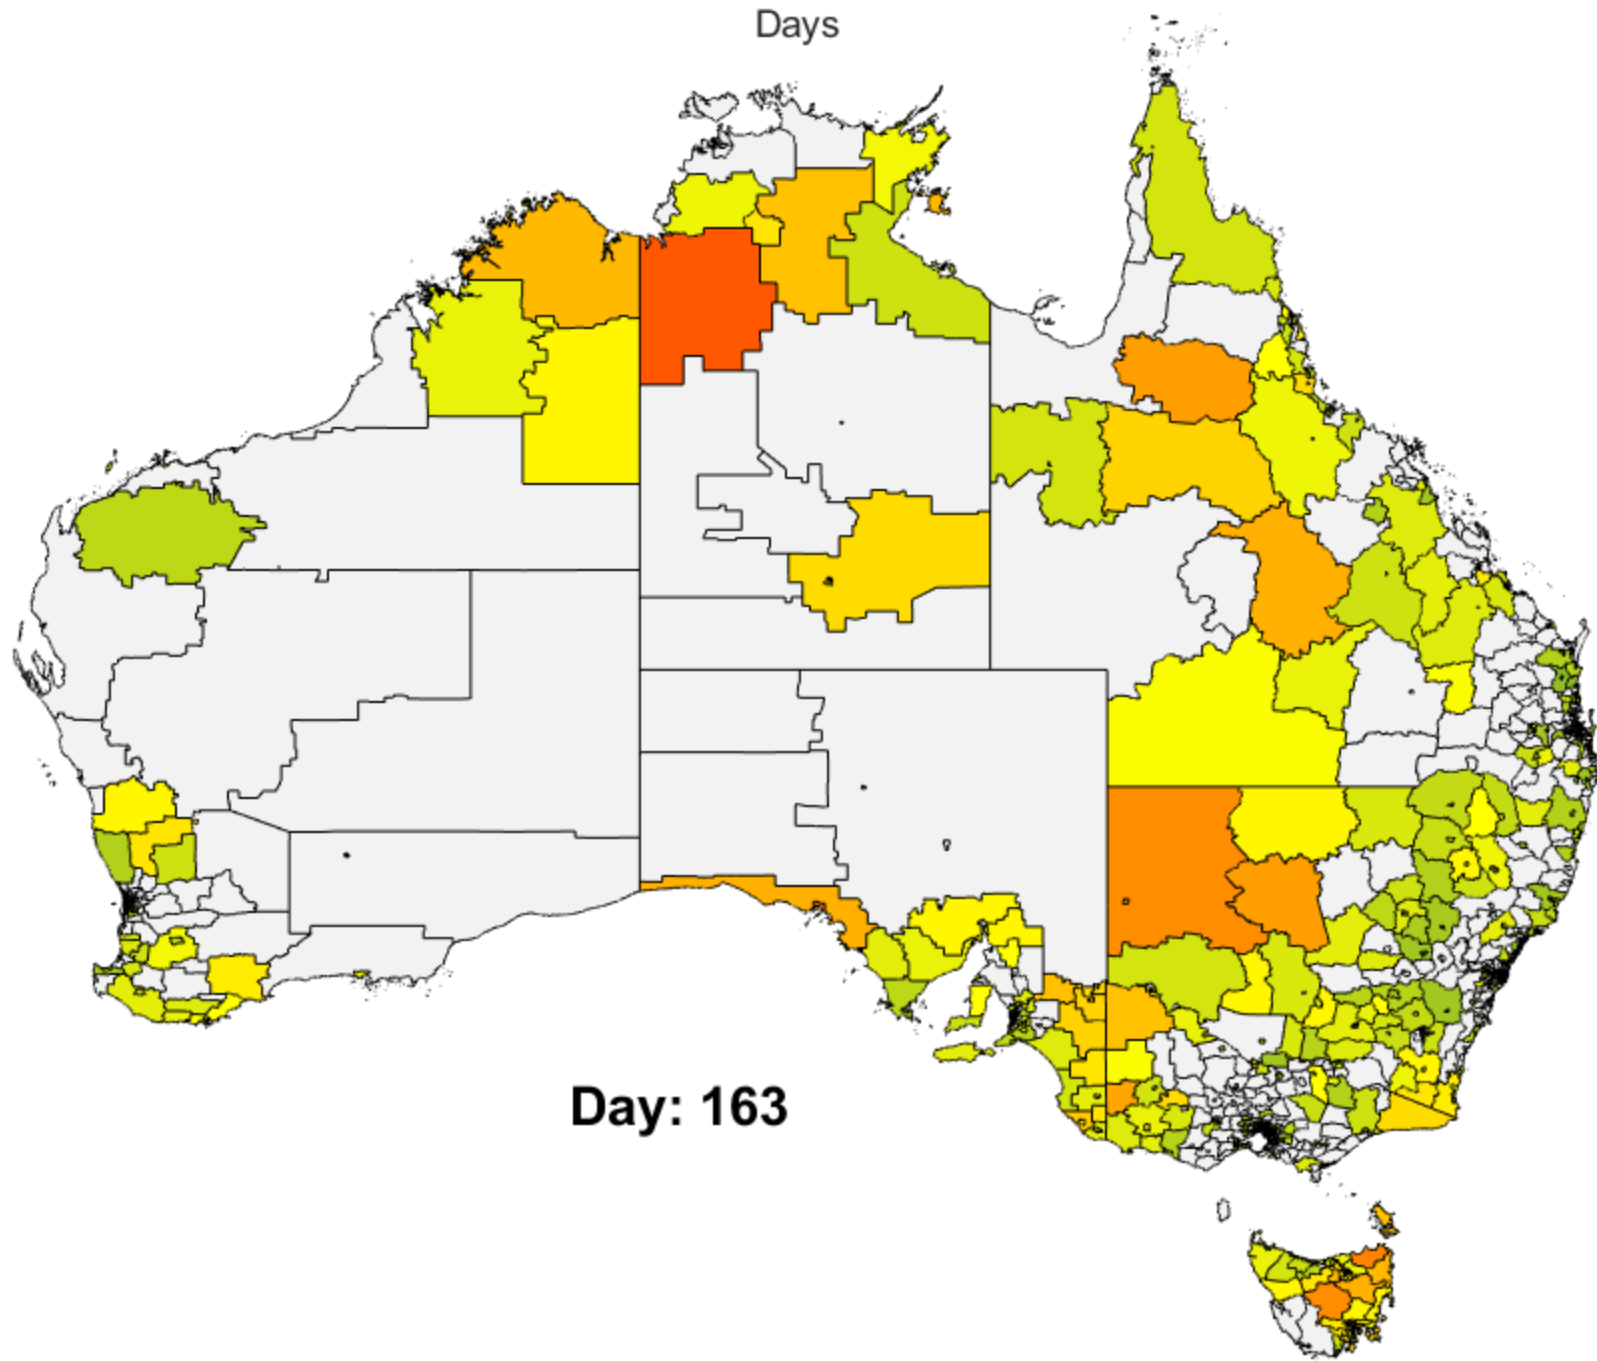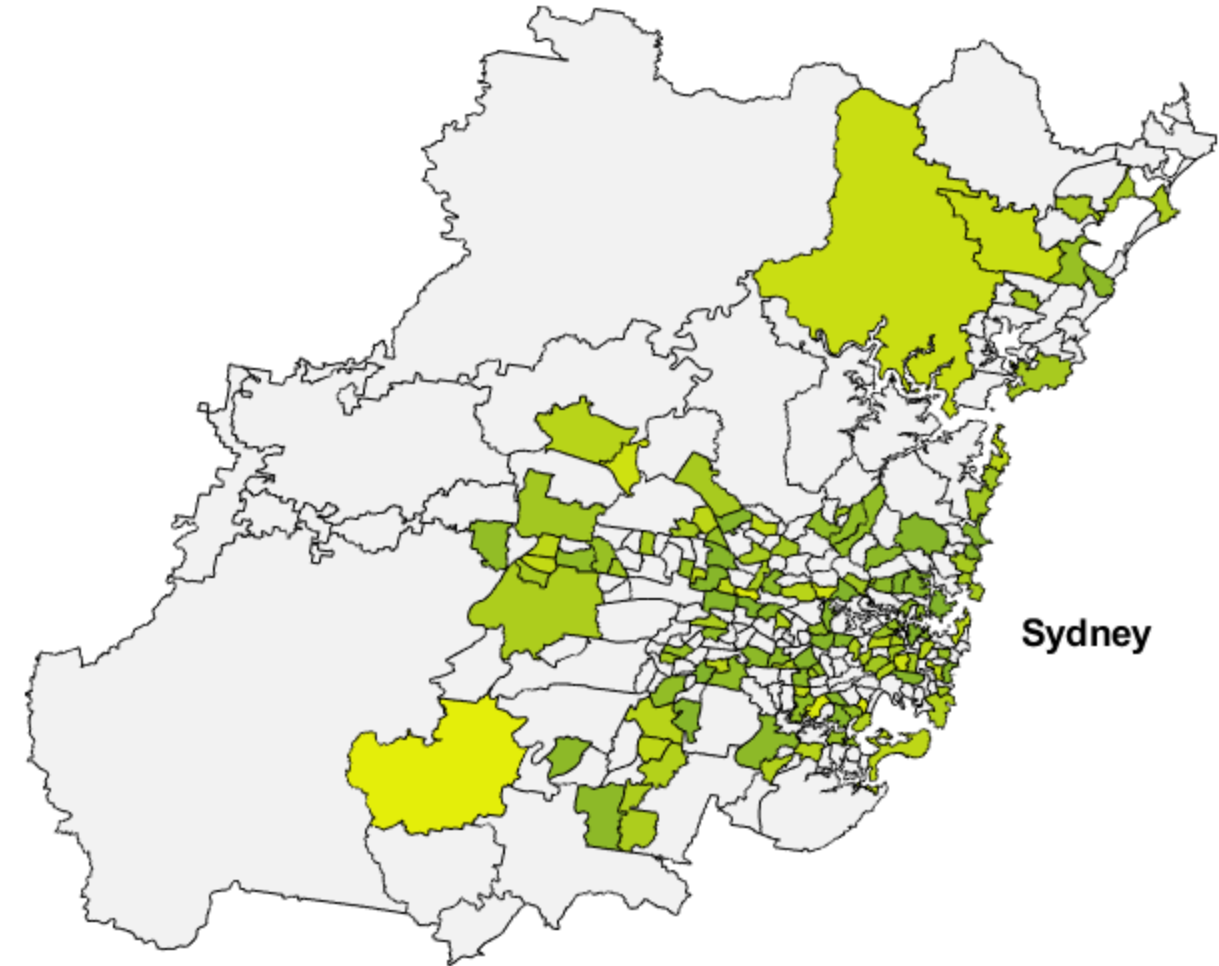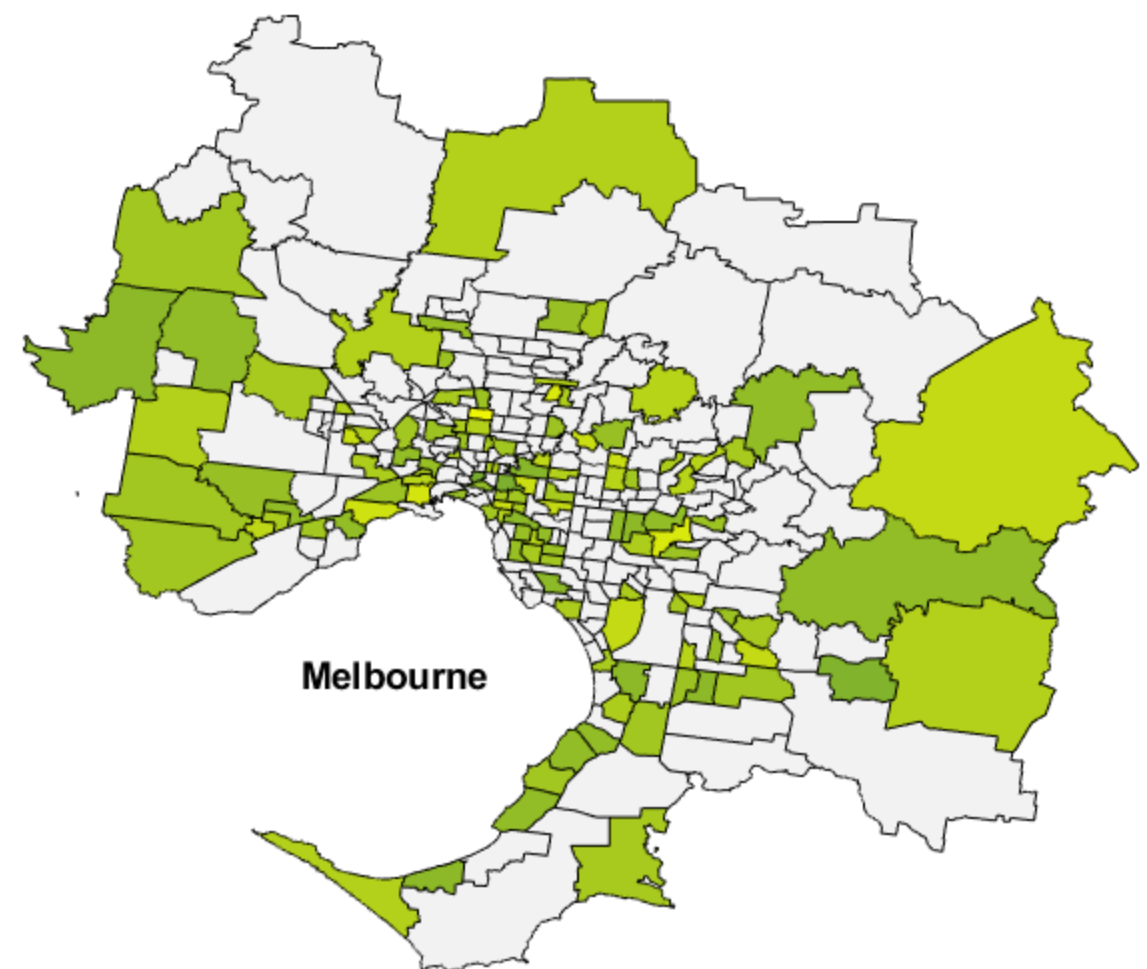



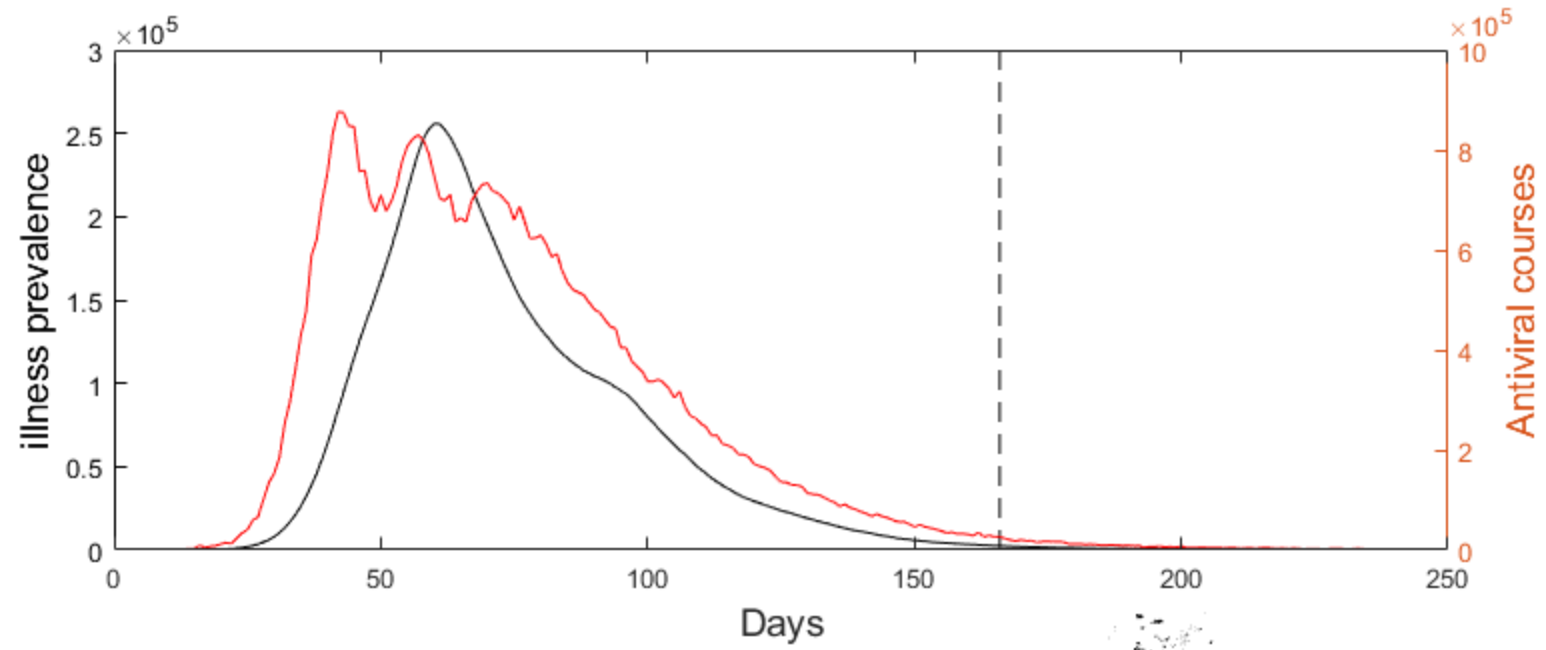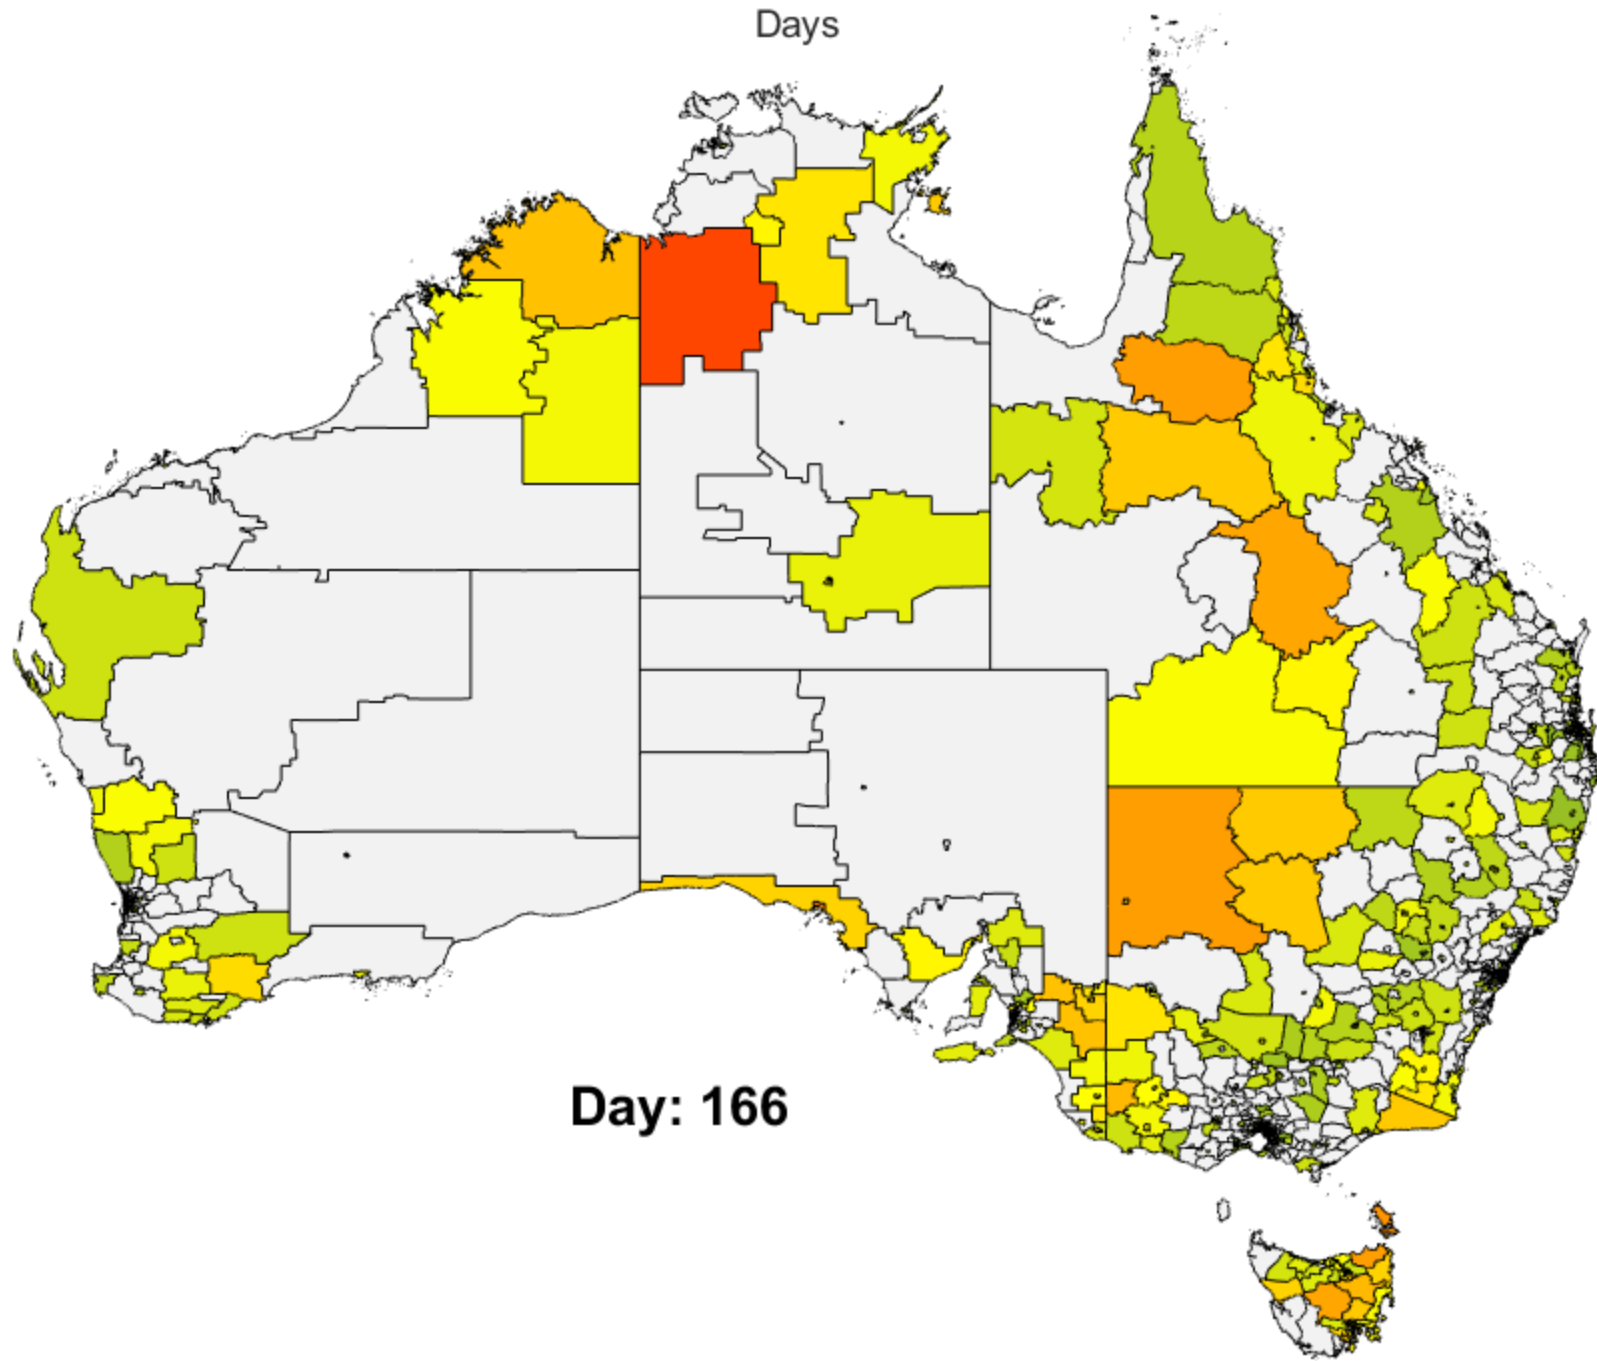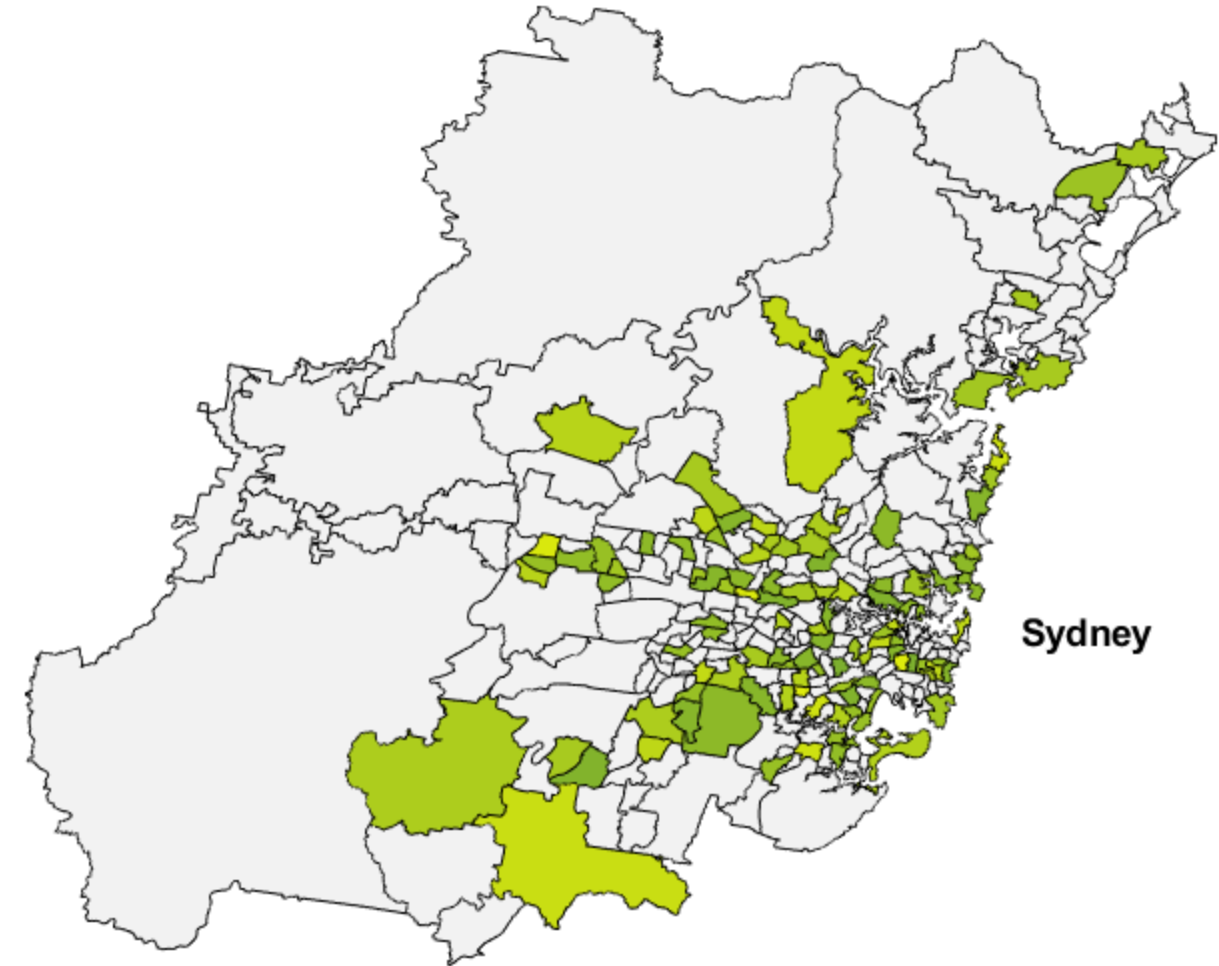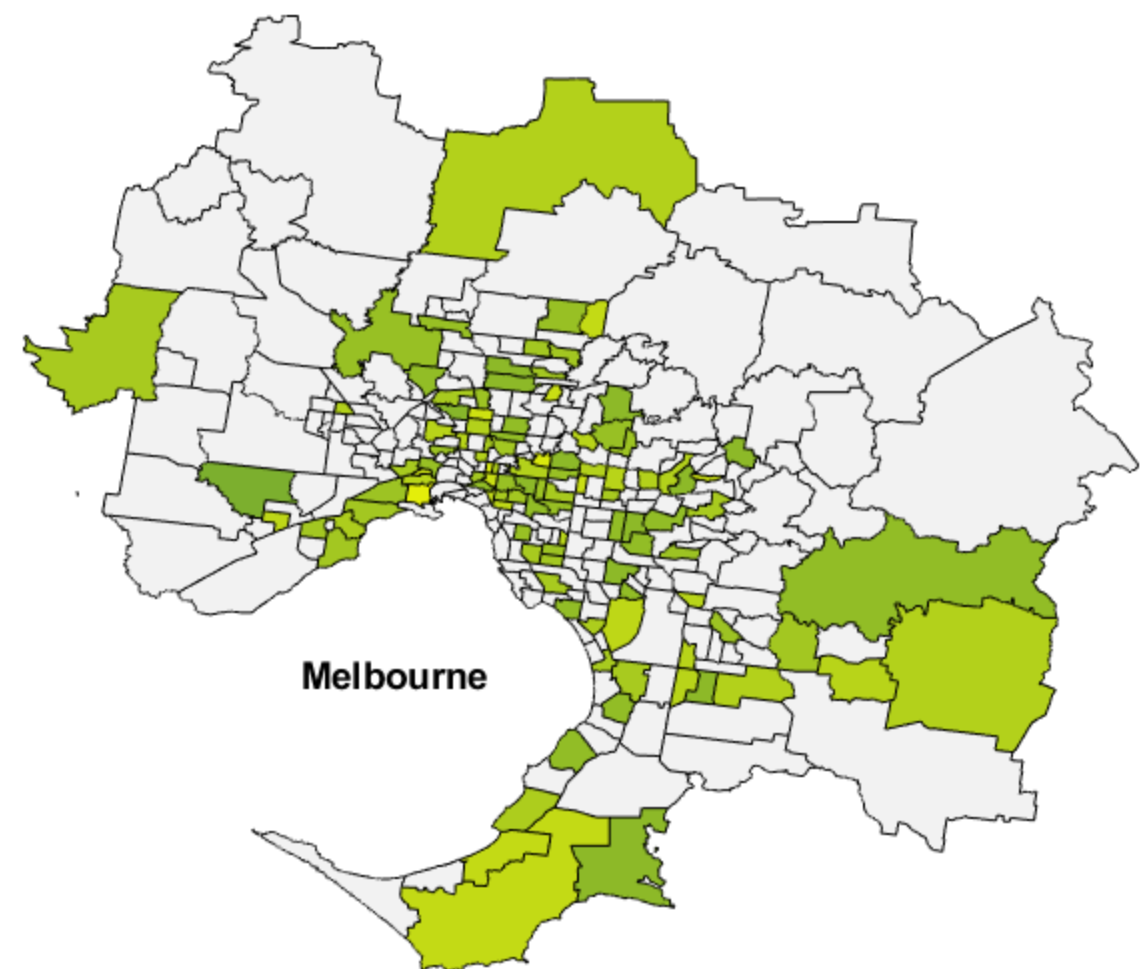

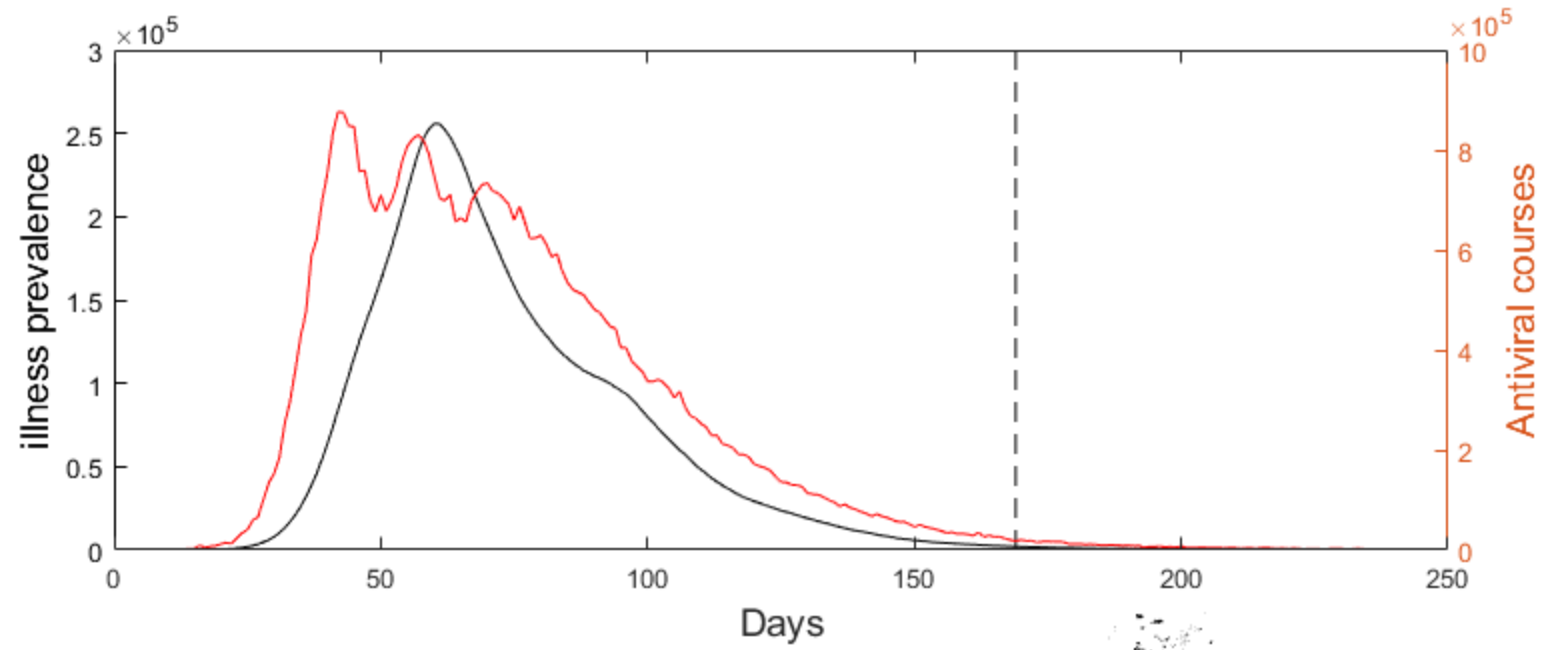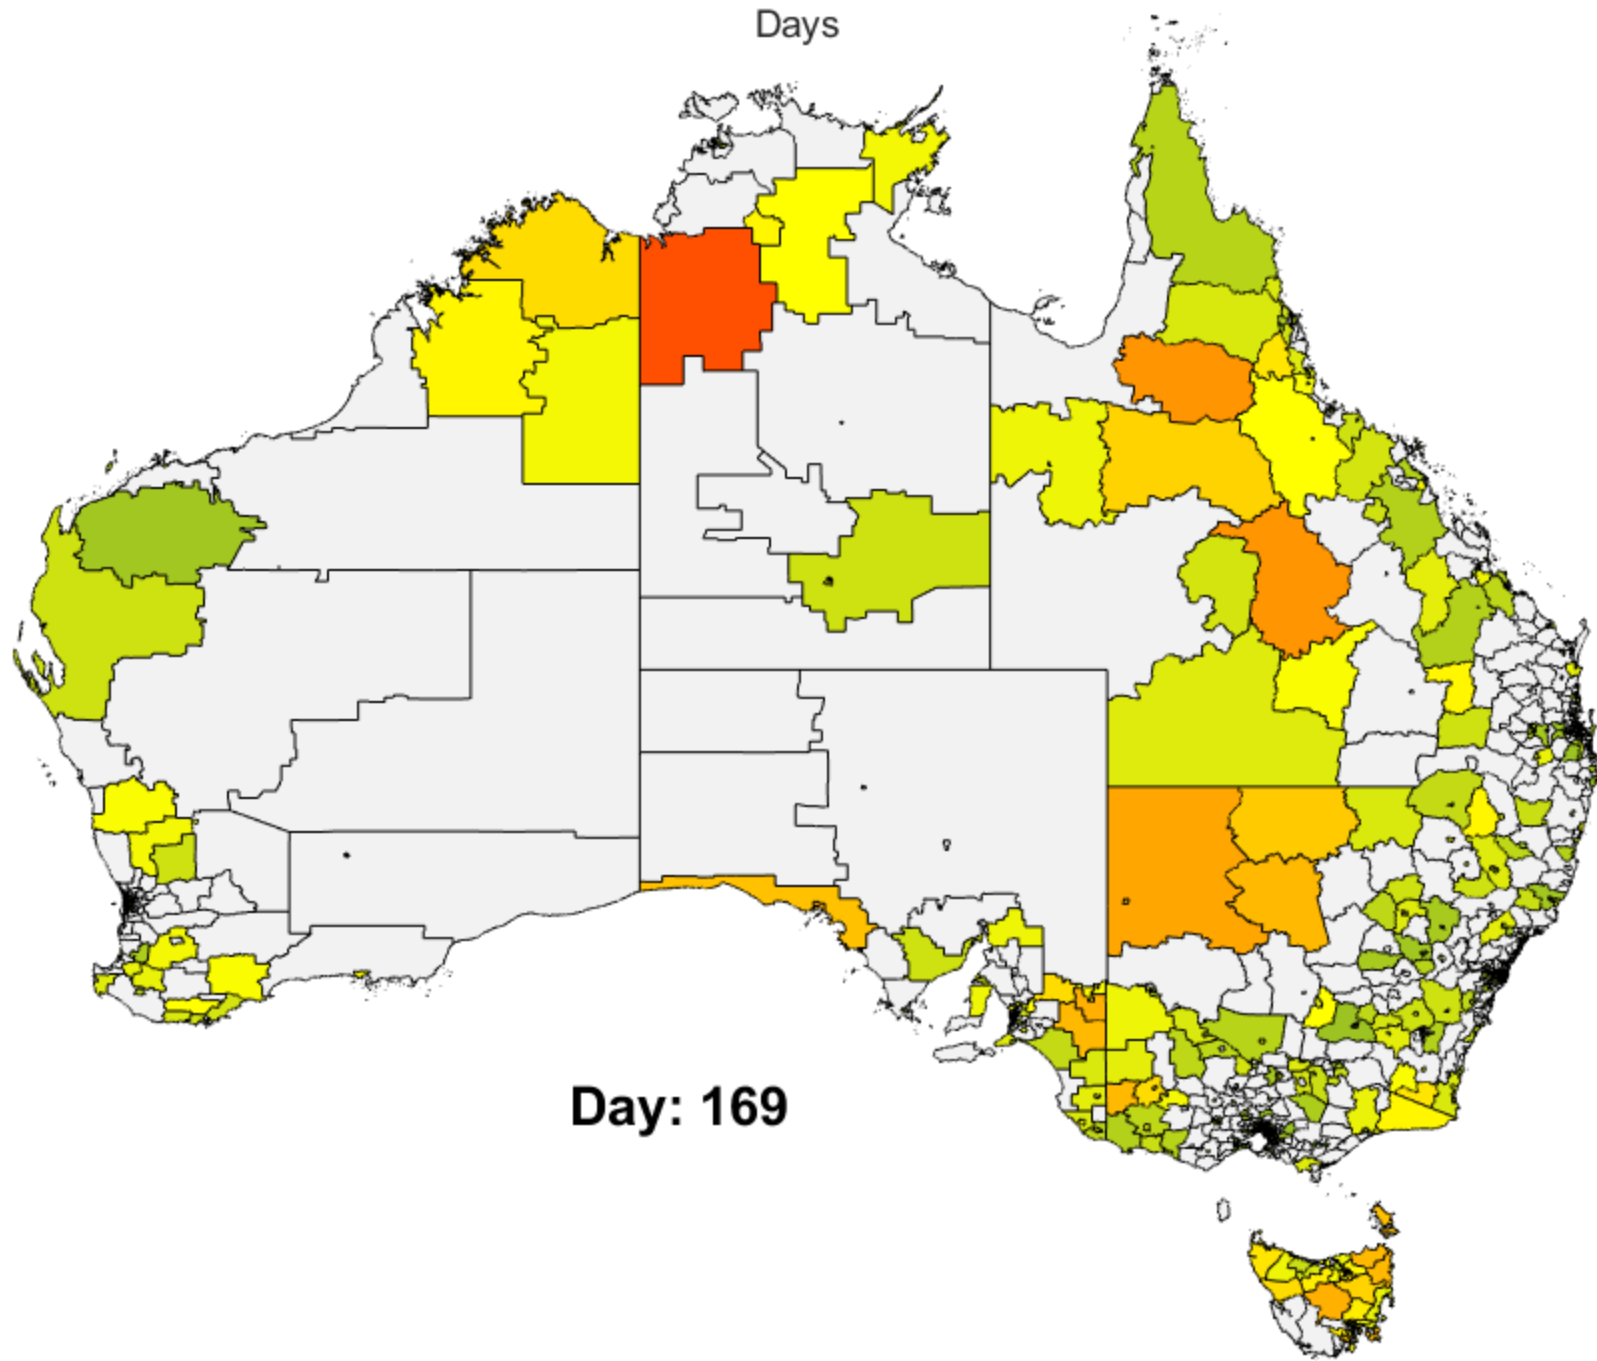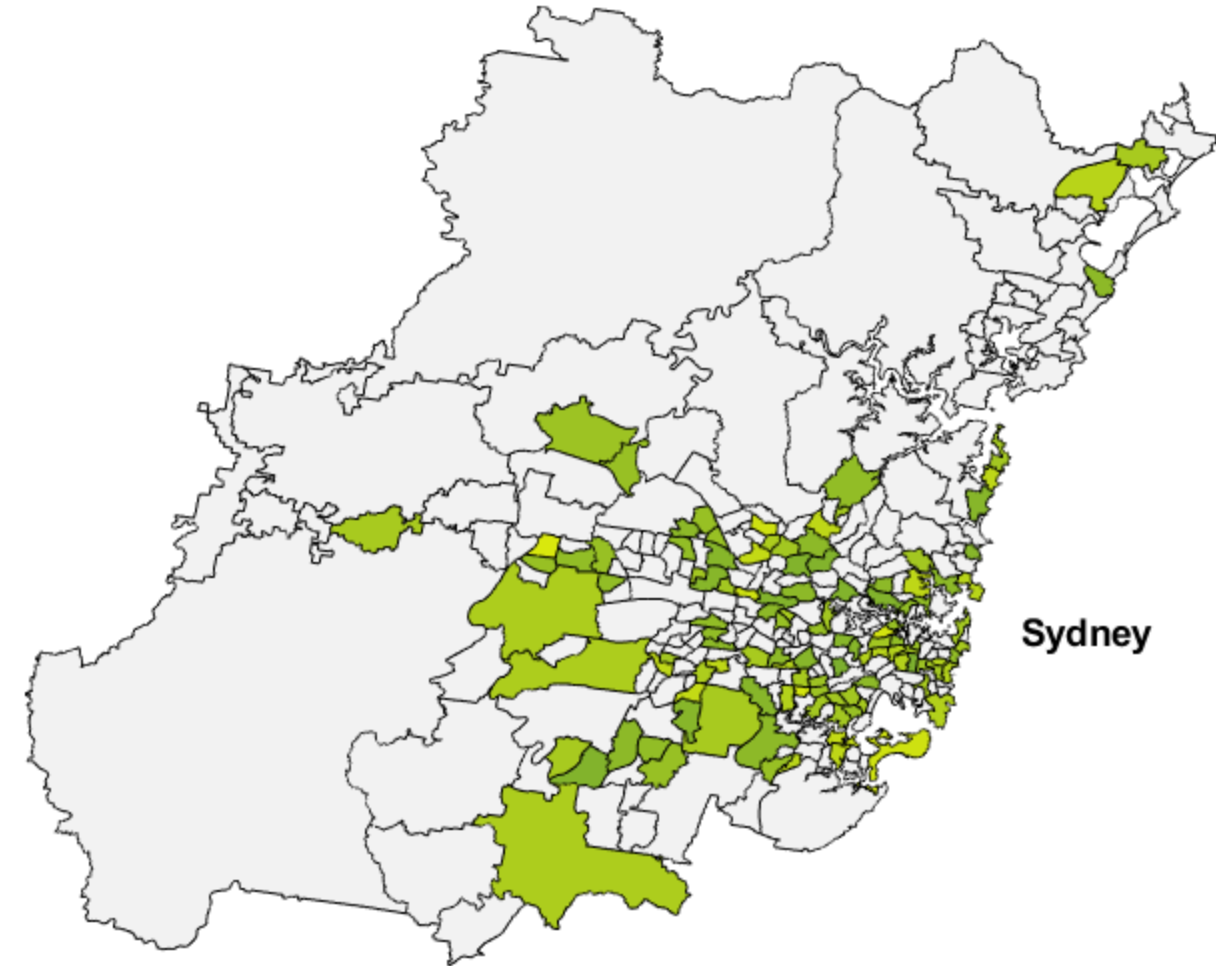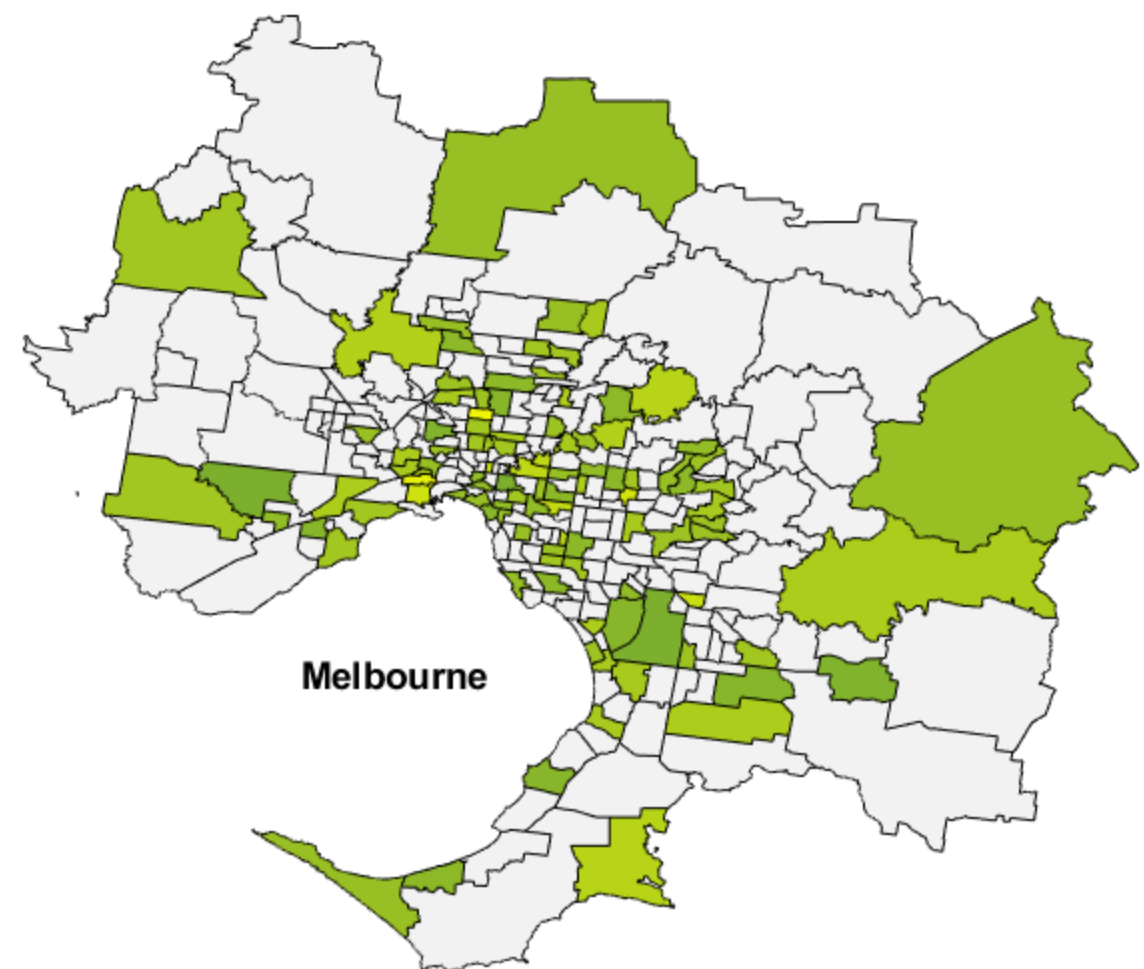

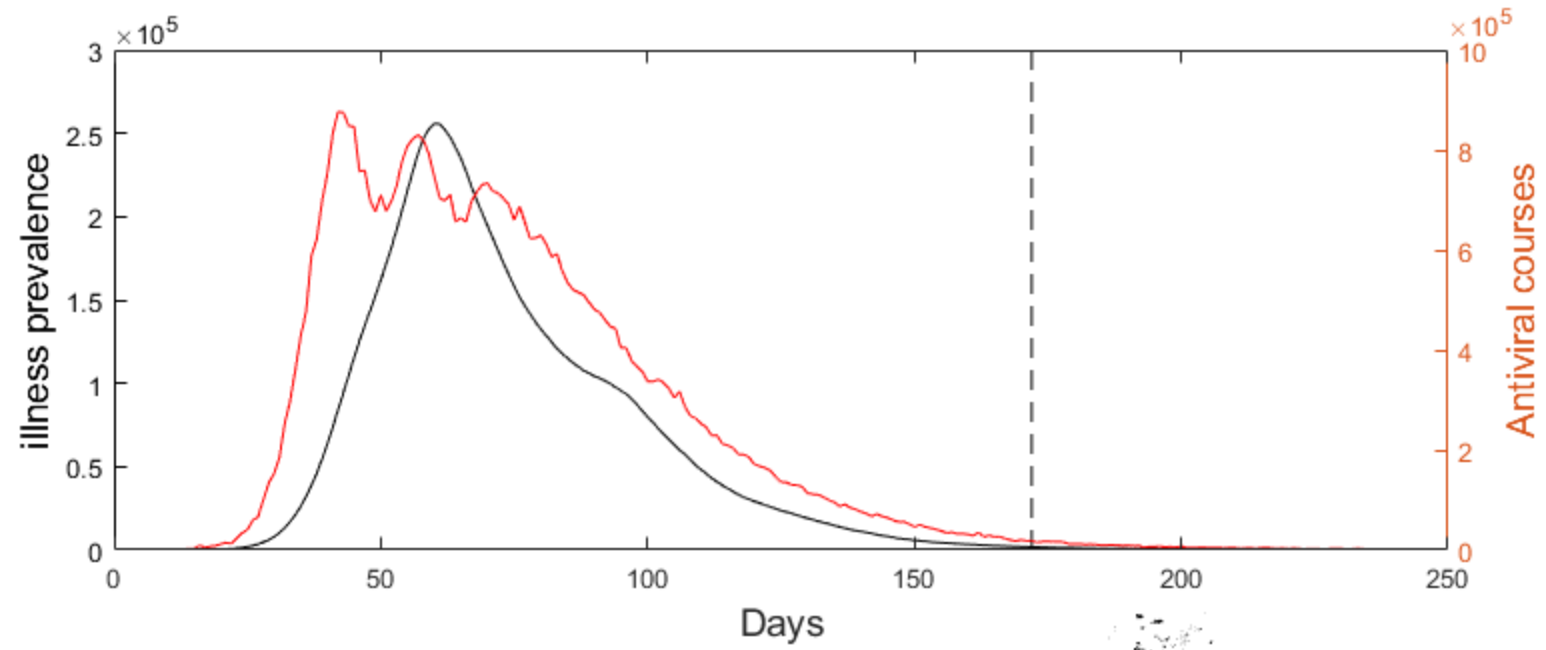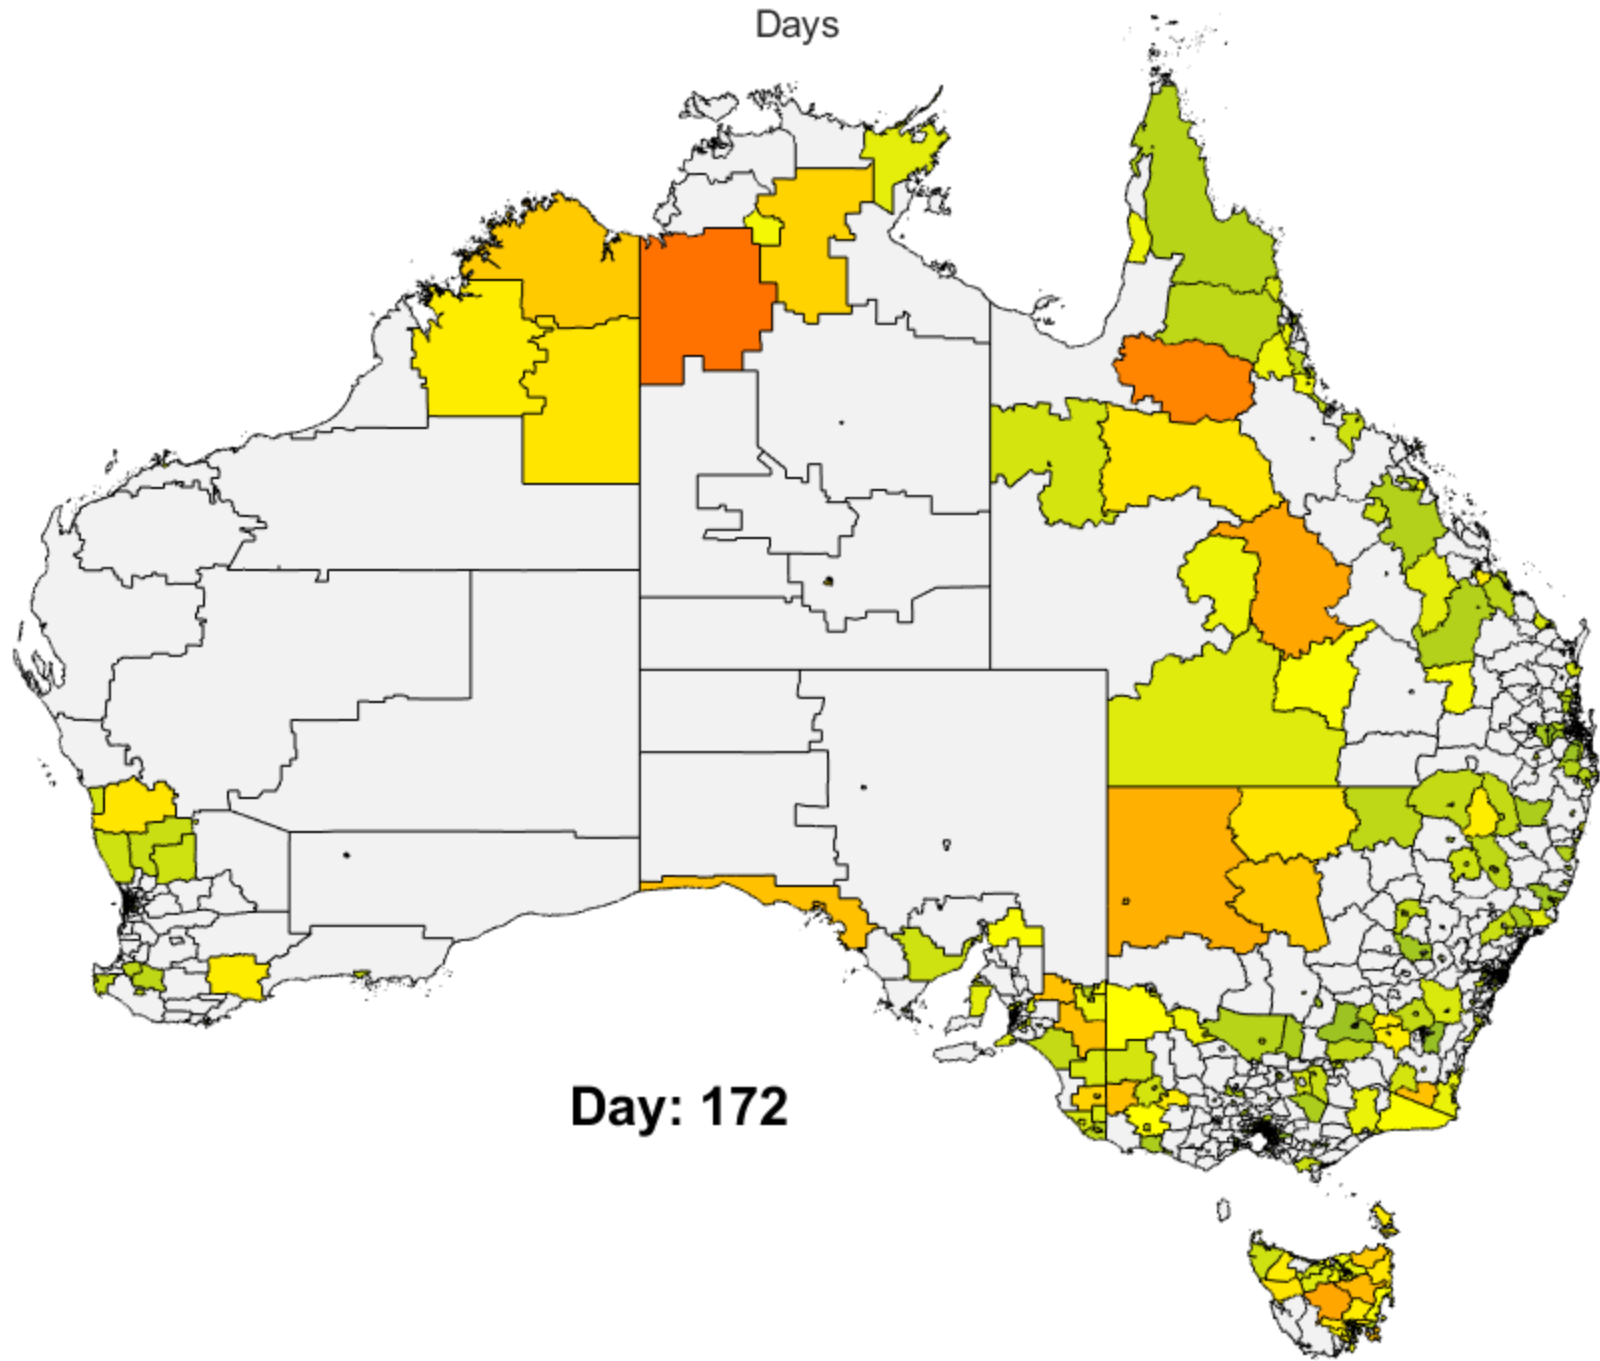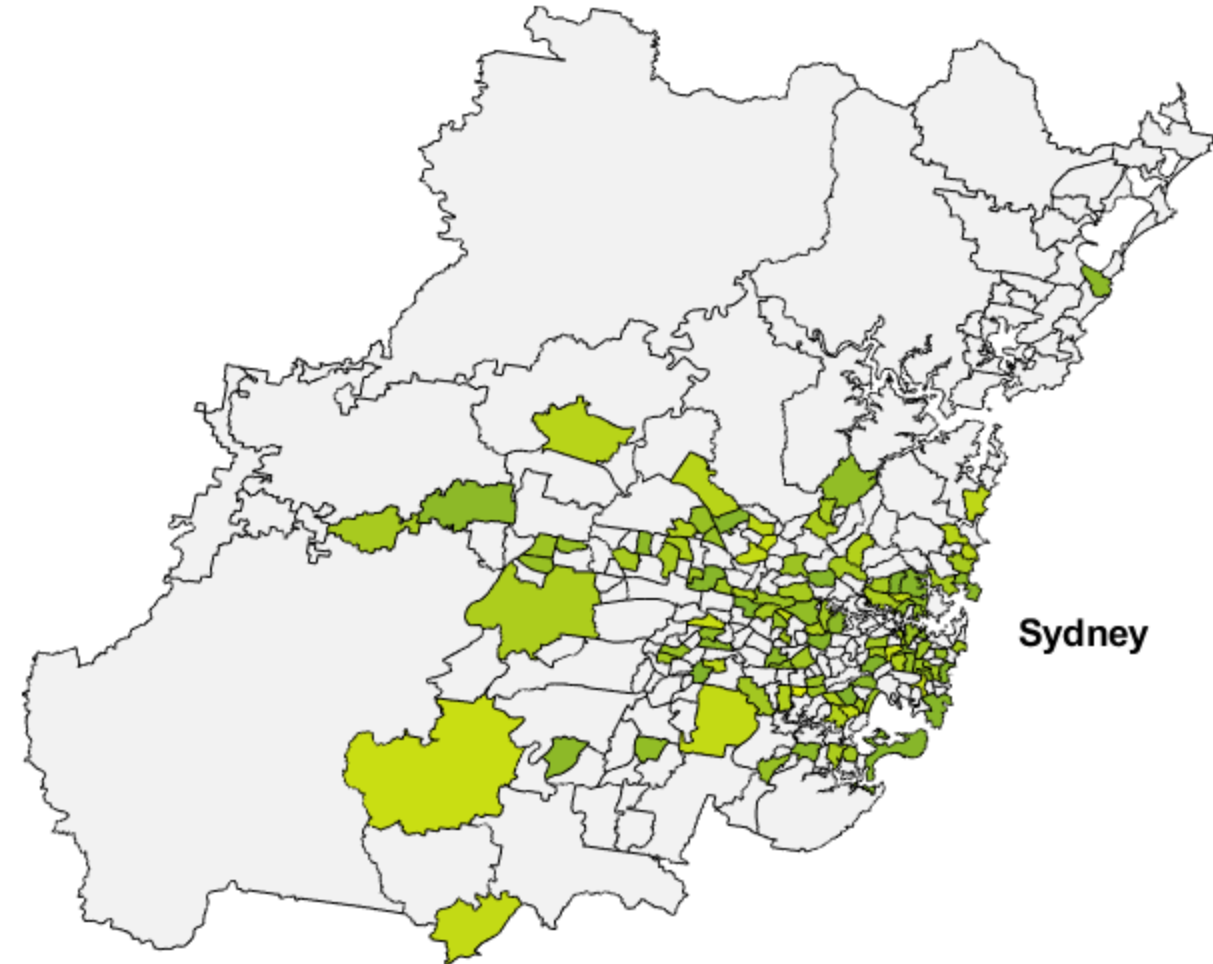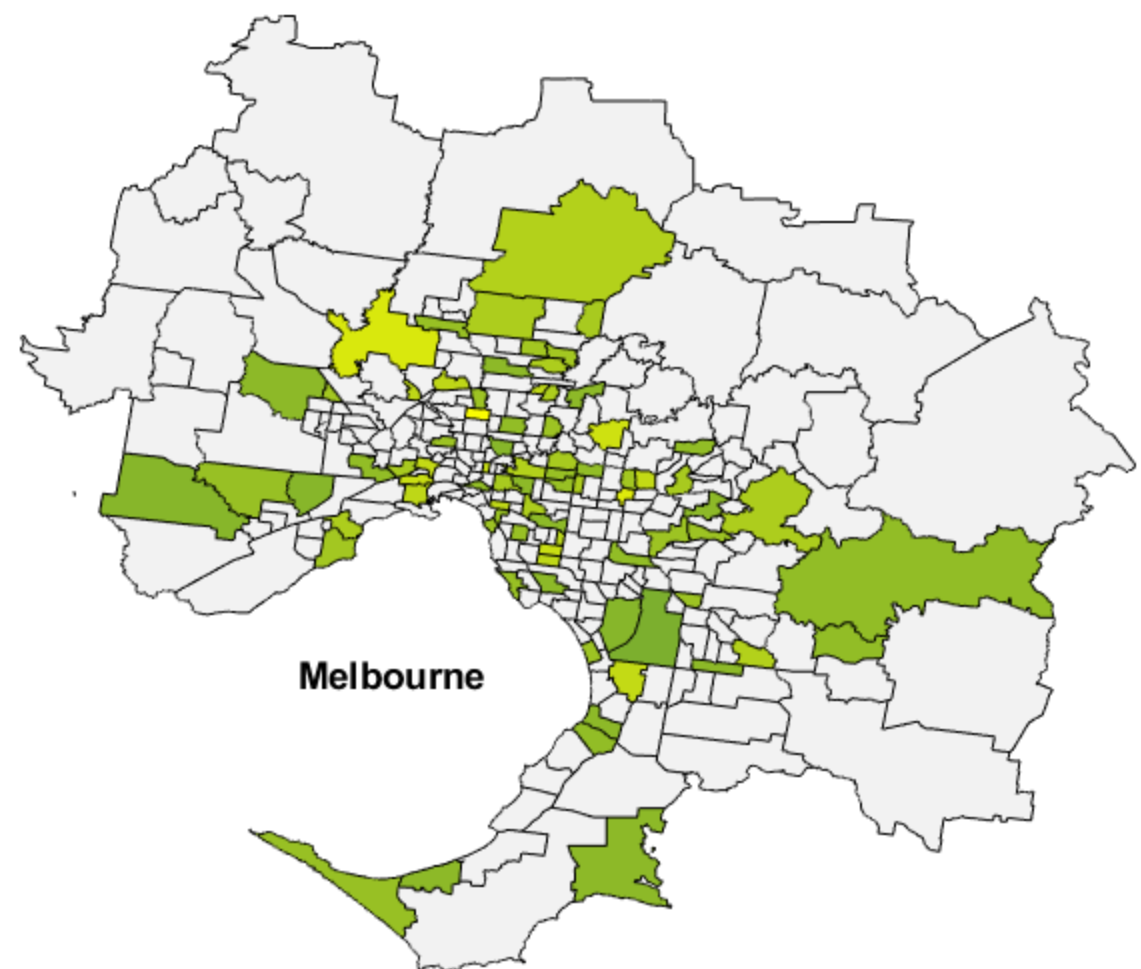



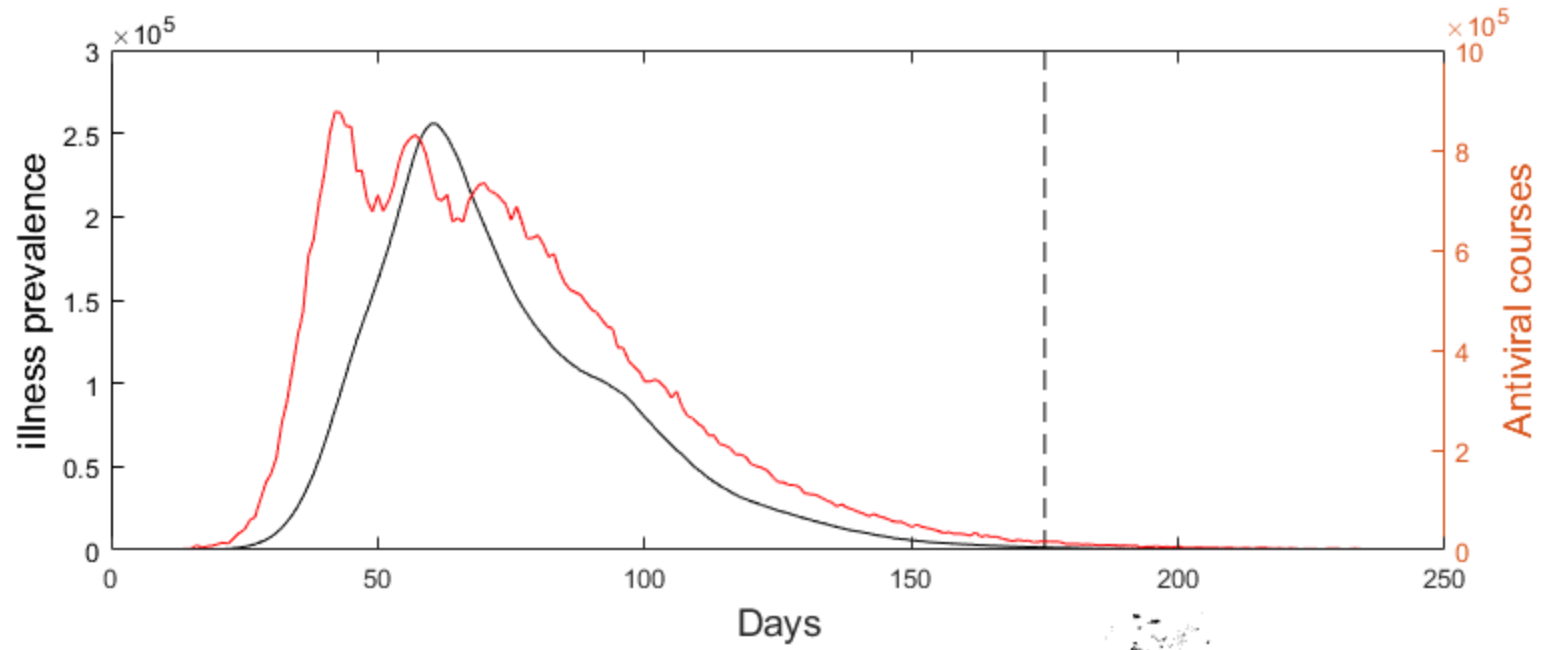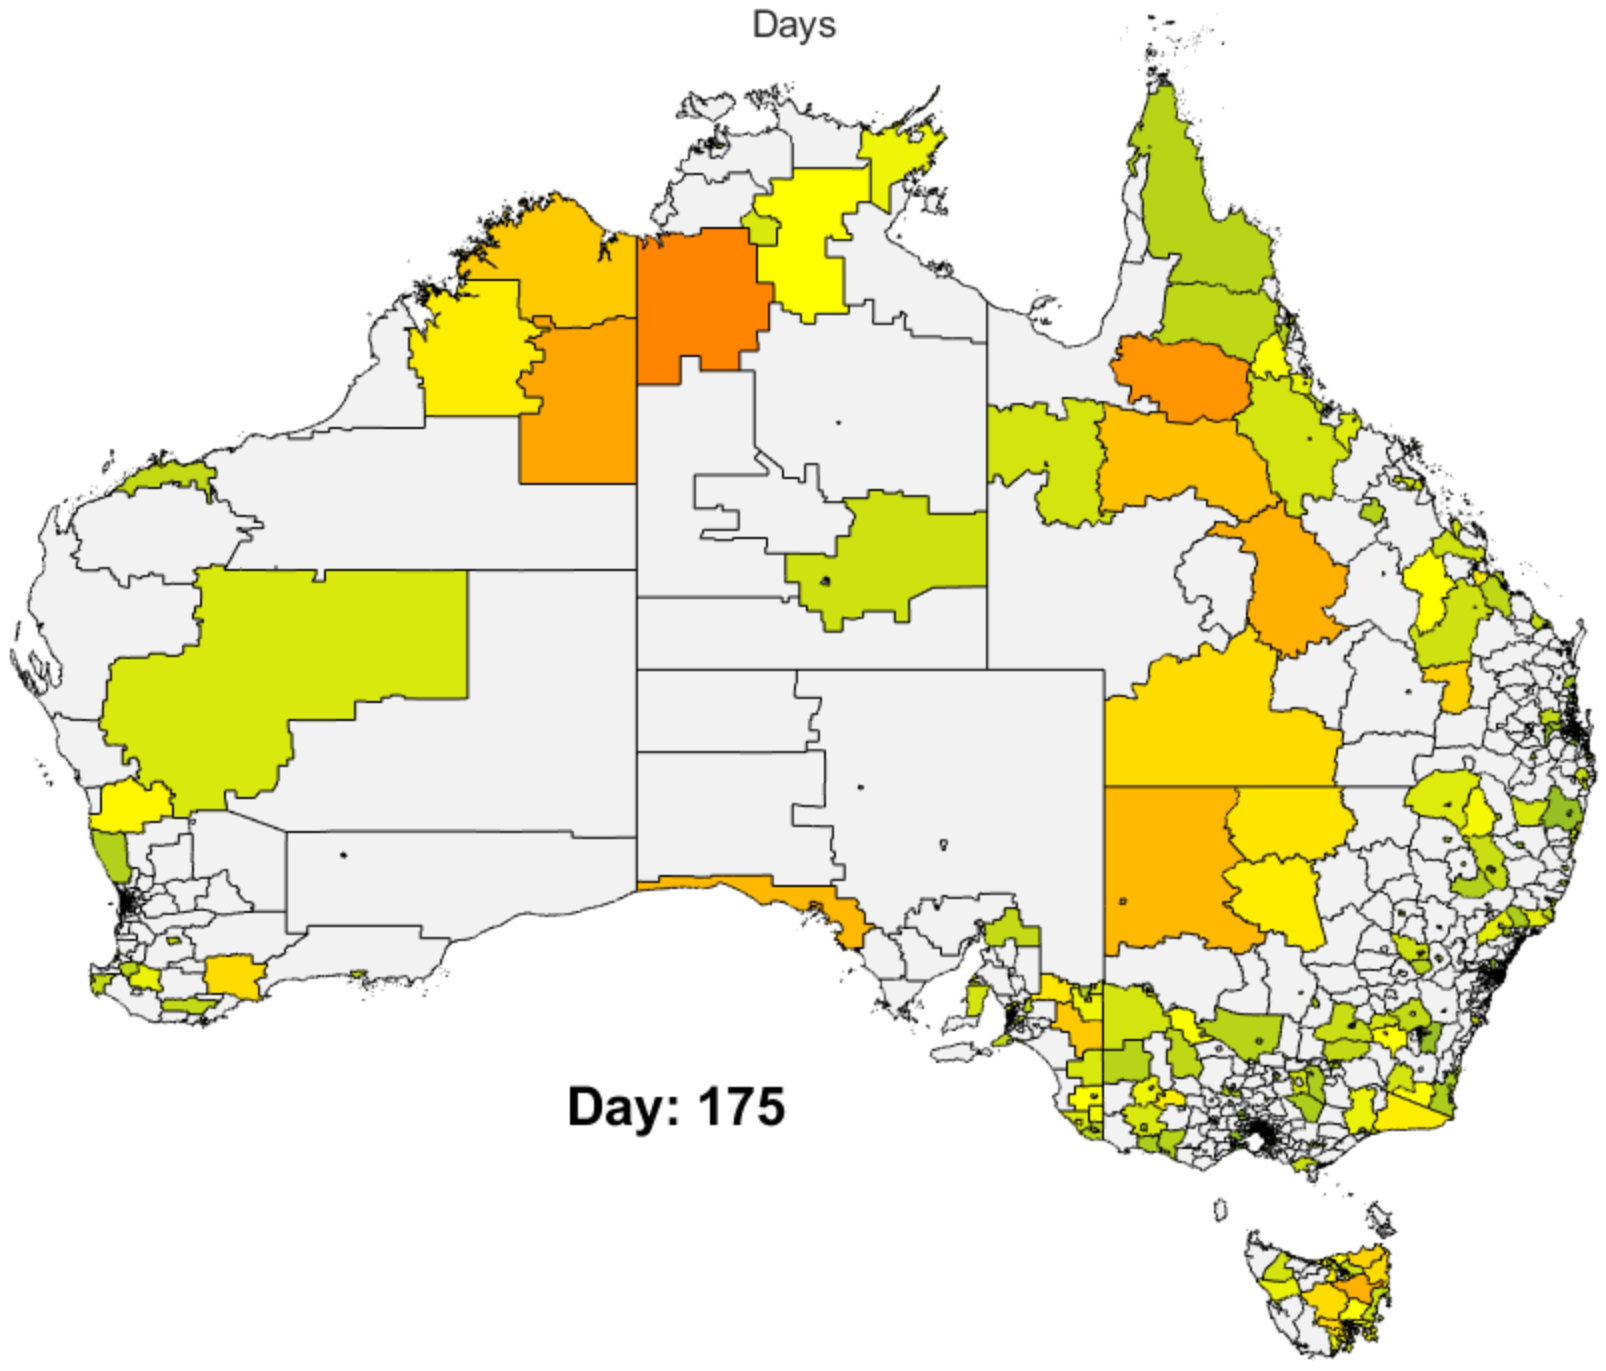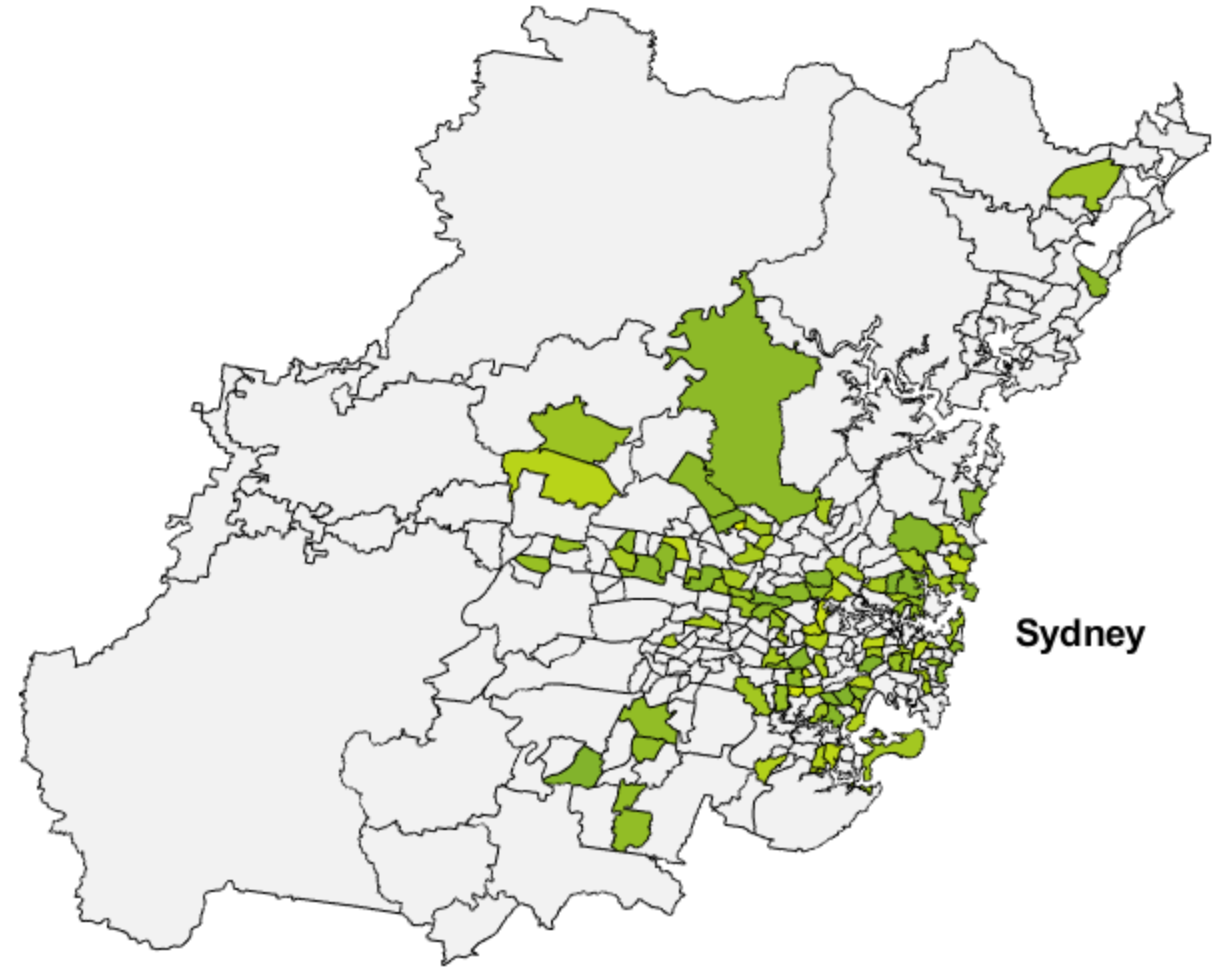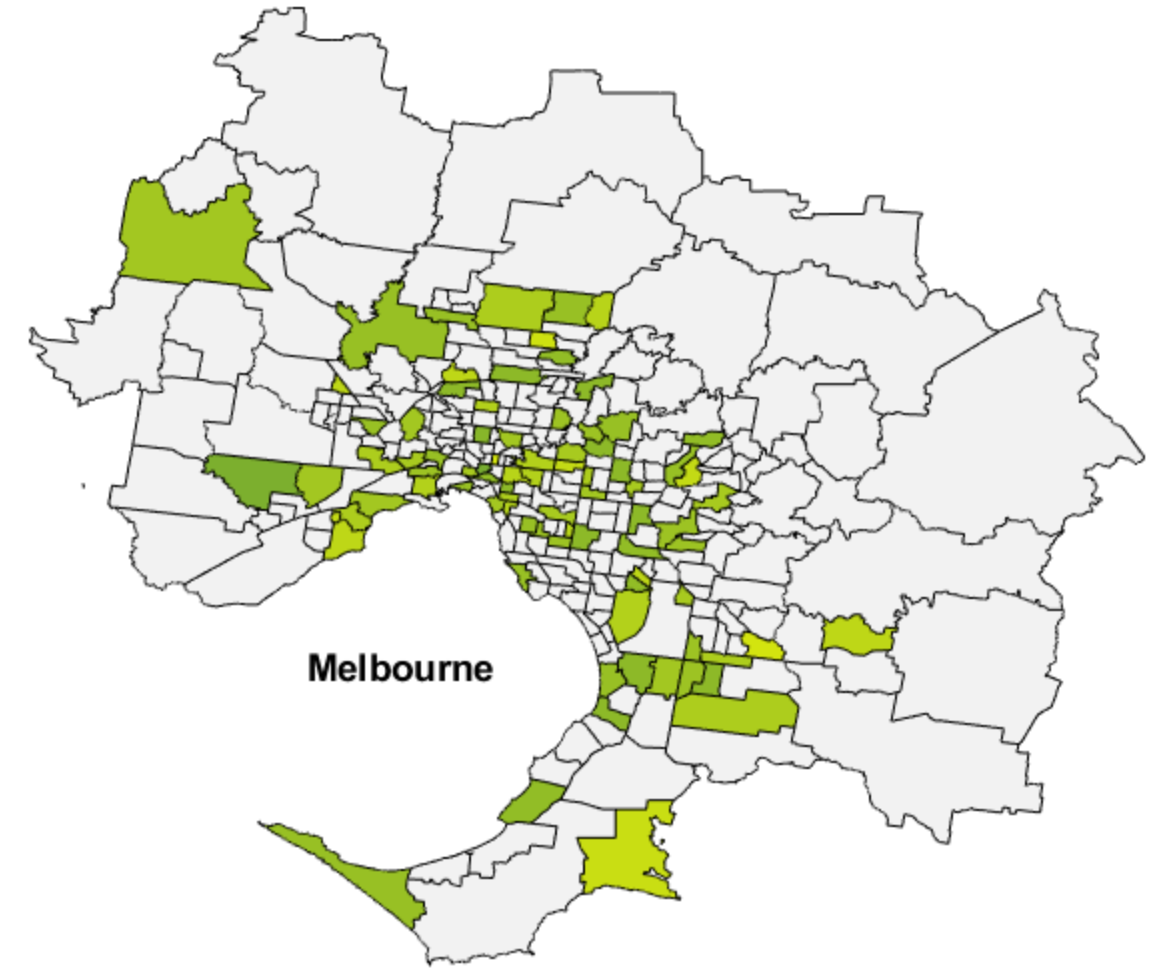

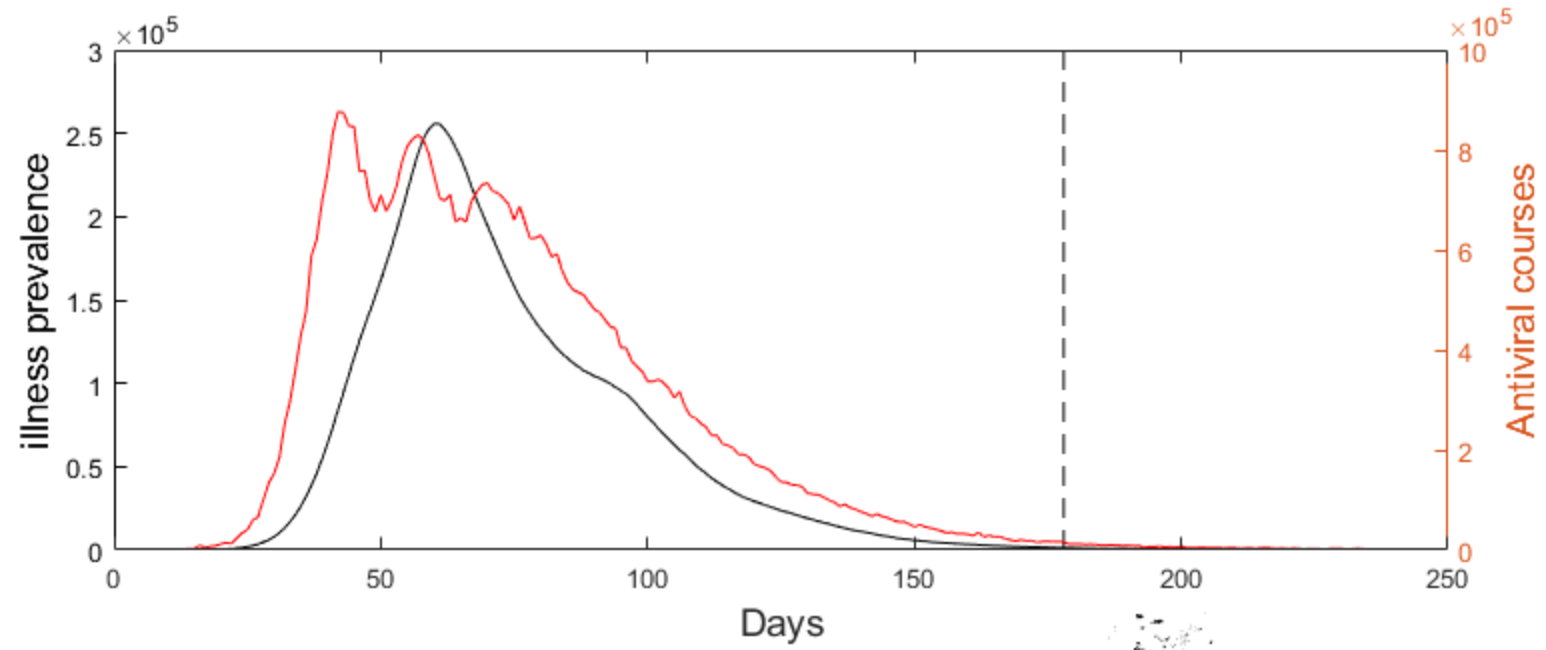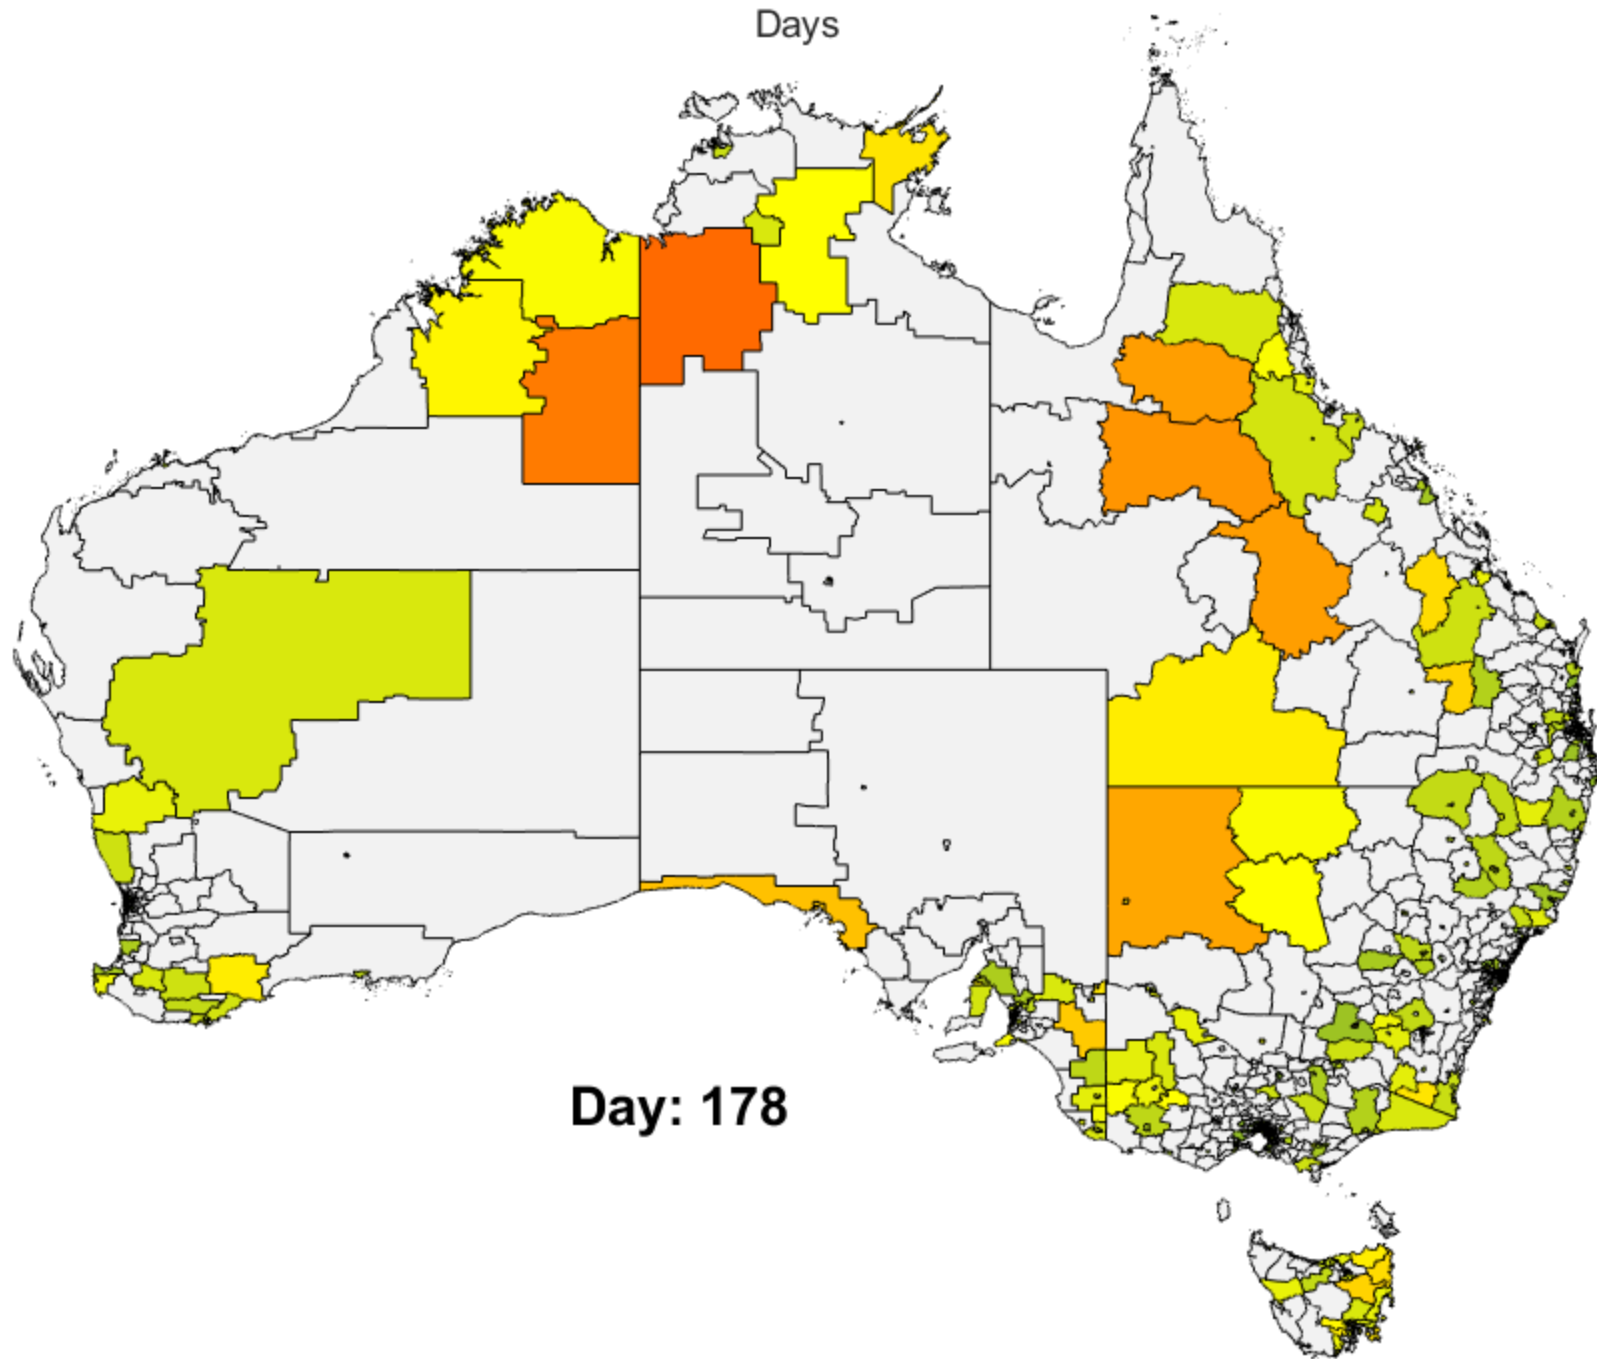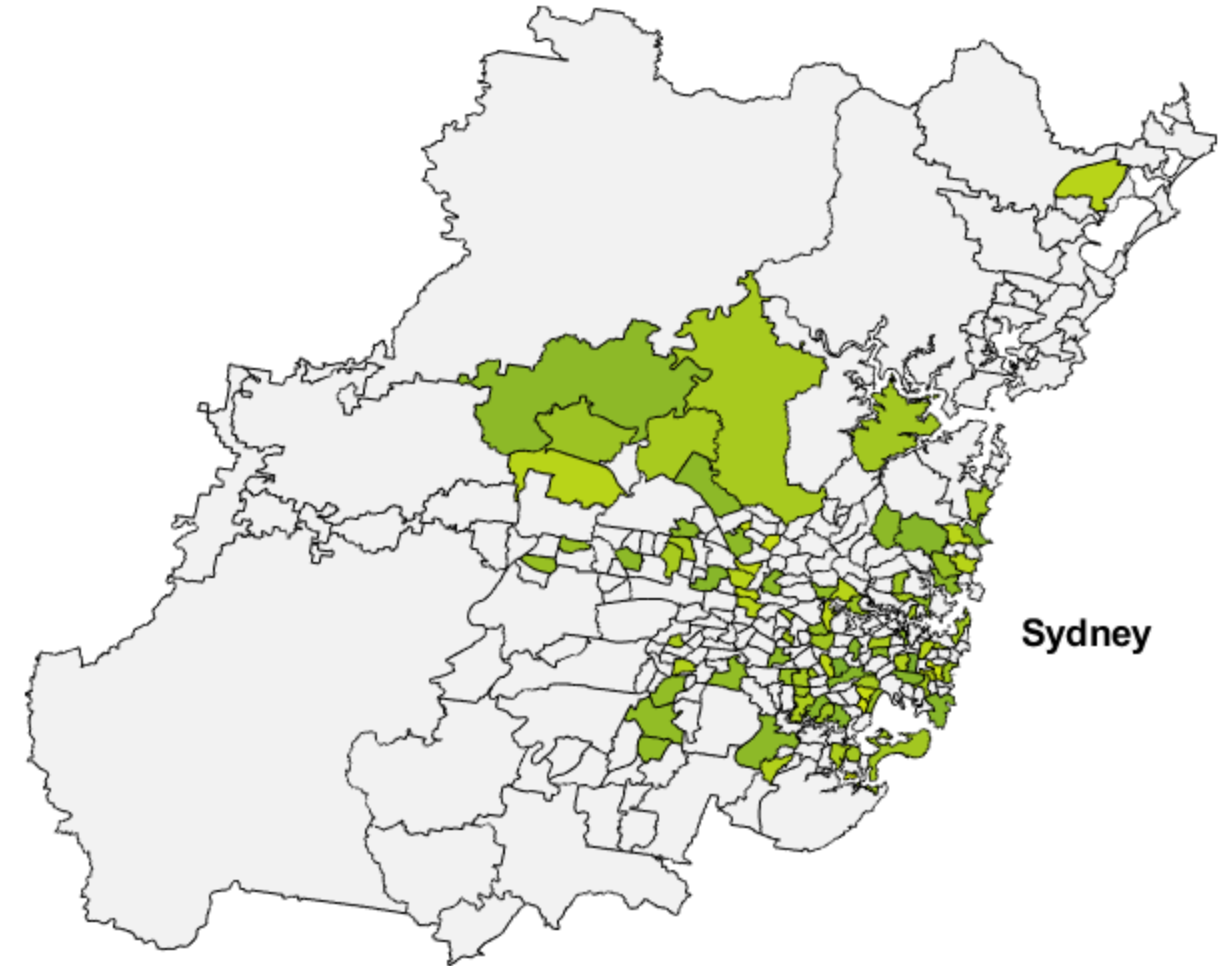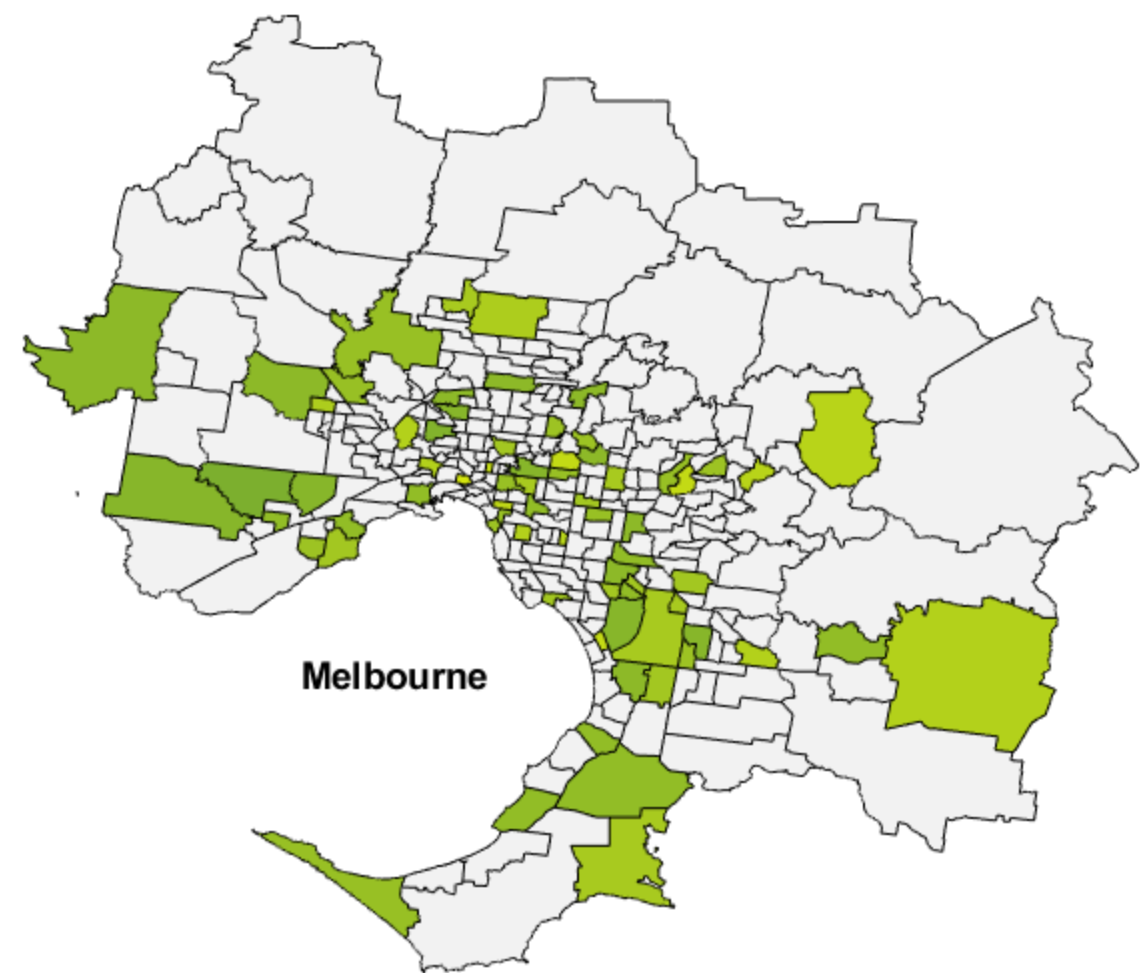

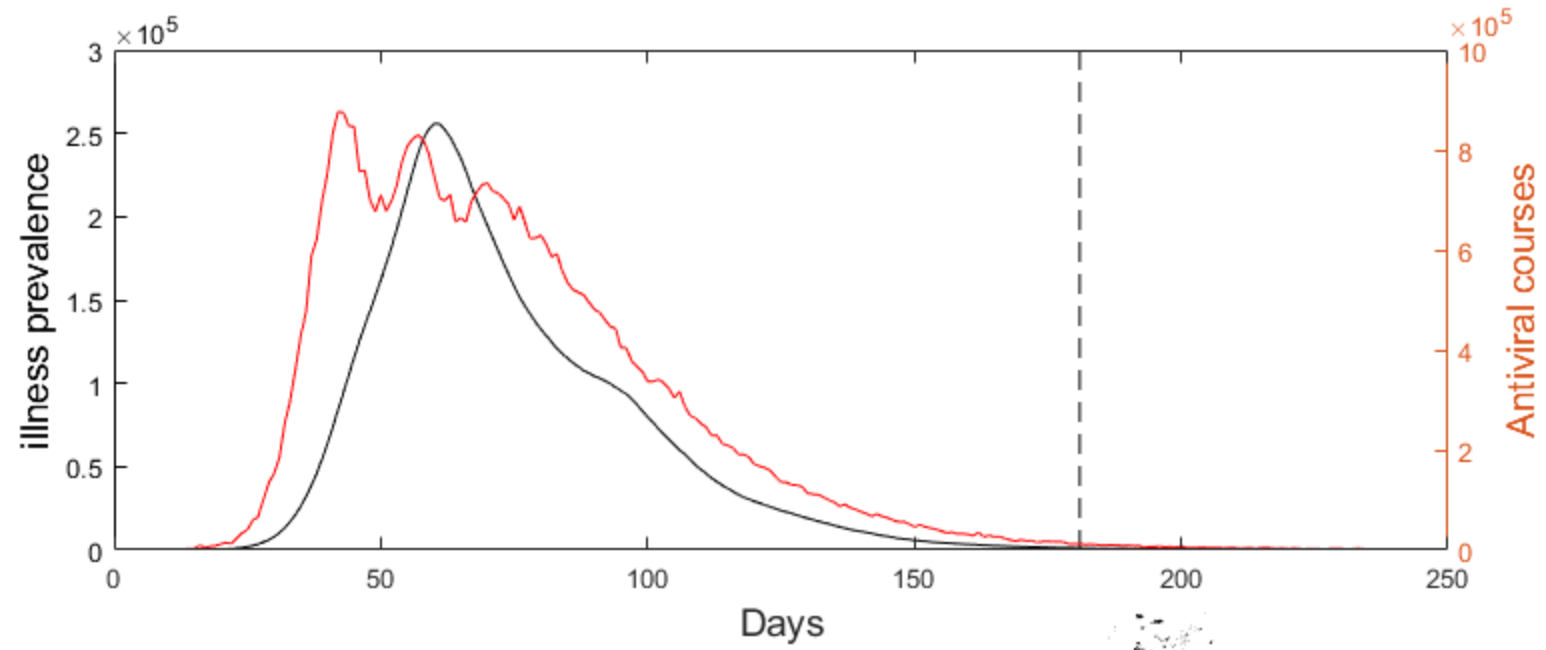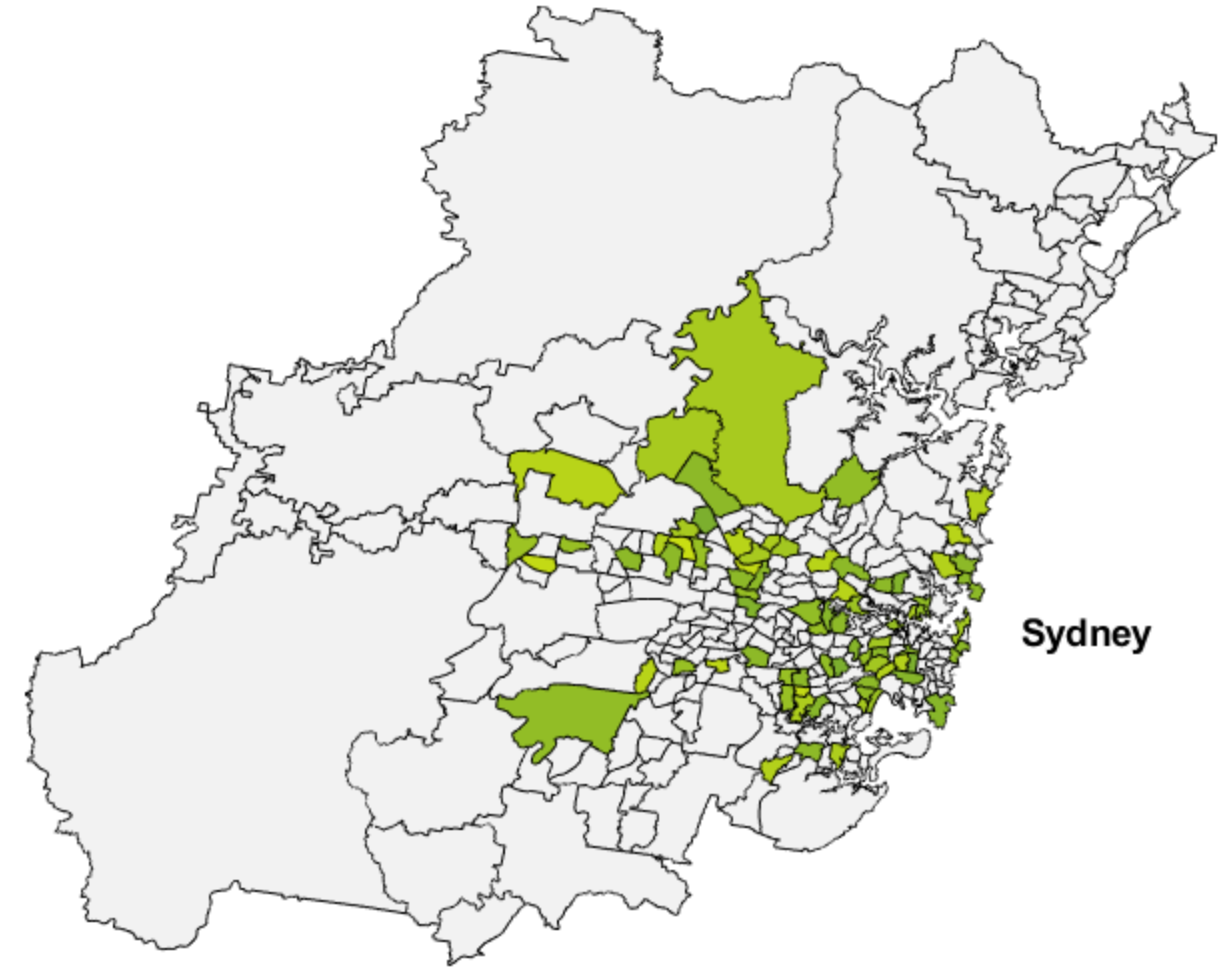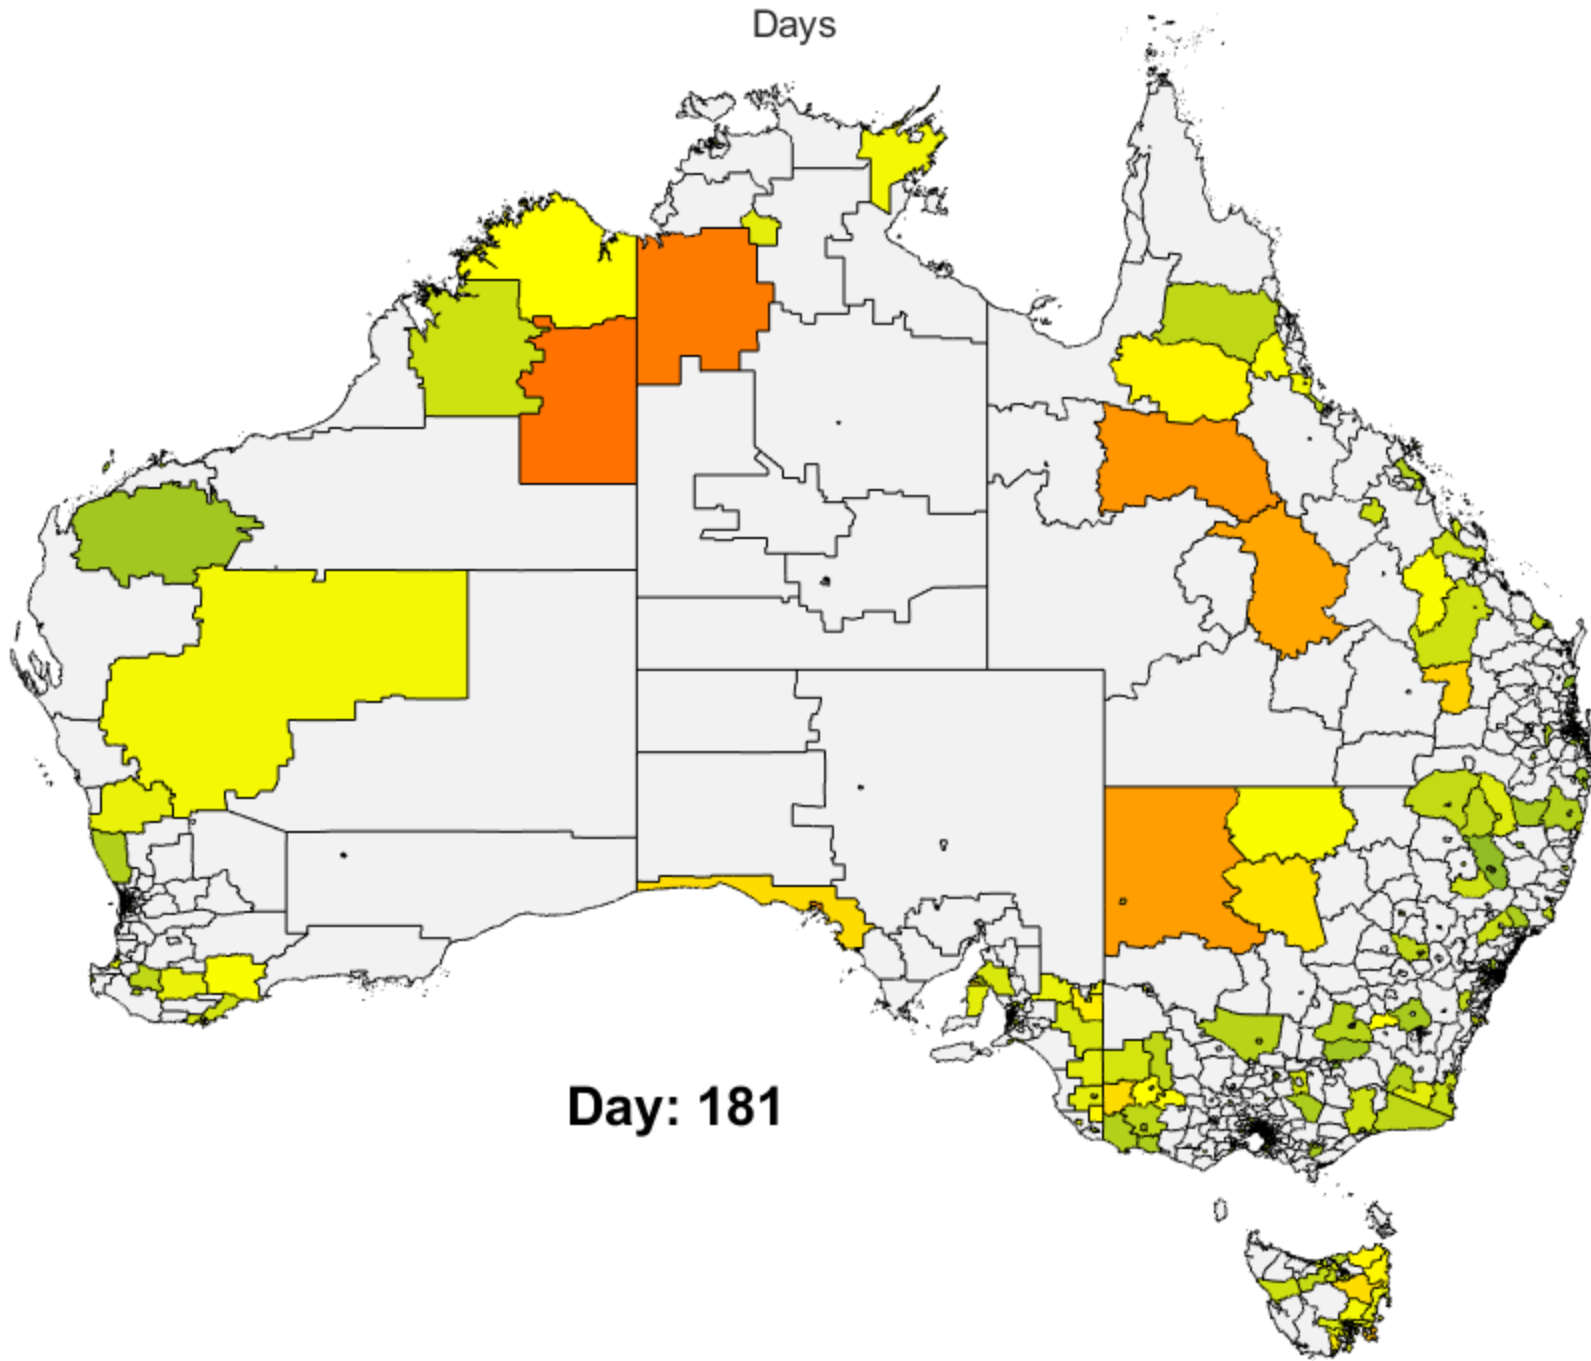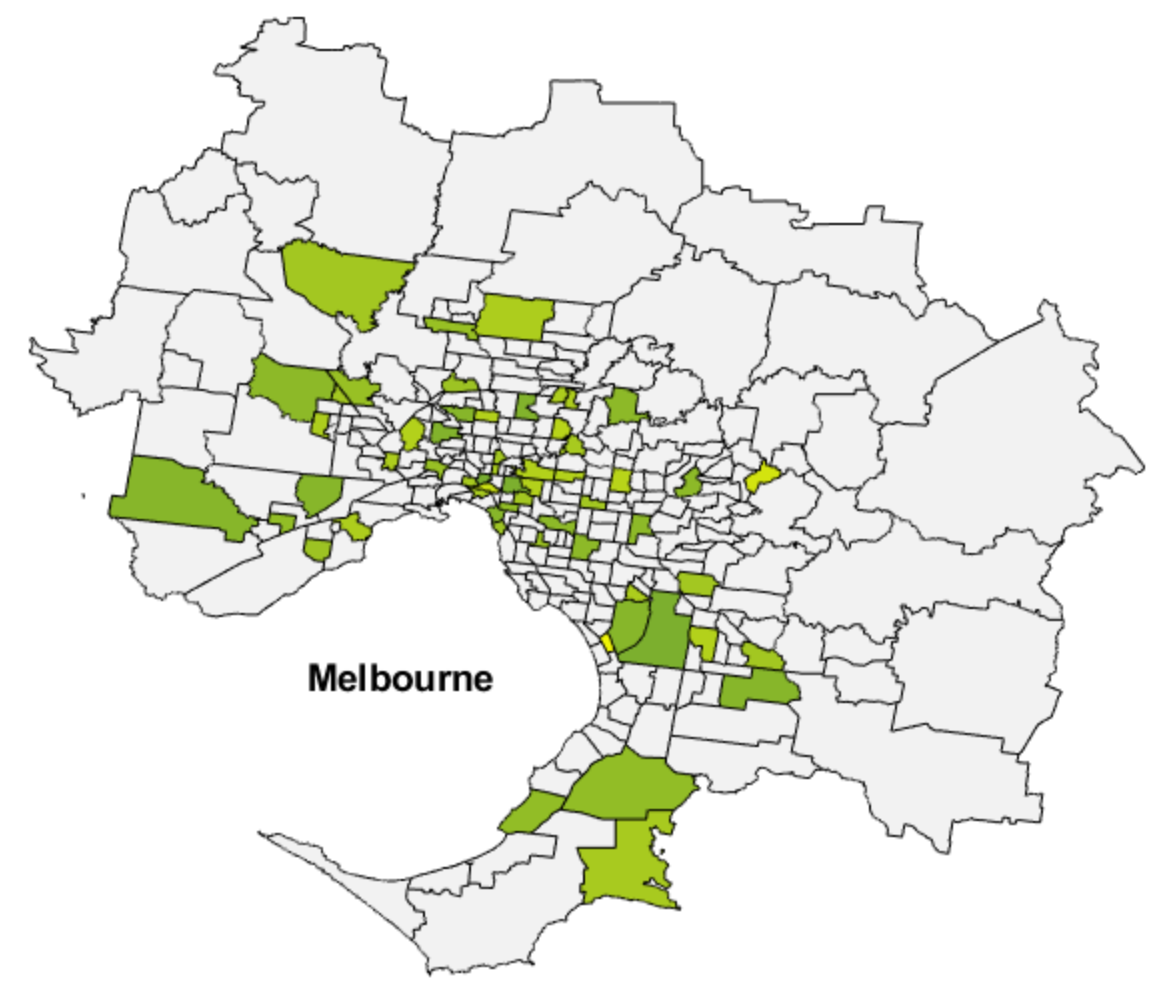



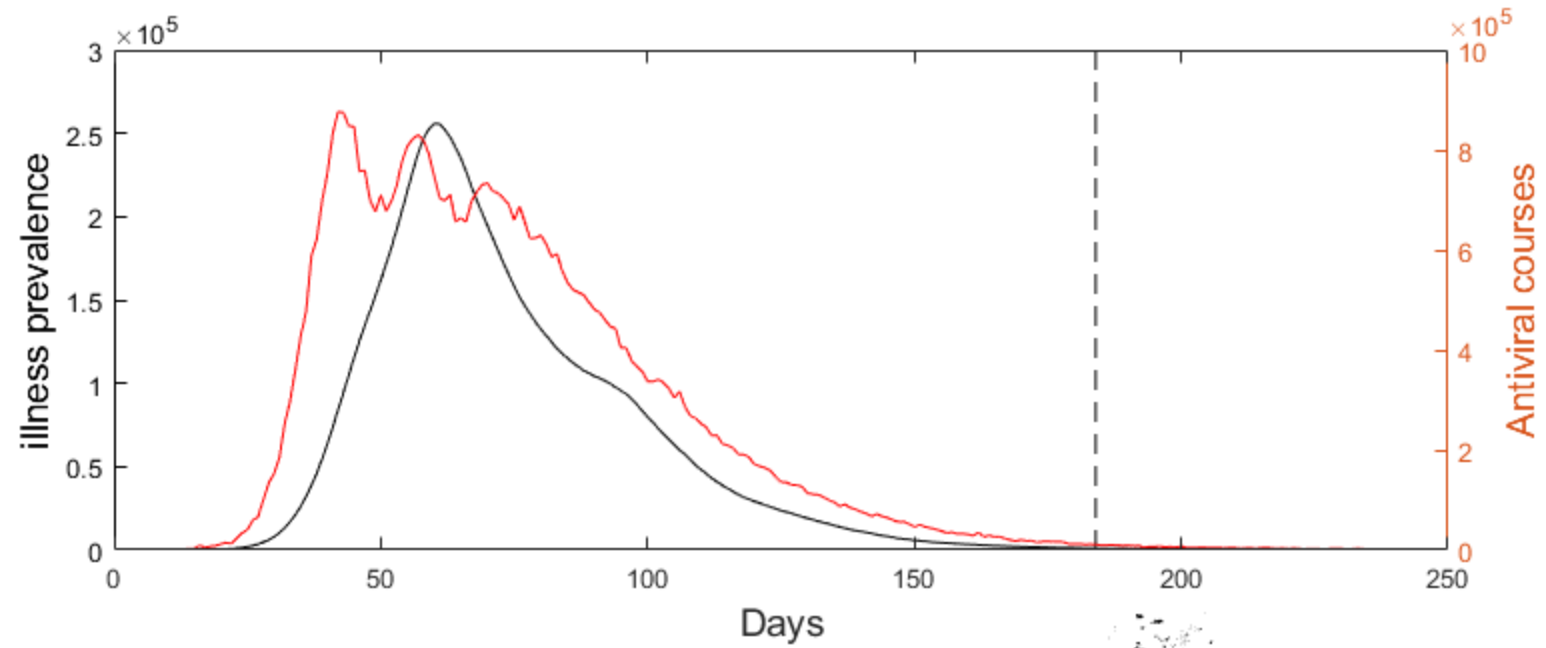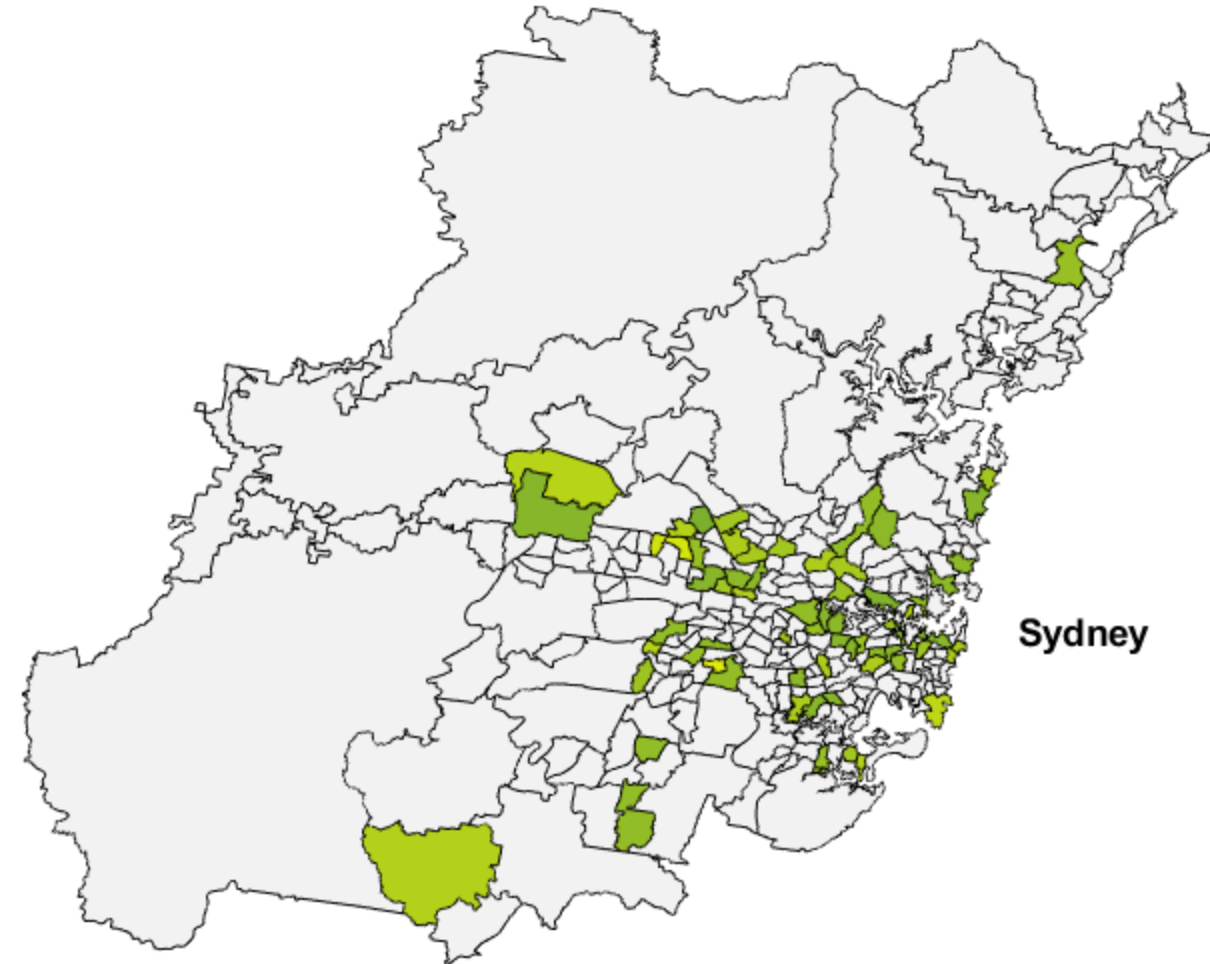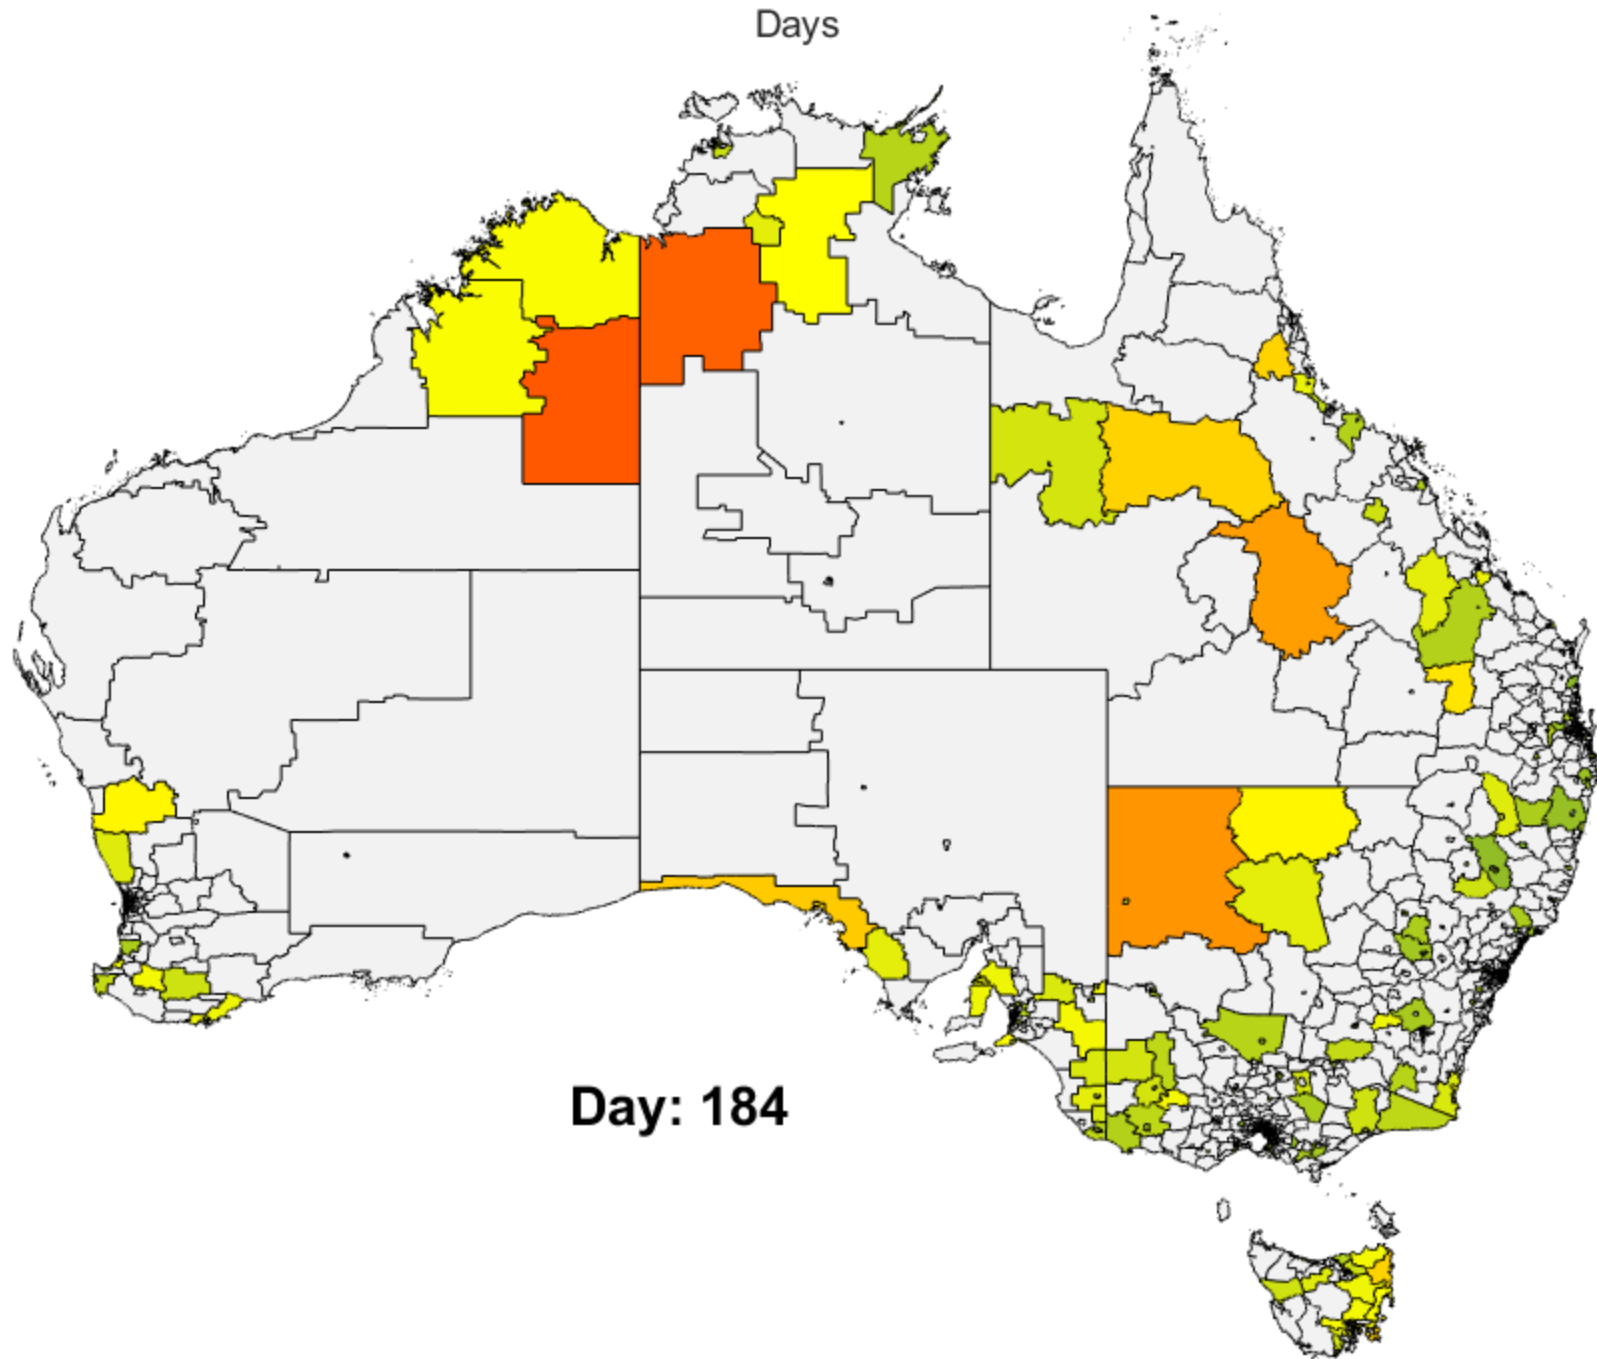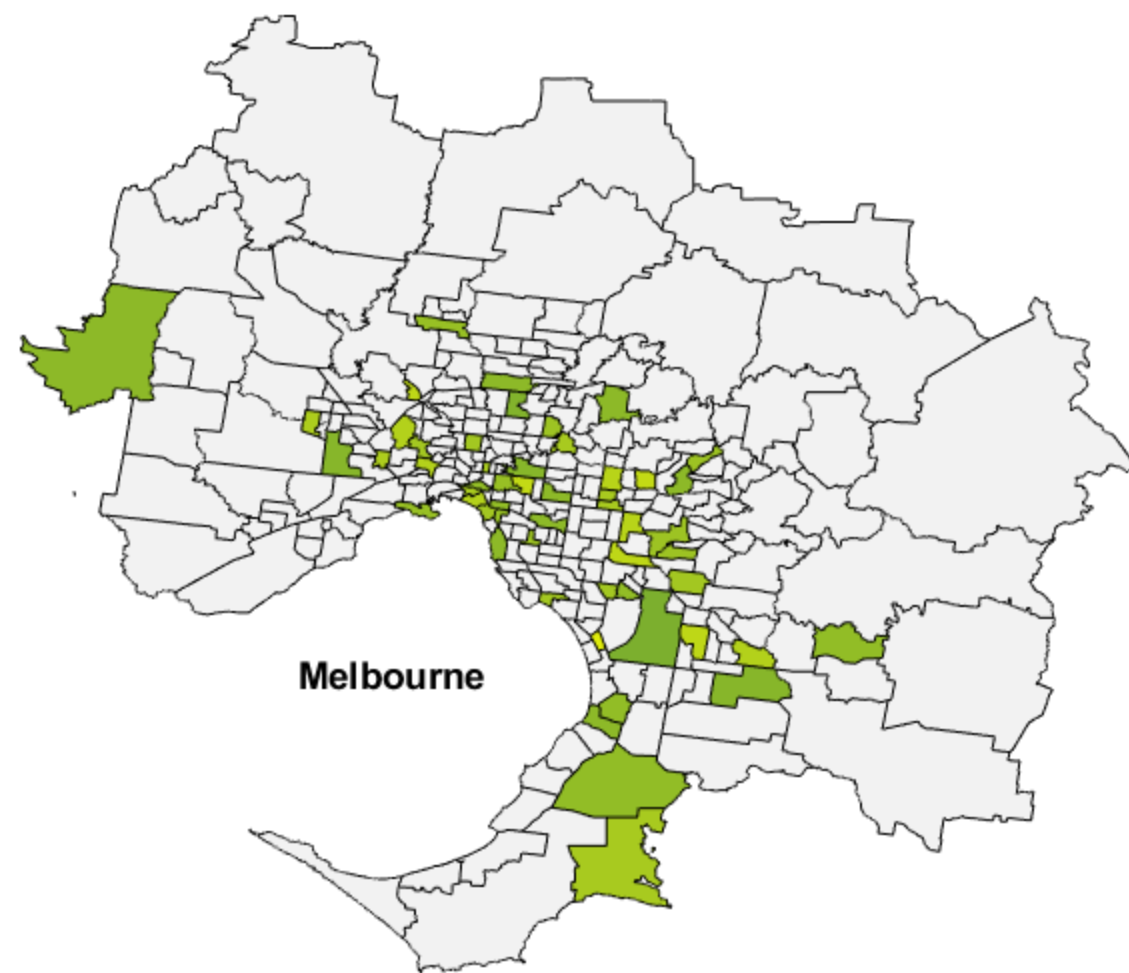

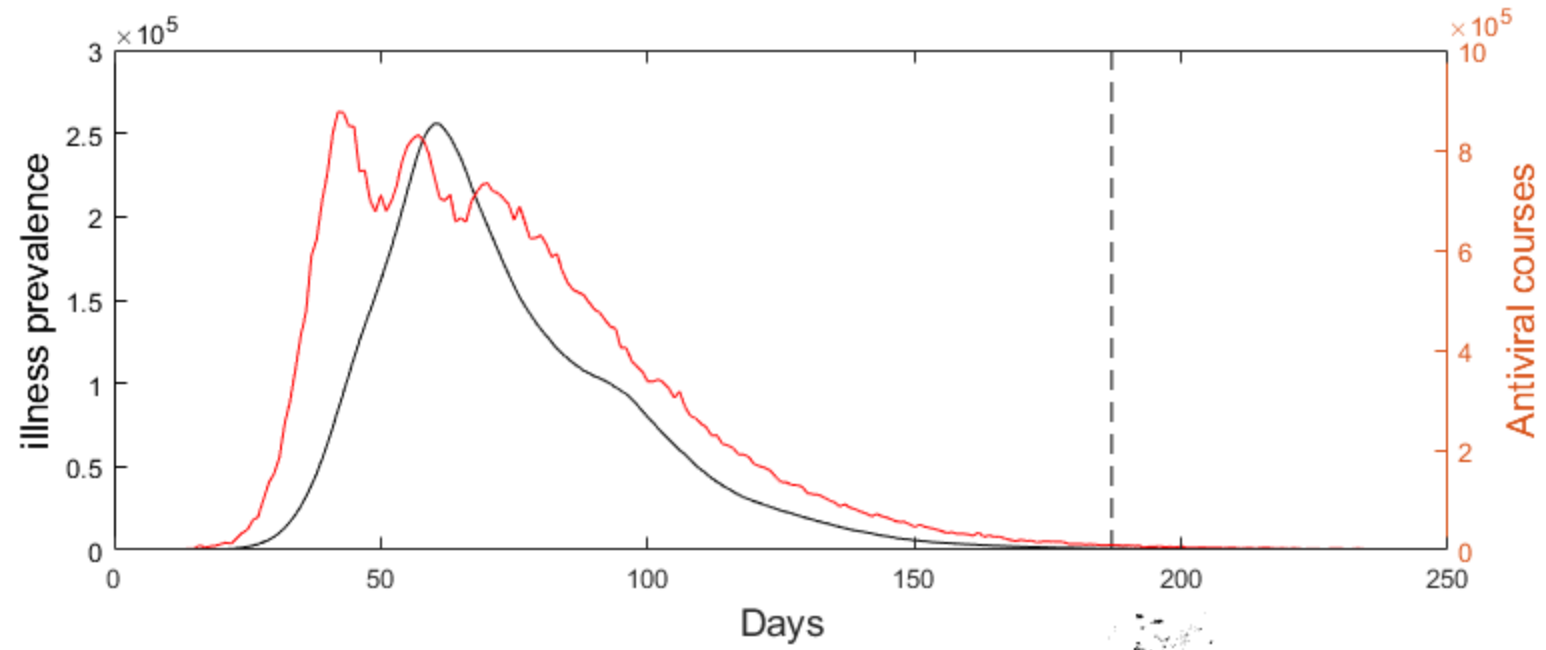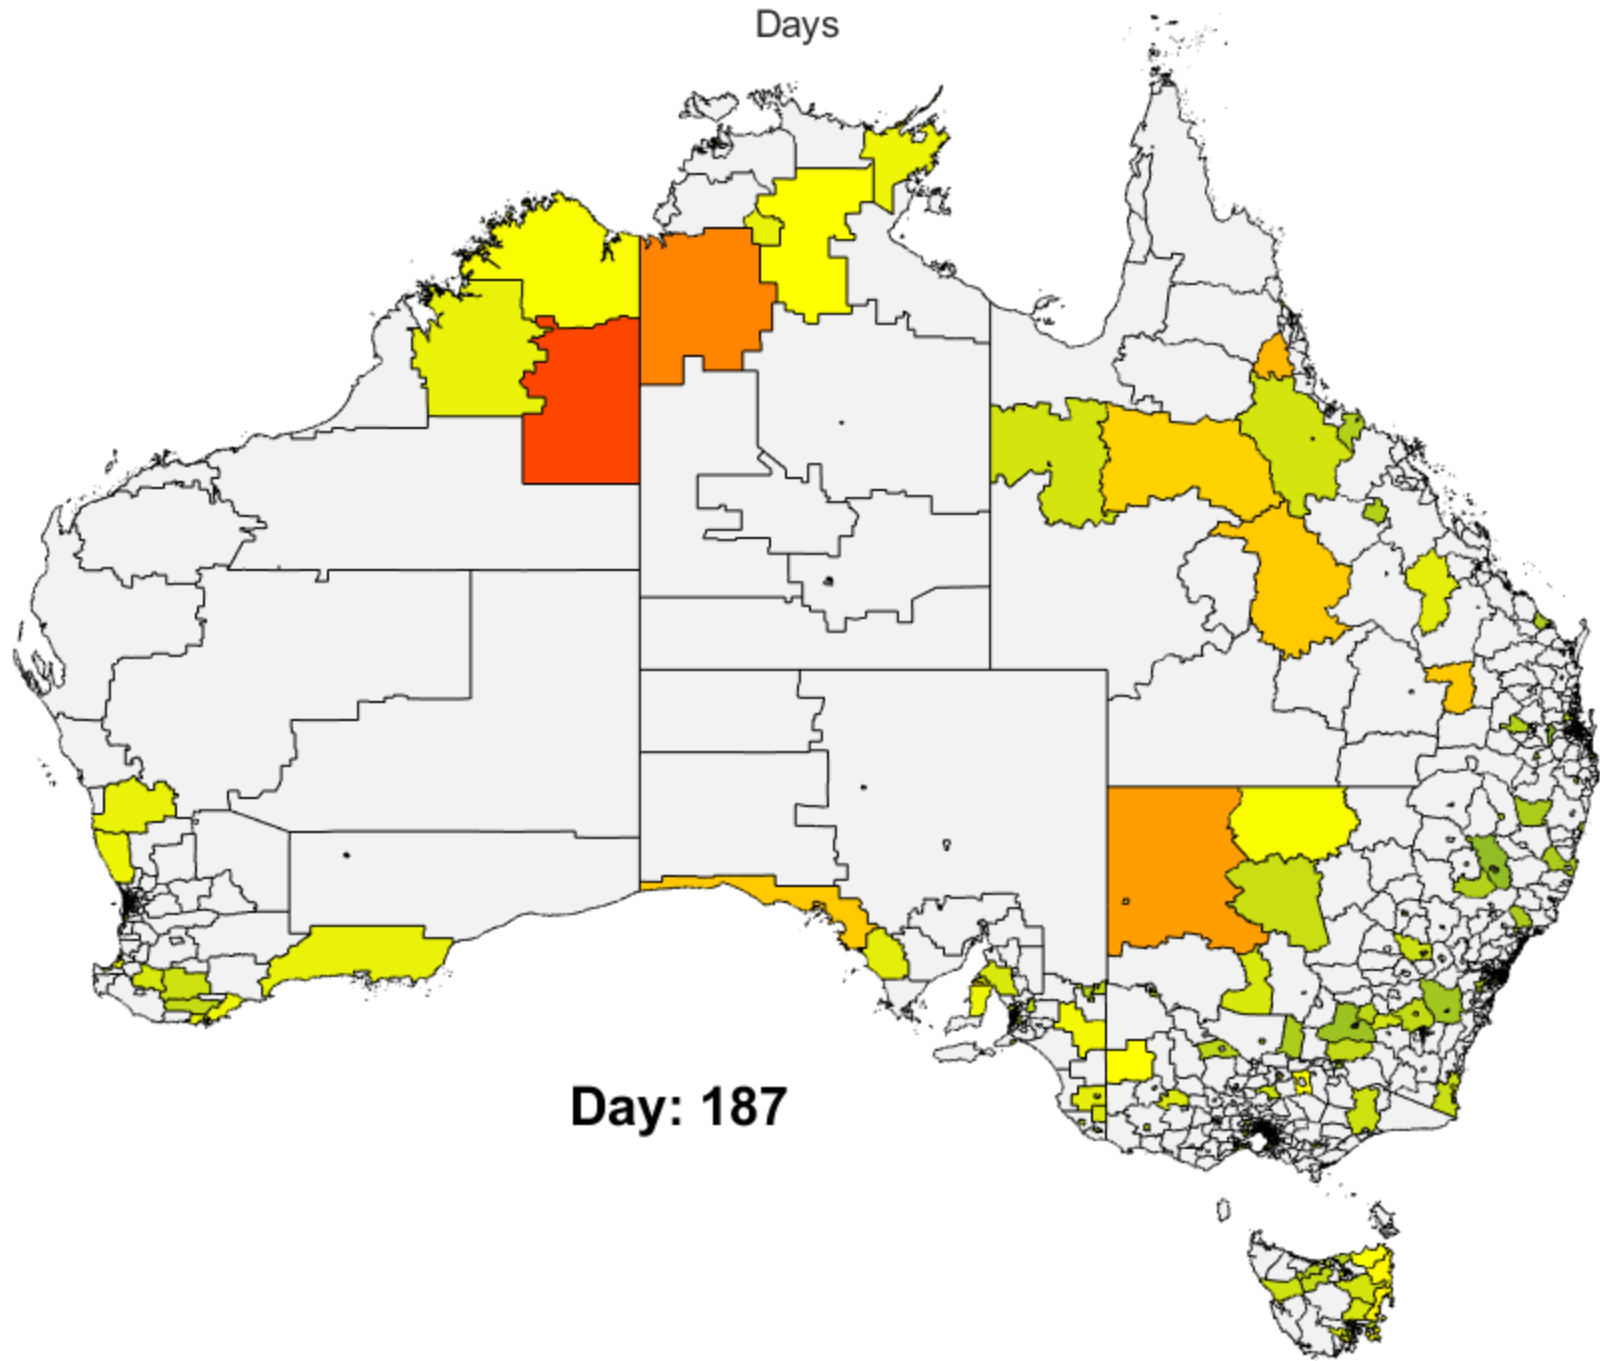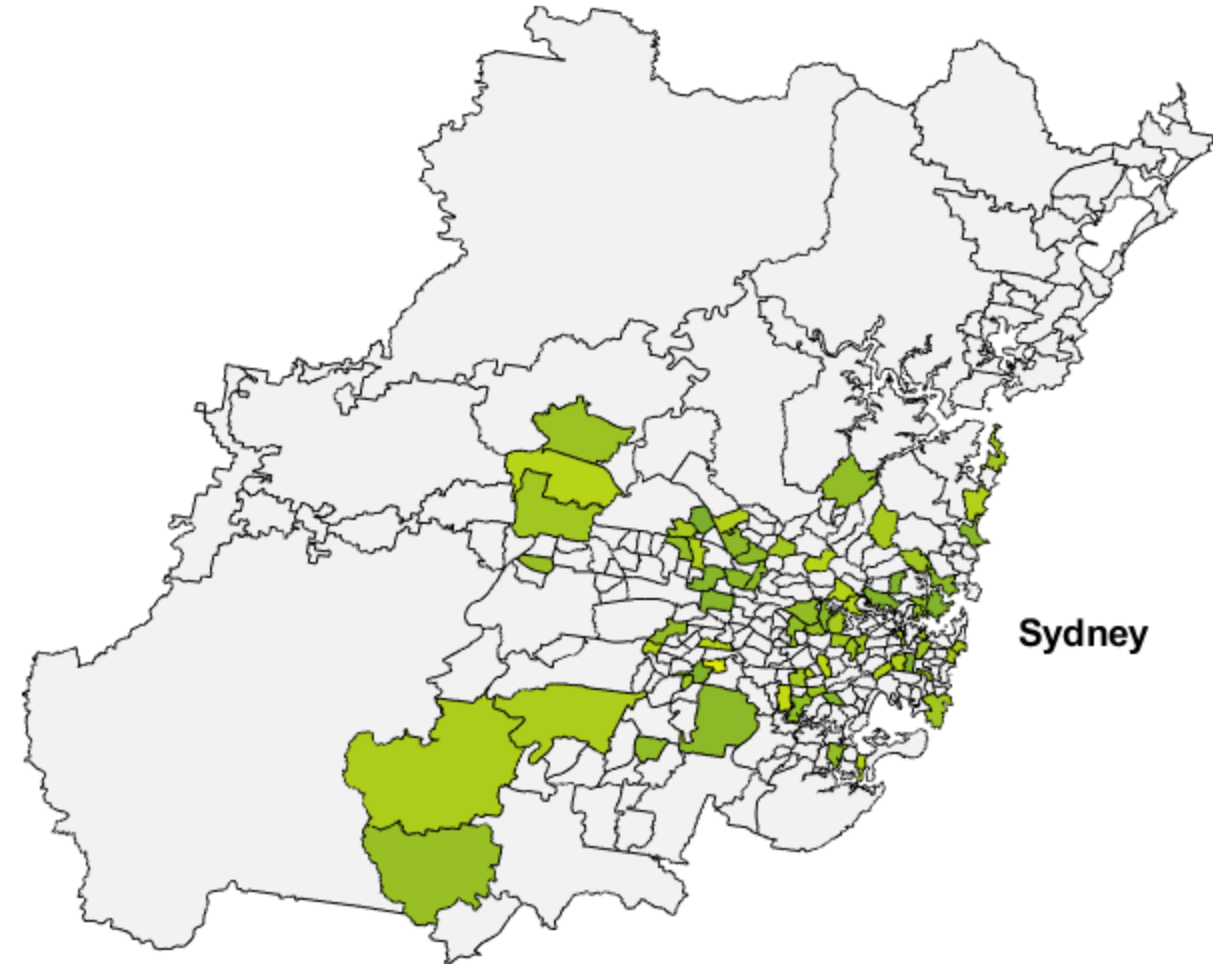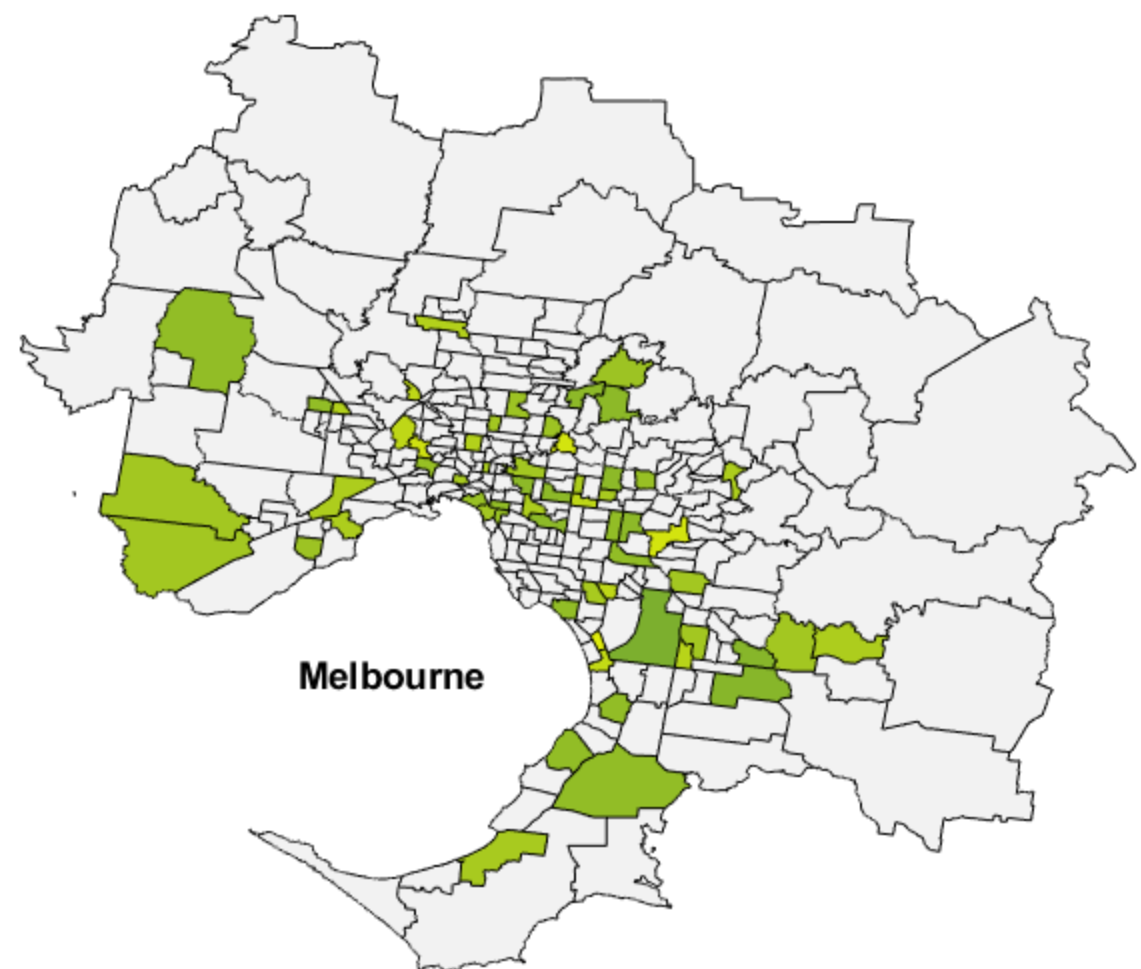

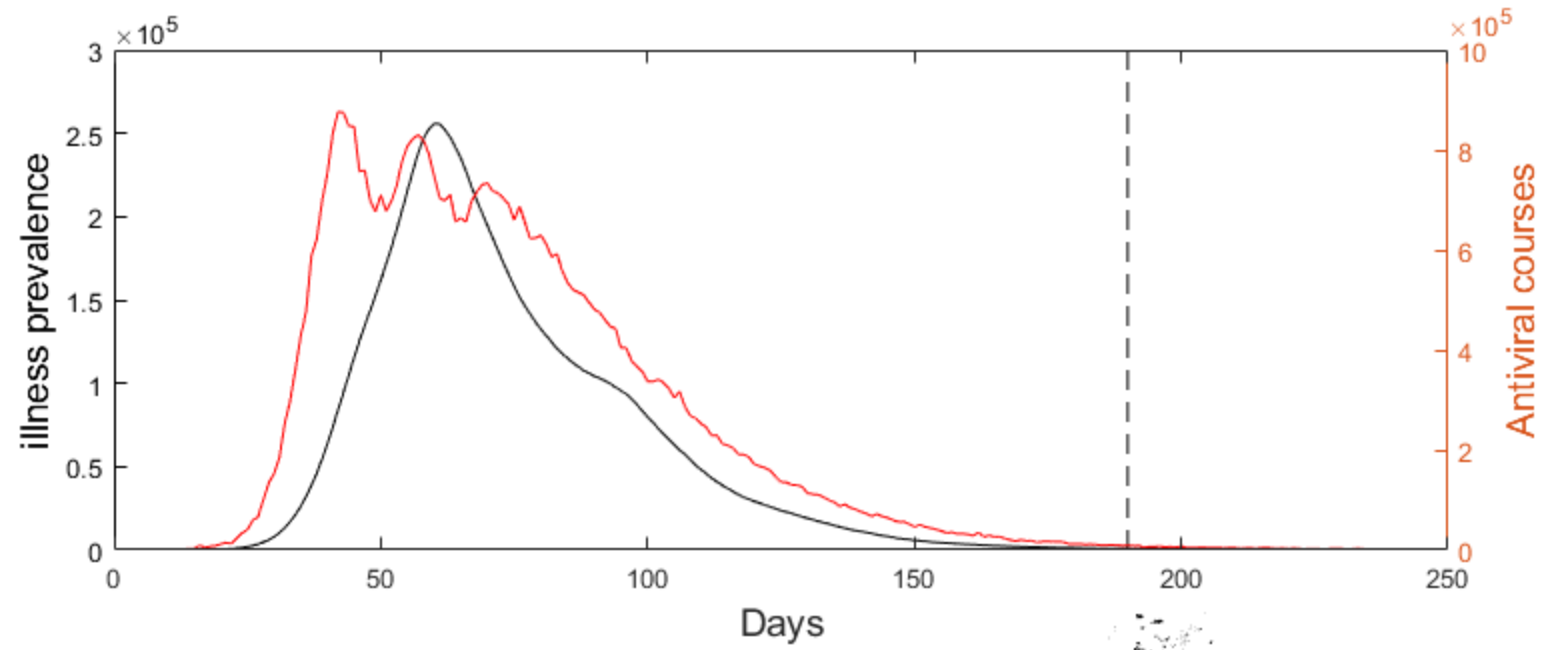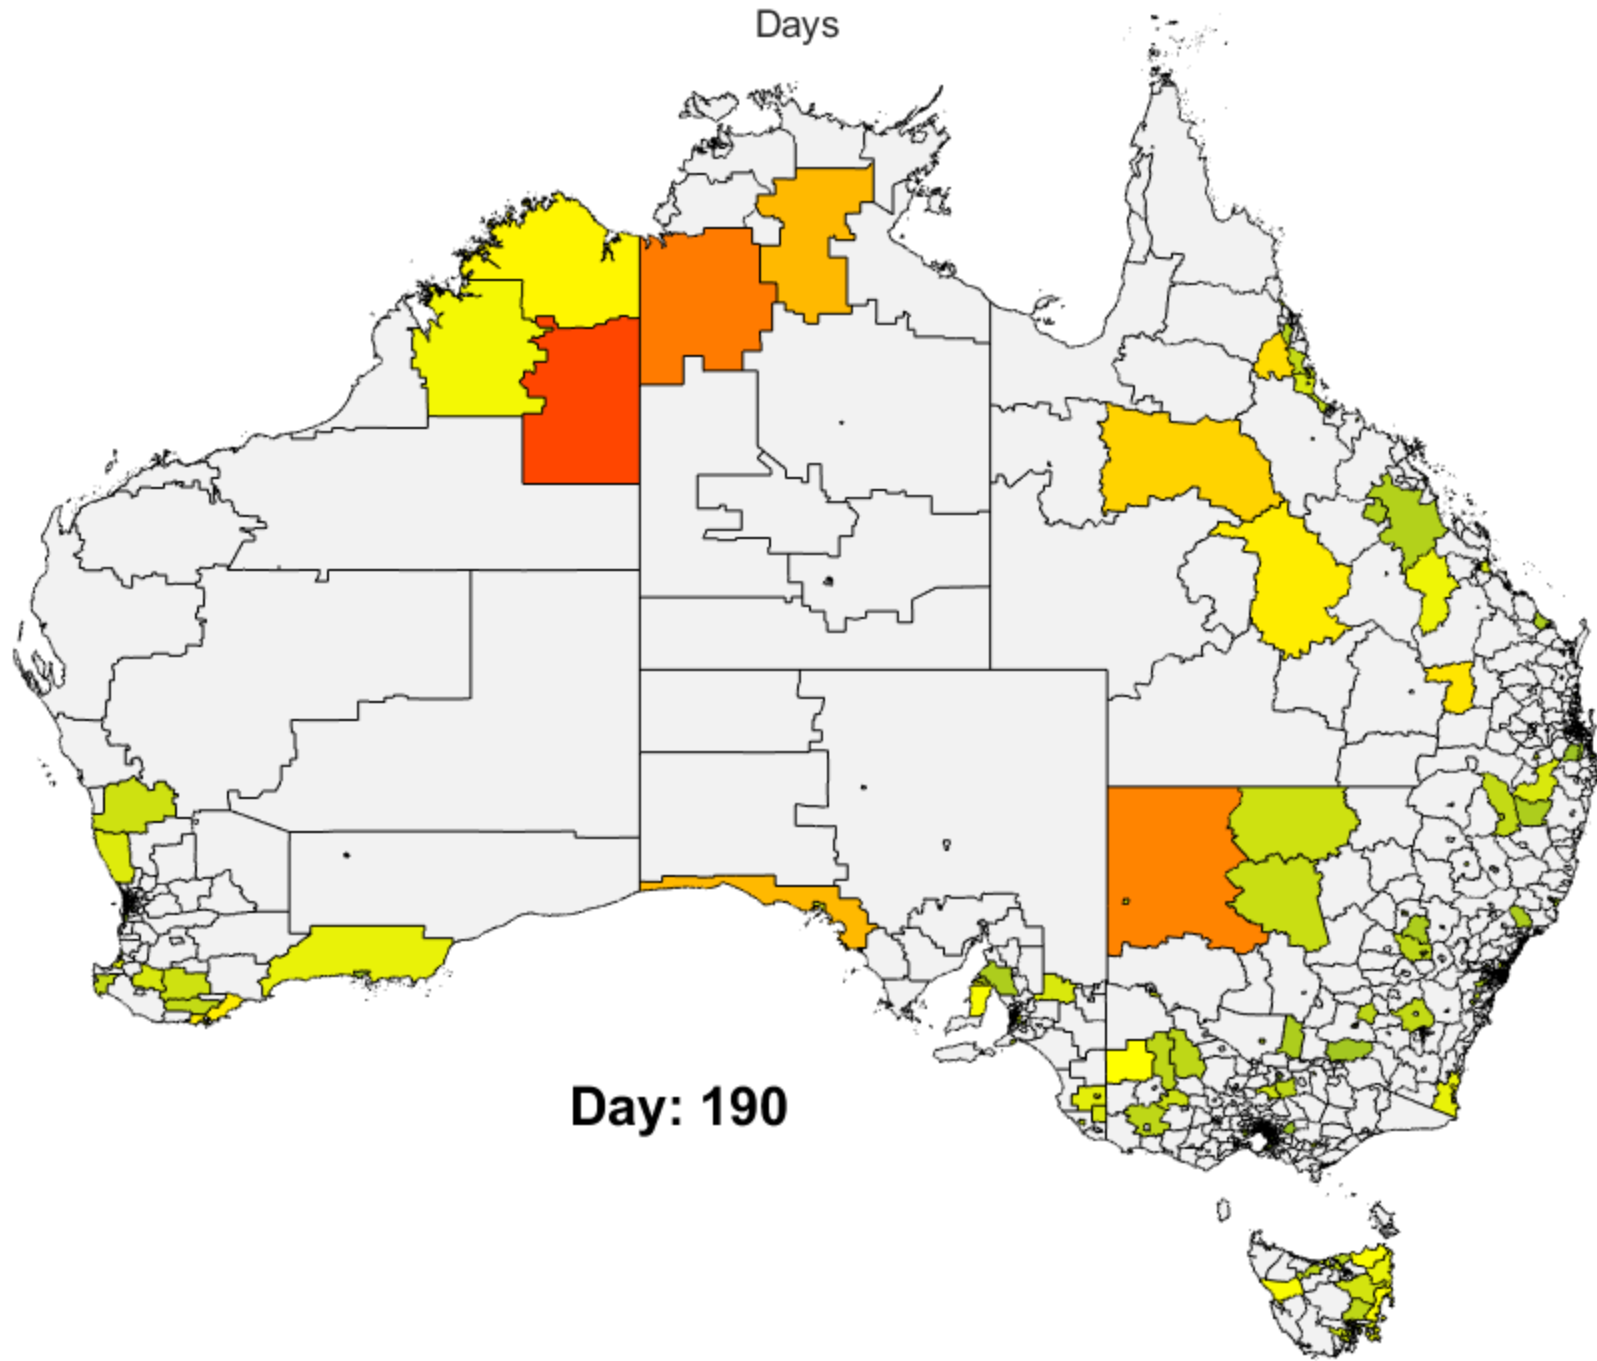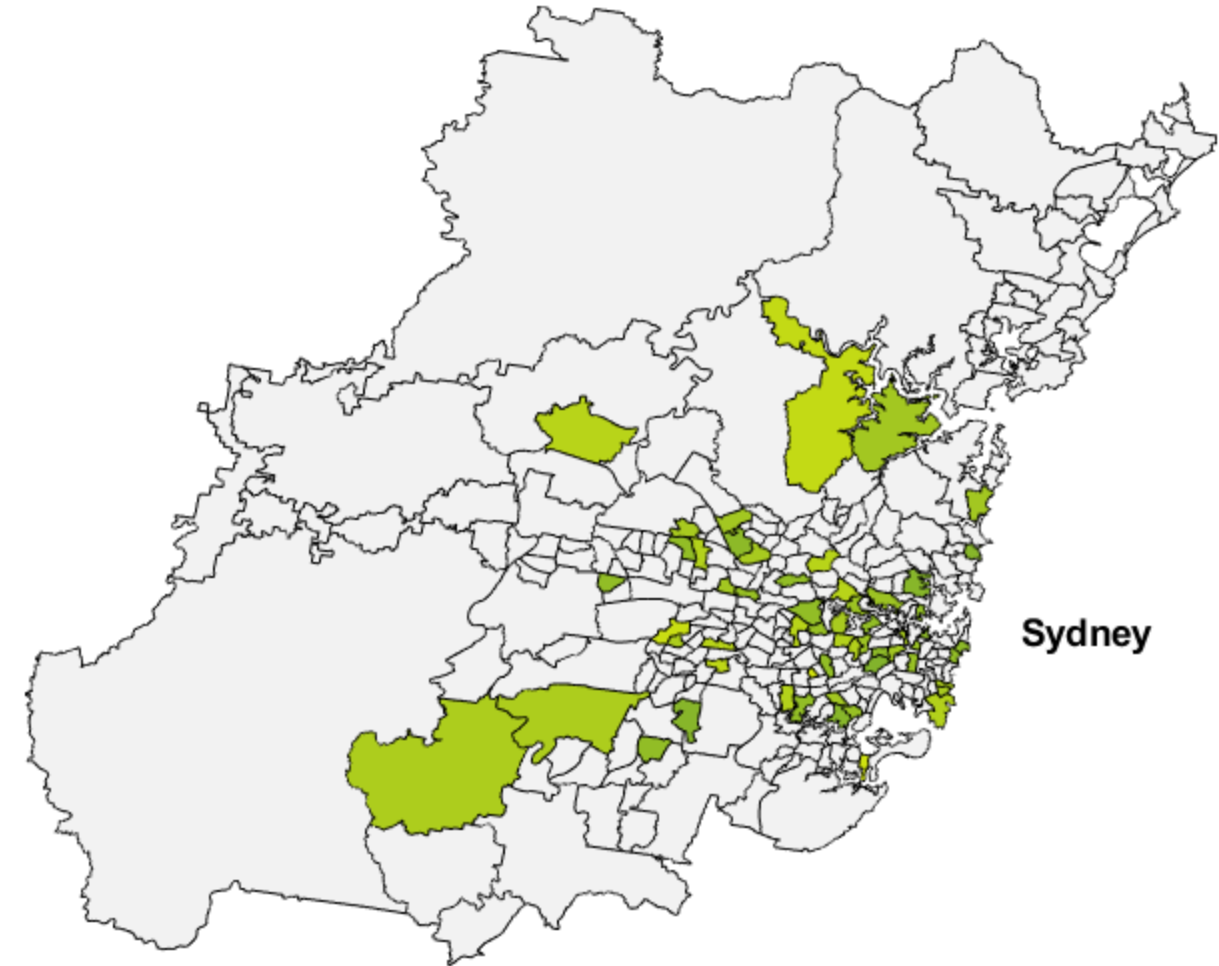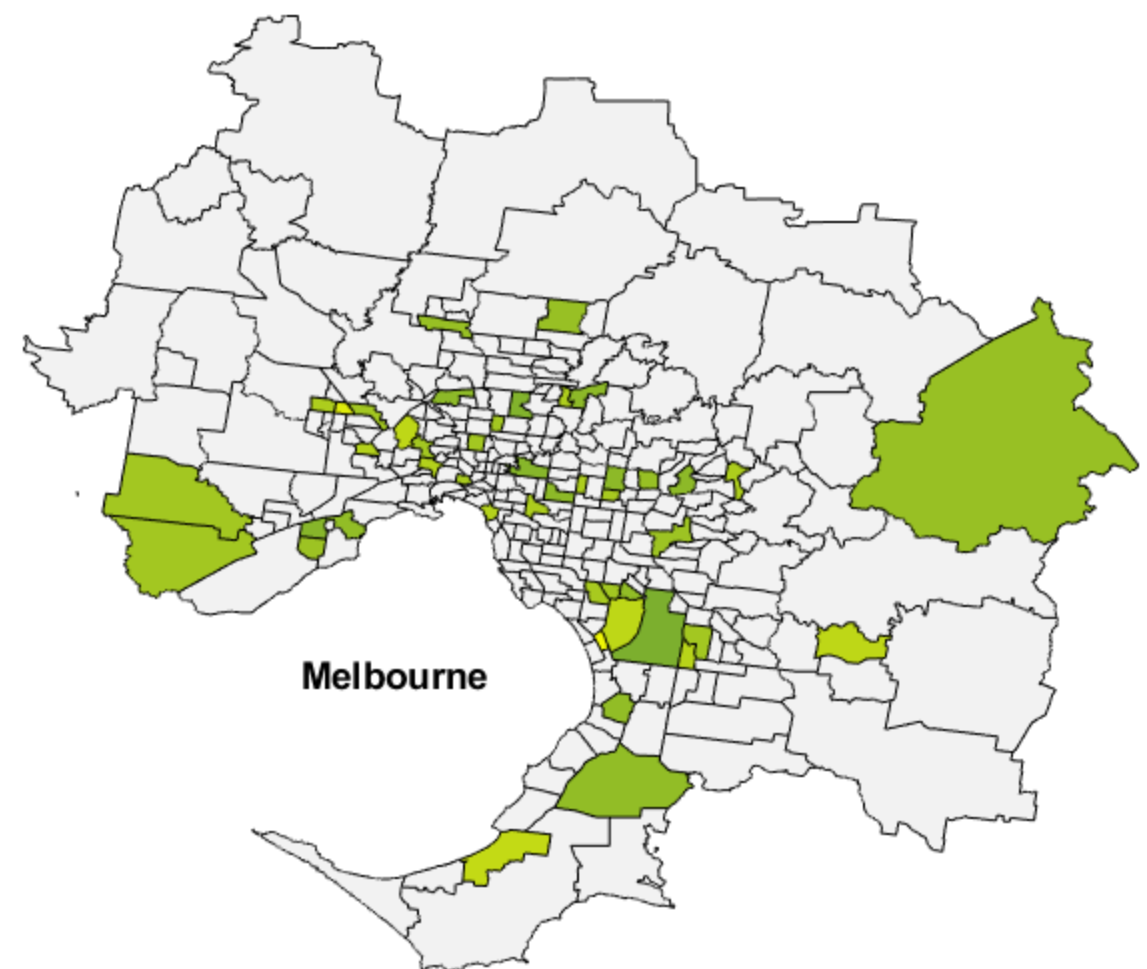



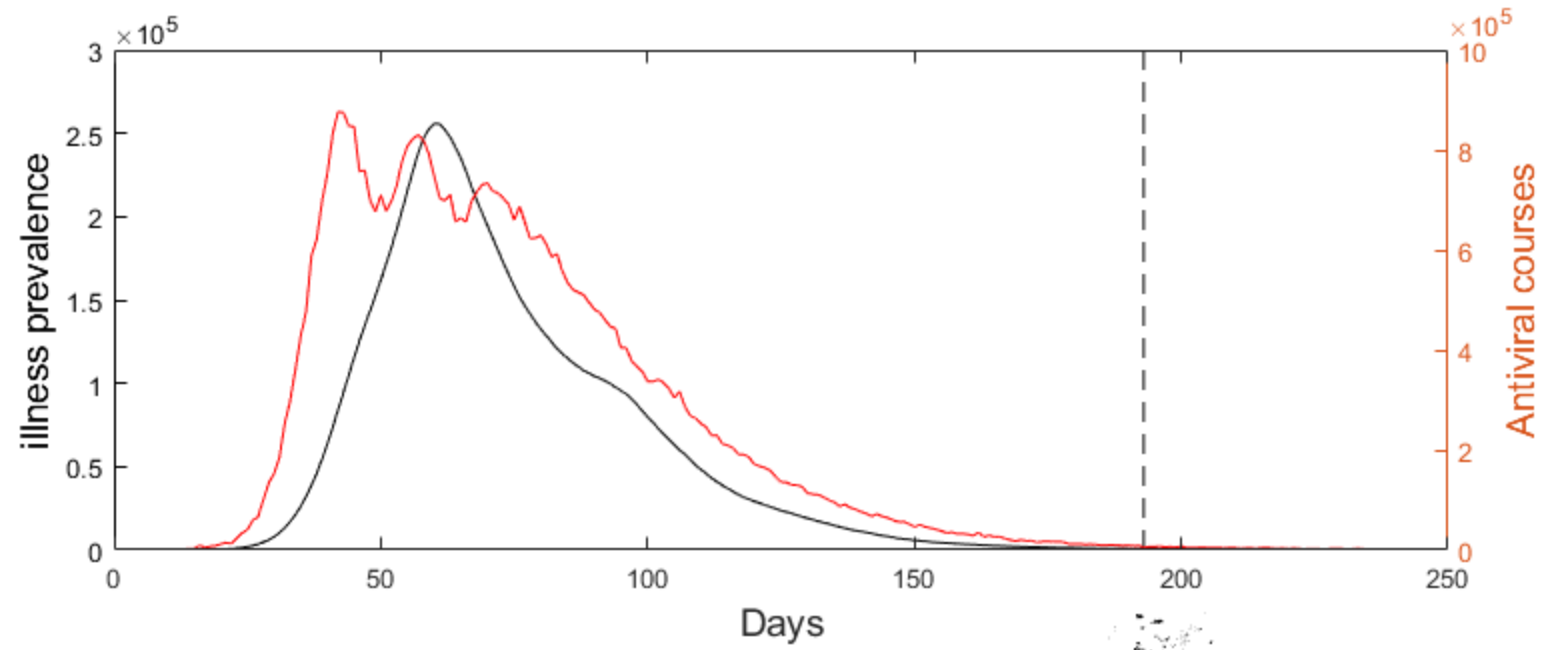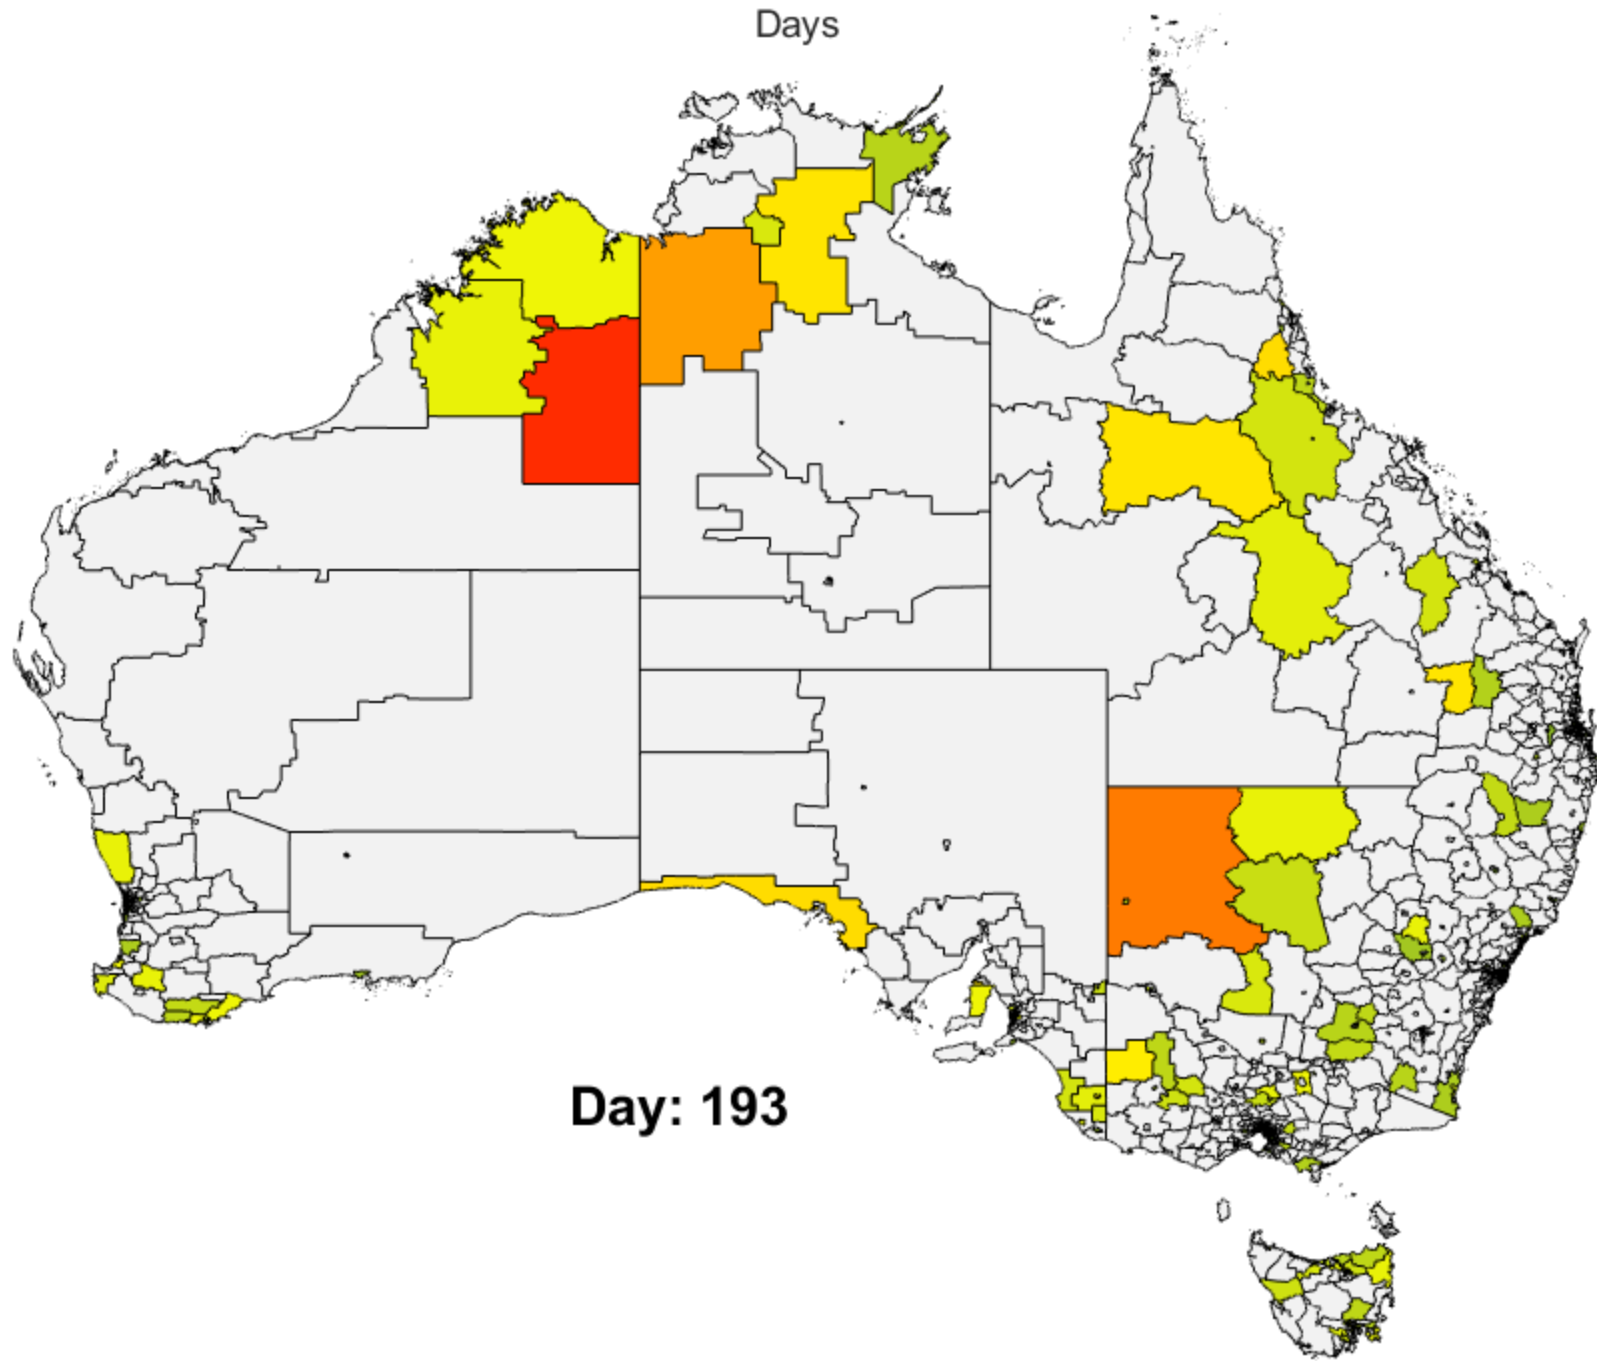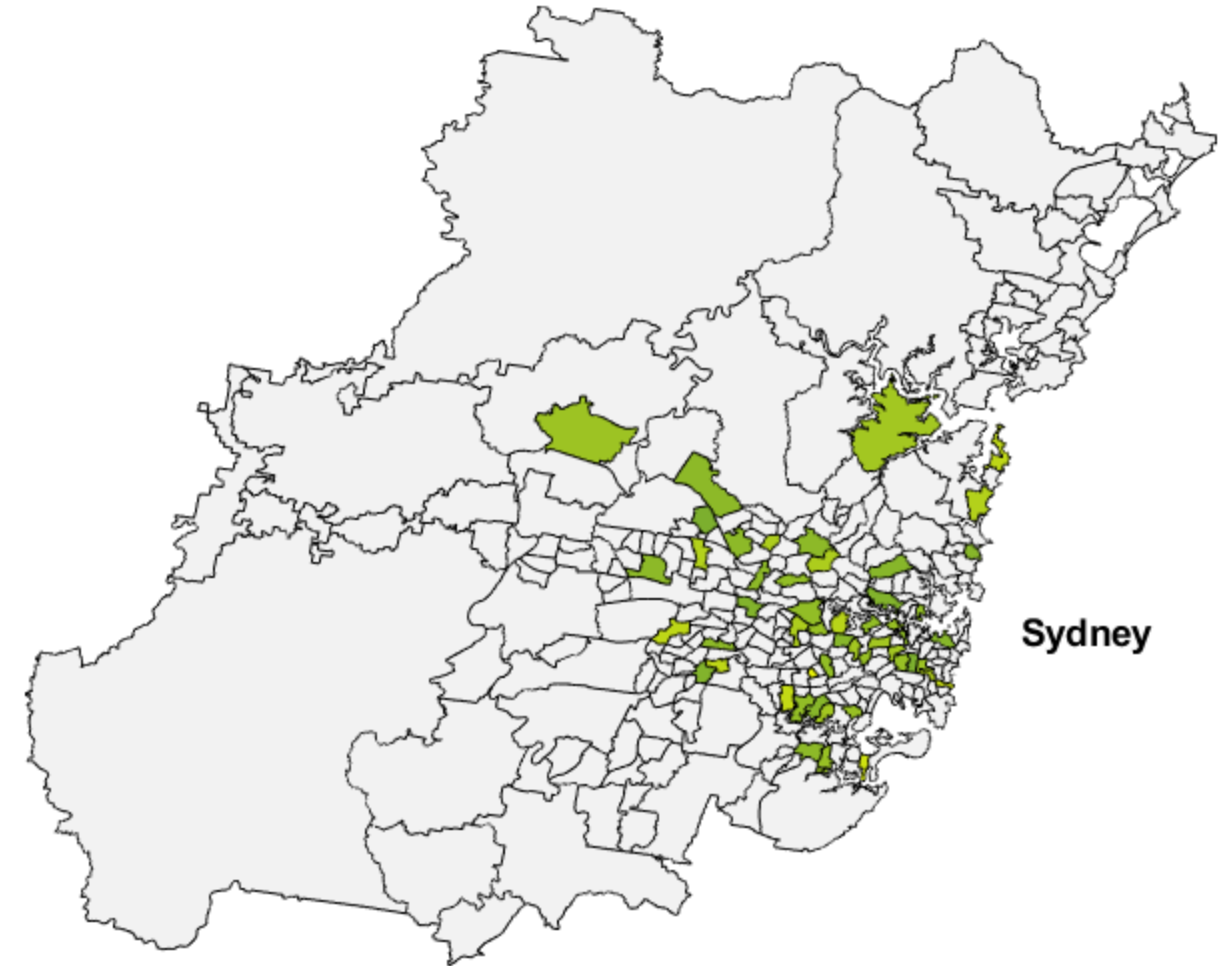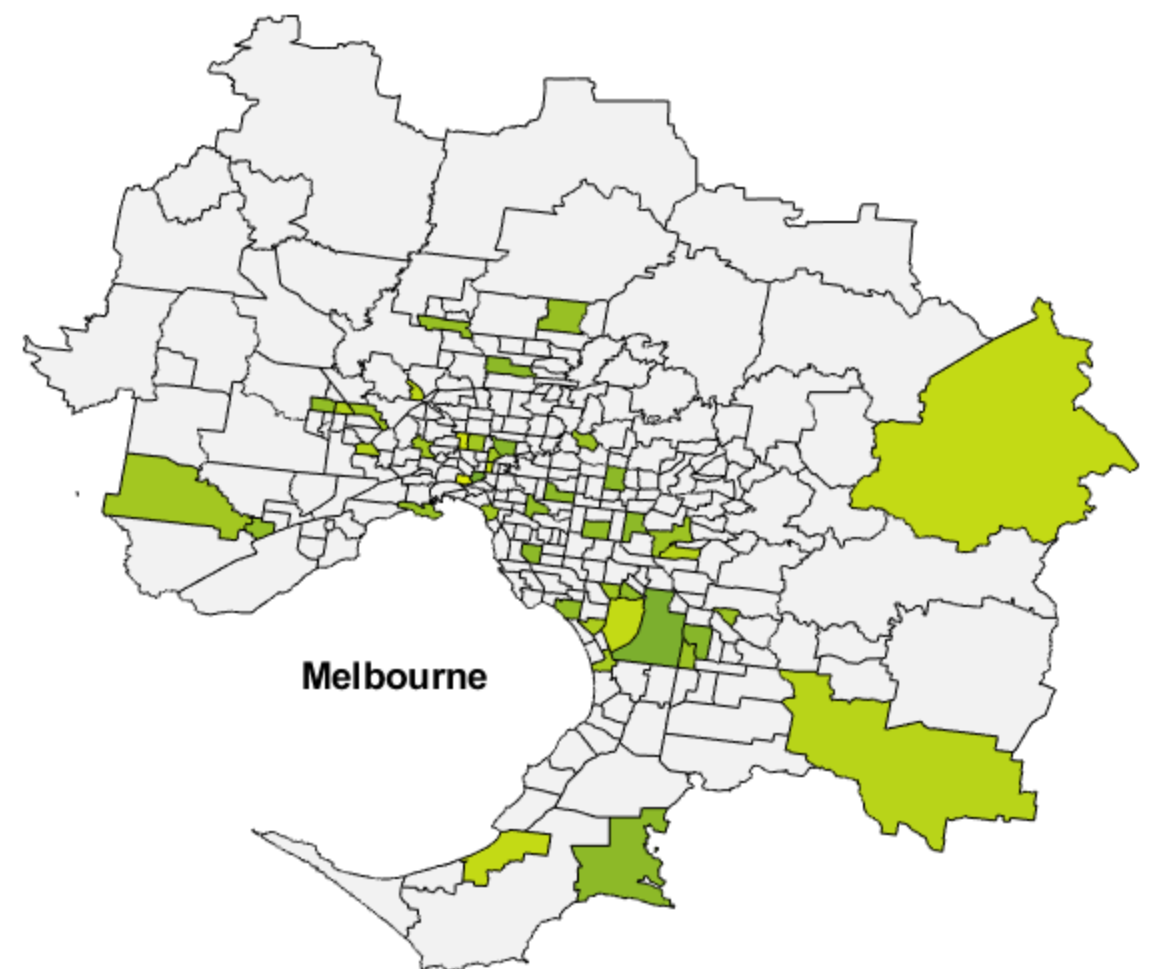

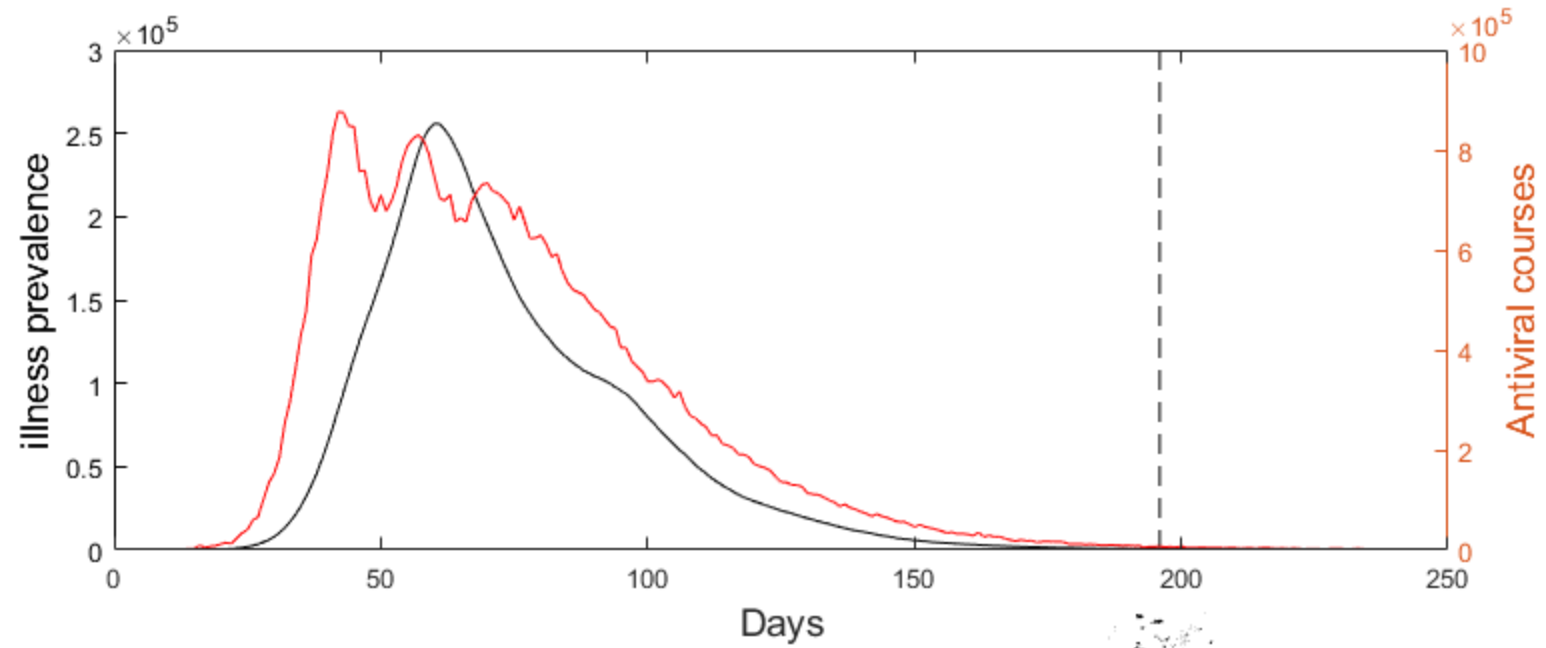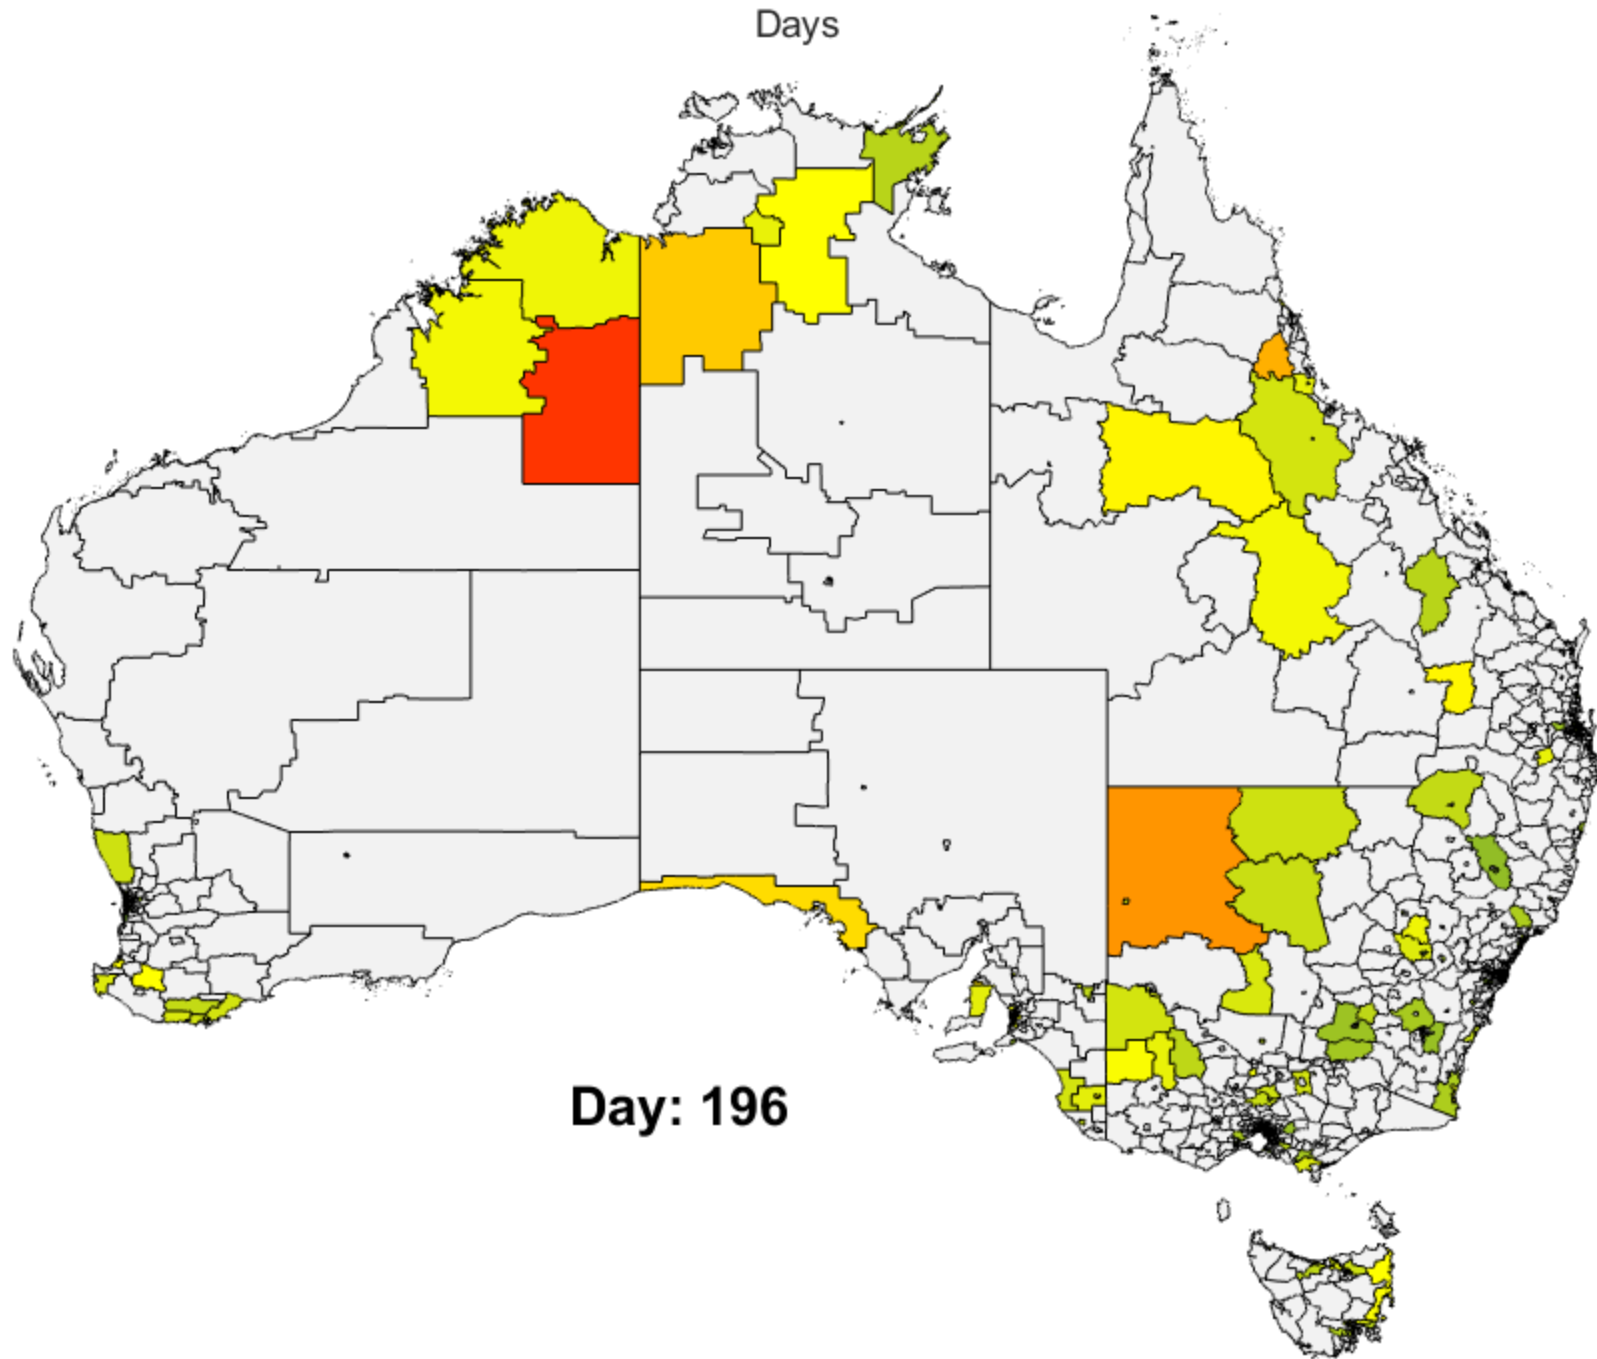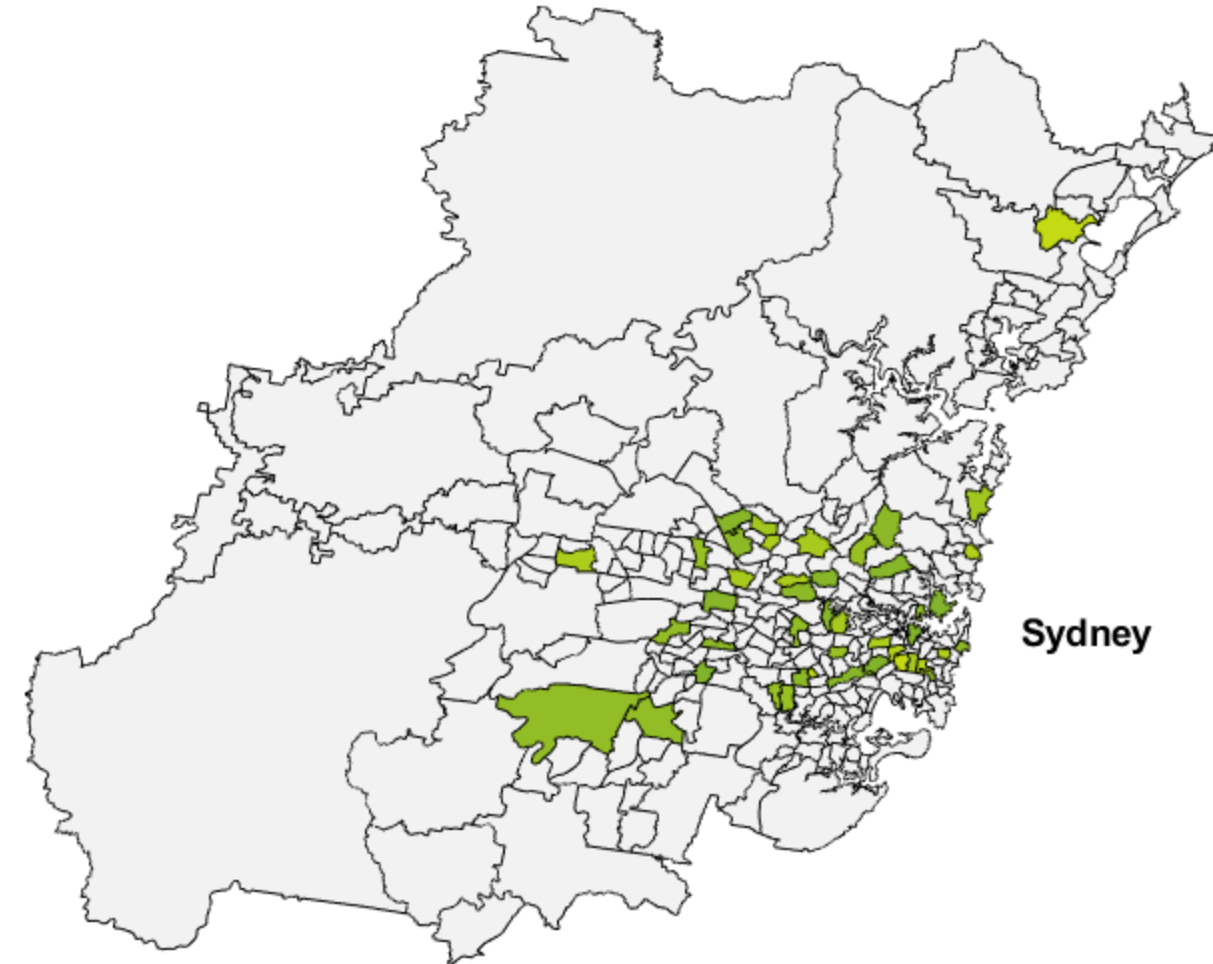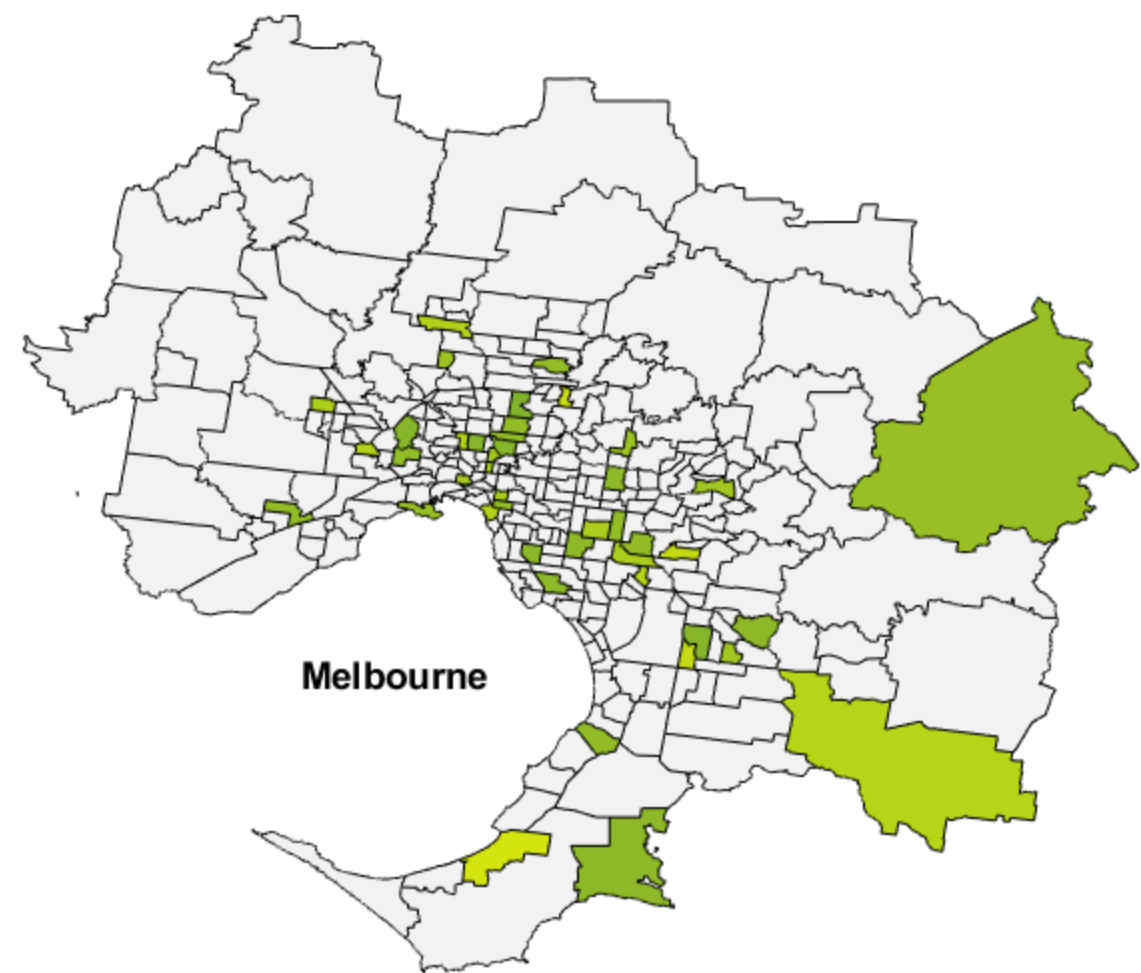

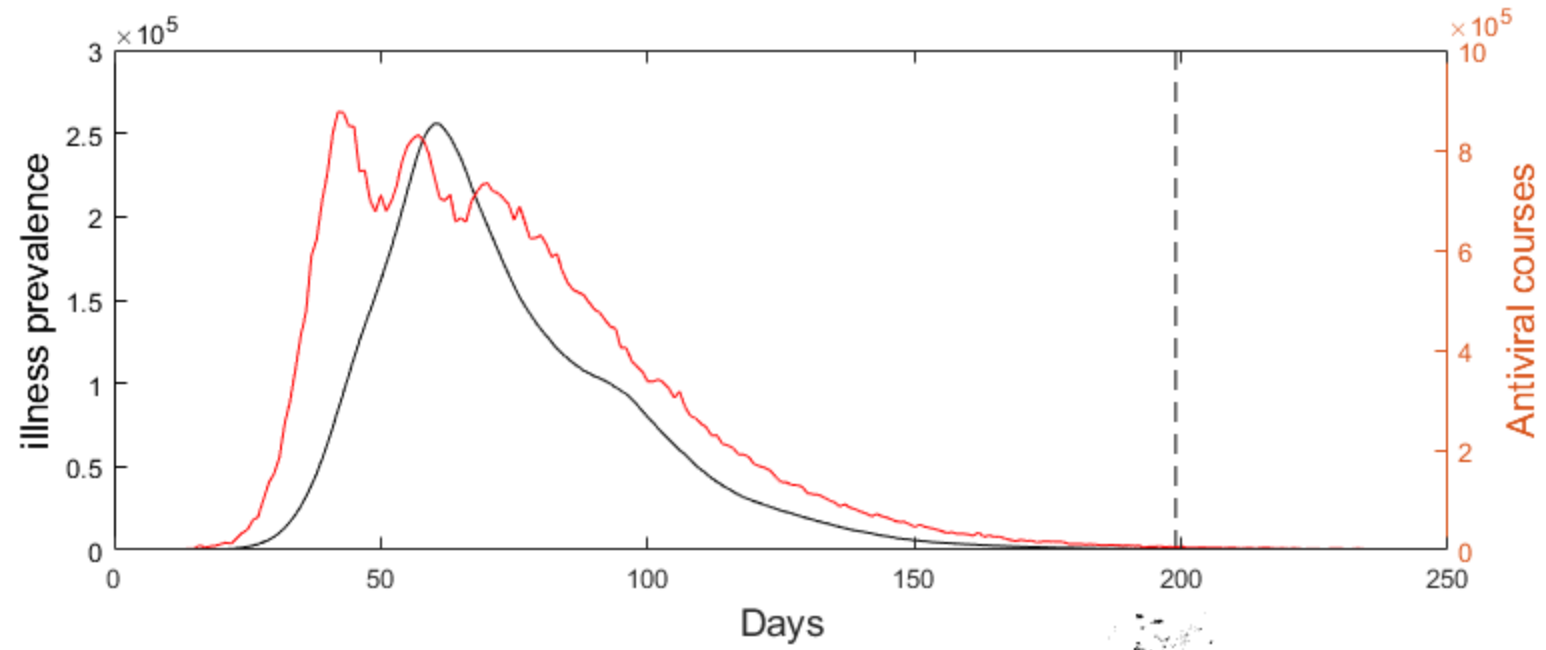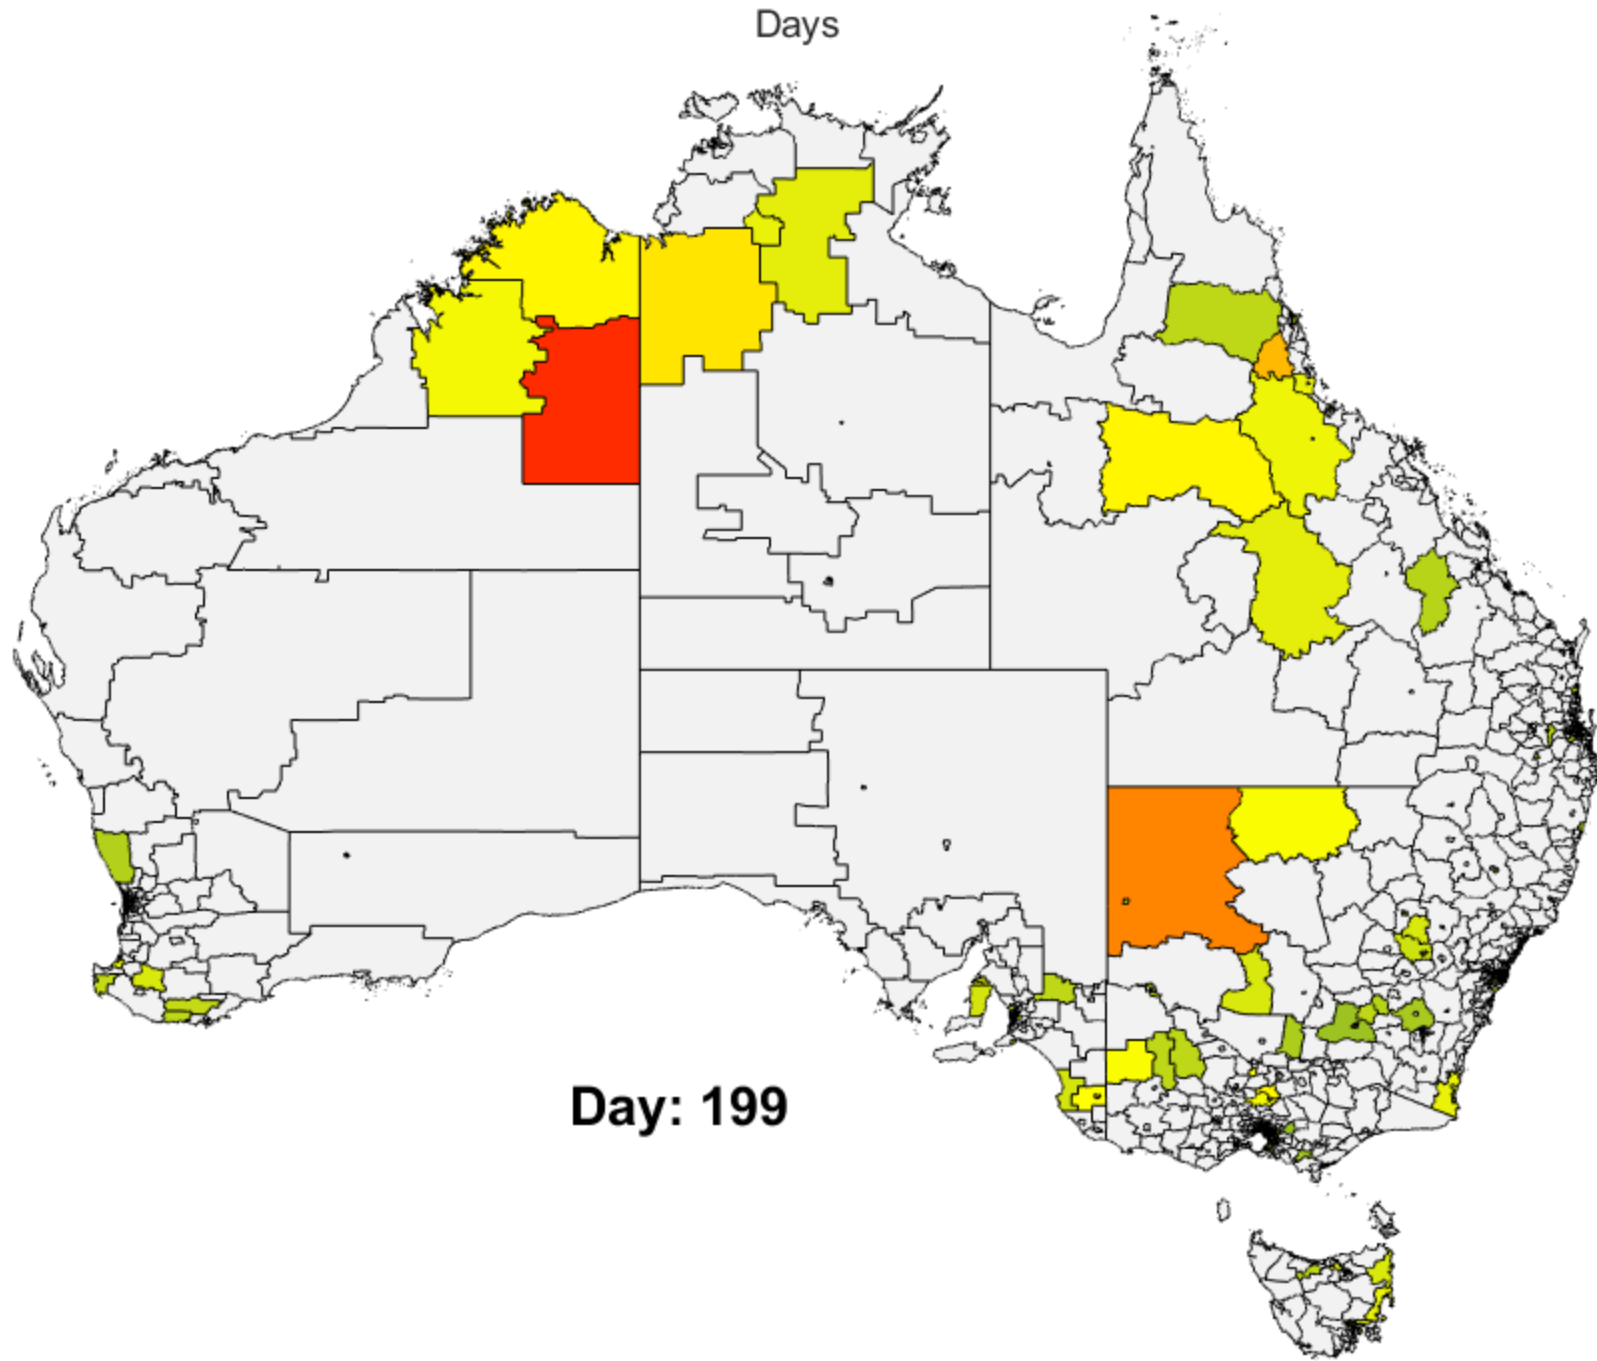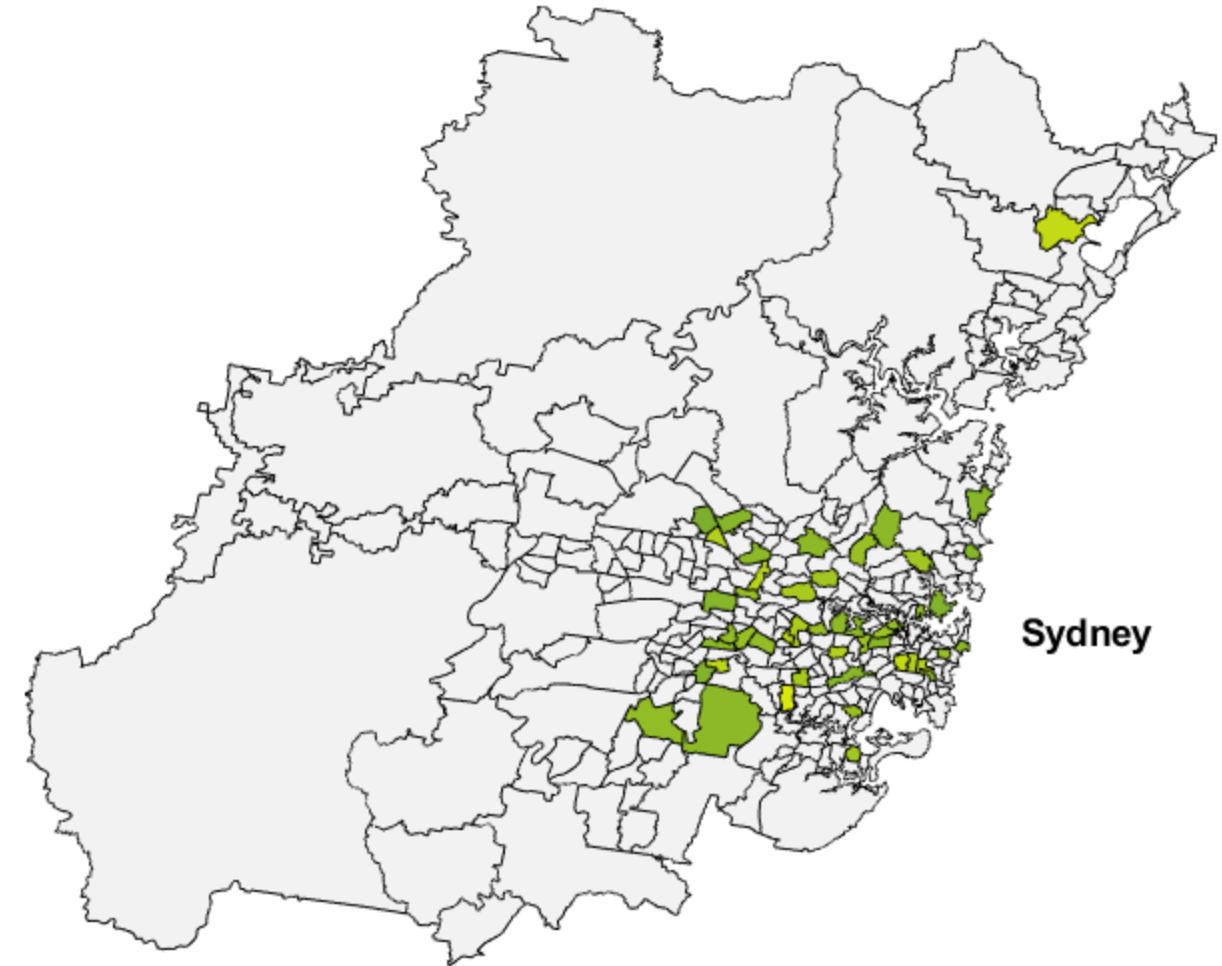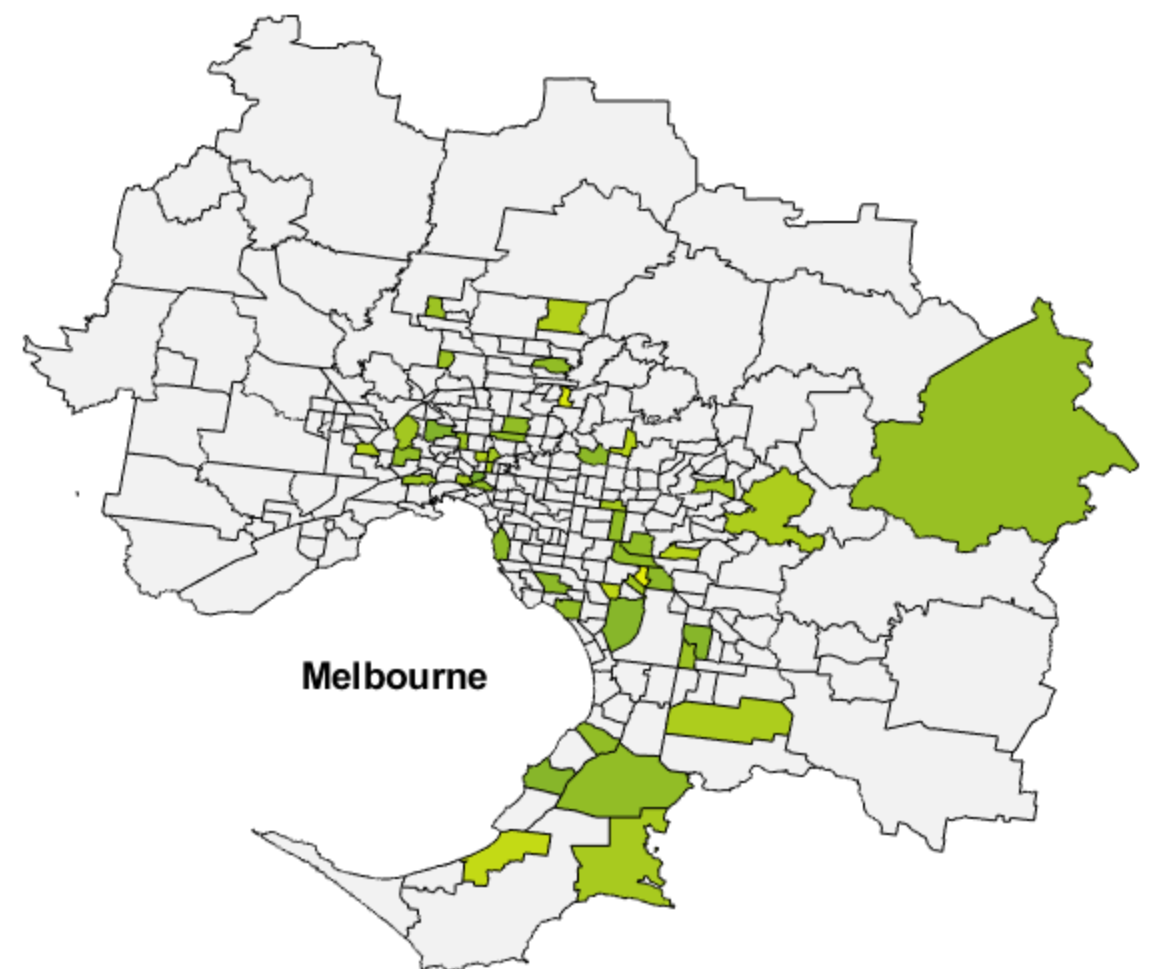



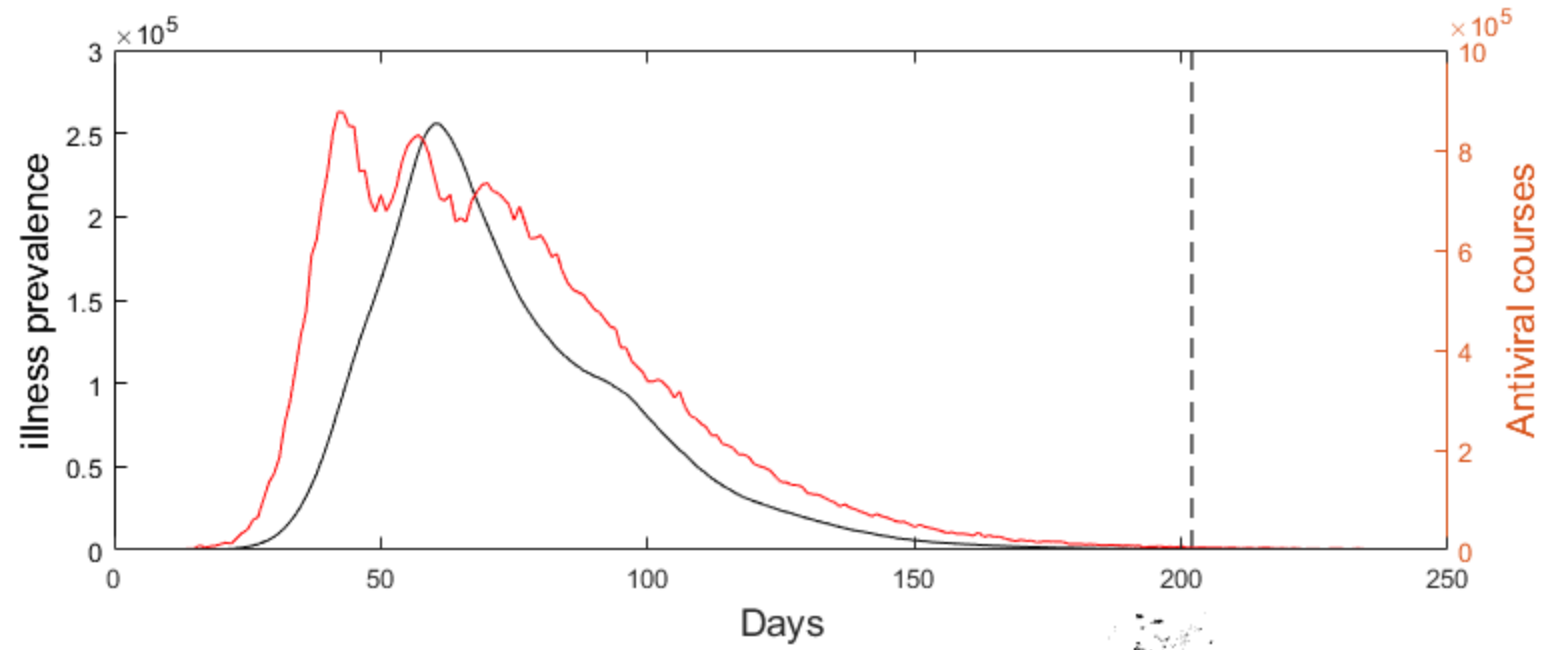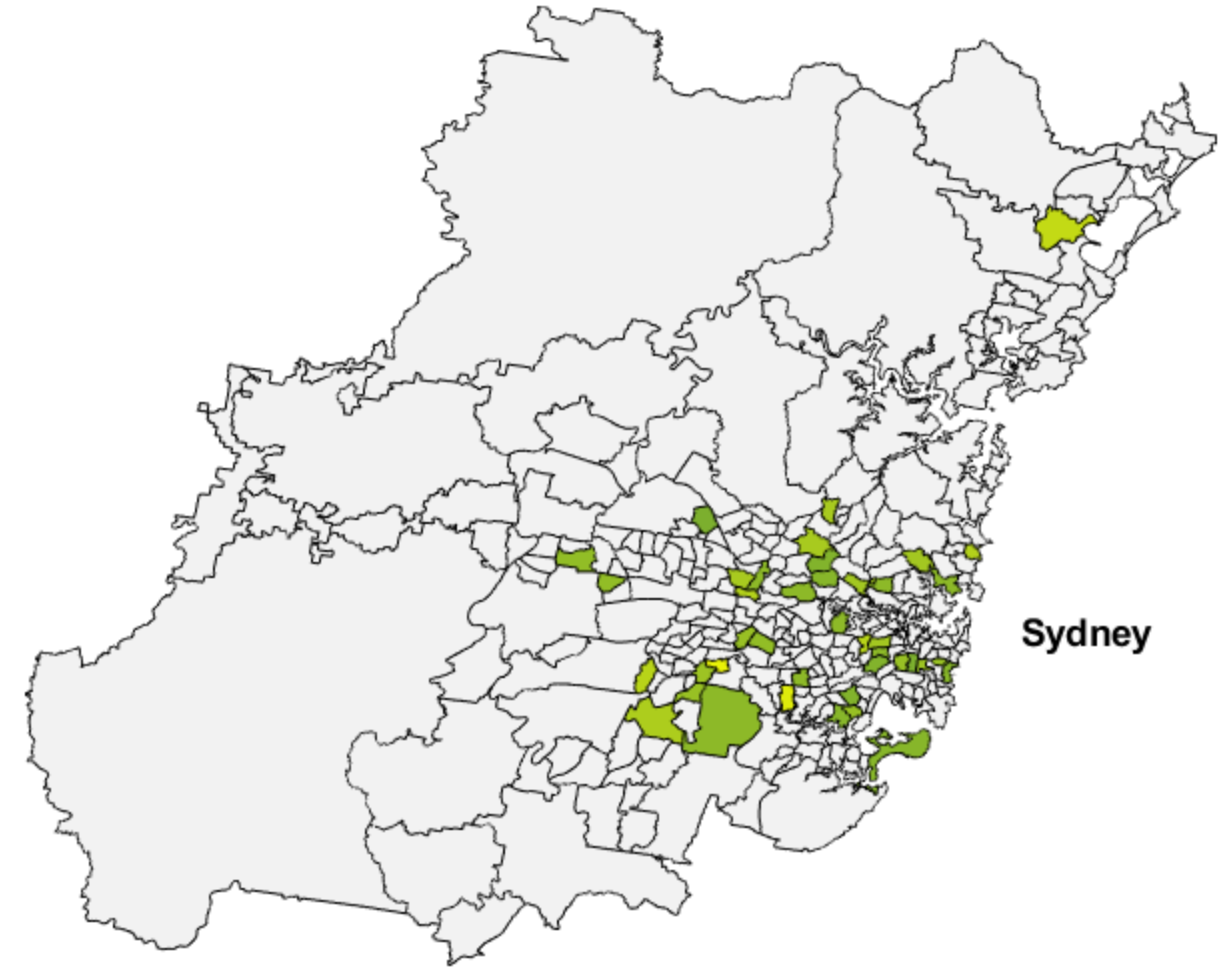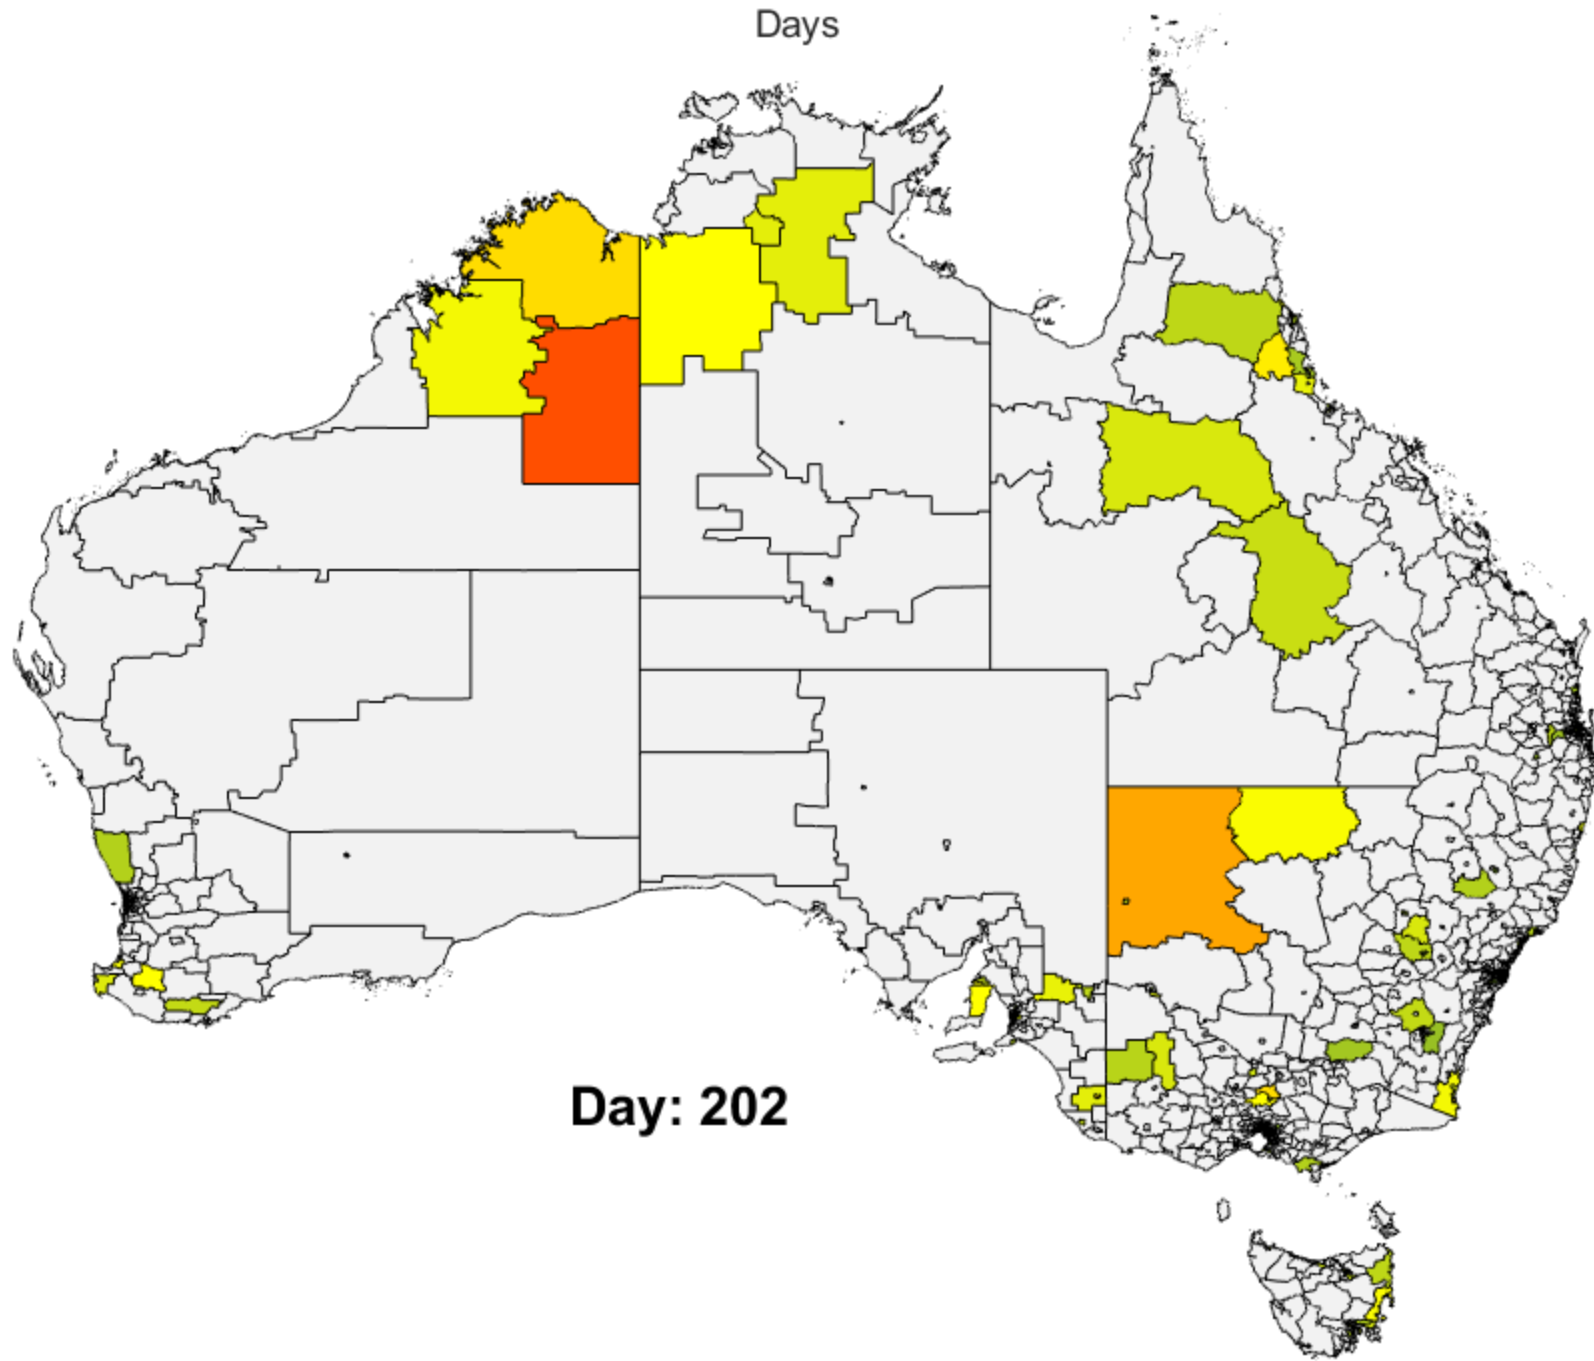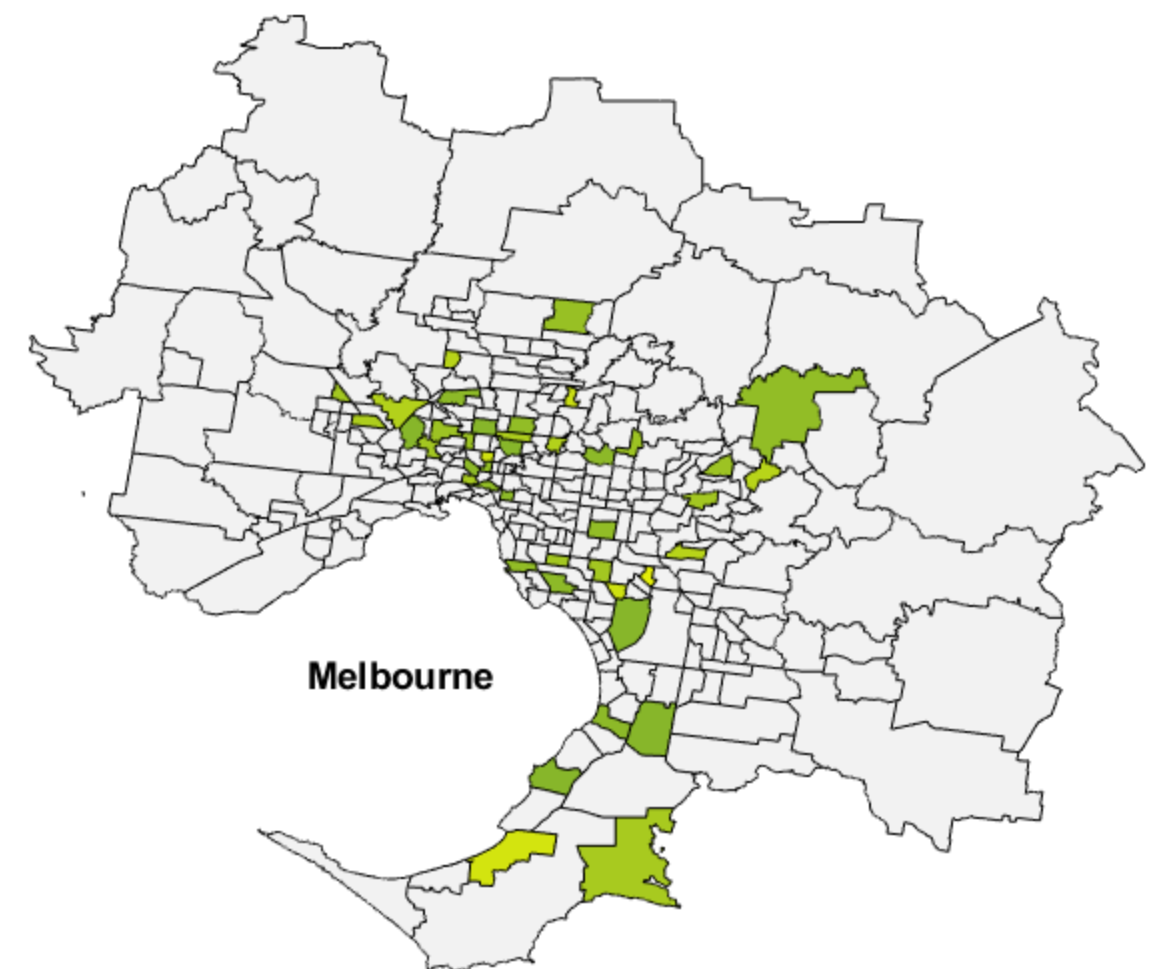

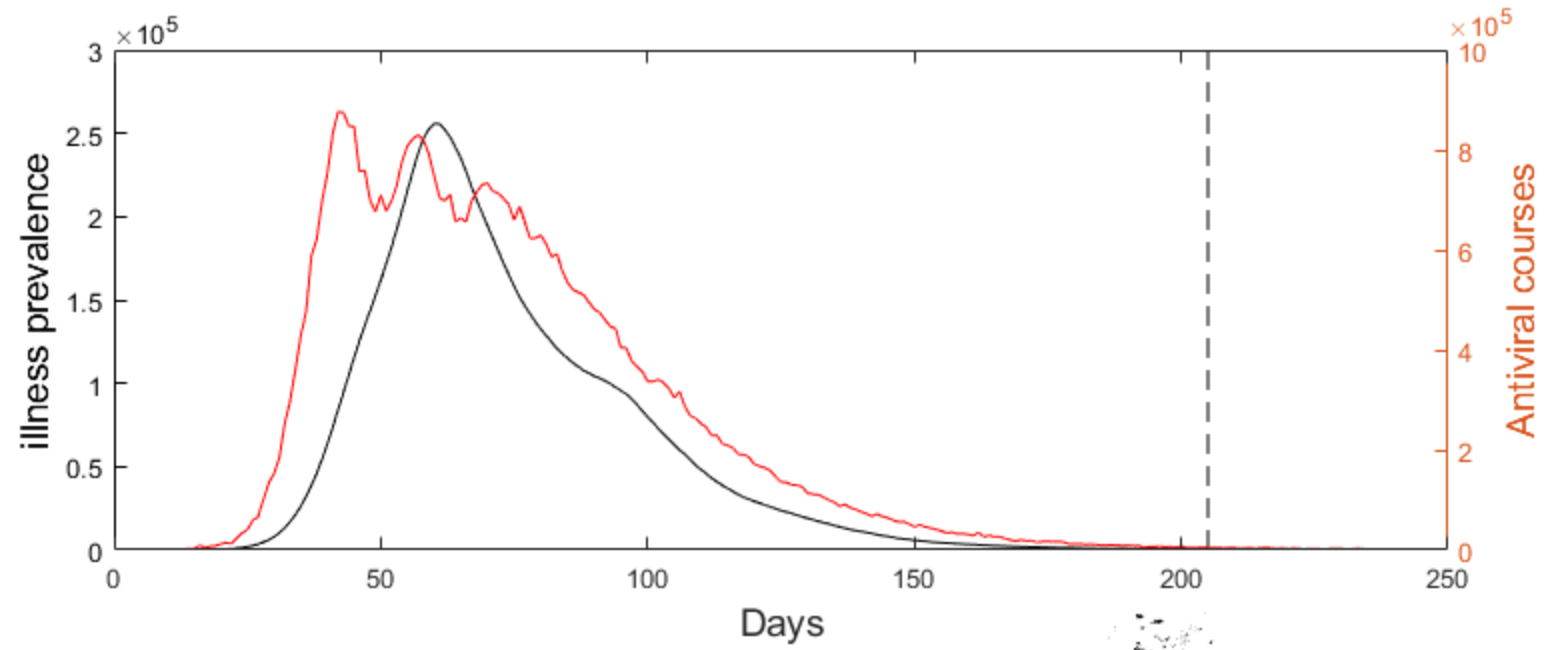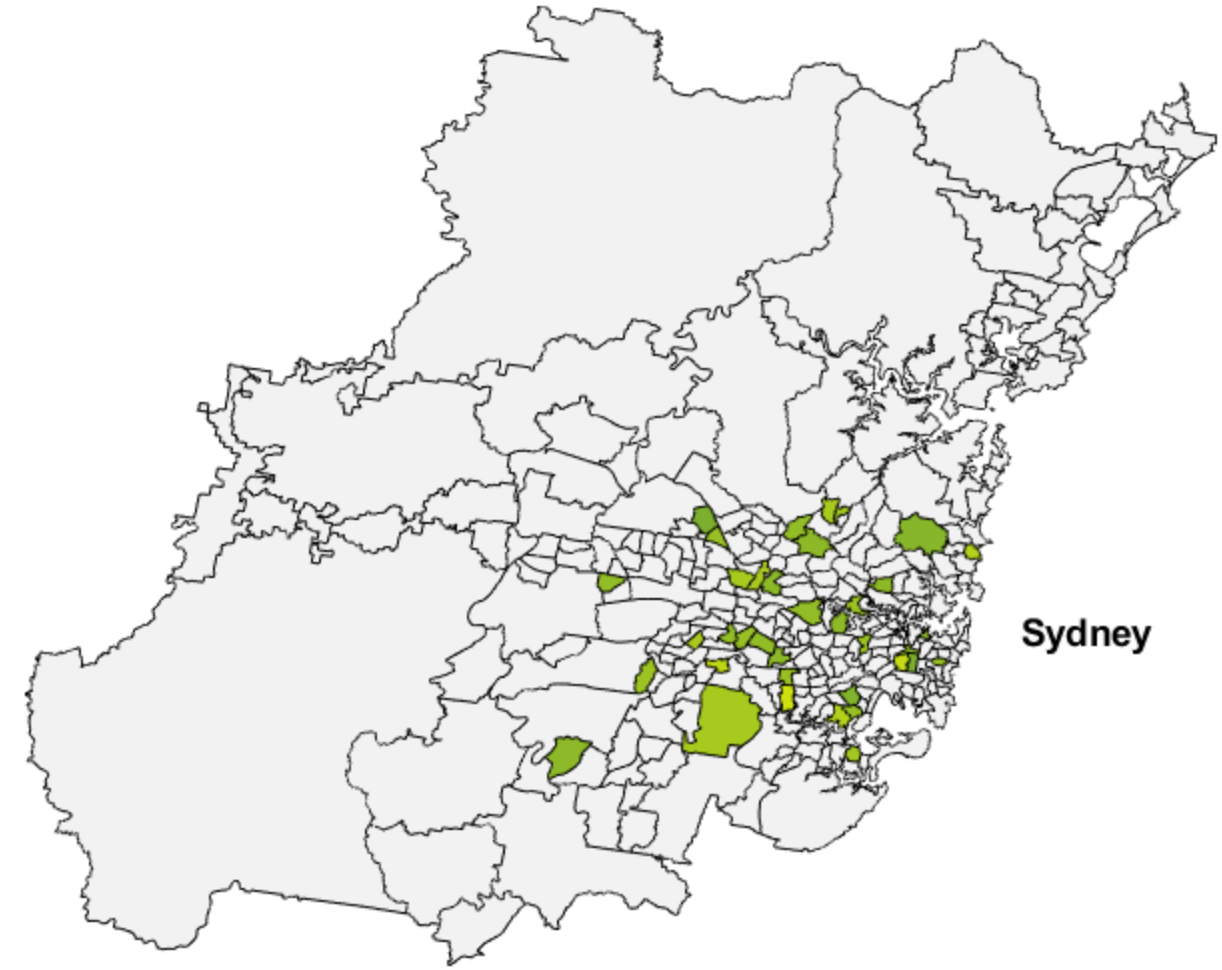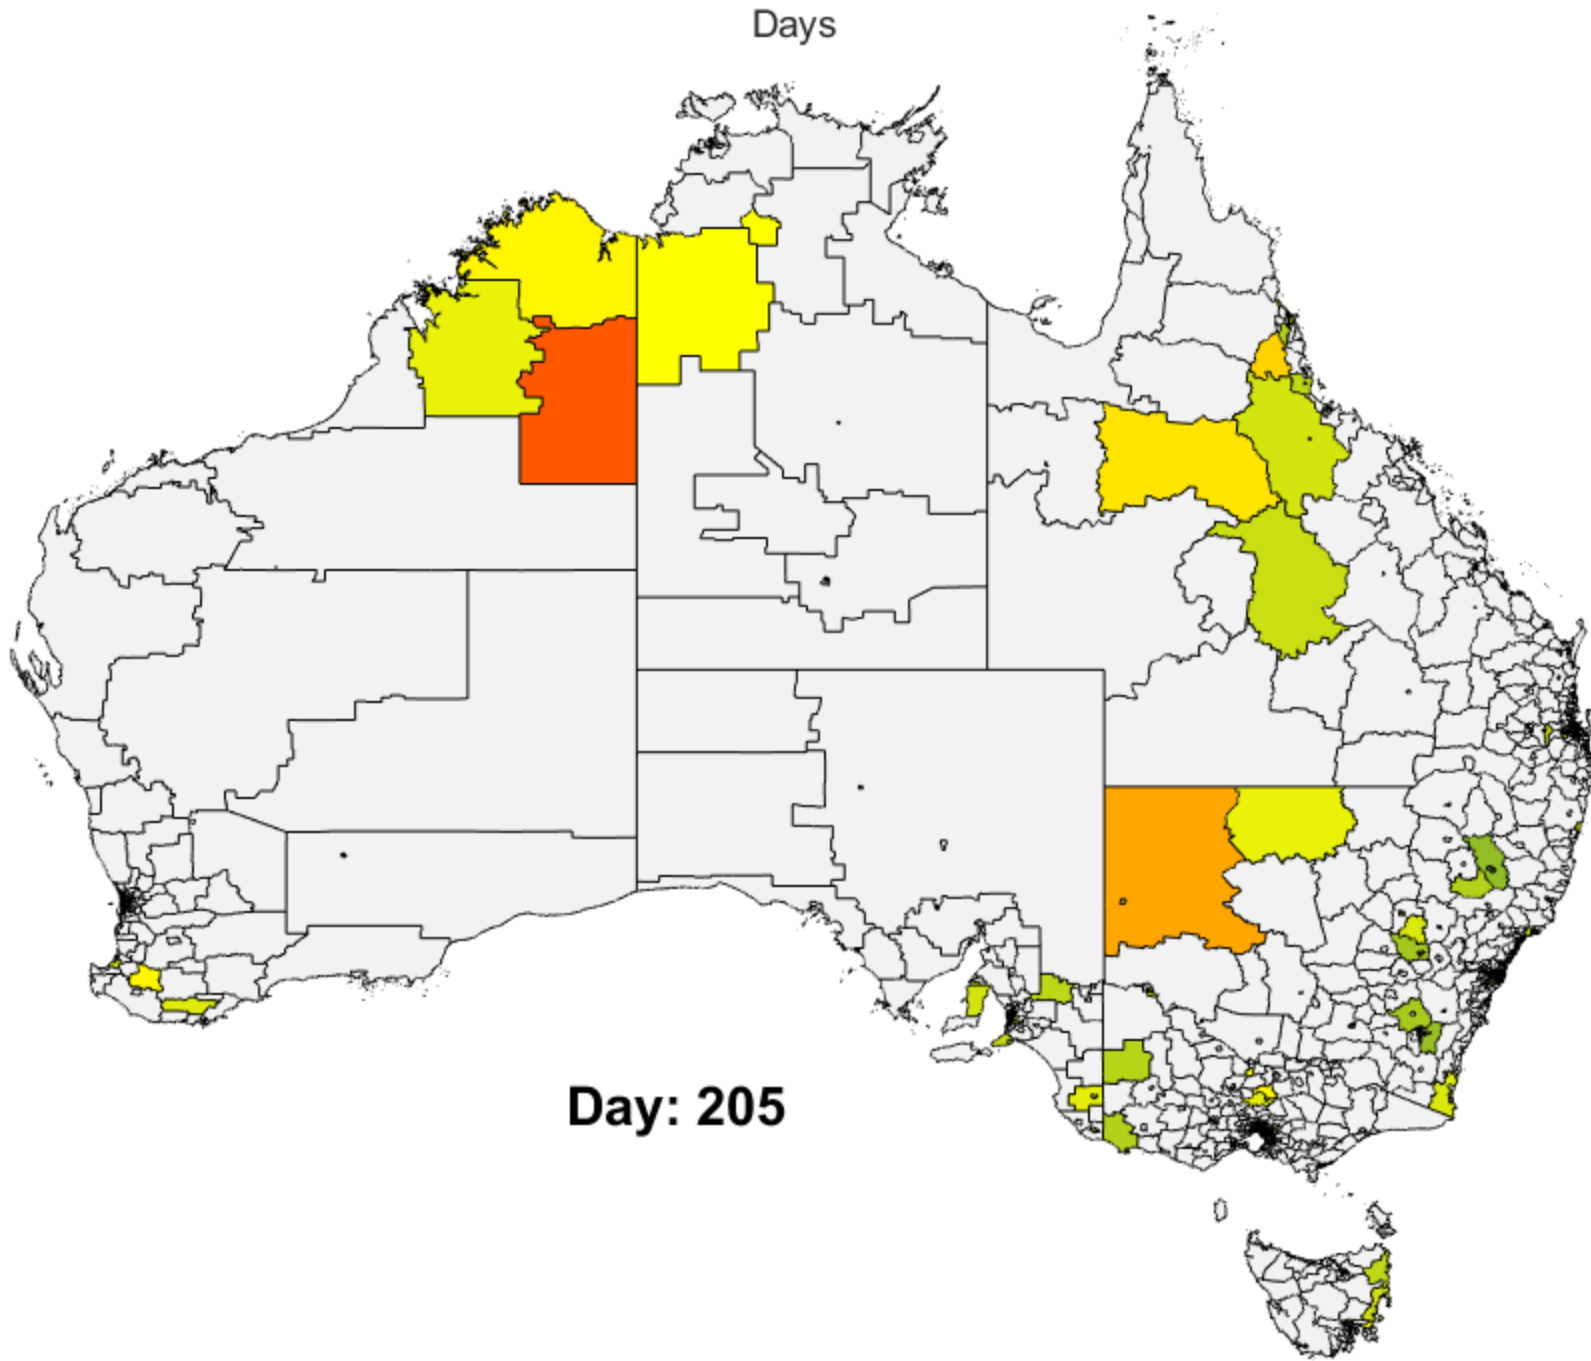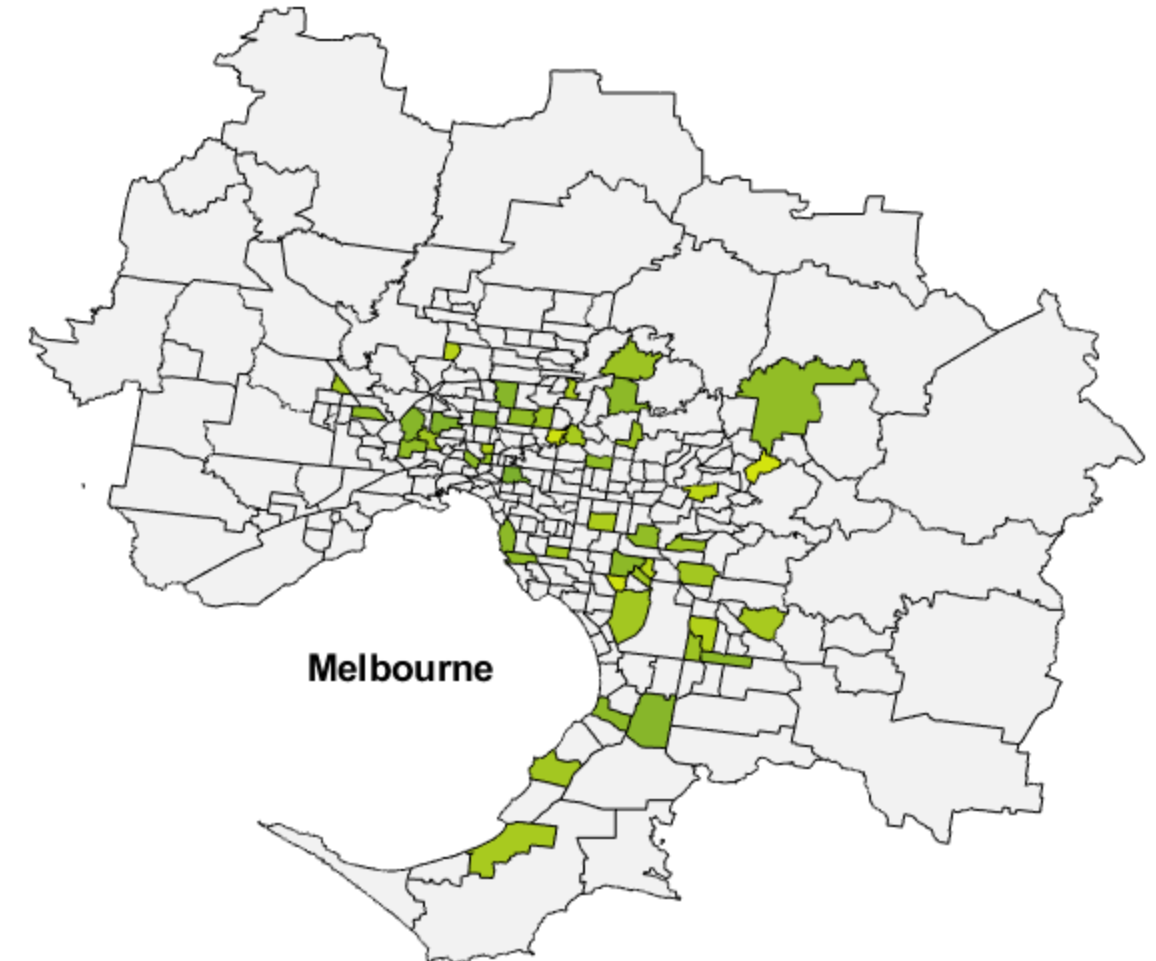

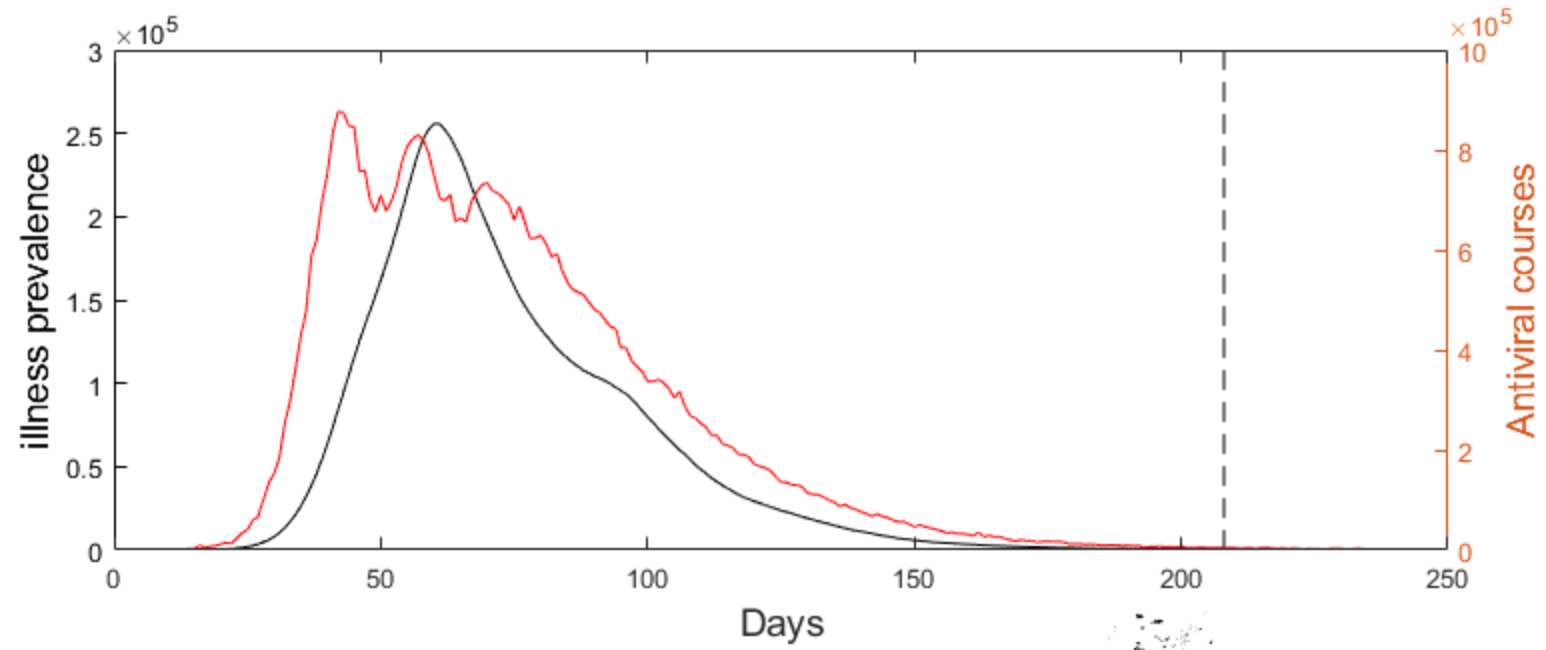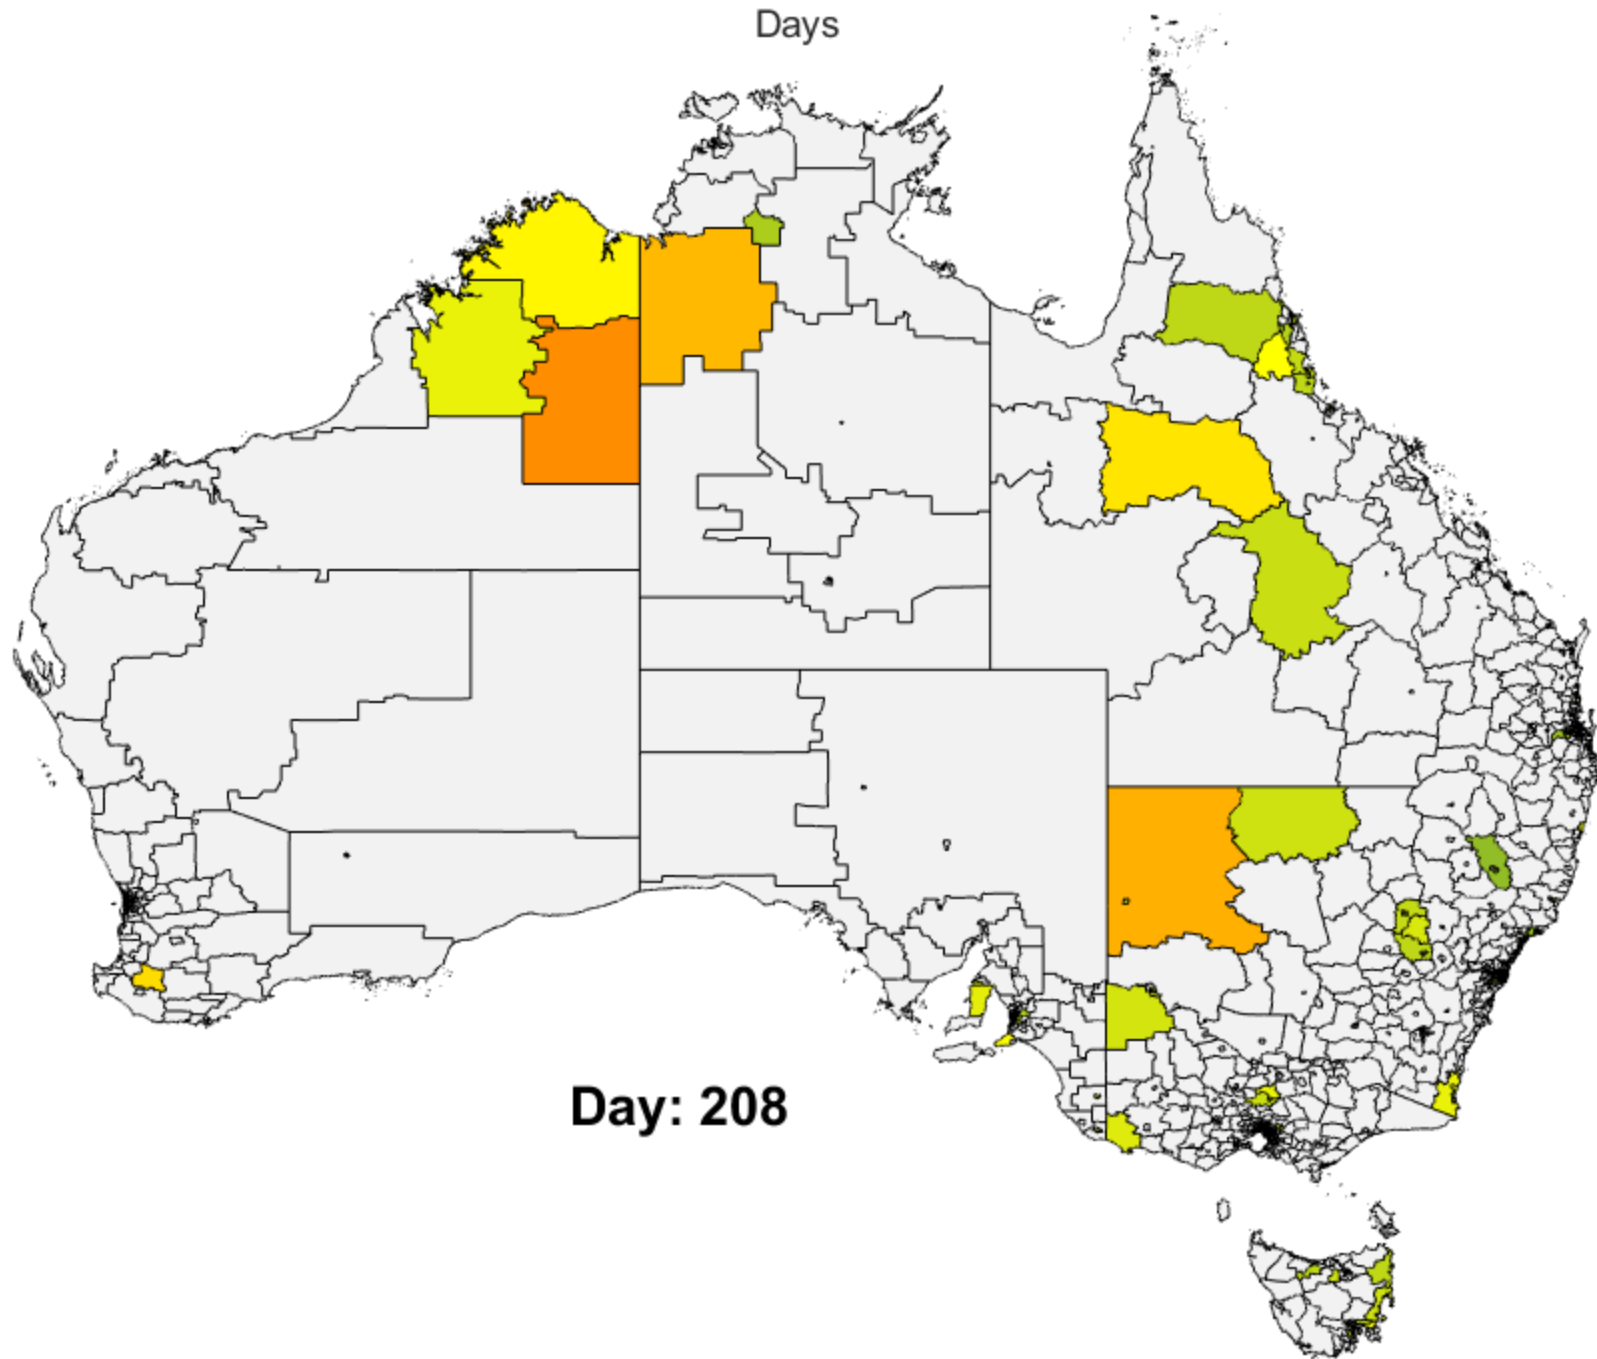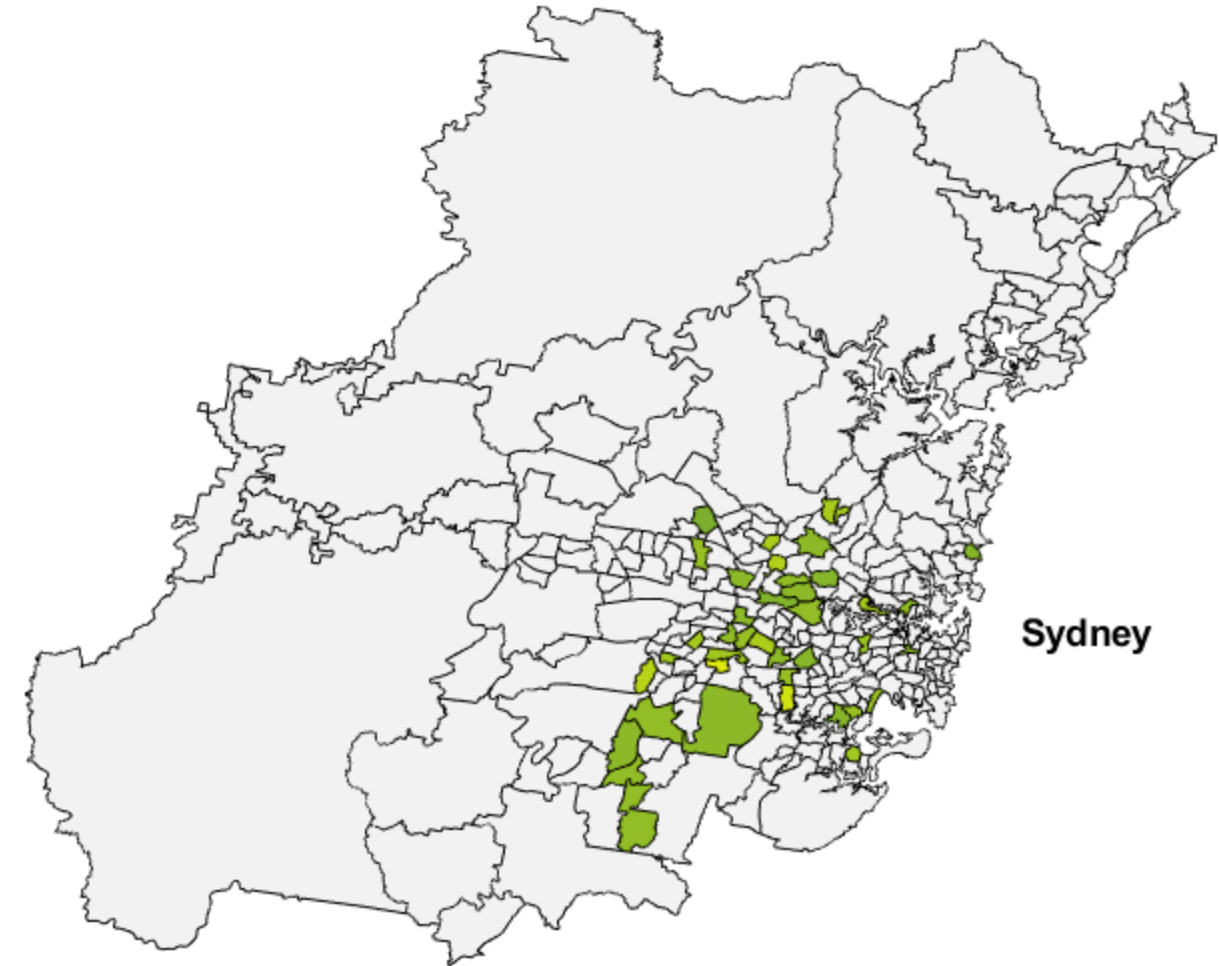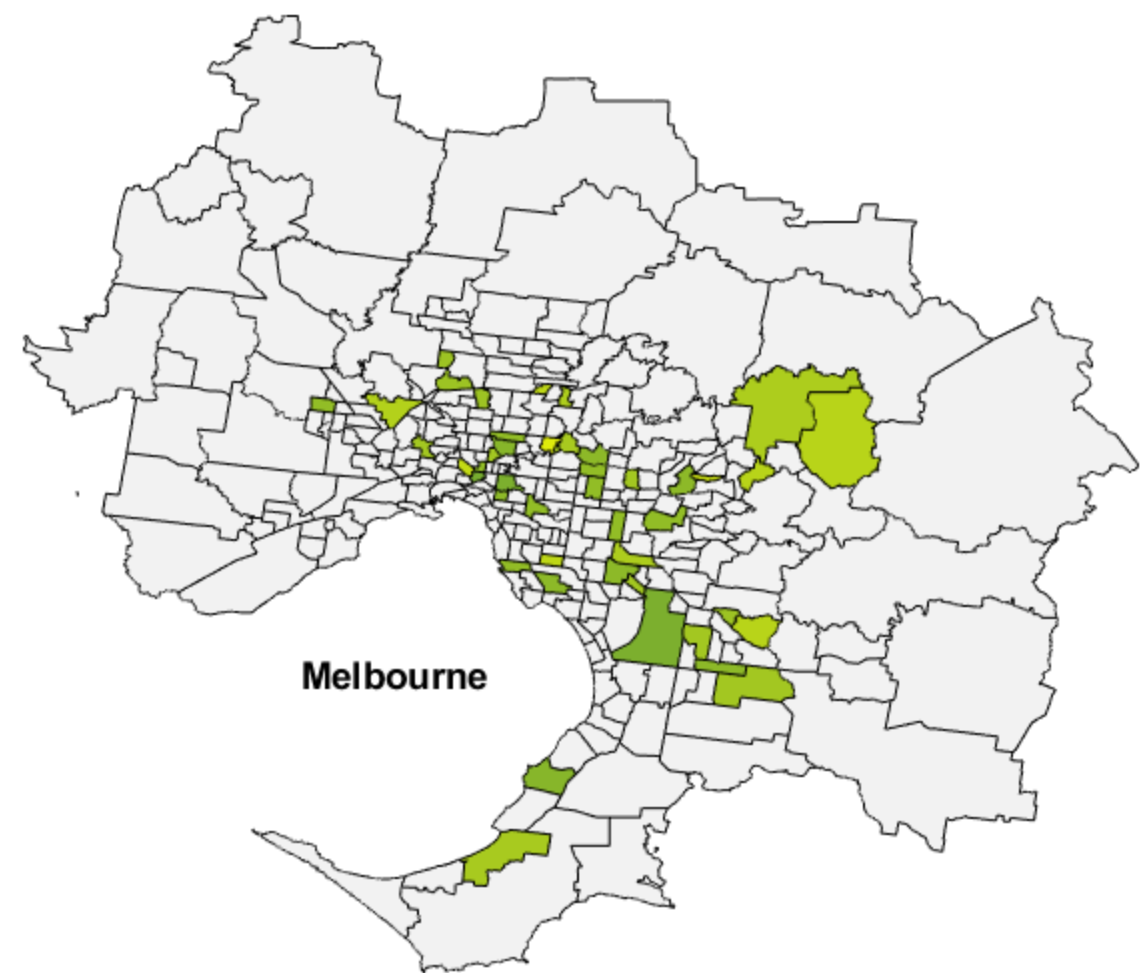



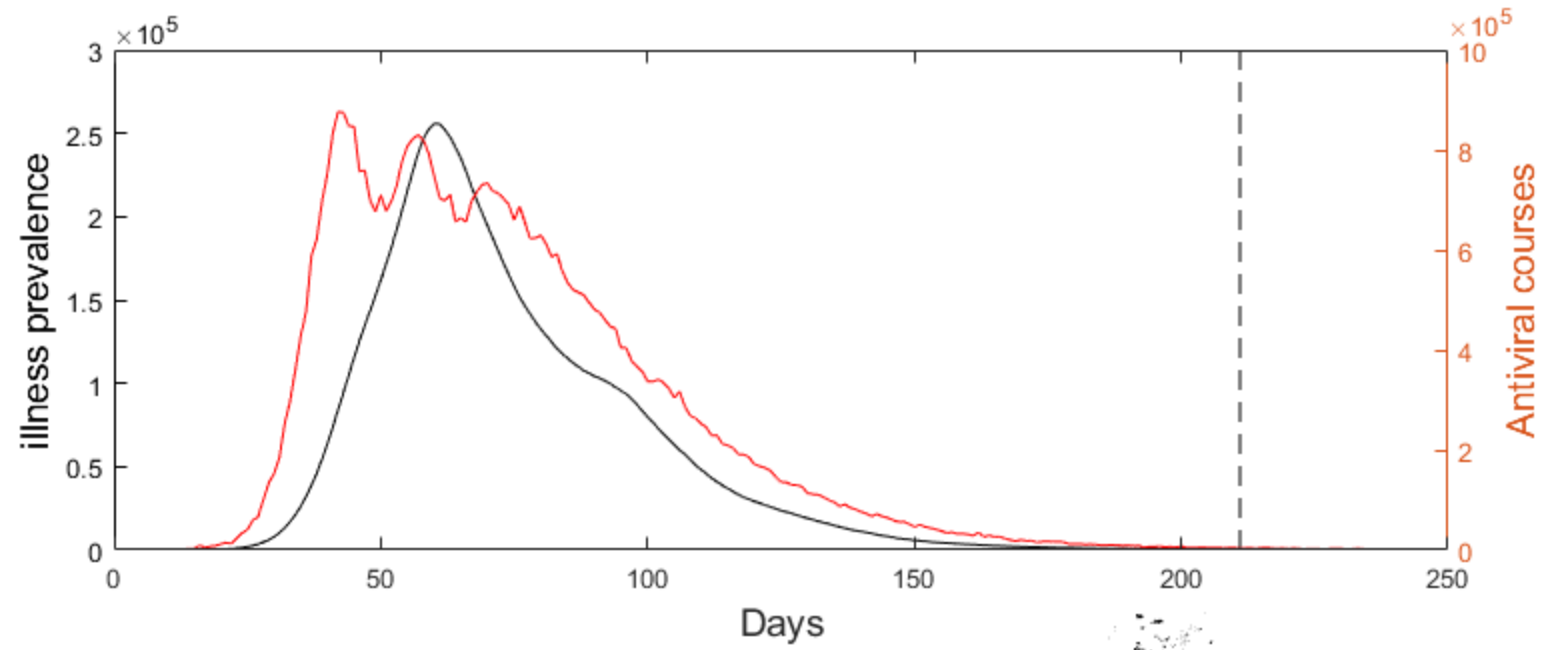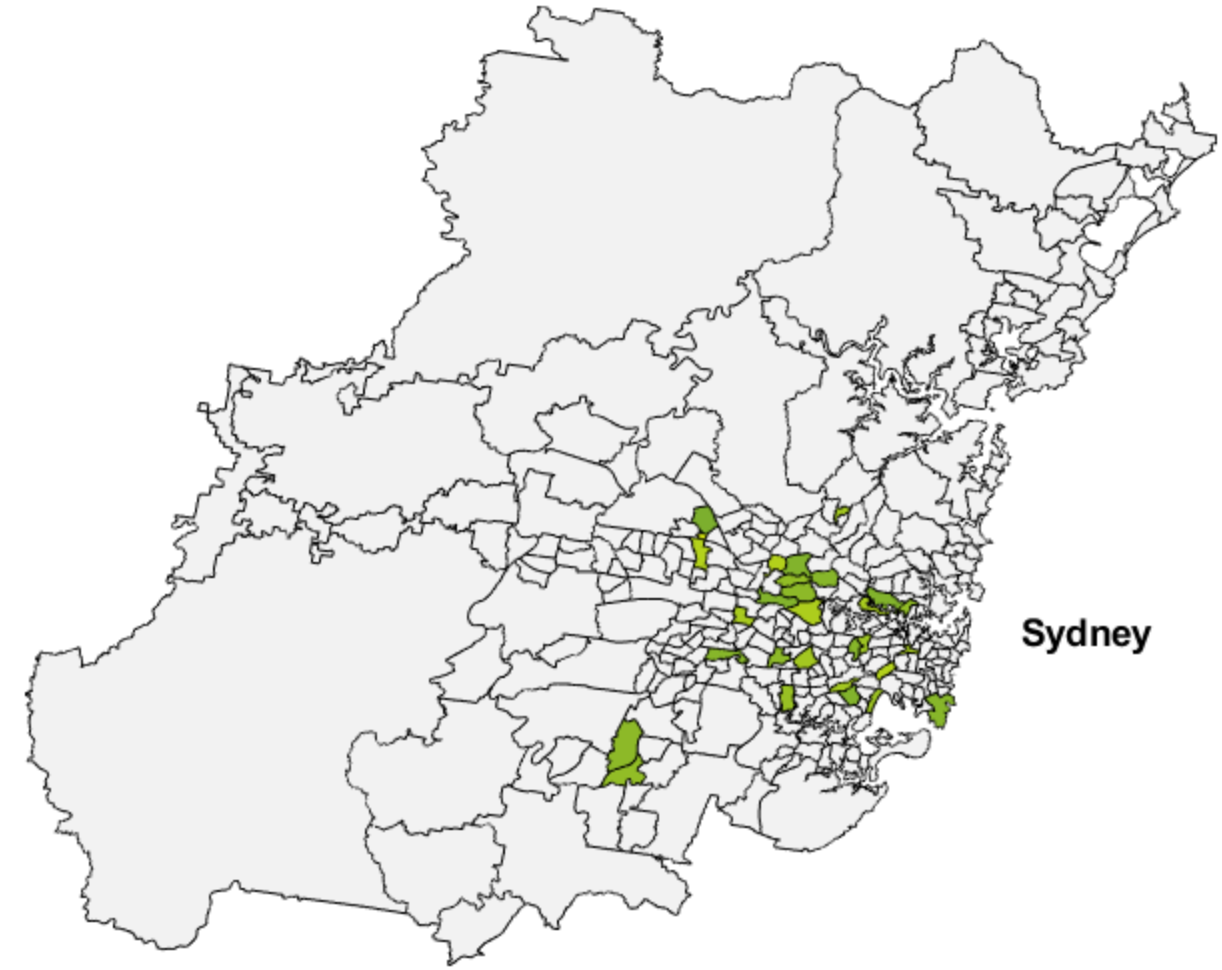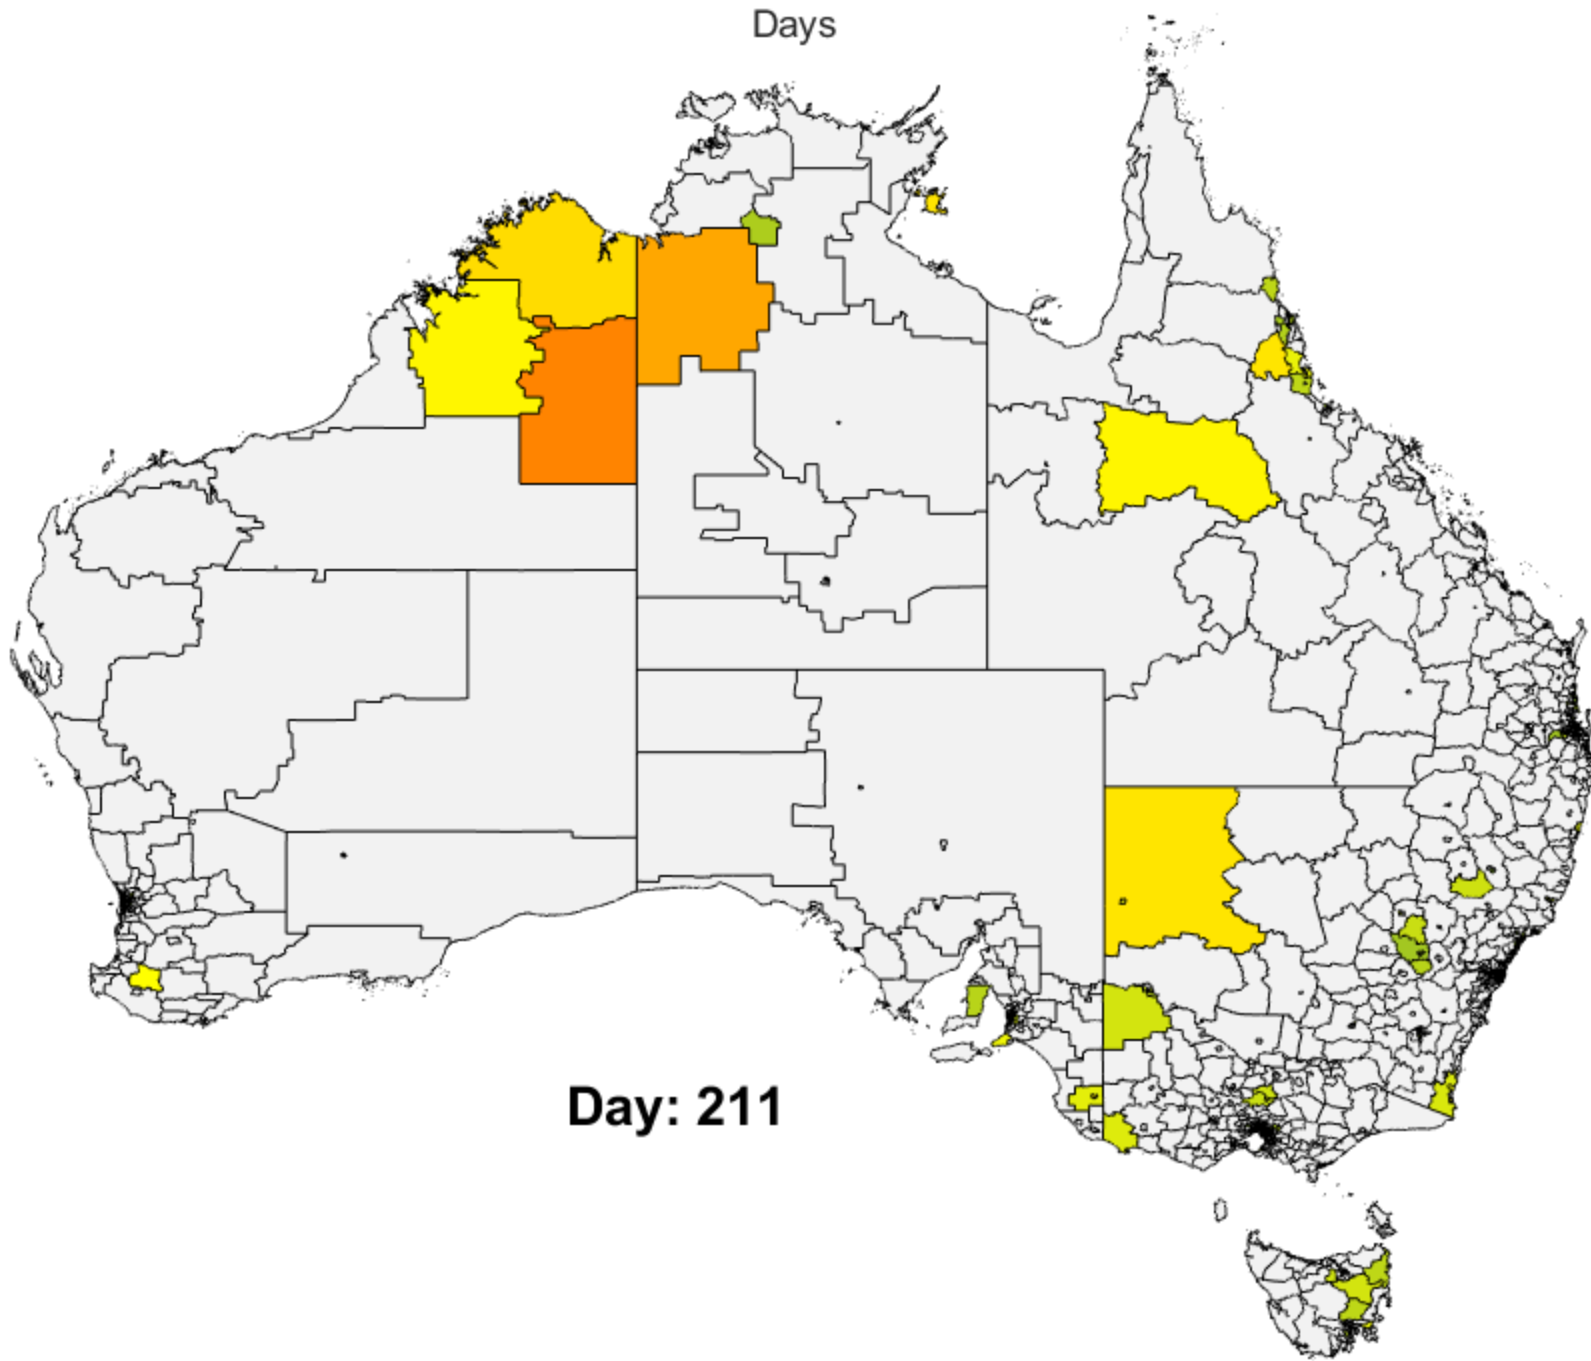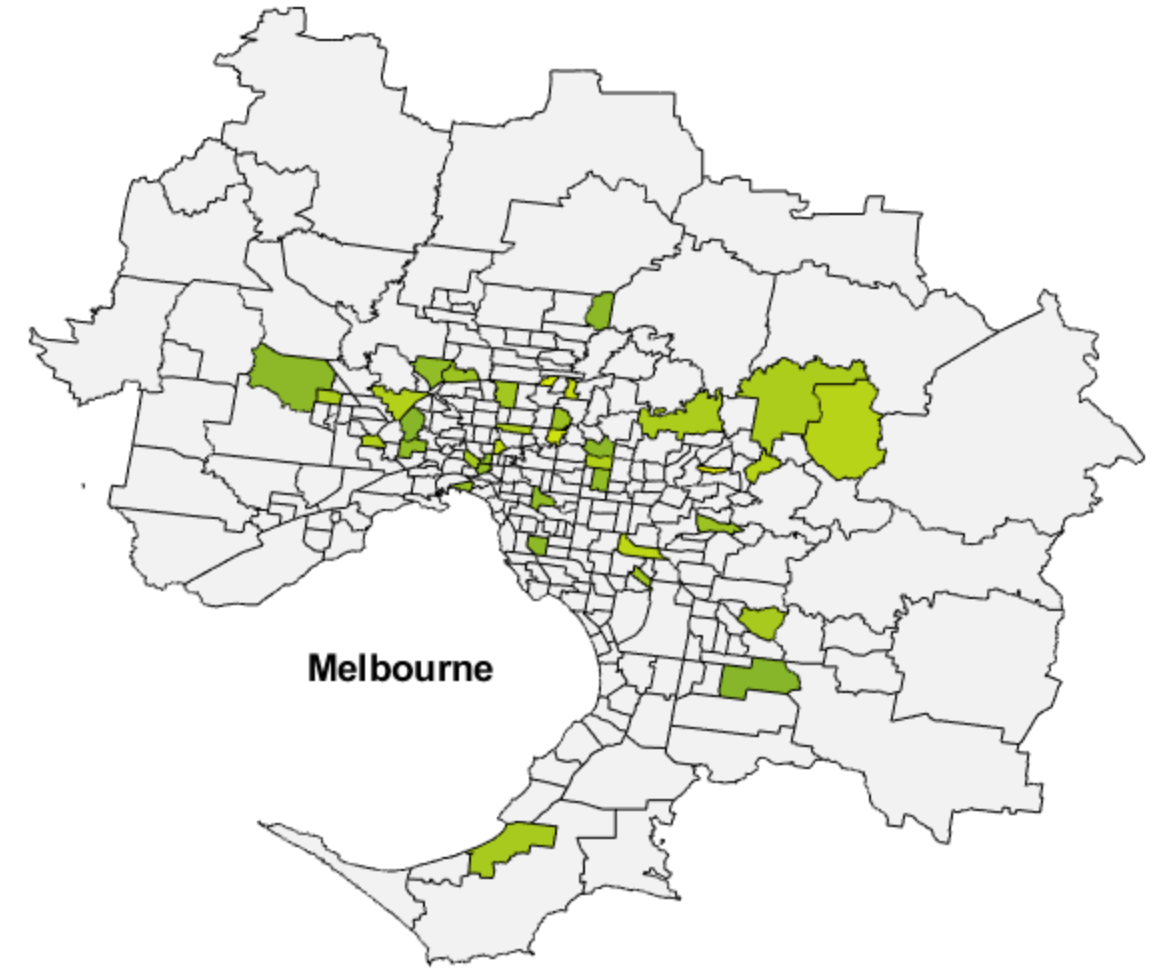

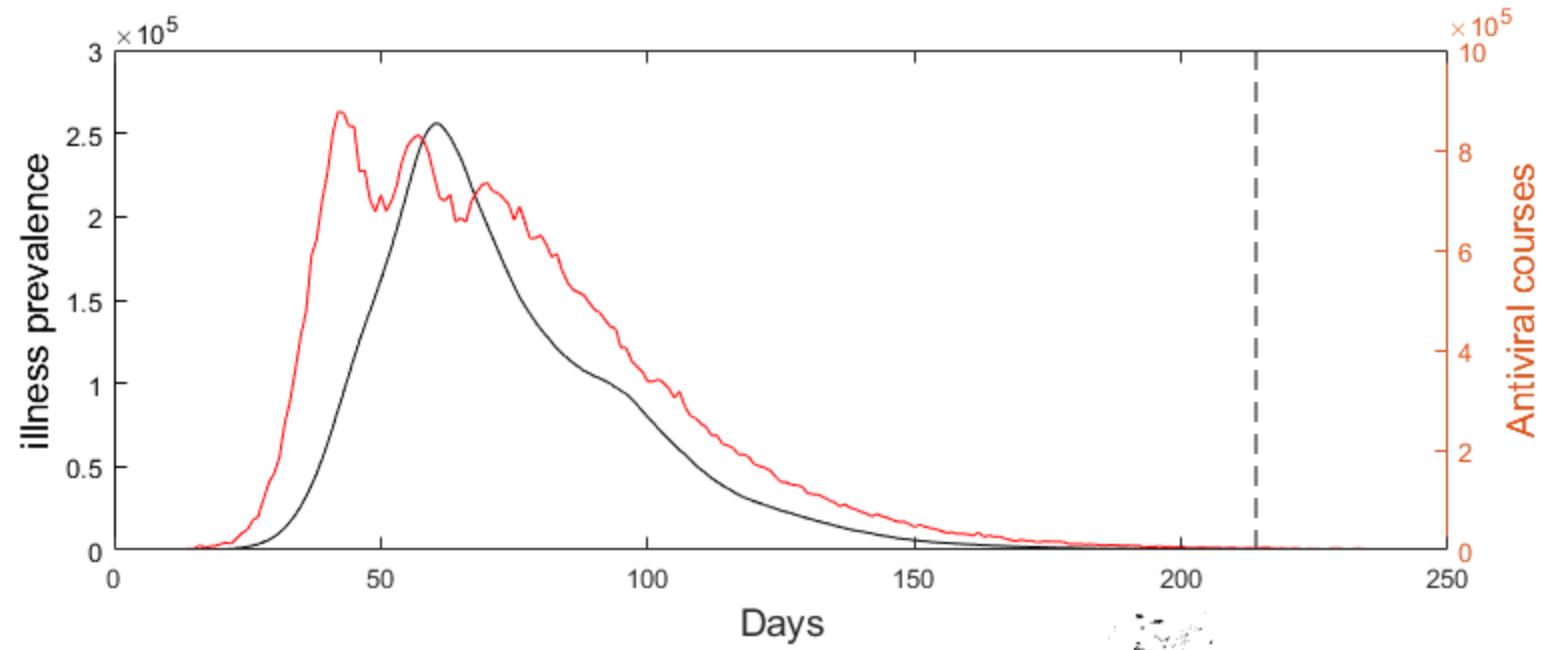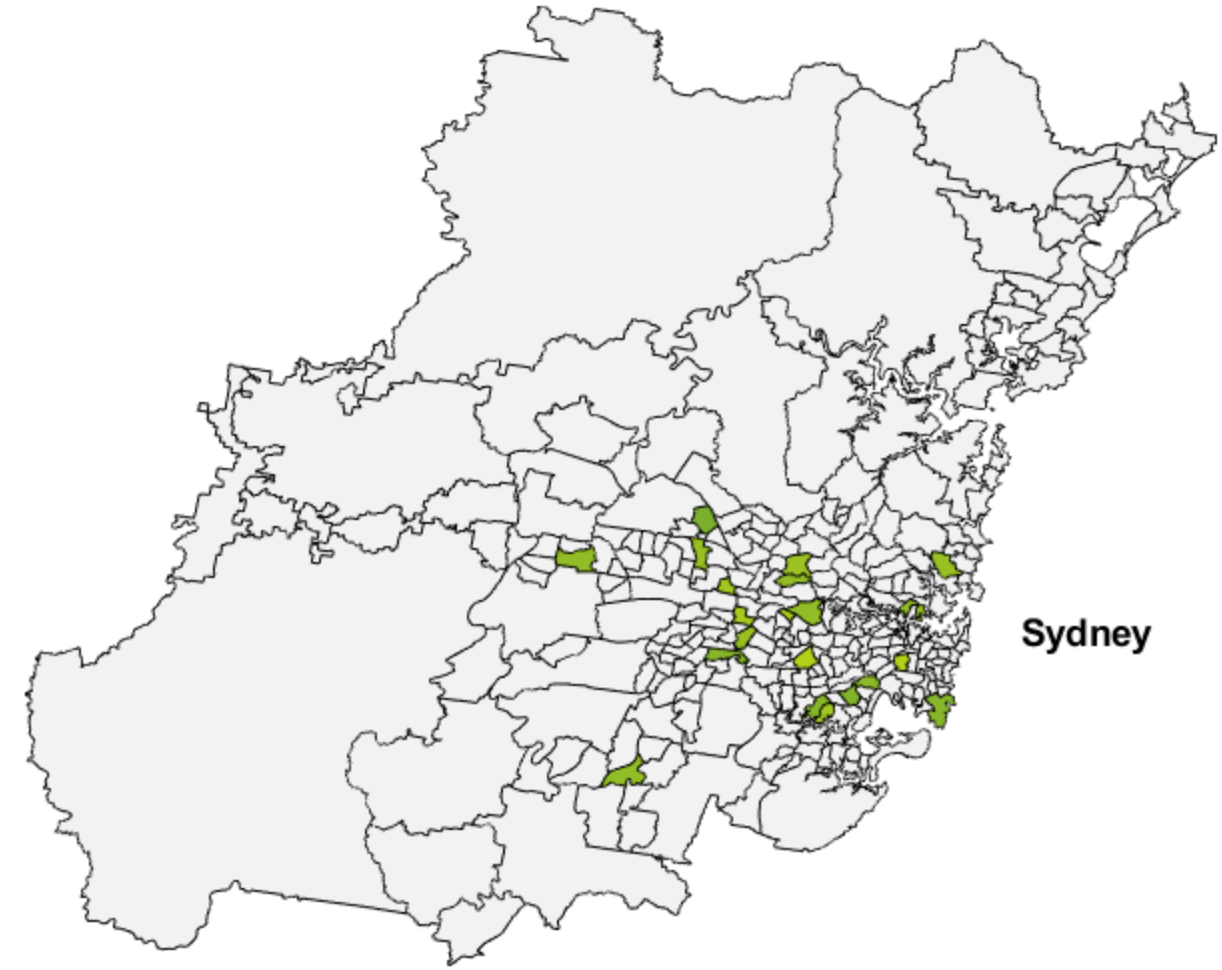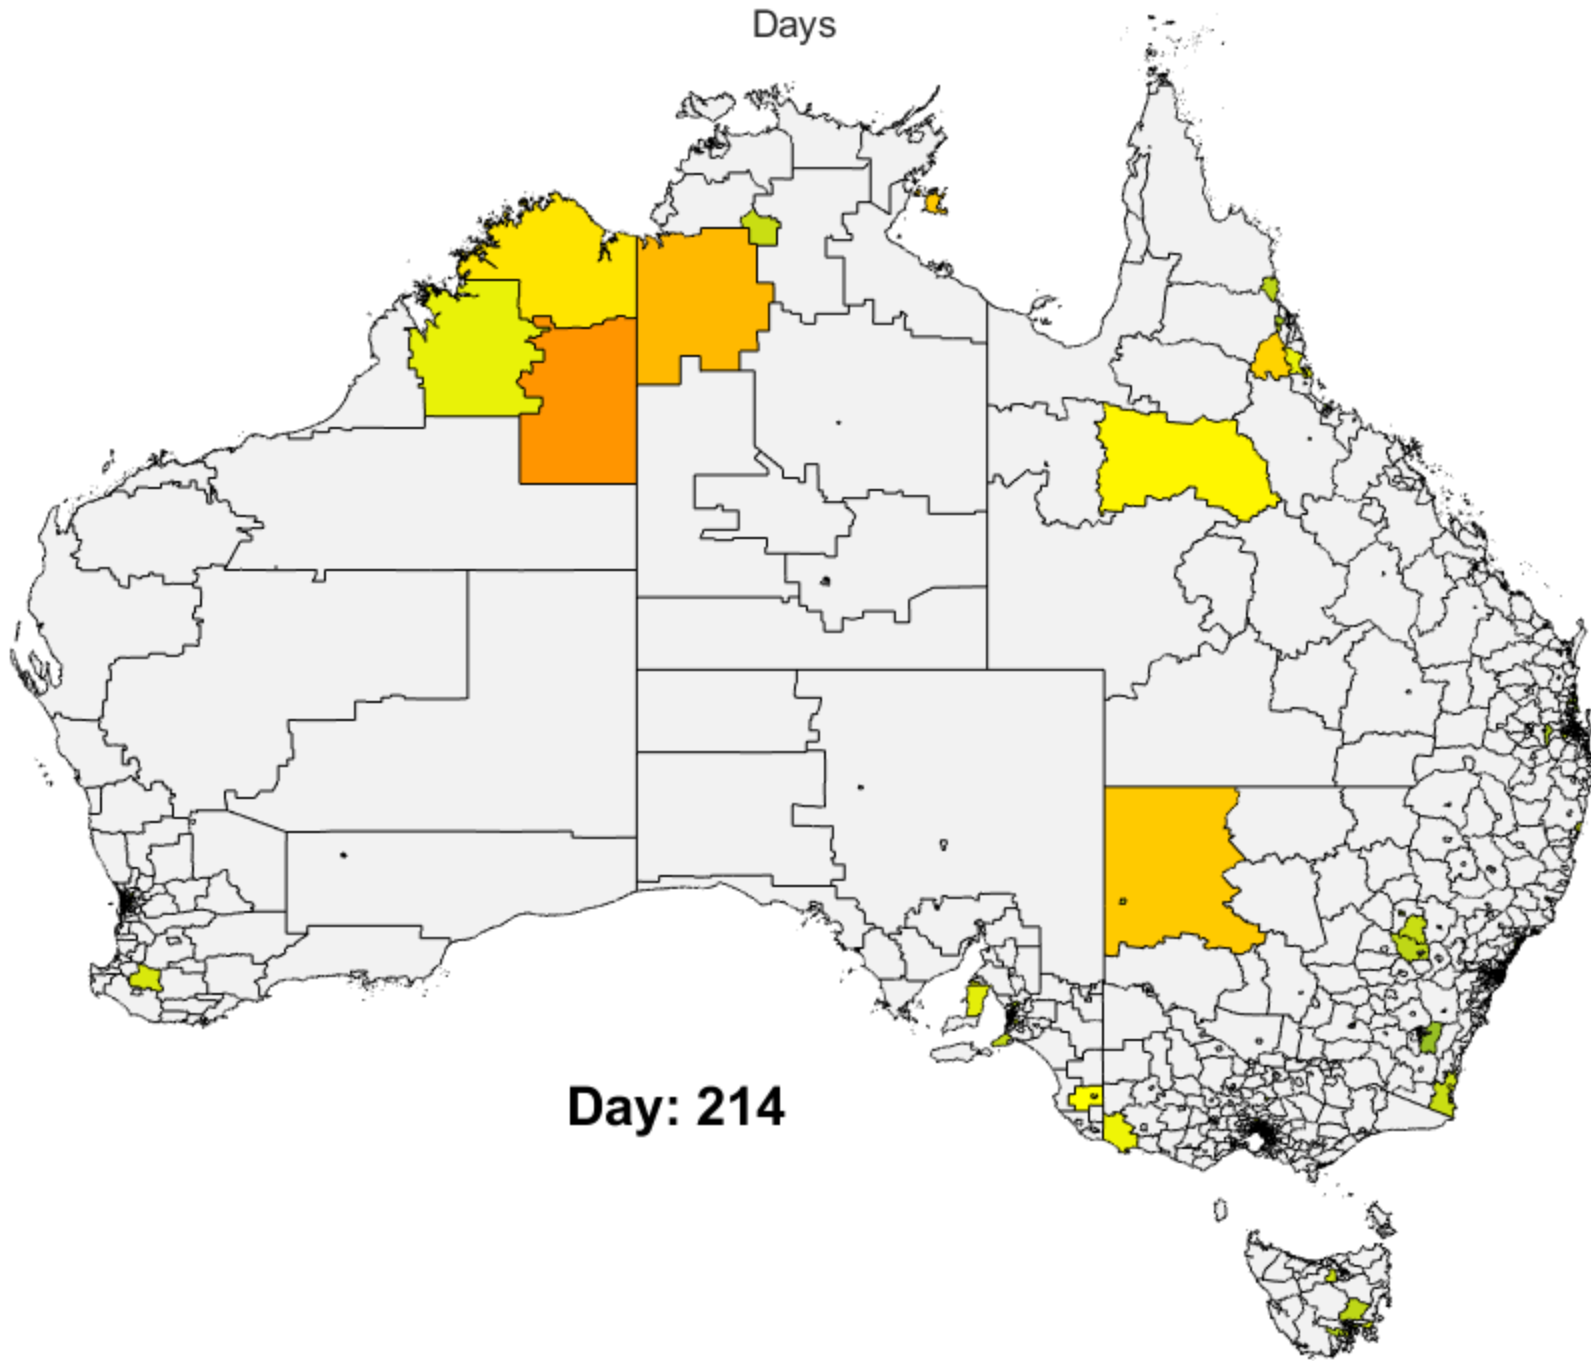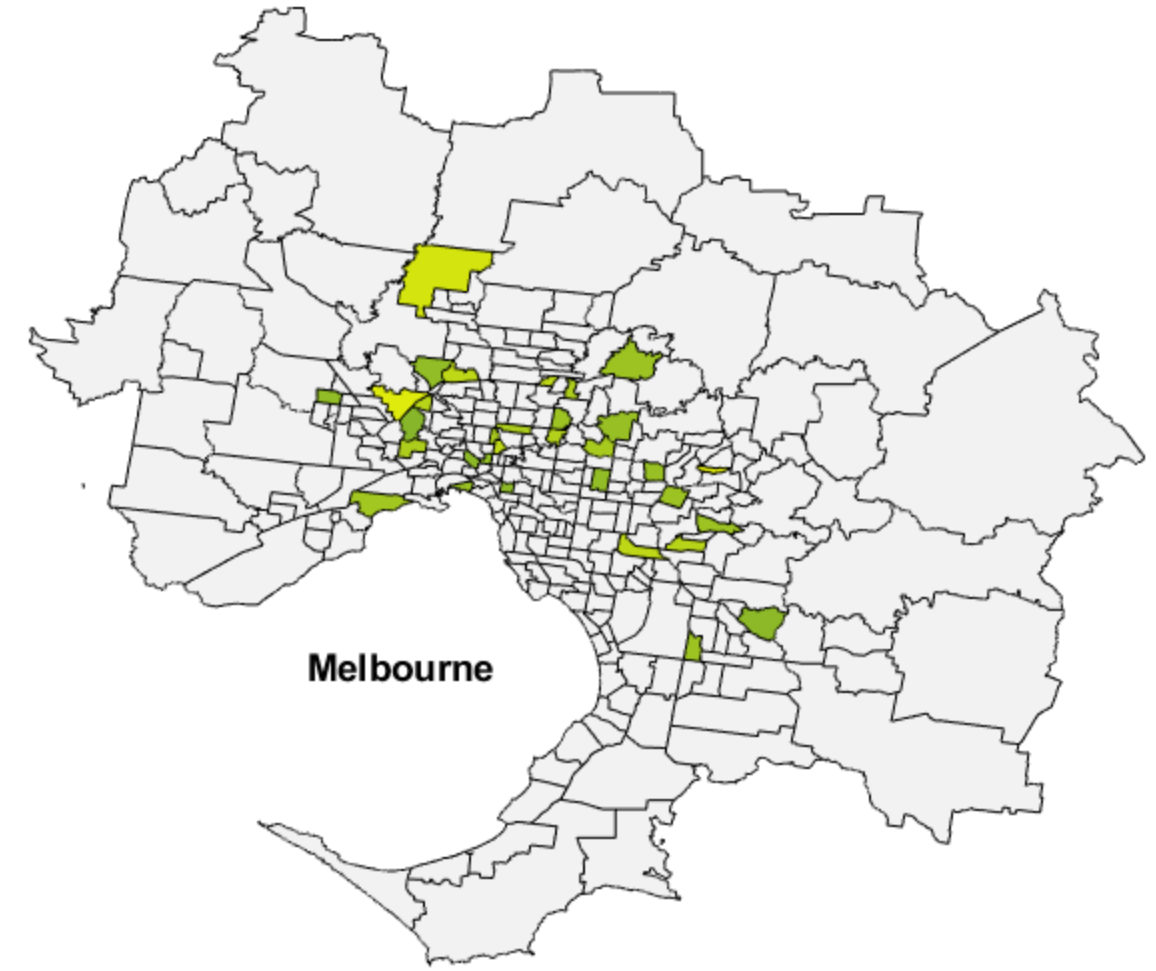

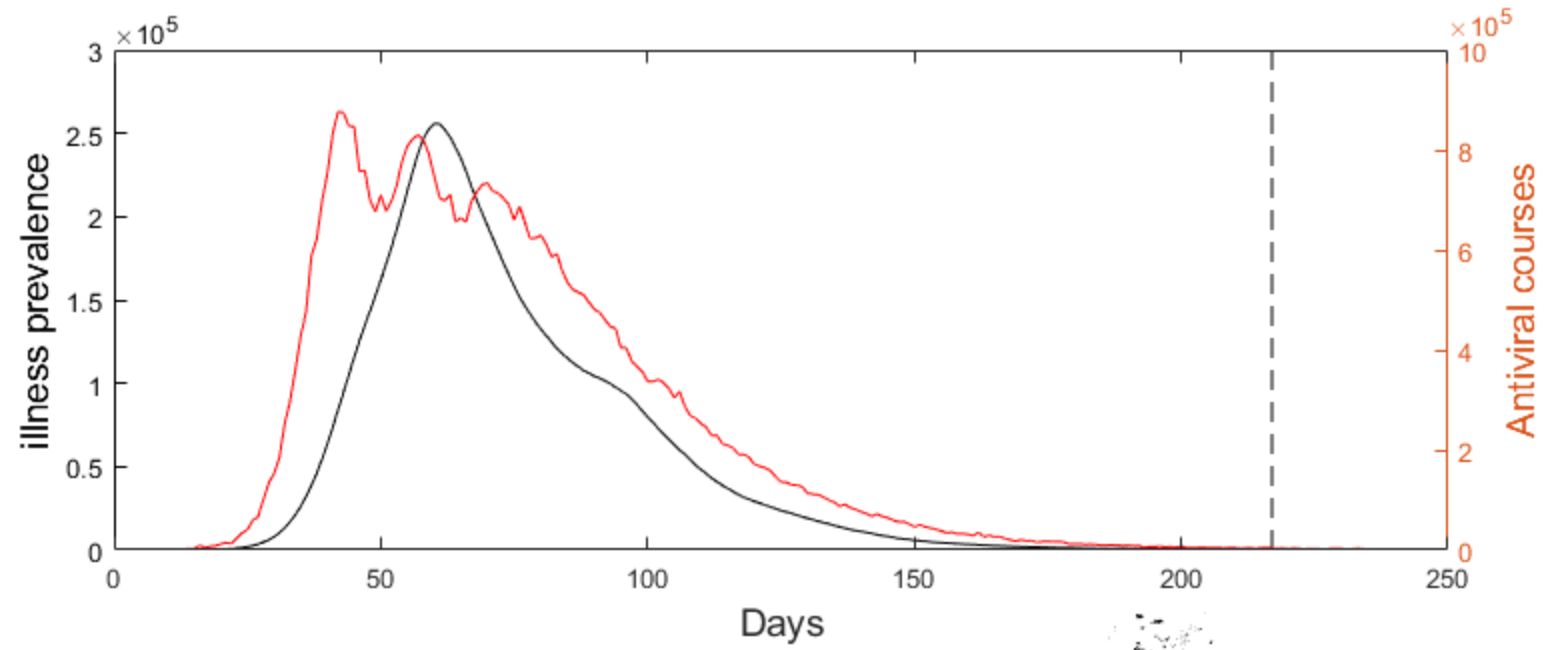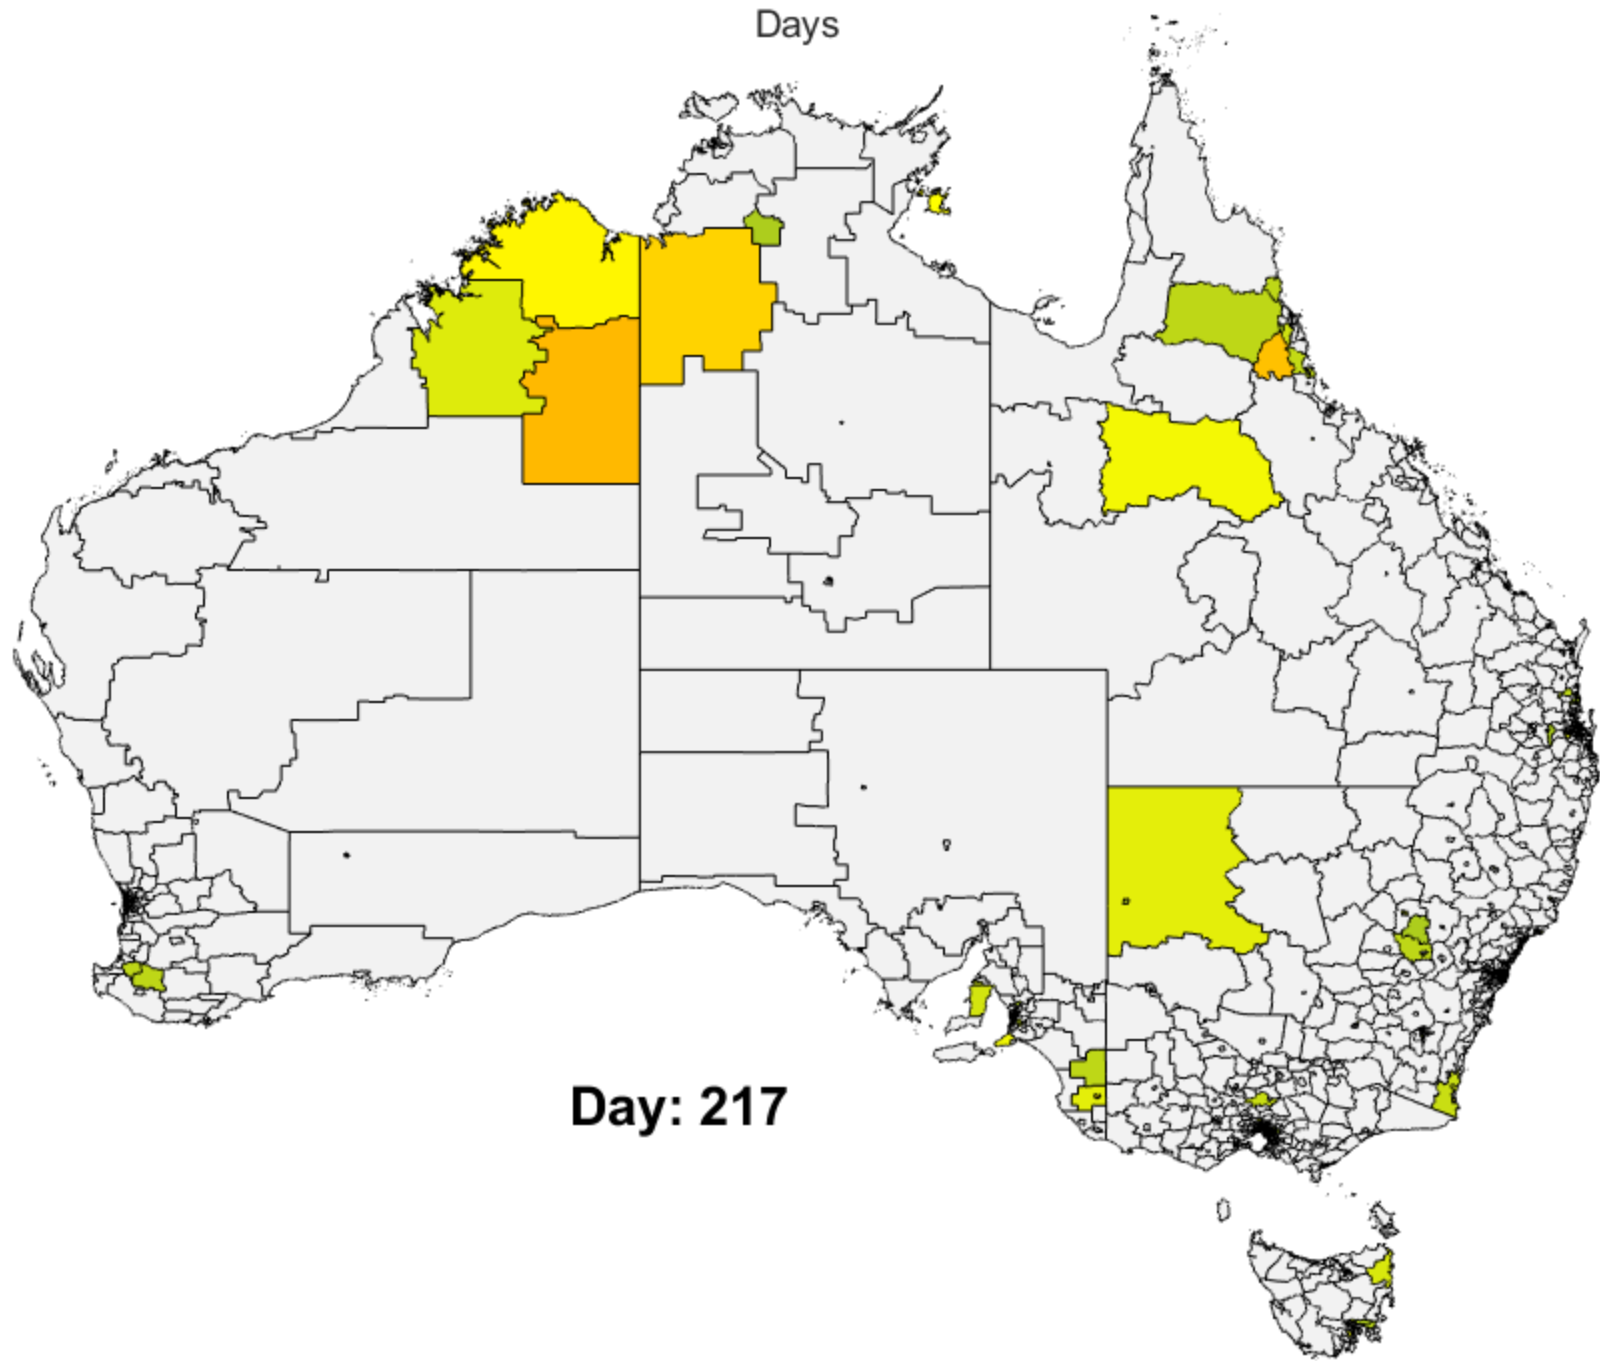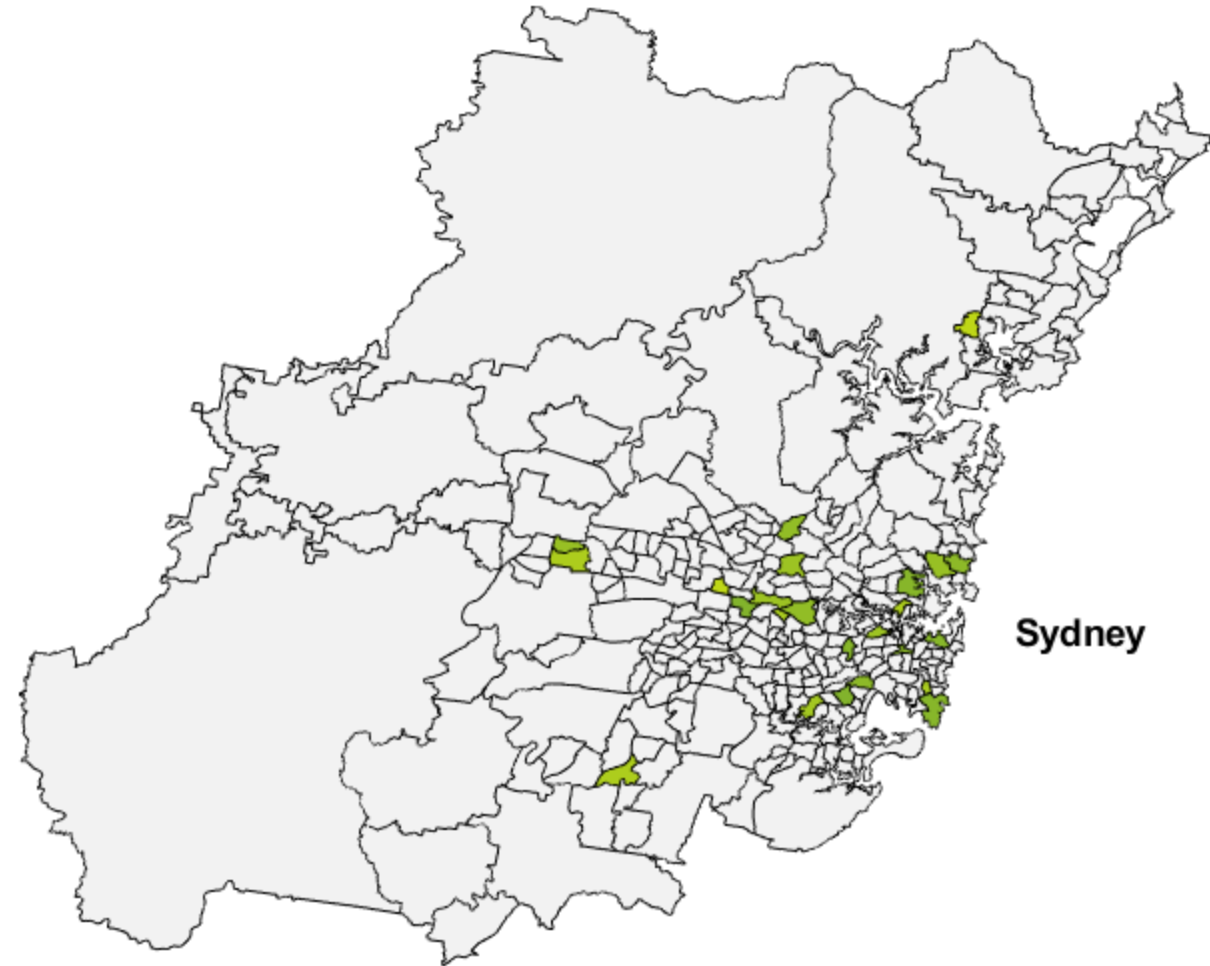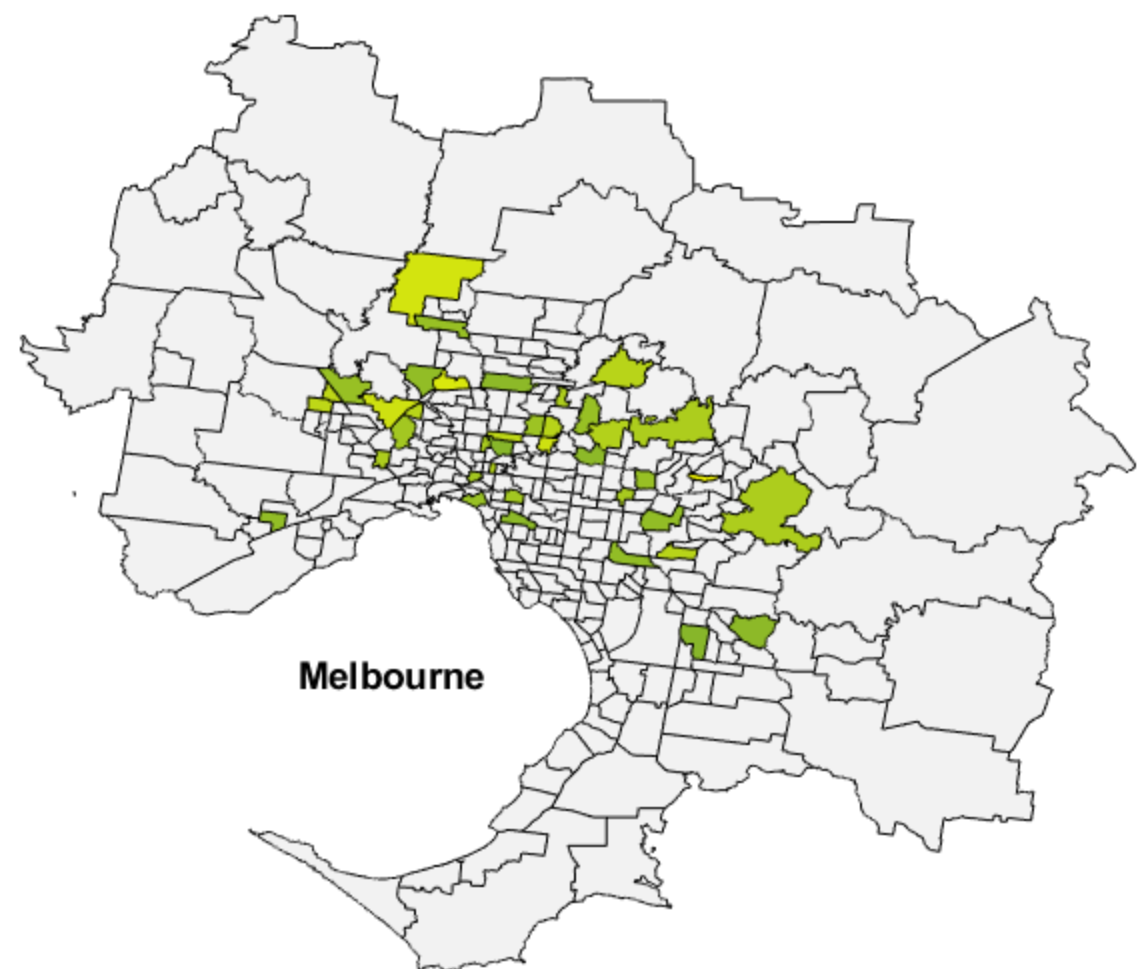



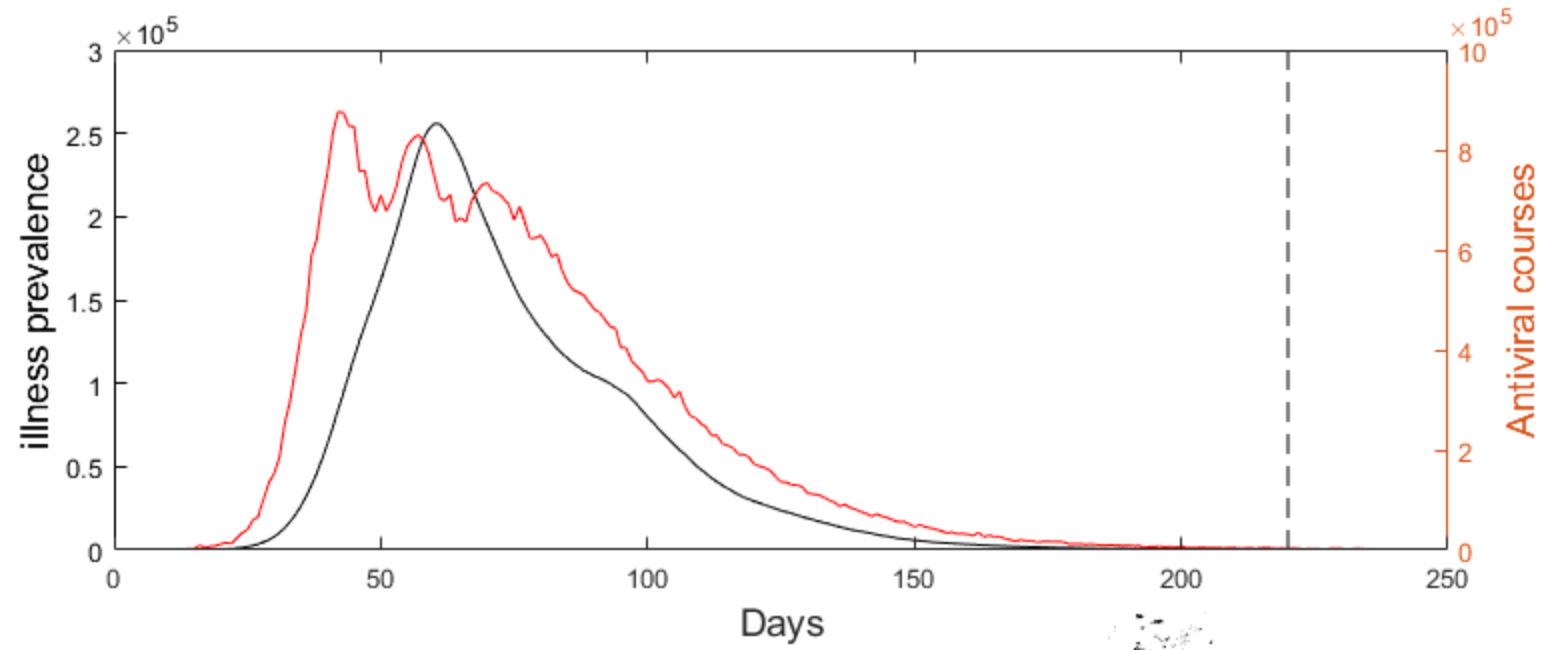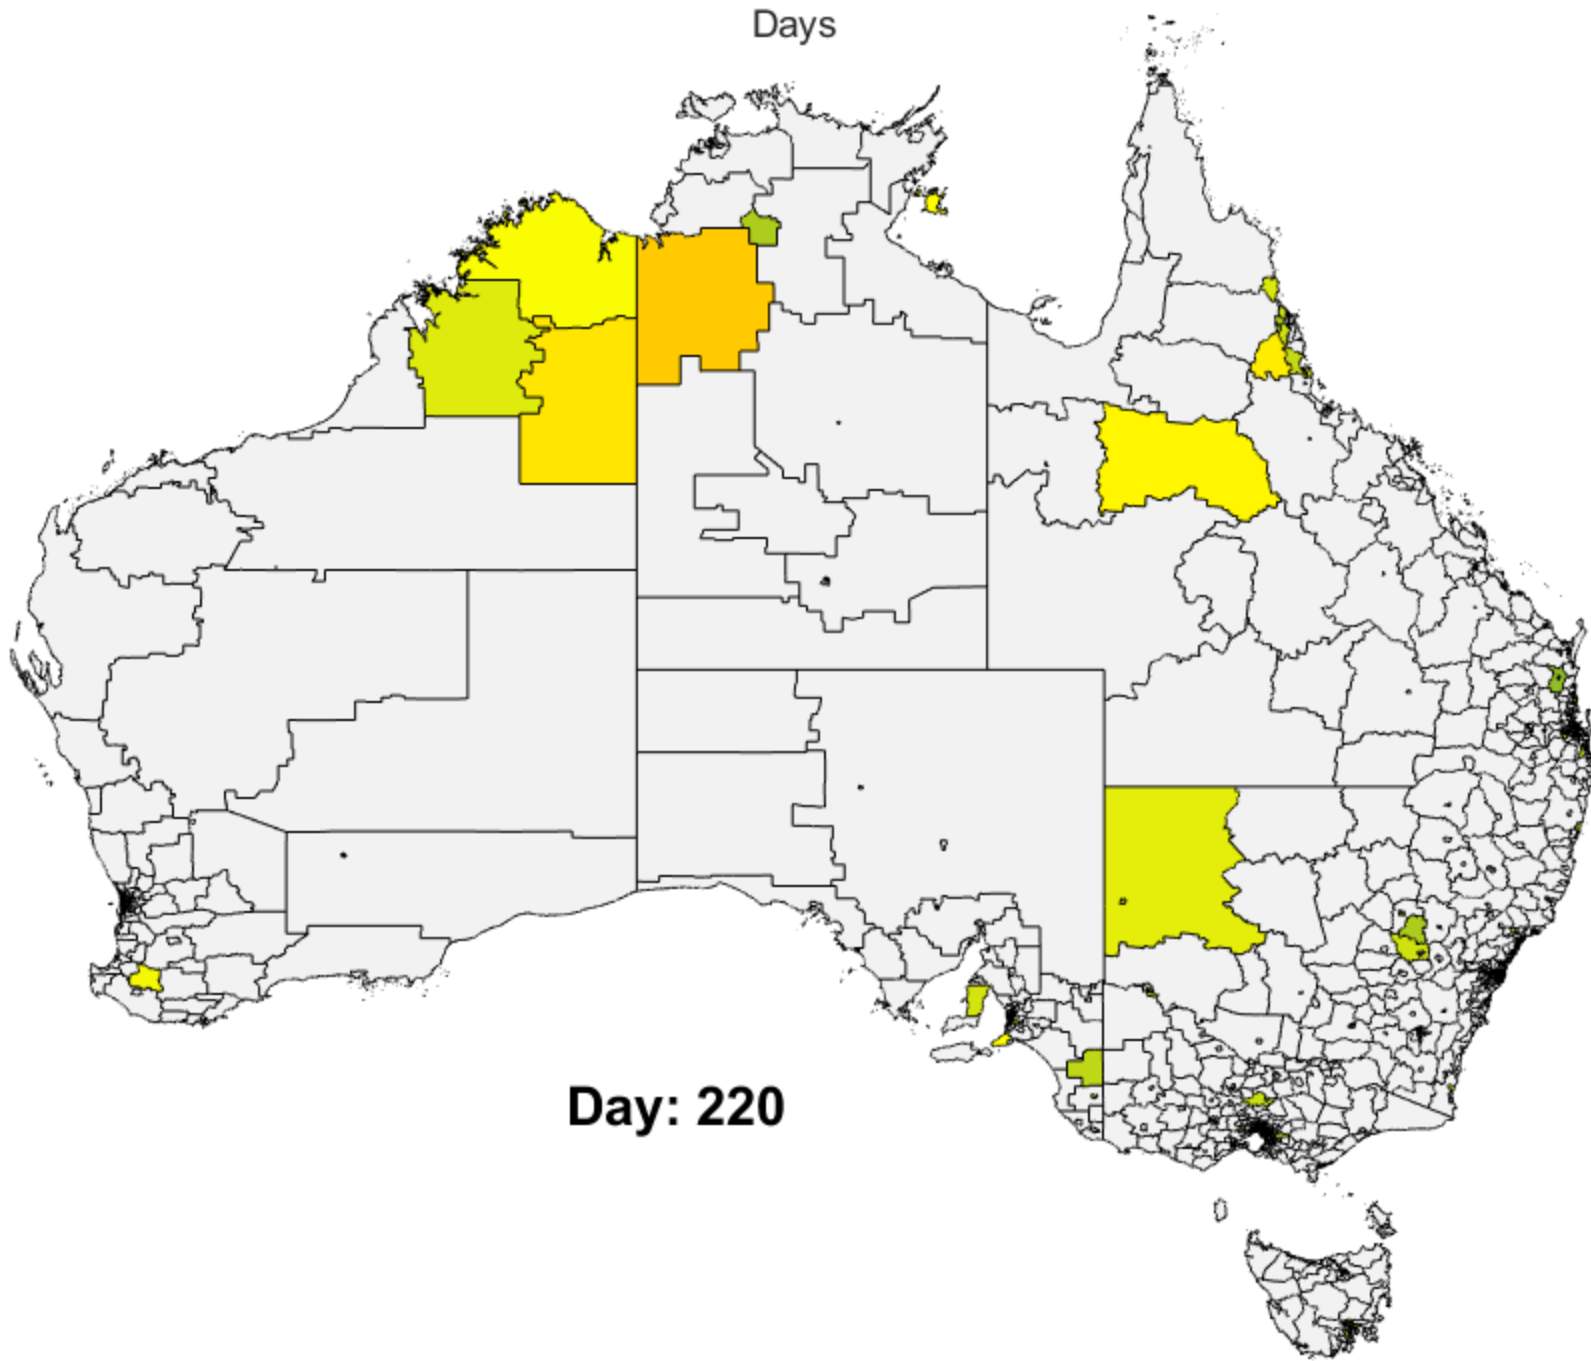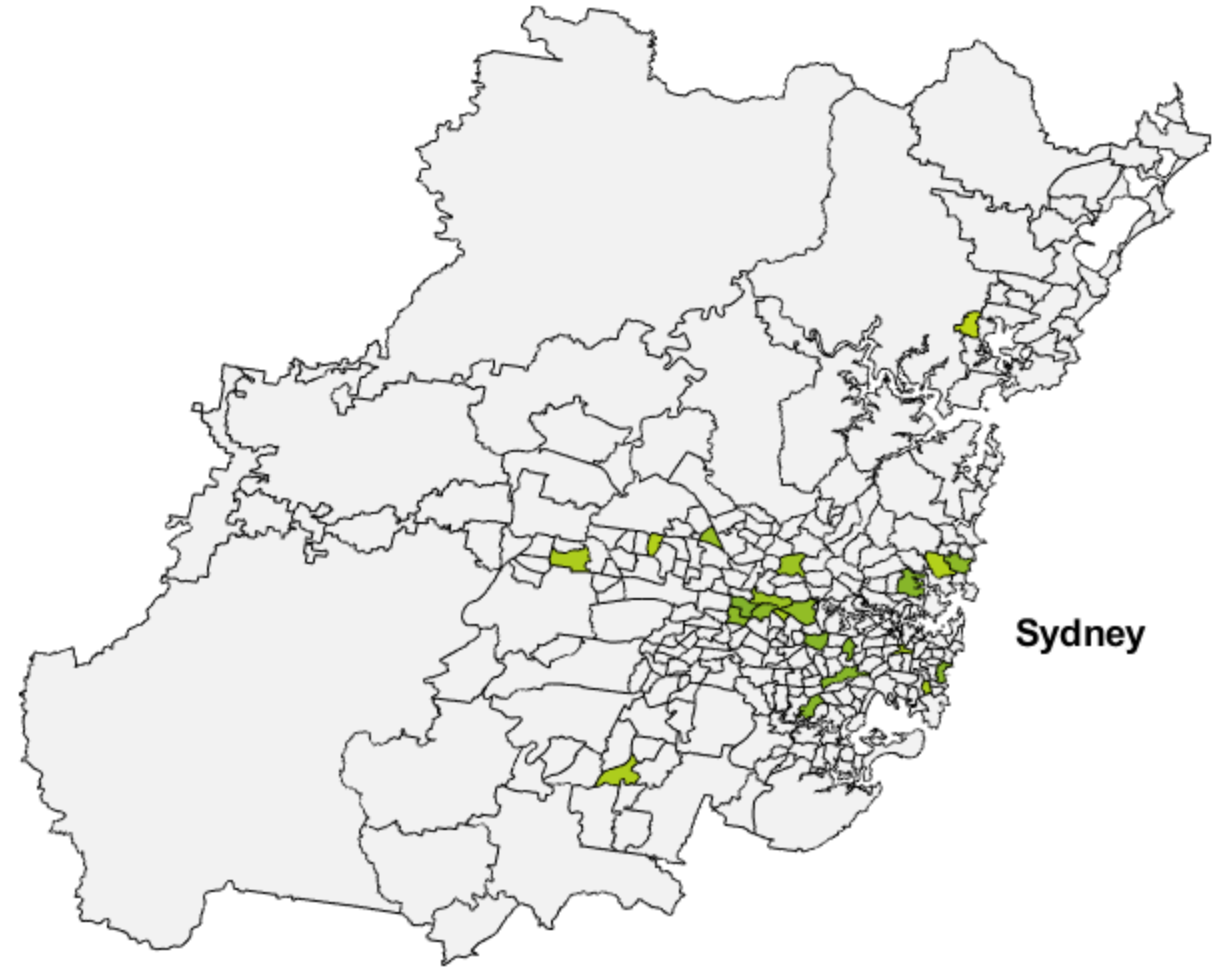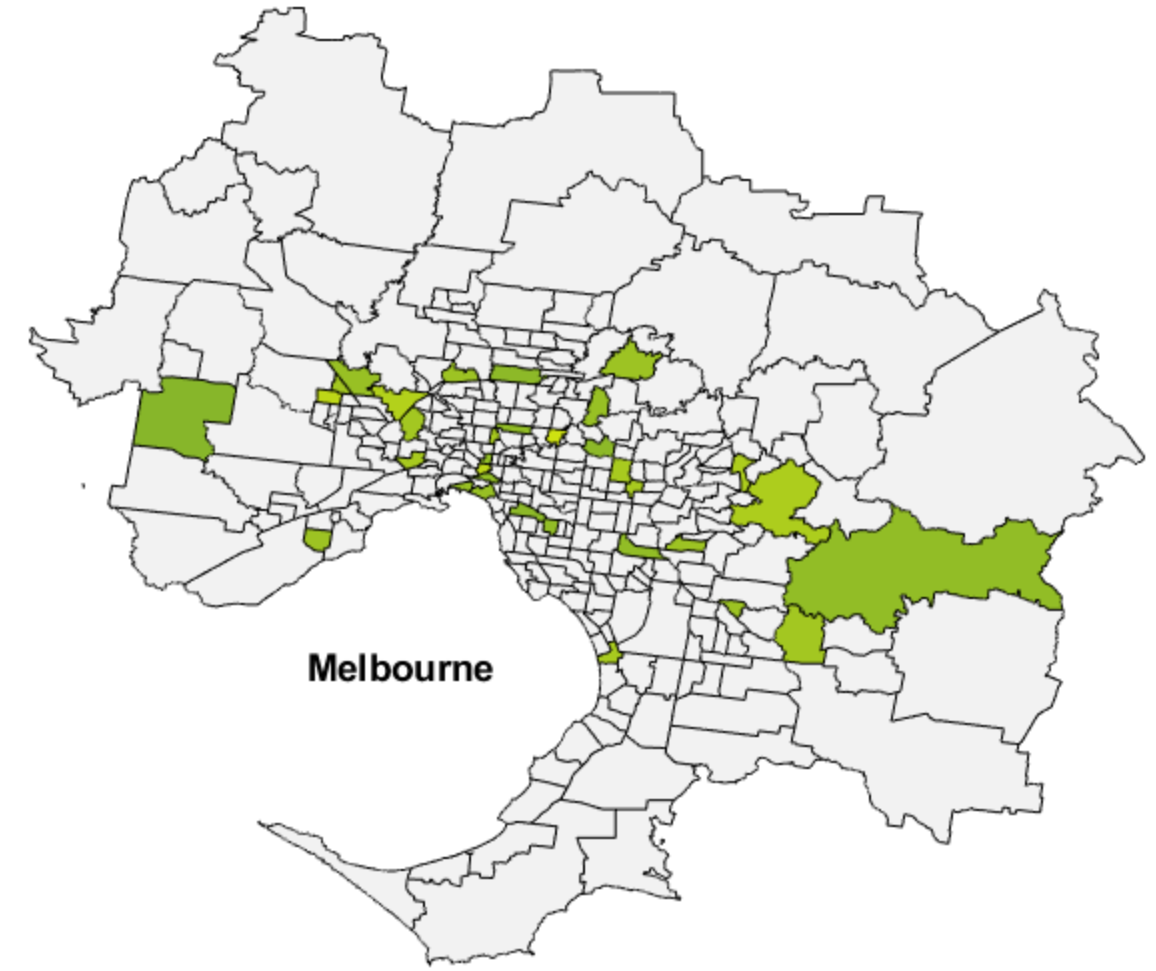

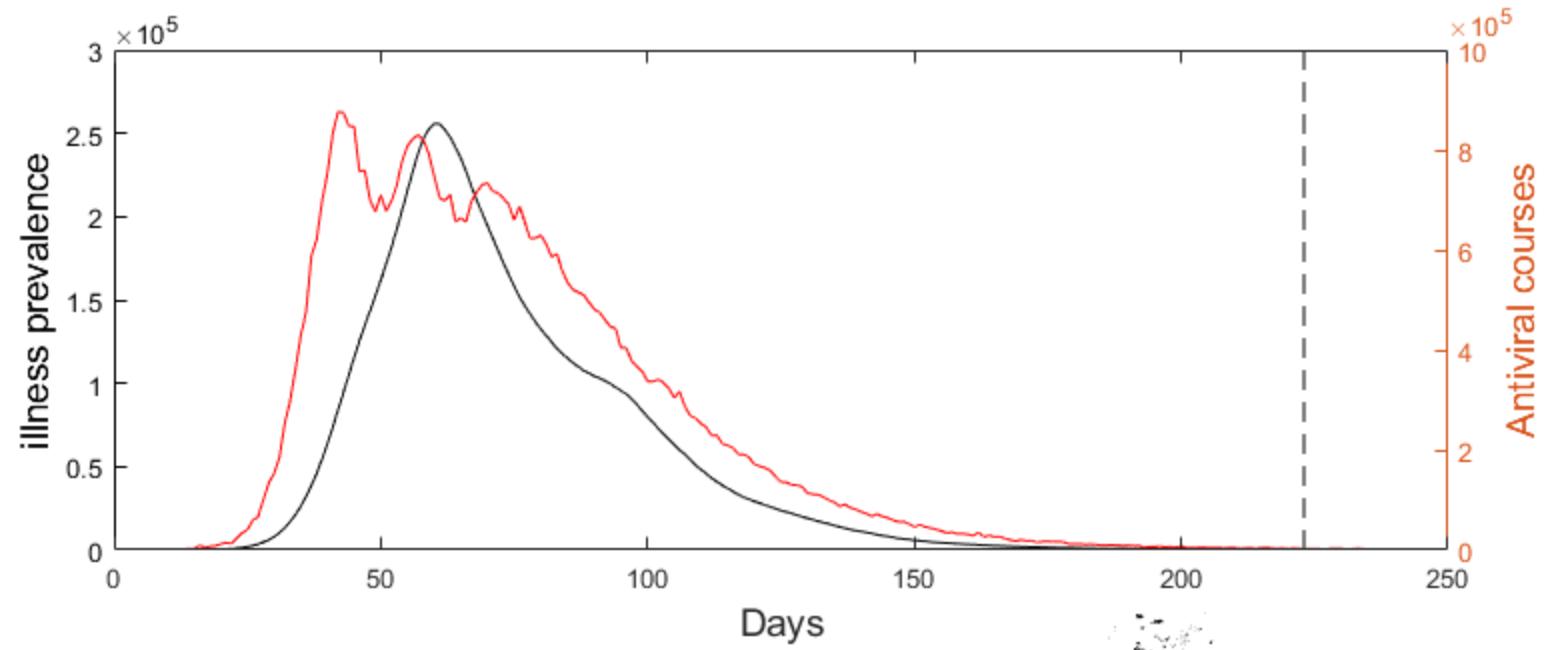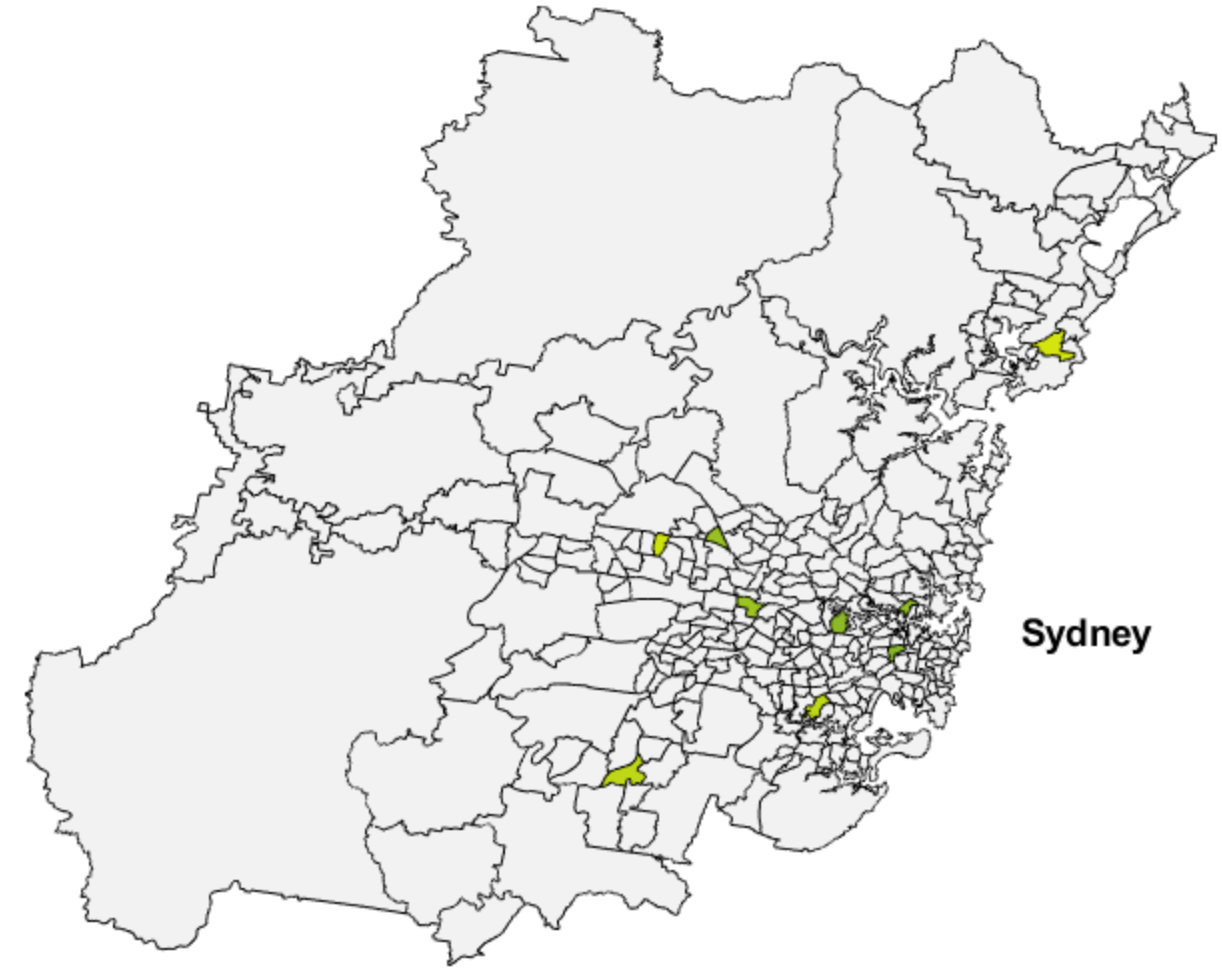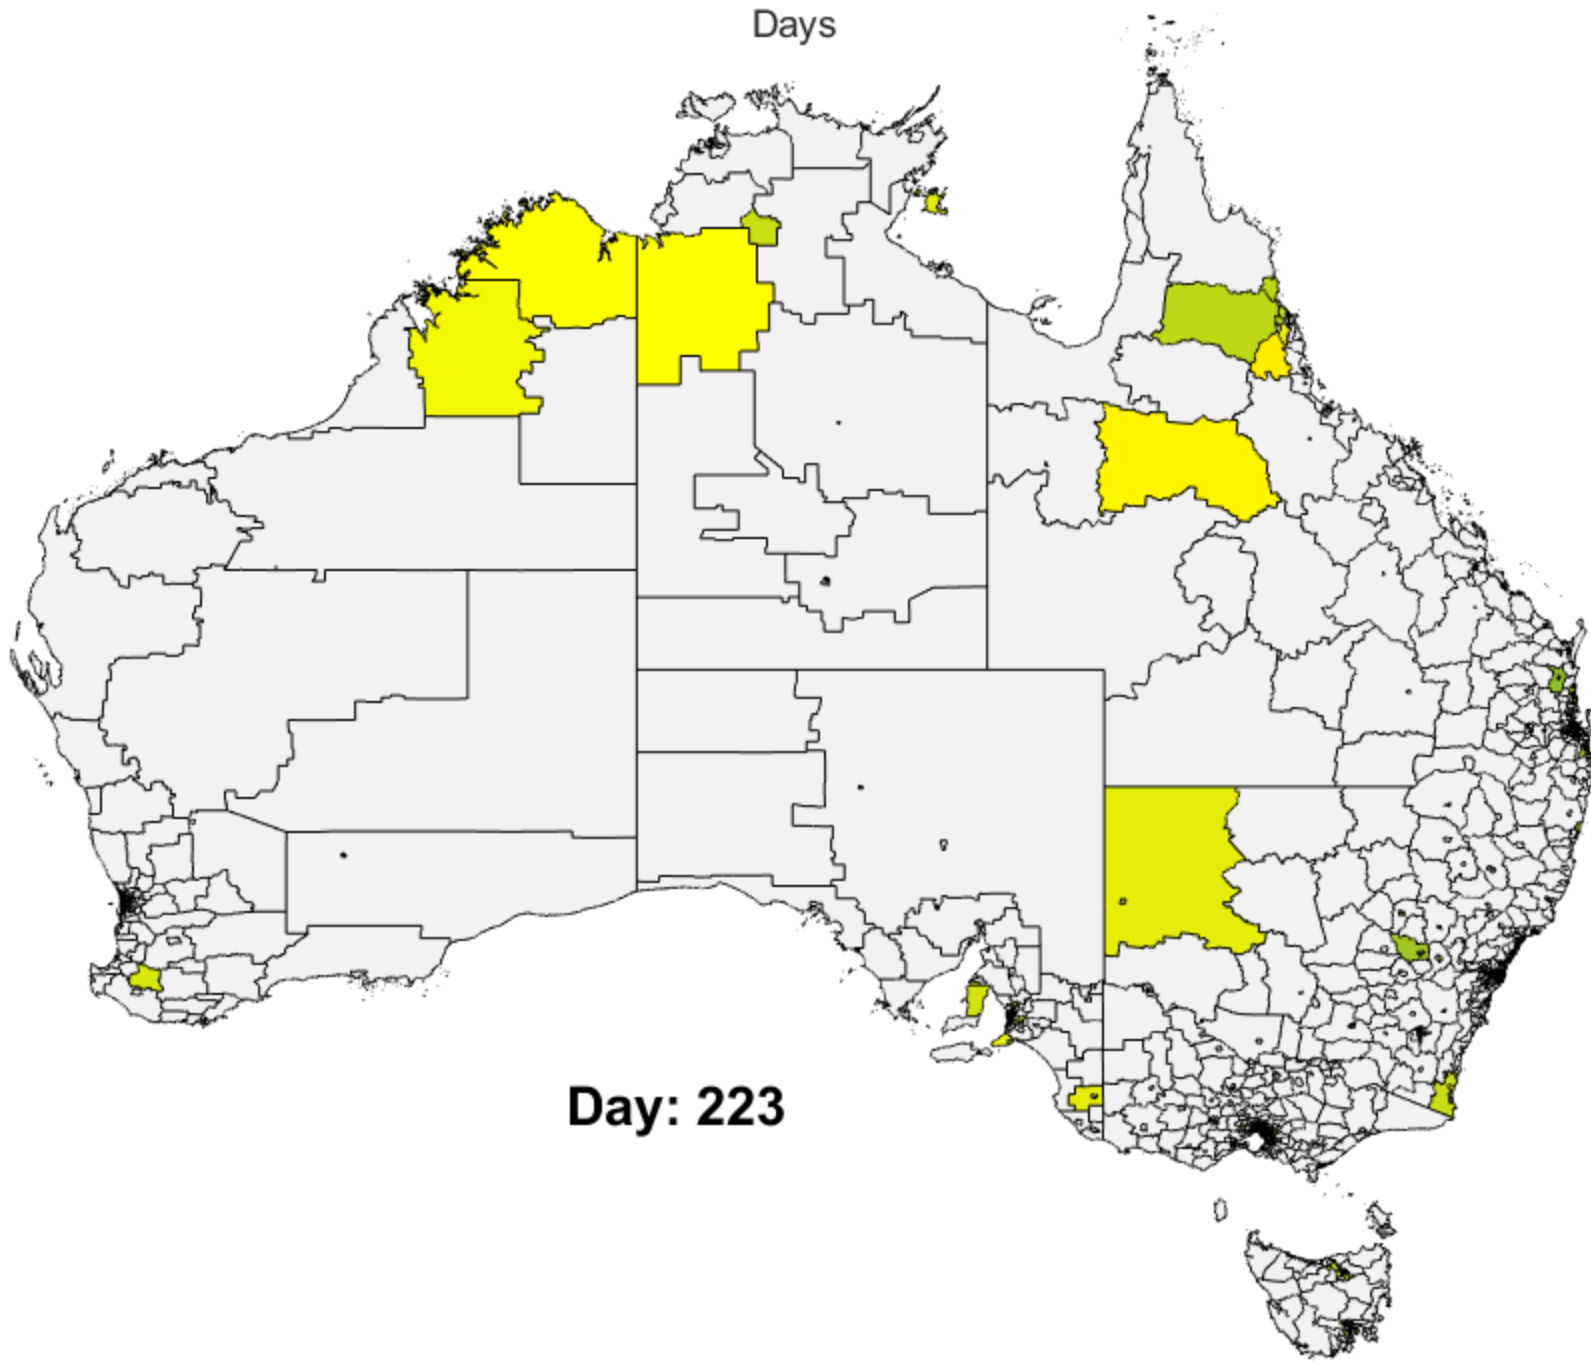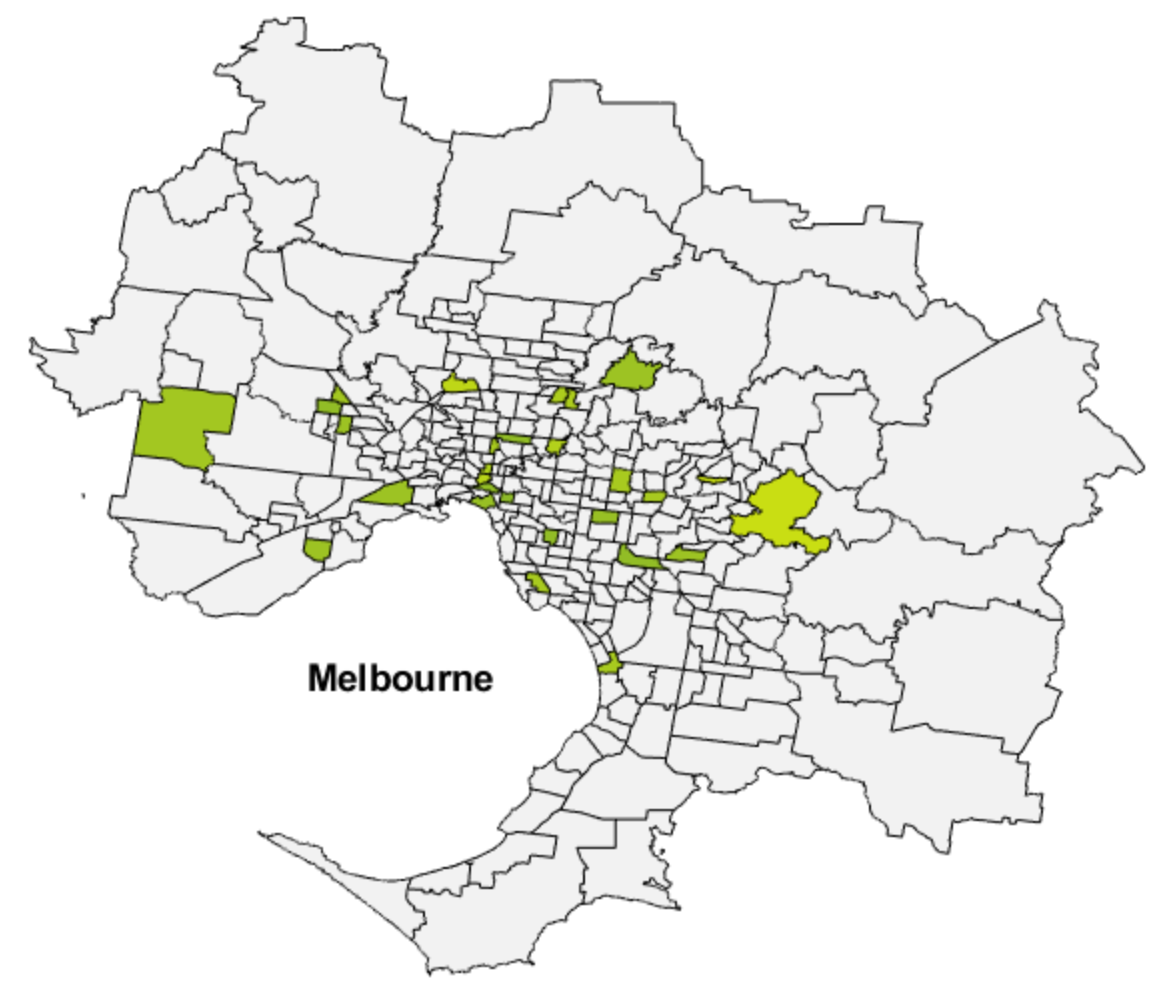

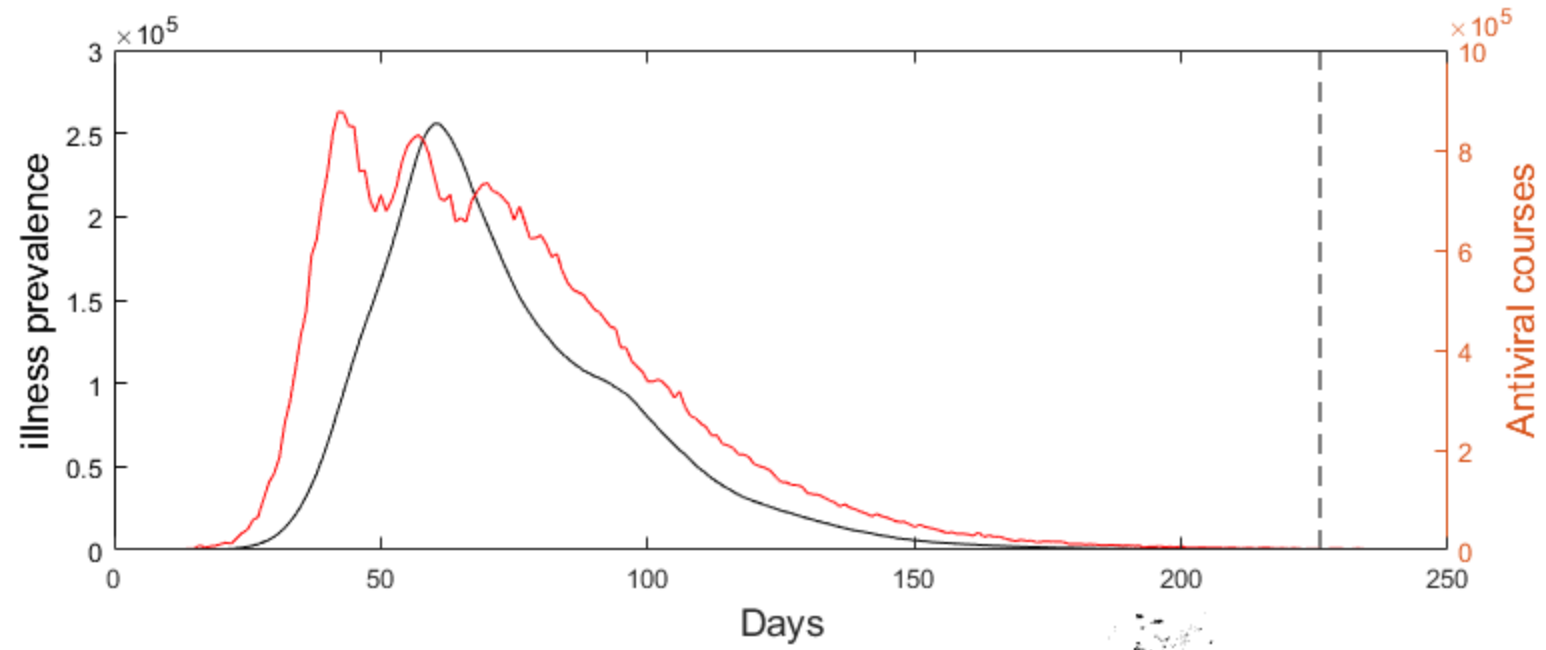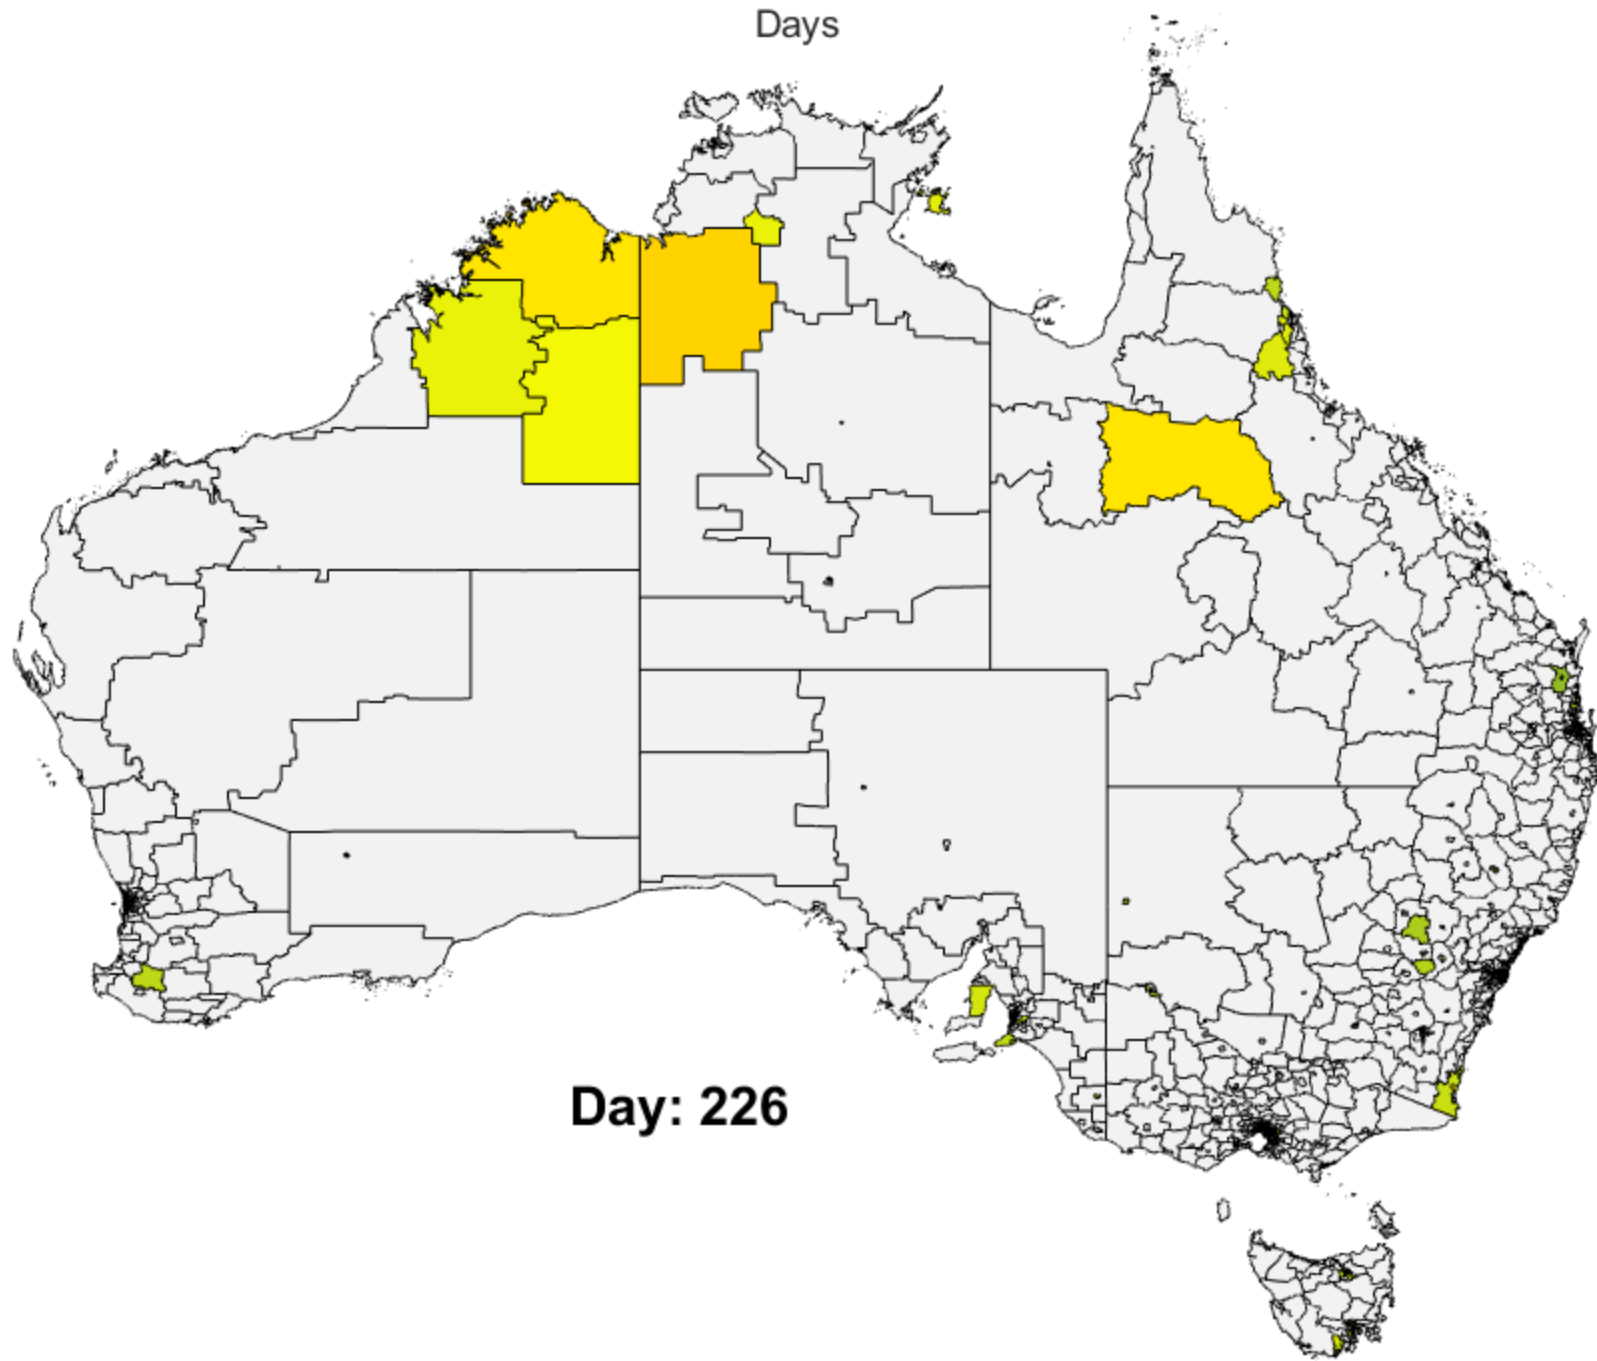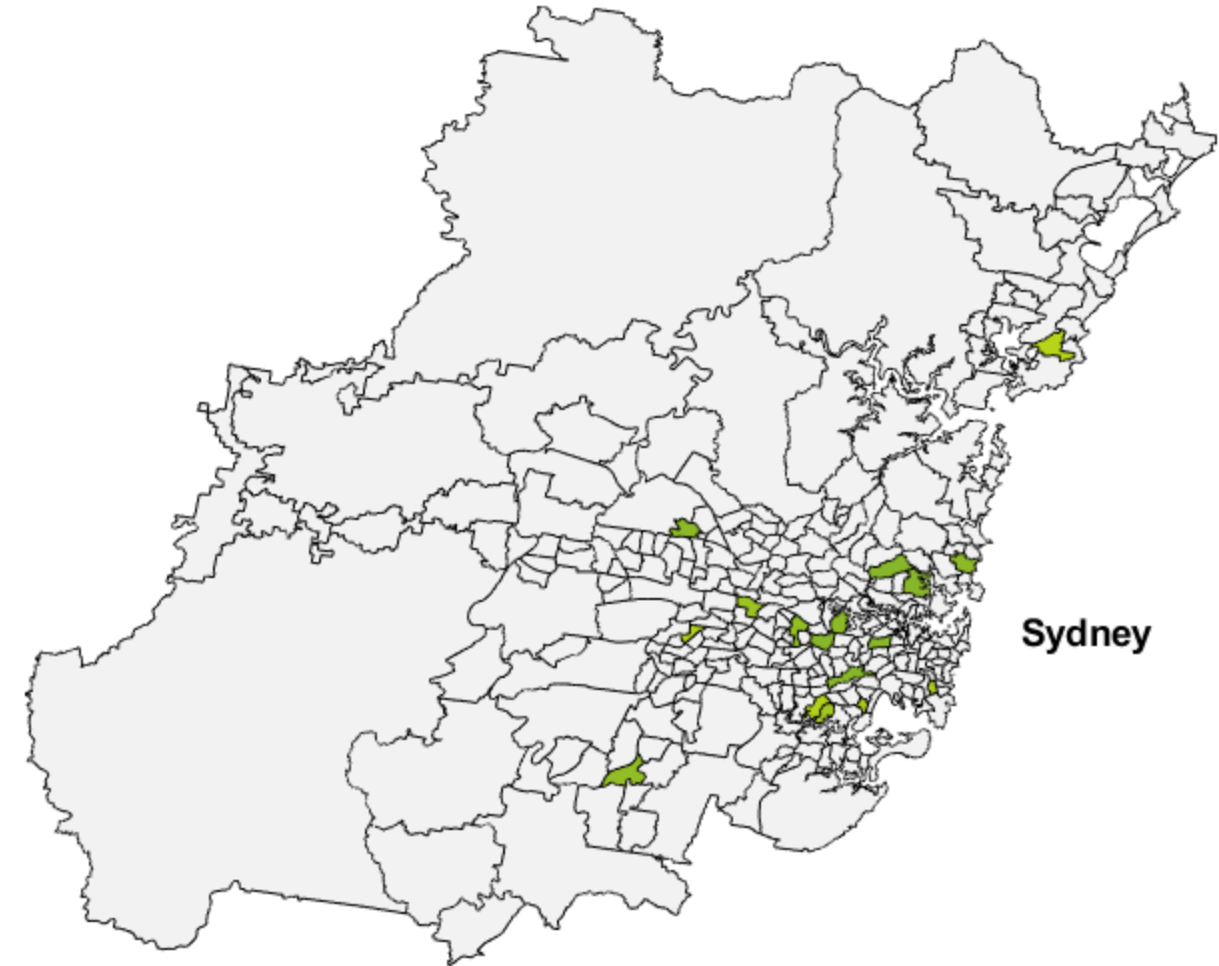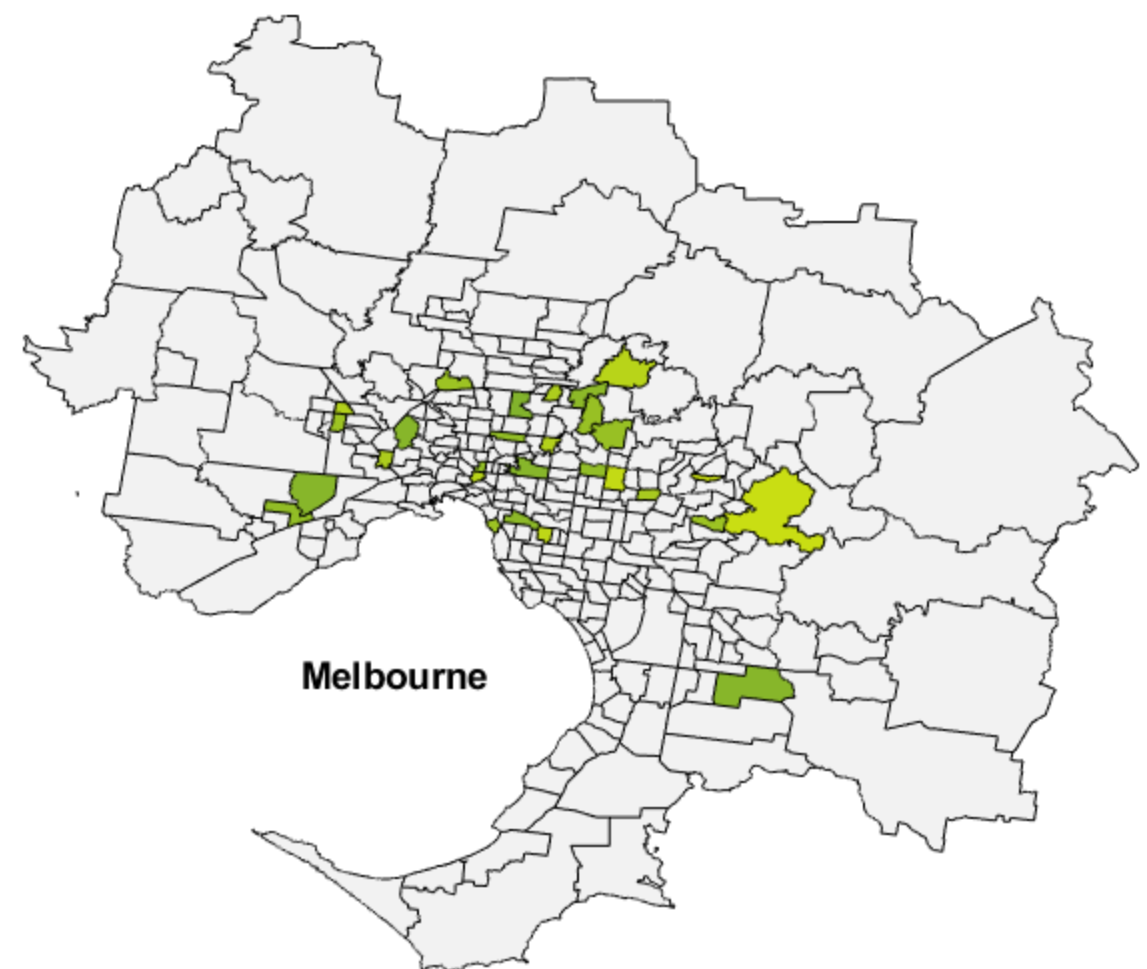



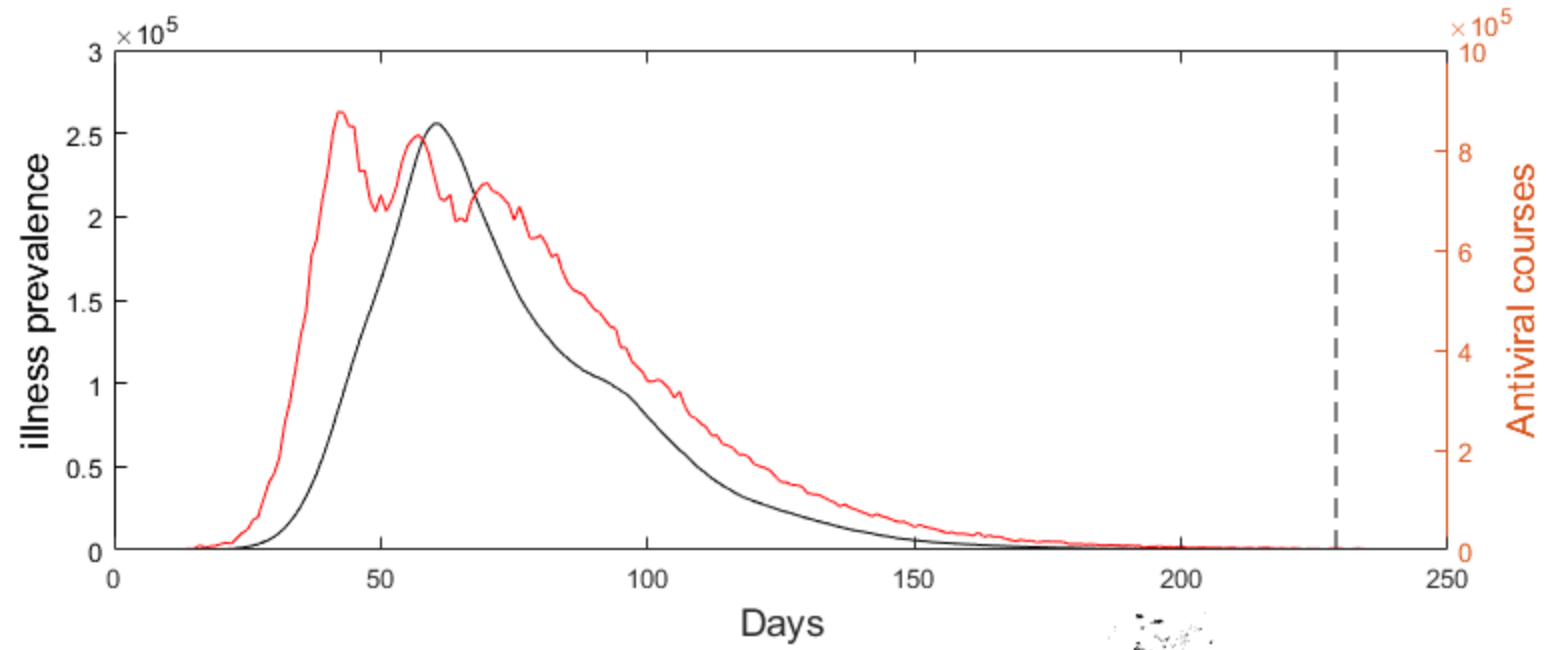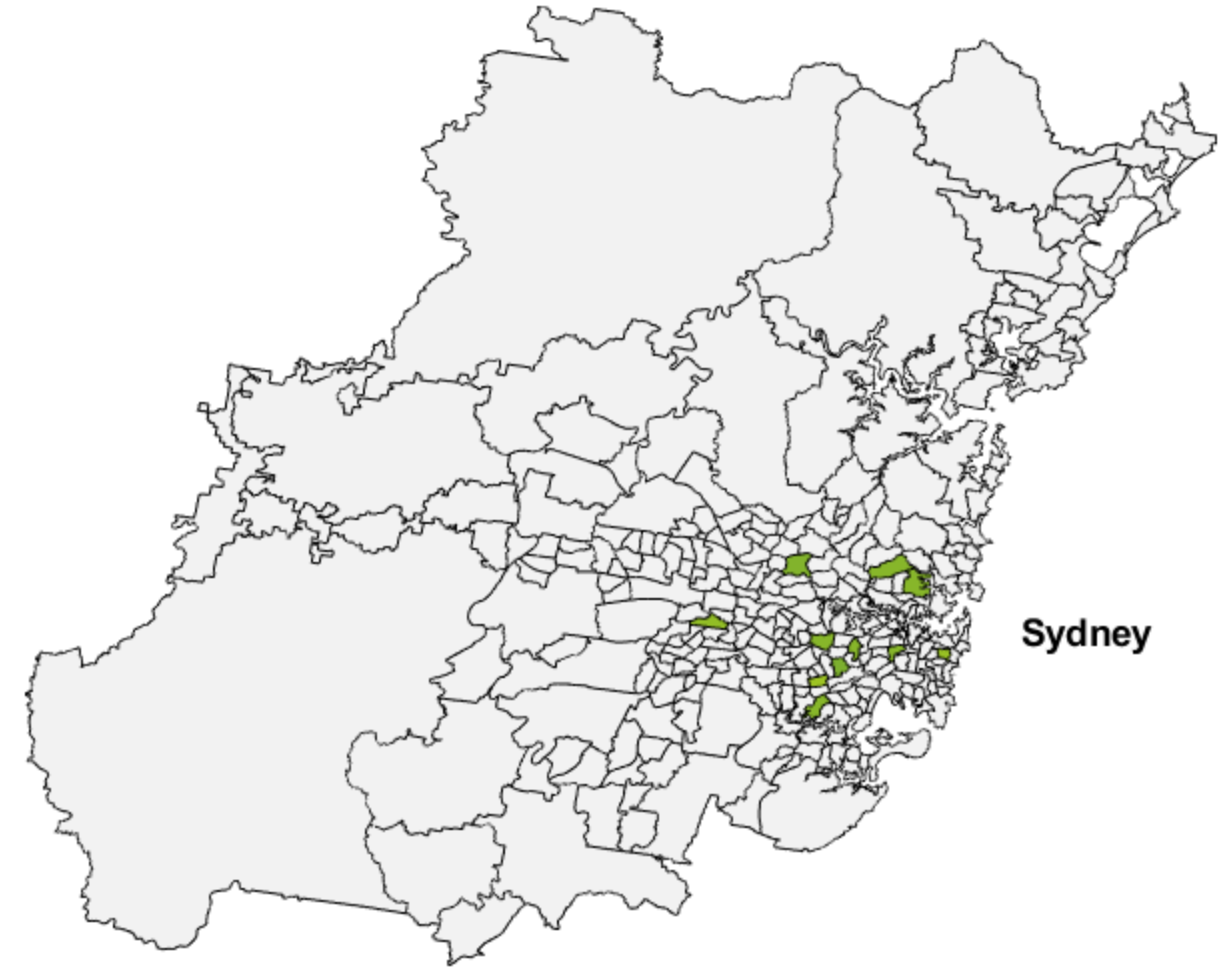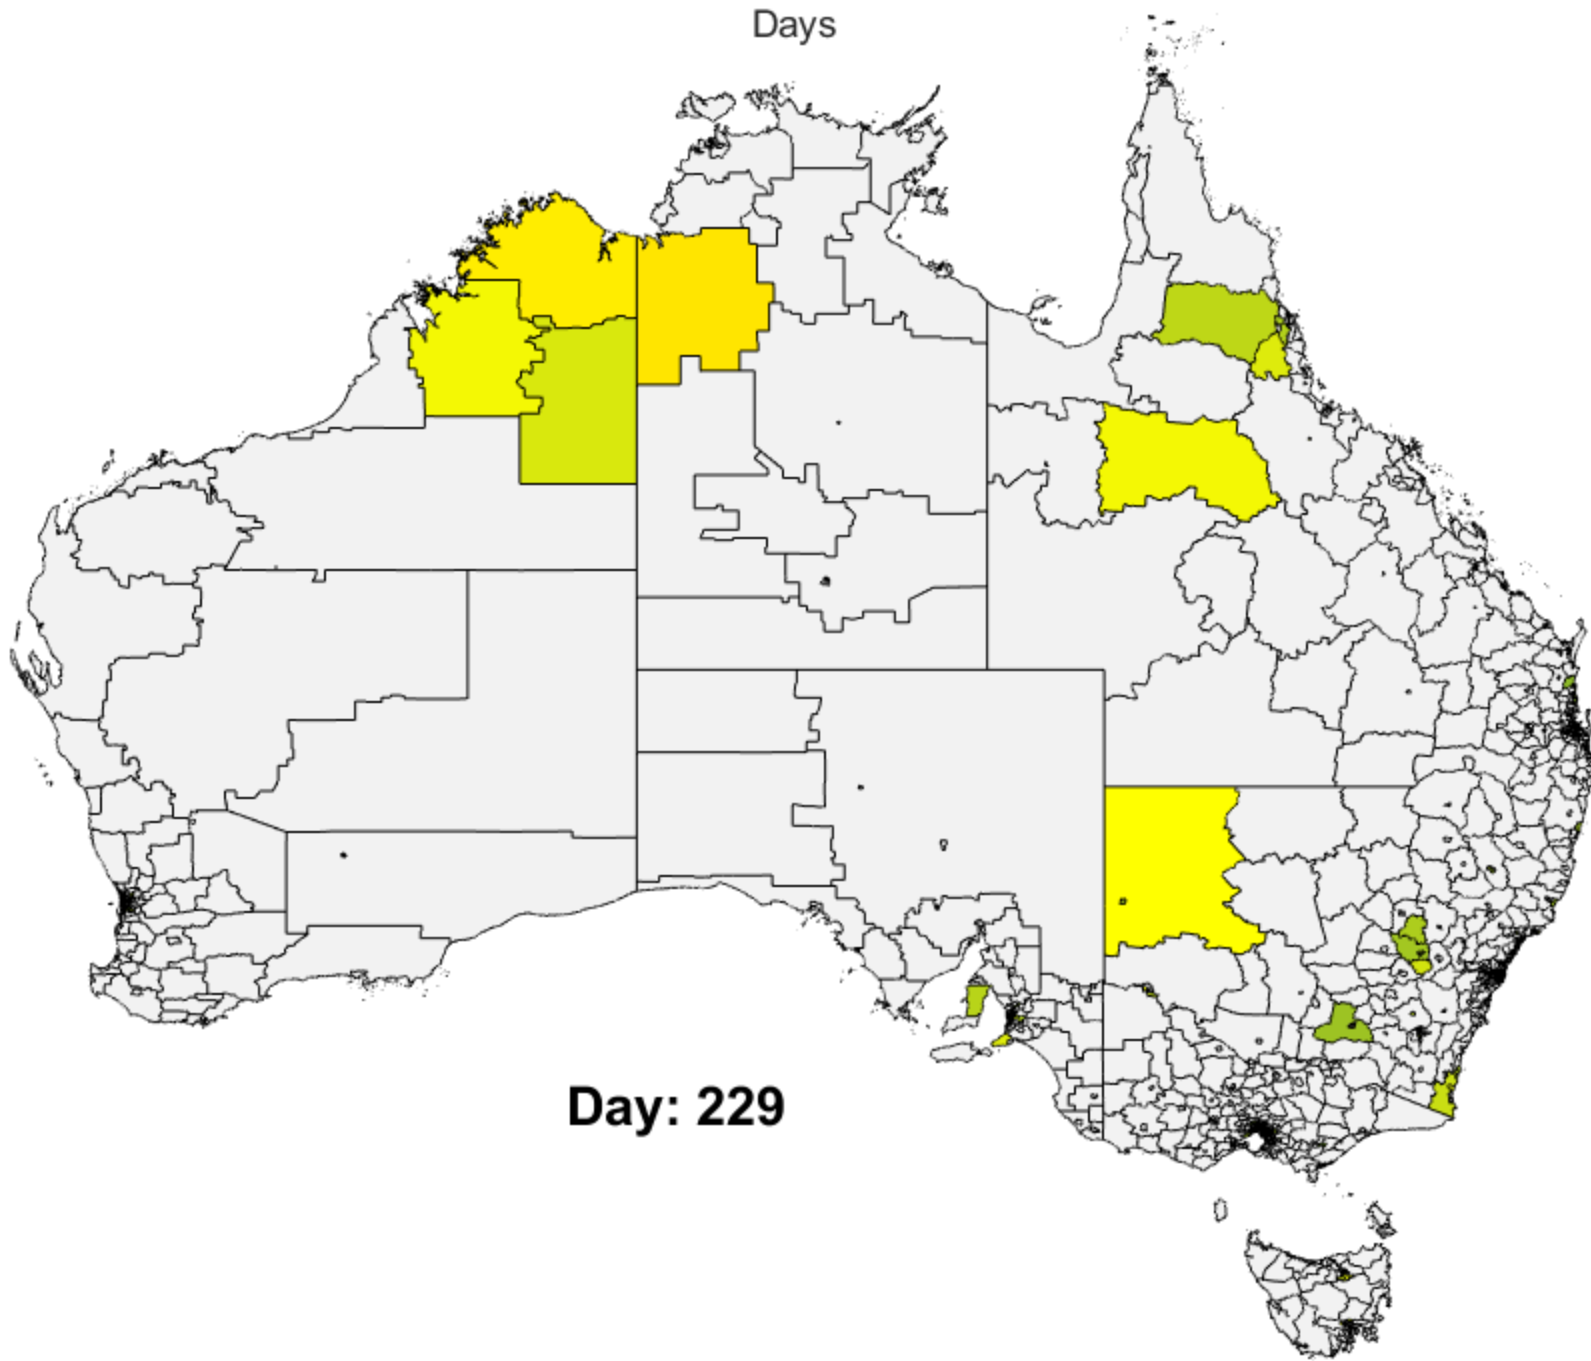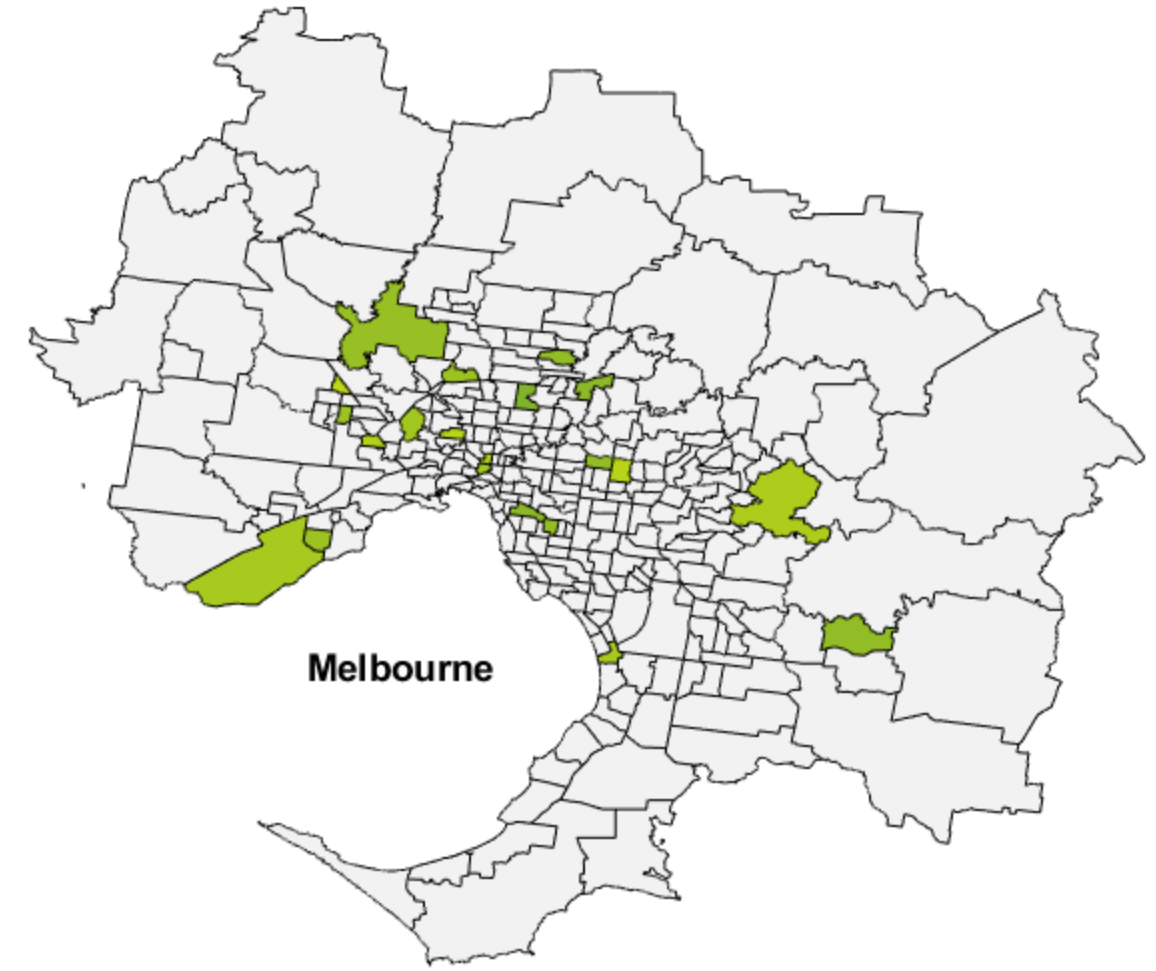

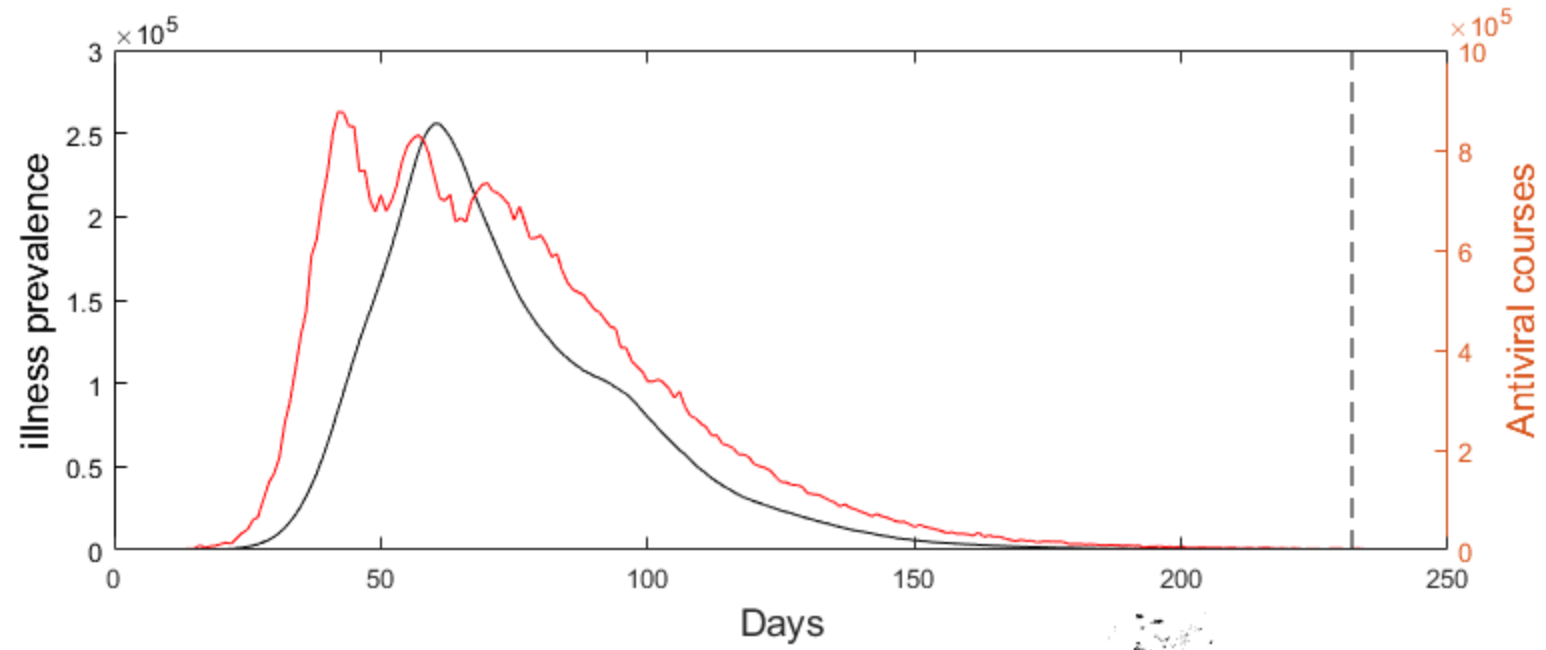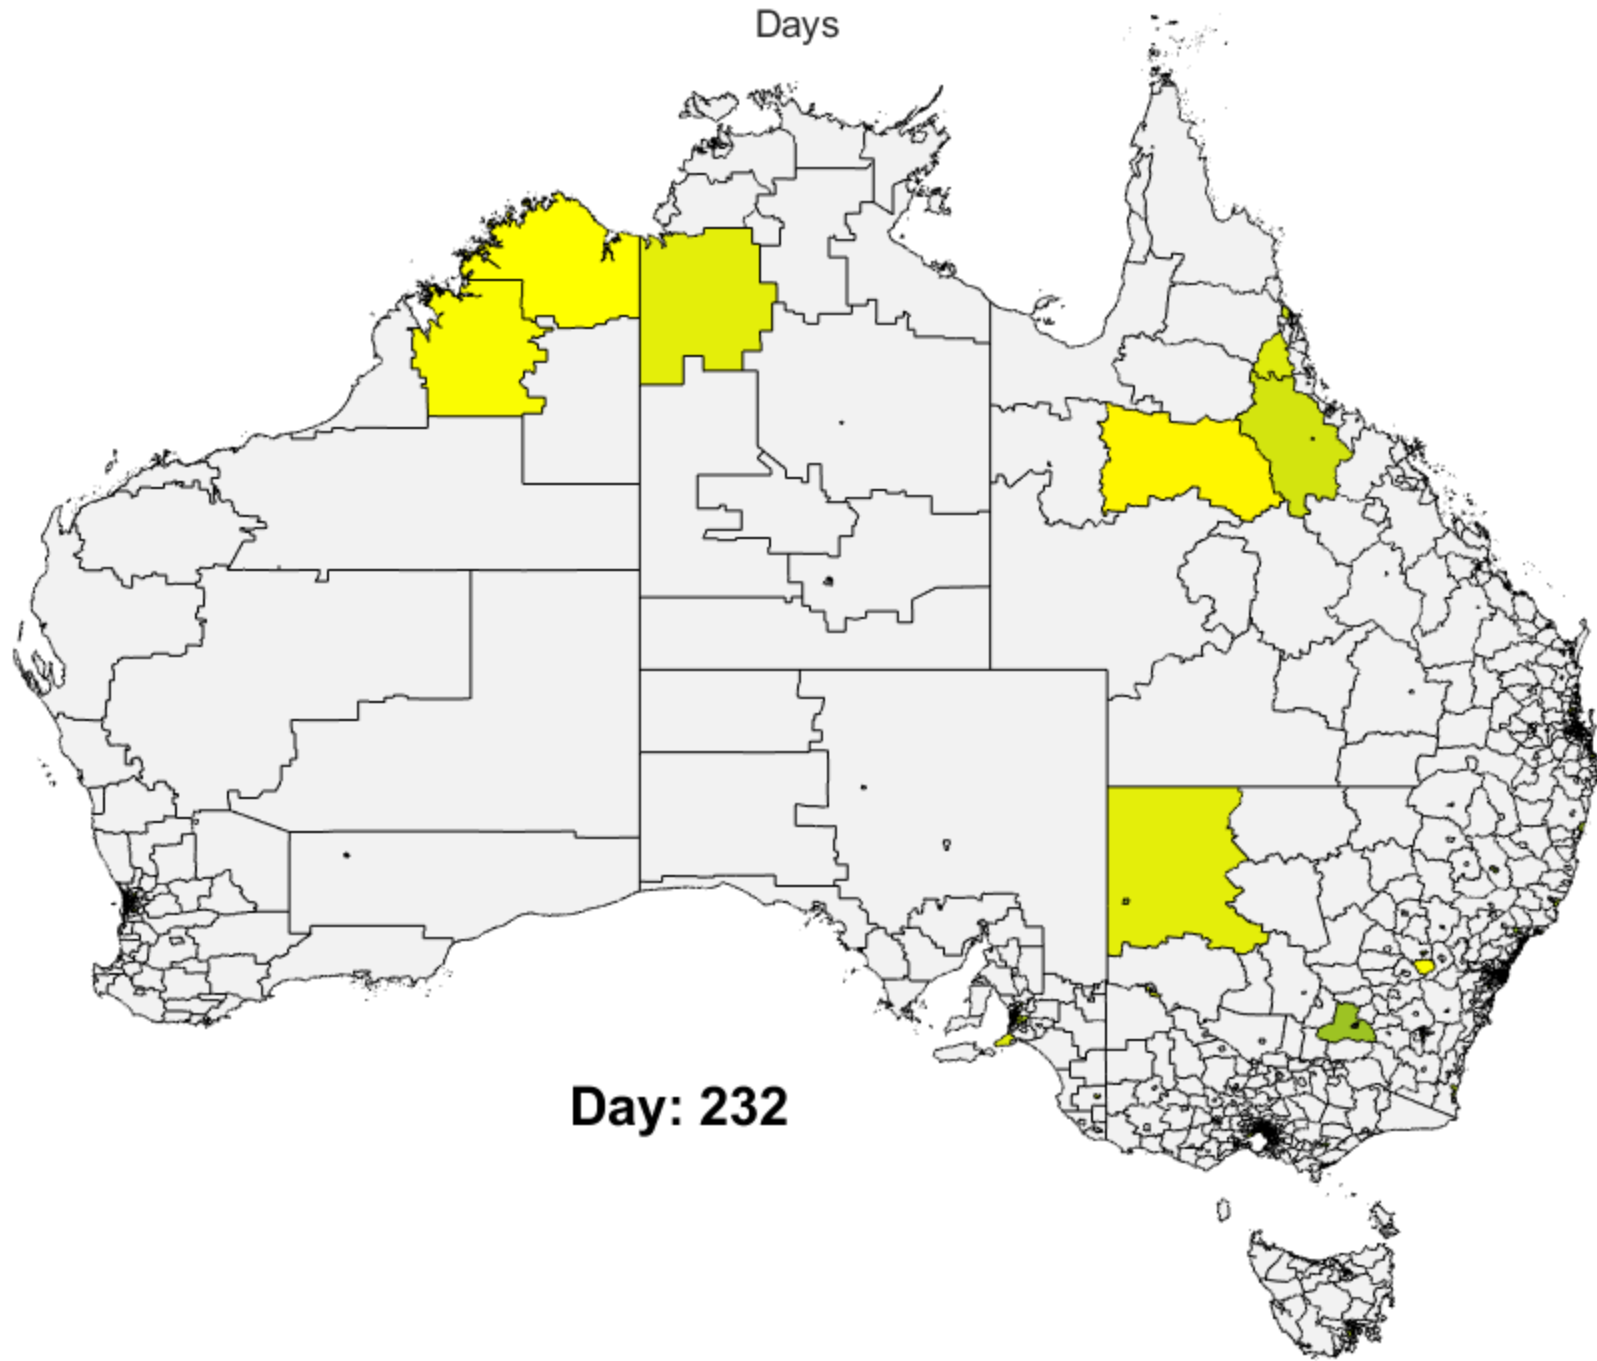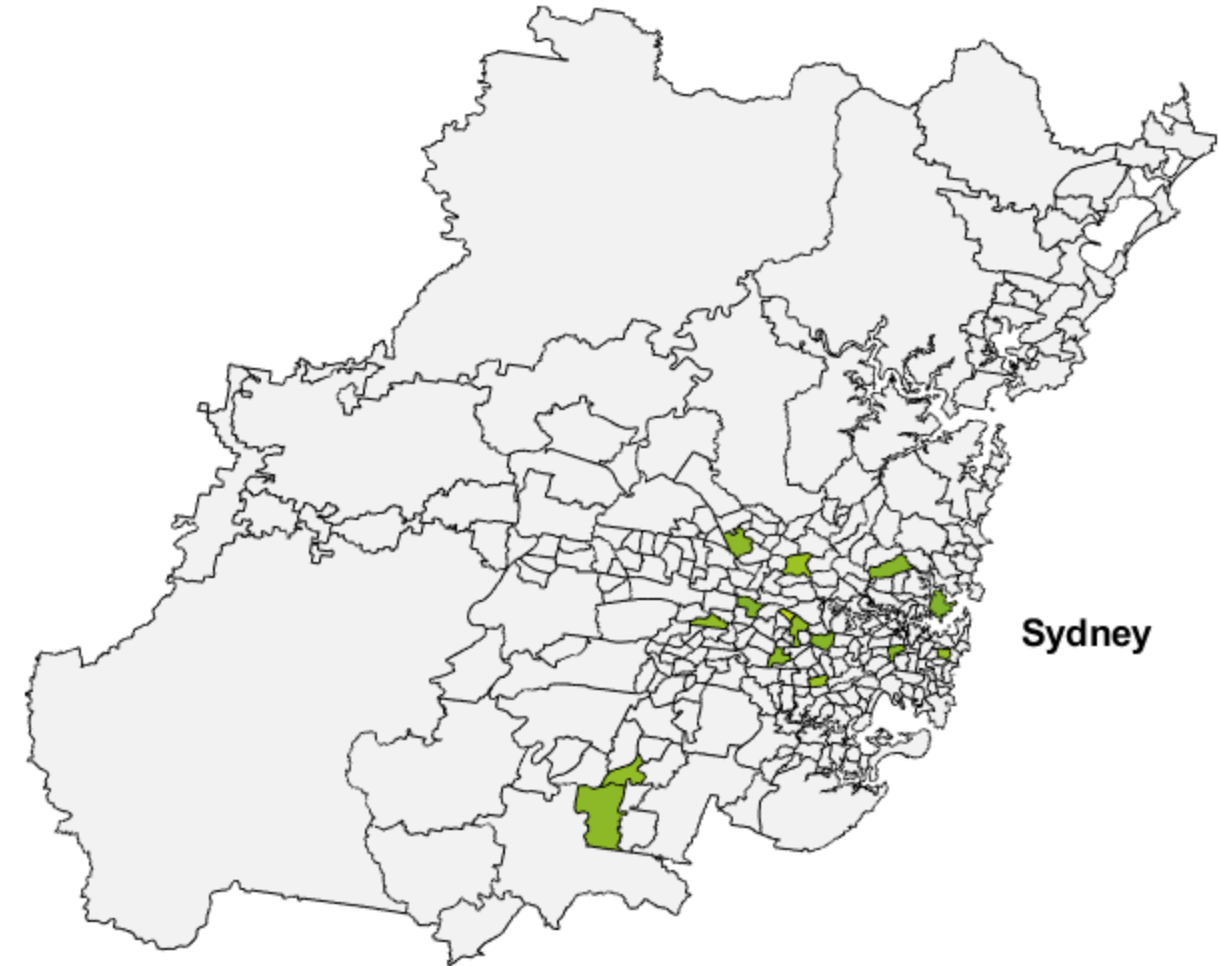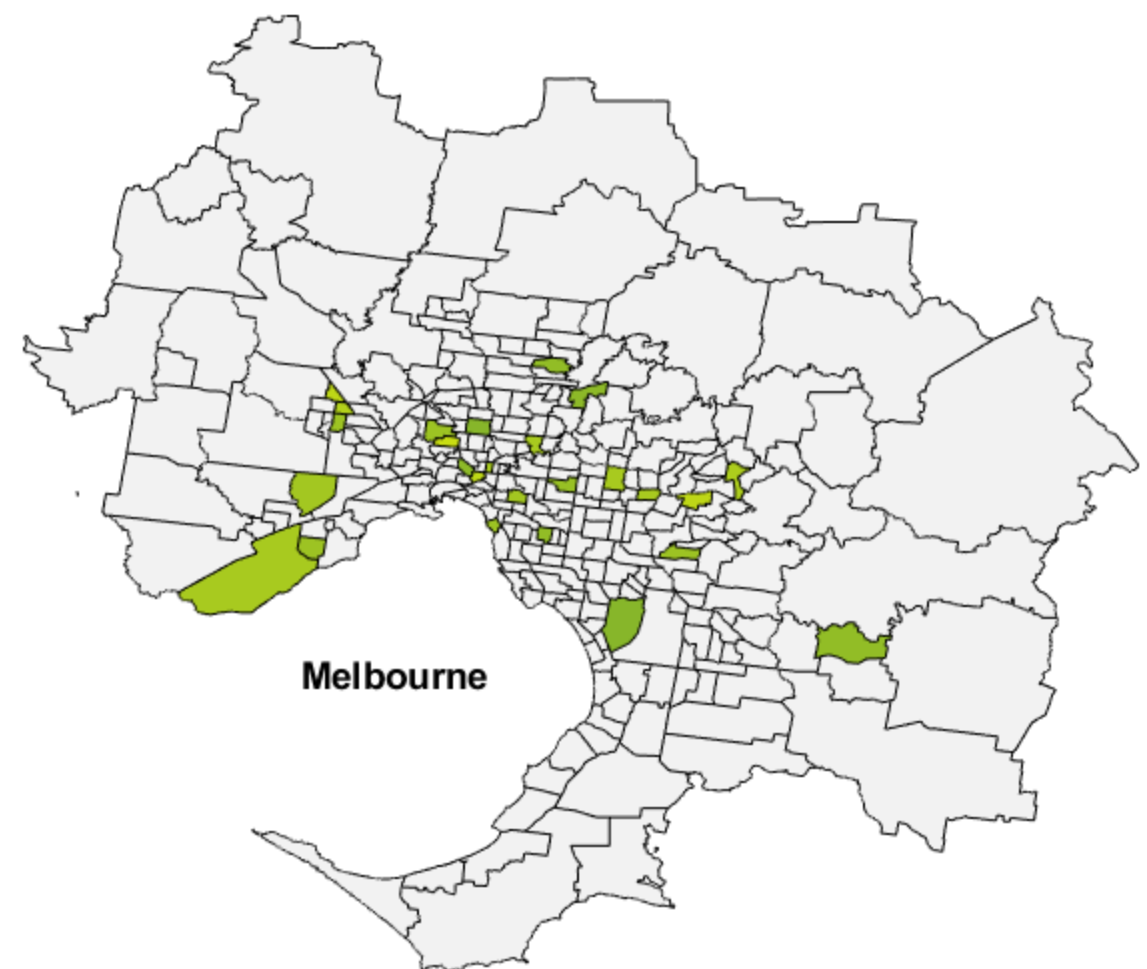

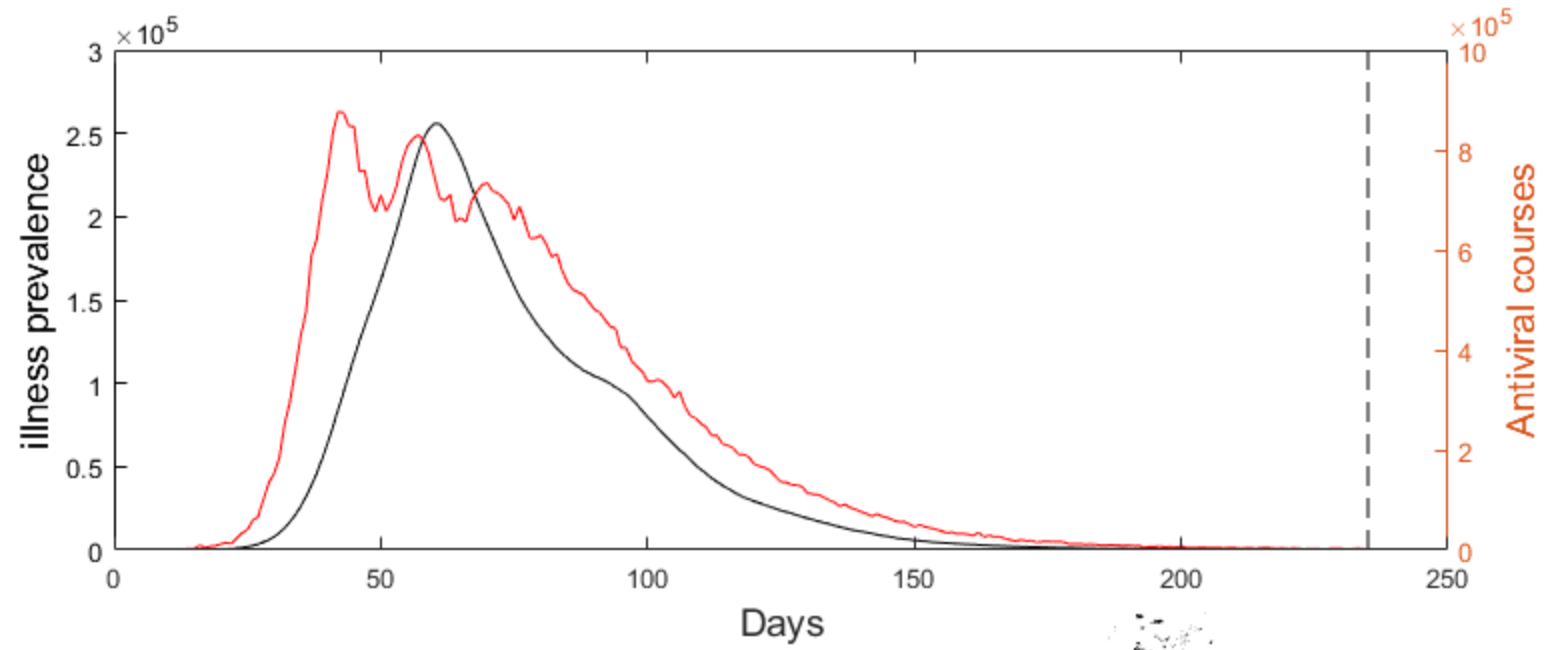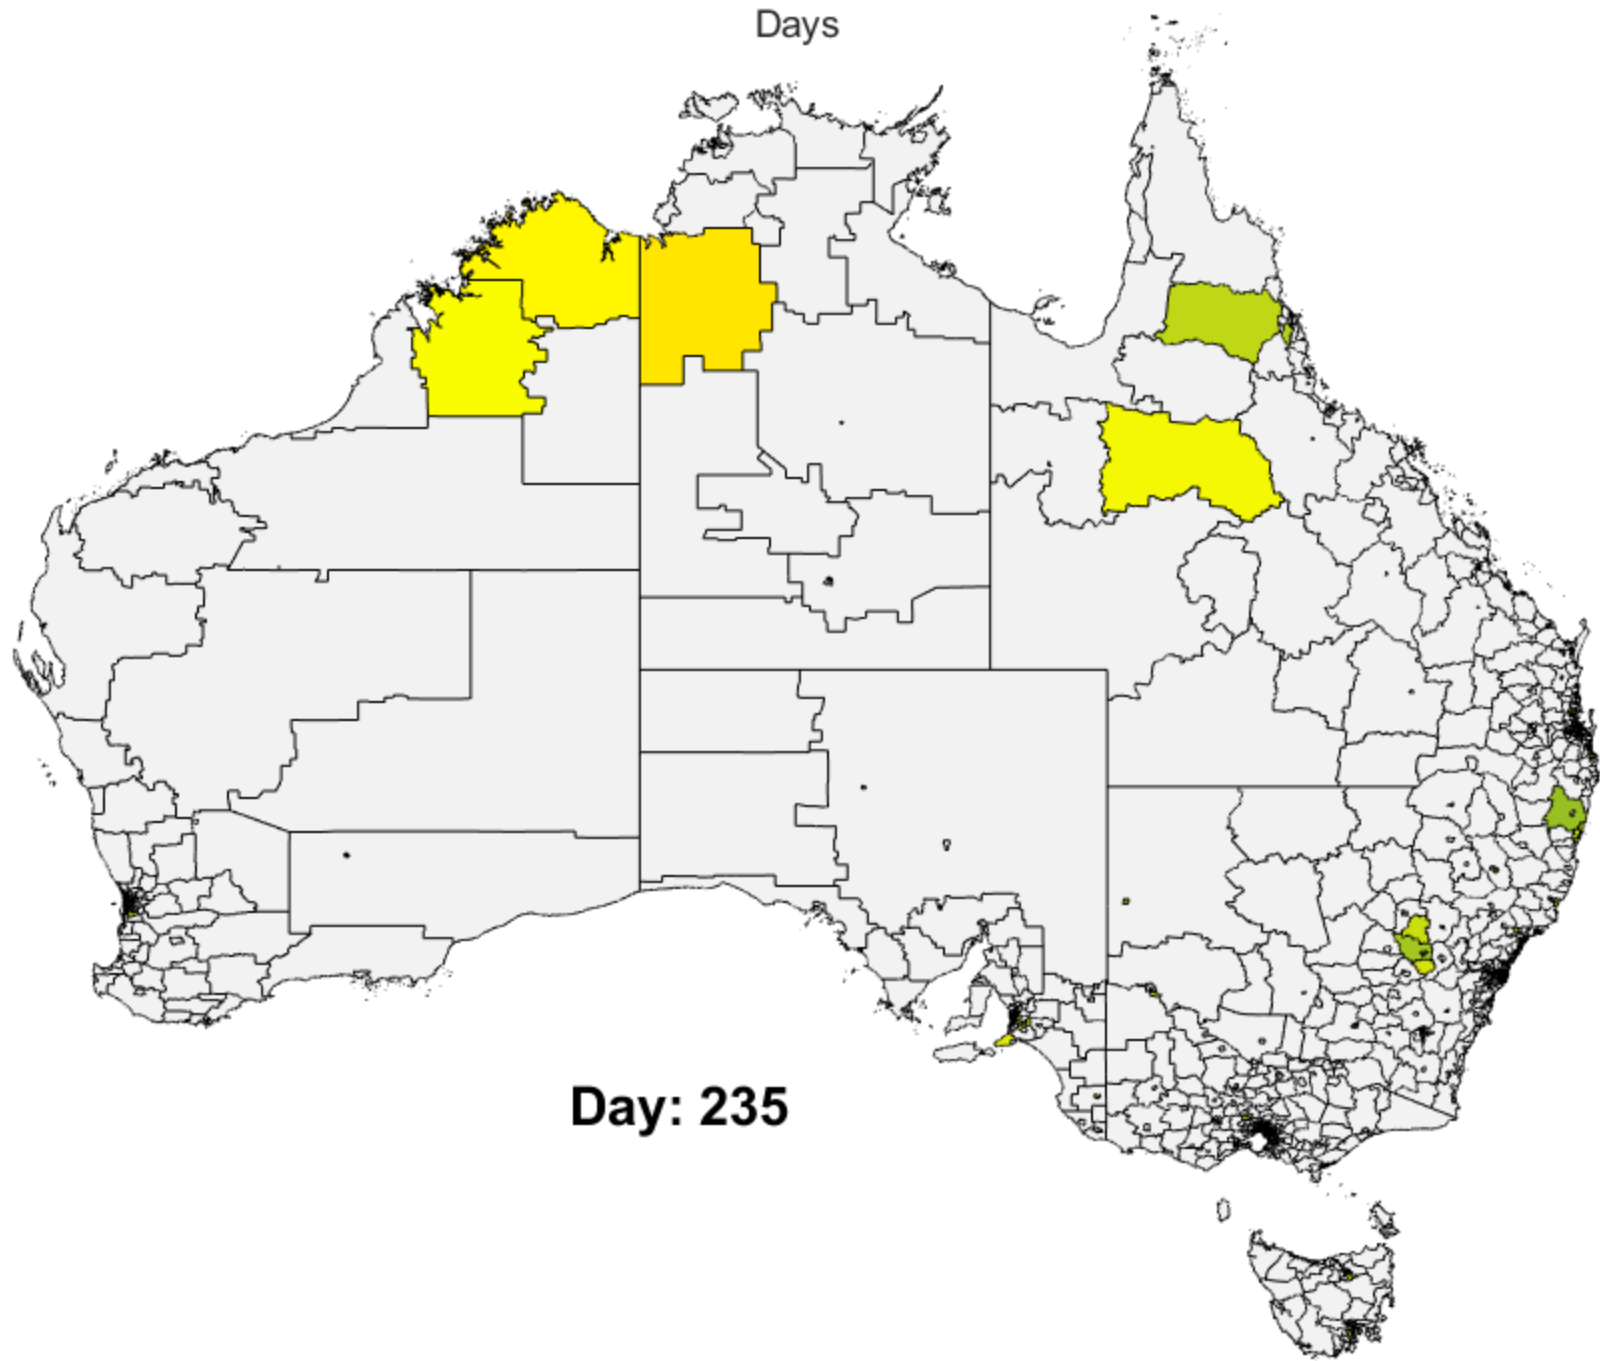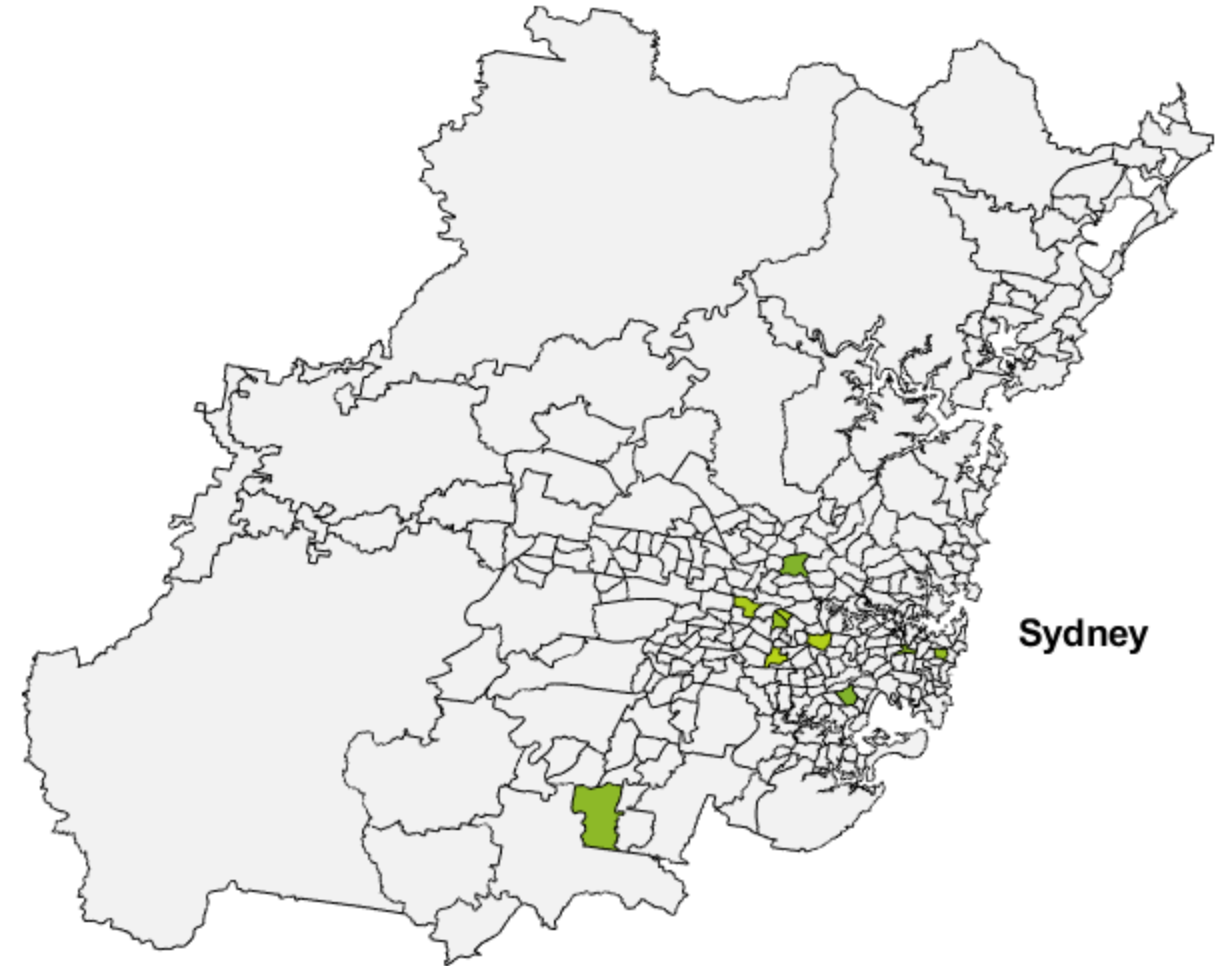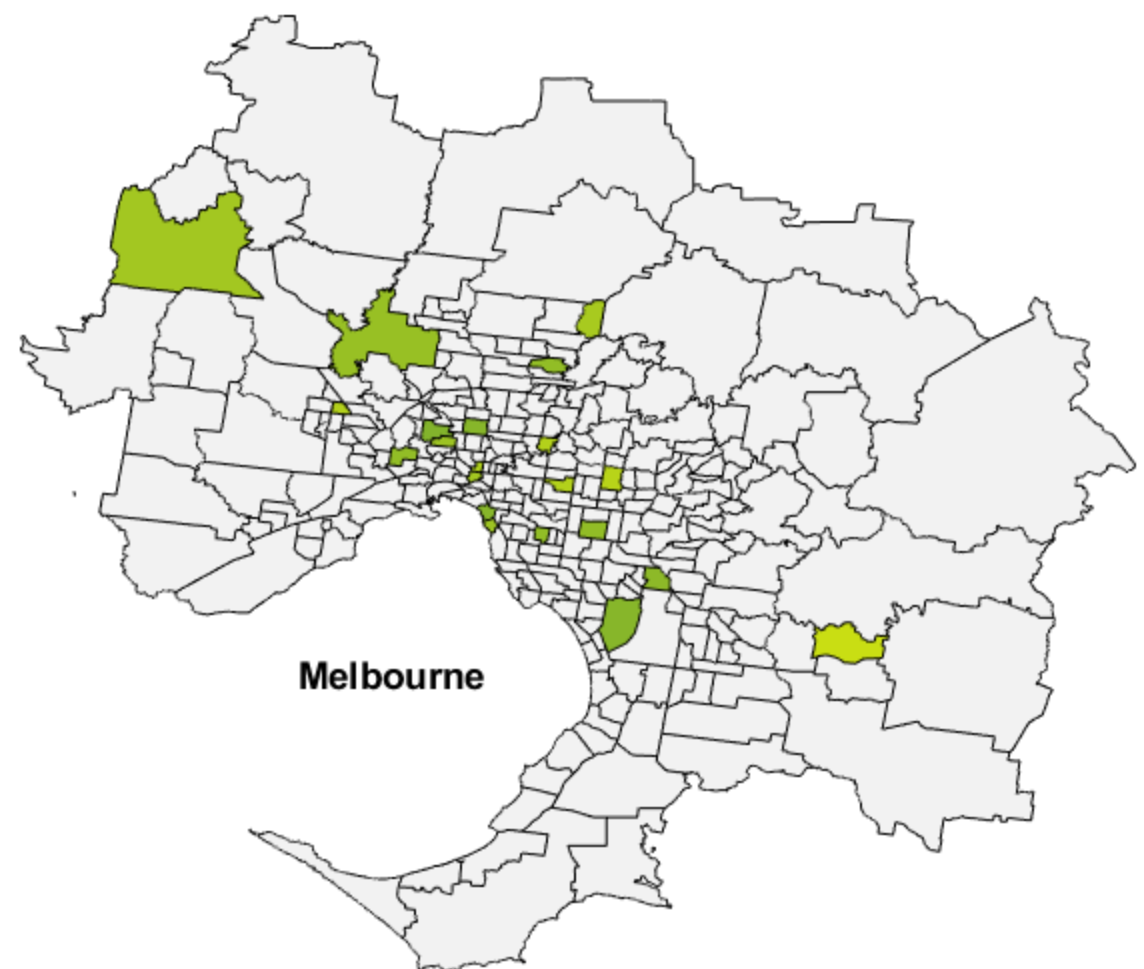



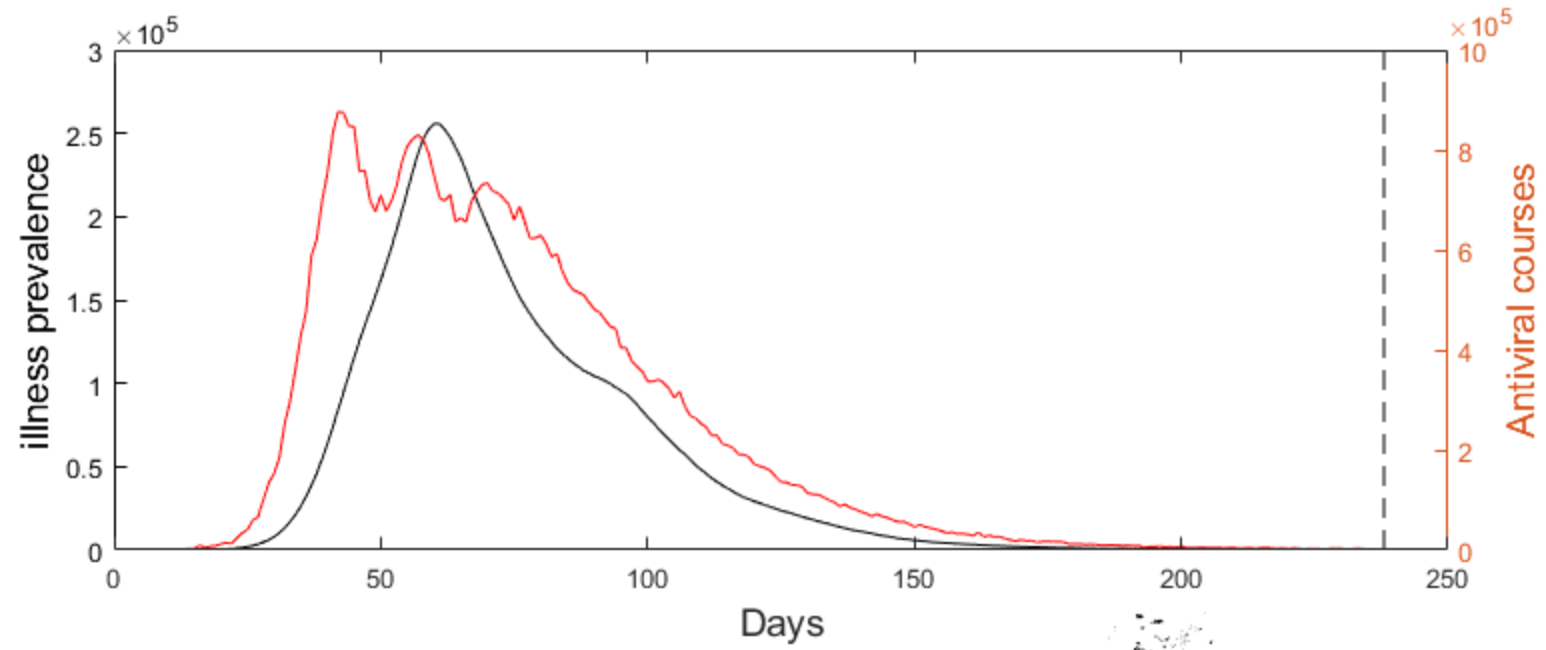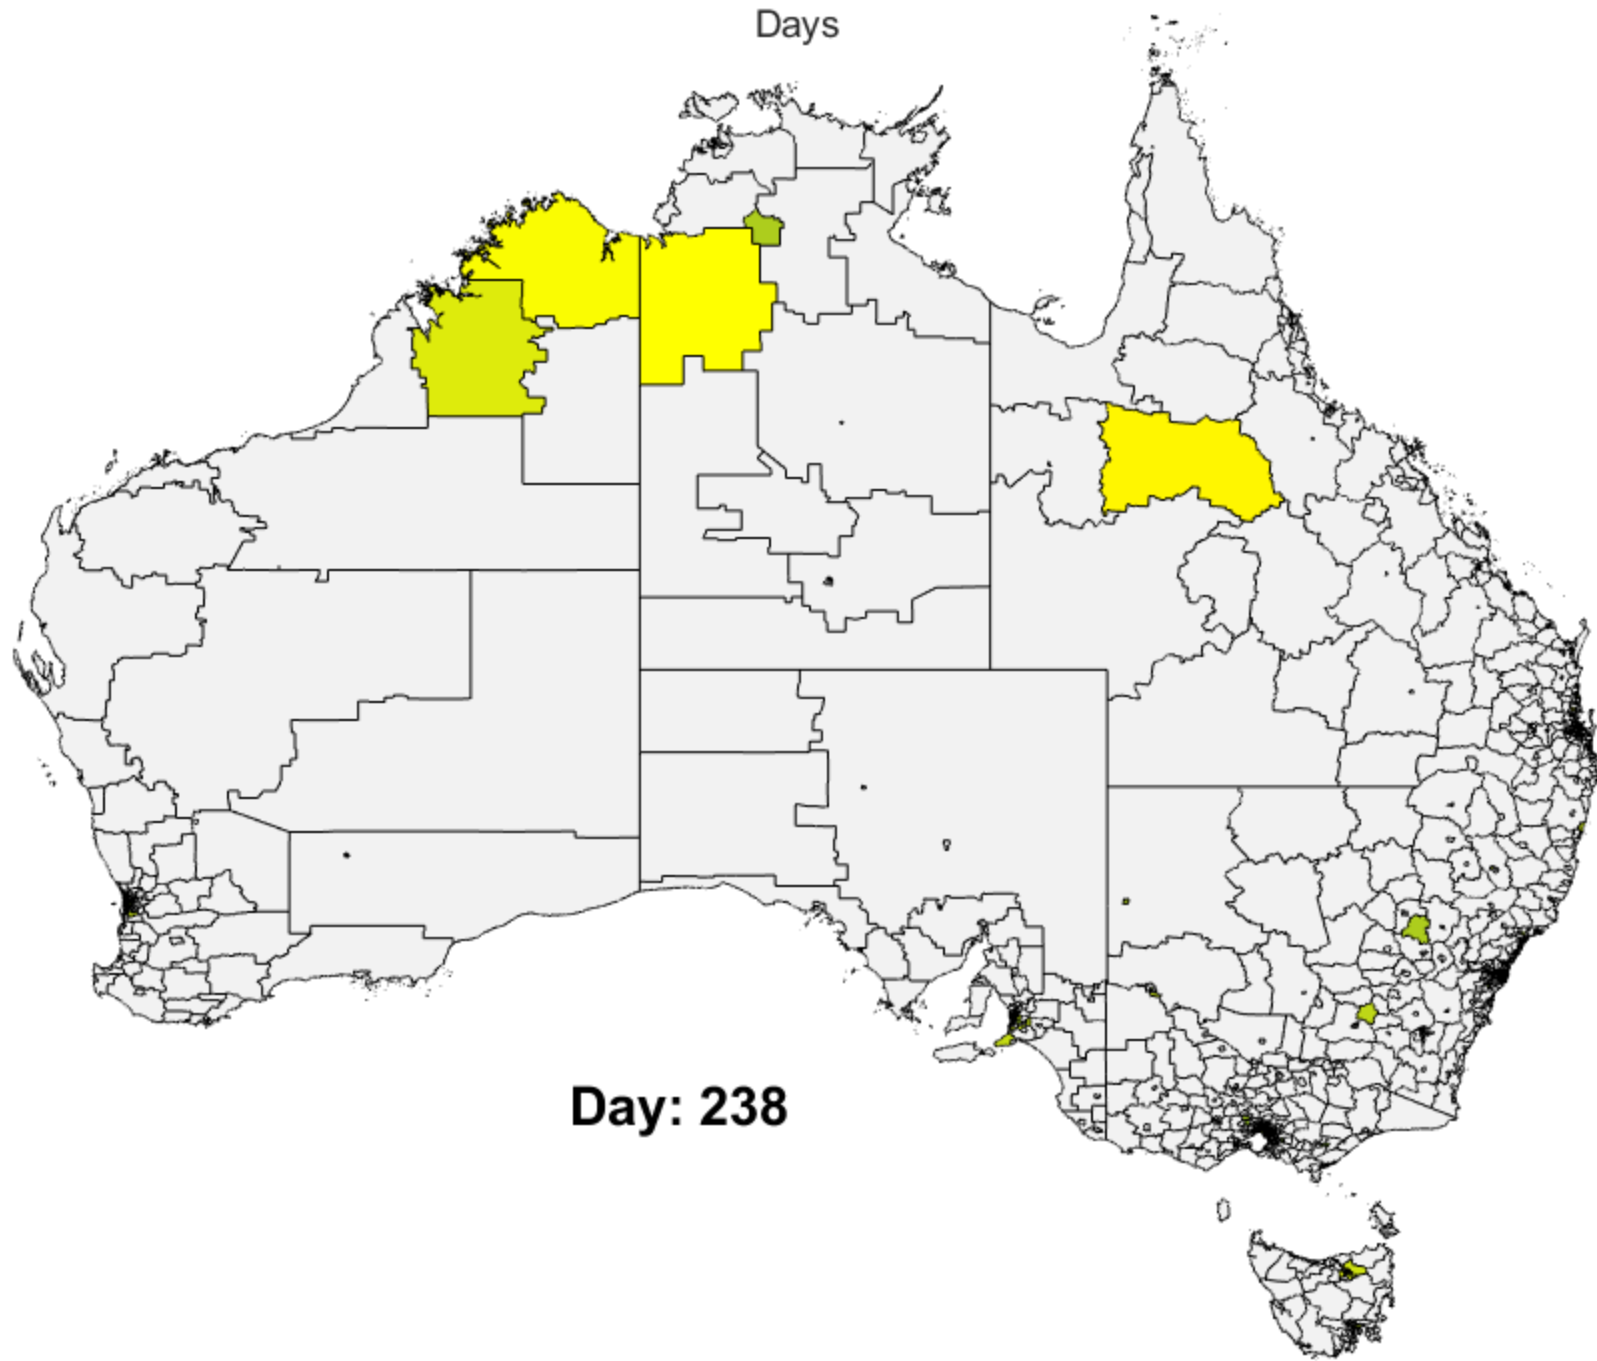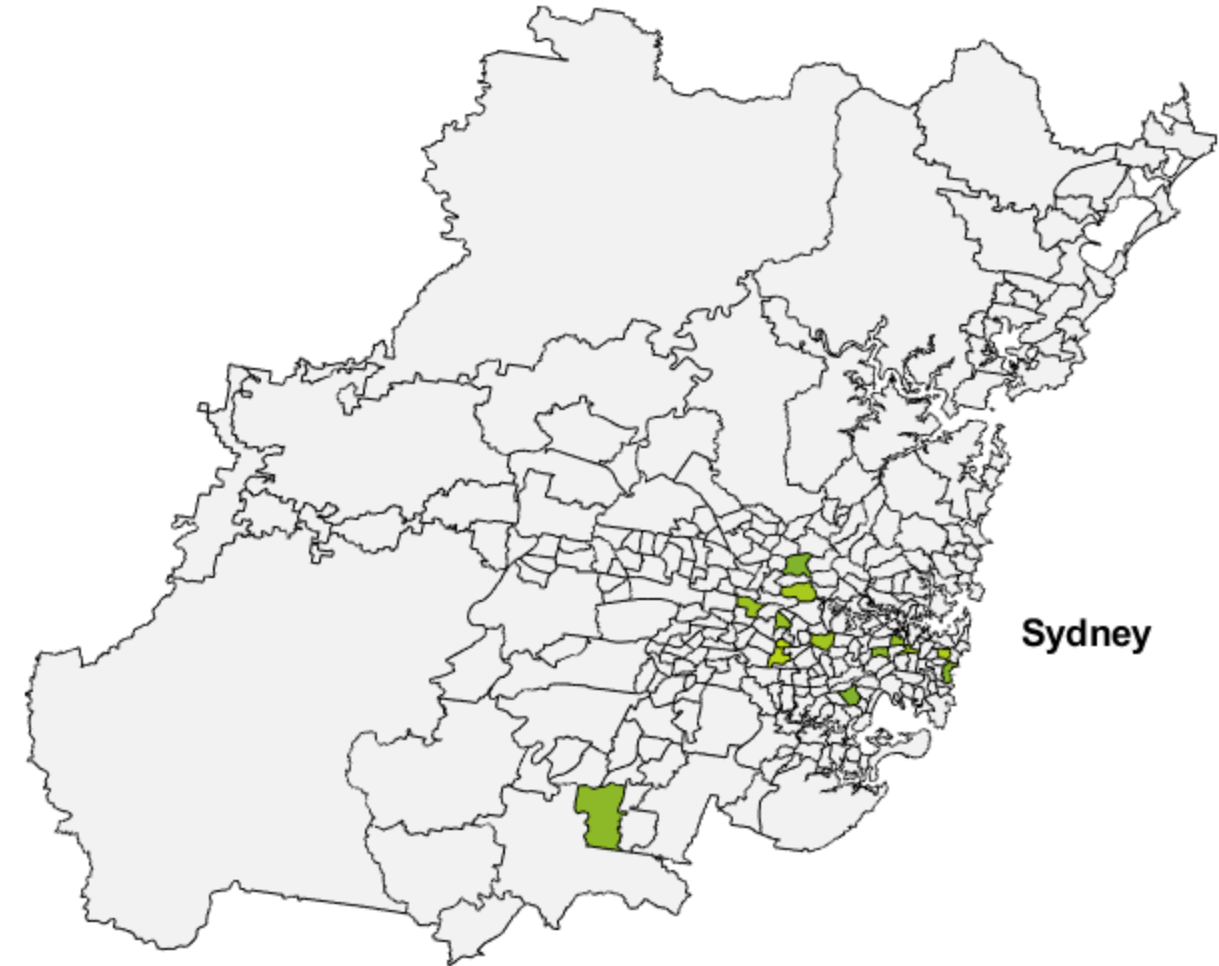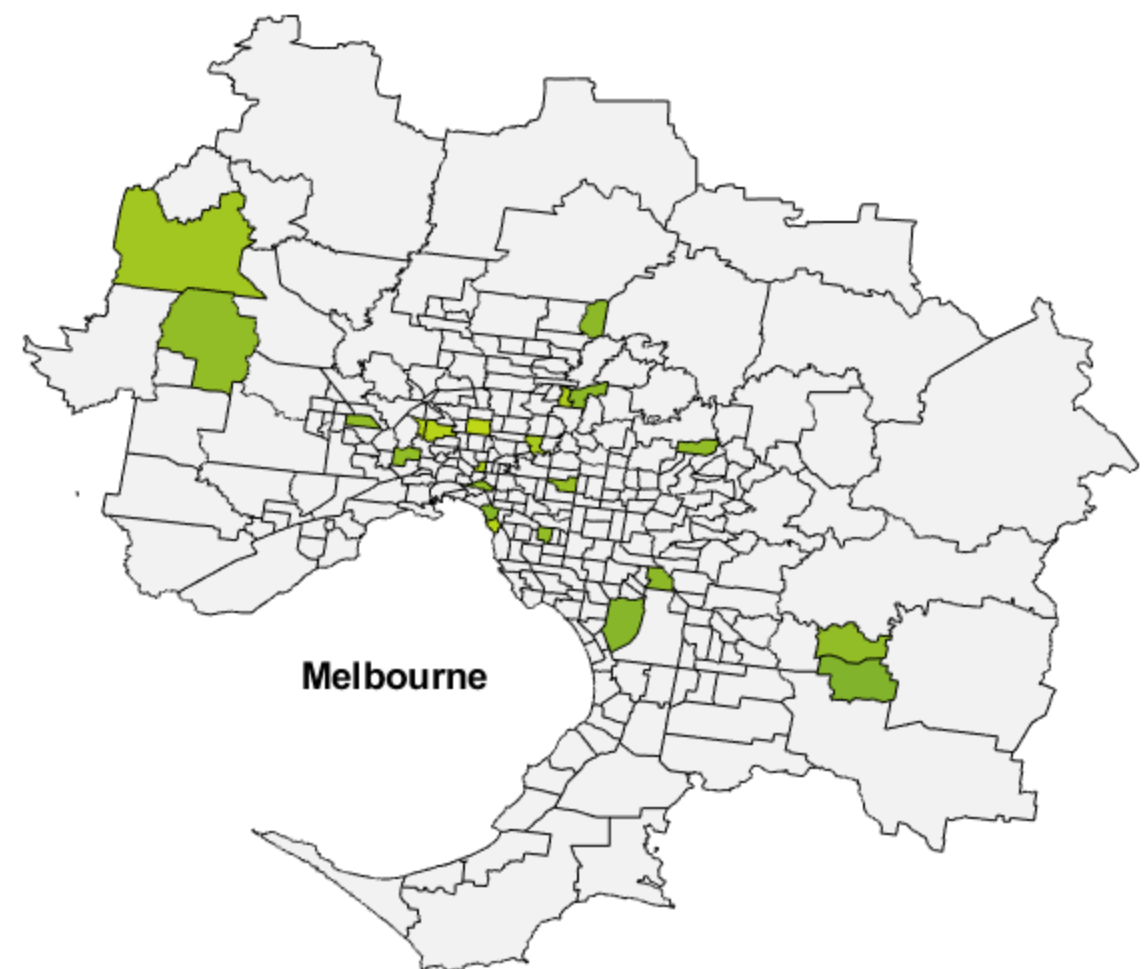

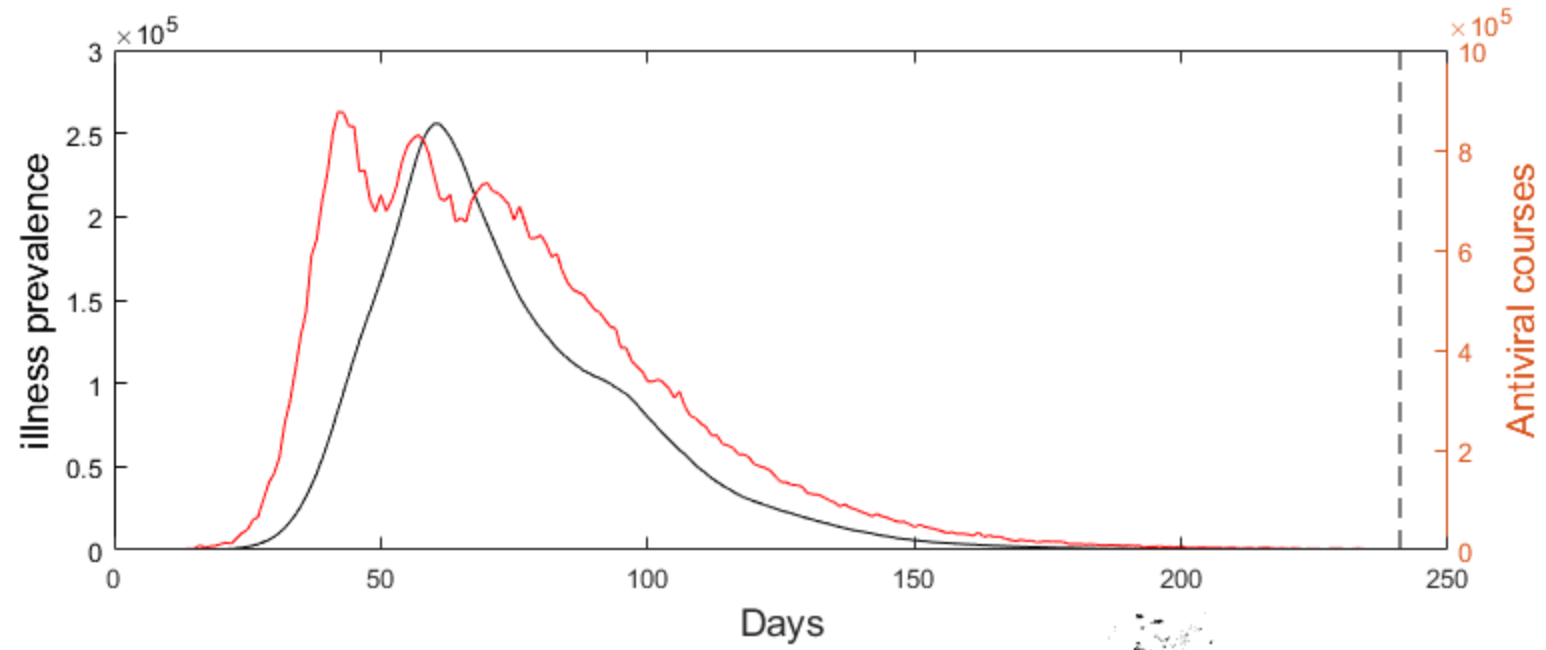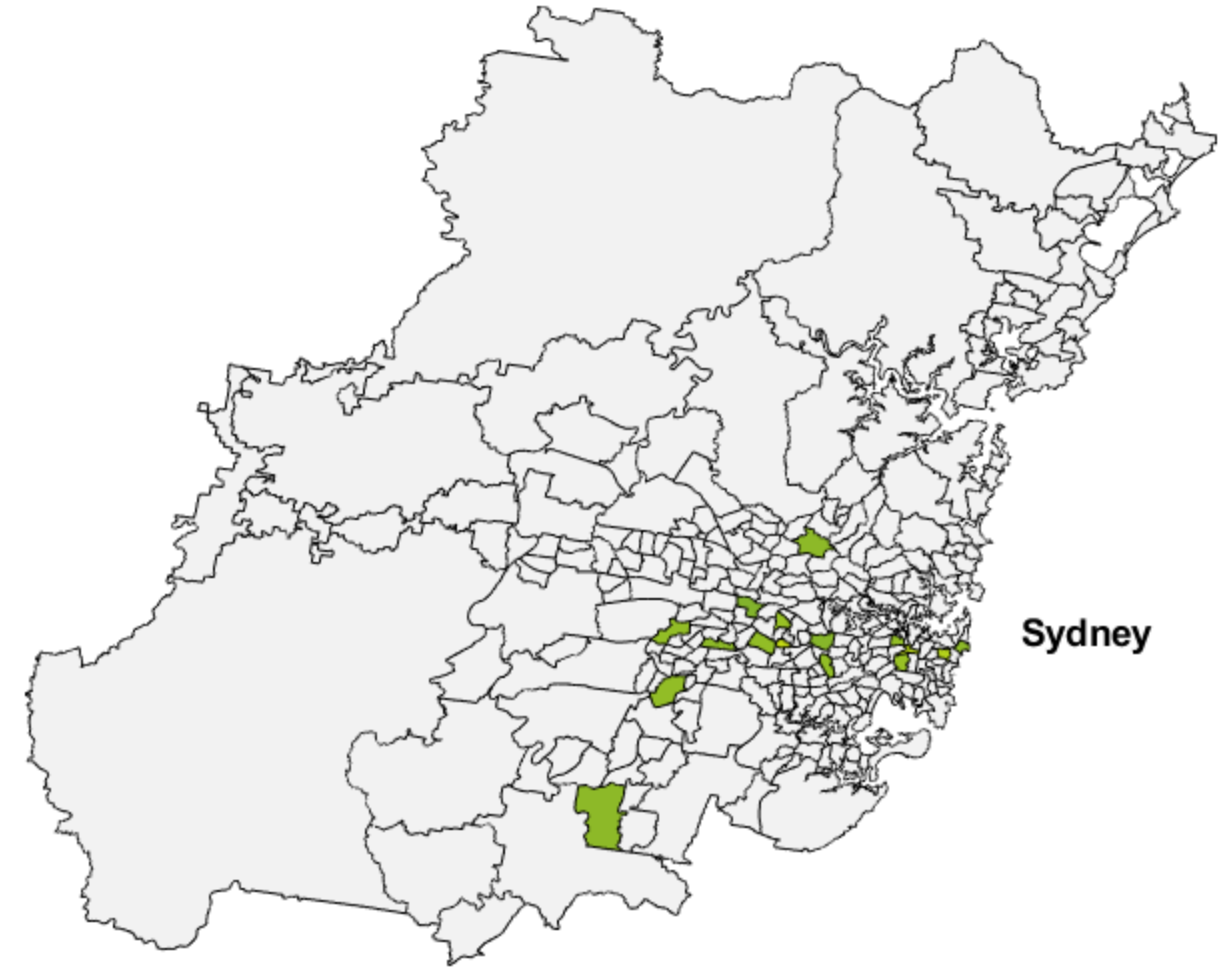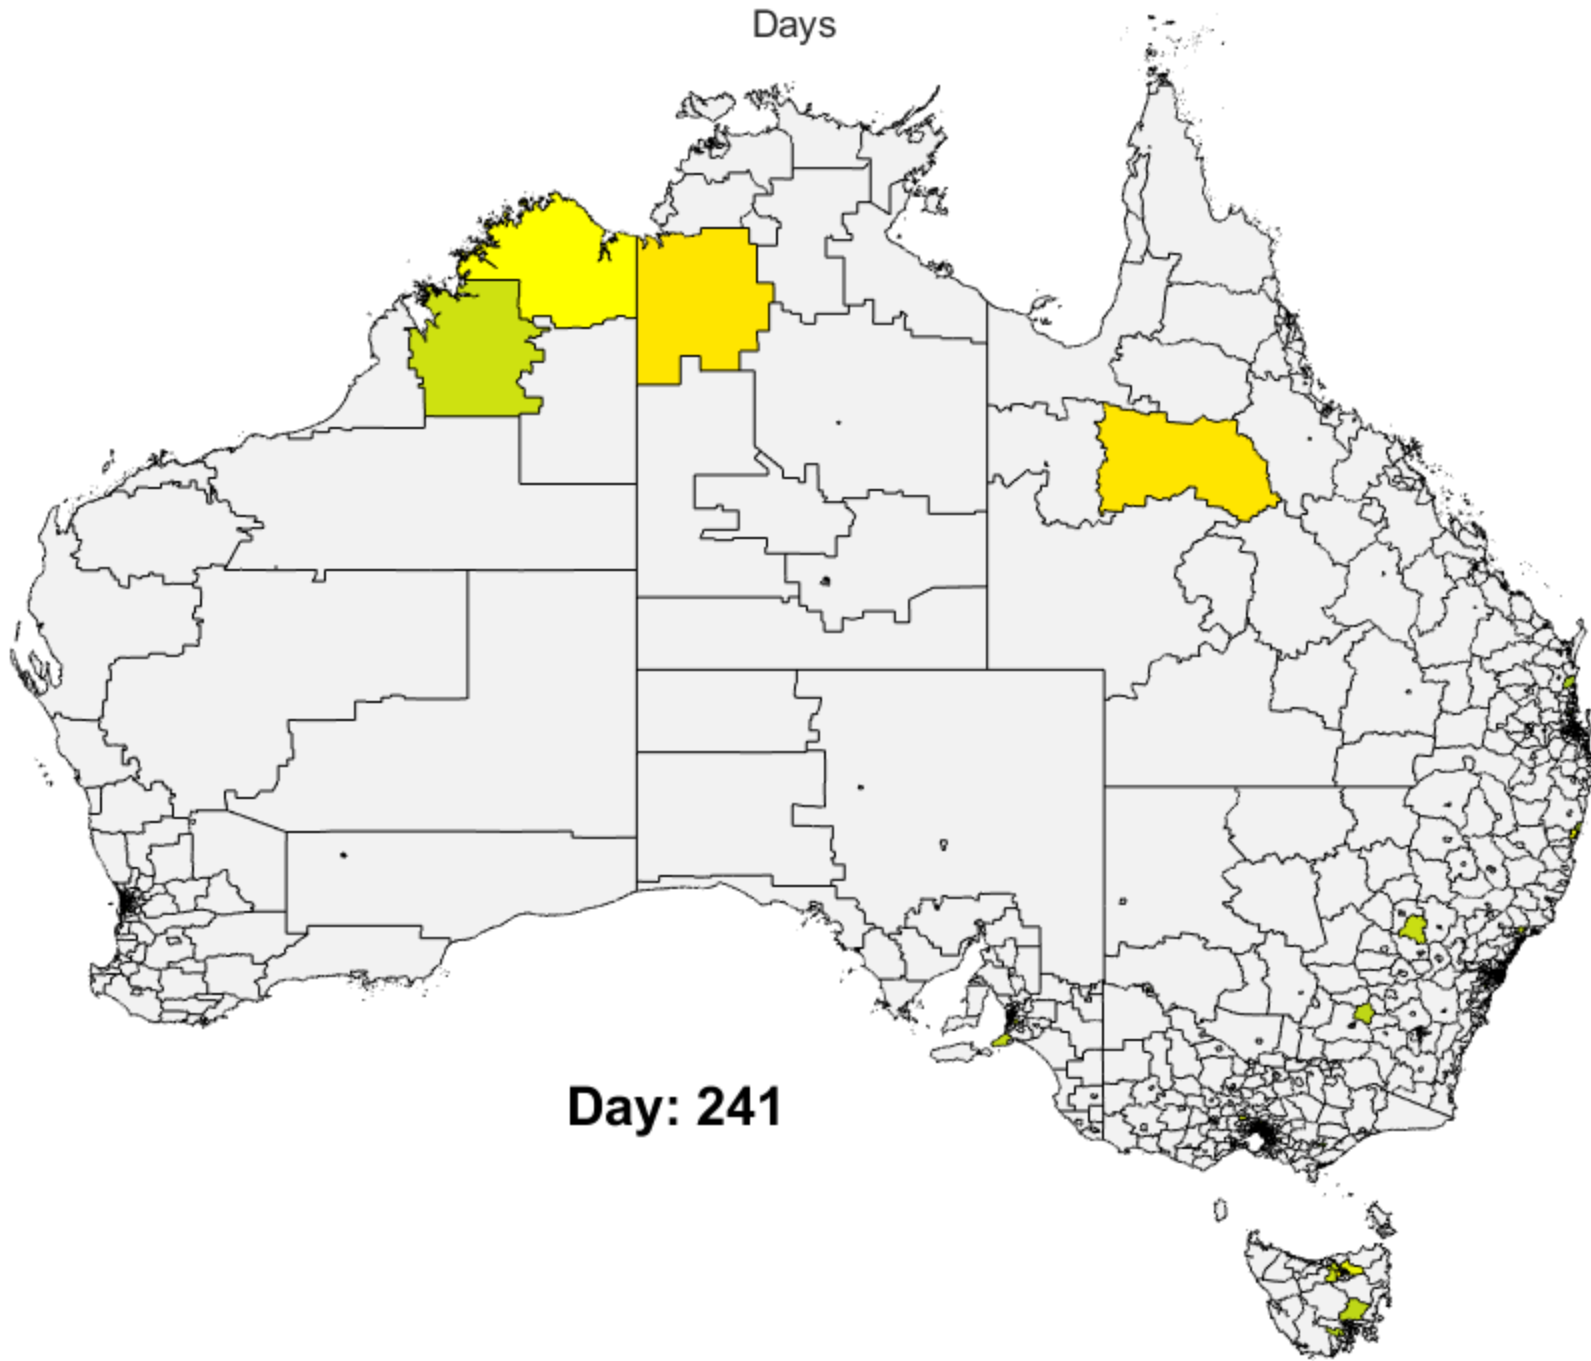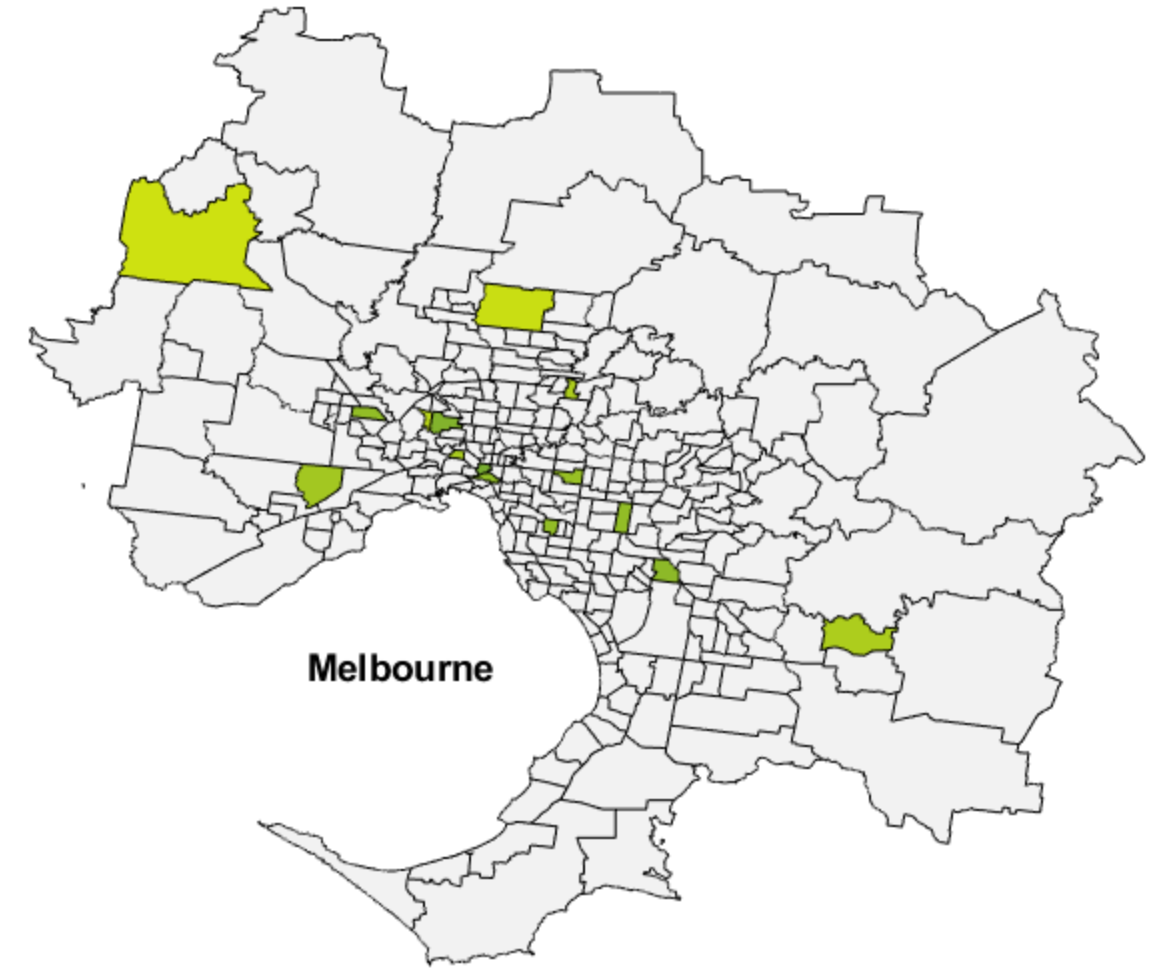

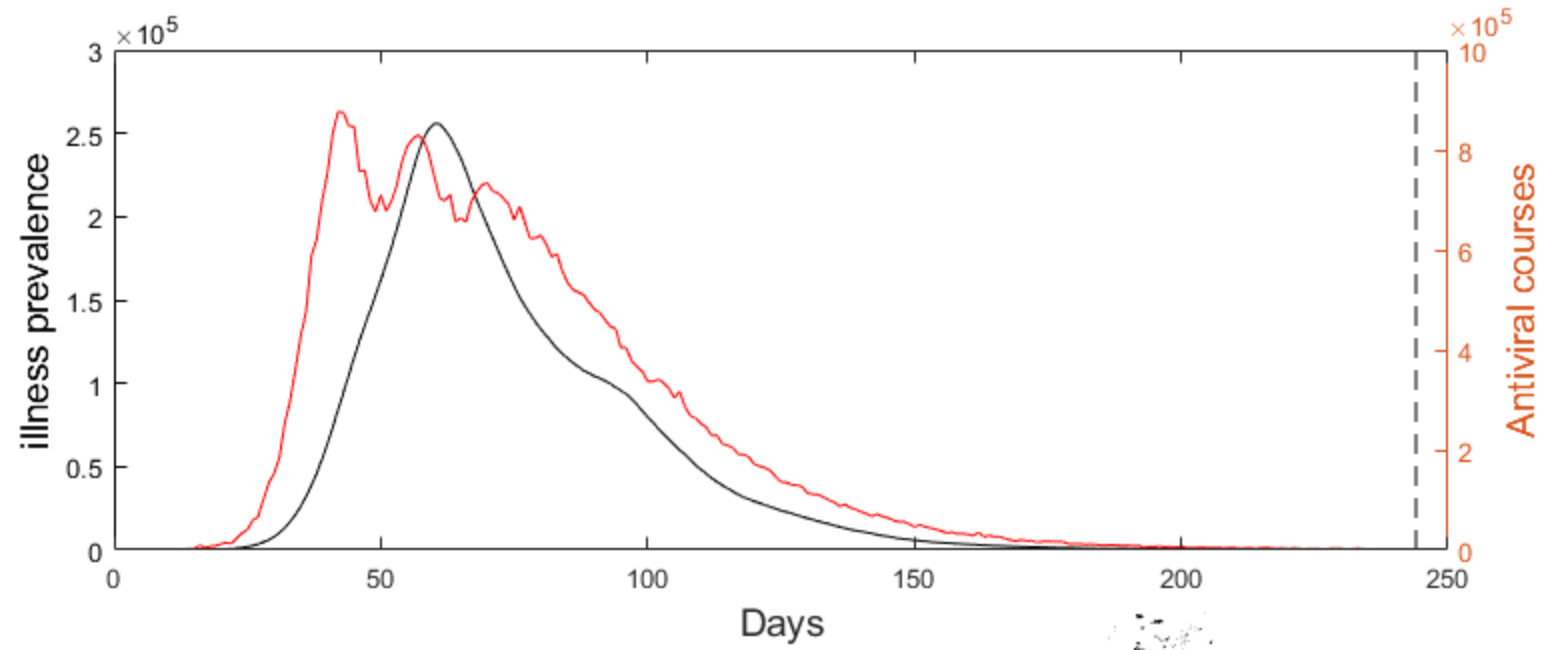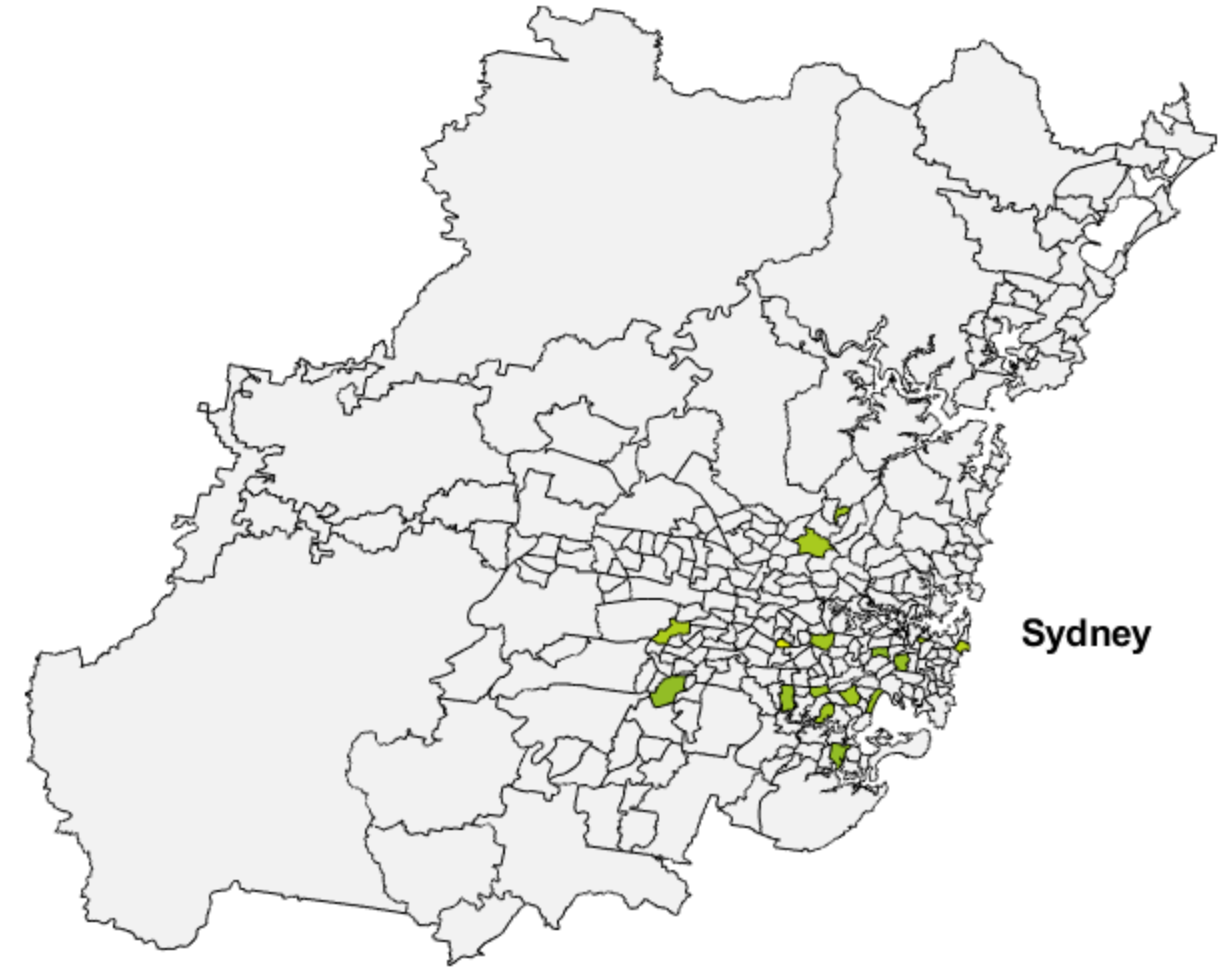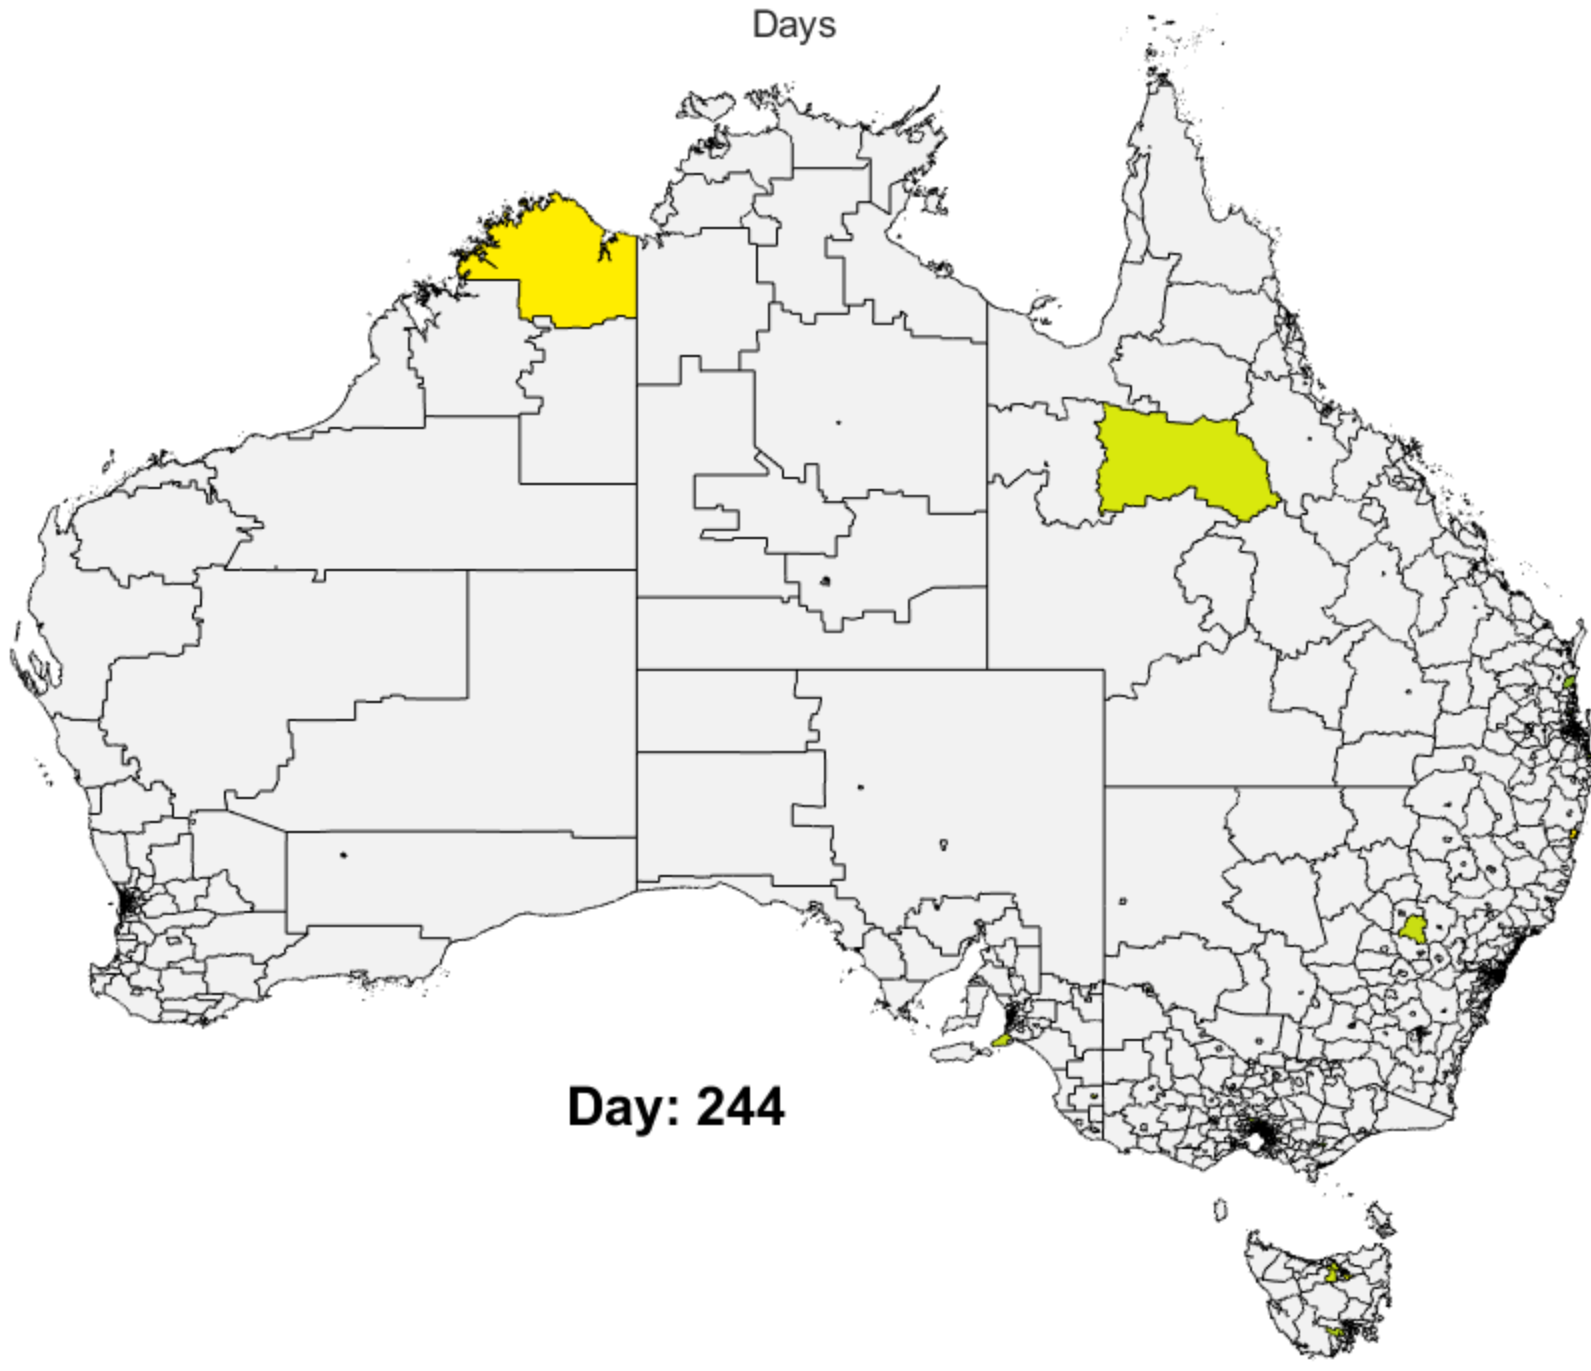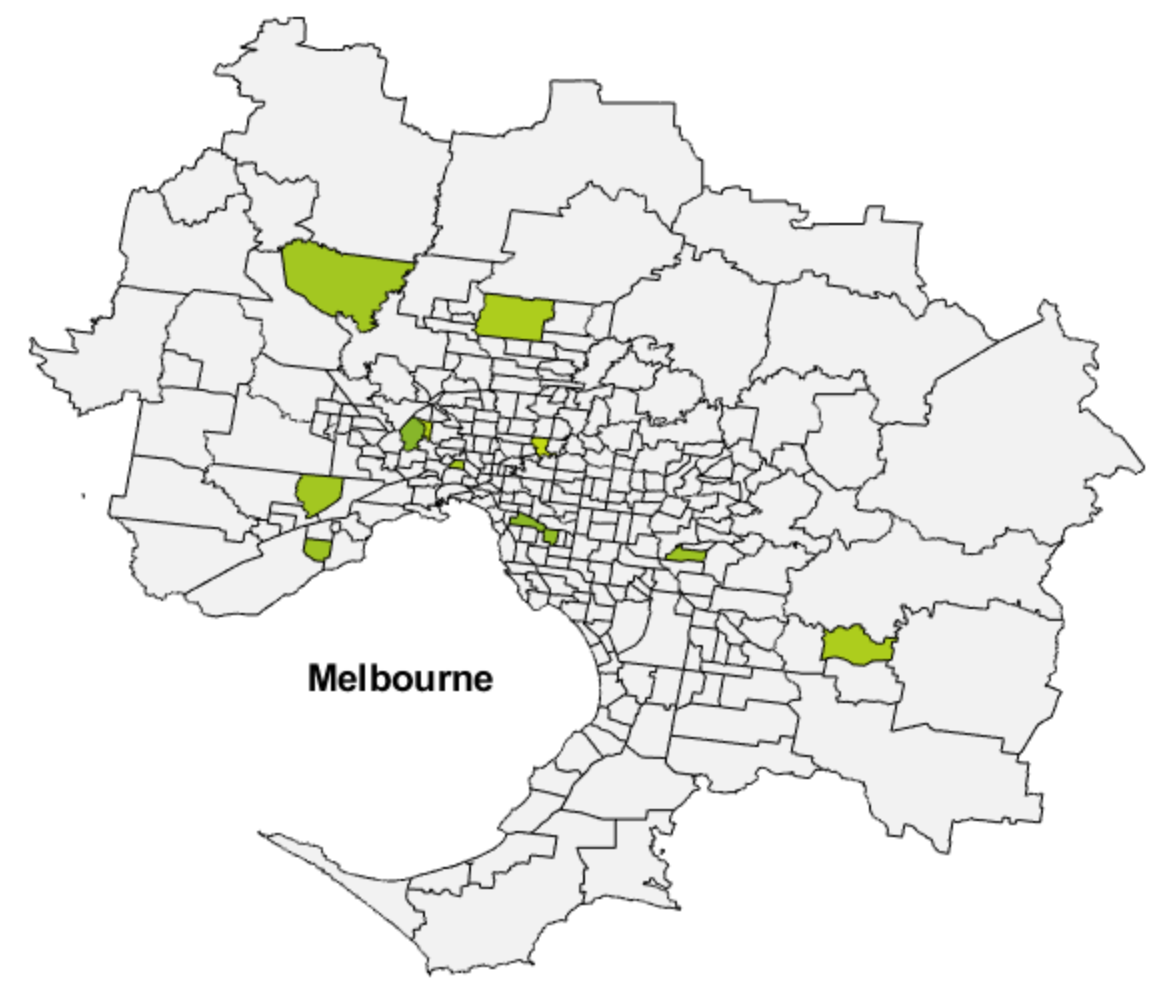



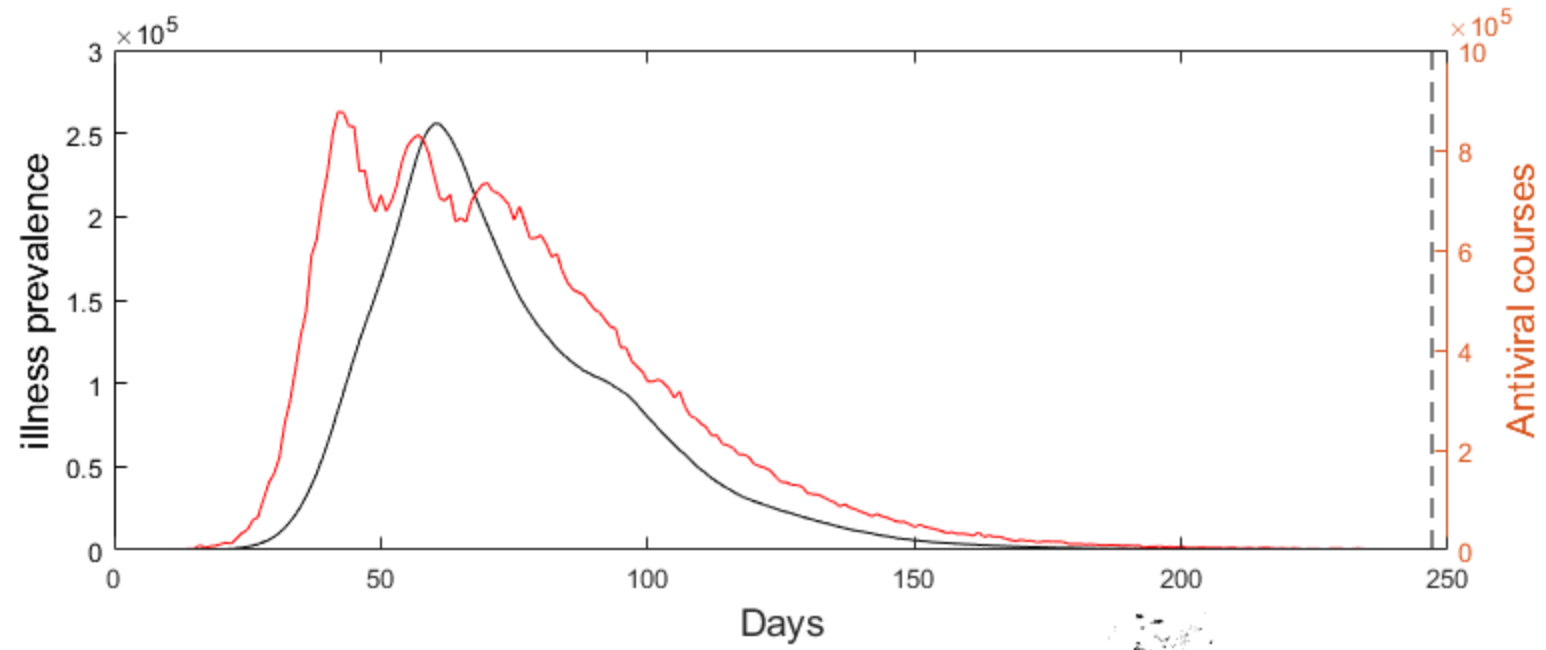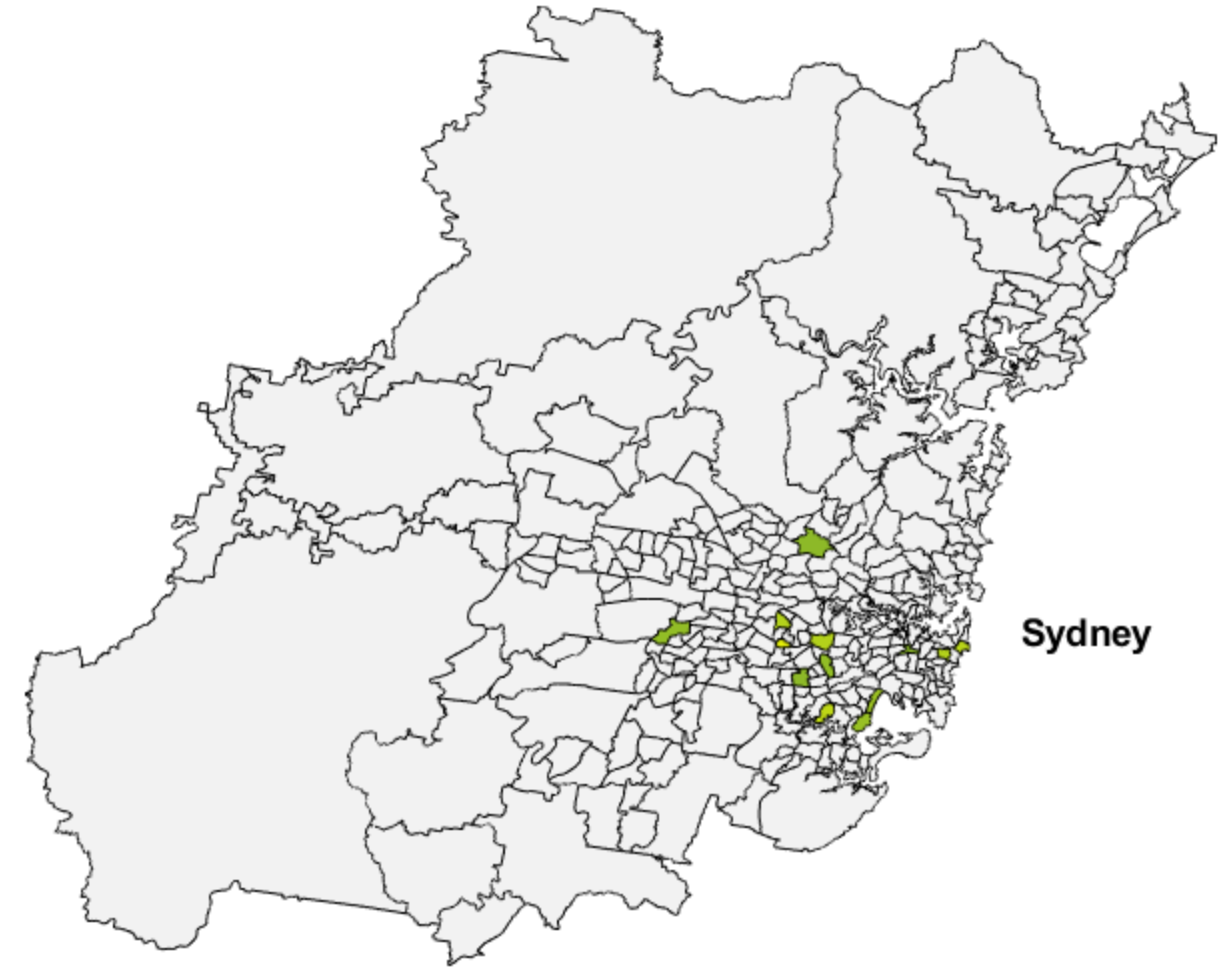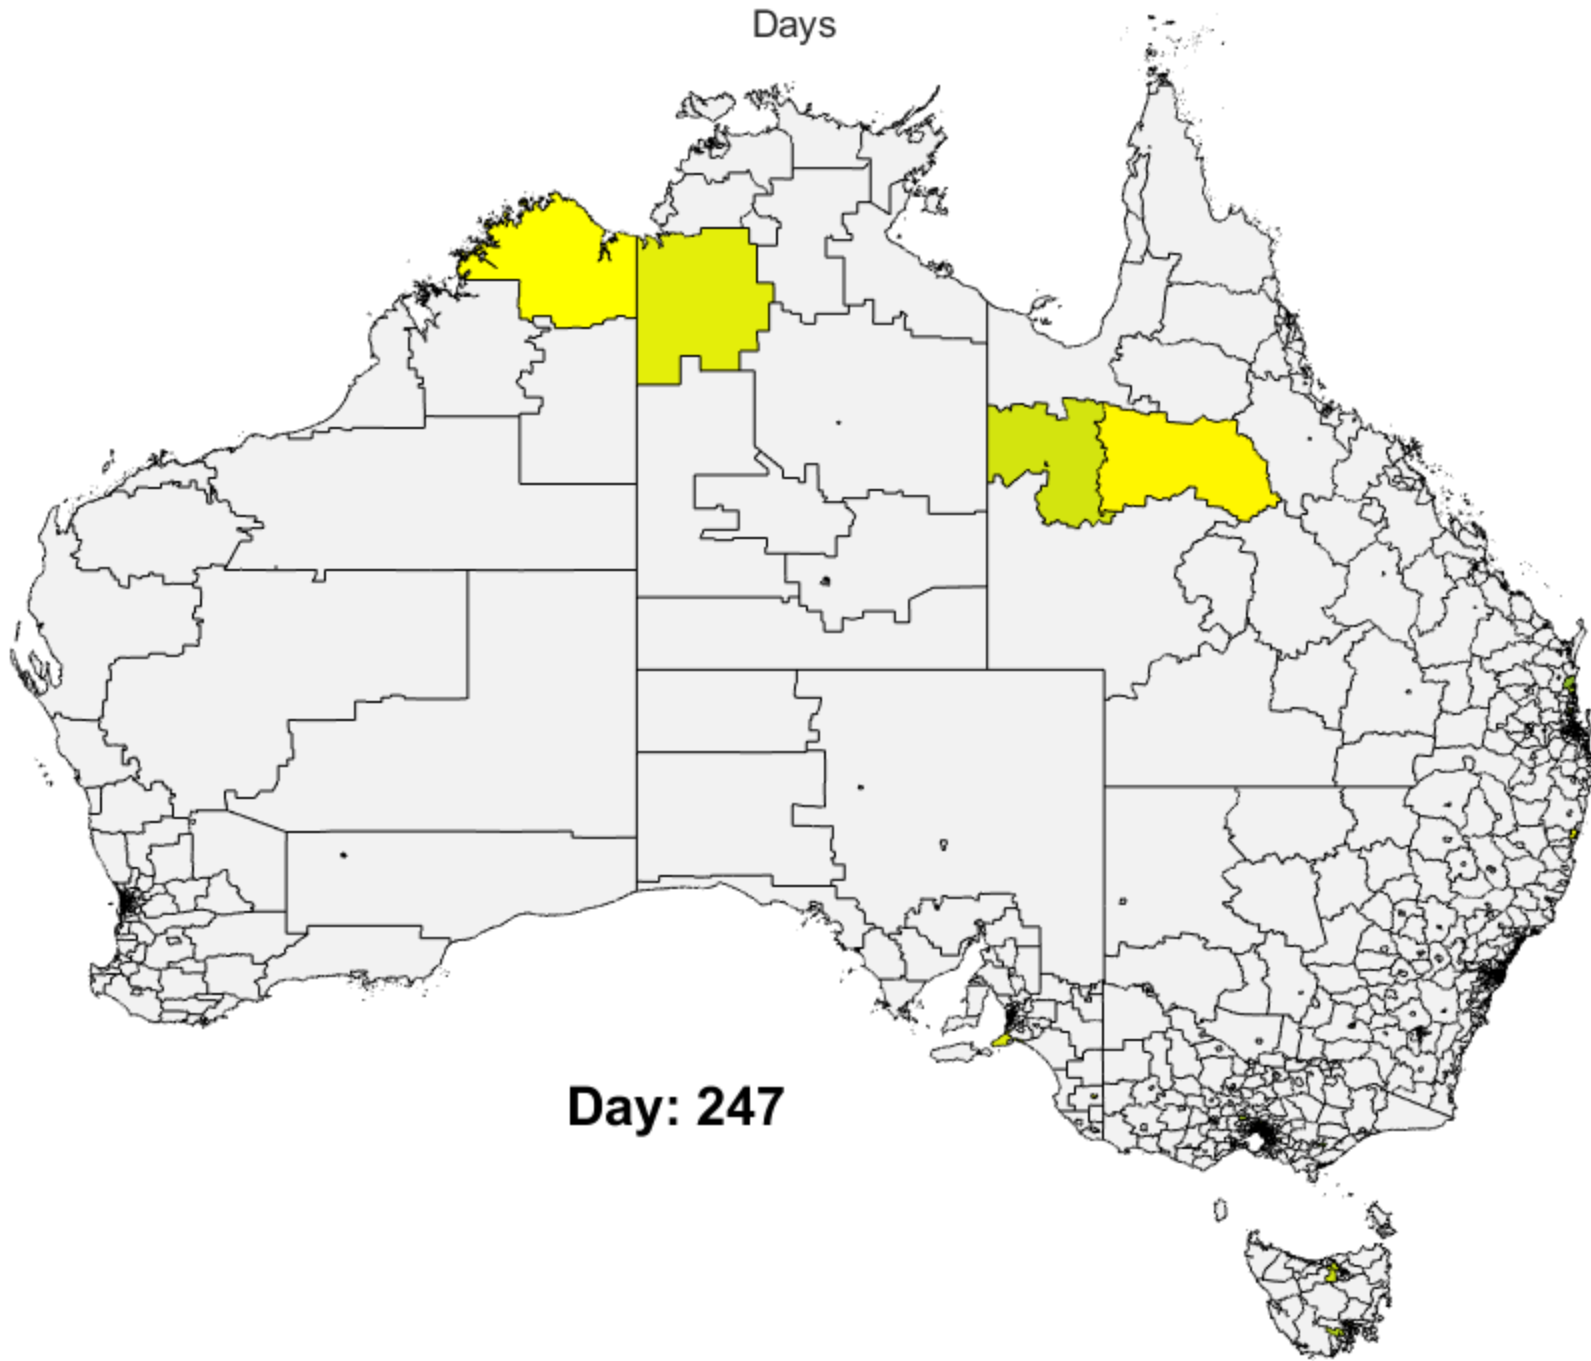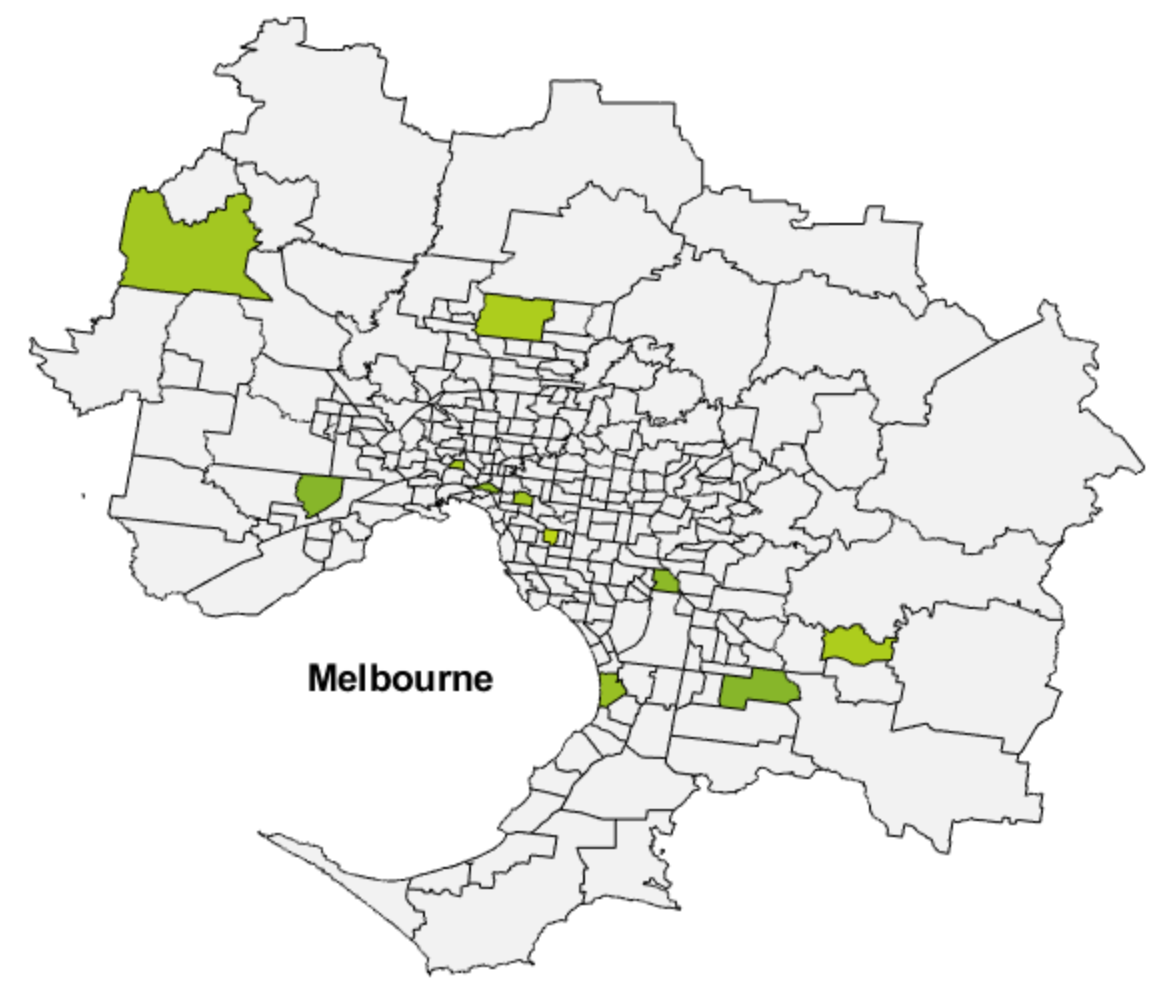

Supplement: rsif20190728supp5.pdf [file rsif20190728supp5.pdf]

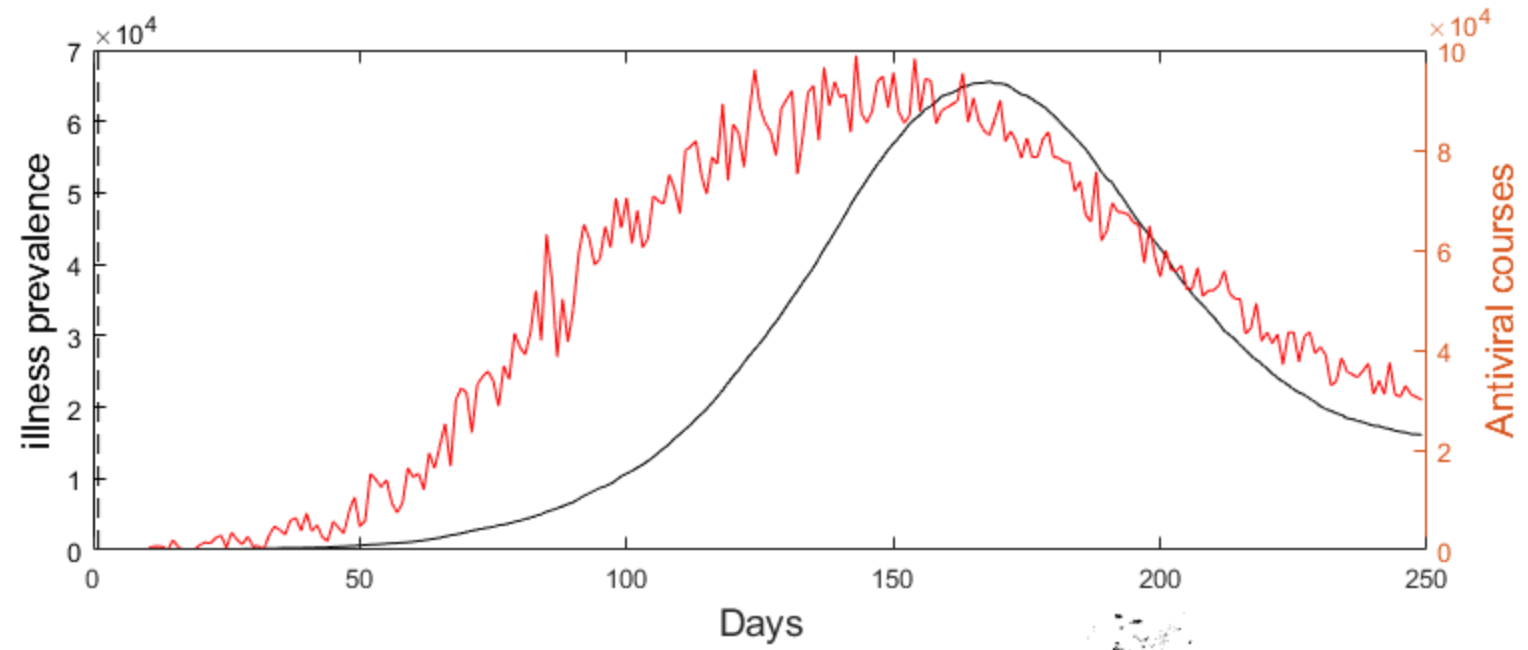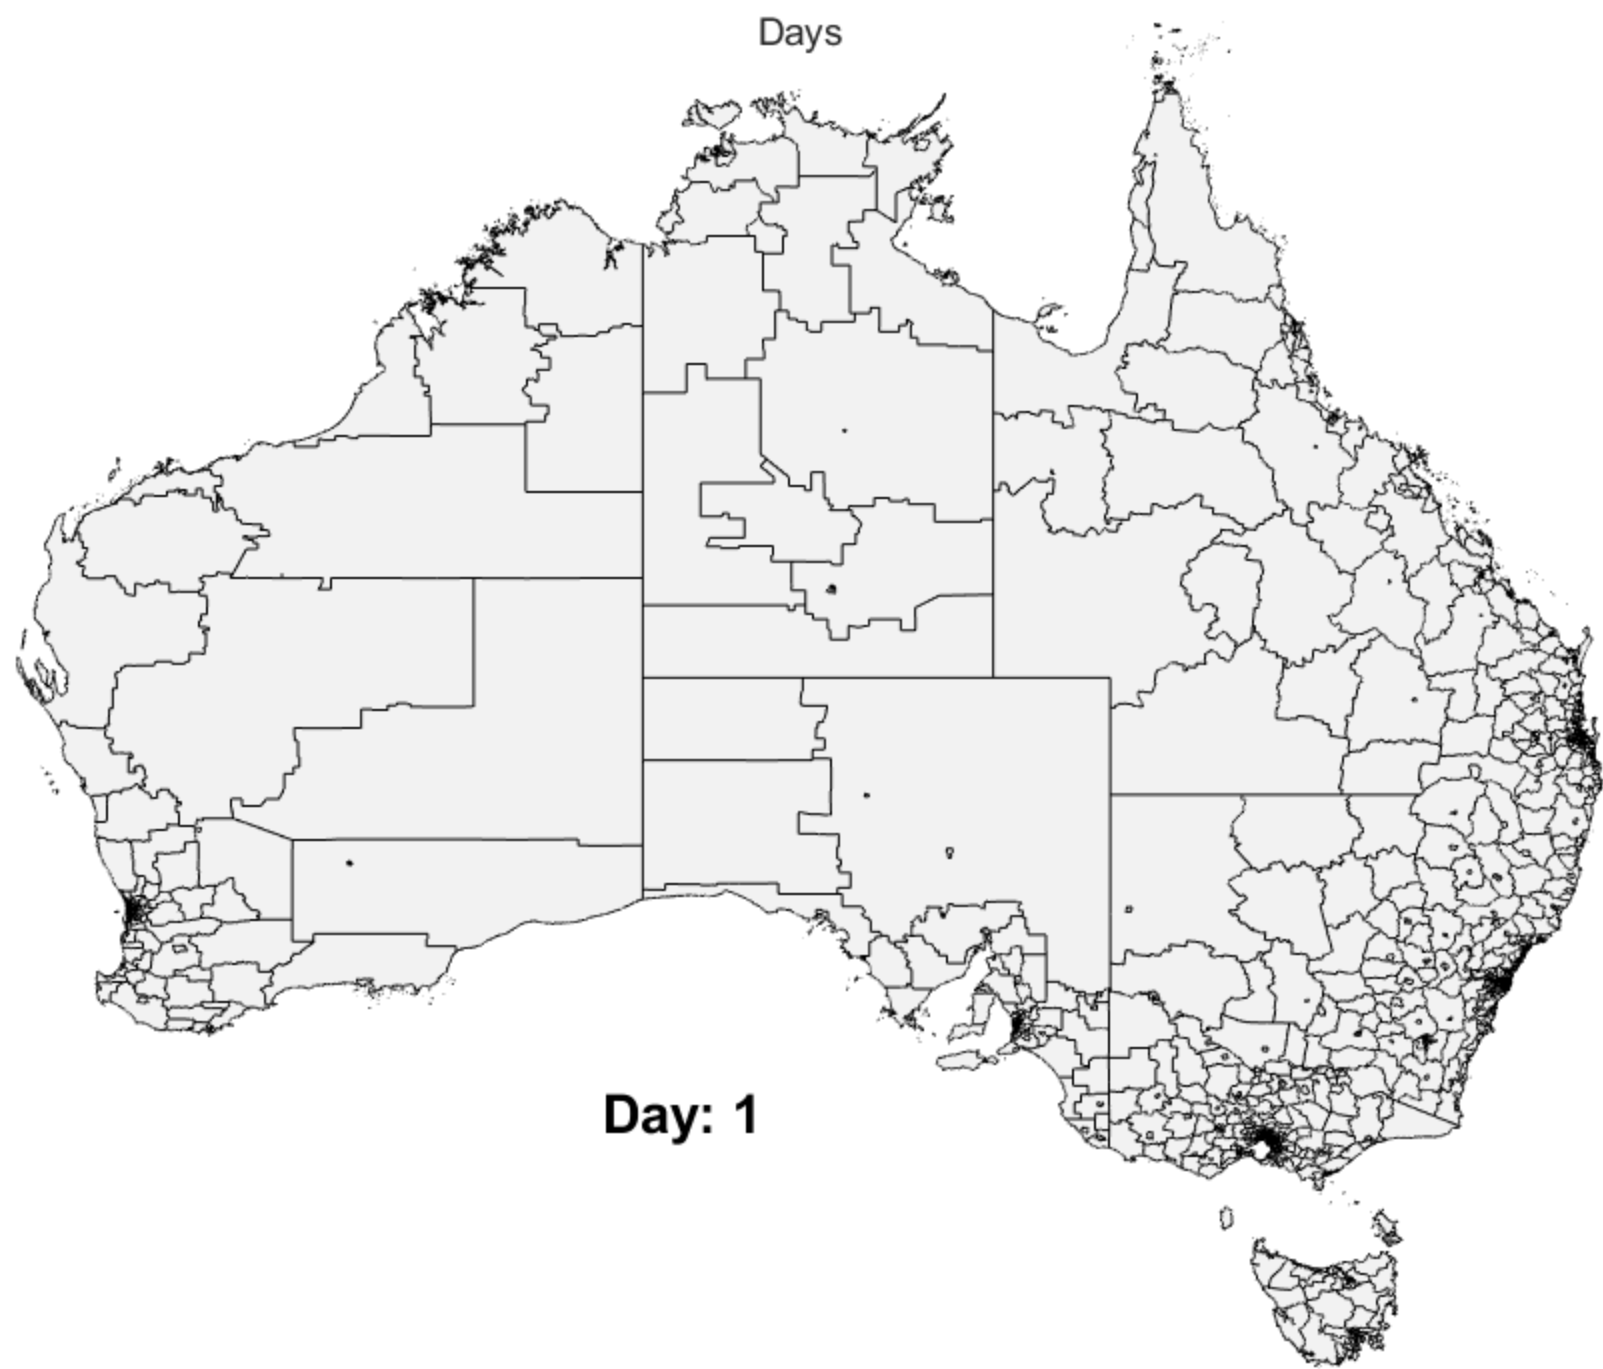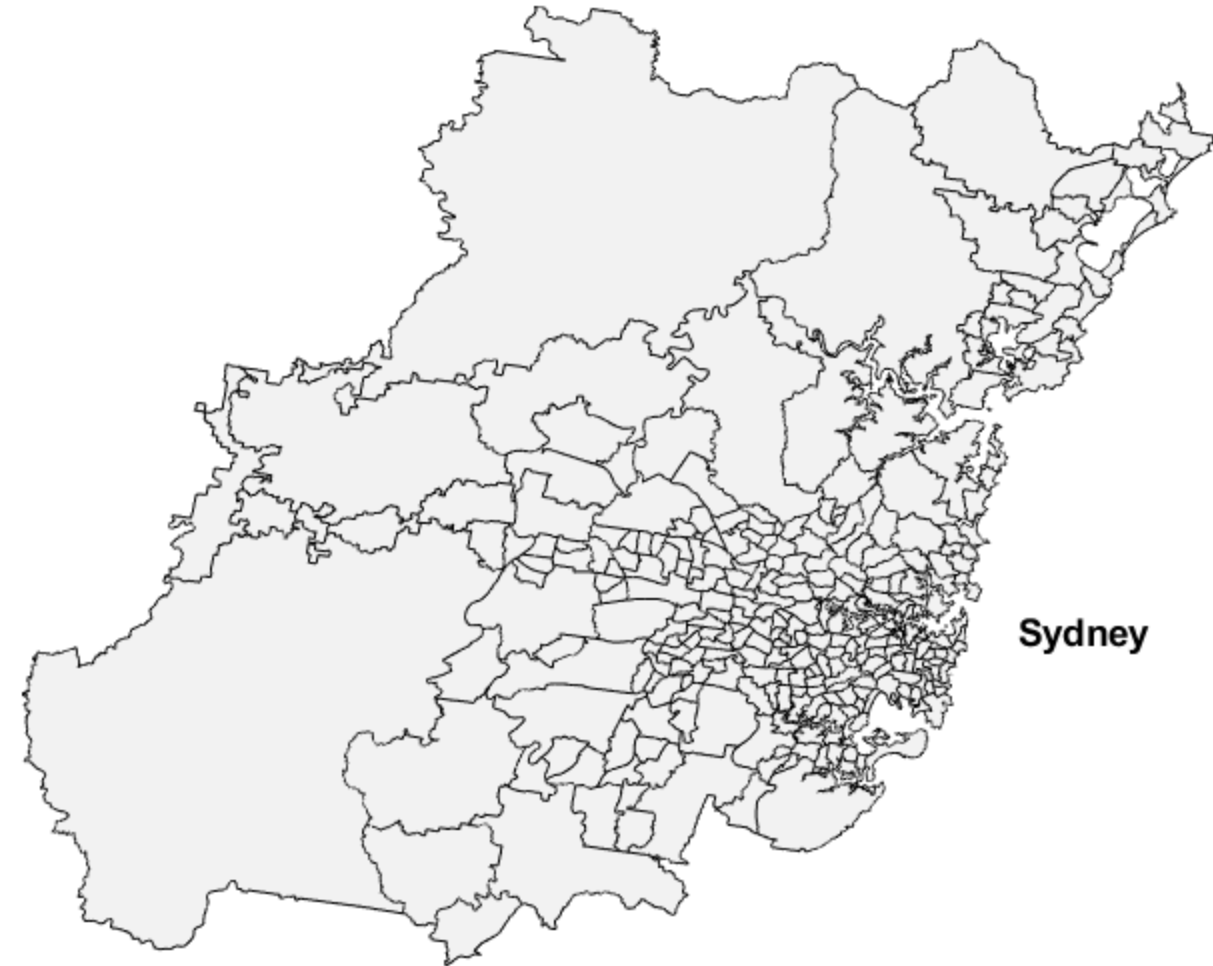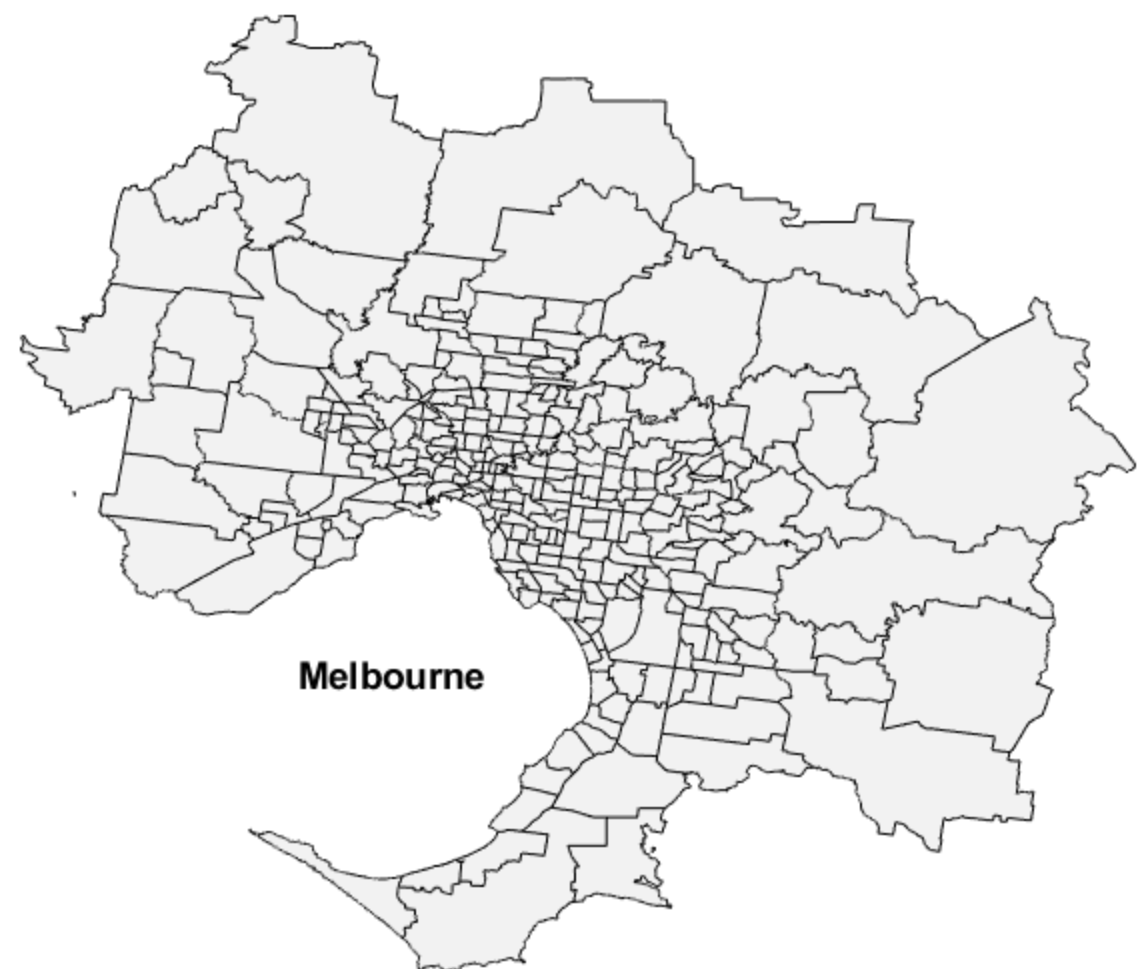

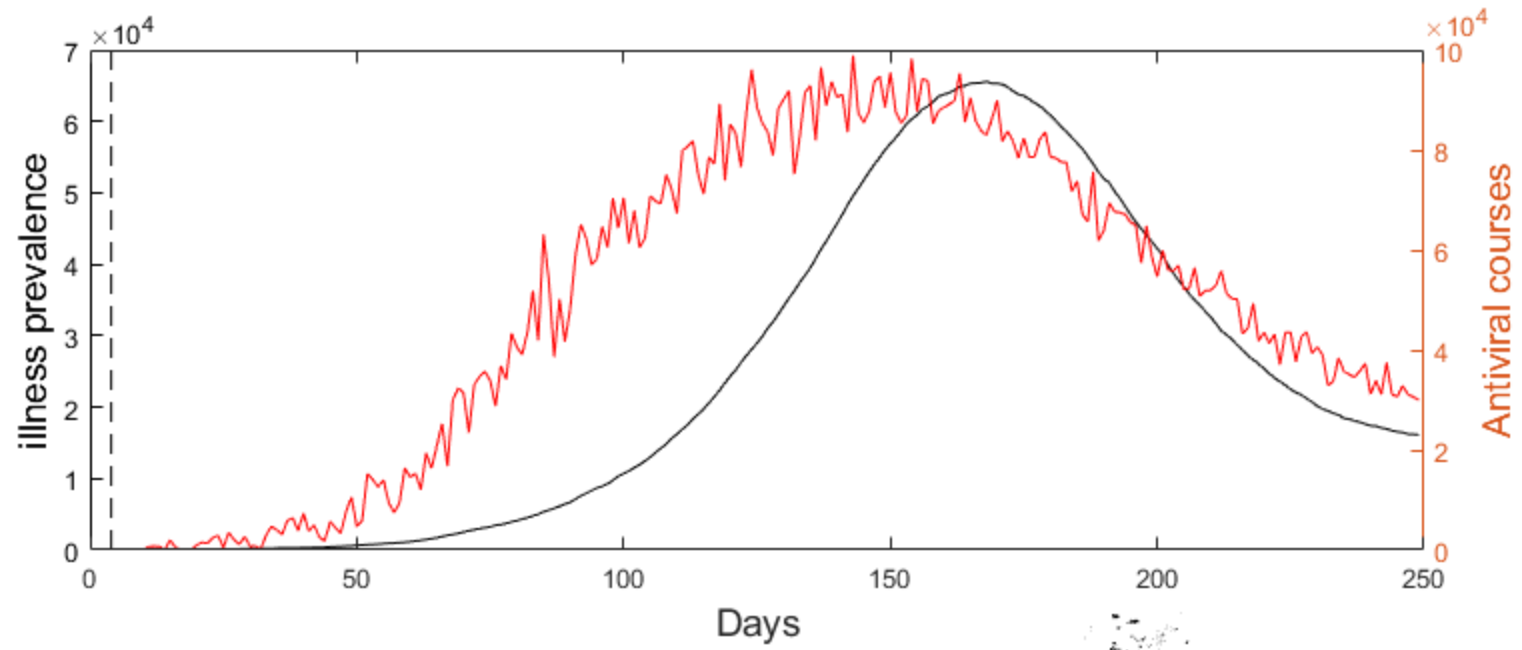

Days



Day: 4

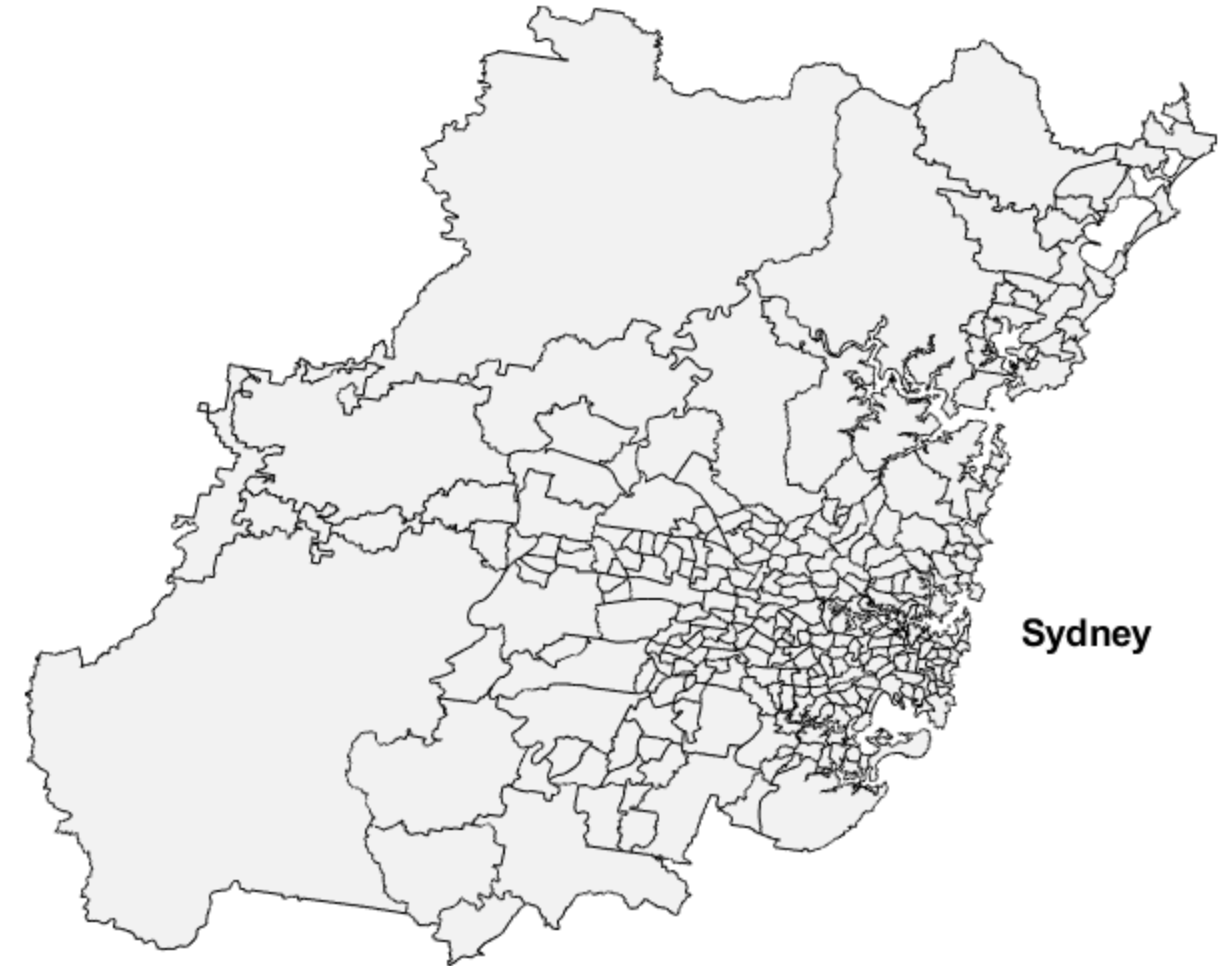

Sydney

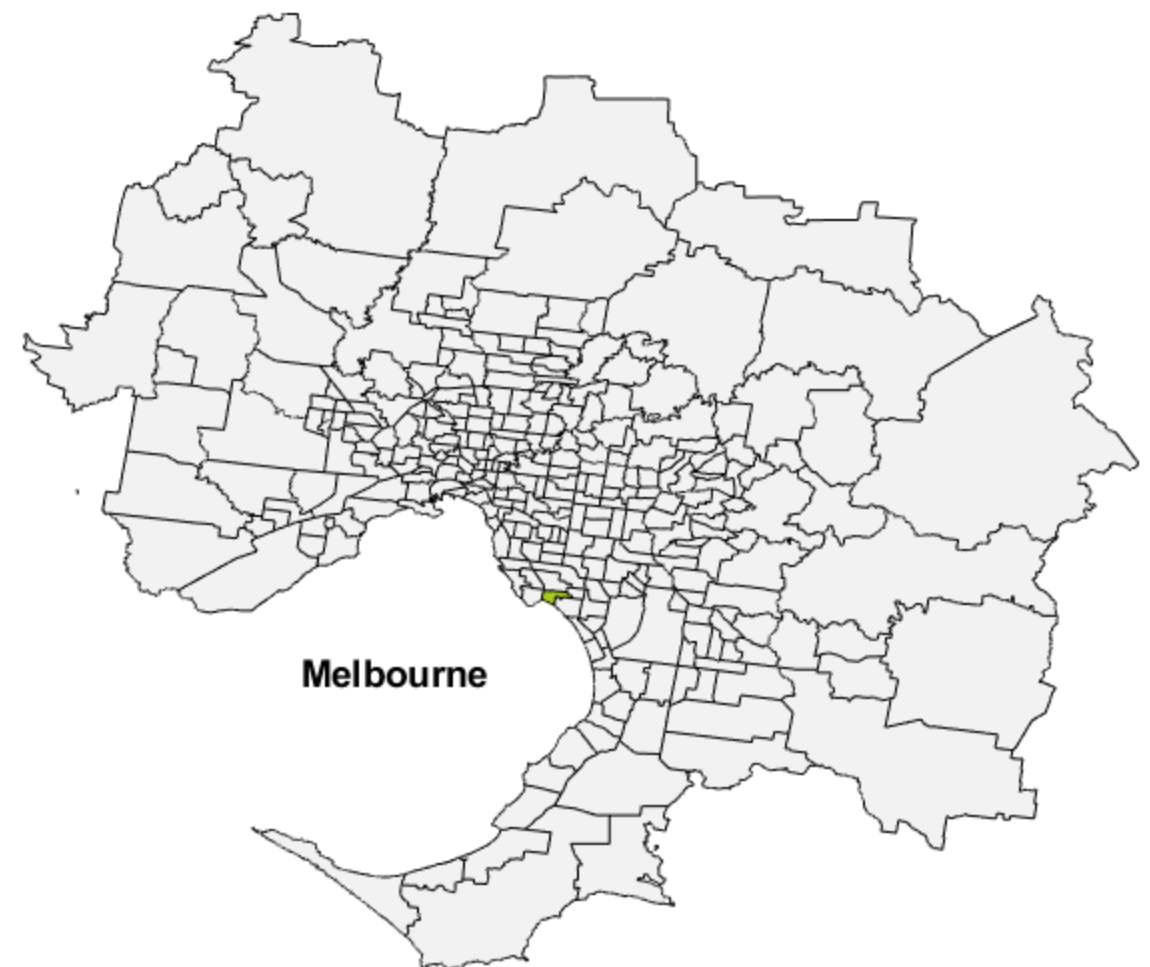

Melbourne

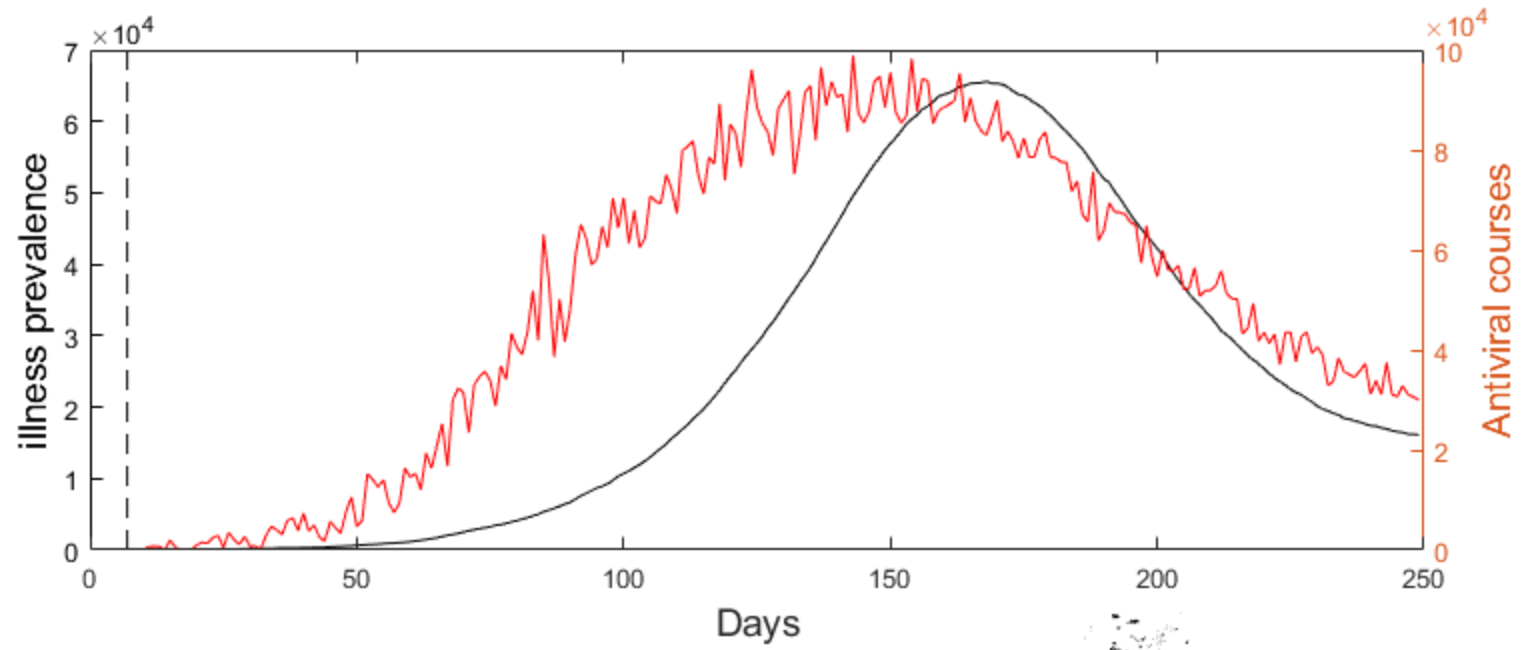

Days

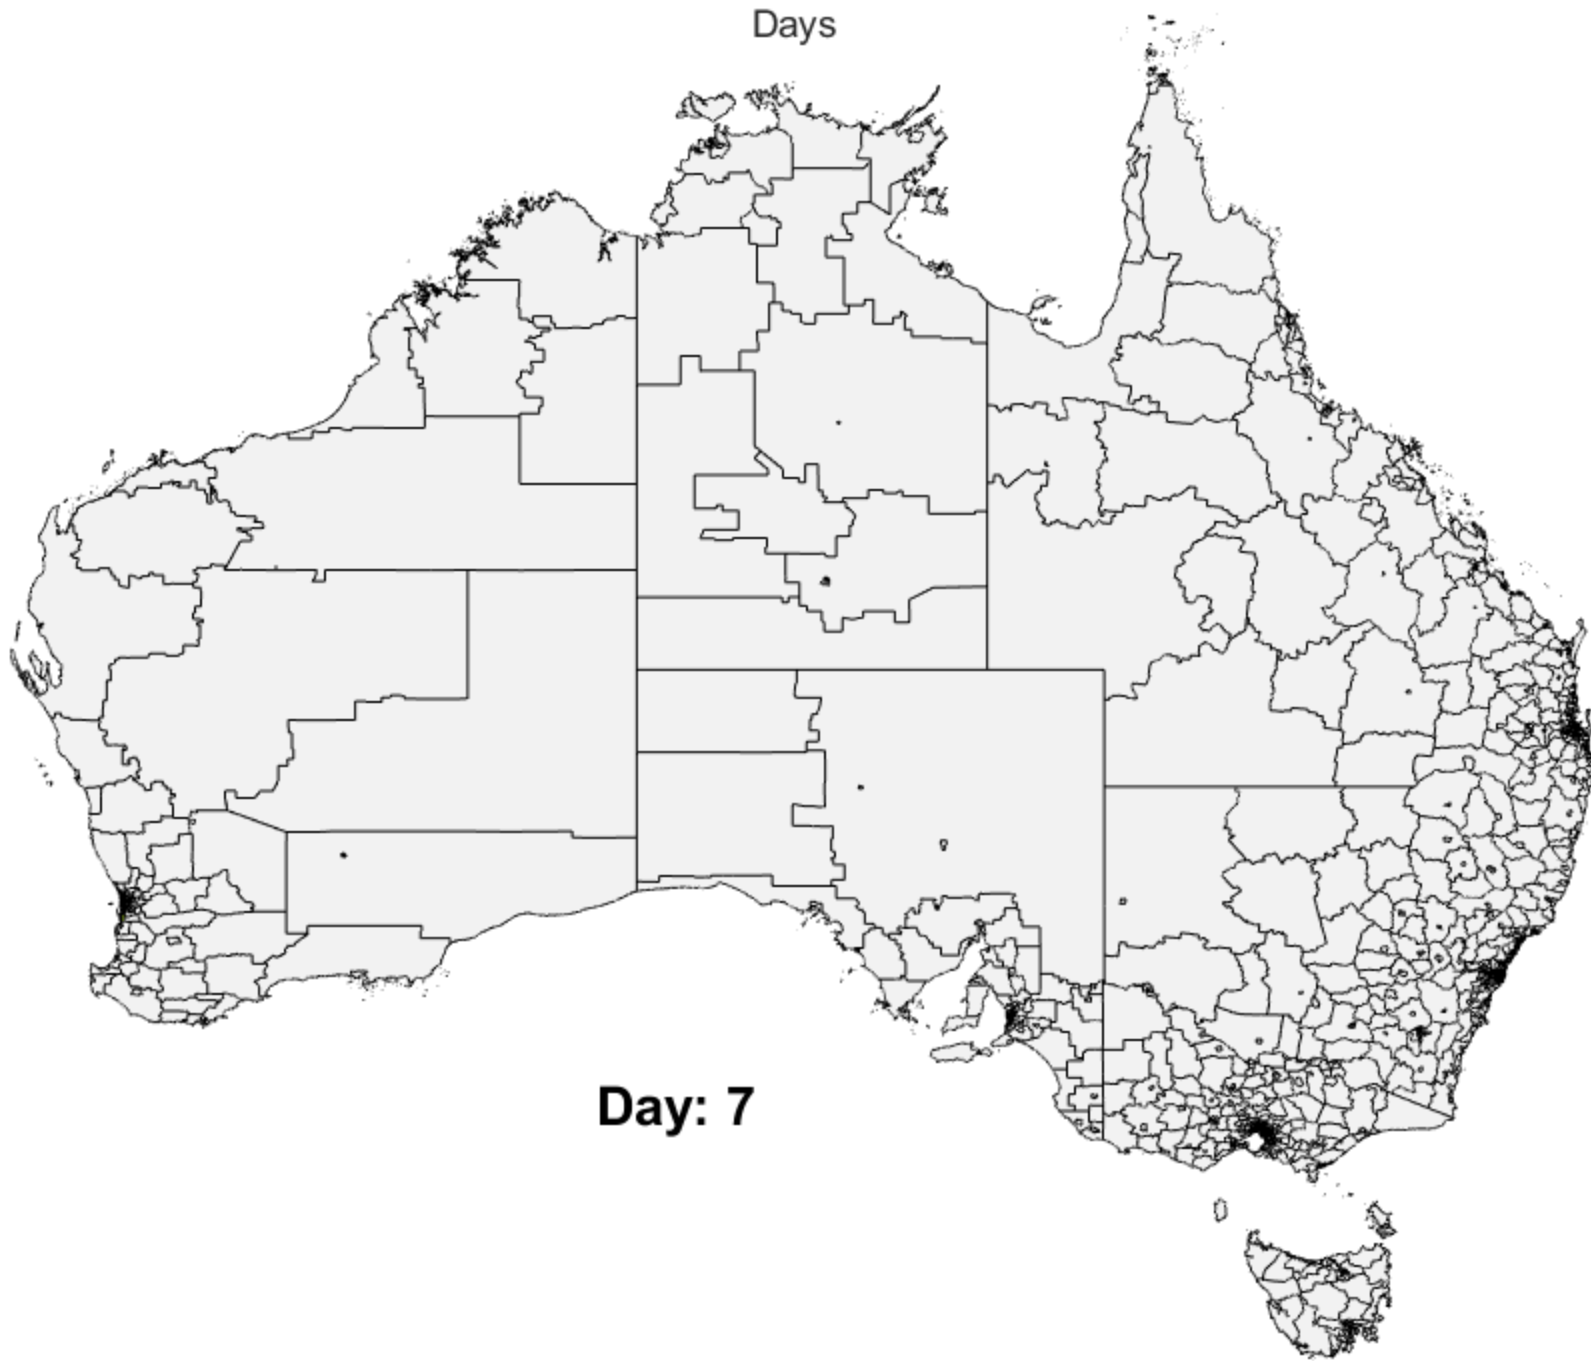

Day: 7

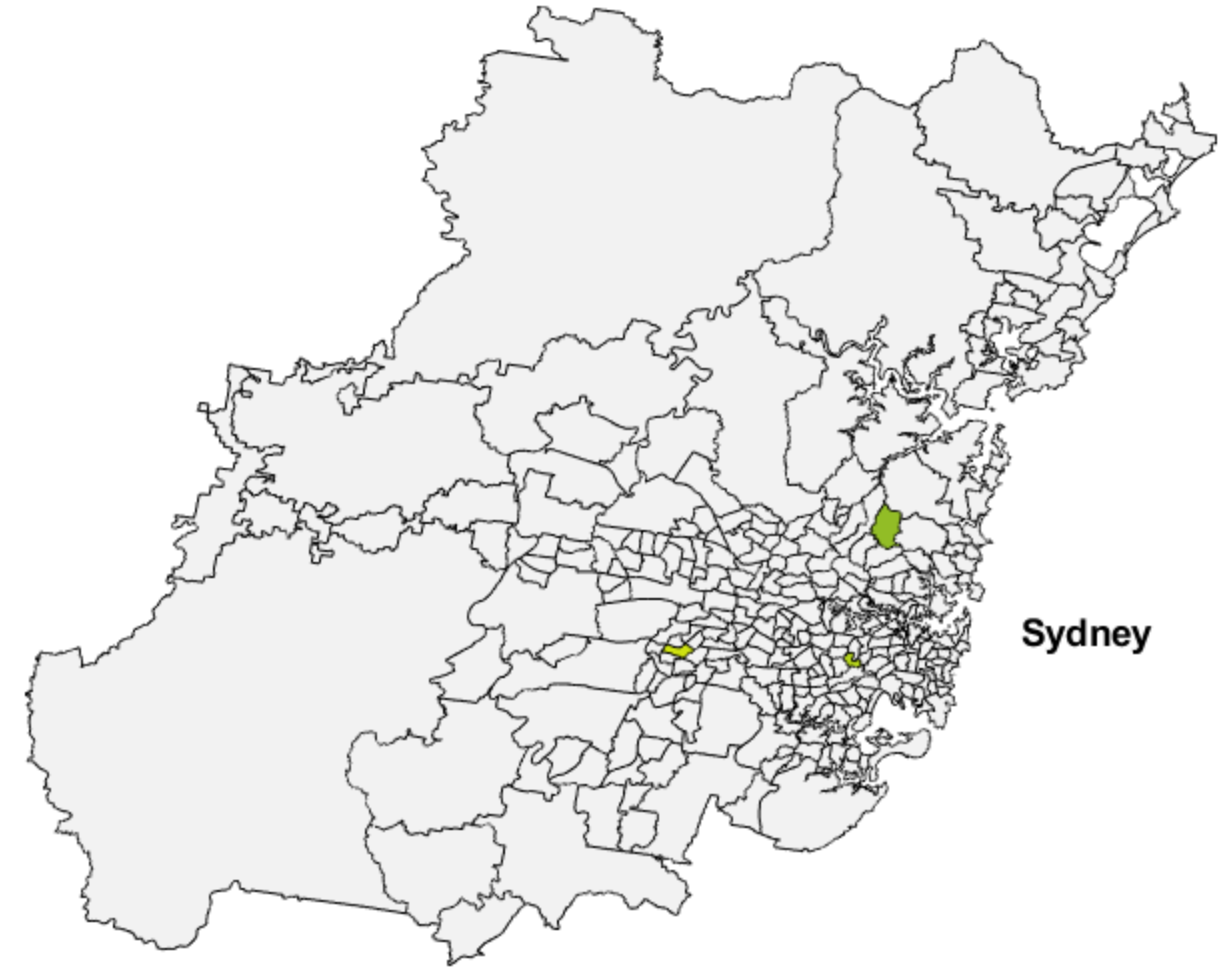

Sydney

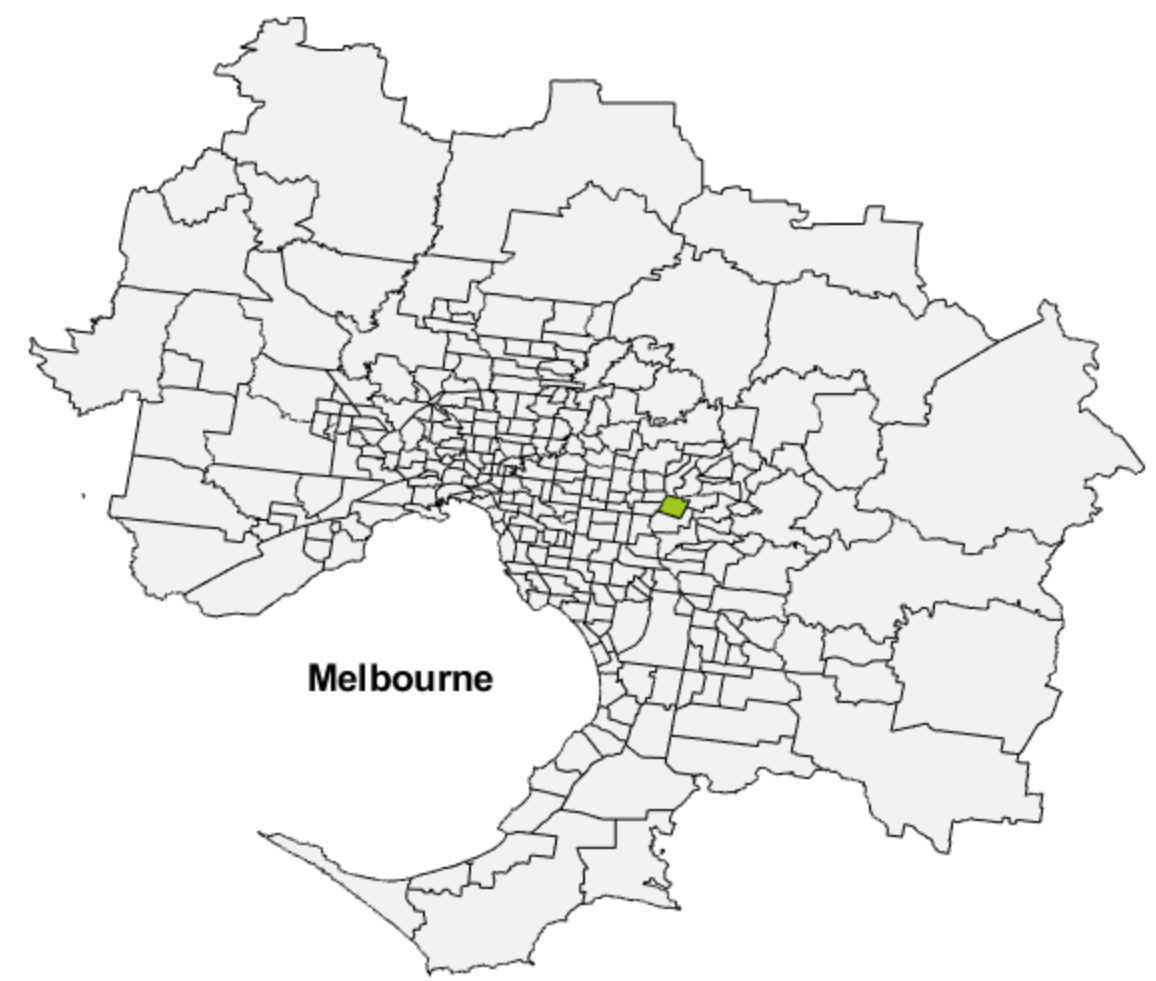

Melbourne



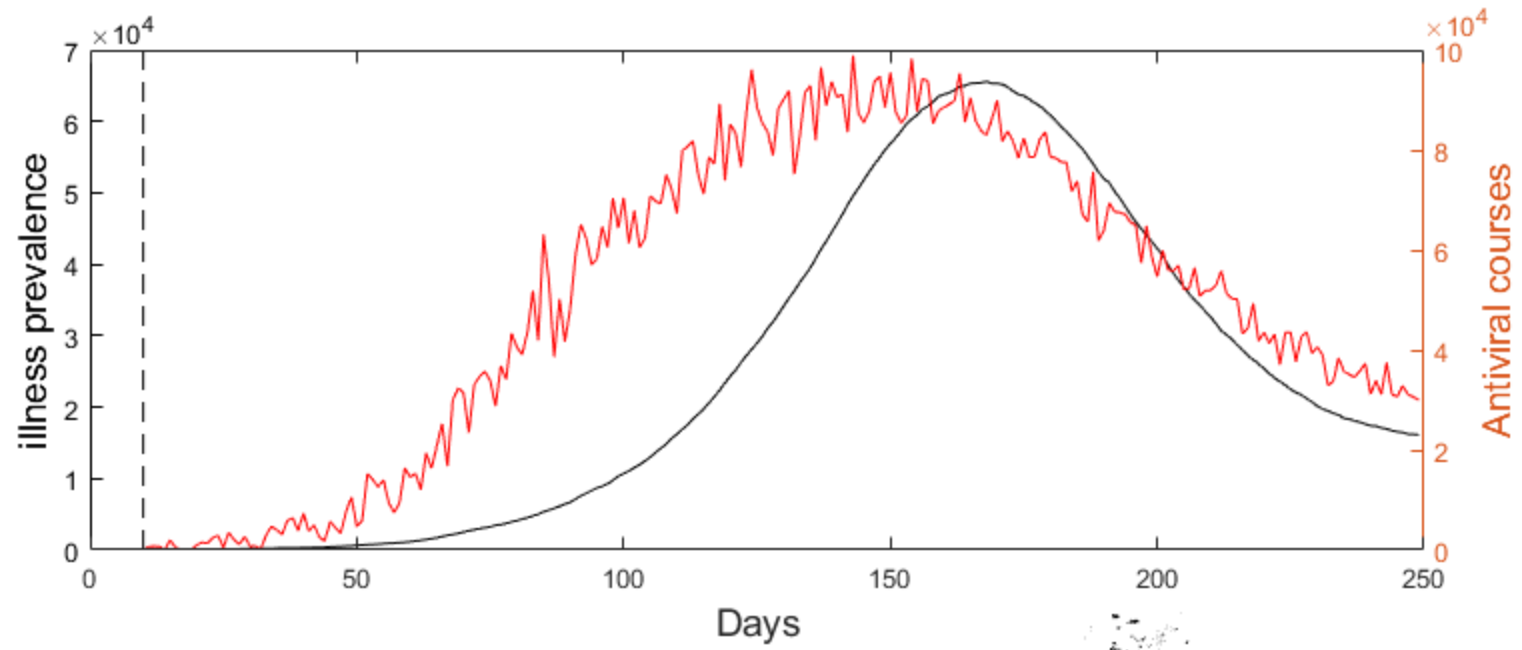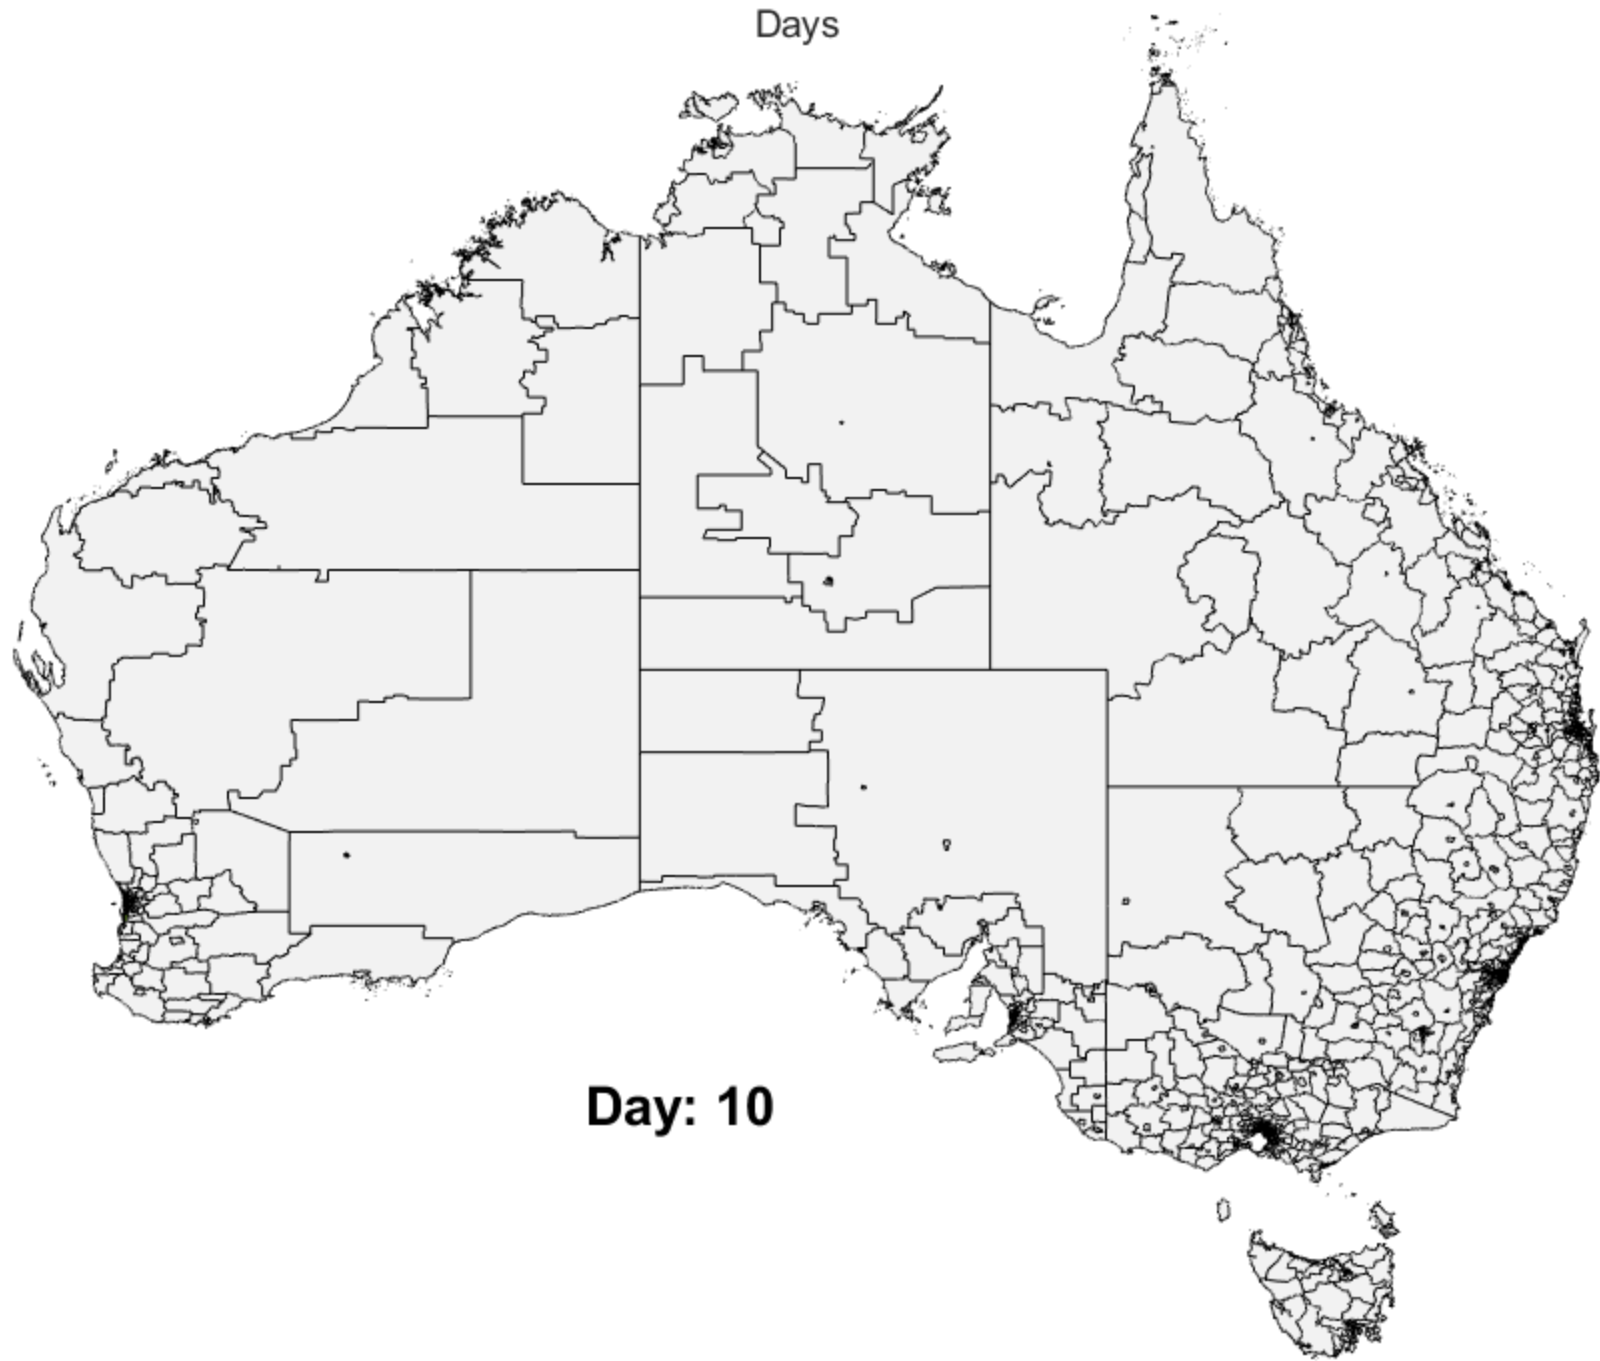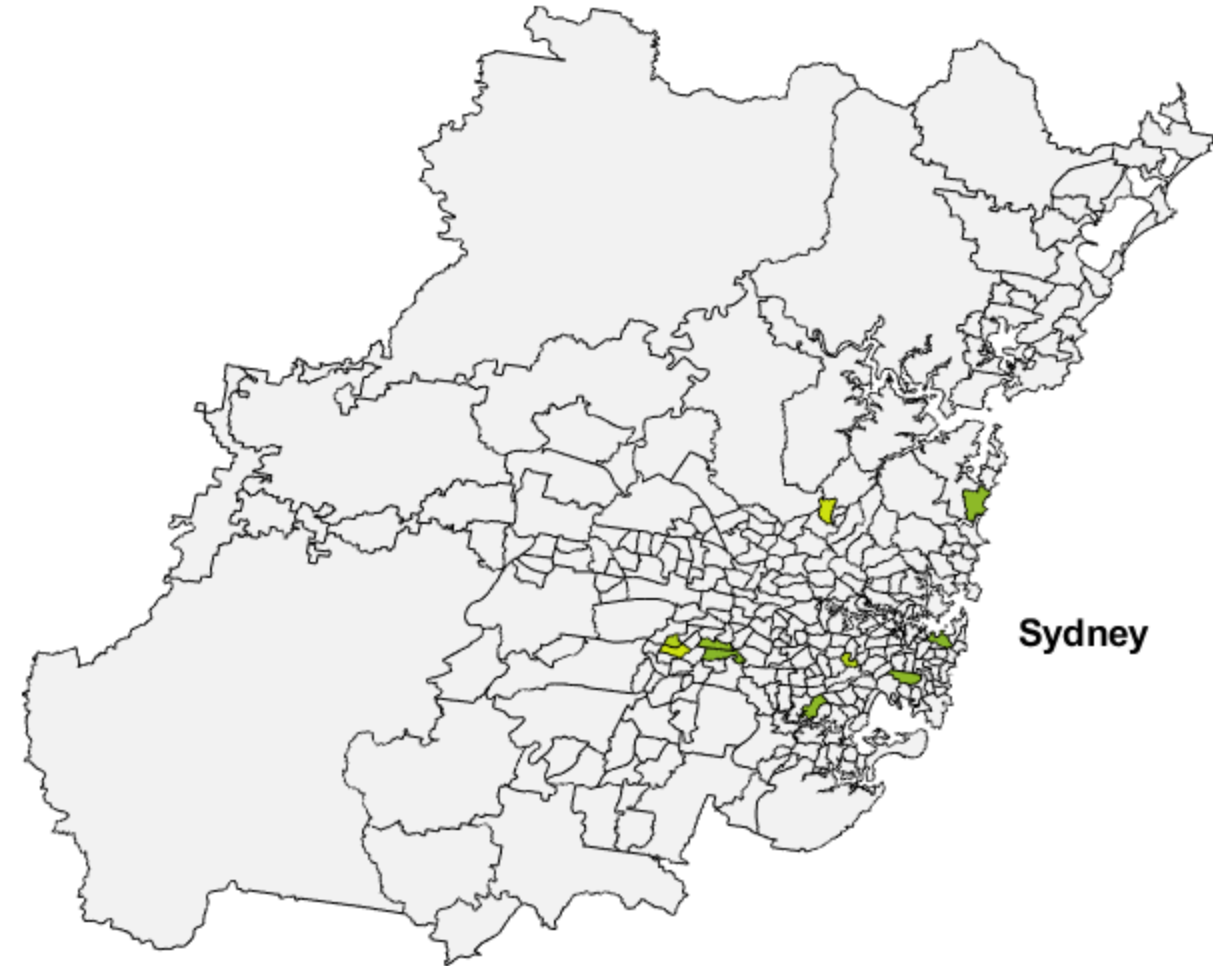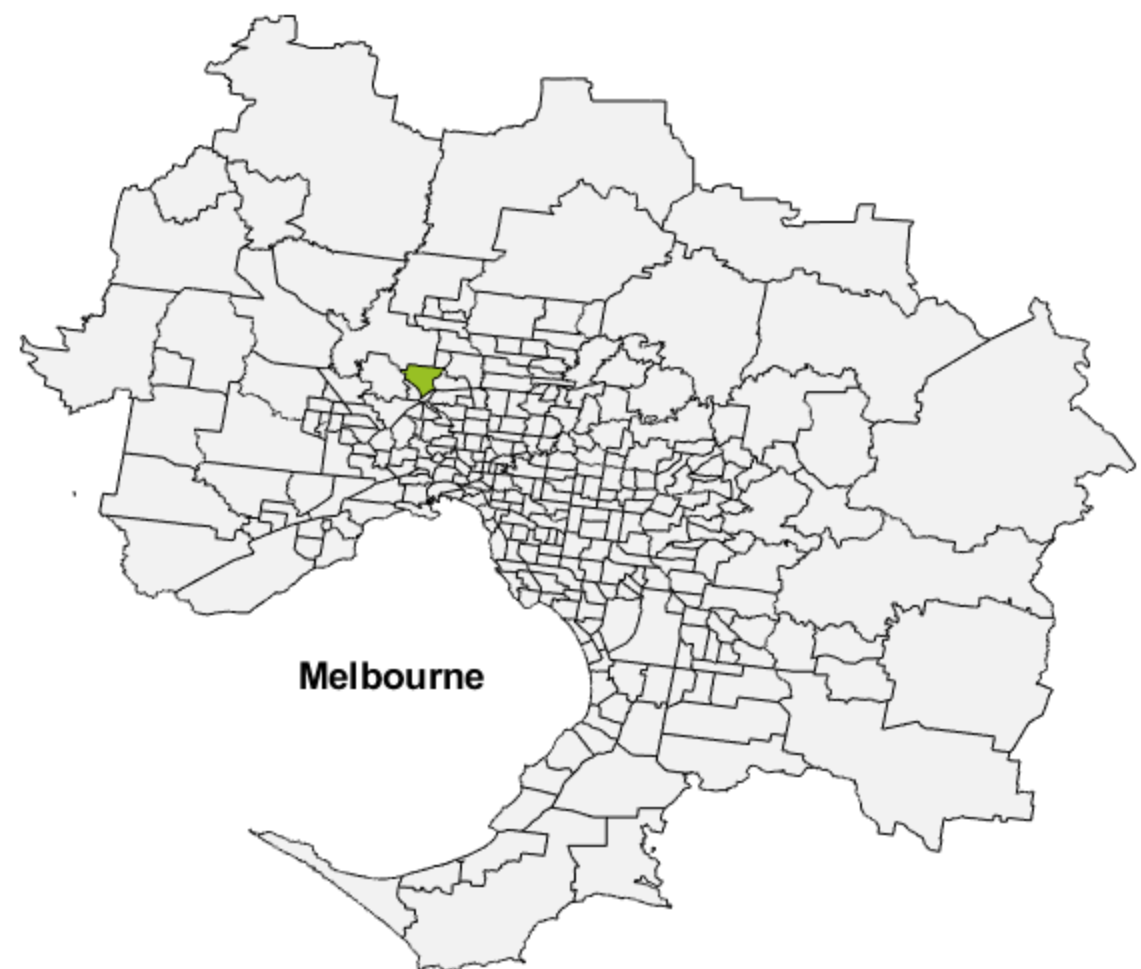



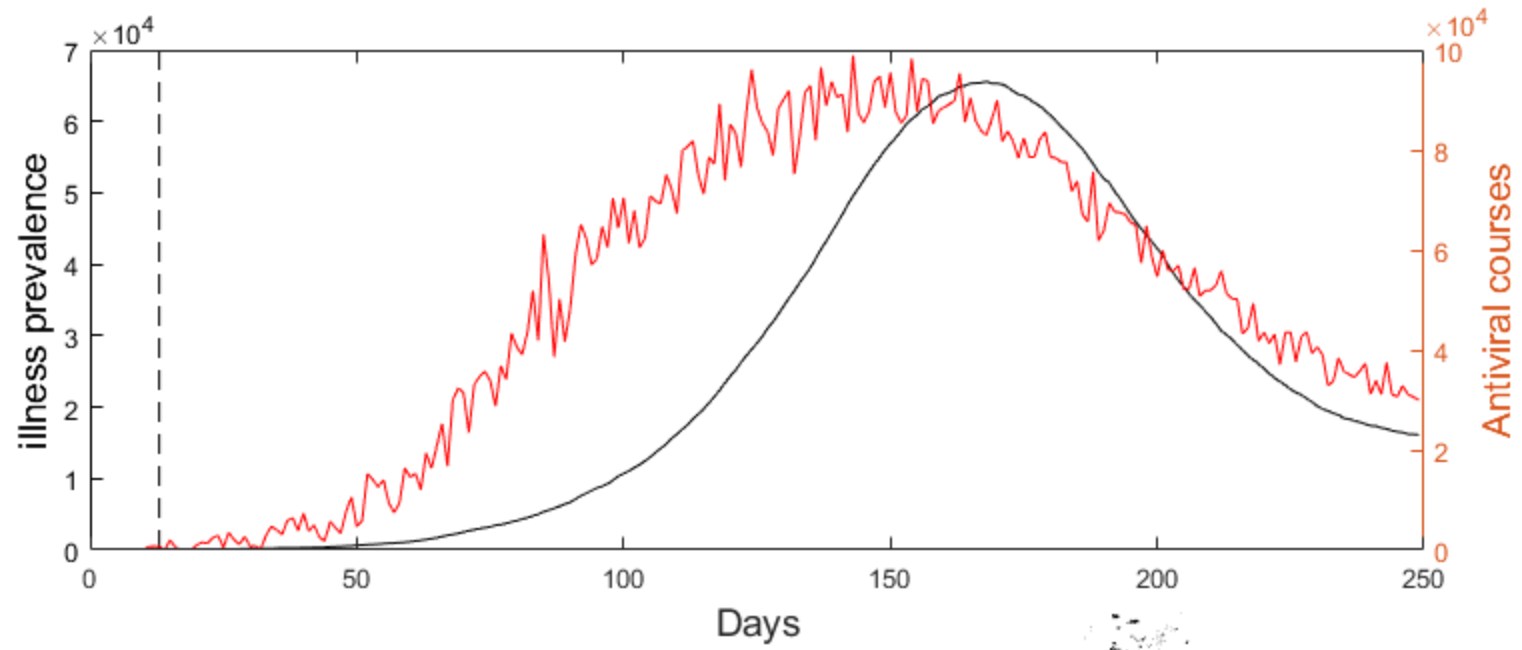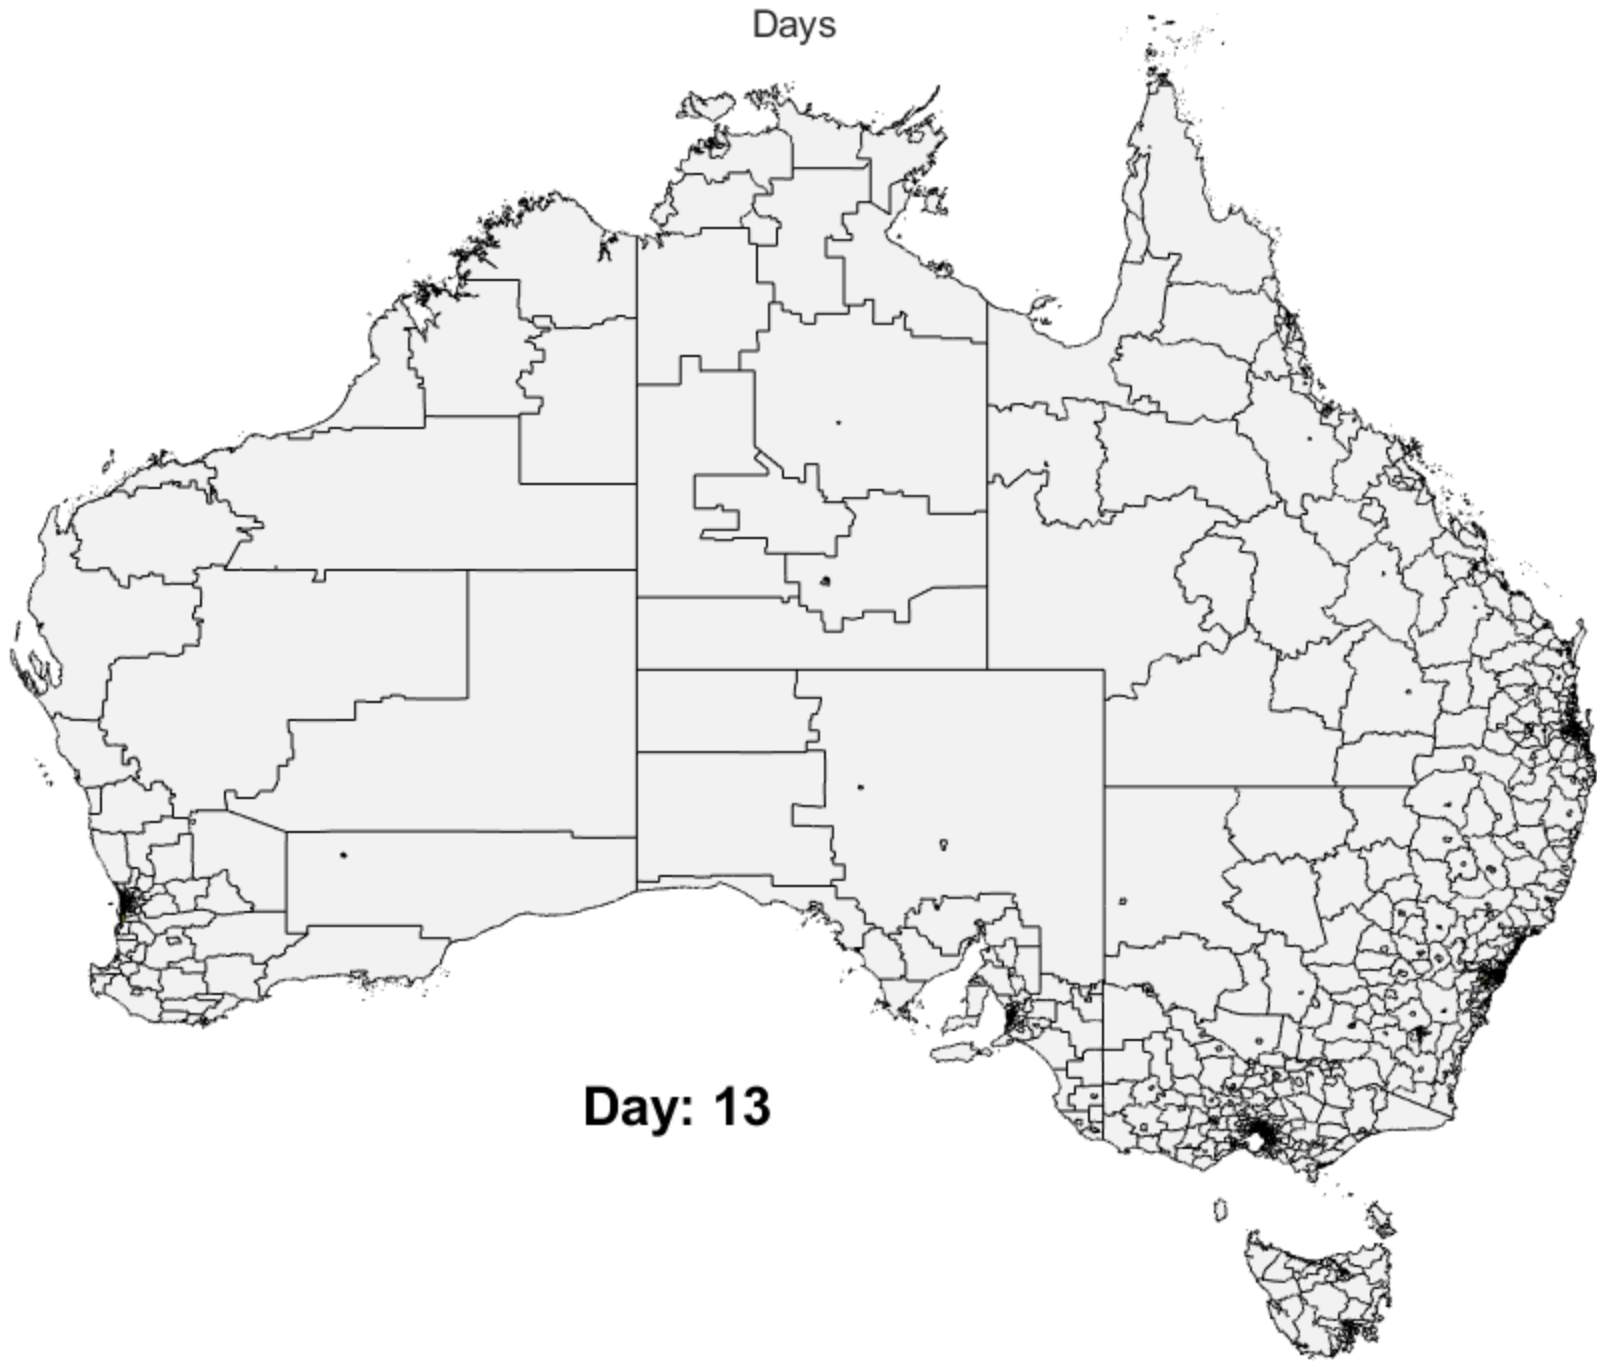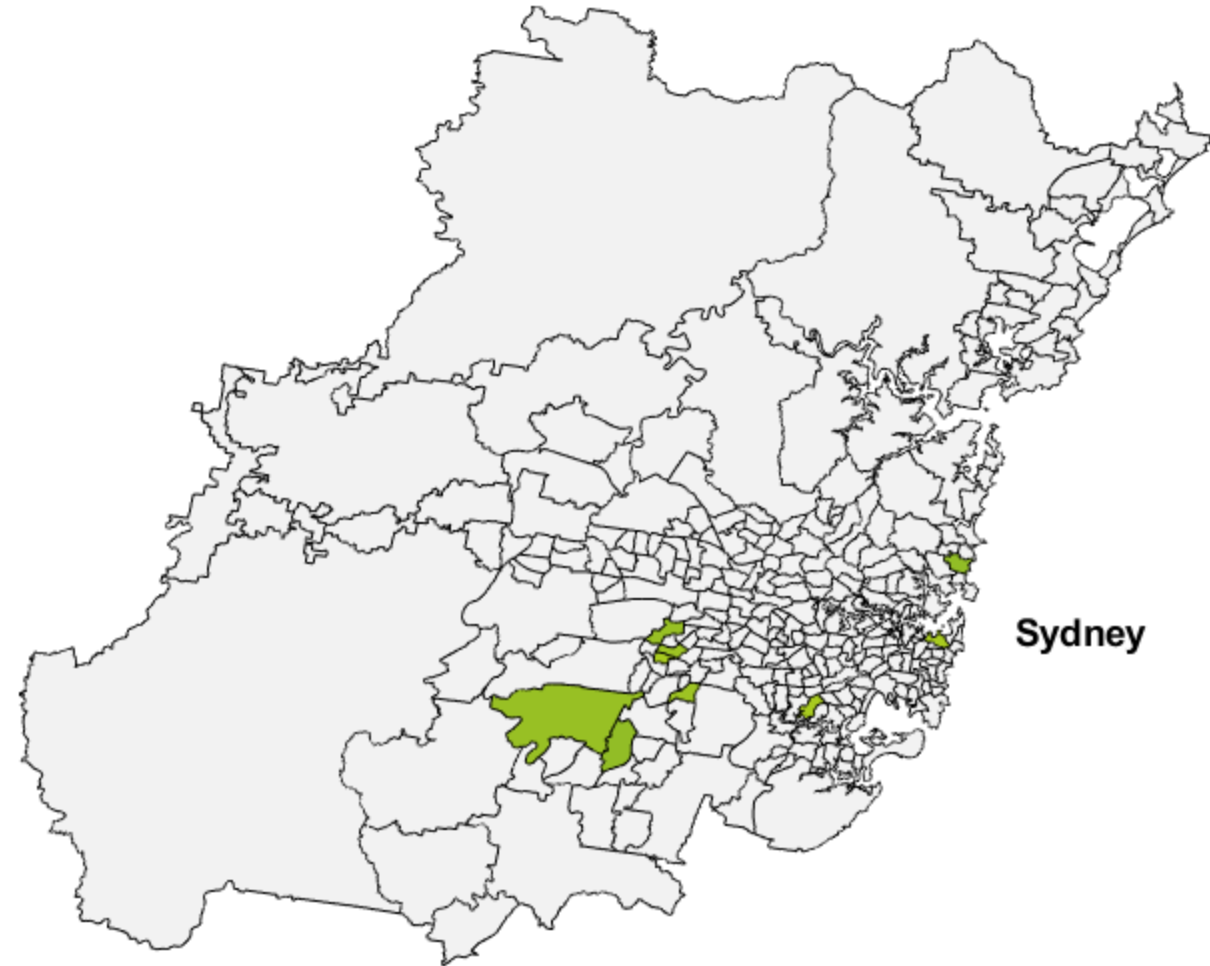

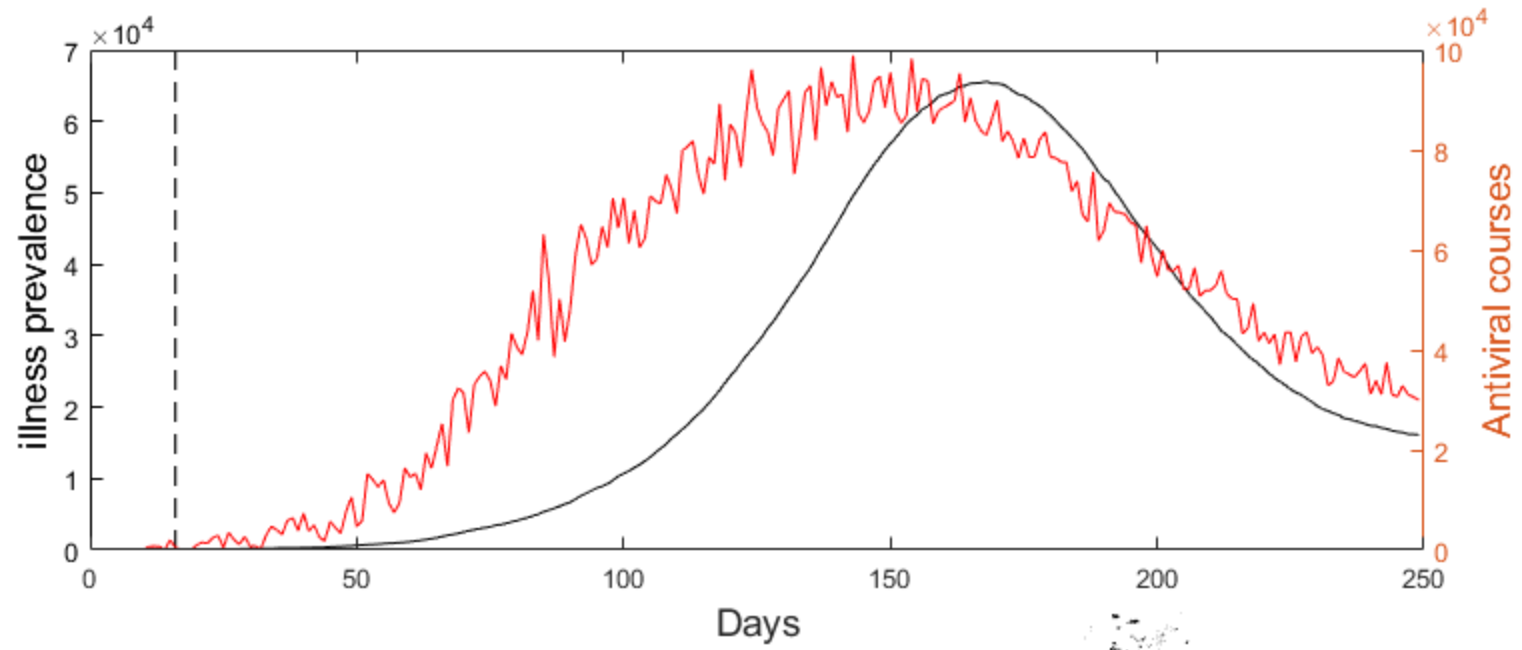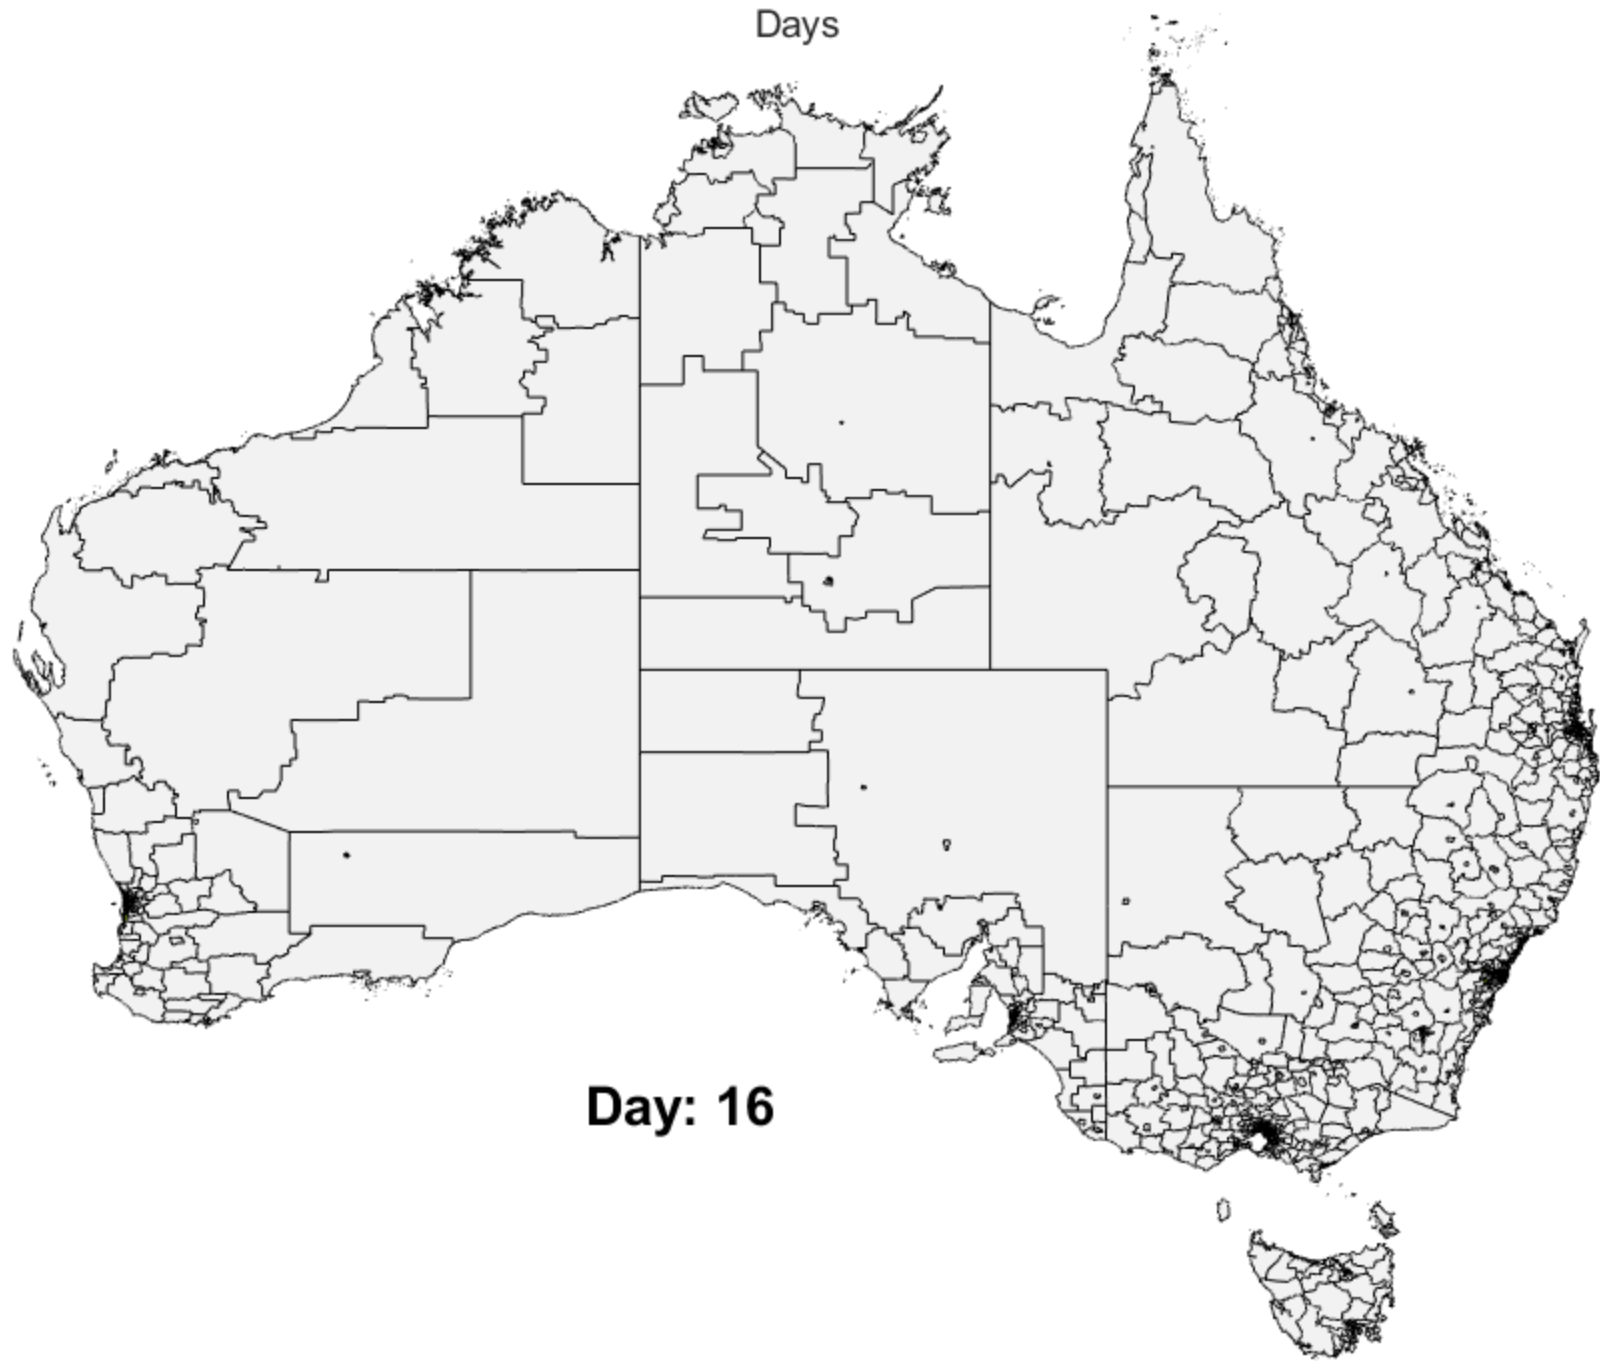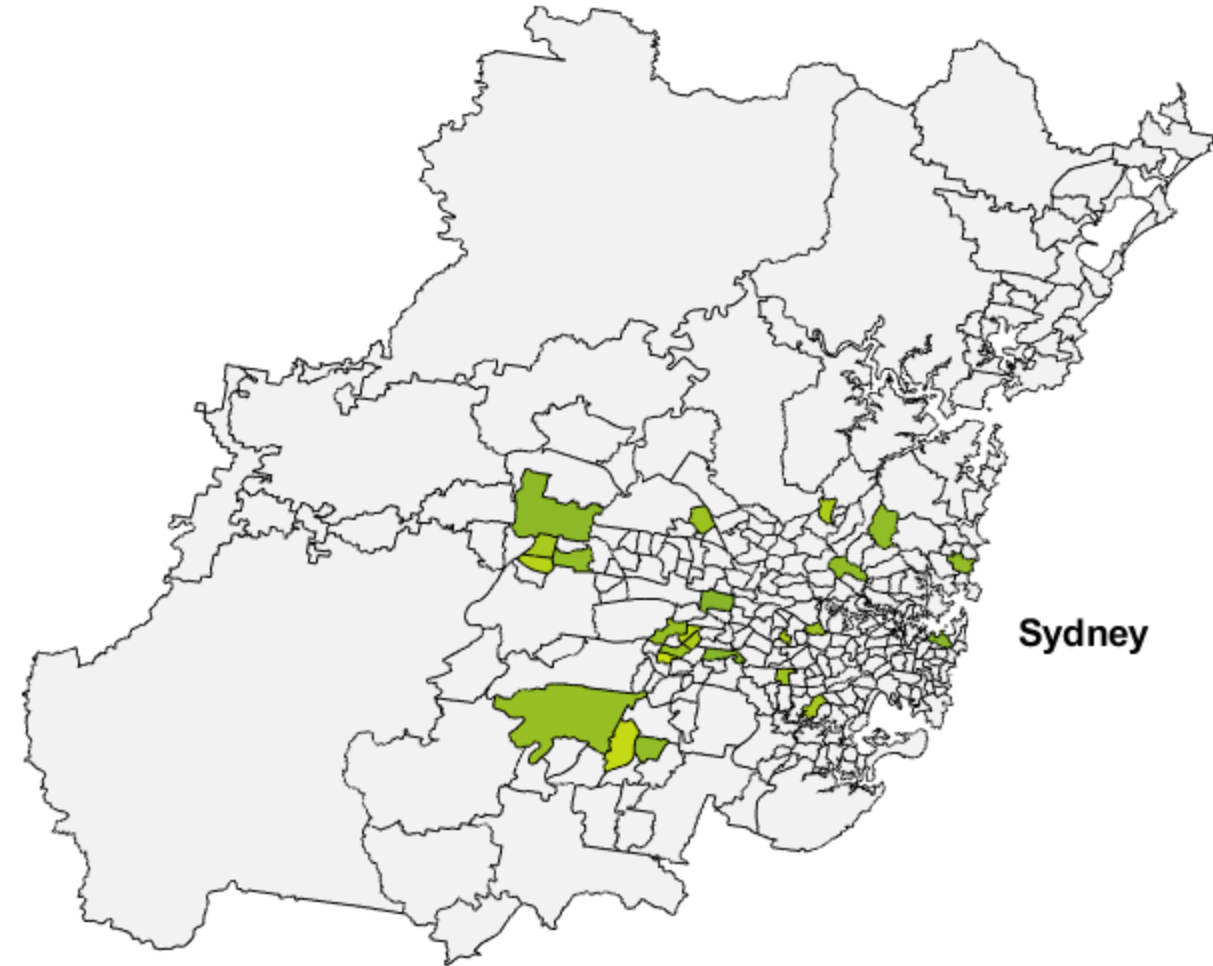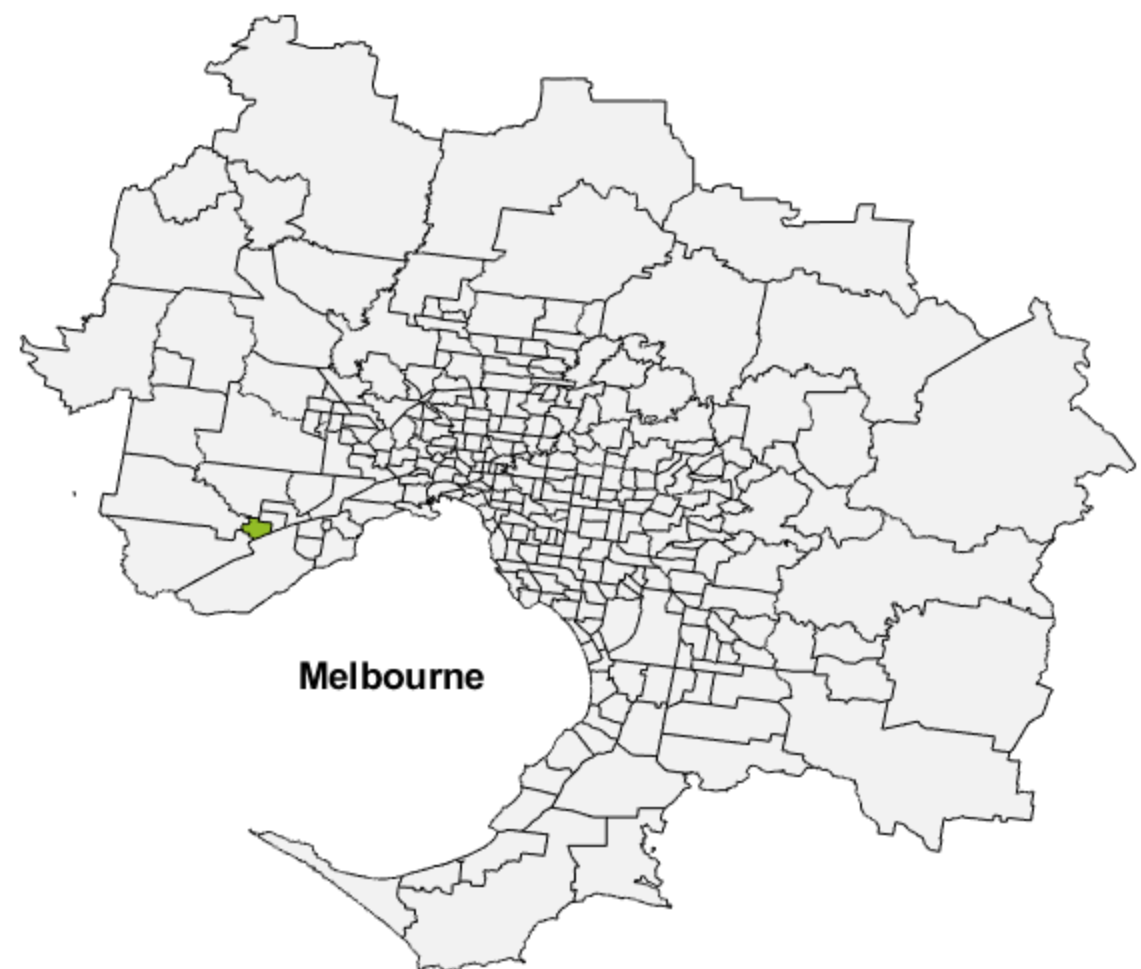

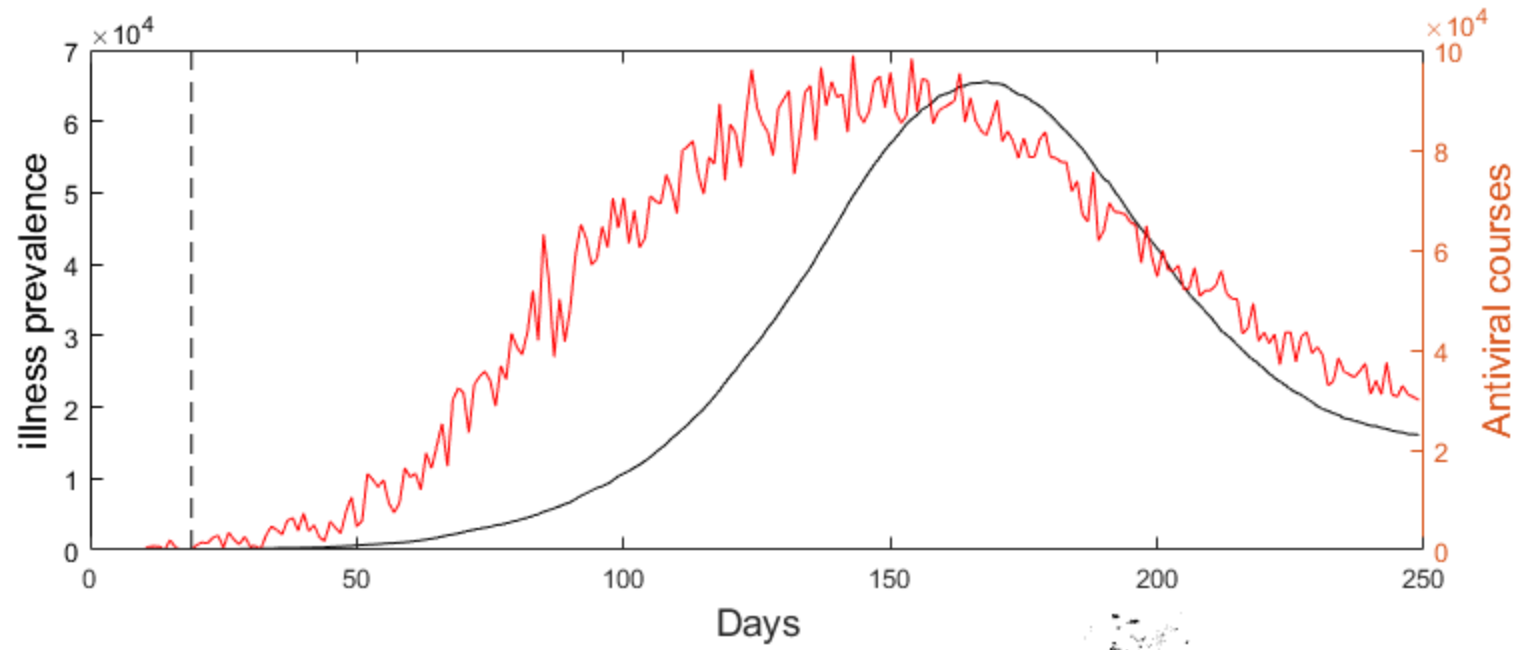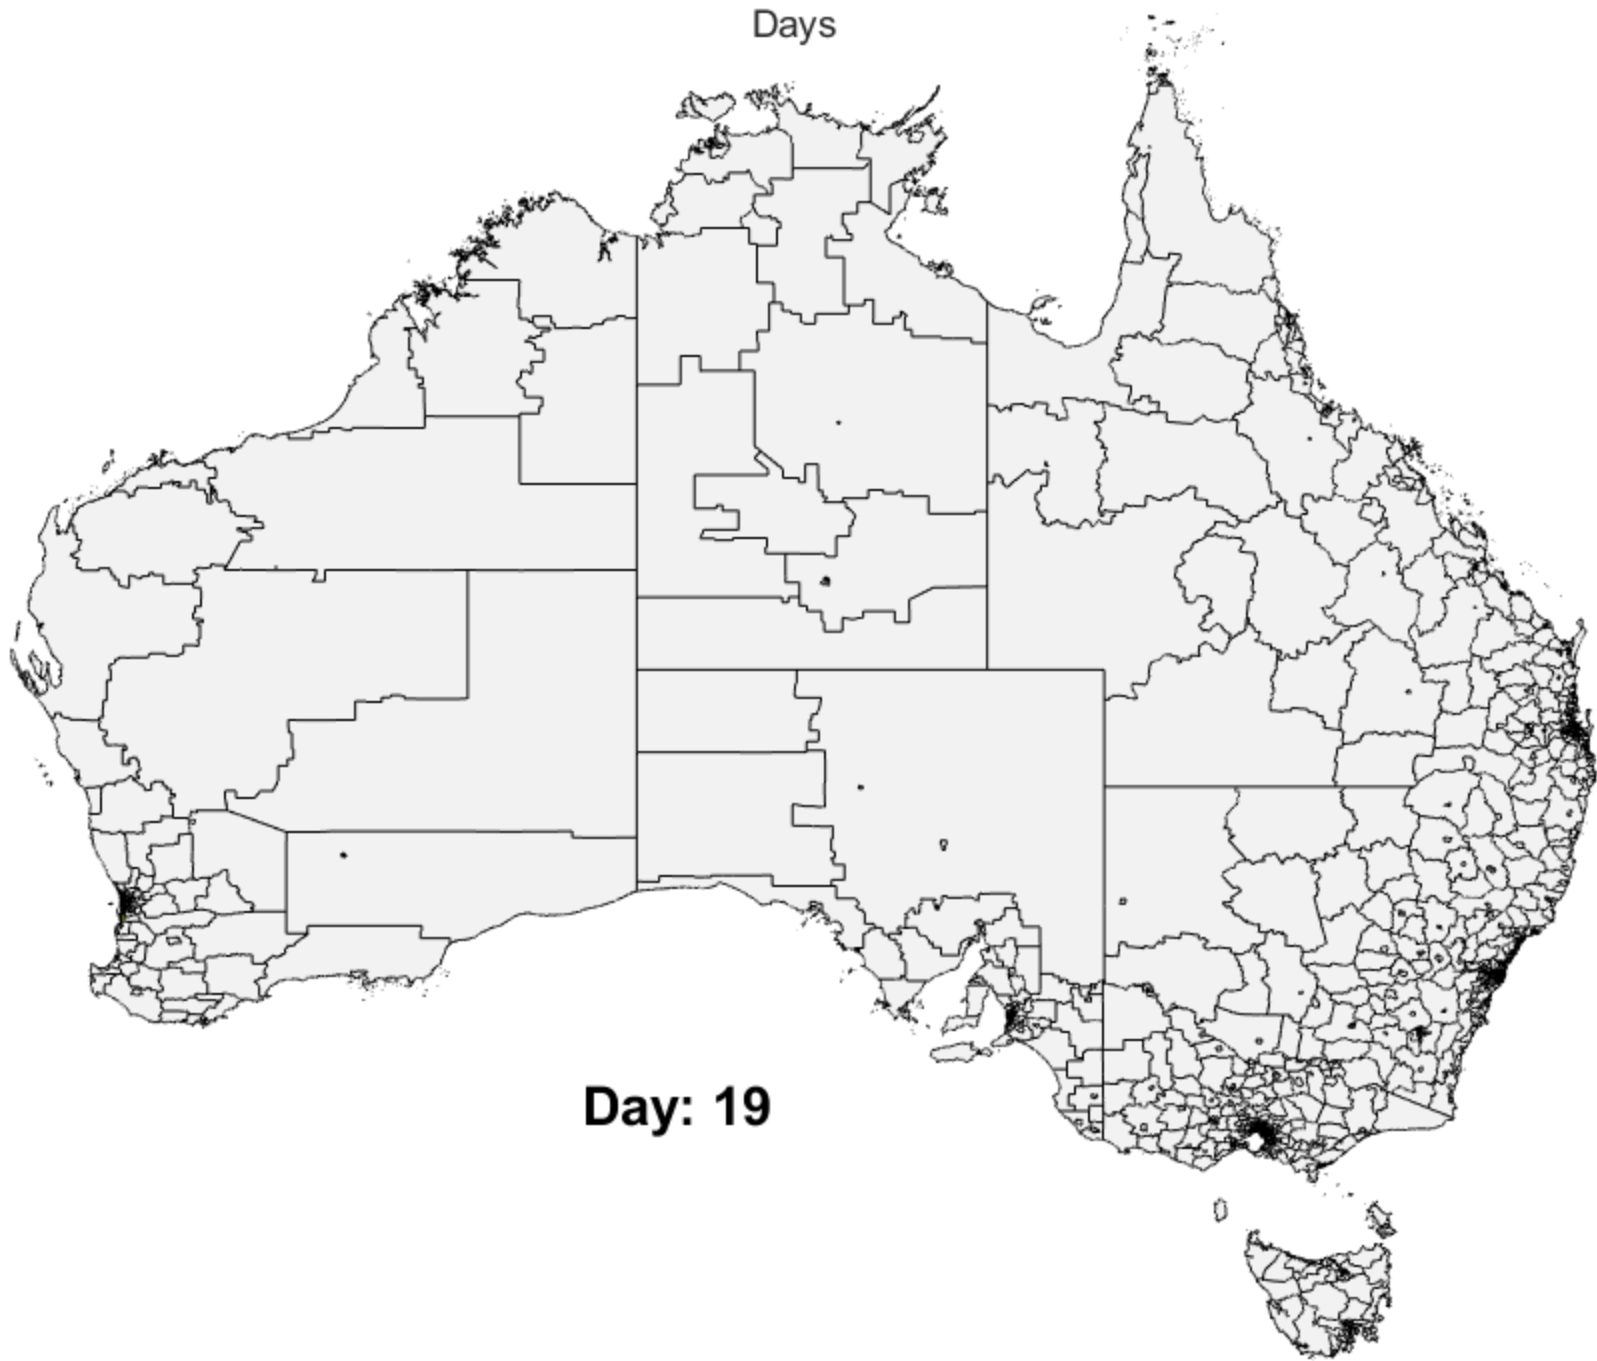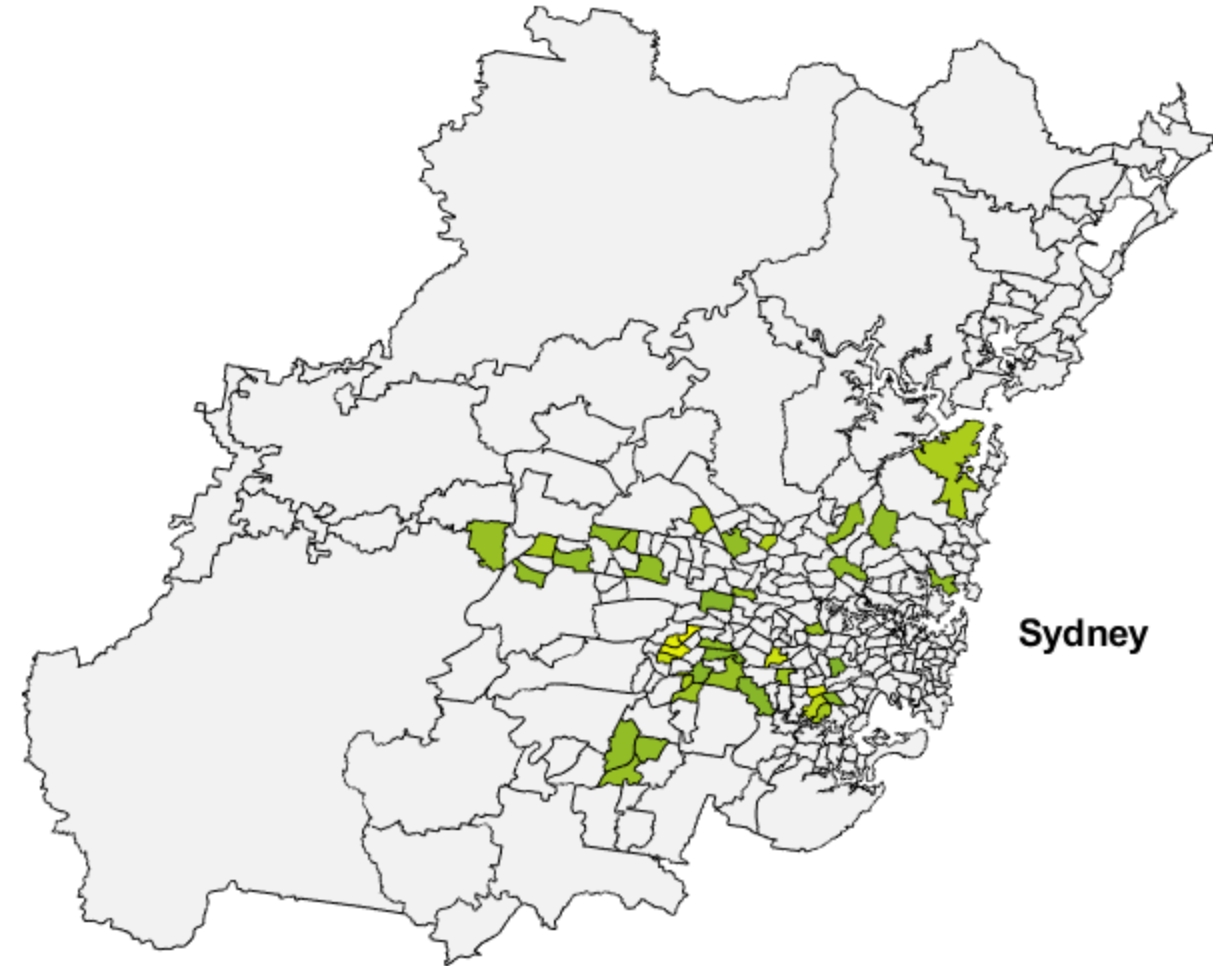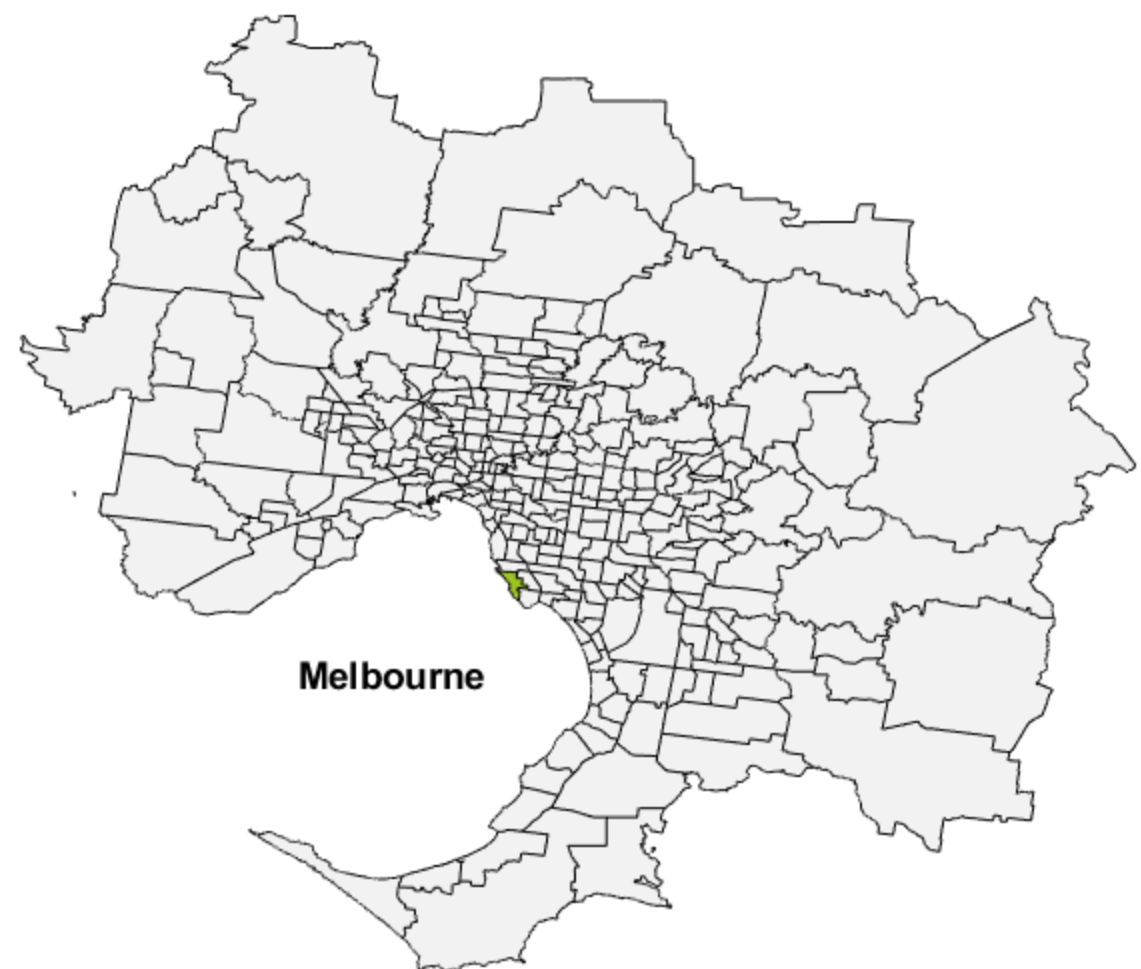



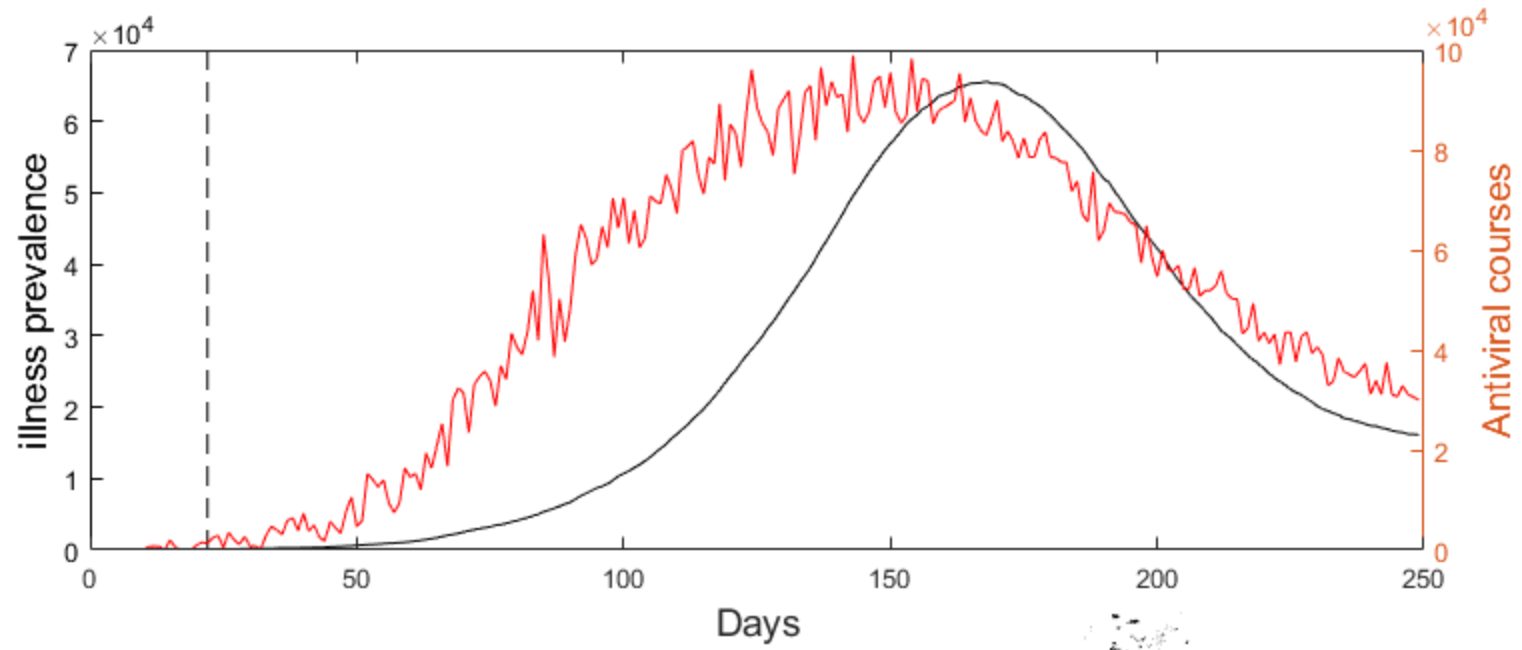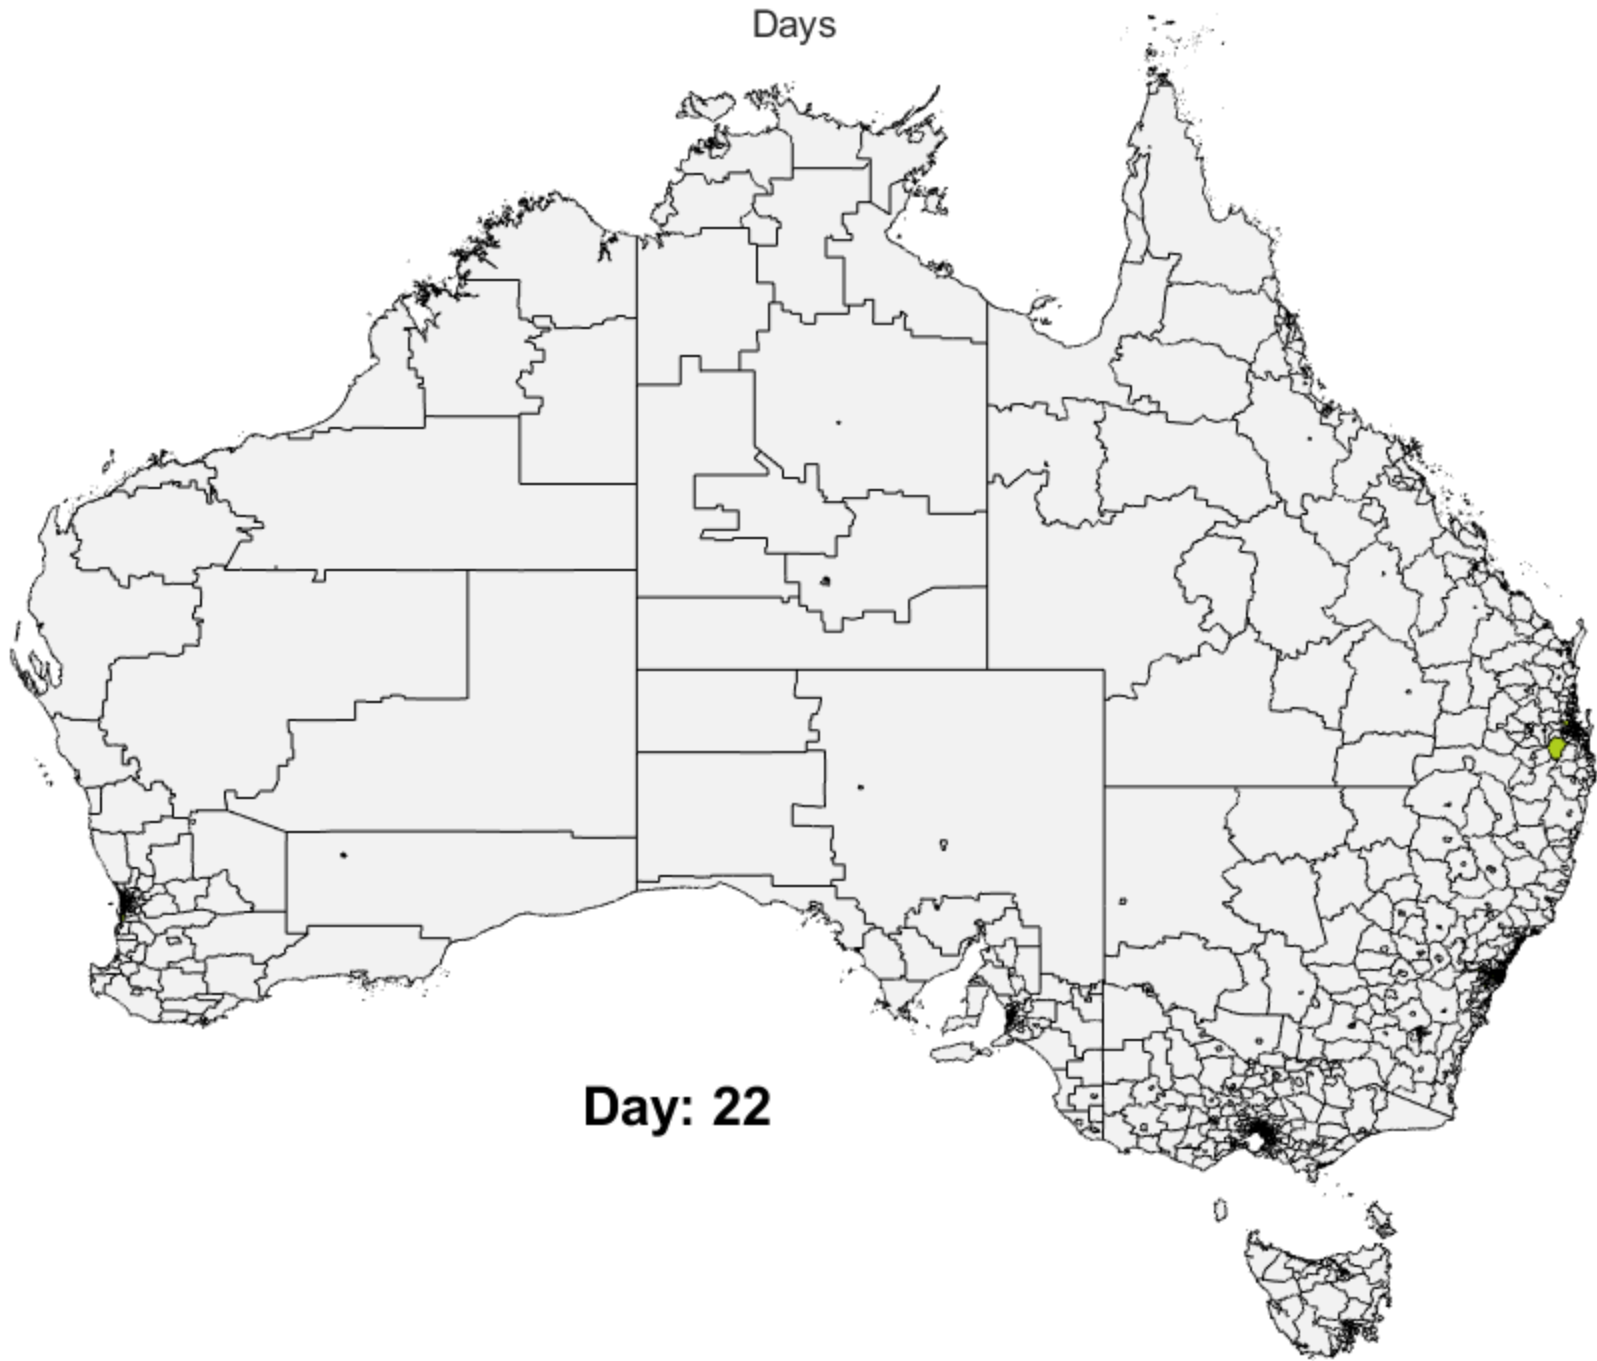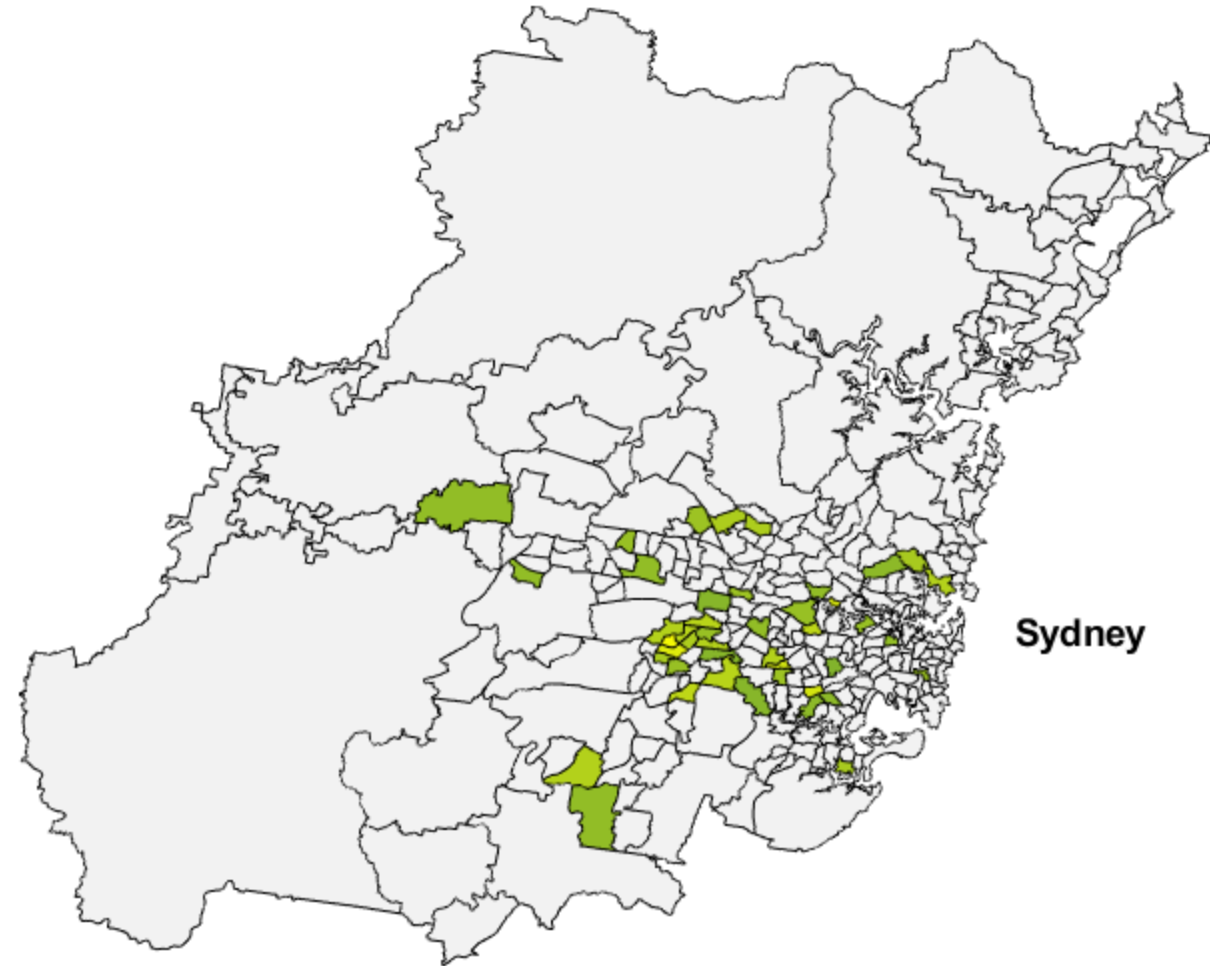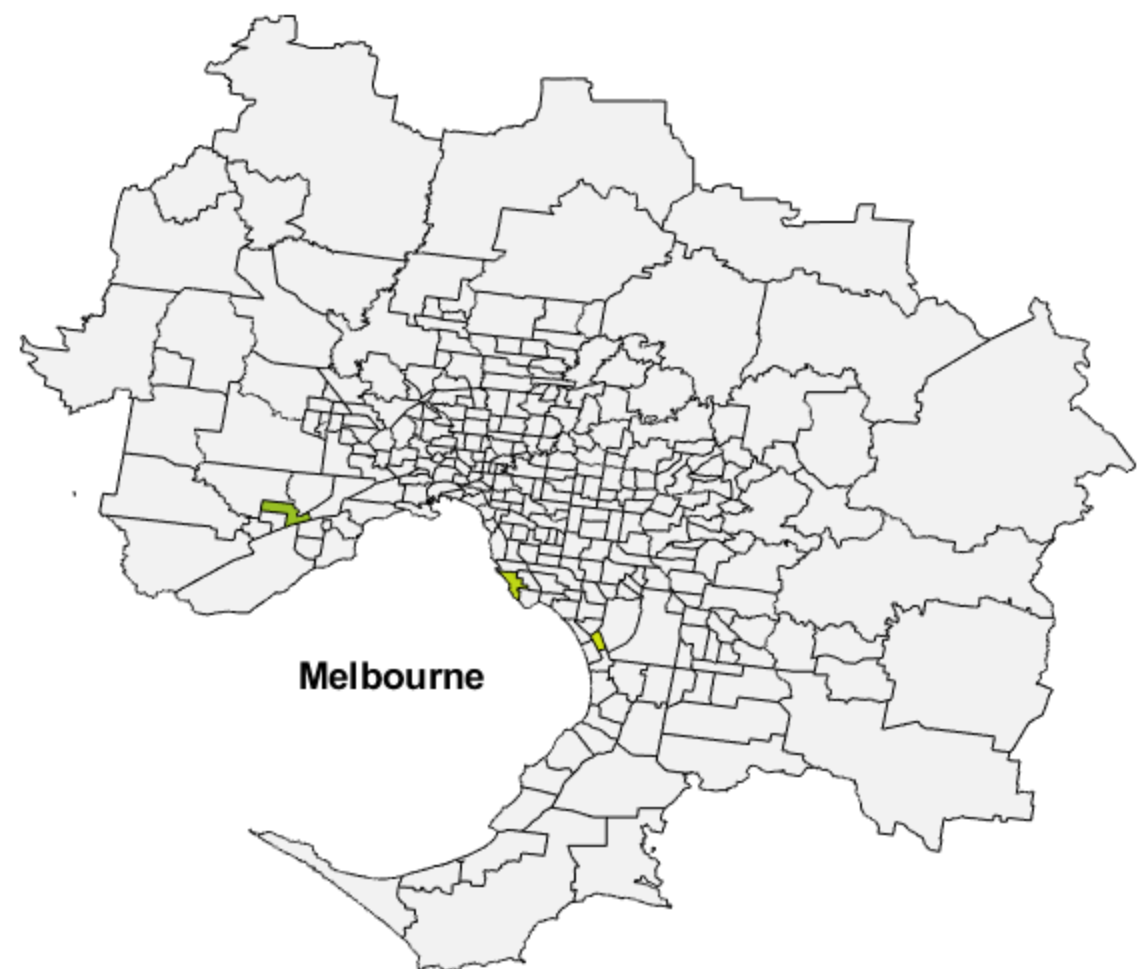

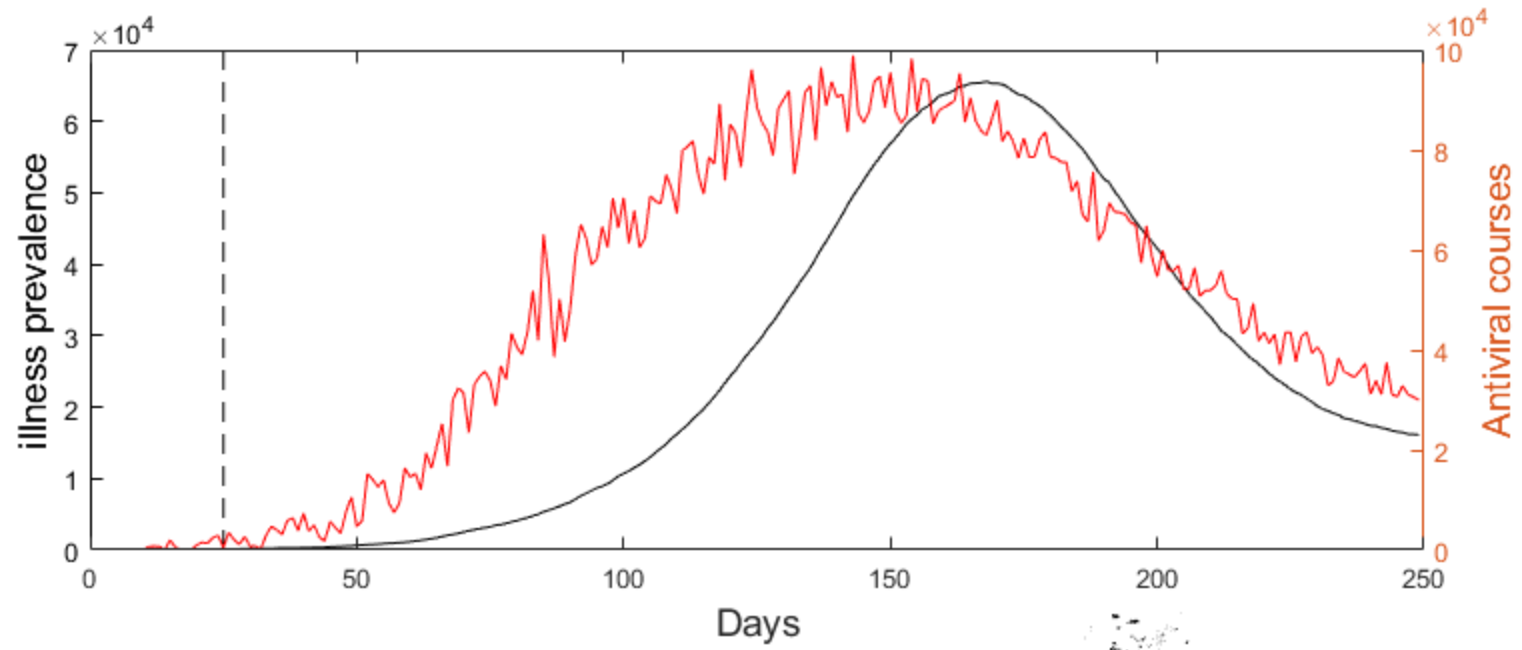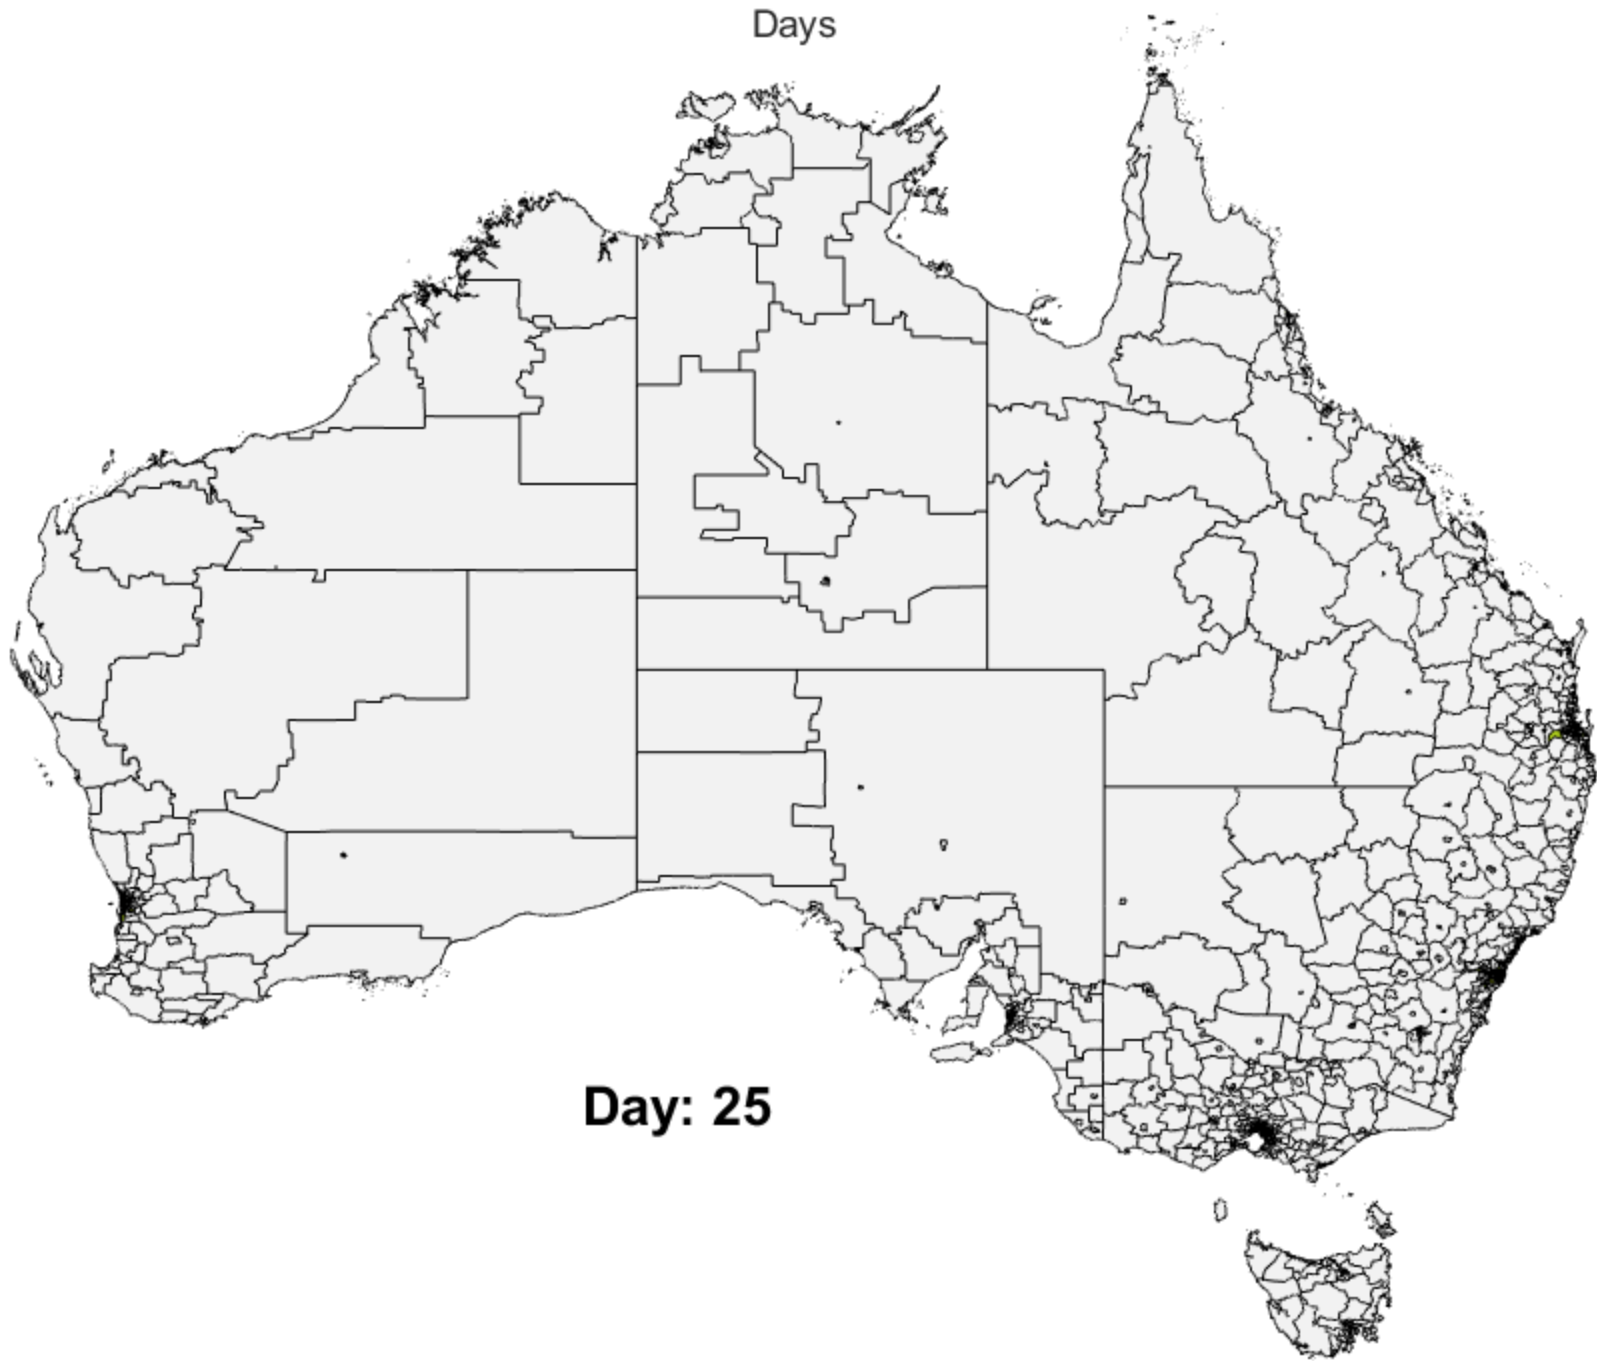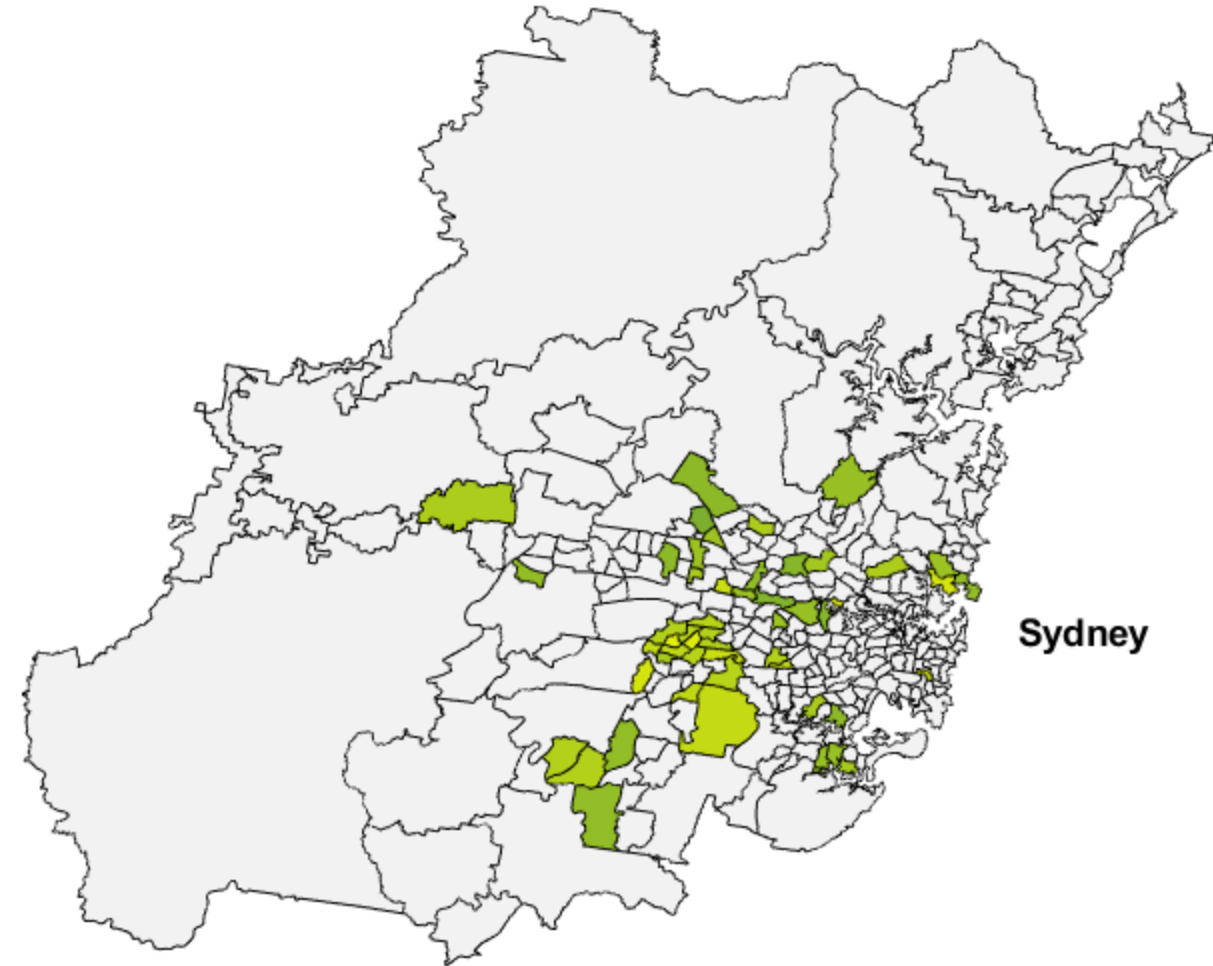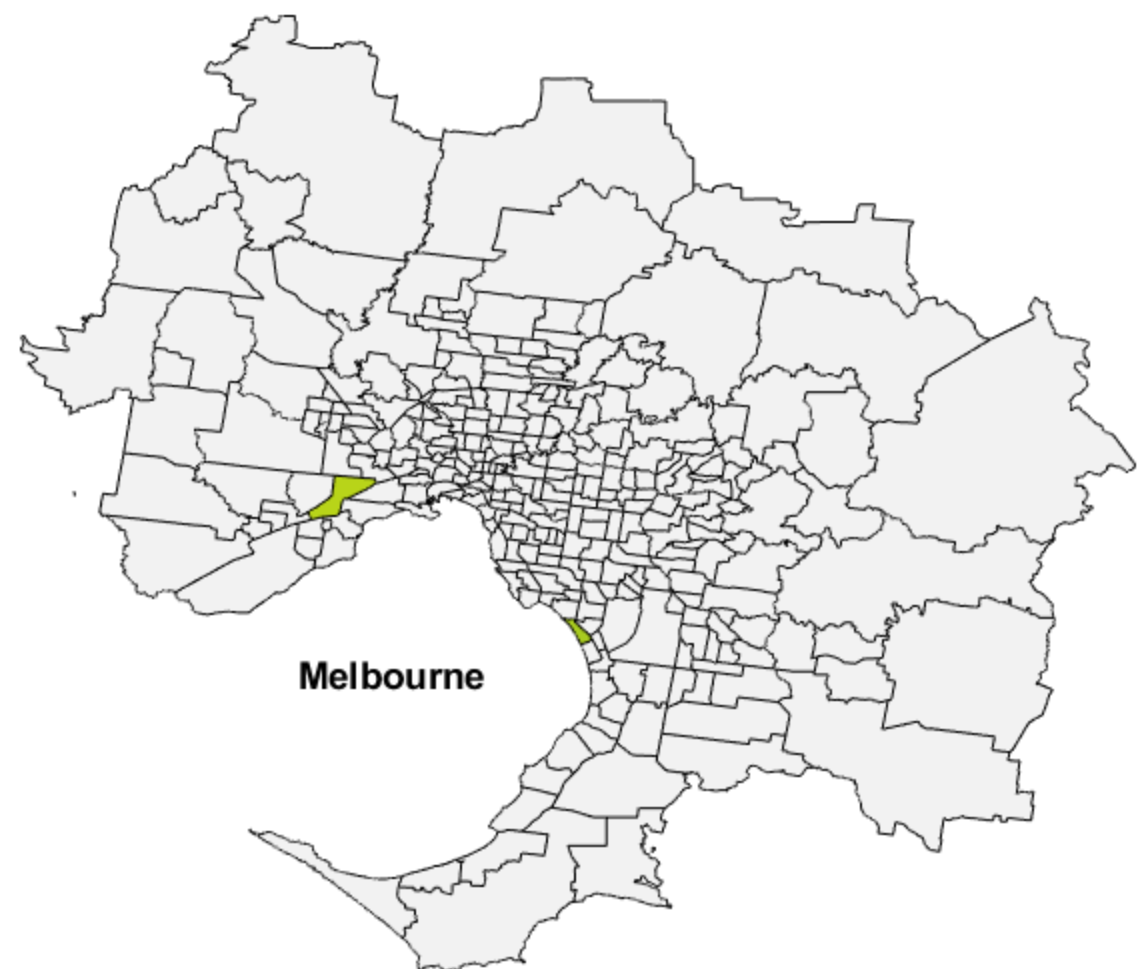

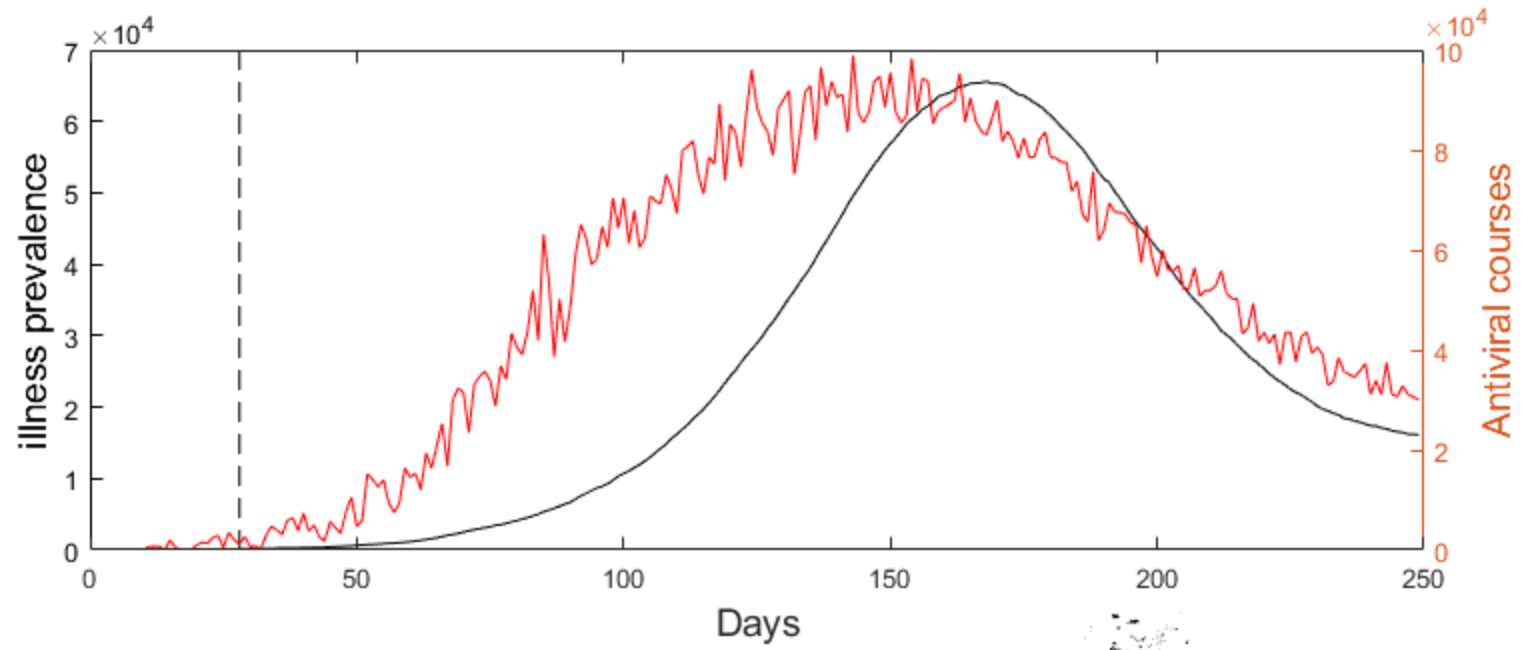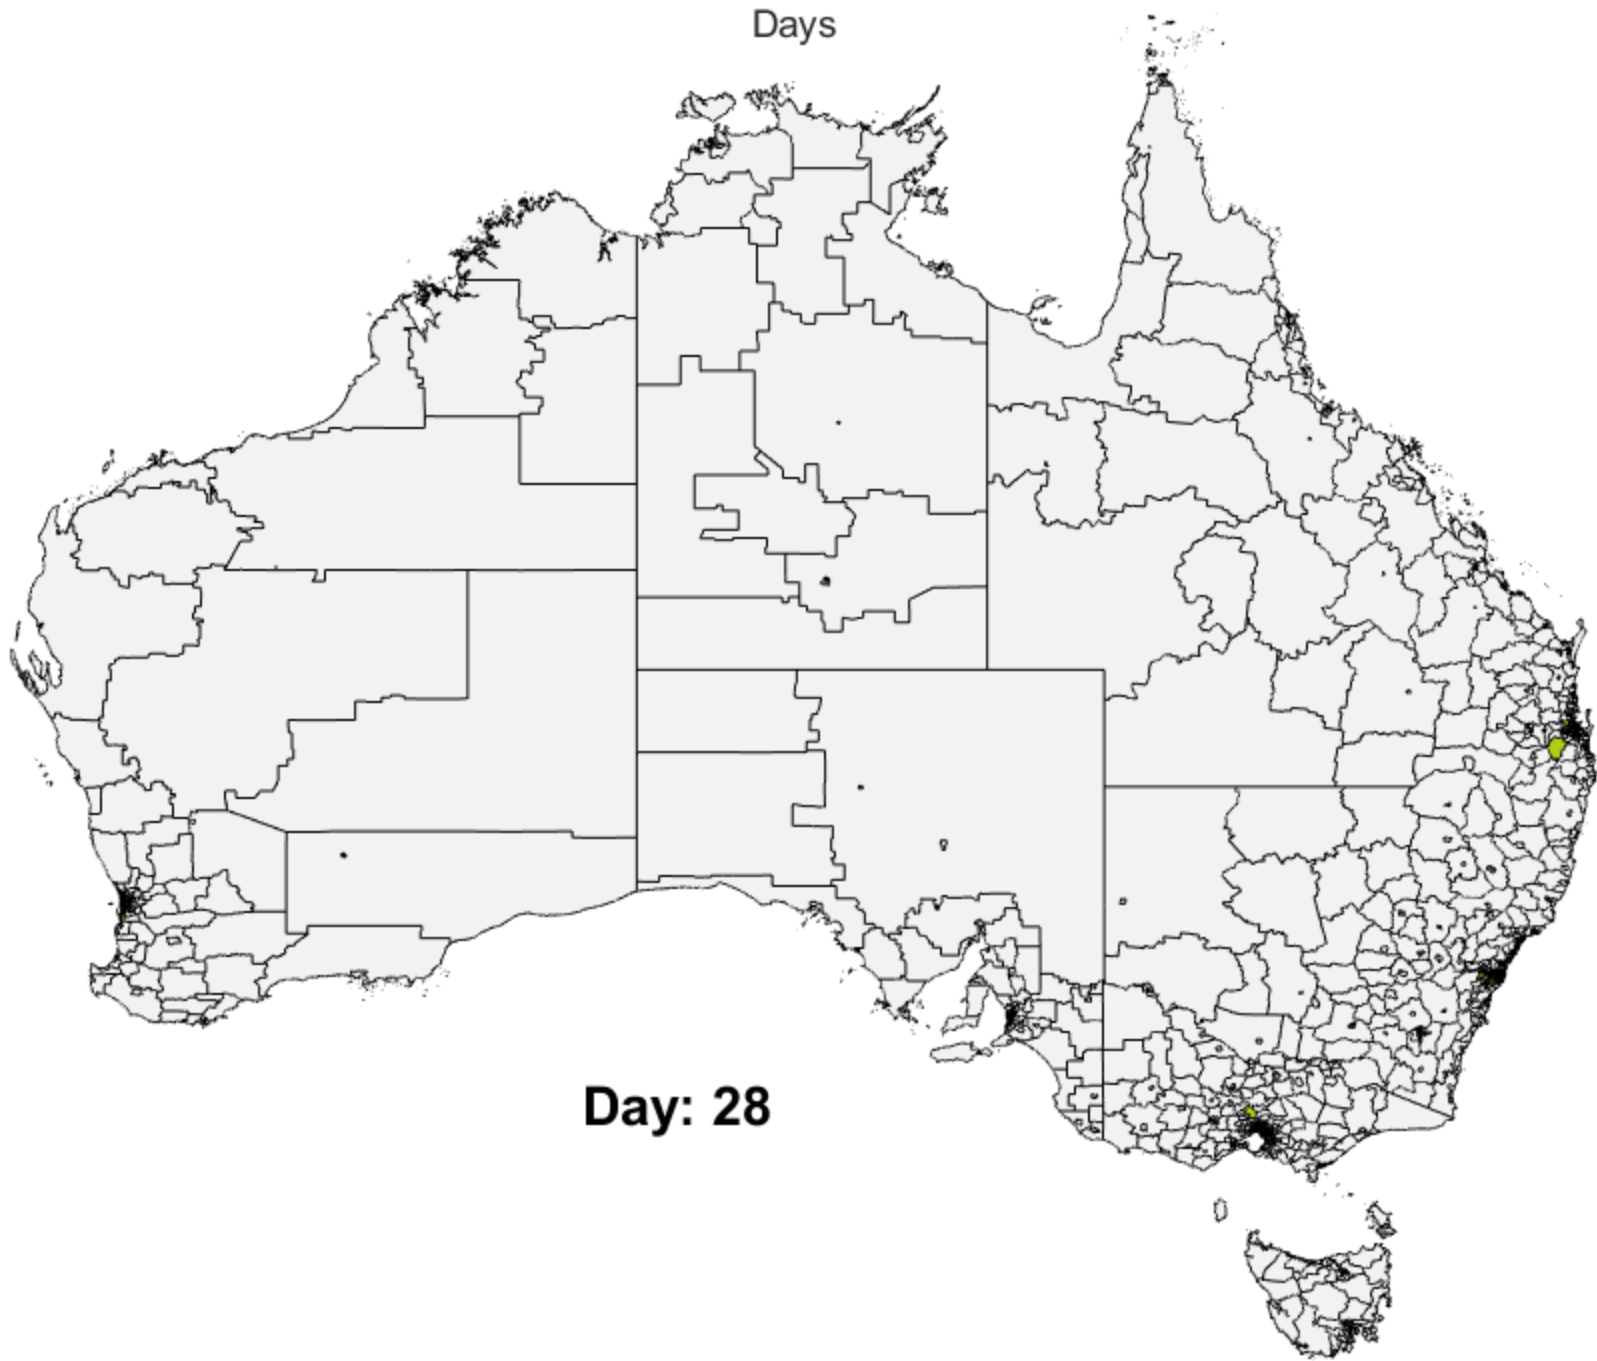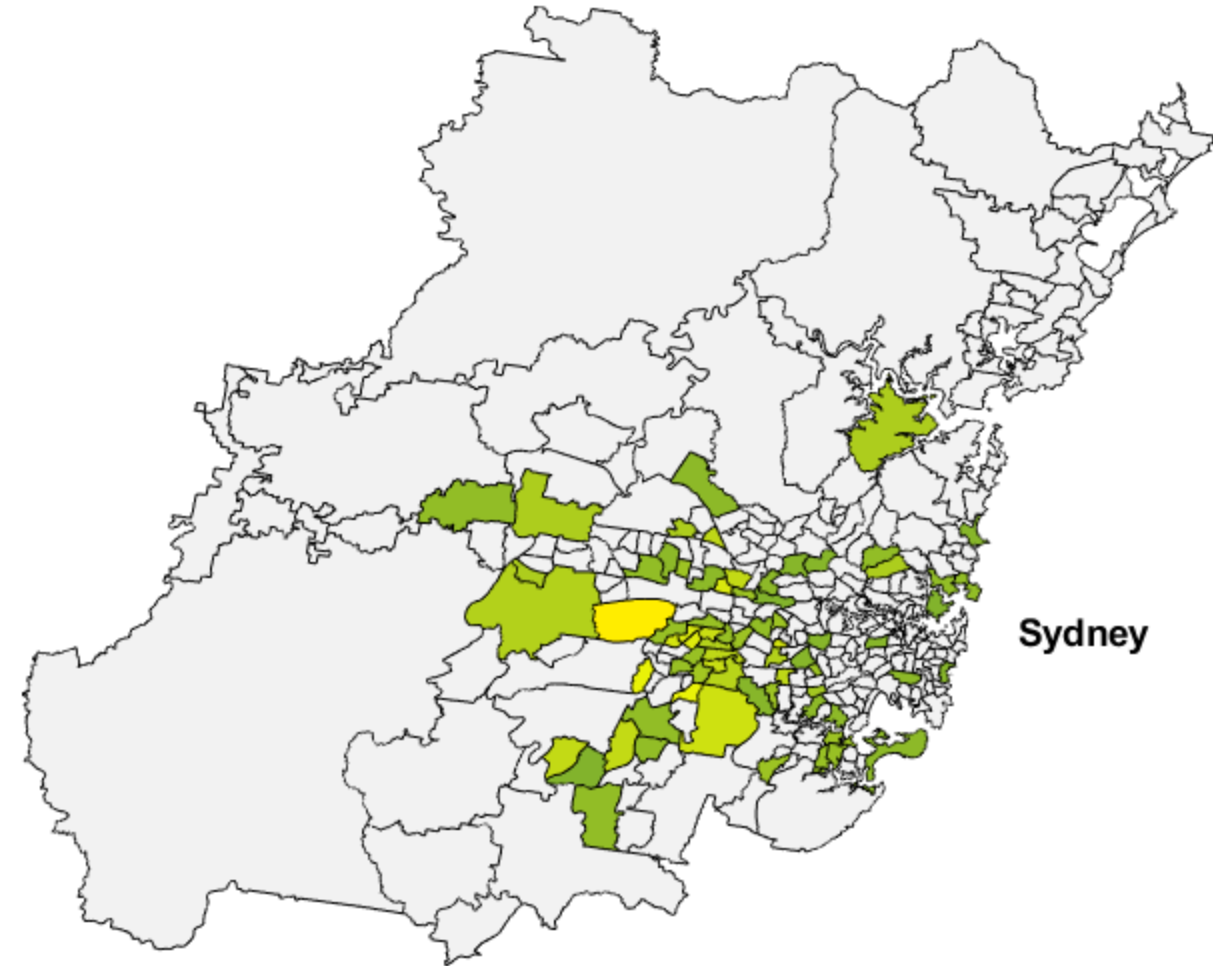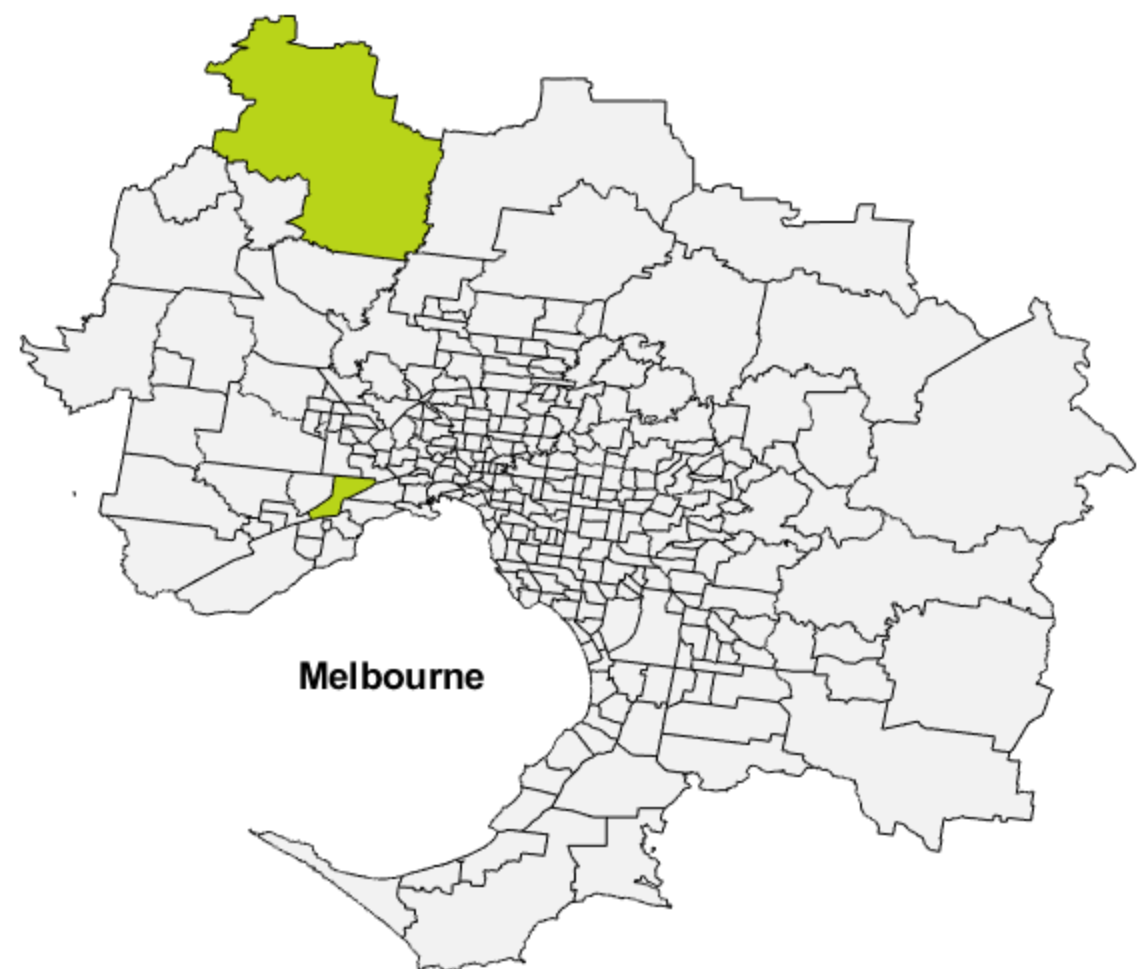



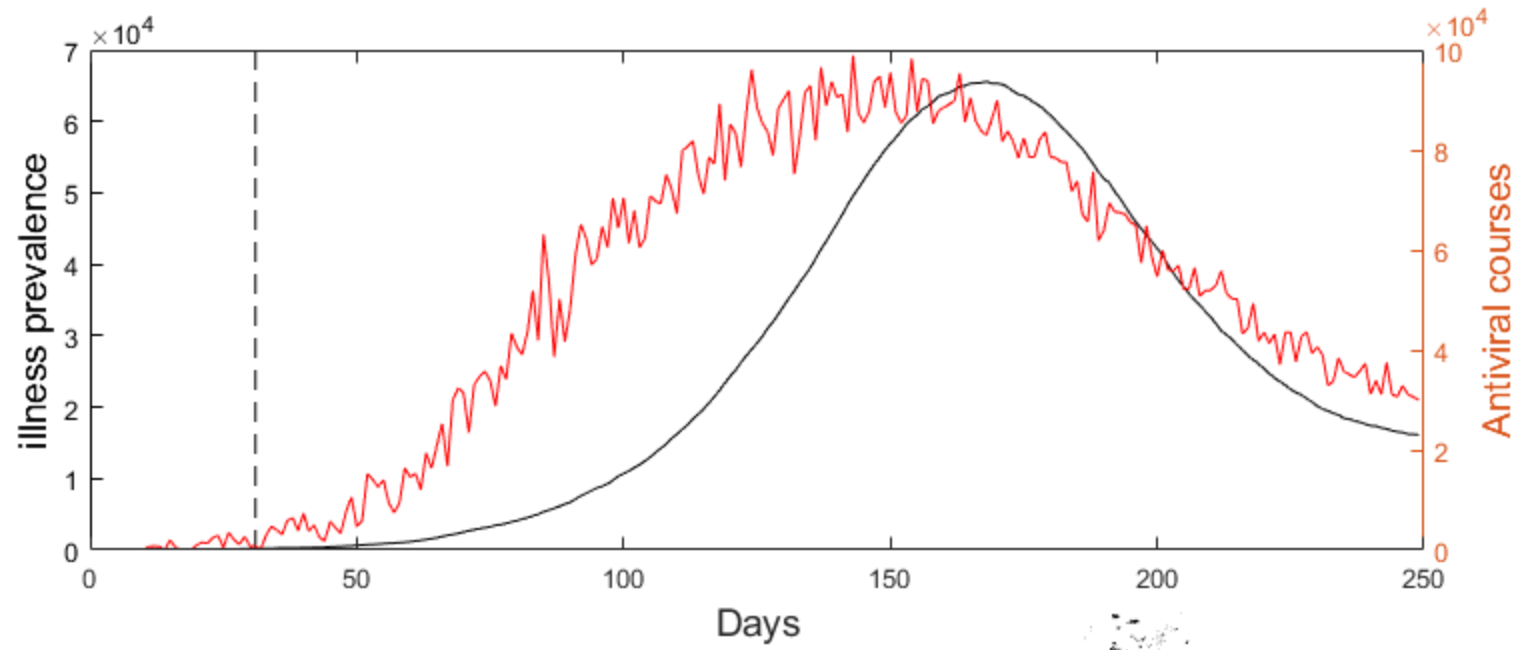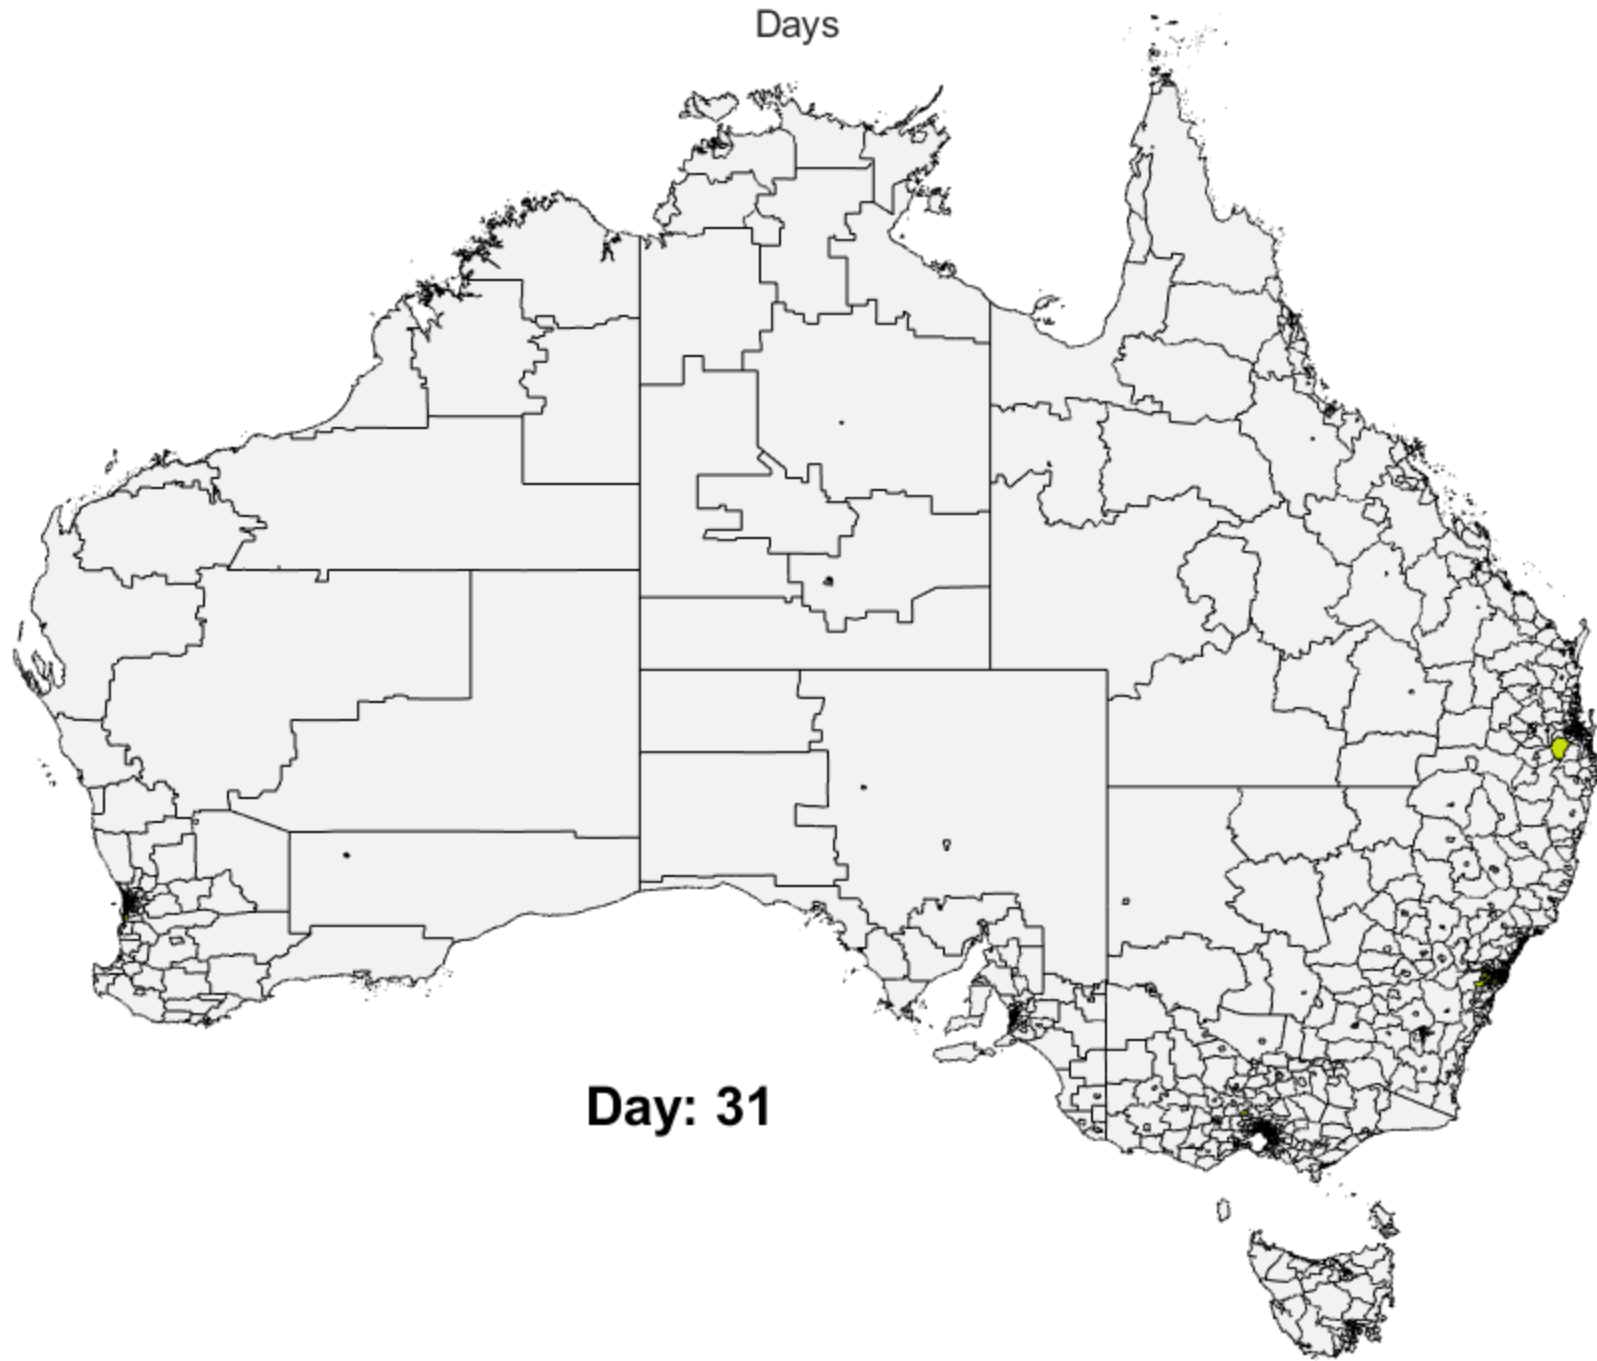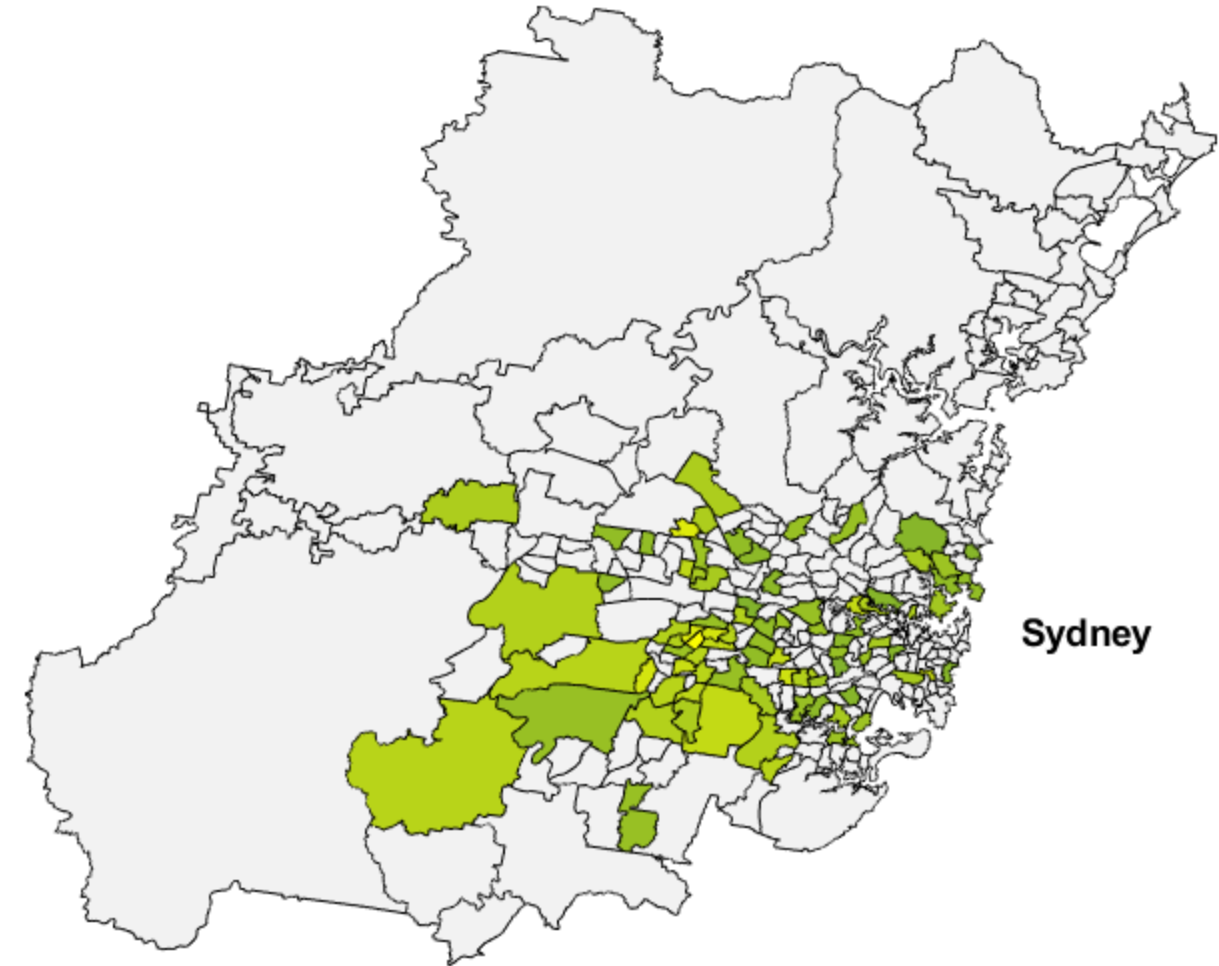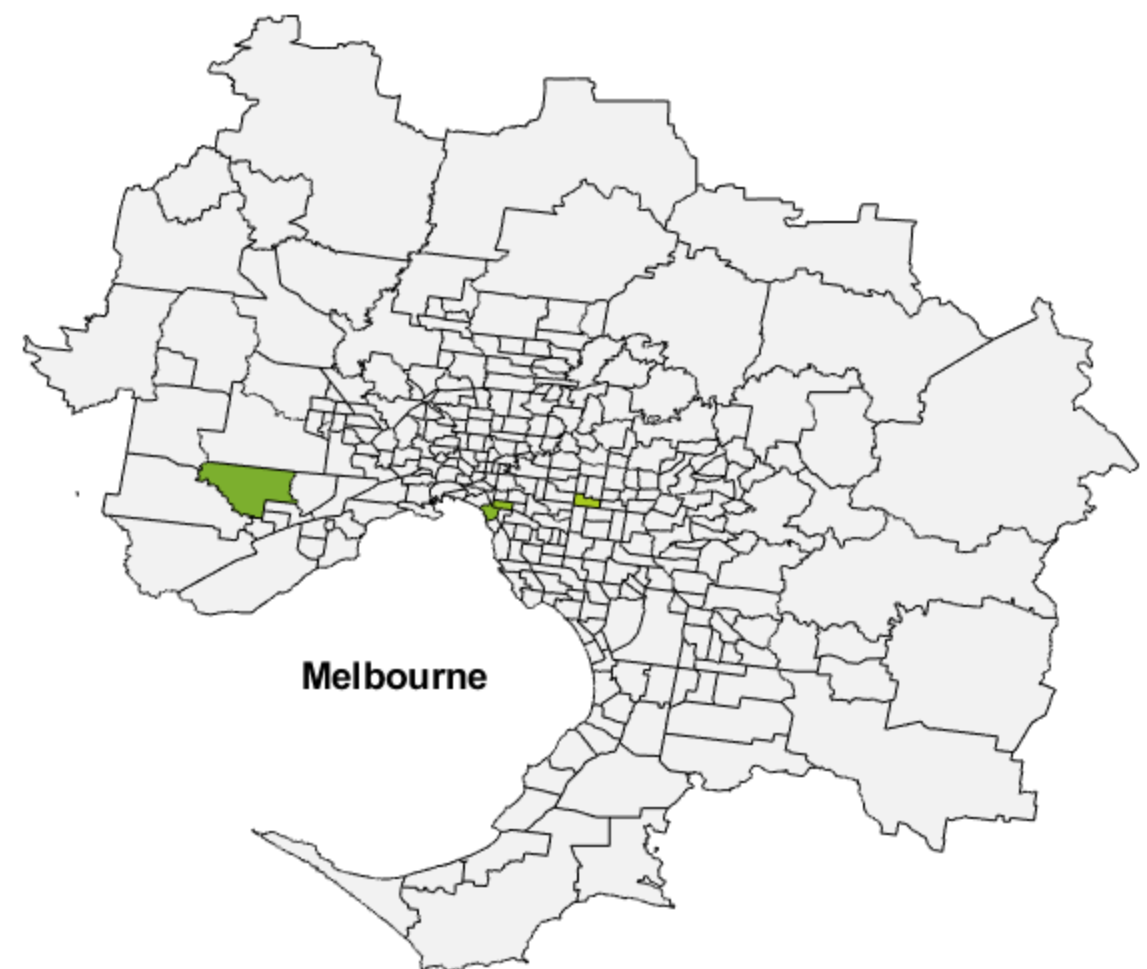

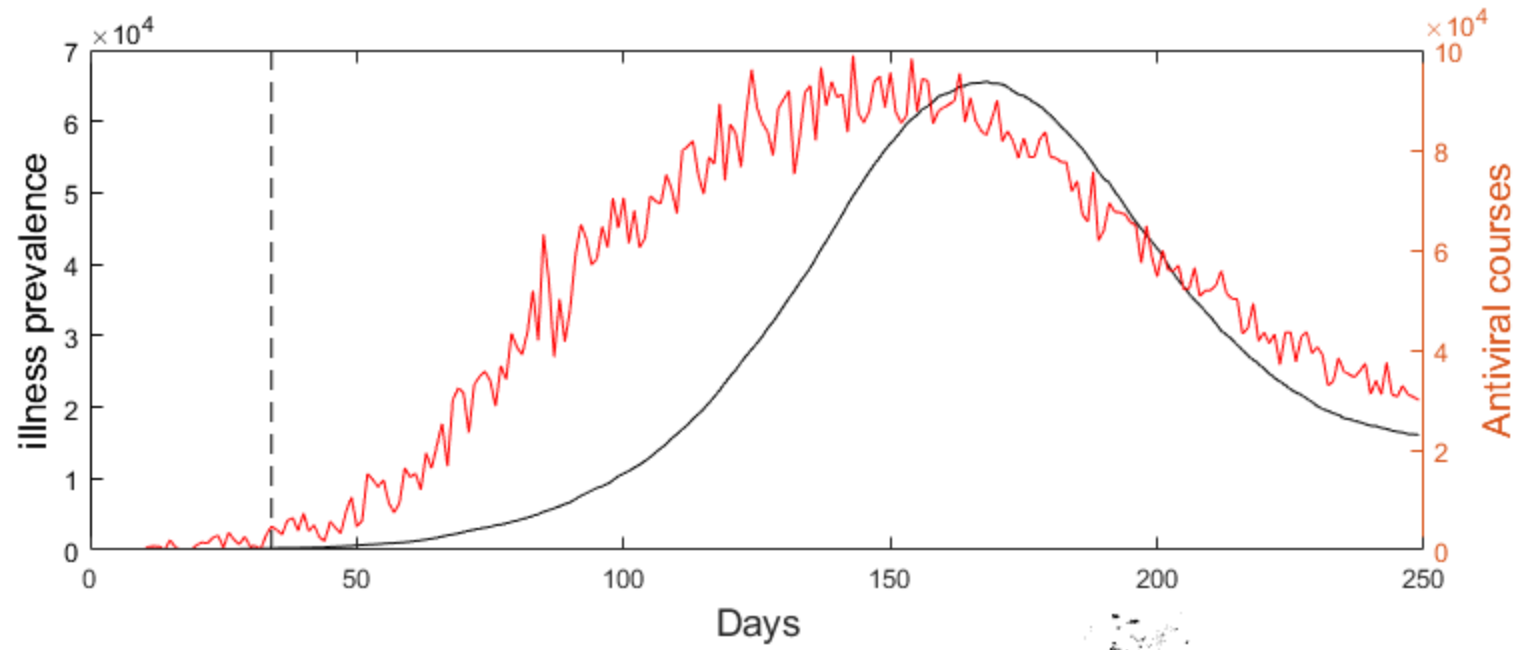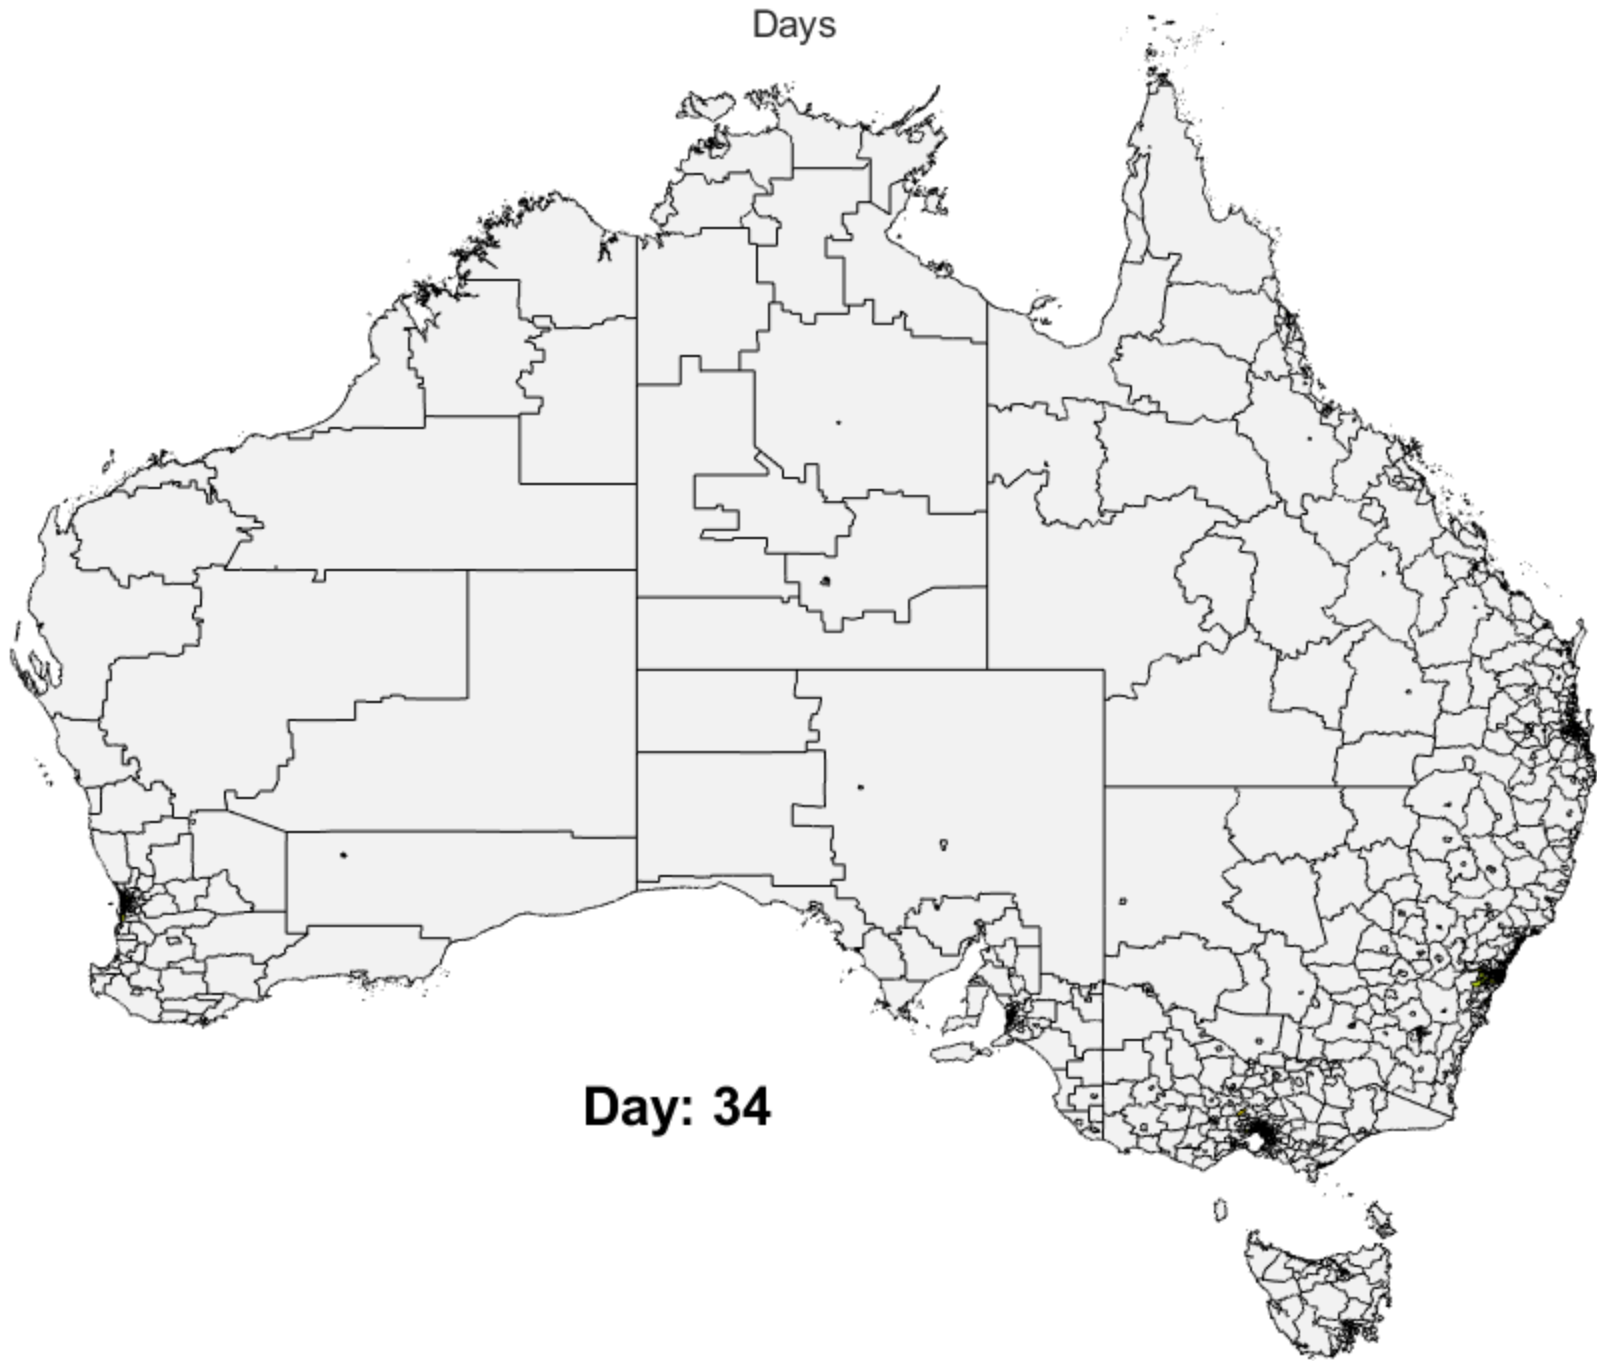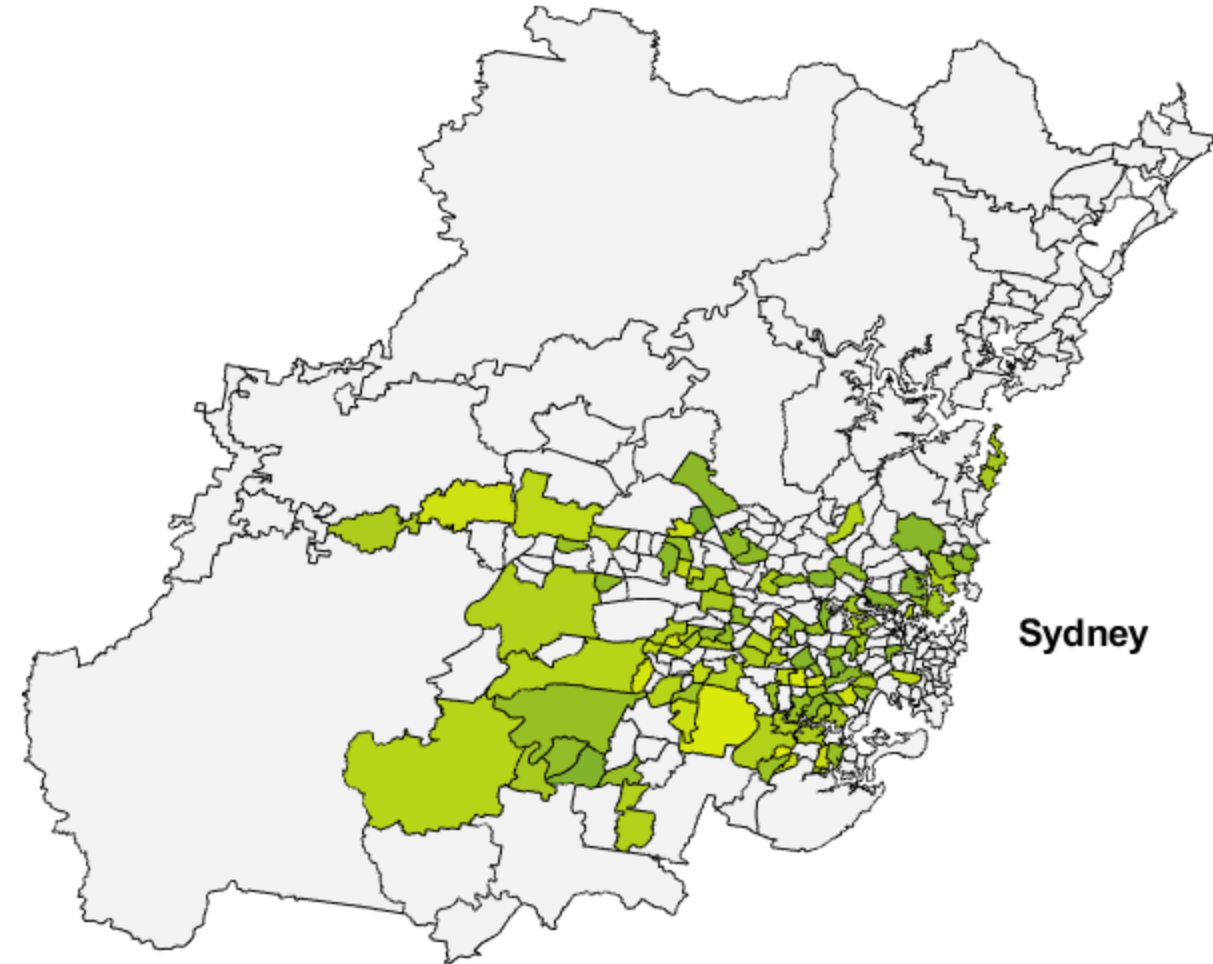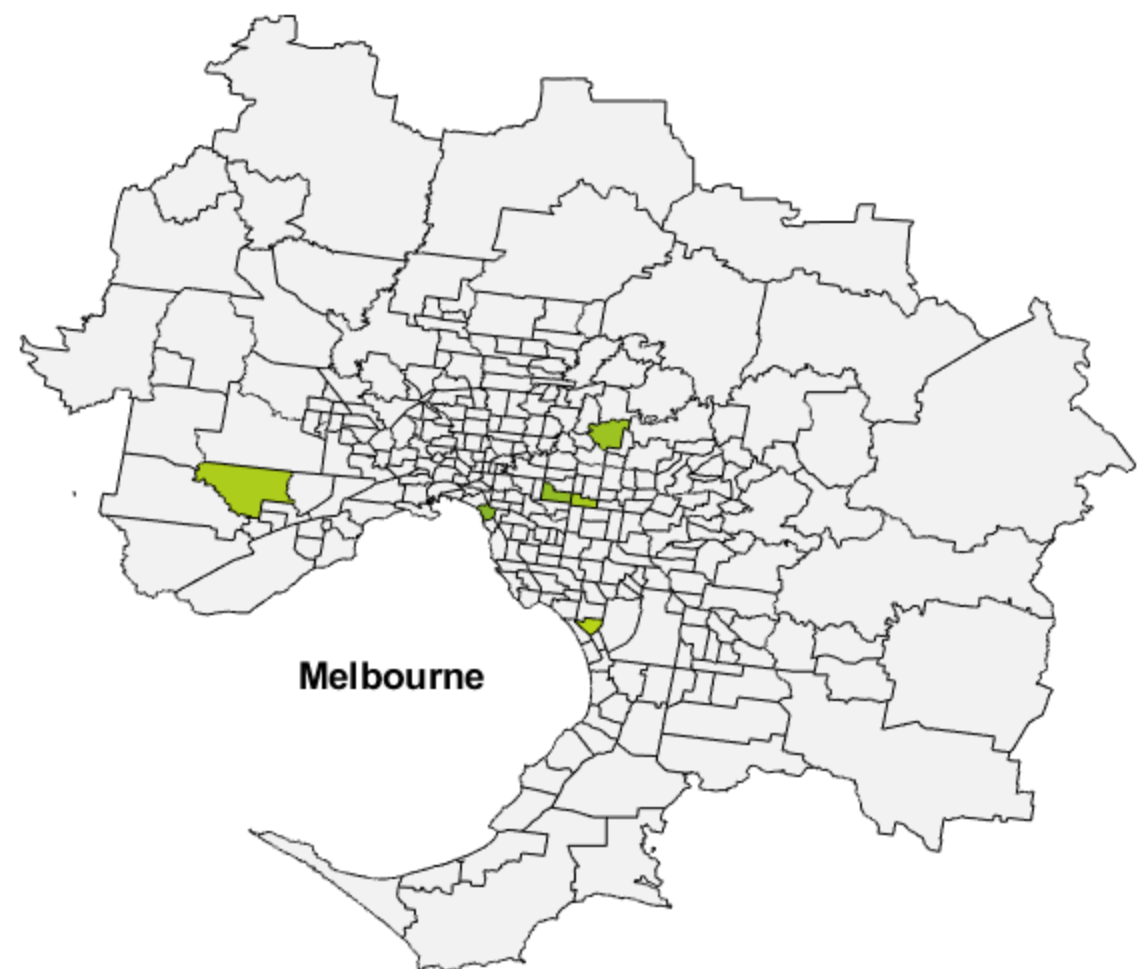

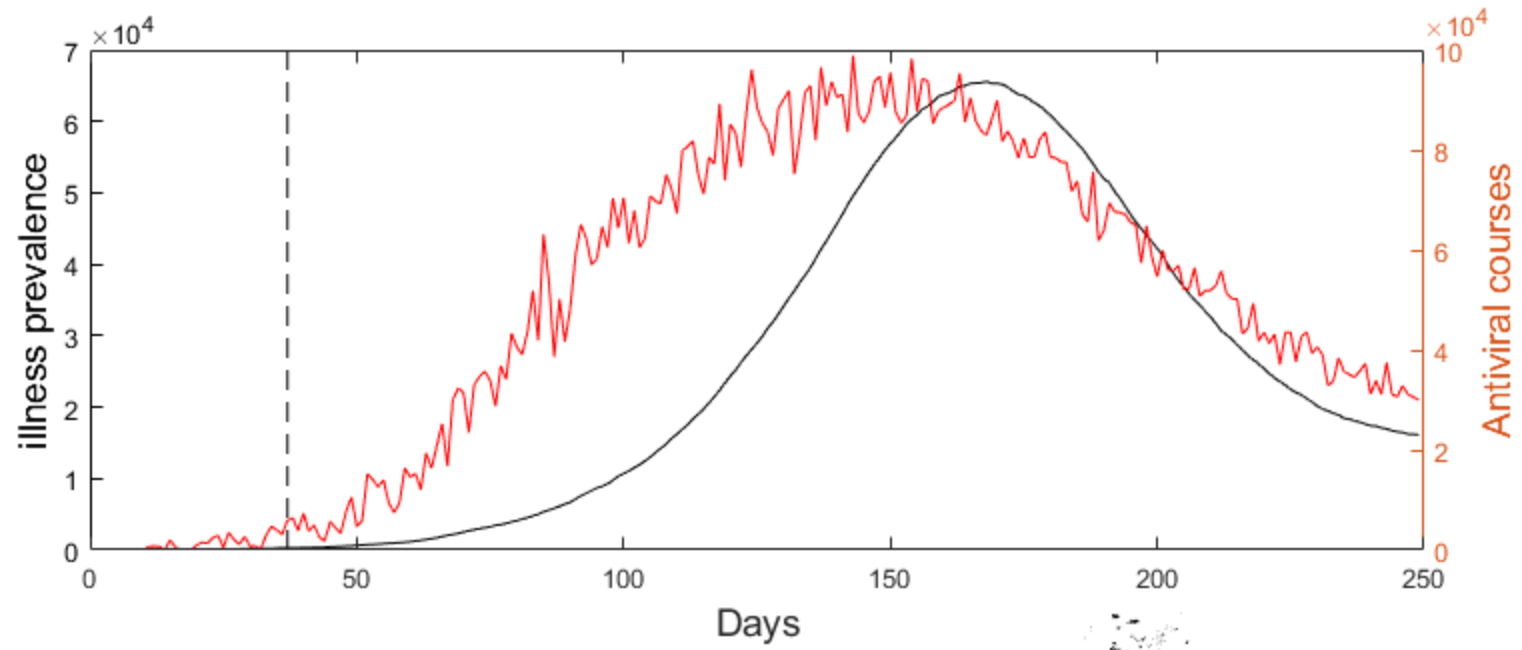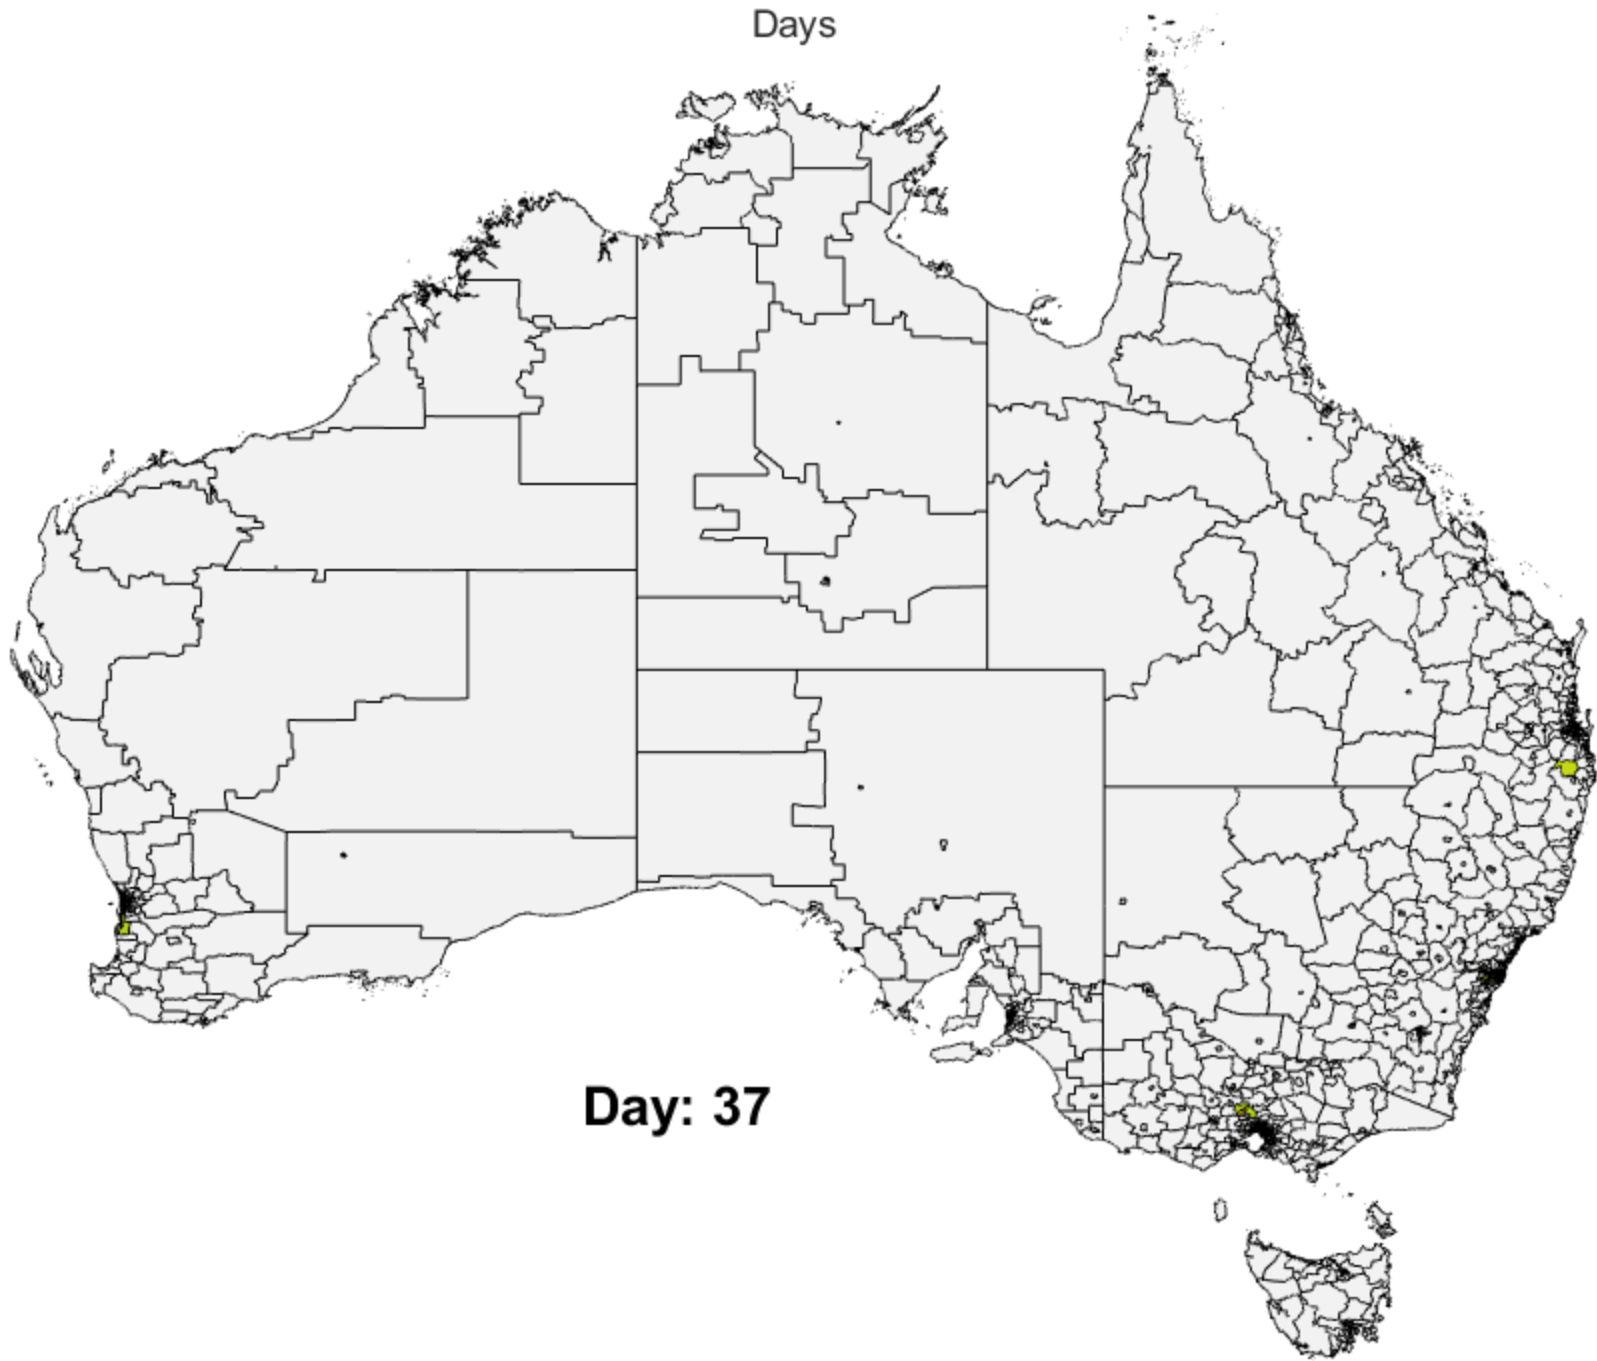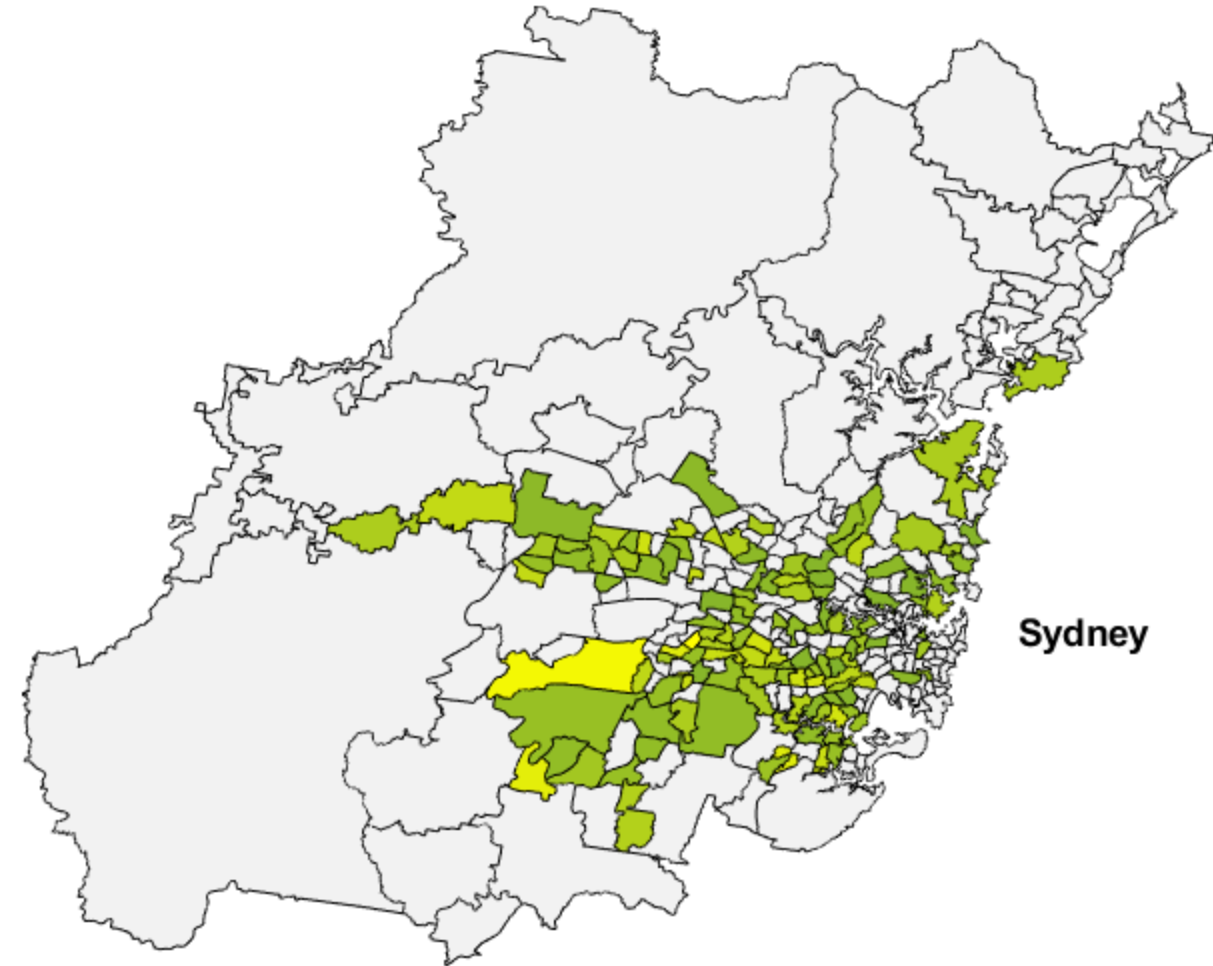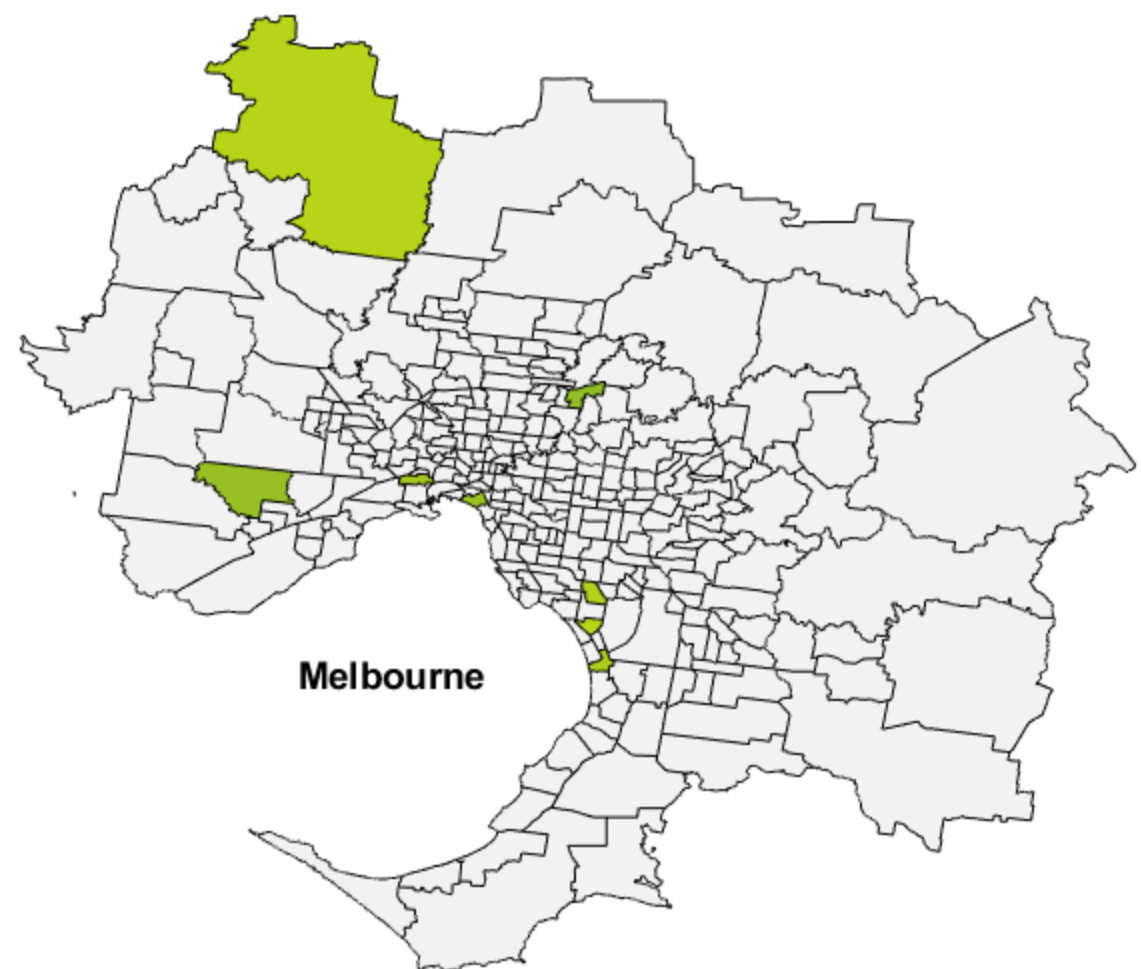



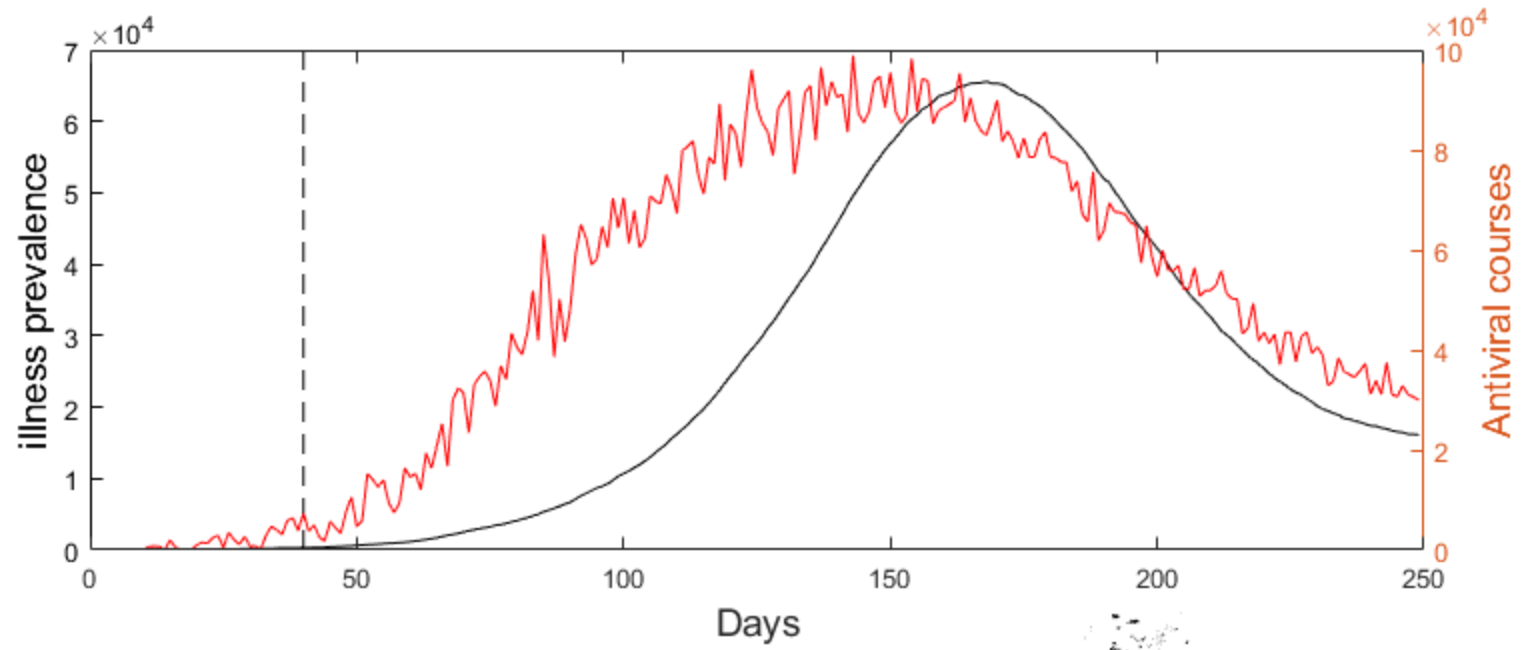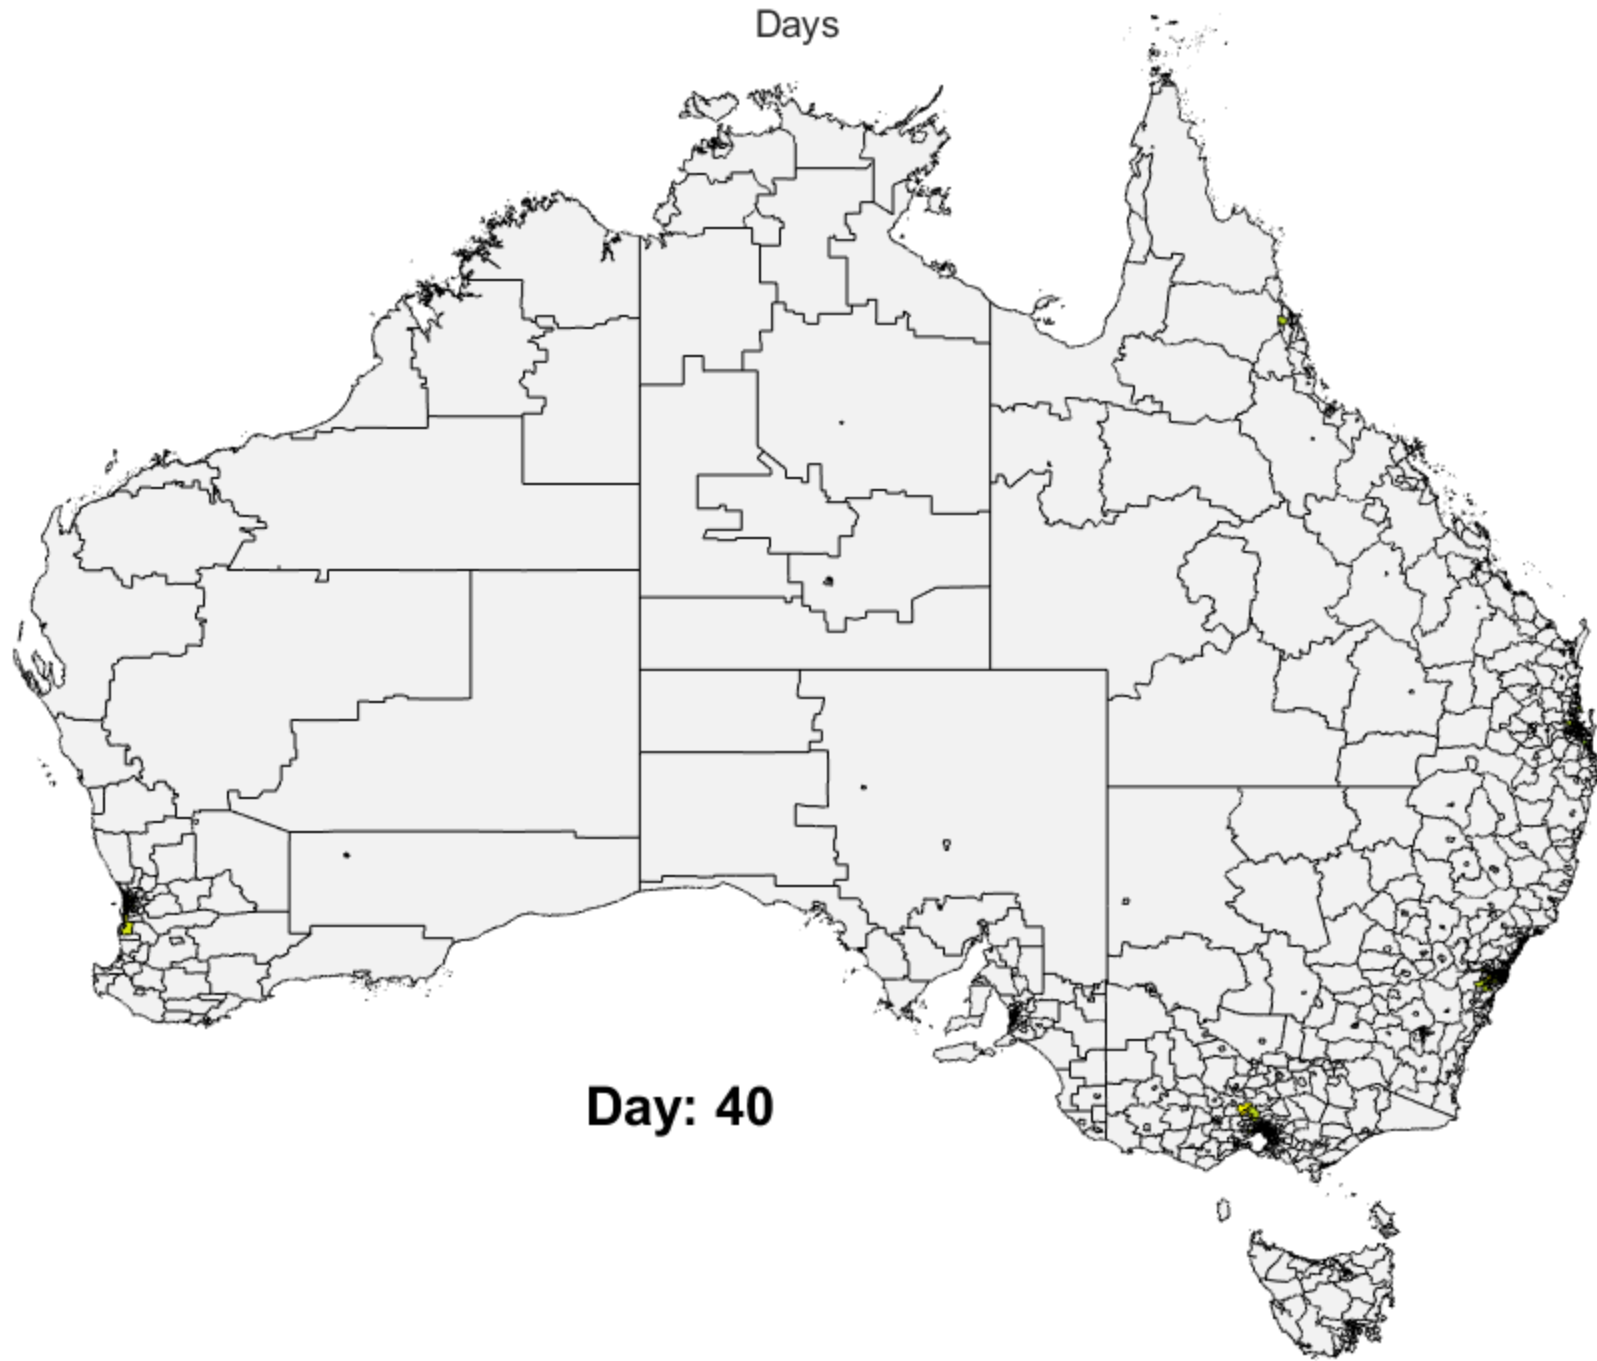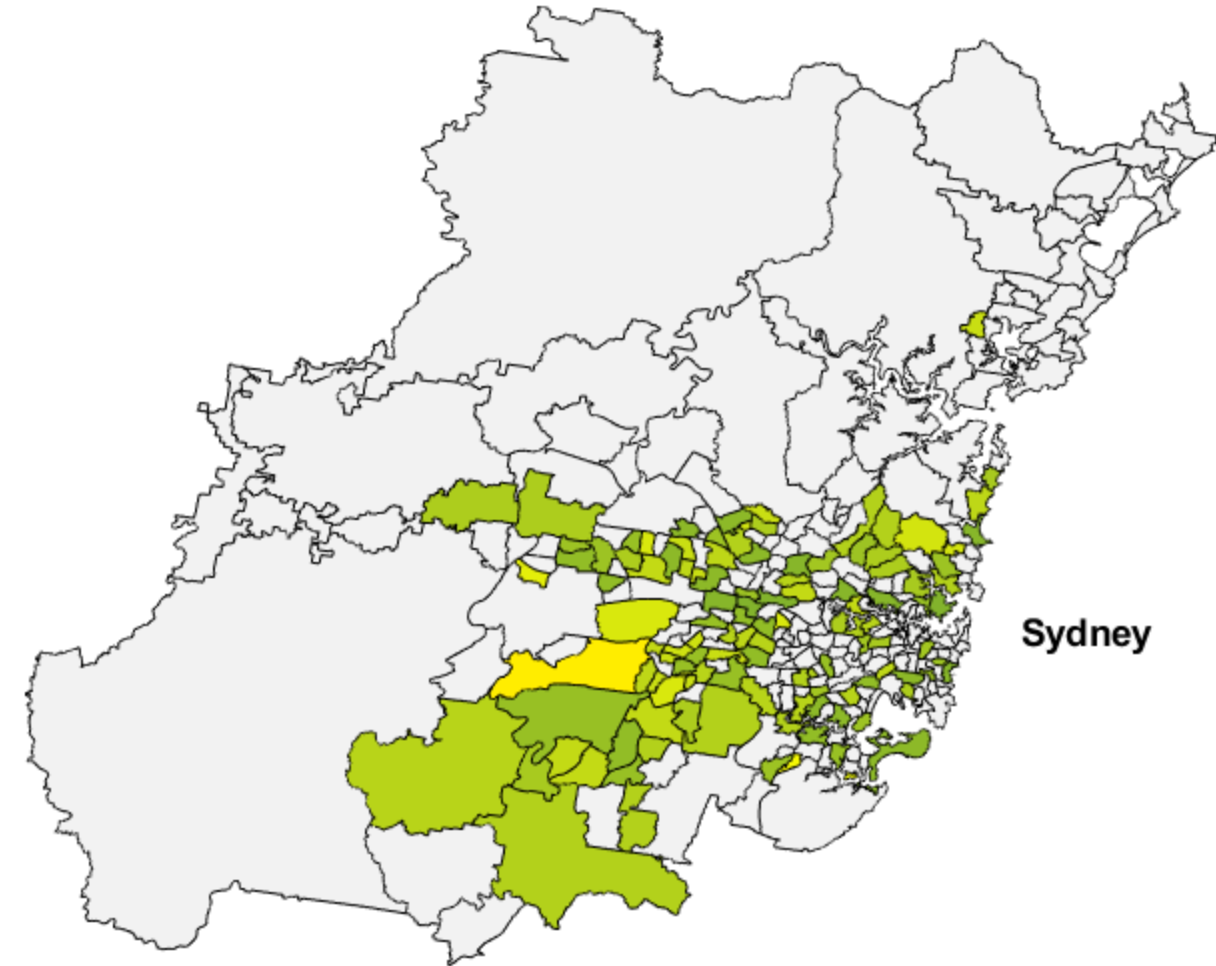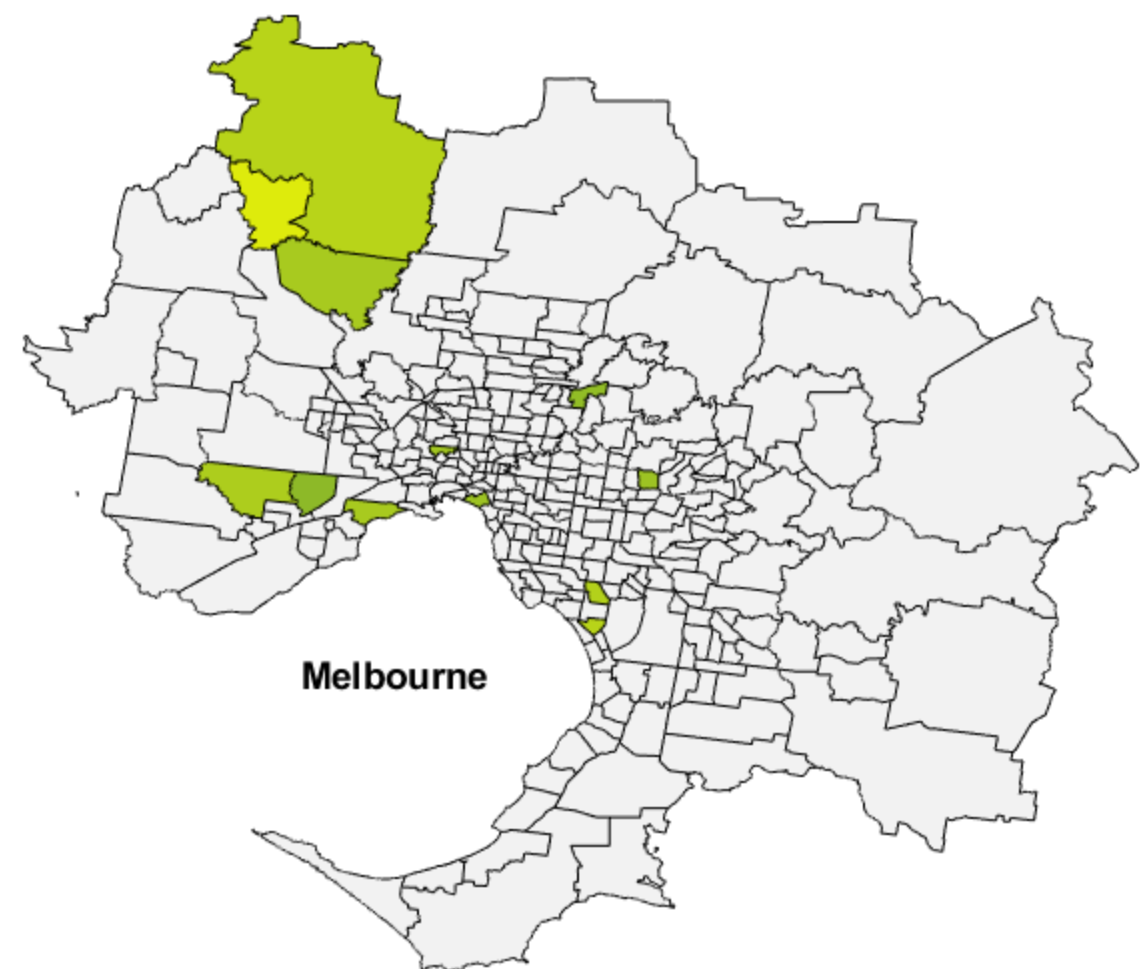

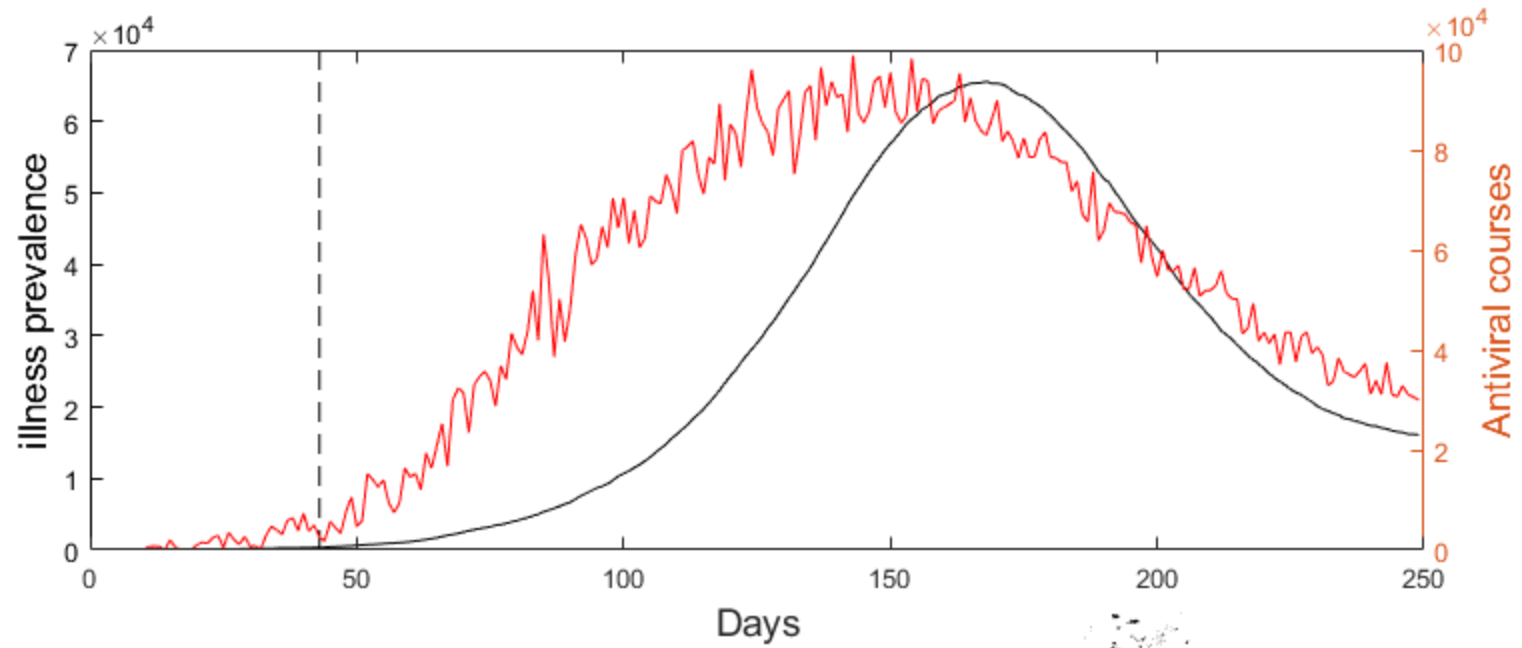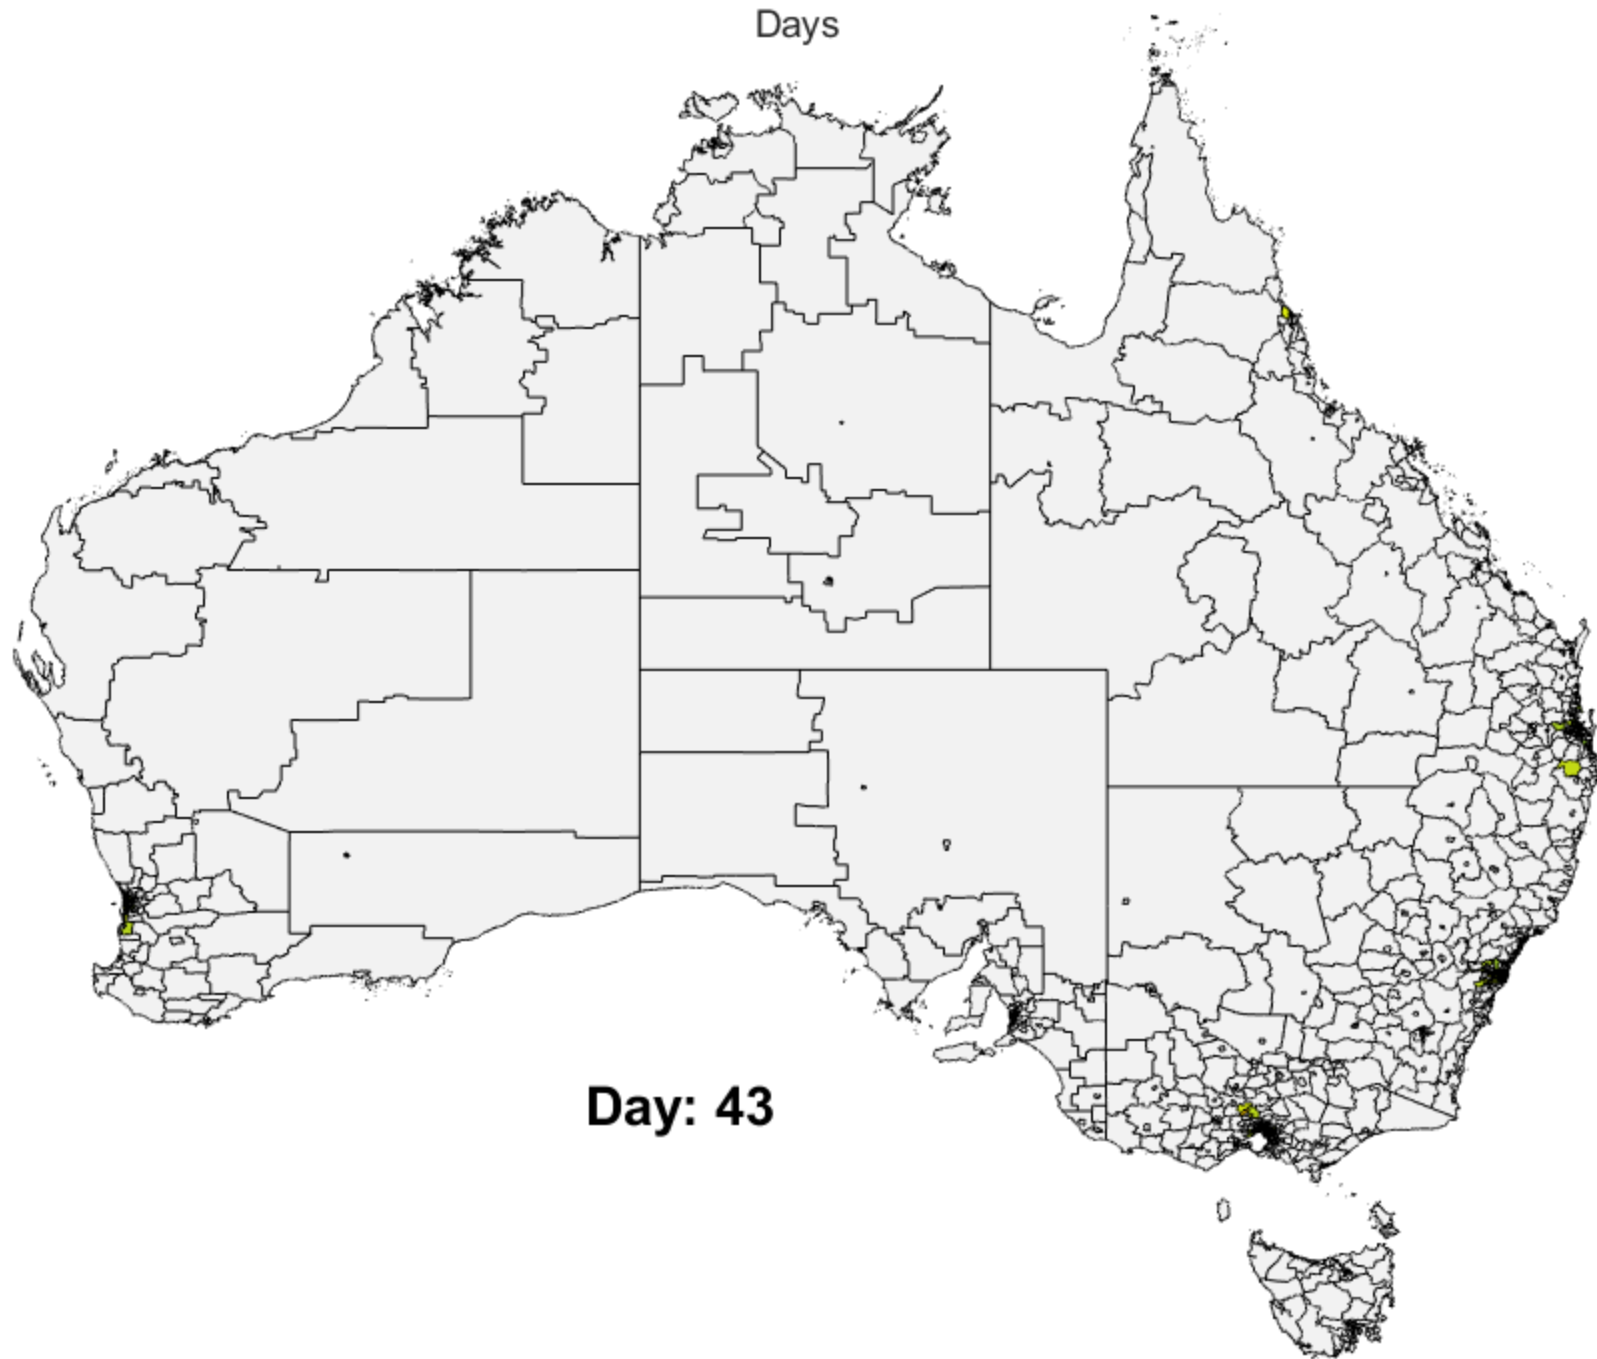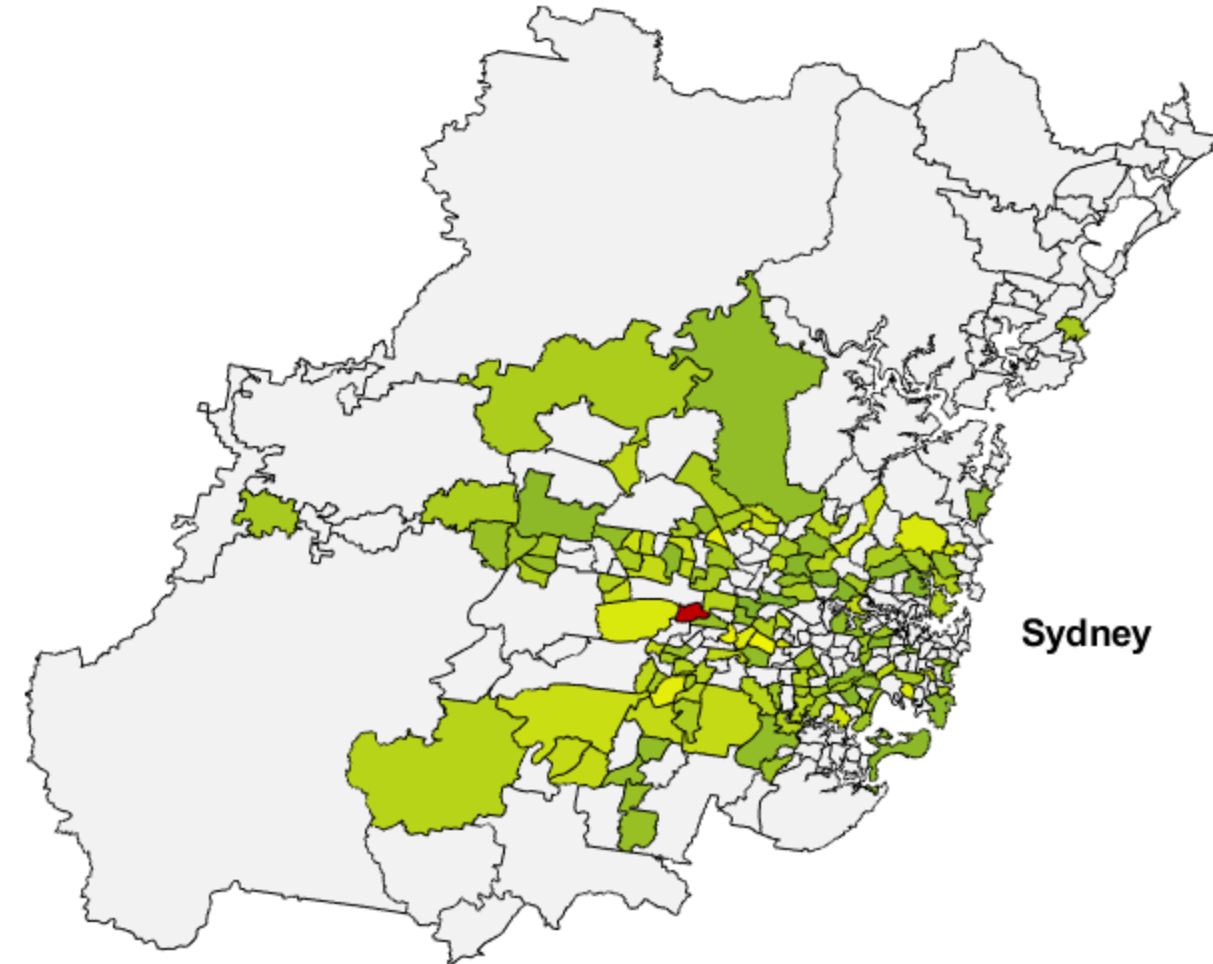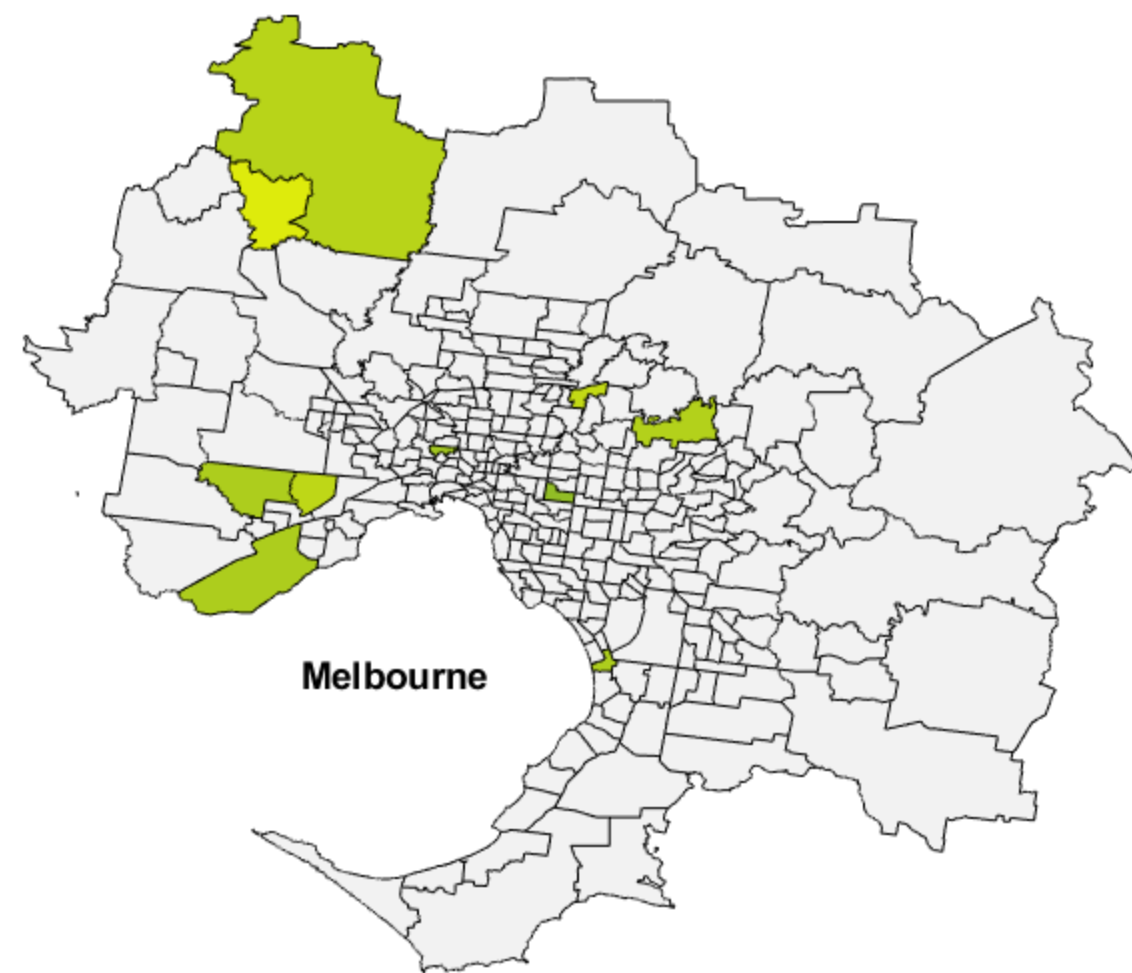

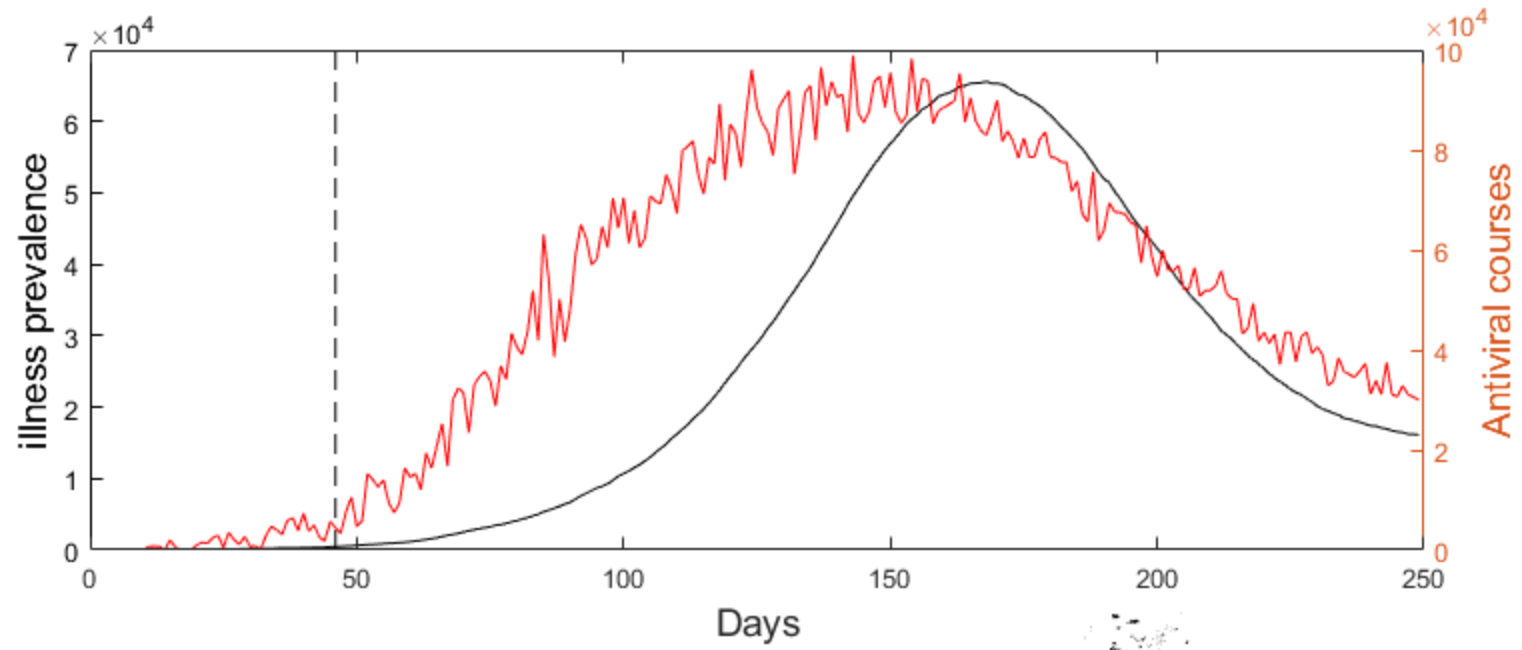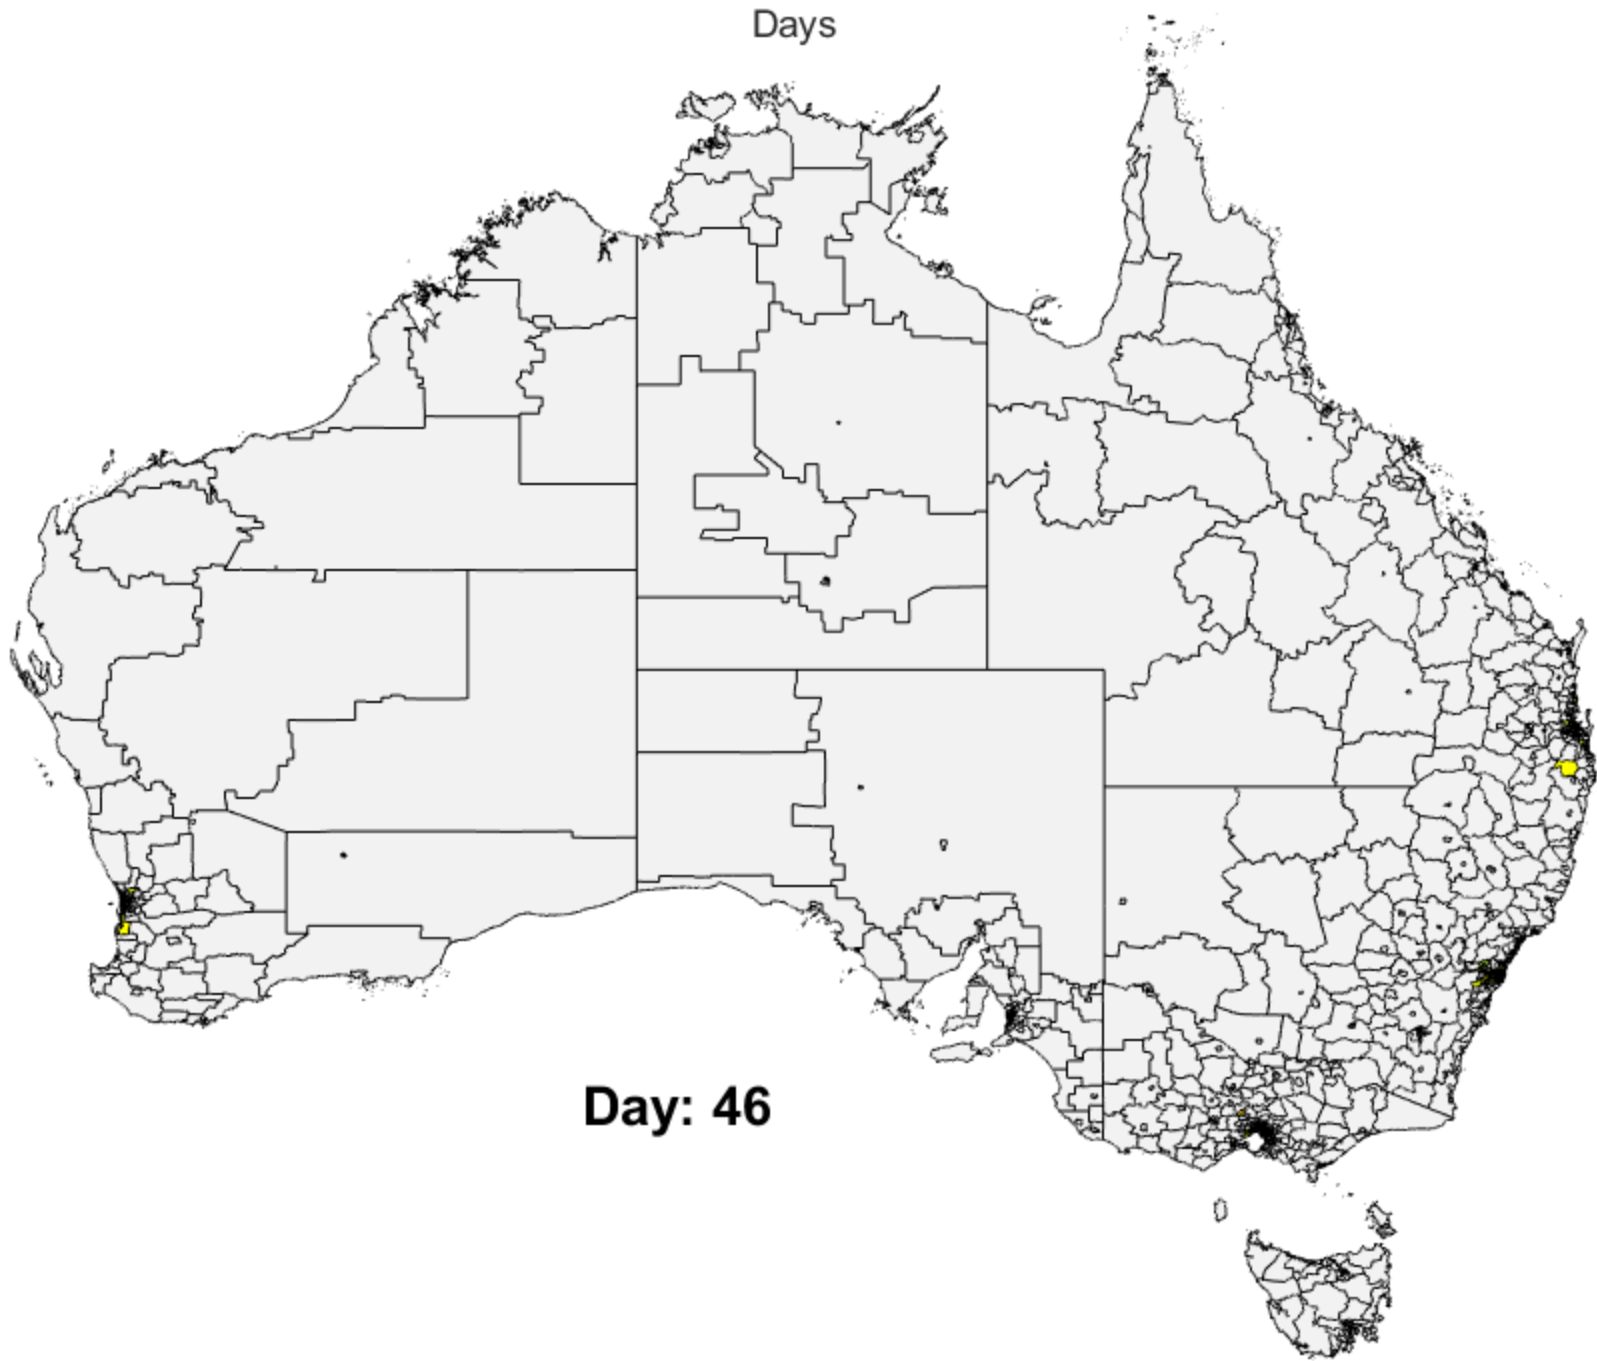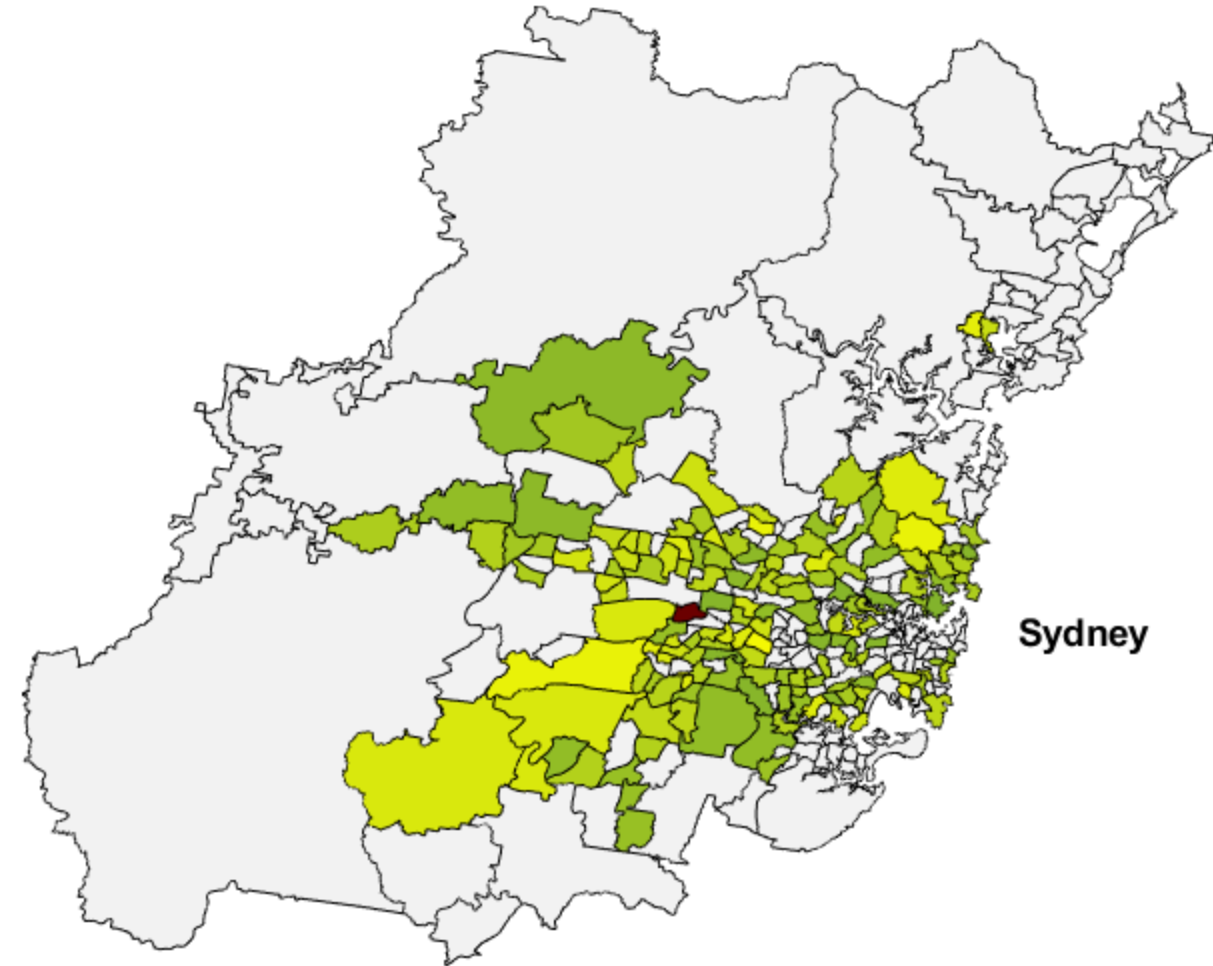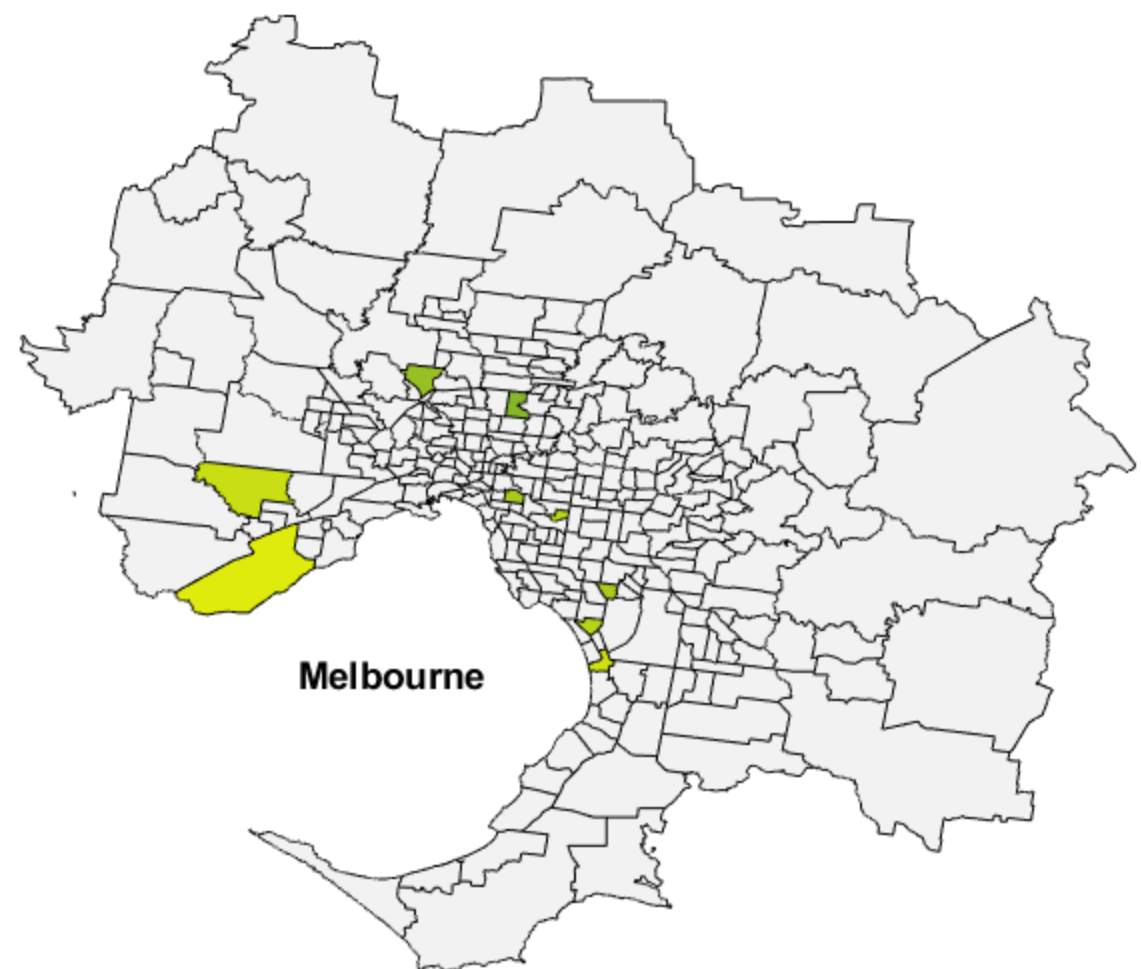



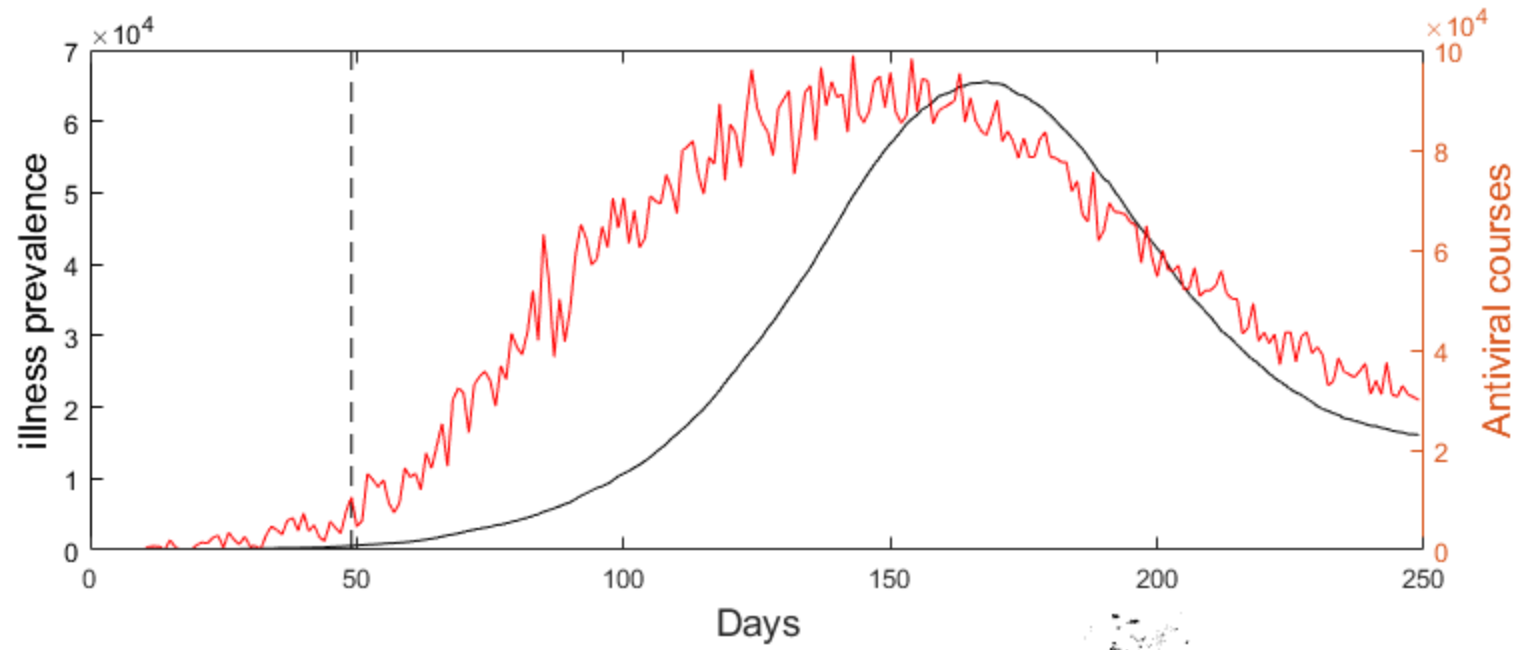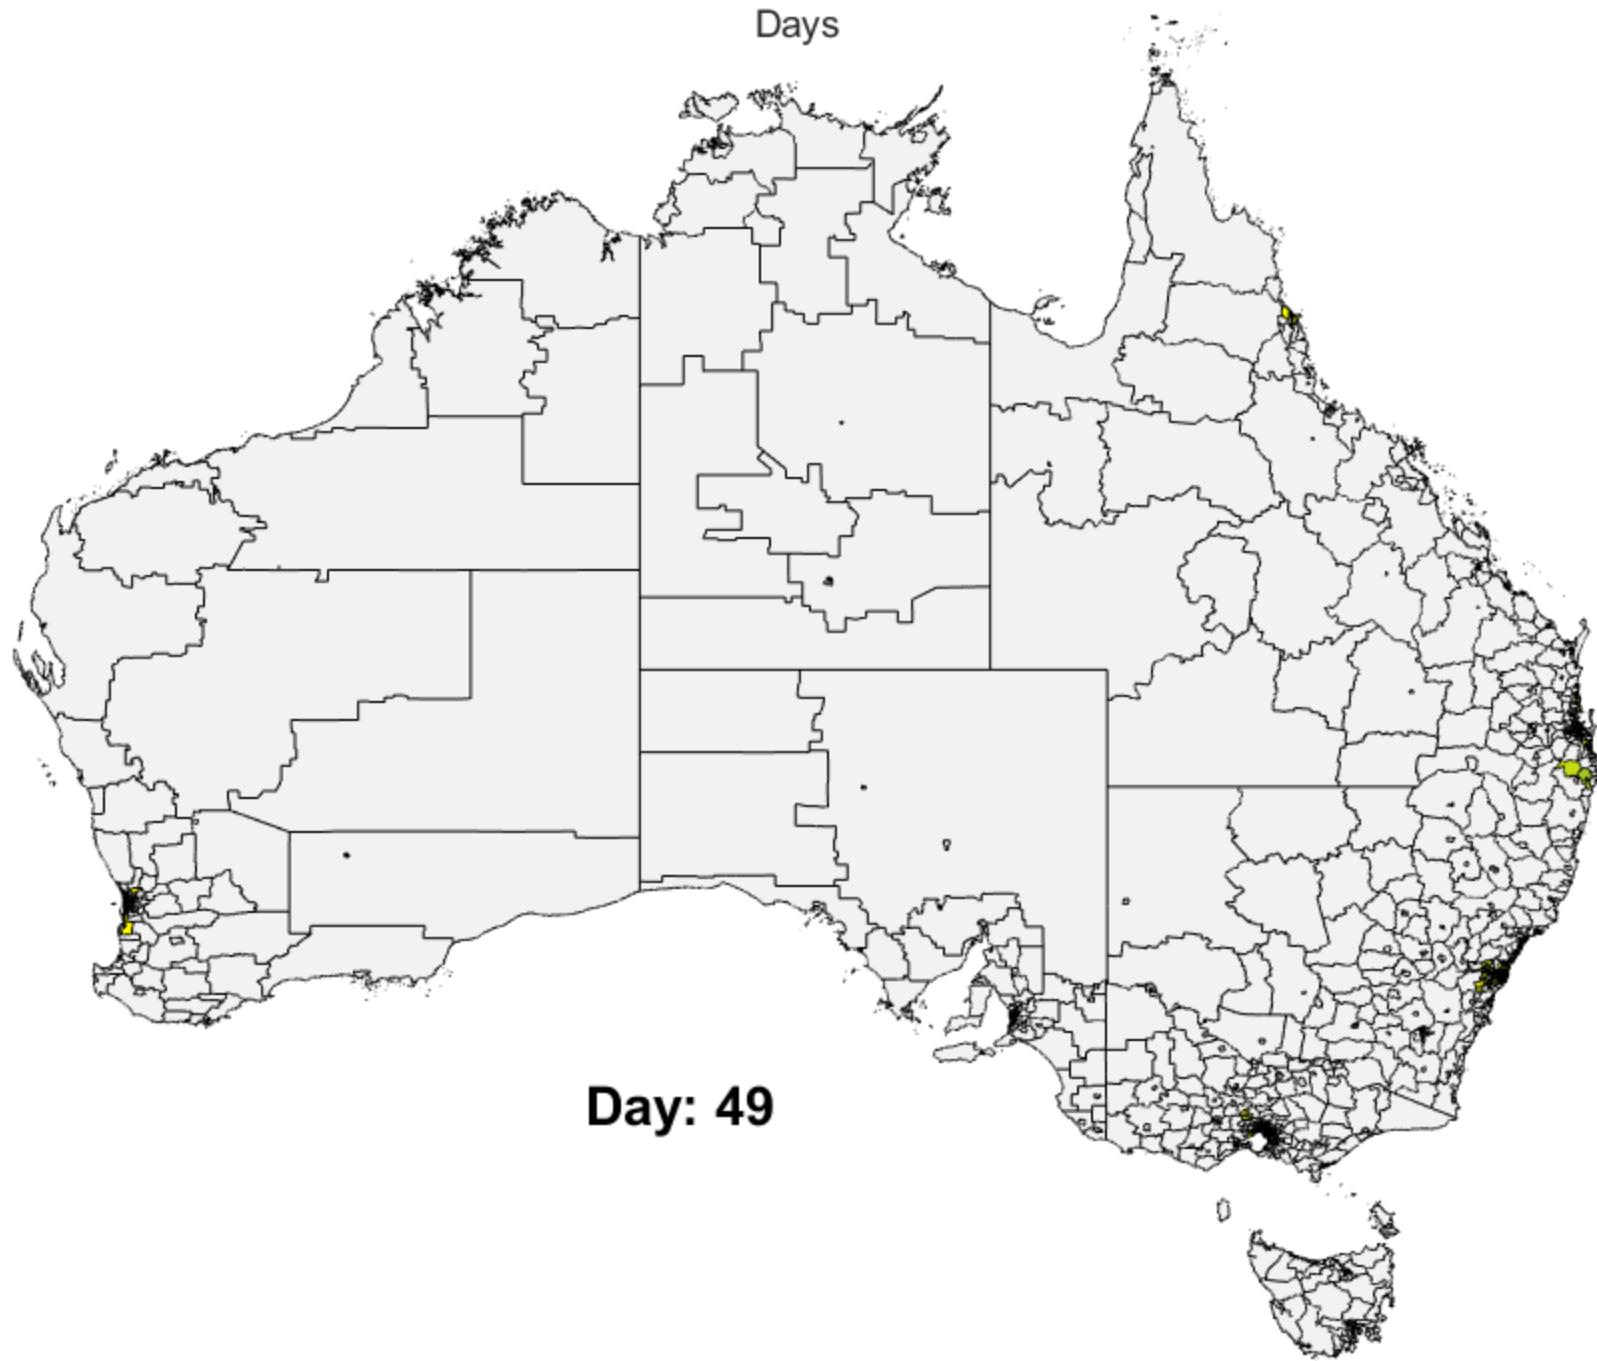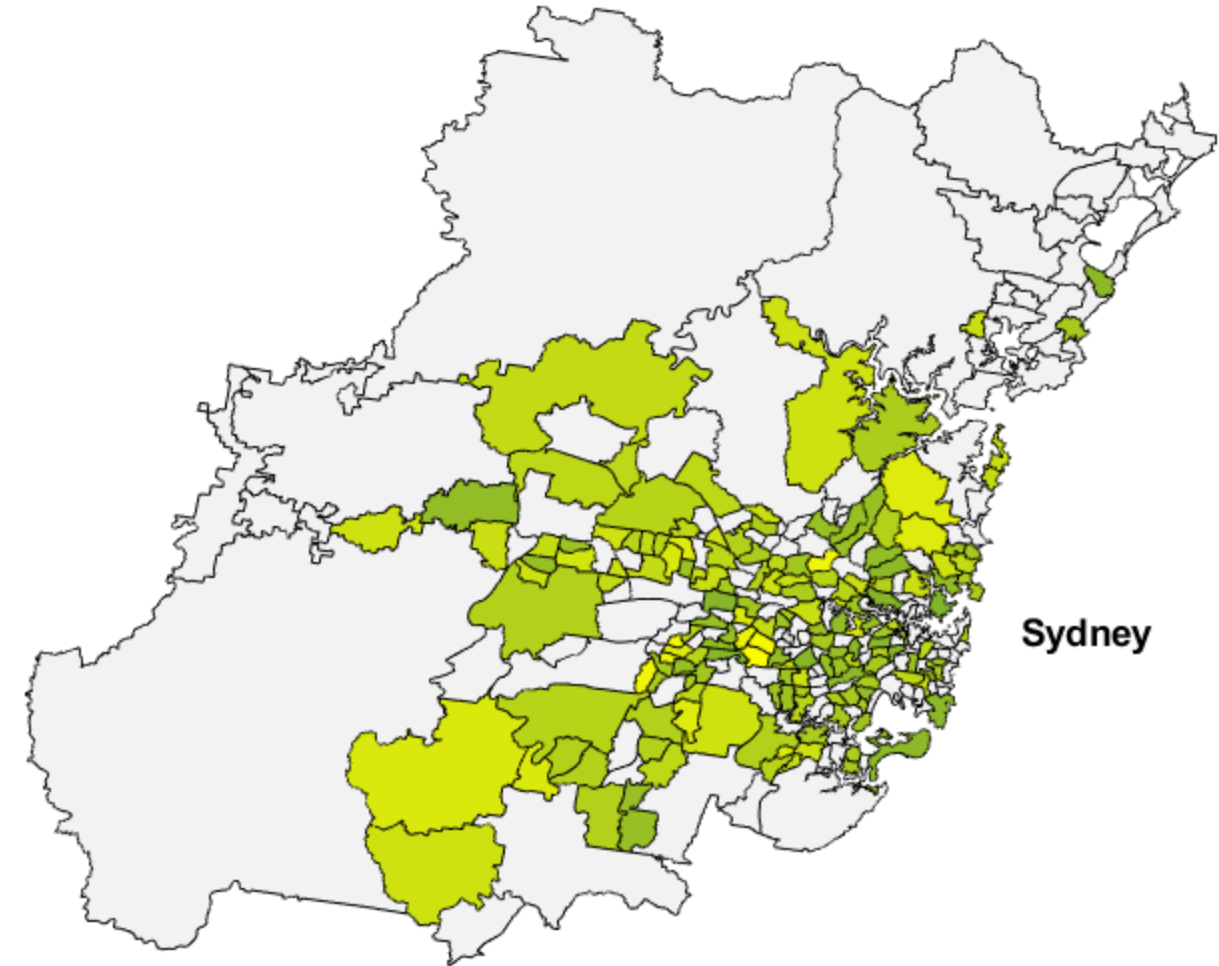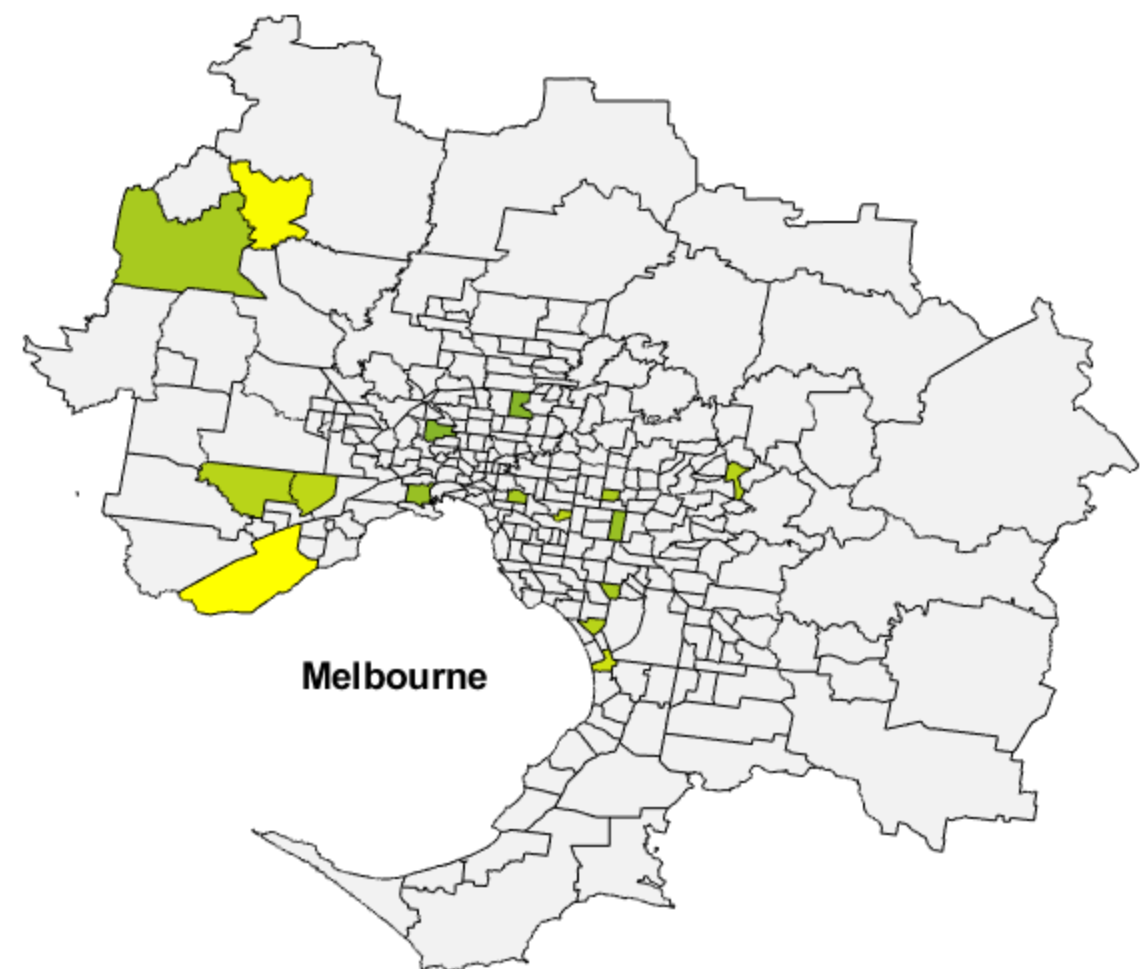

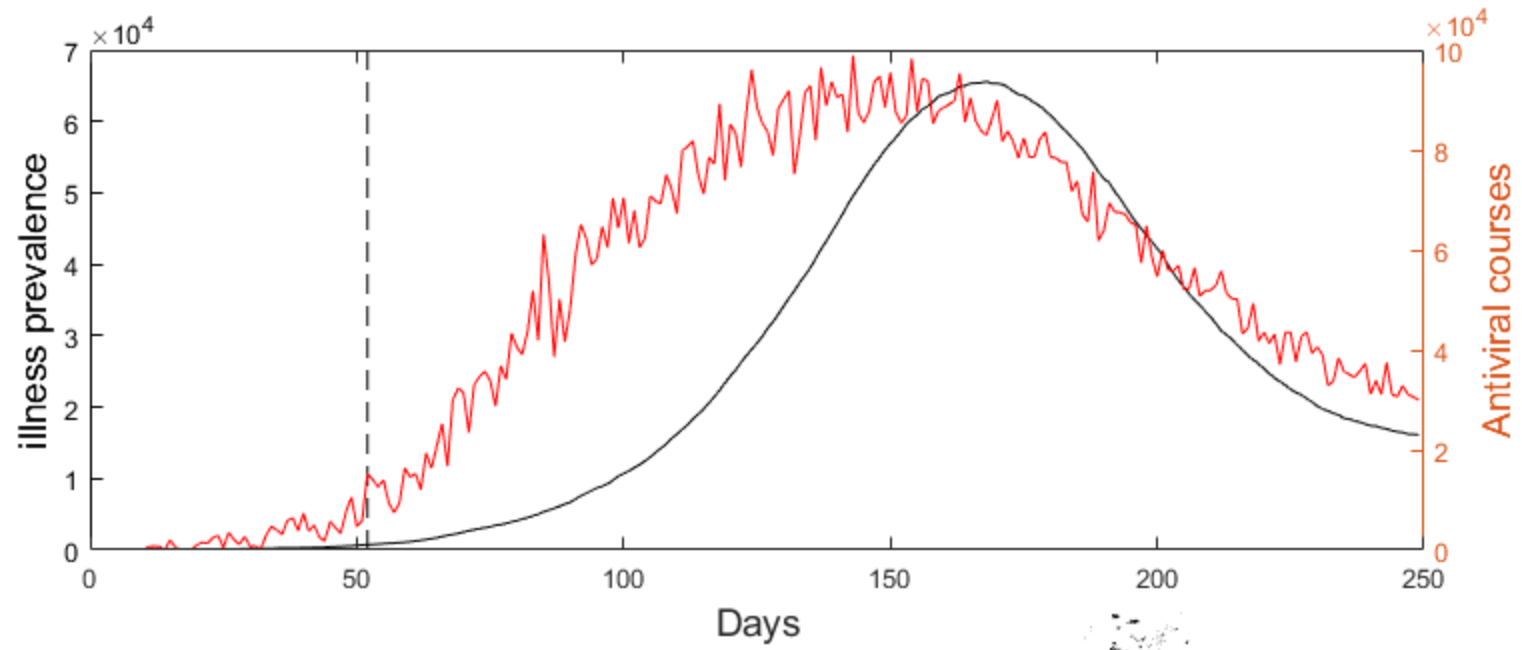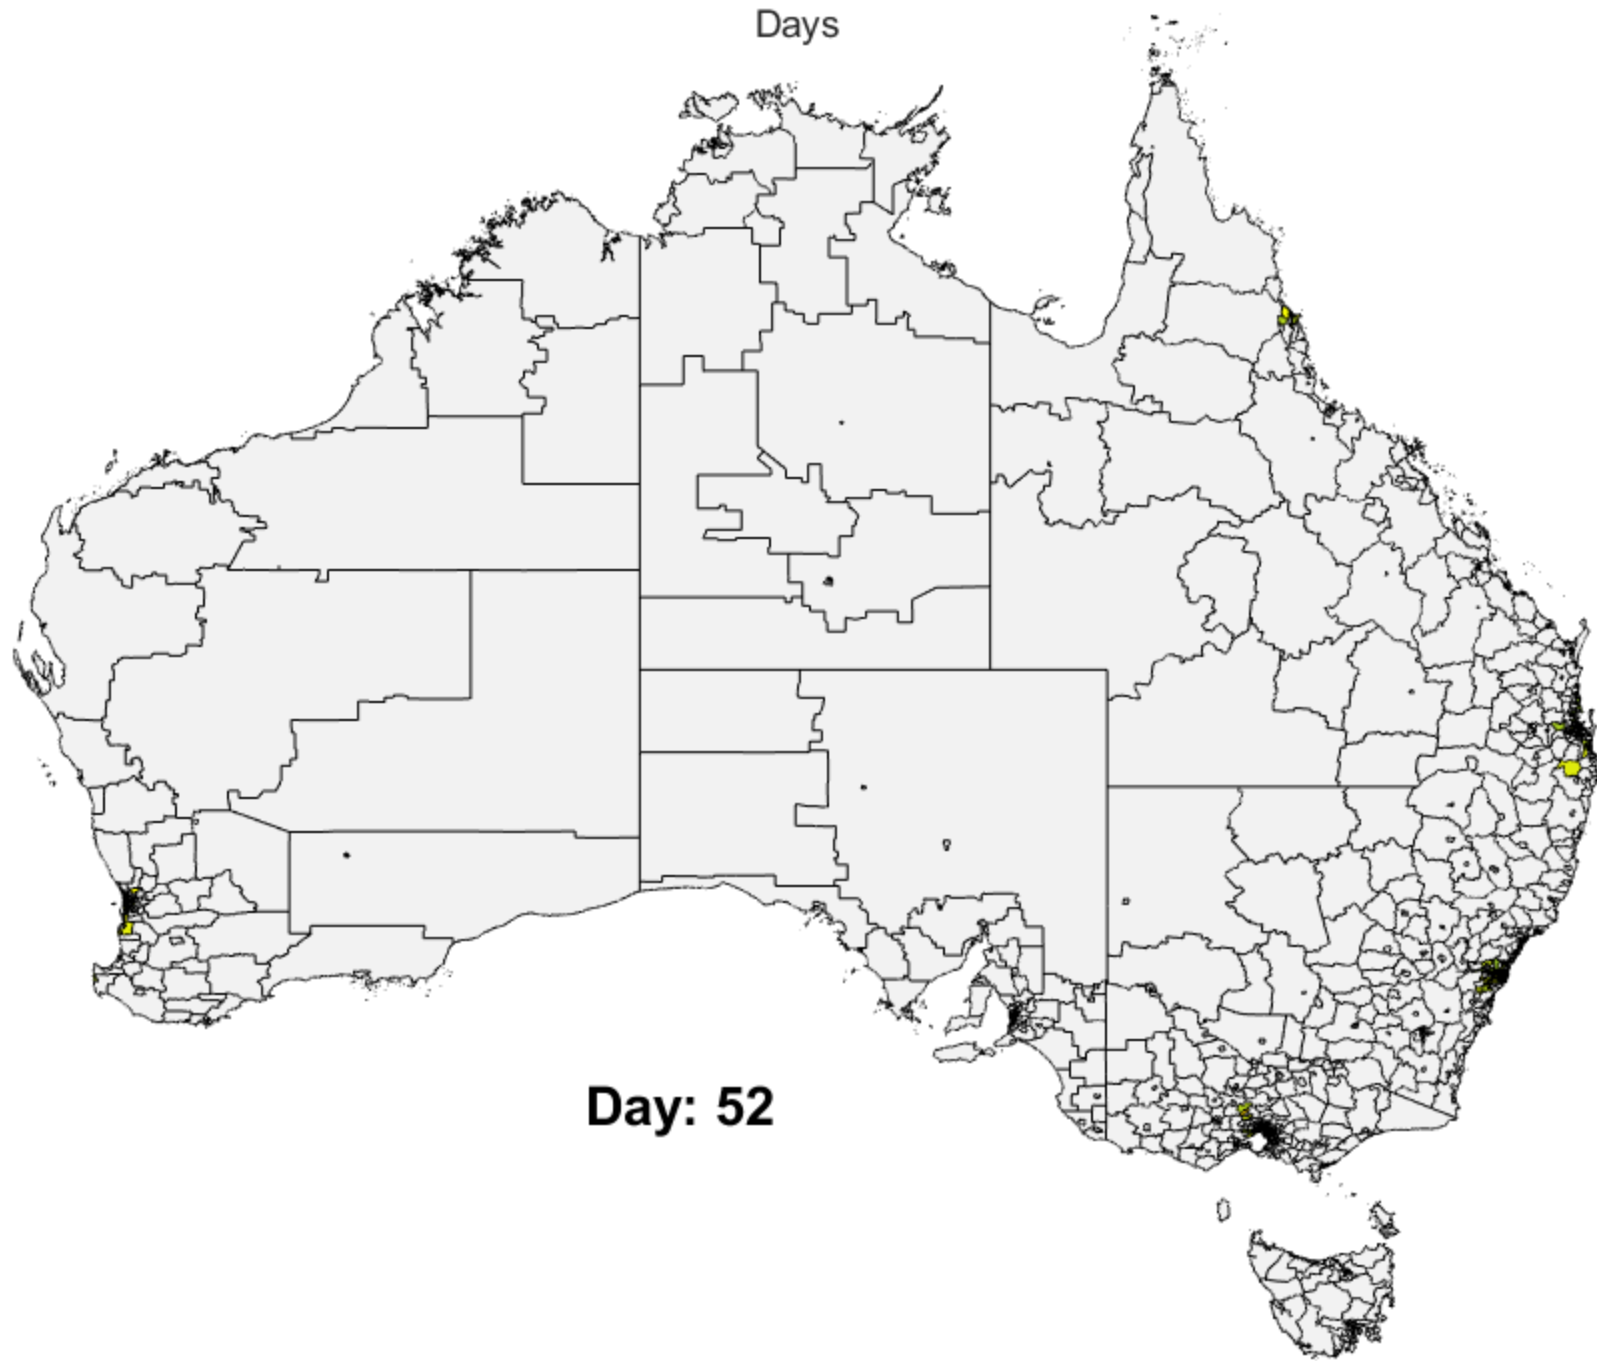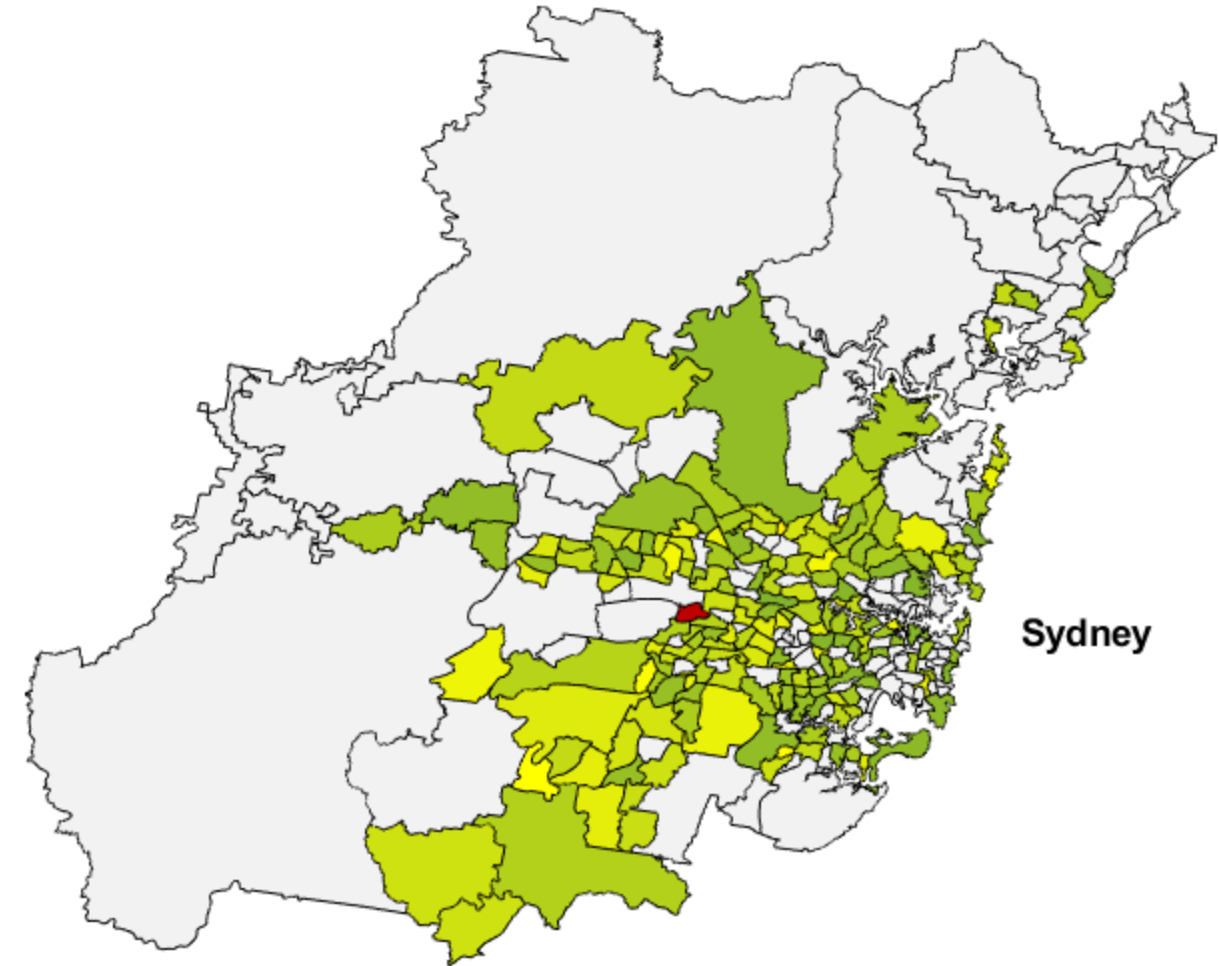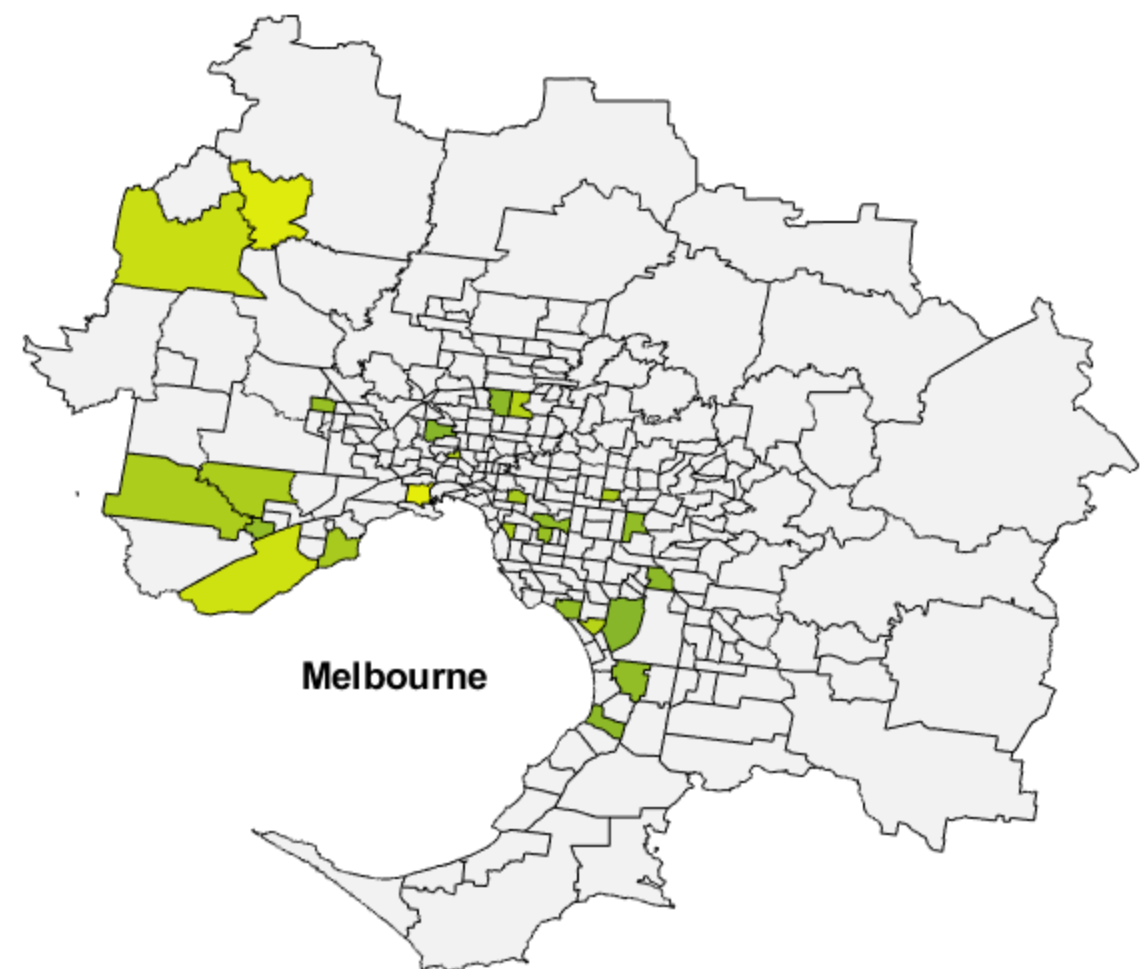

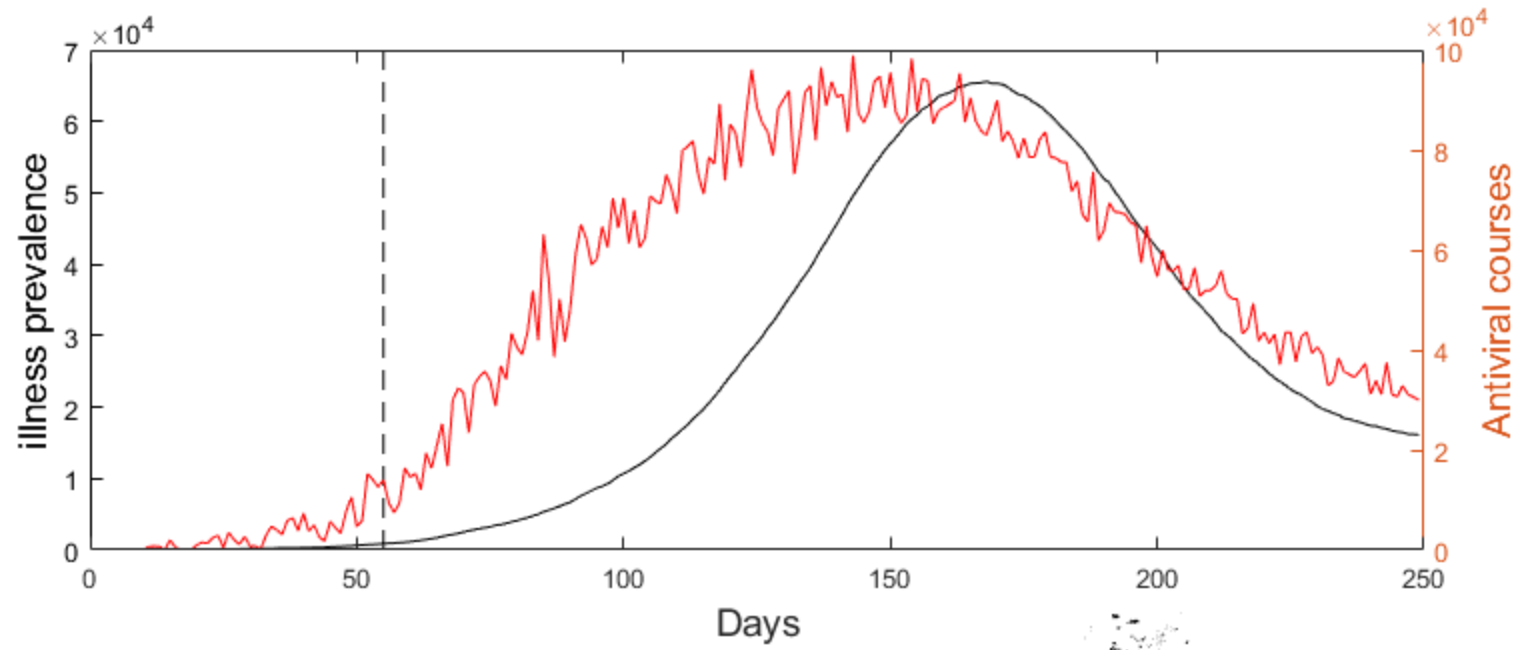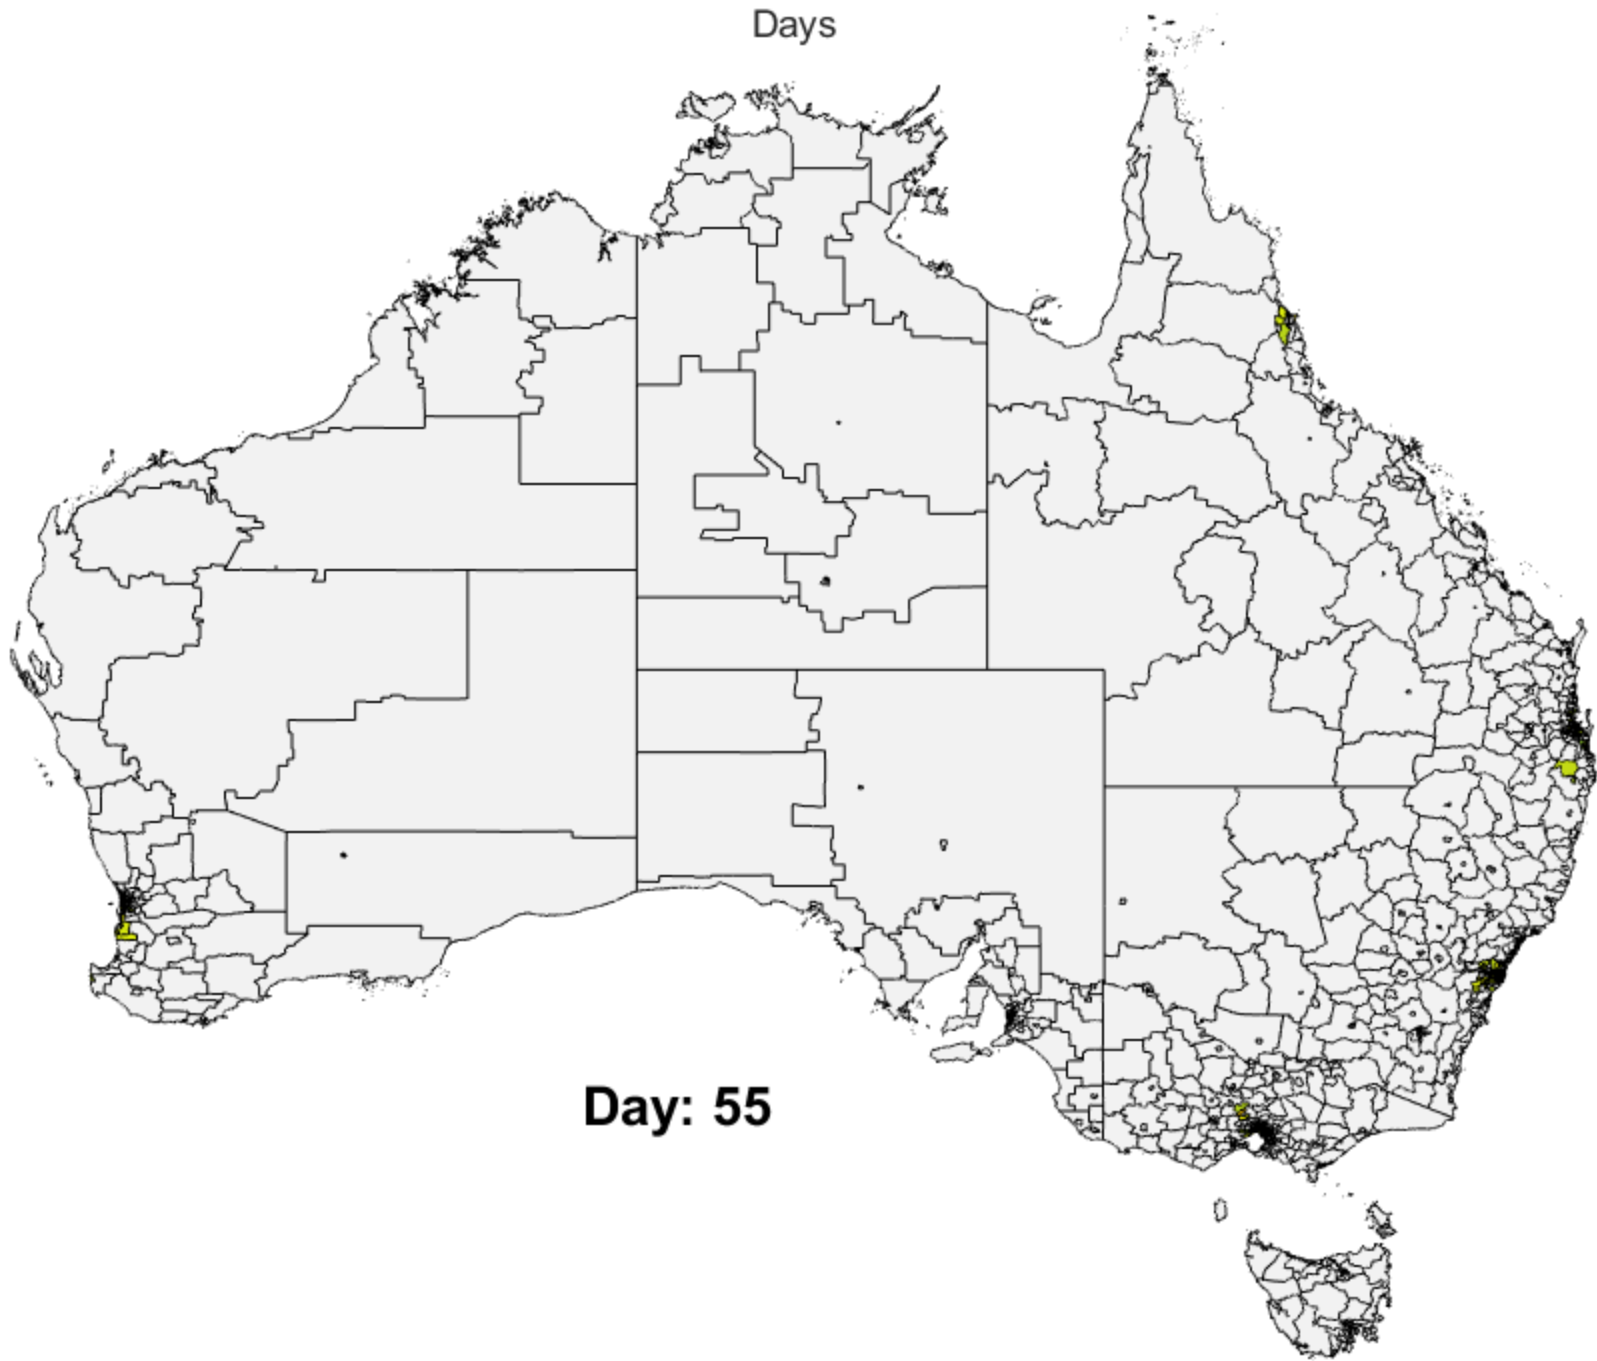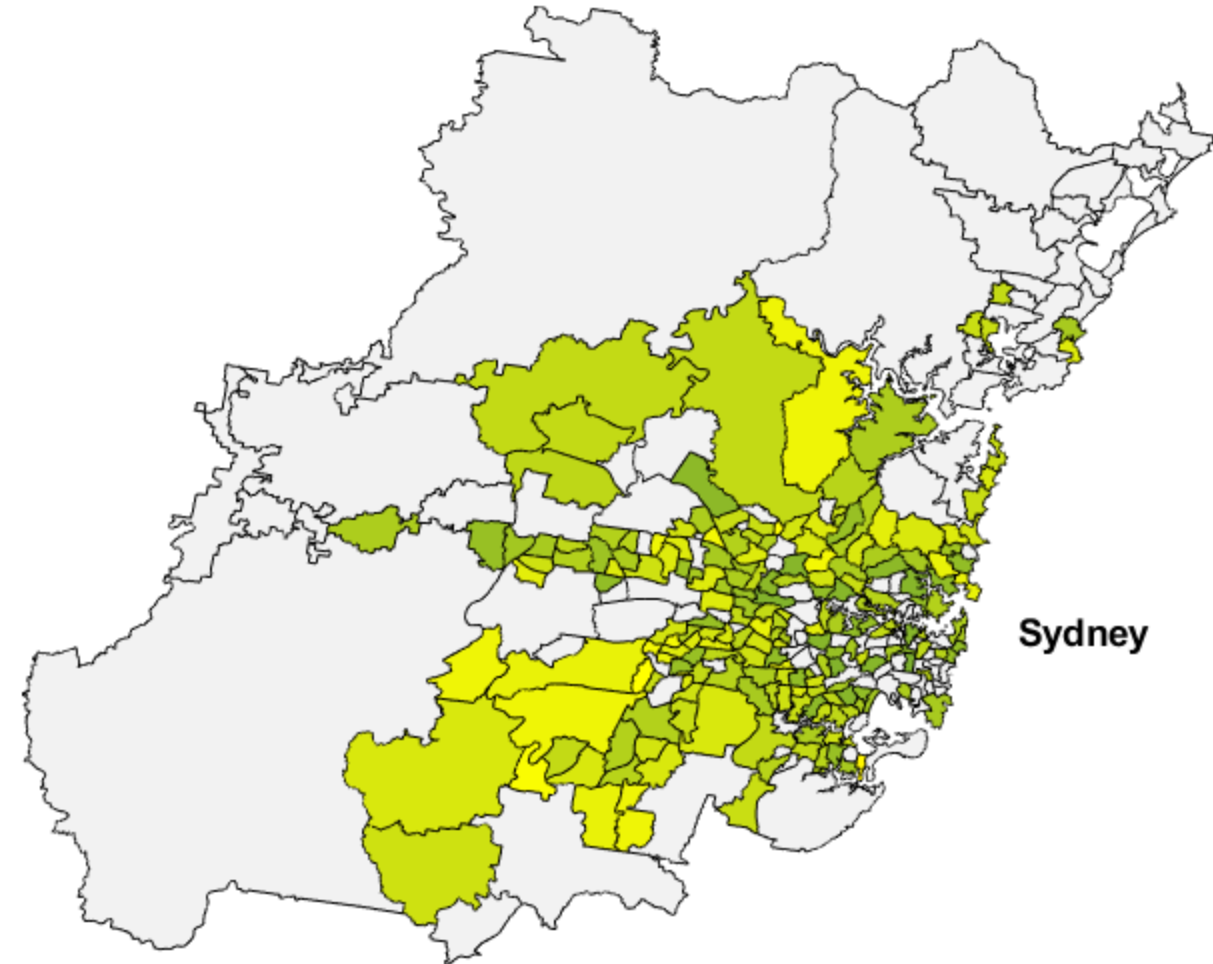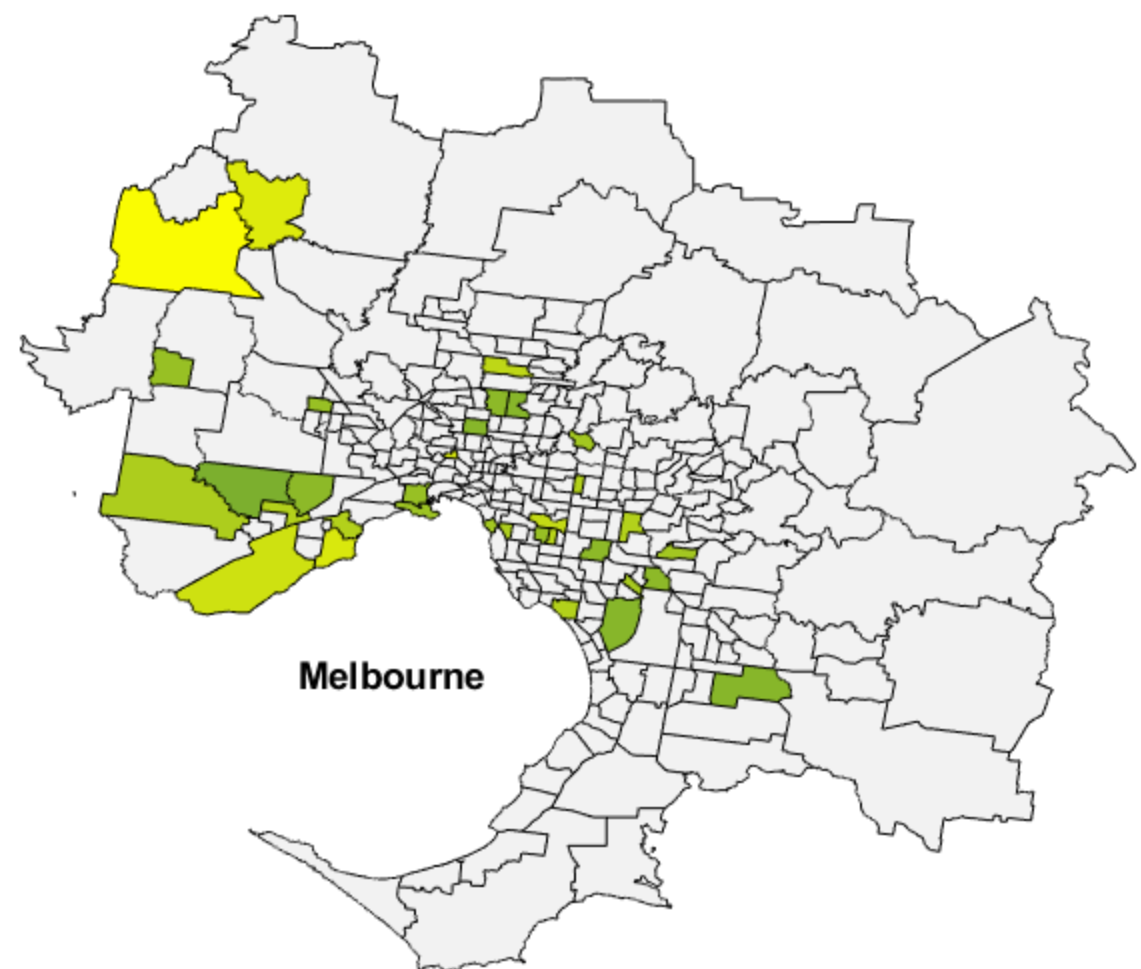



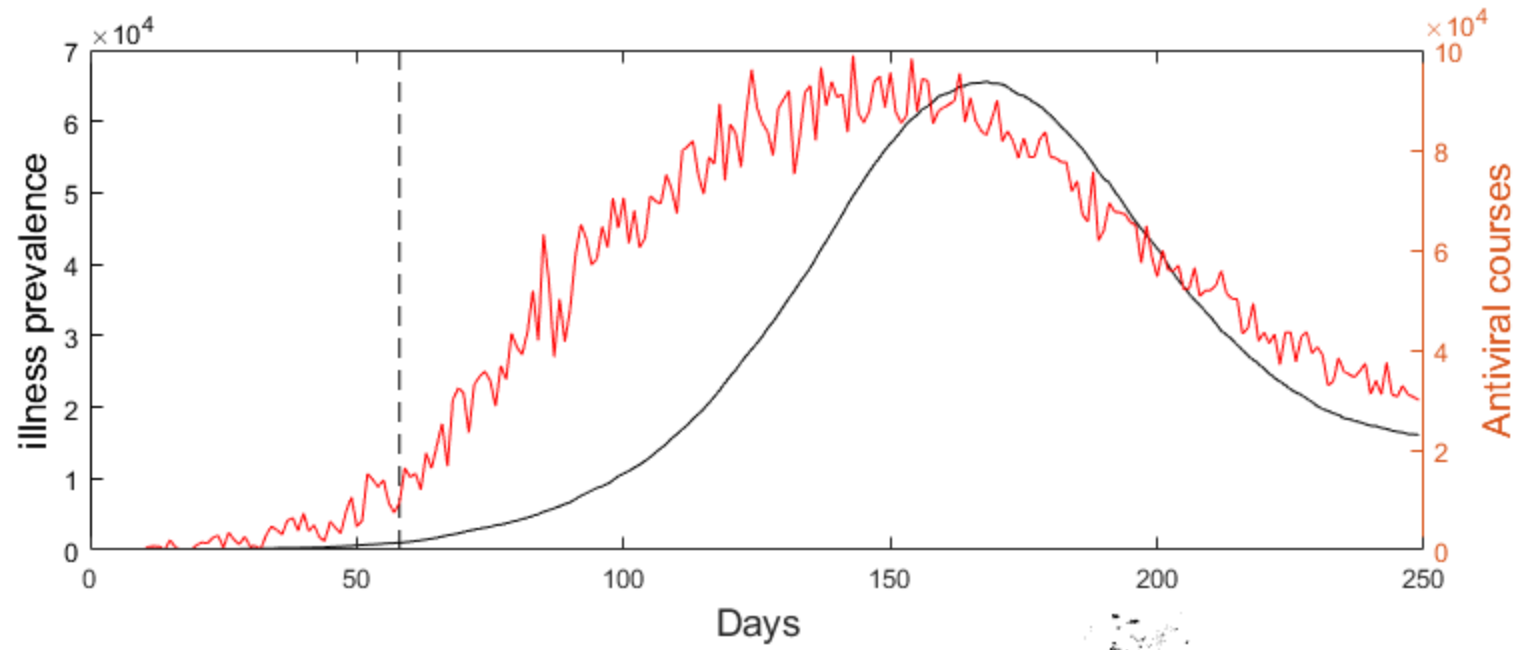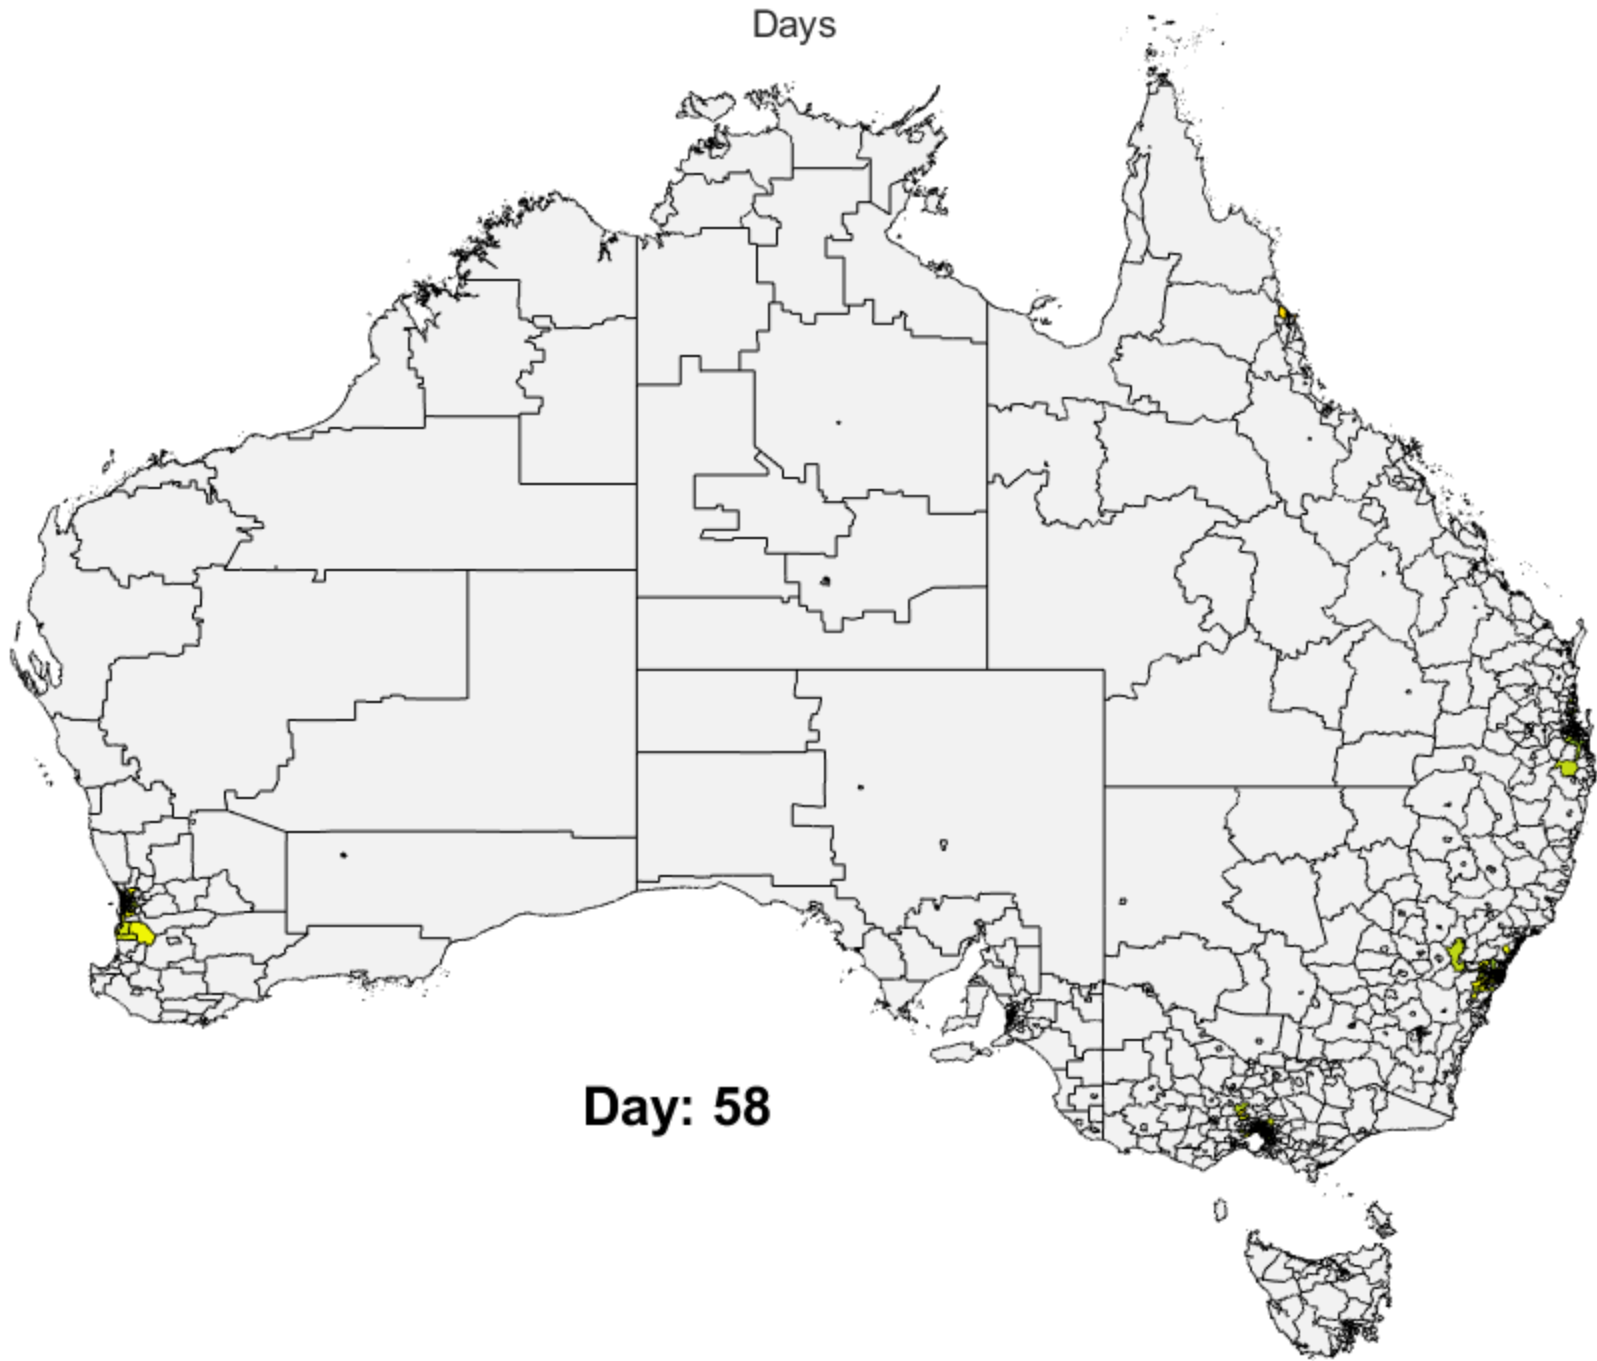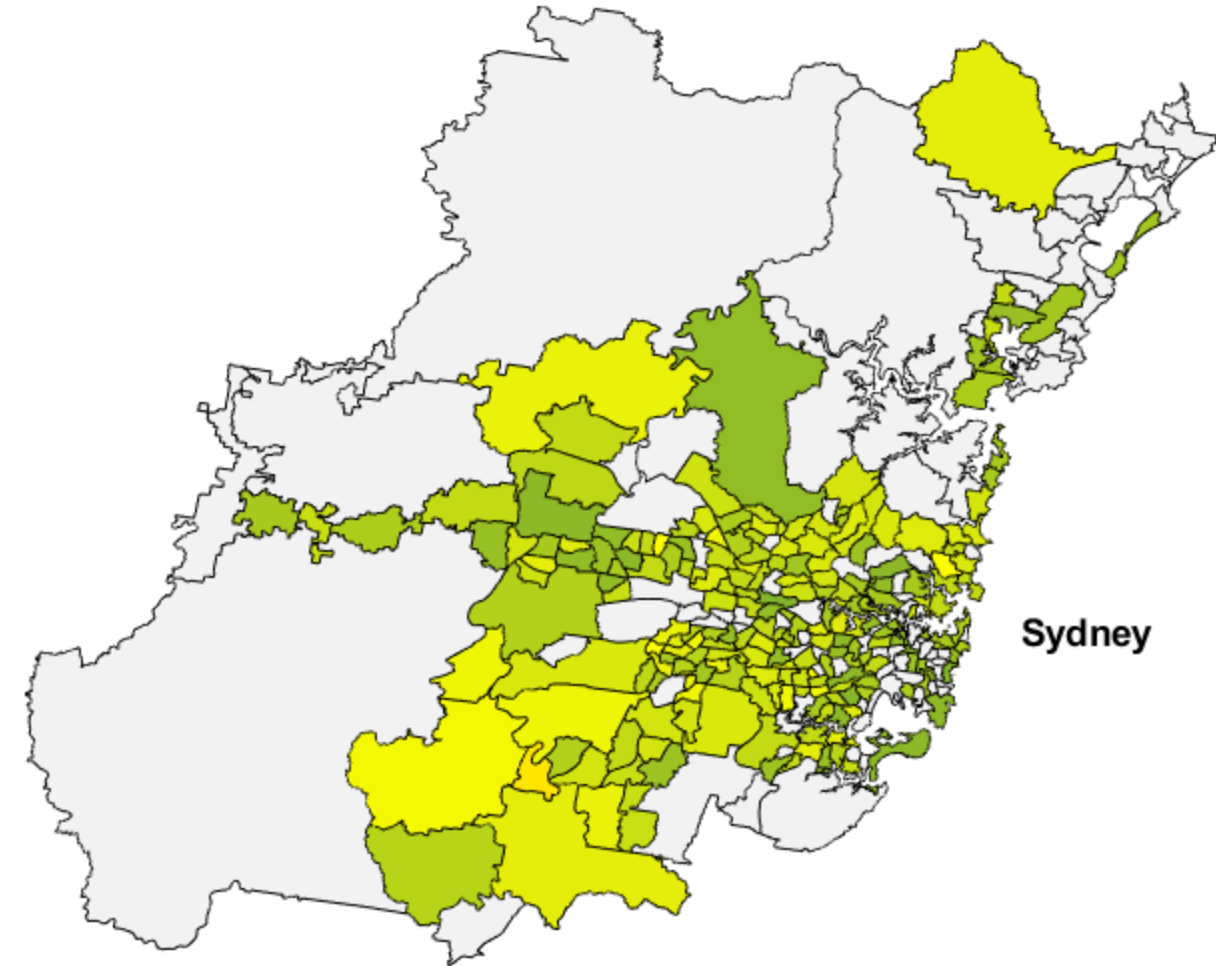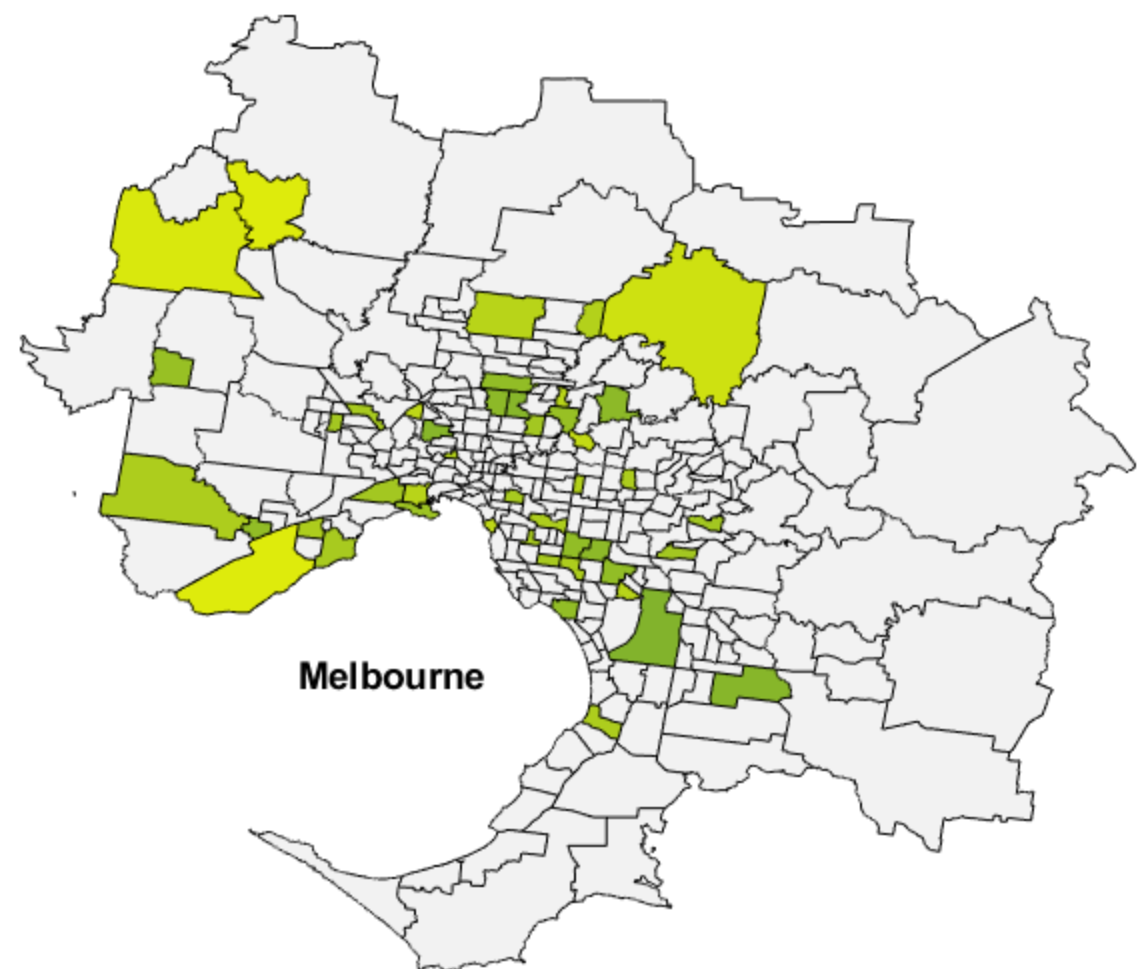

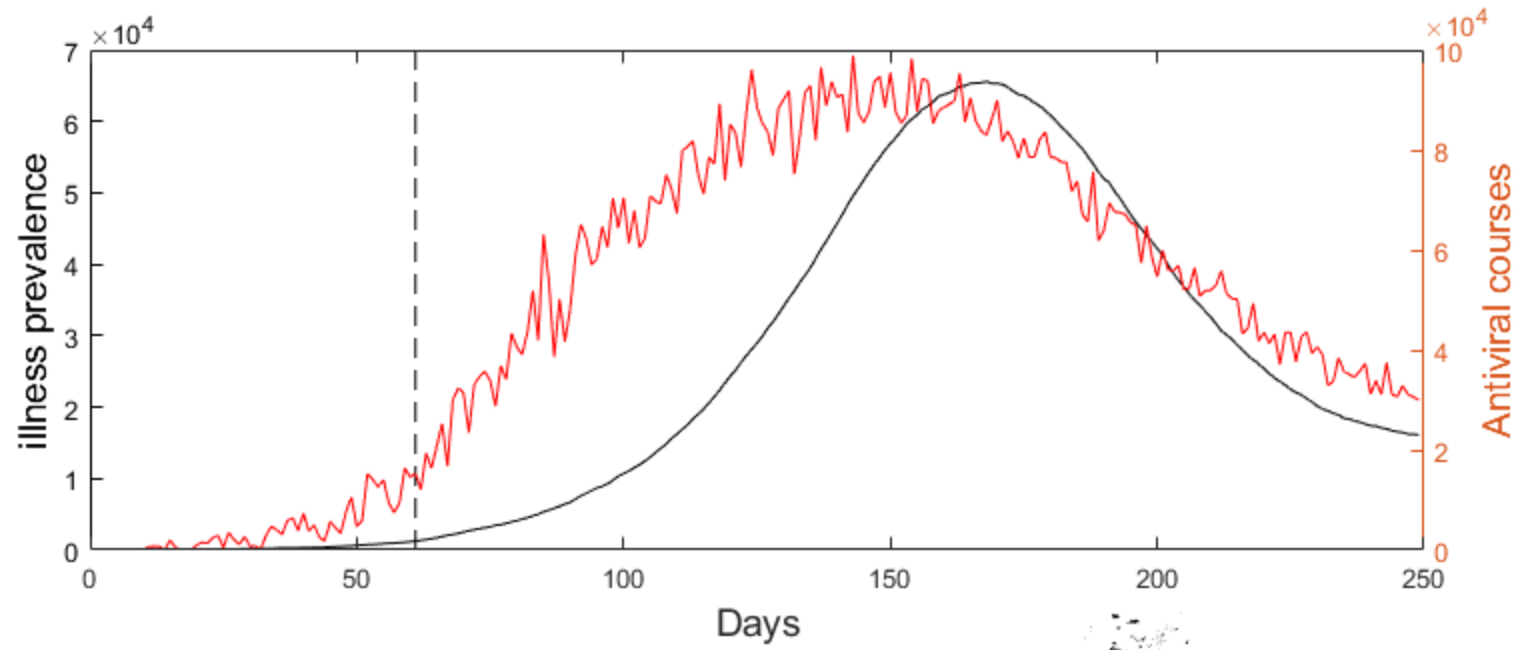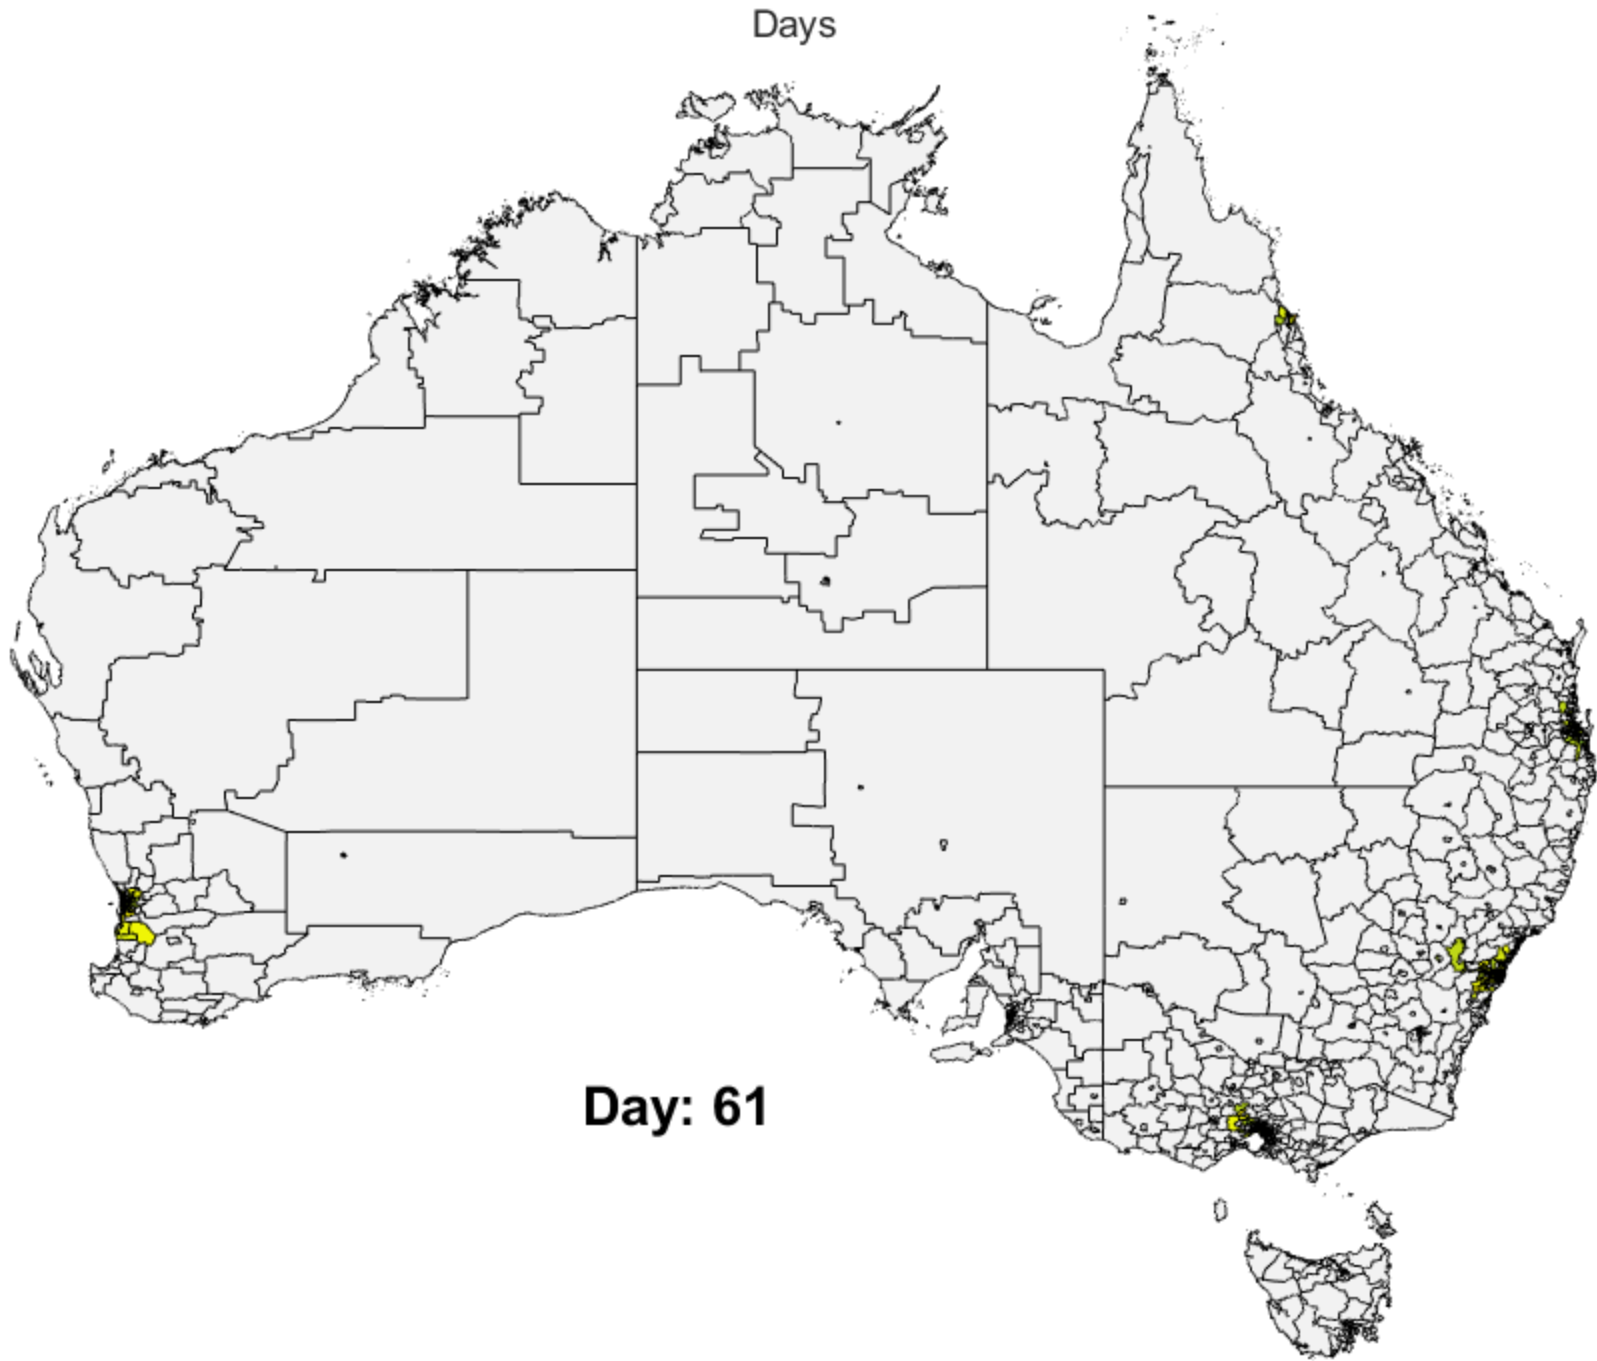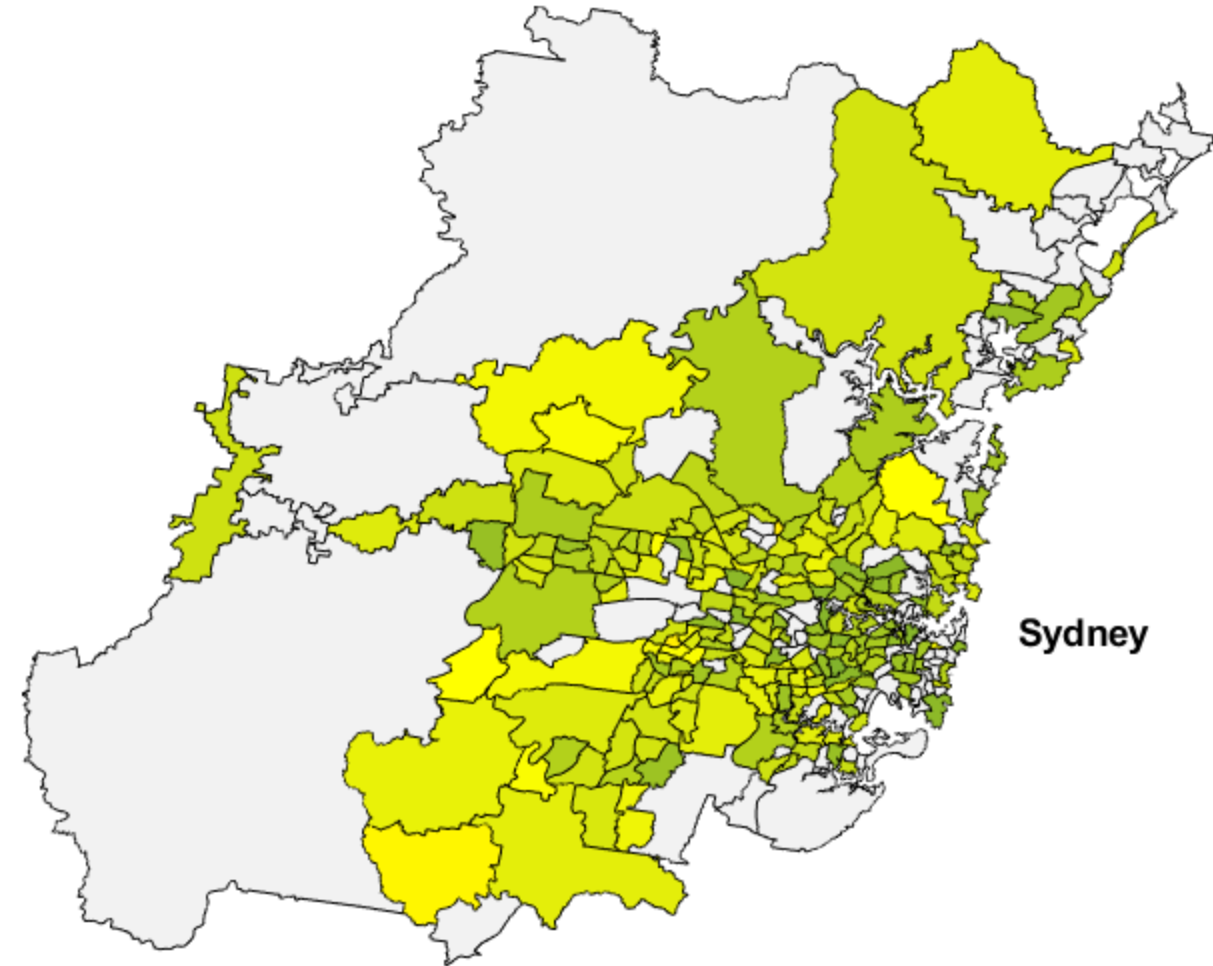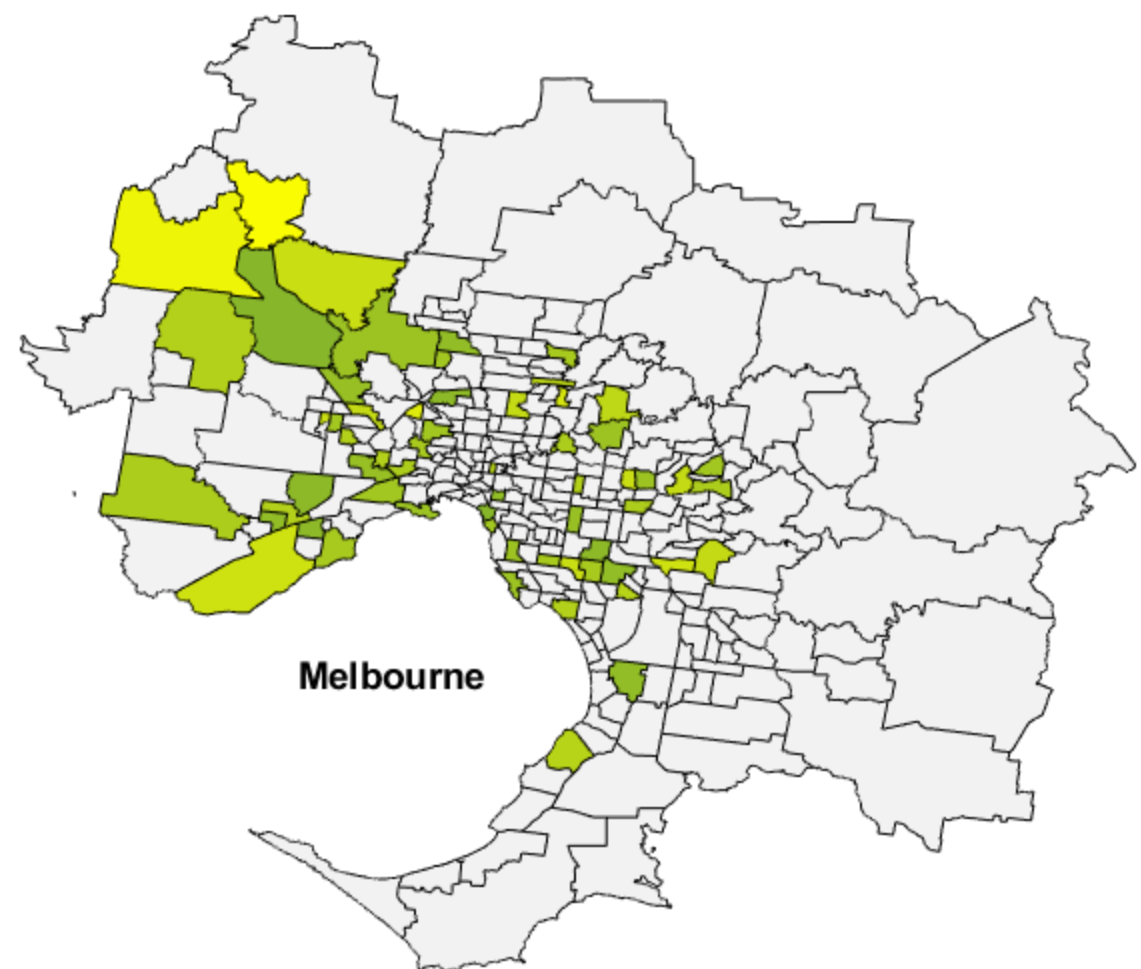

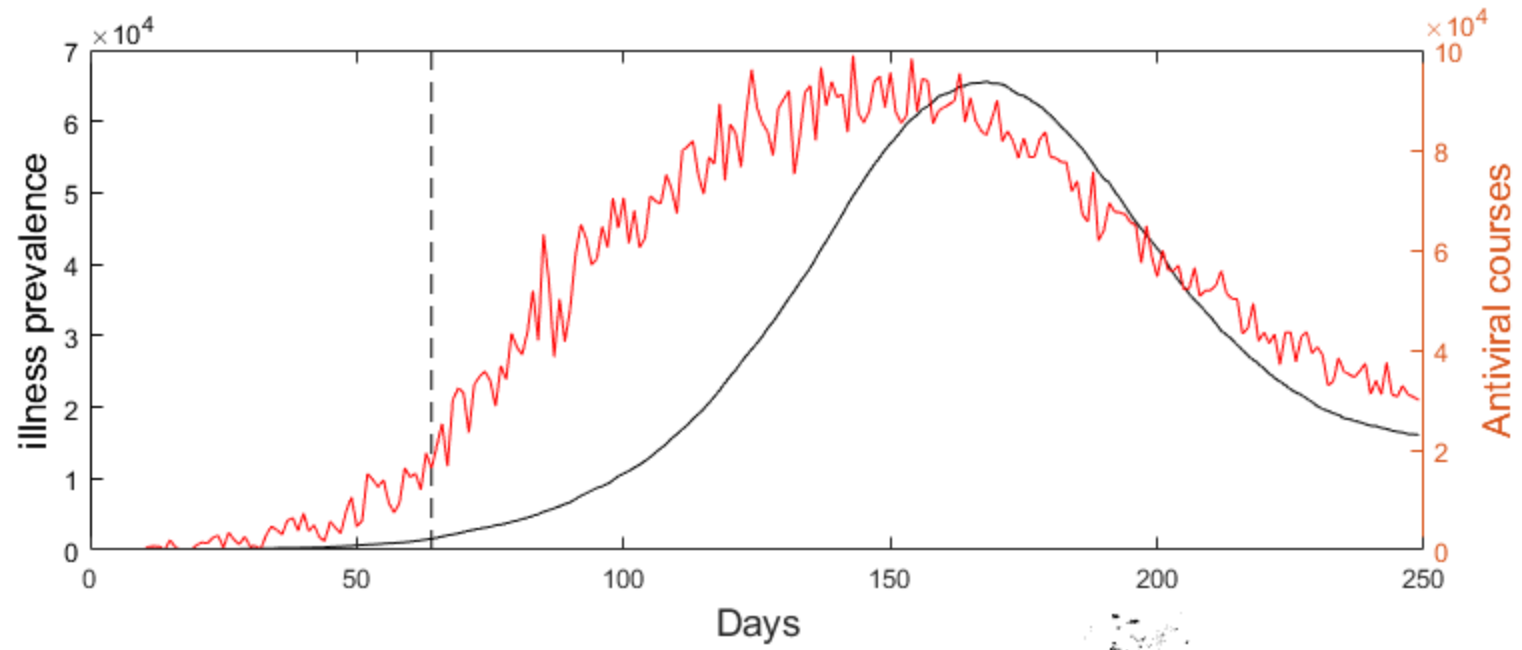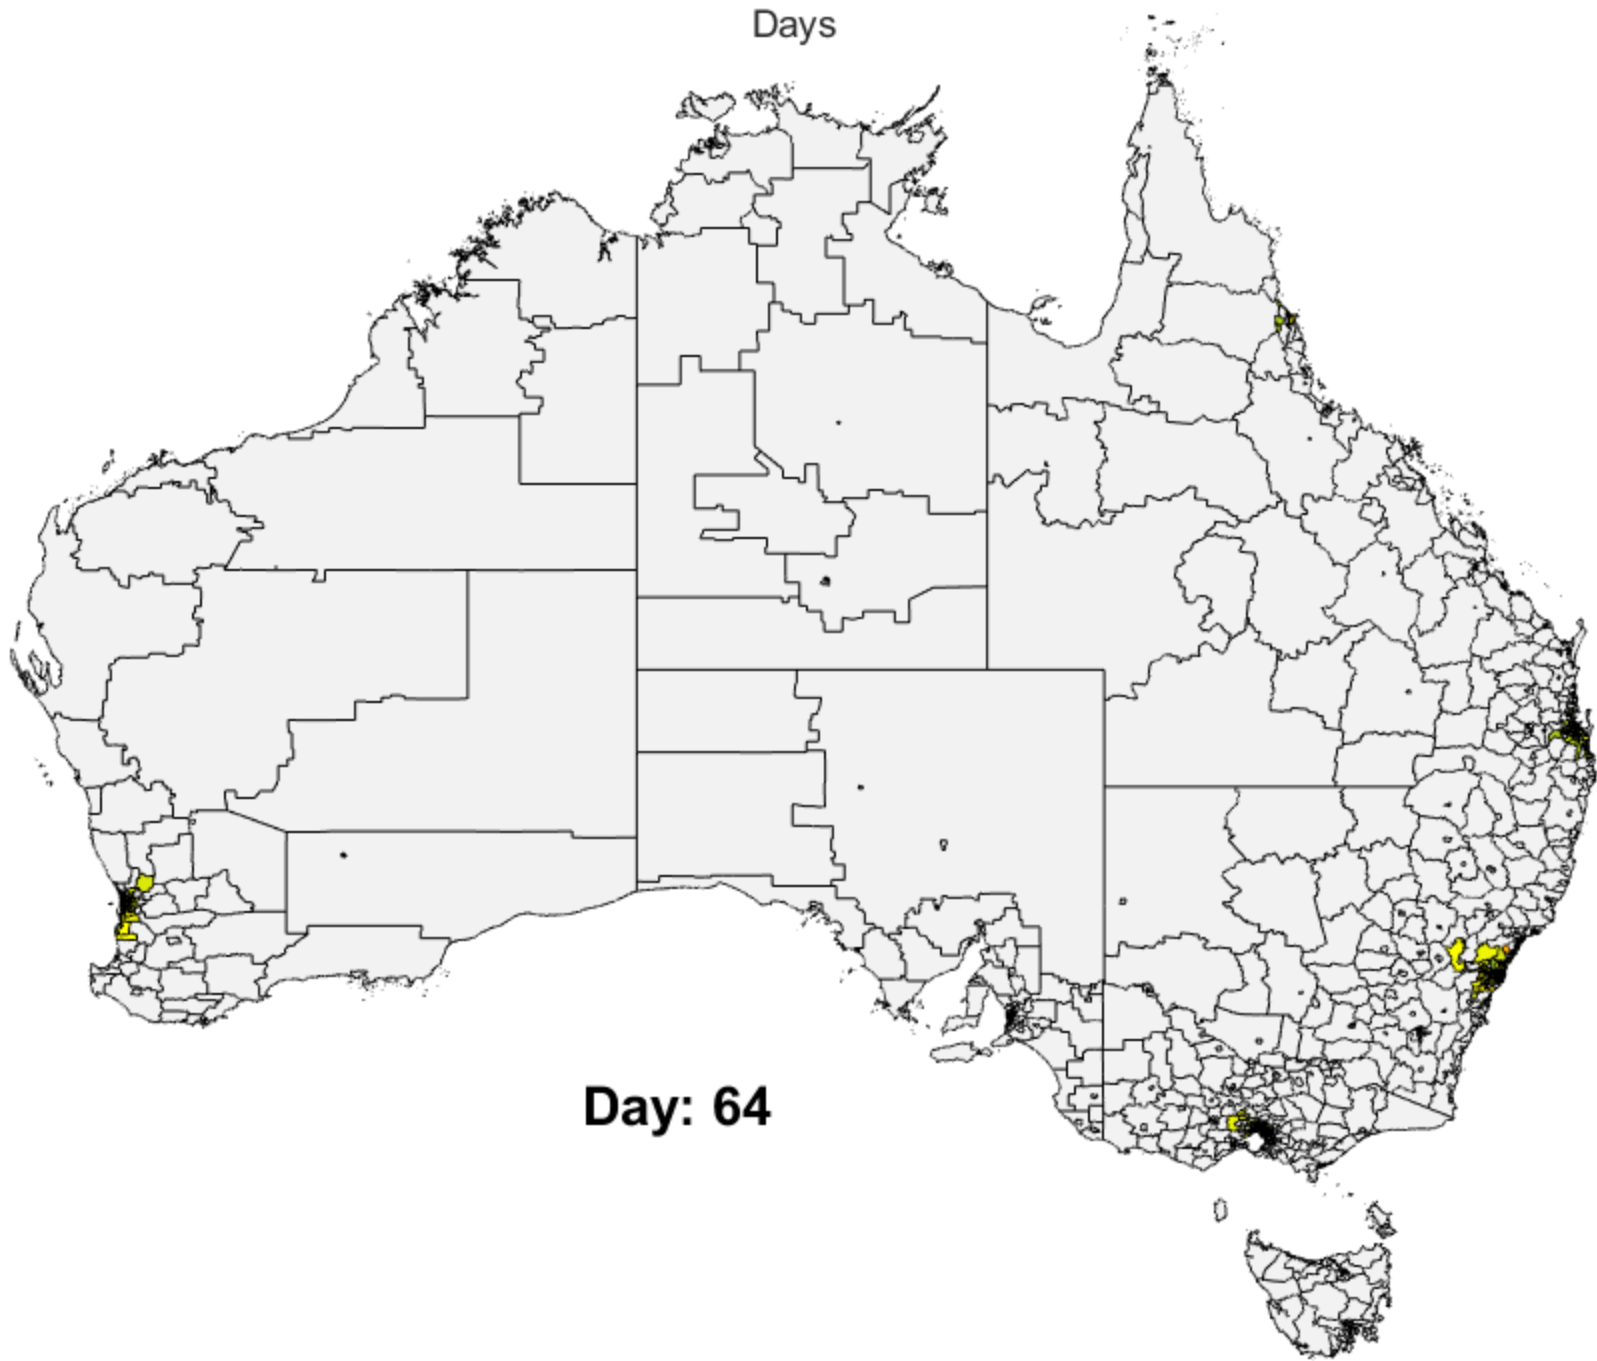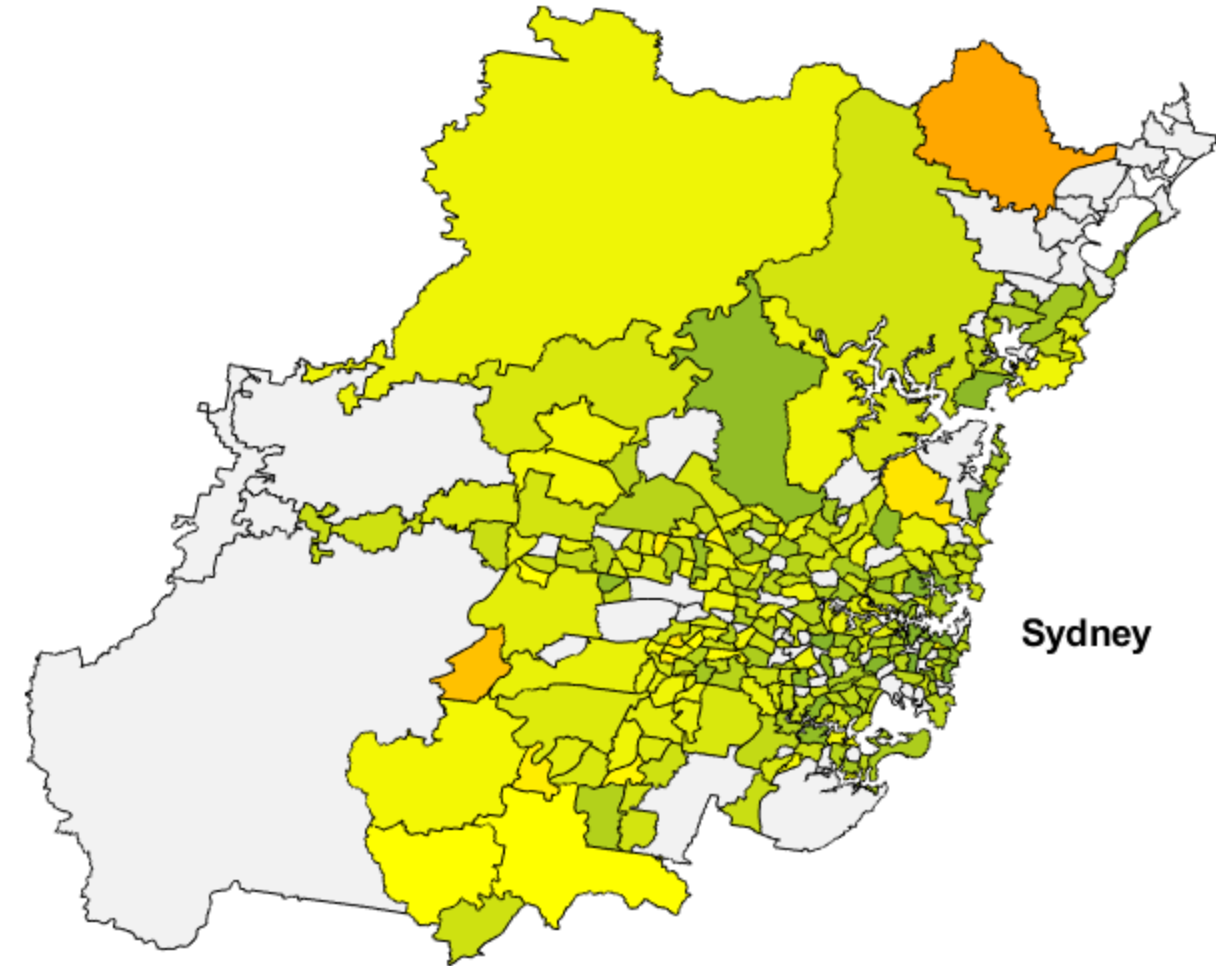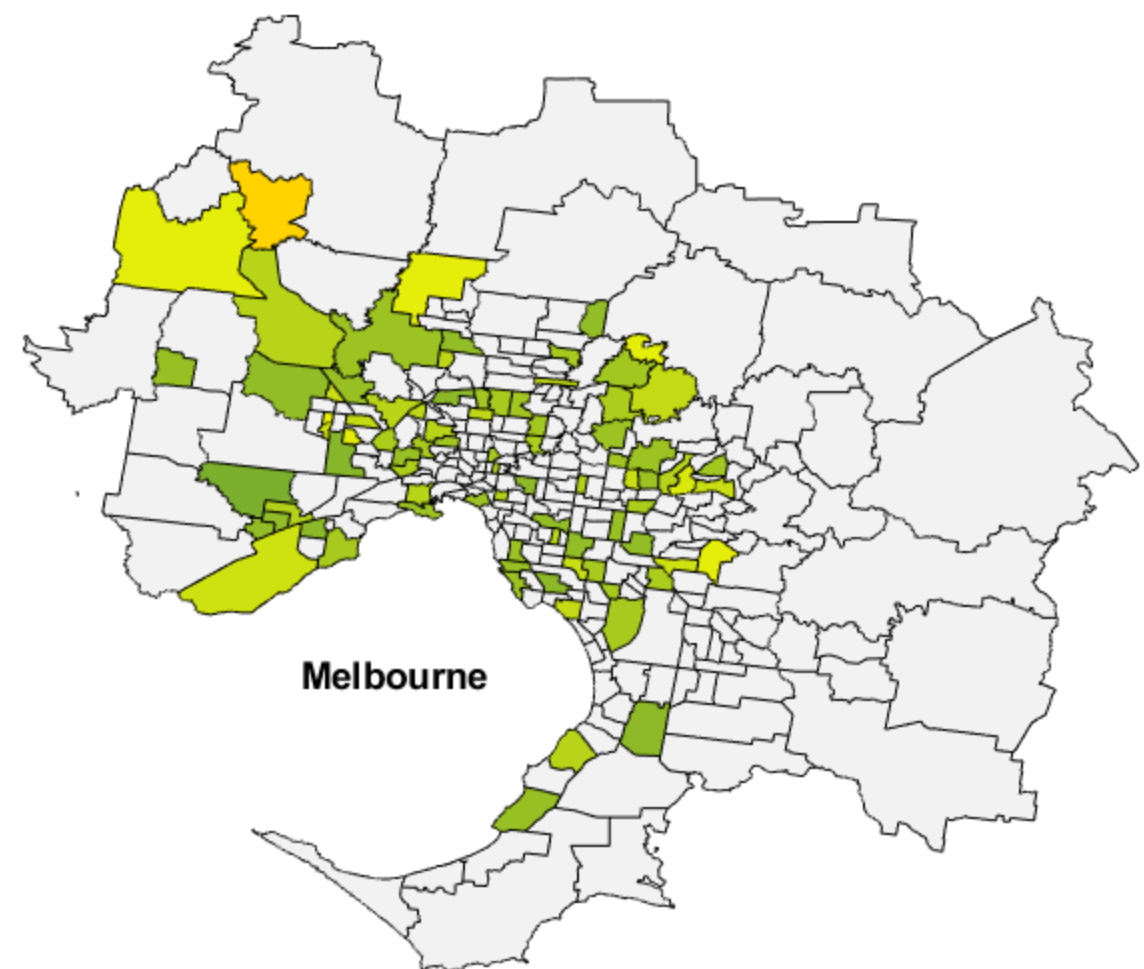



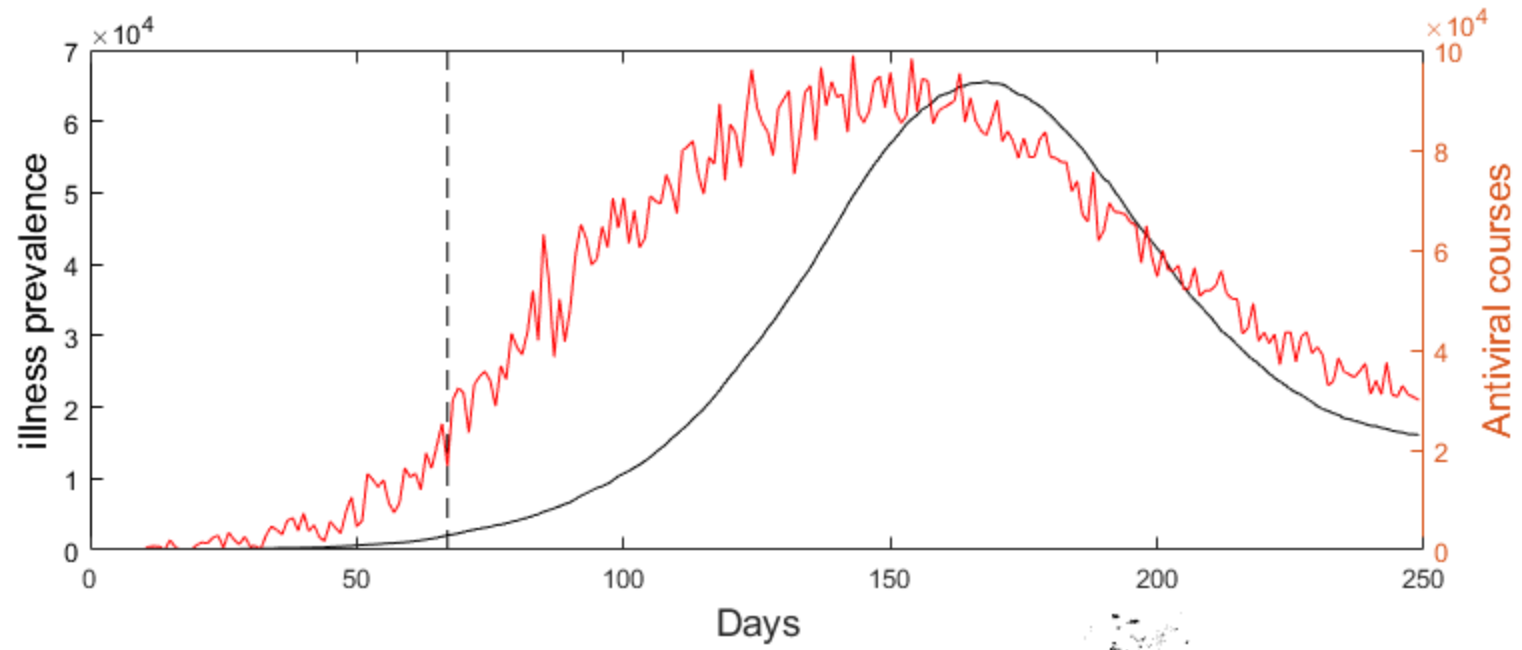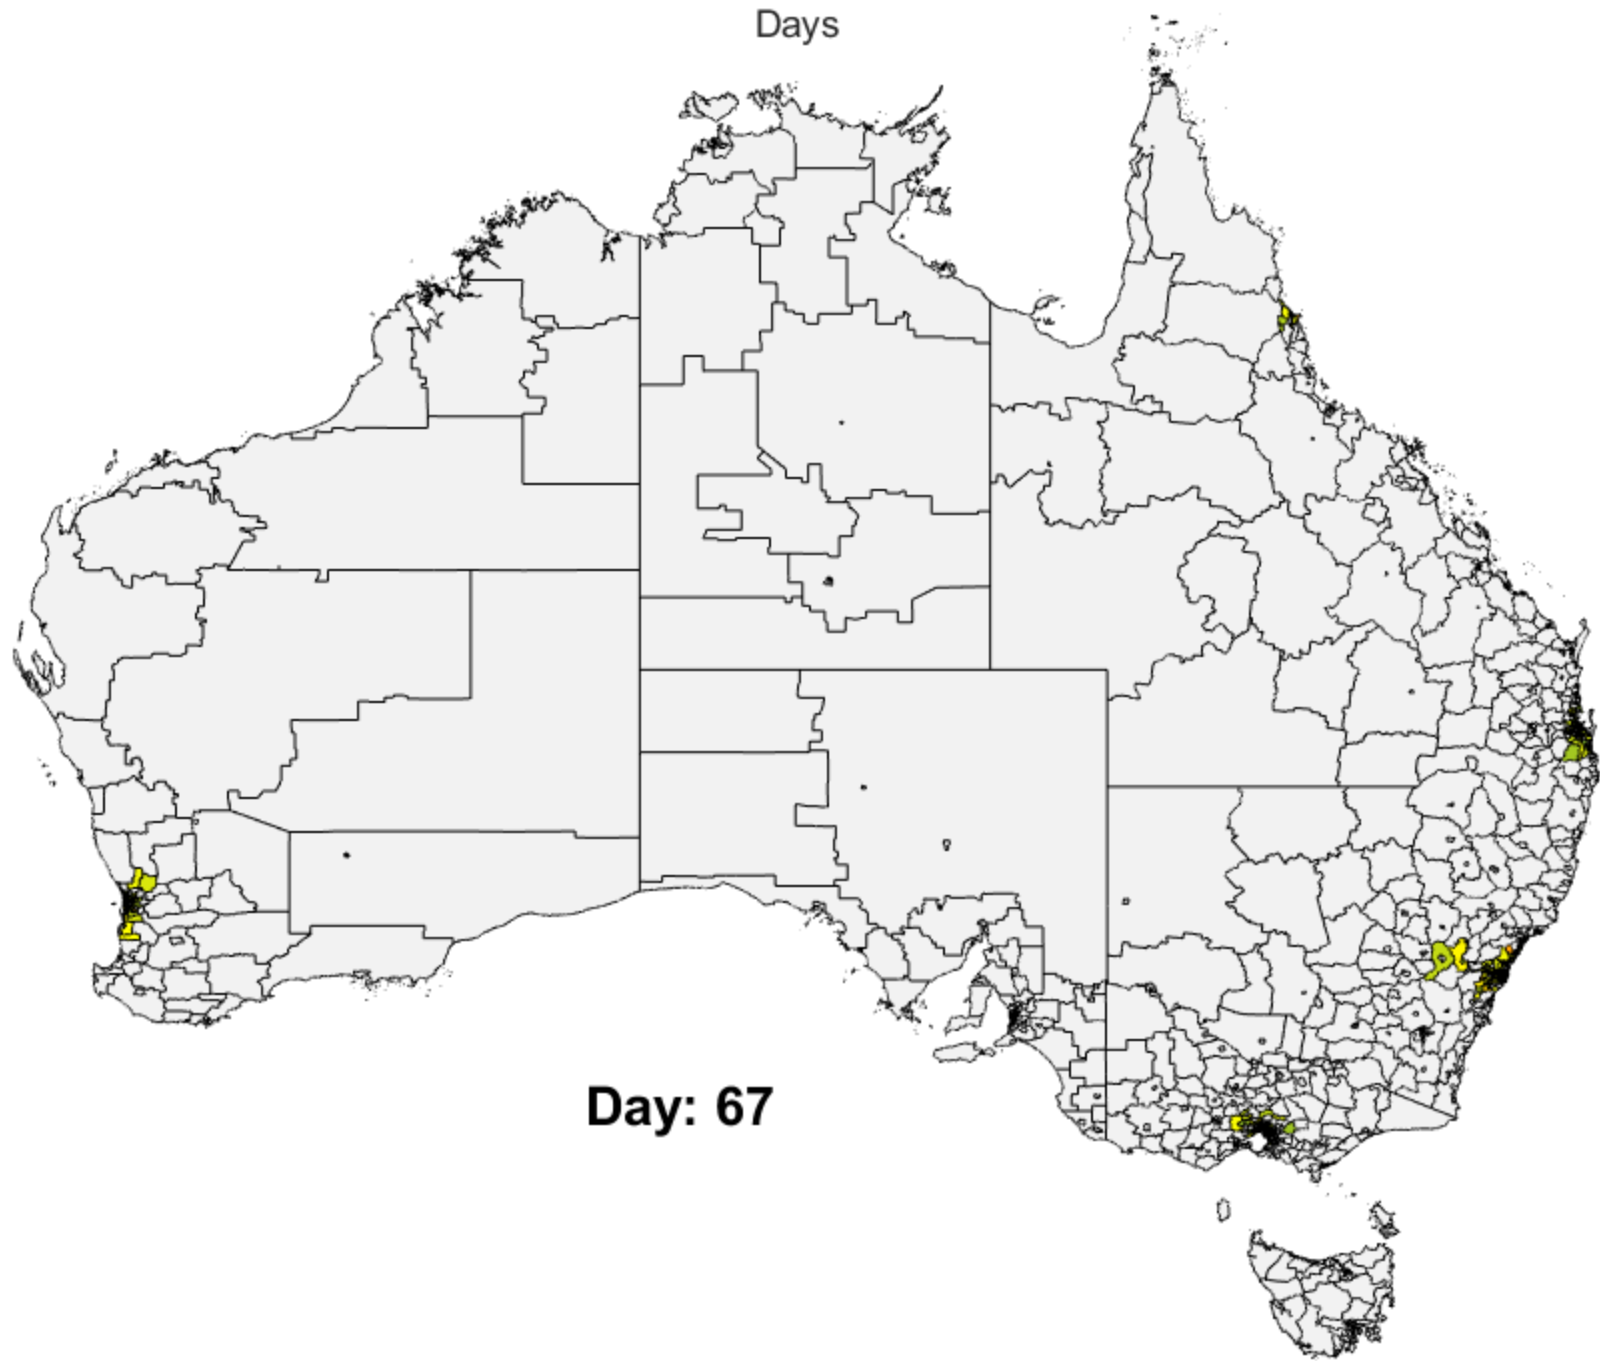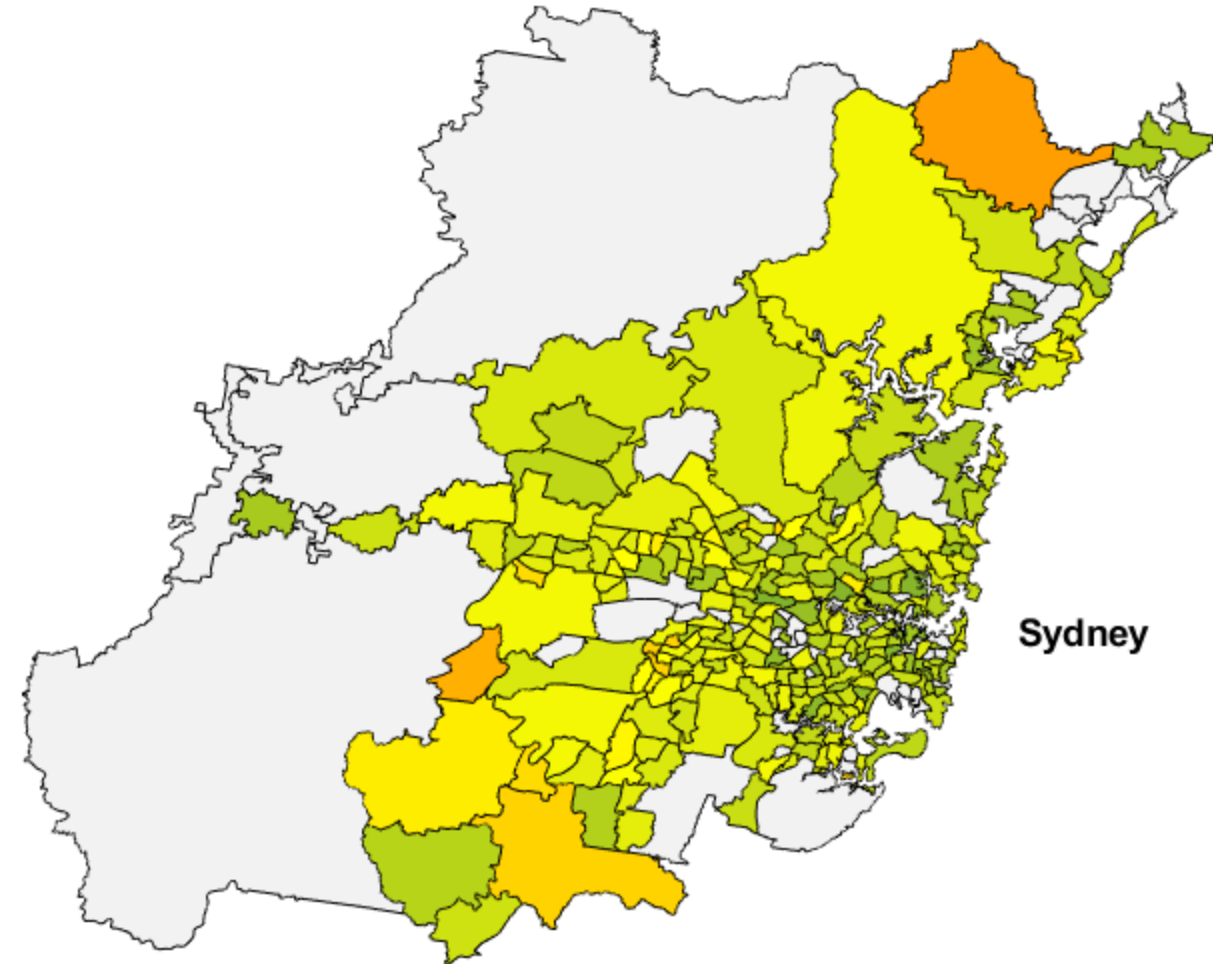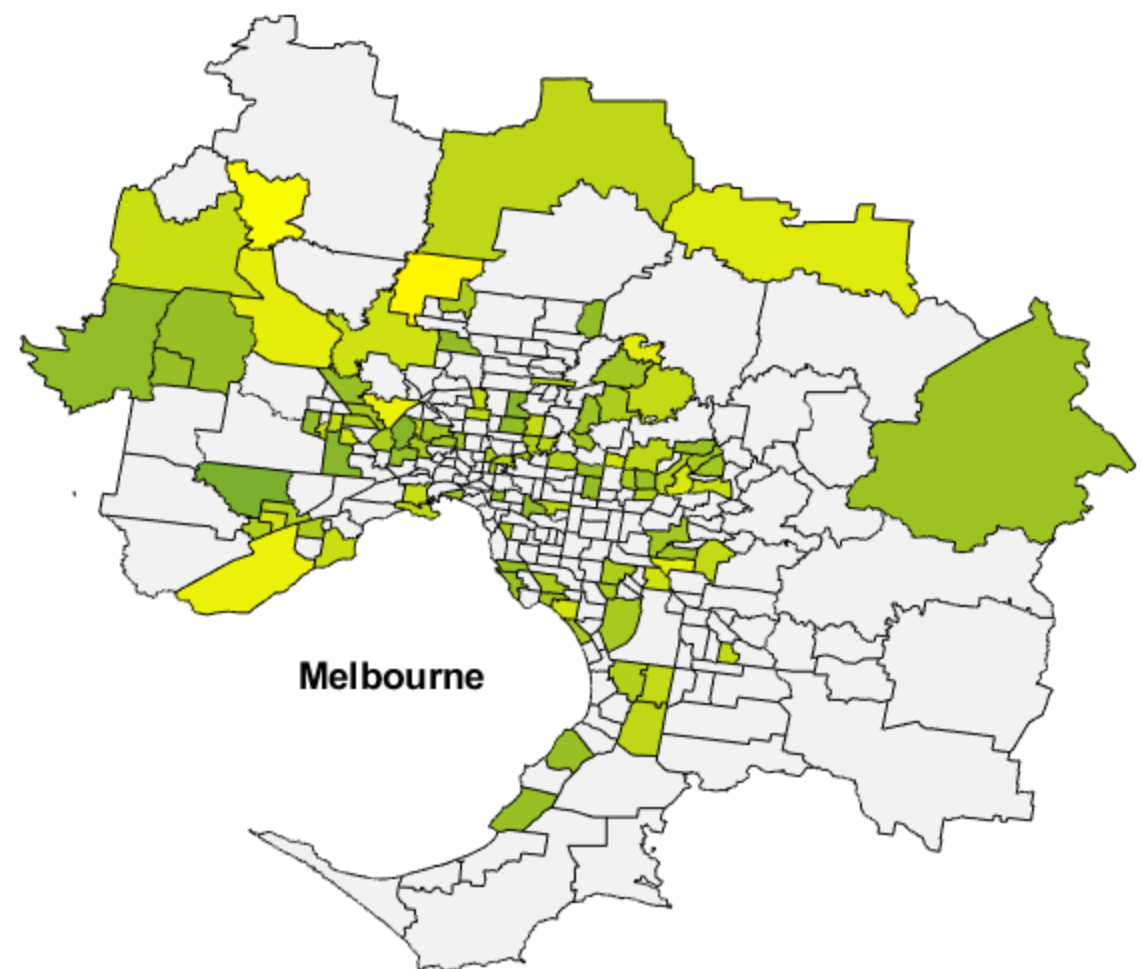

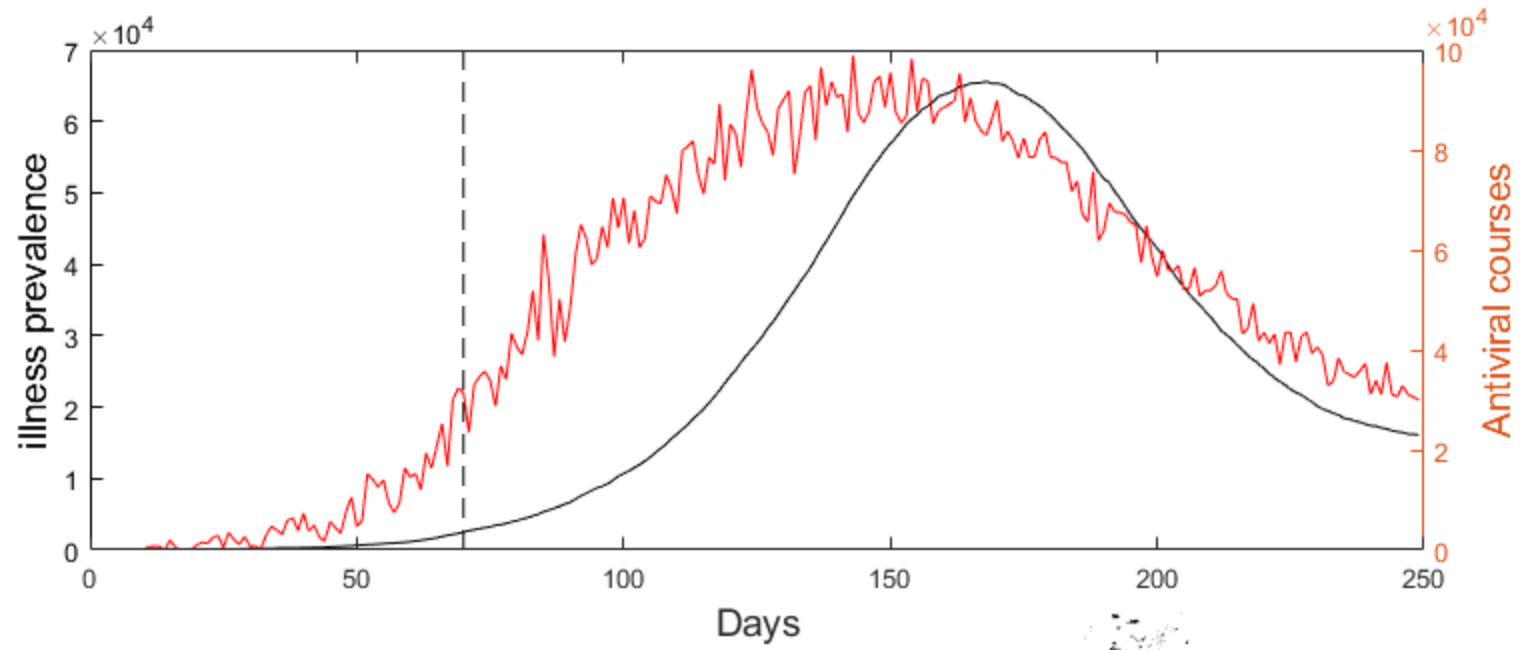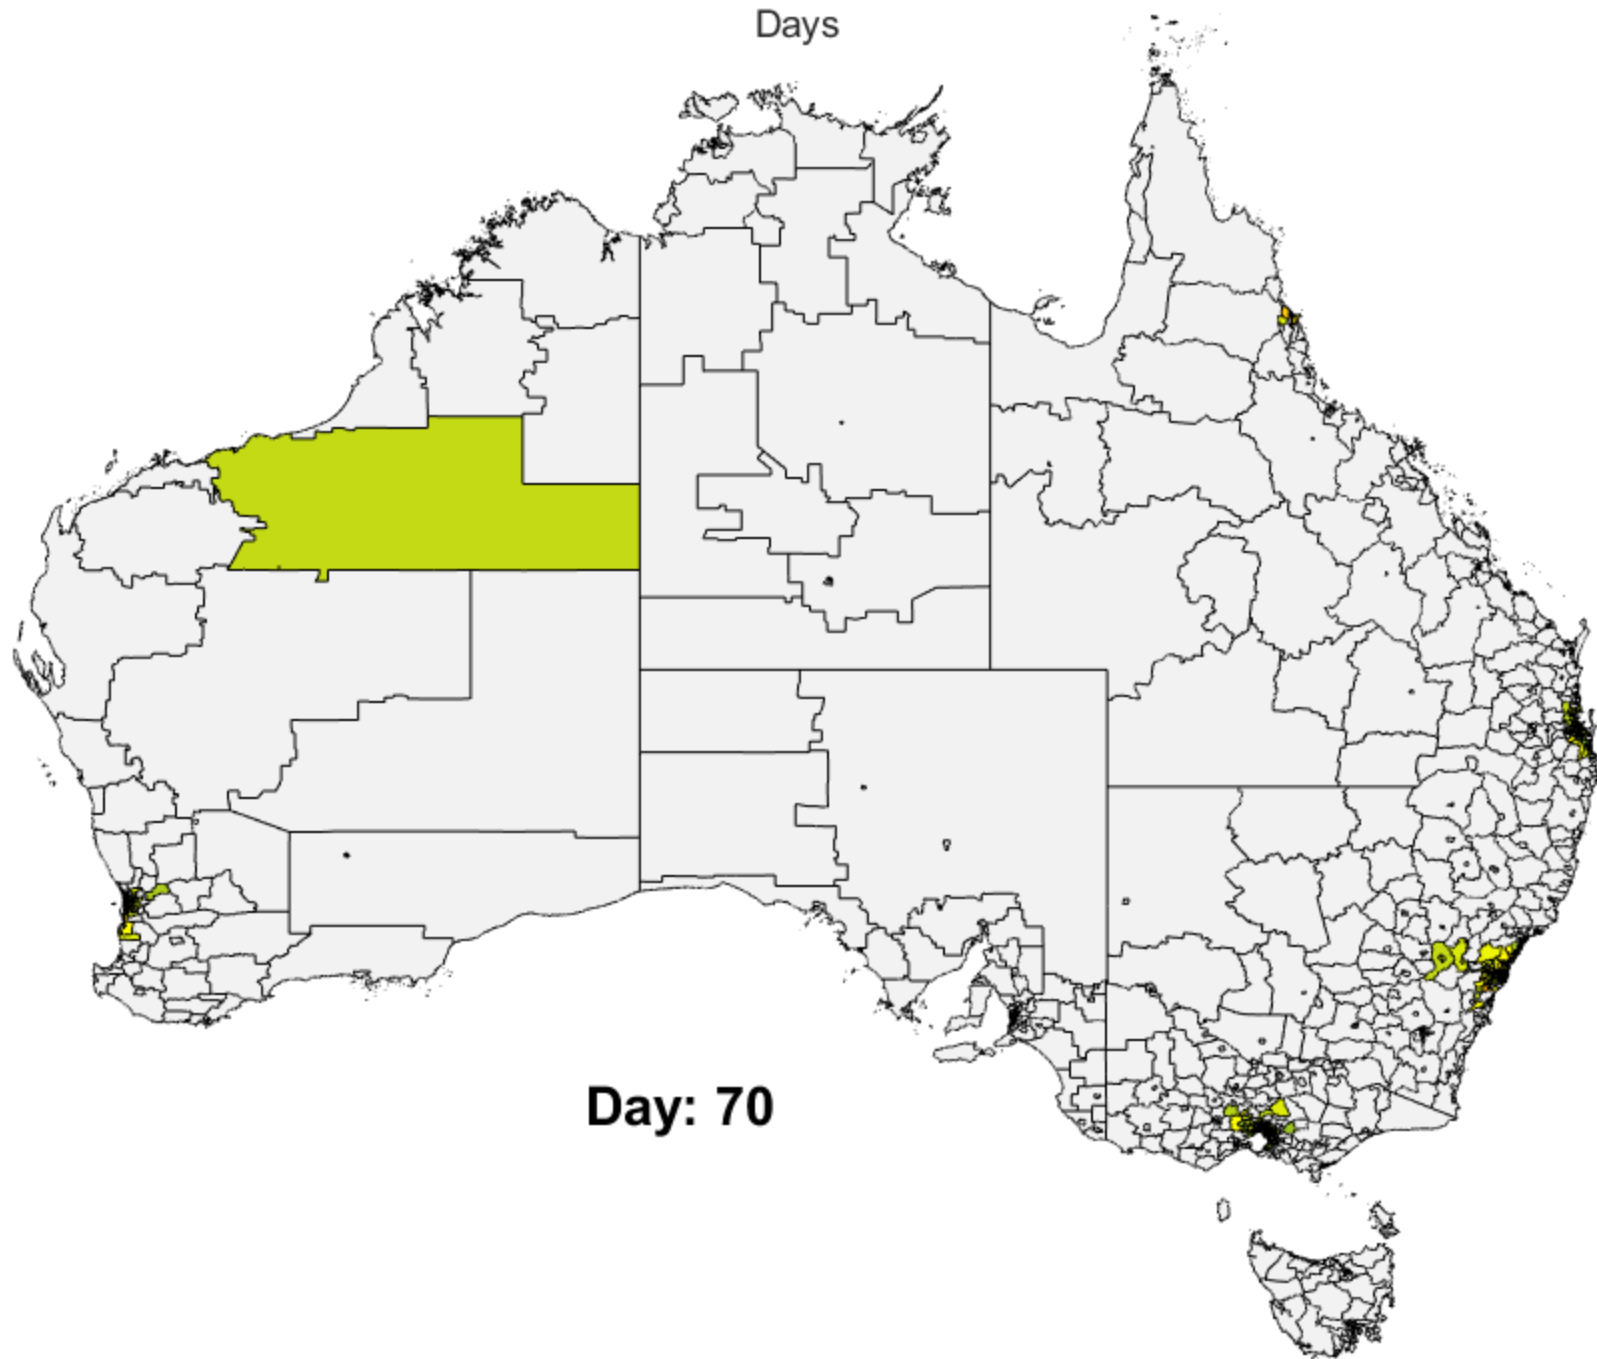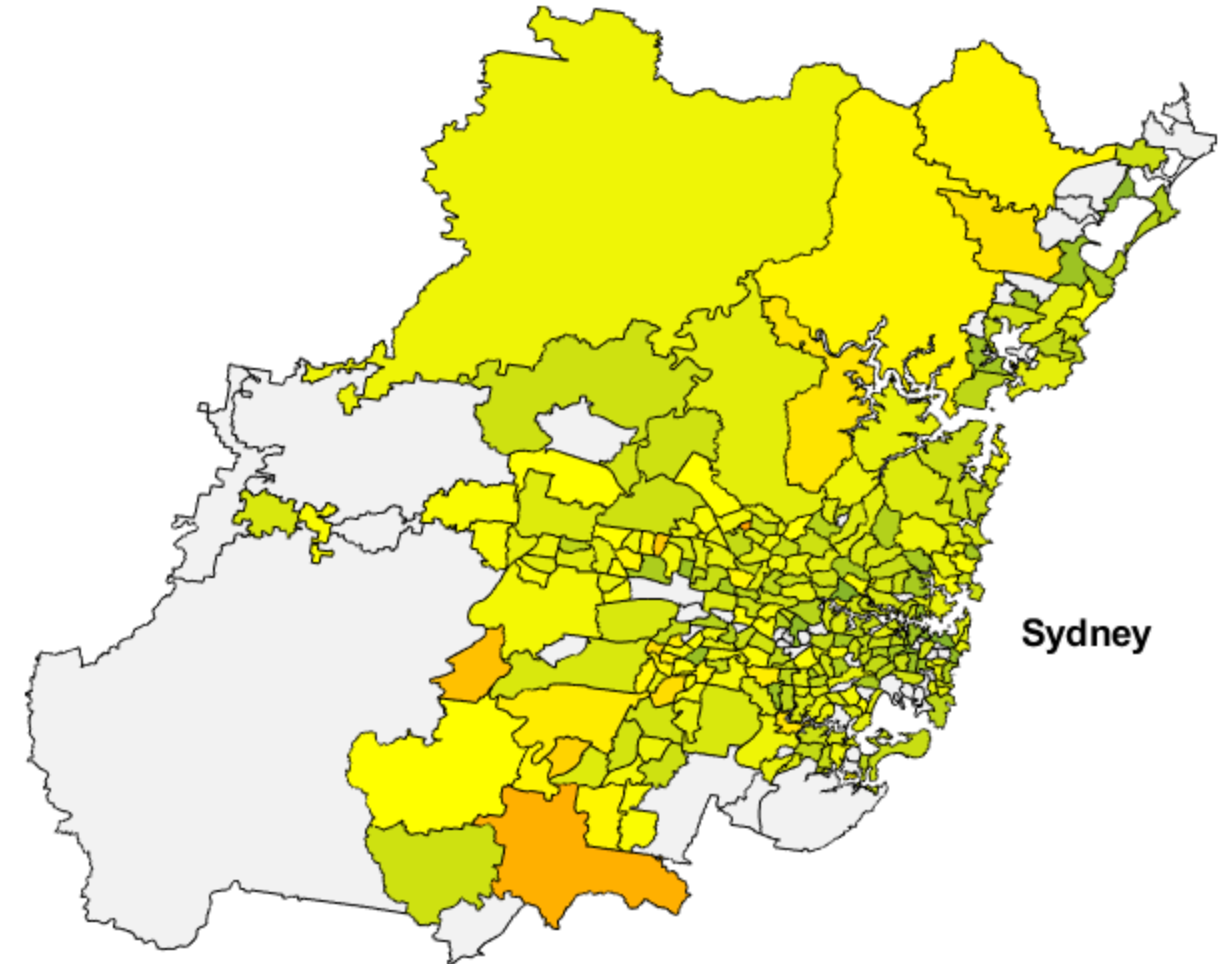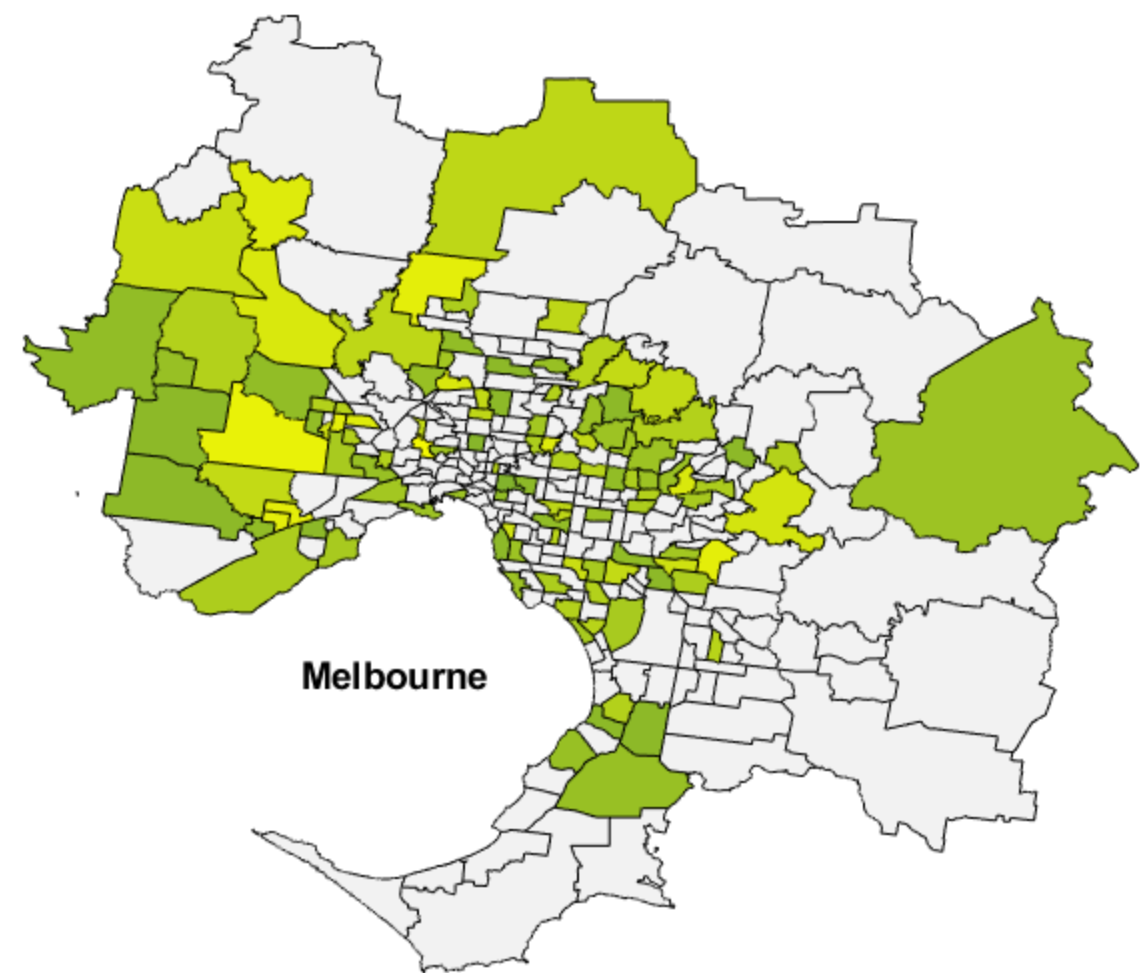

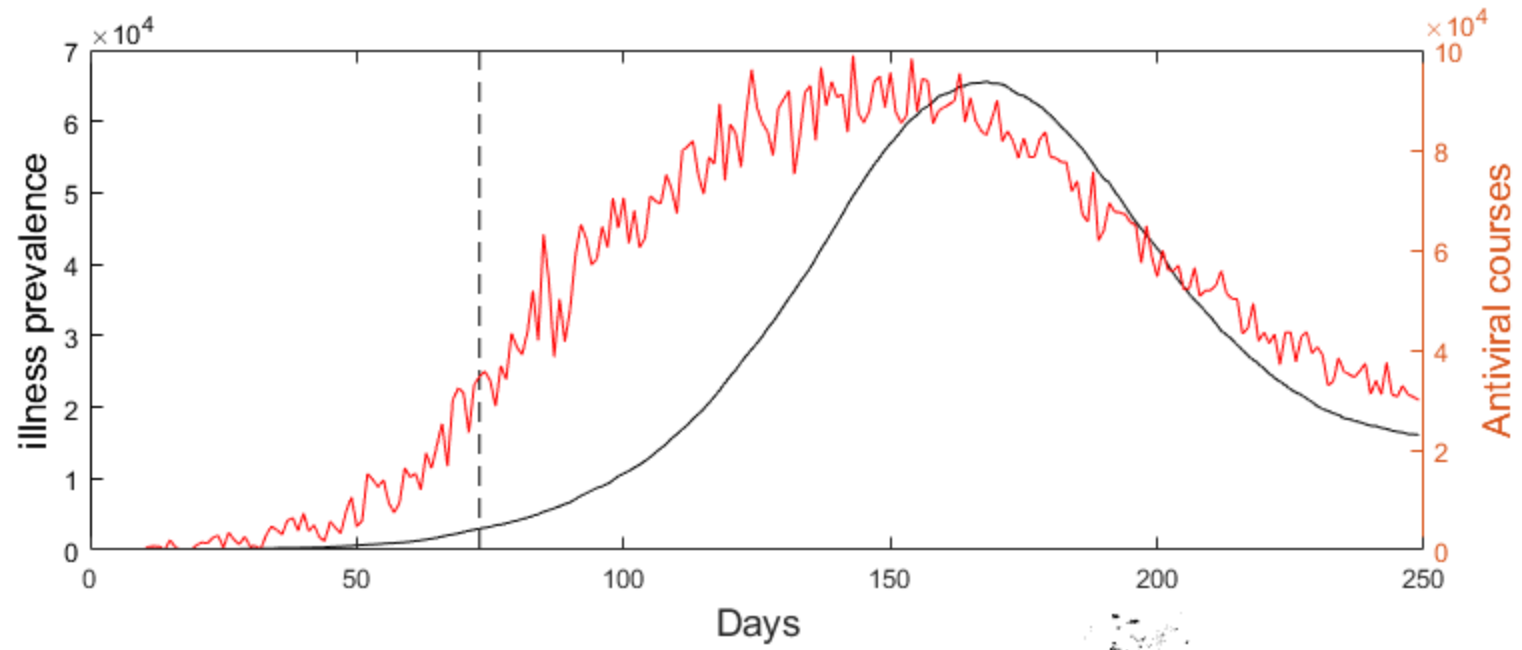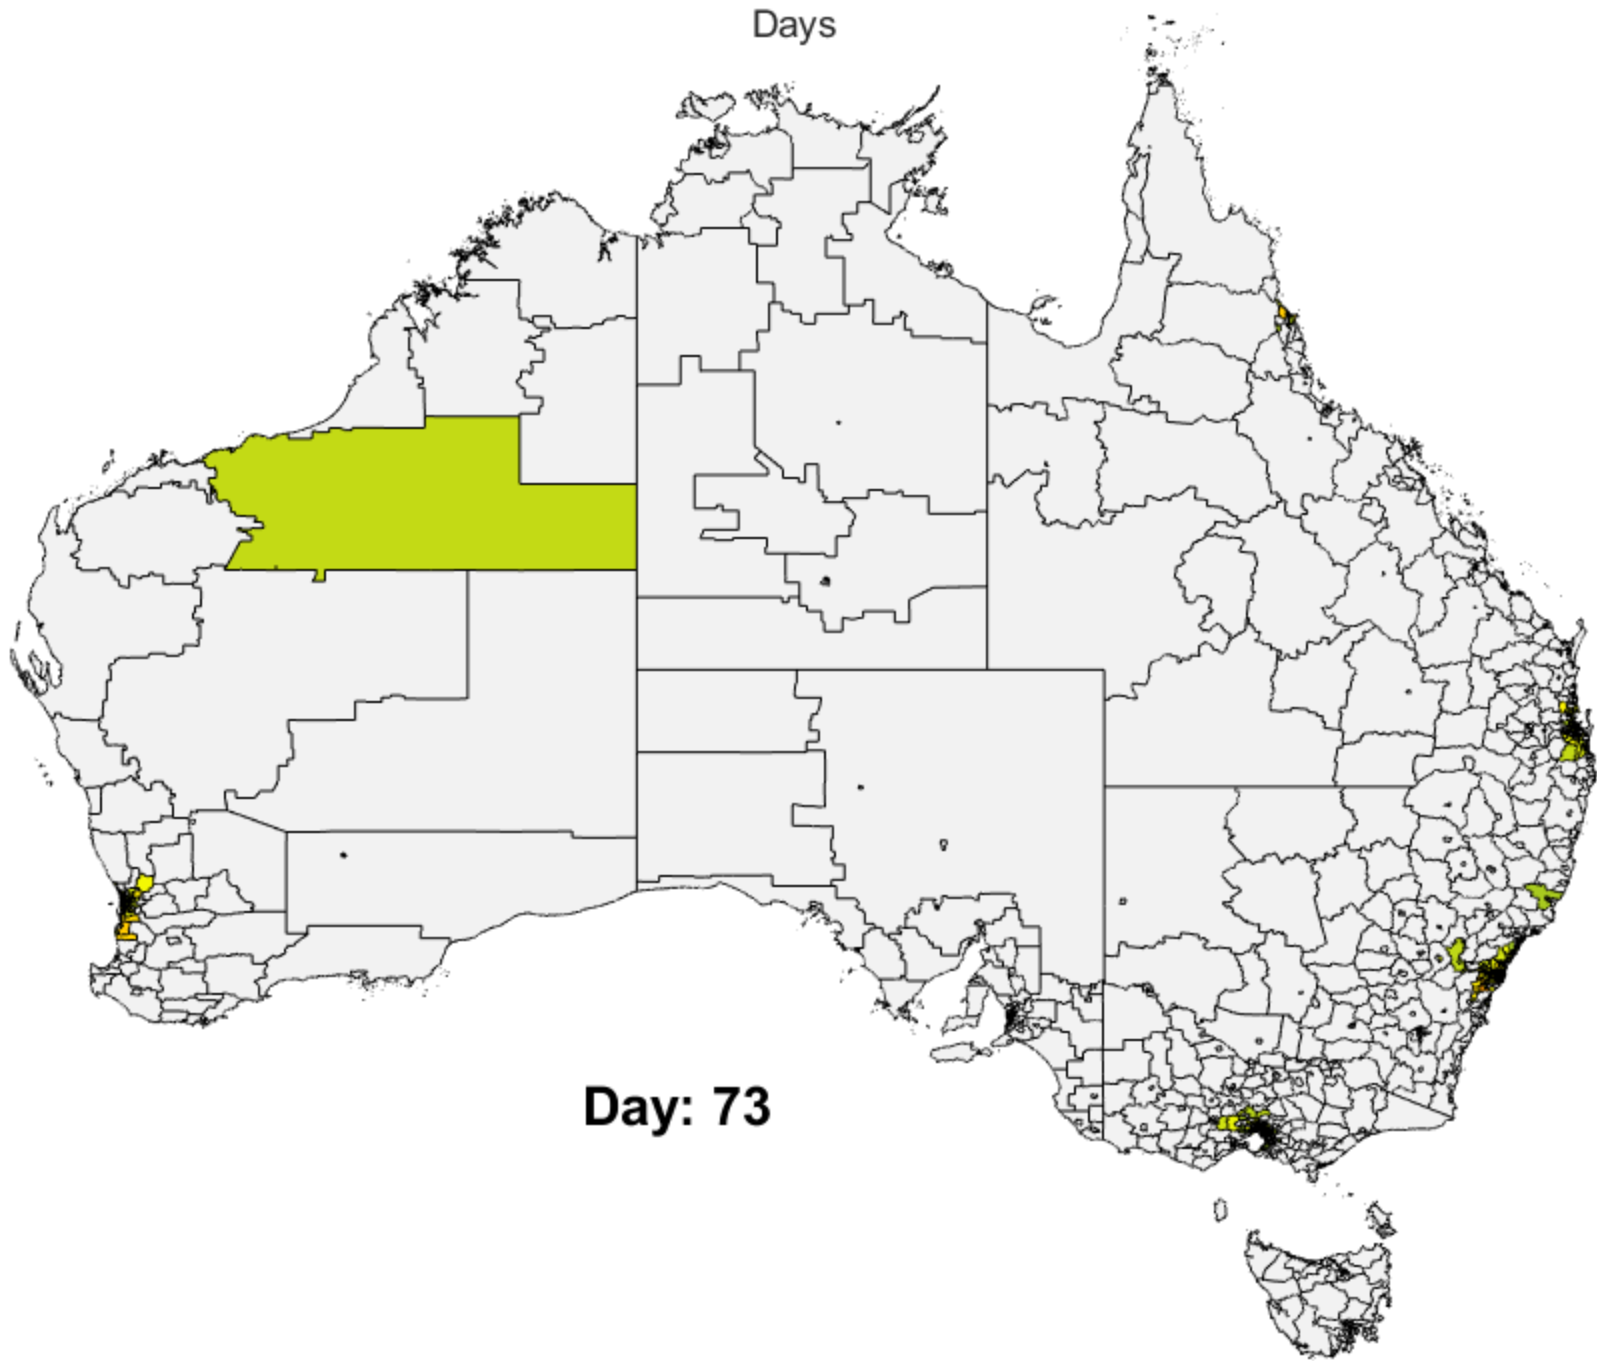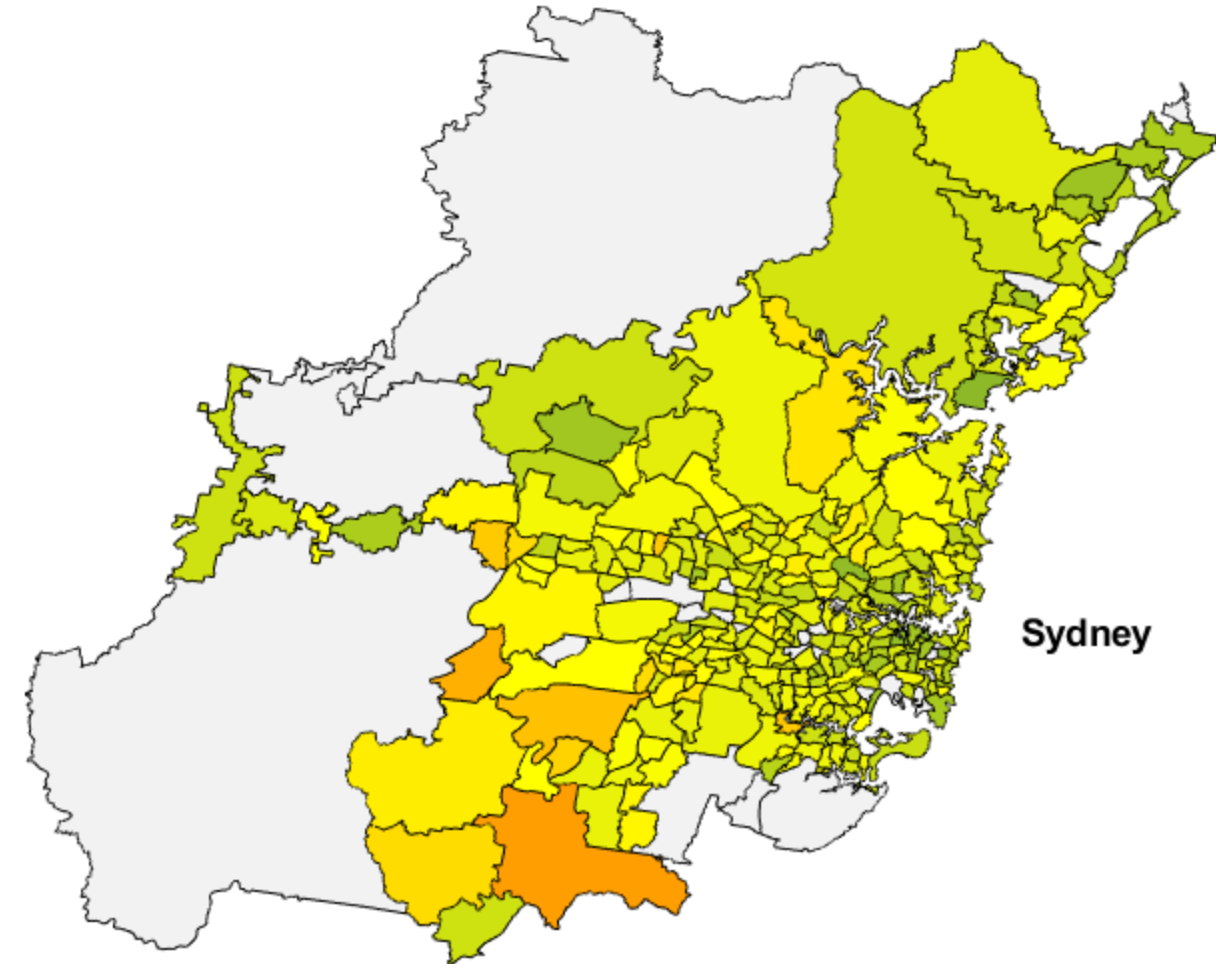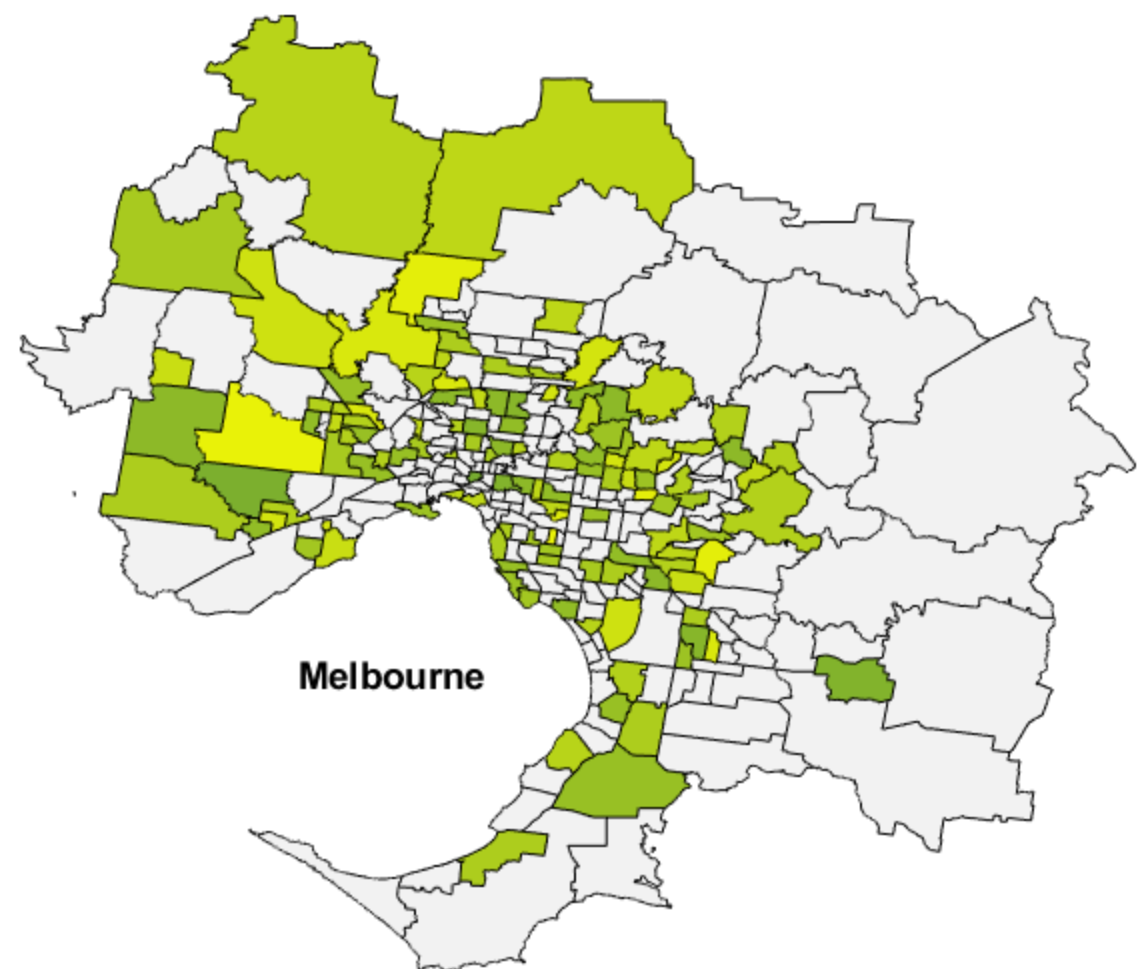



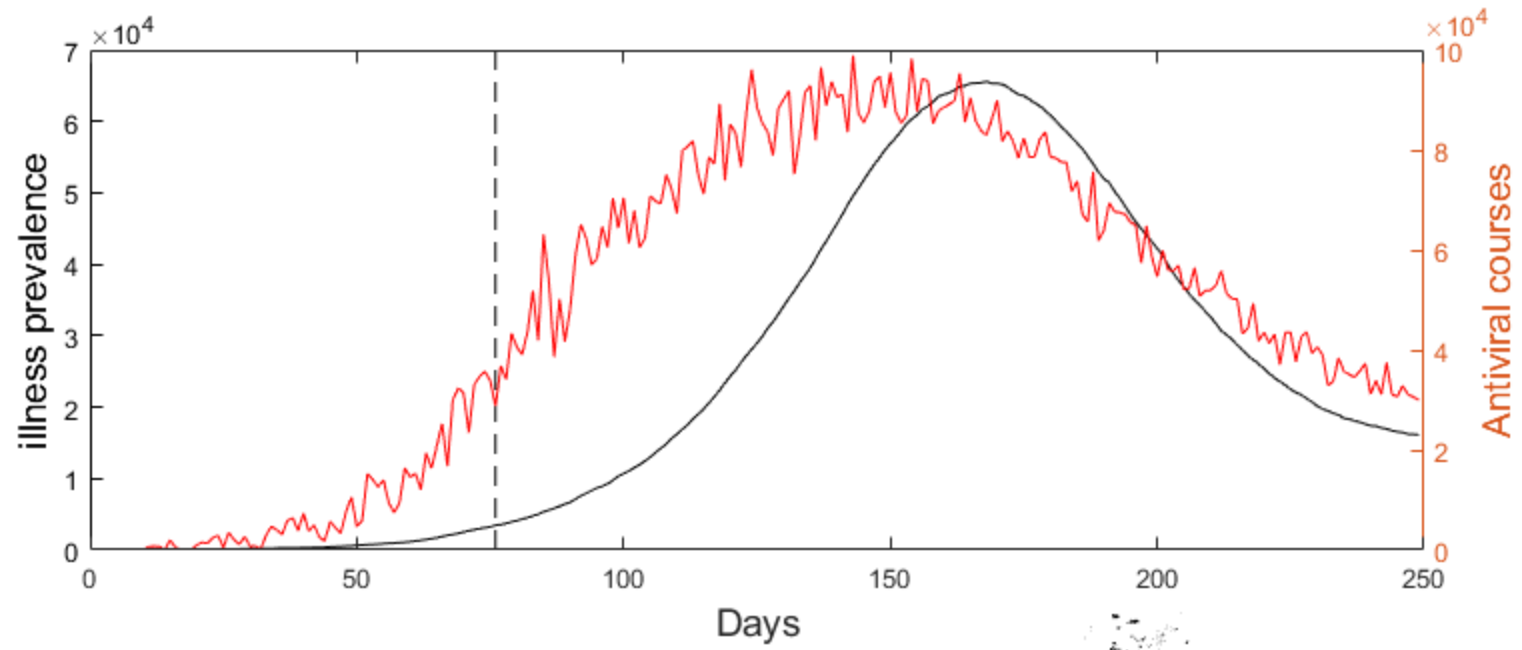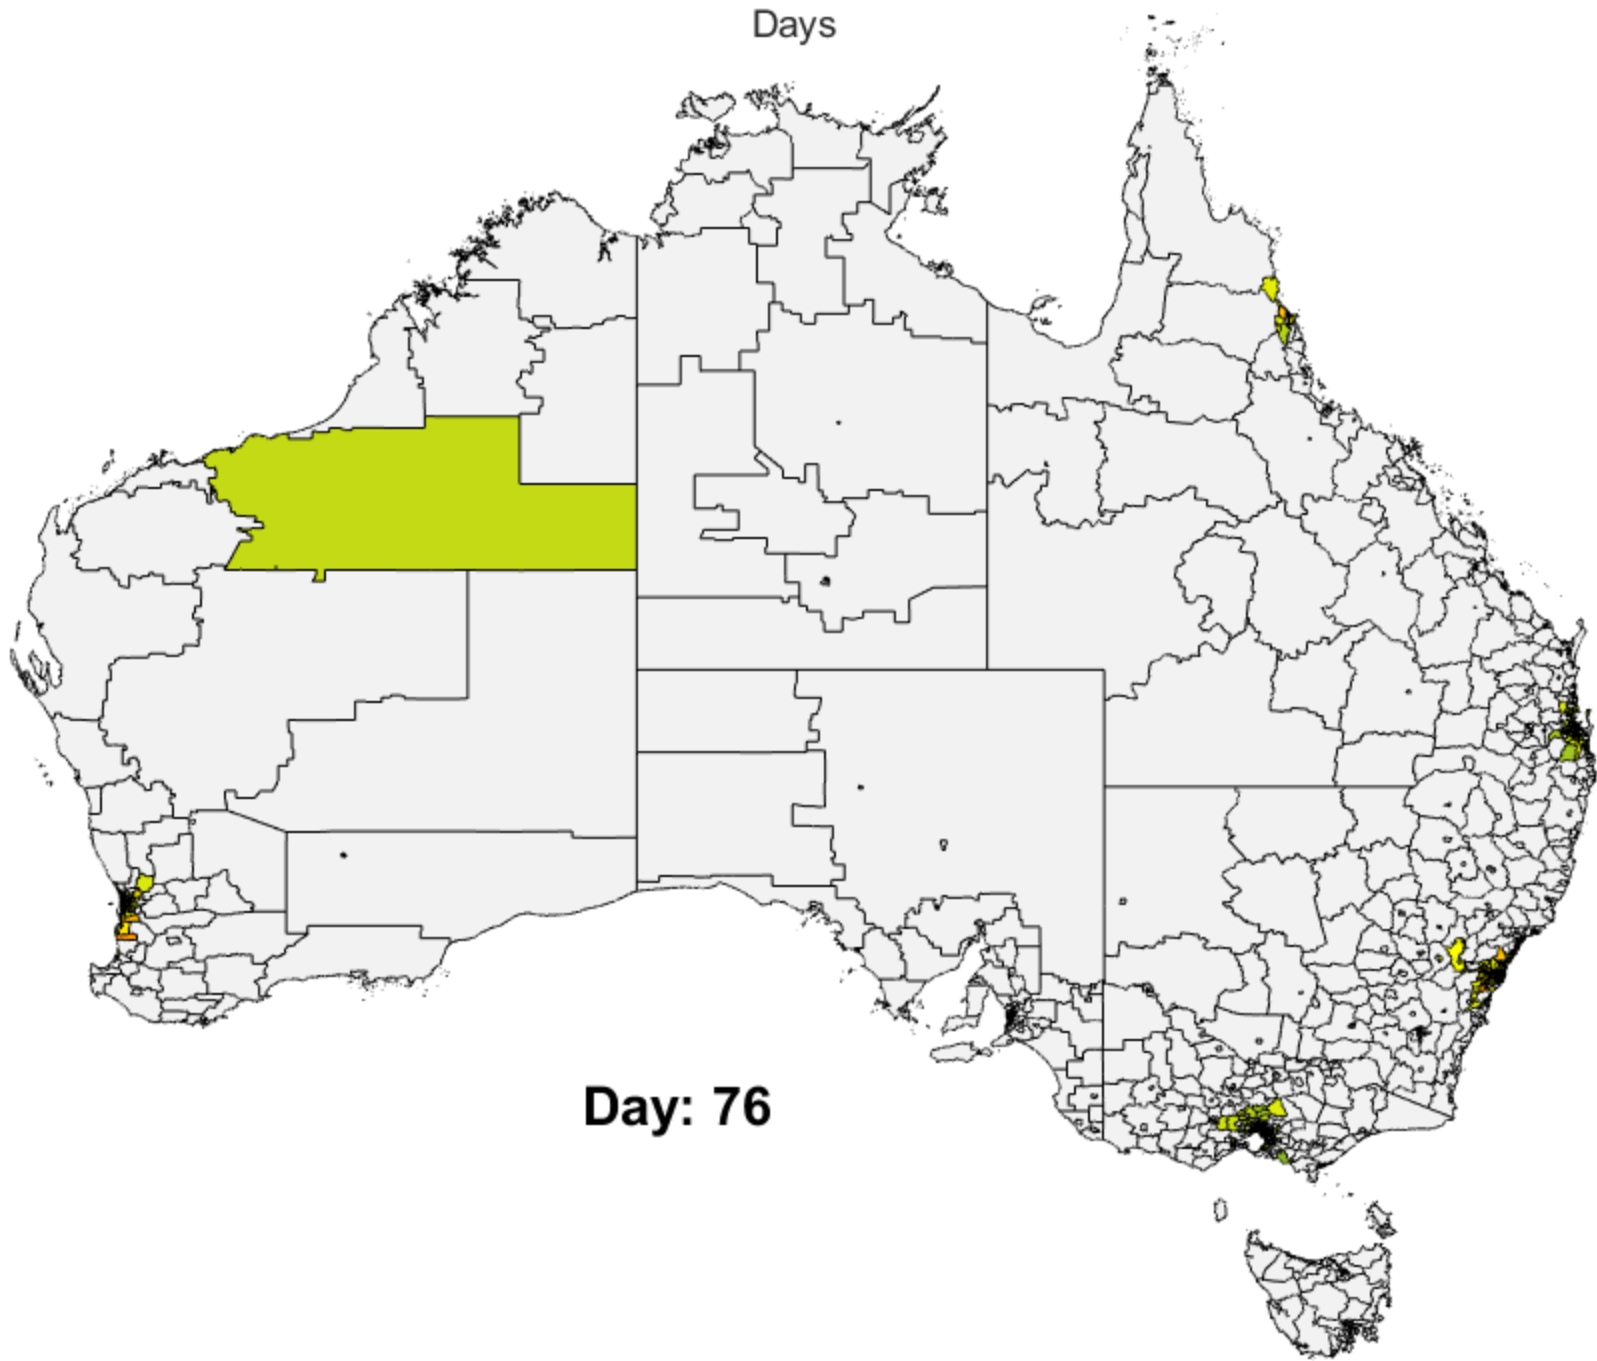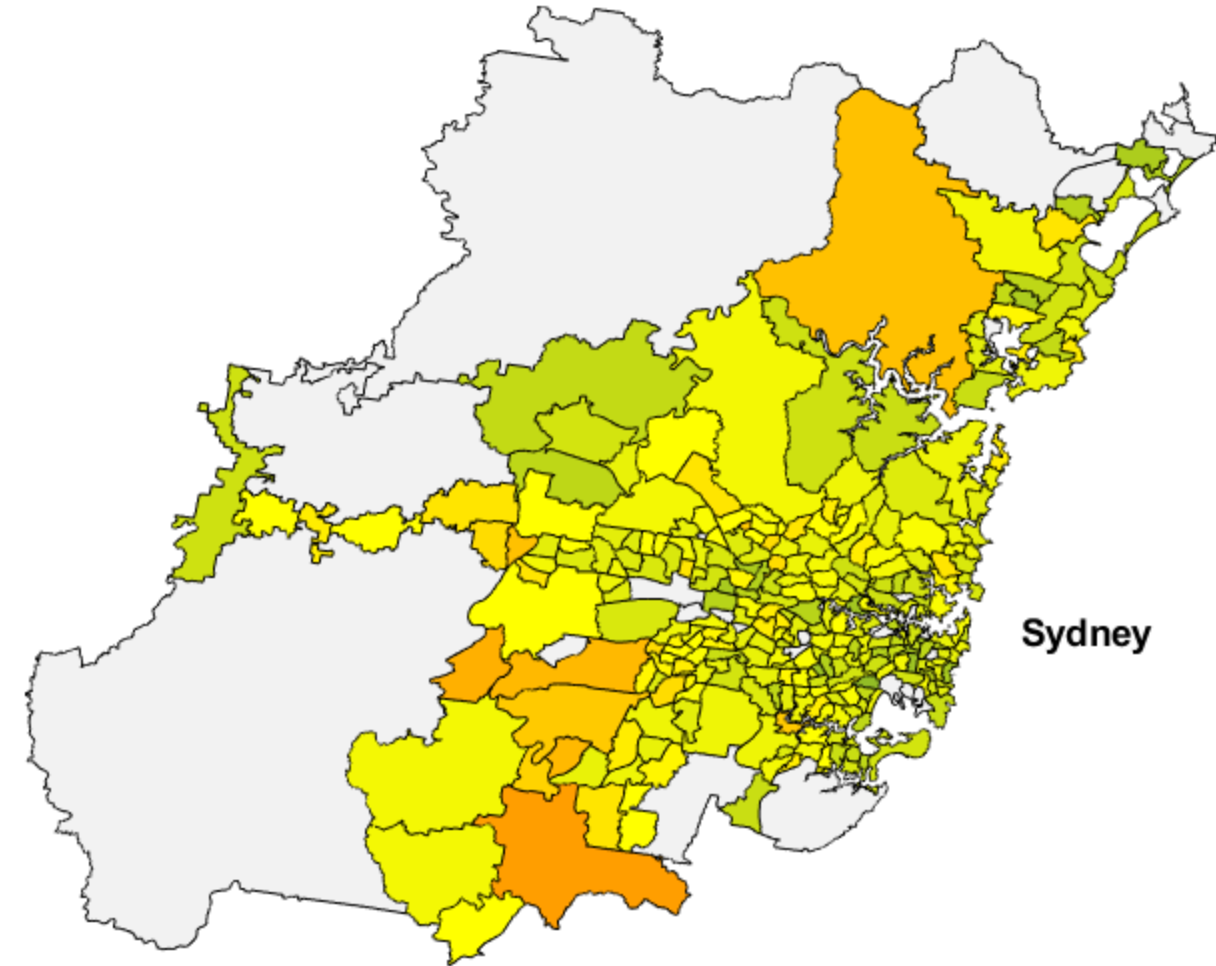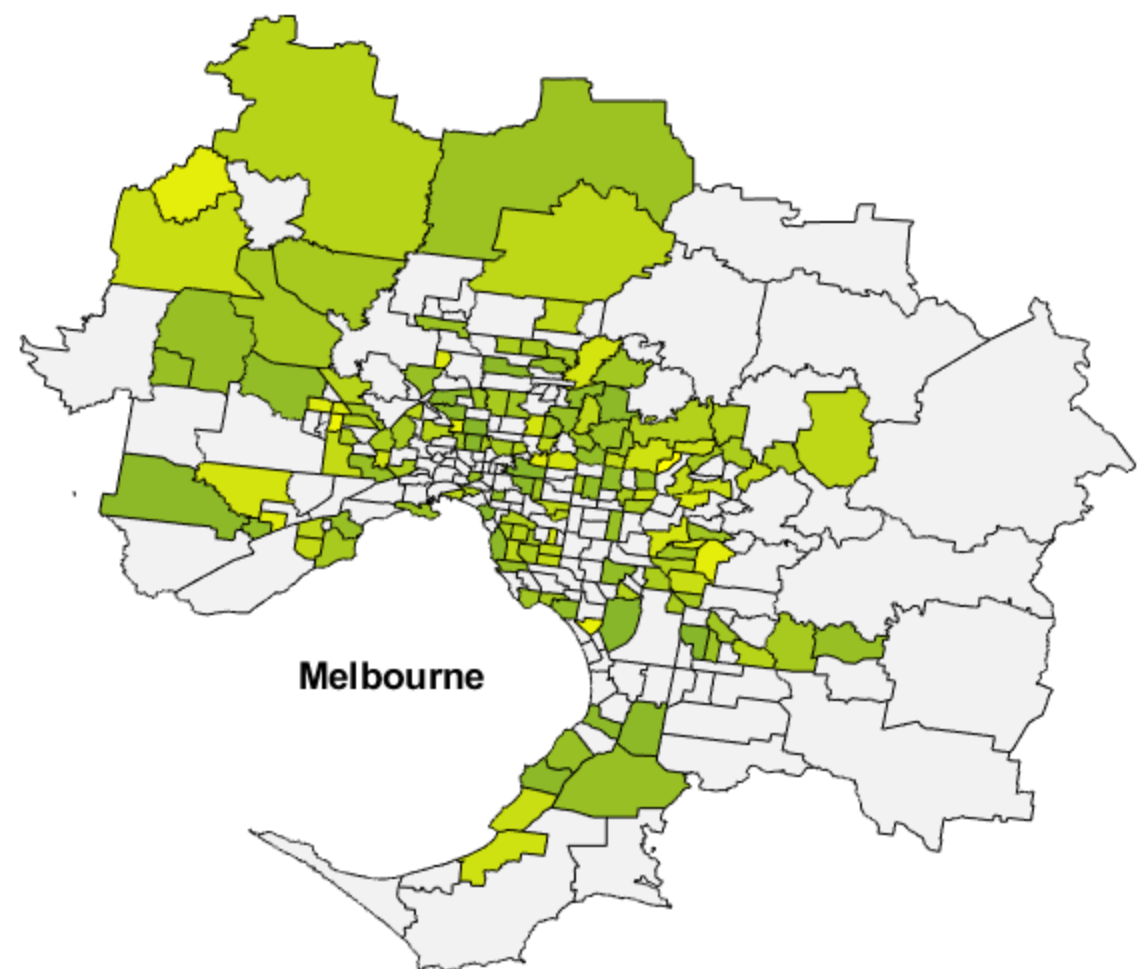

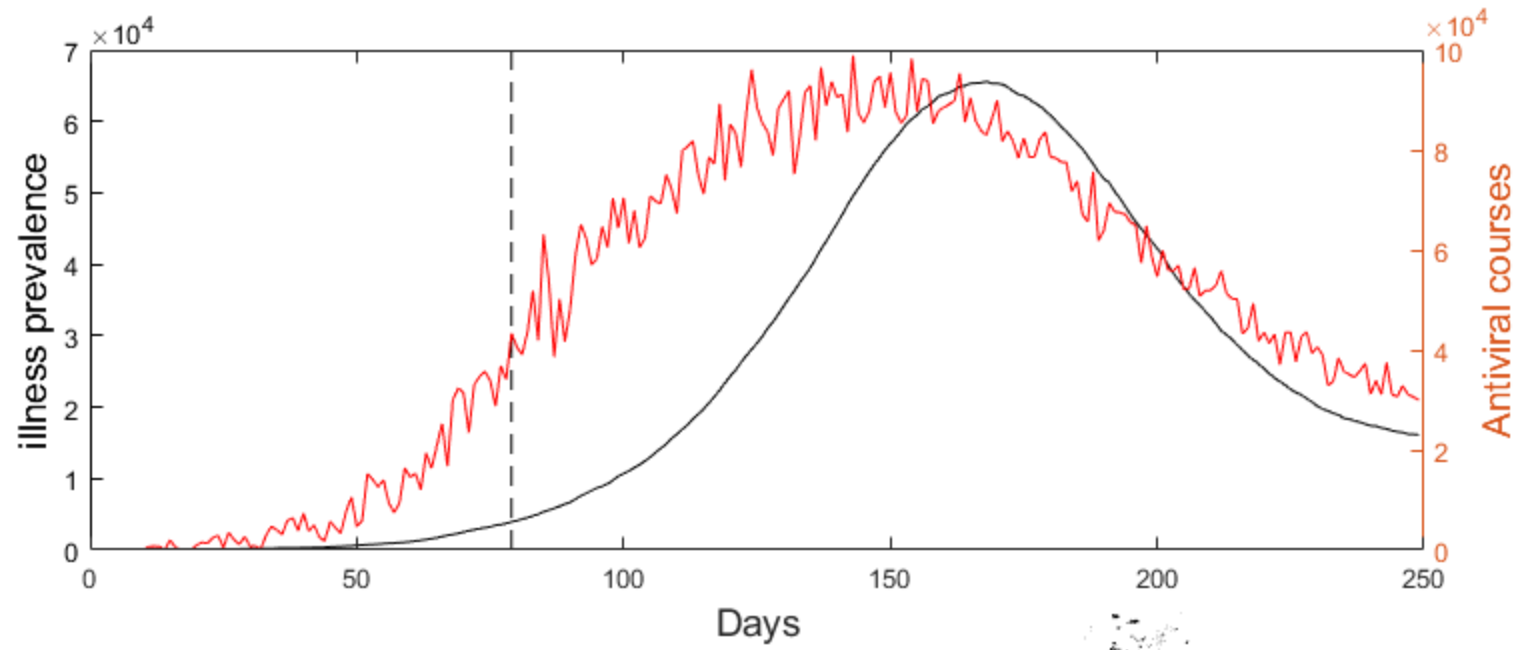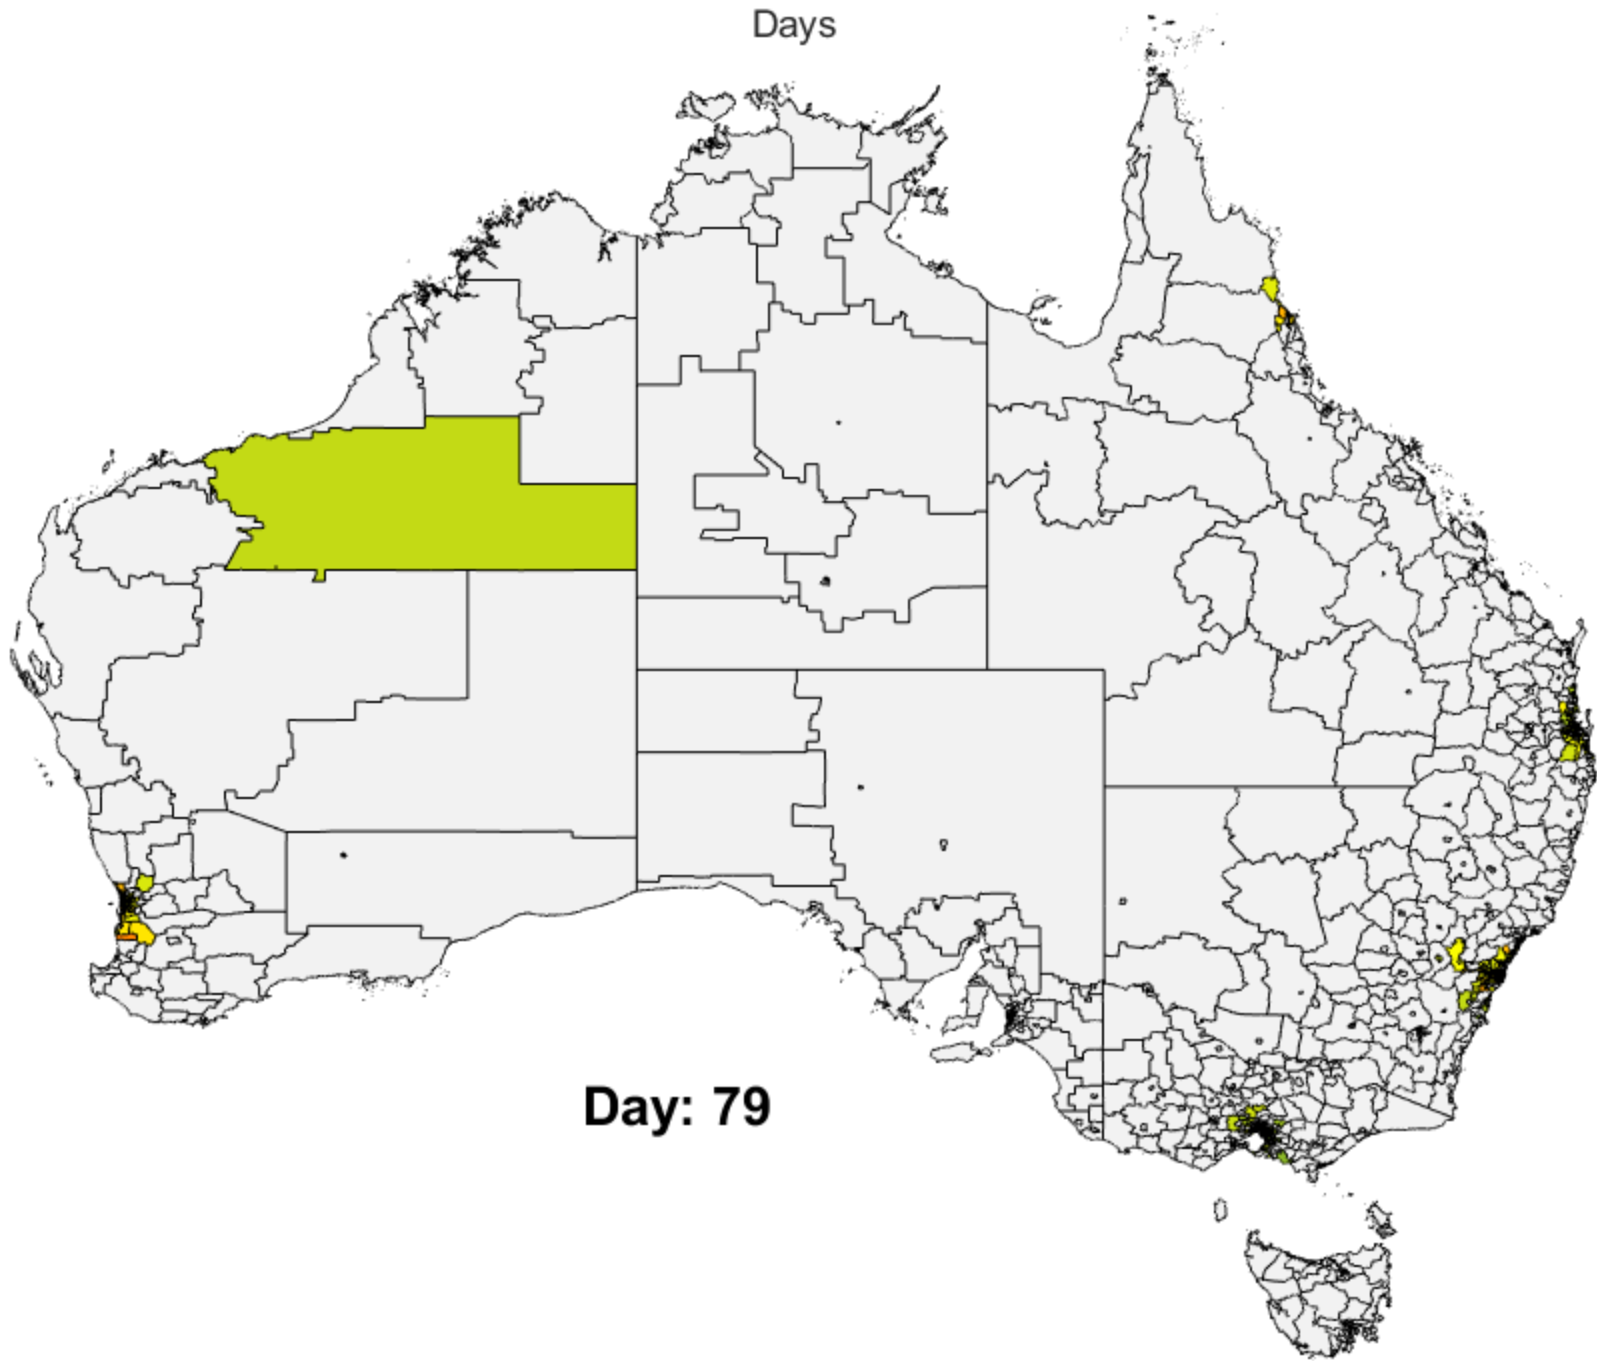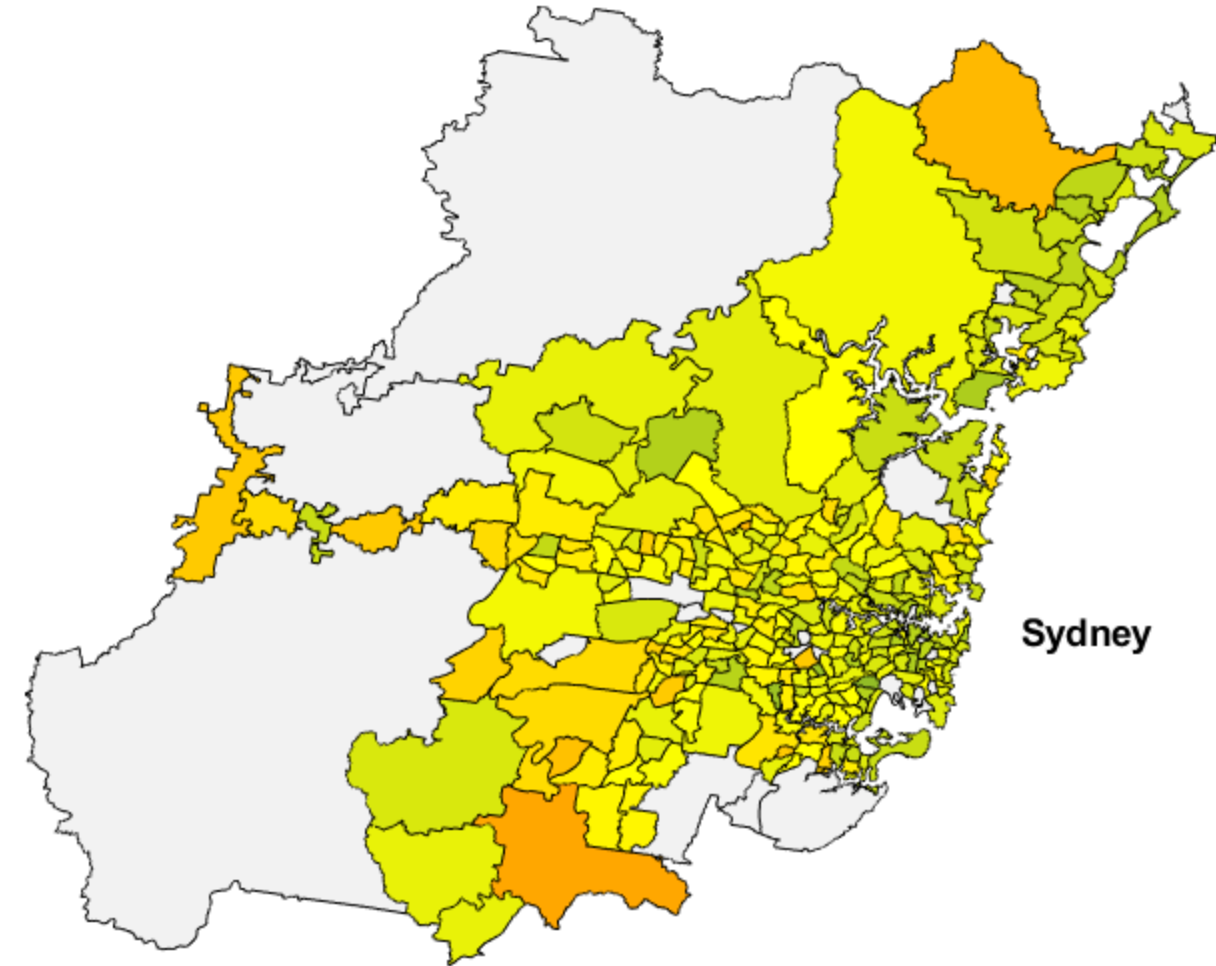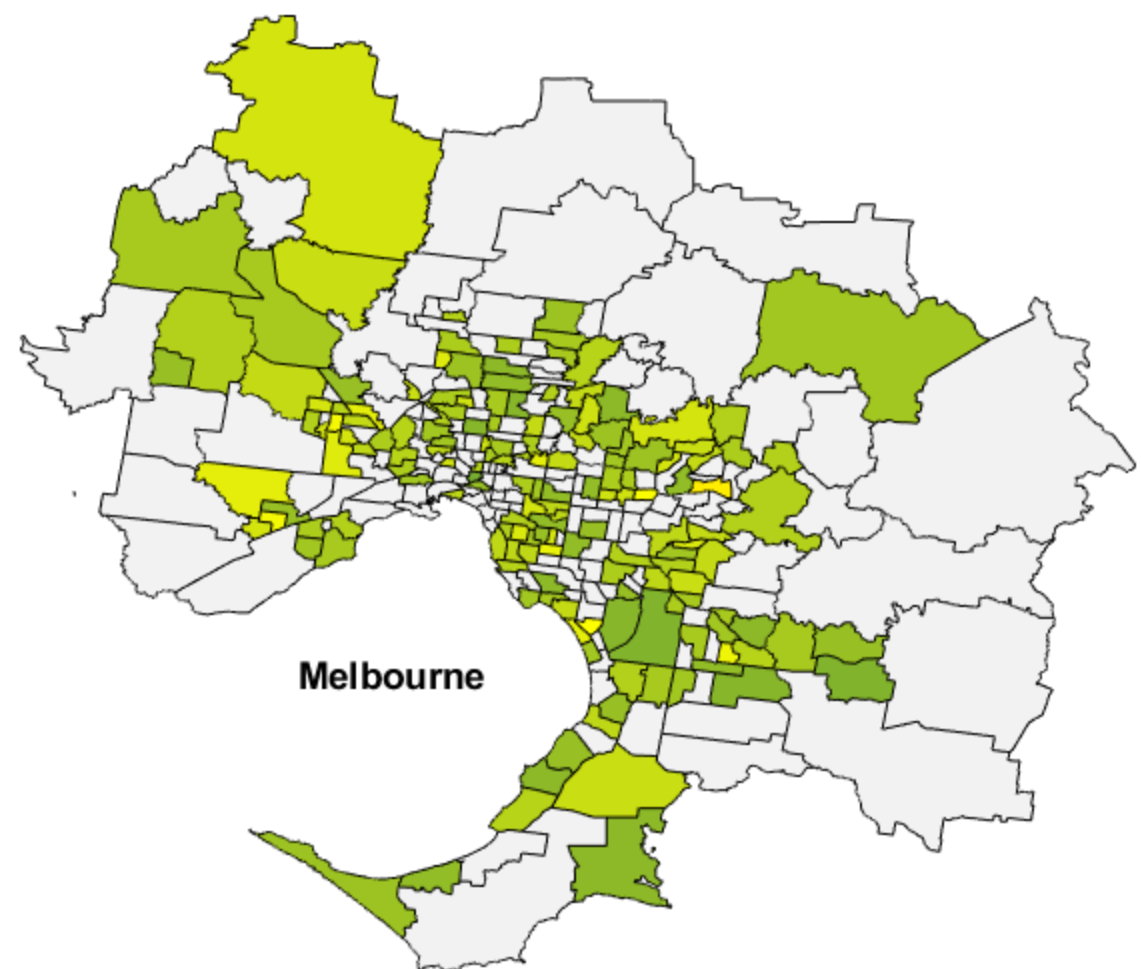

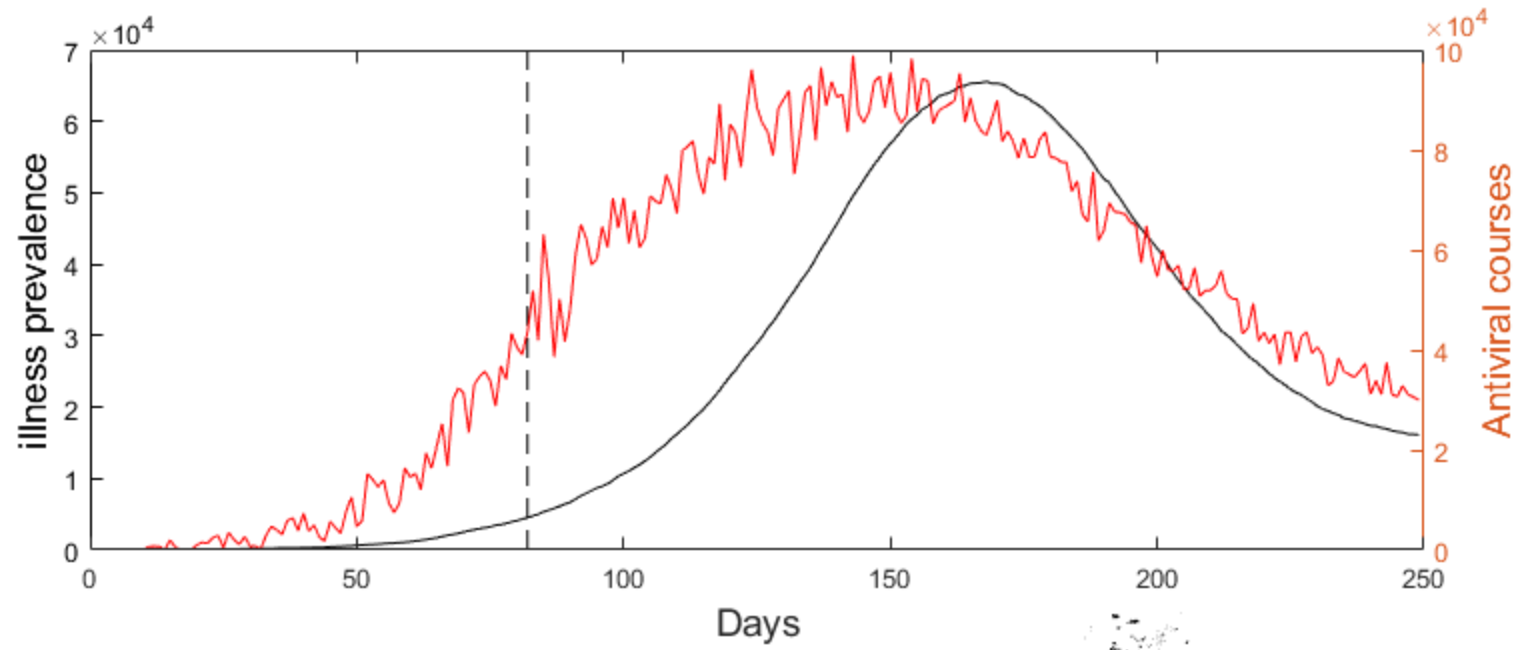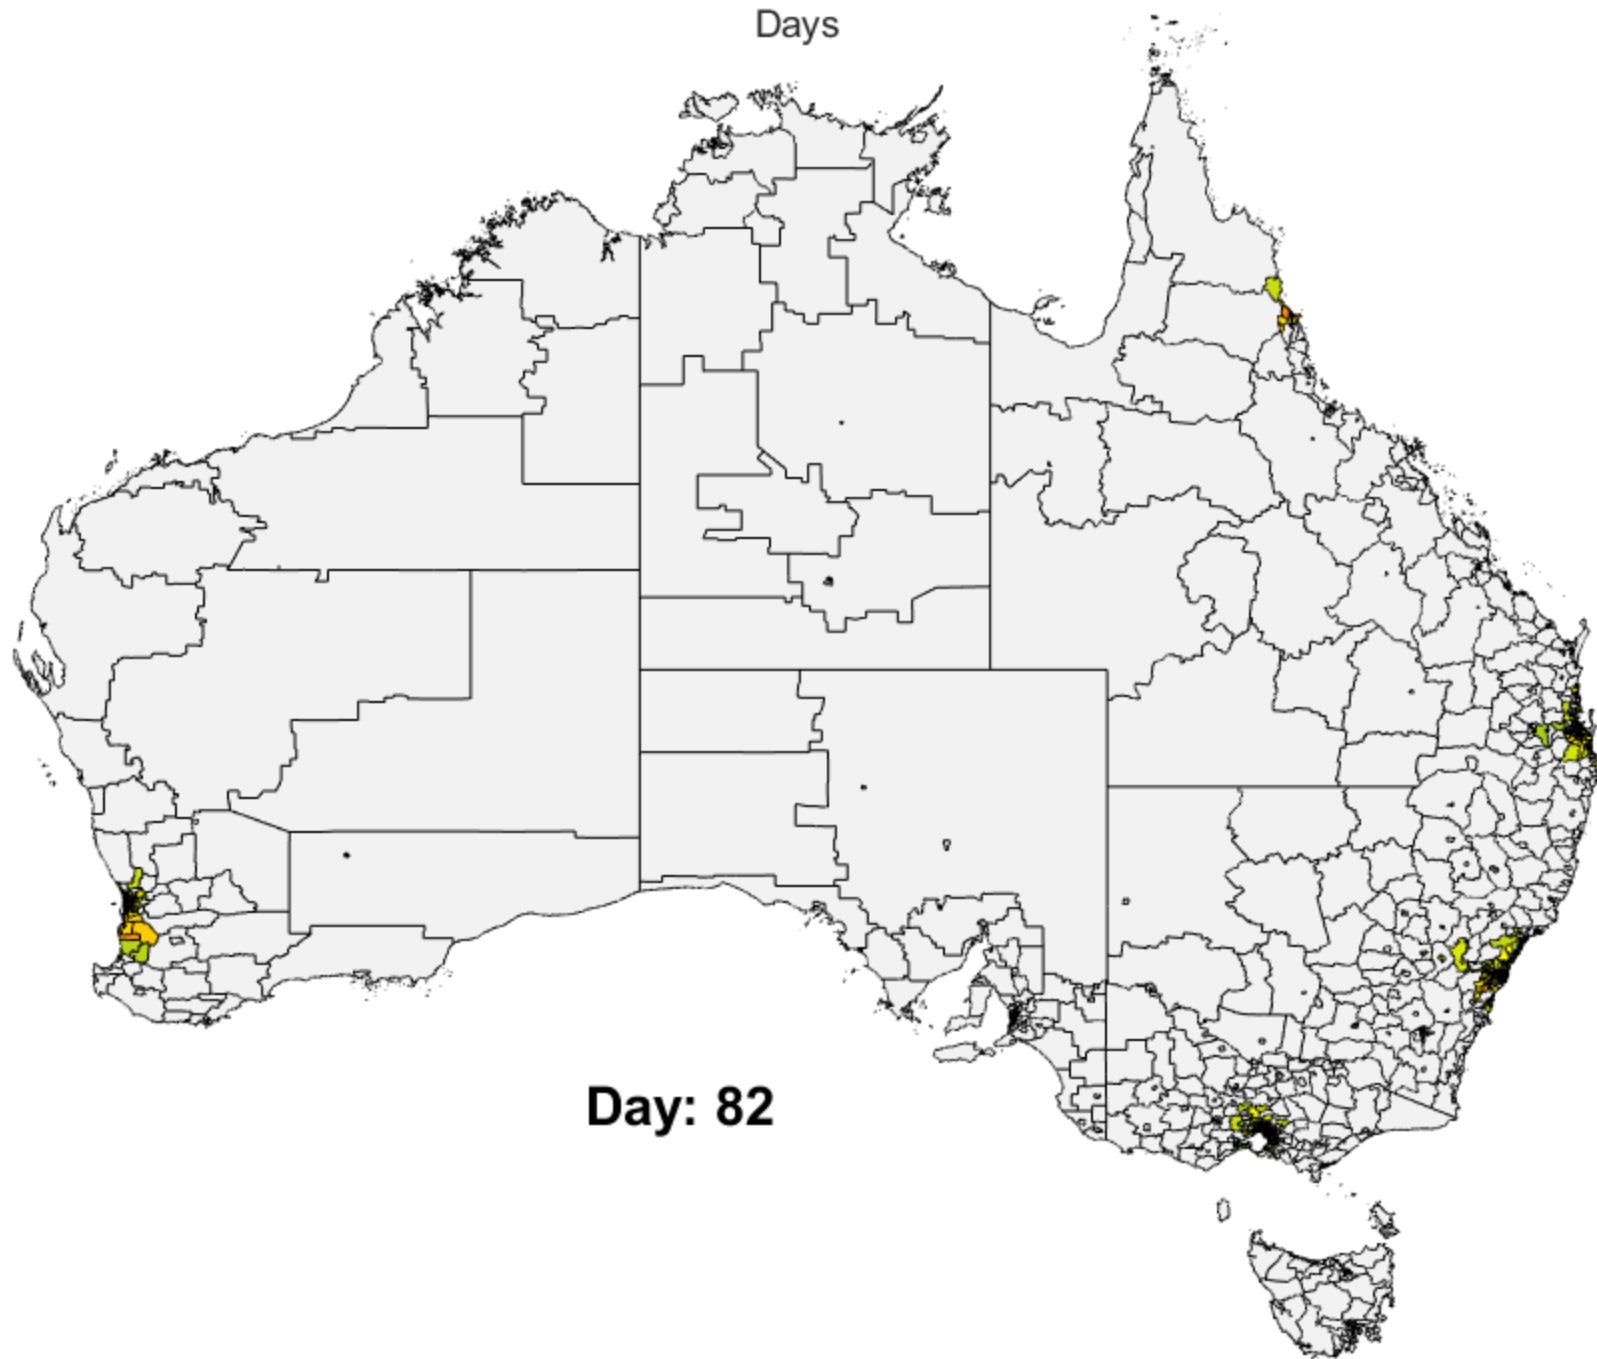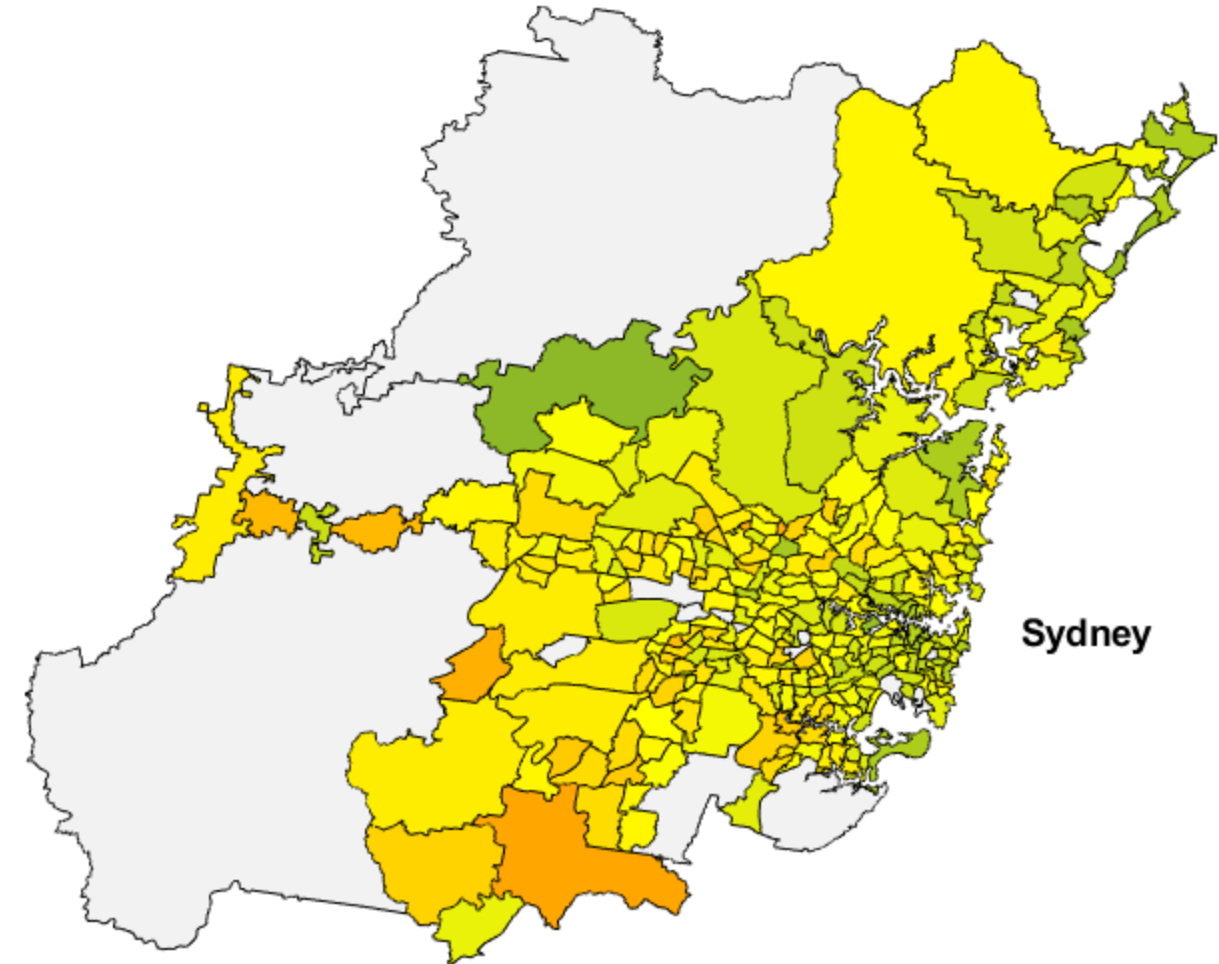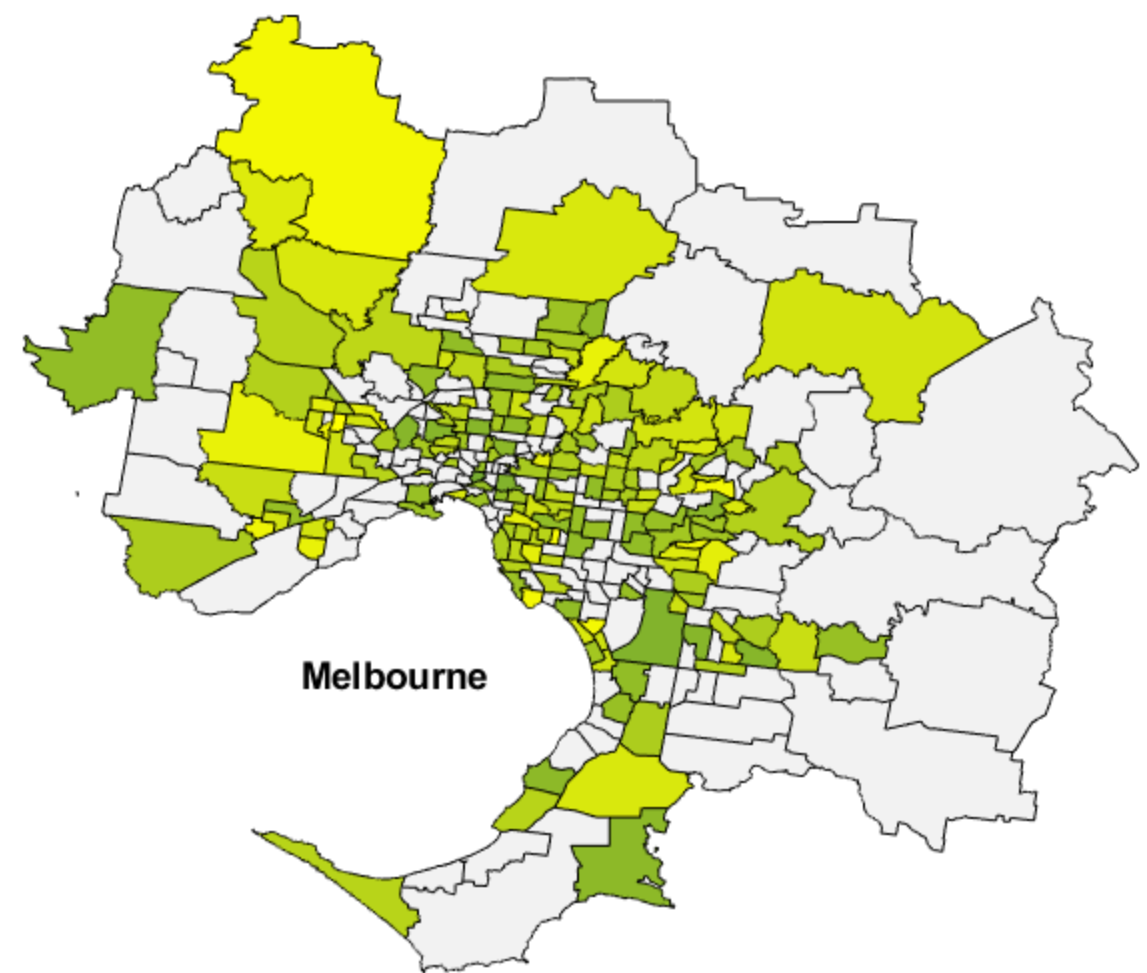



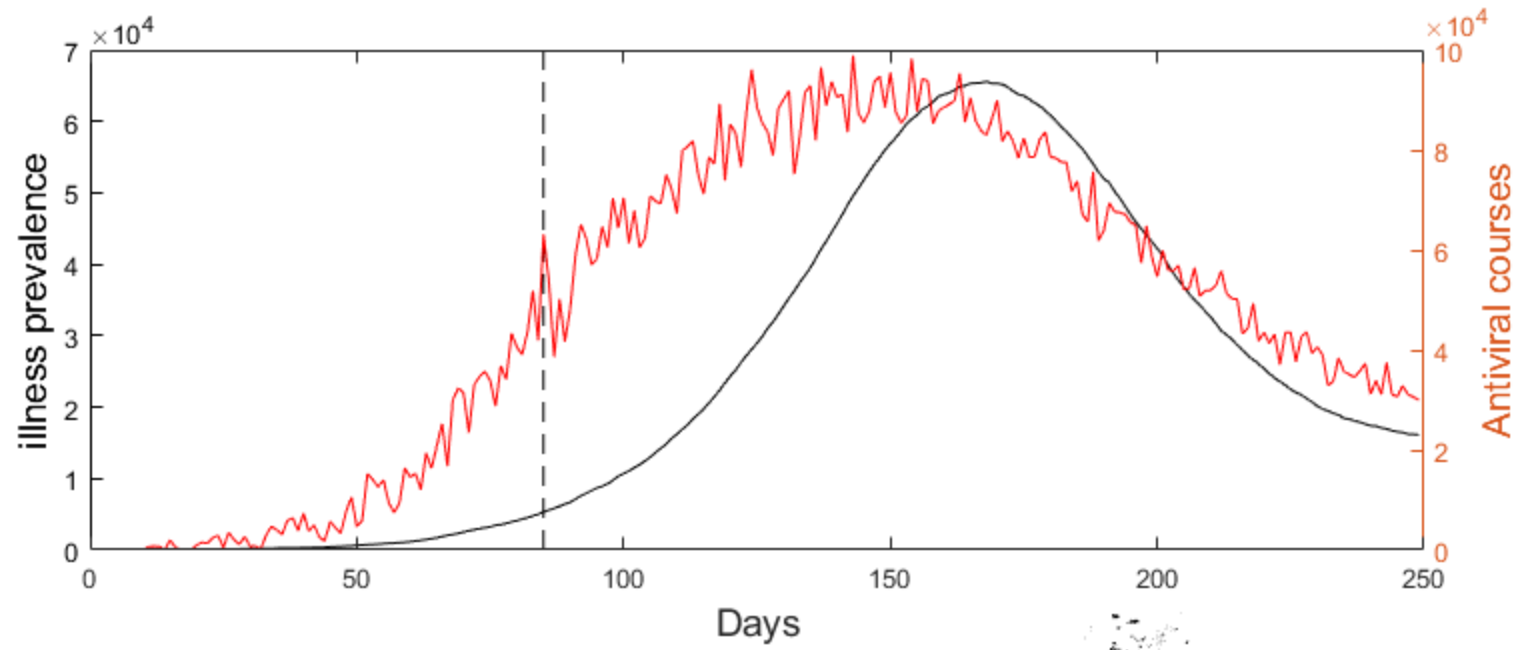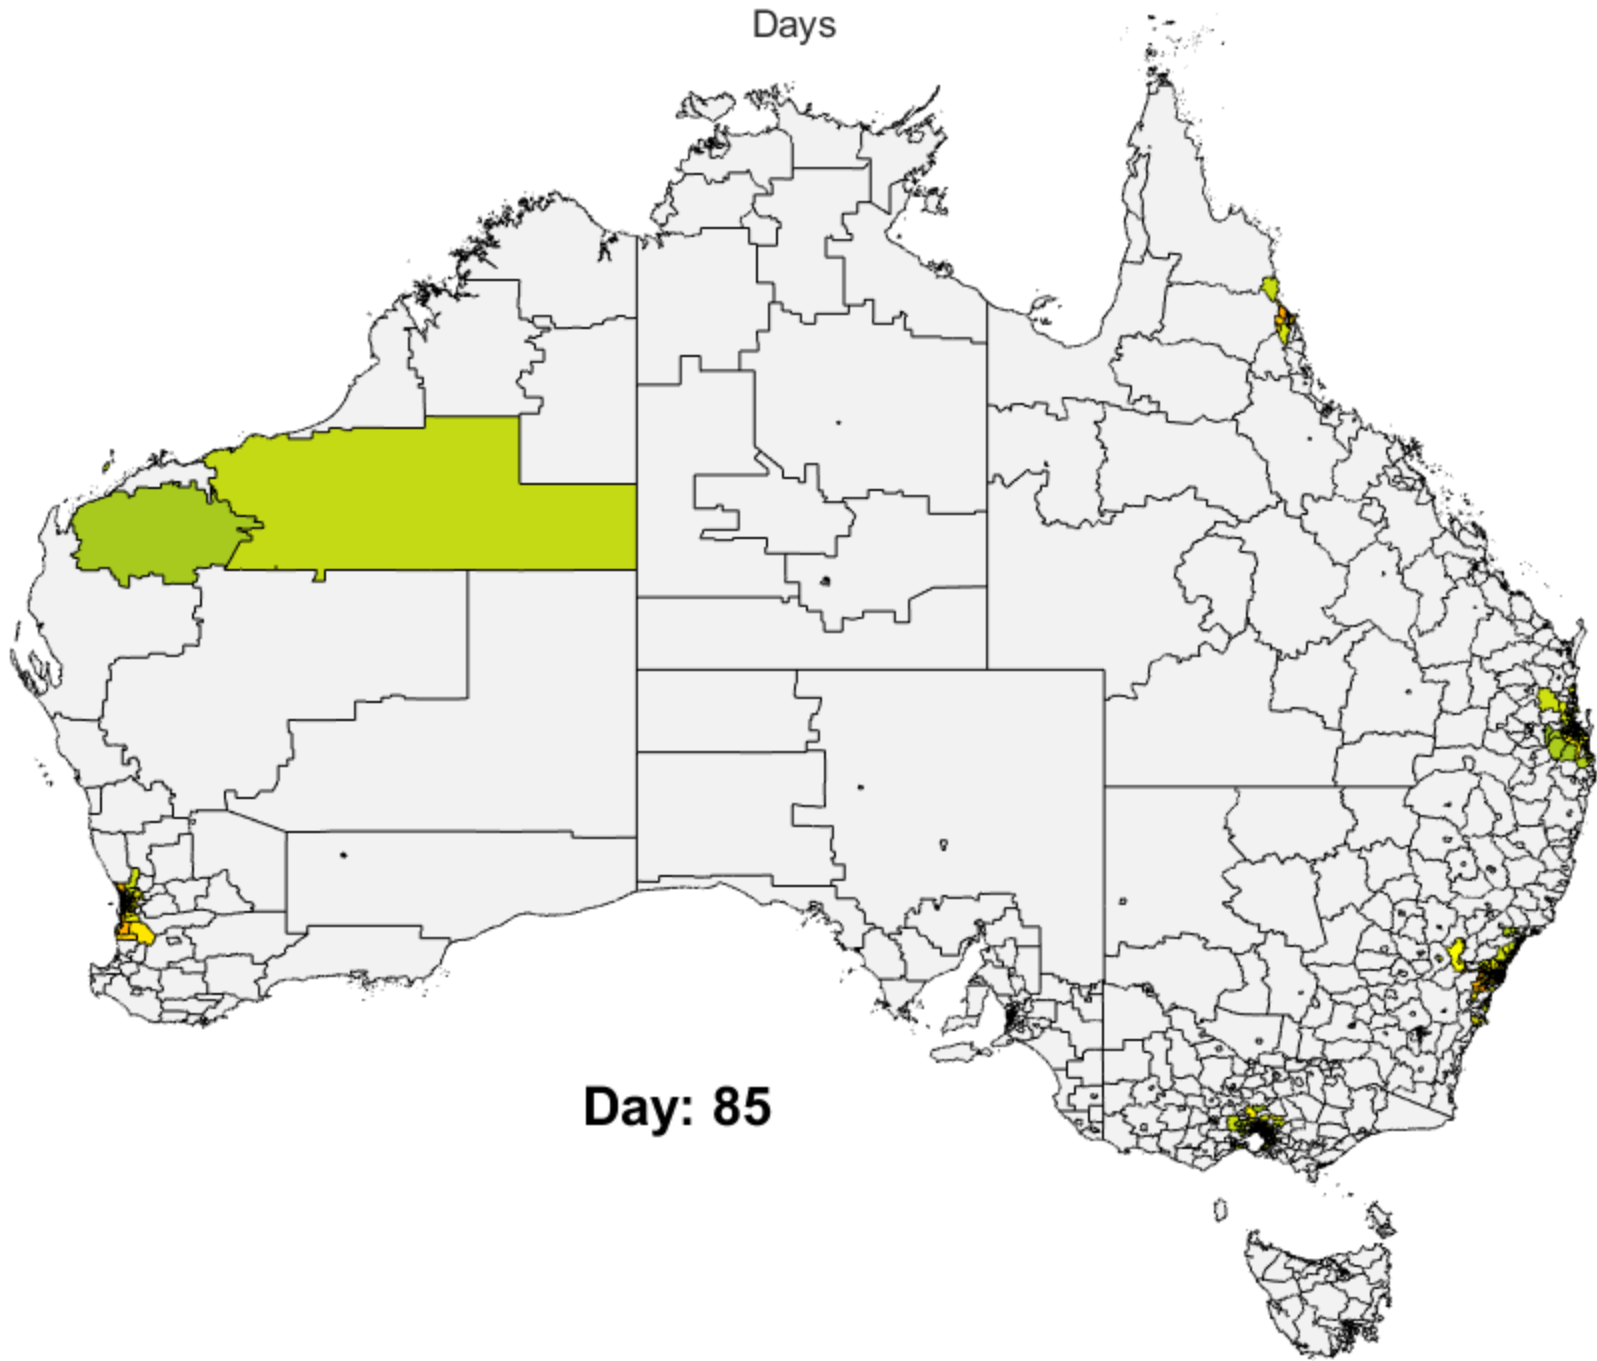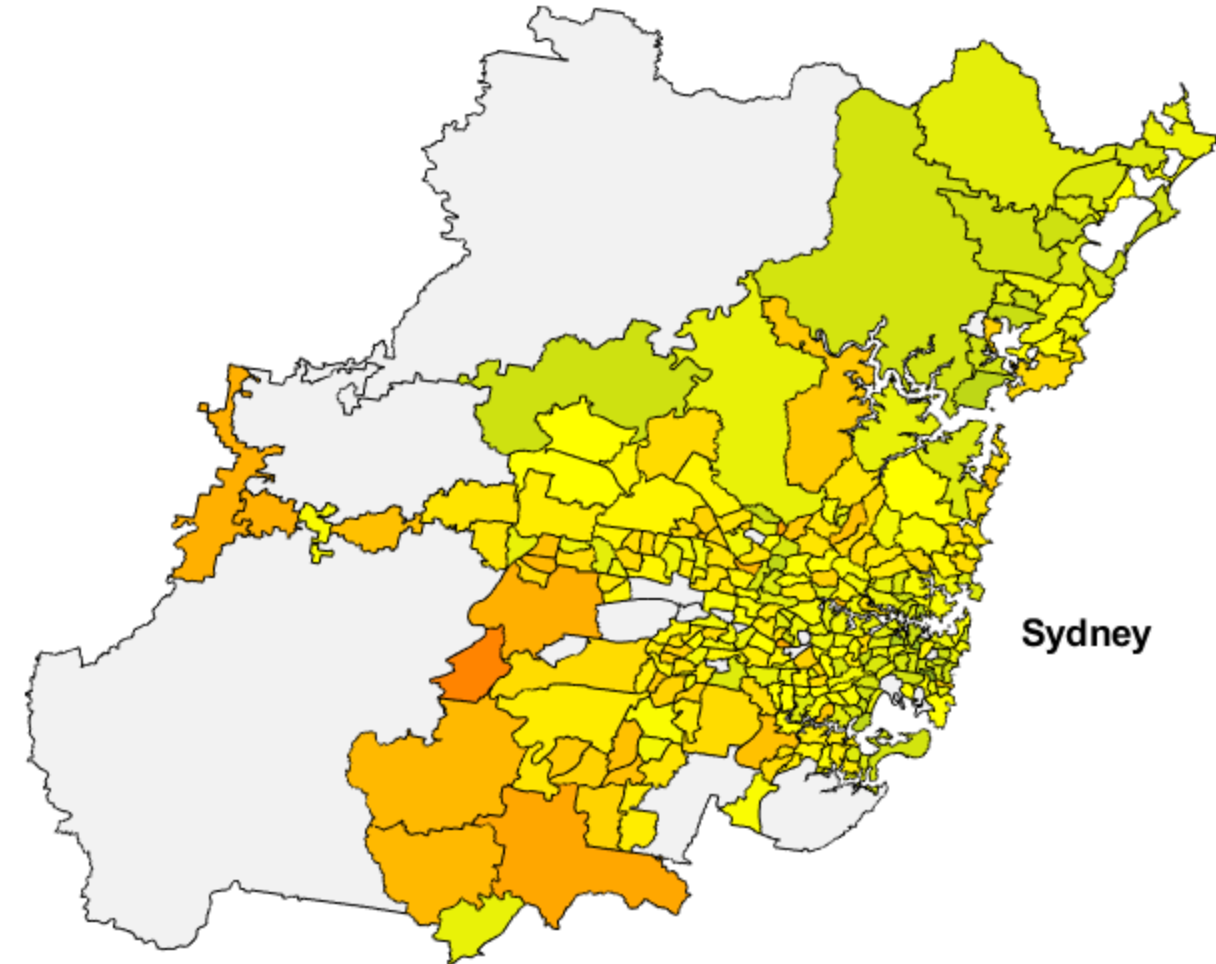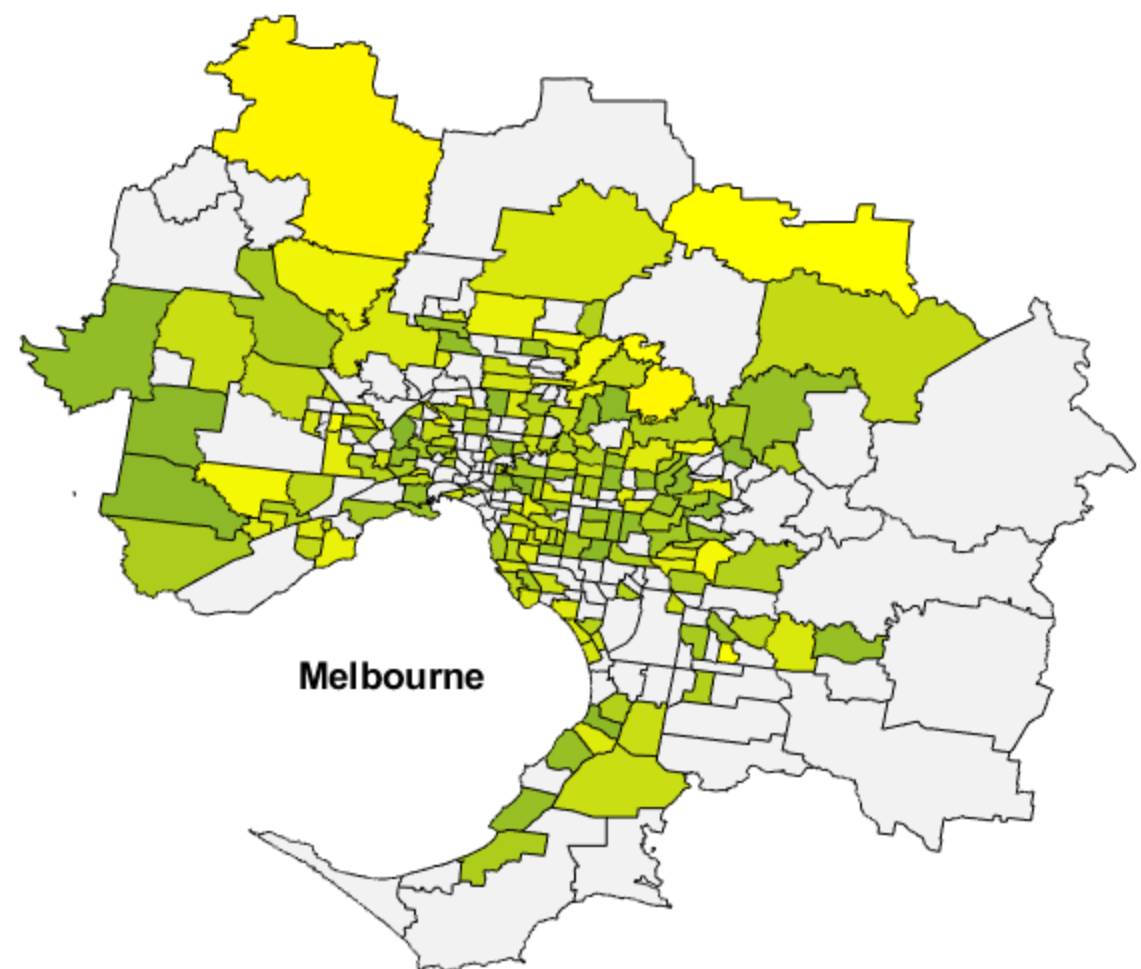

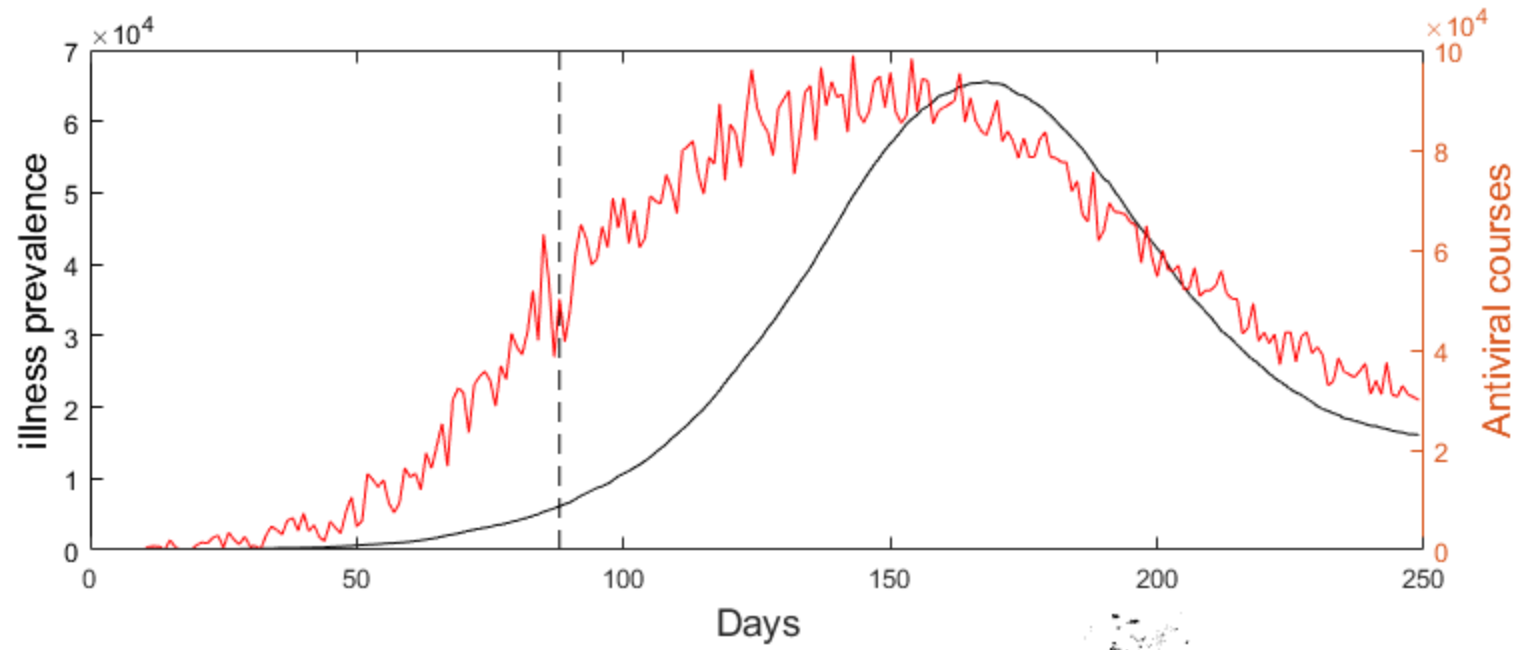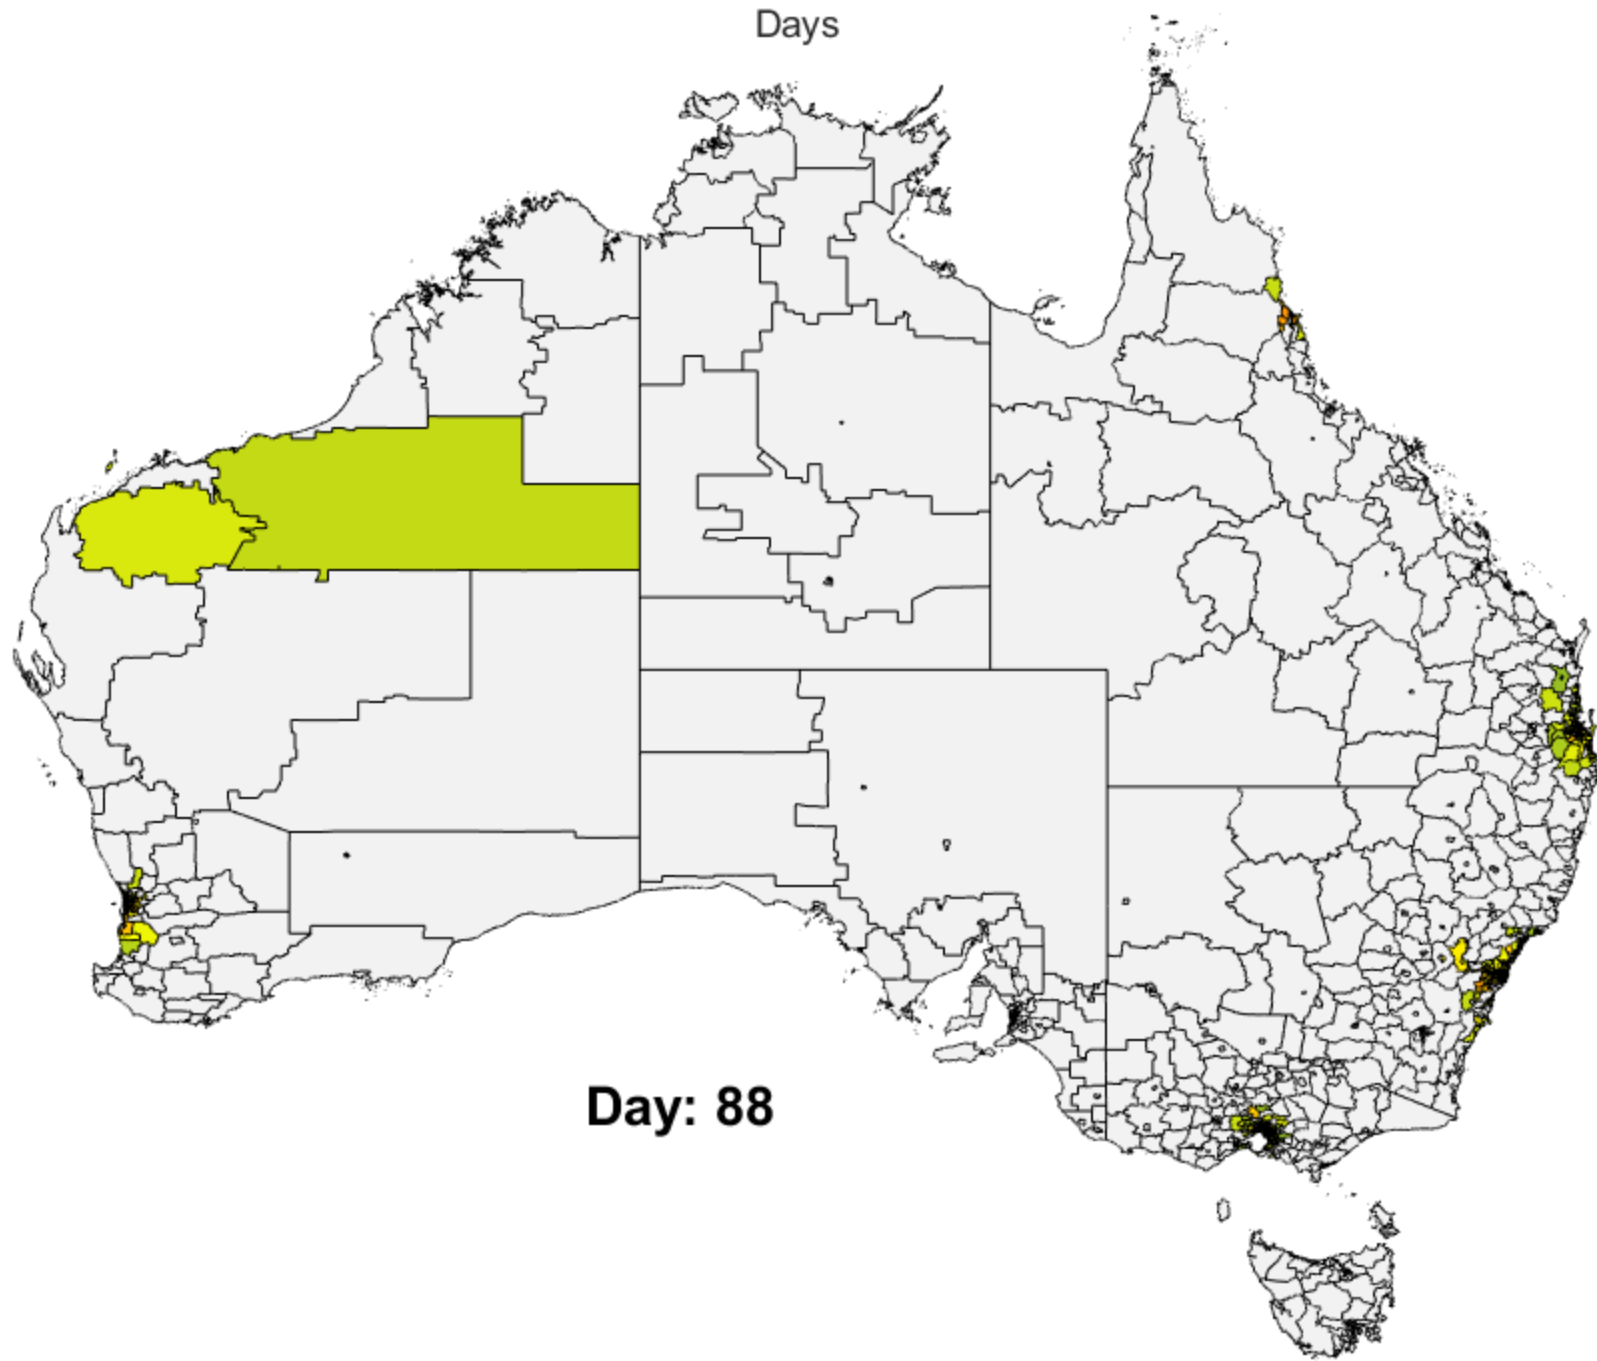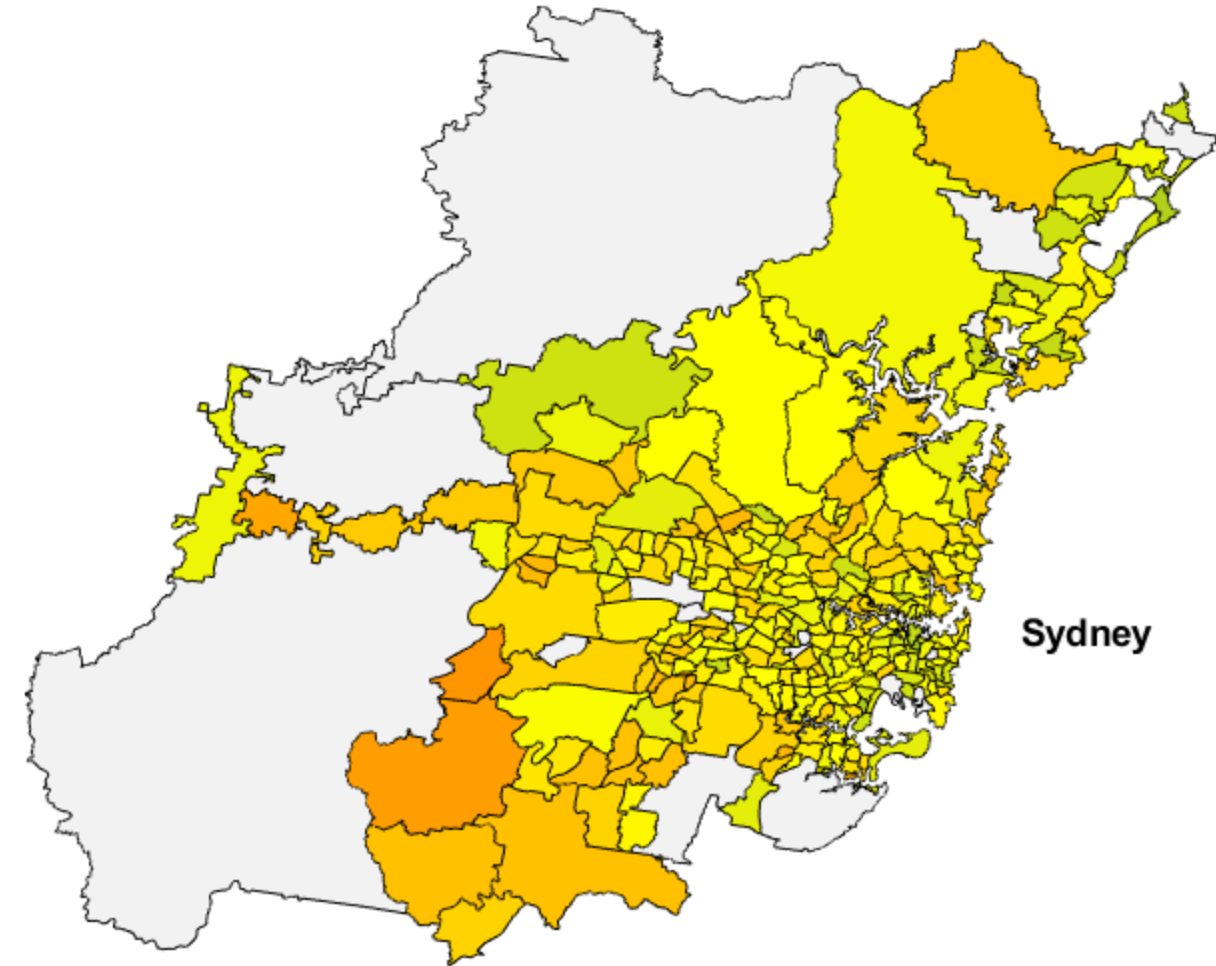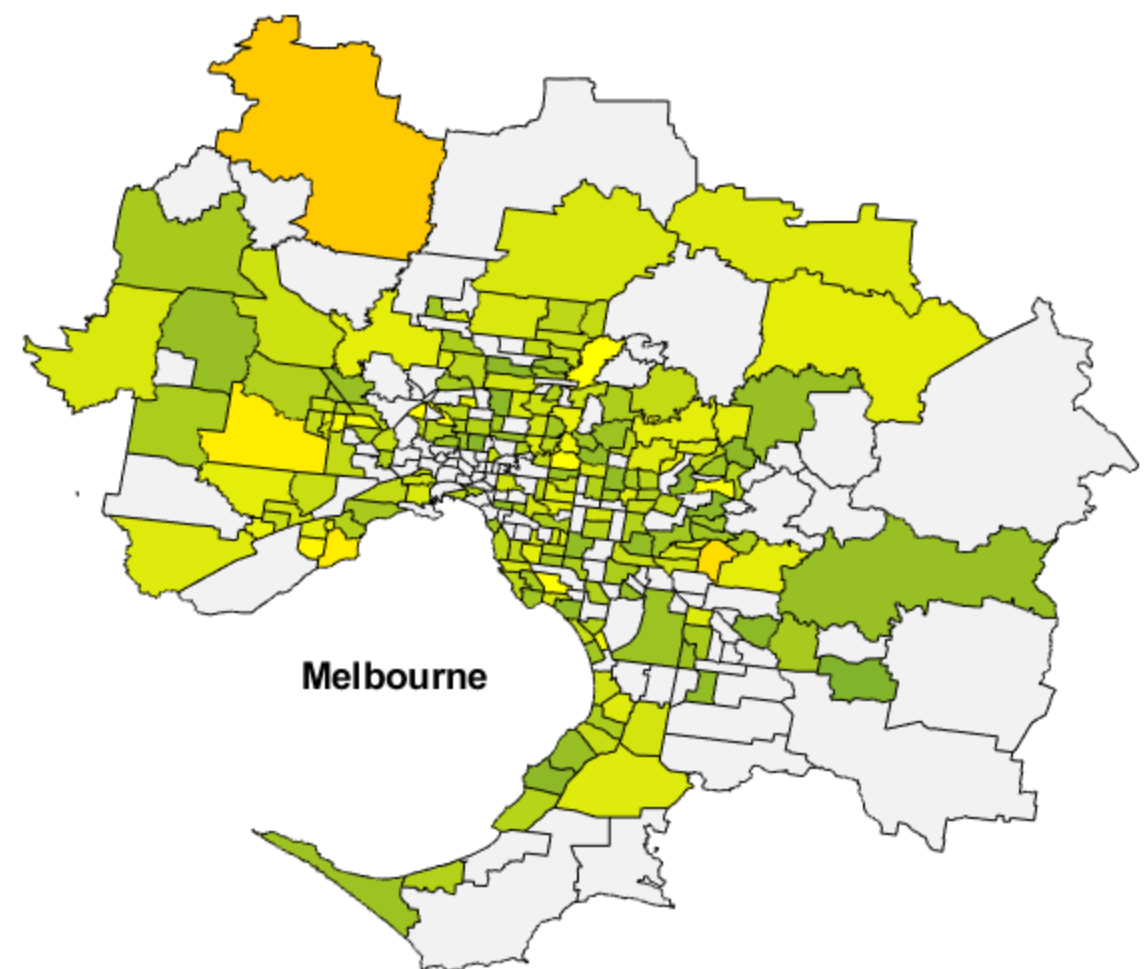

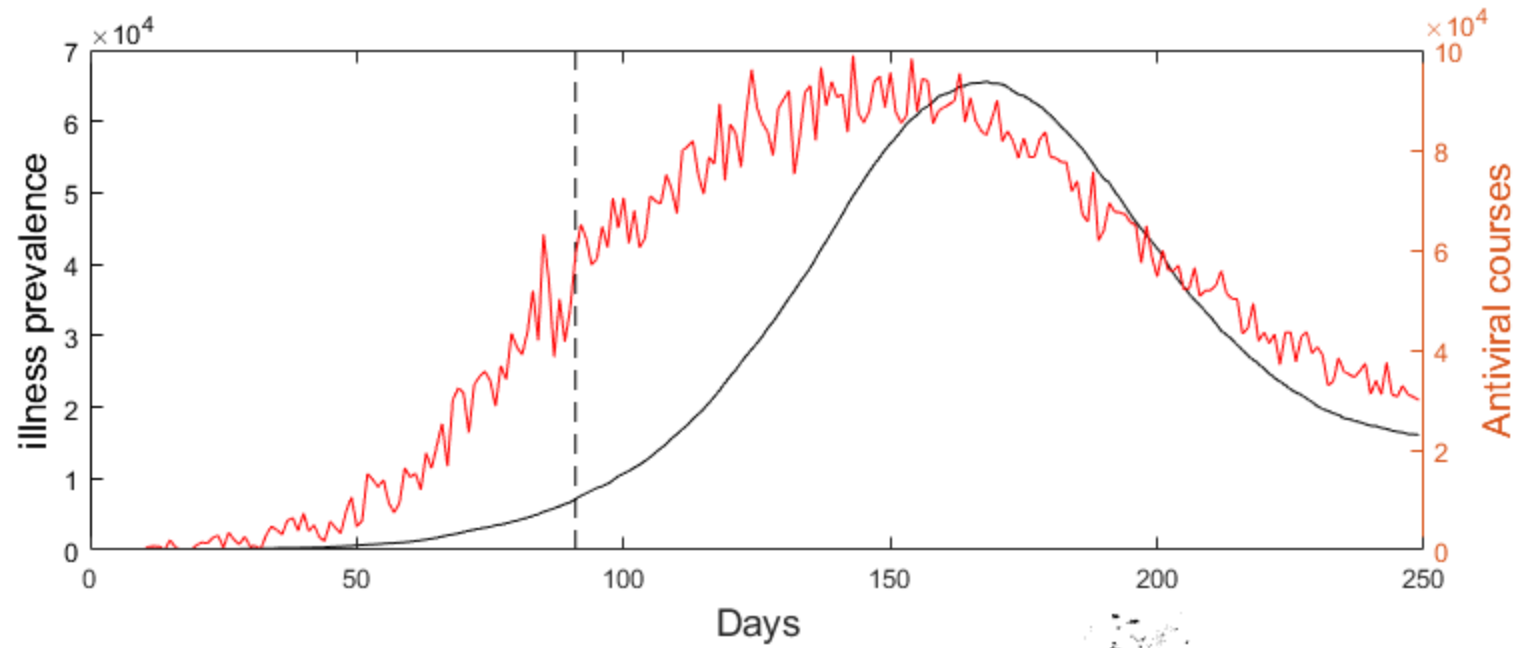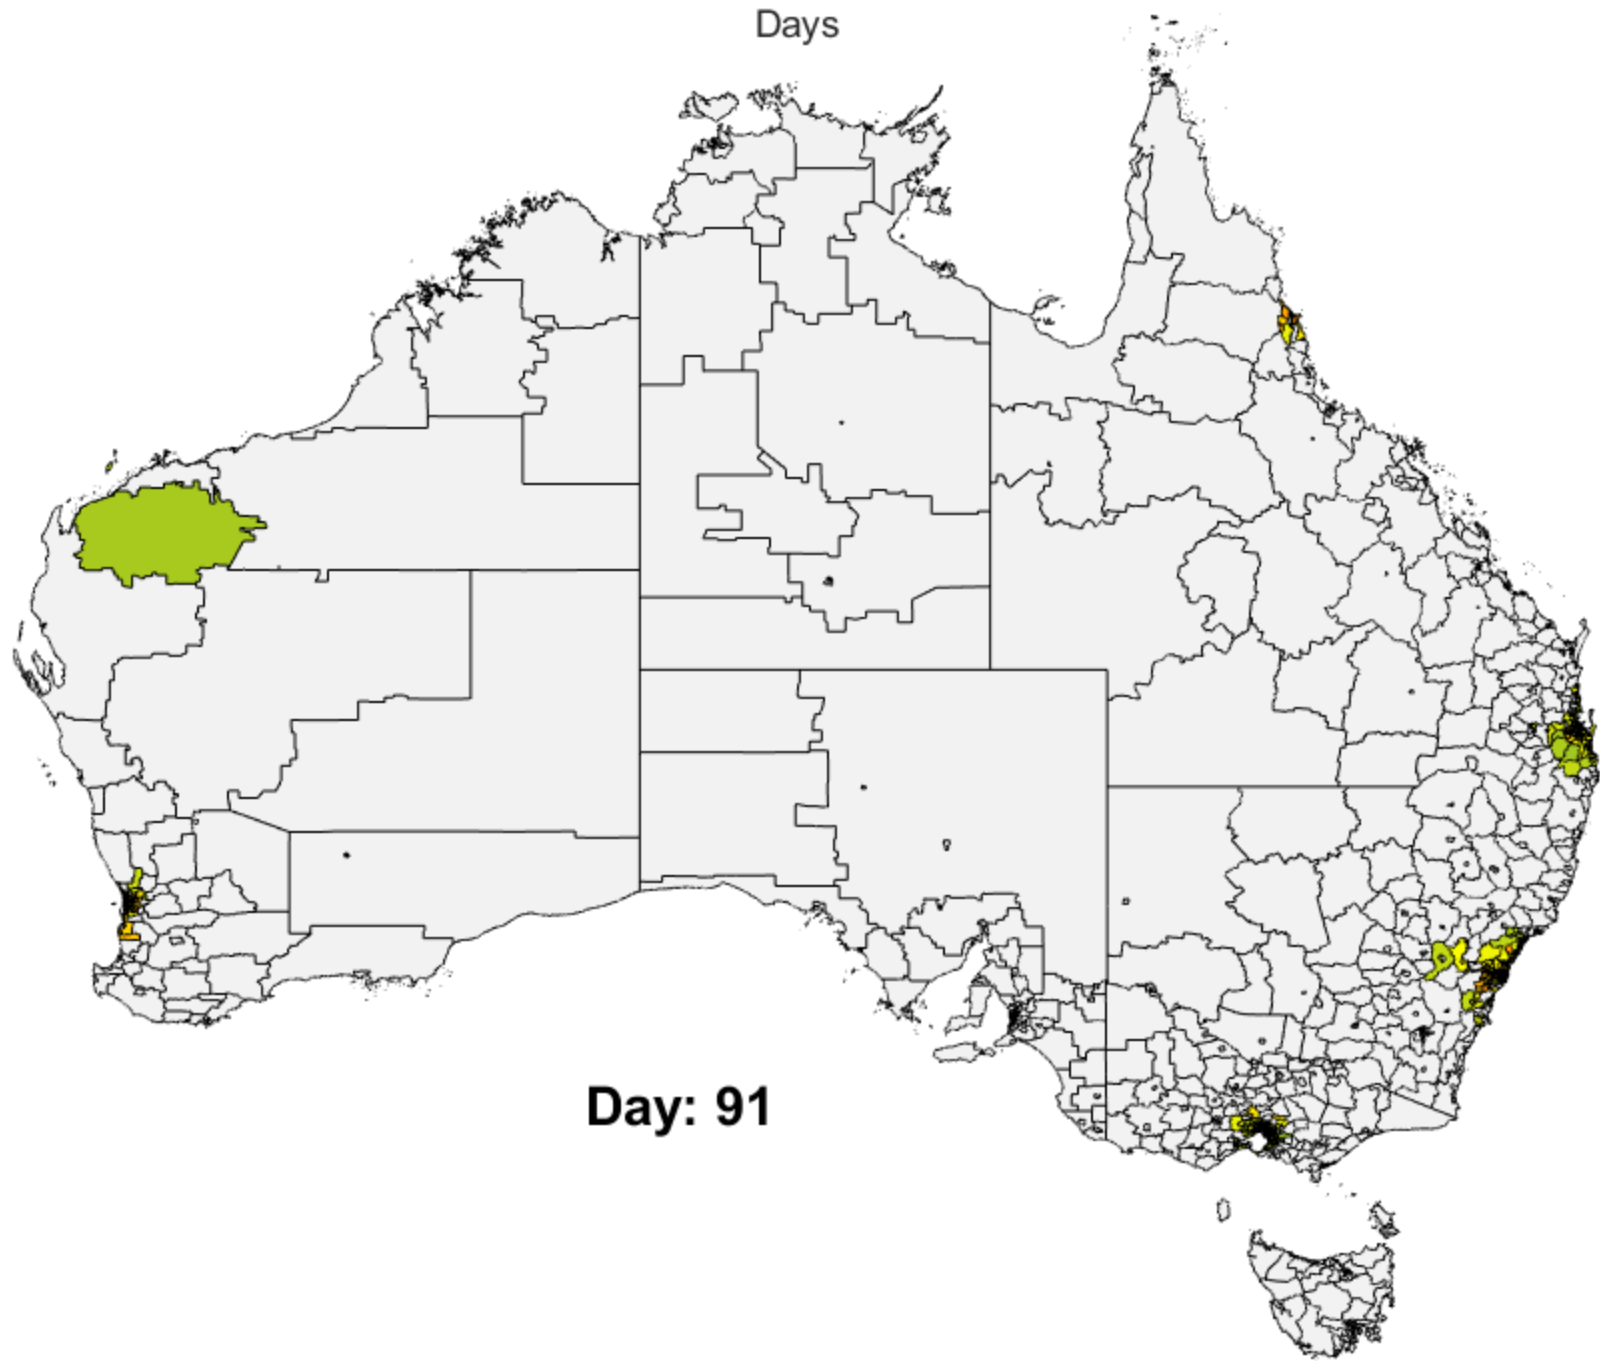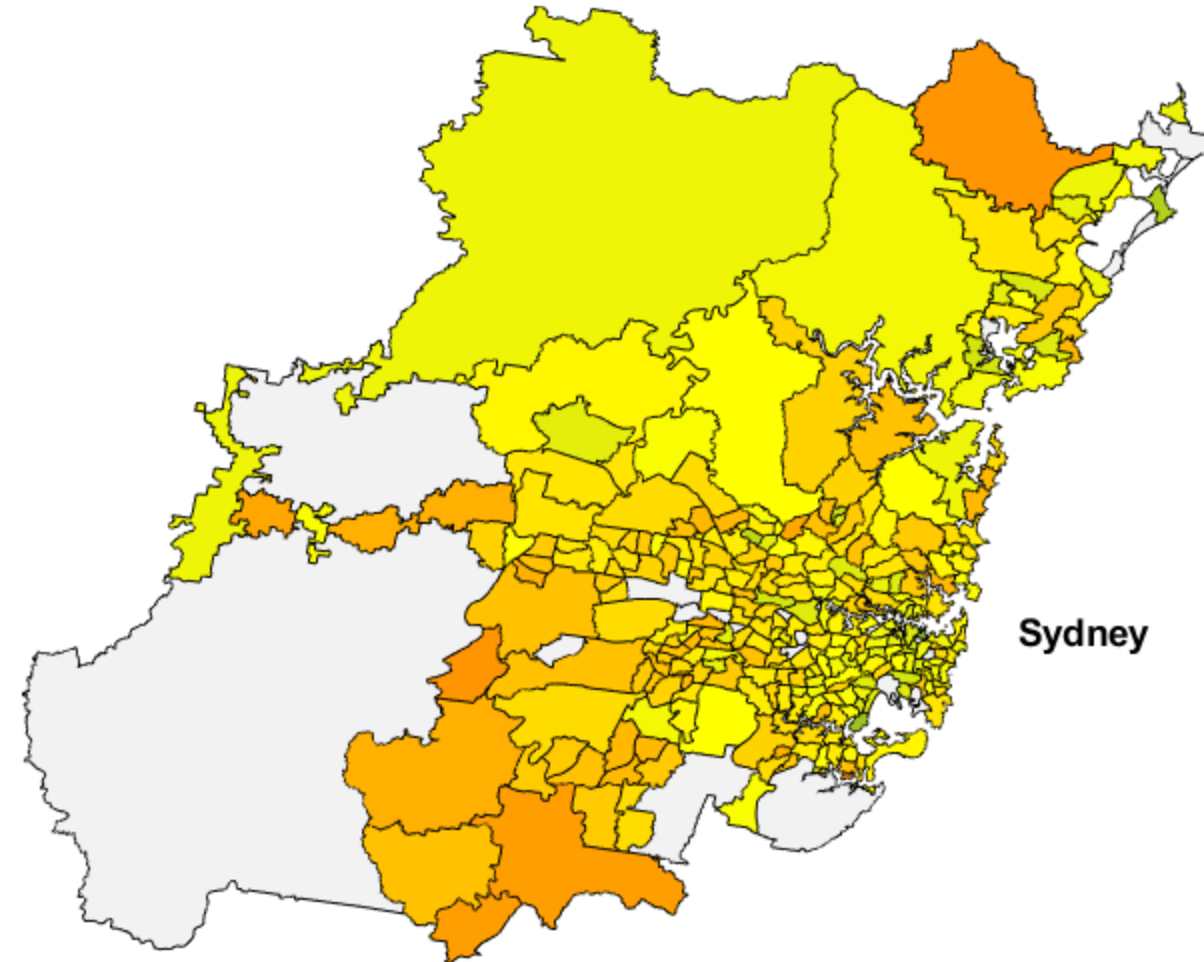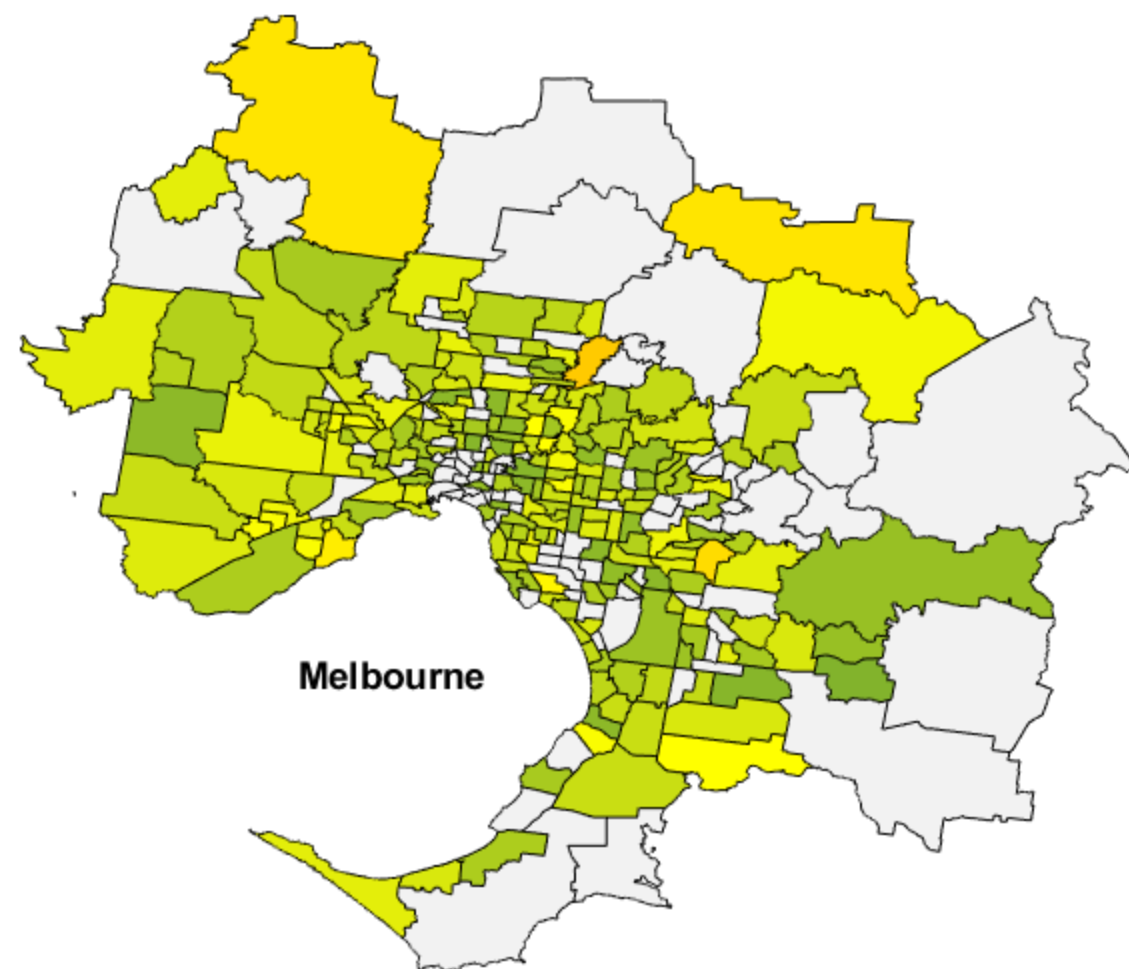



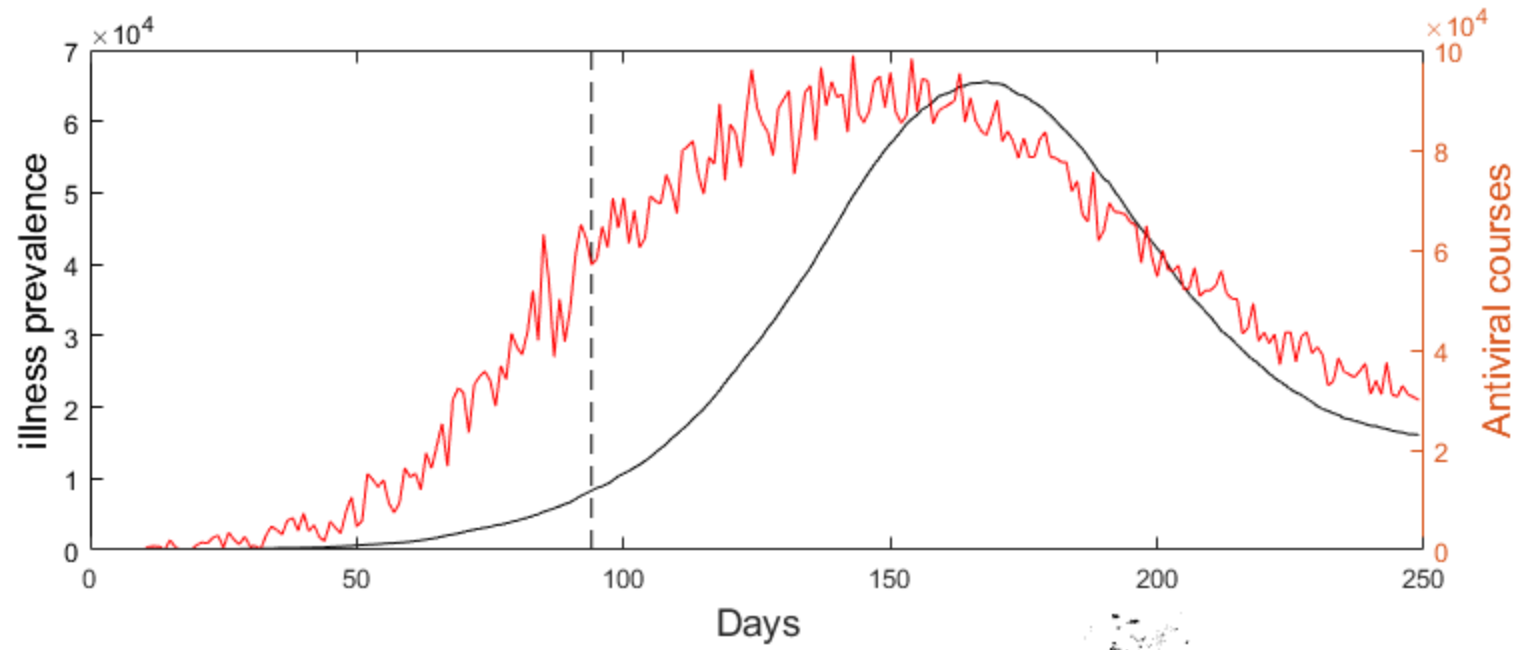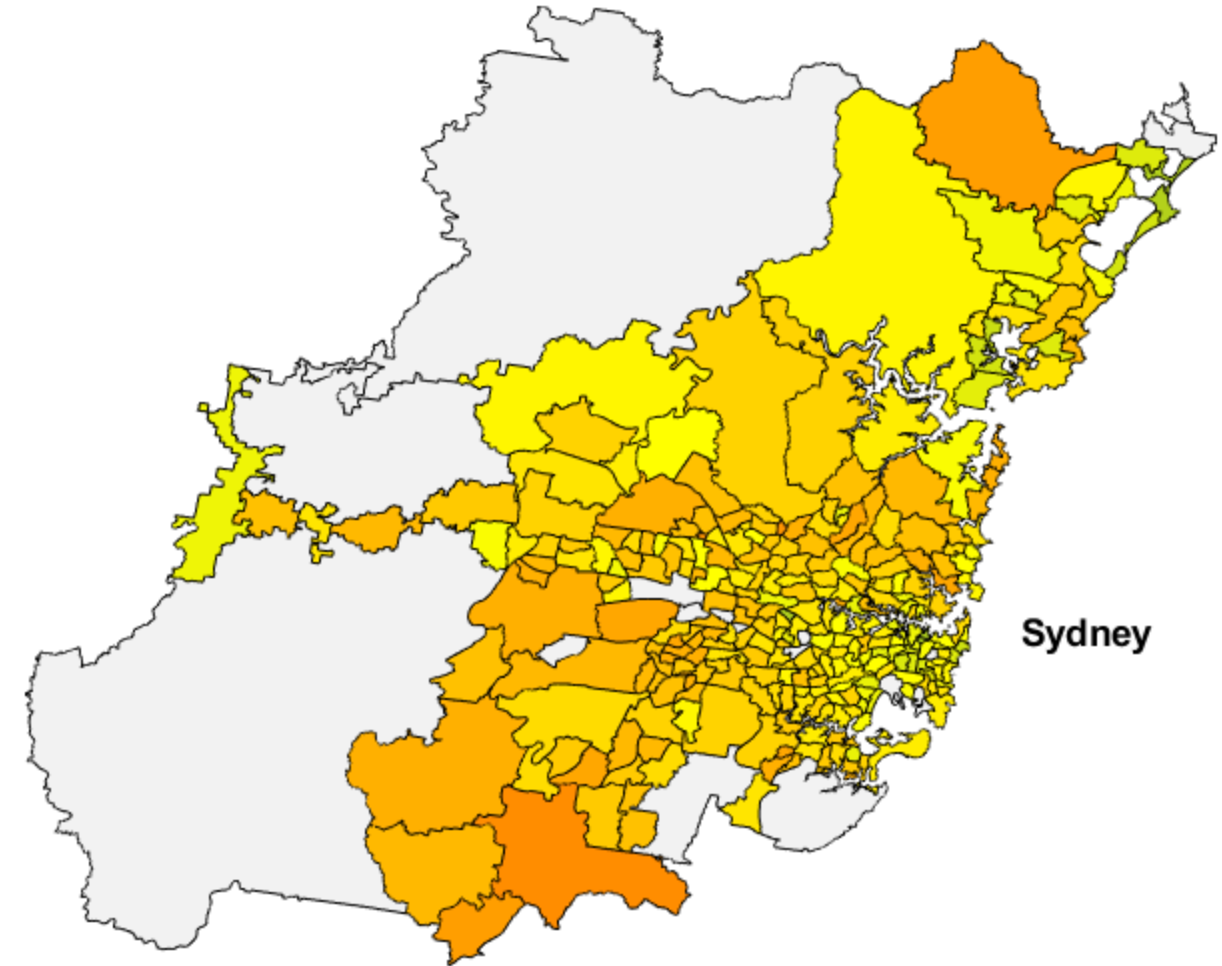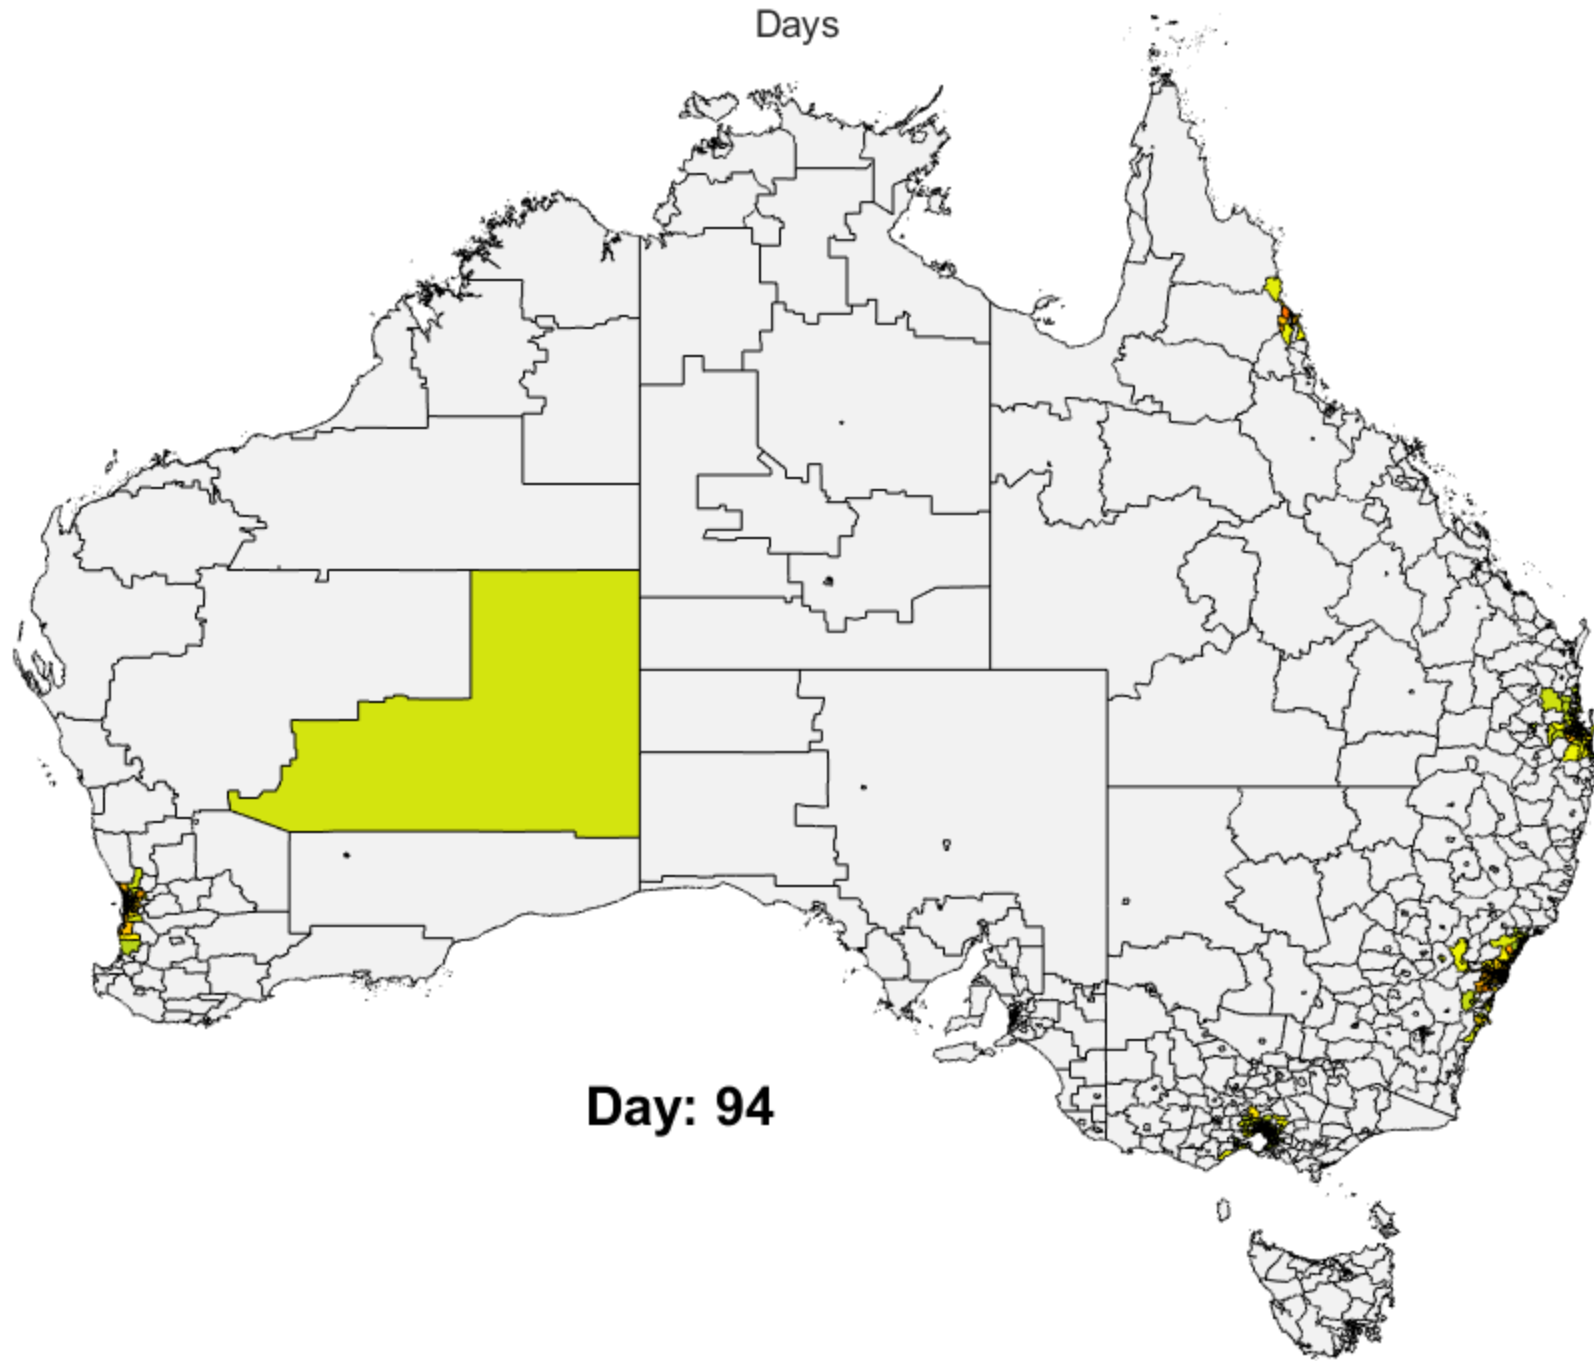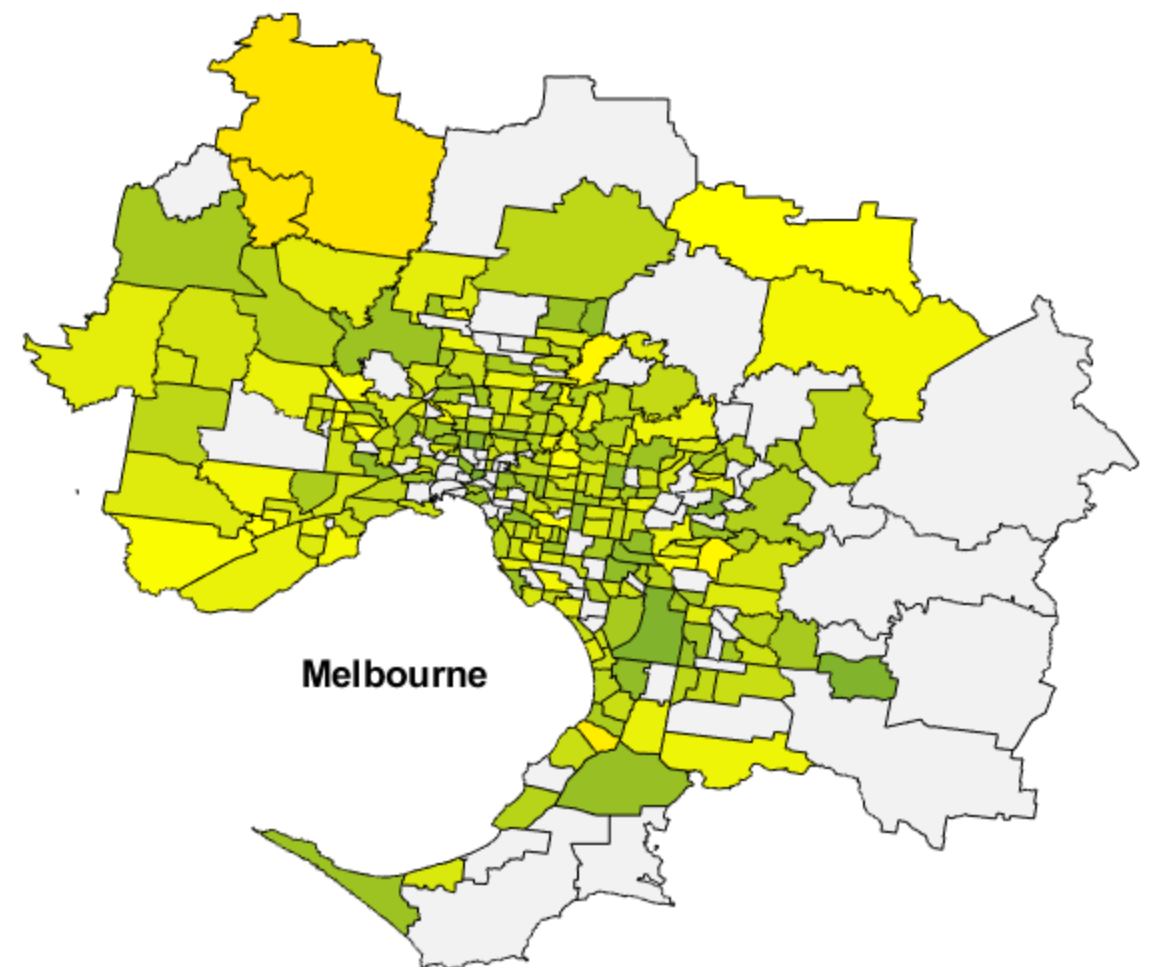

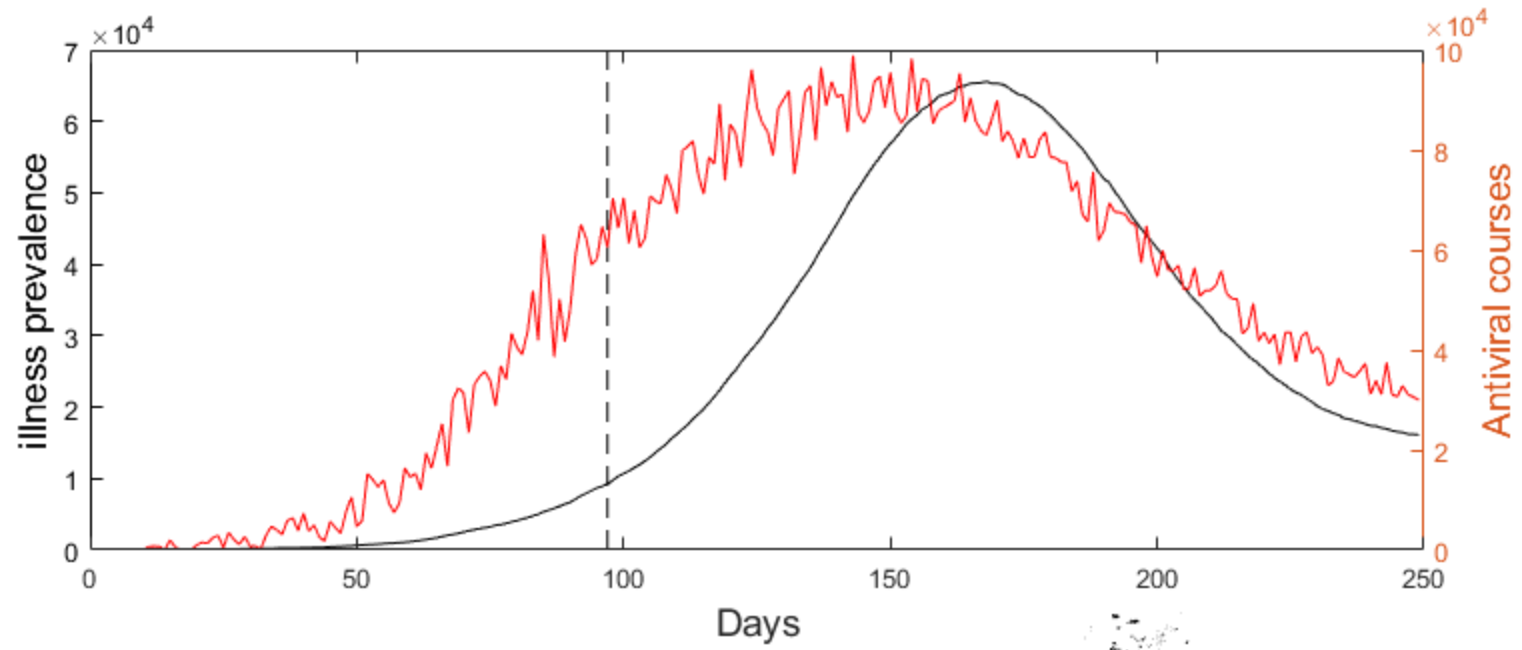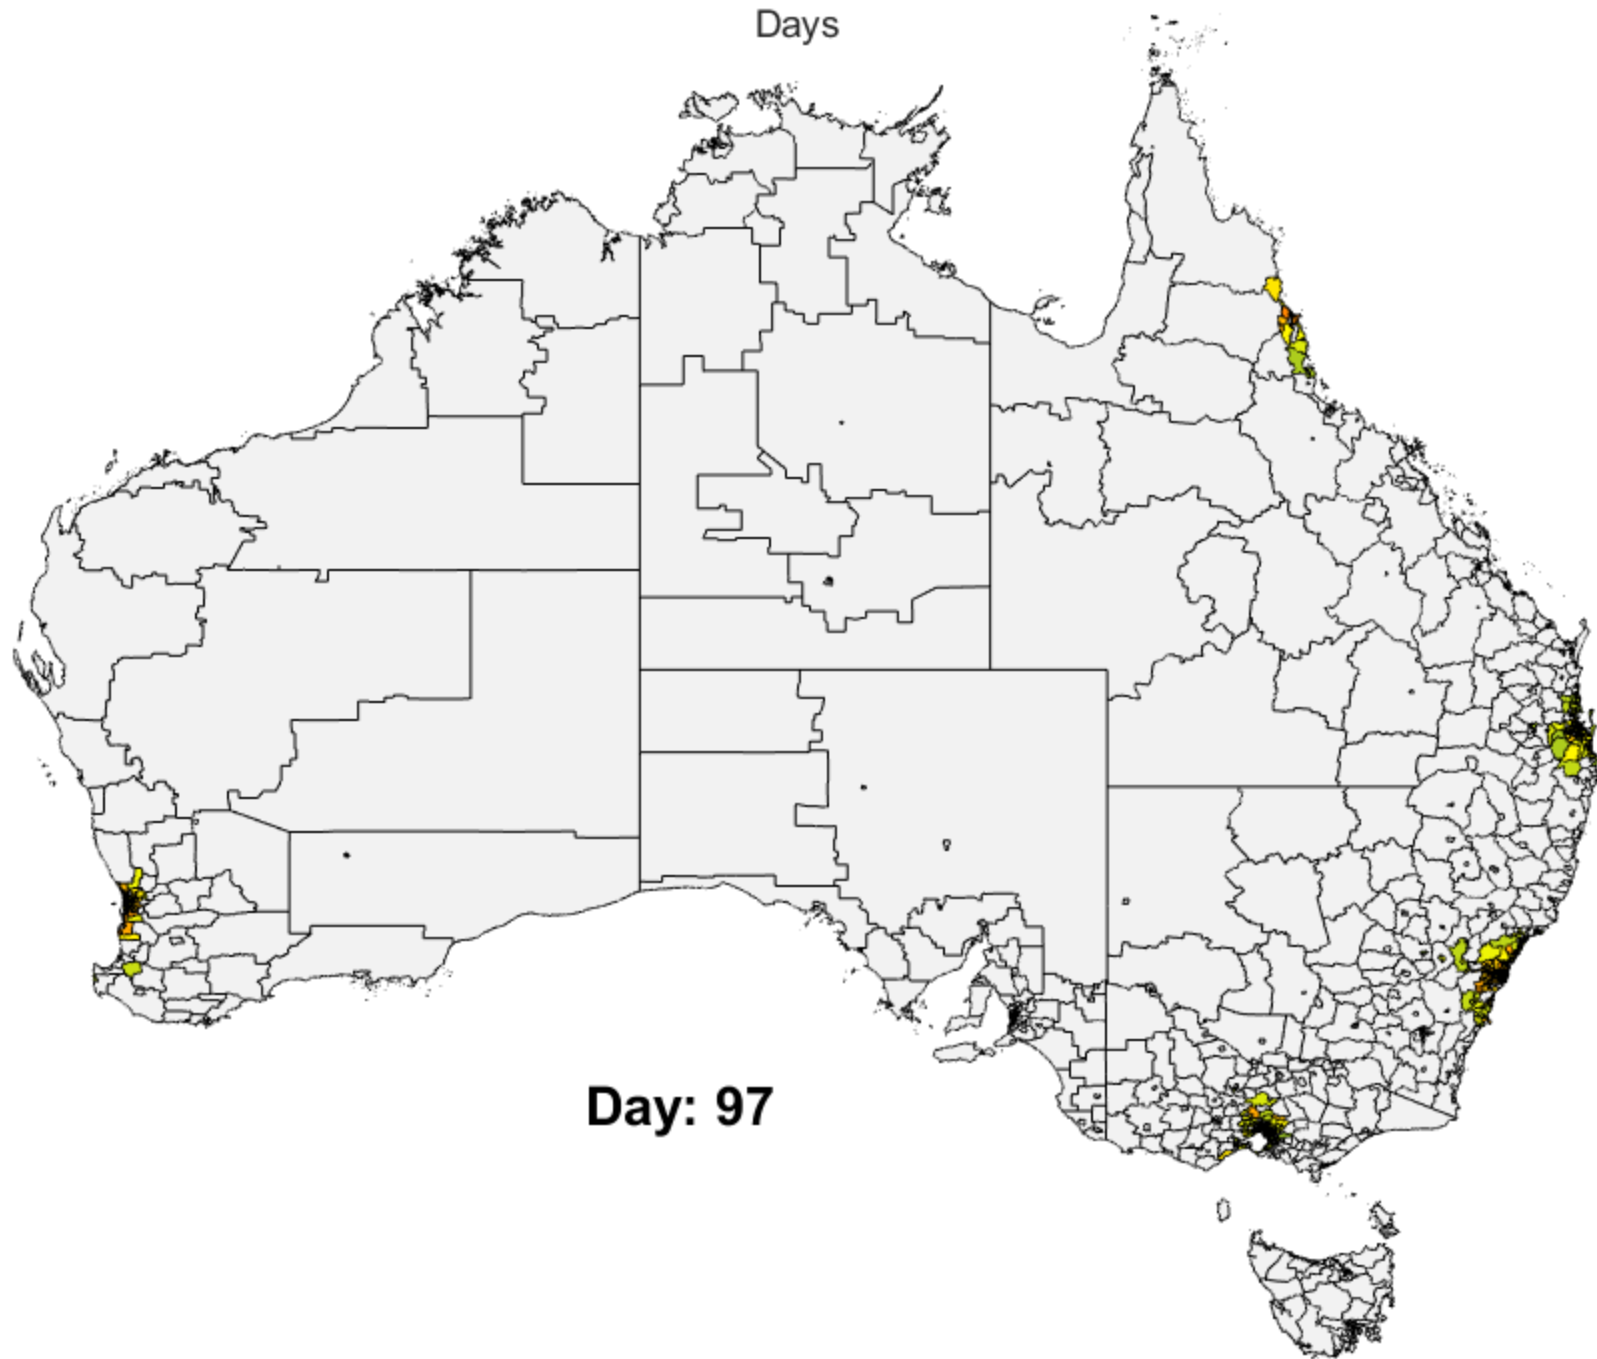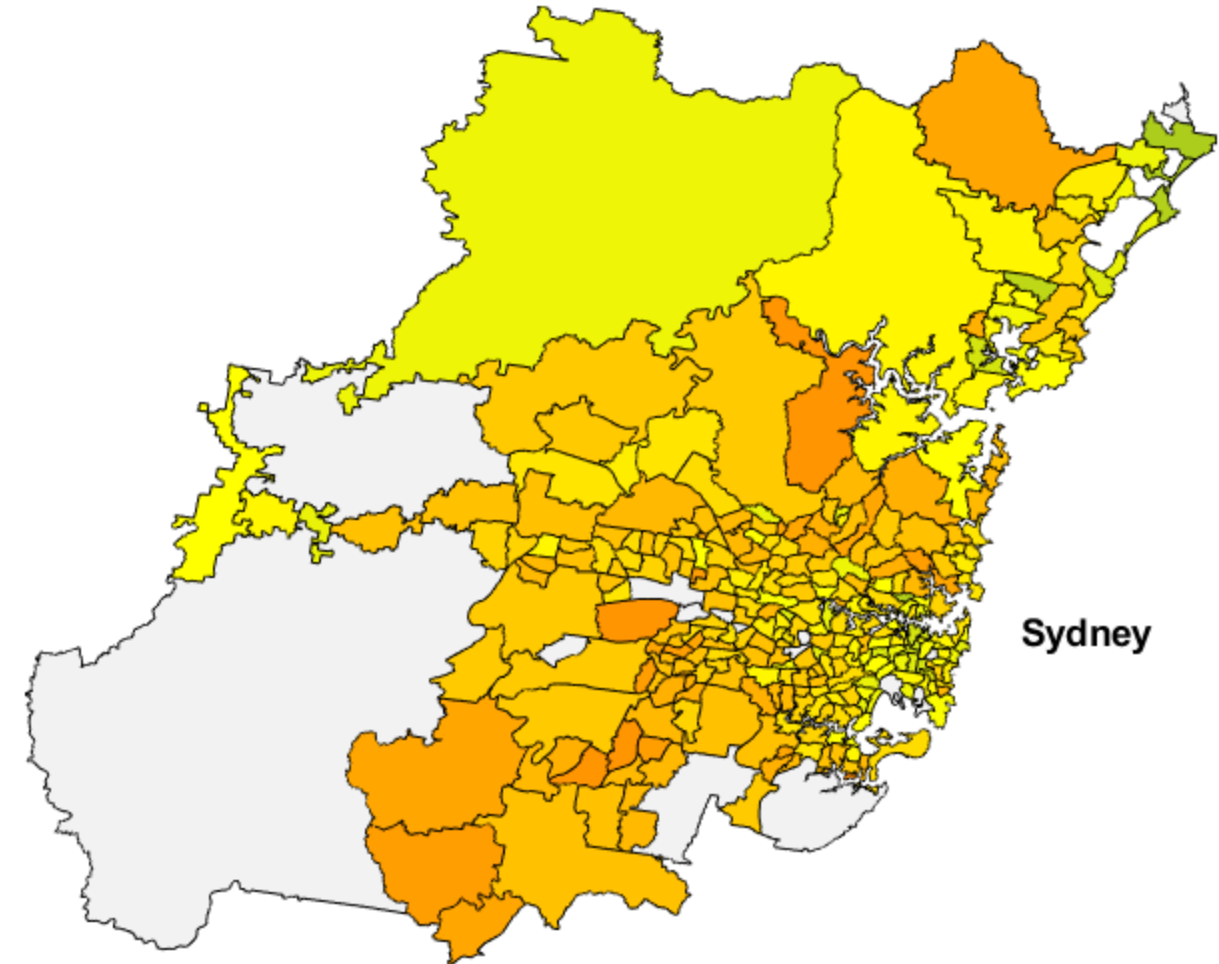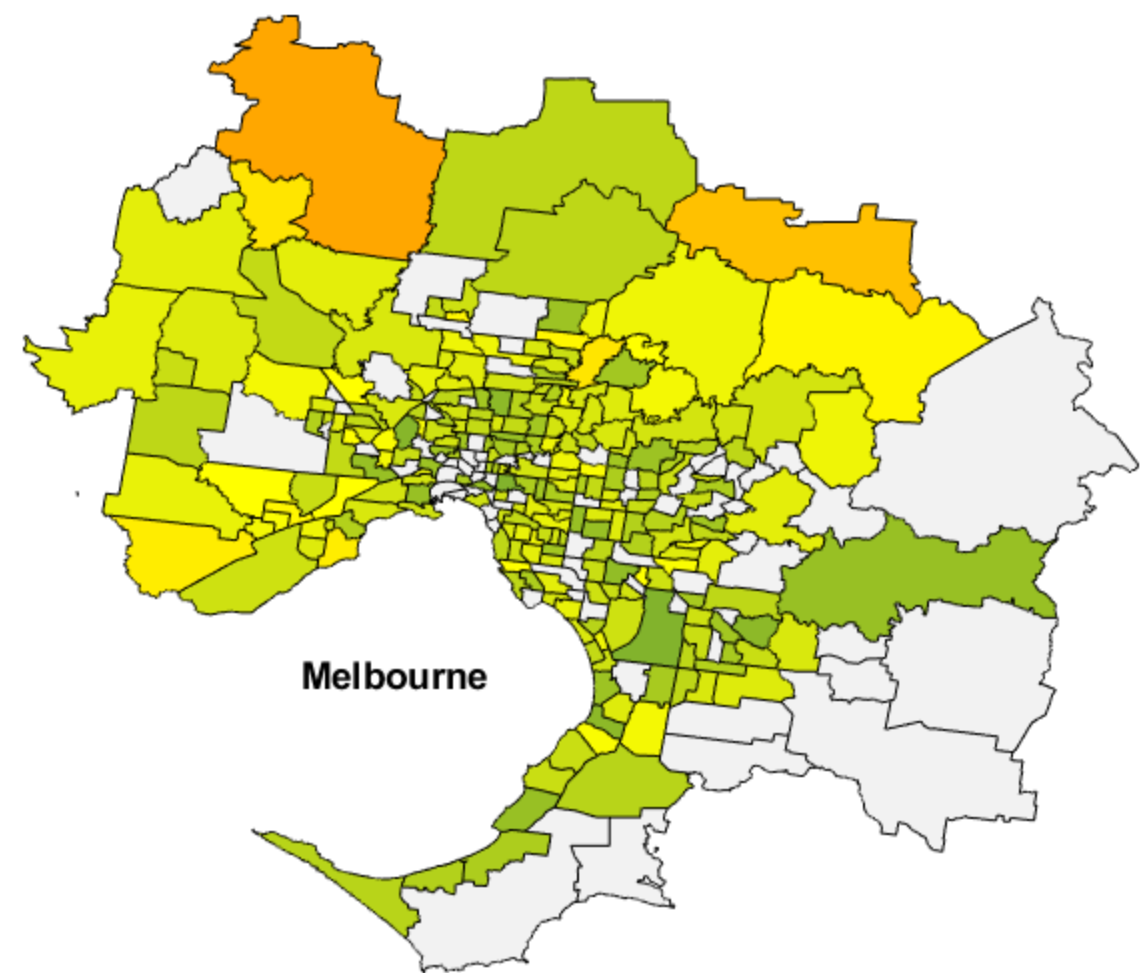

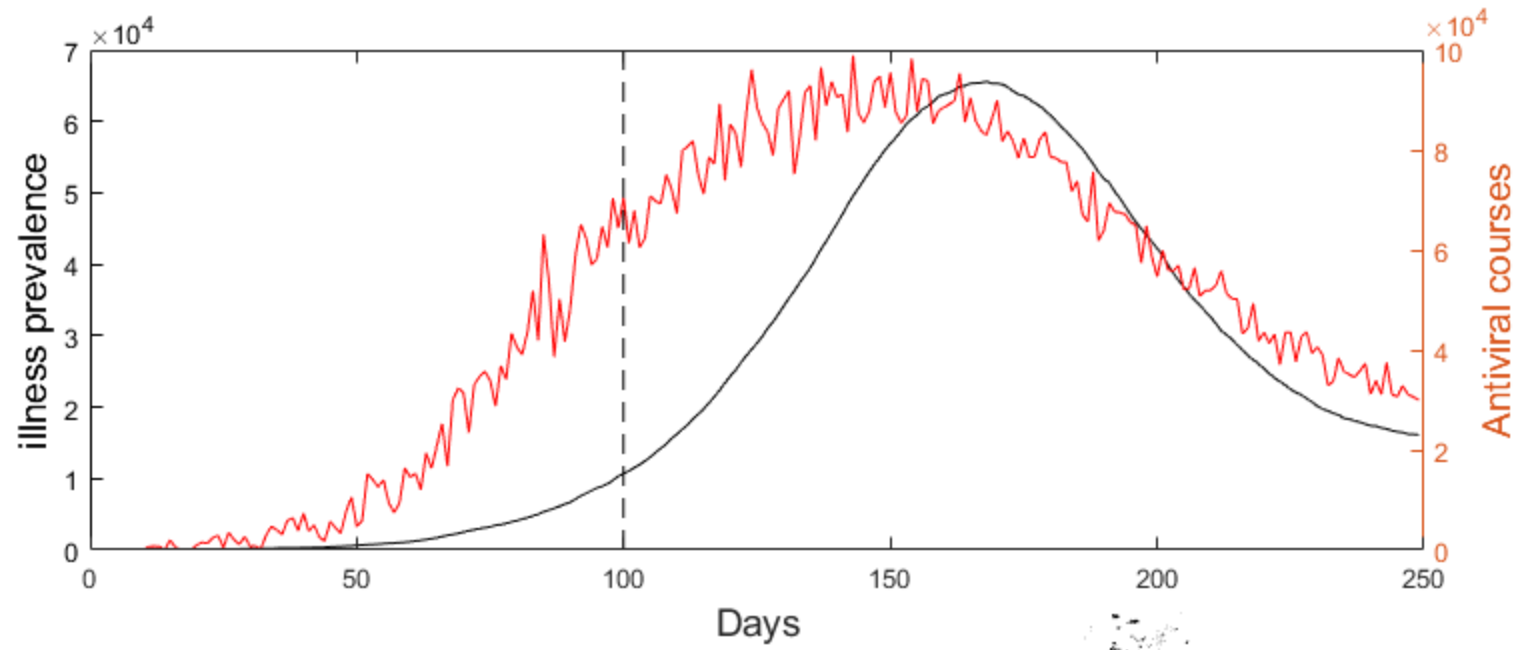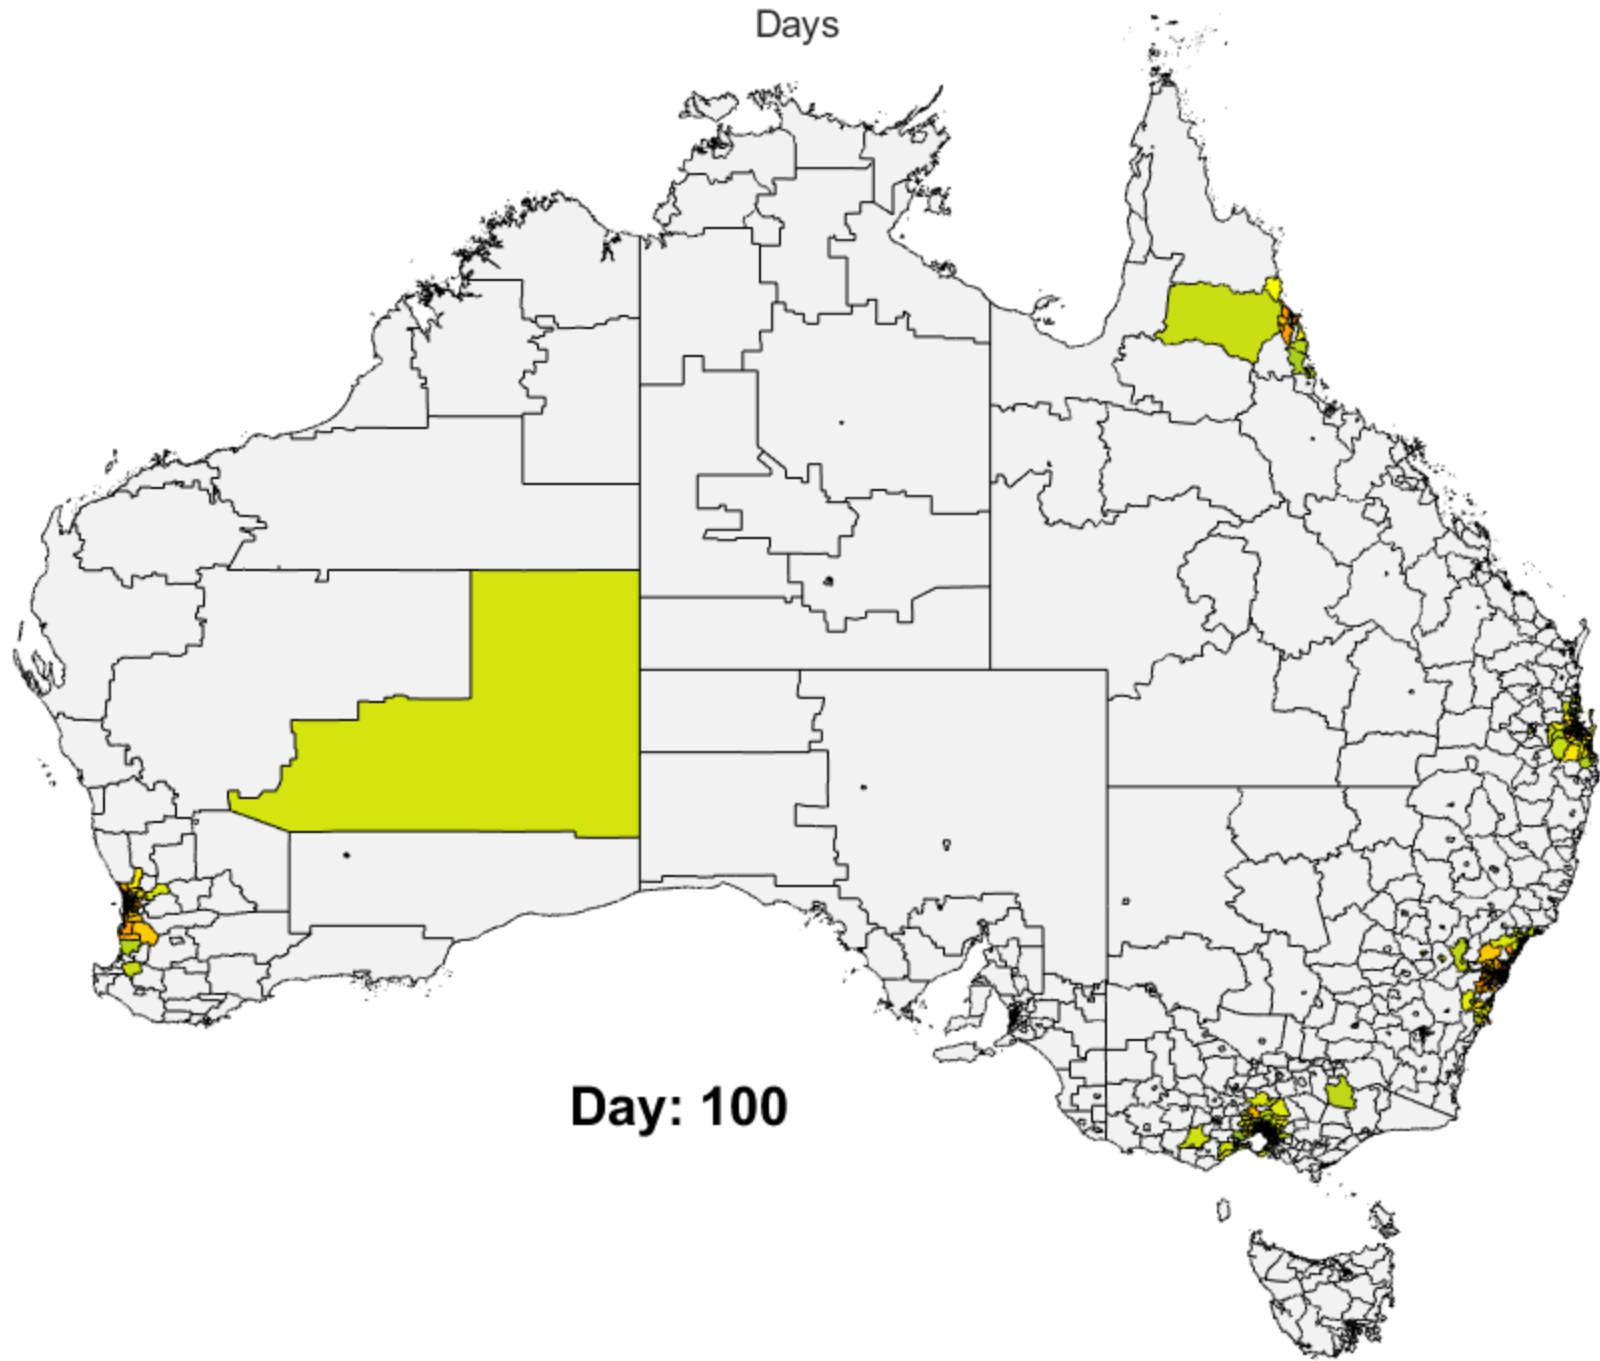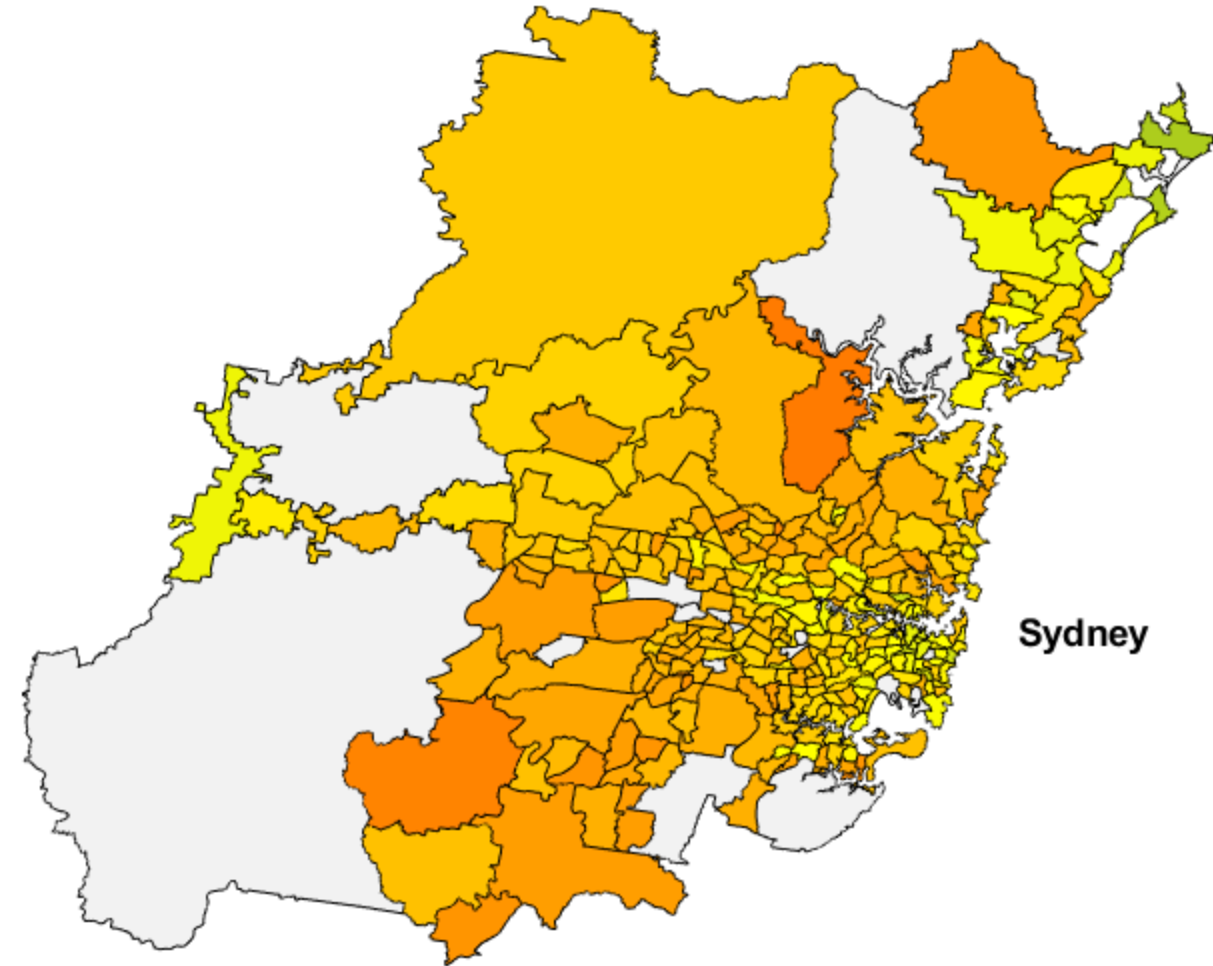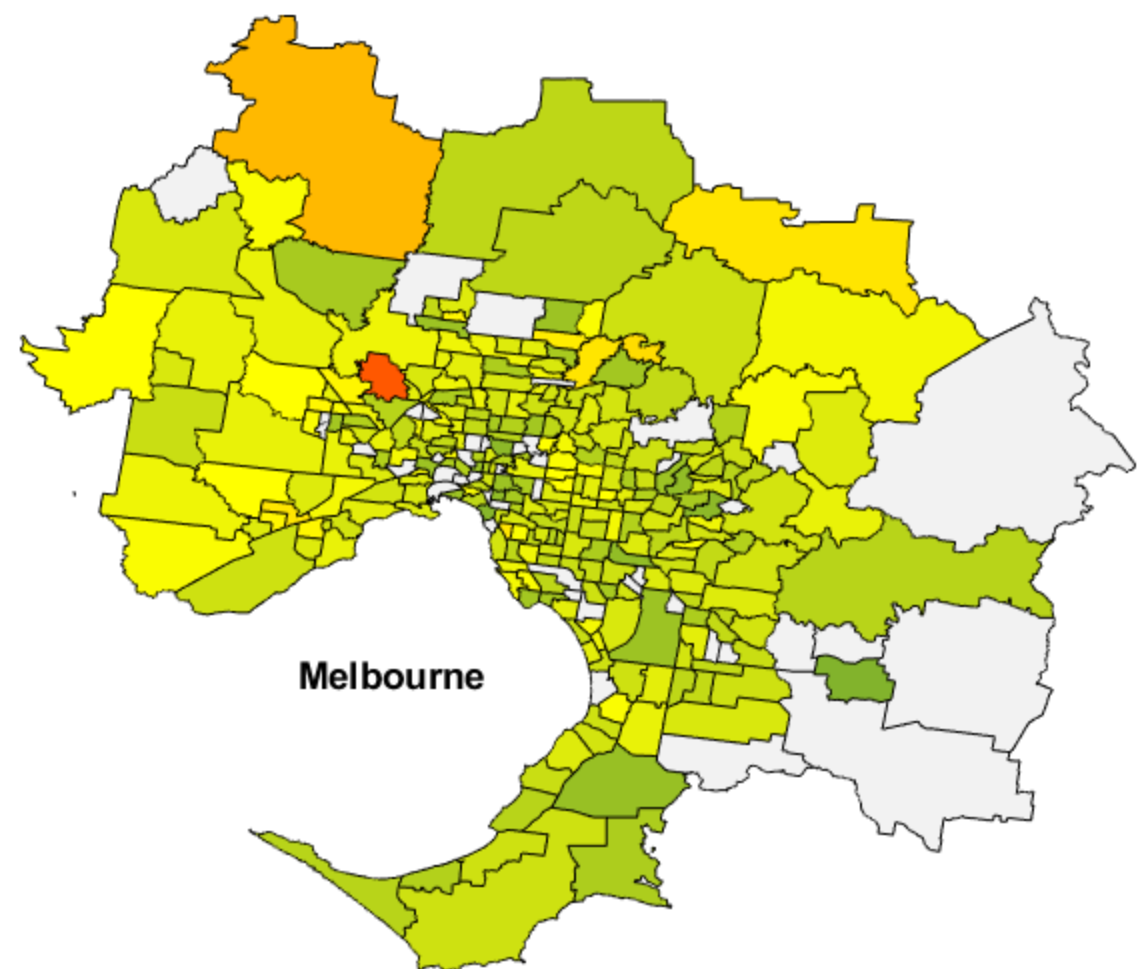



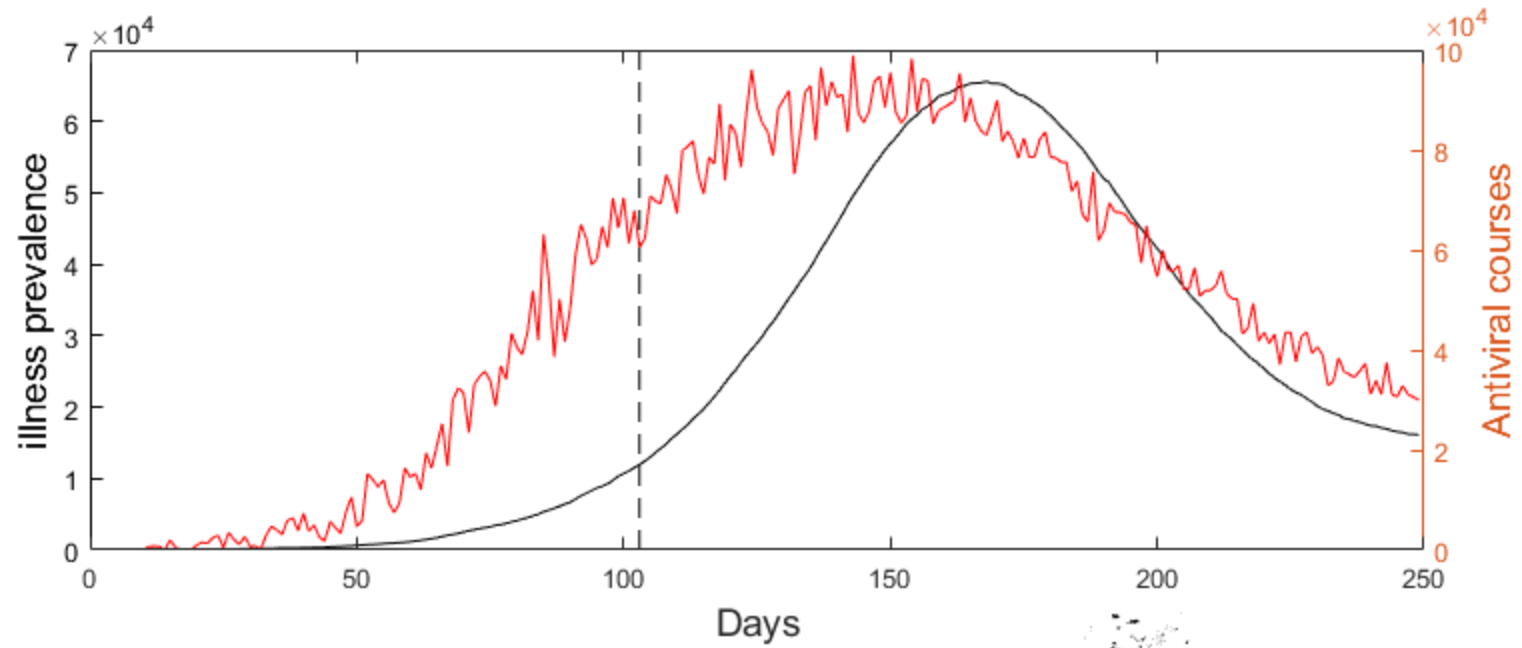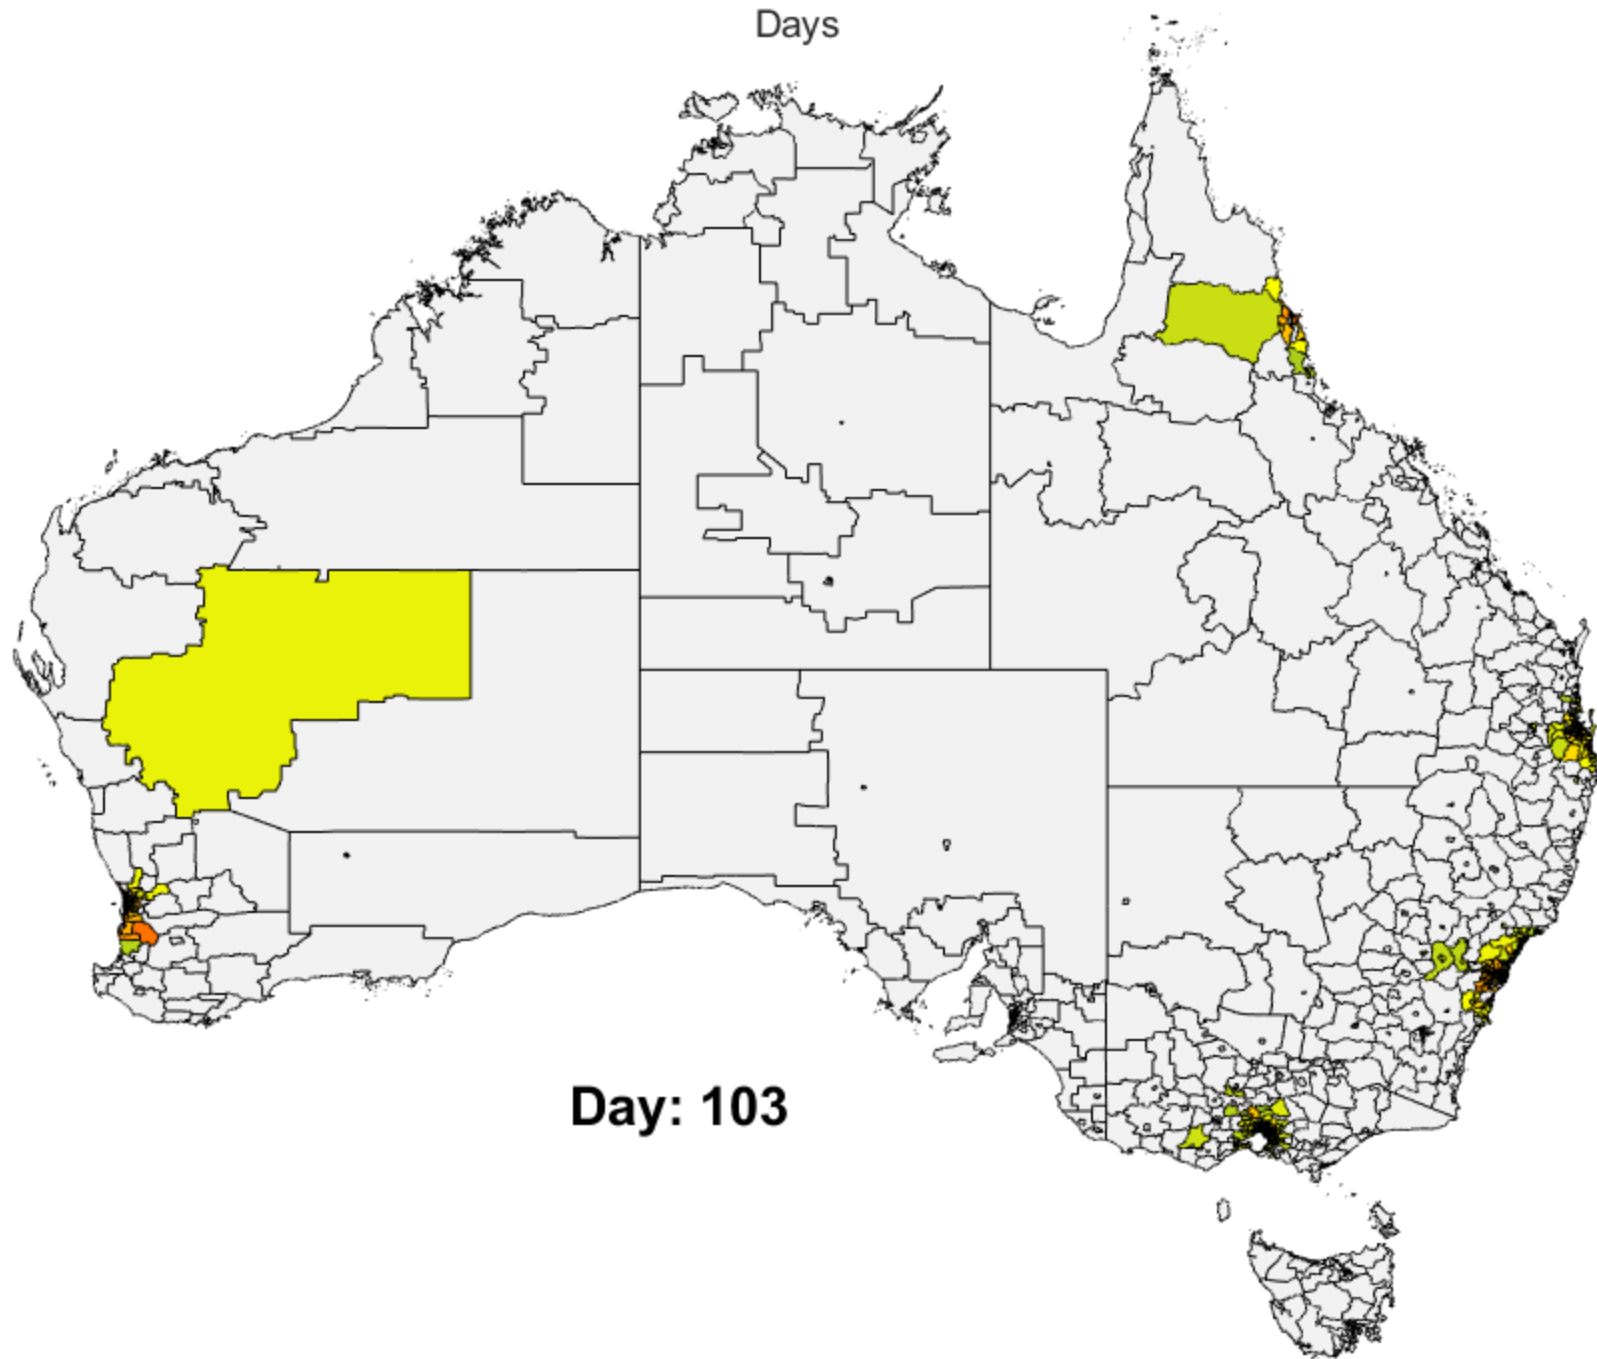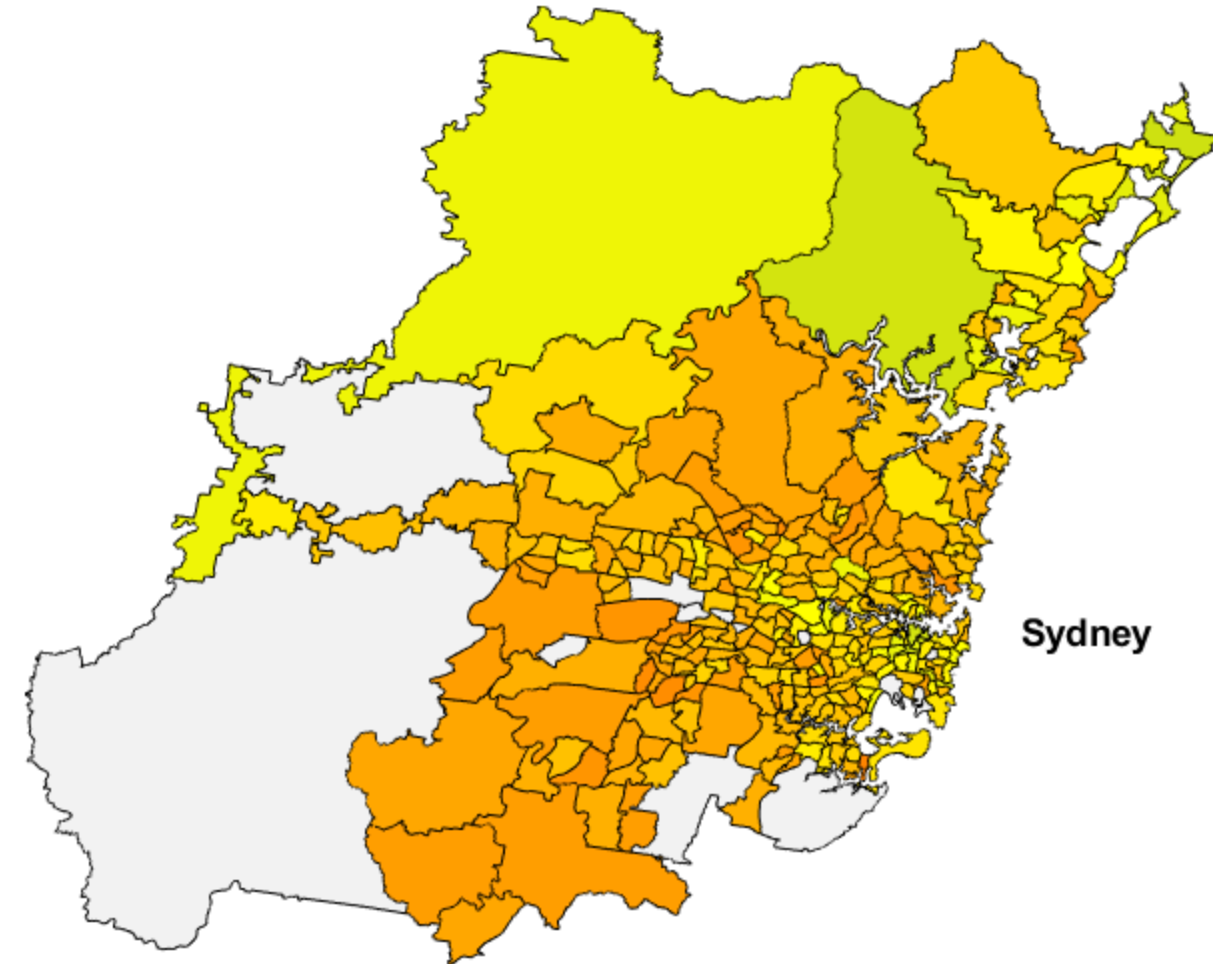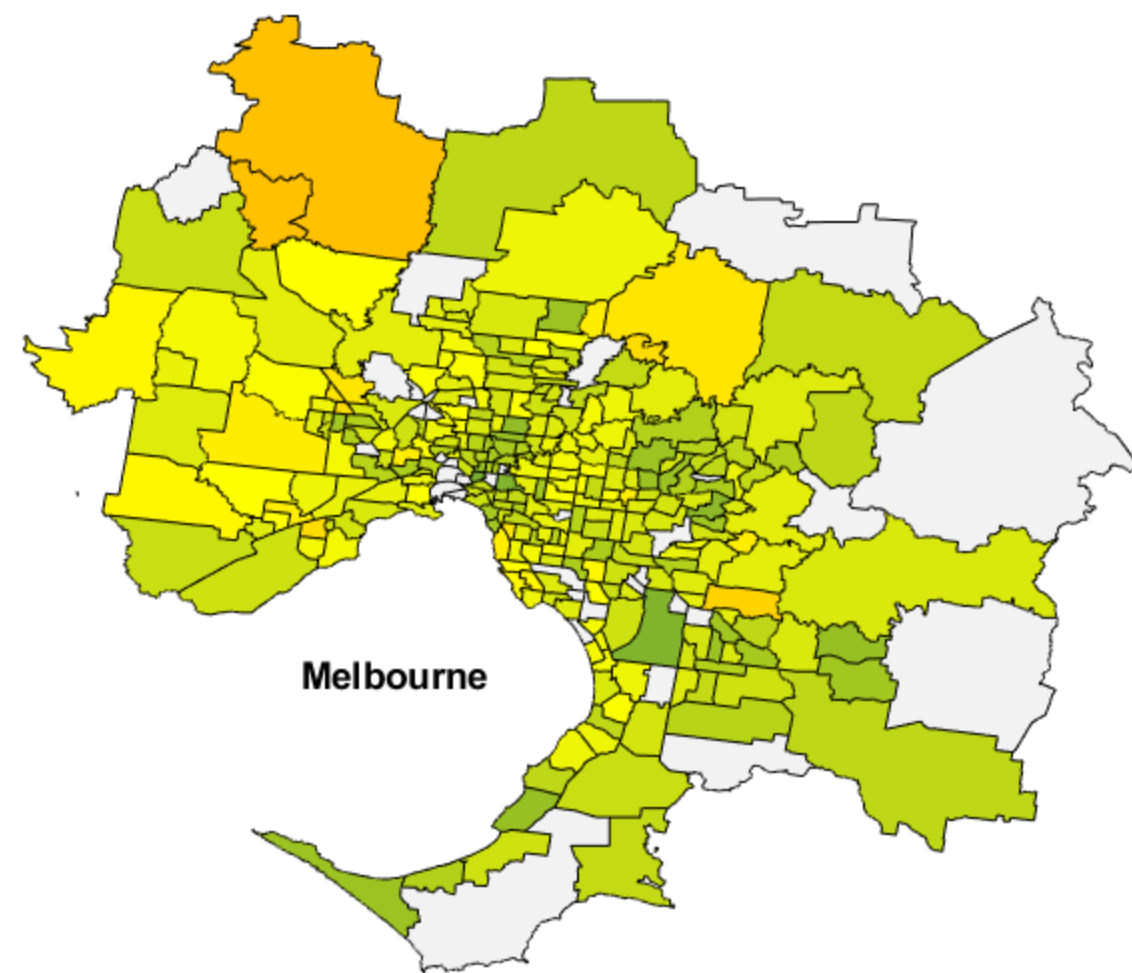

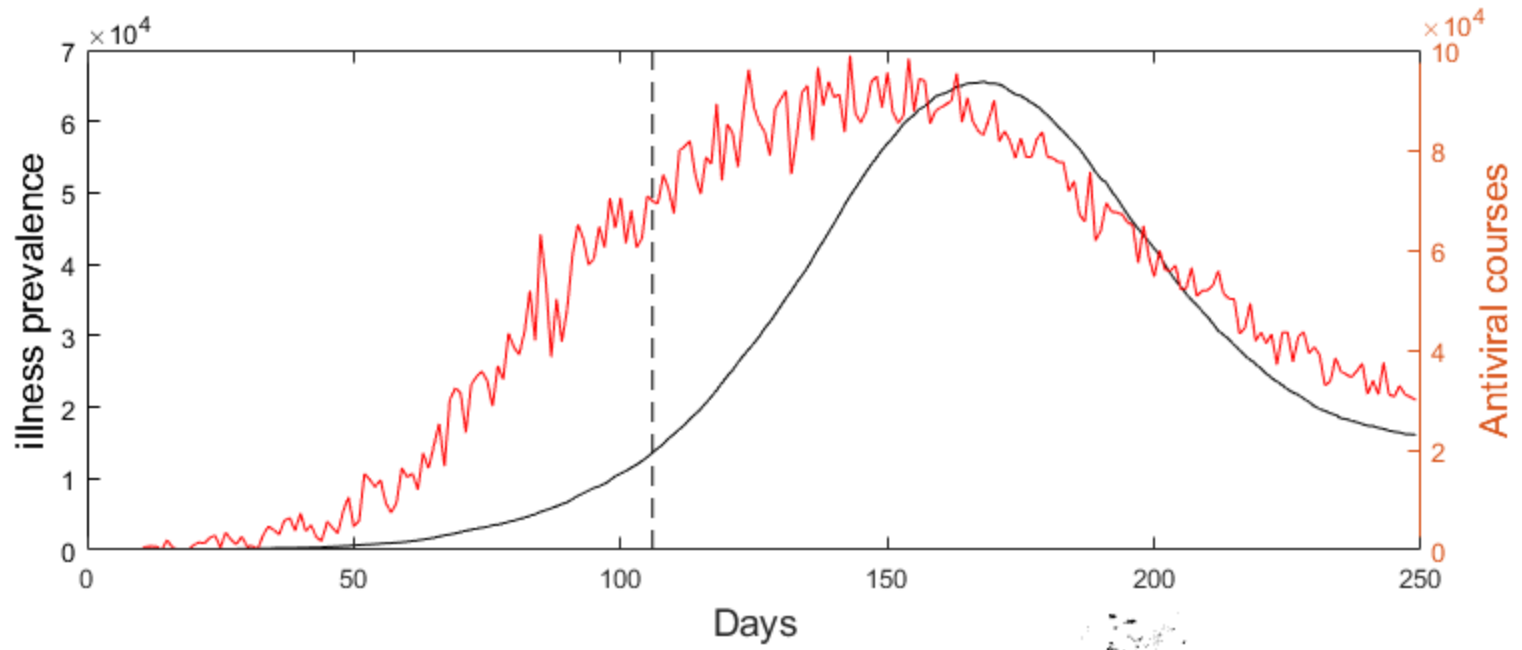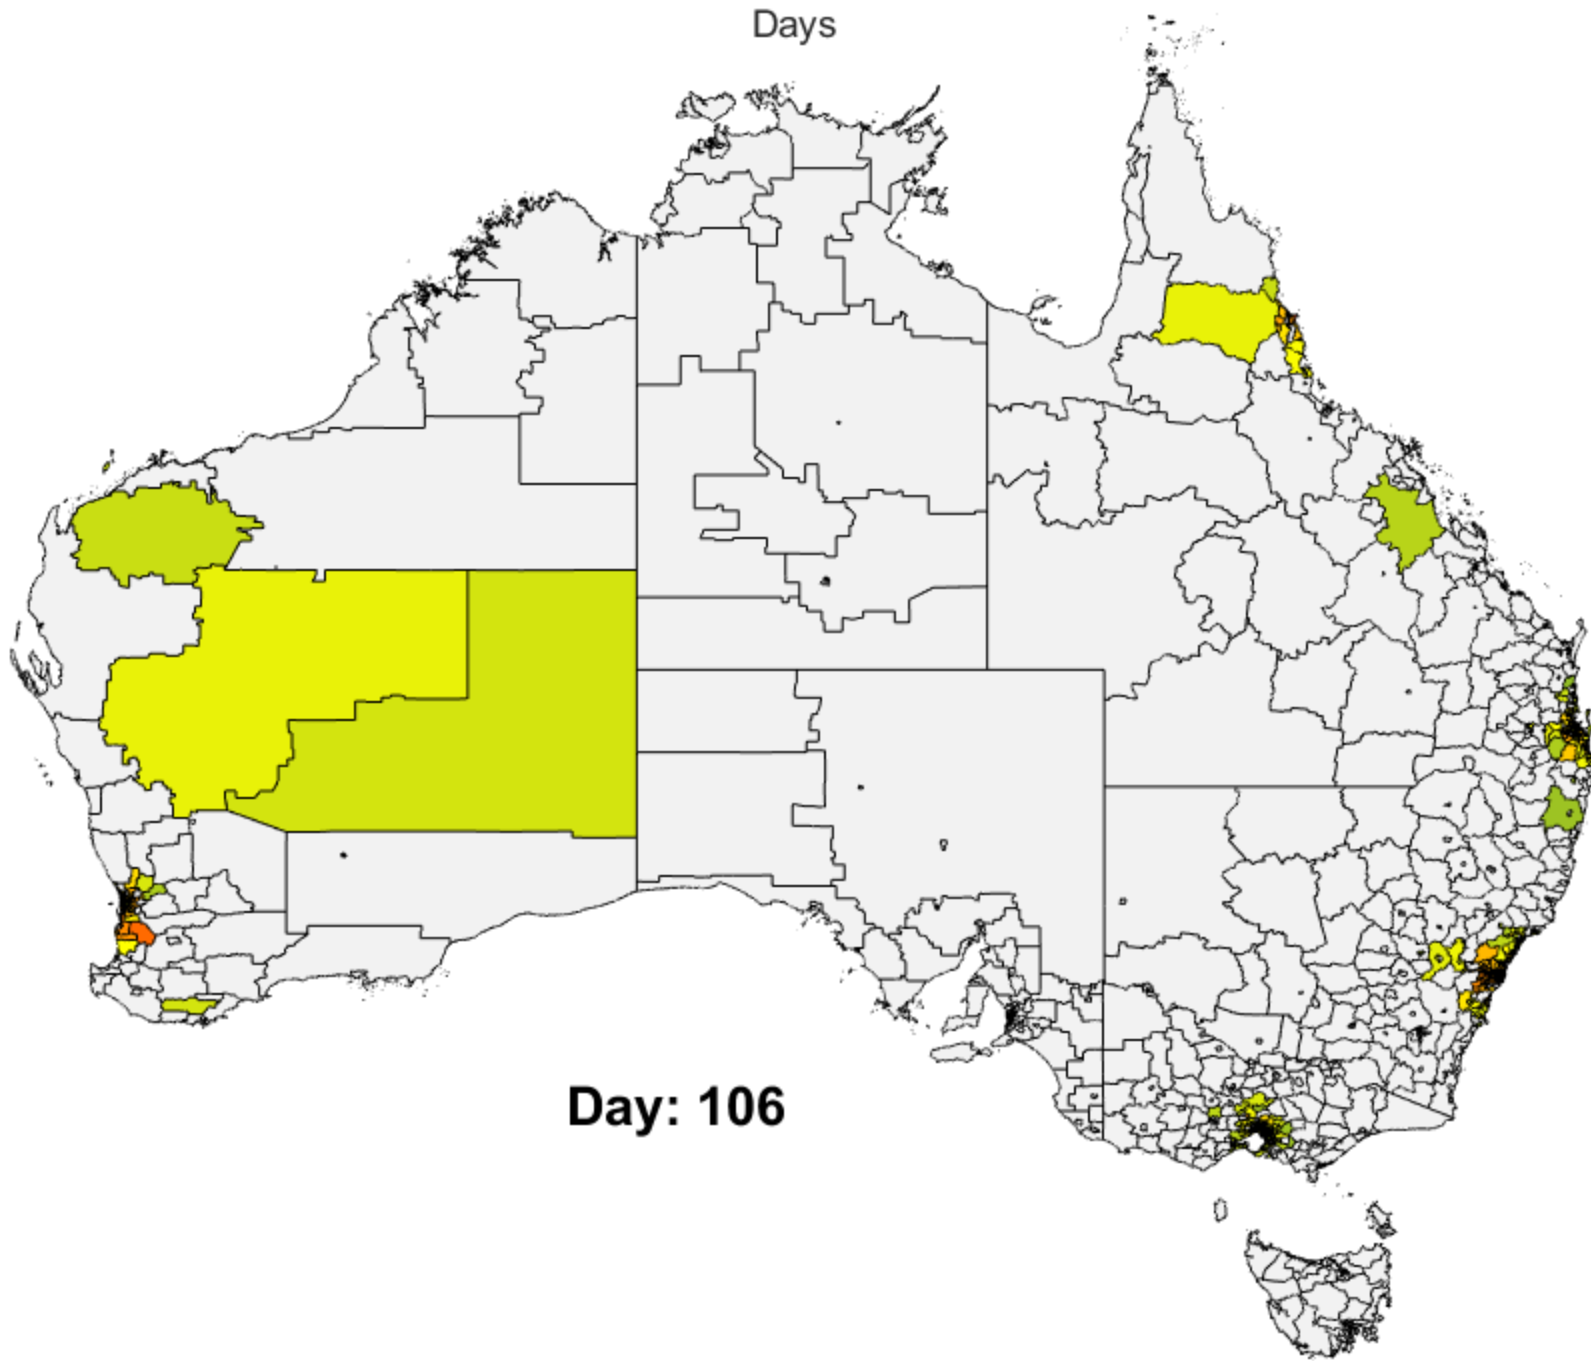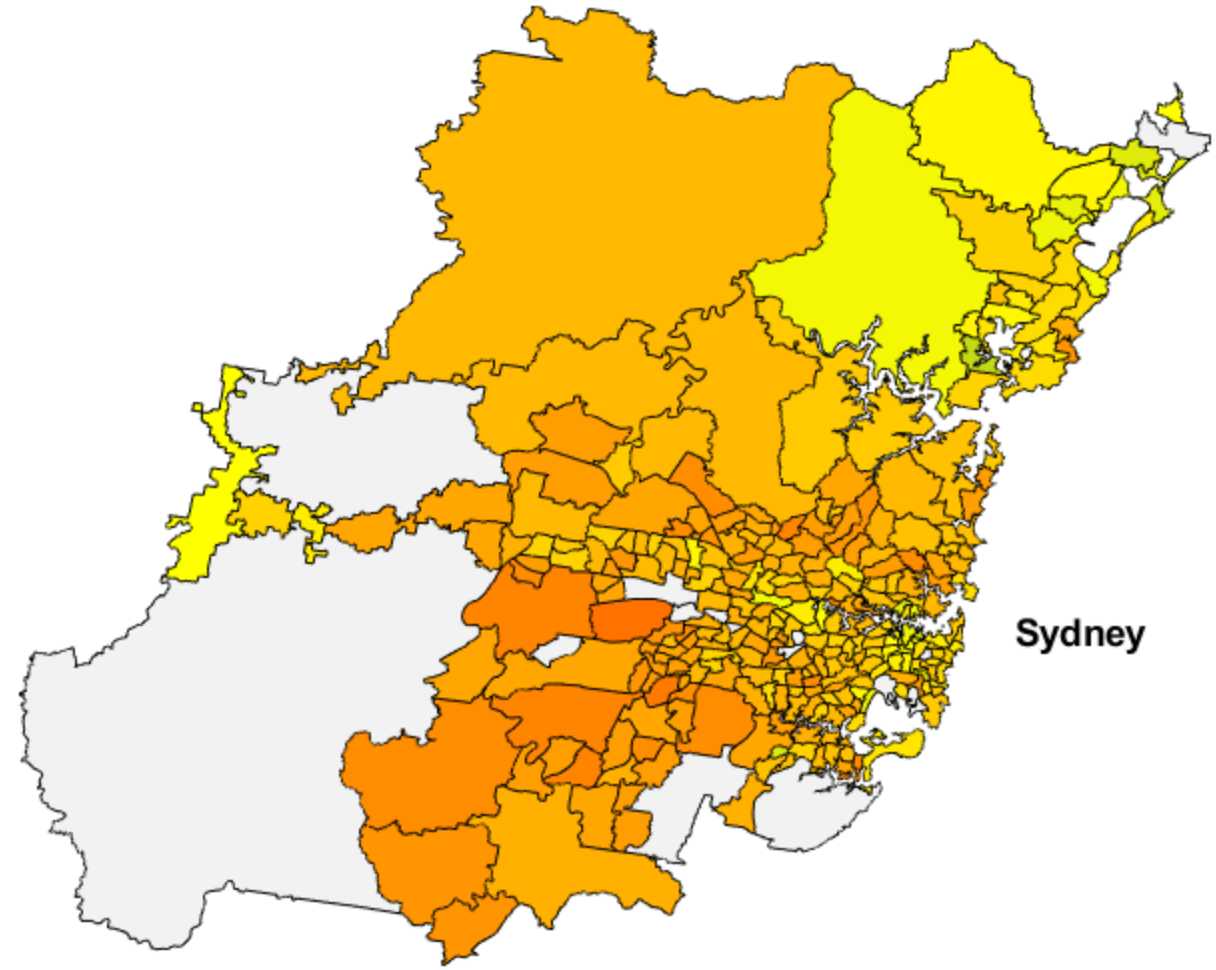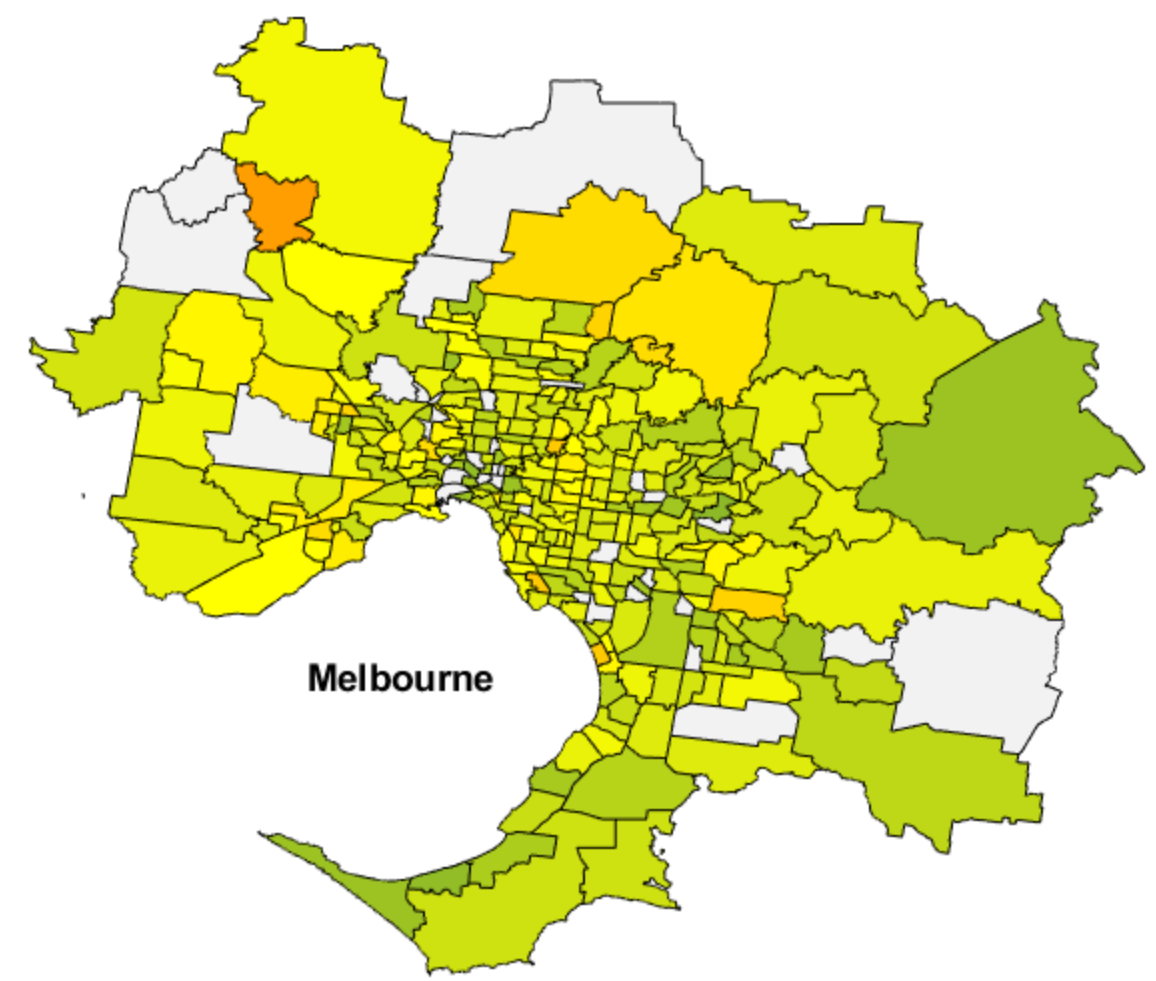

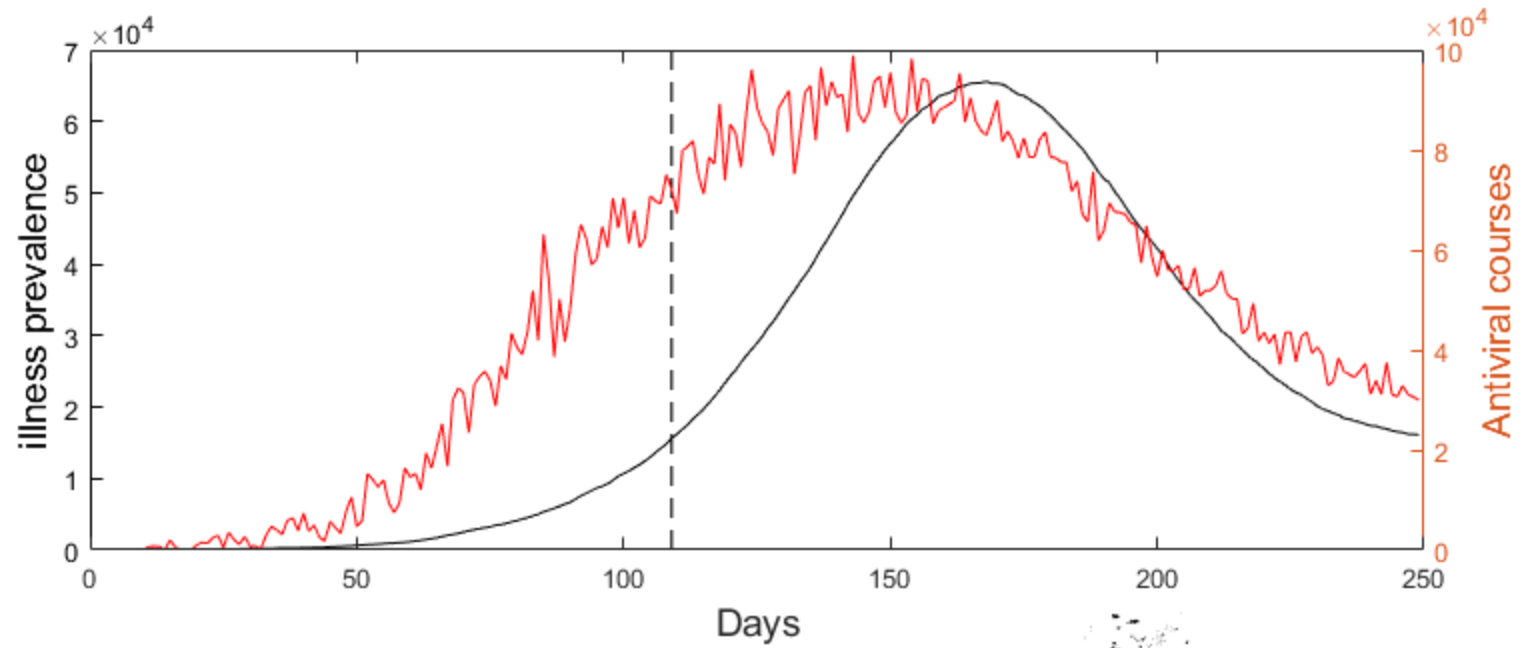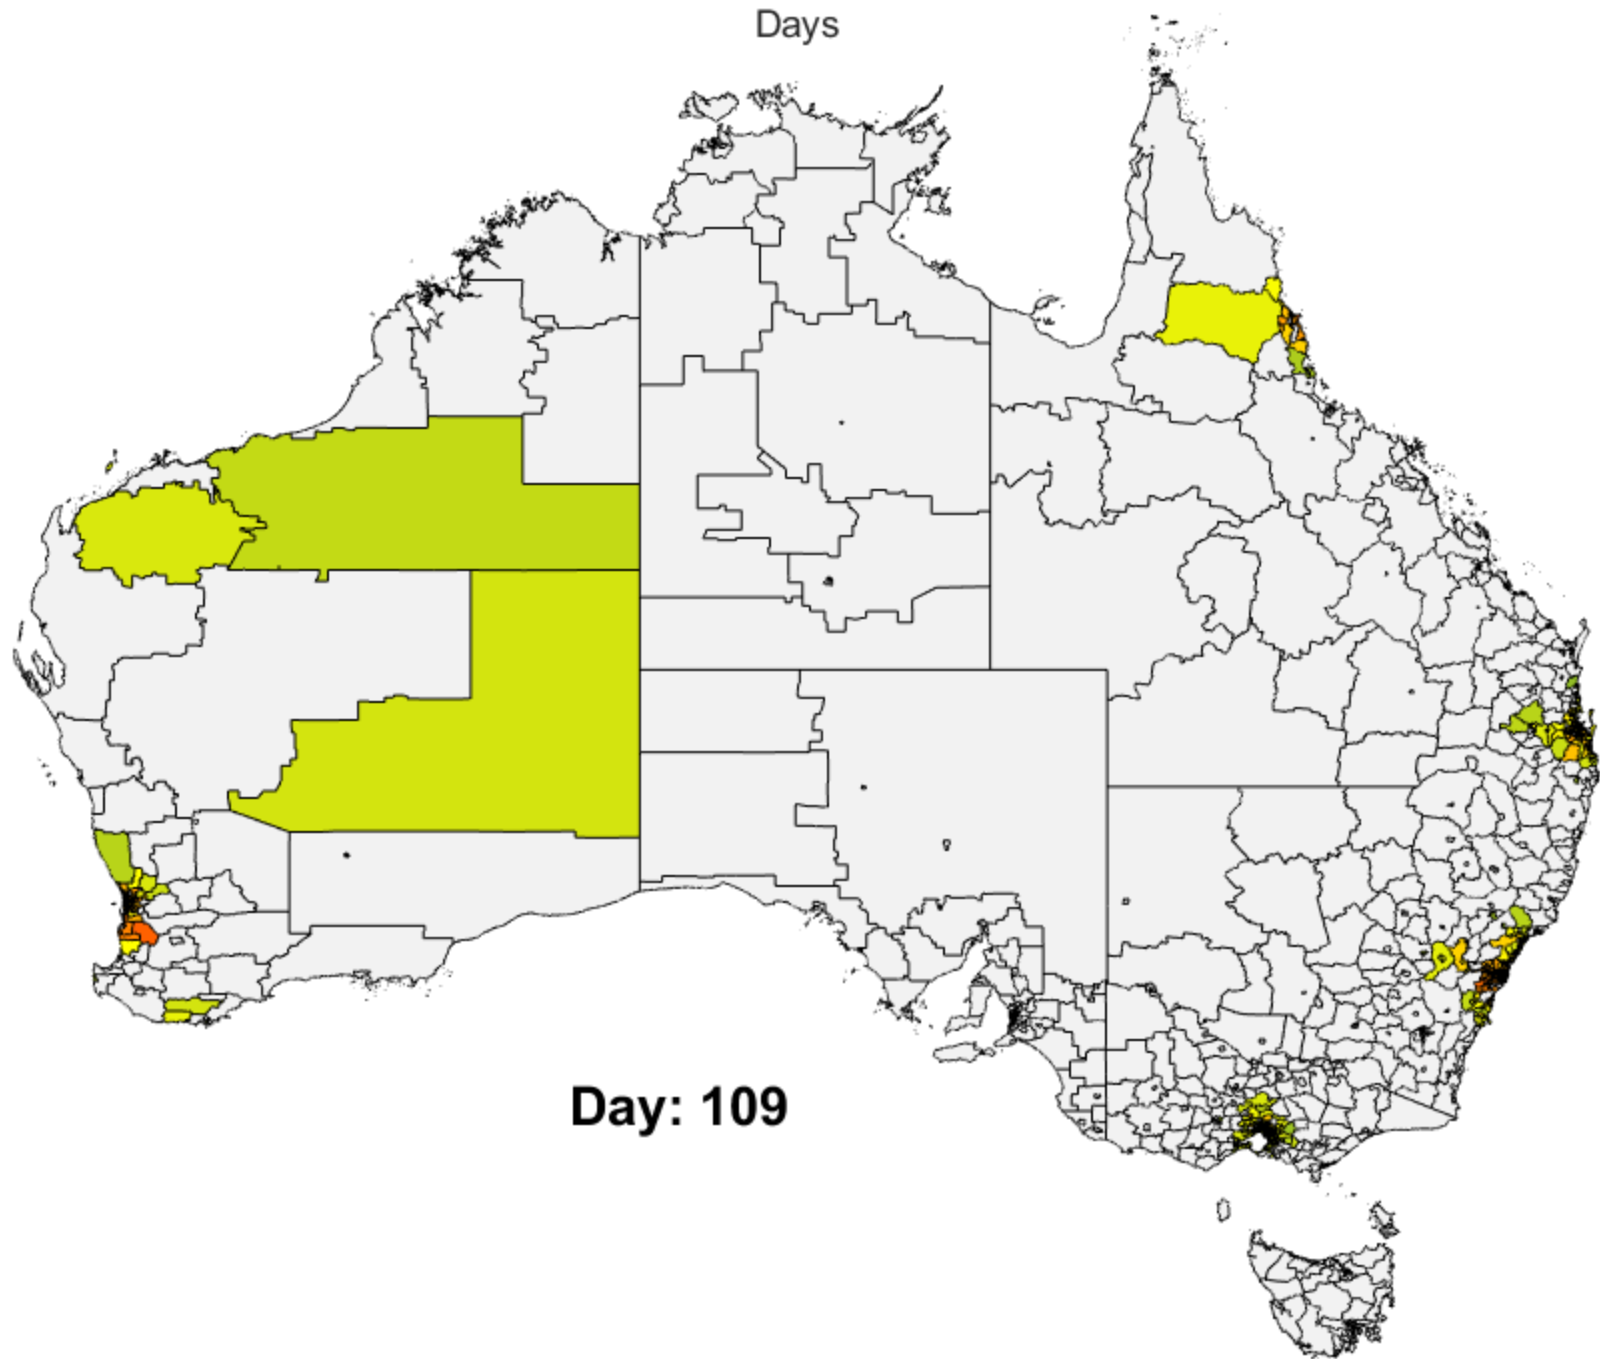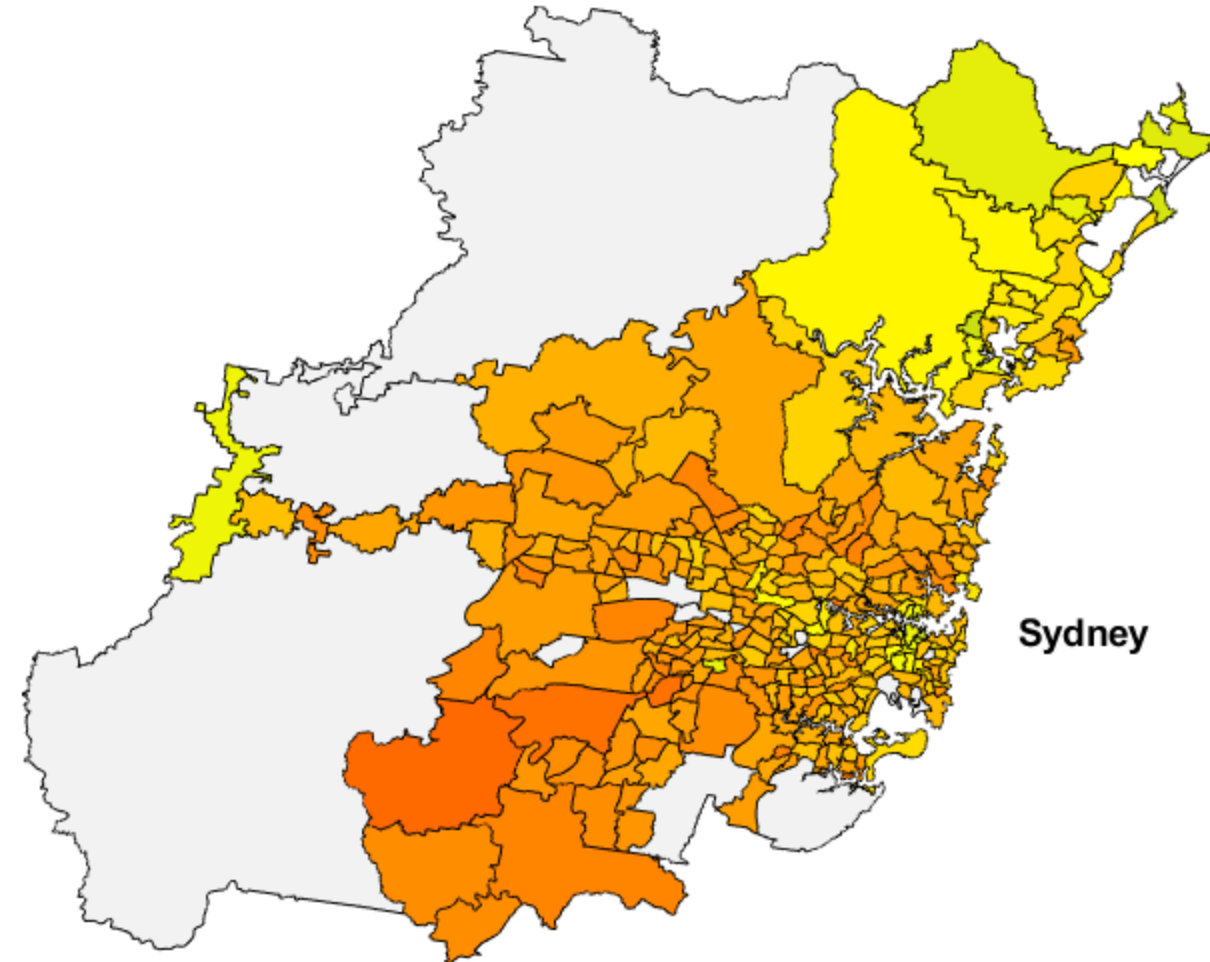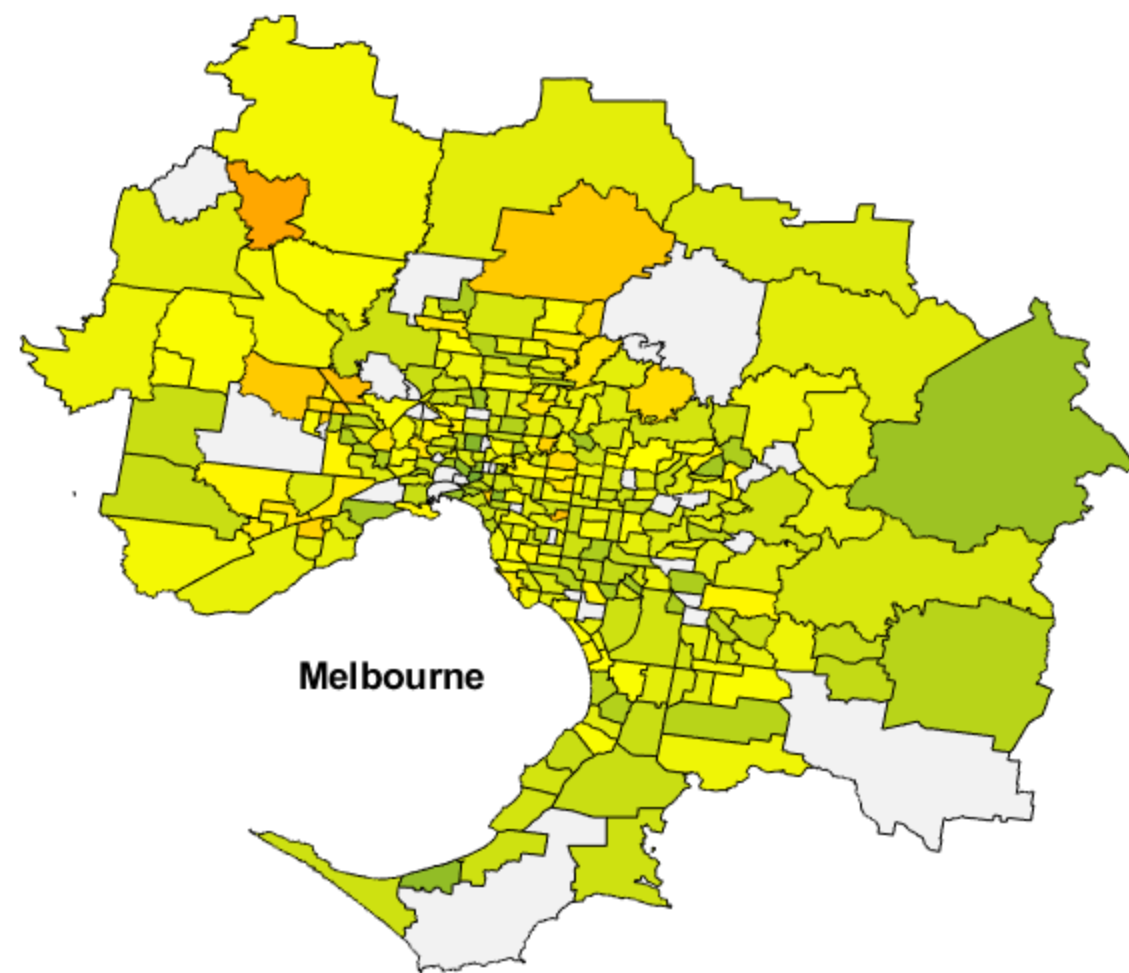



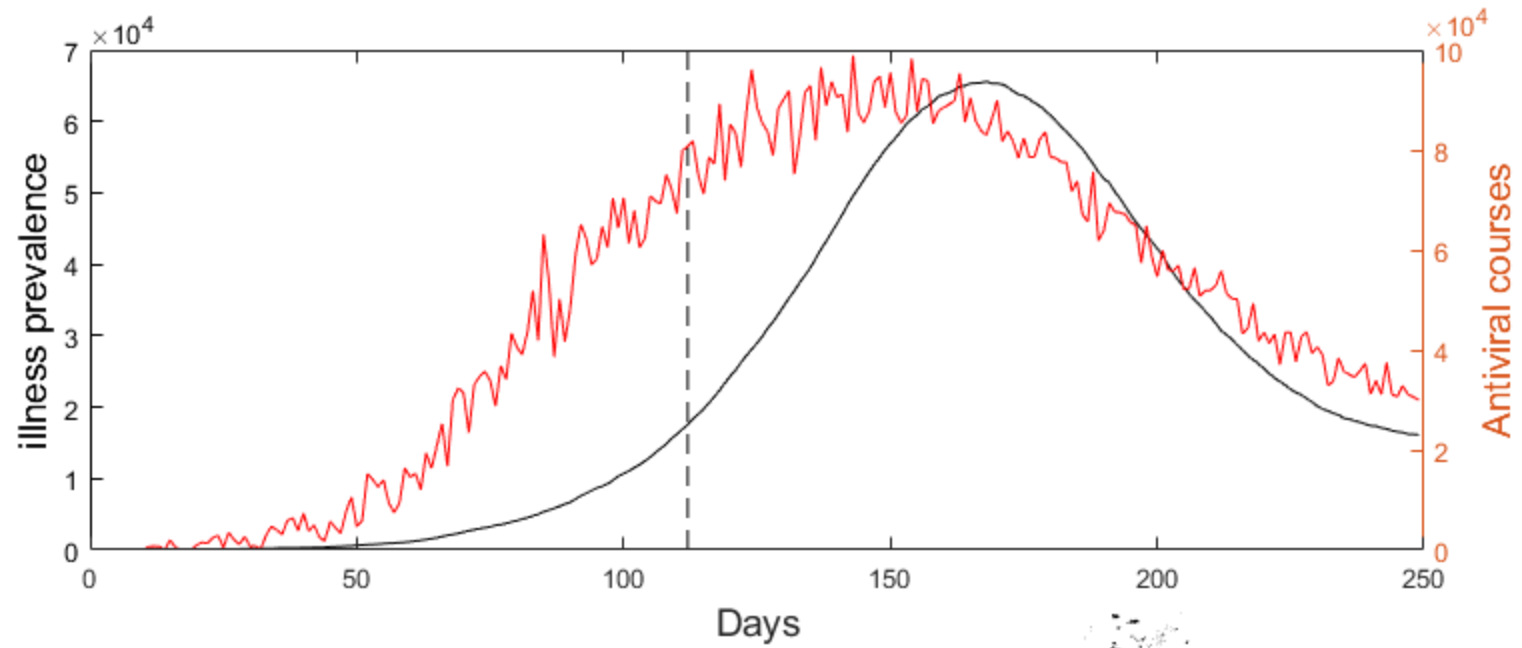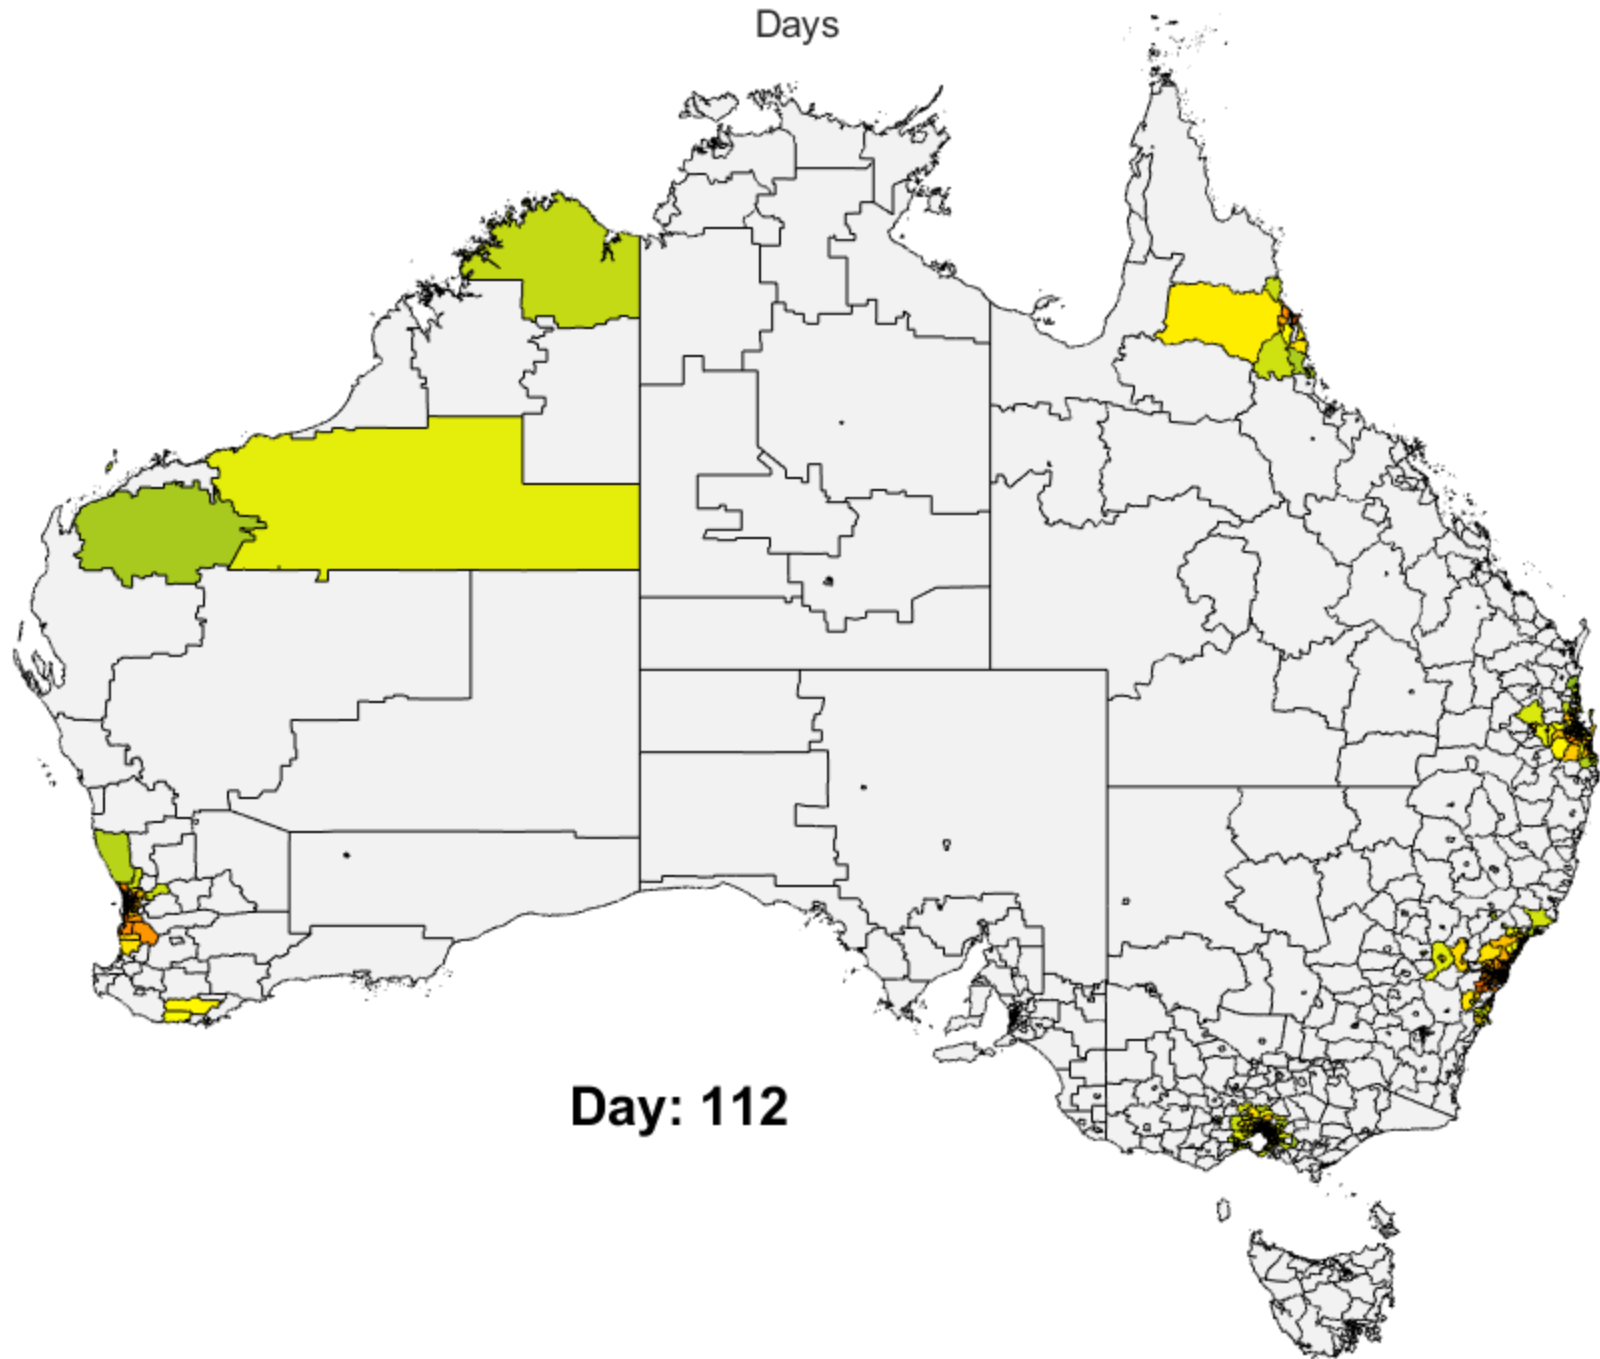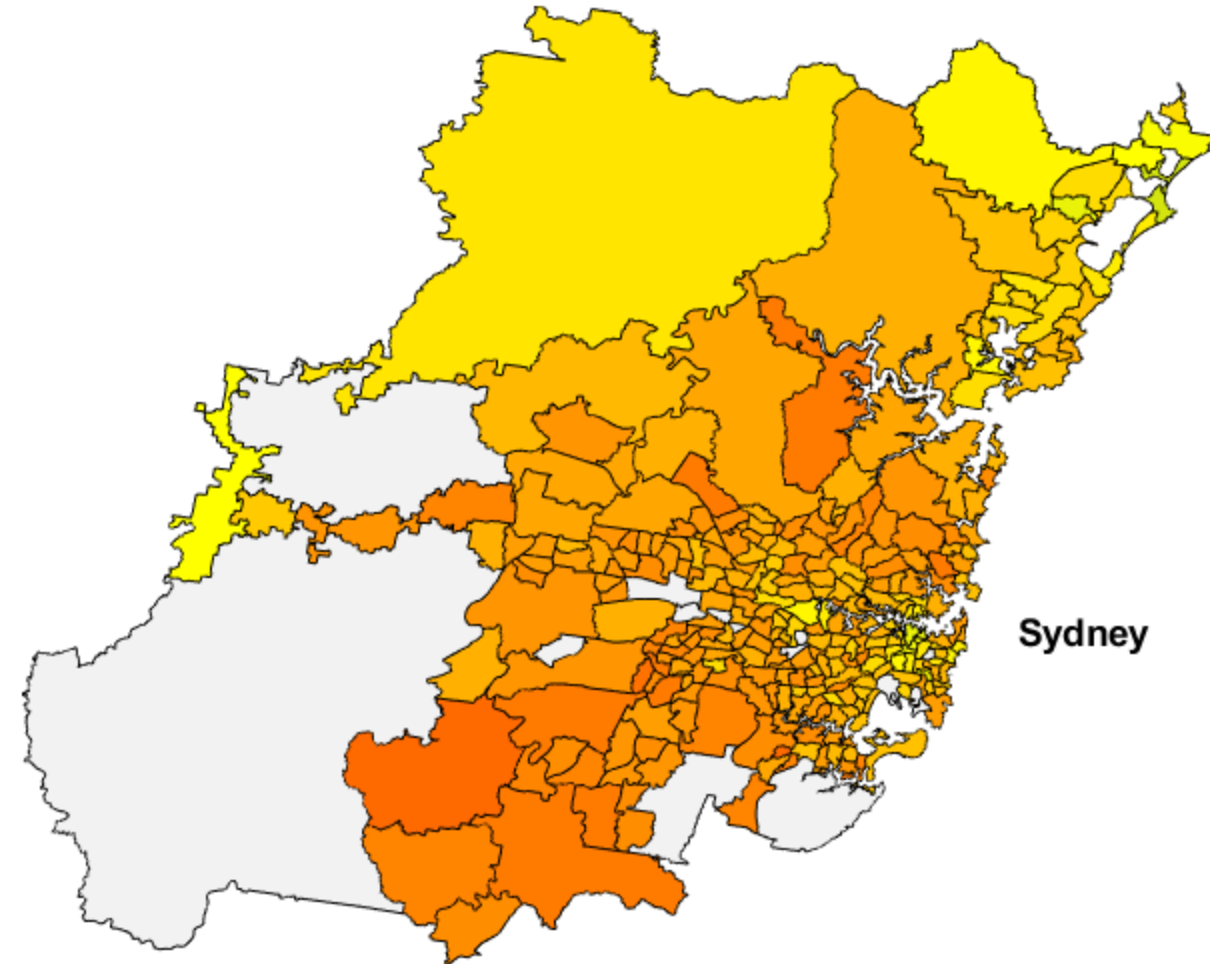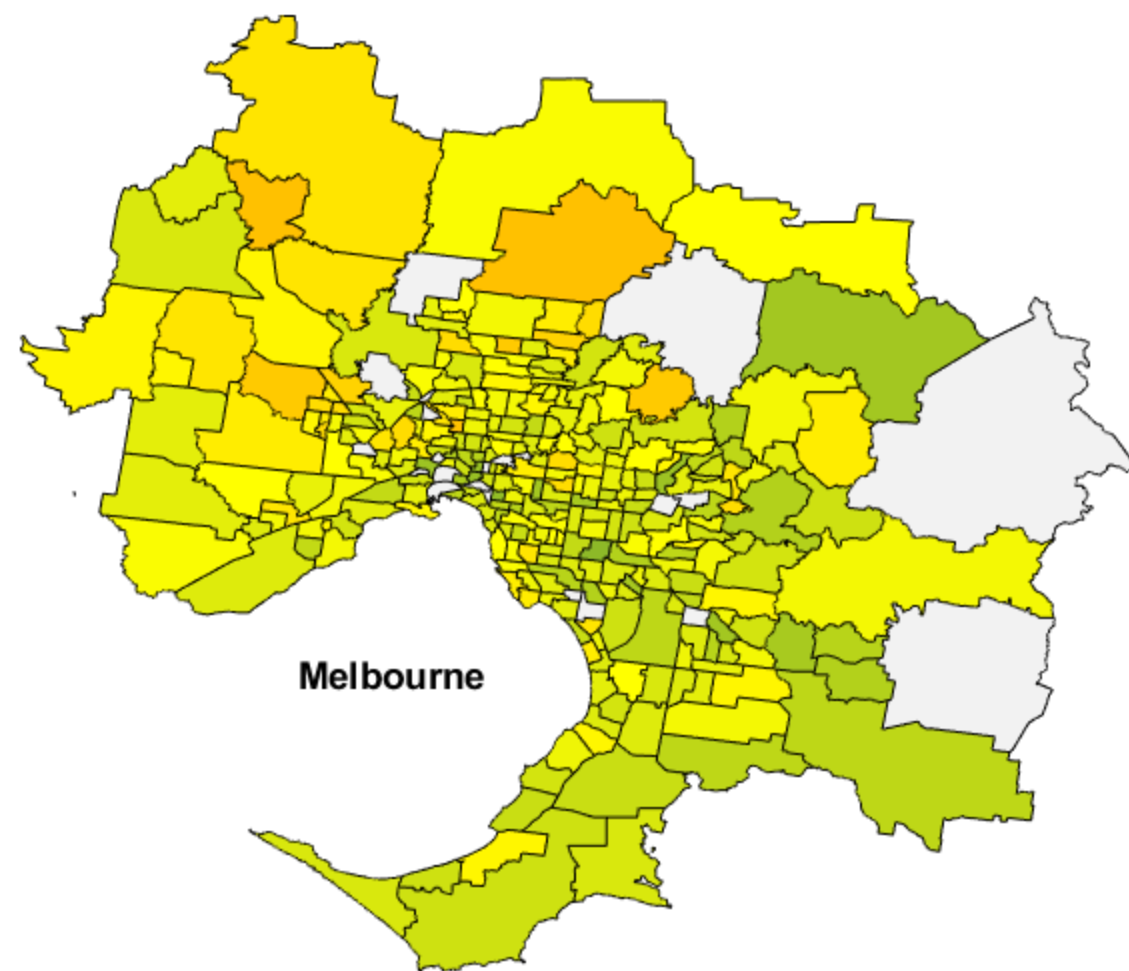

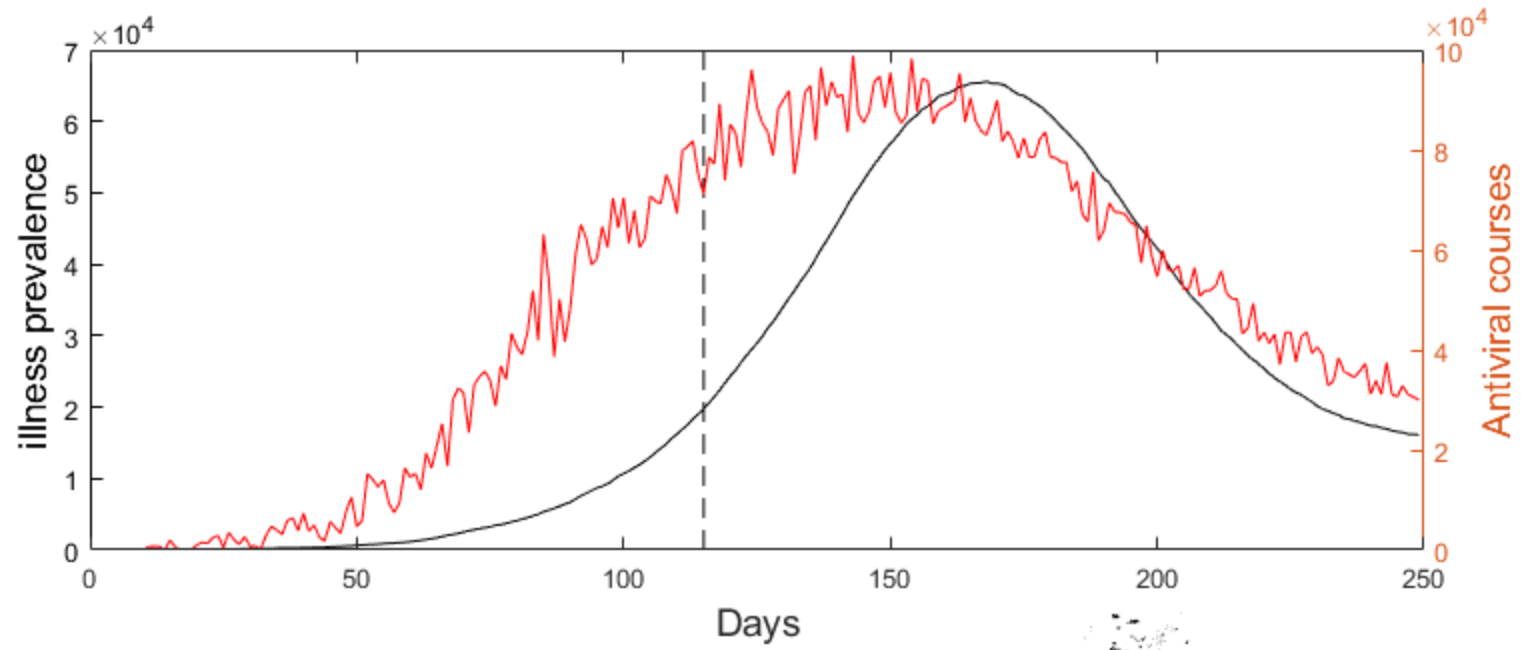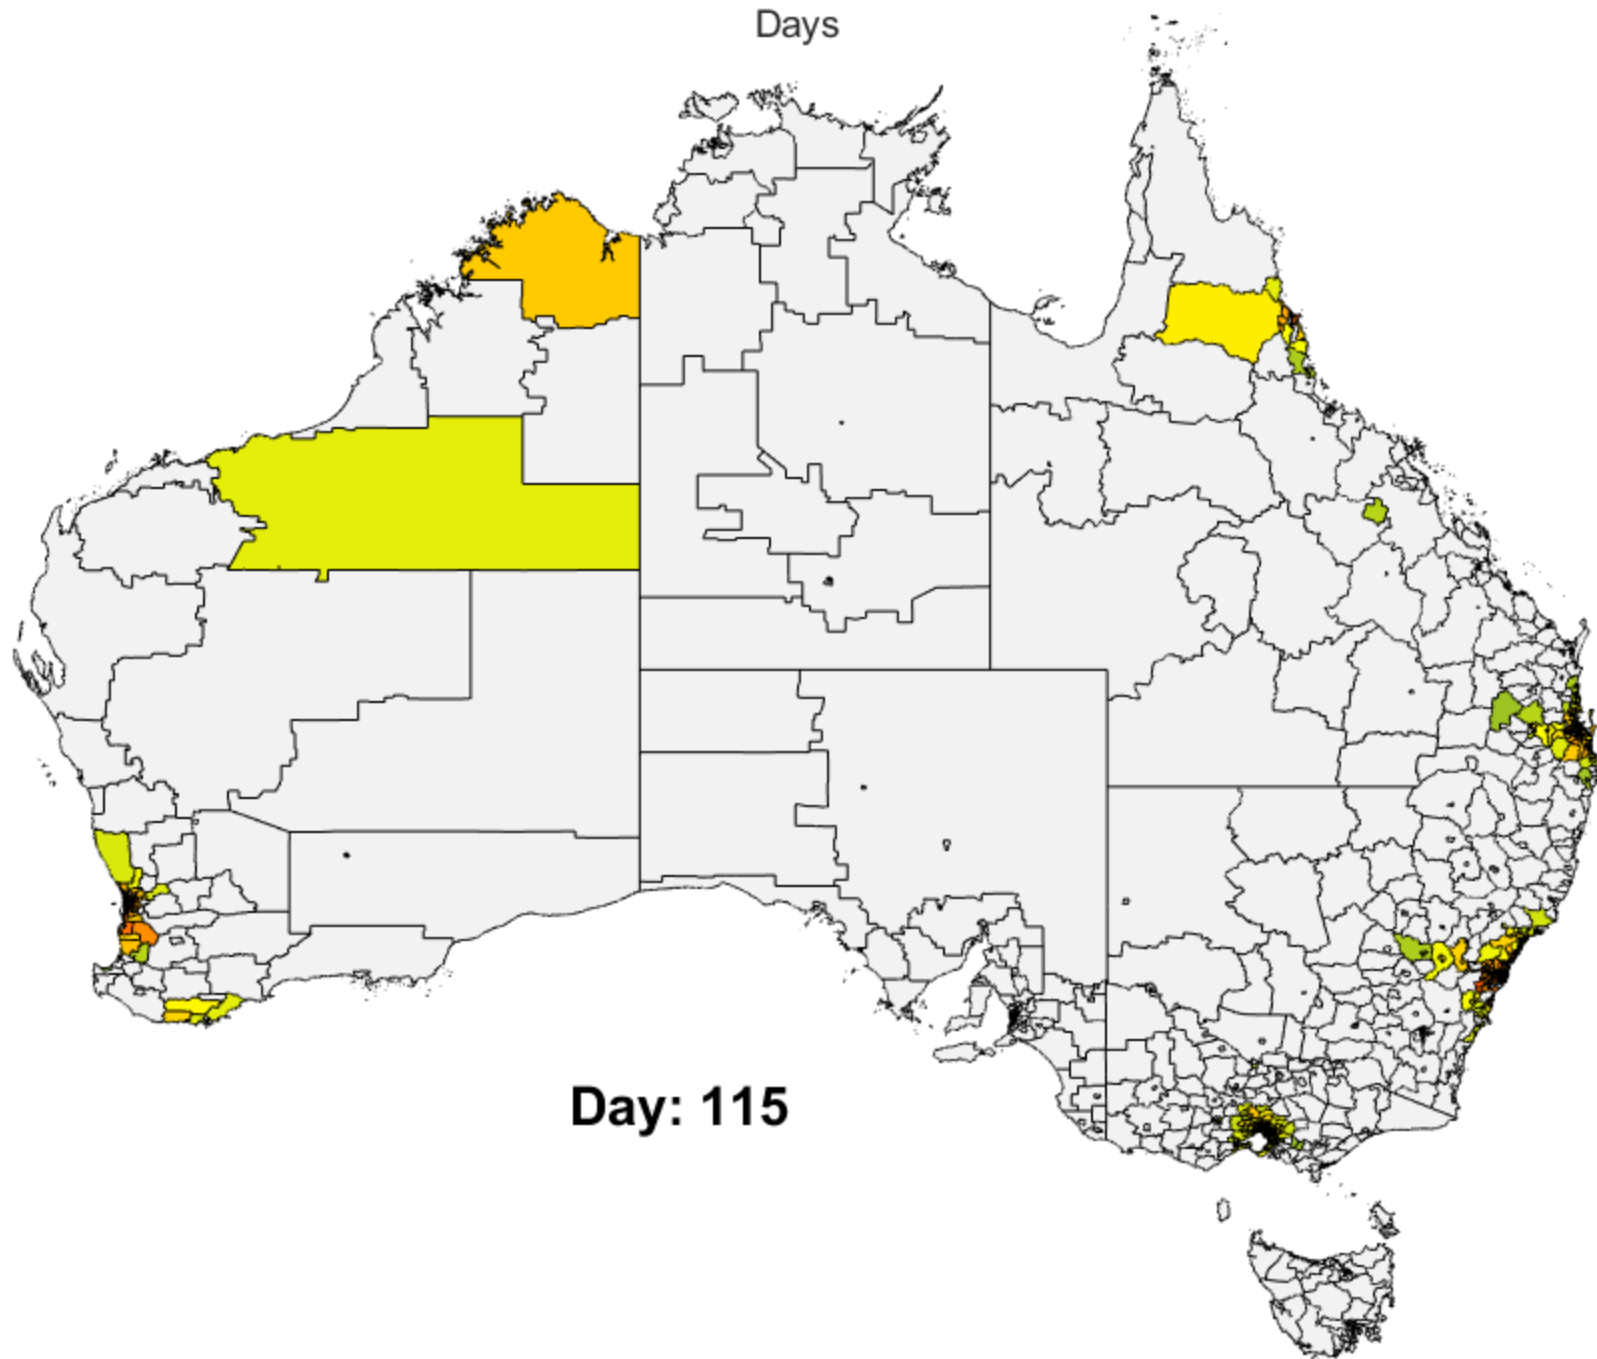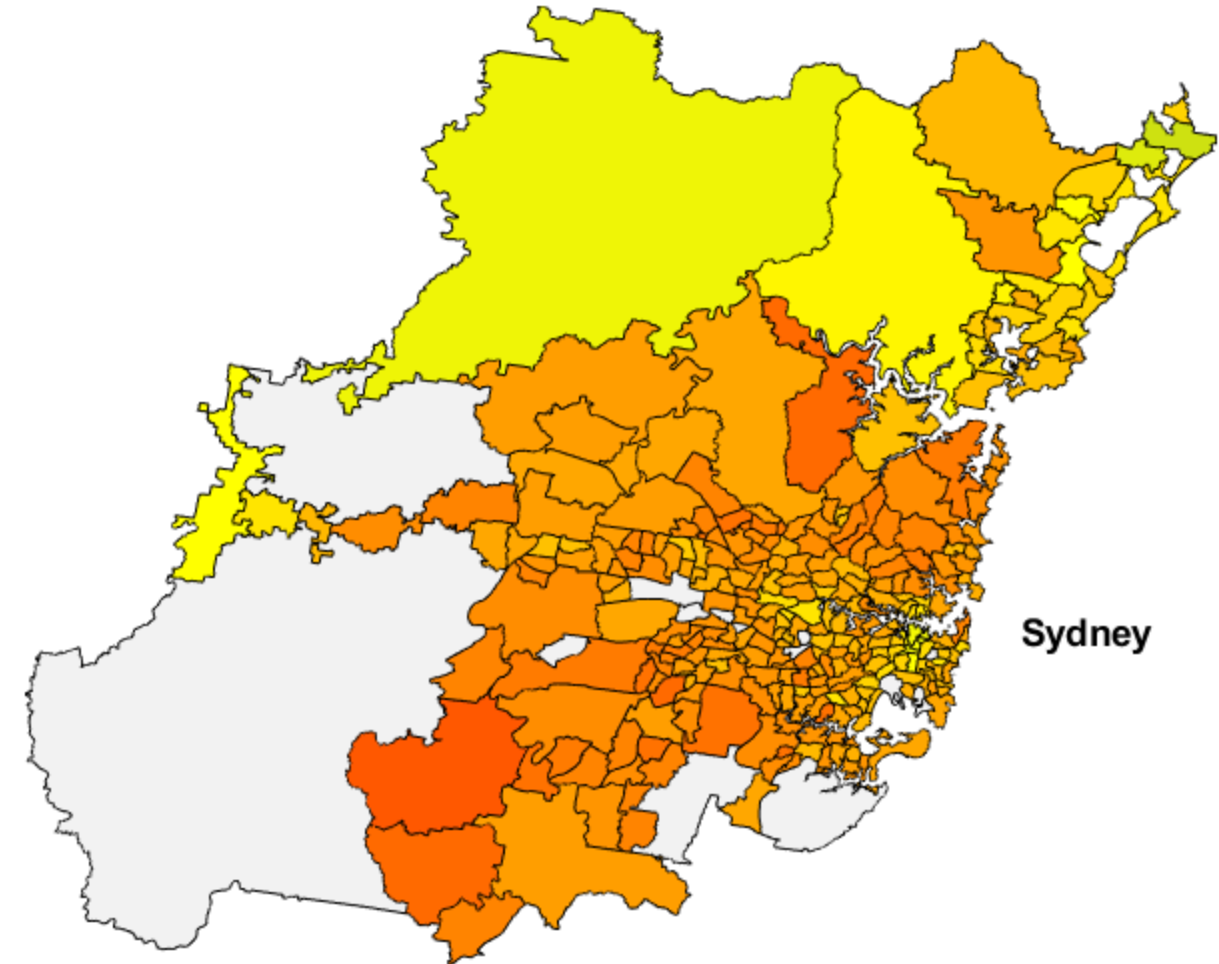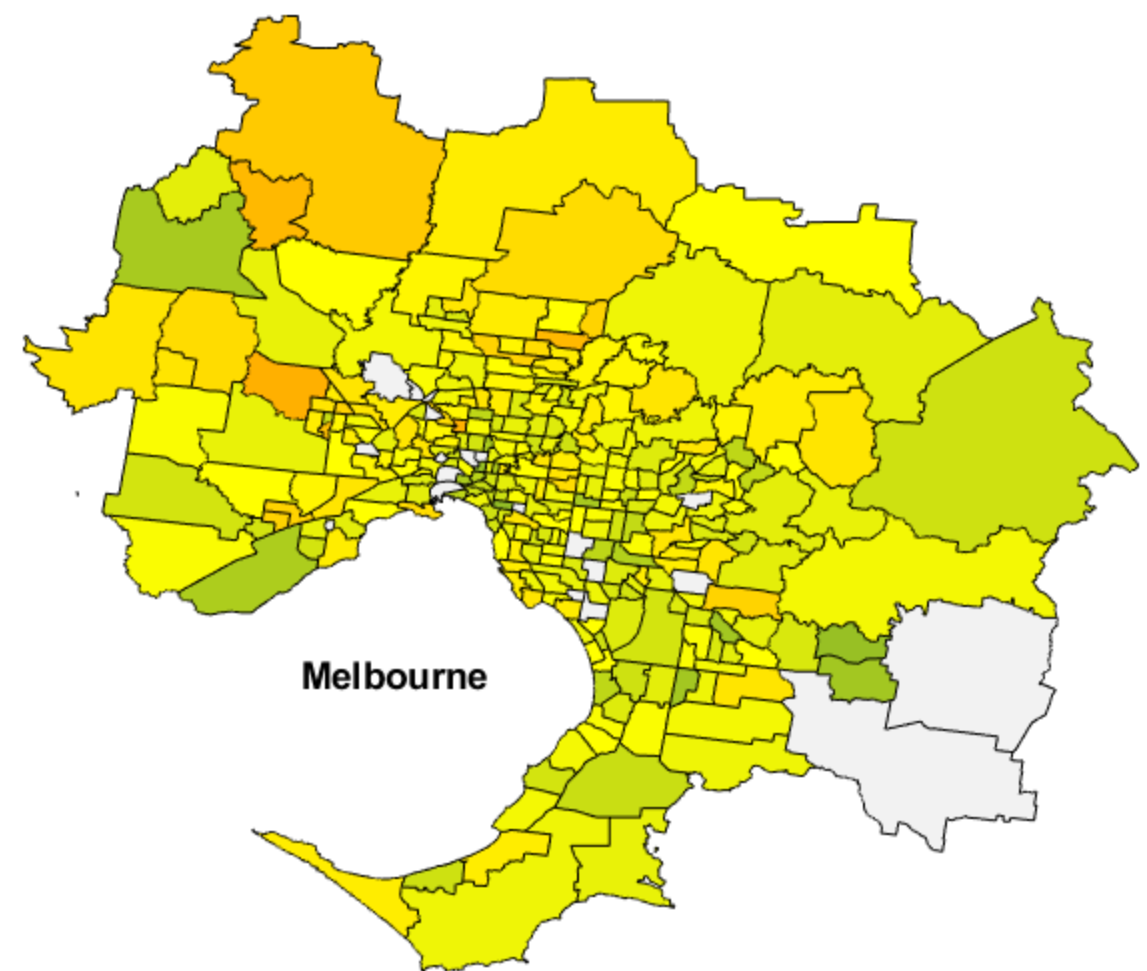

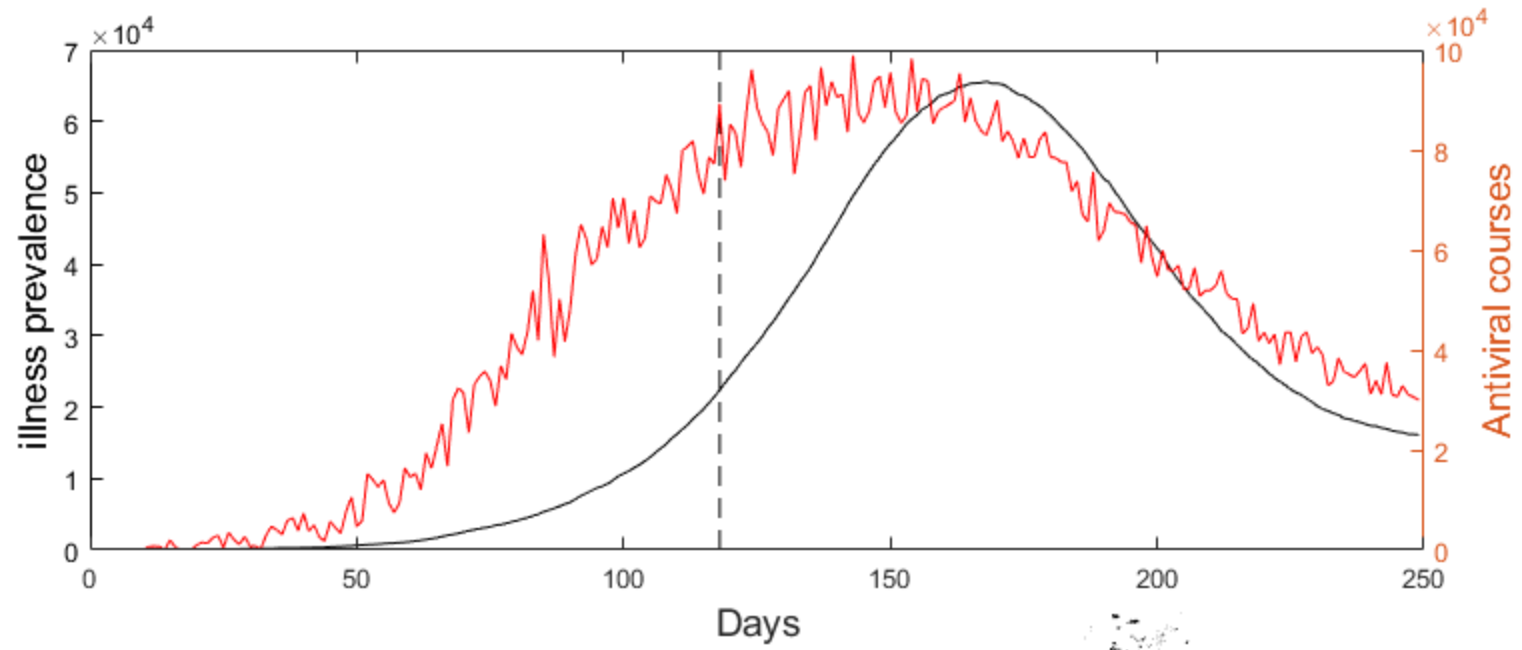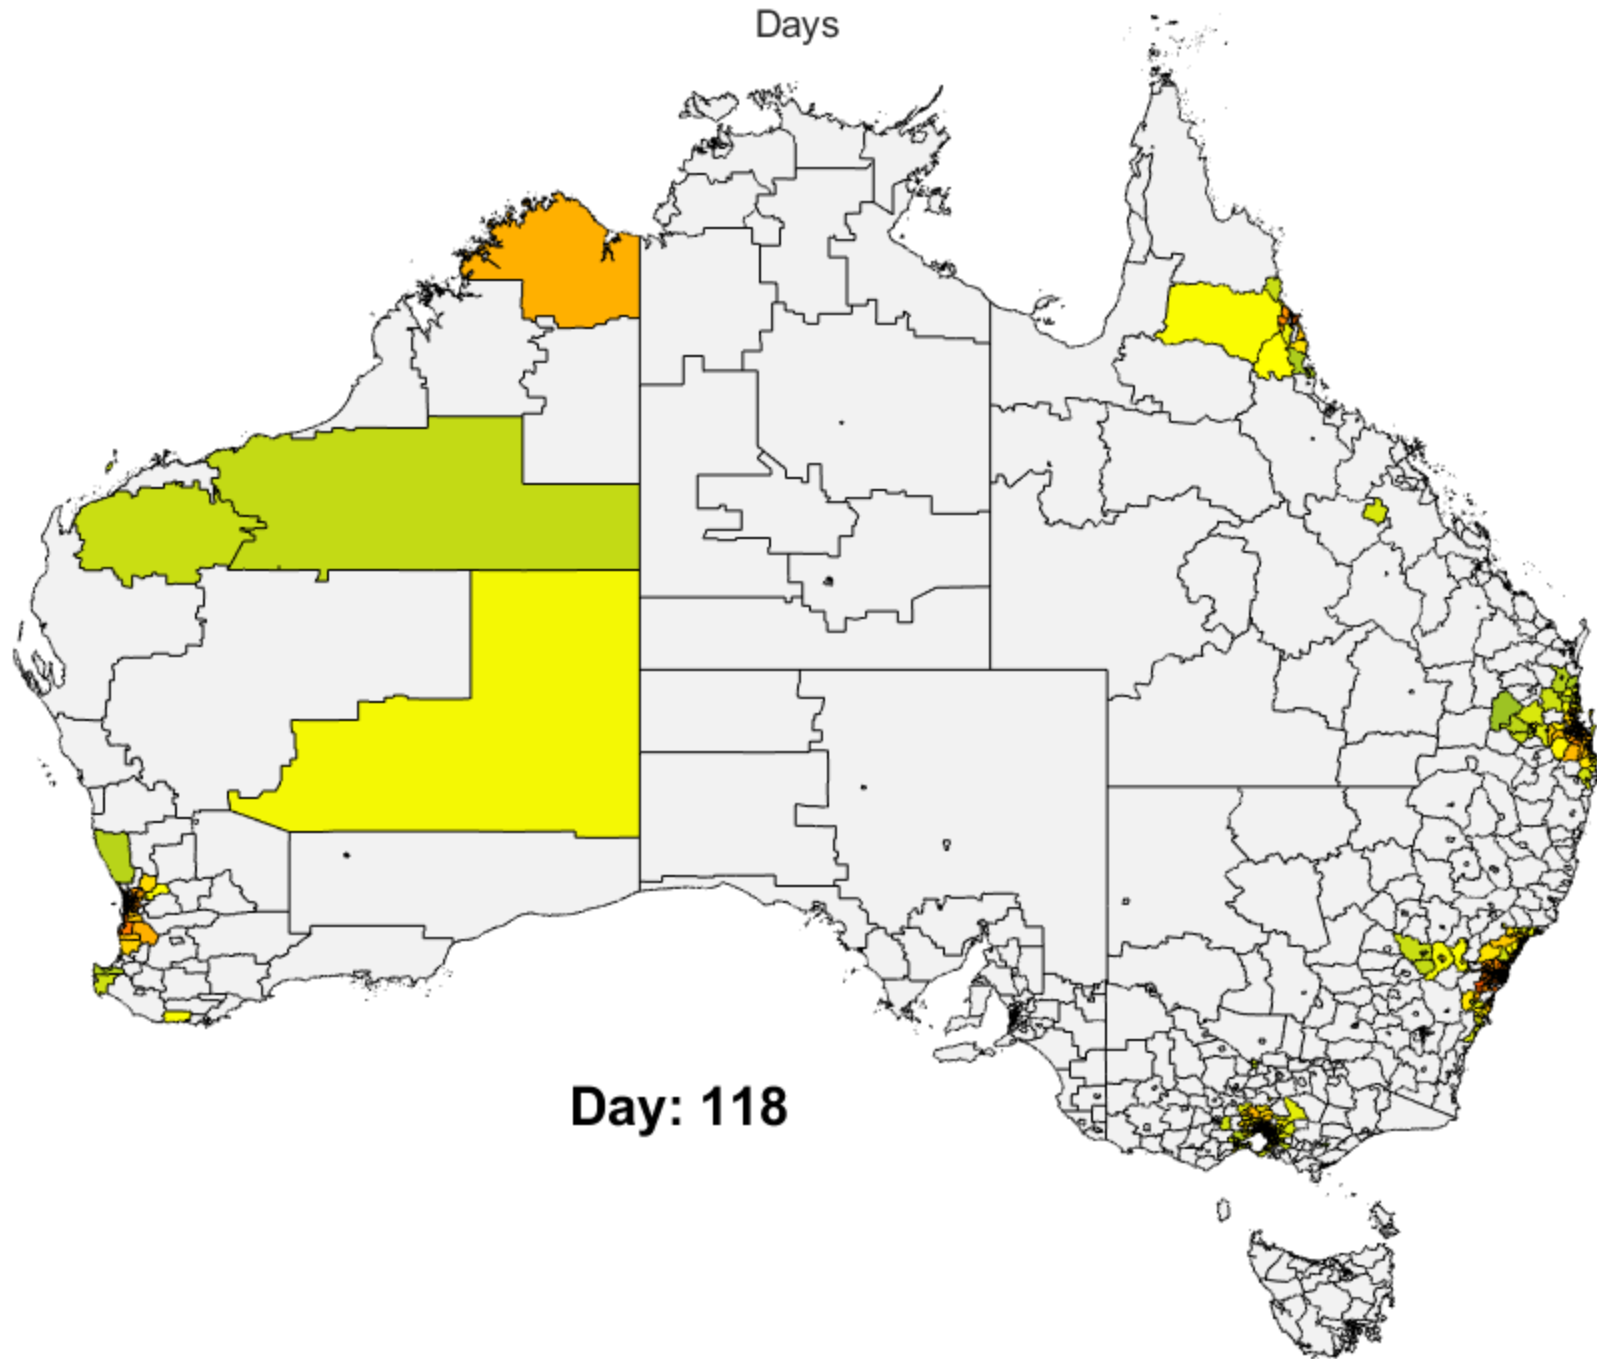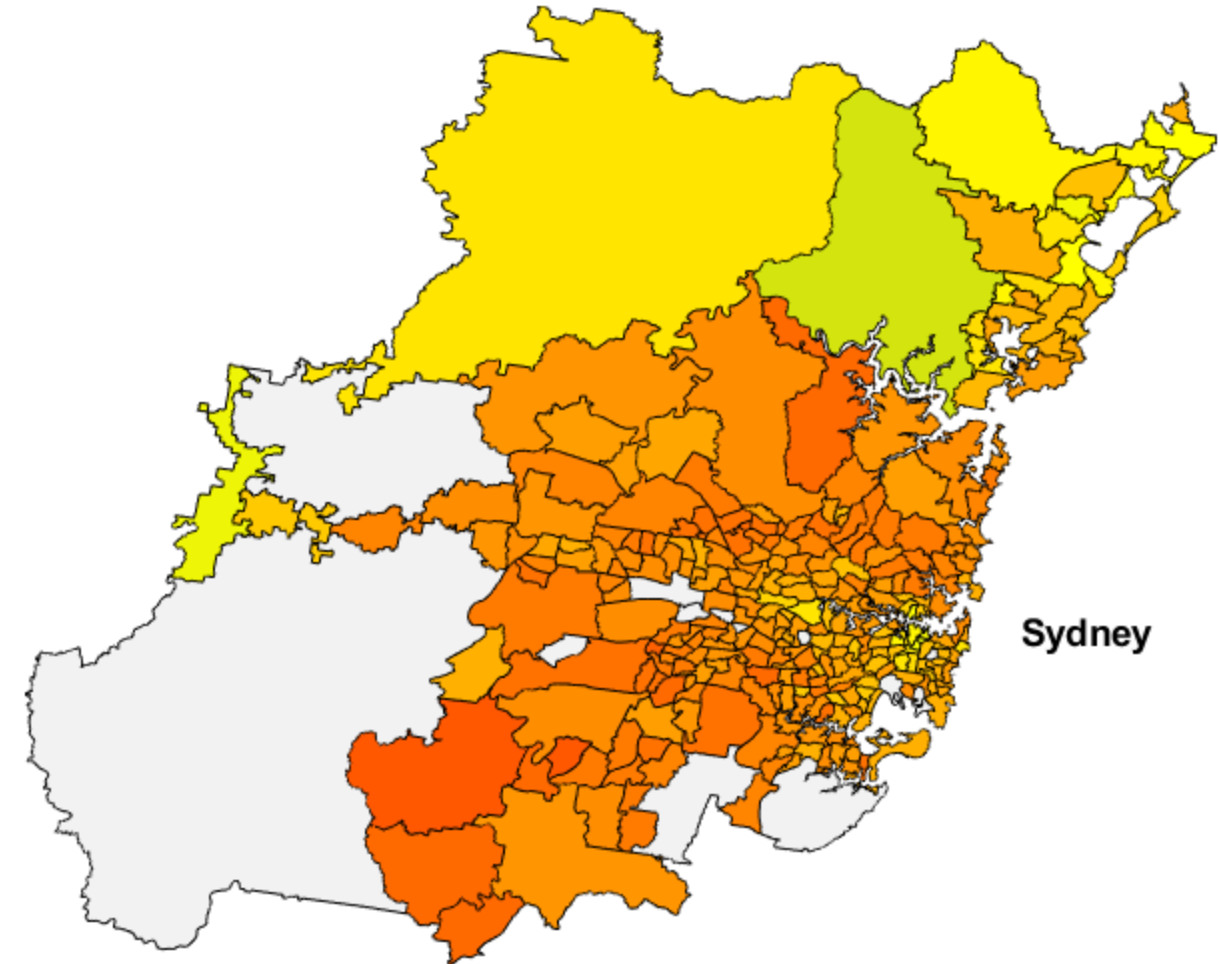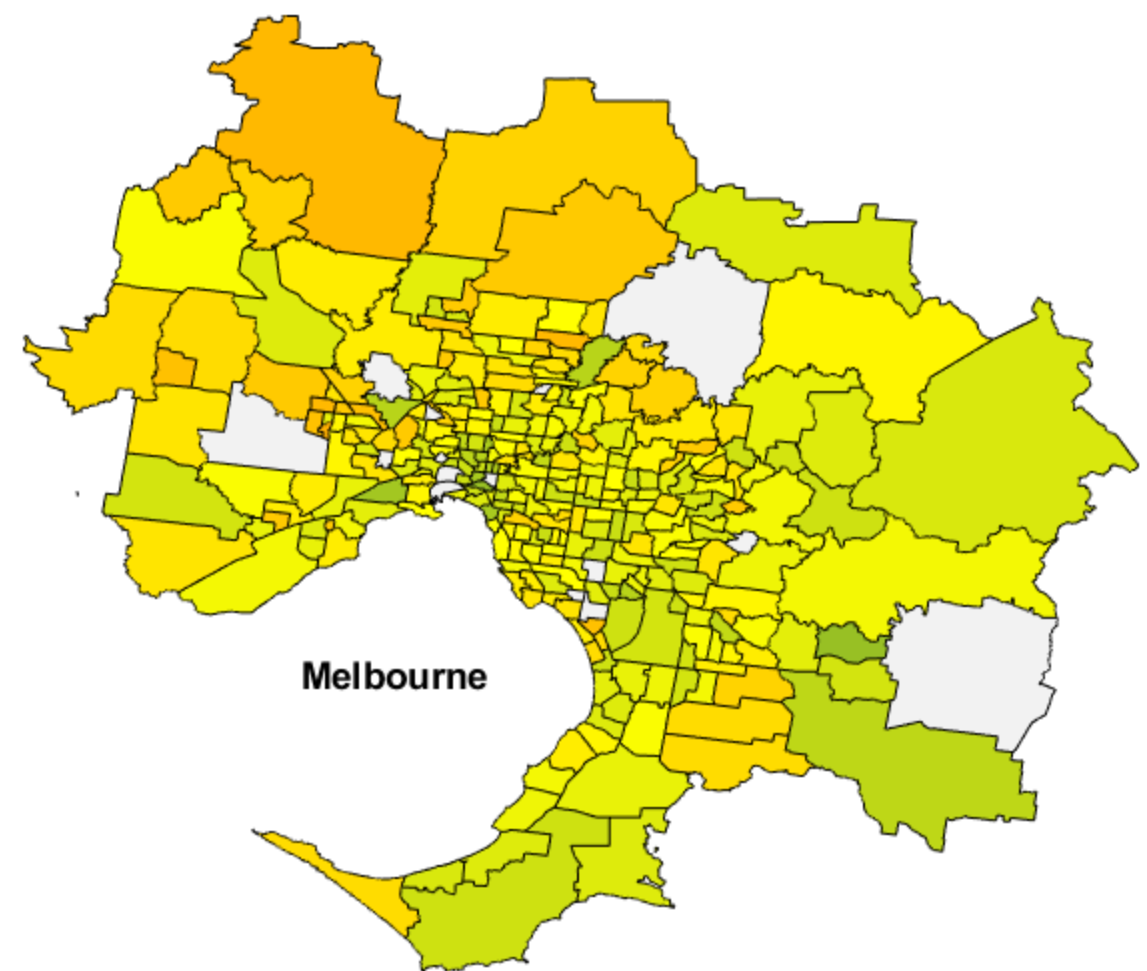



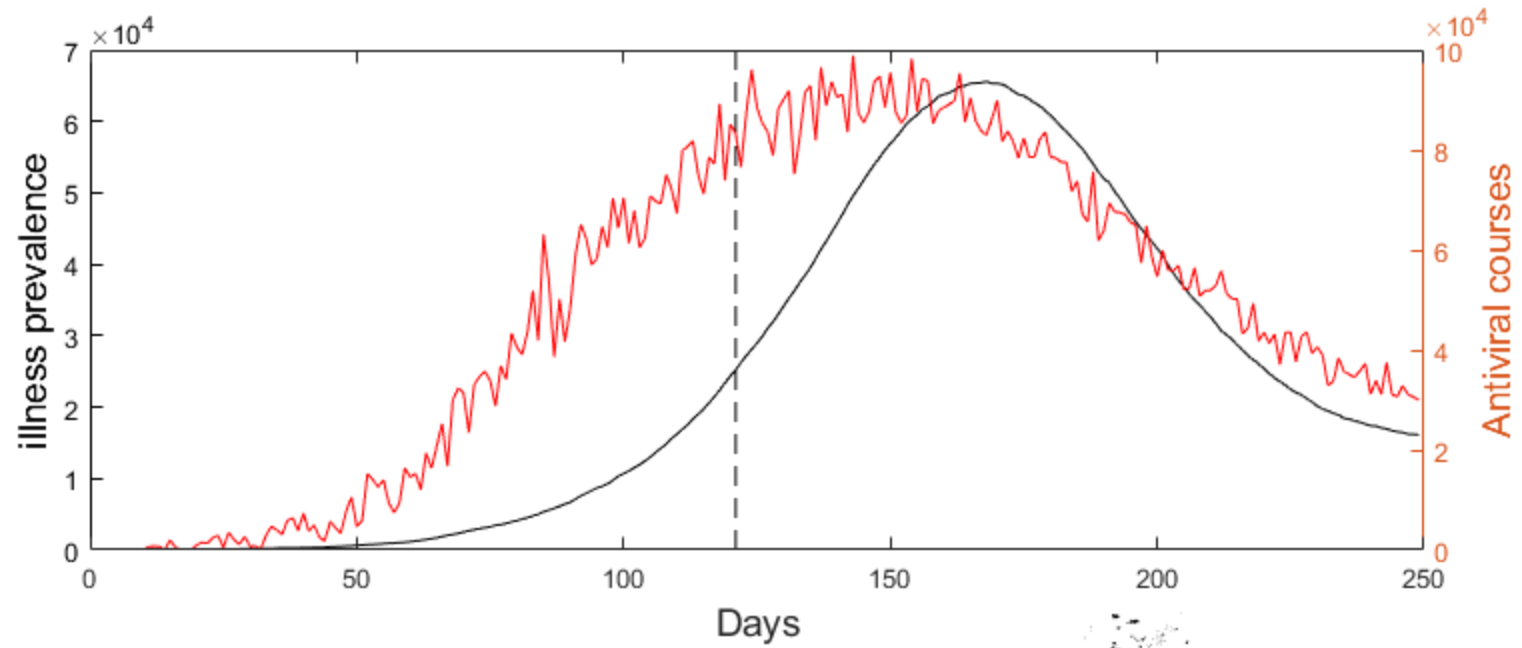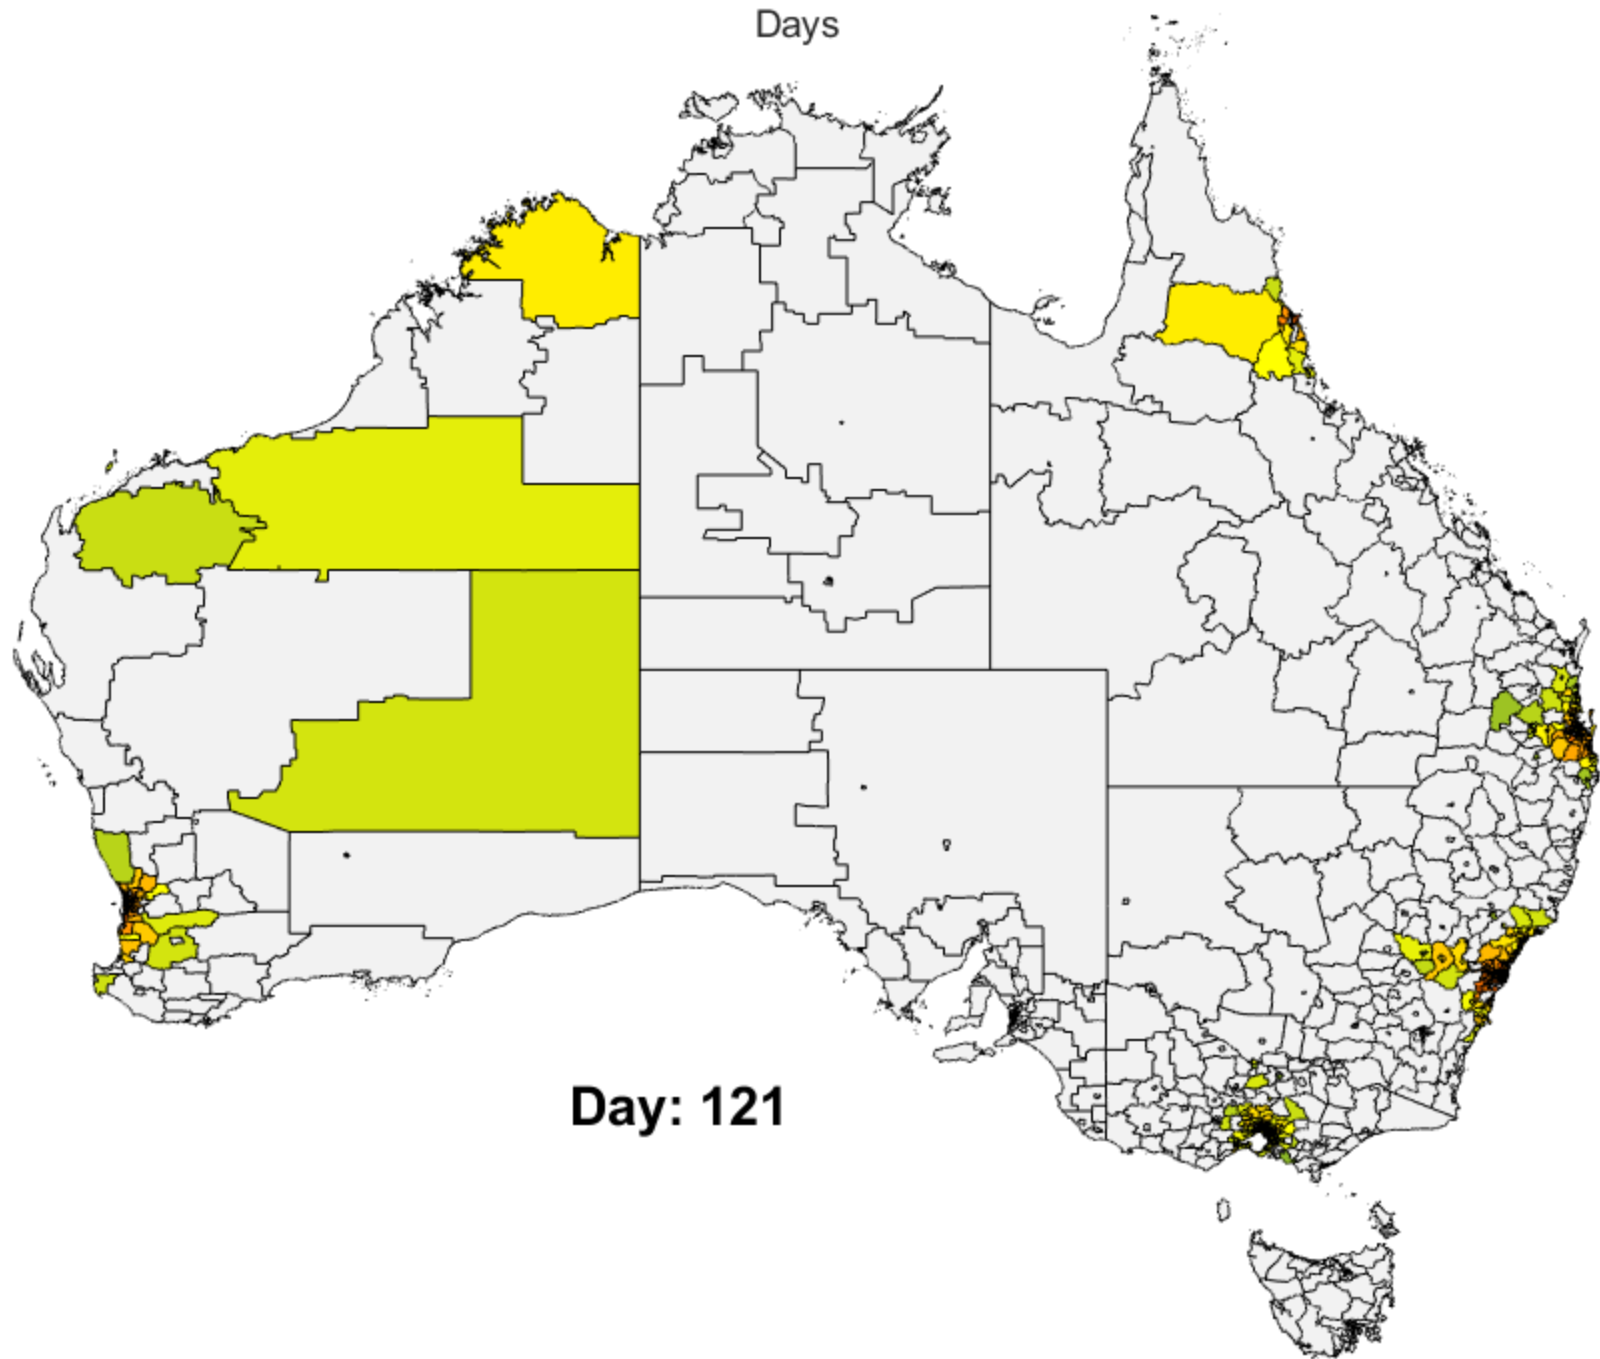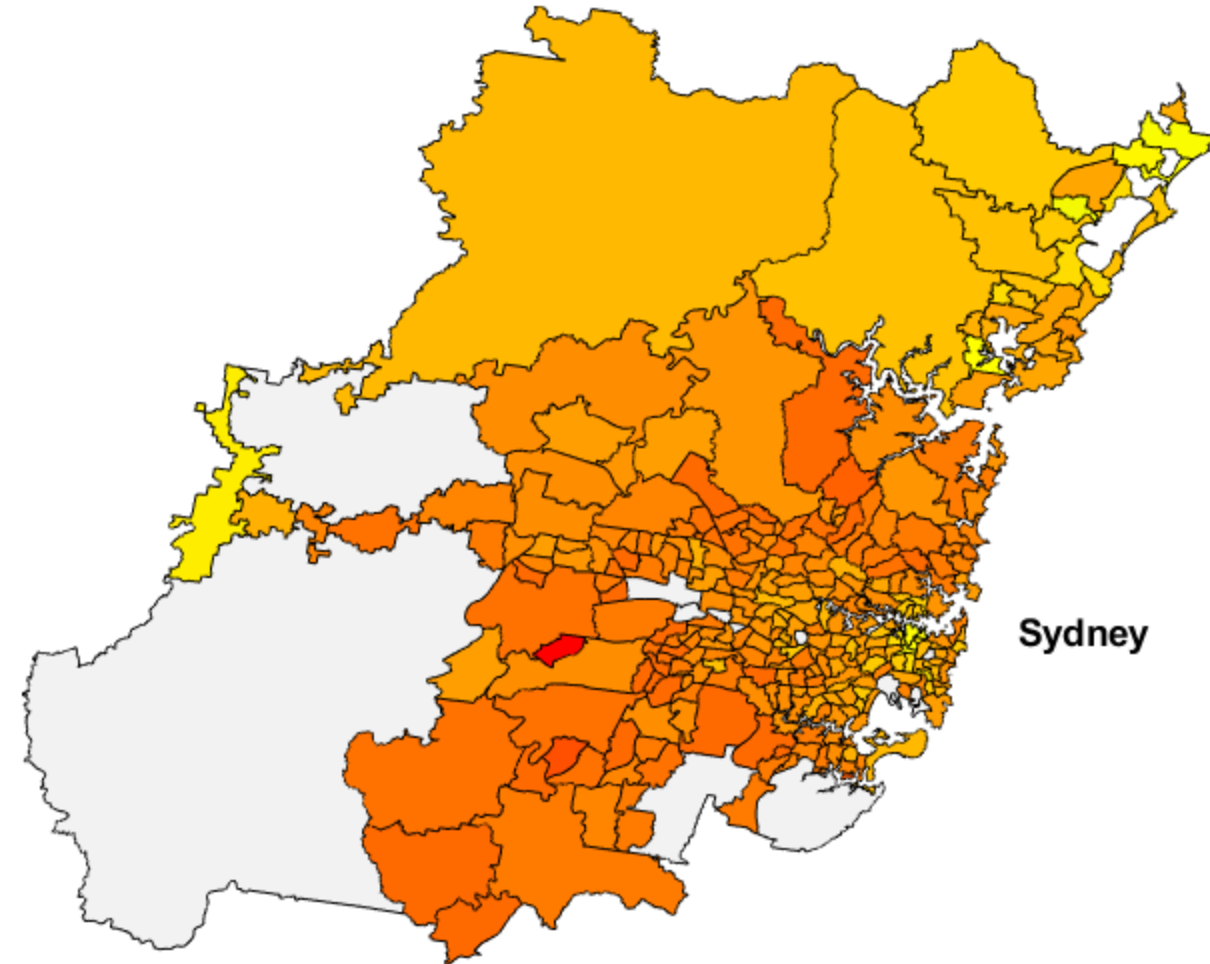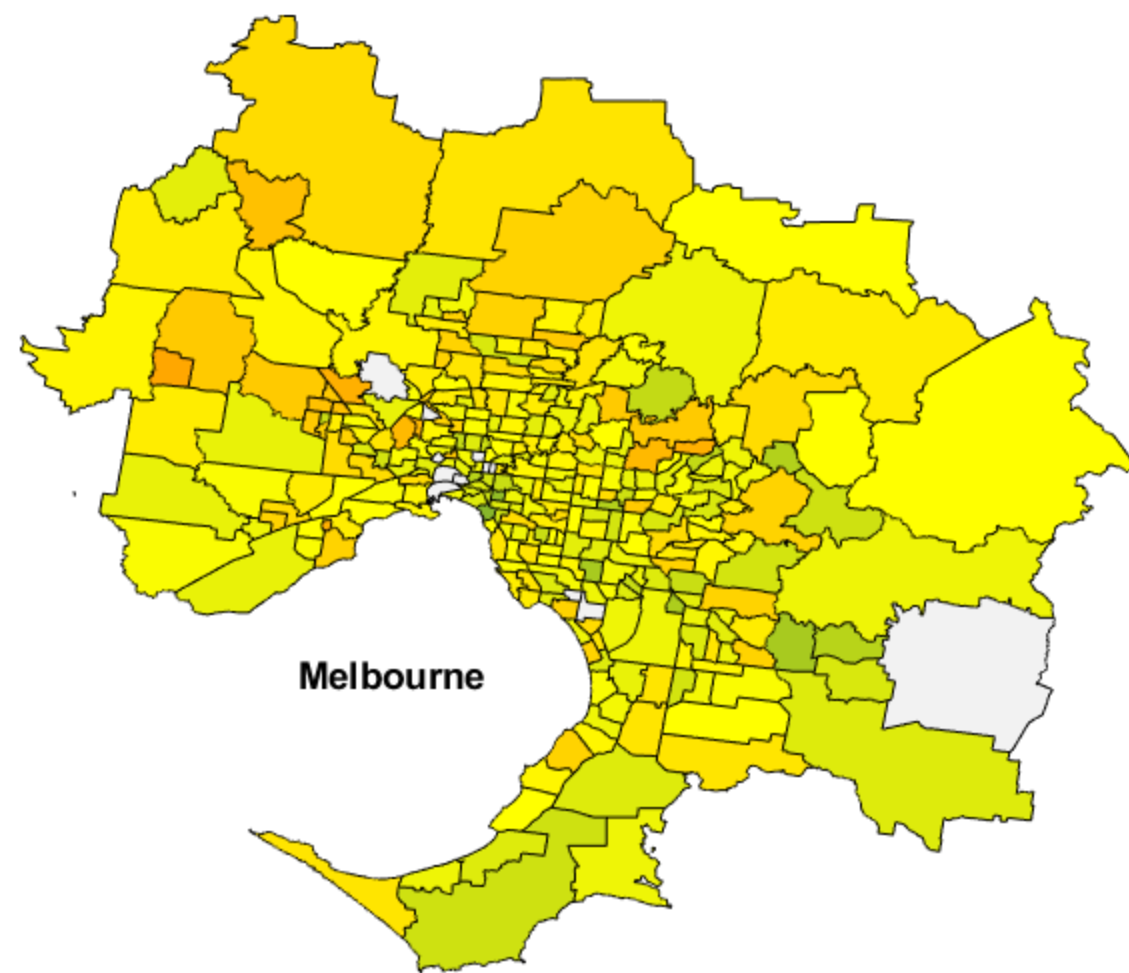

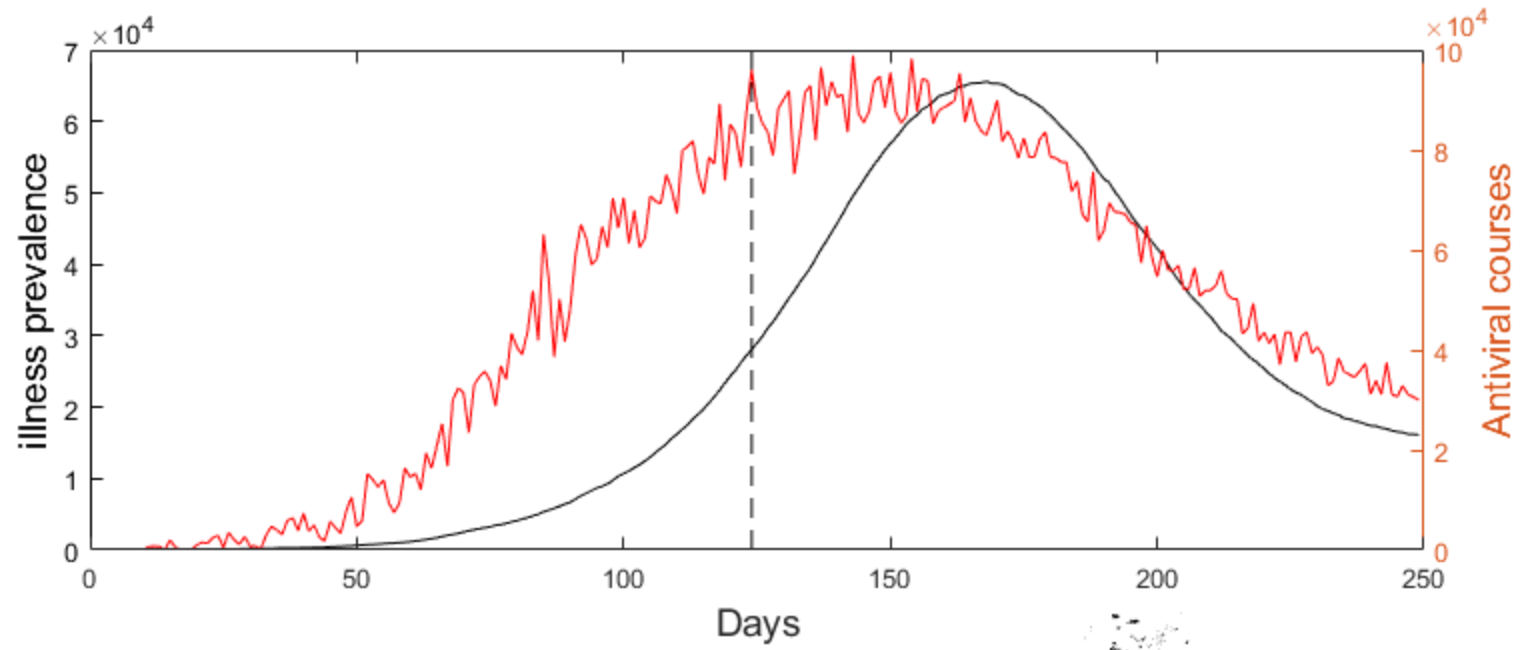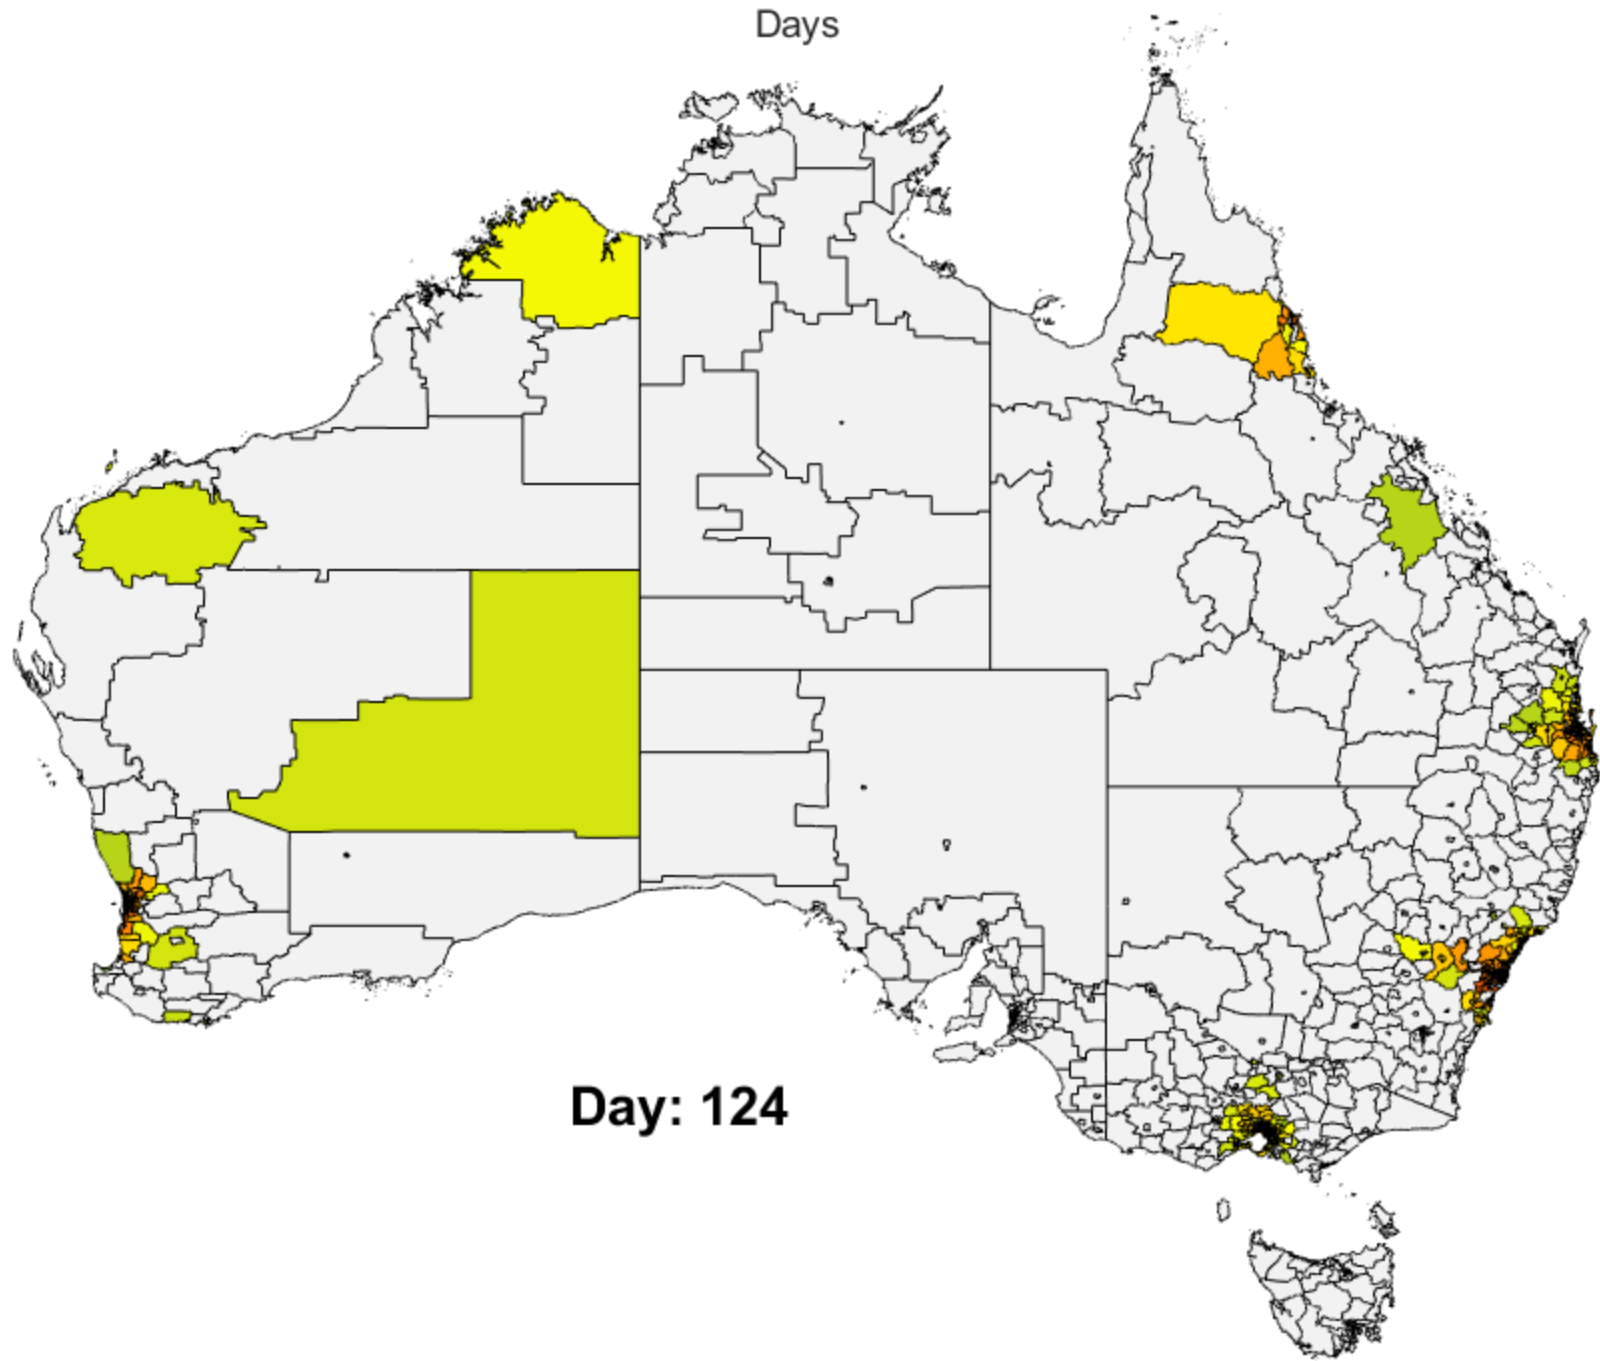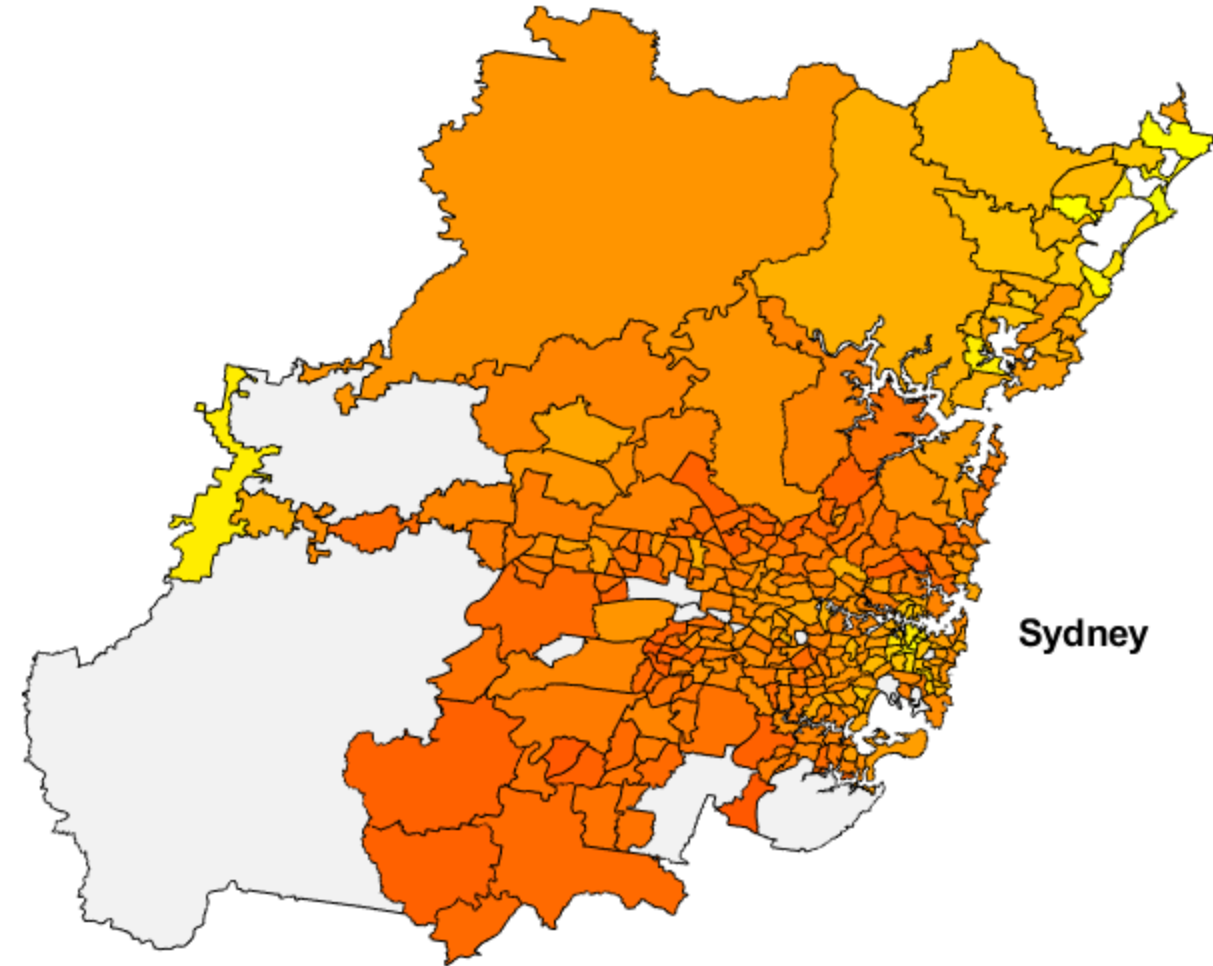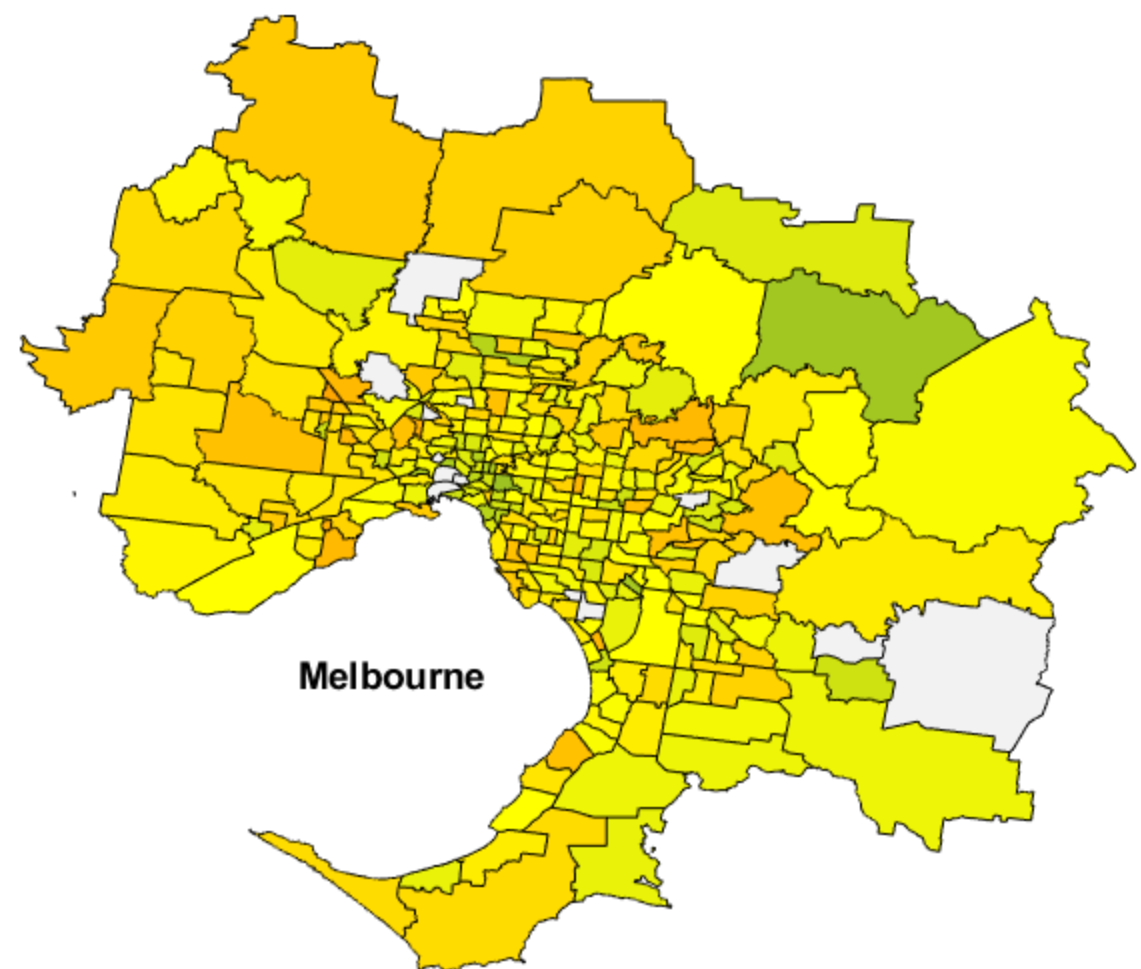

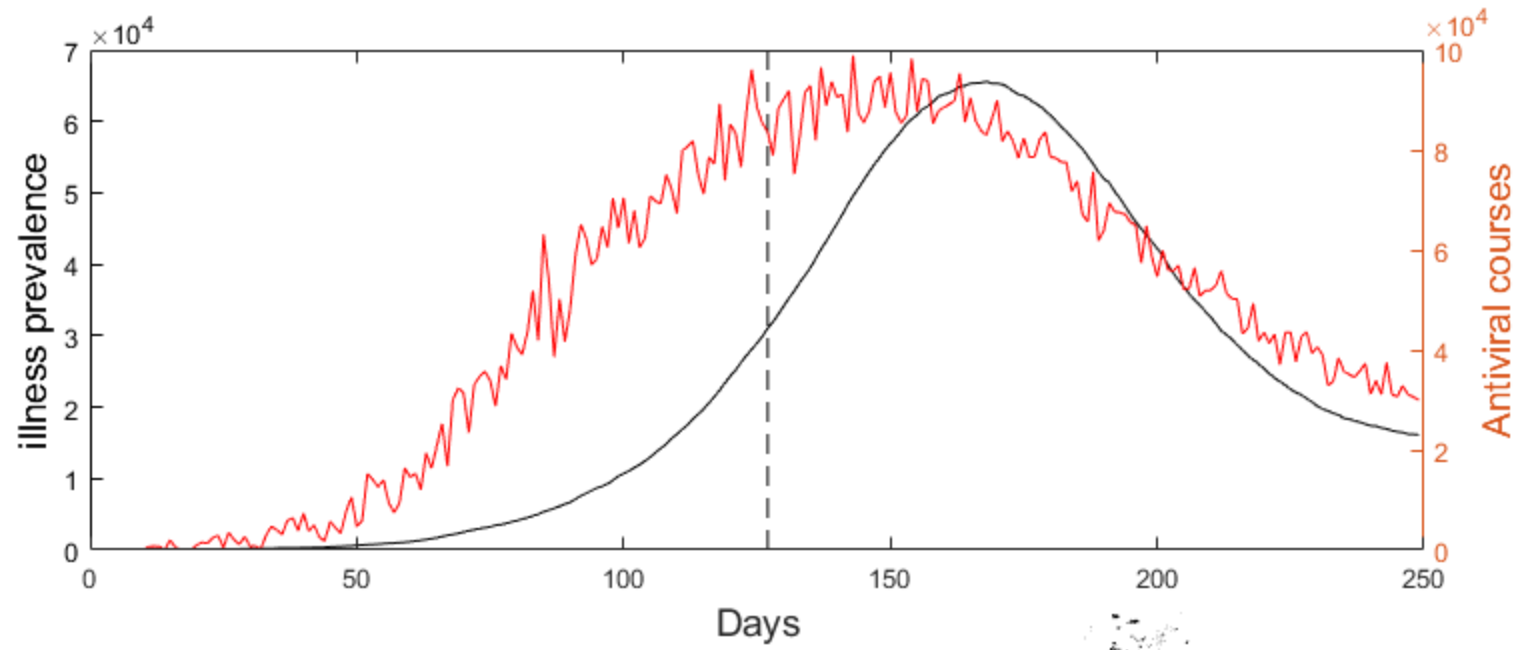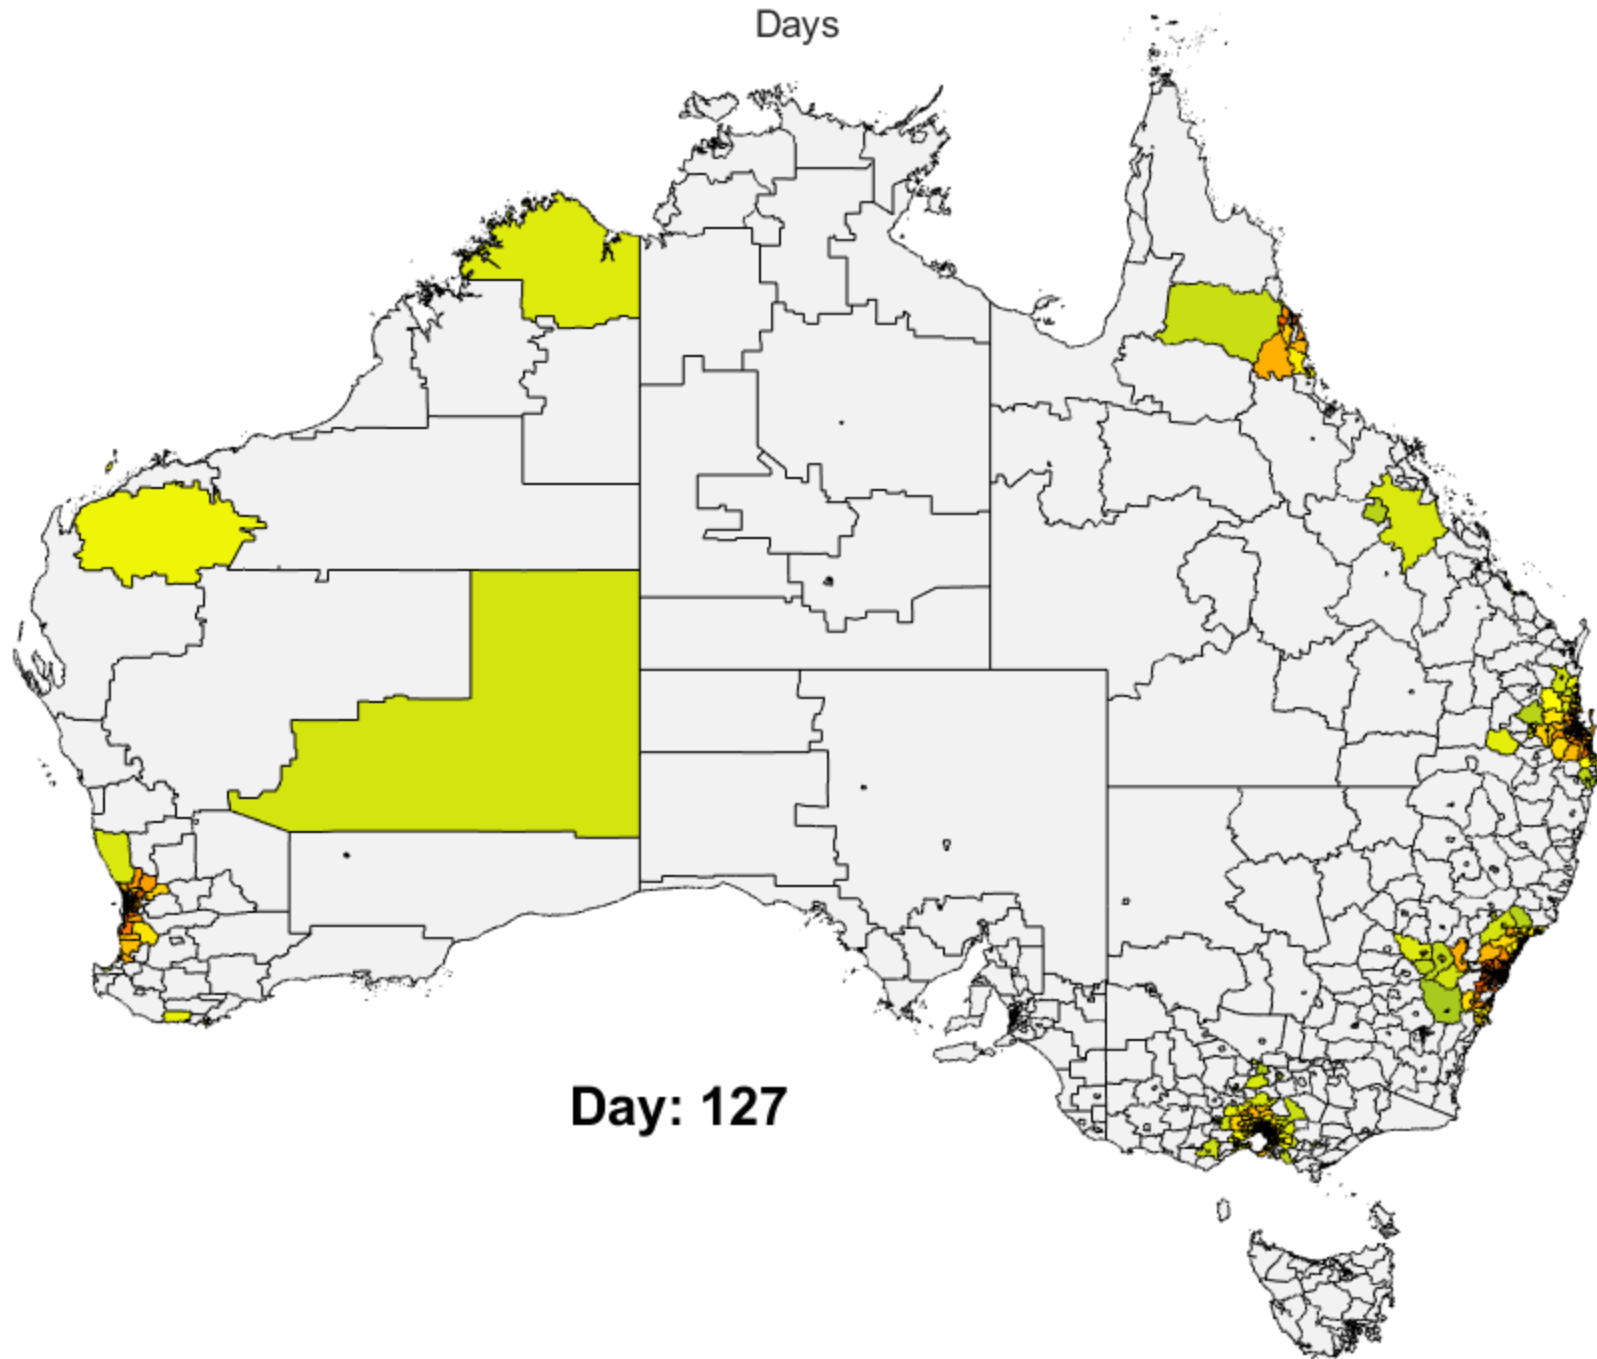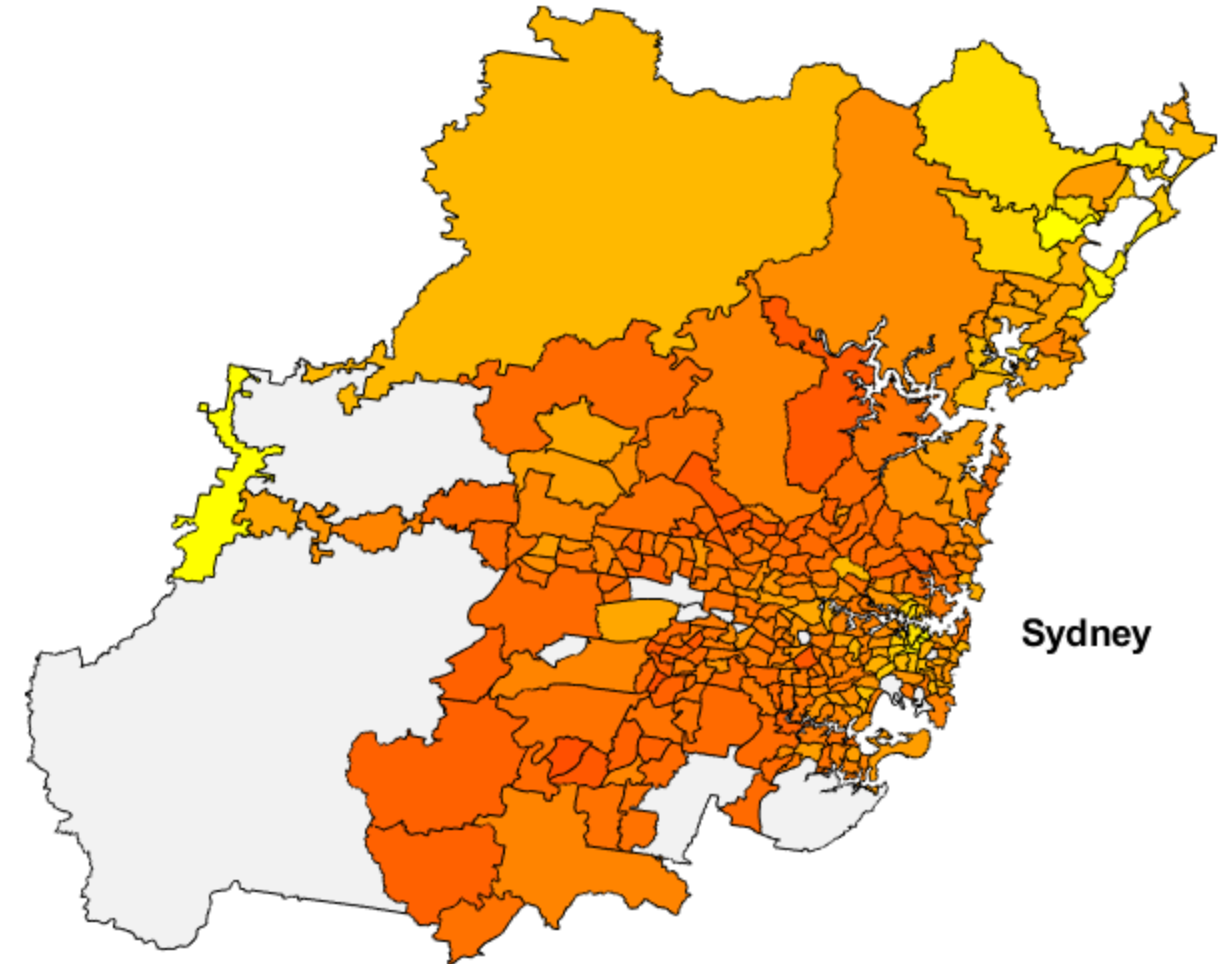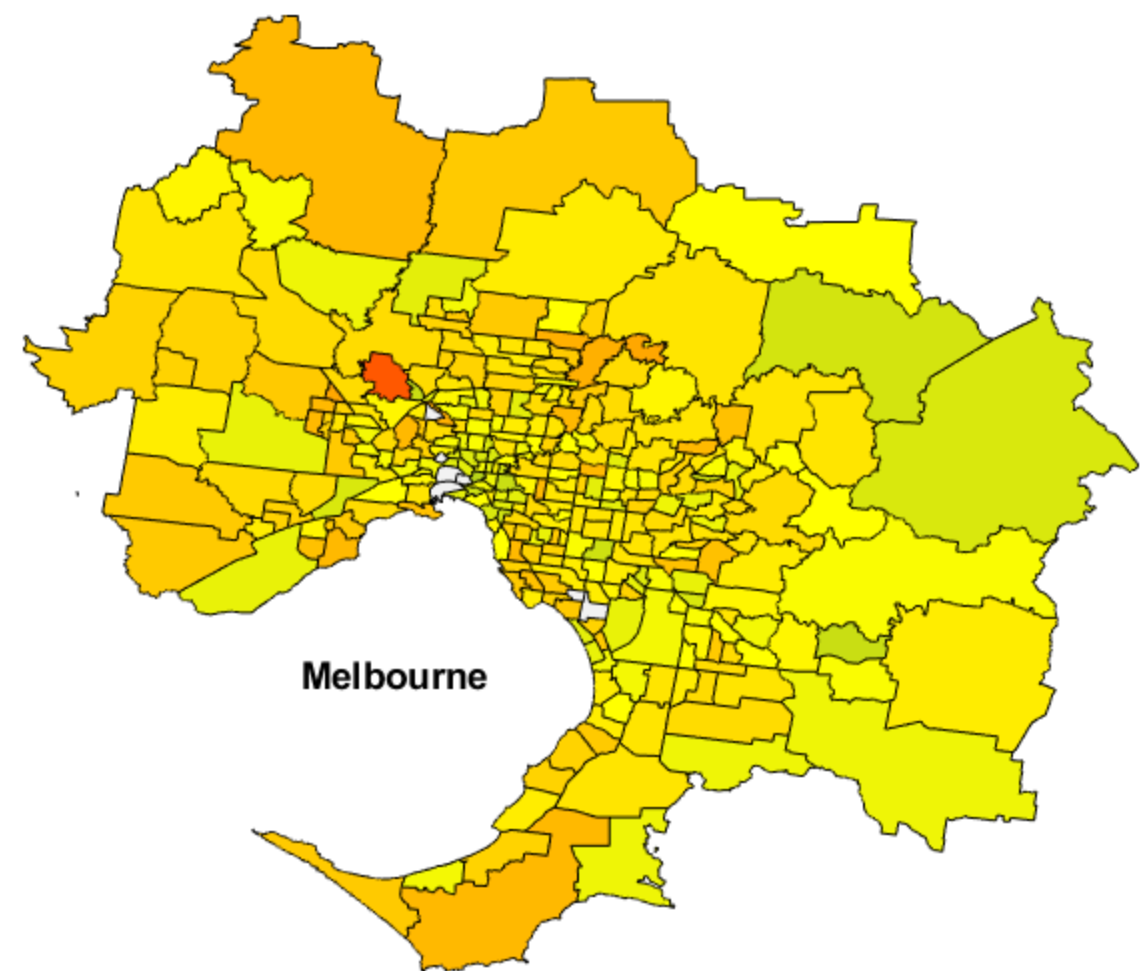



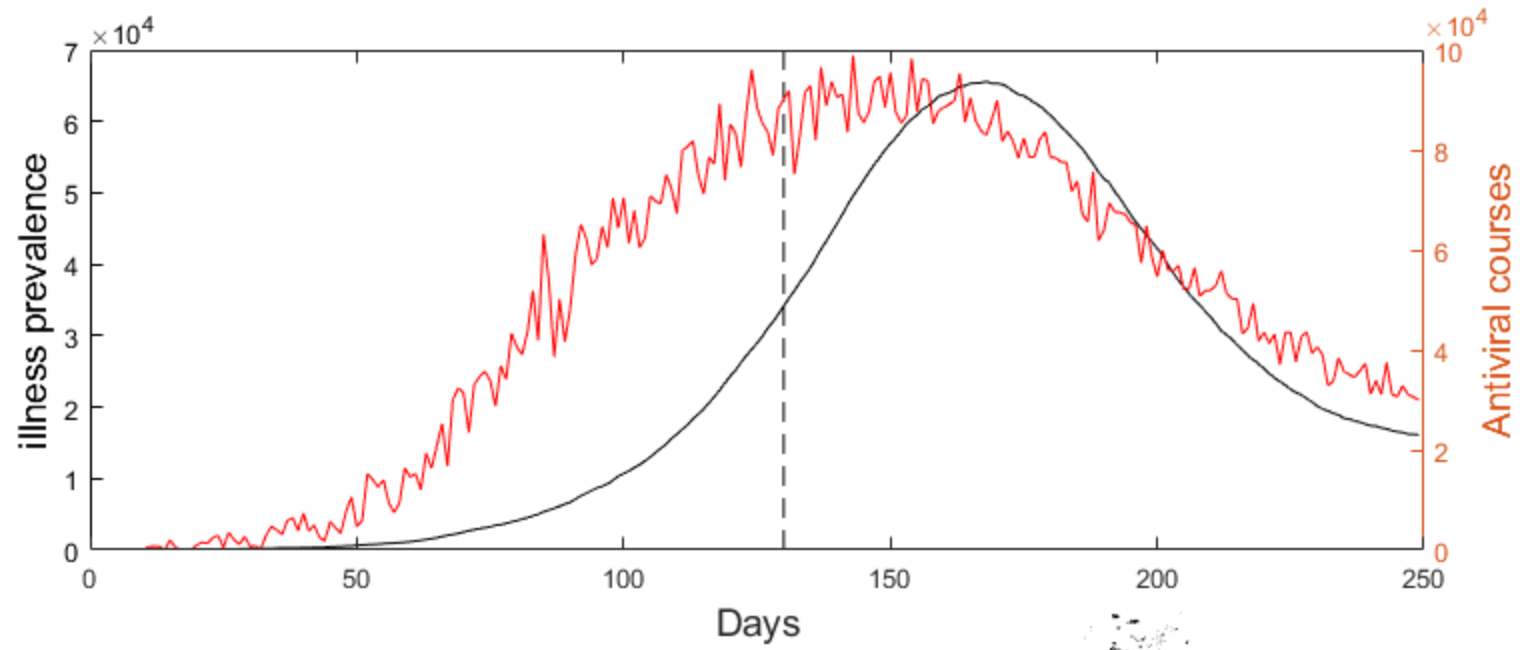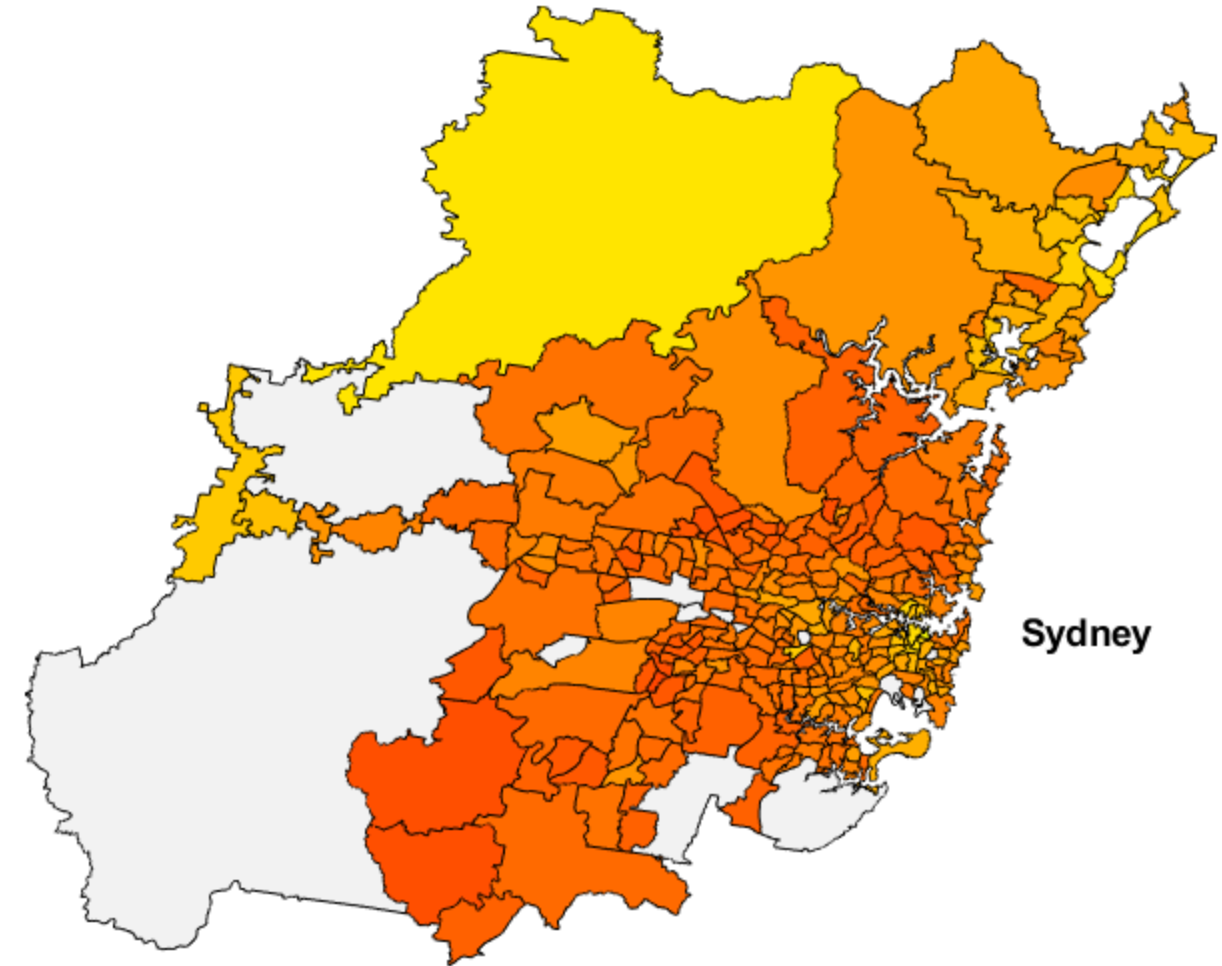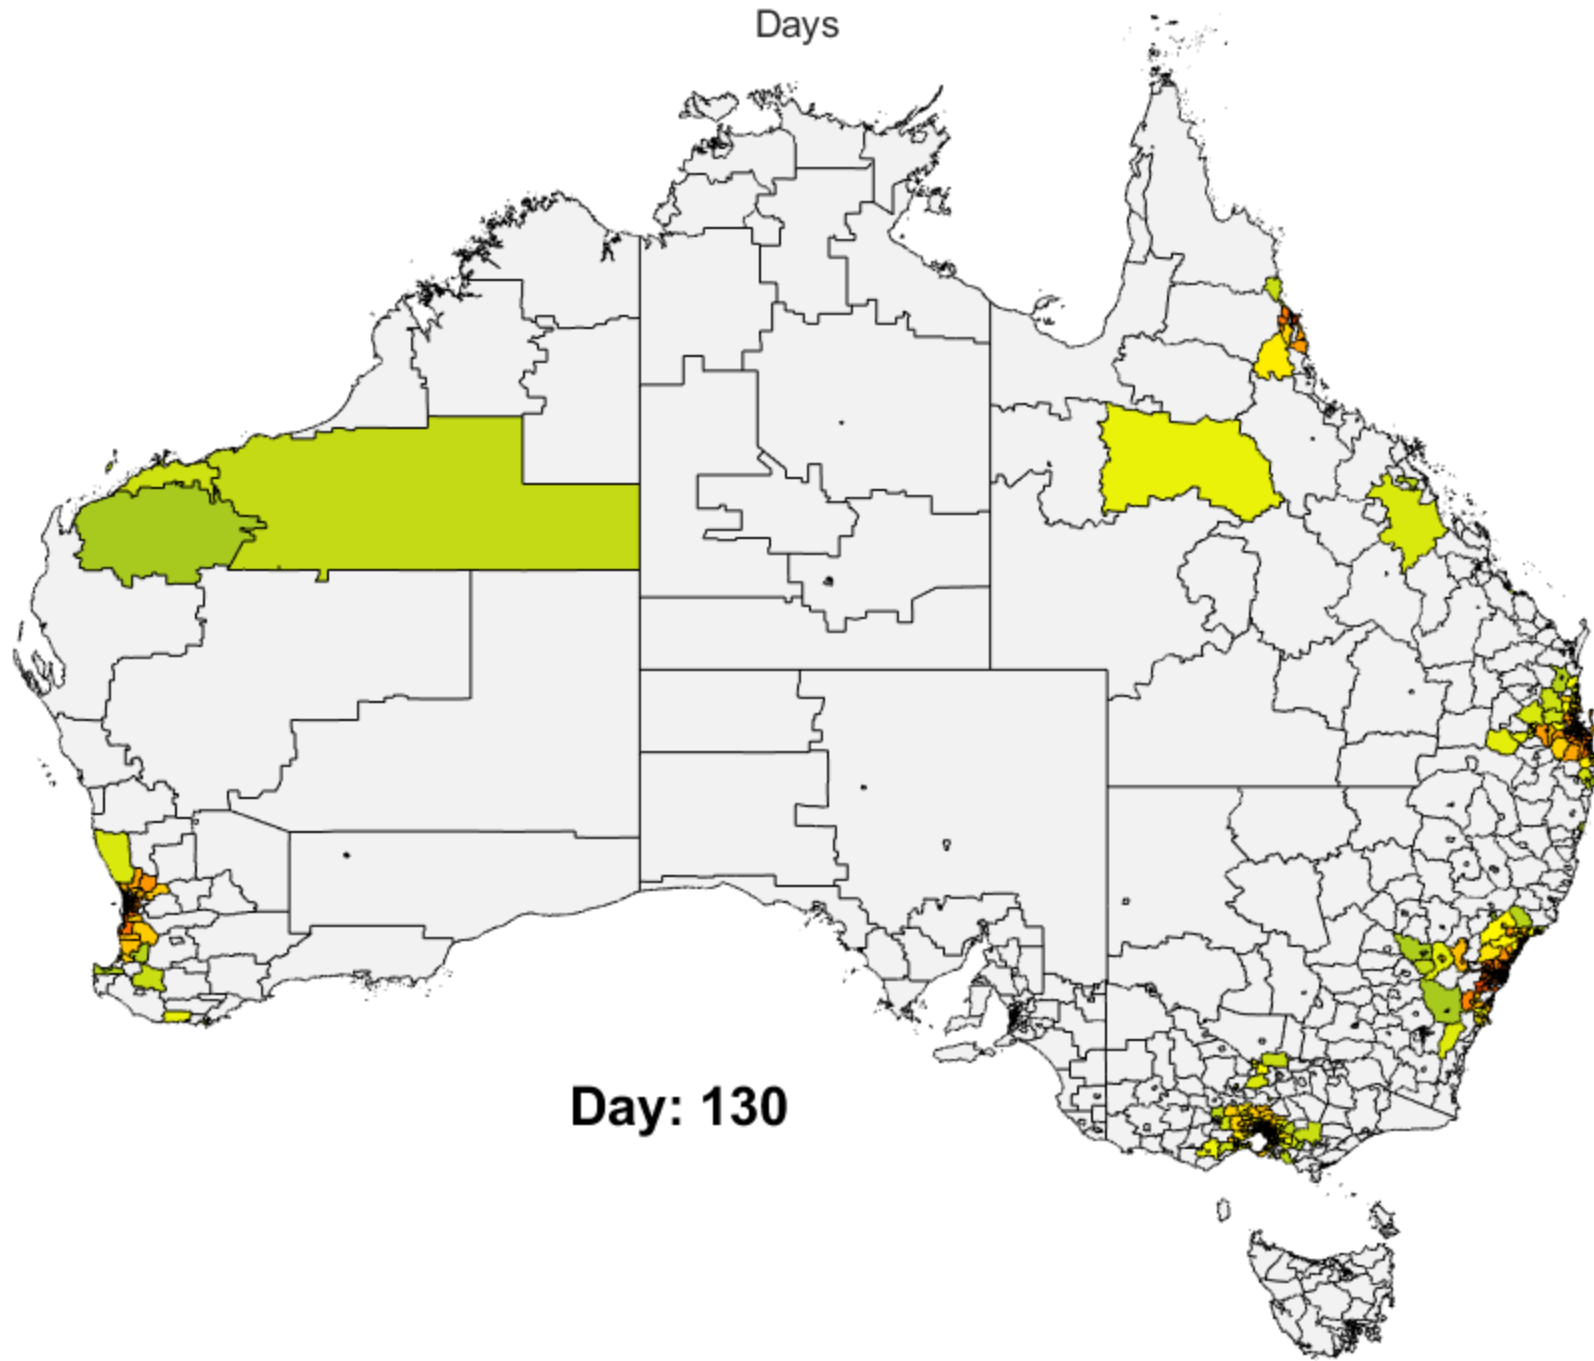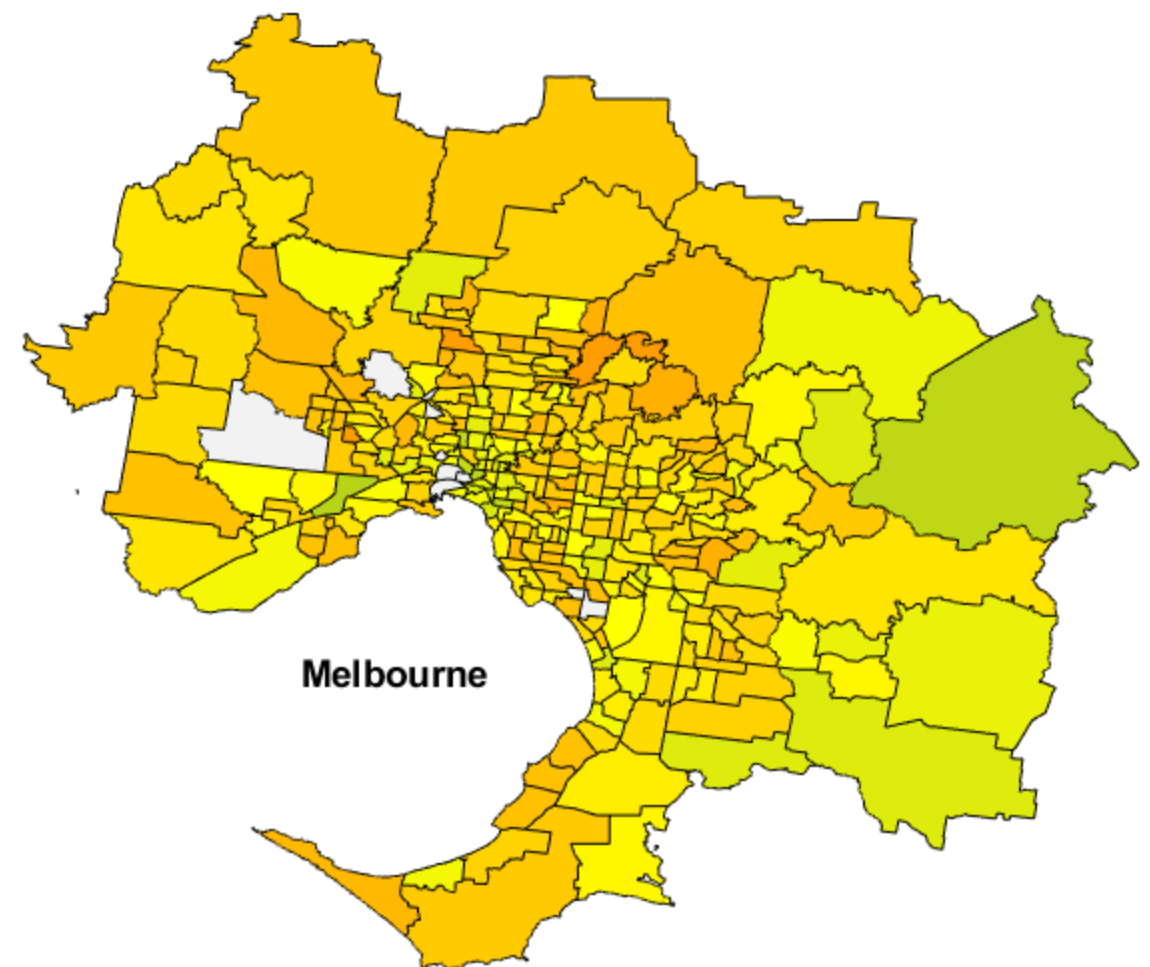

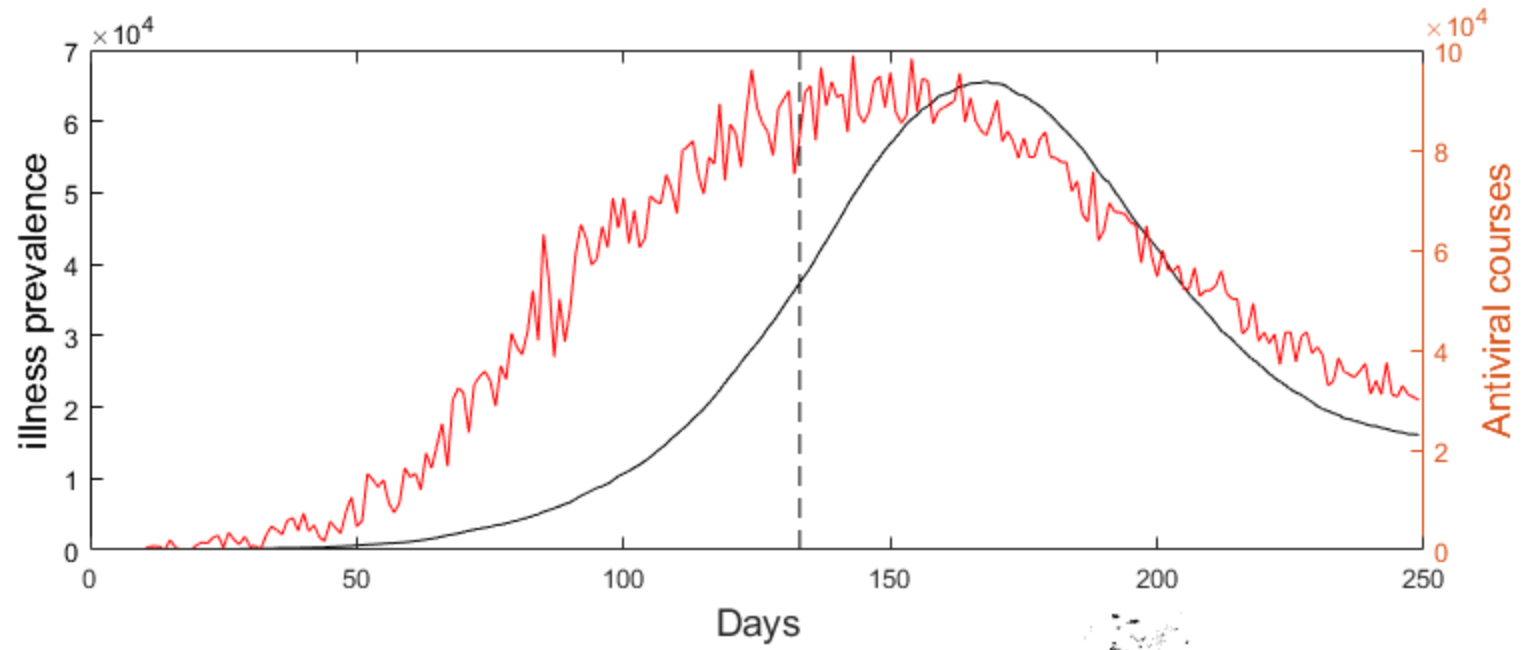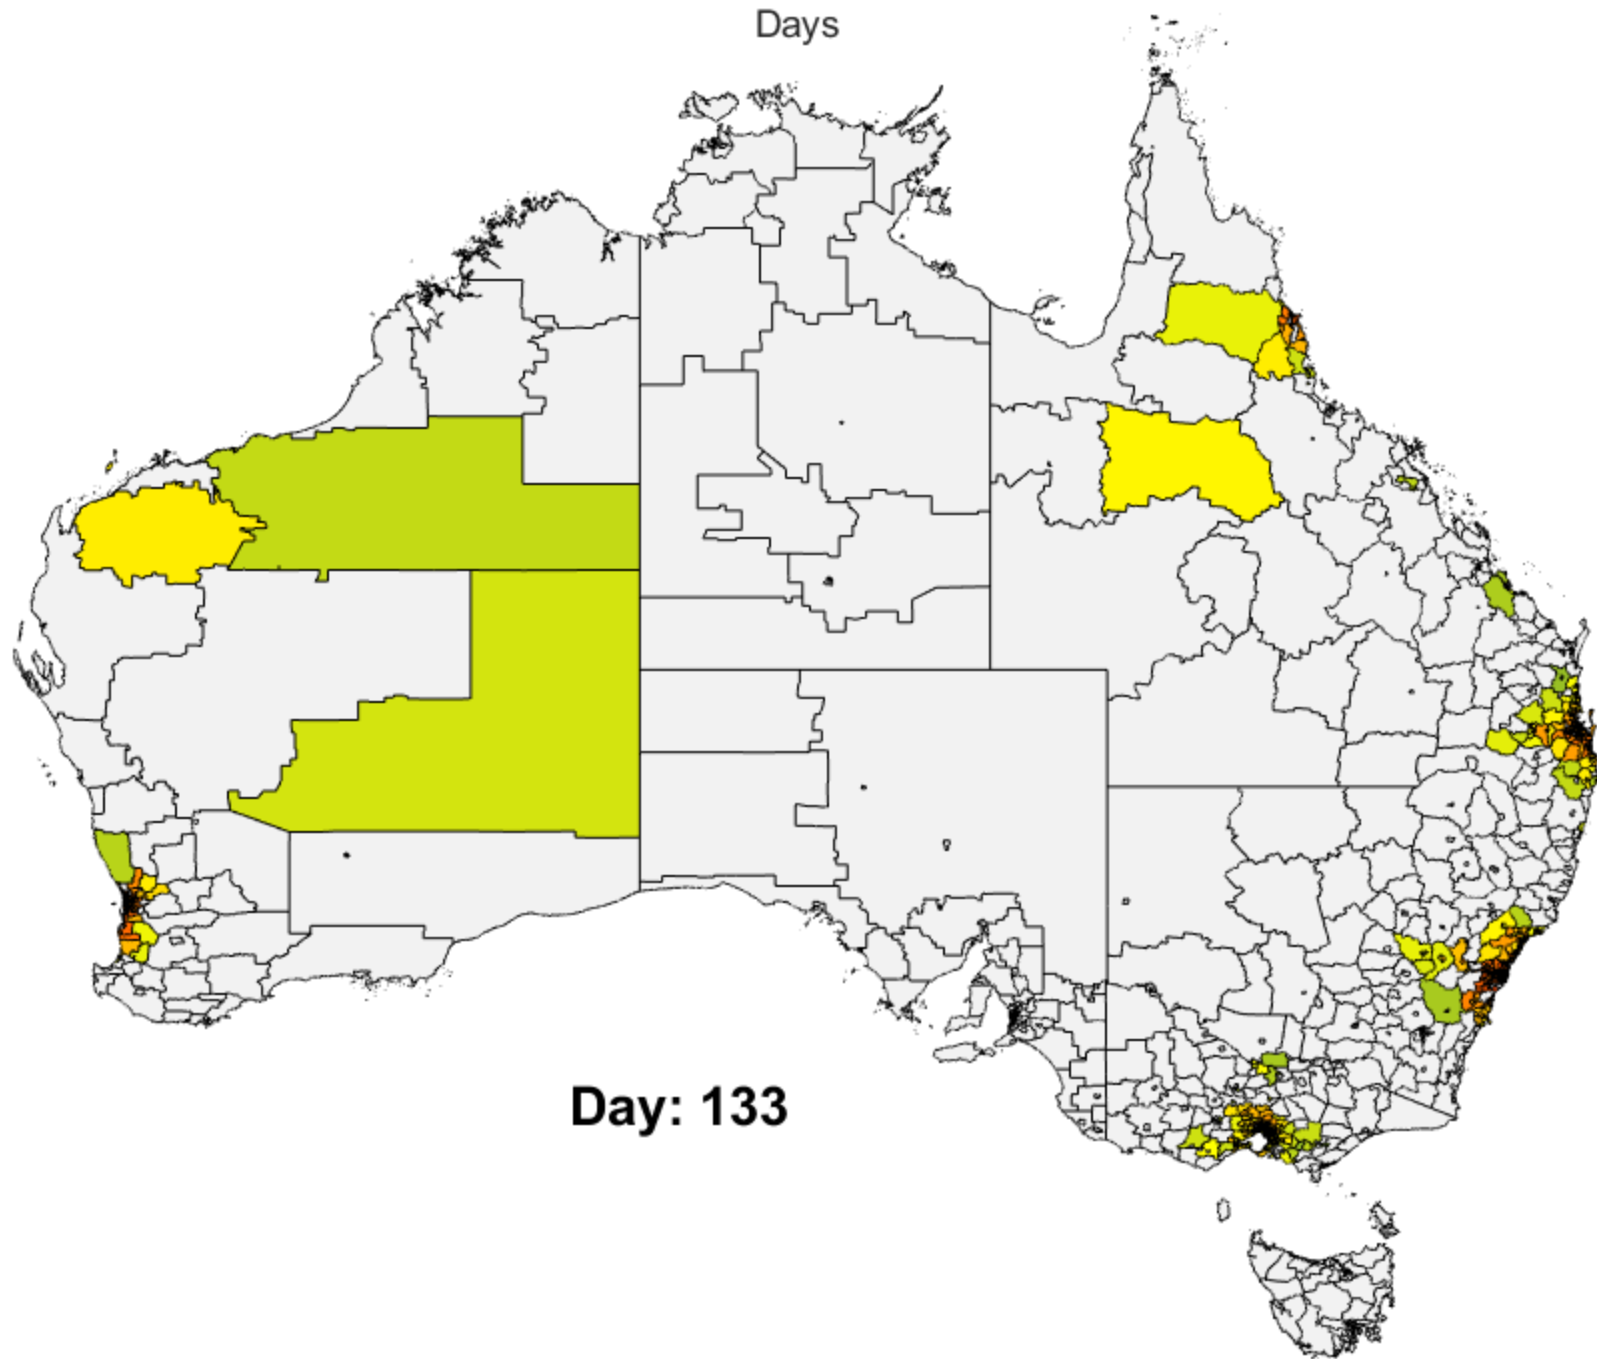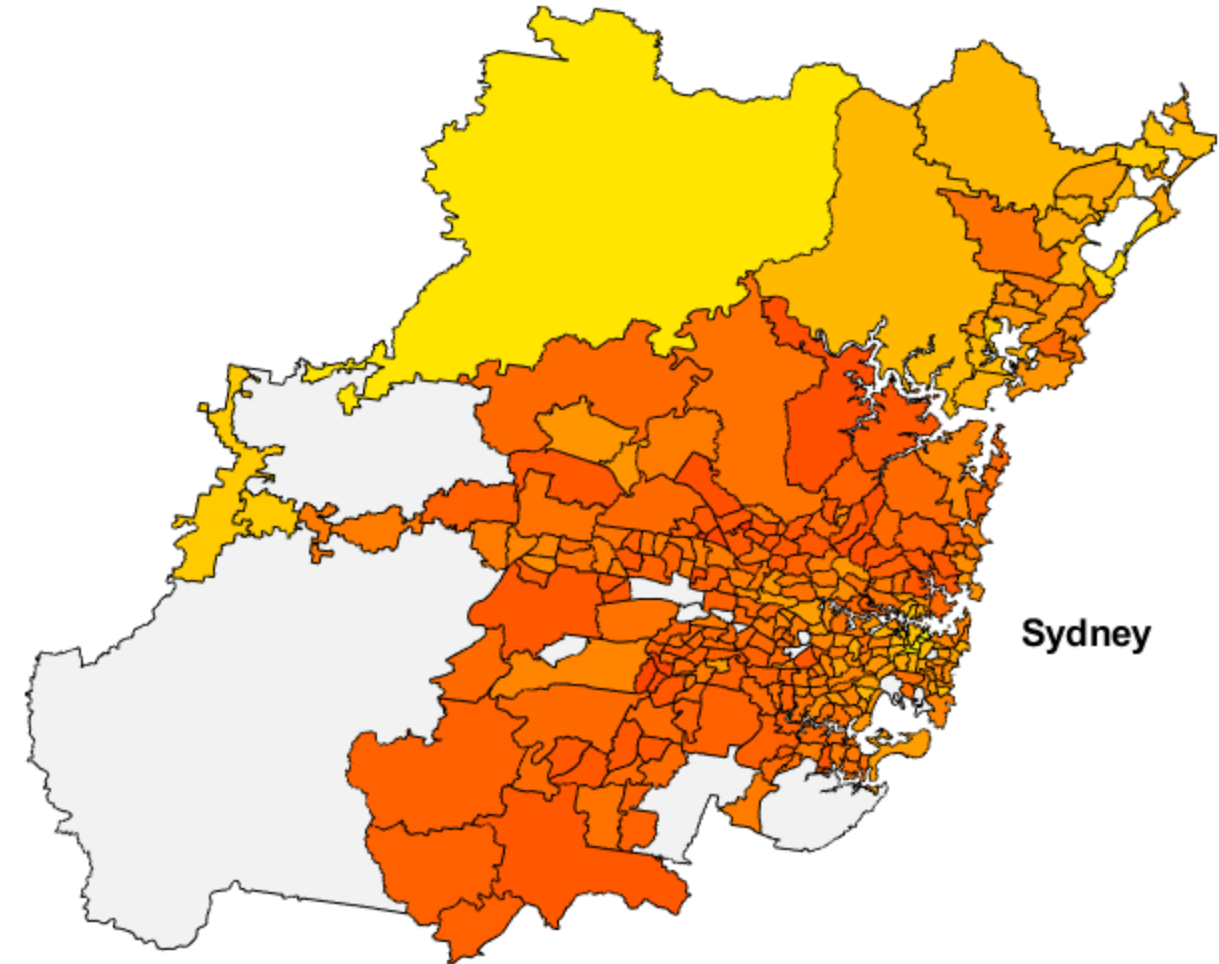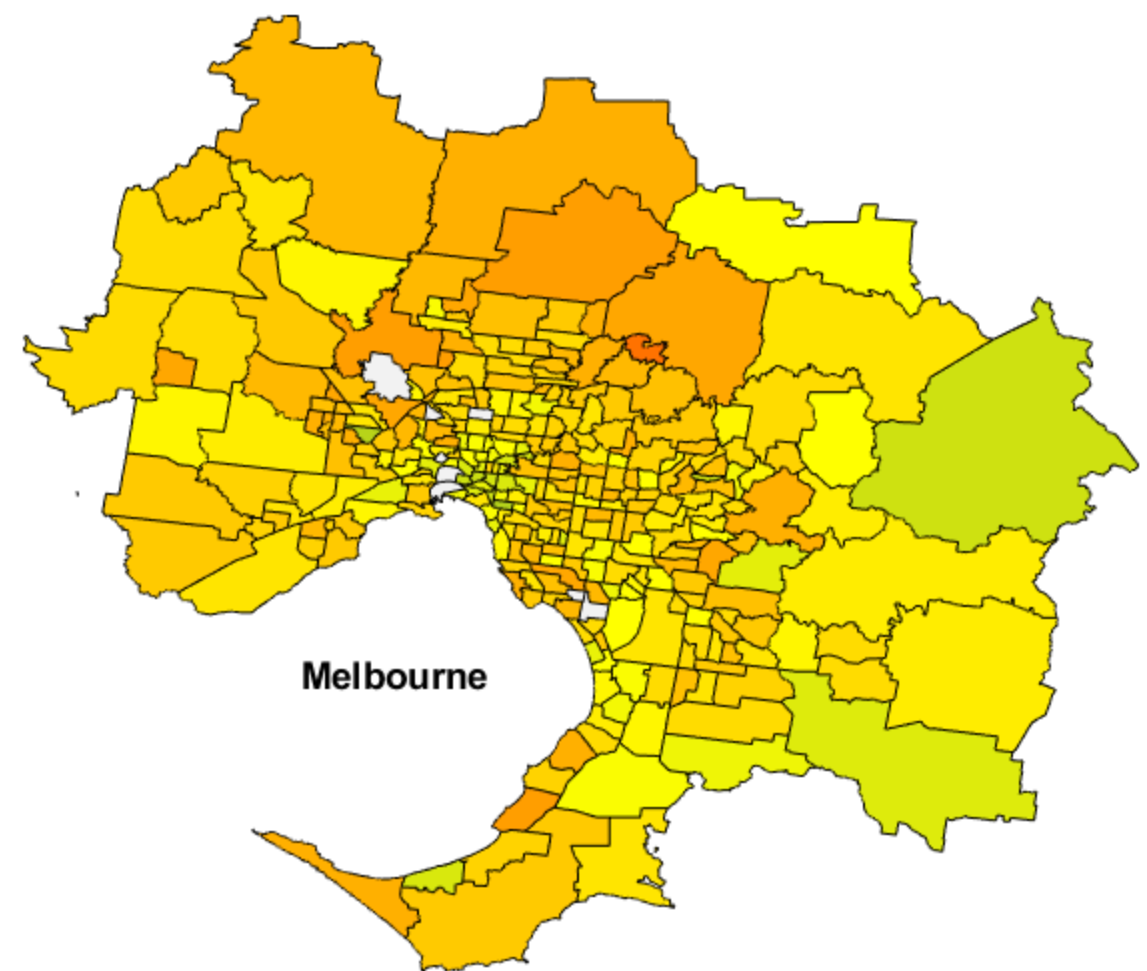

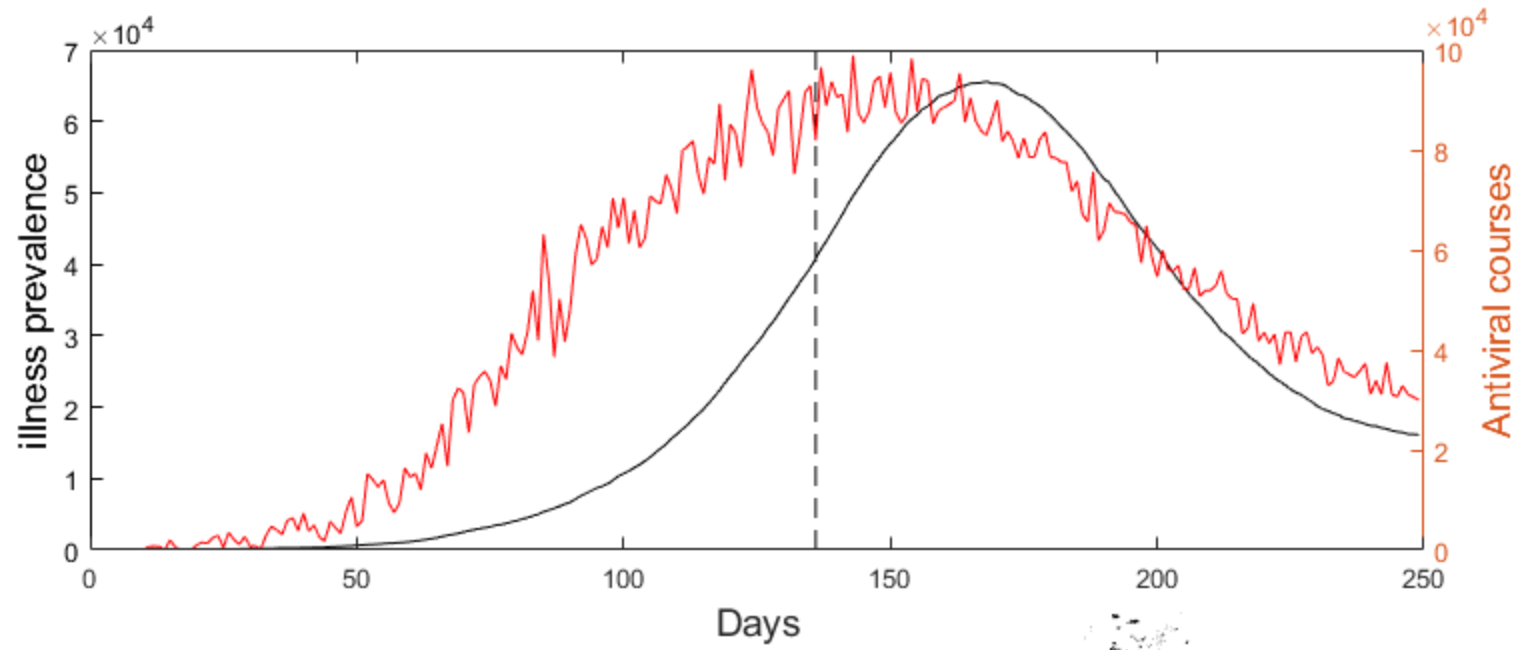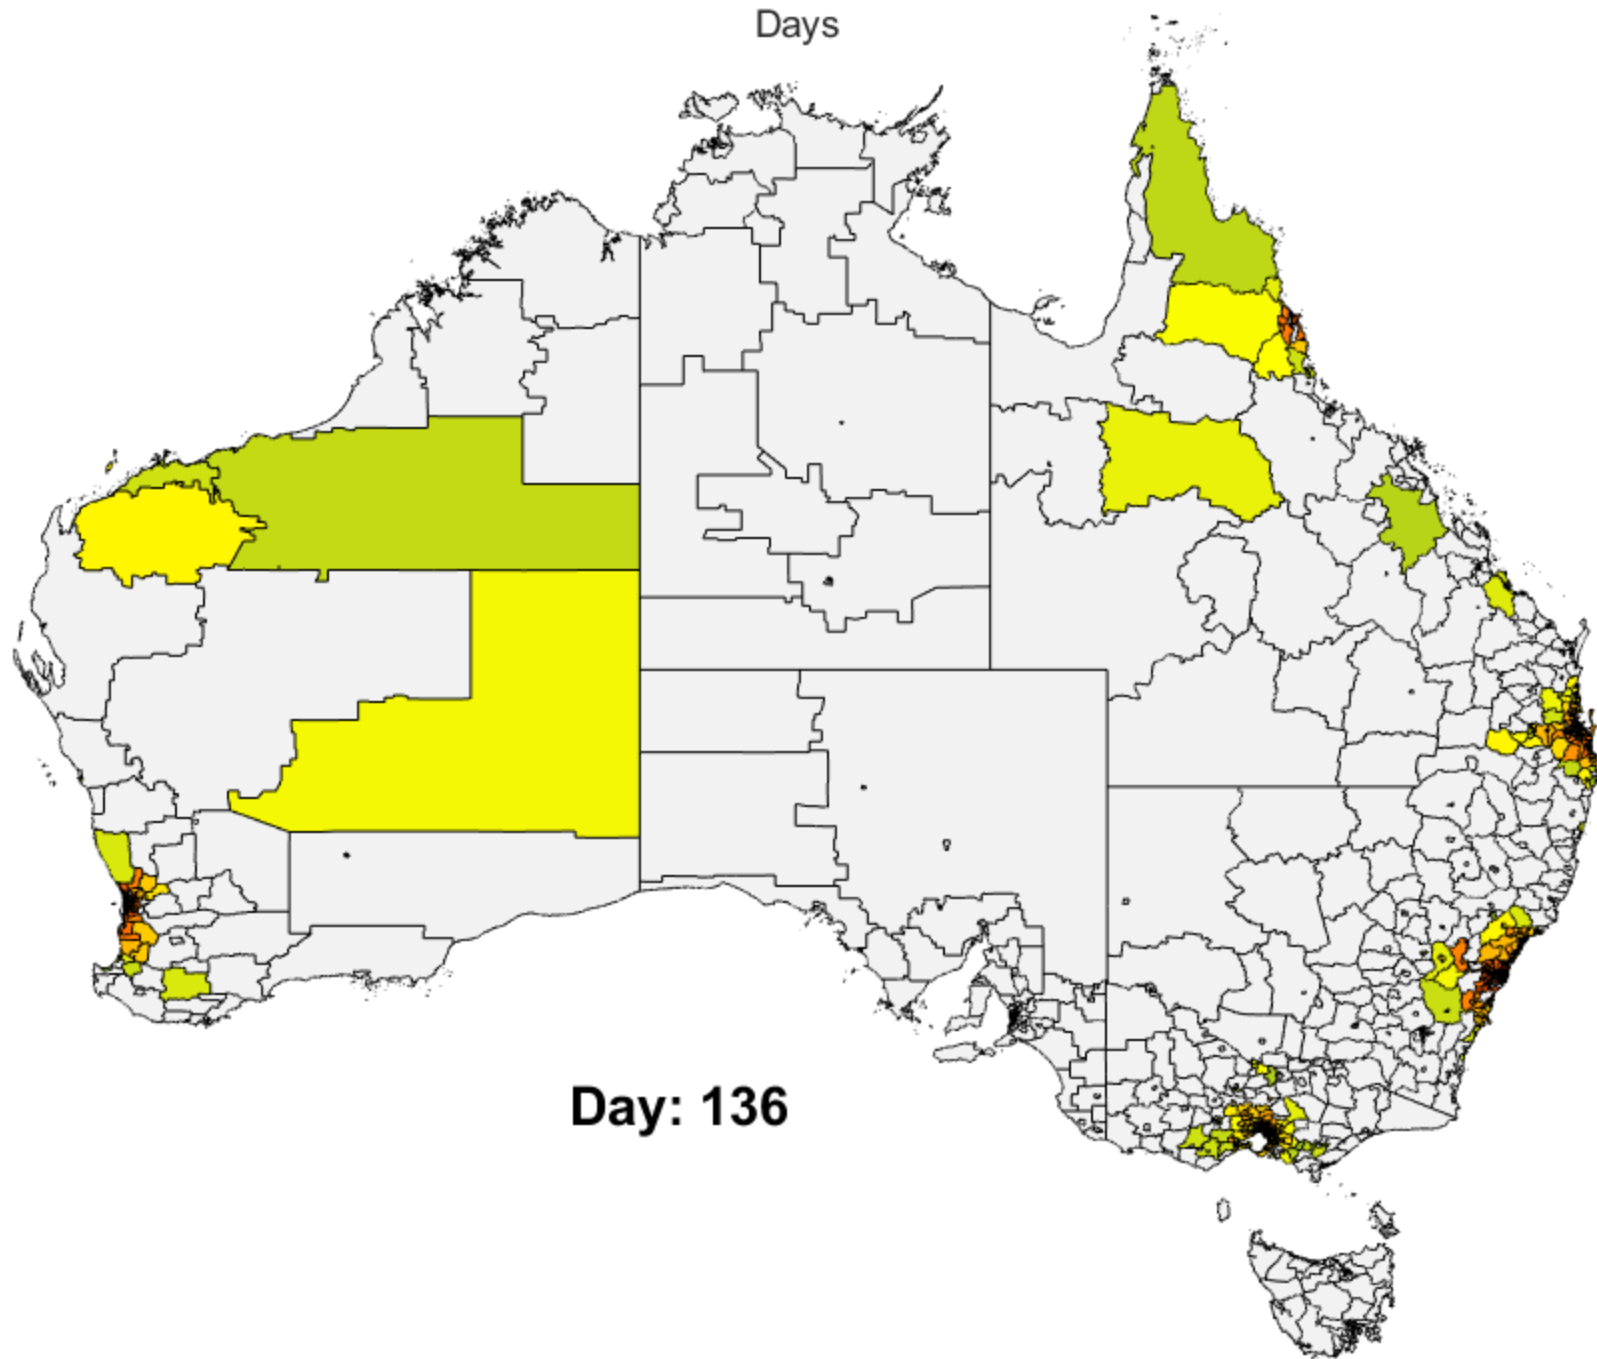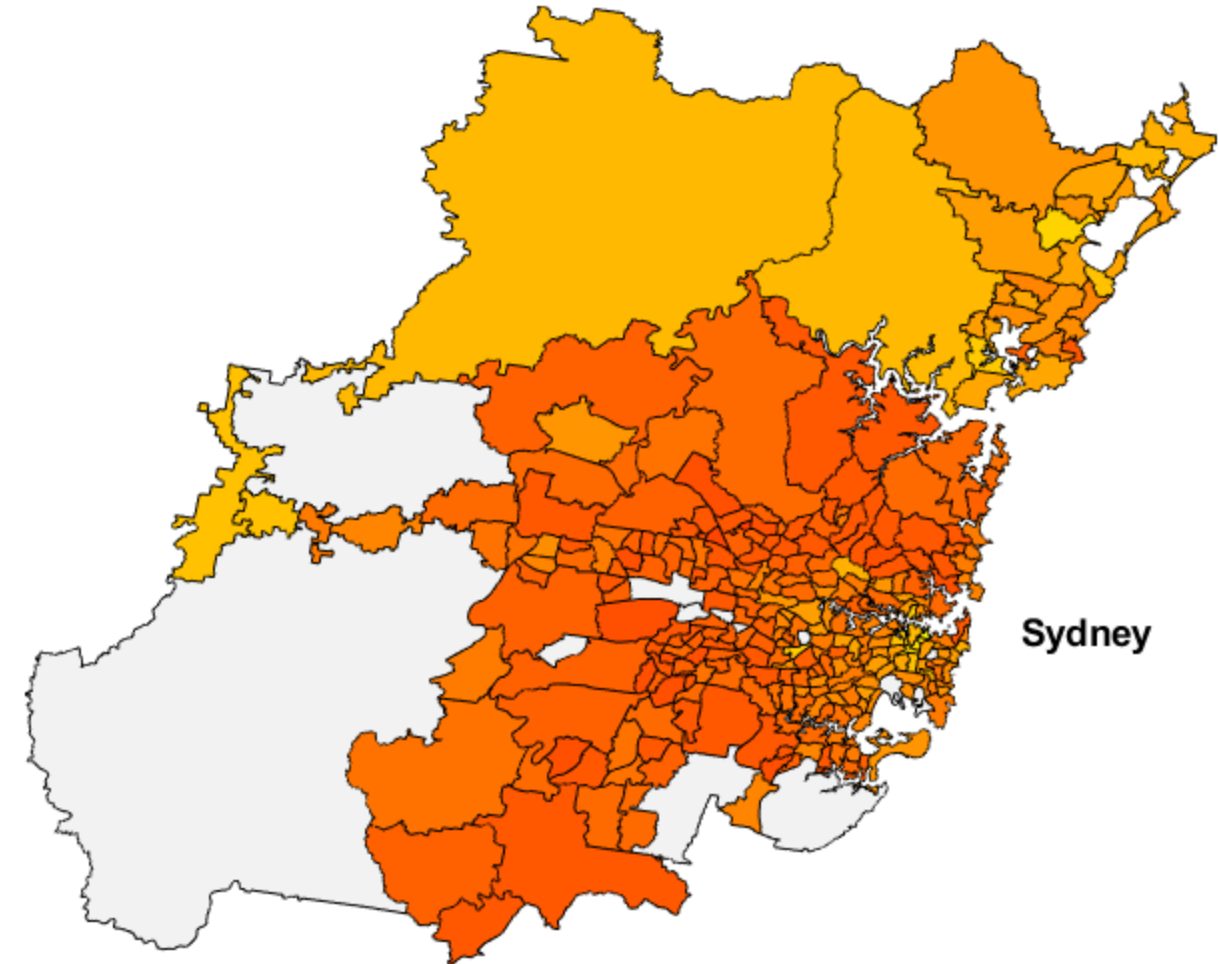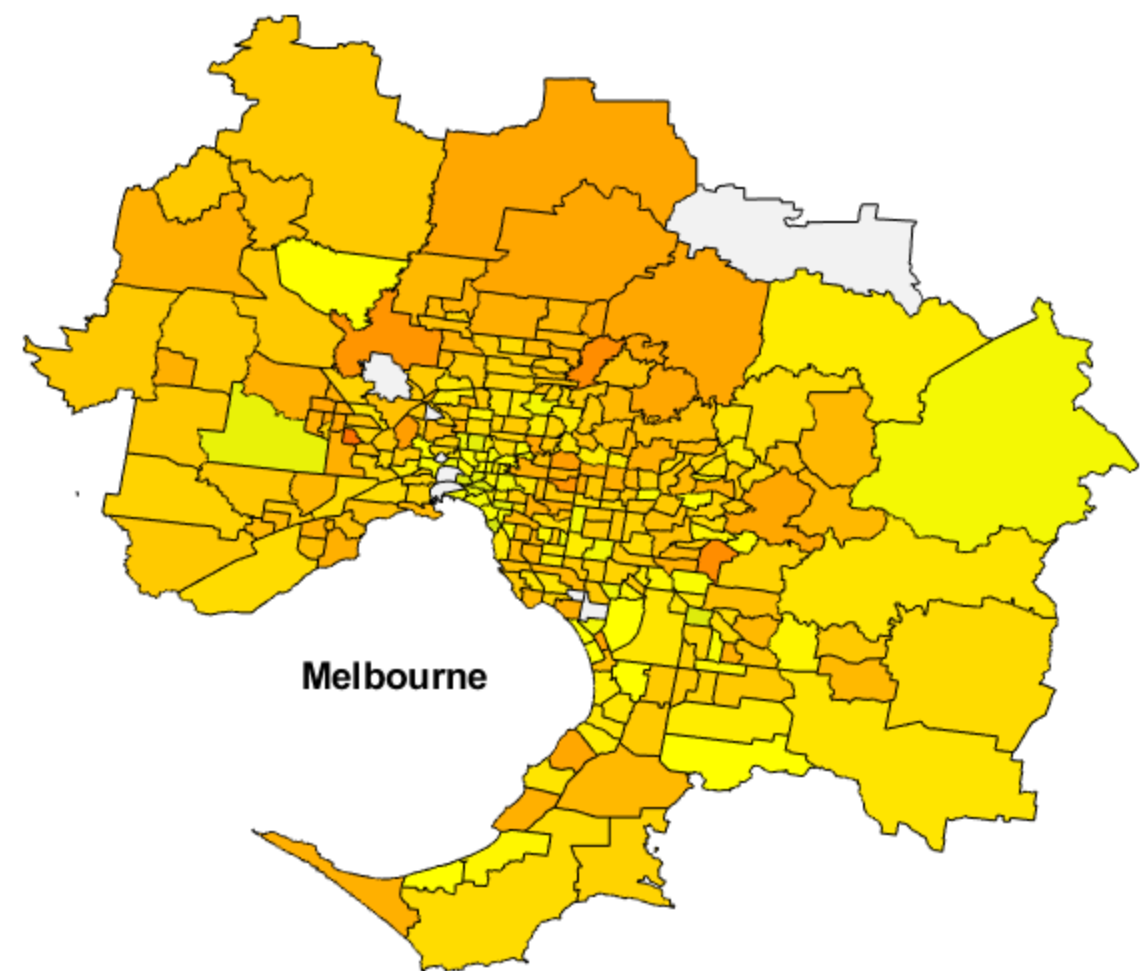



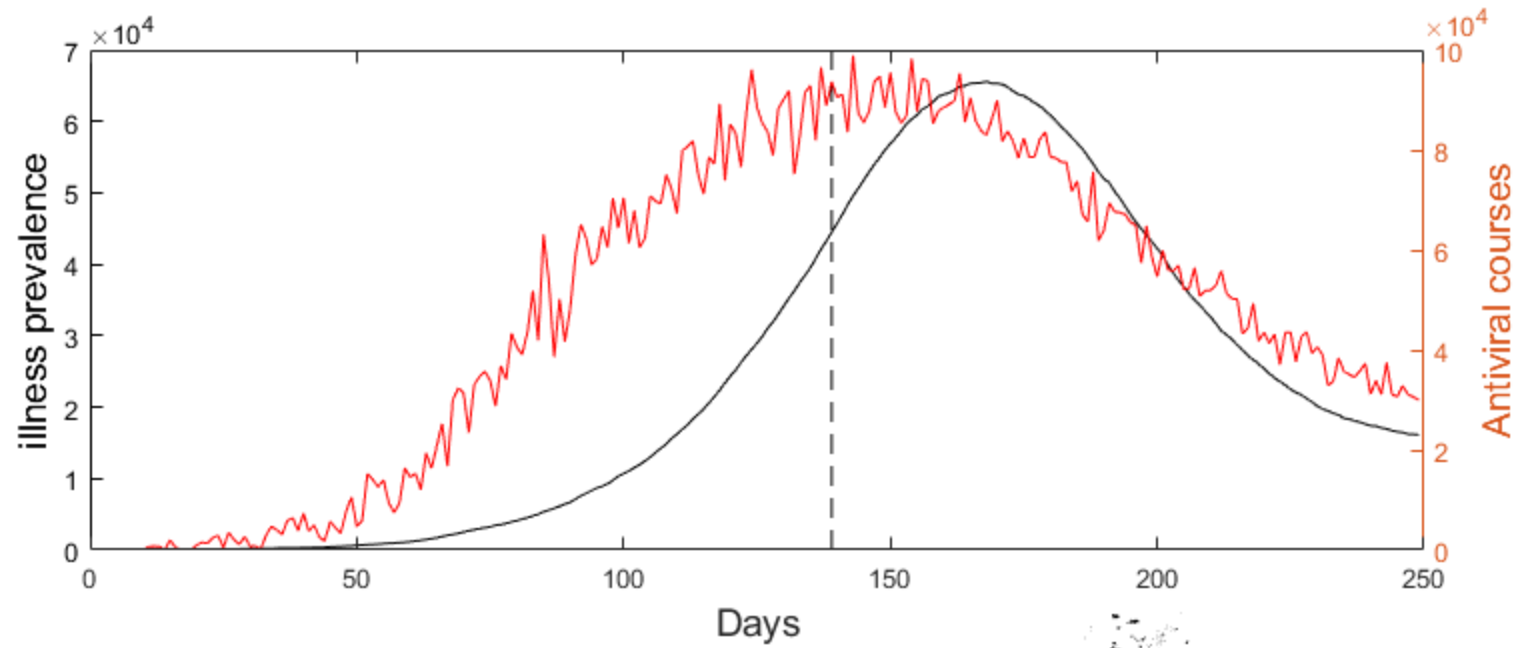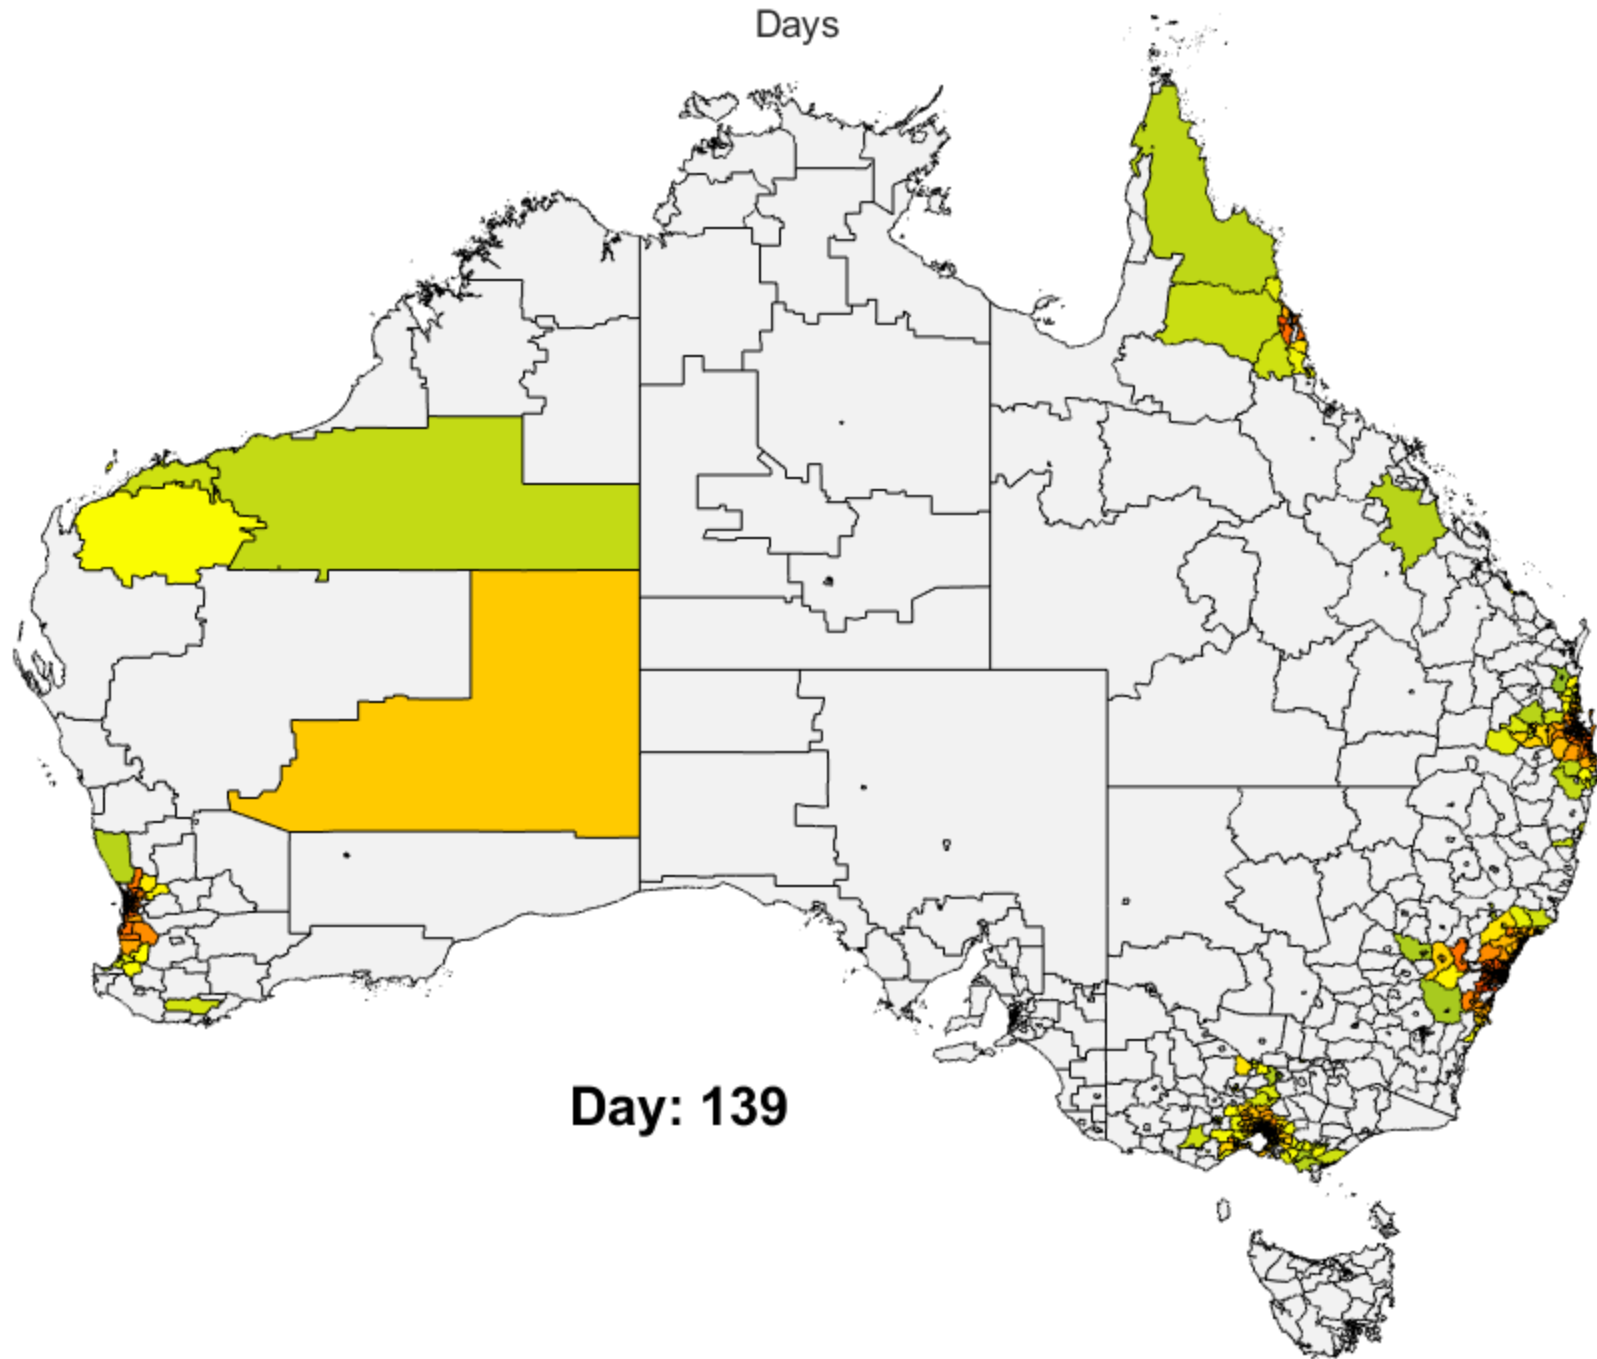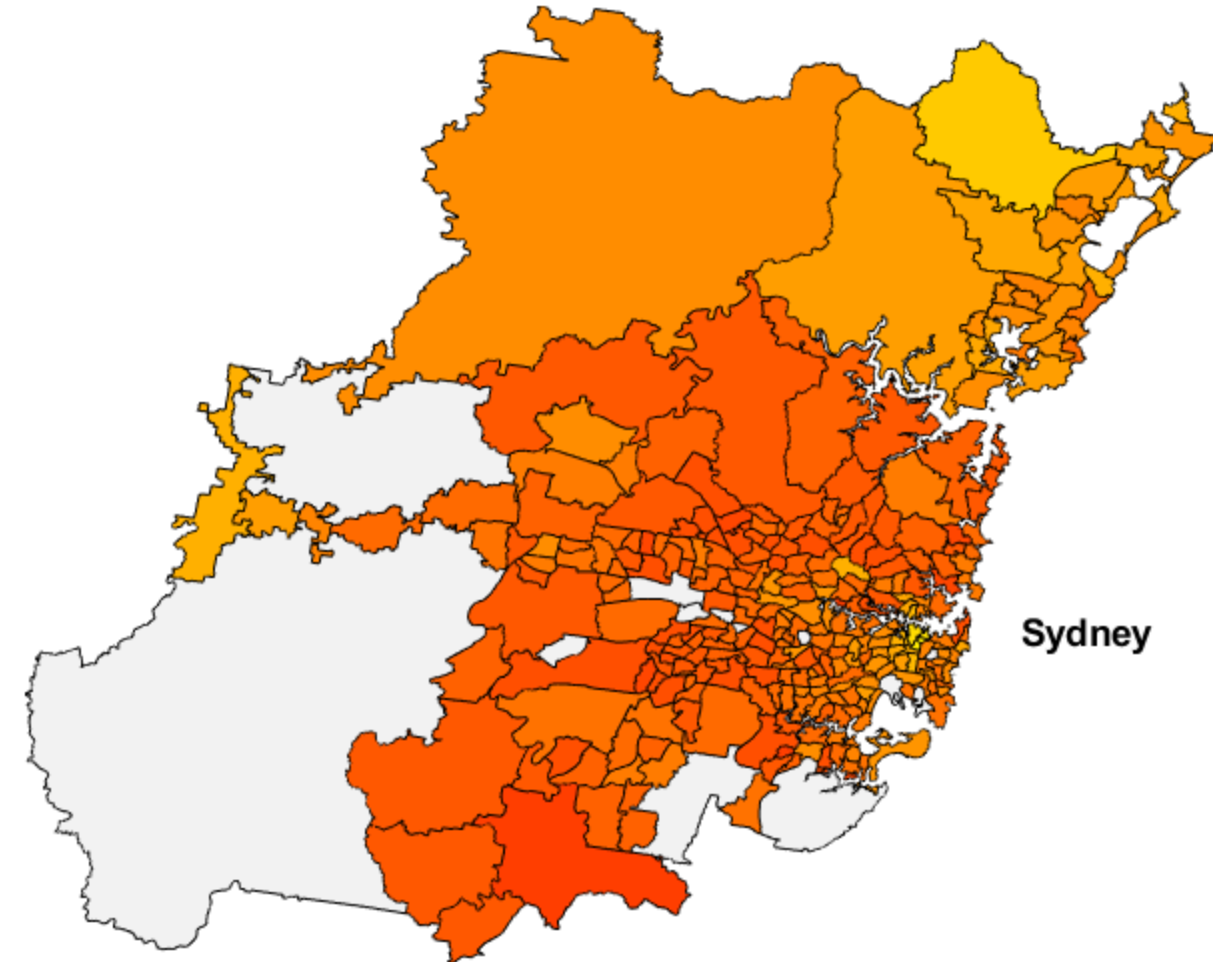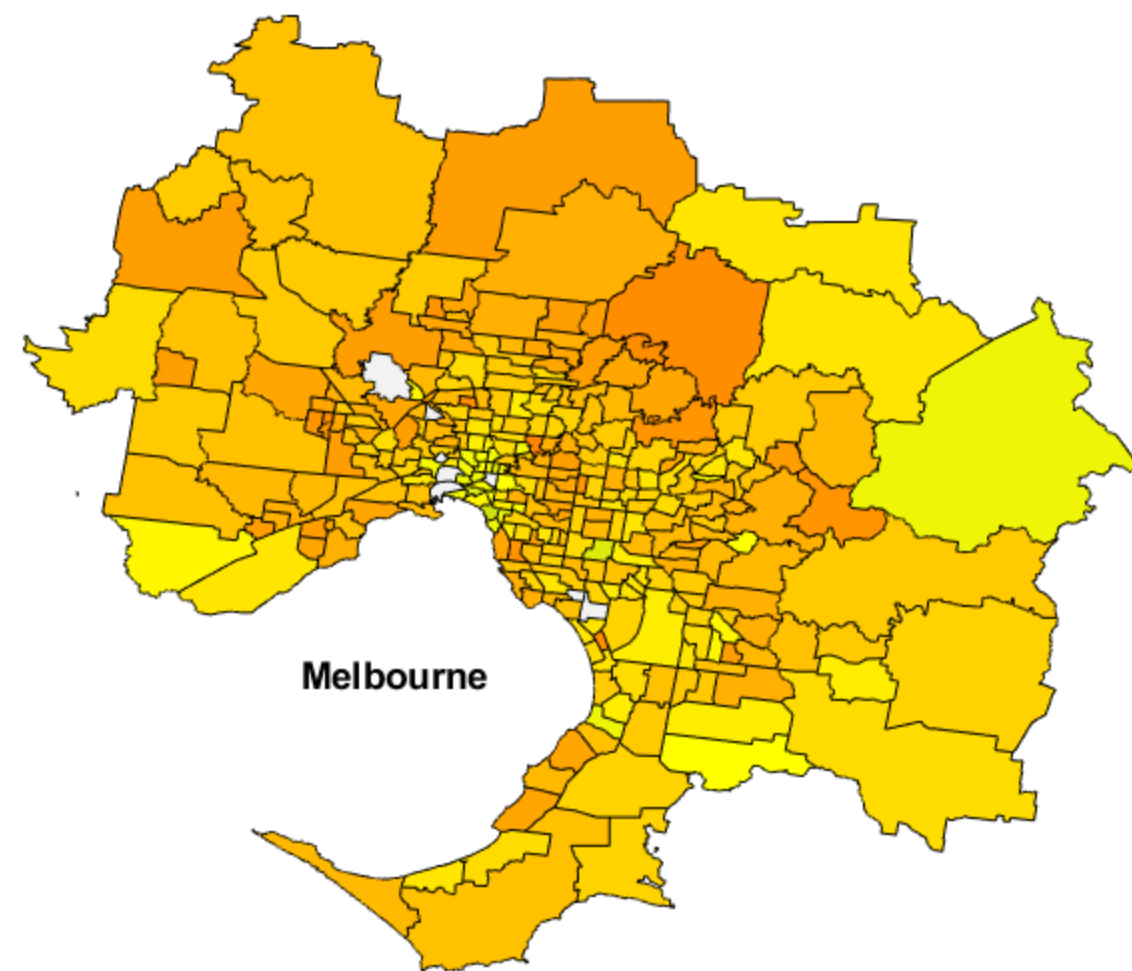

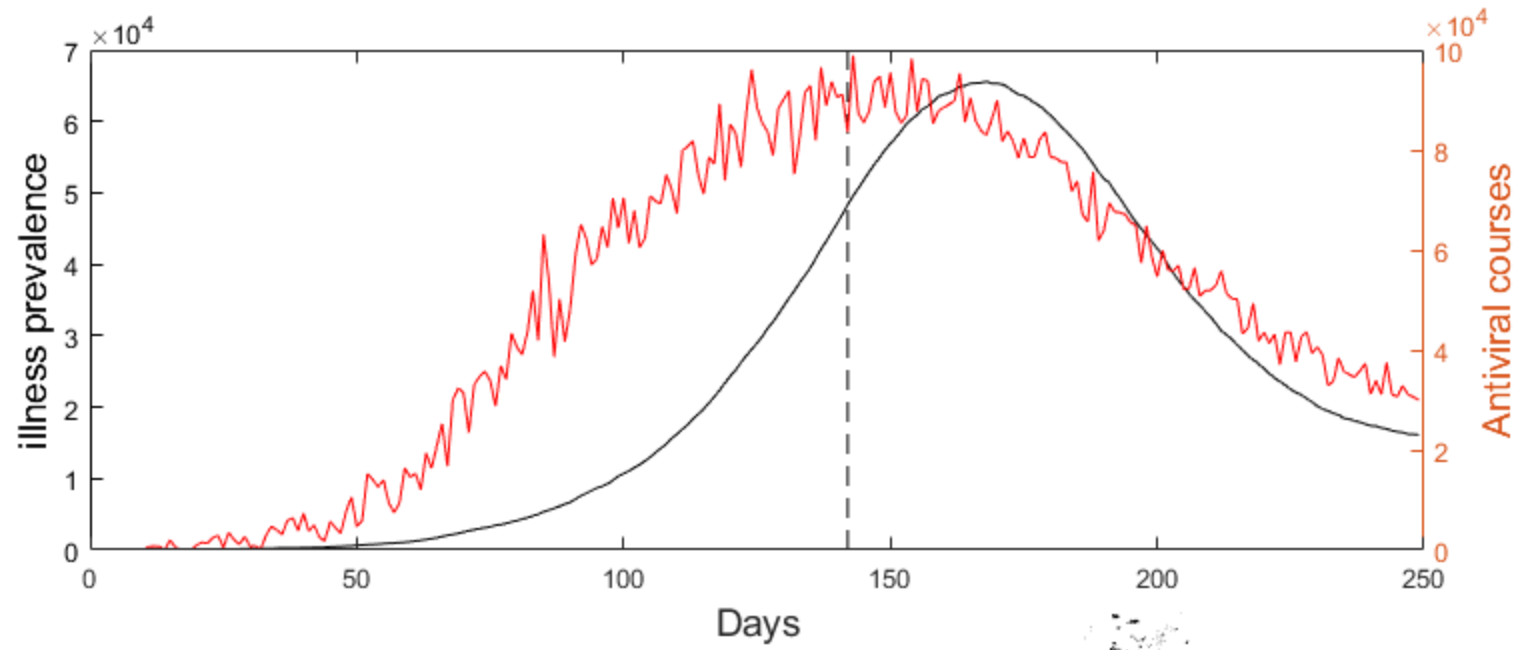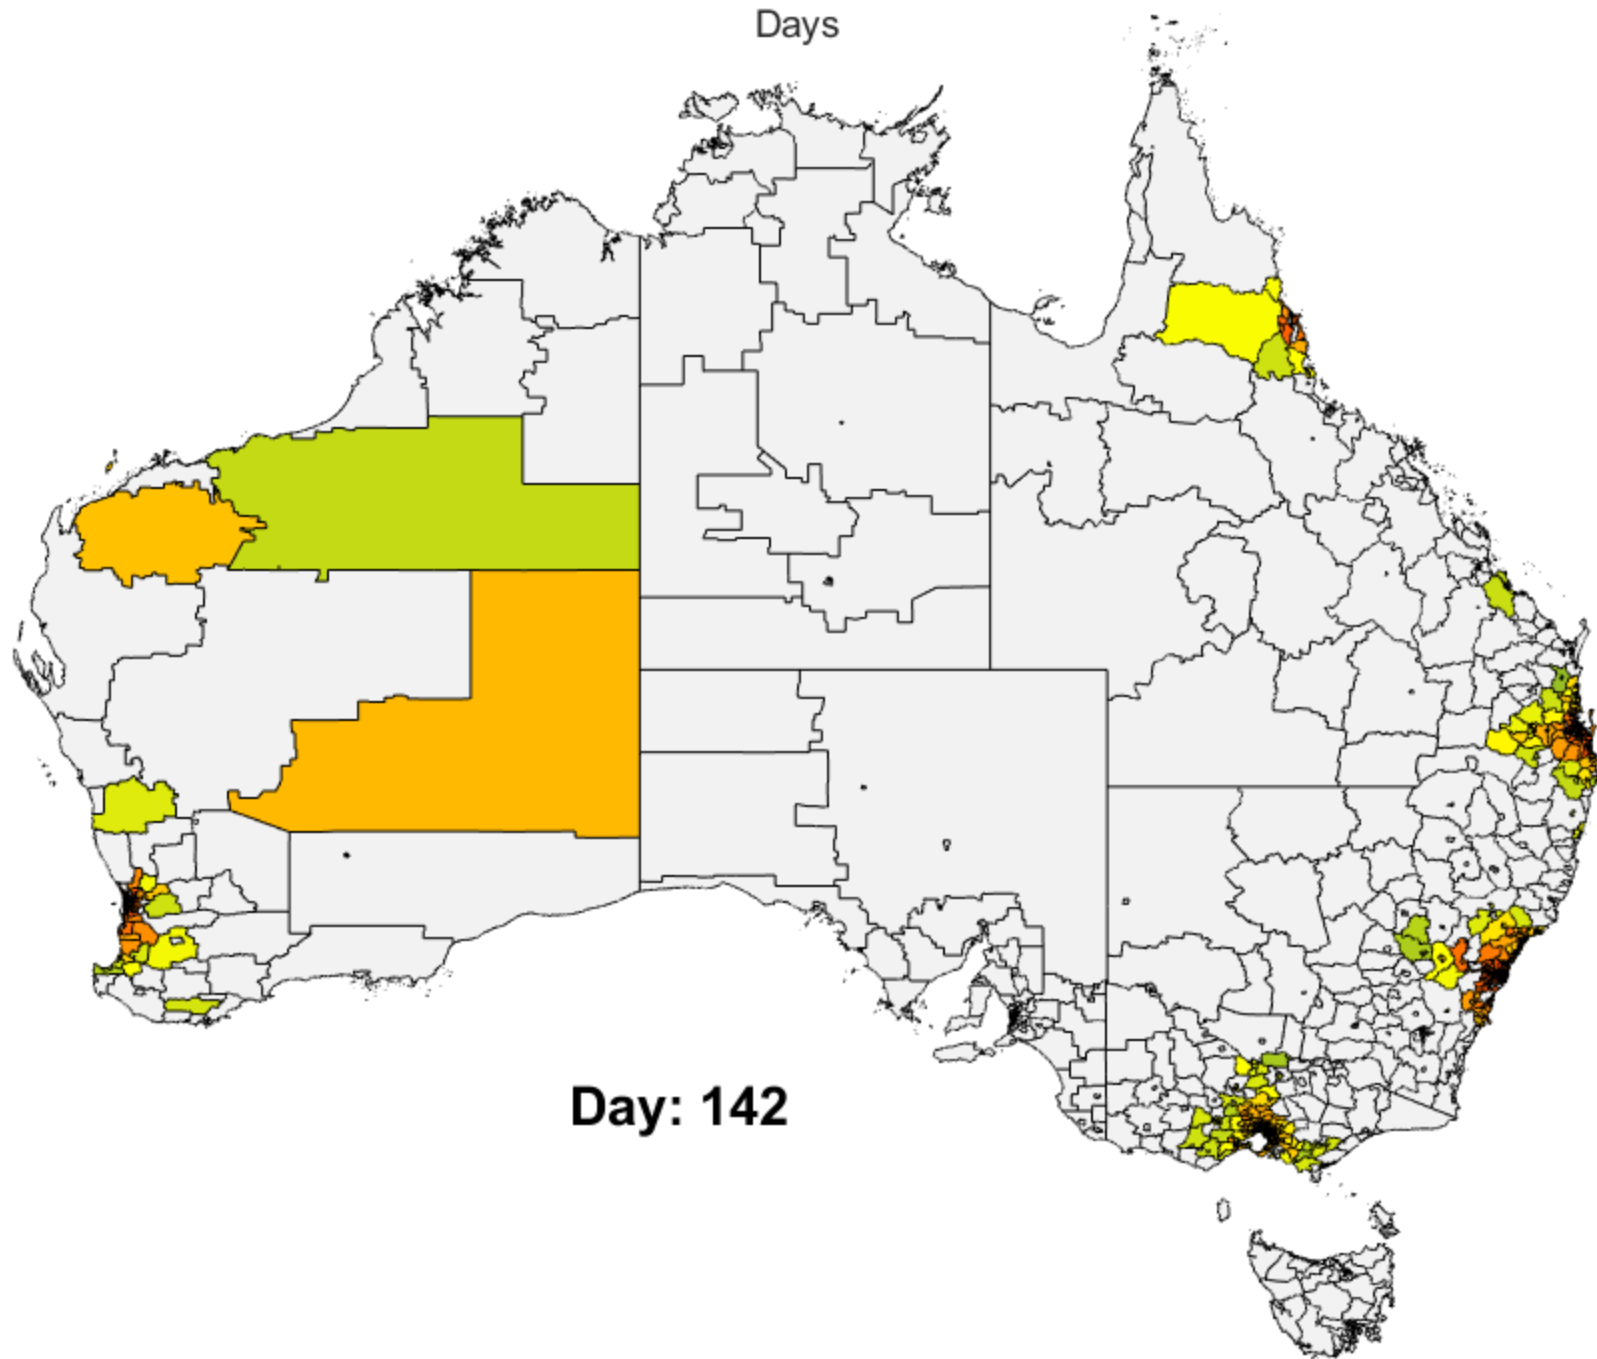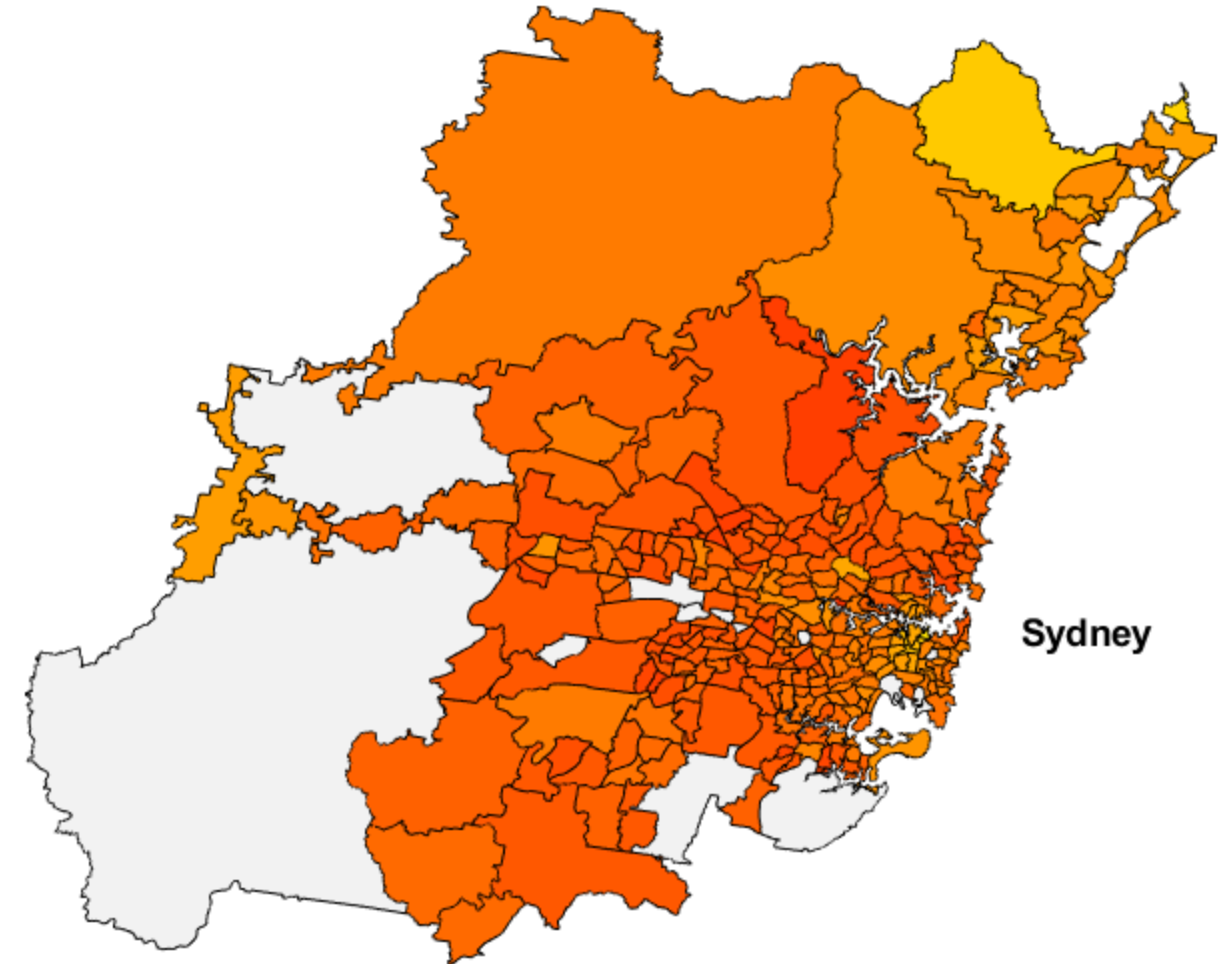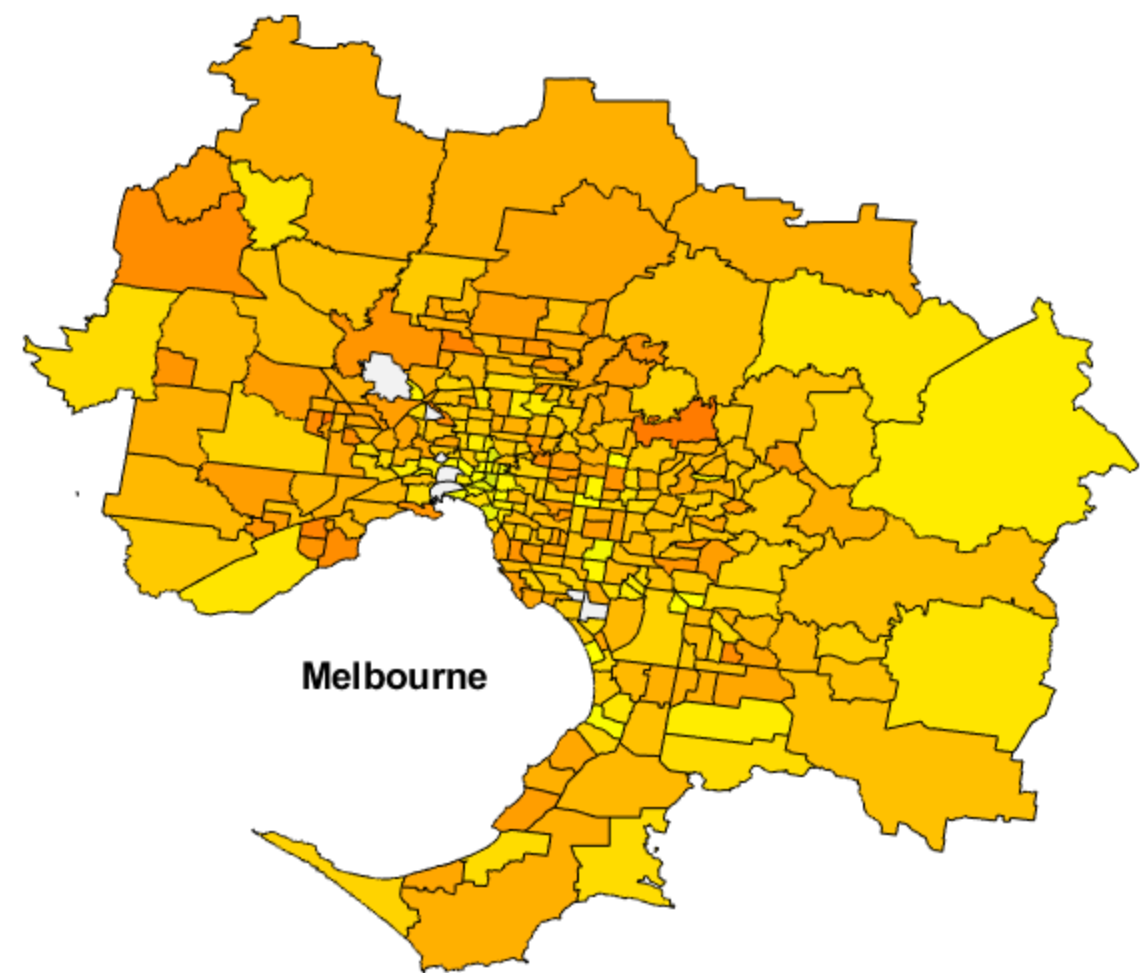

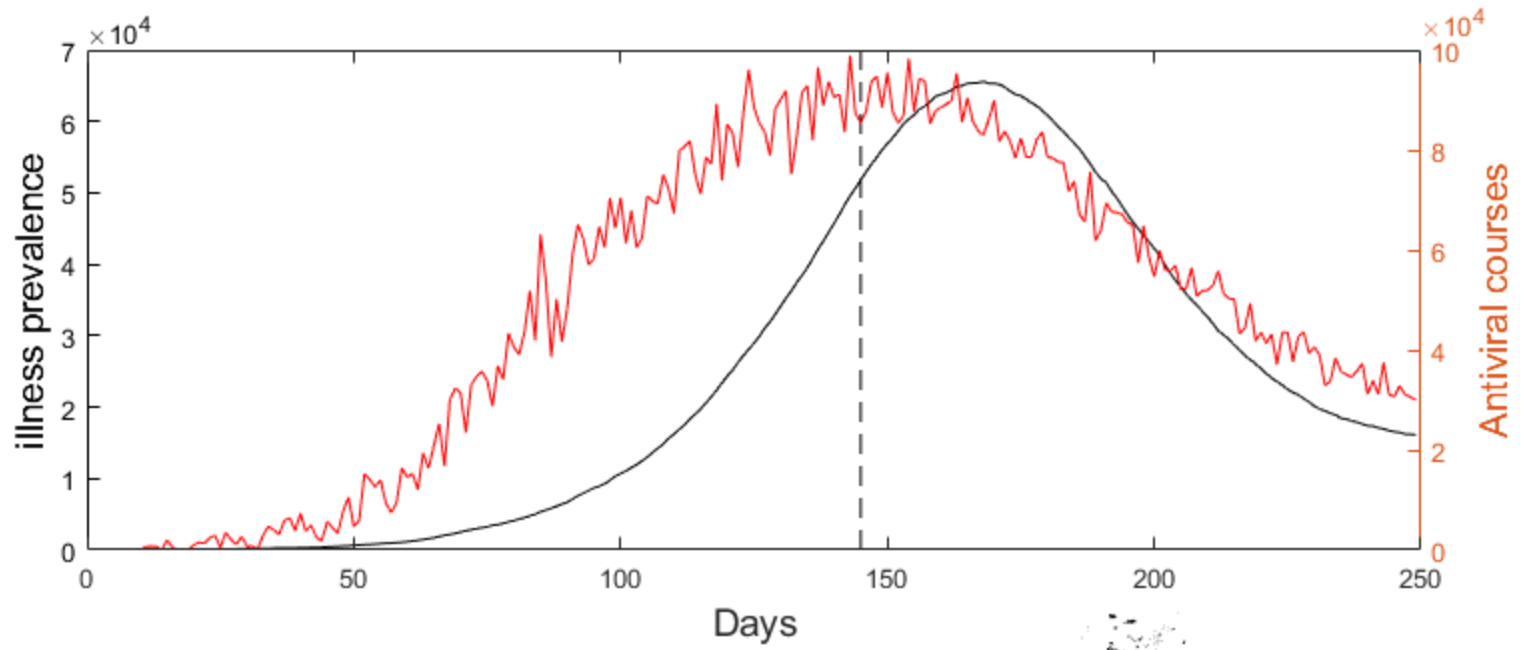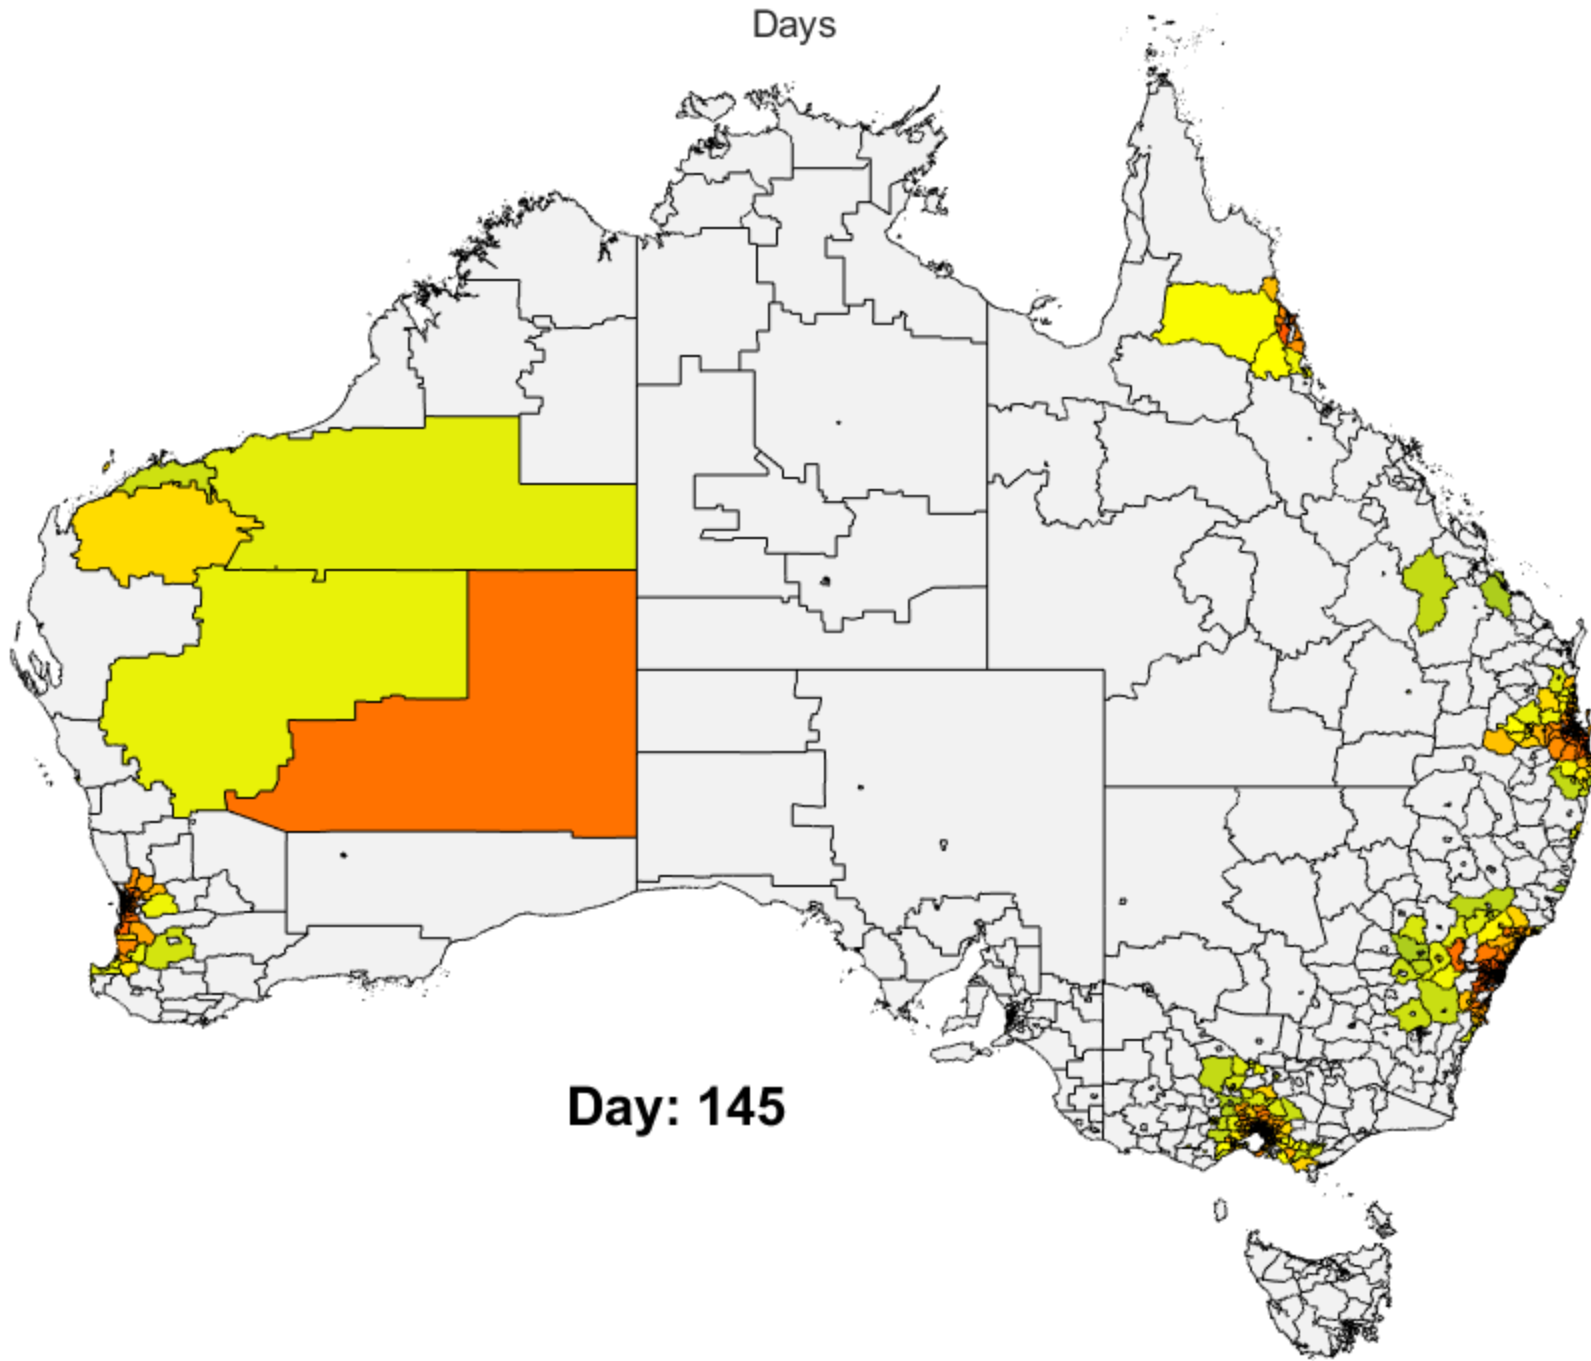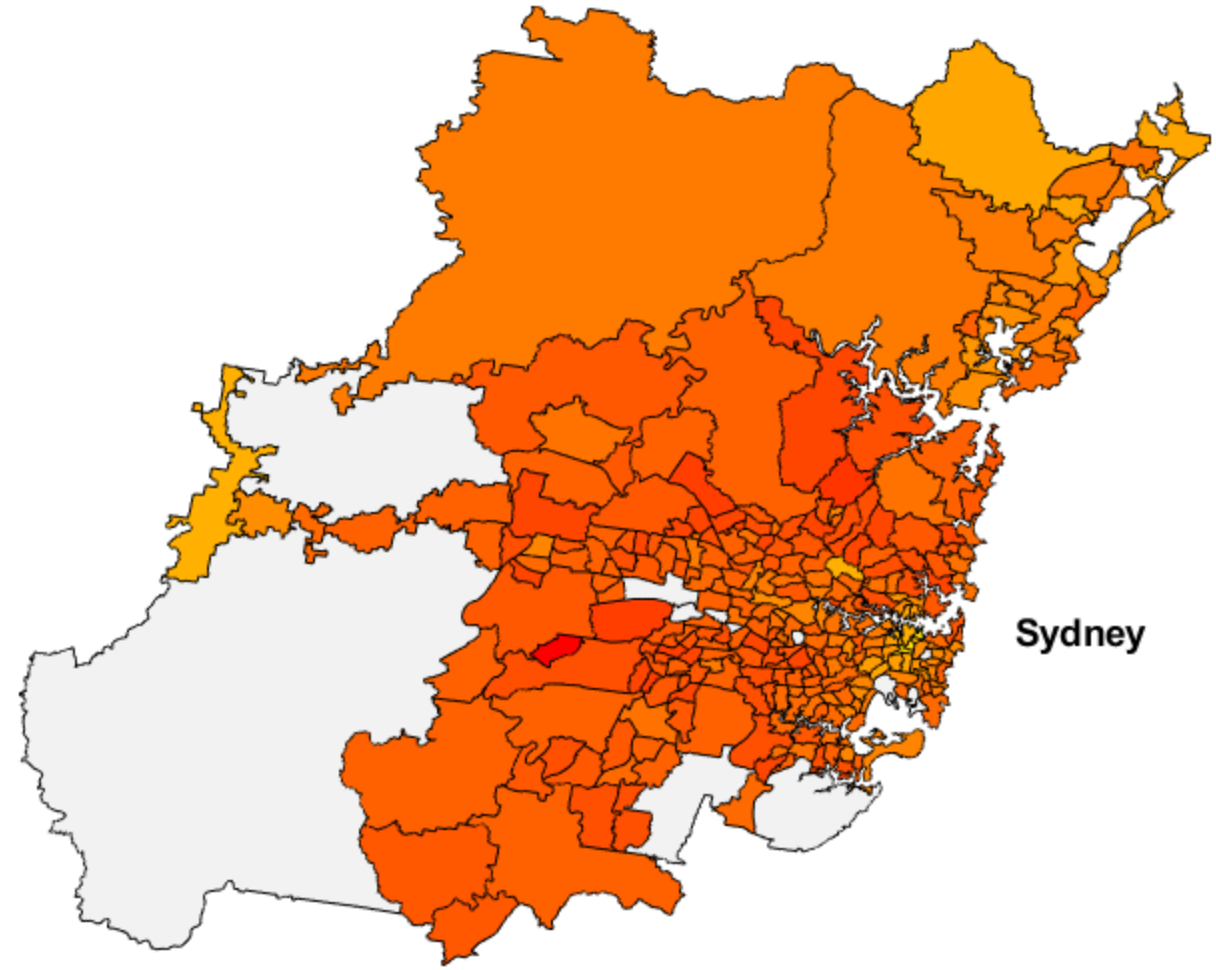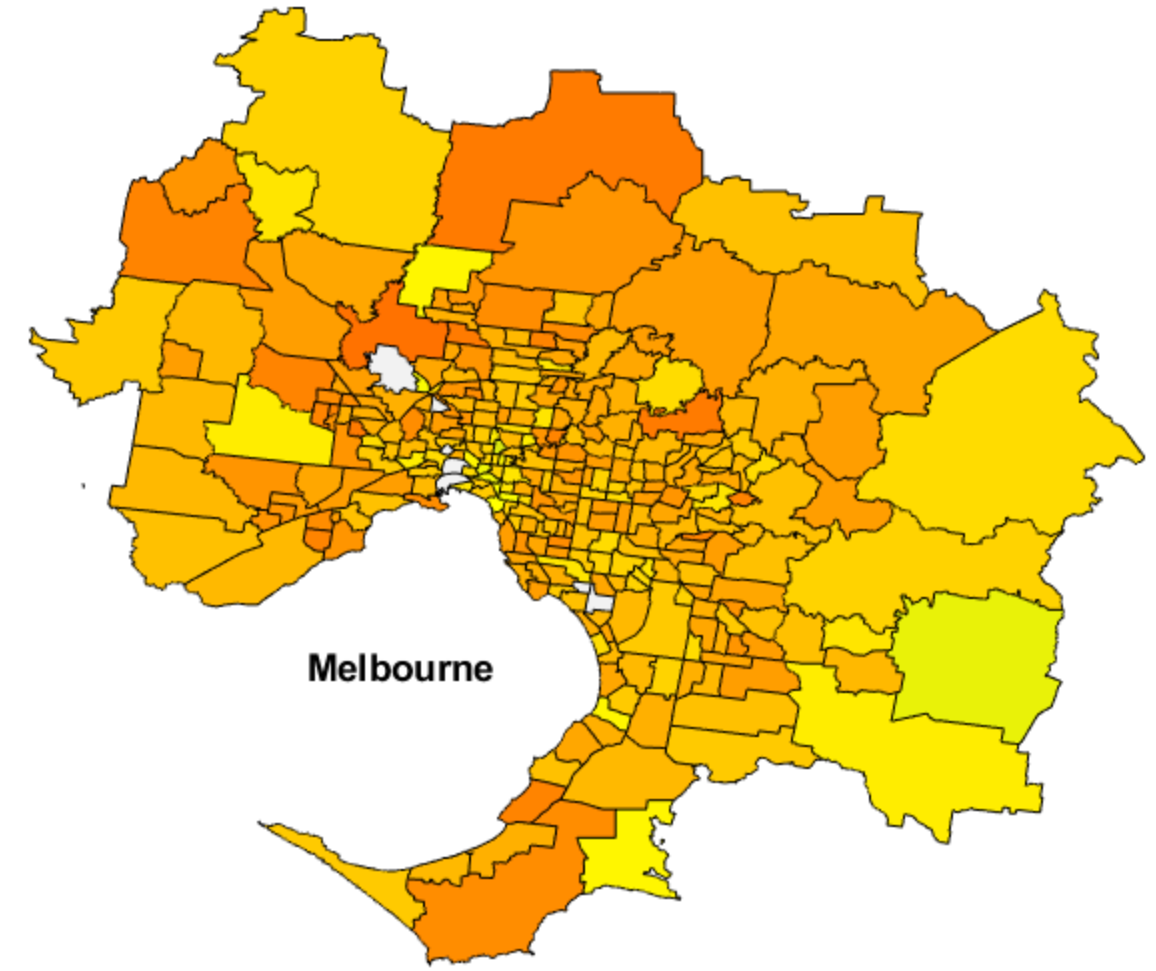



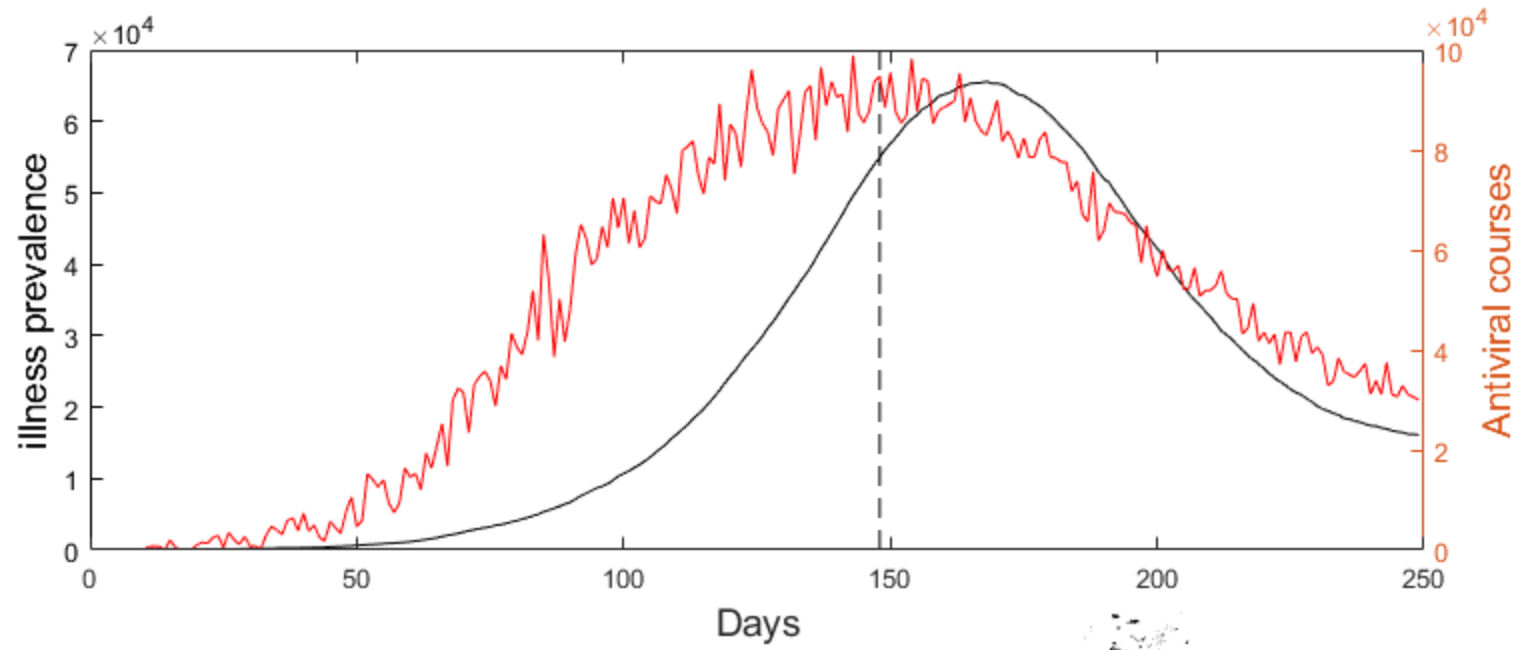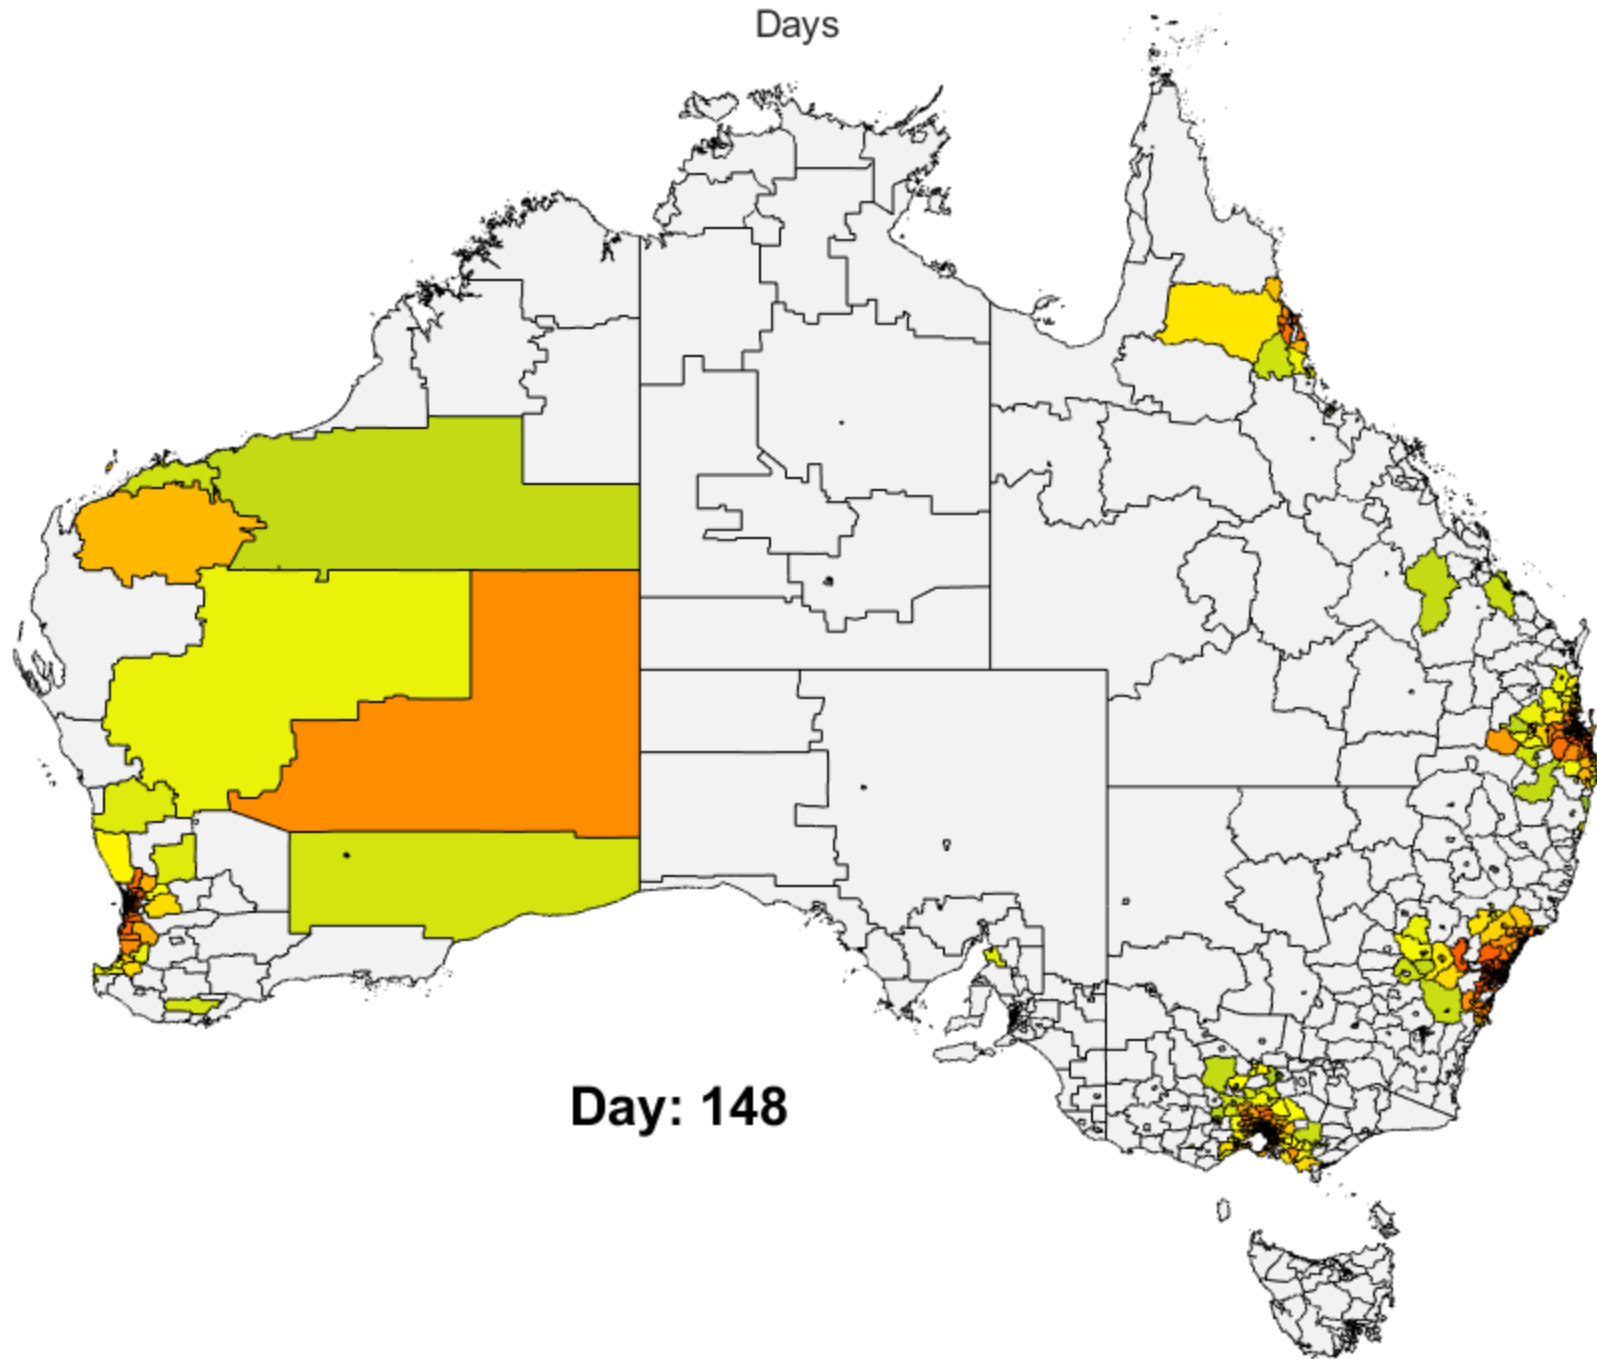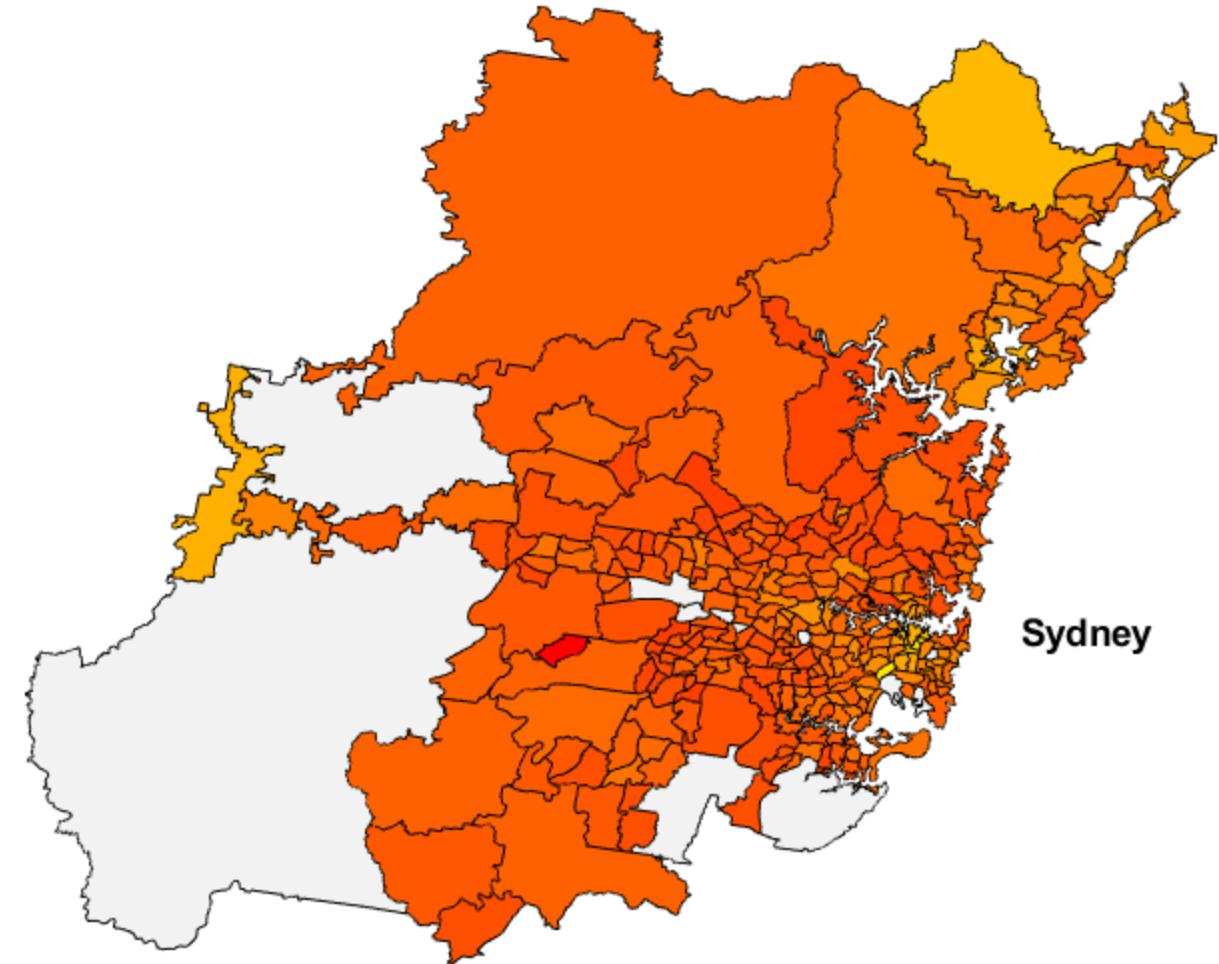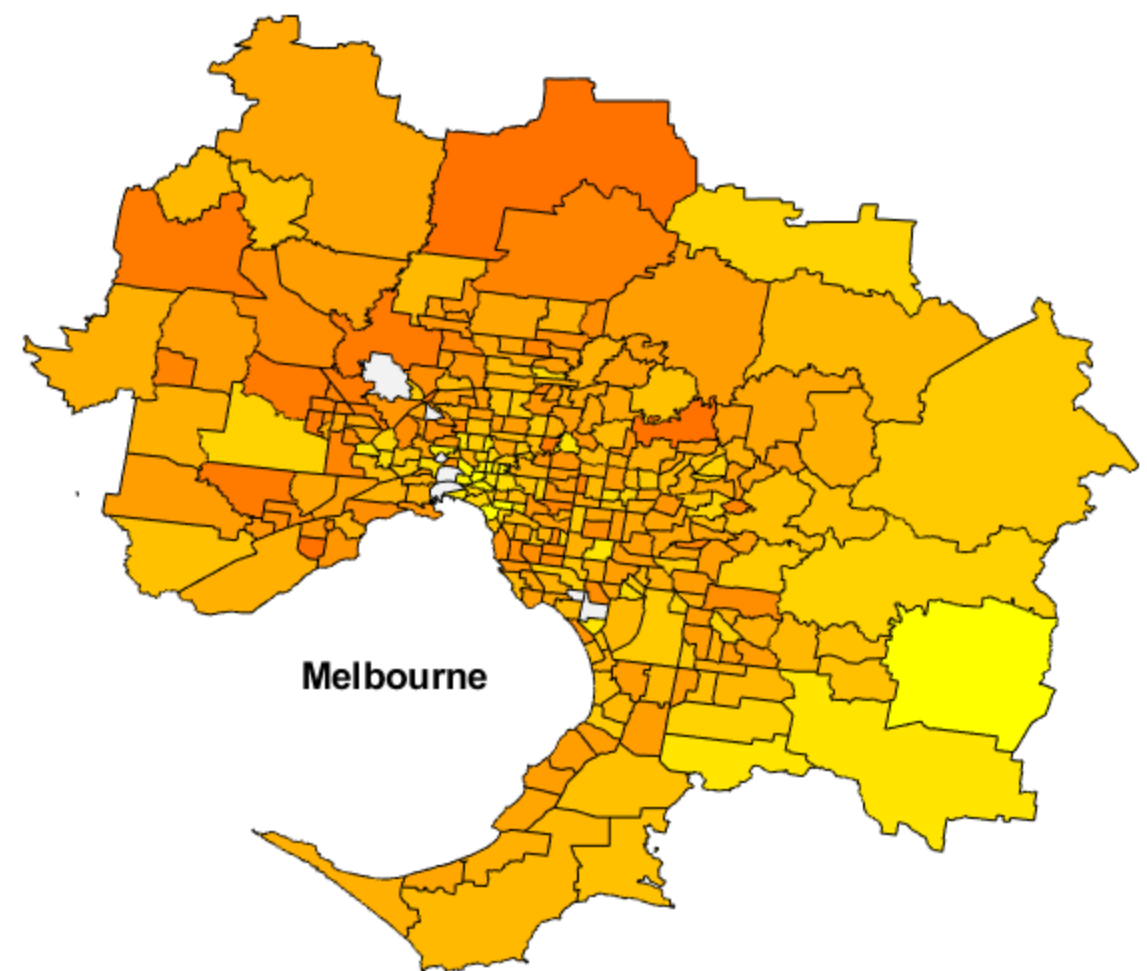

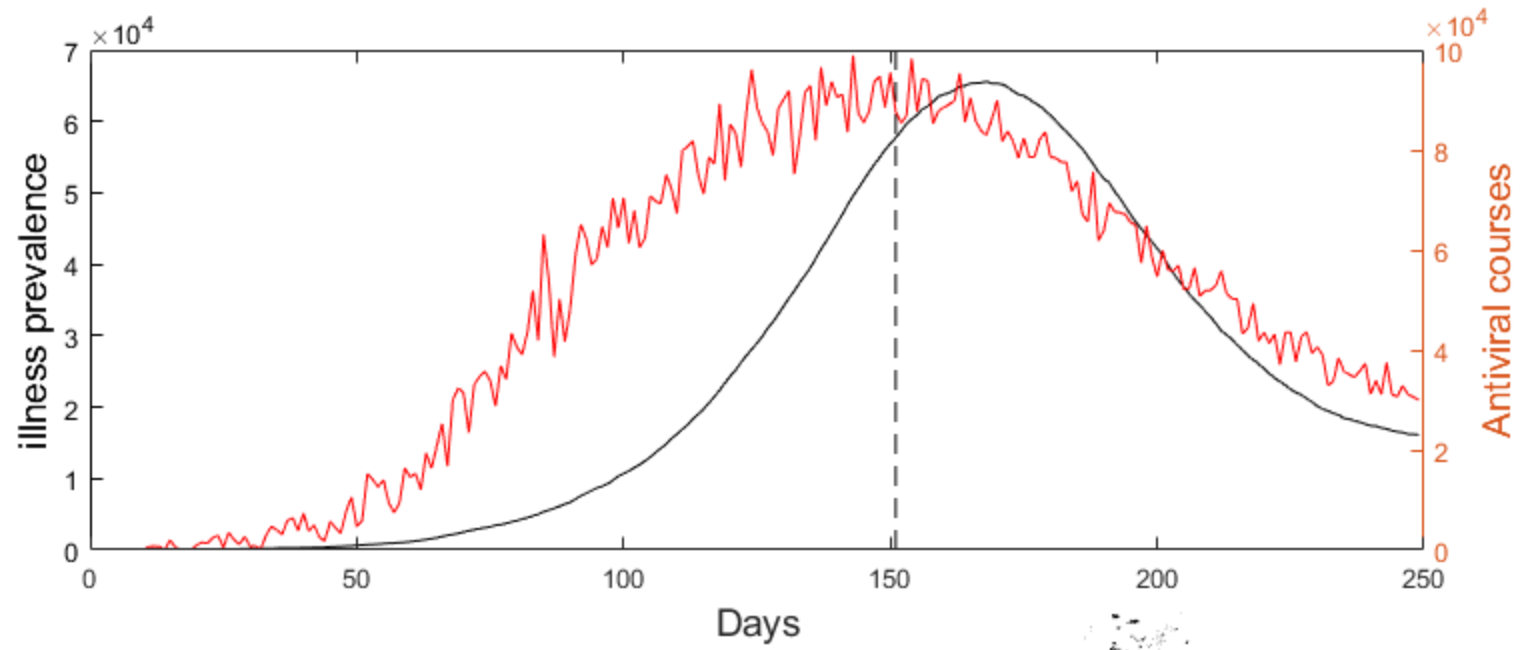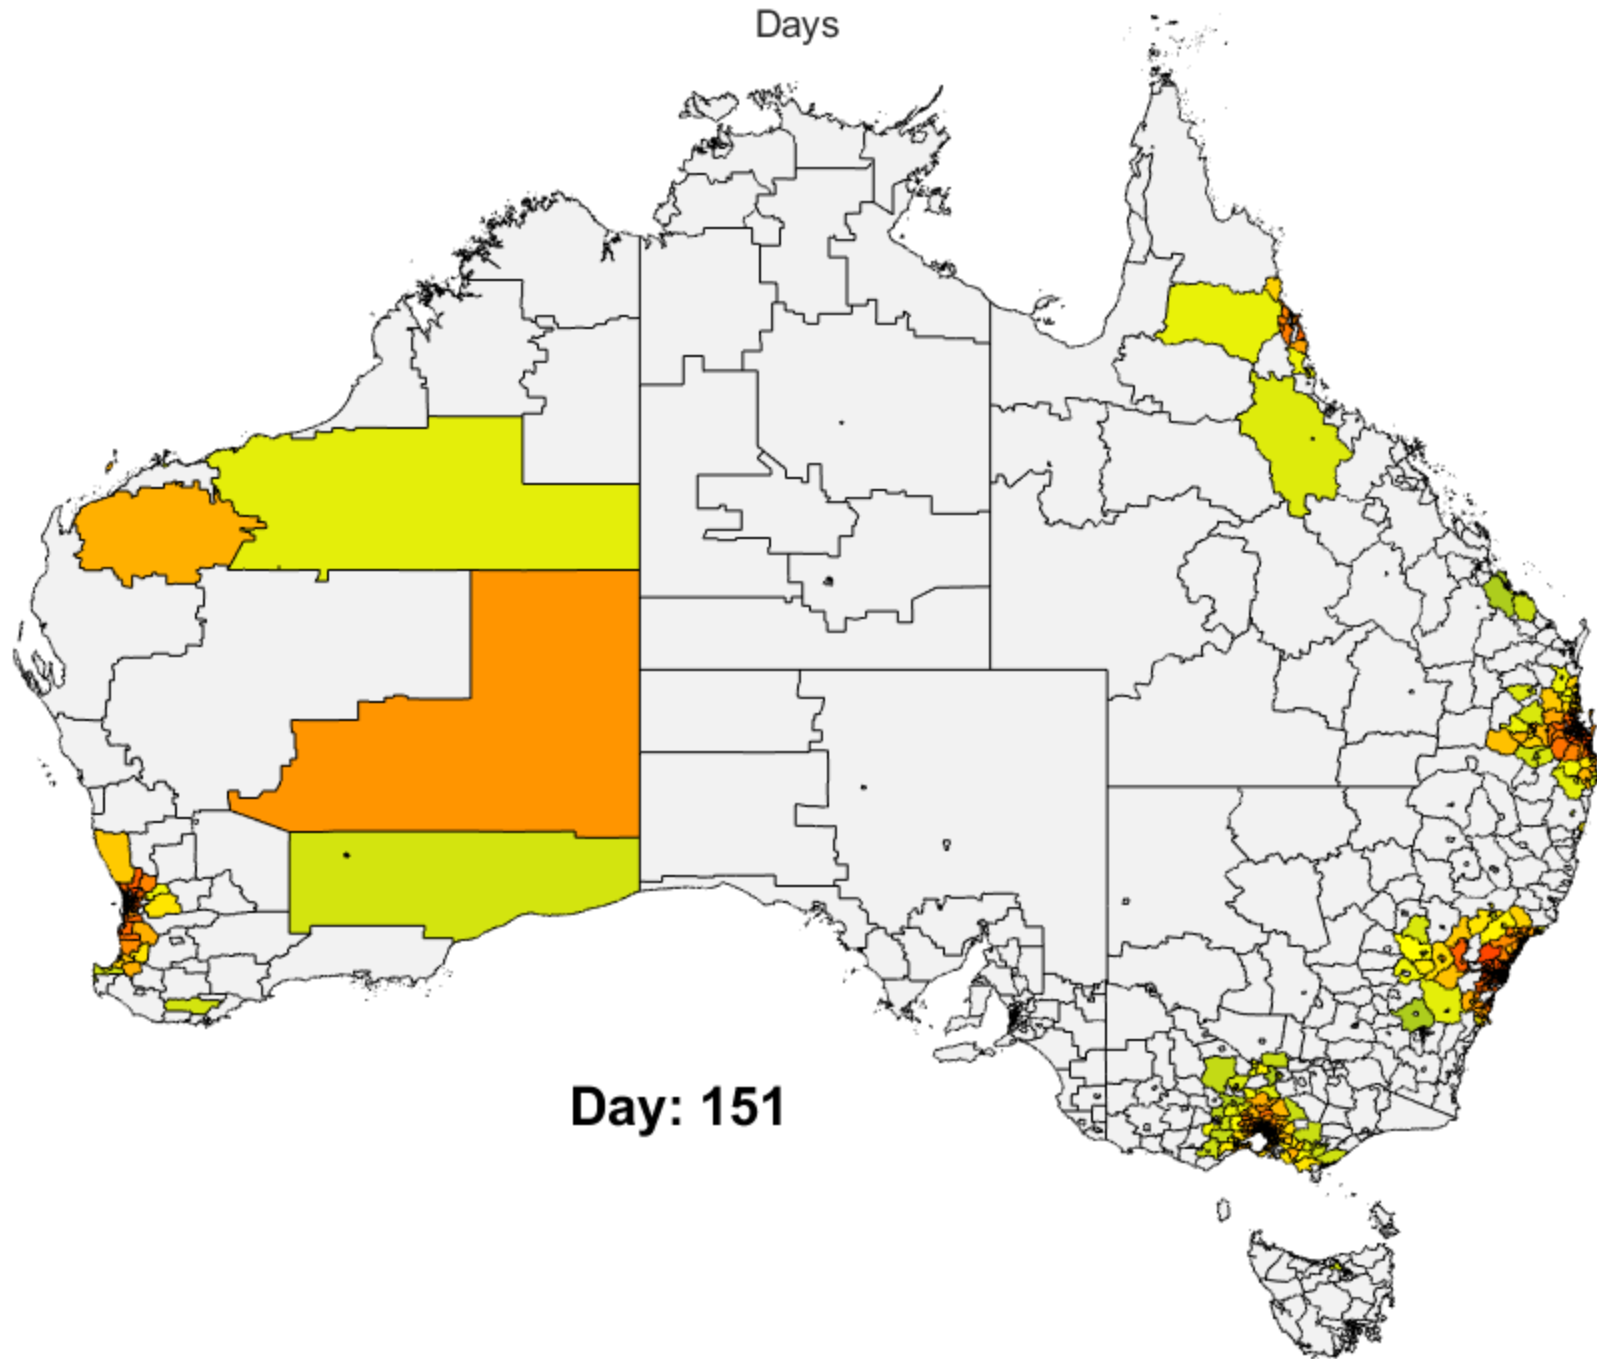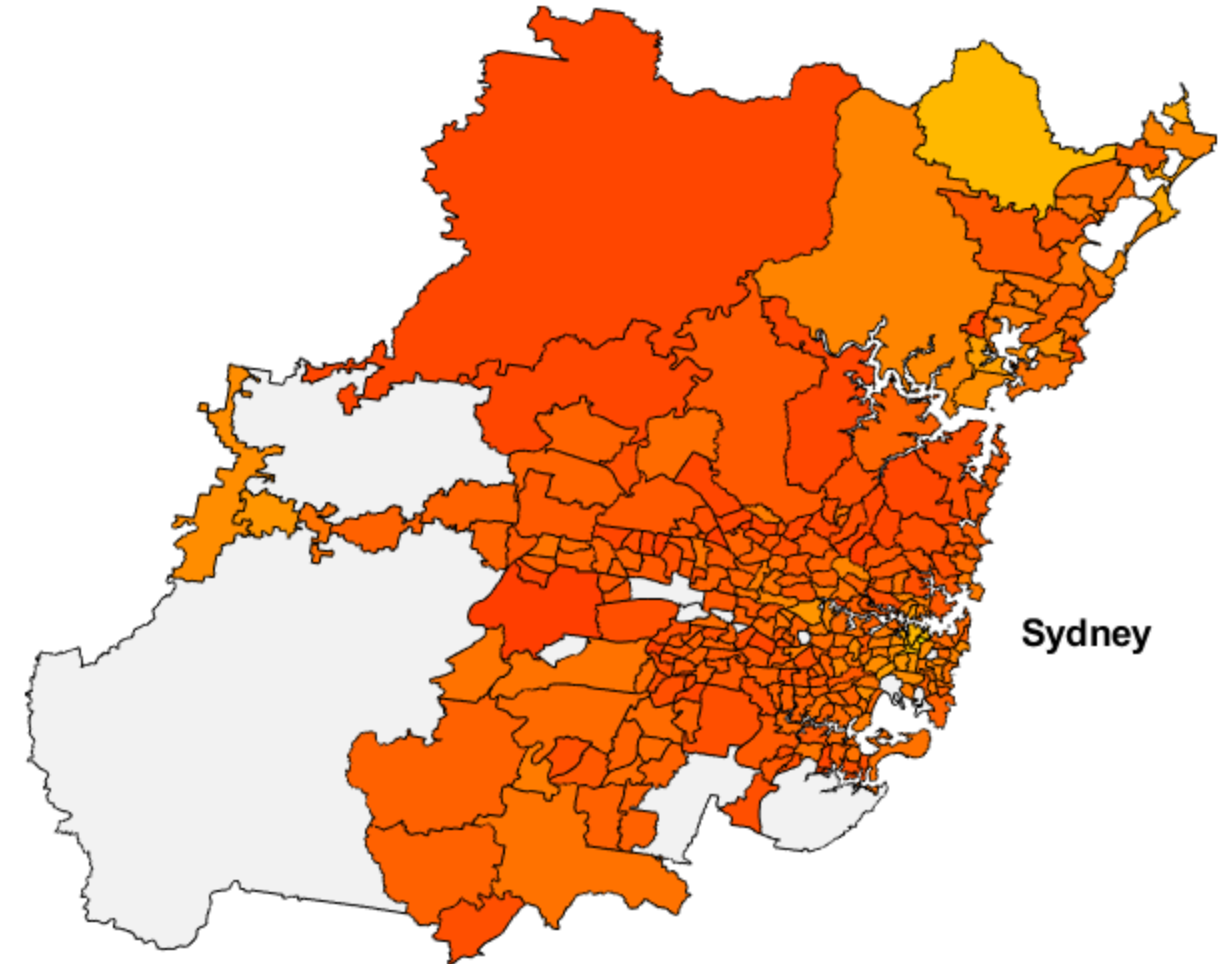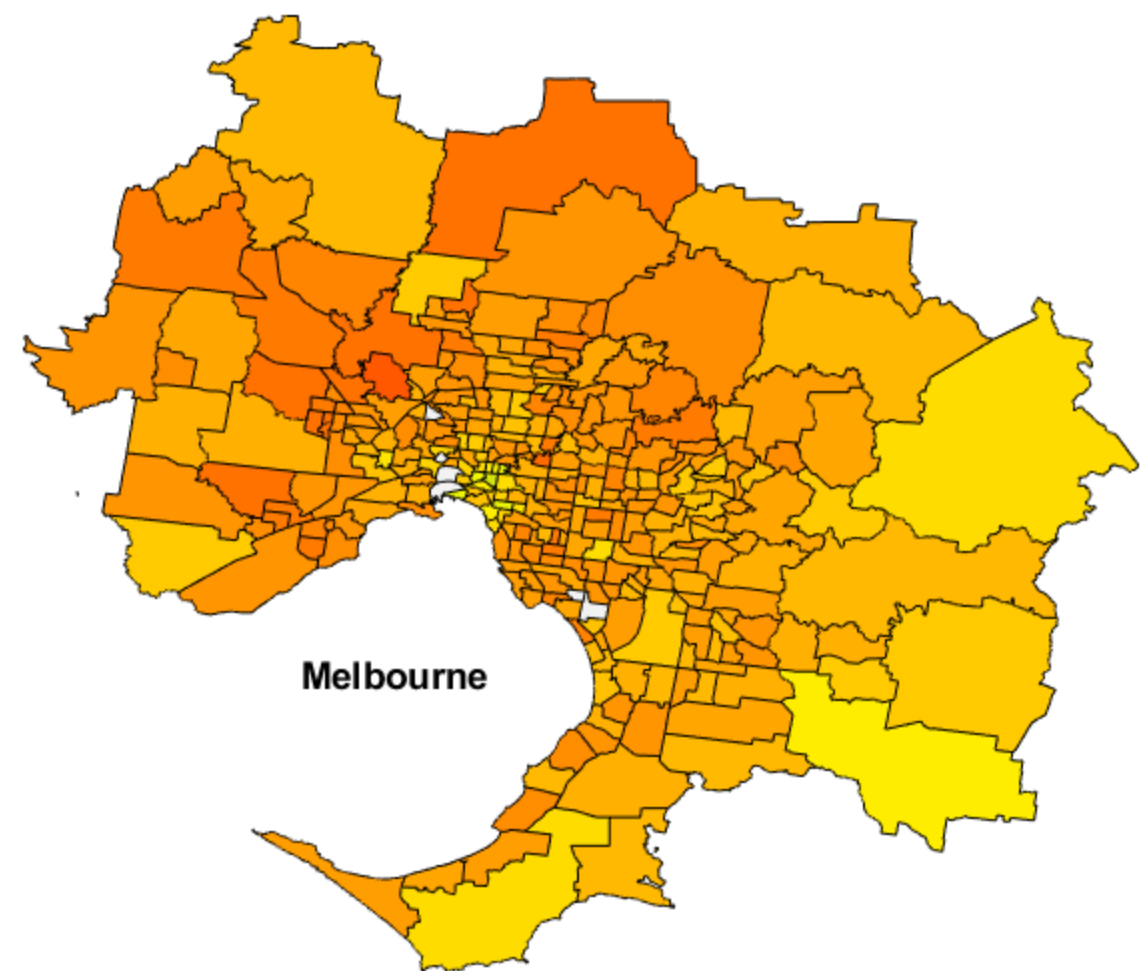

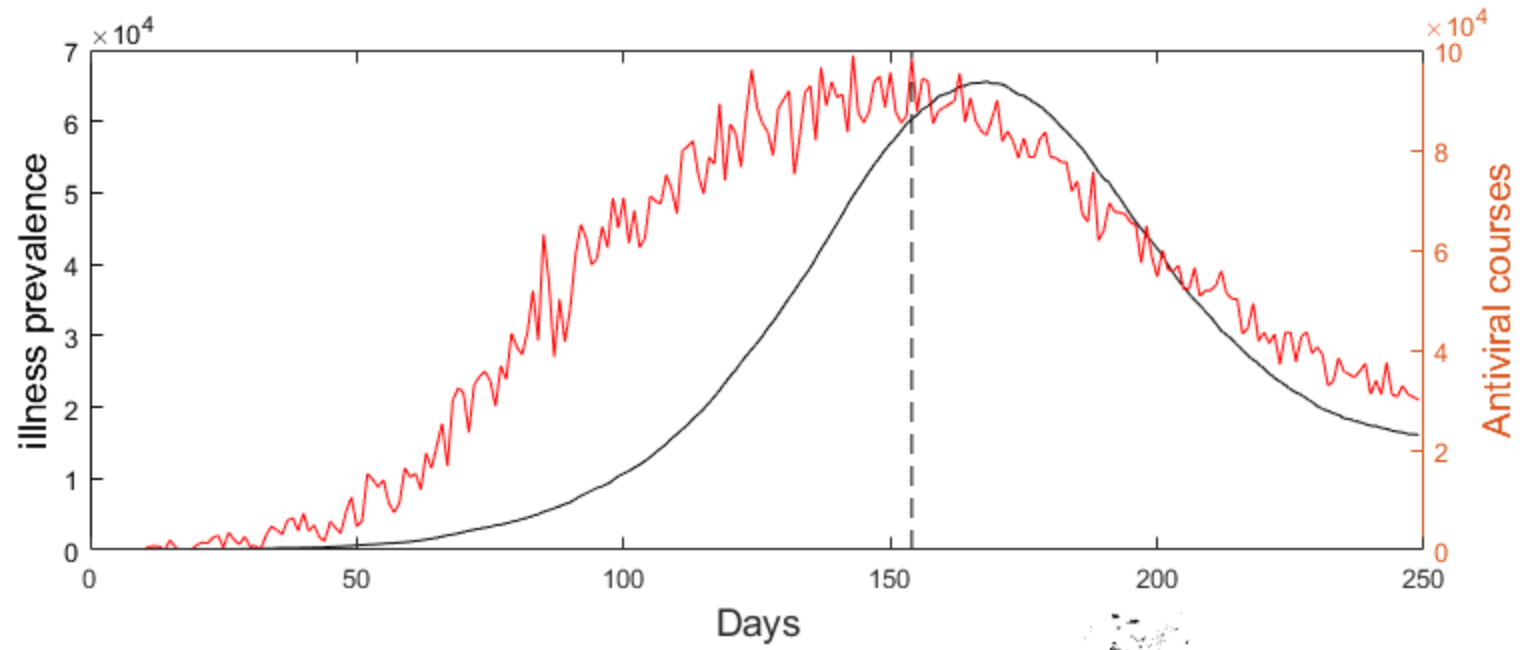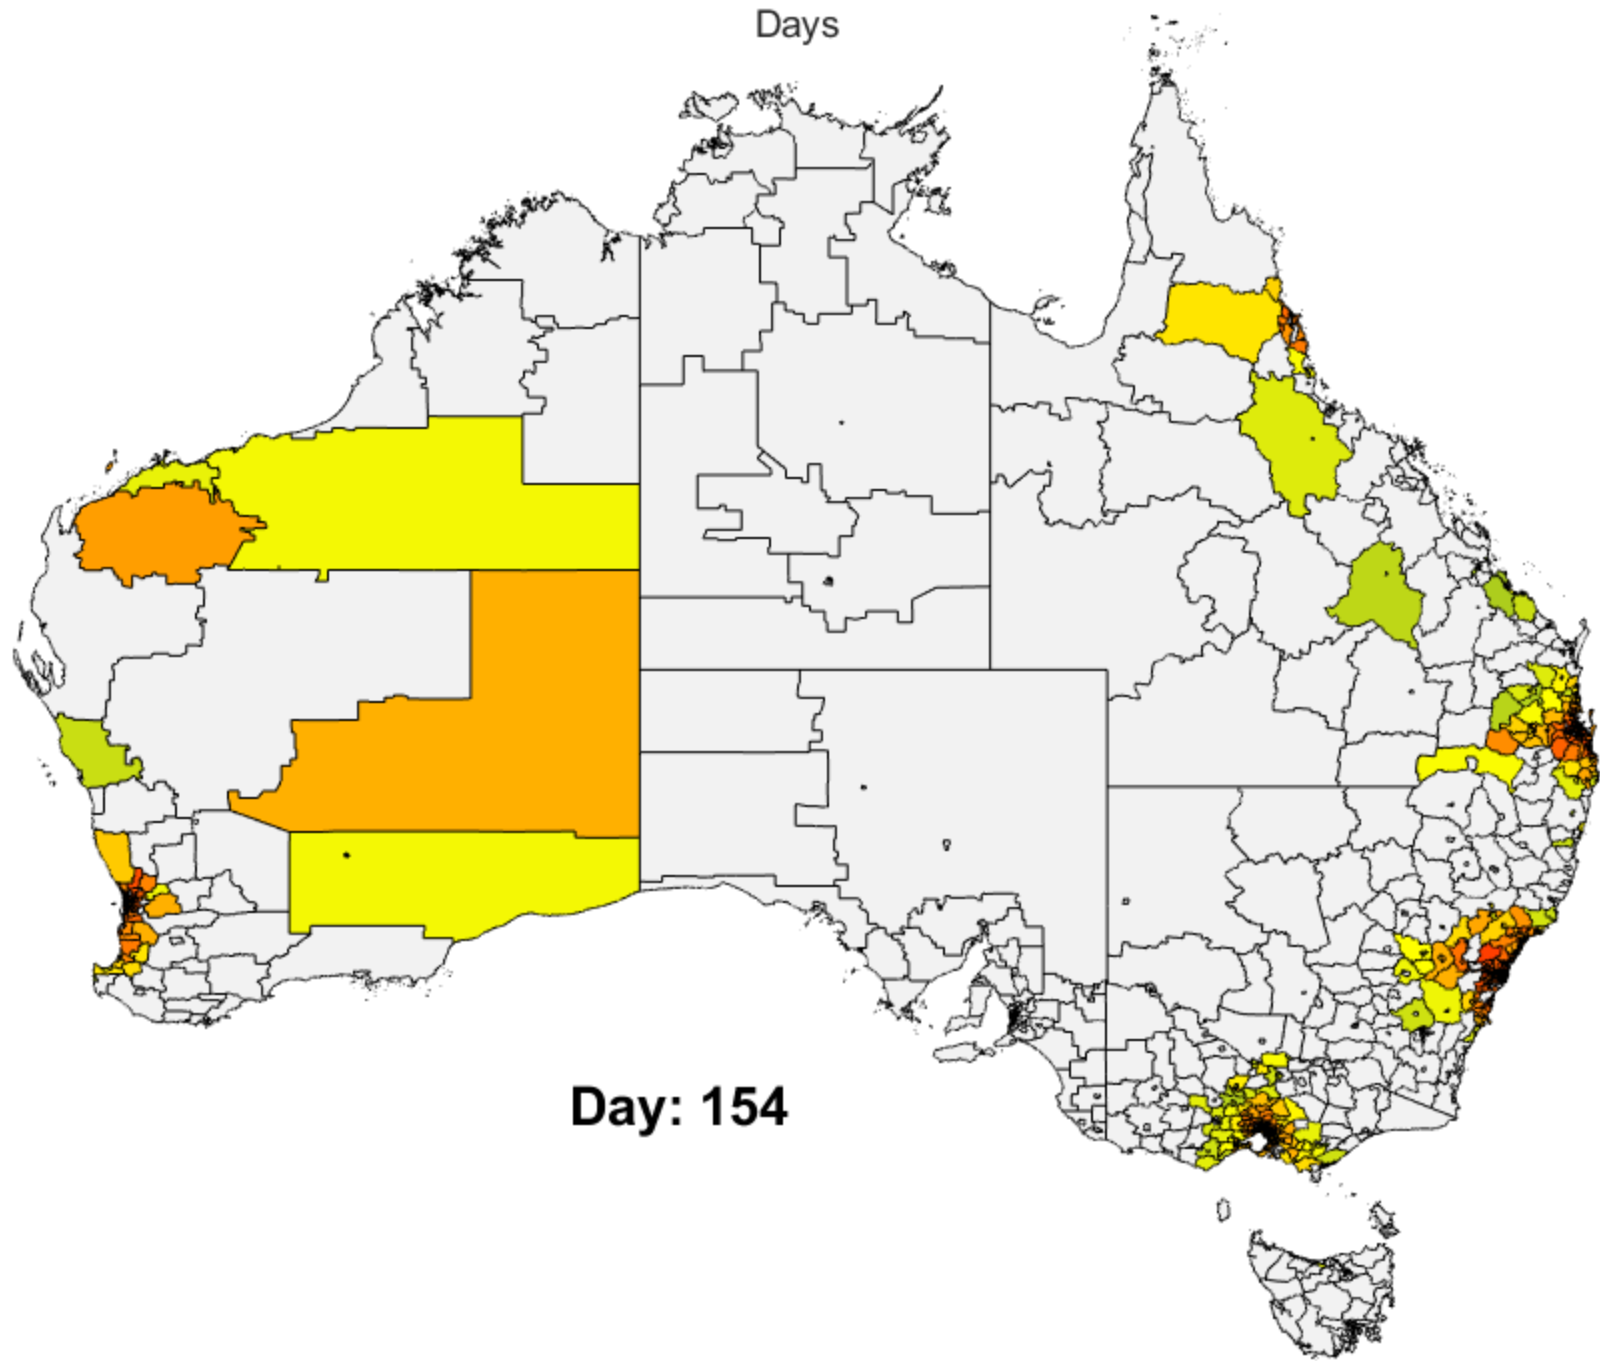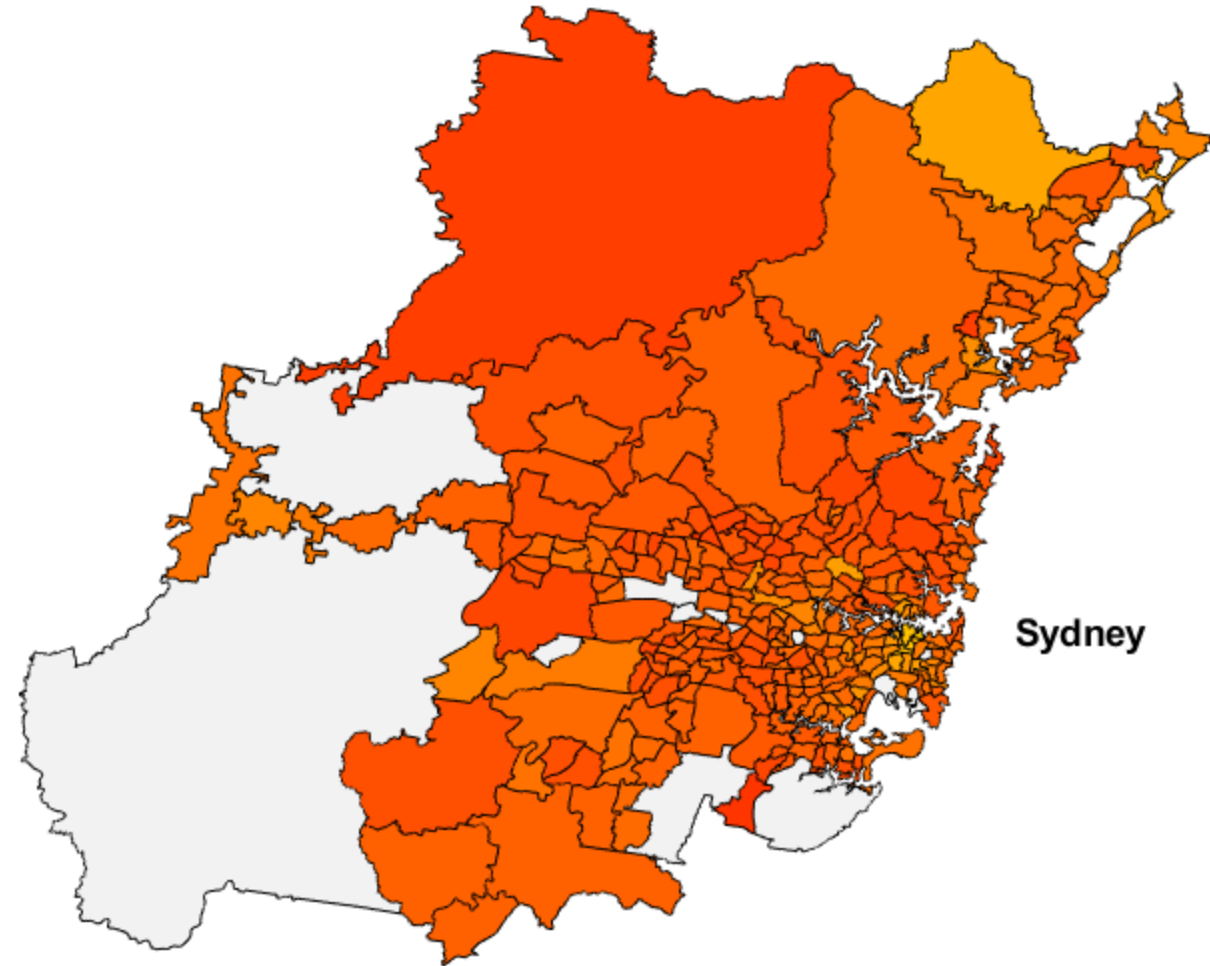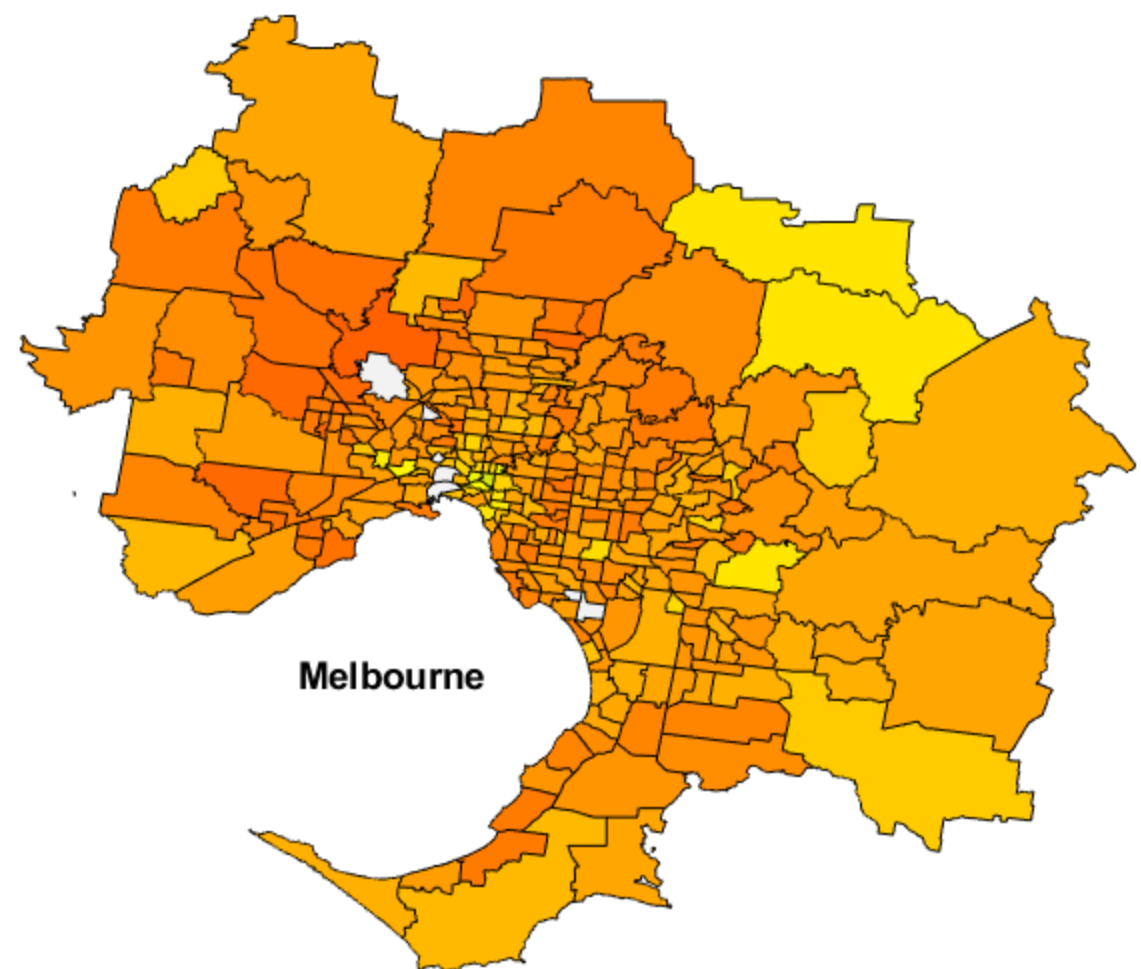



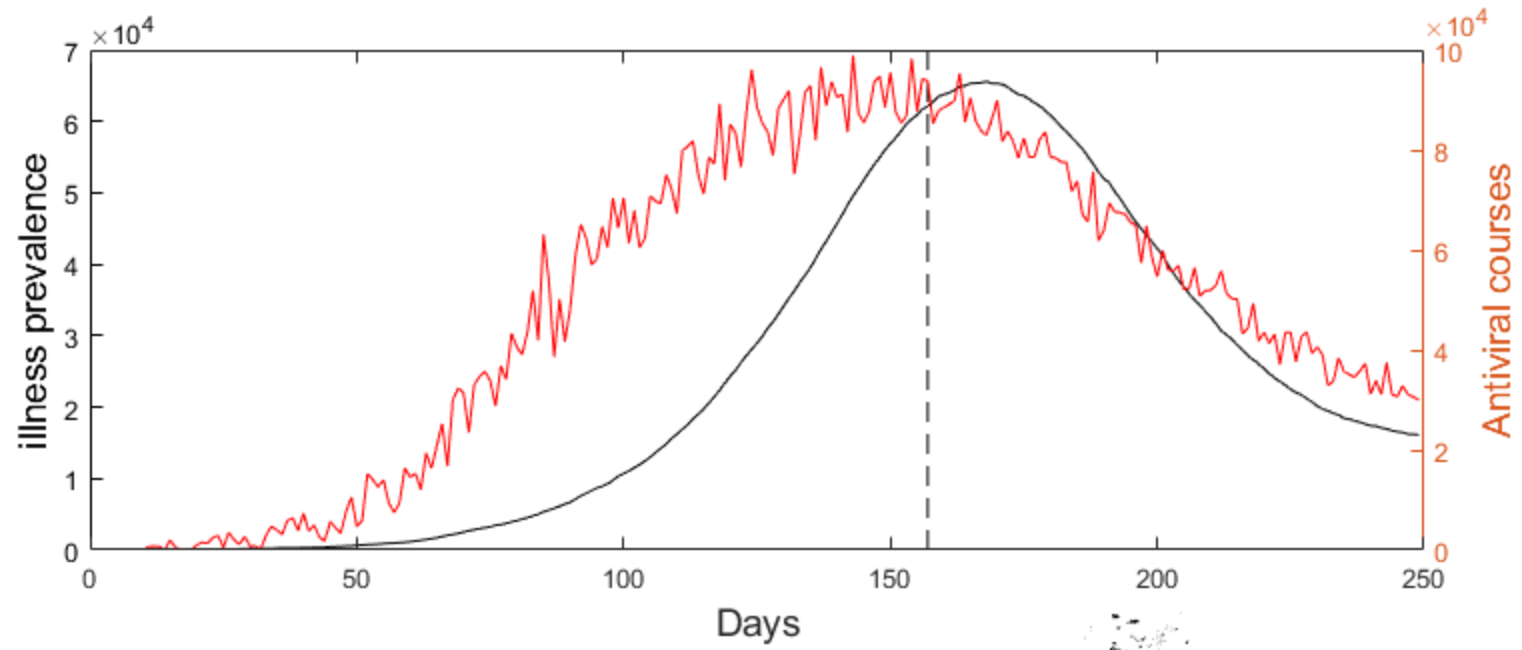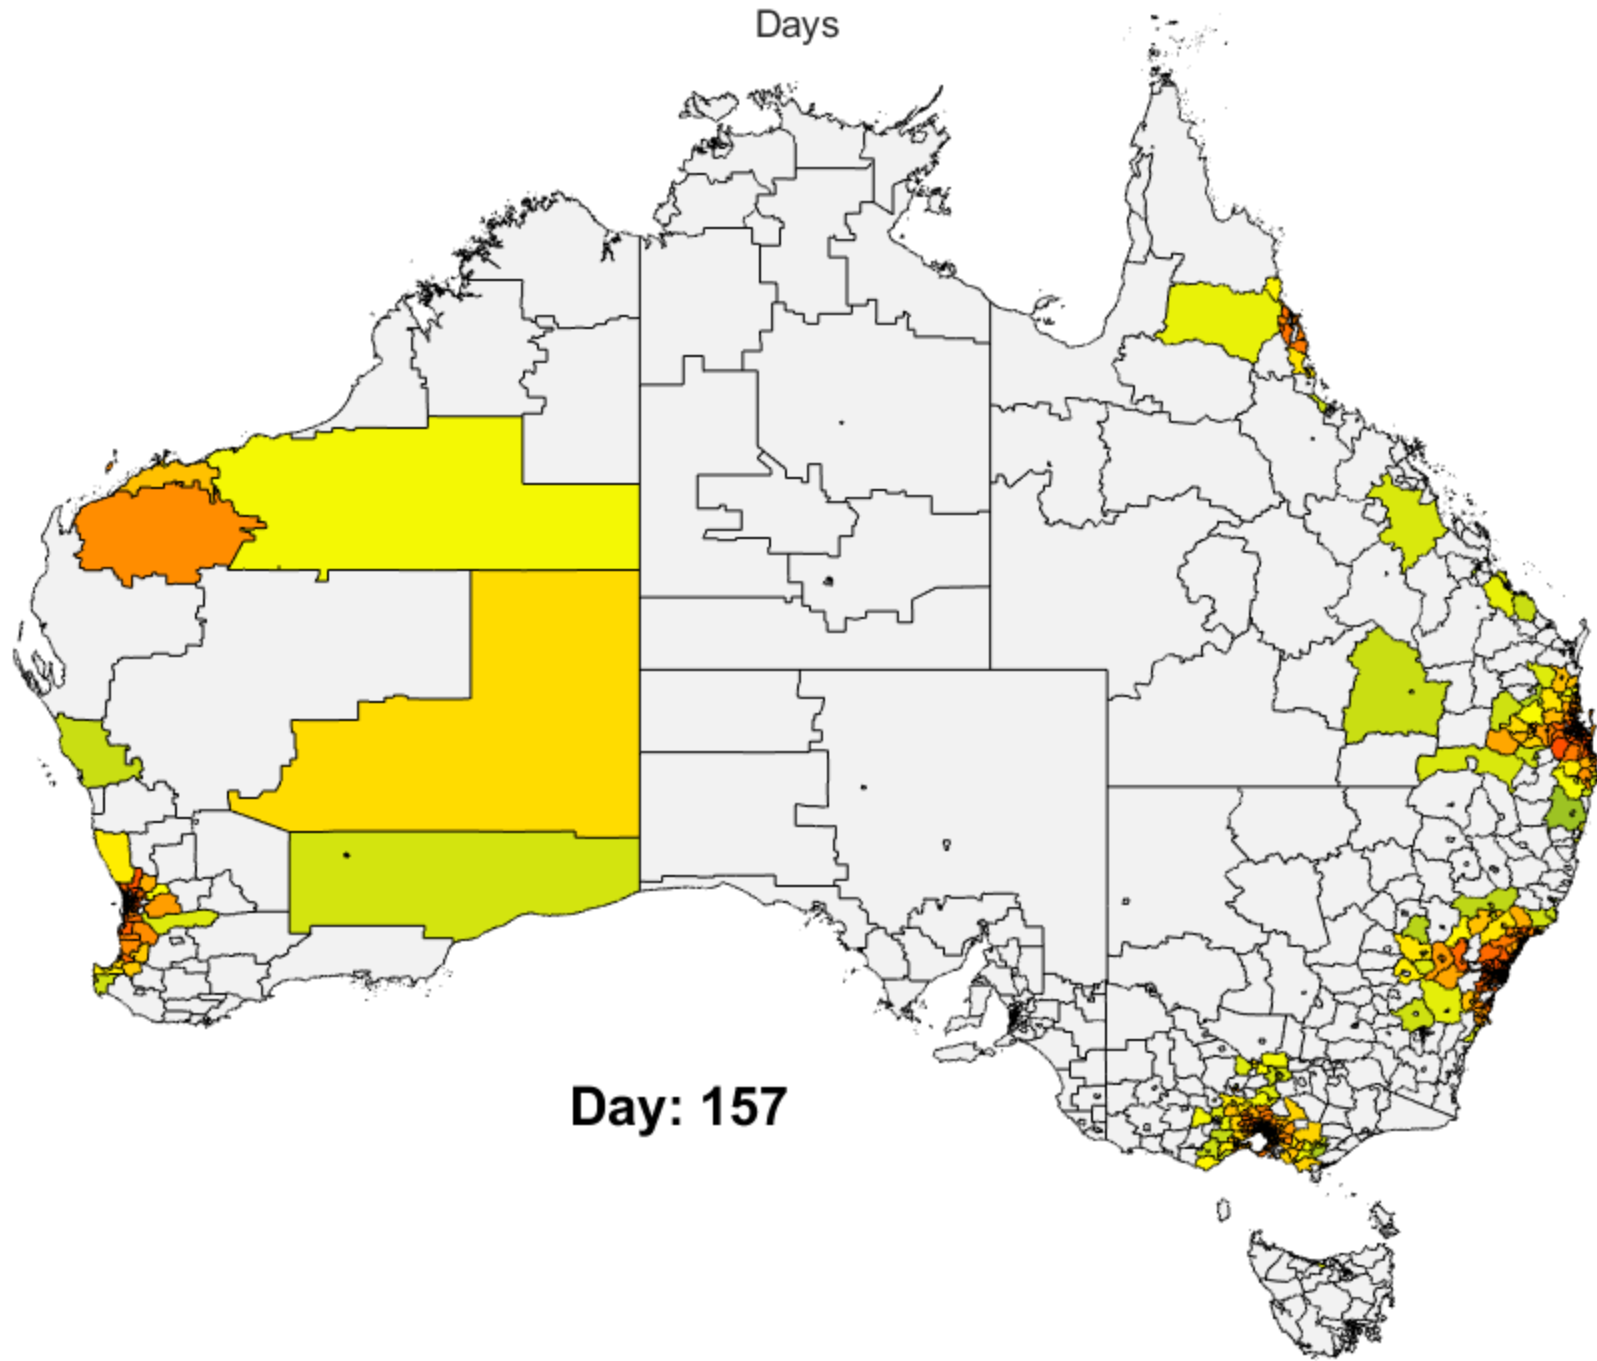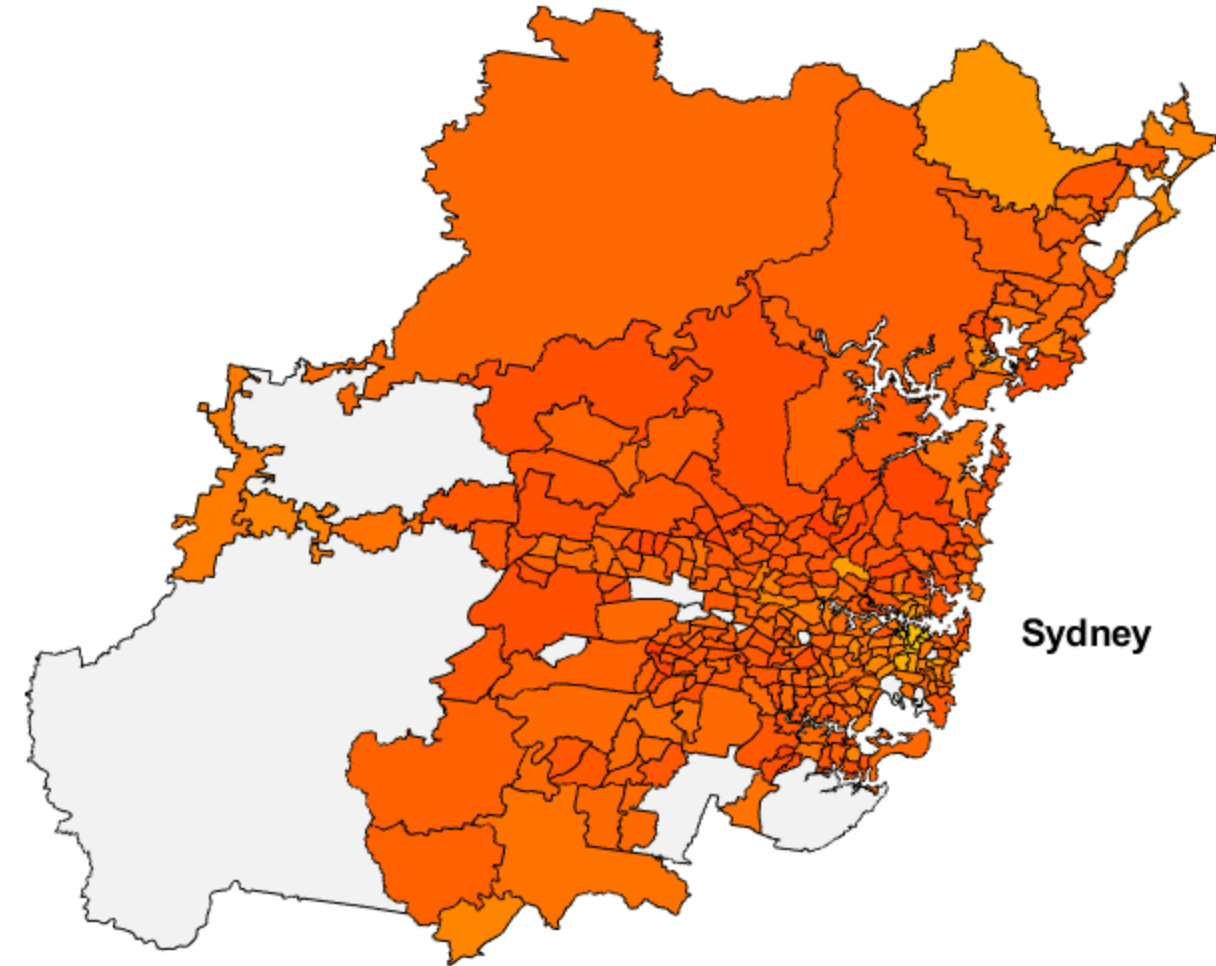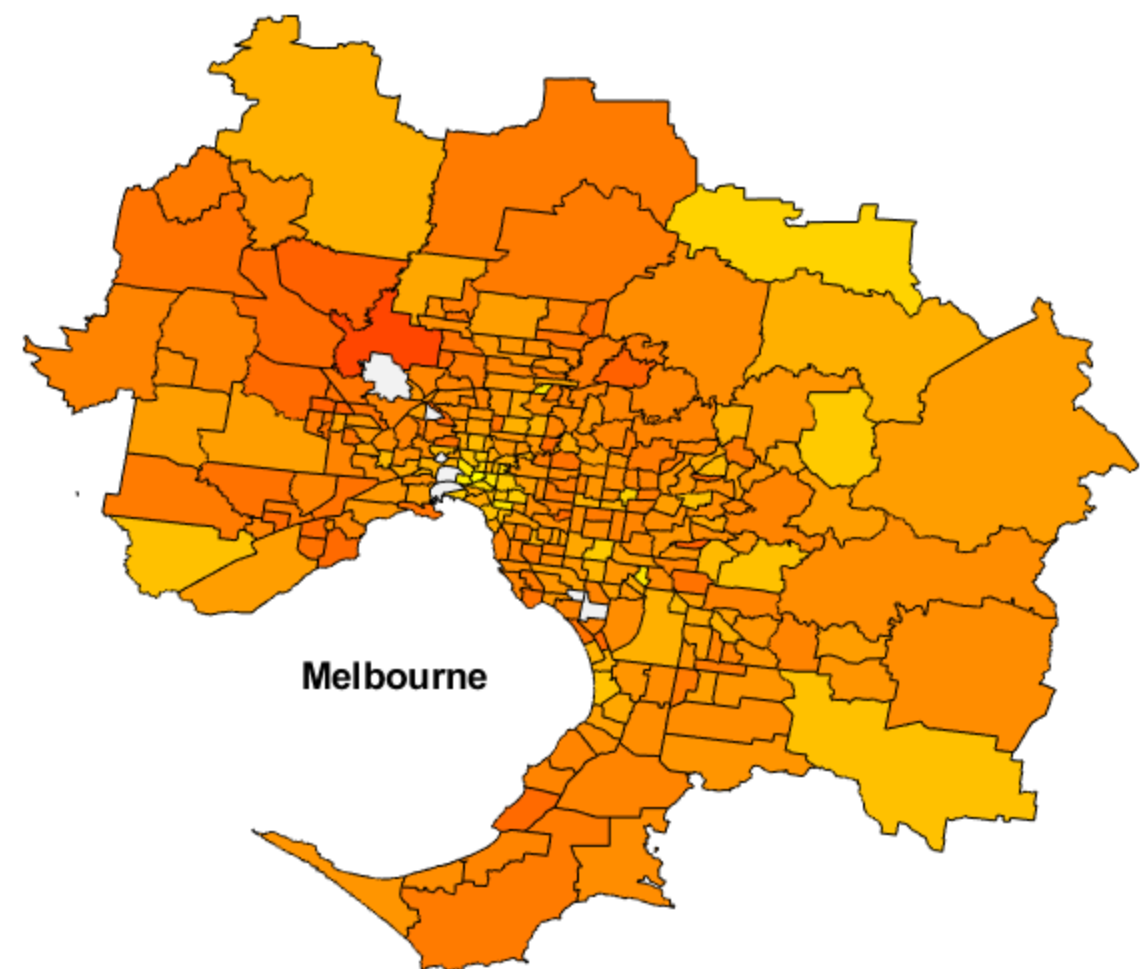

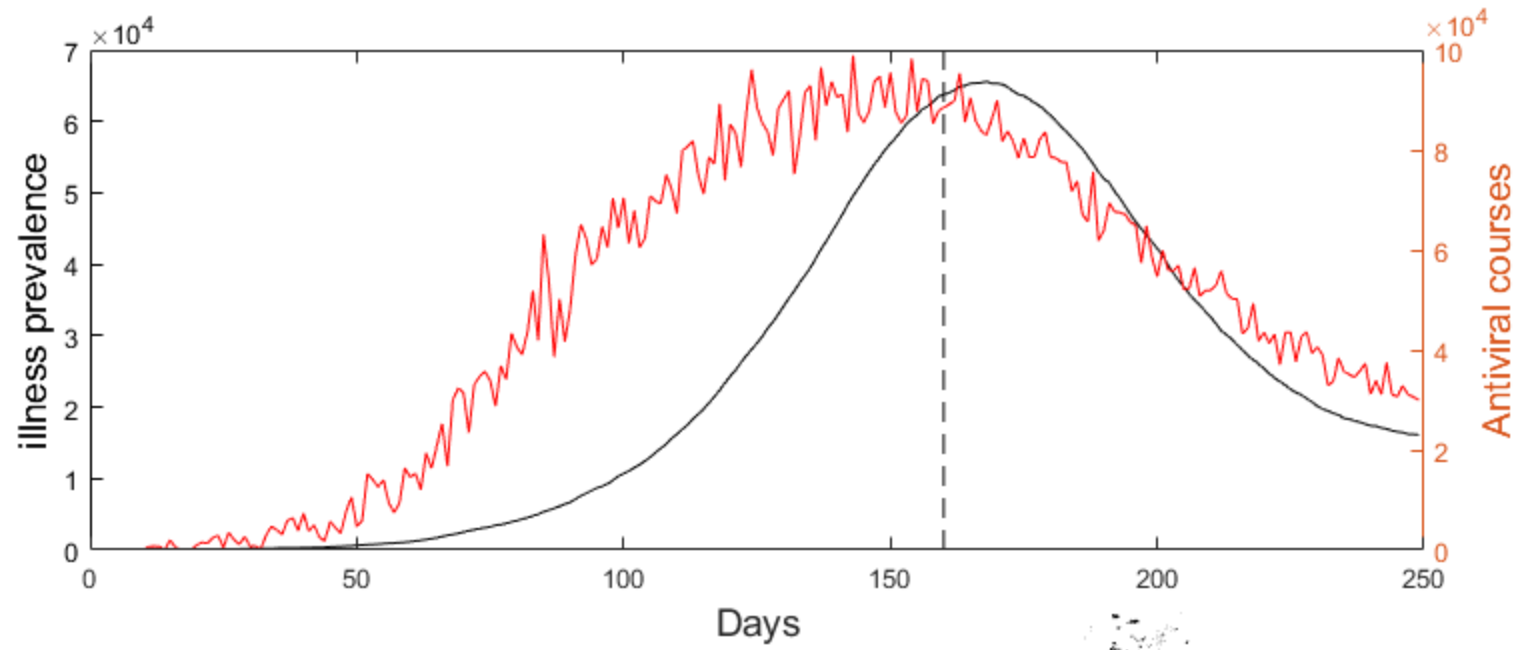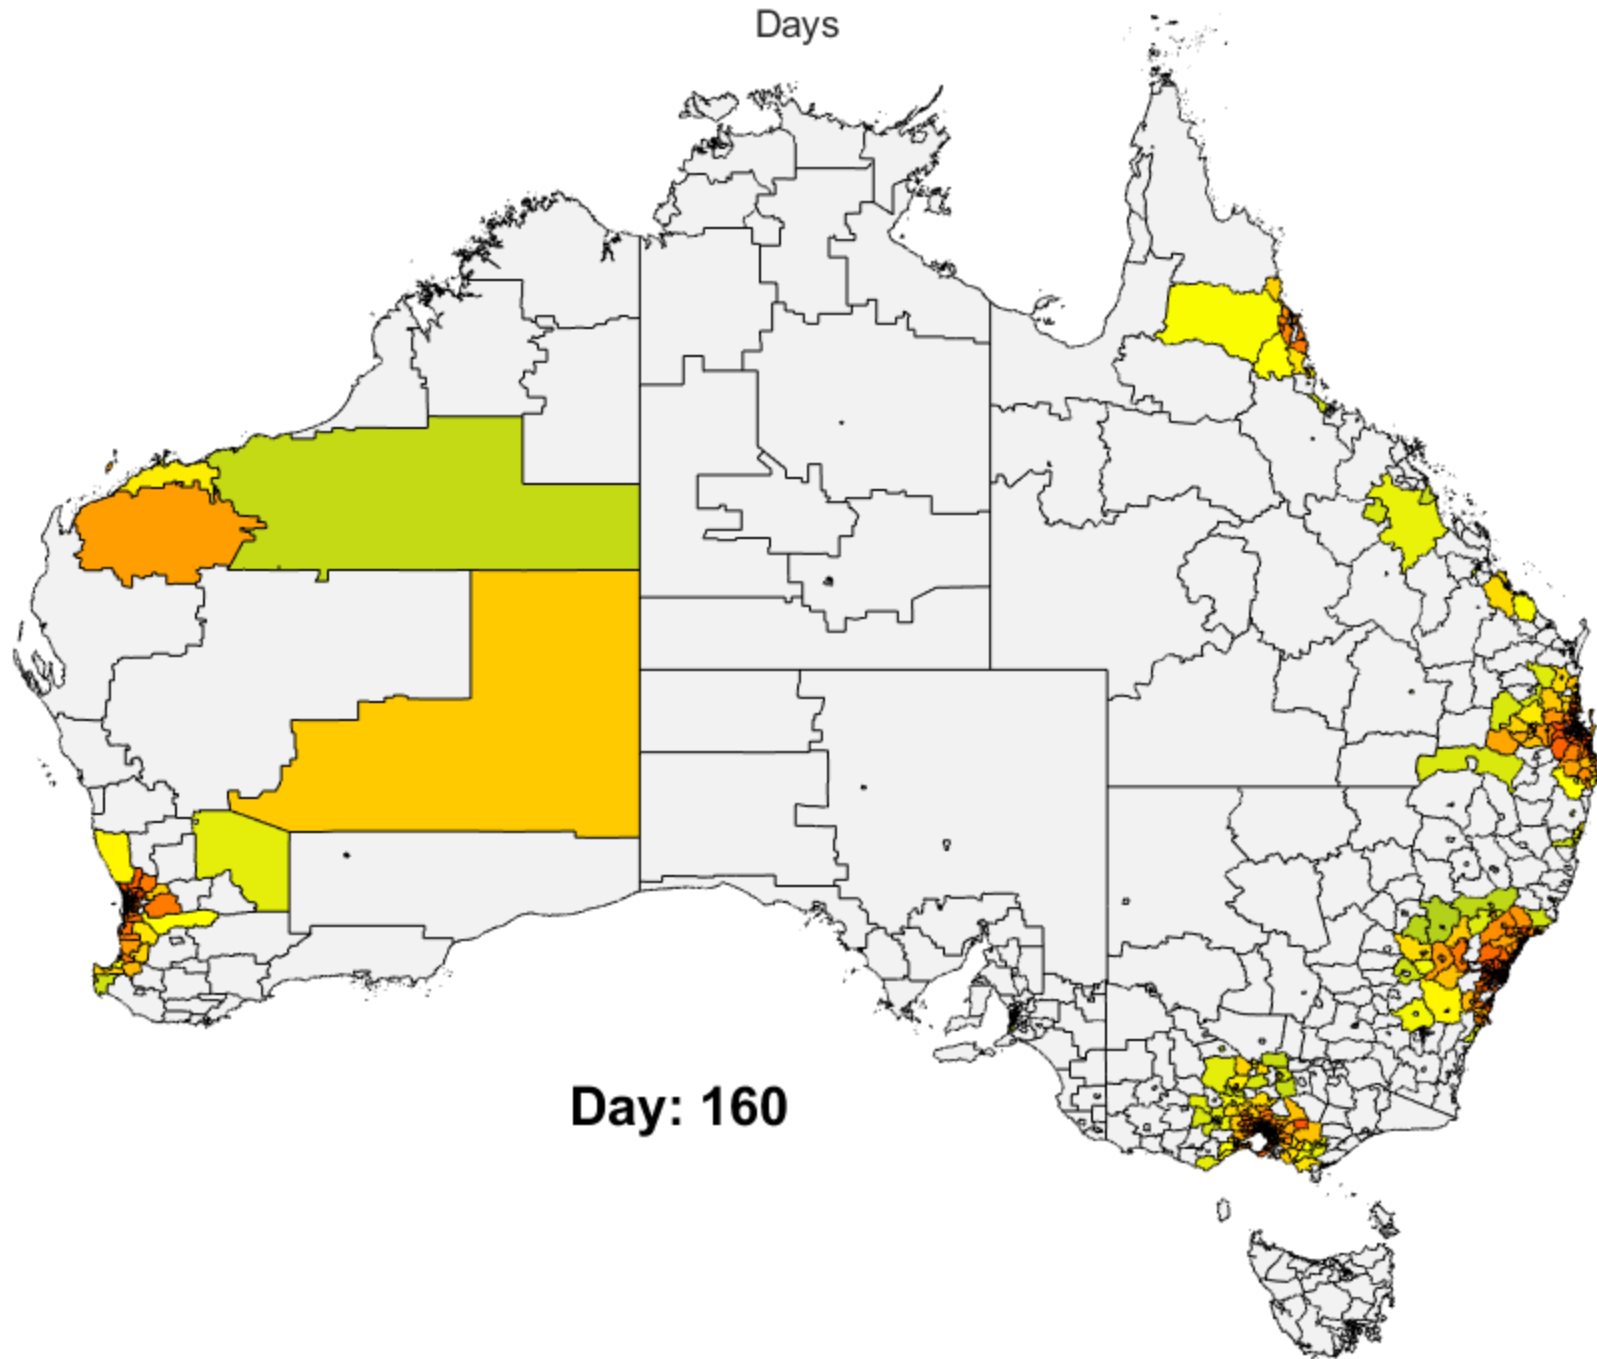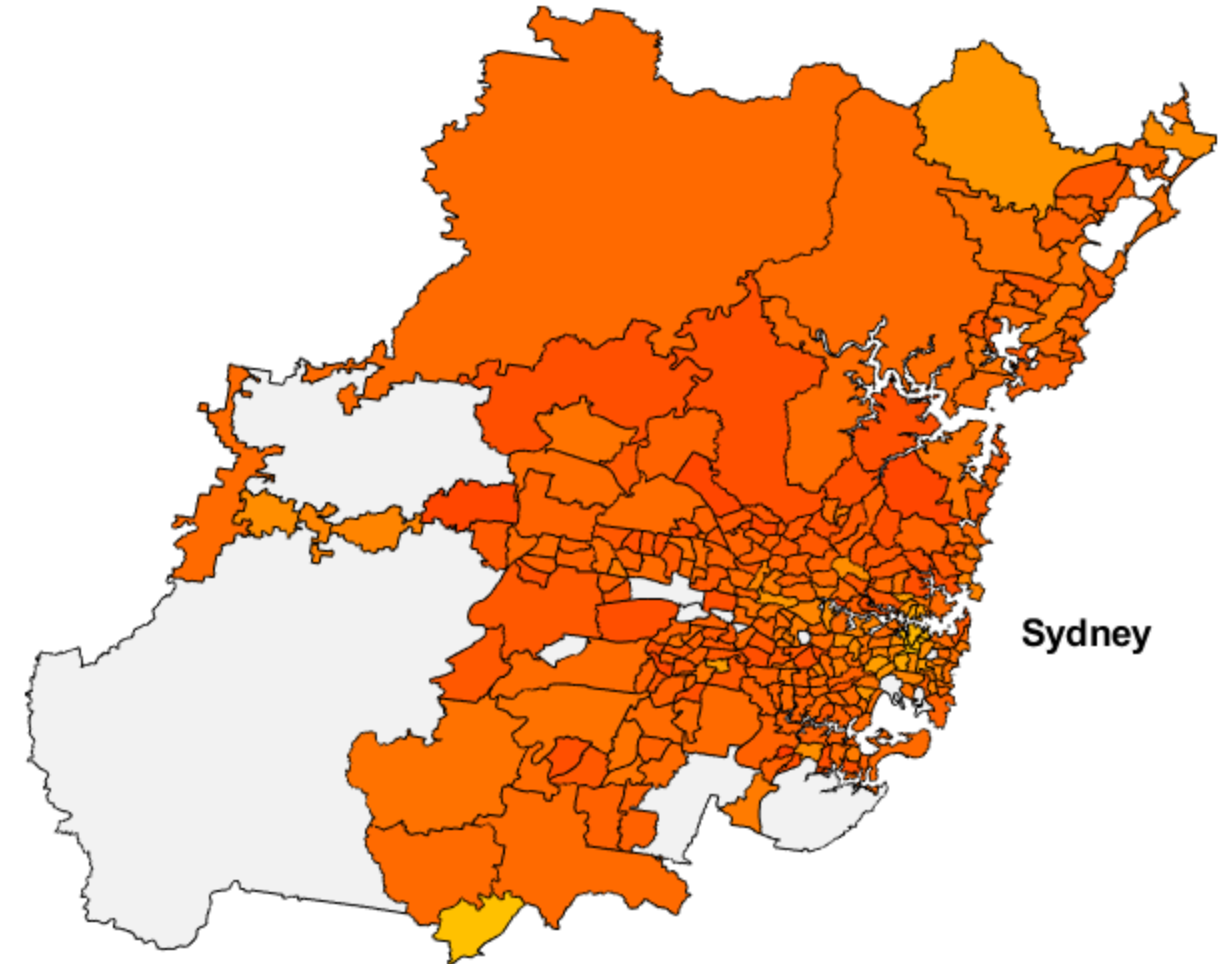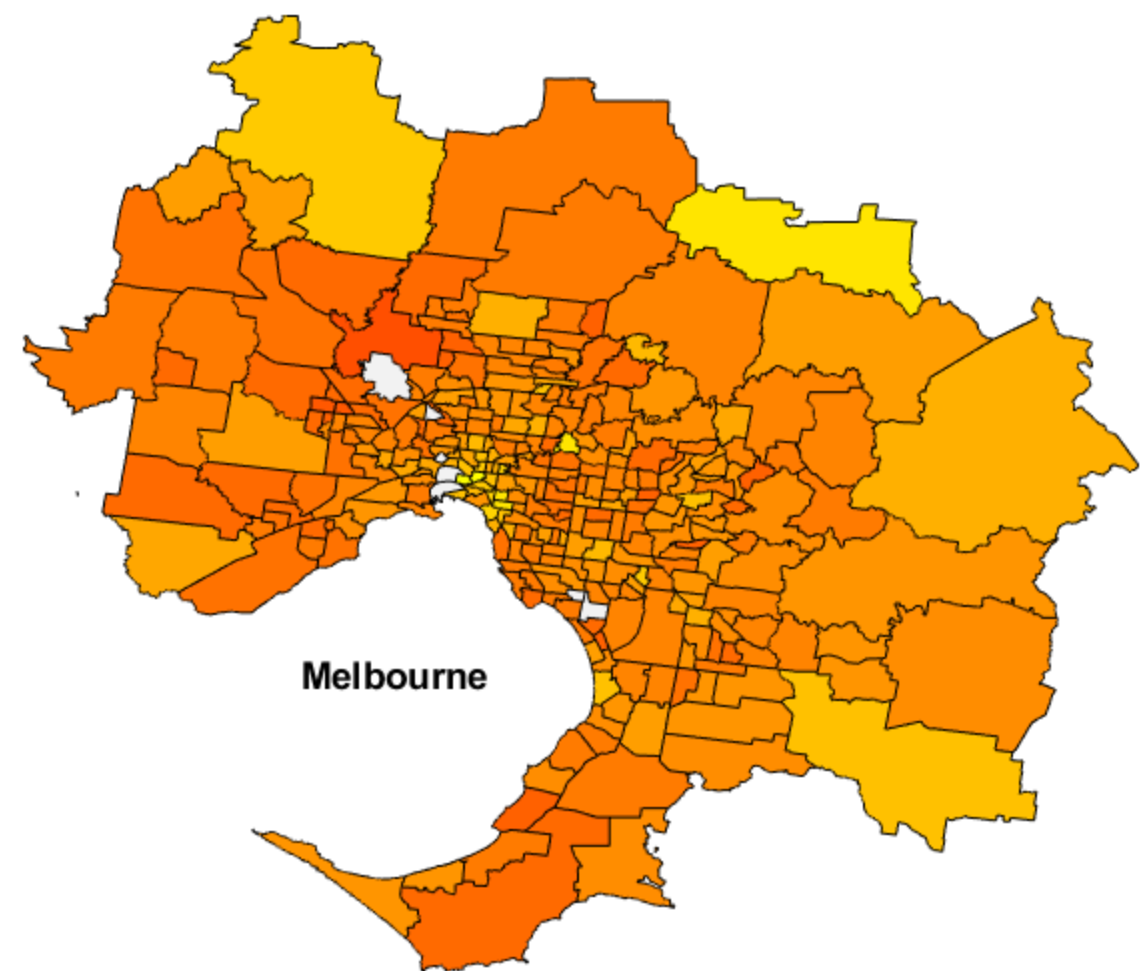

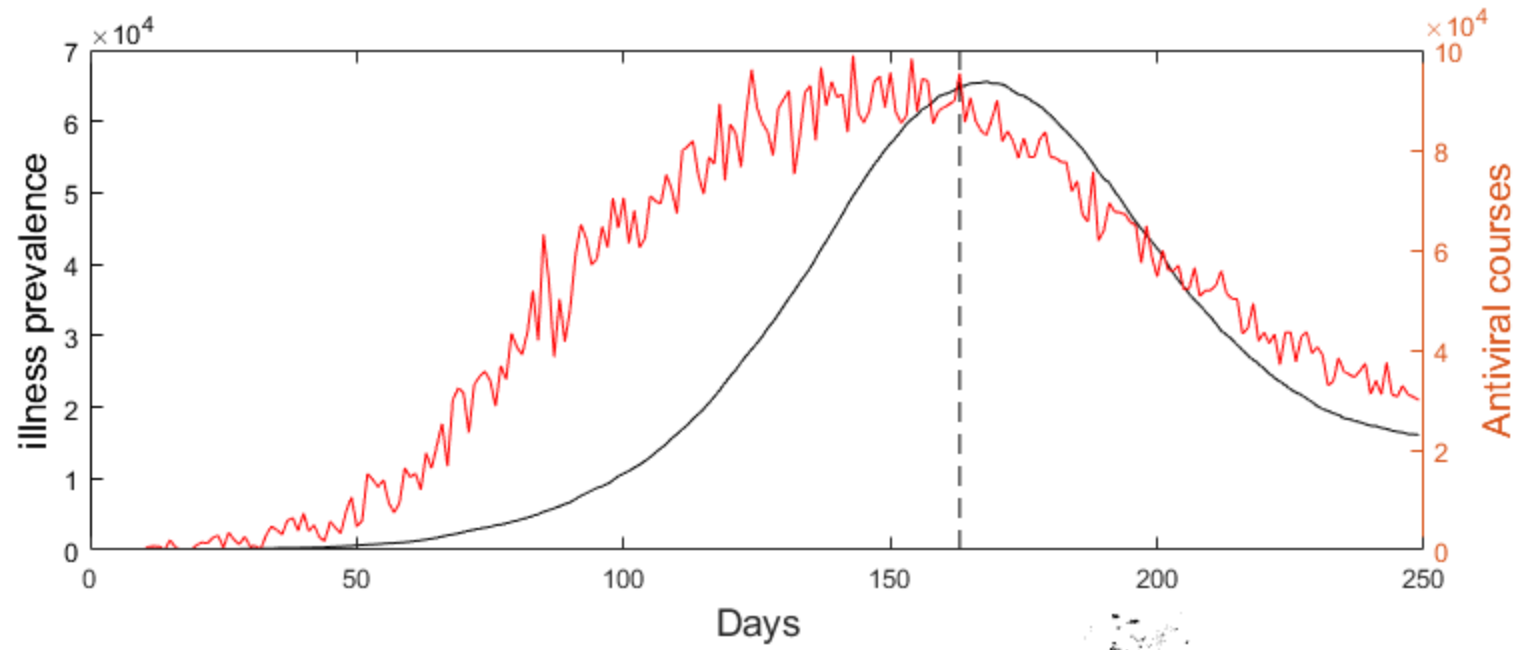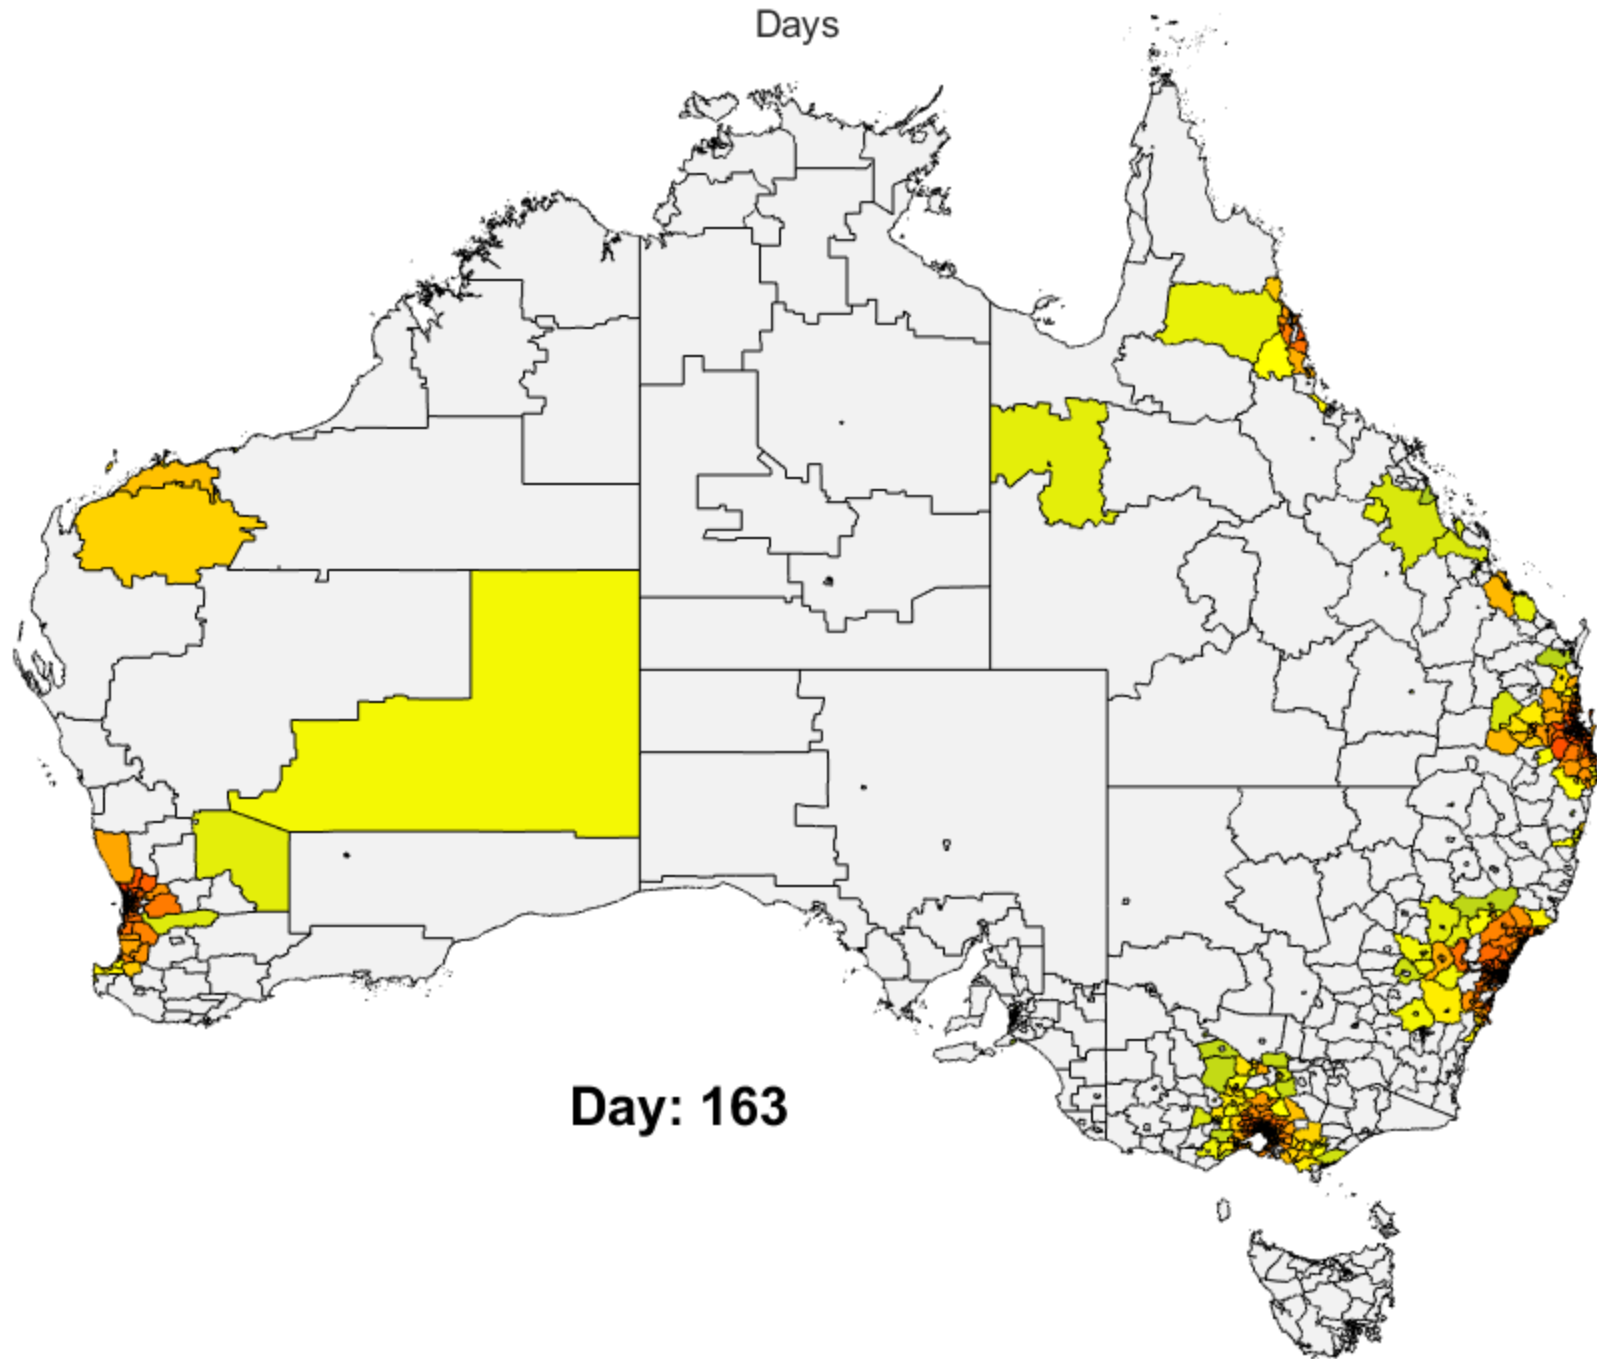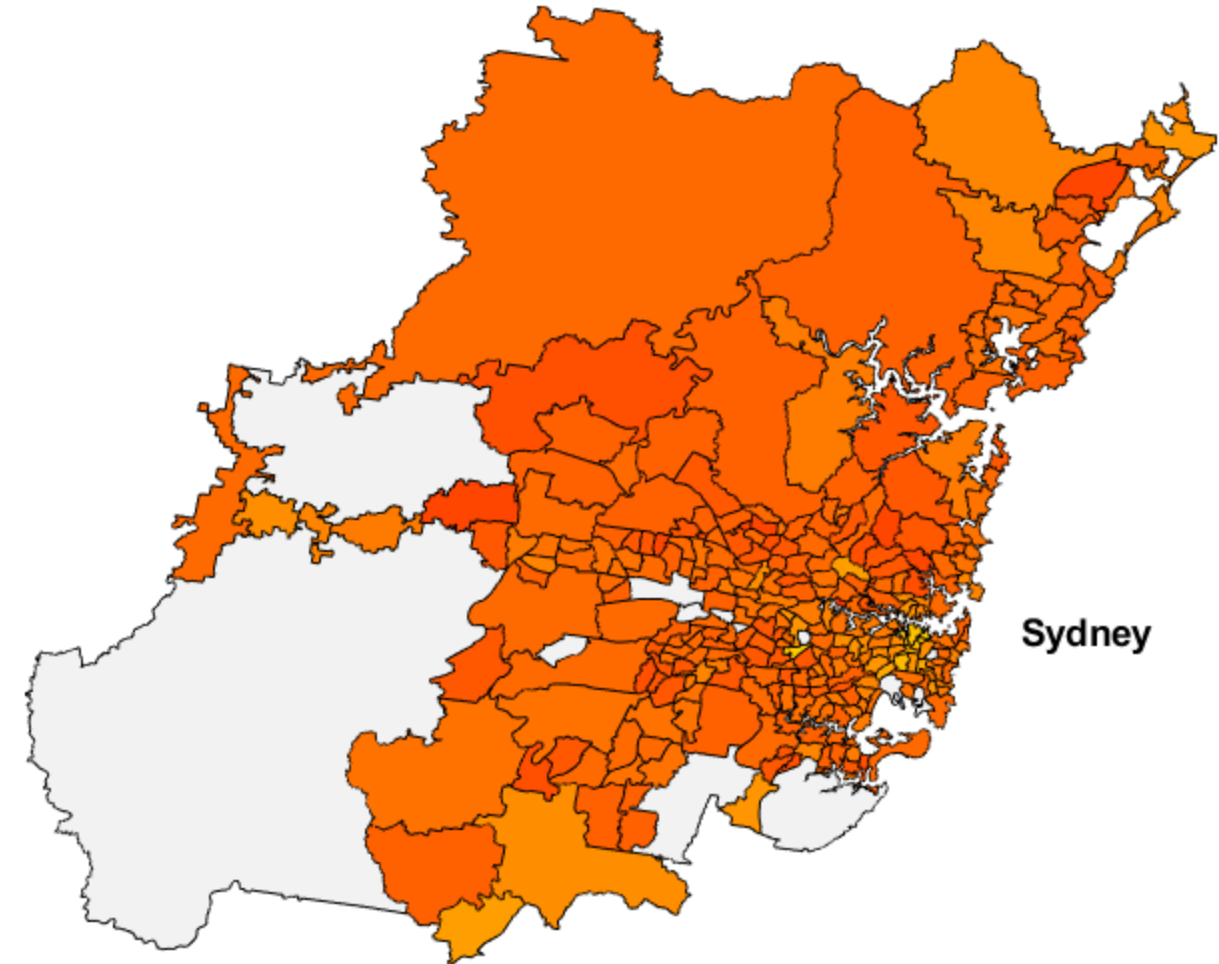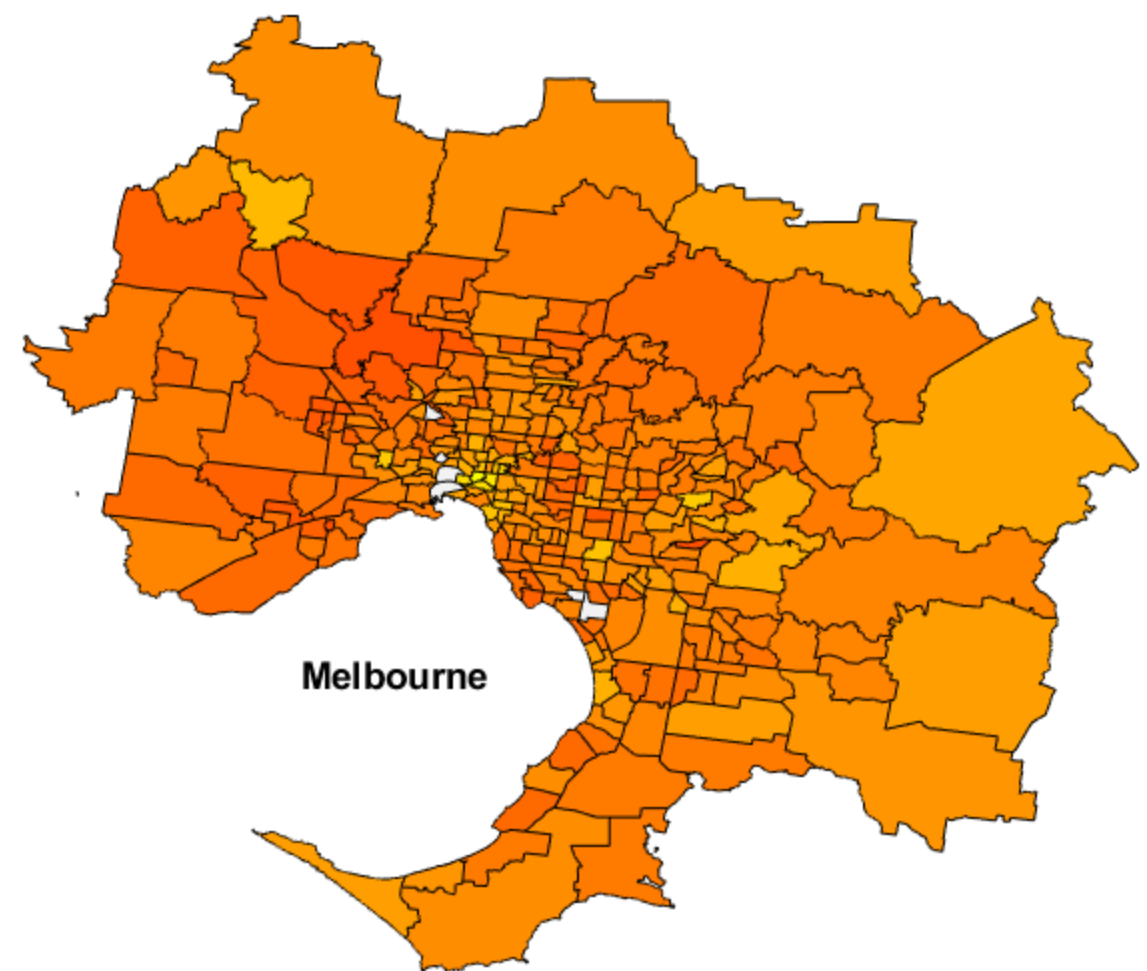



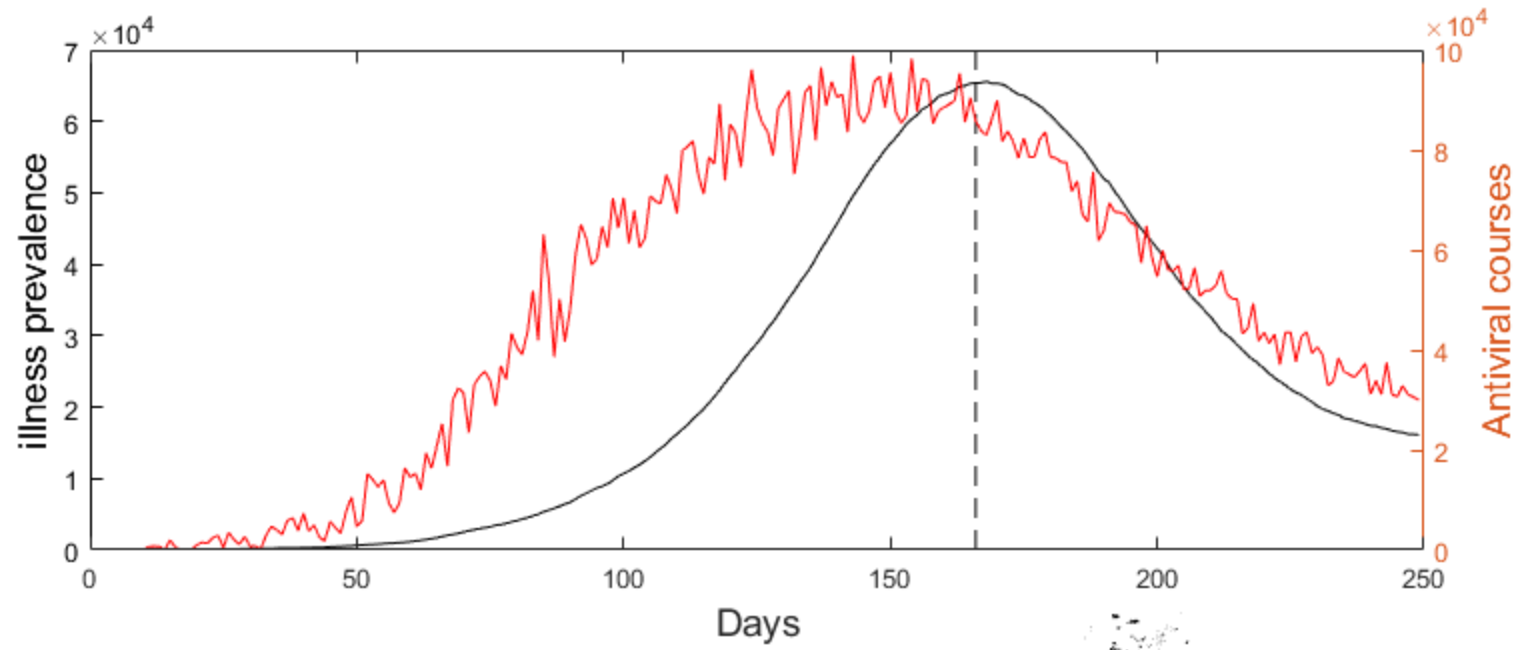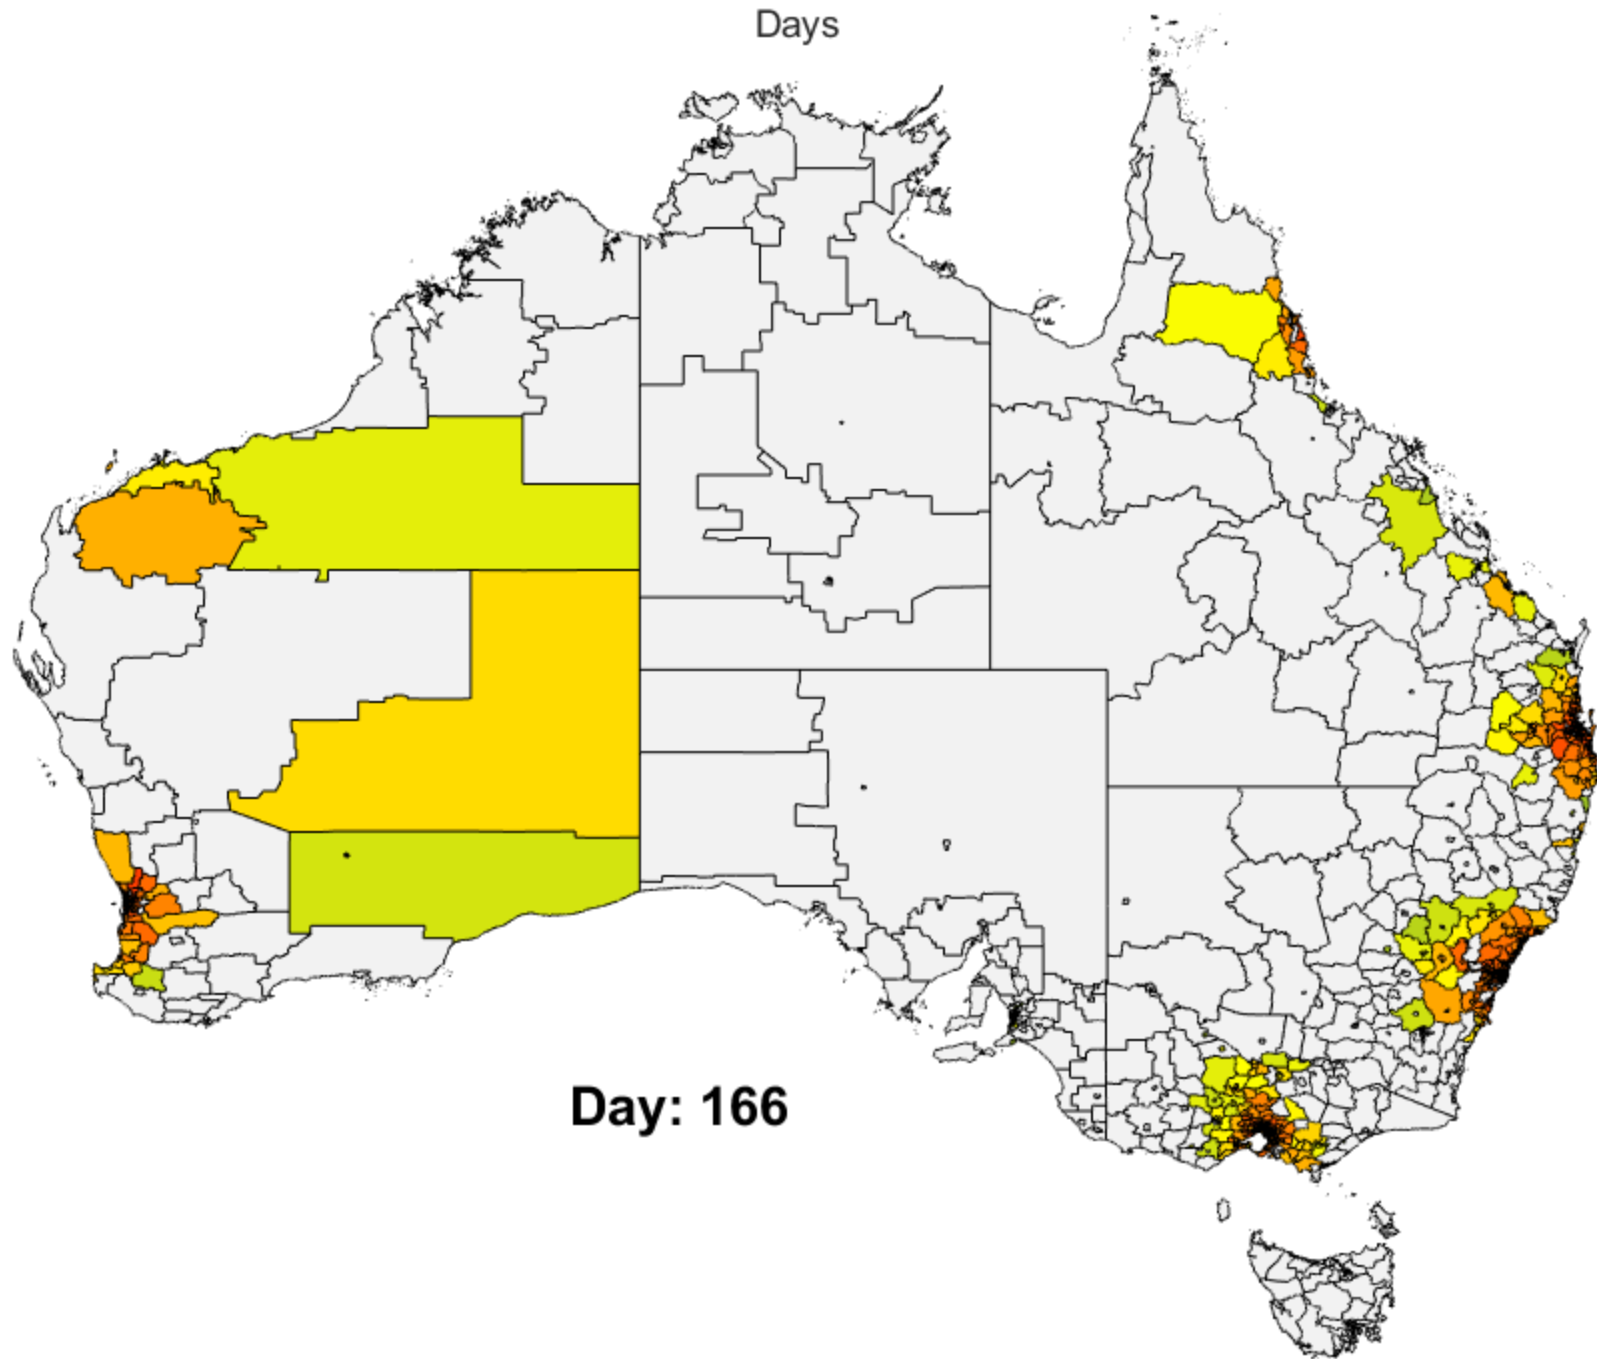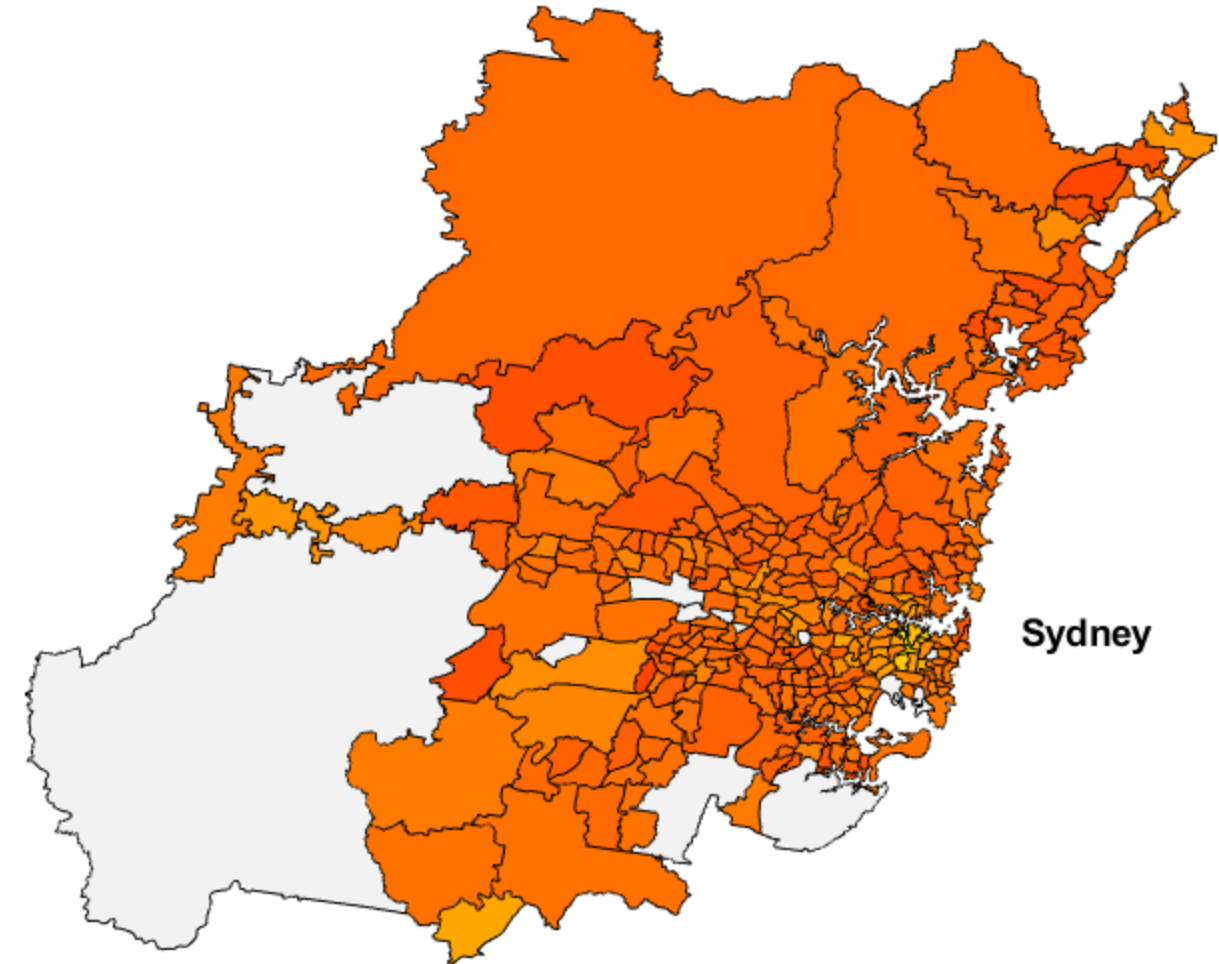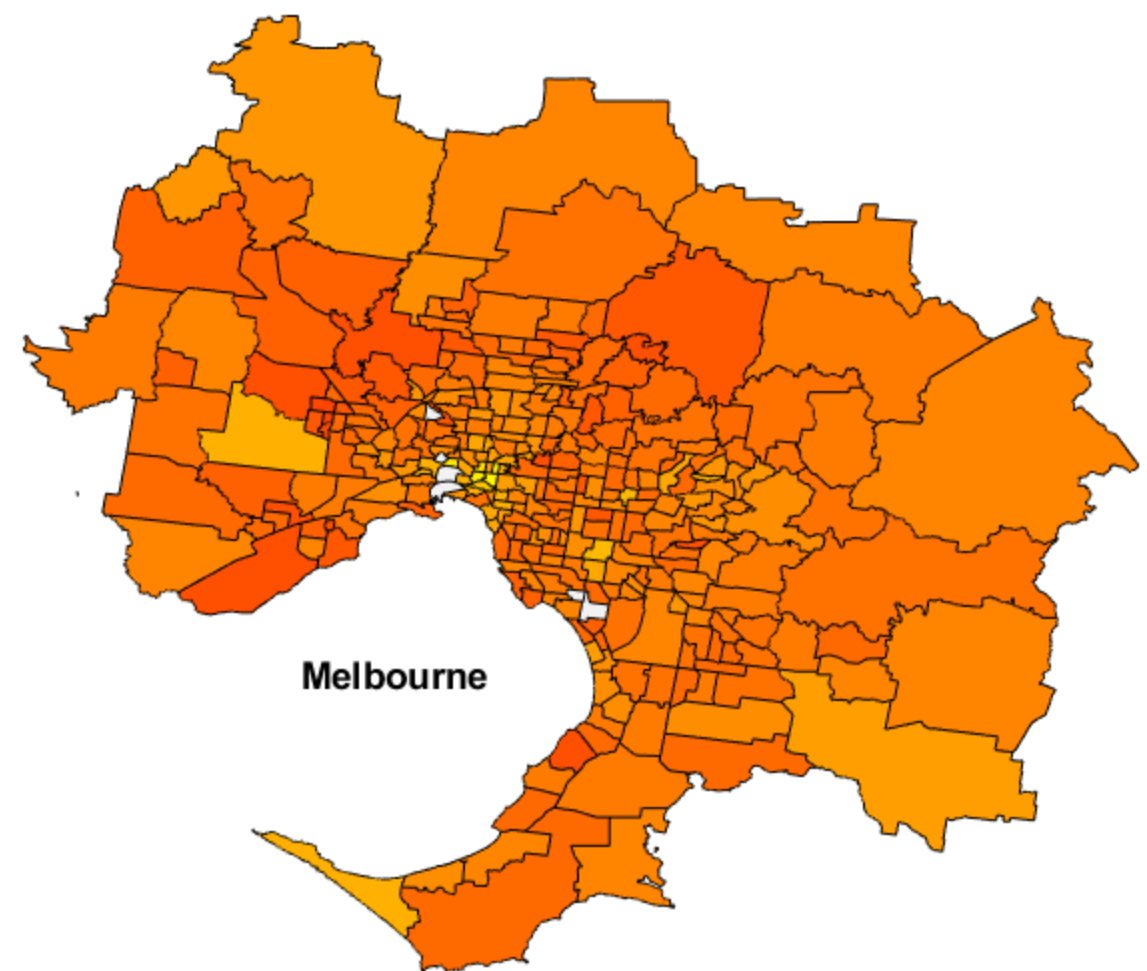

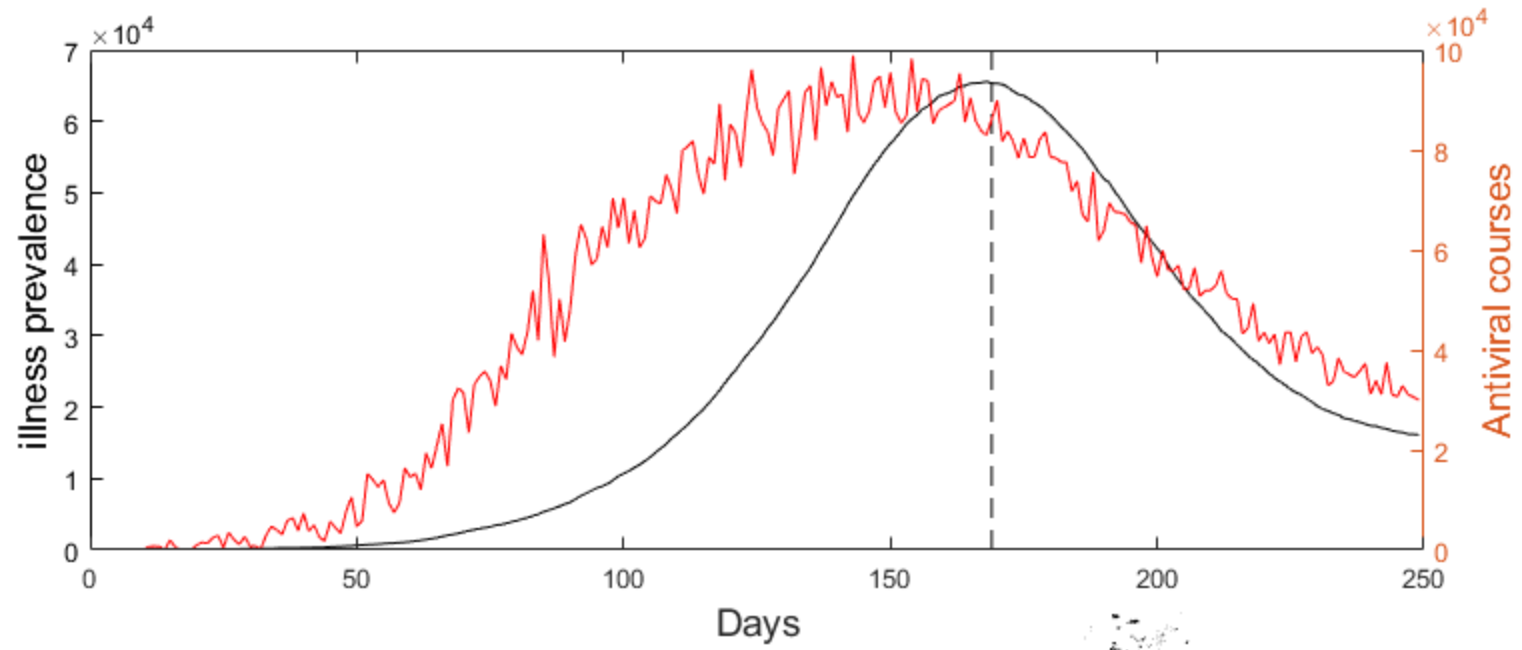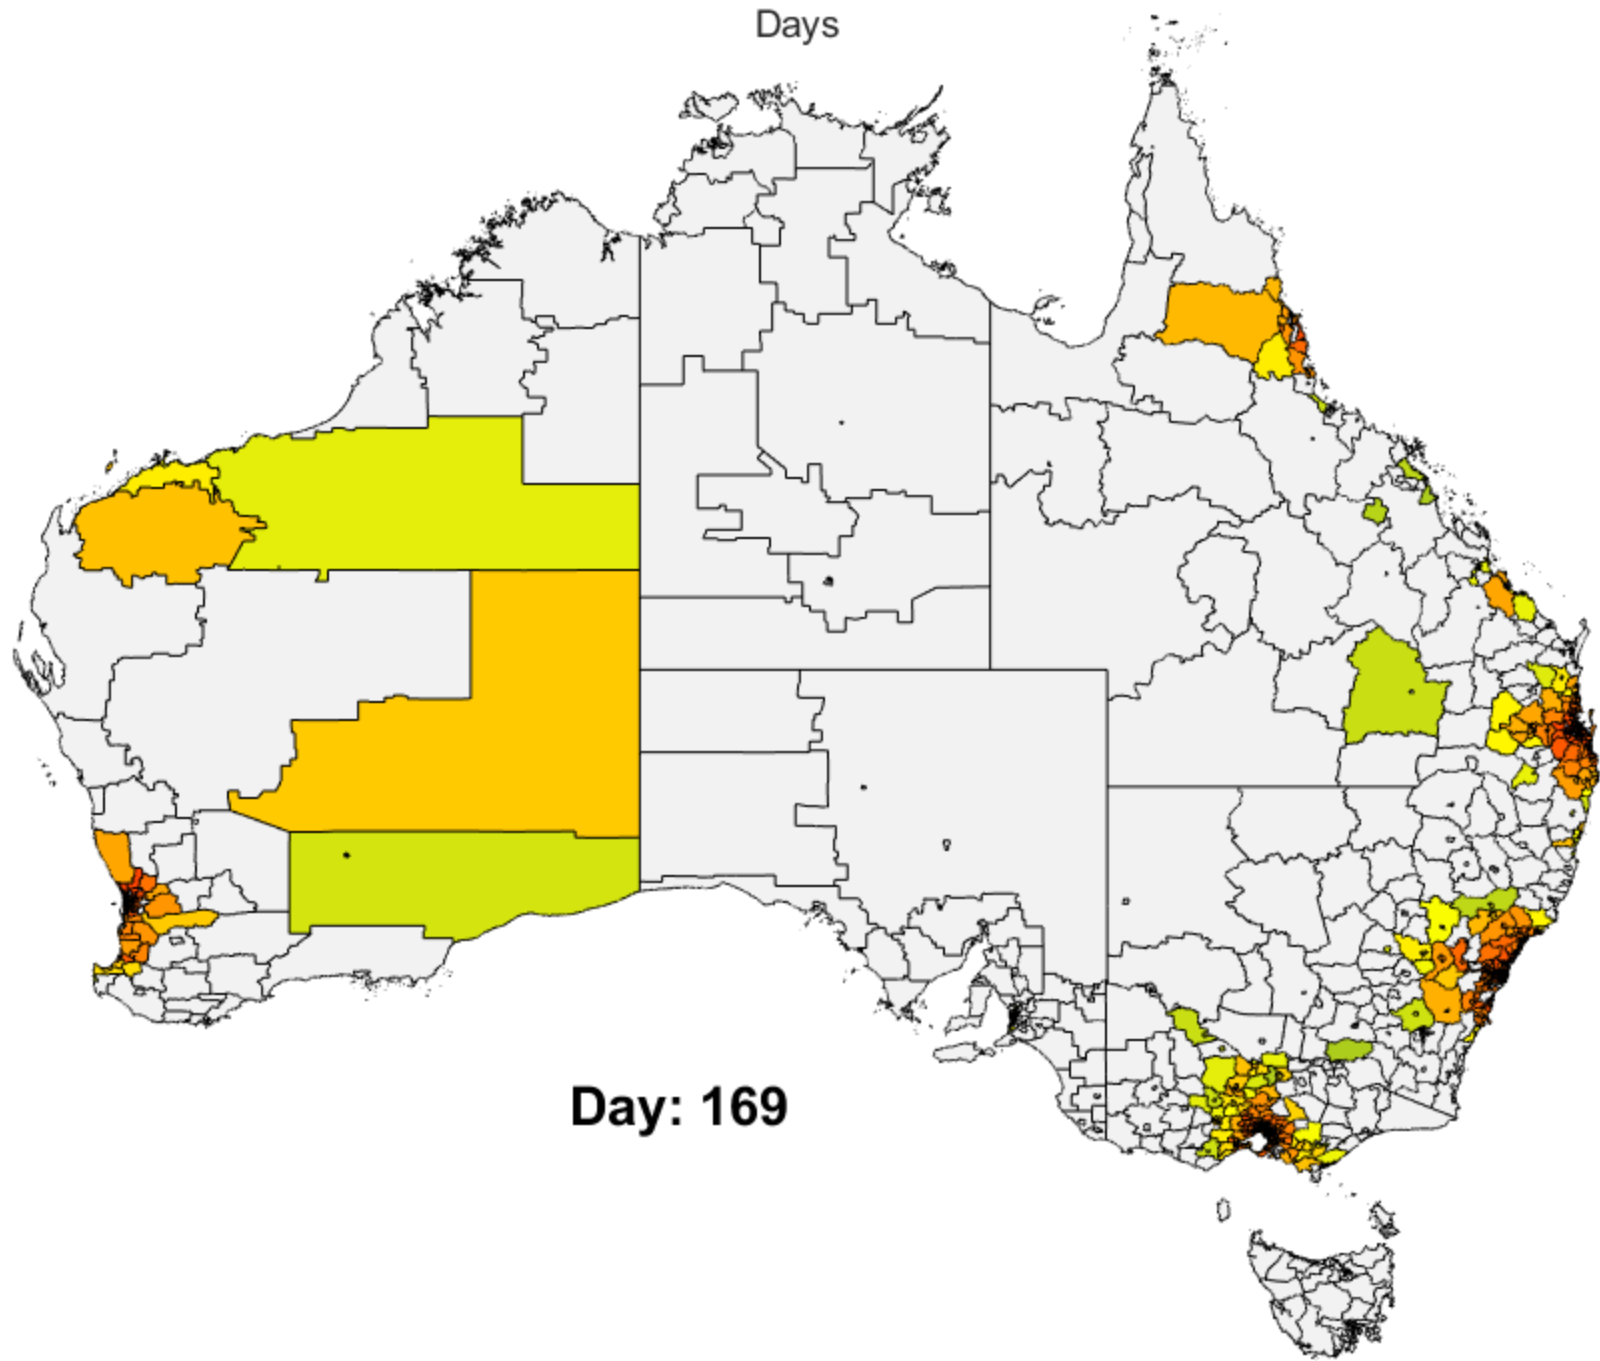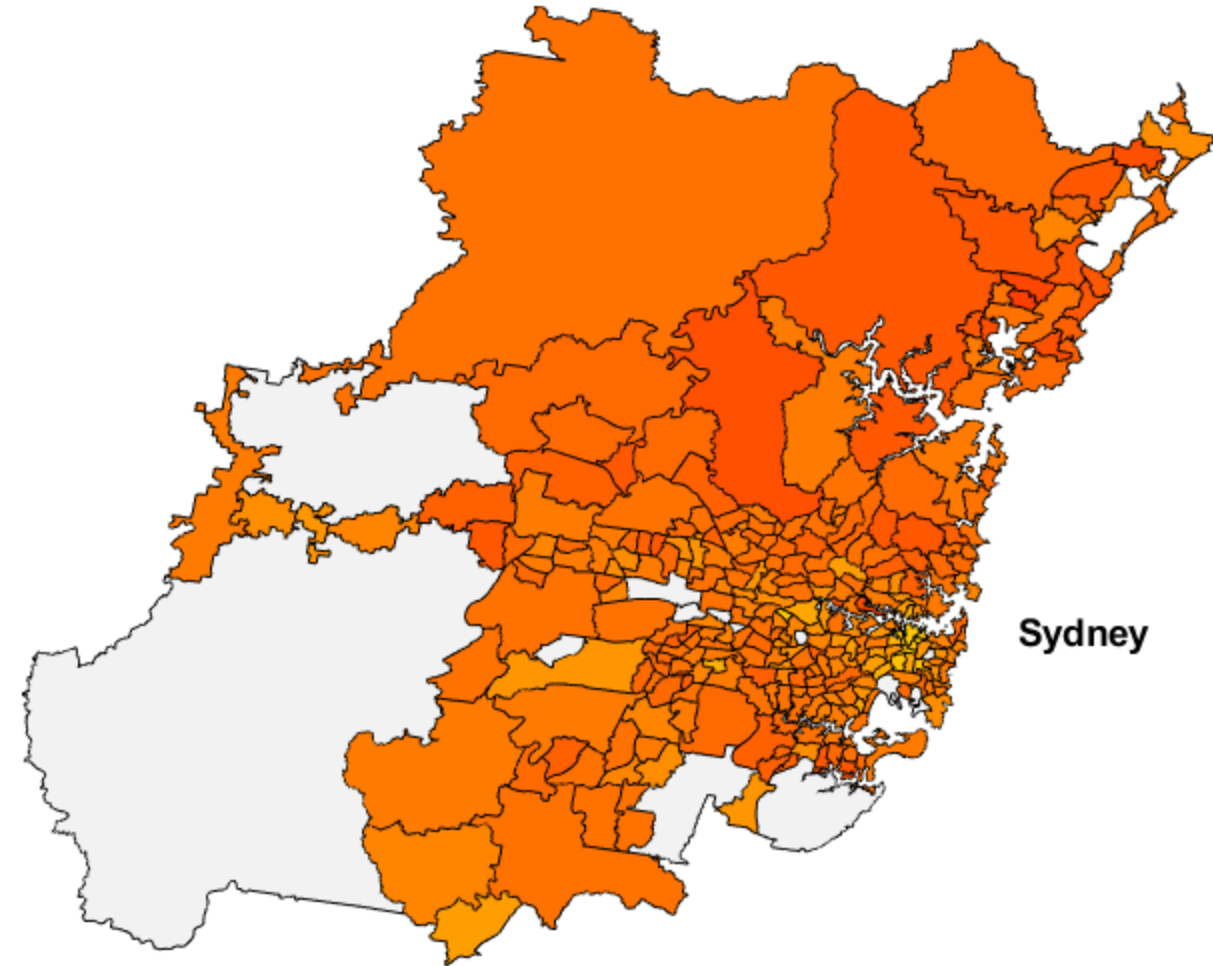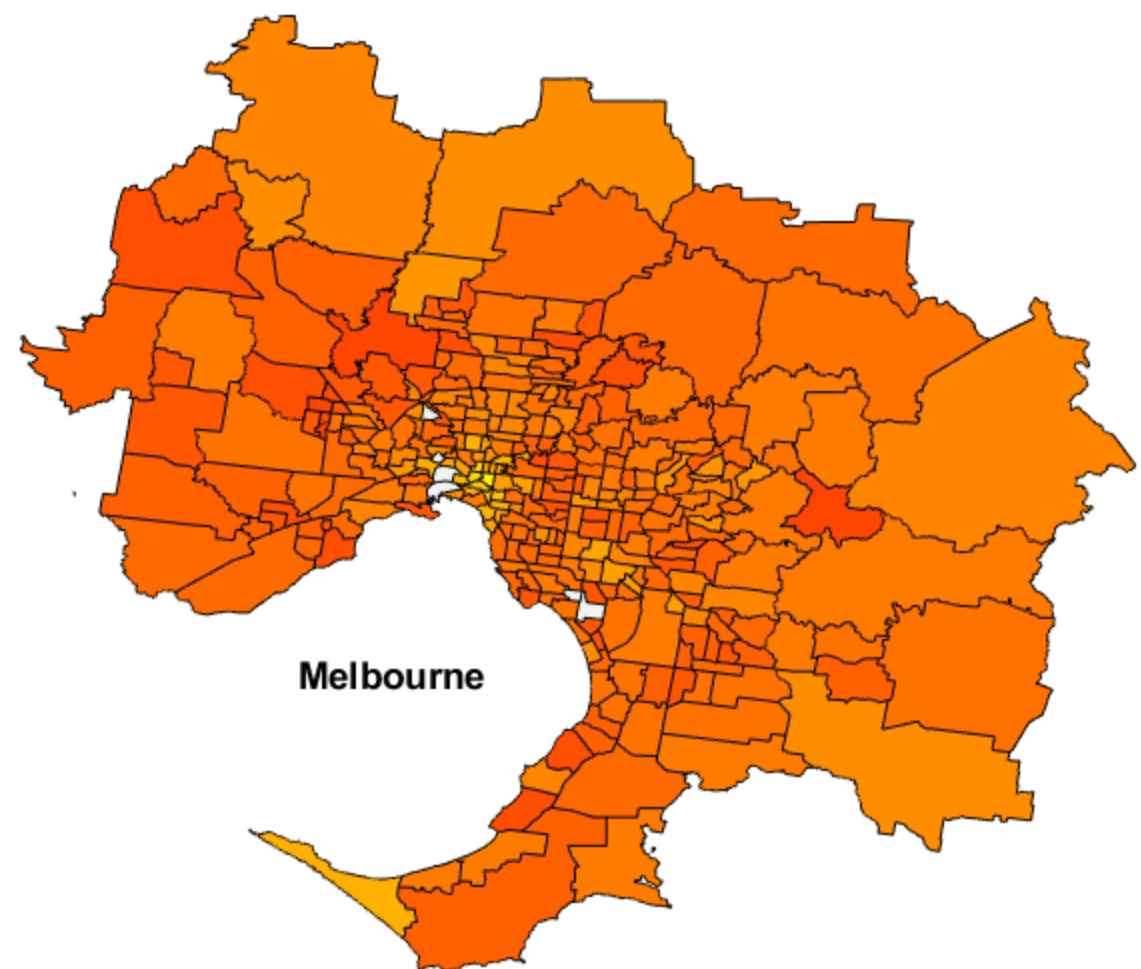

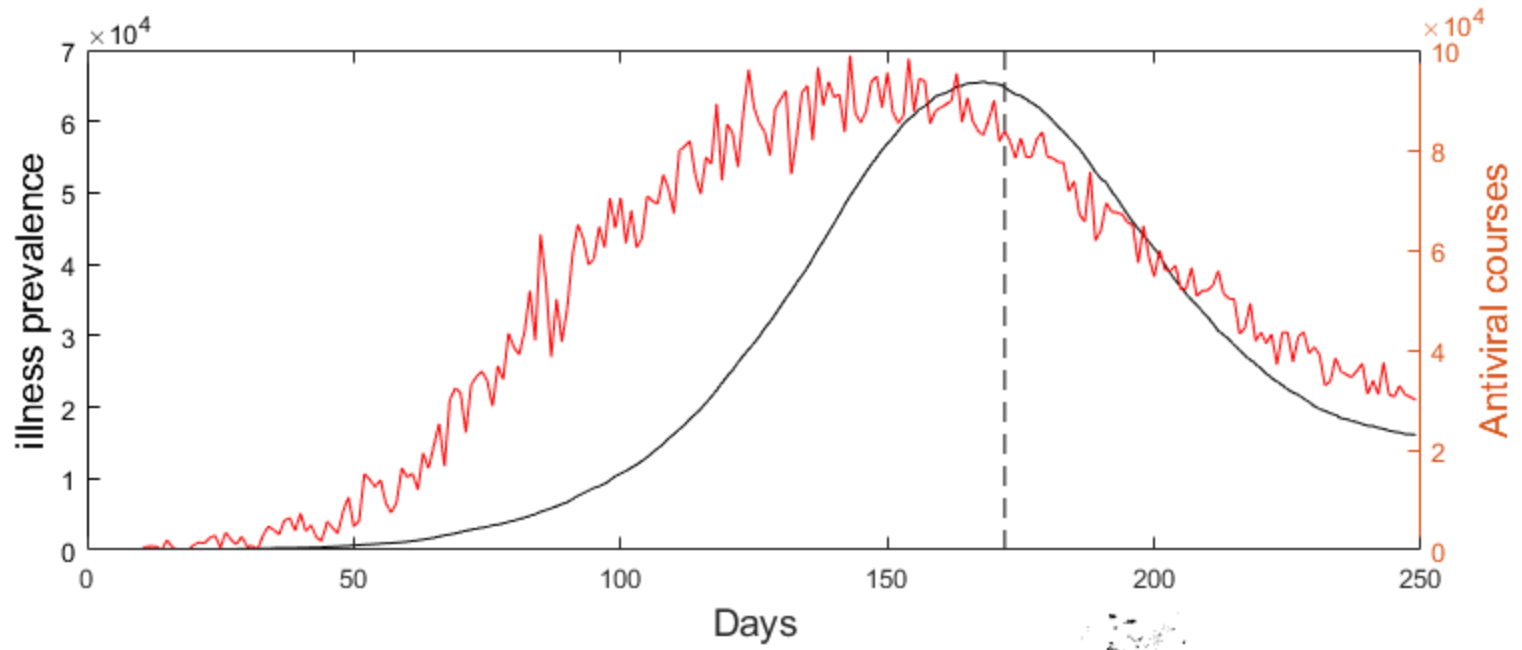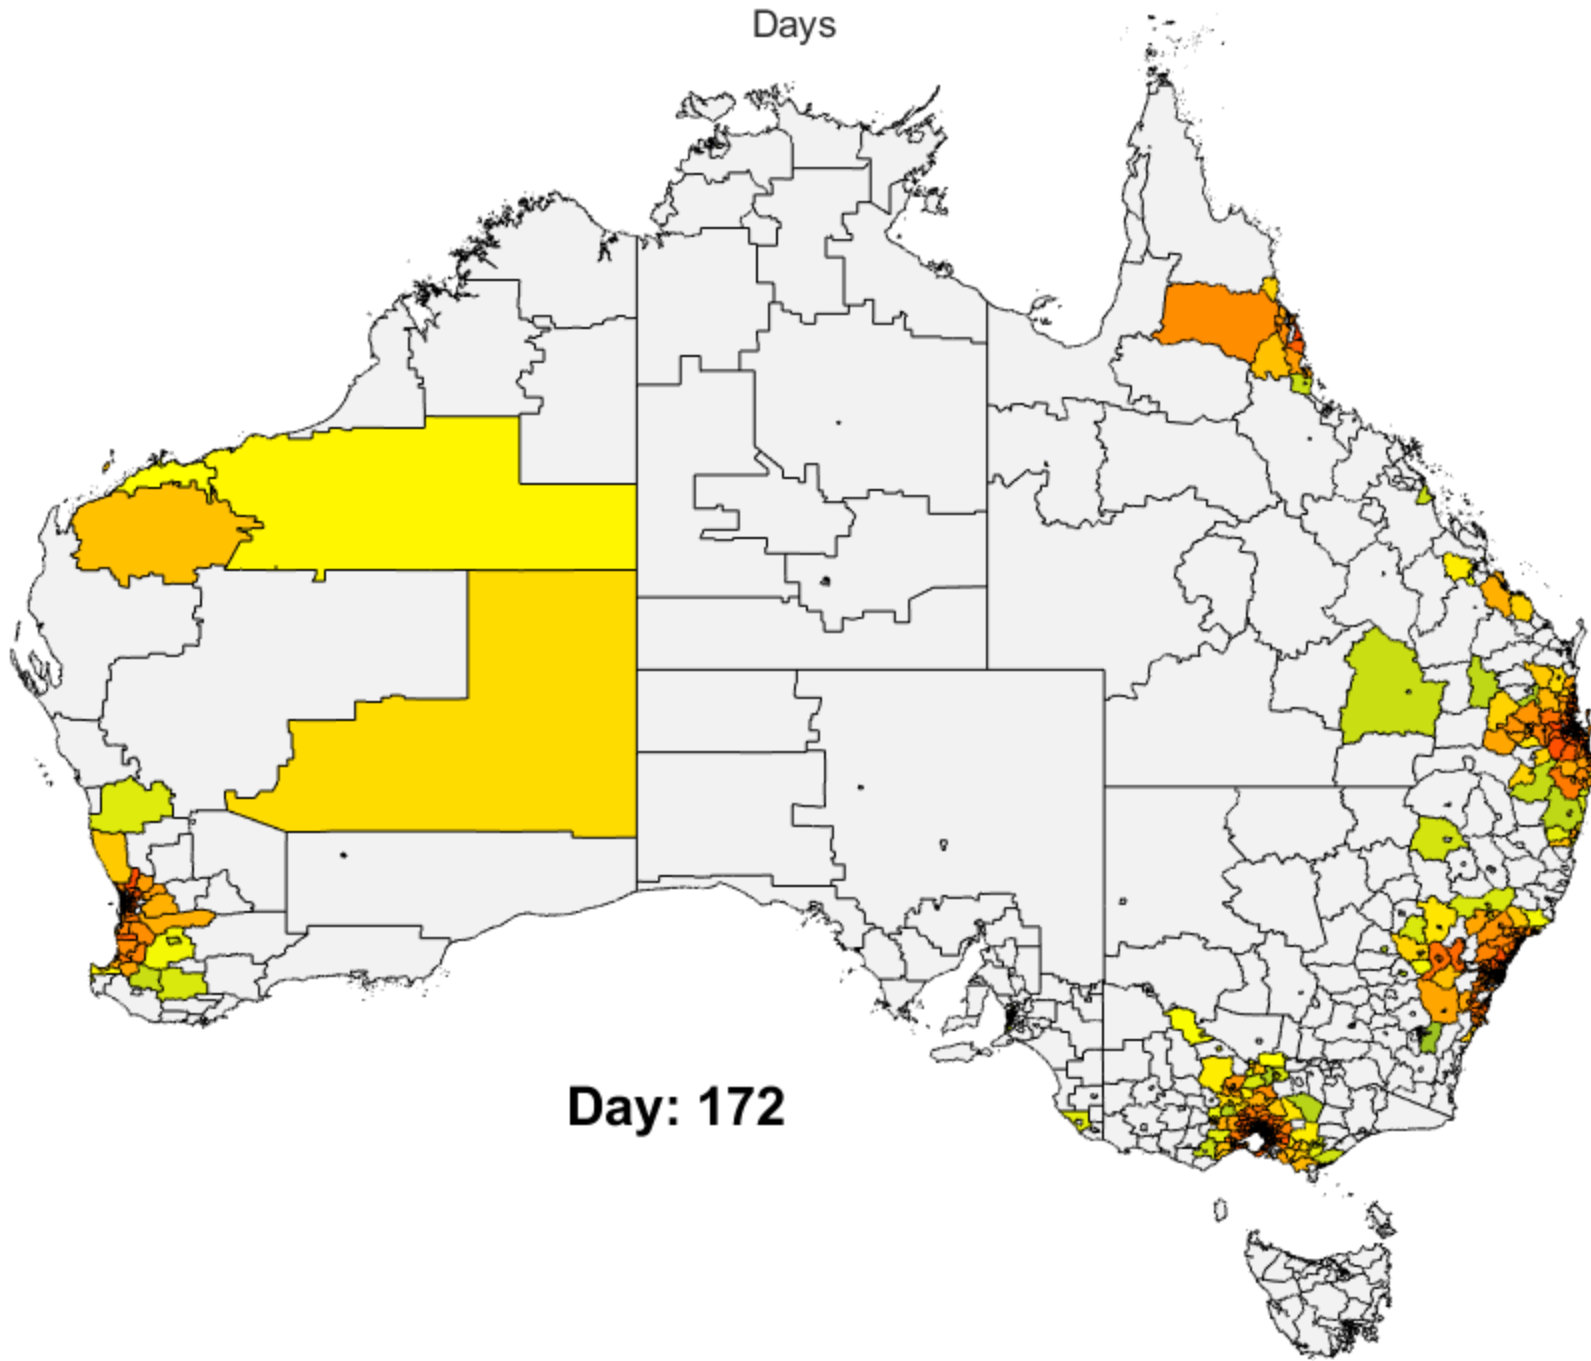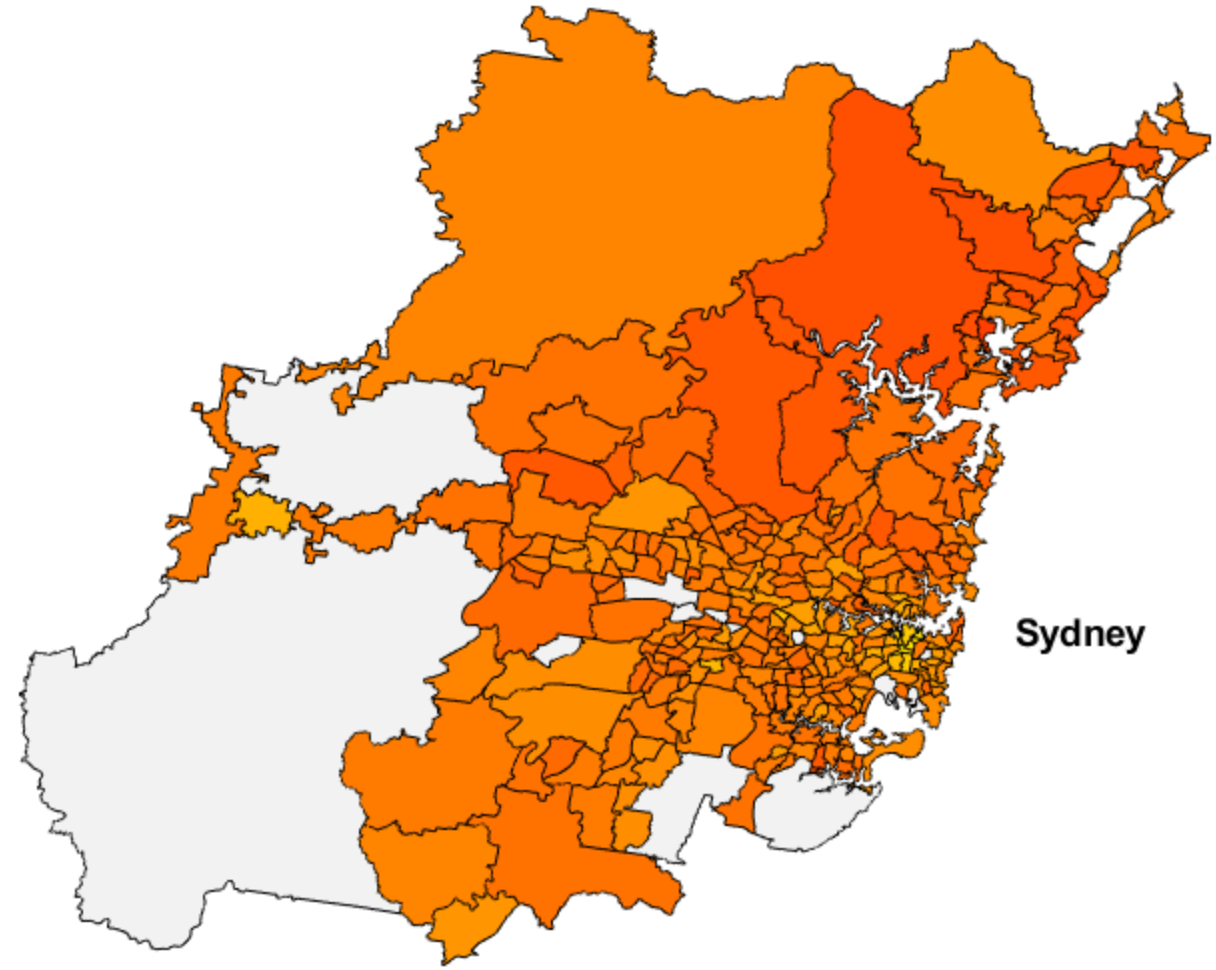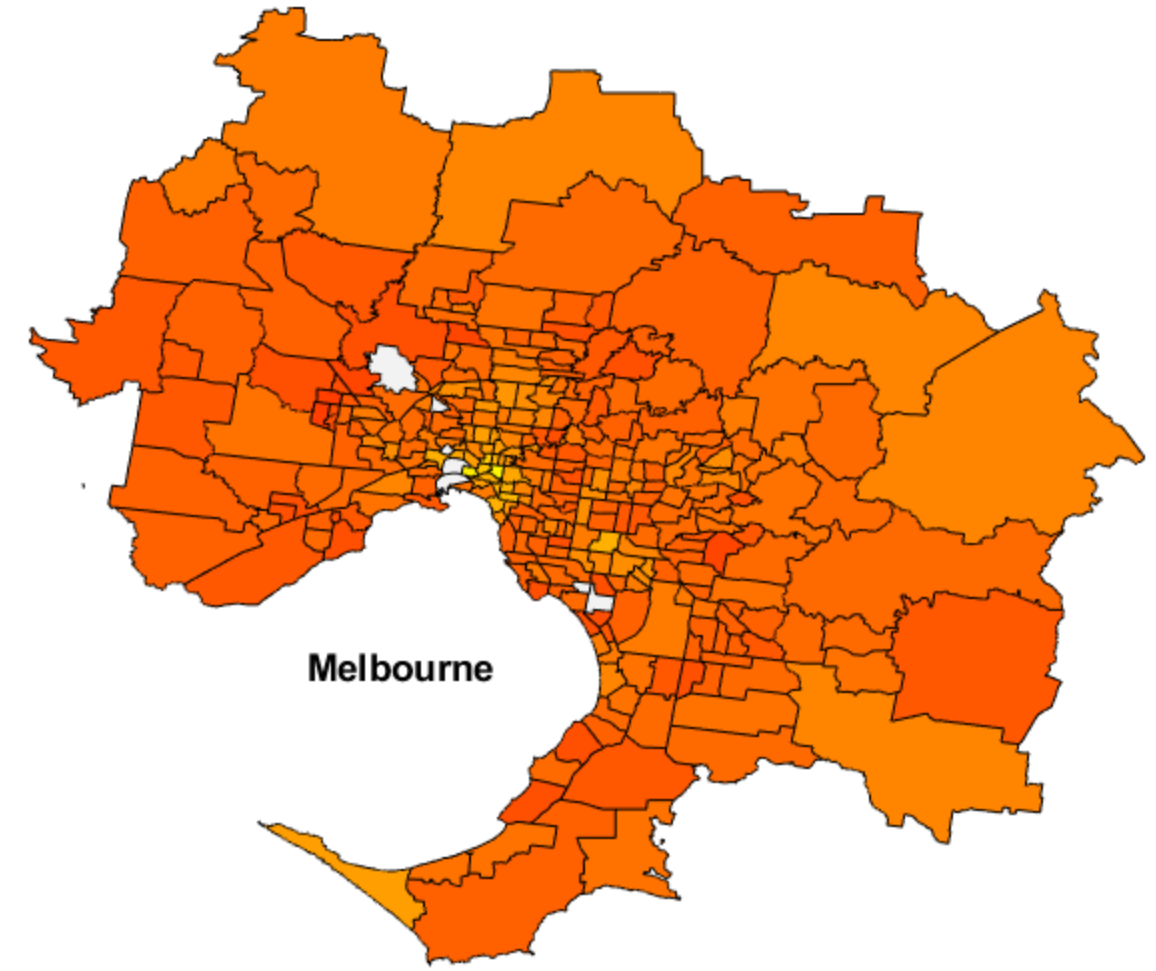



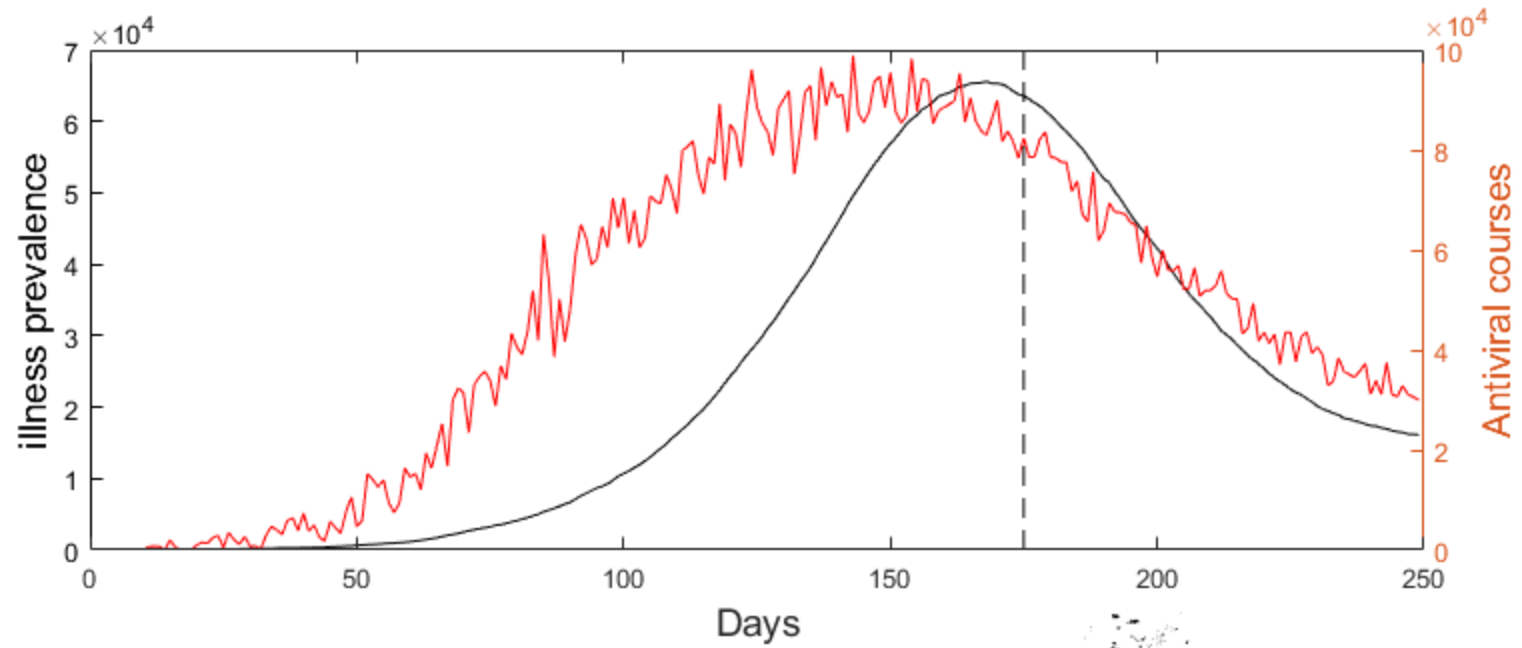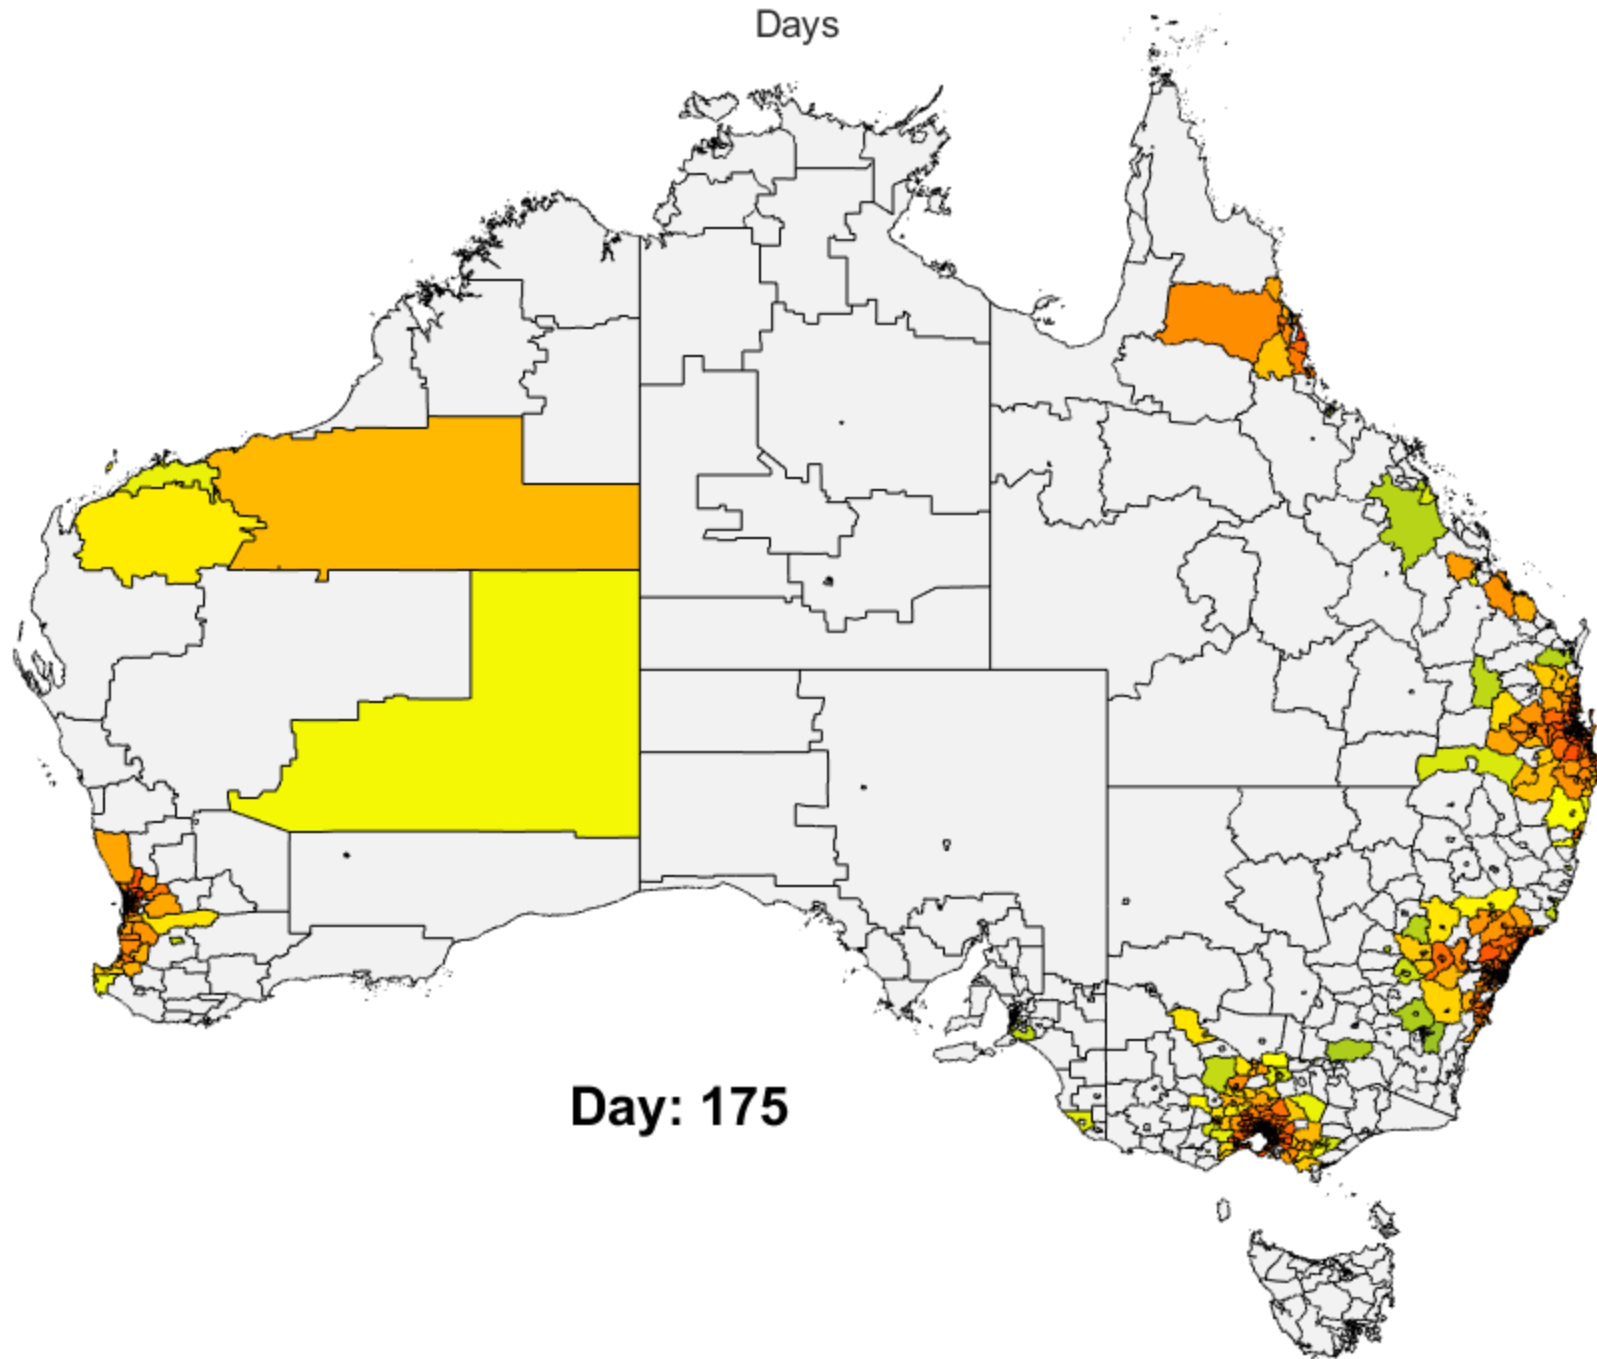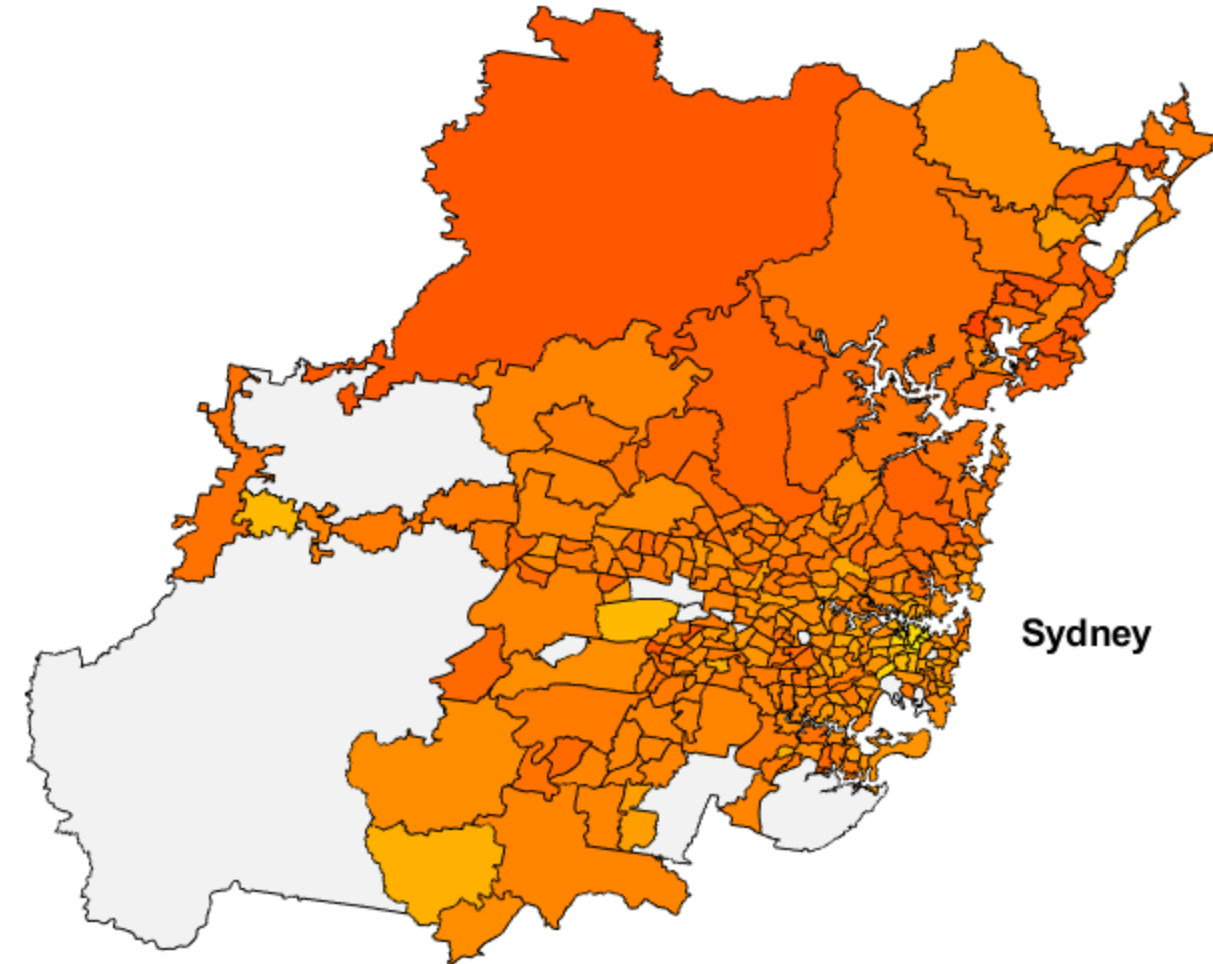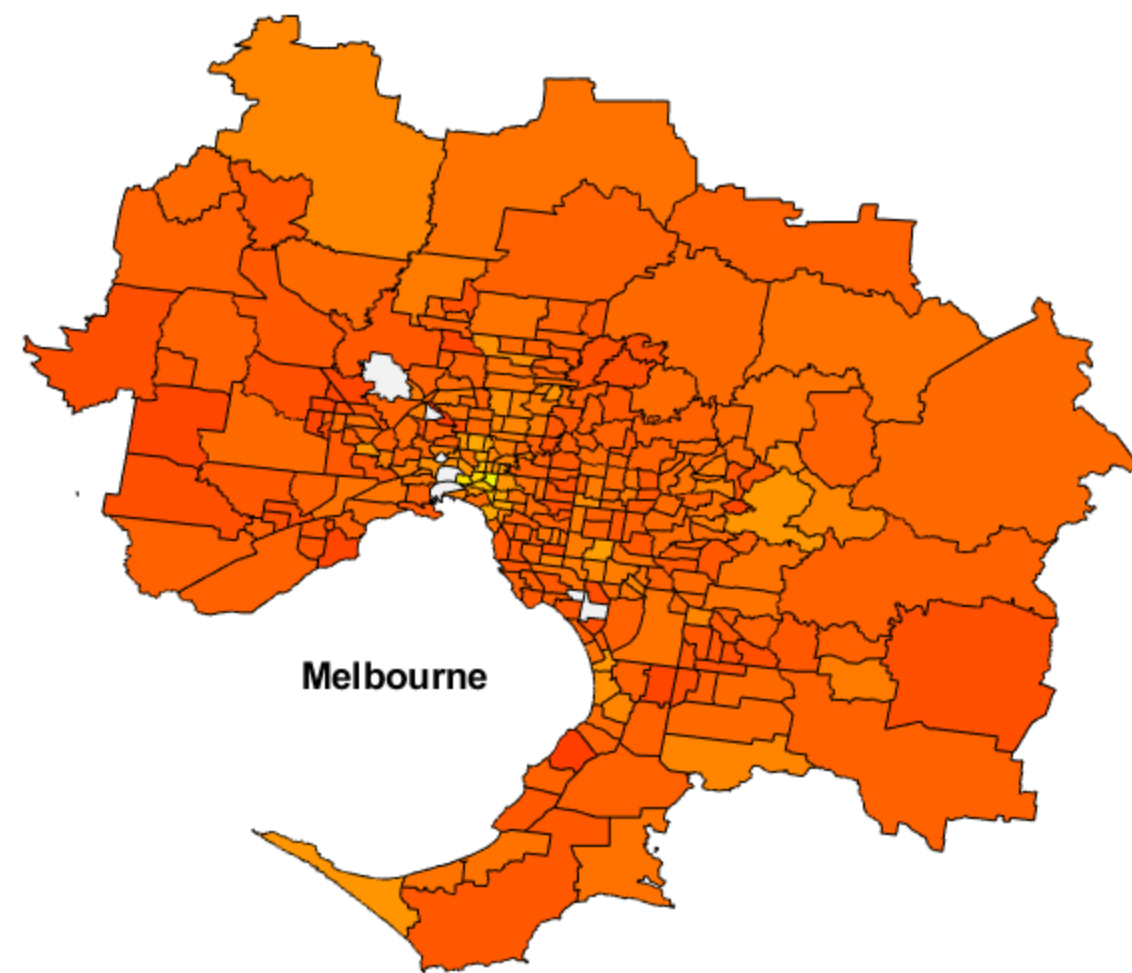

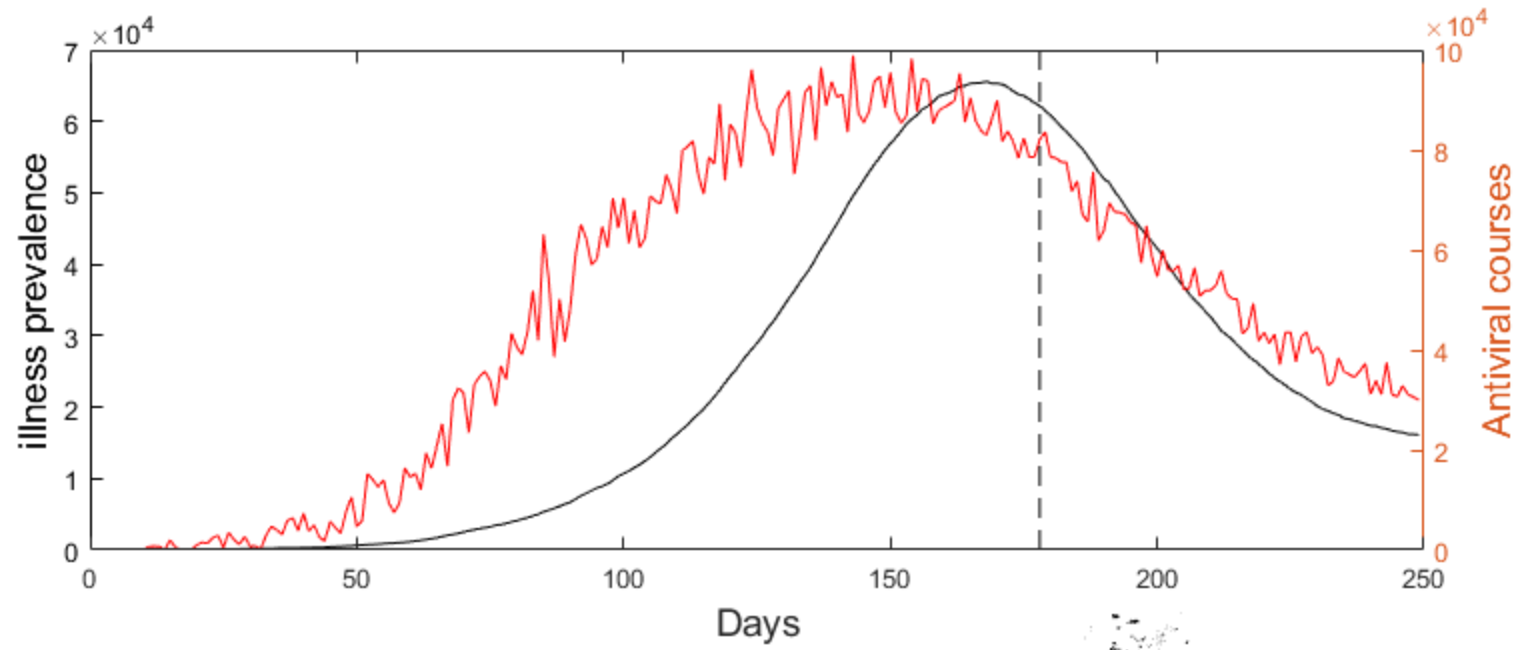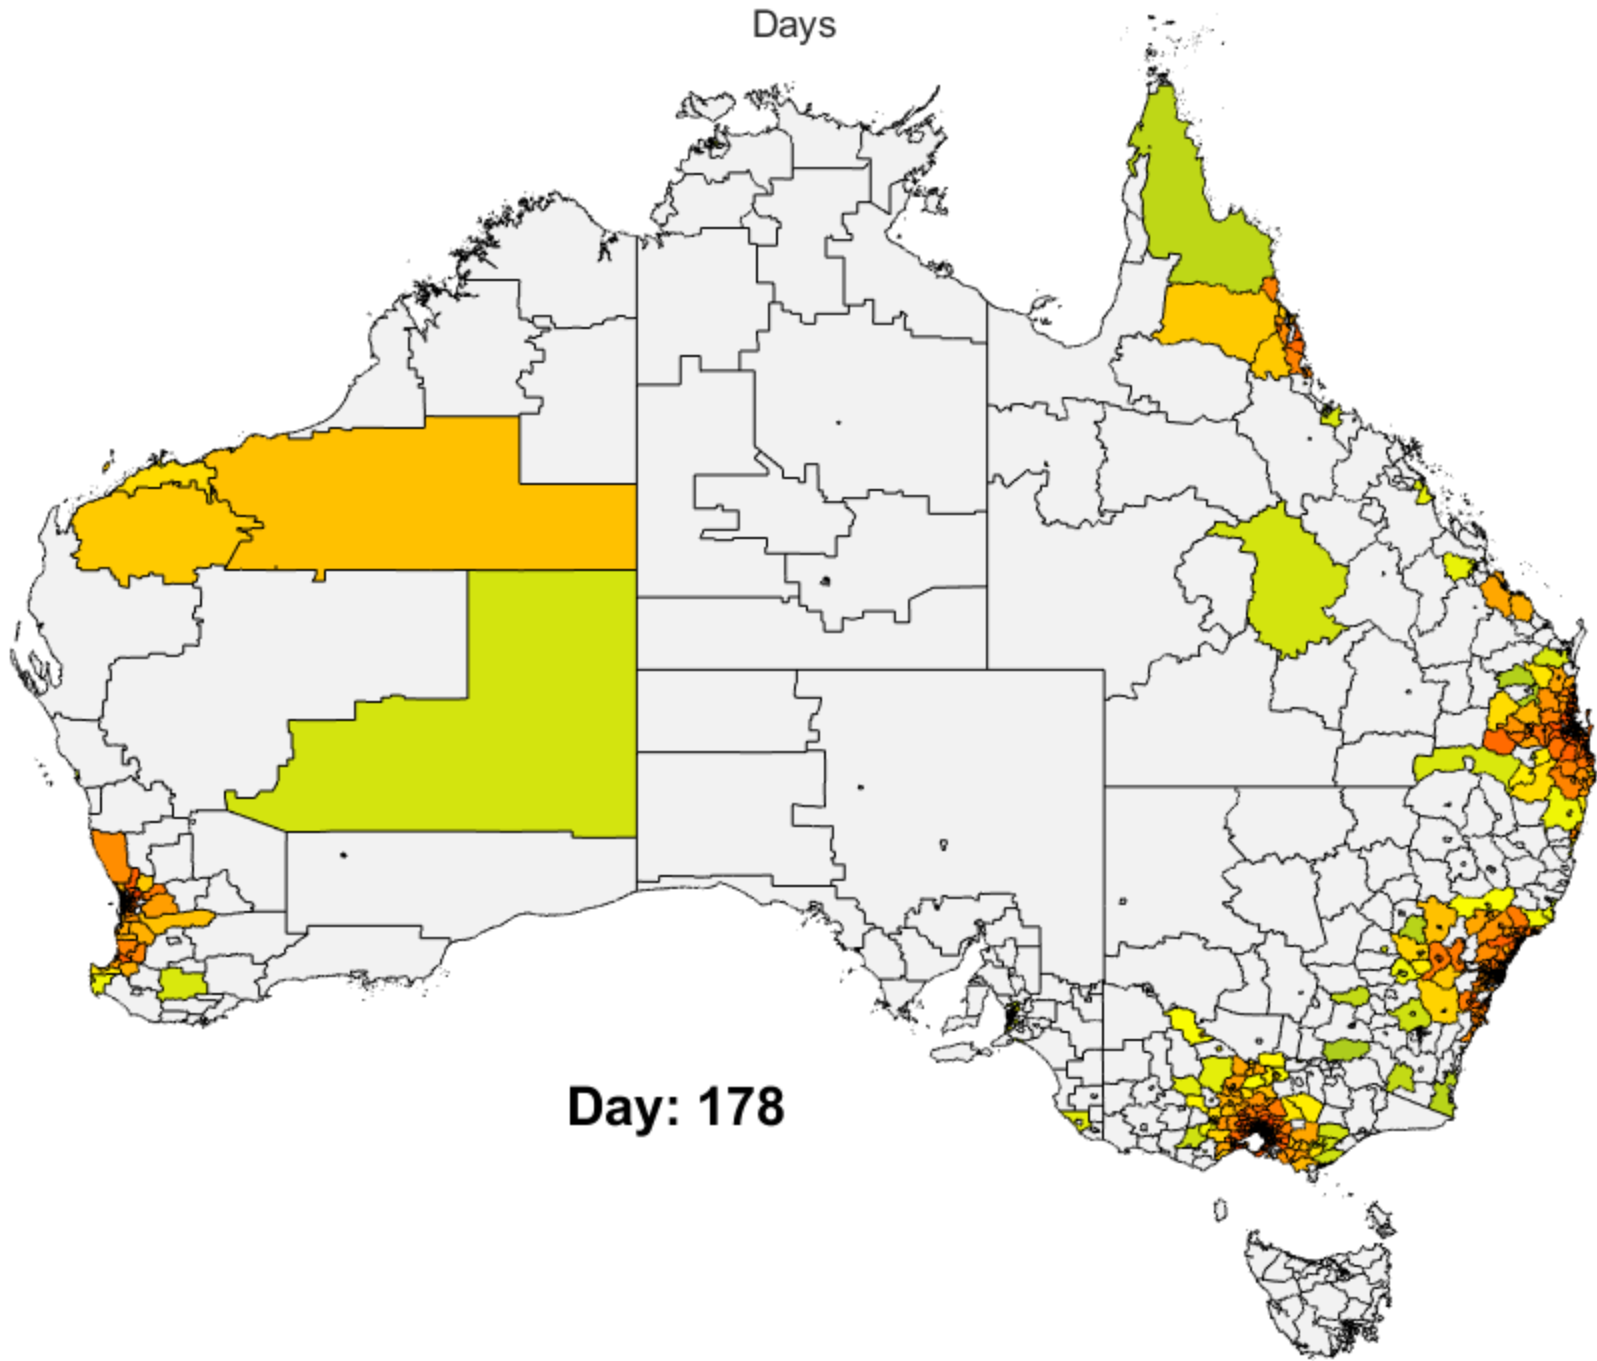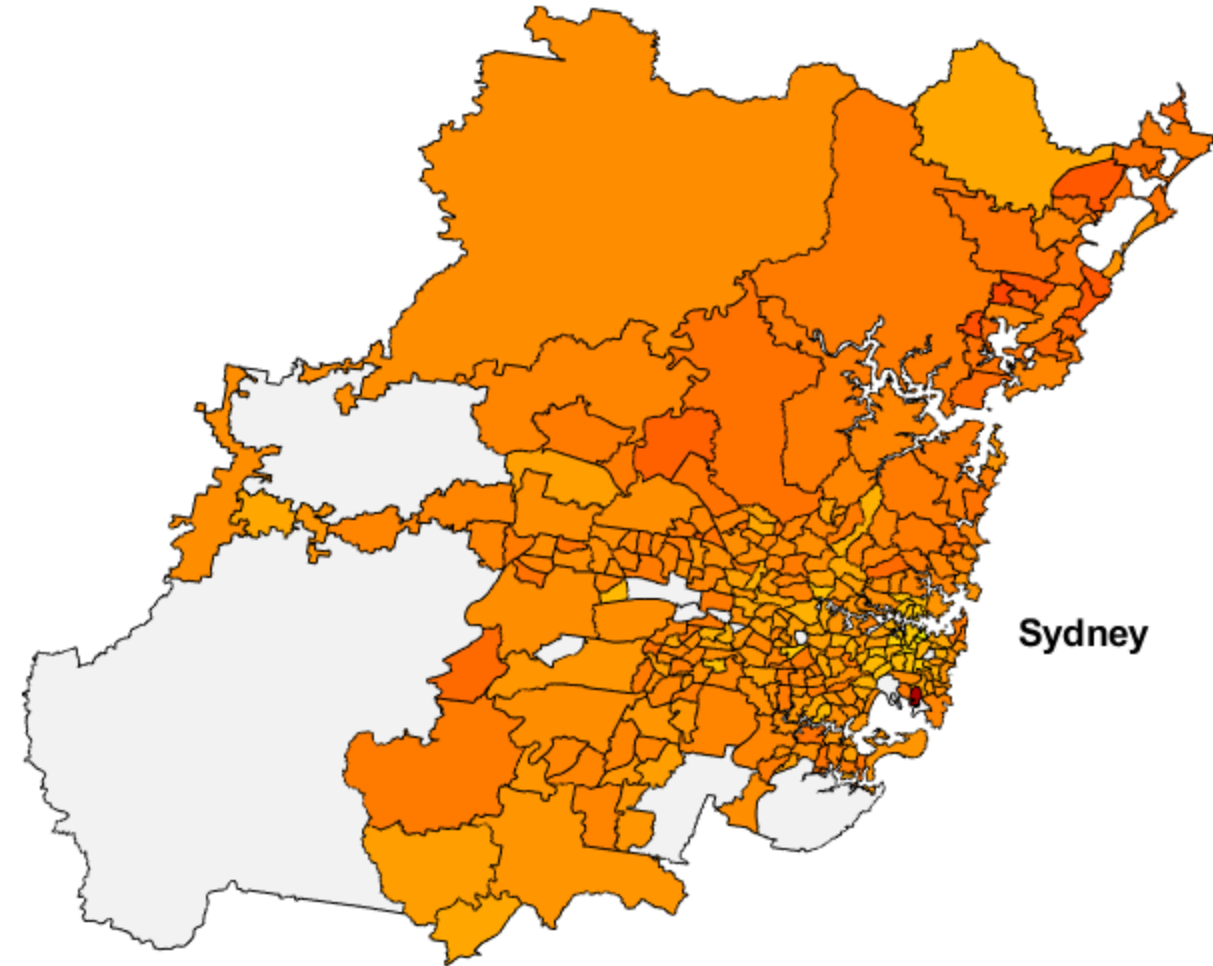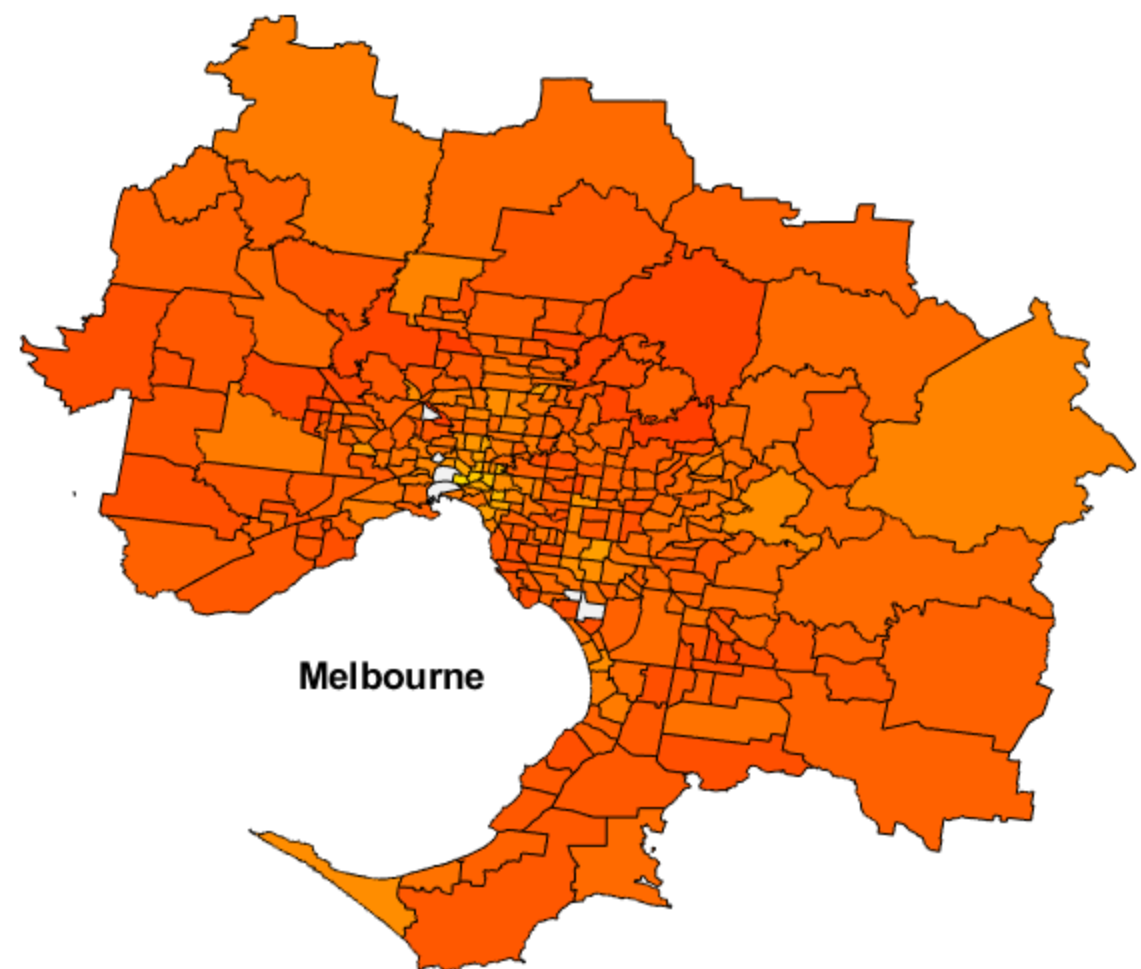

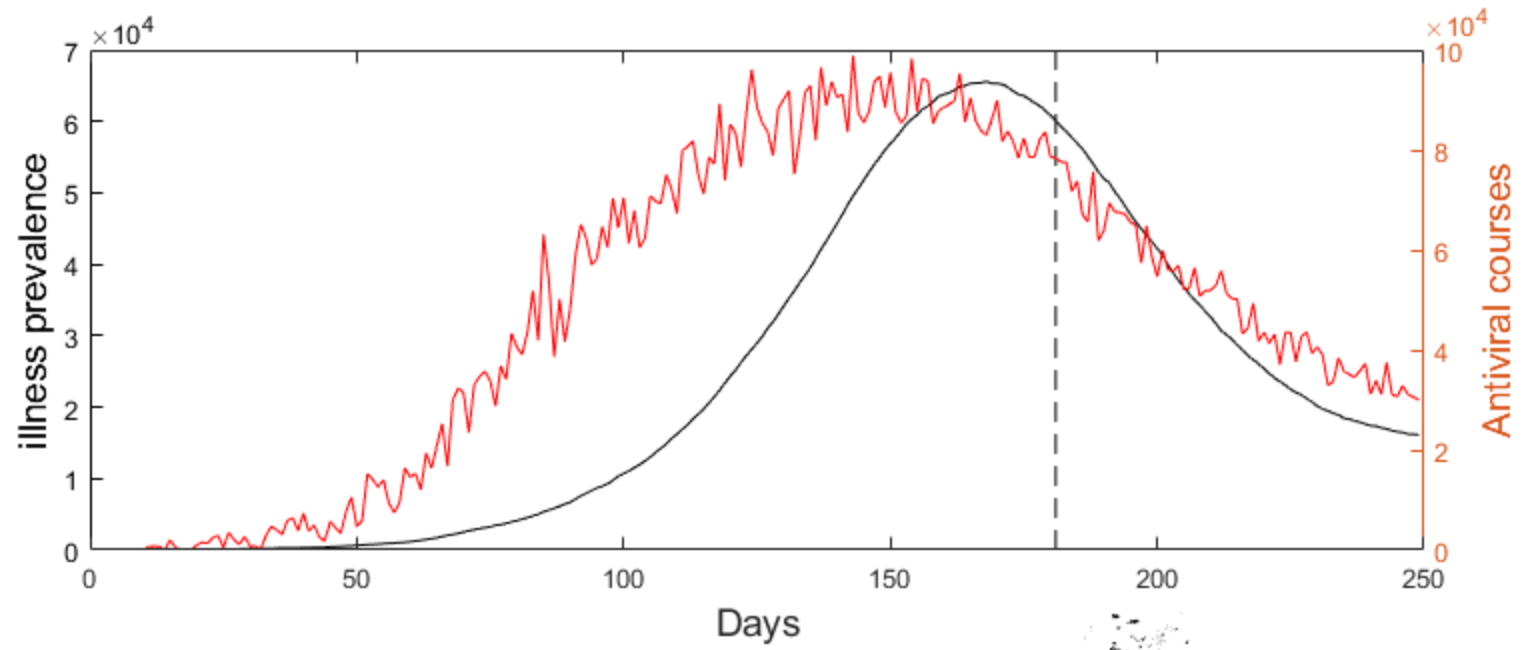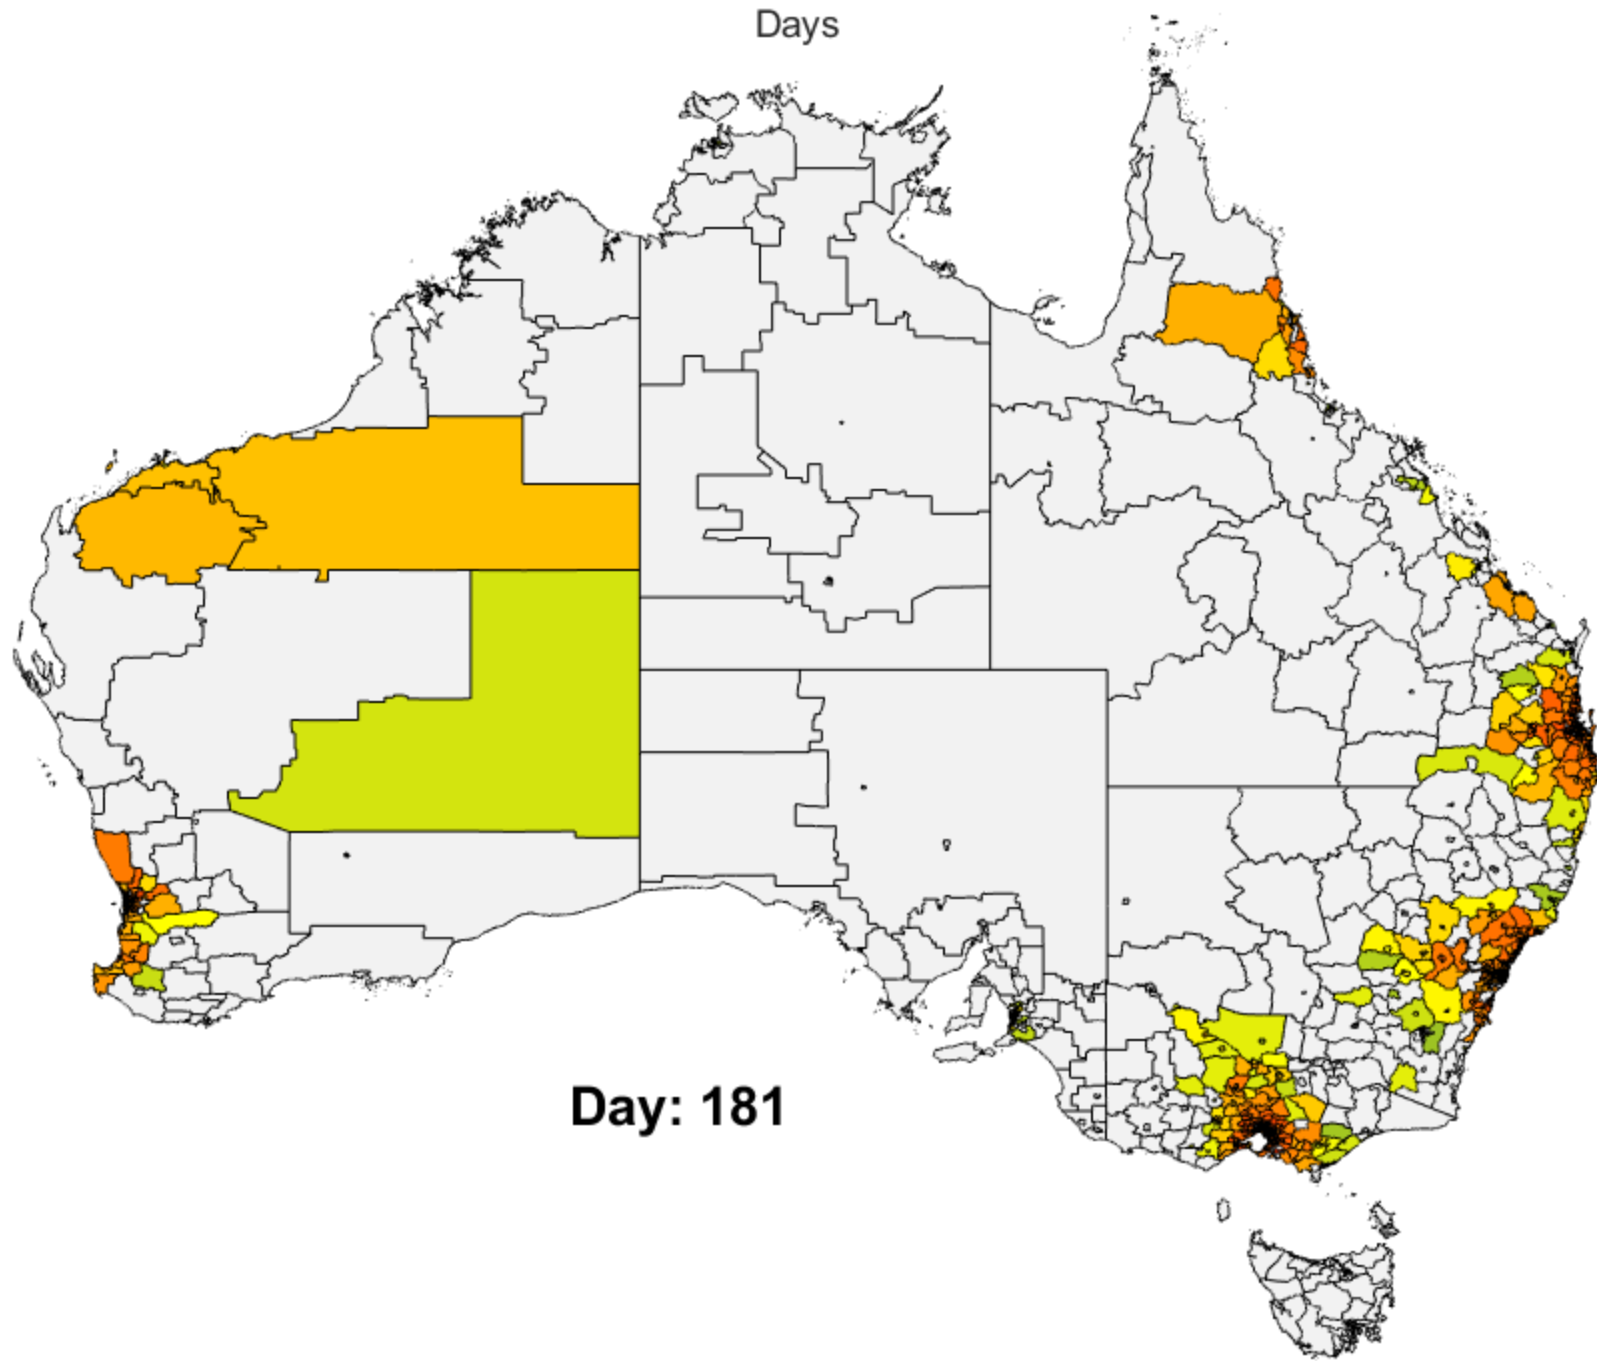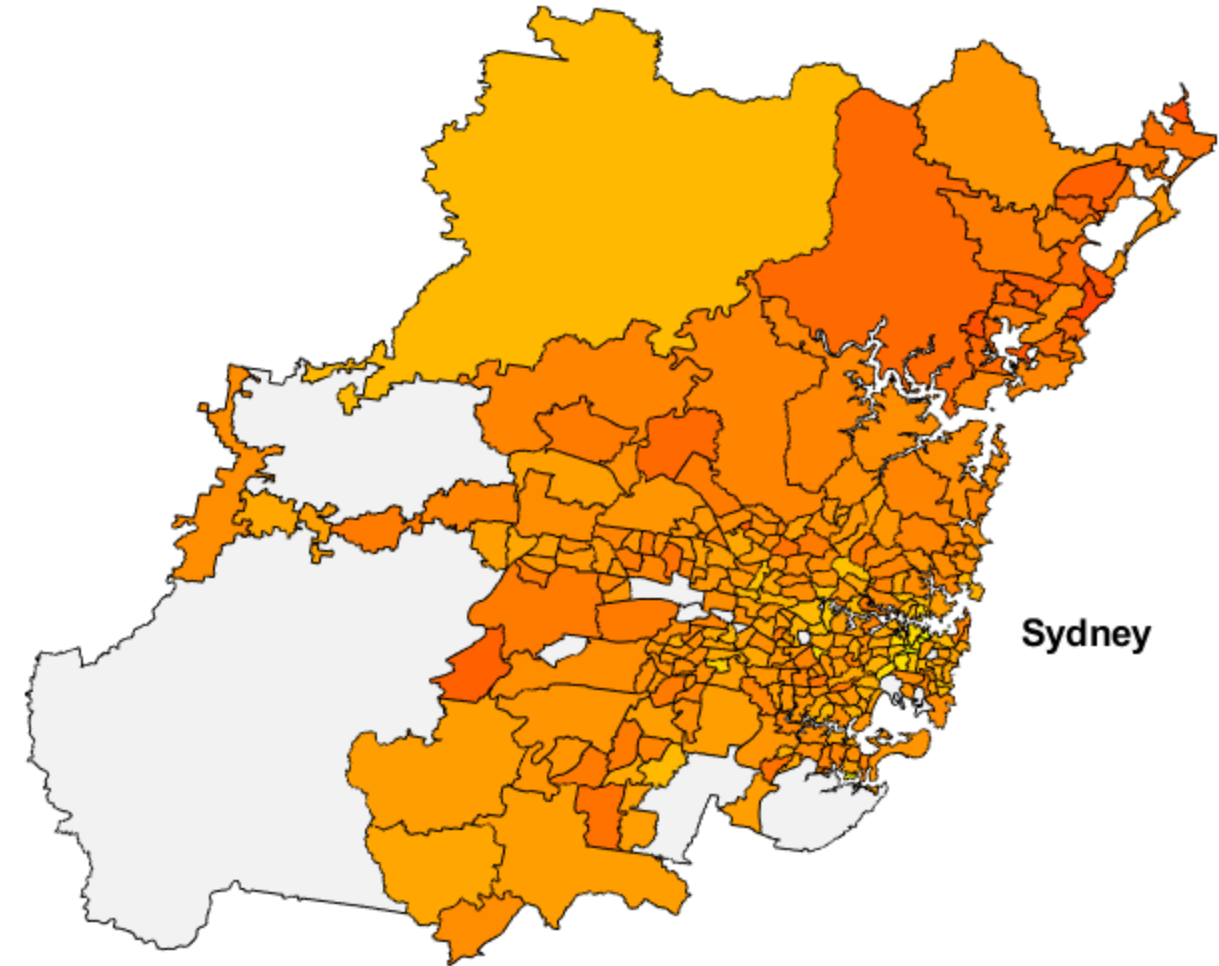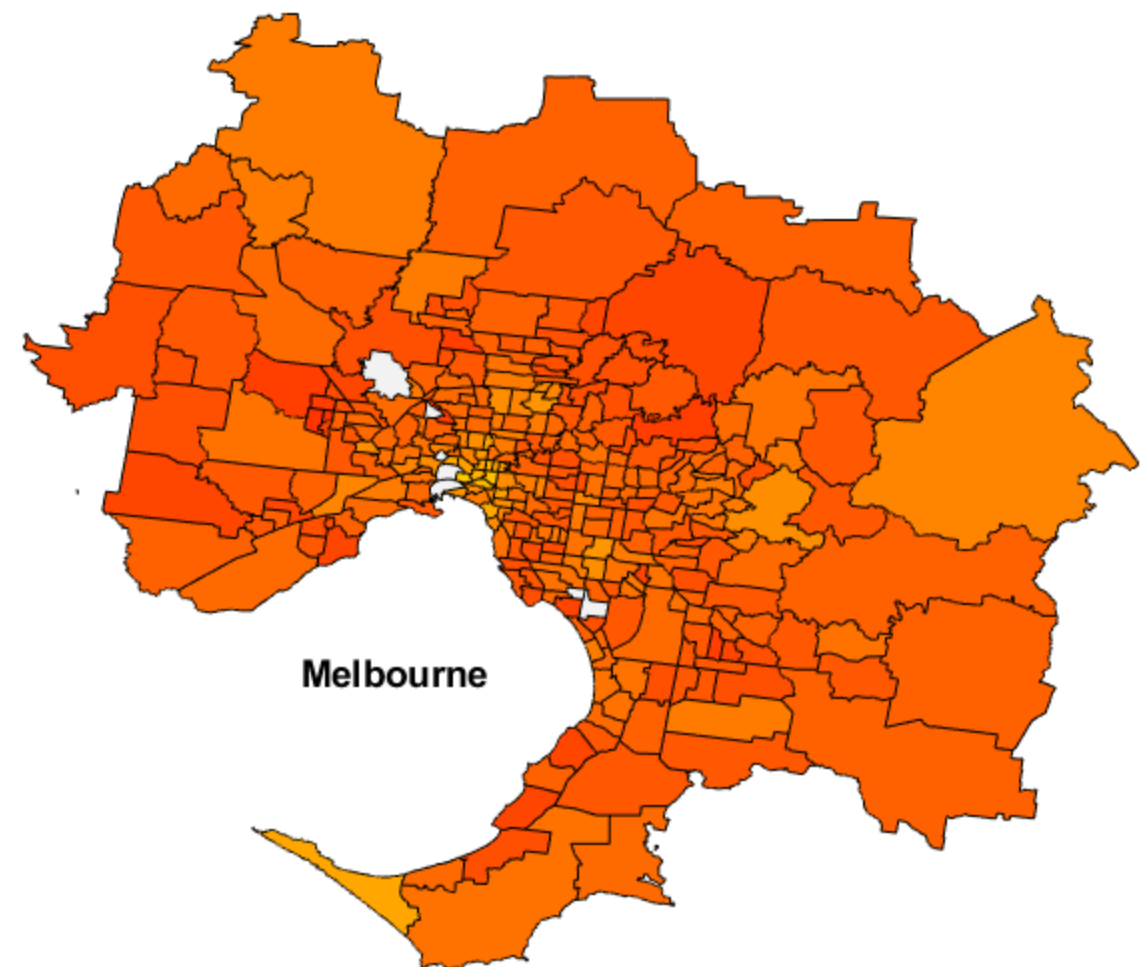



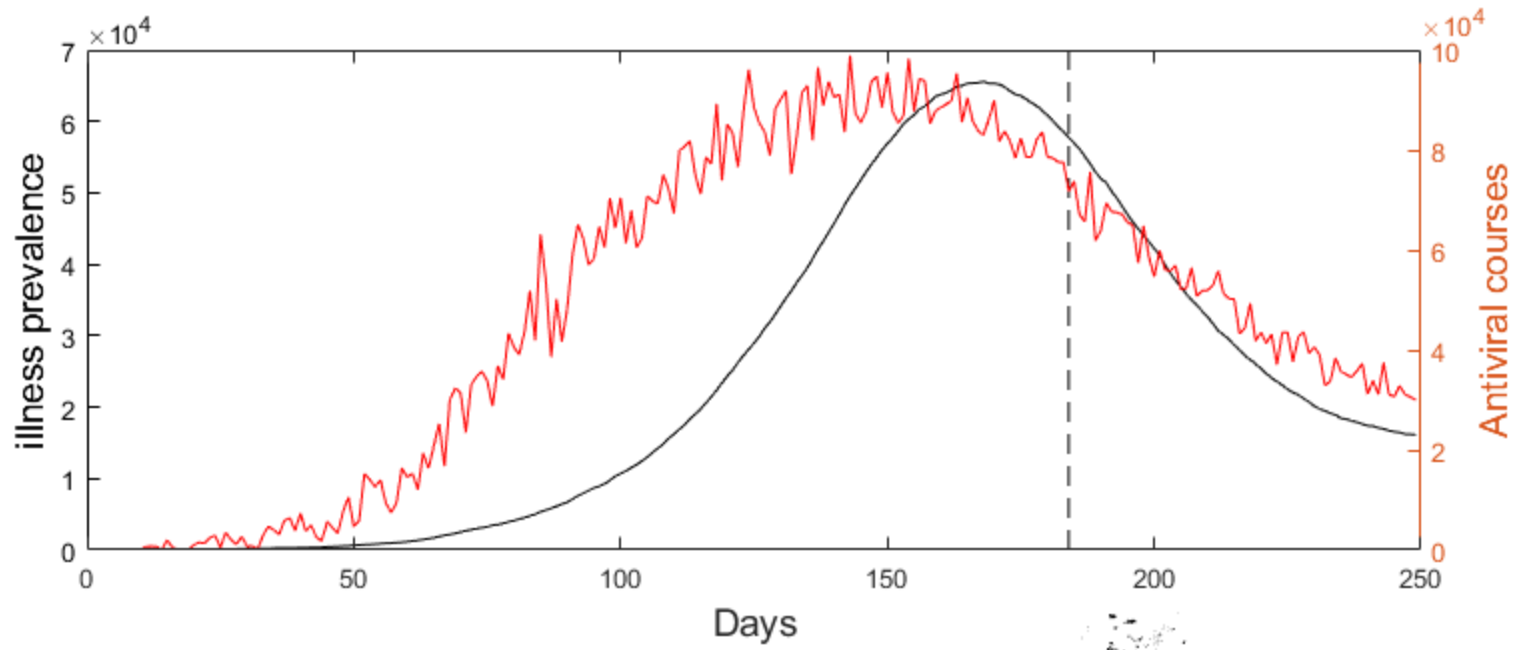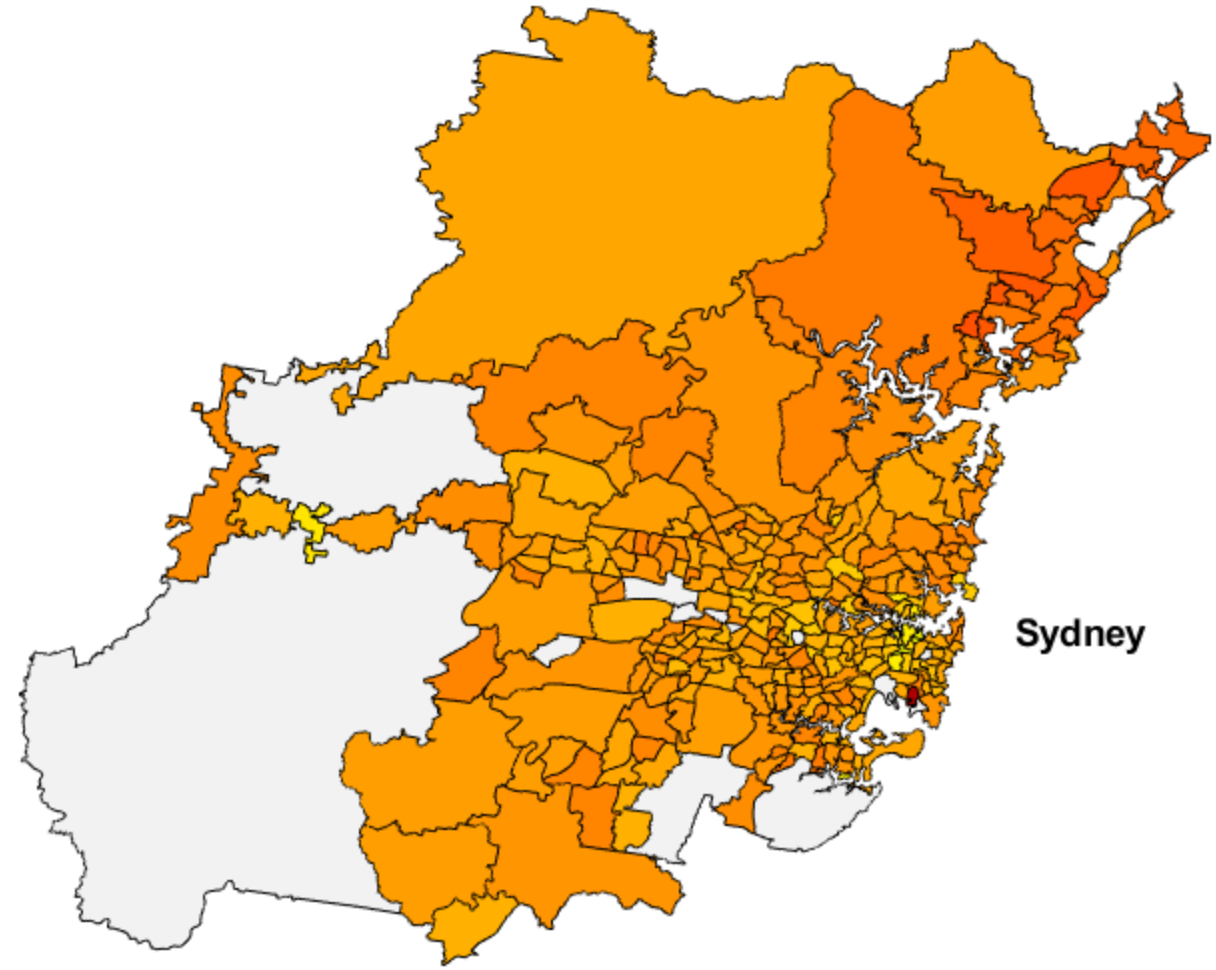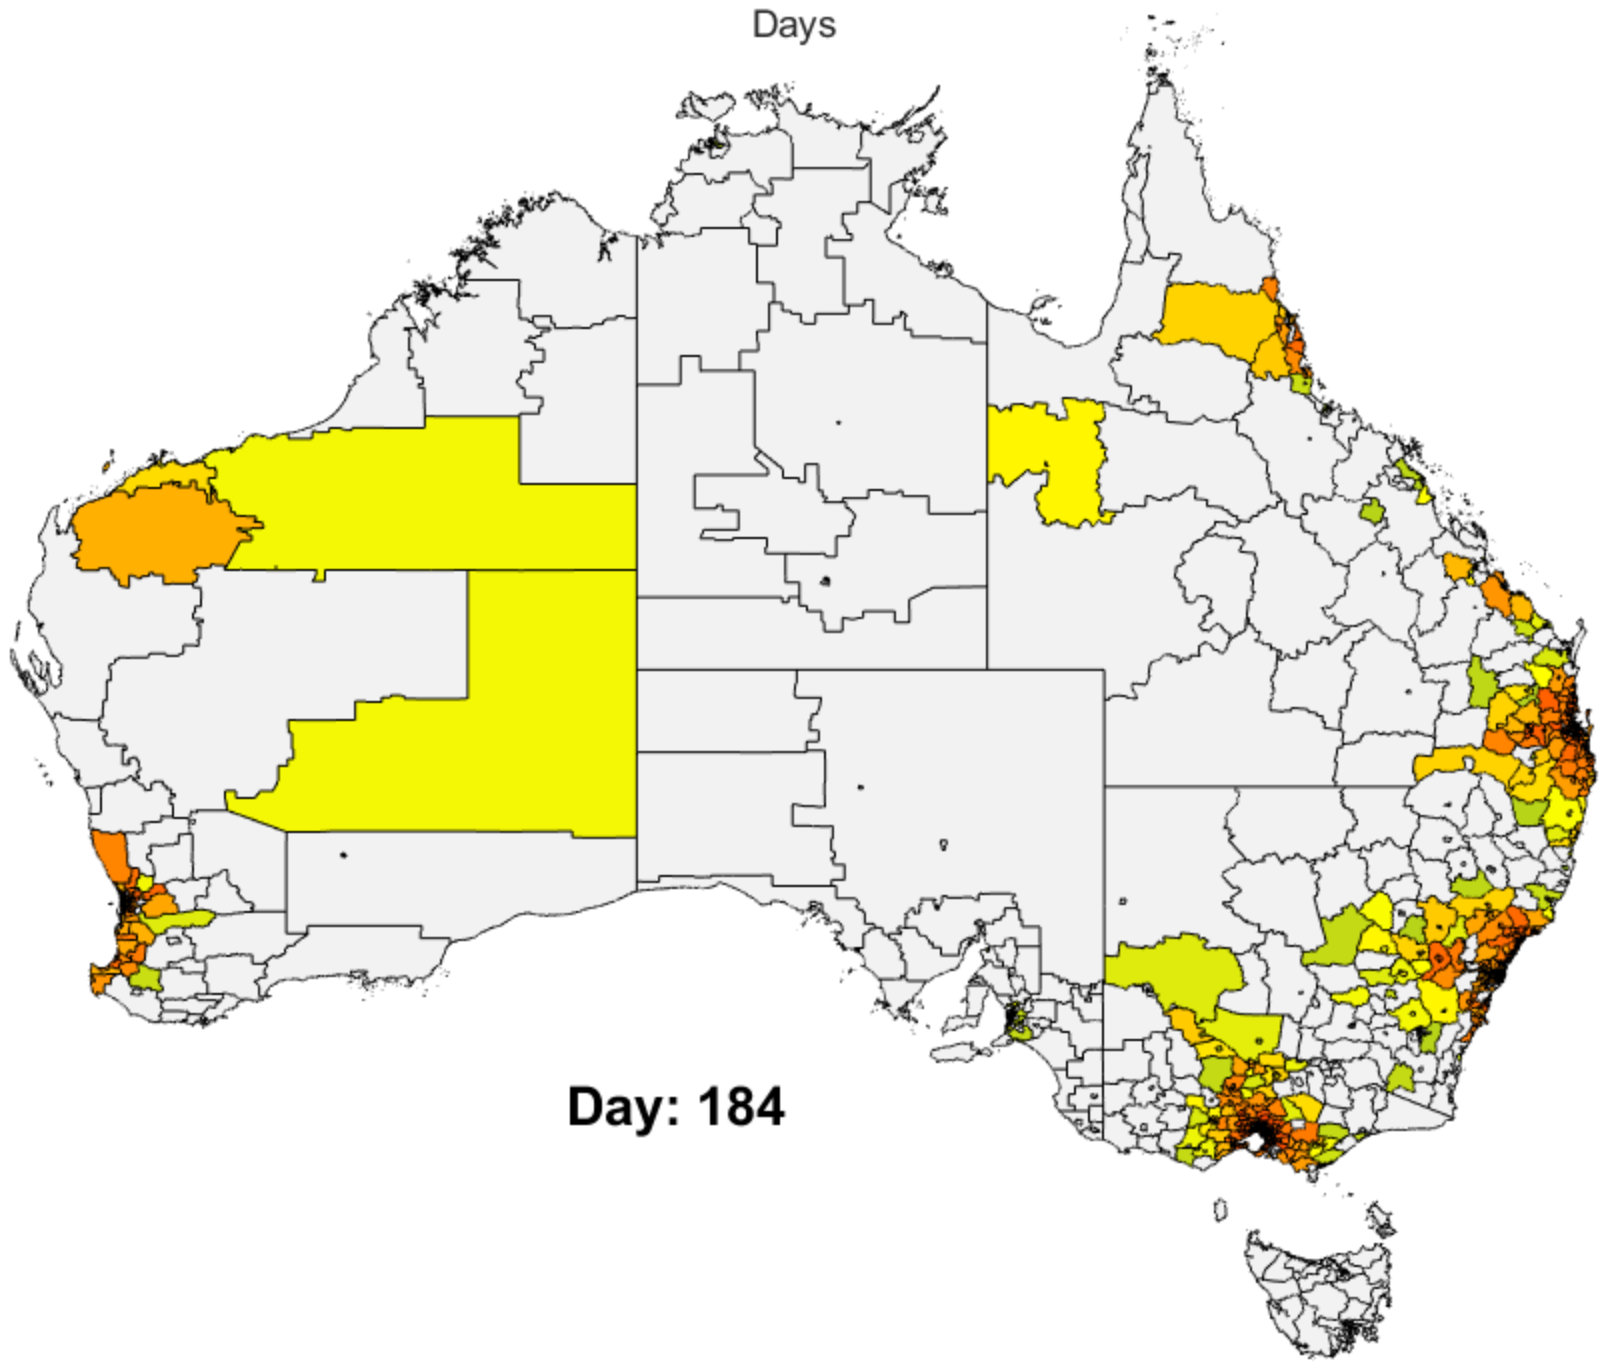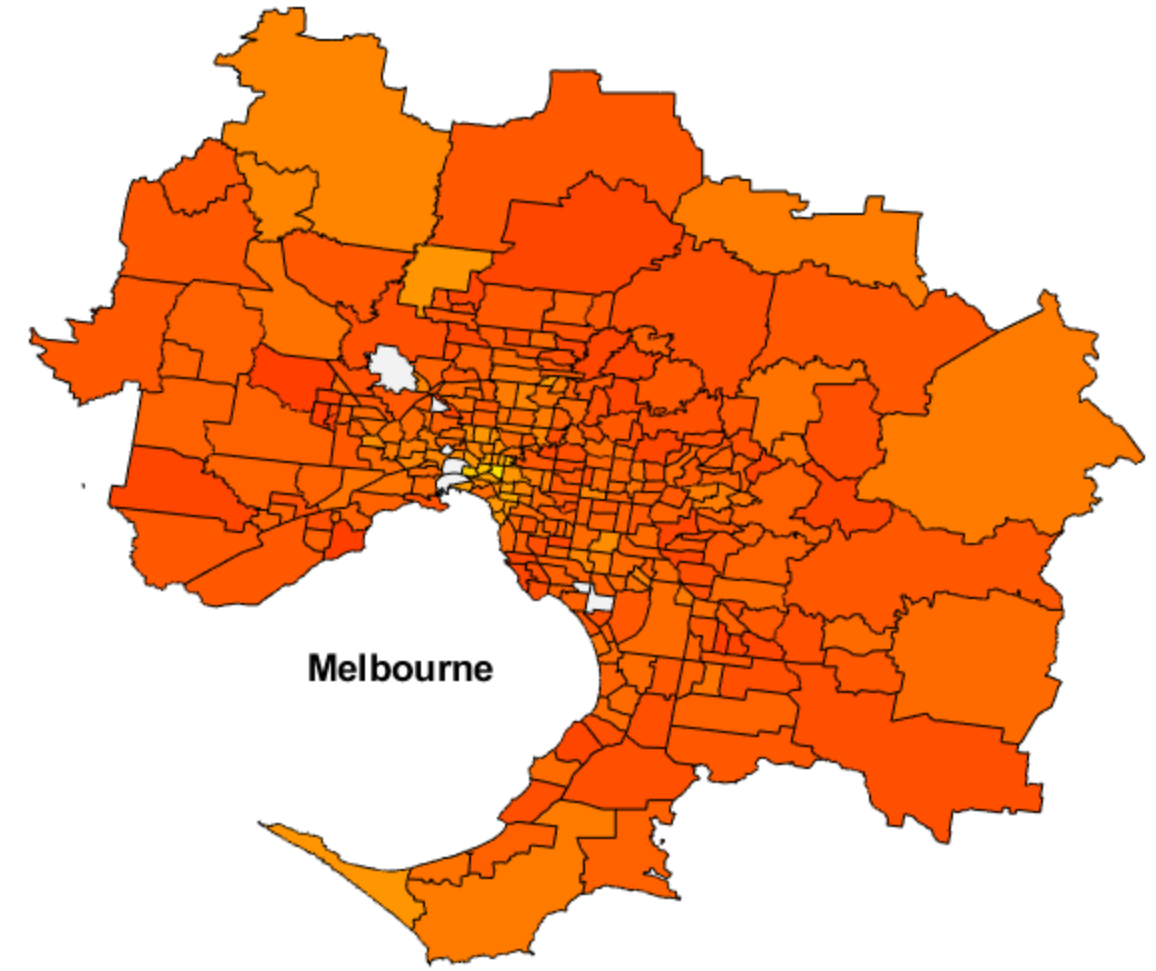

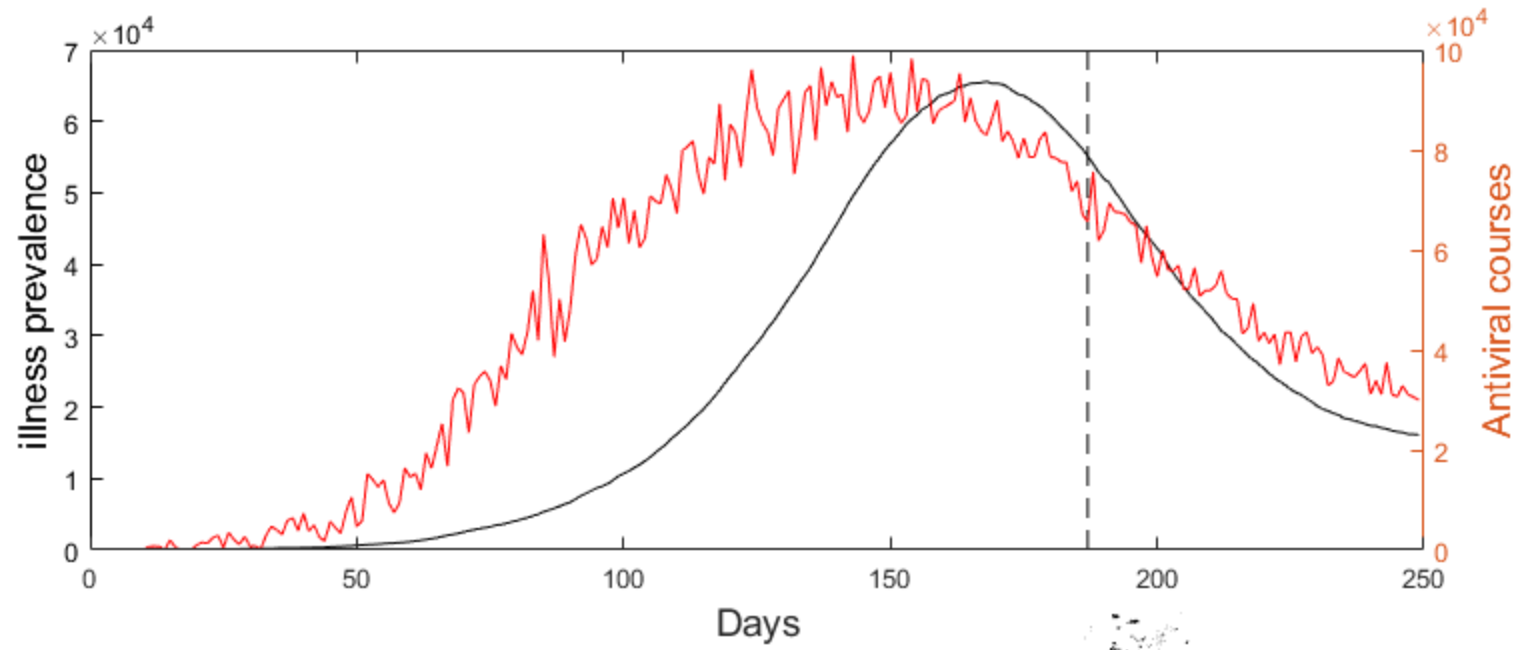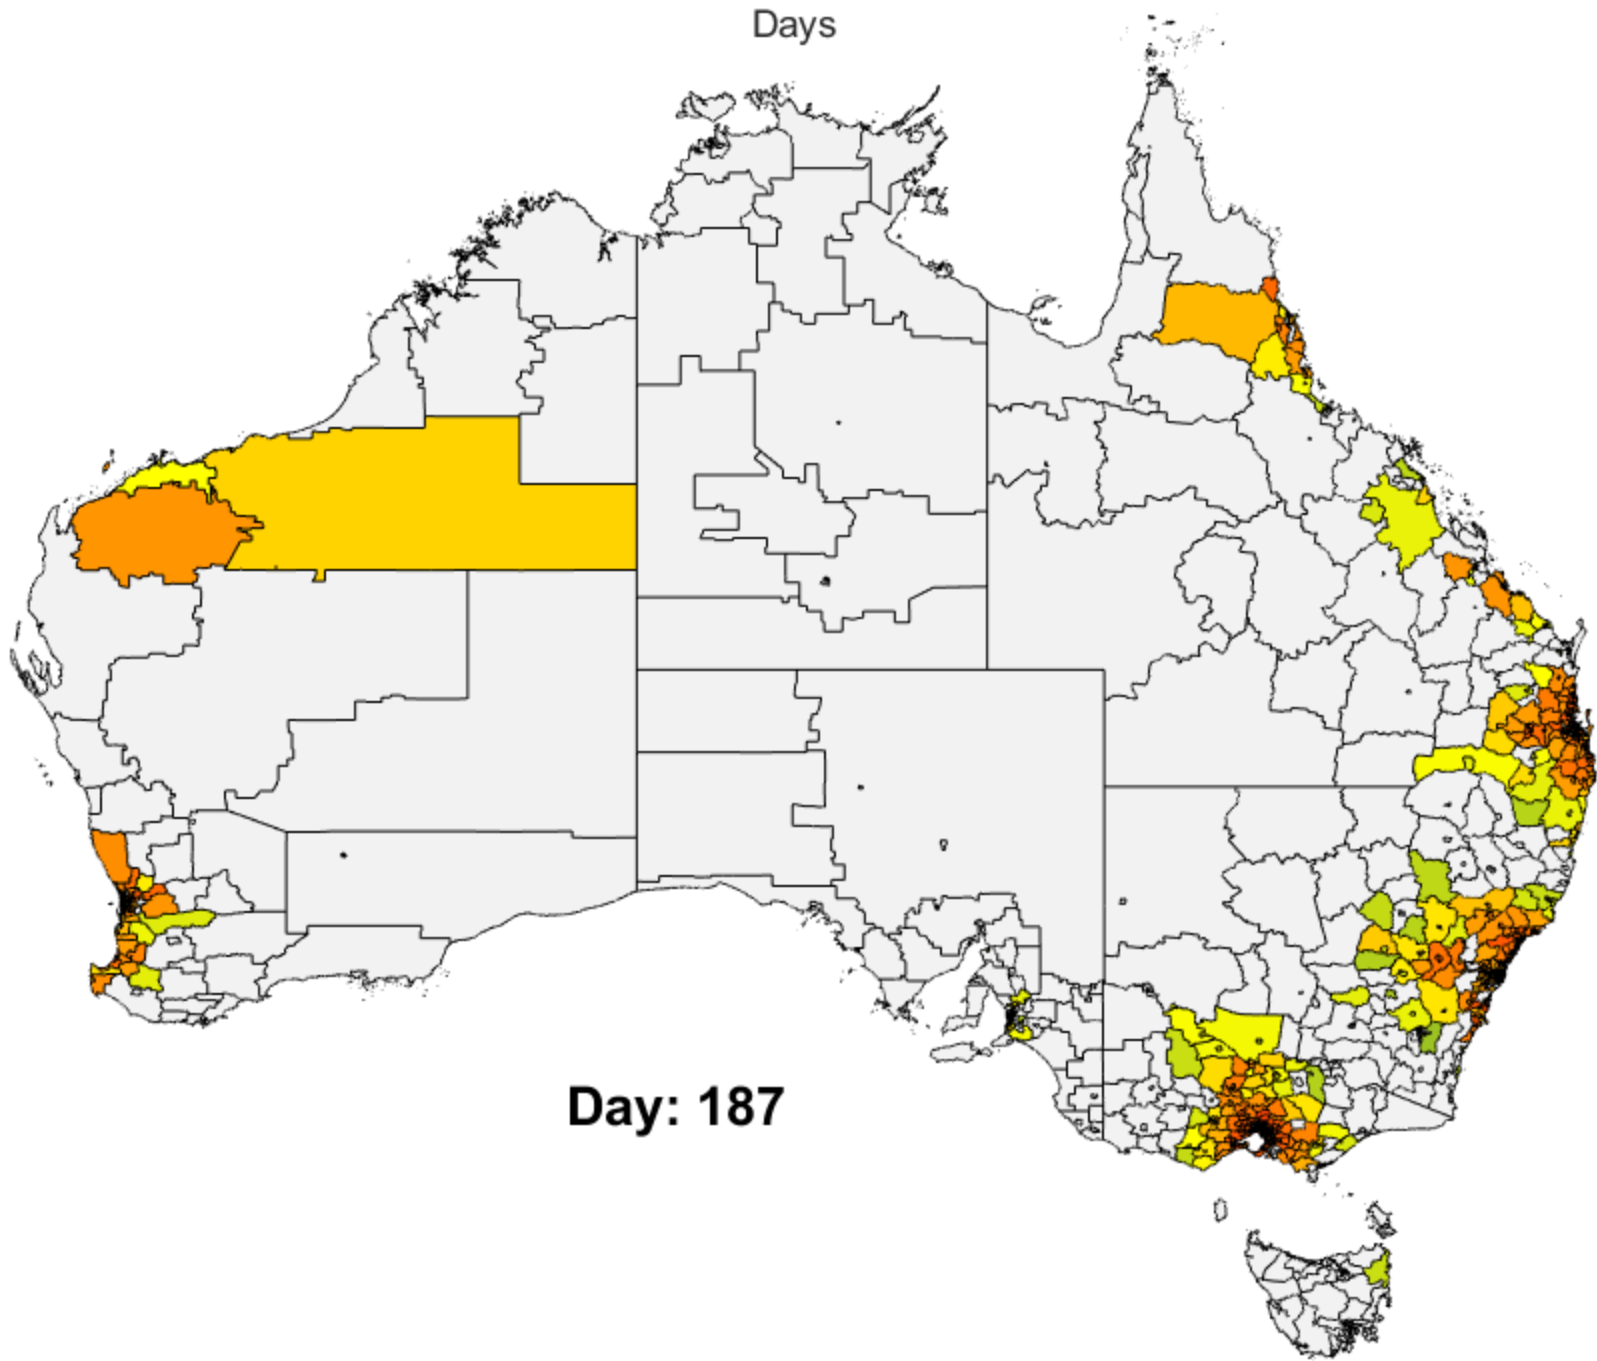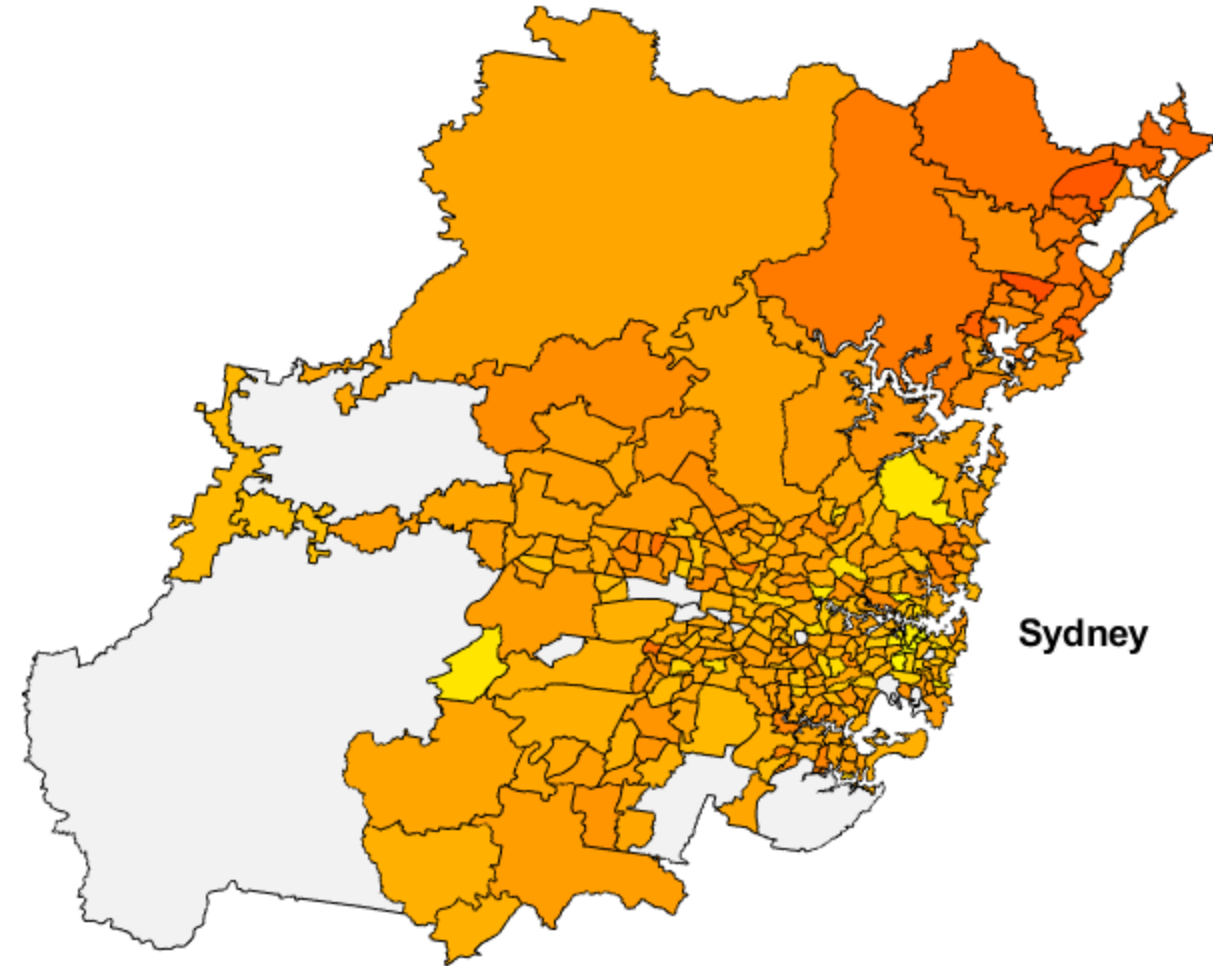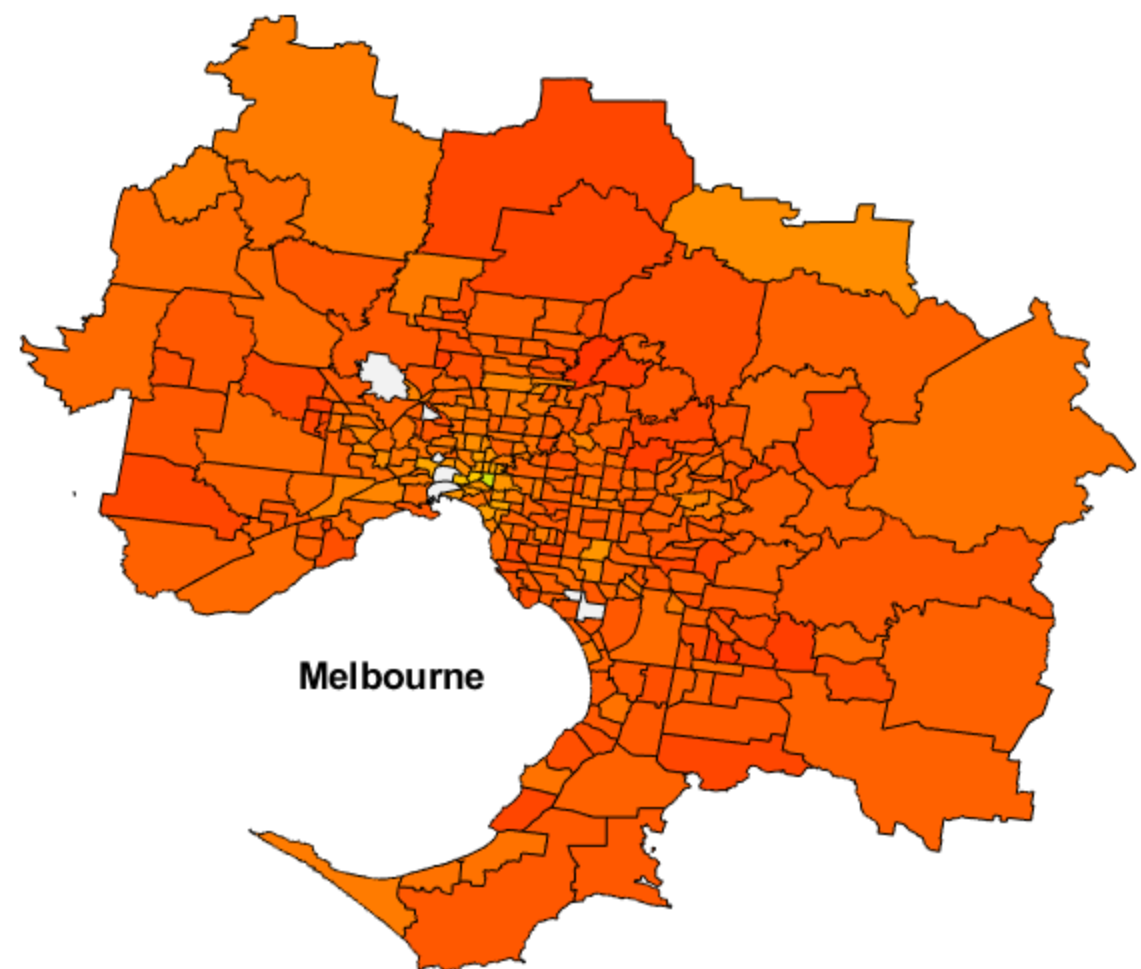

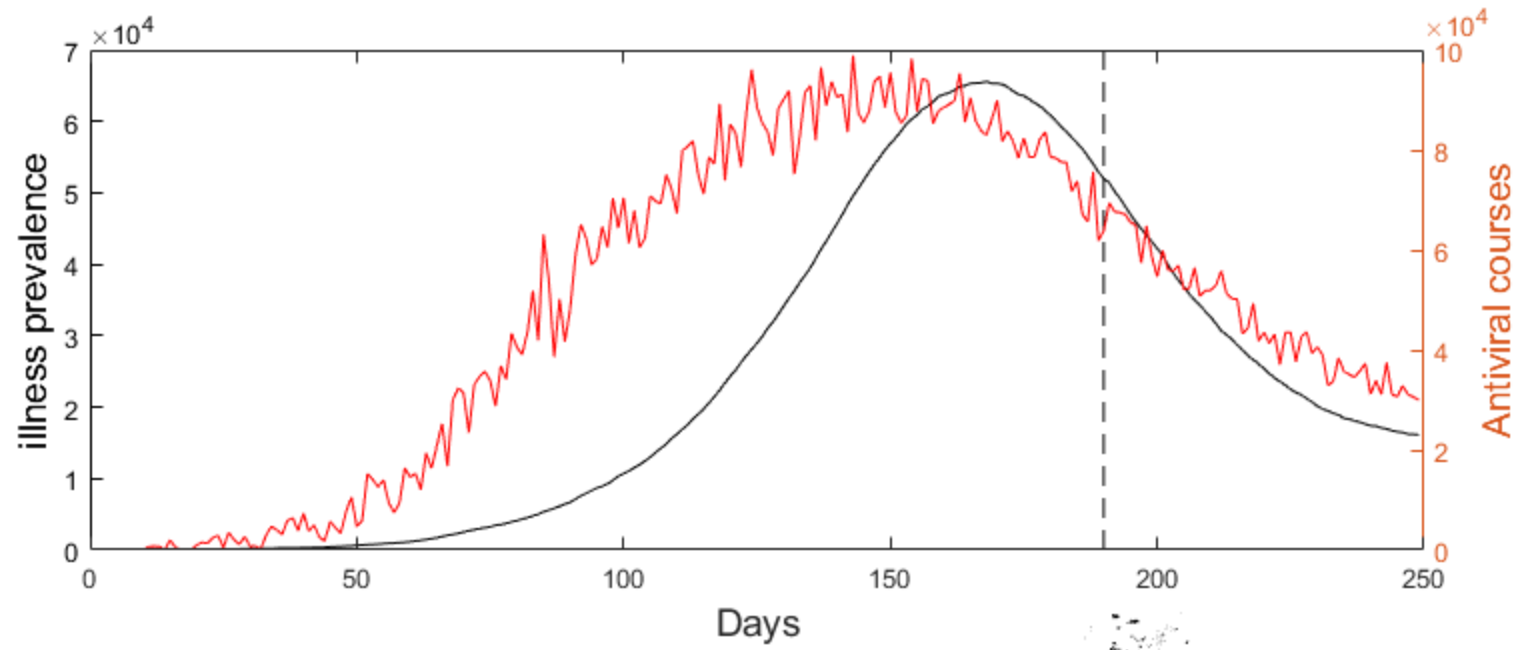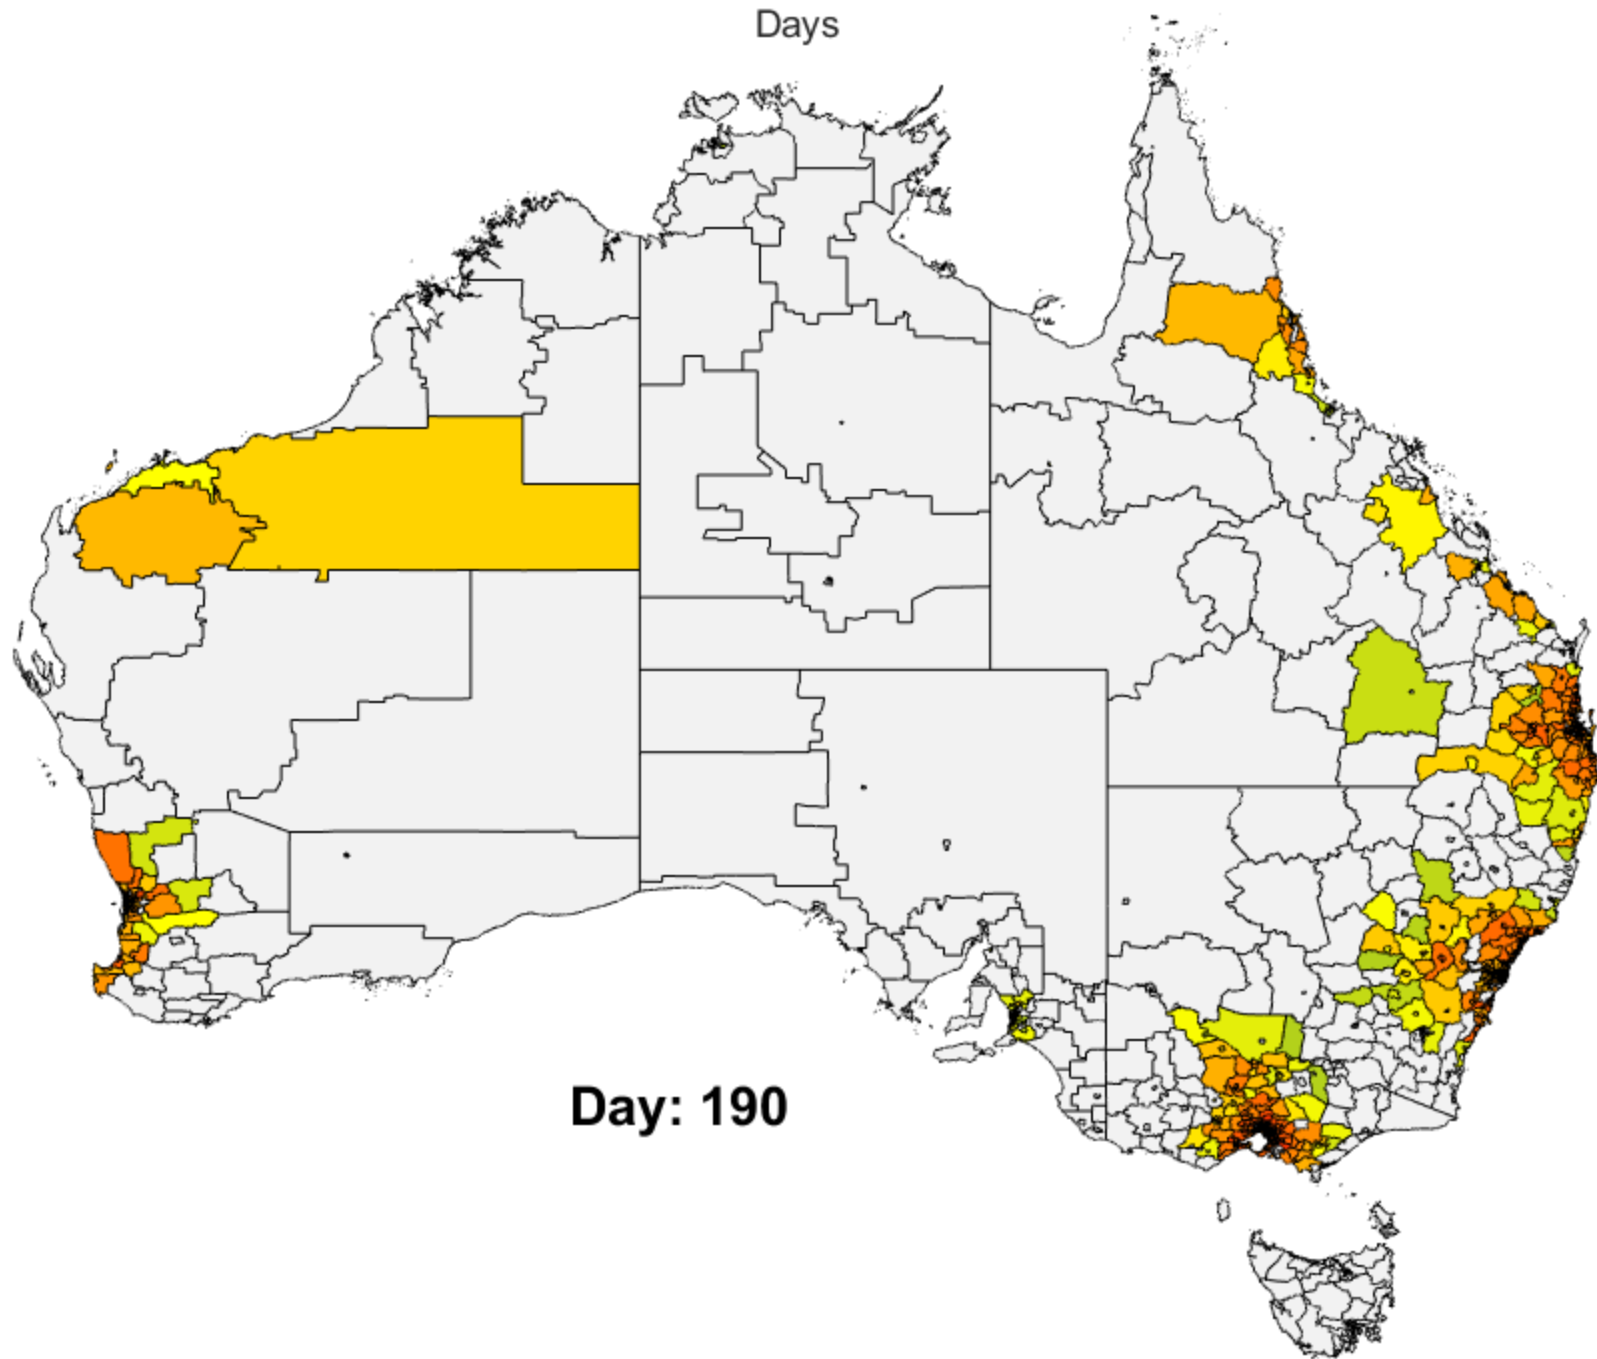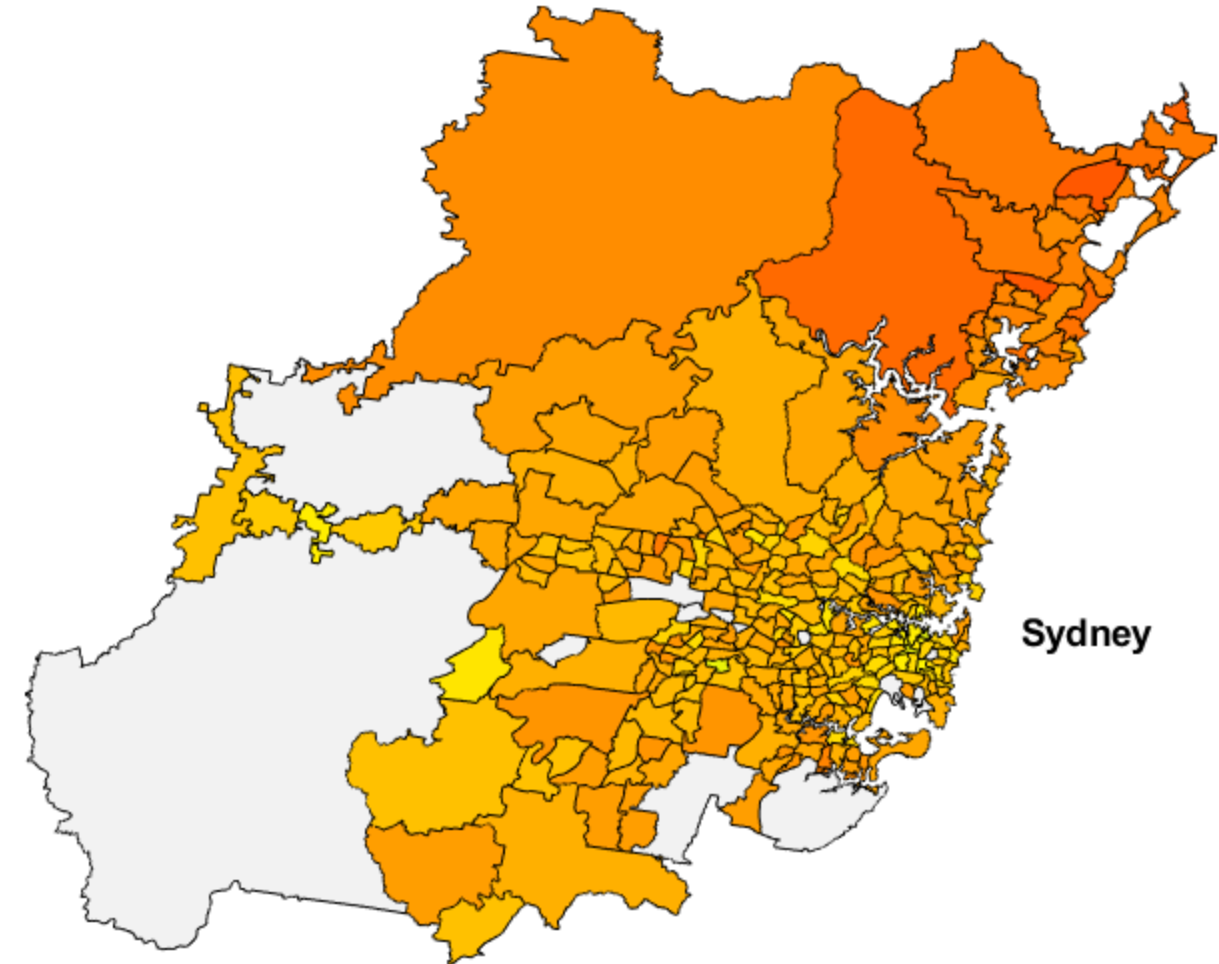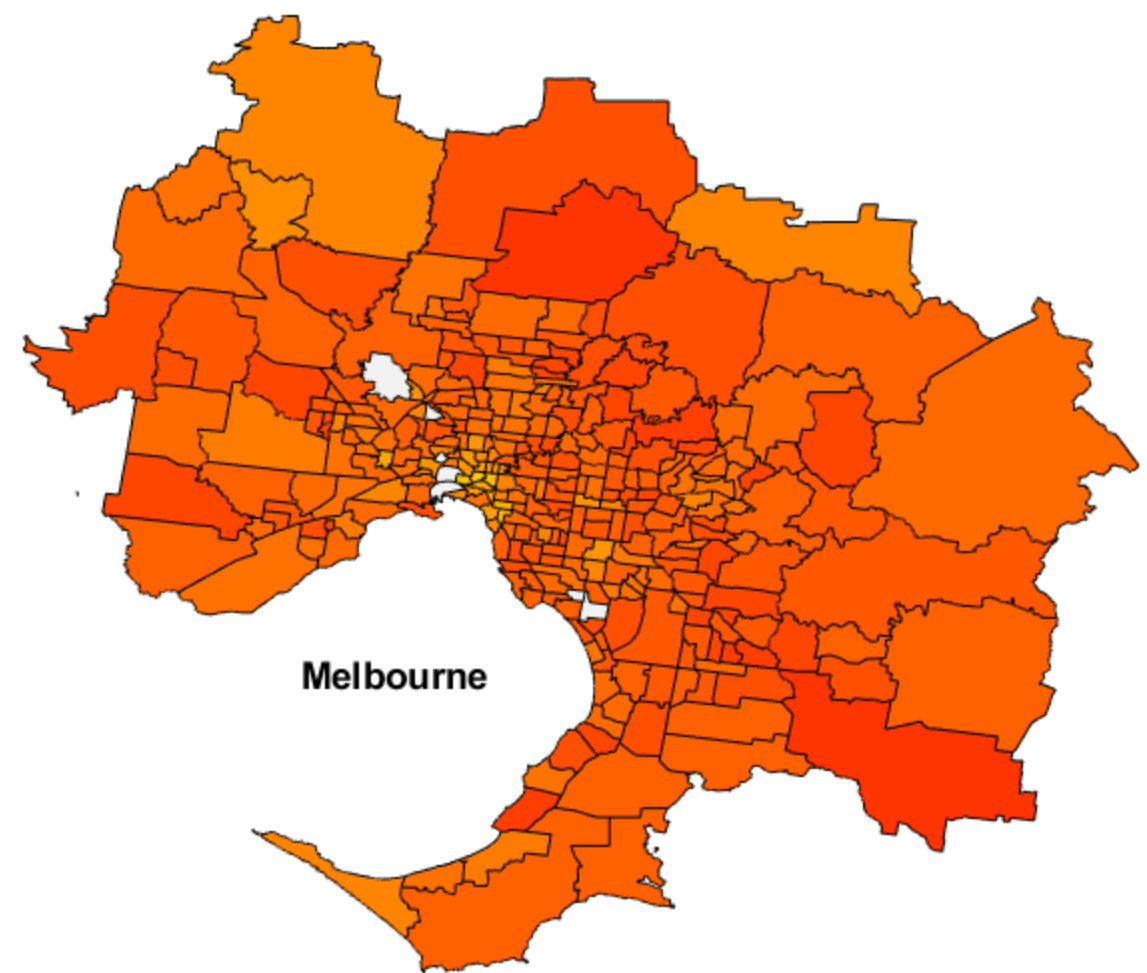



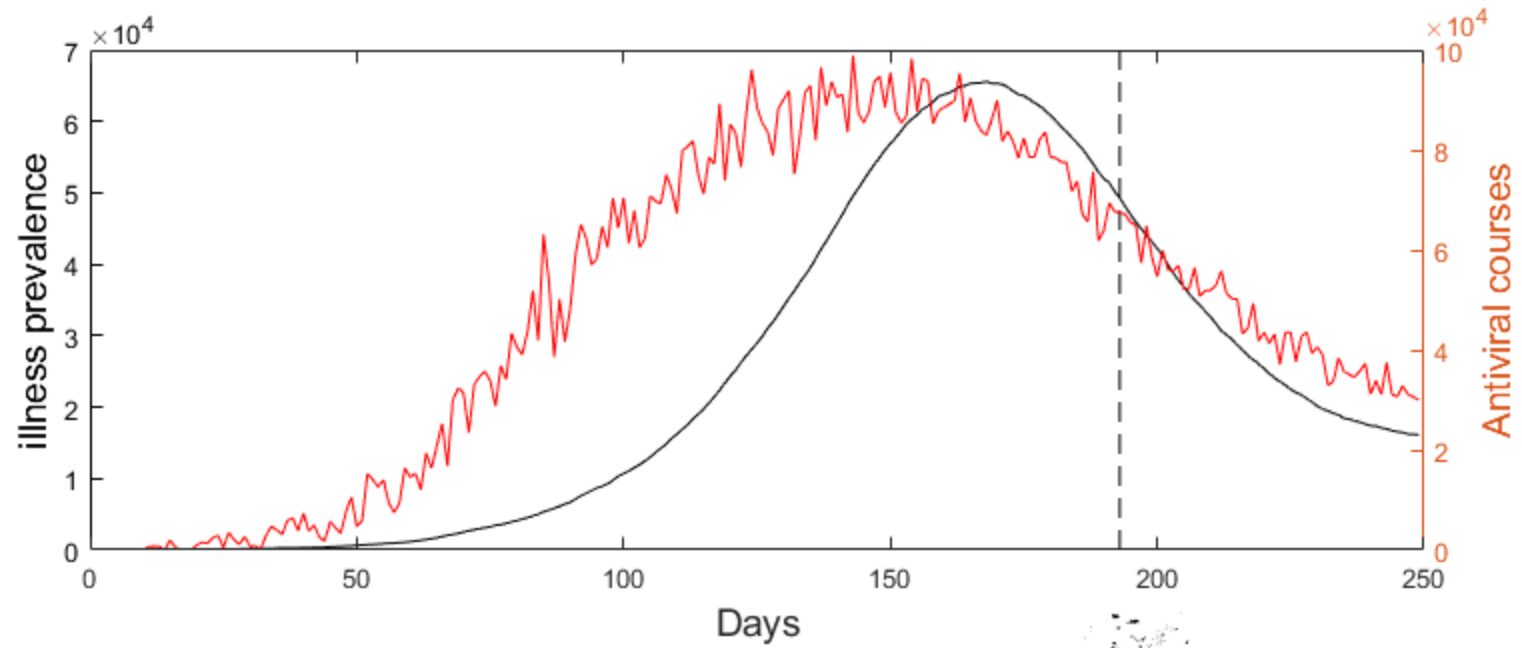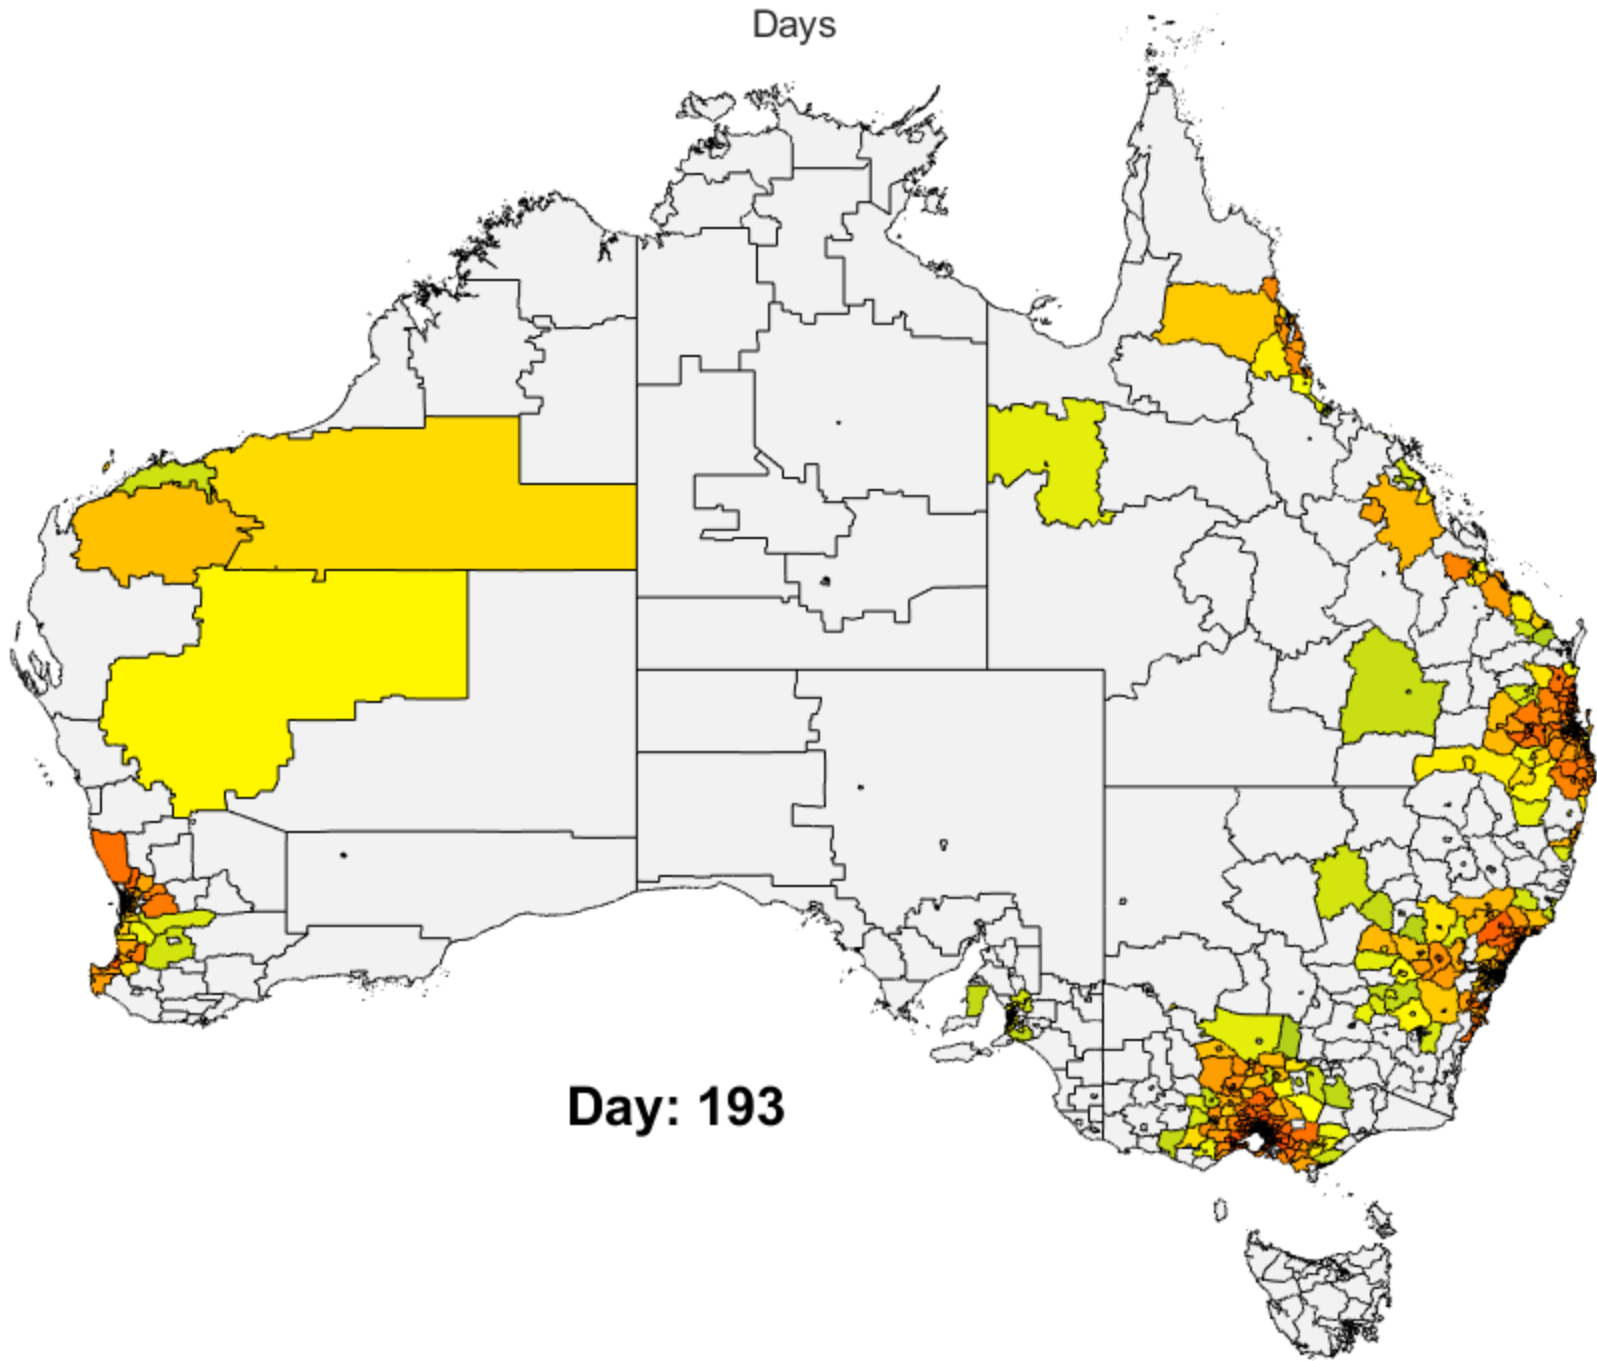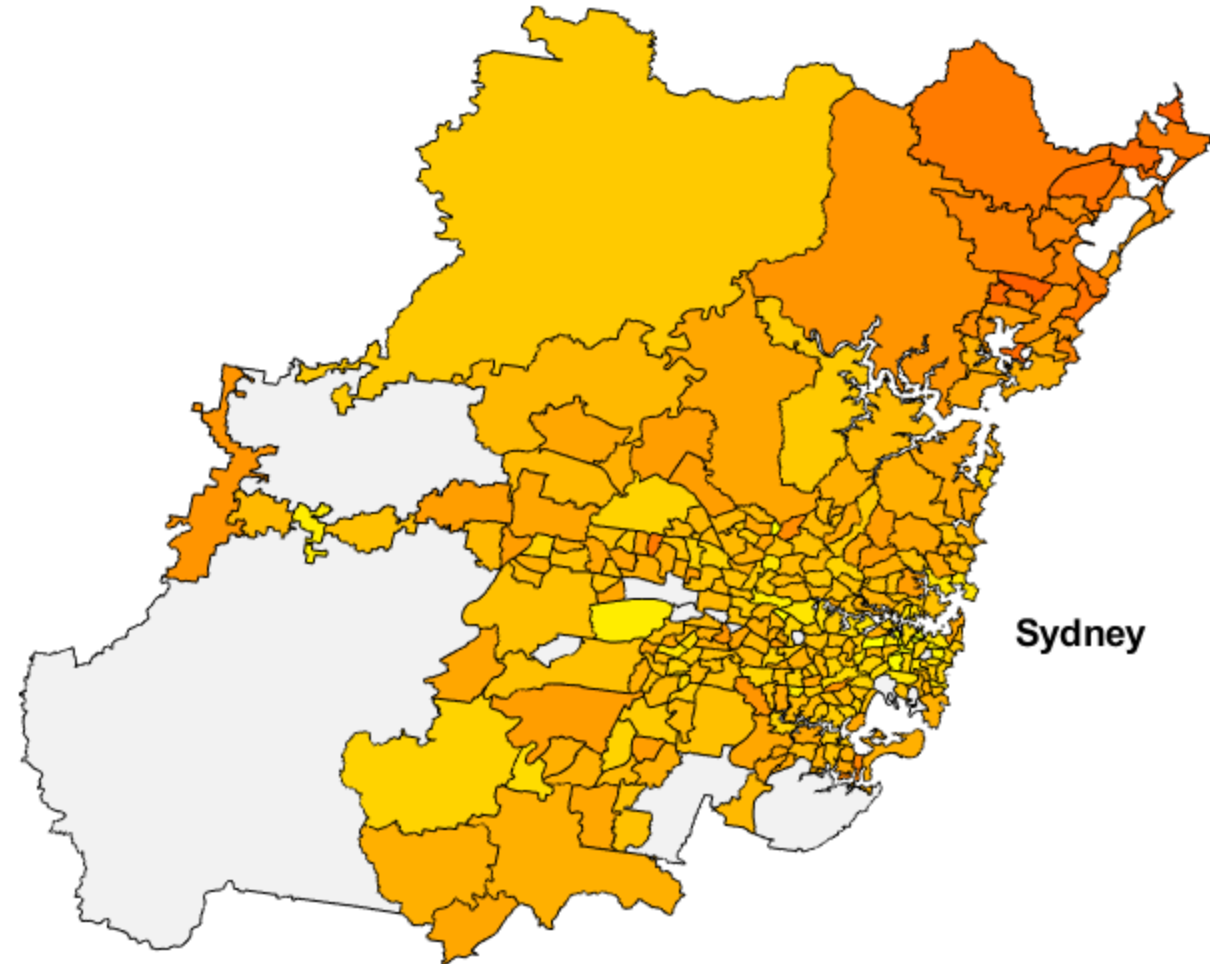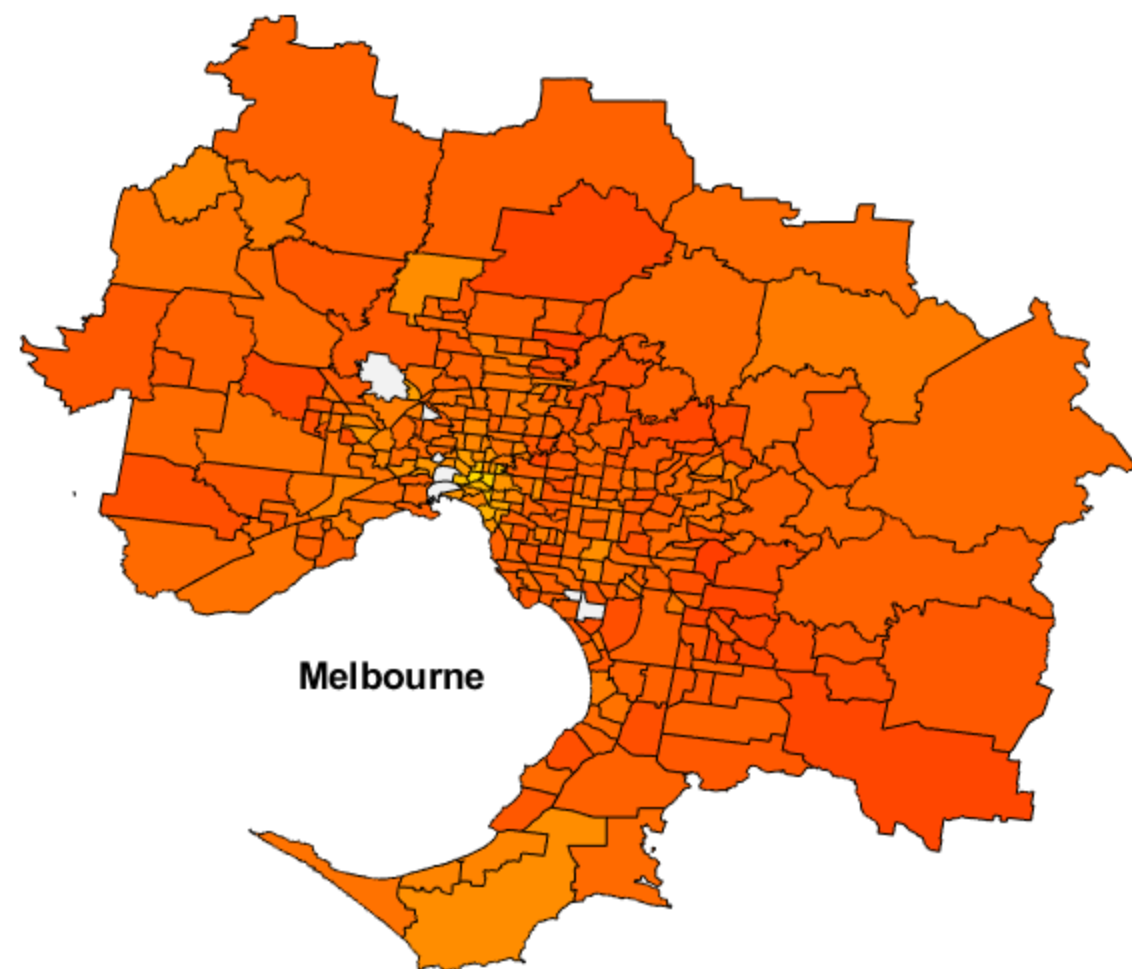

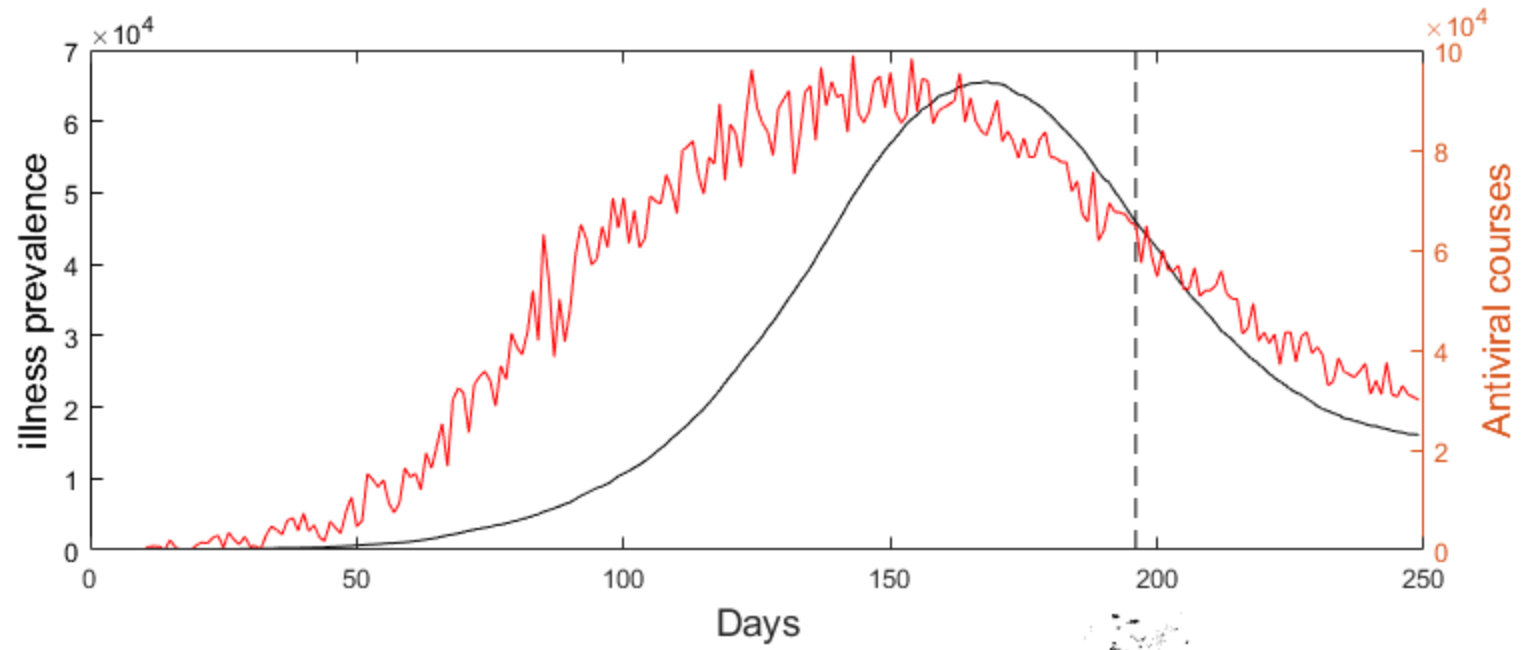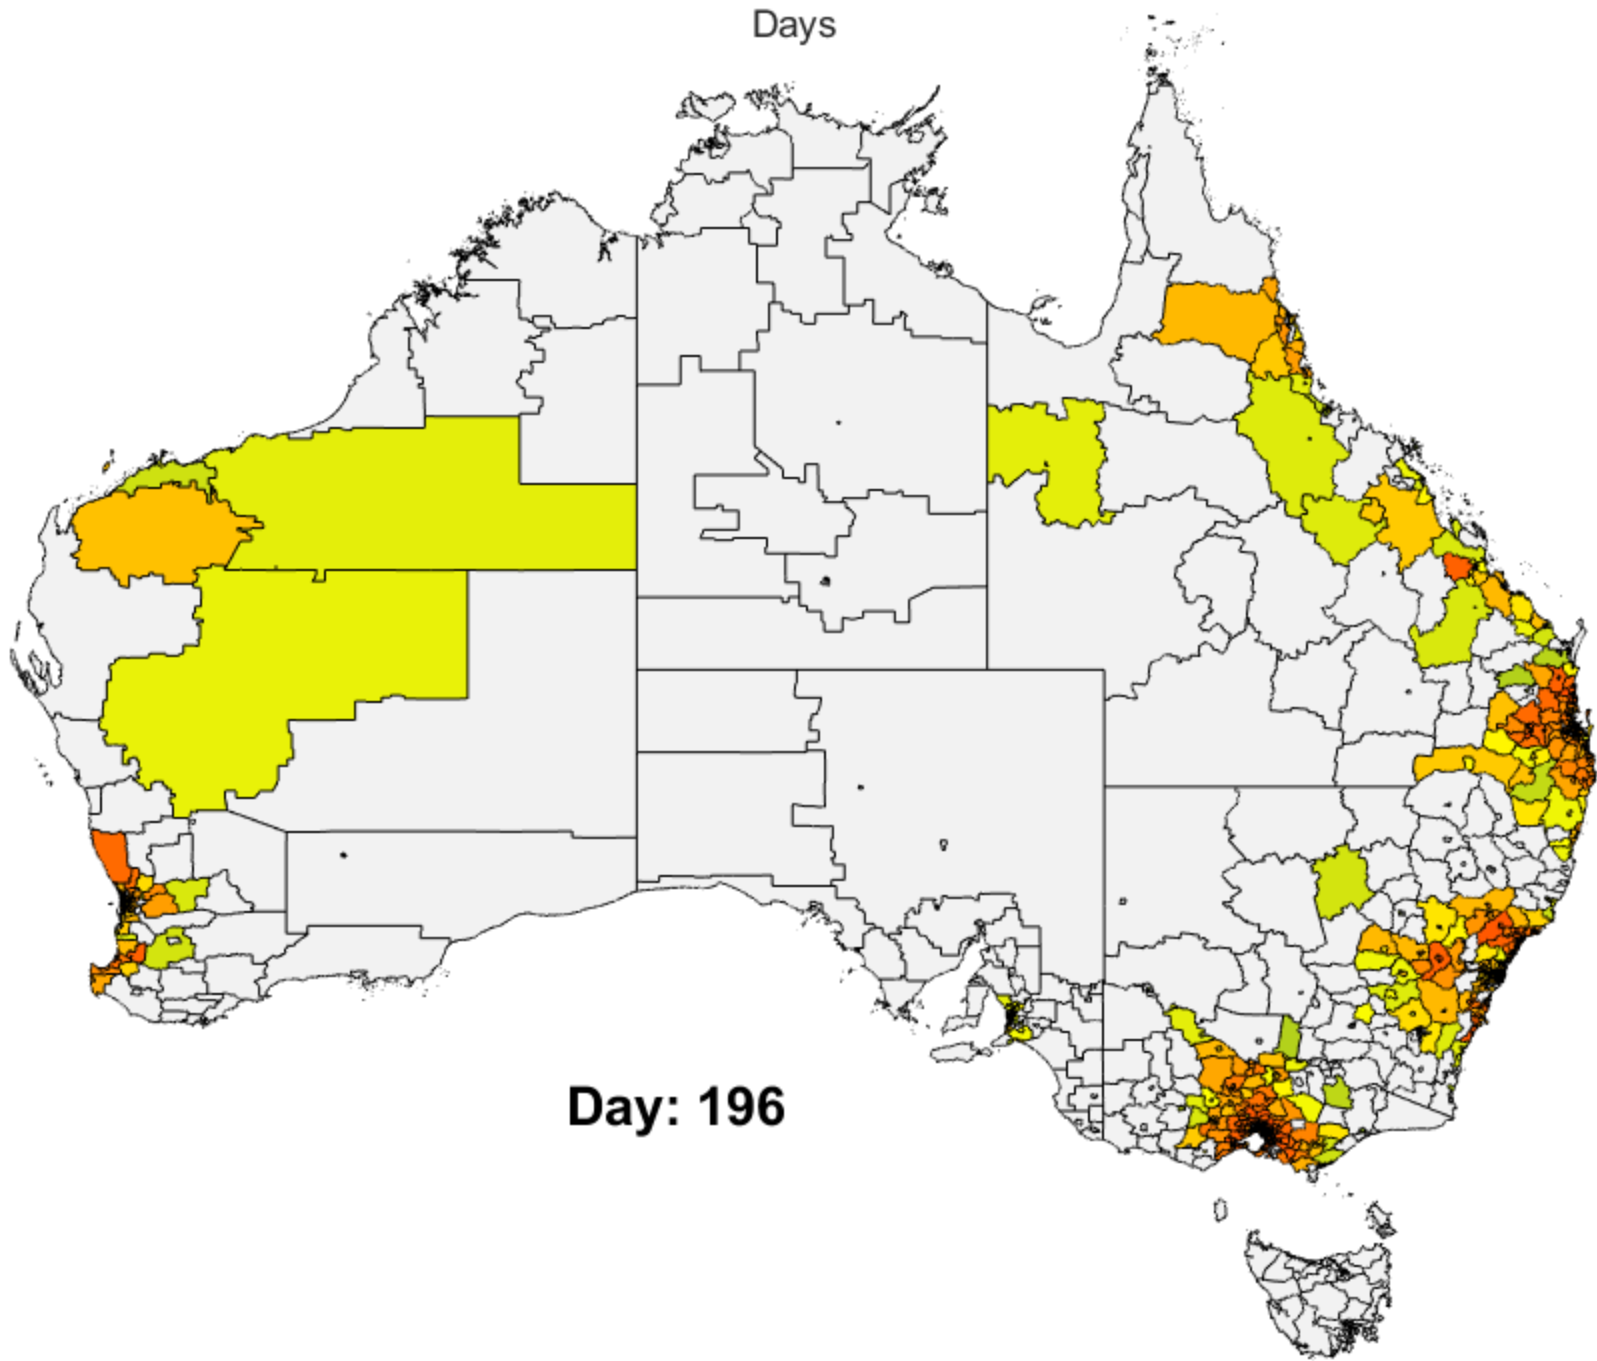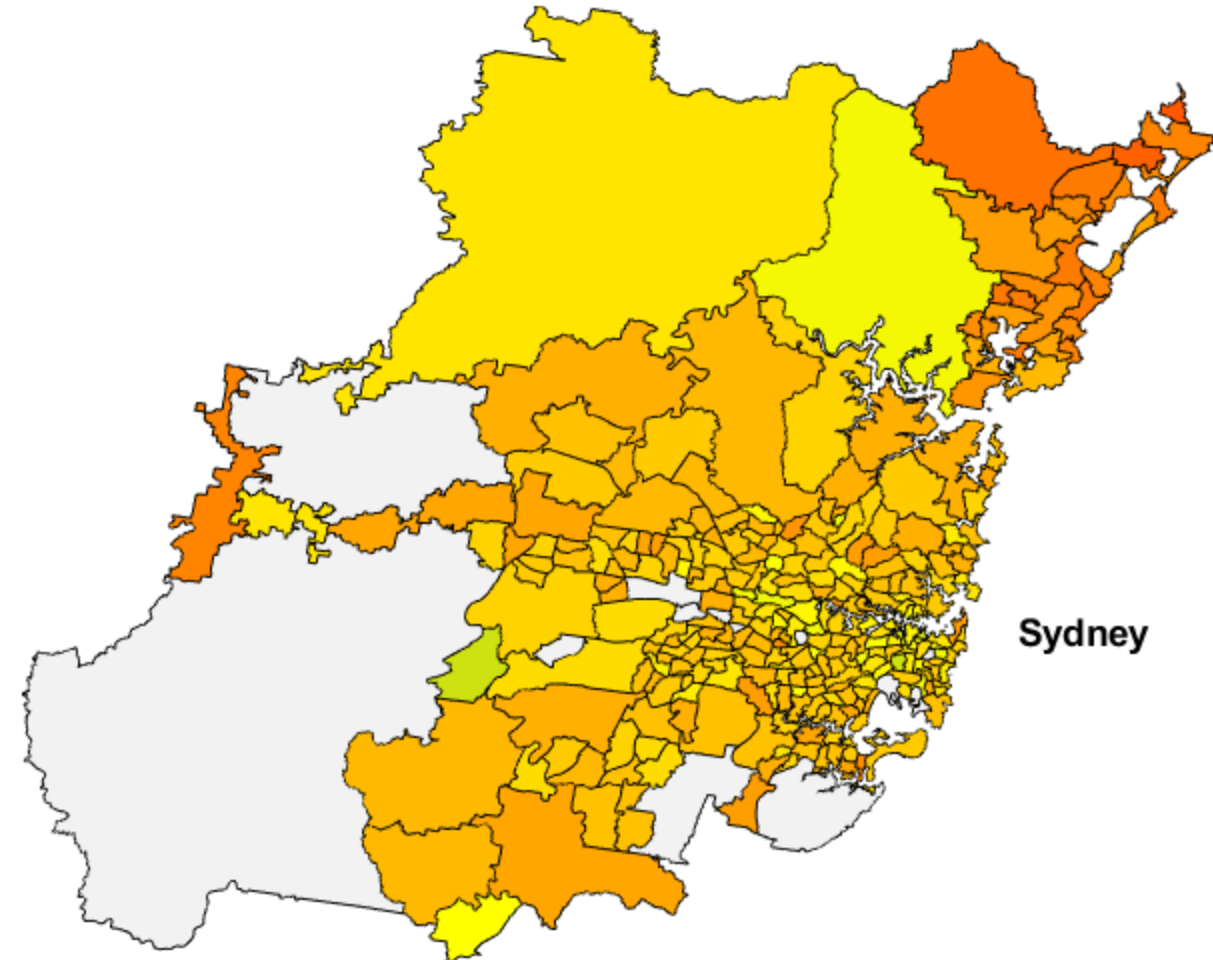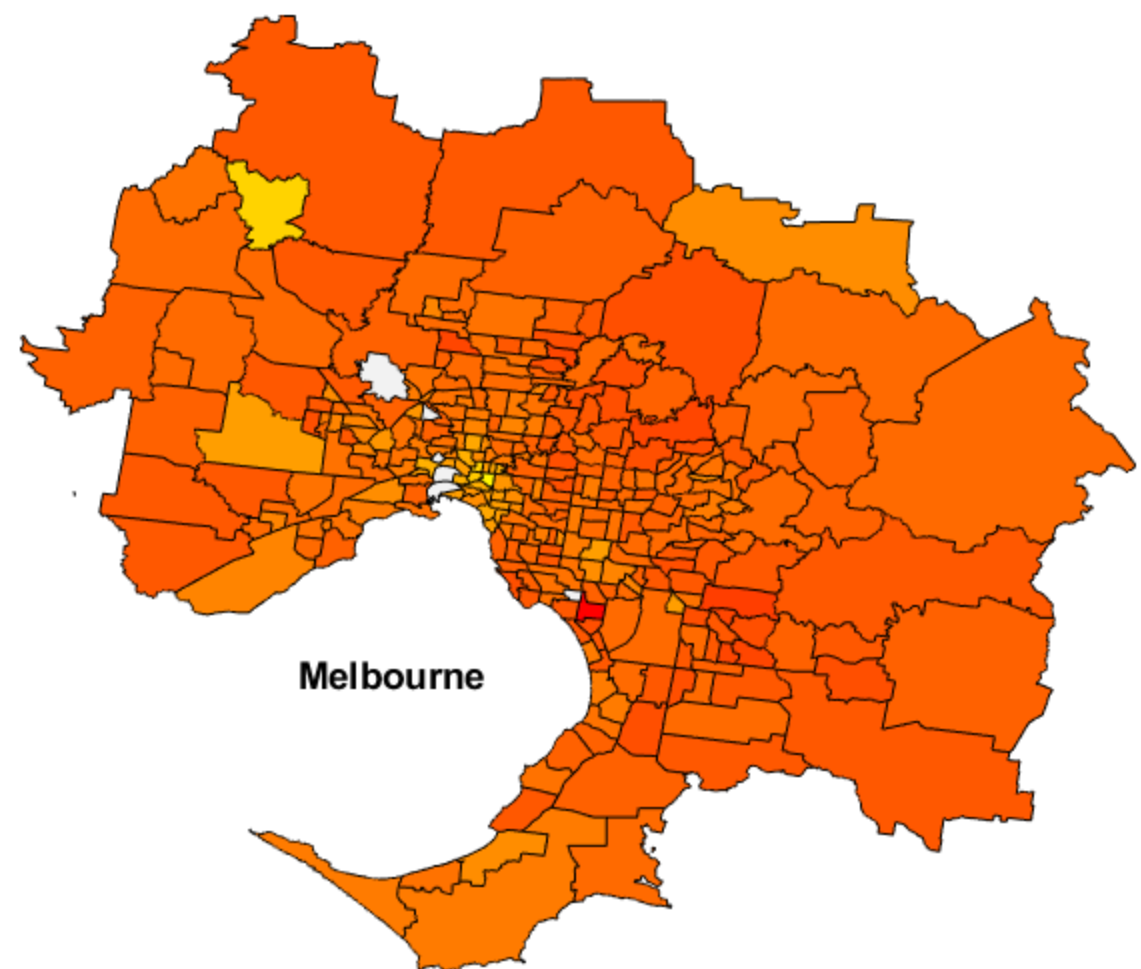

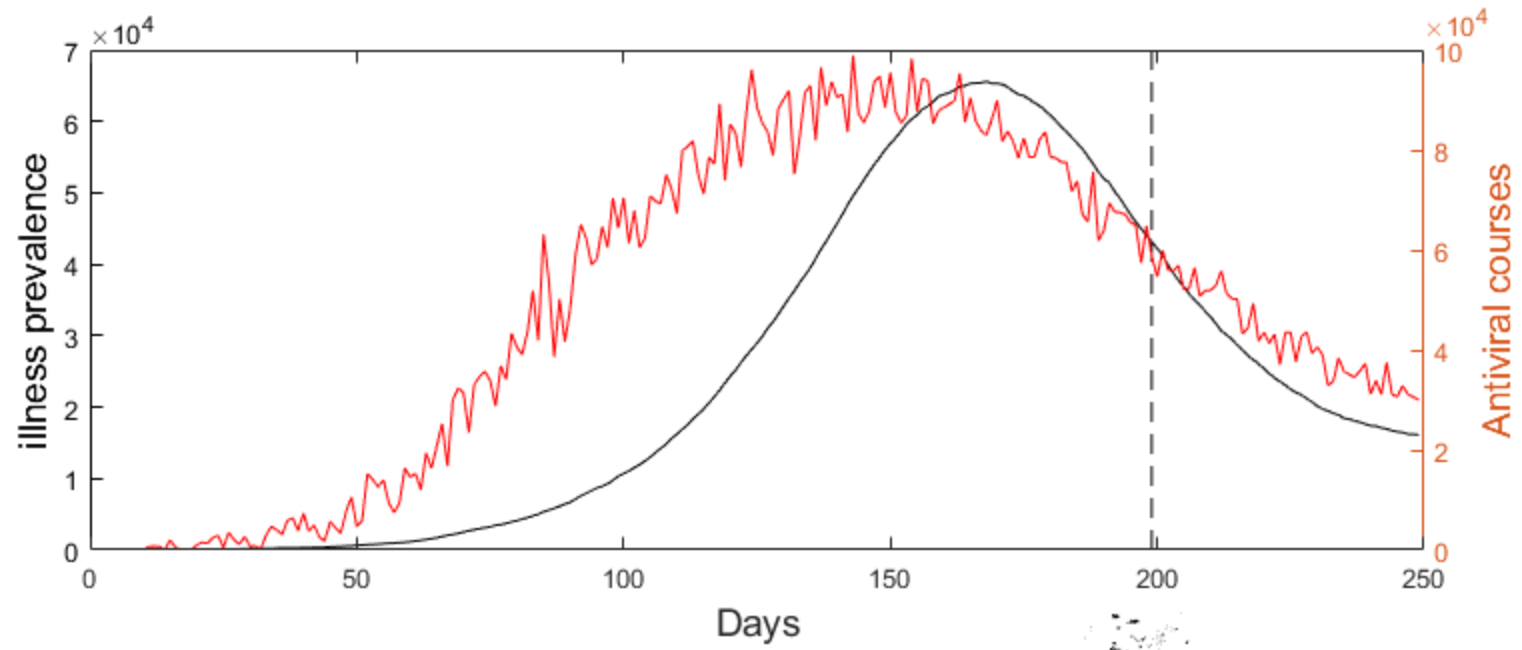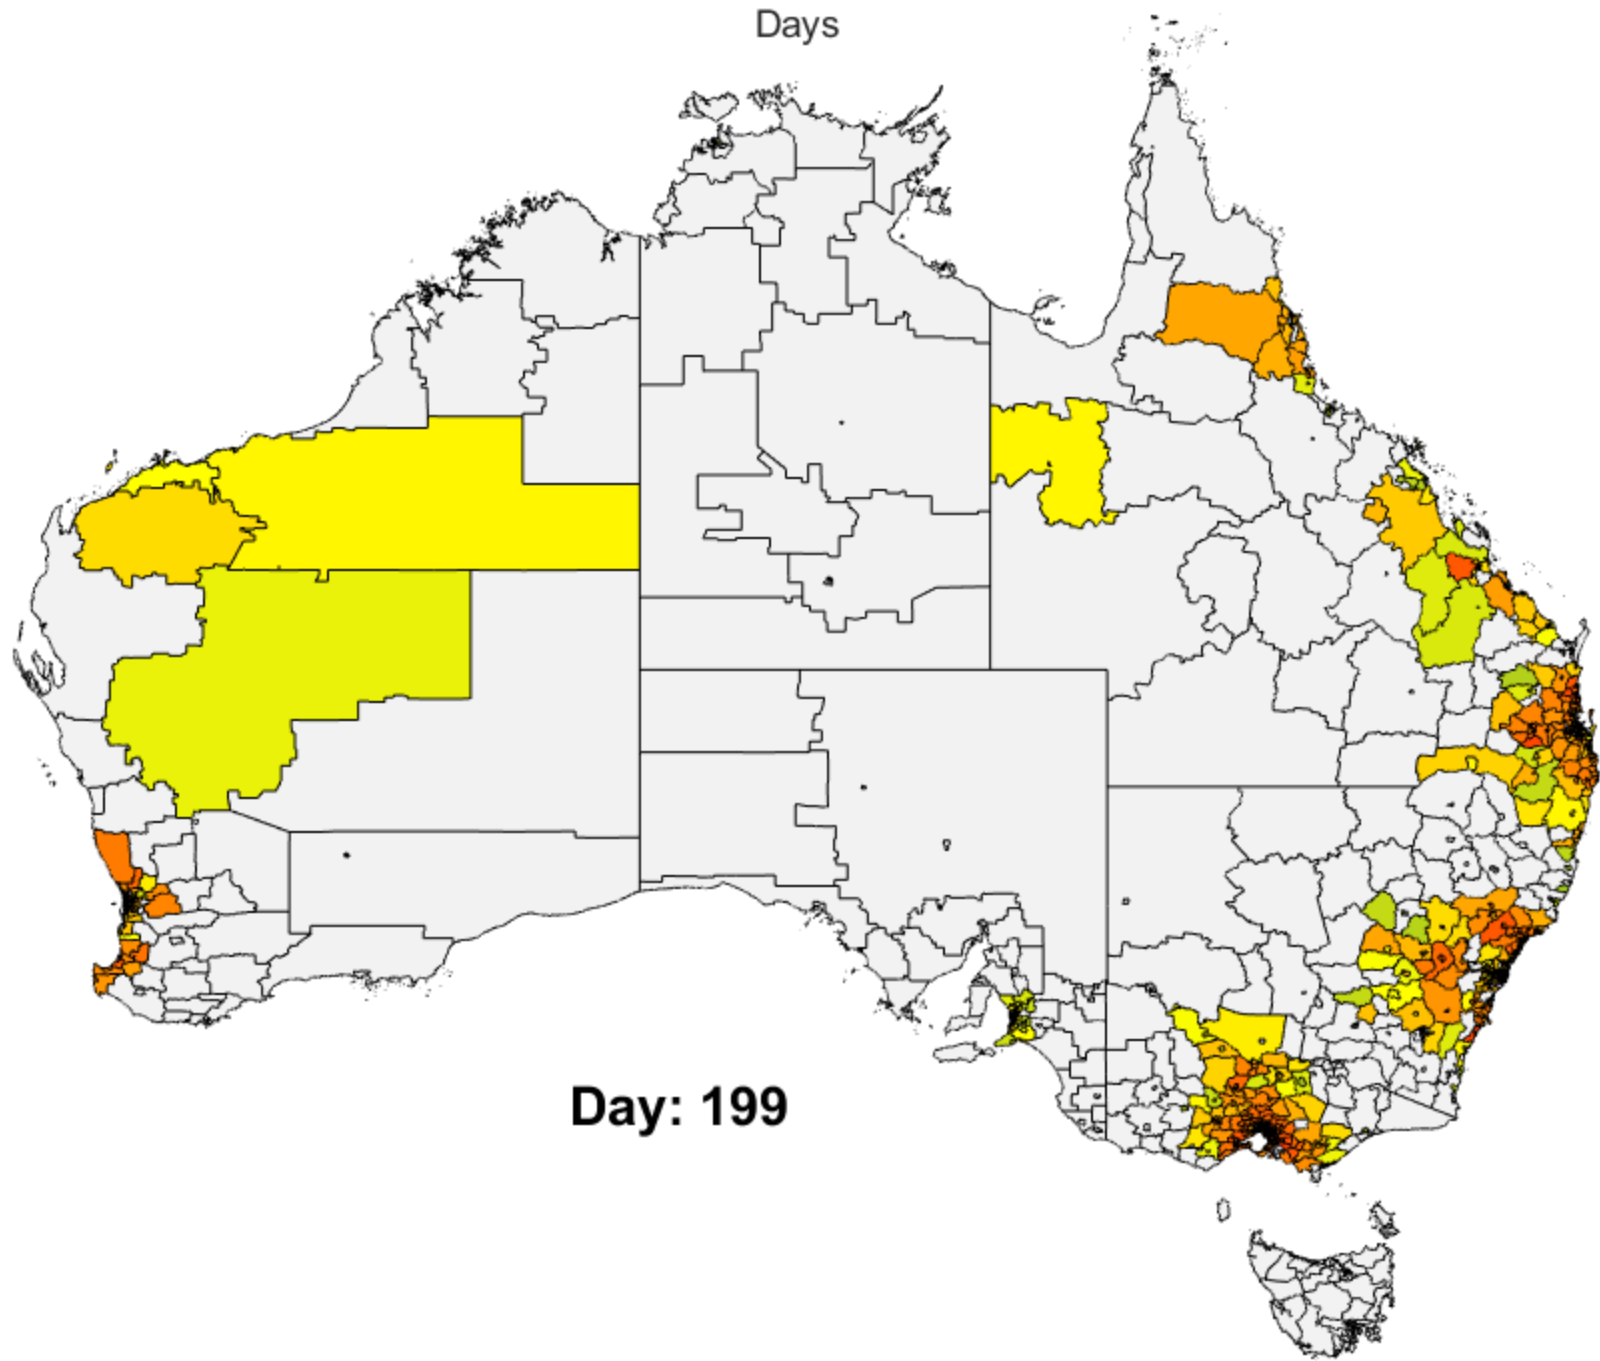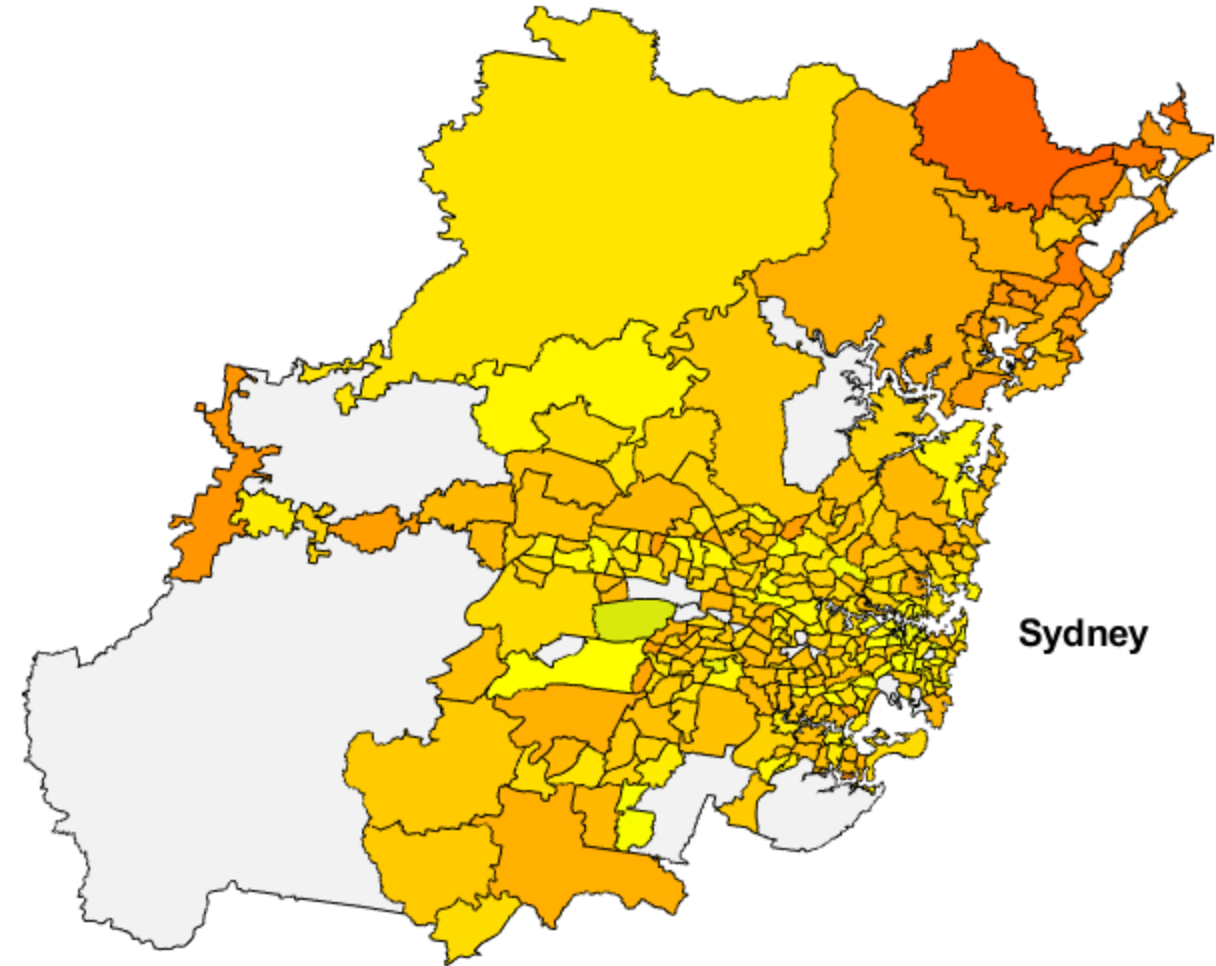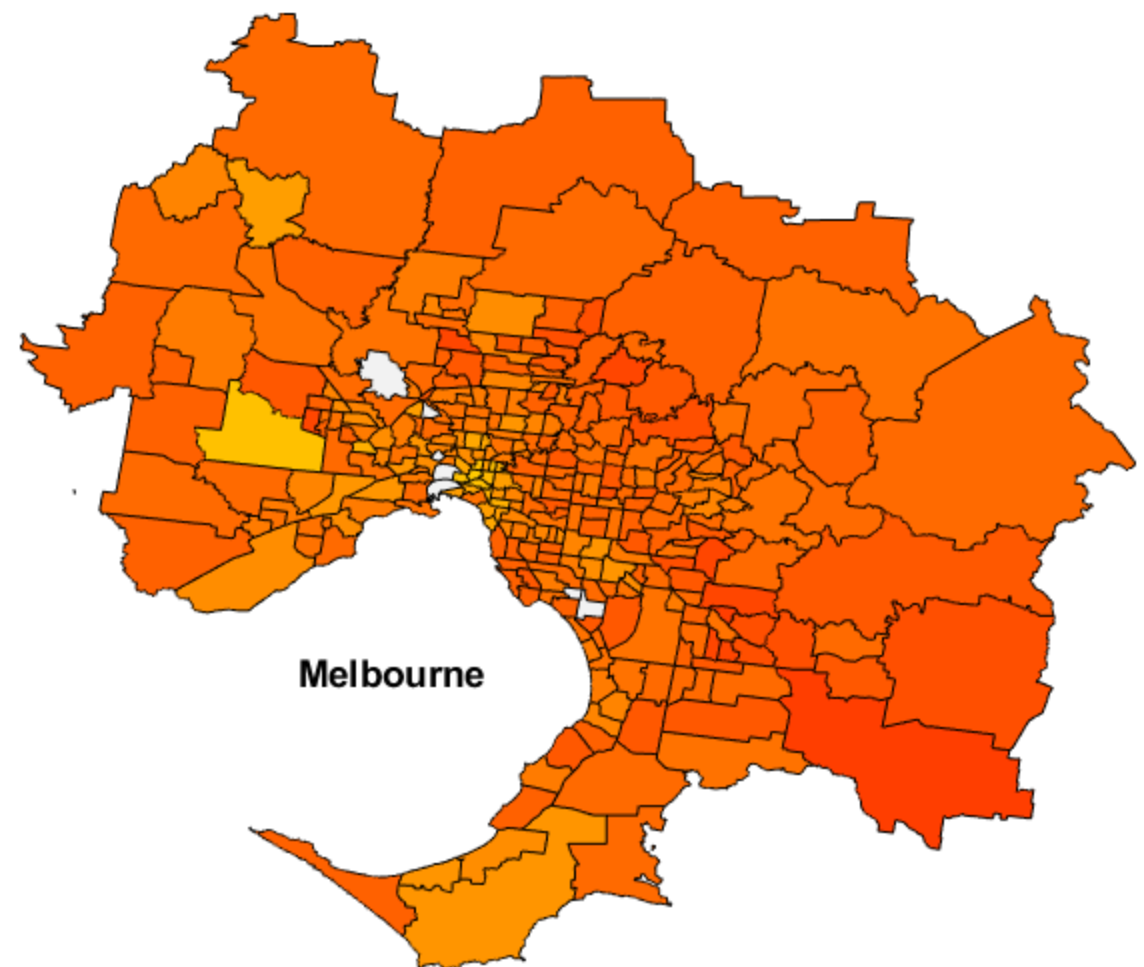



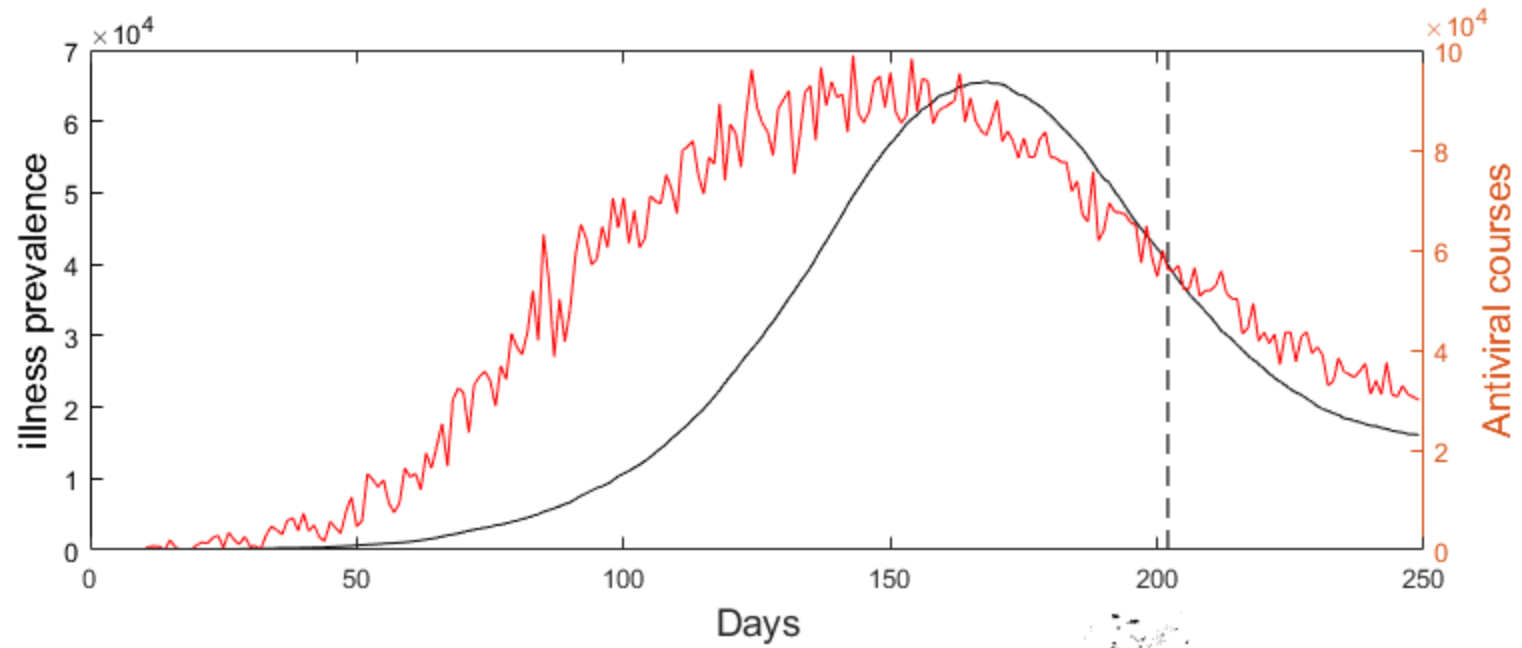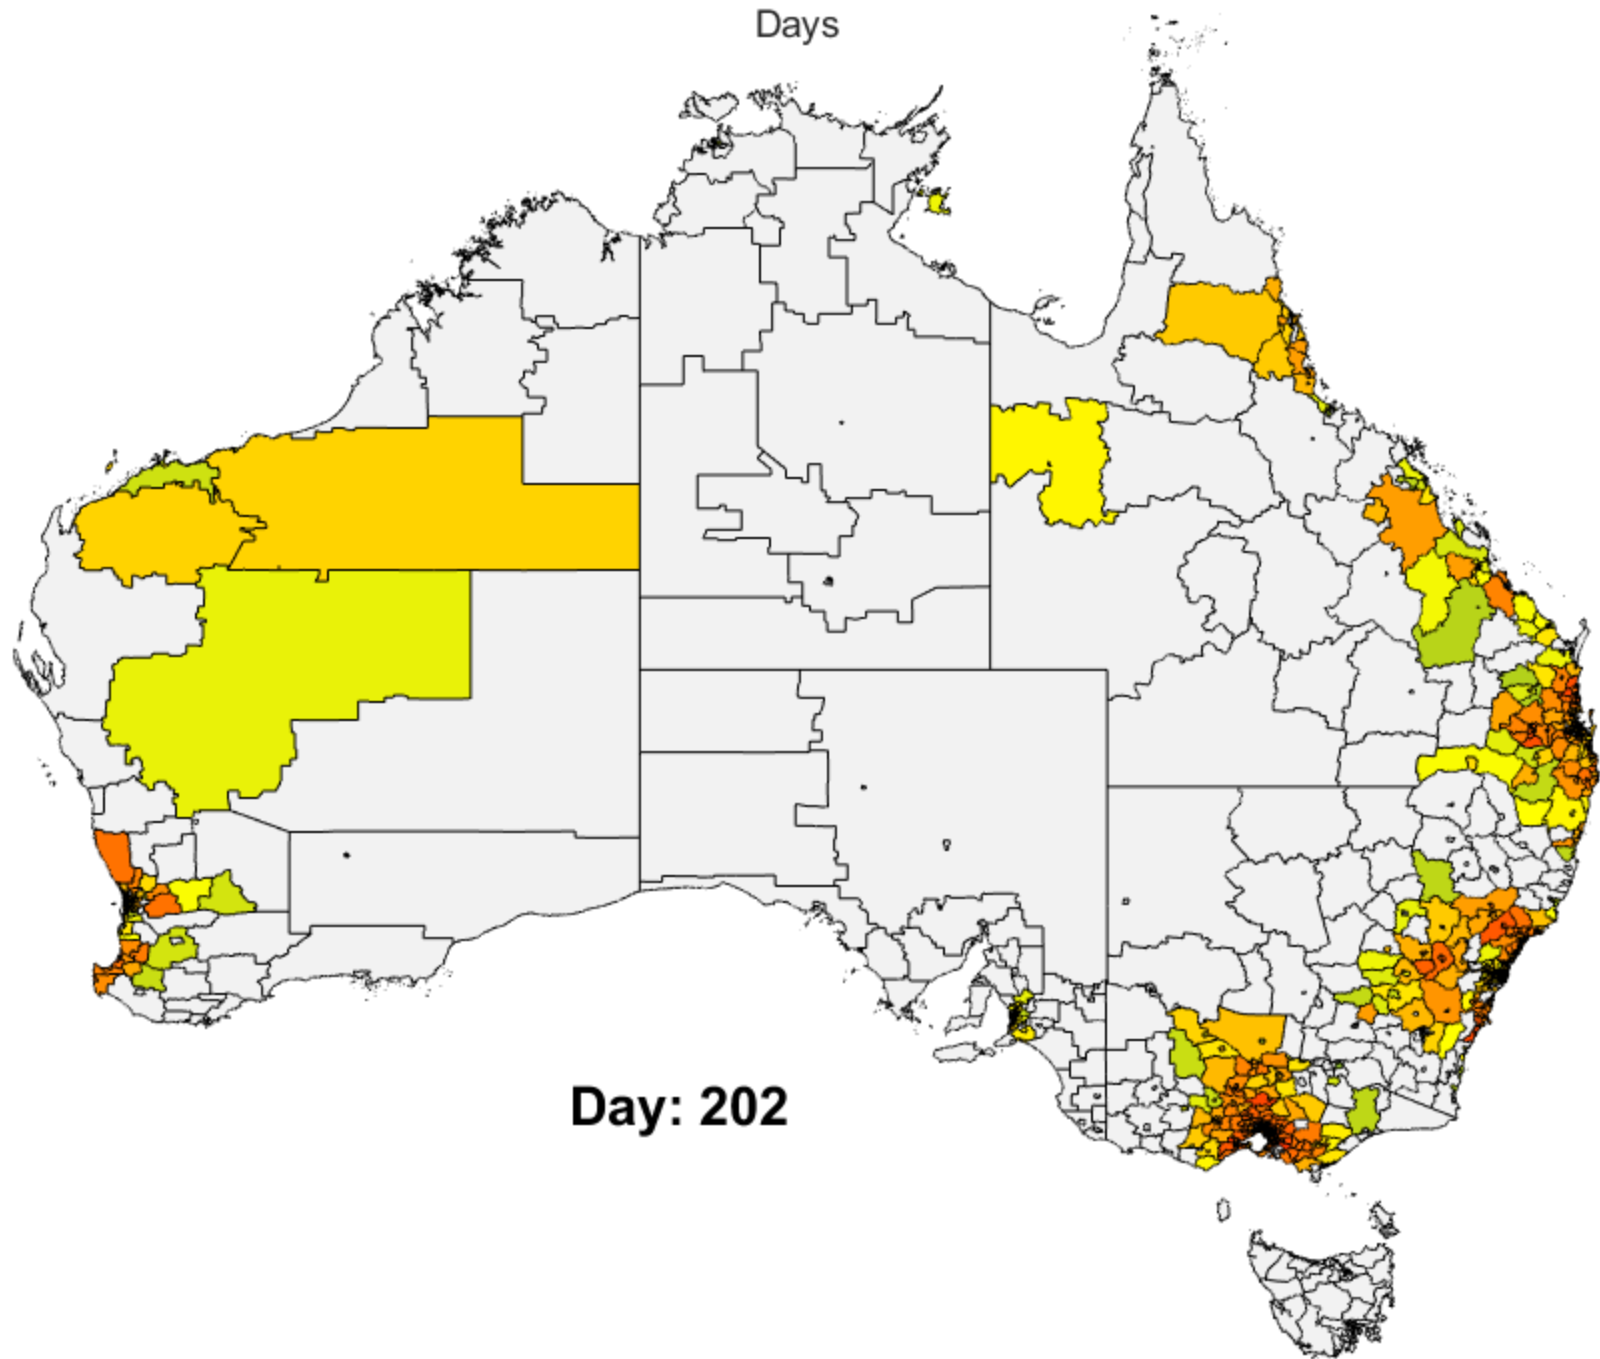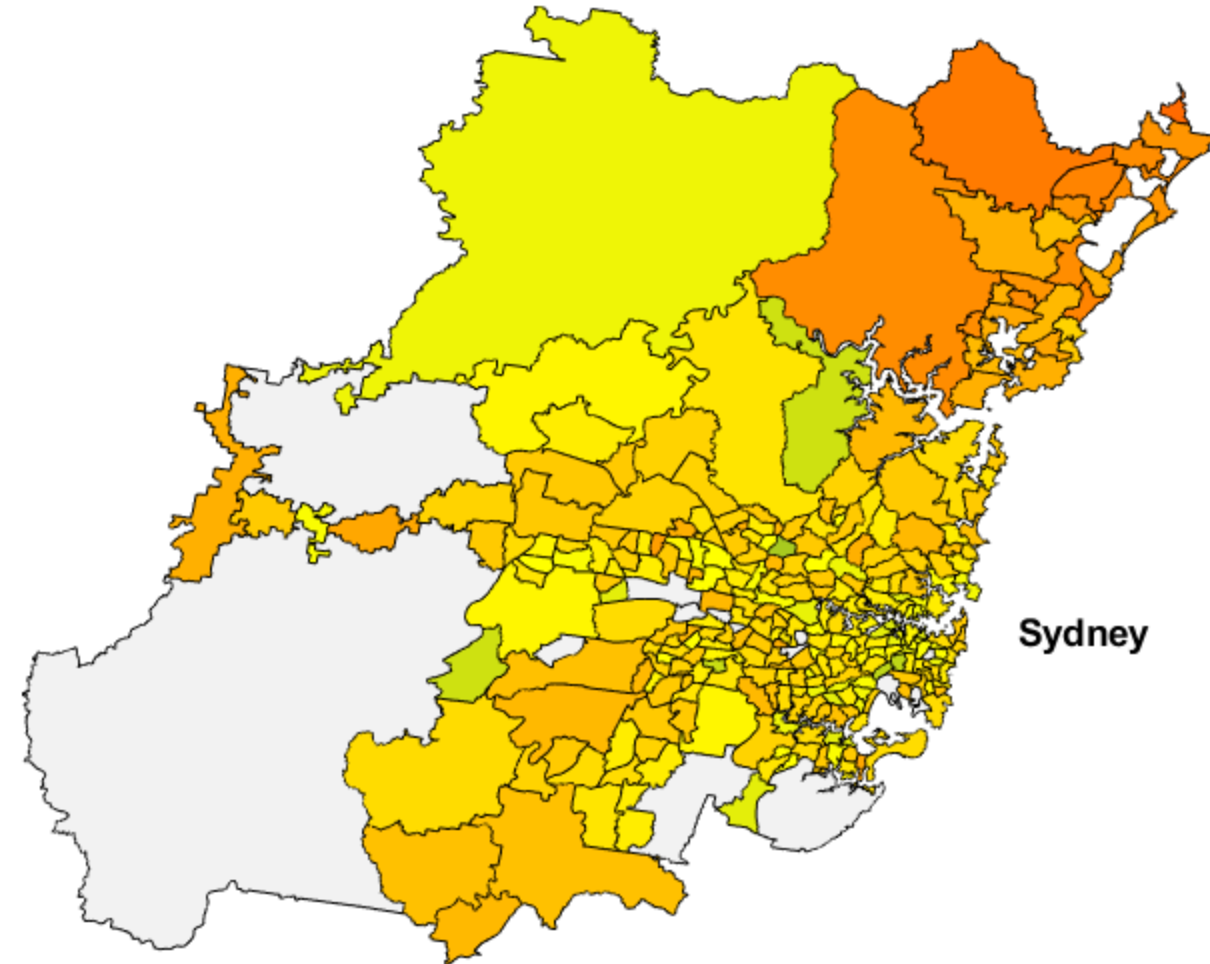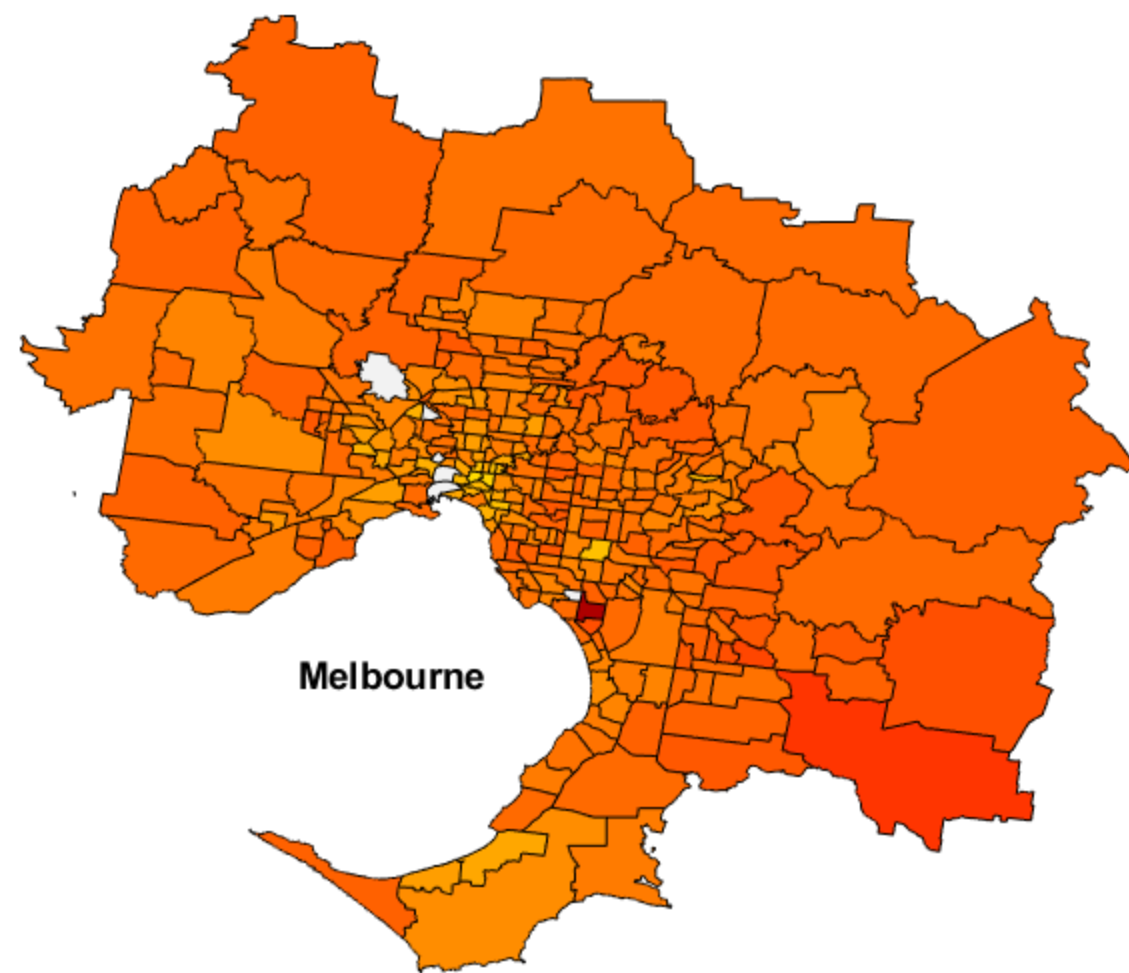

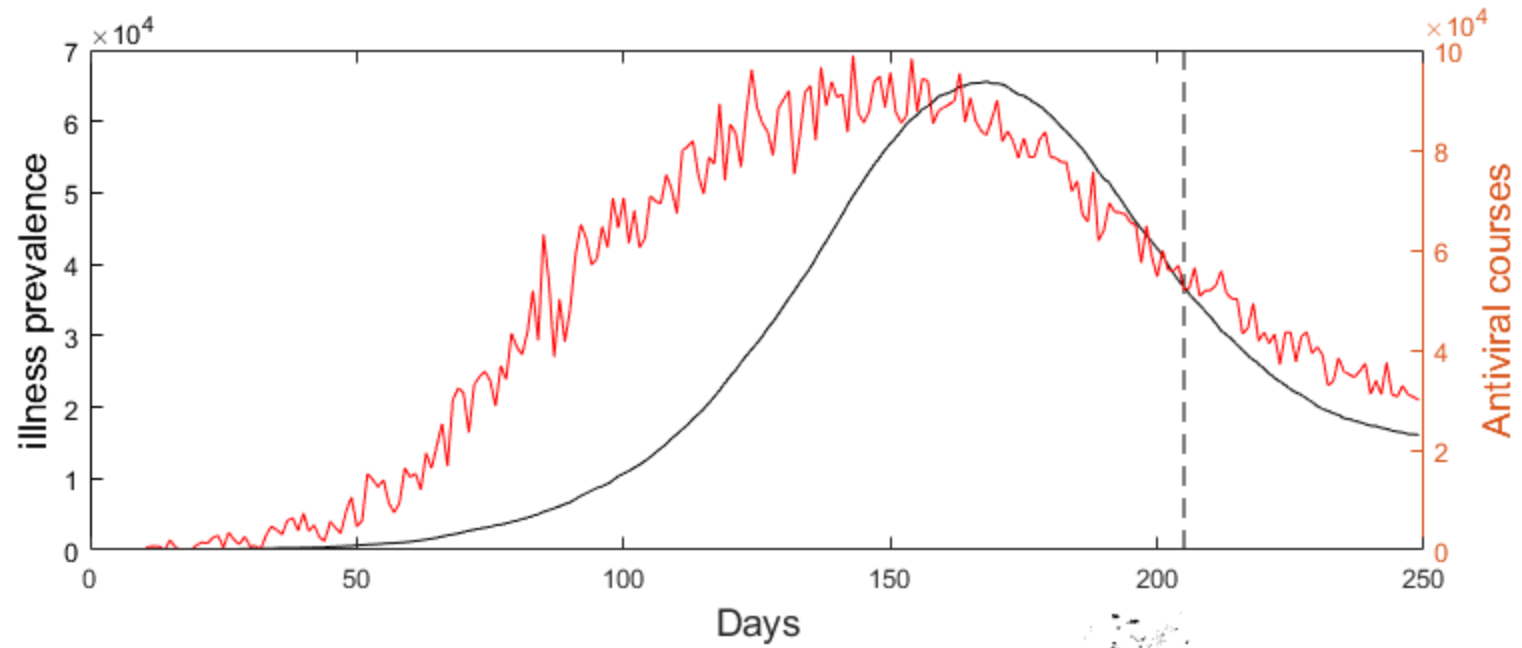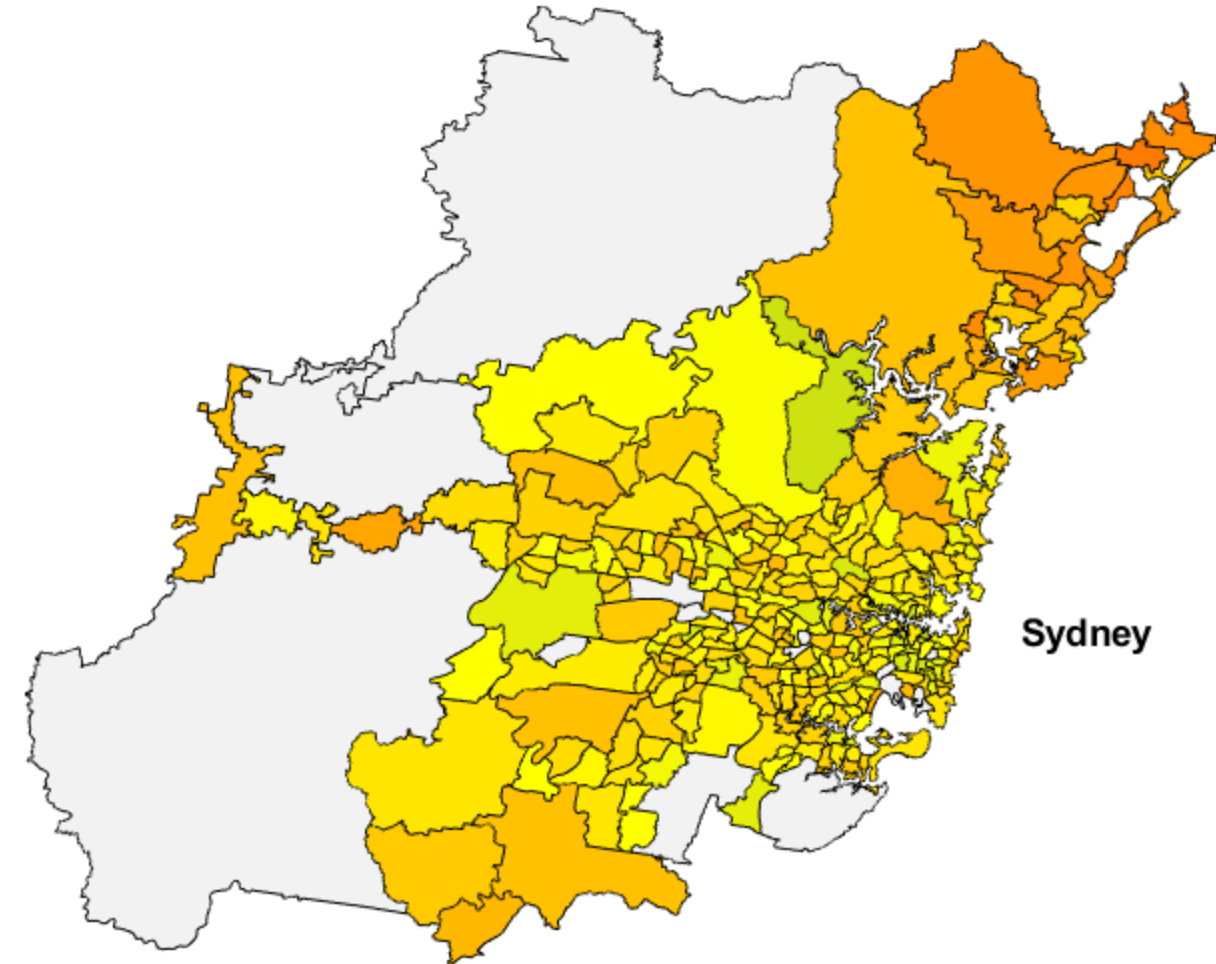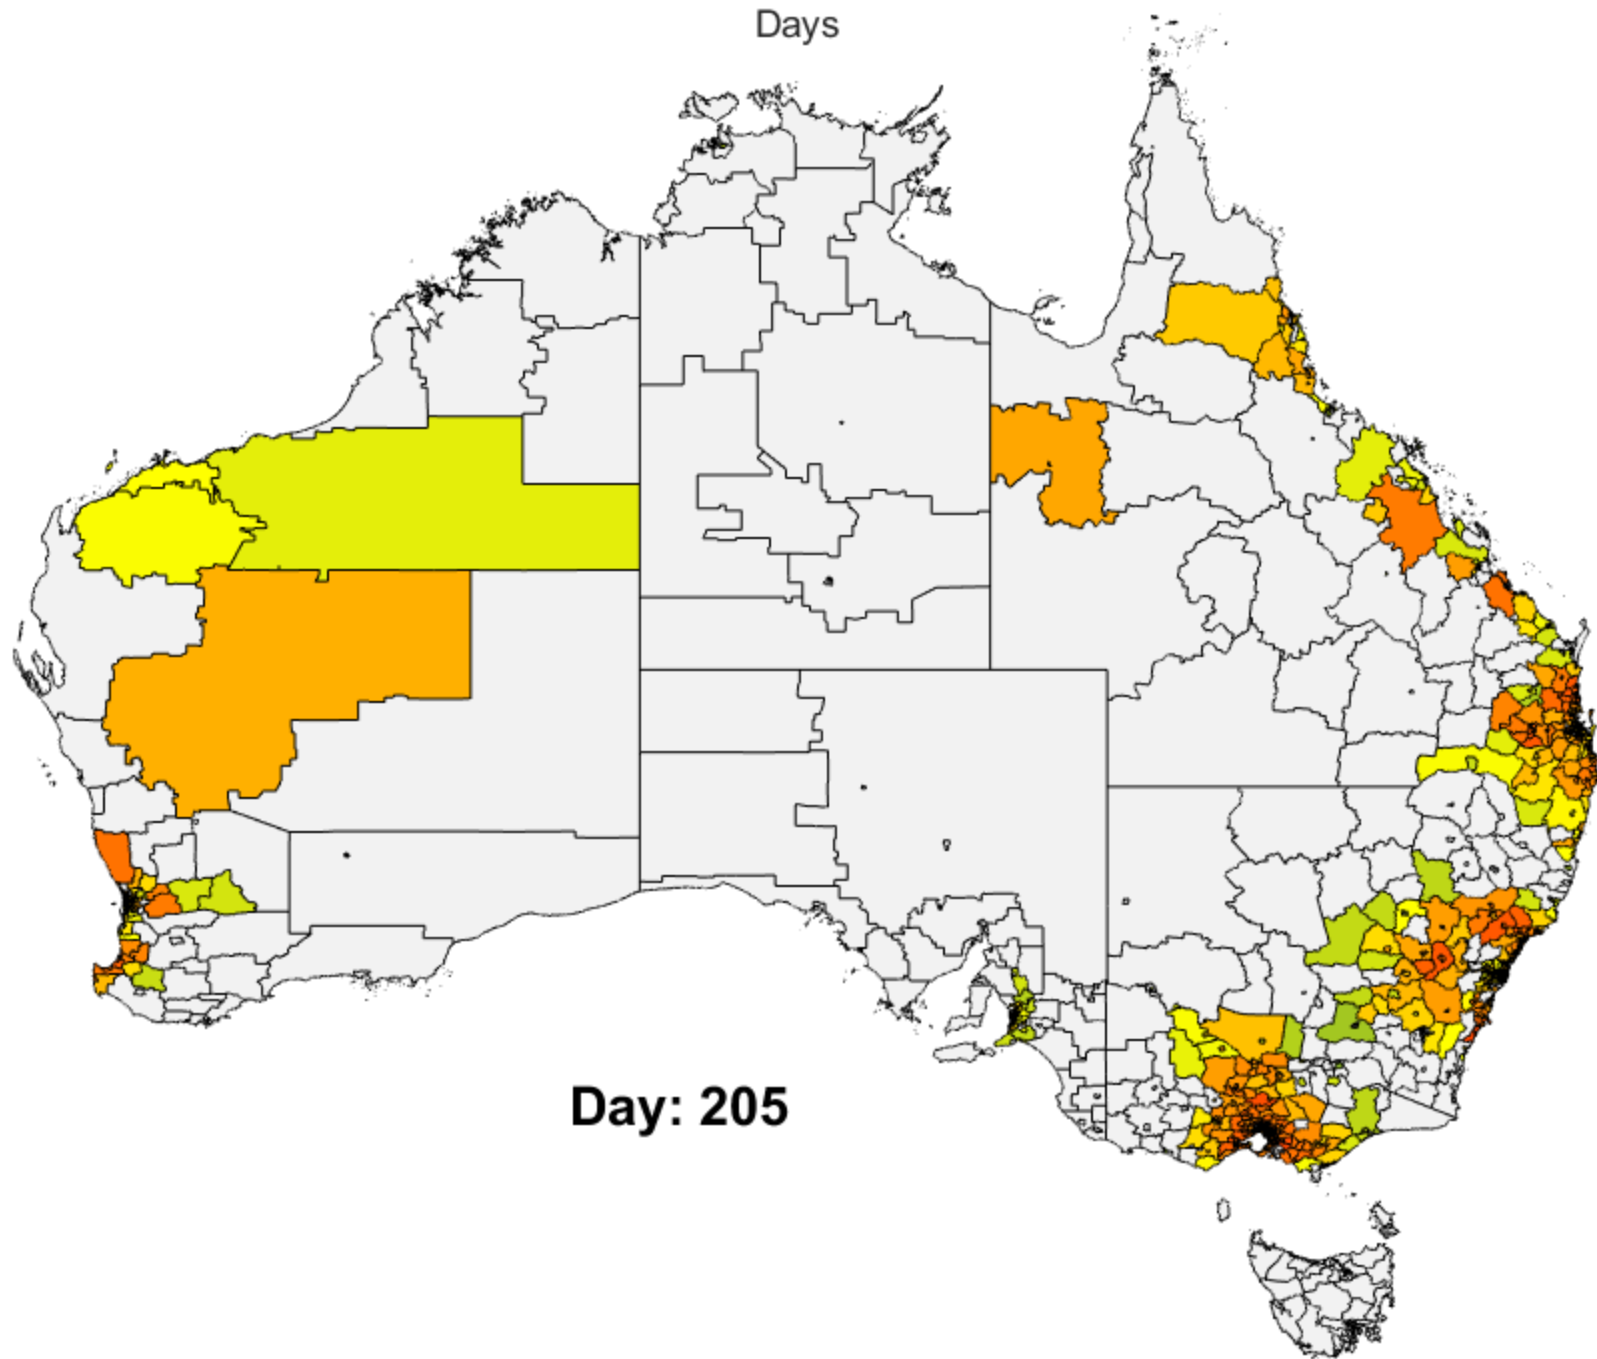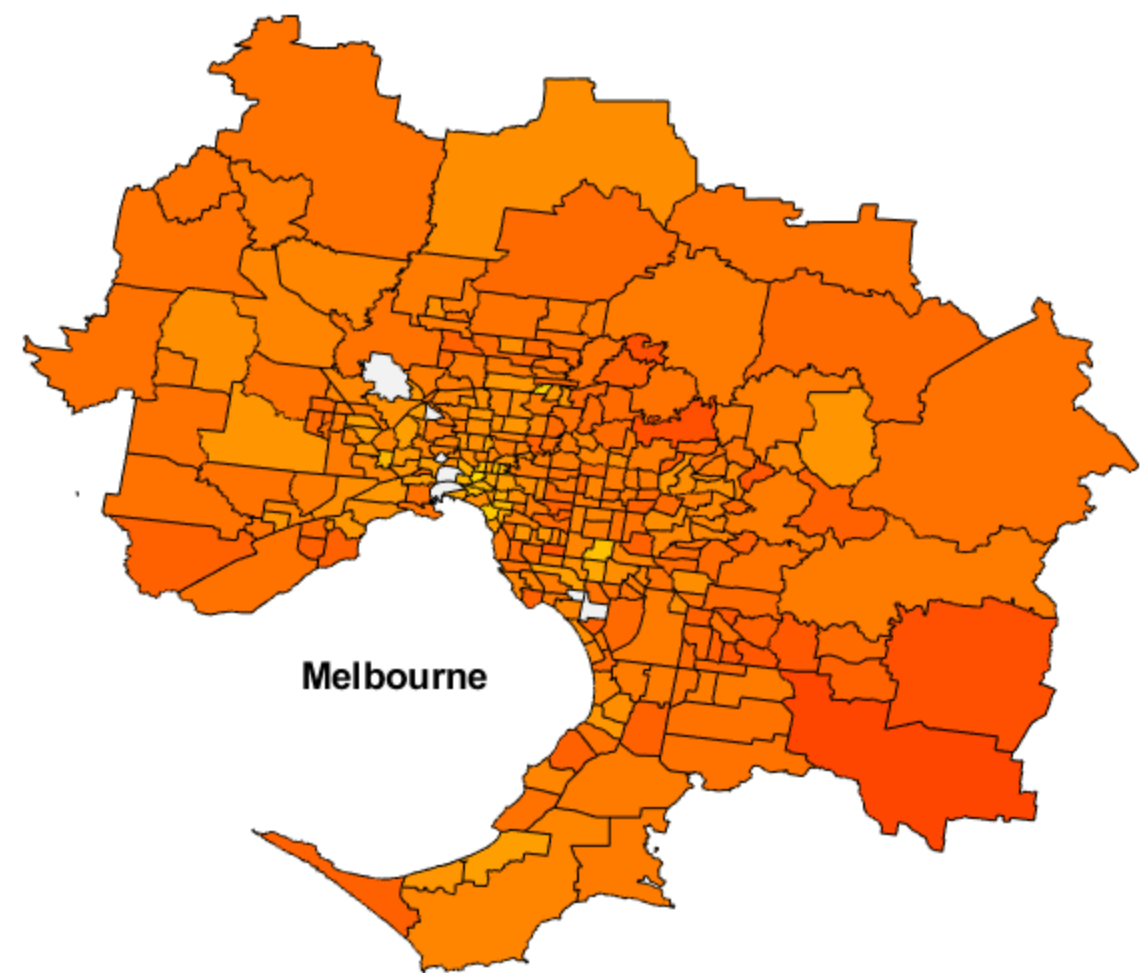

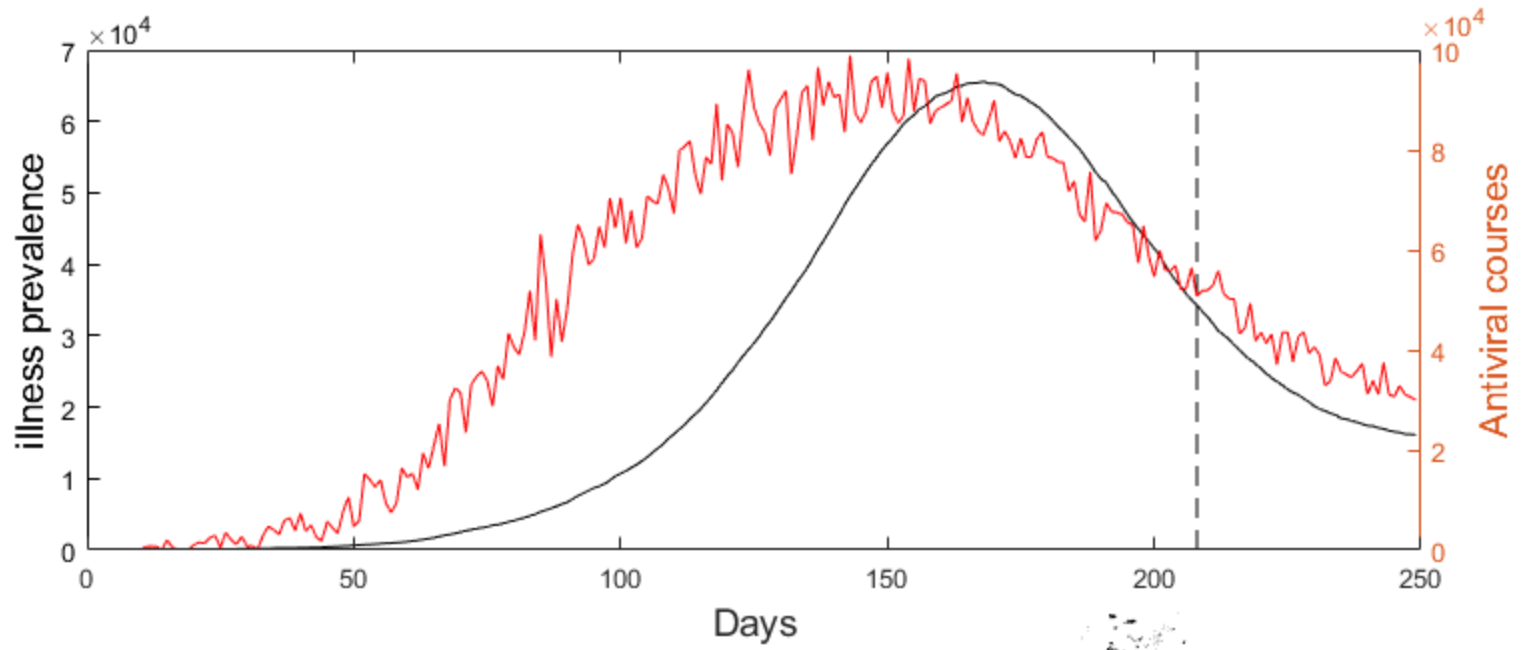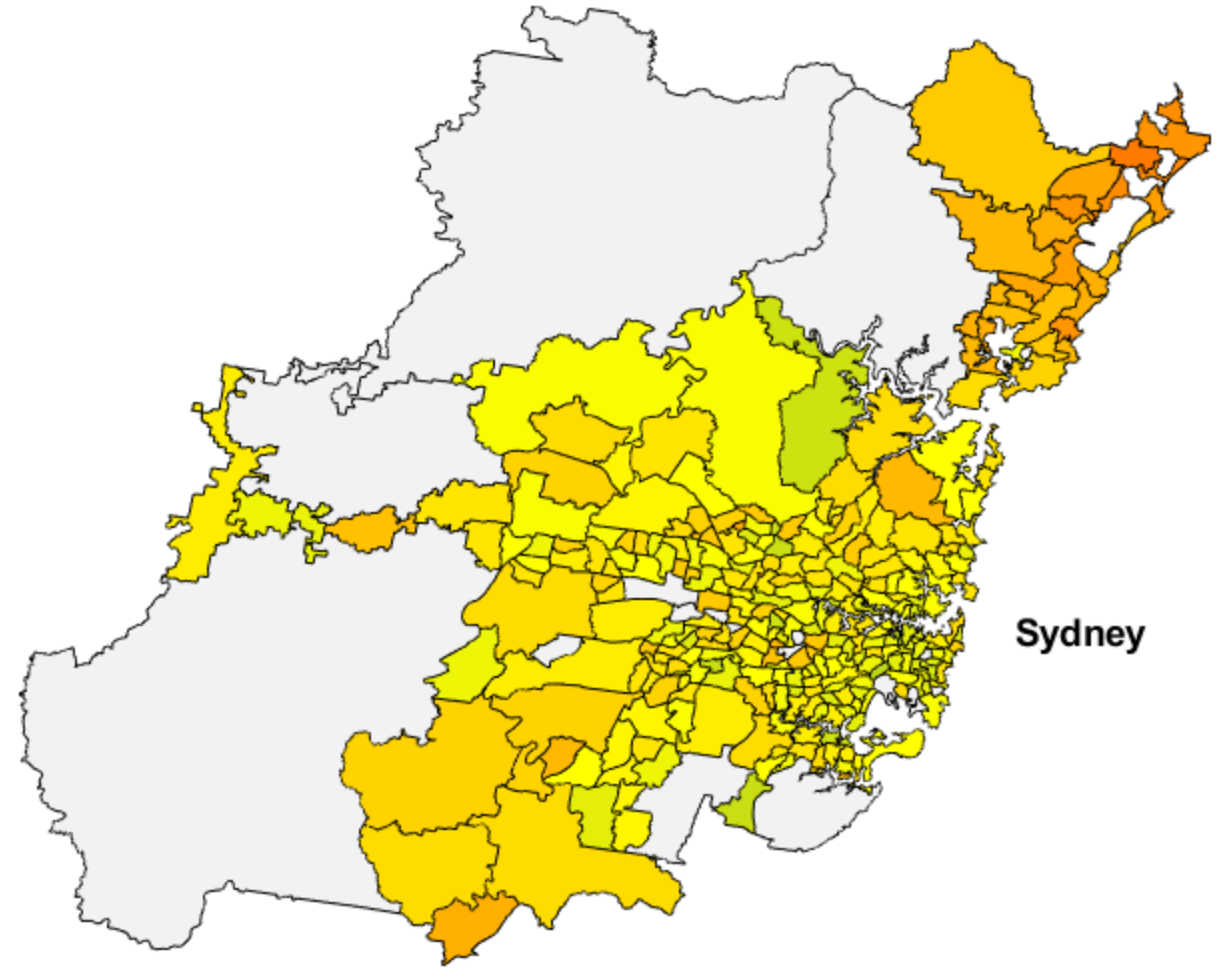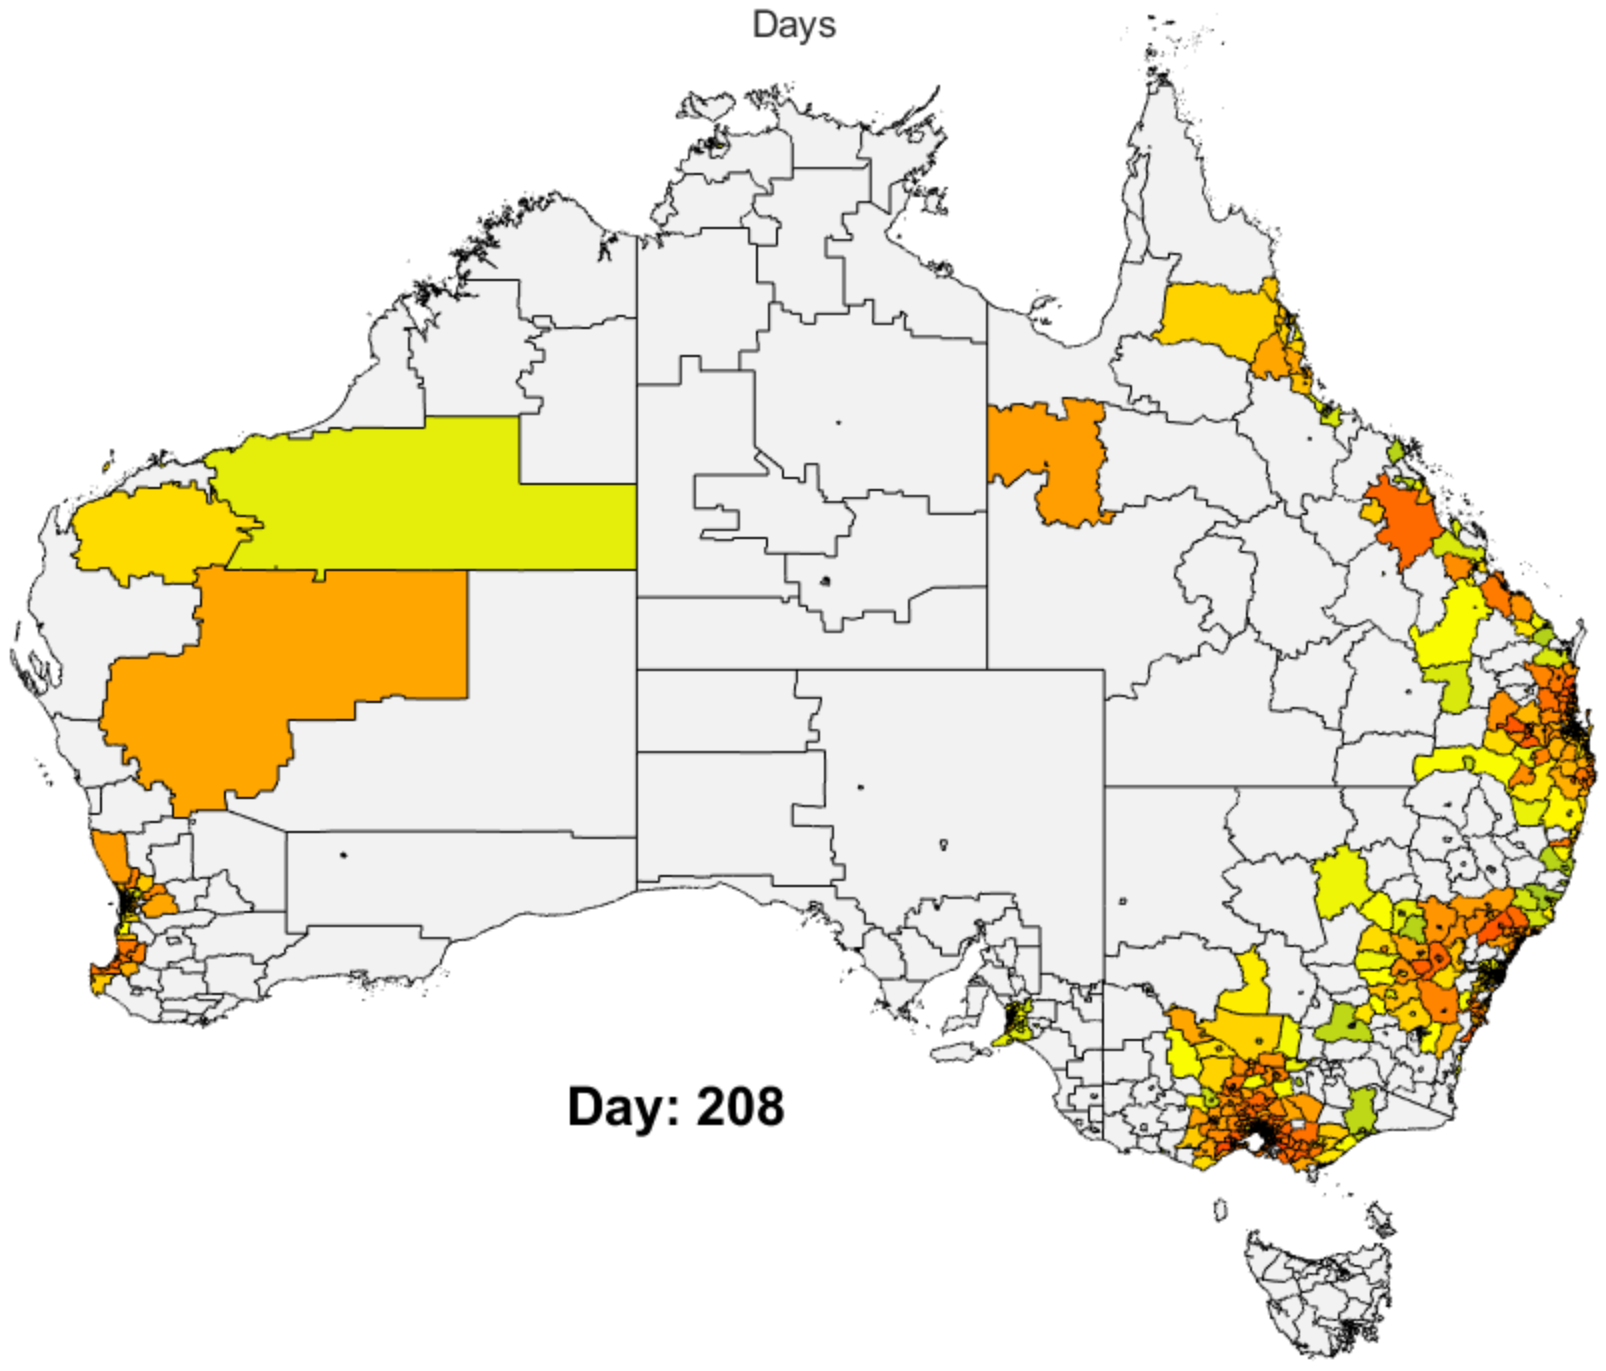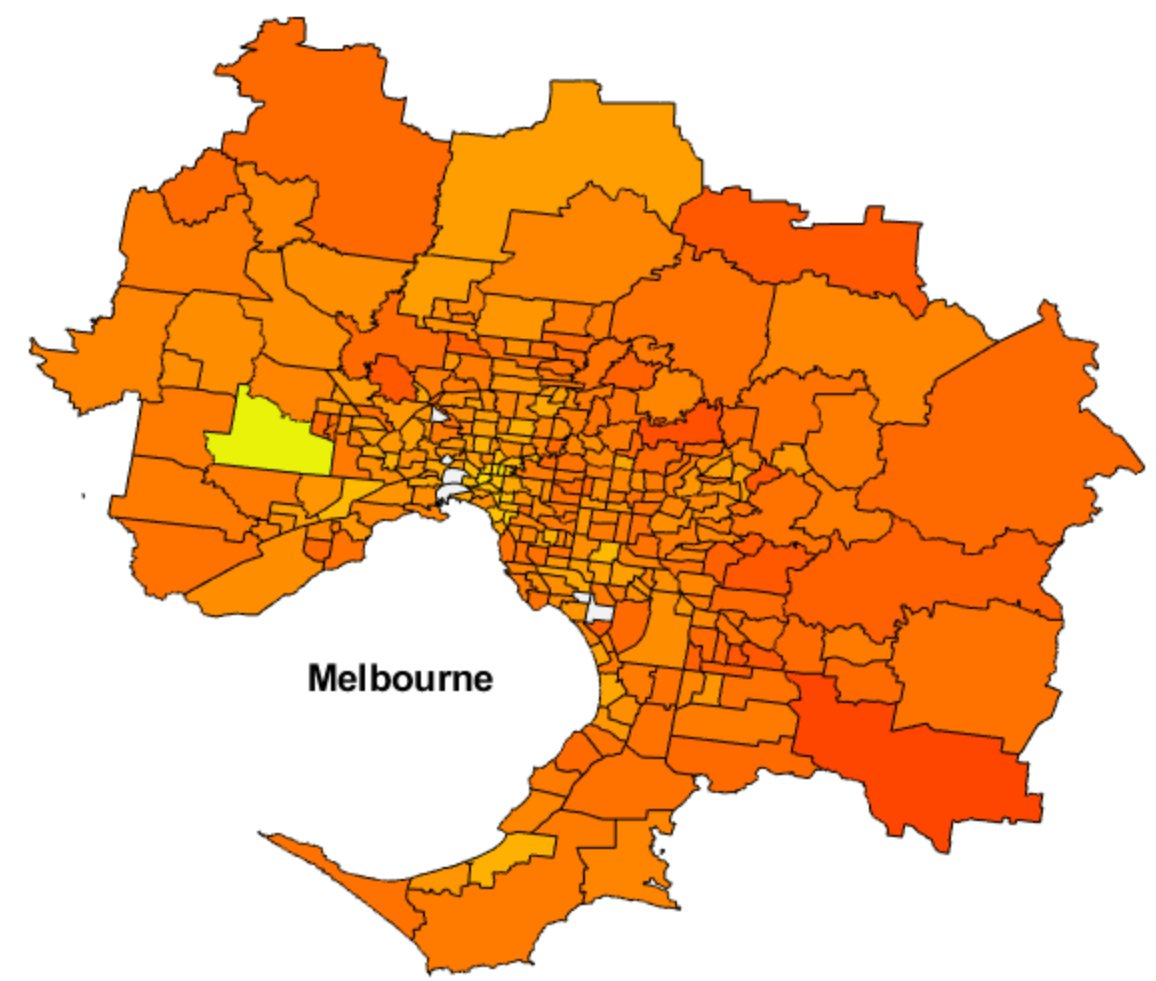



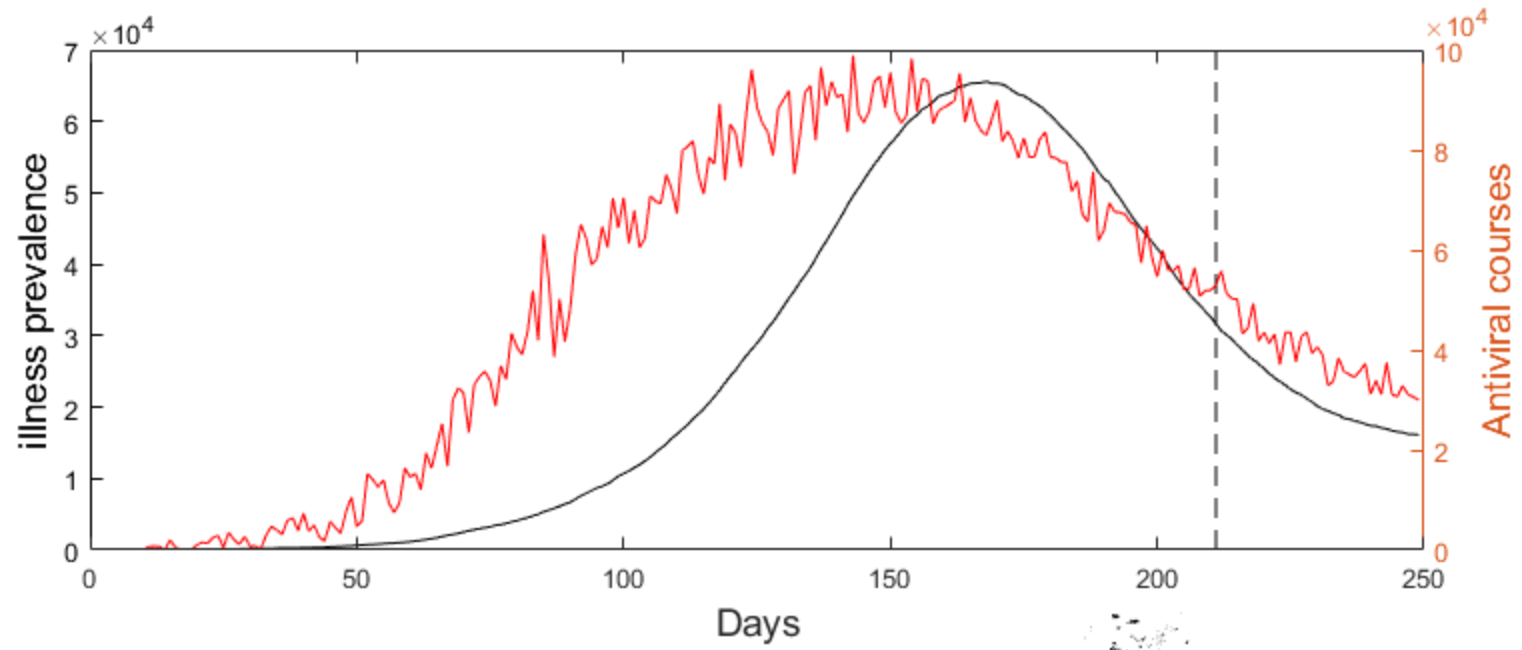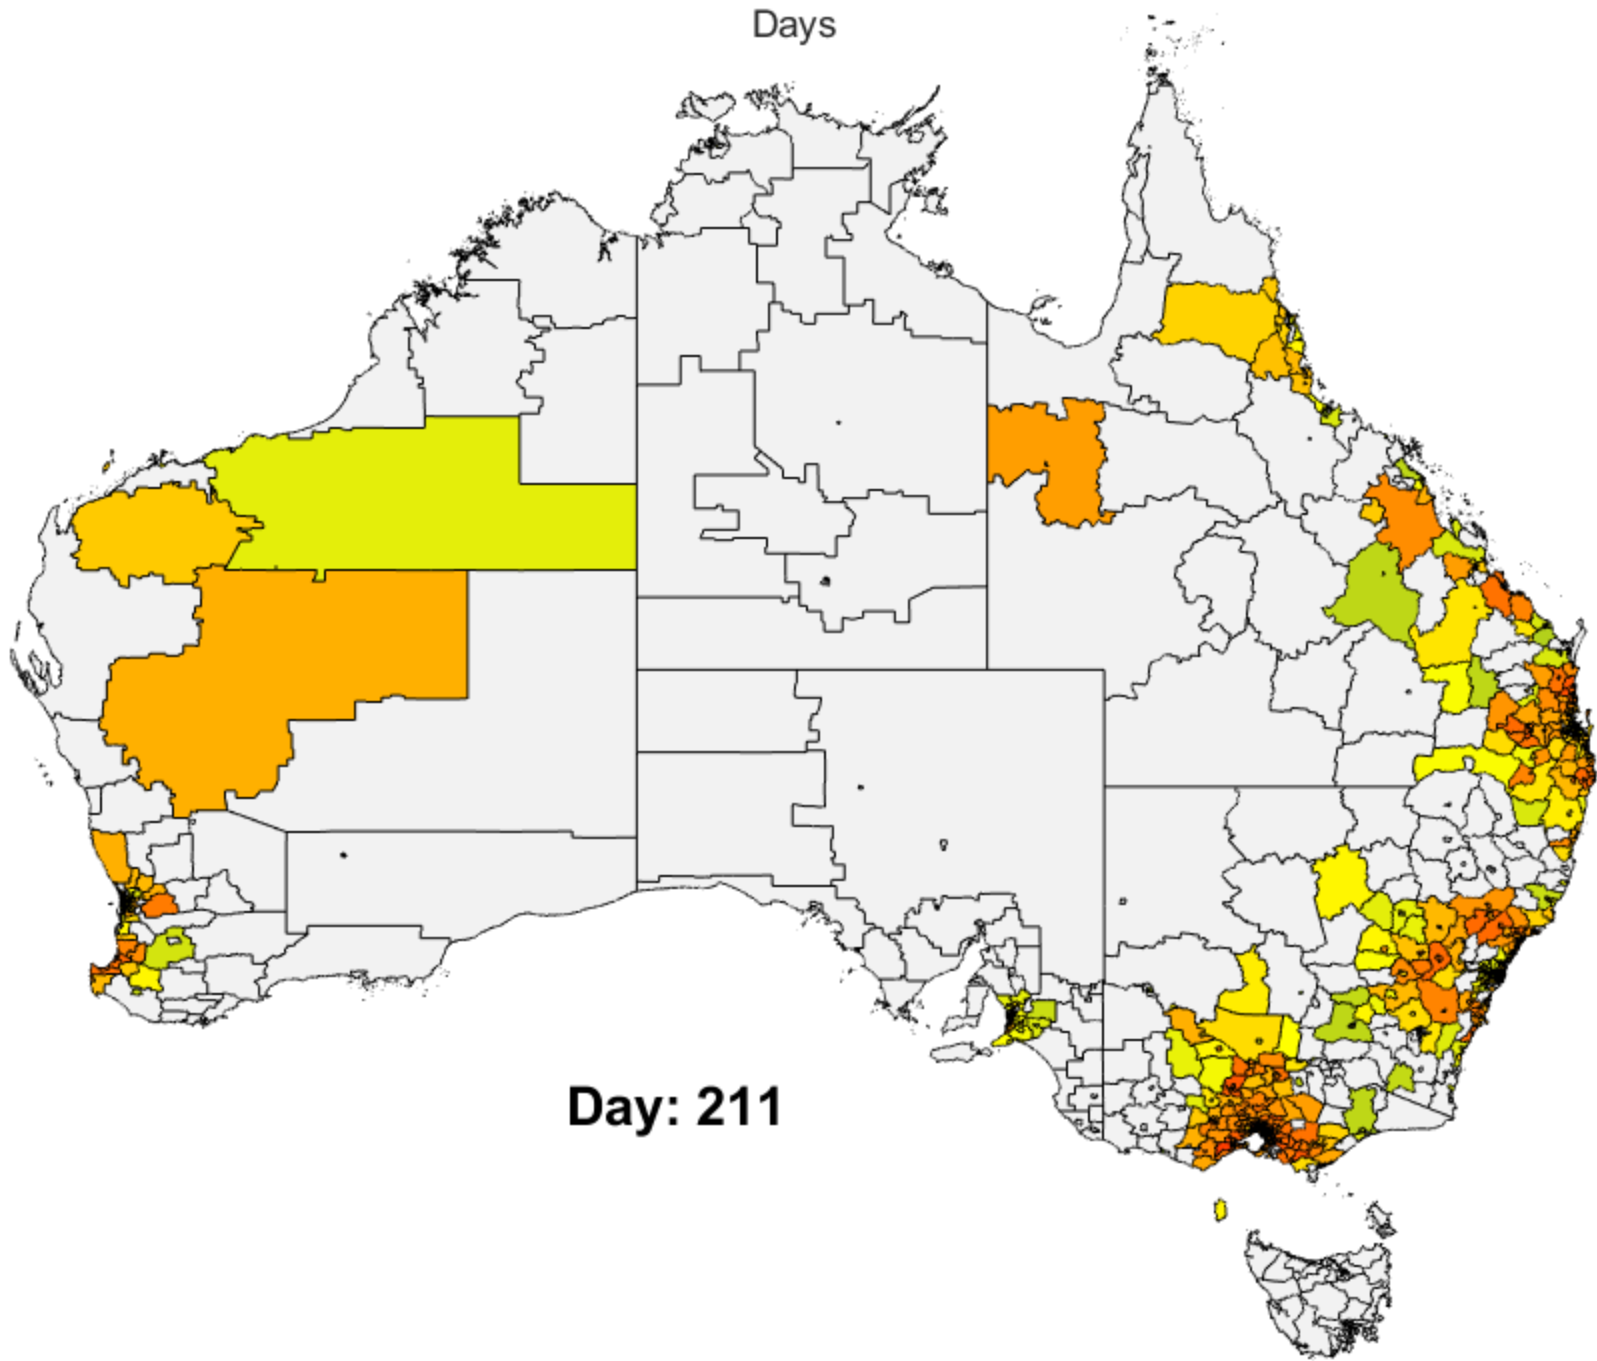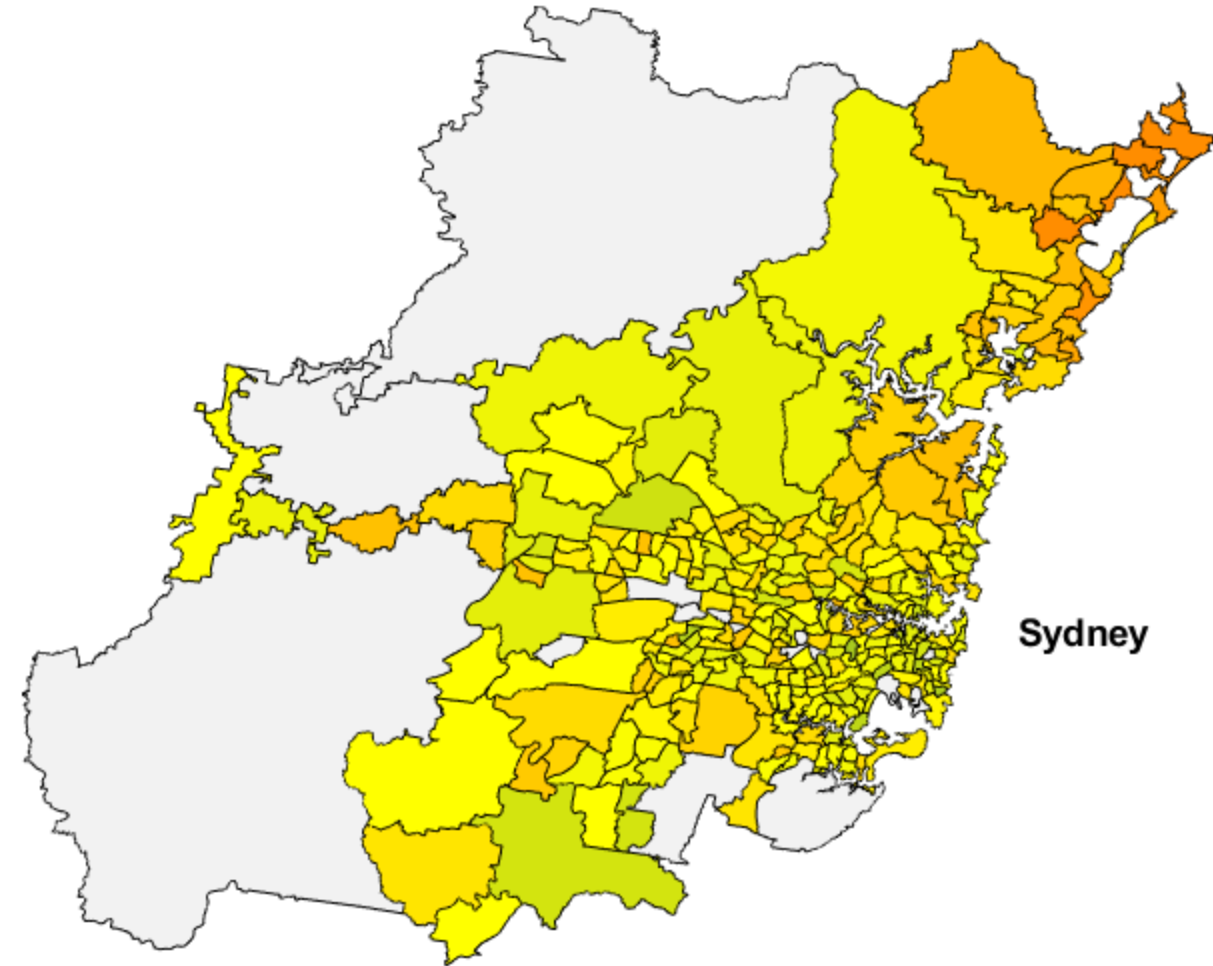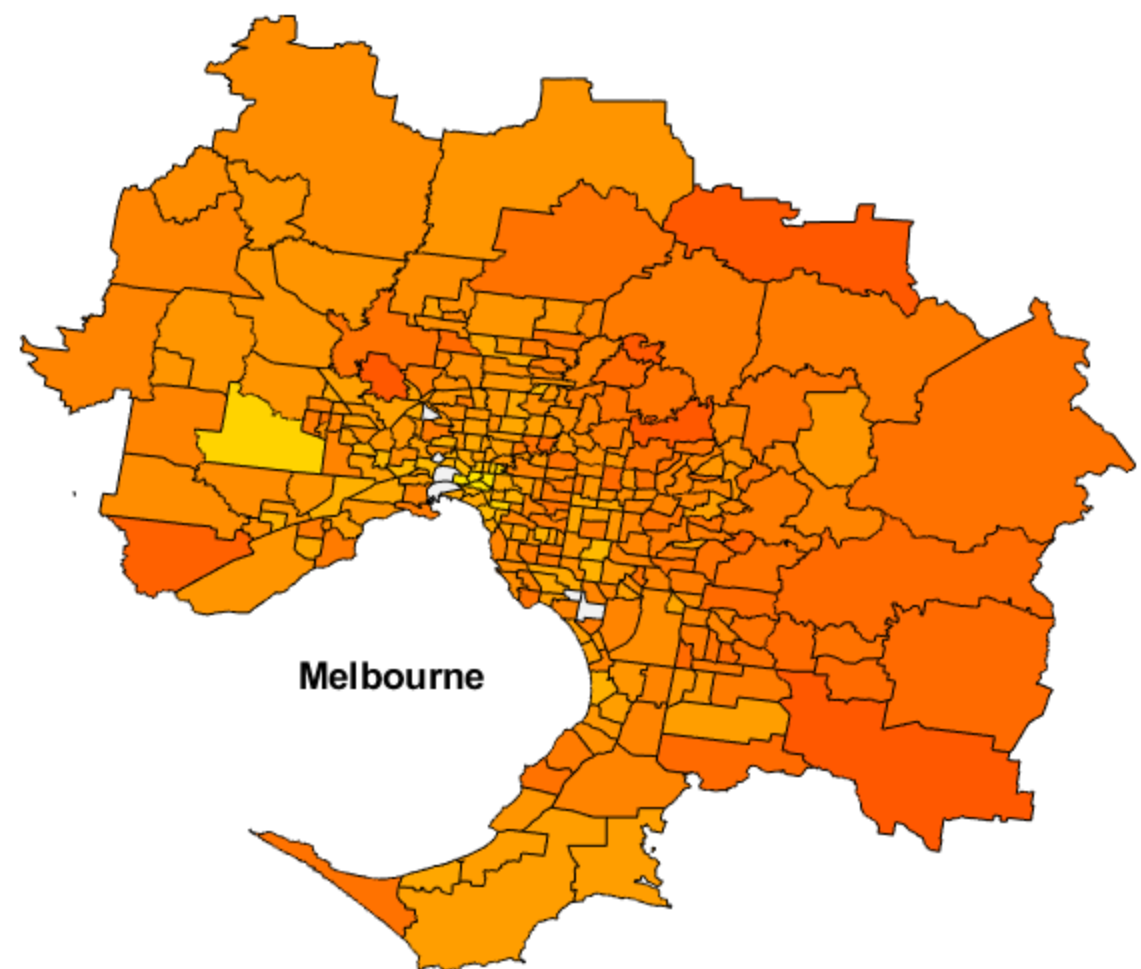

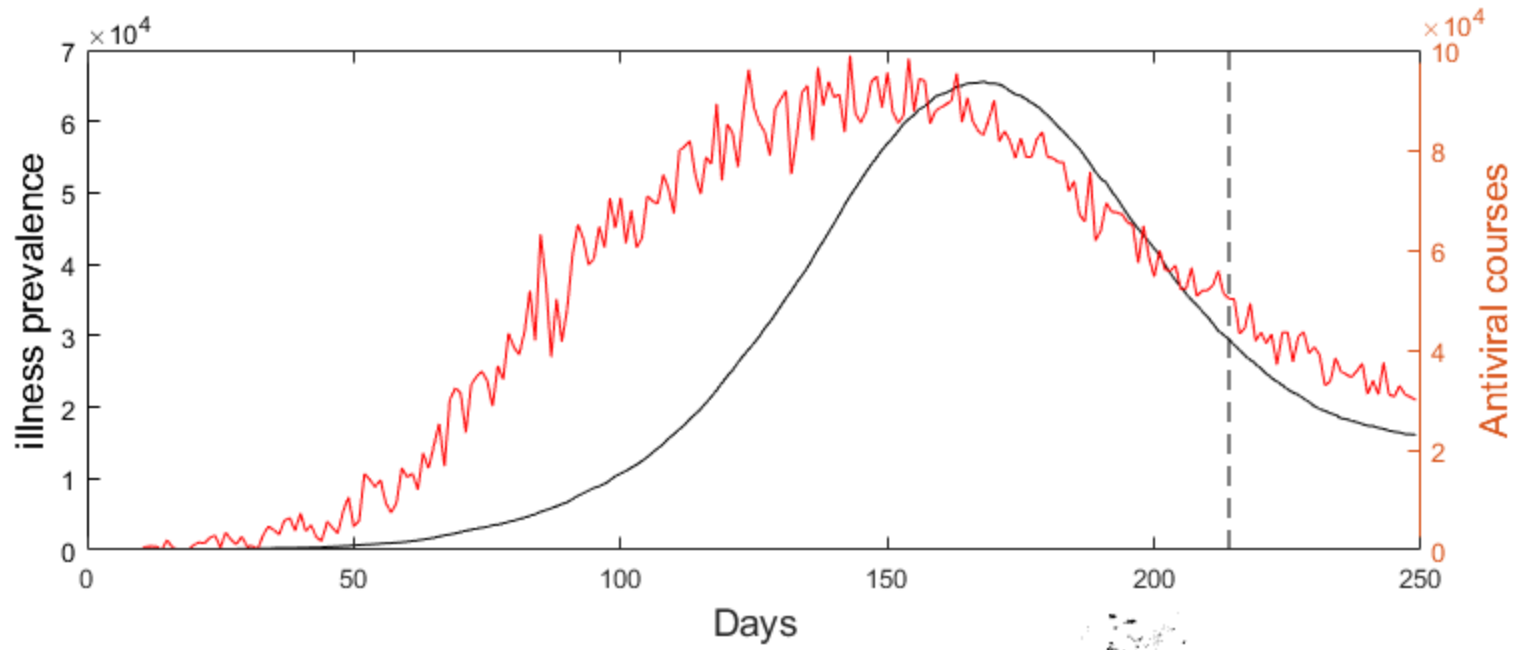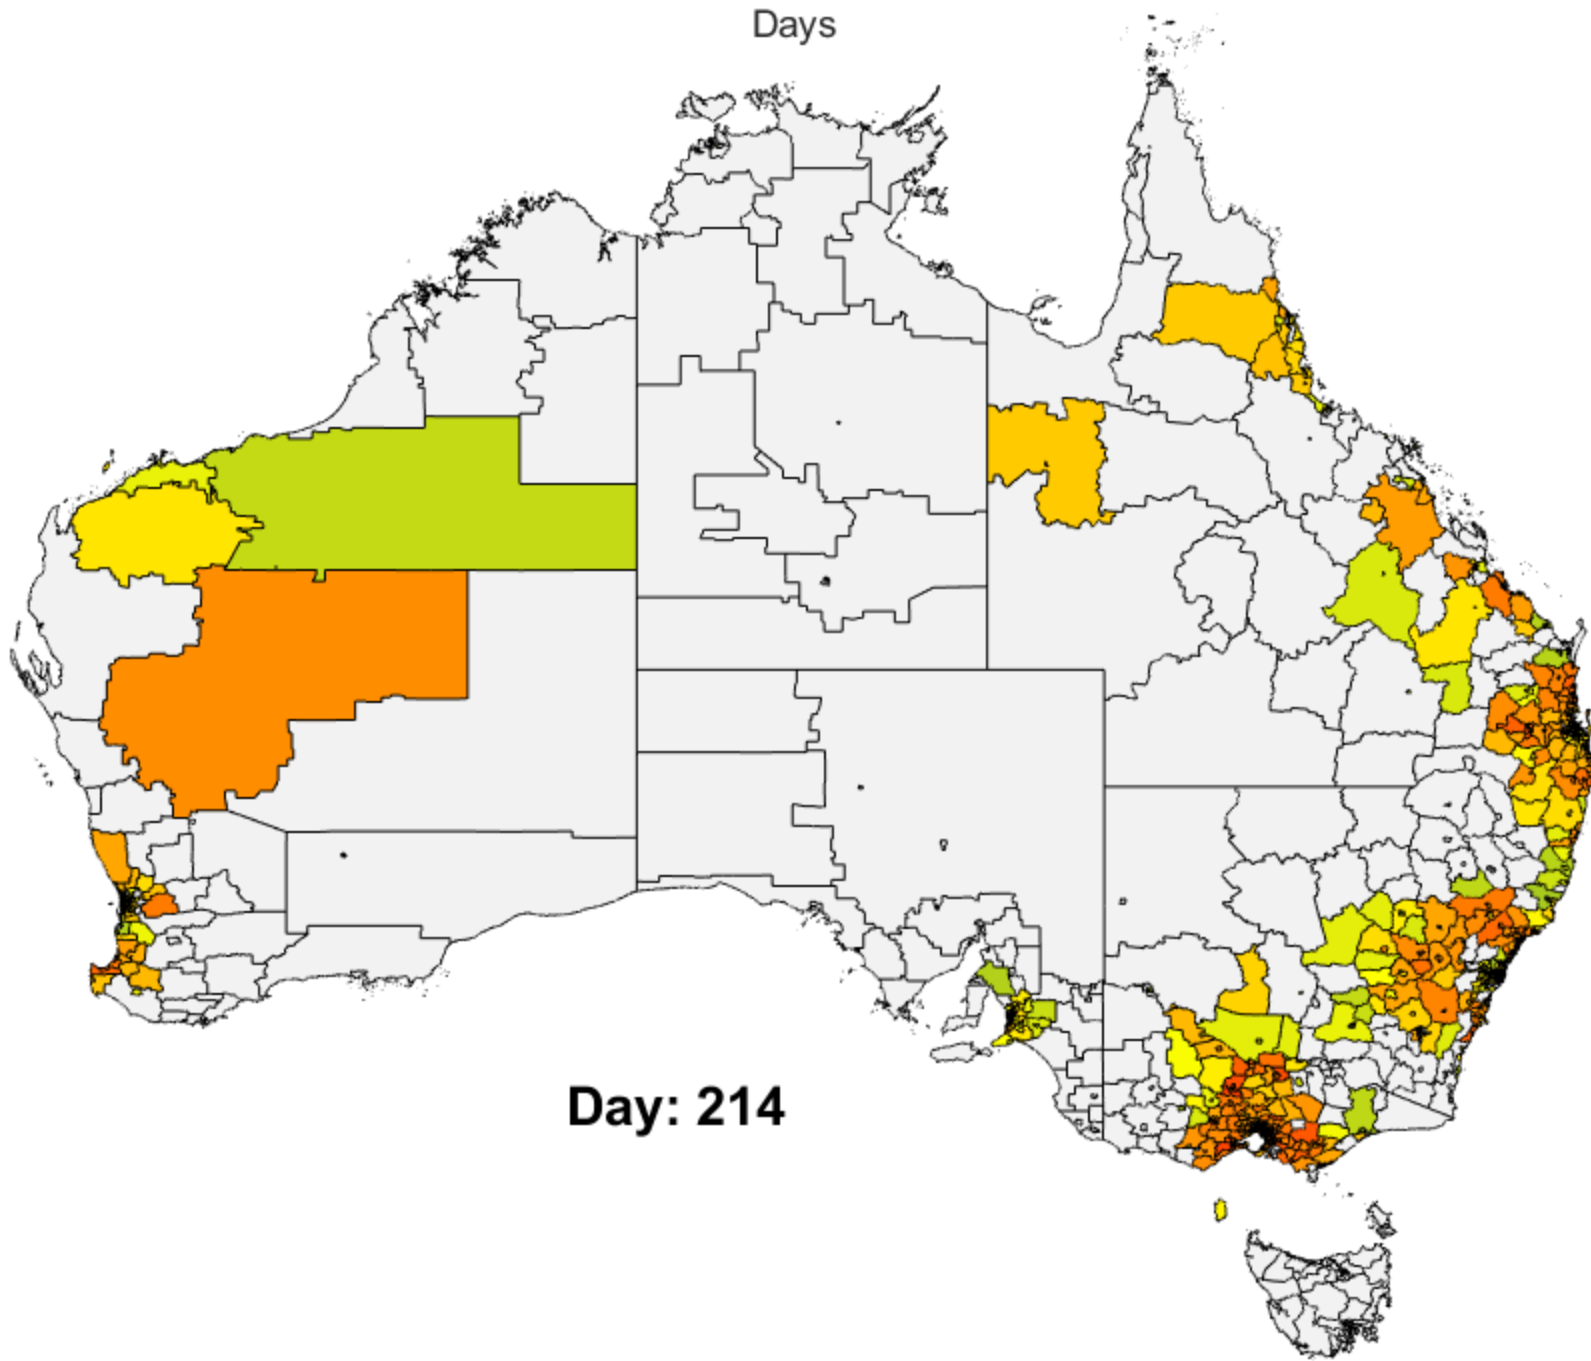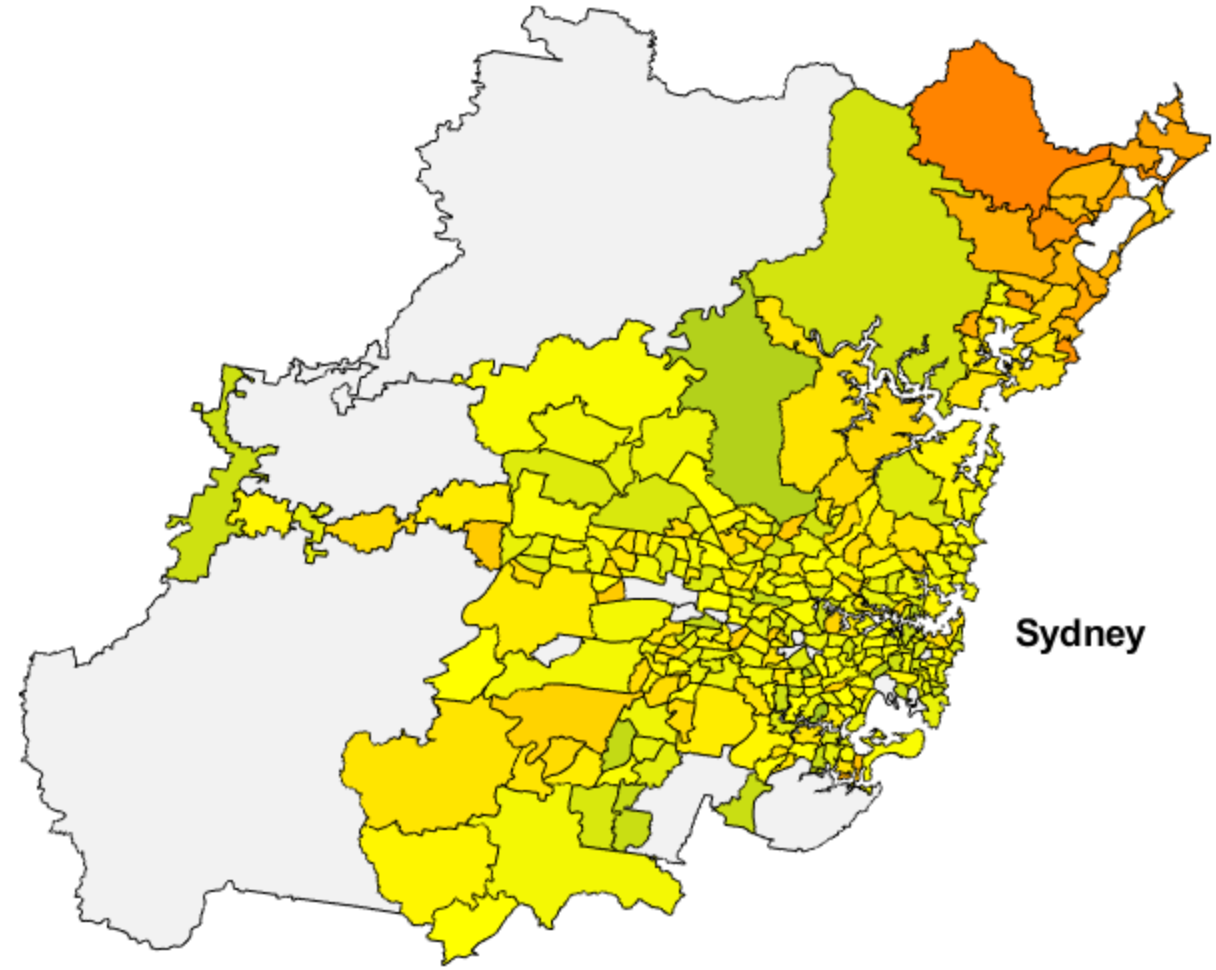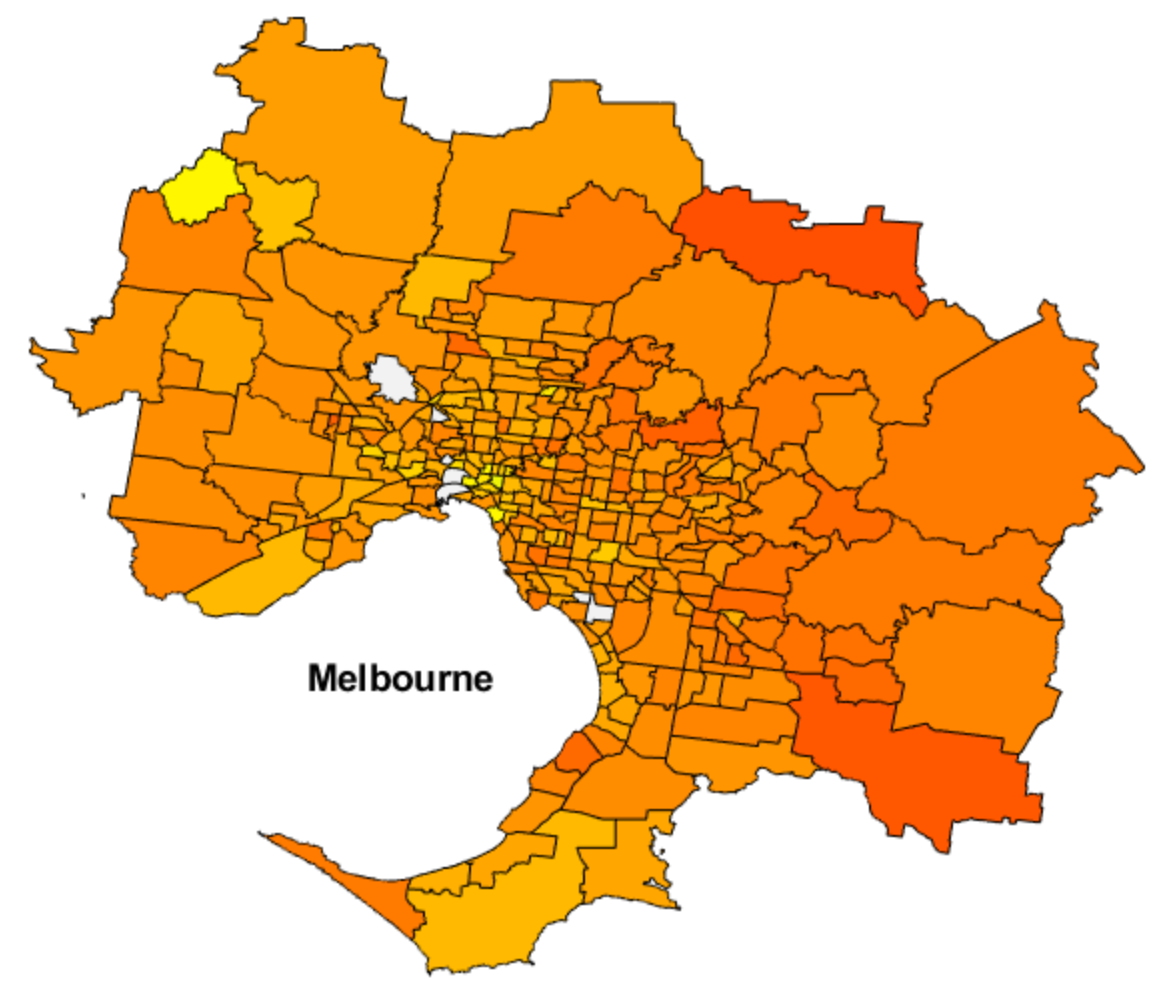

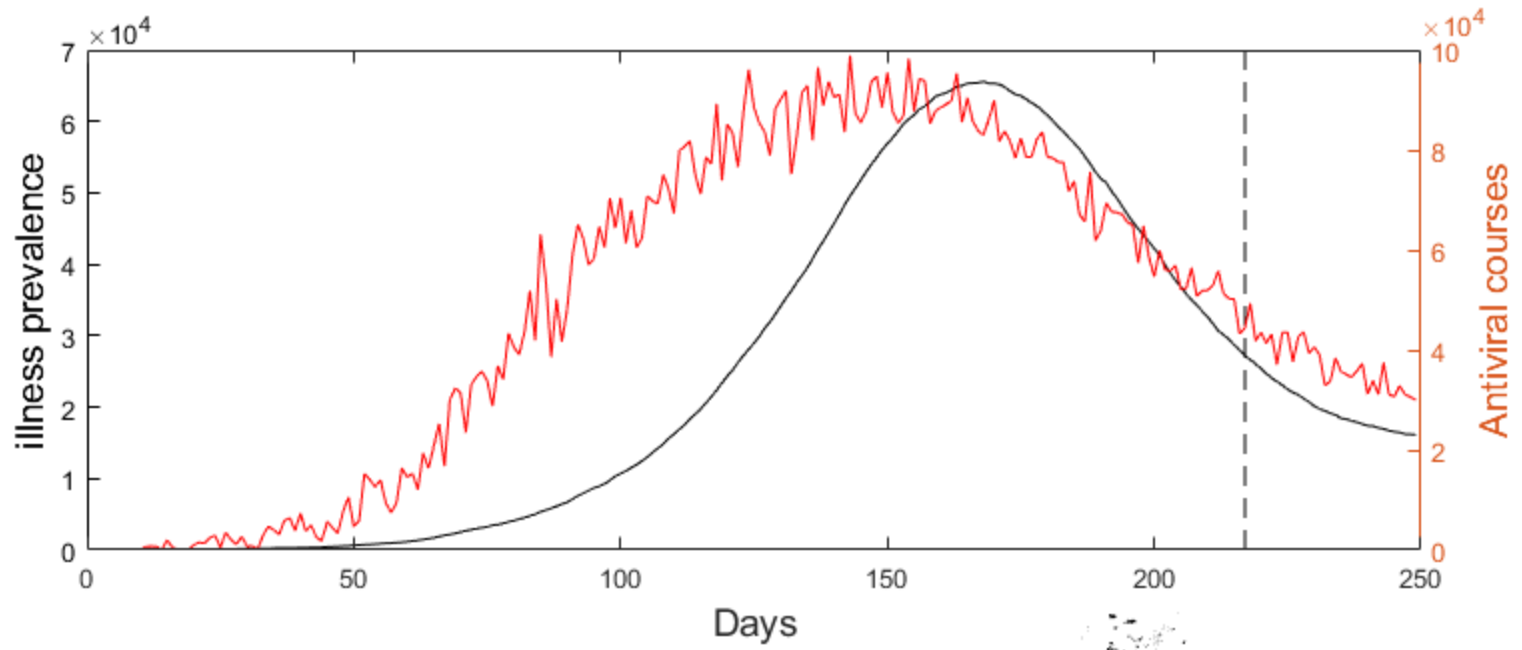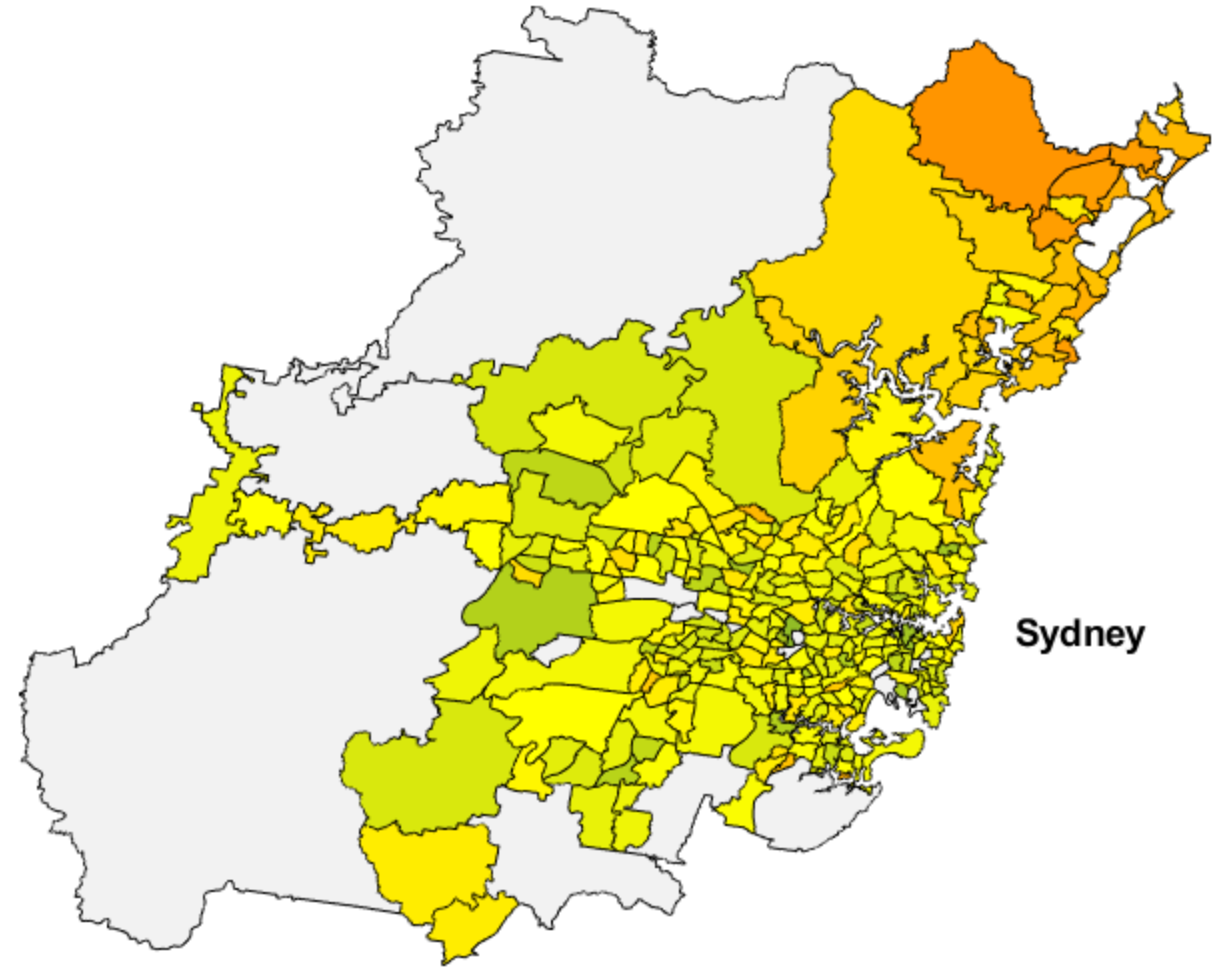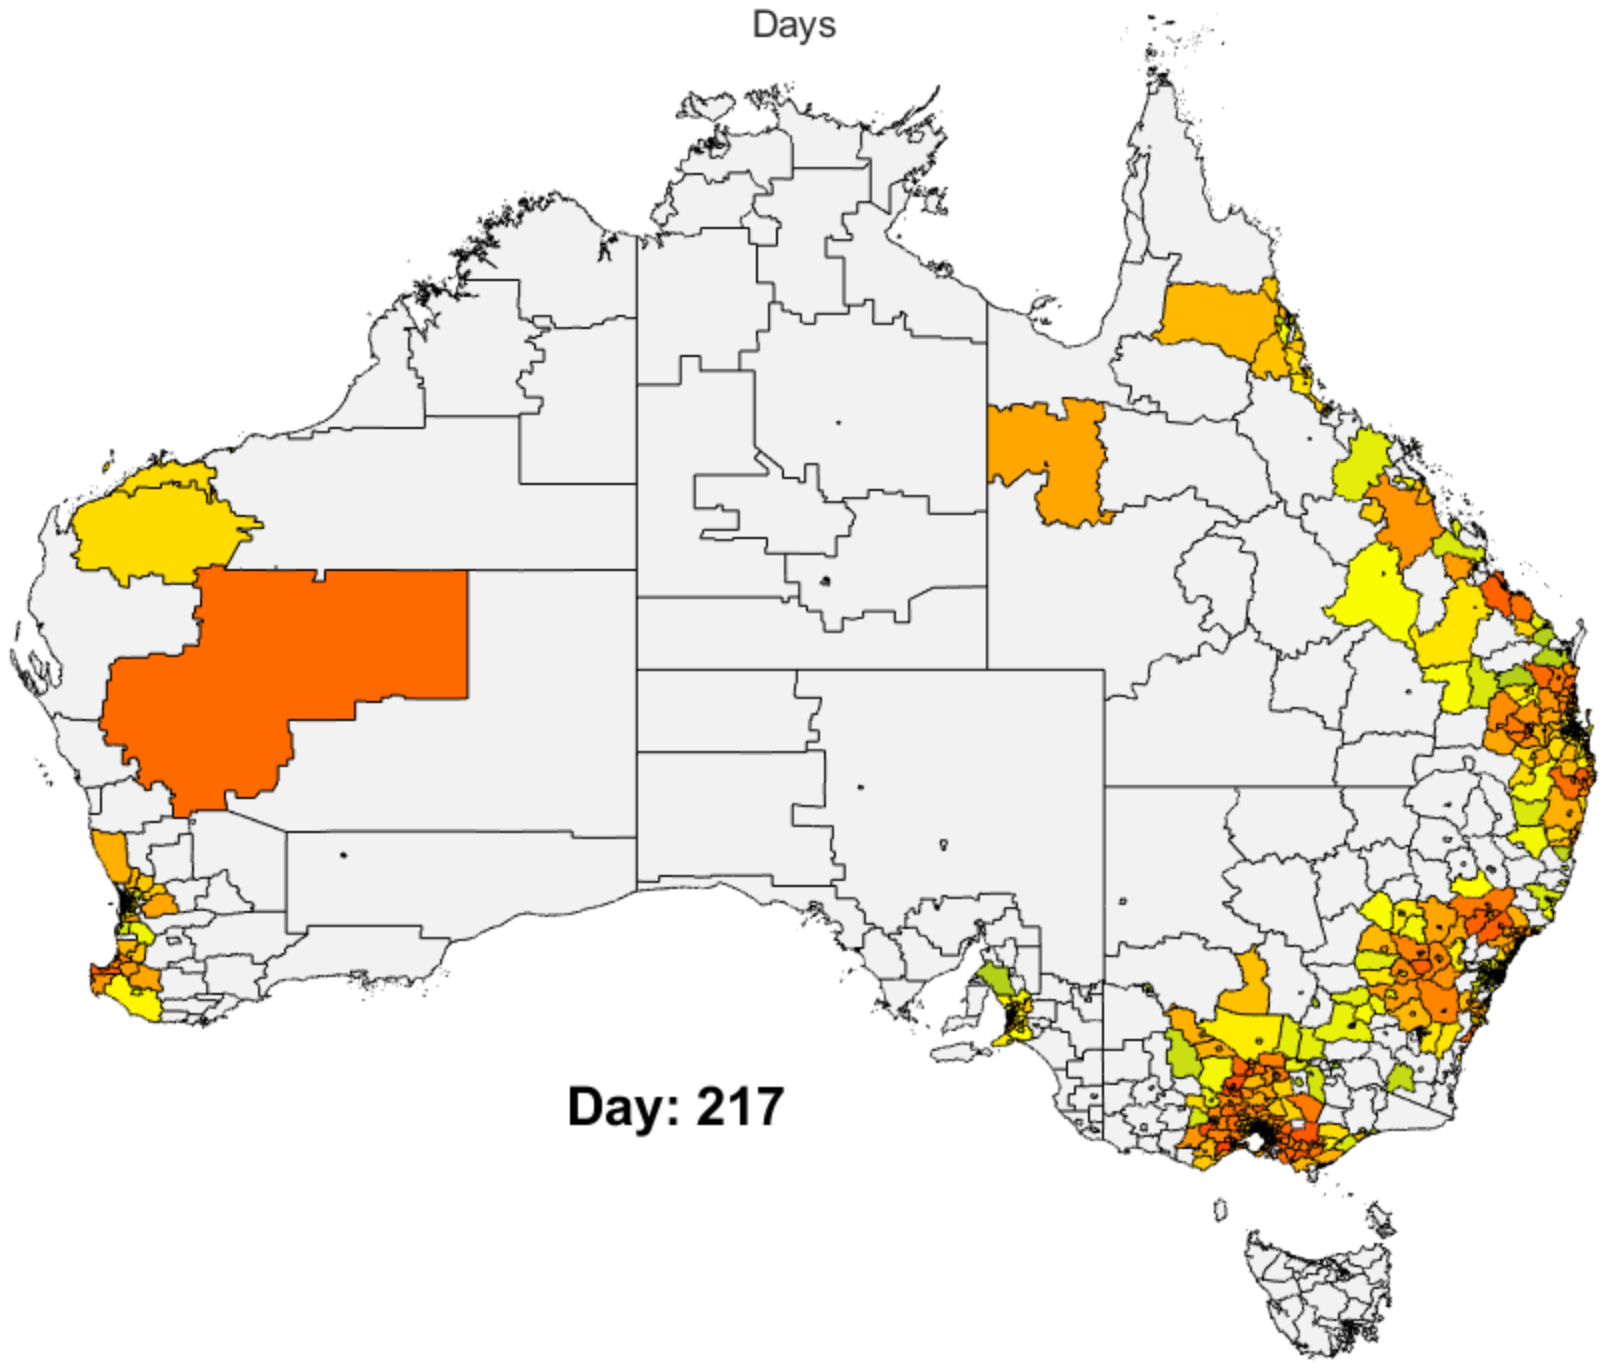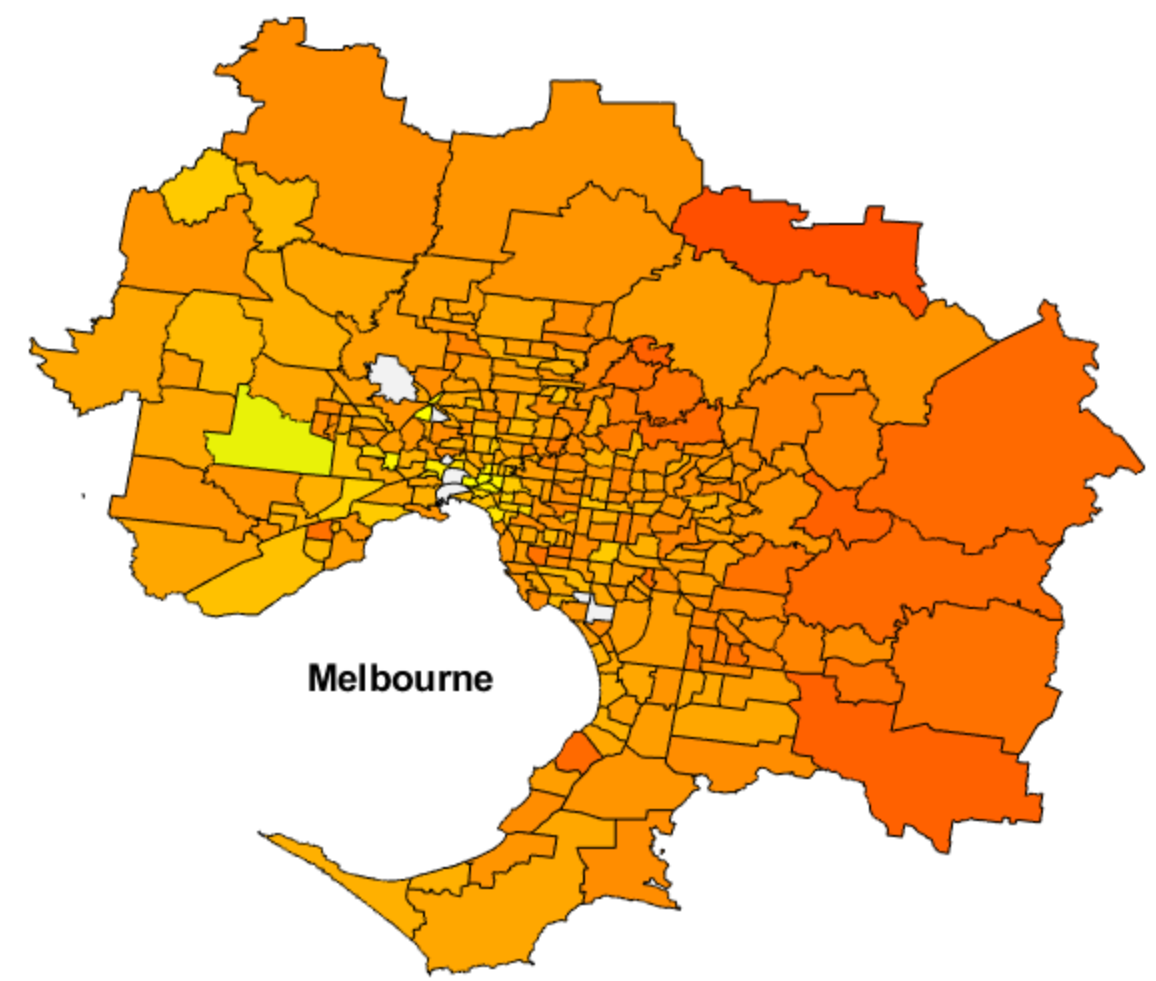



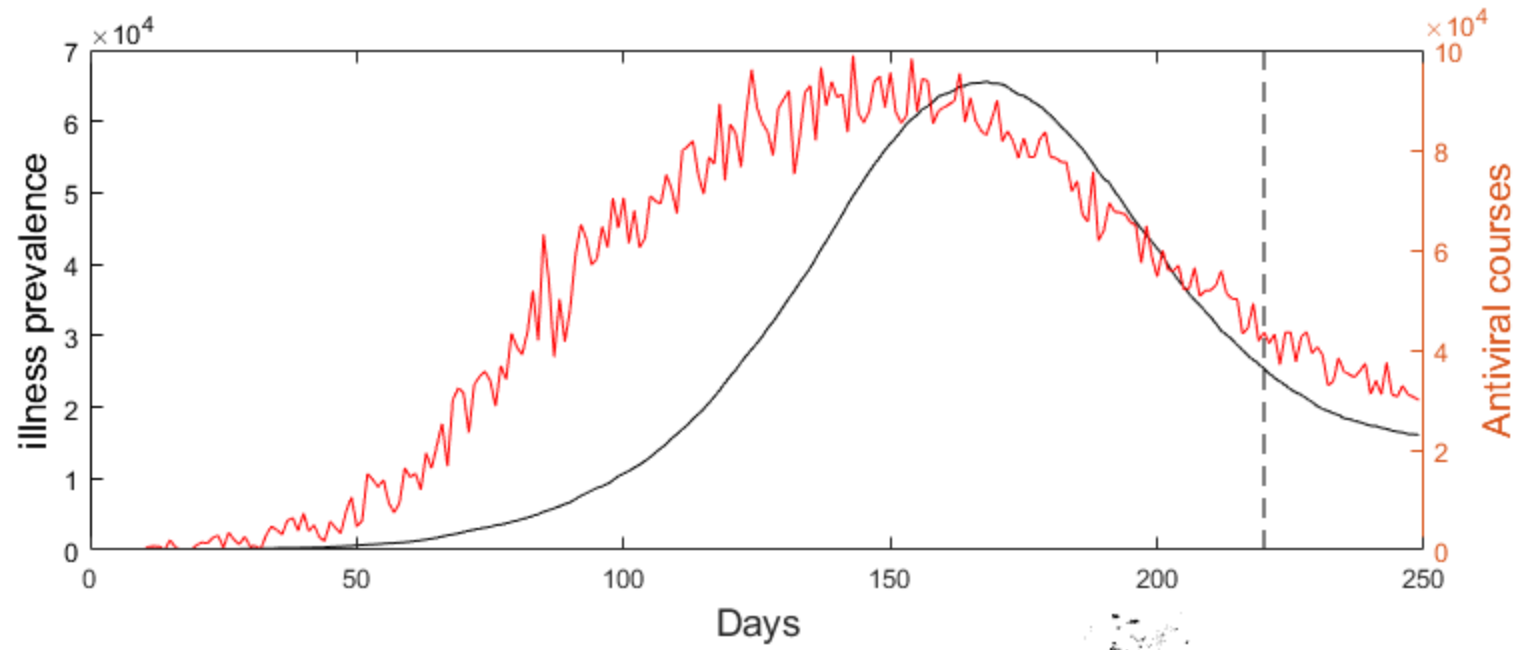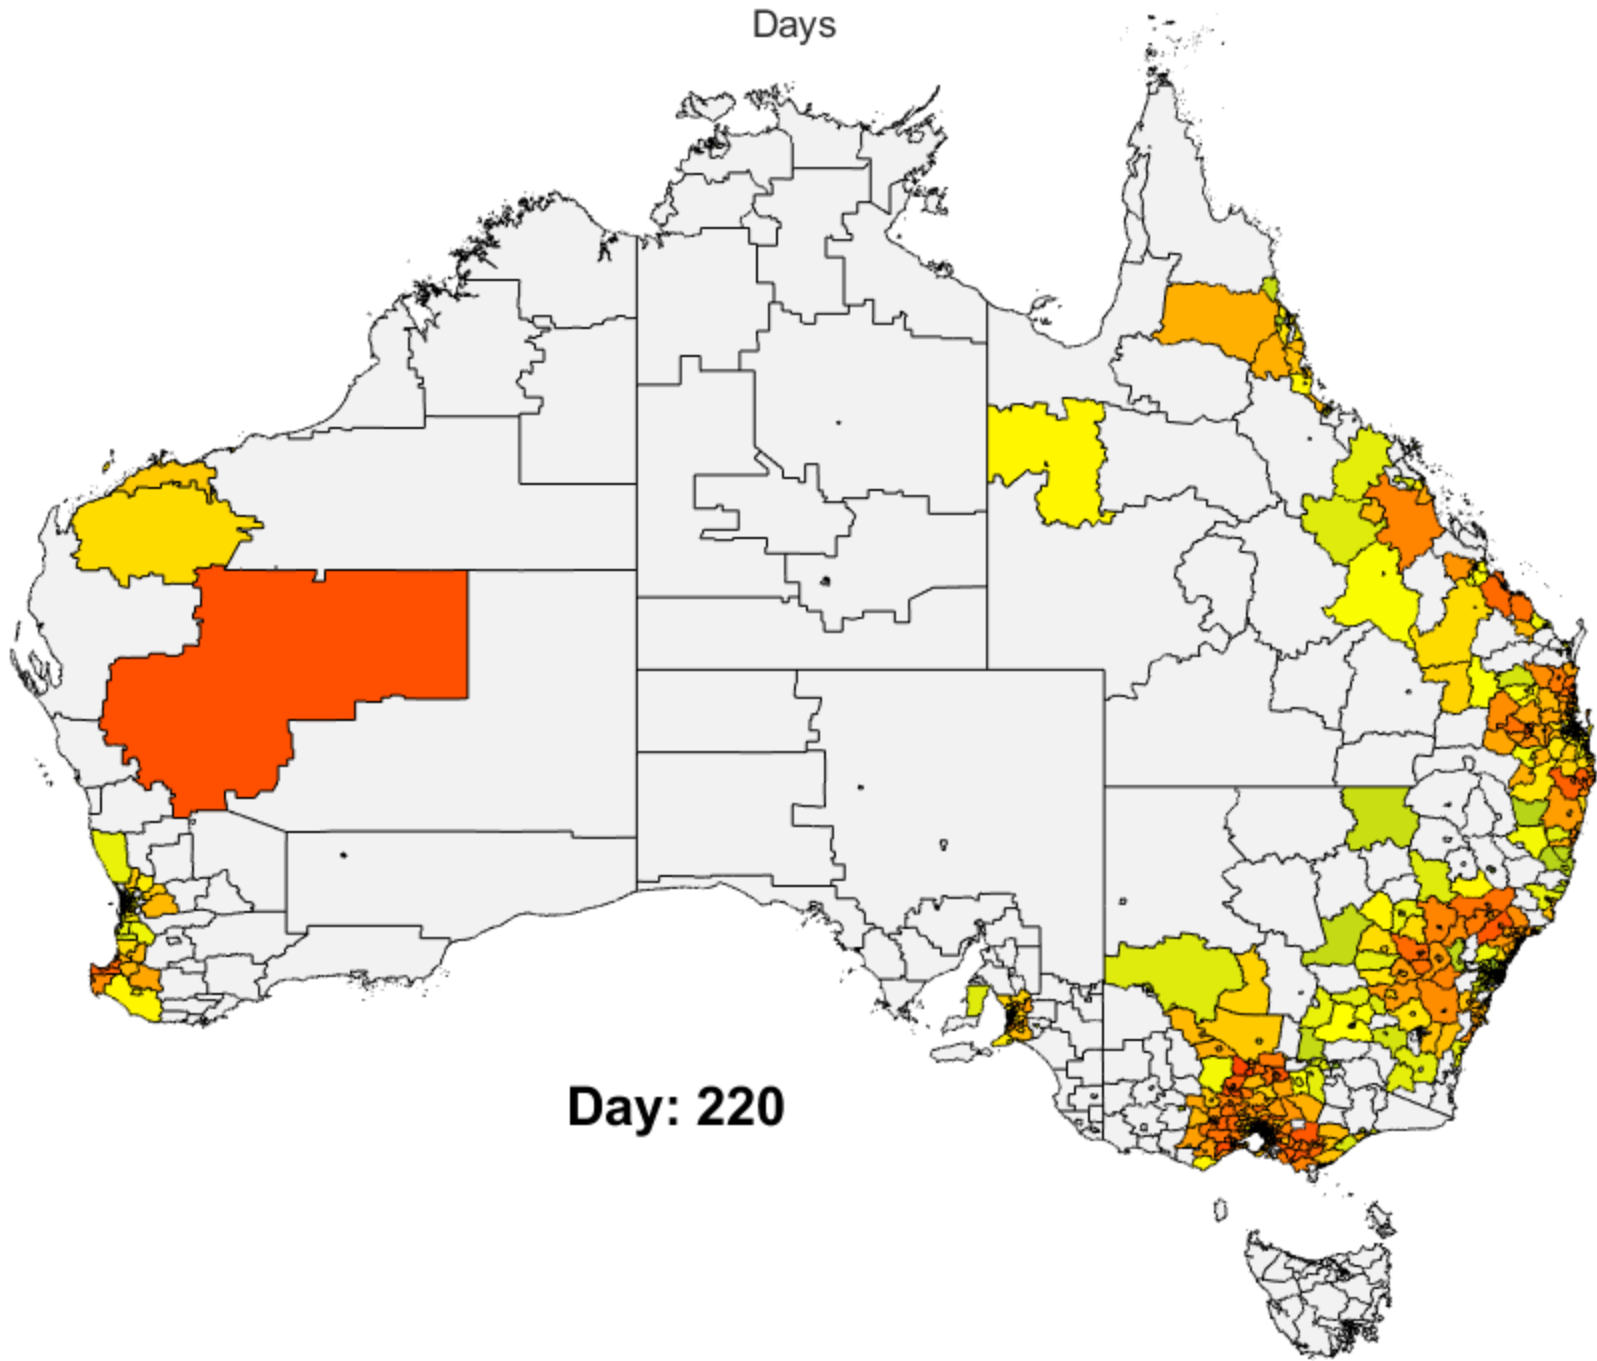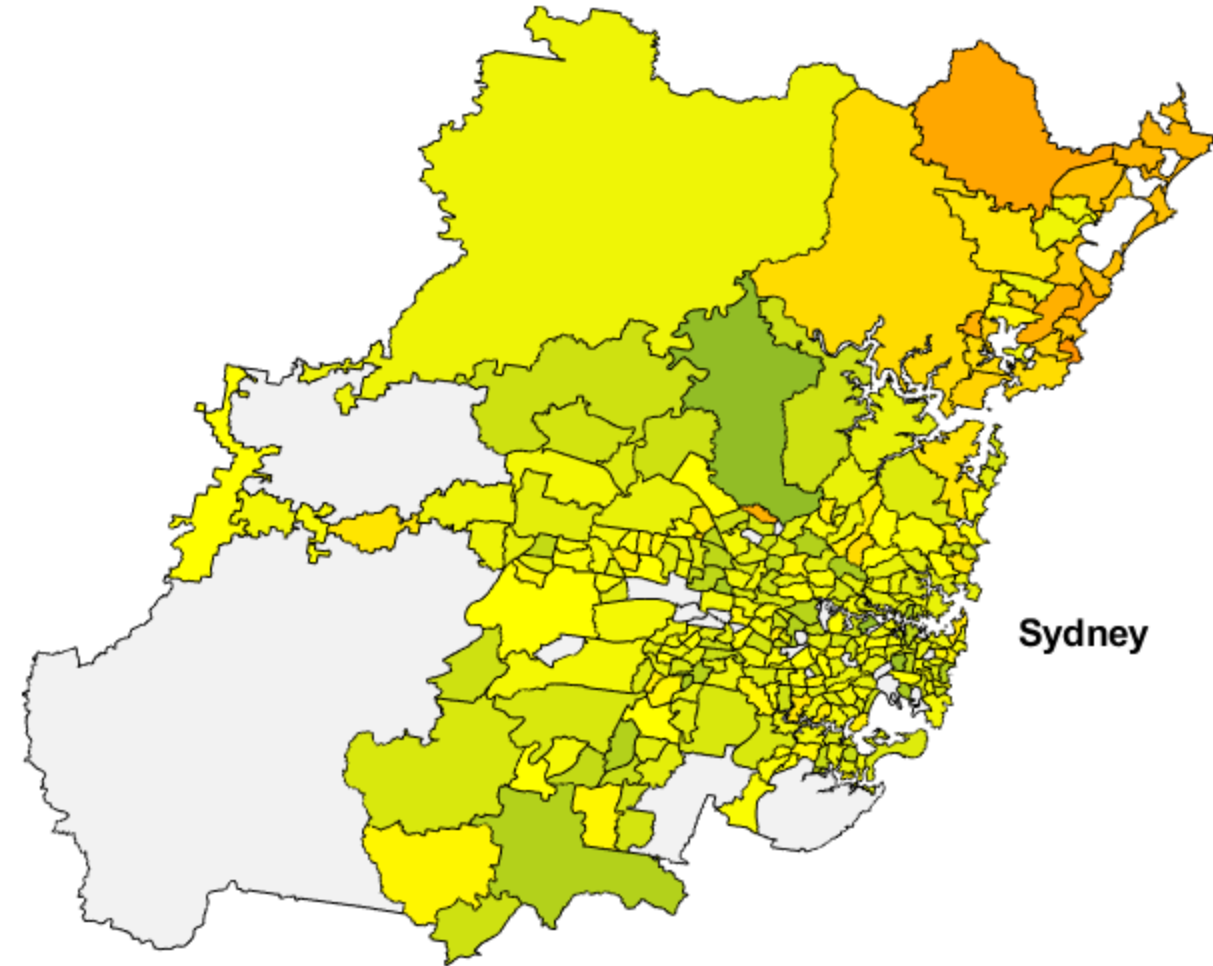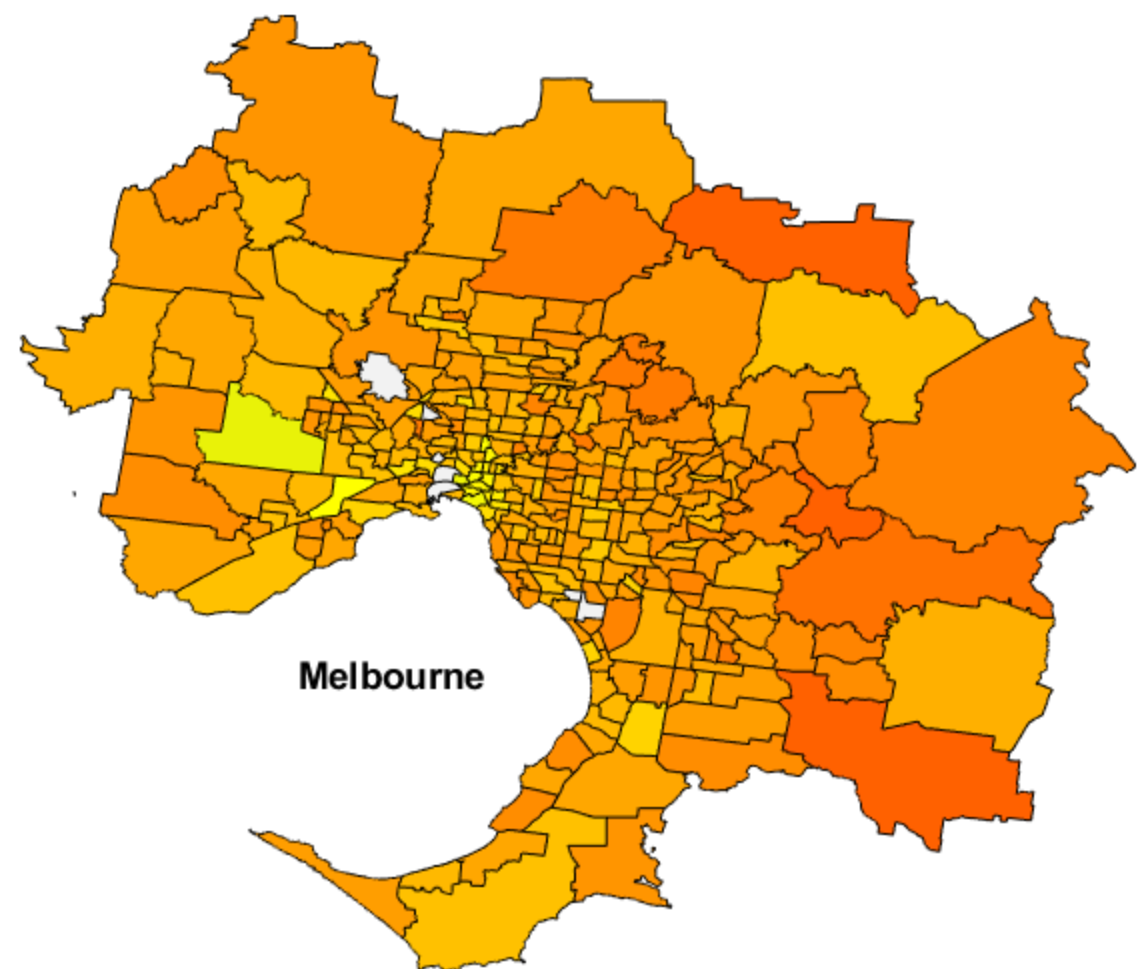

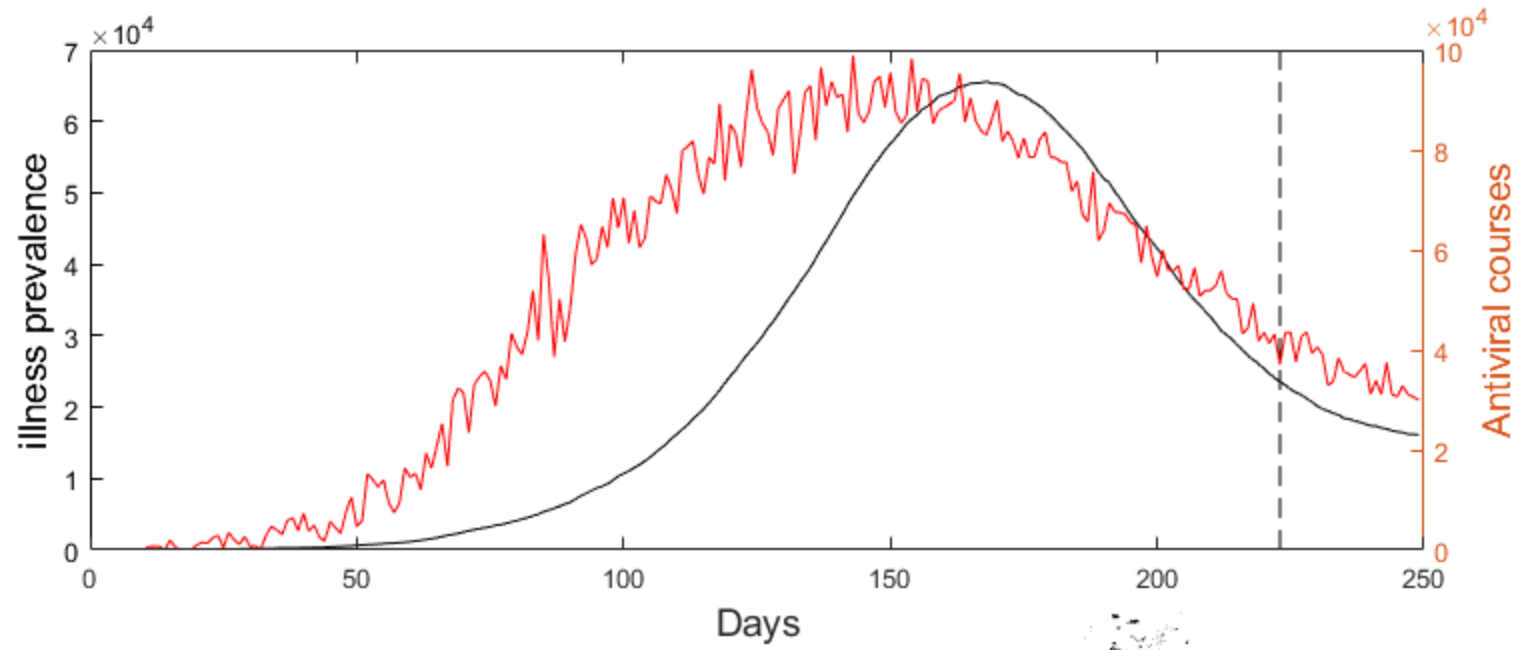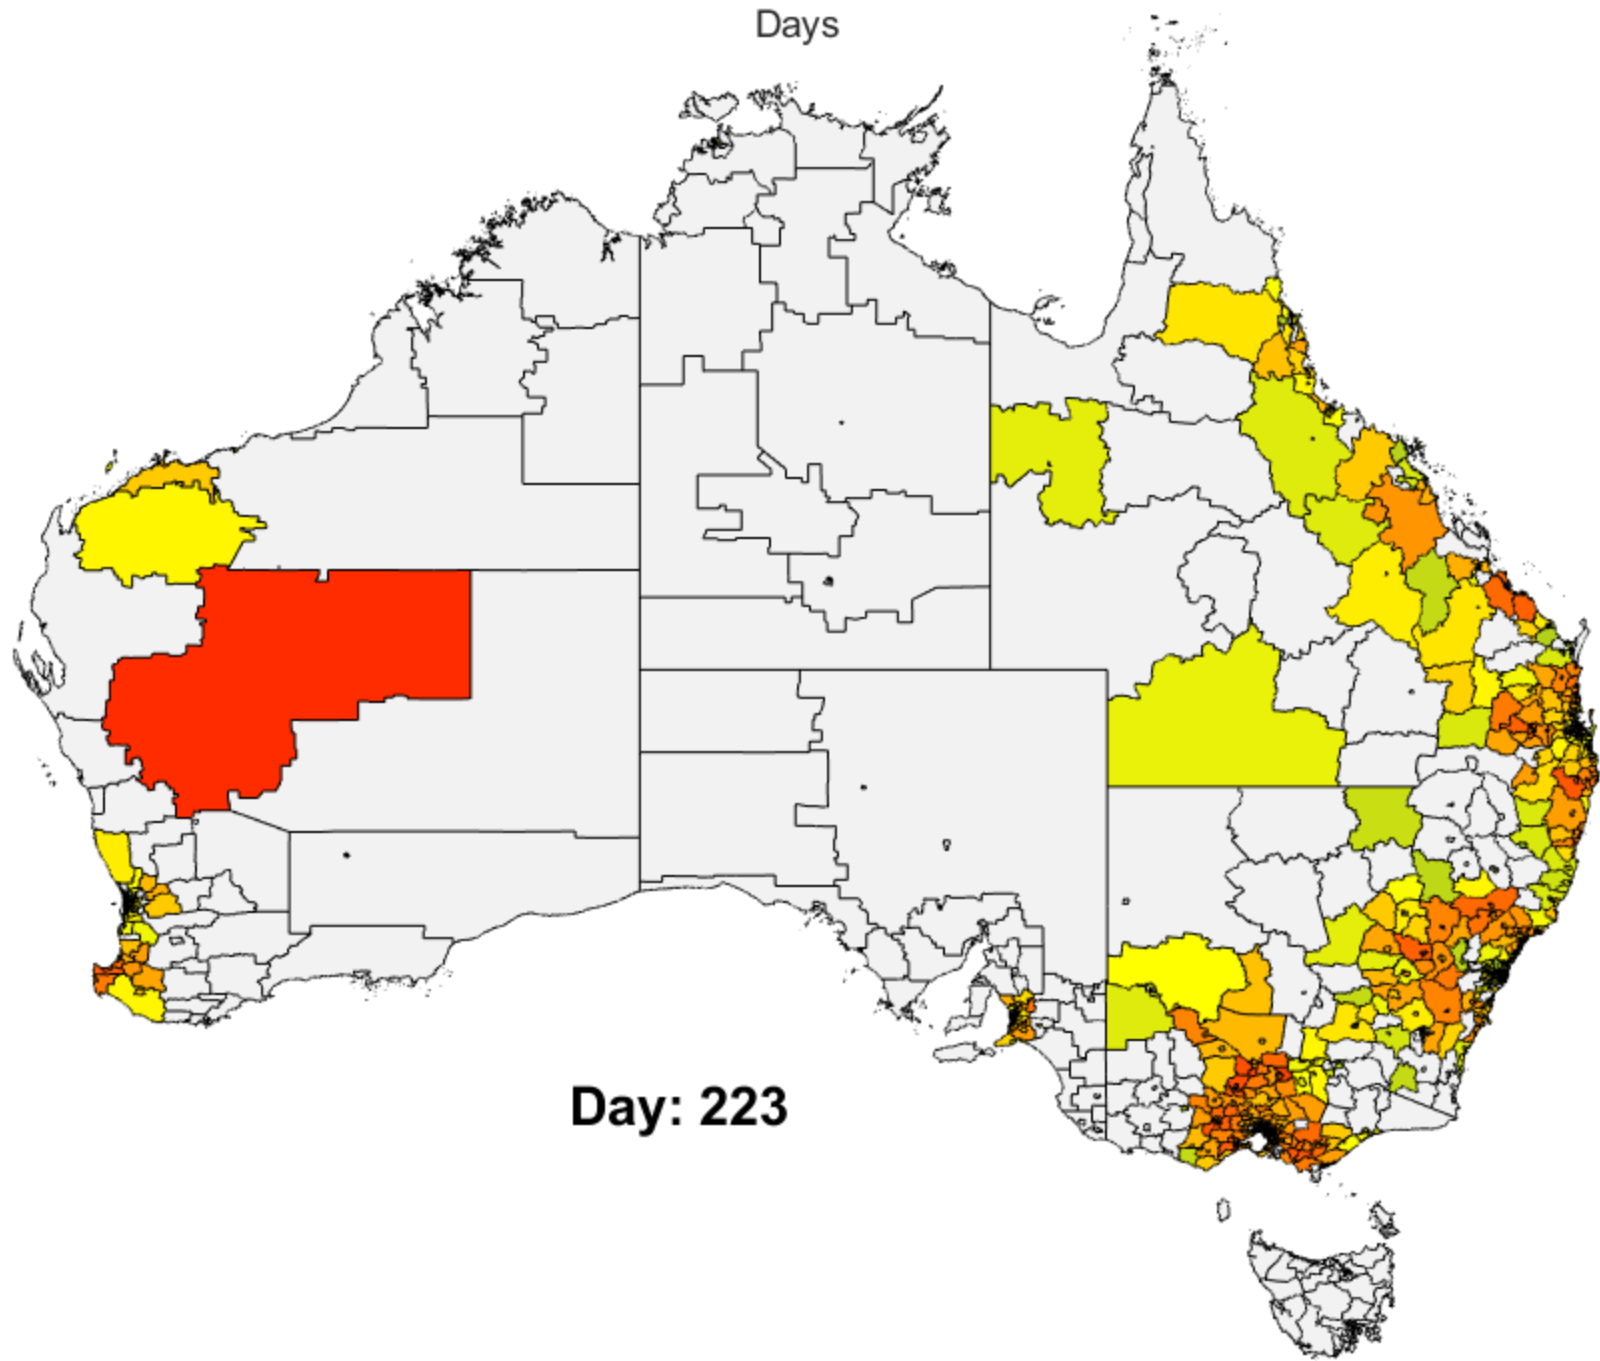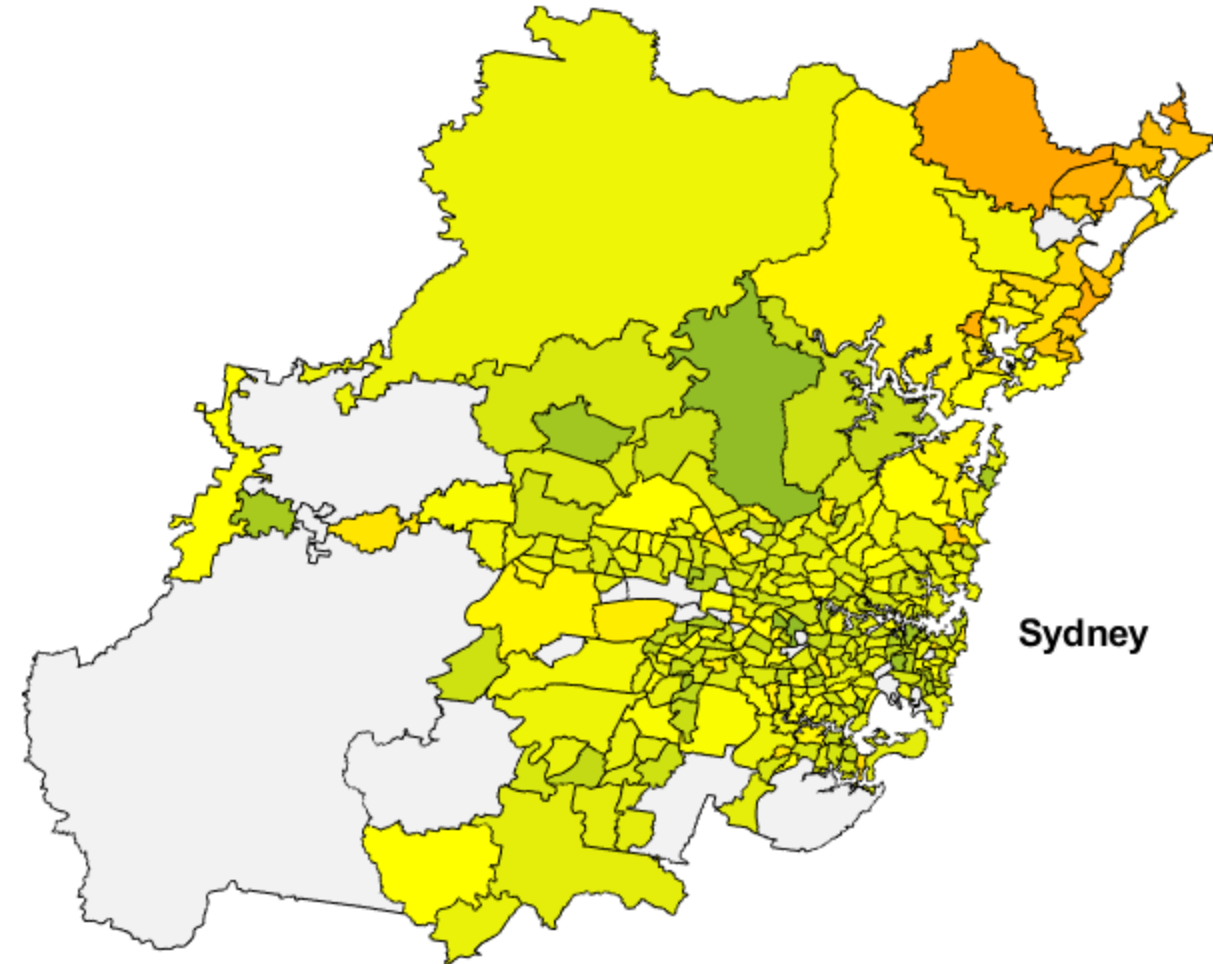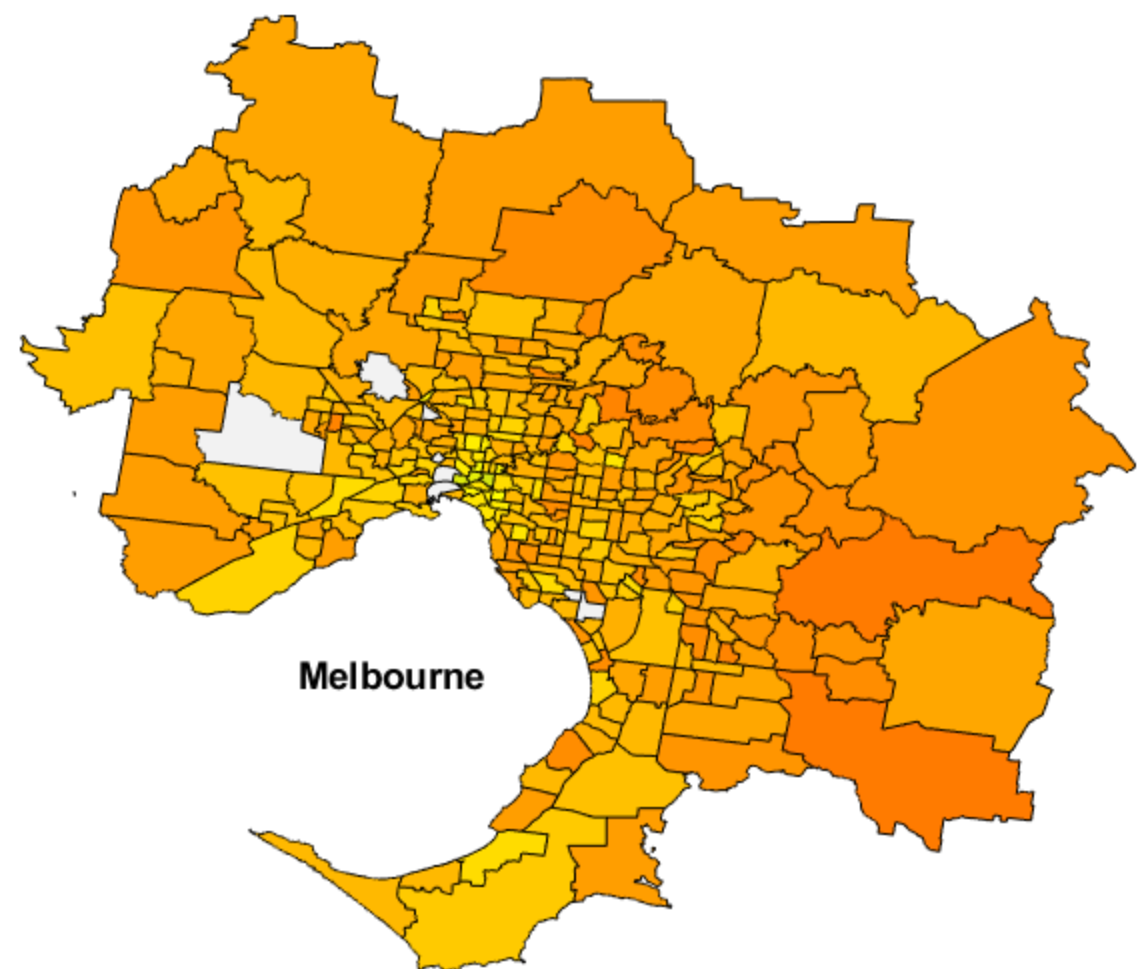

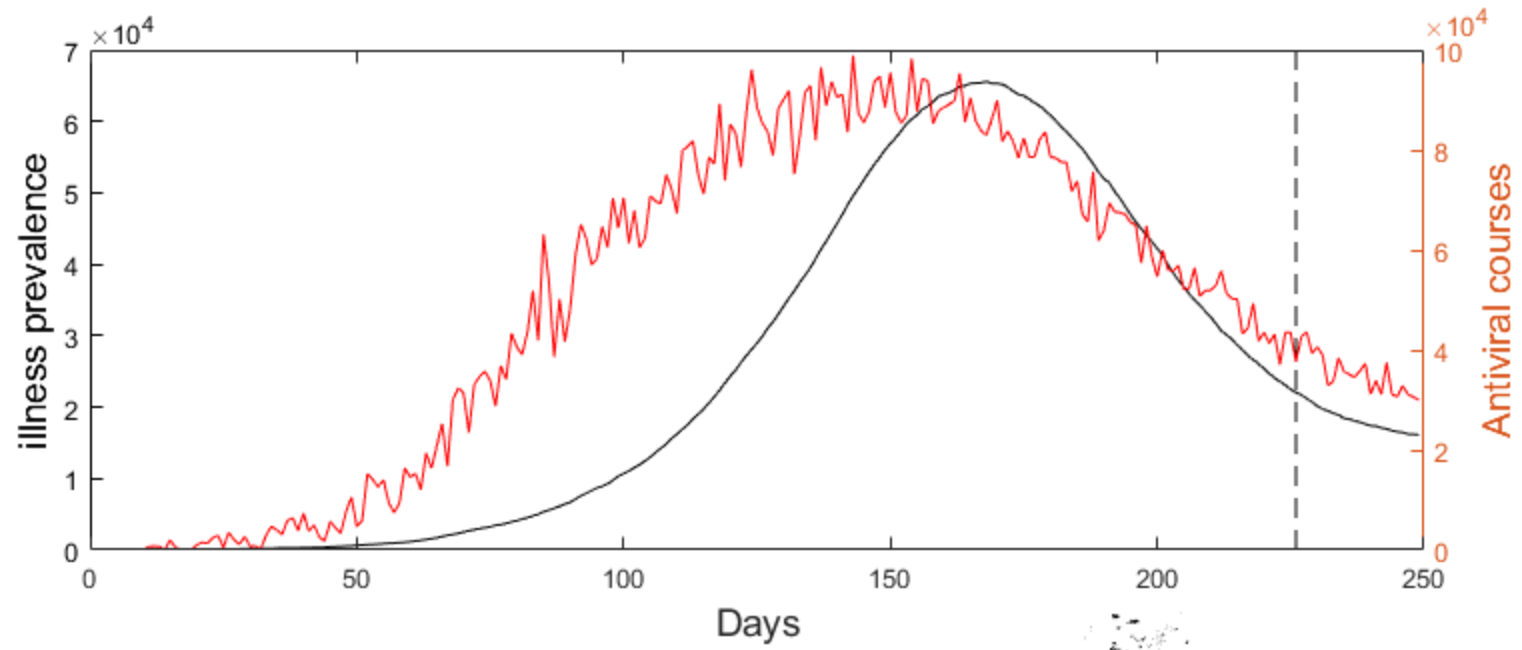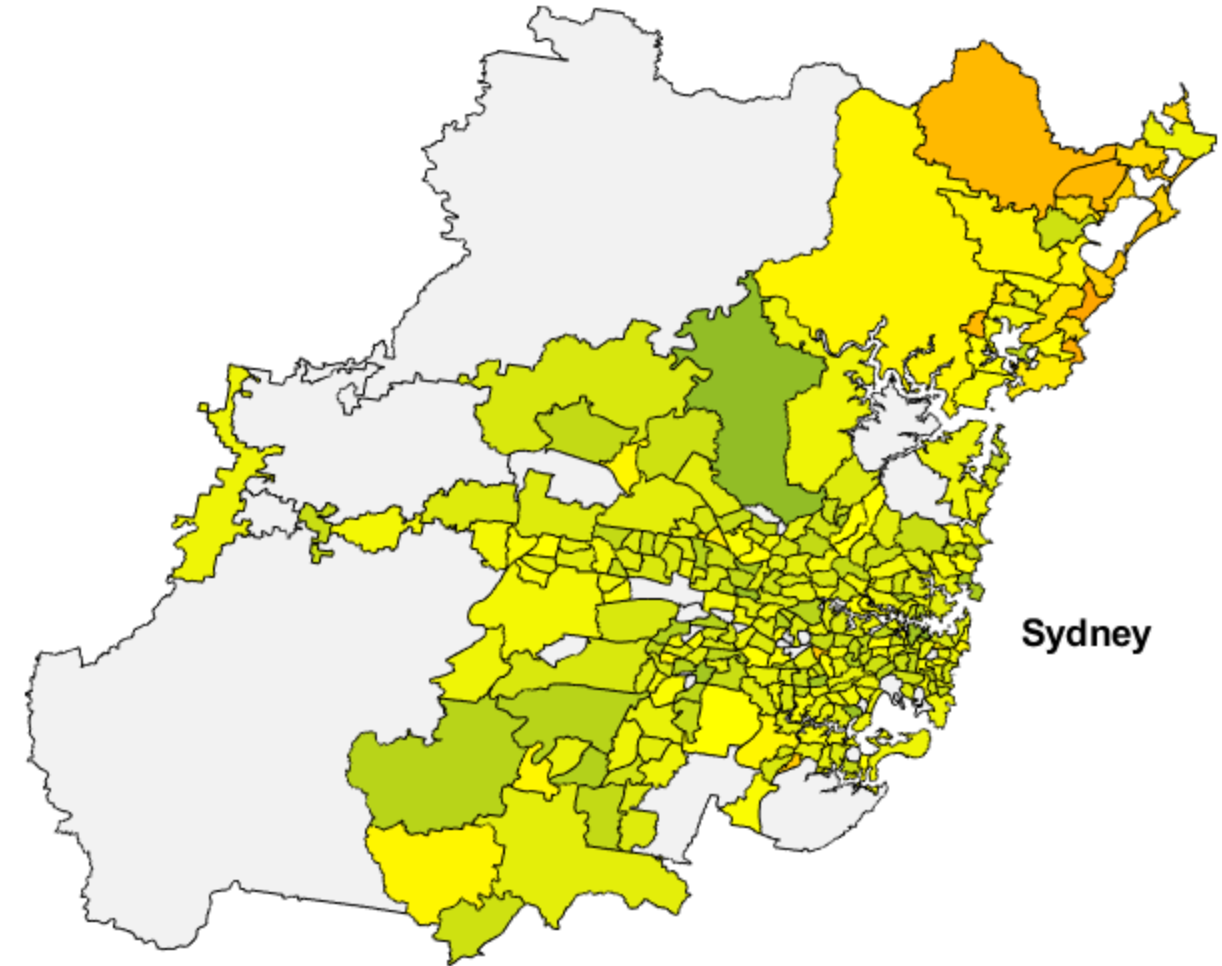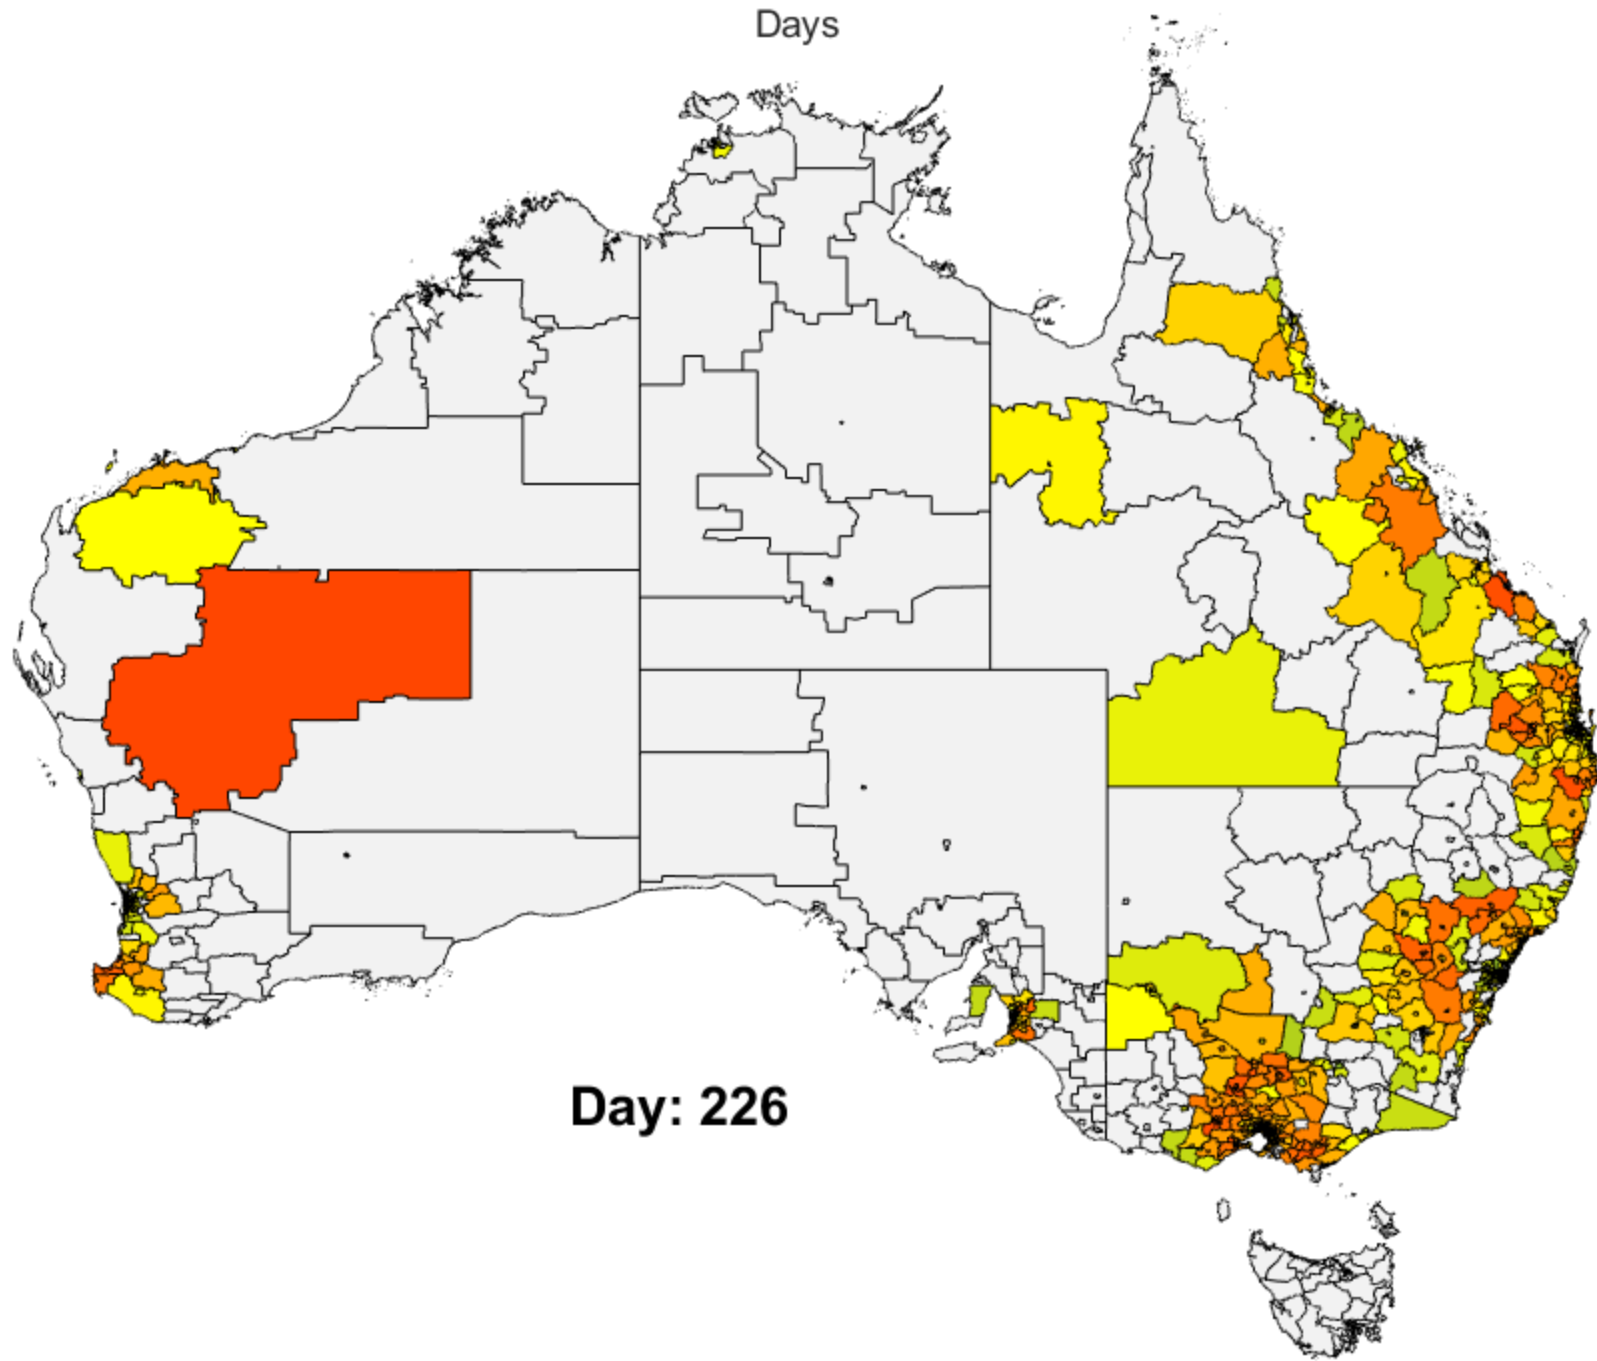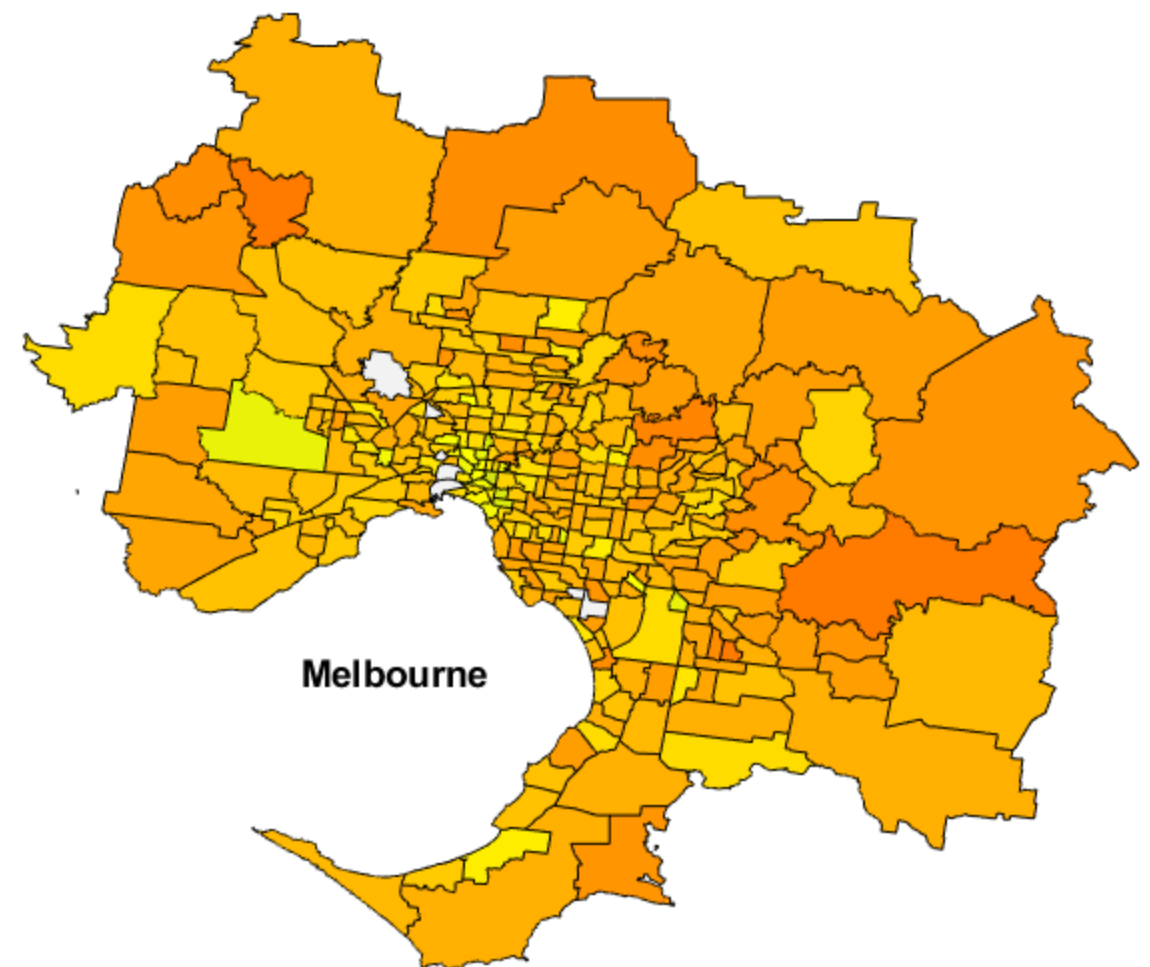



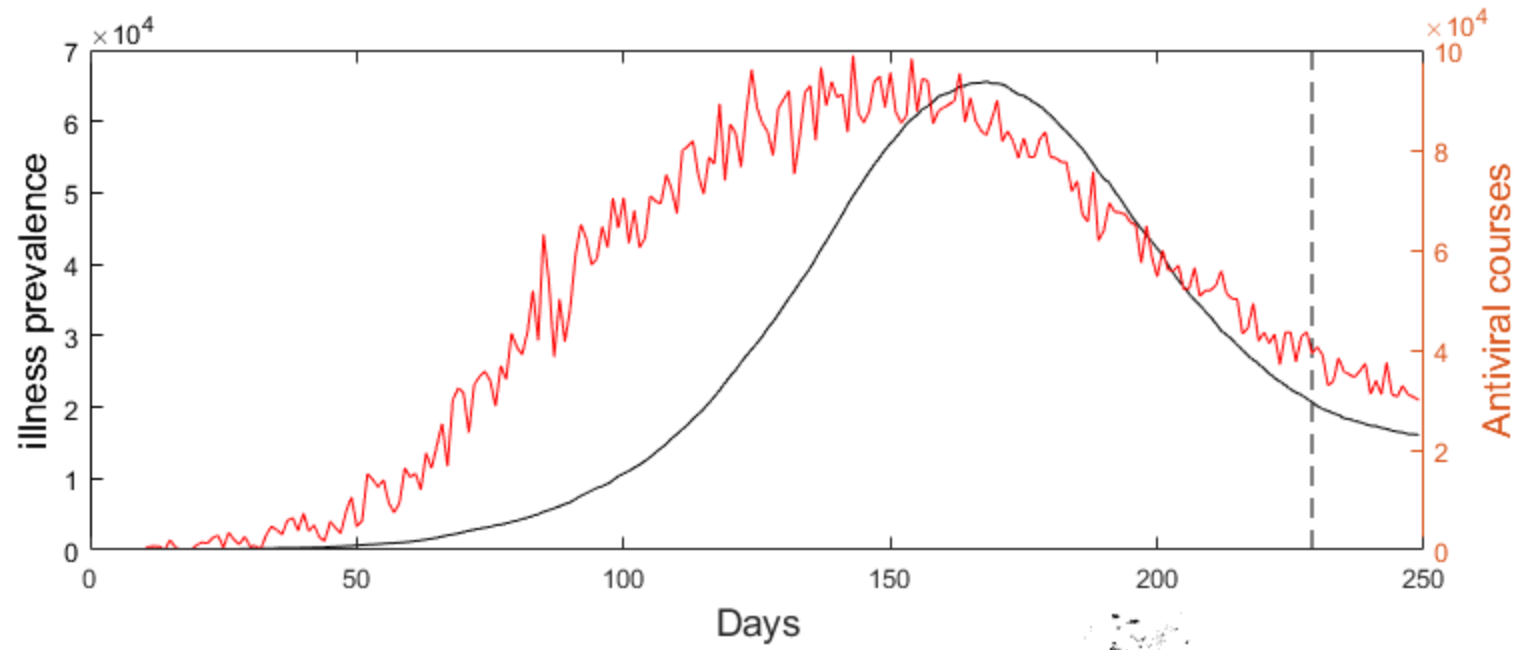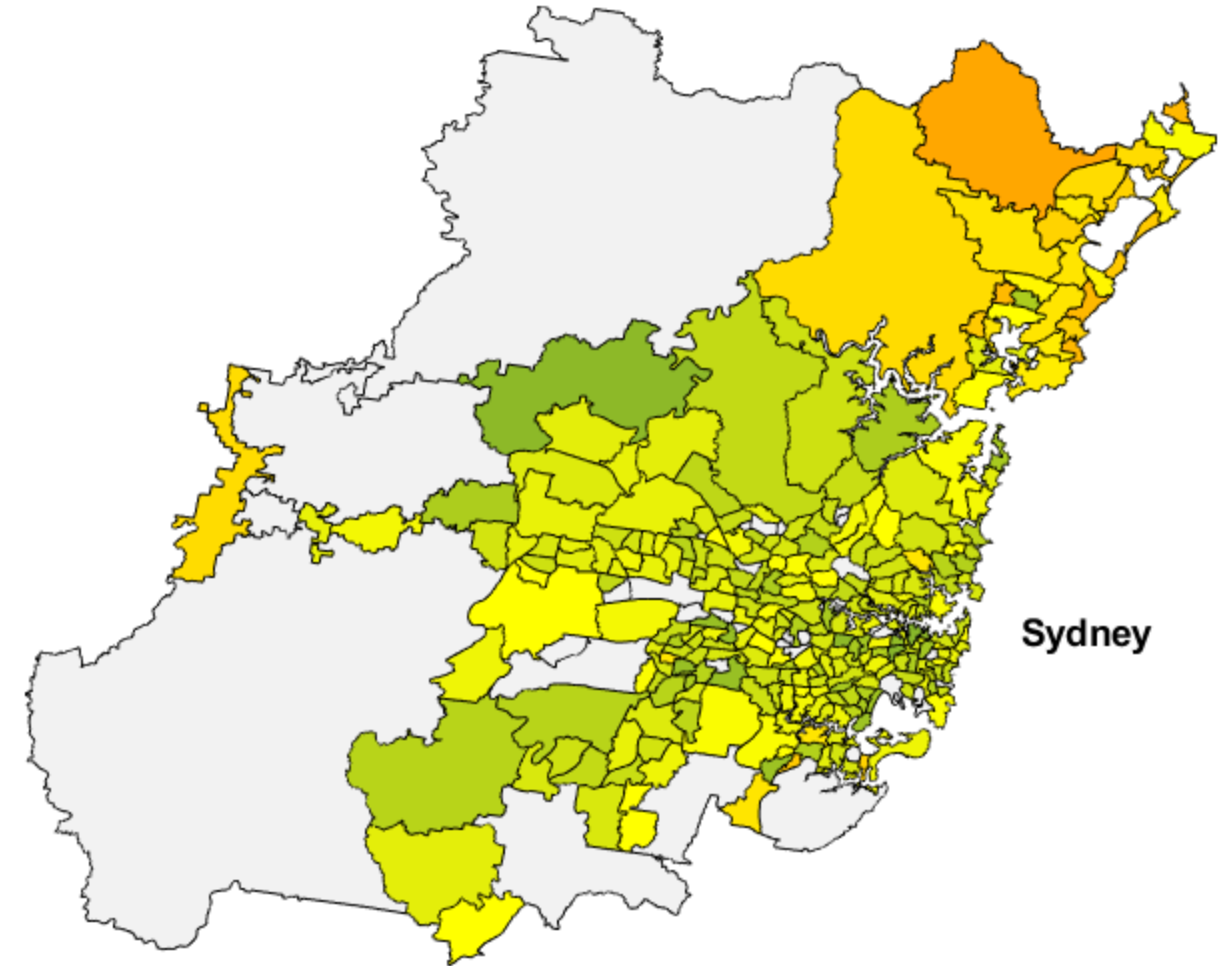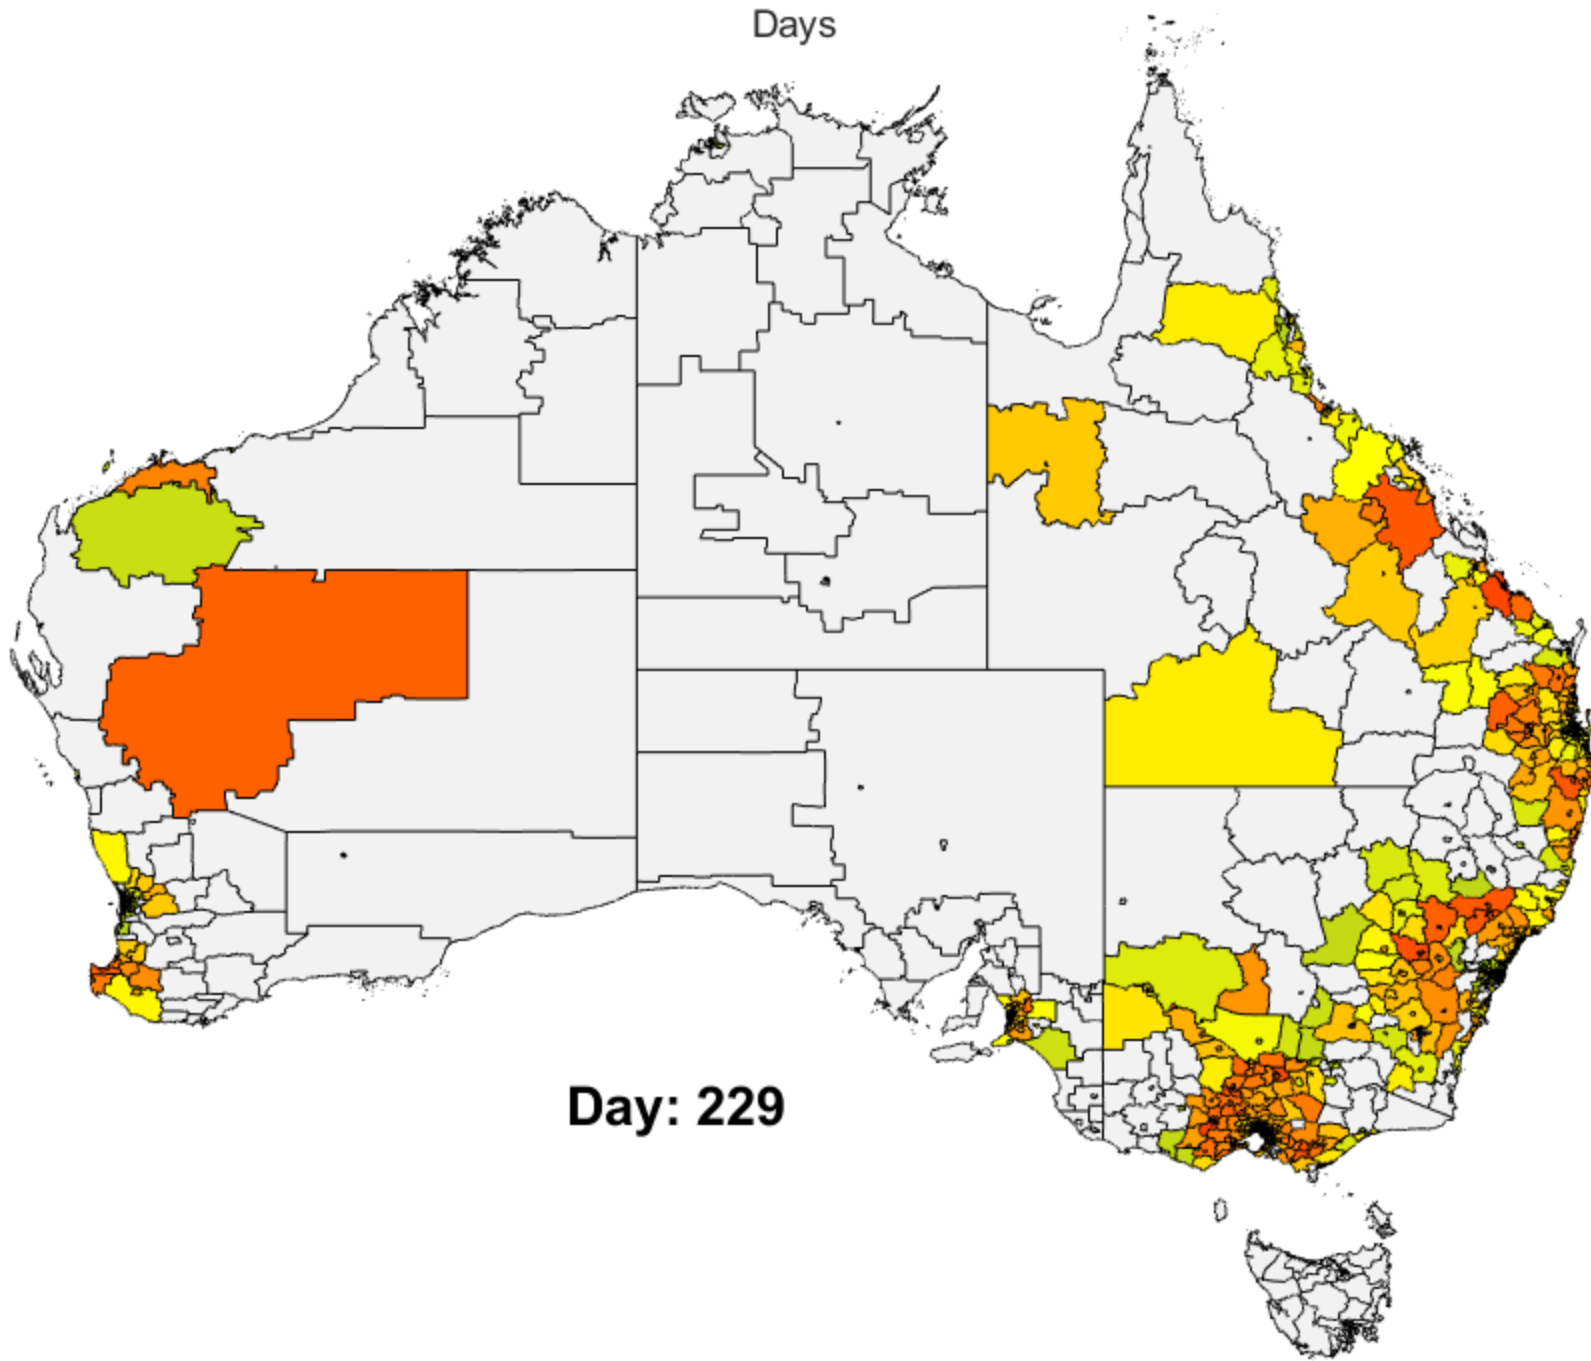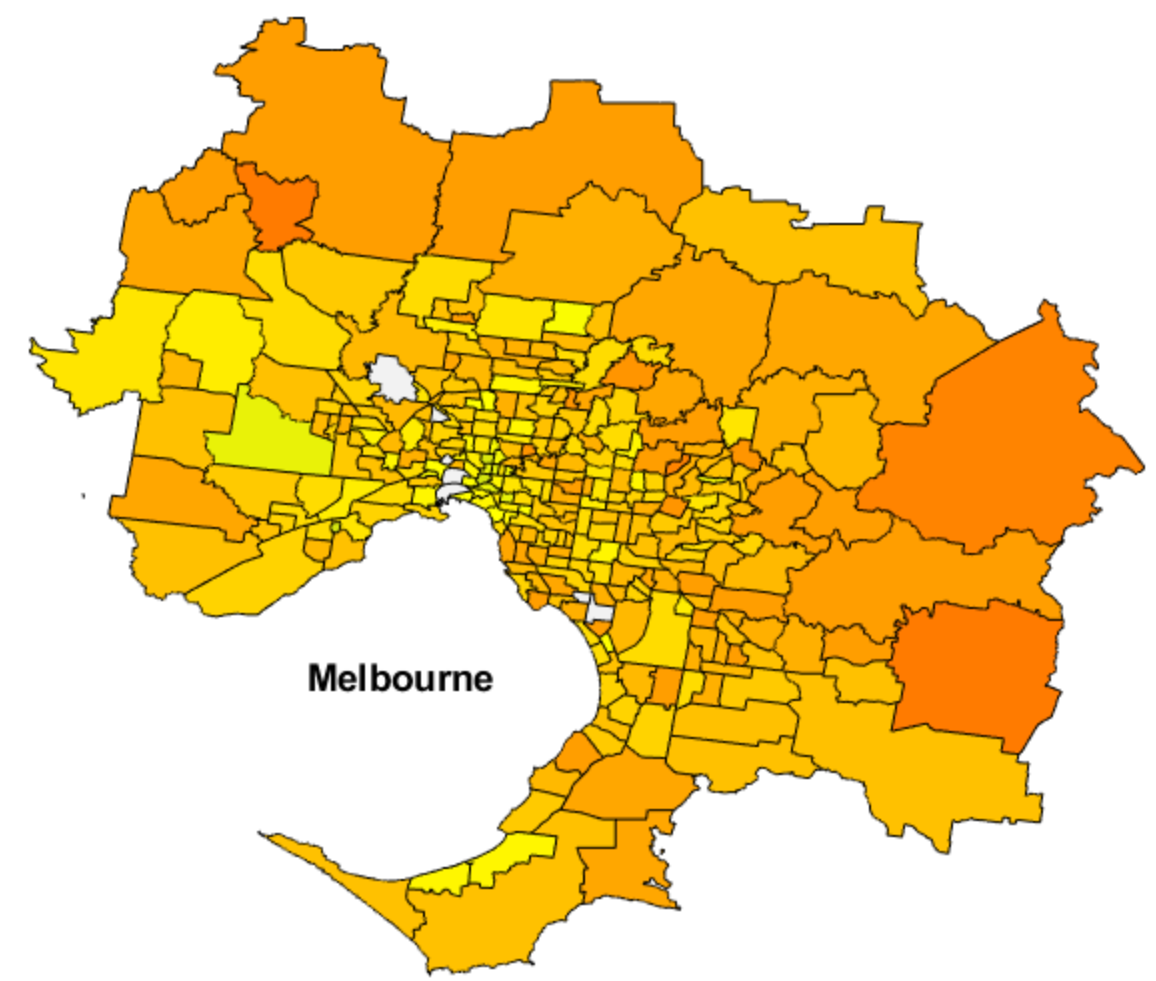

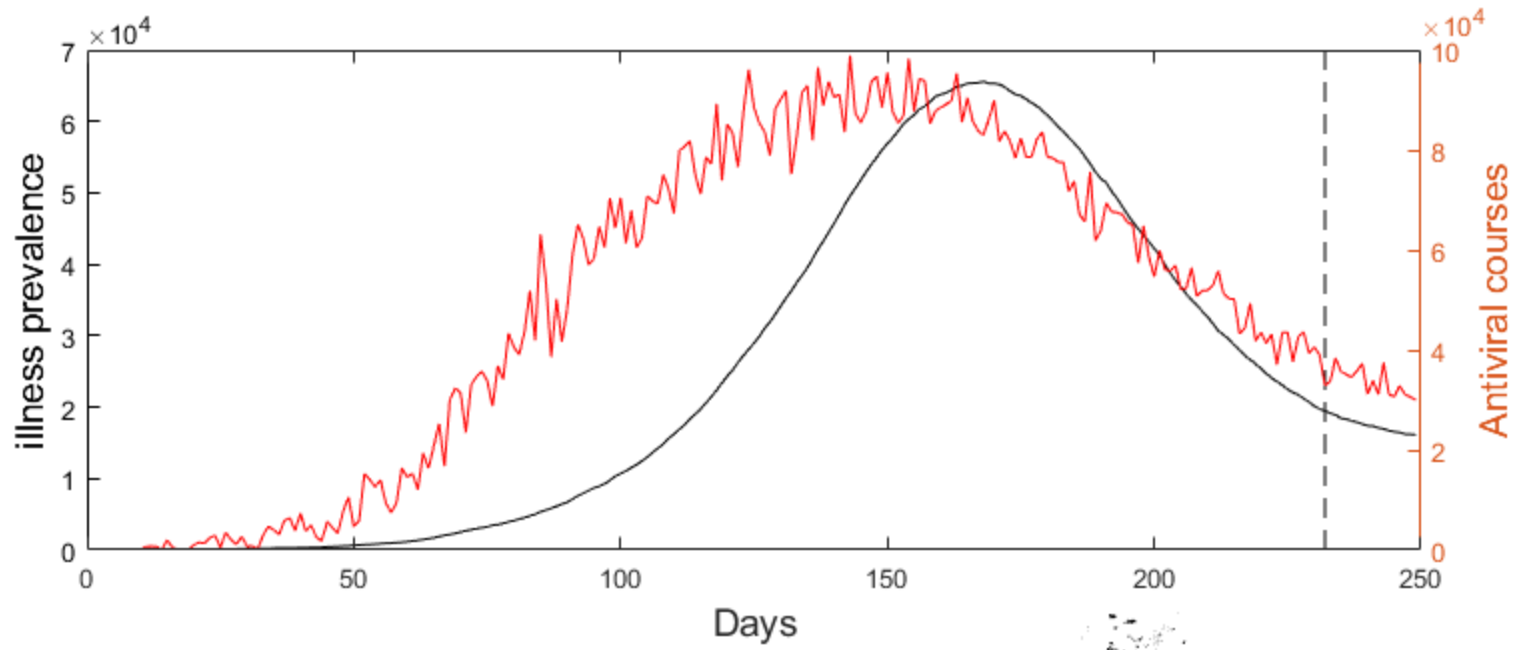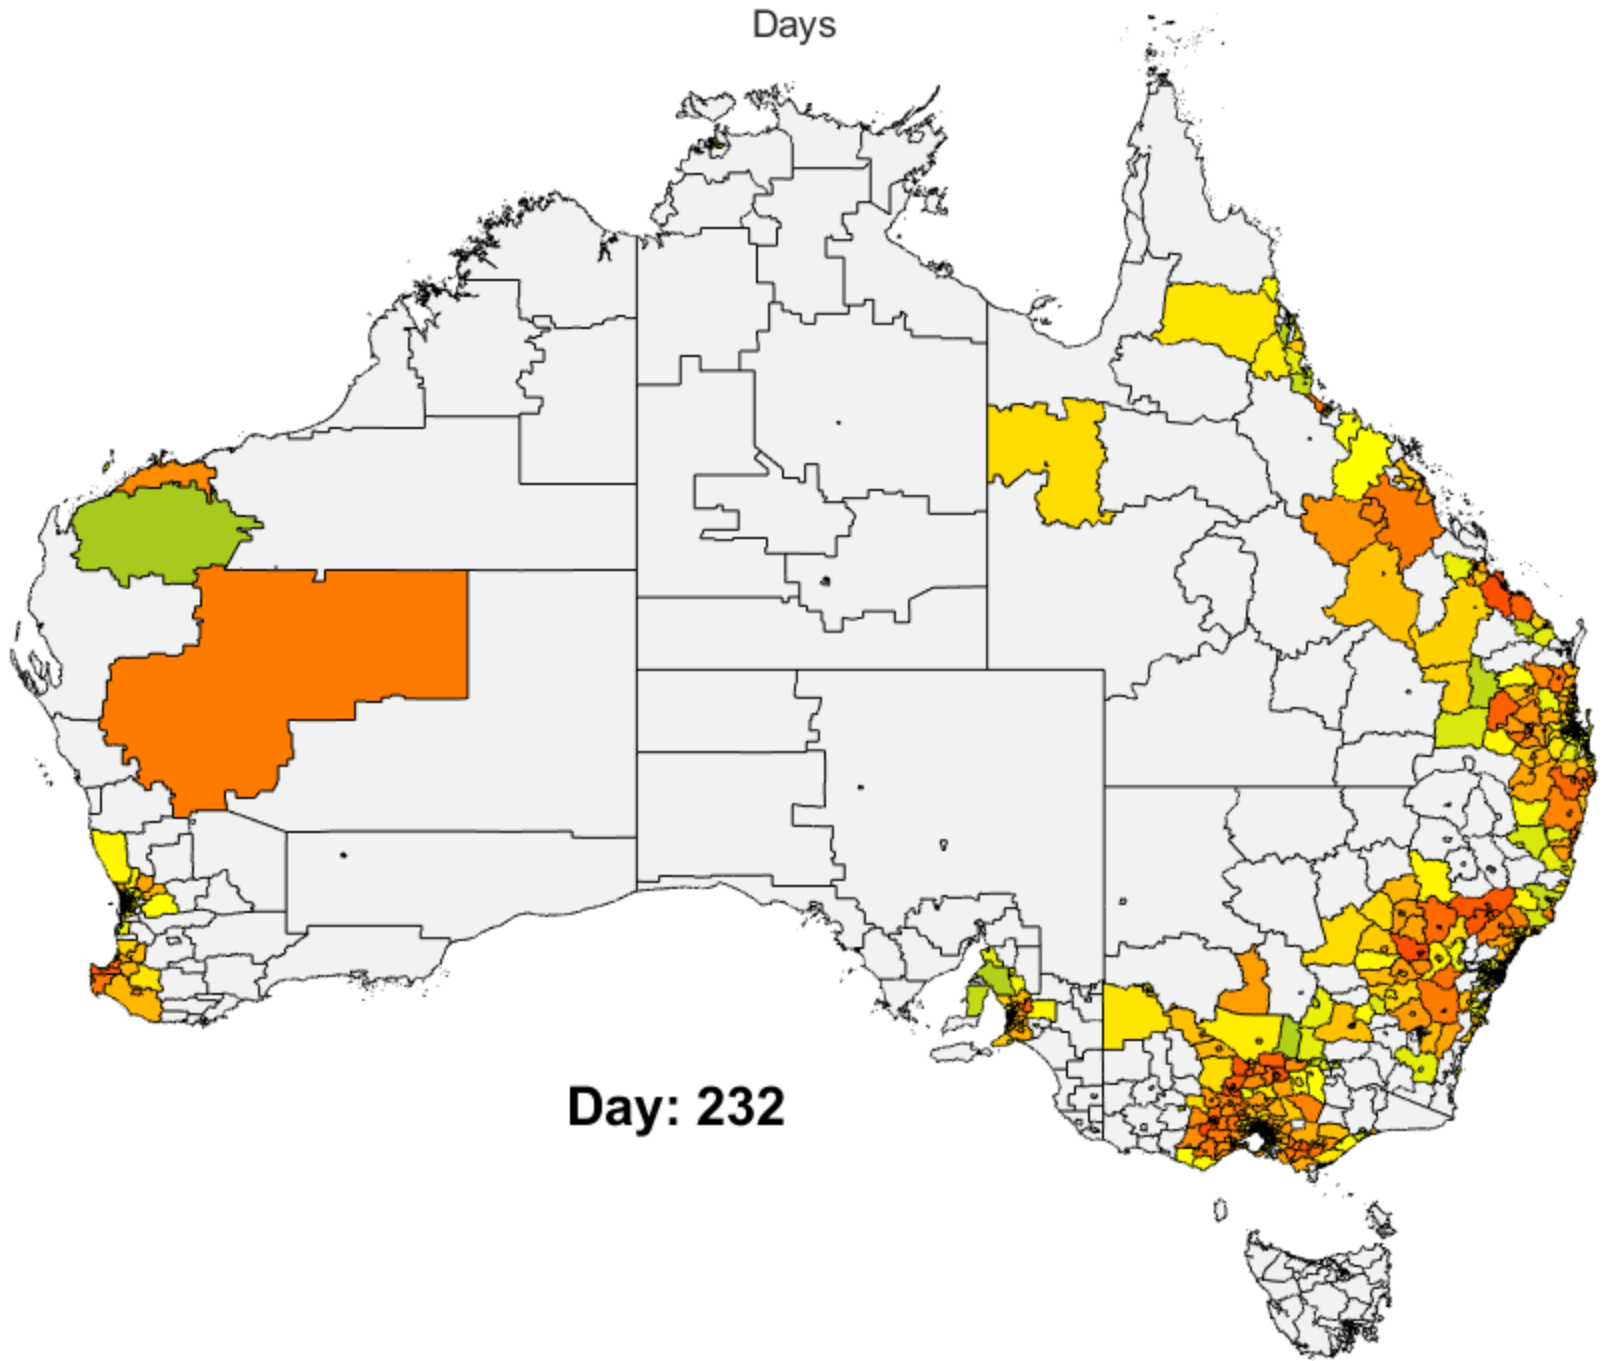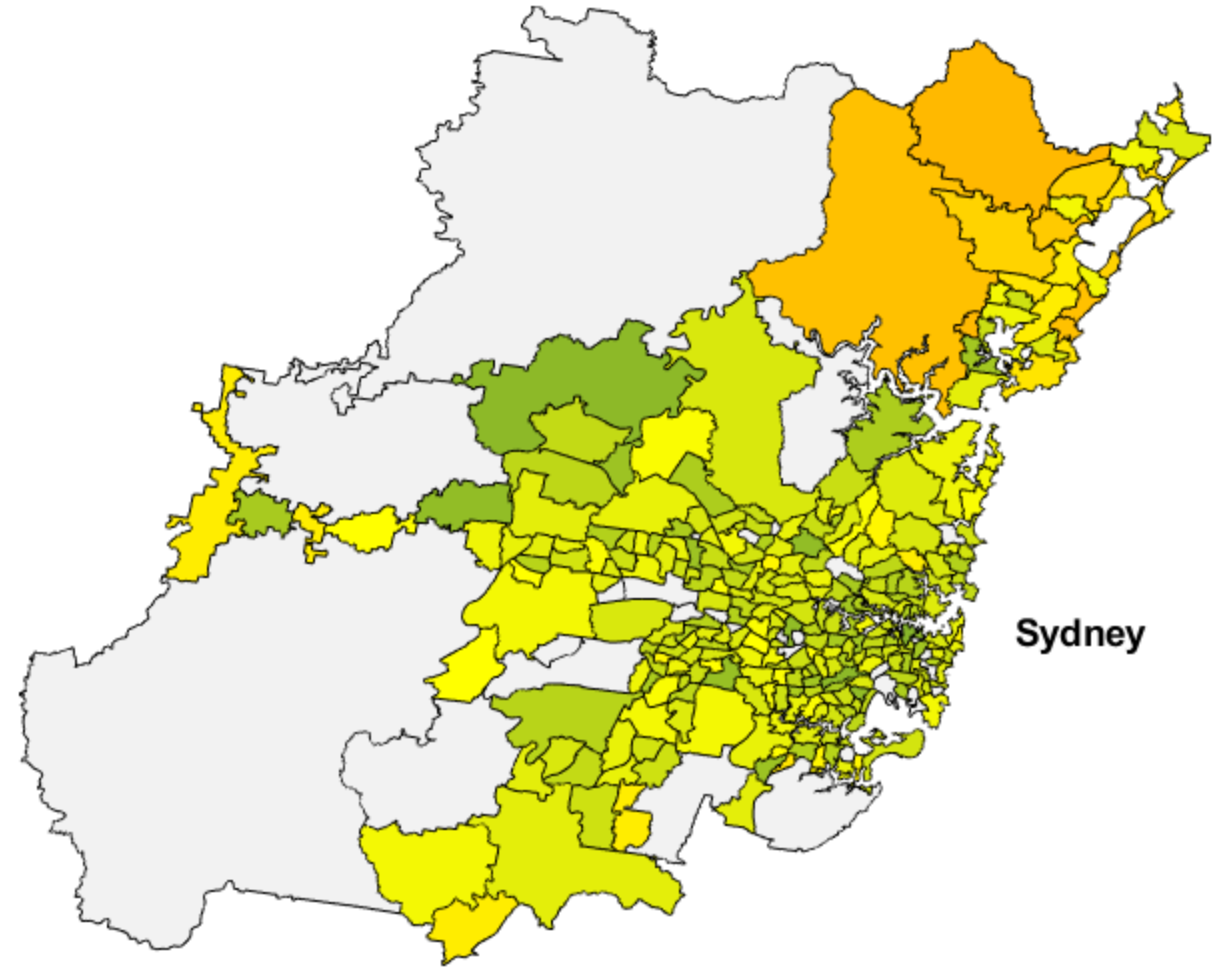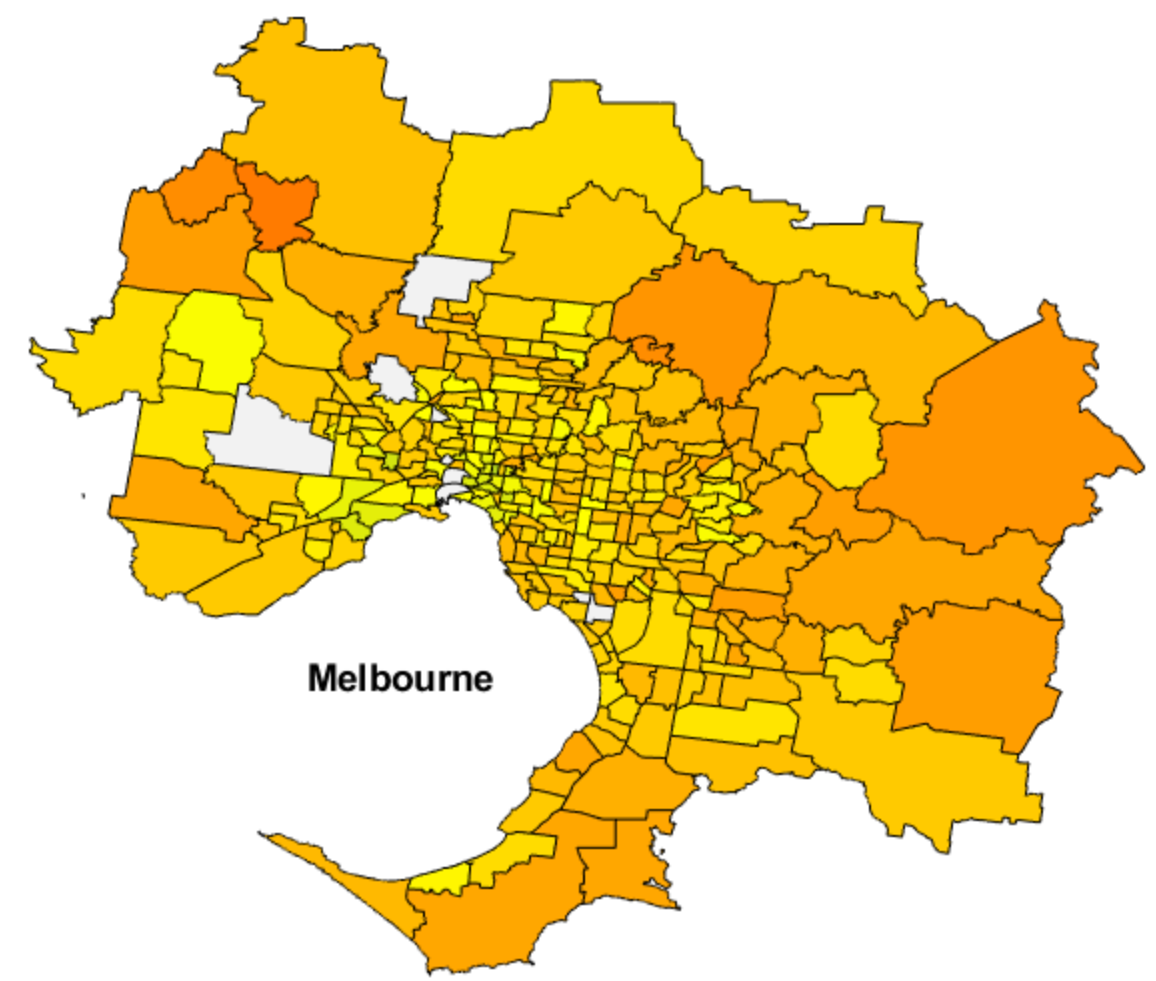

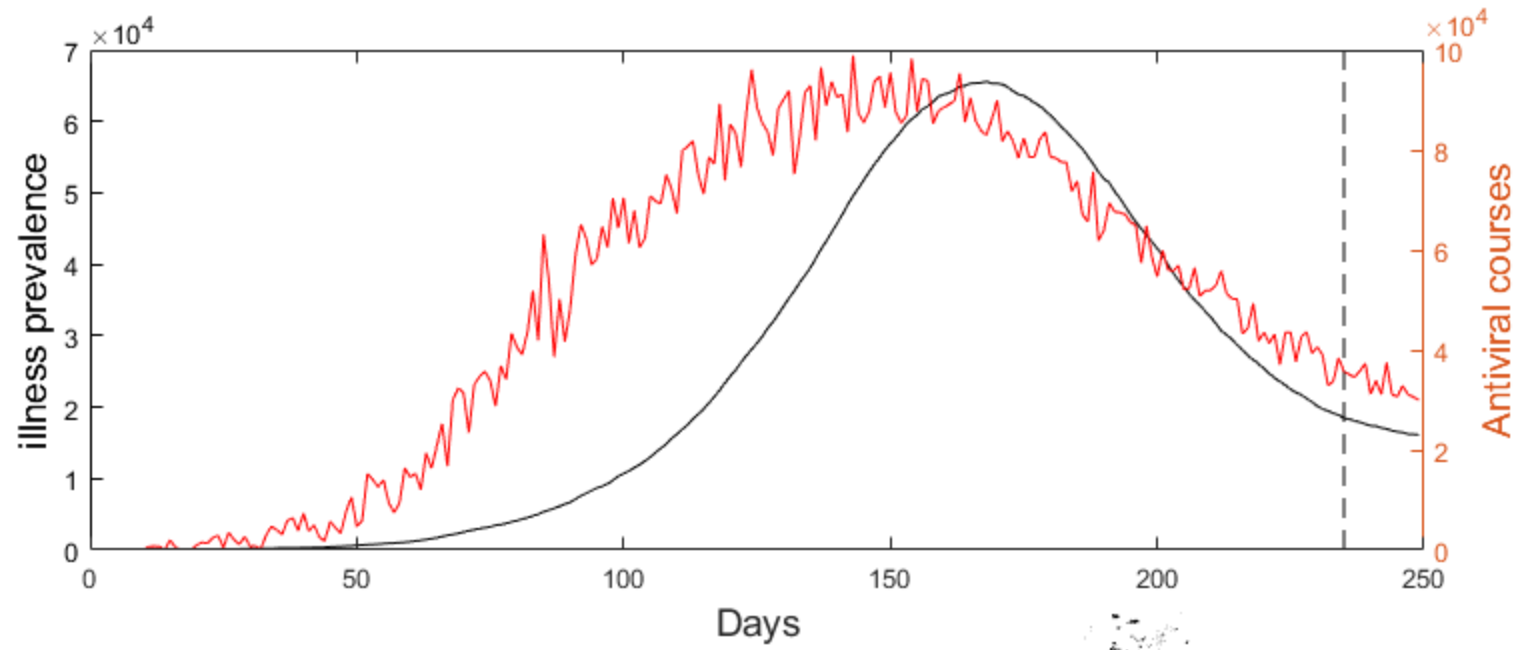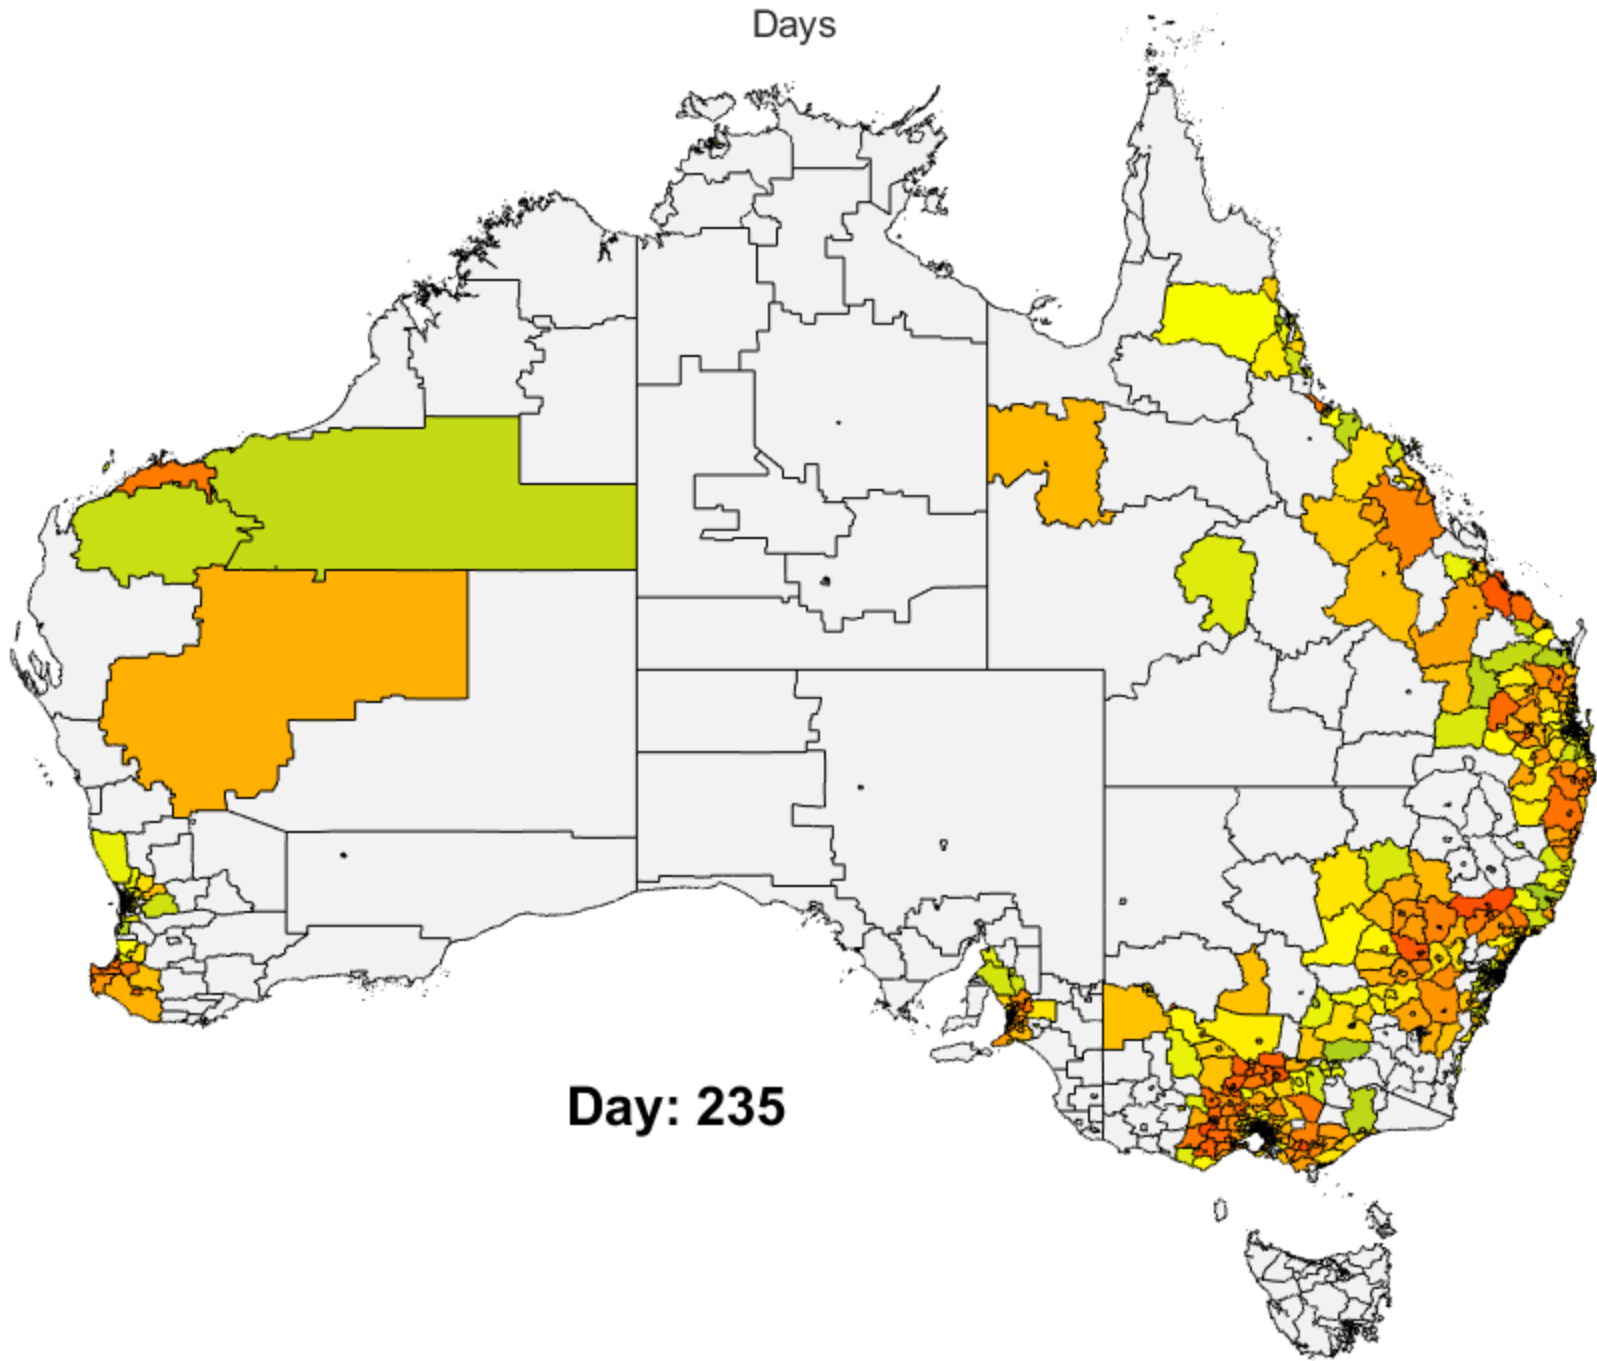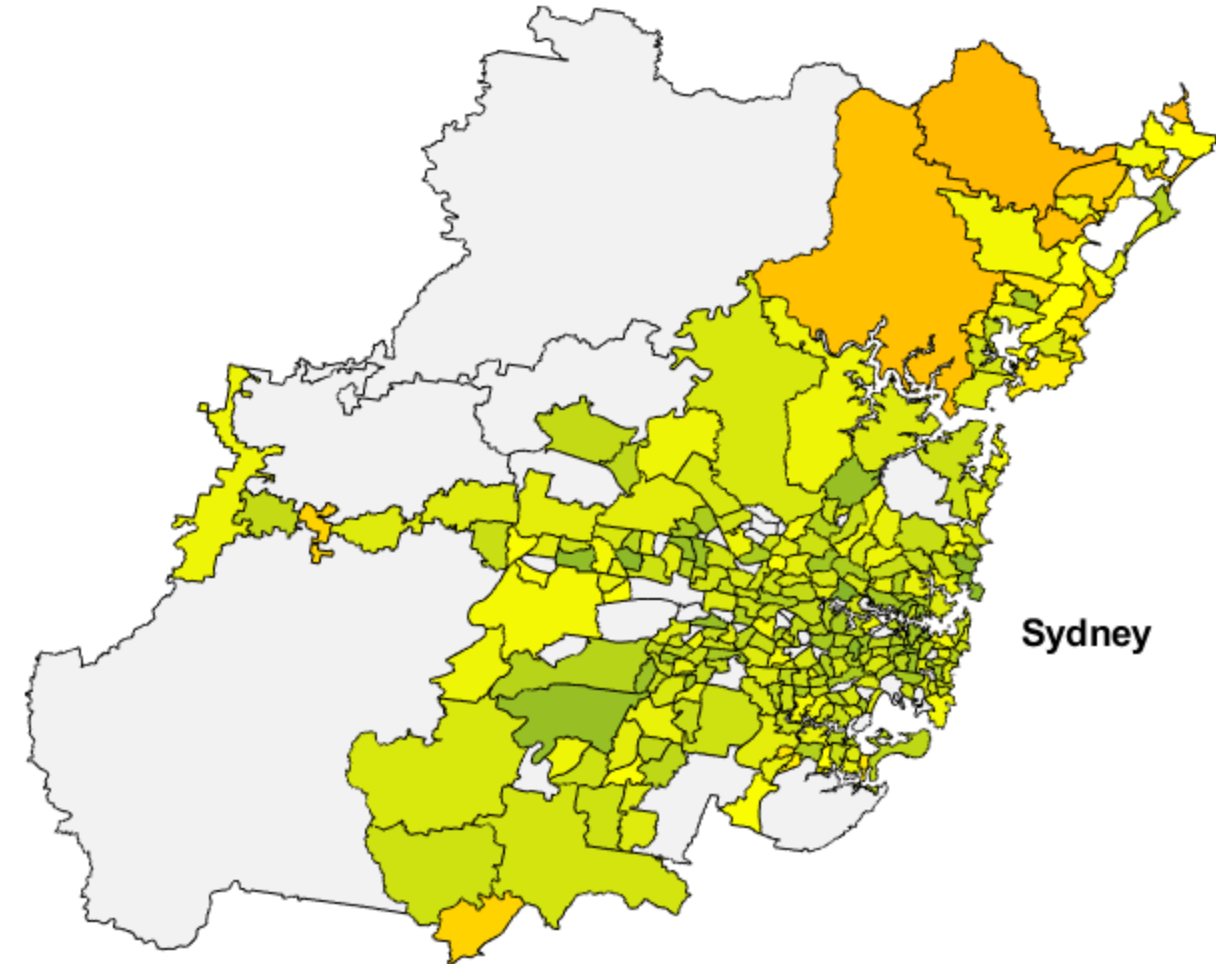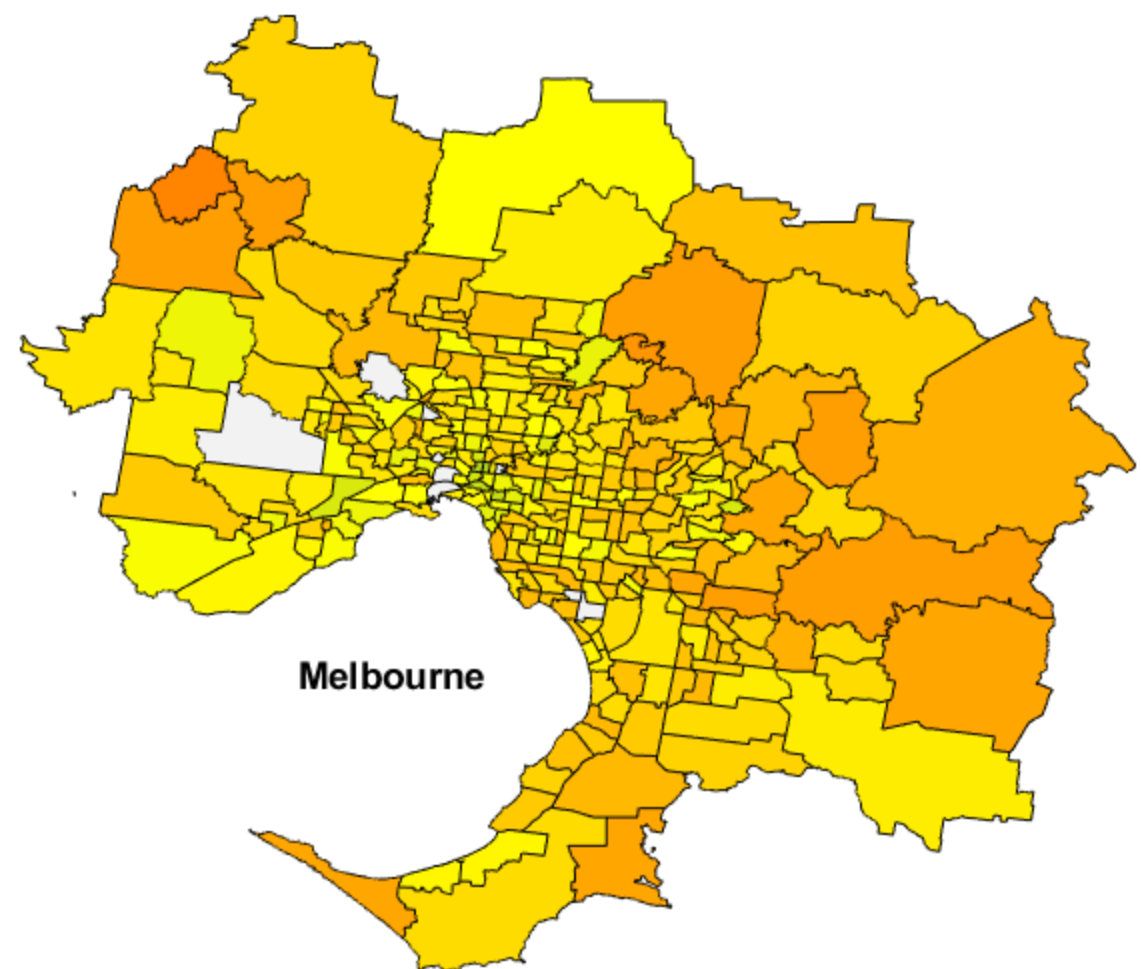



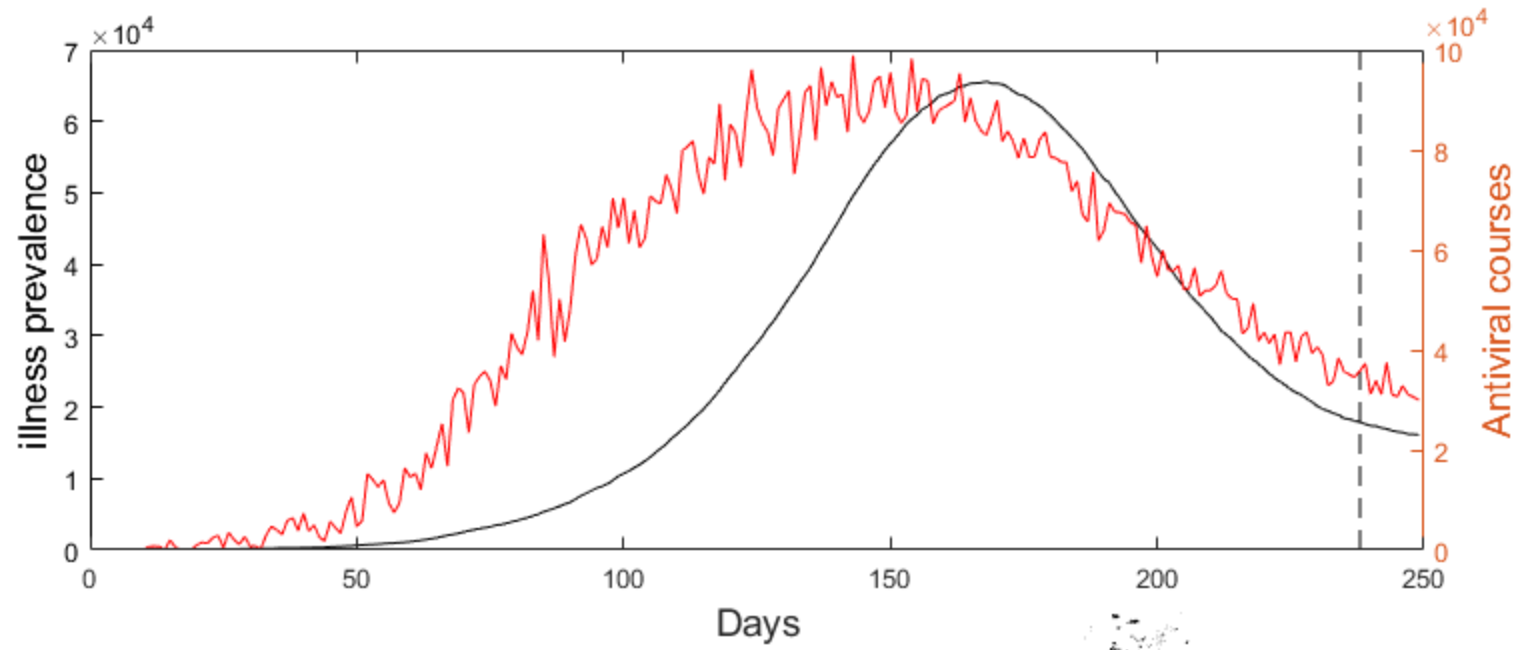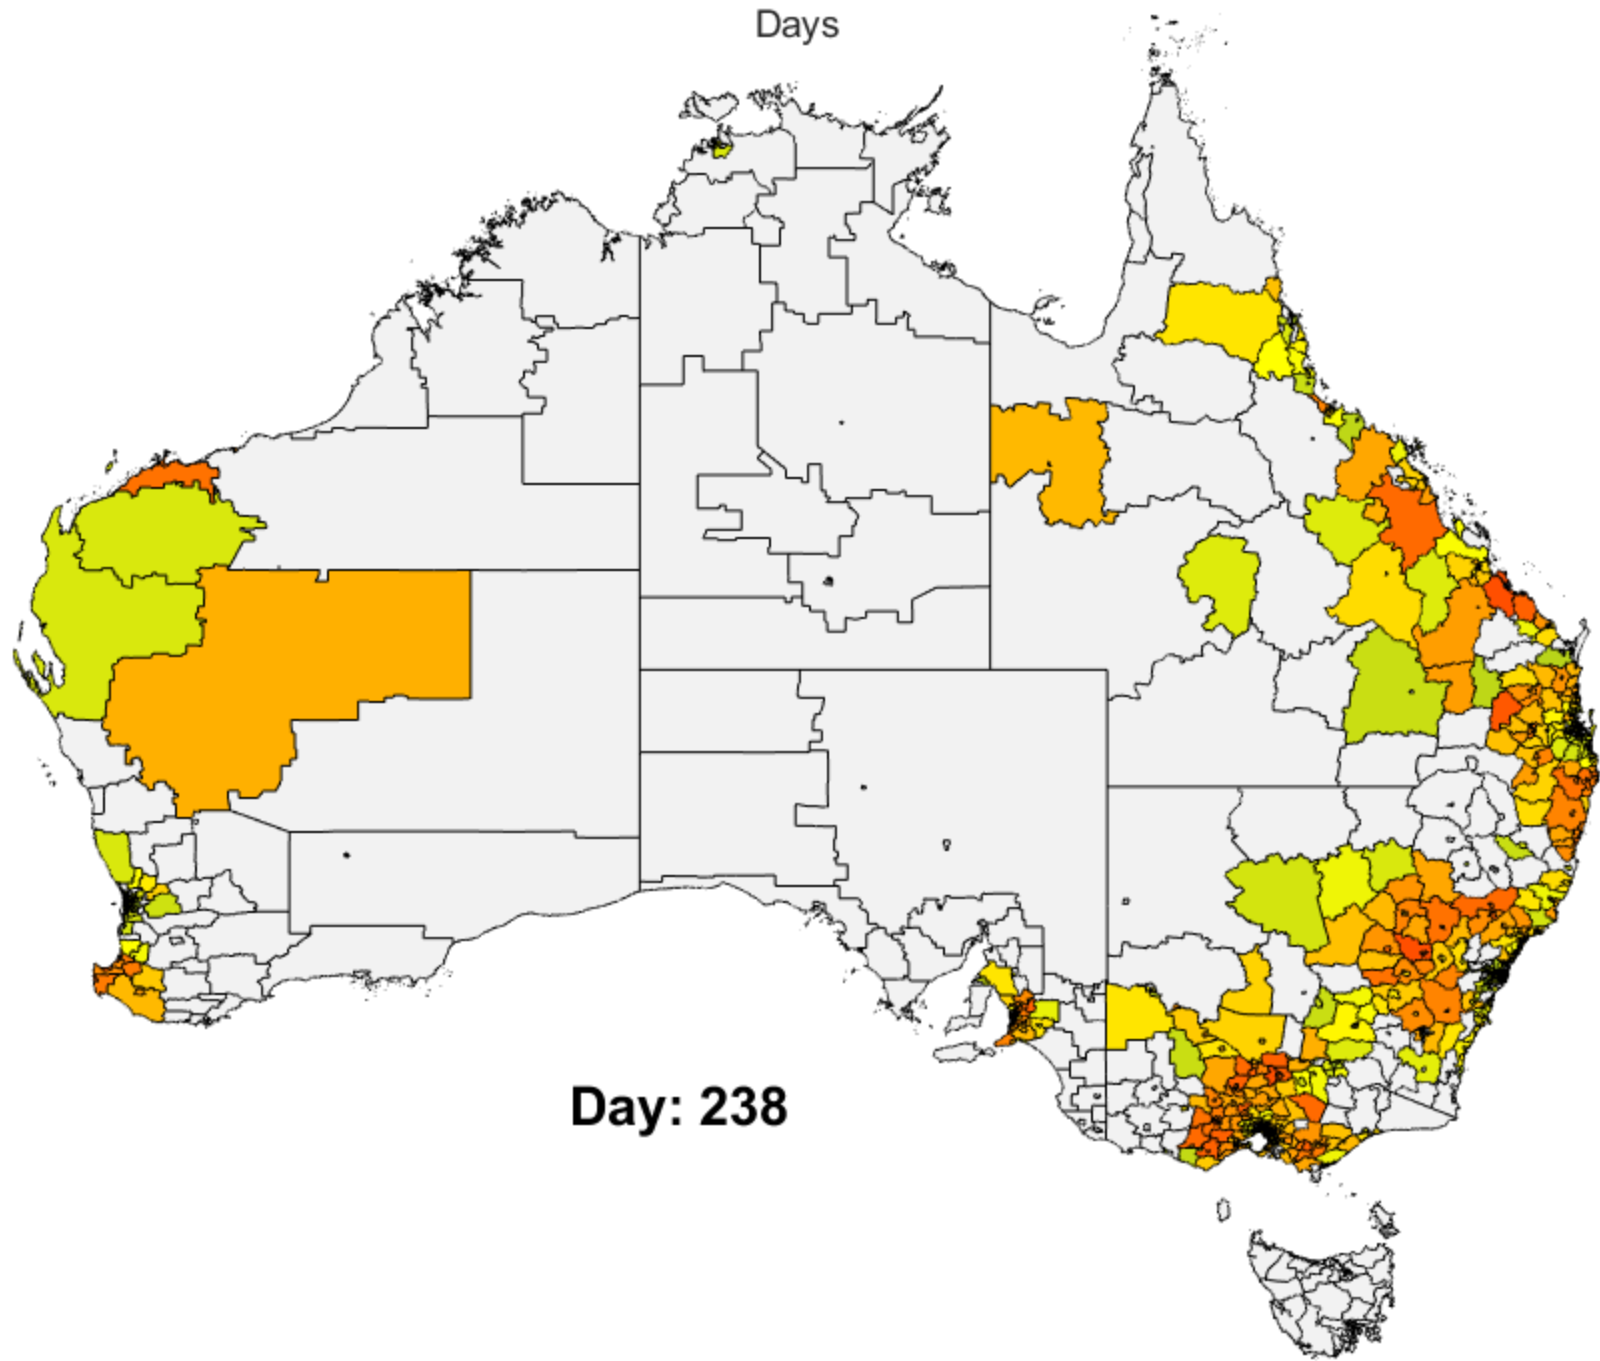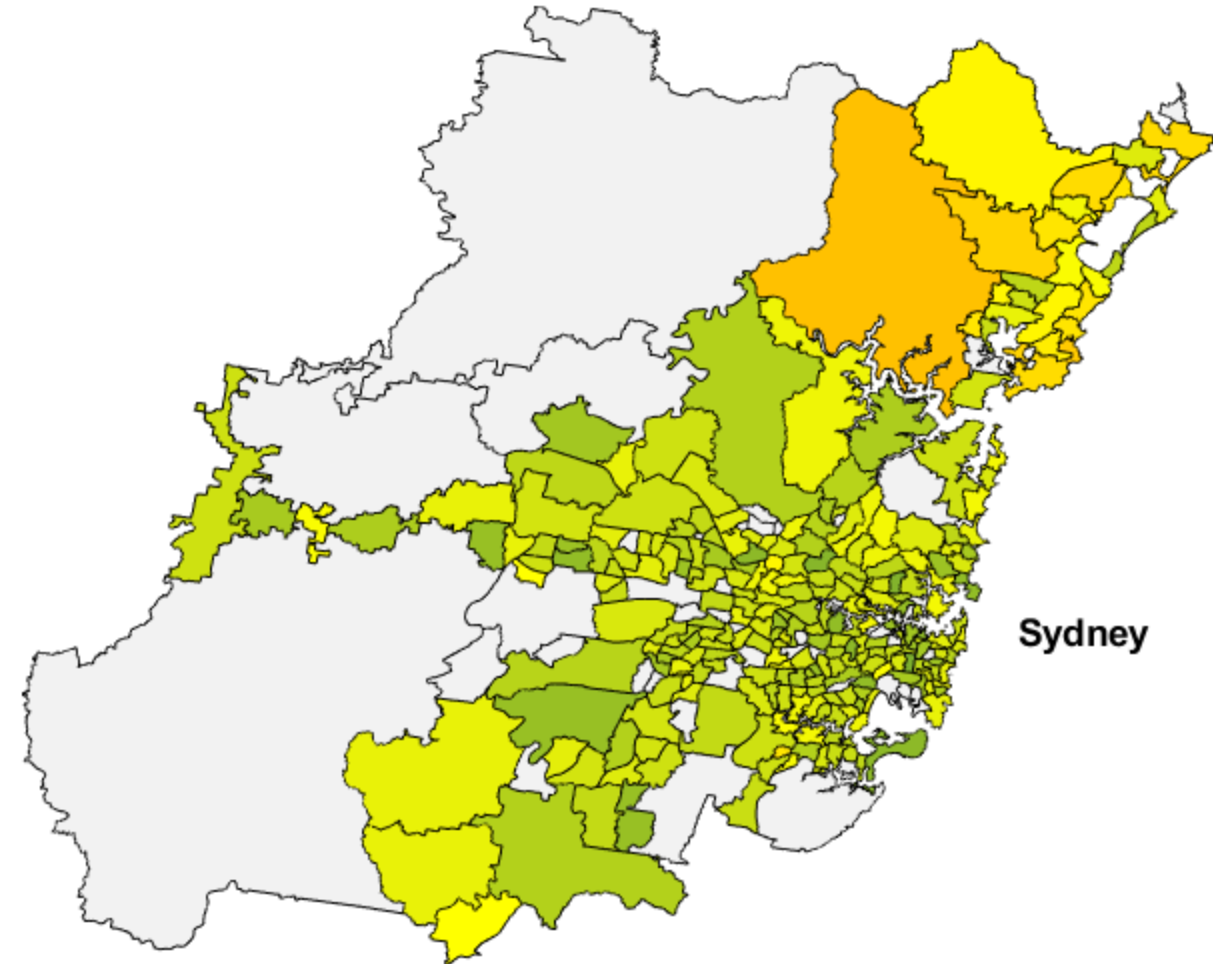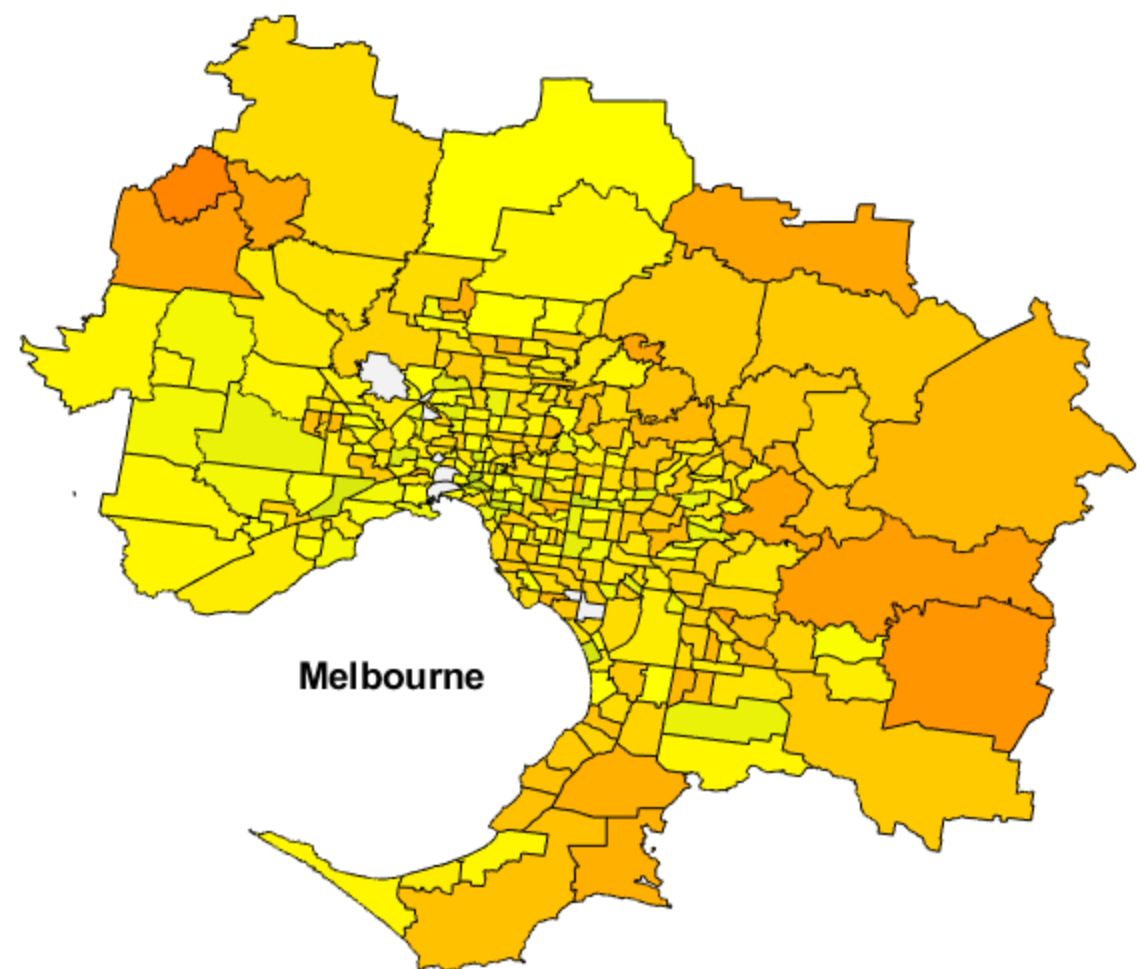

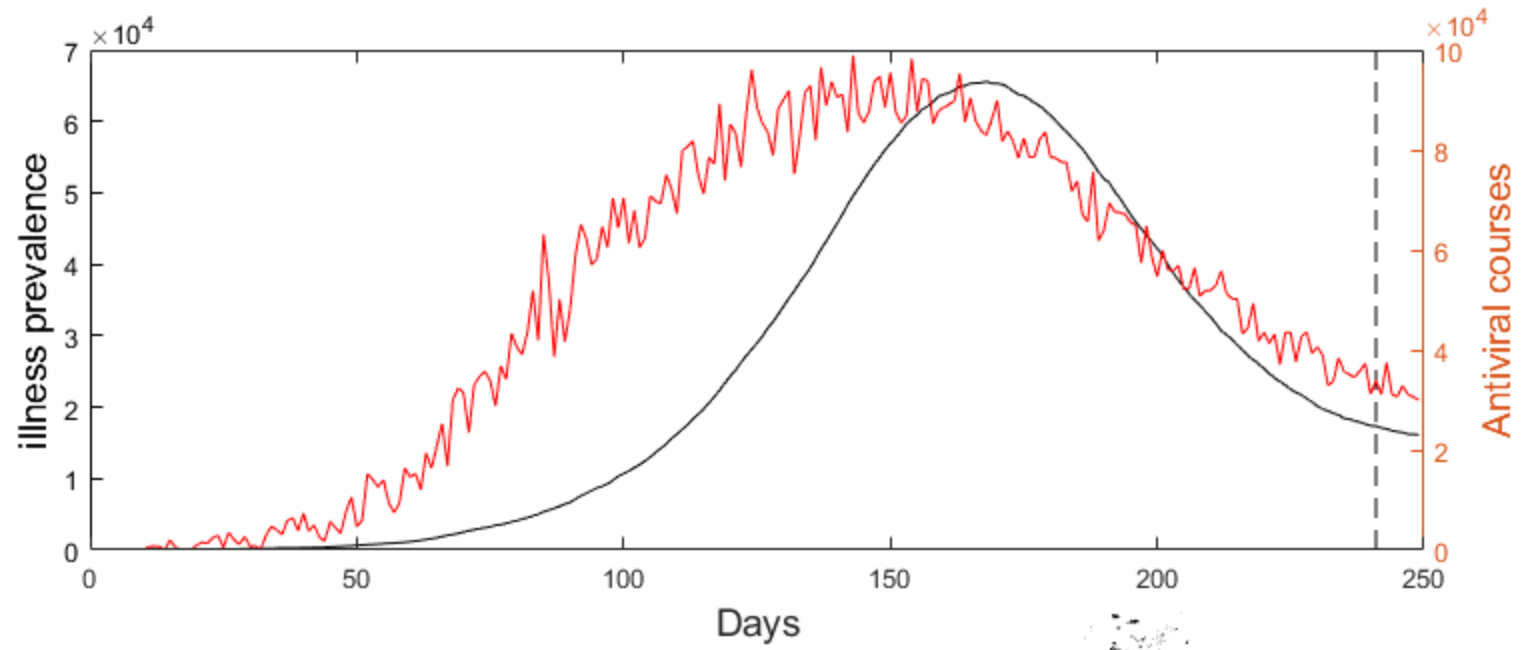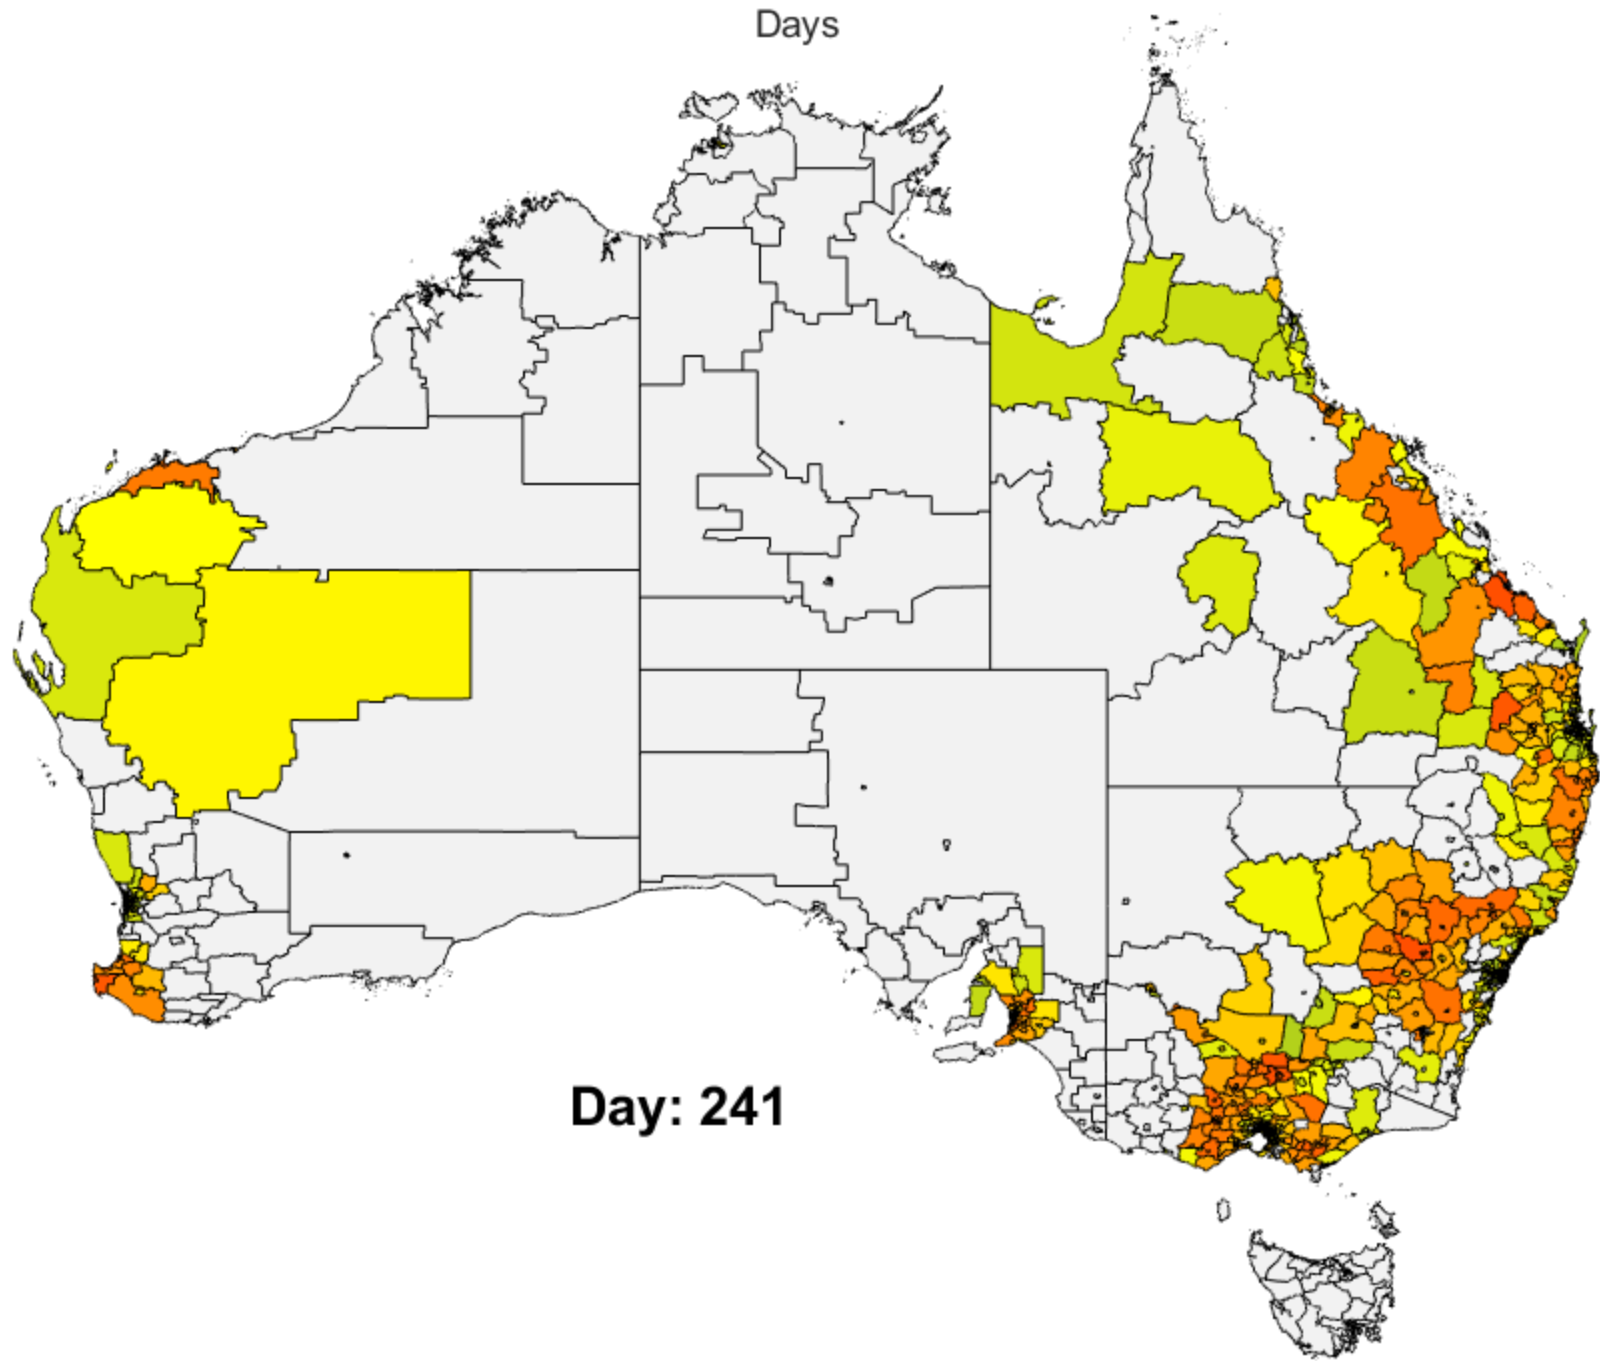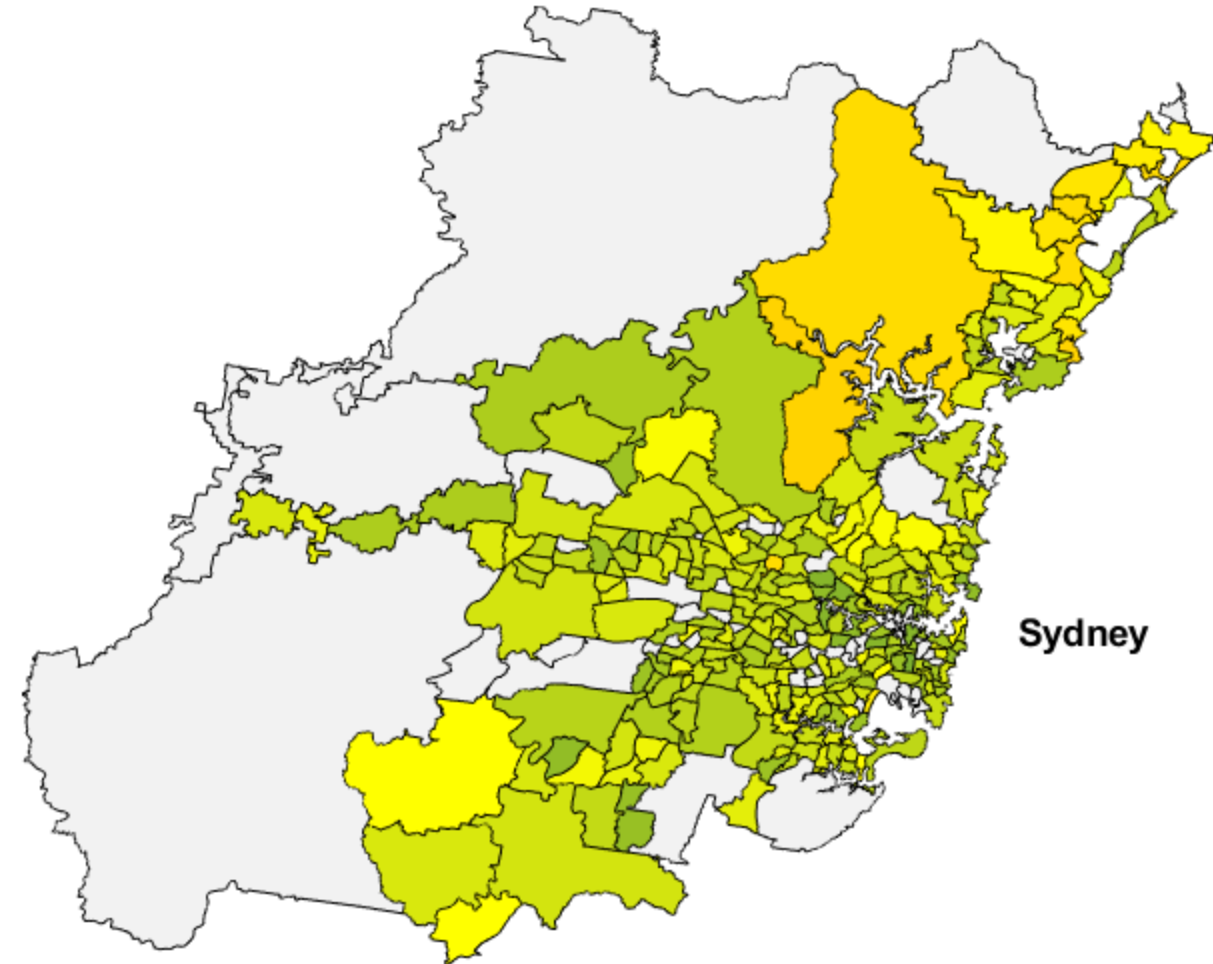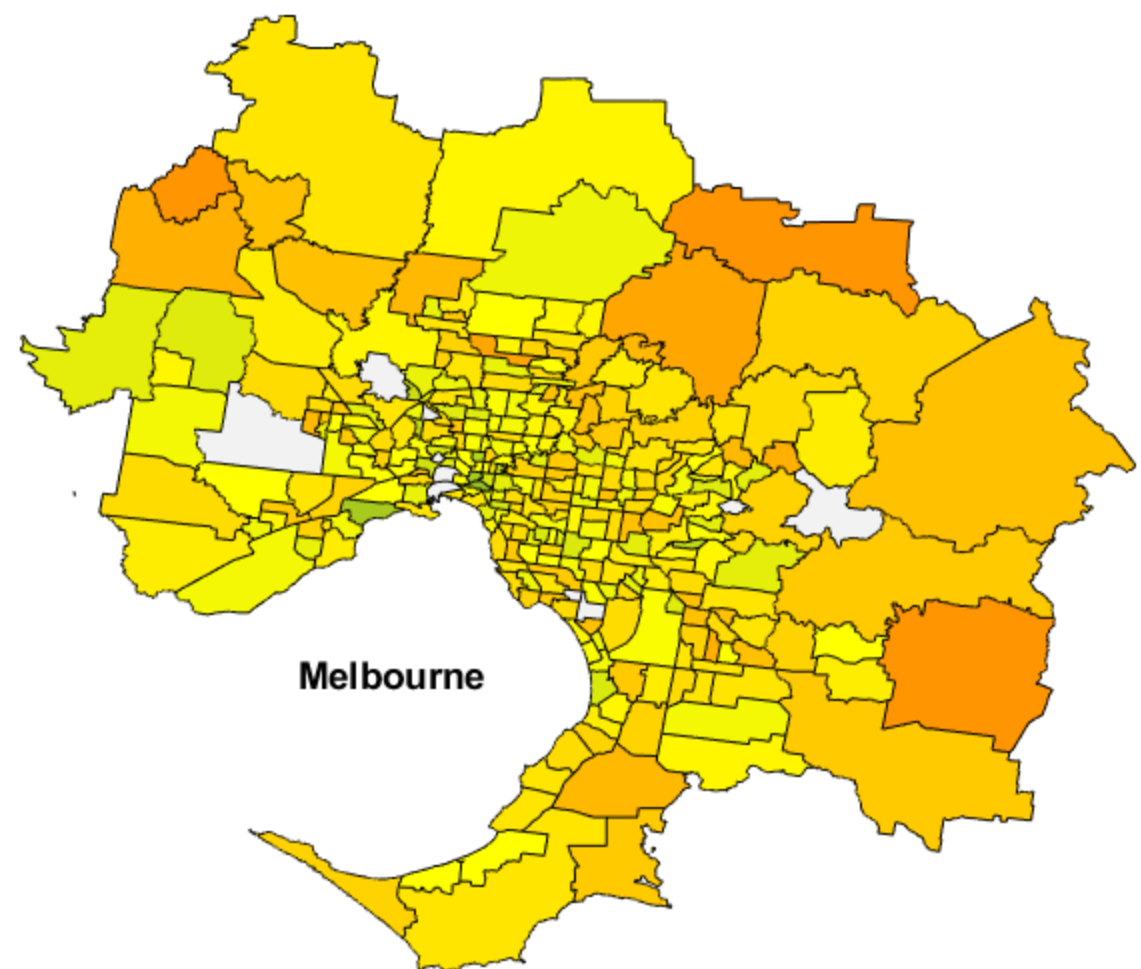



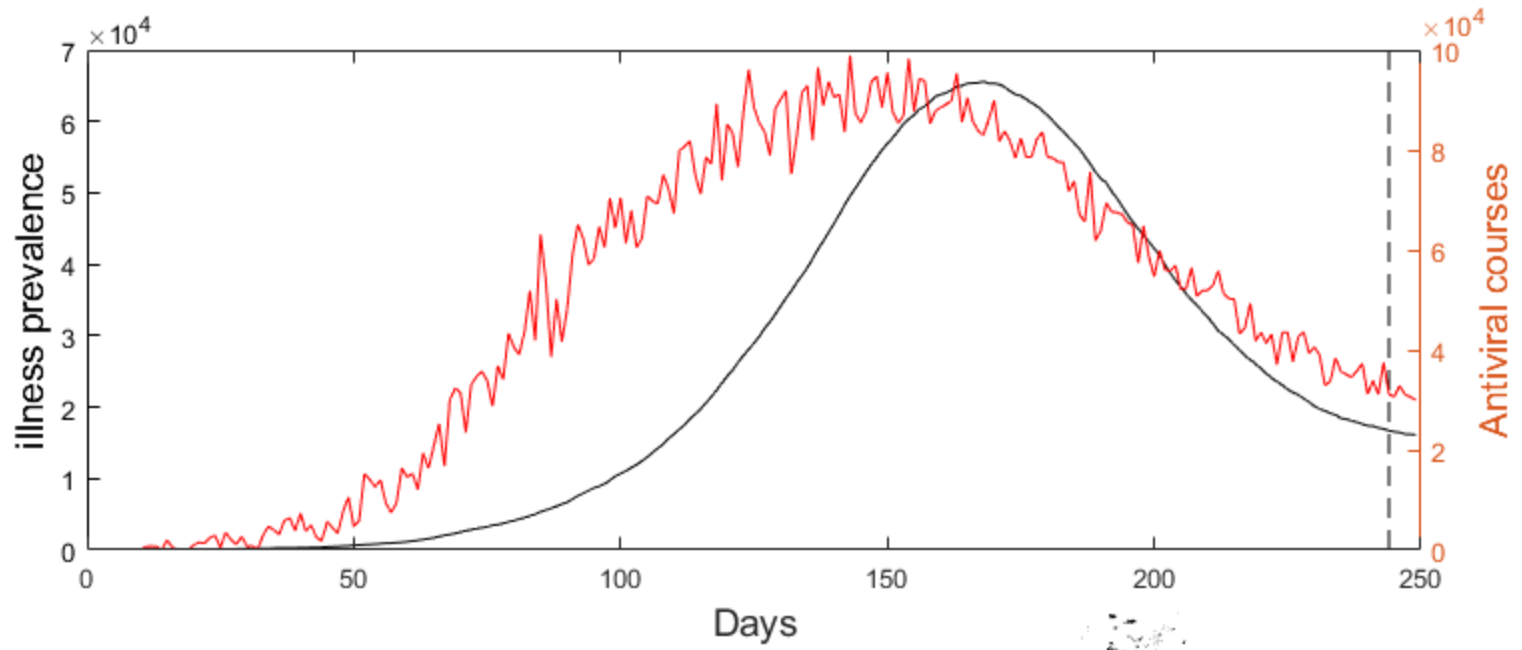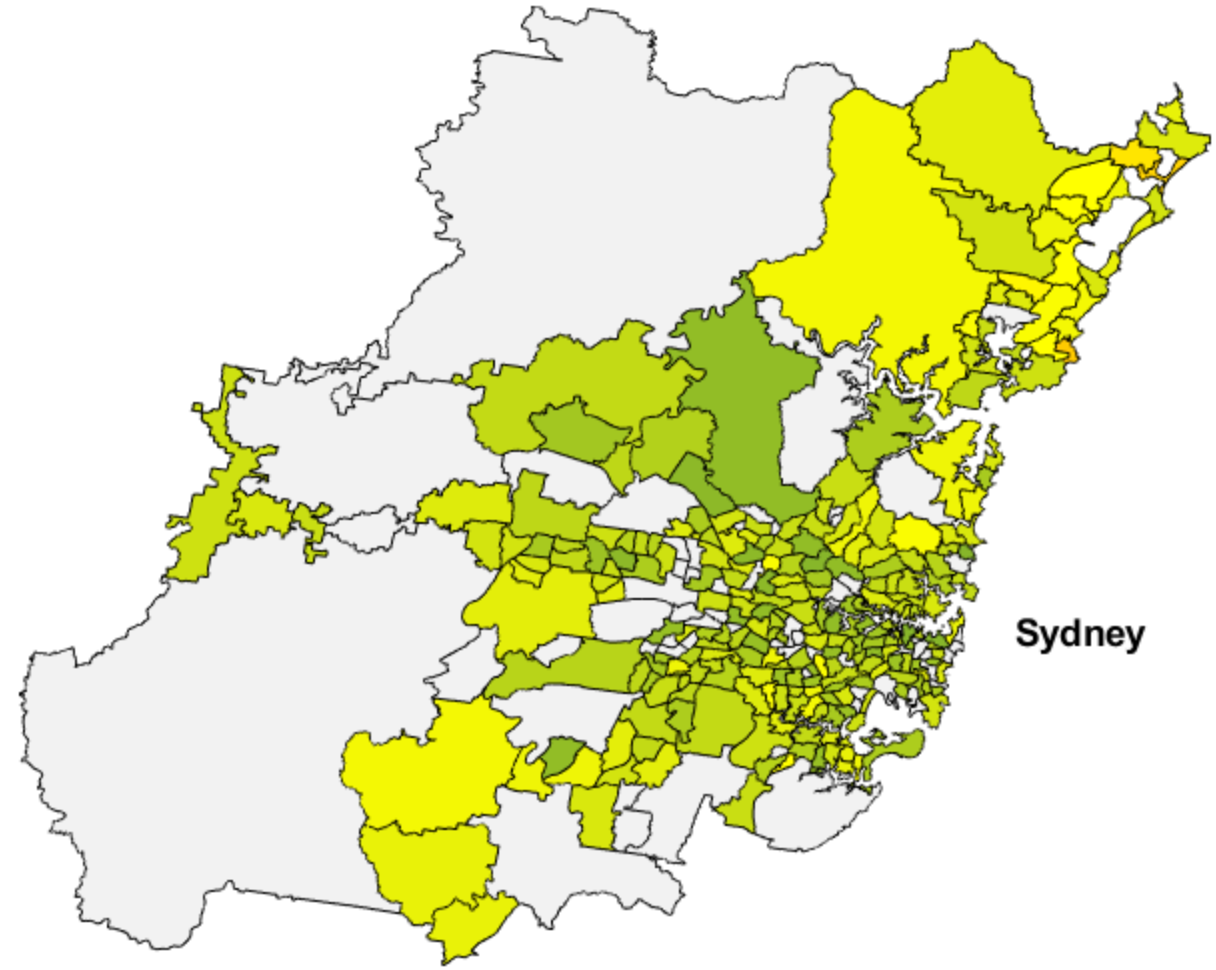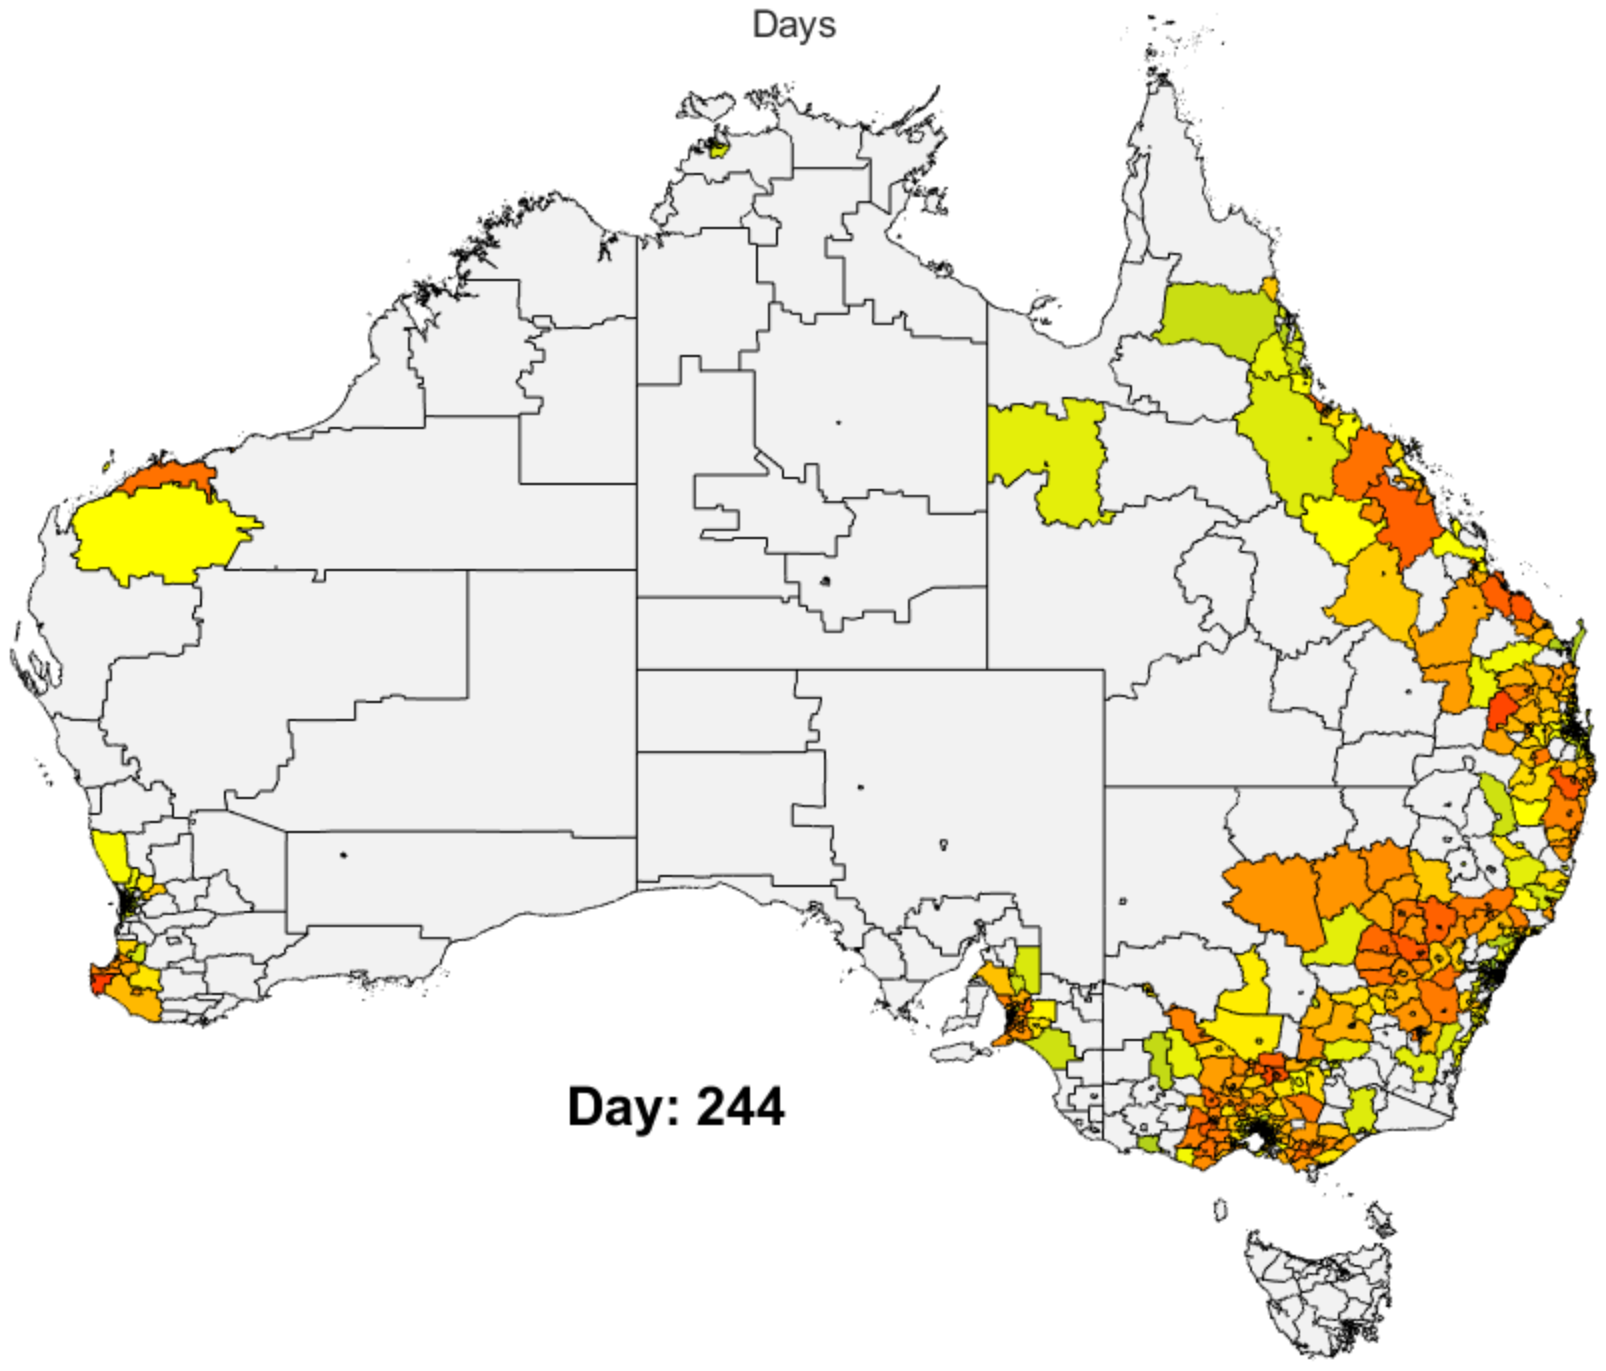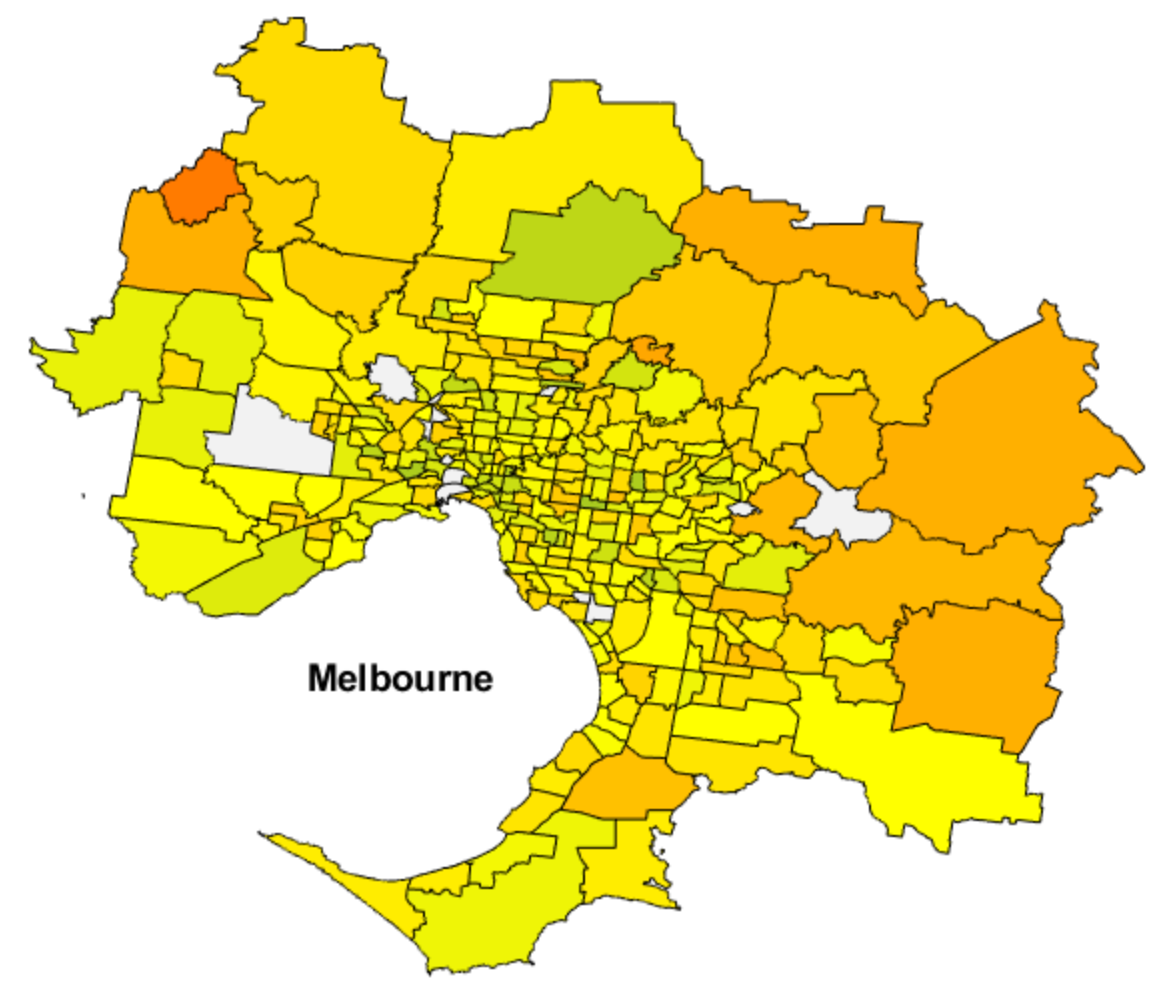



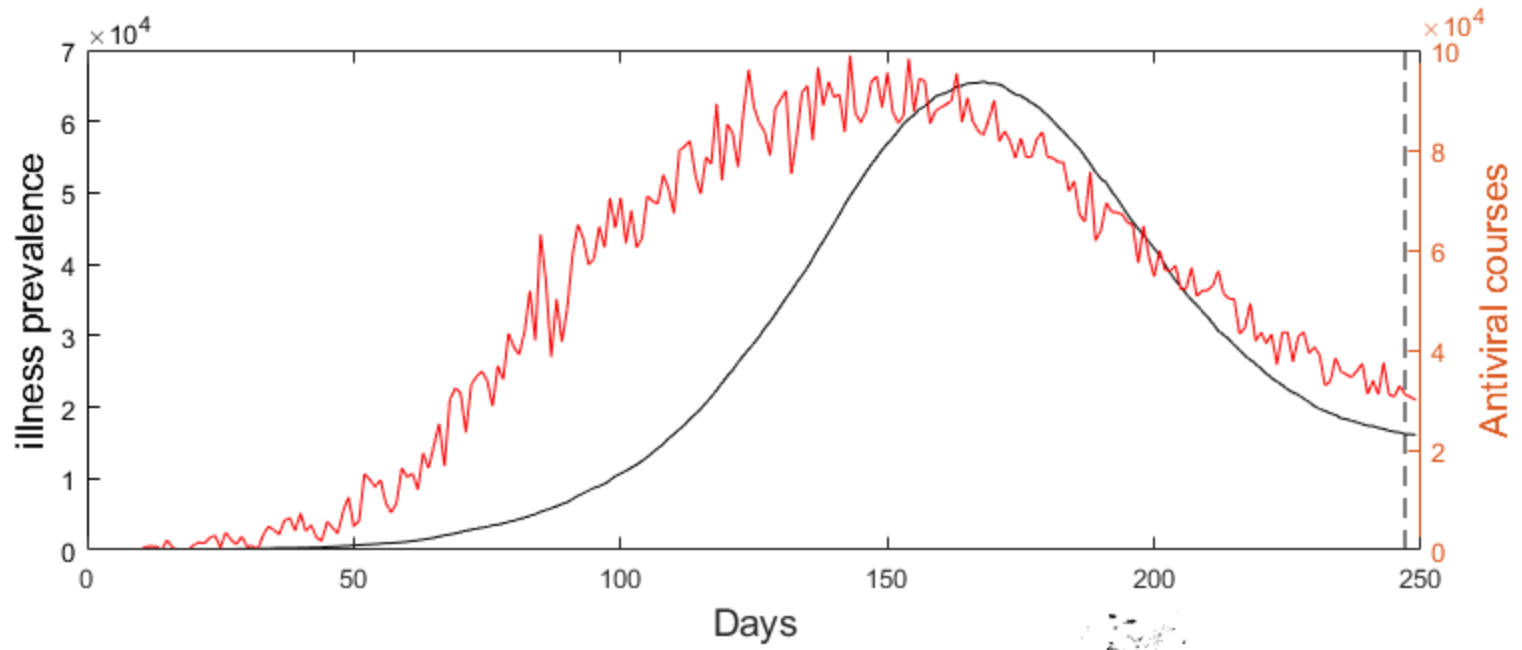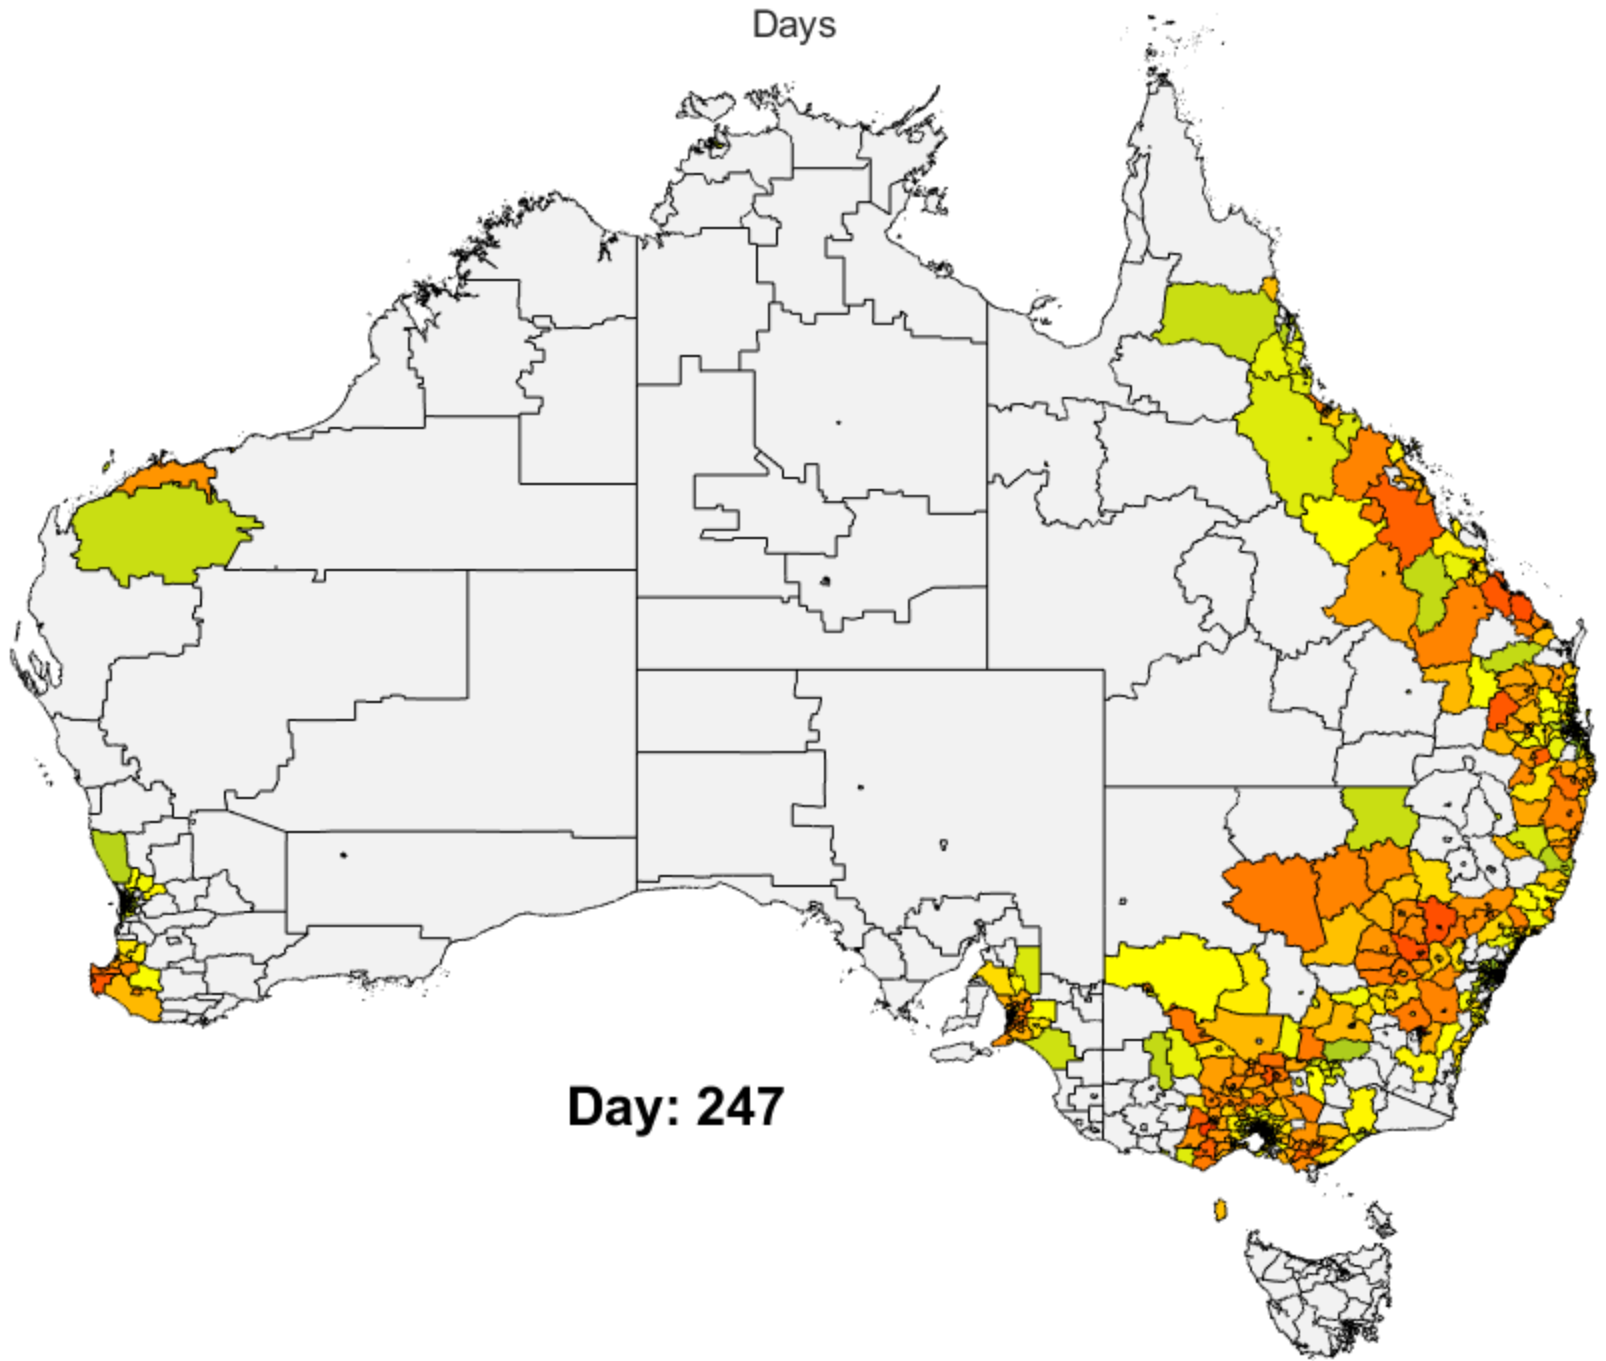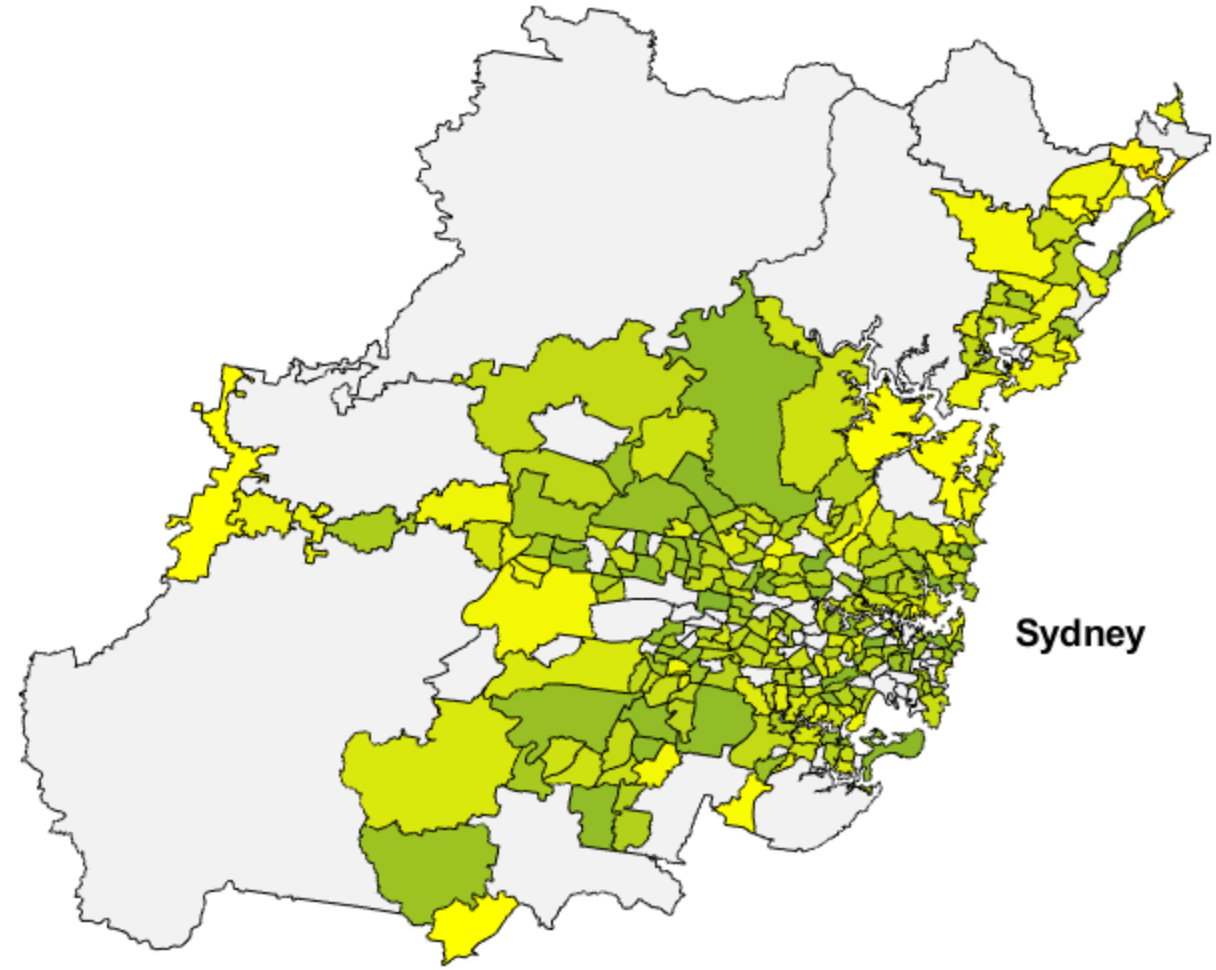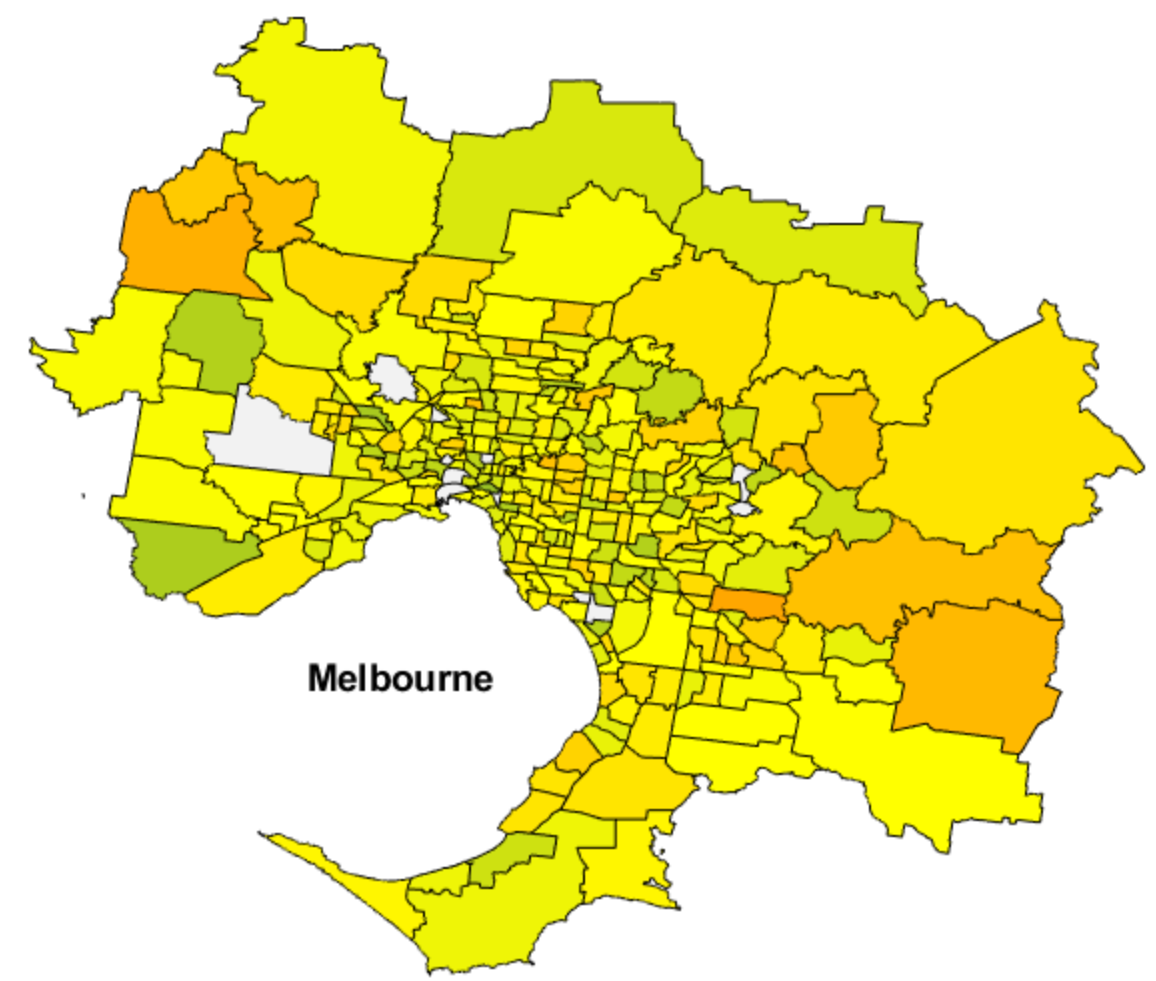

Supplement: rsif20190728supp6.pdf [file rsif20190728supp6.pdf]

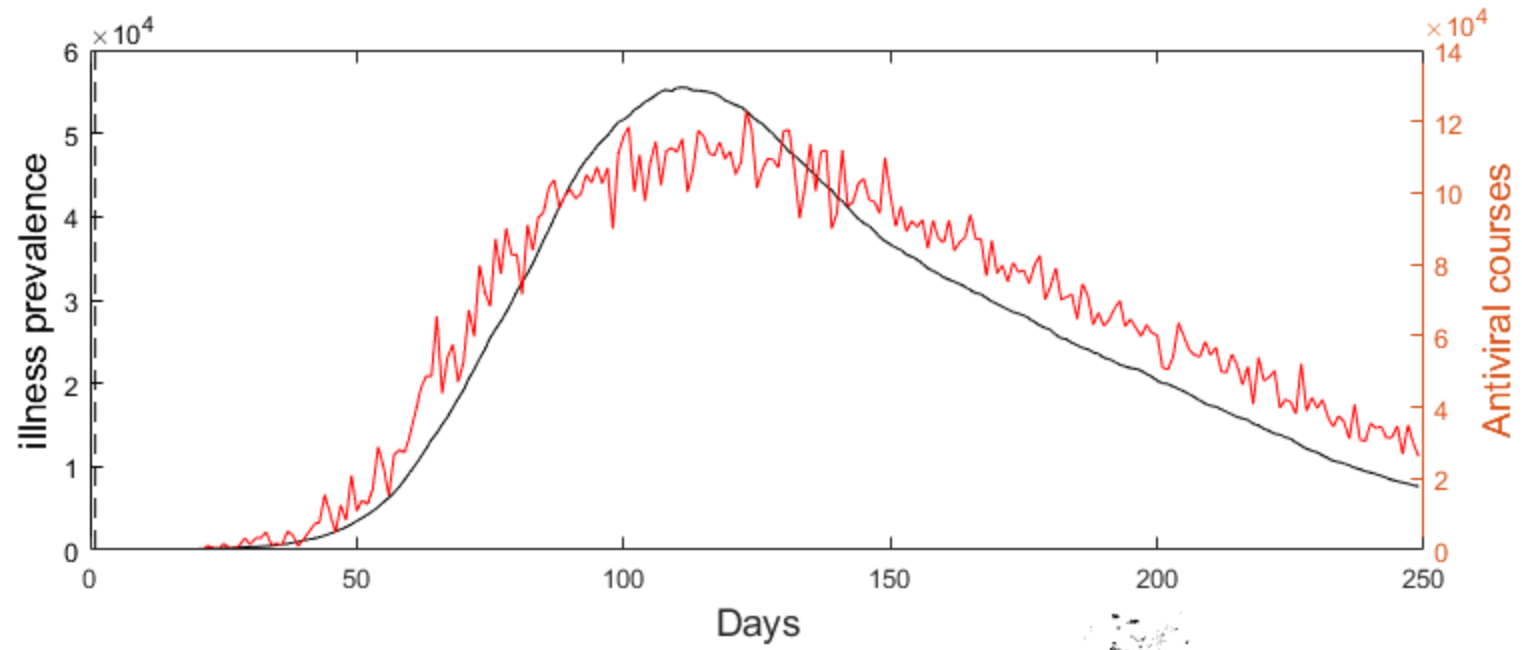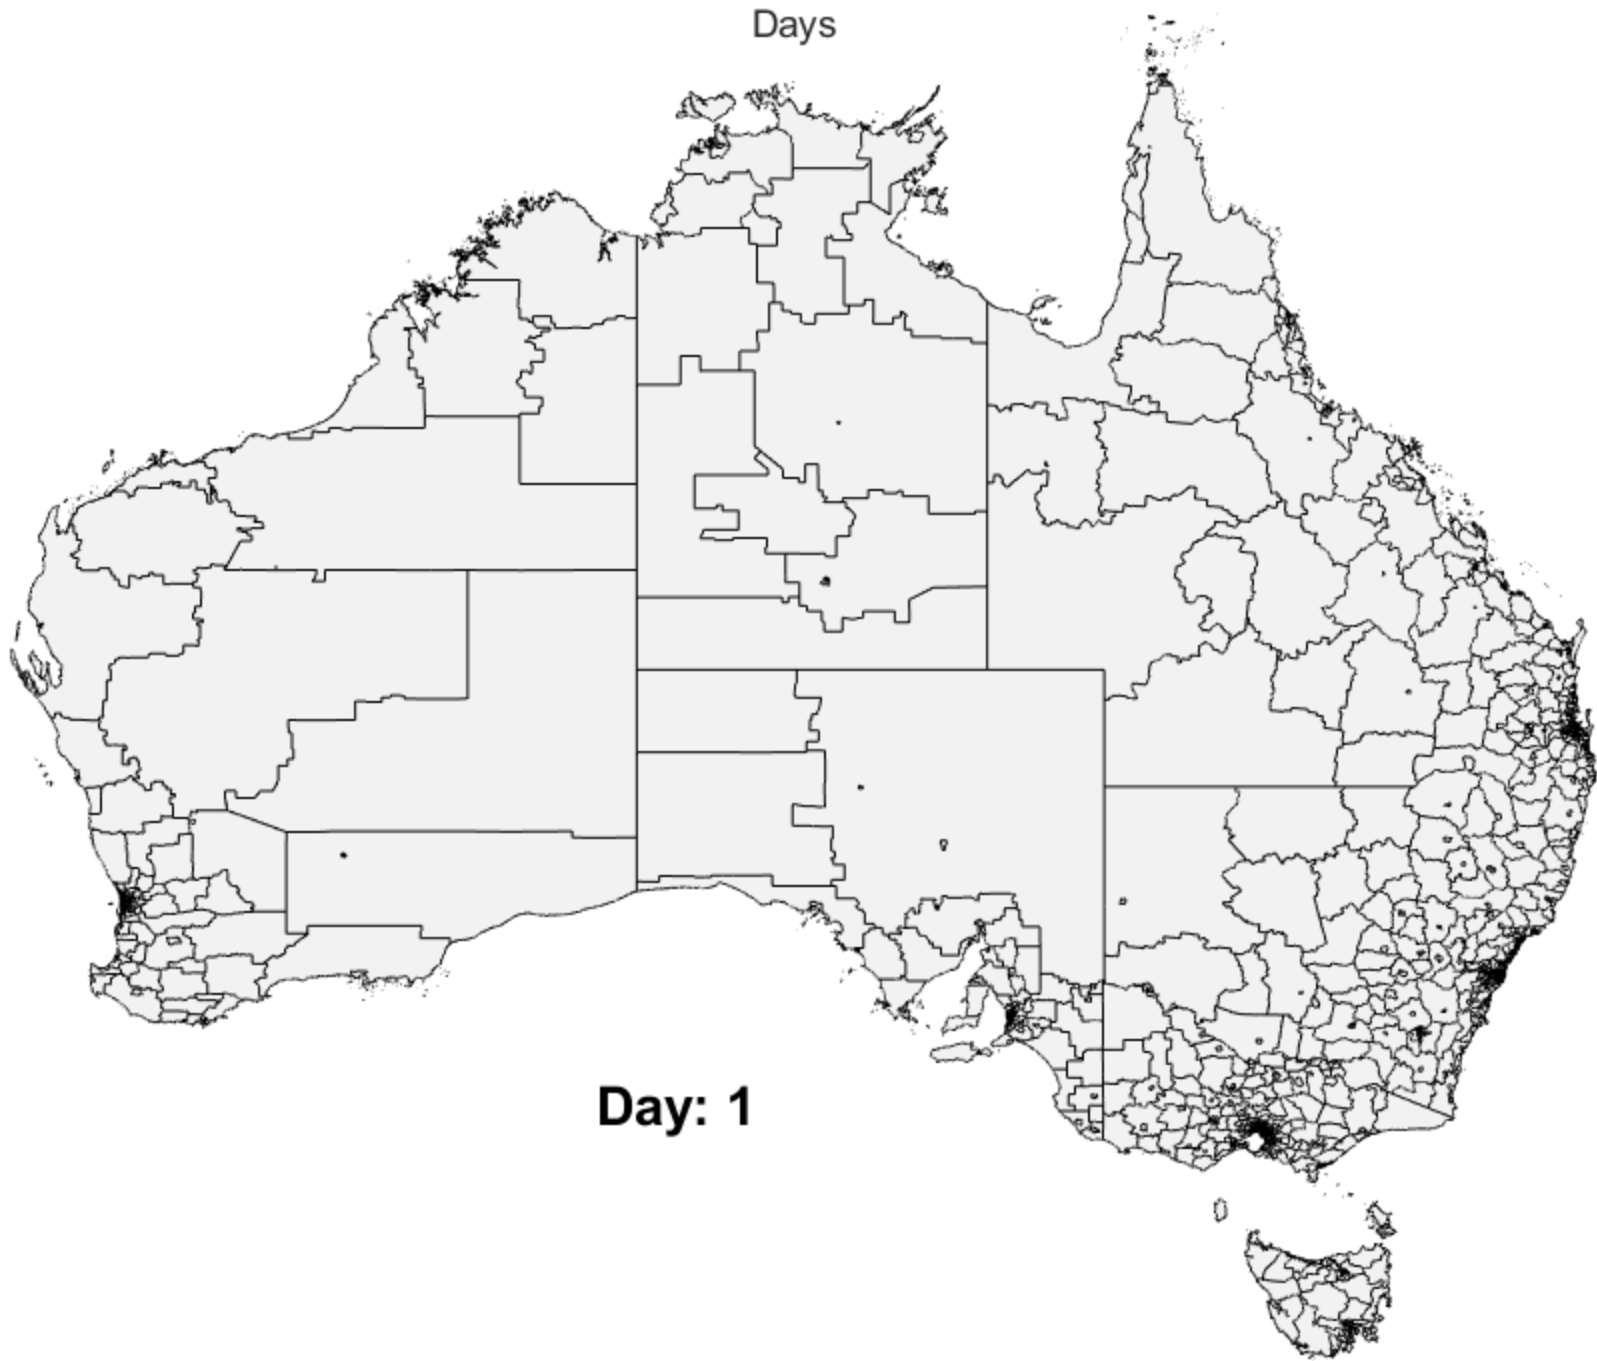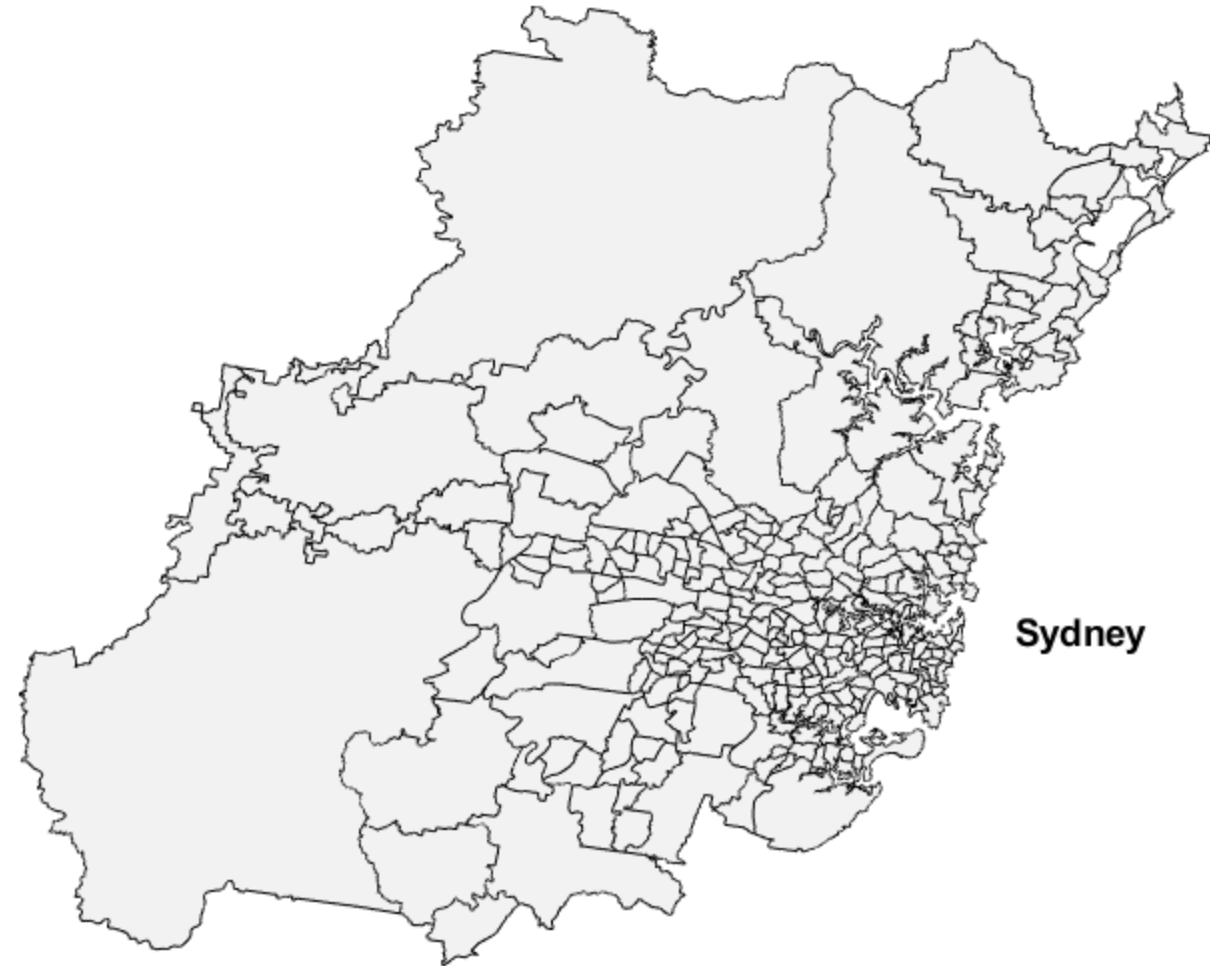

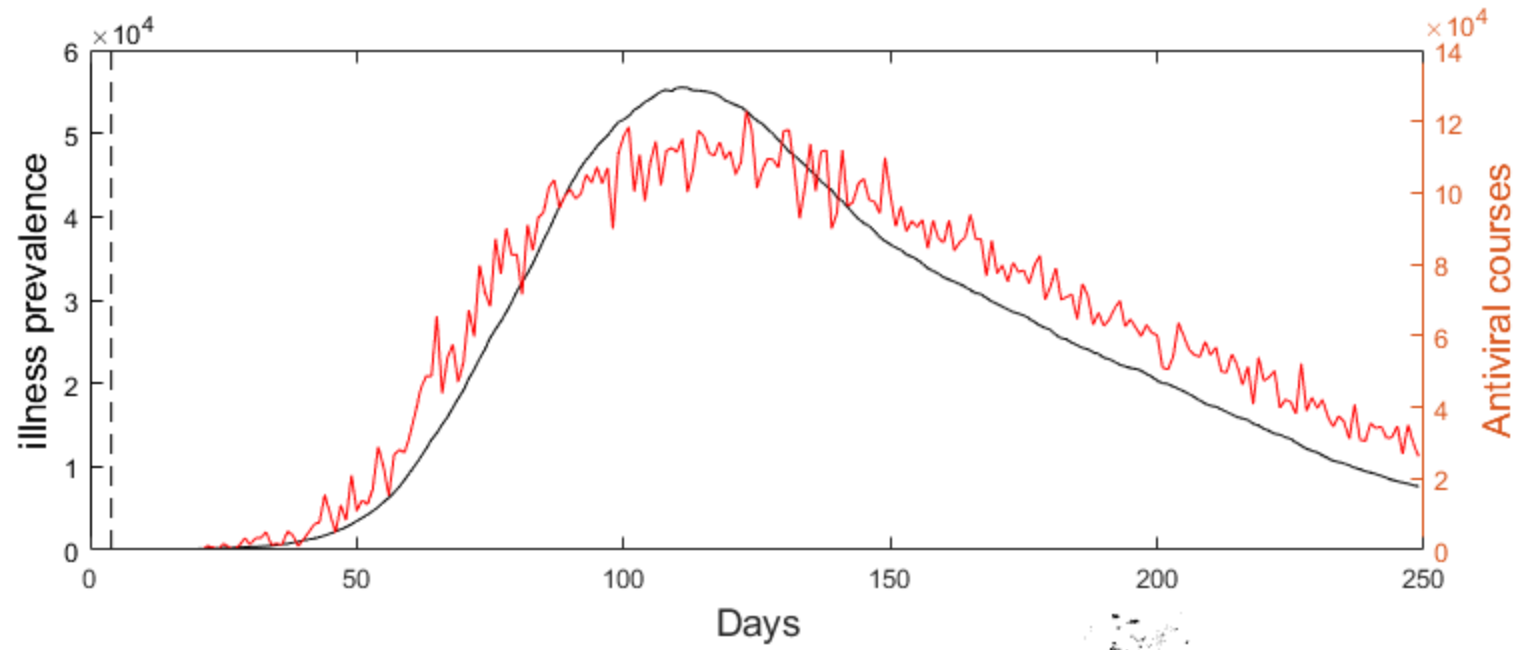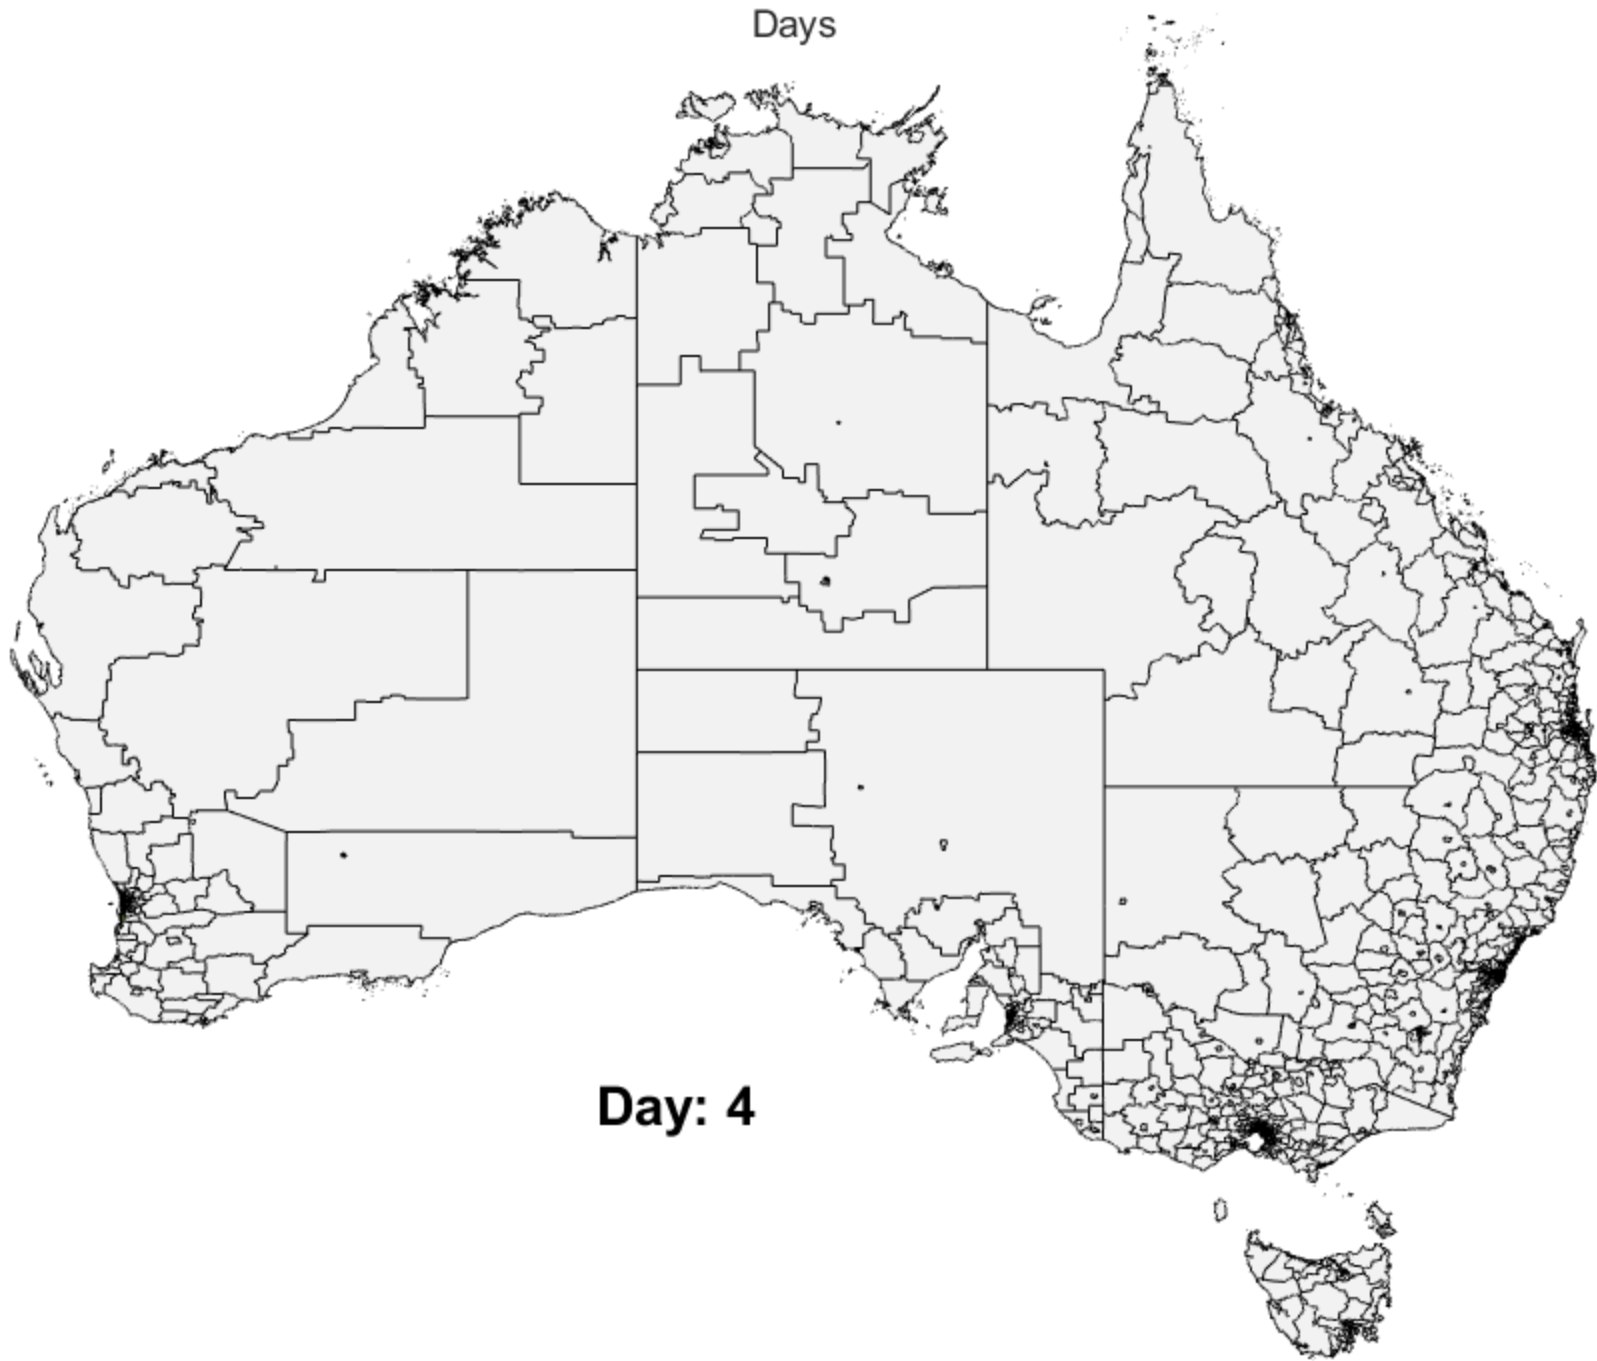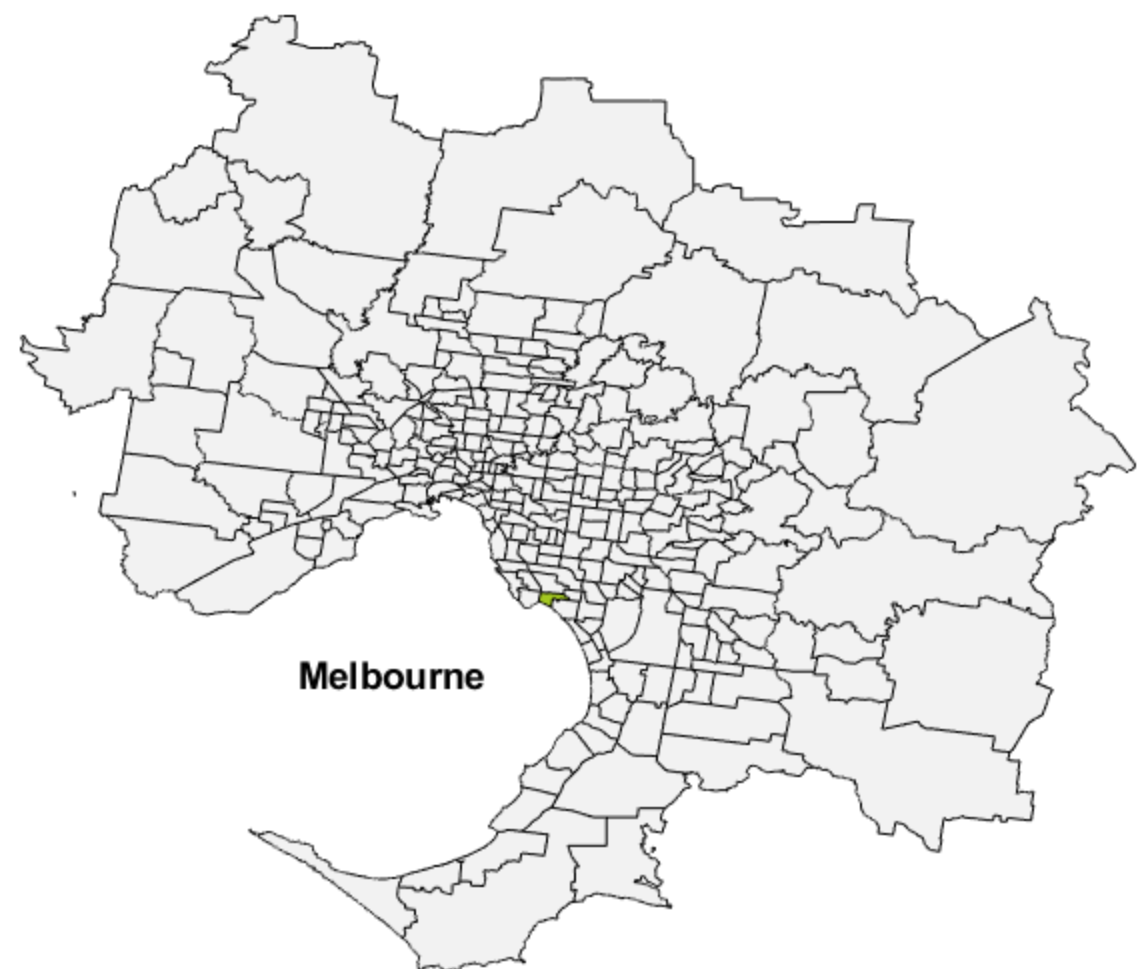

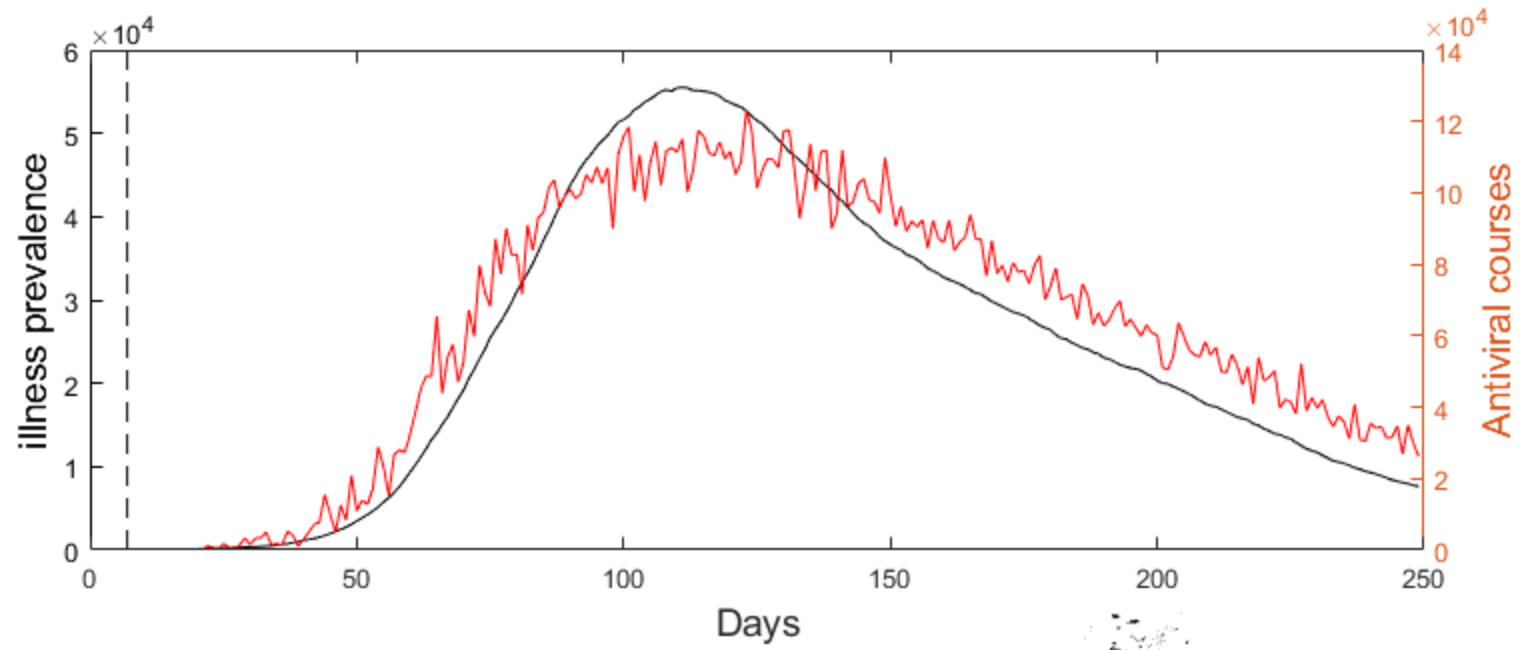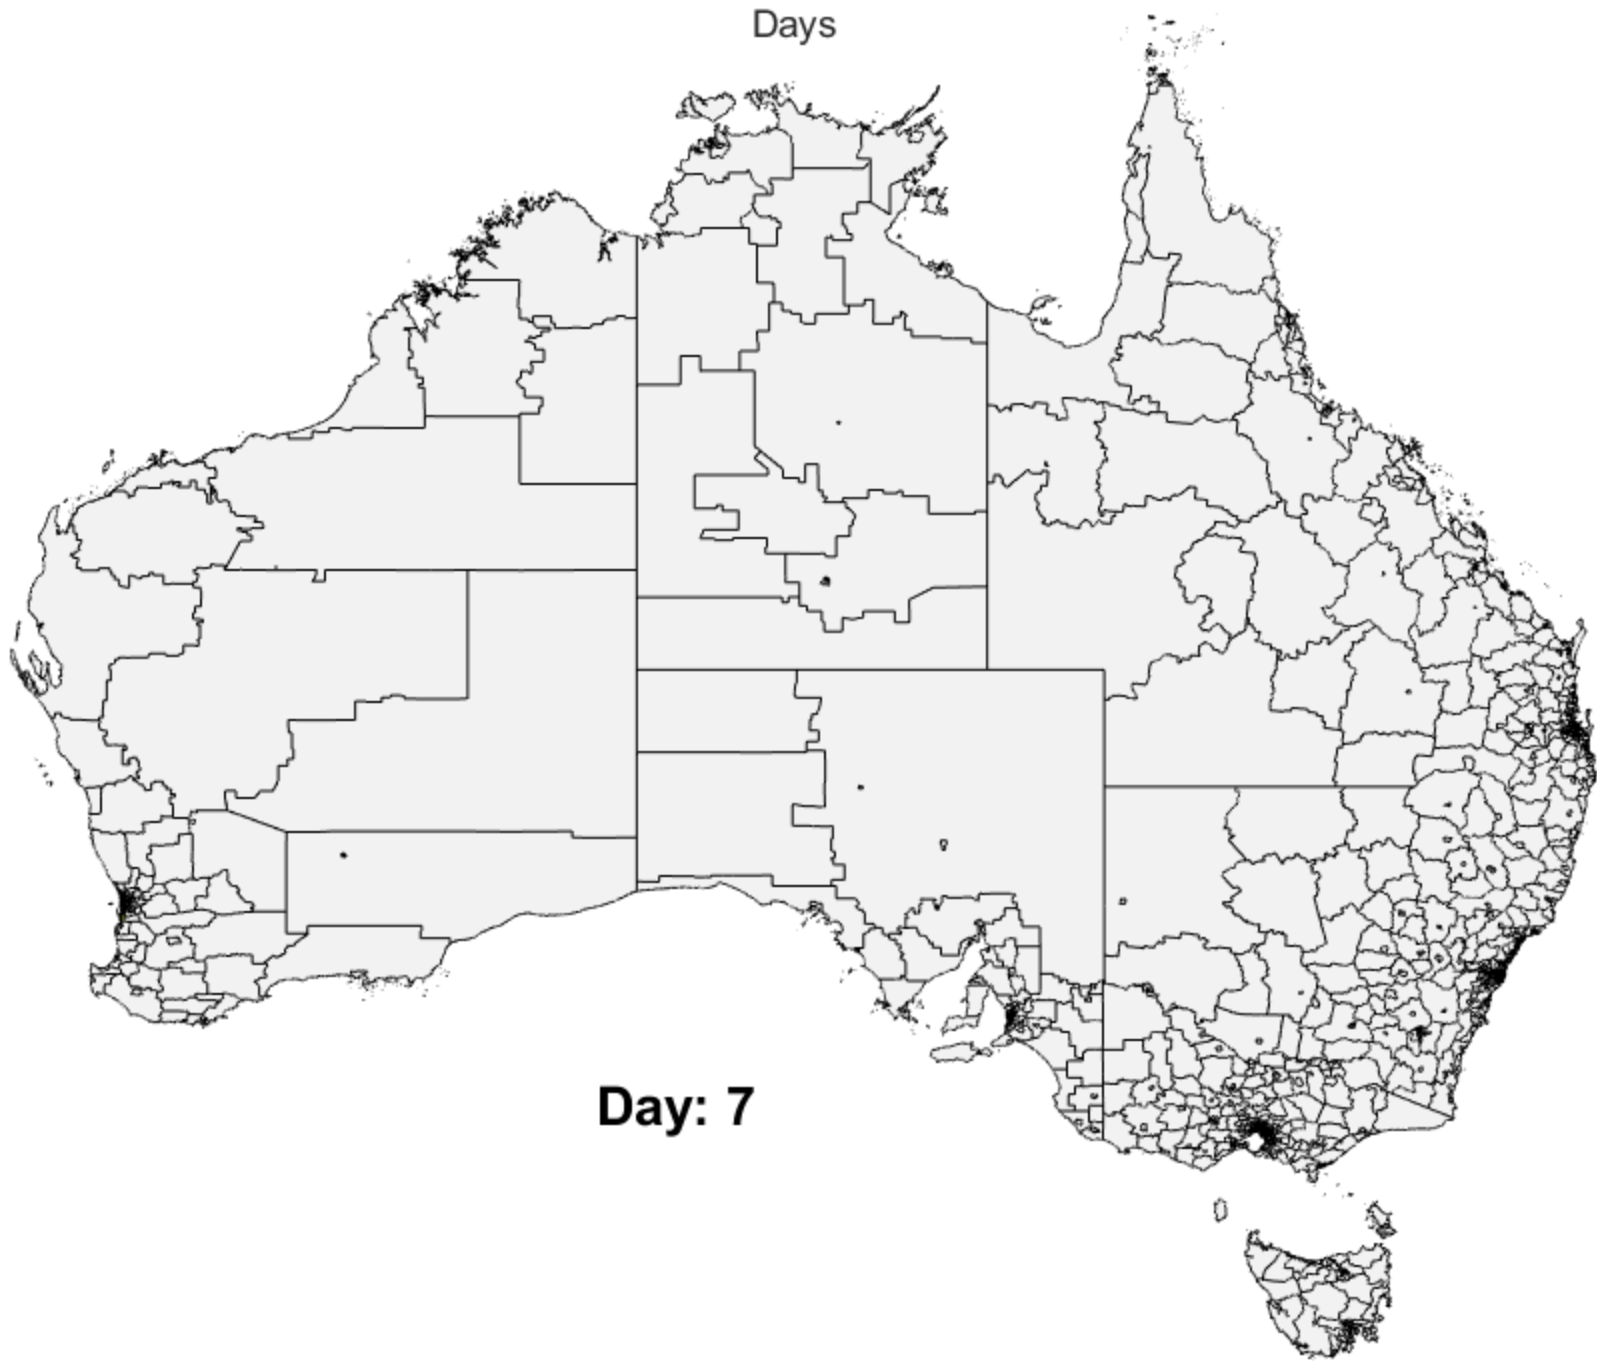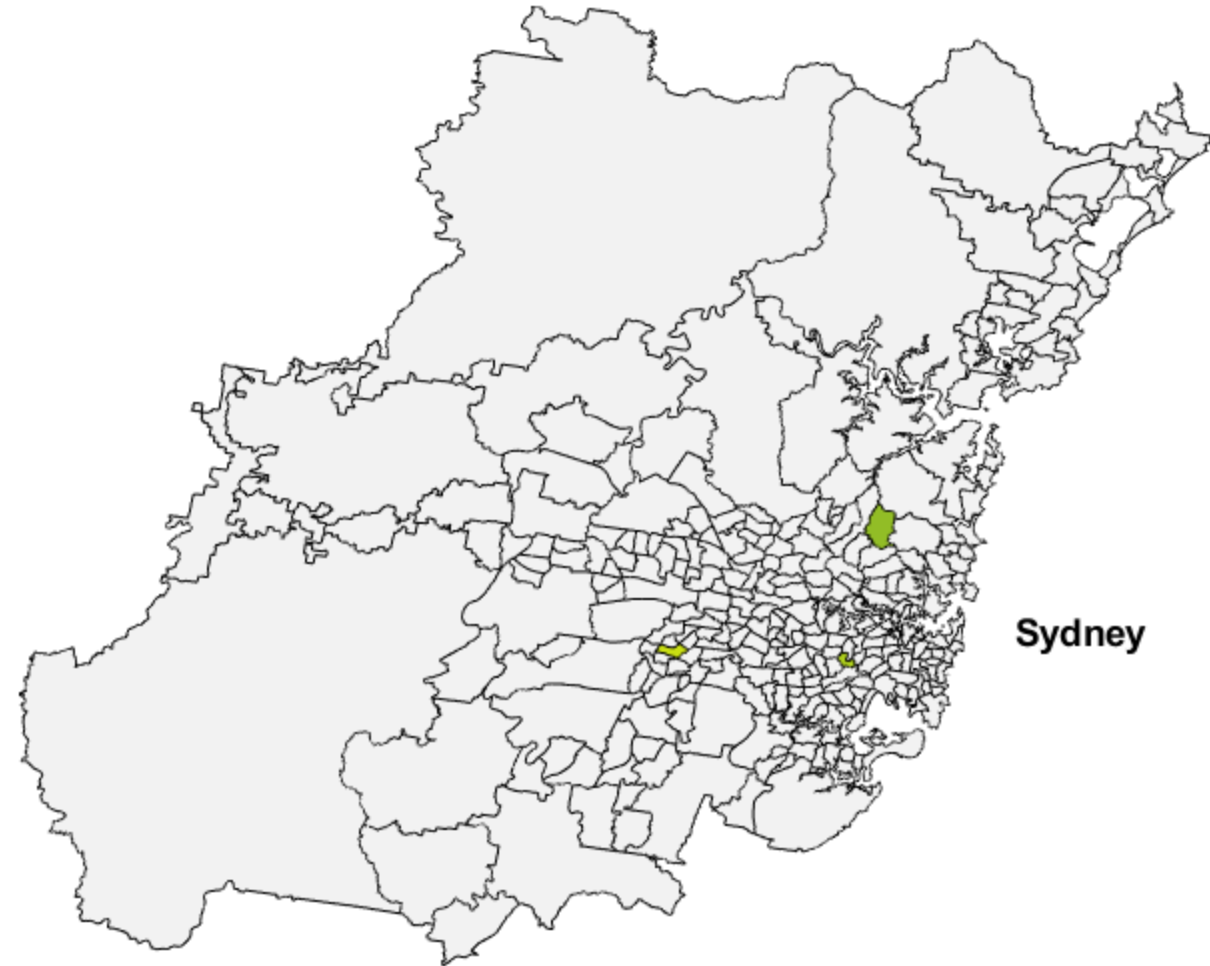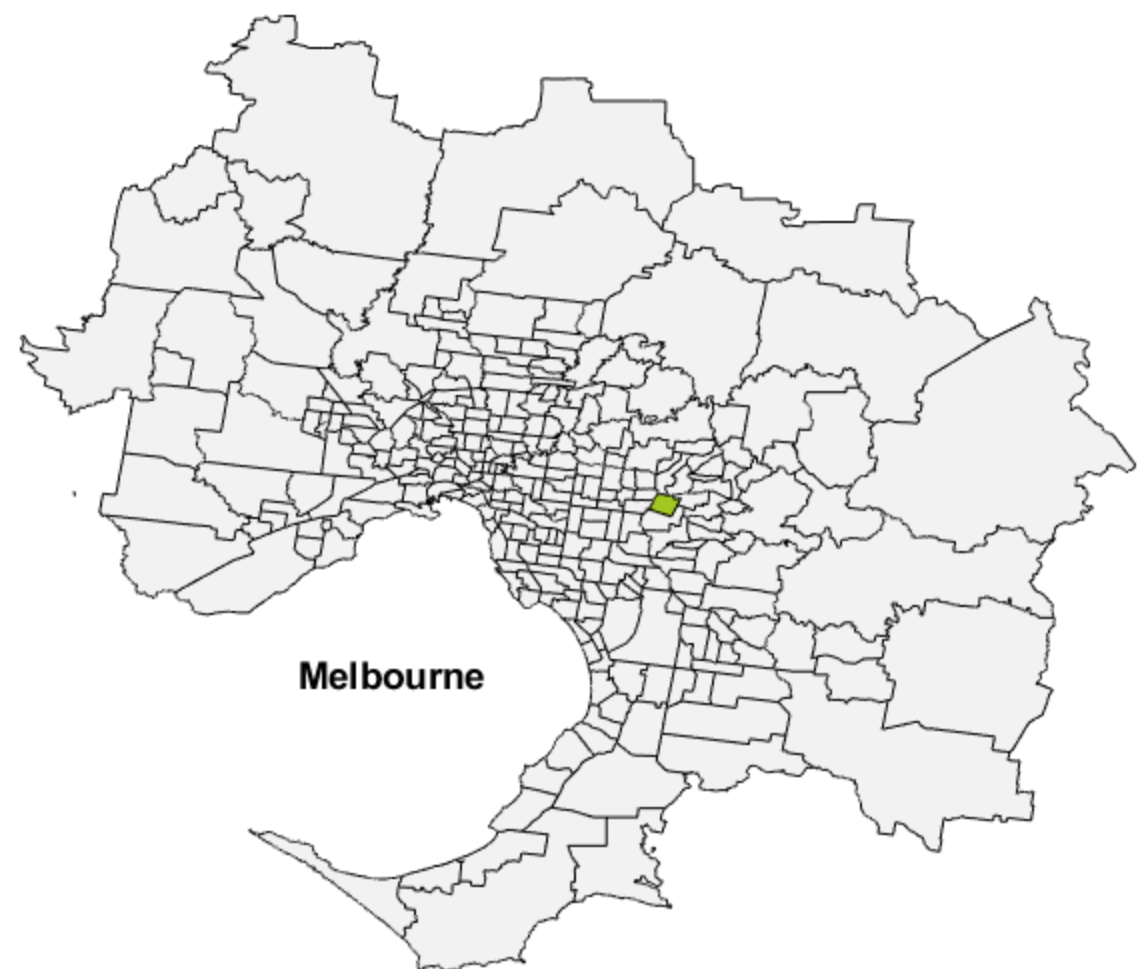



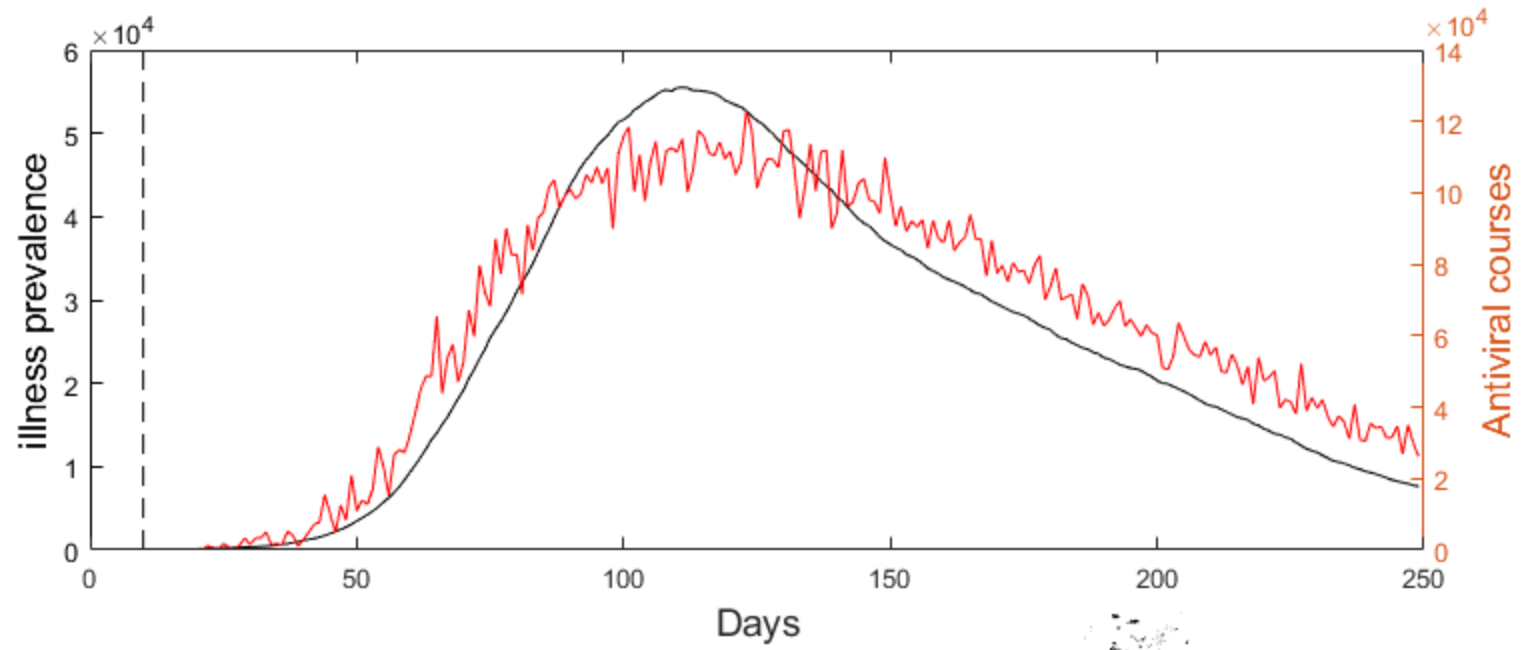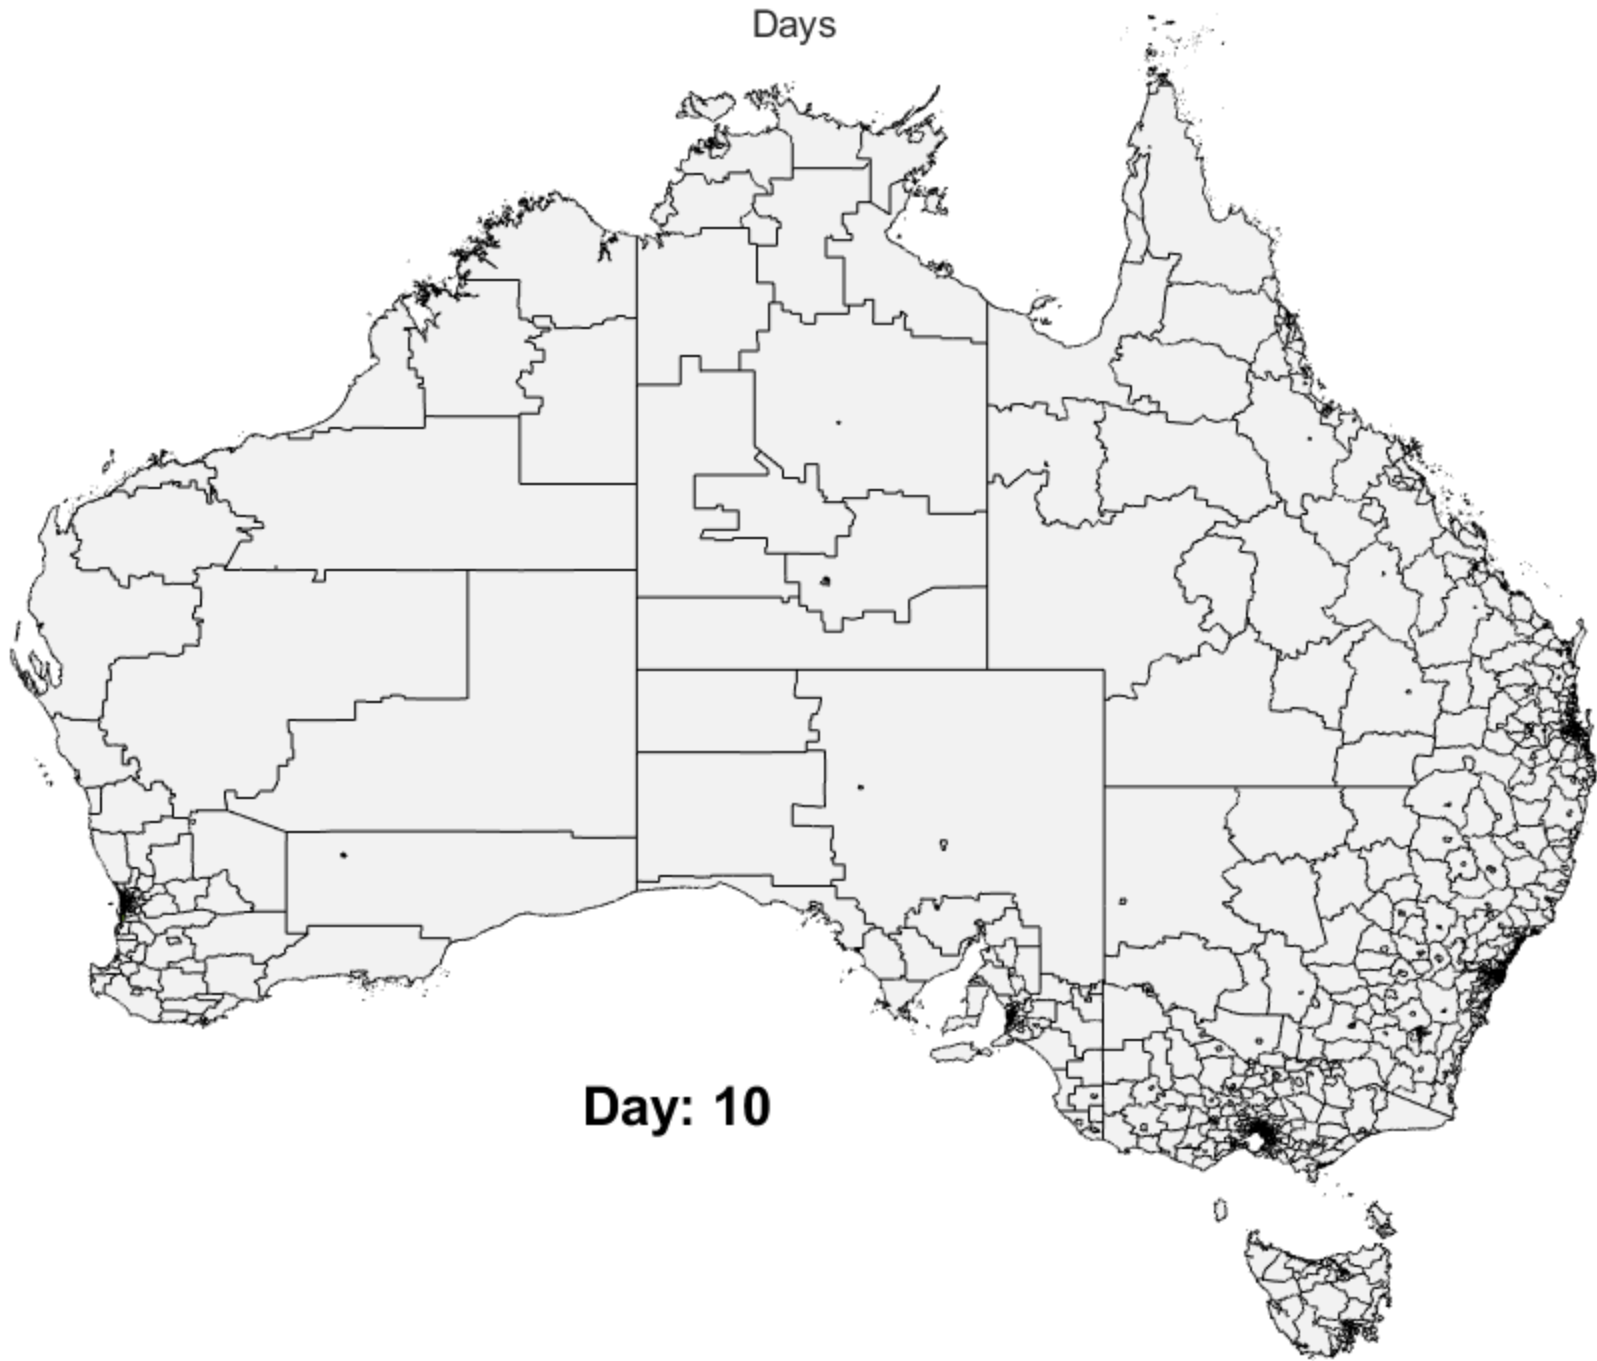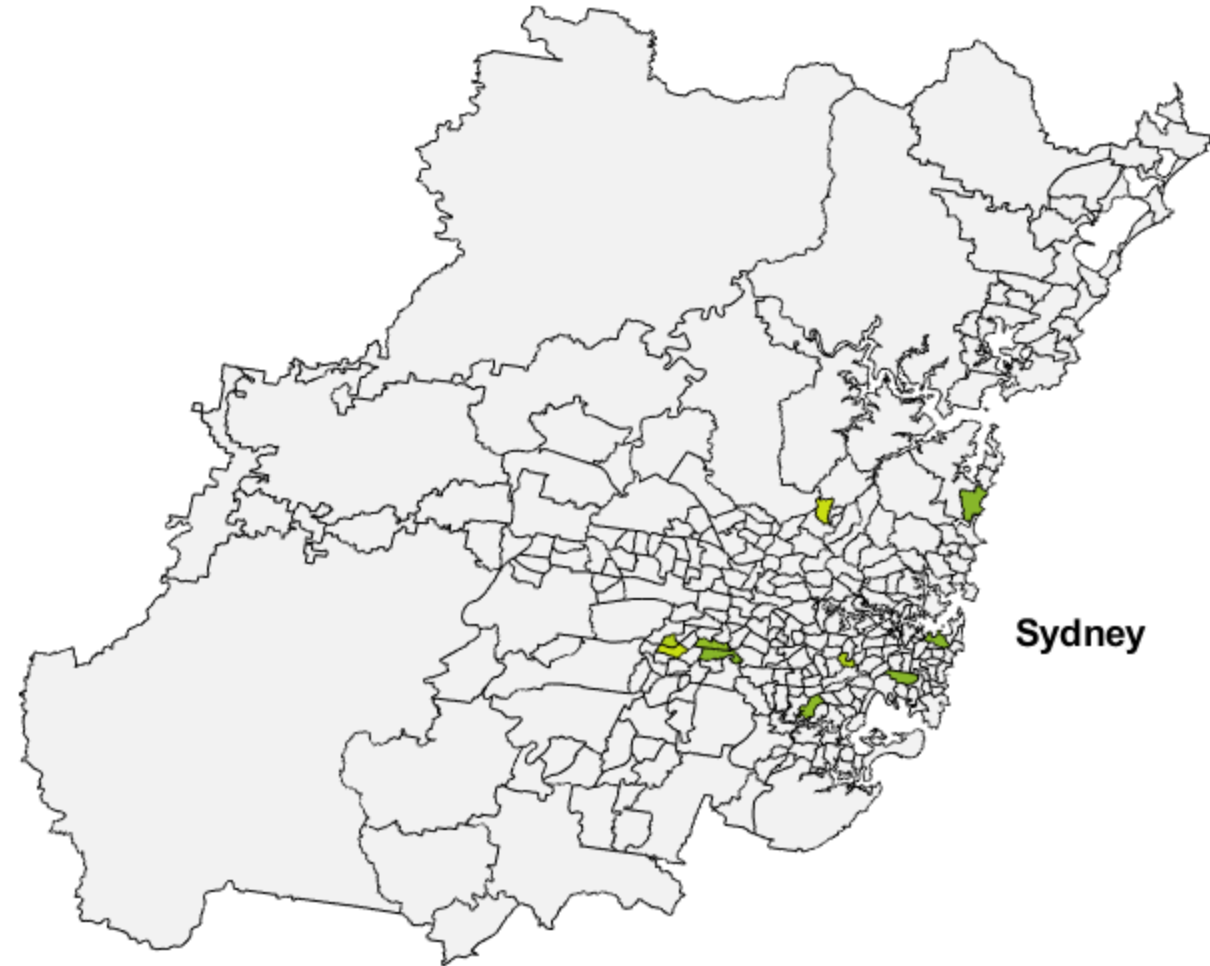



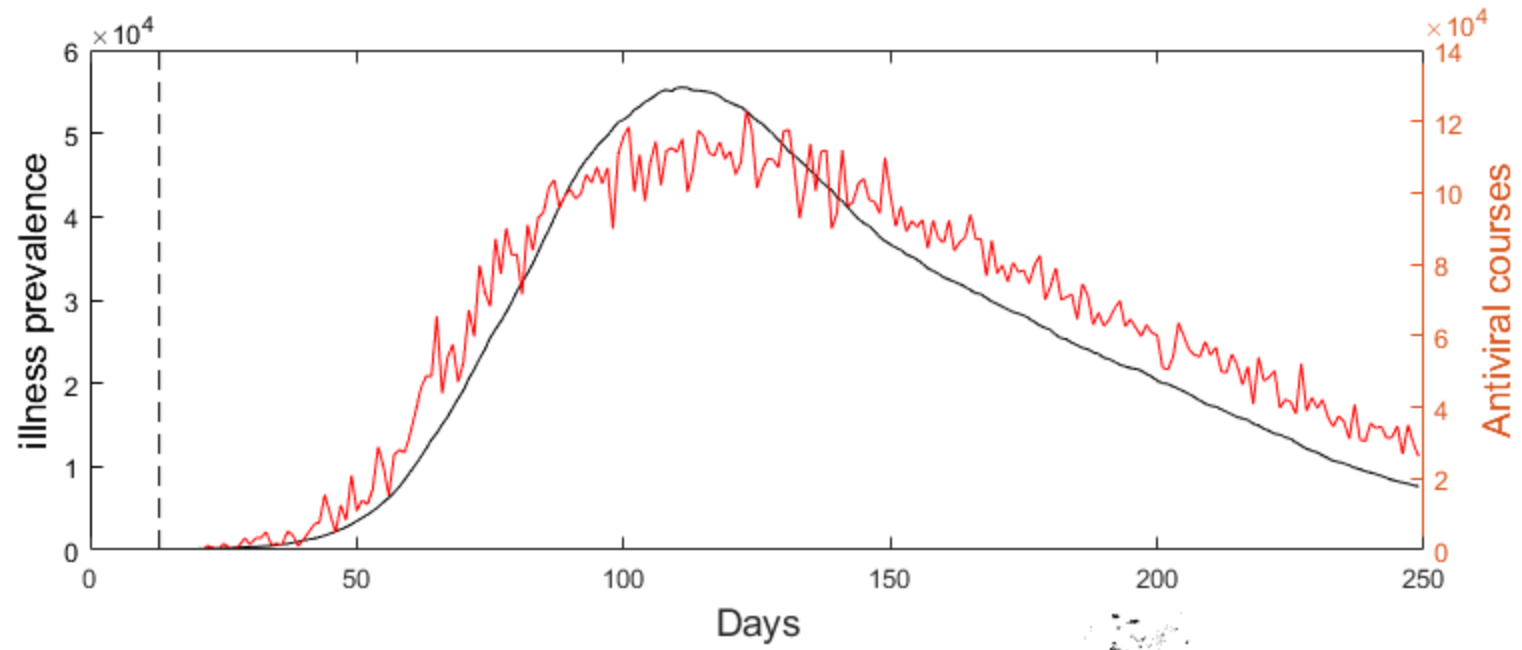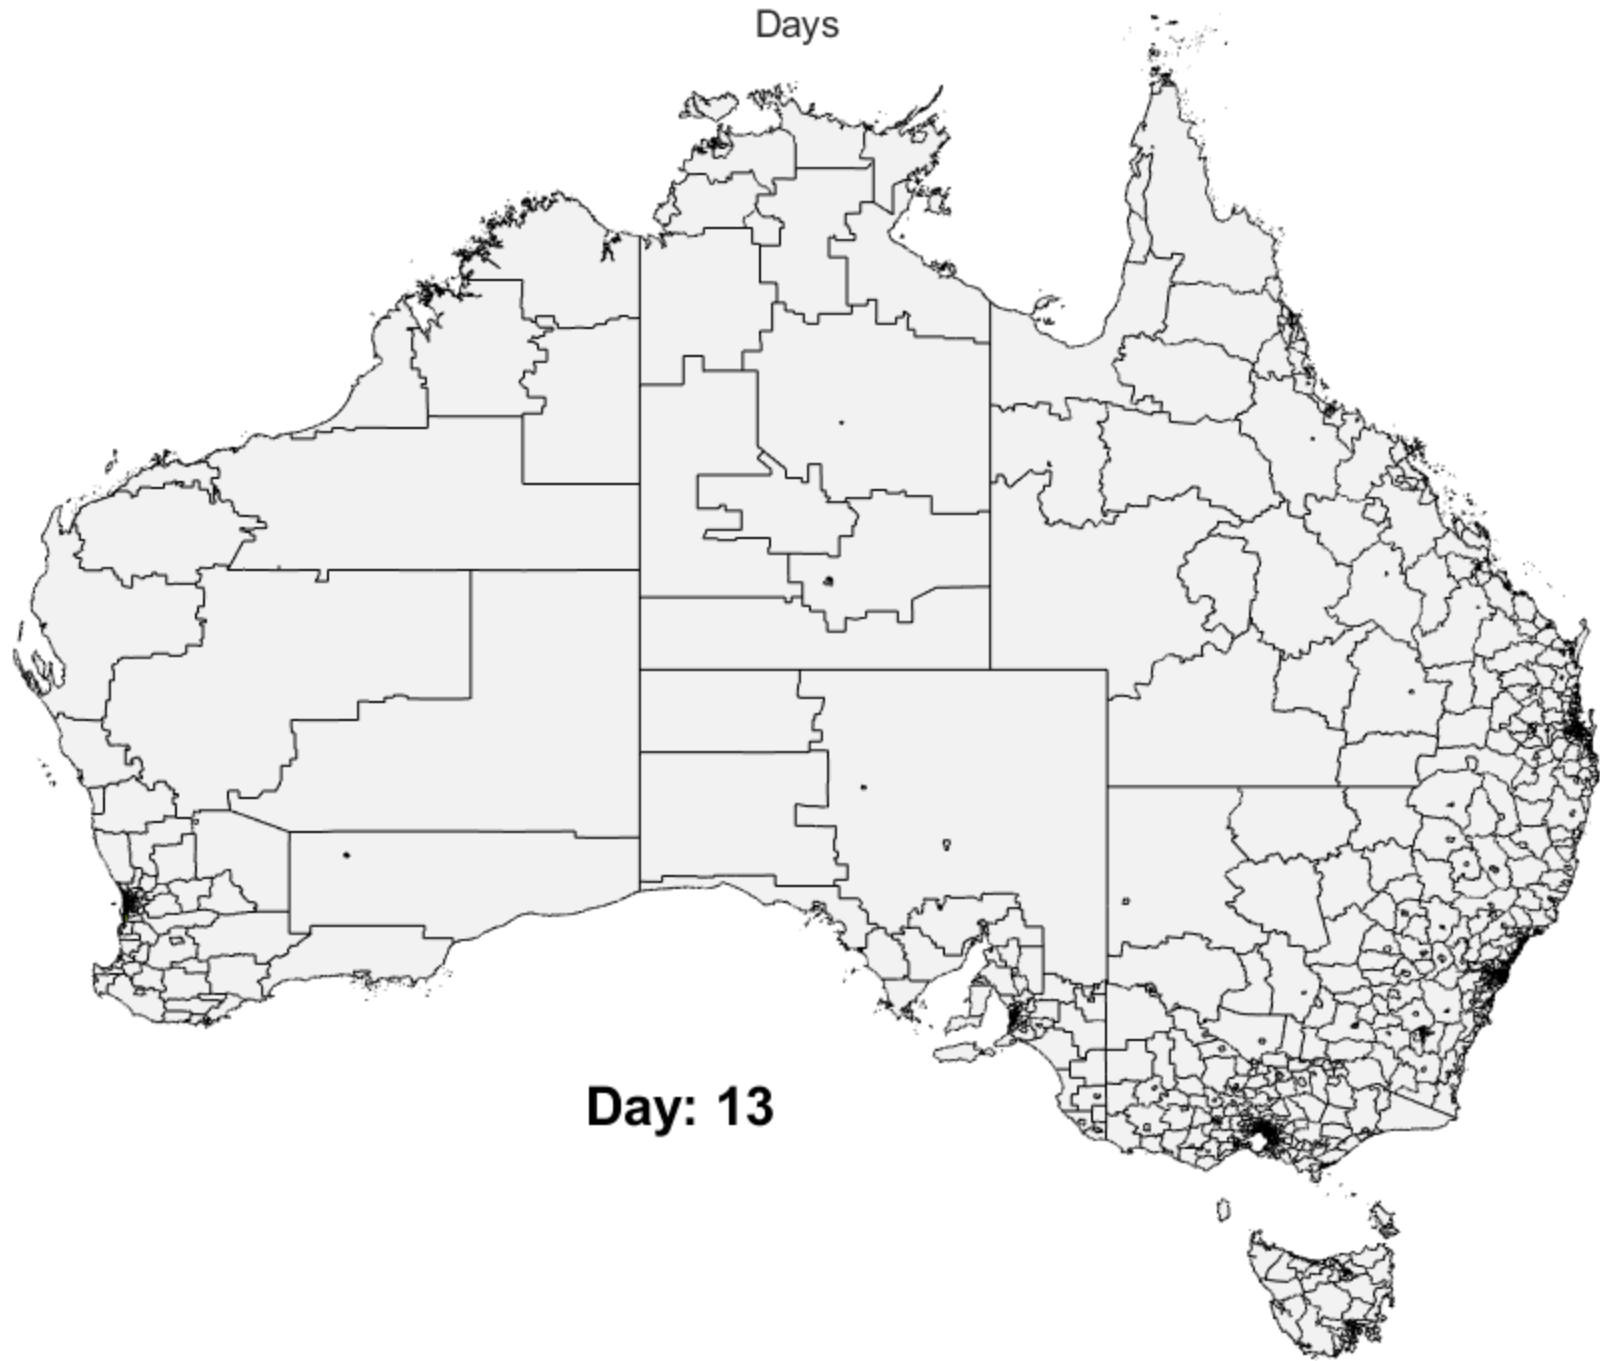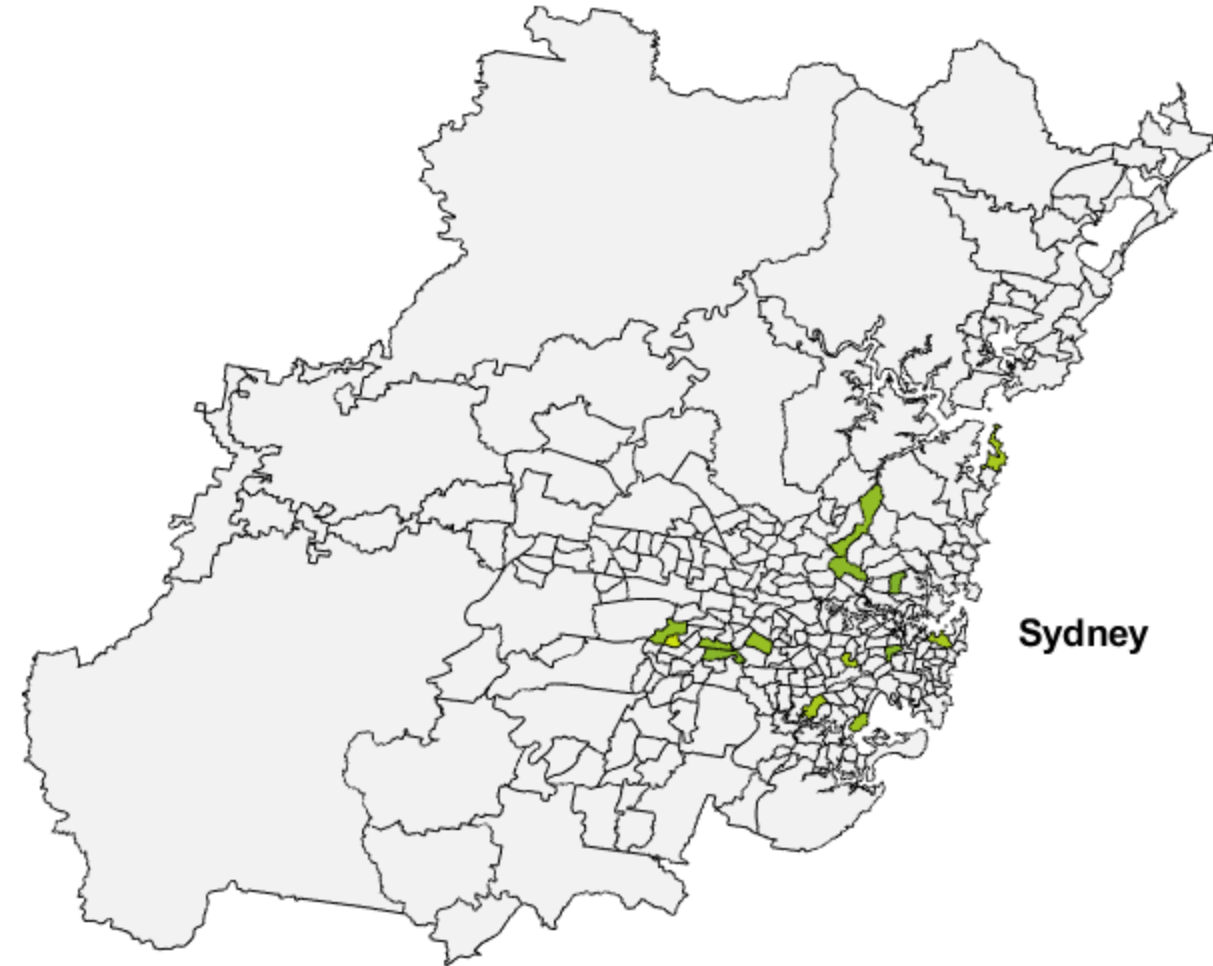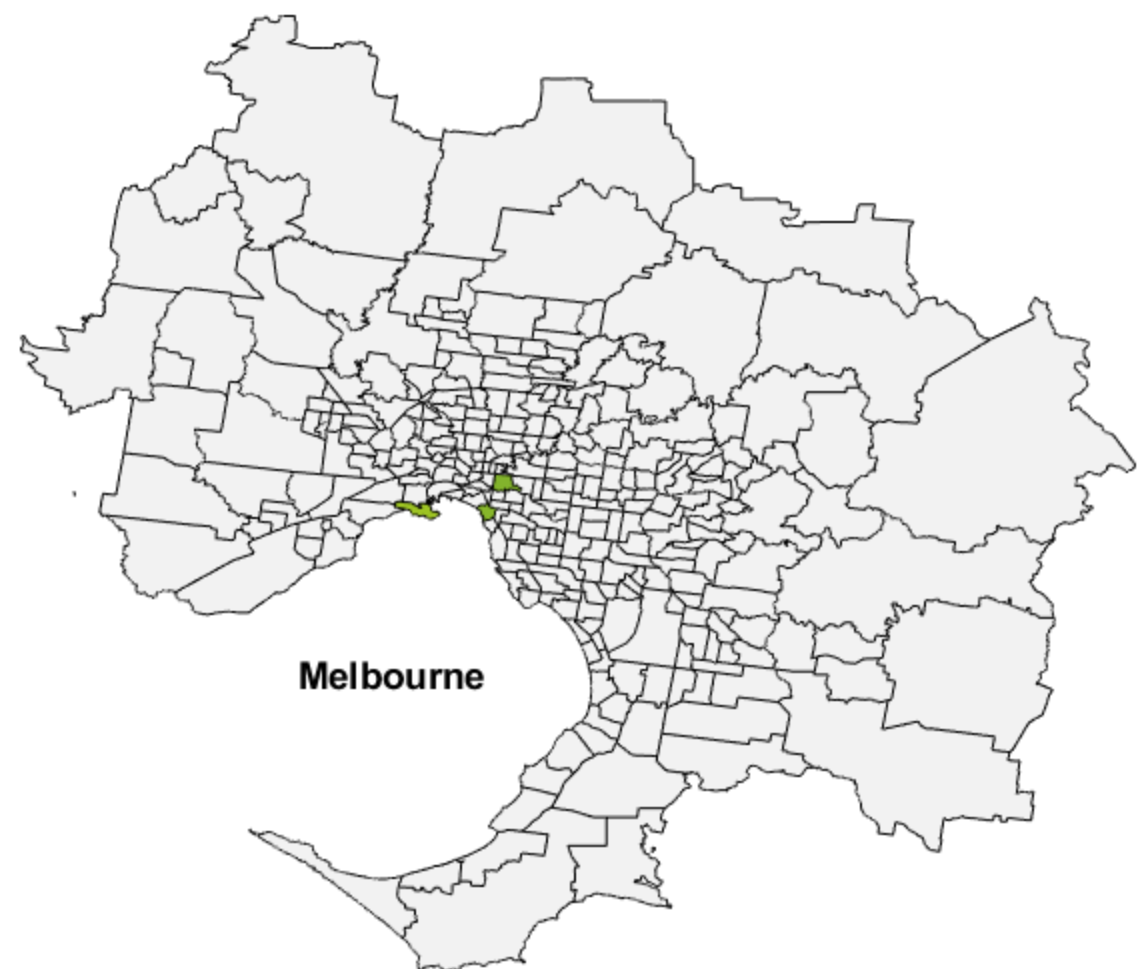

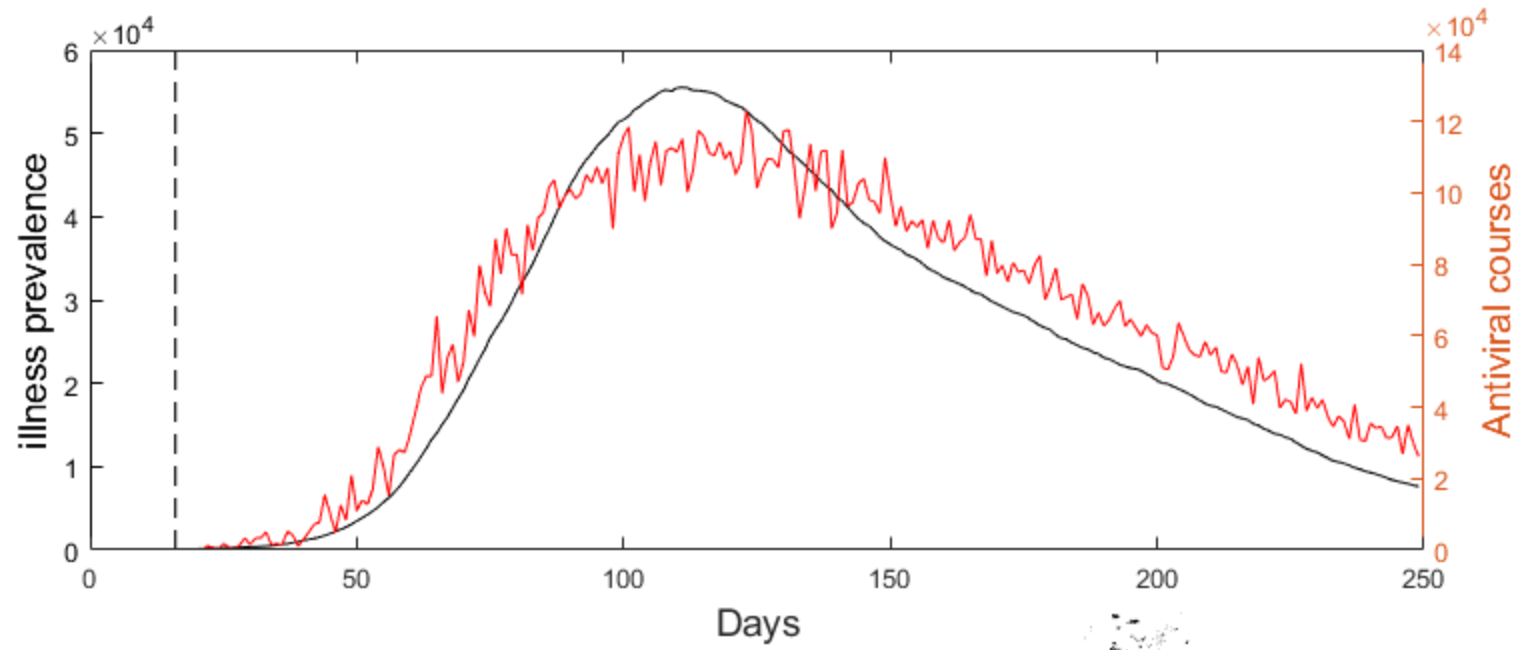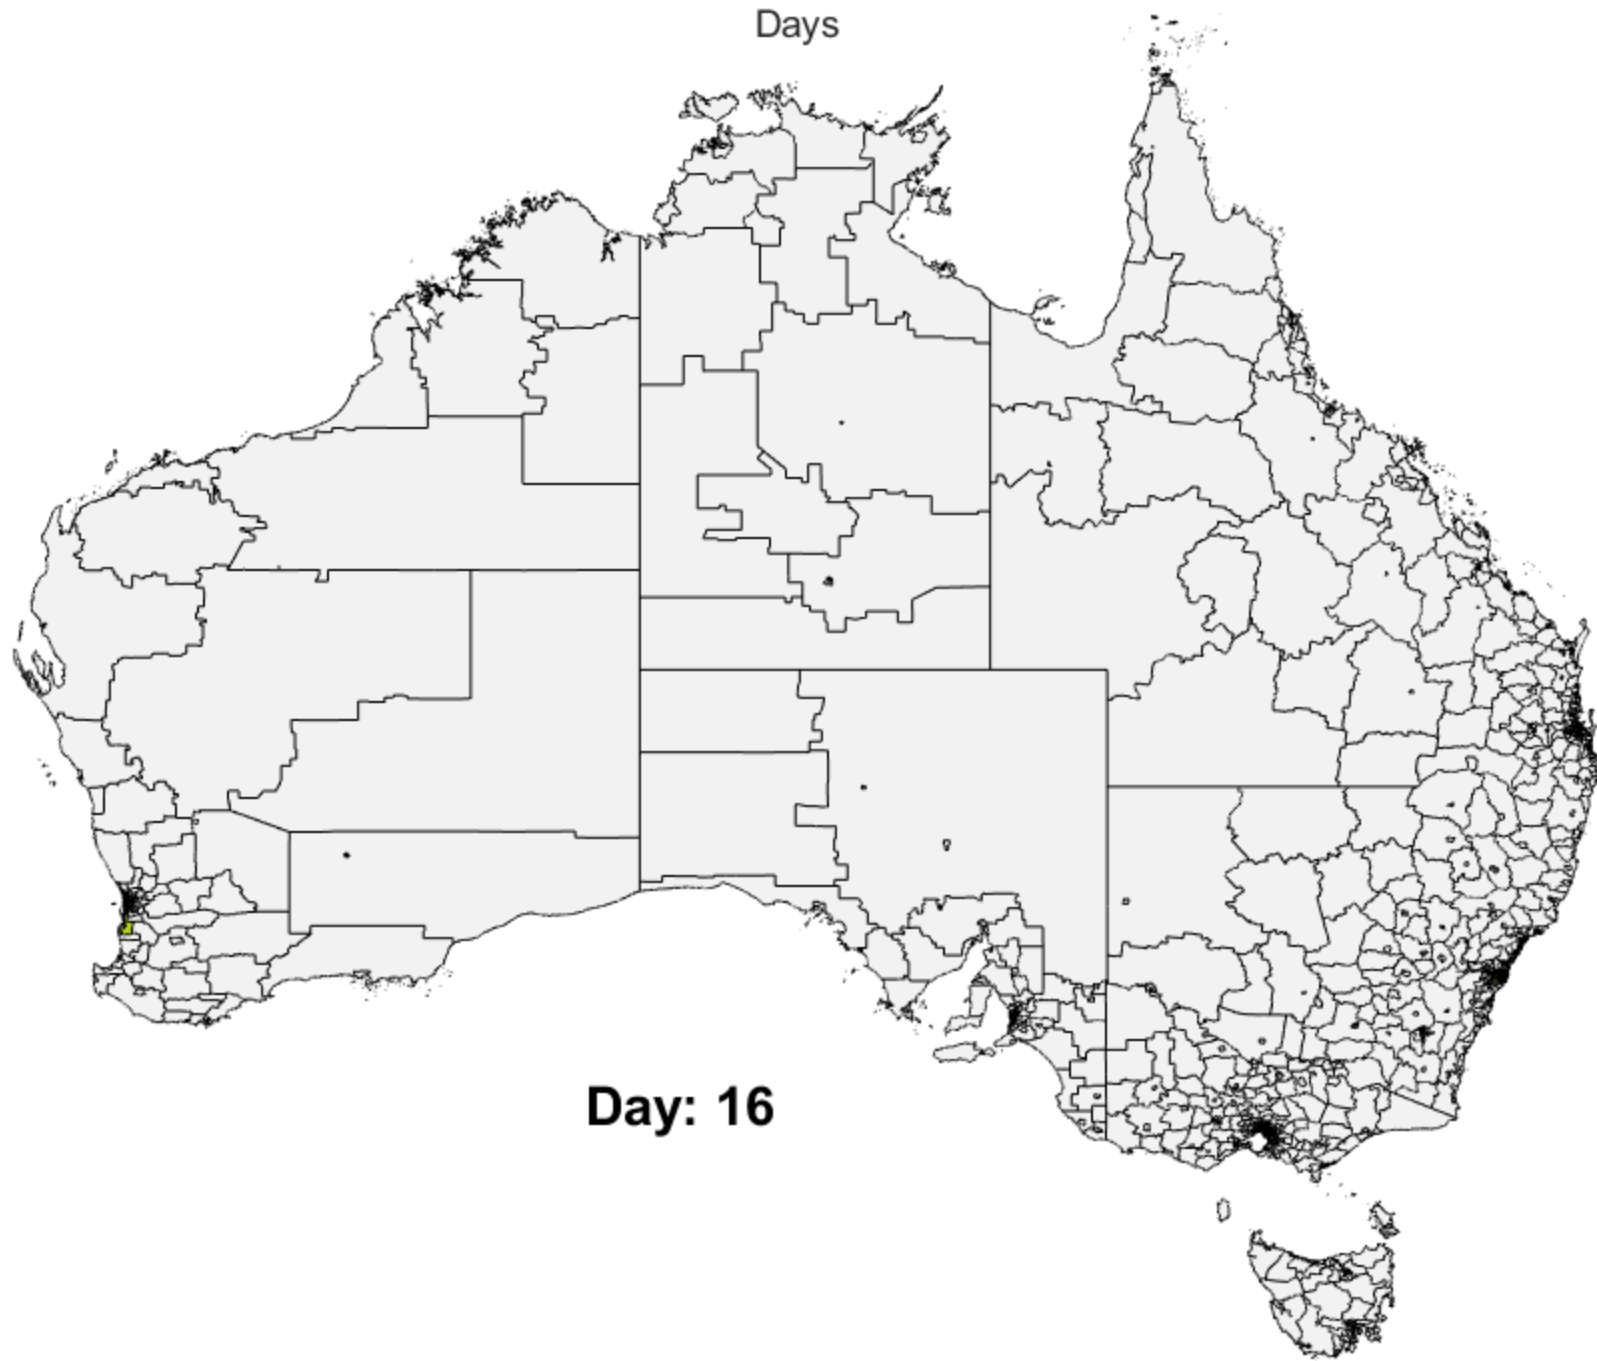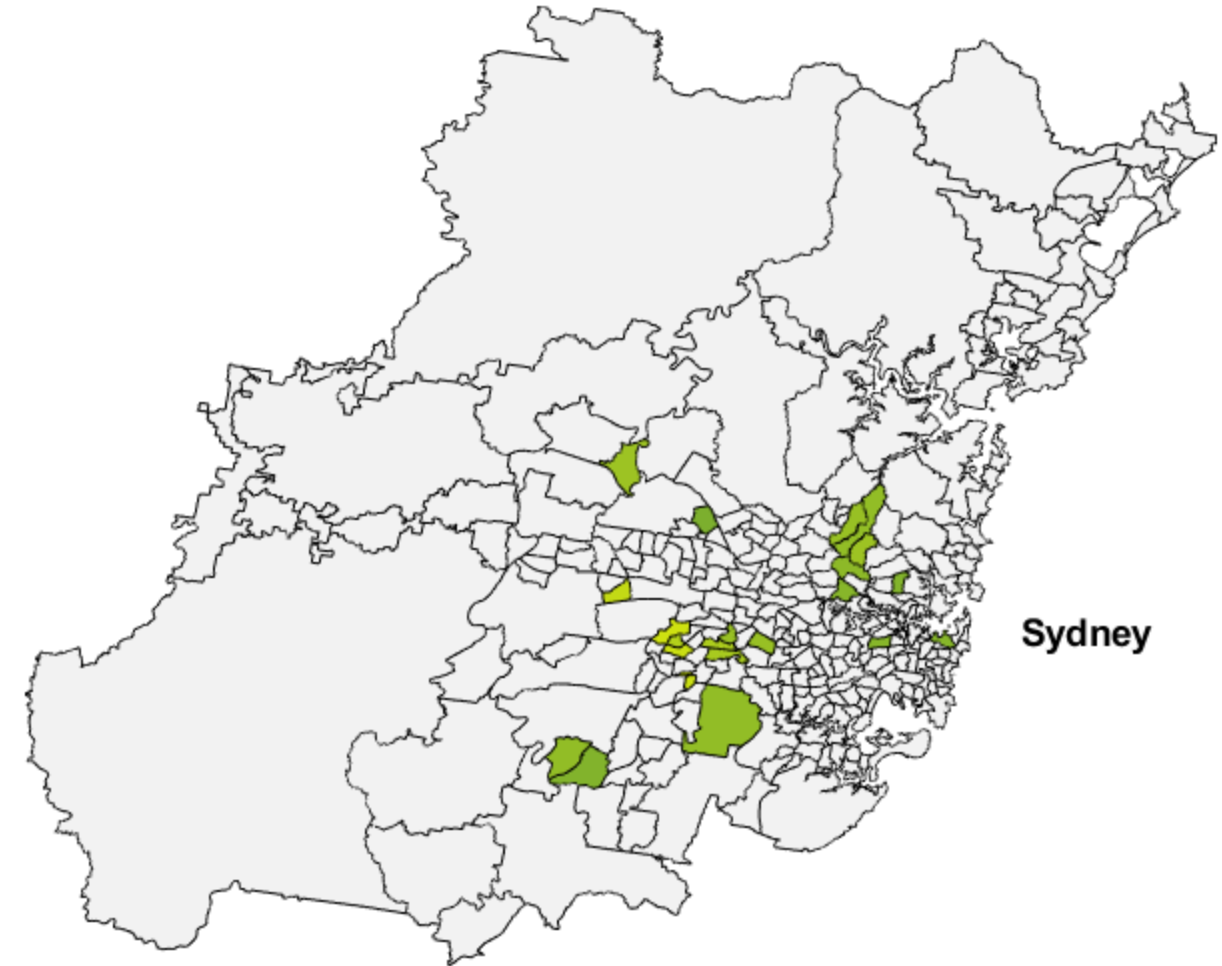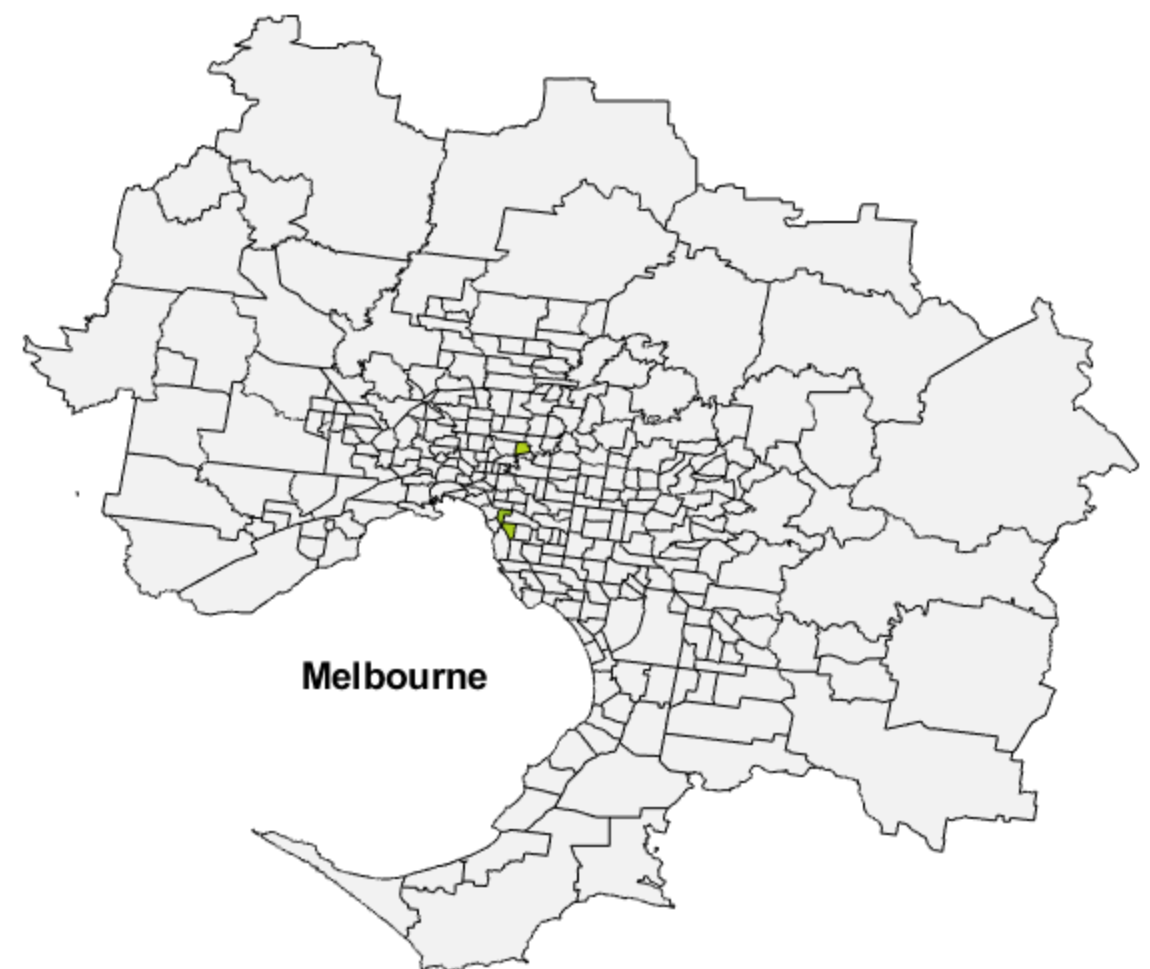

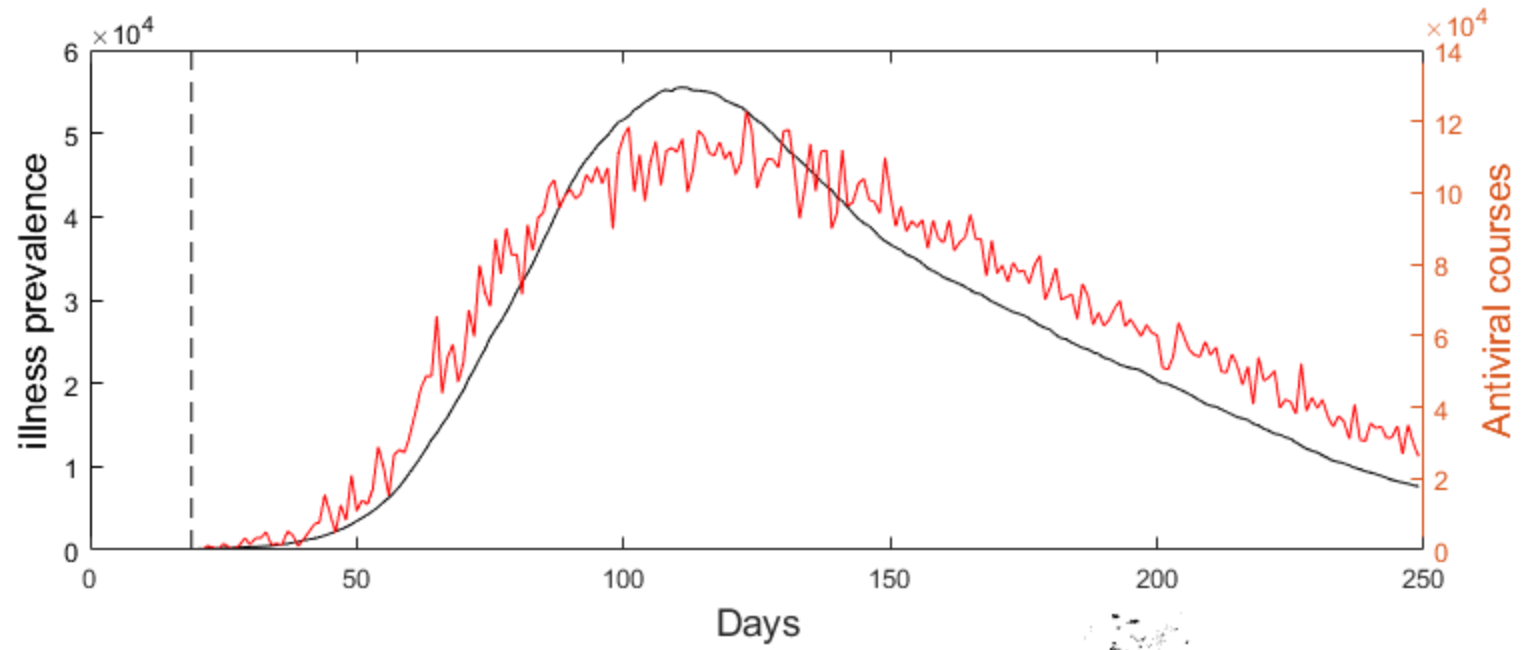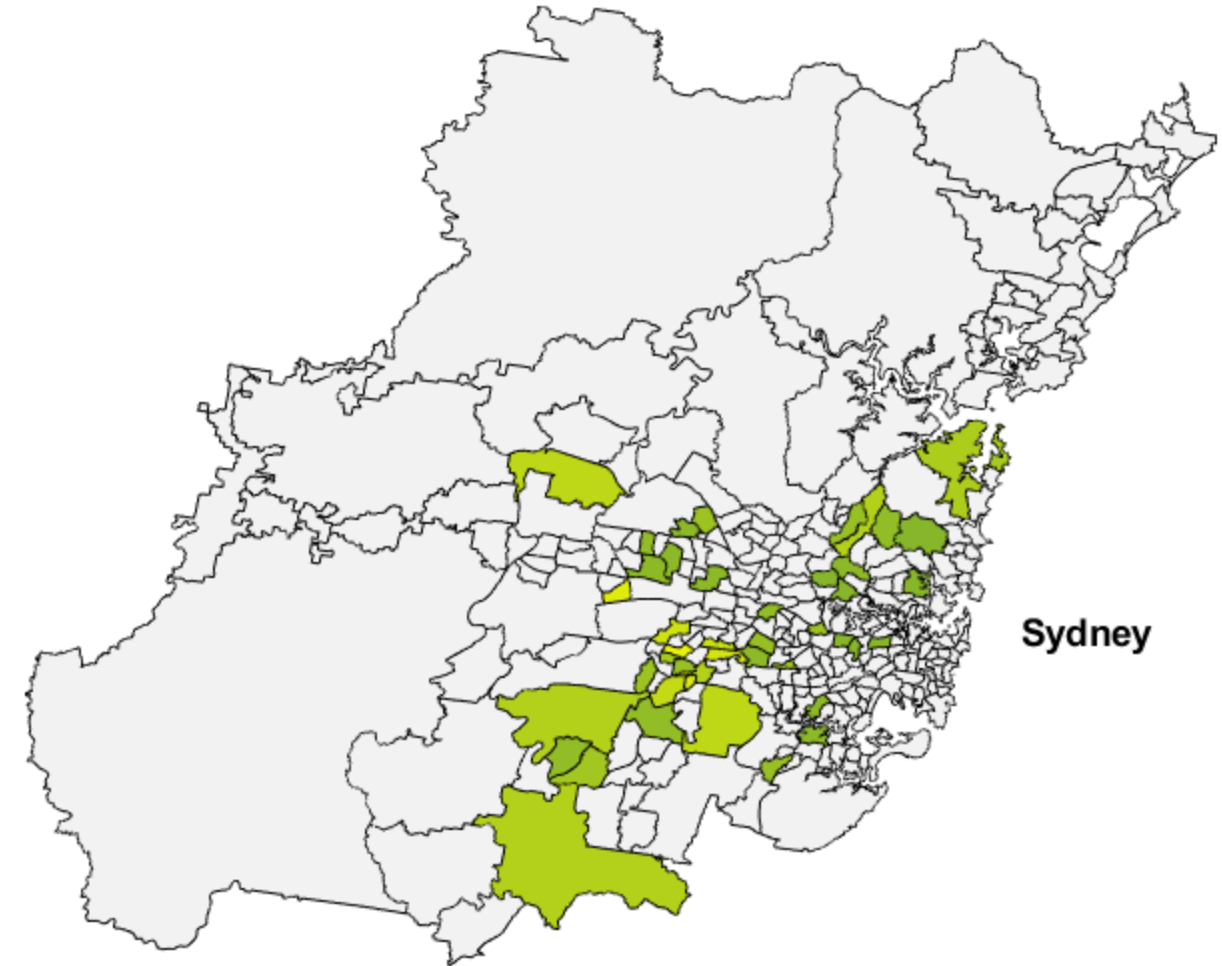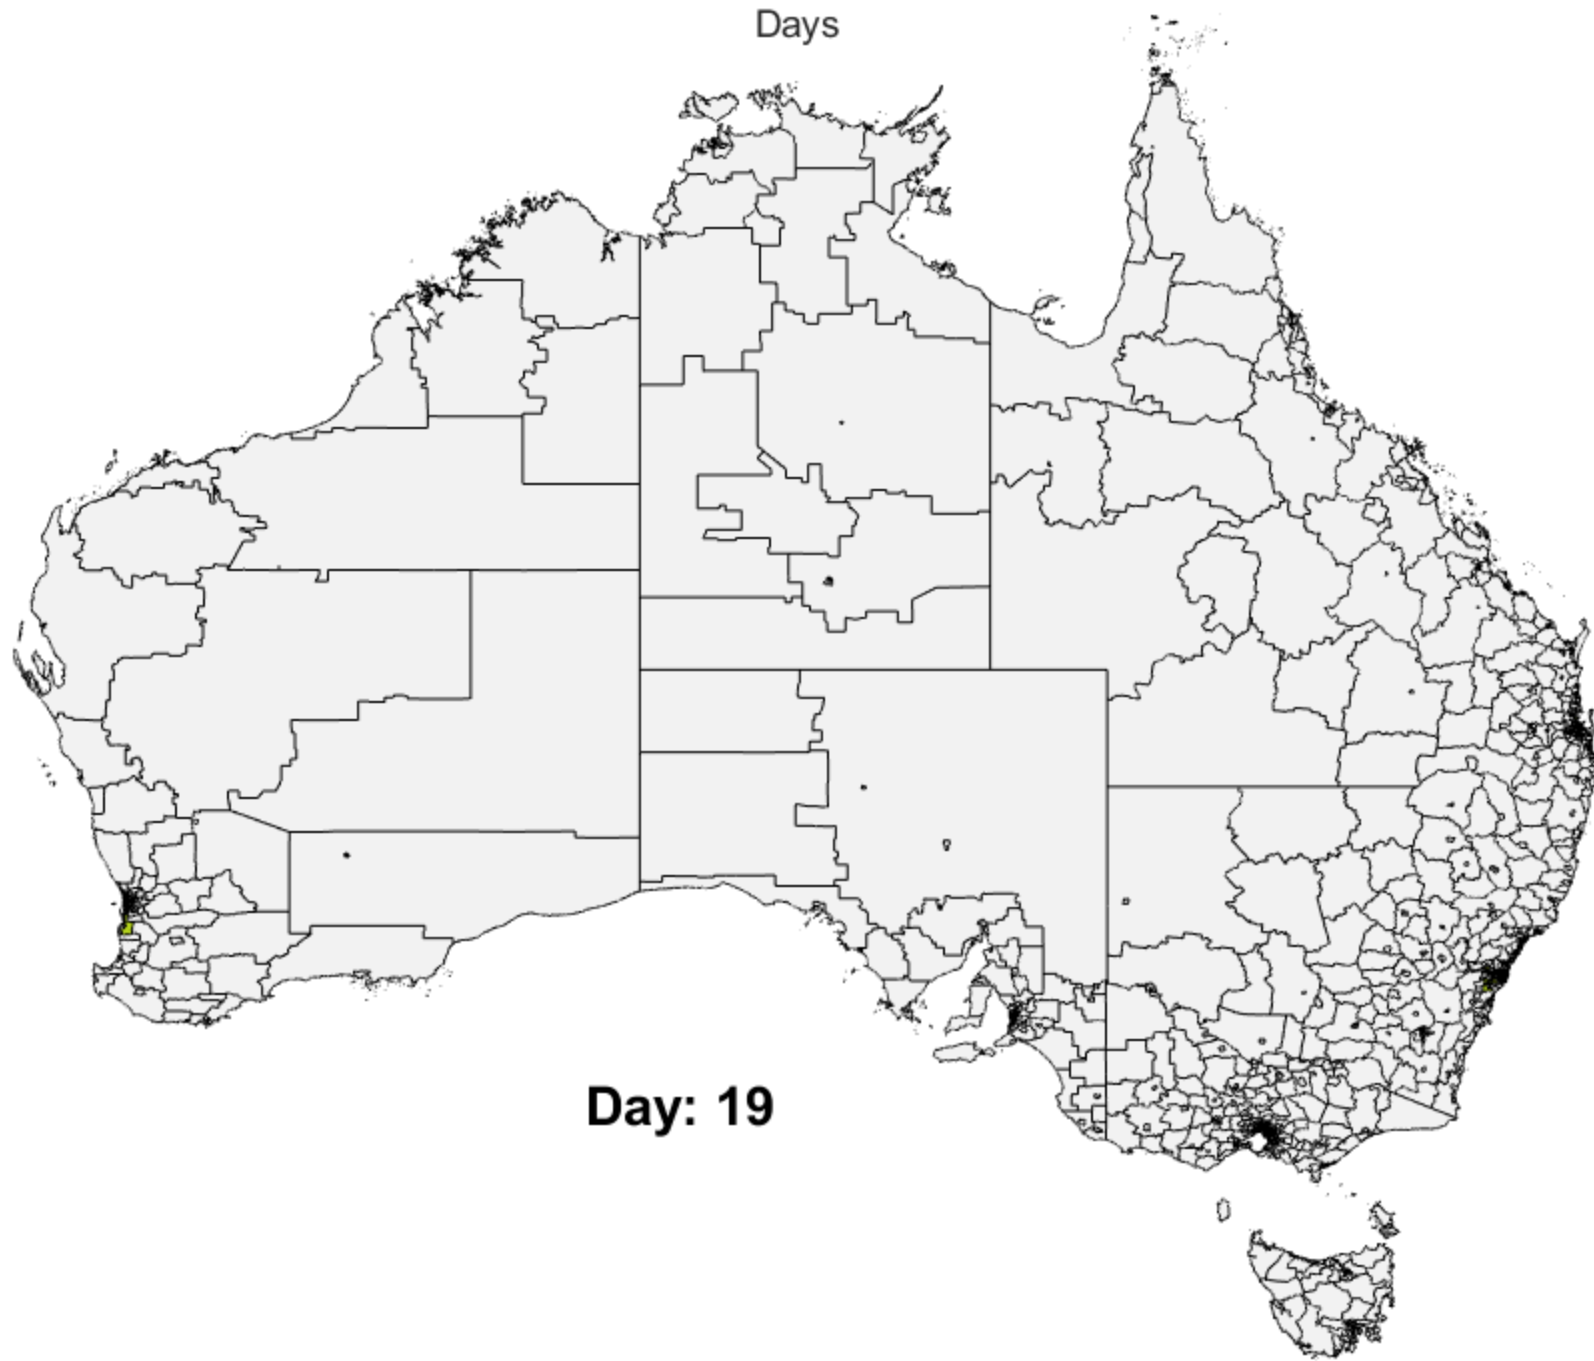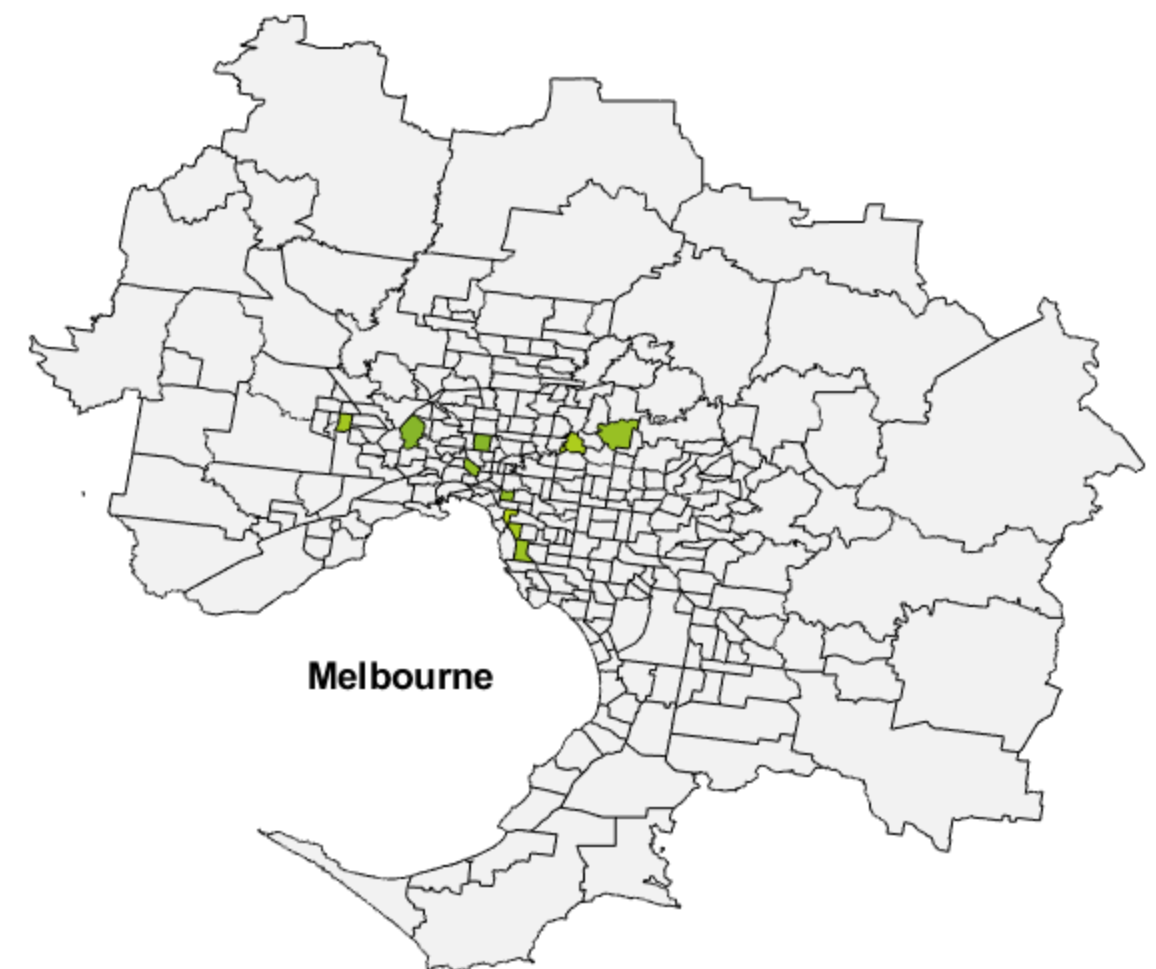



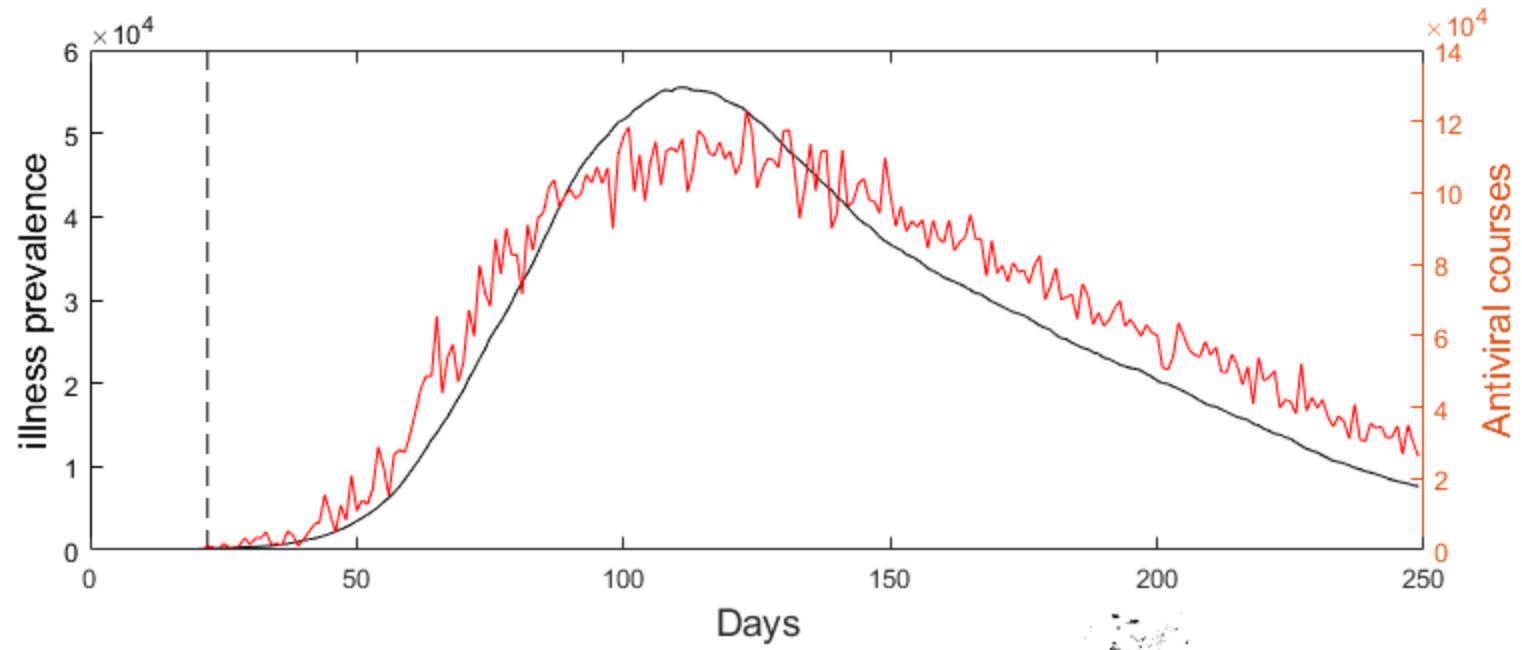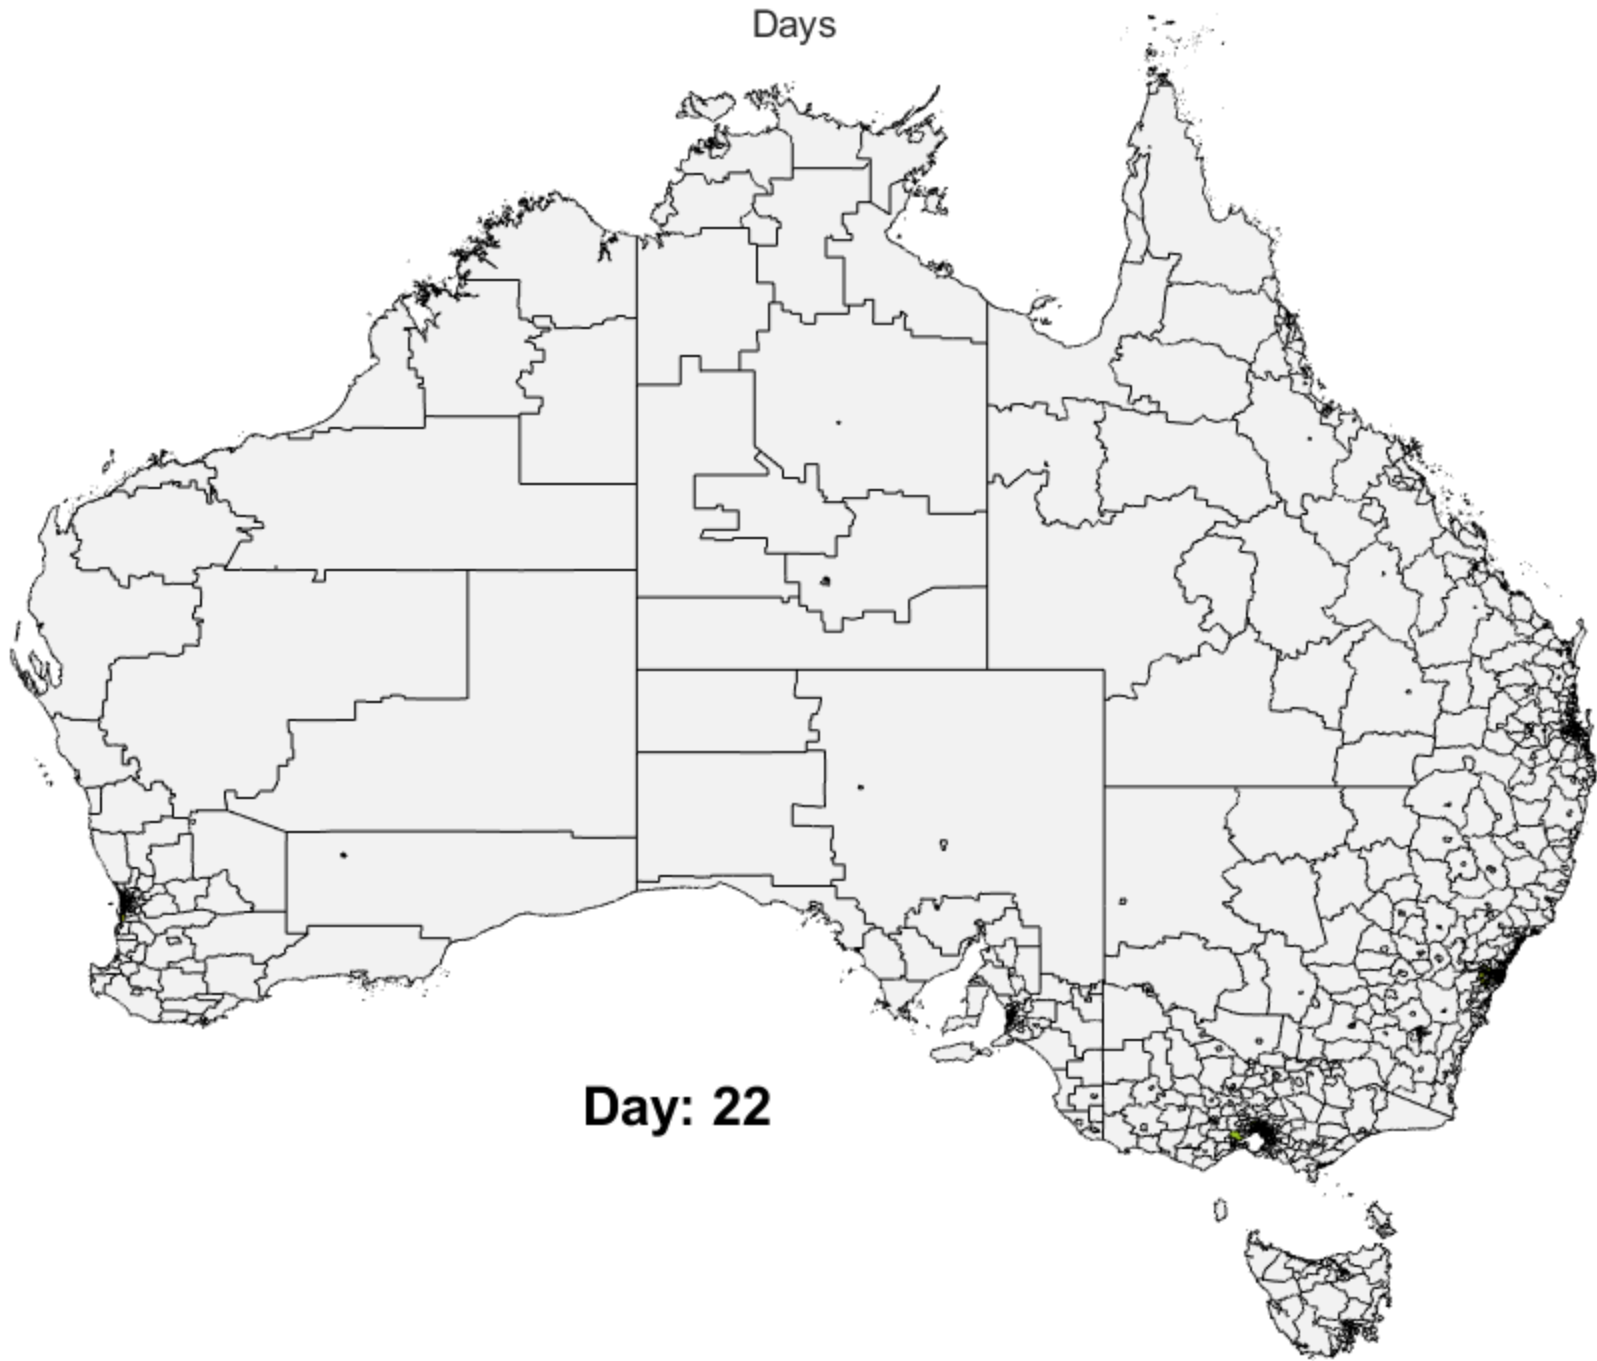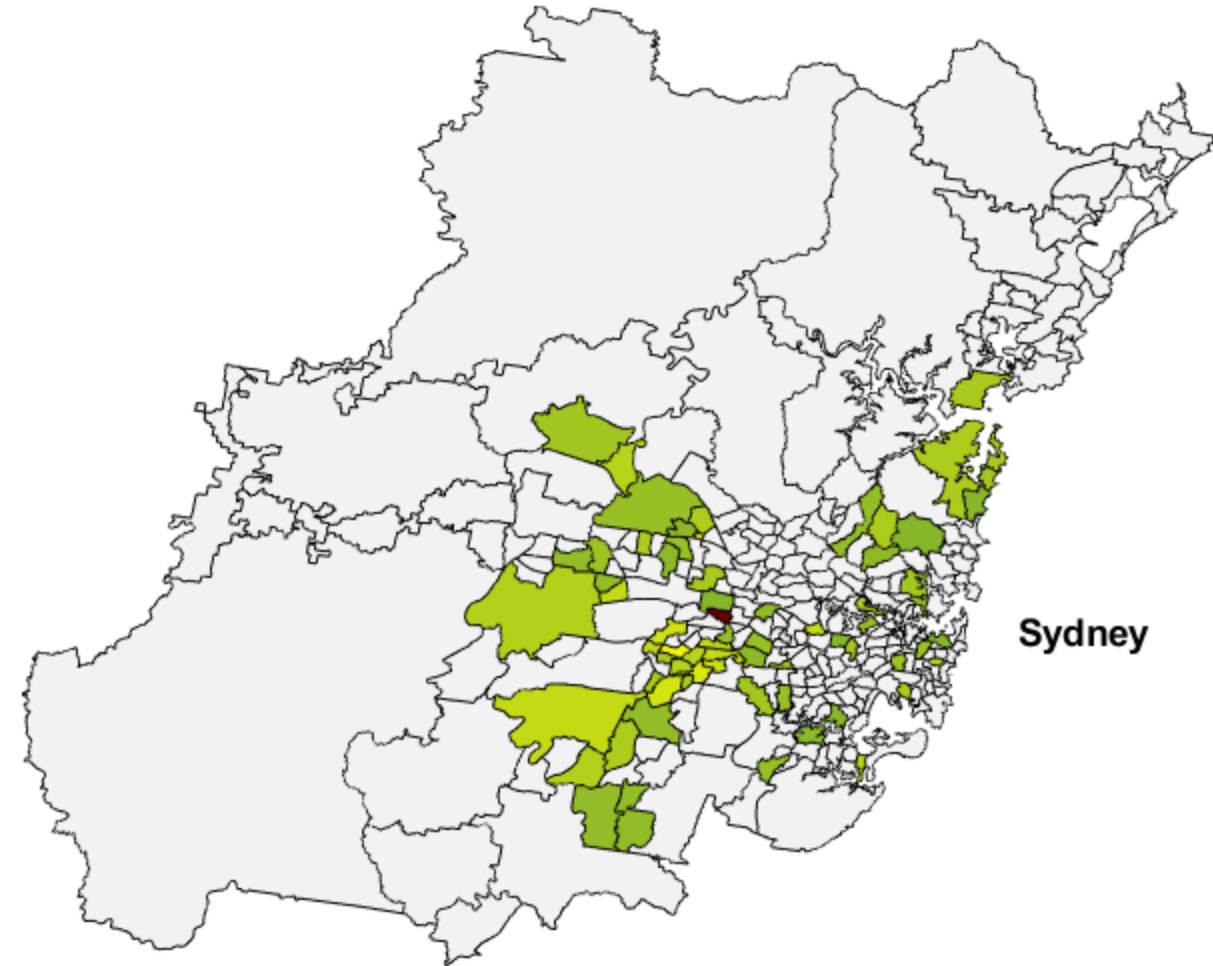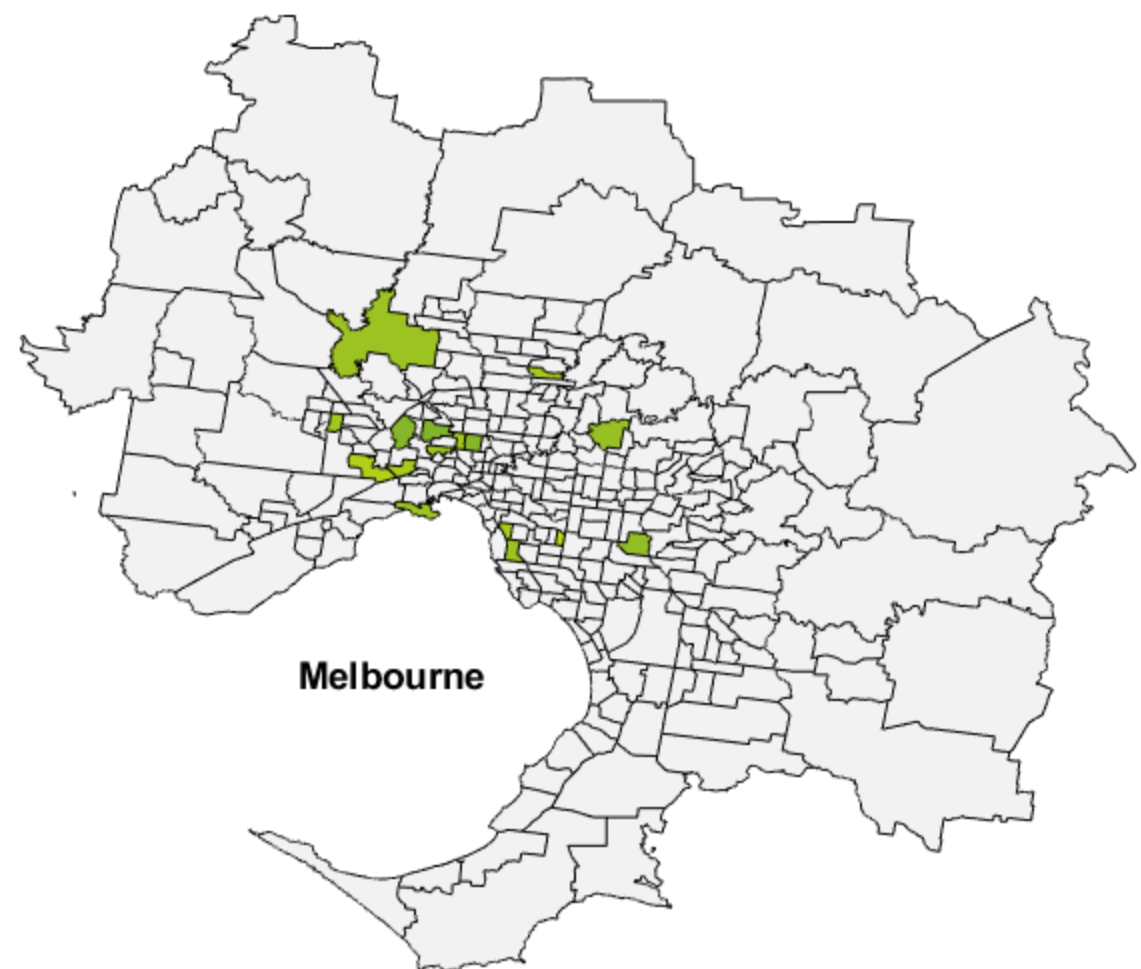

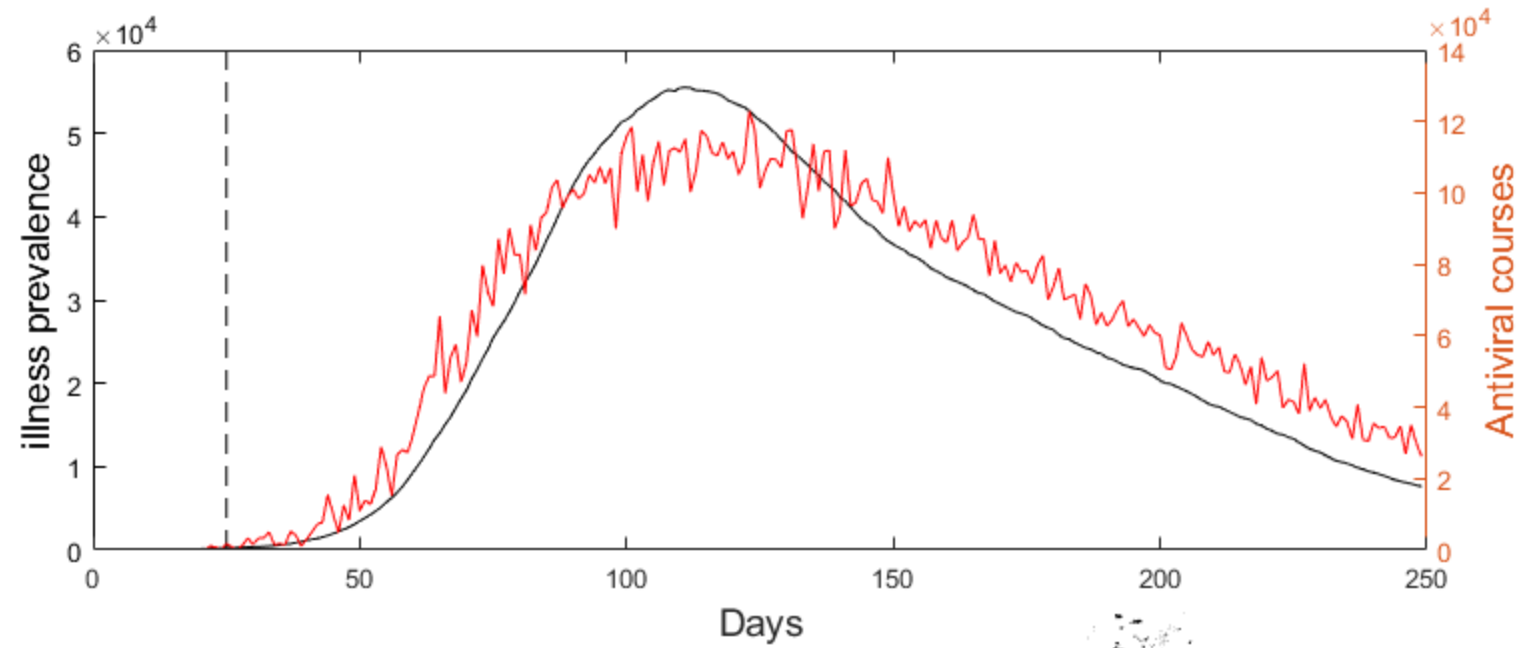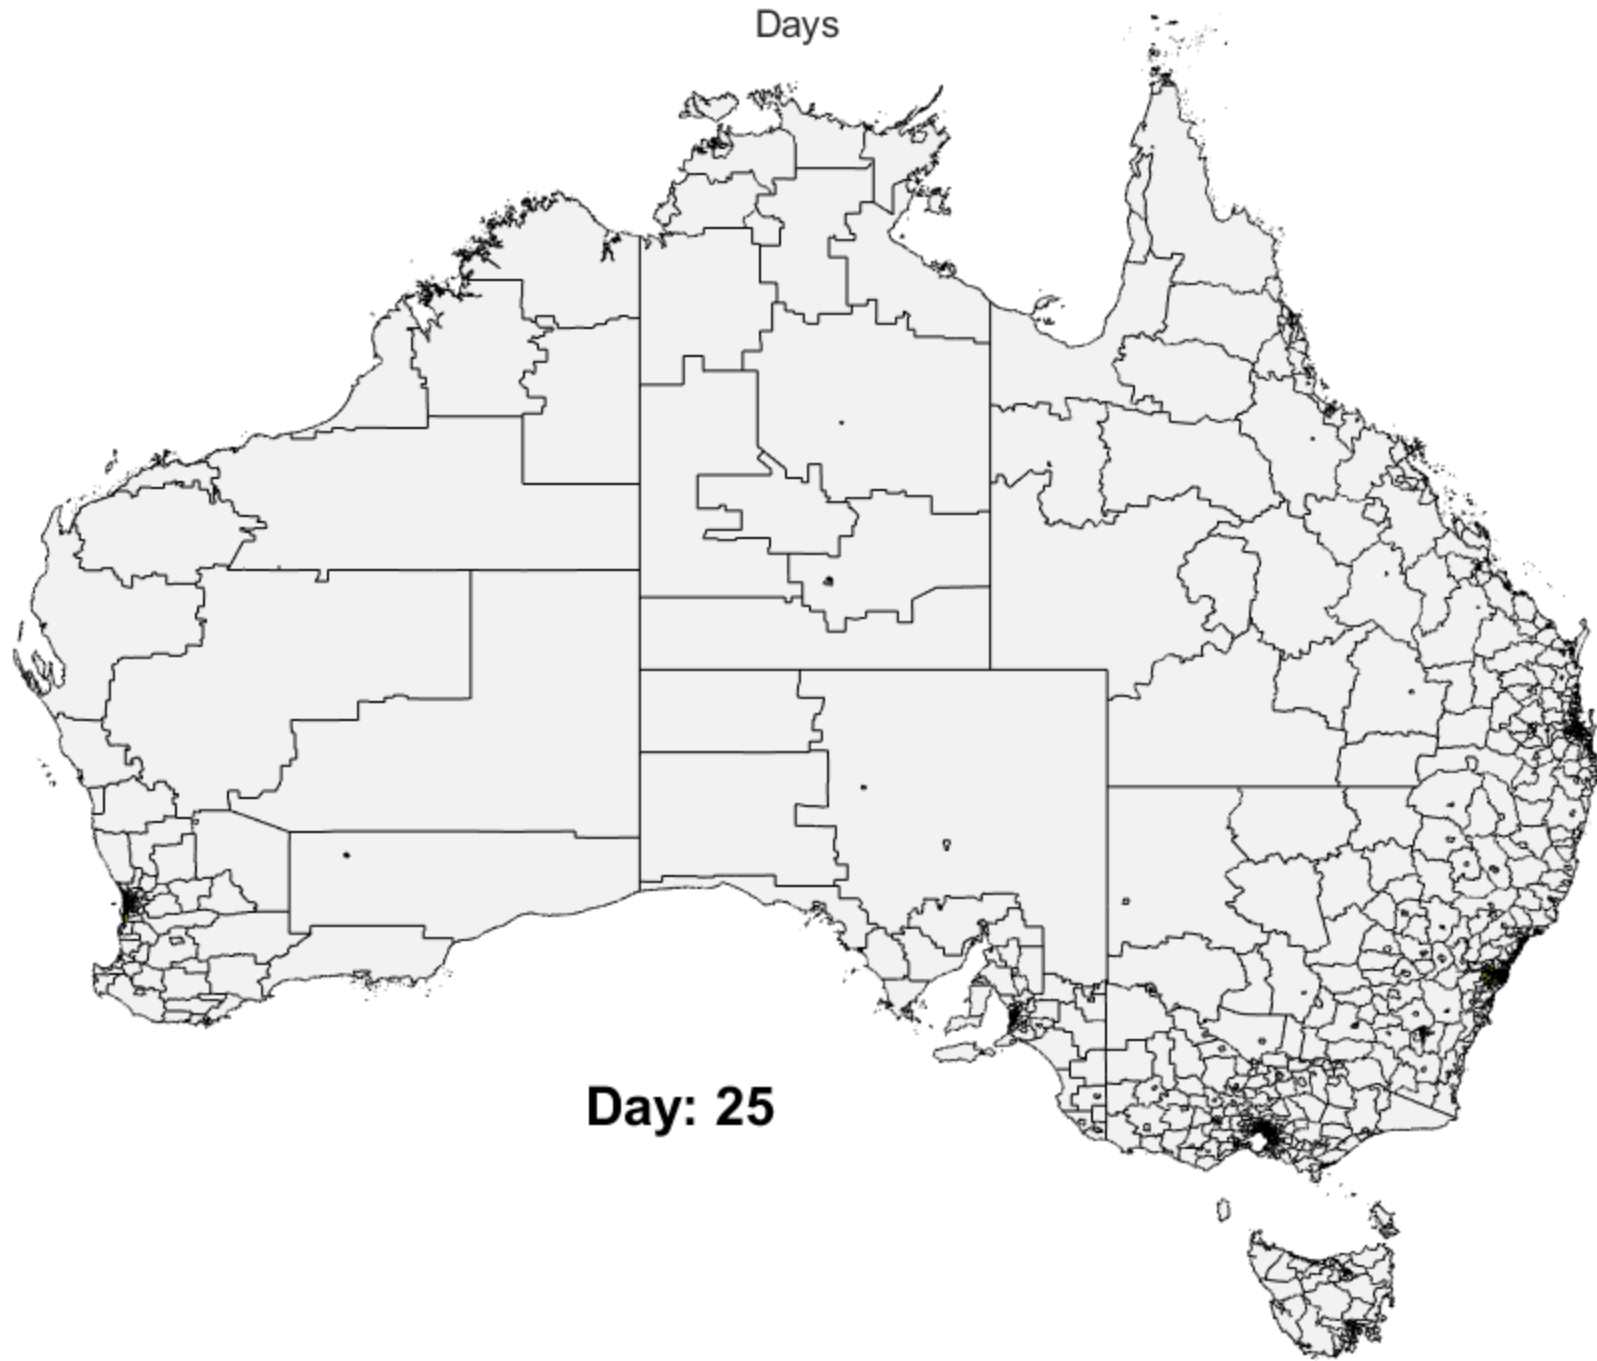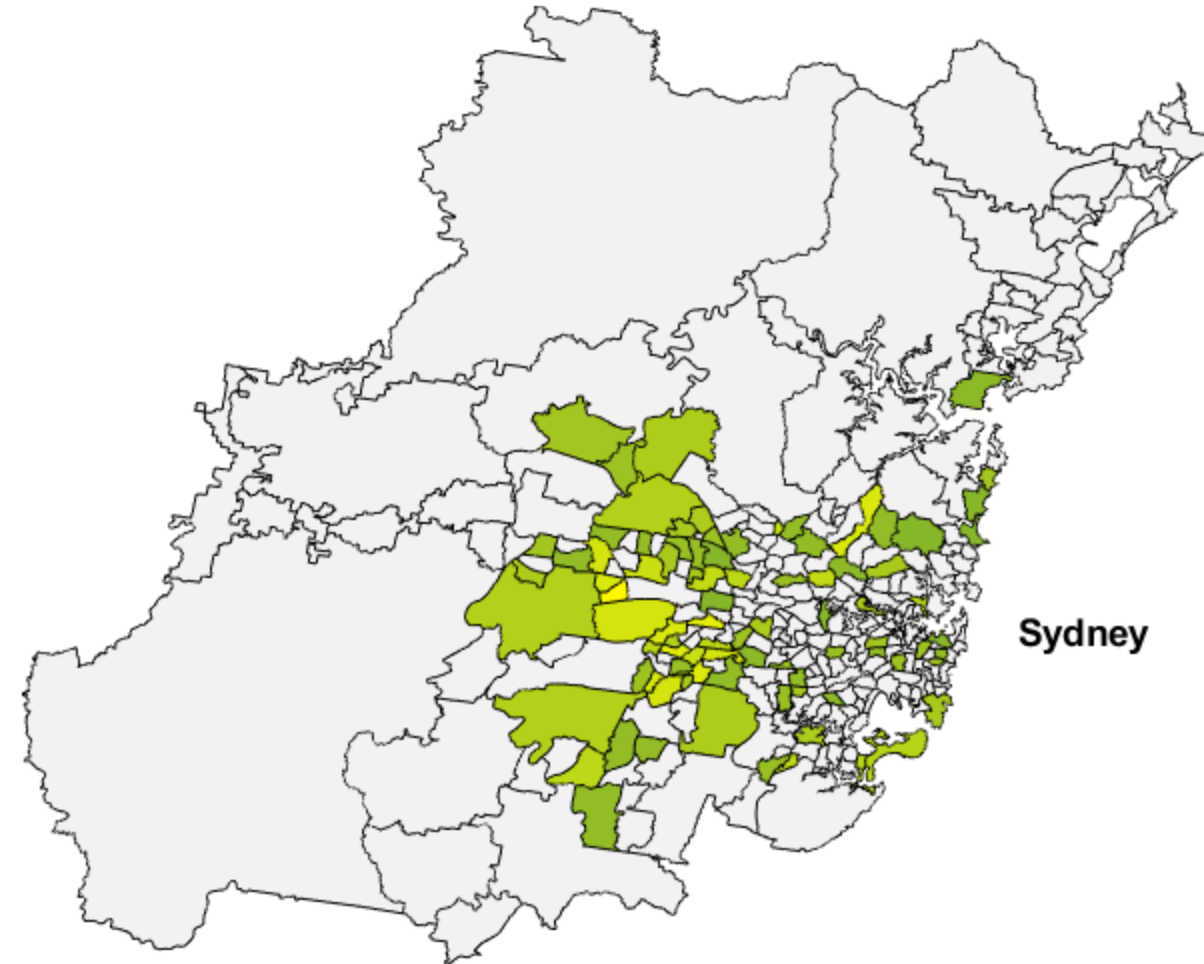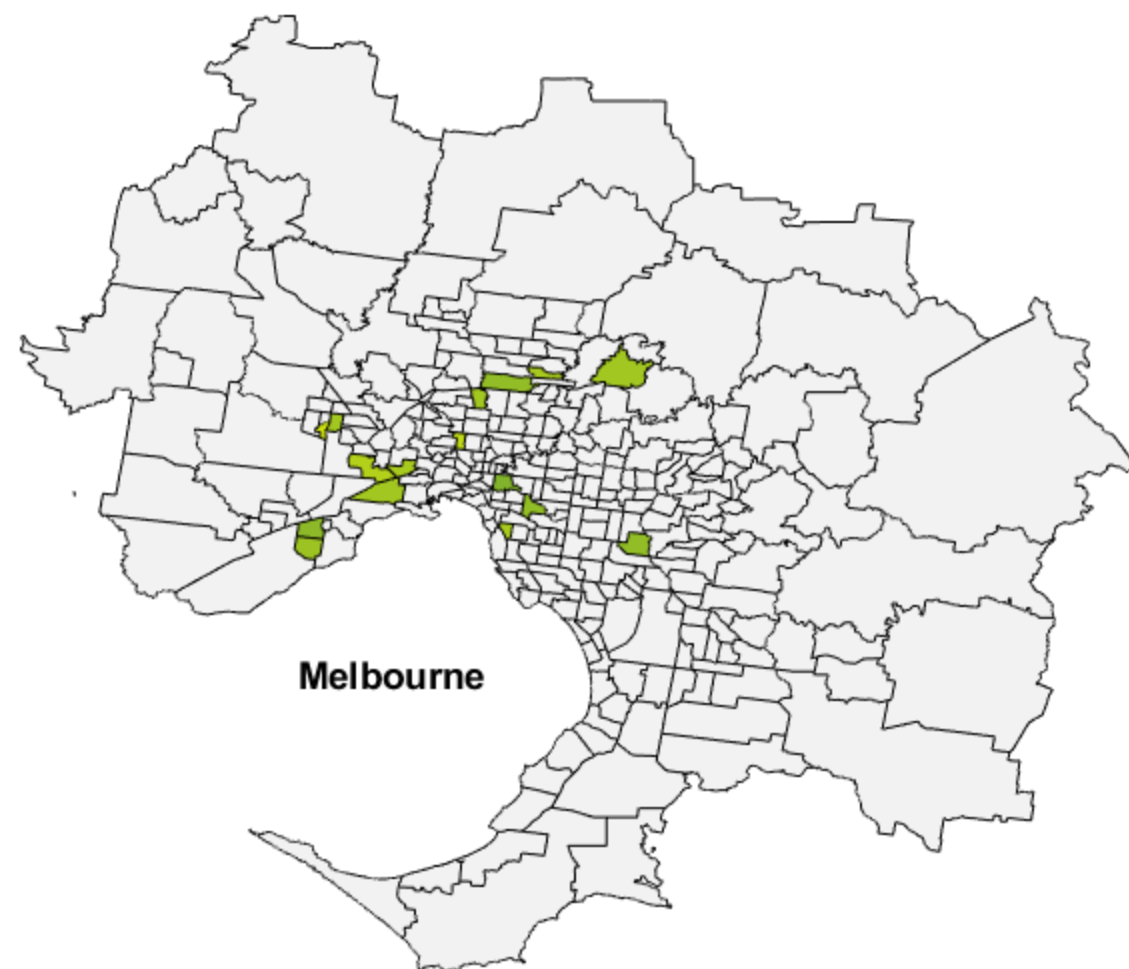

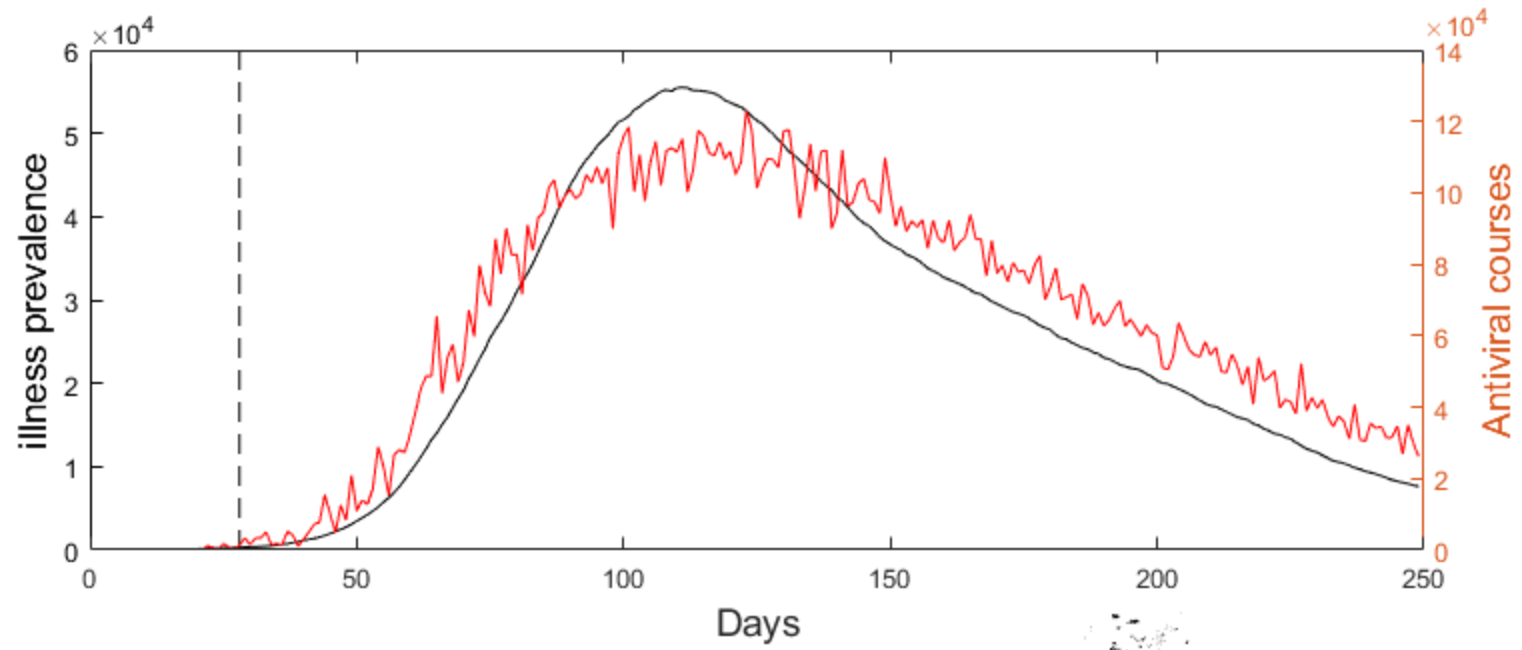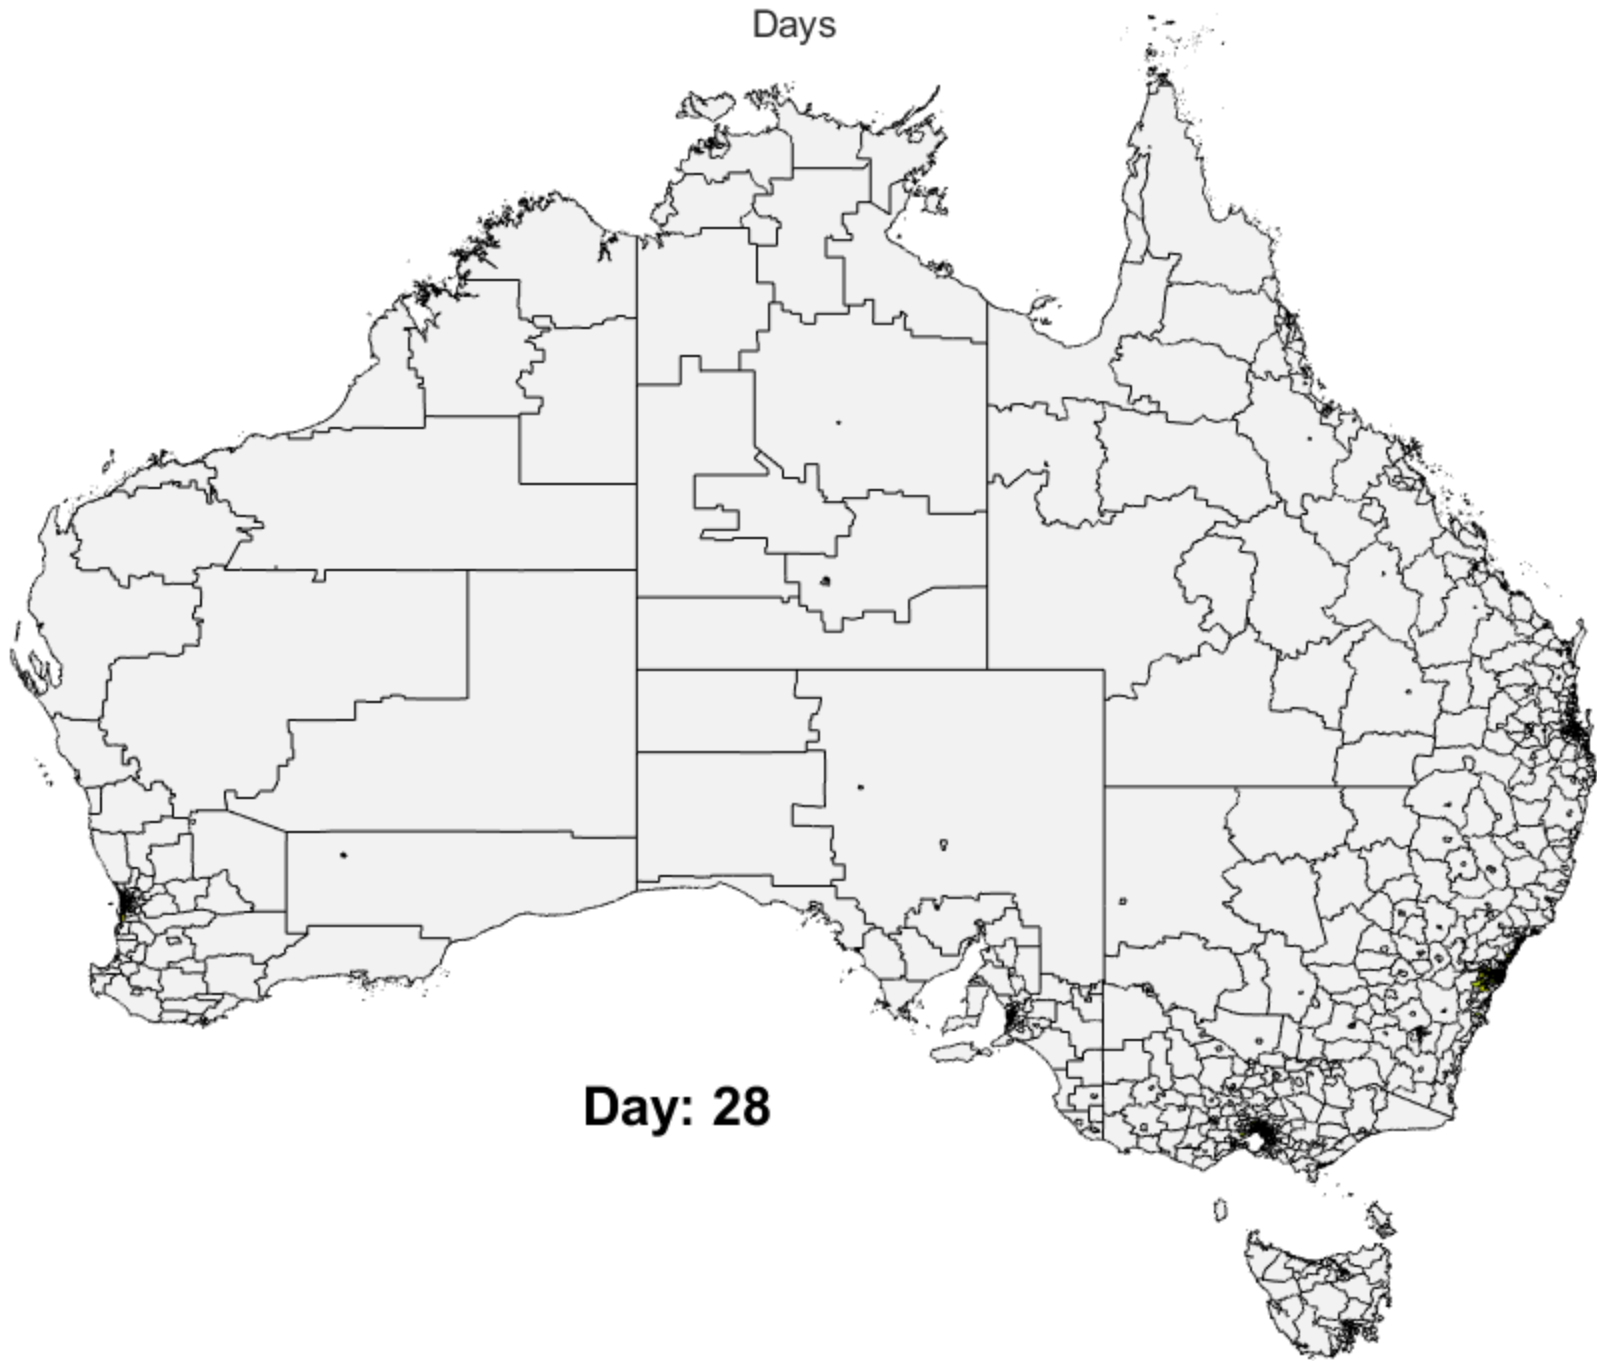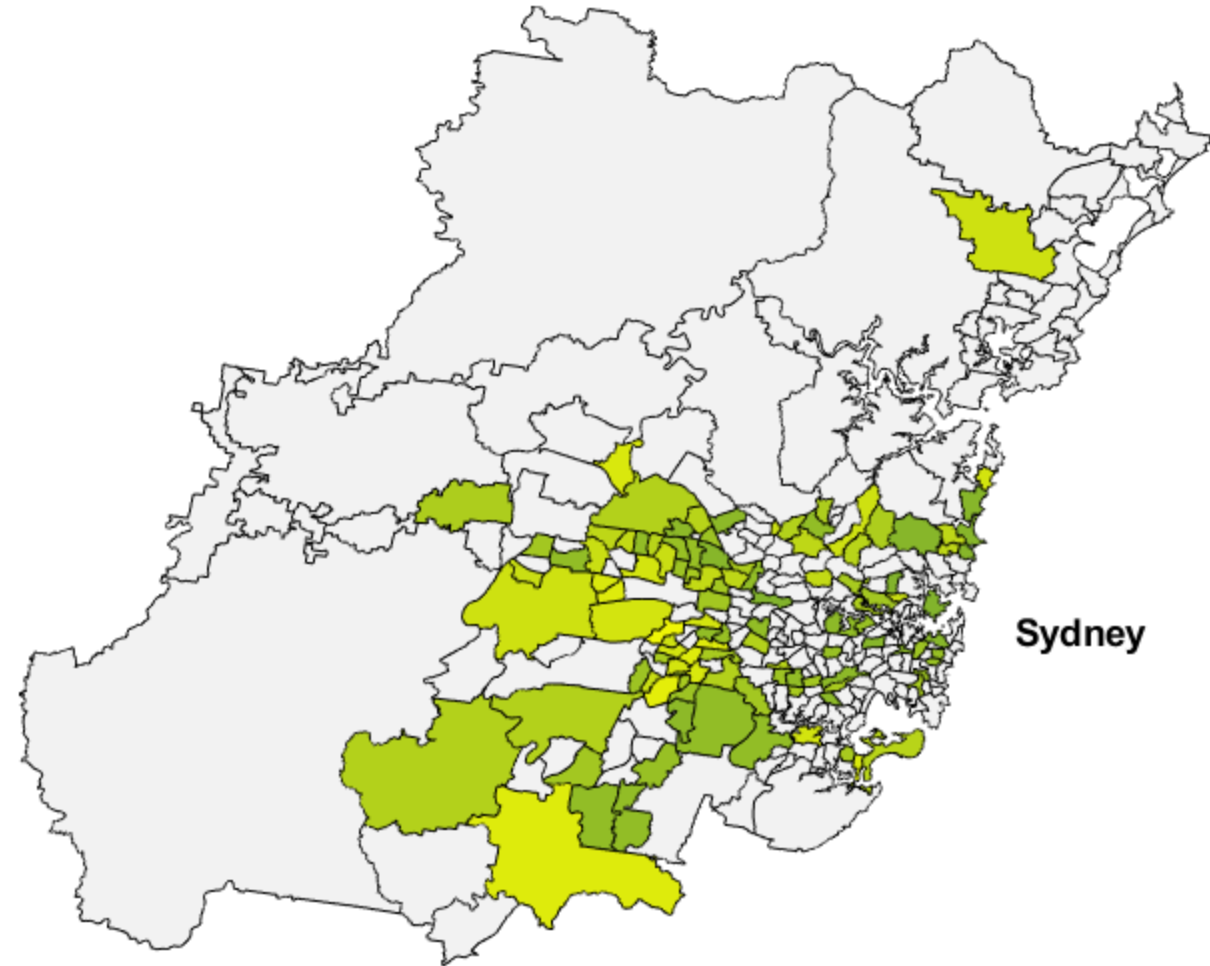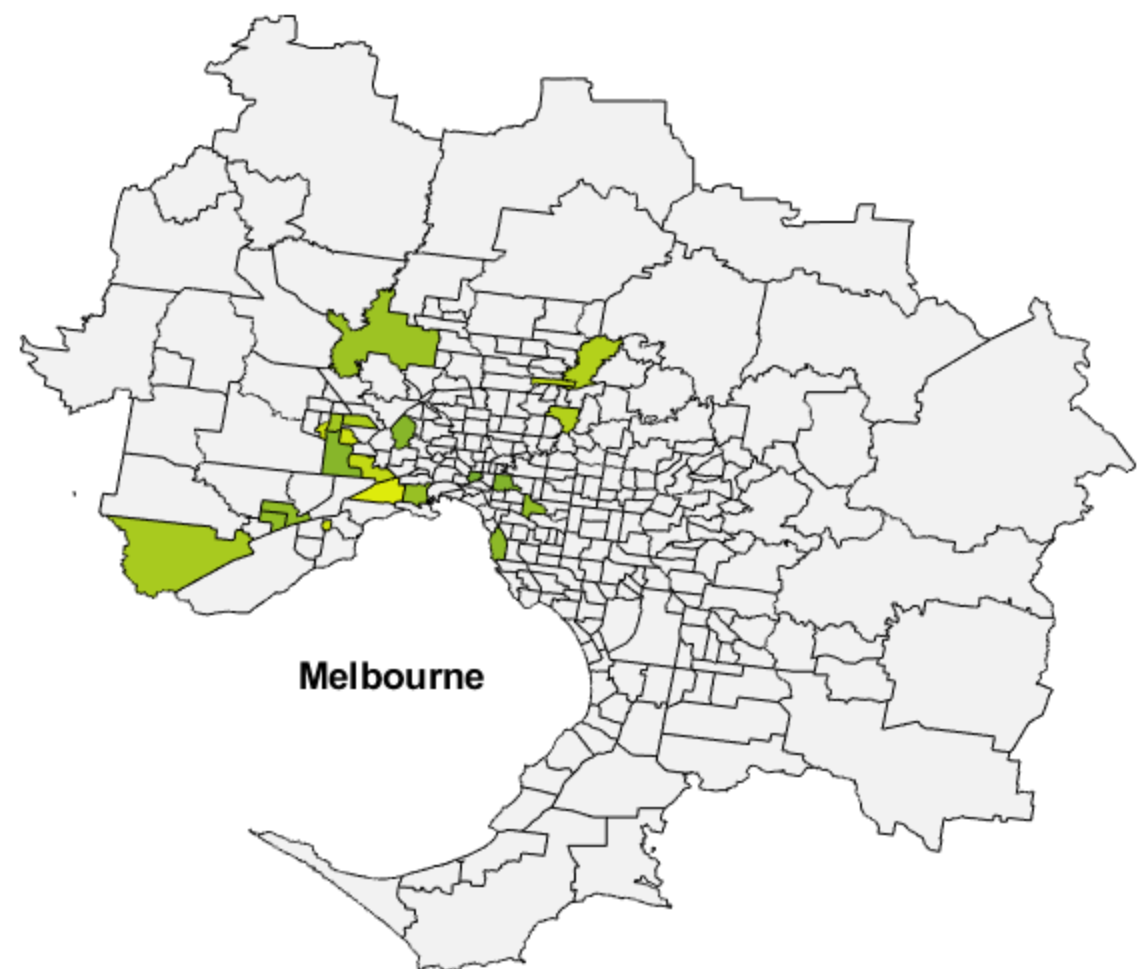



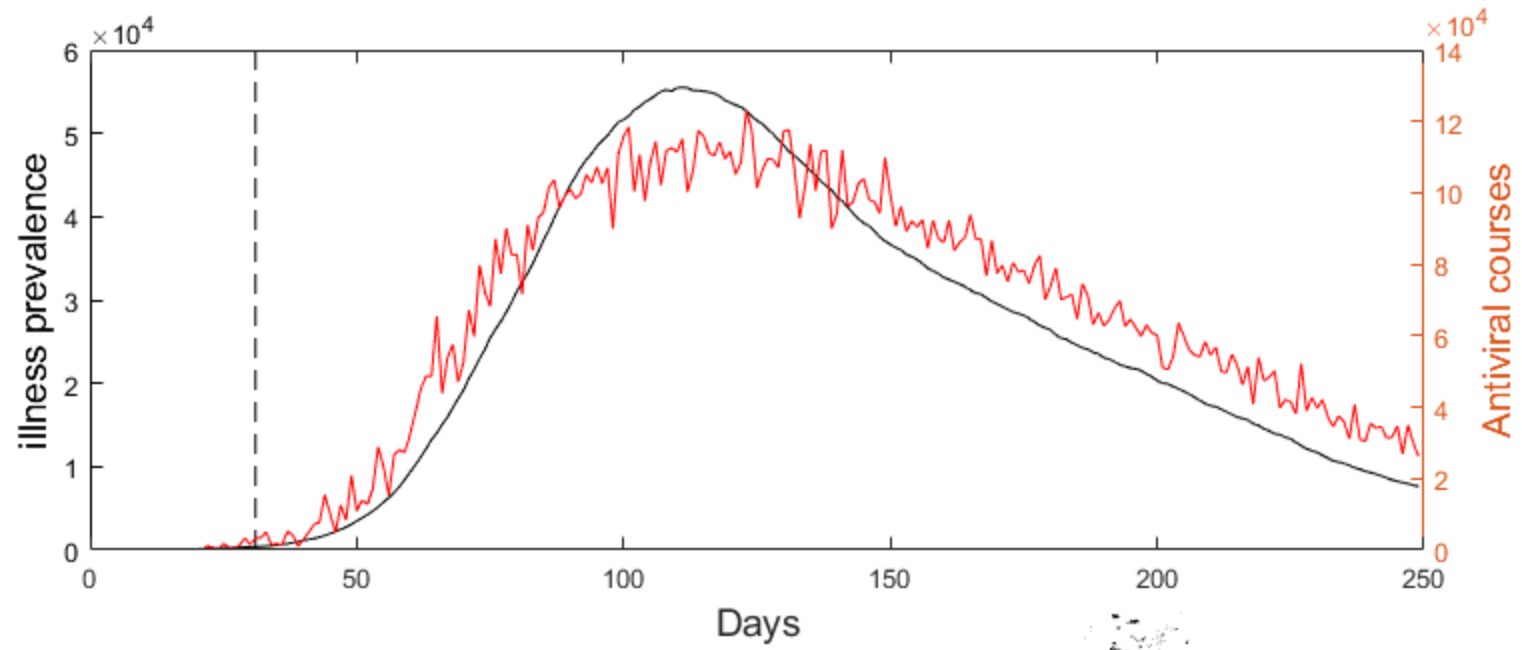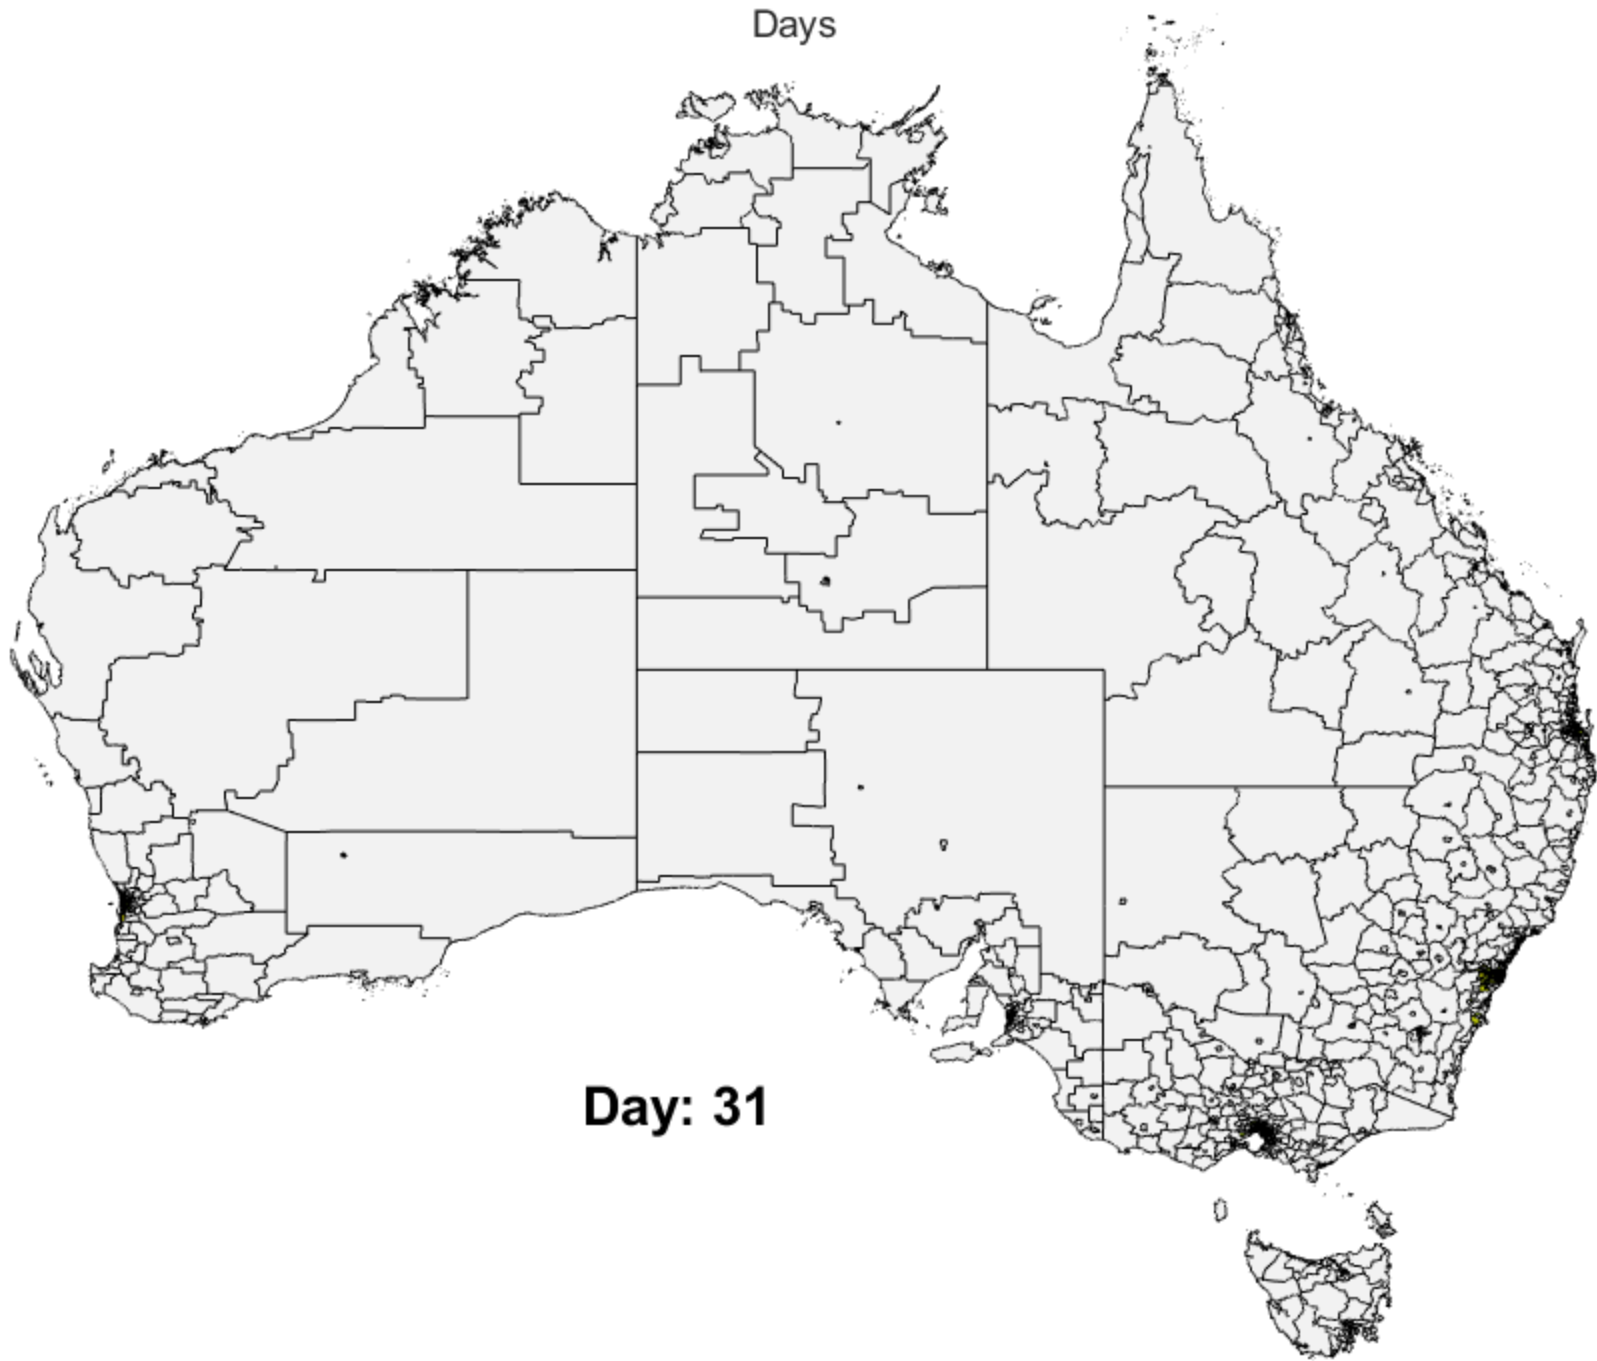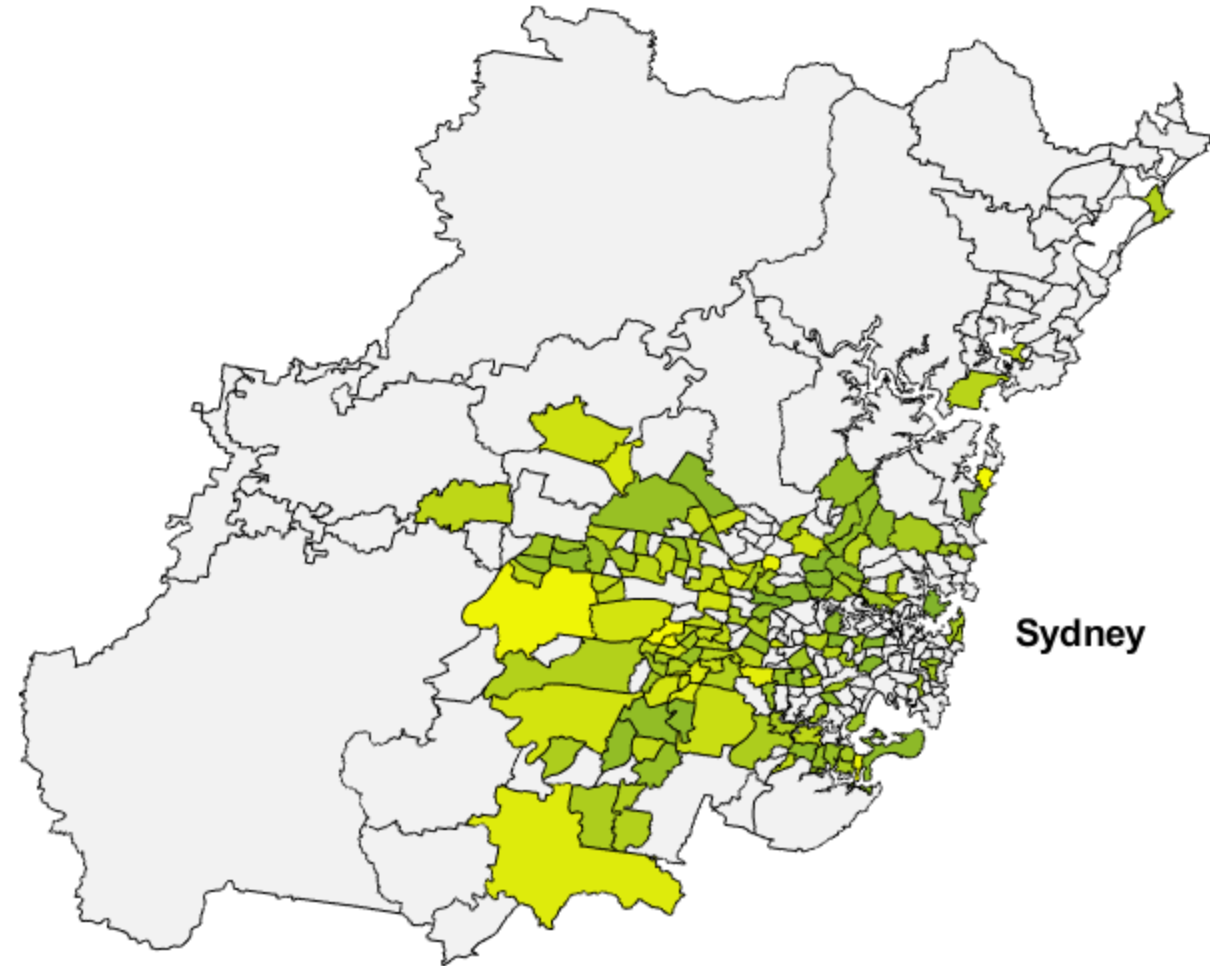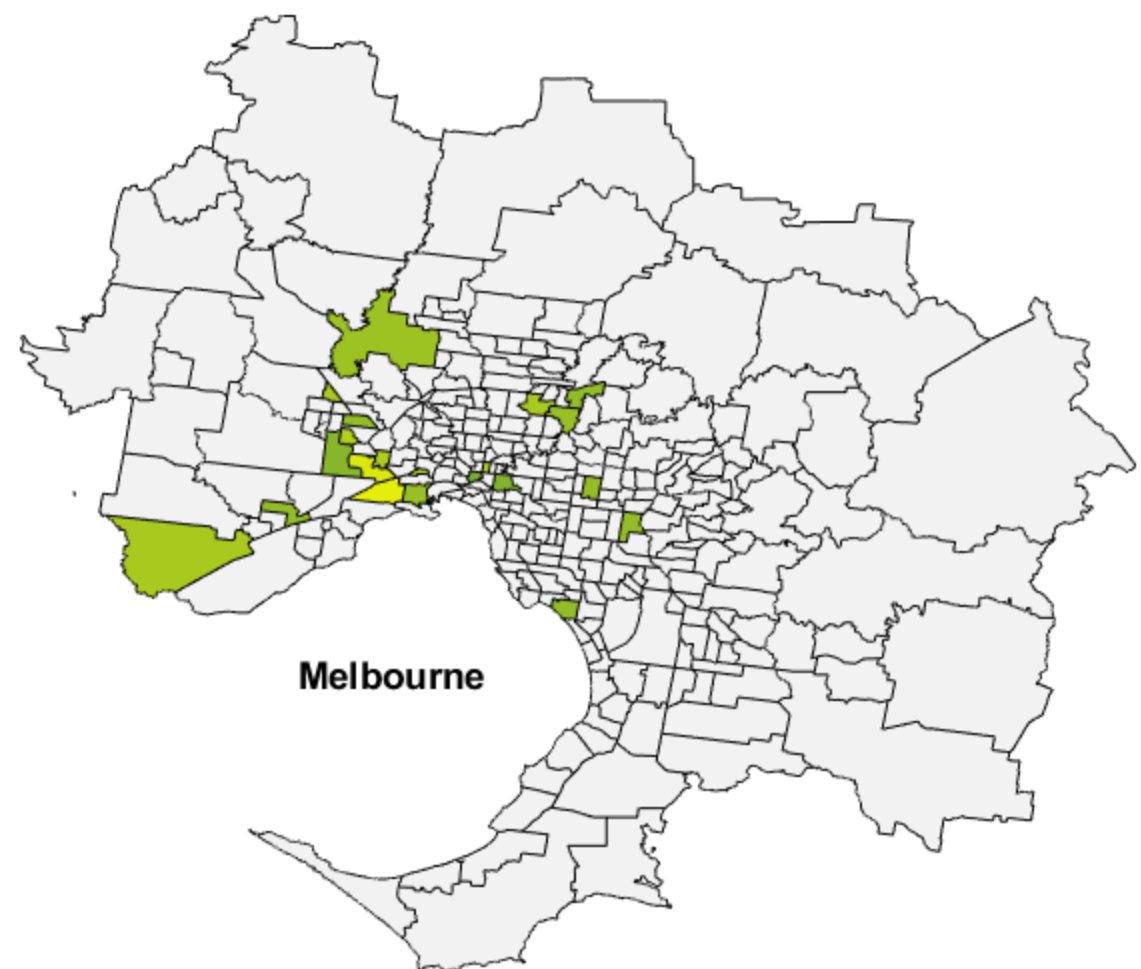

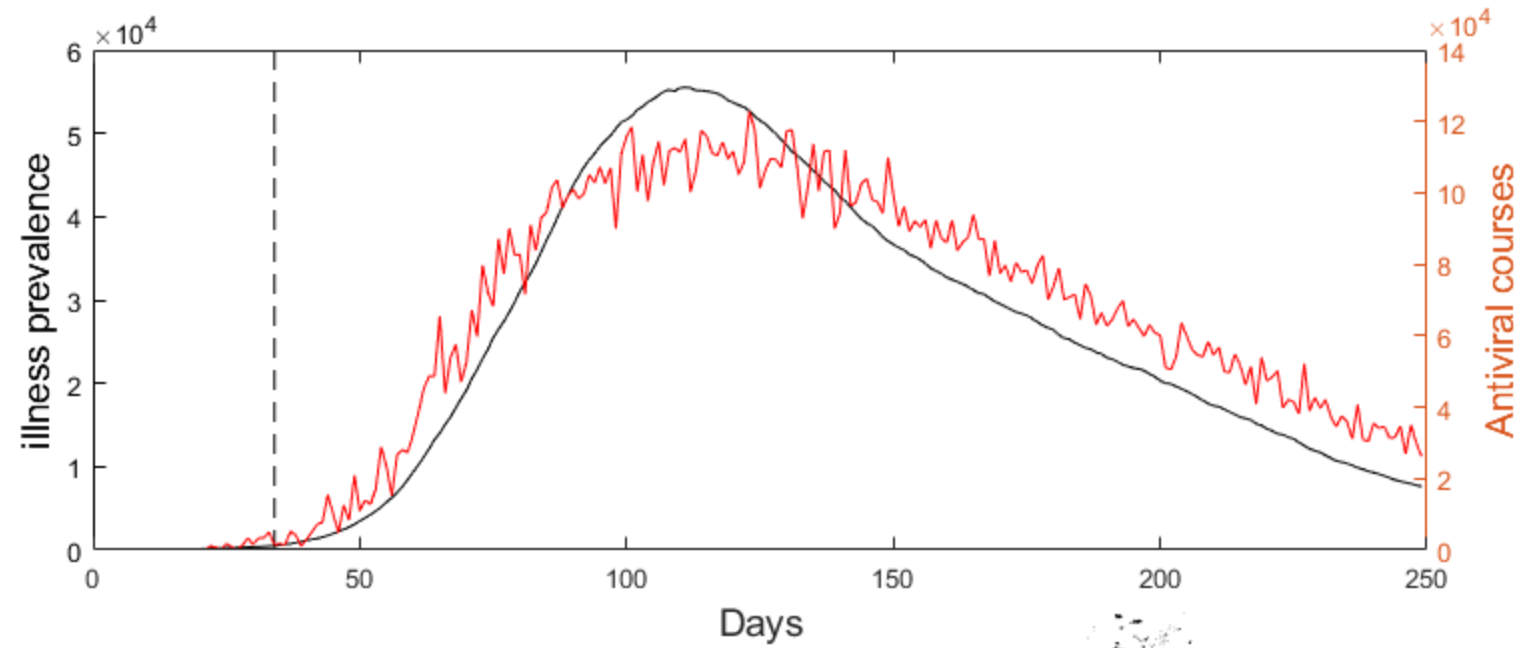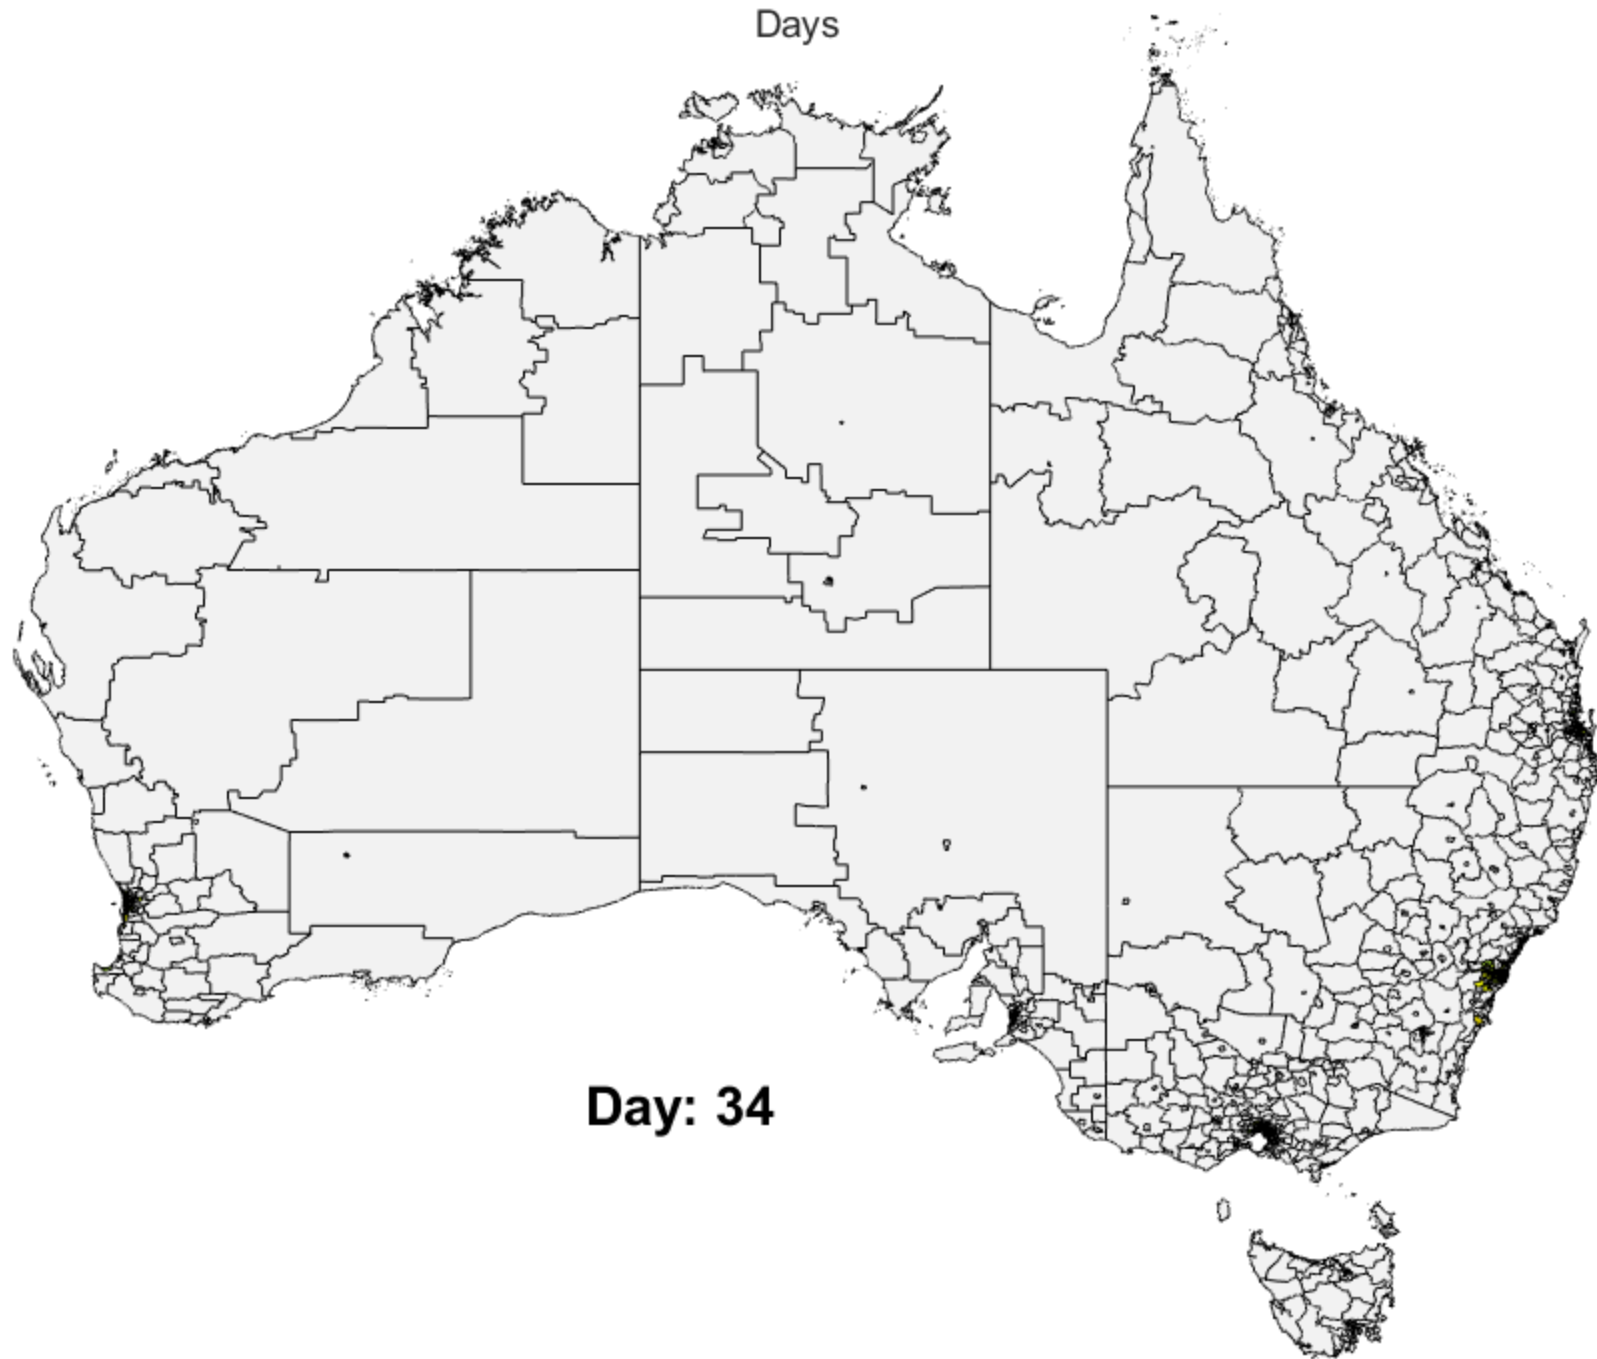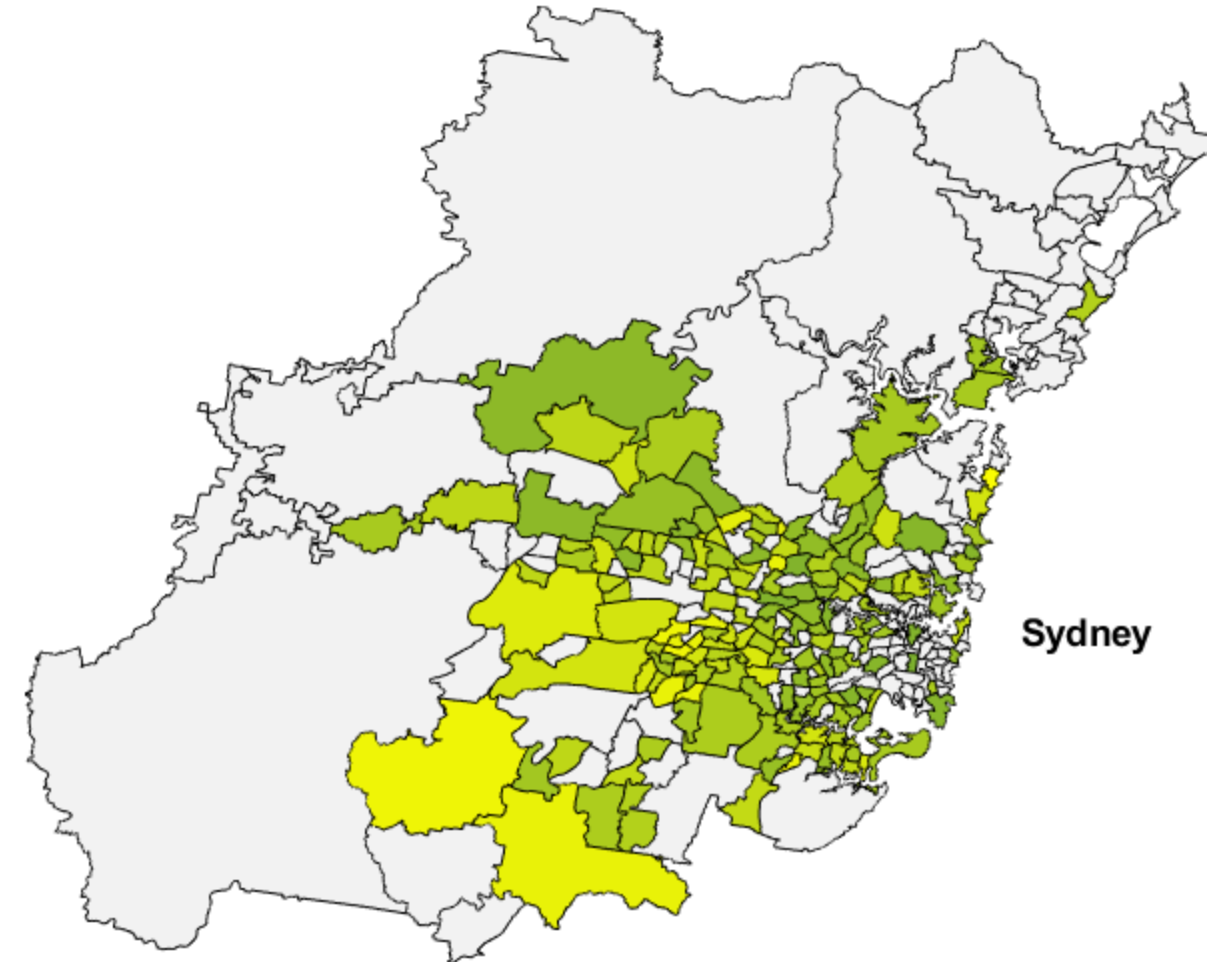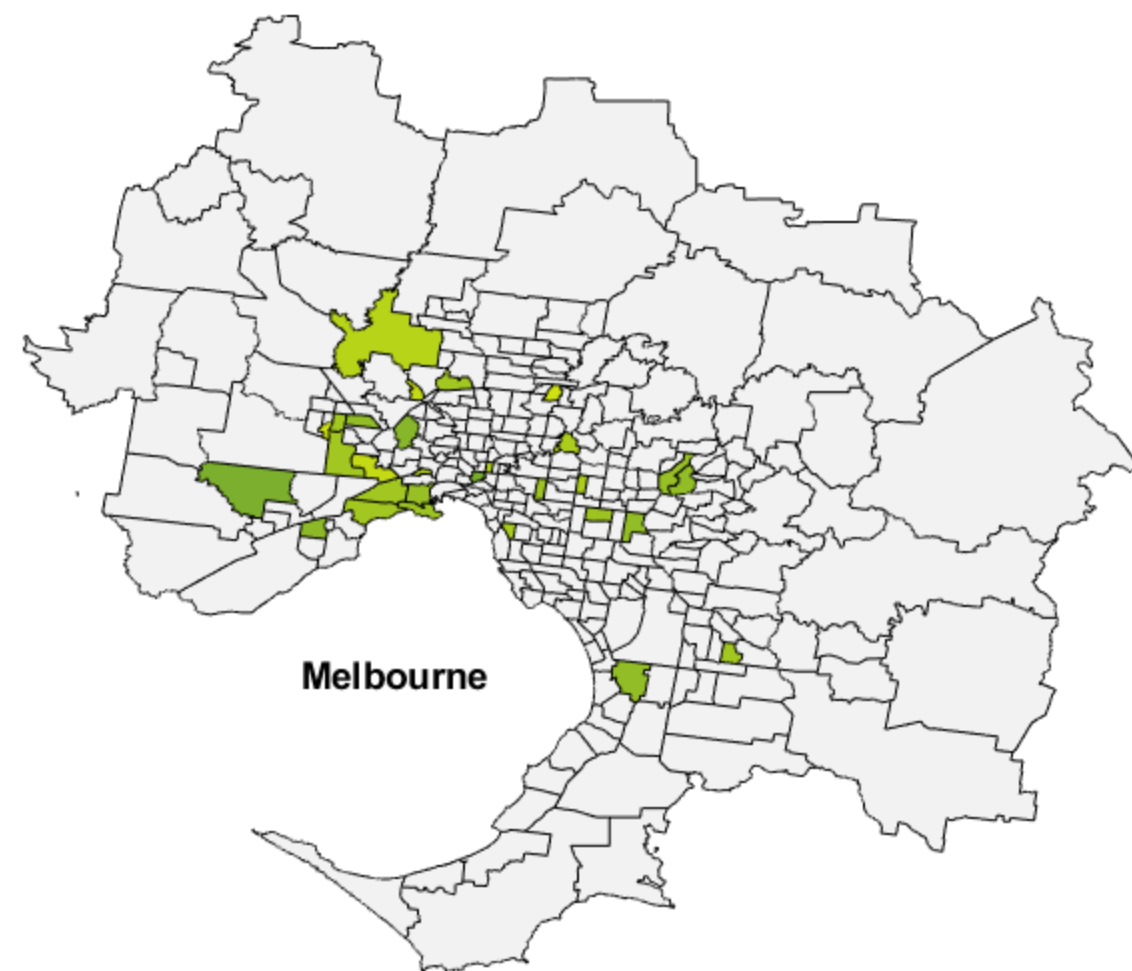

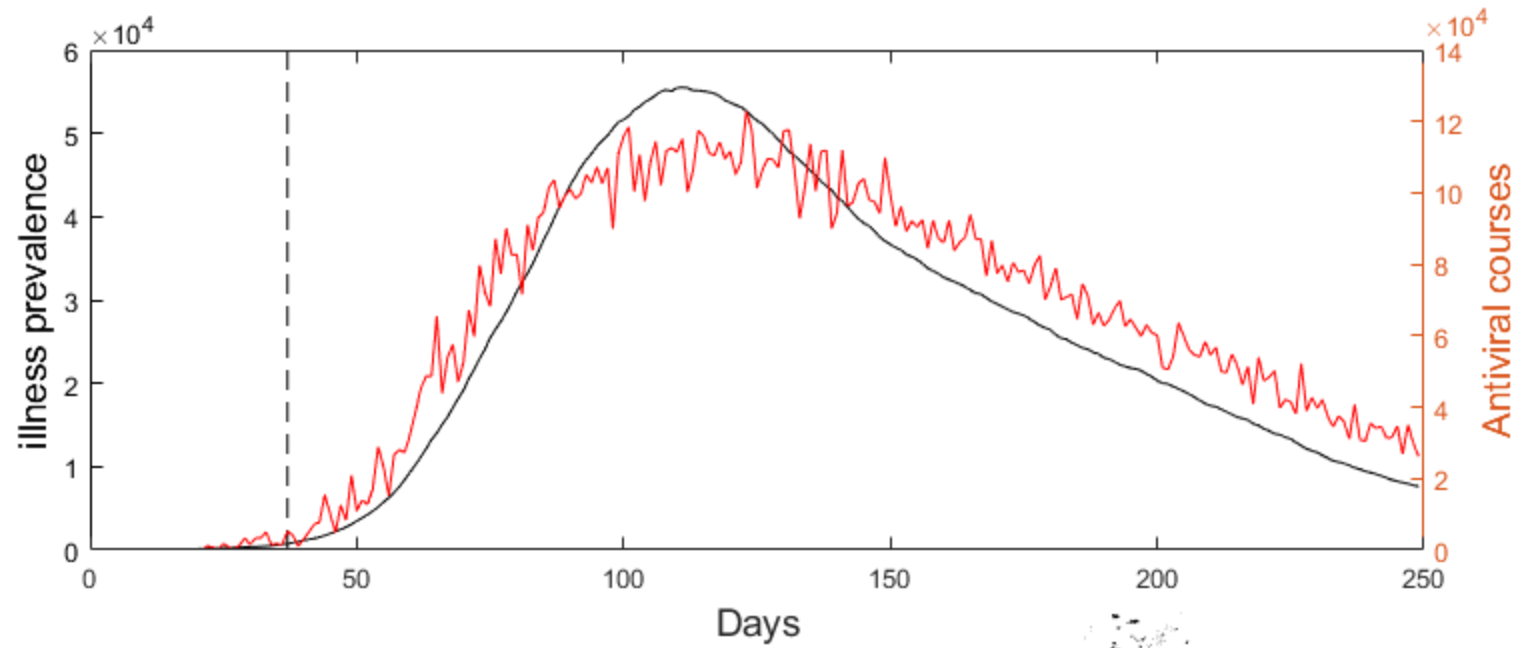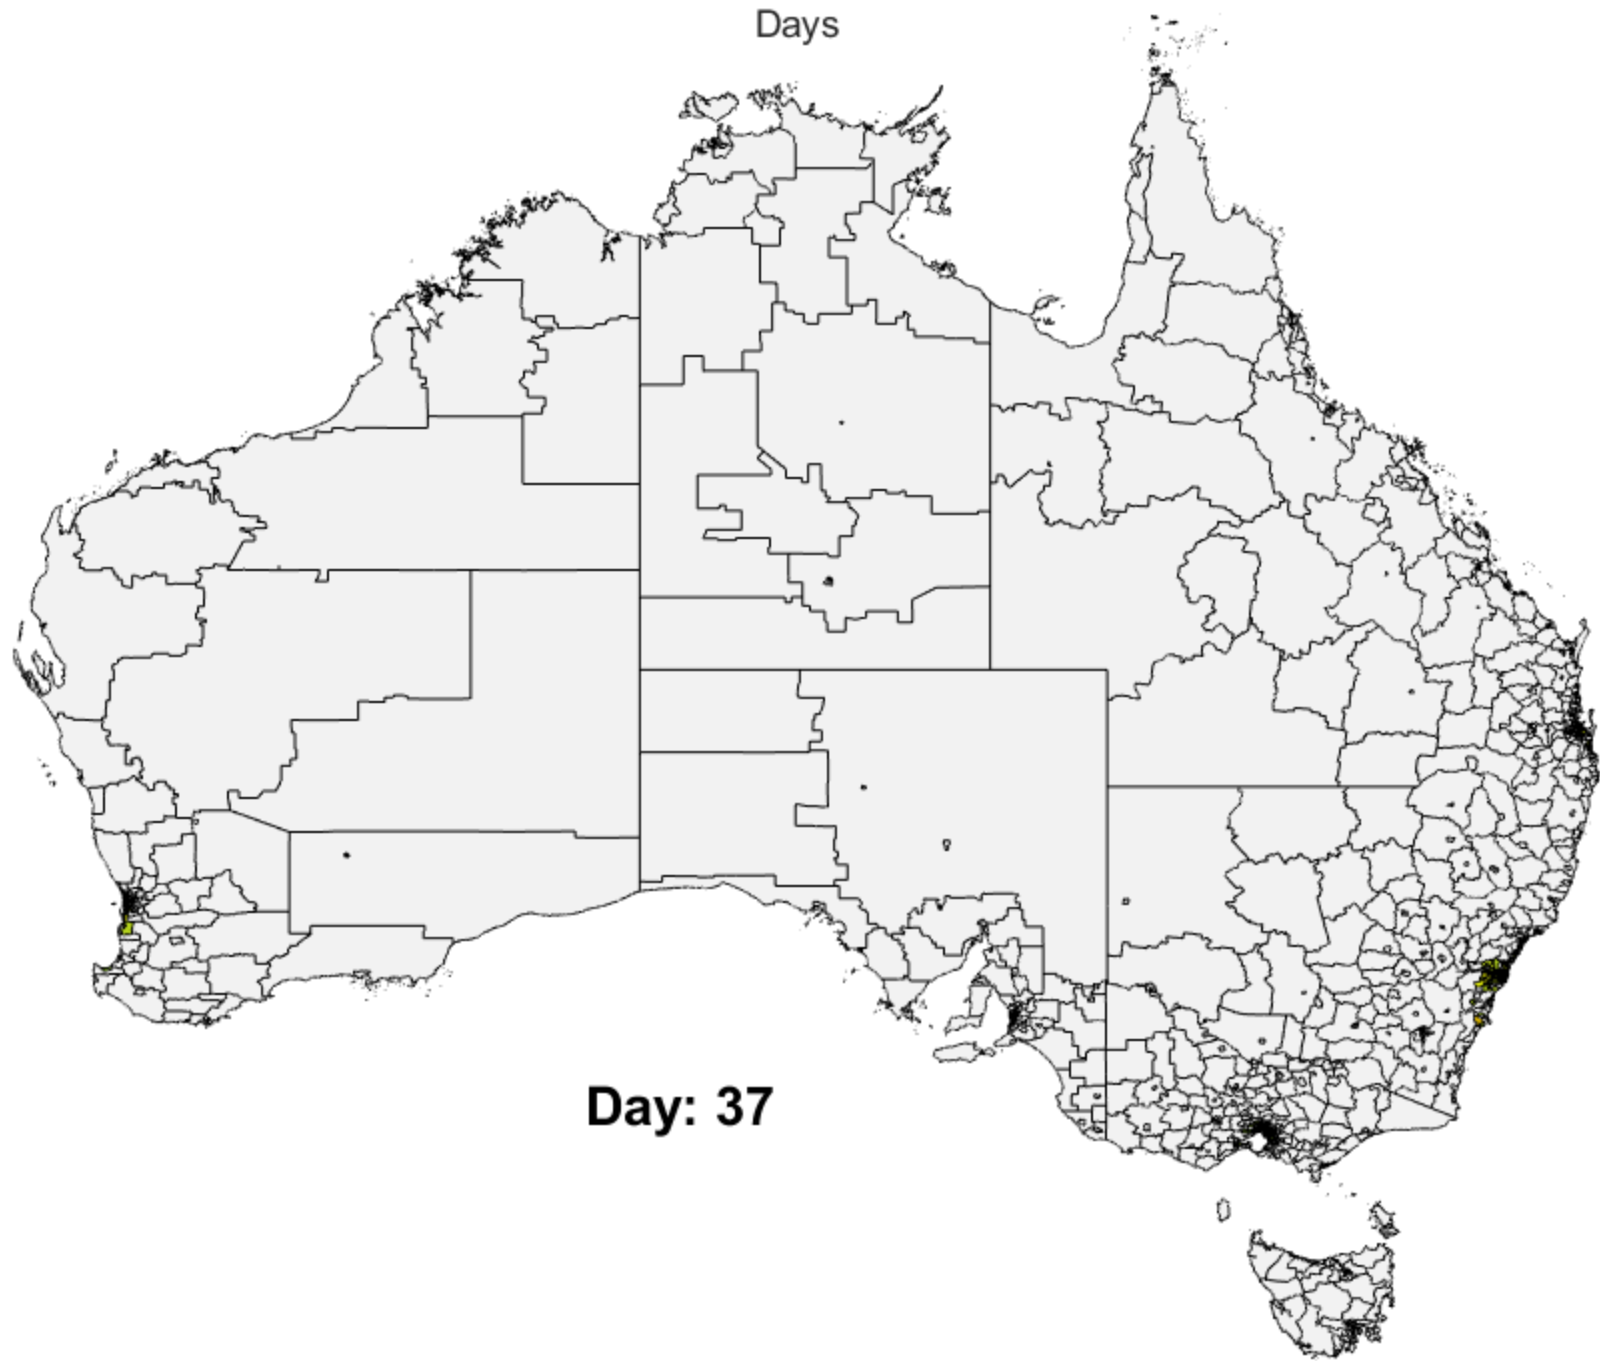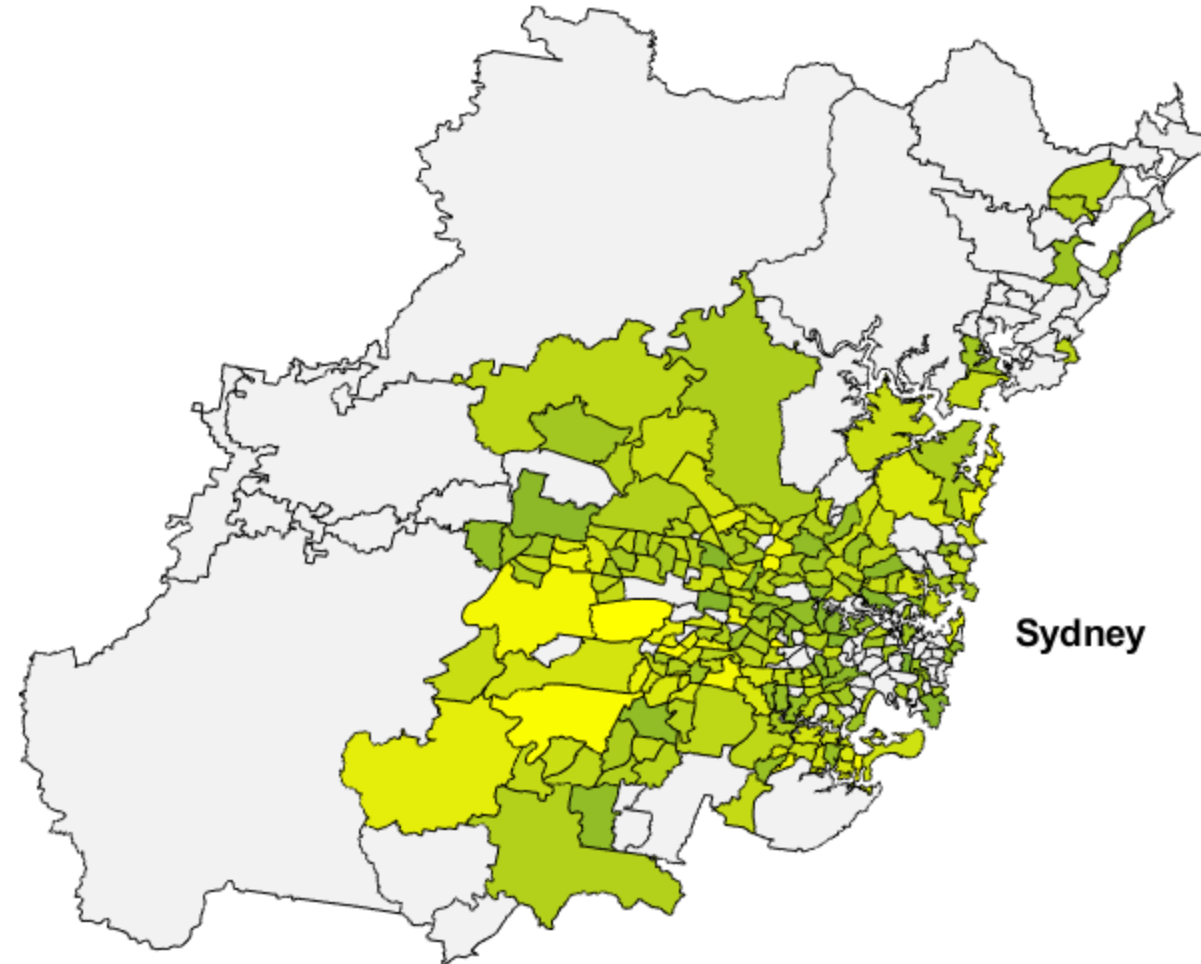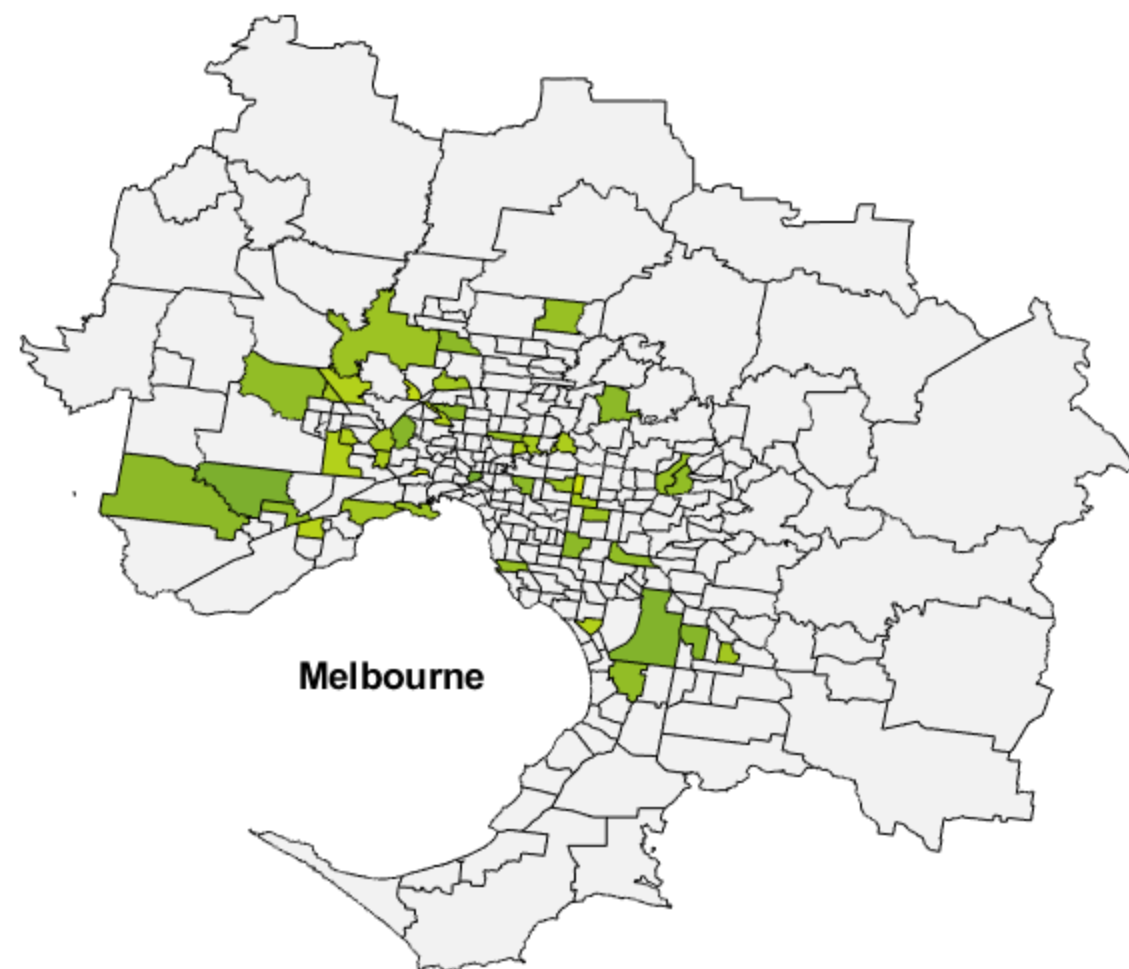



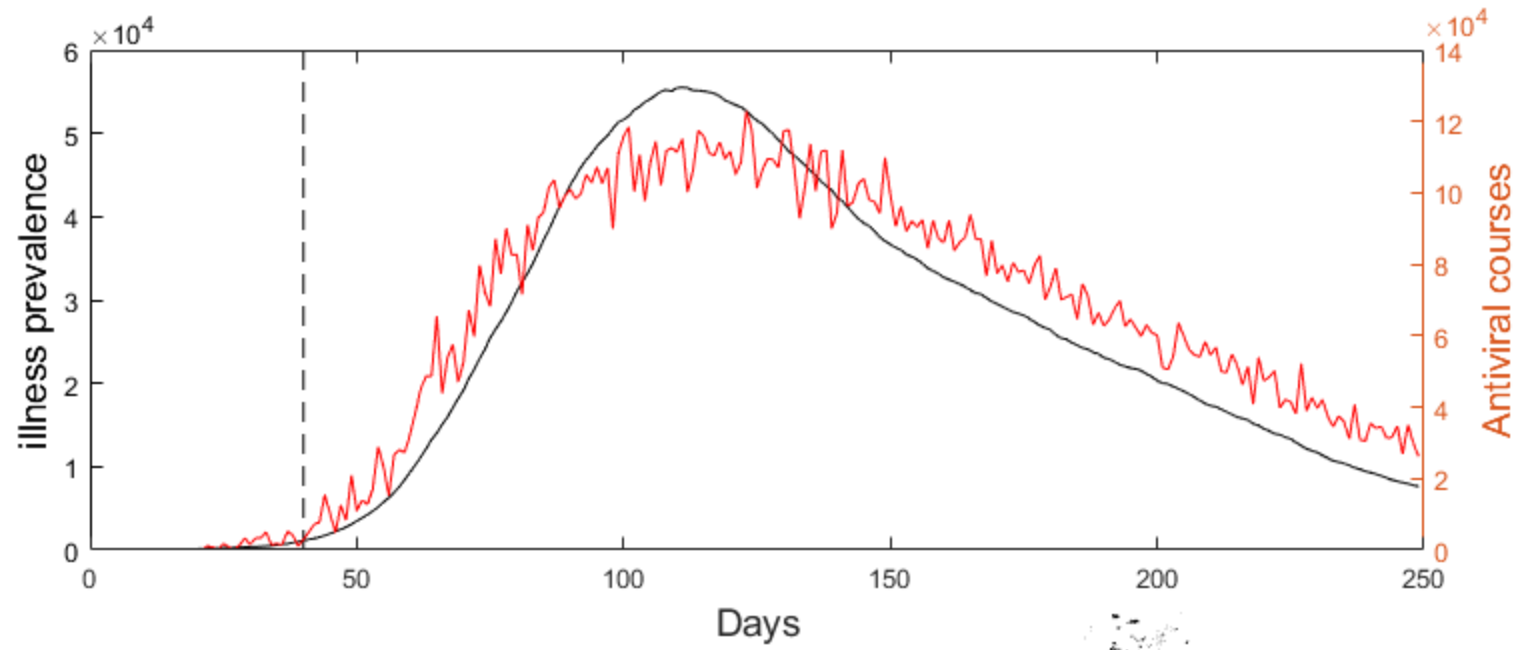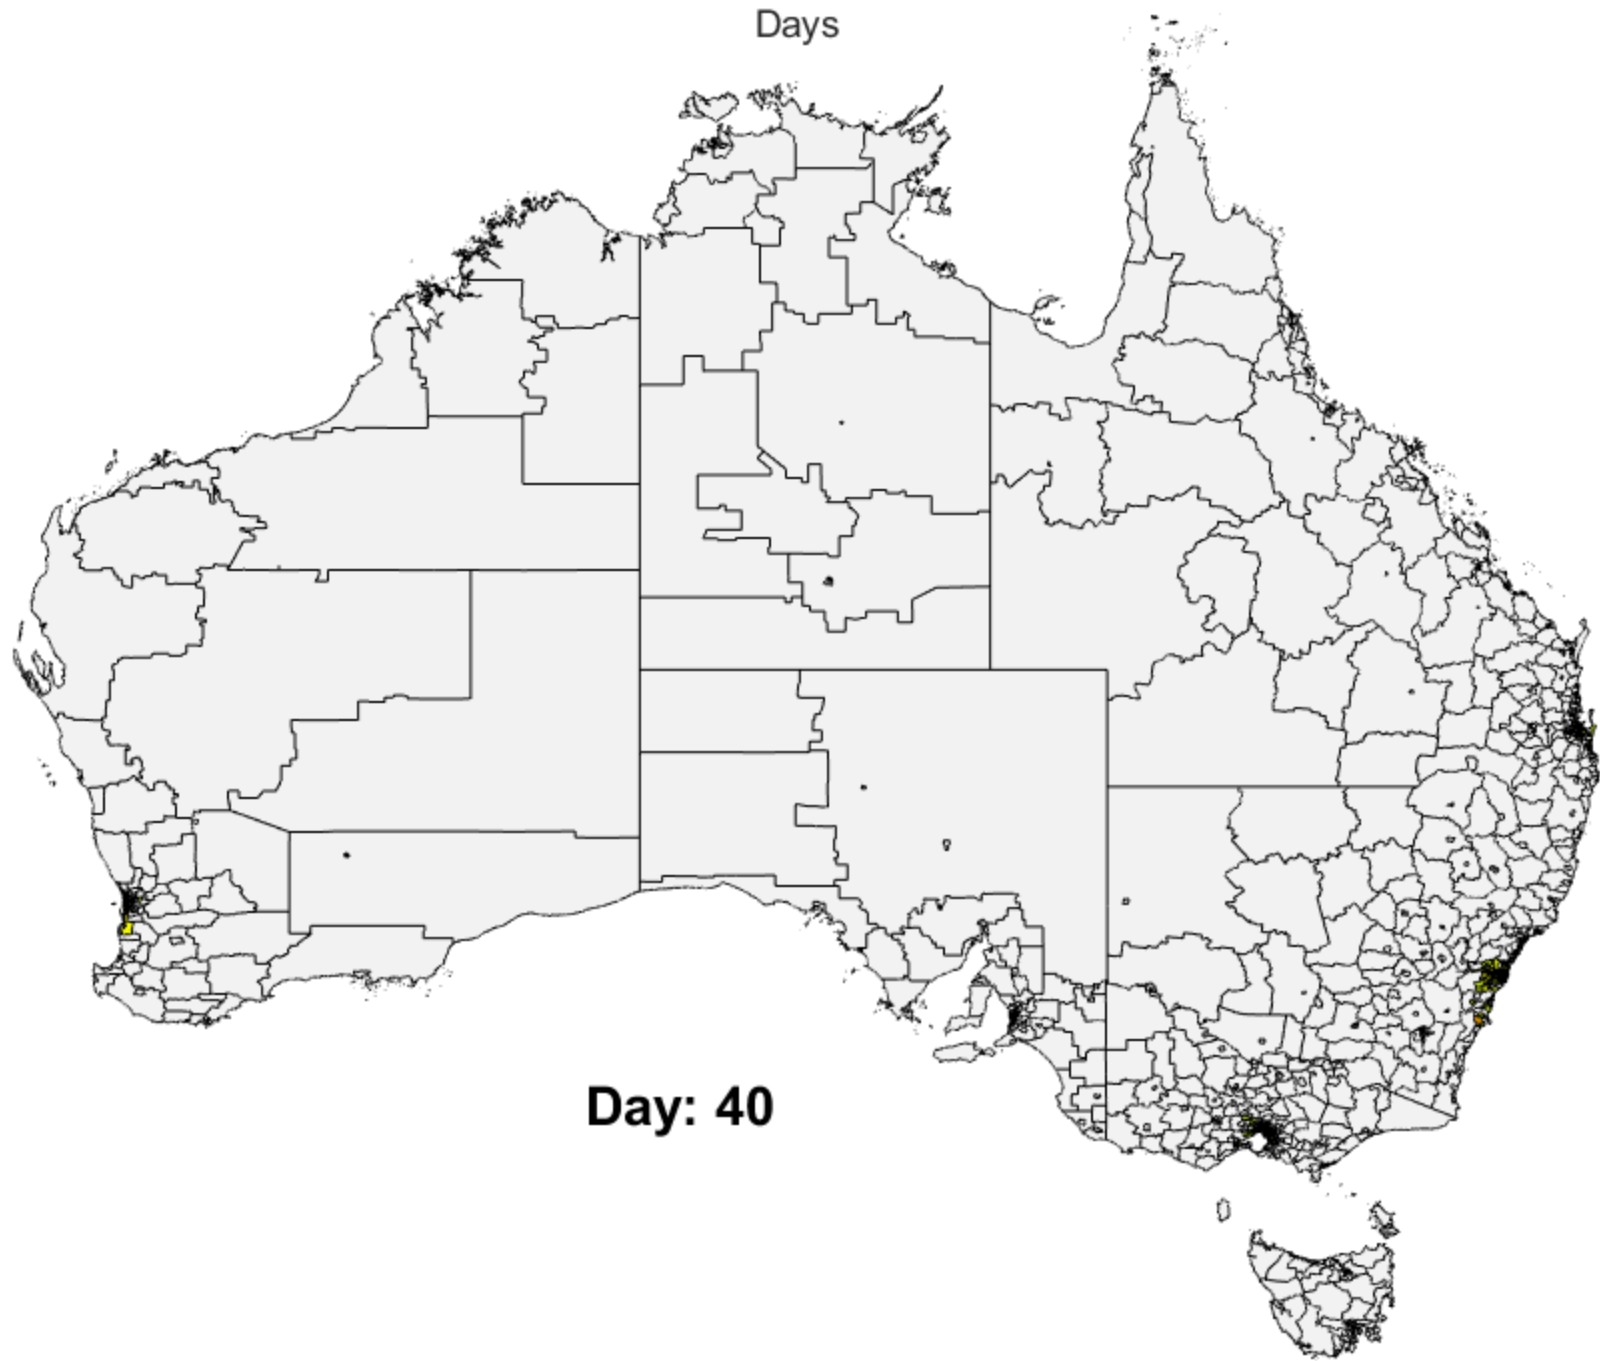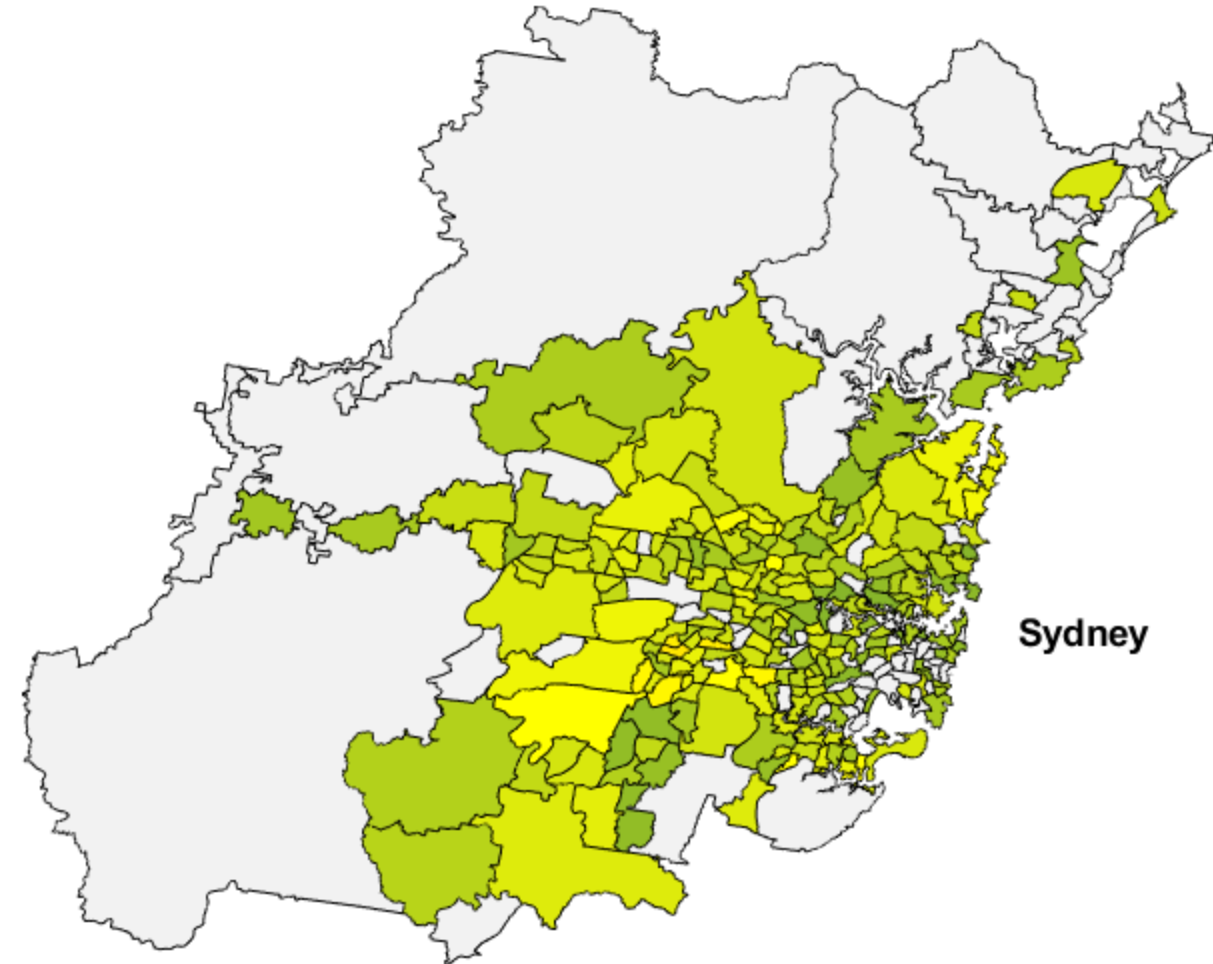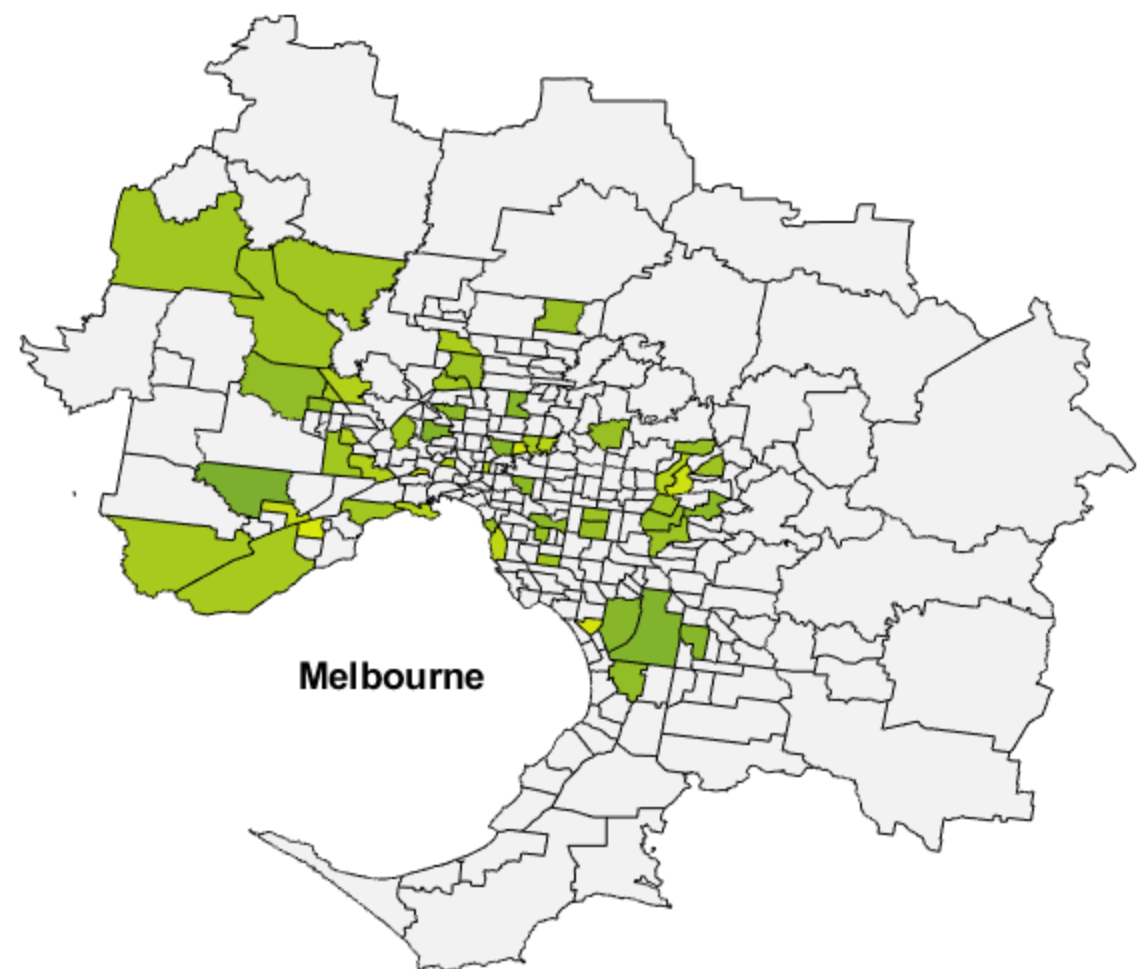

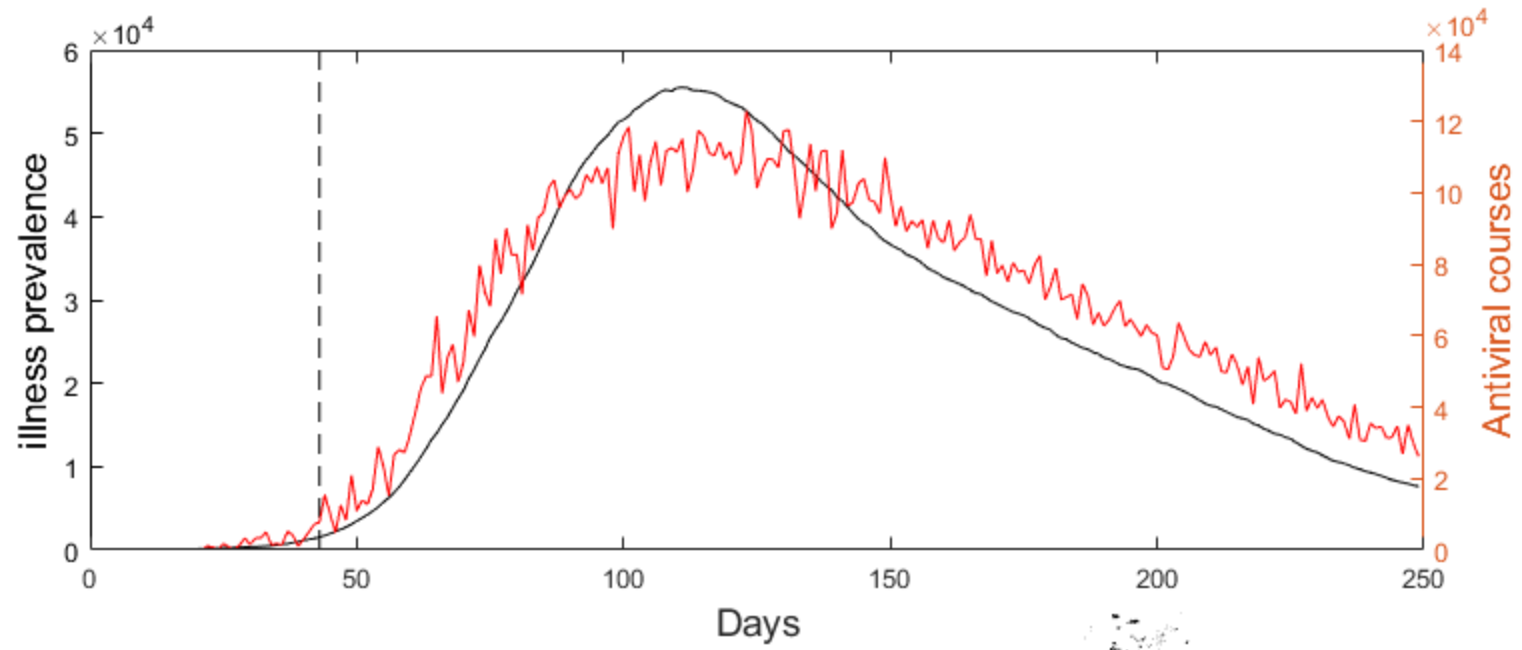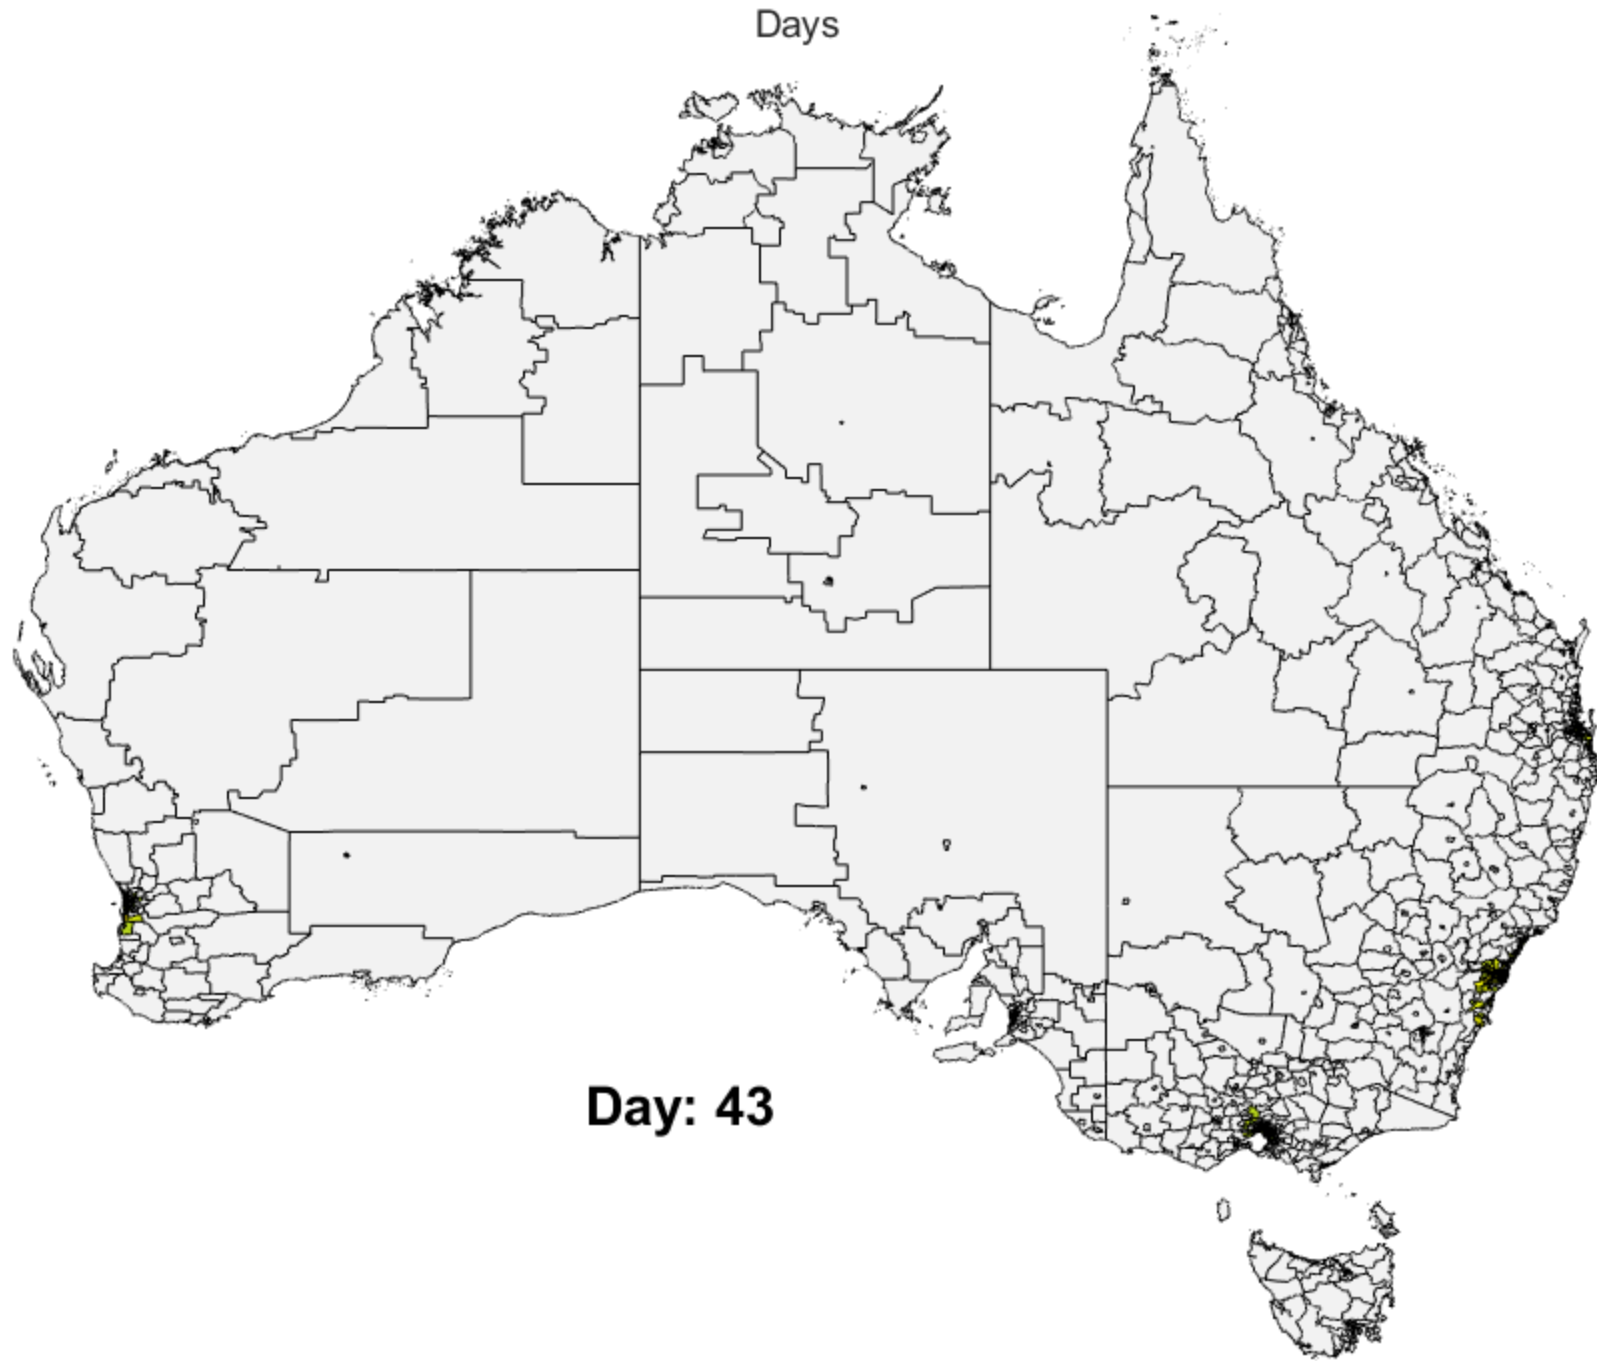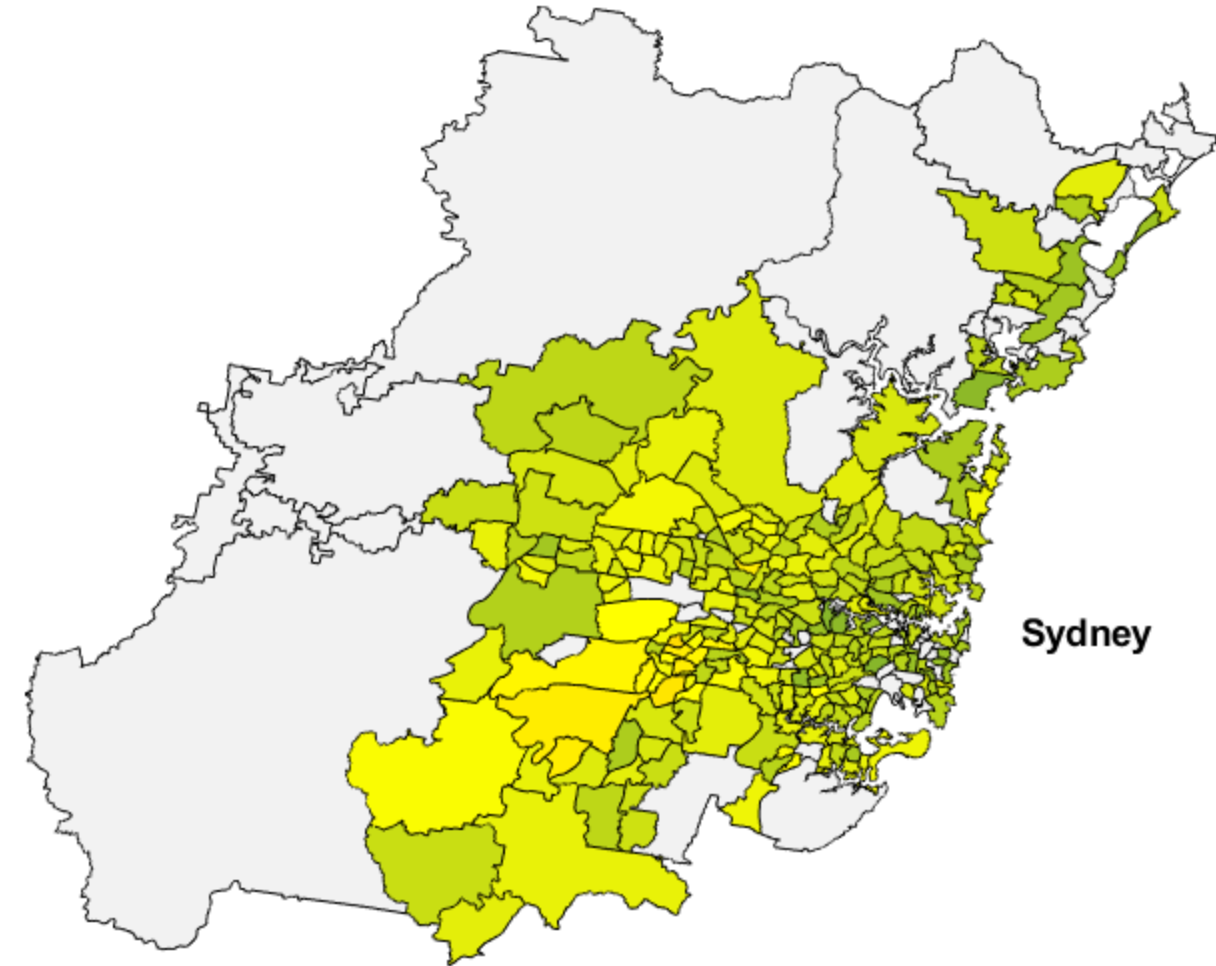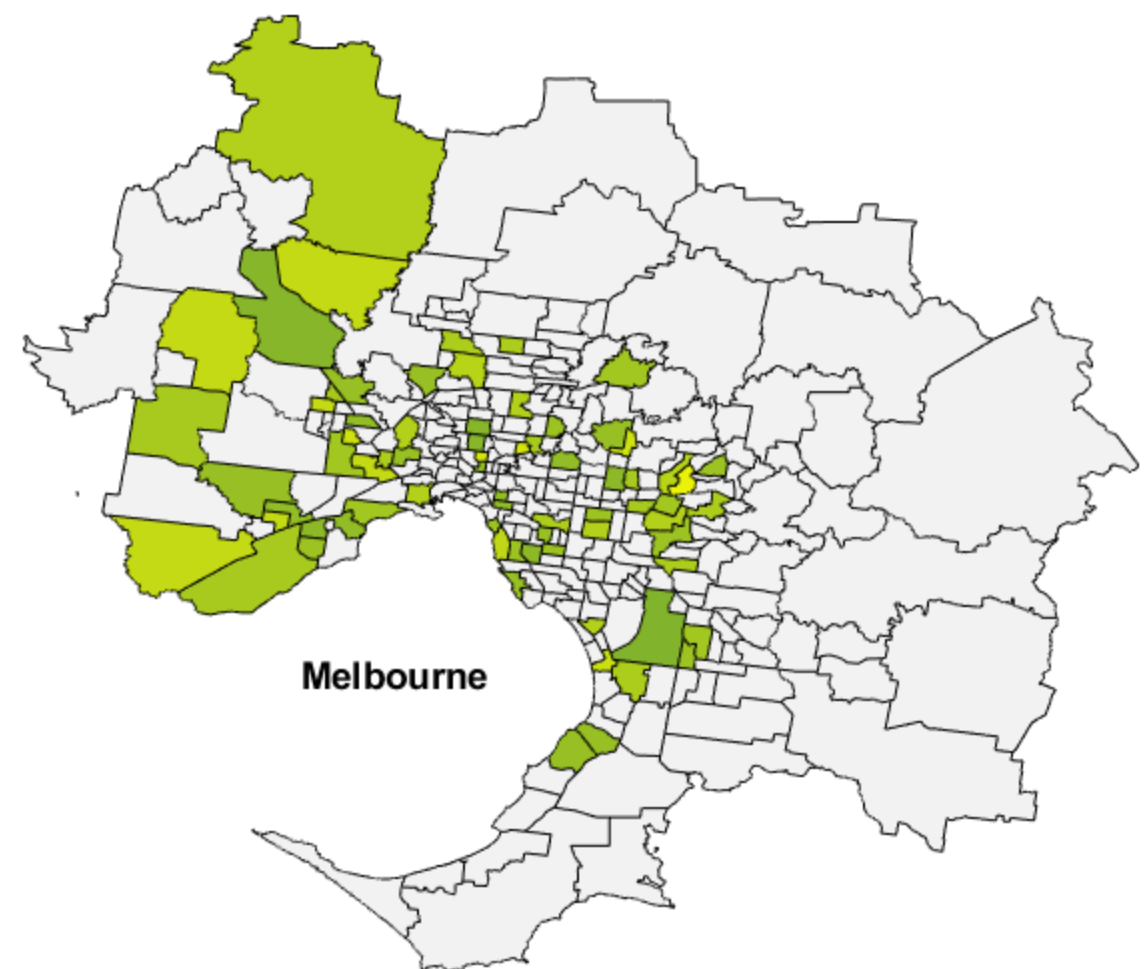

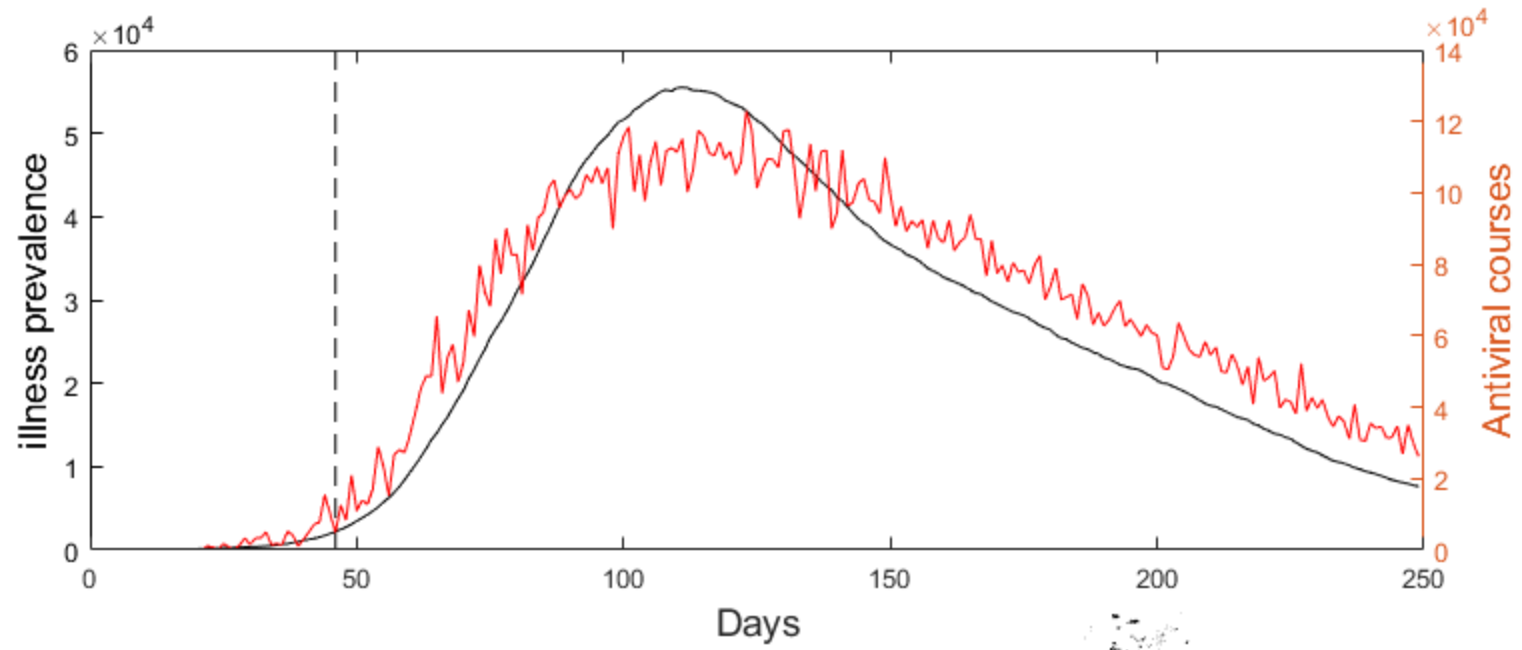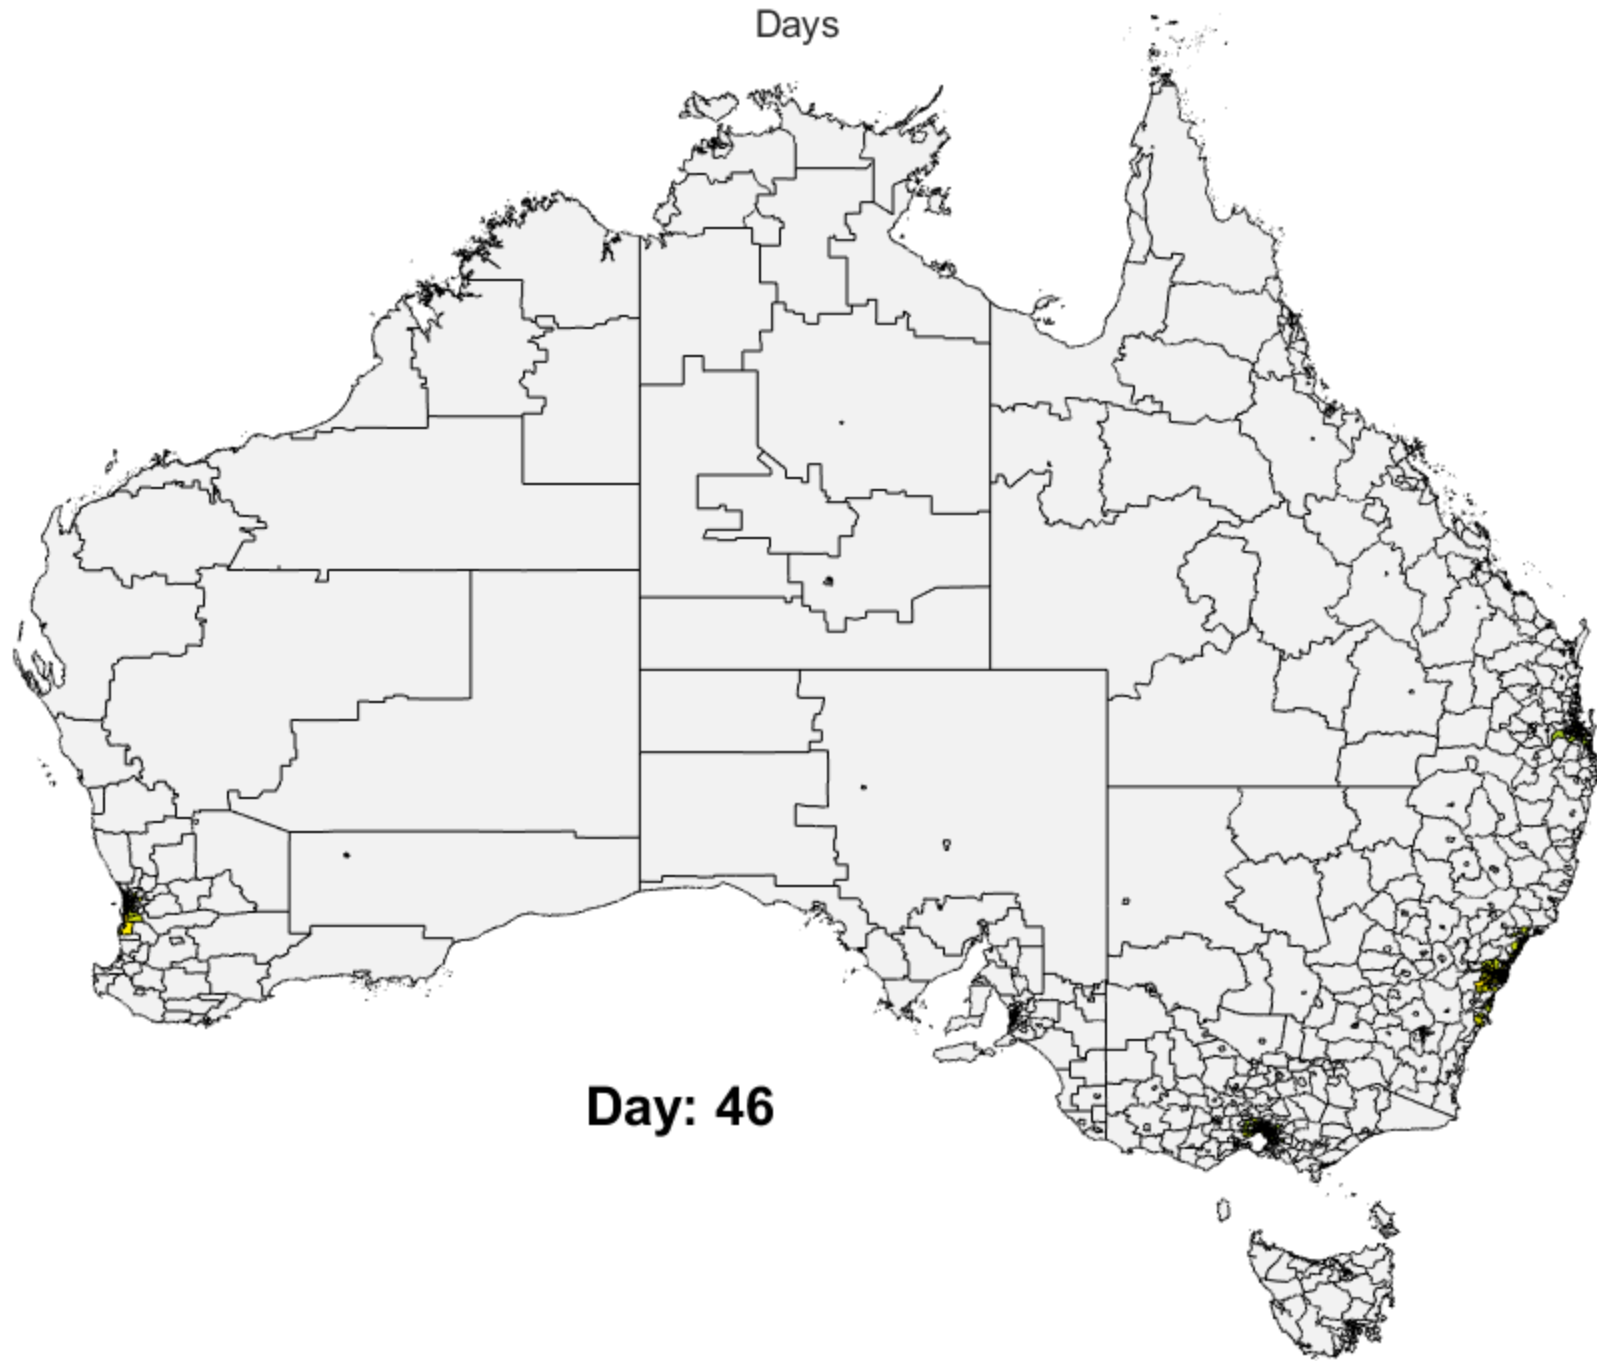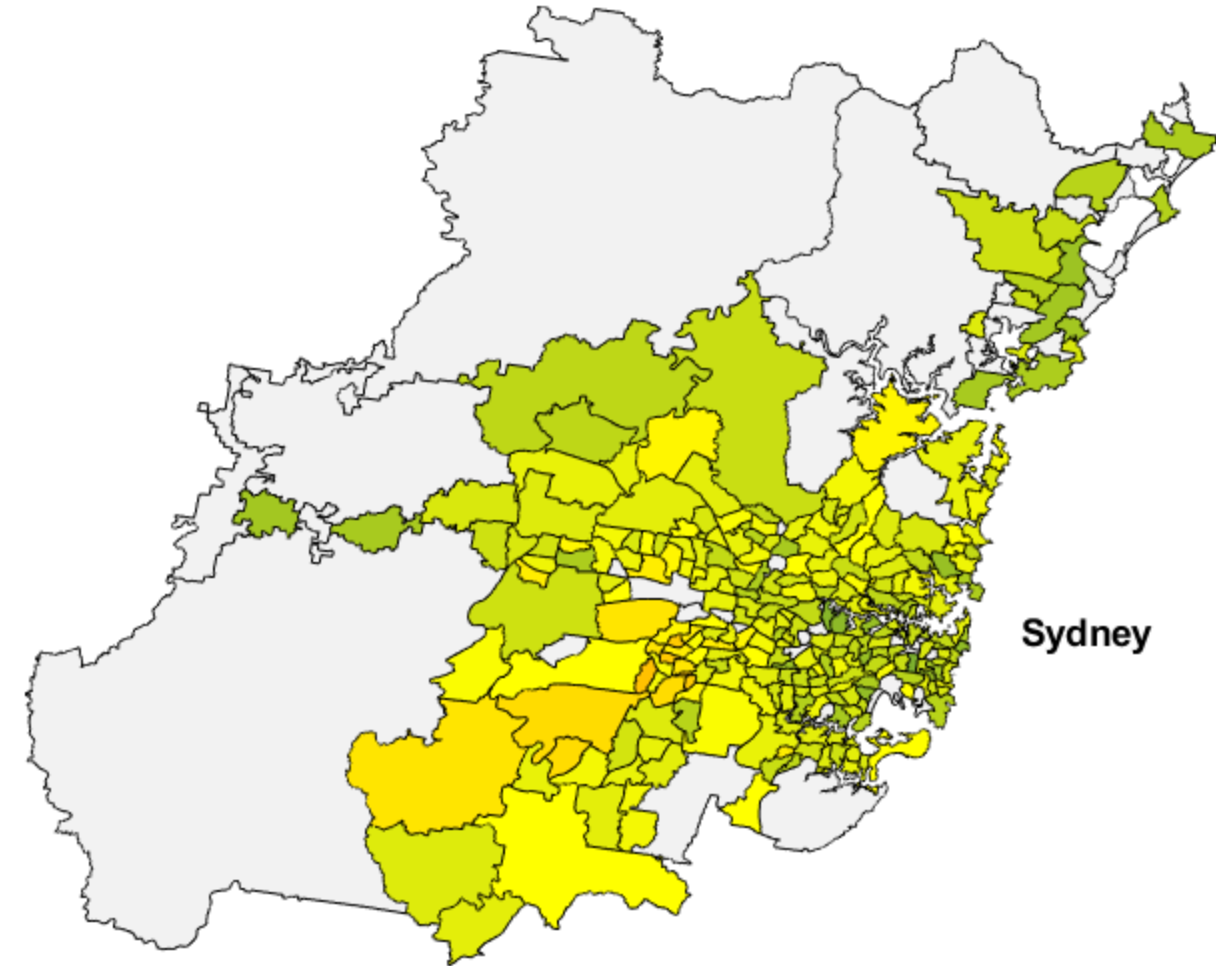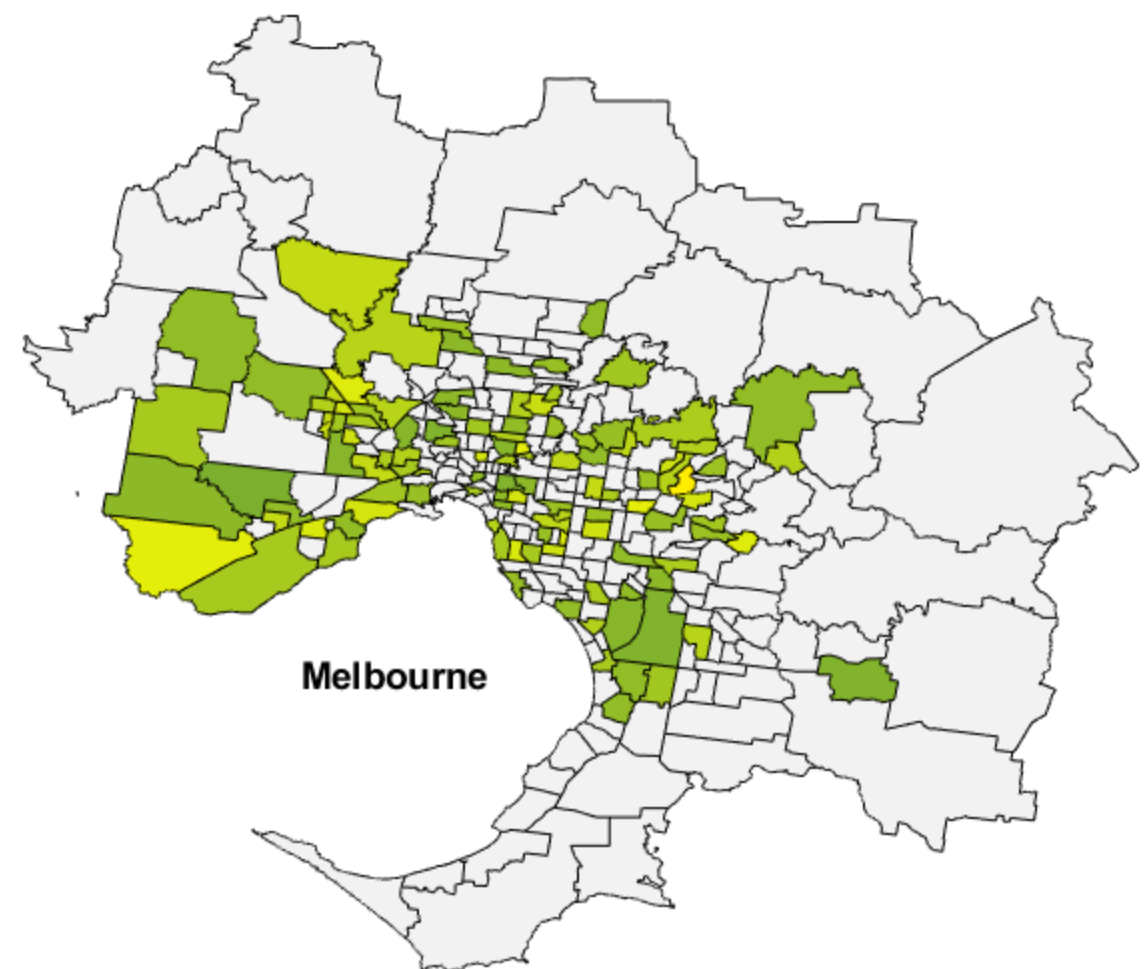



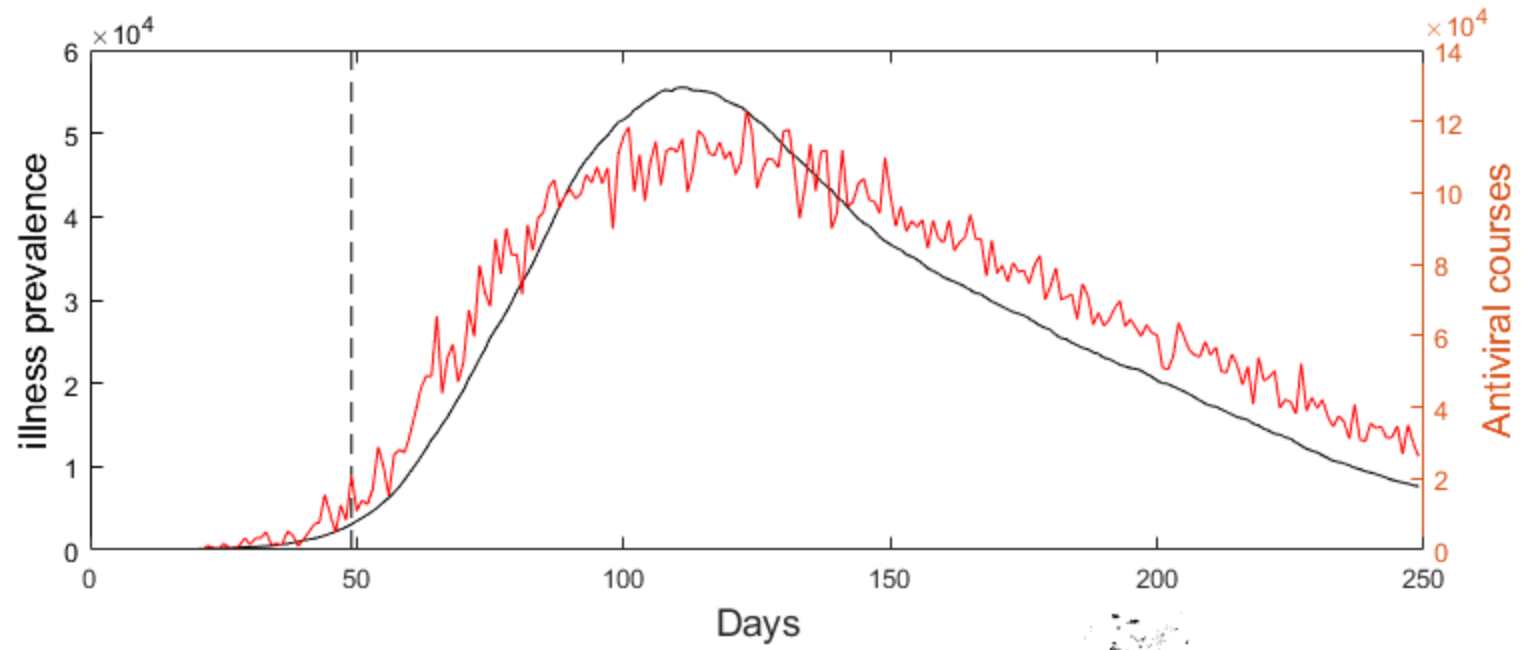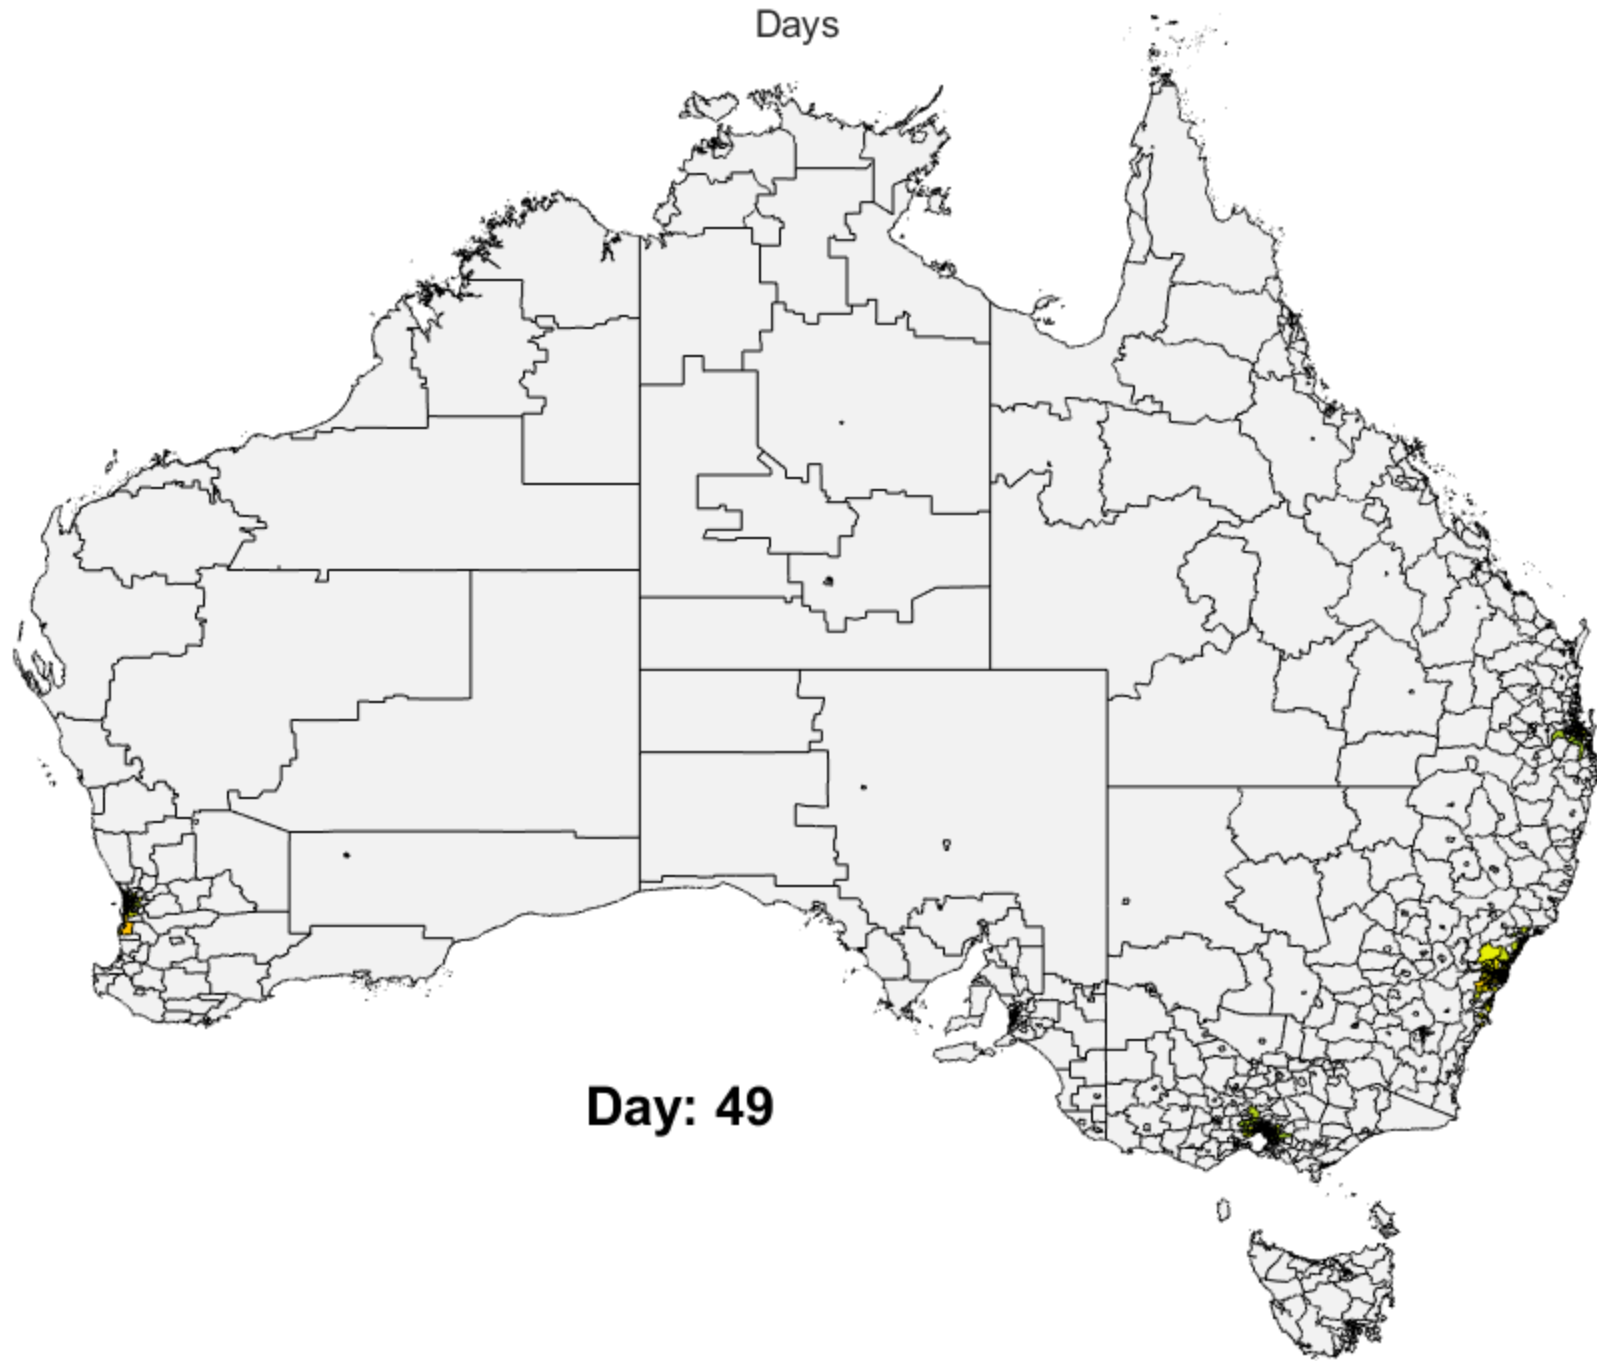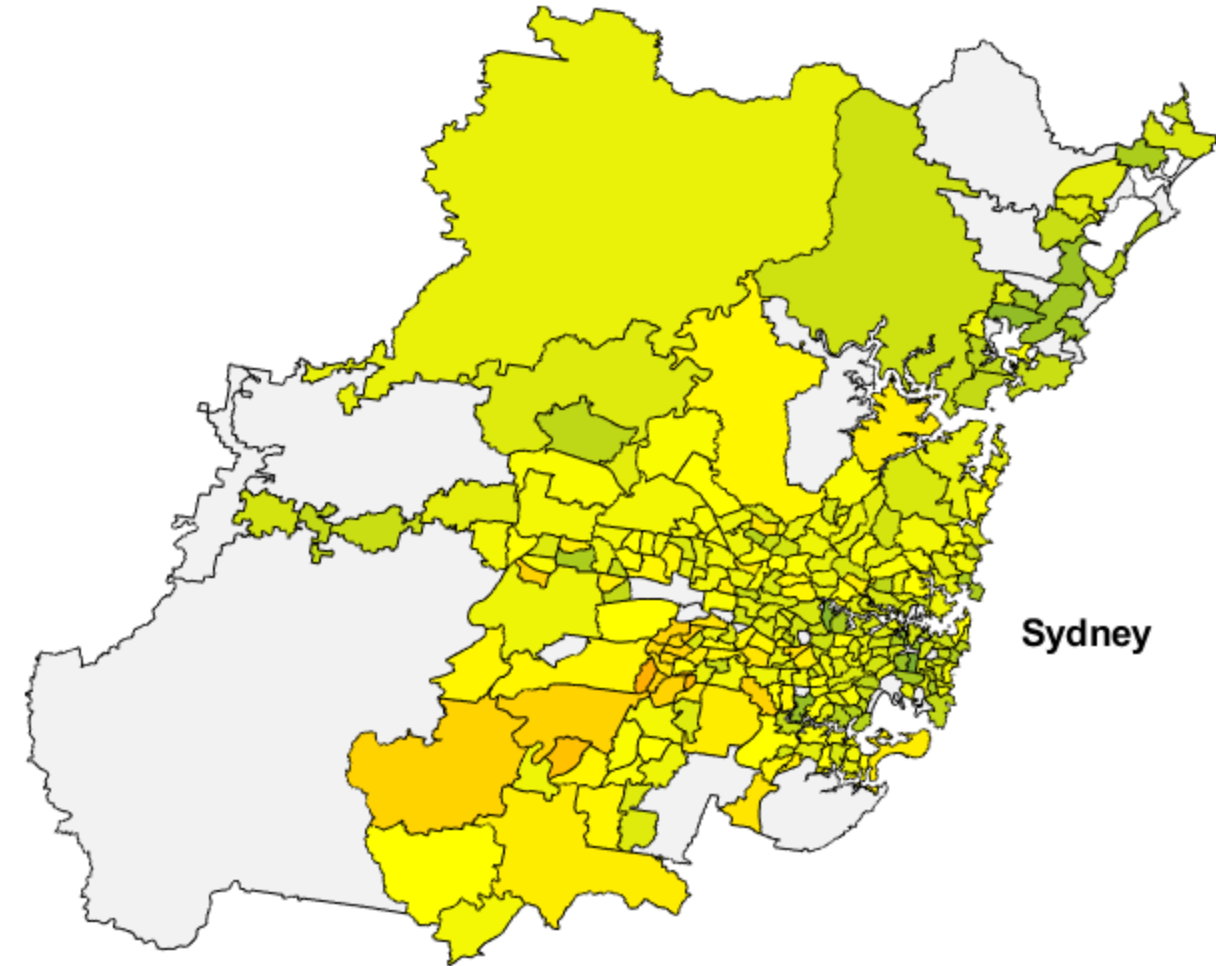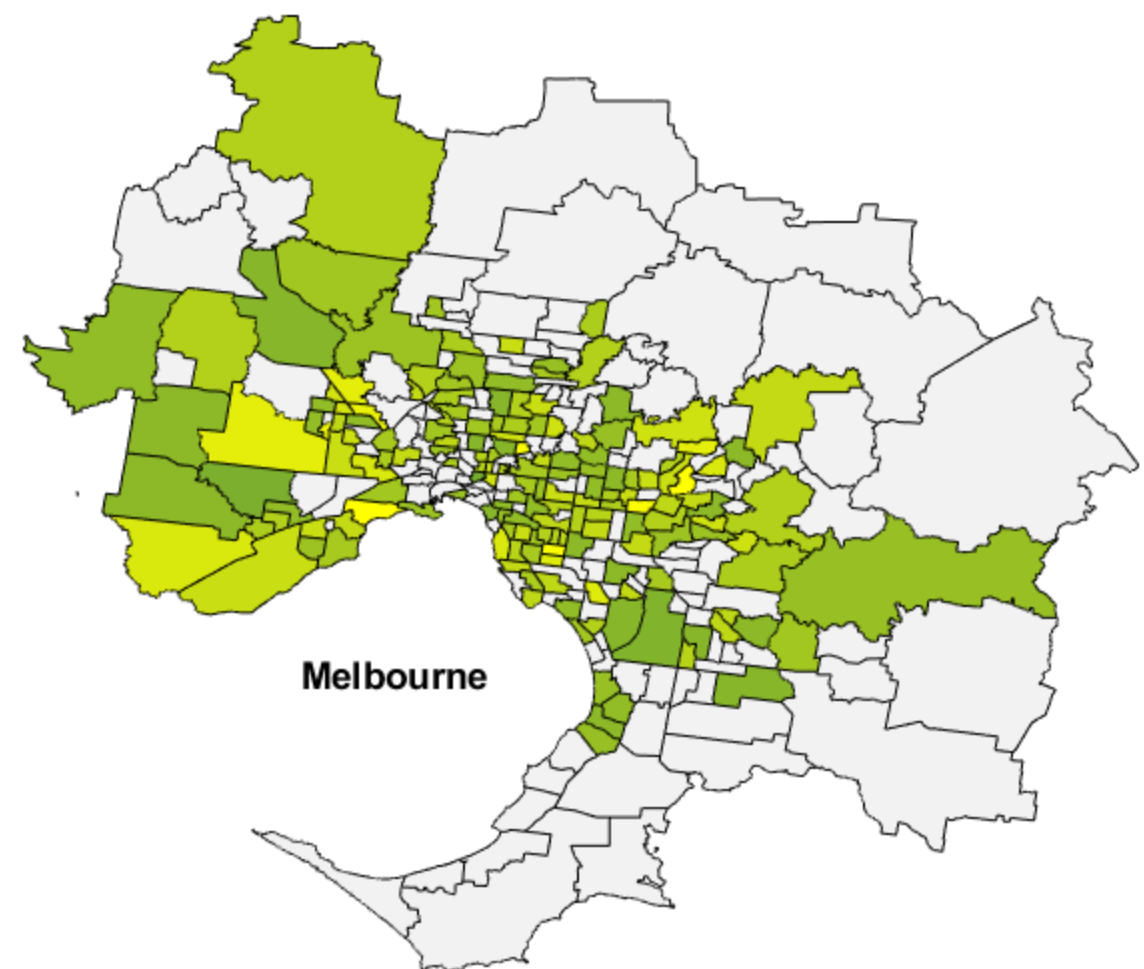

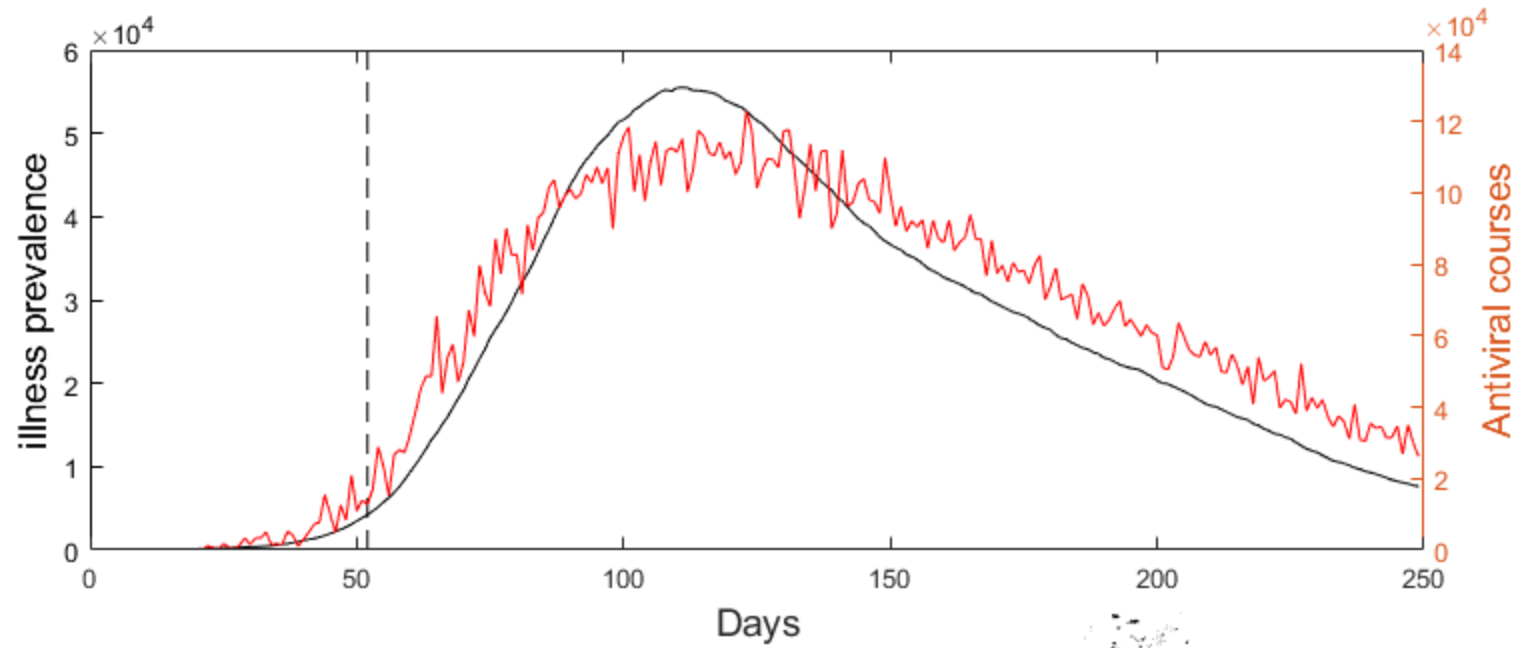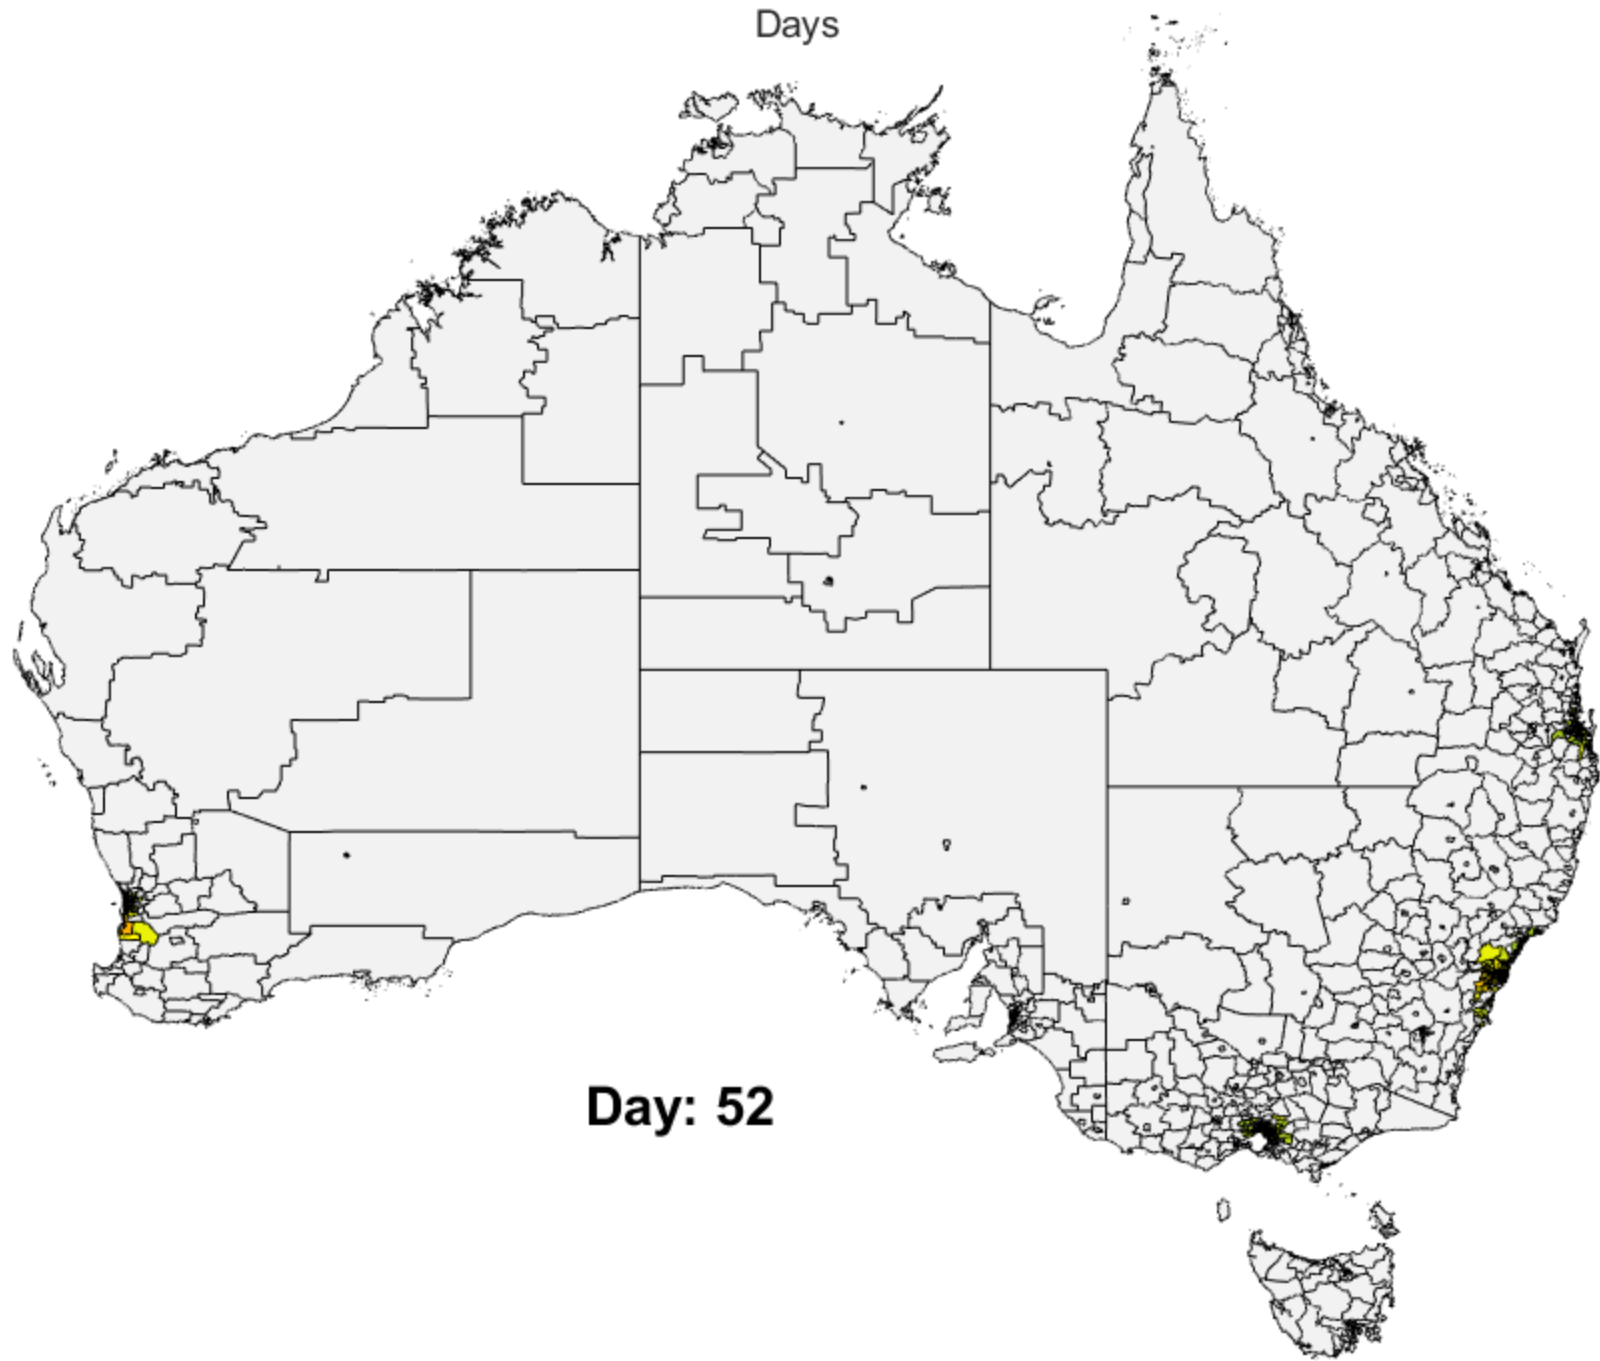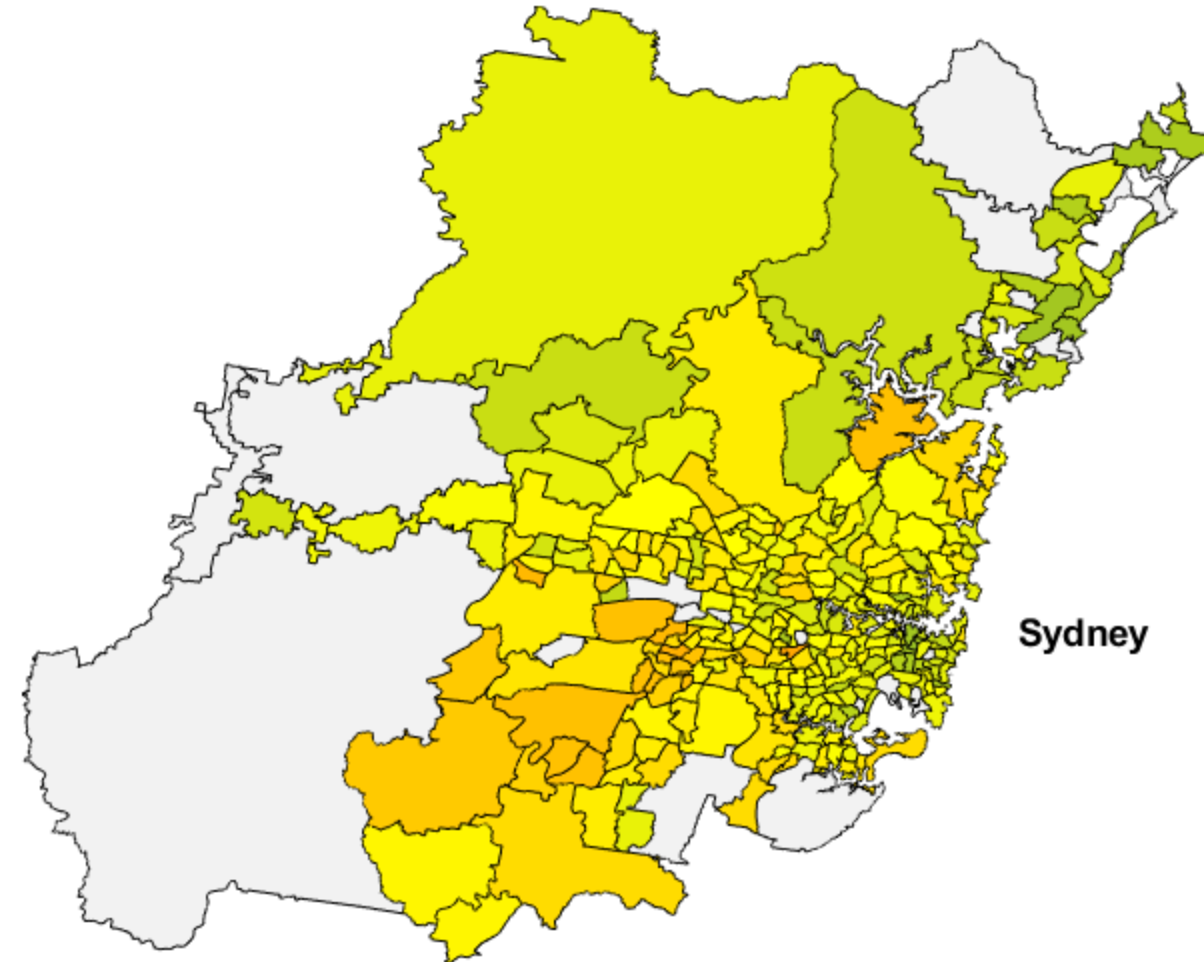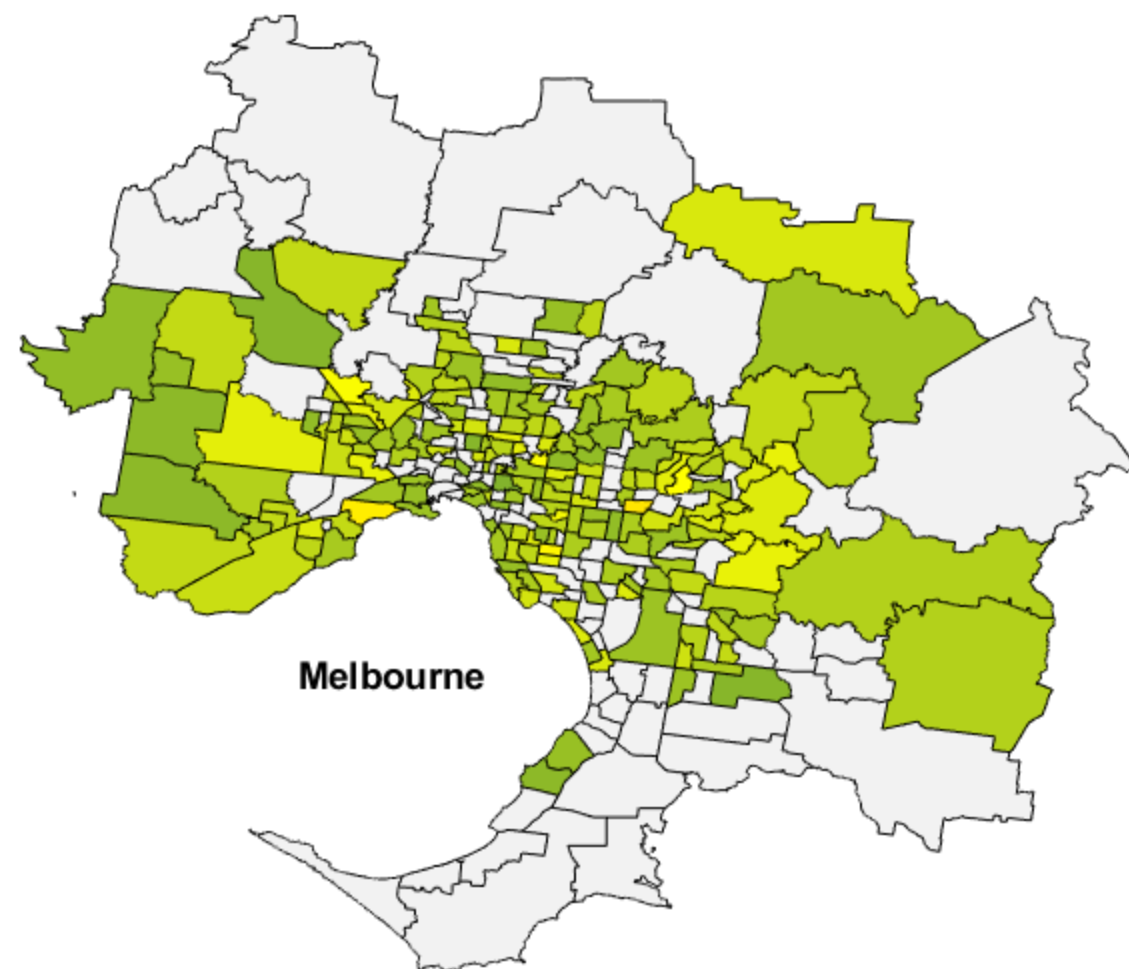

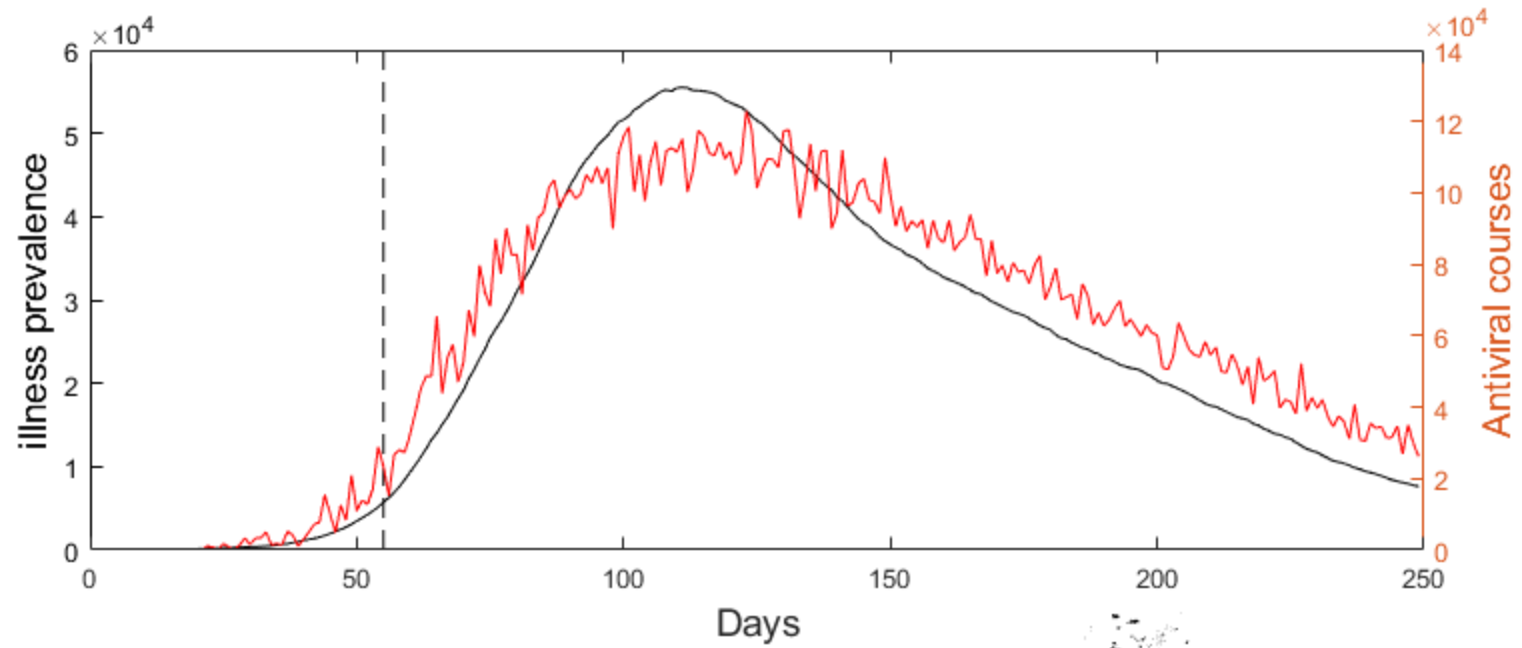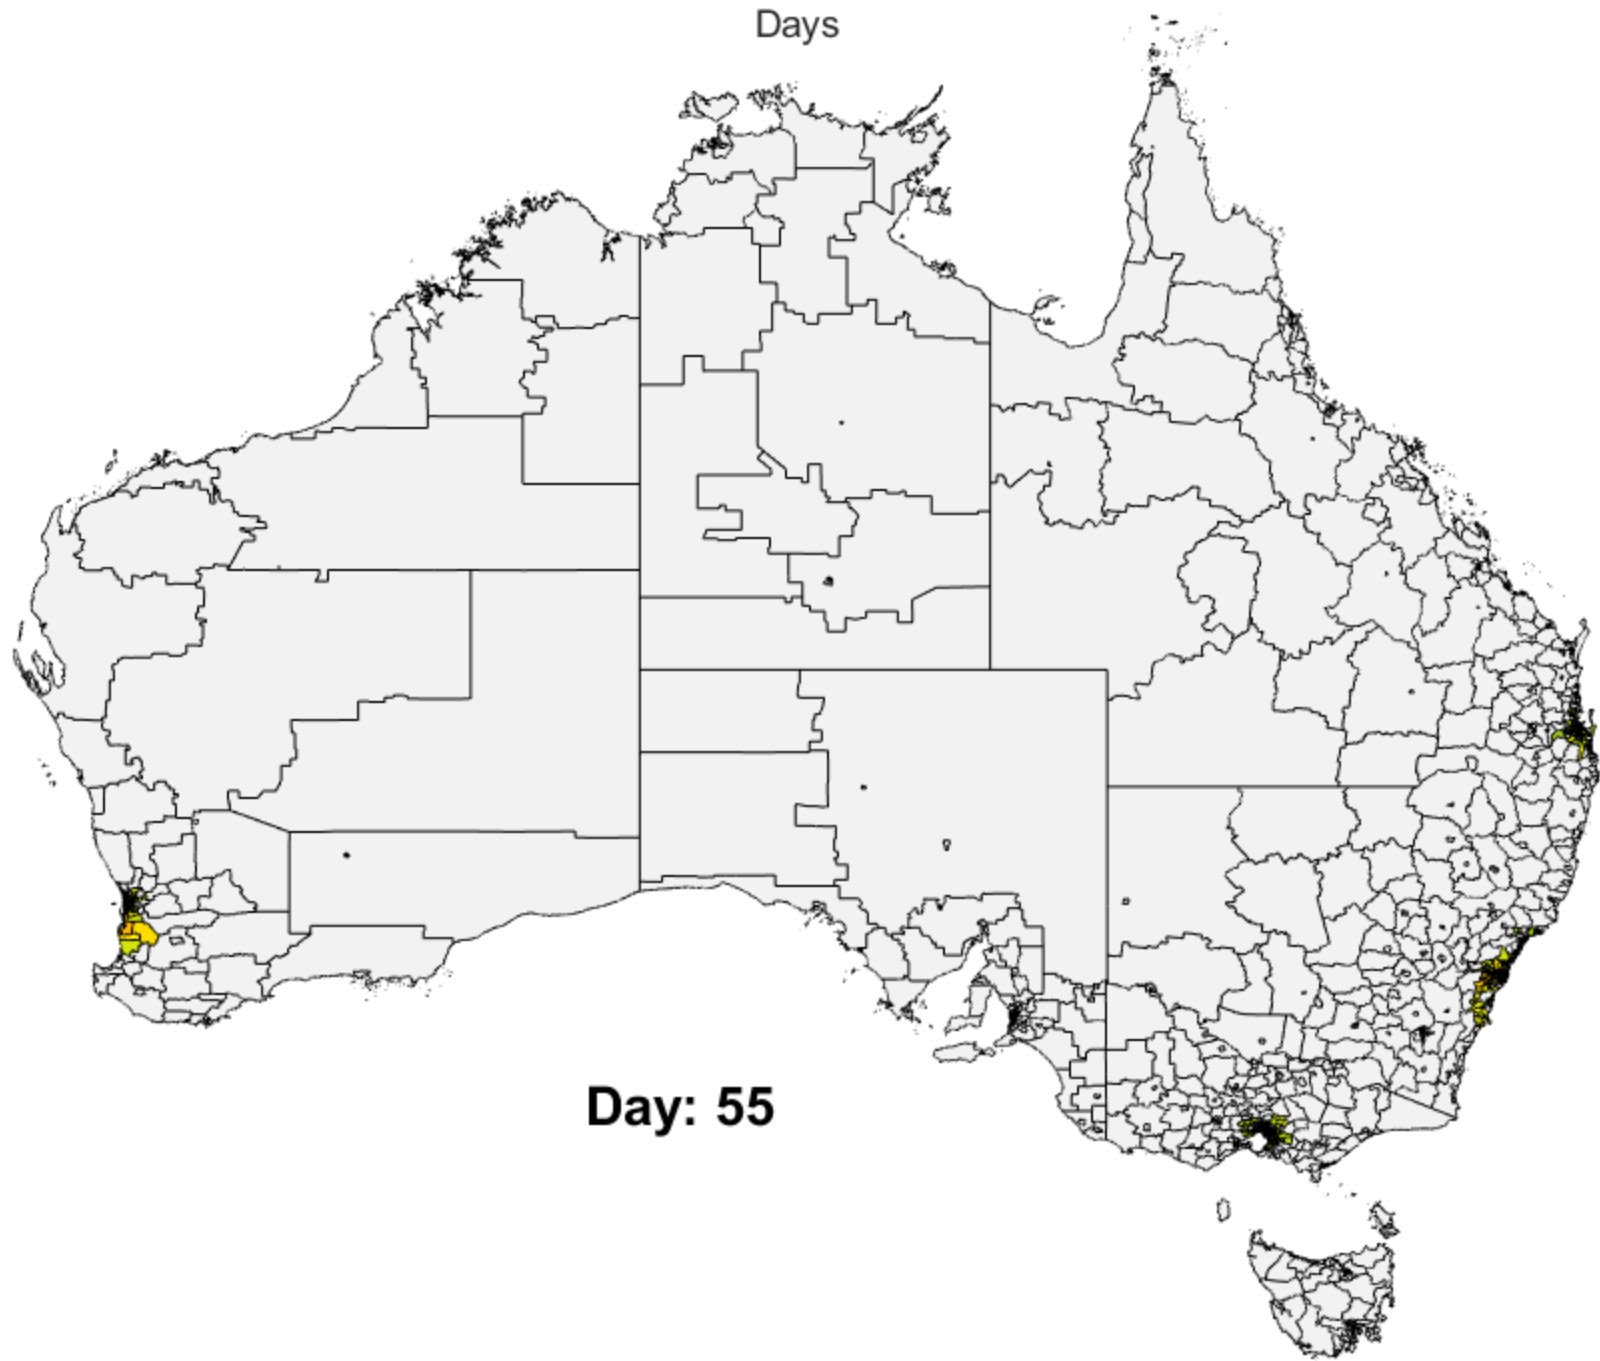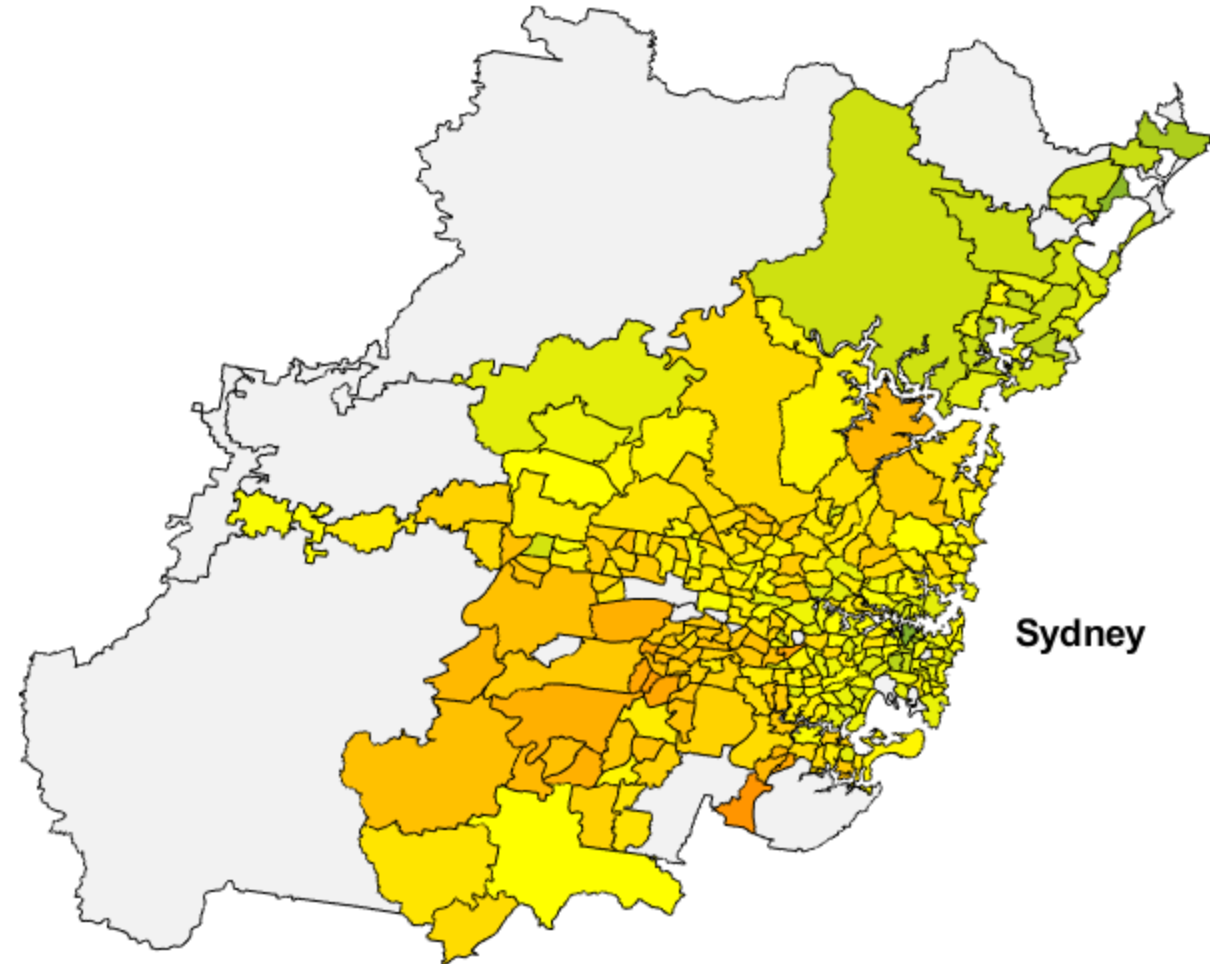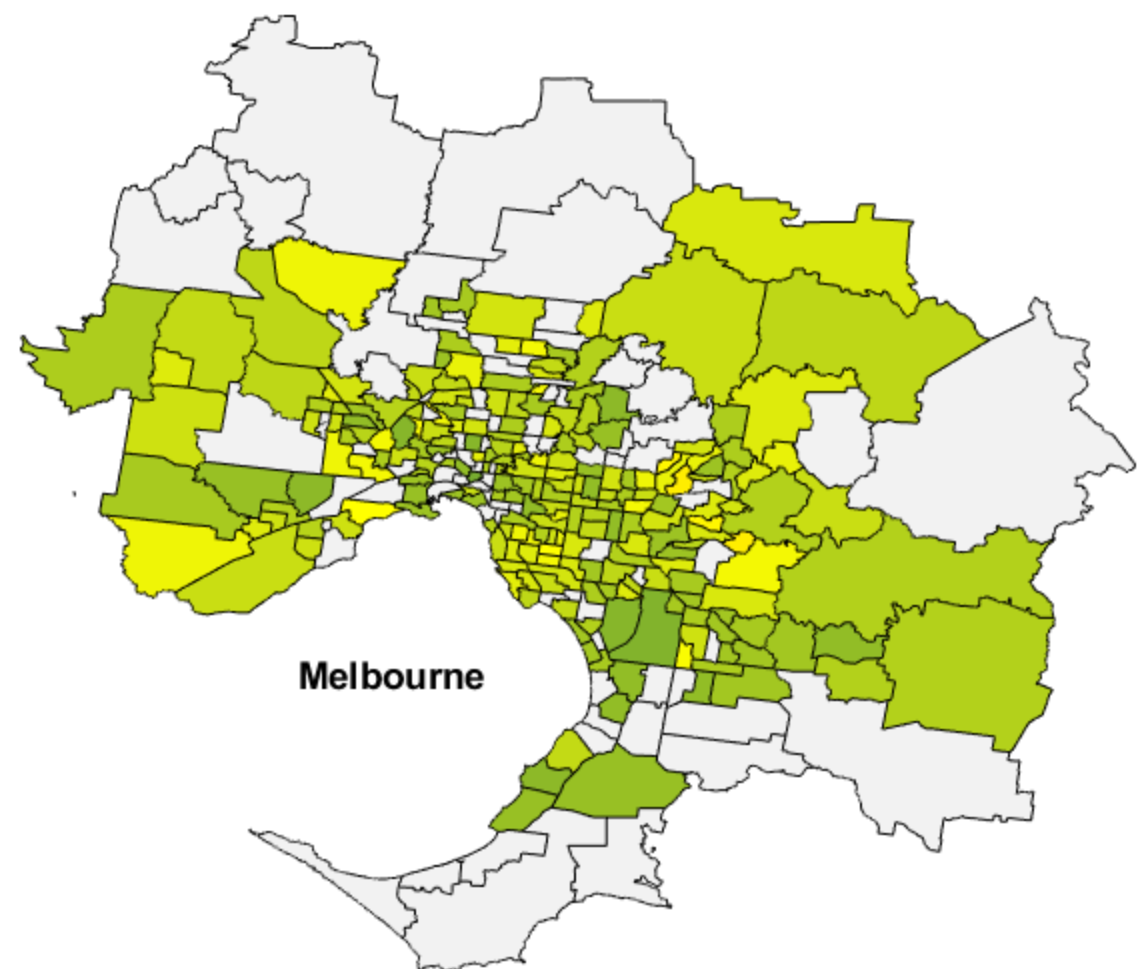



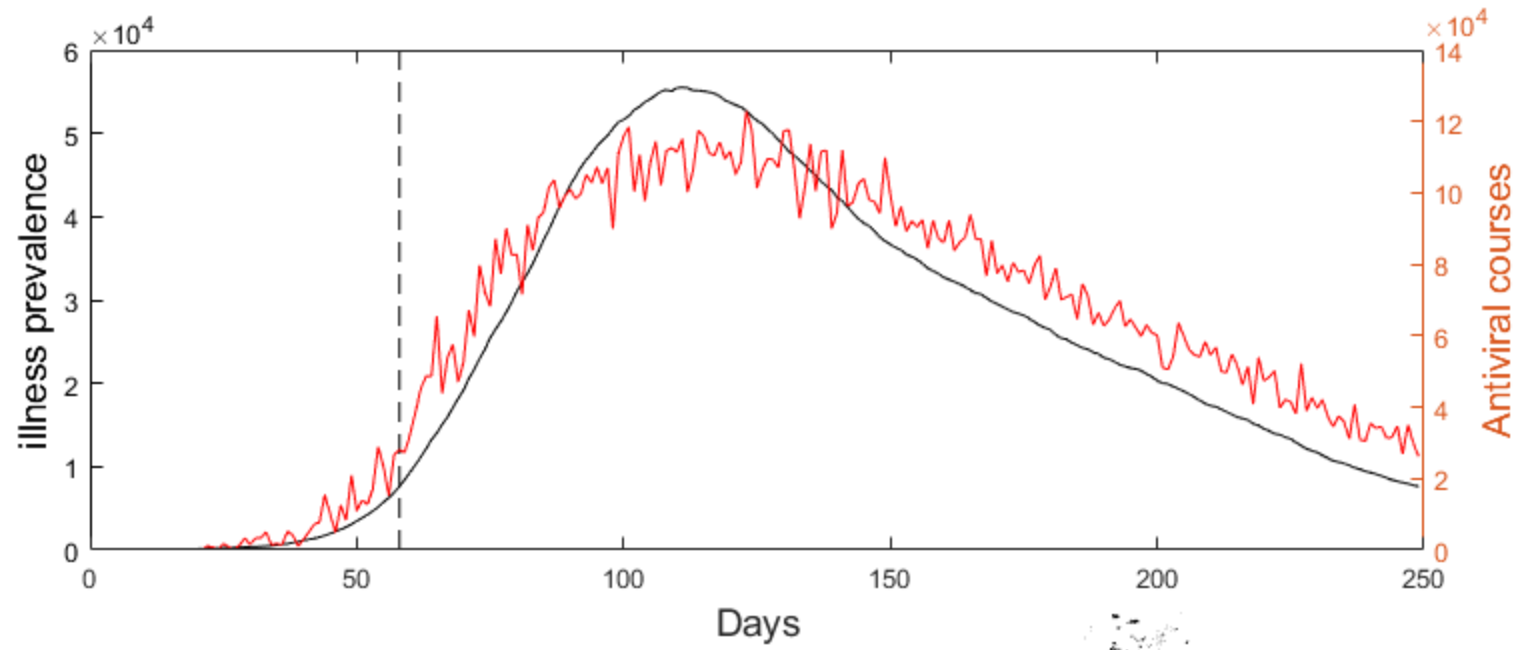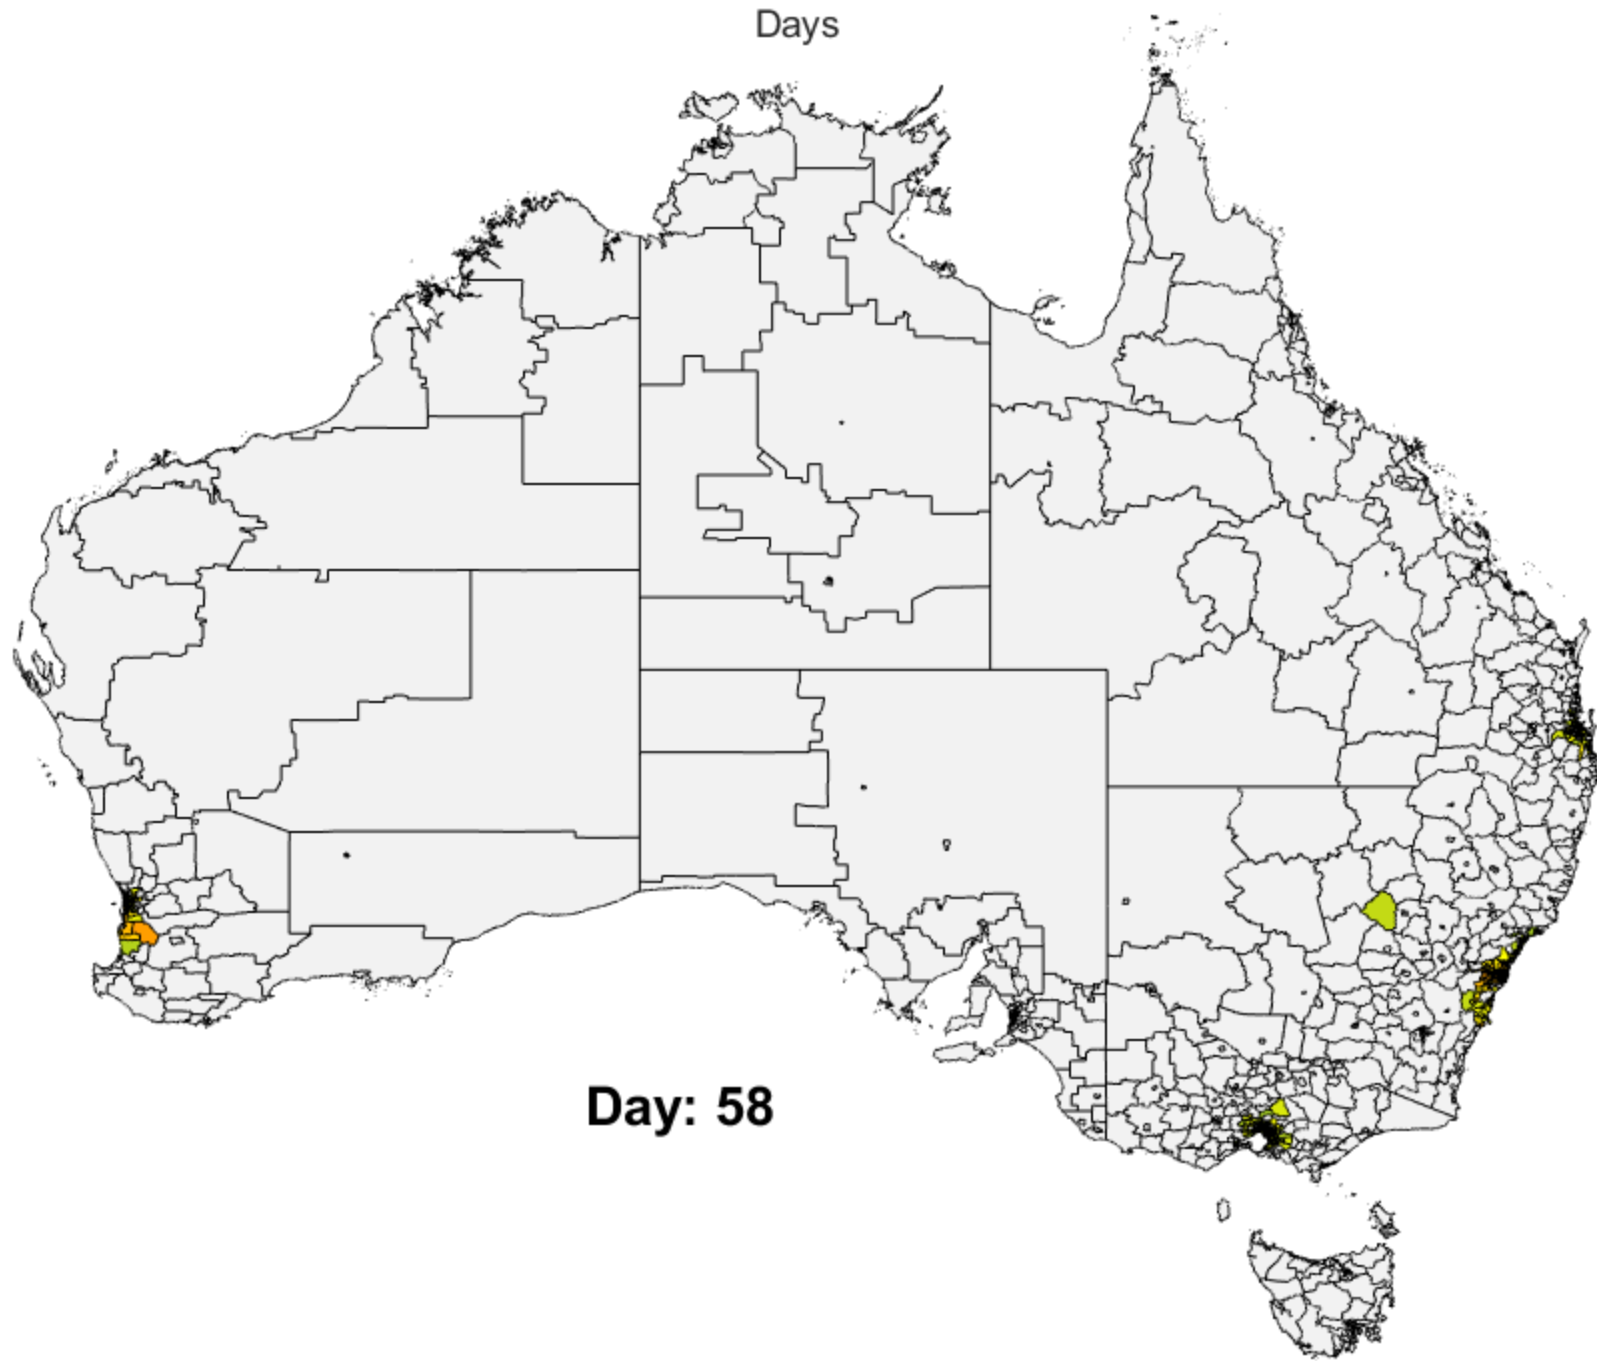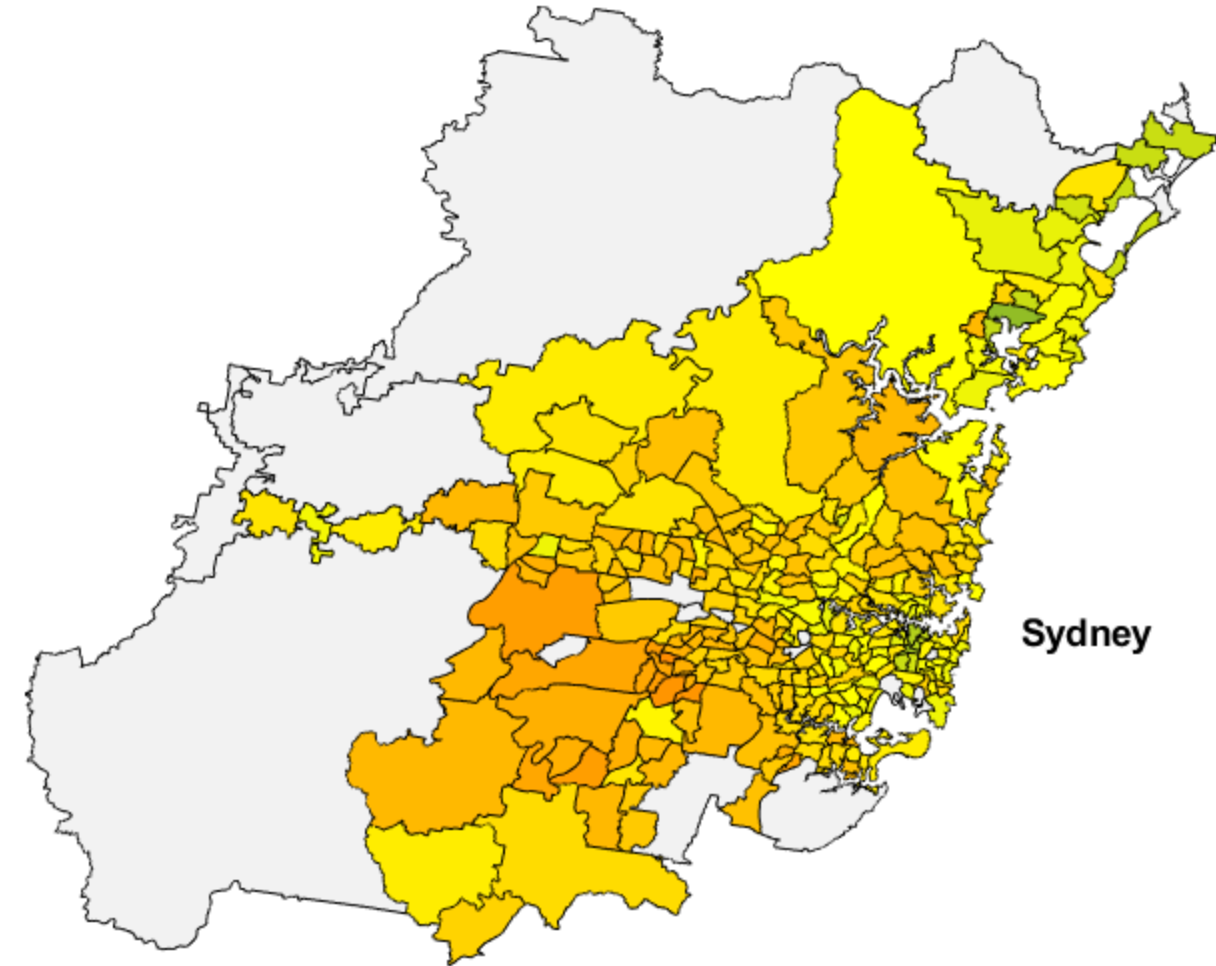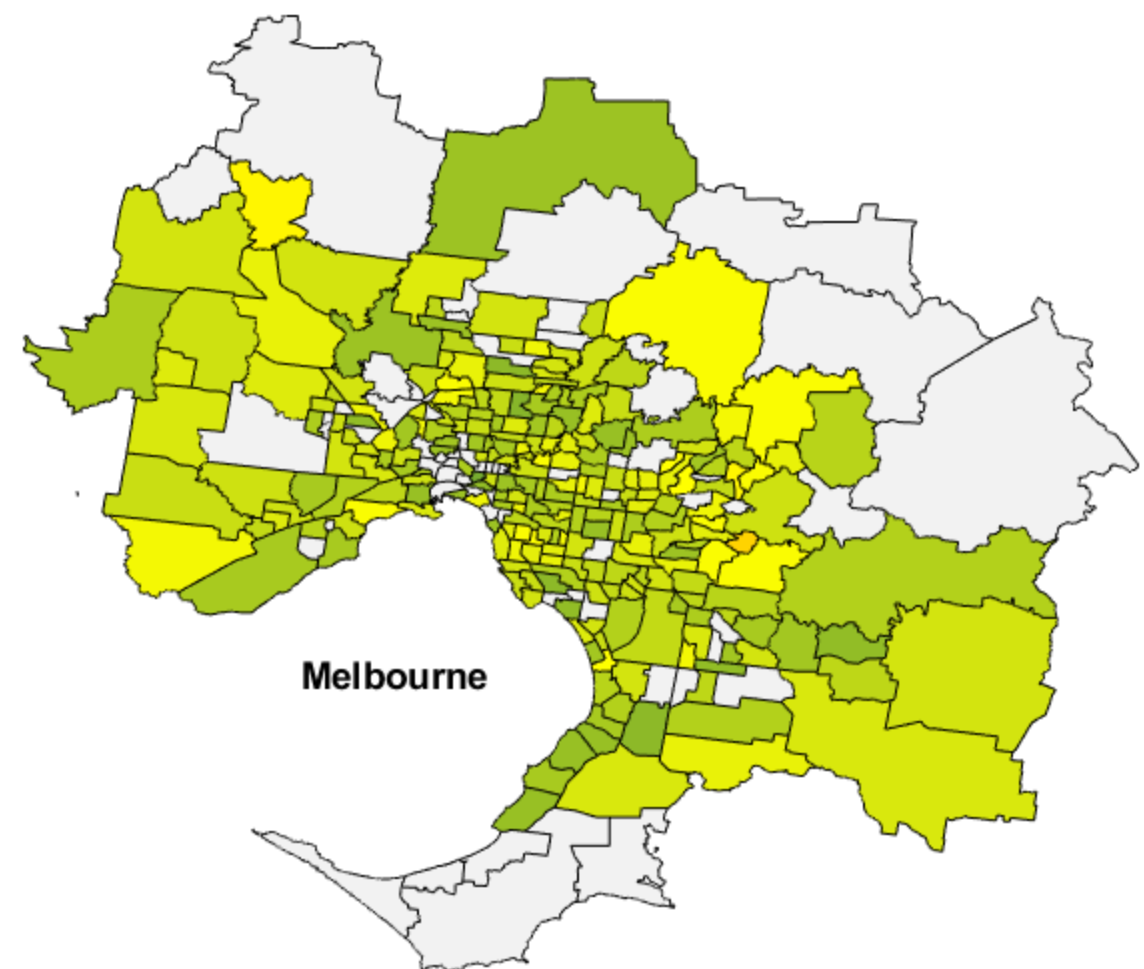

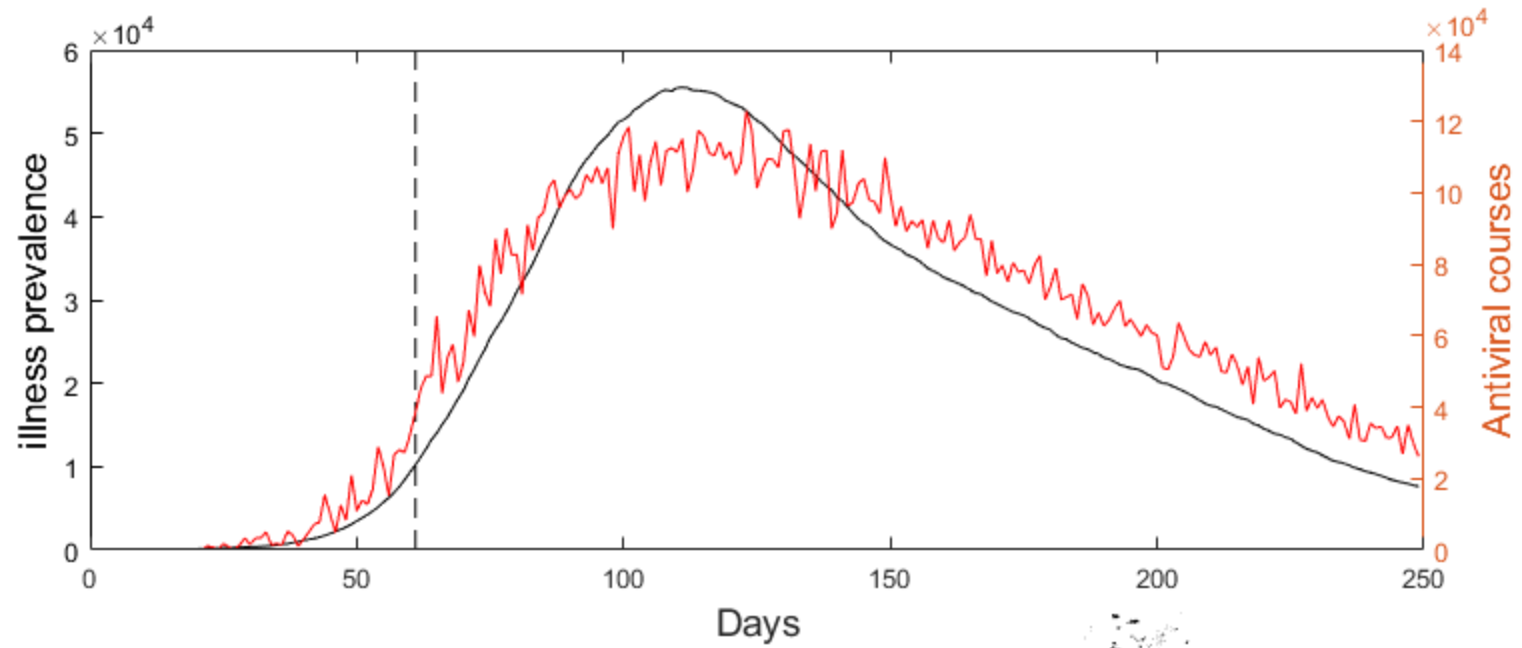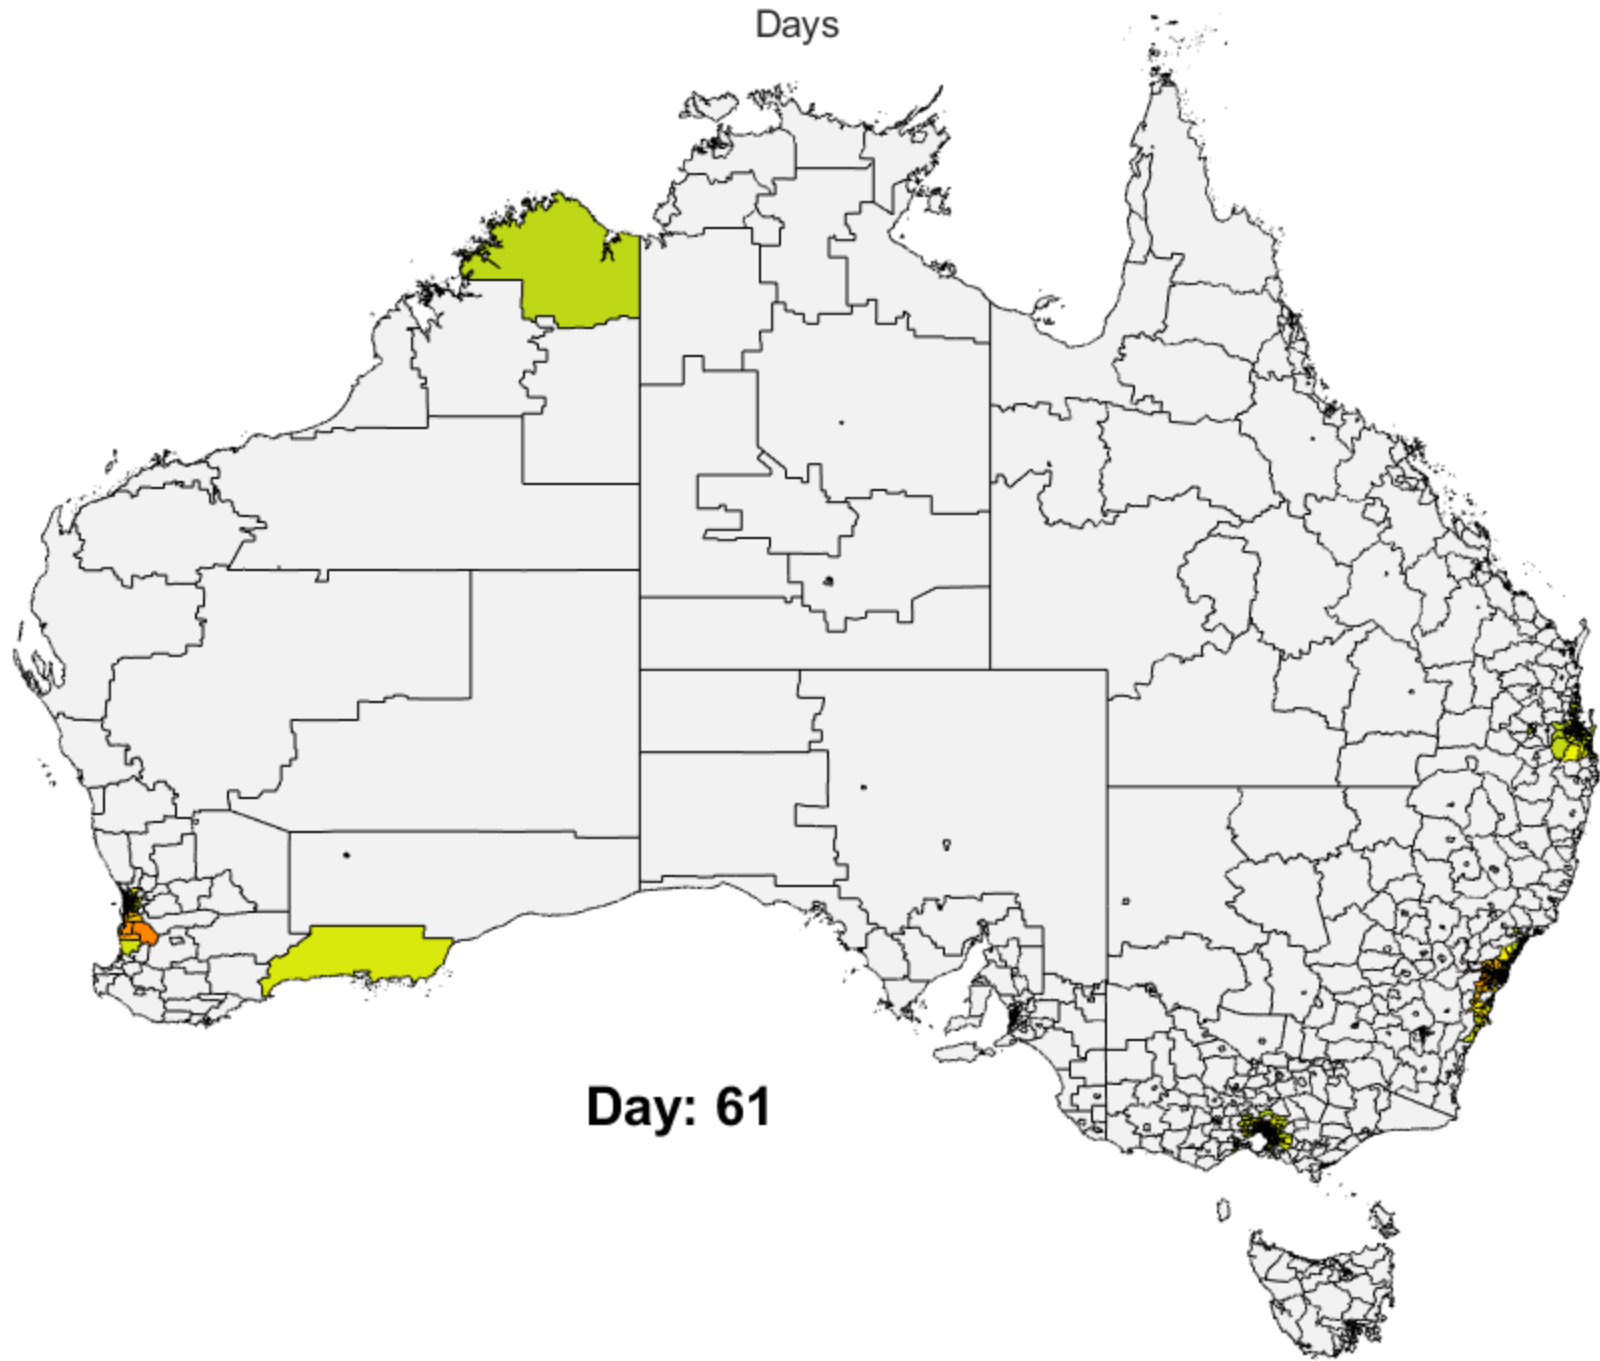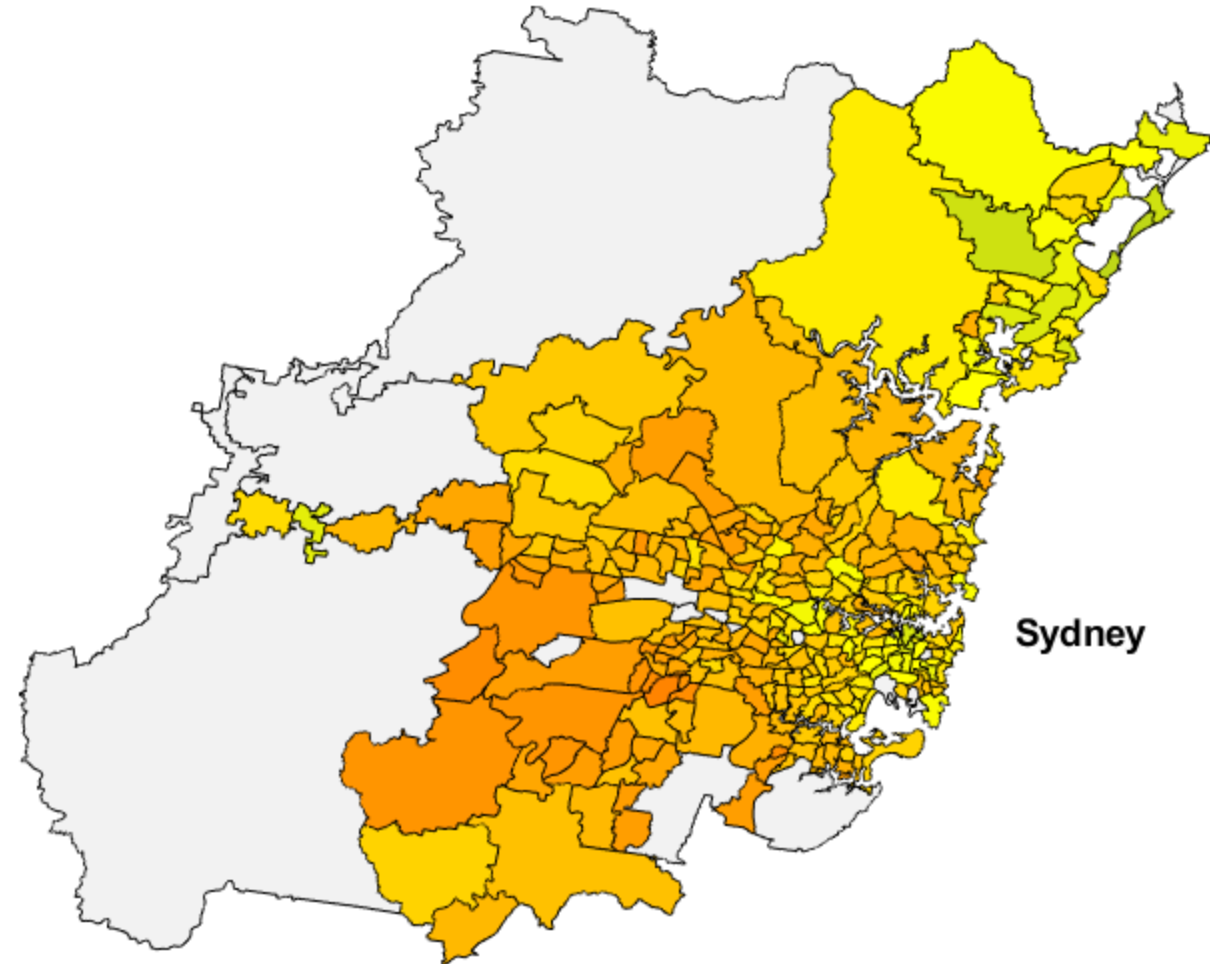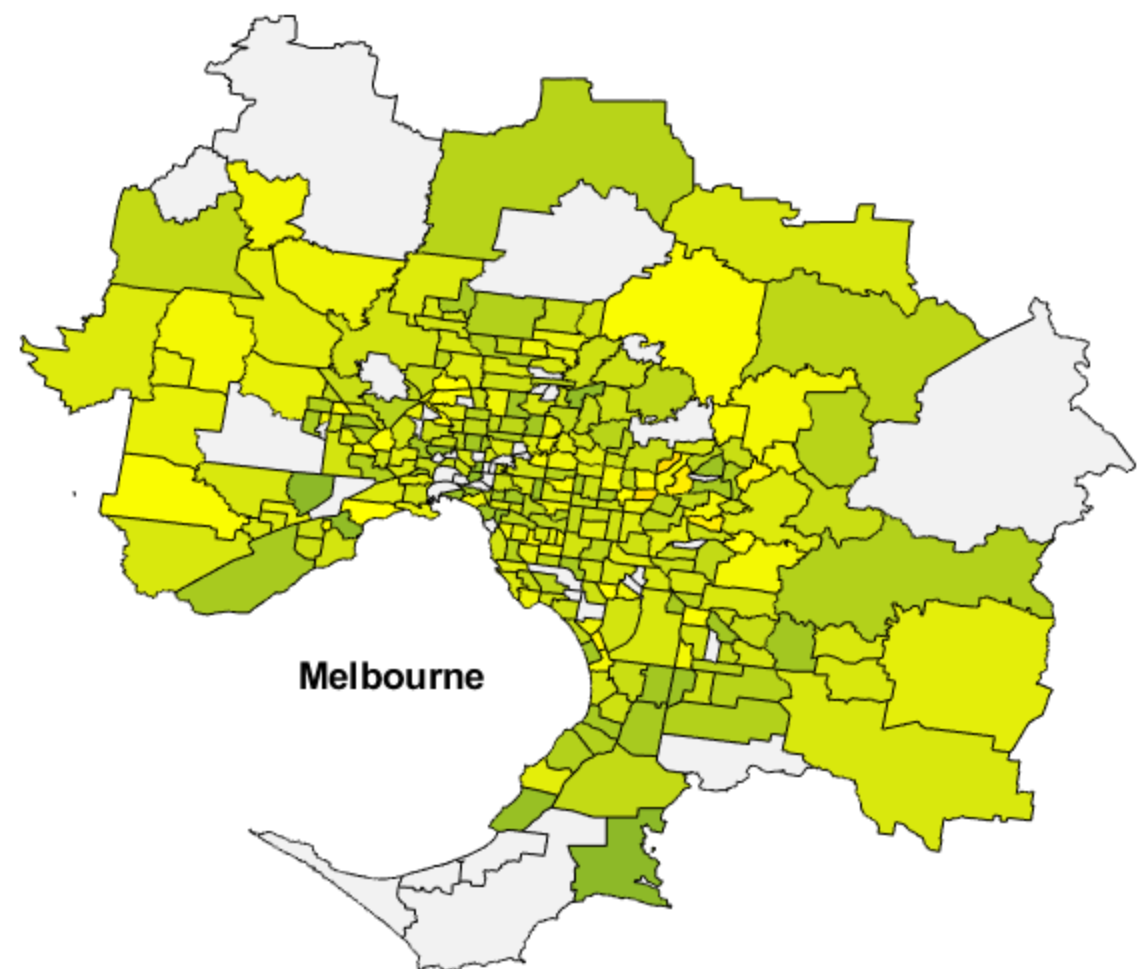

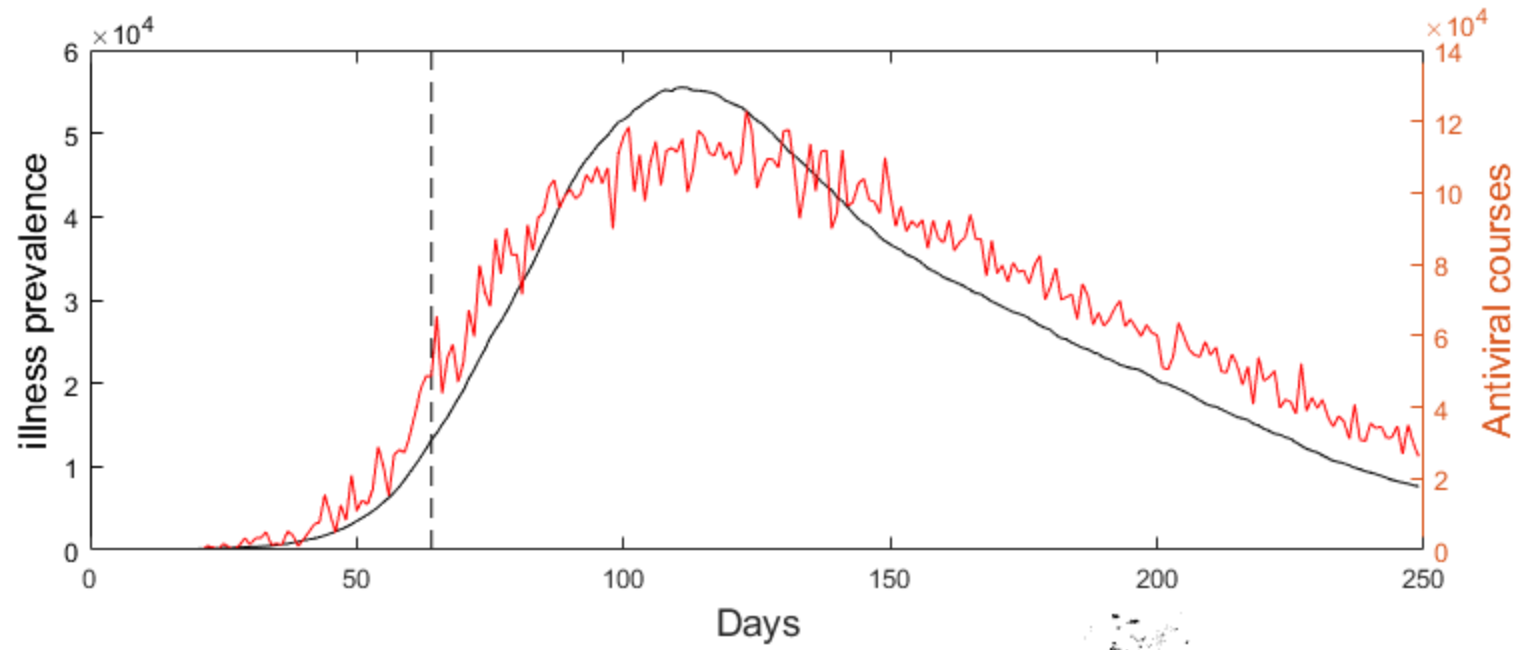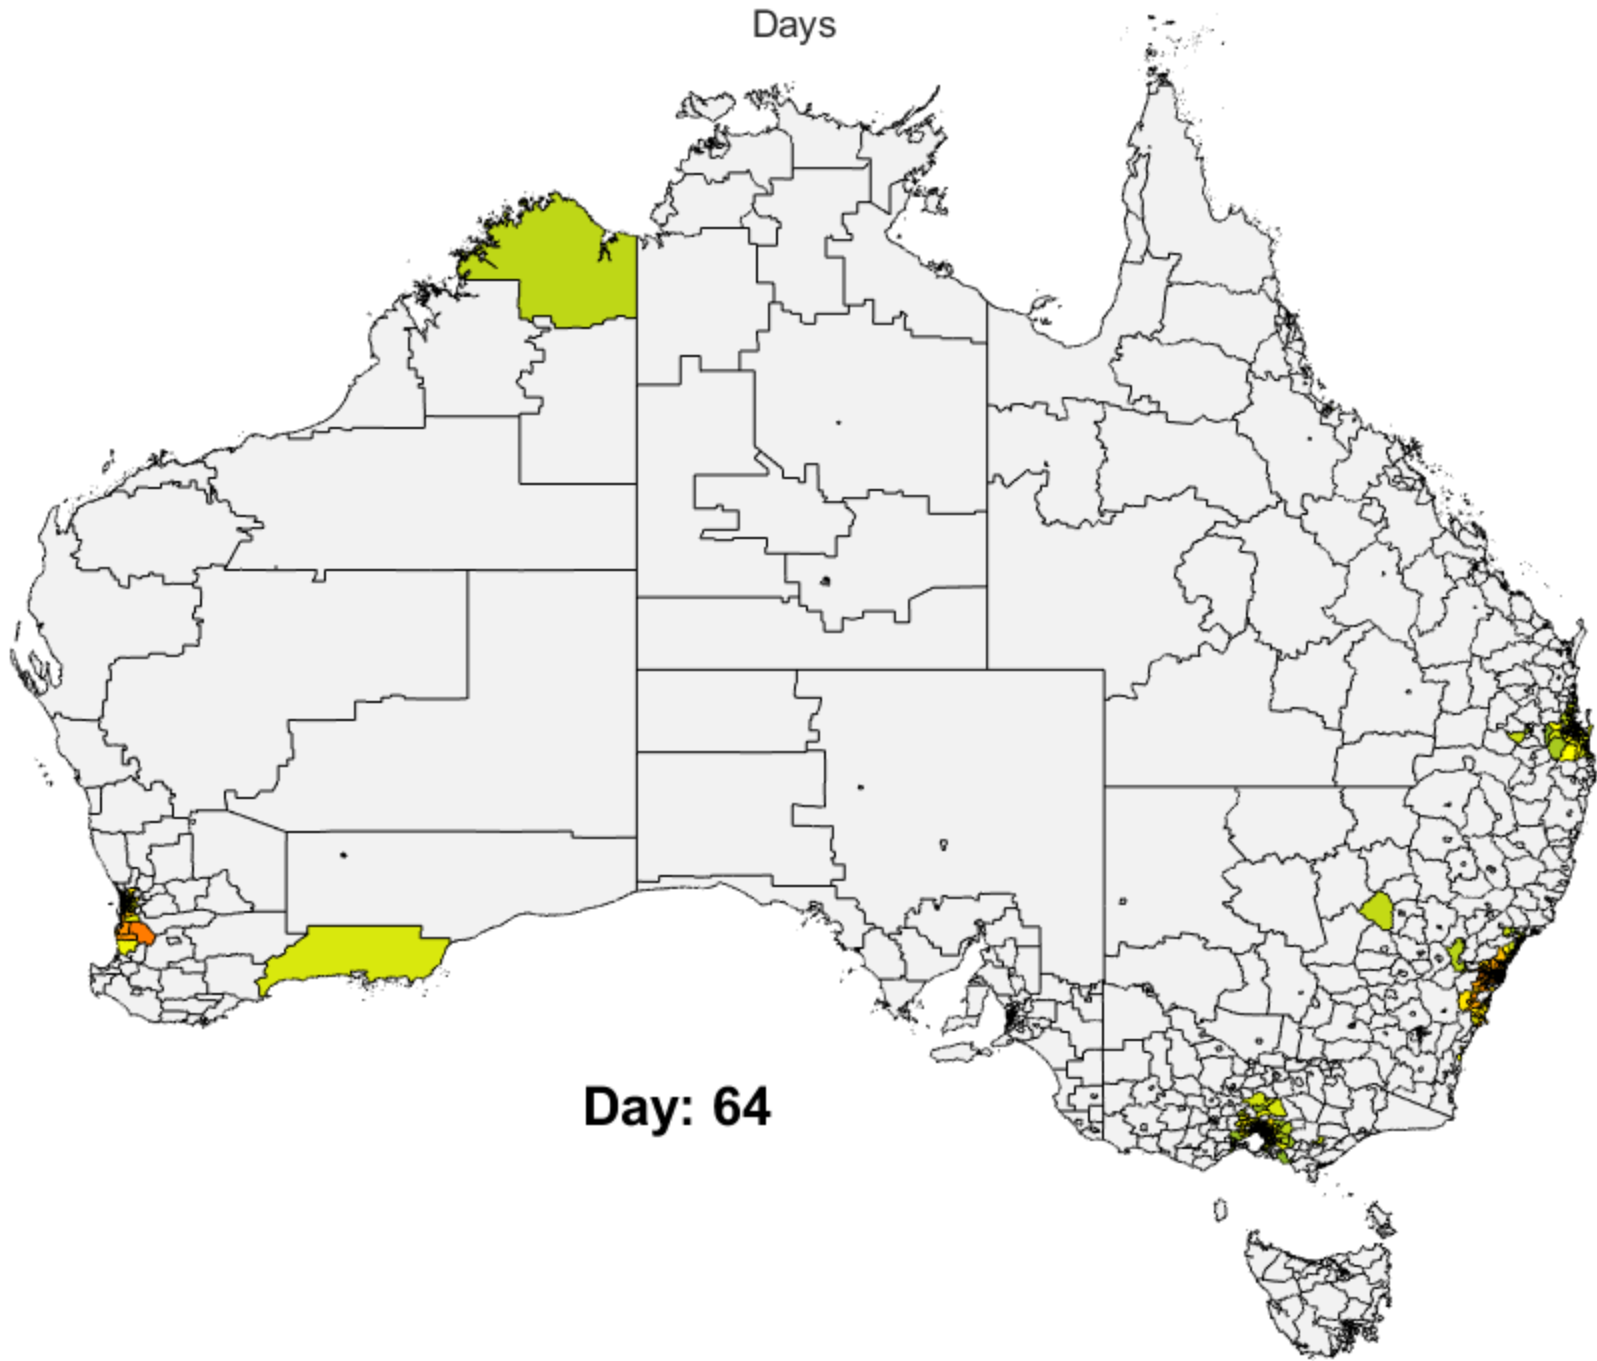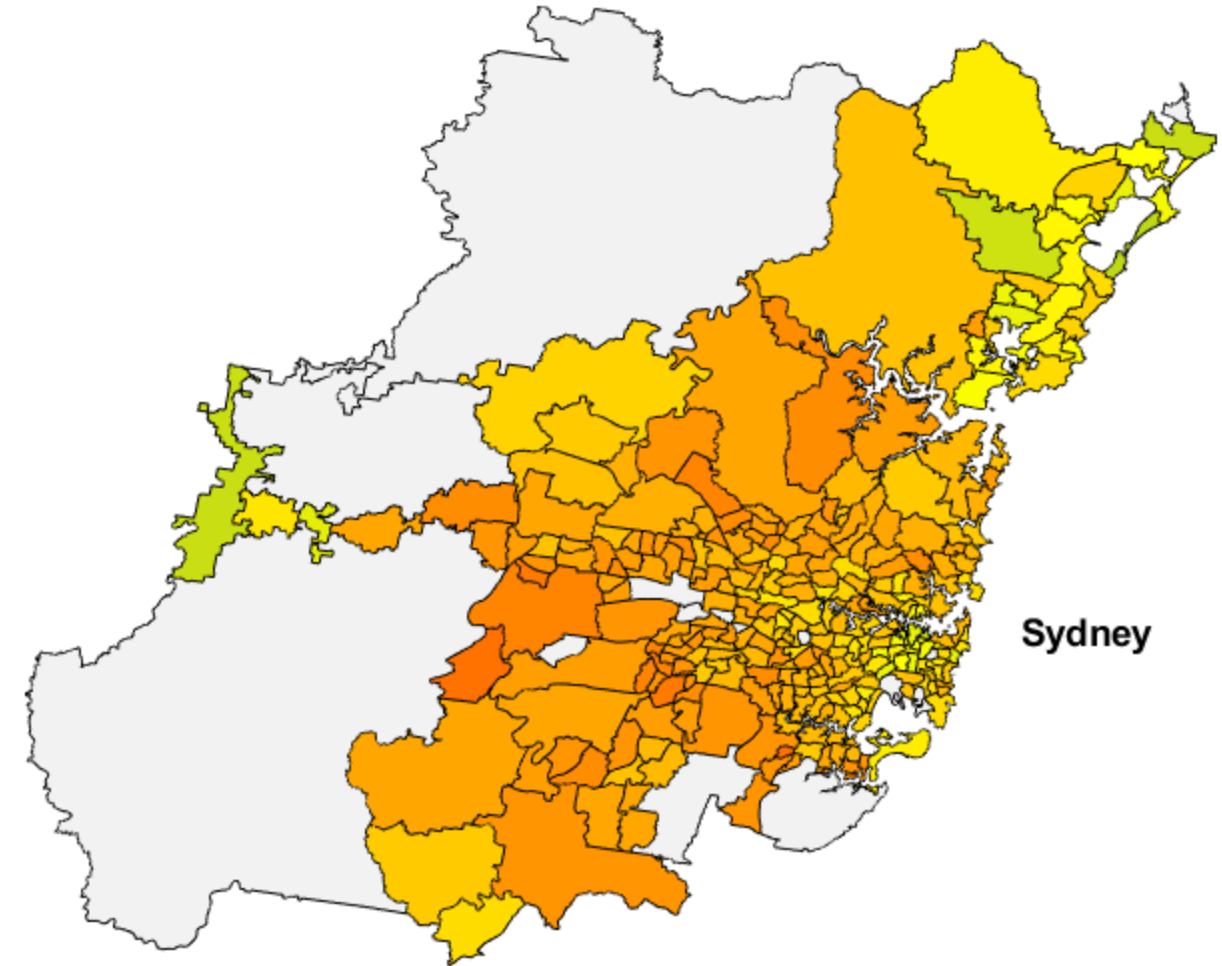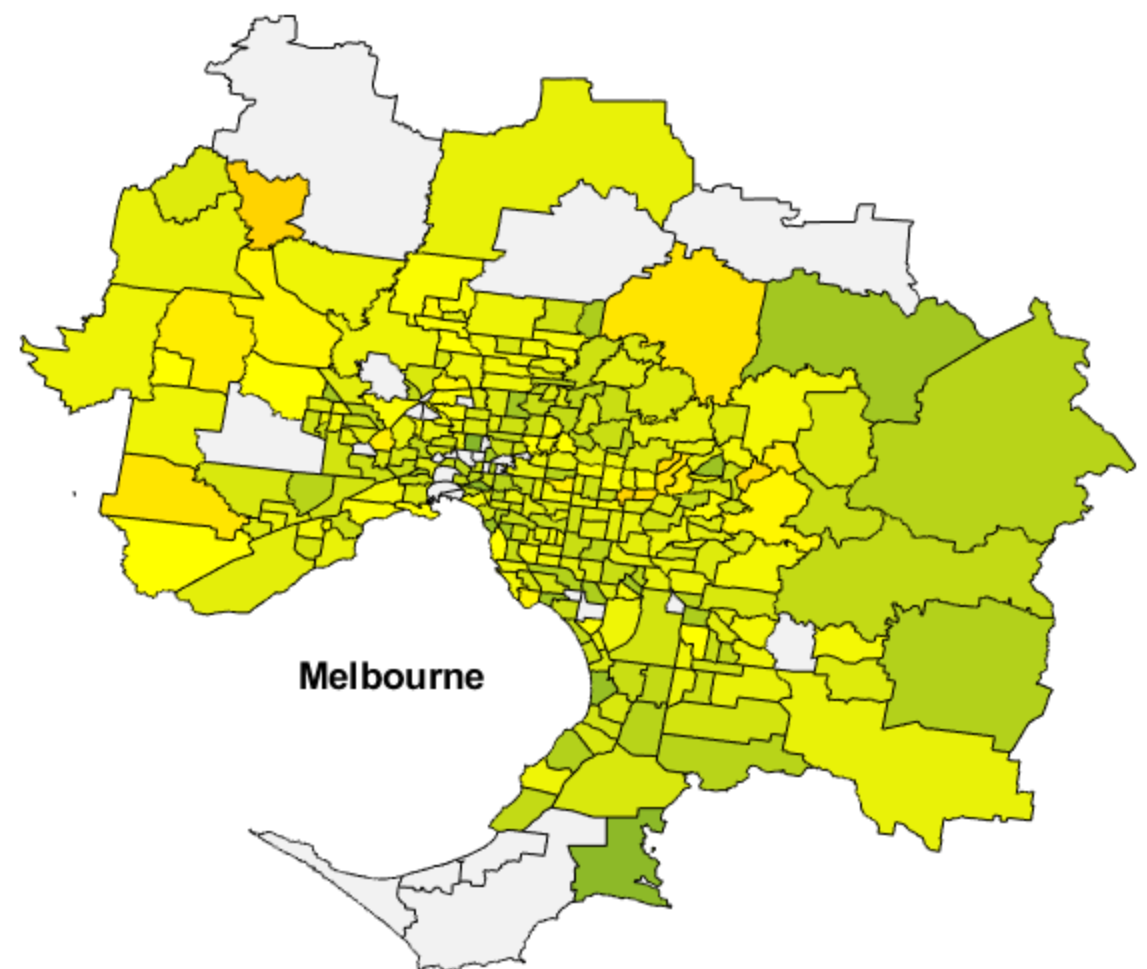



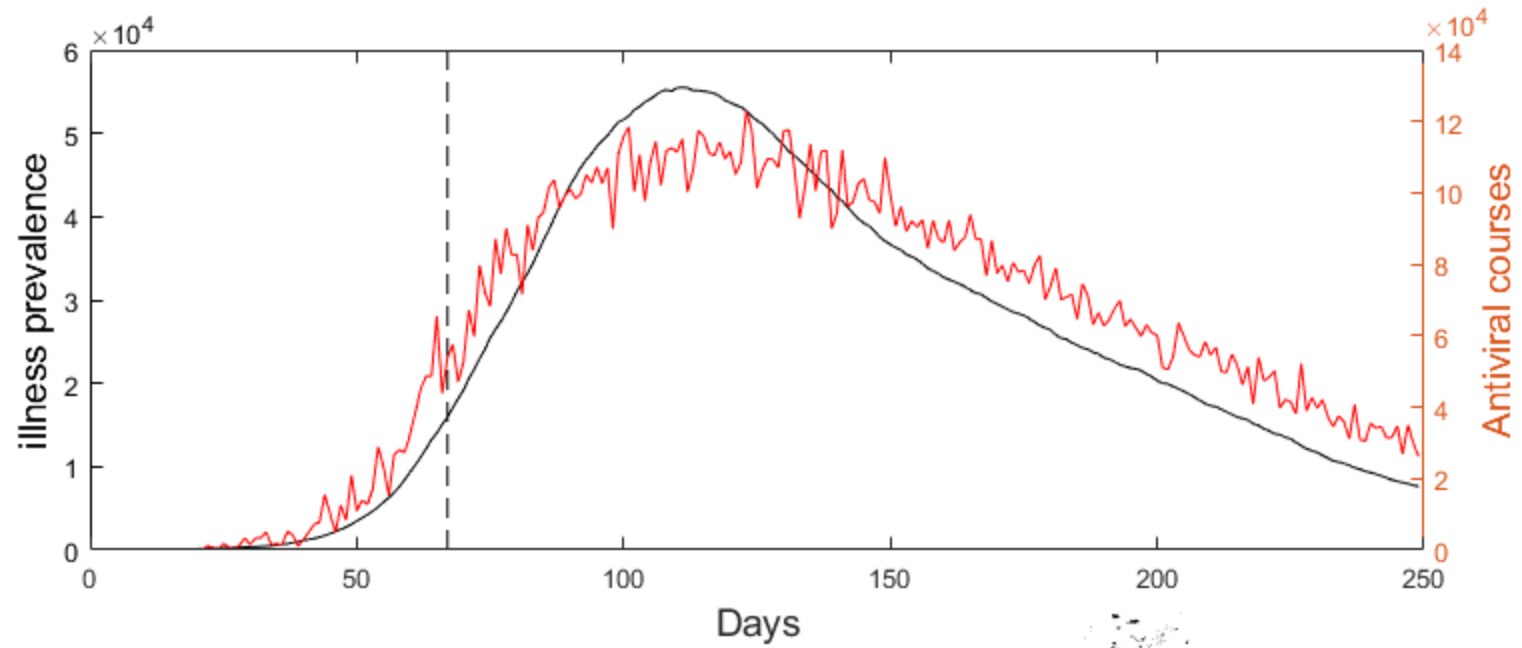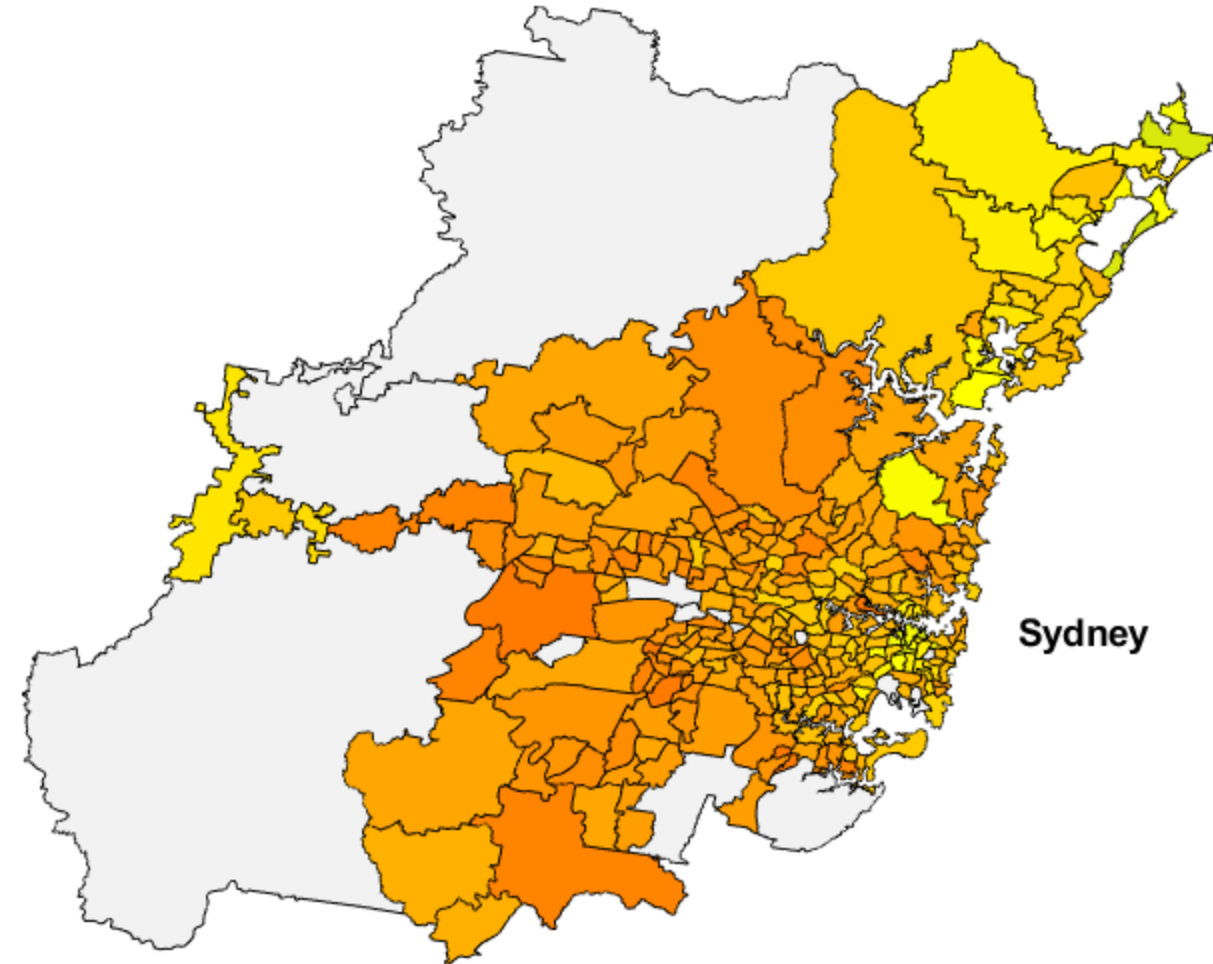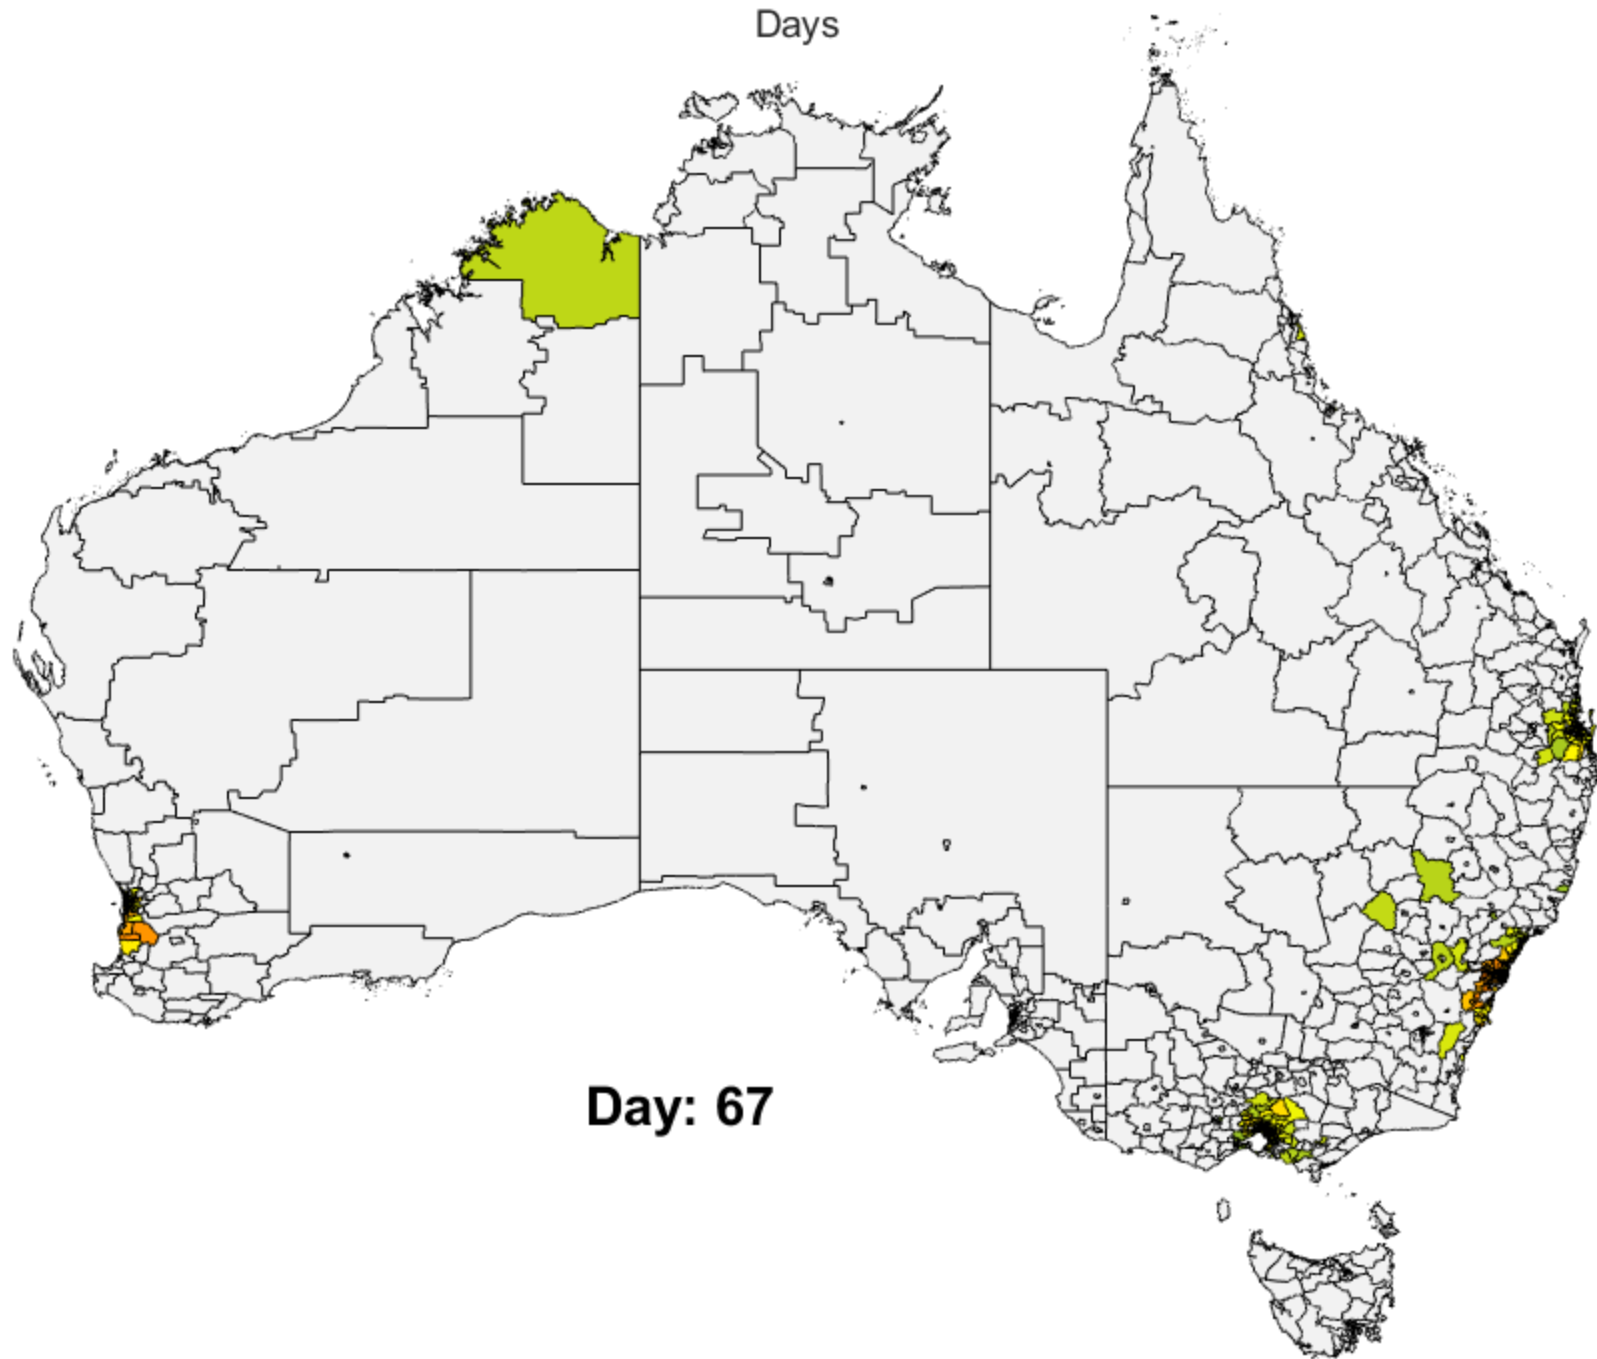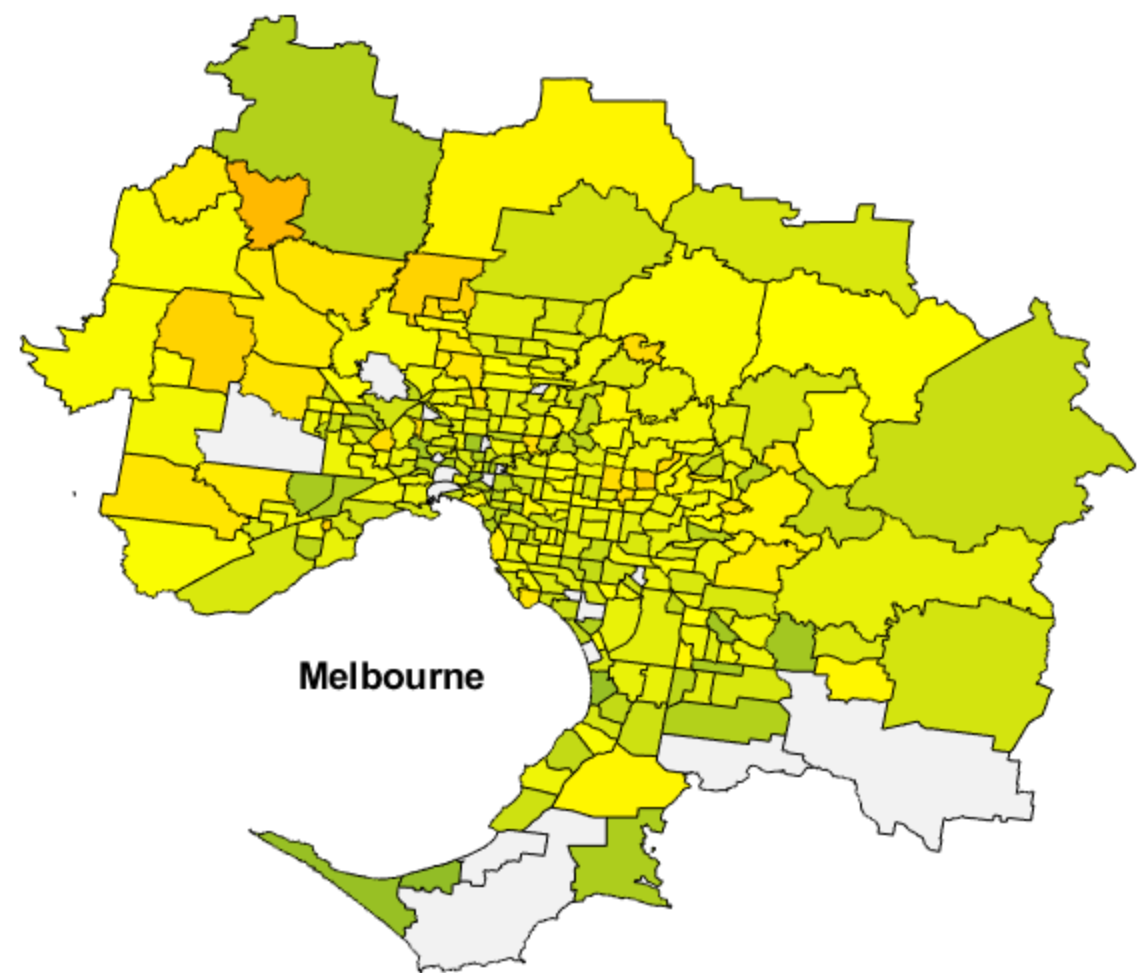

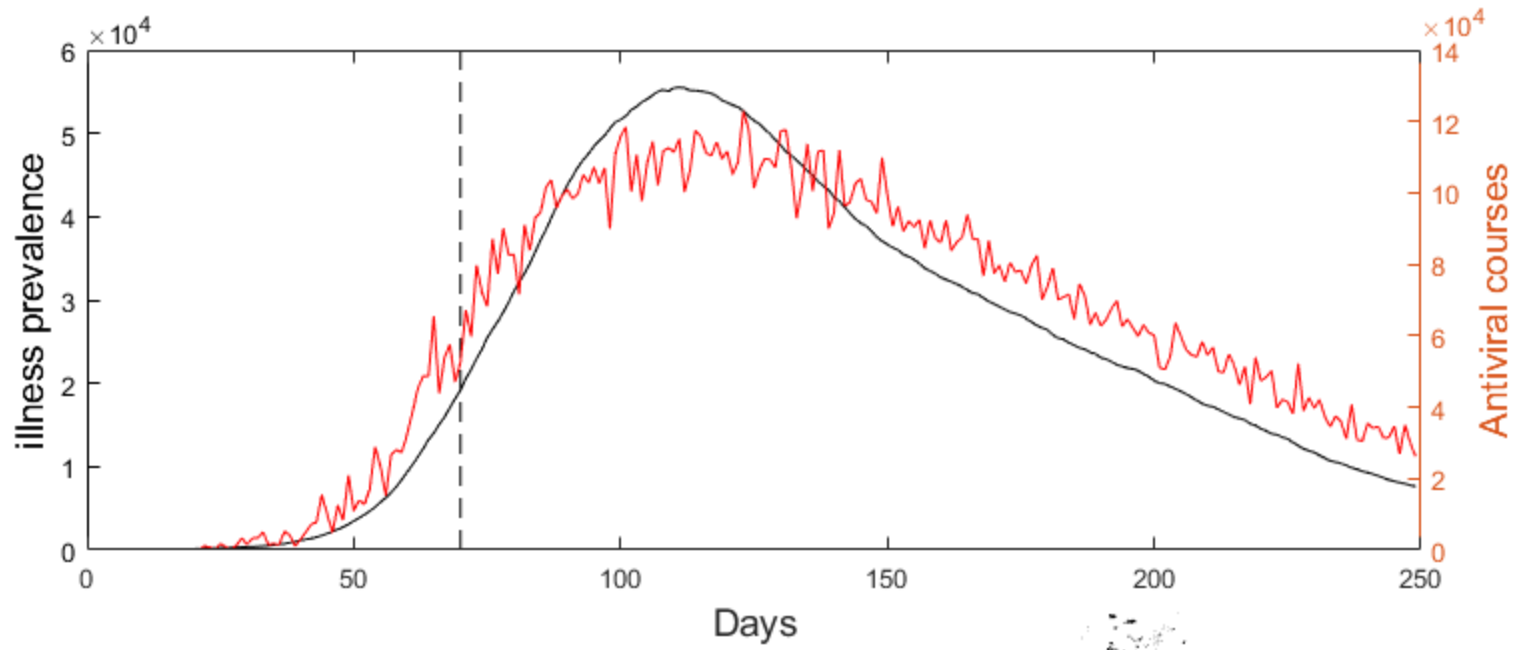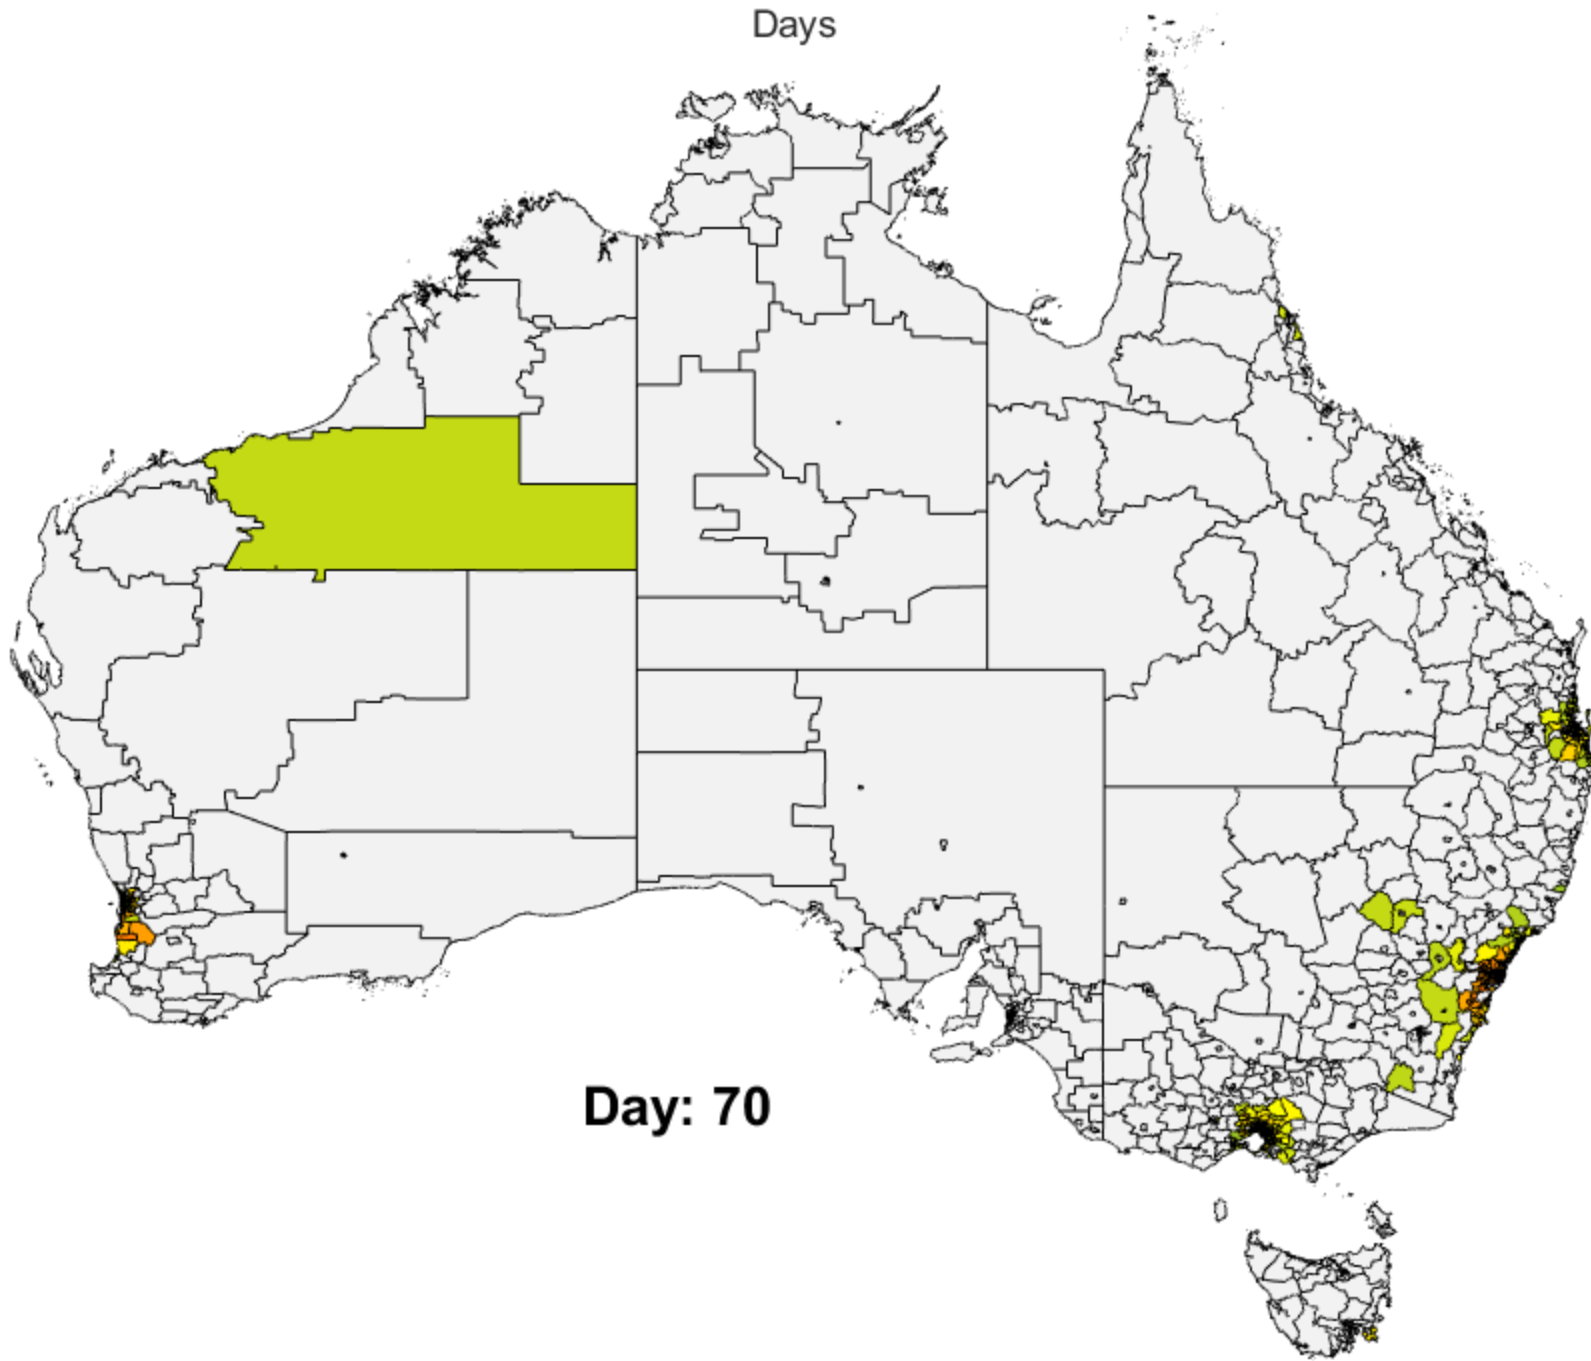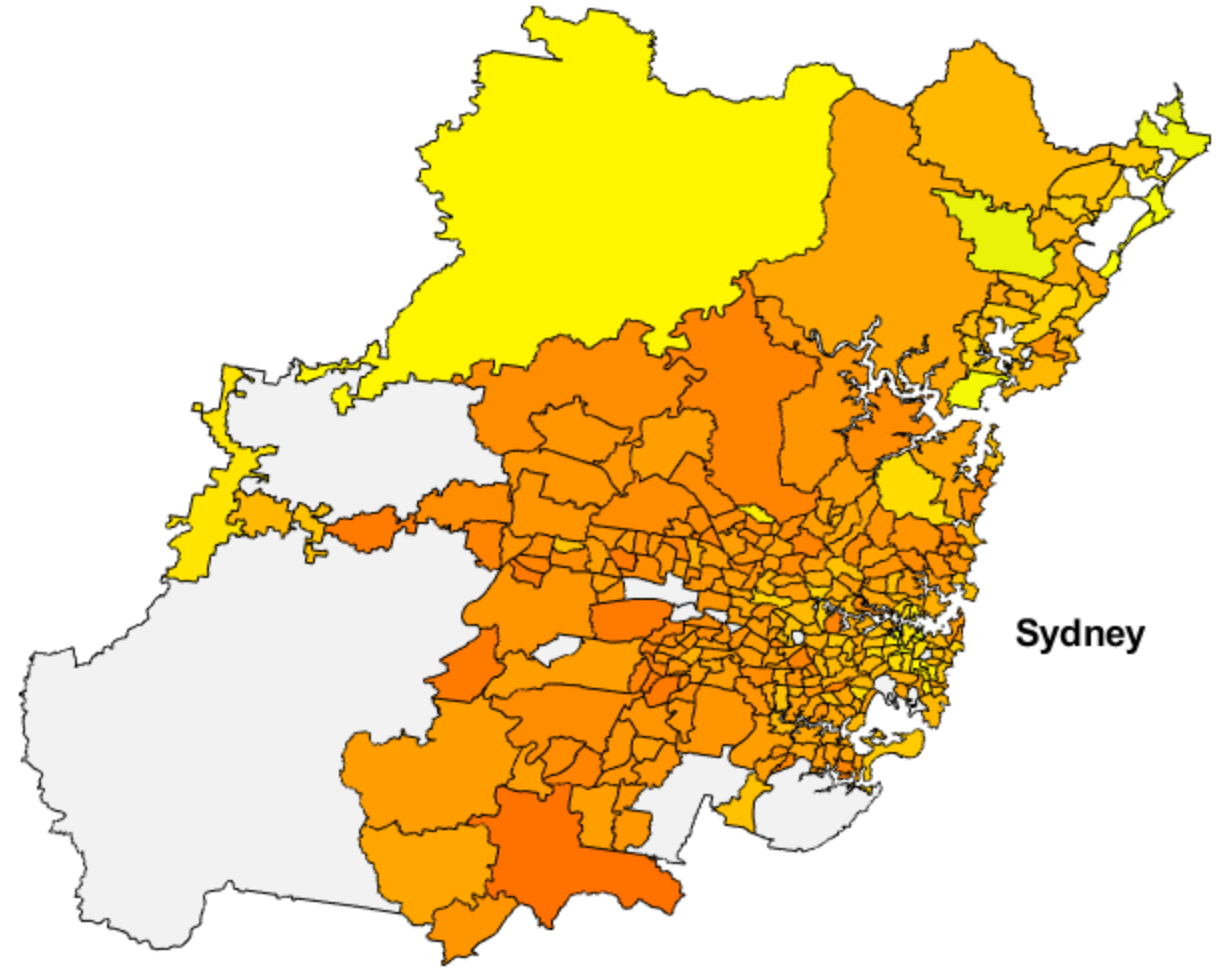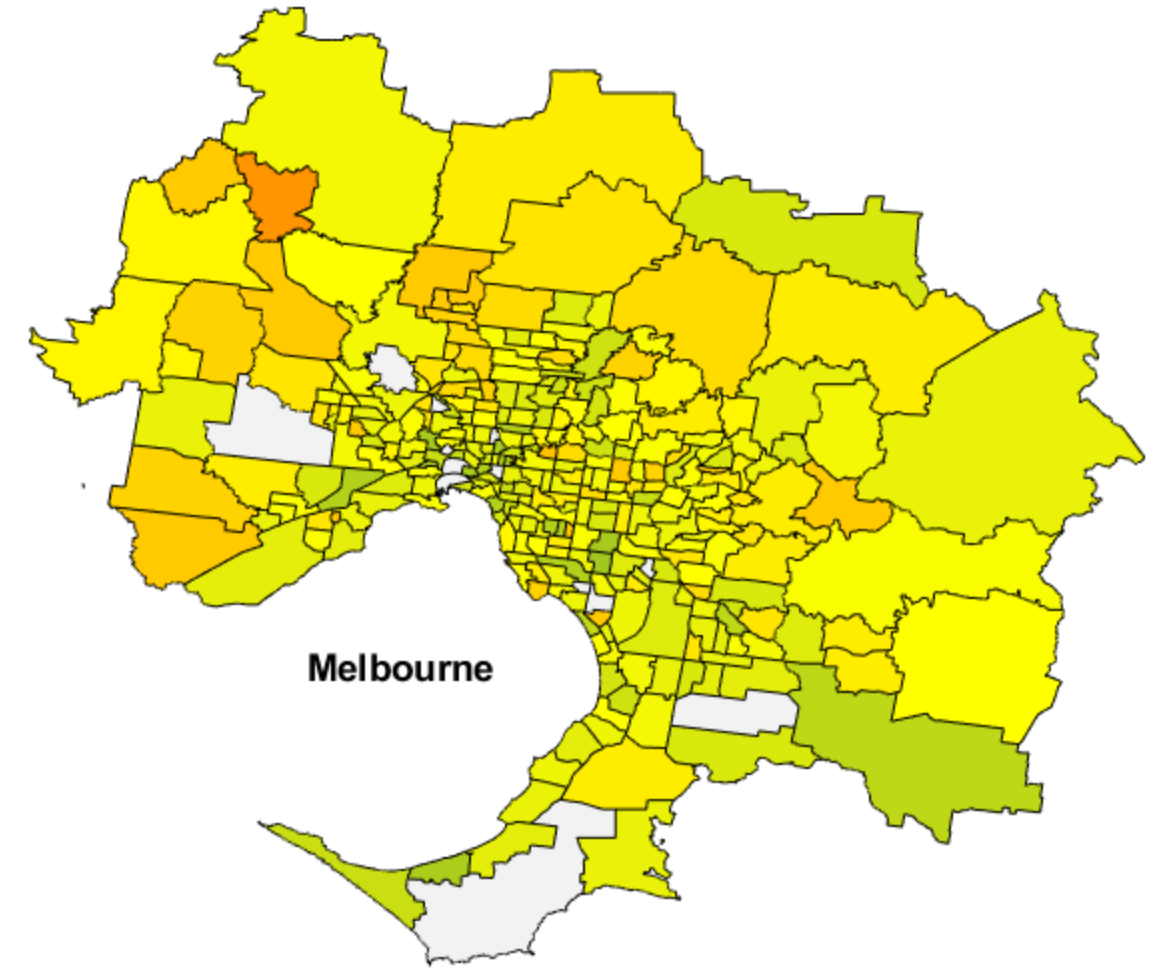

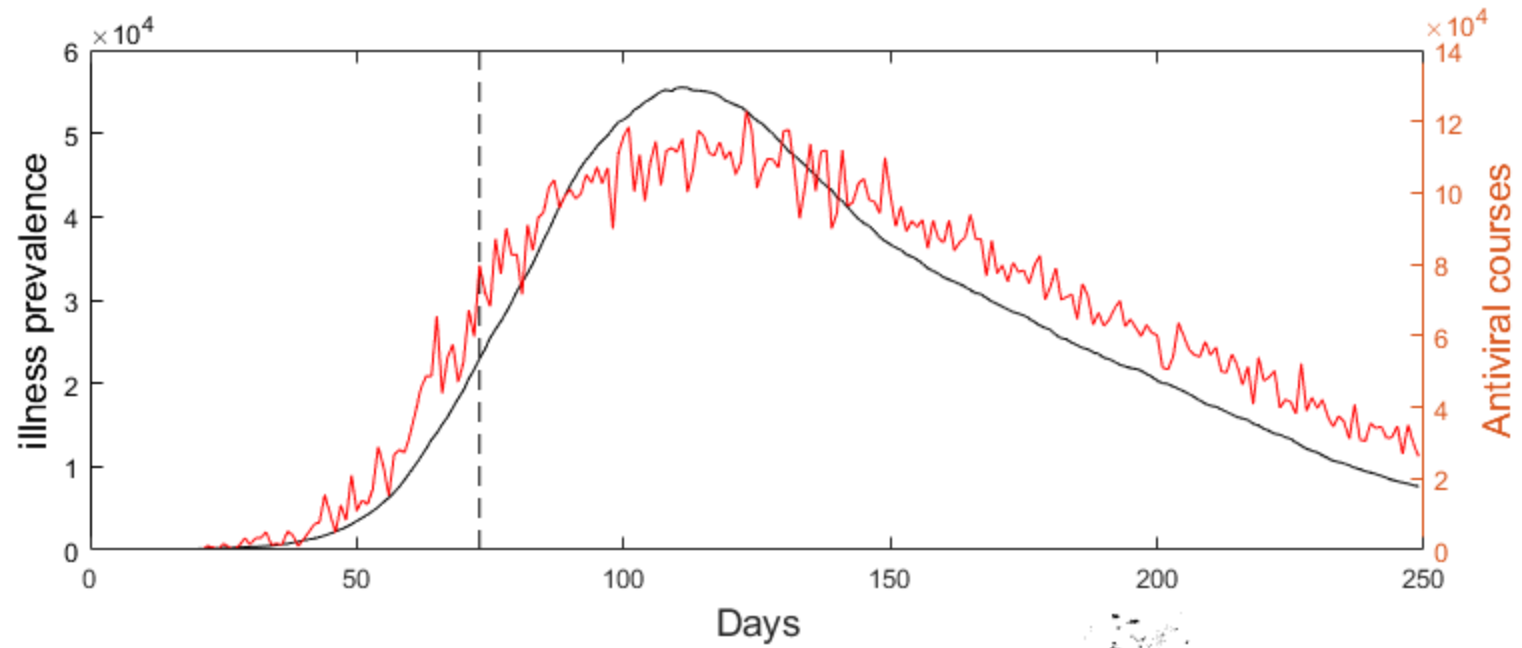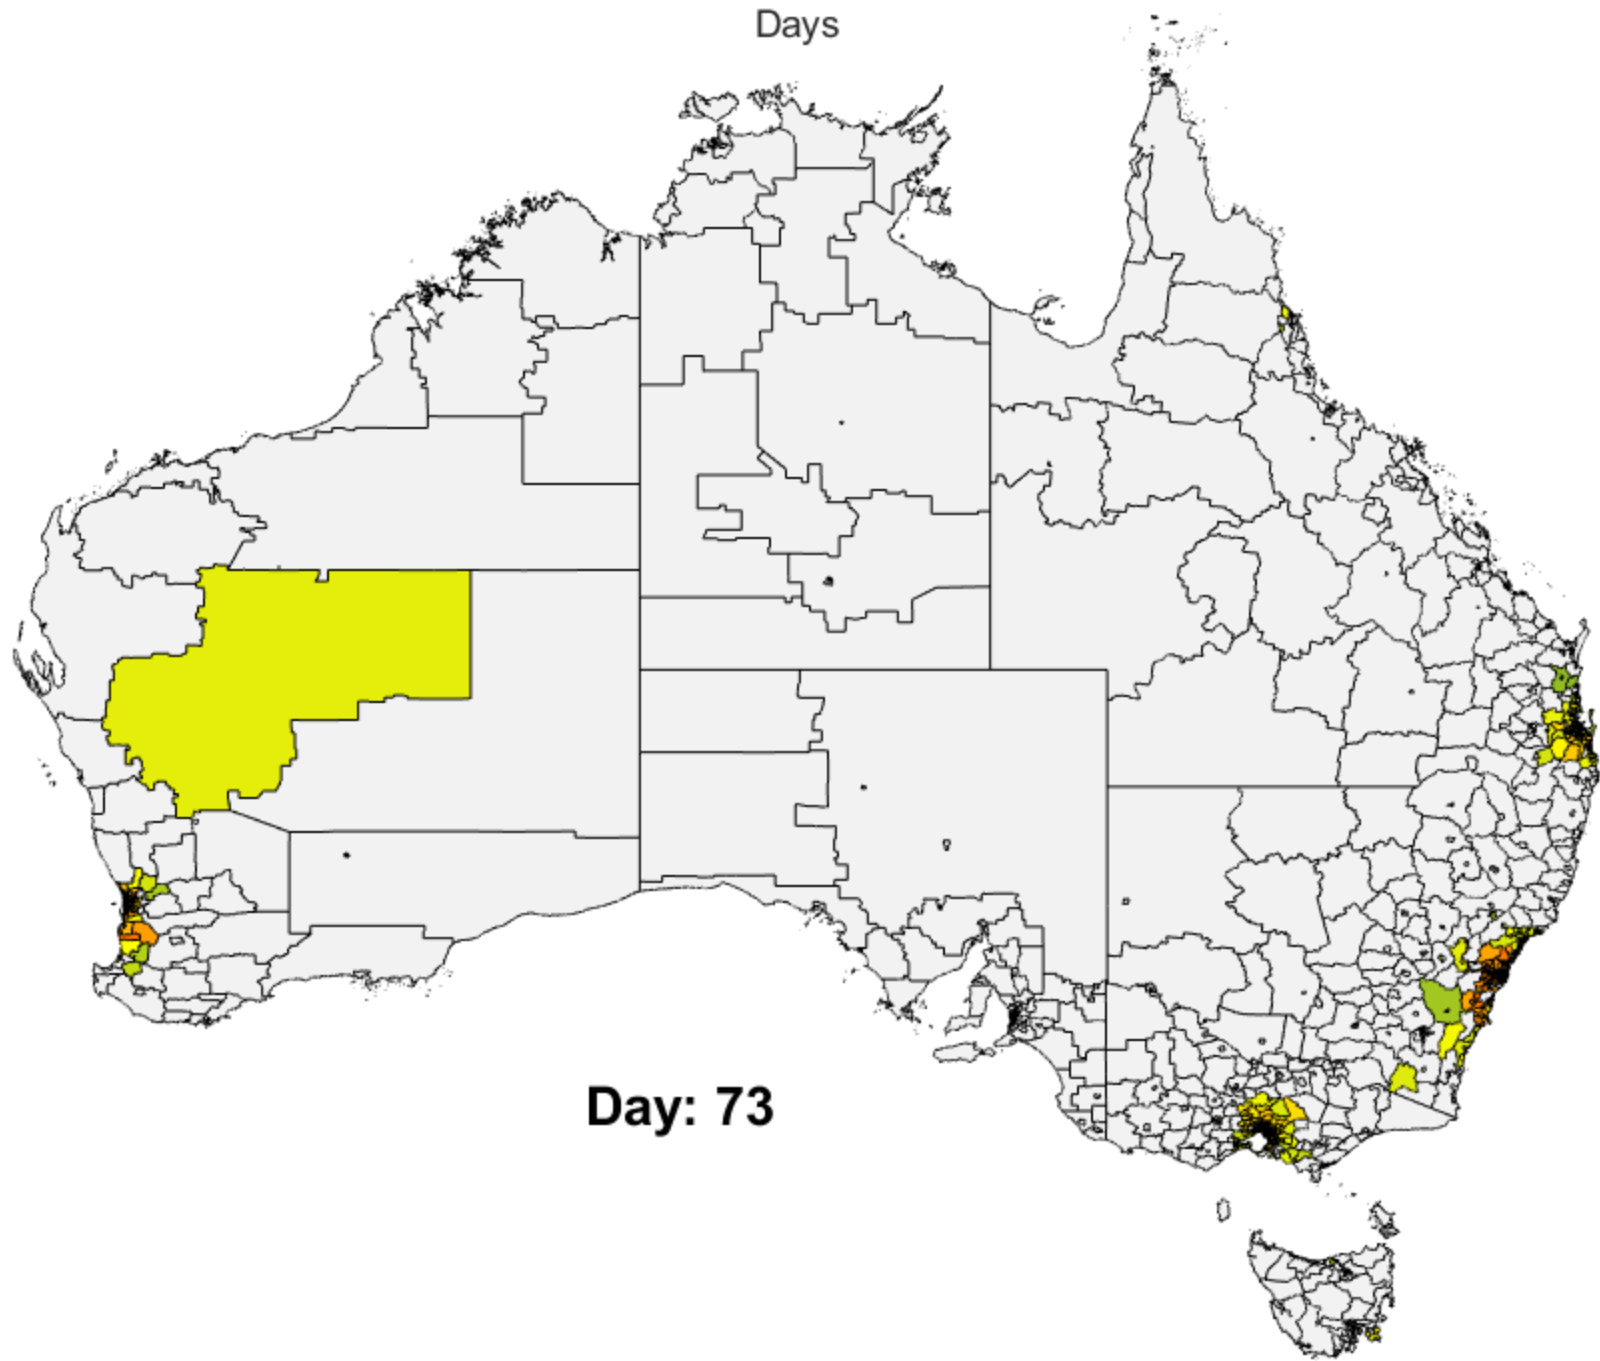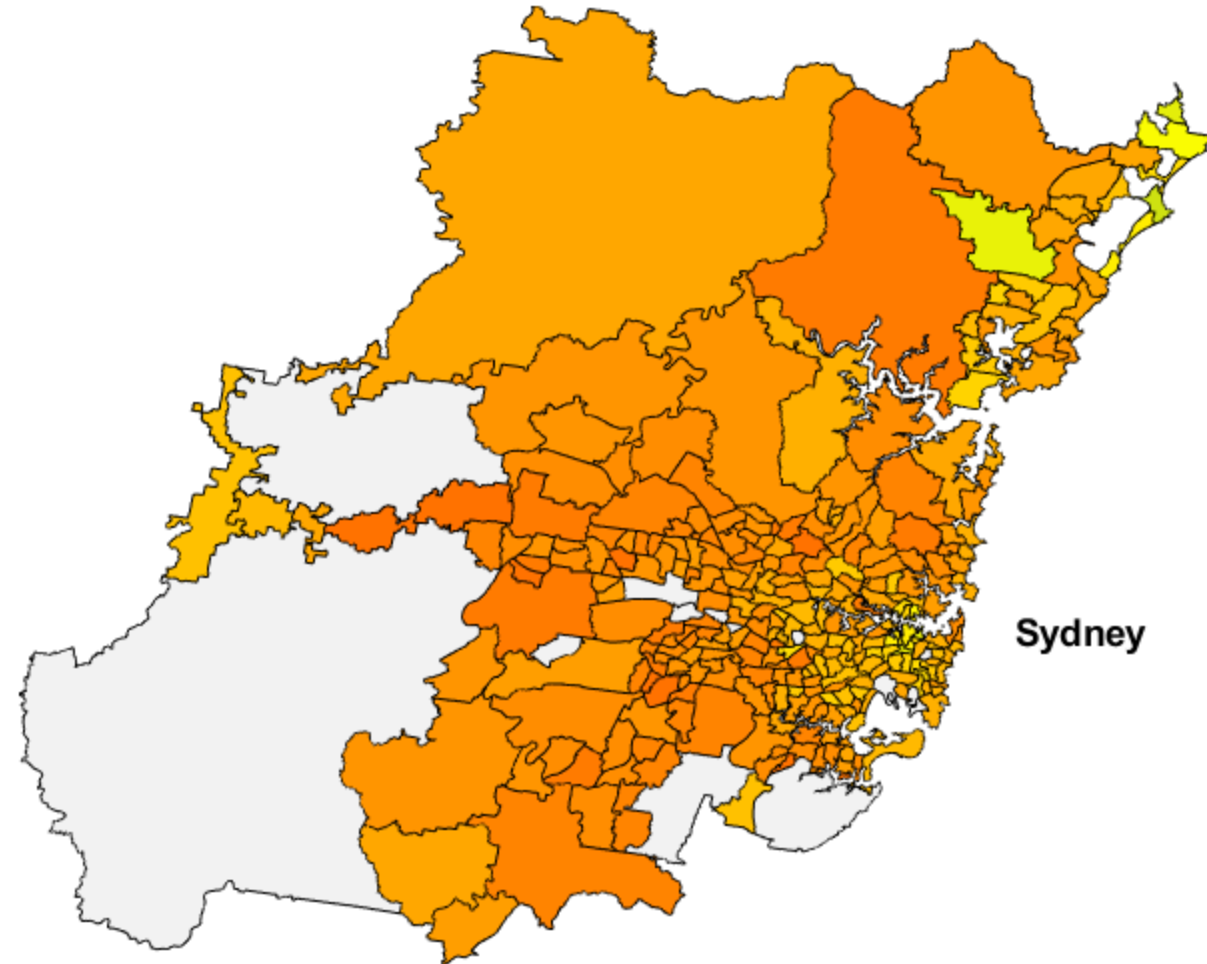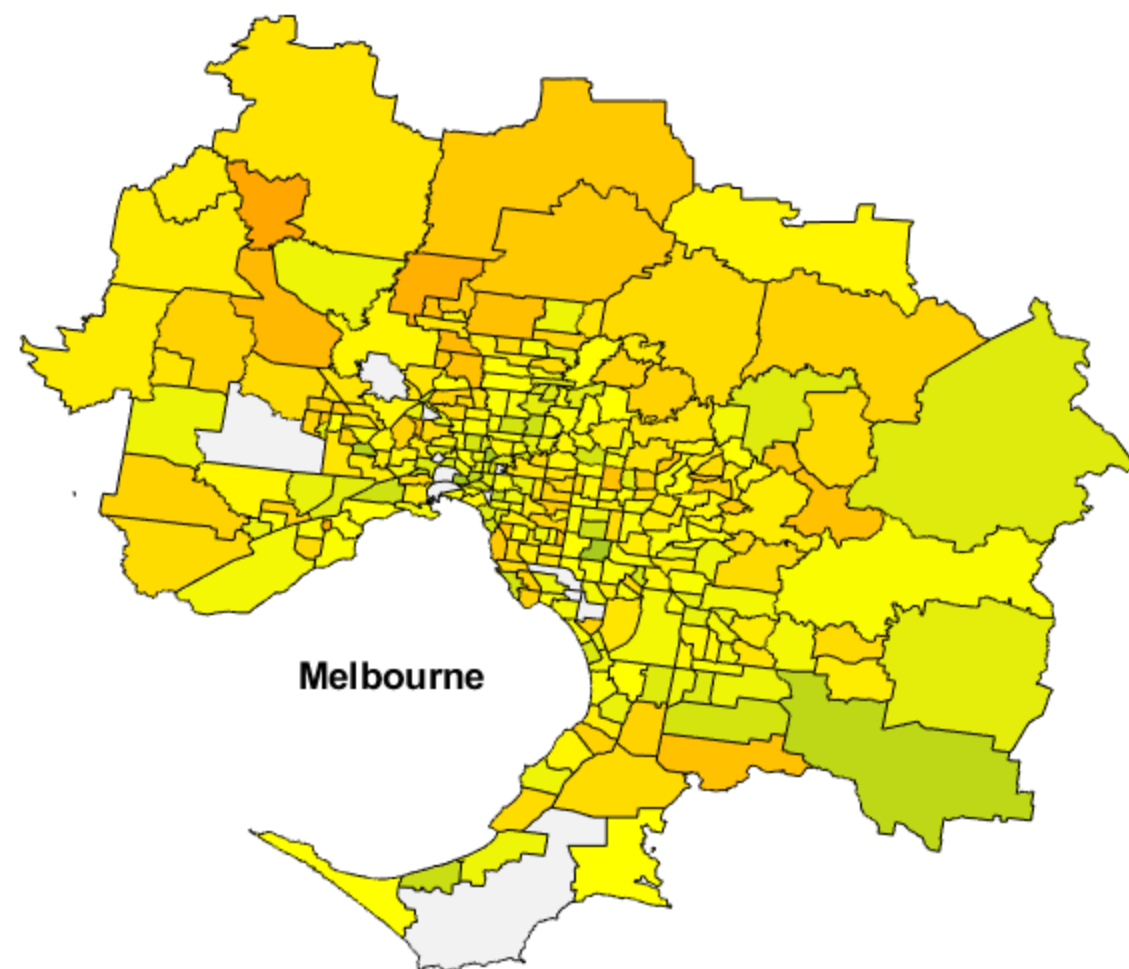



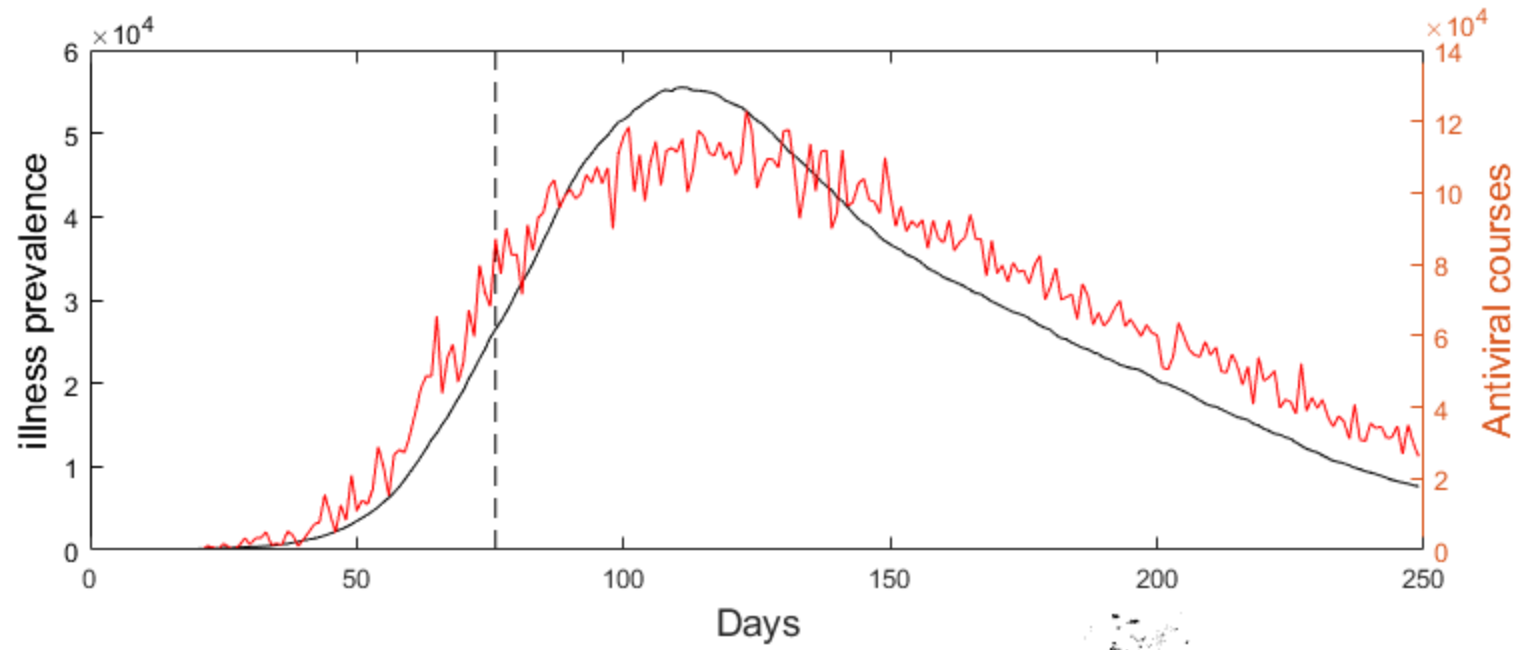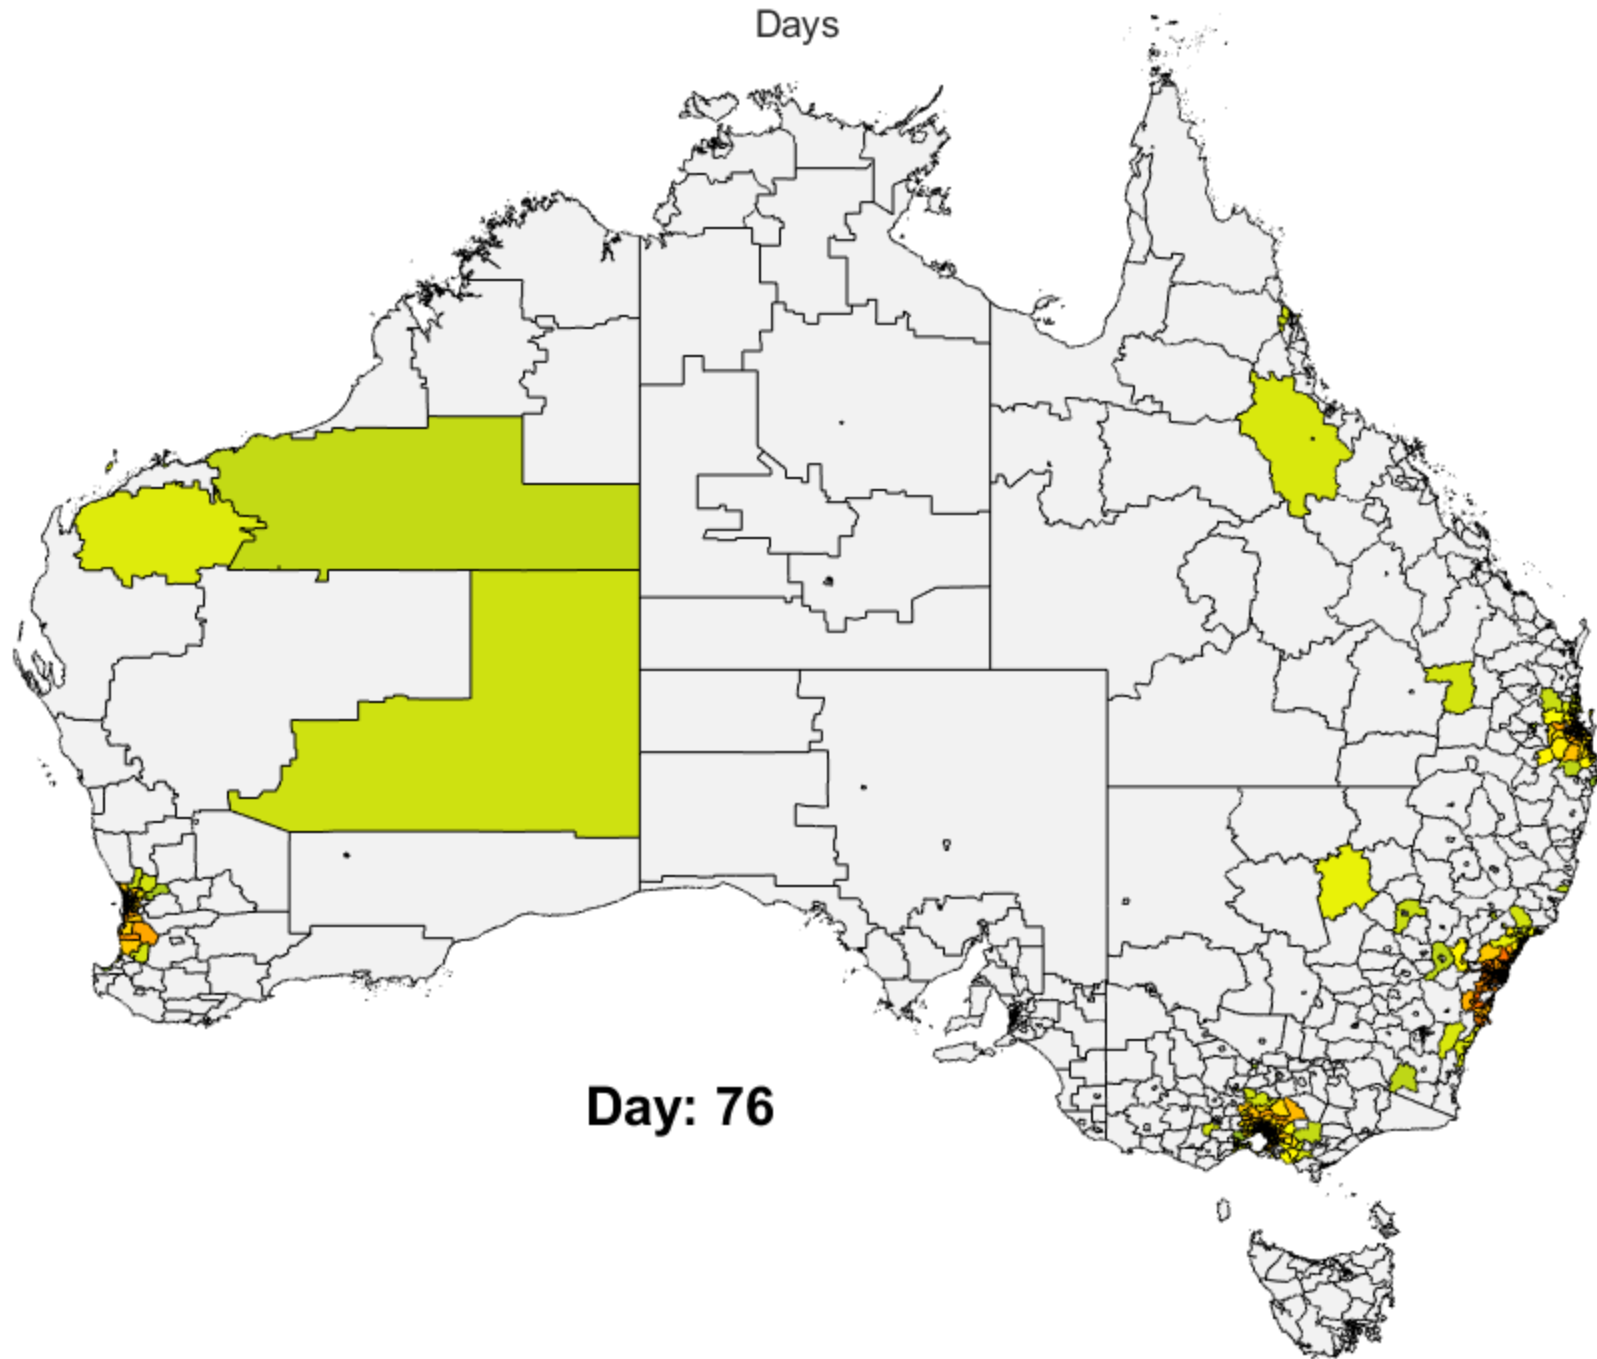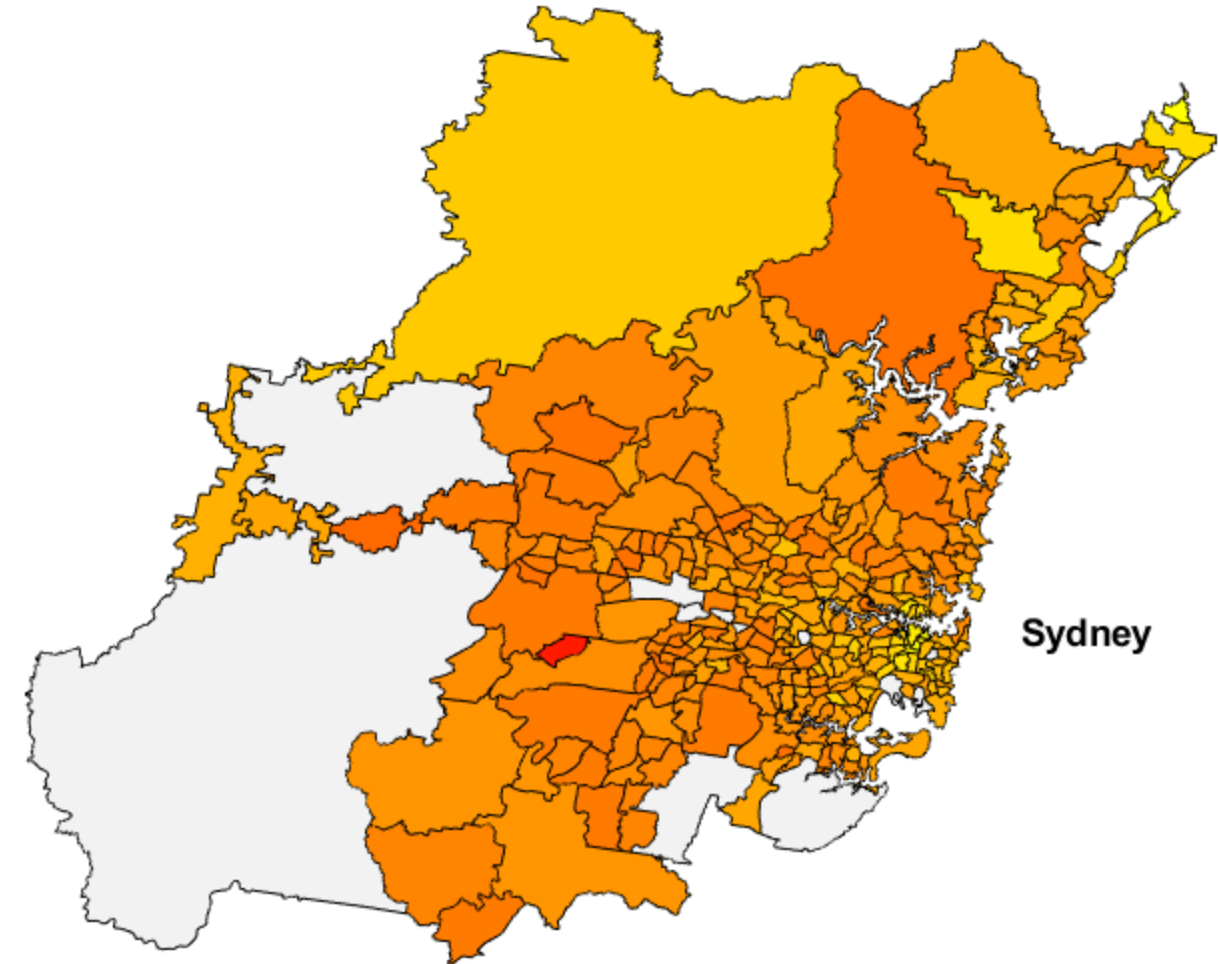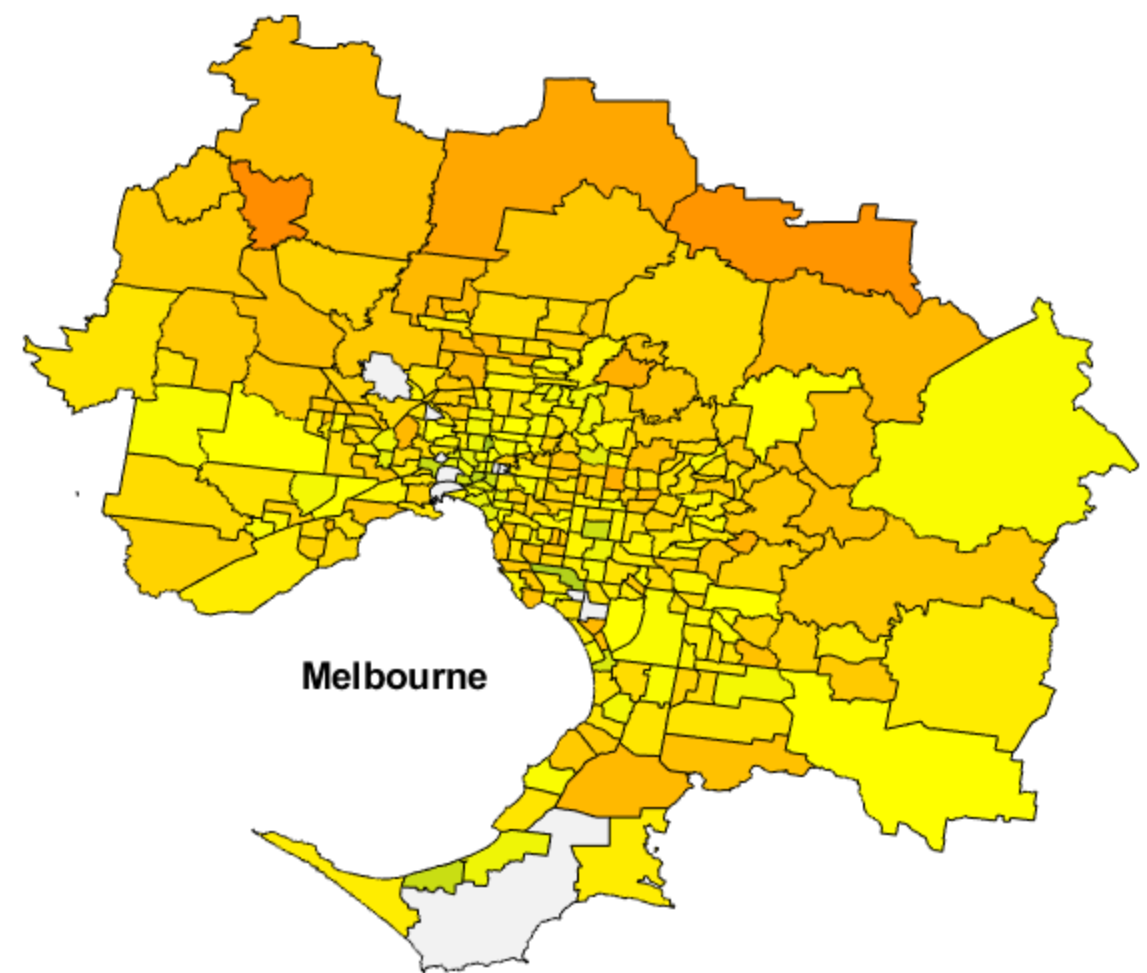

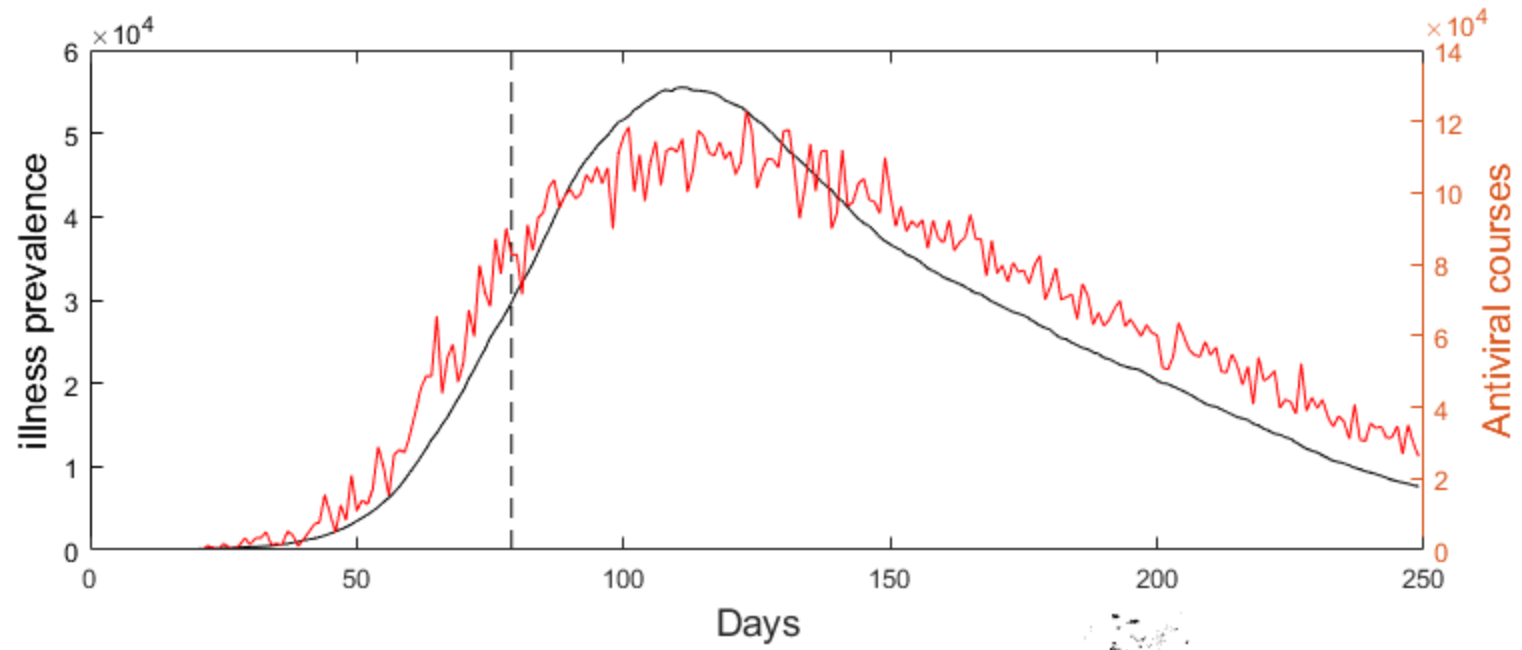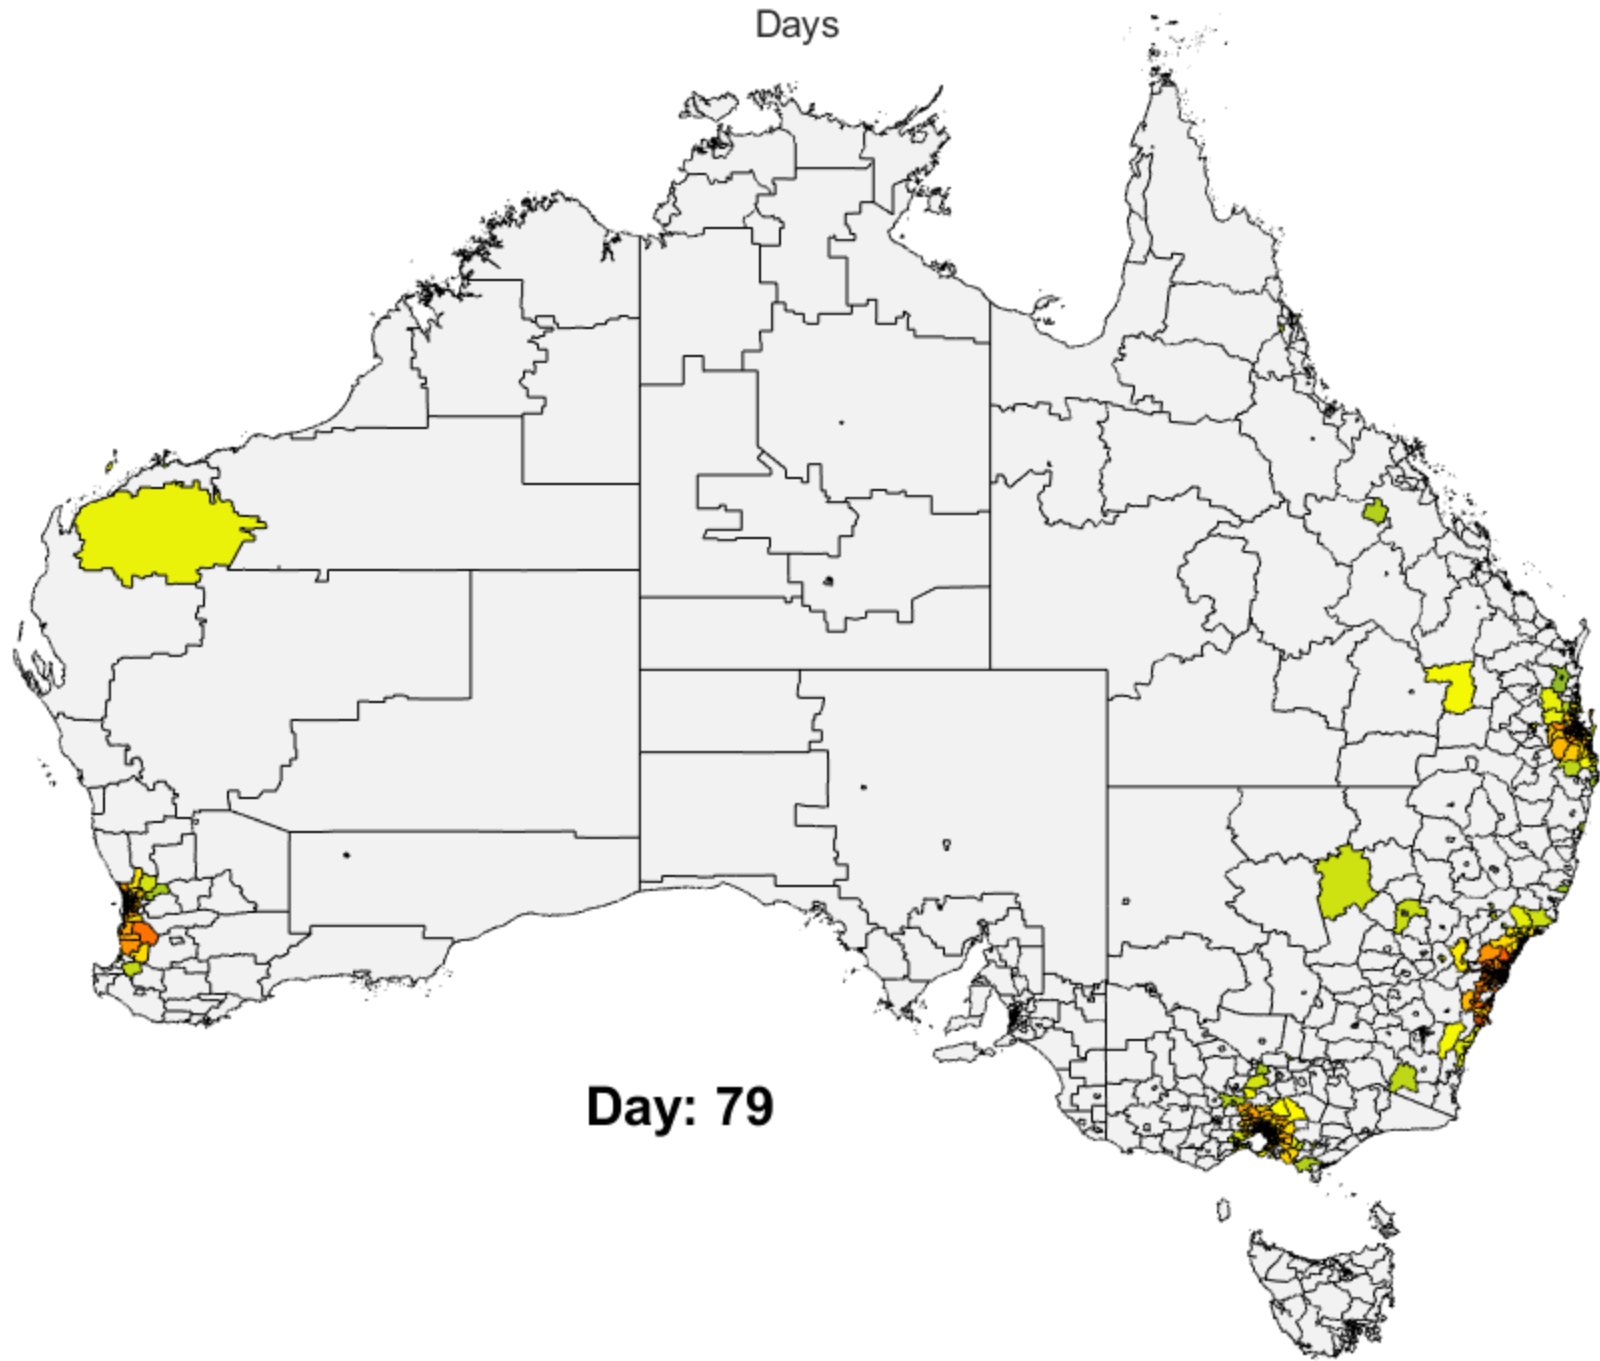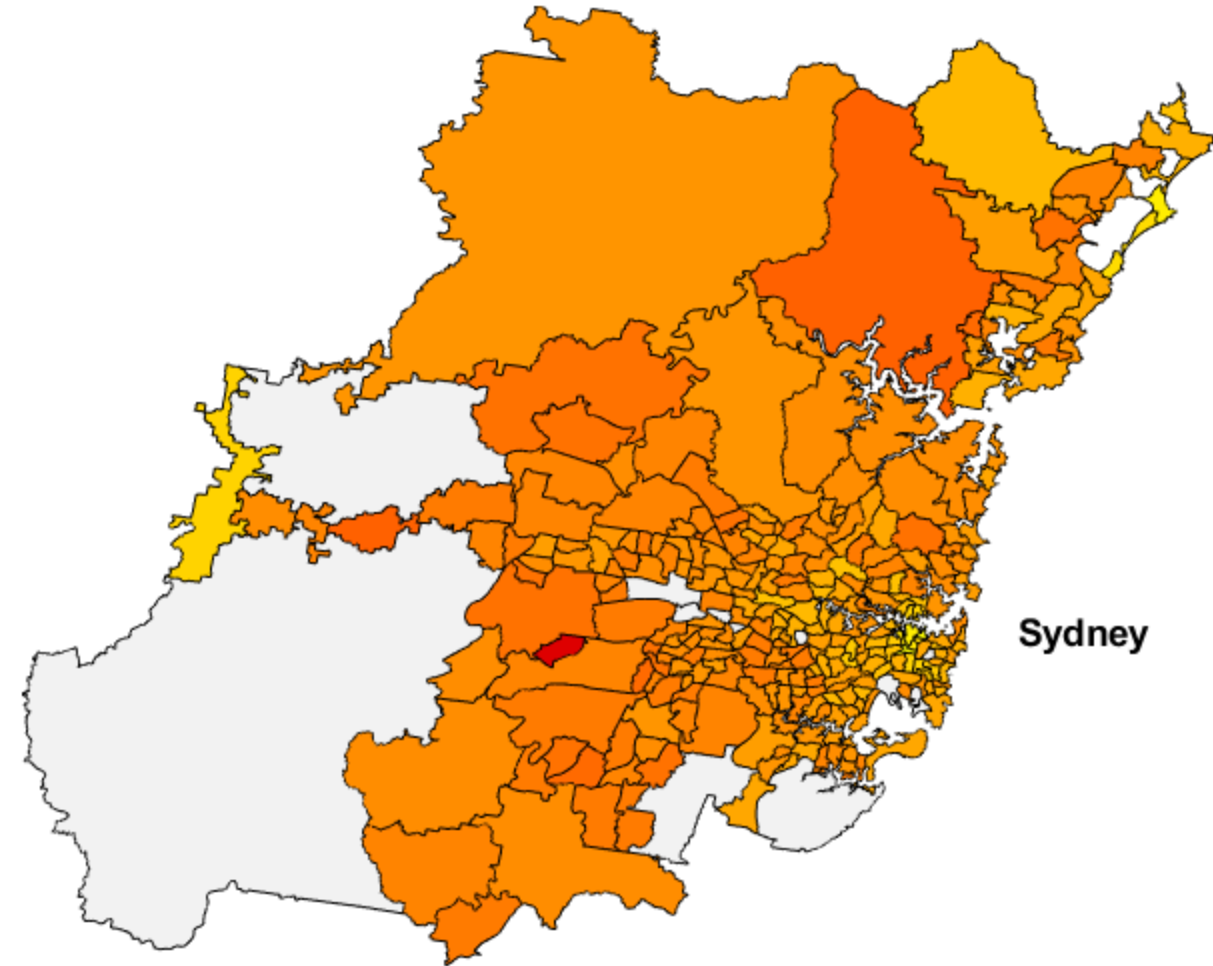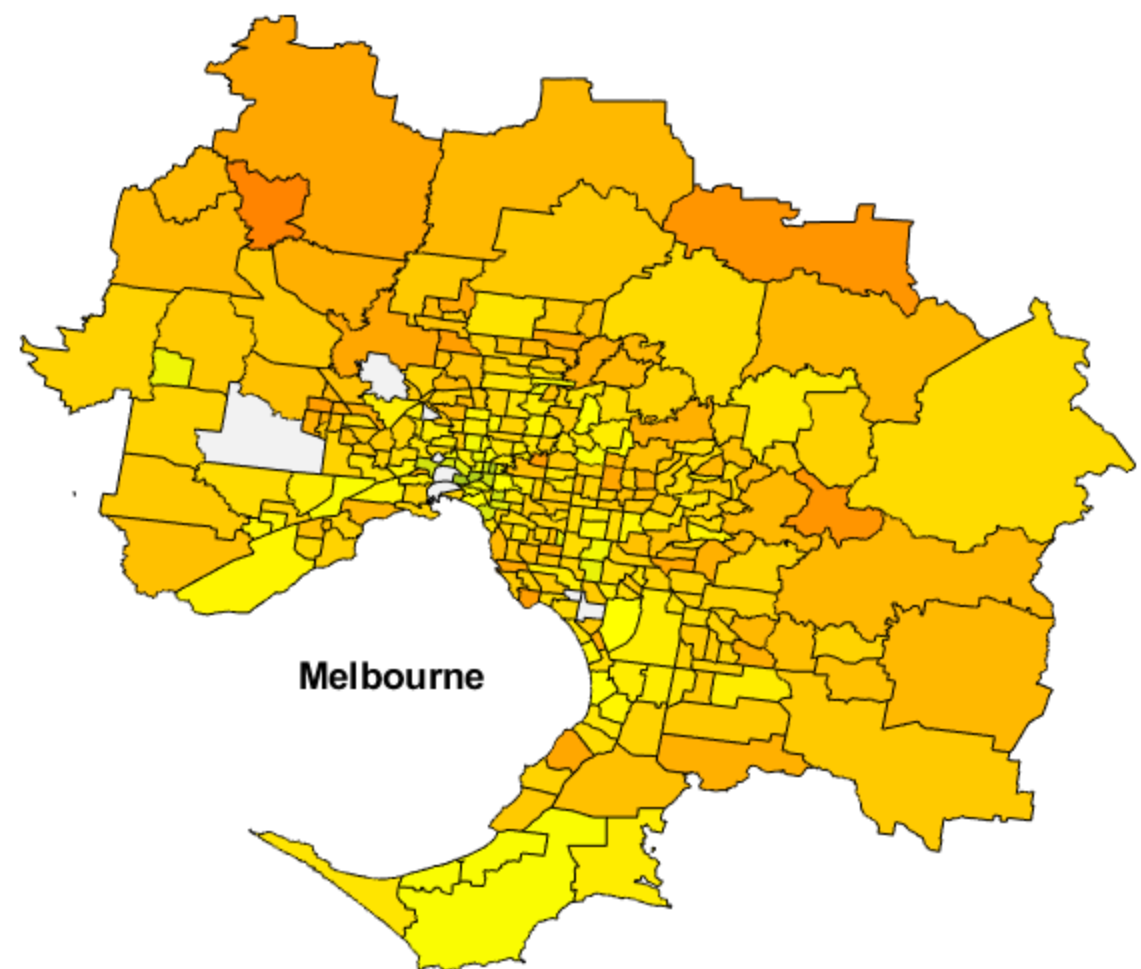

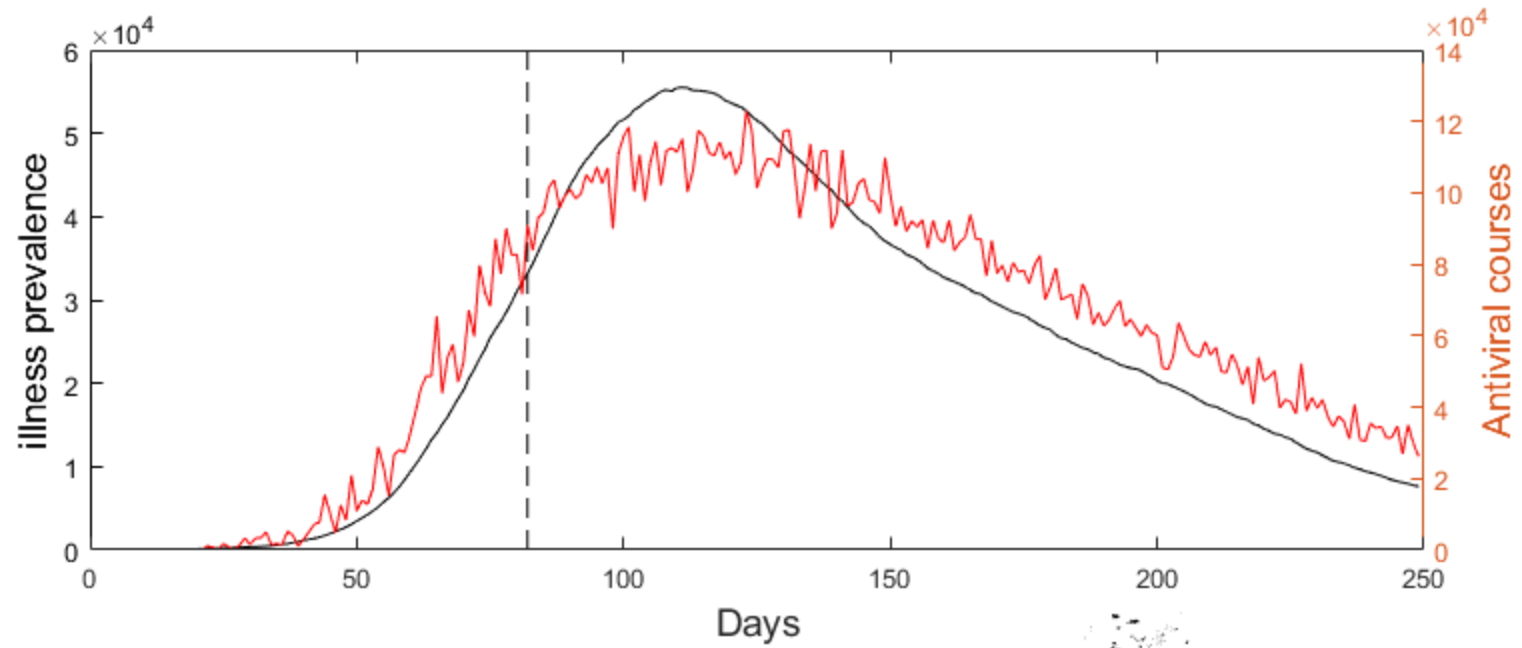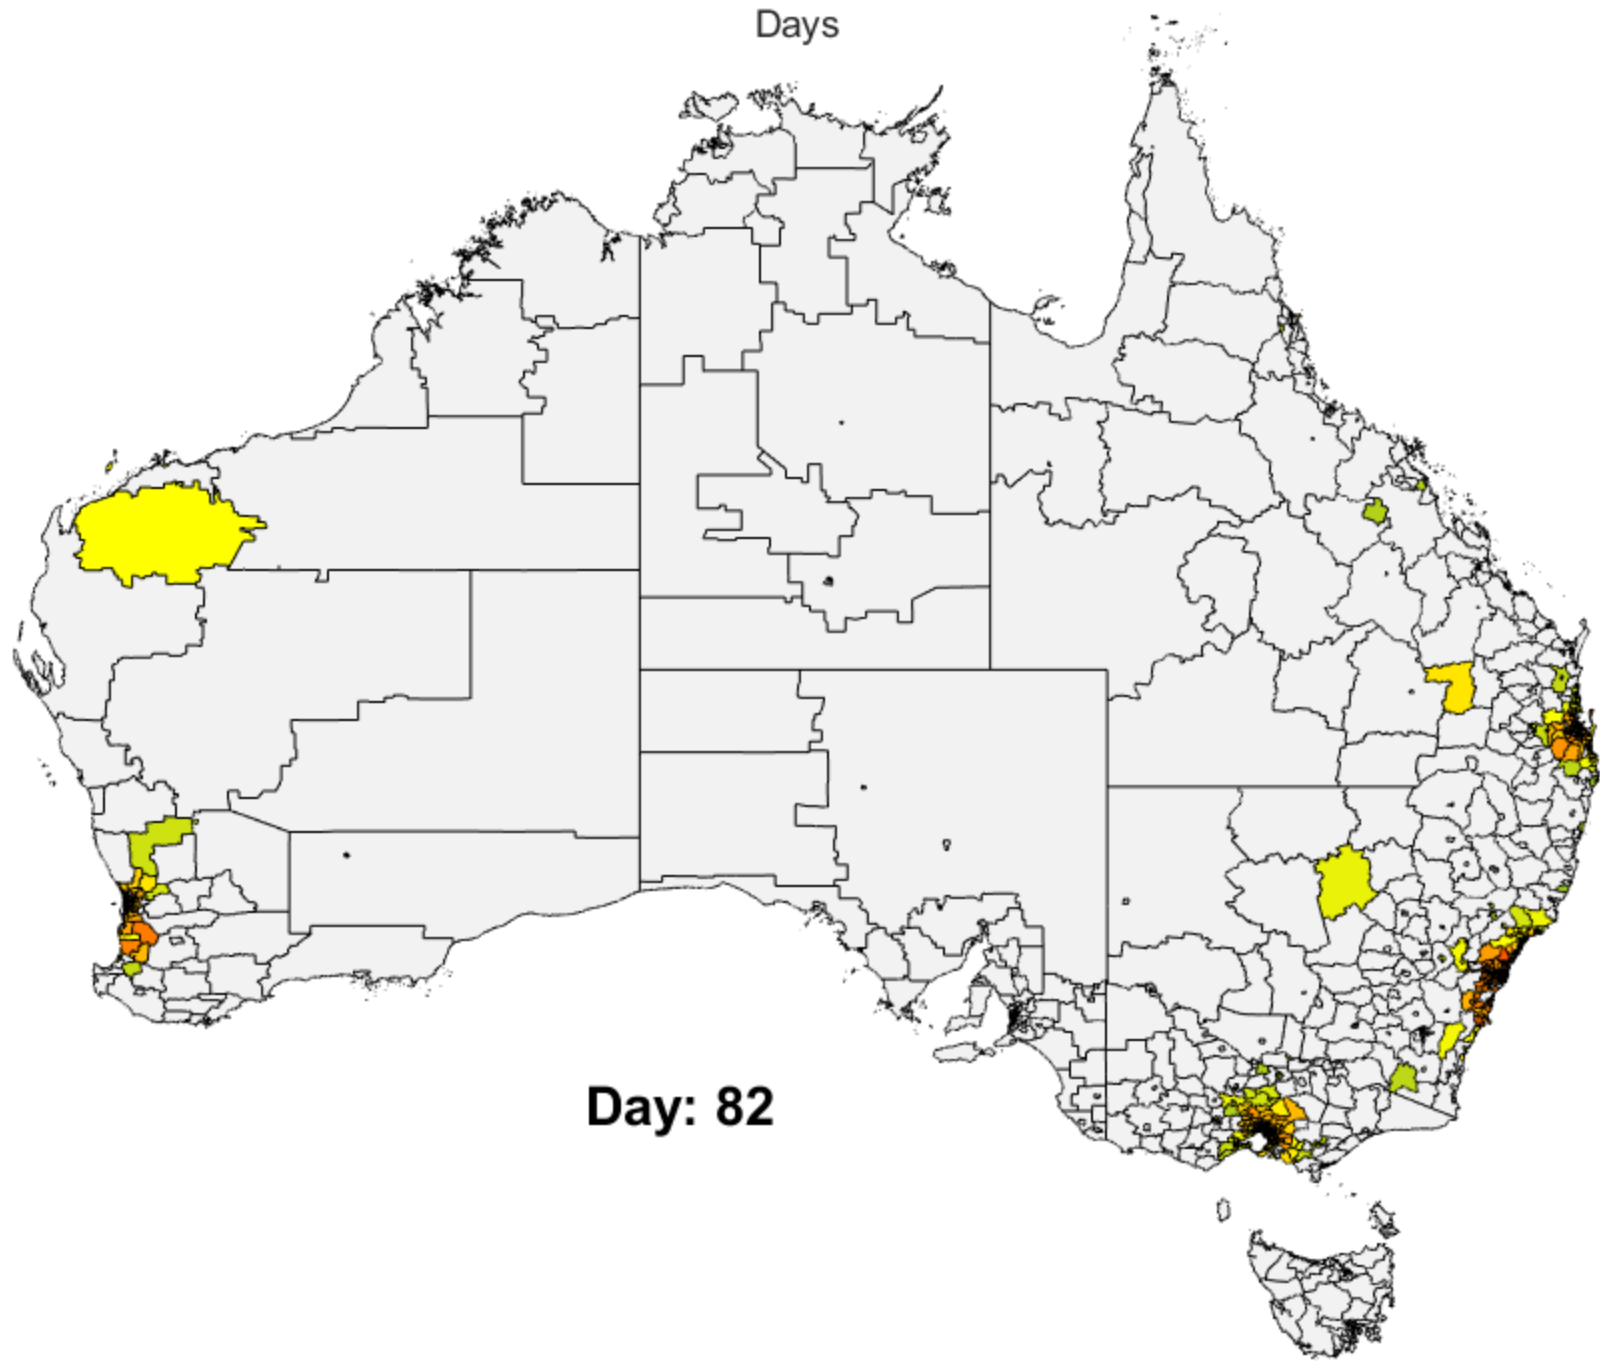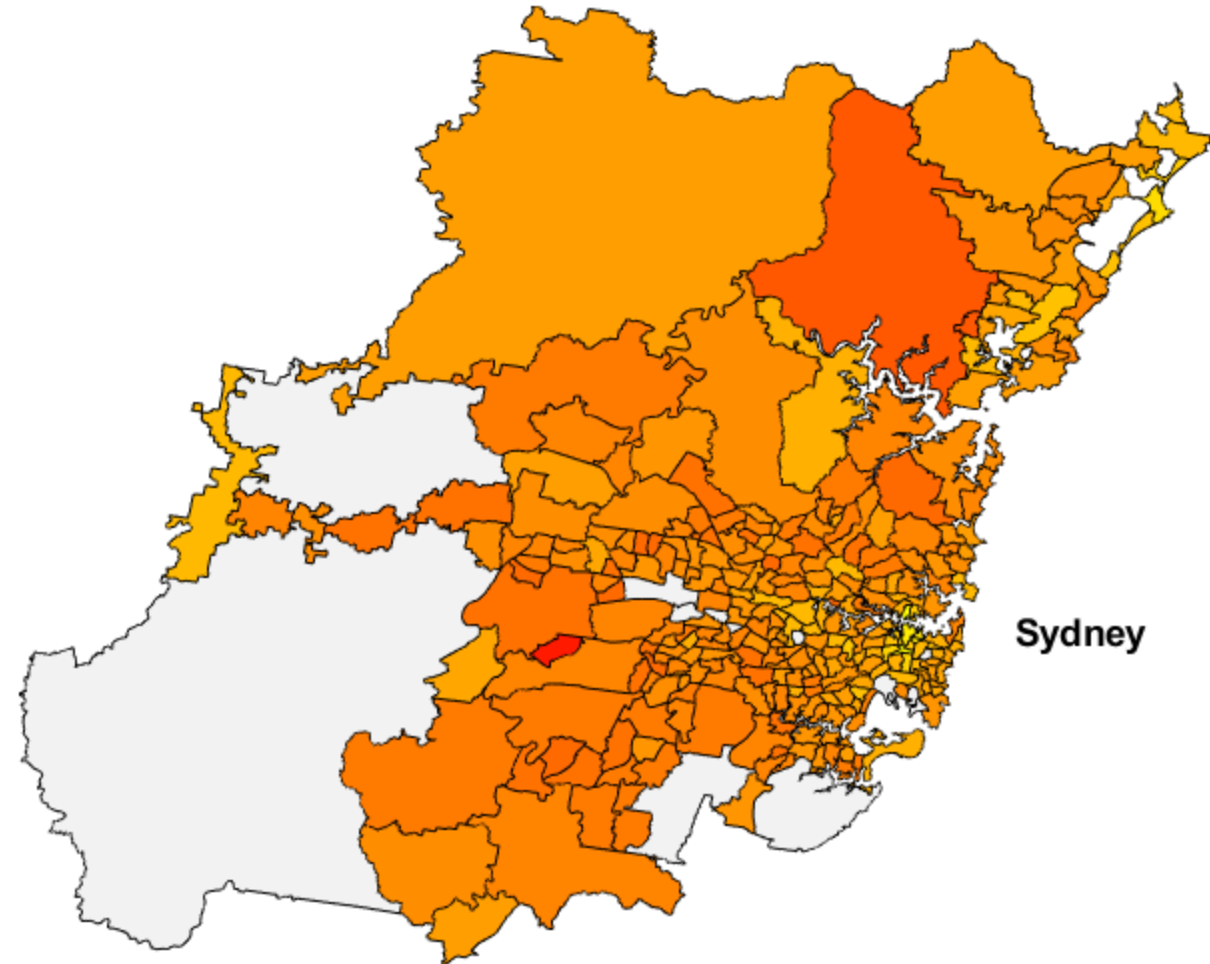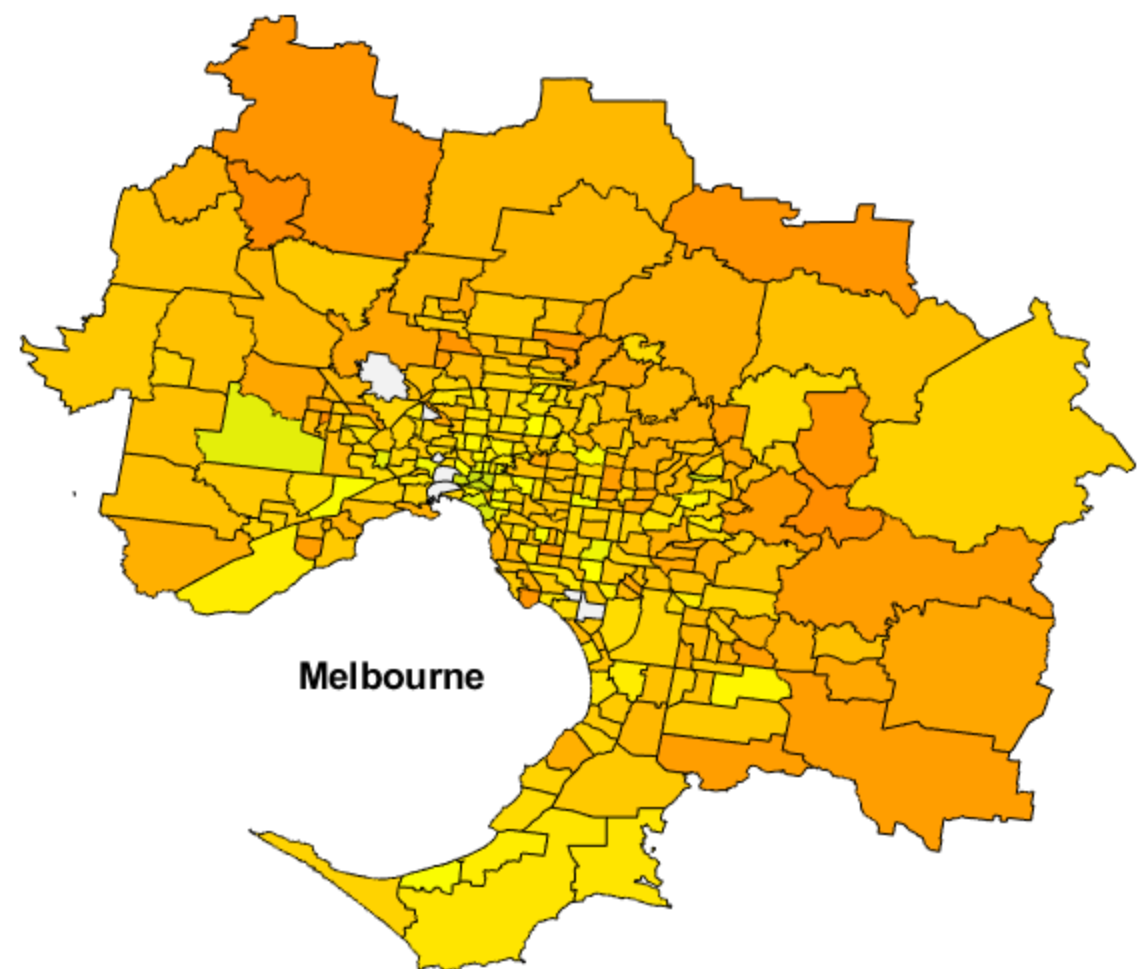



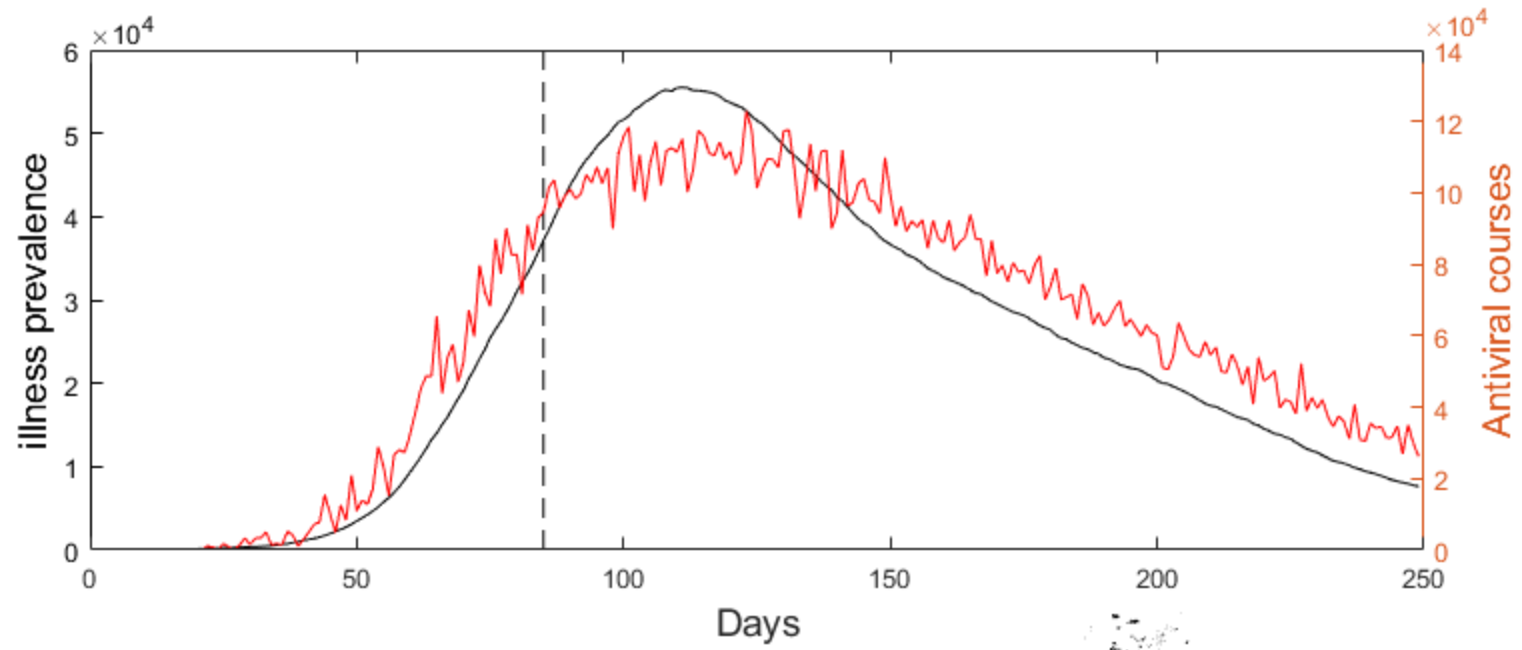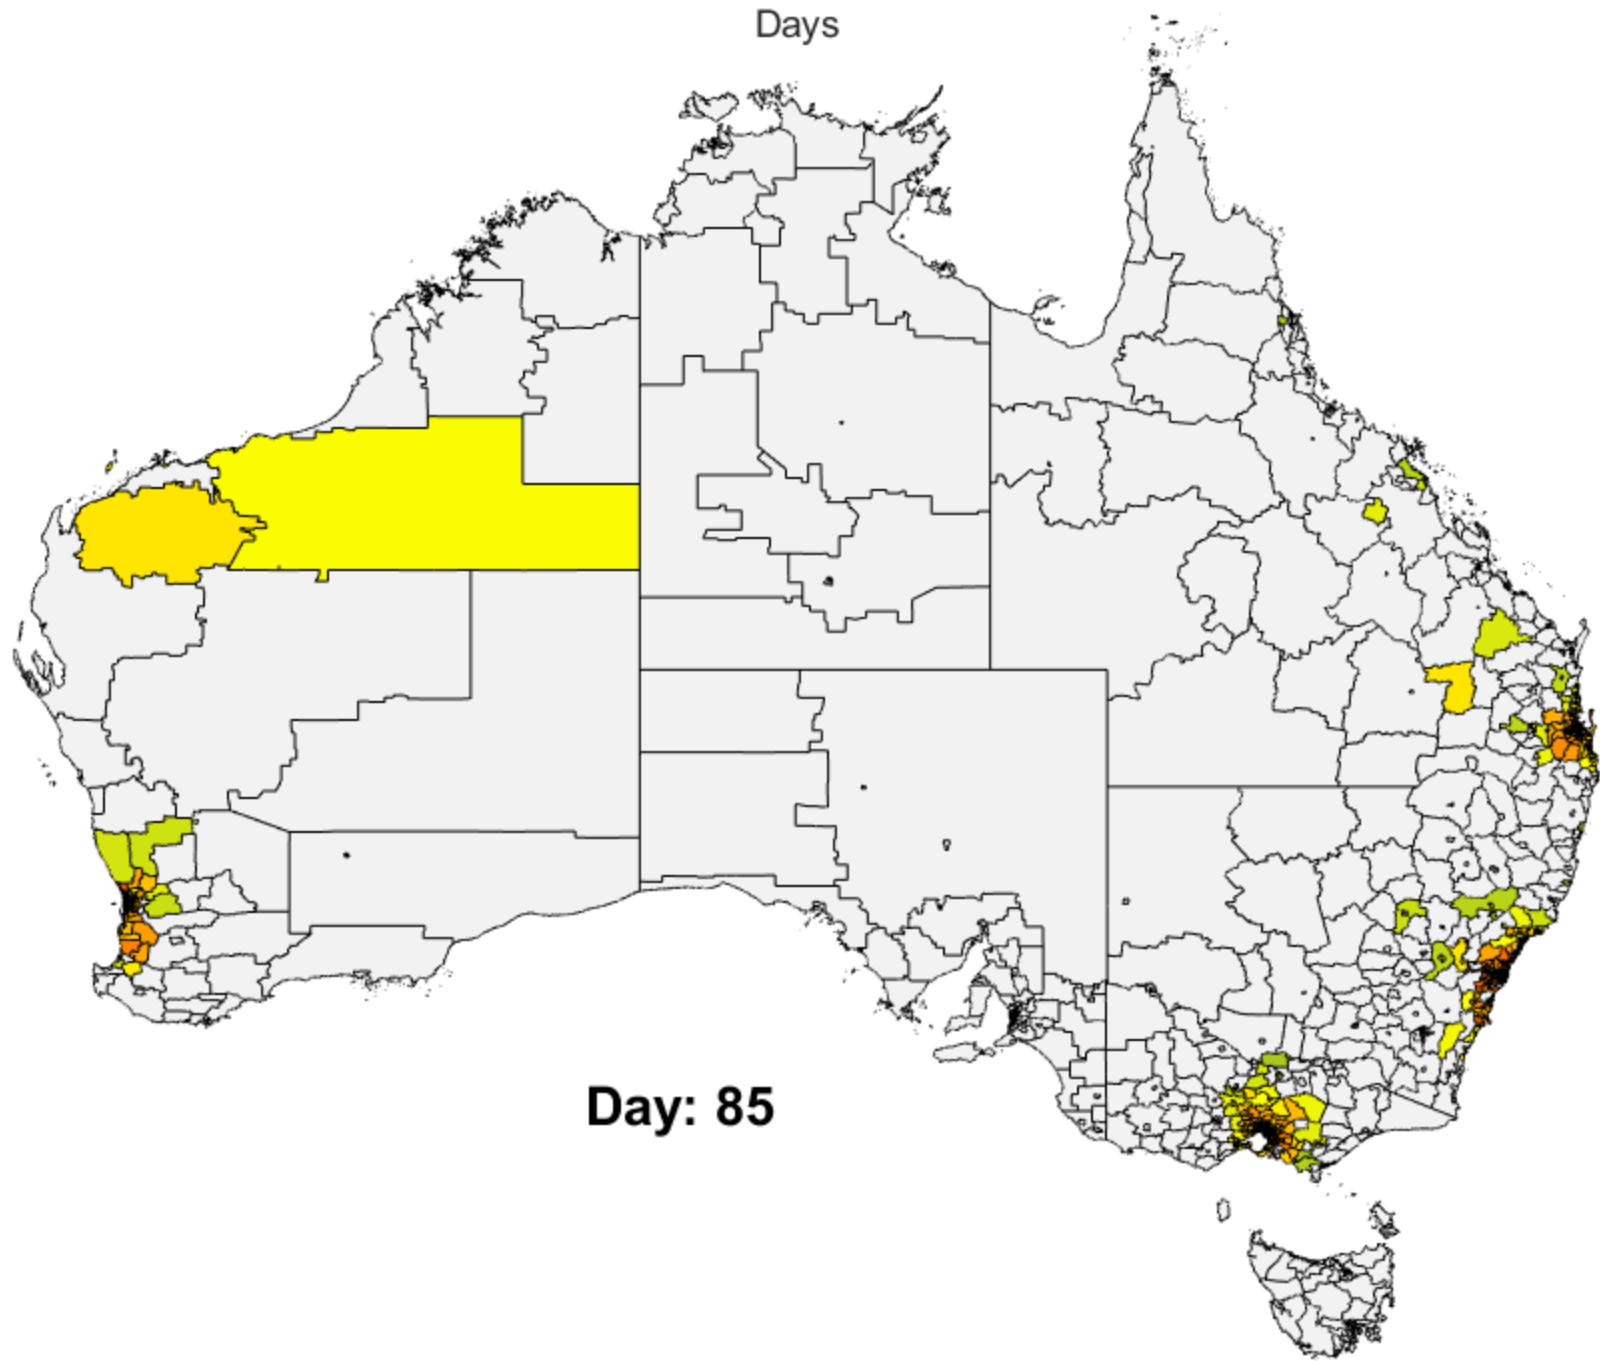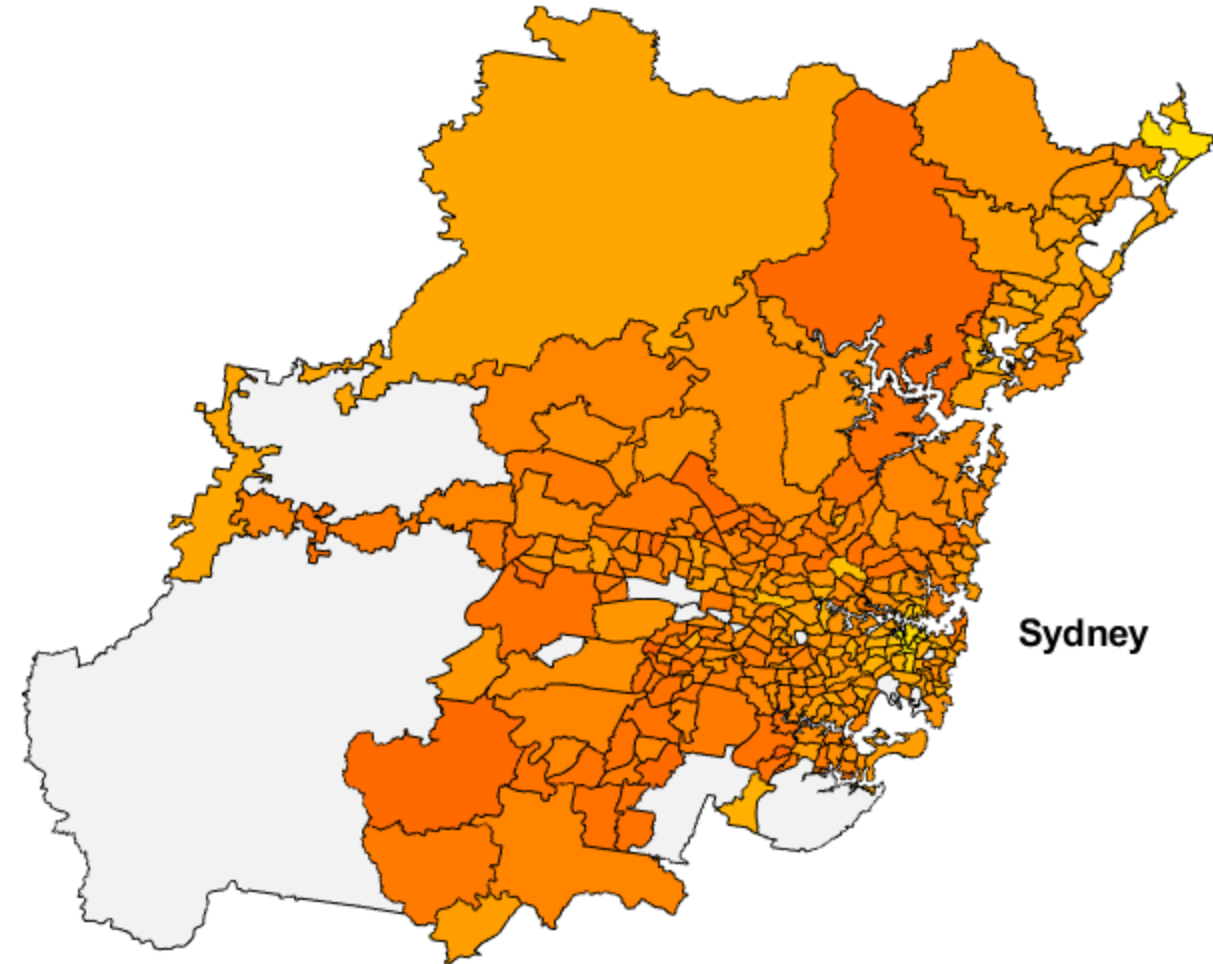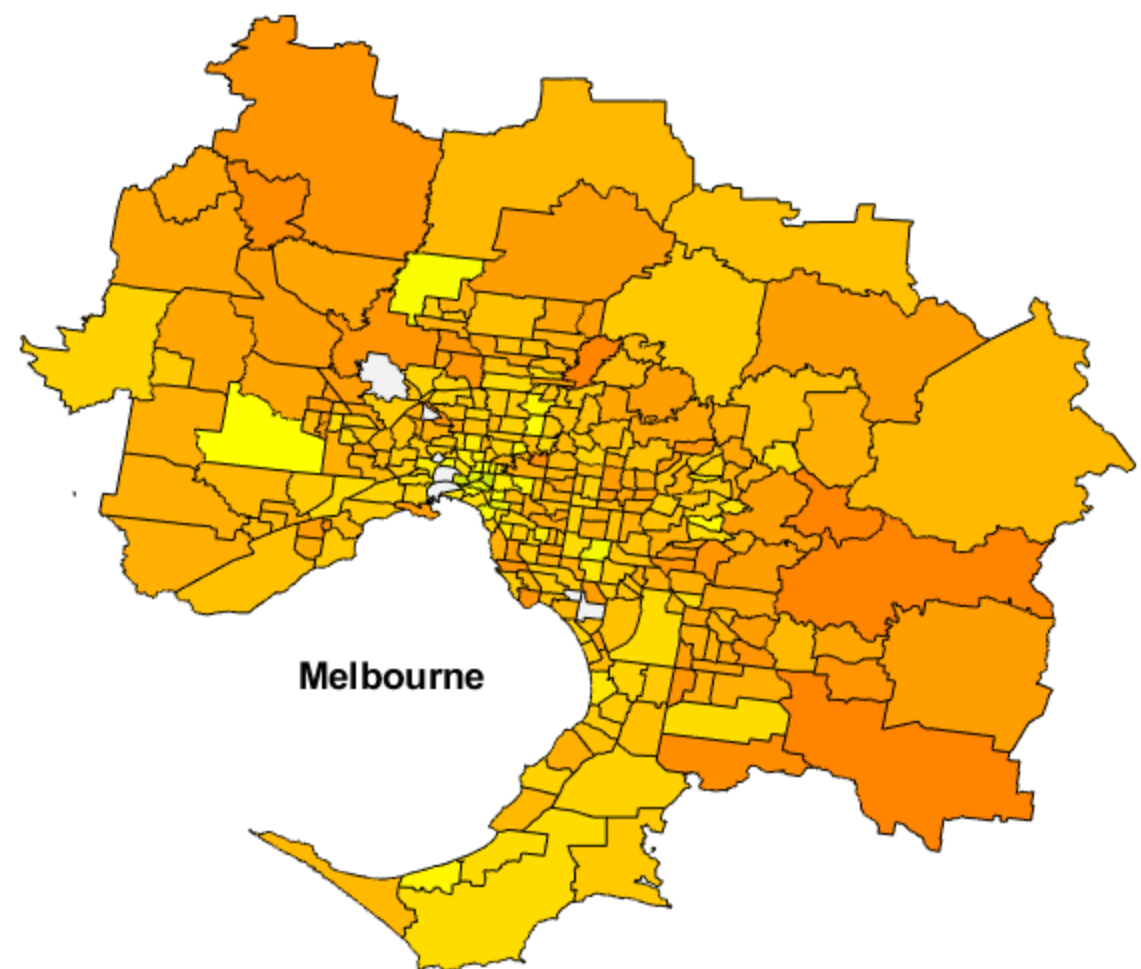

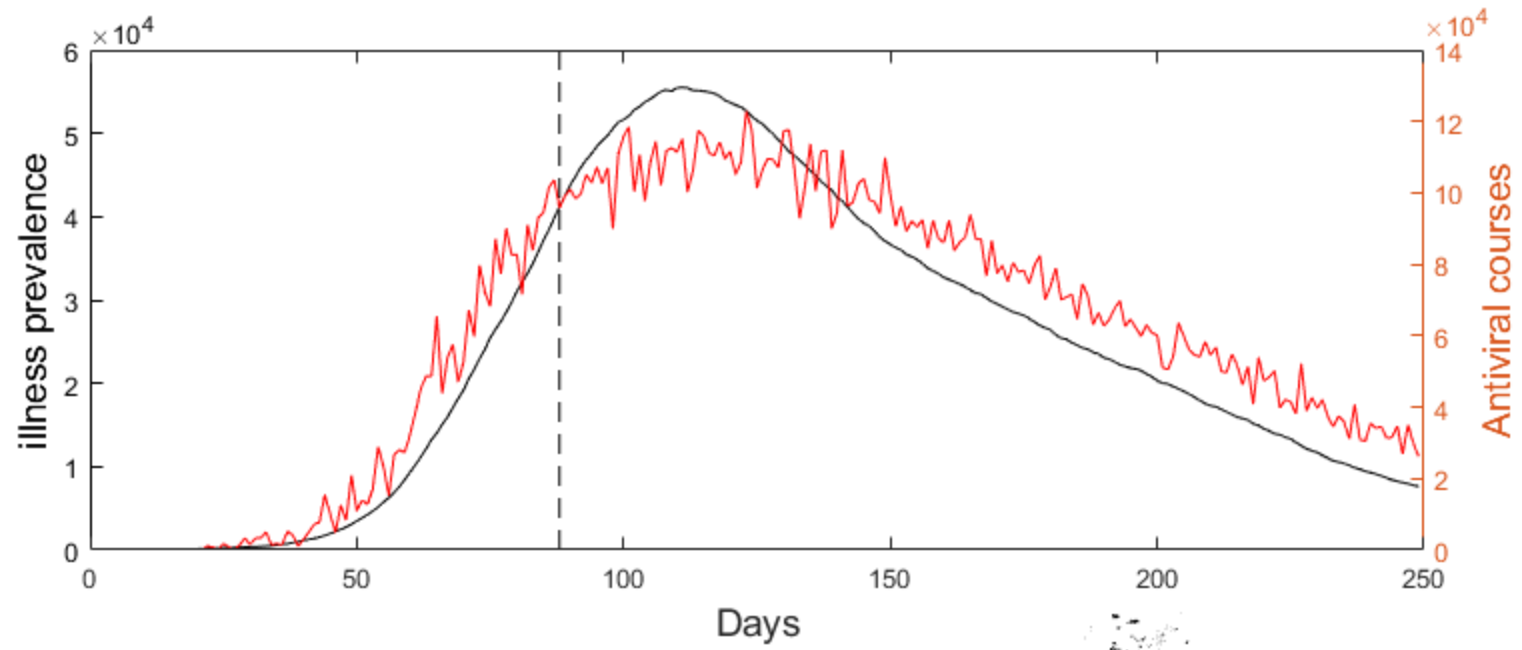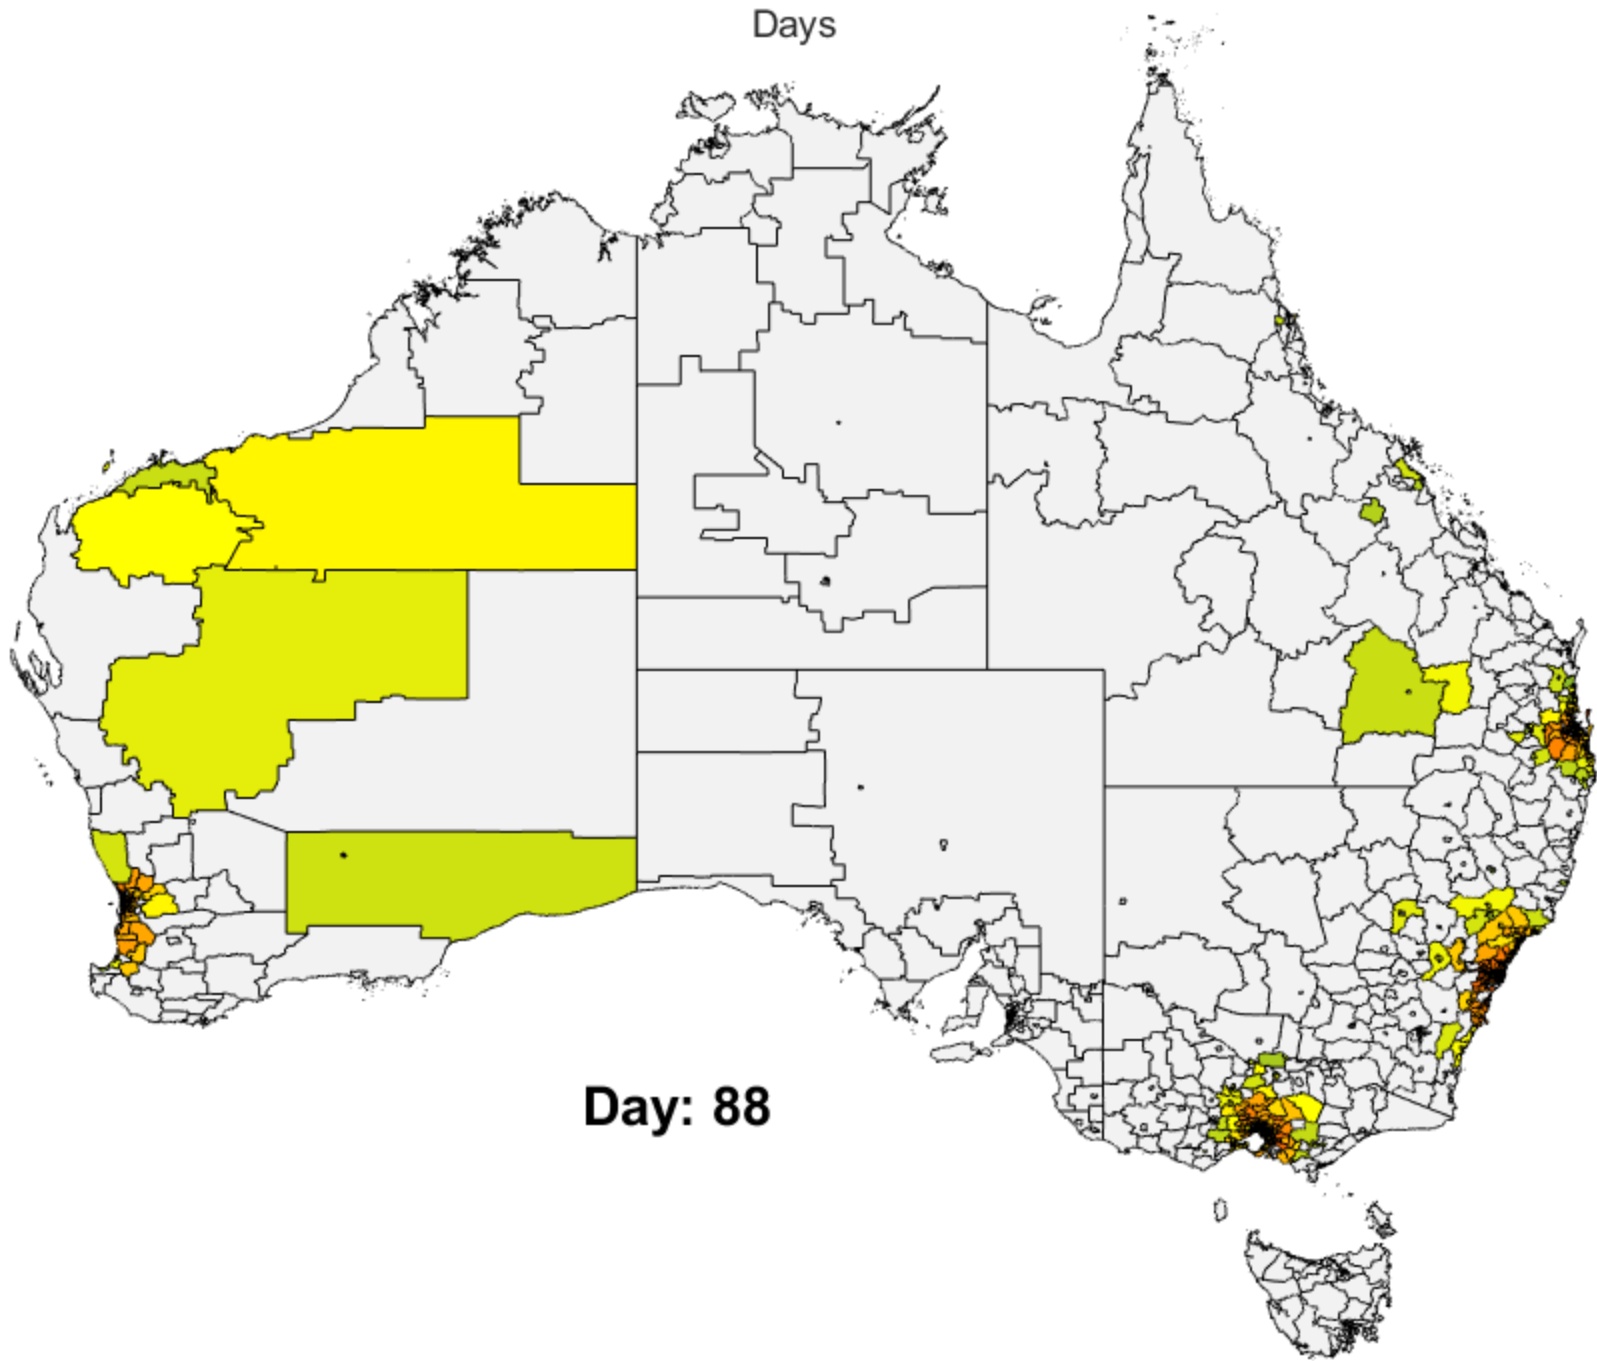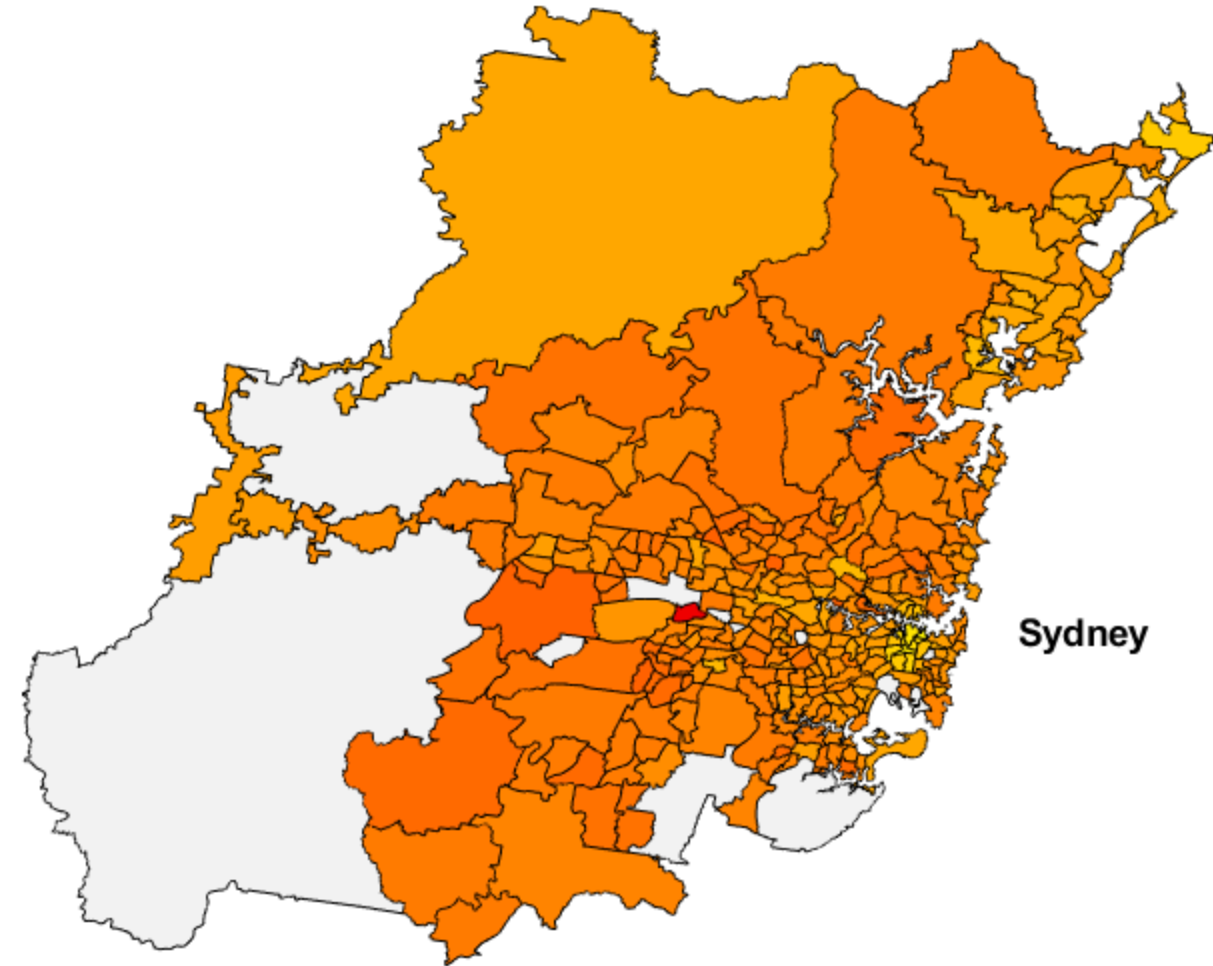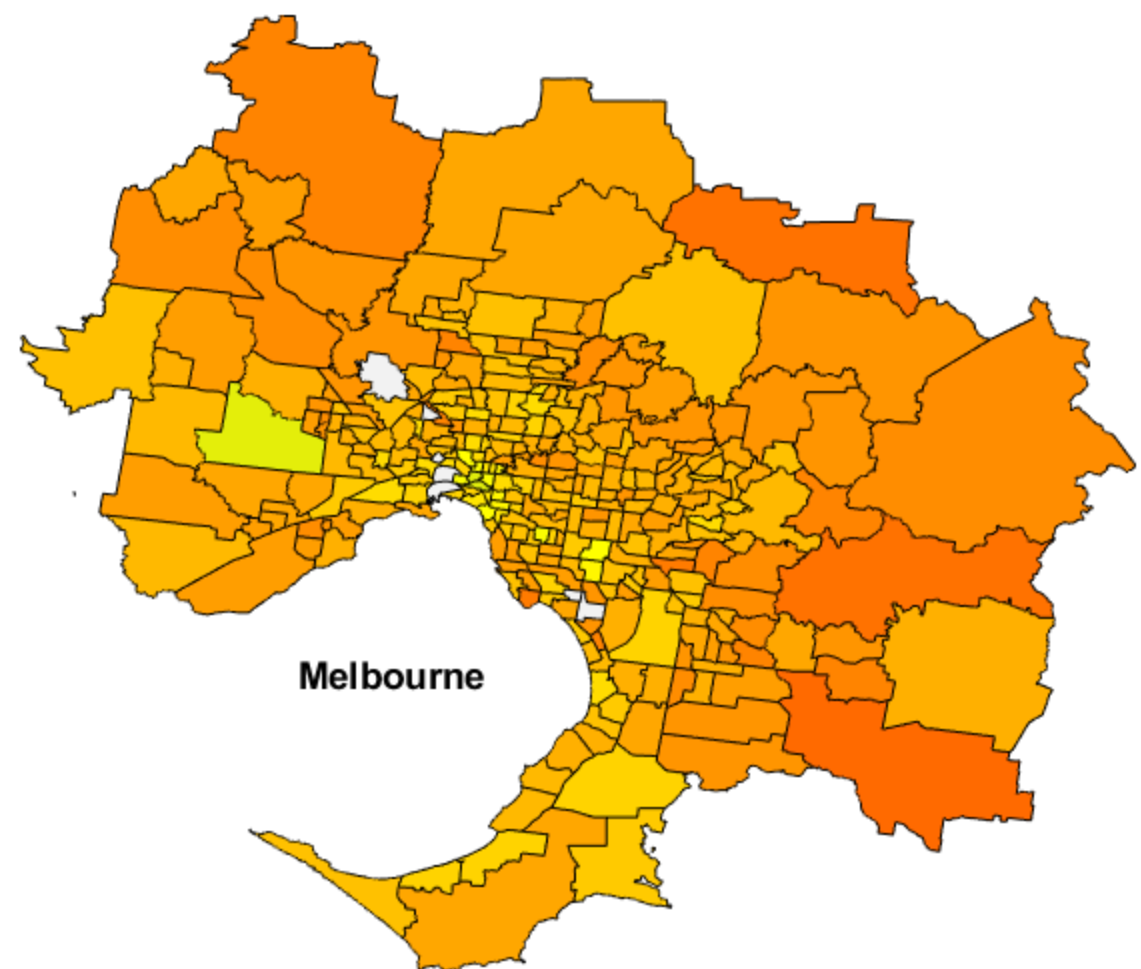

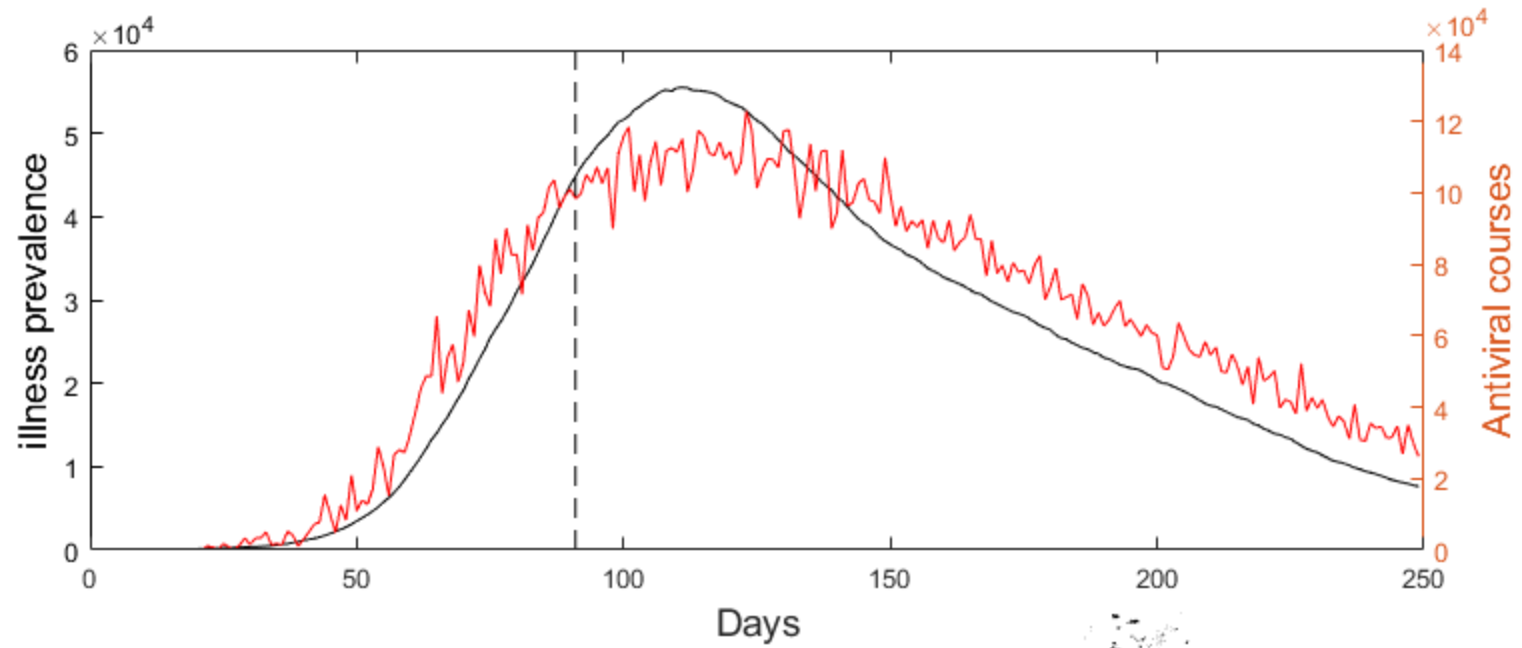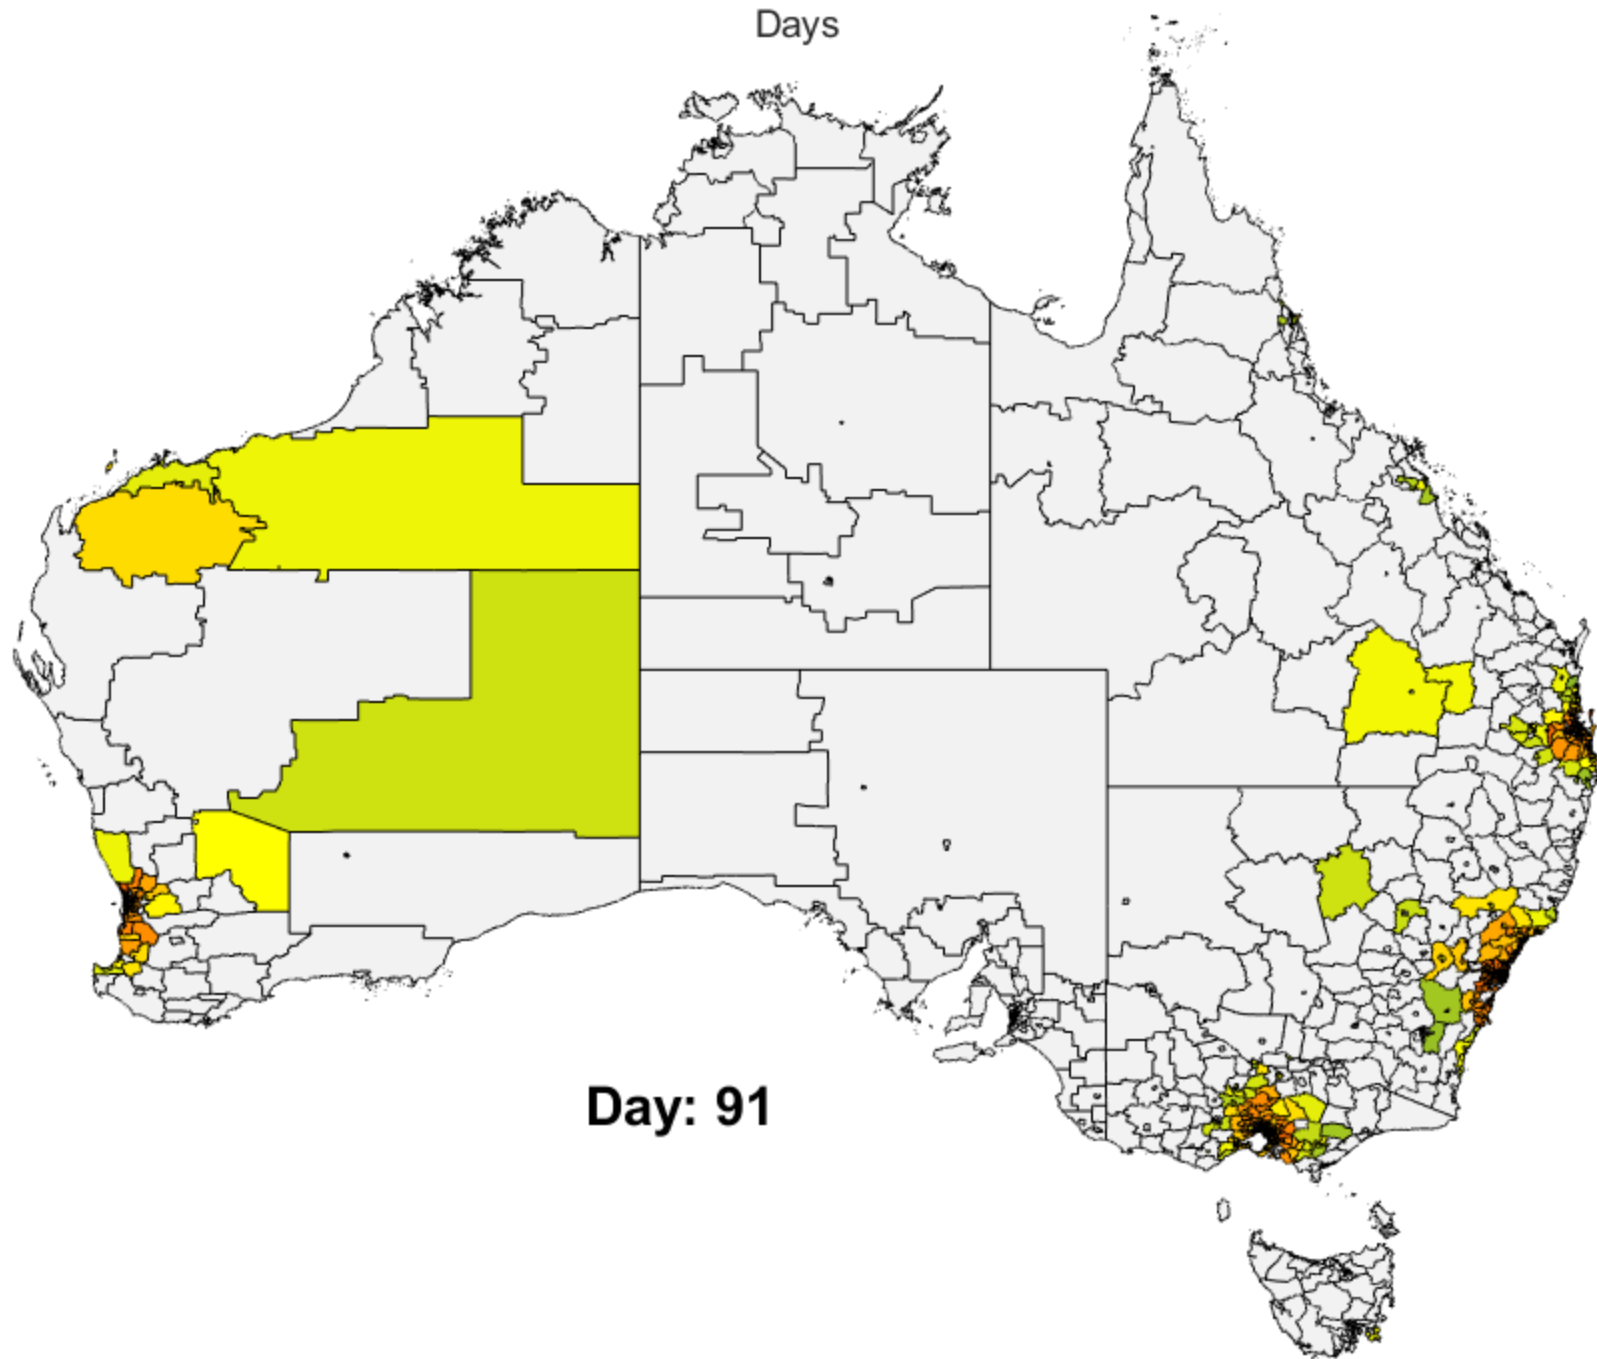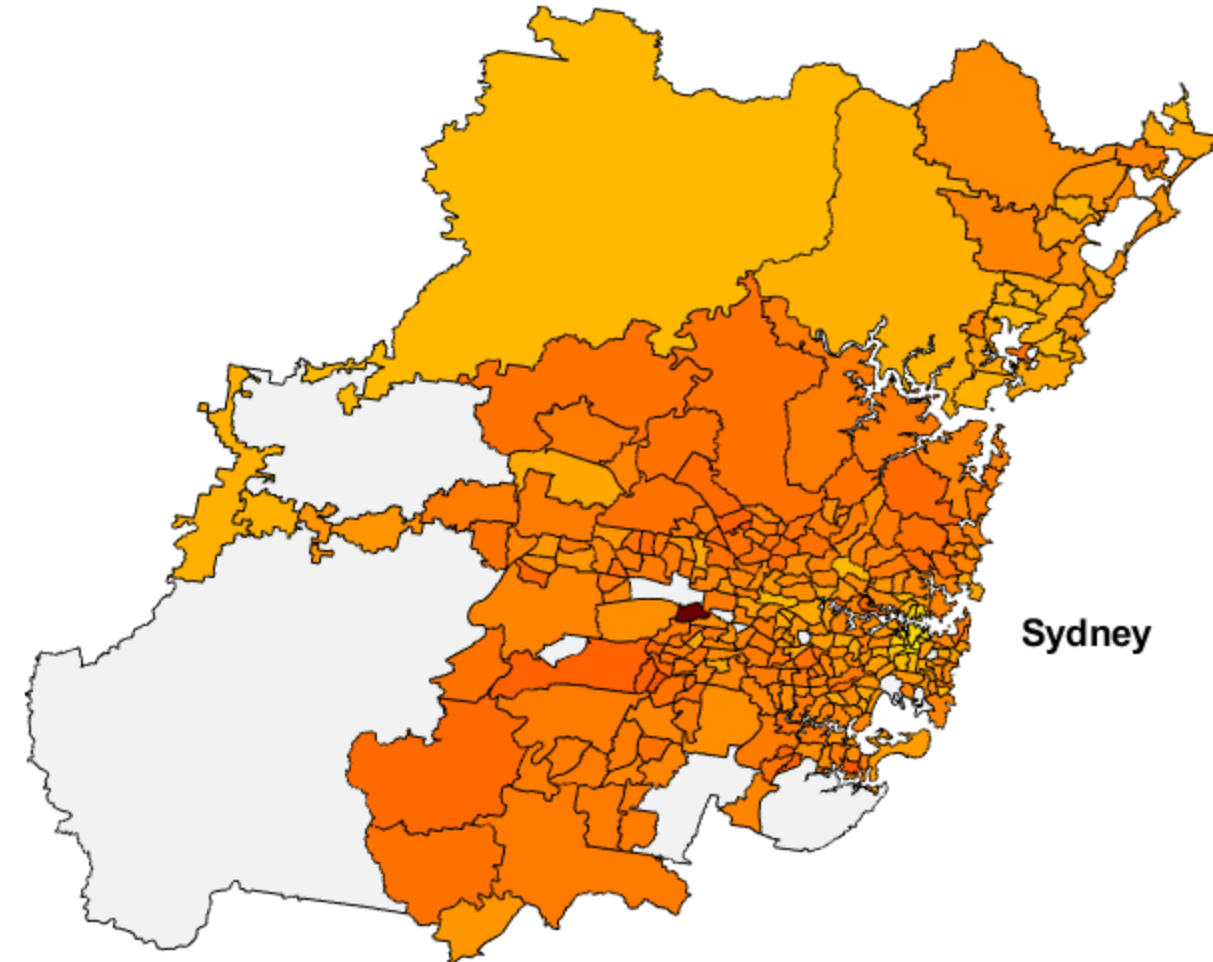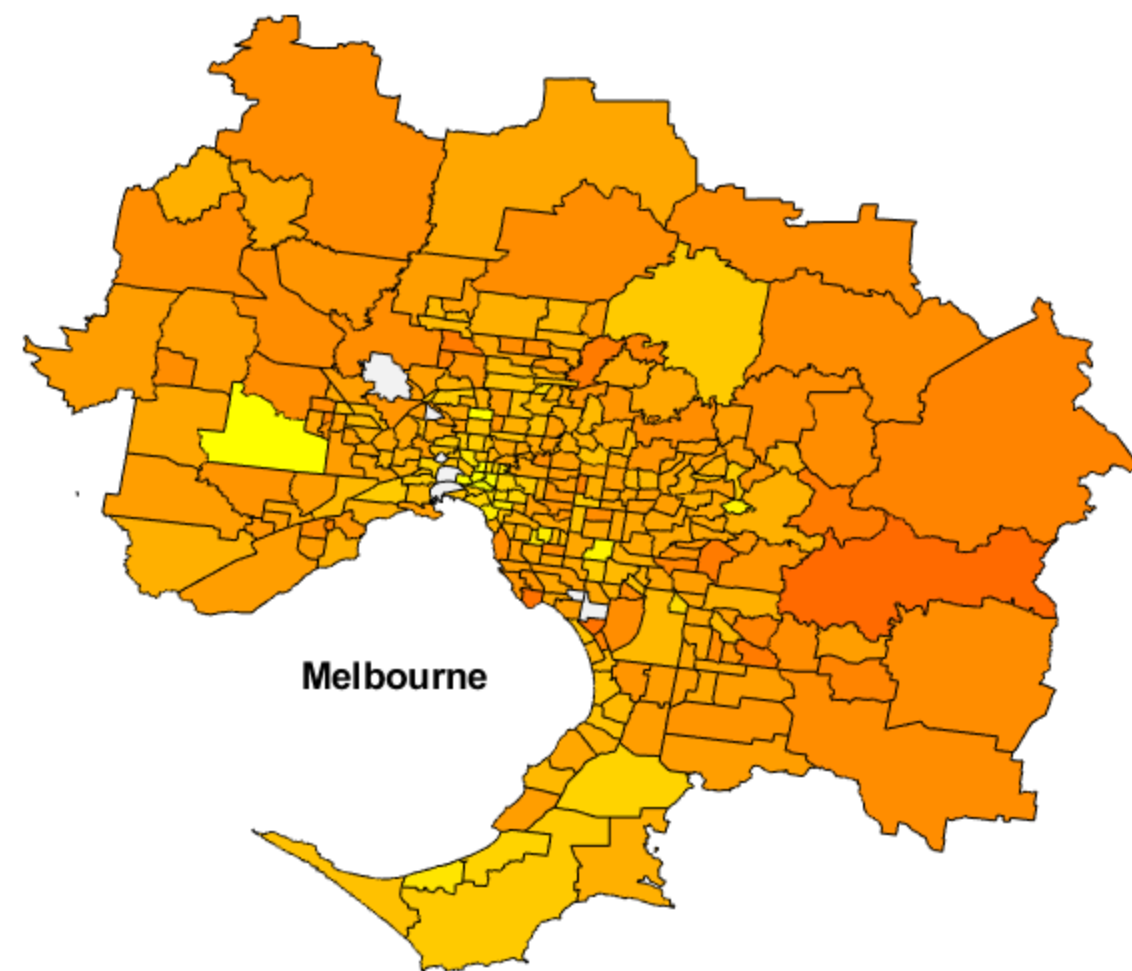



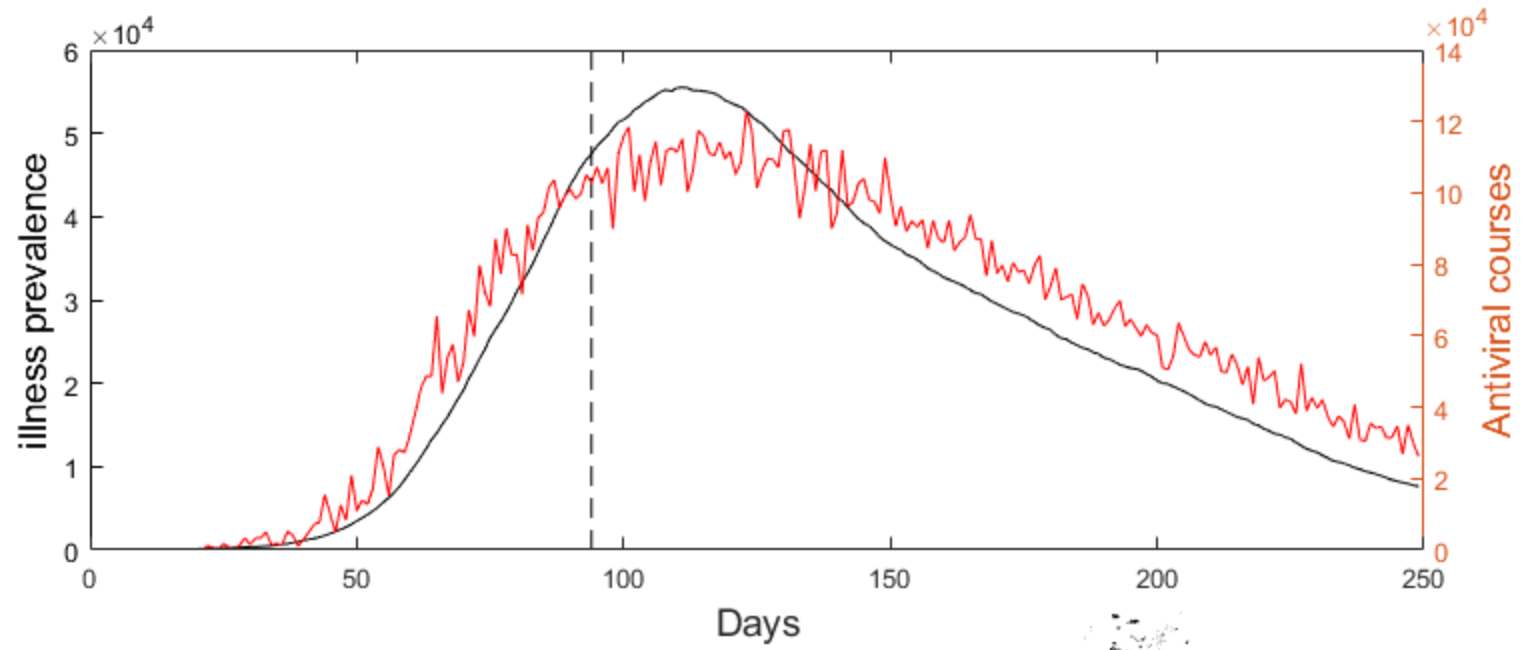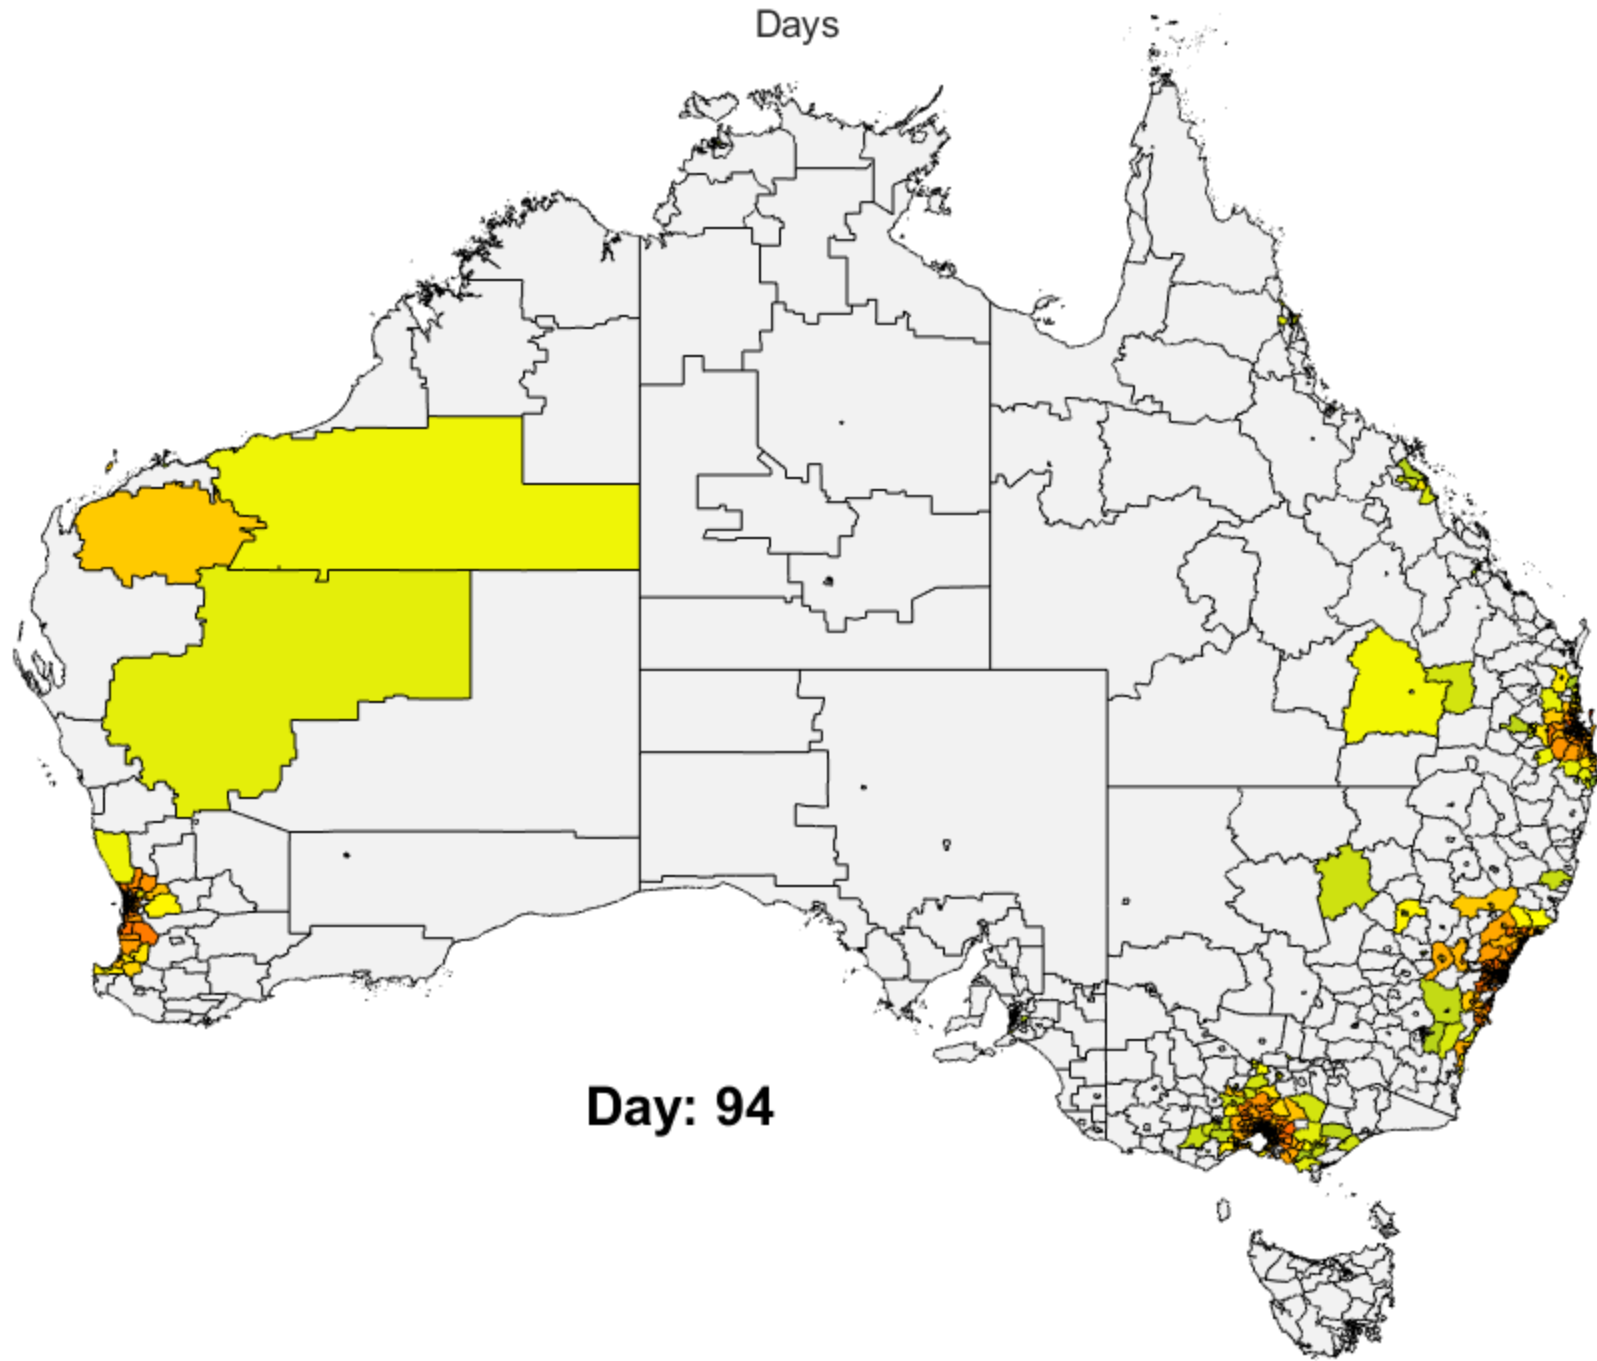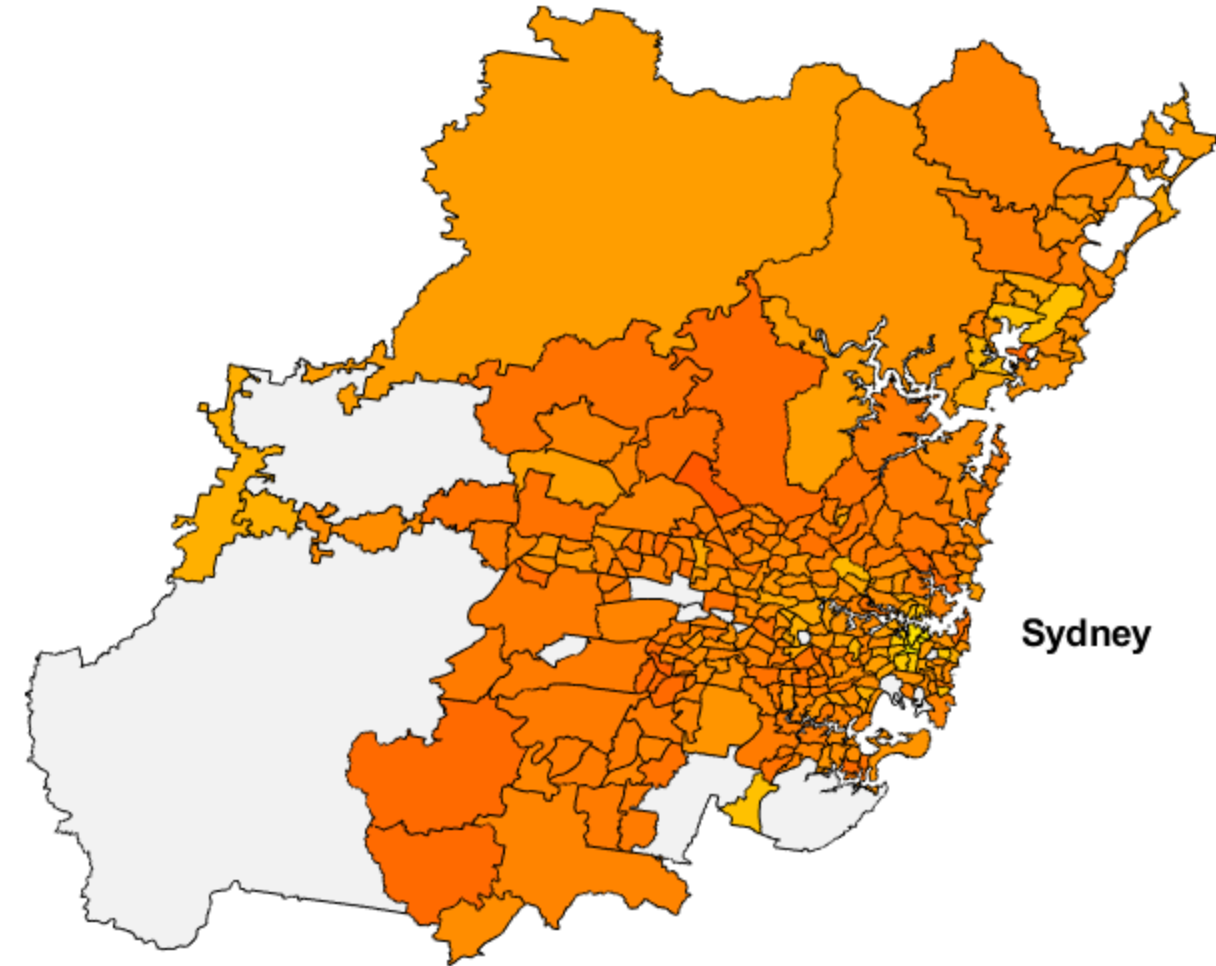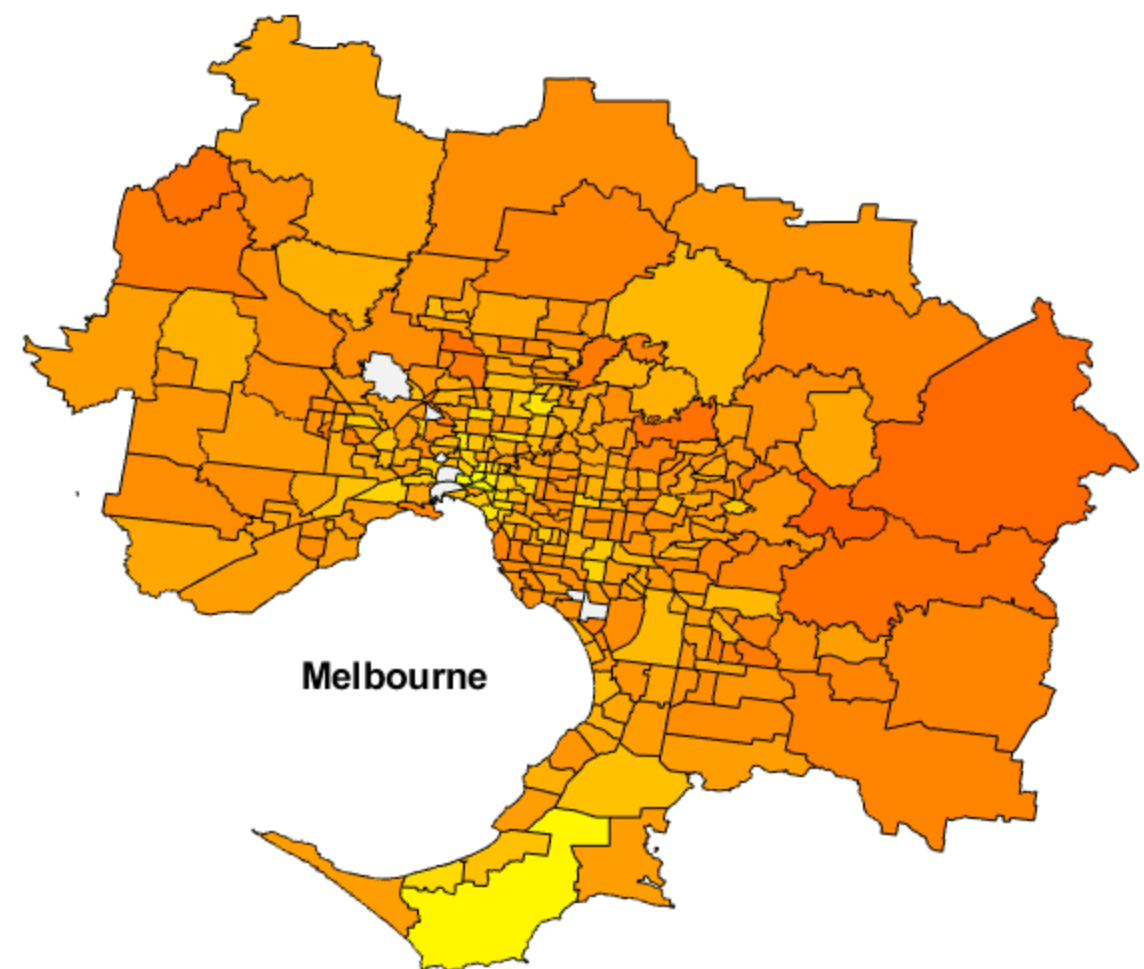

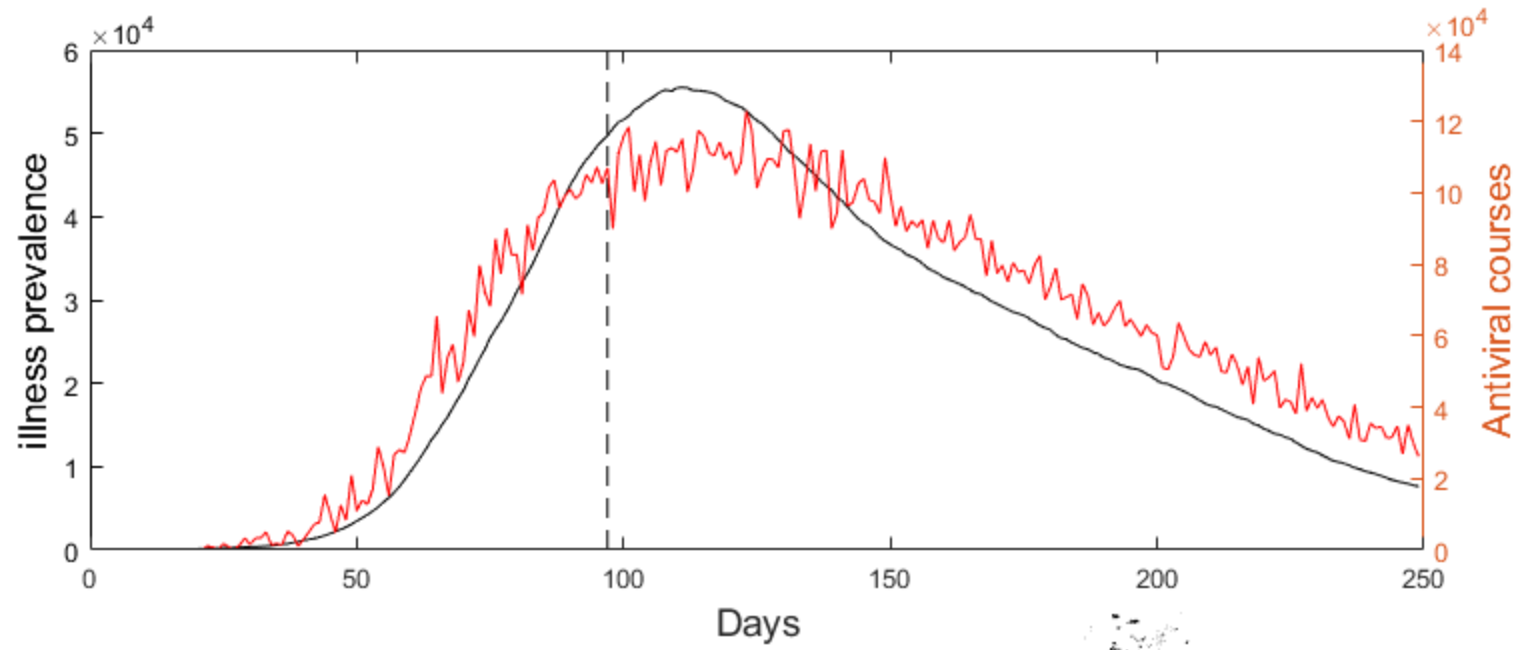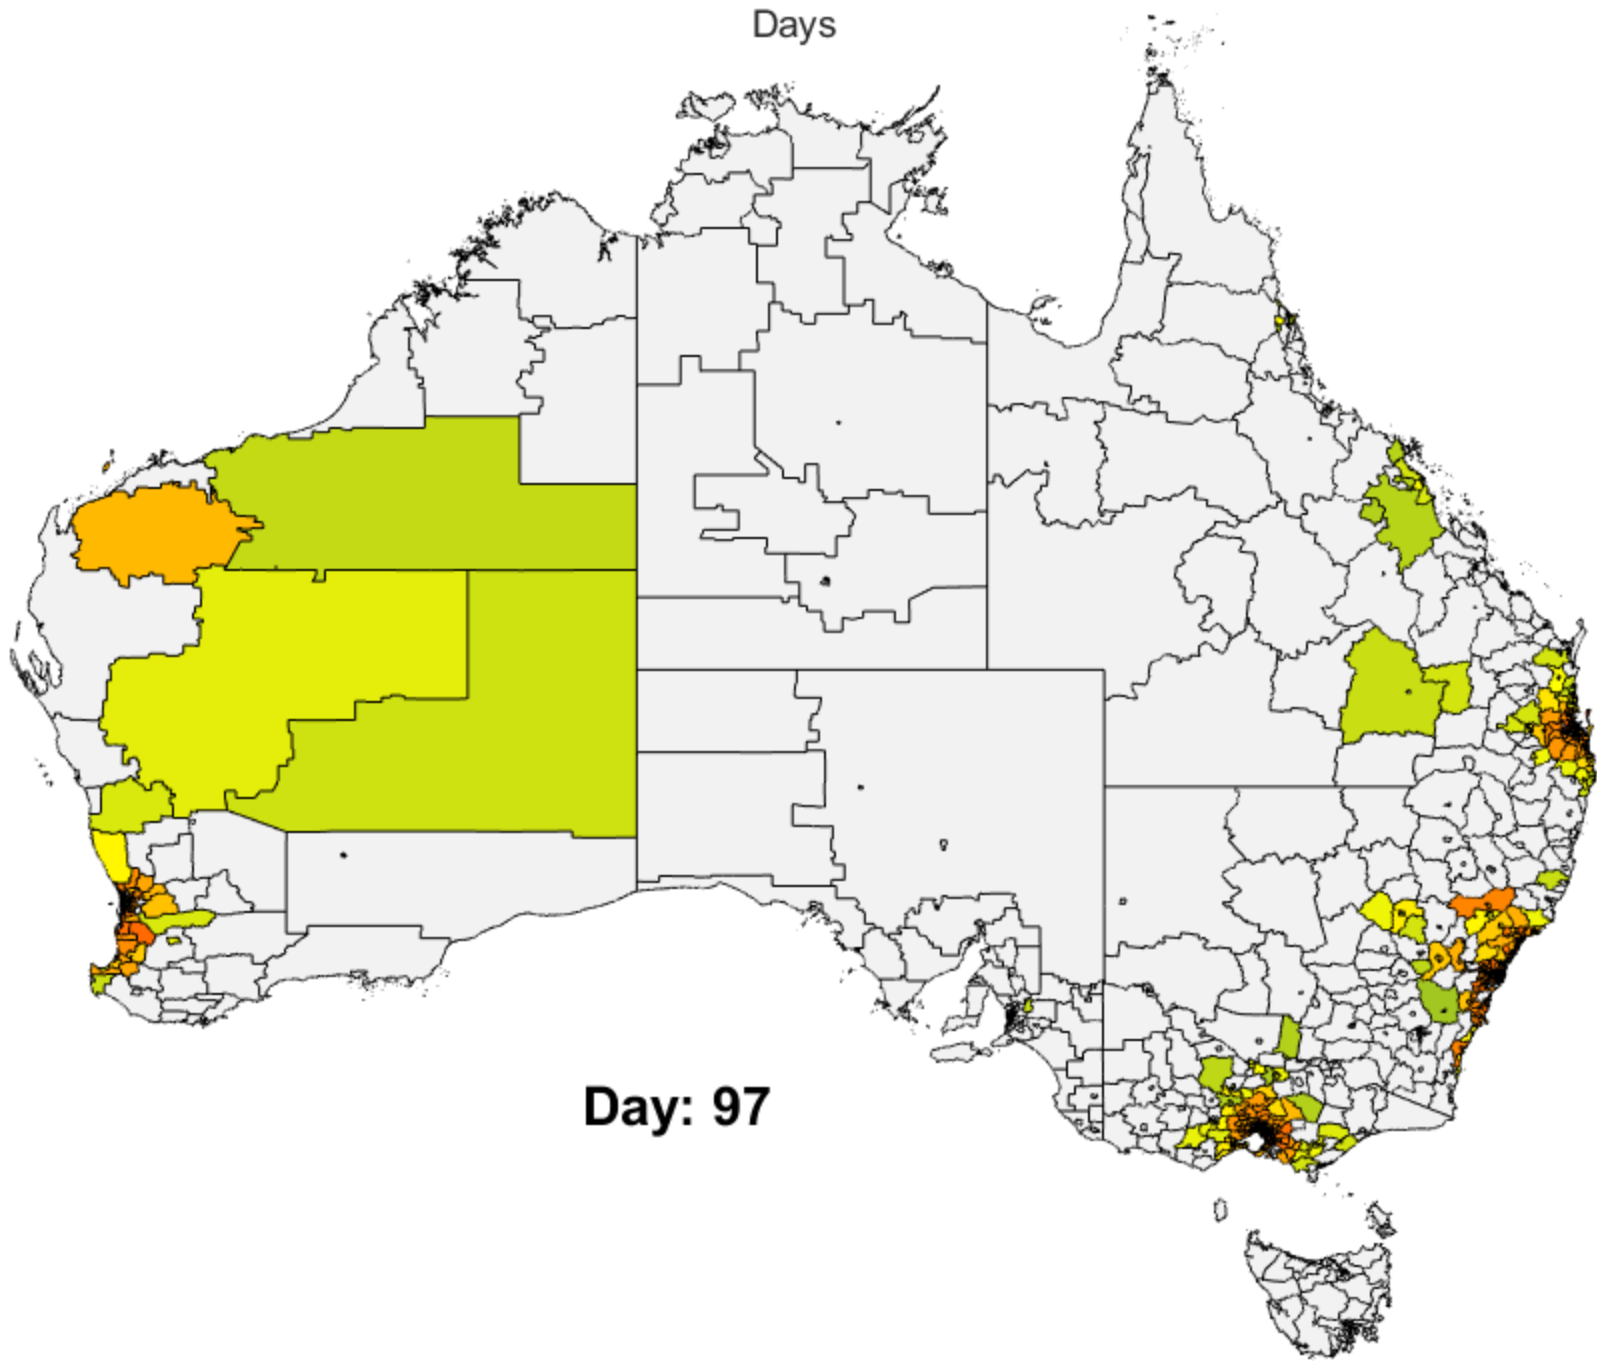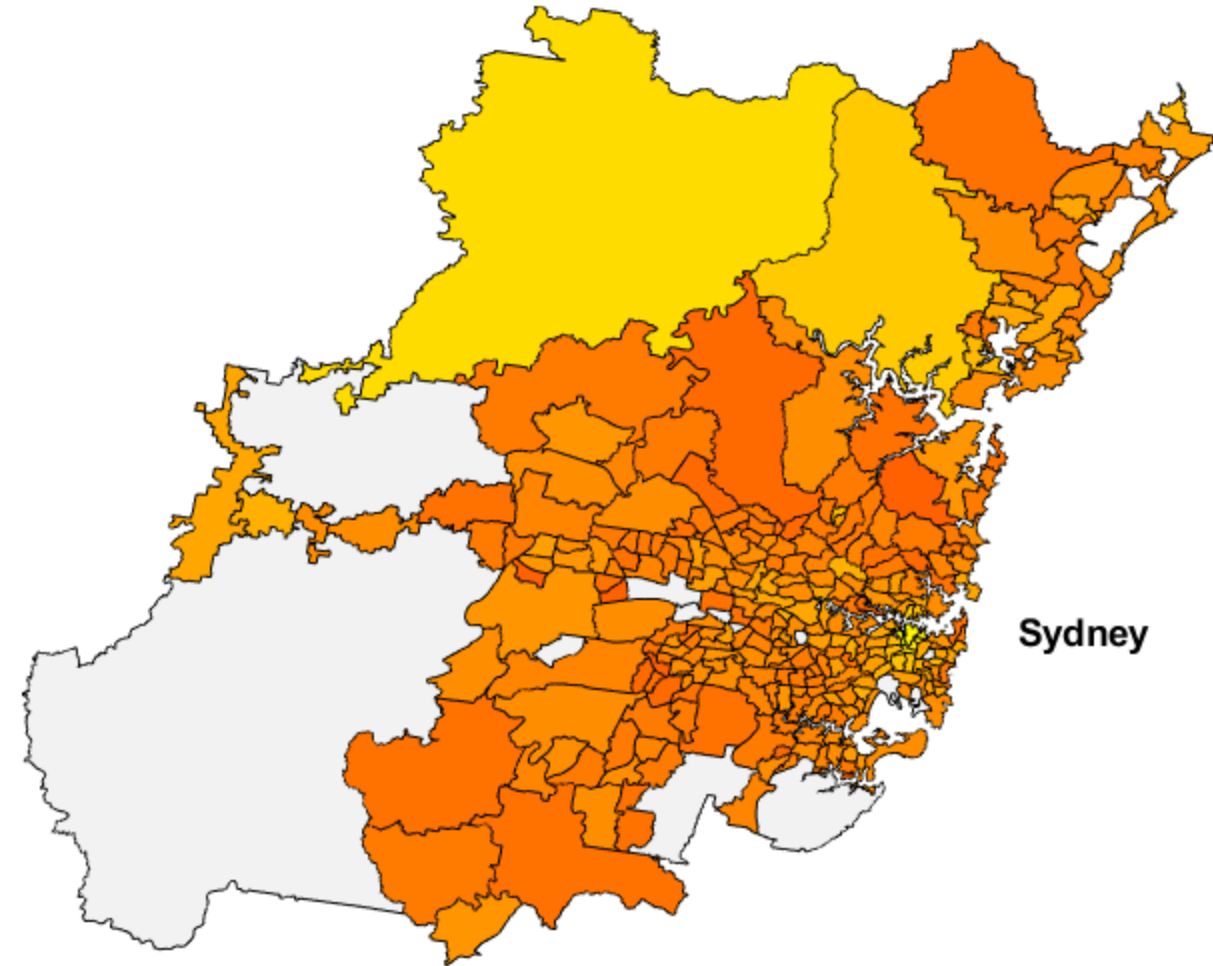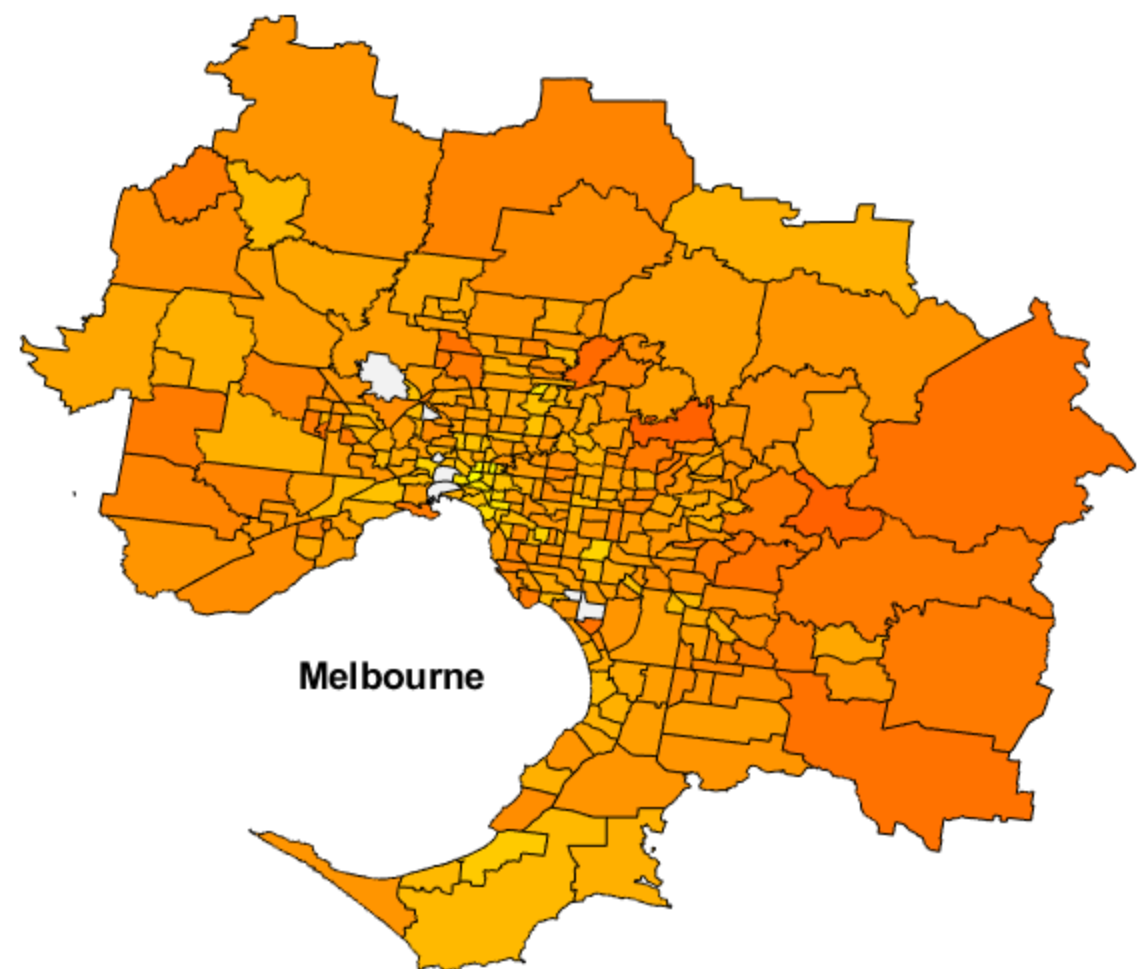

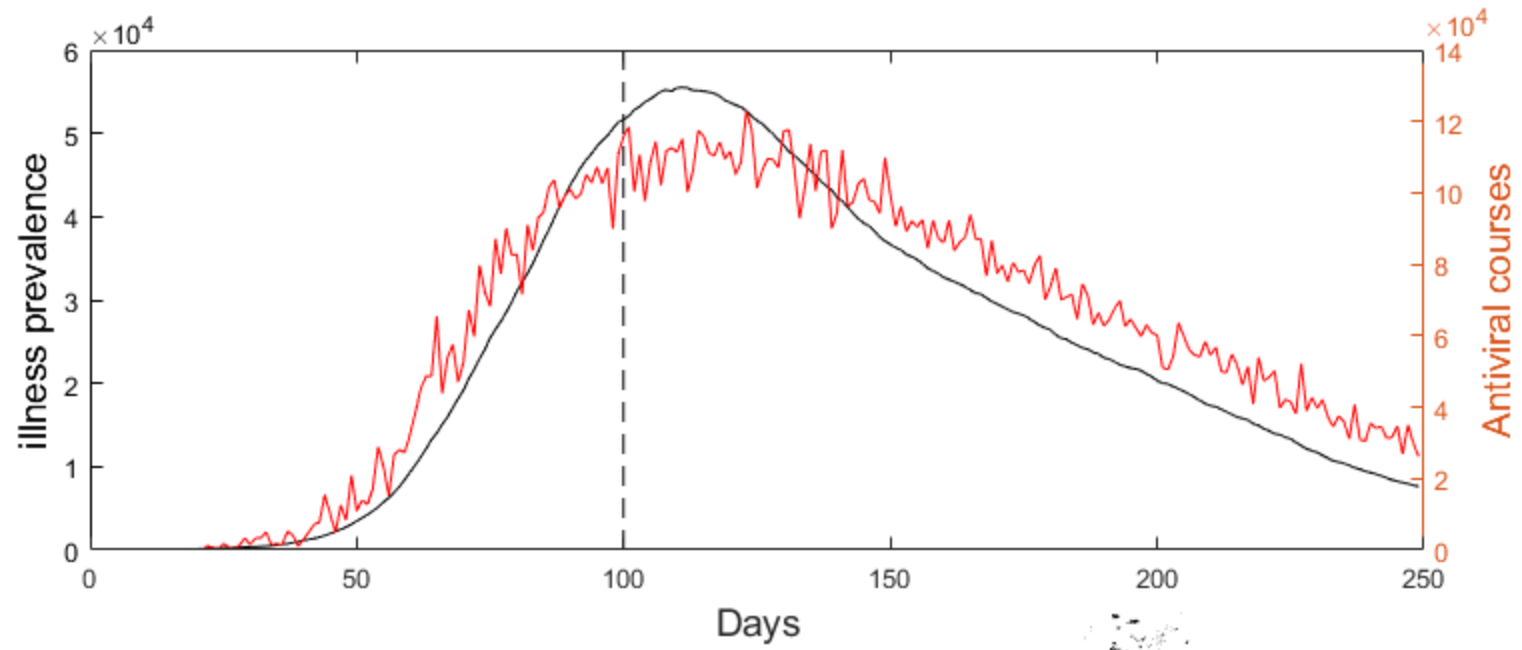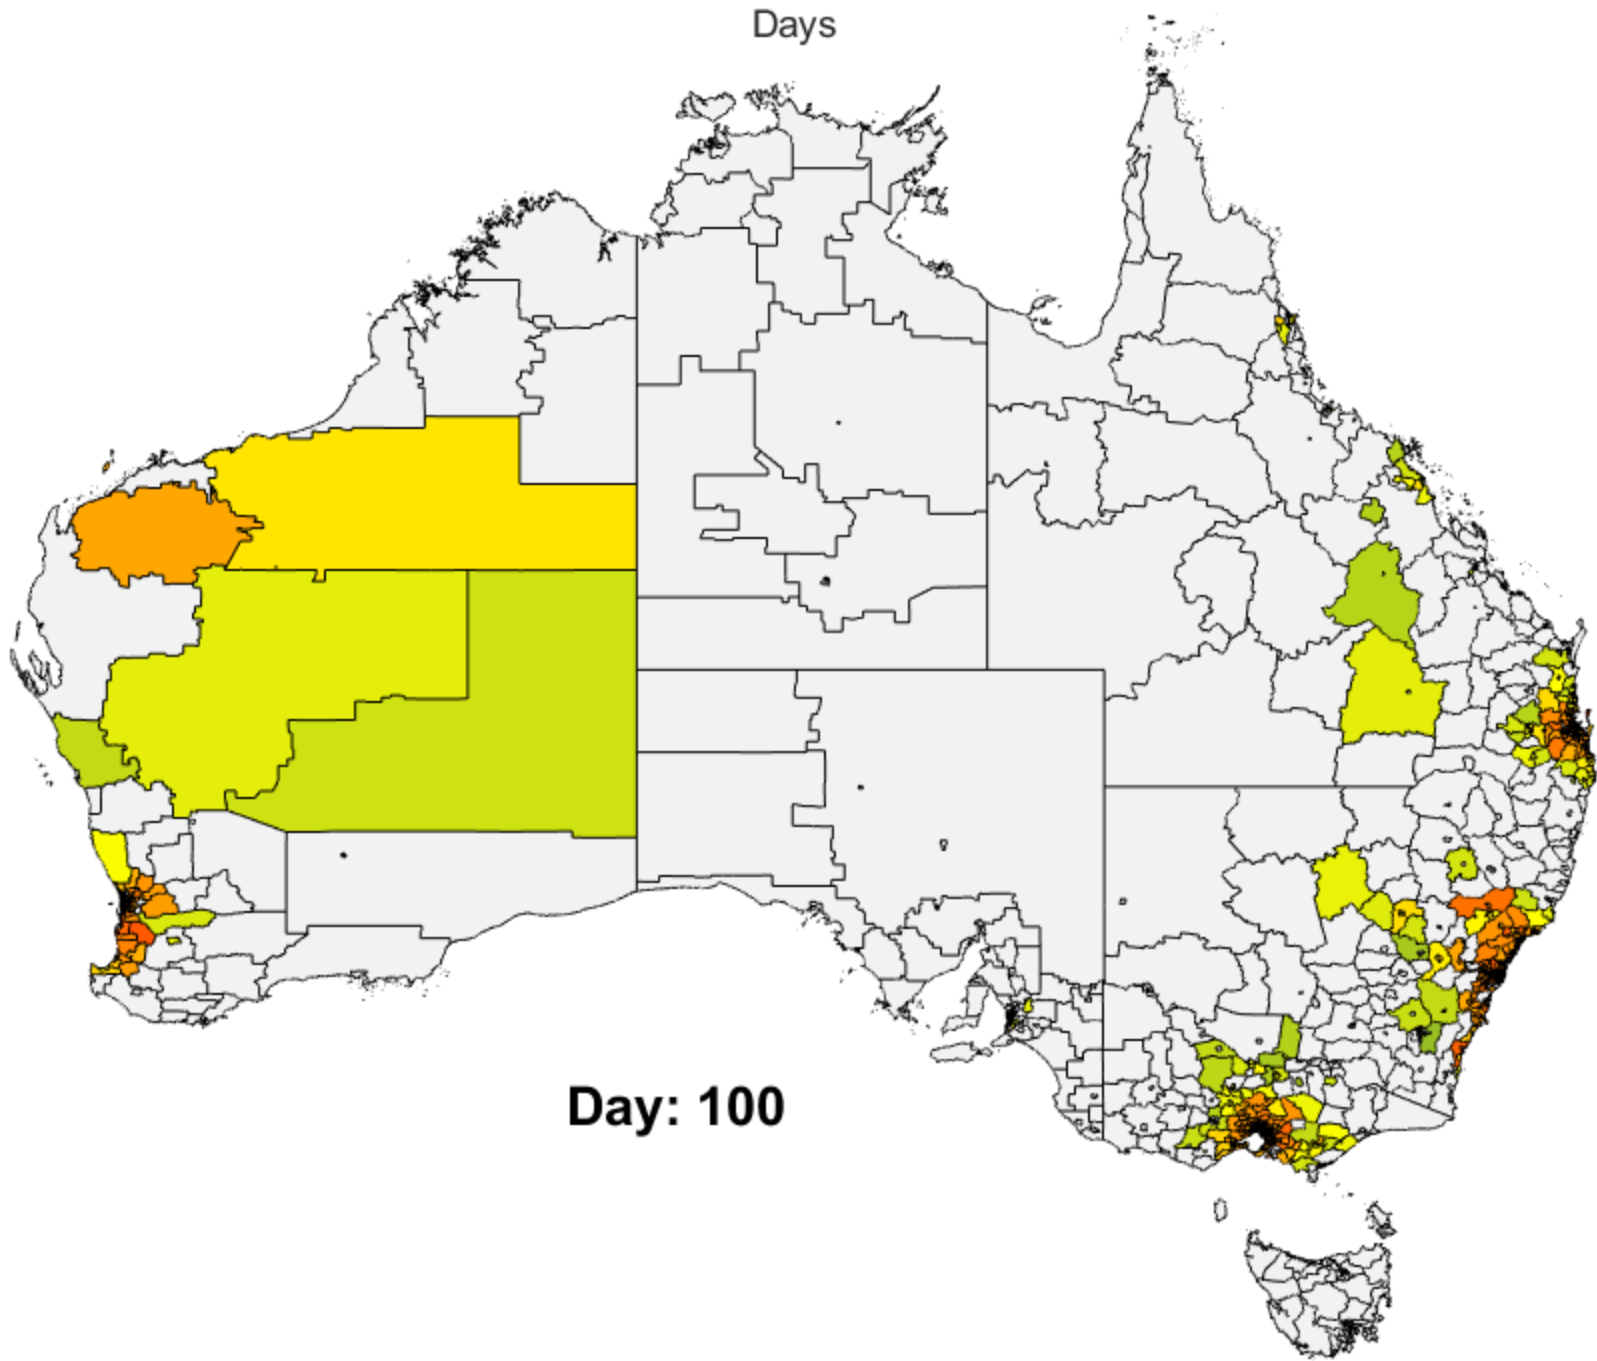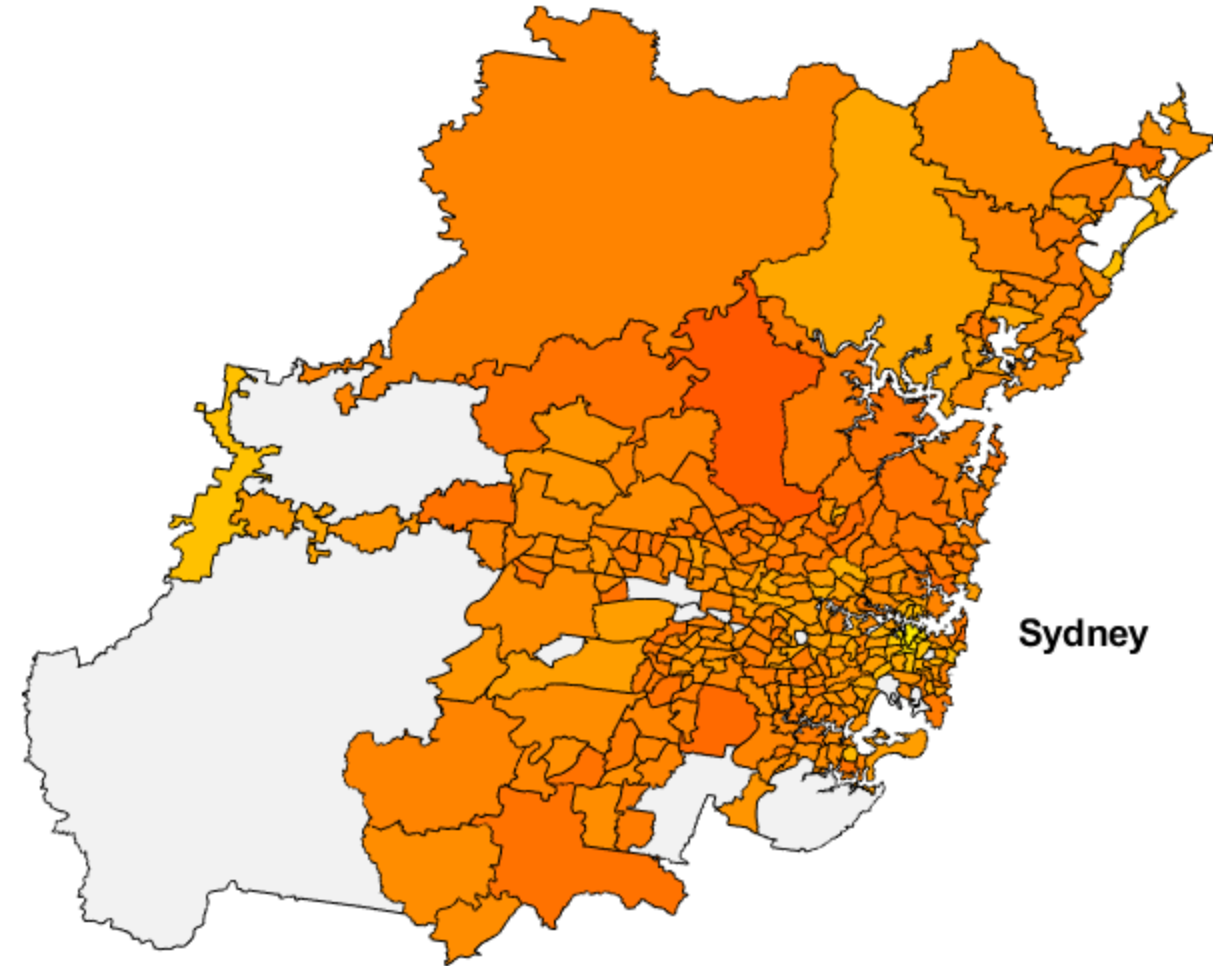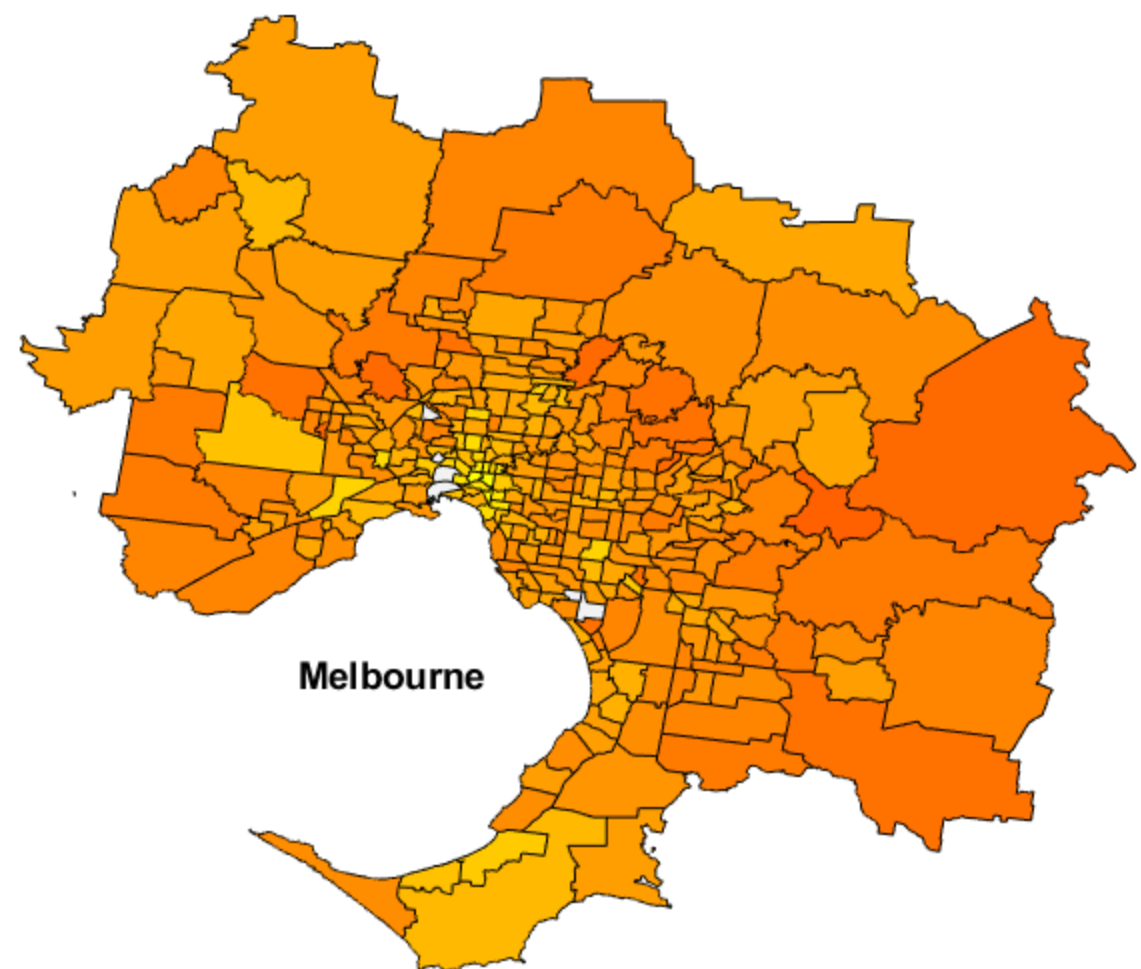



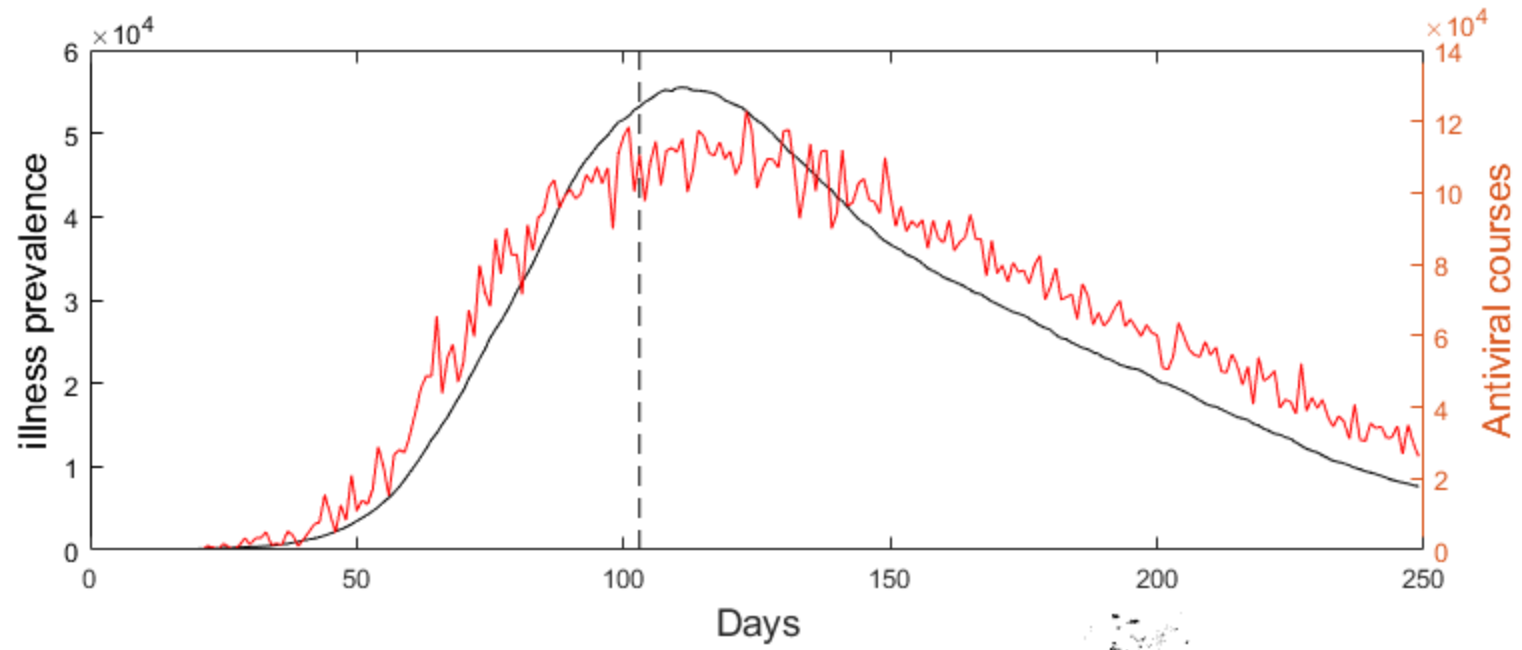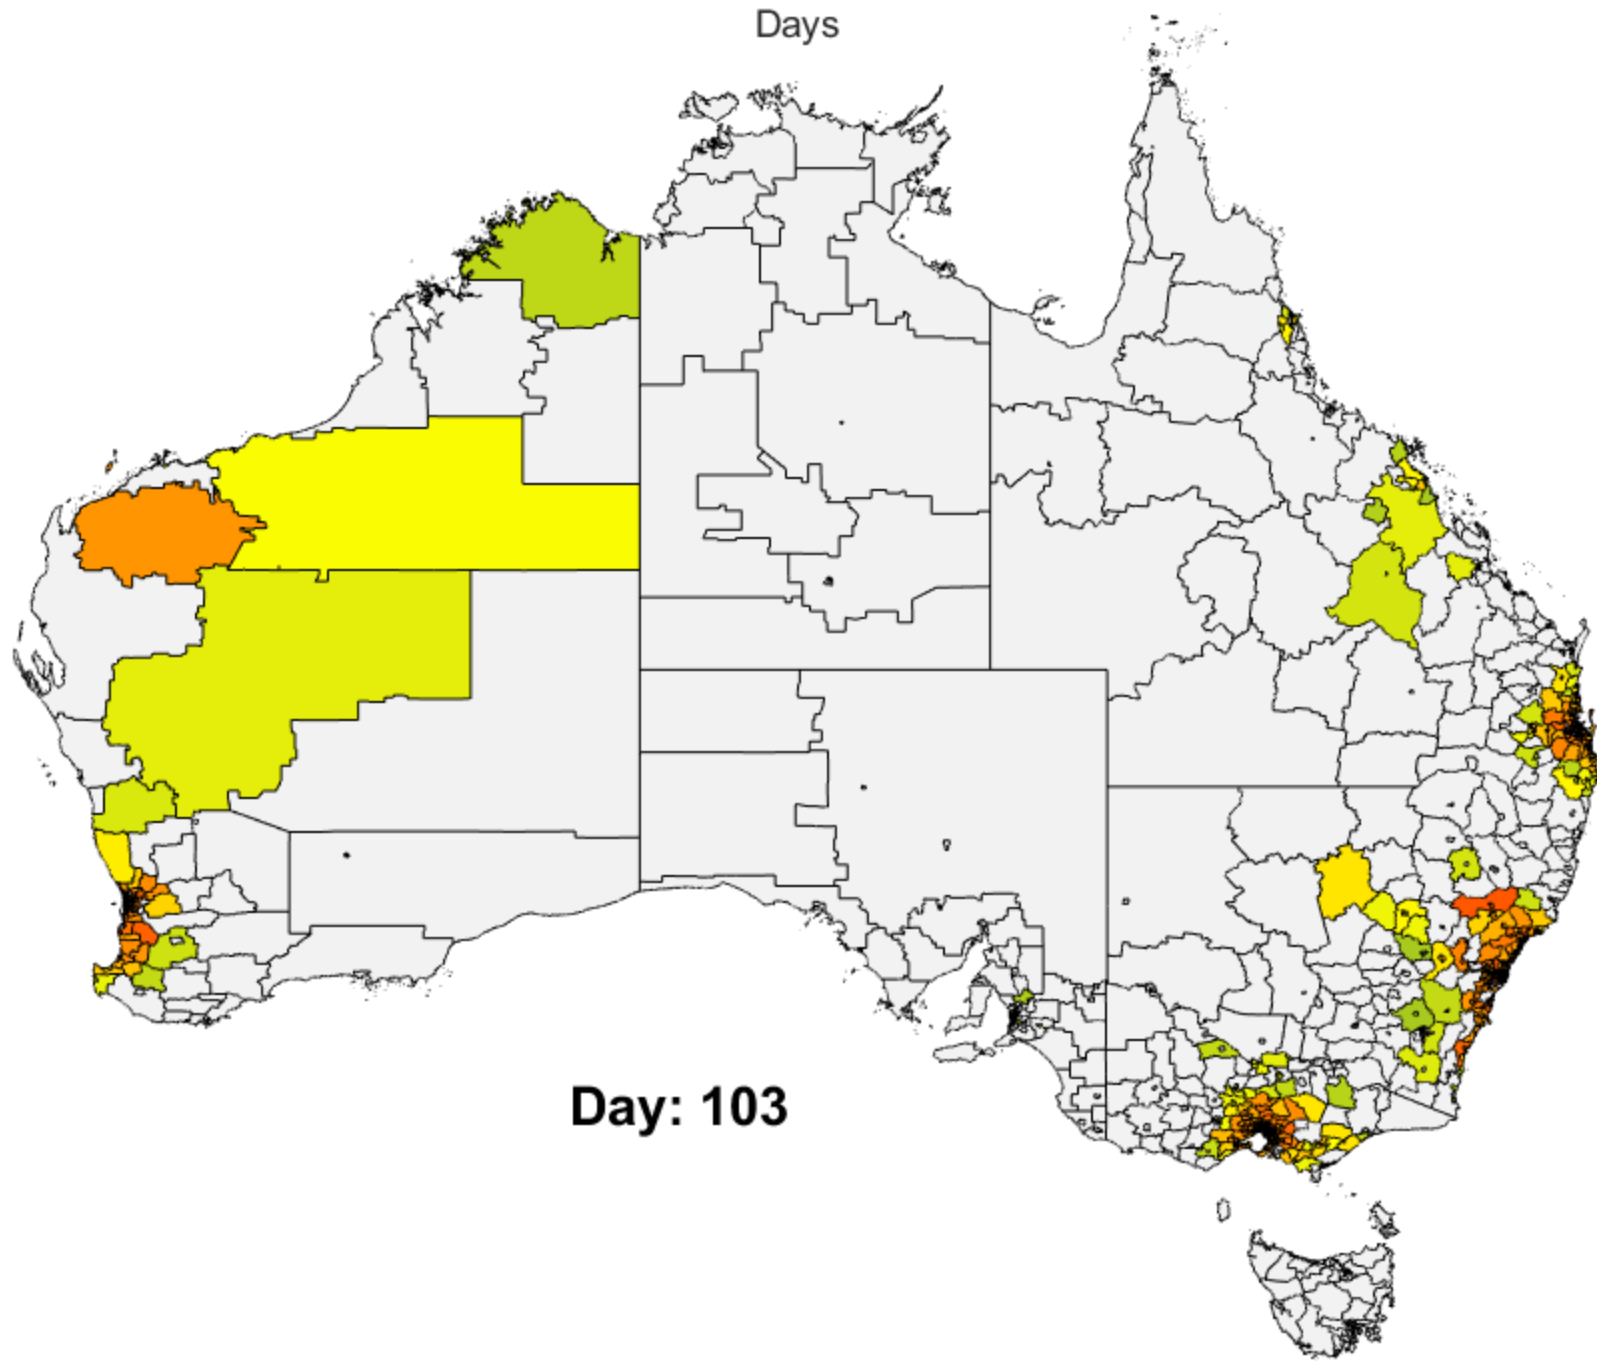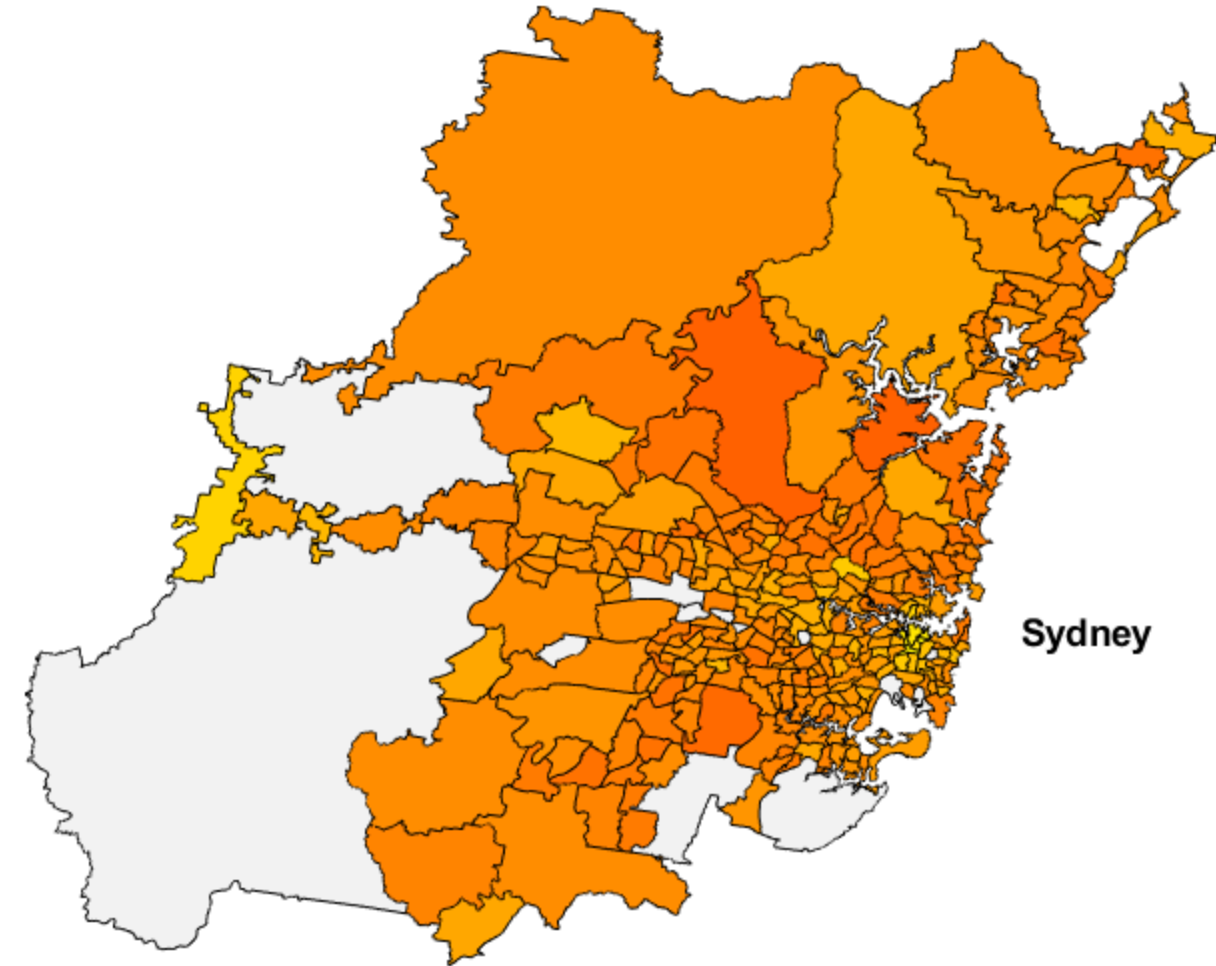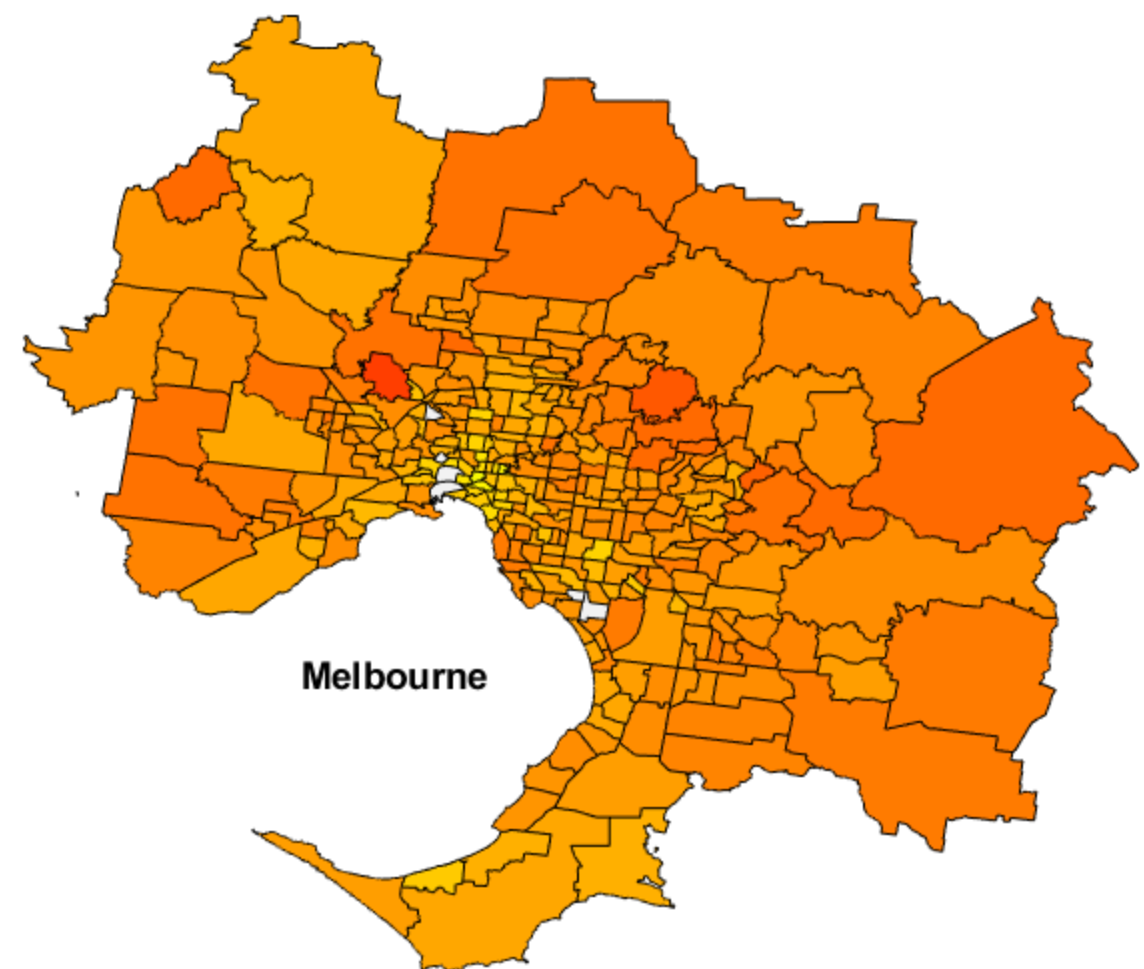

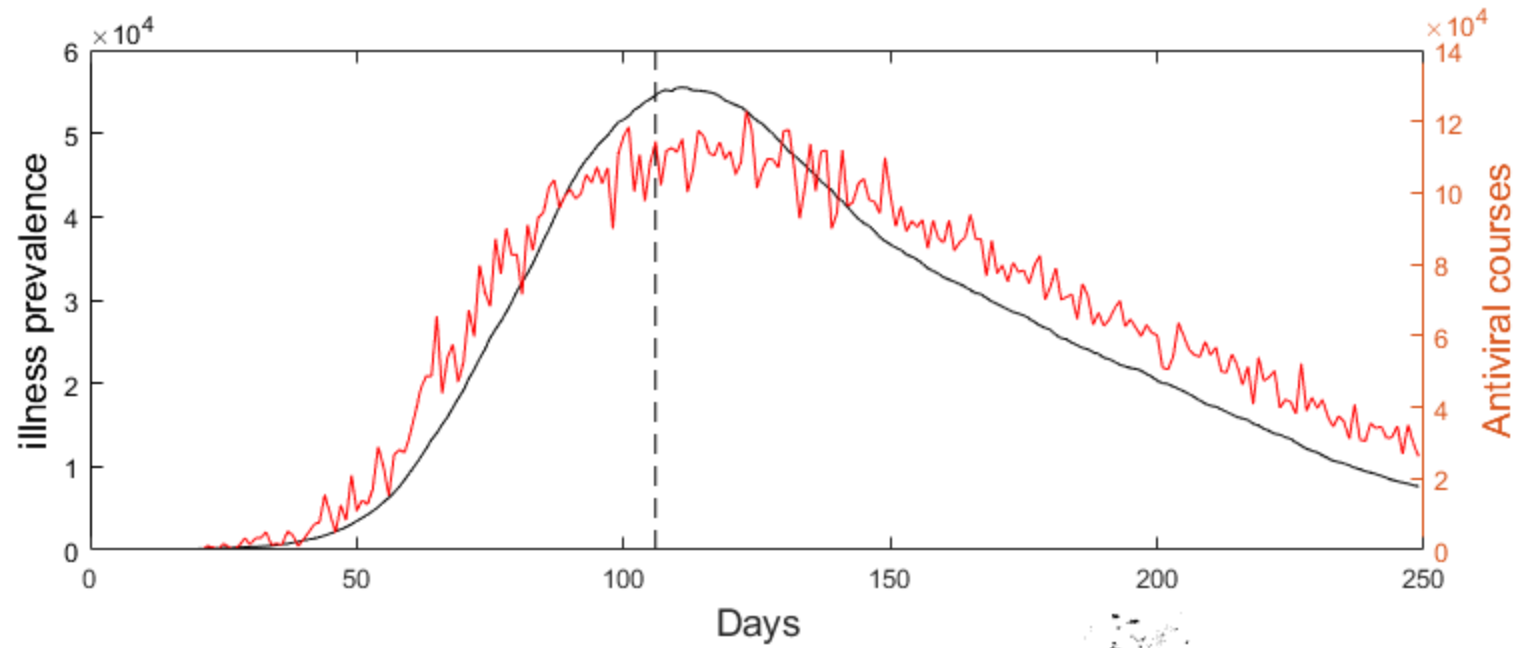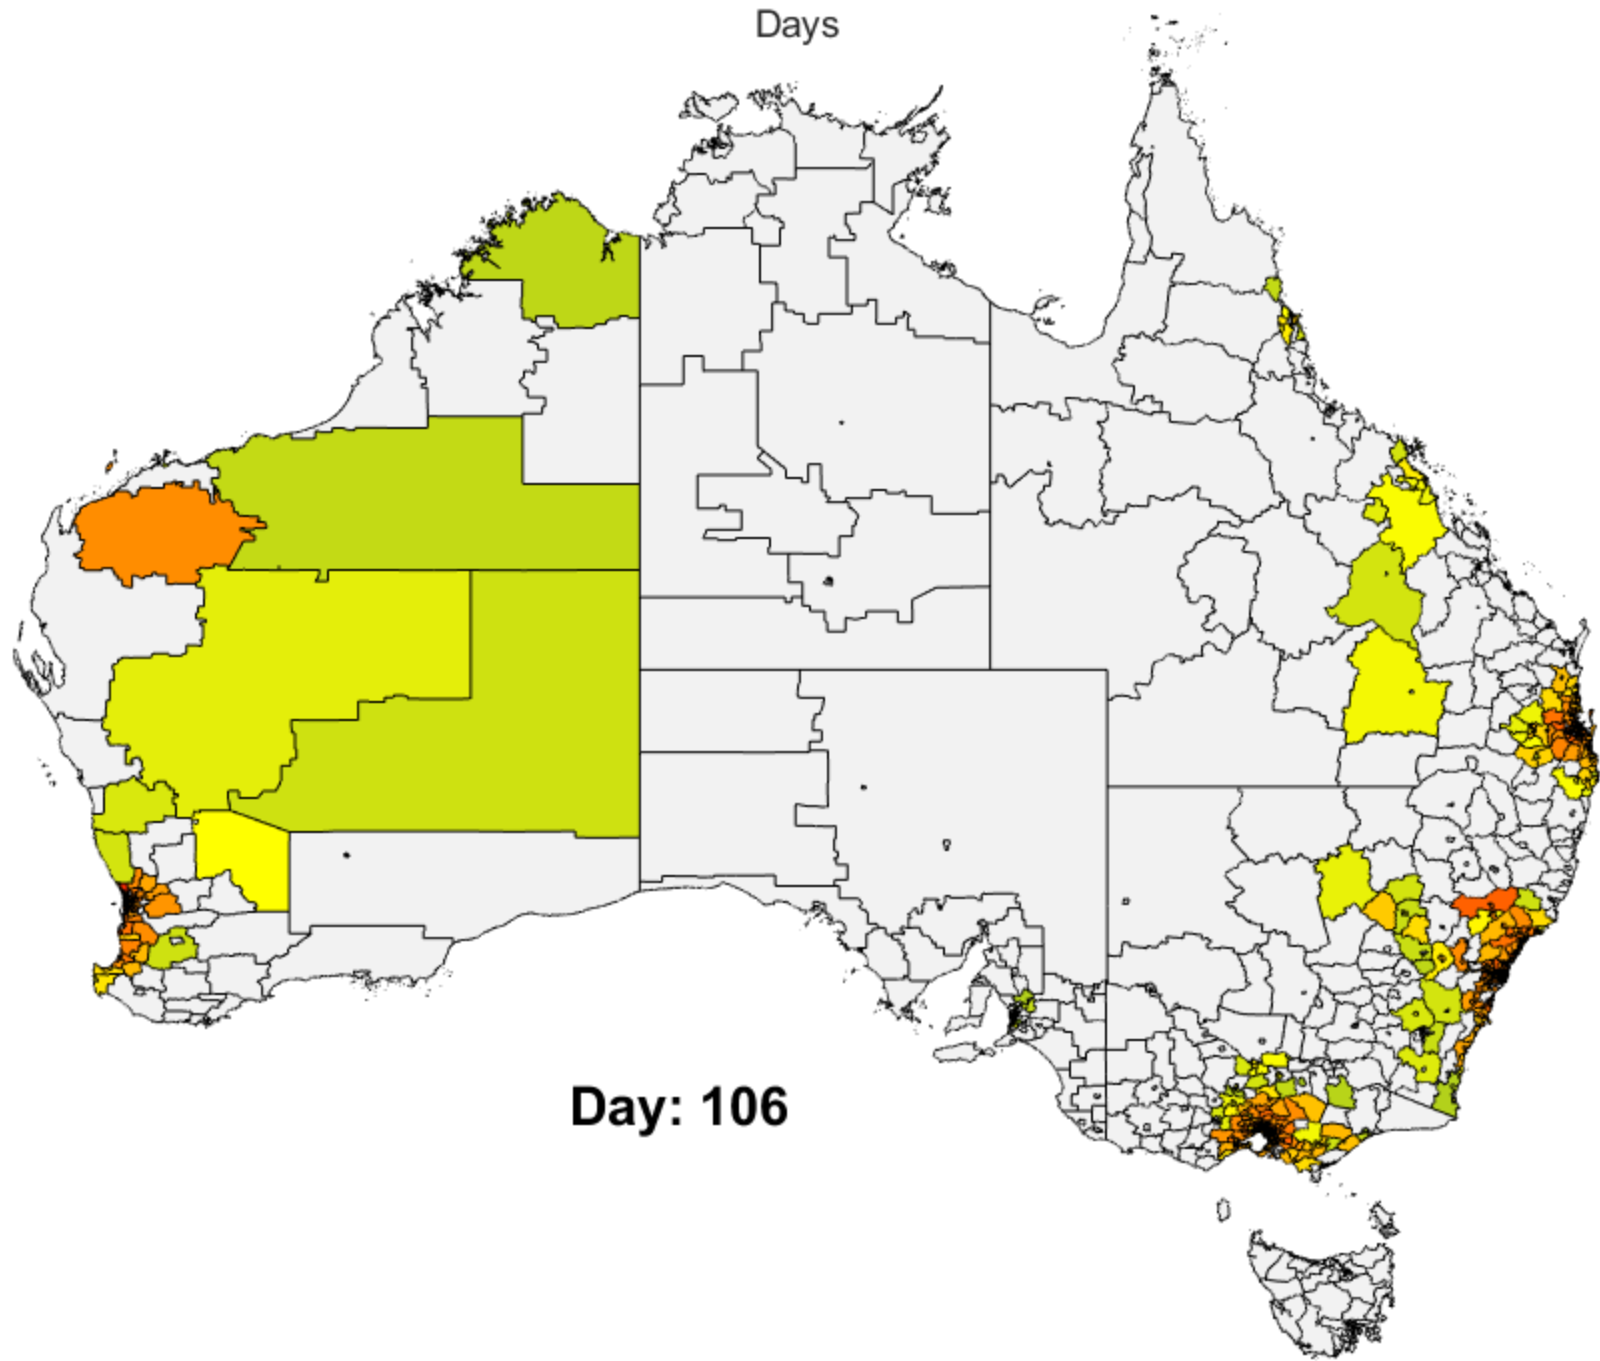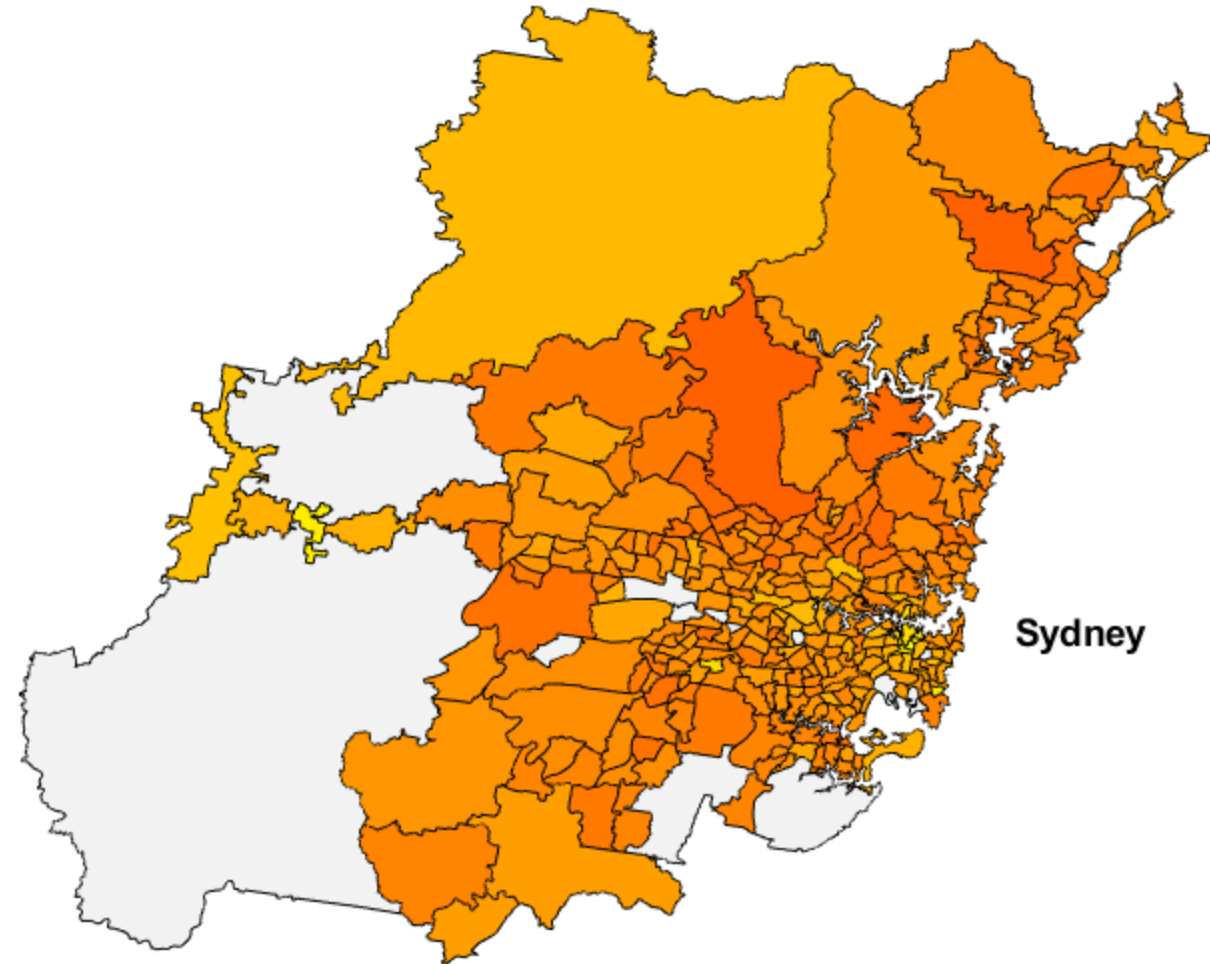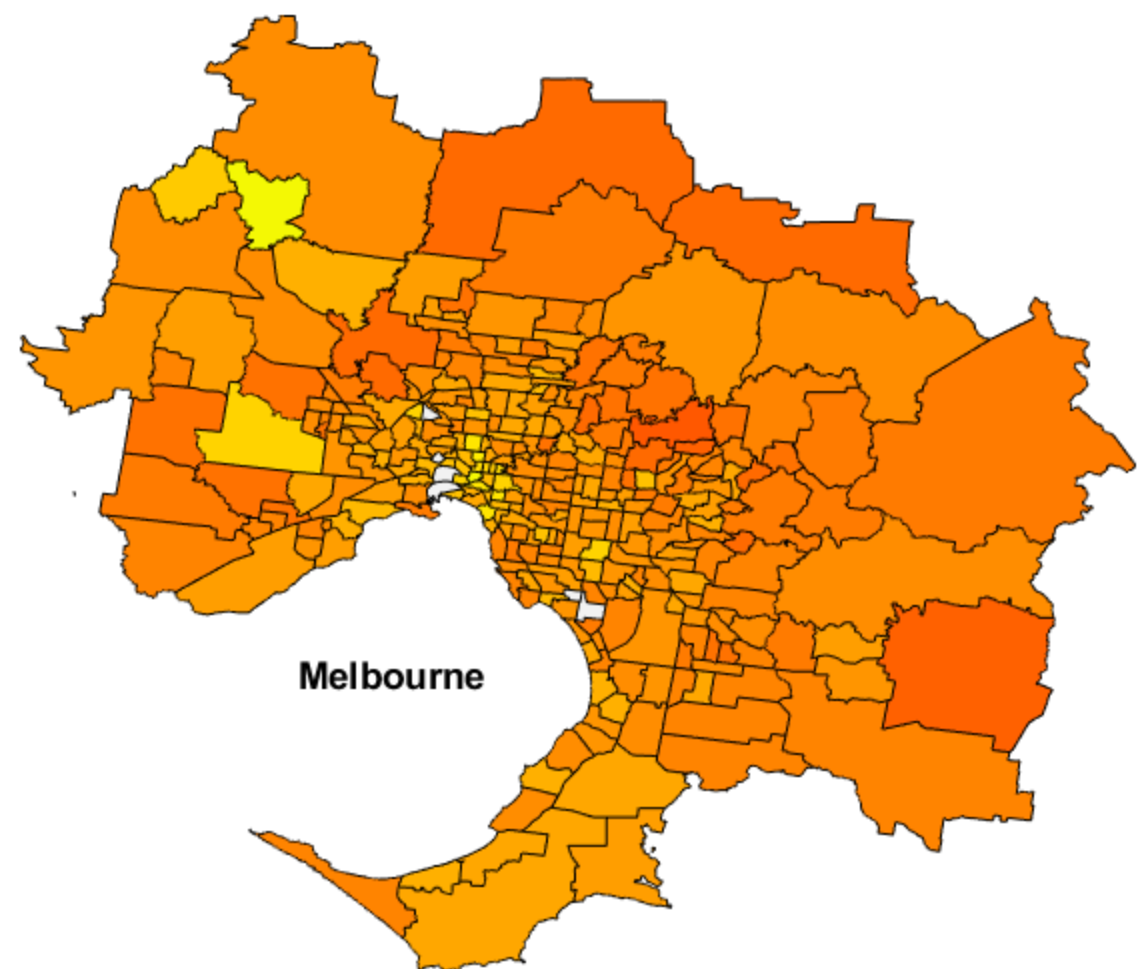

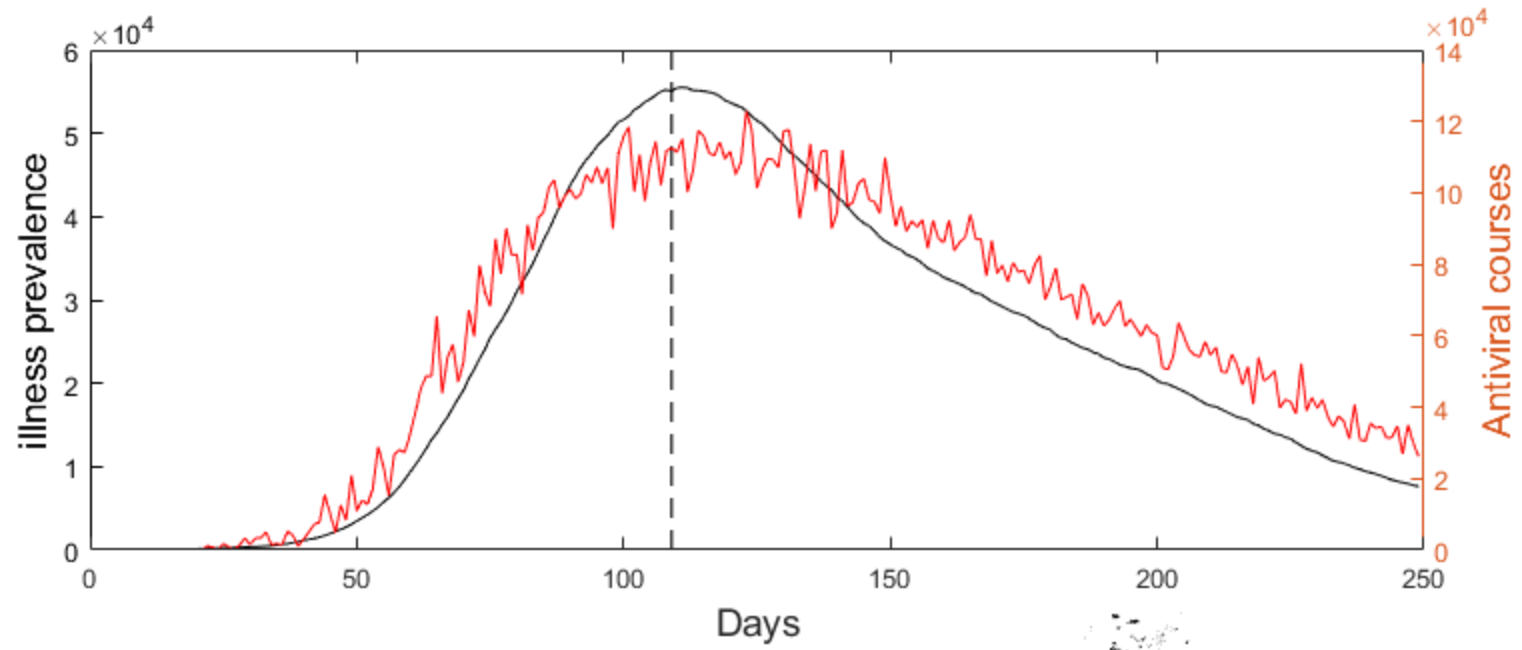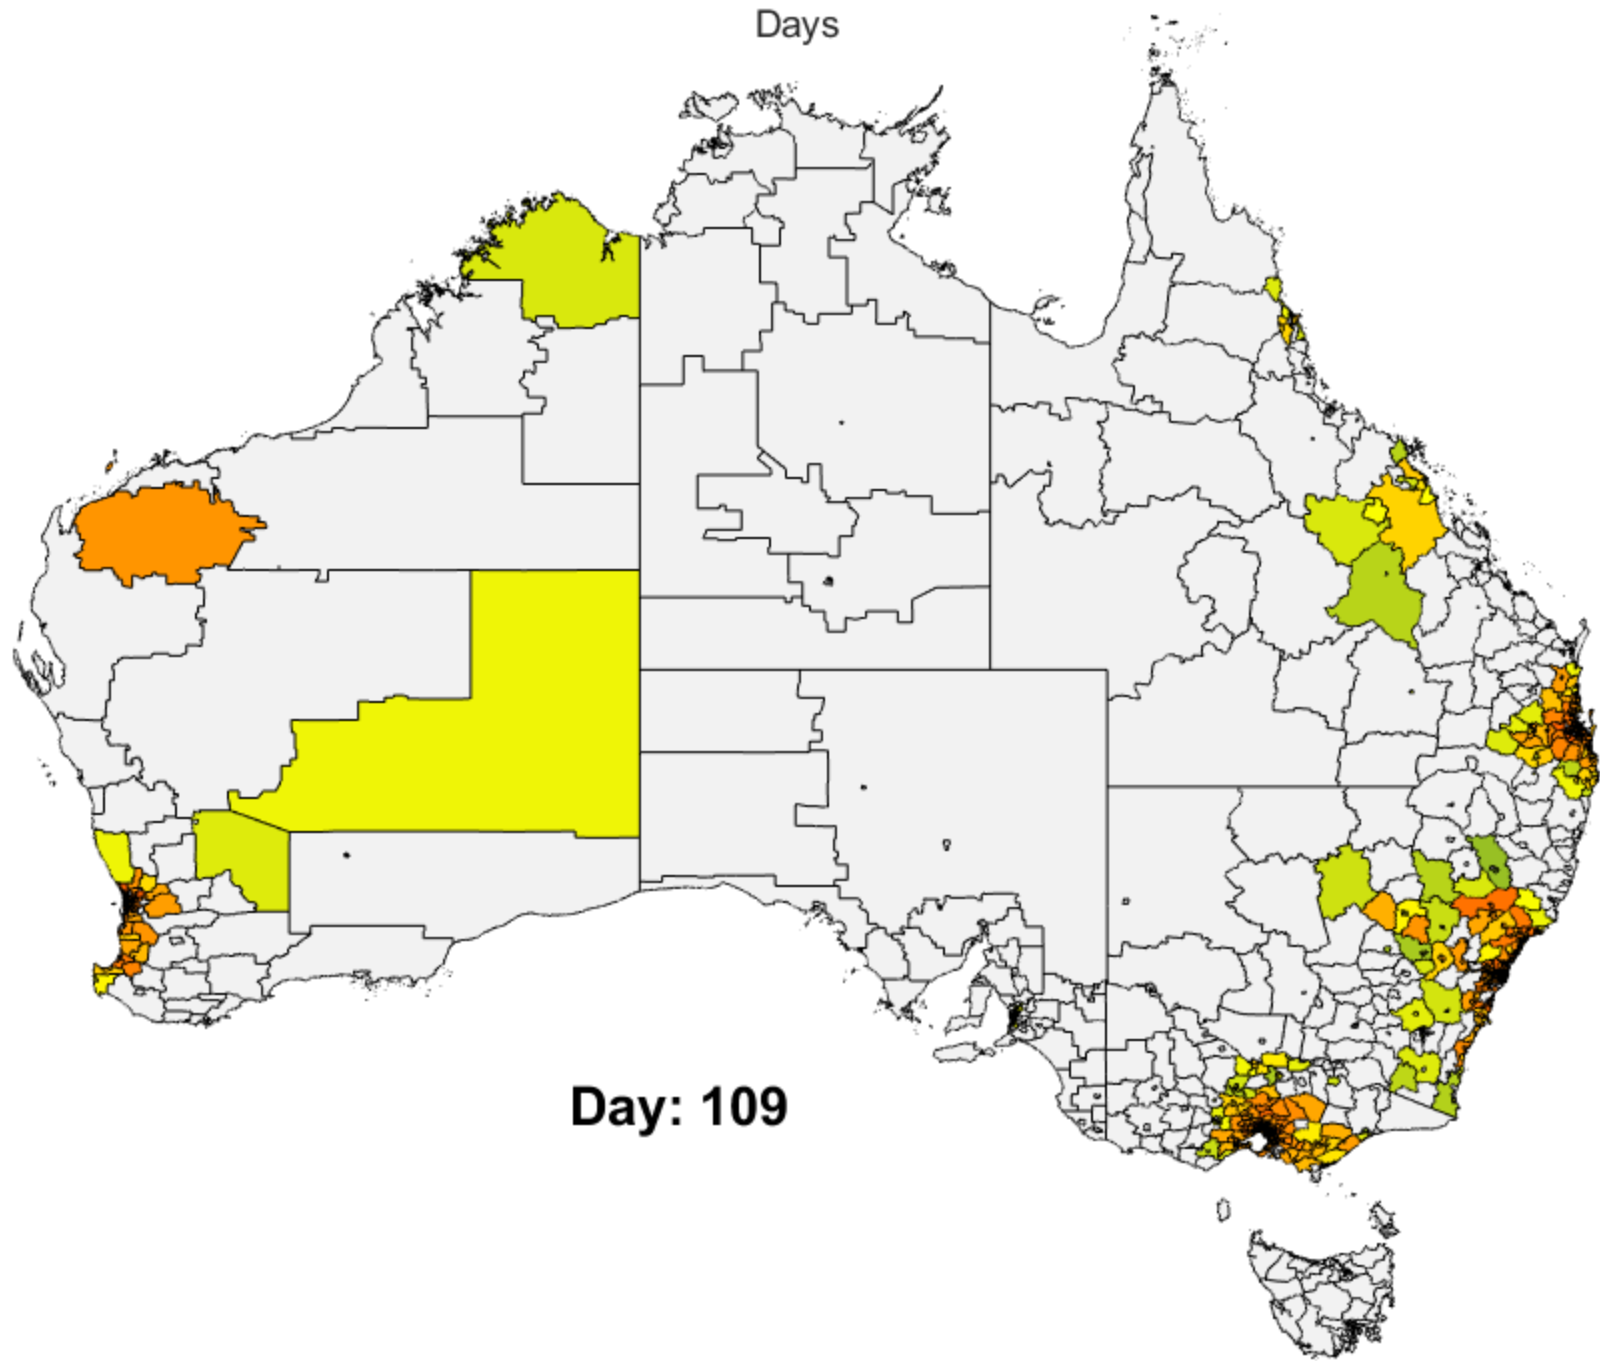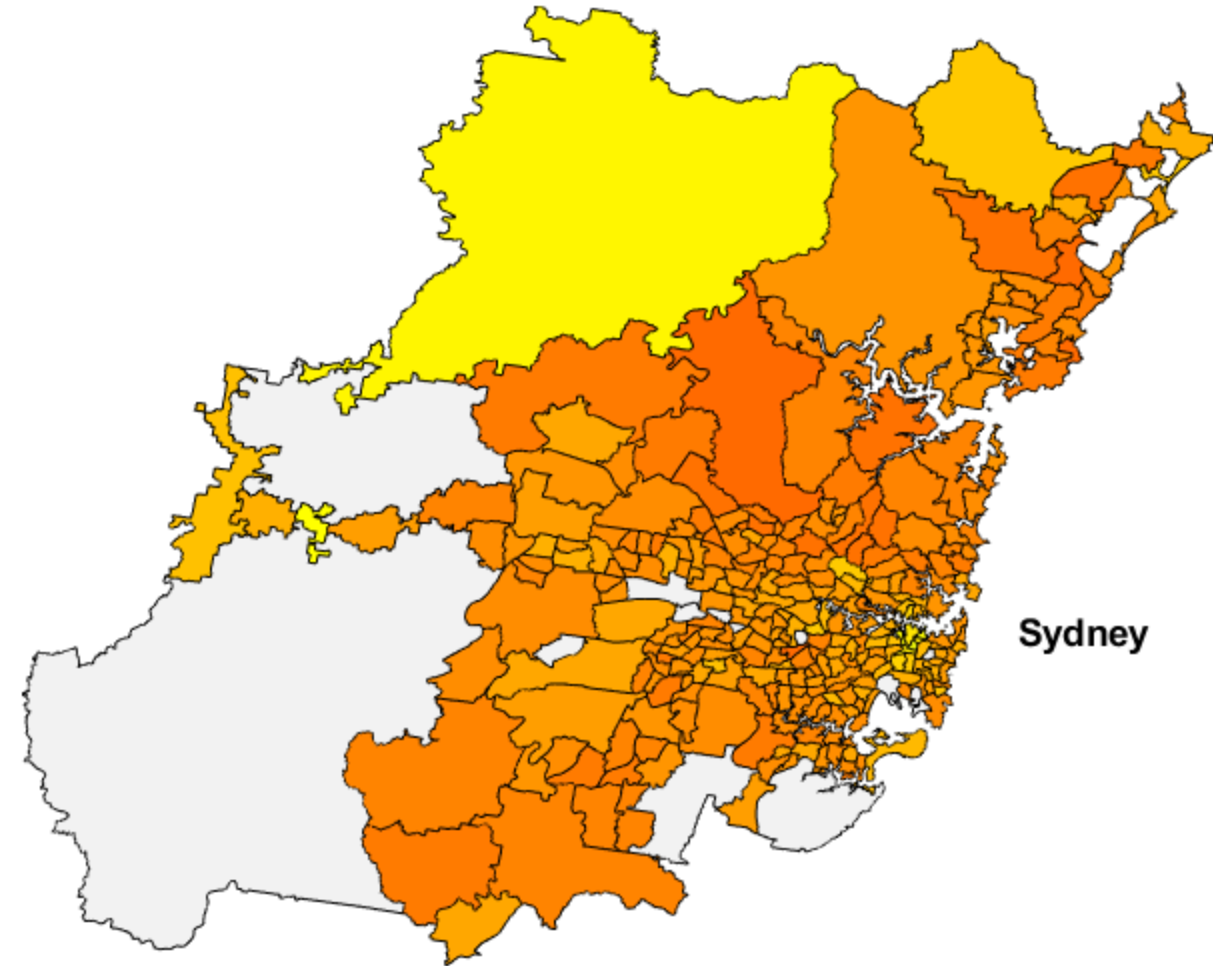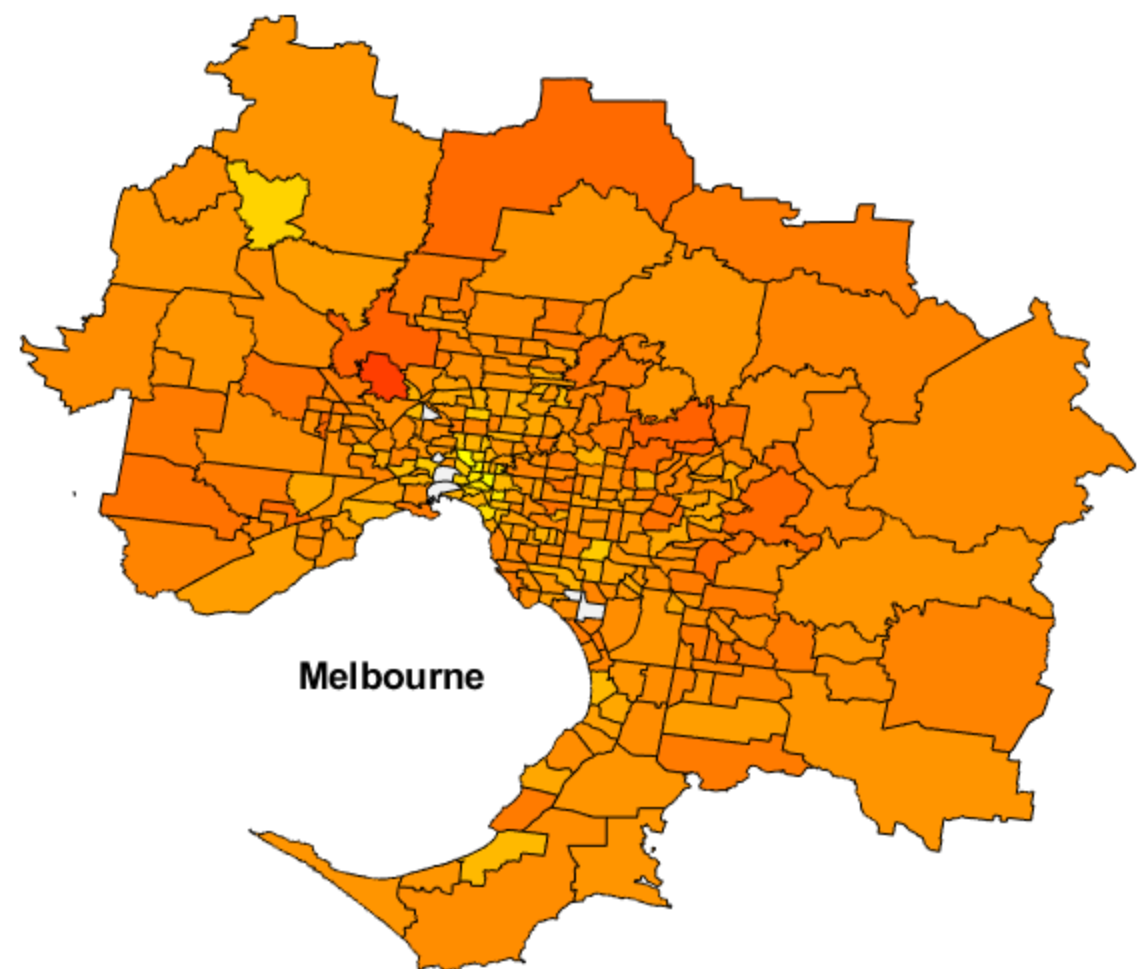



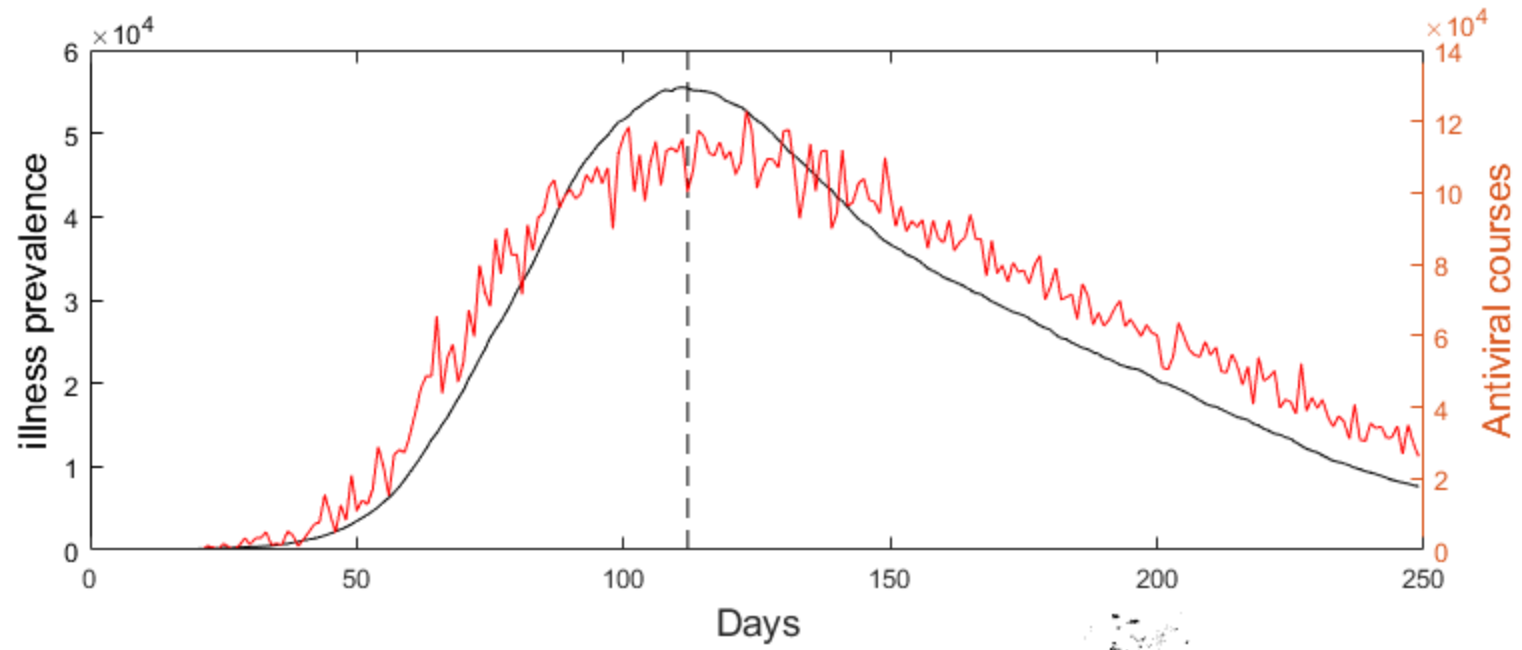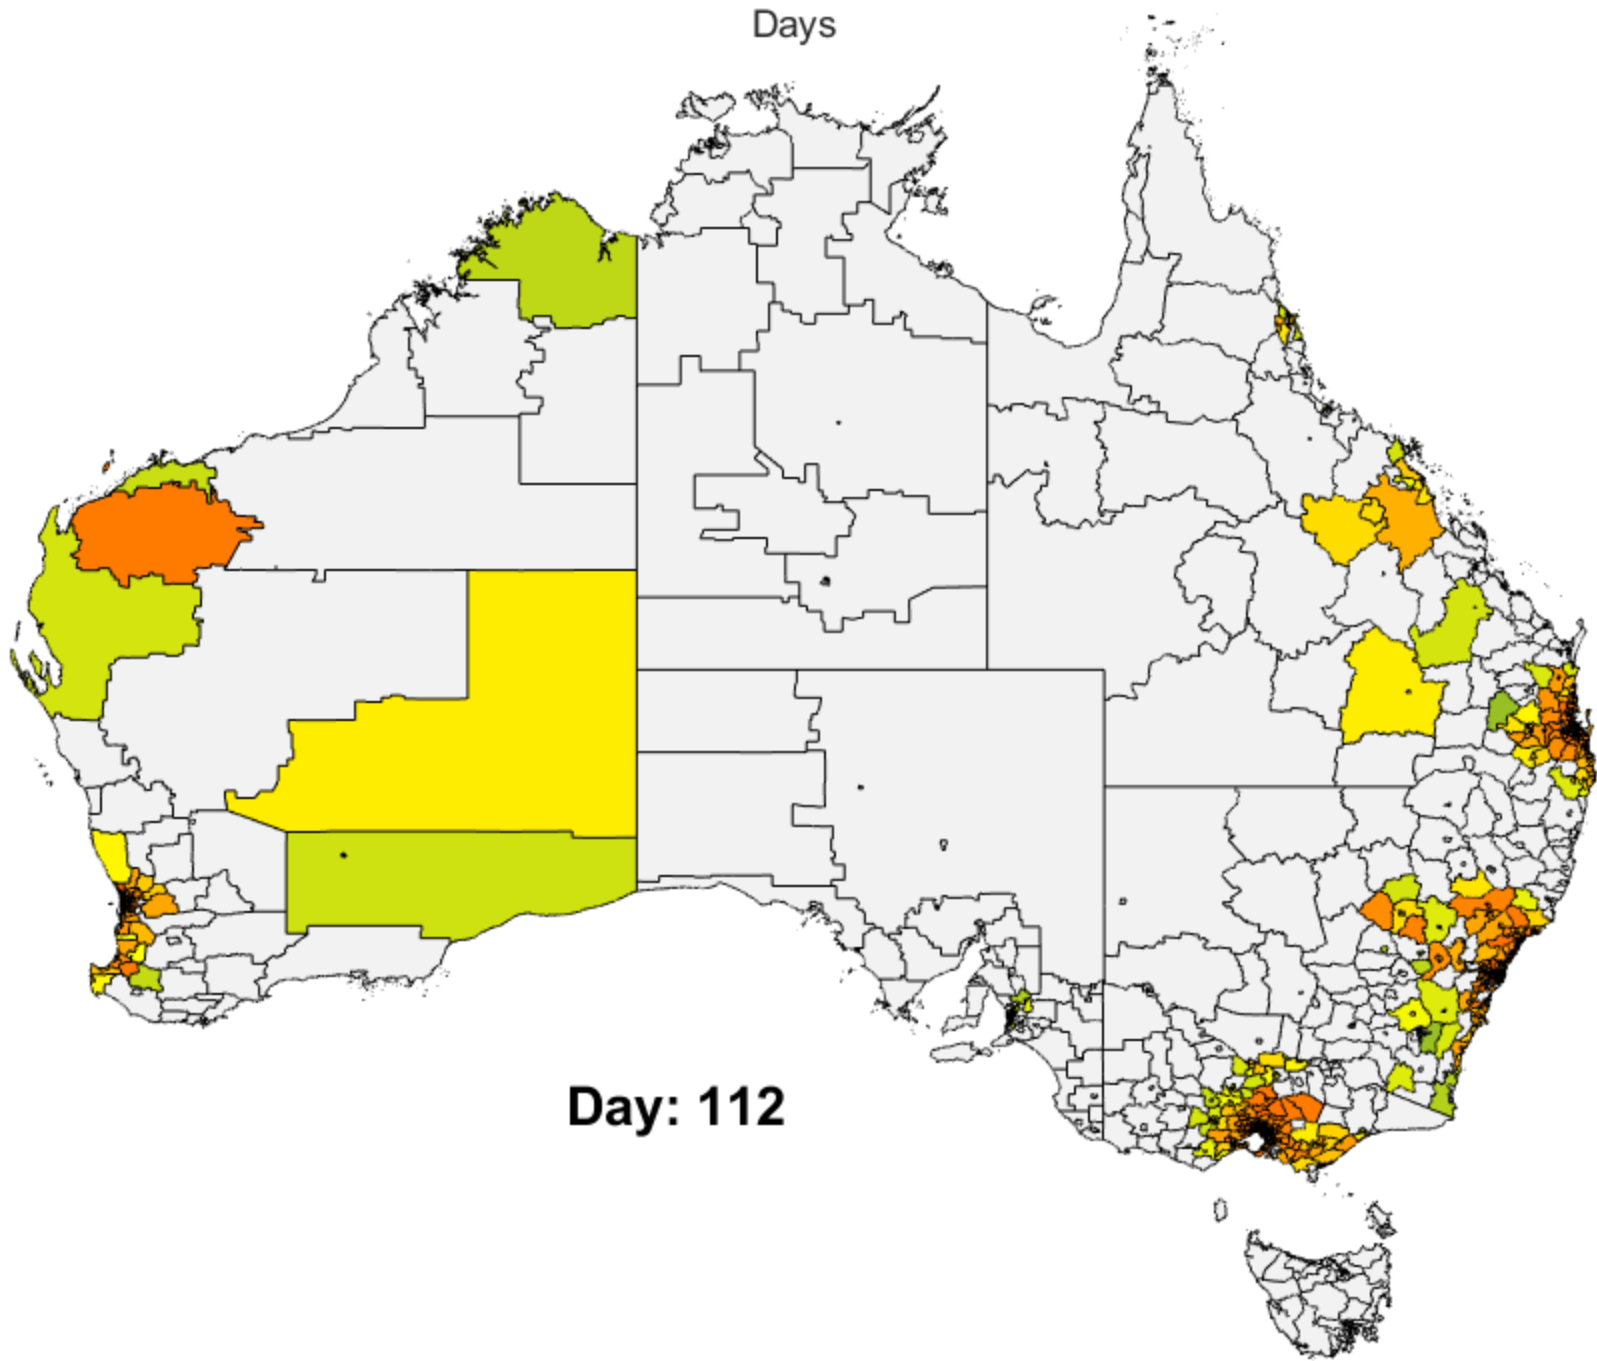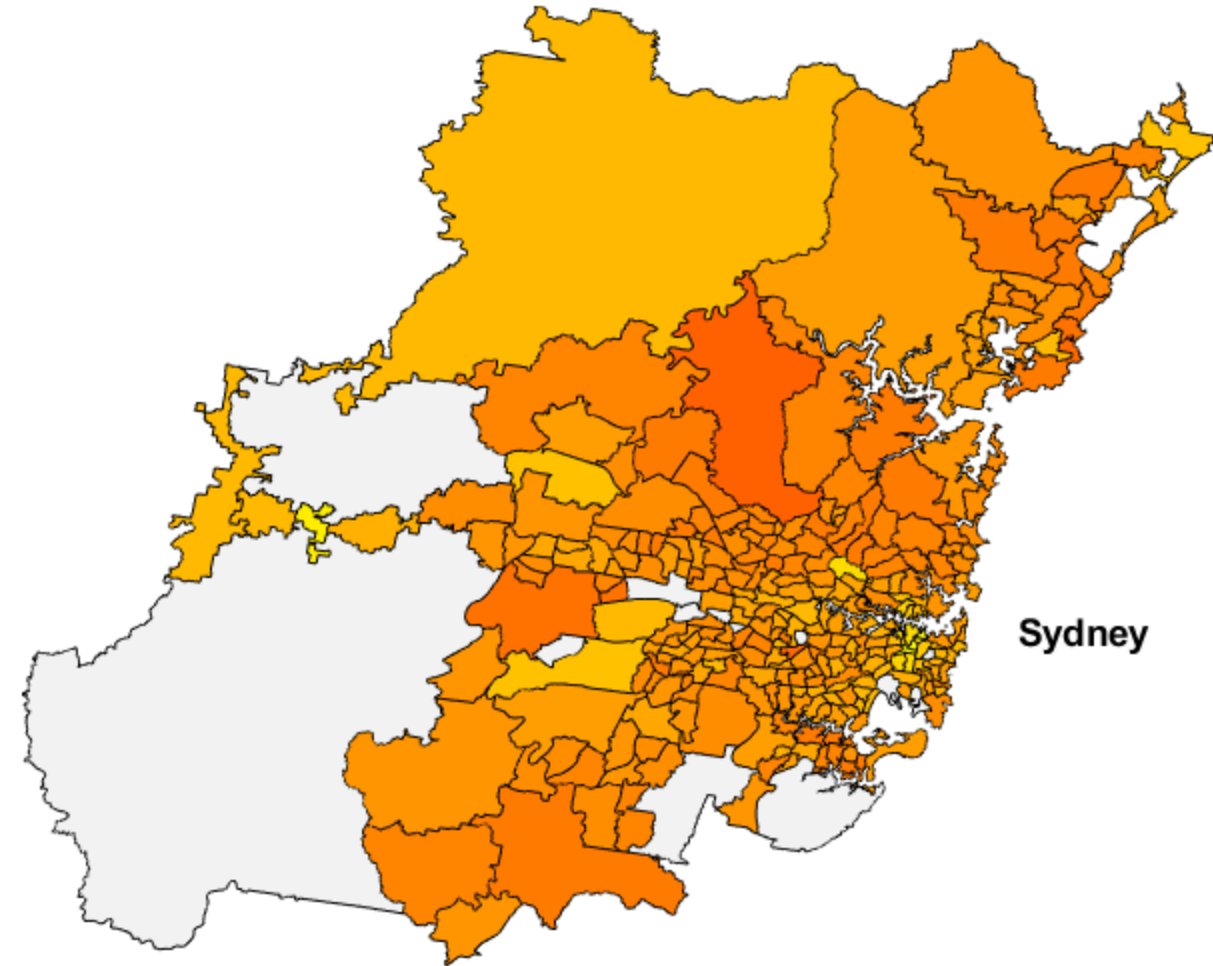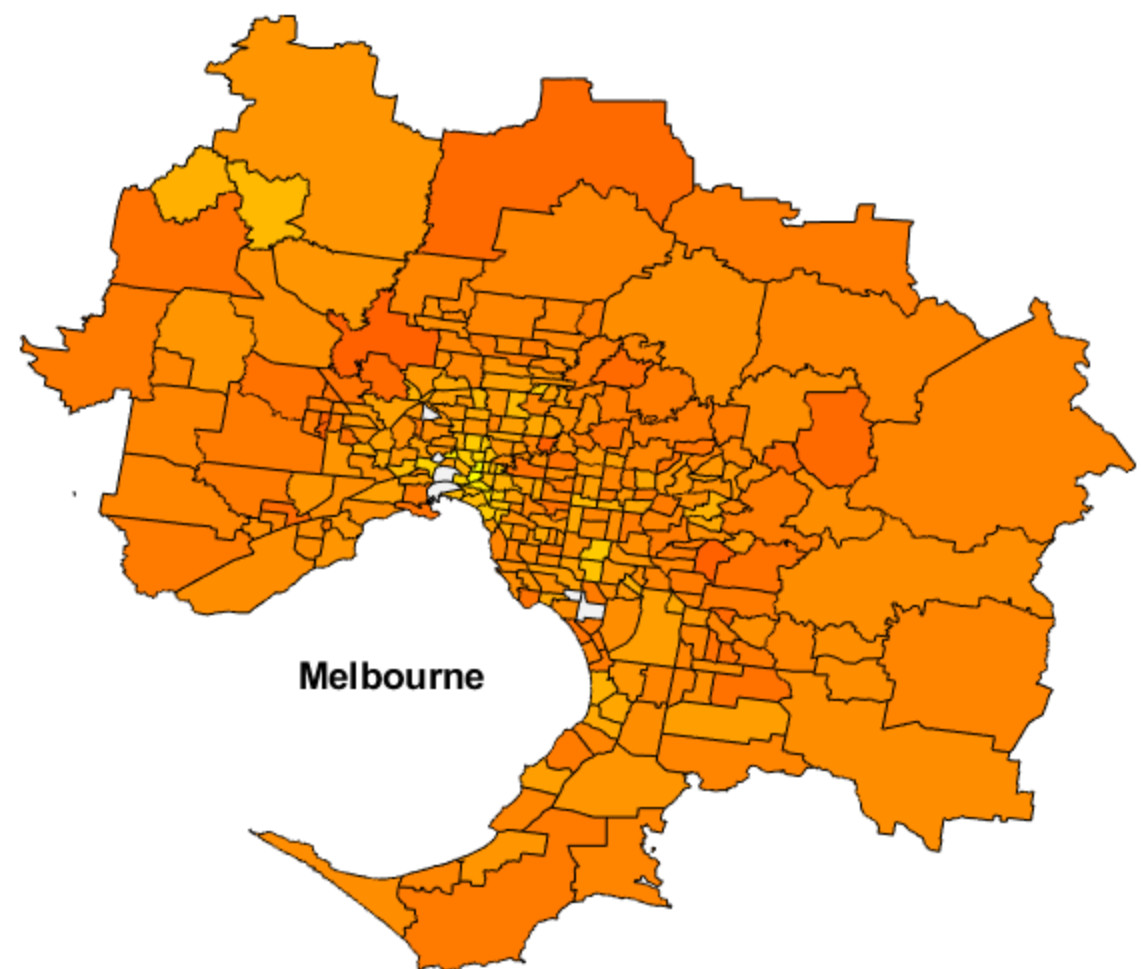

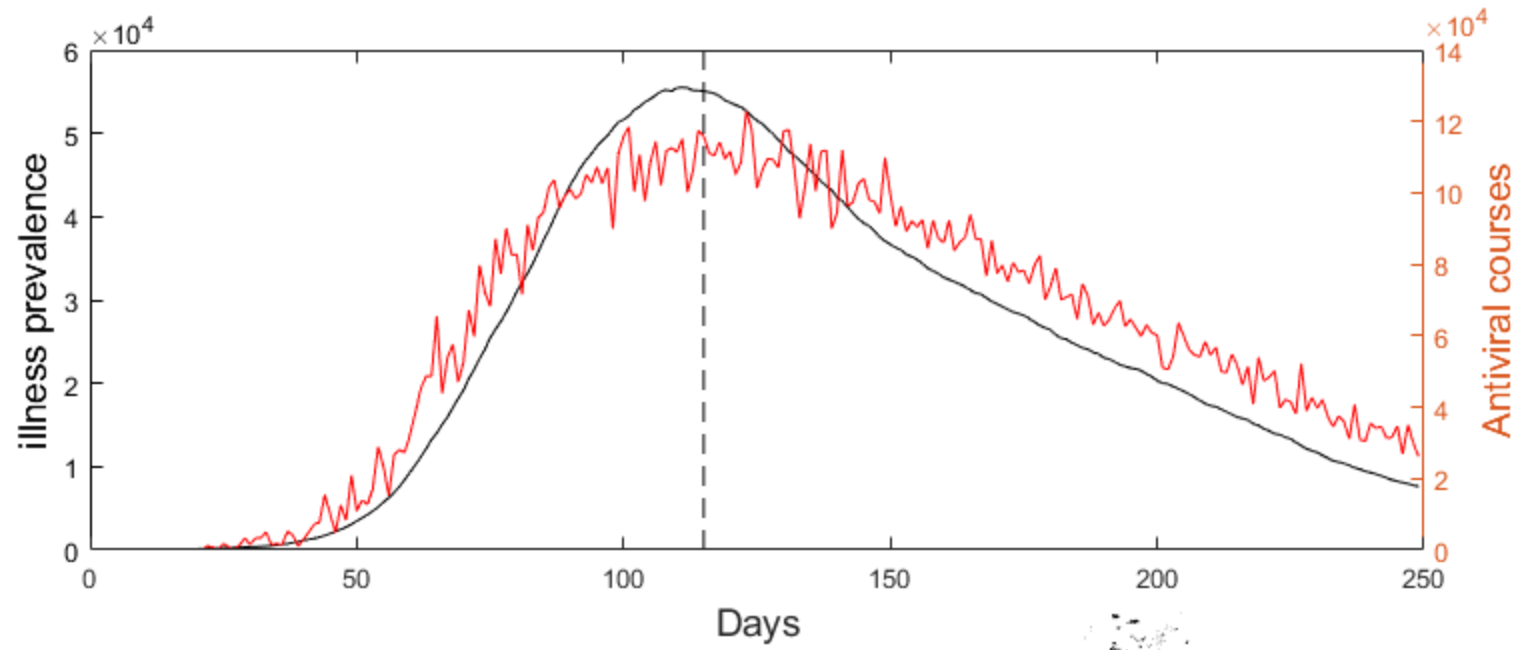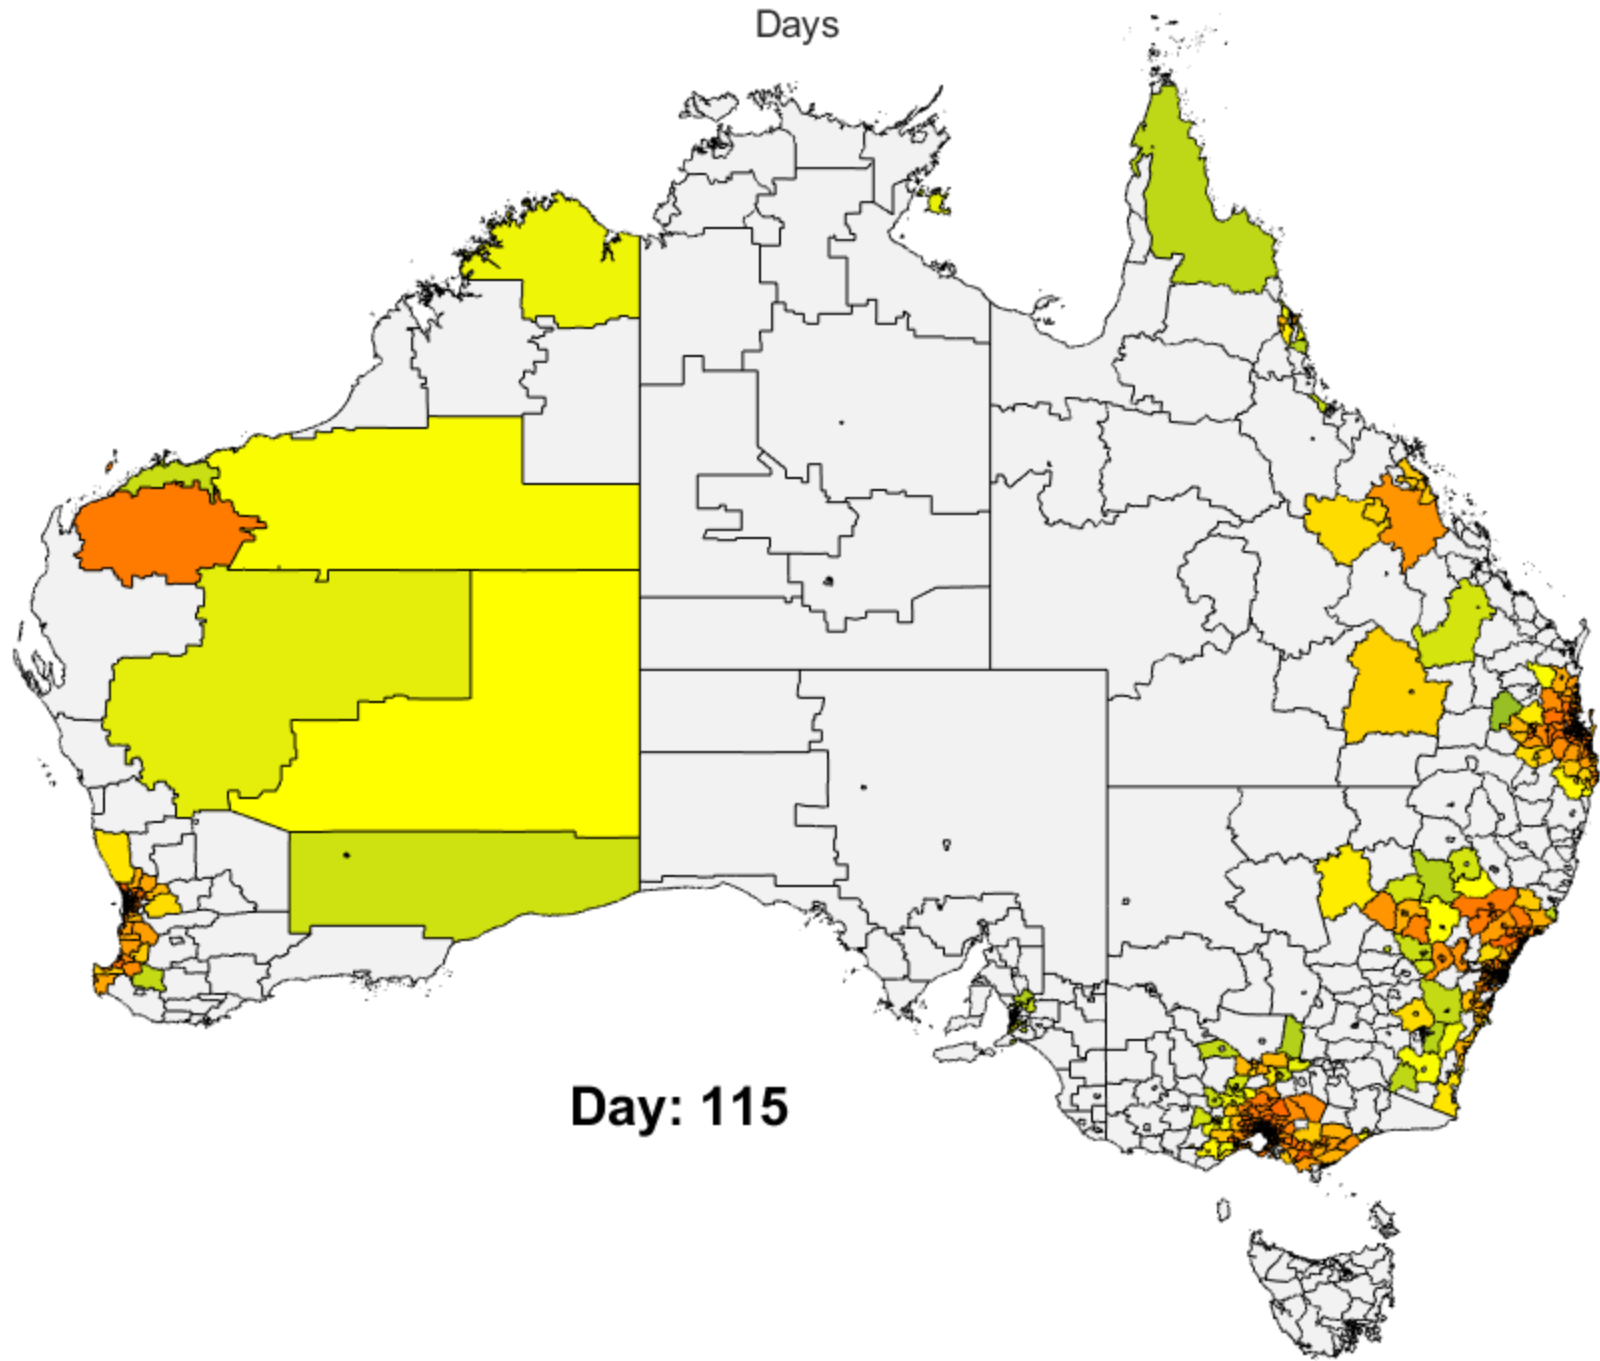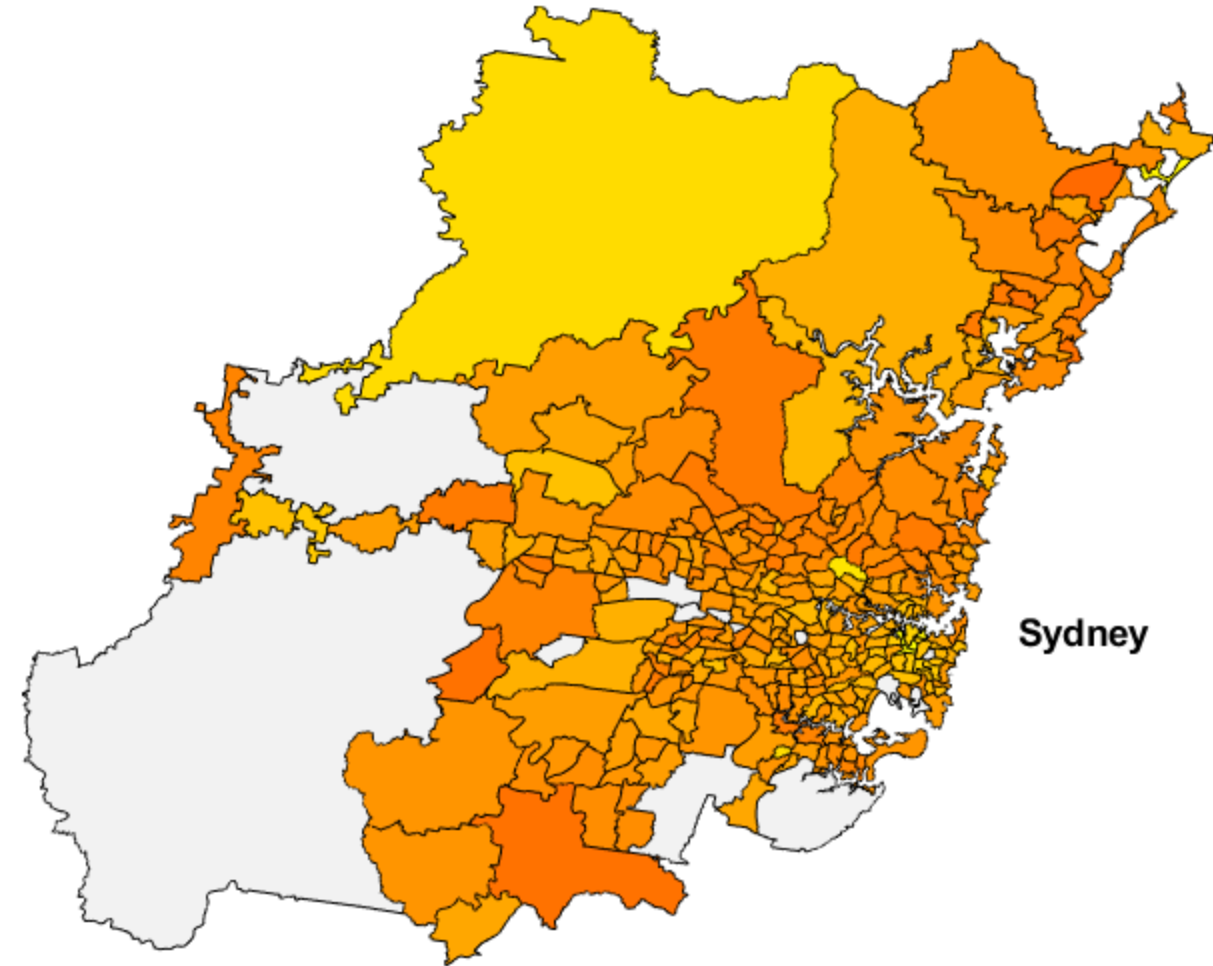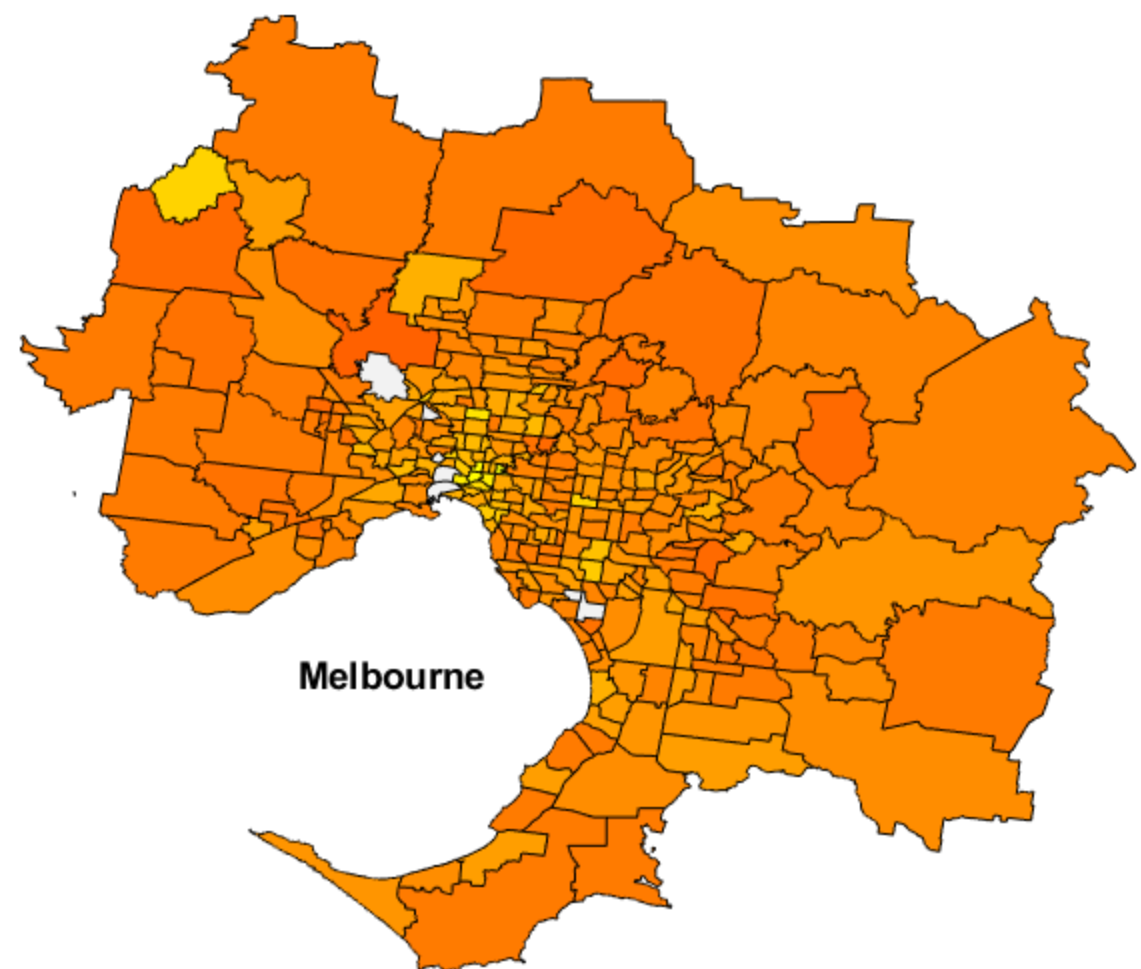

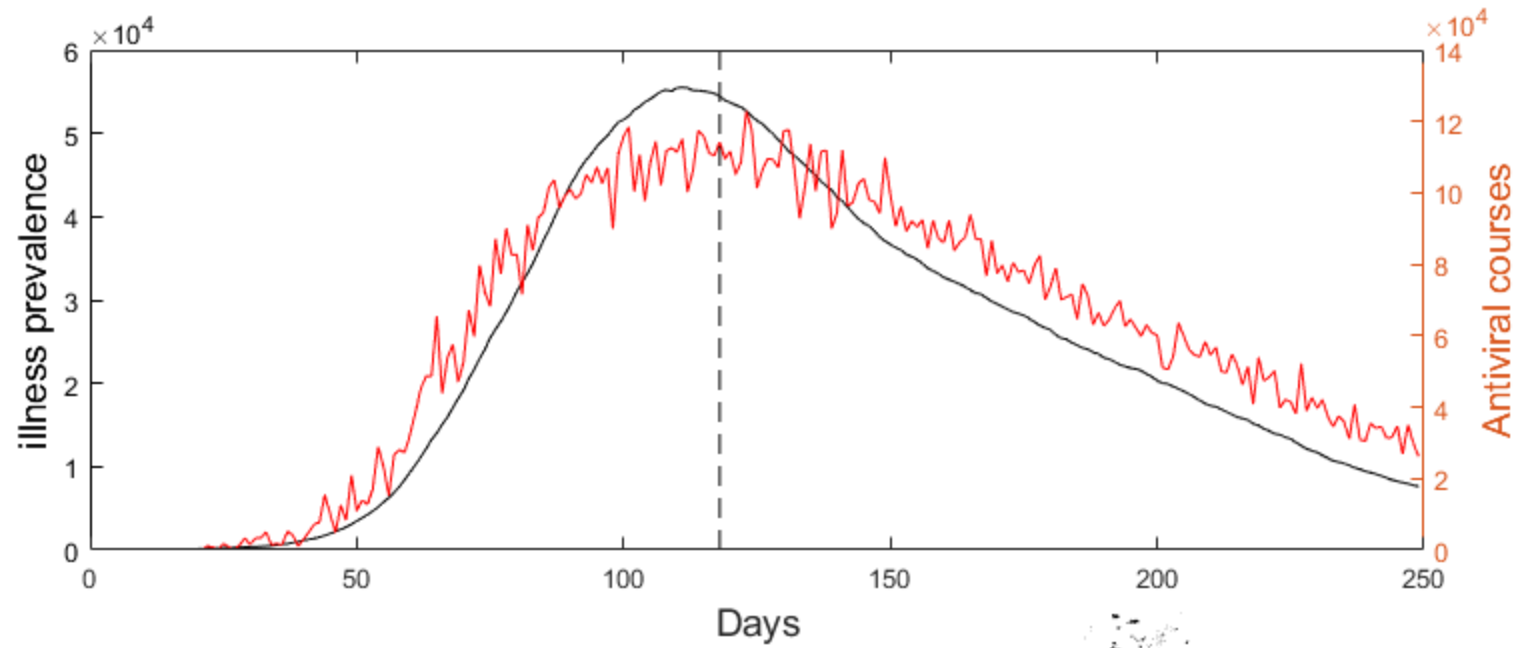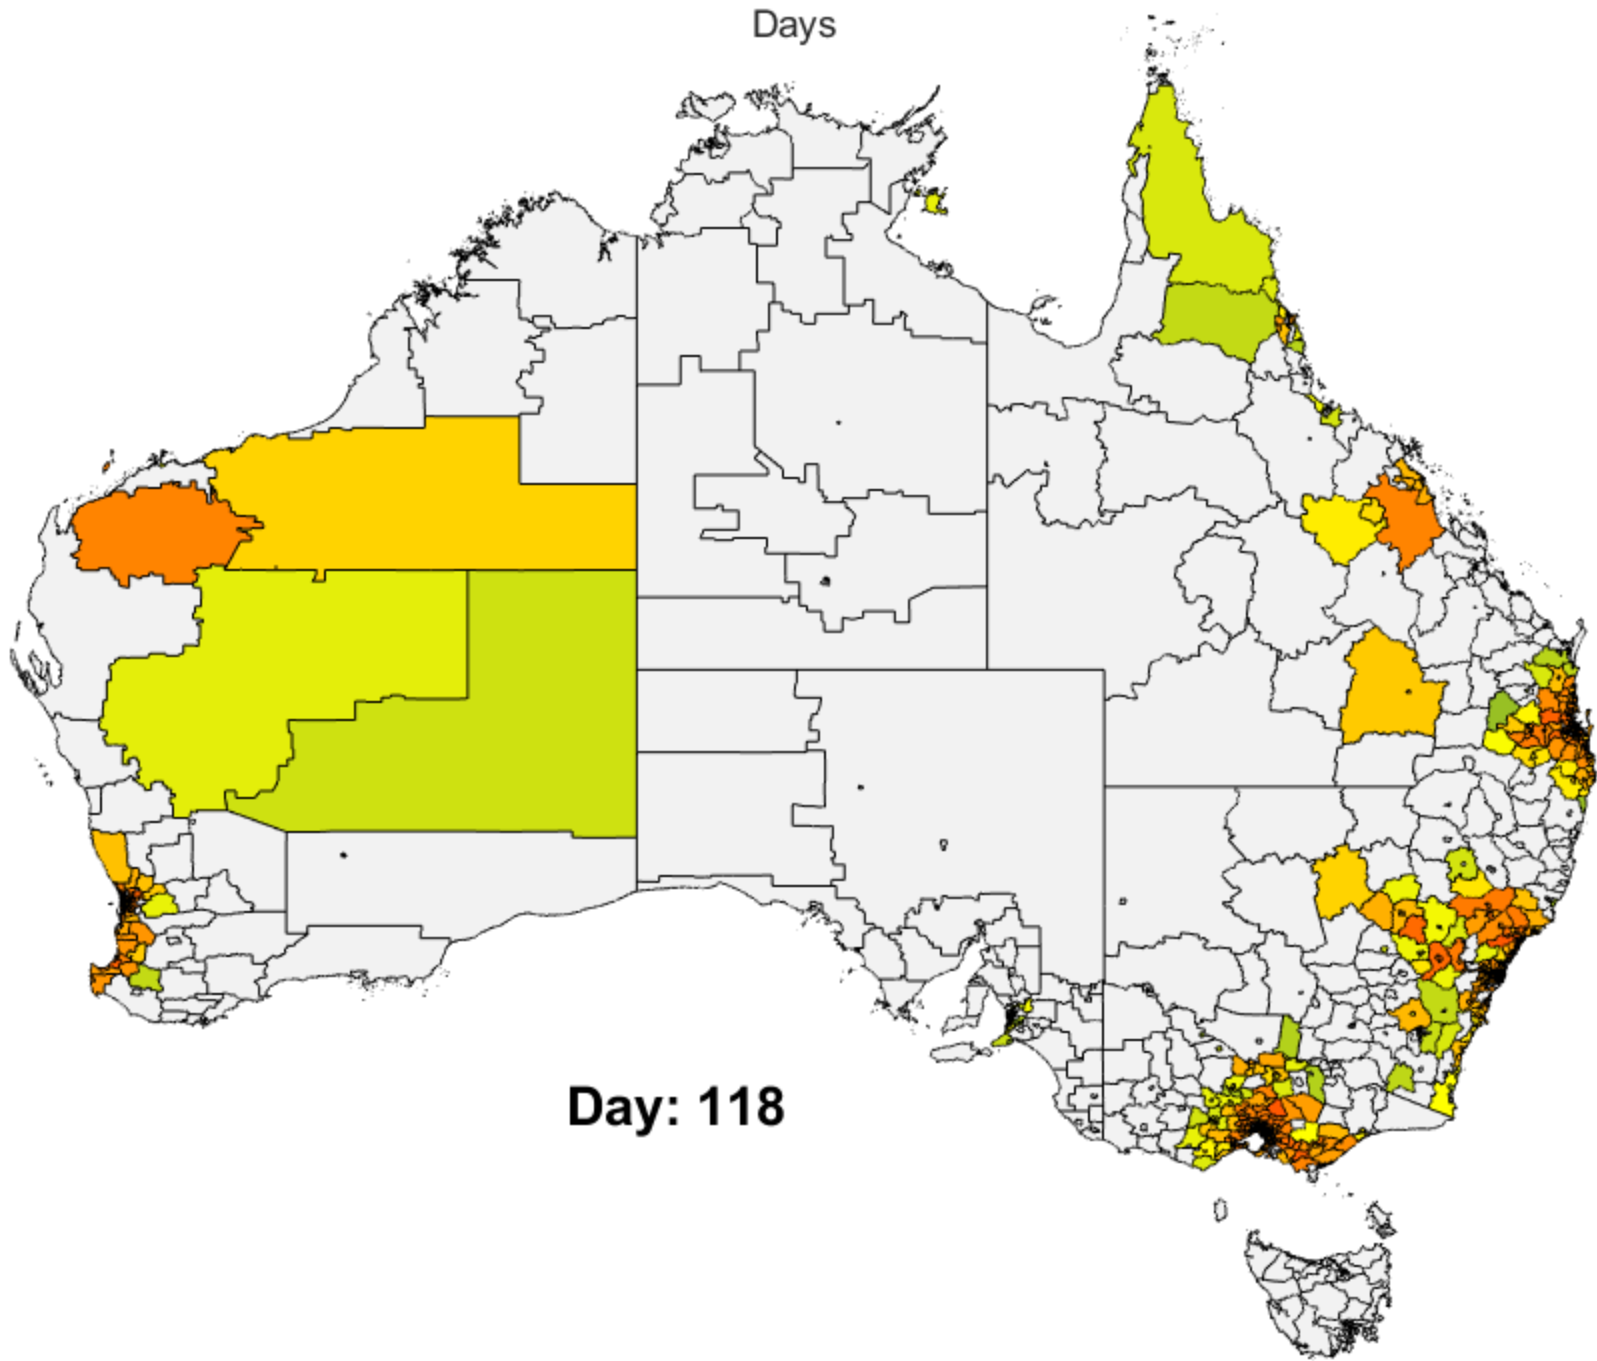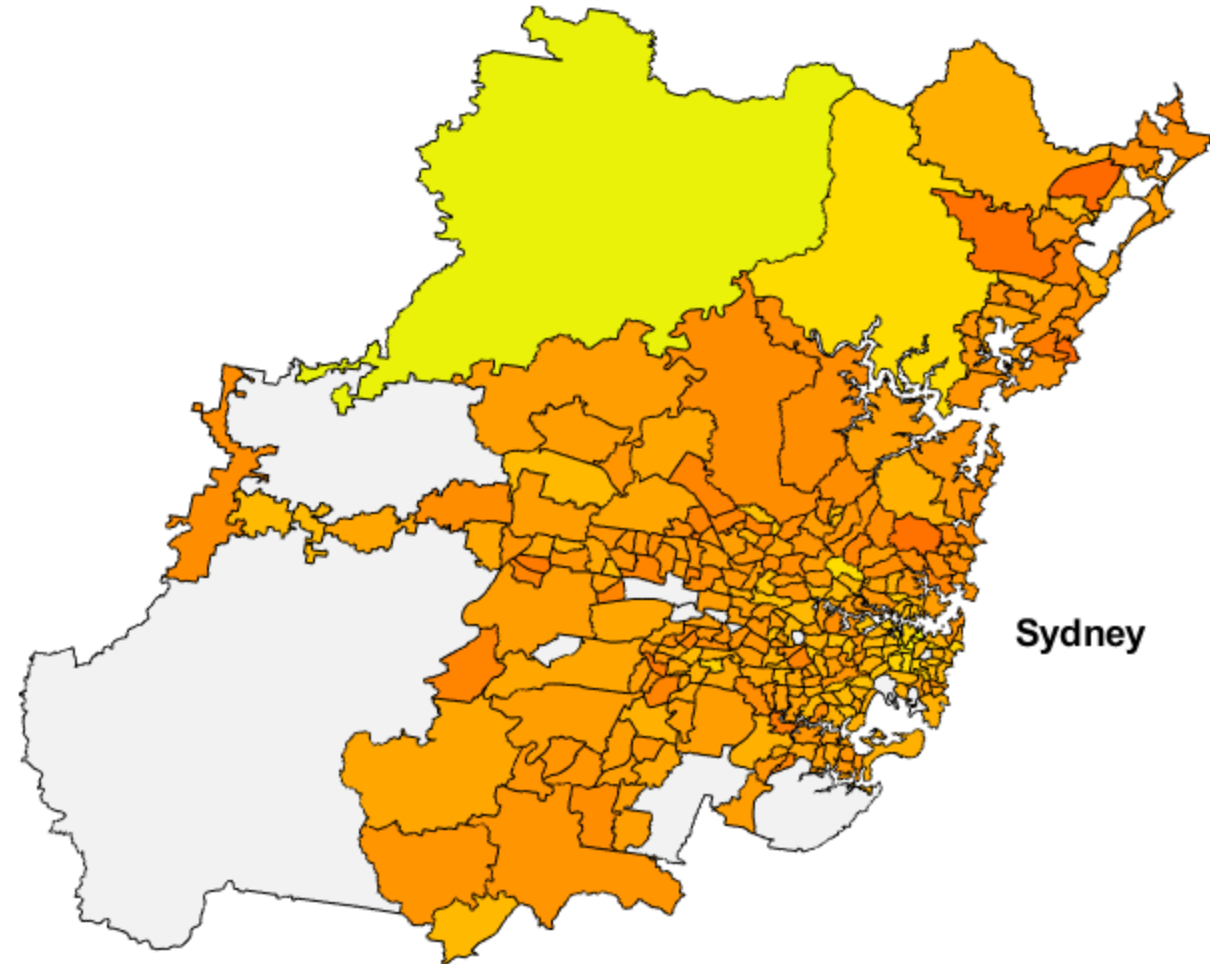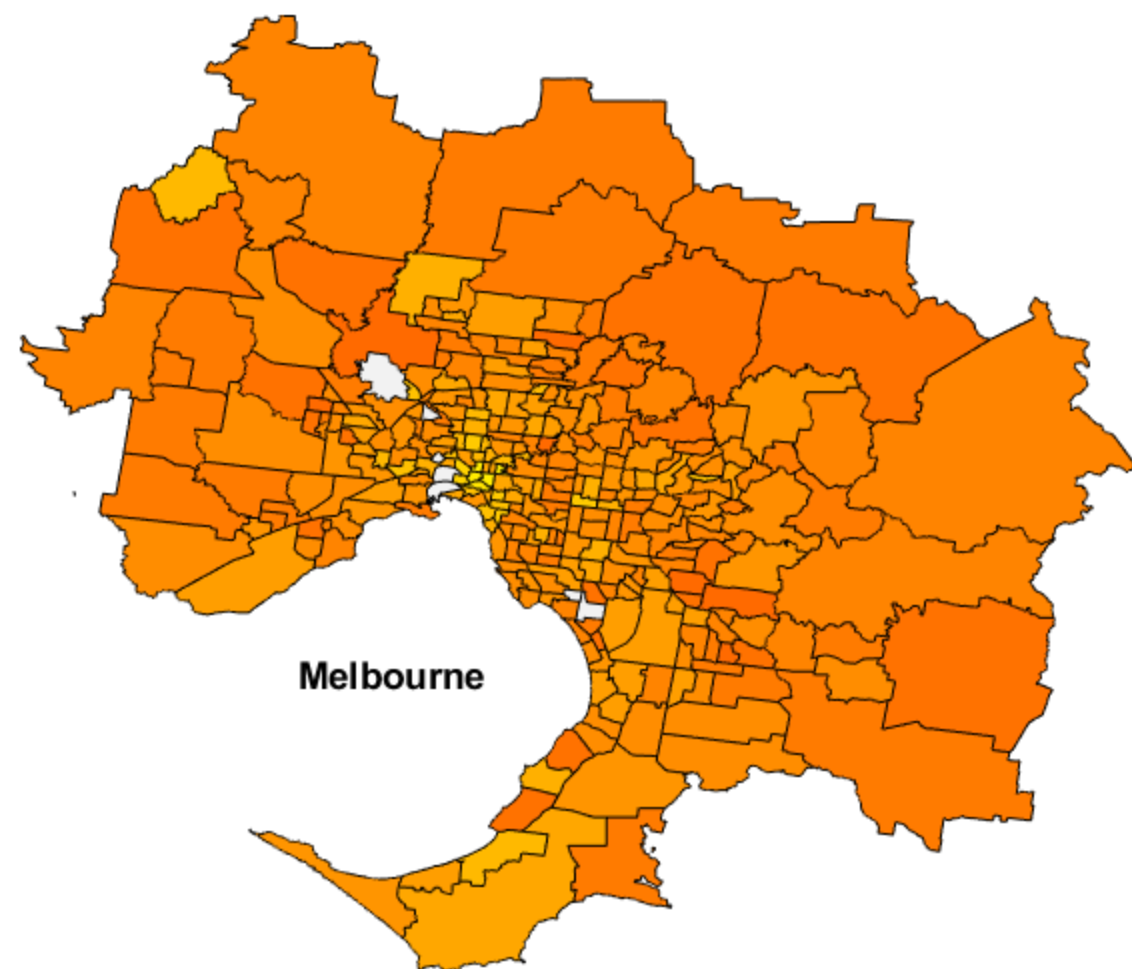



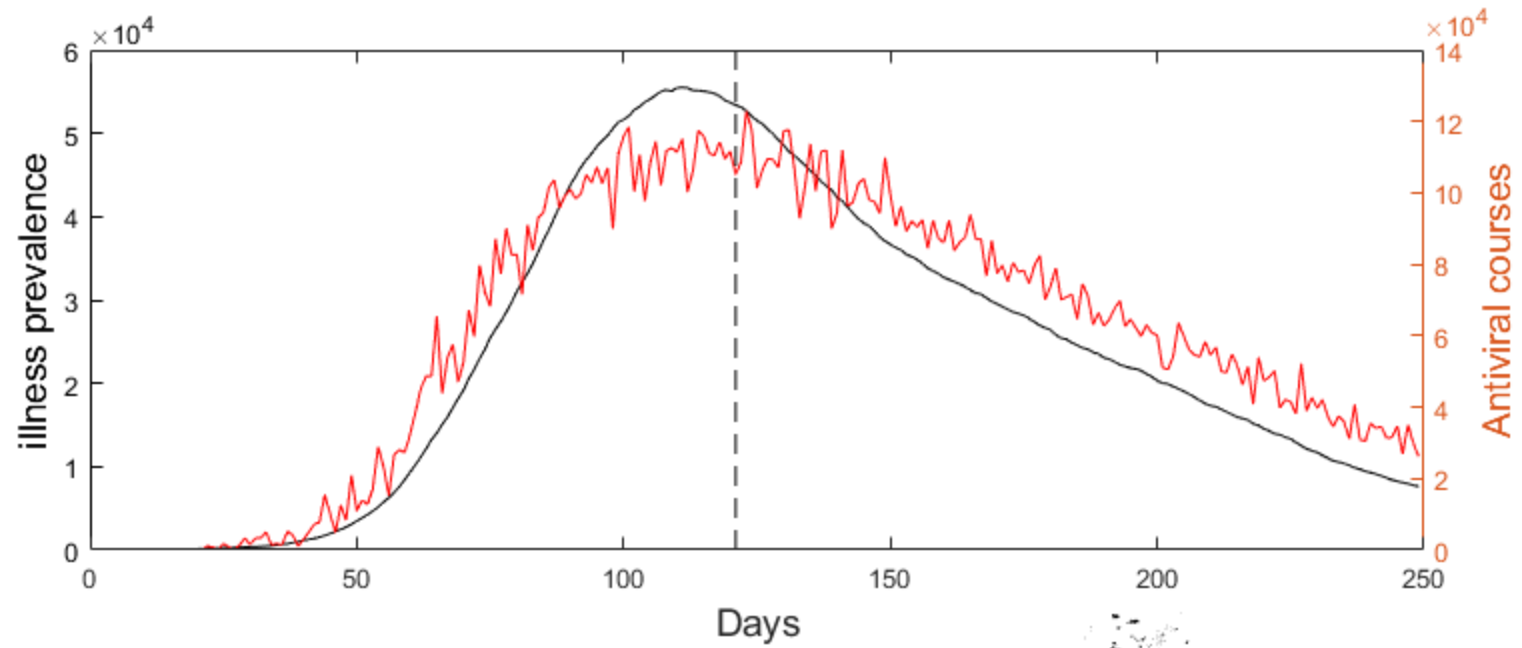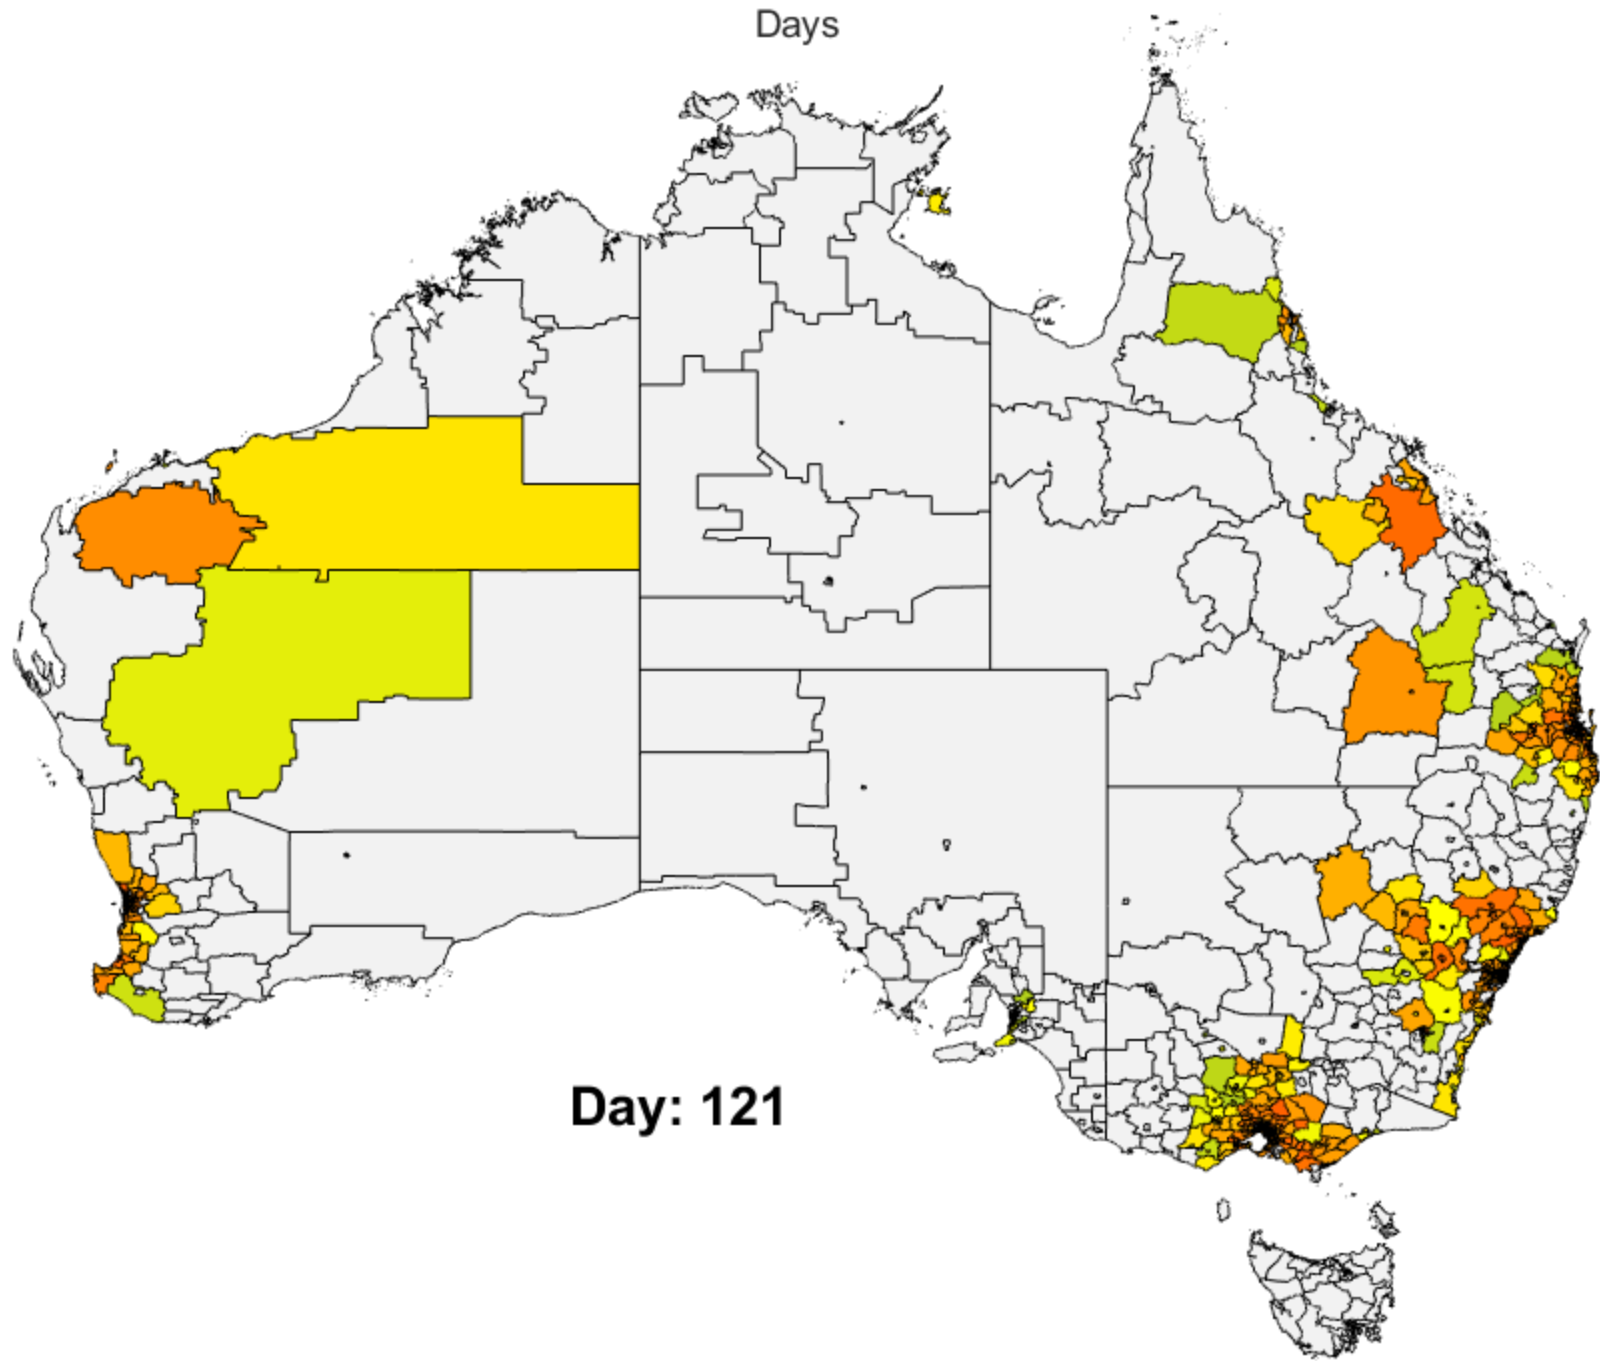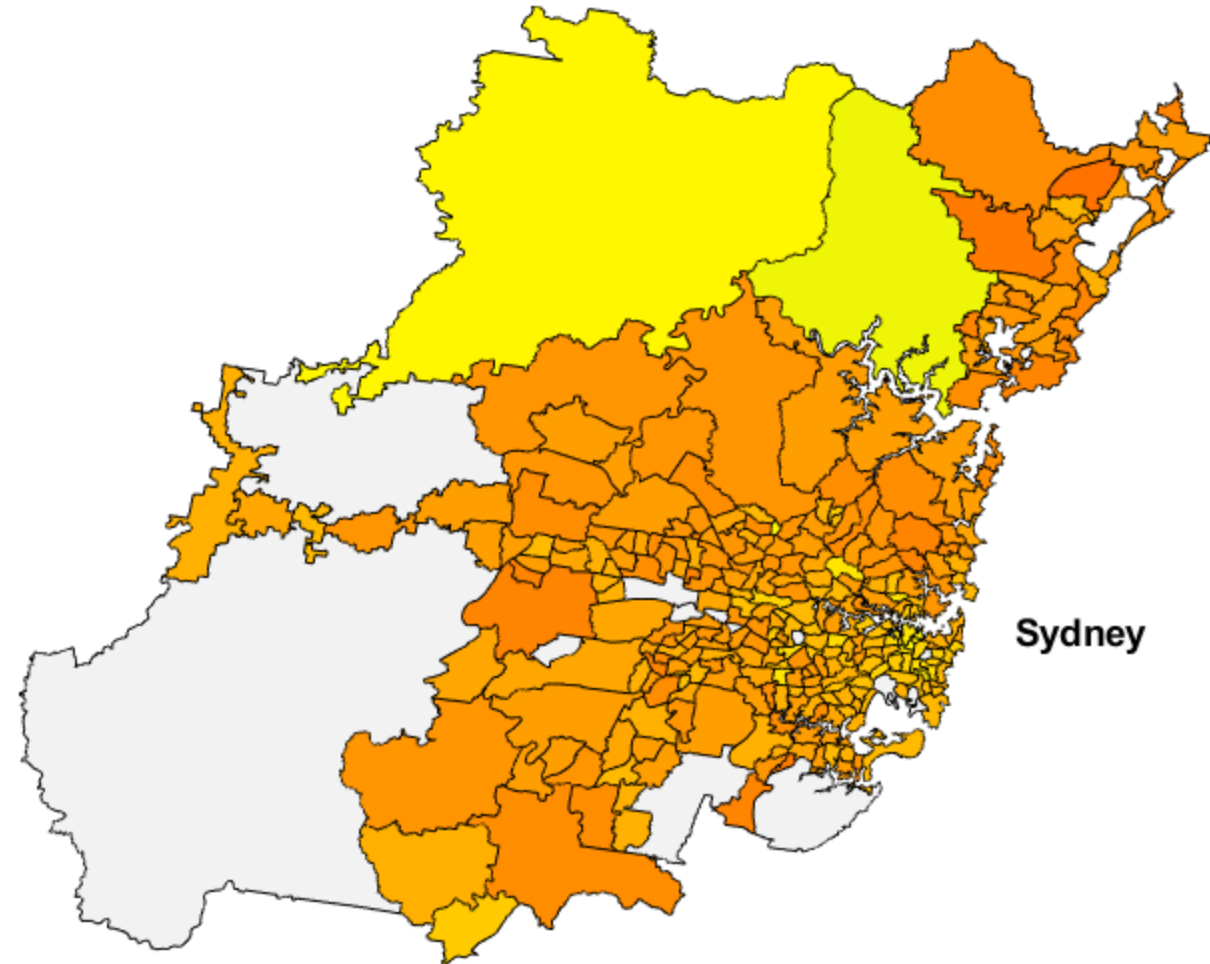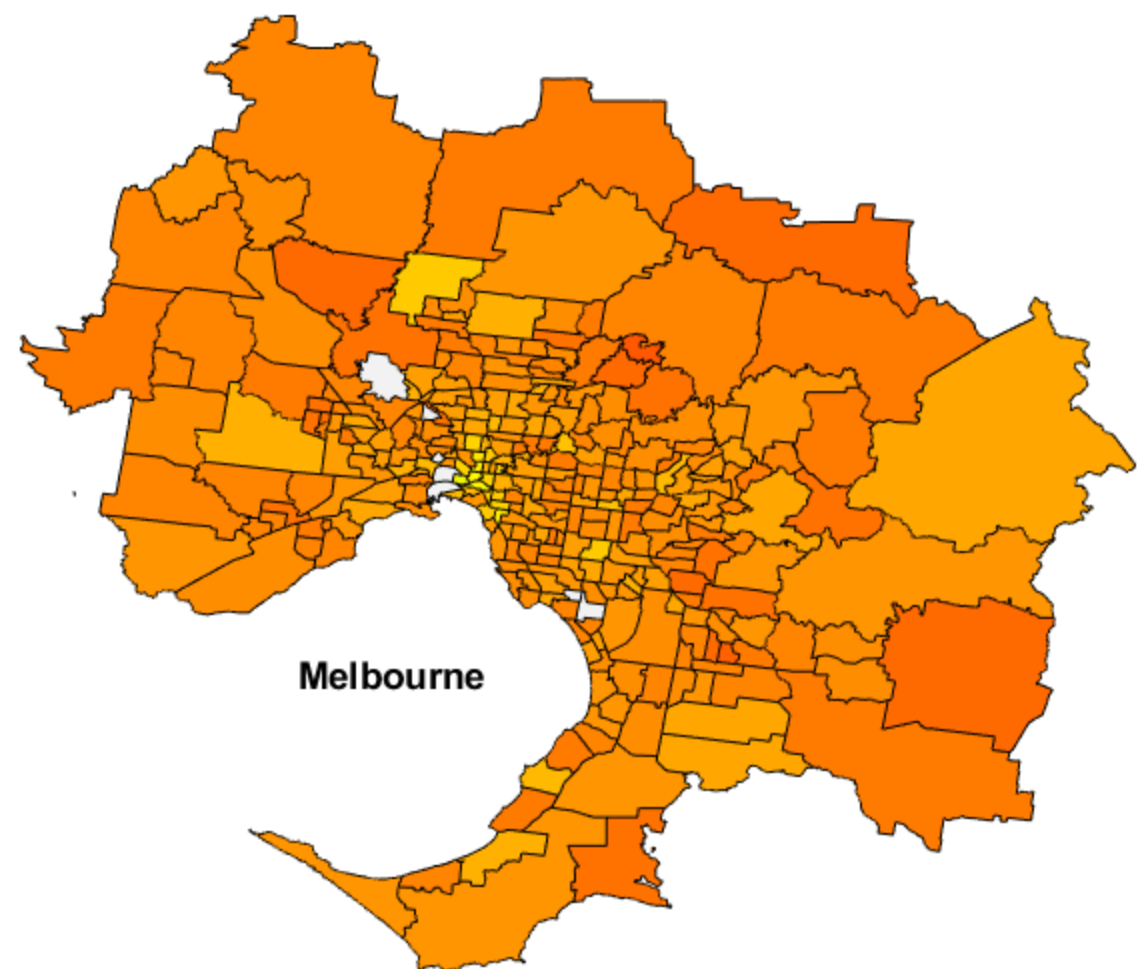

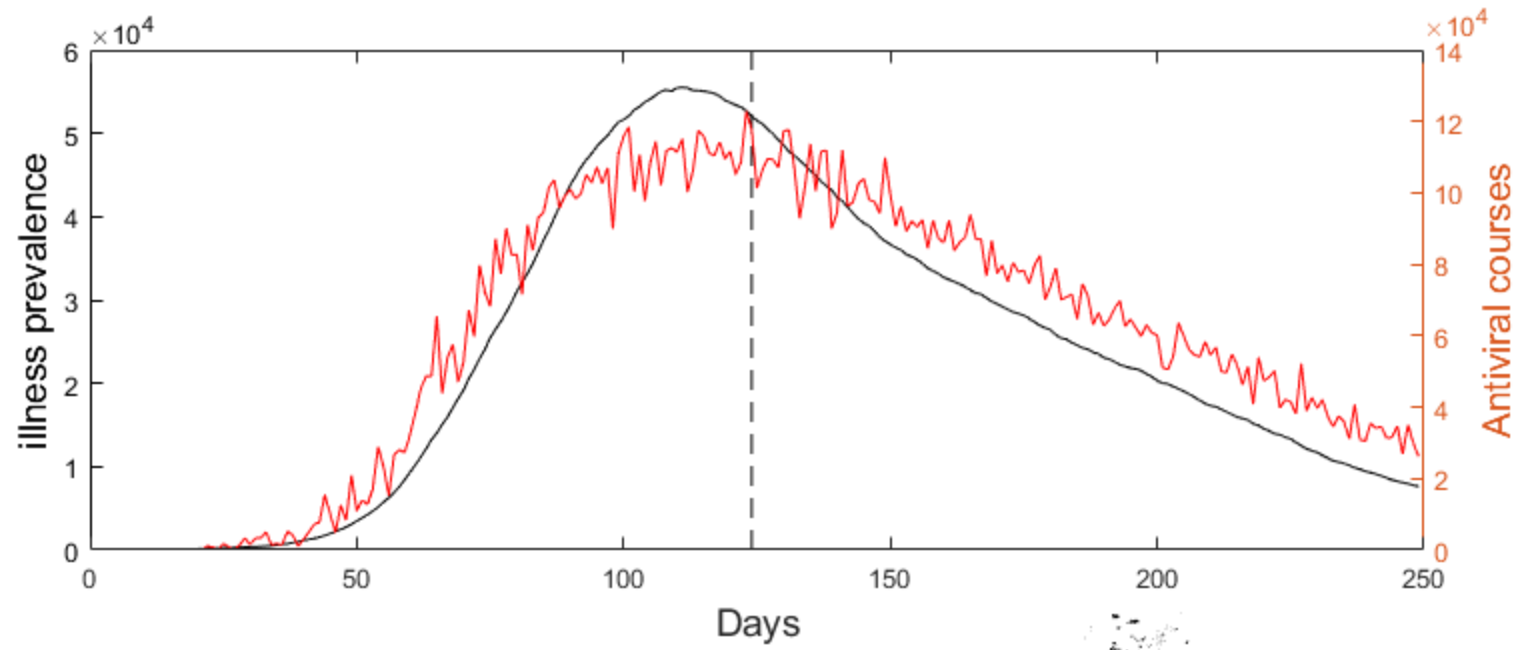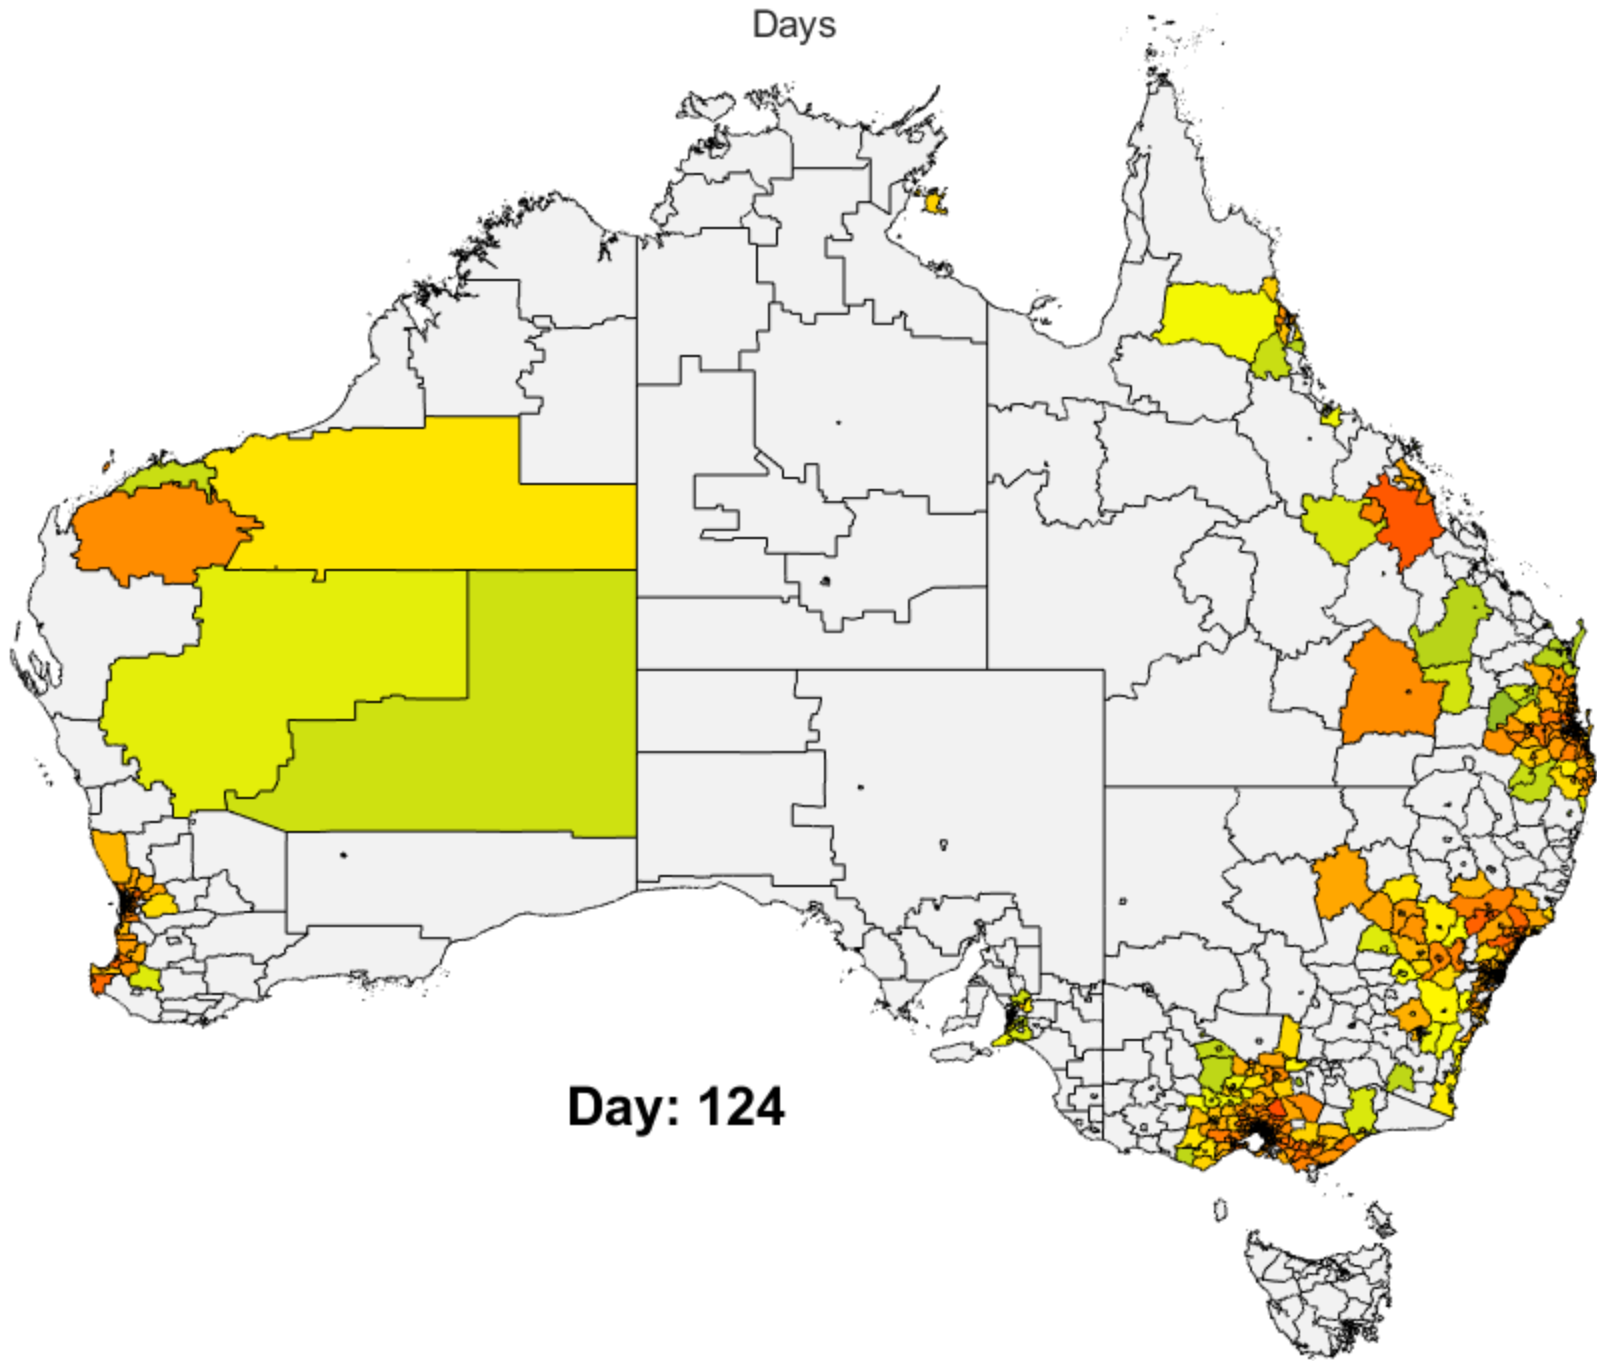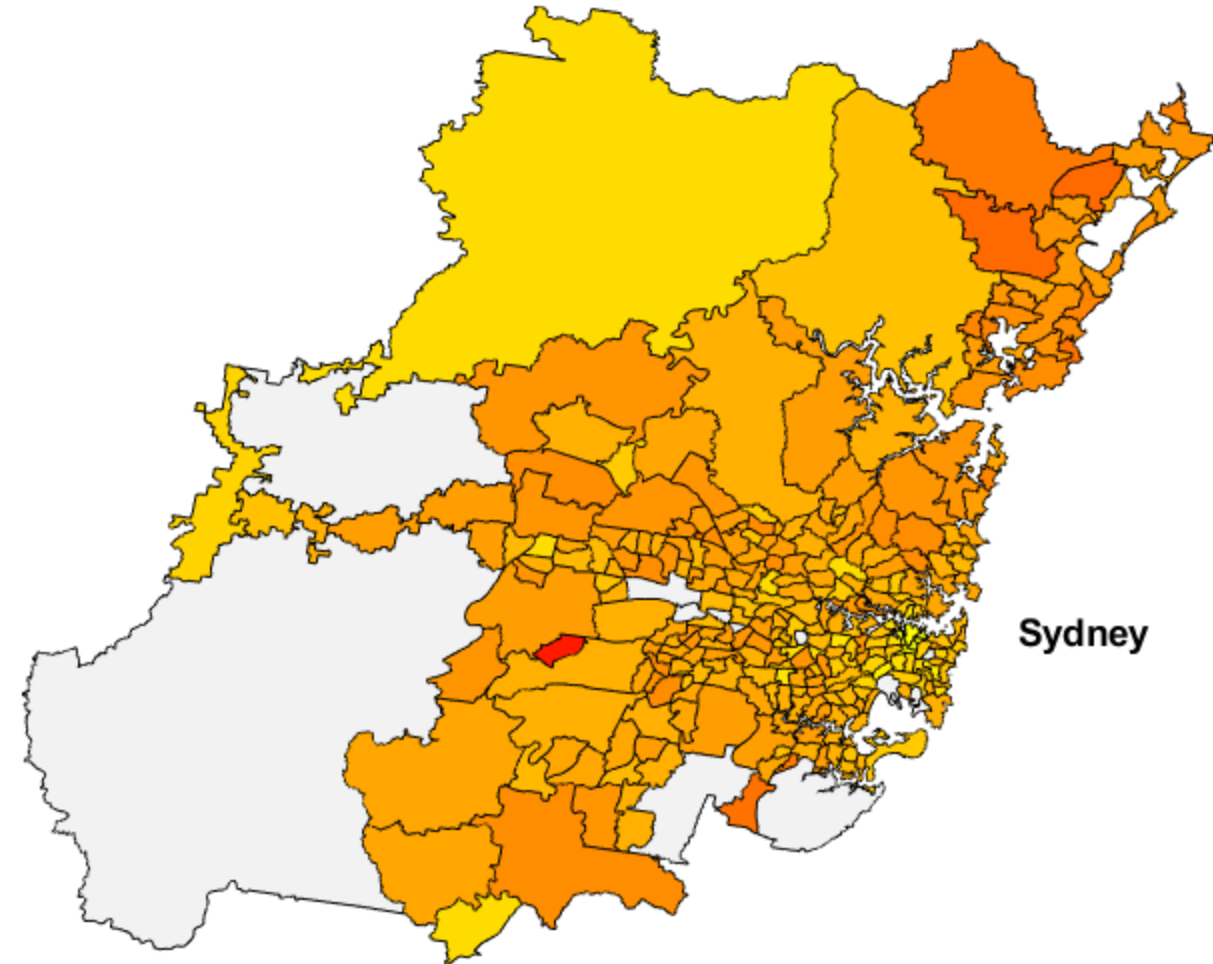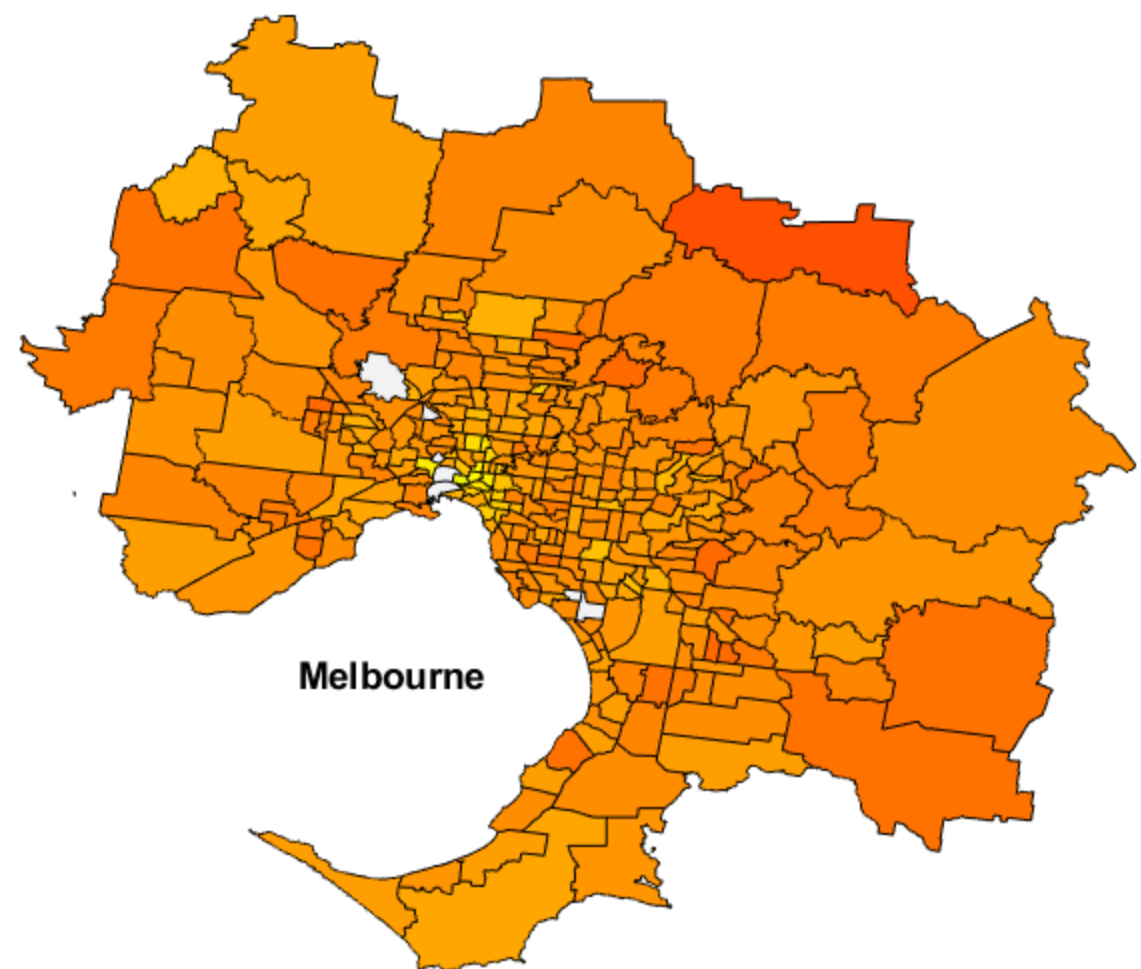

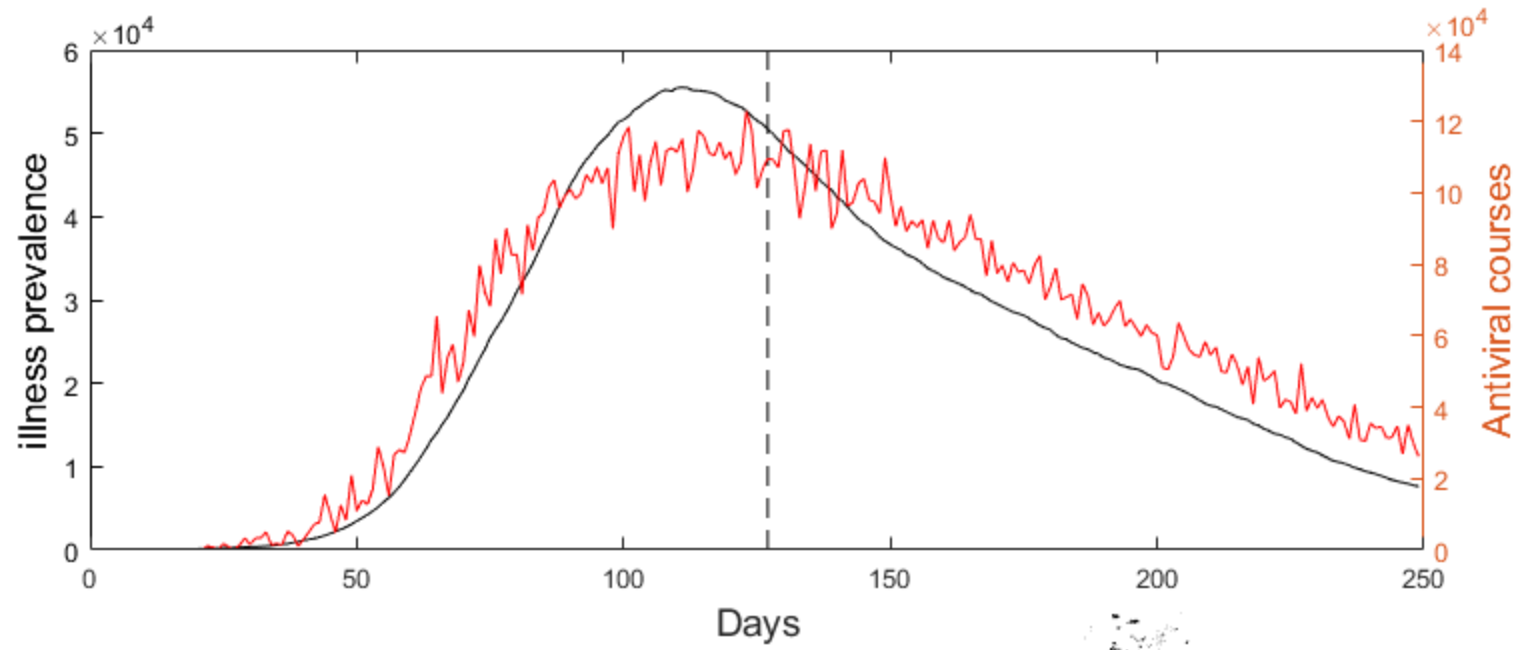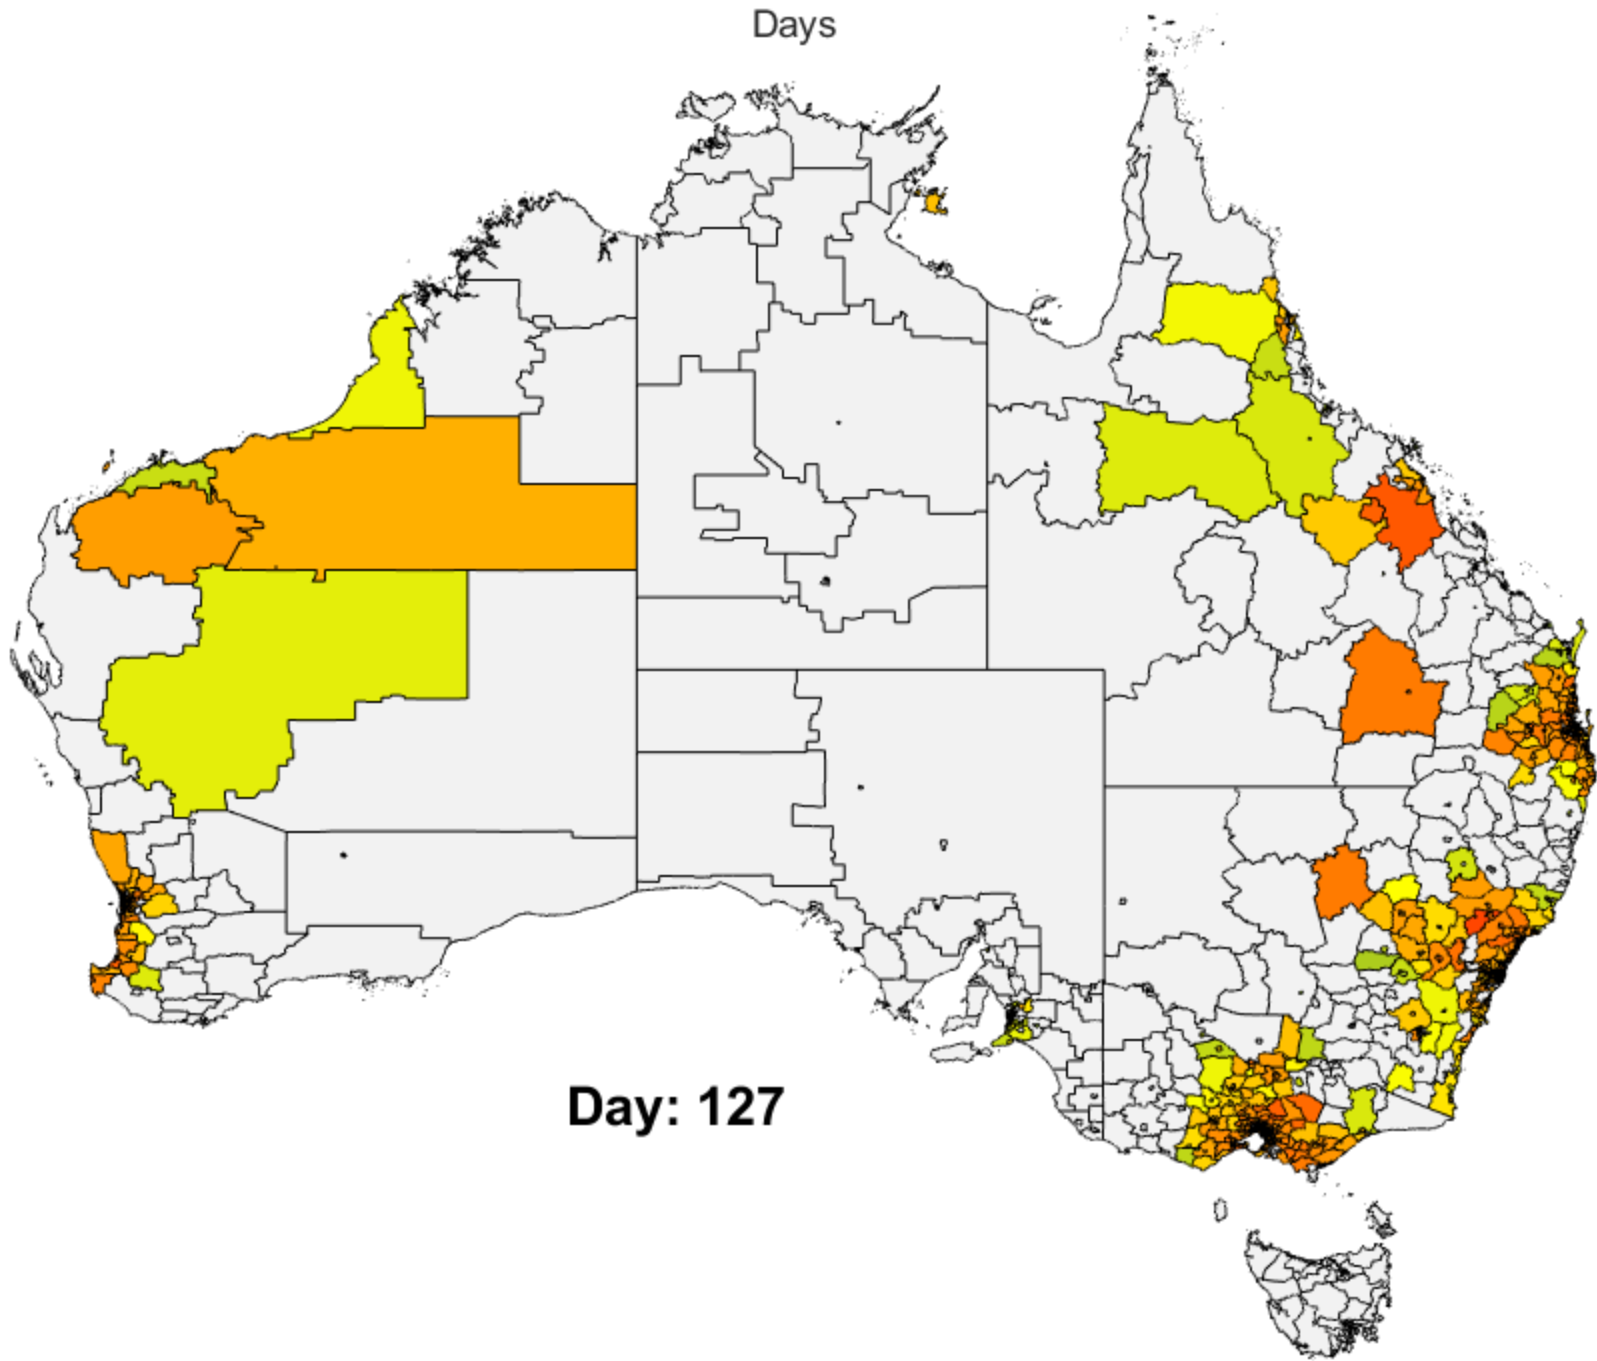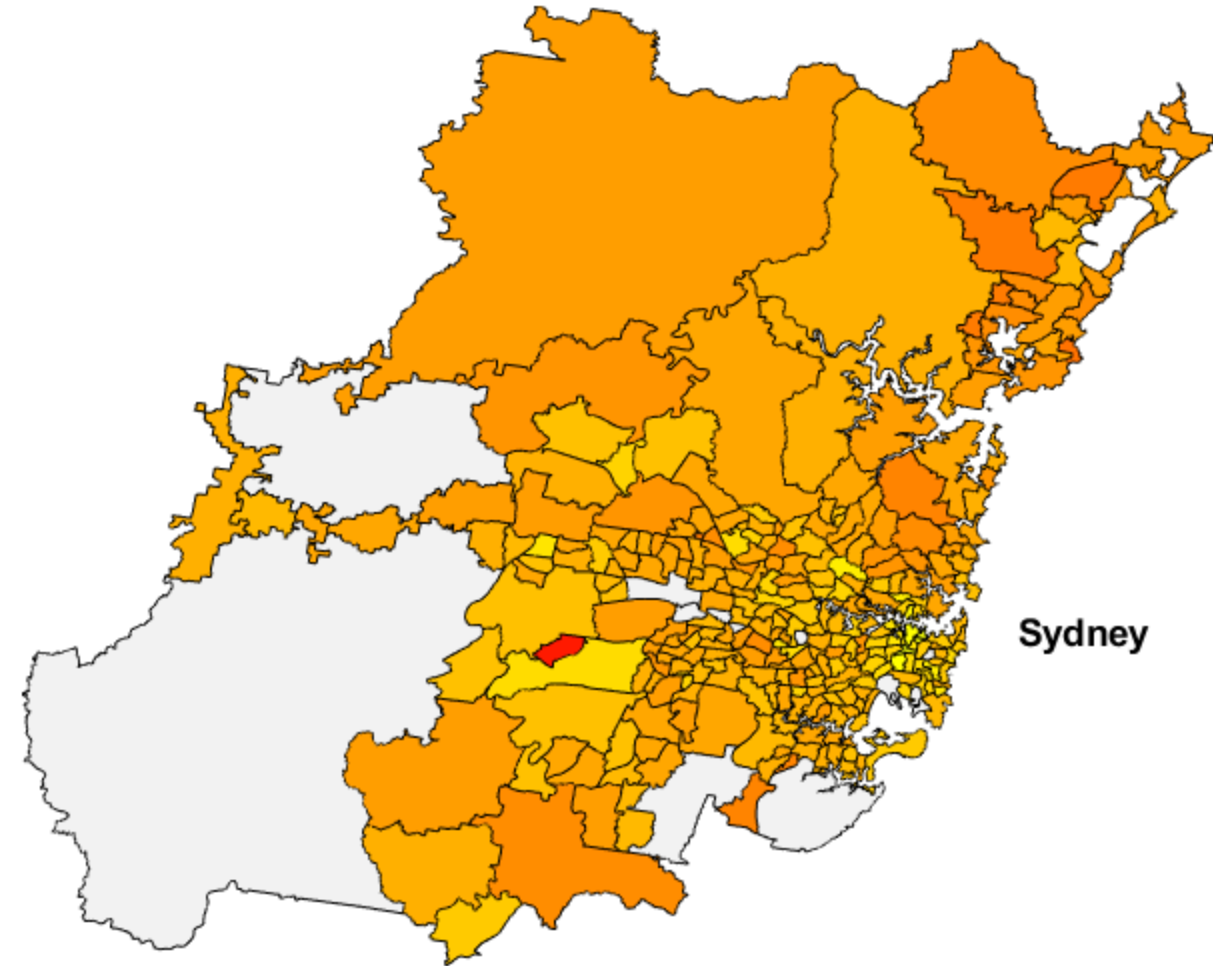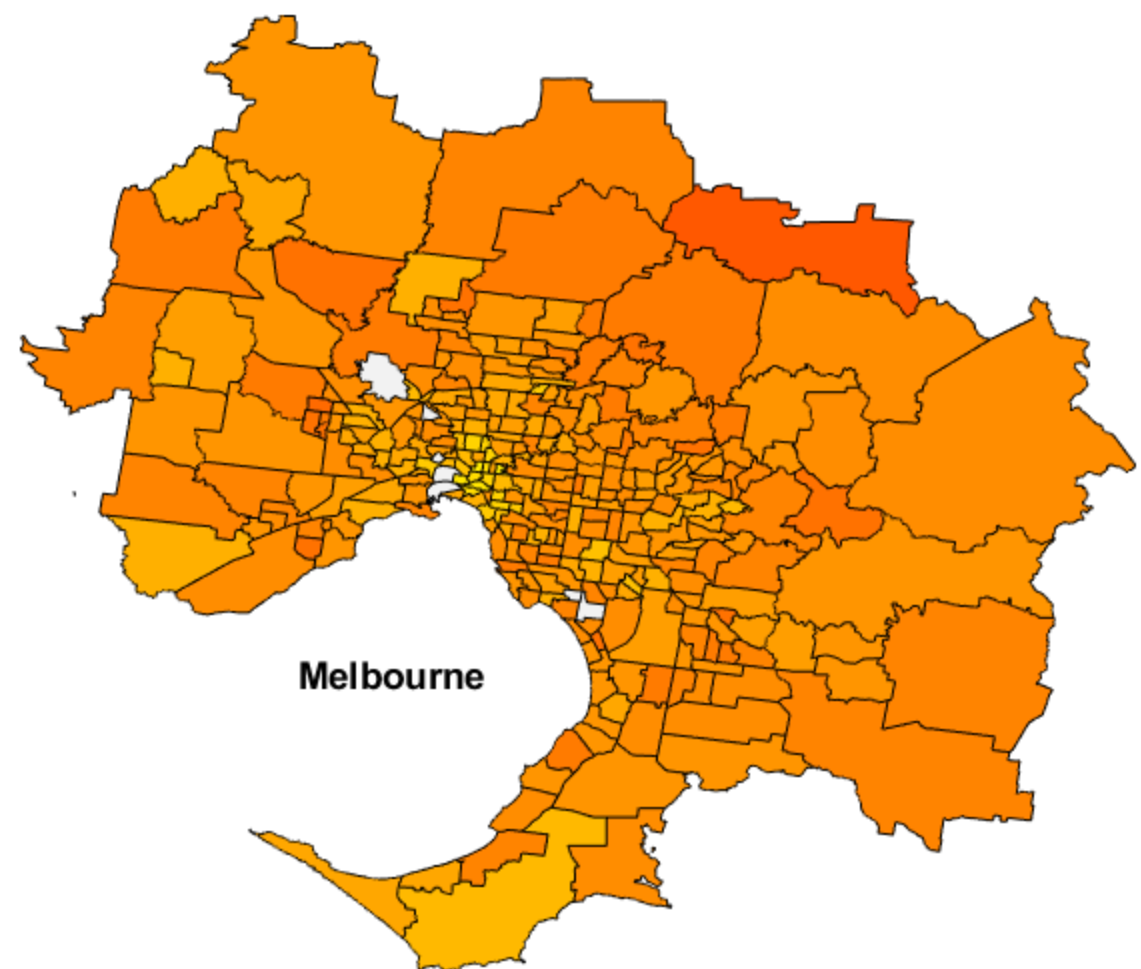



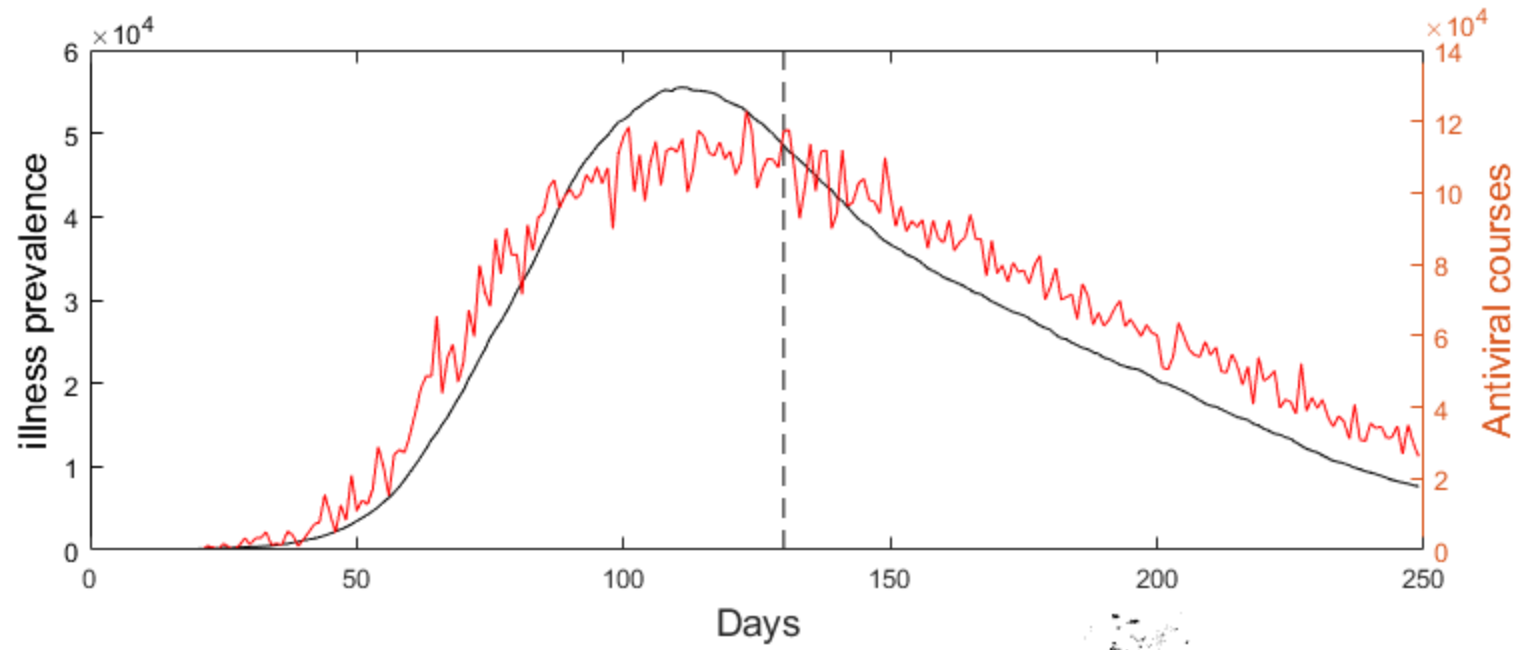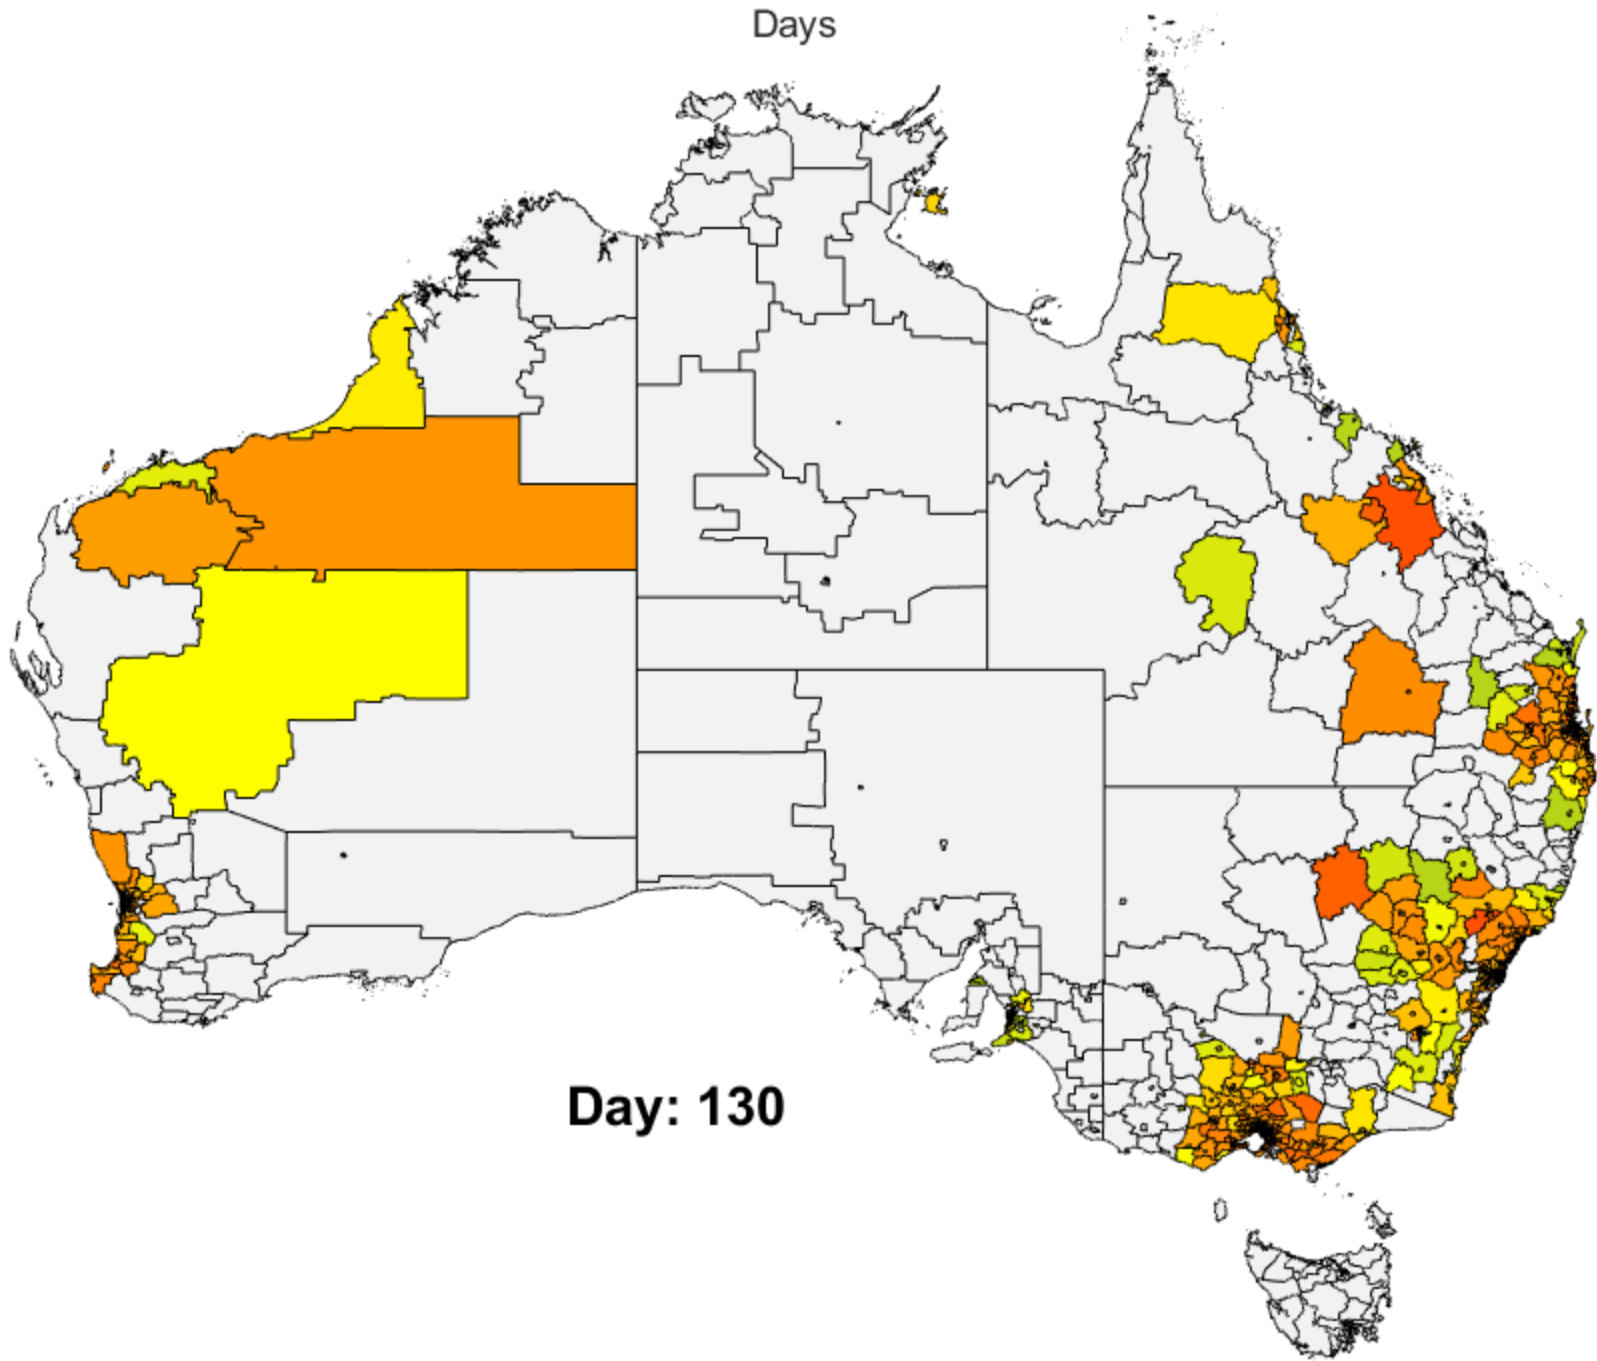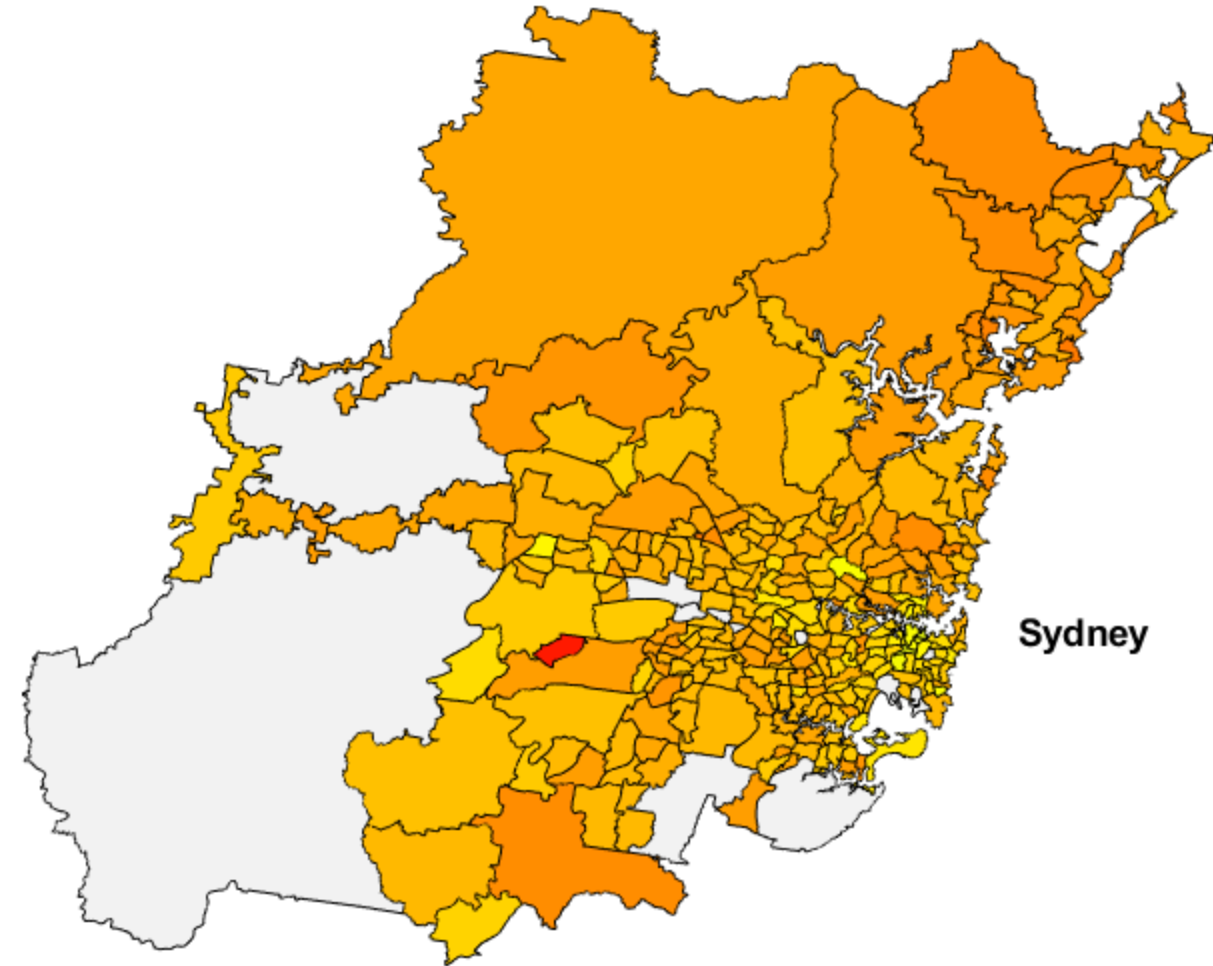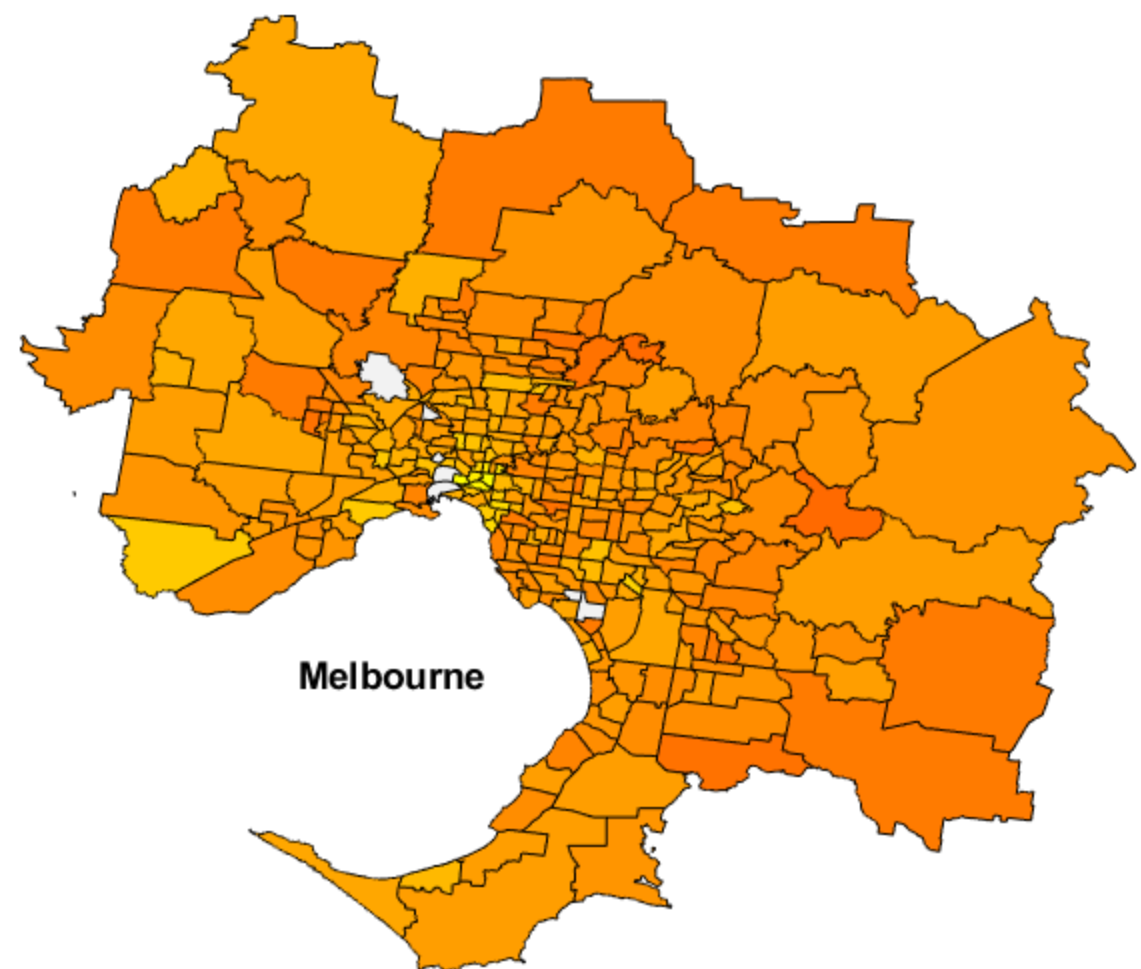

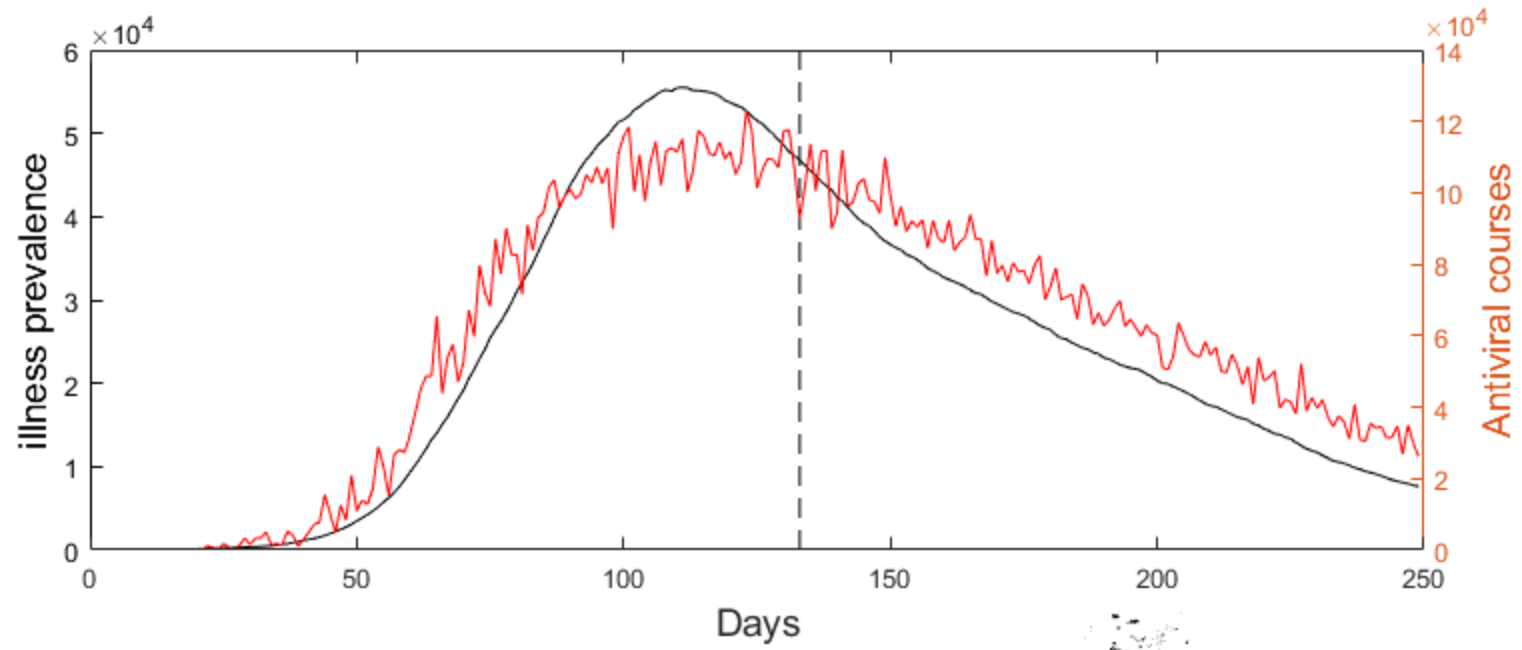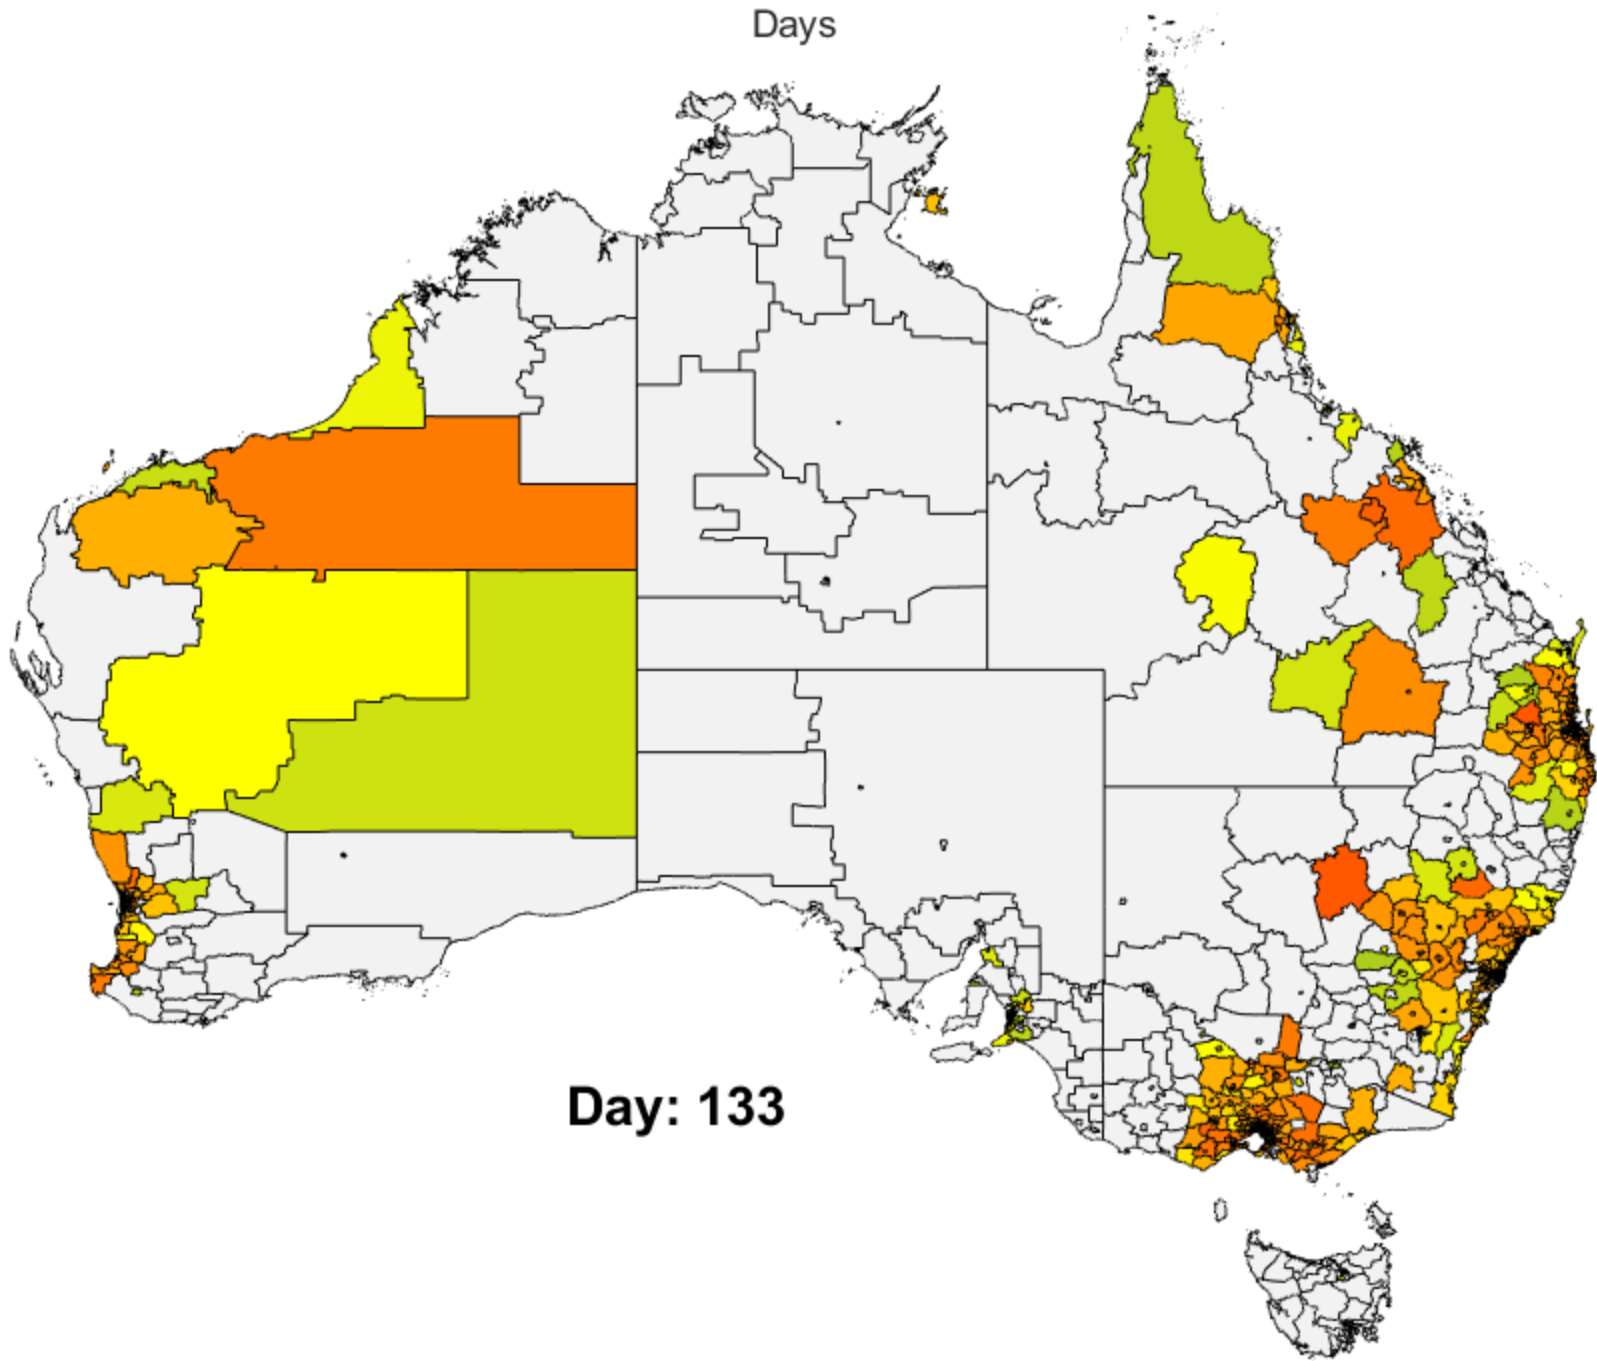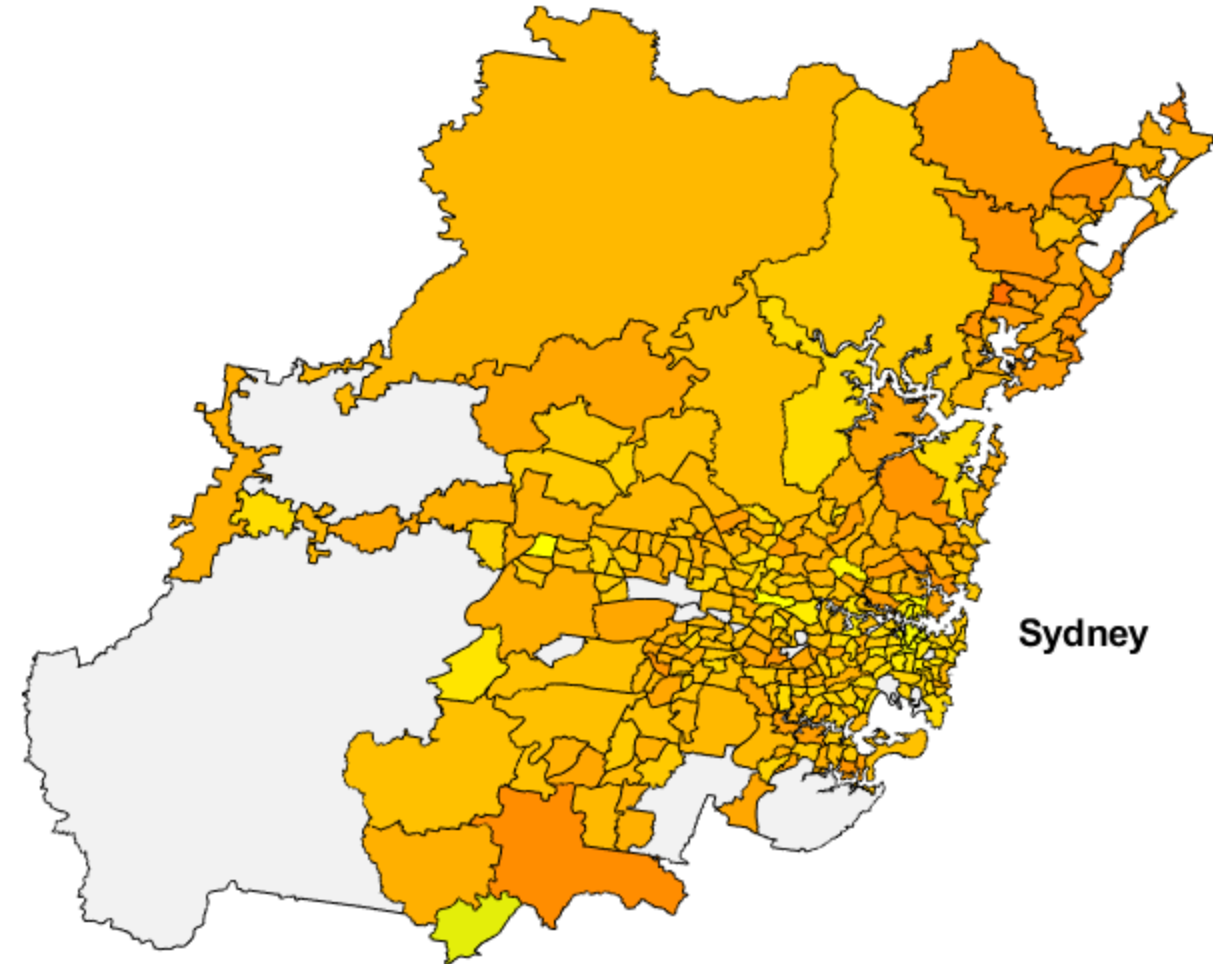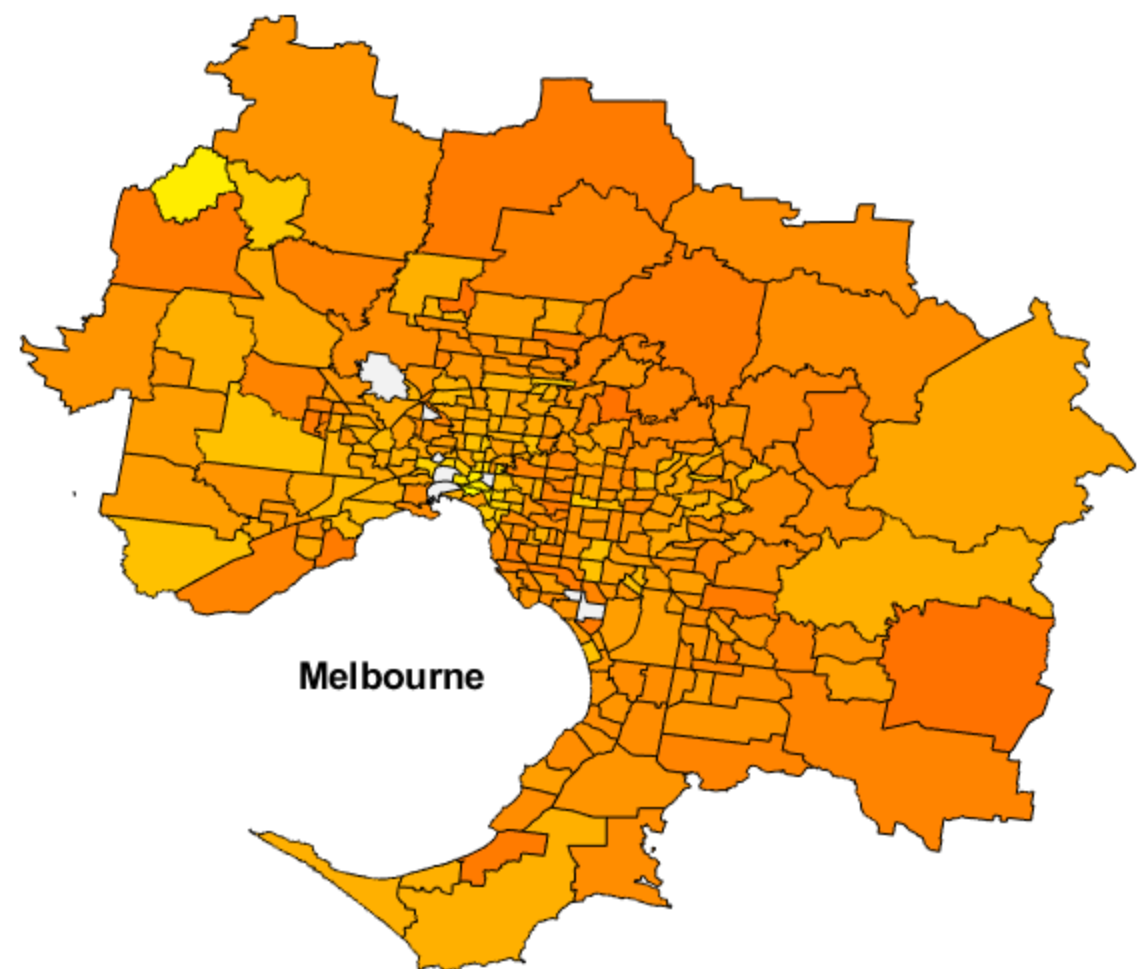

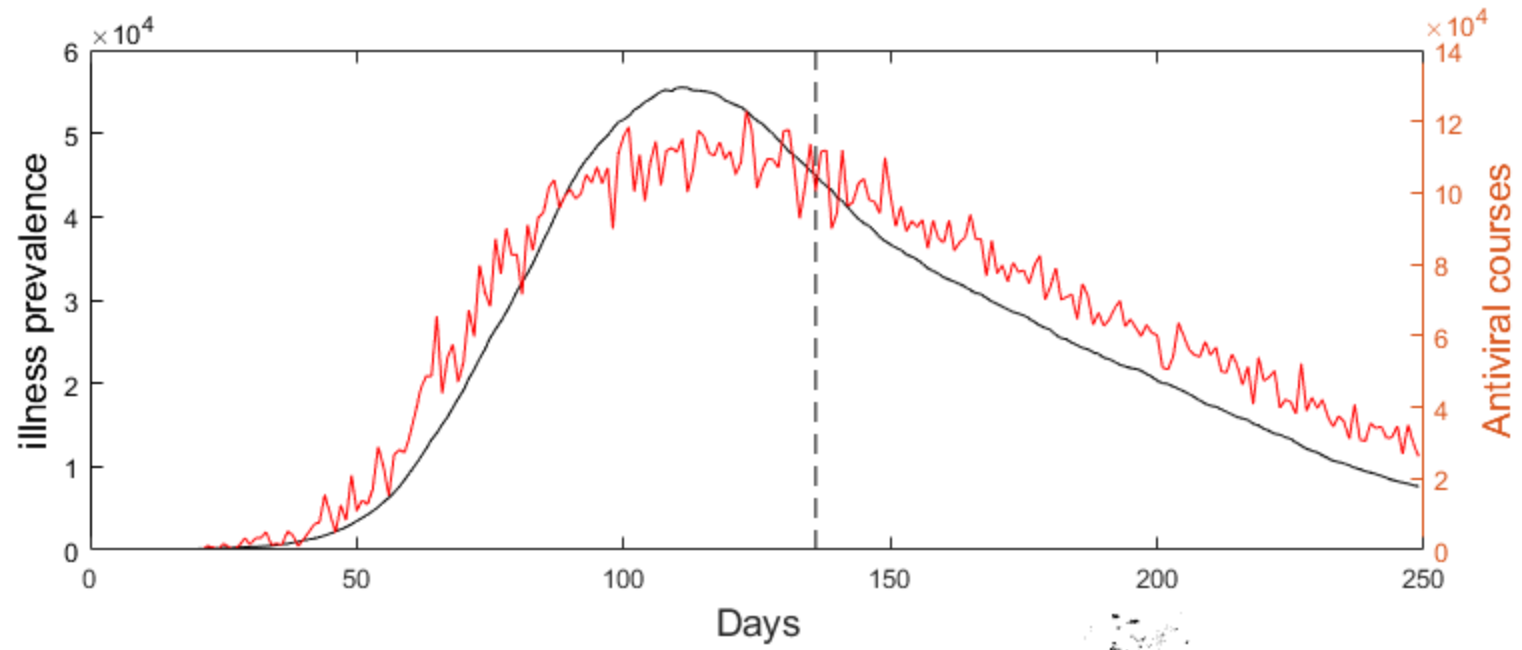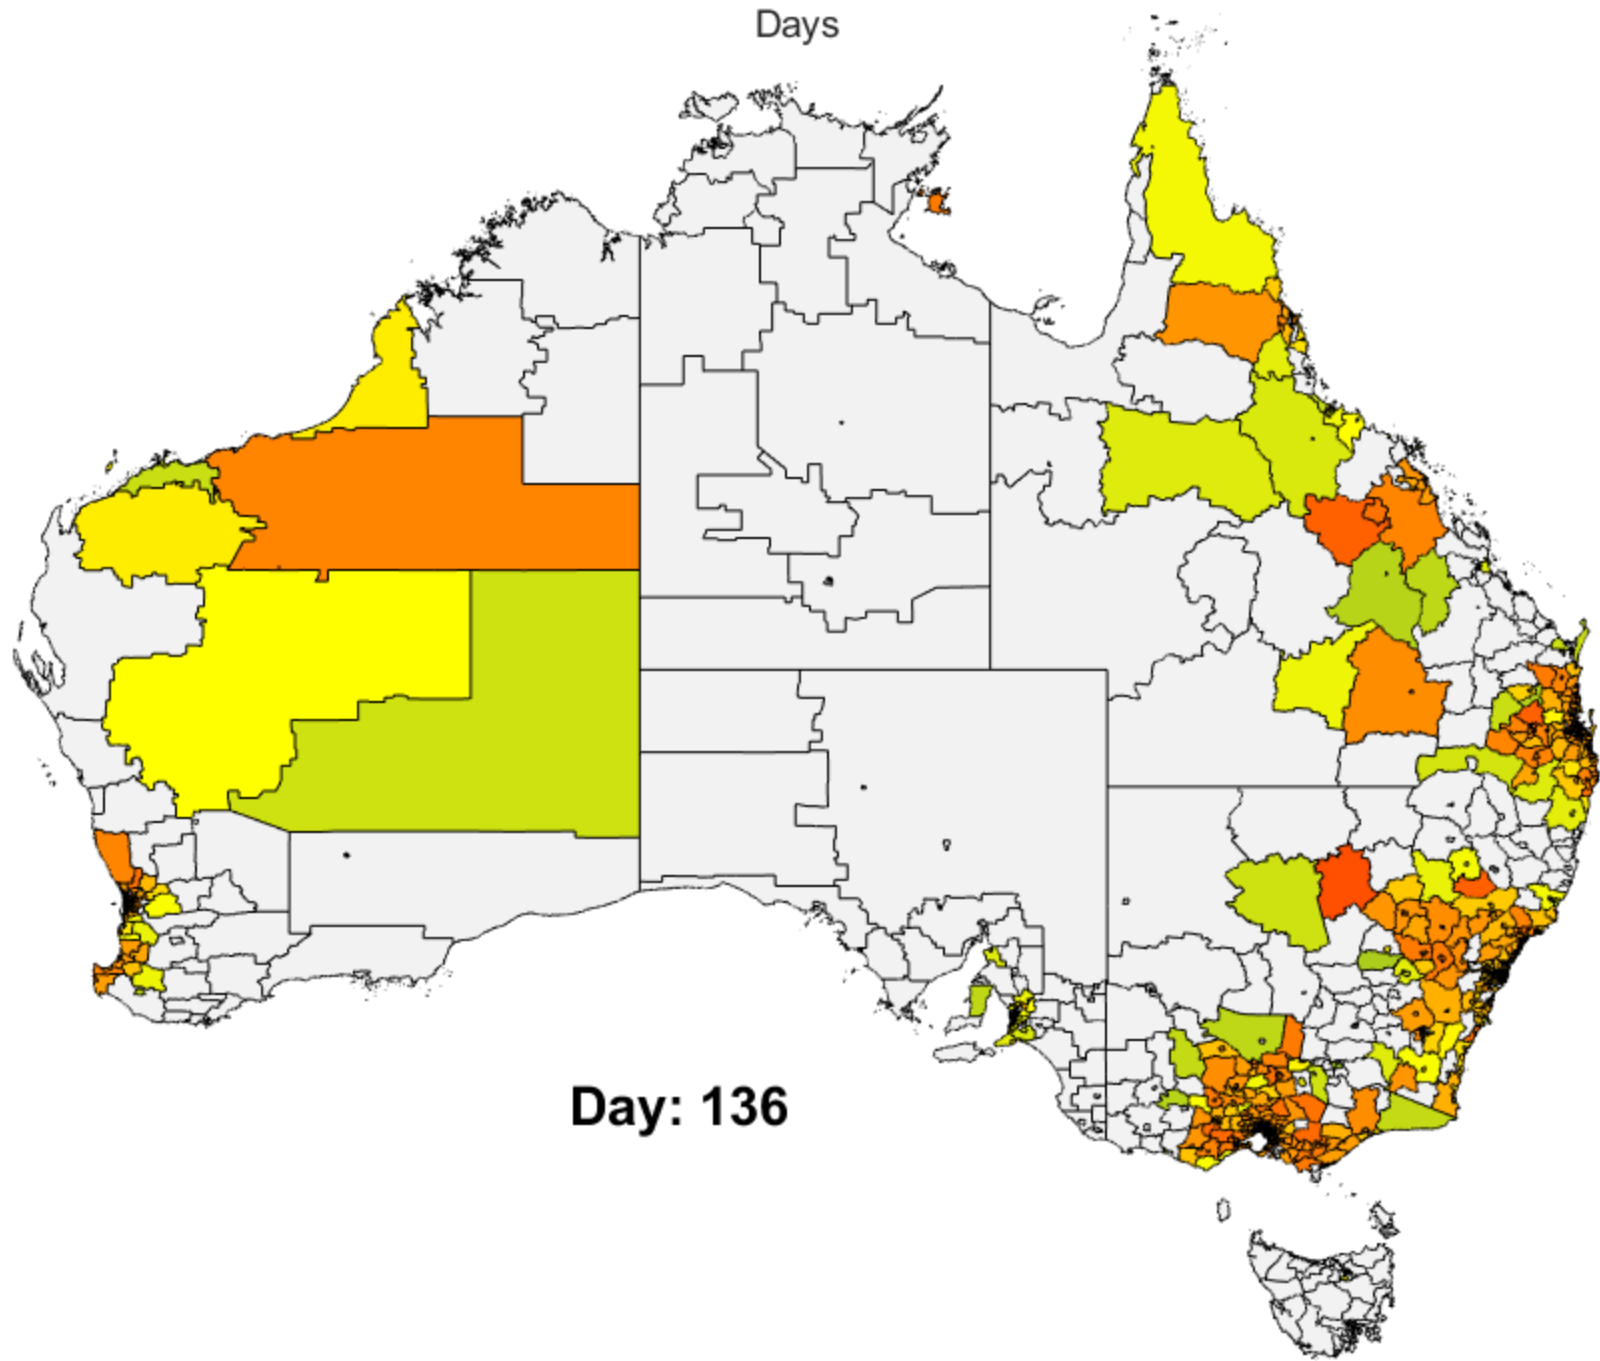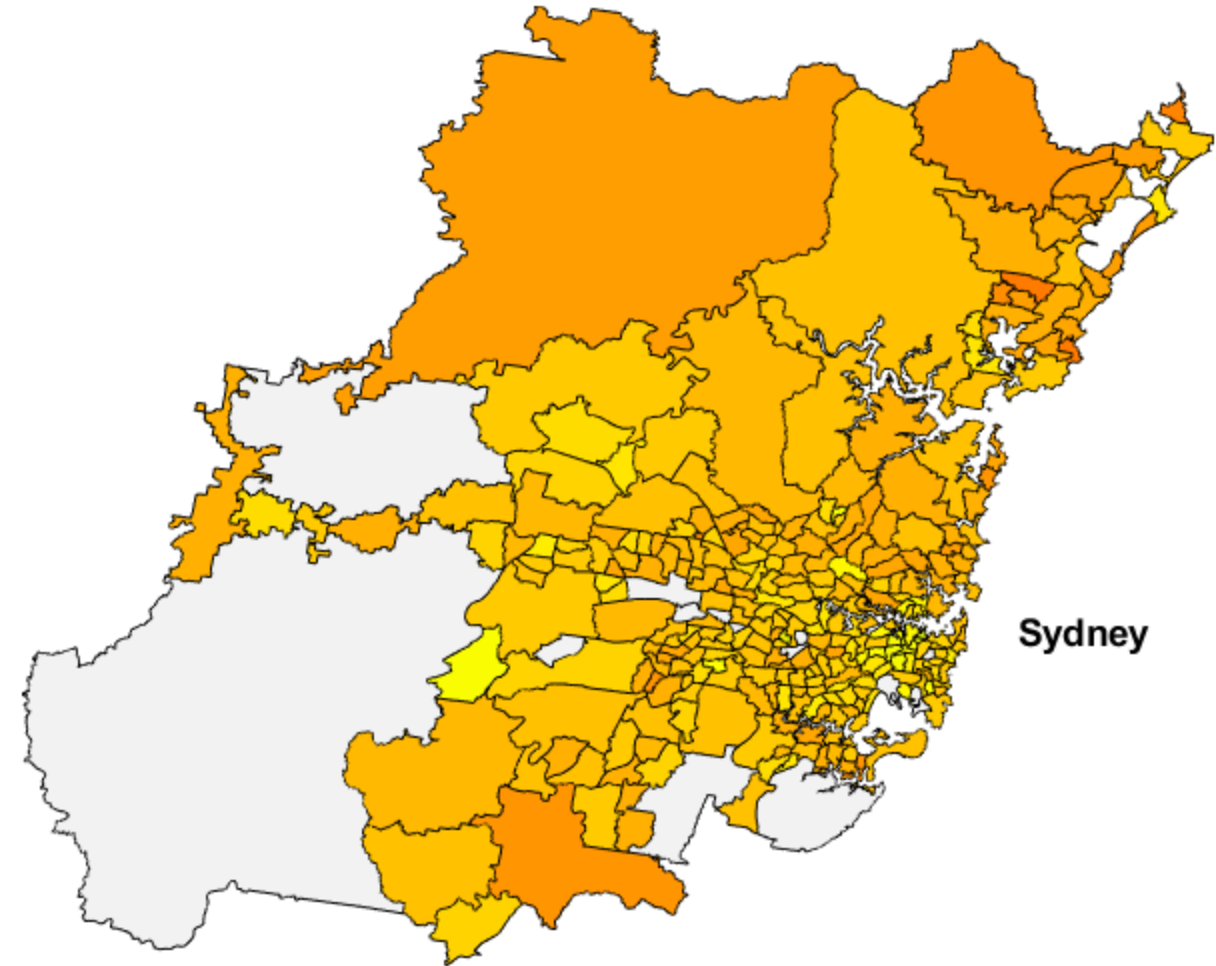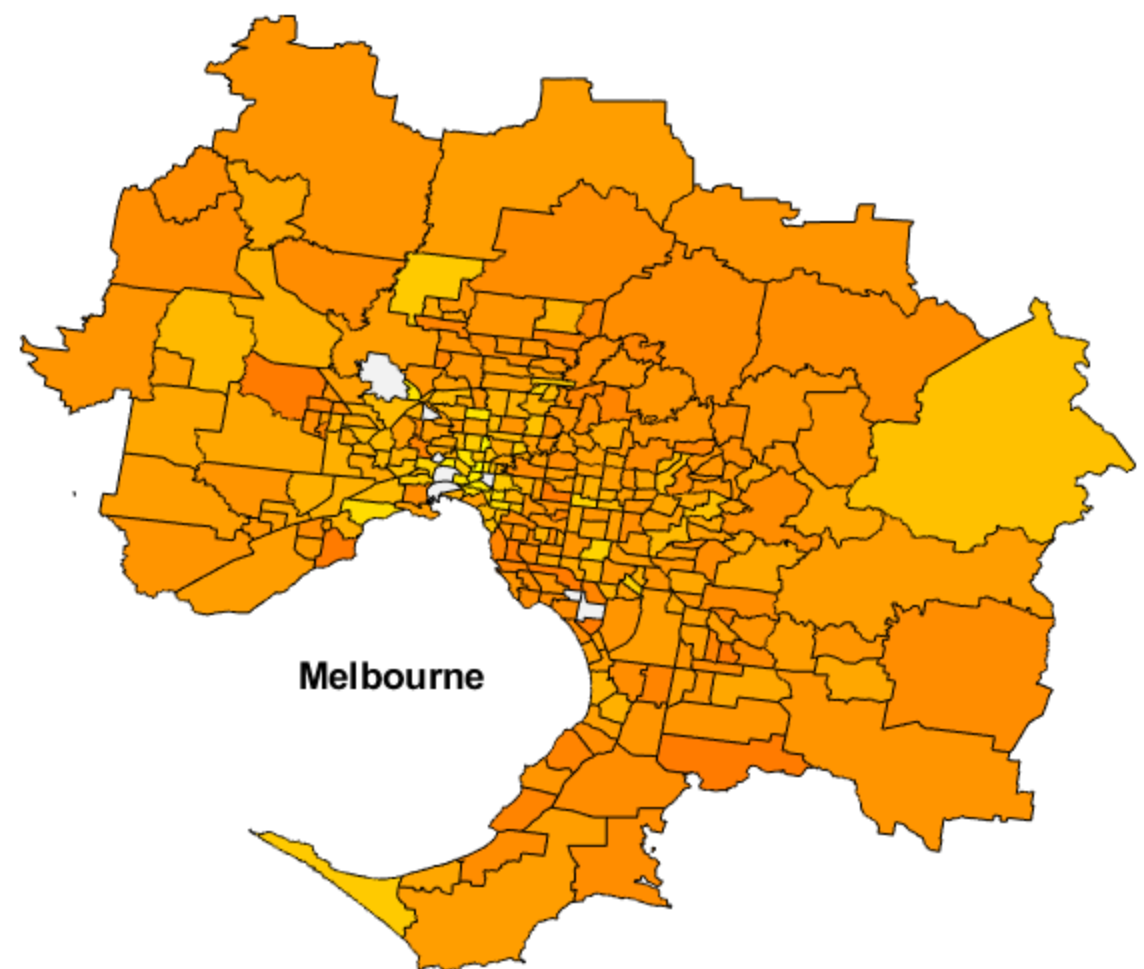



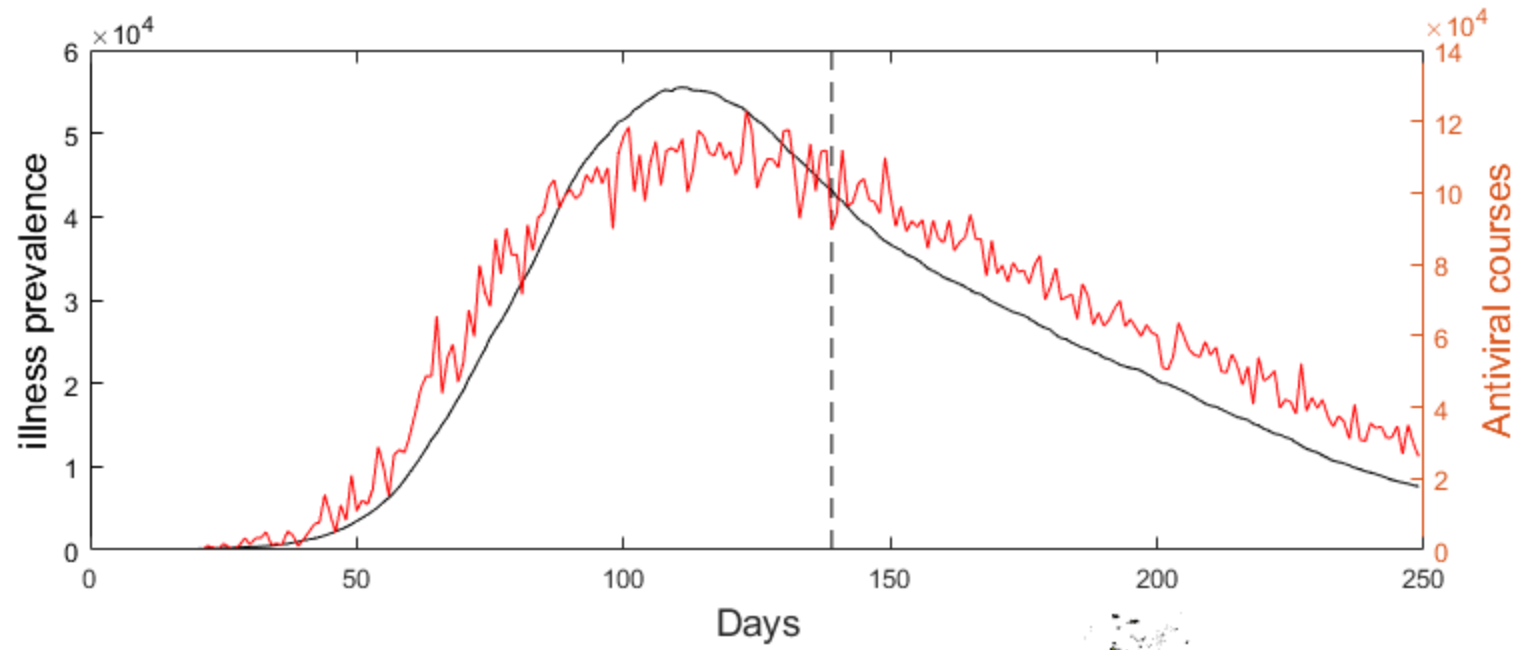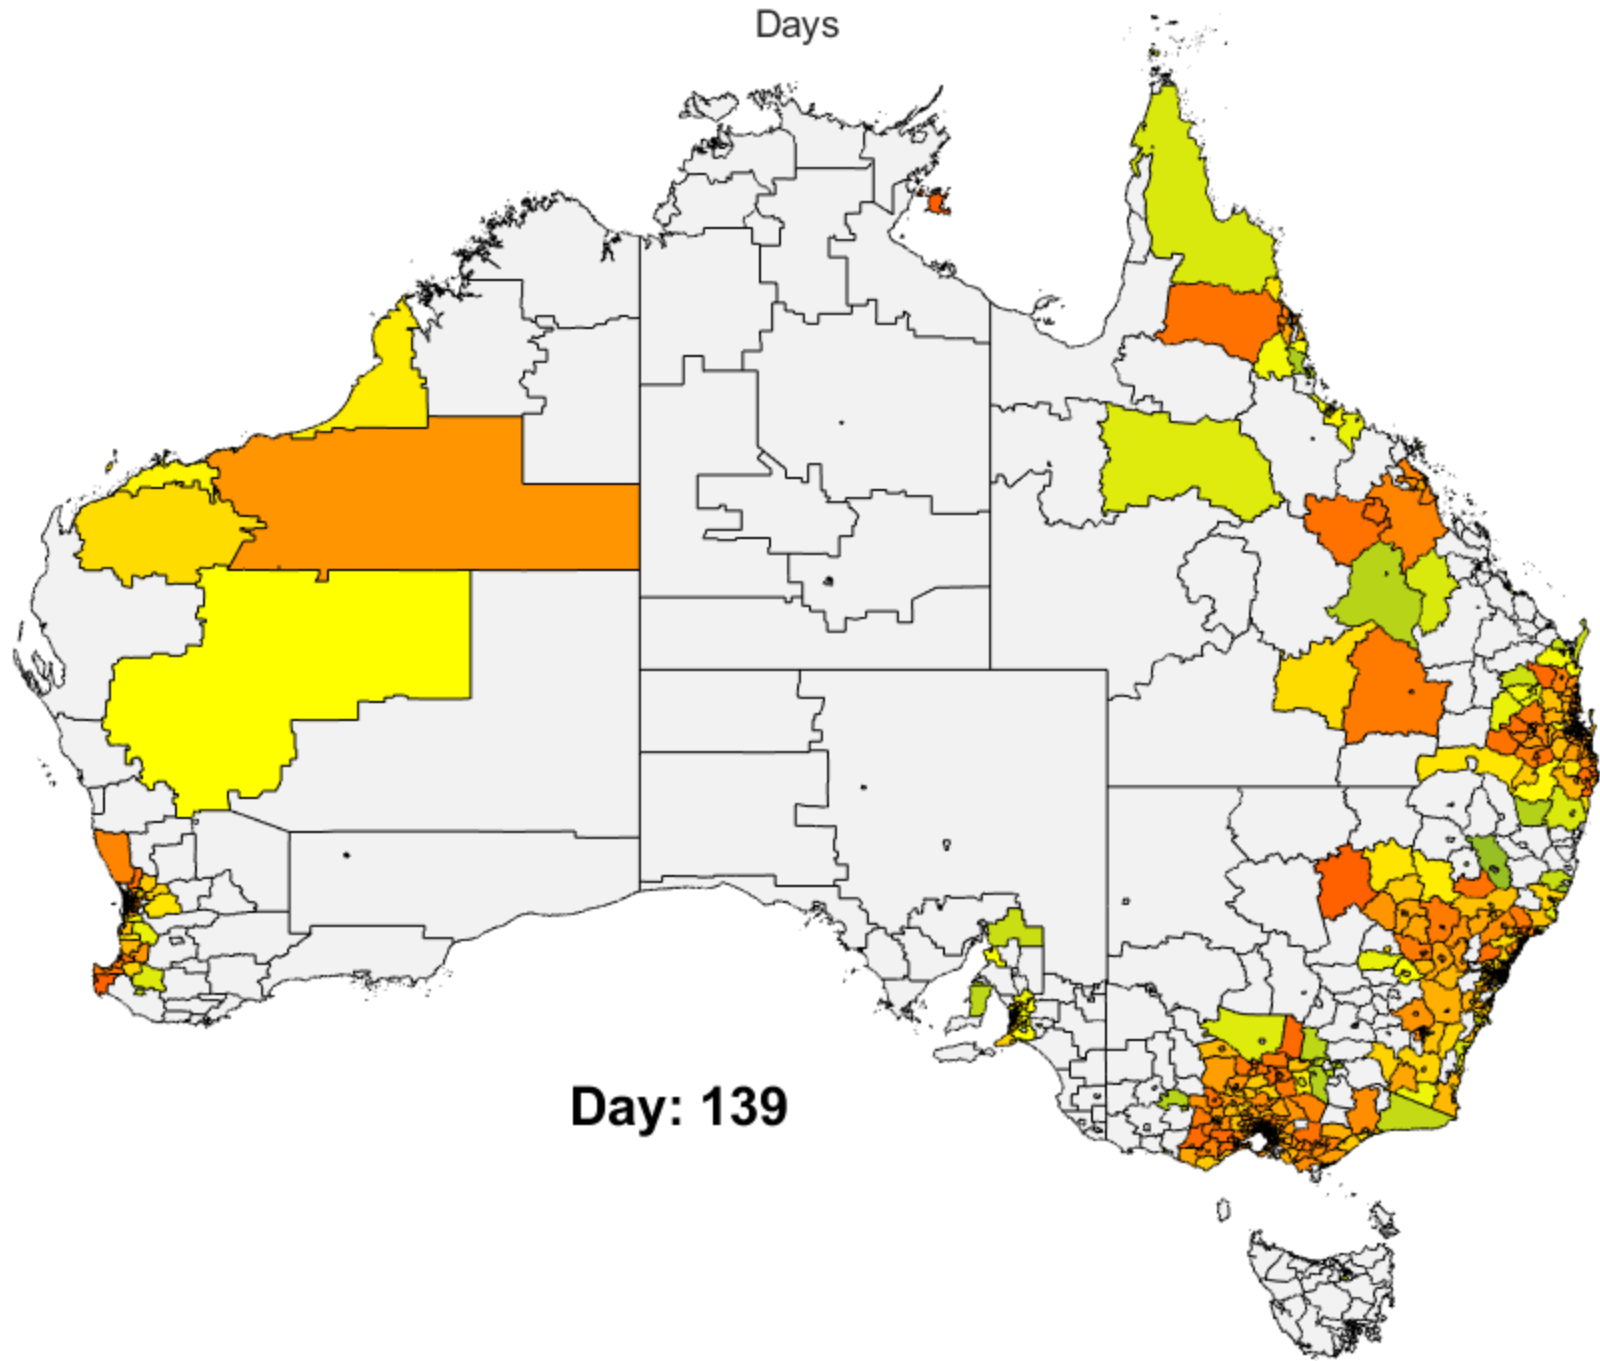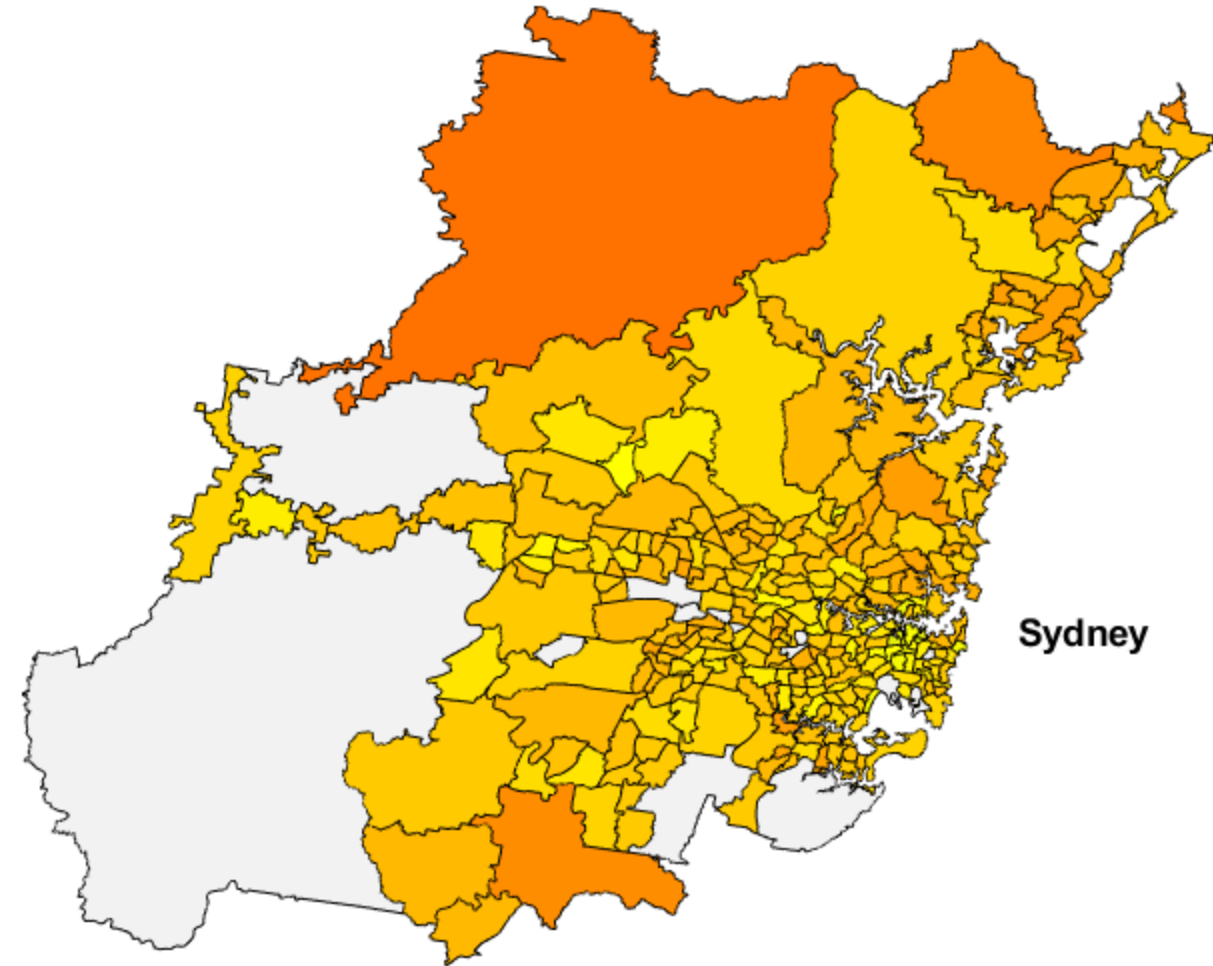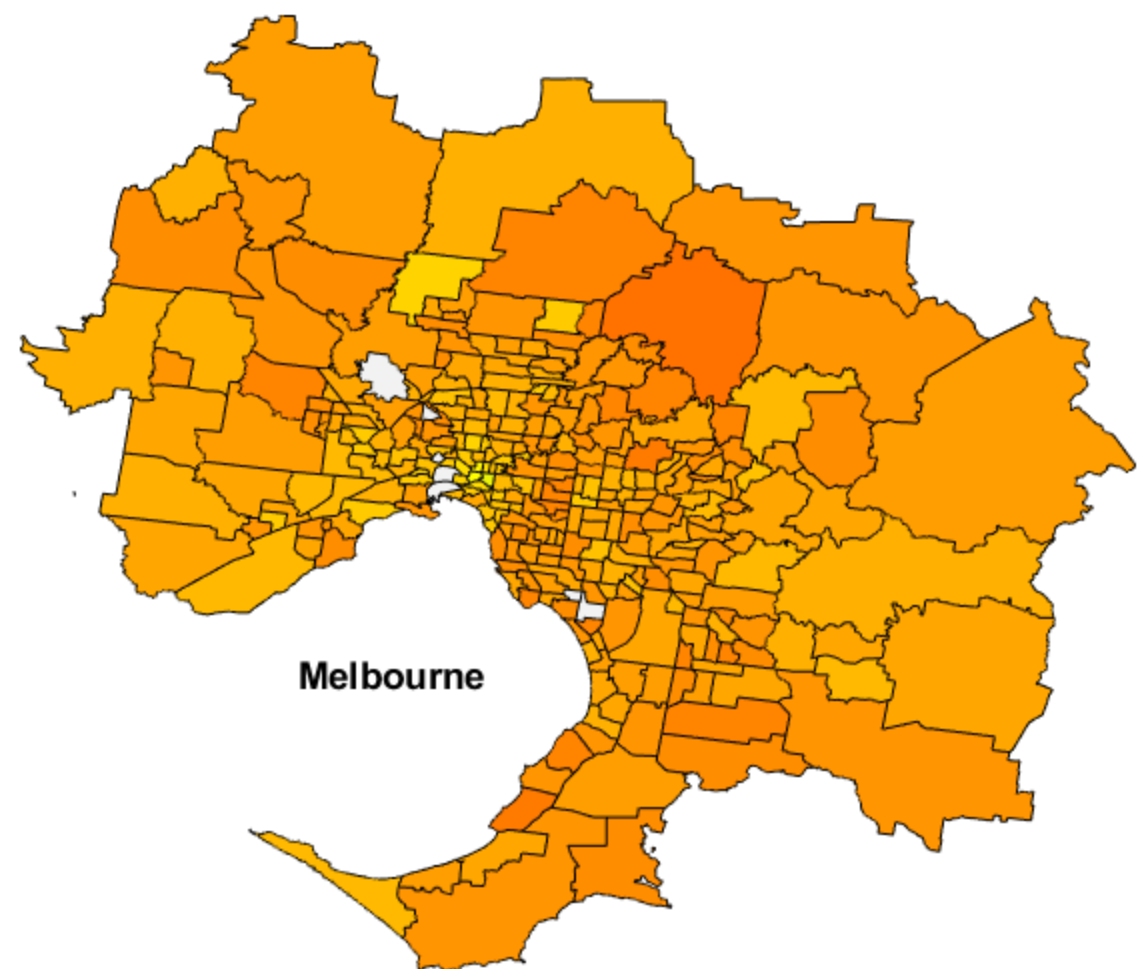

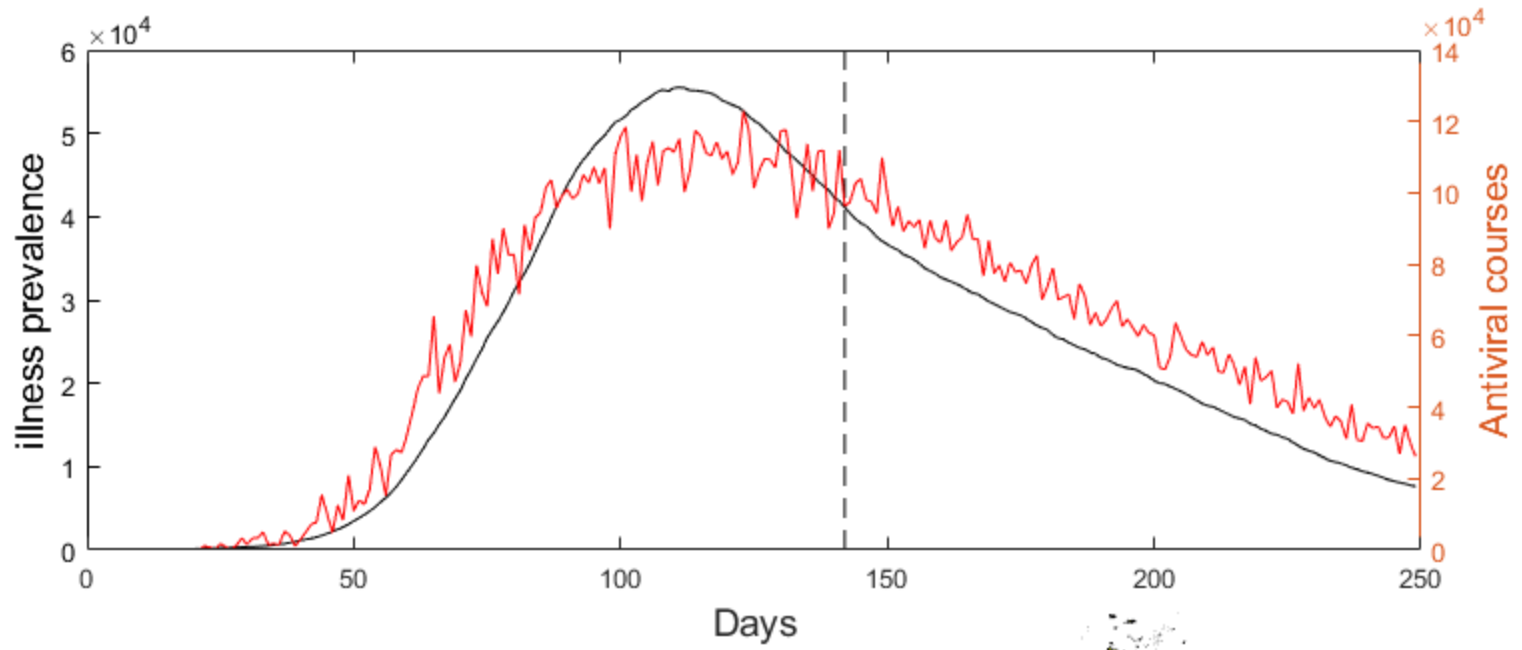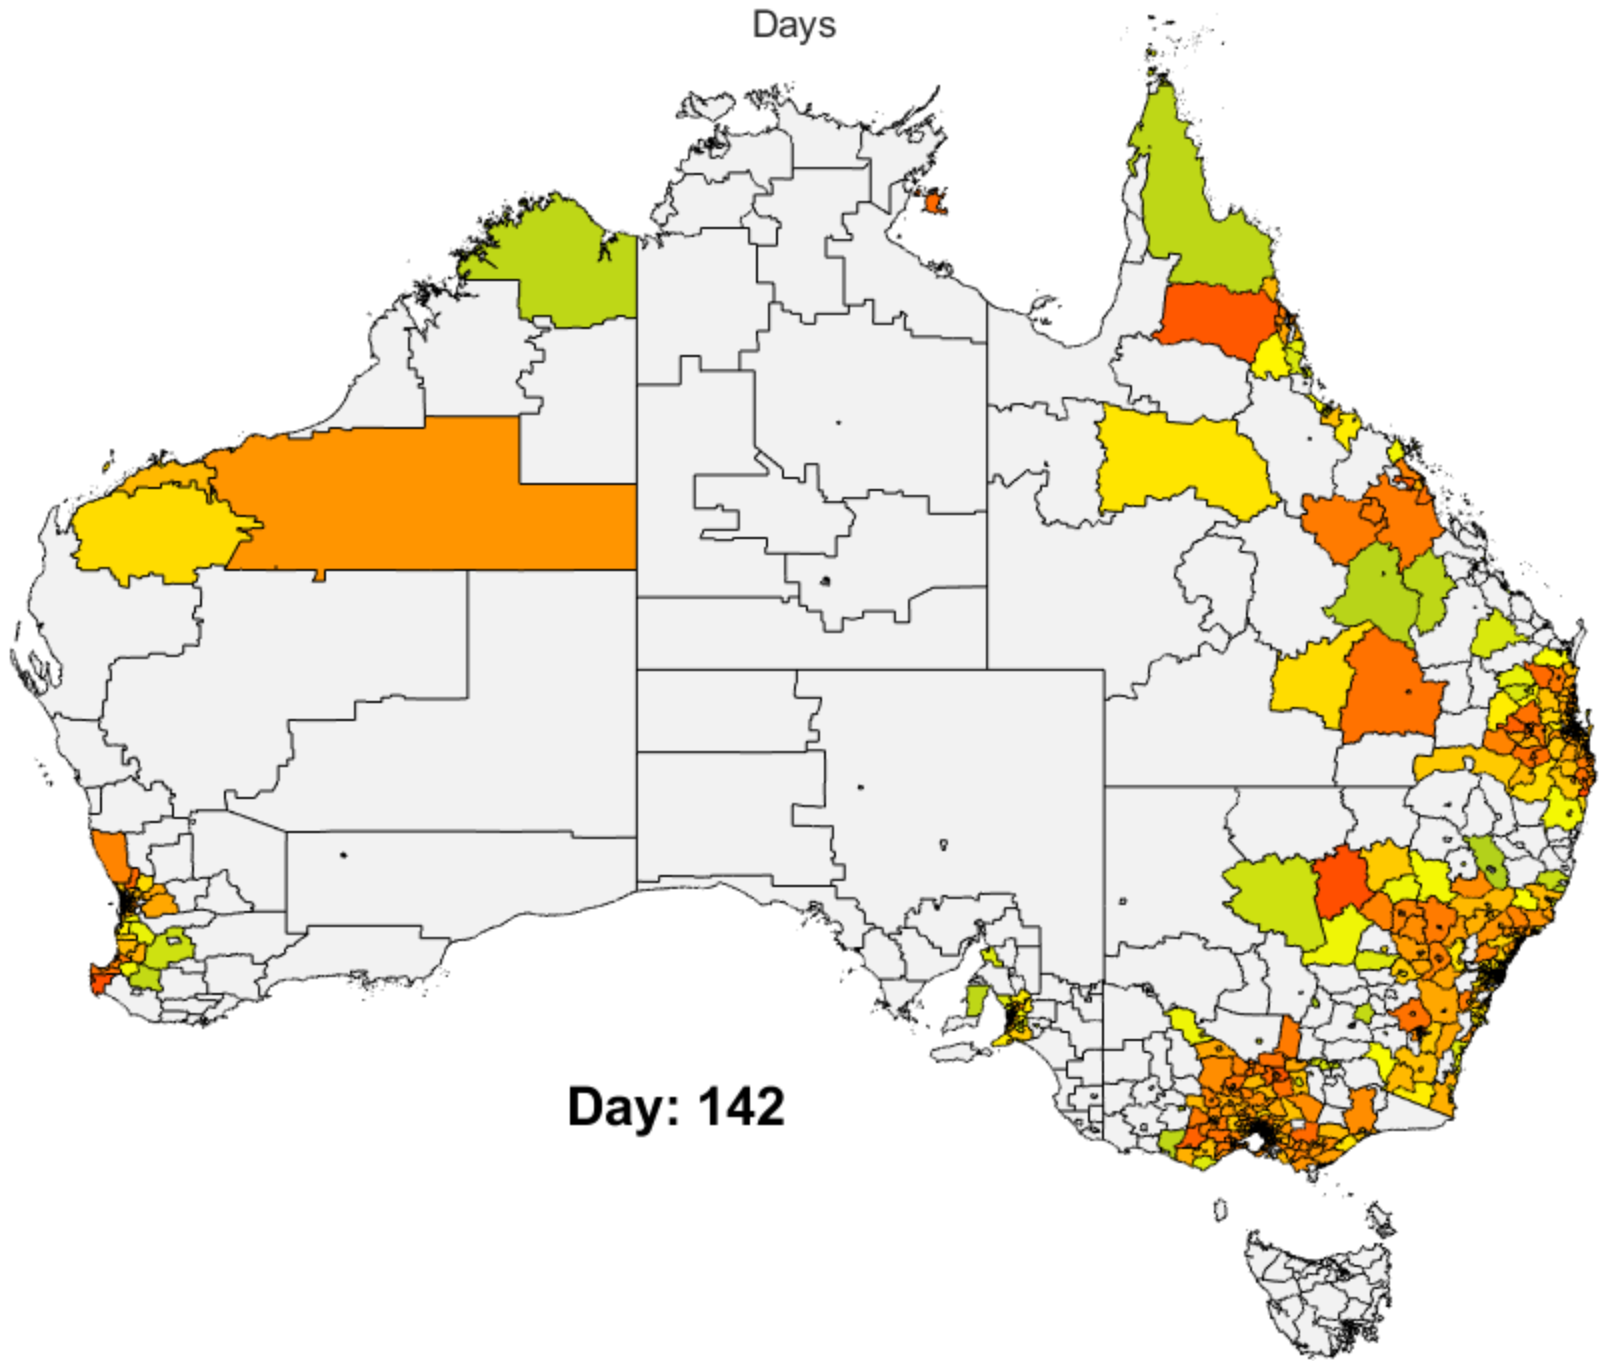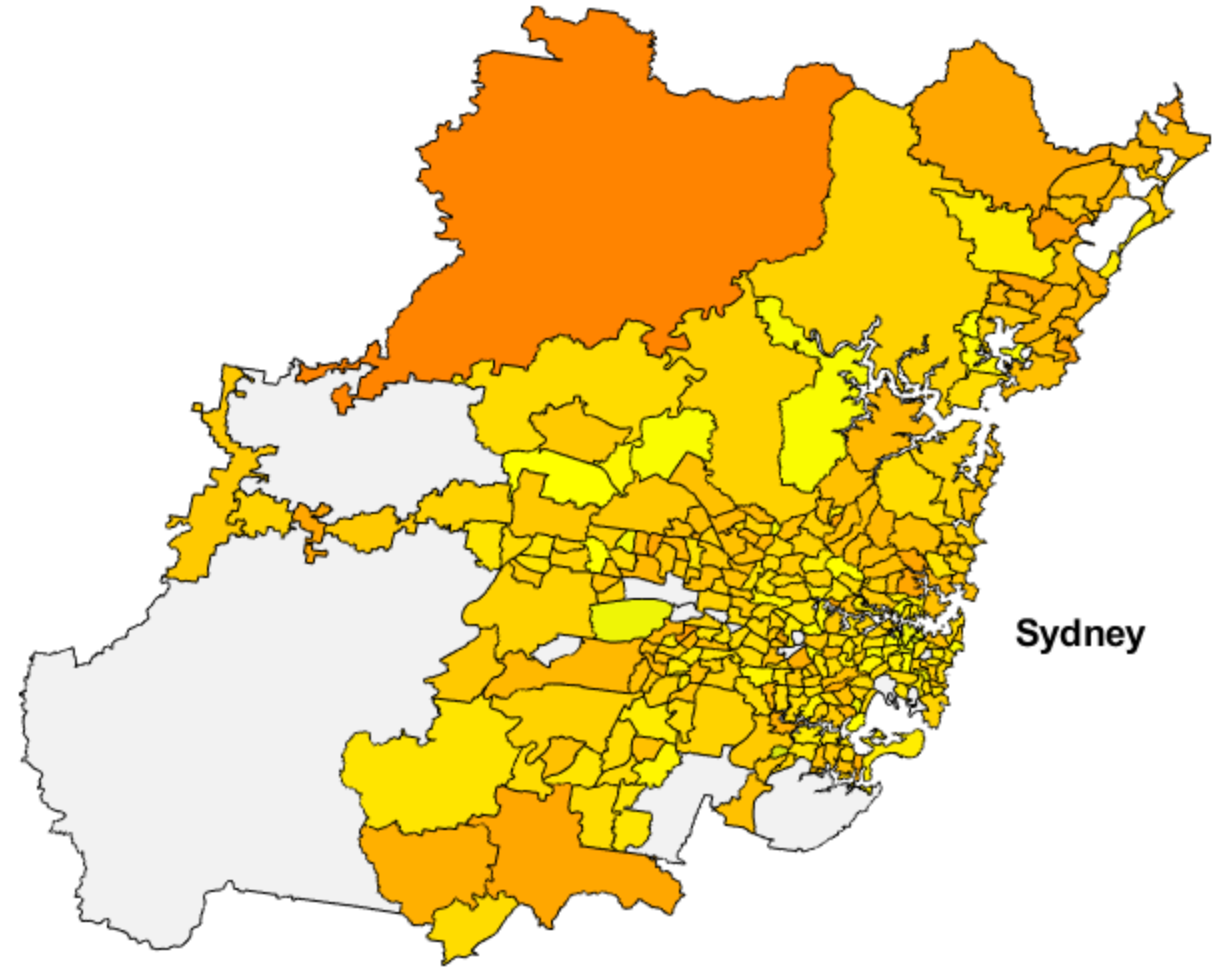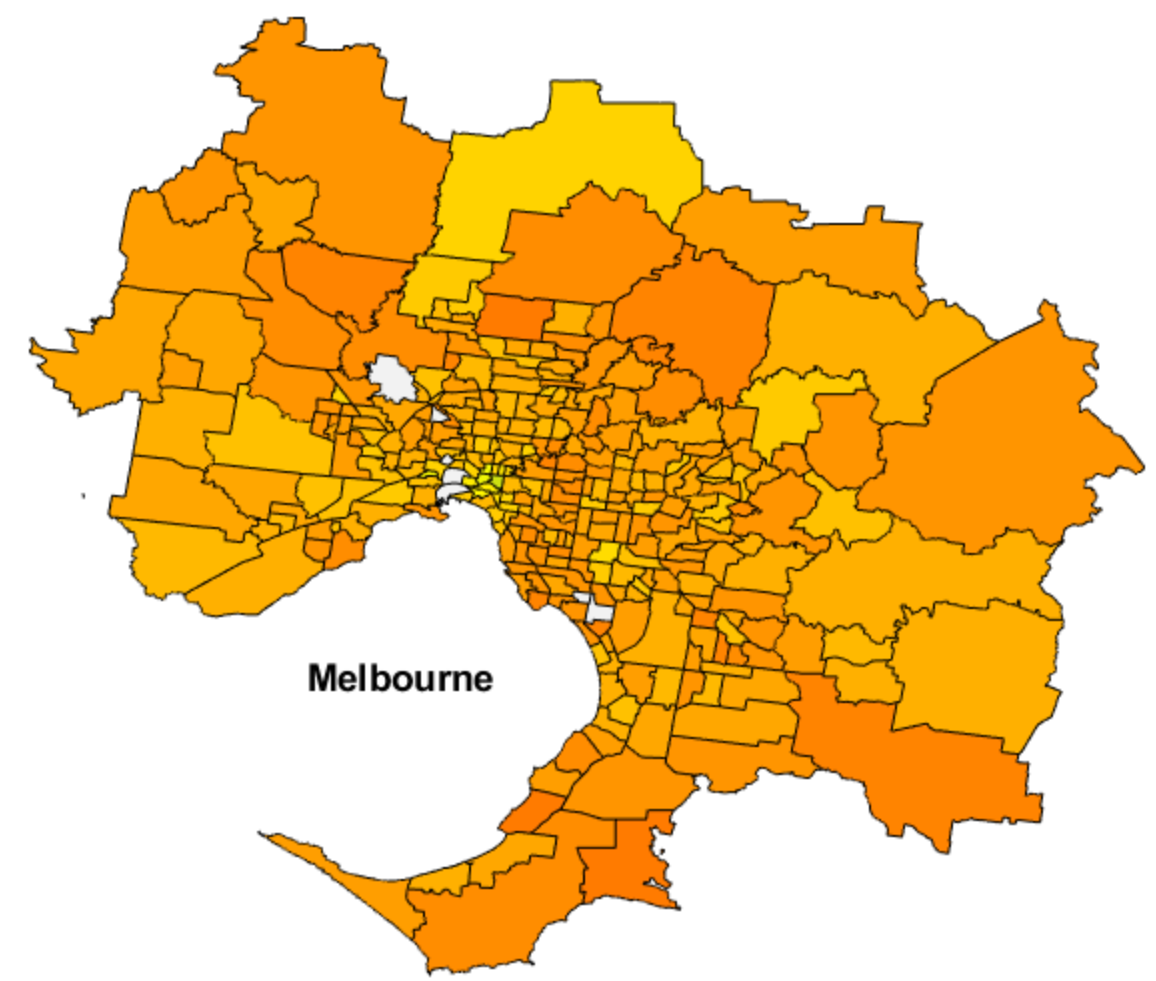

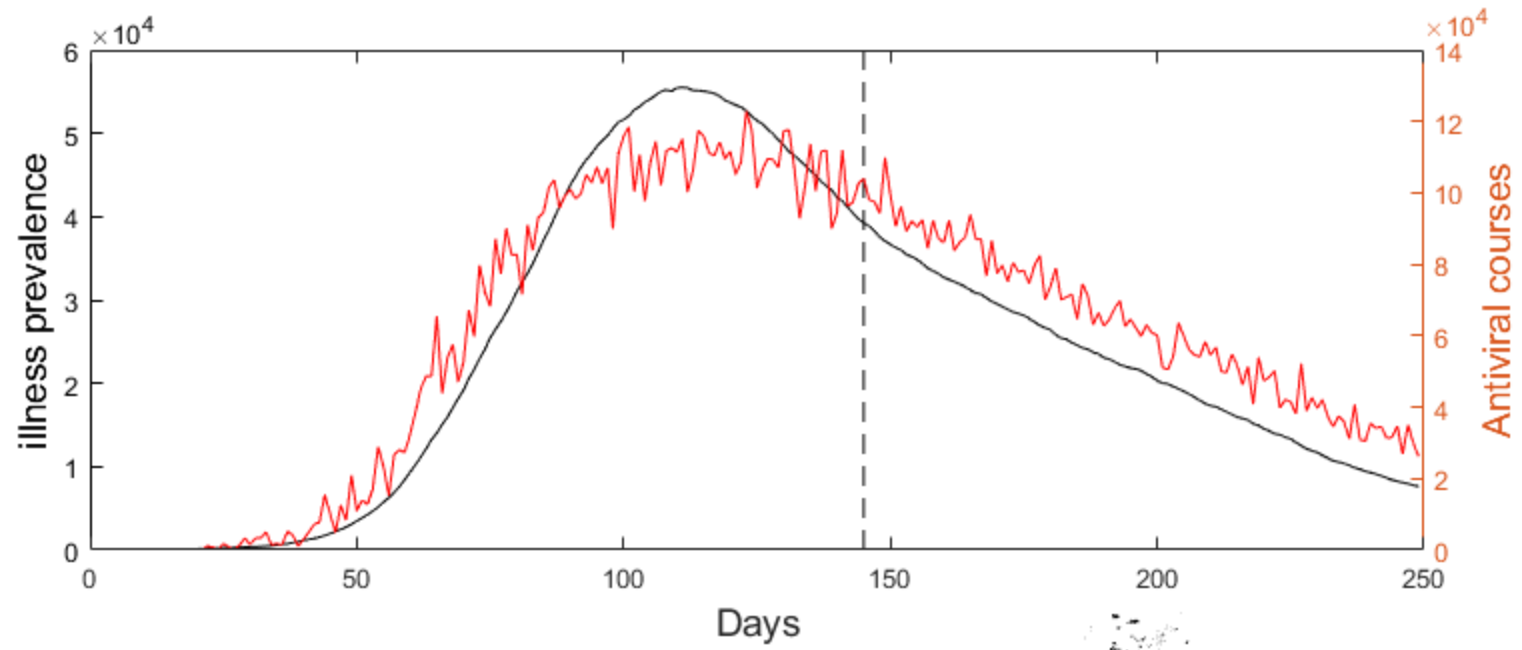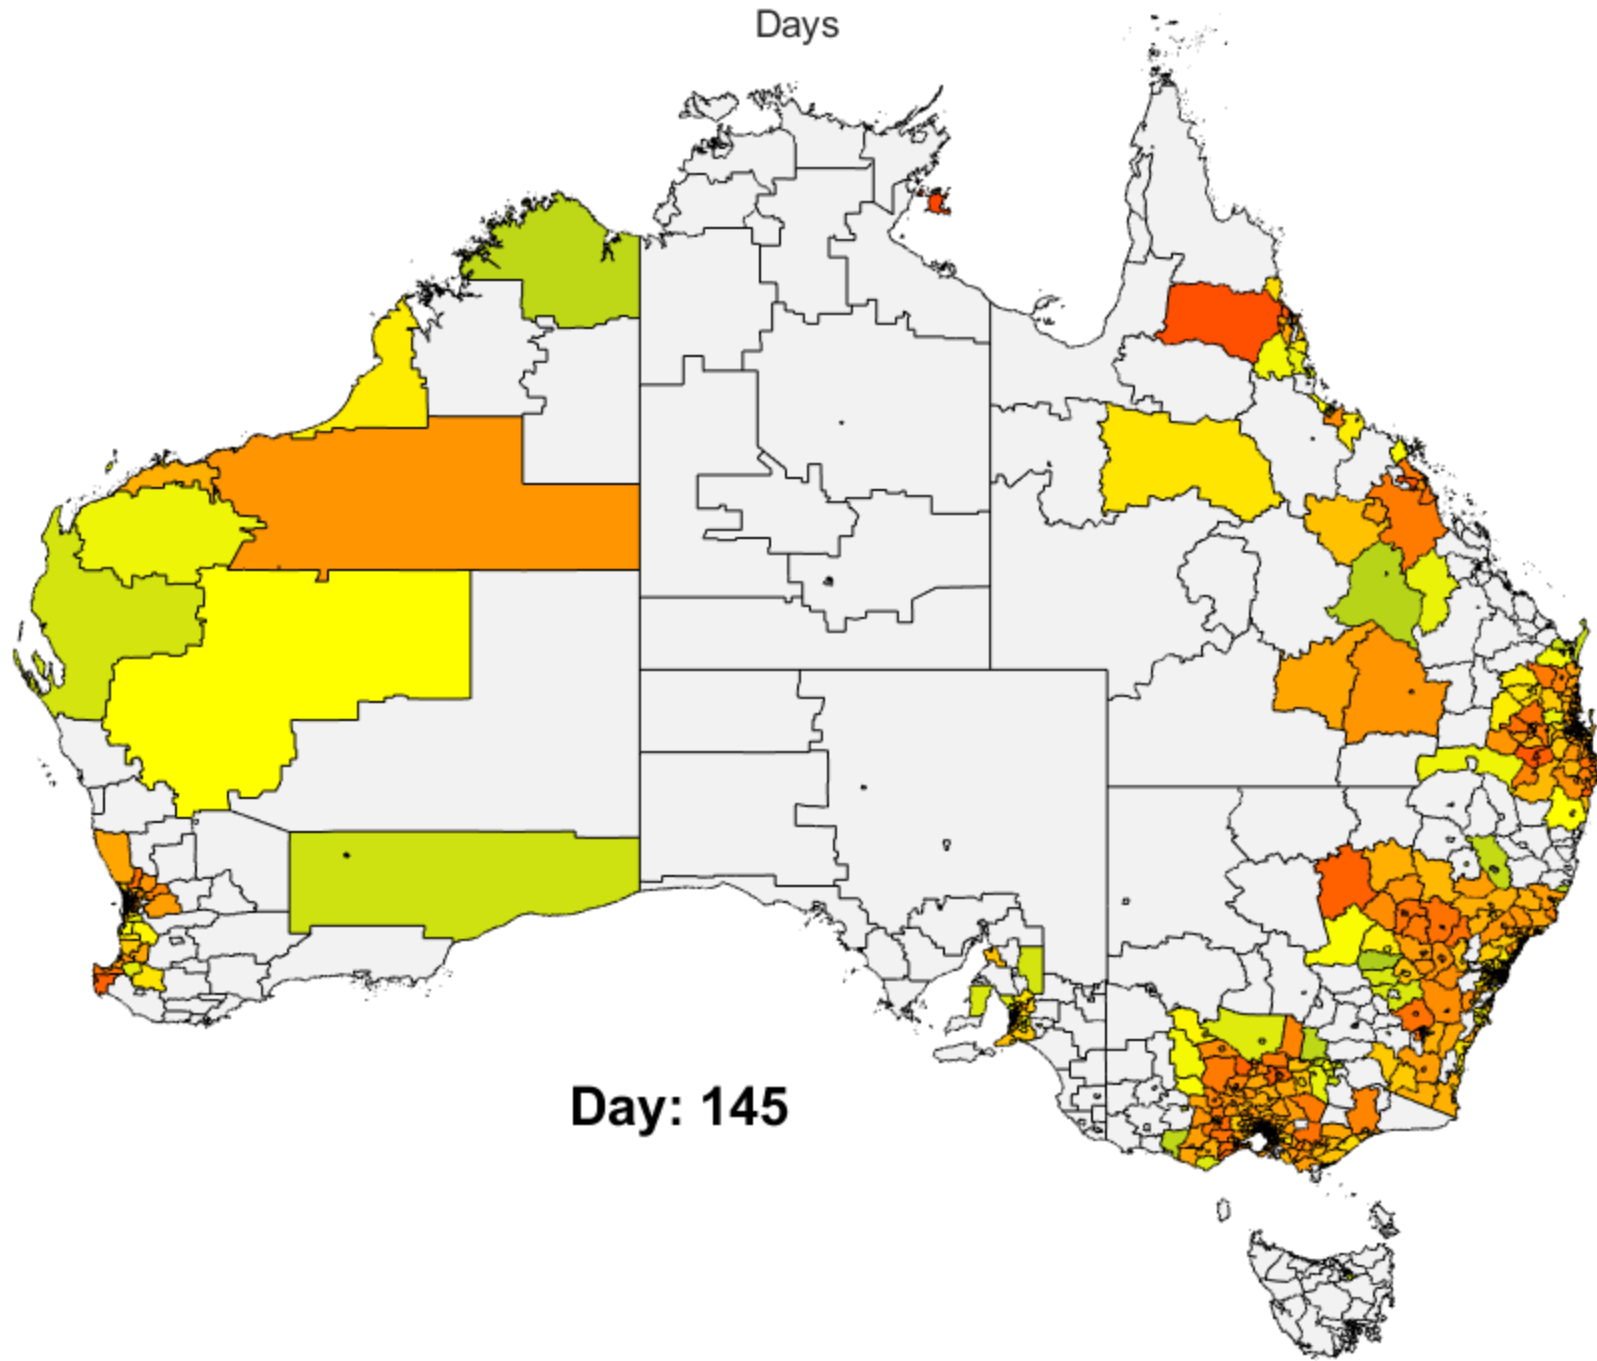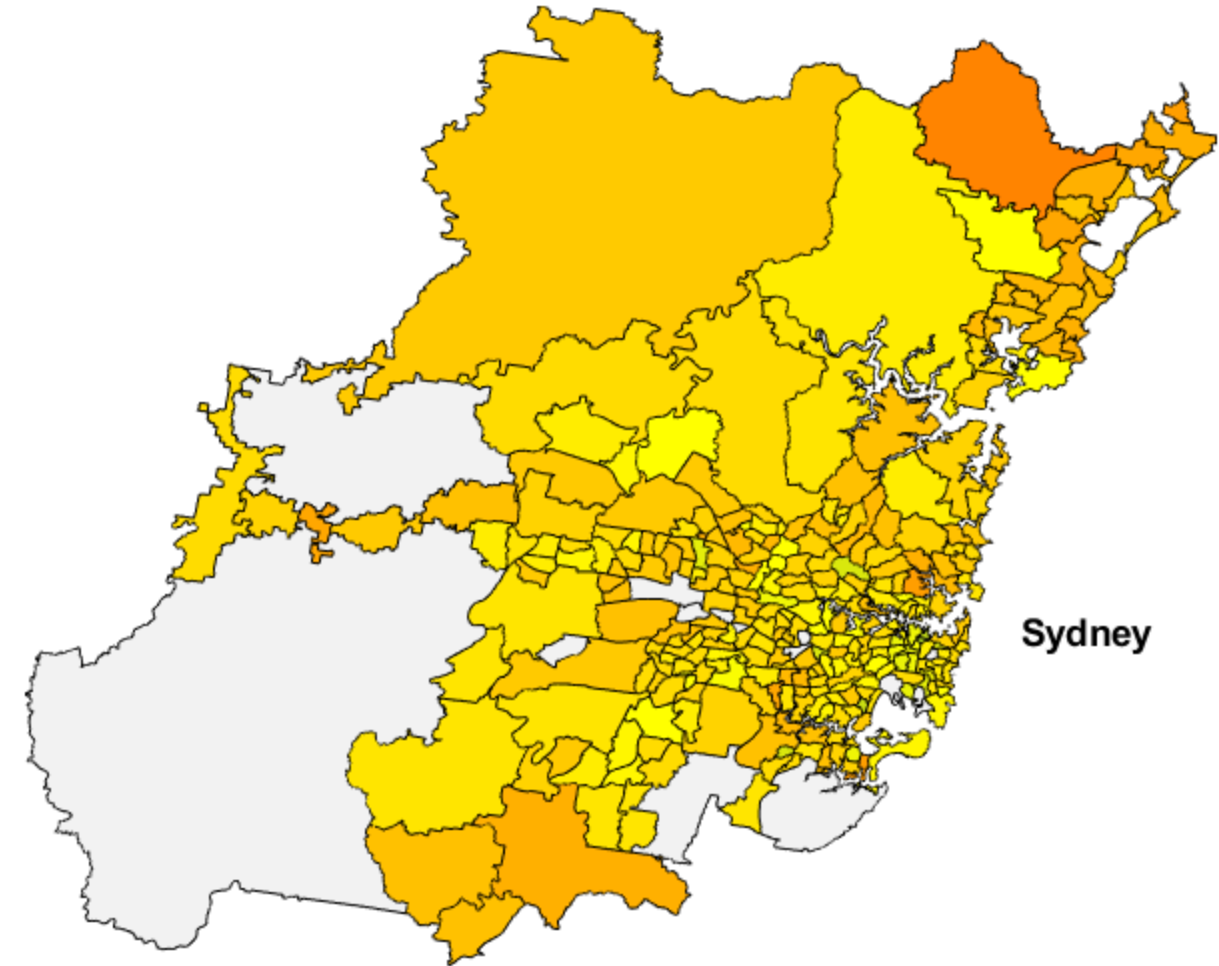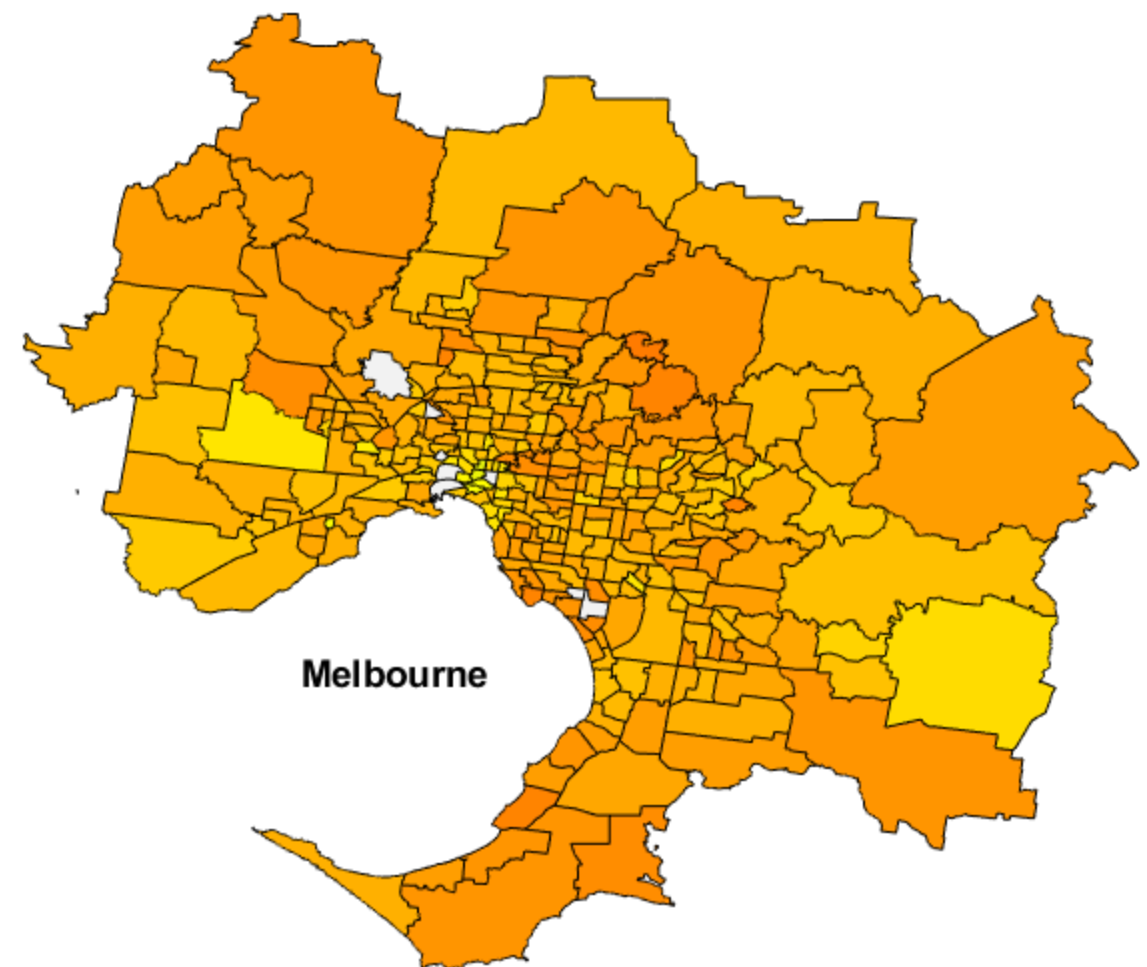



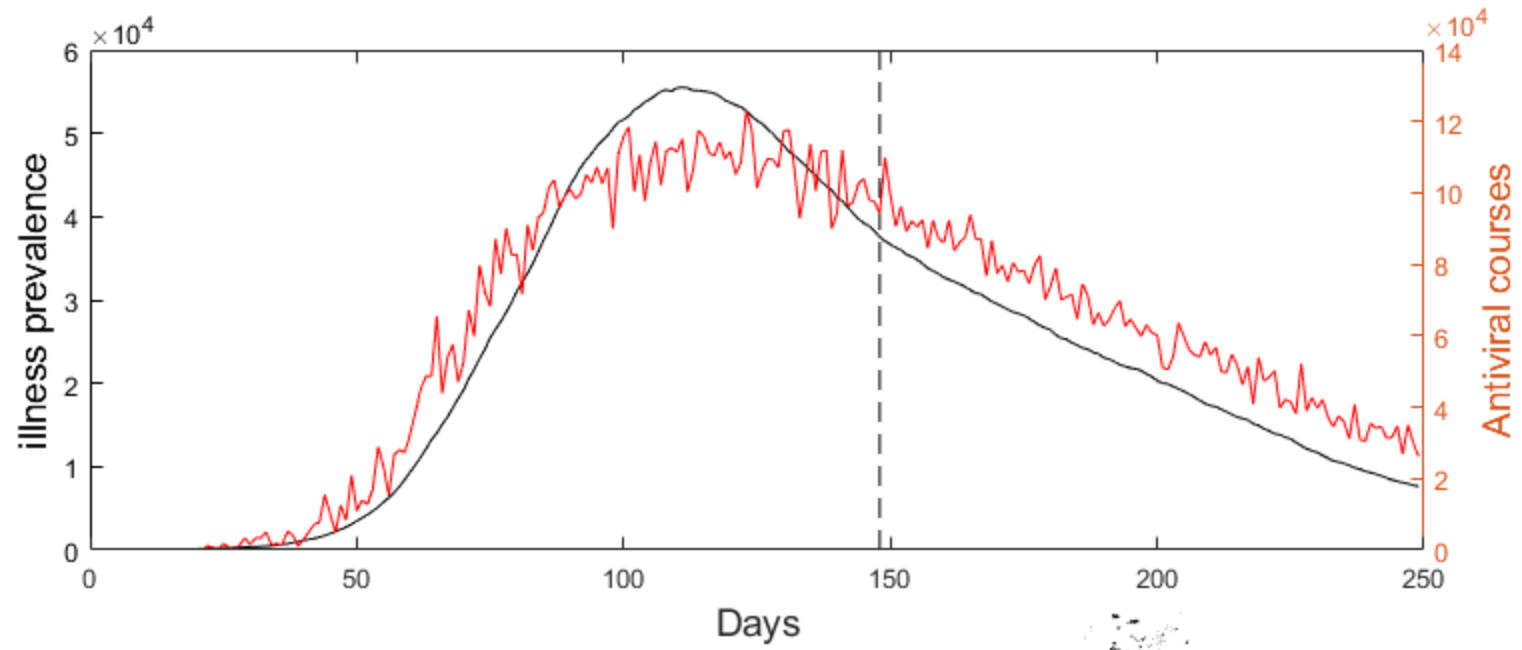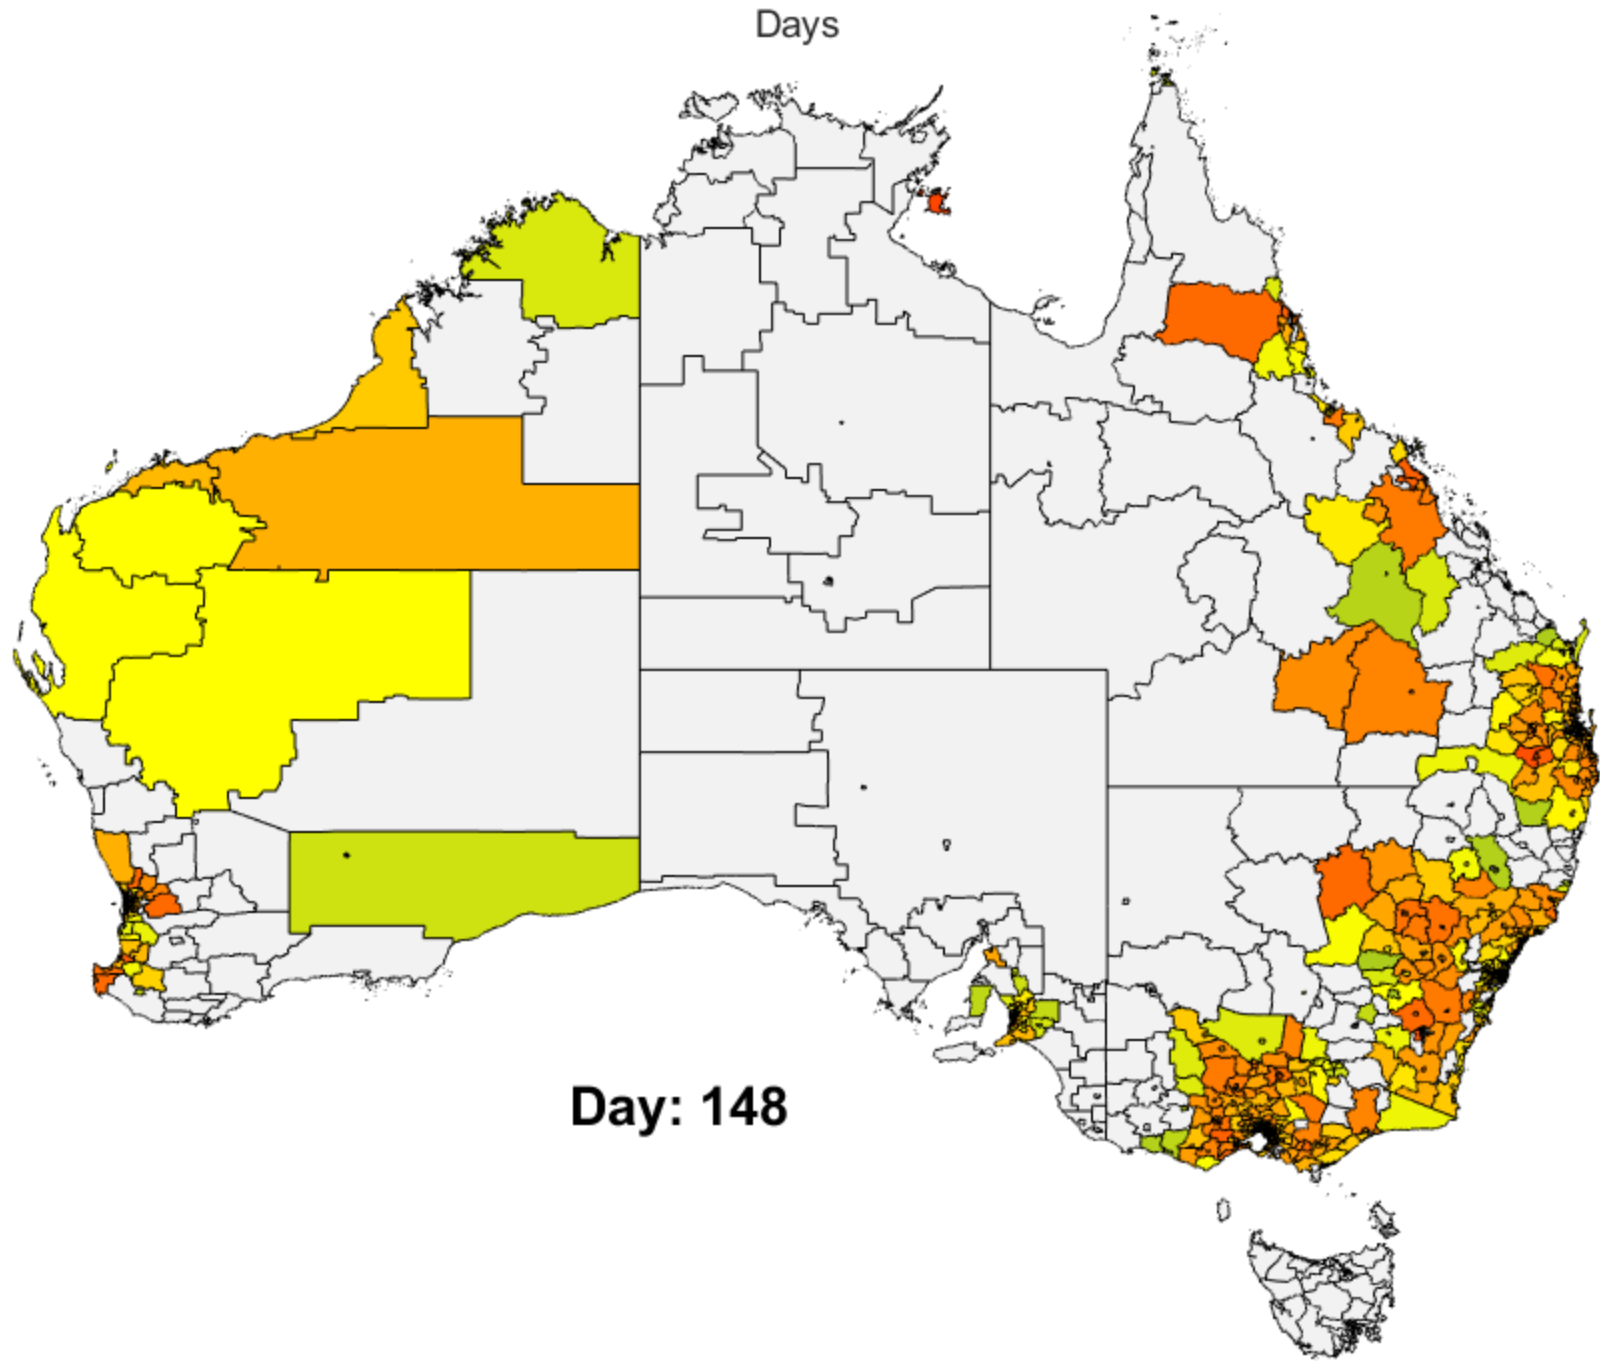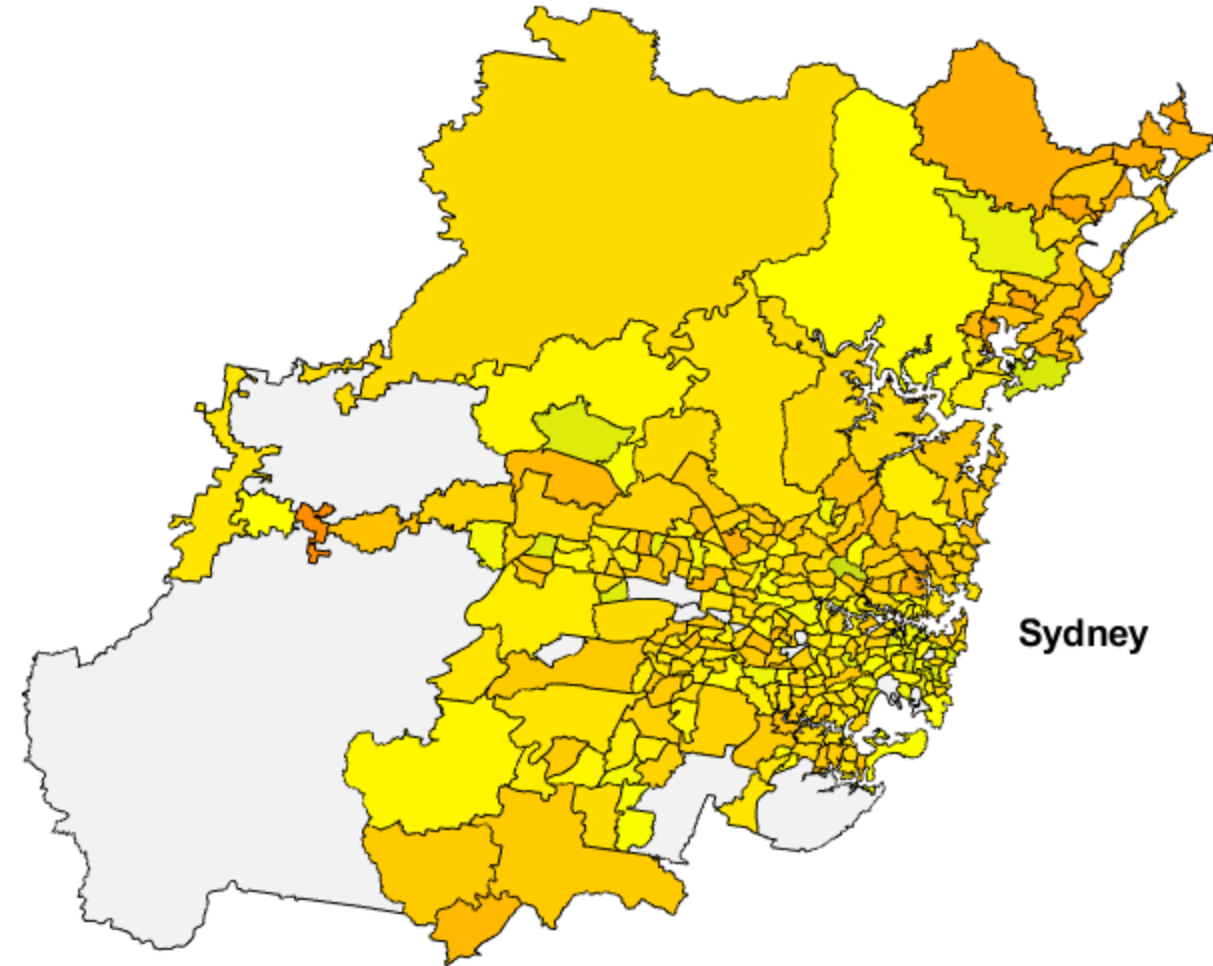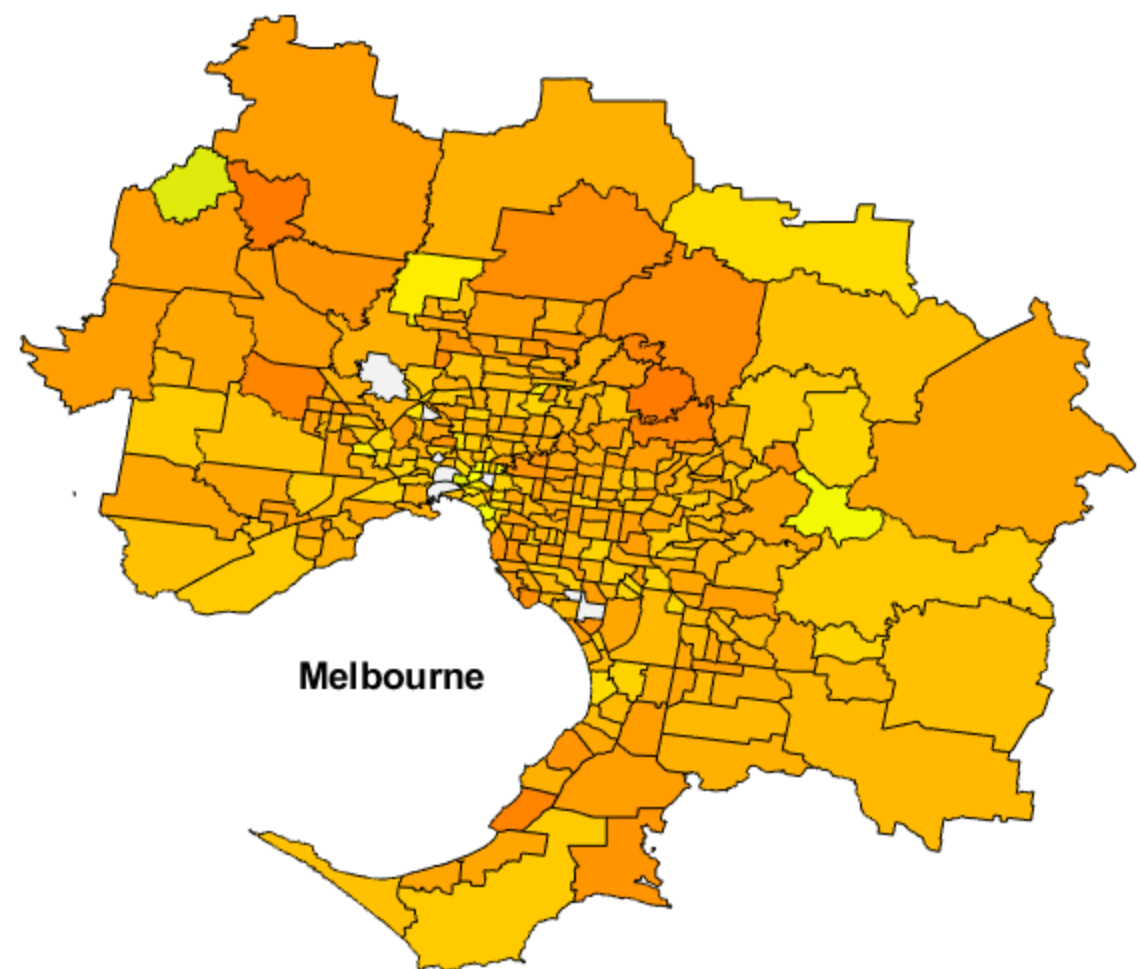

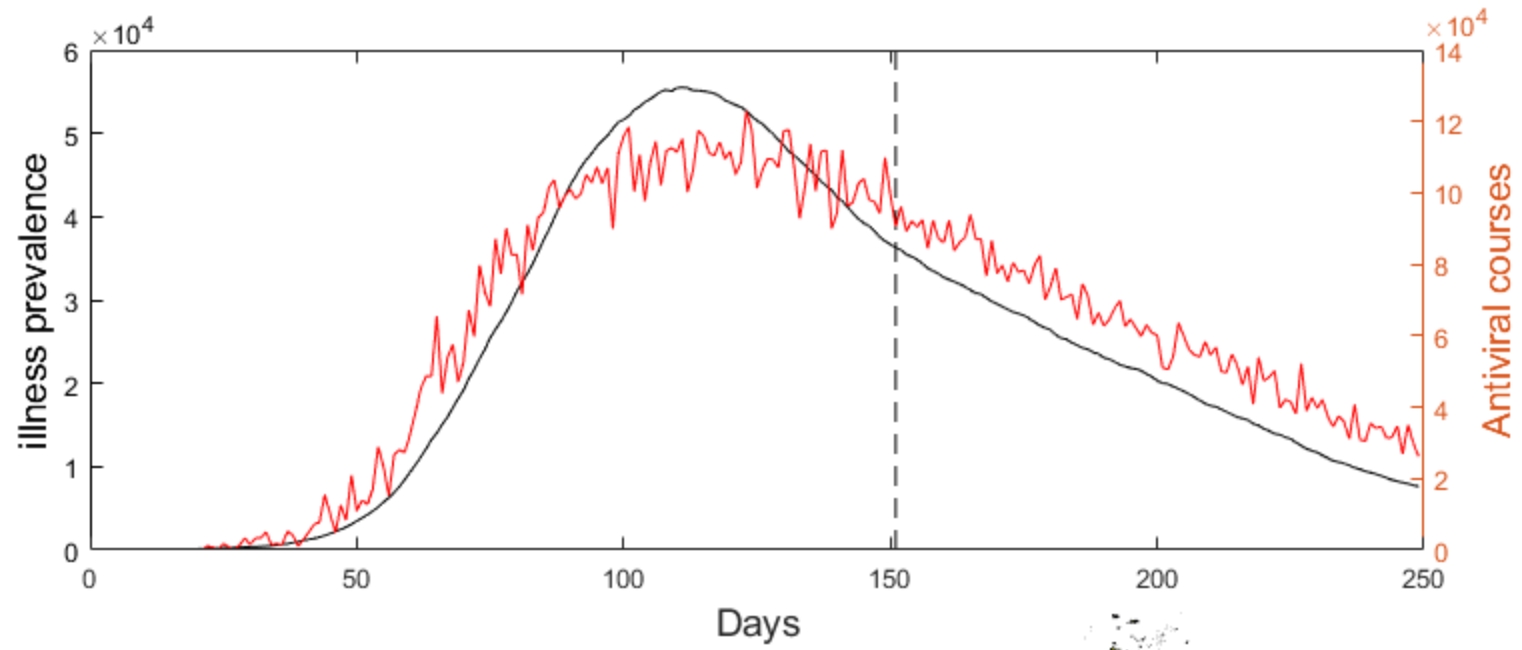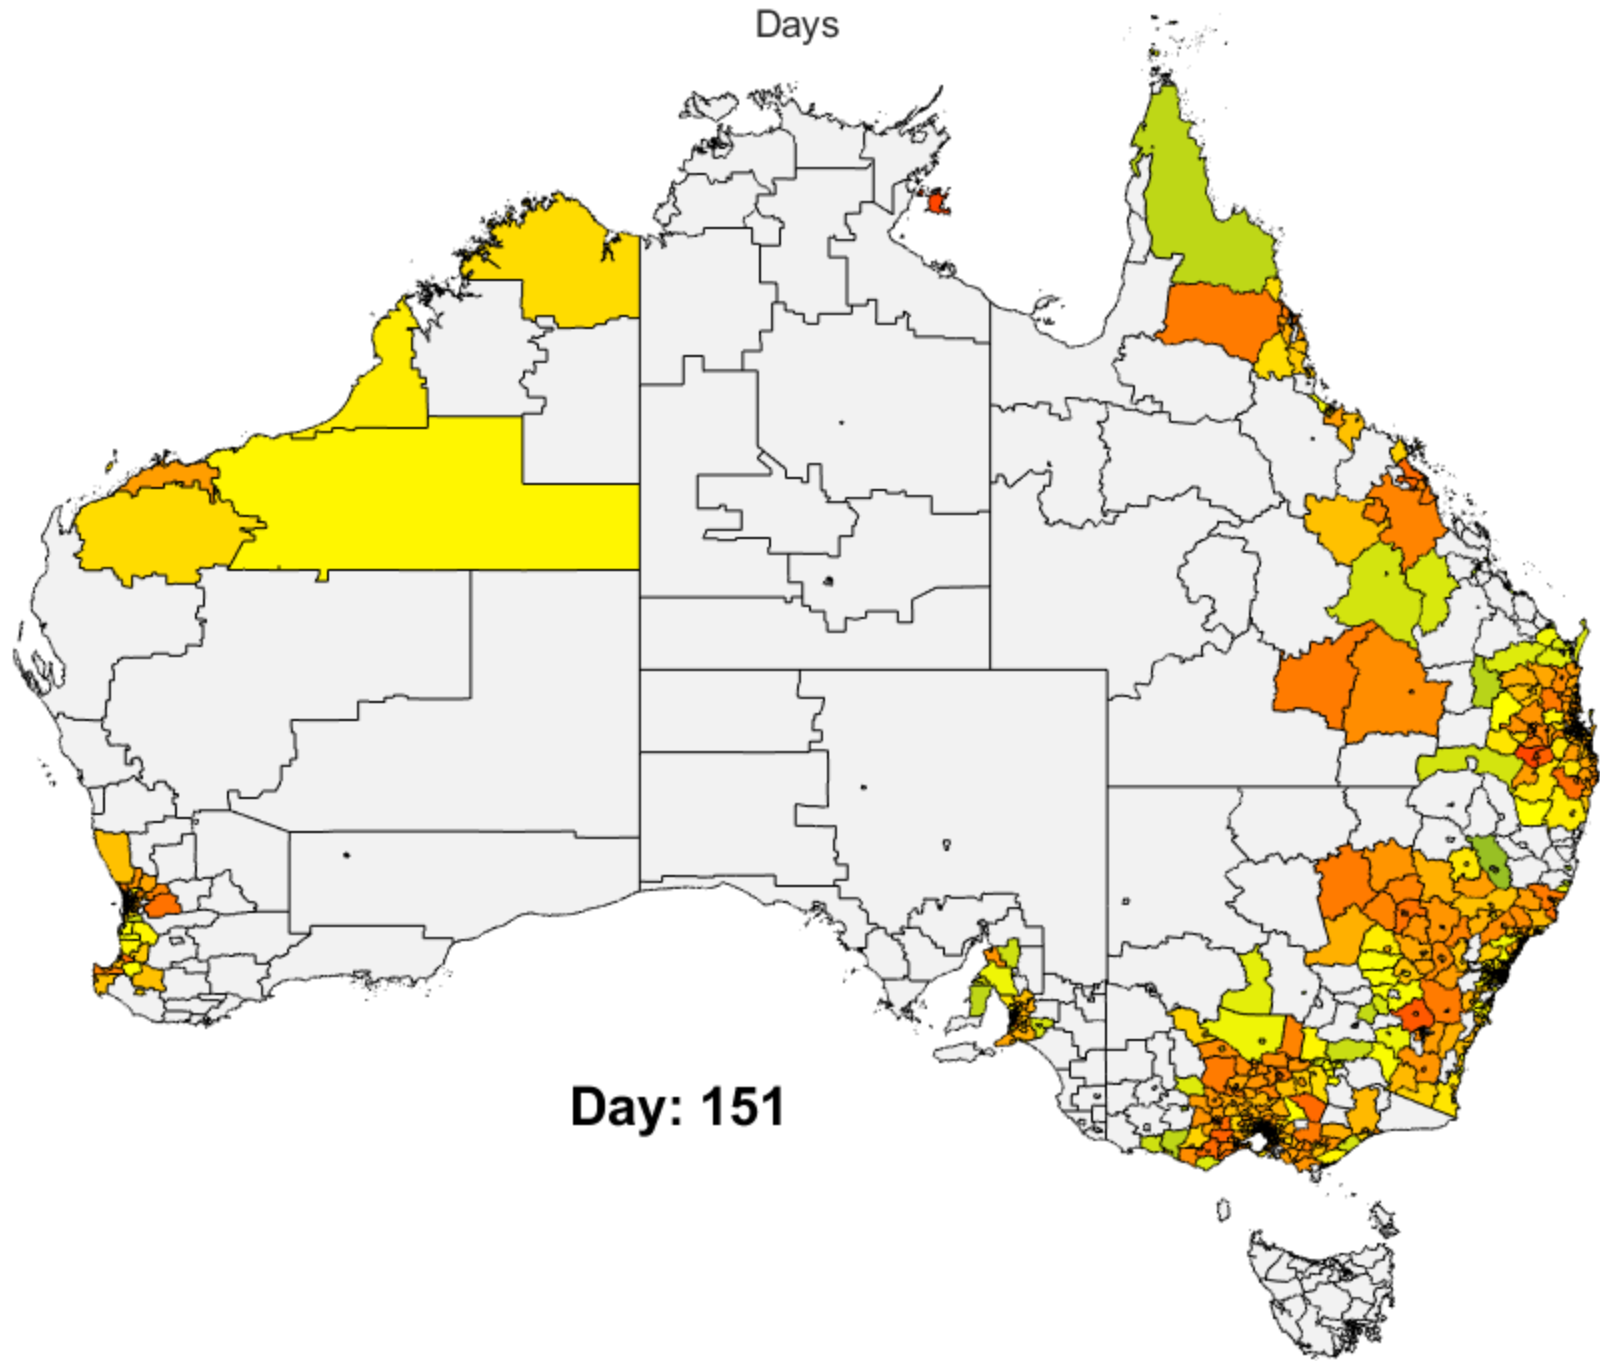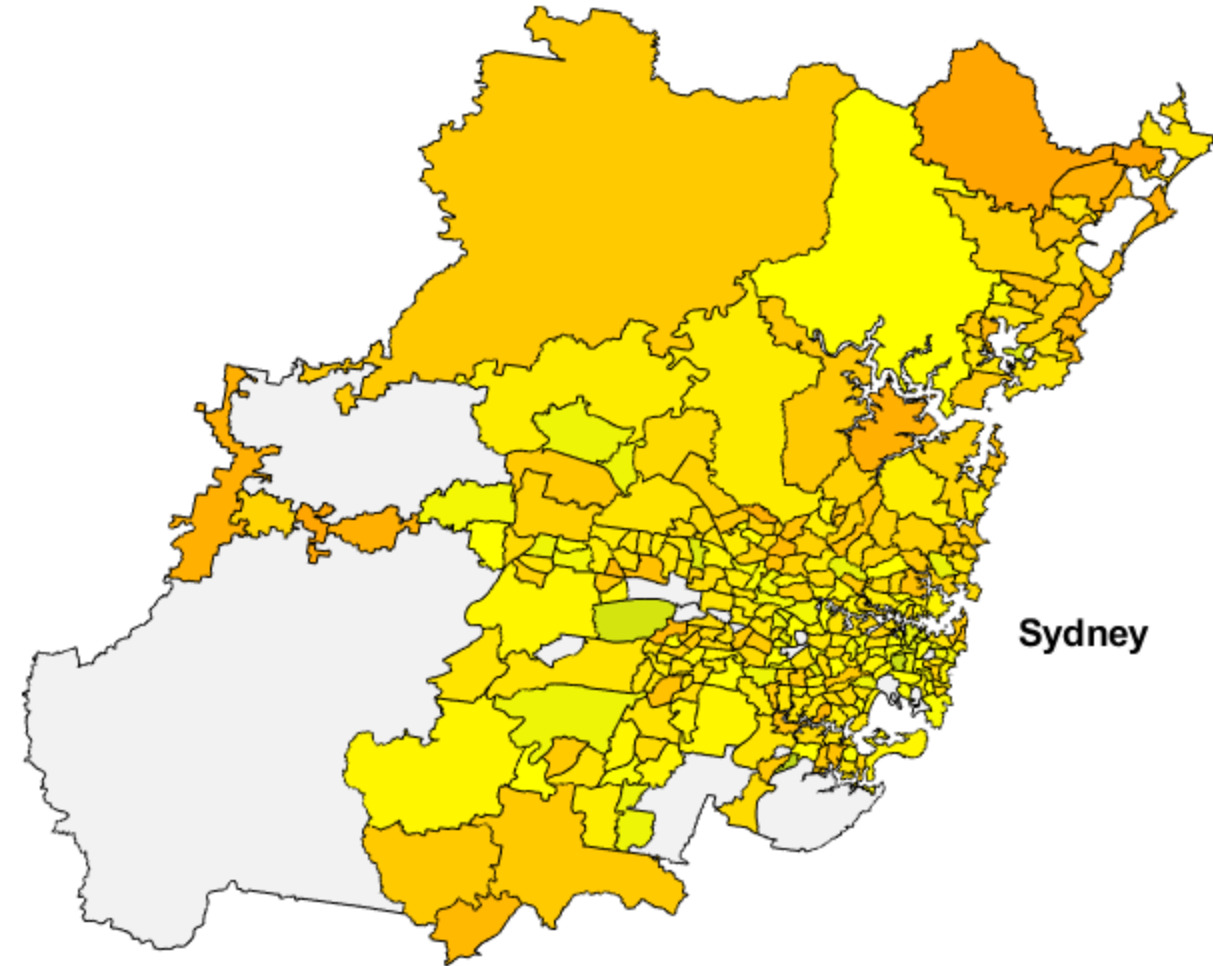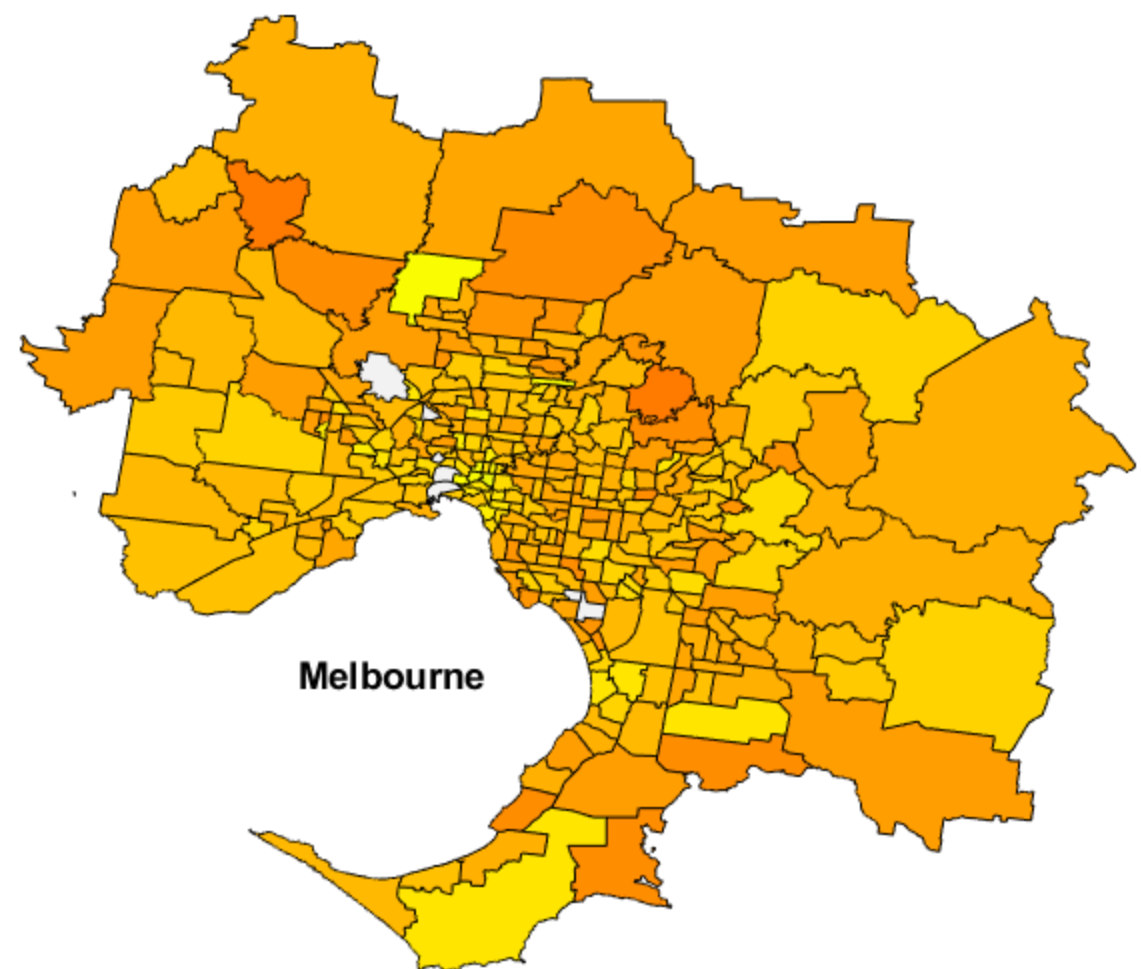

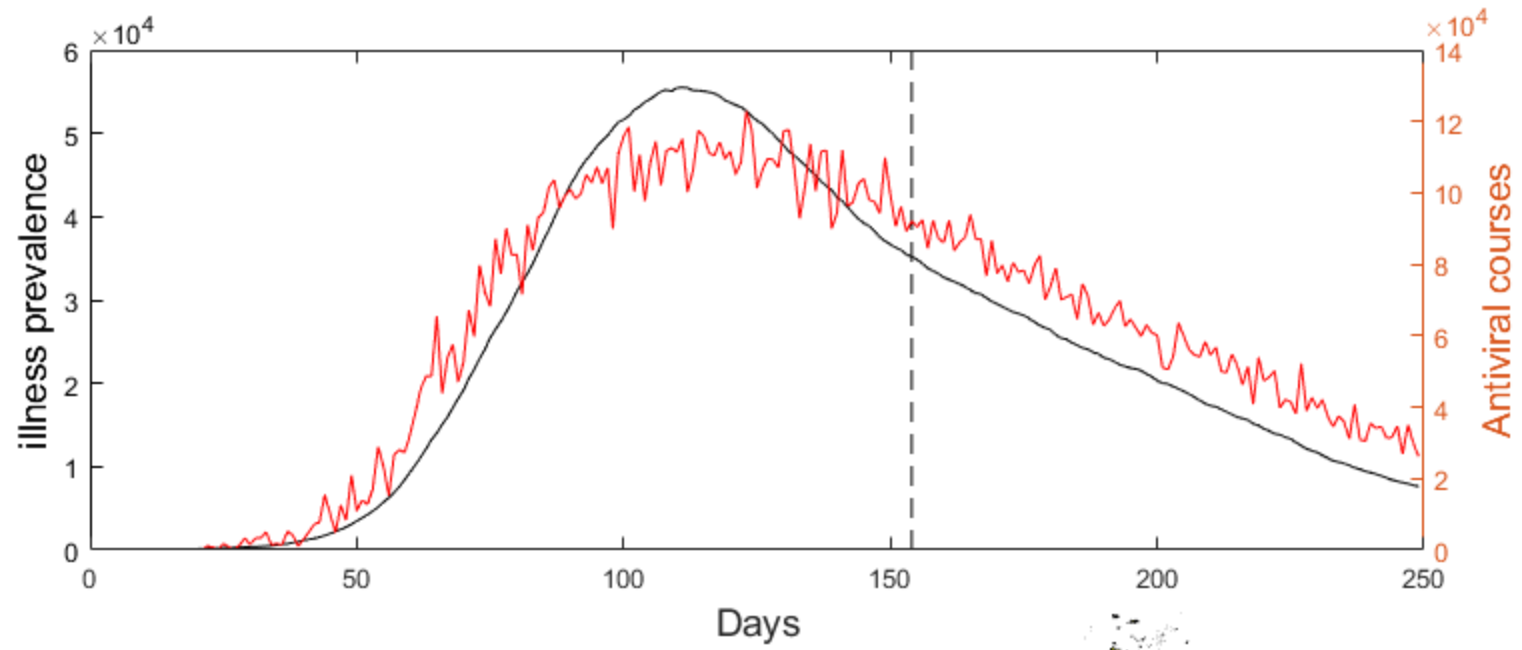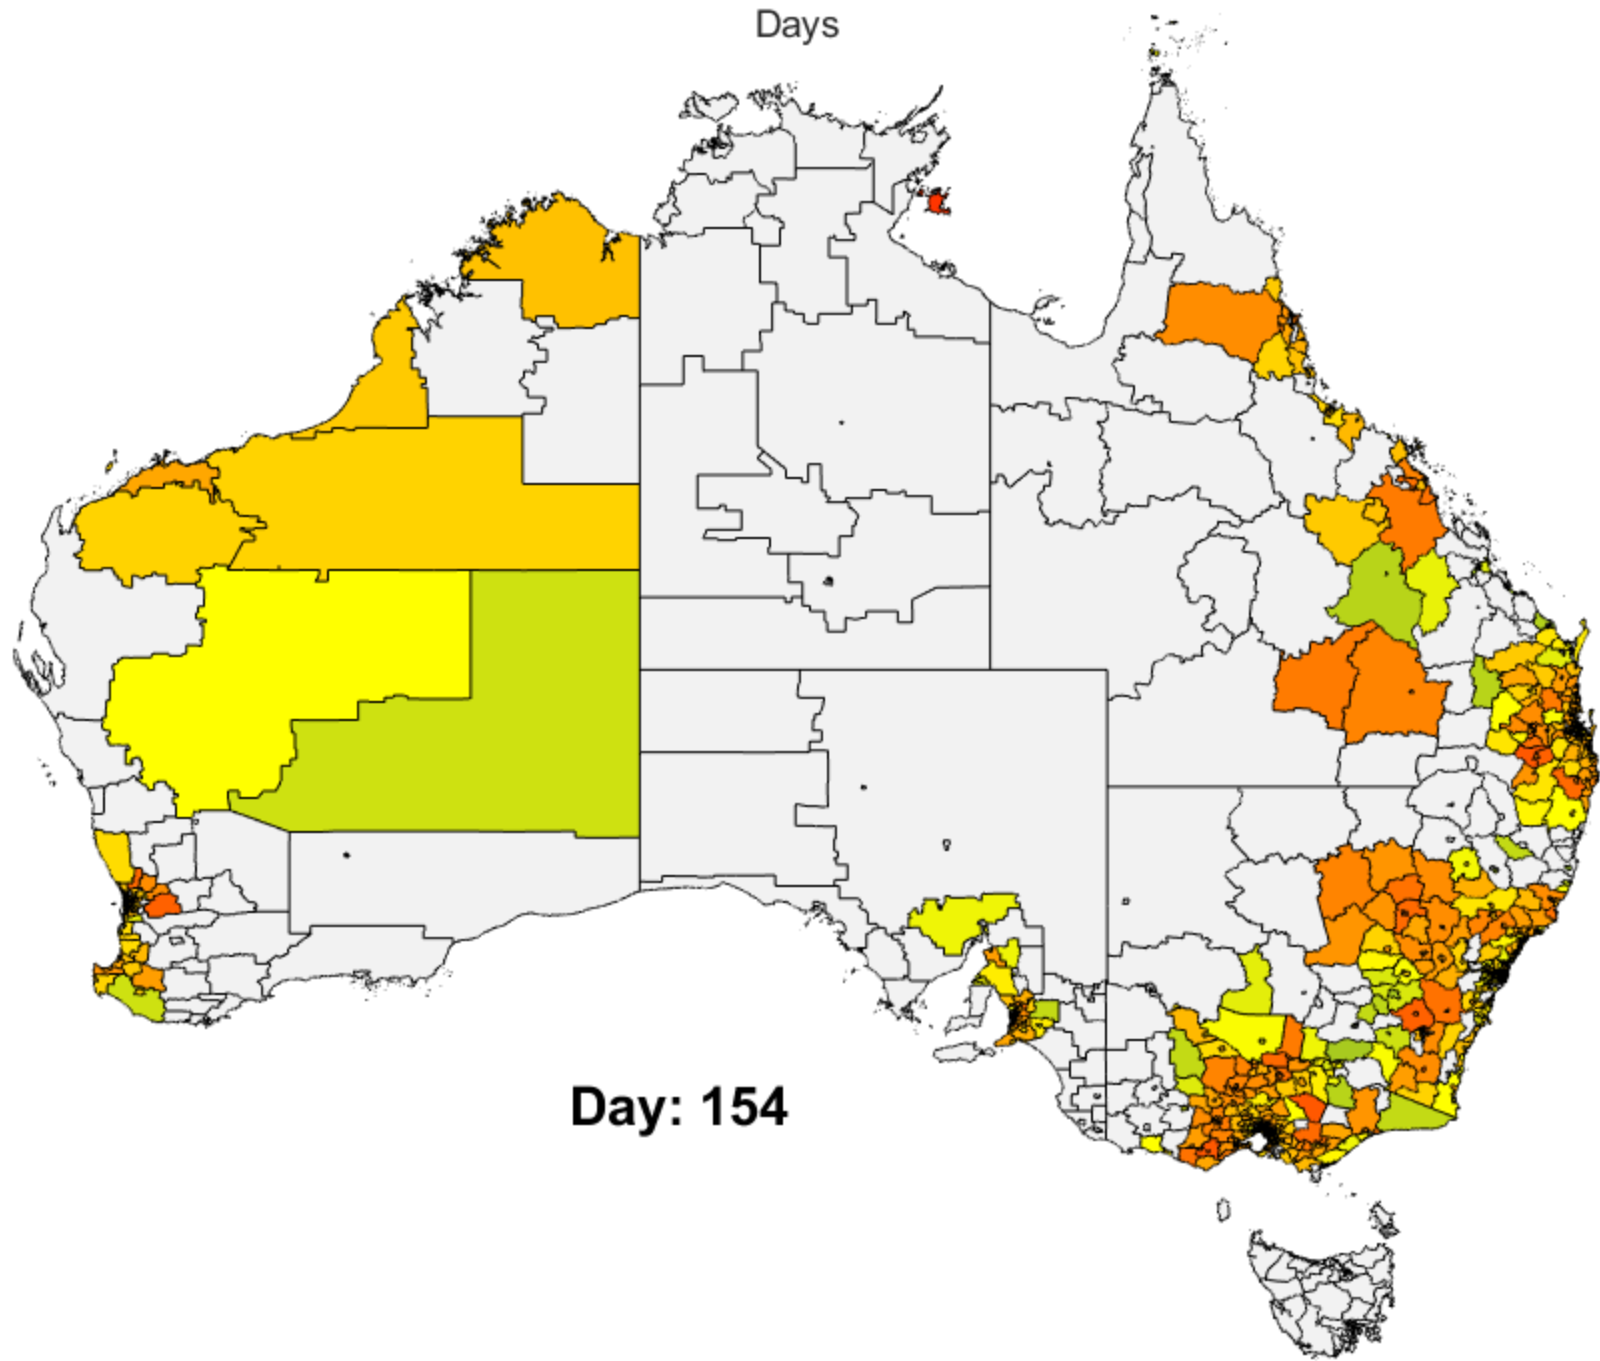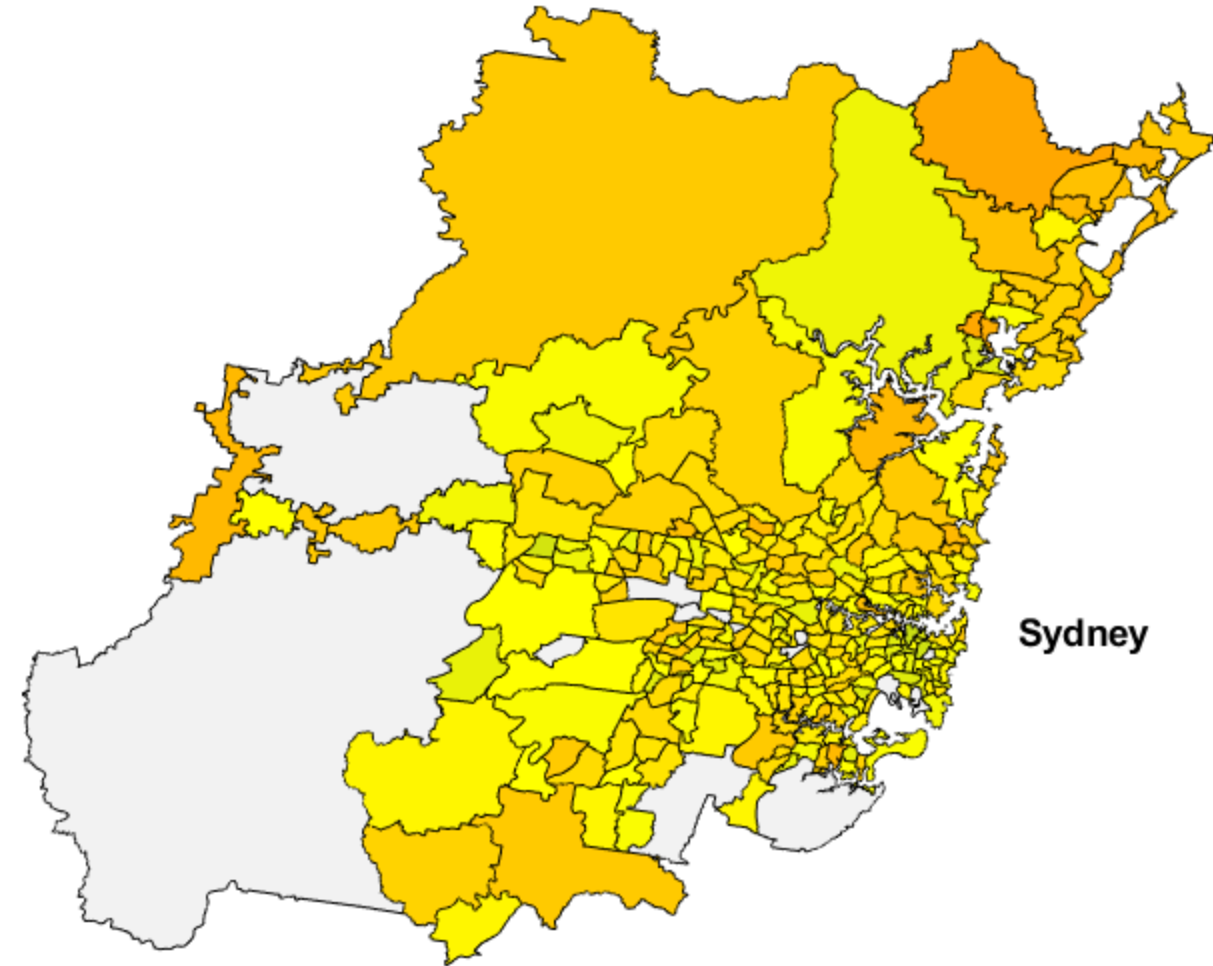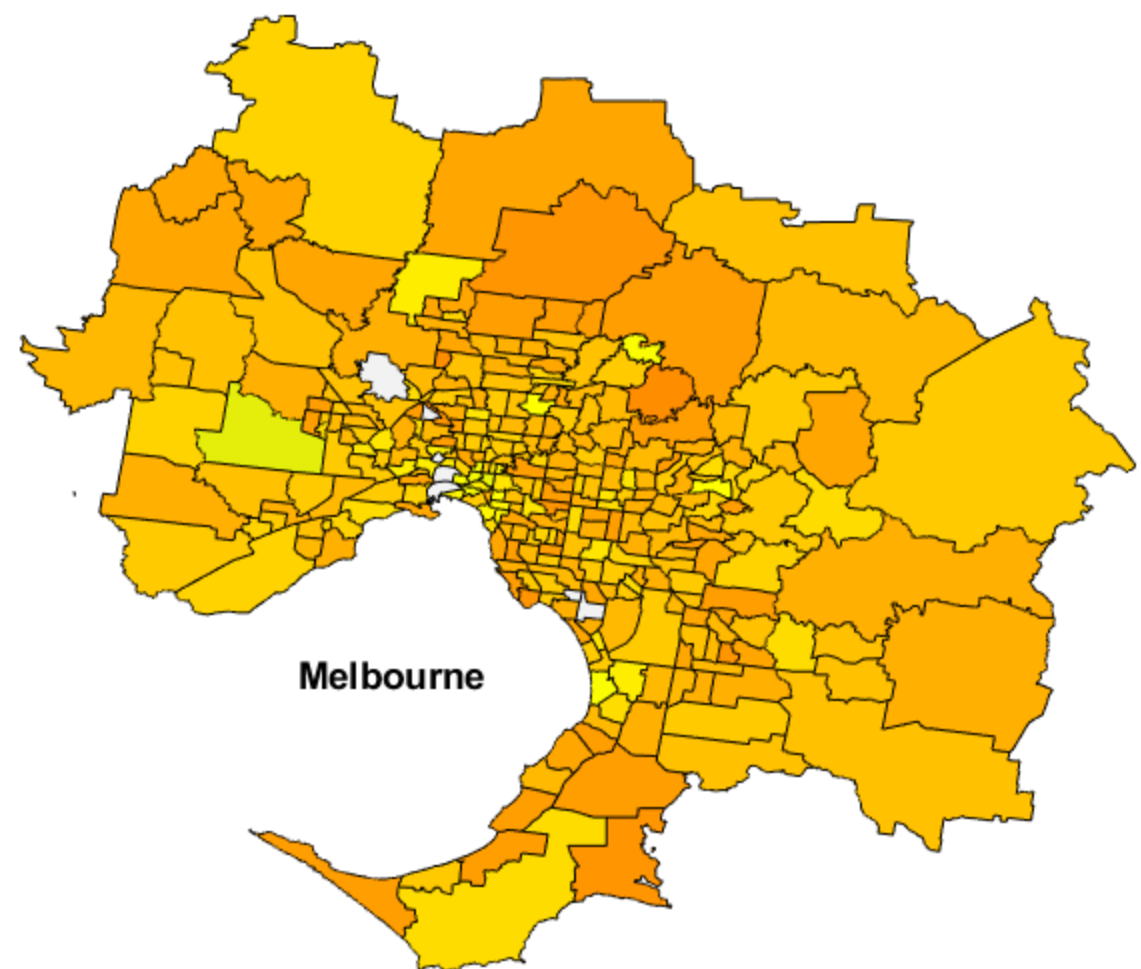



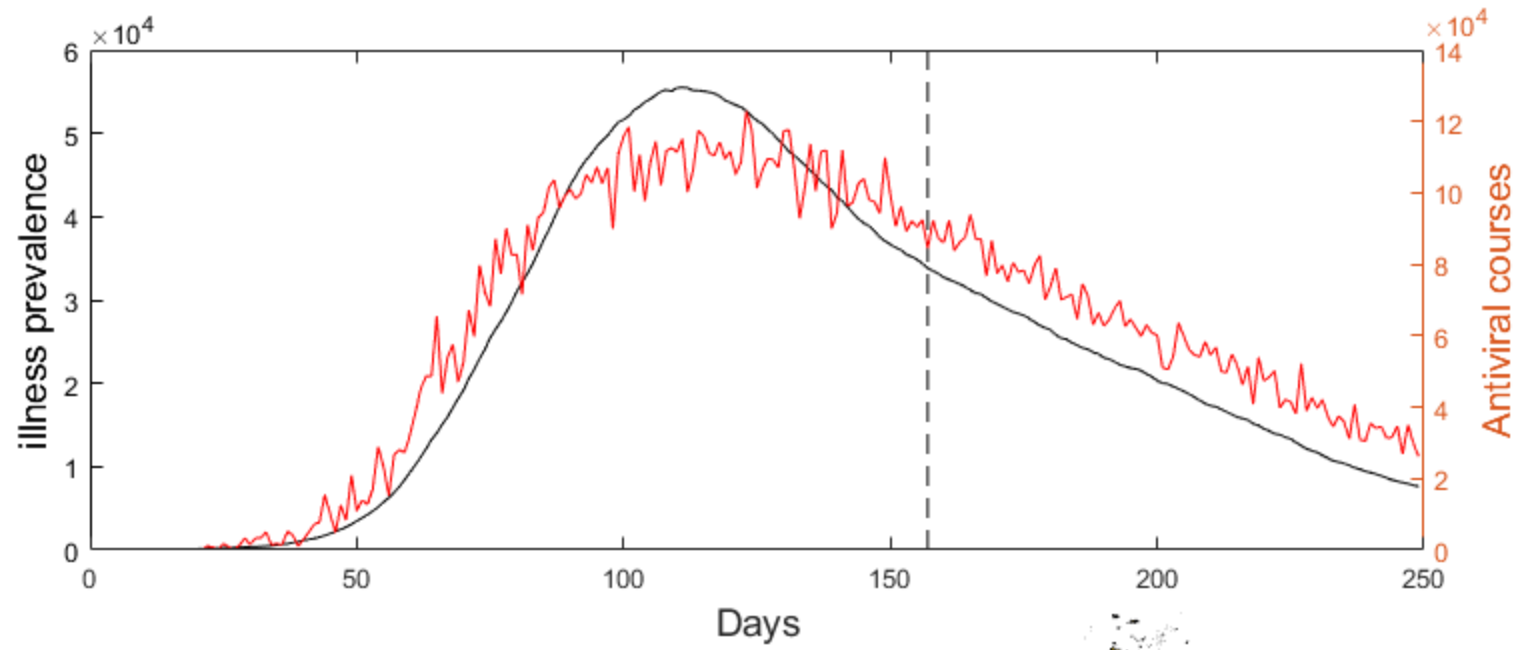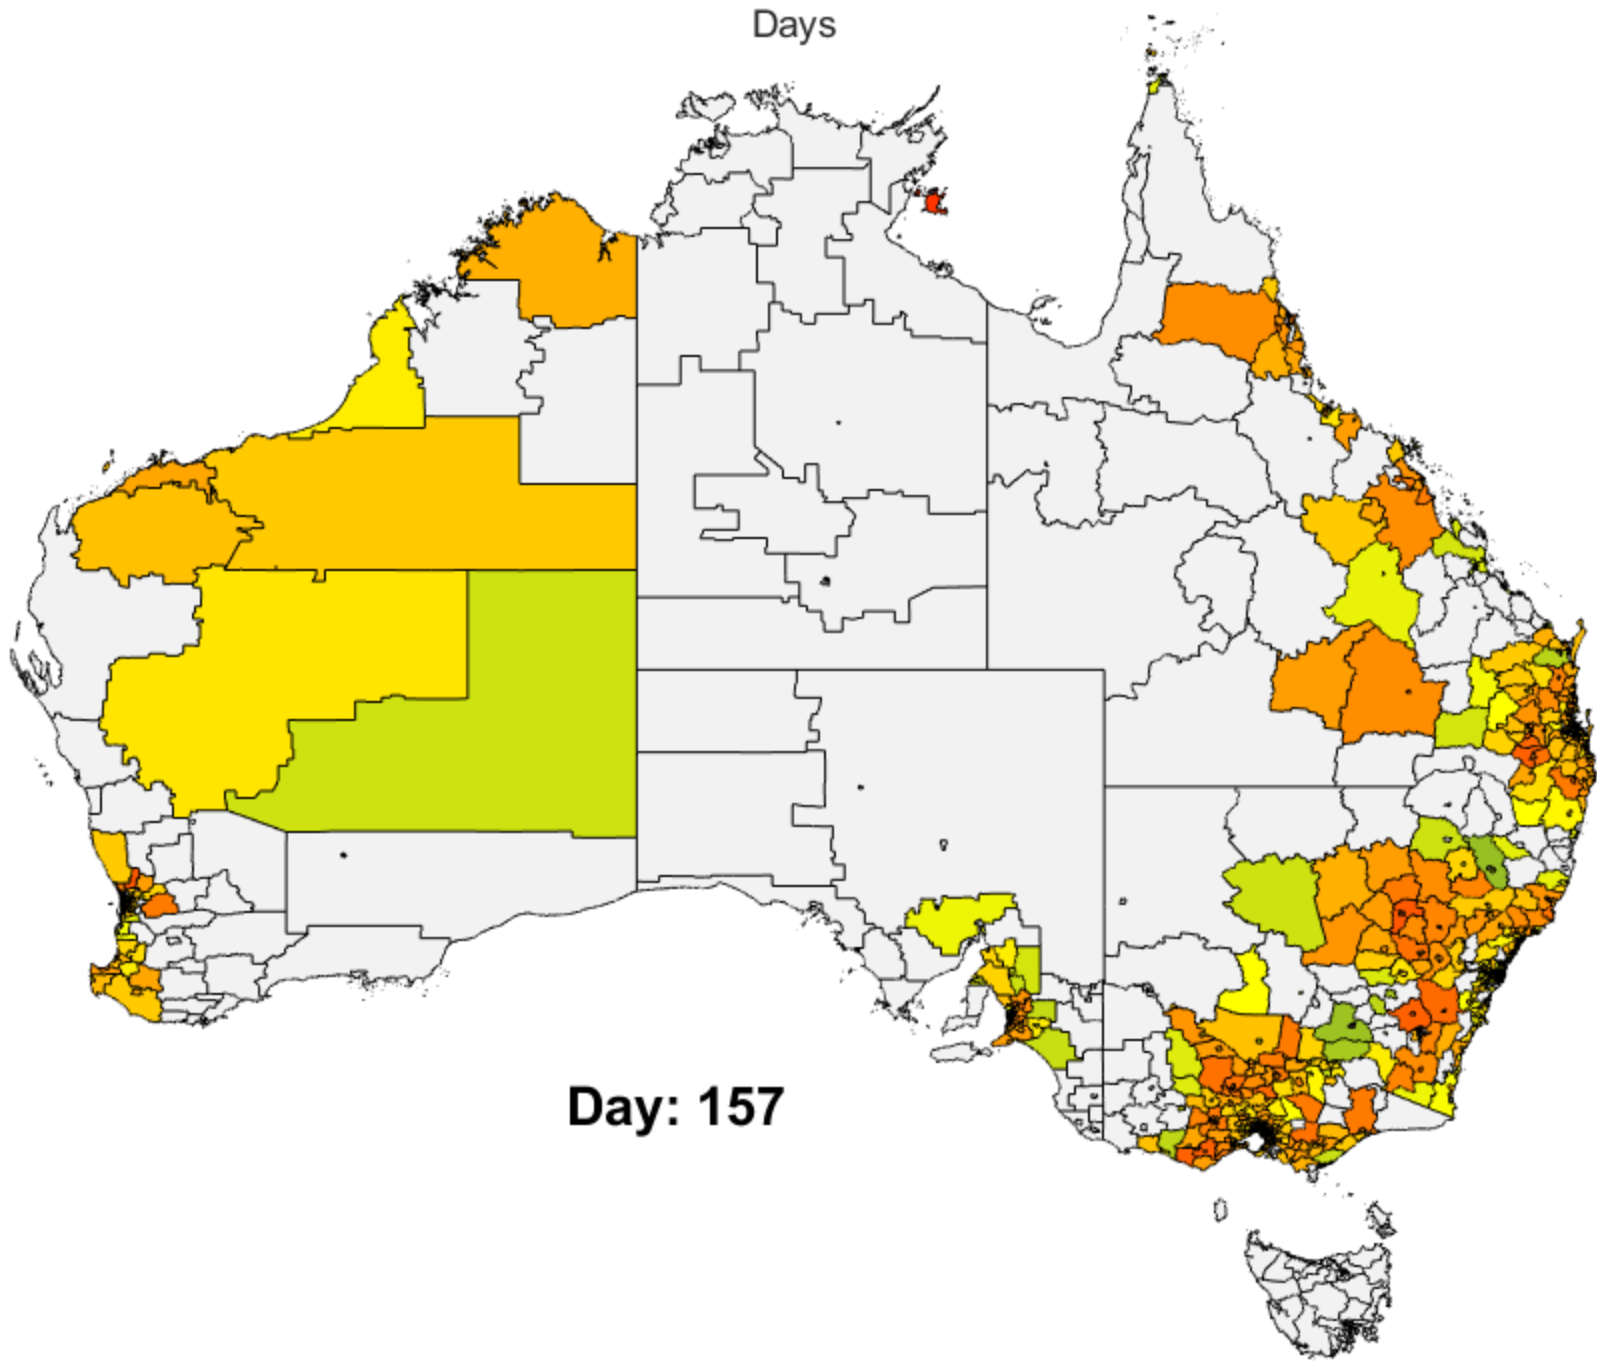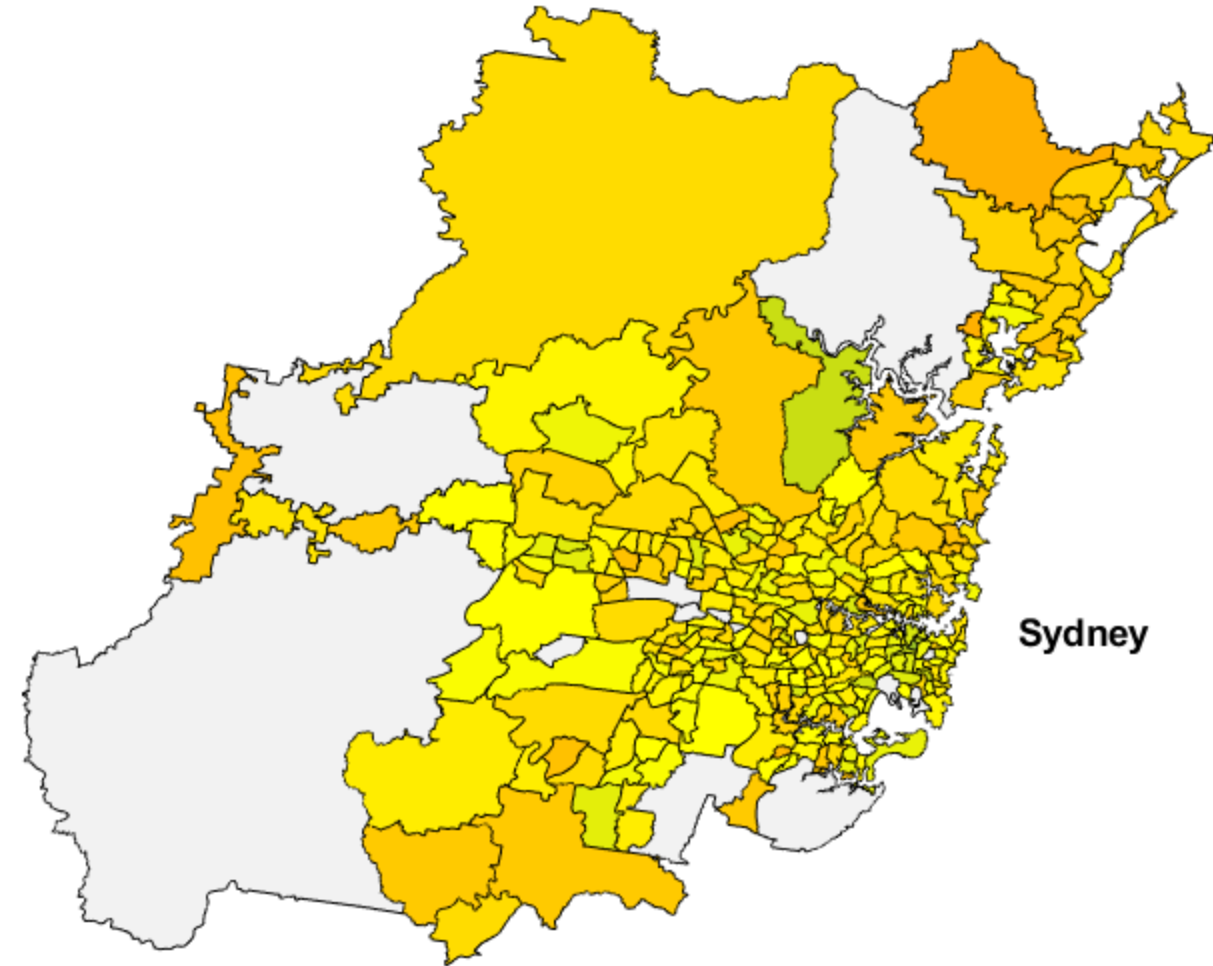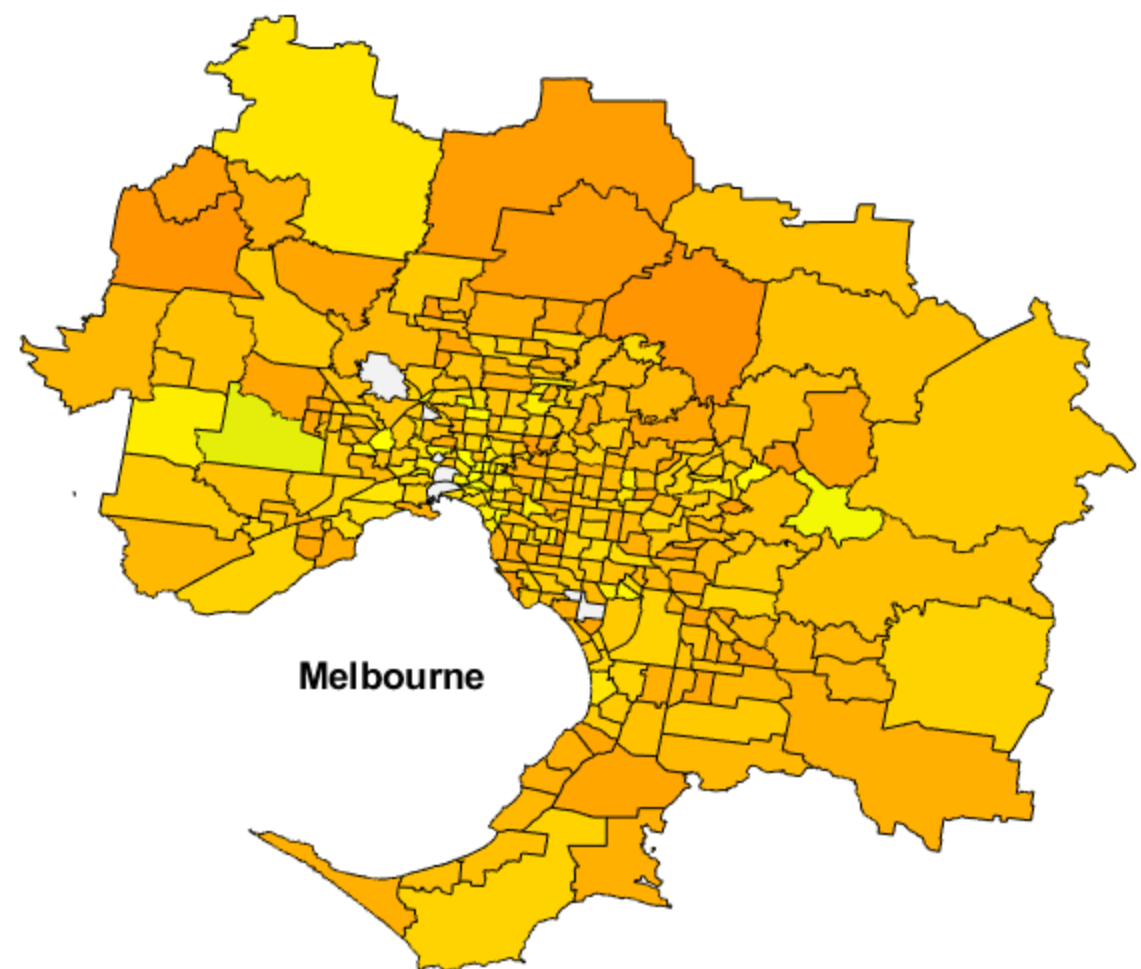

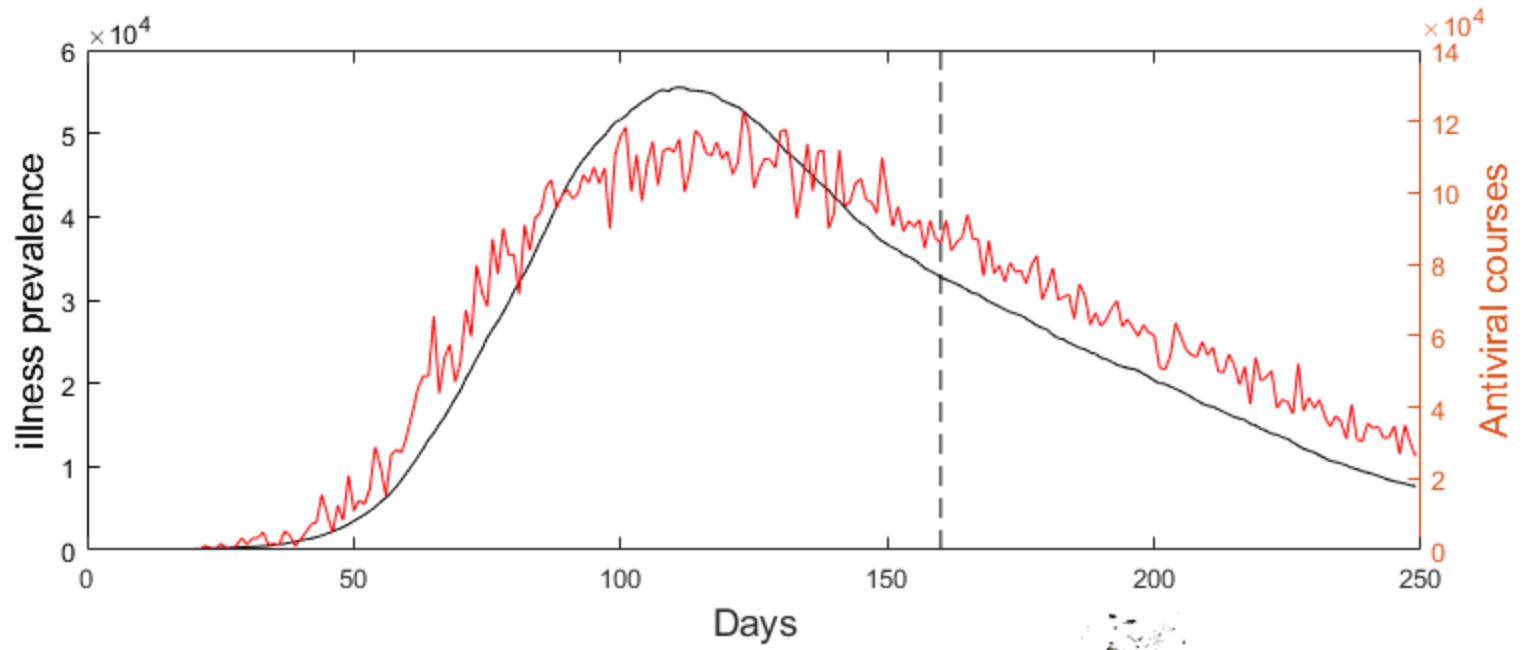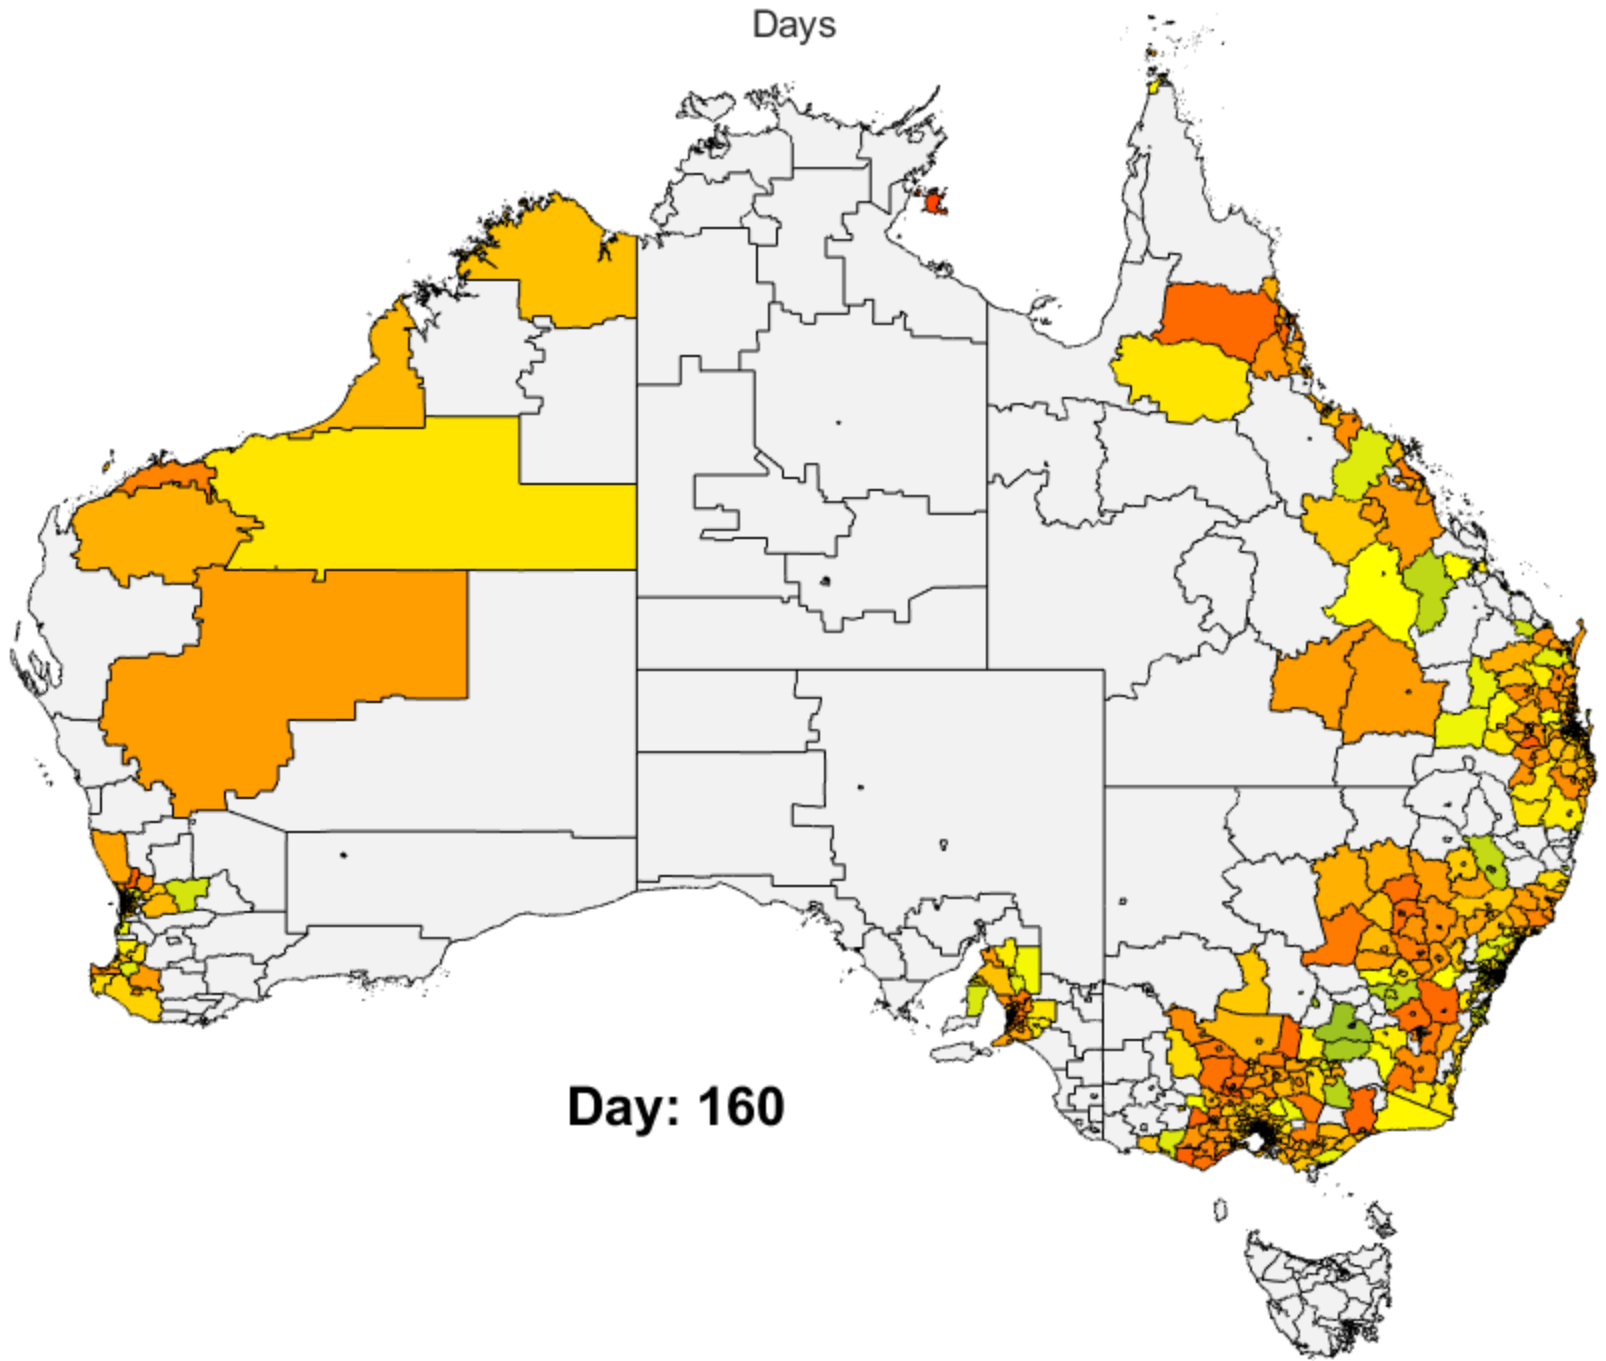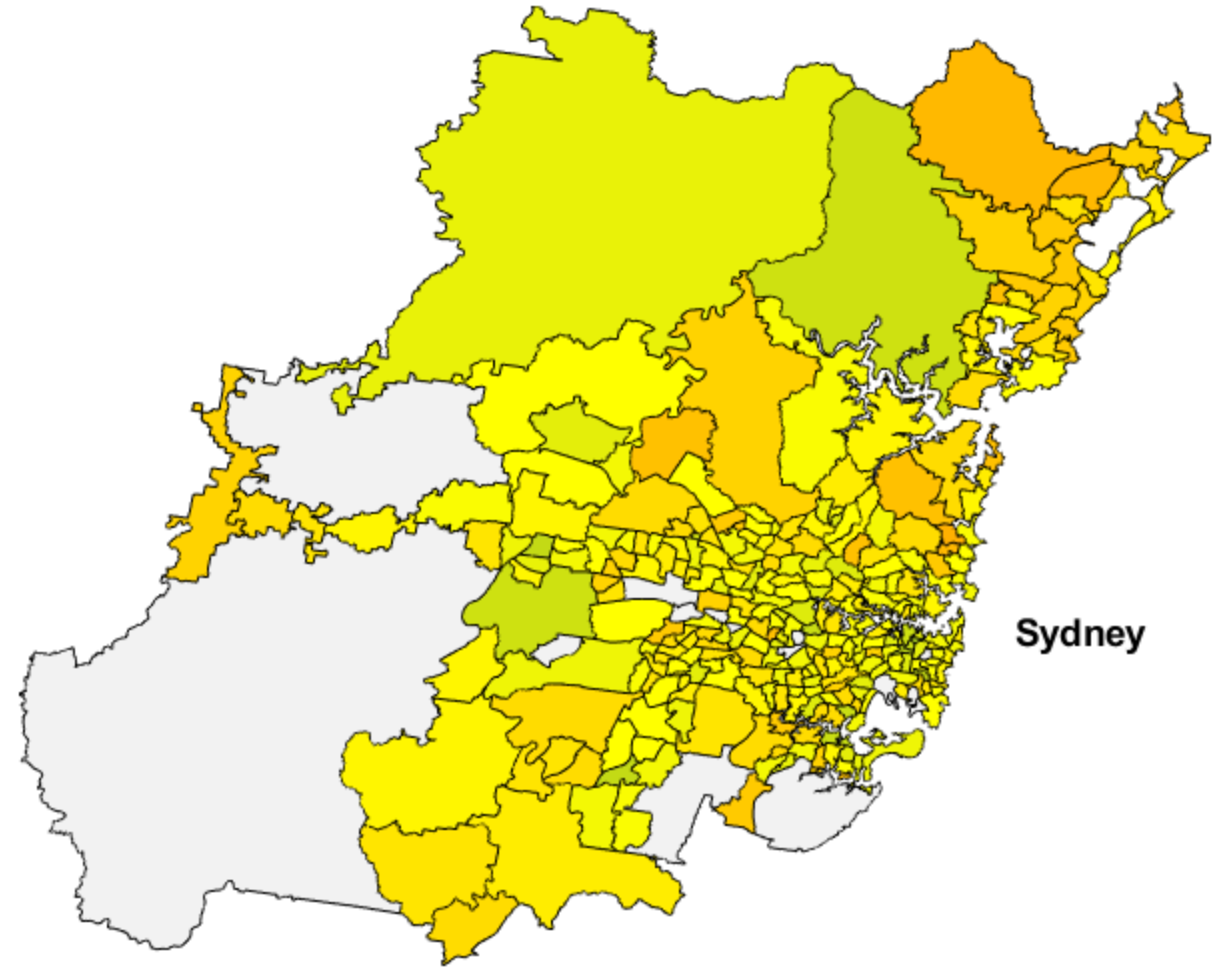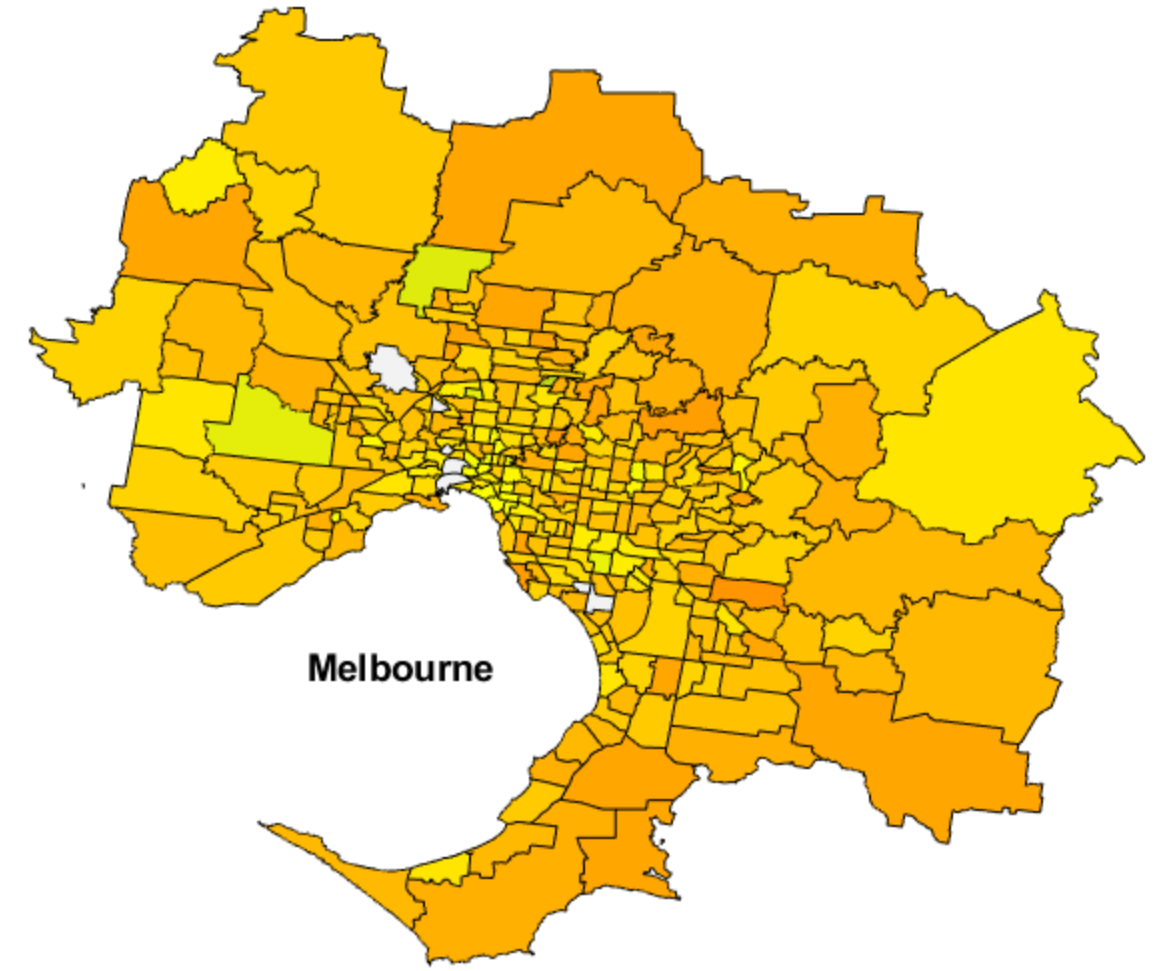

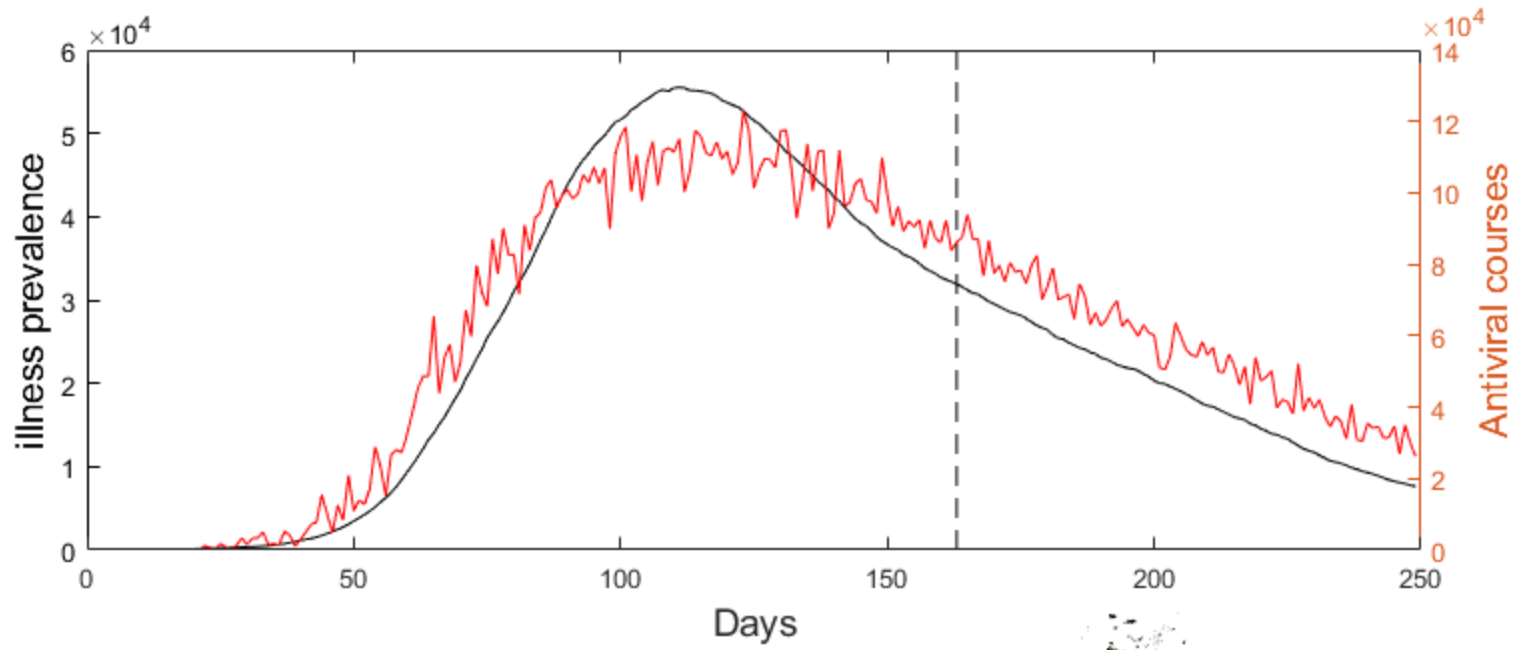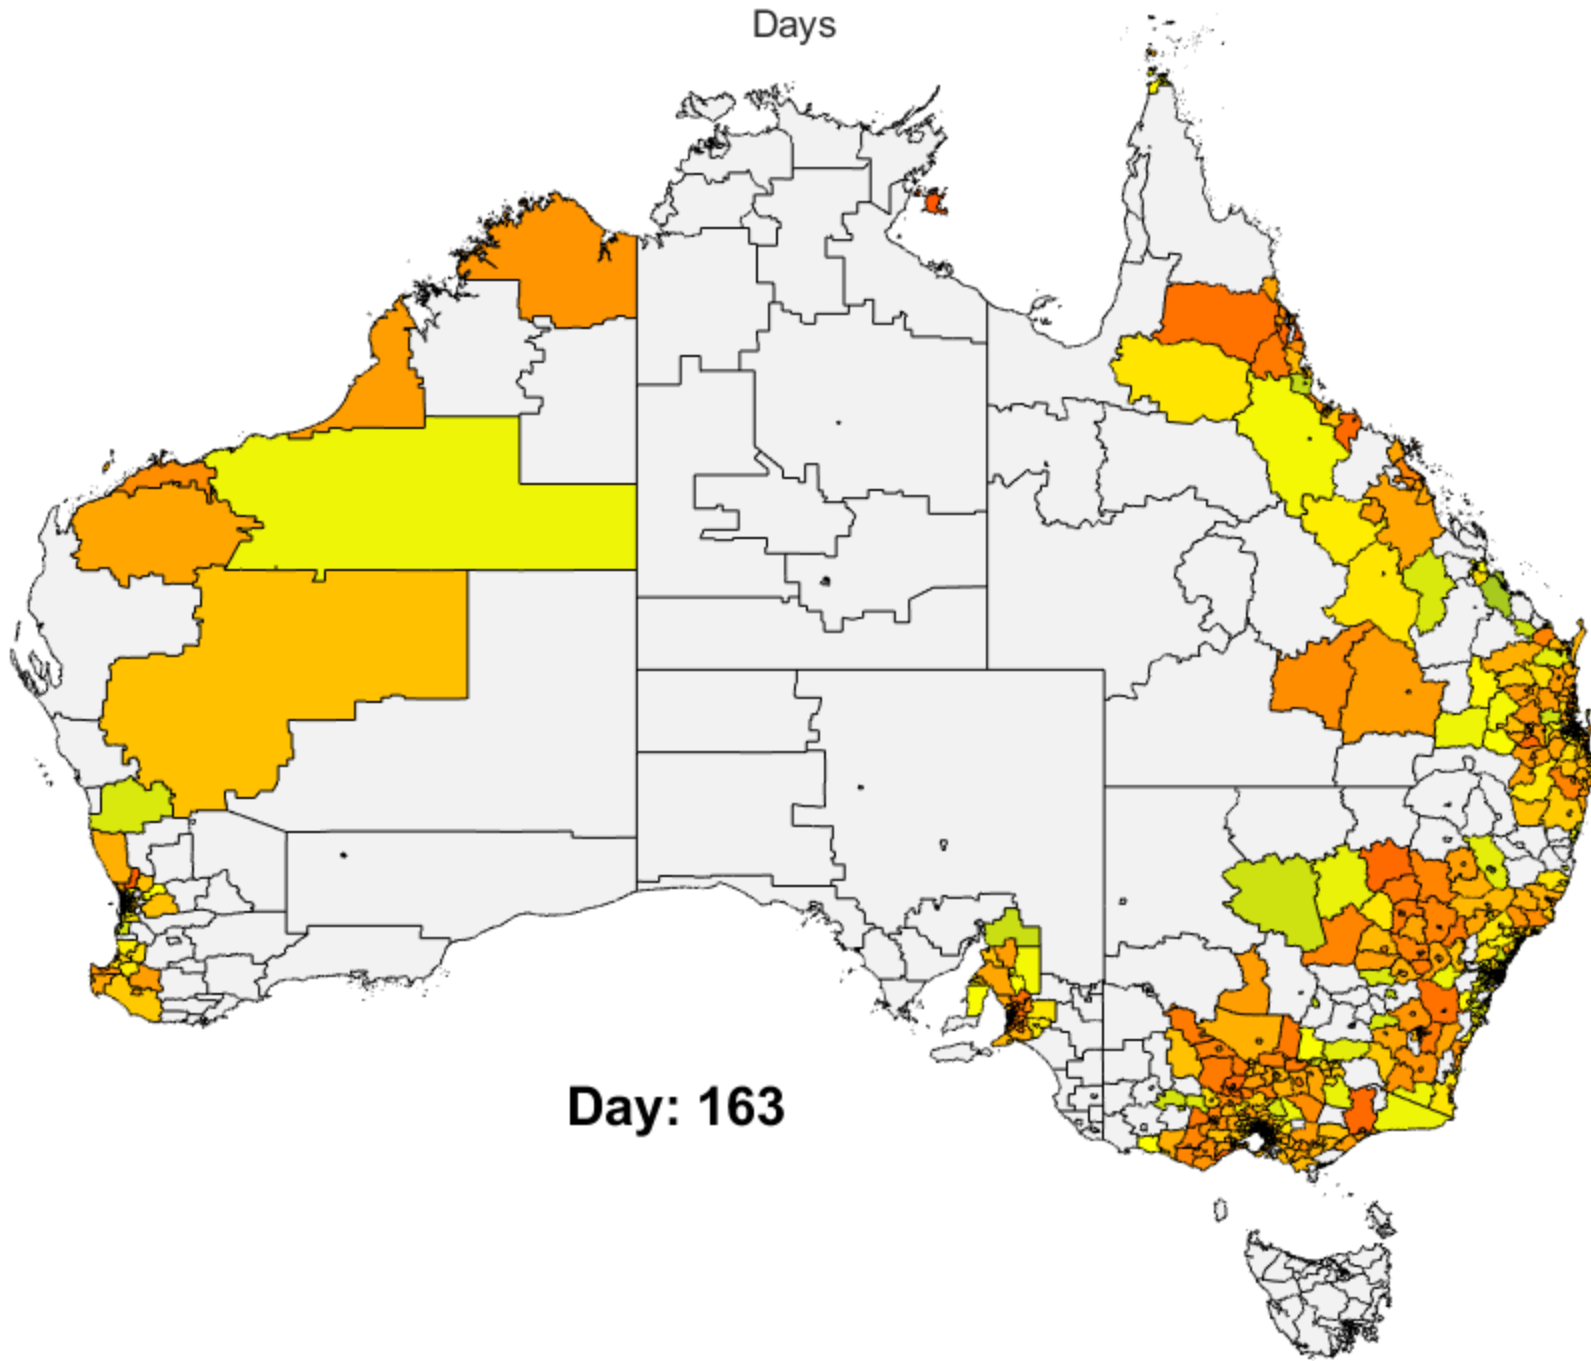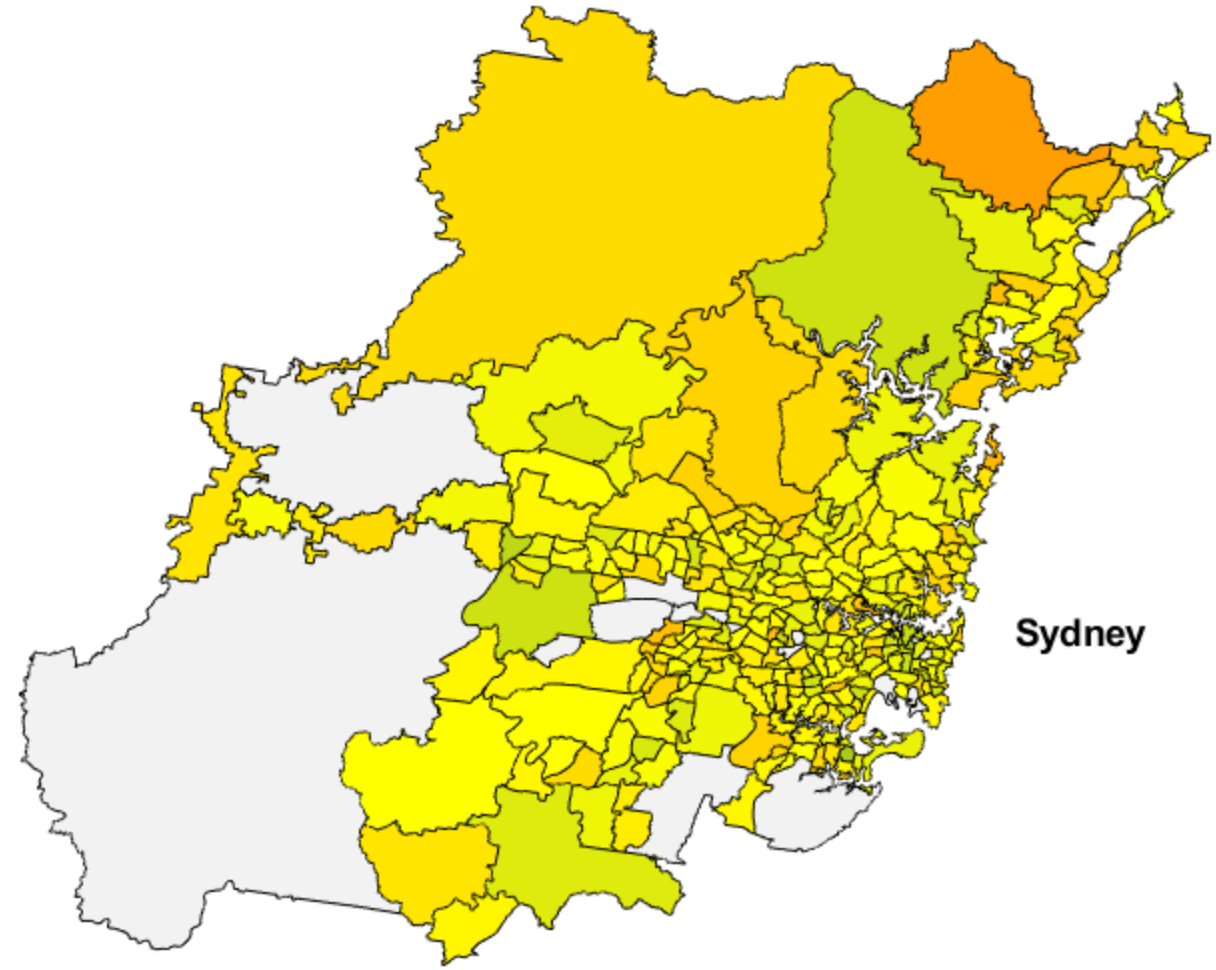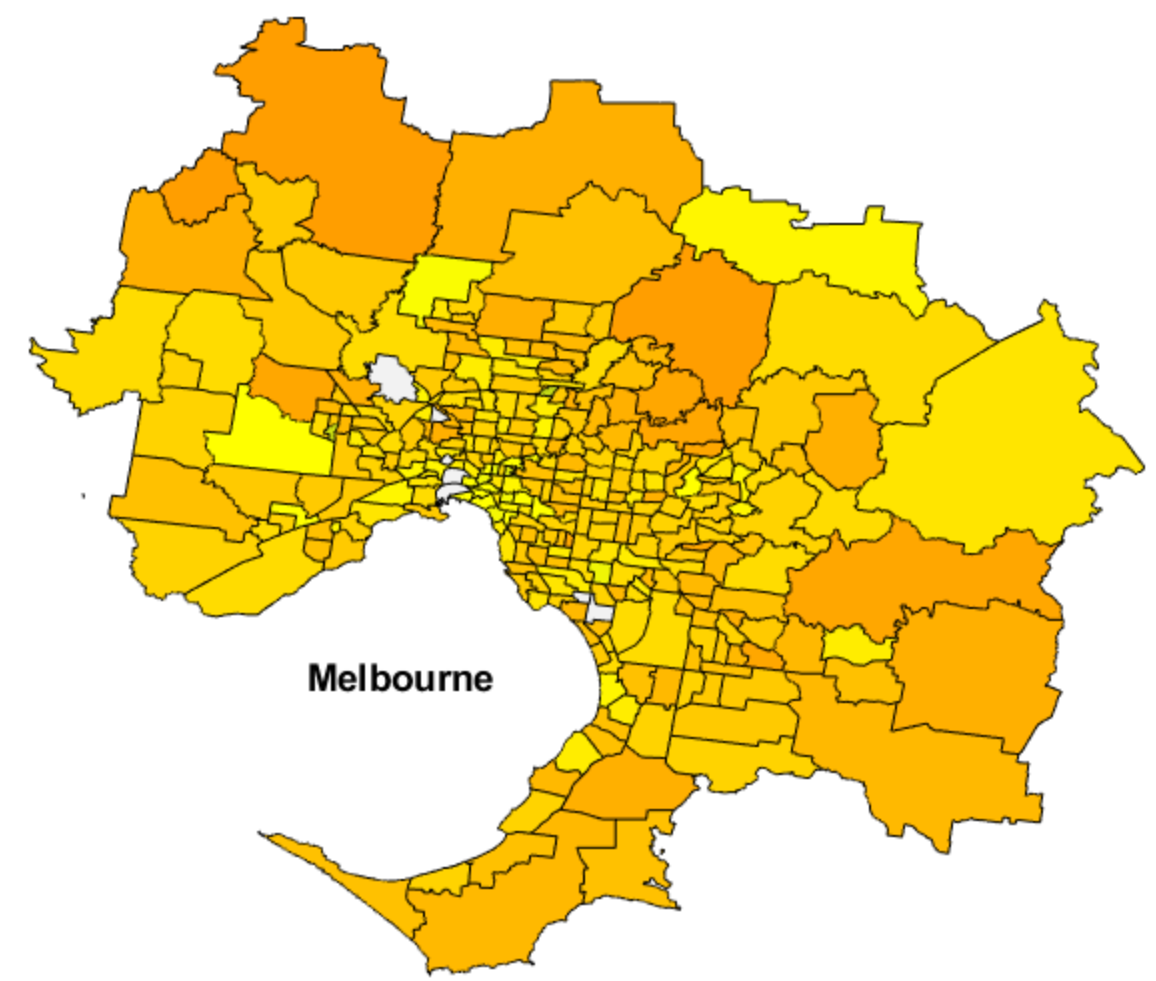



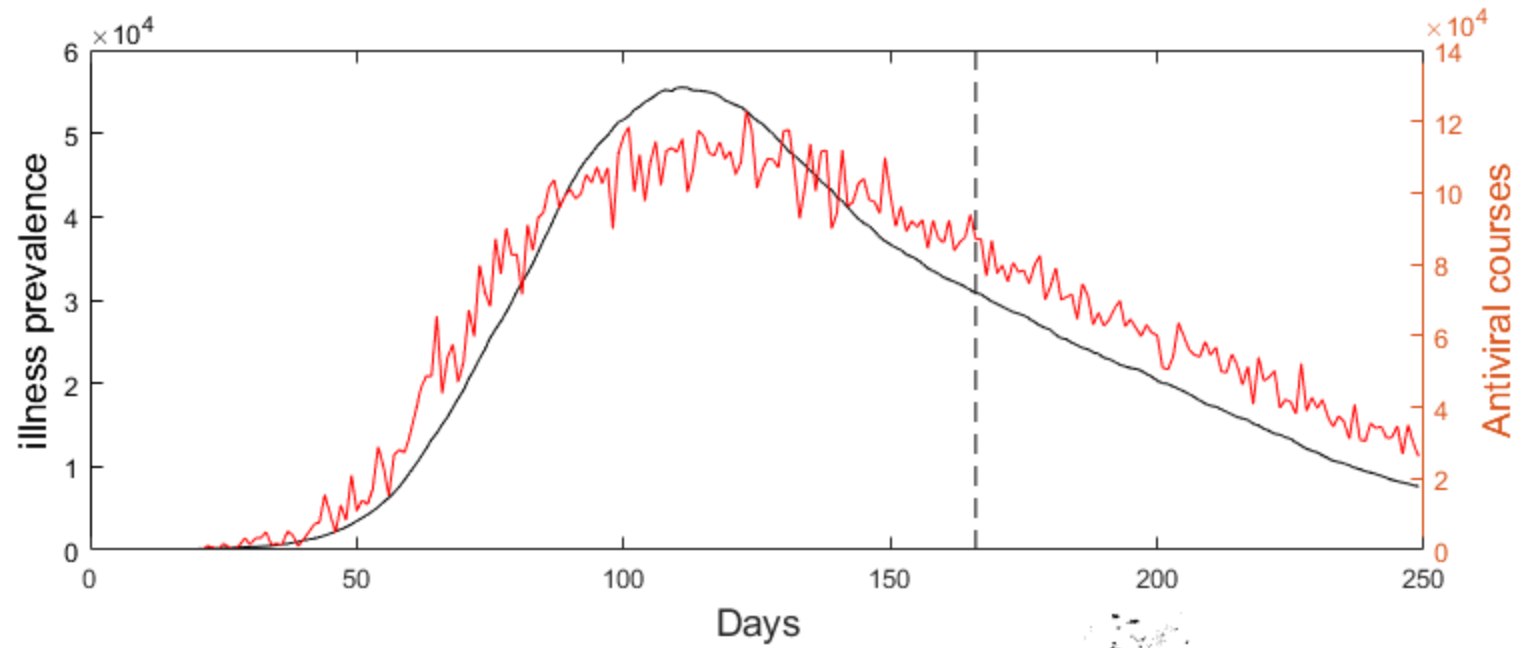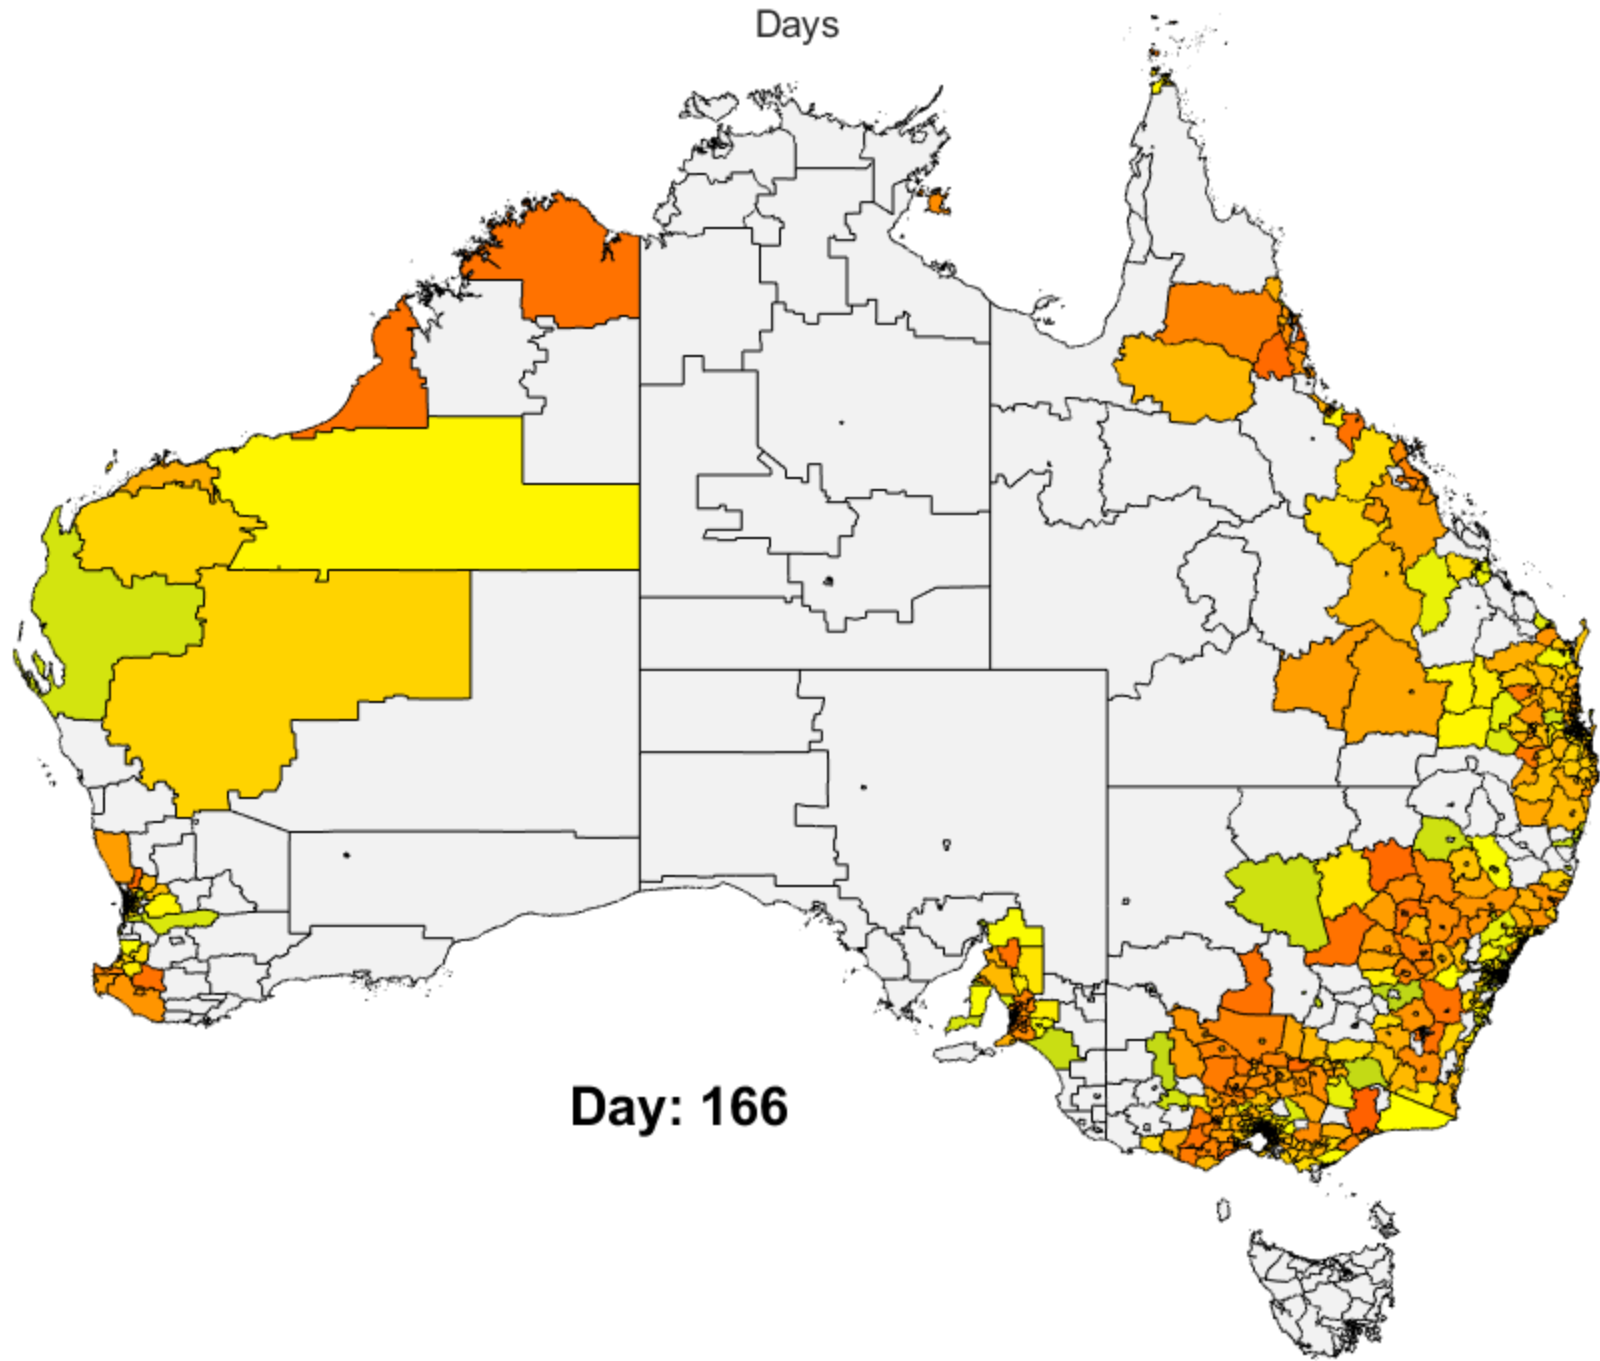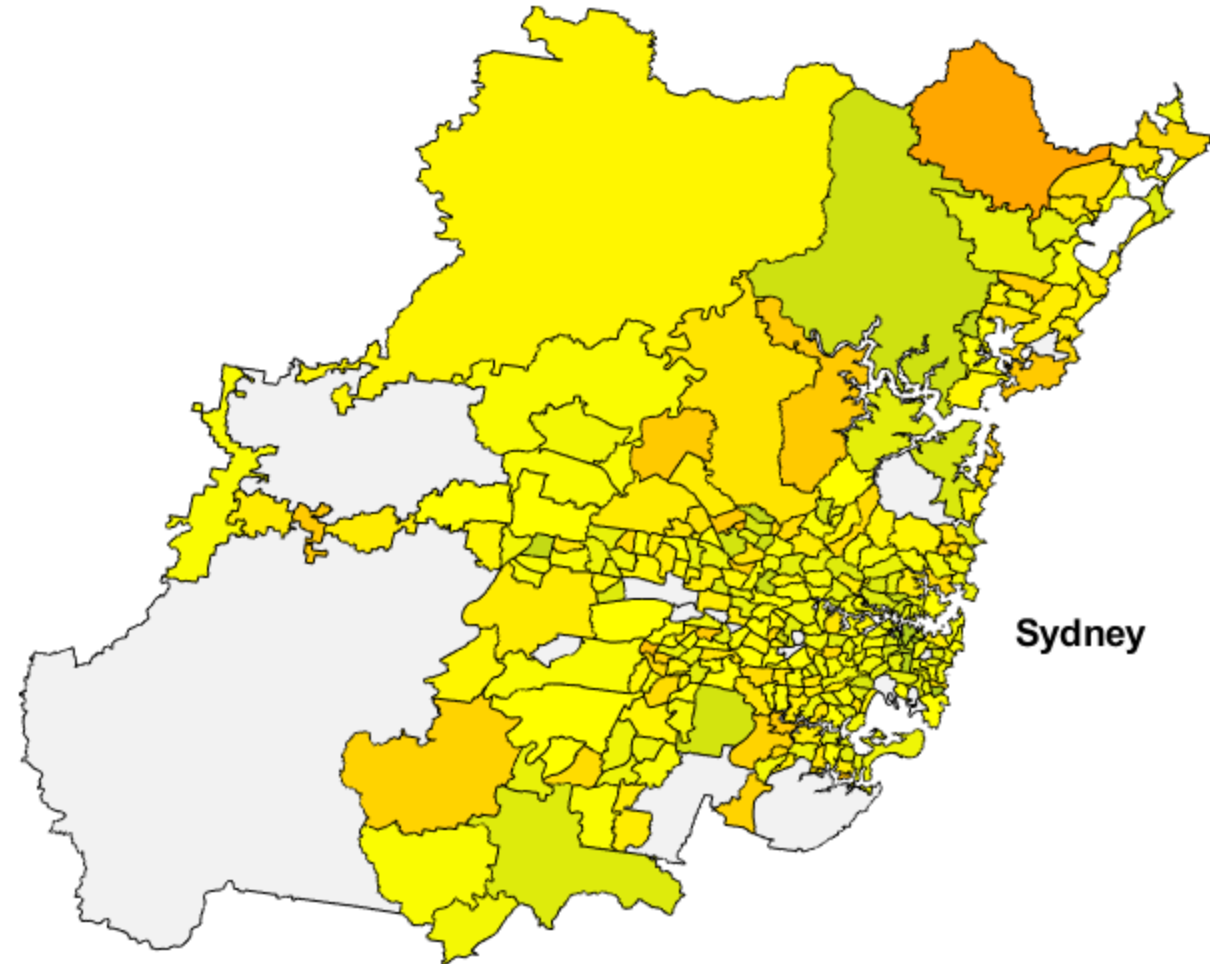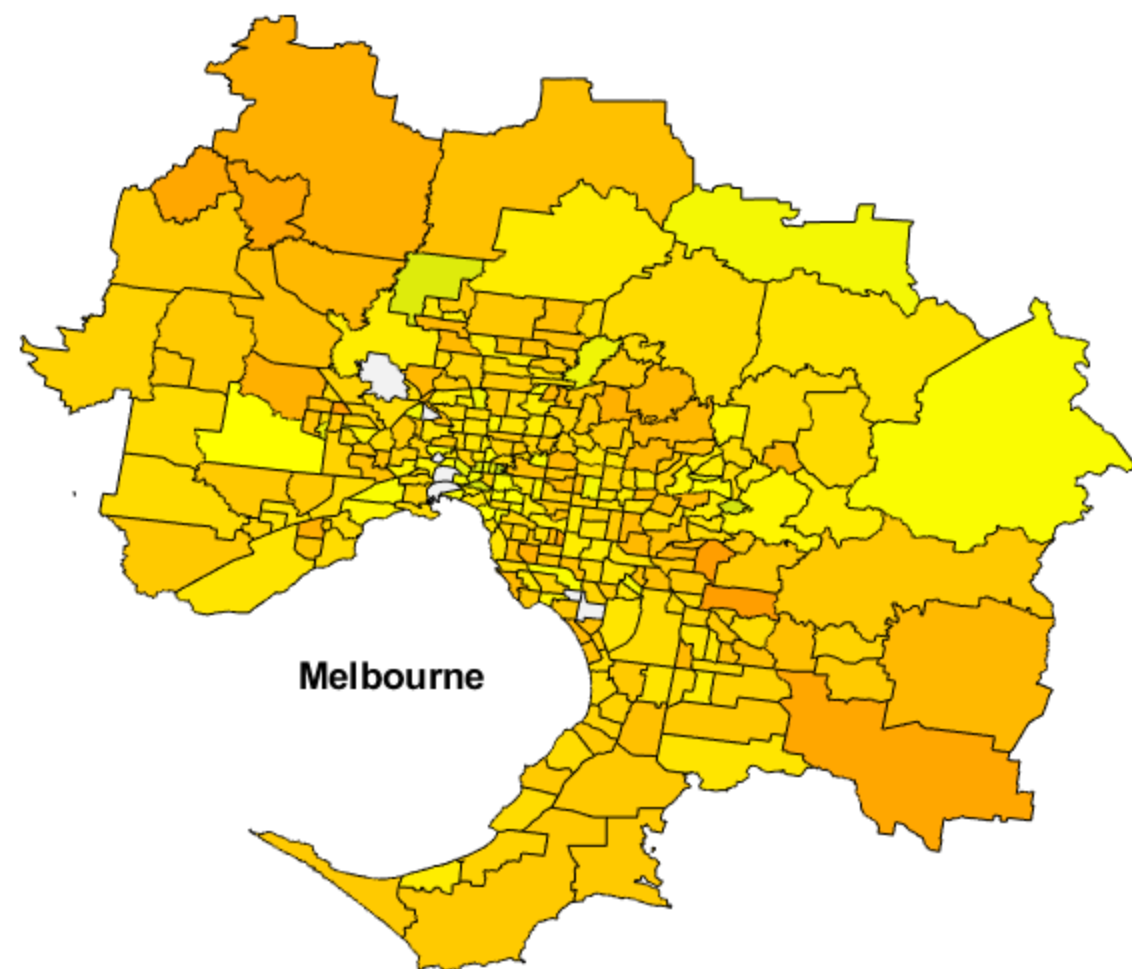

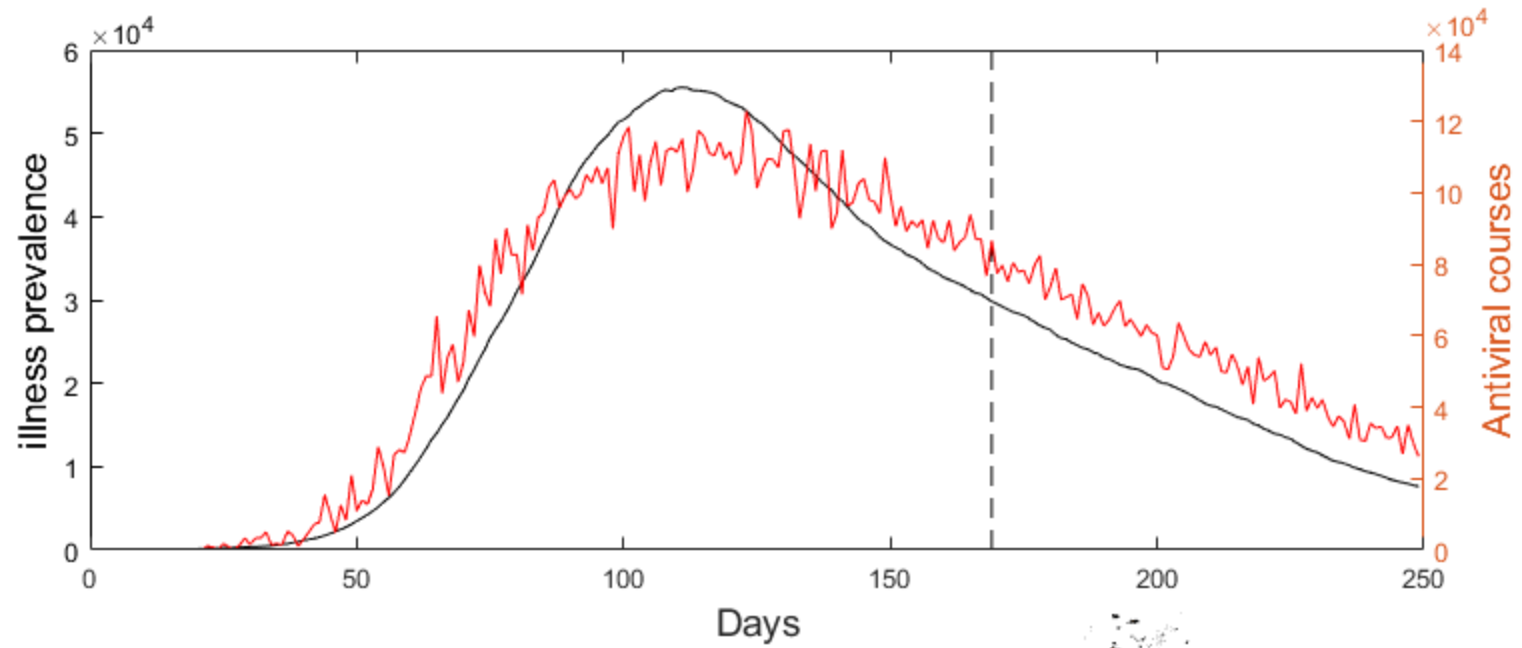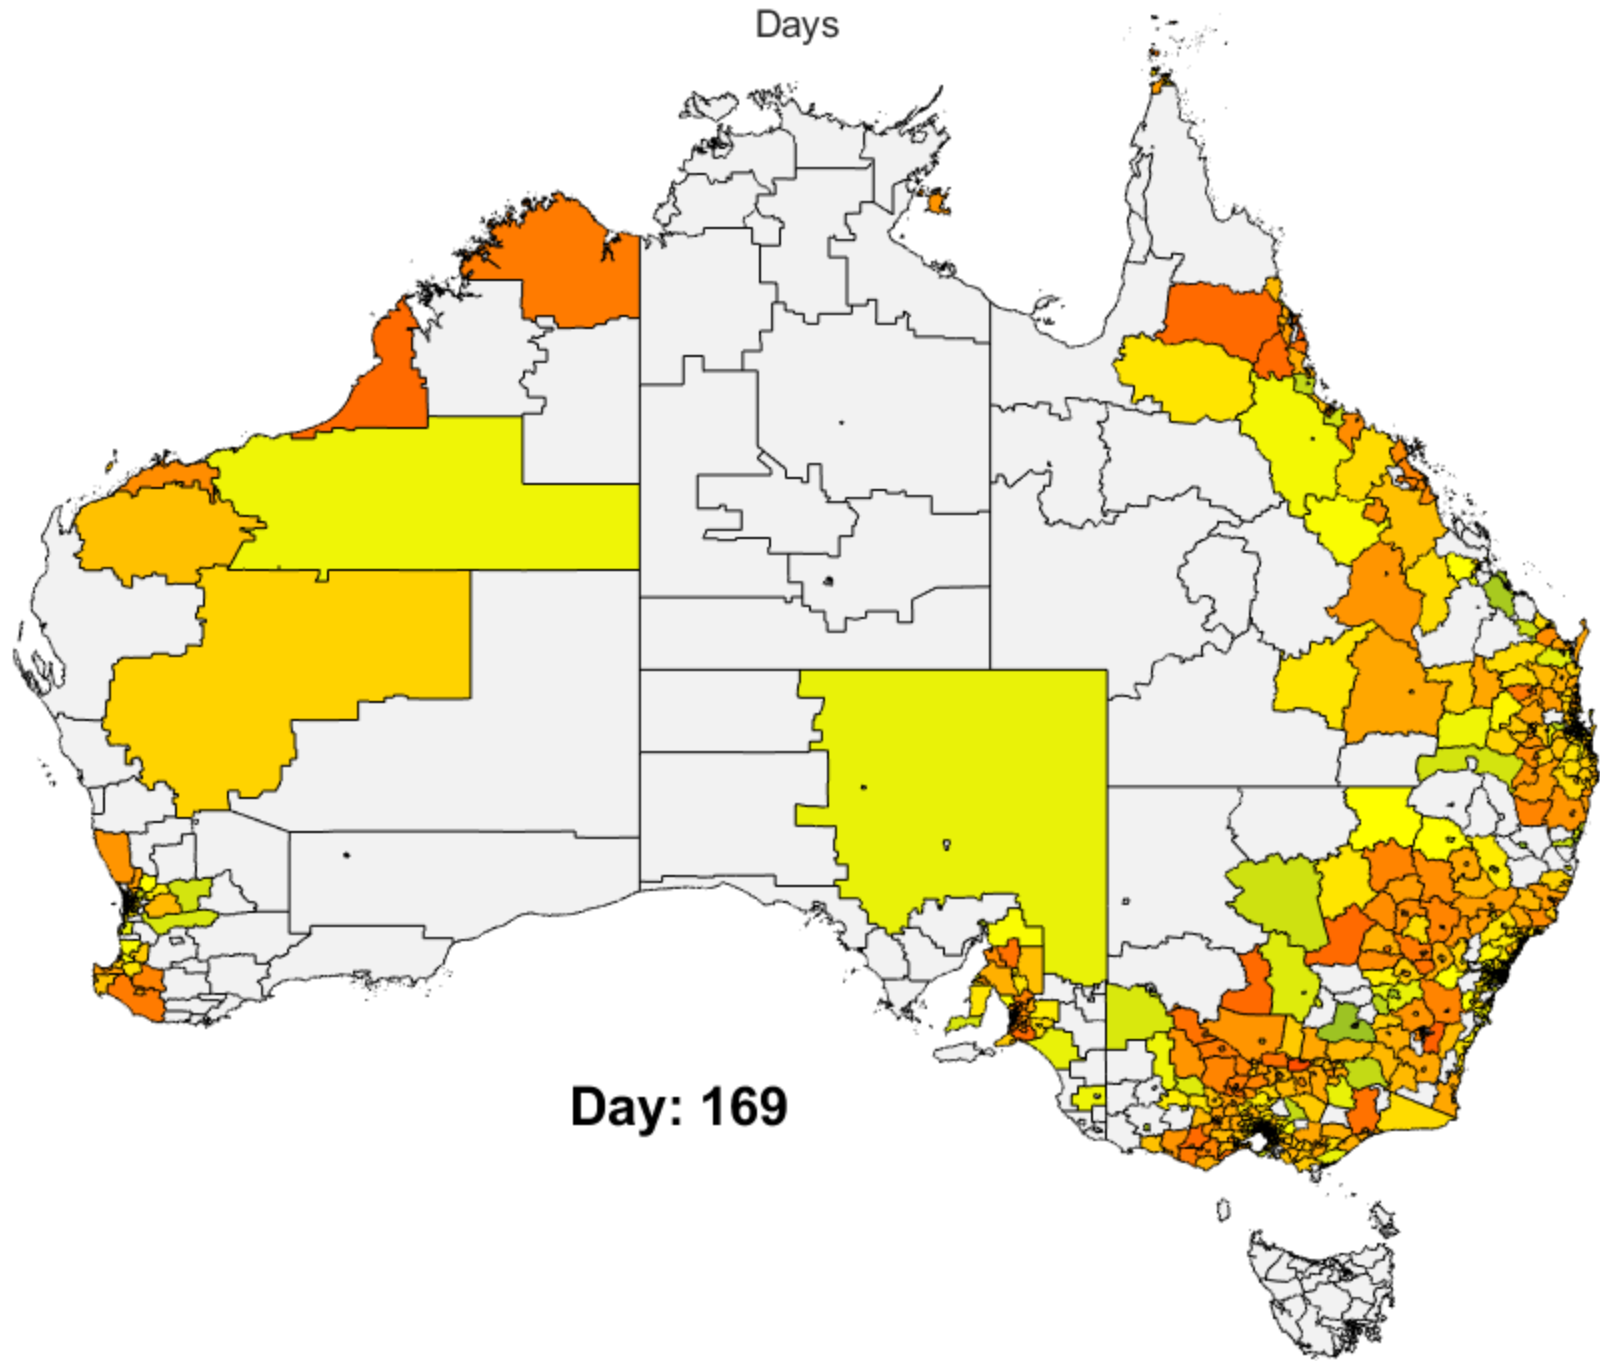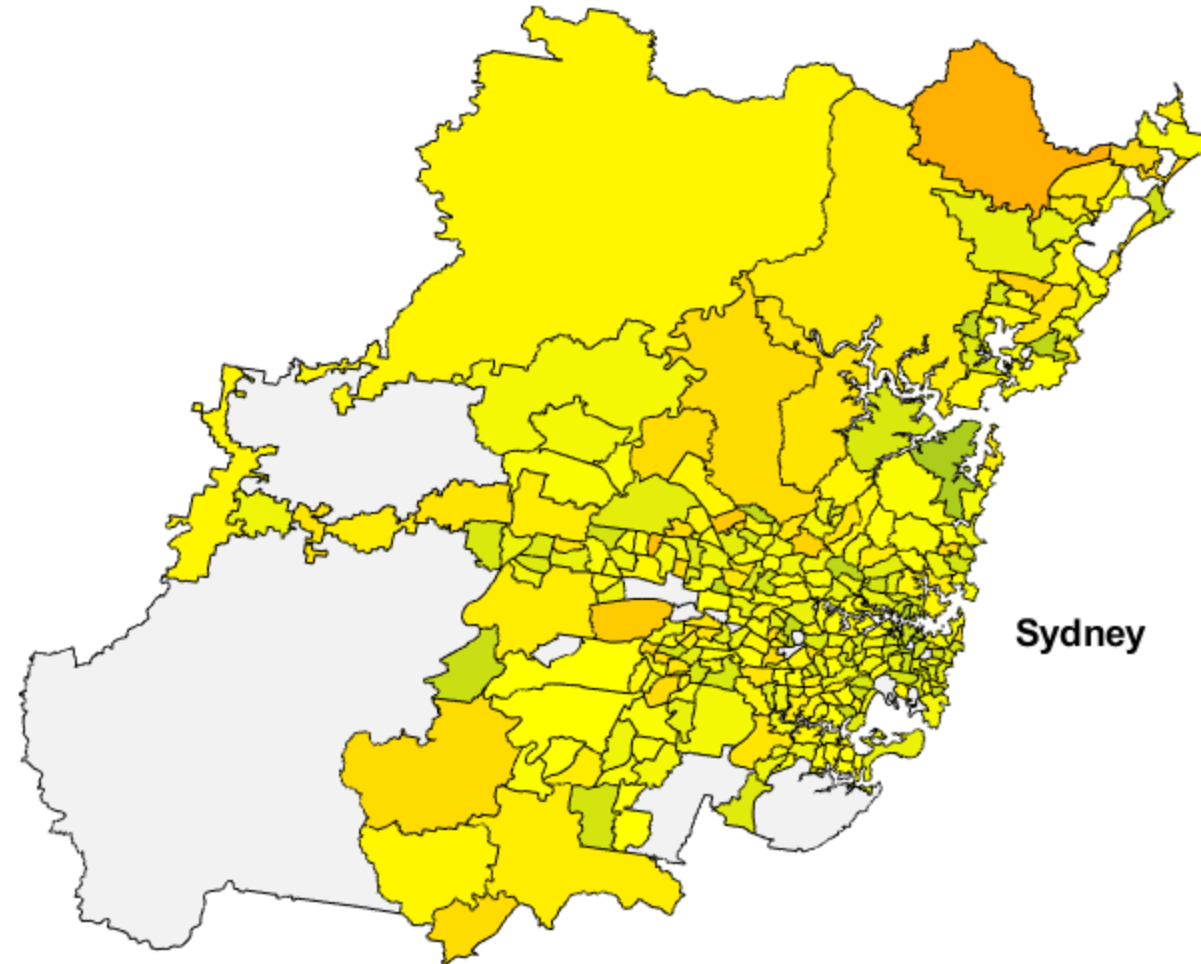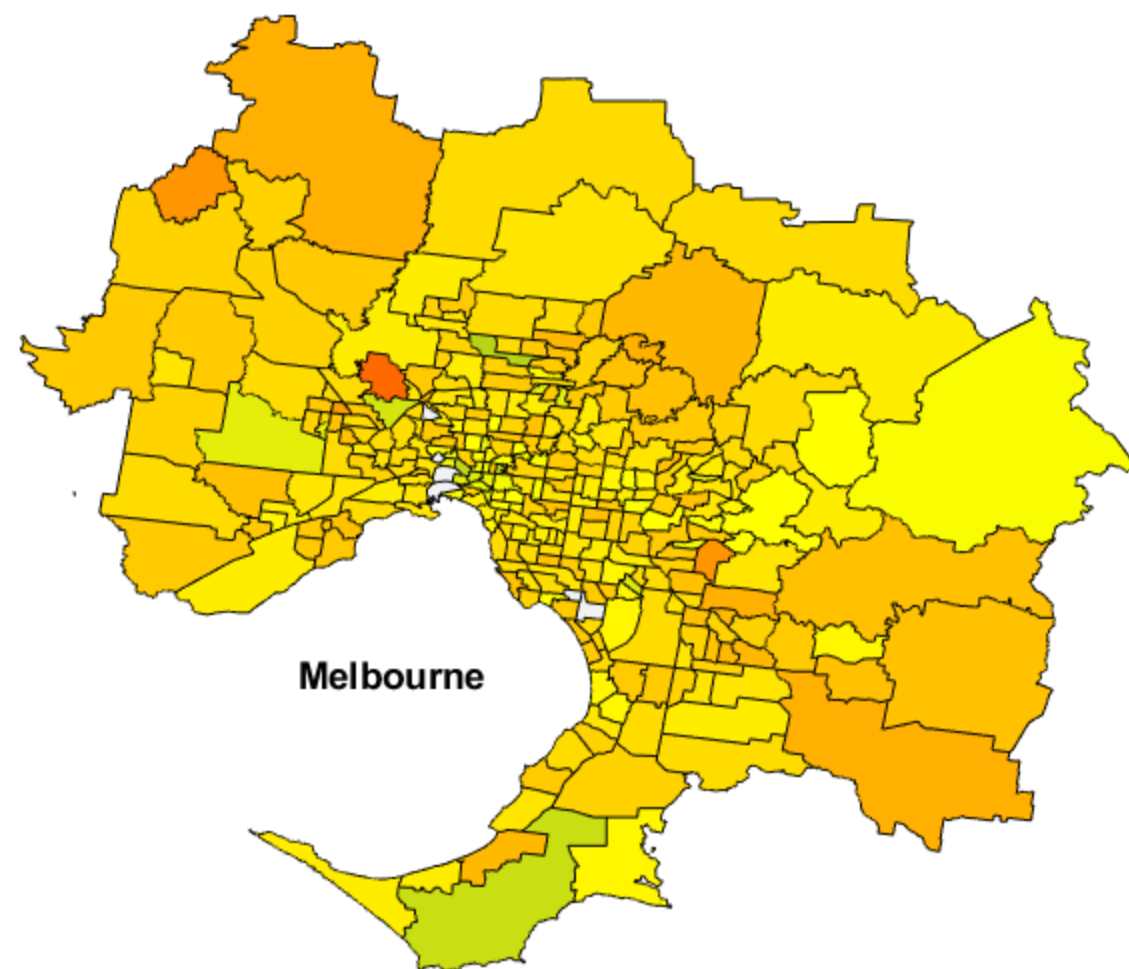

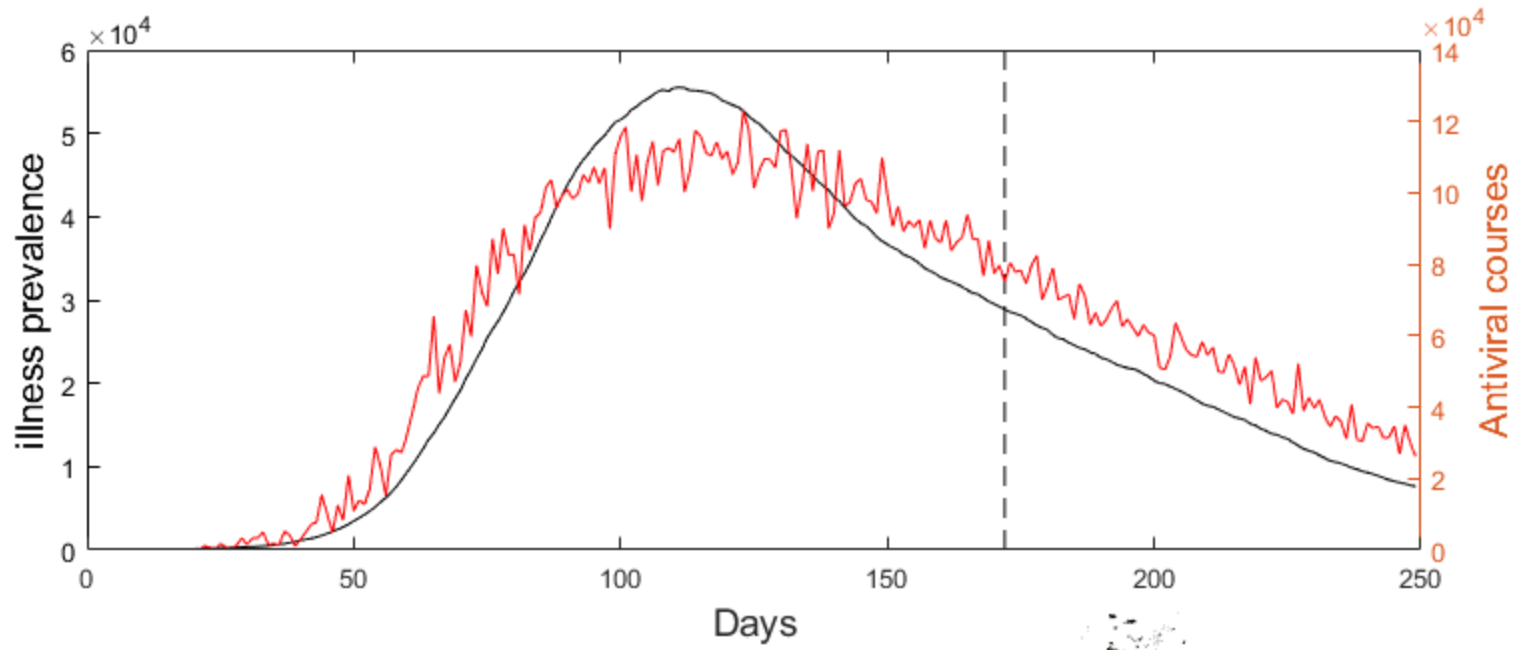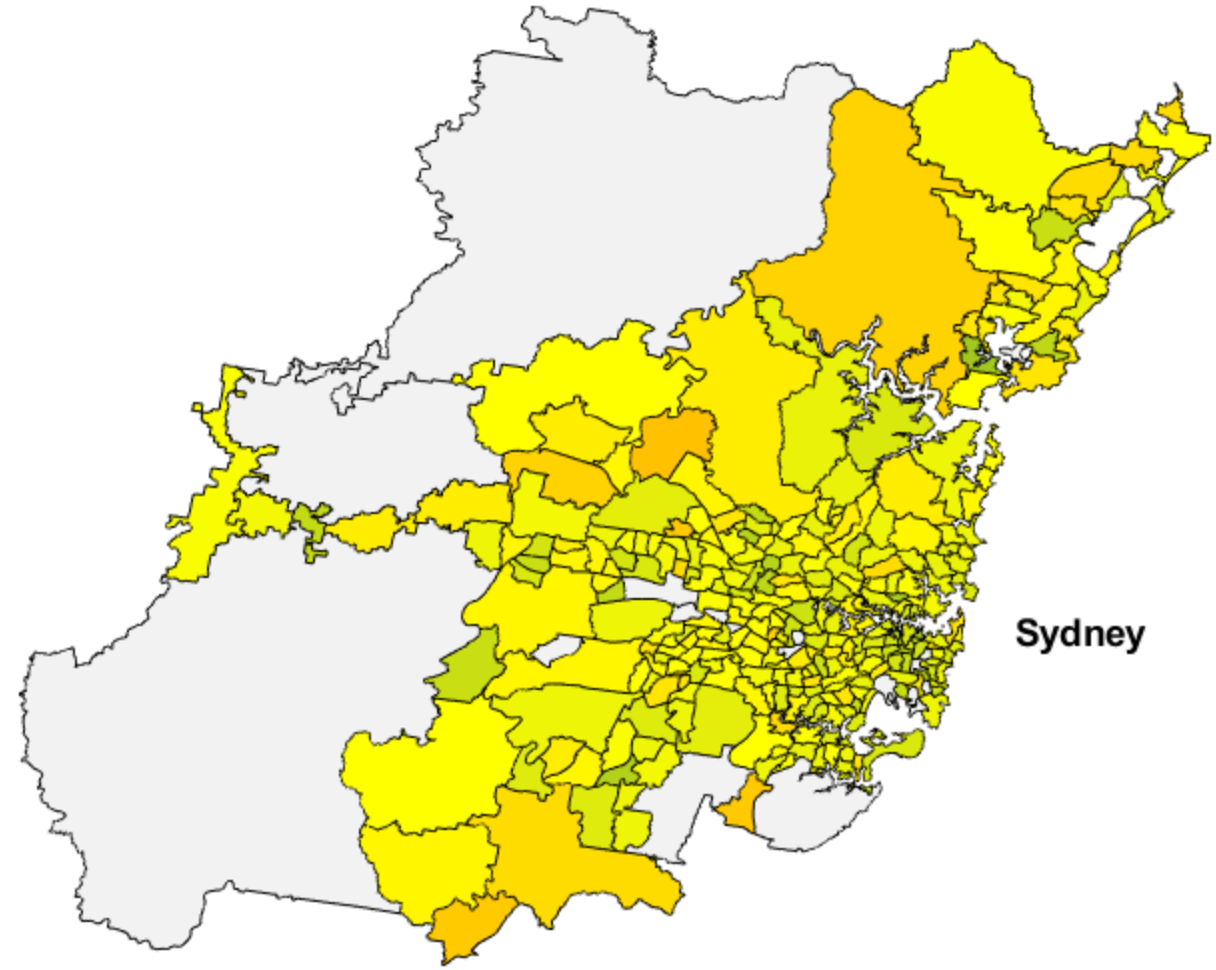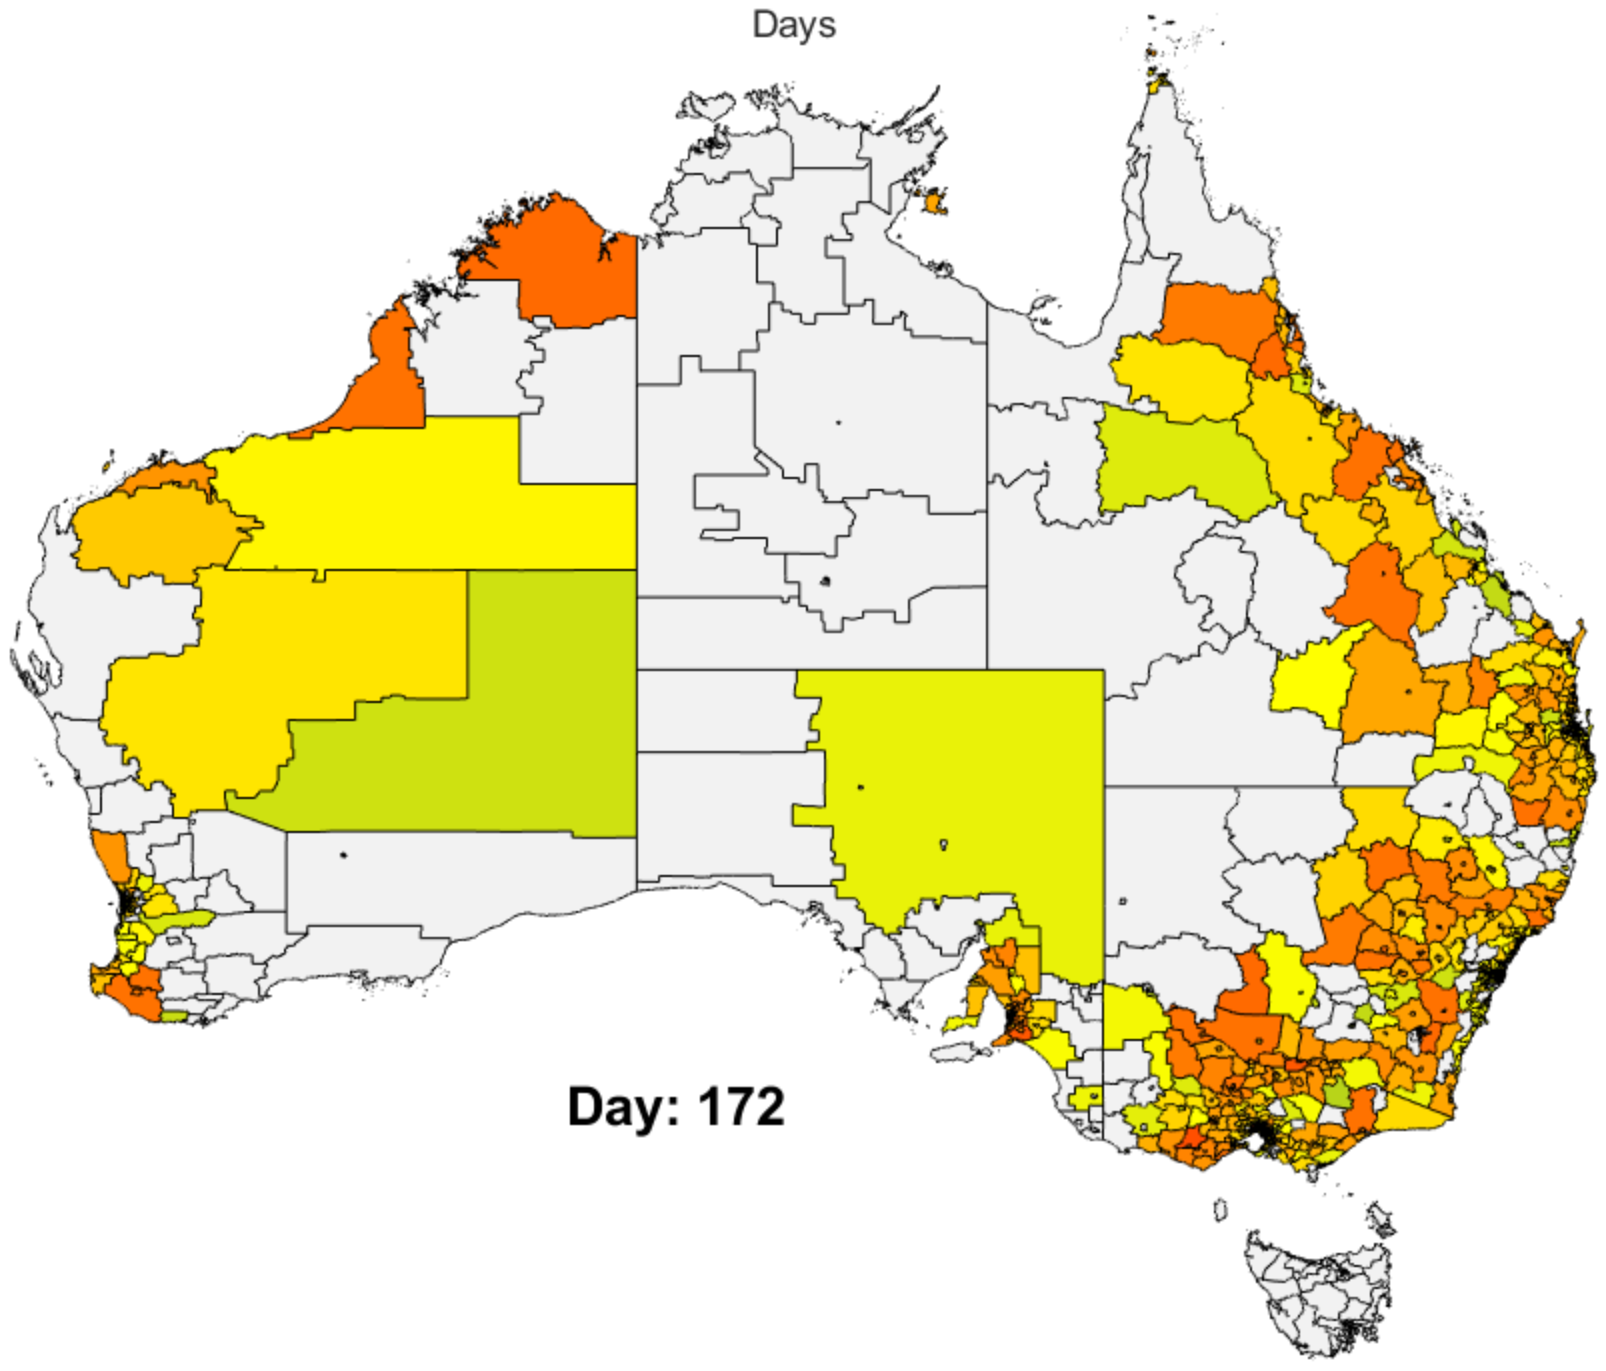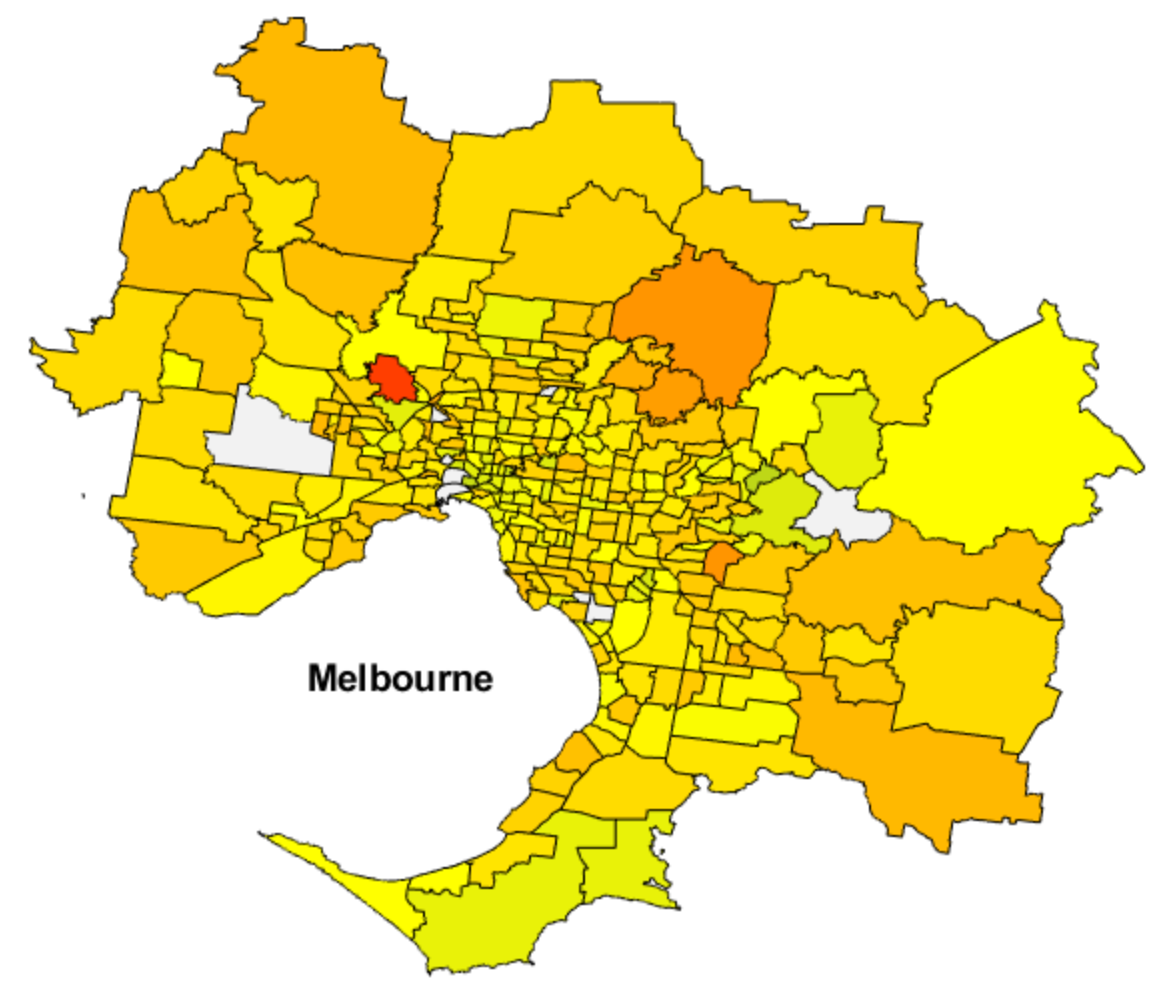



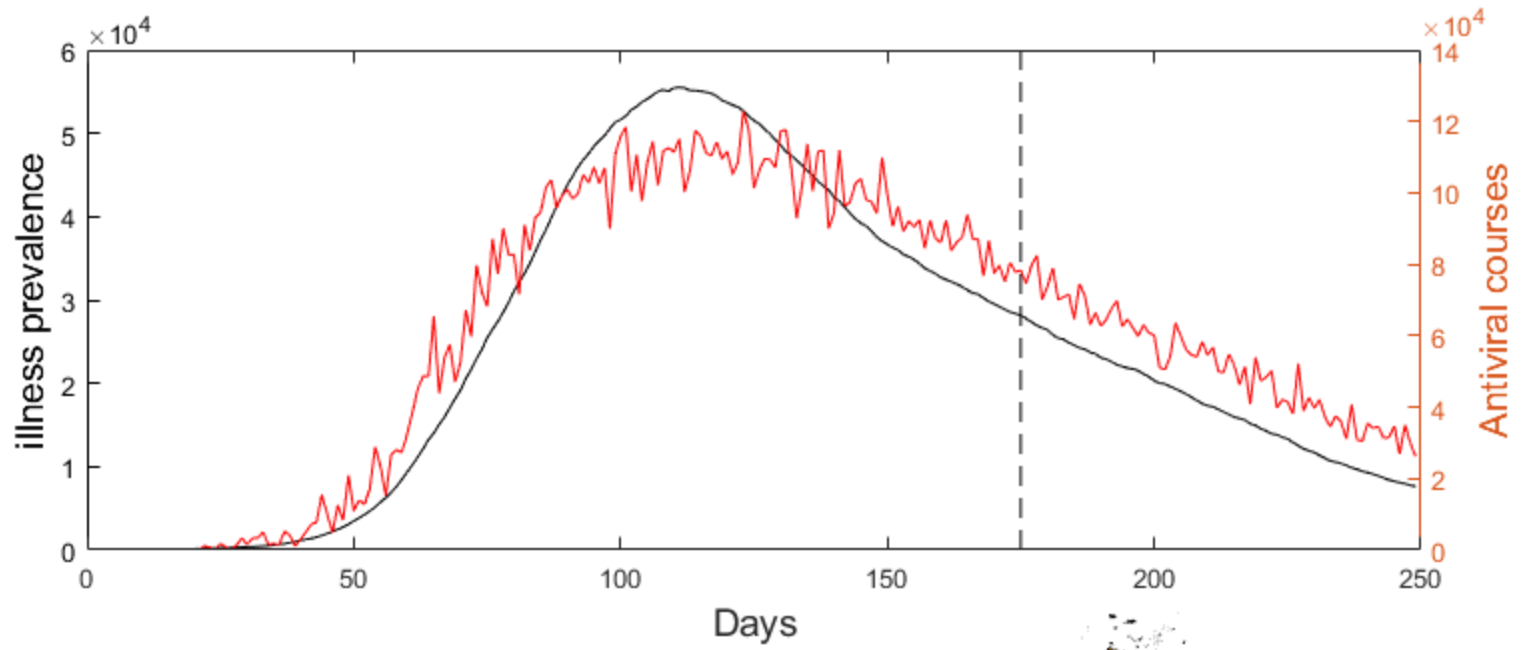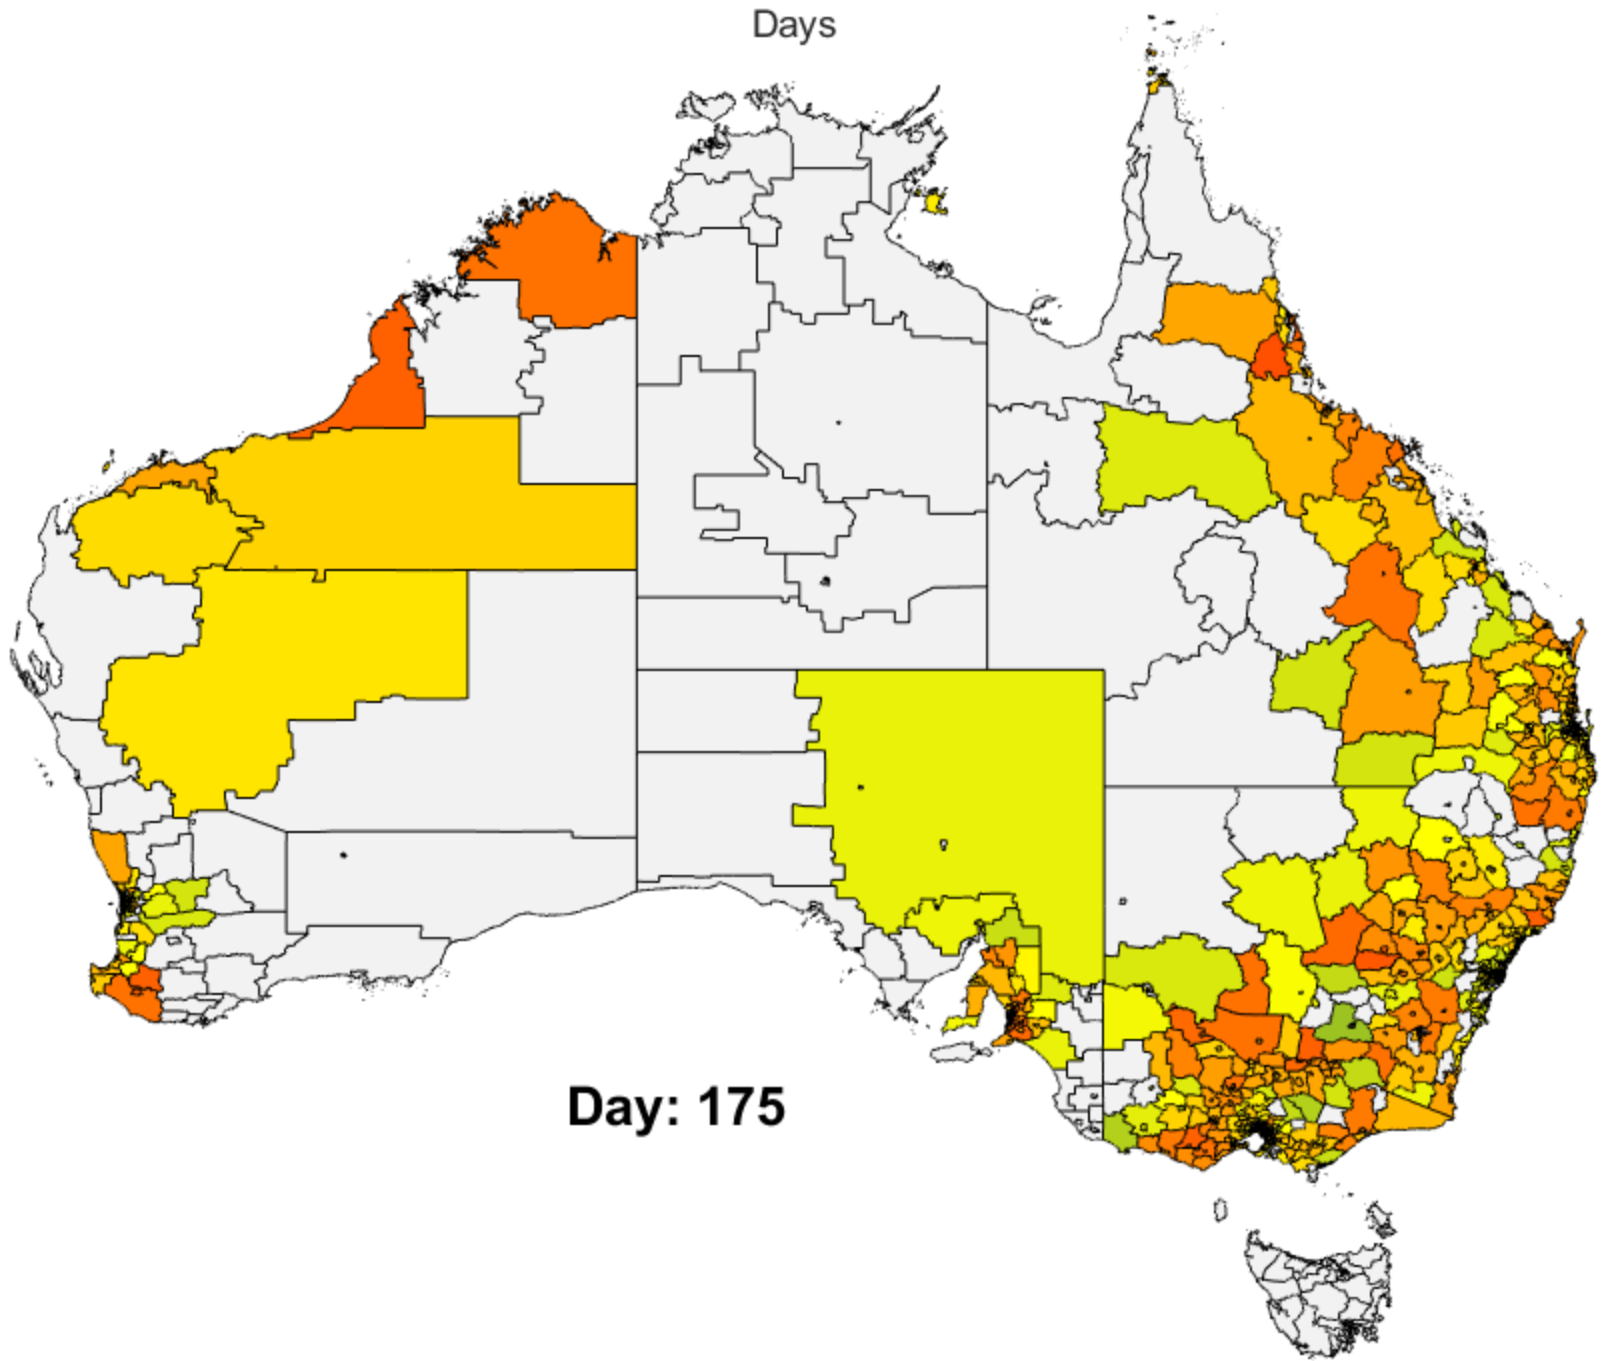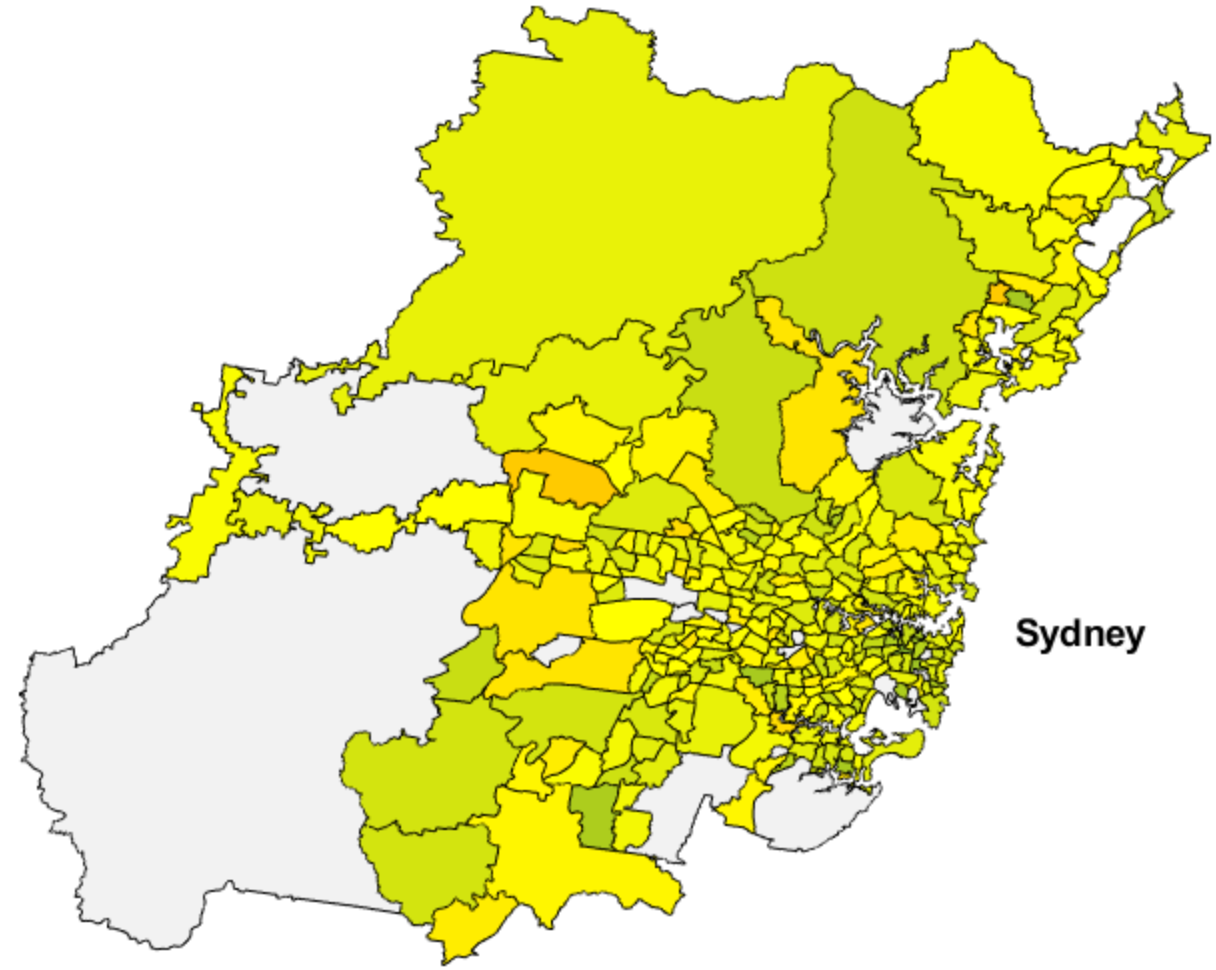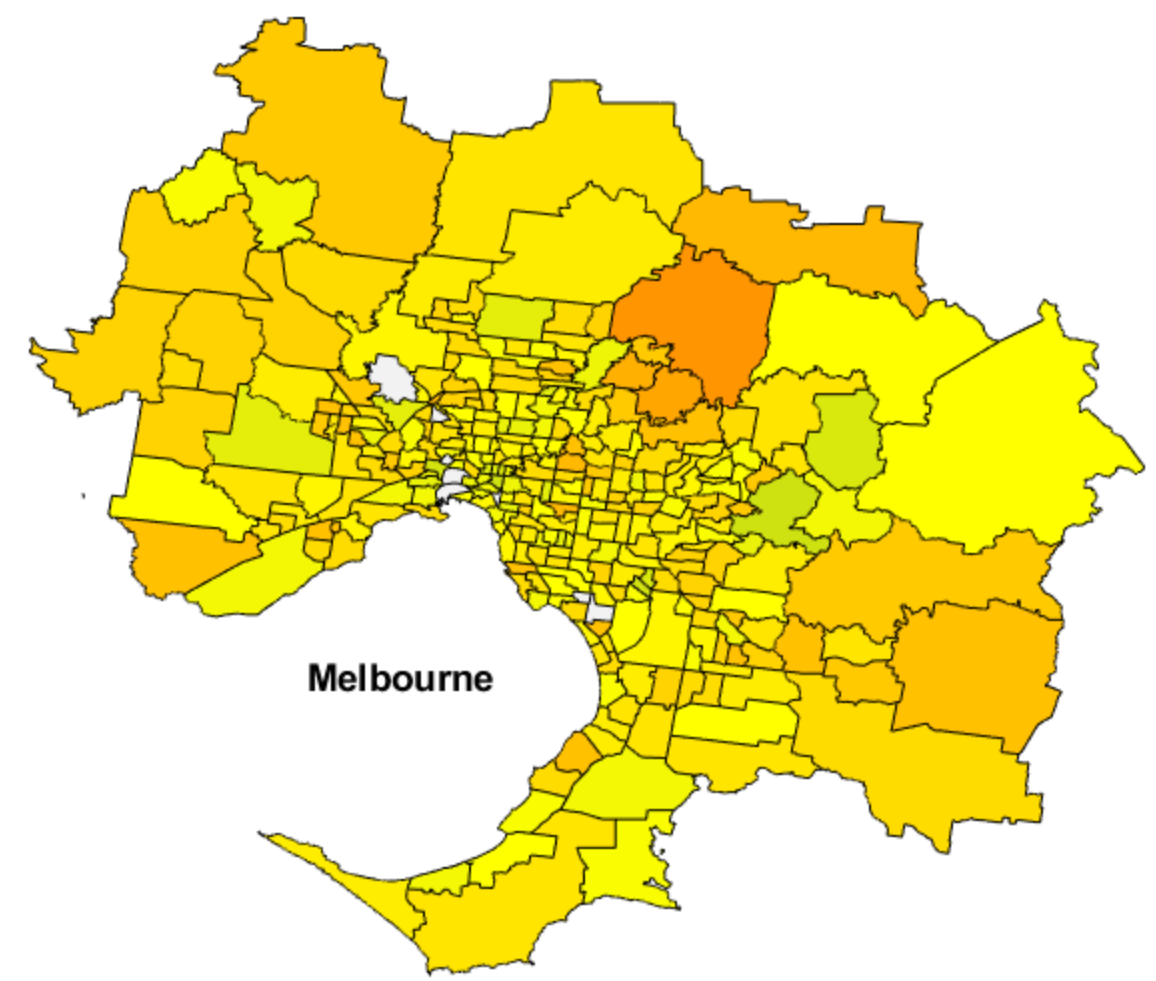

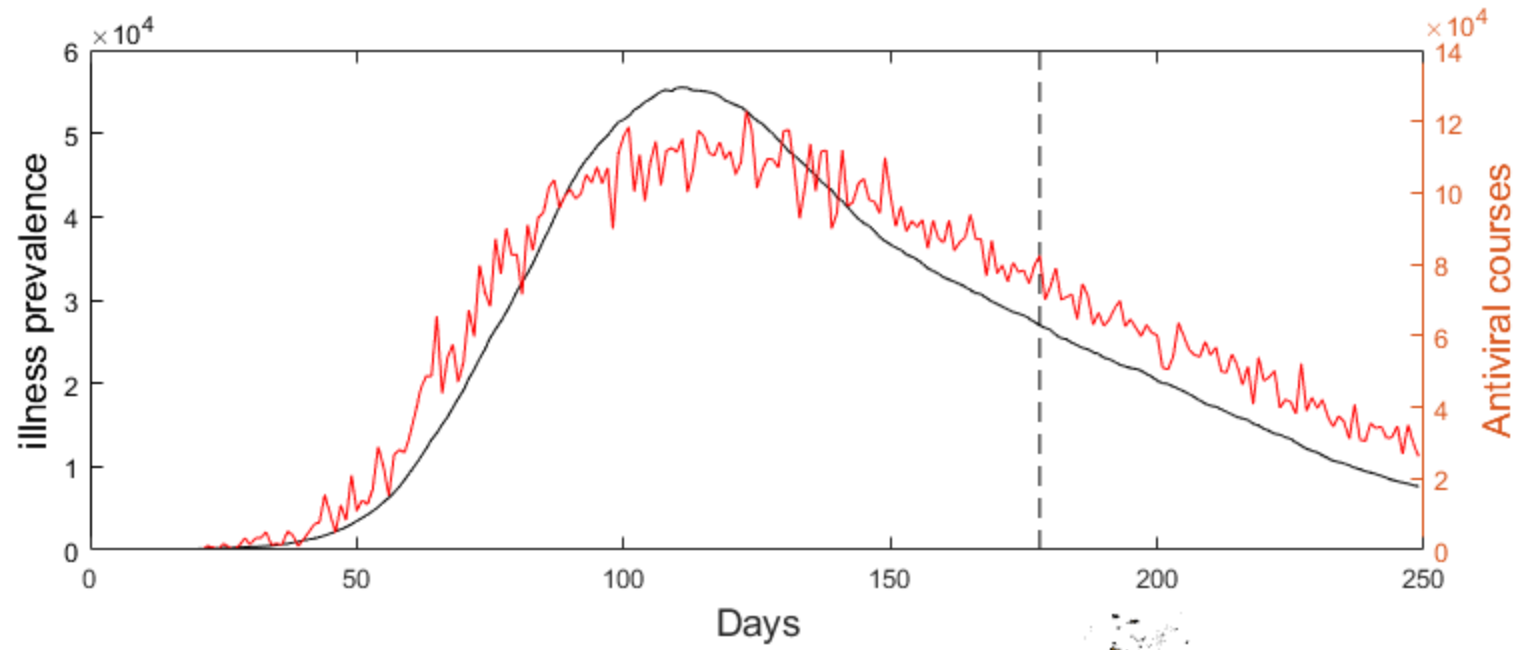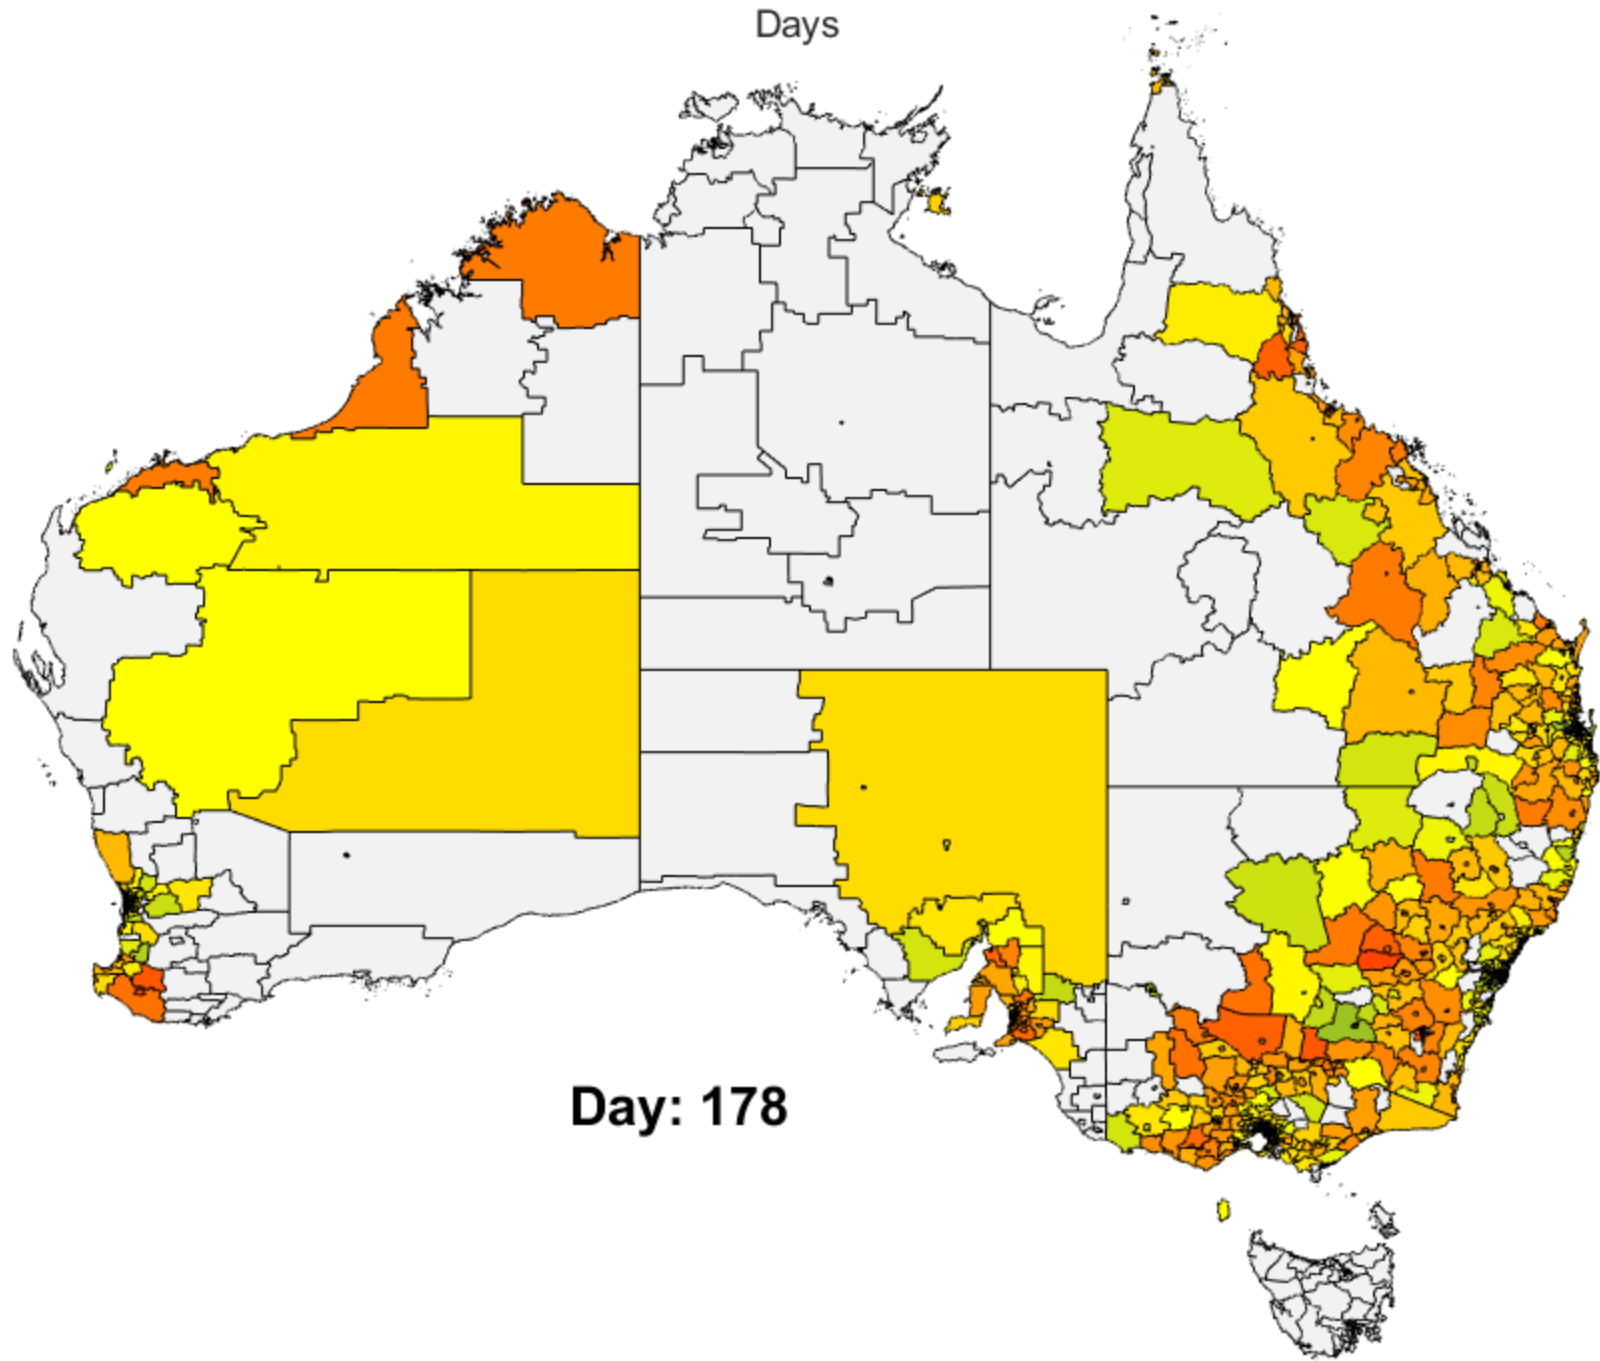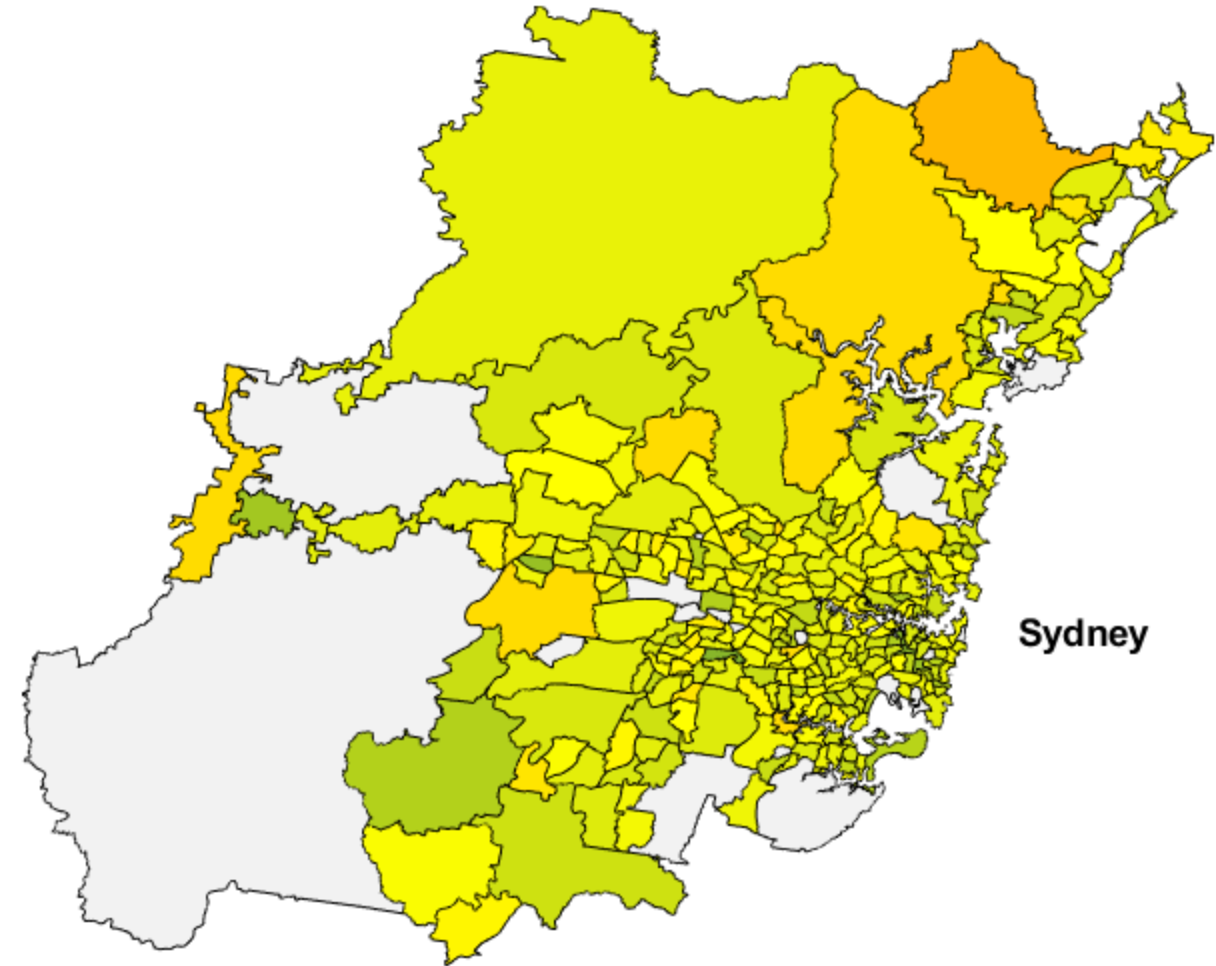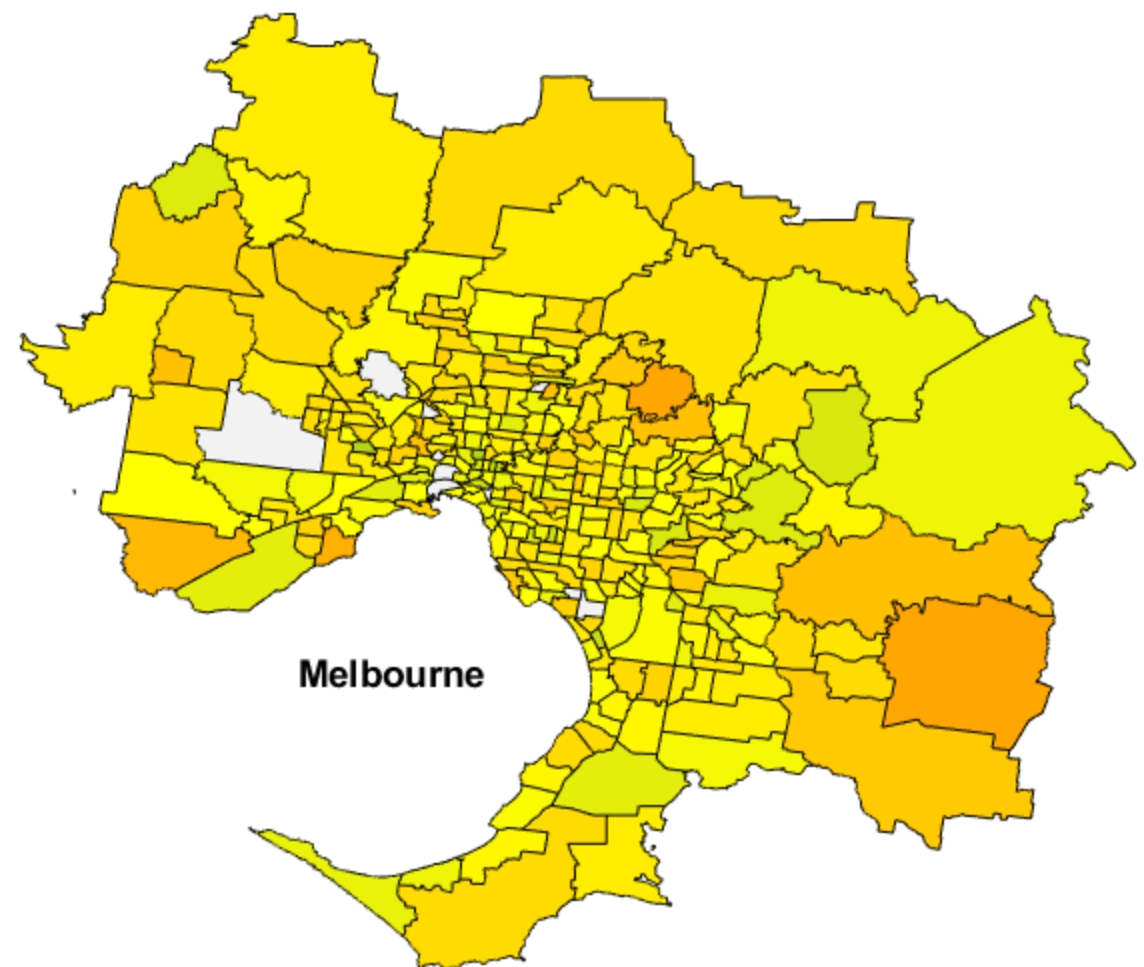

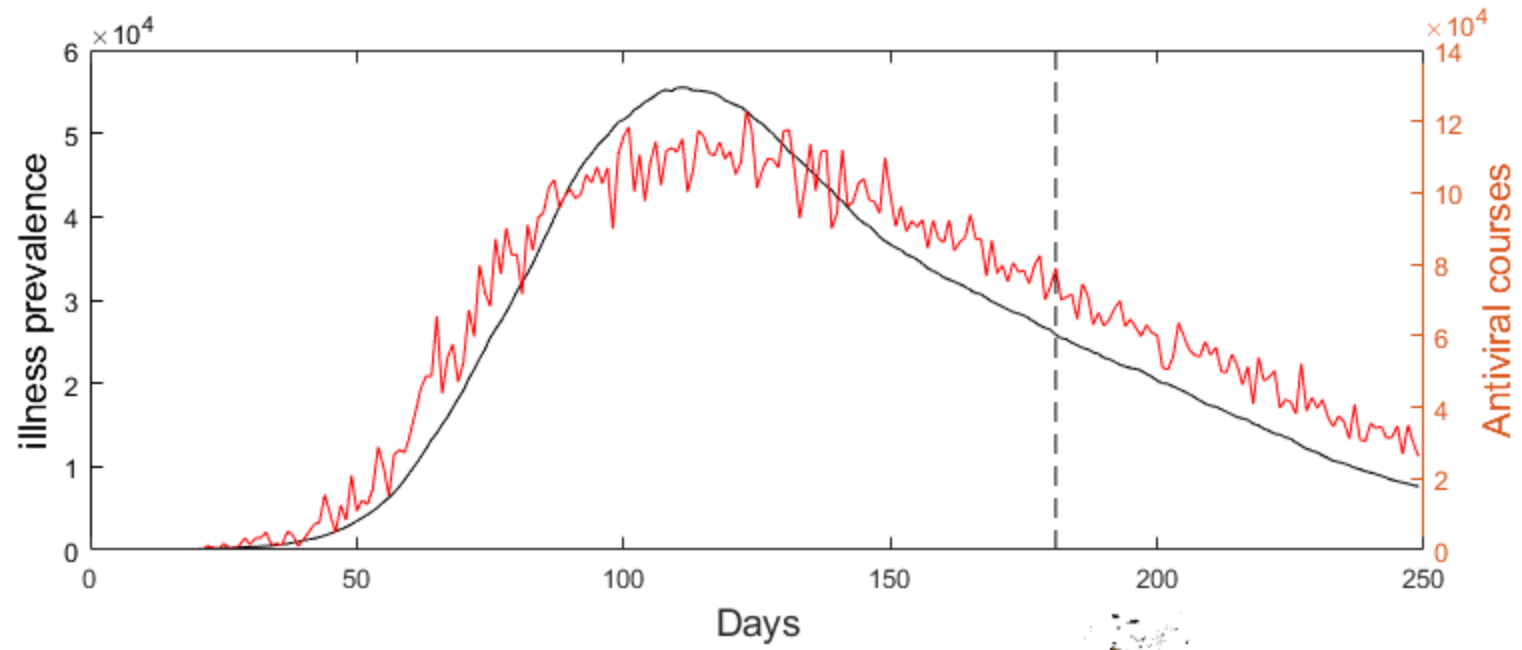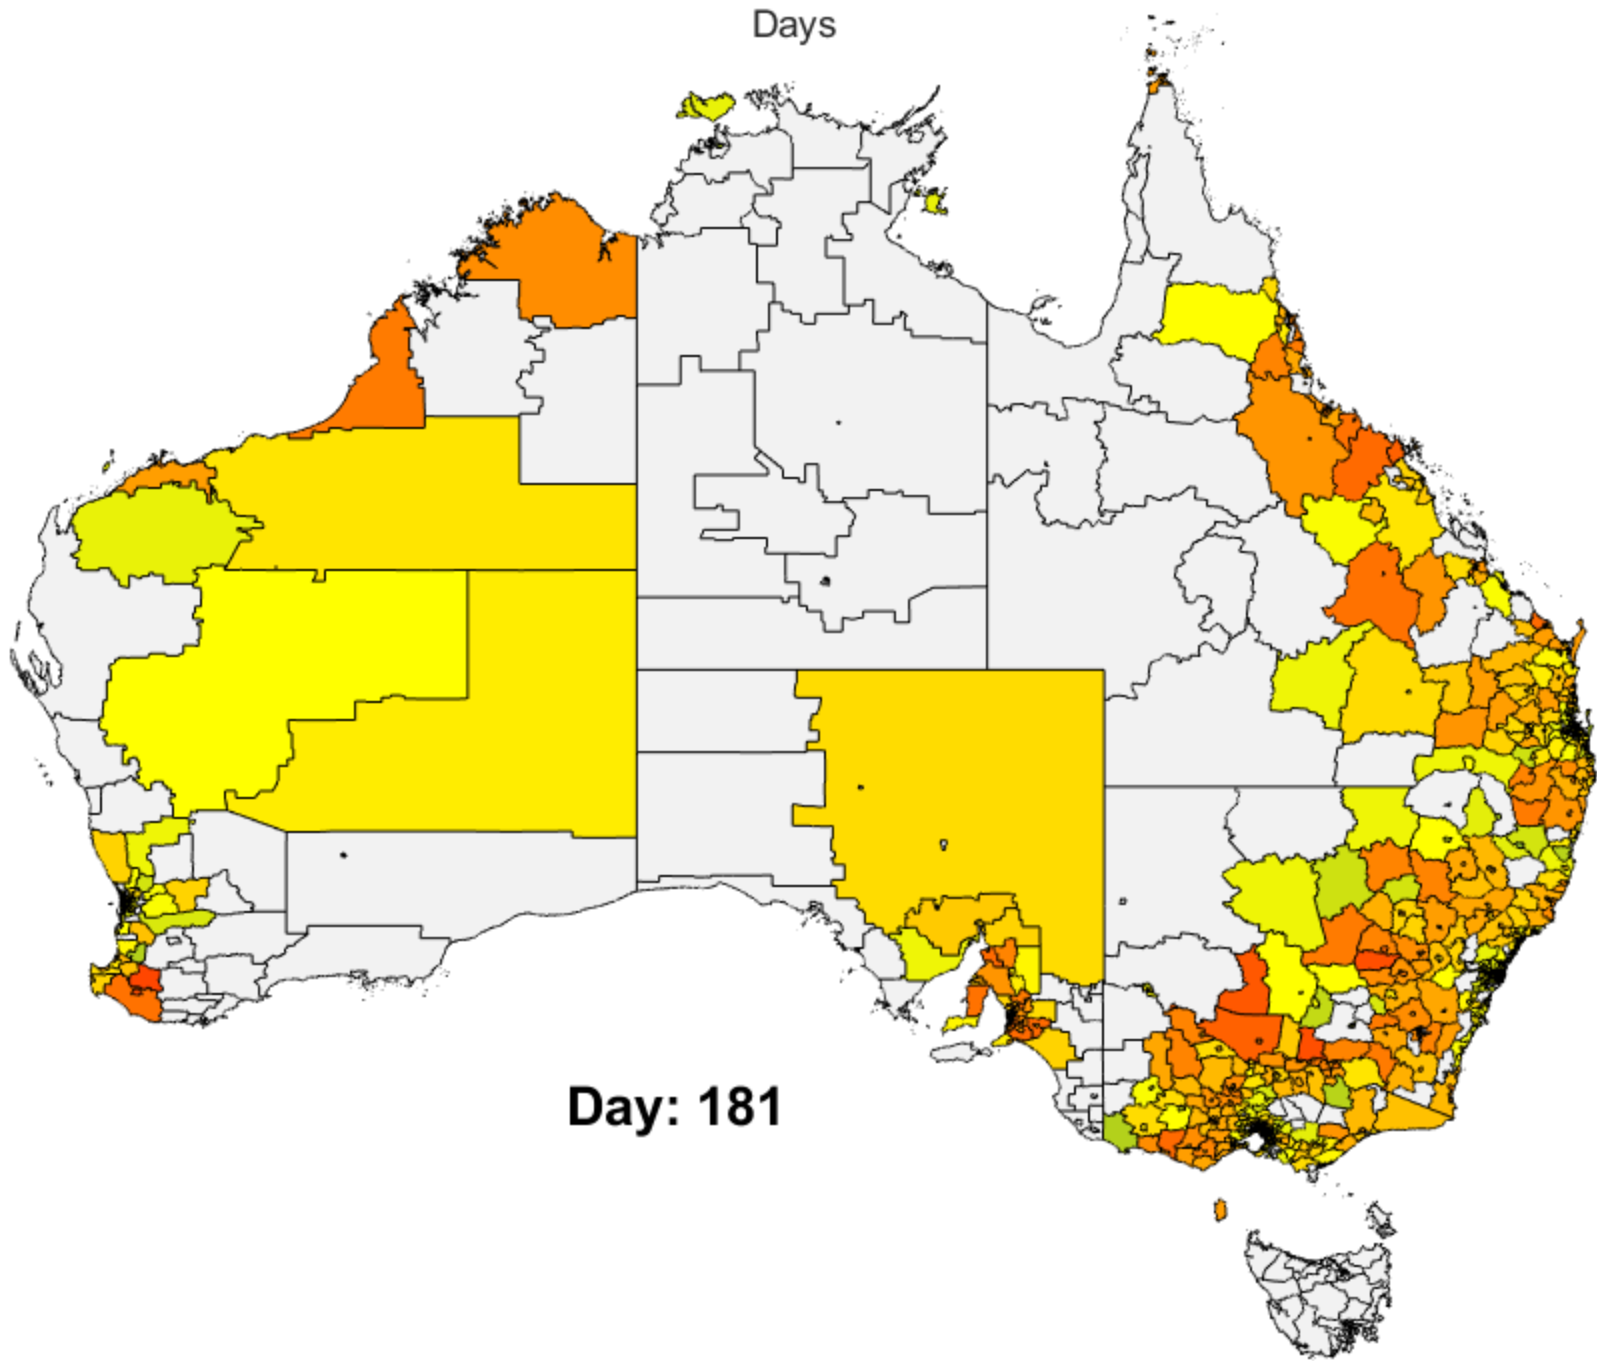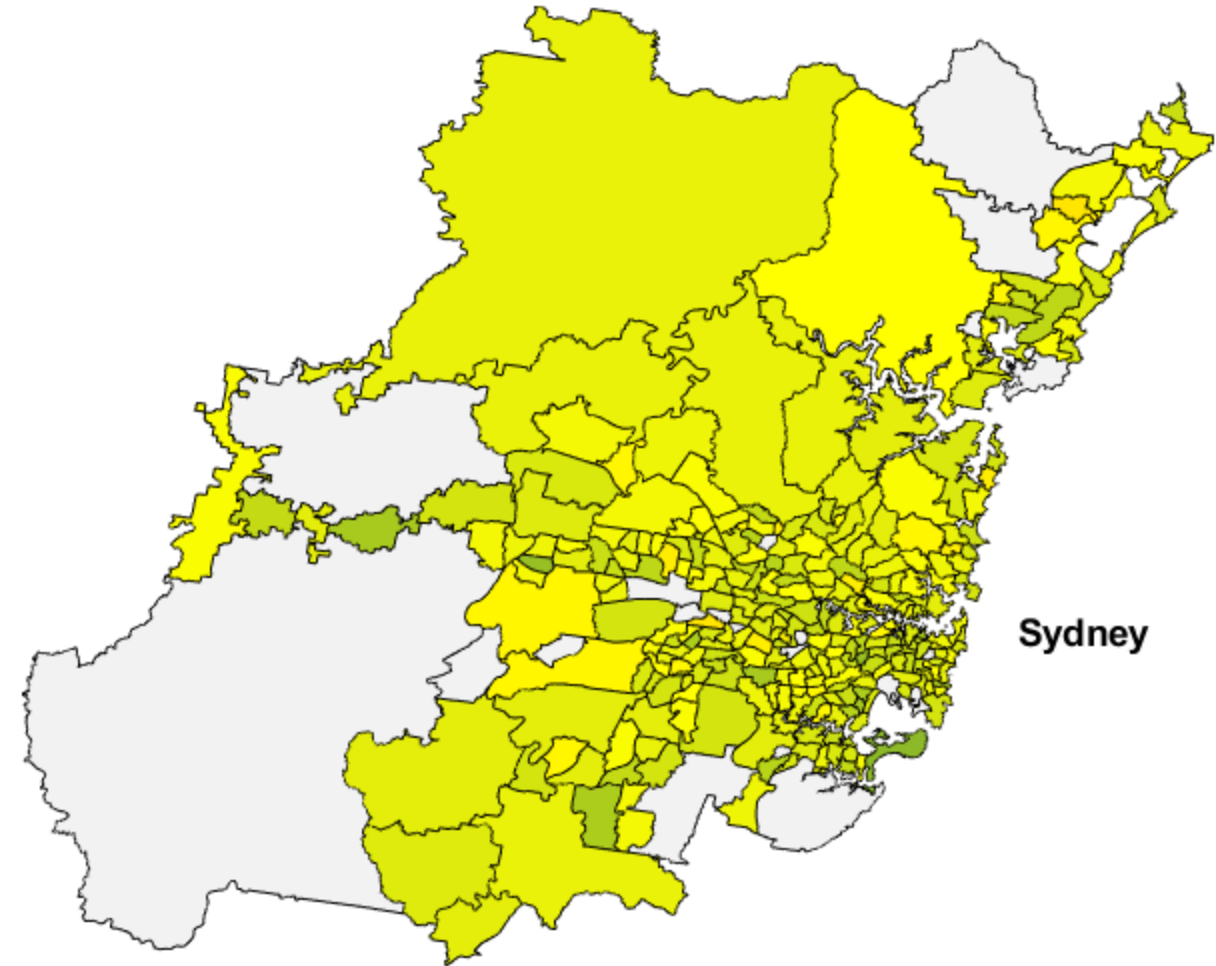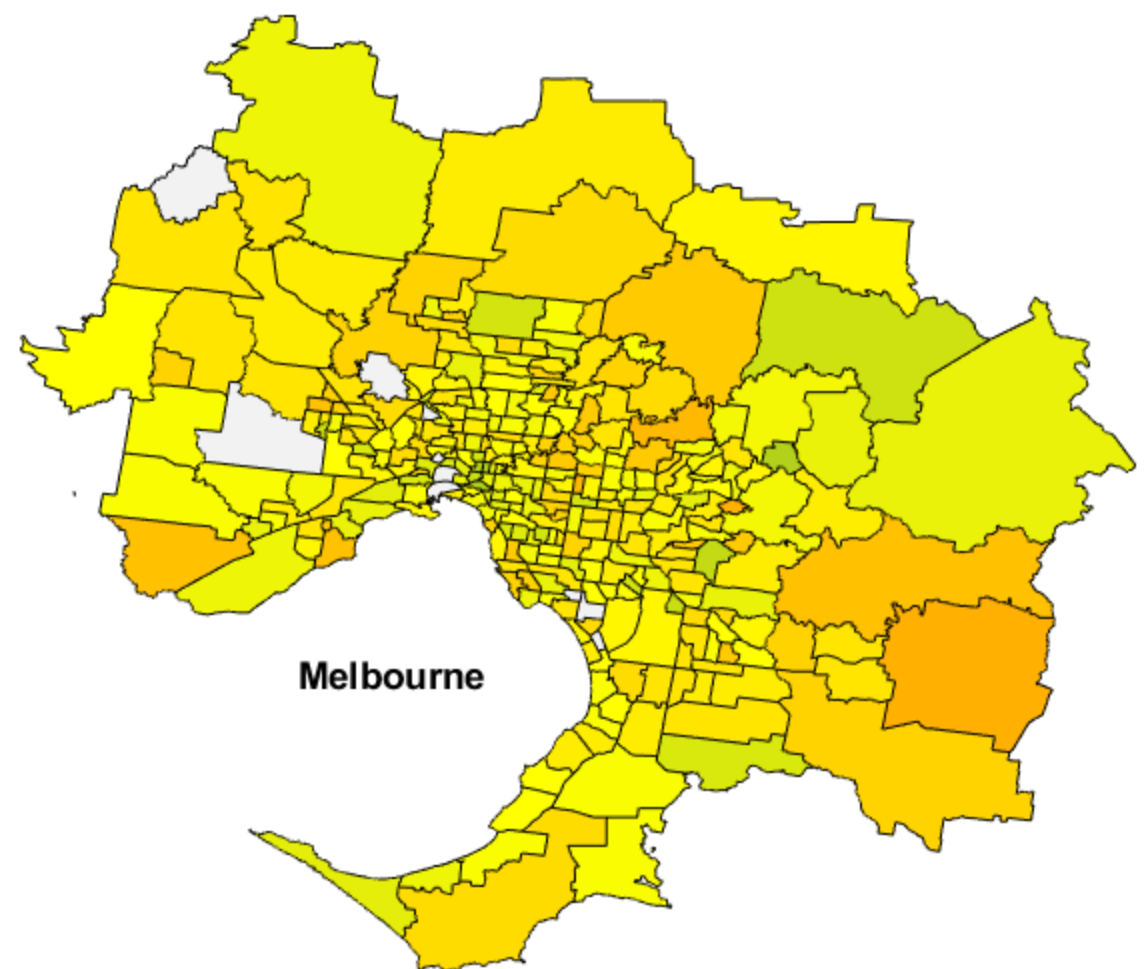



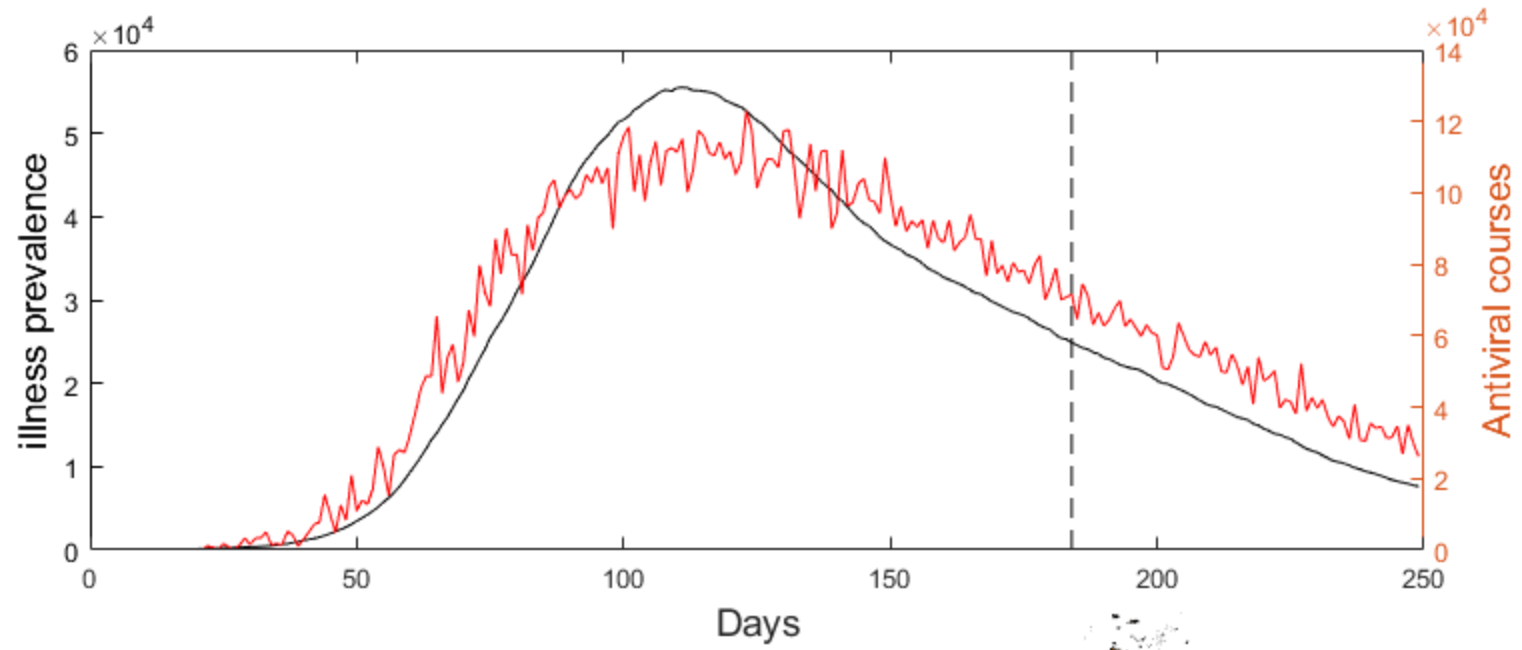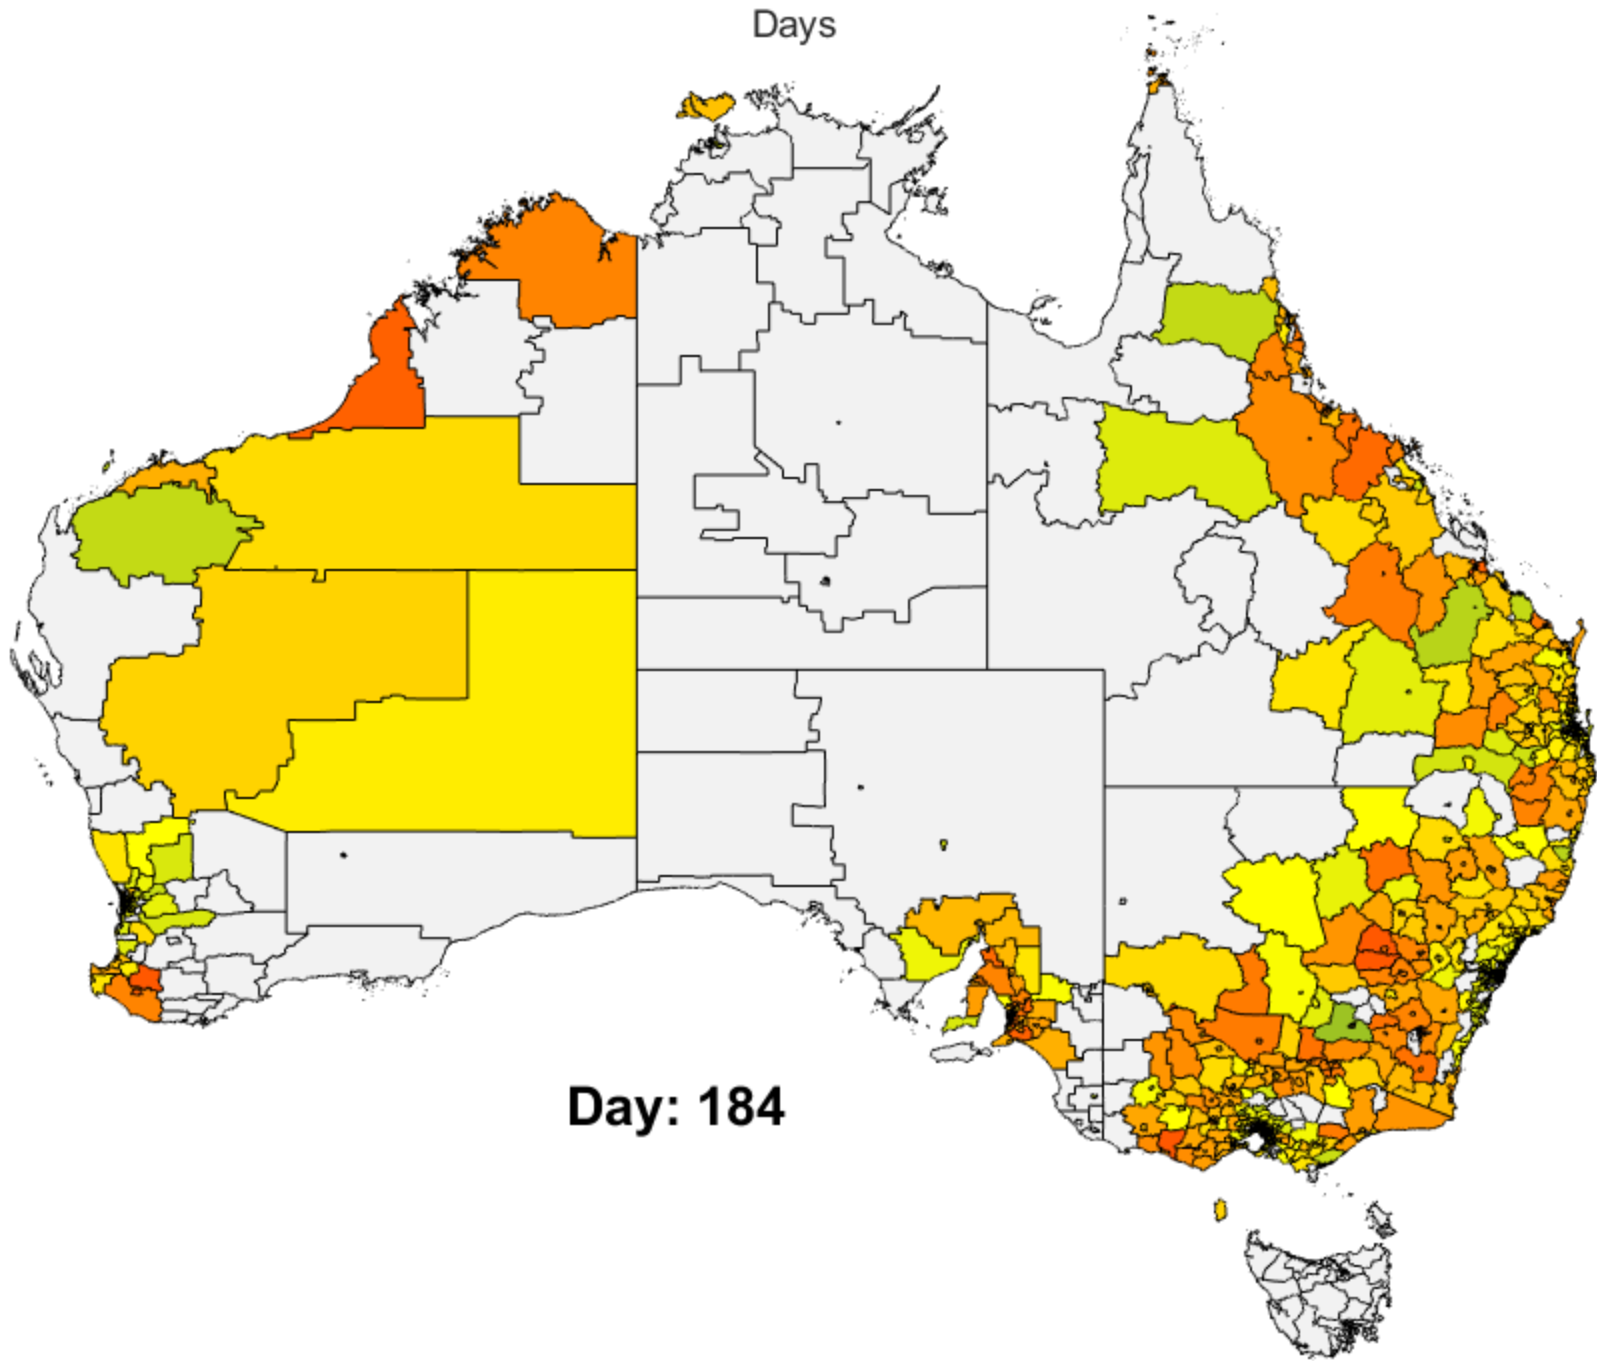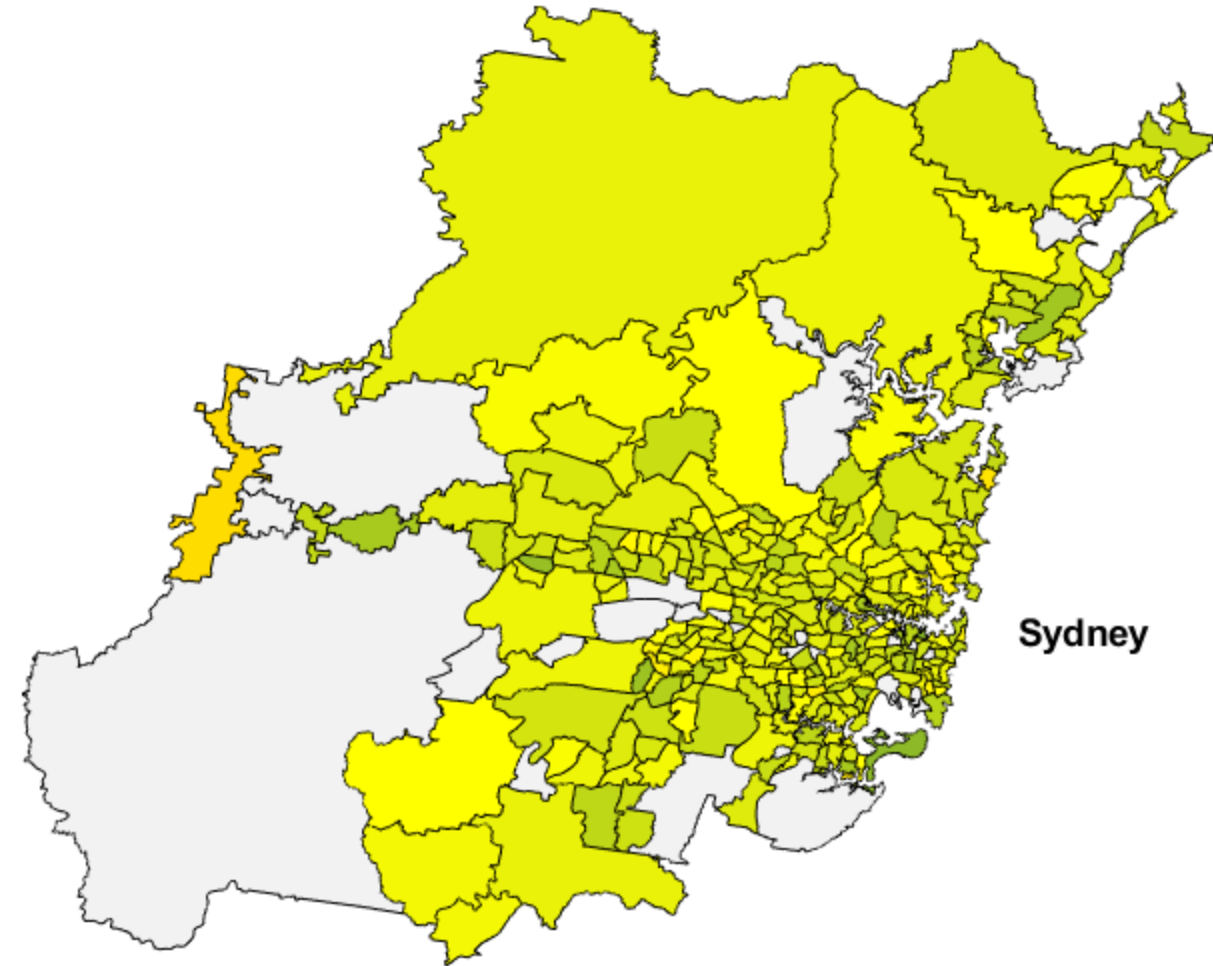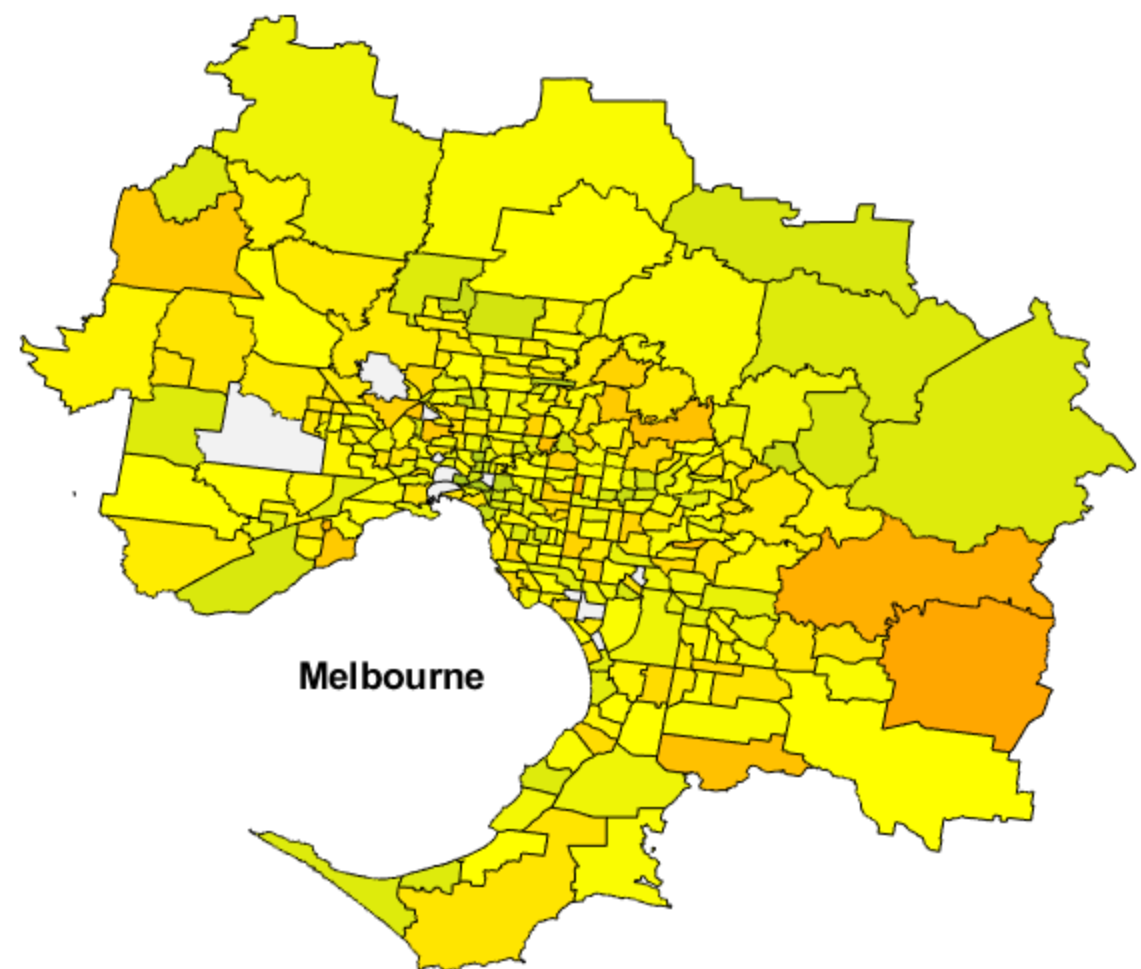

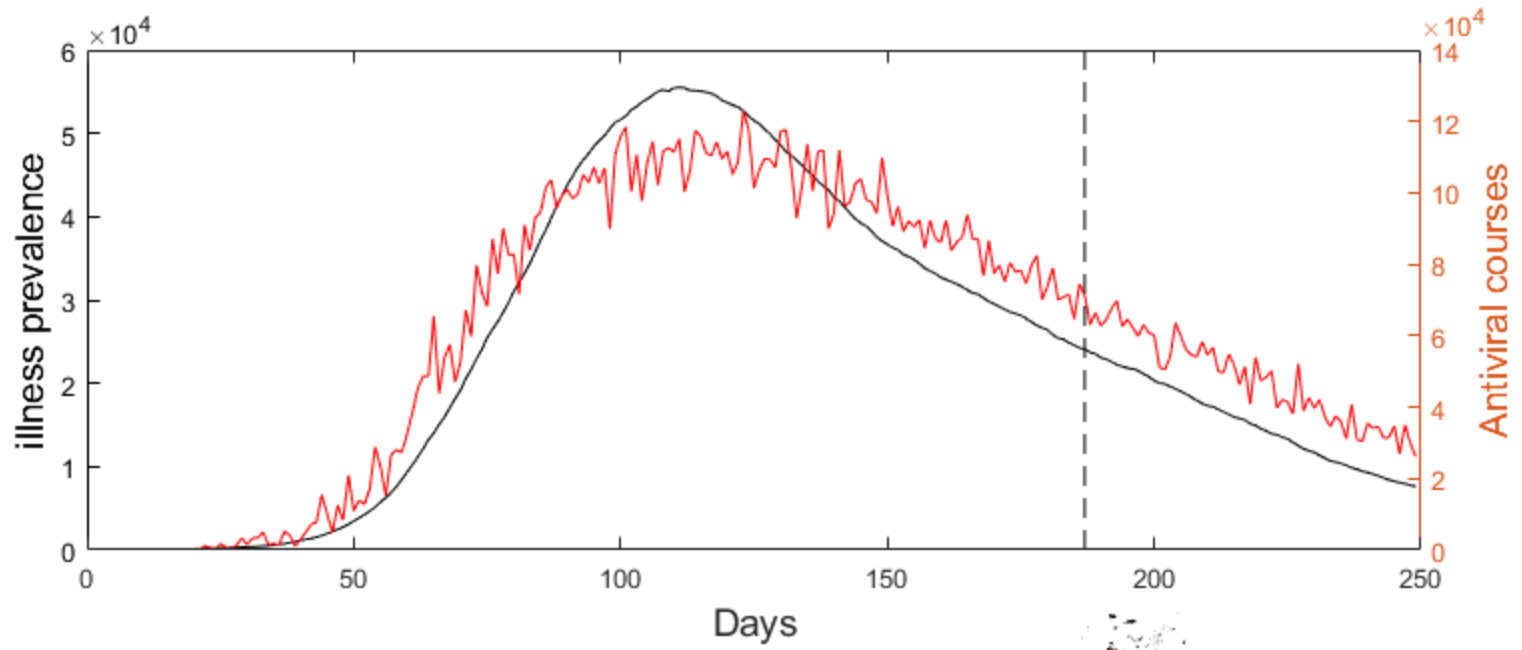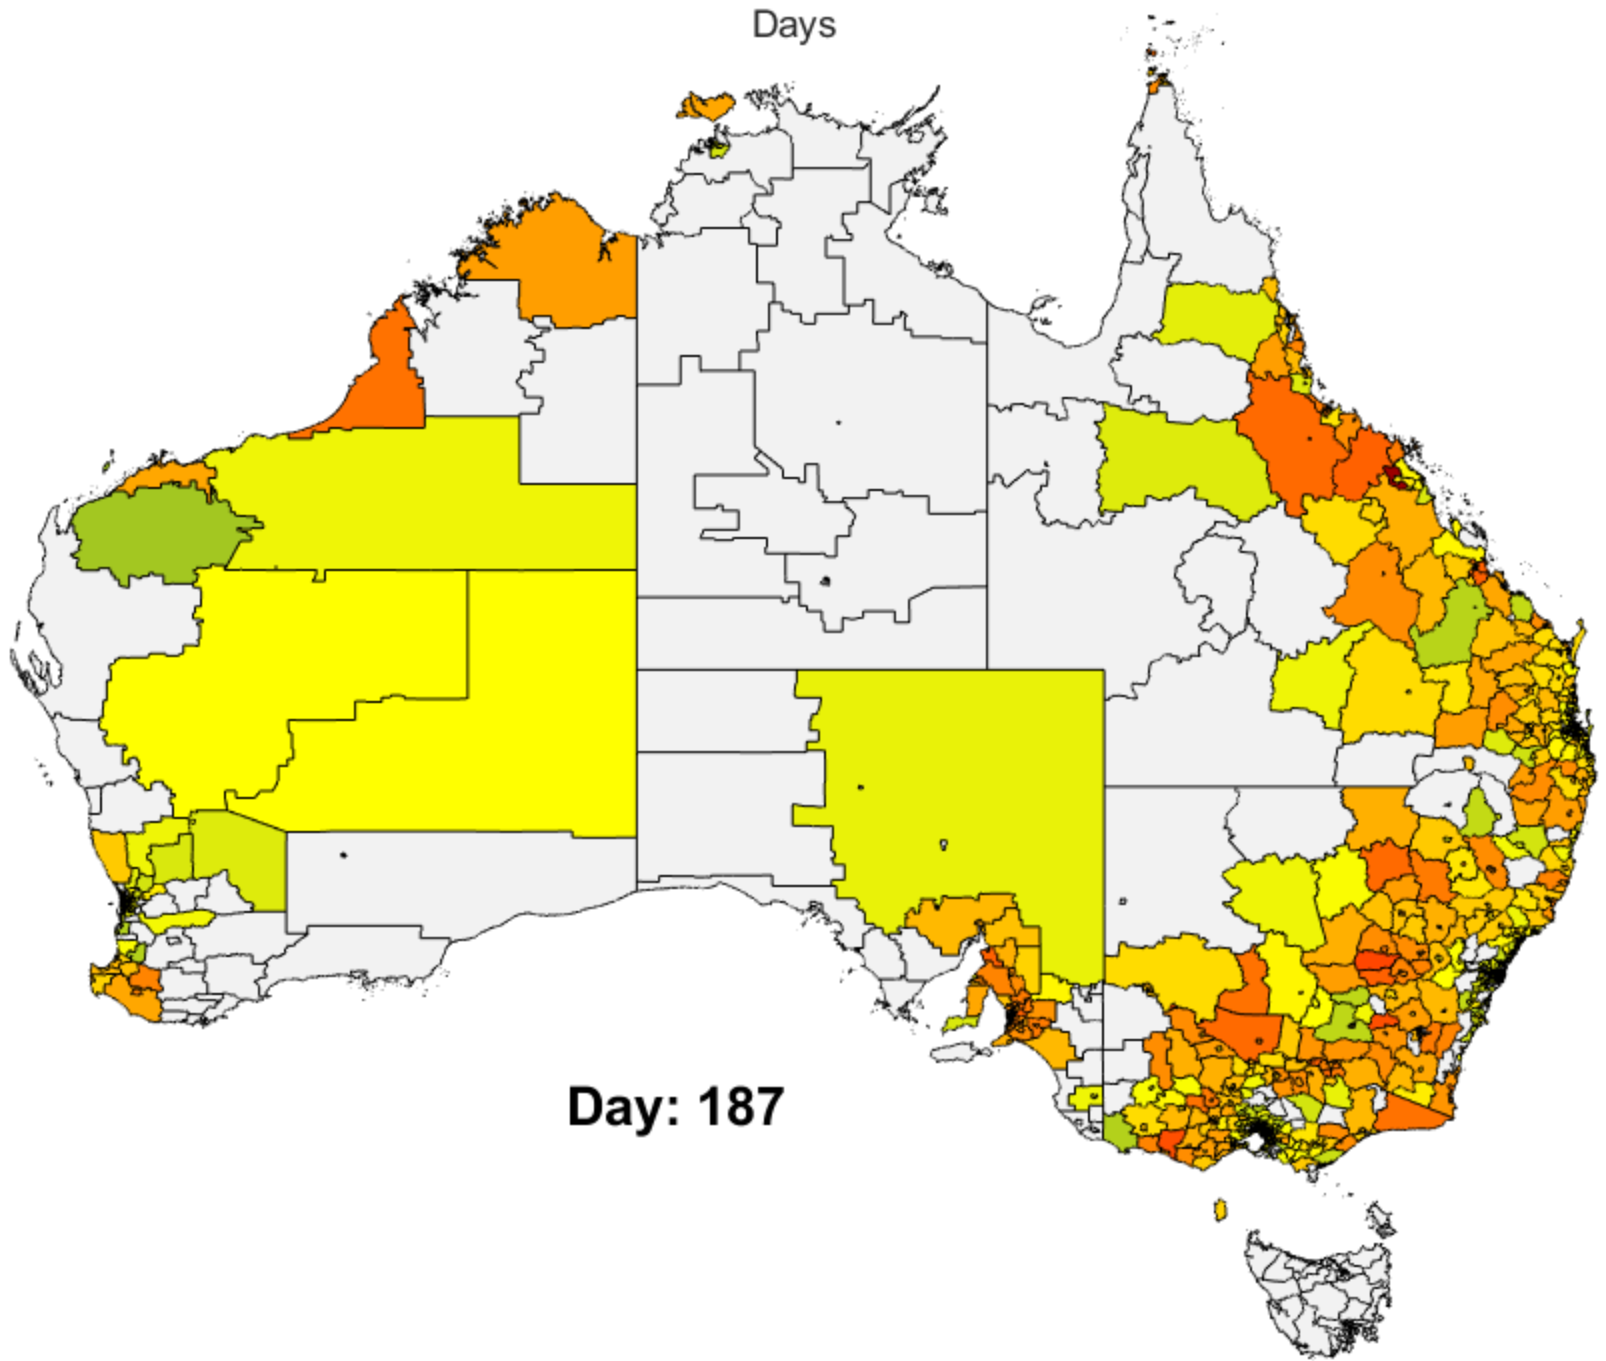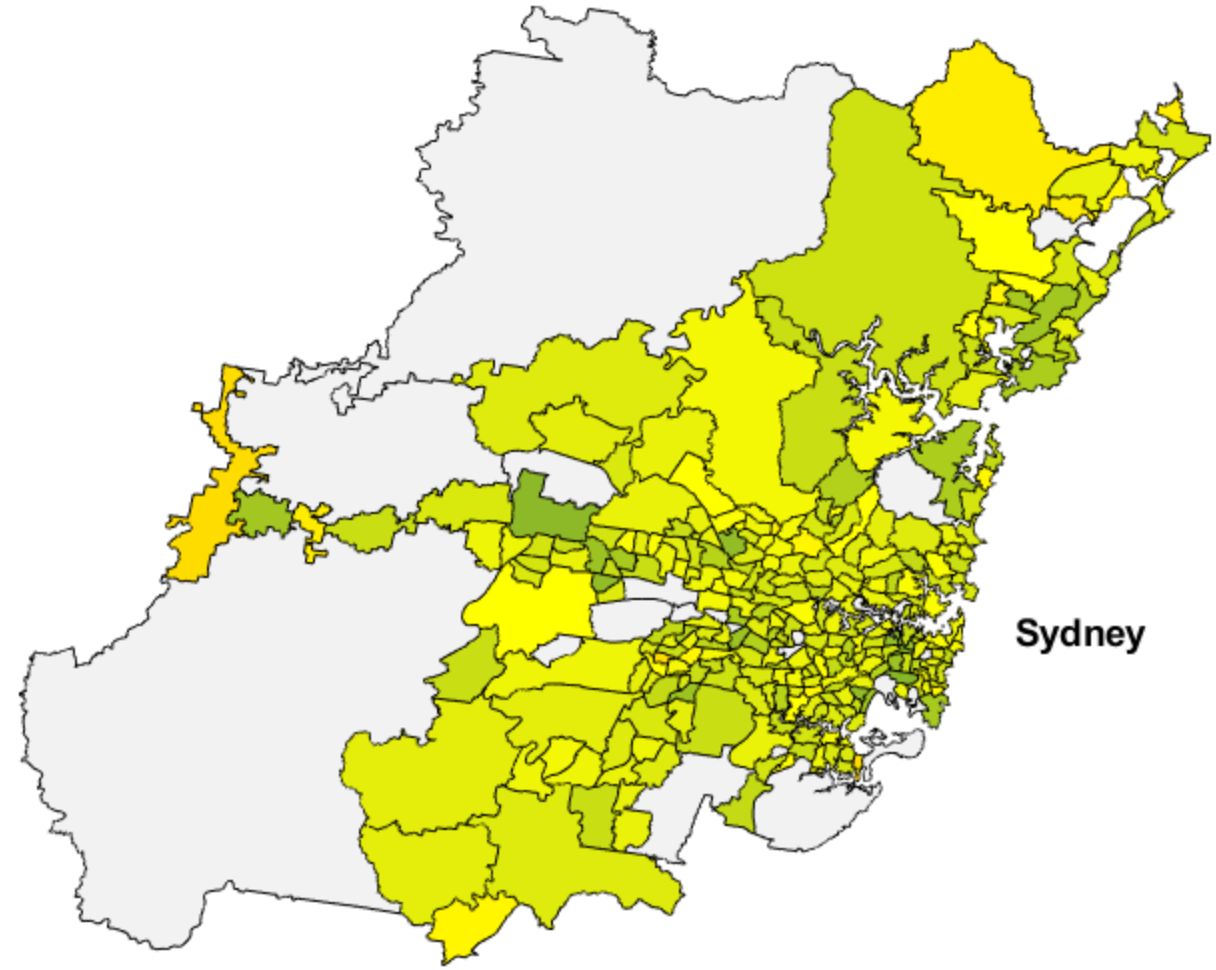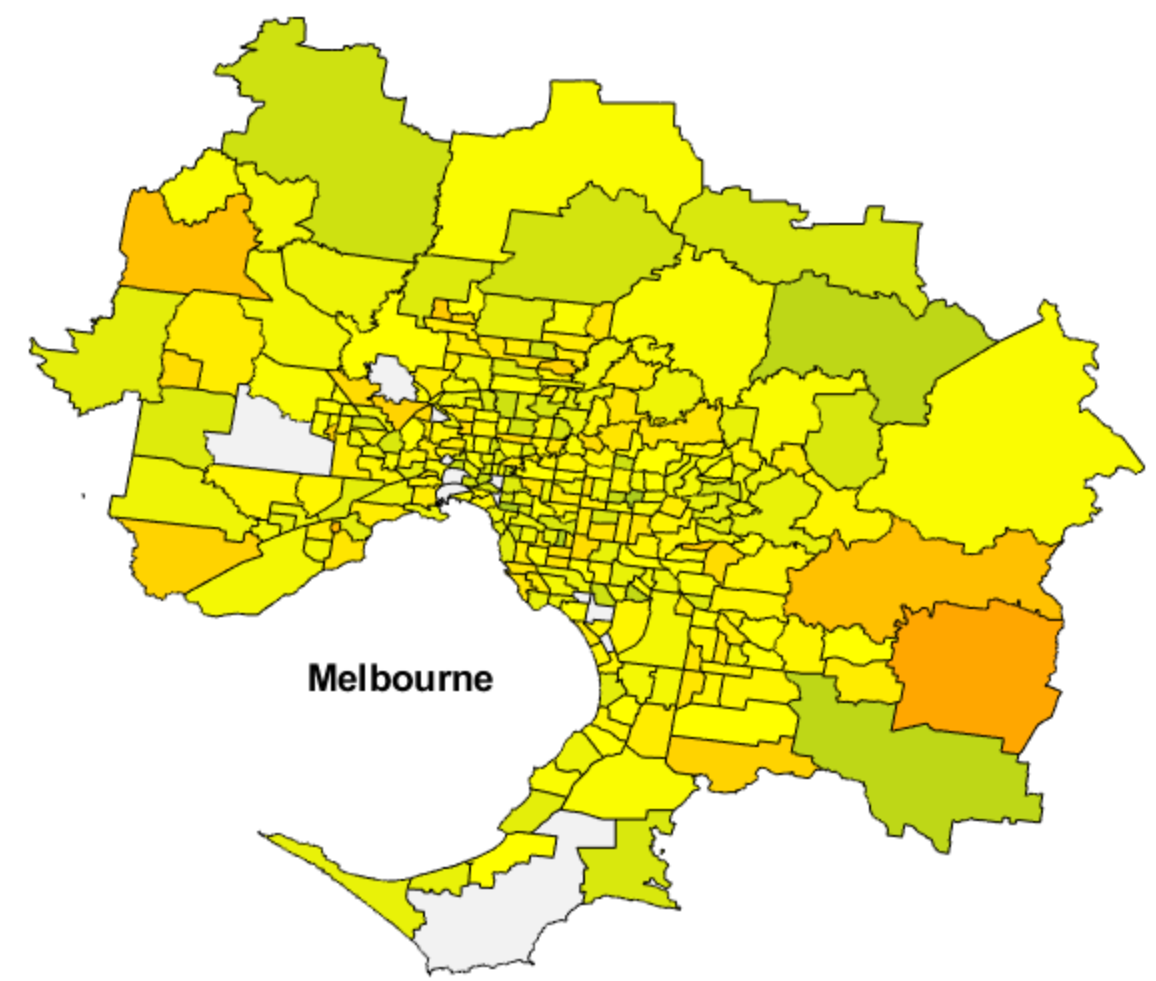



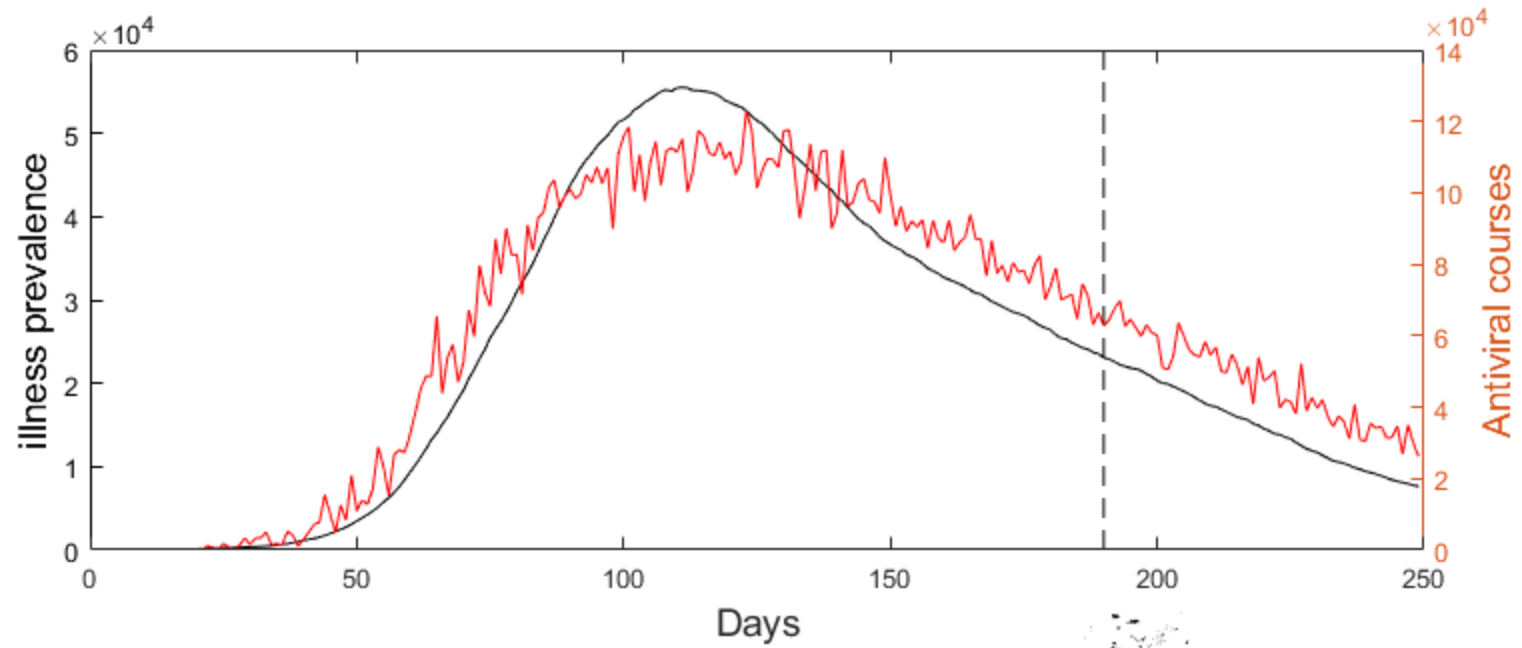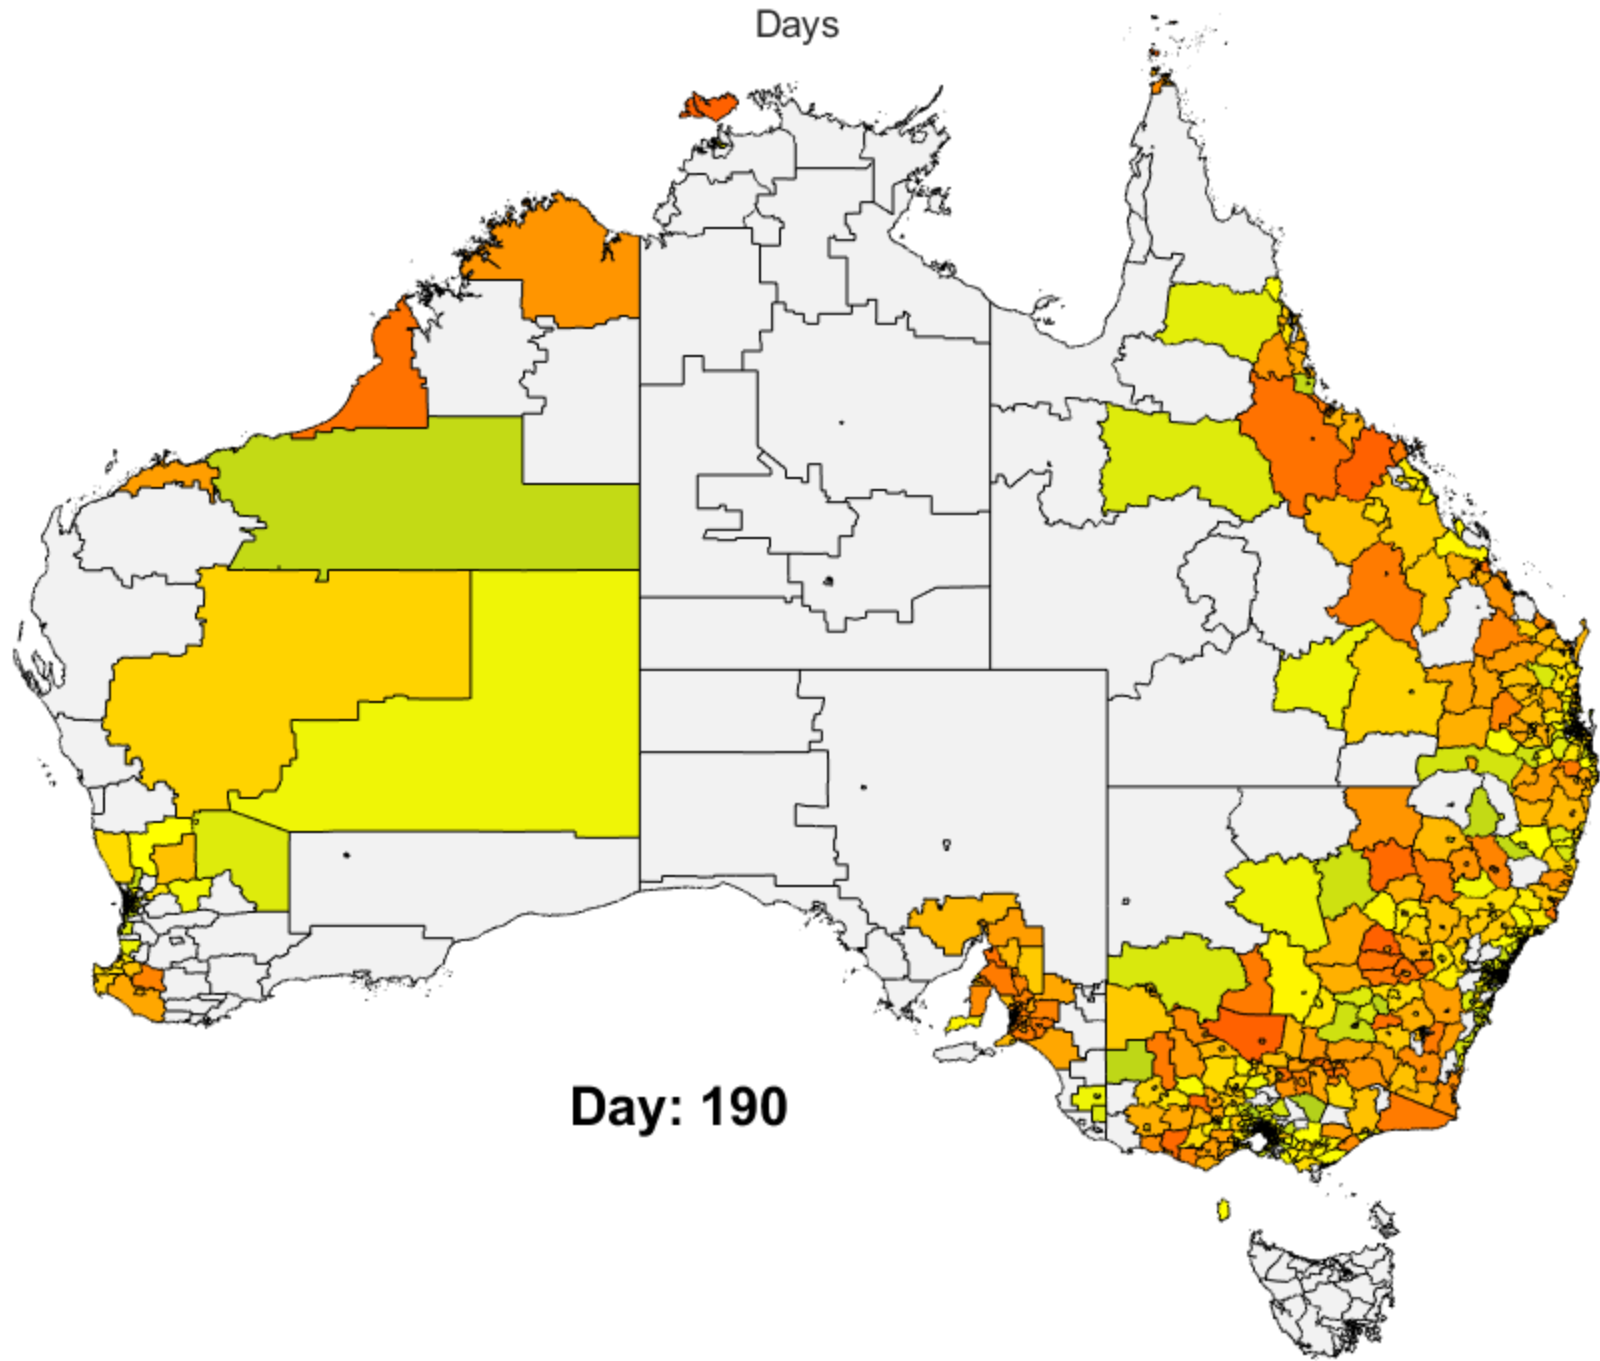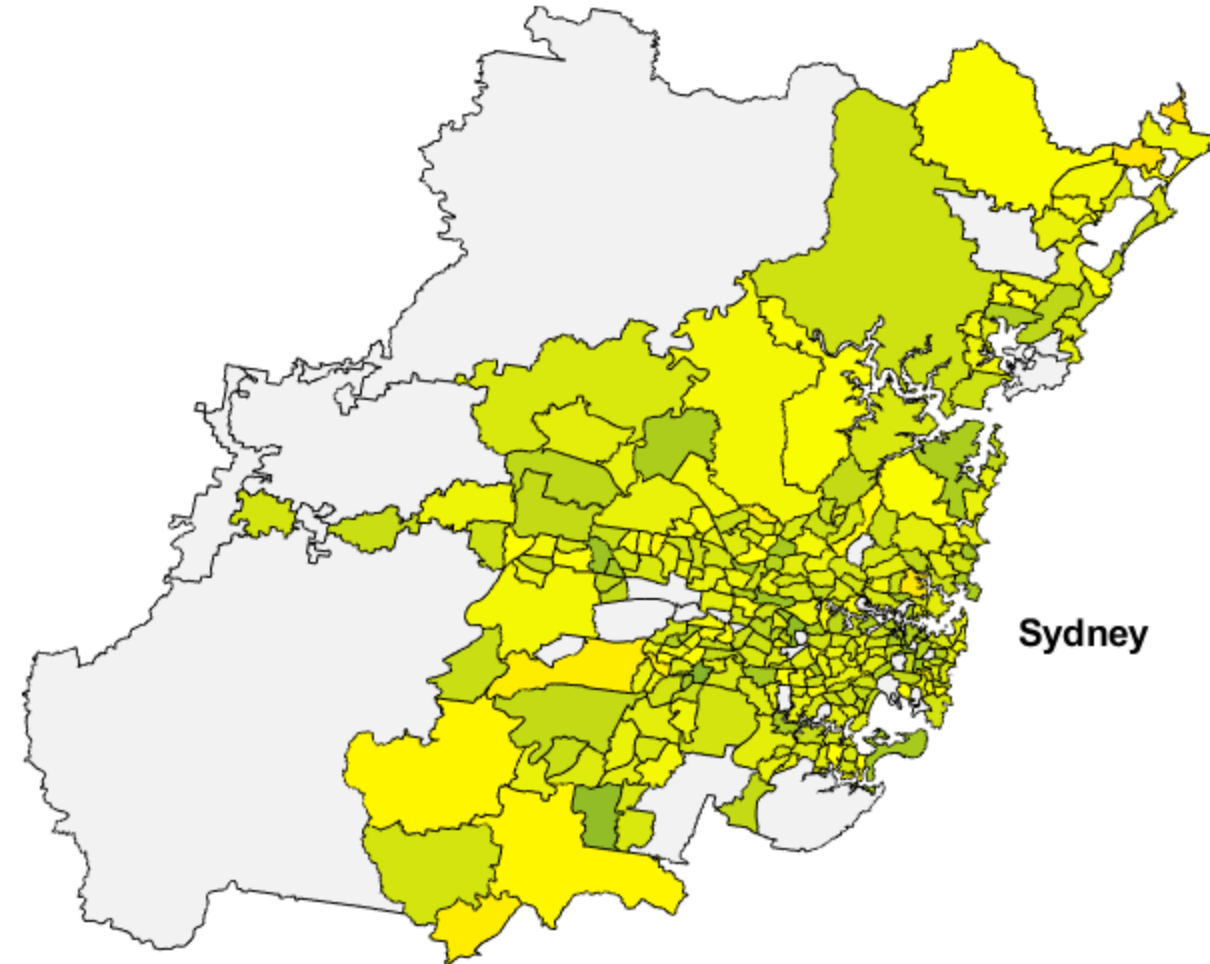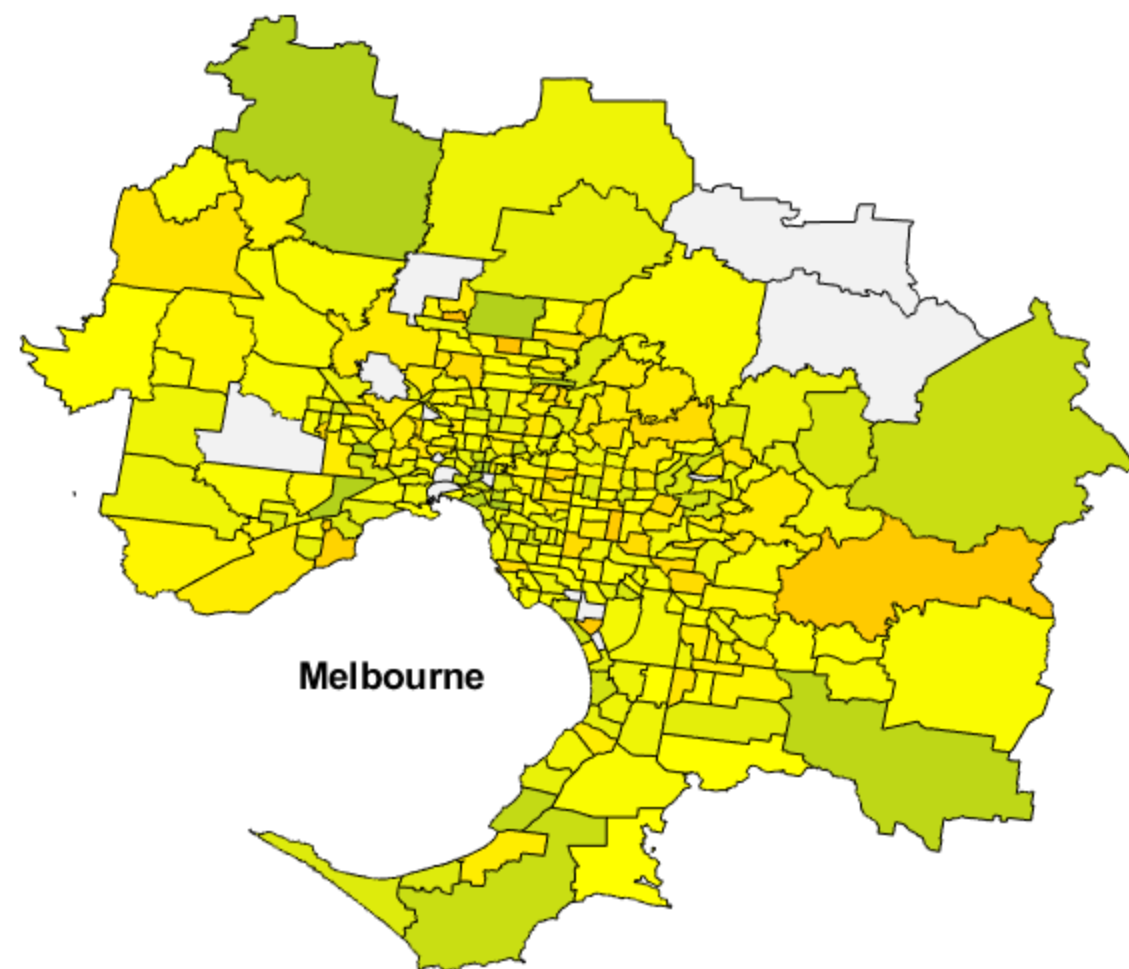



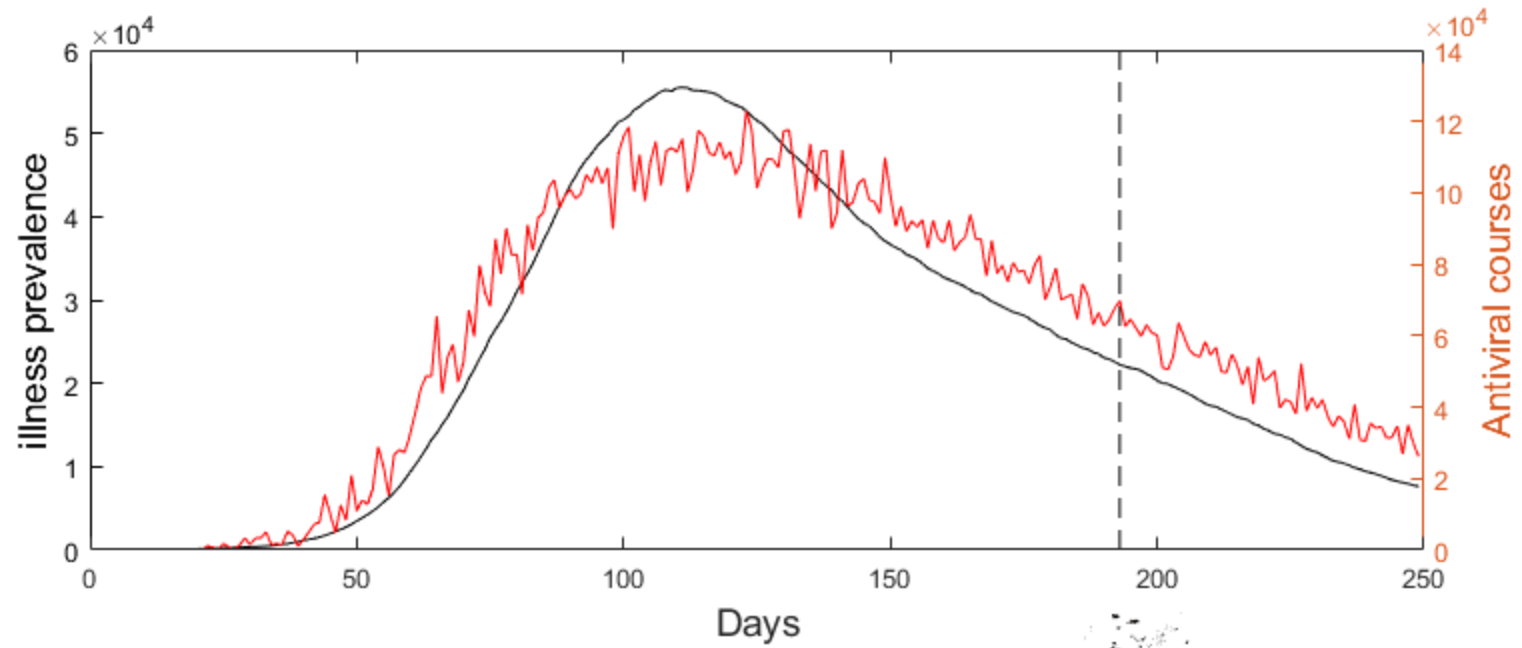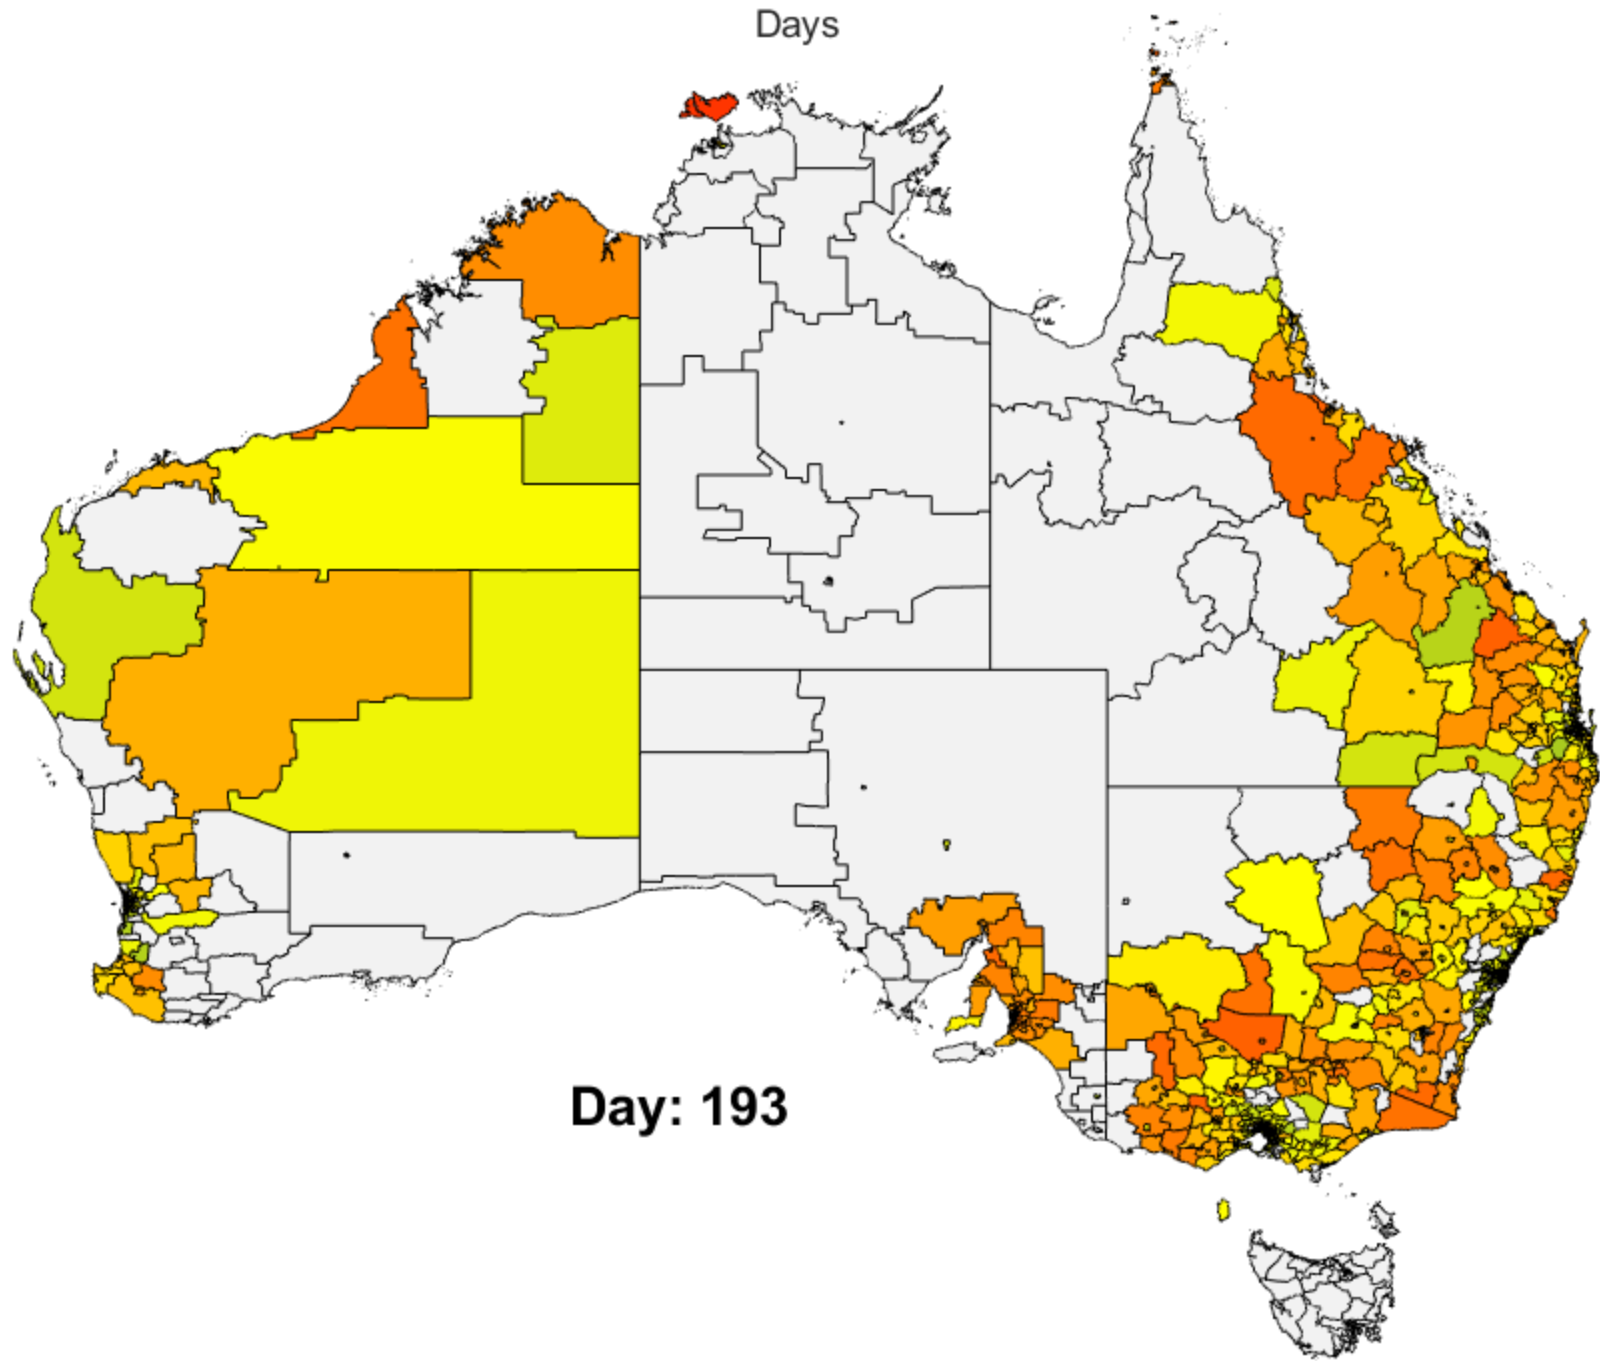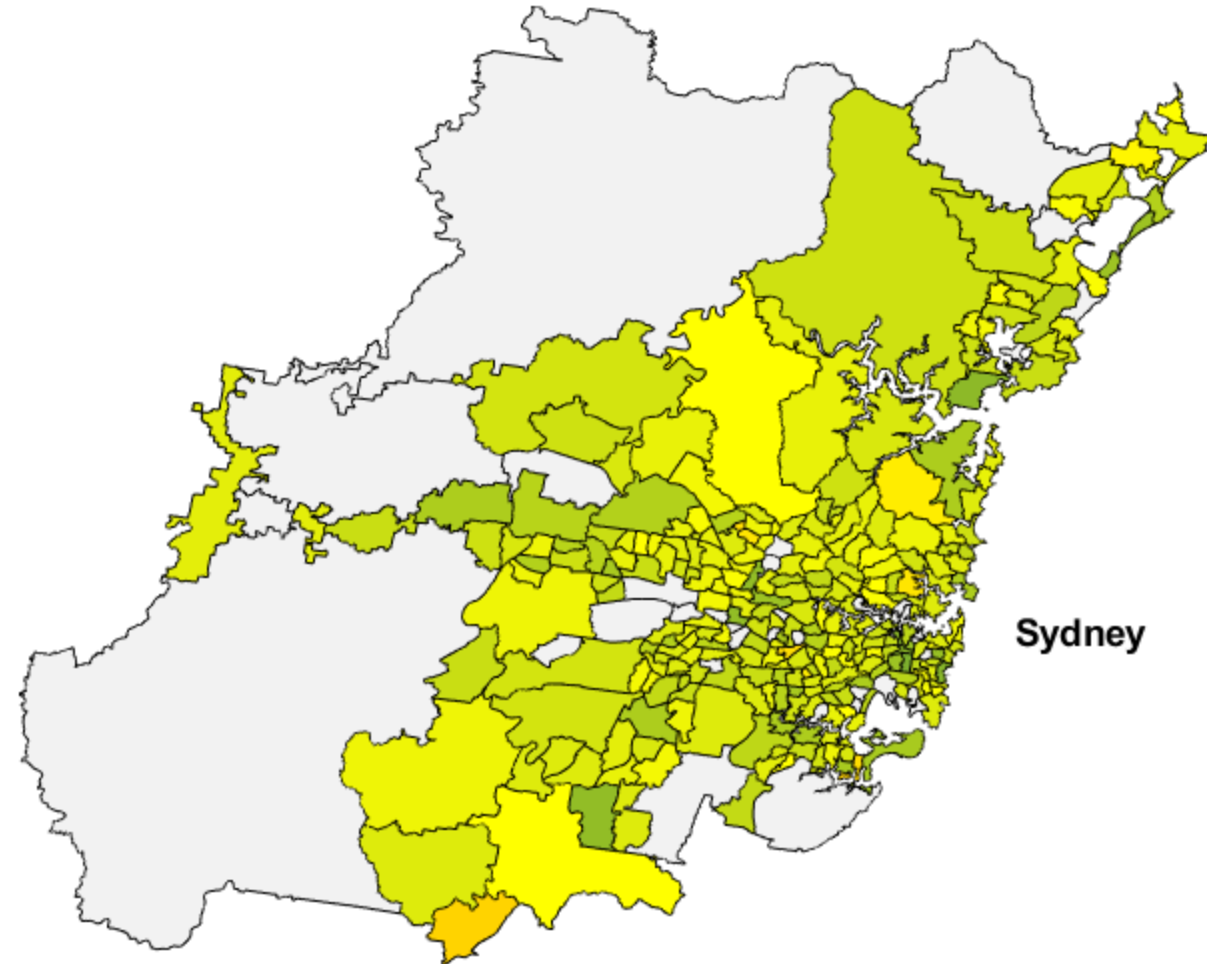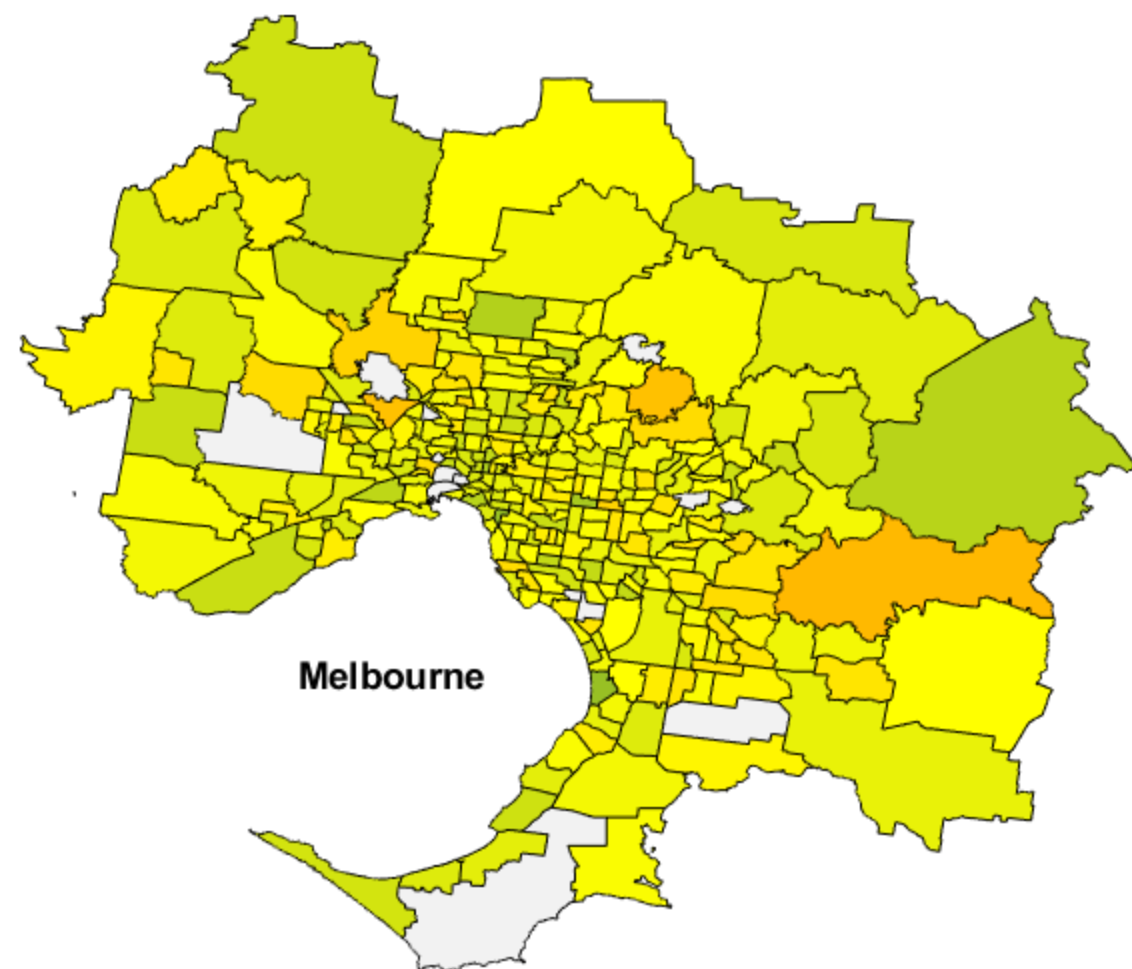

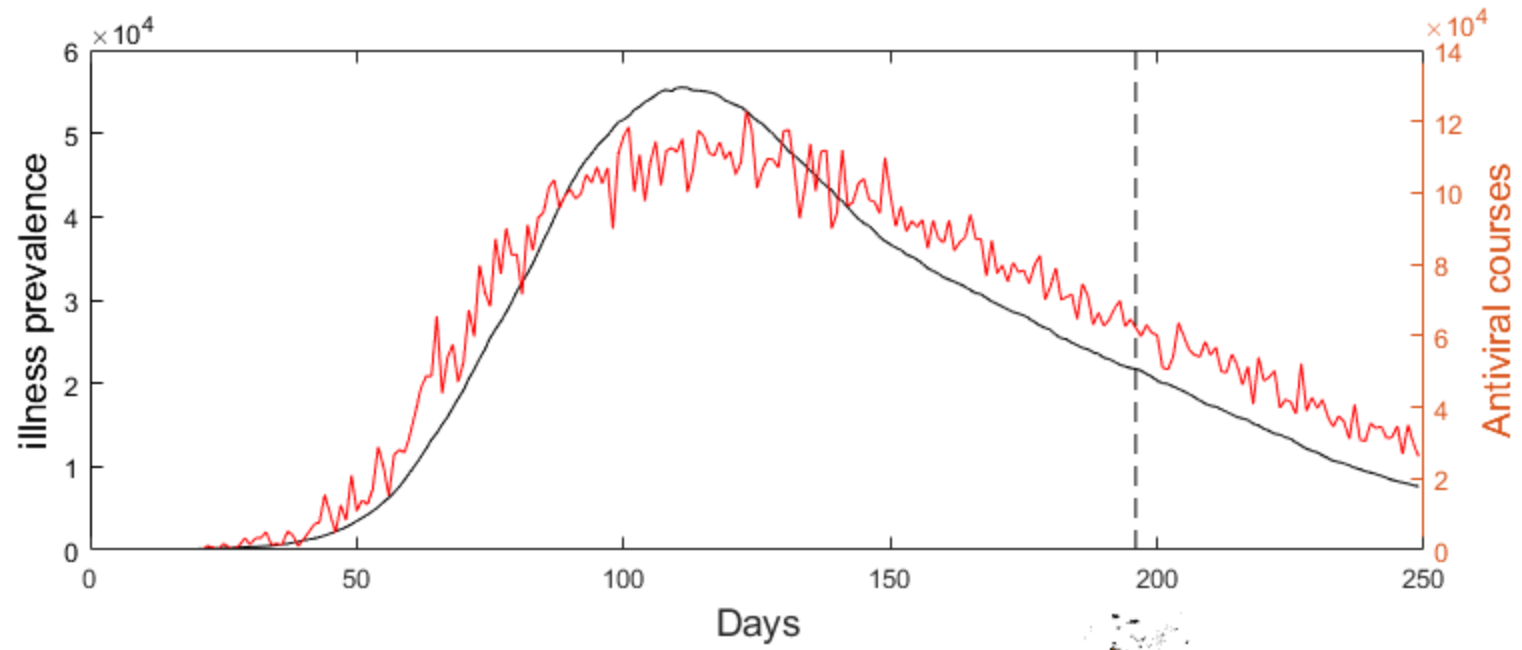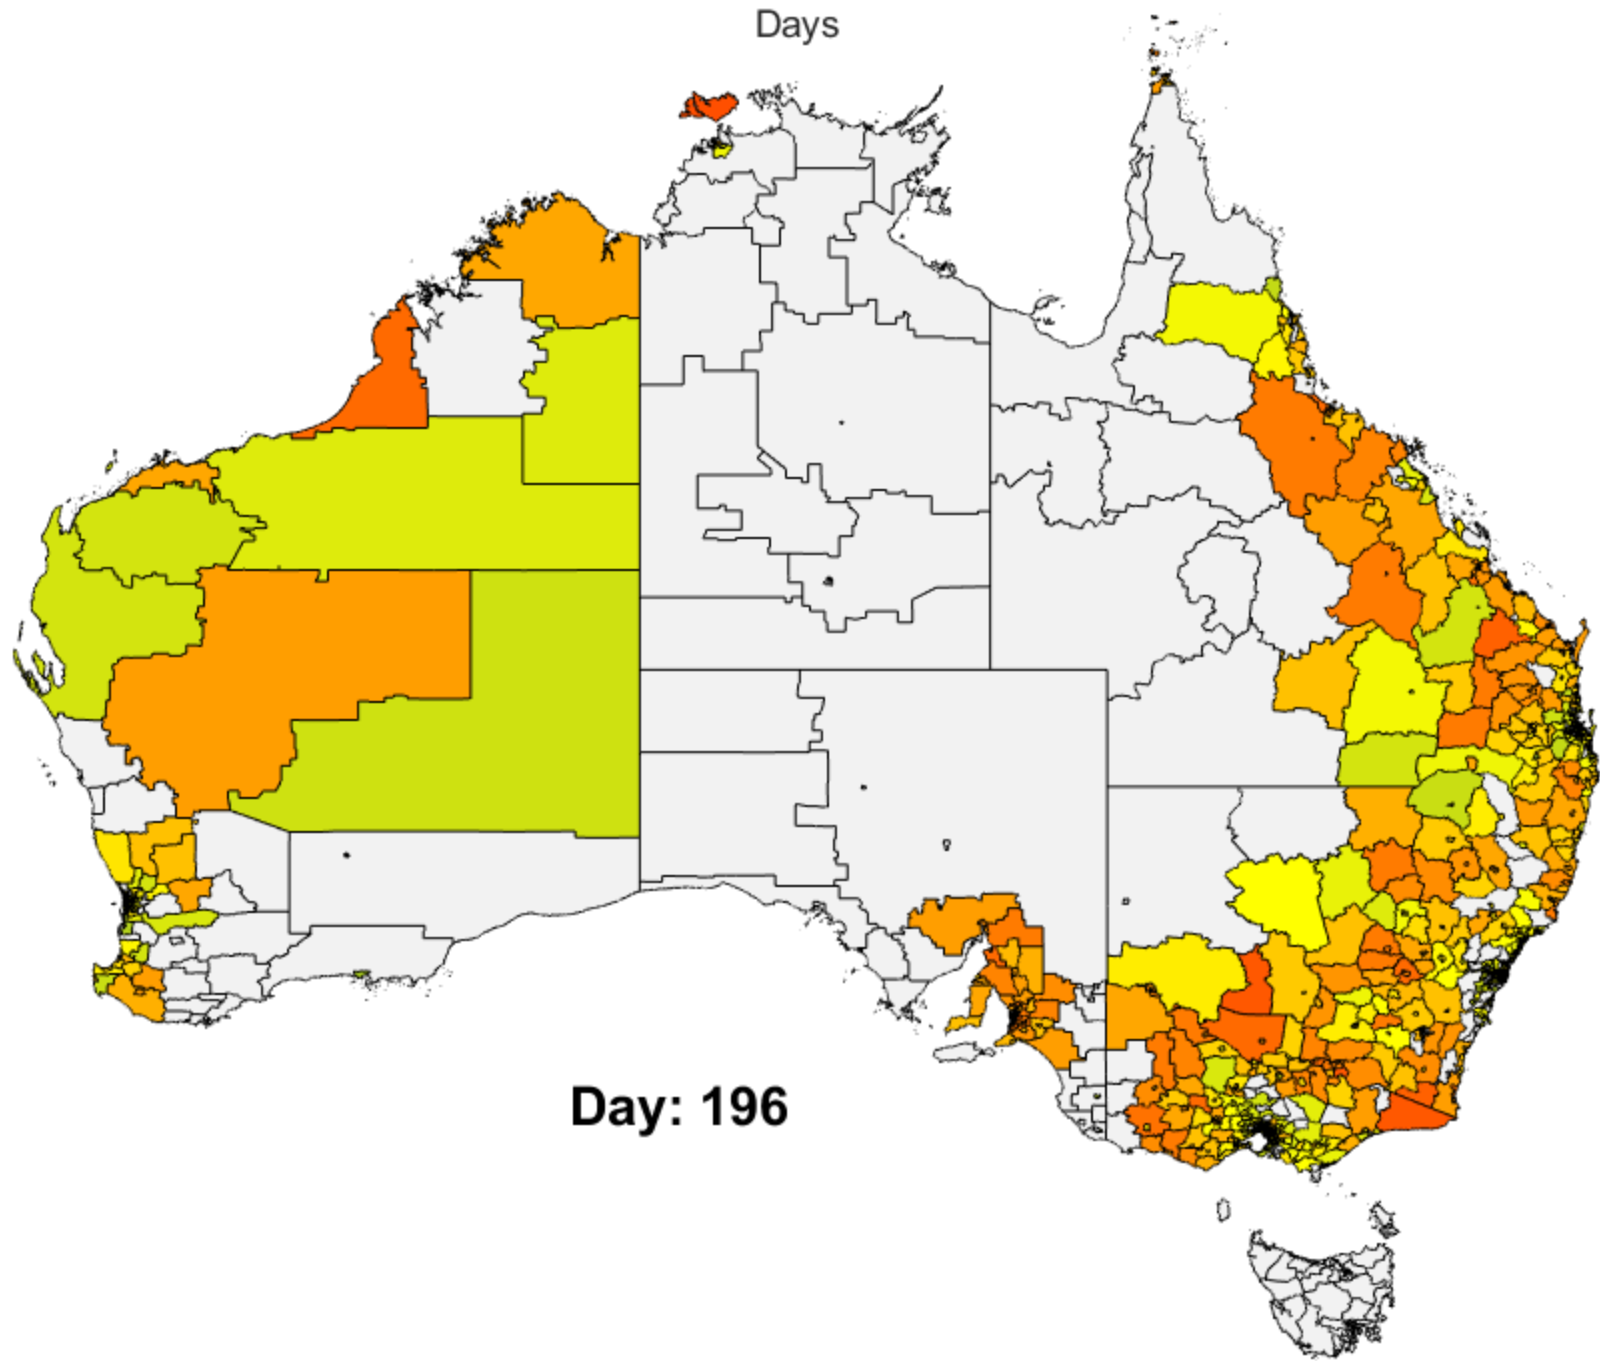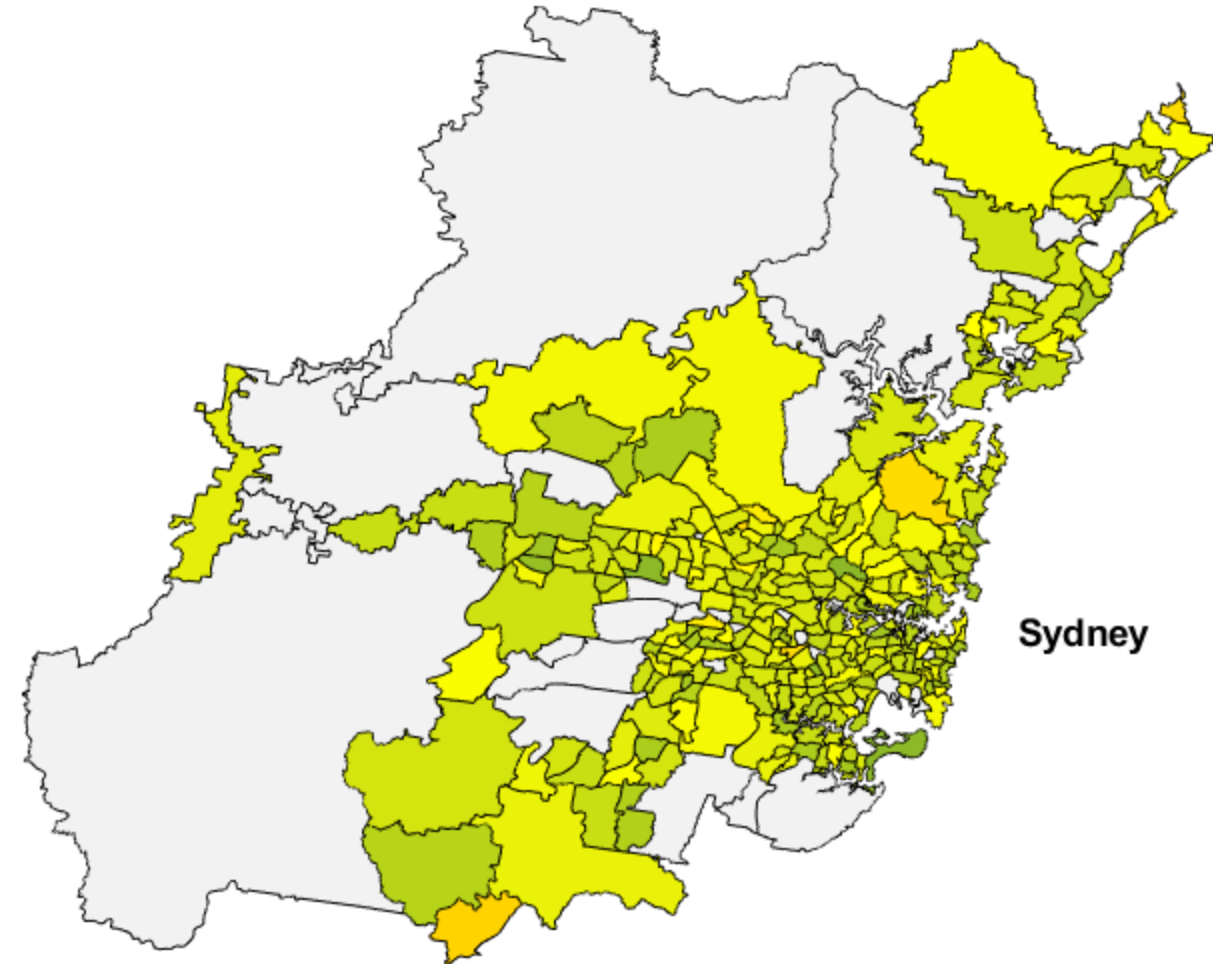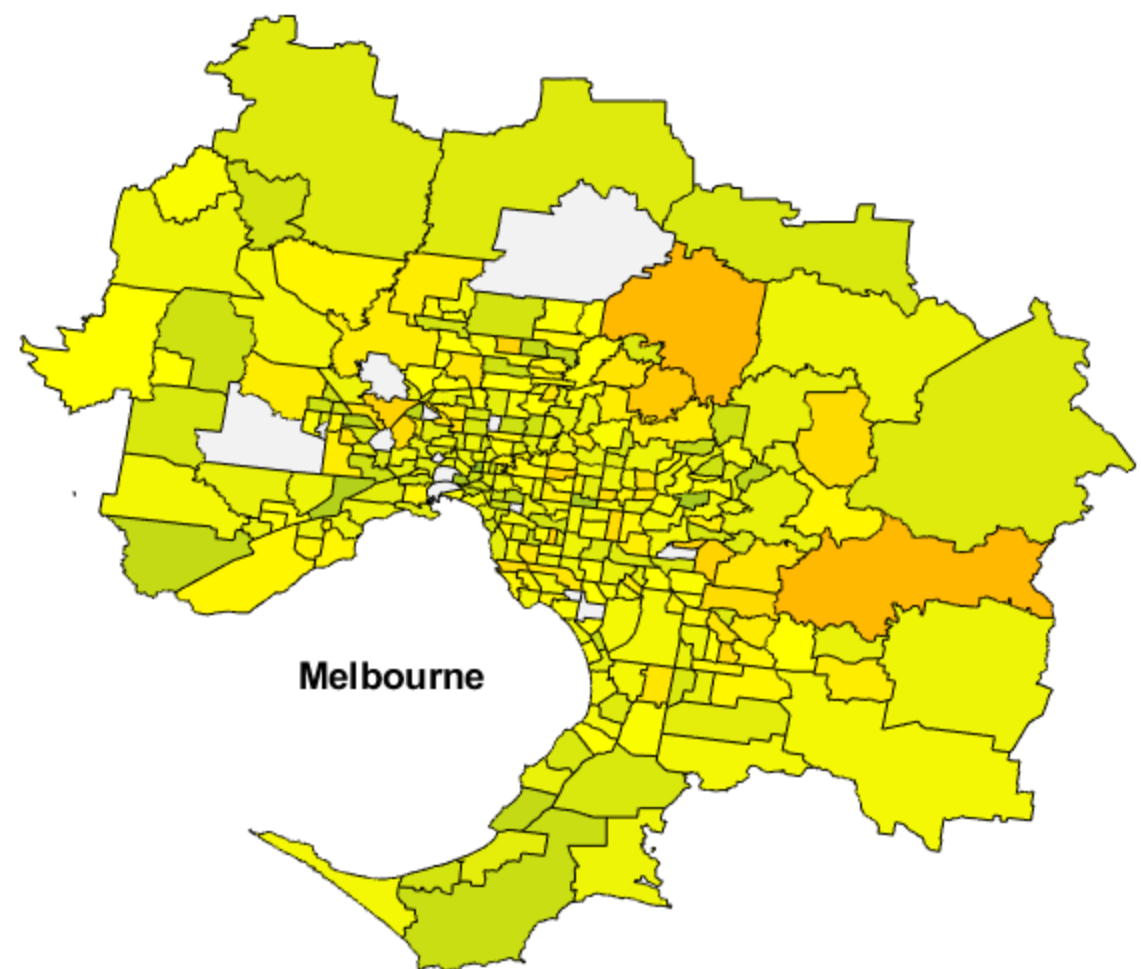



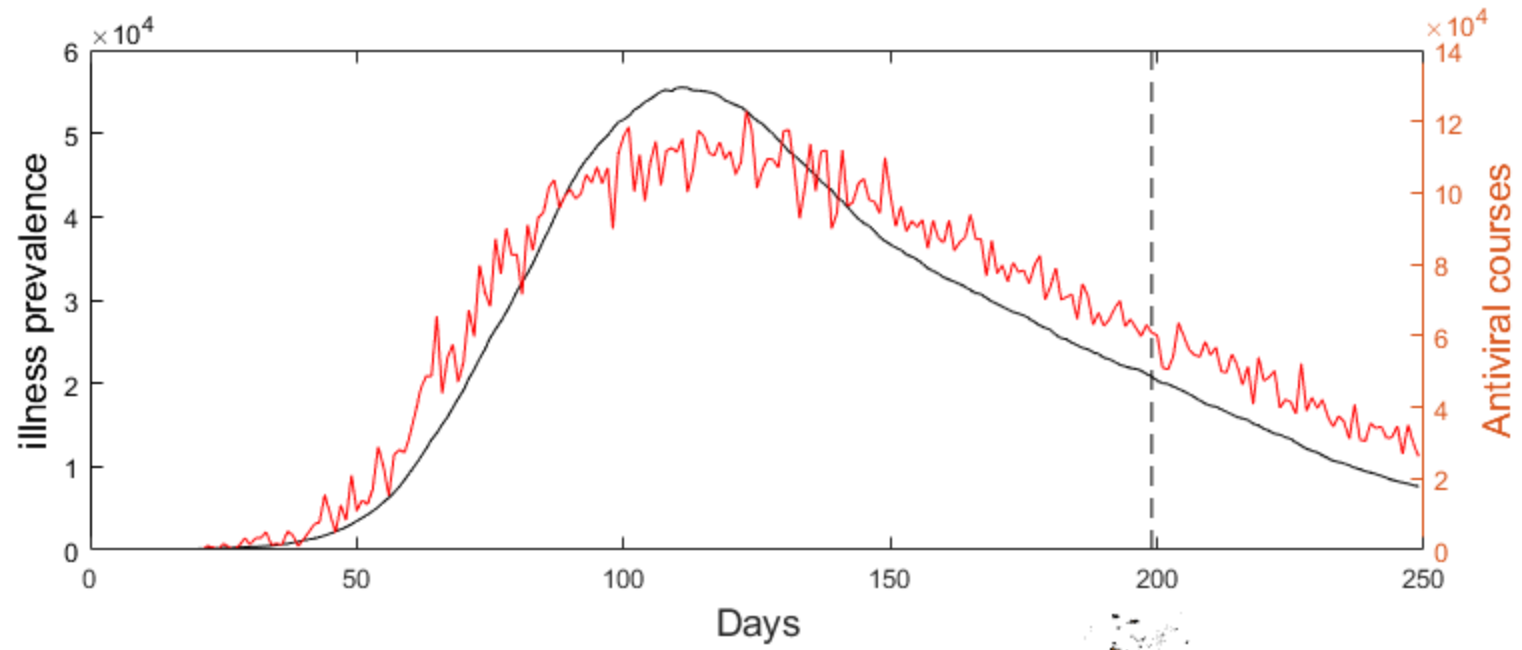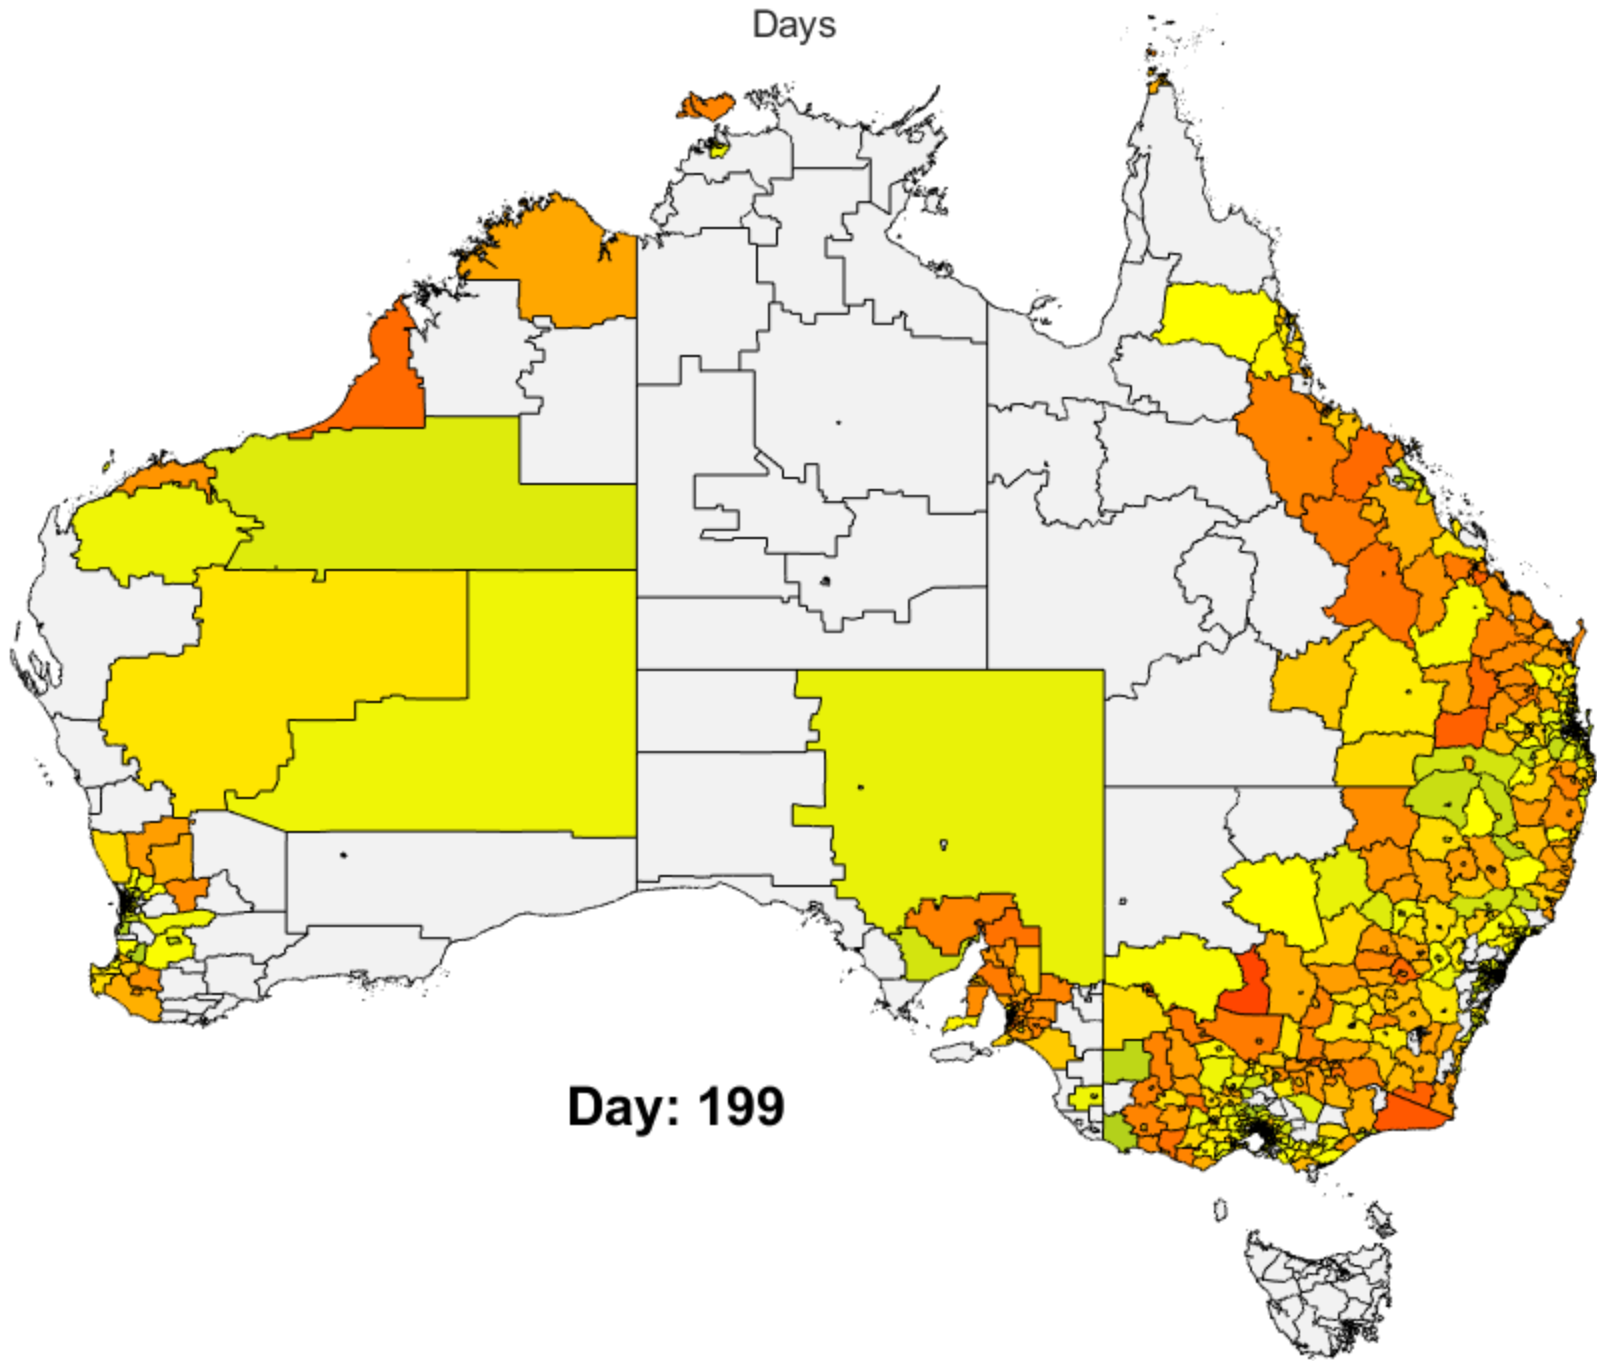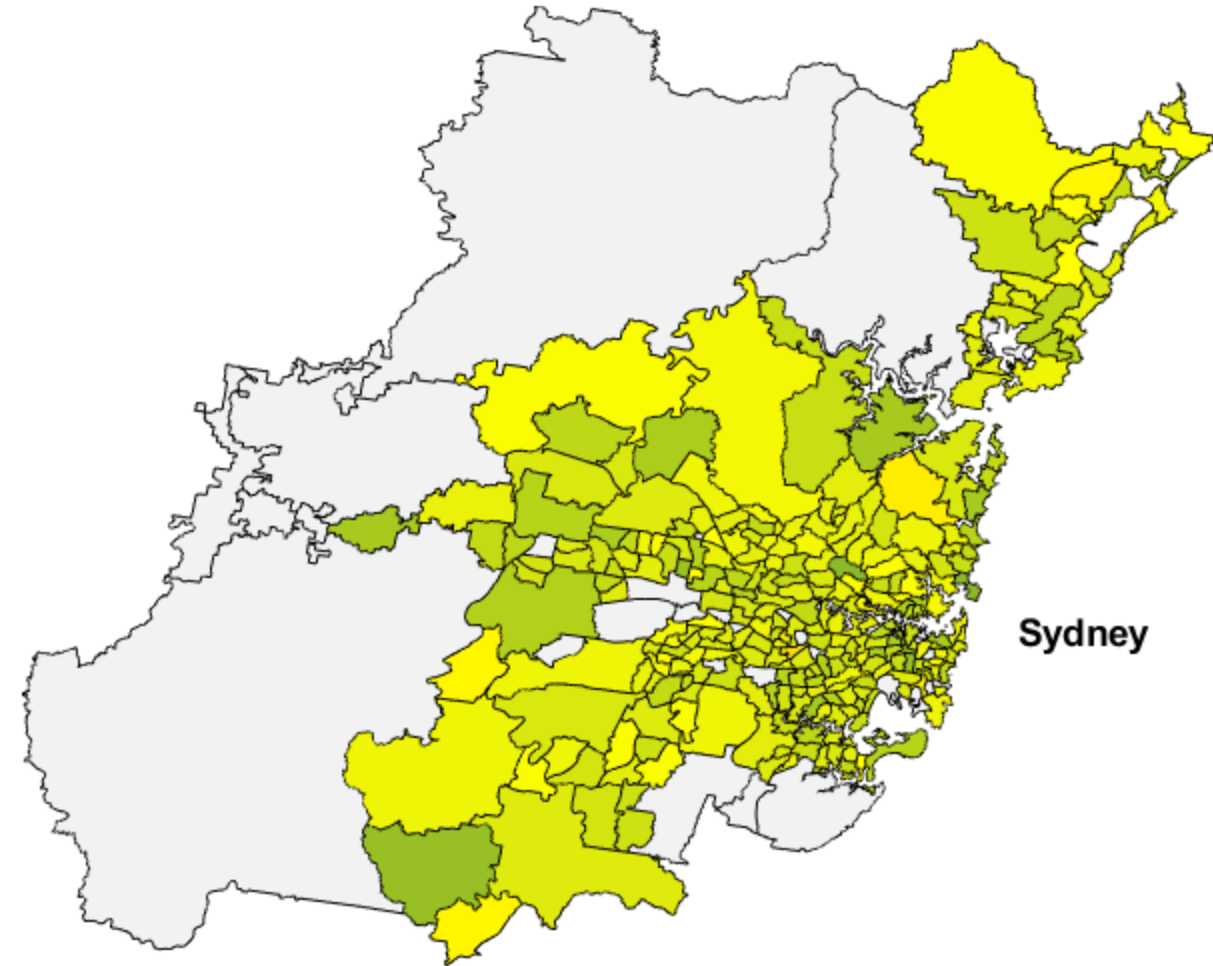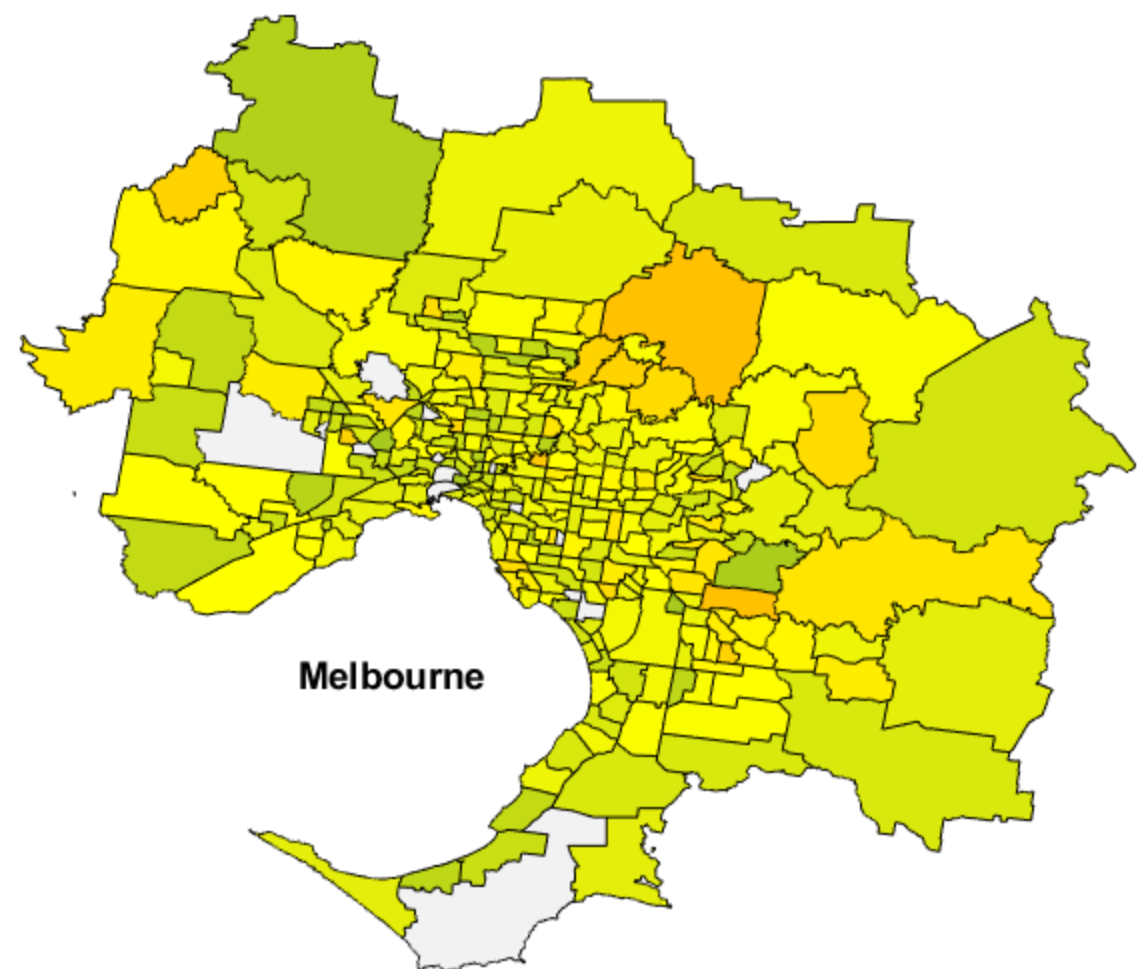



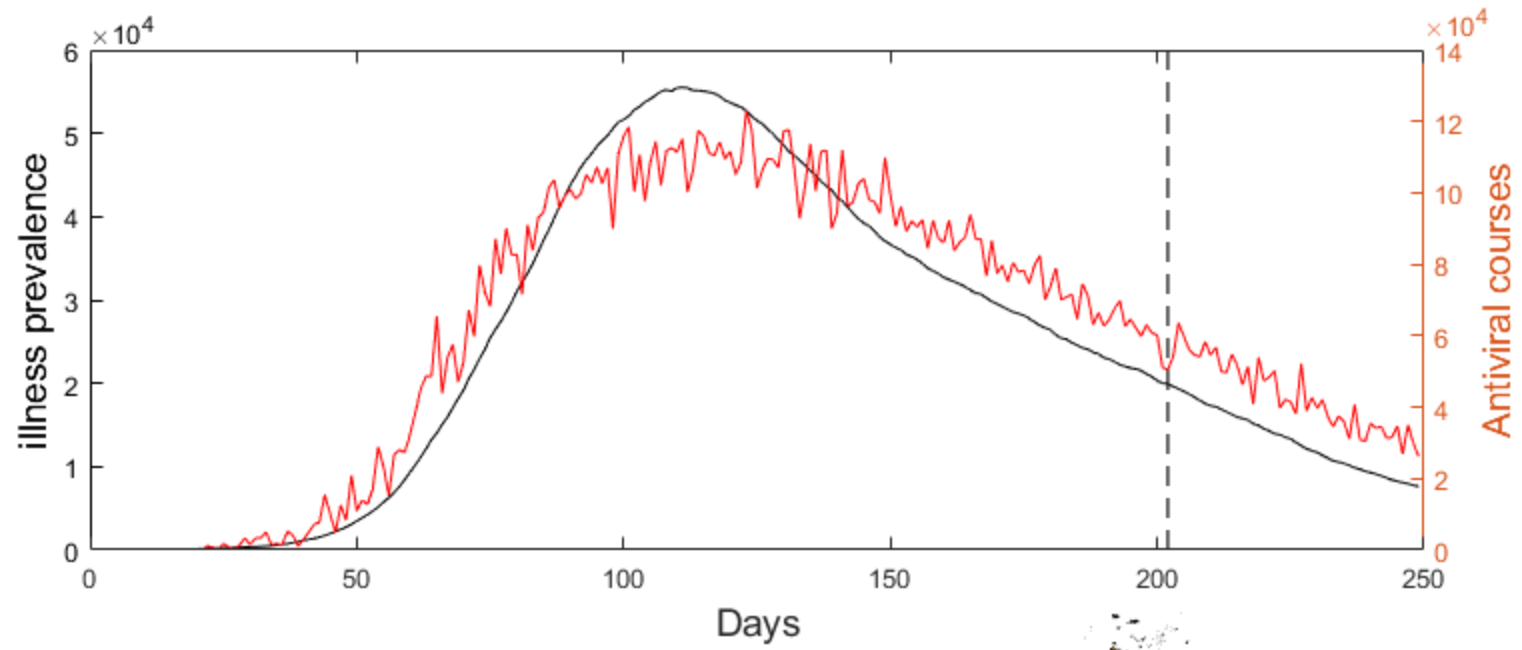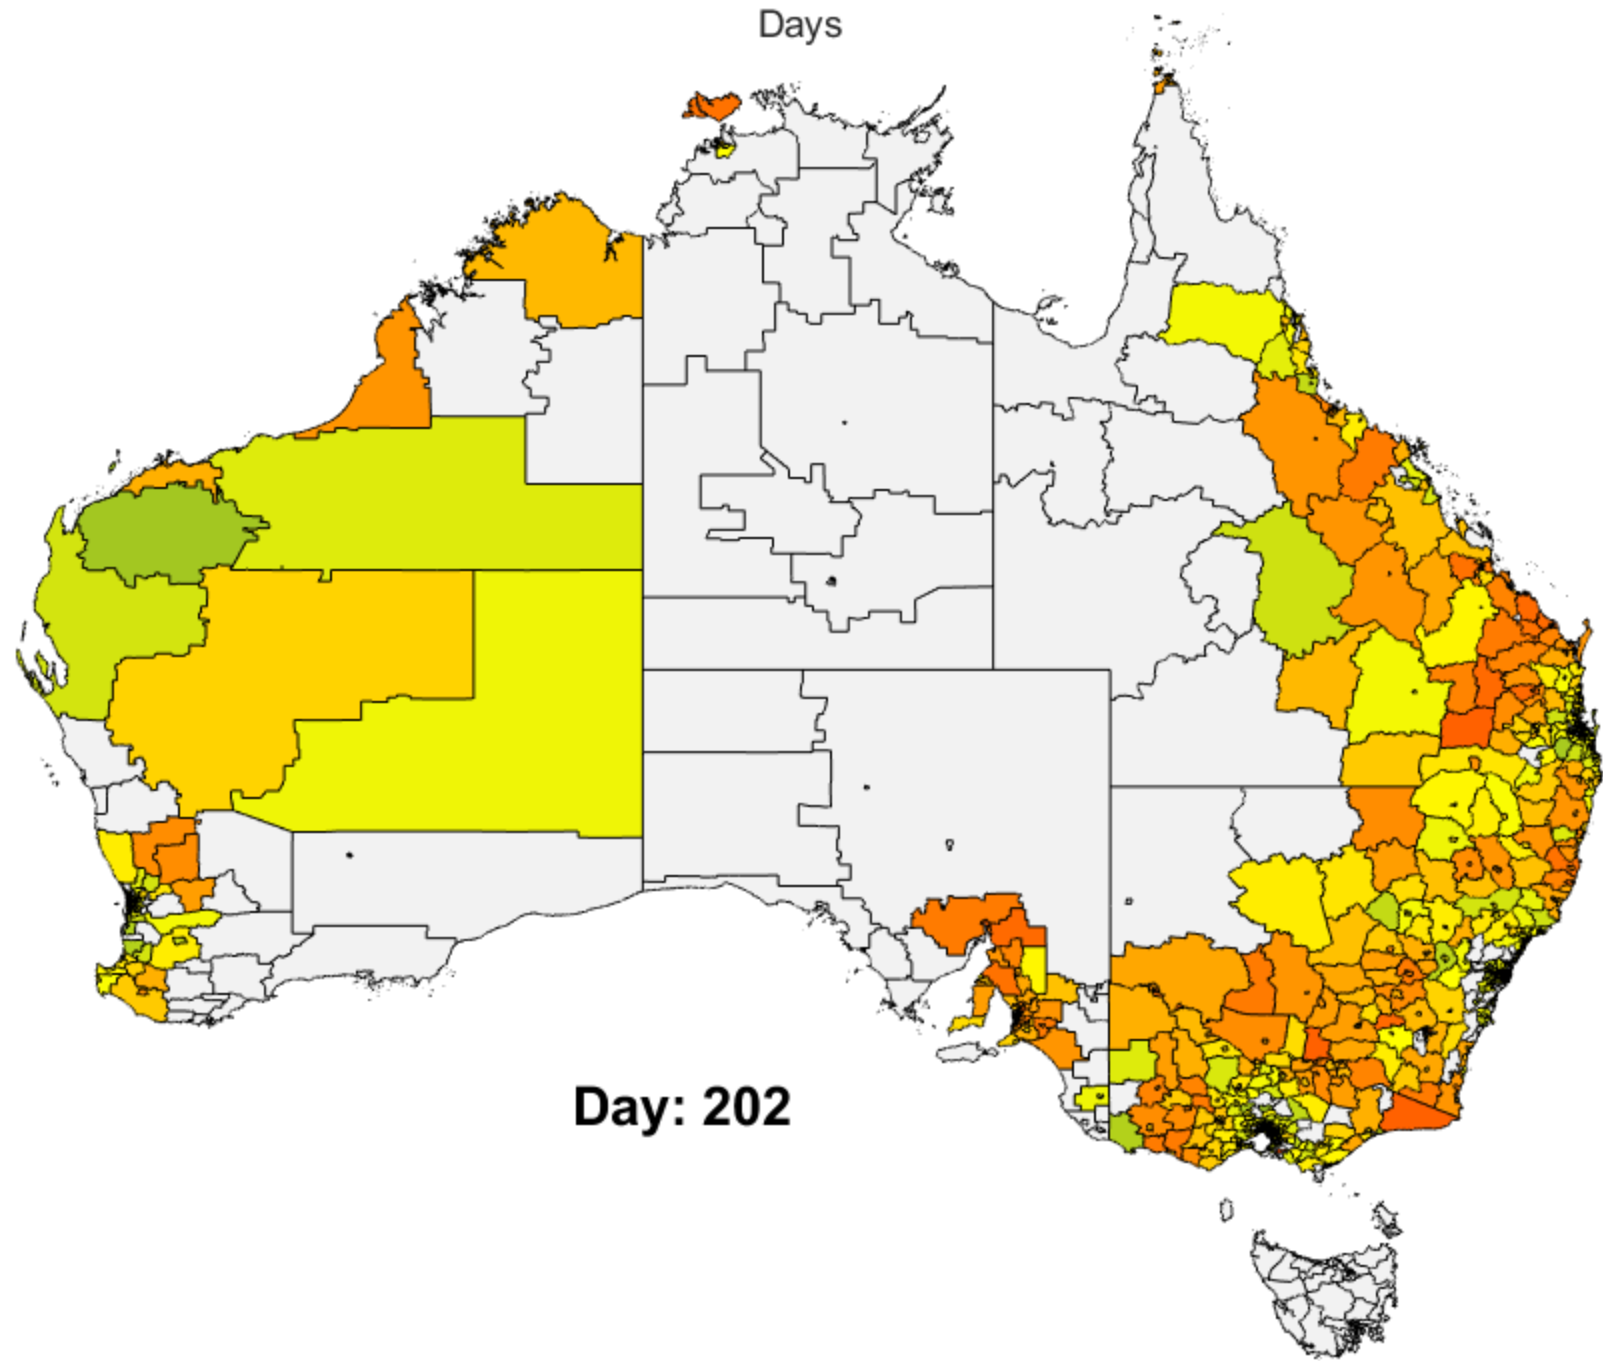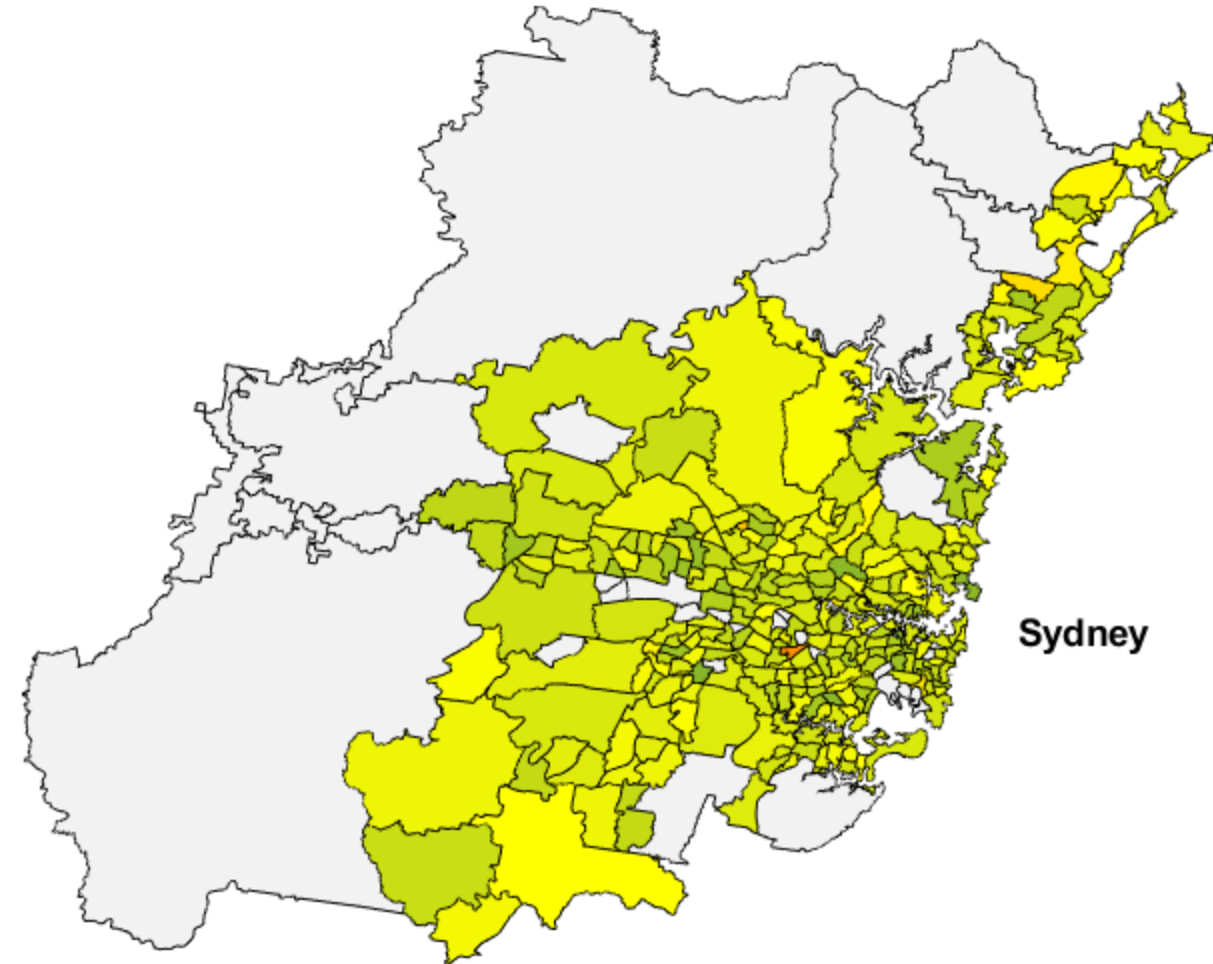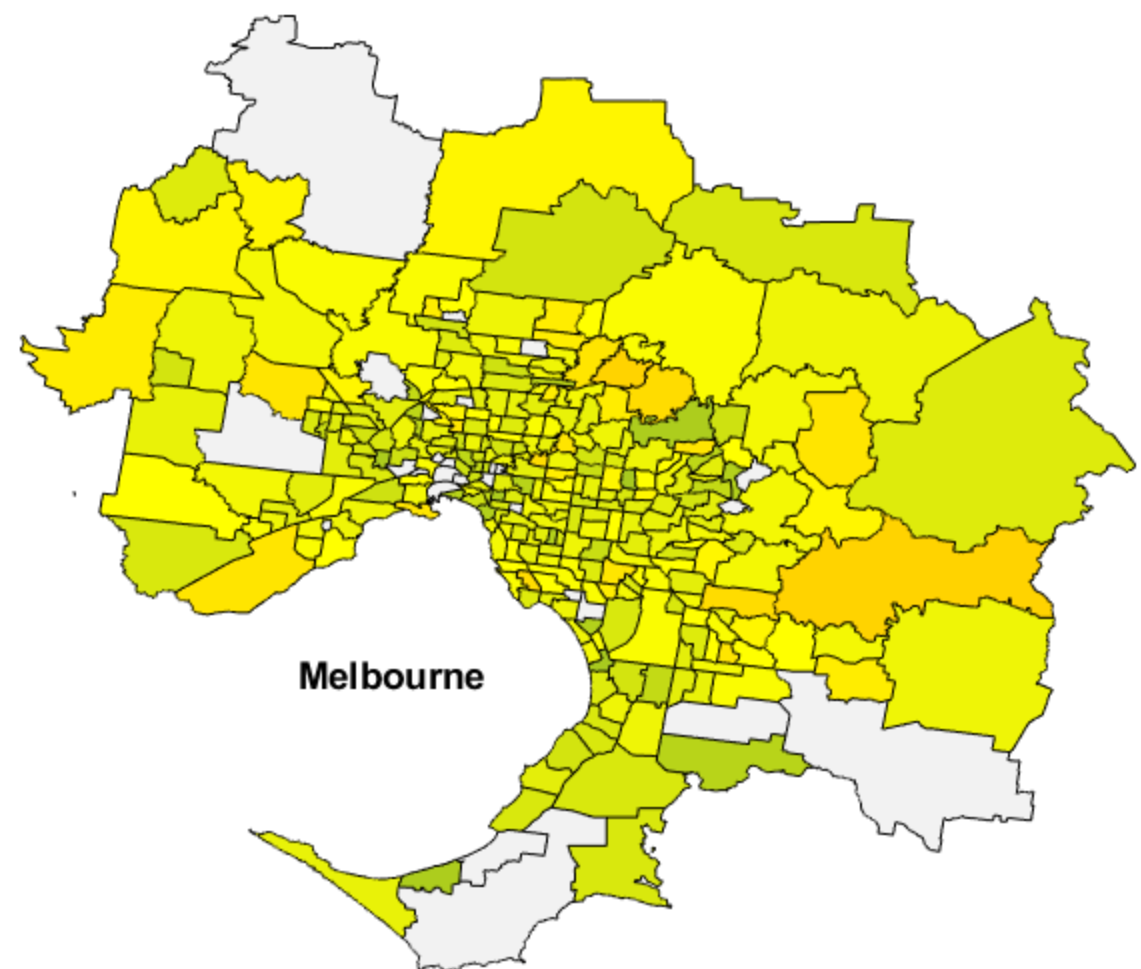

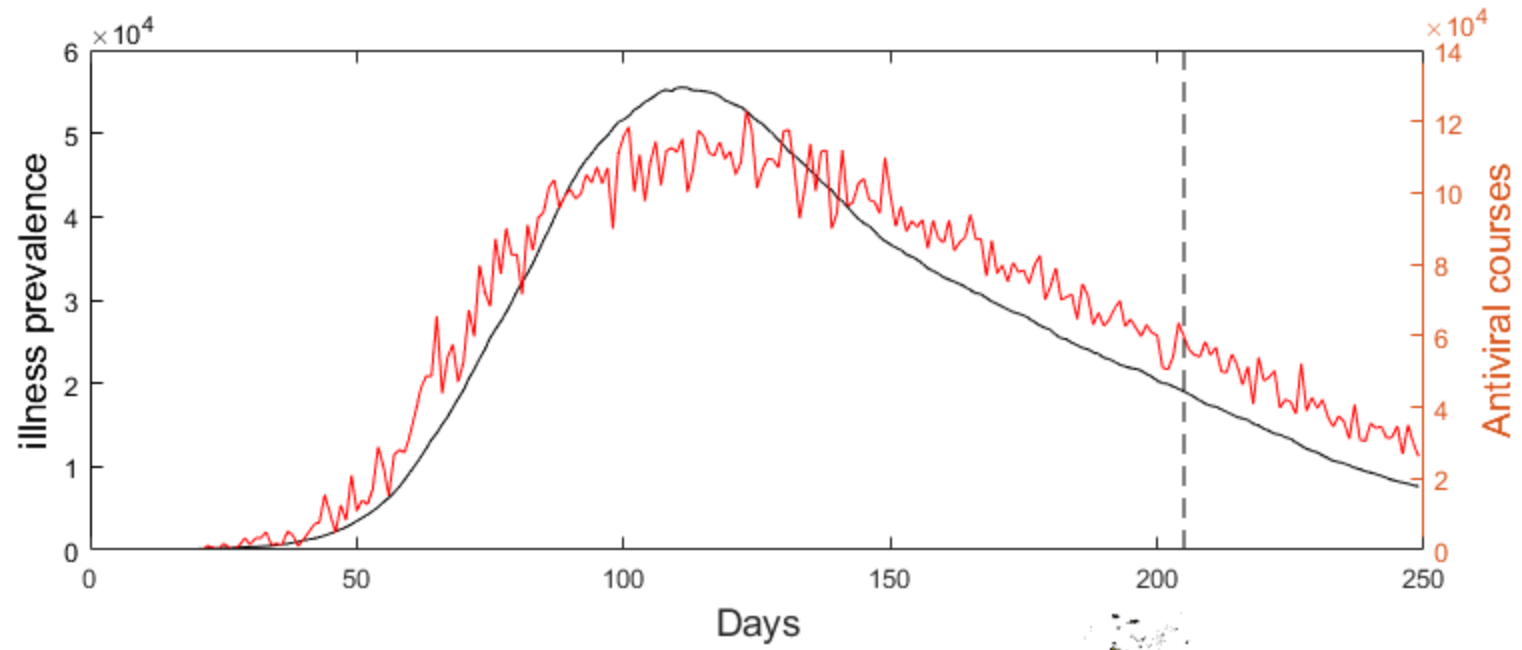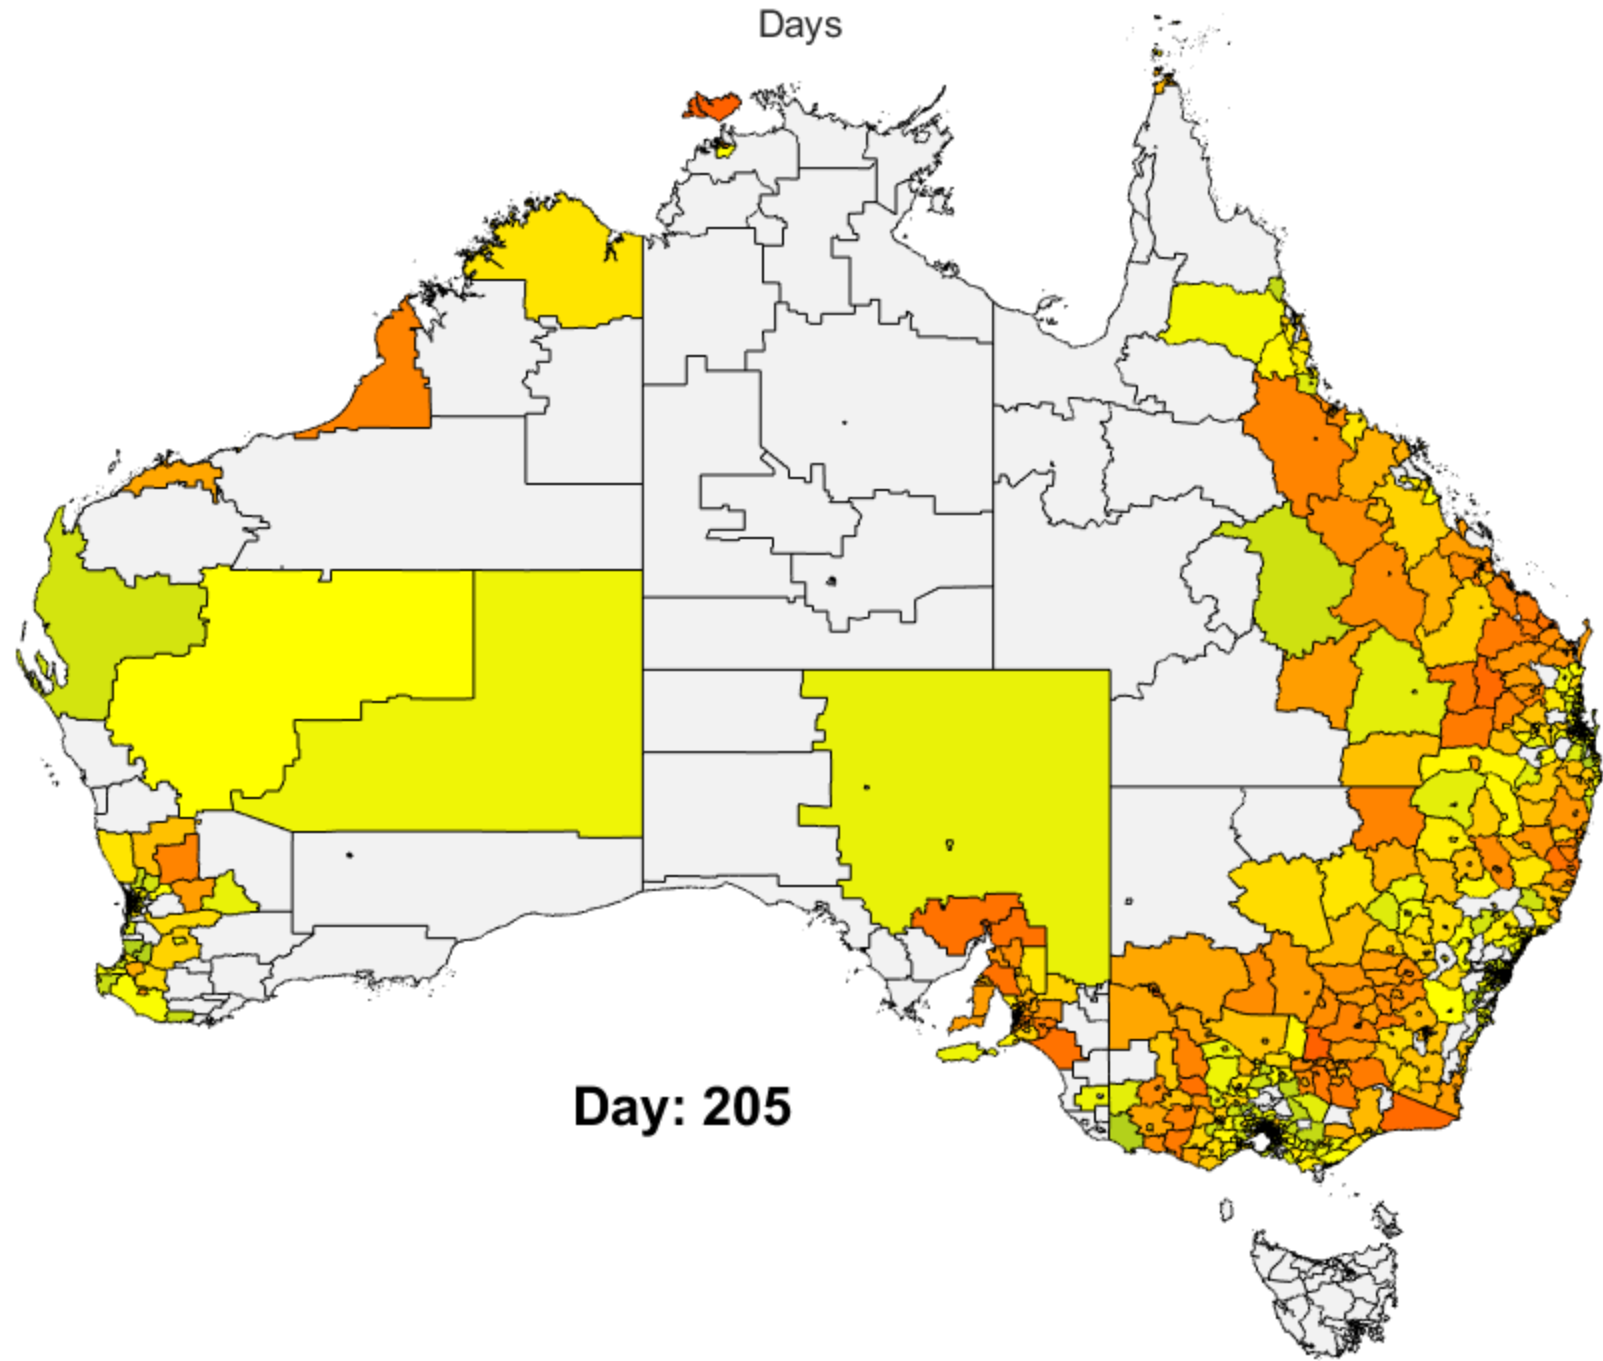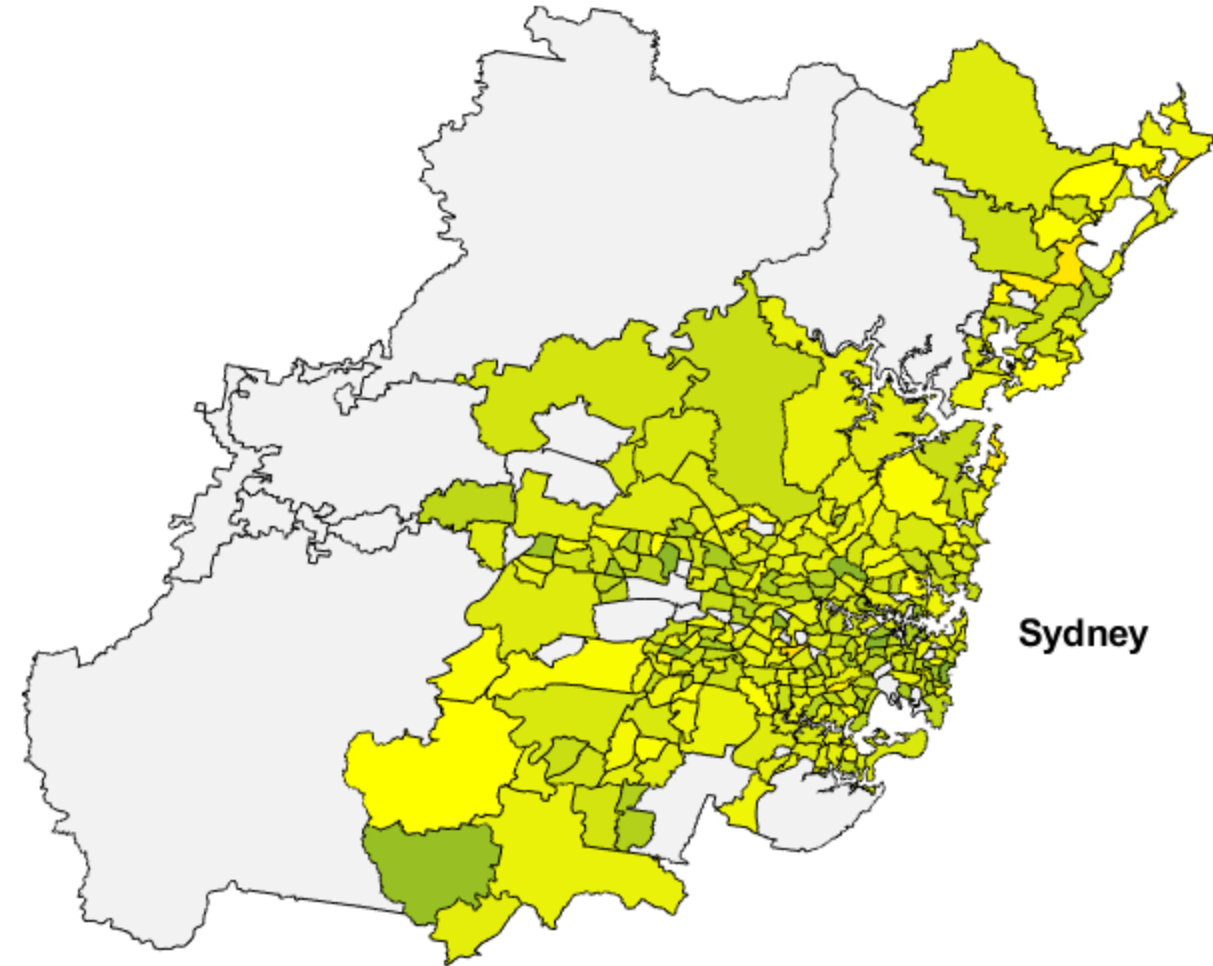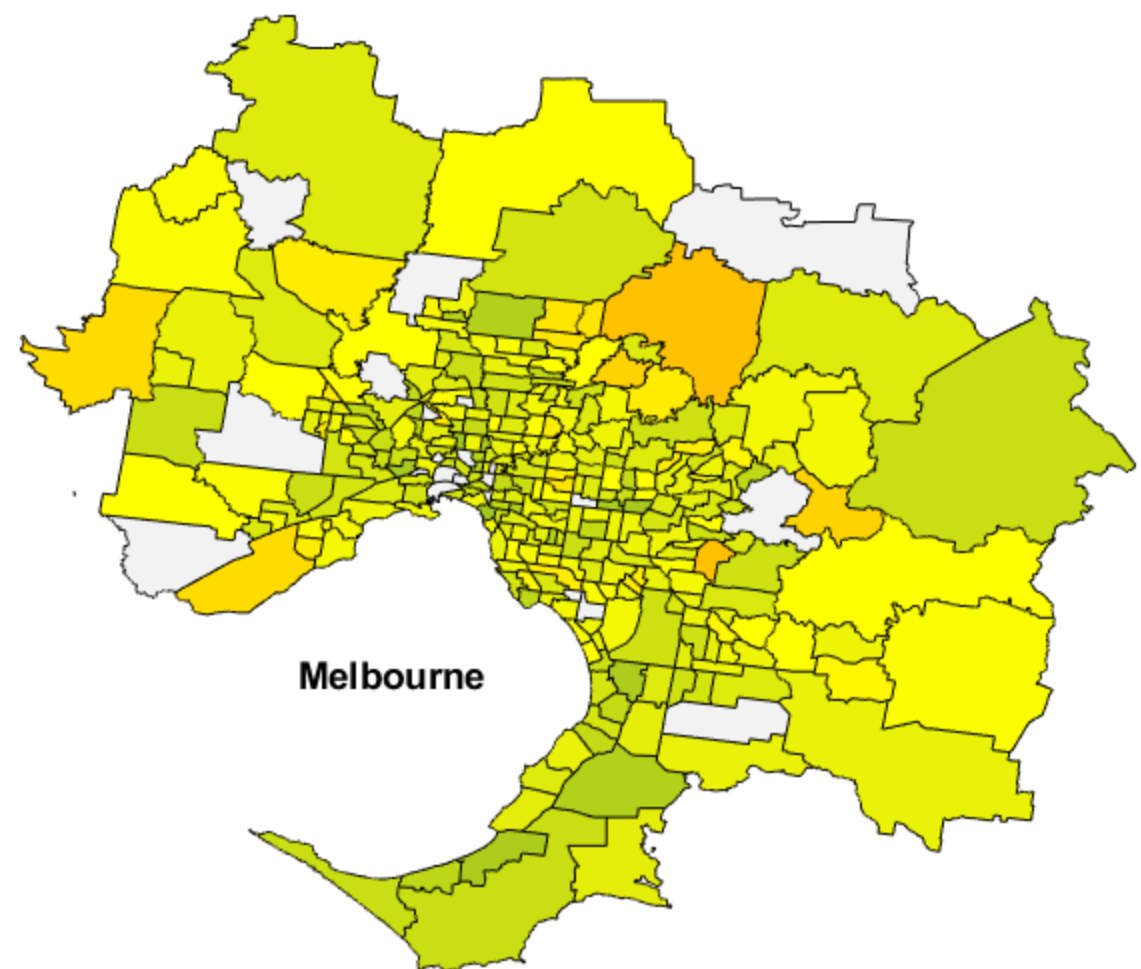



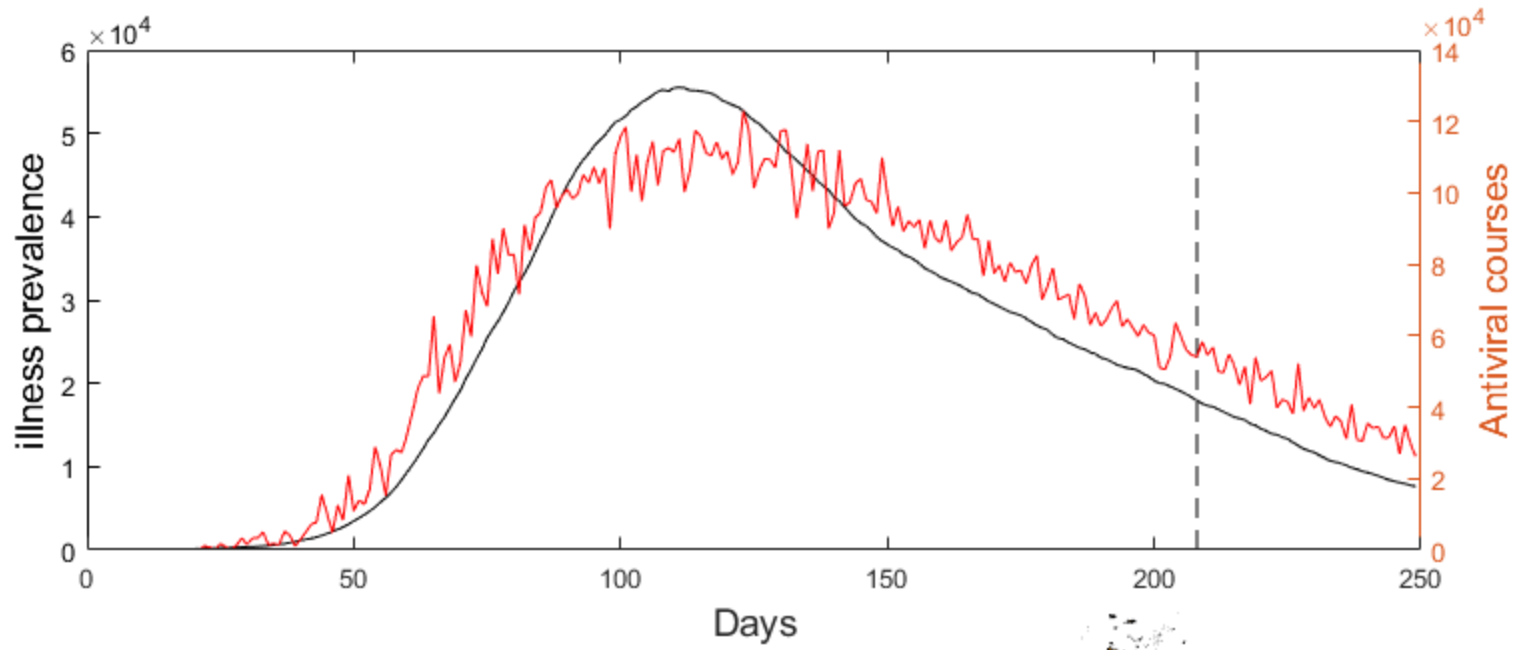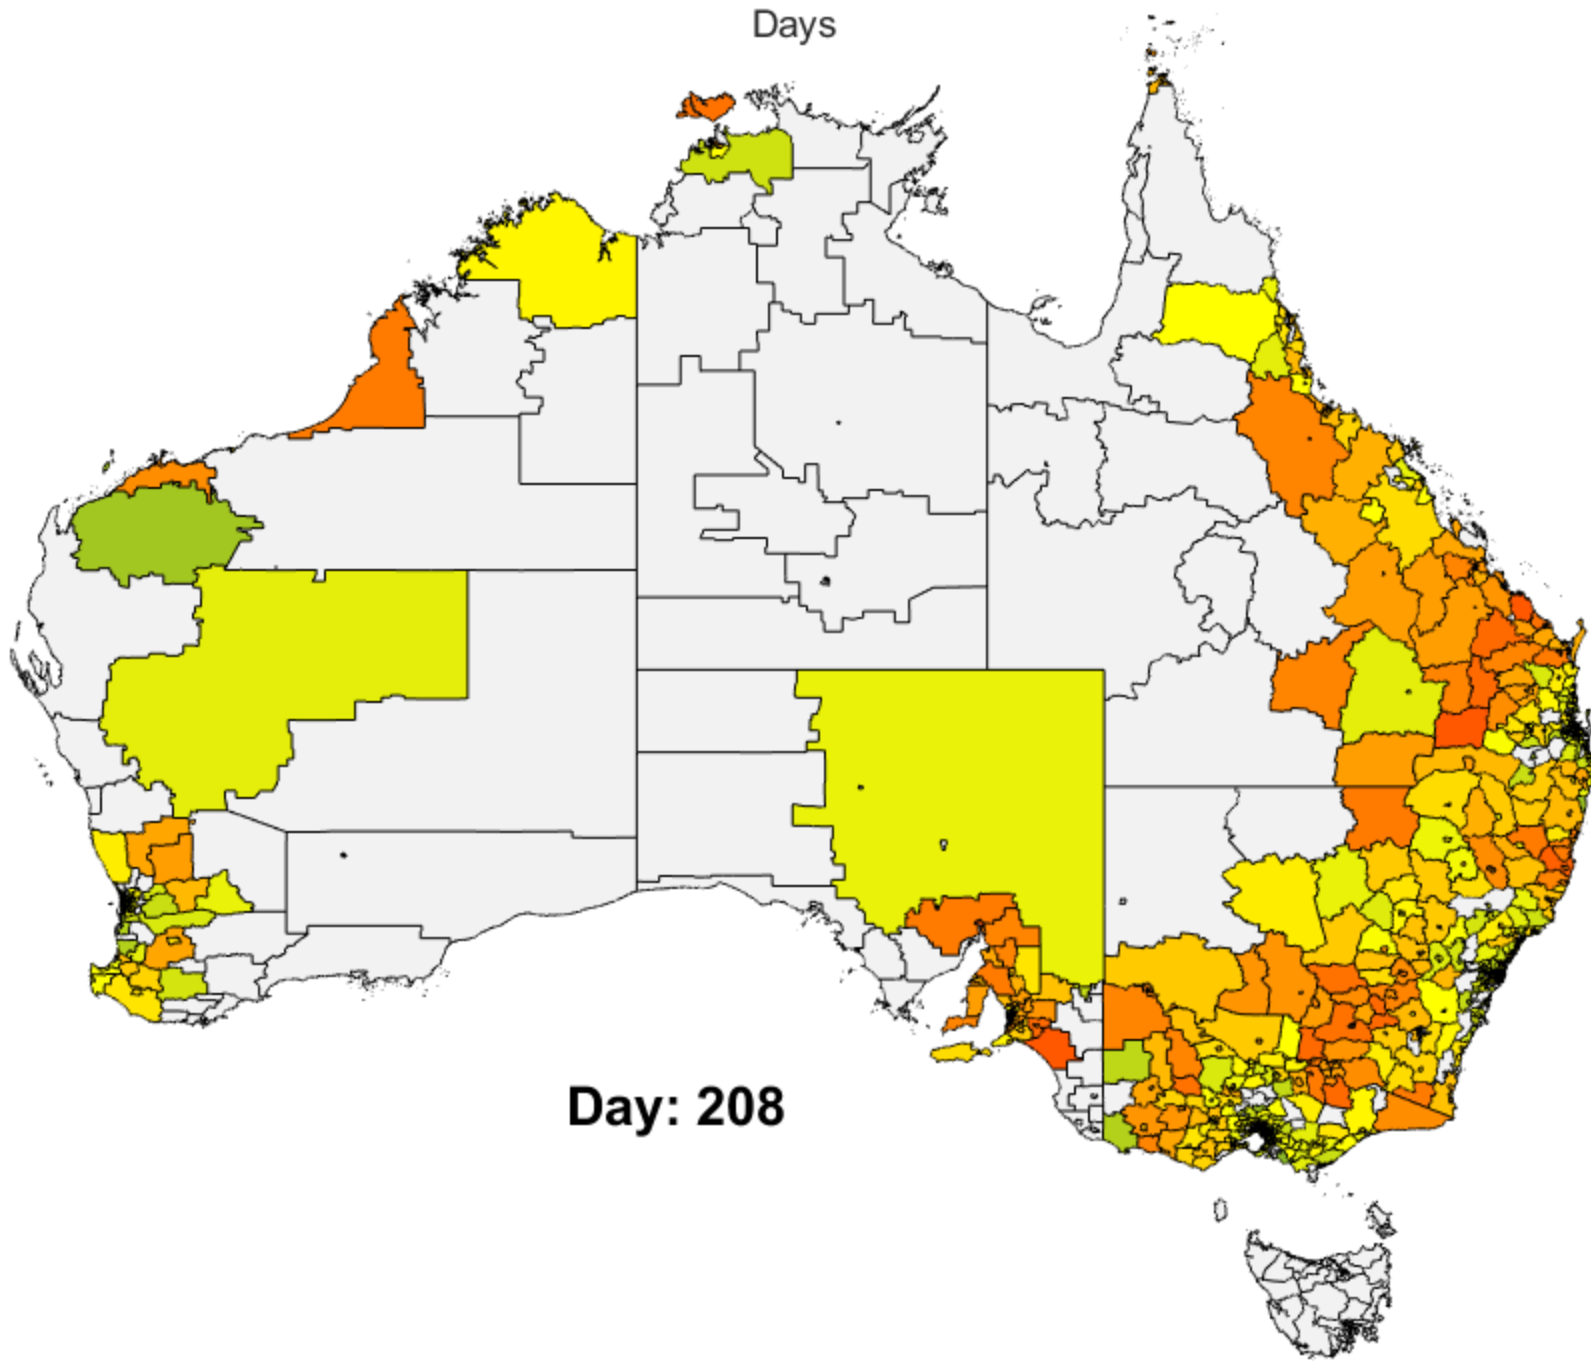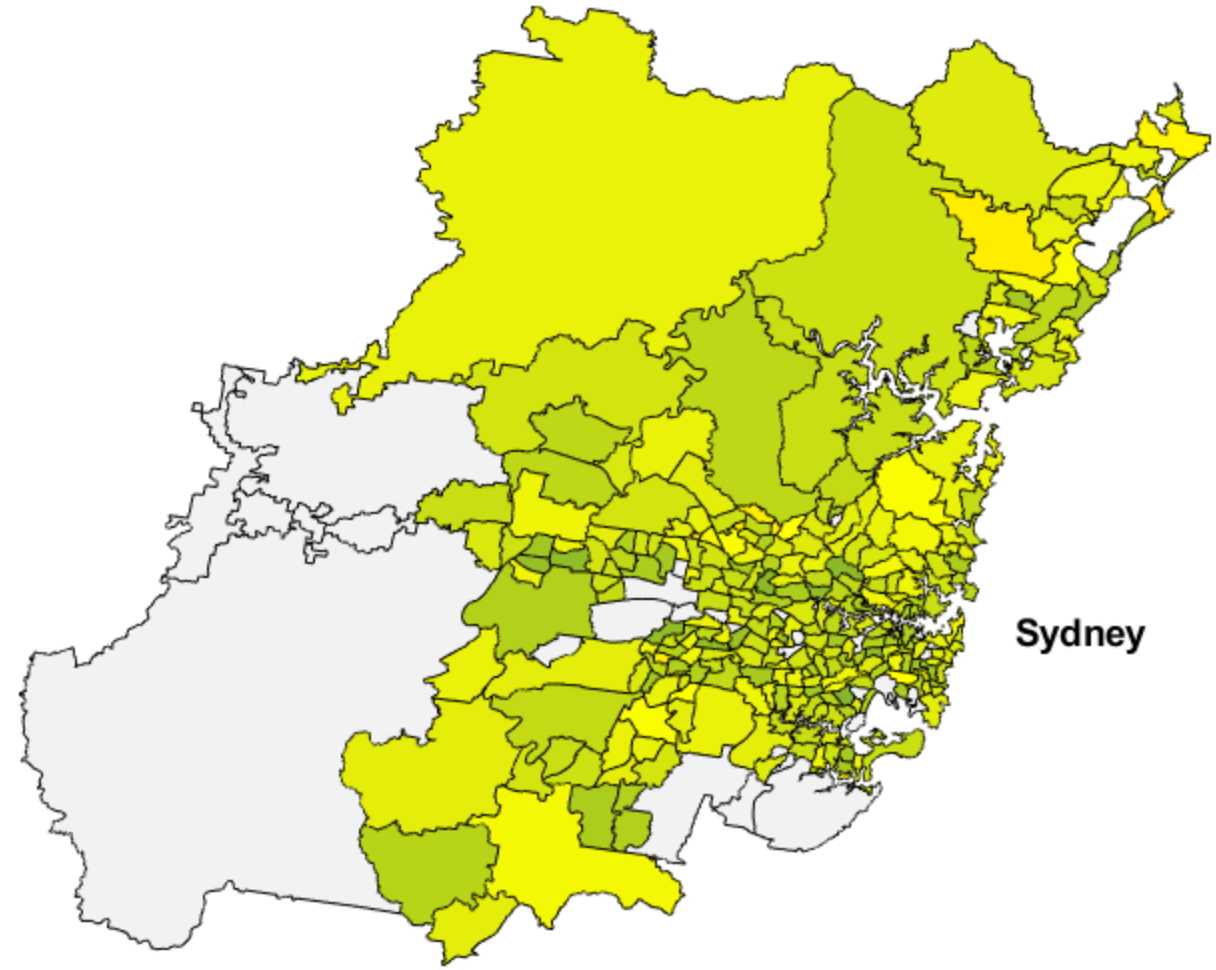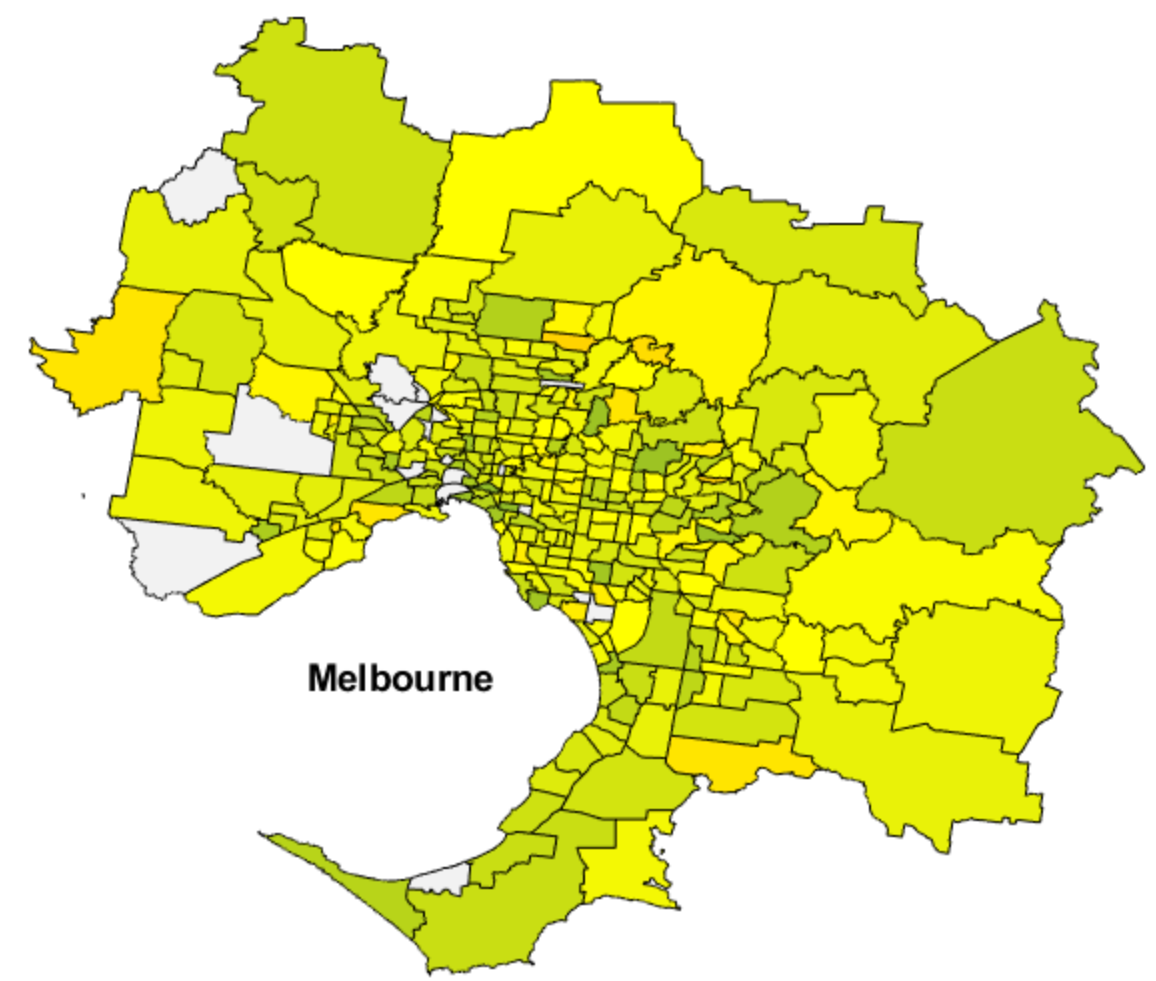



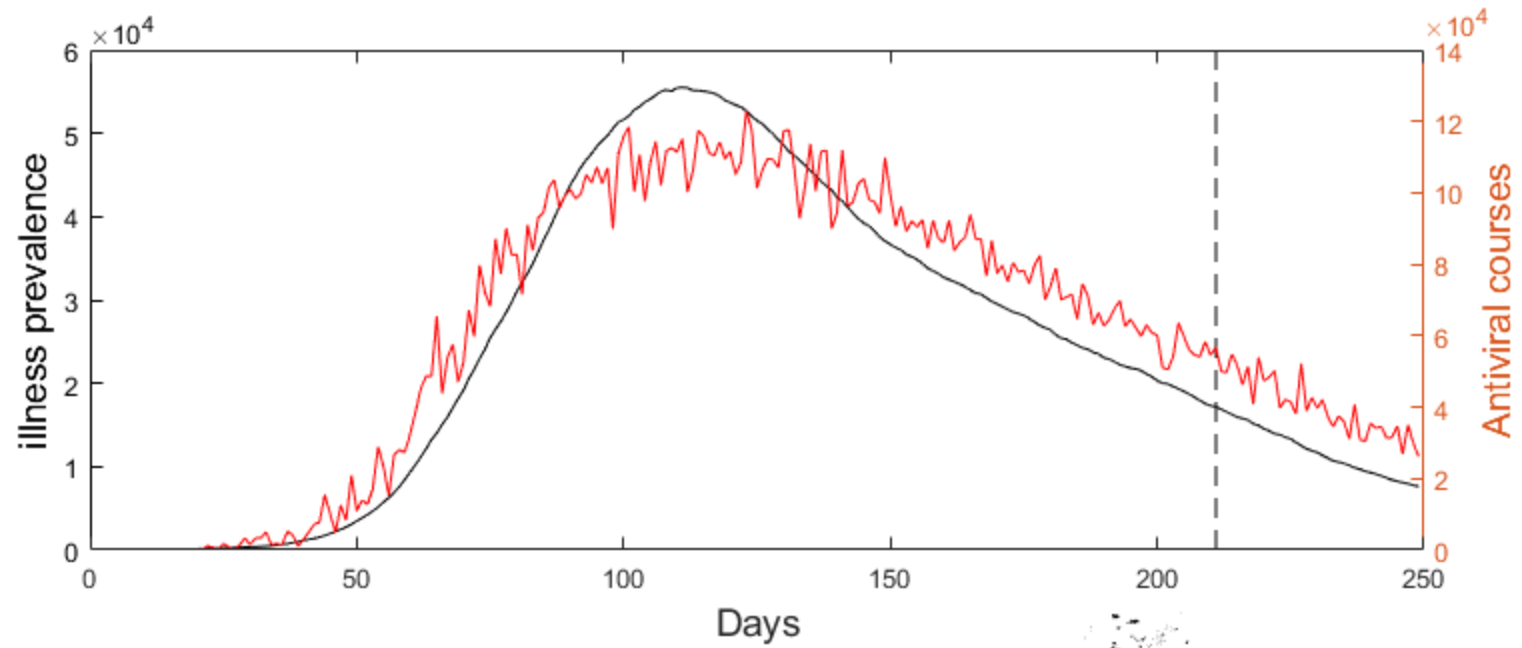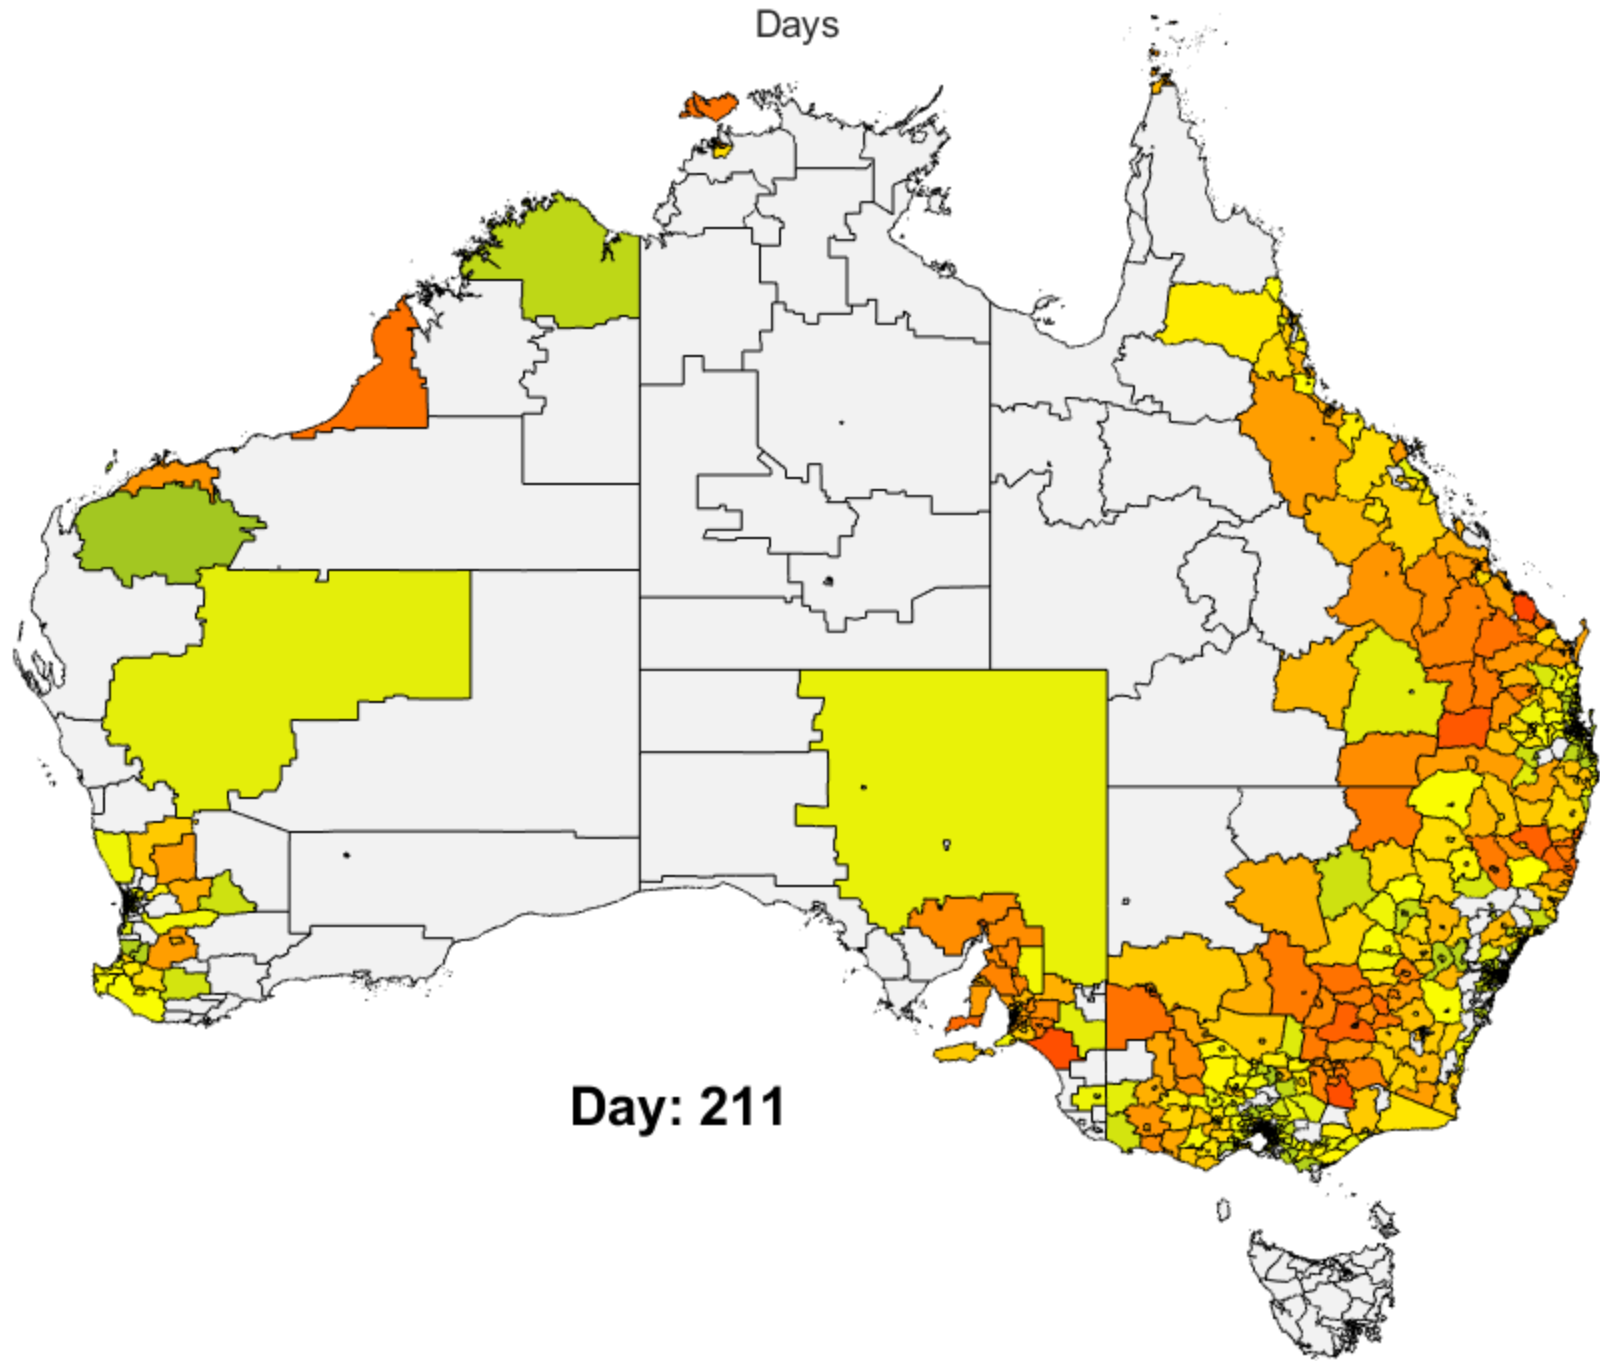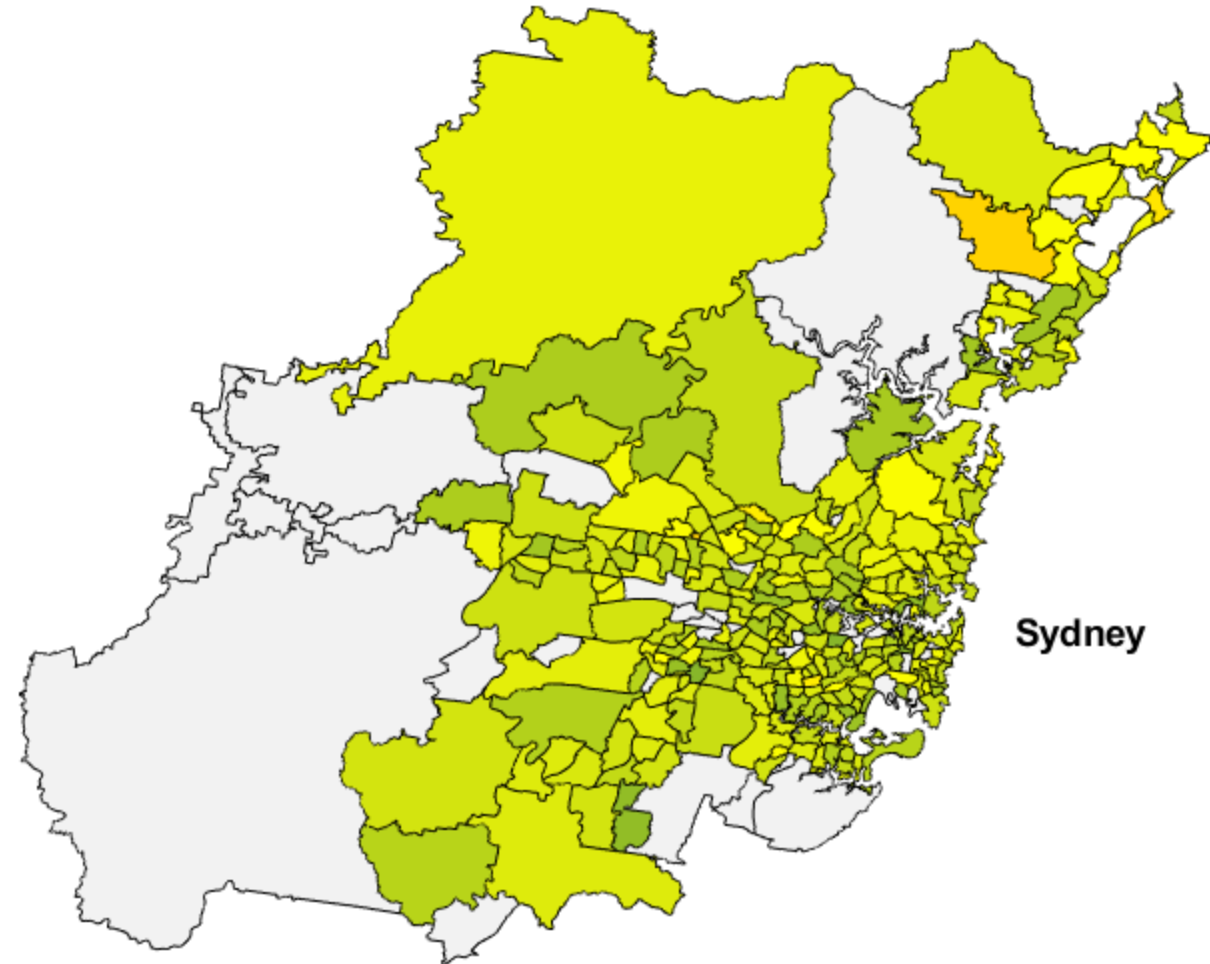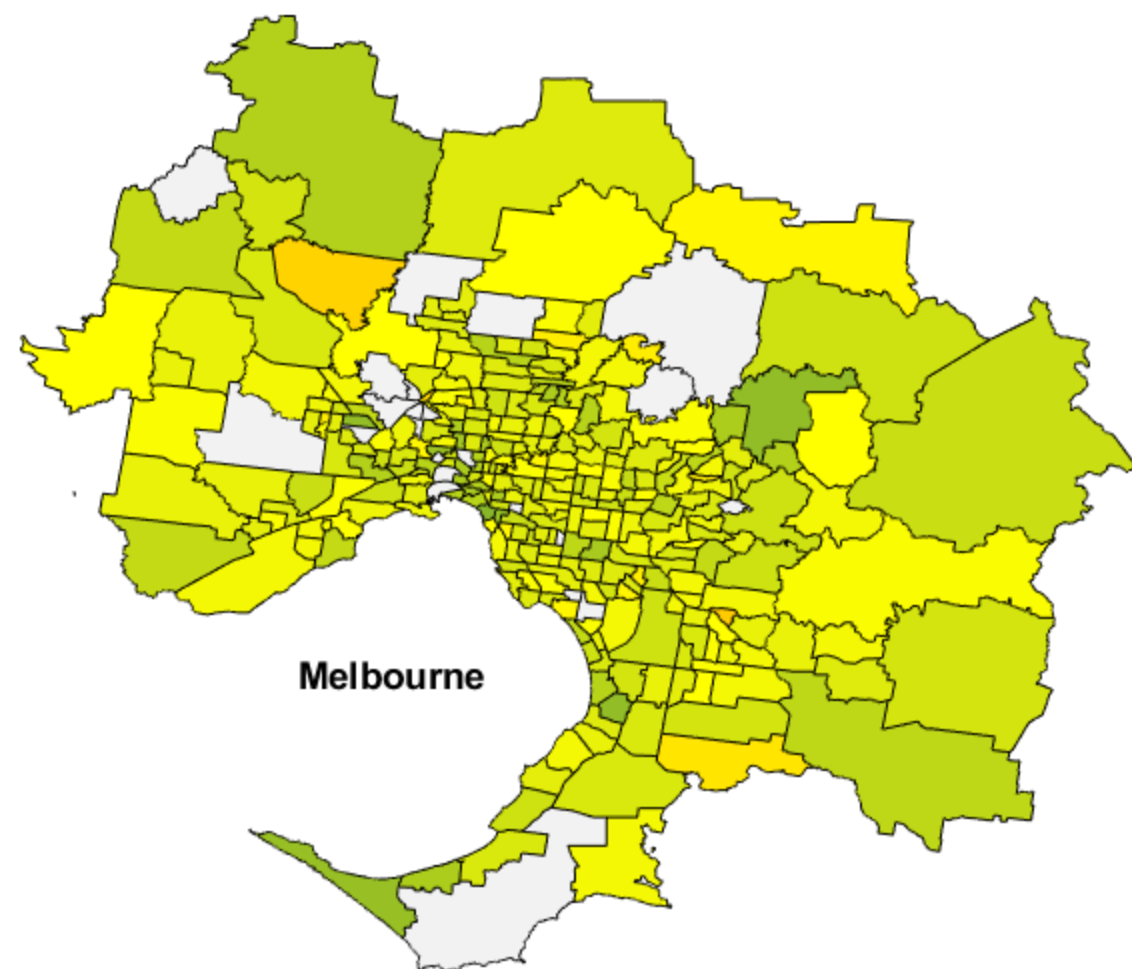

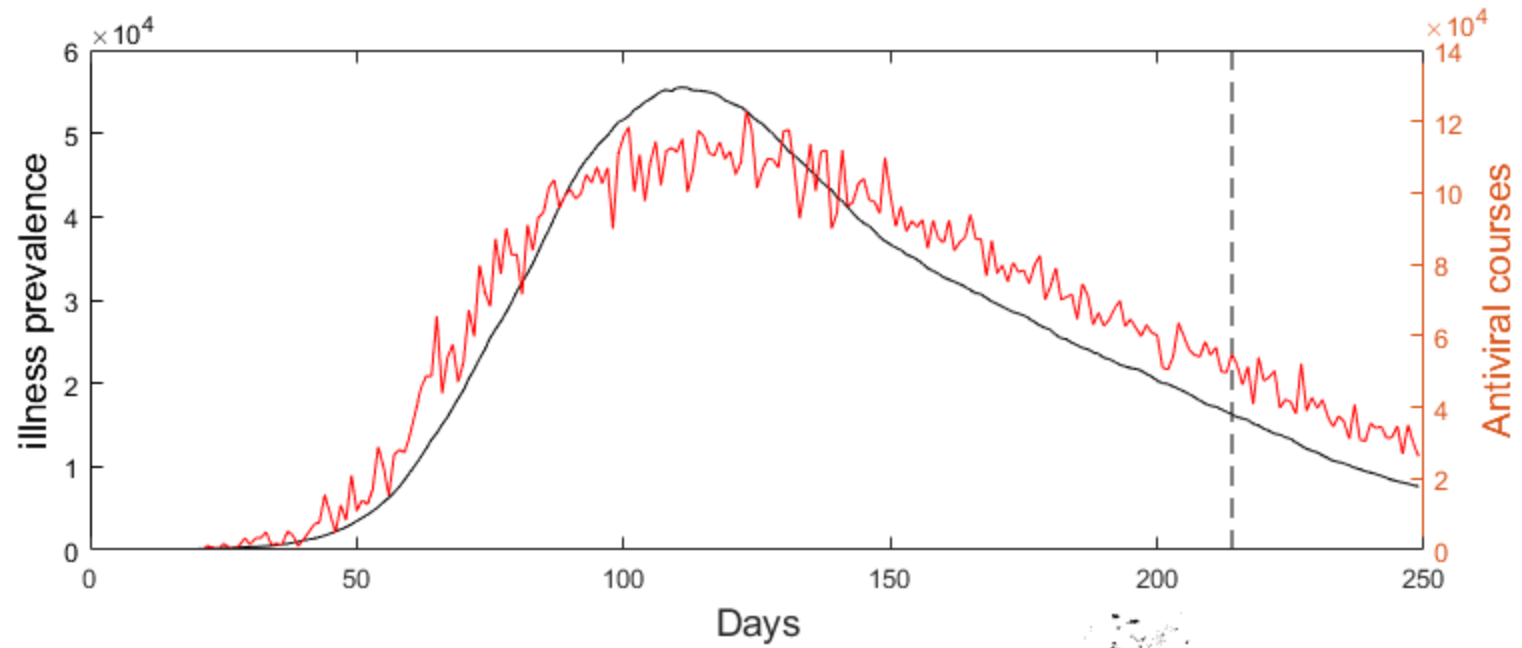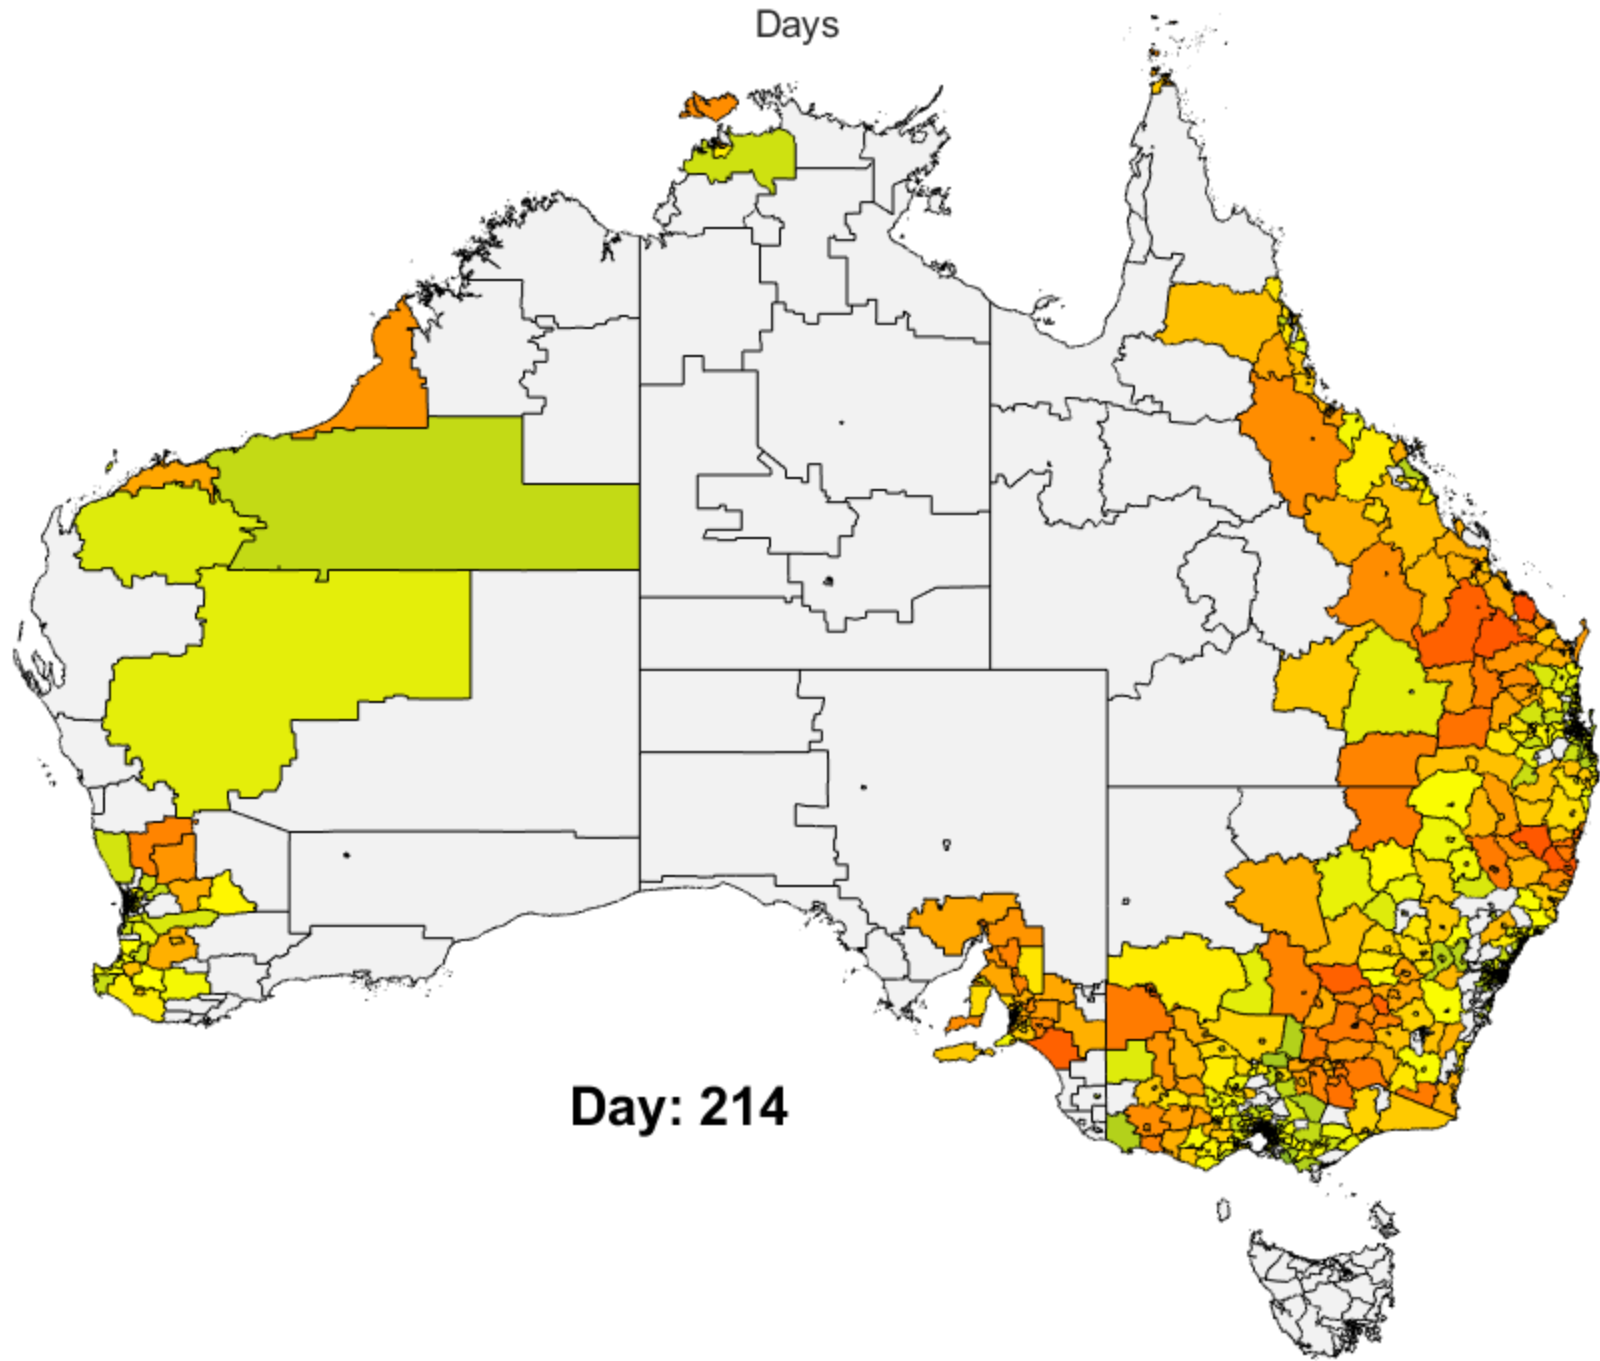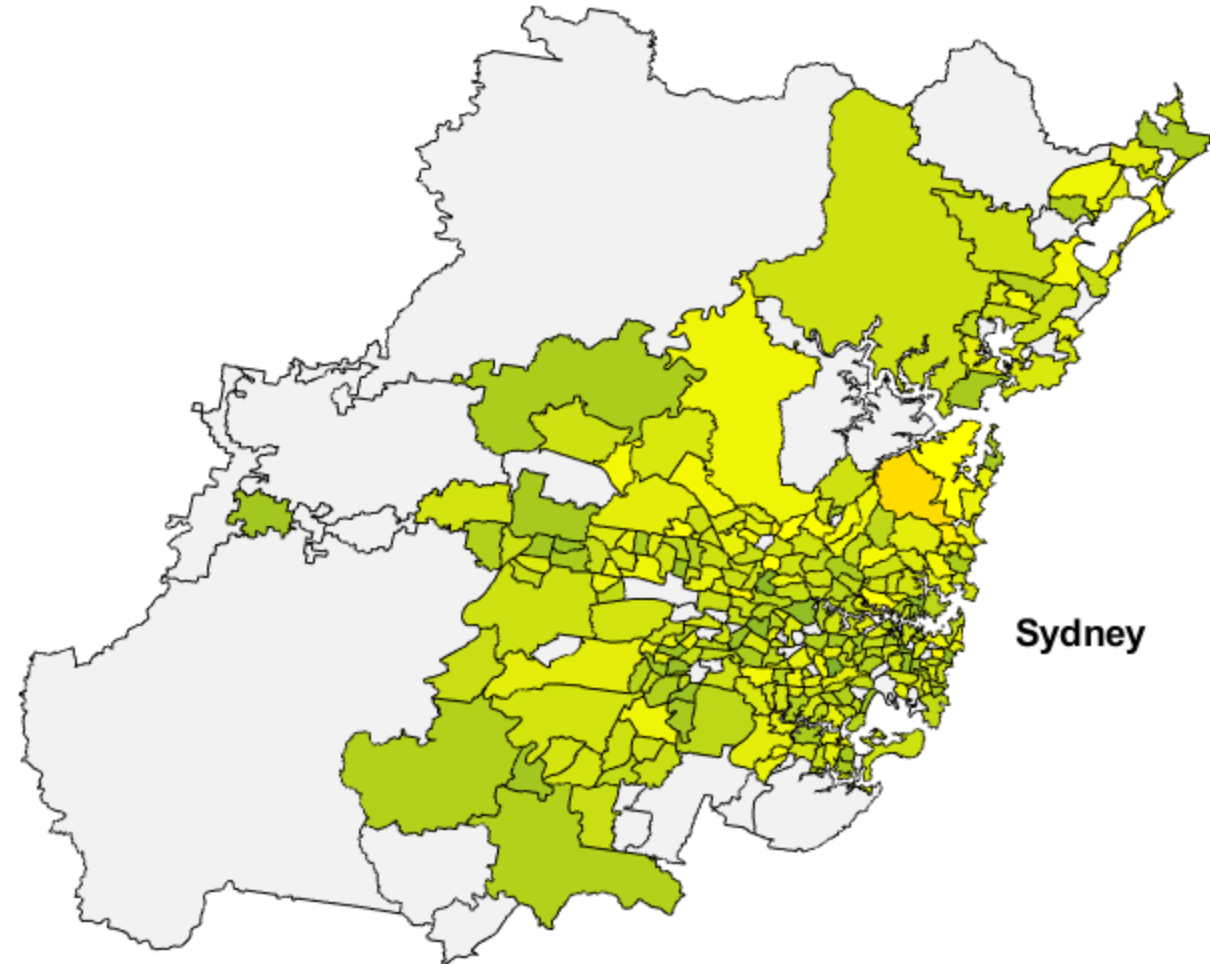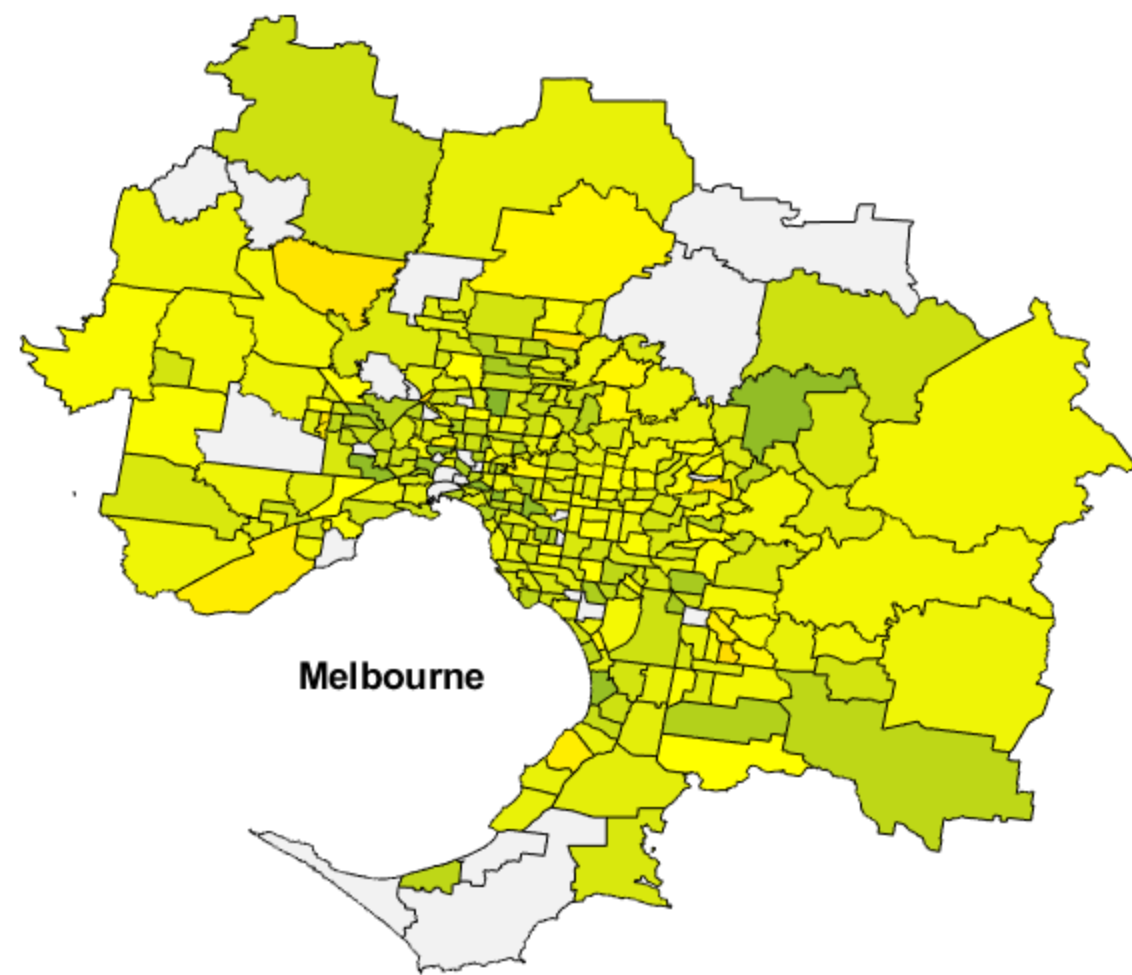



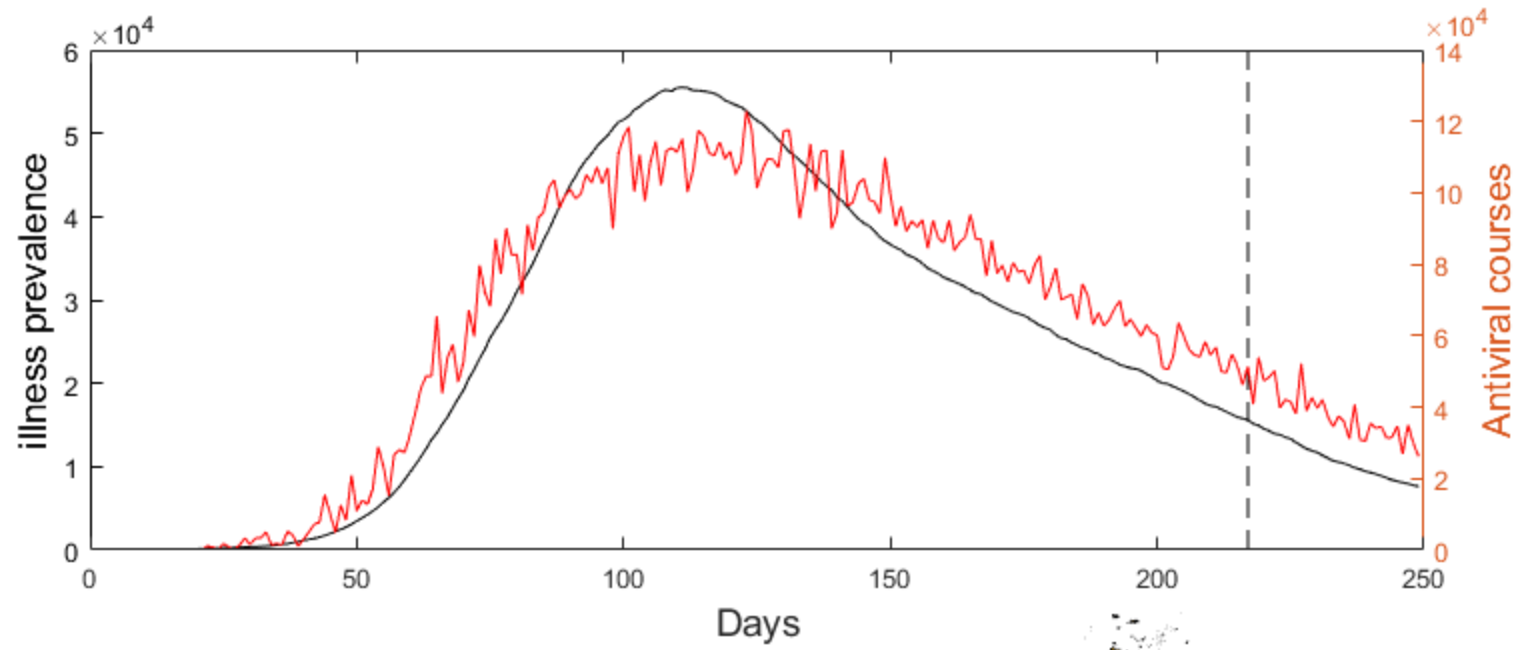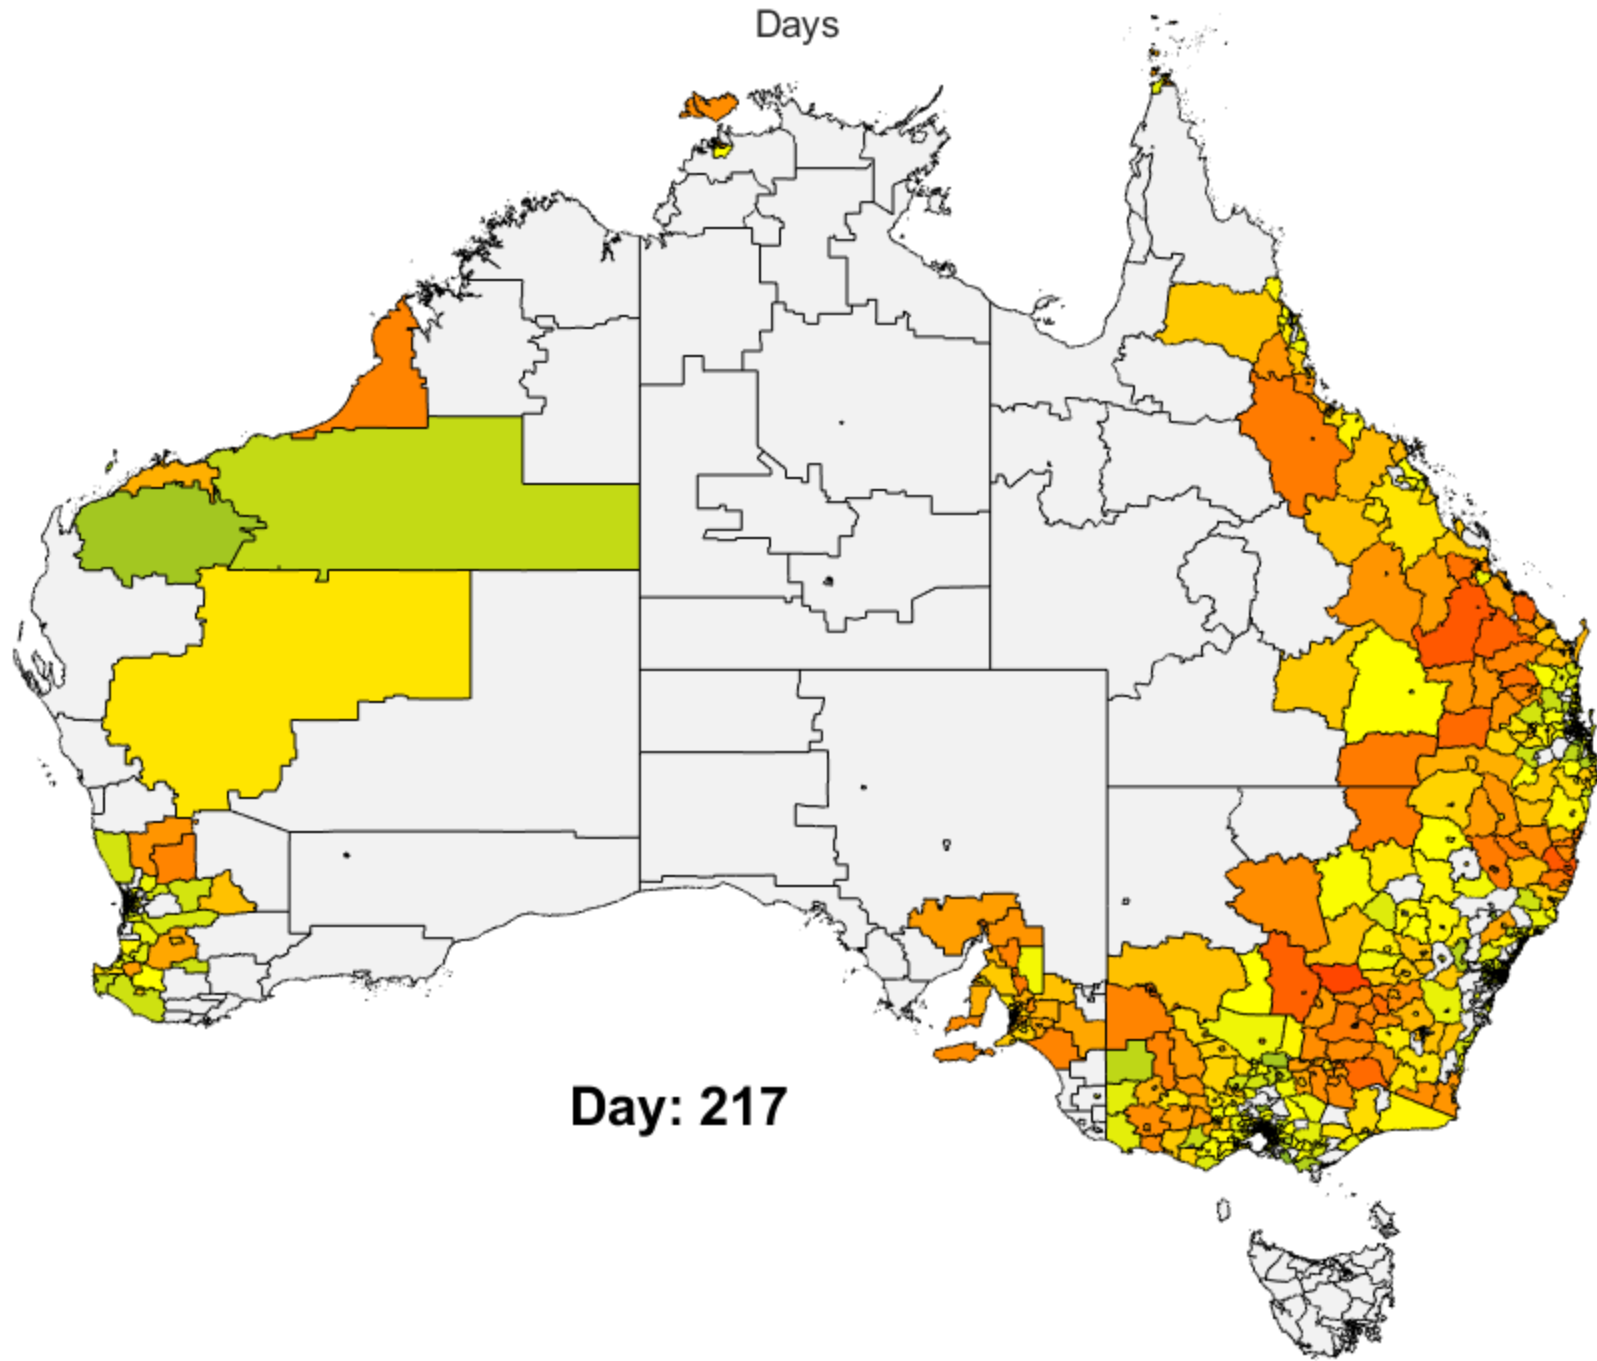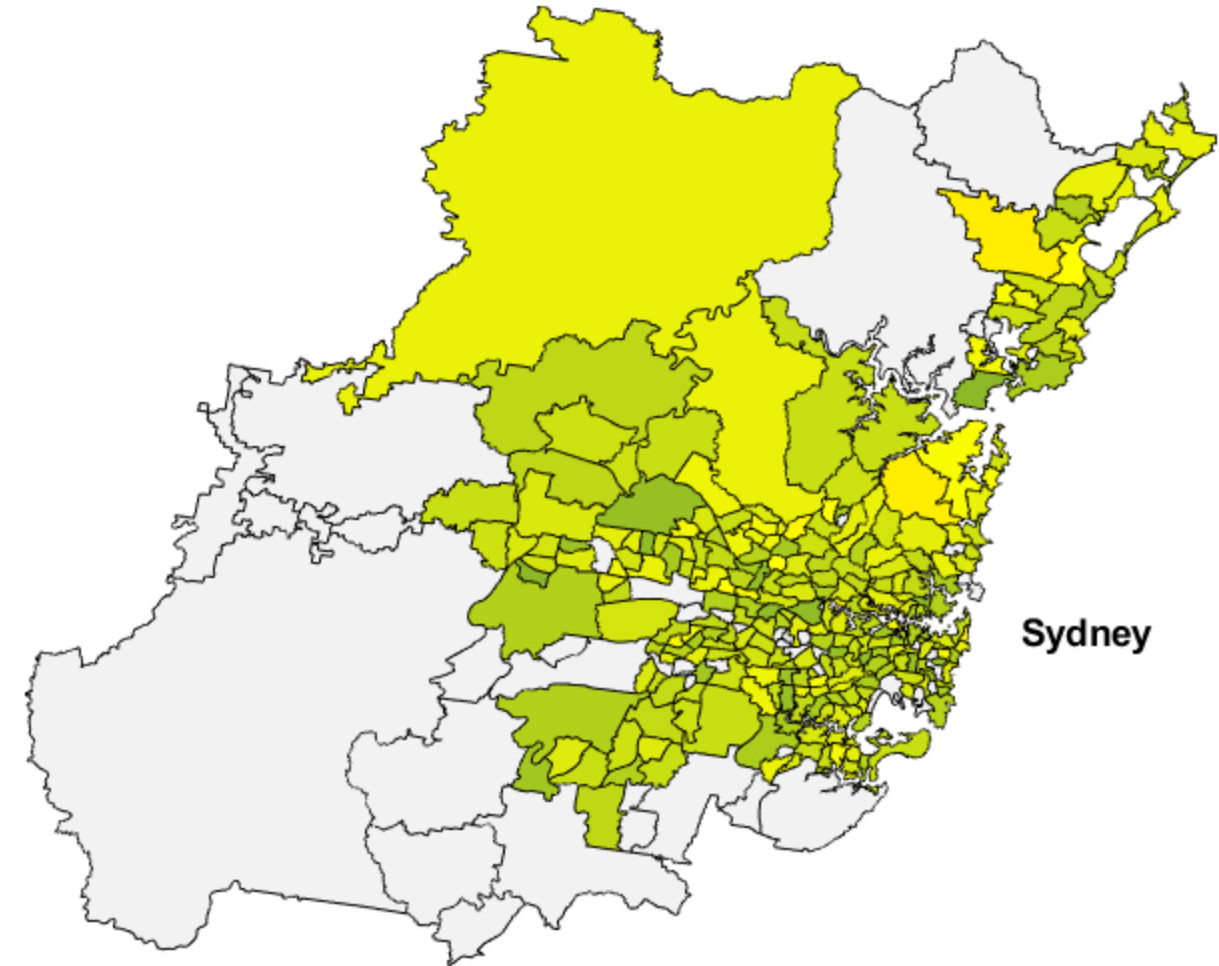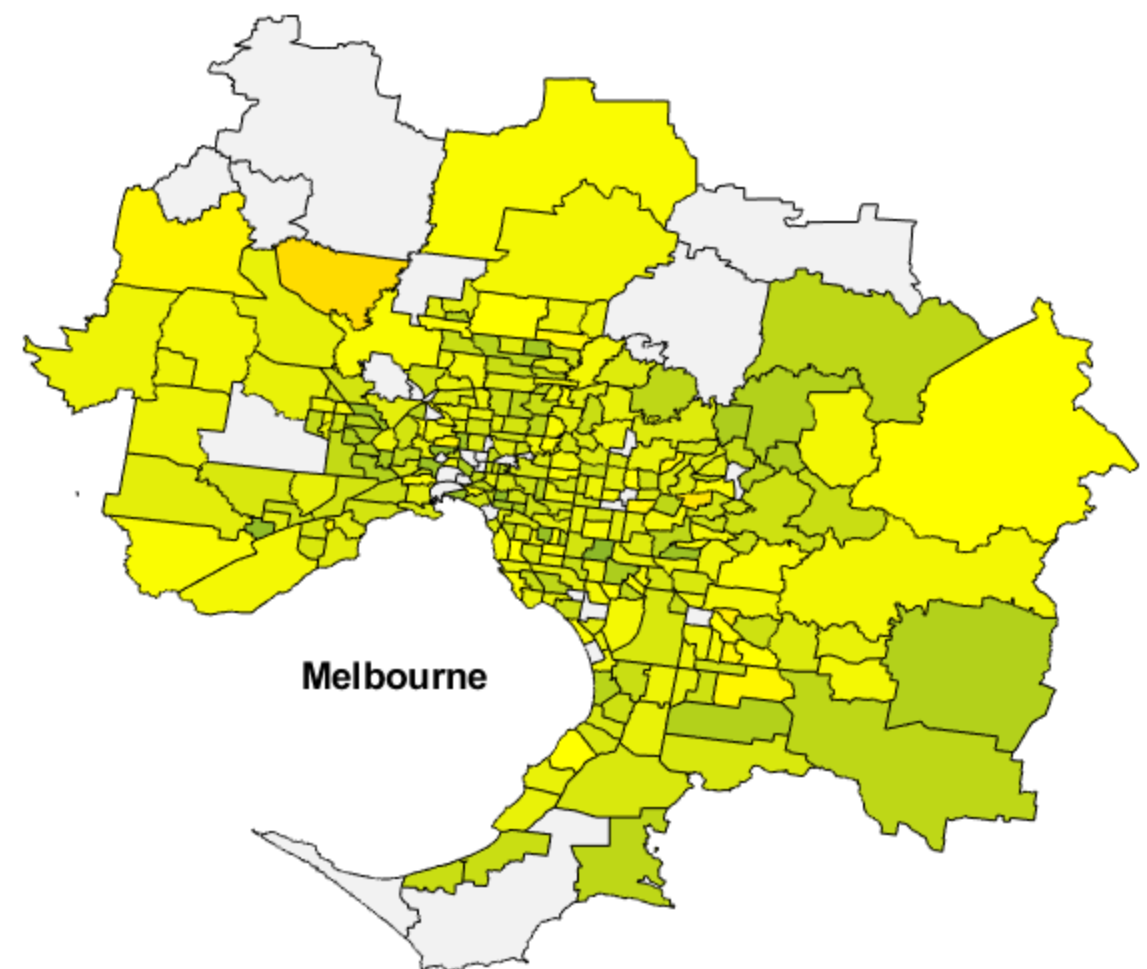



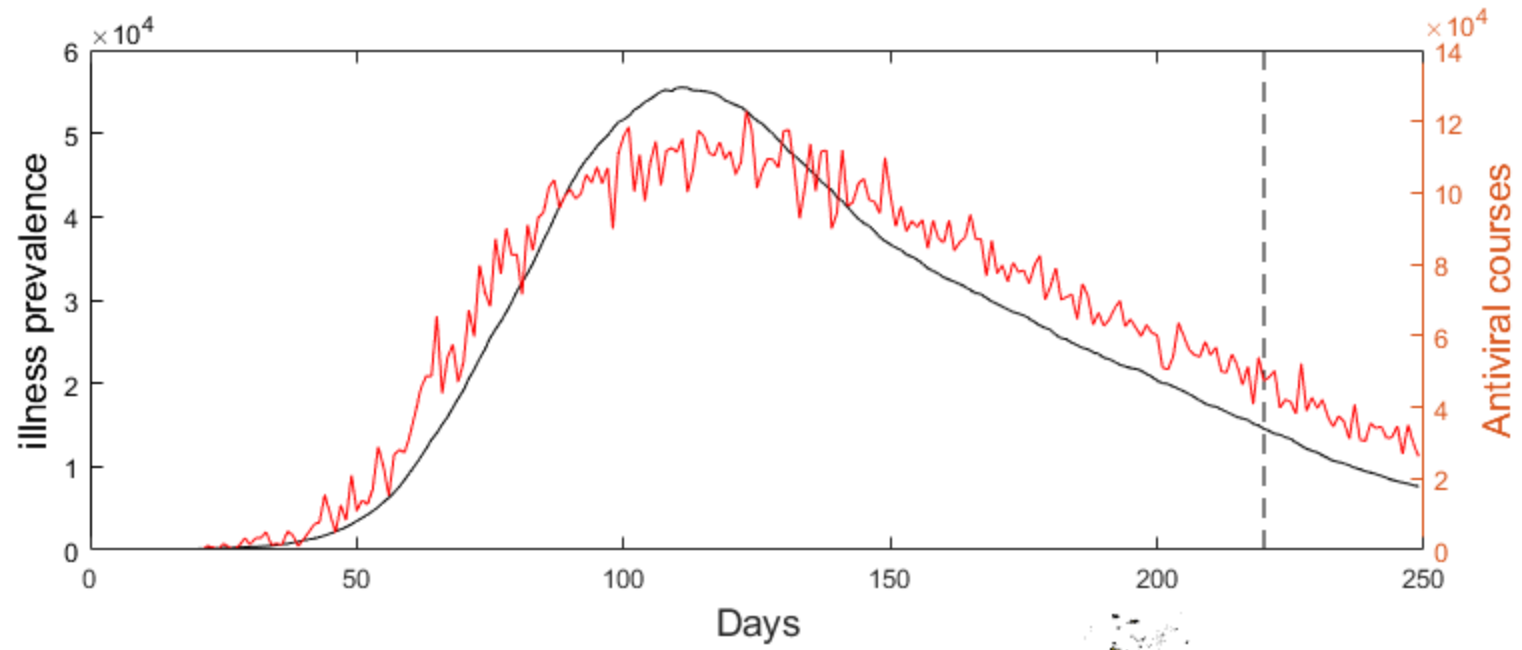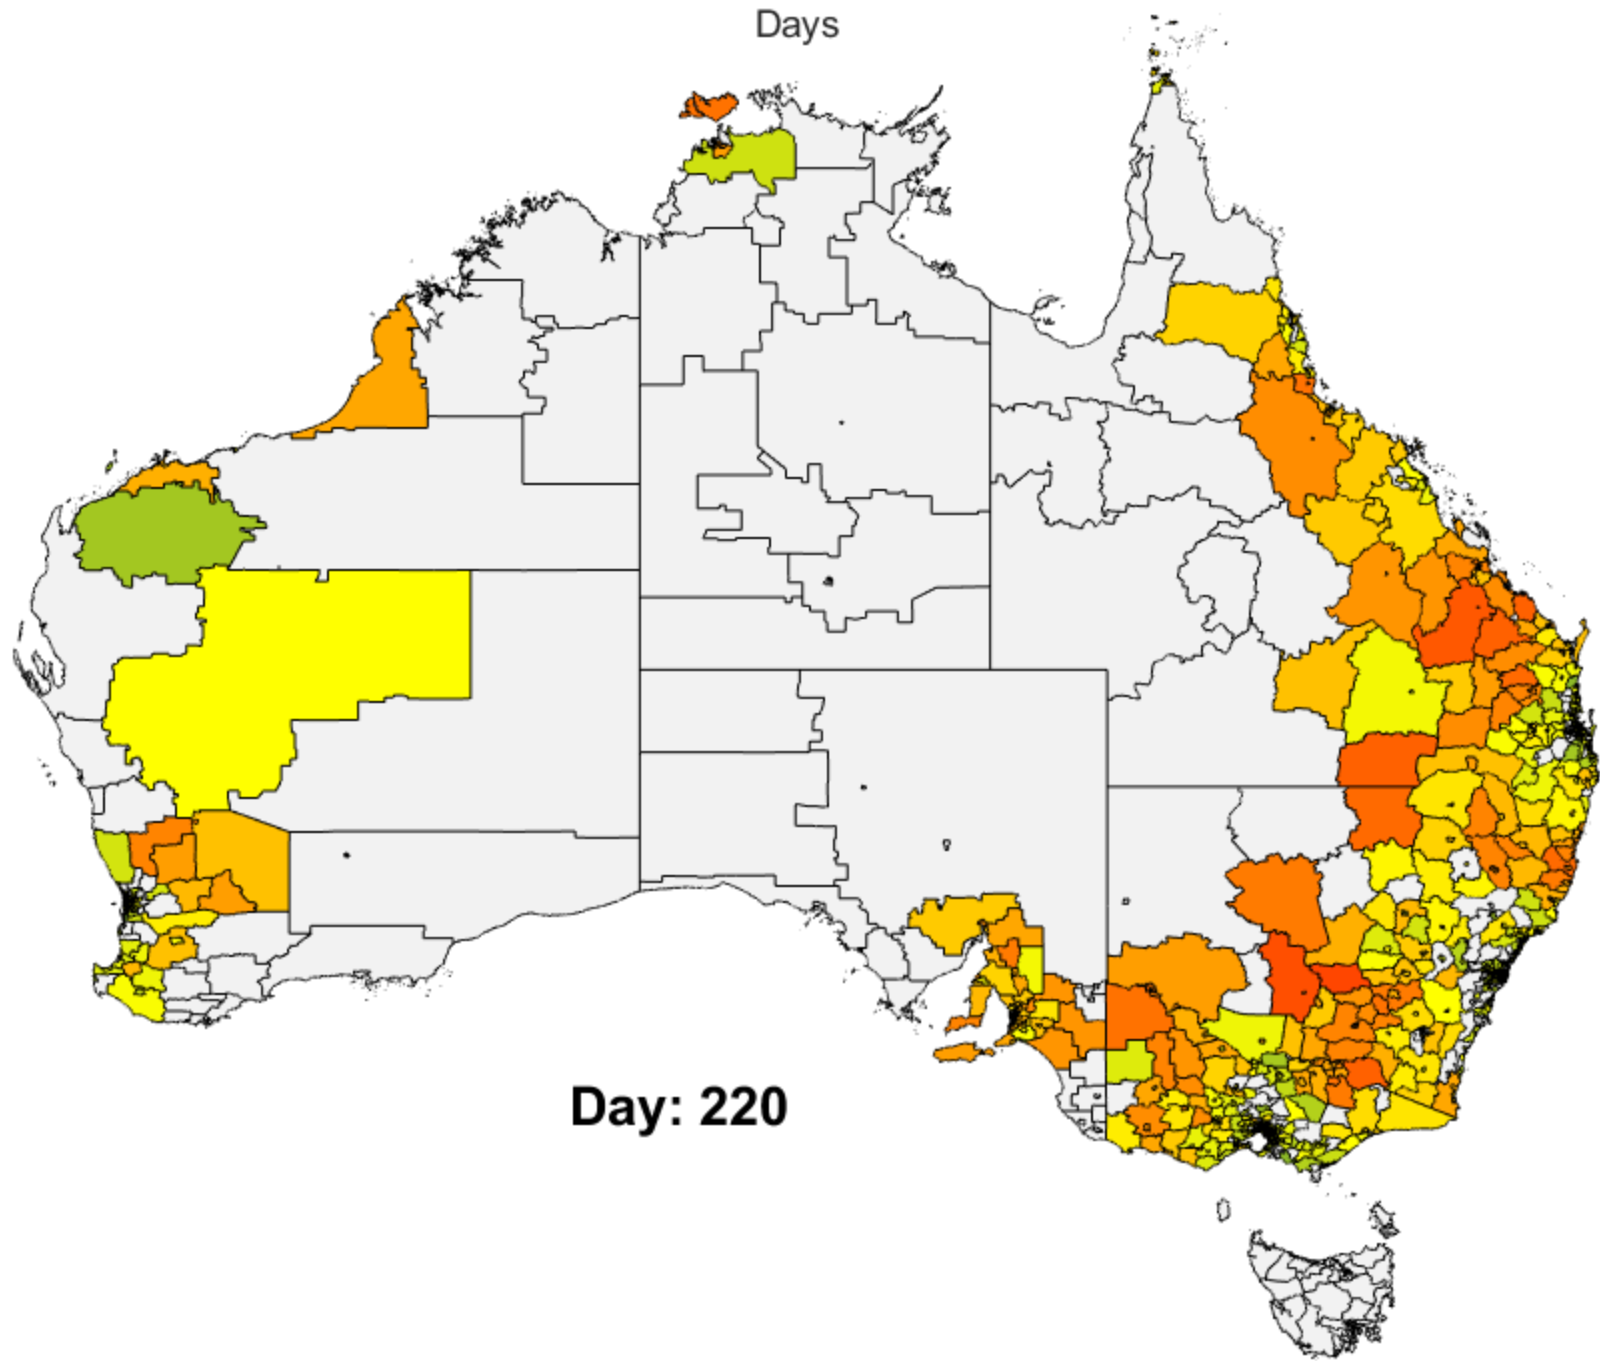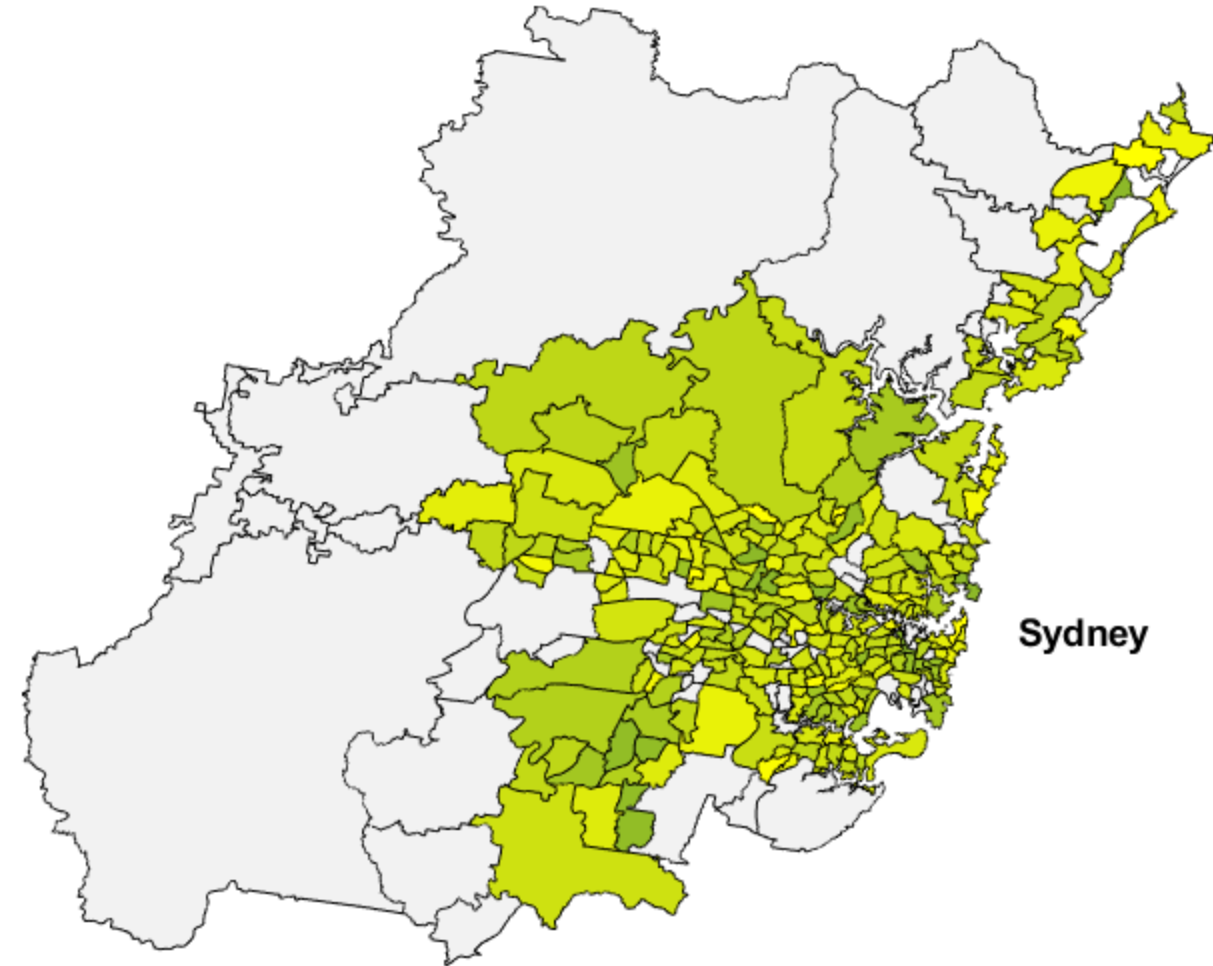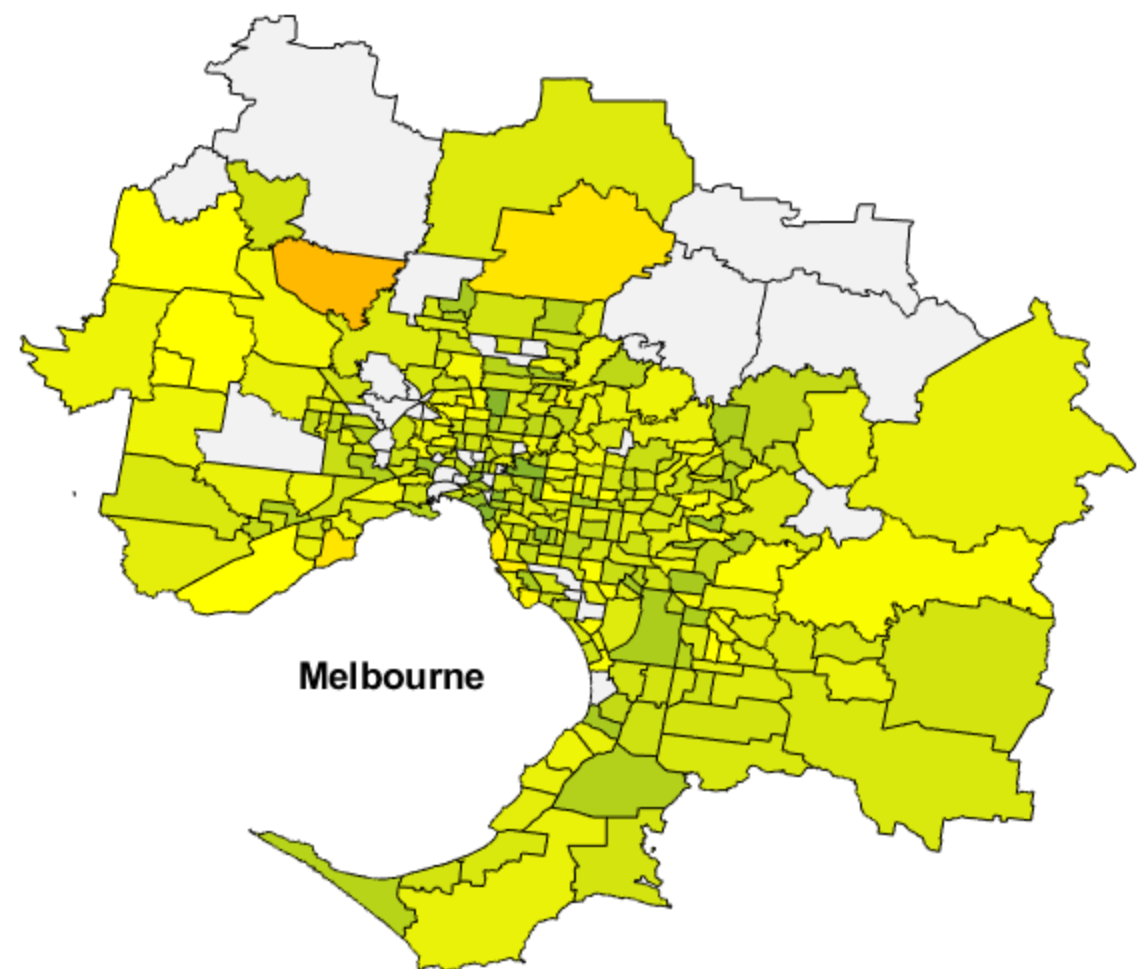

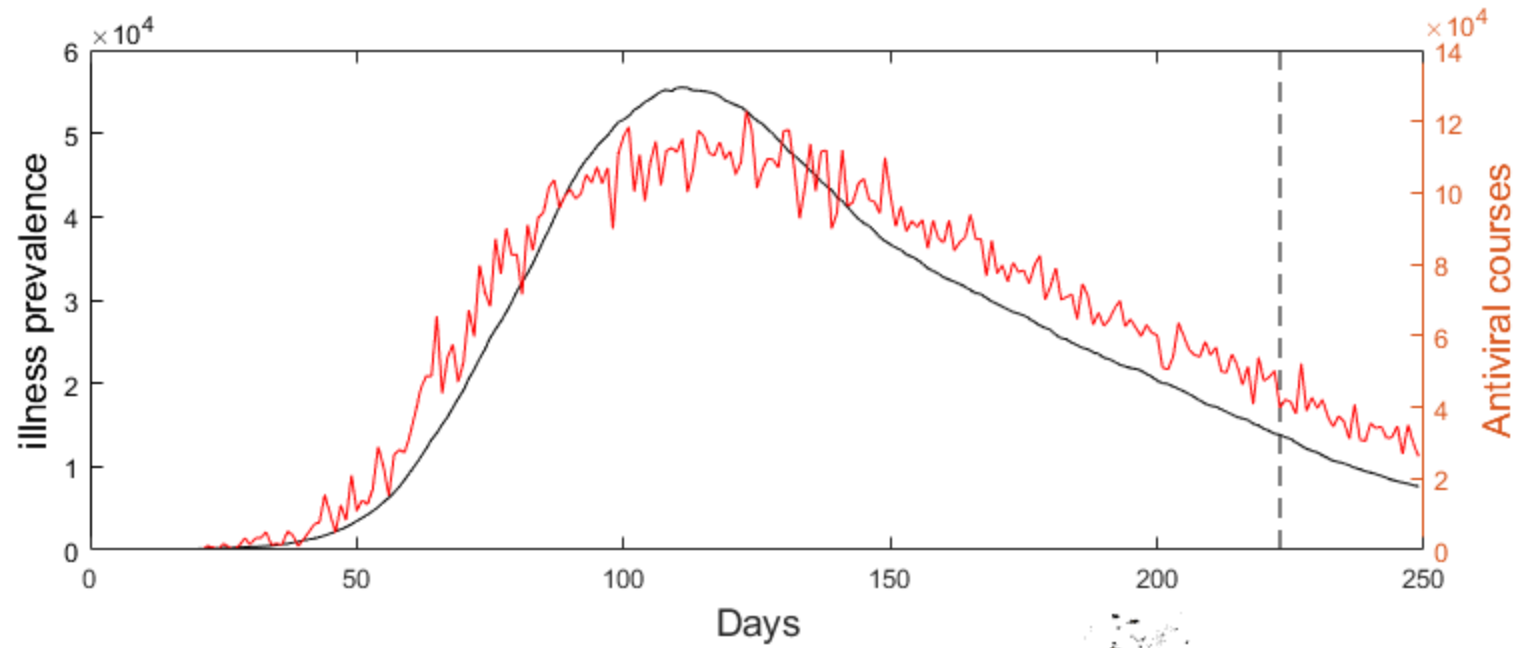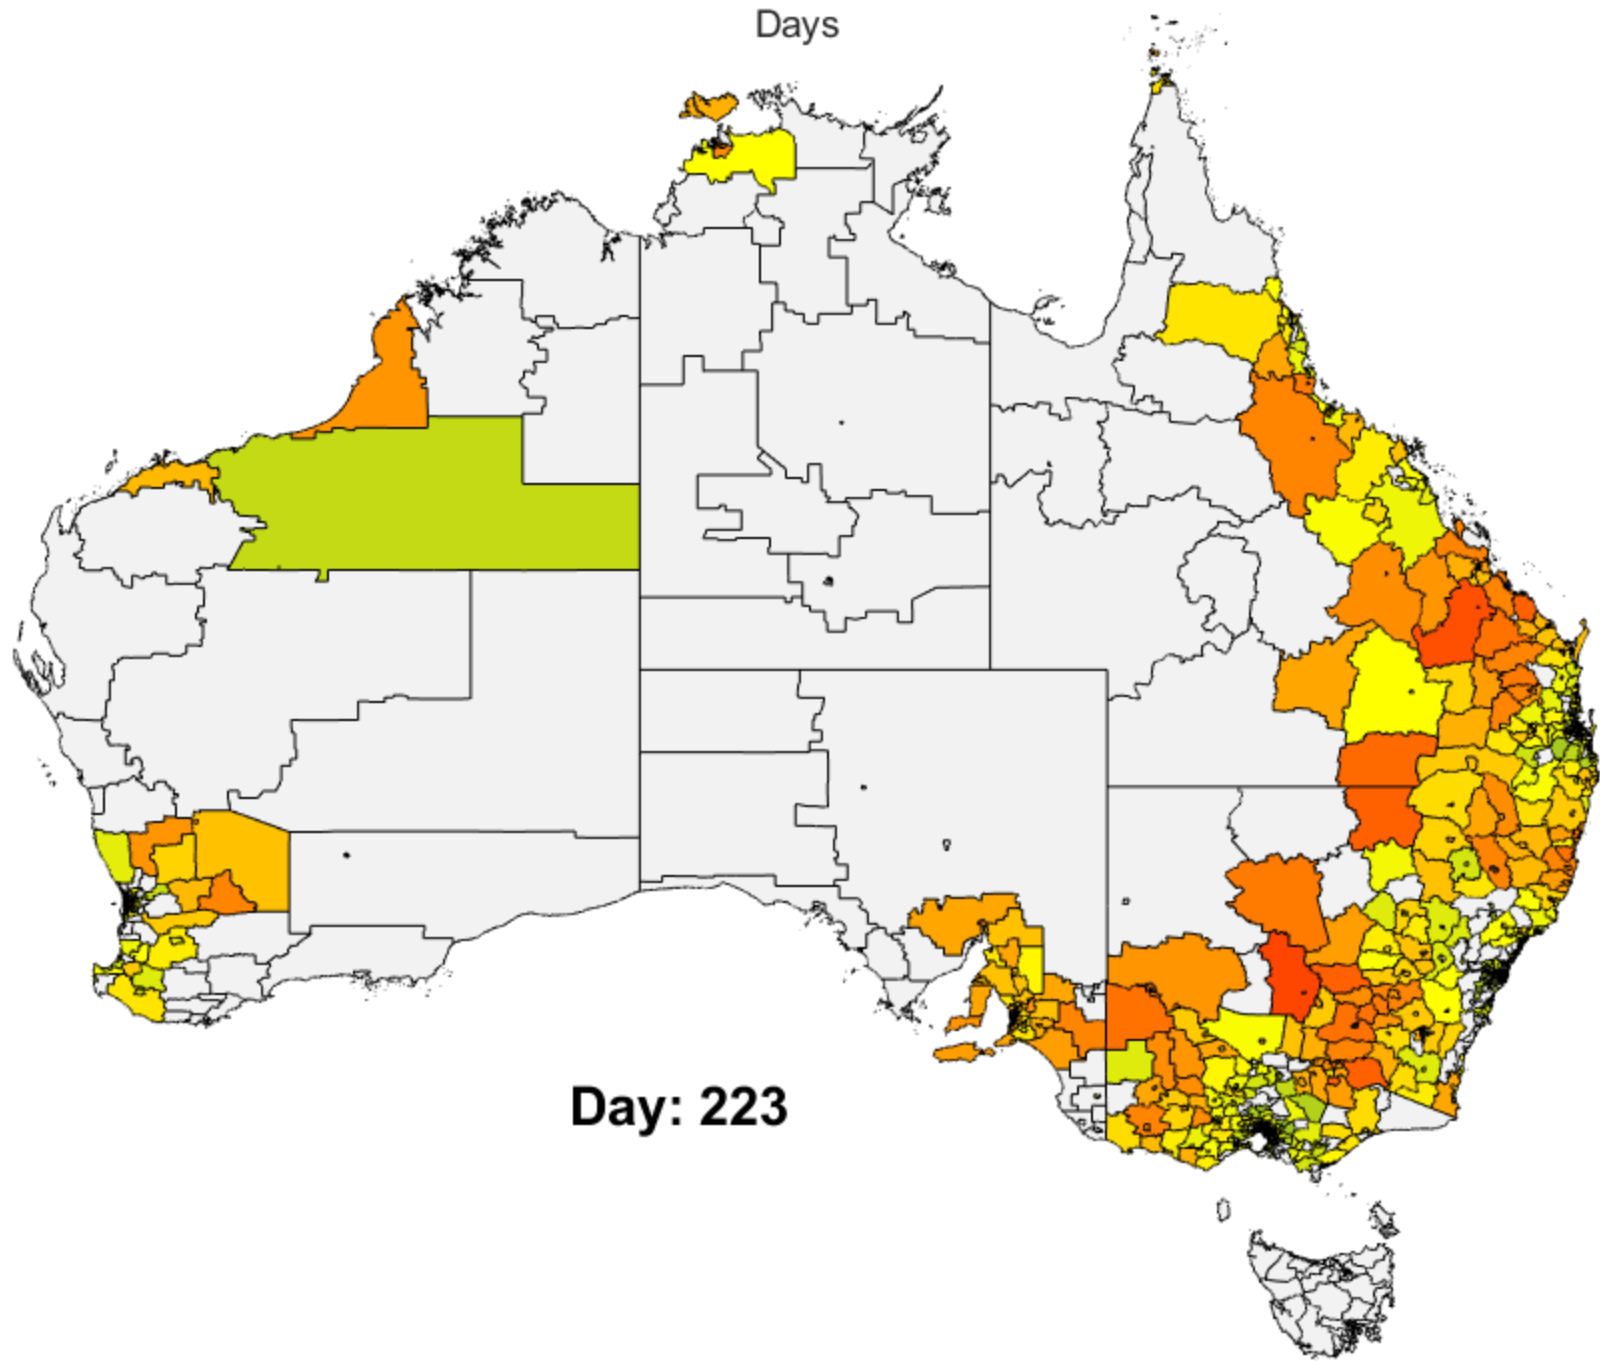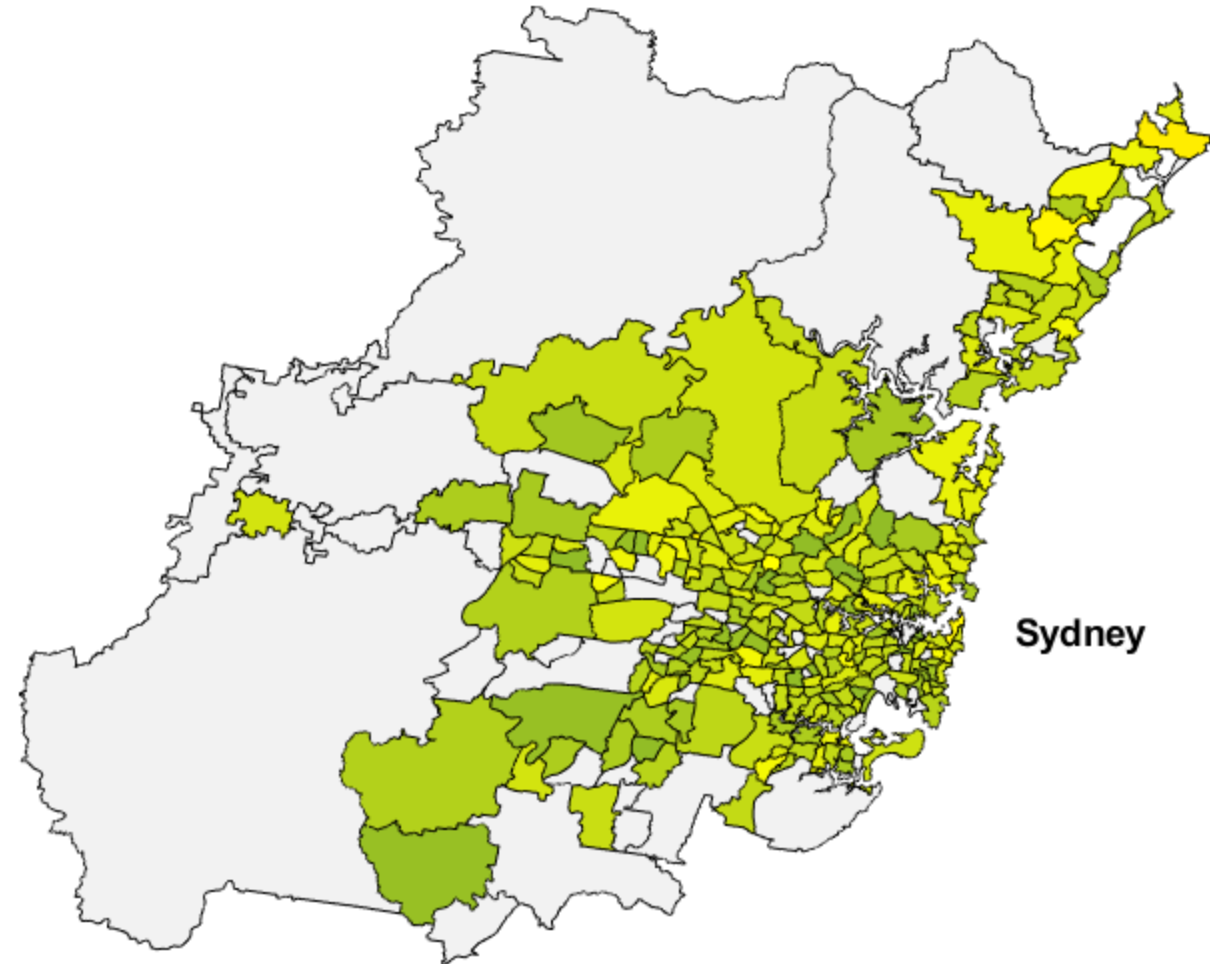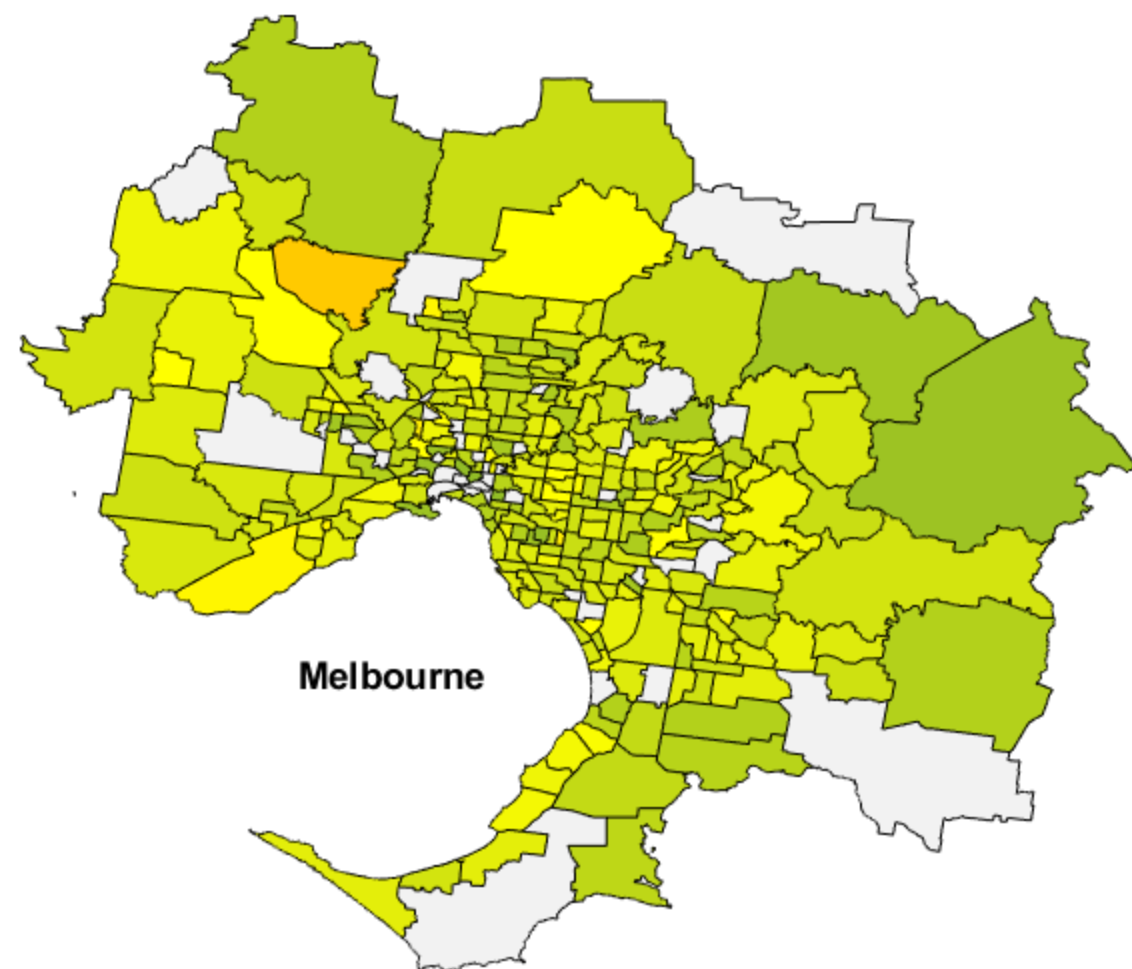



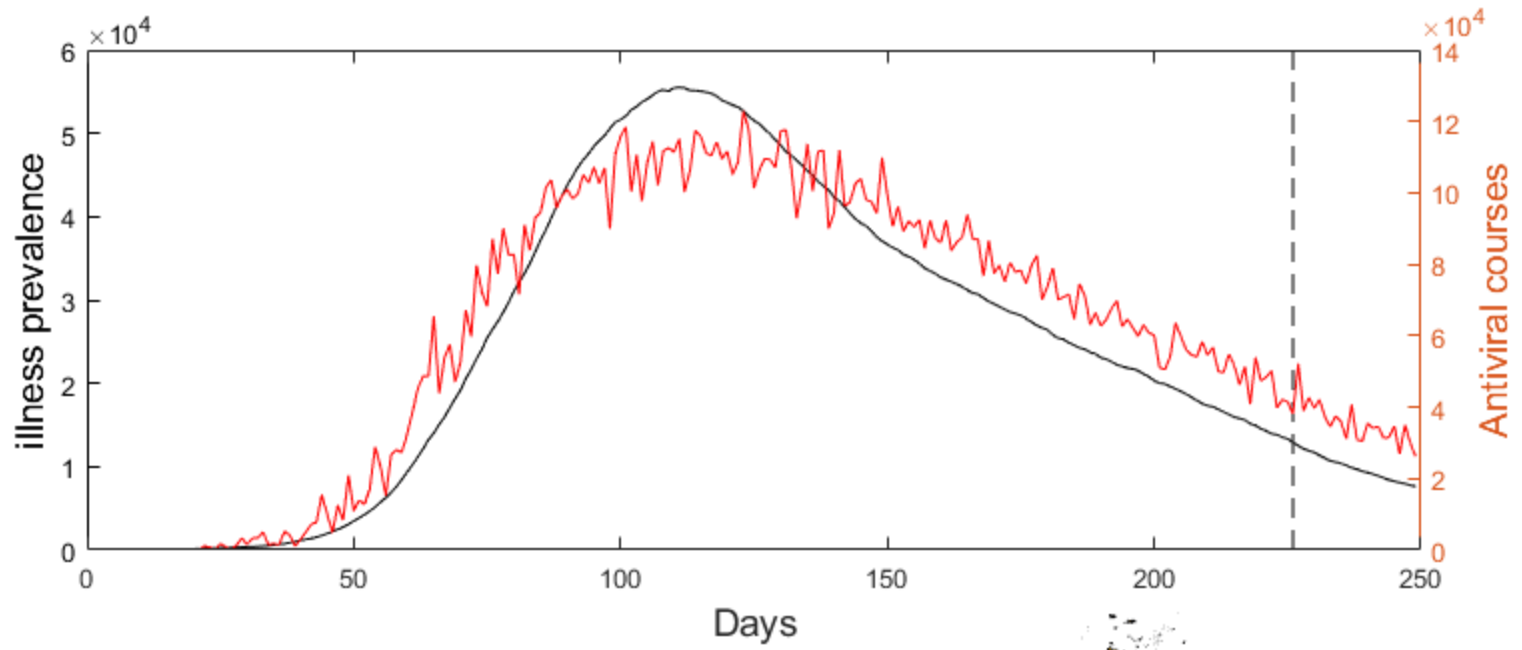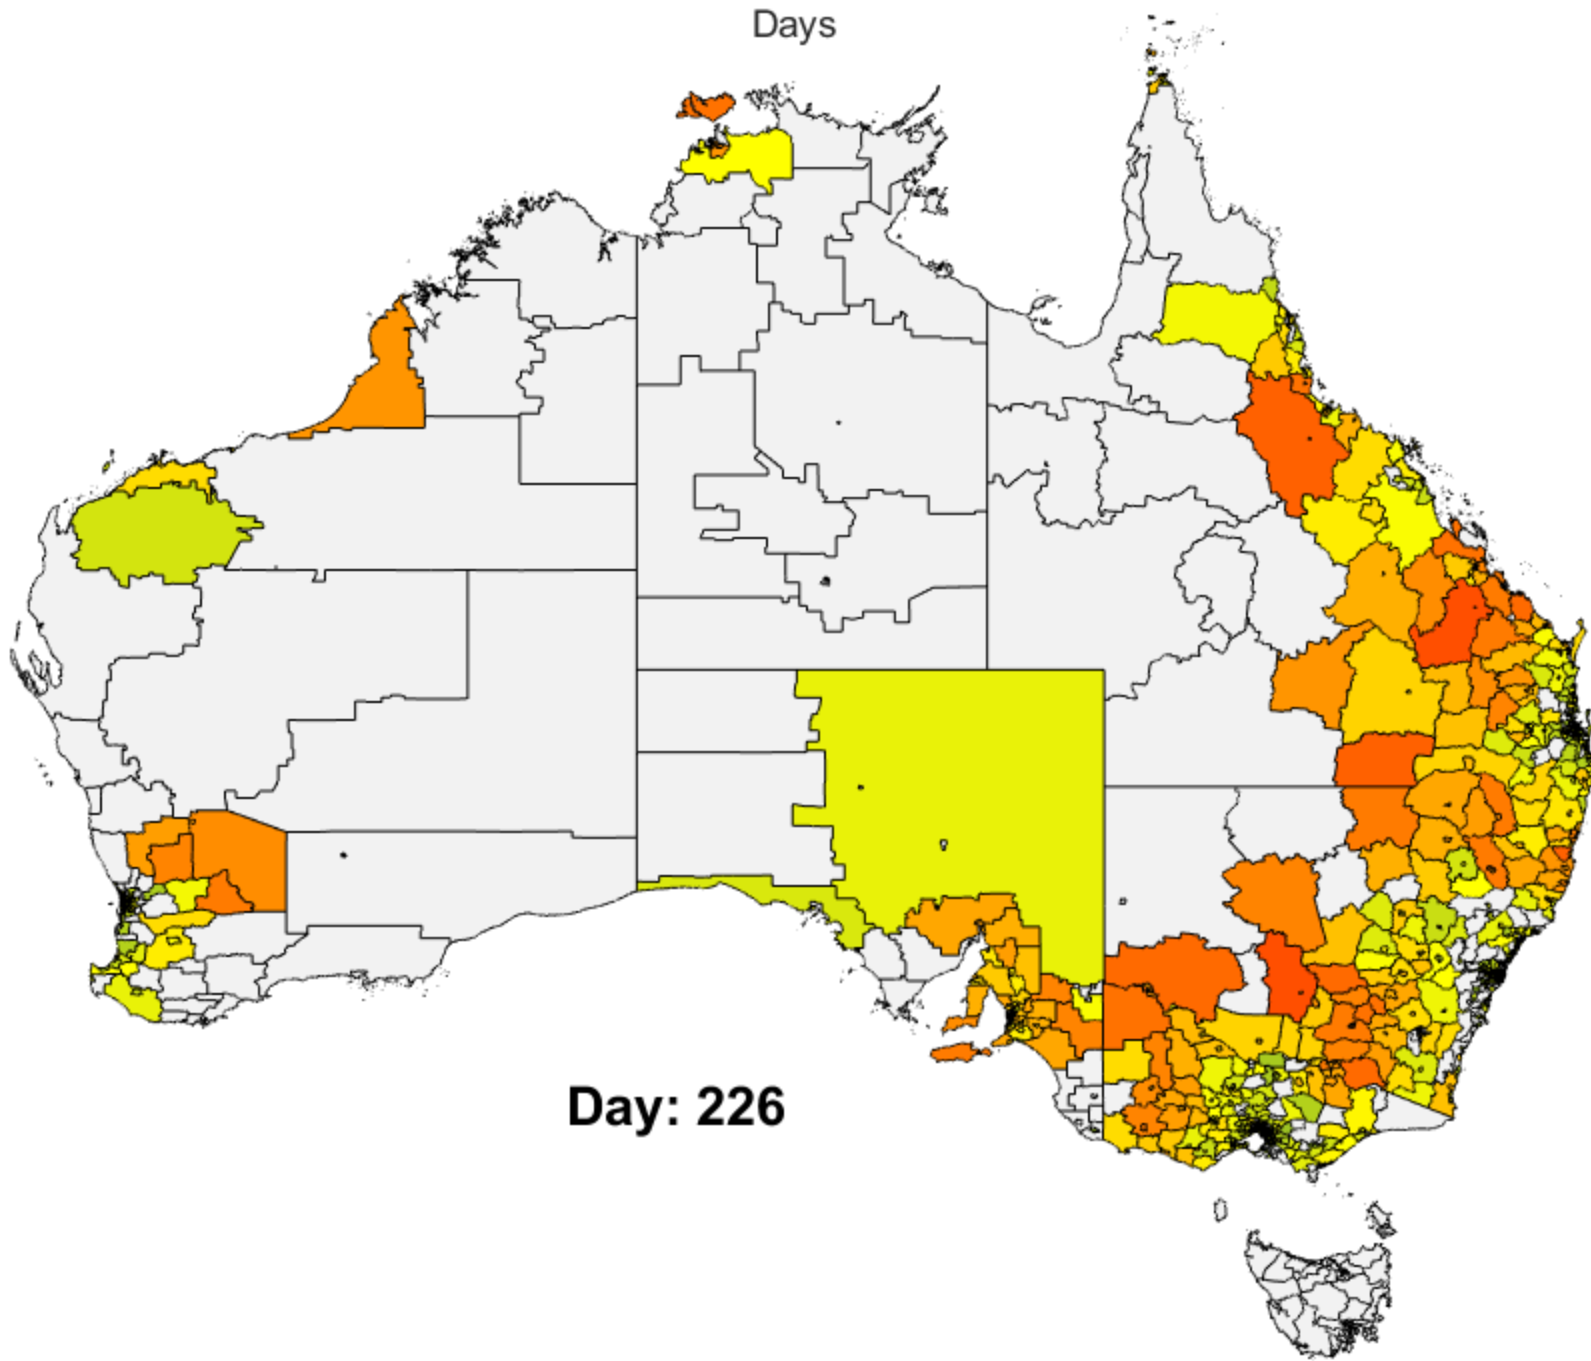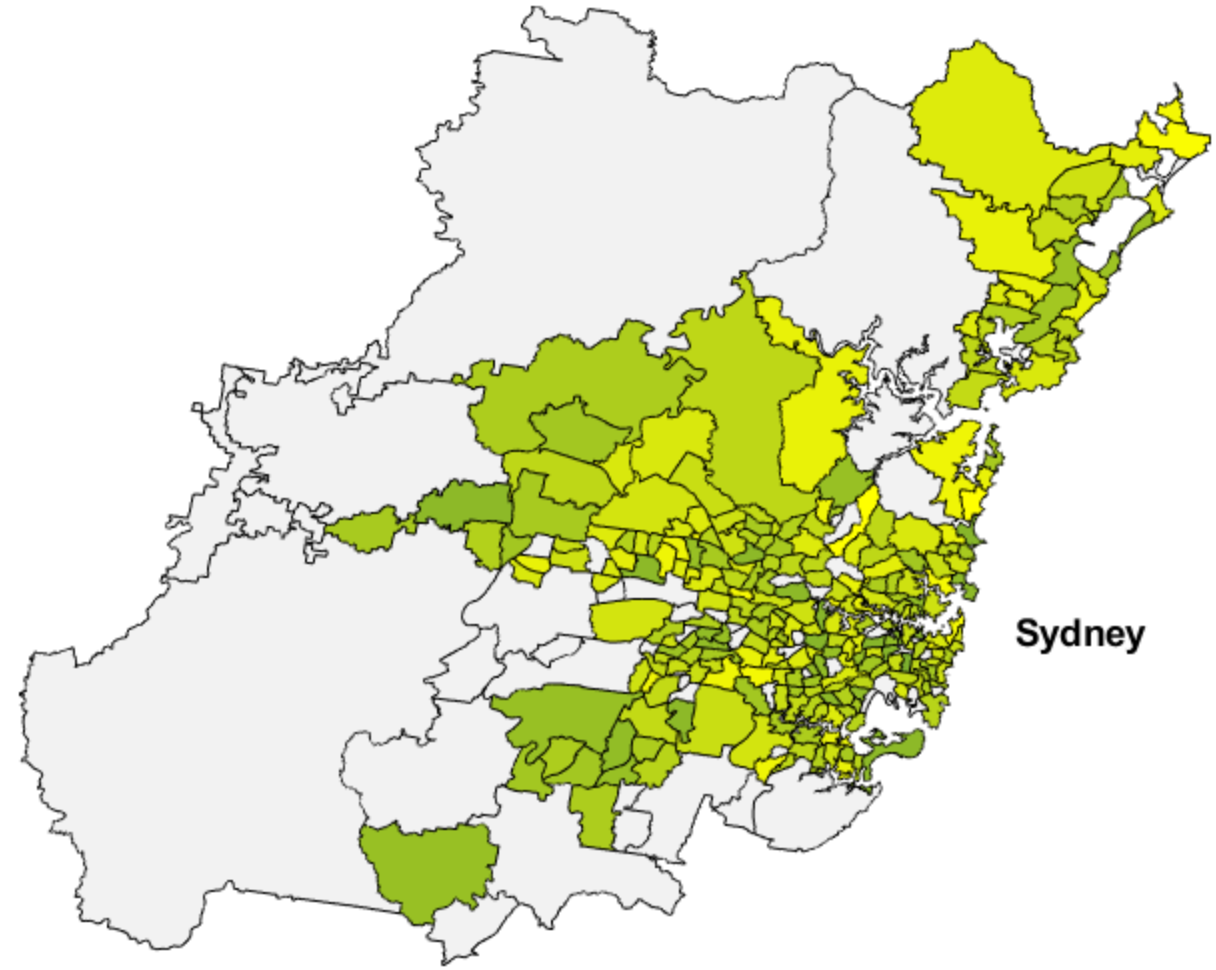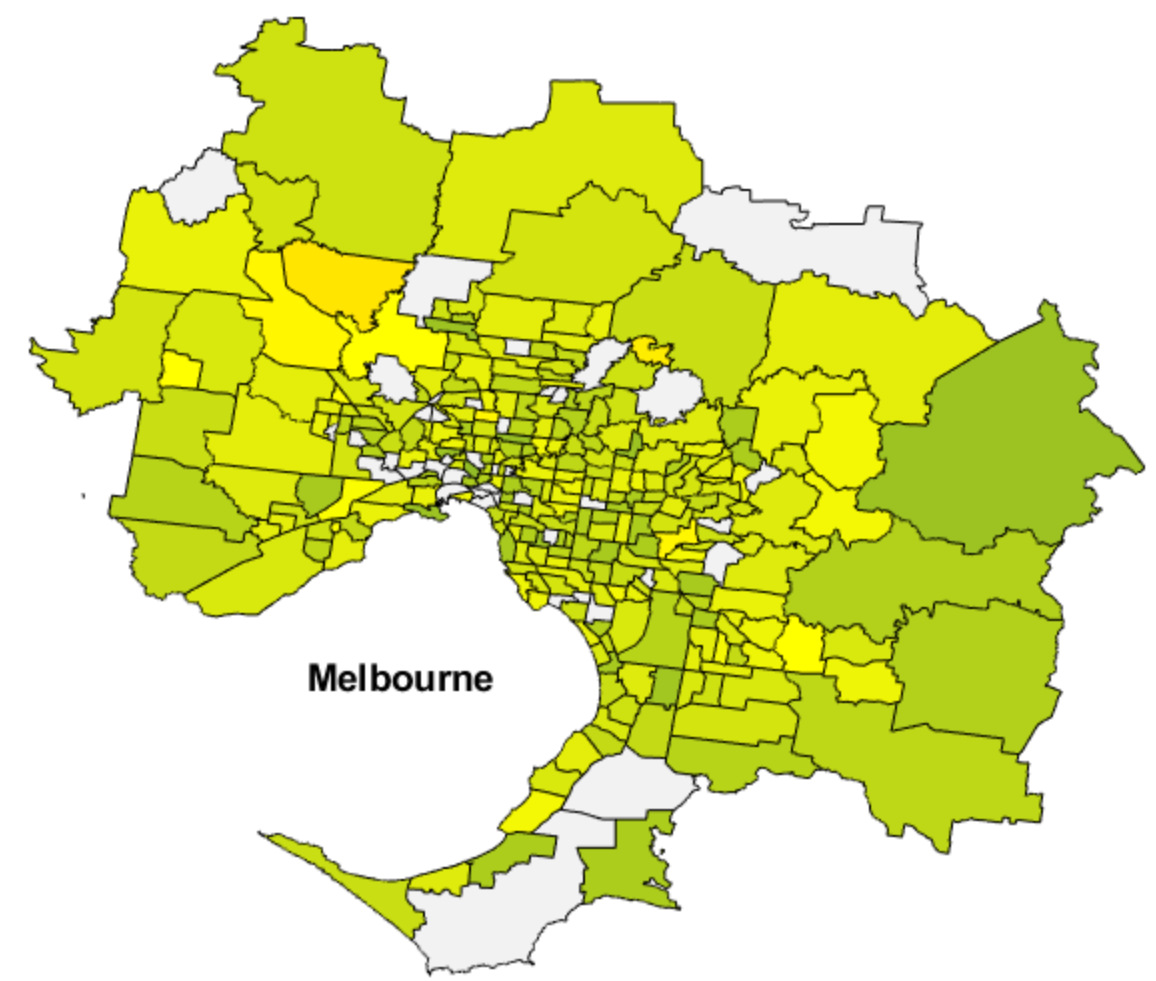



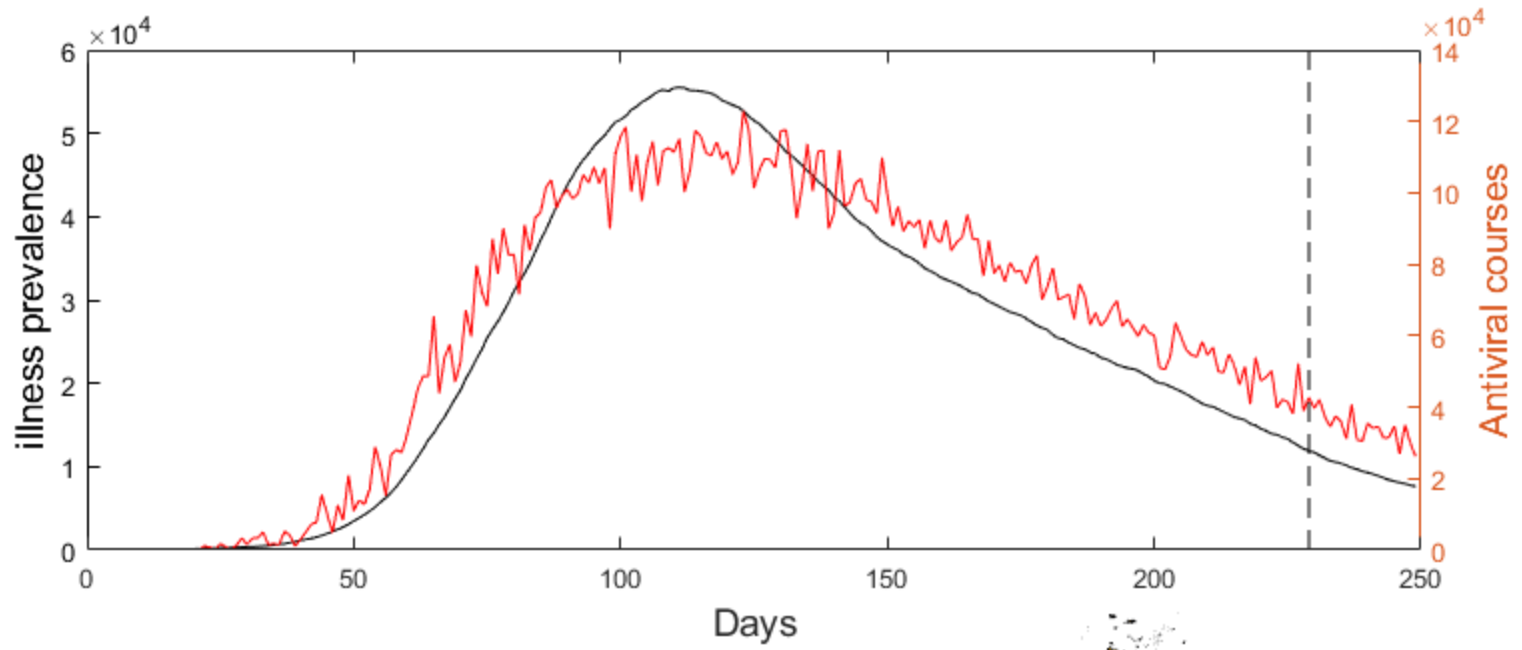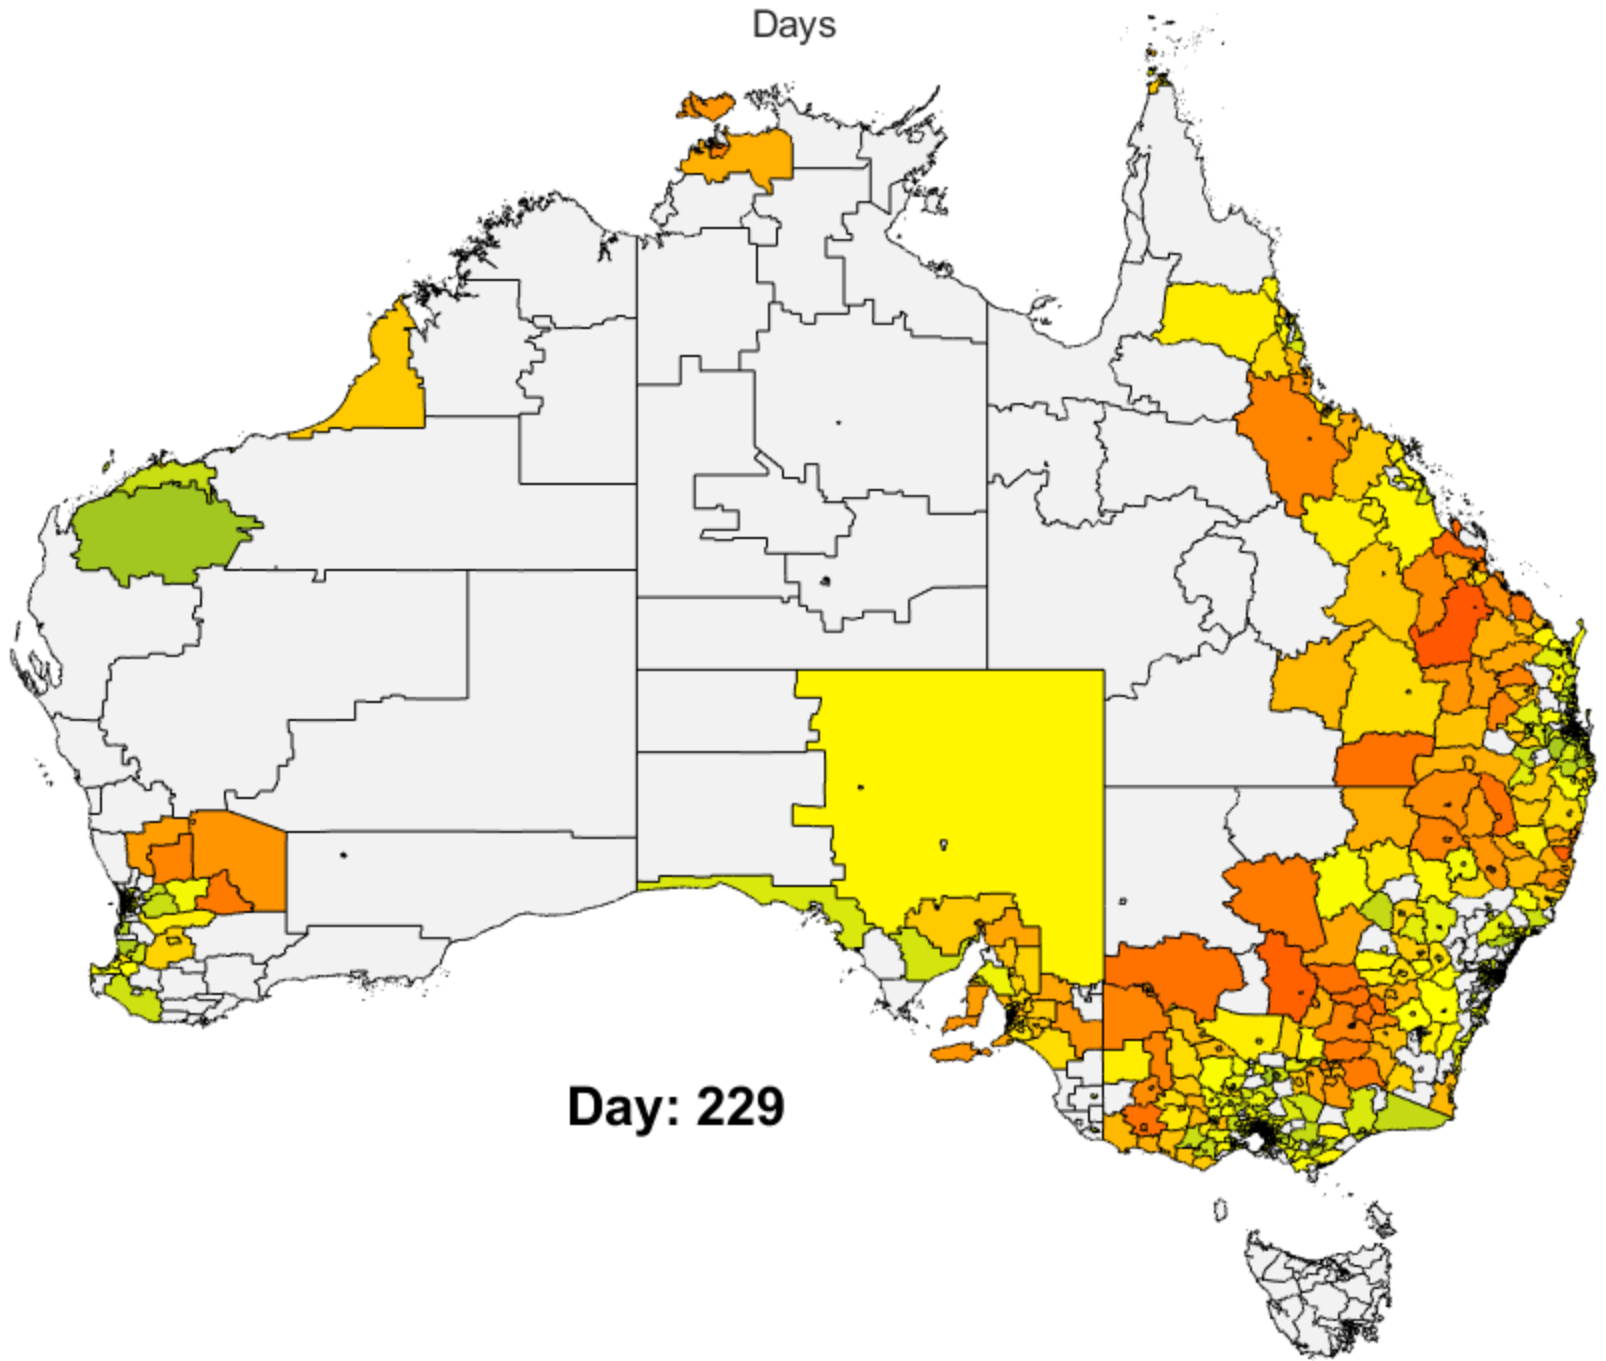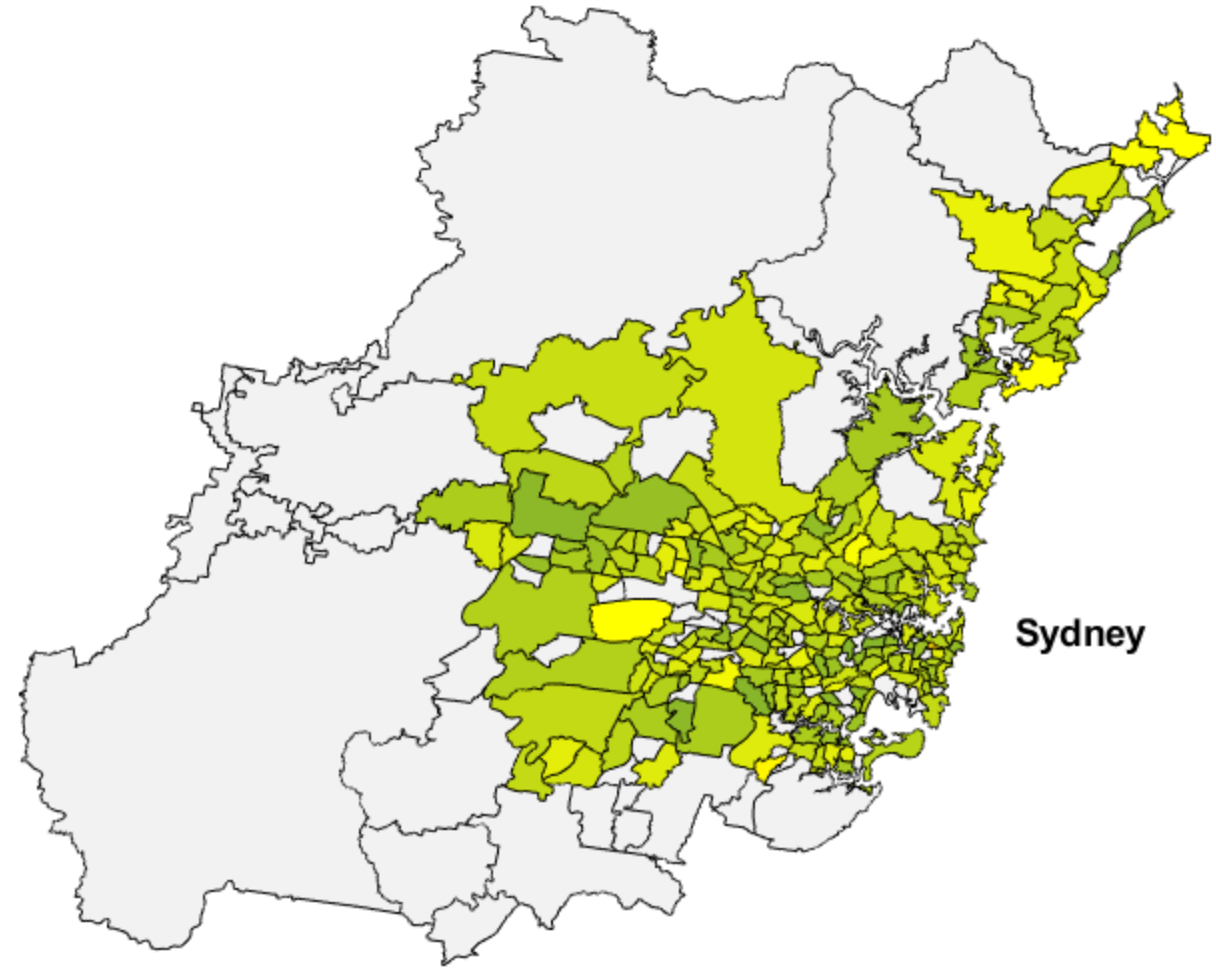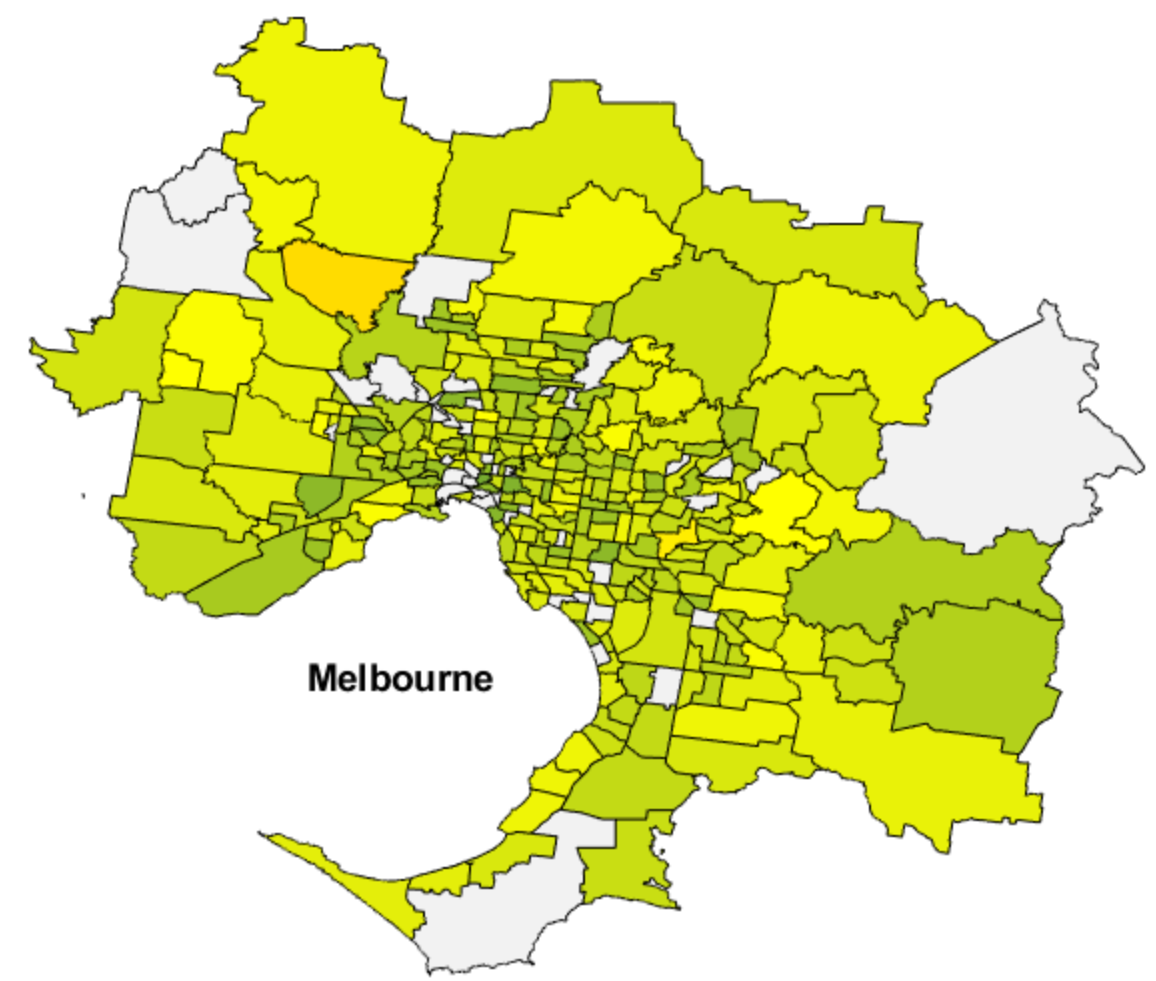

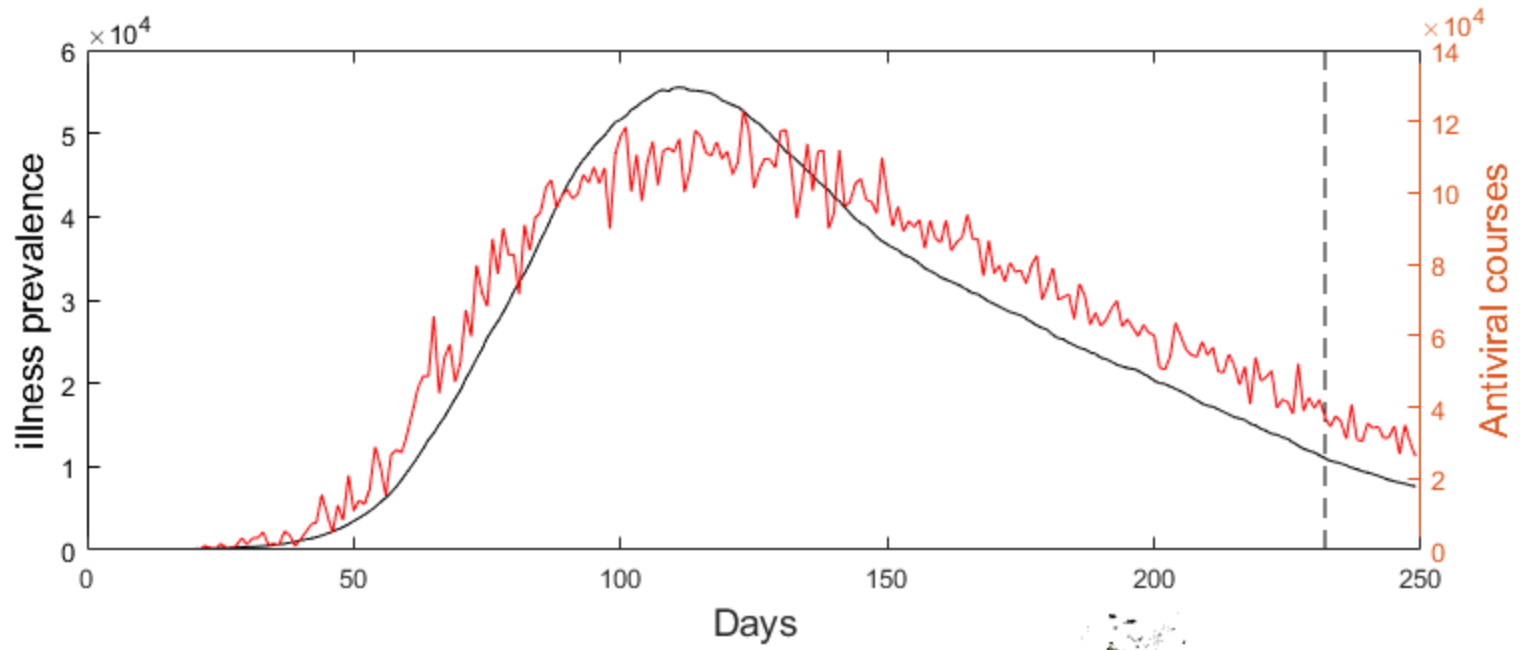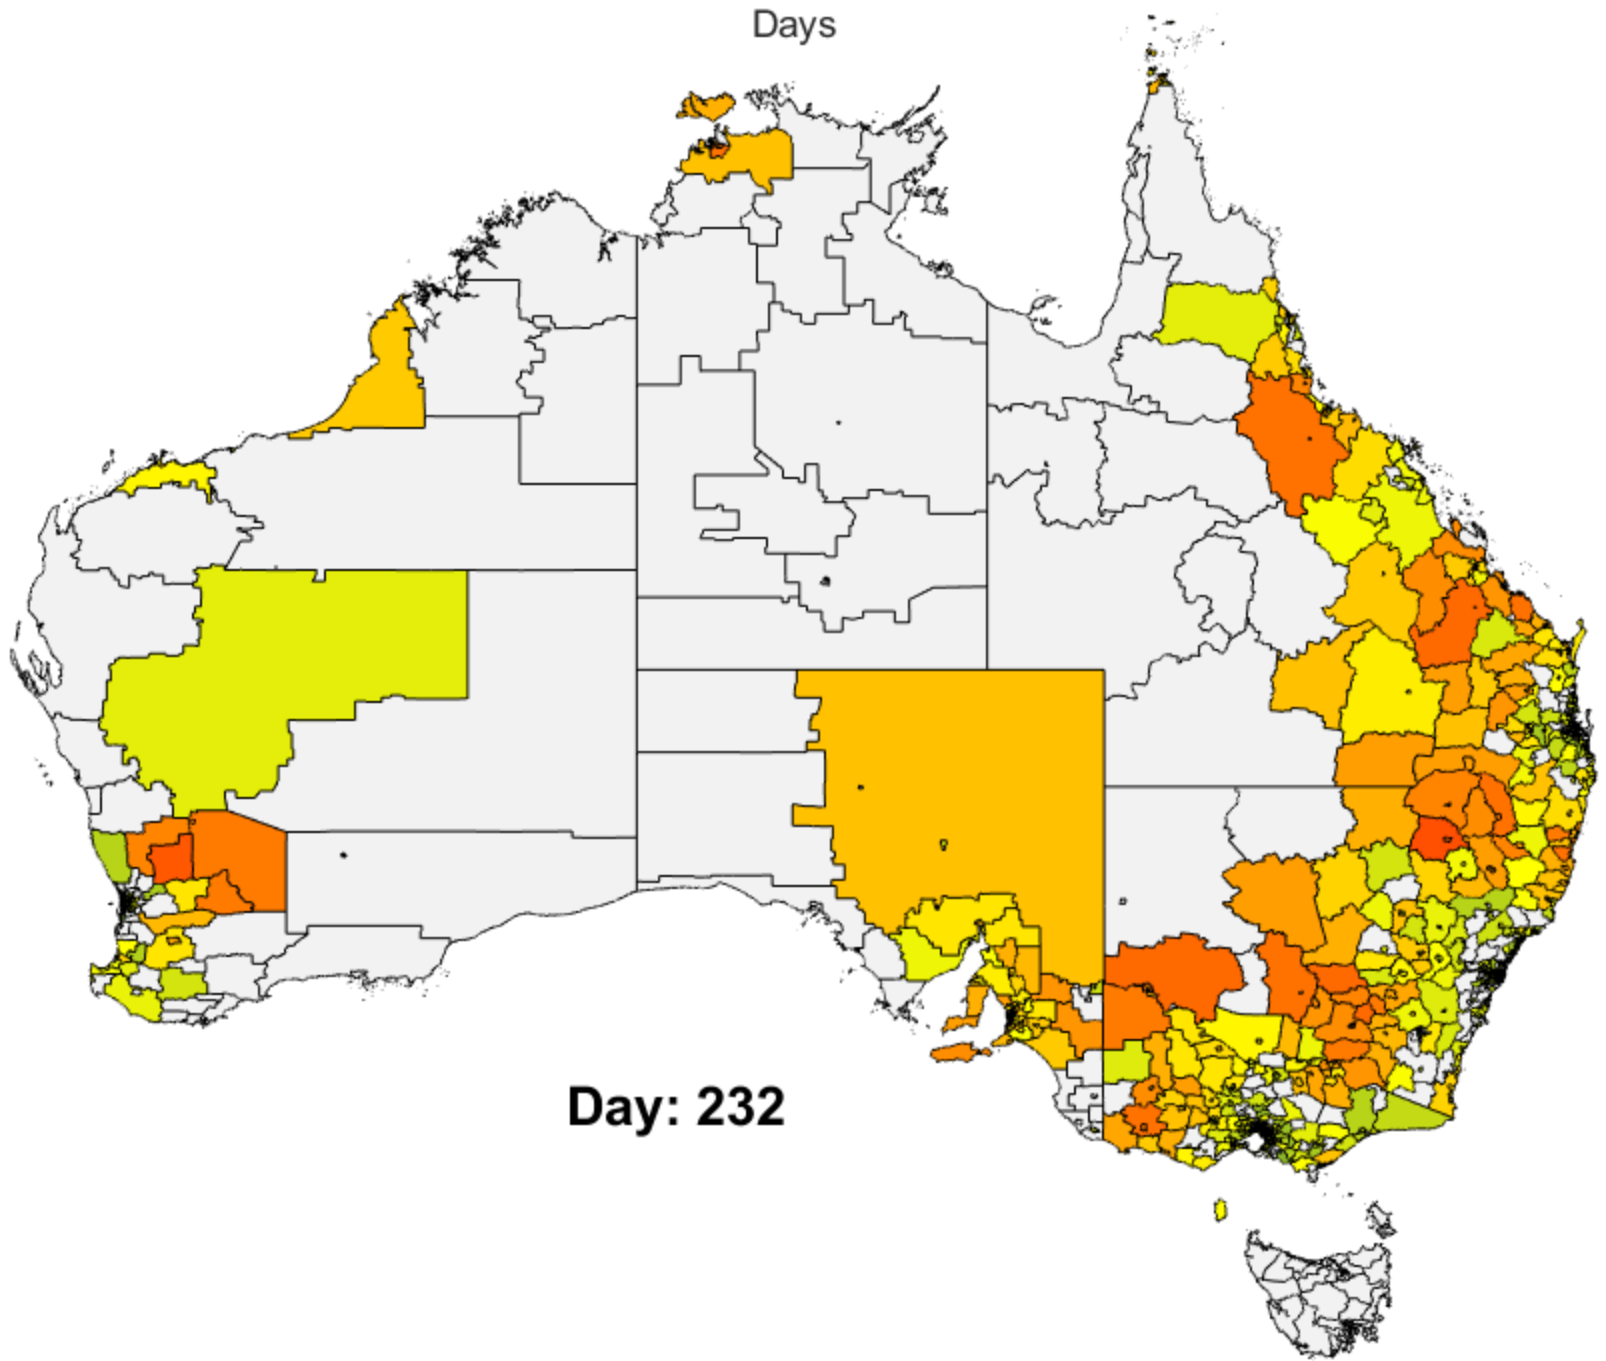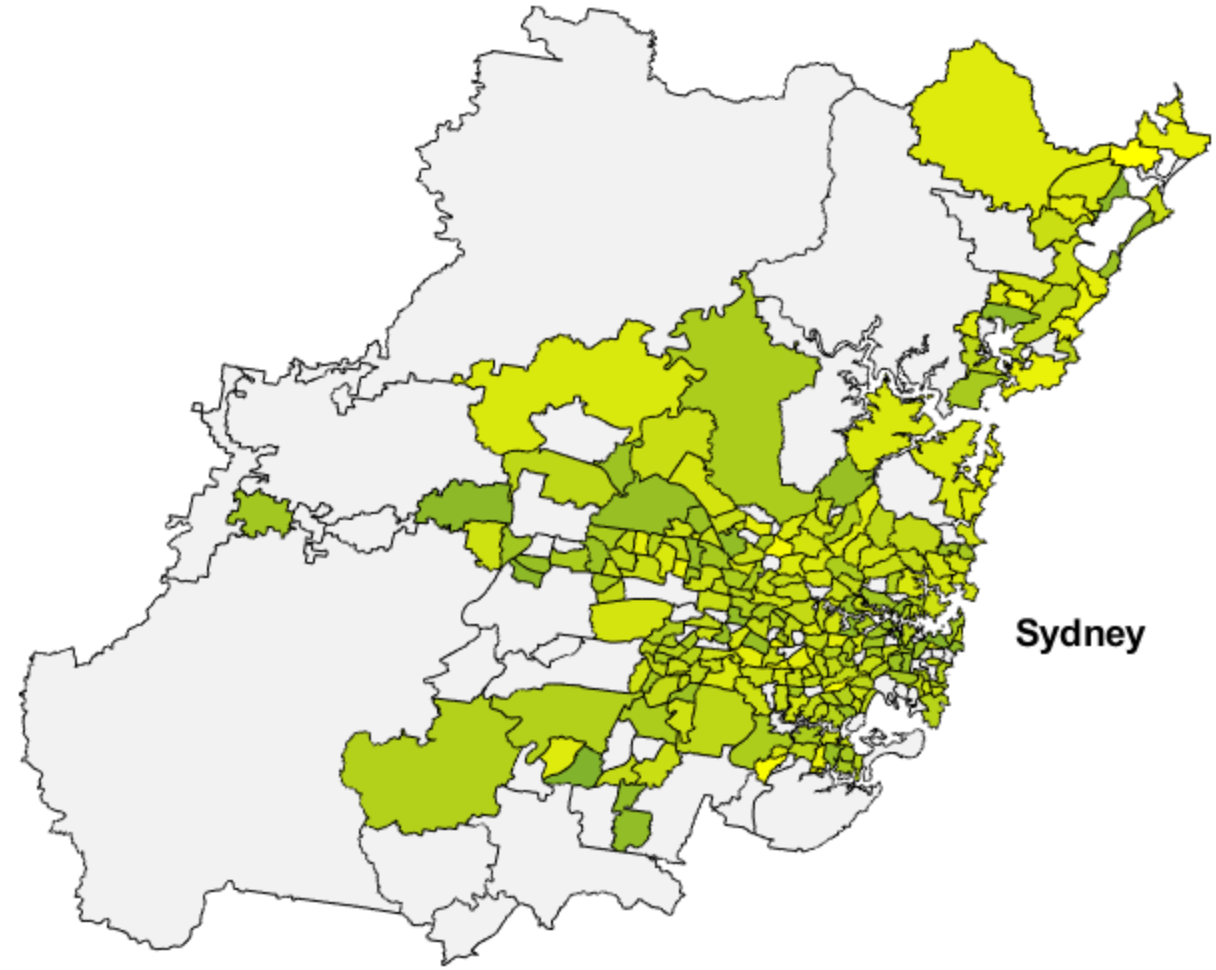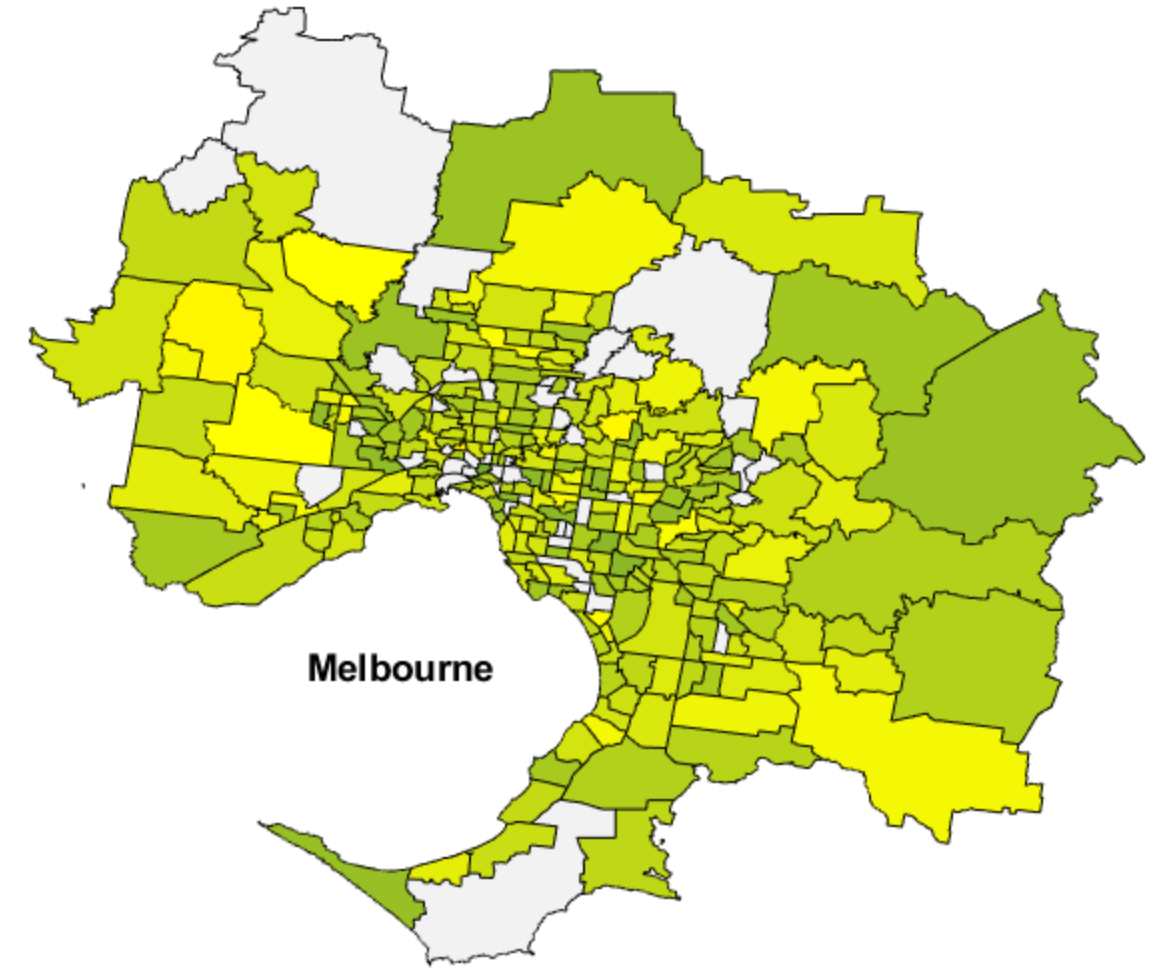



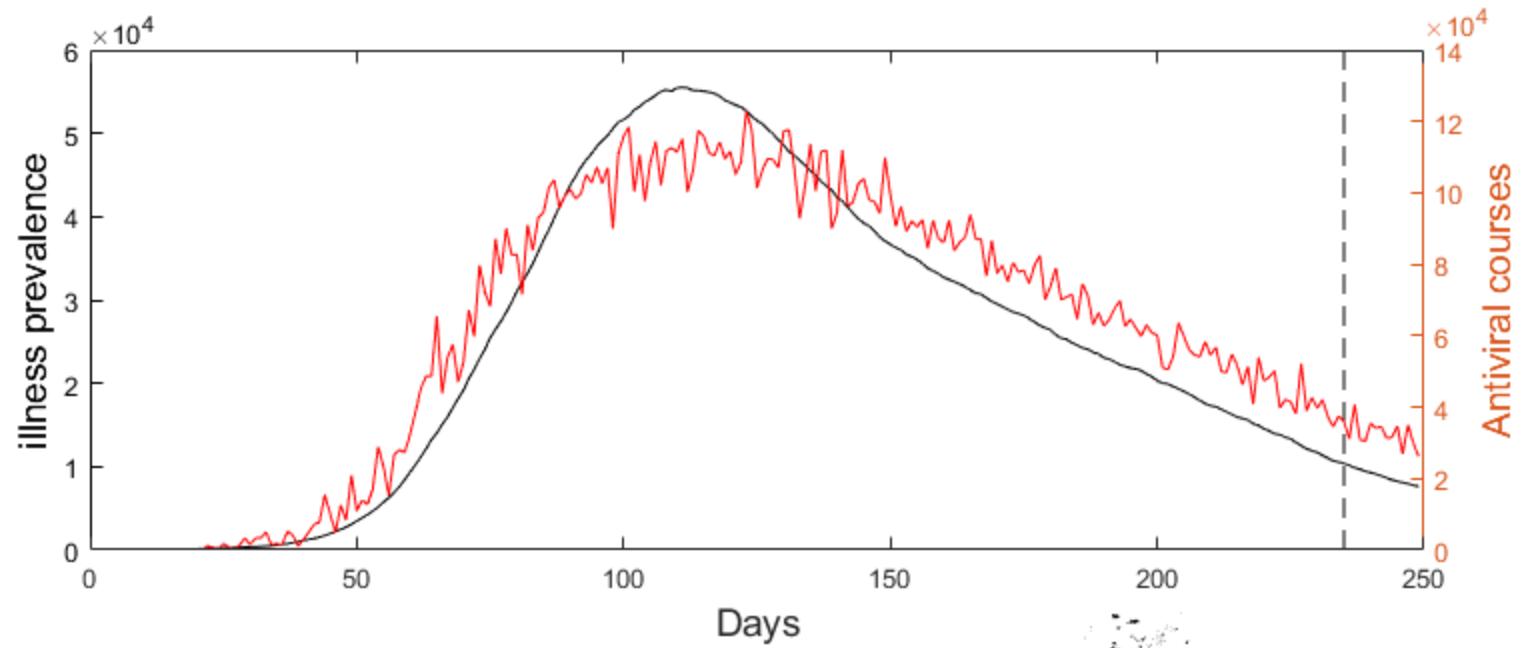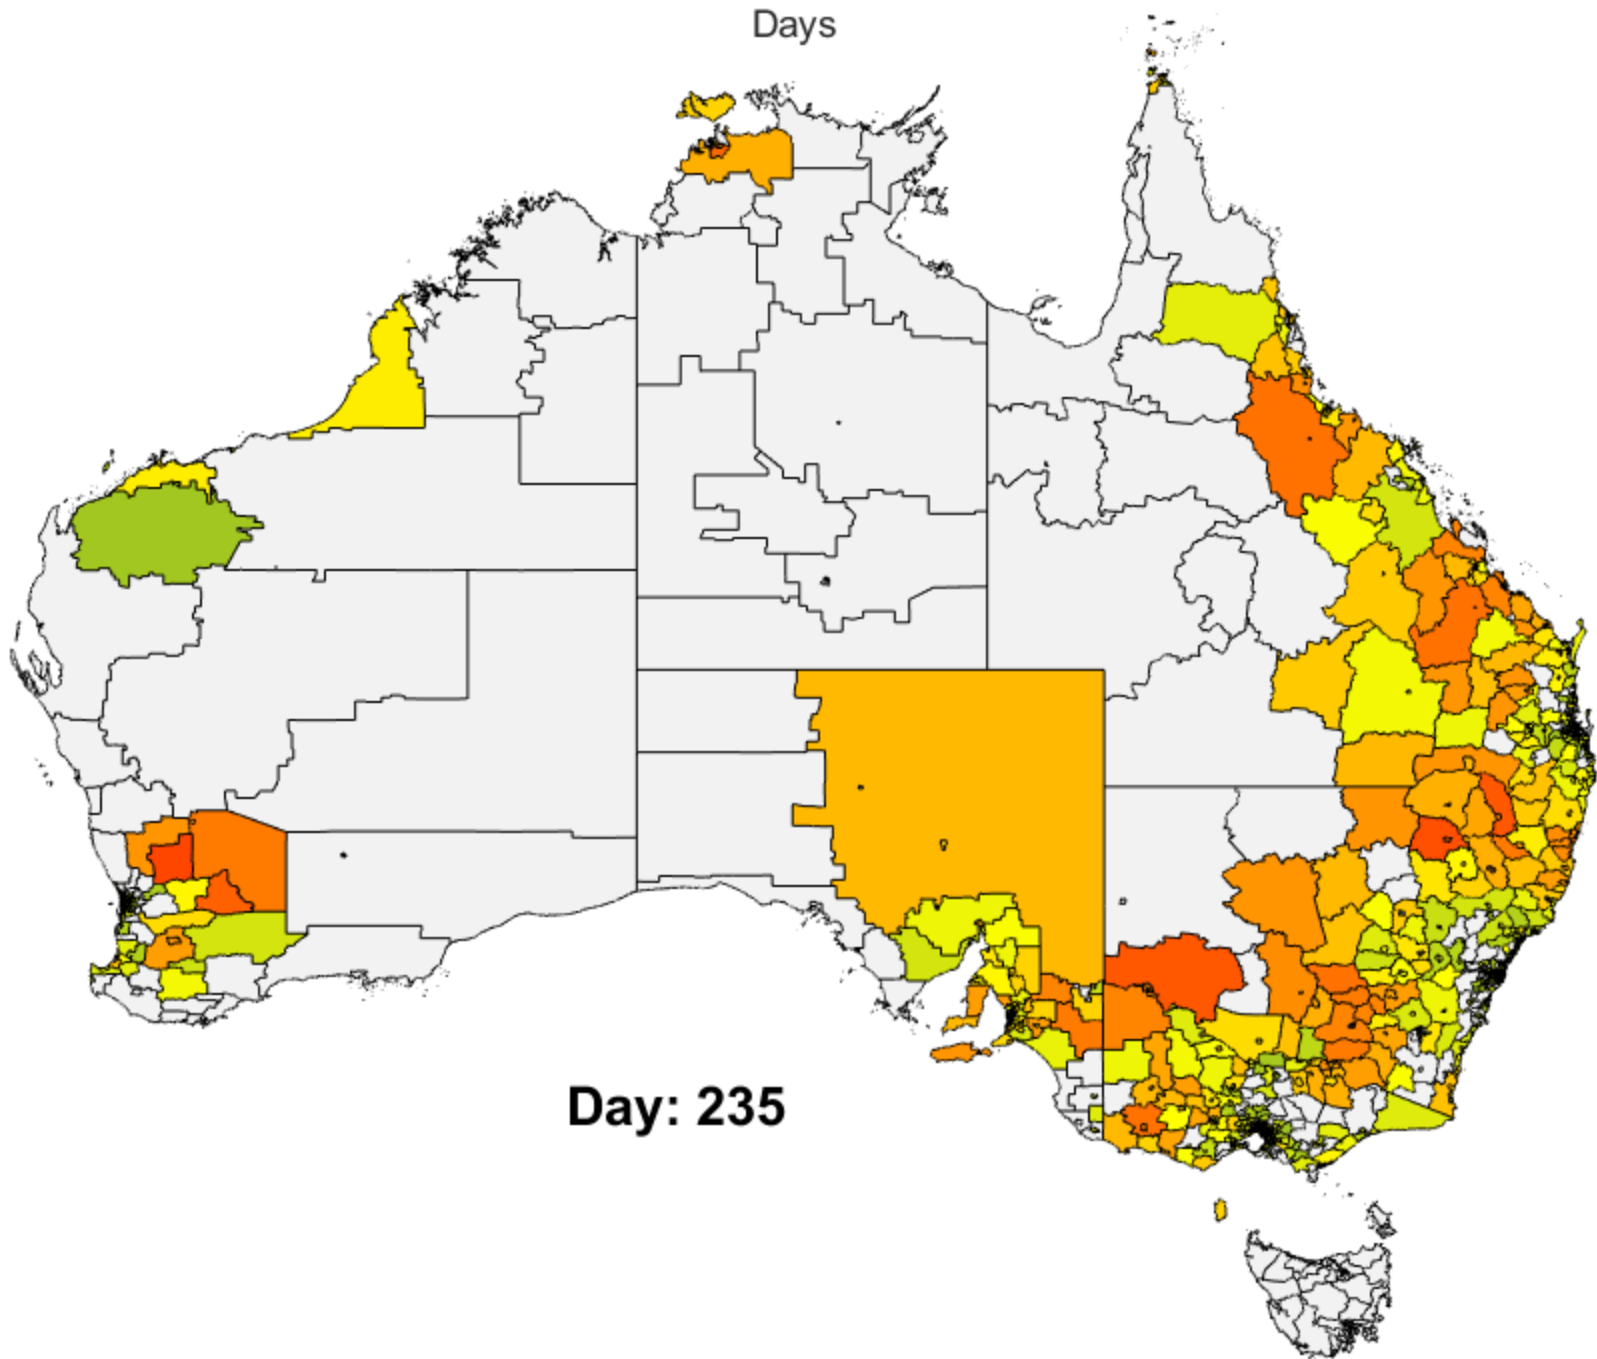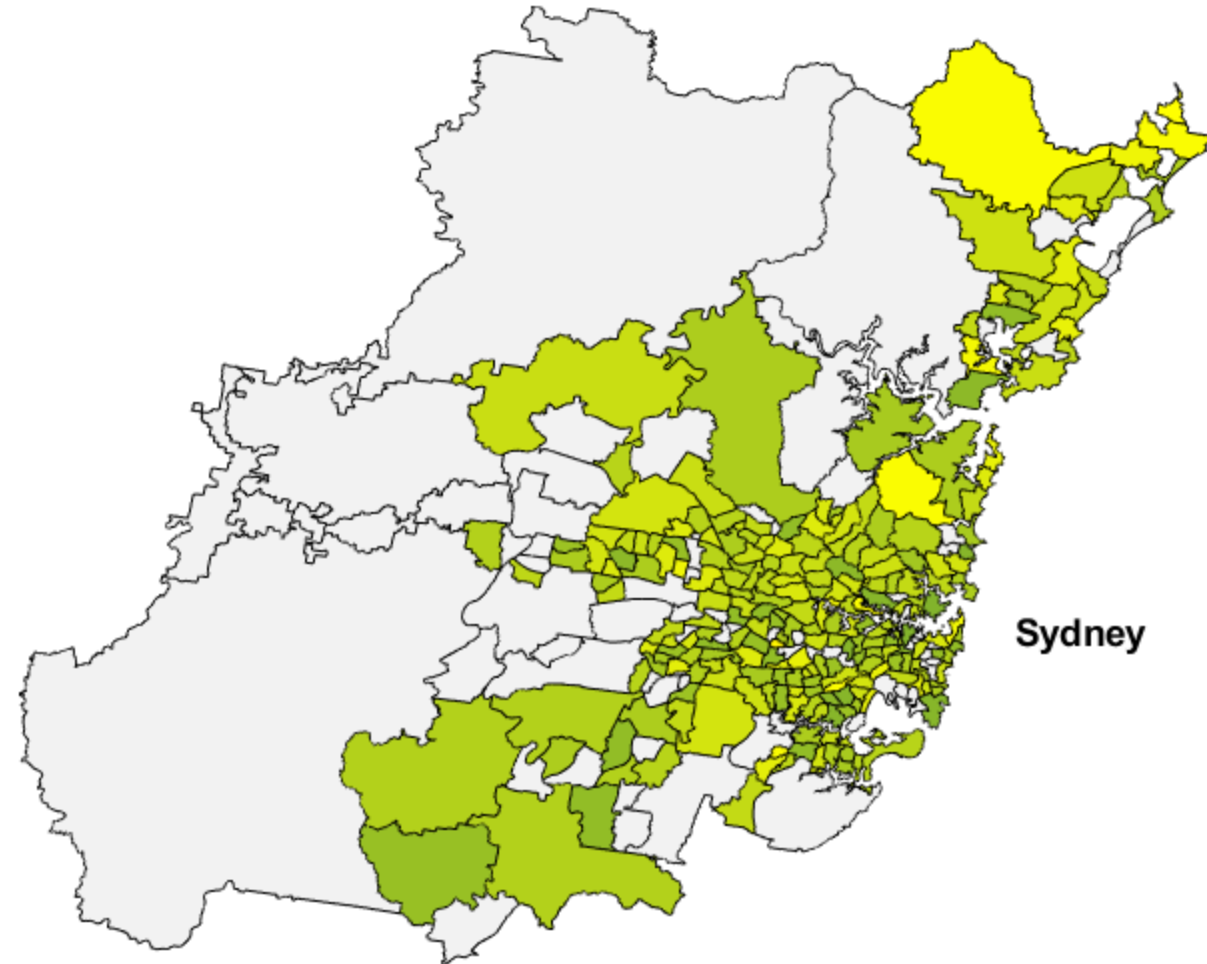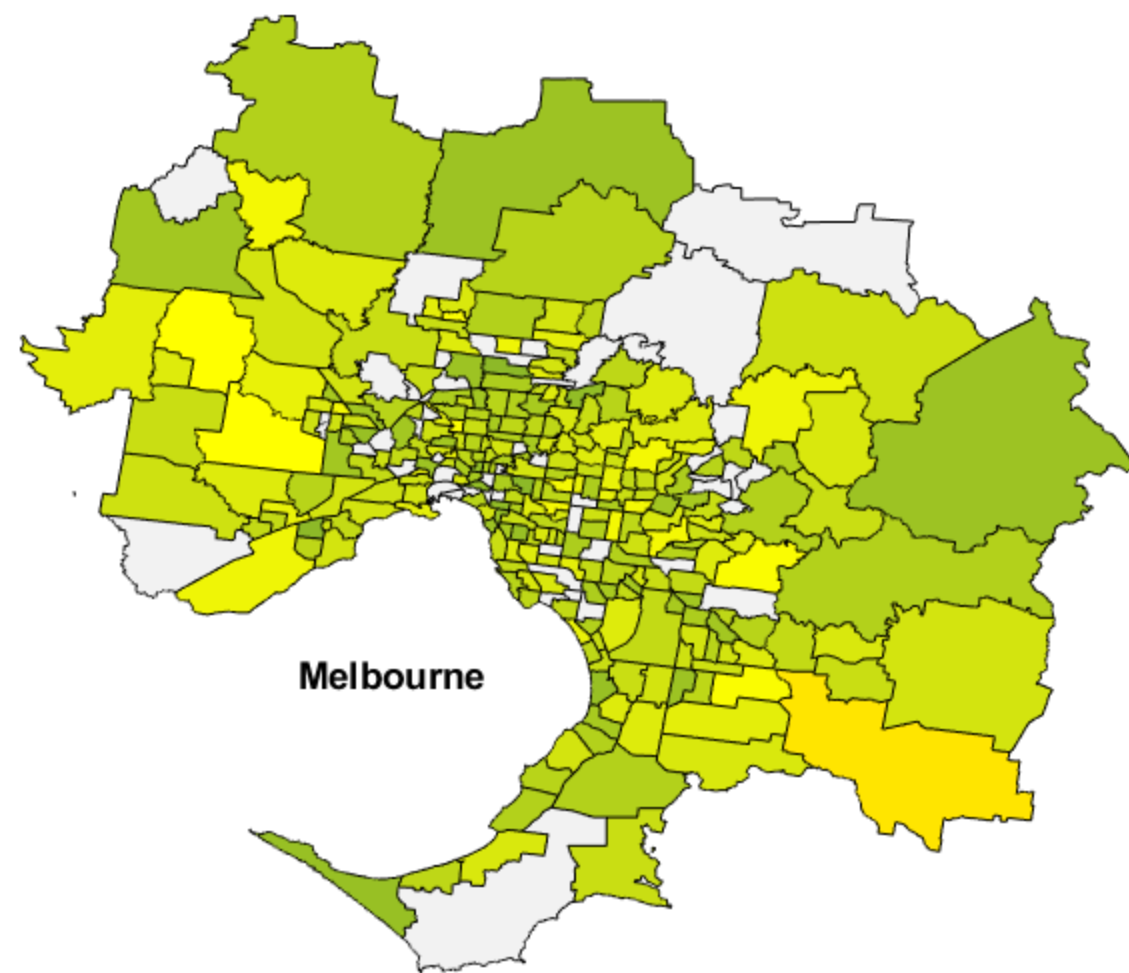



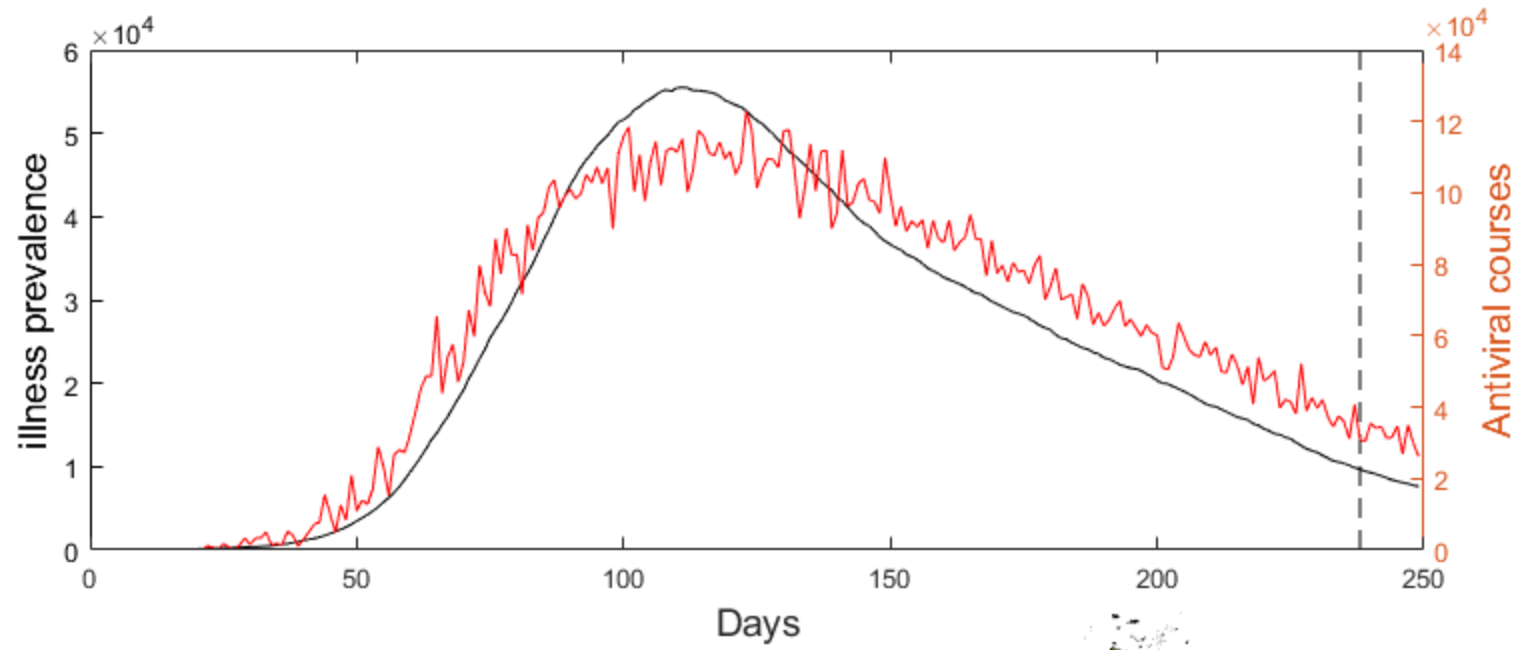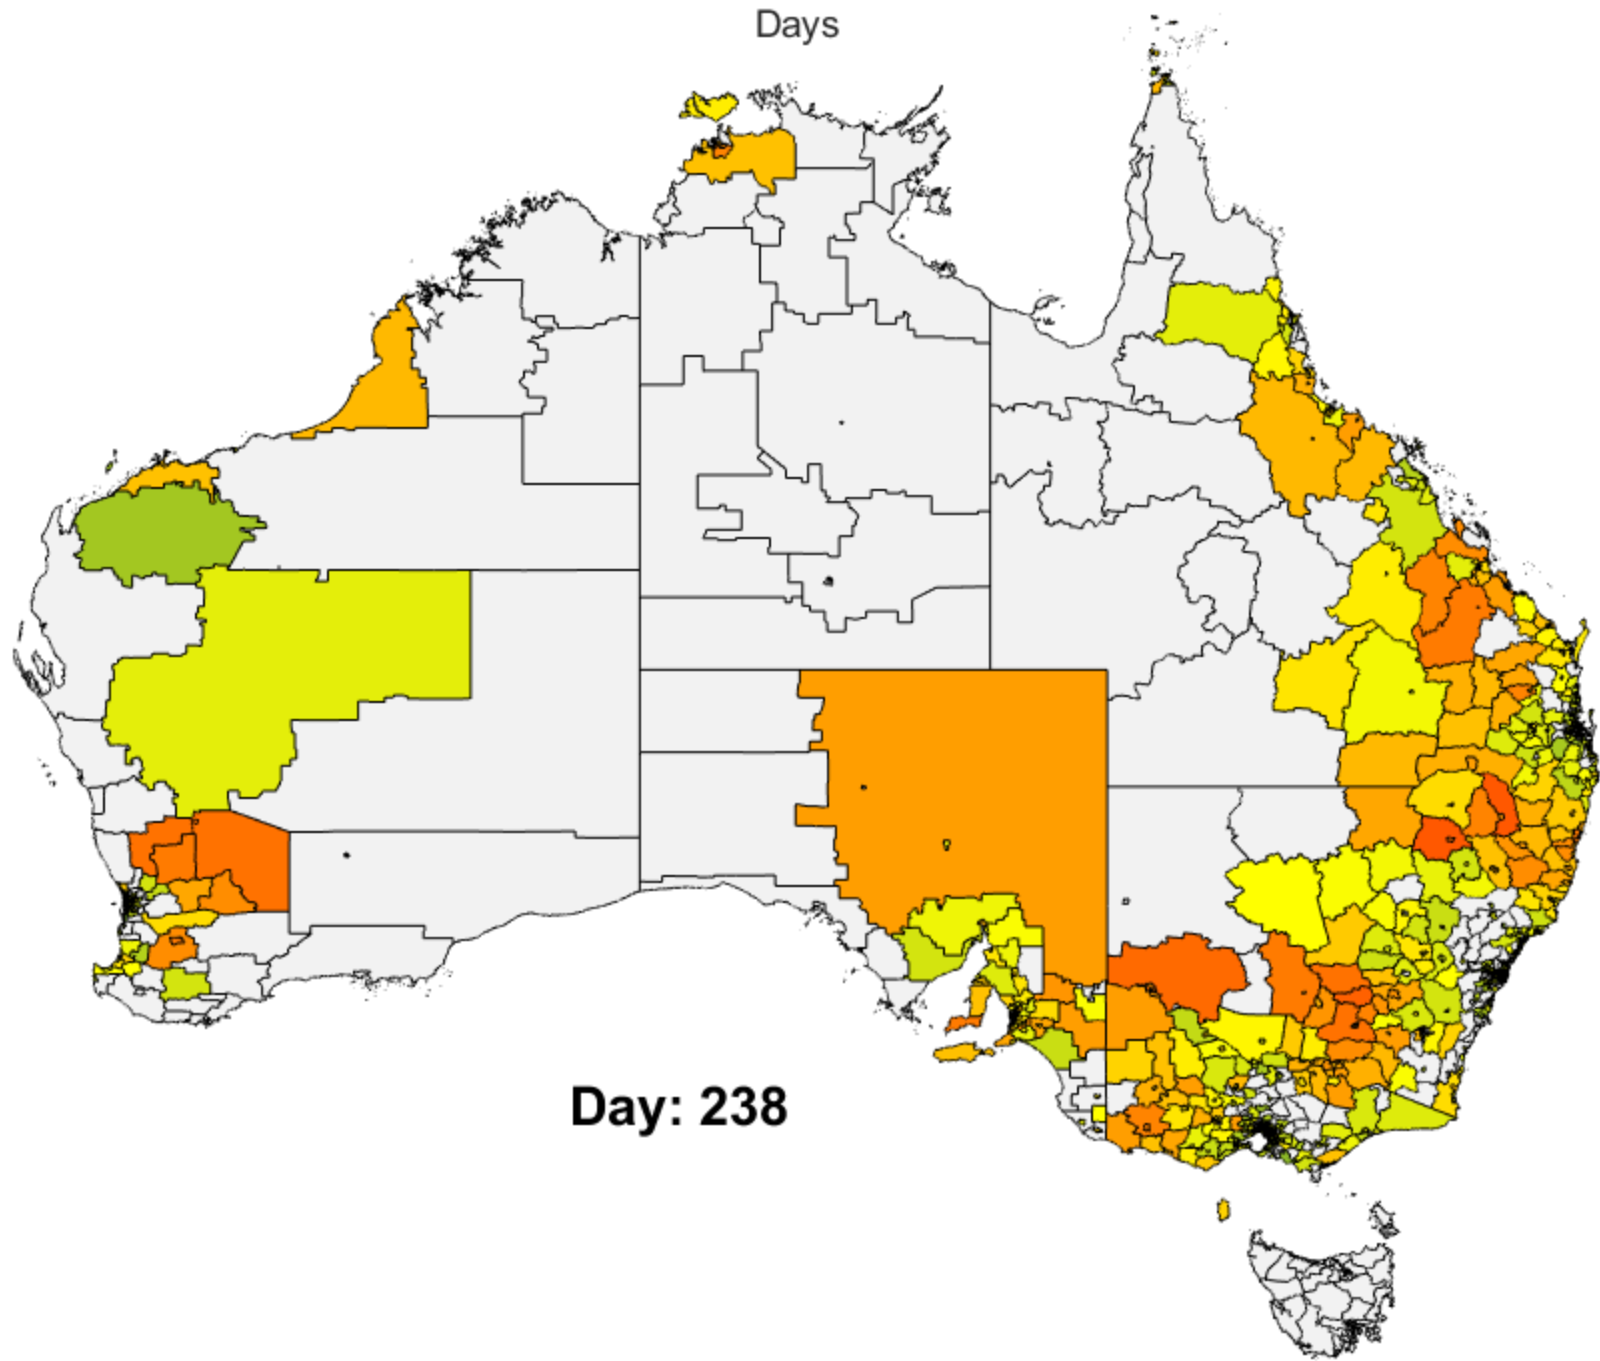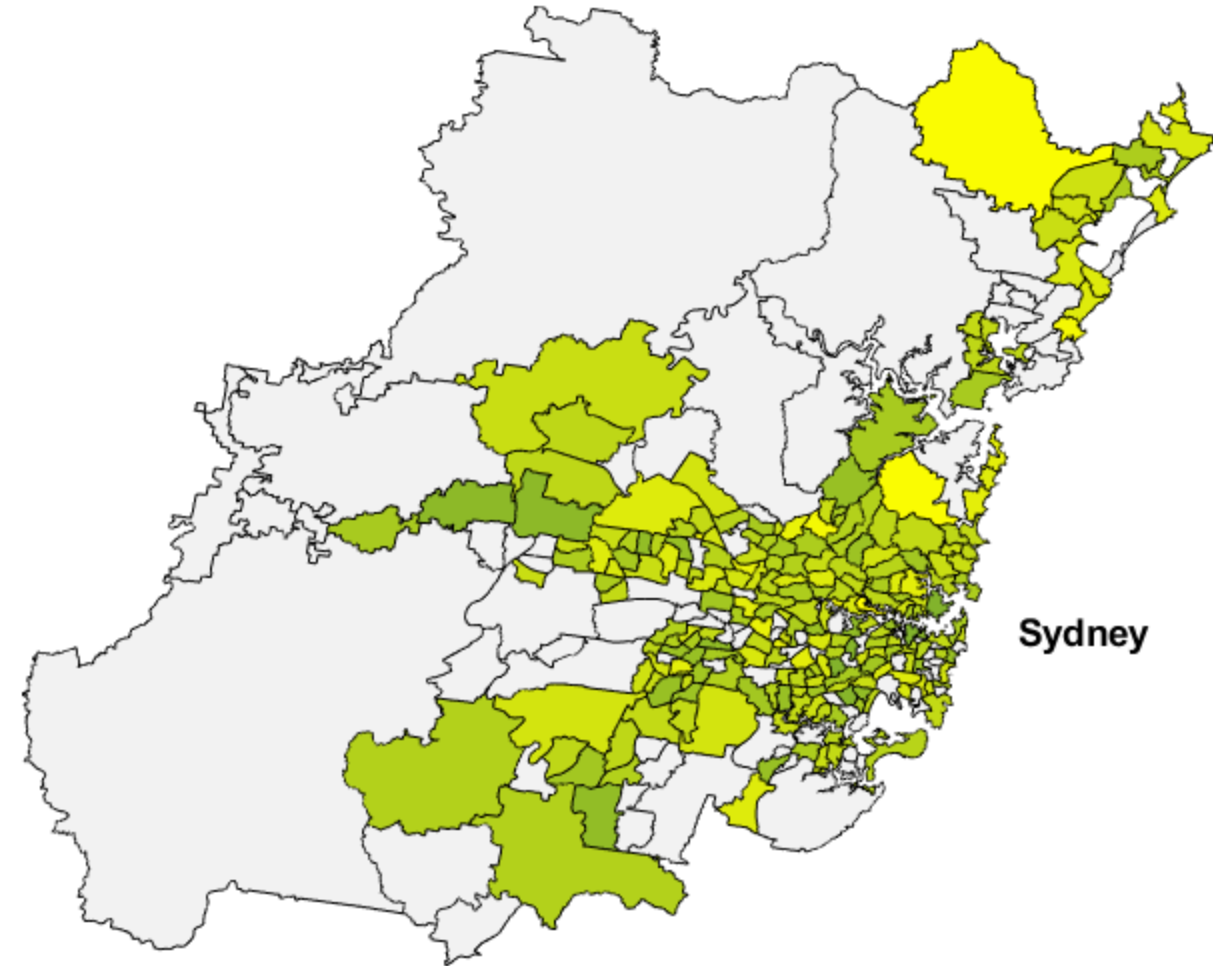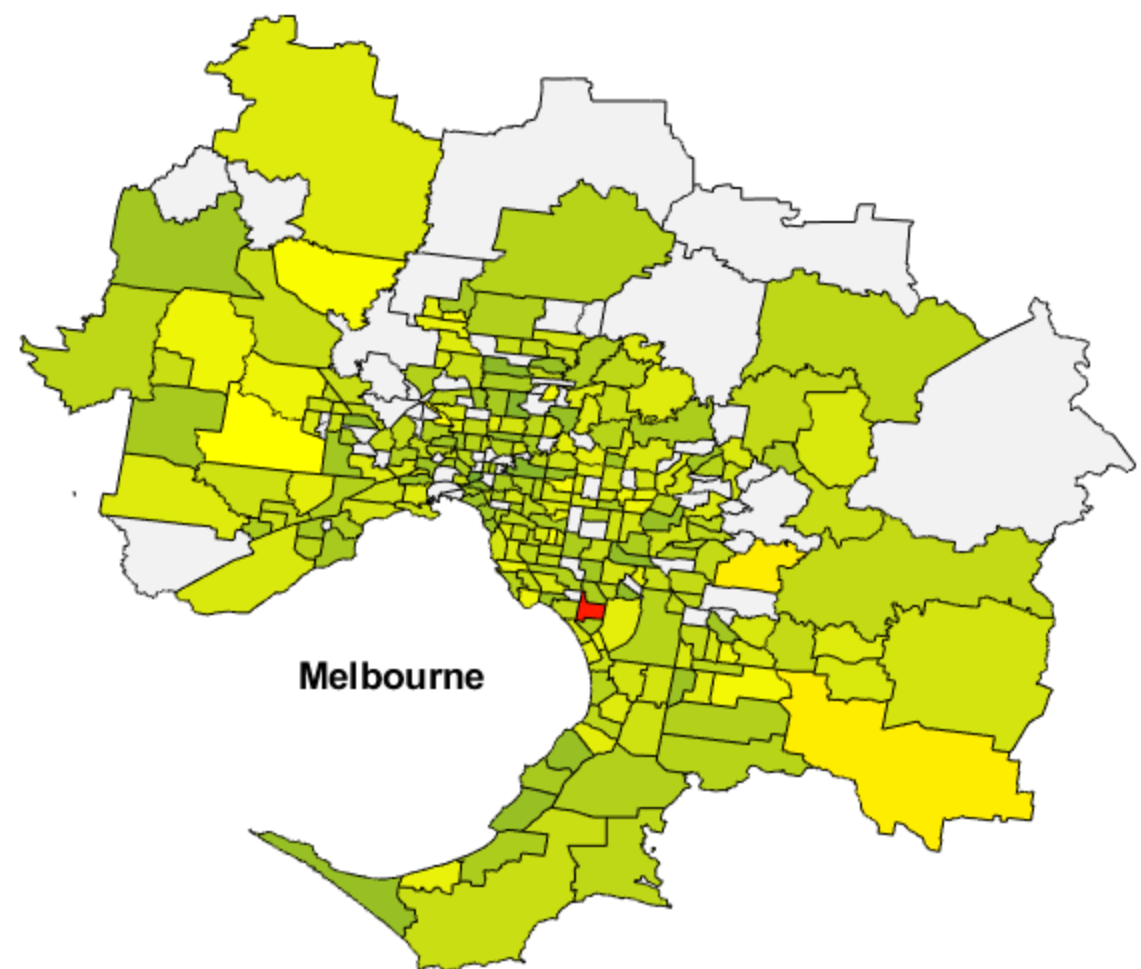

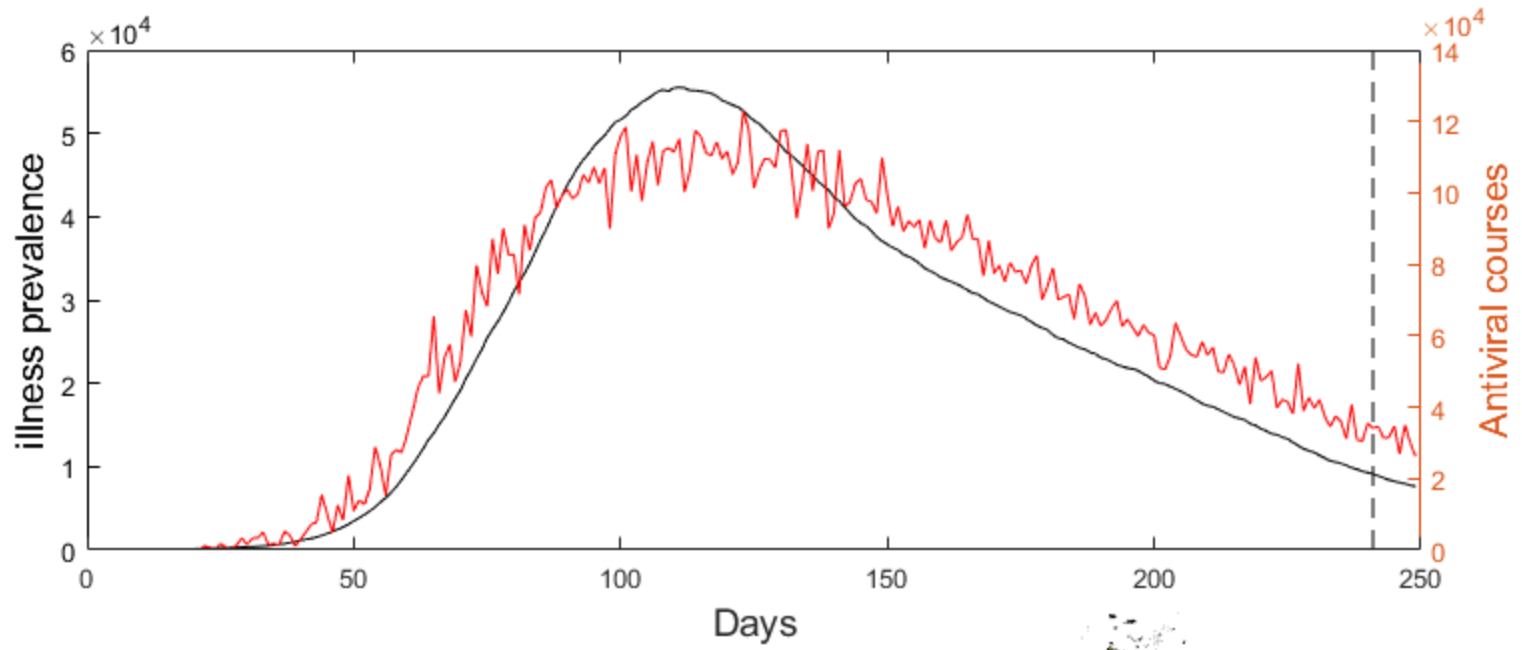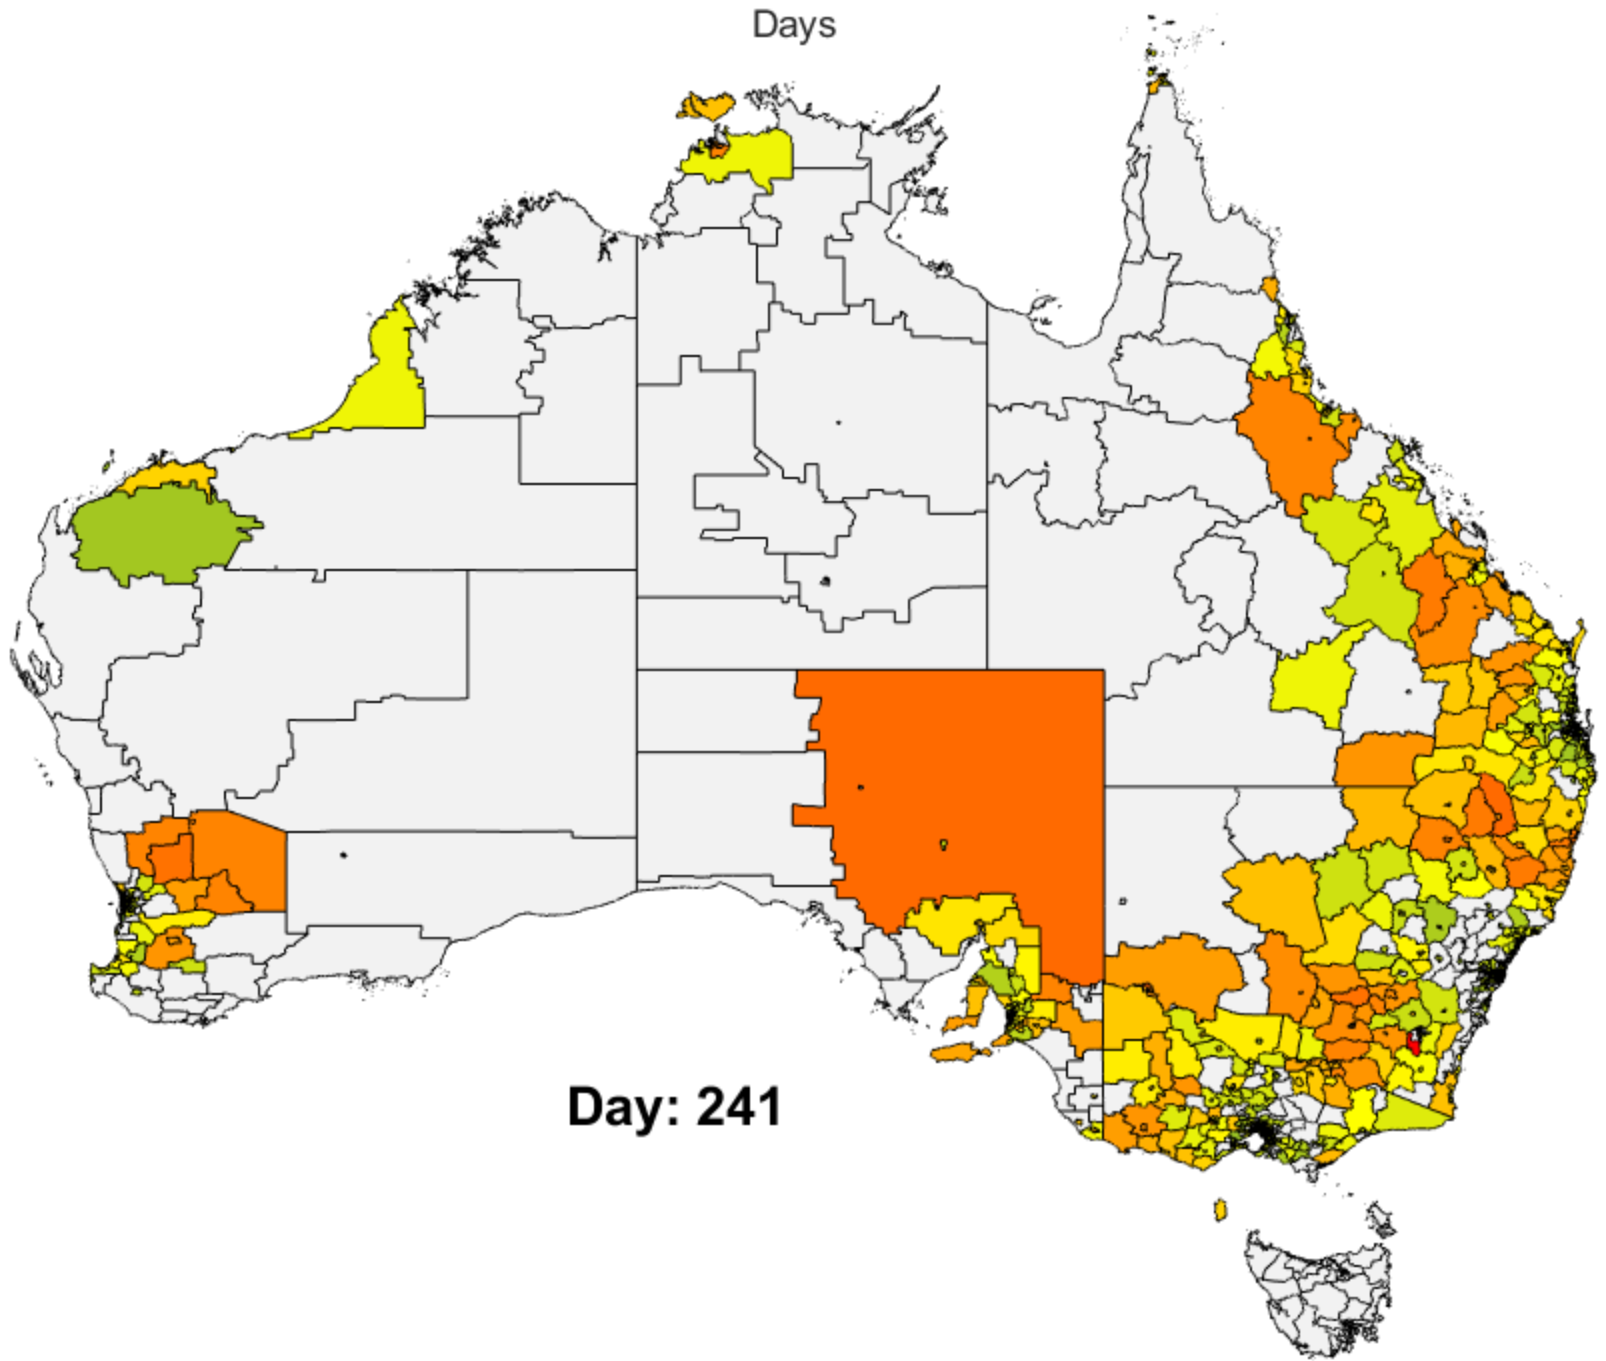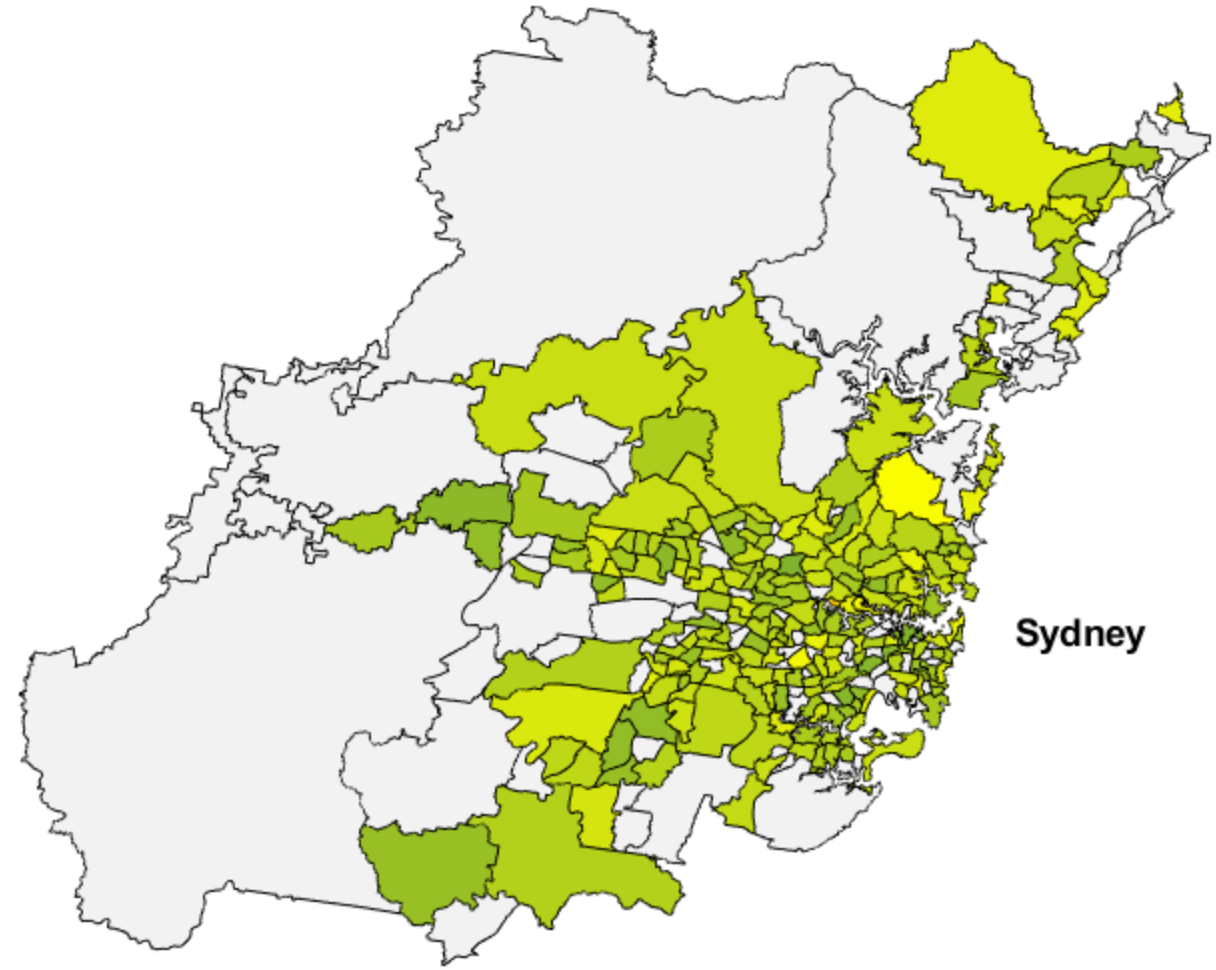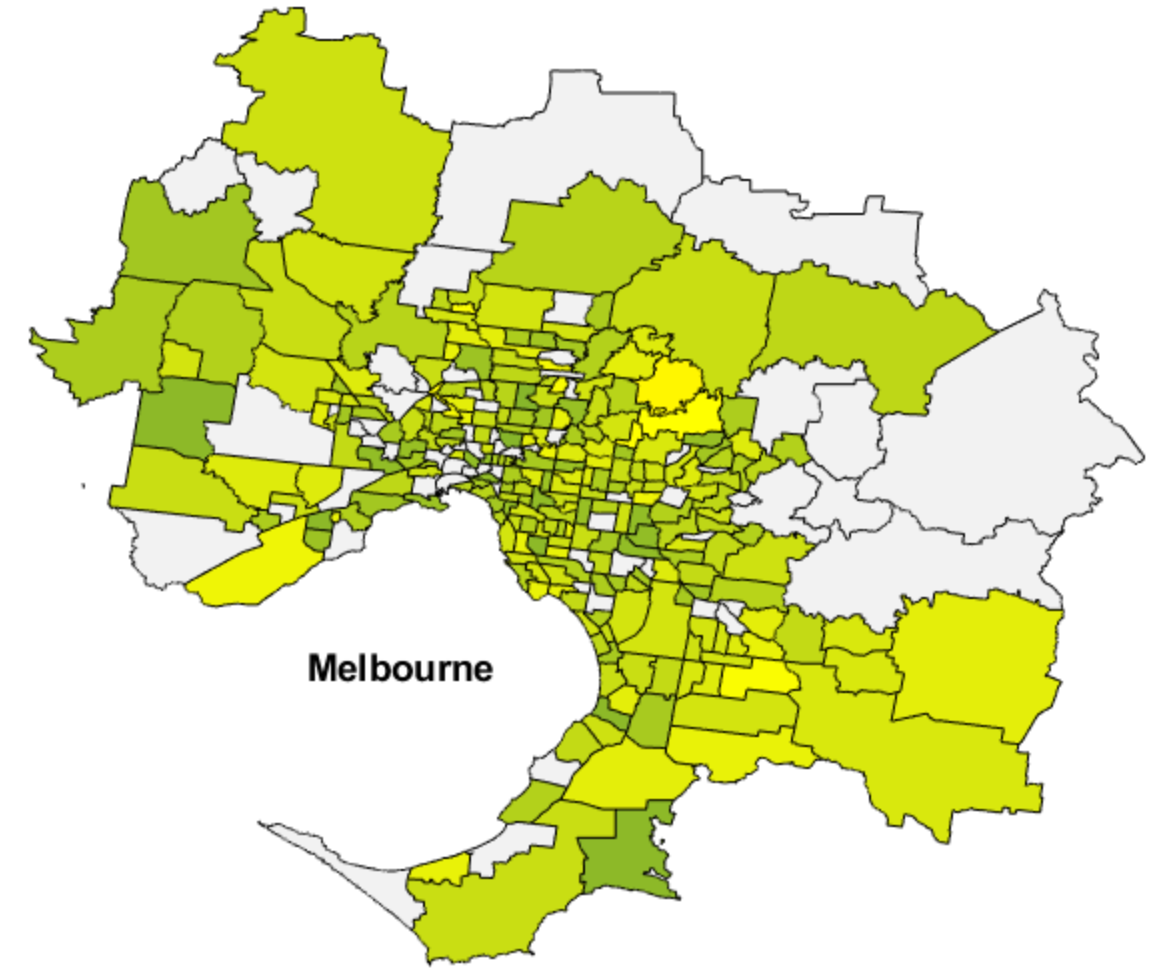



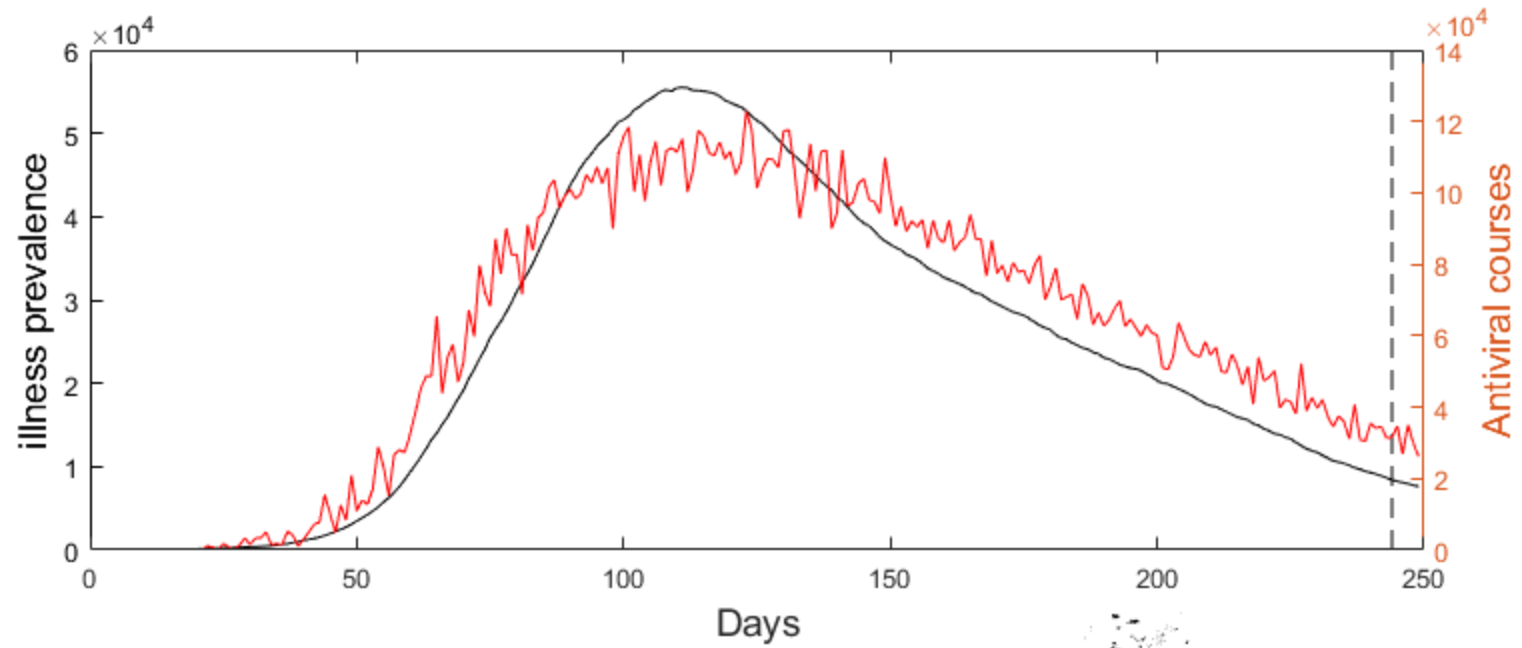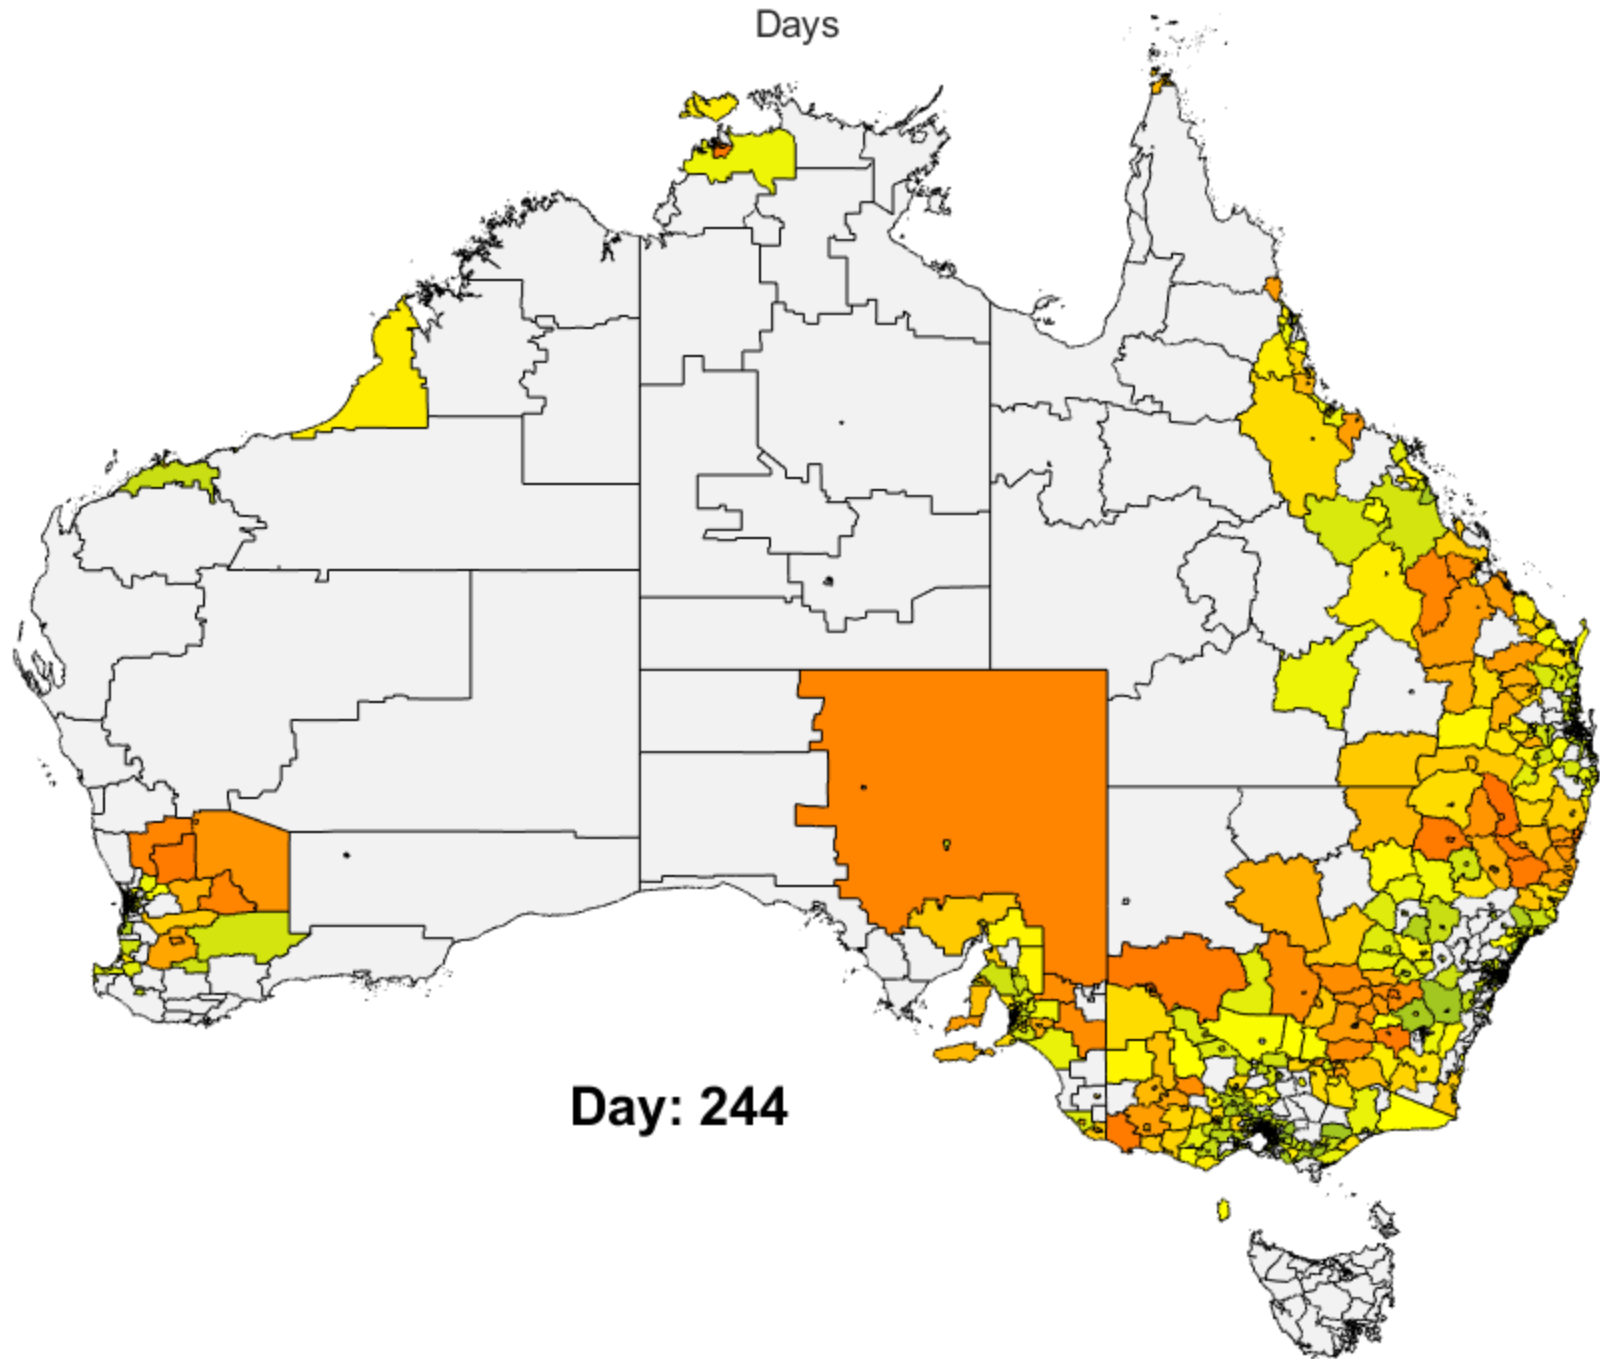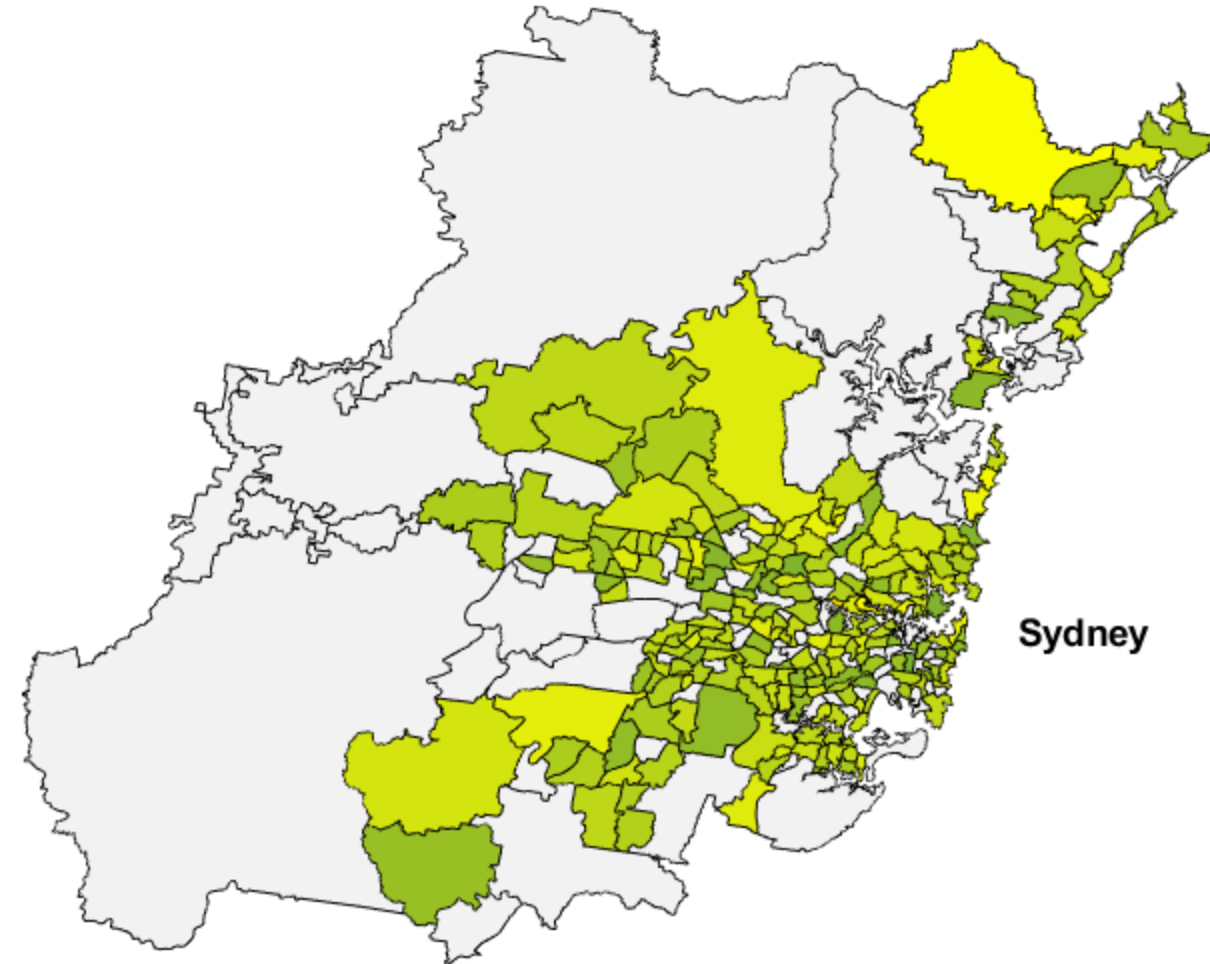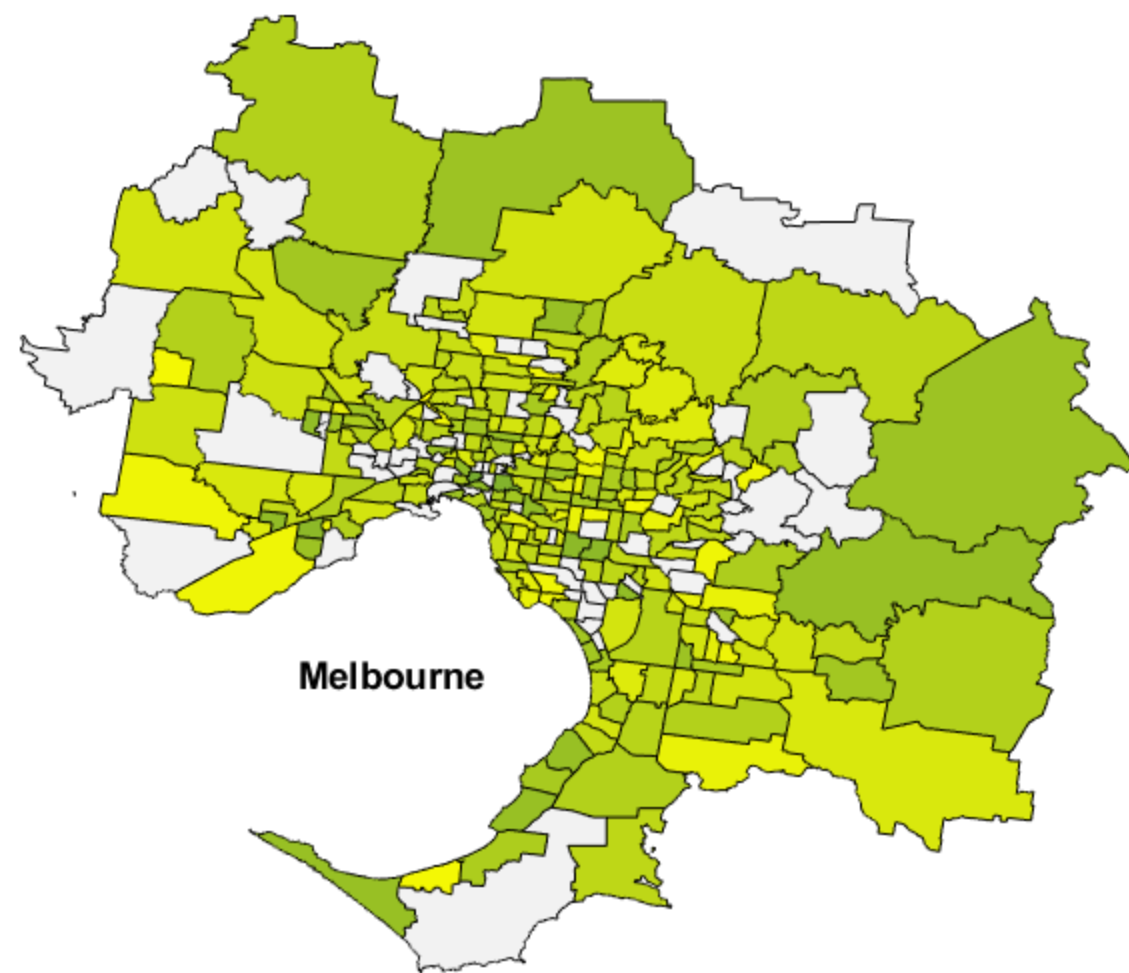



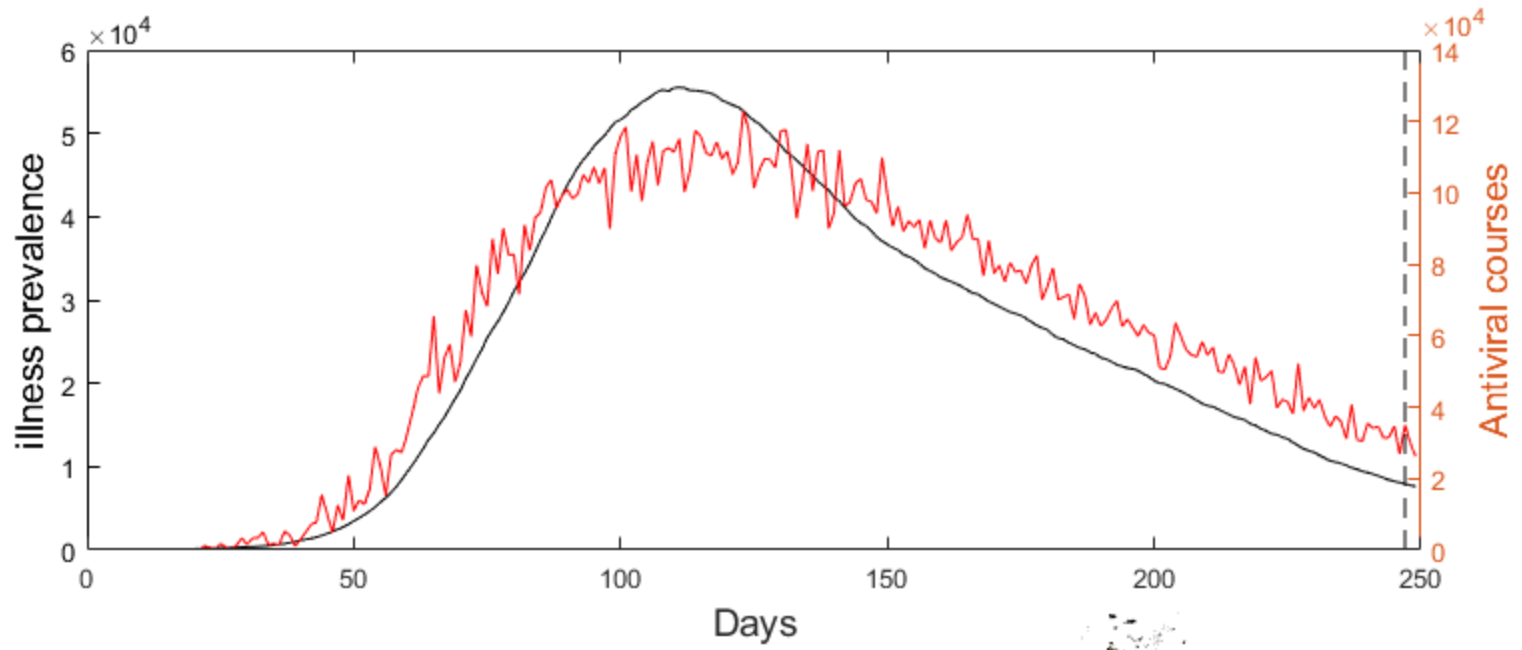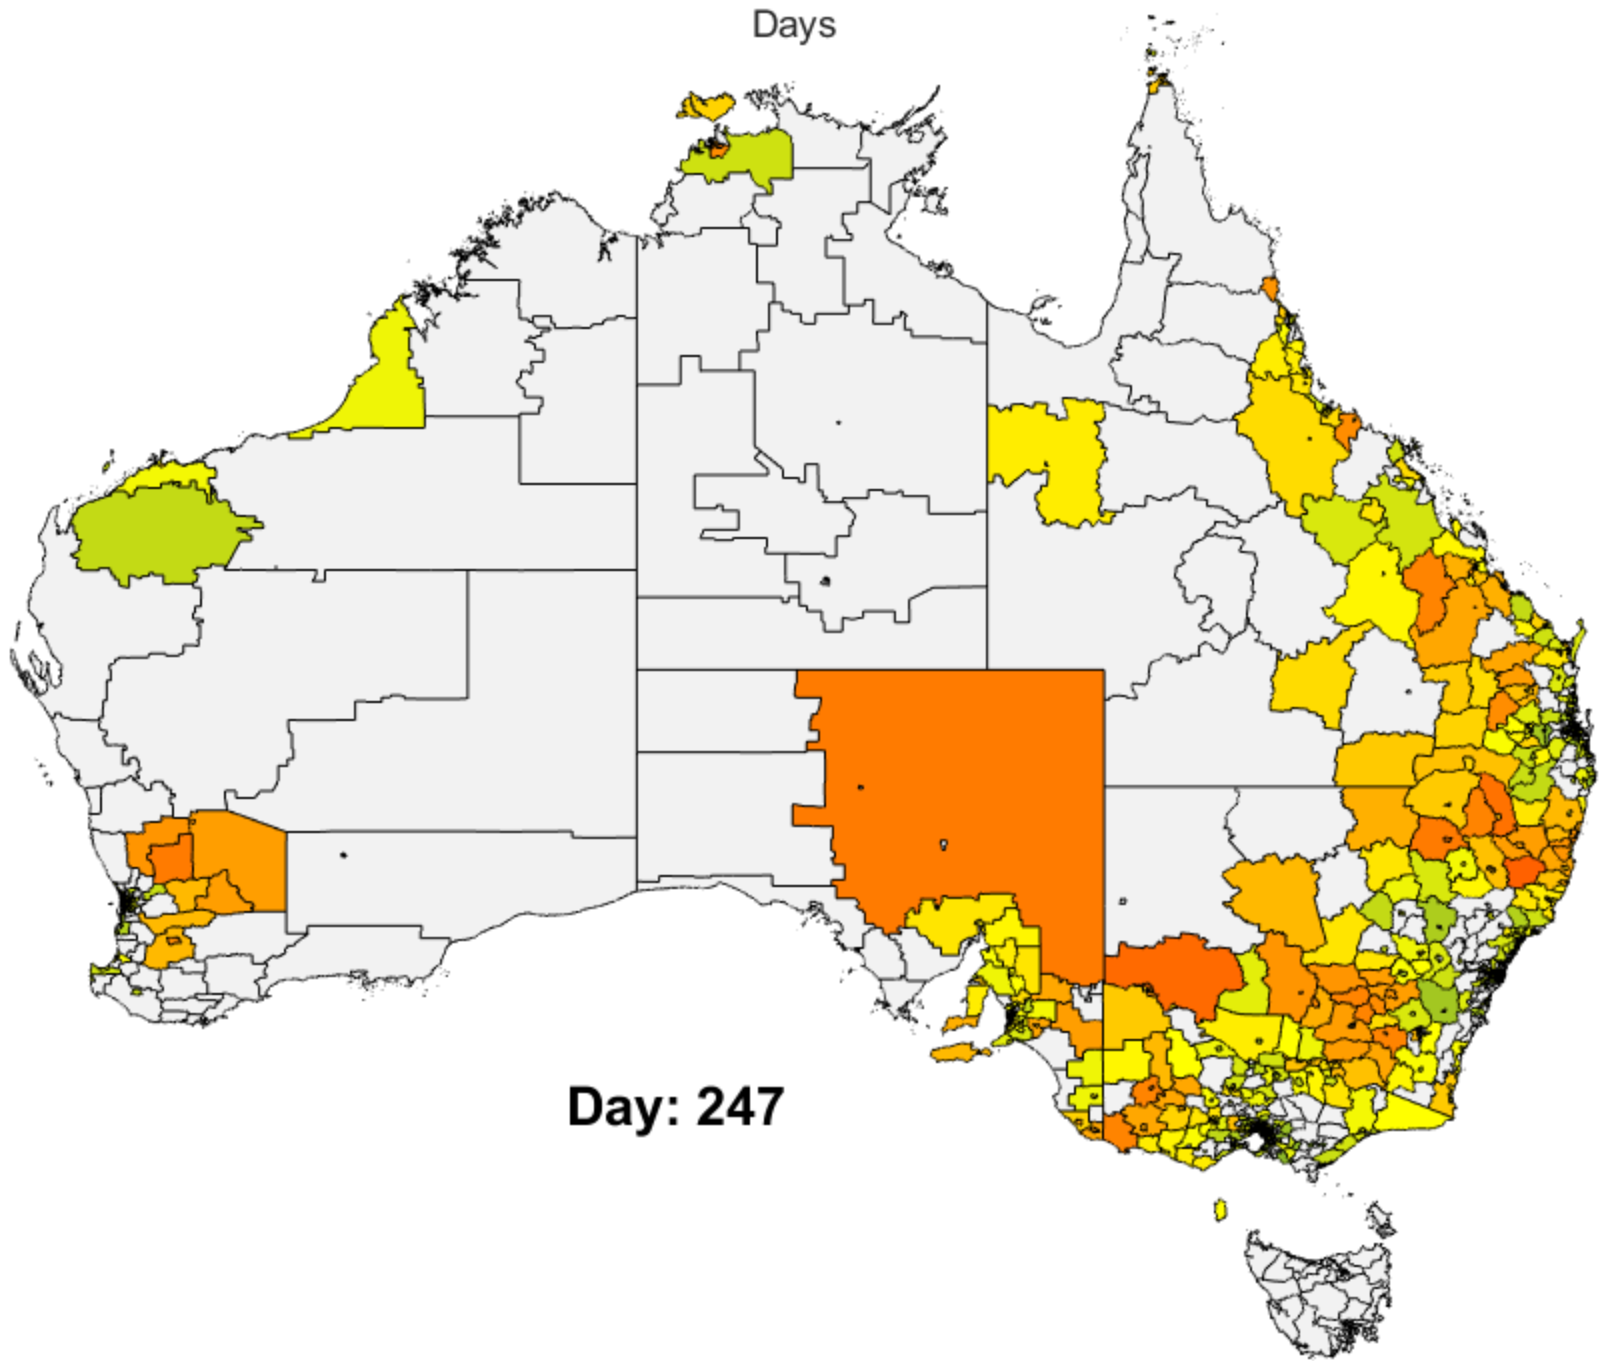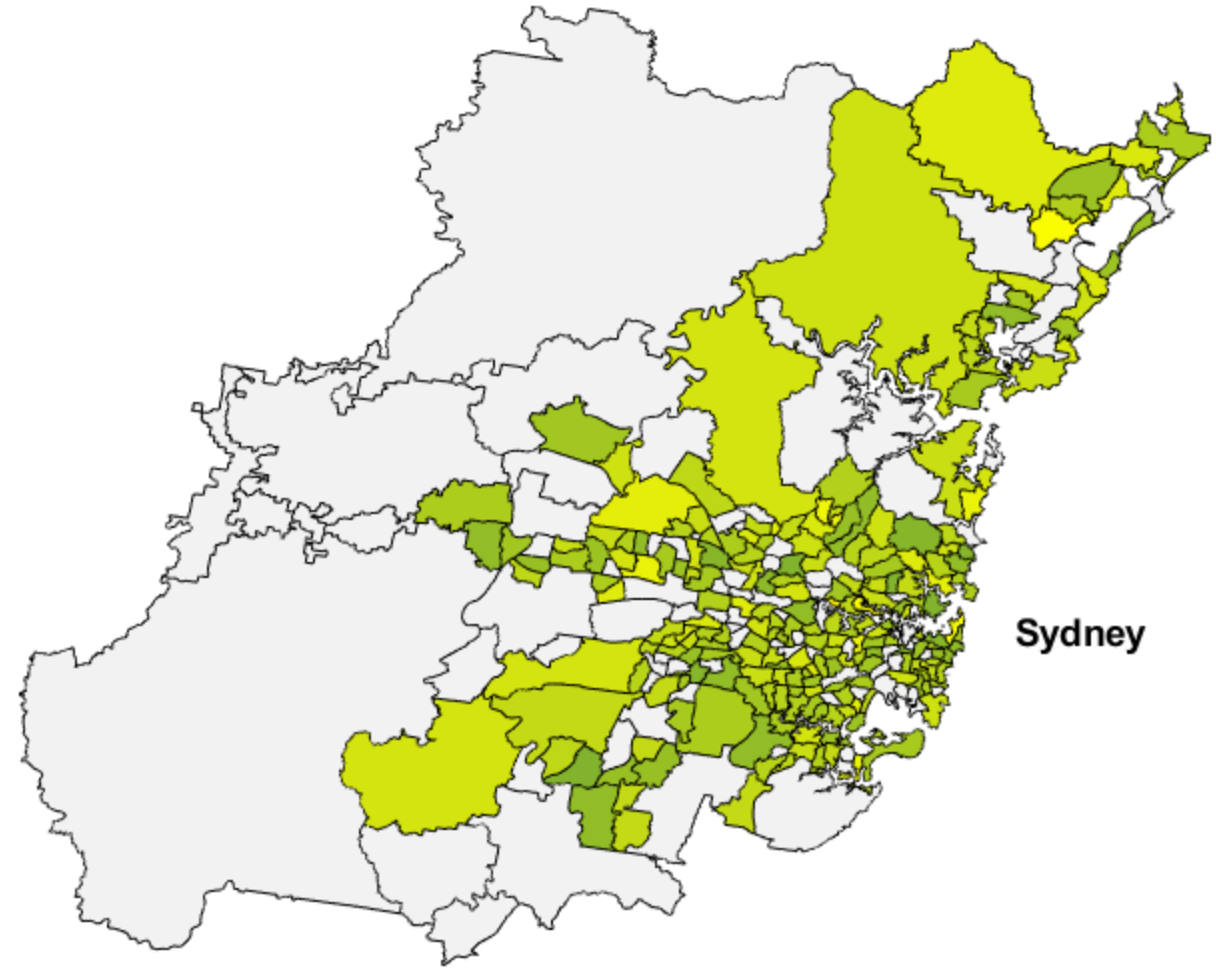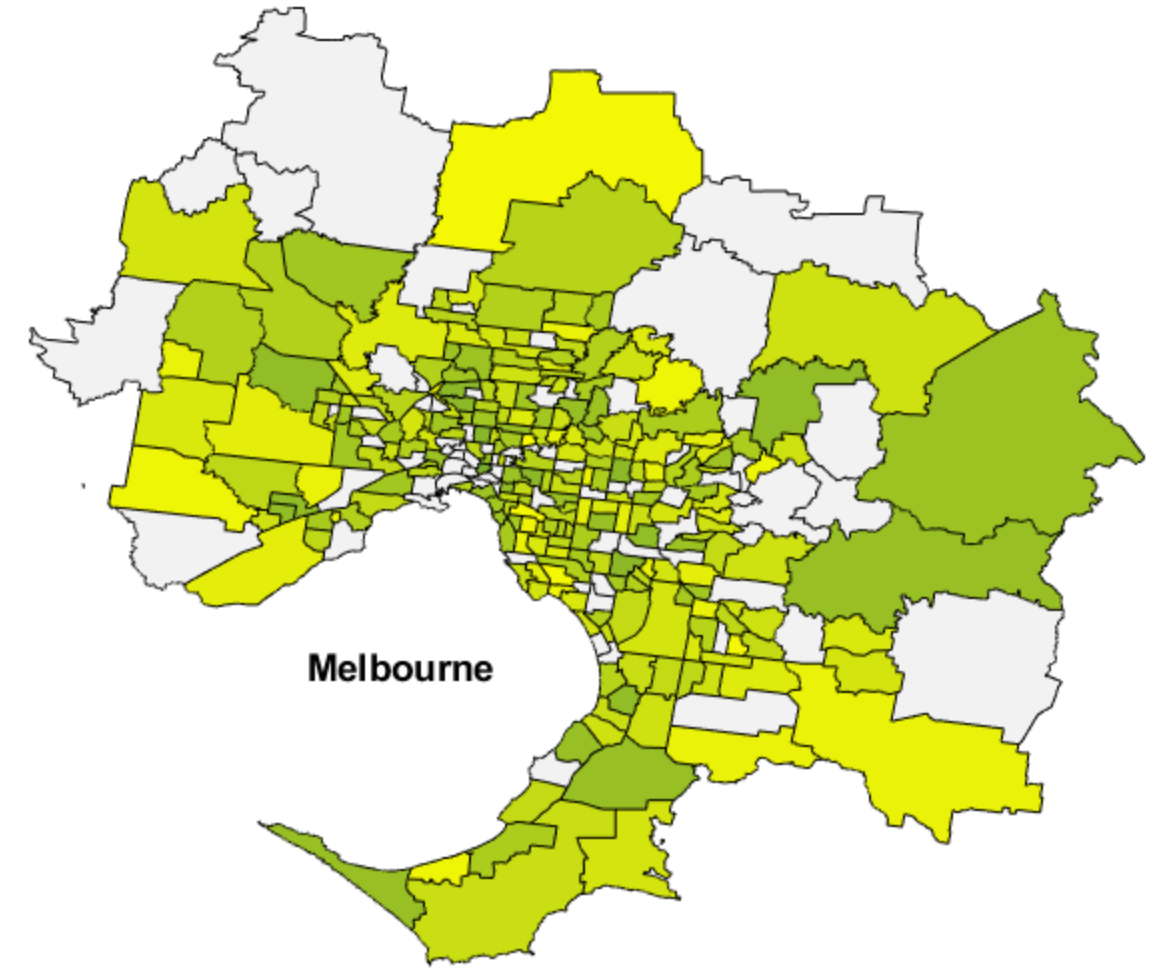

Supplement: rsif20190728supp7.pdf [file rsif20190728supp7.pdf]

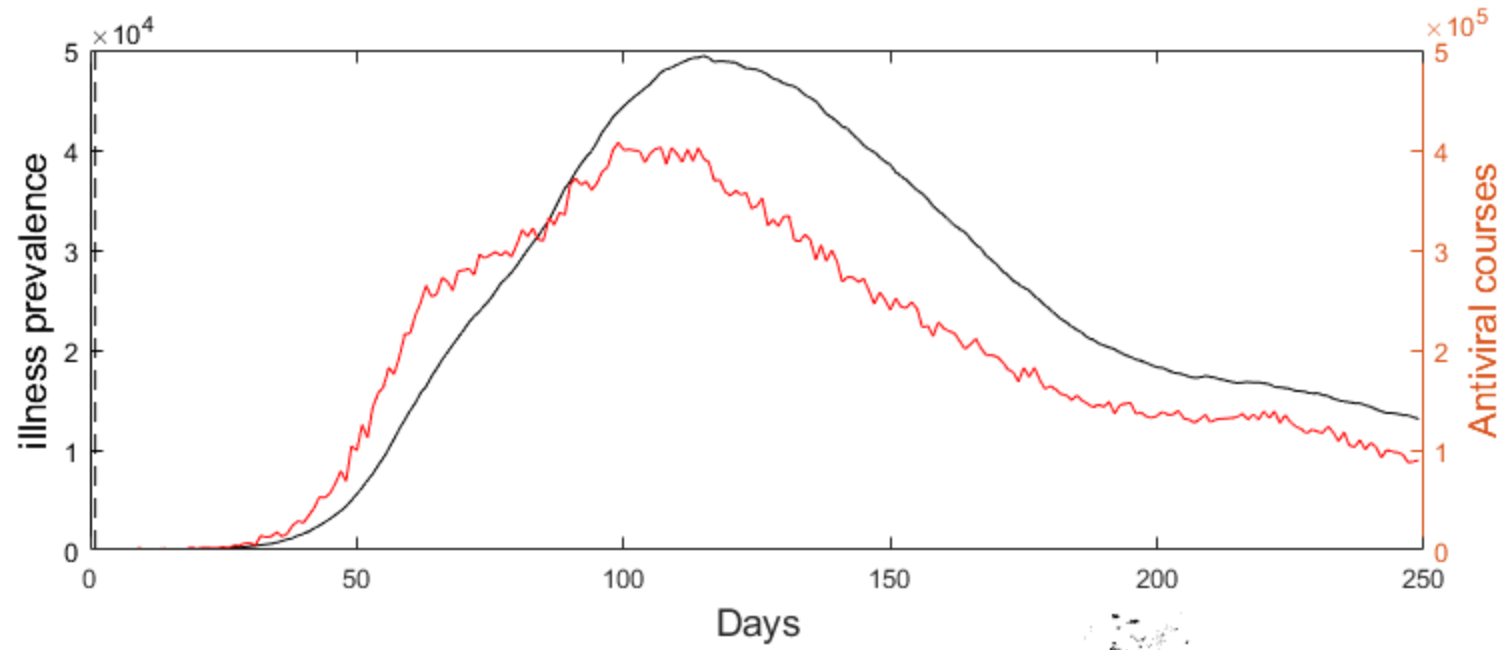

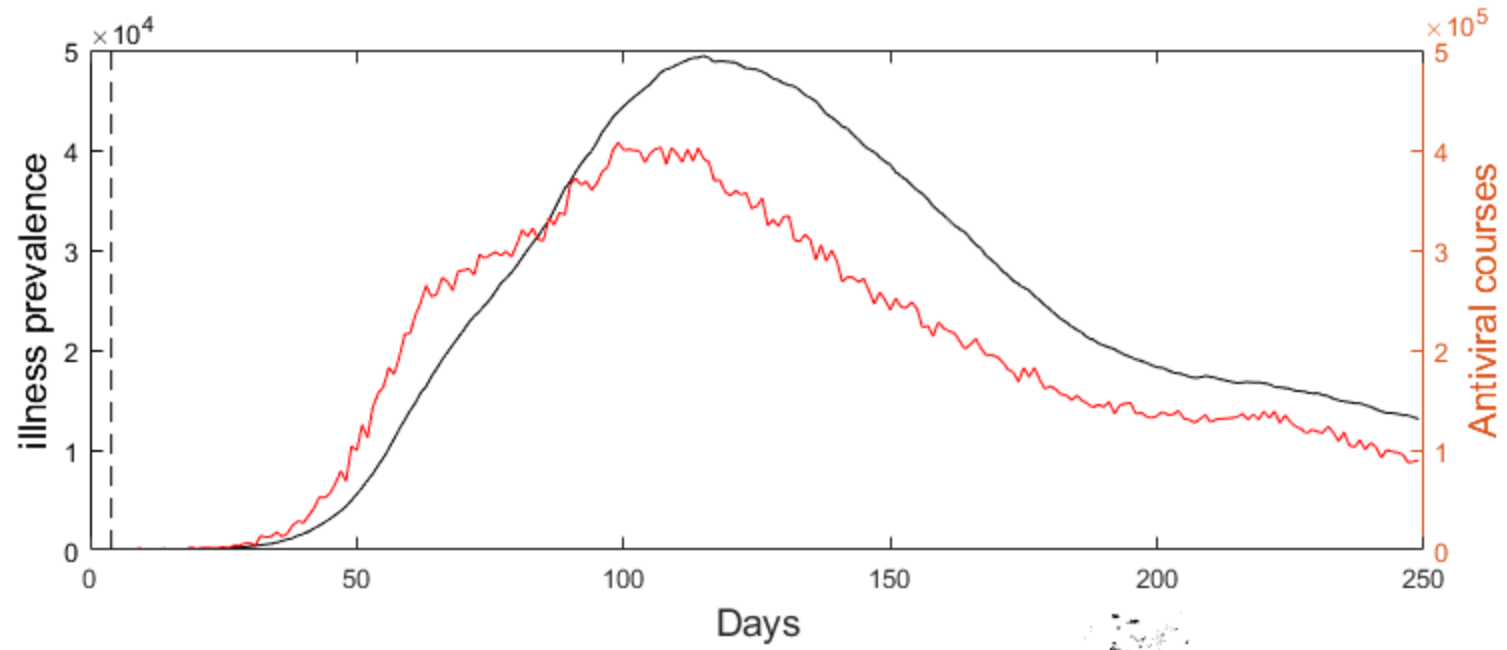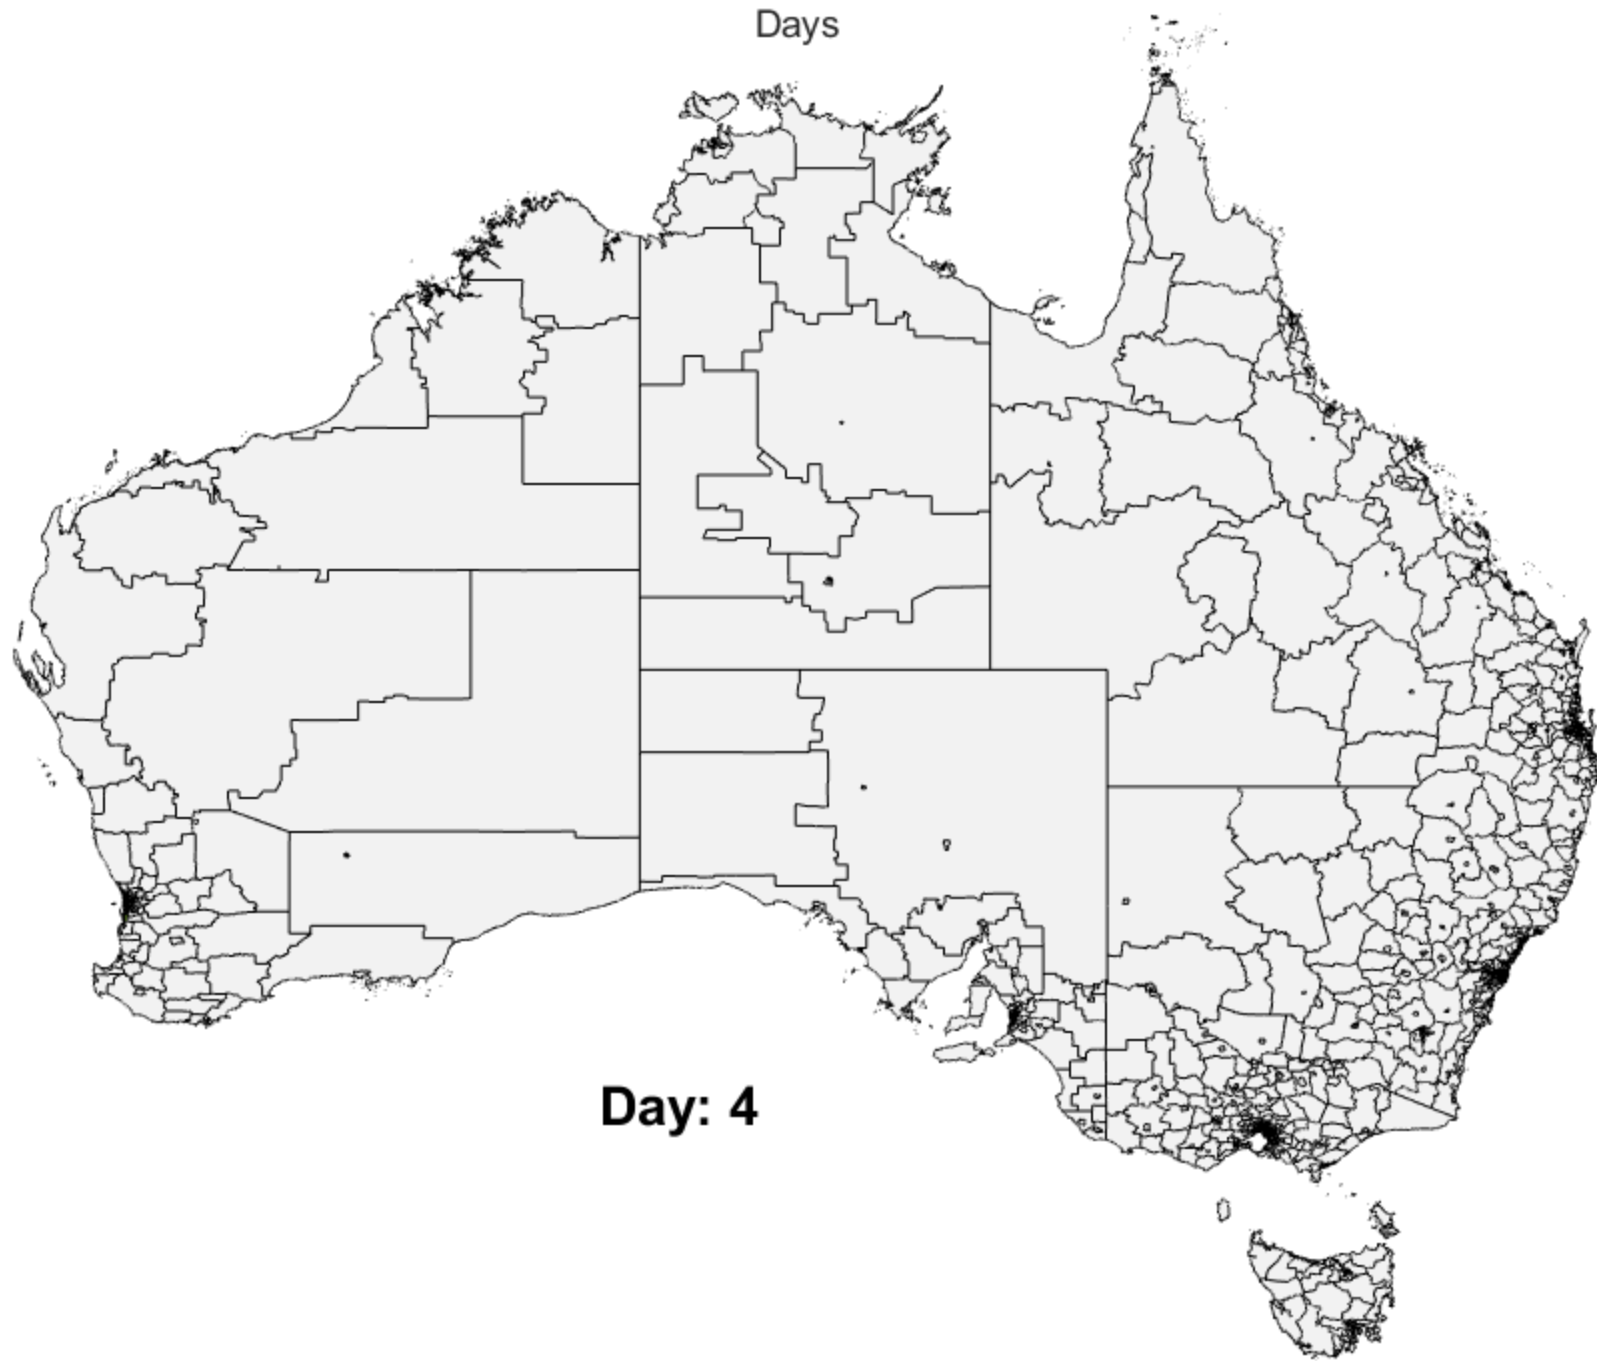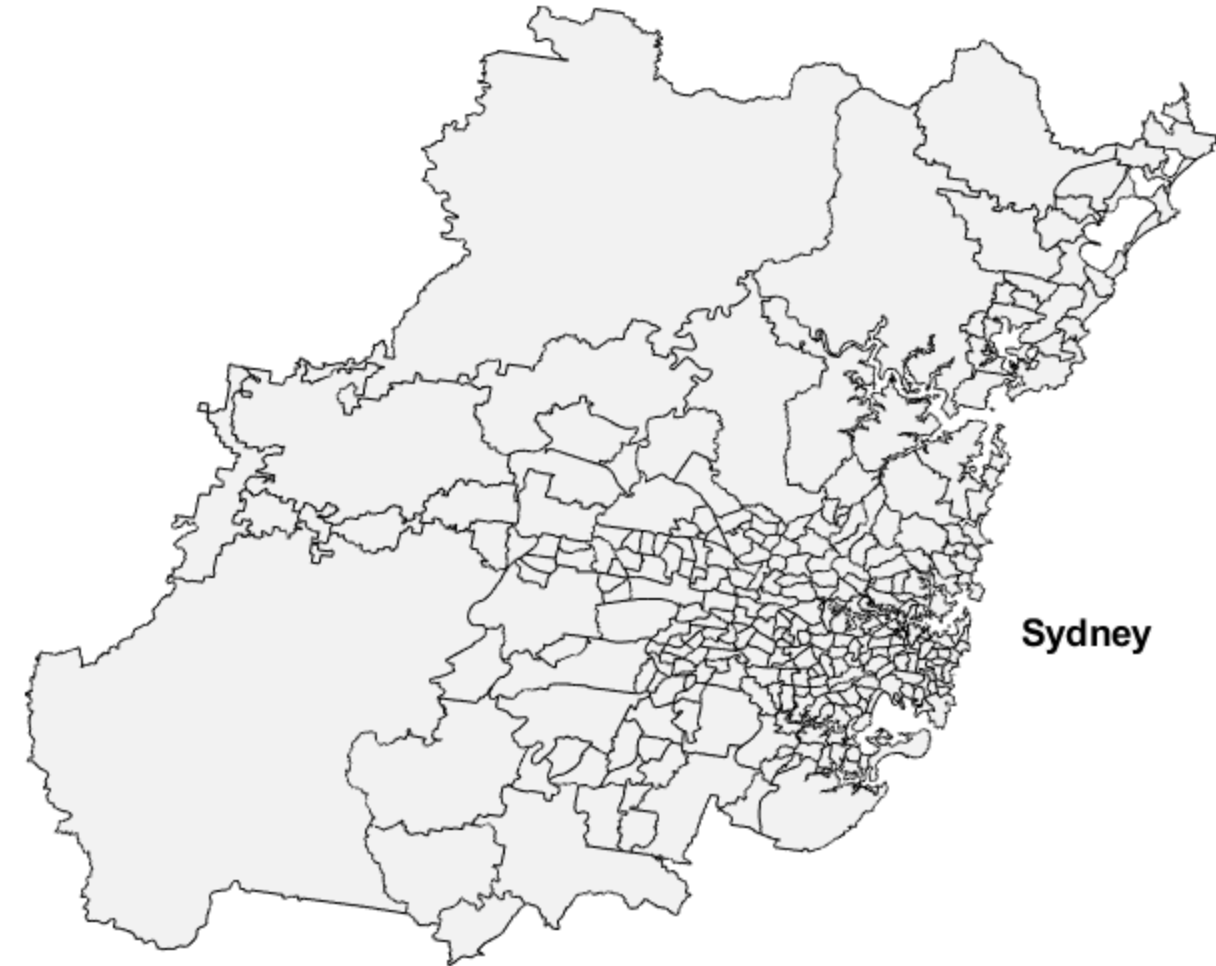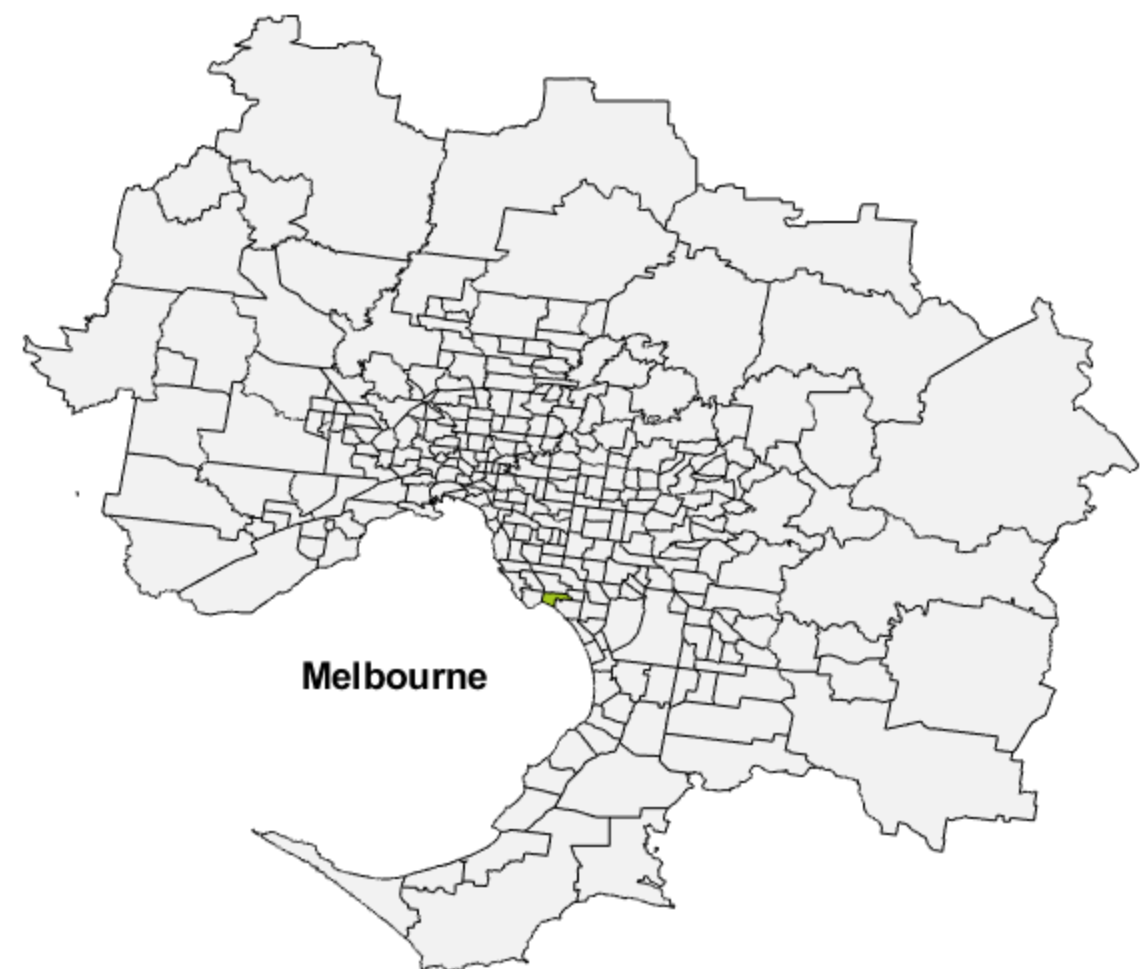

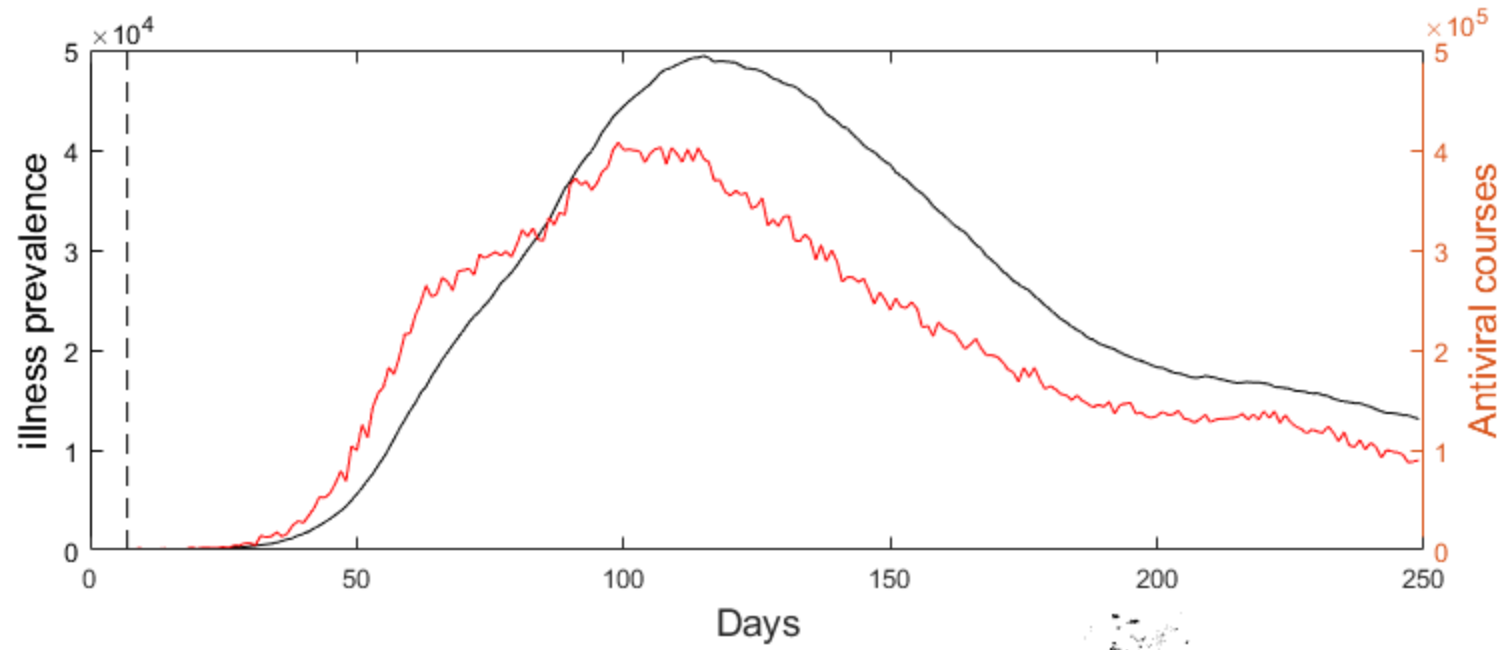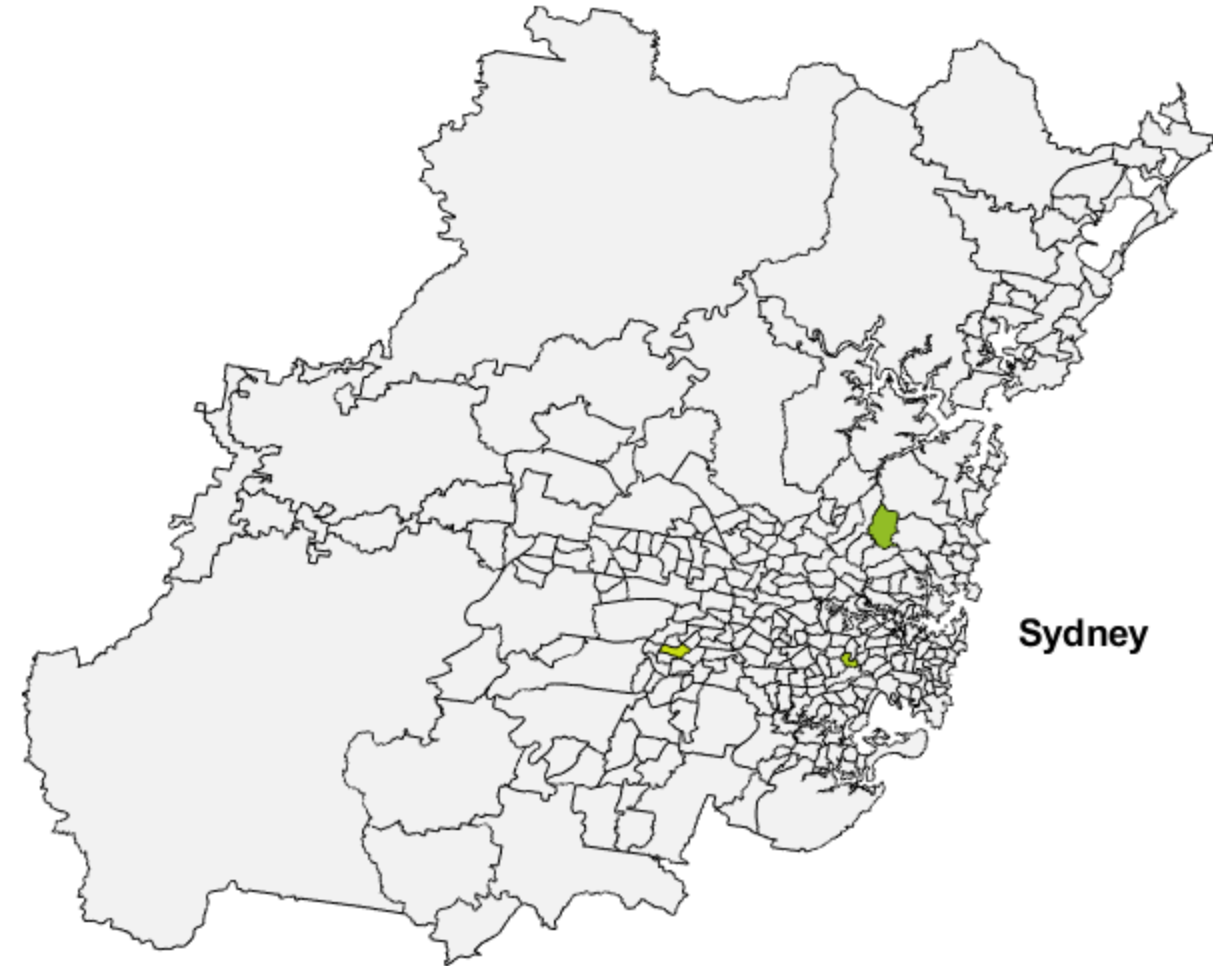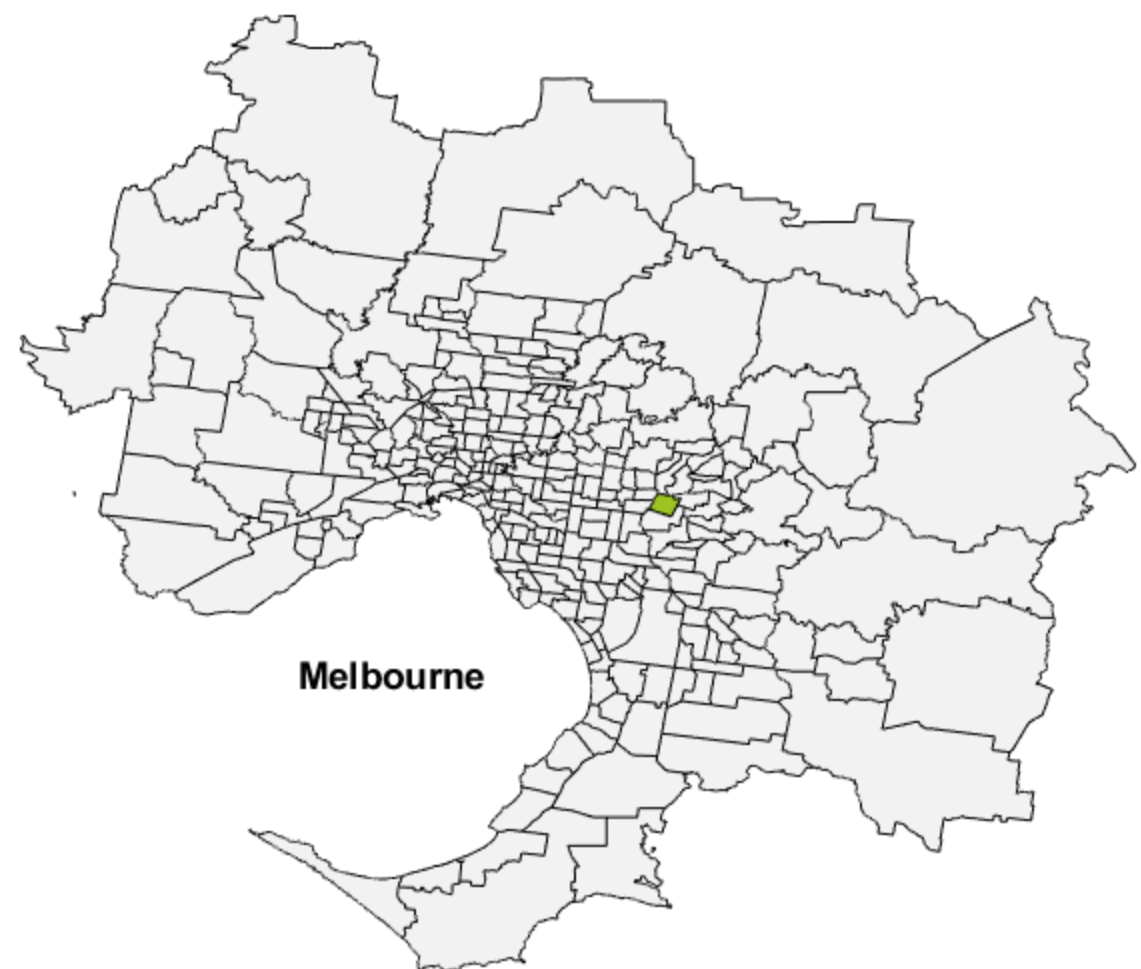

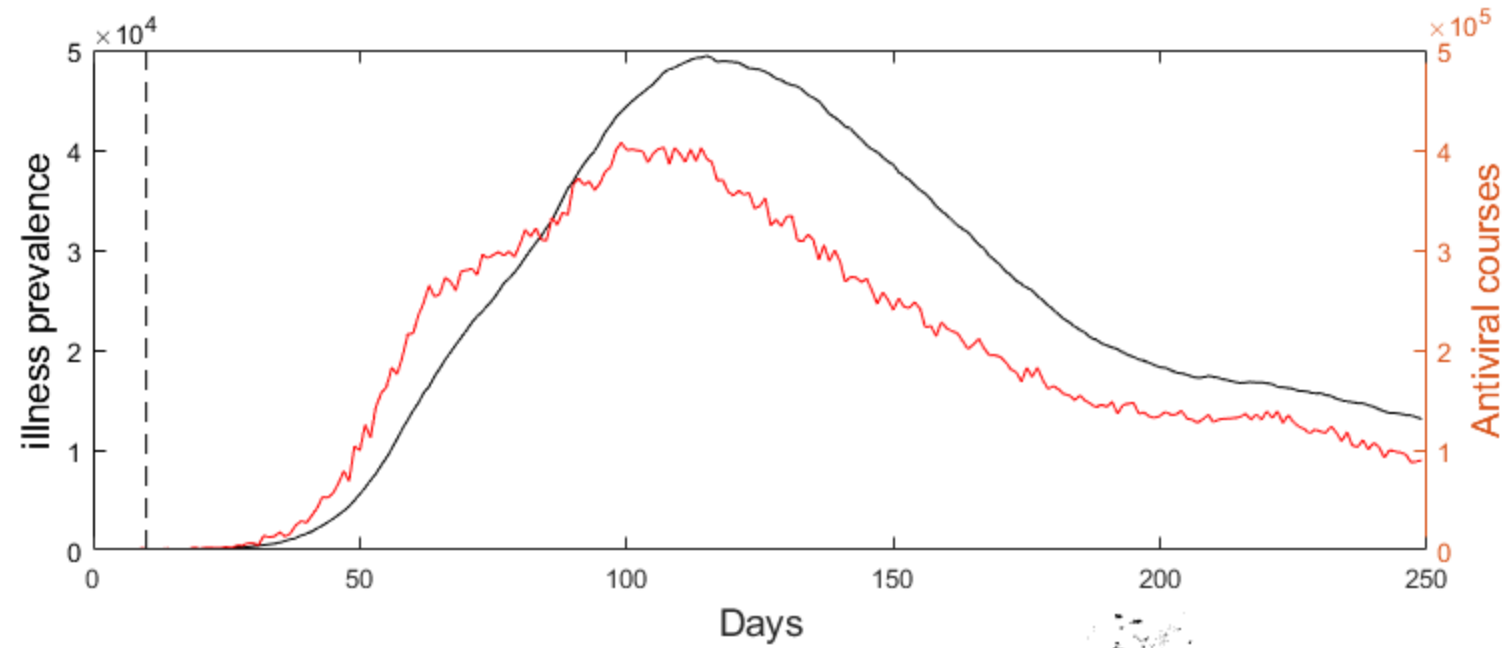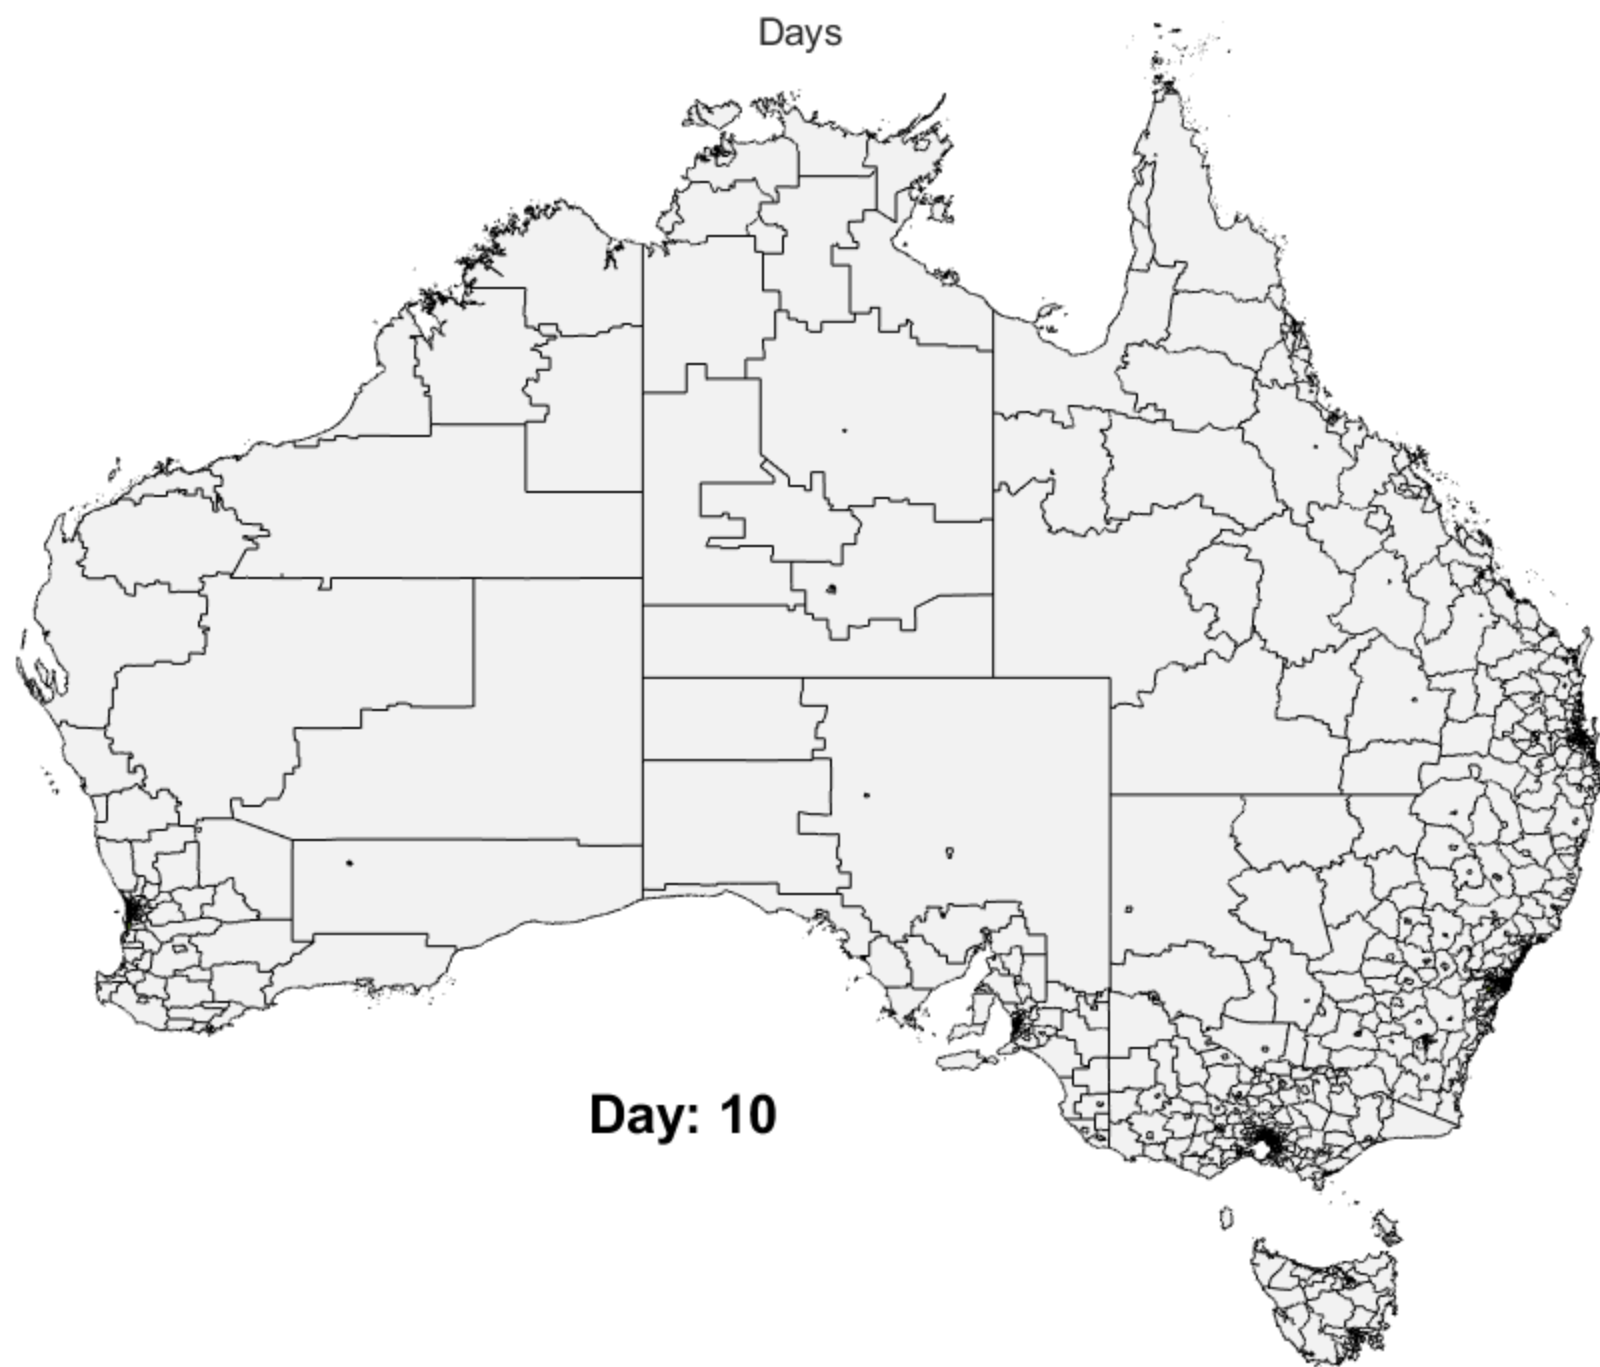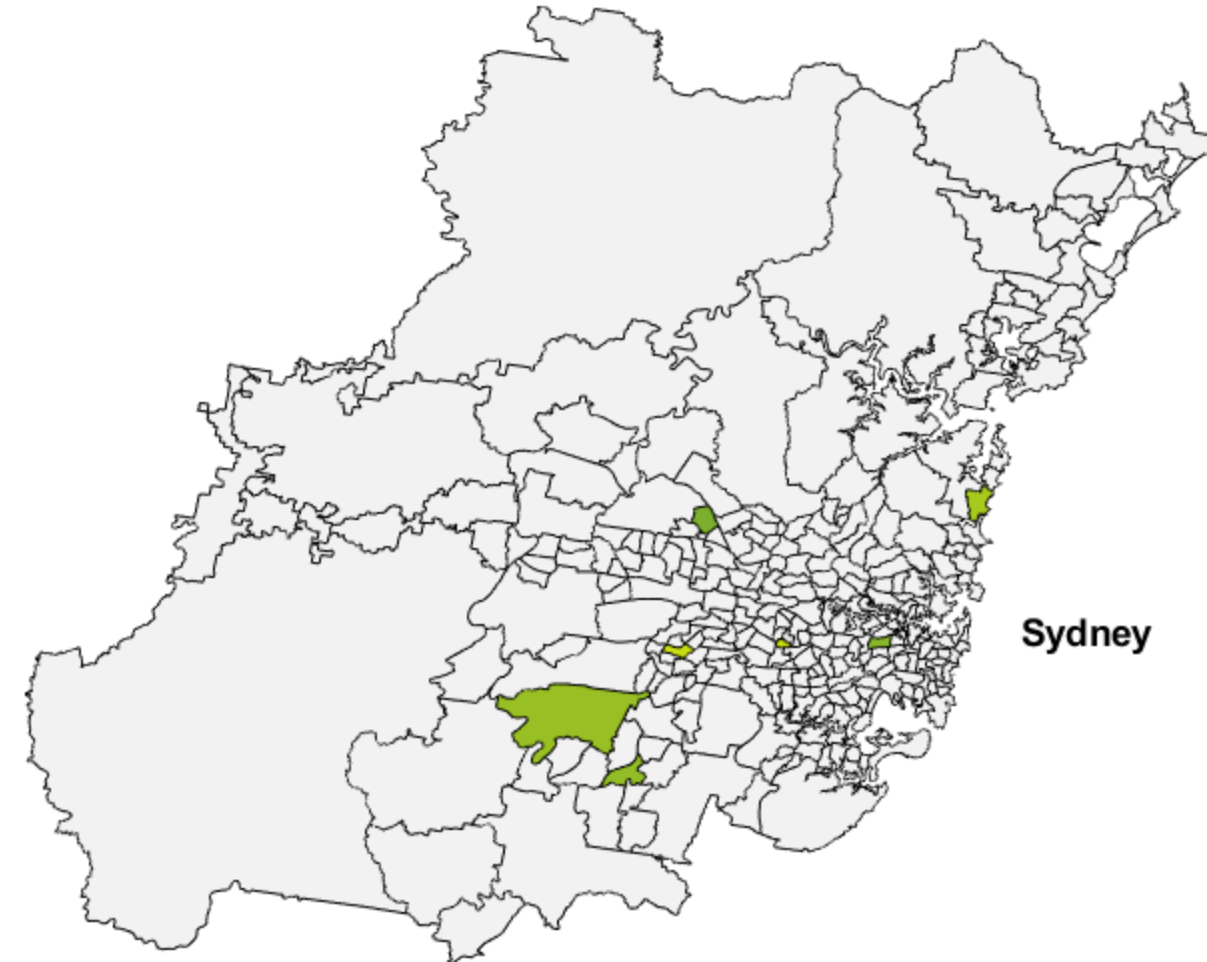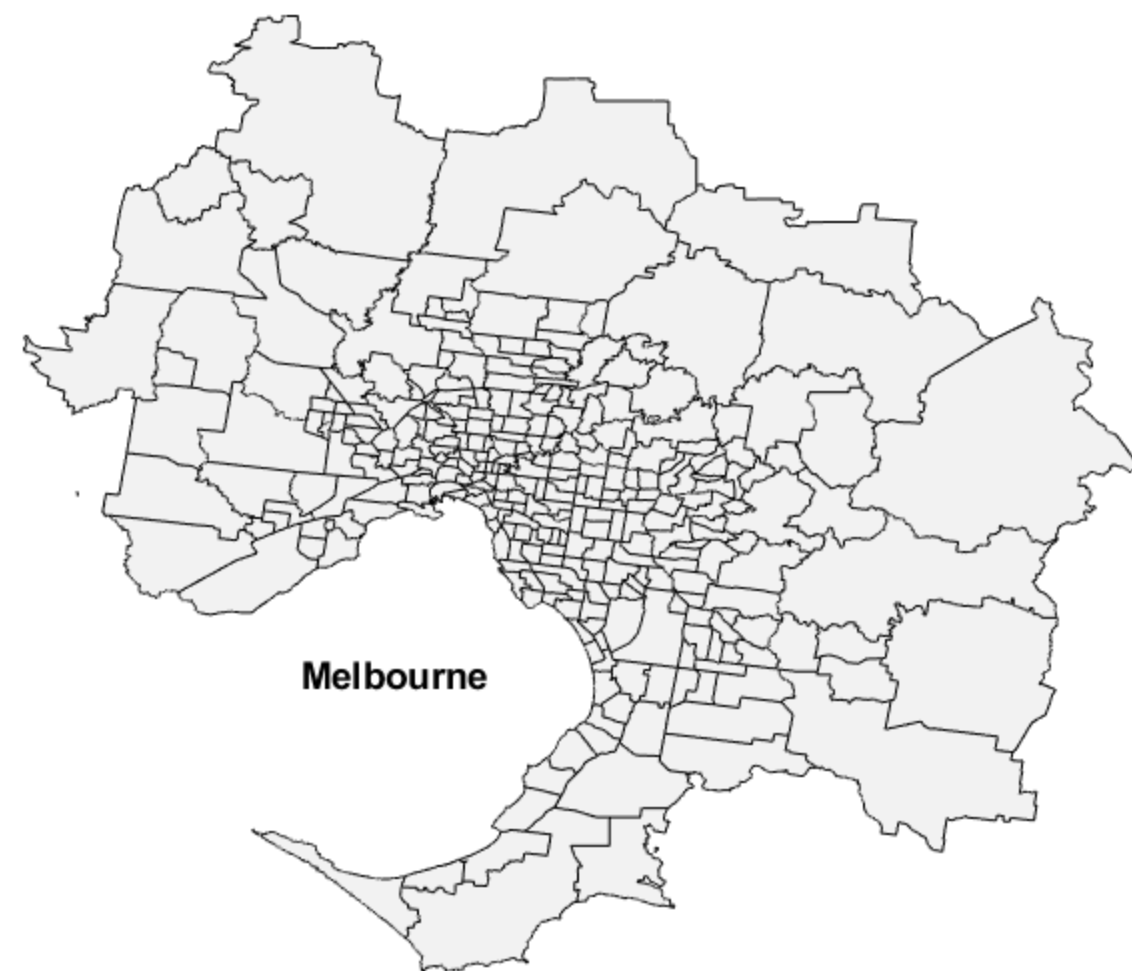

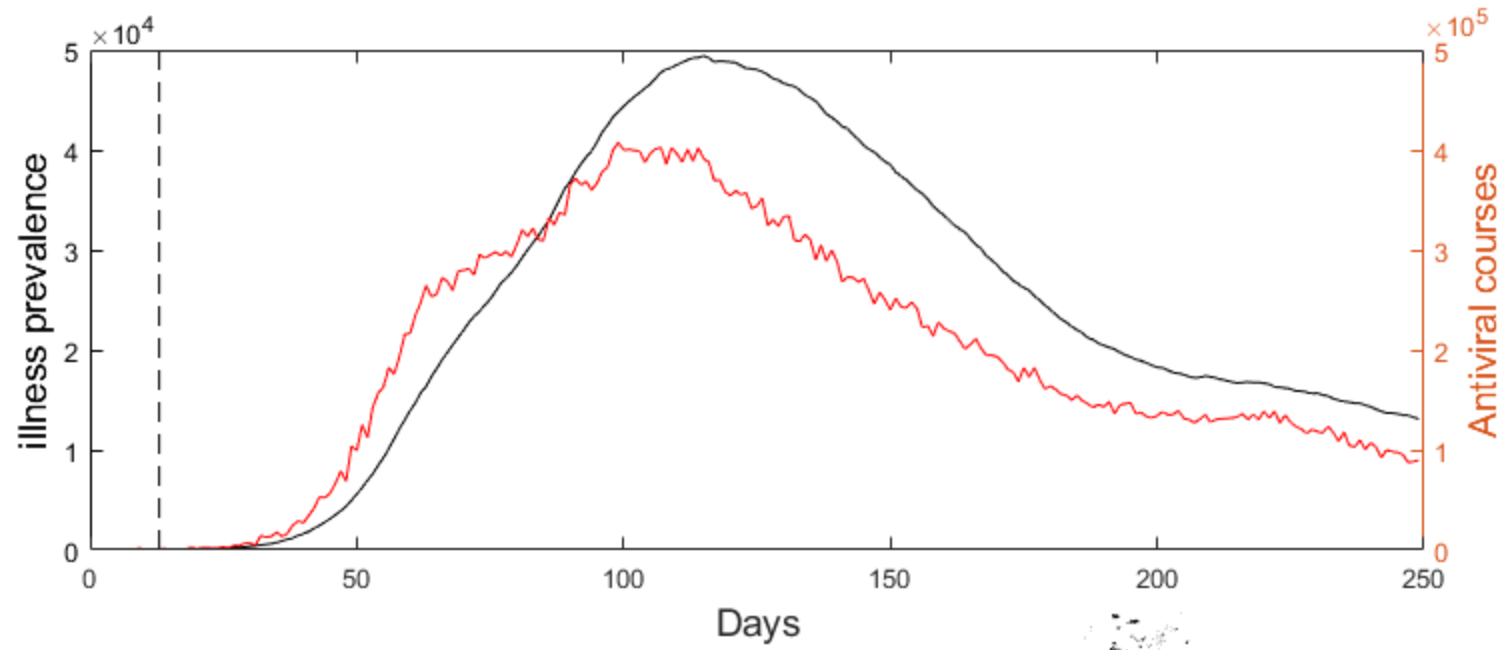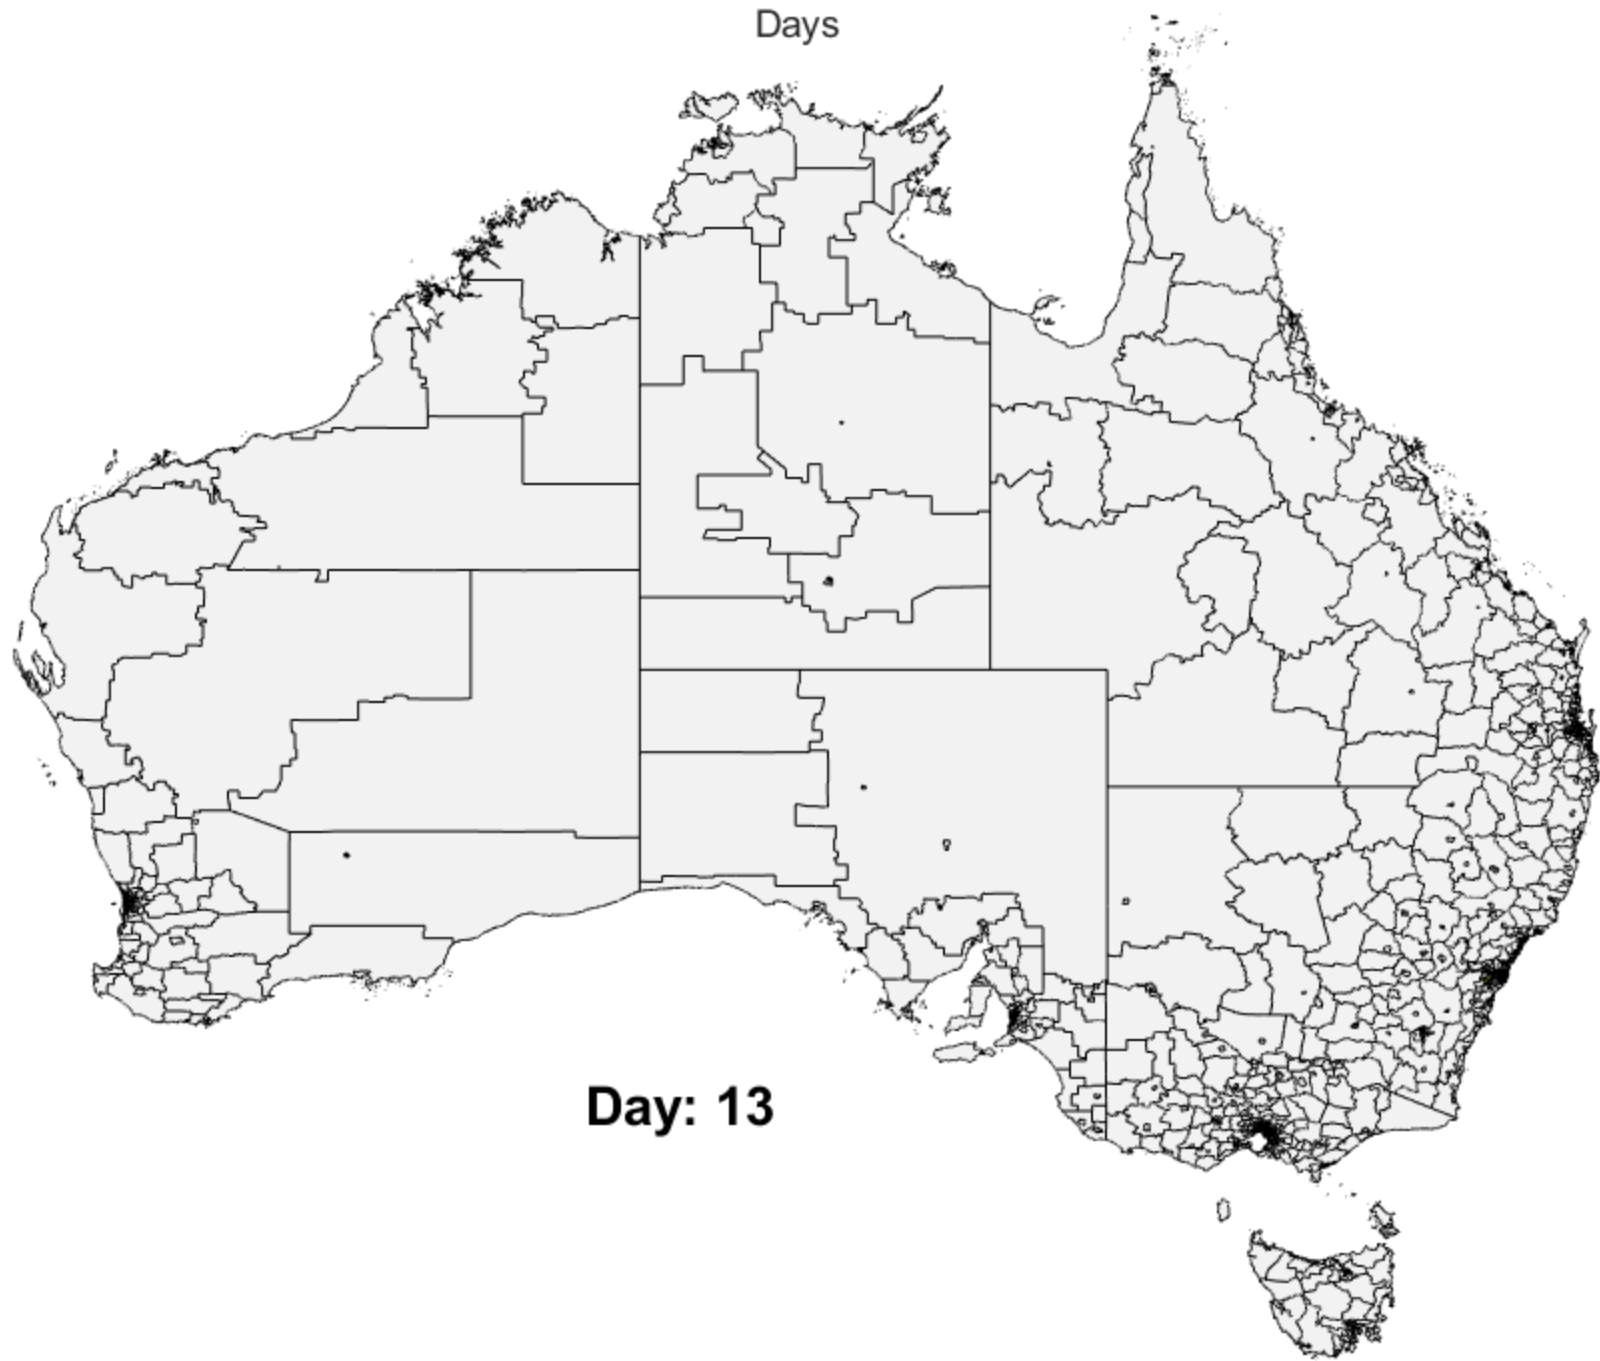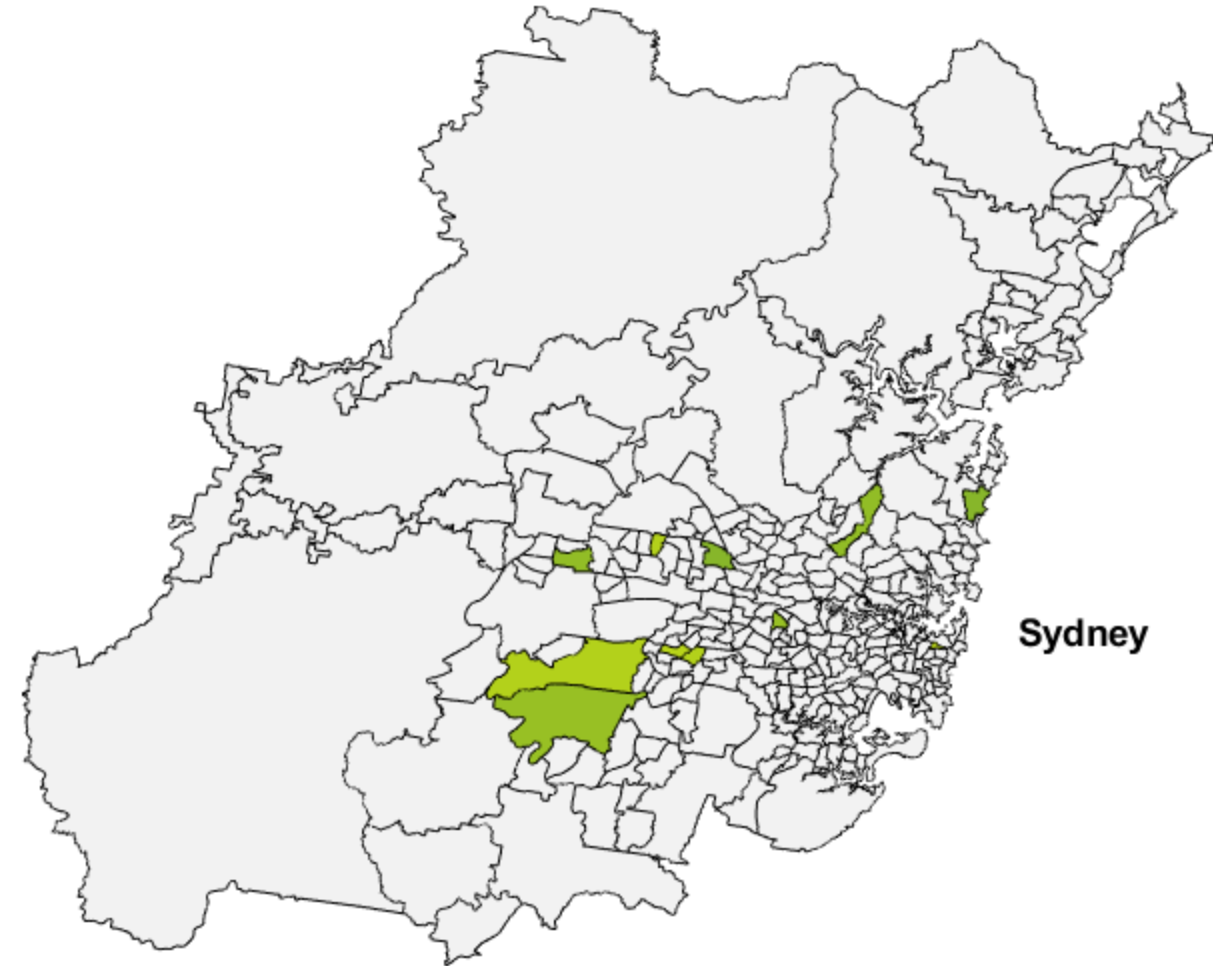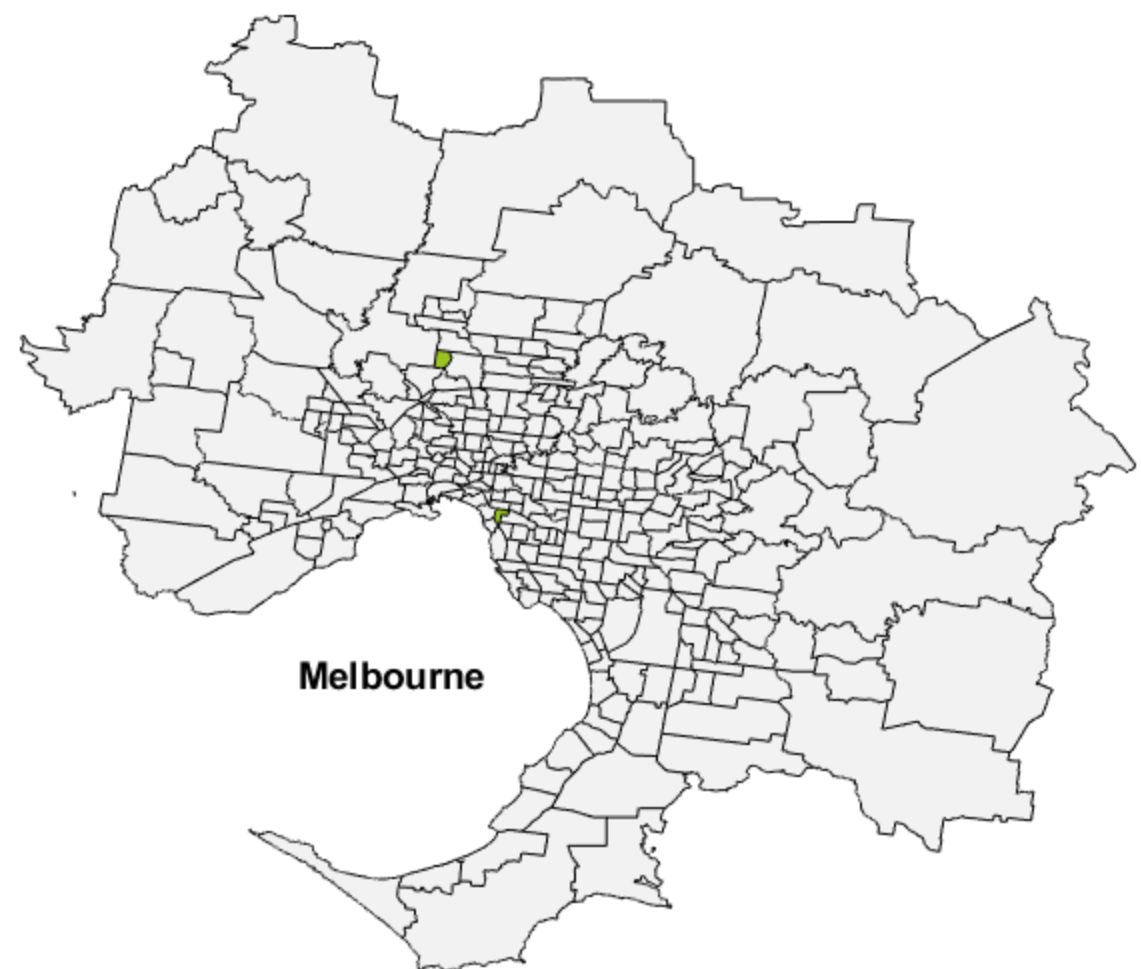

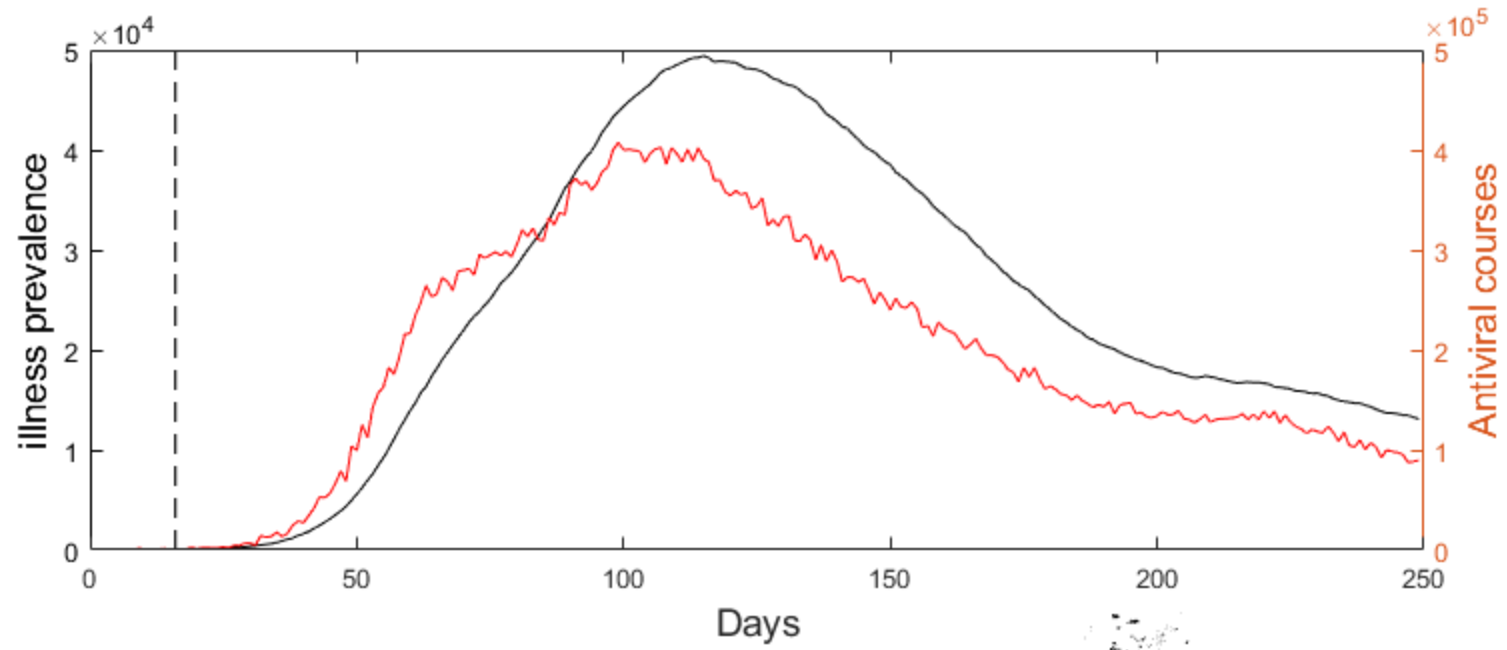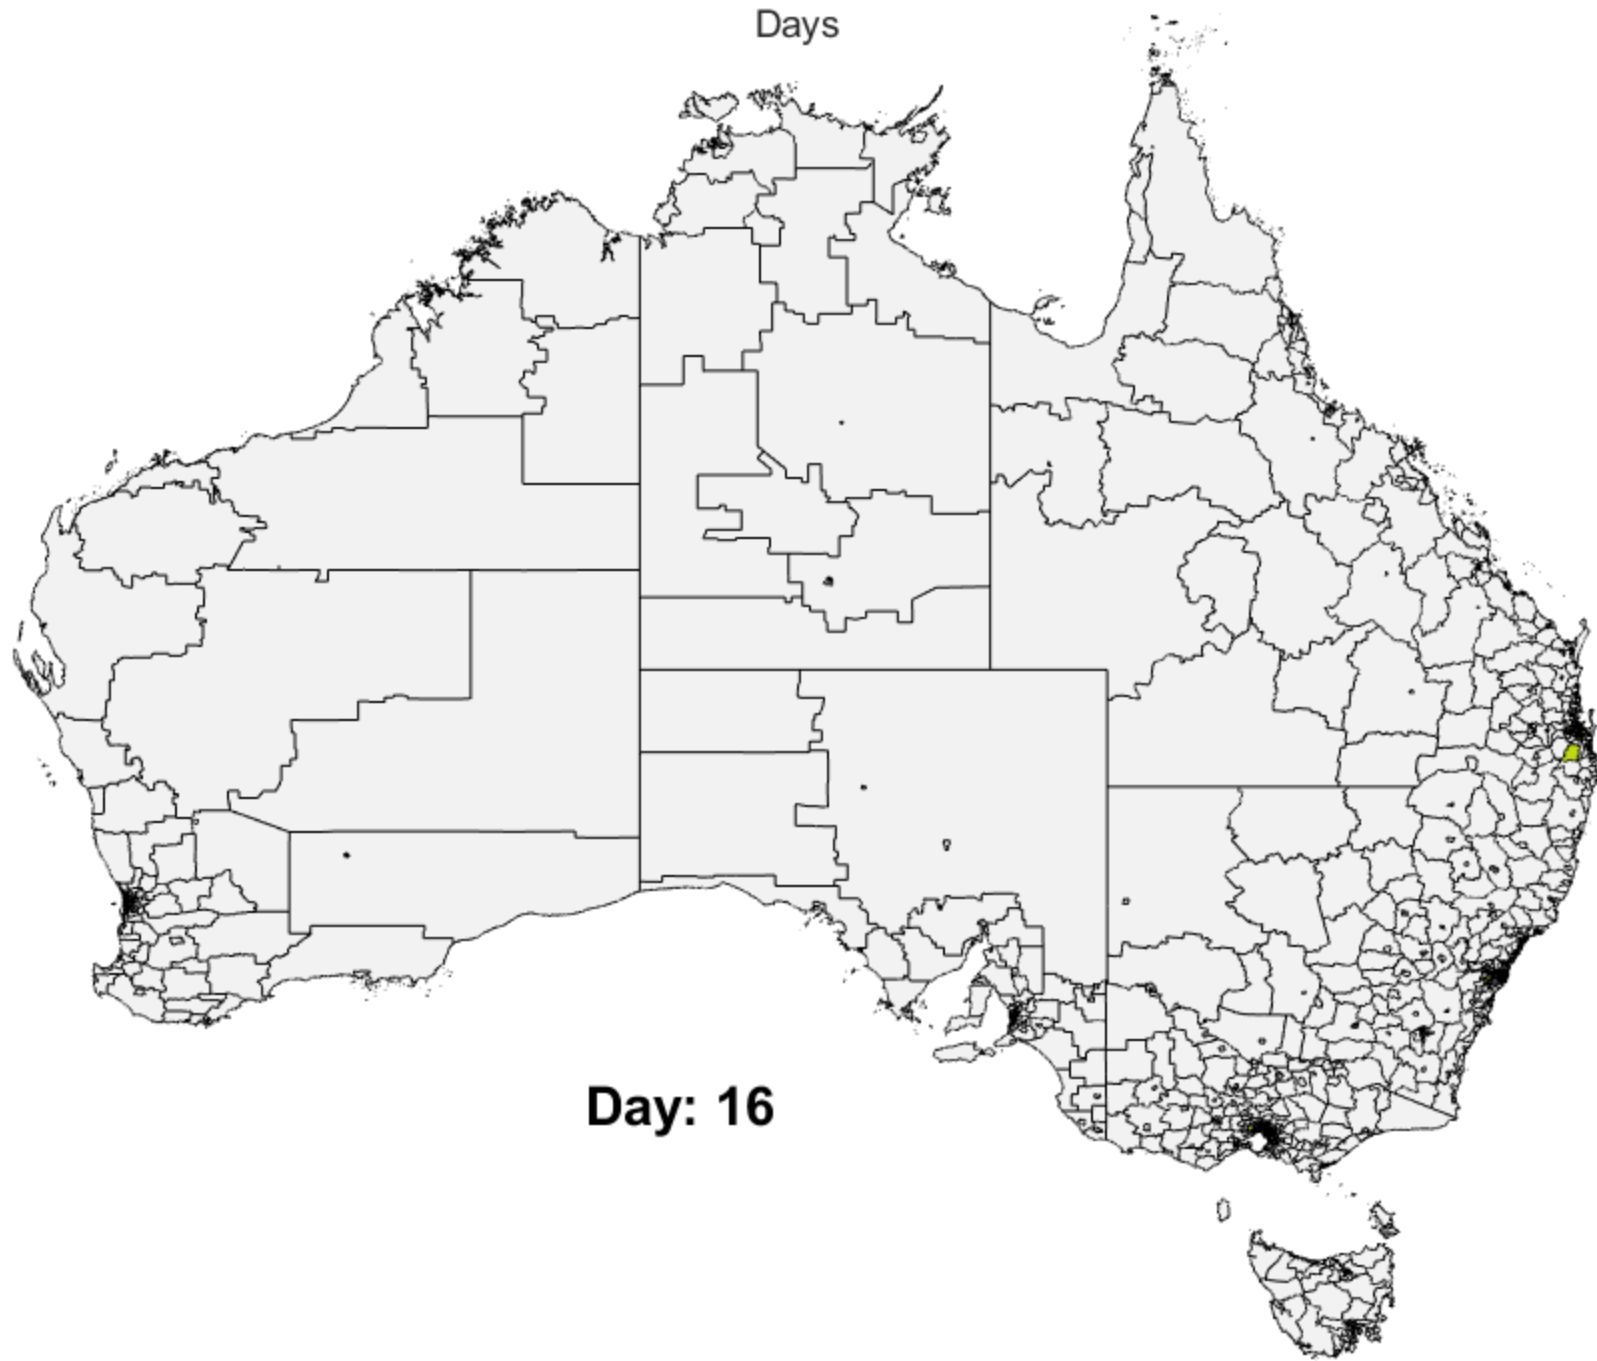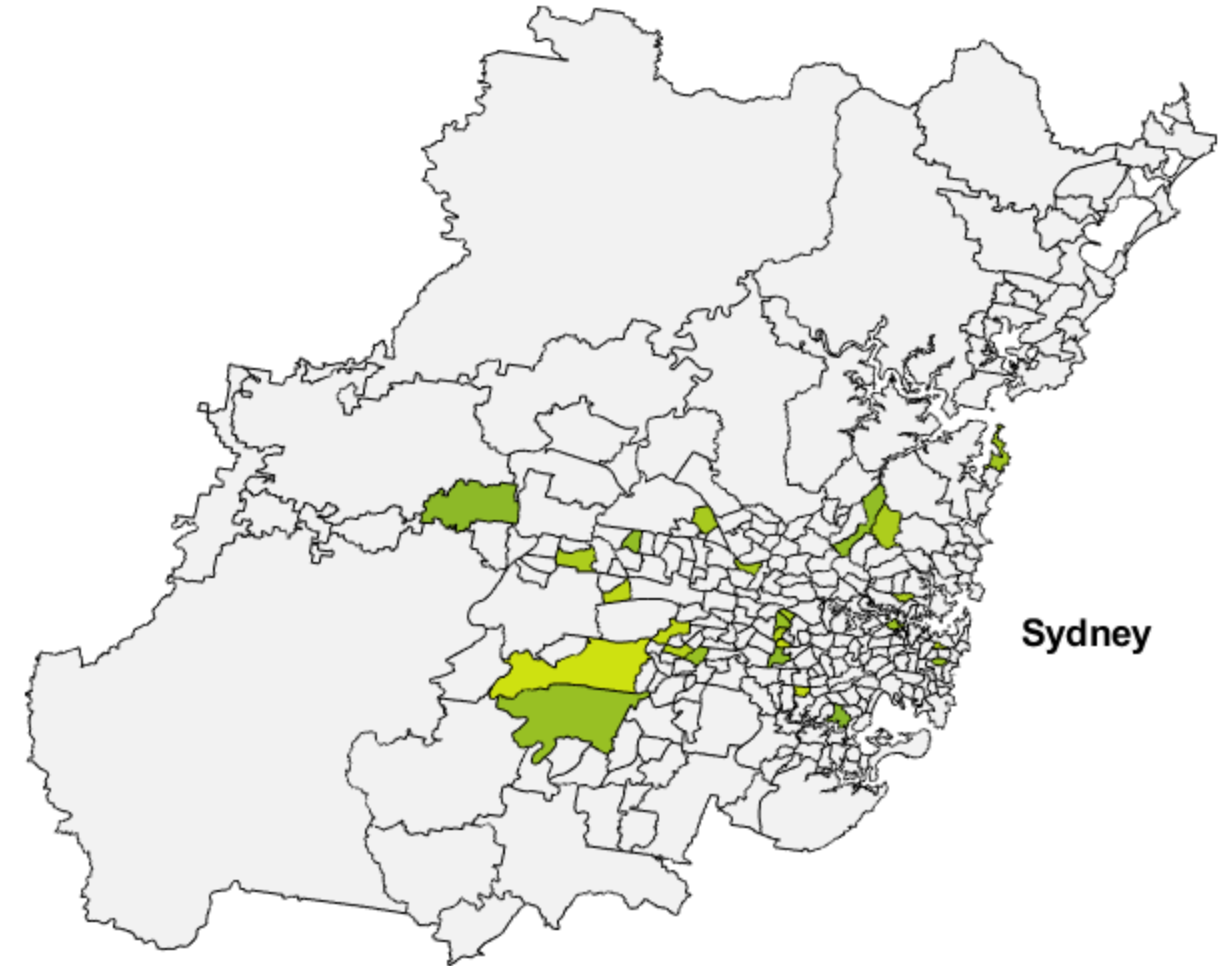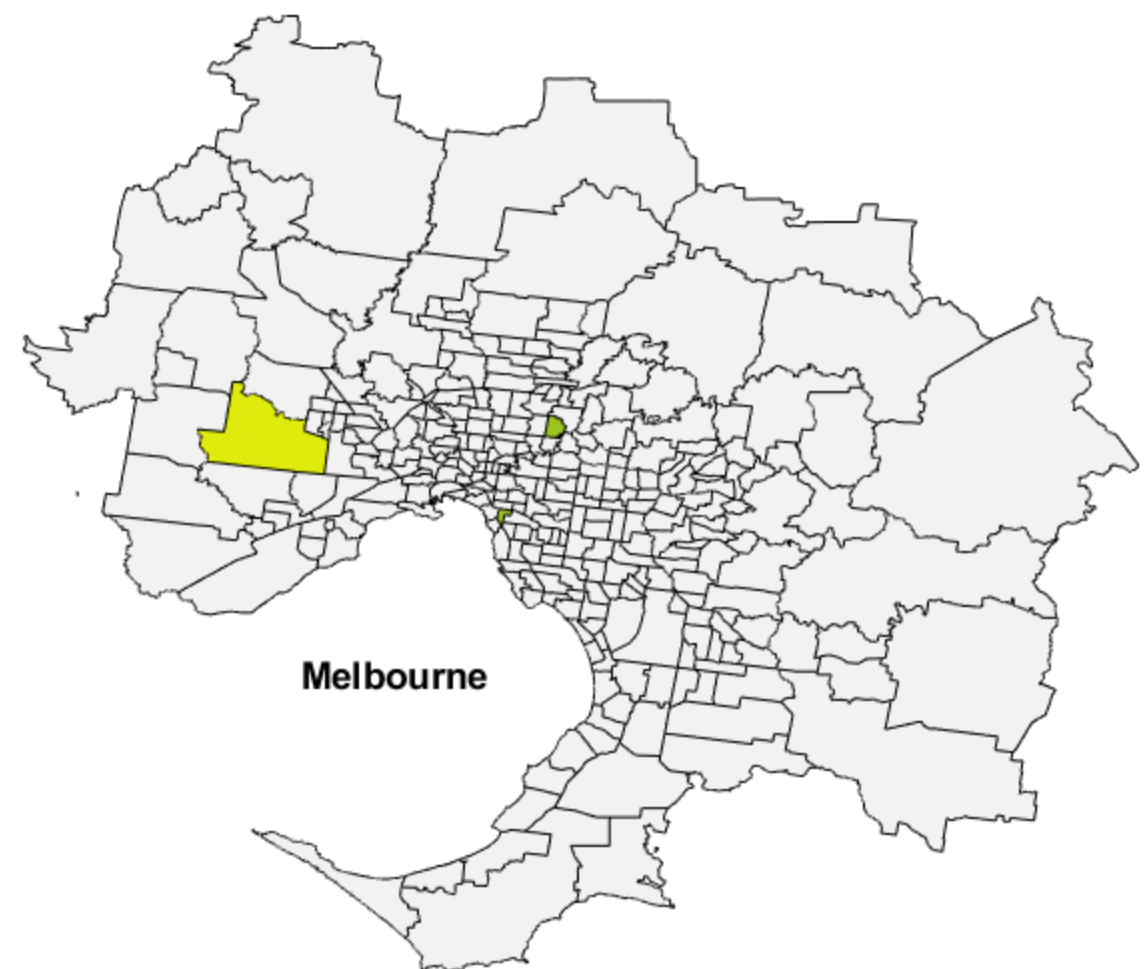

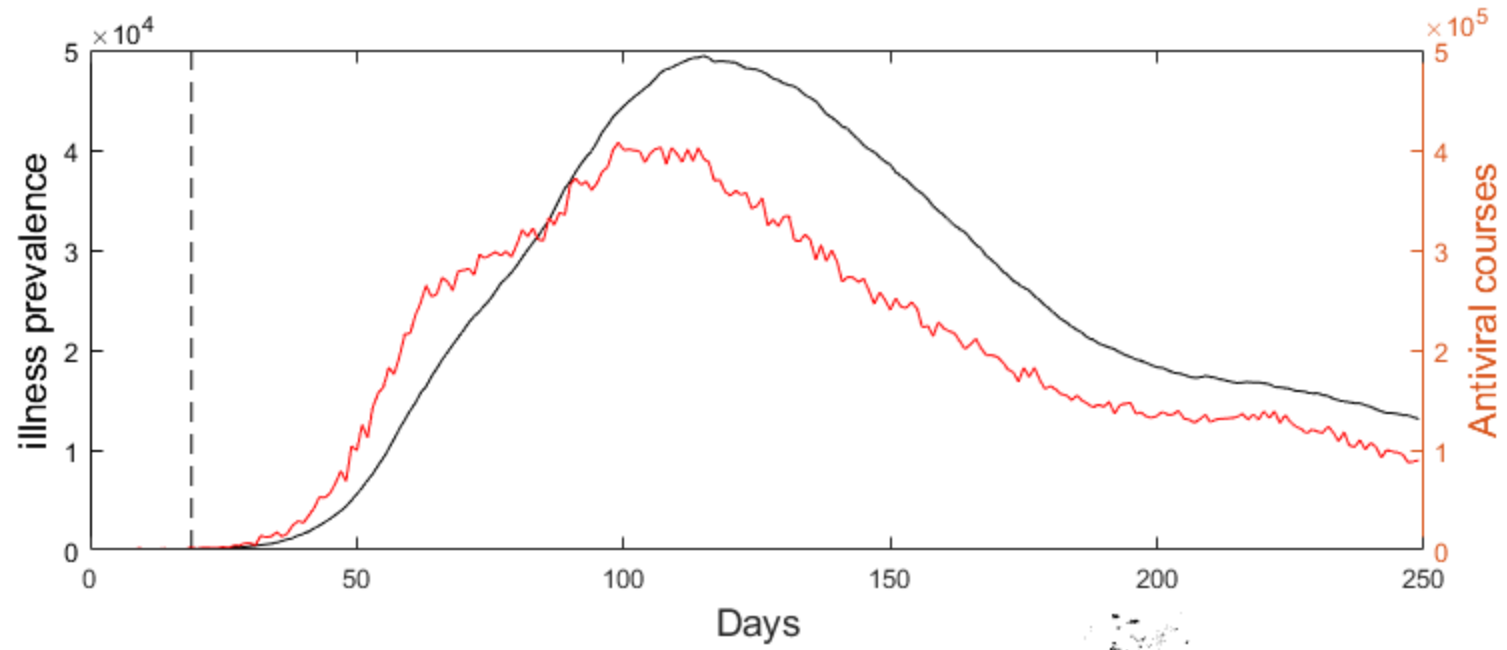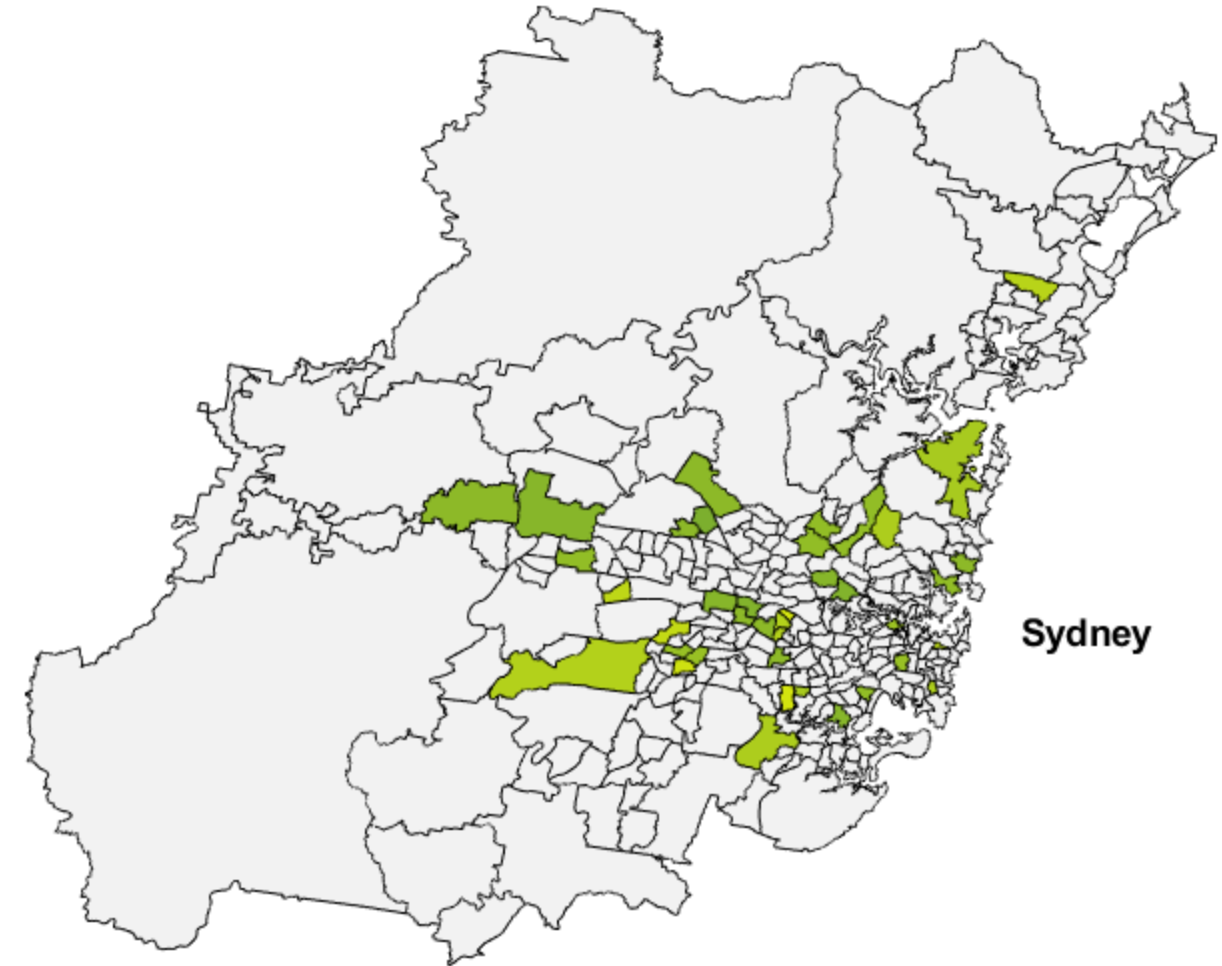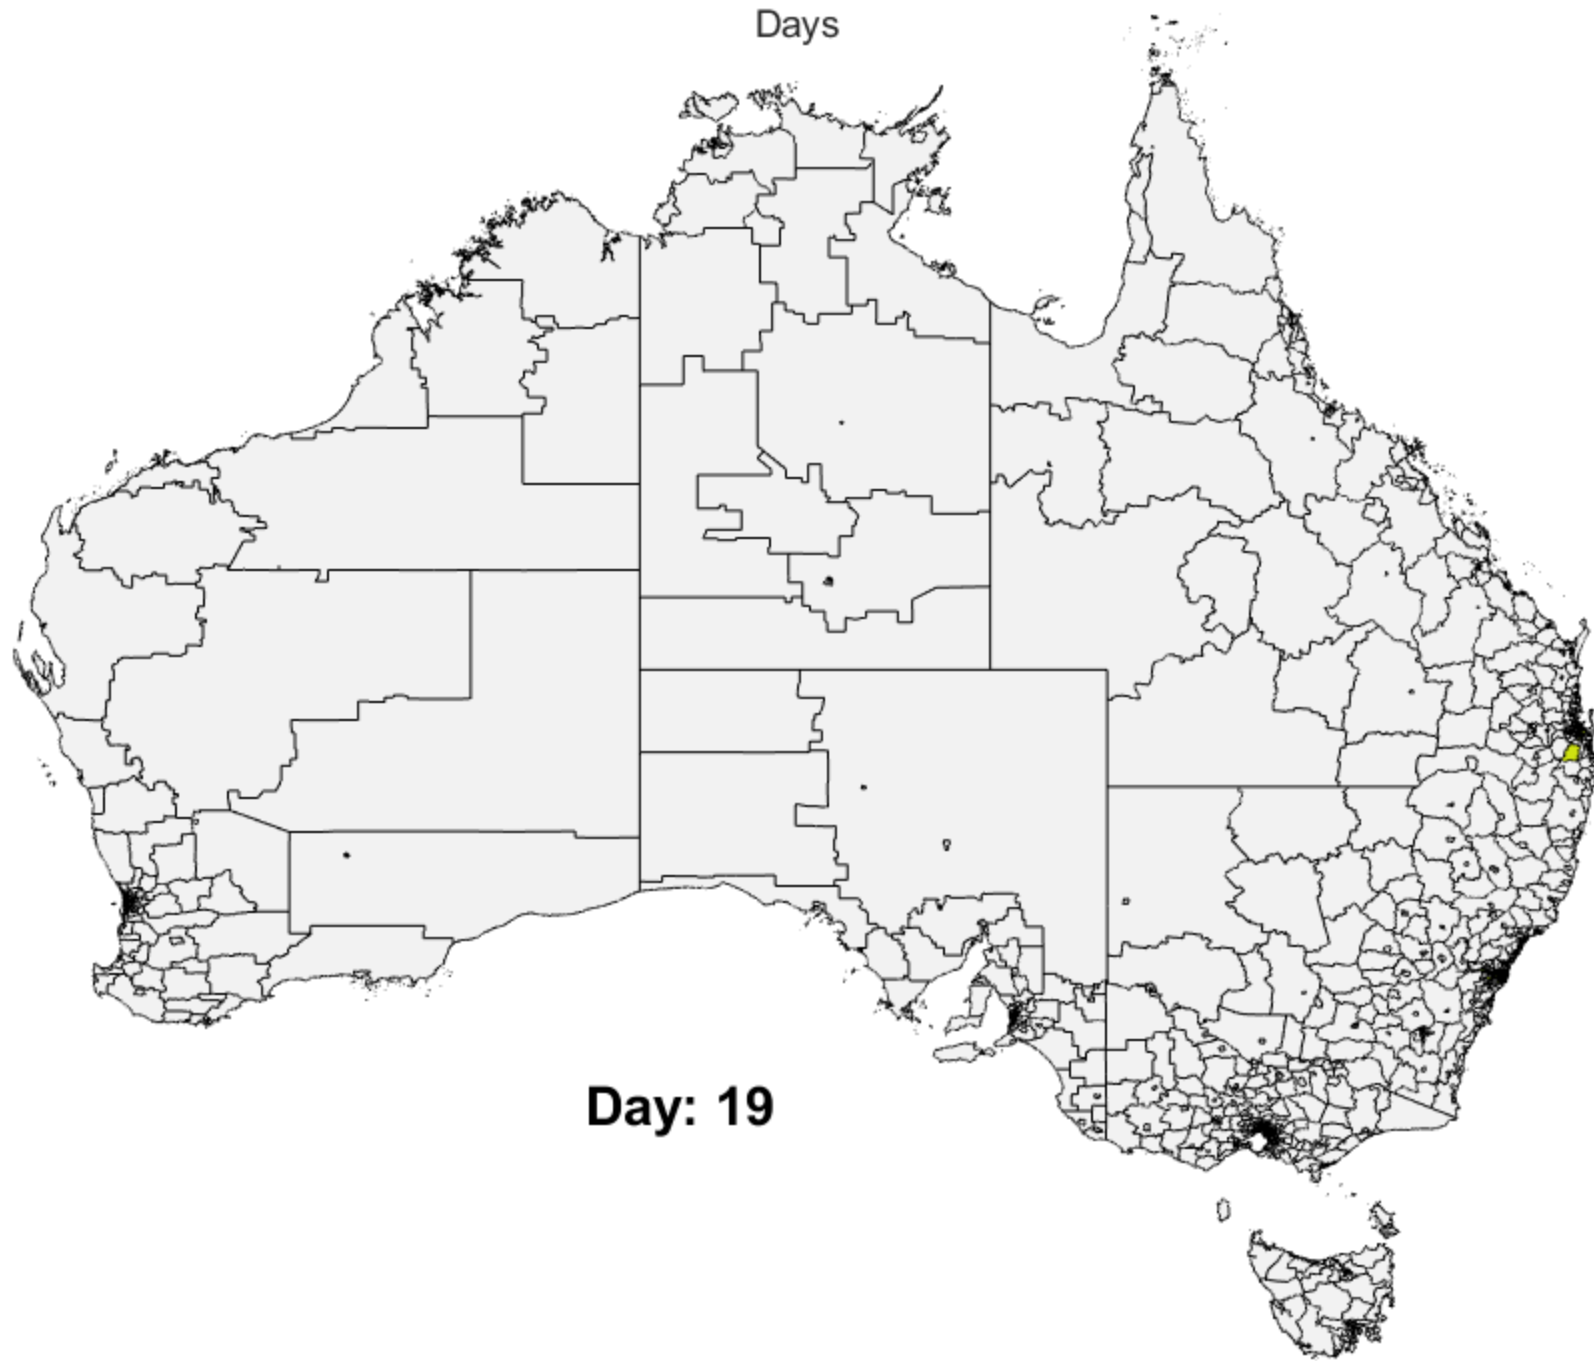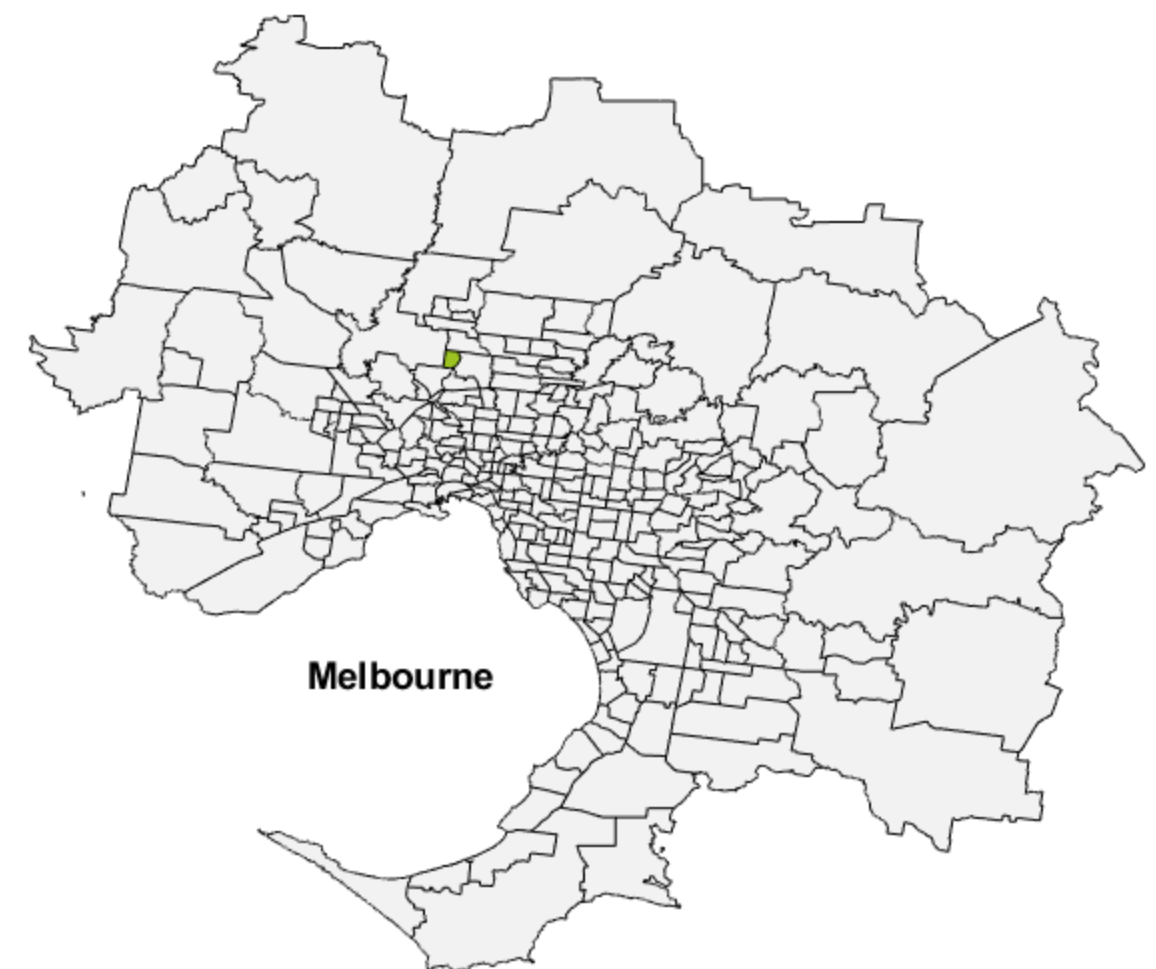

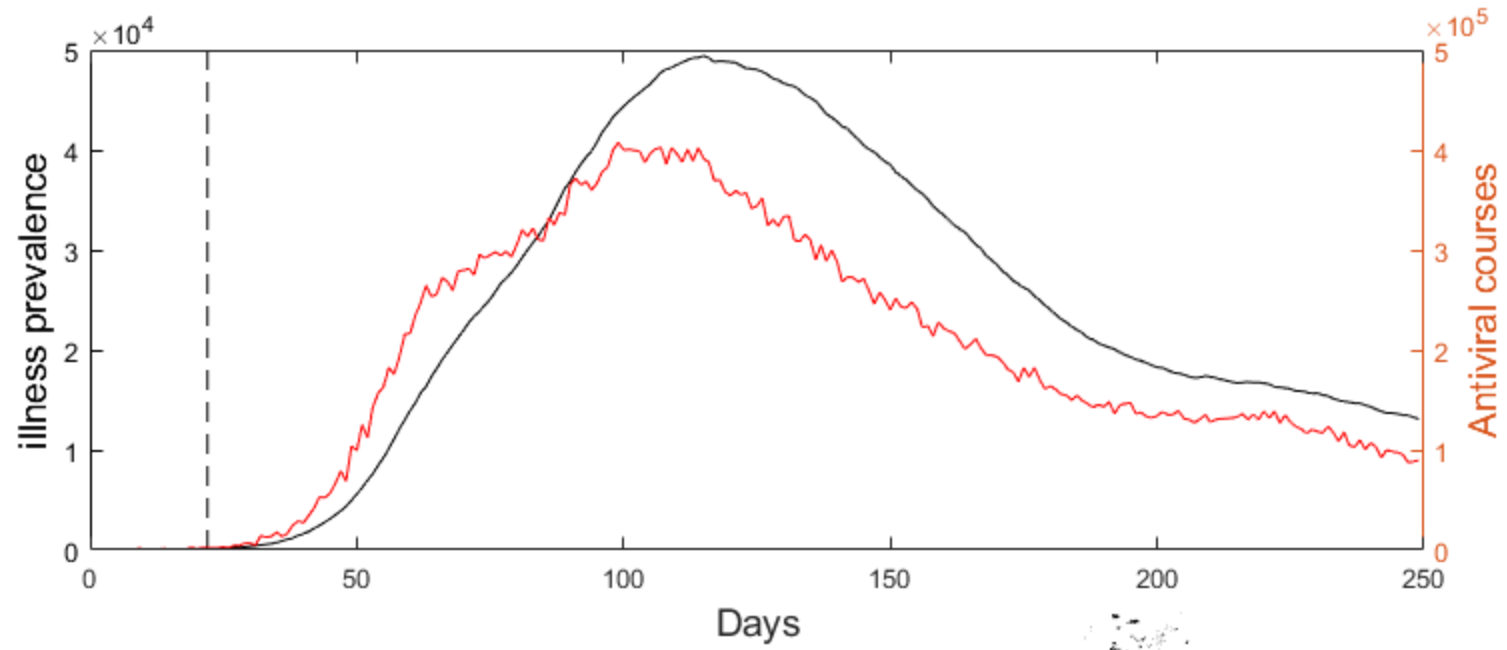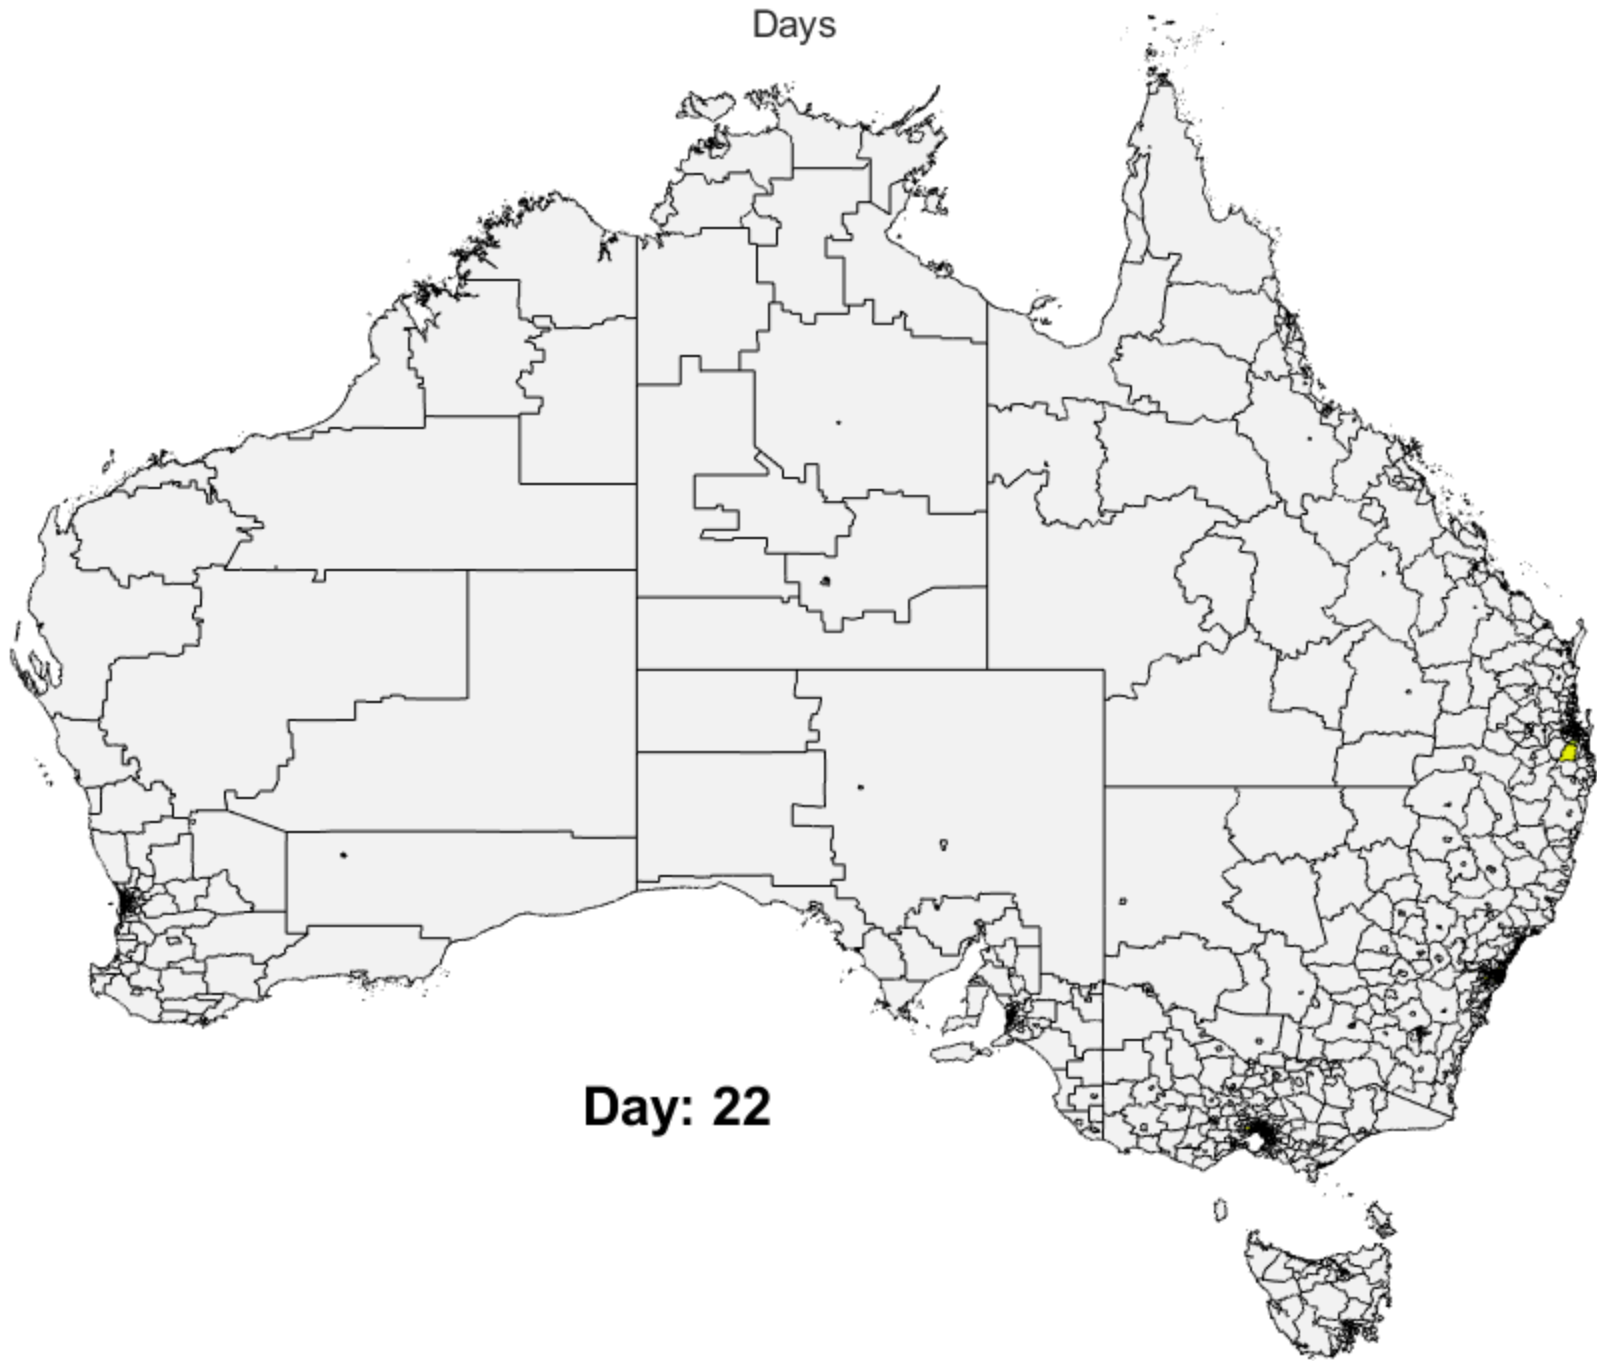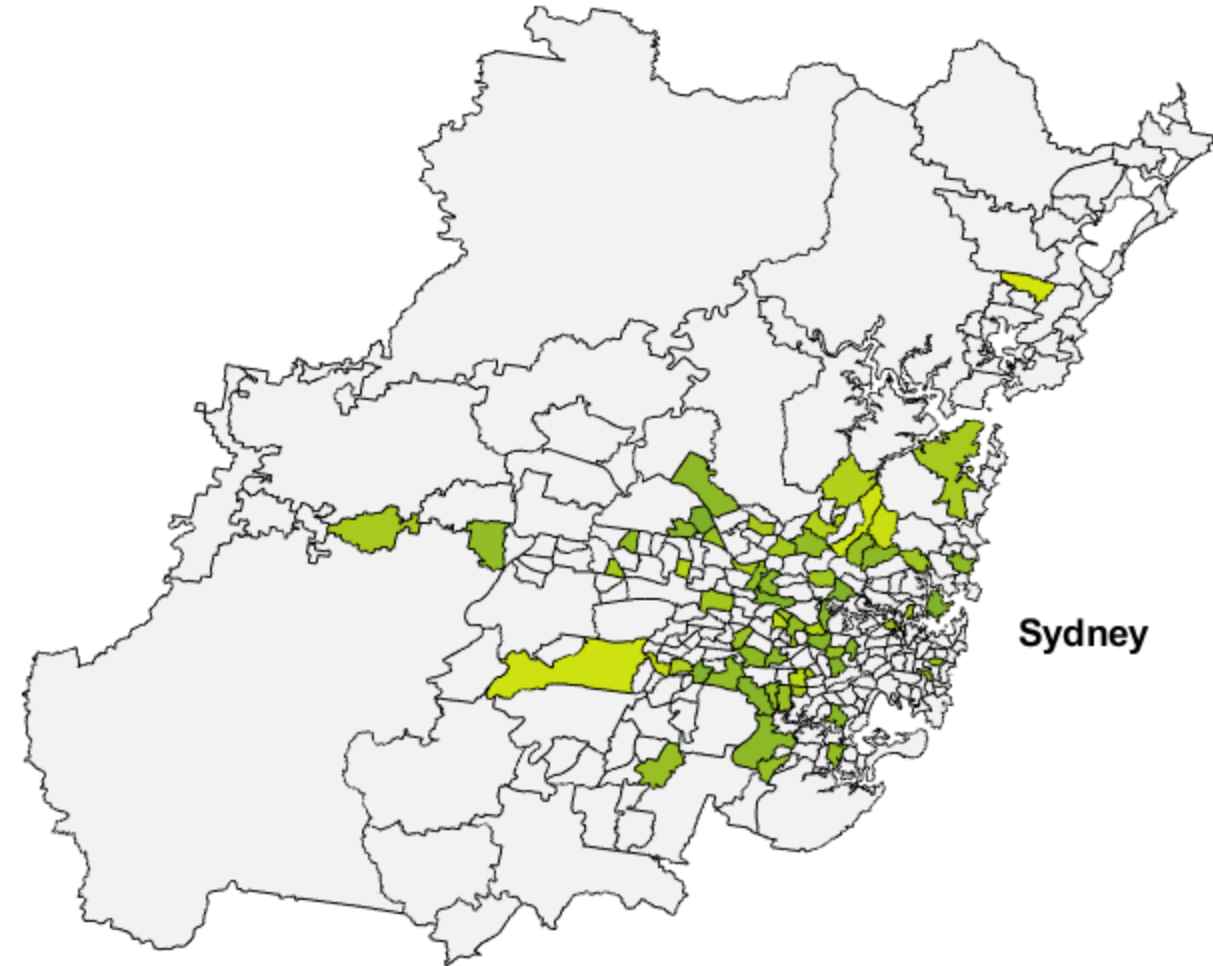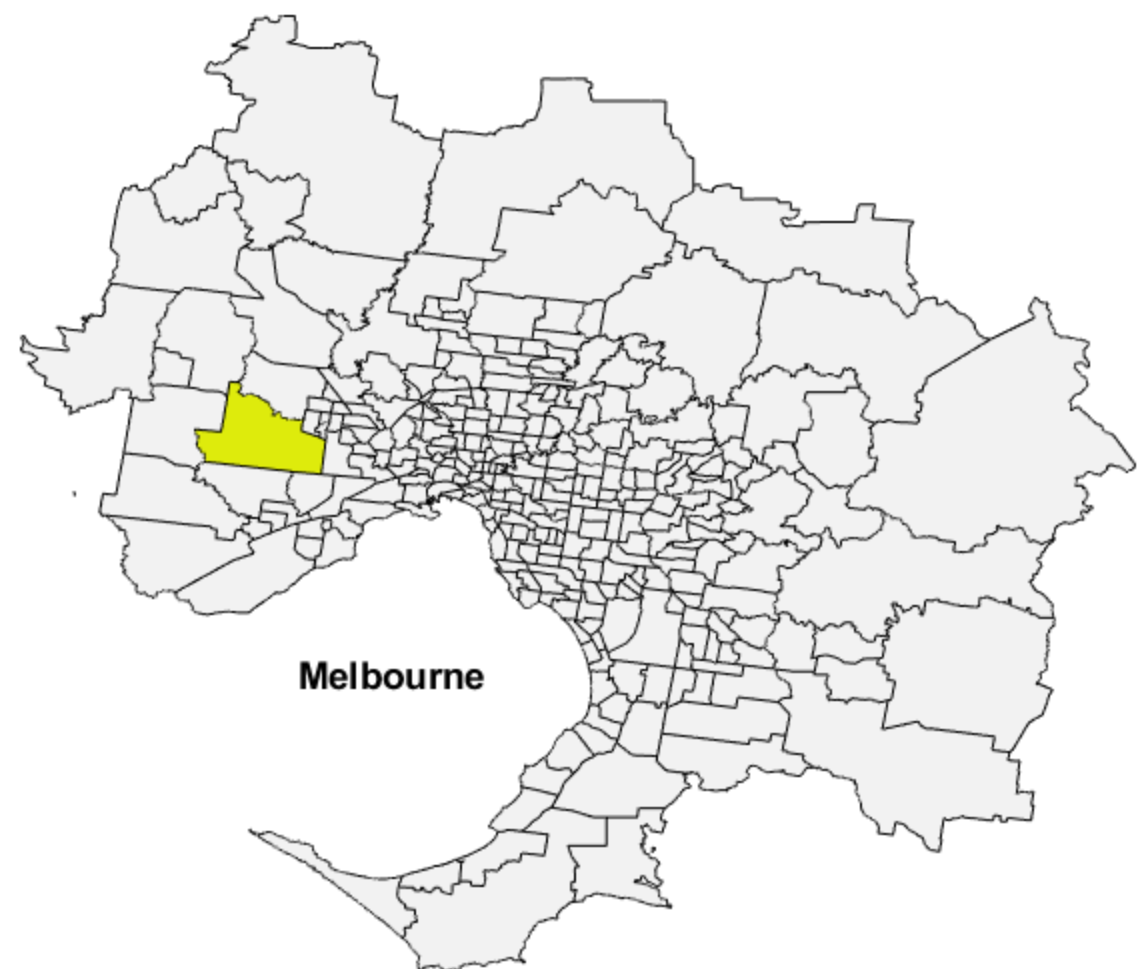



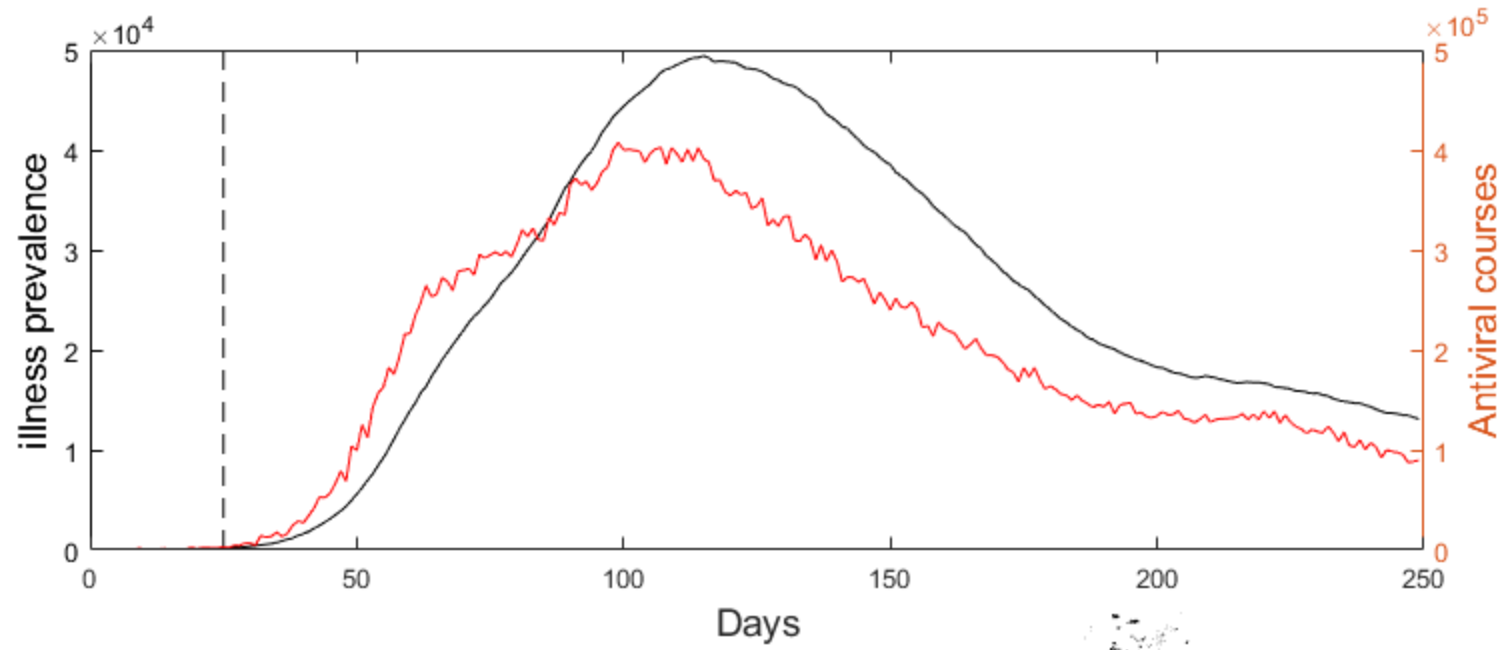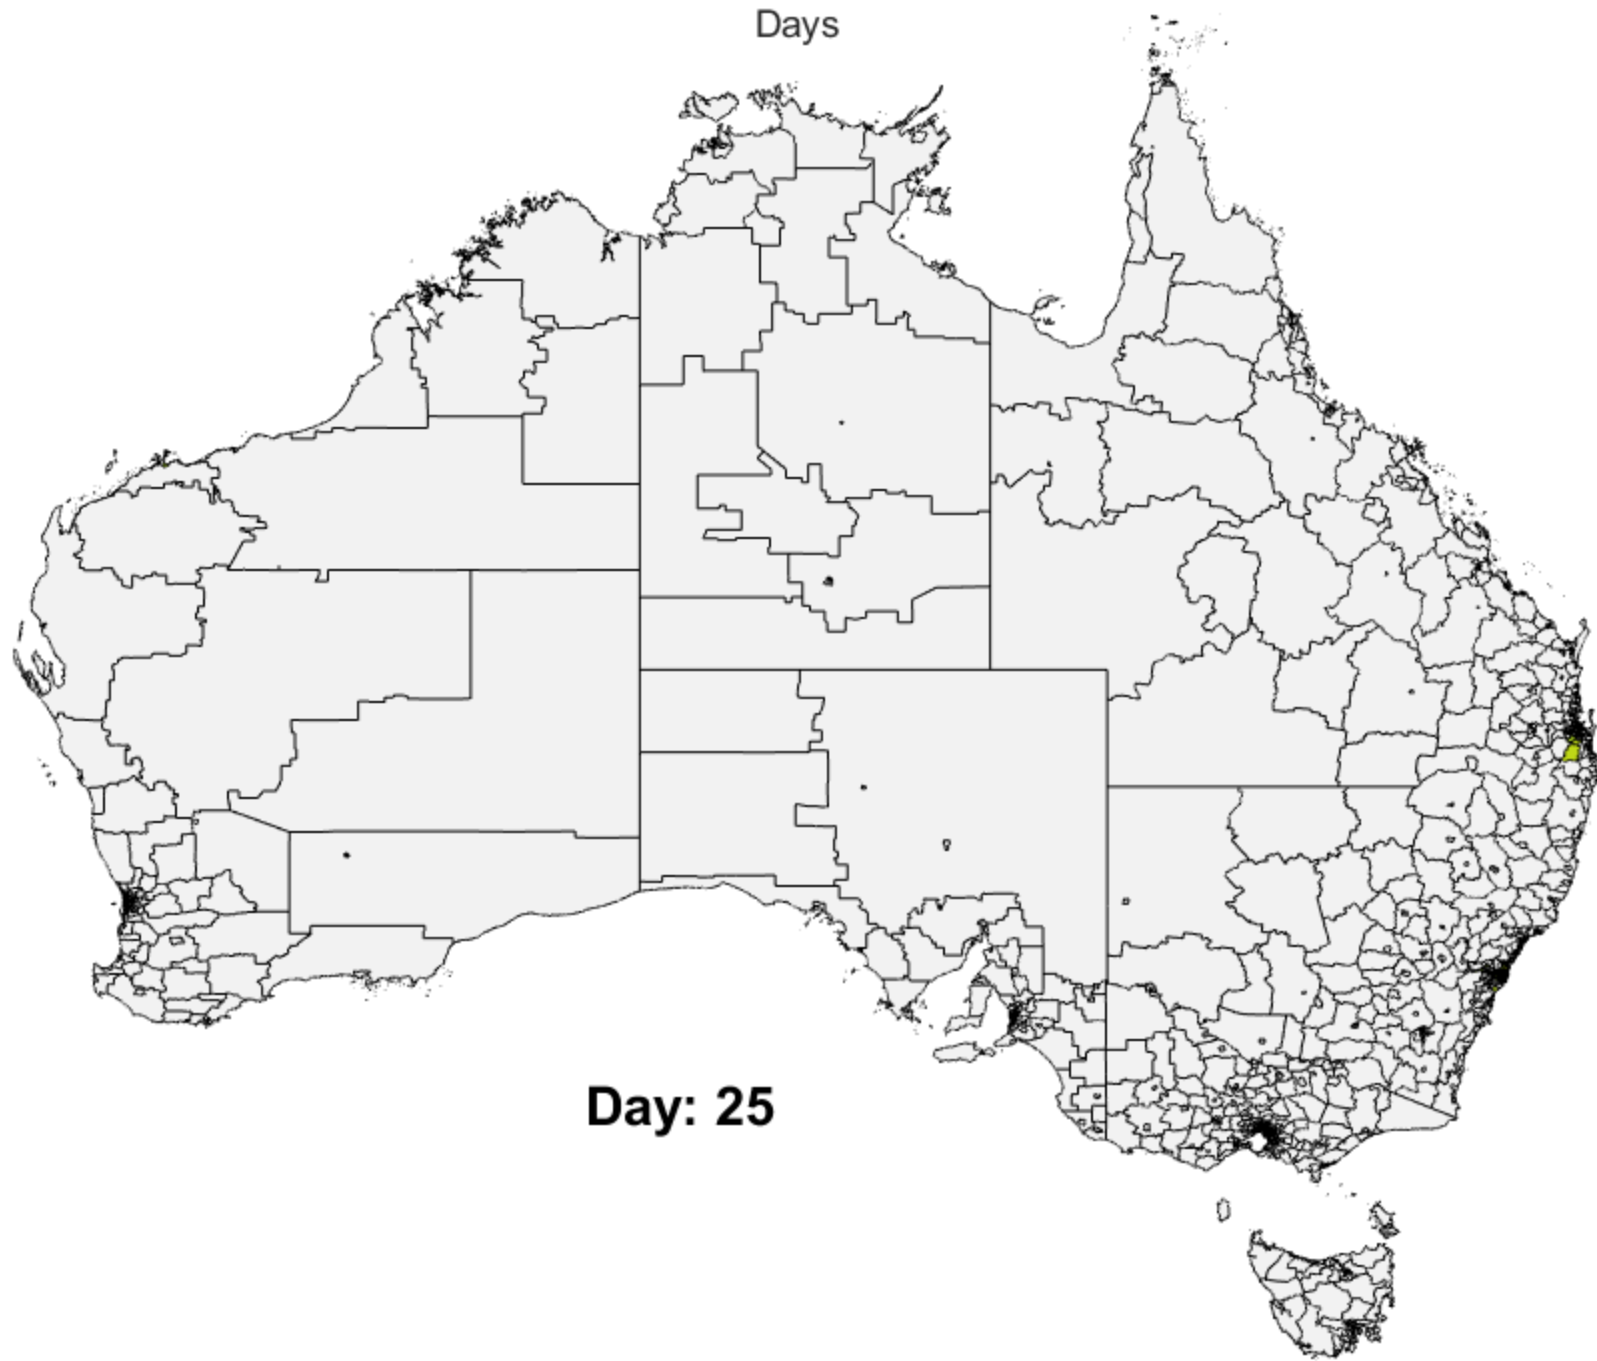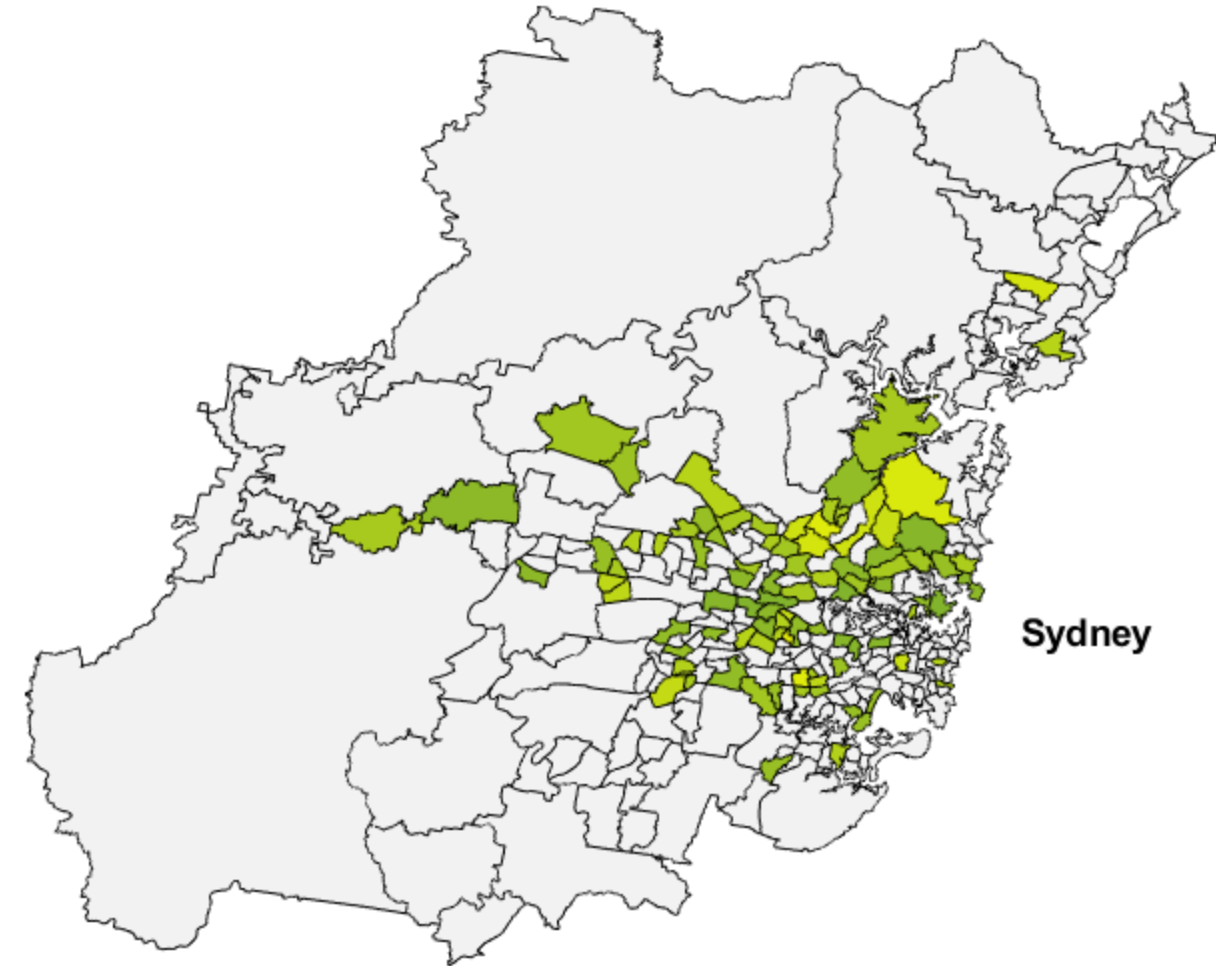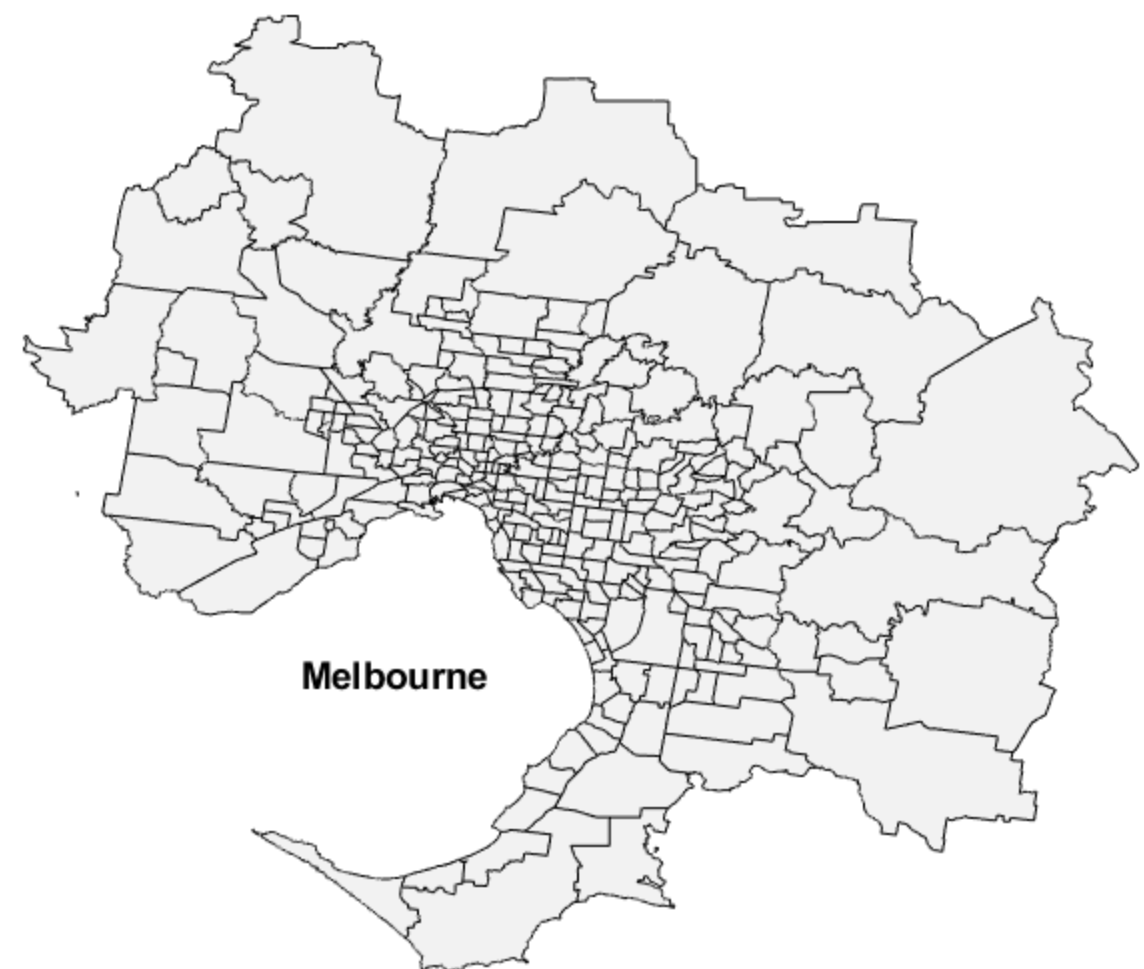

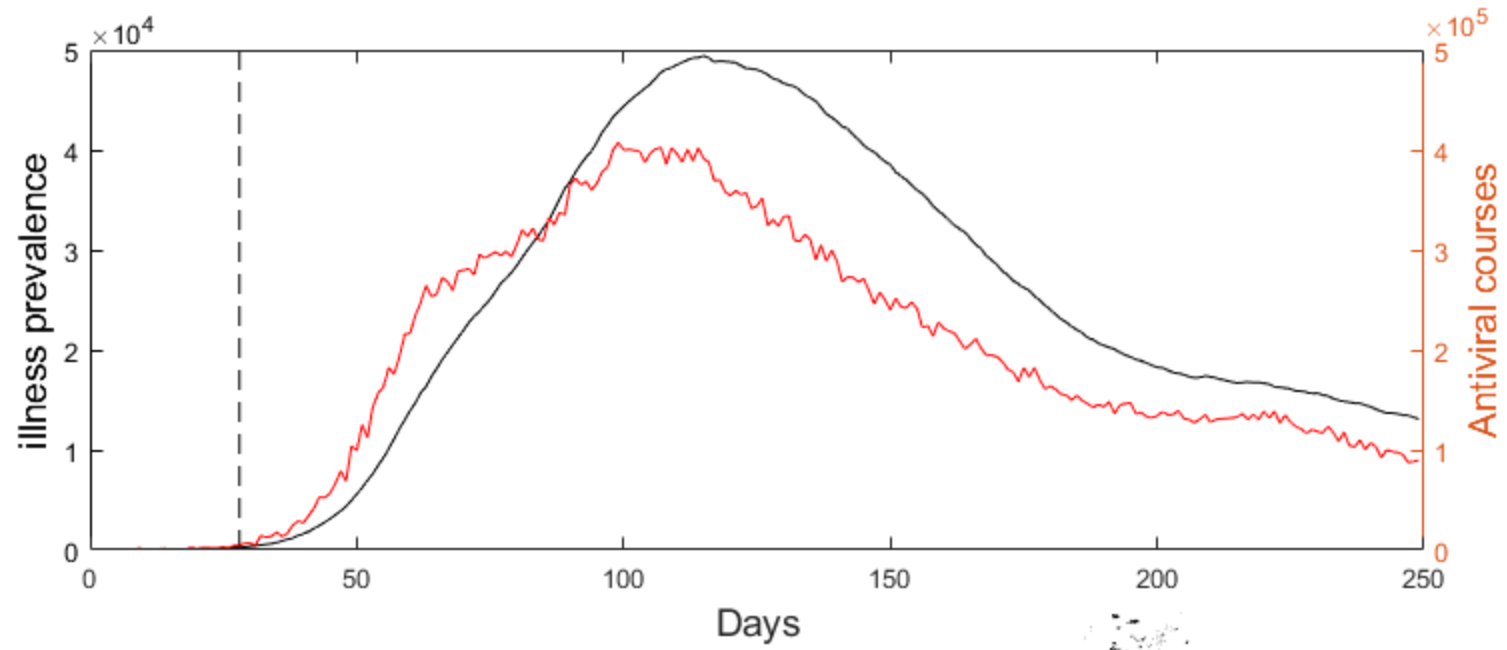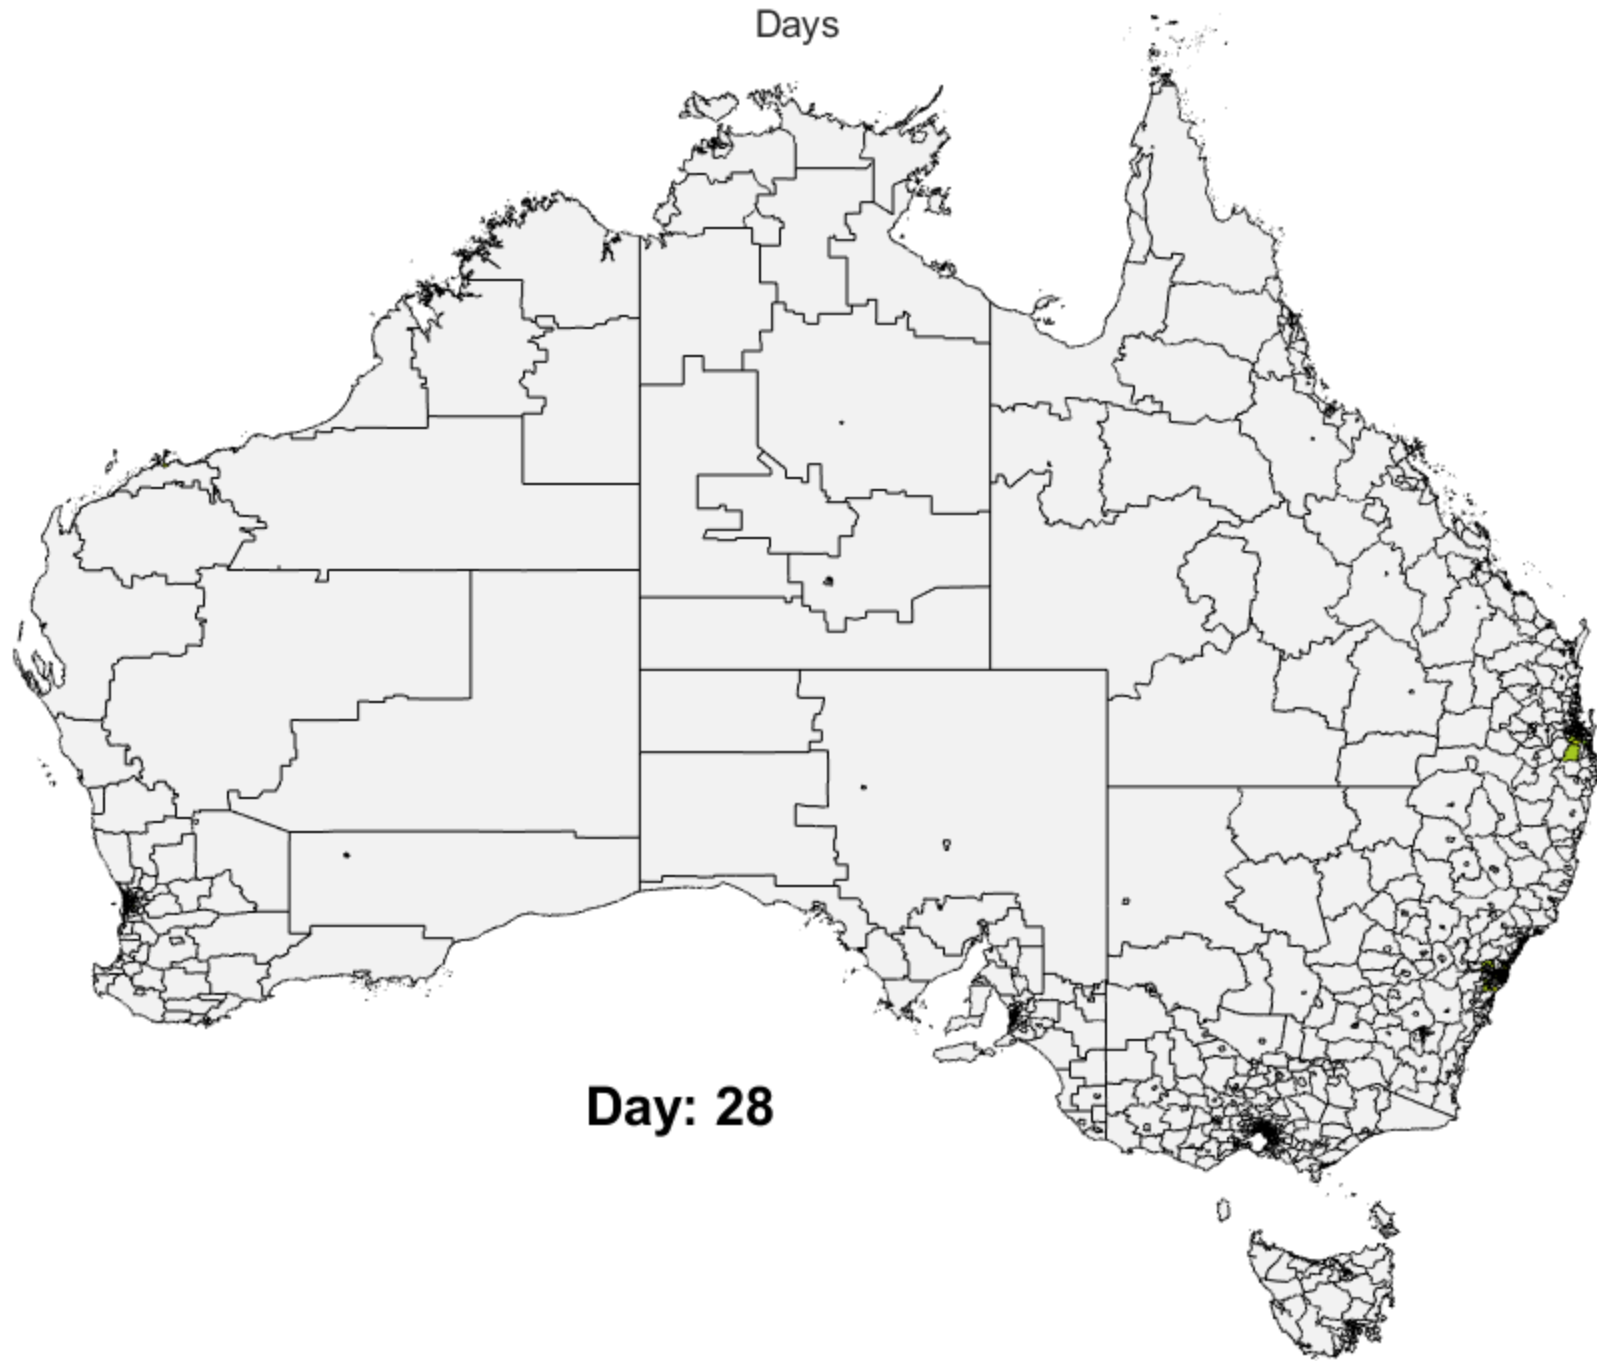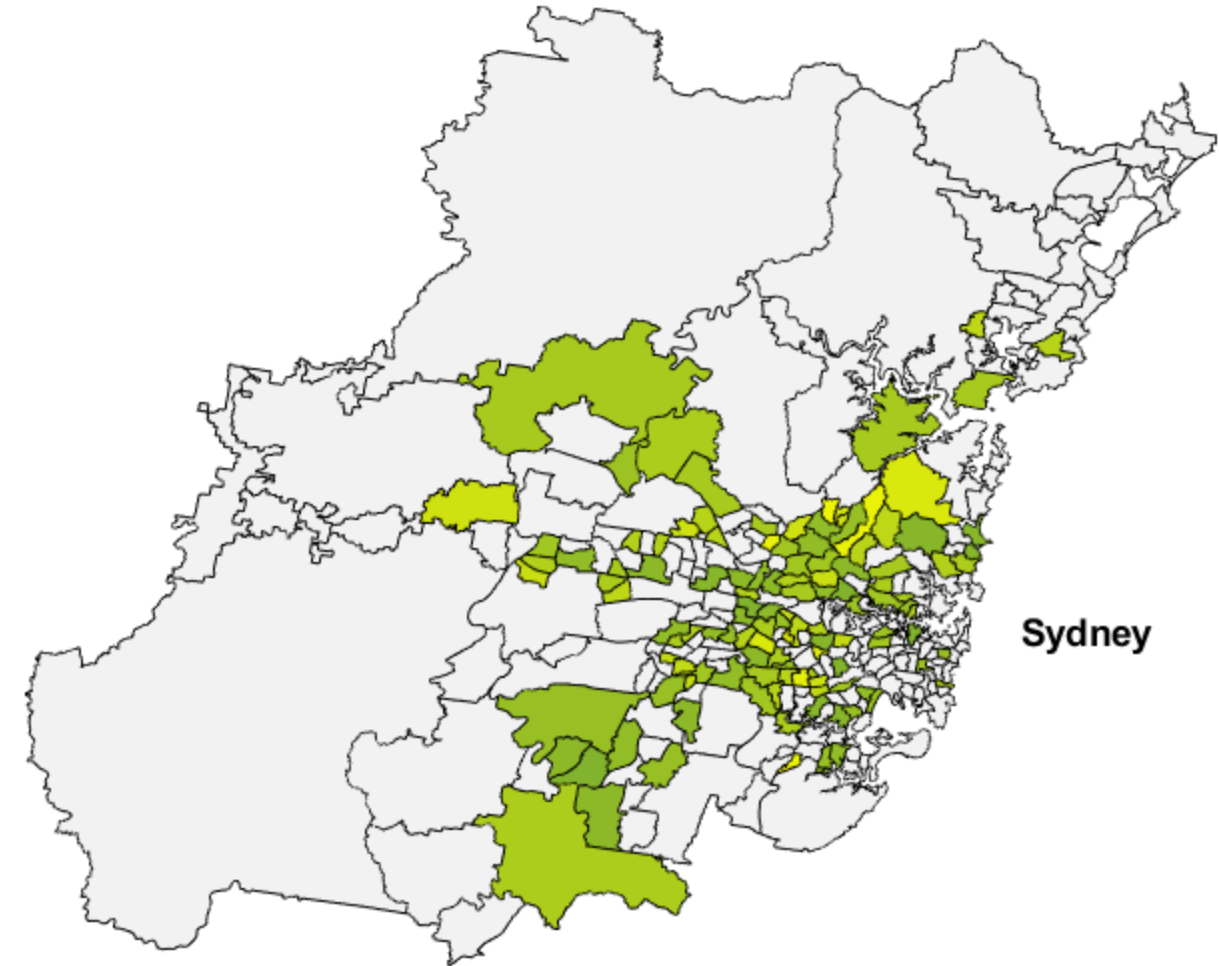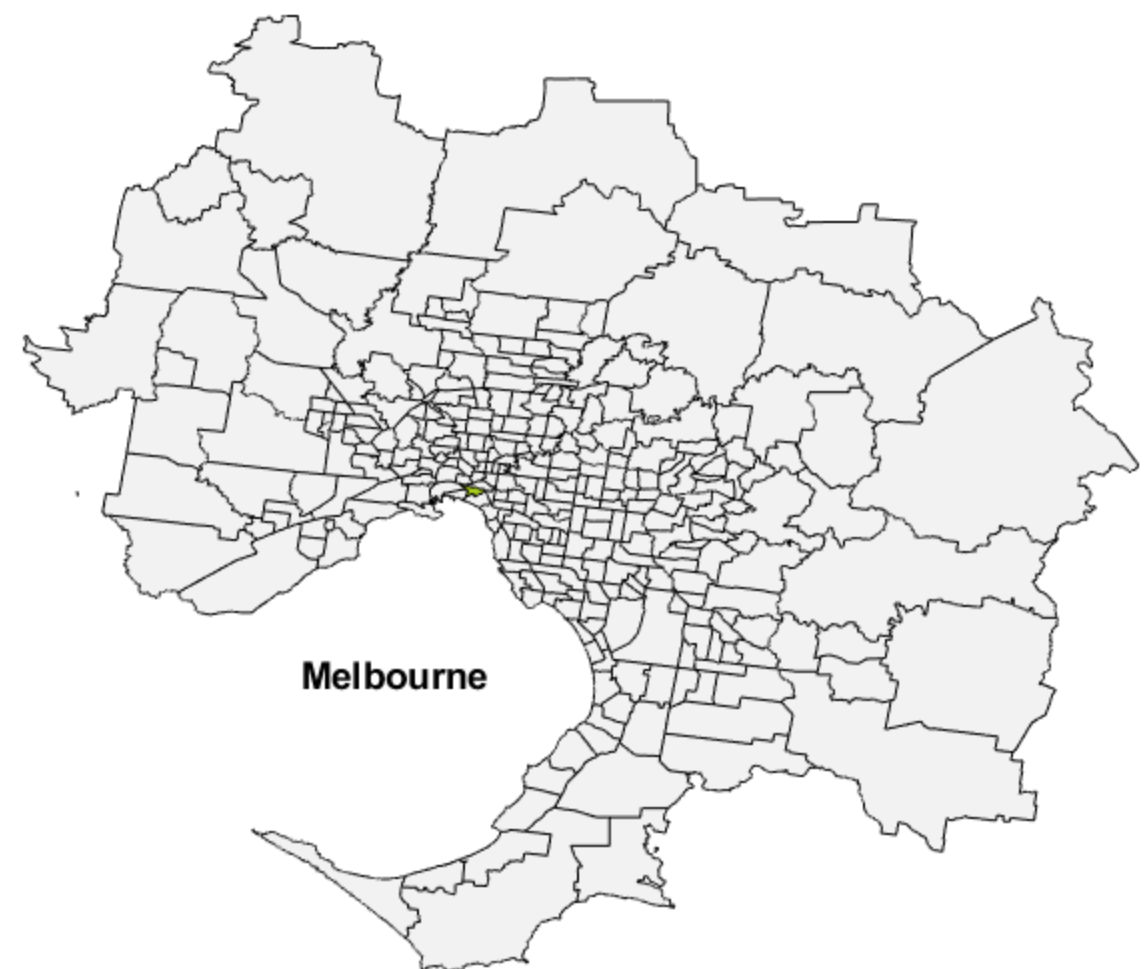

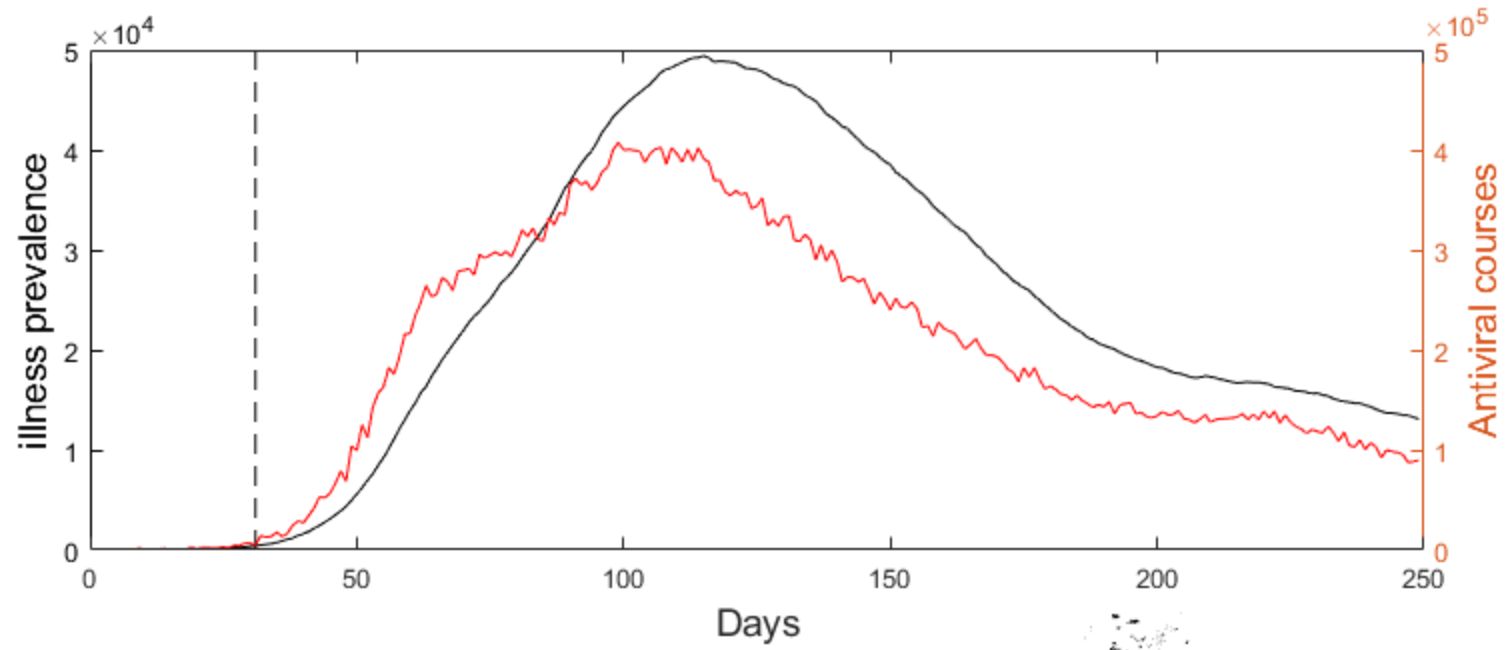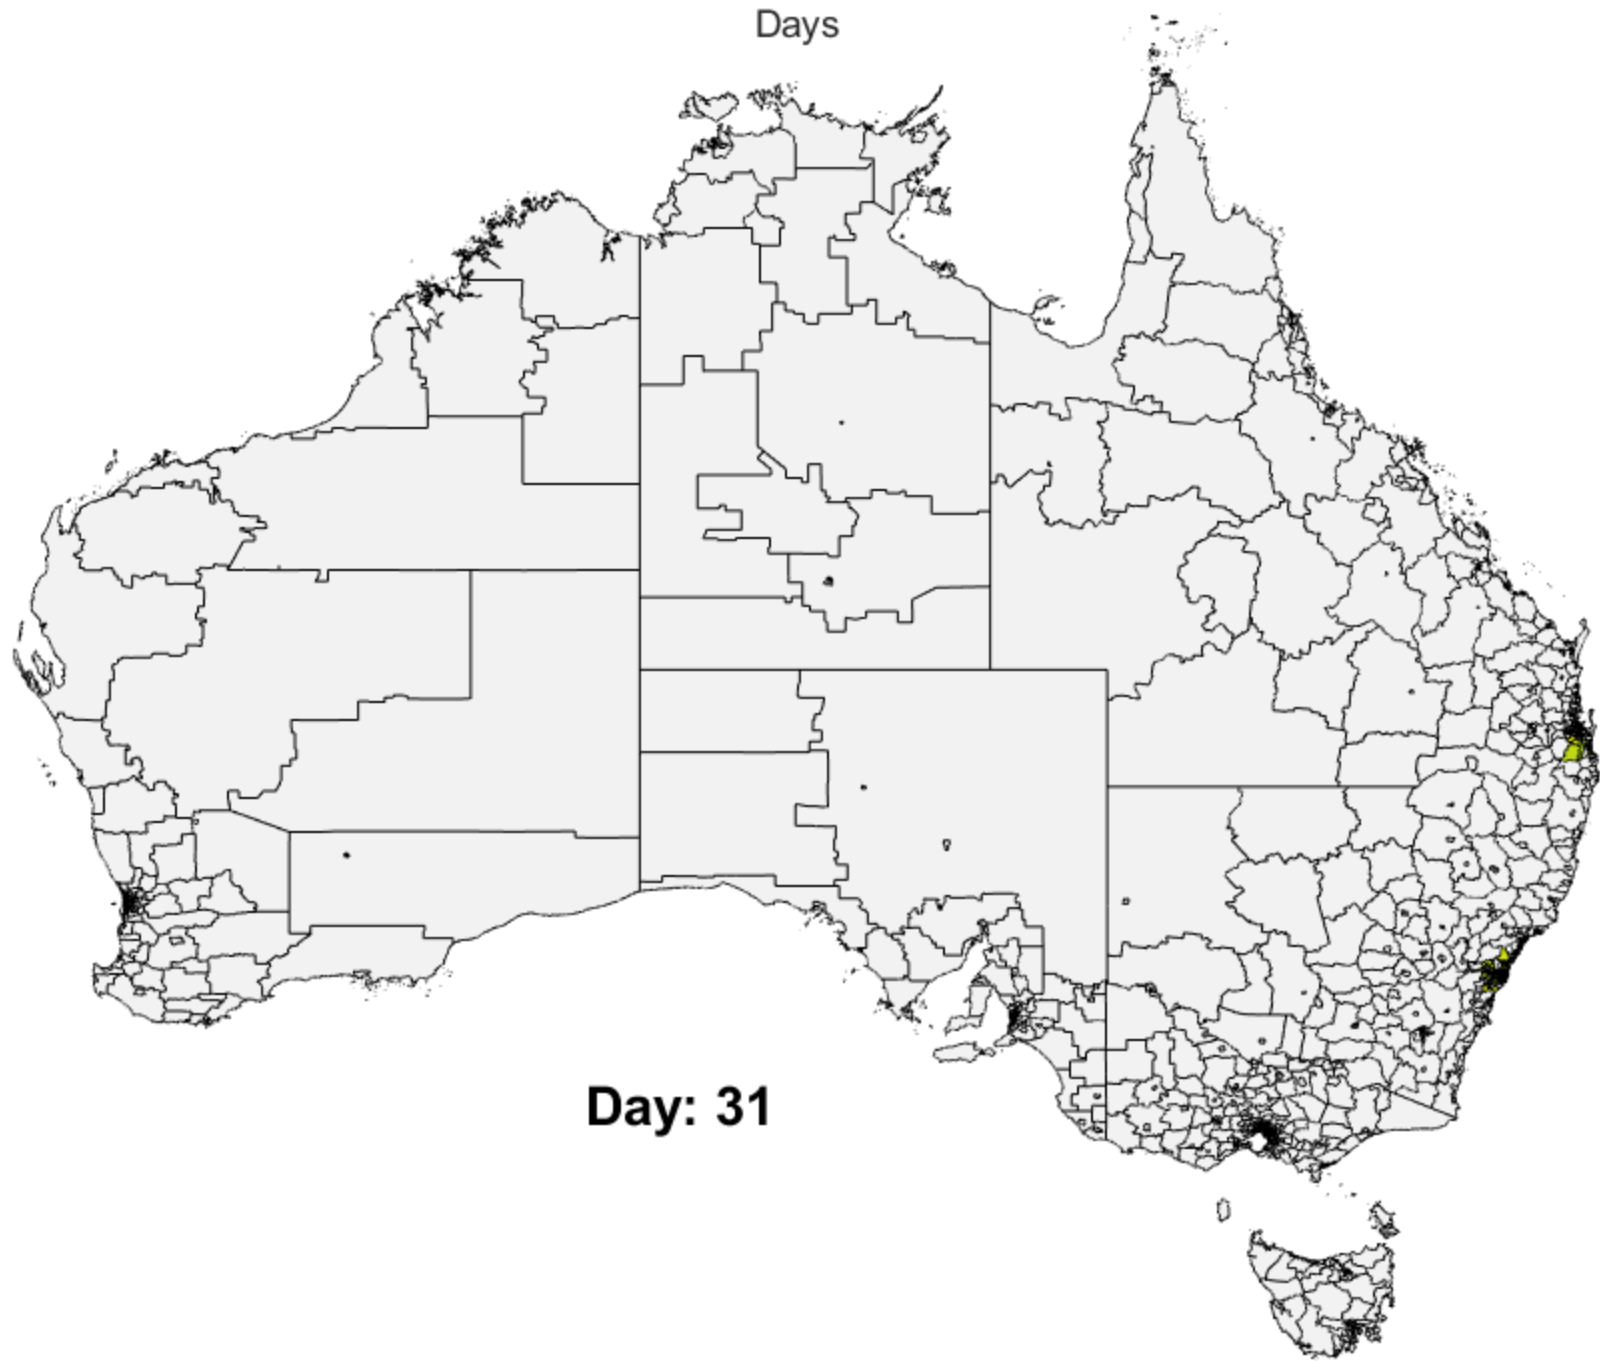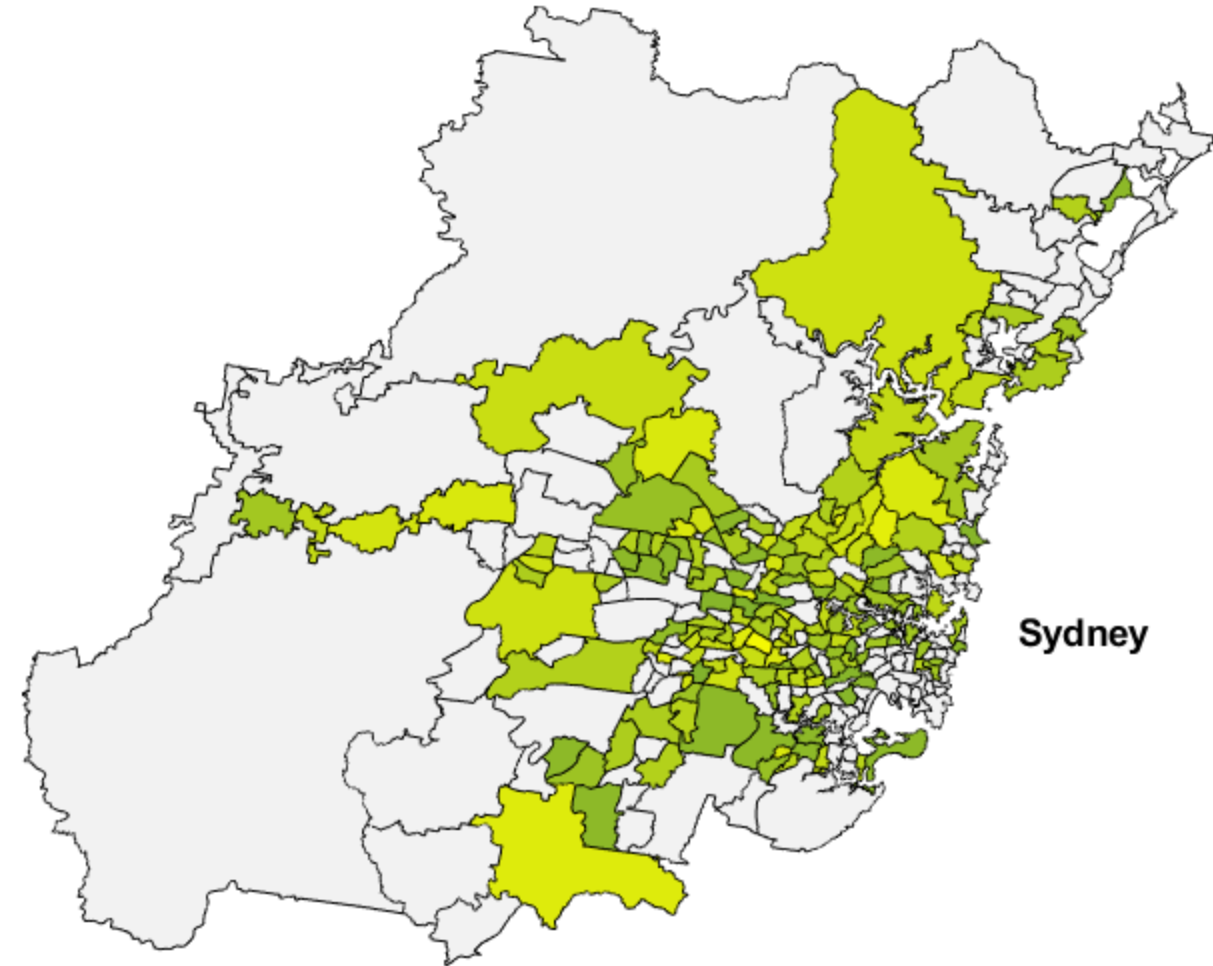

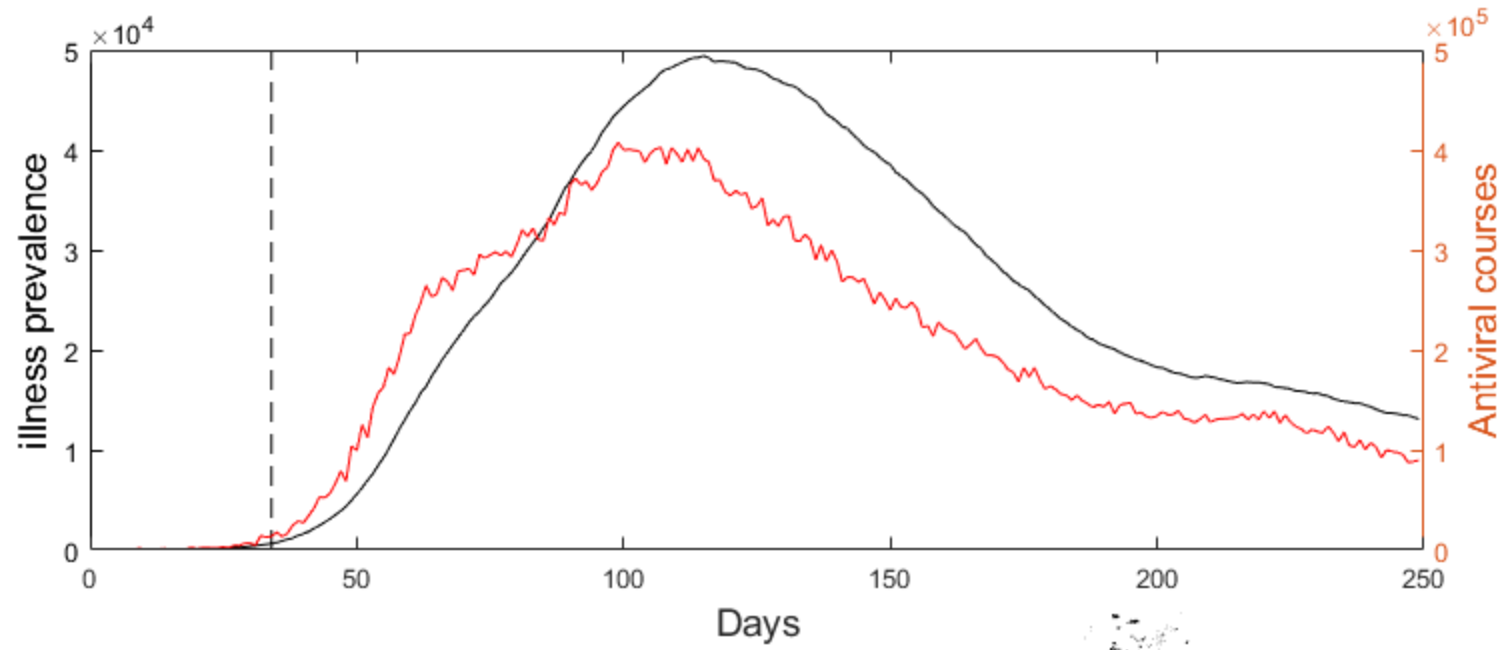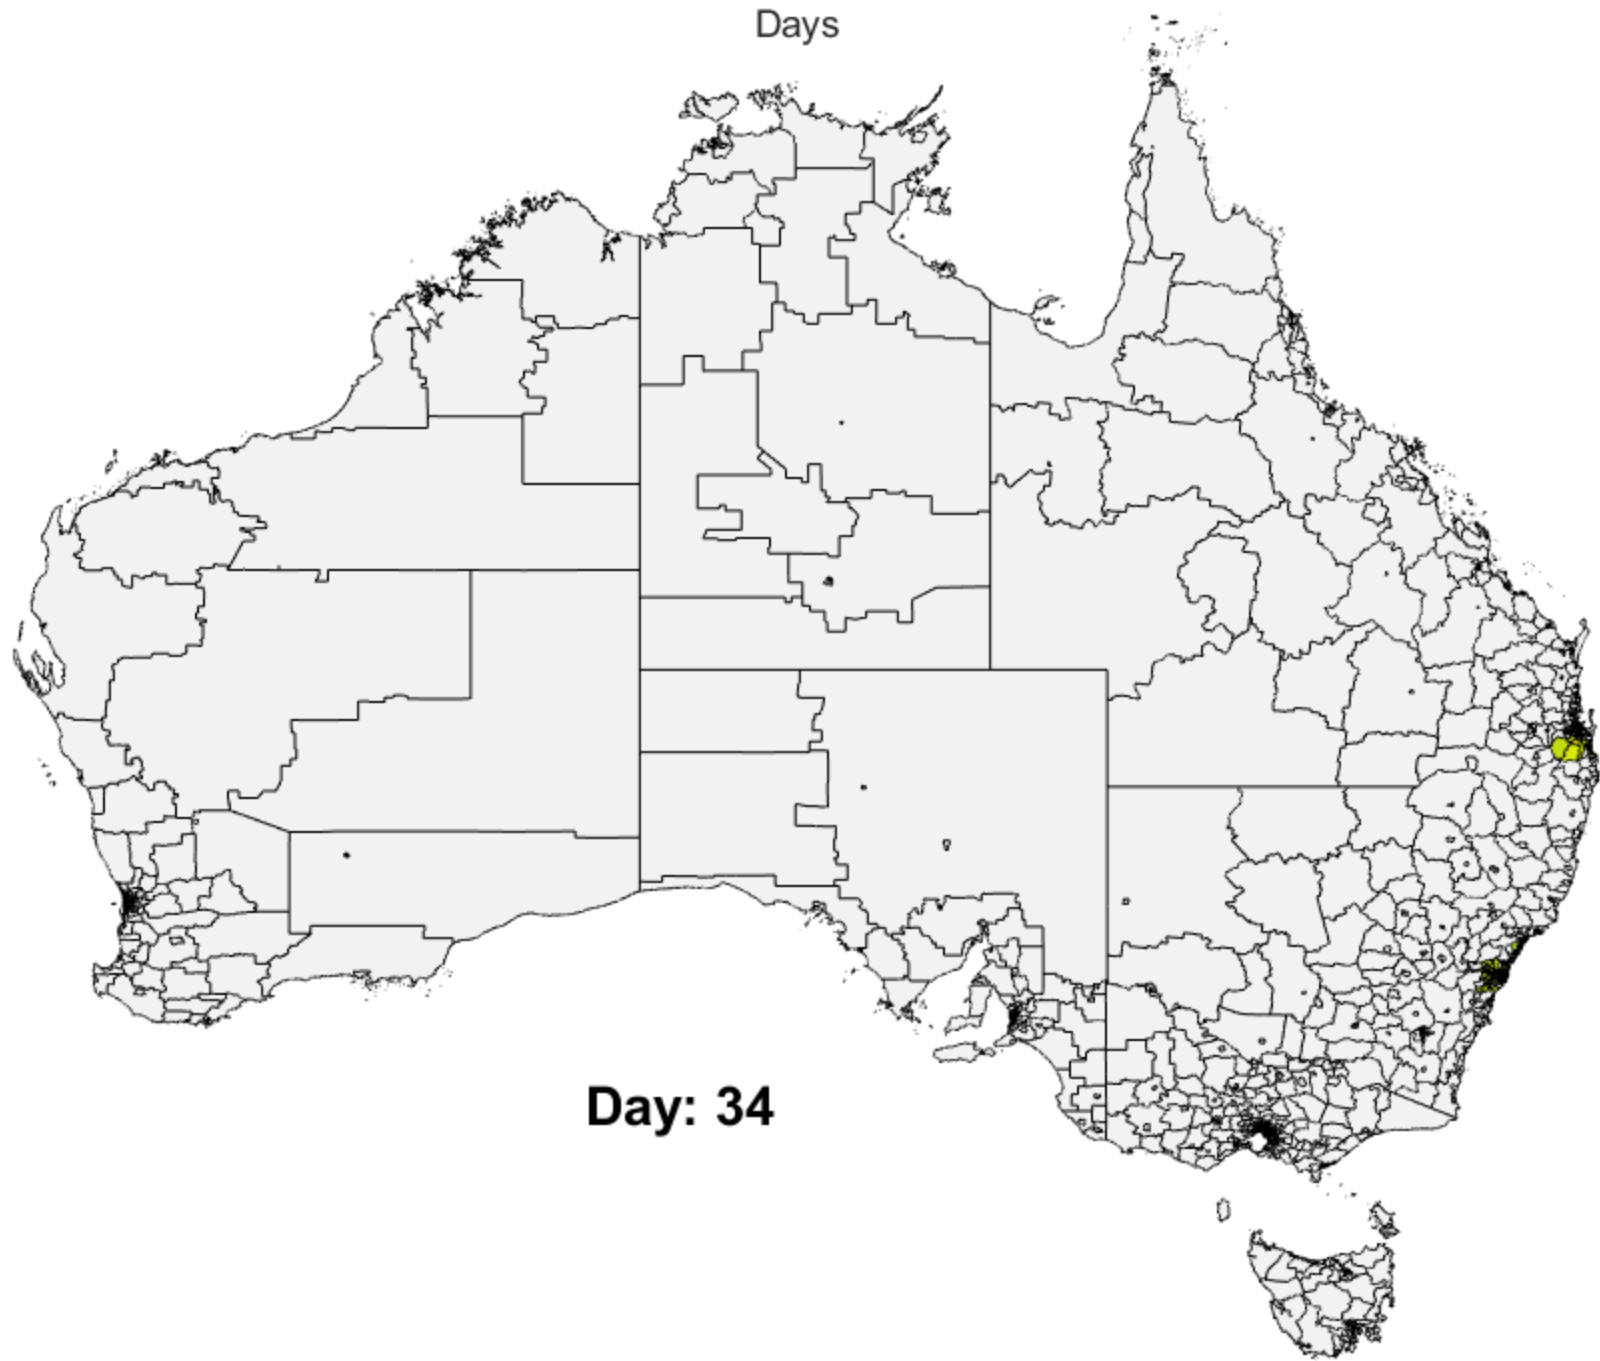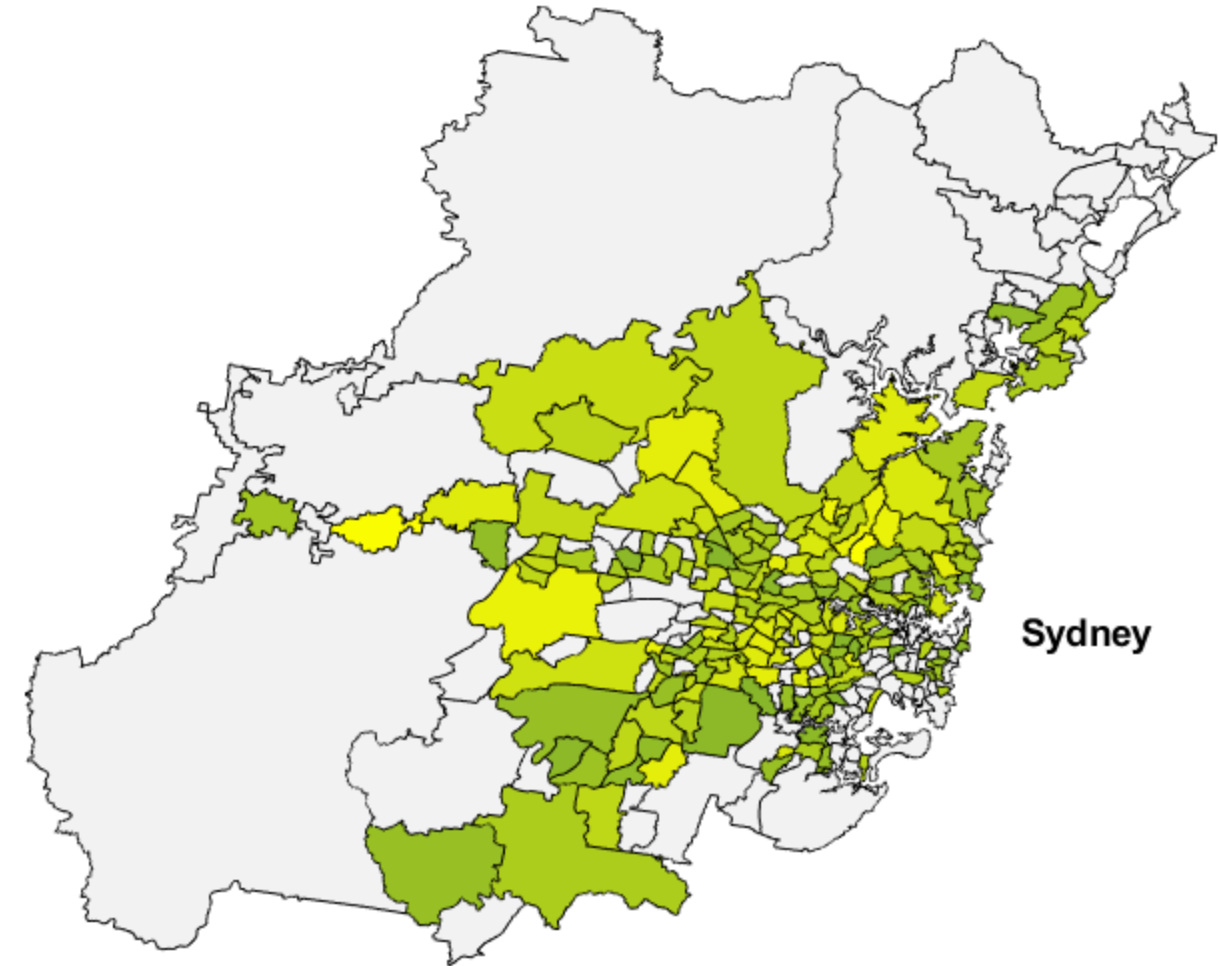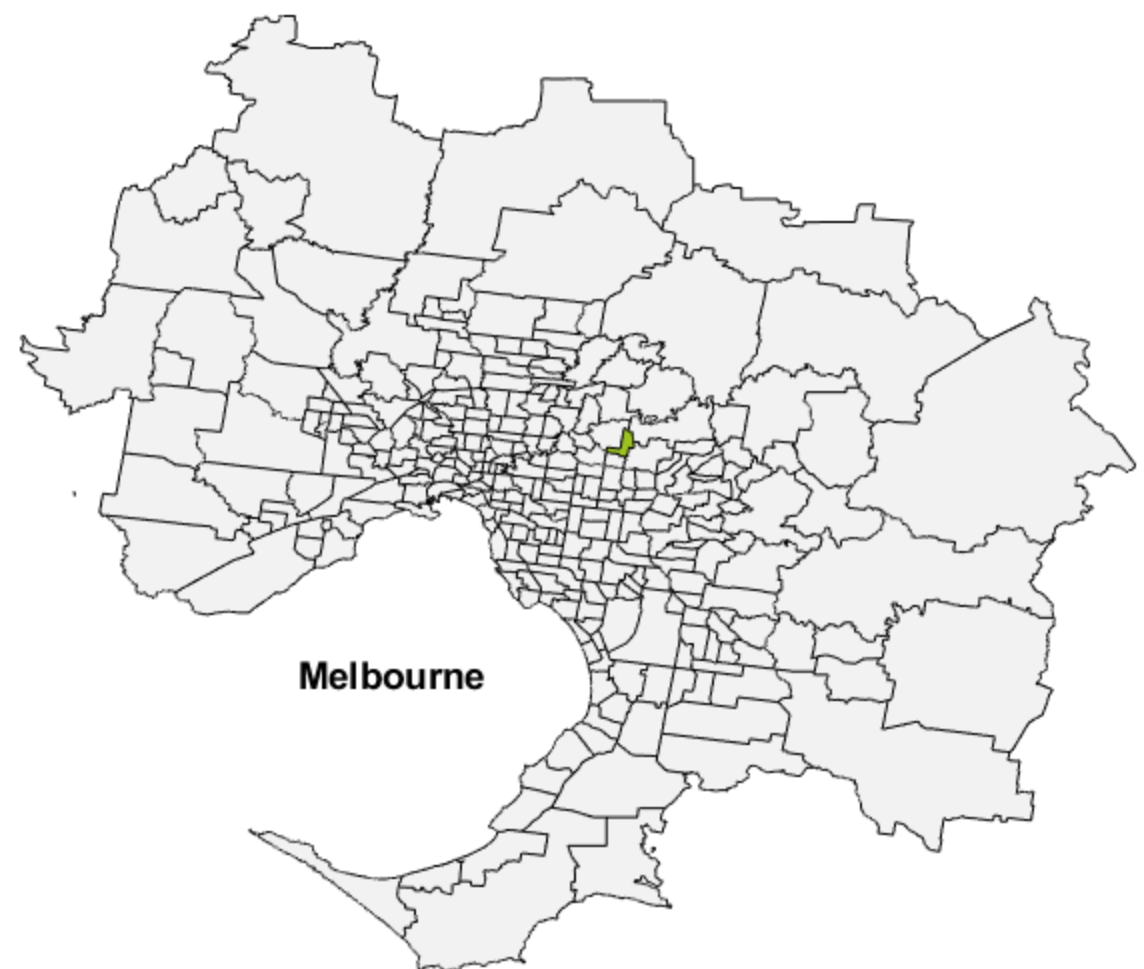

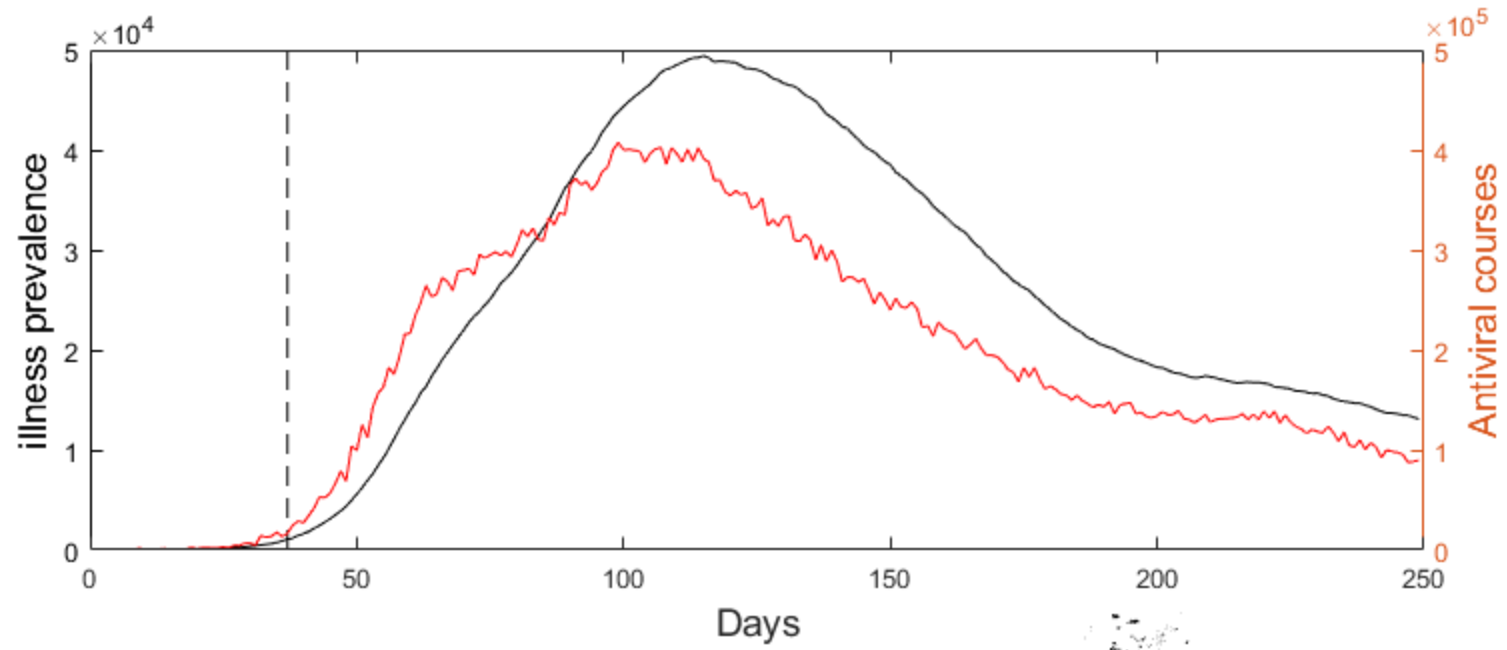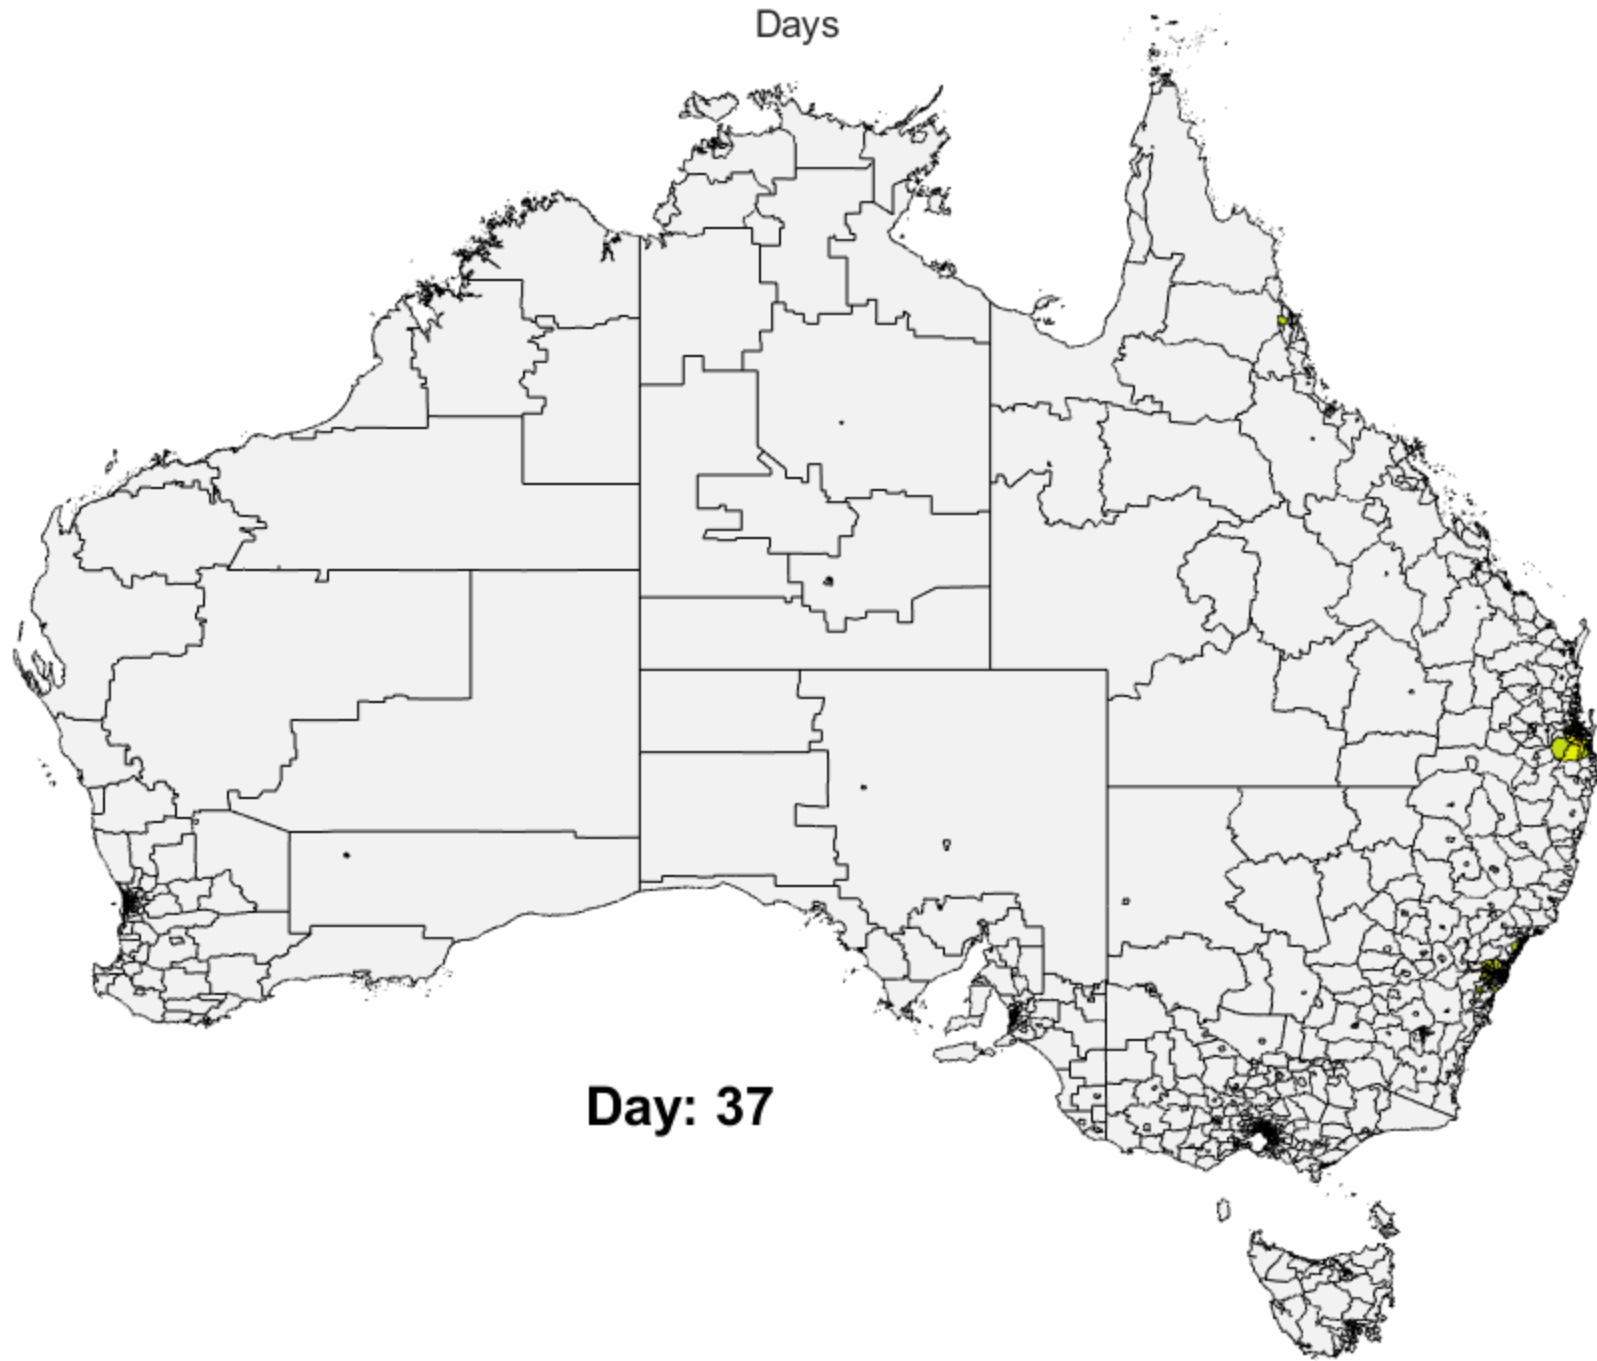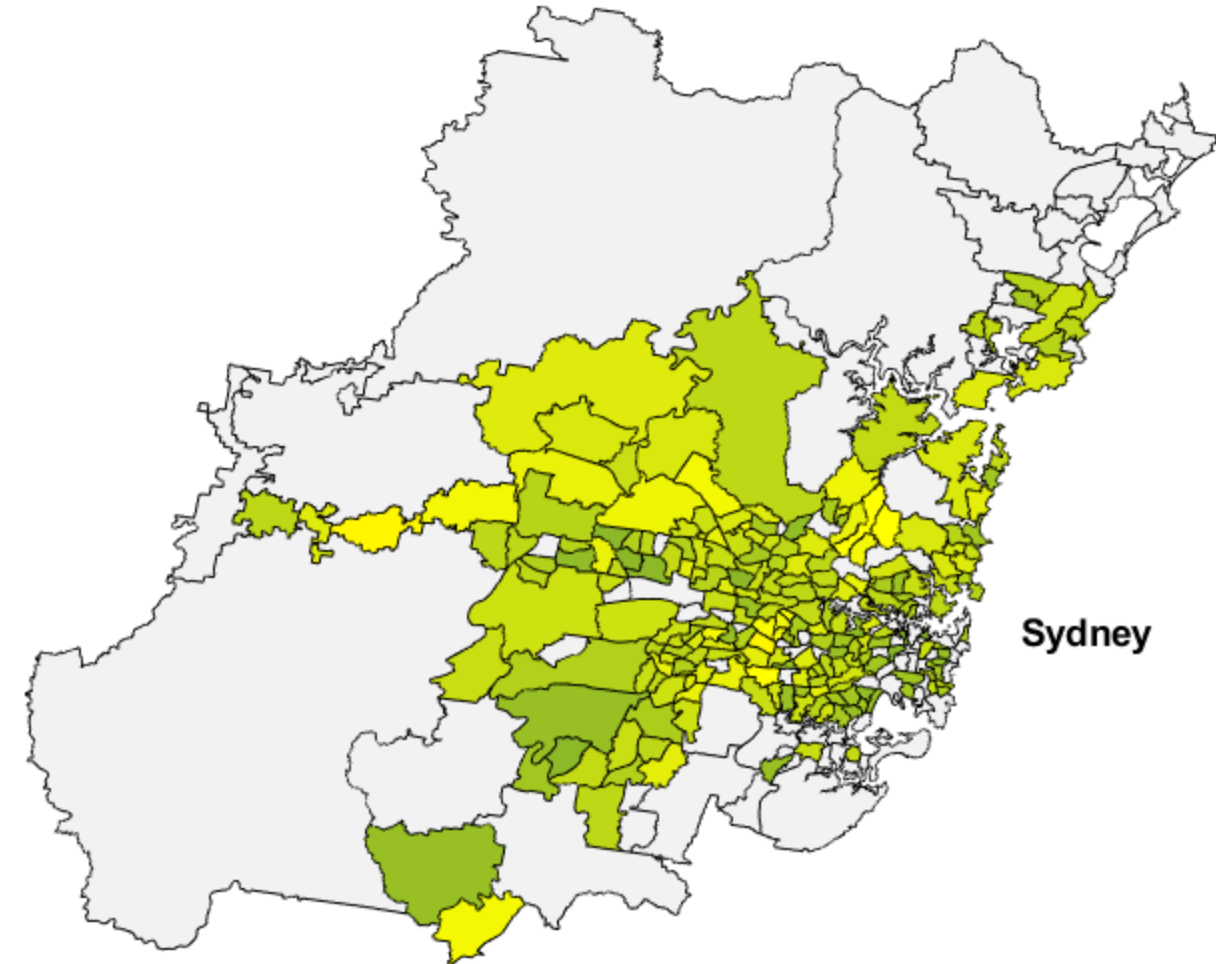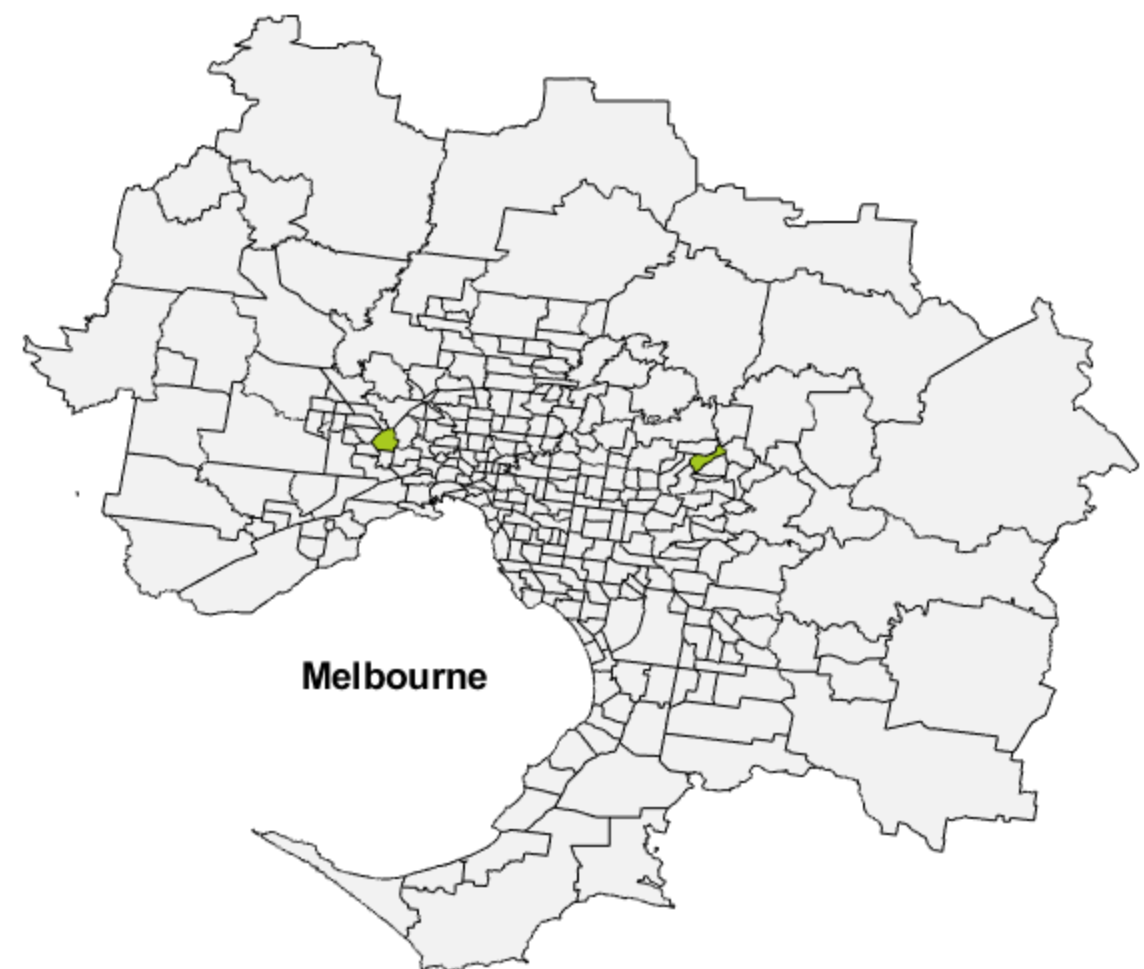

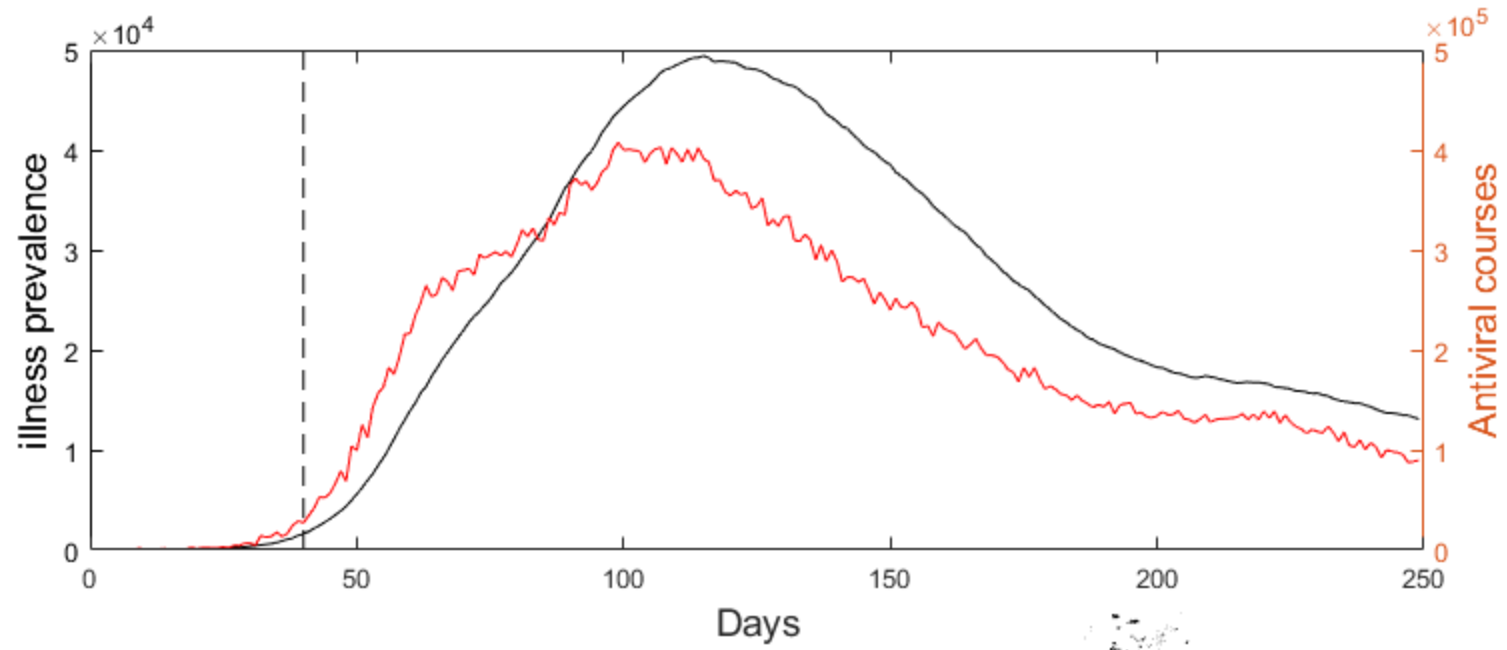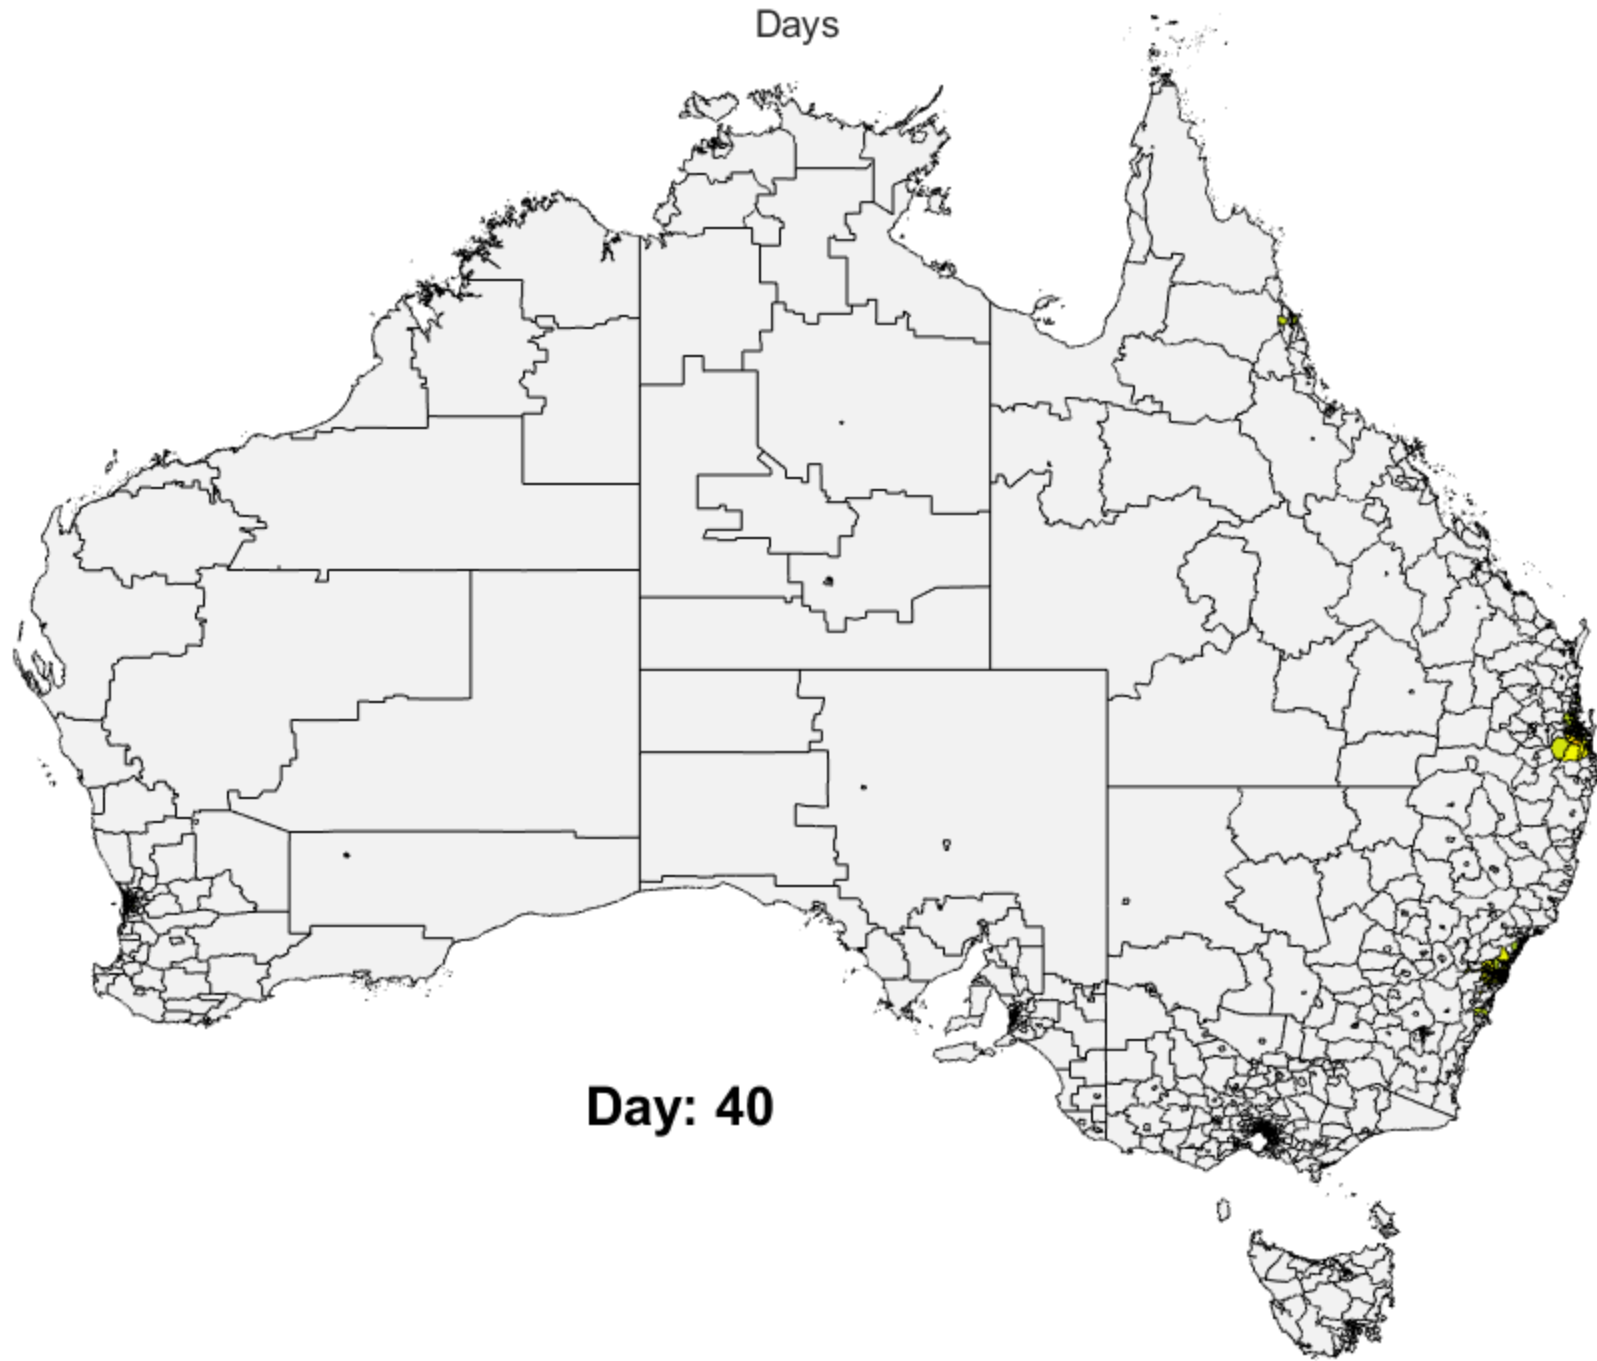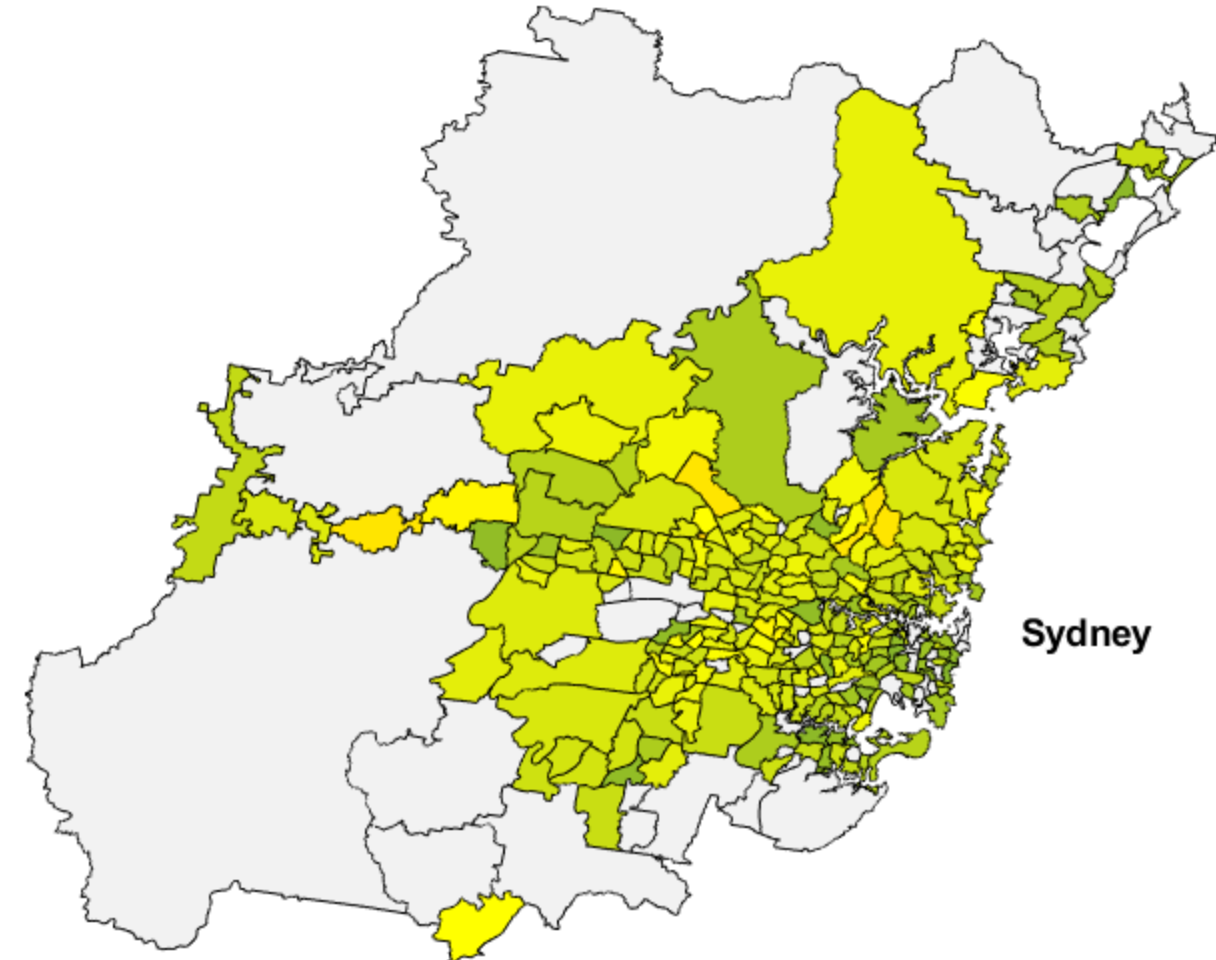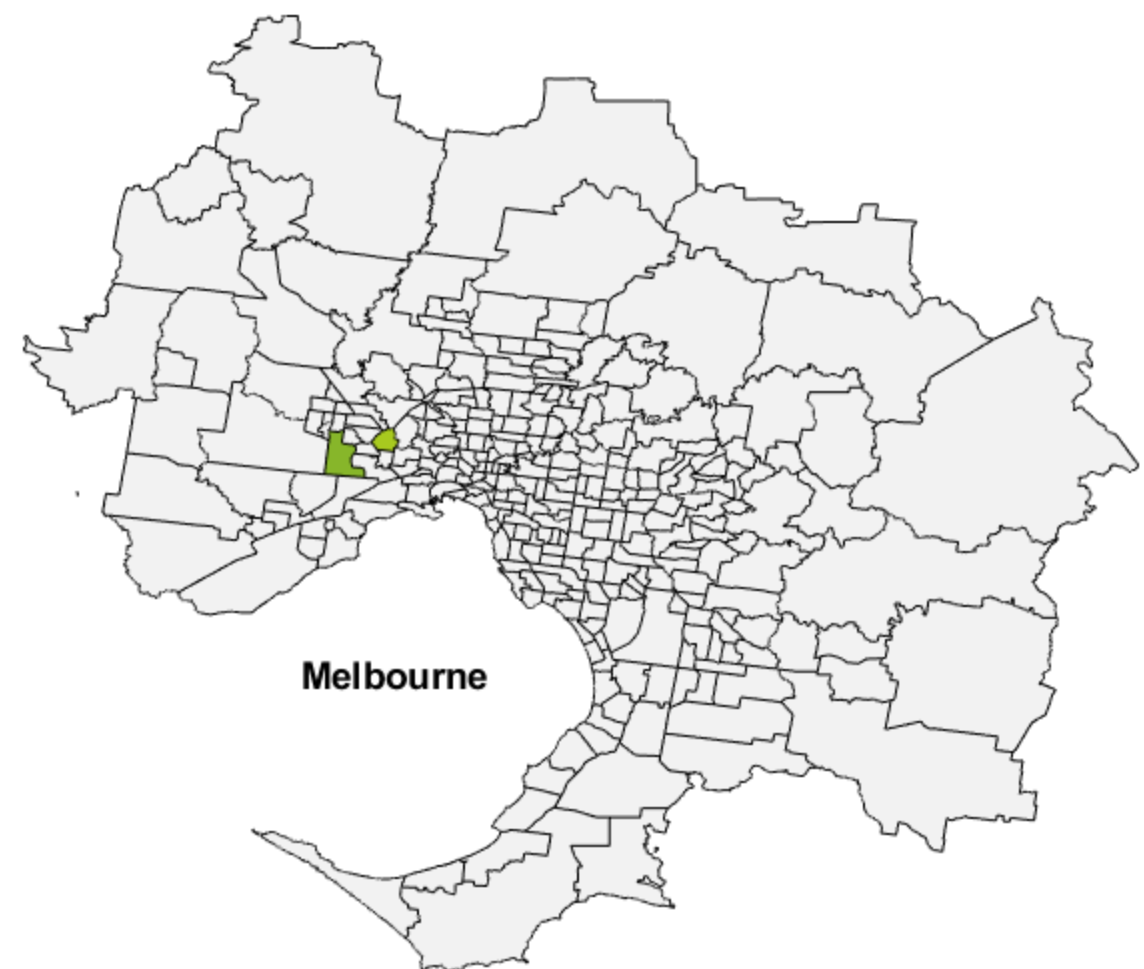

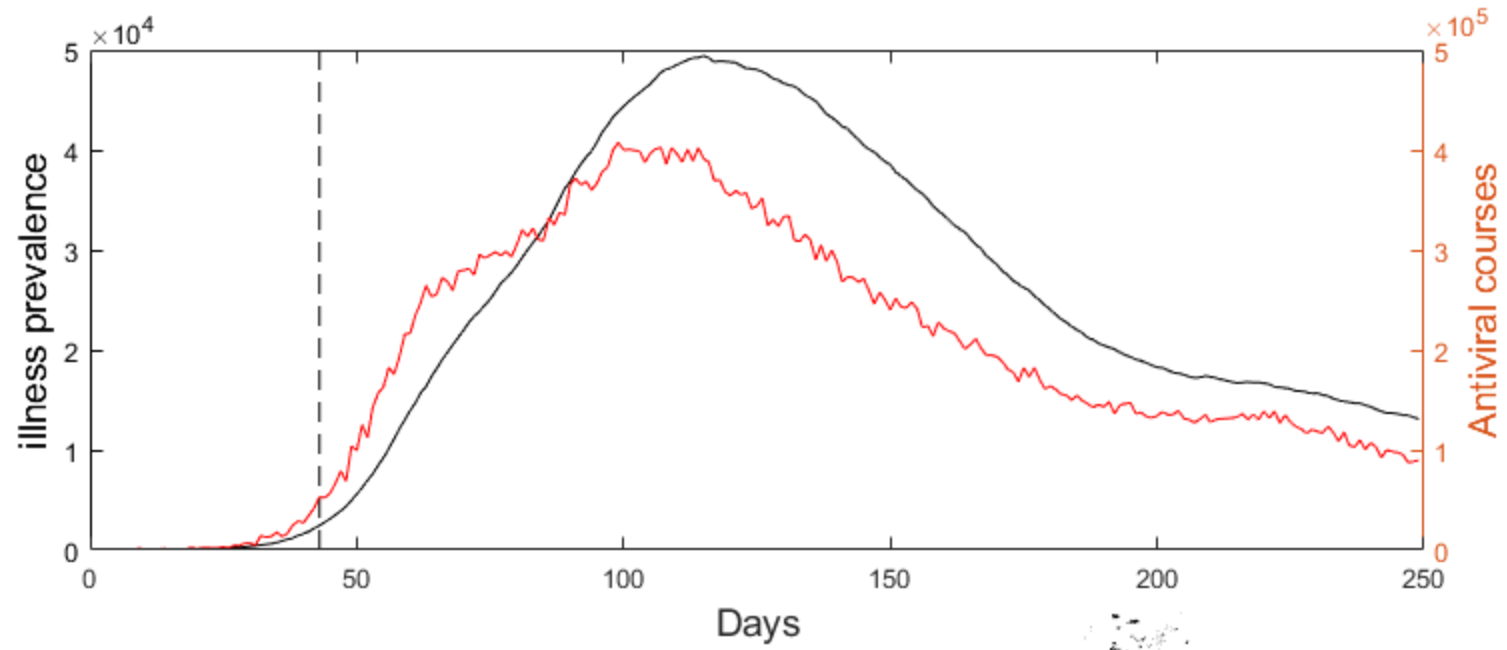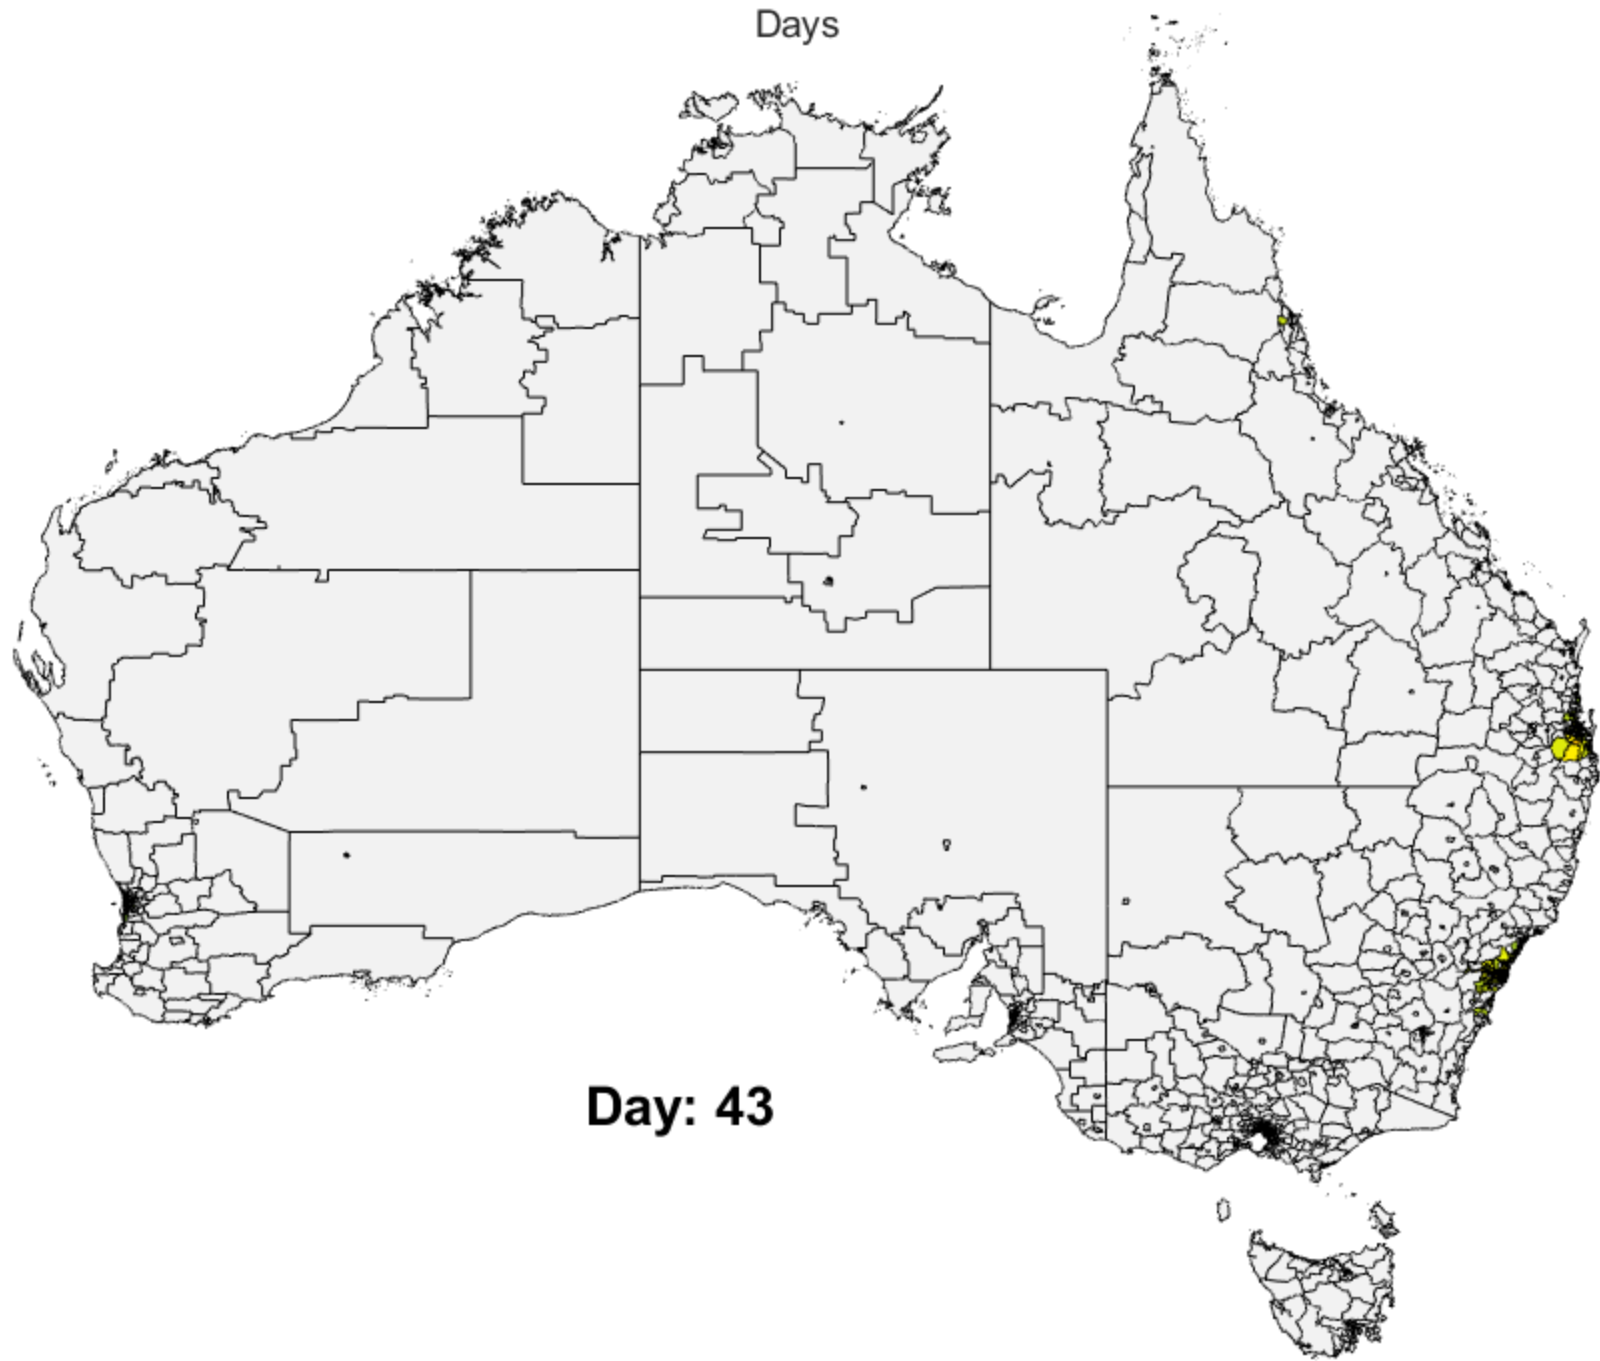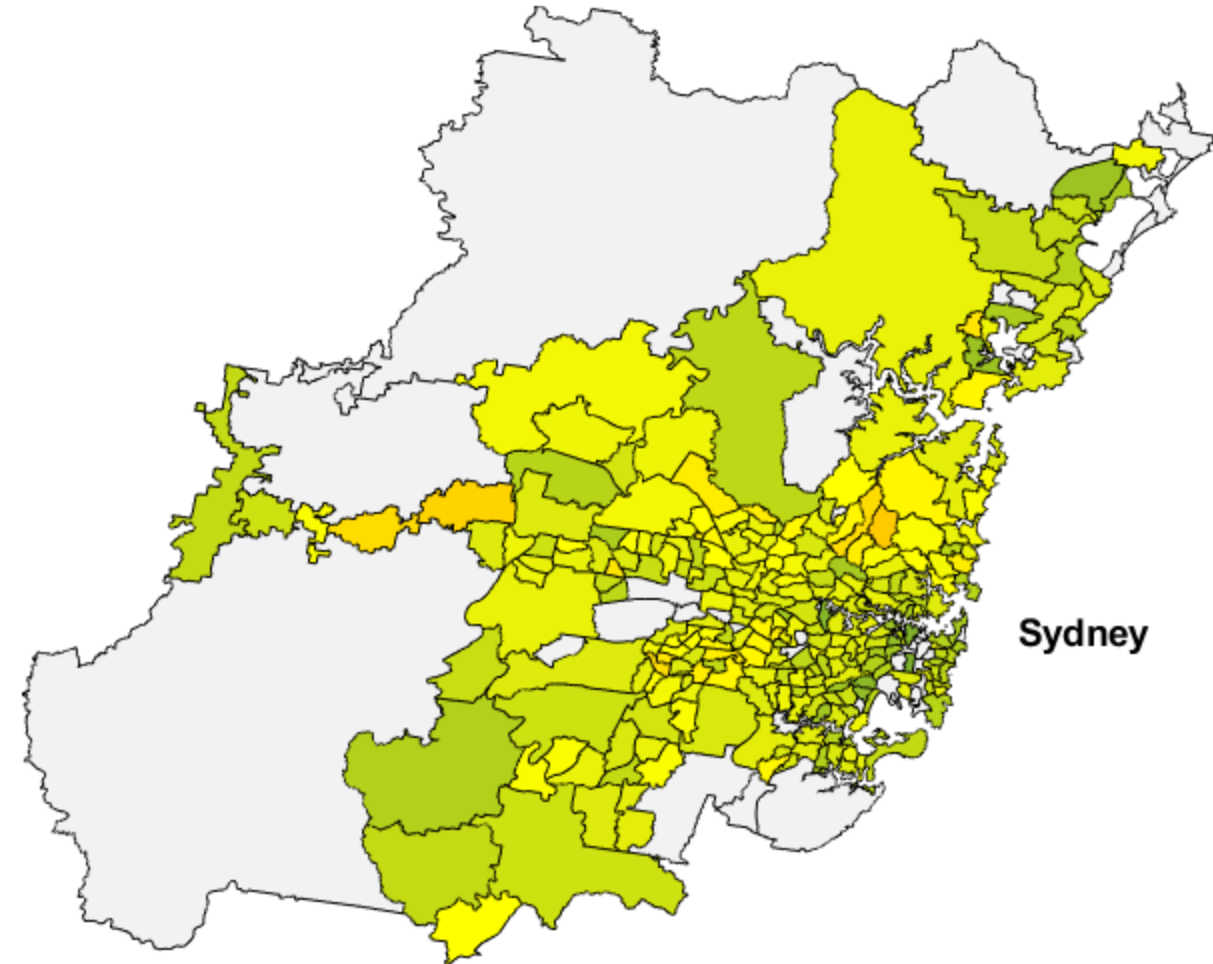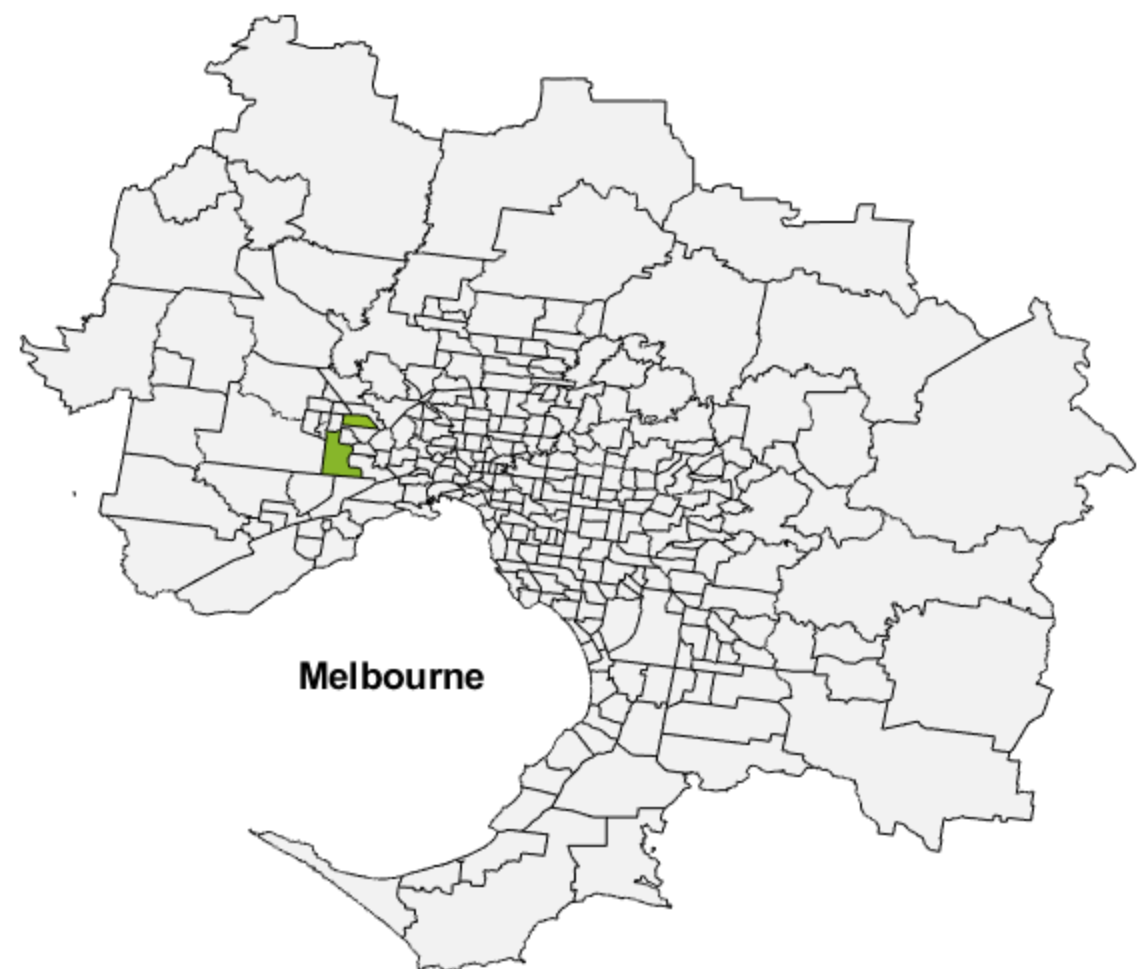

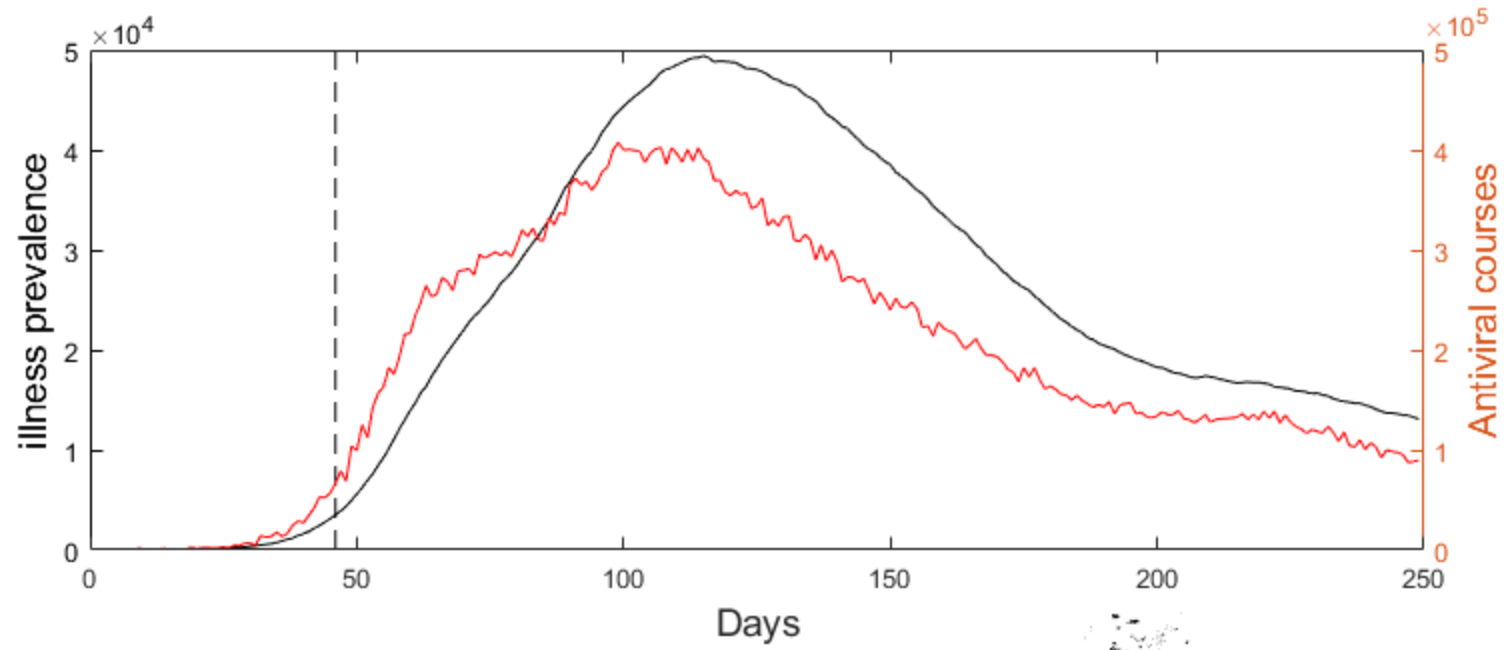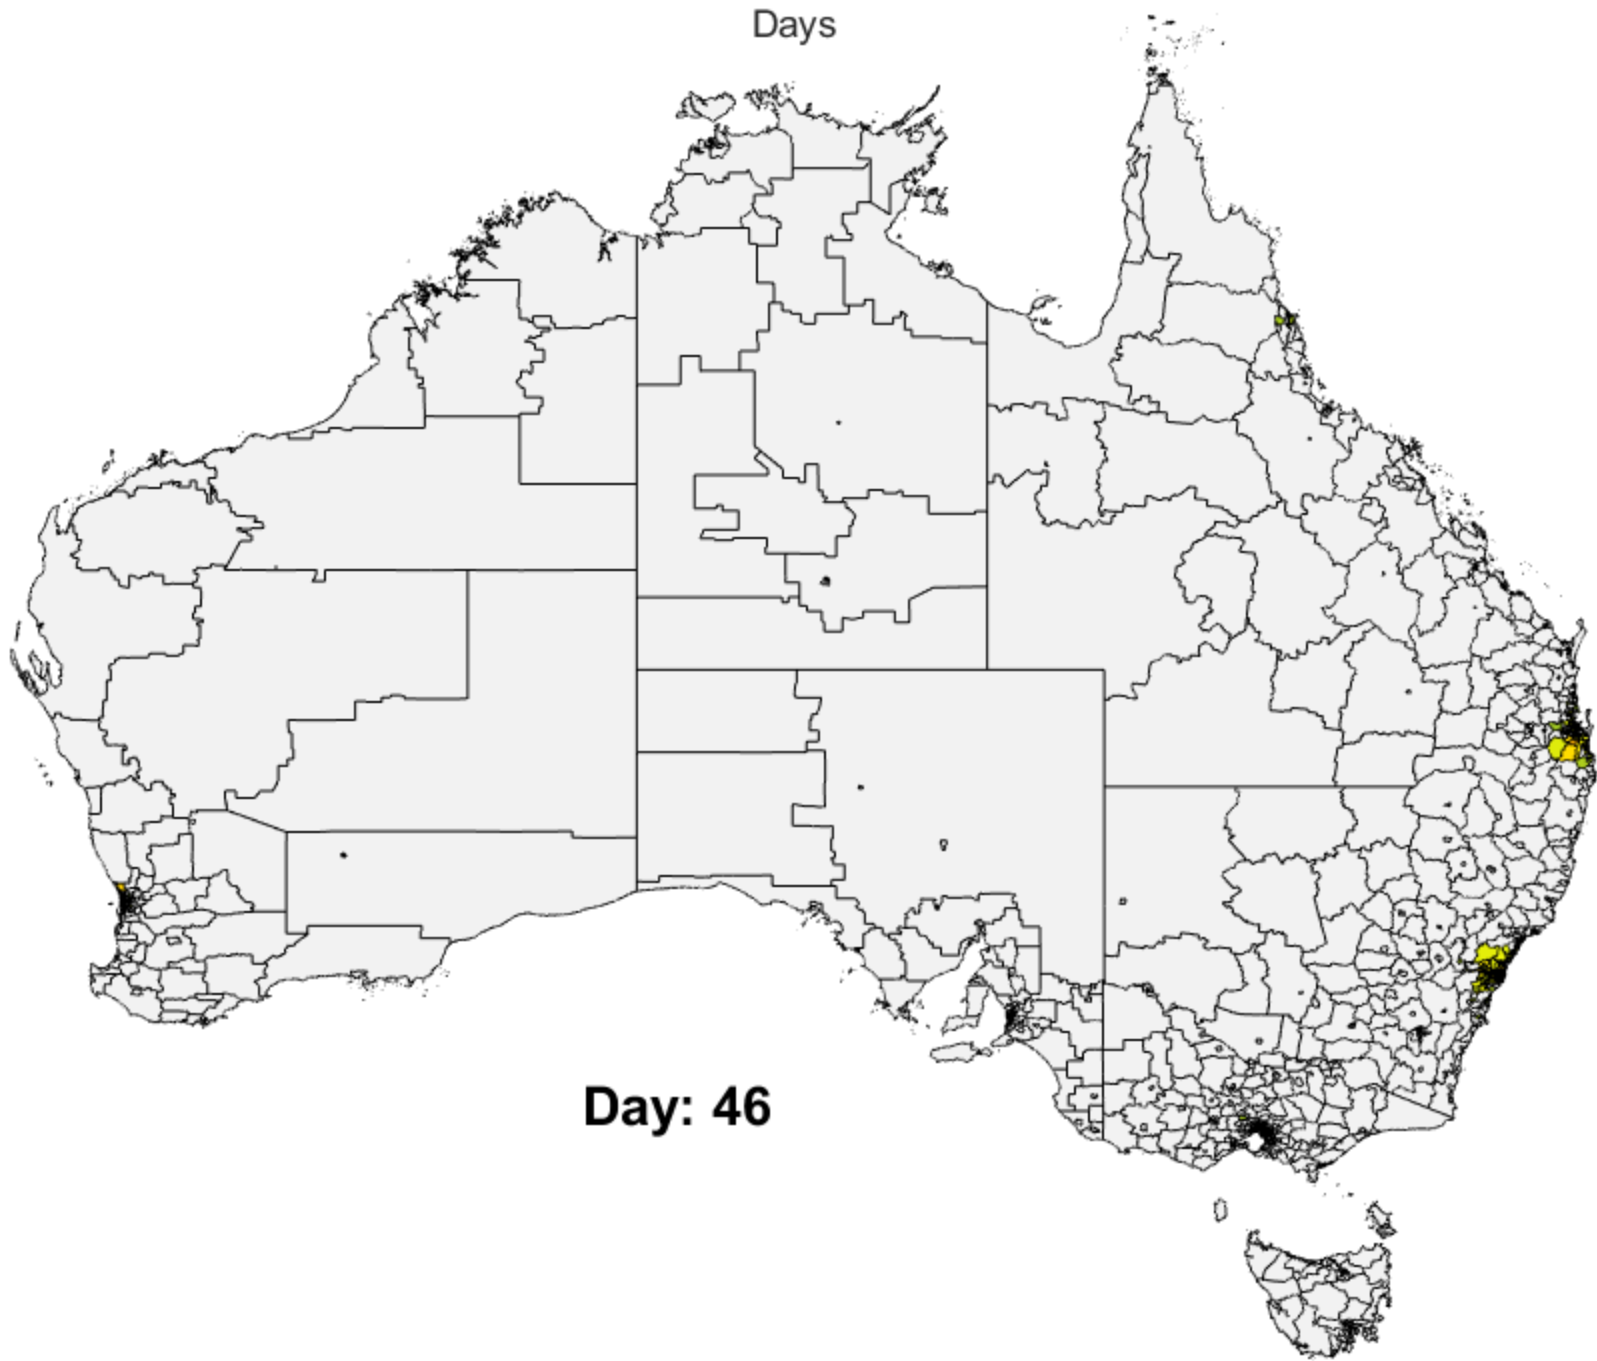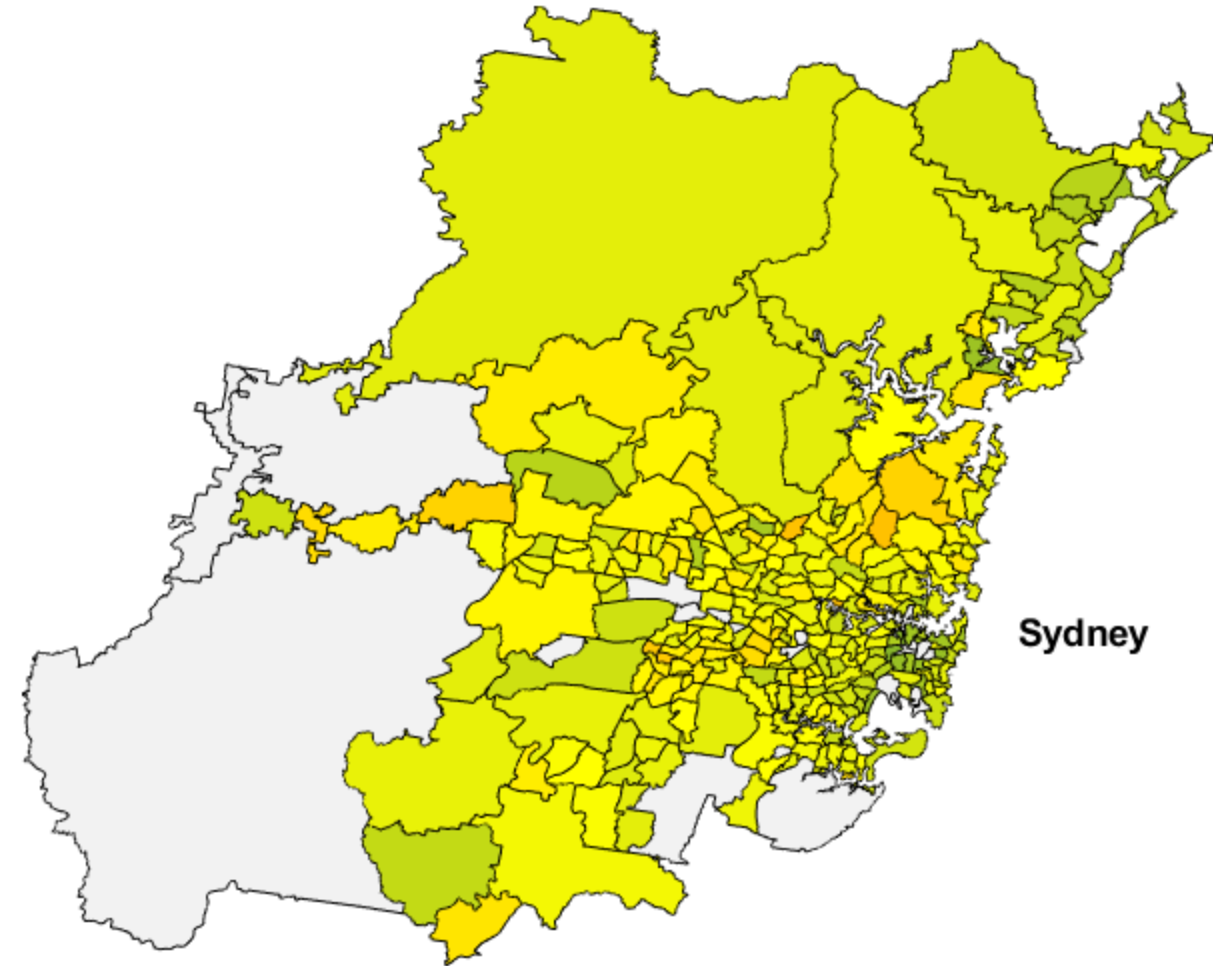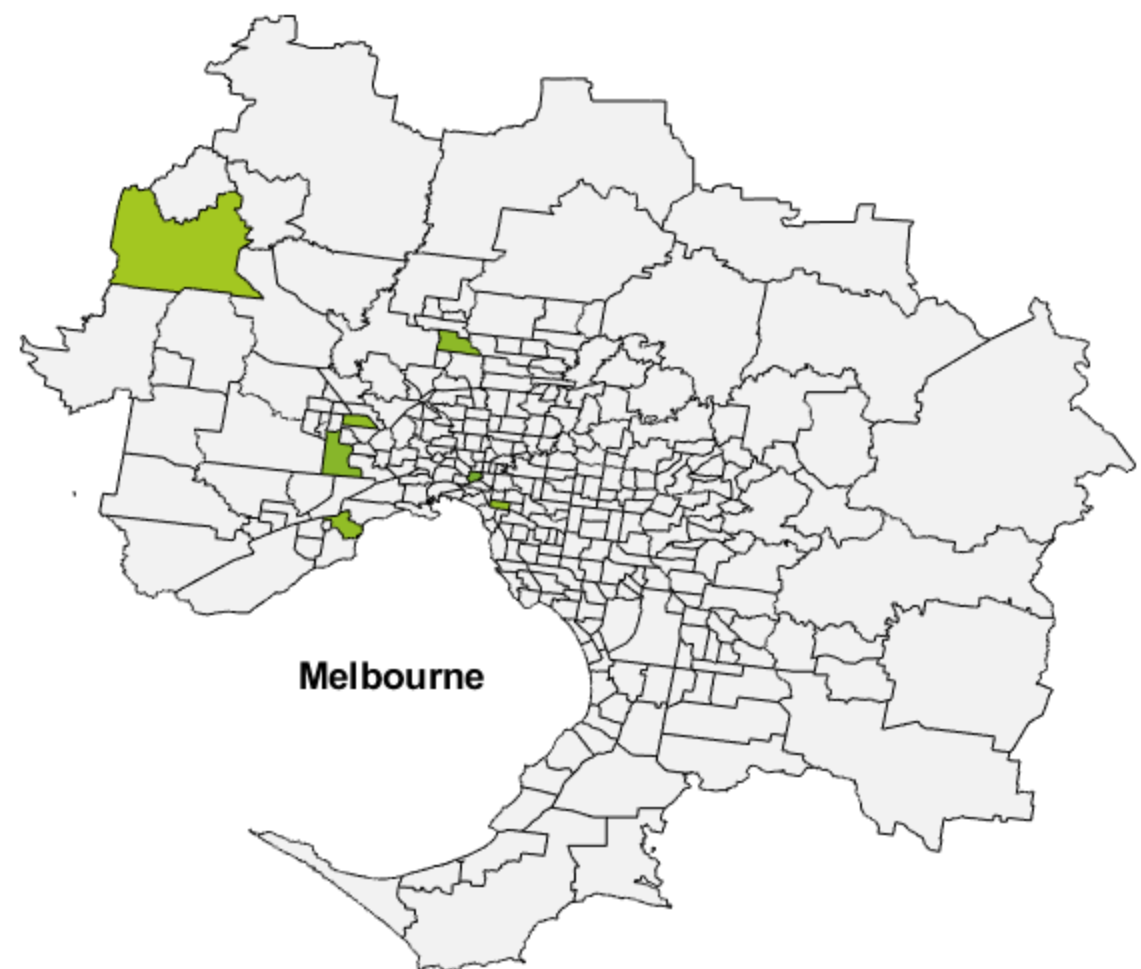



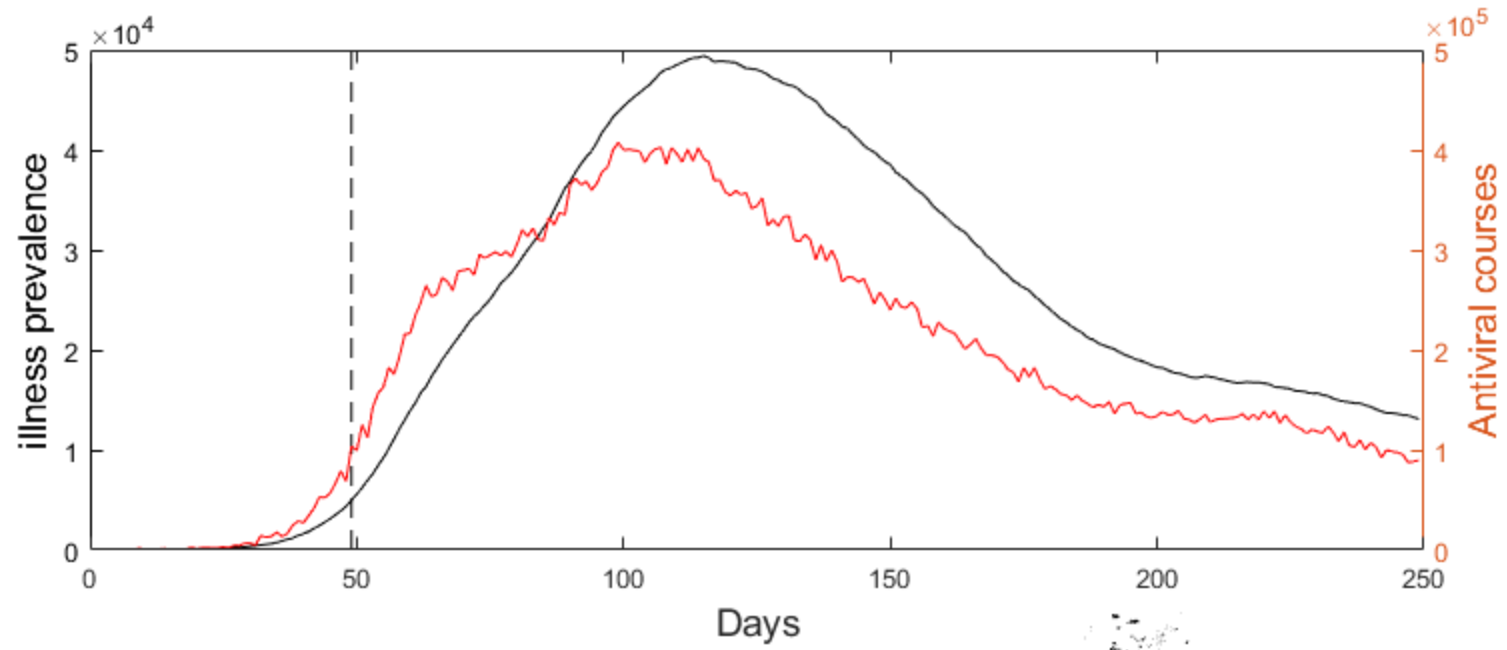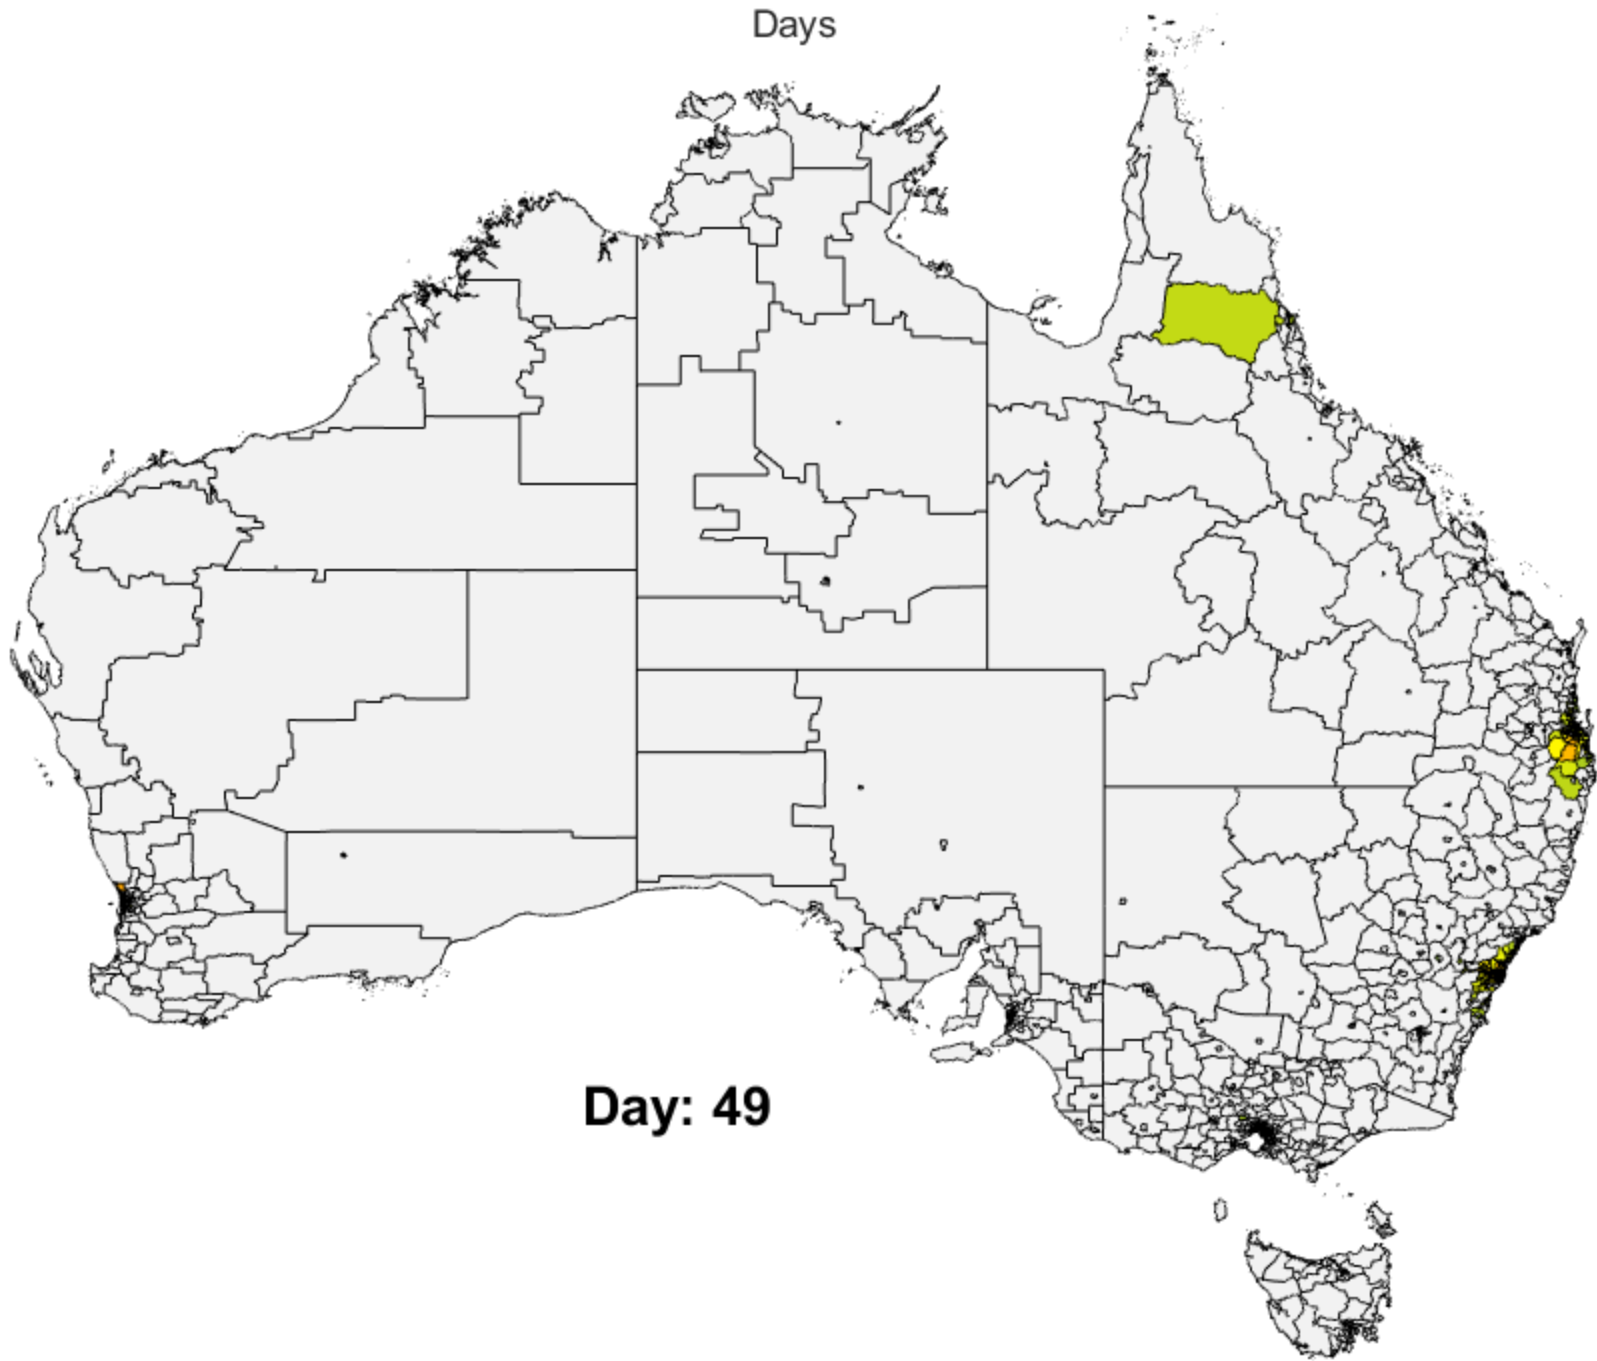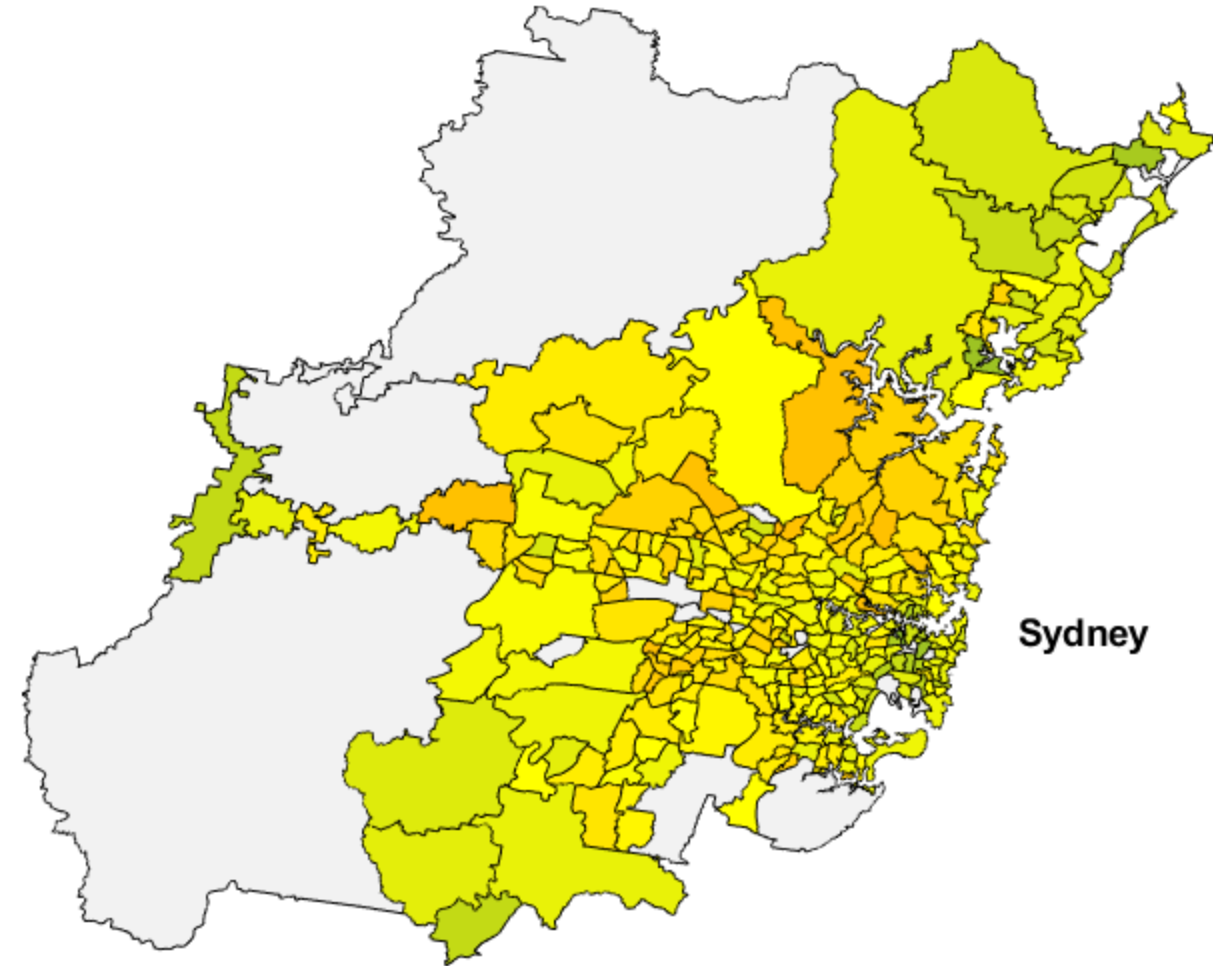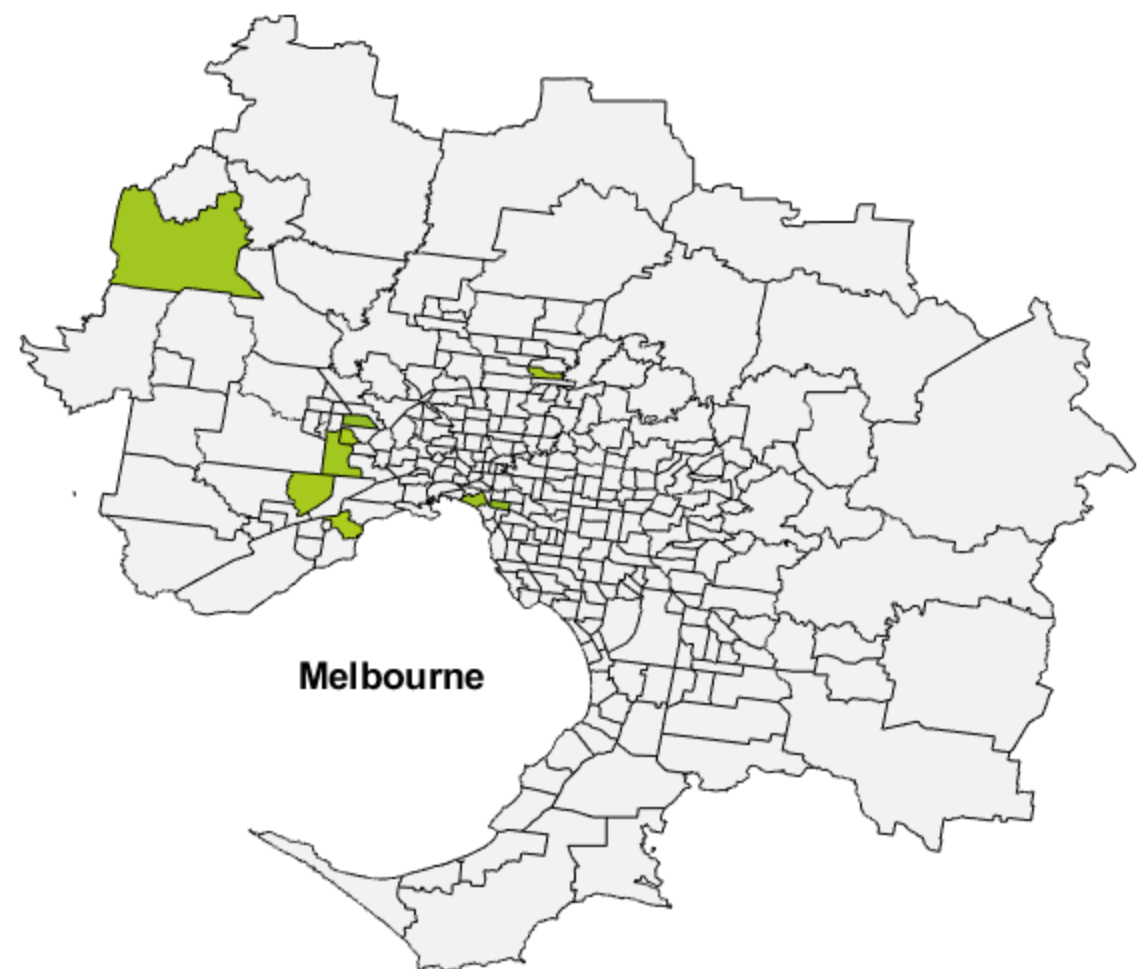

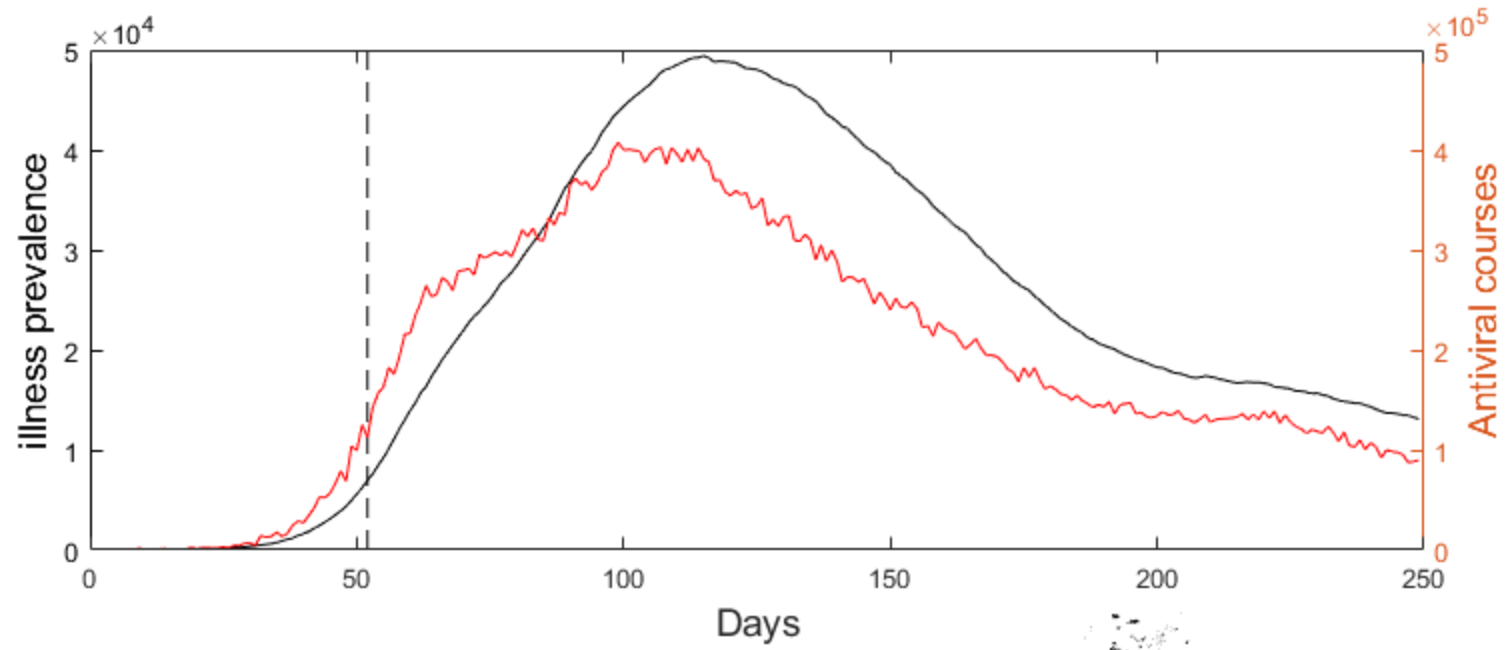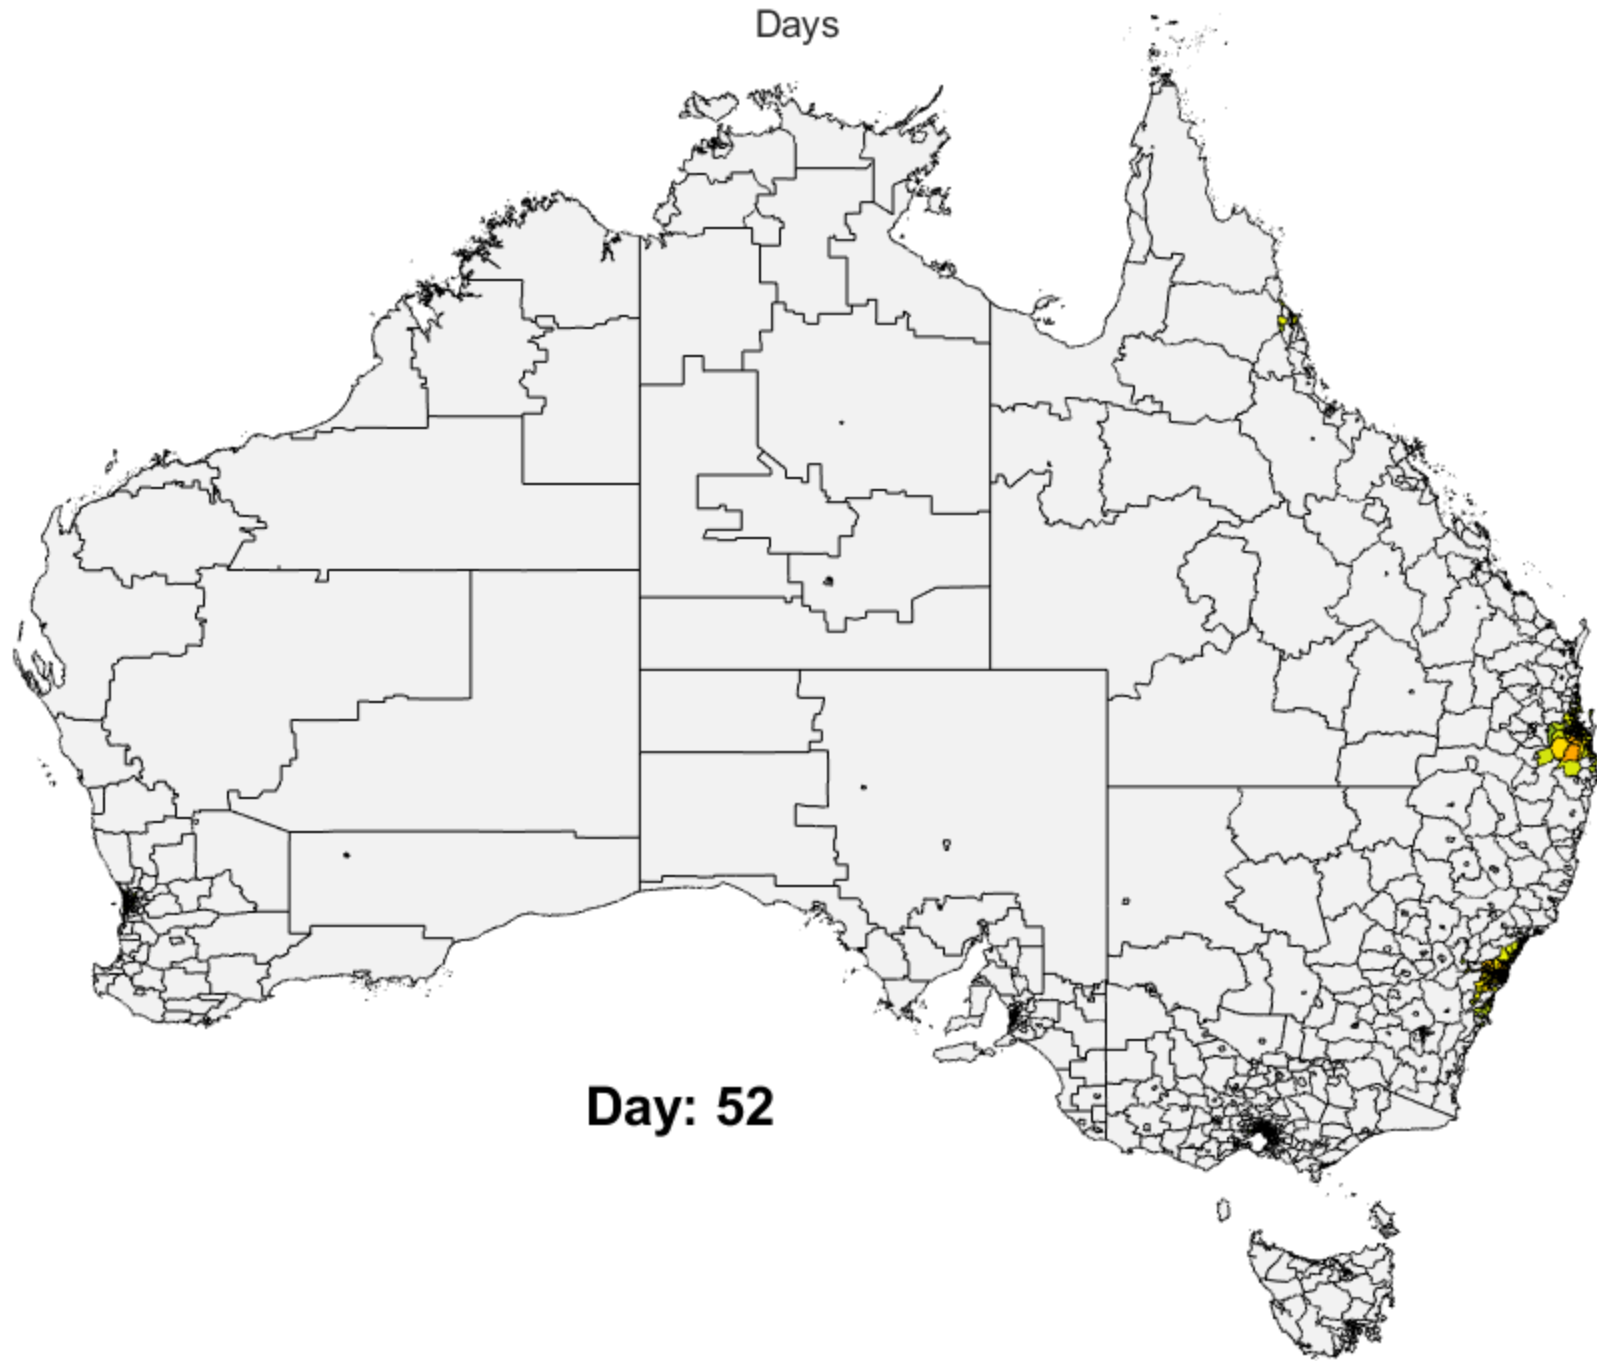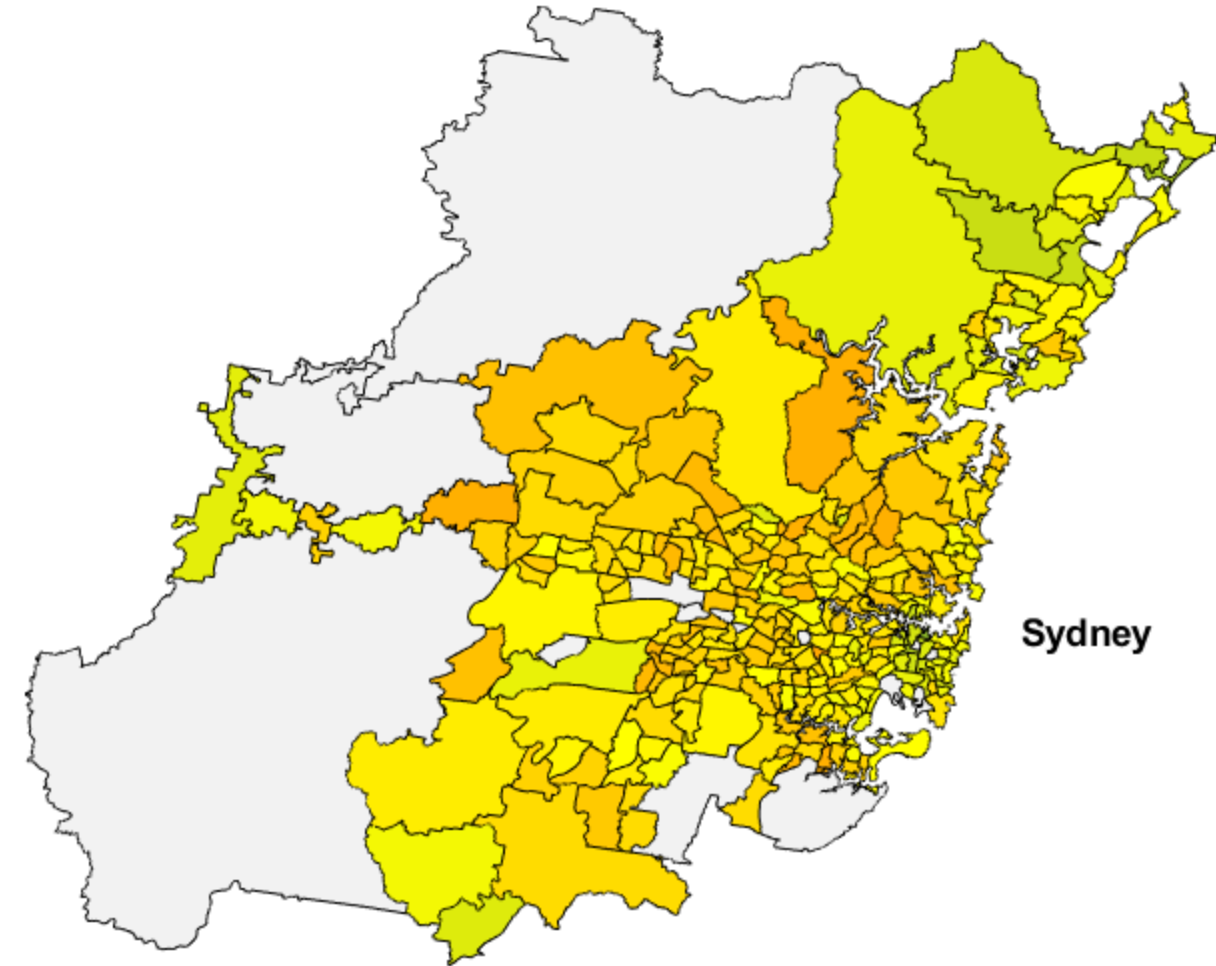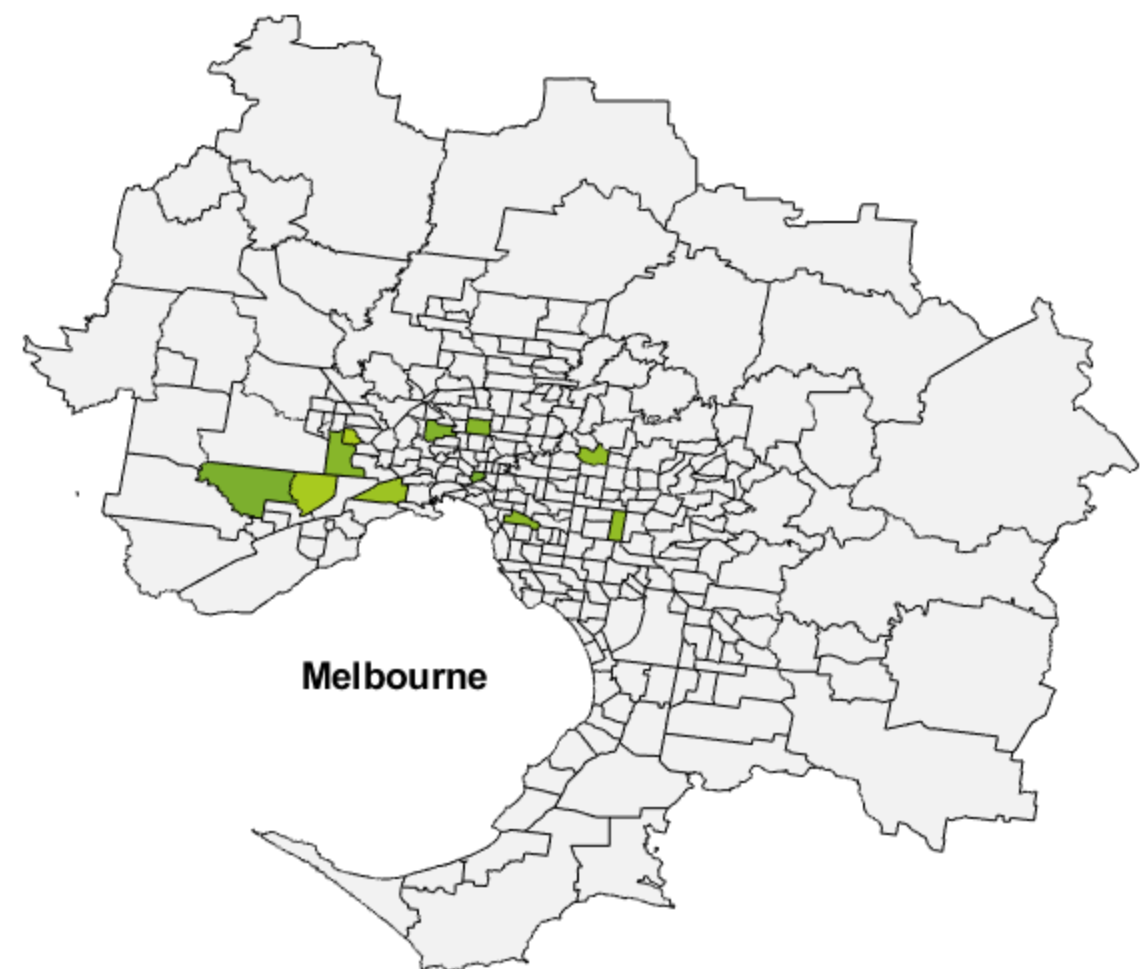

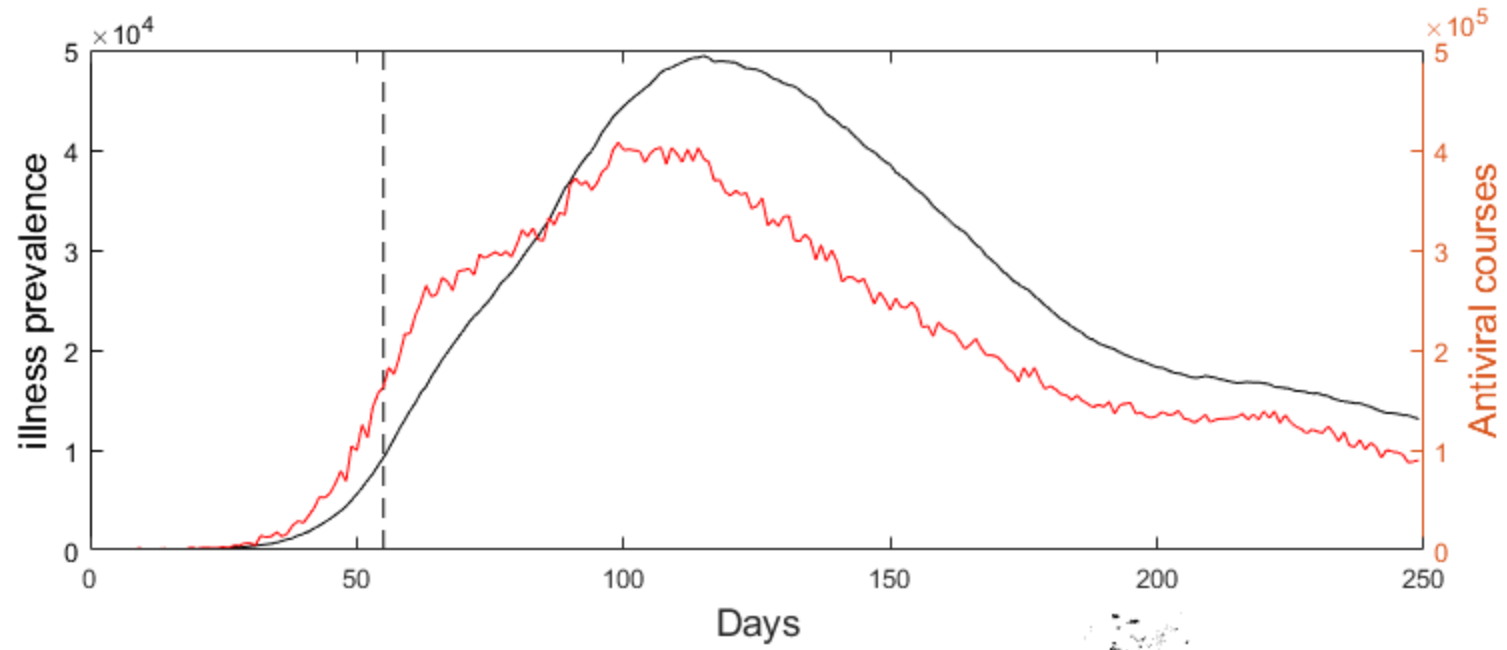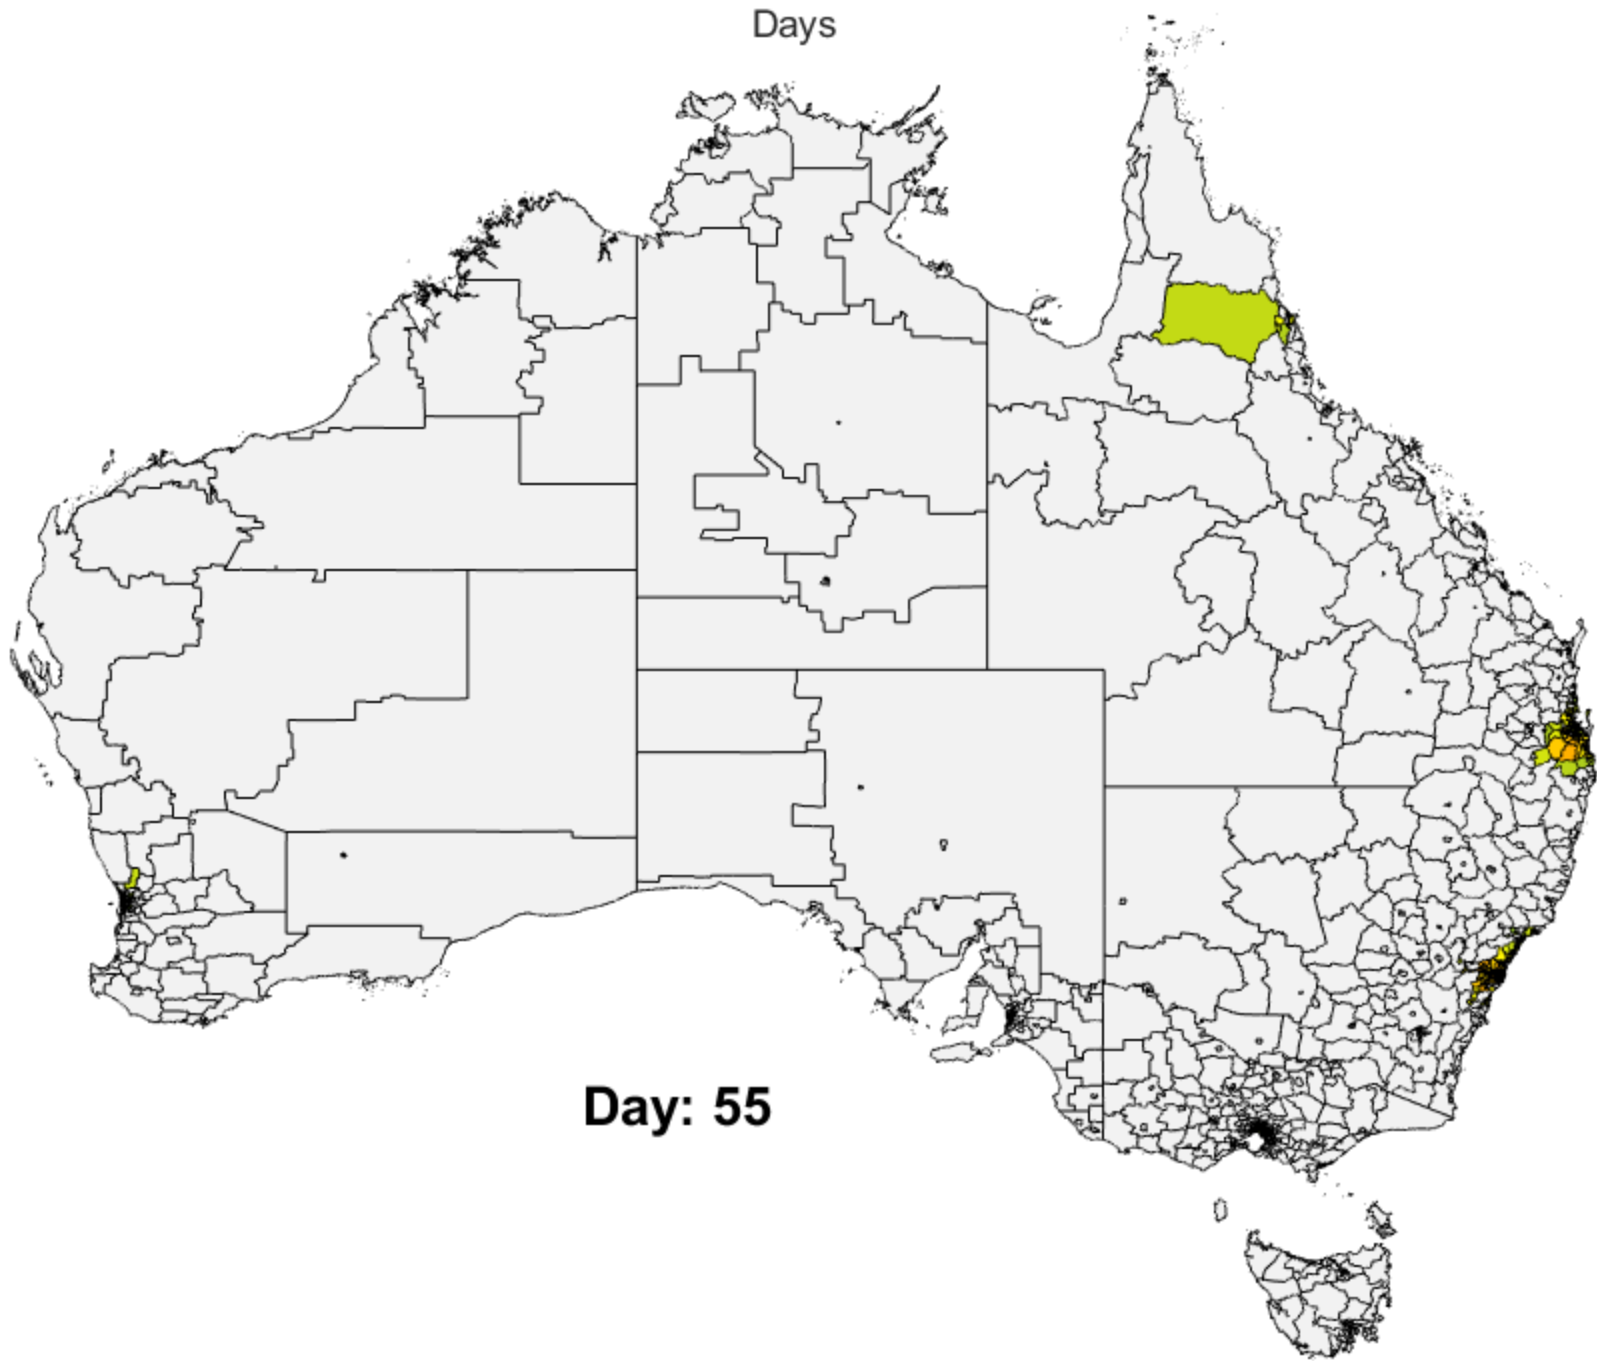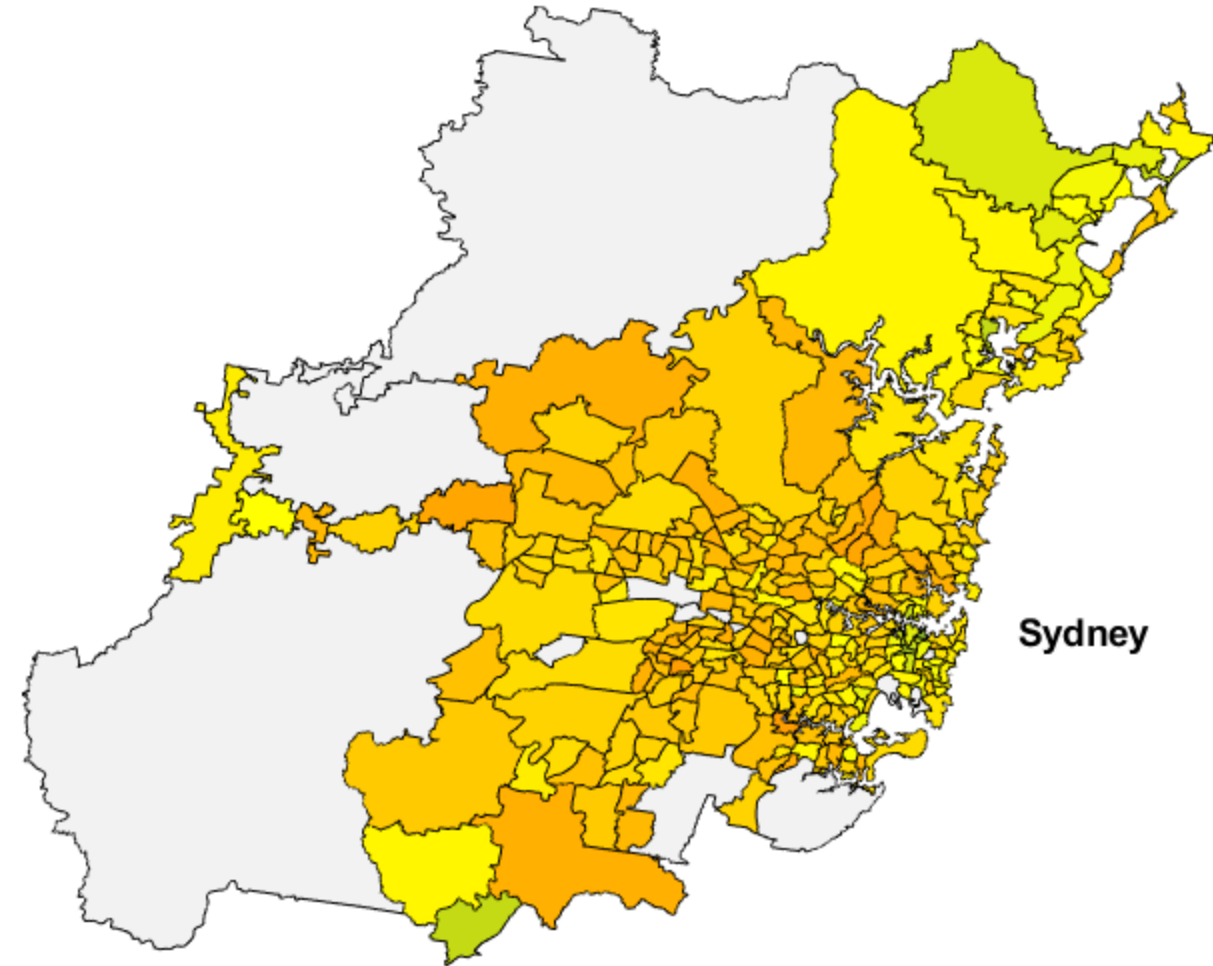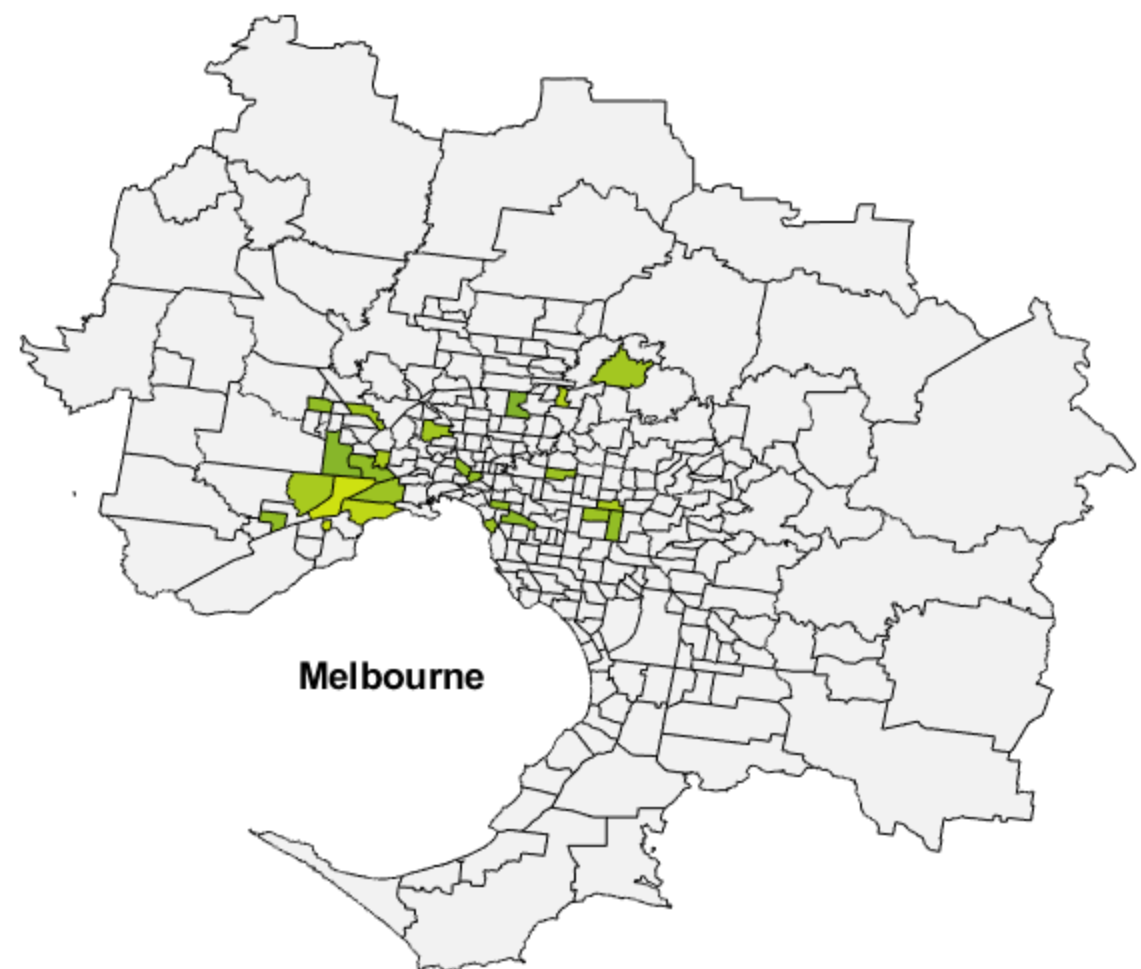

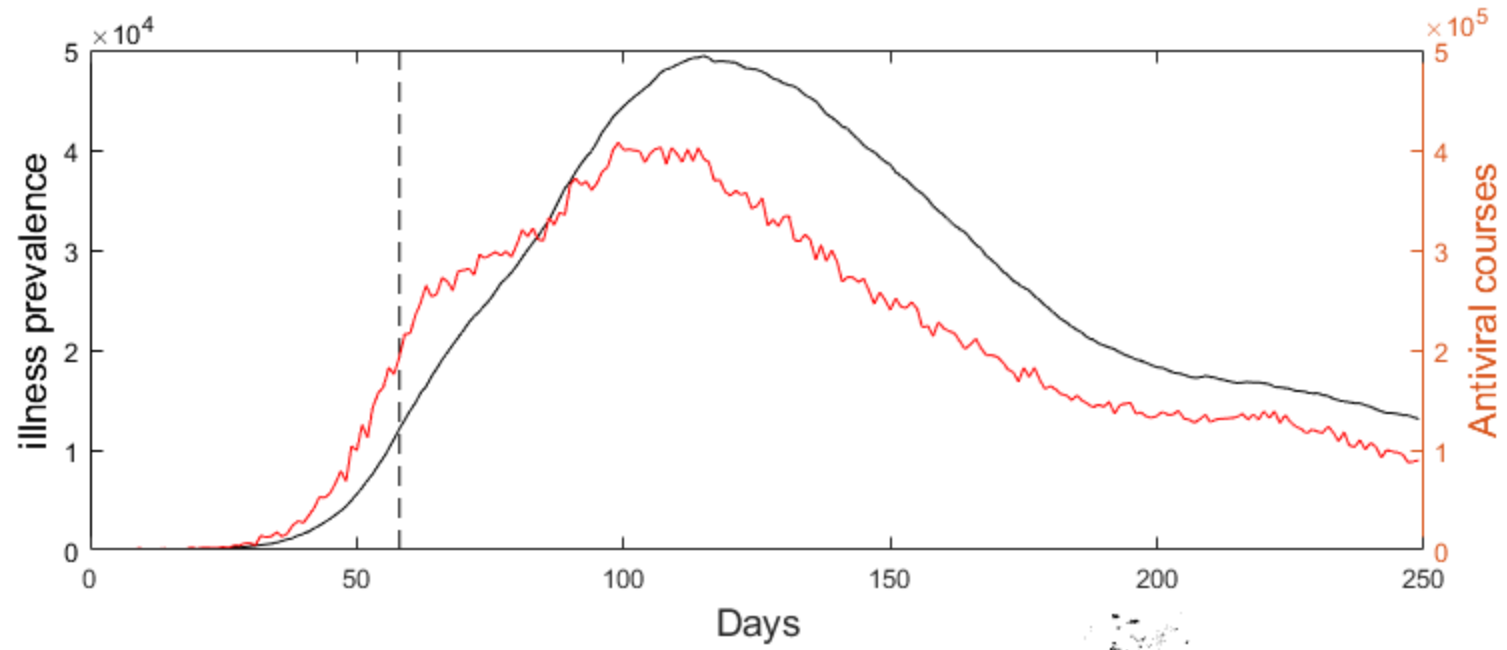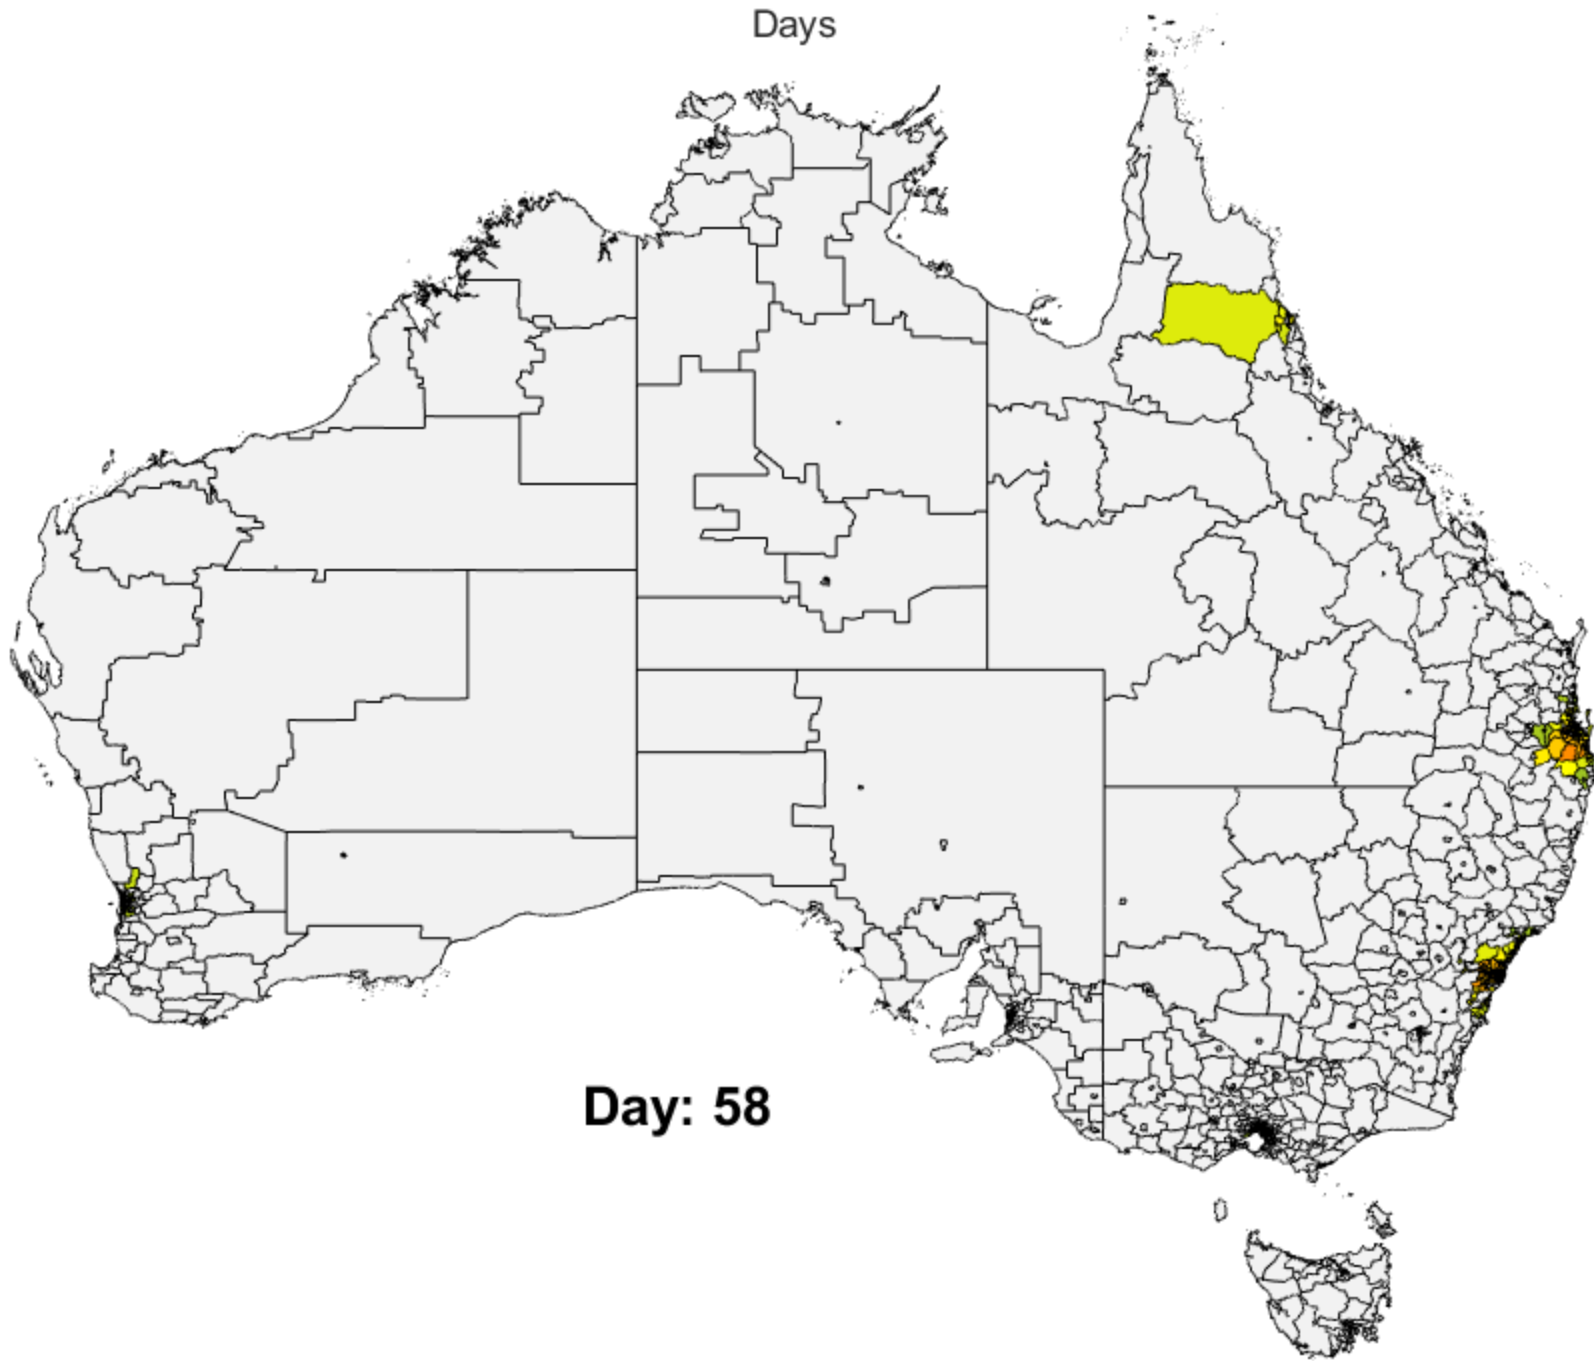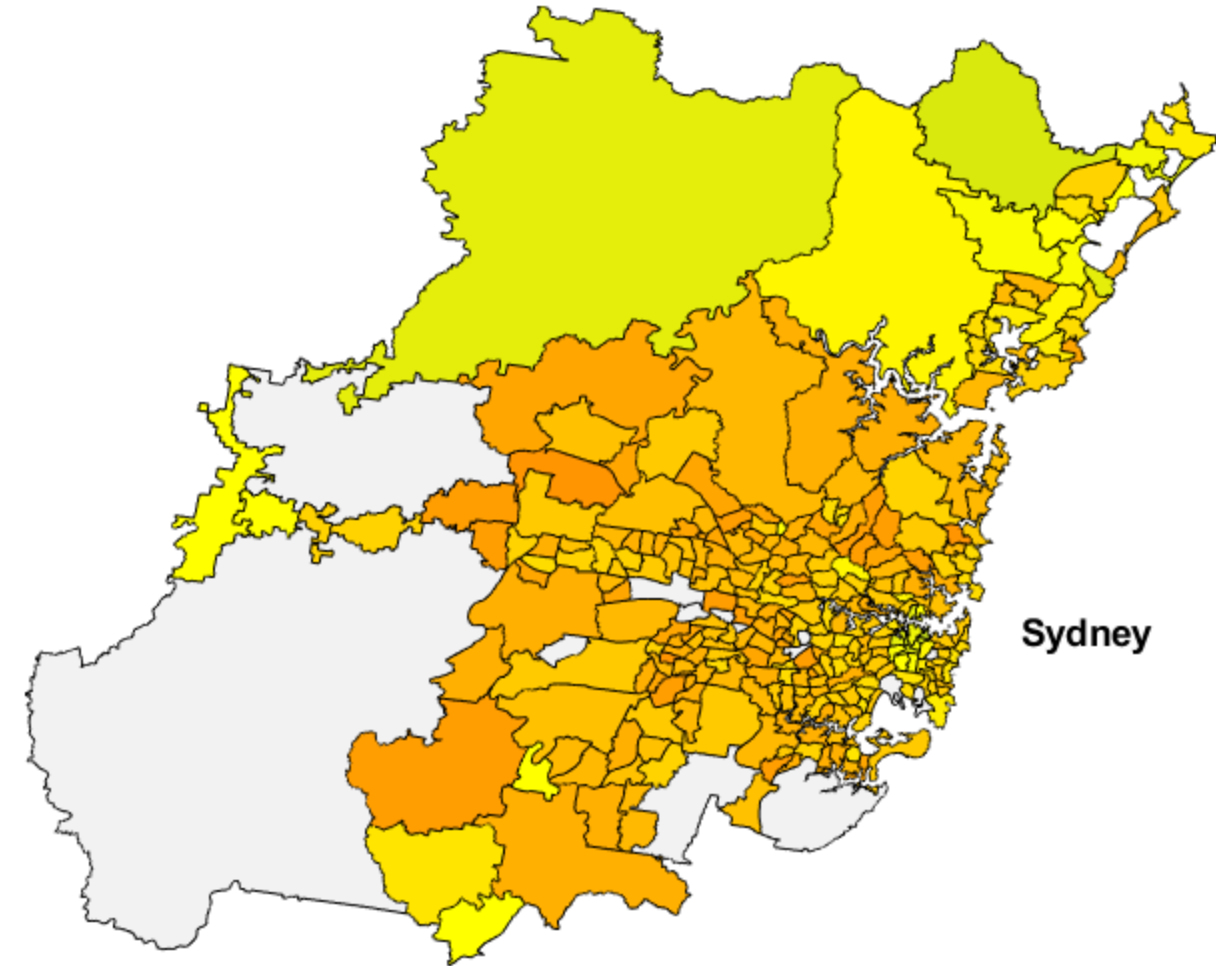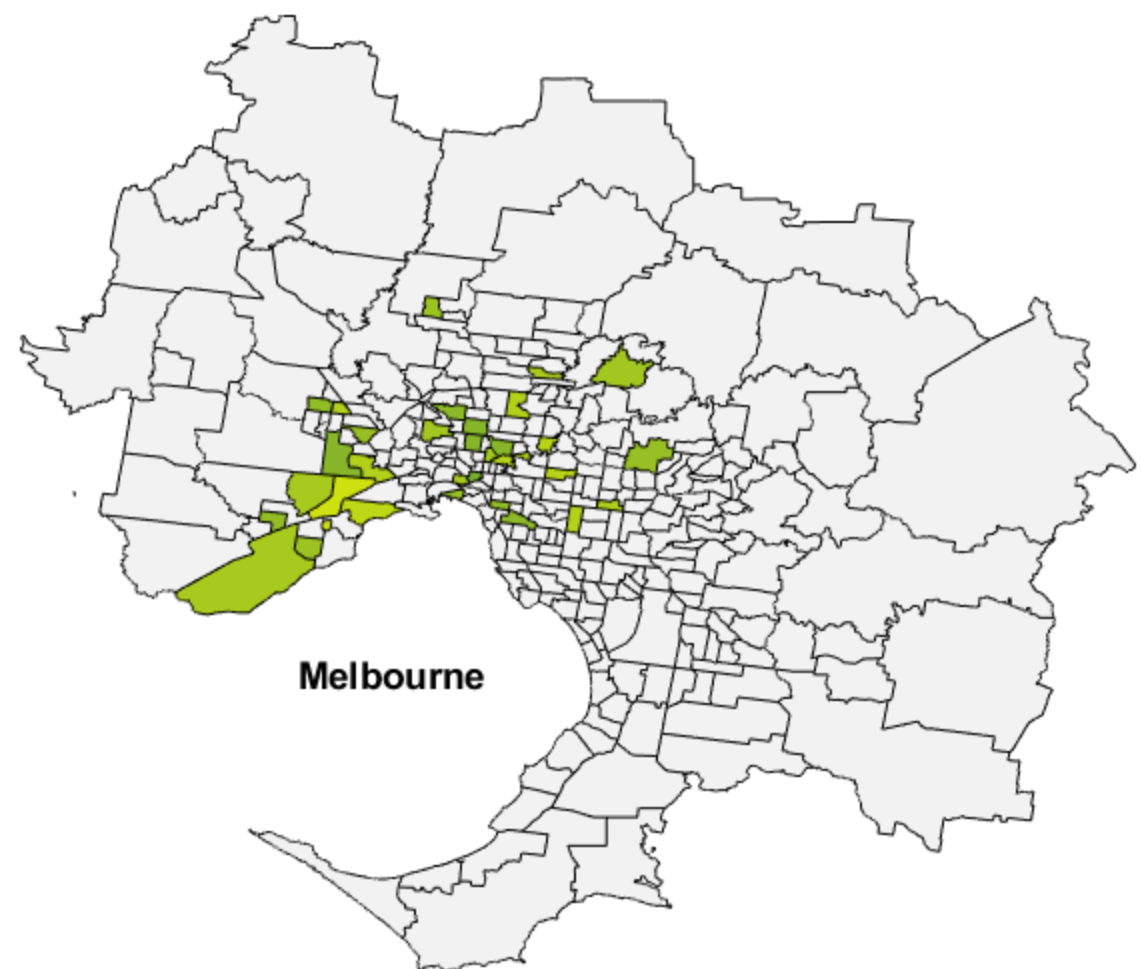

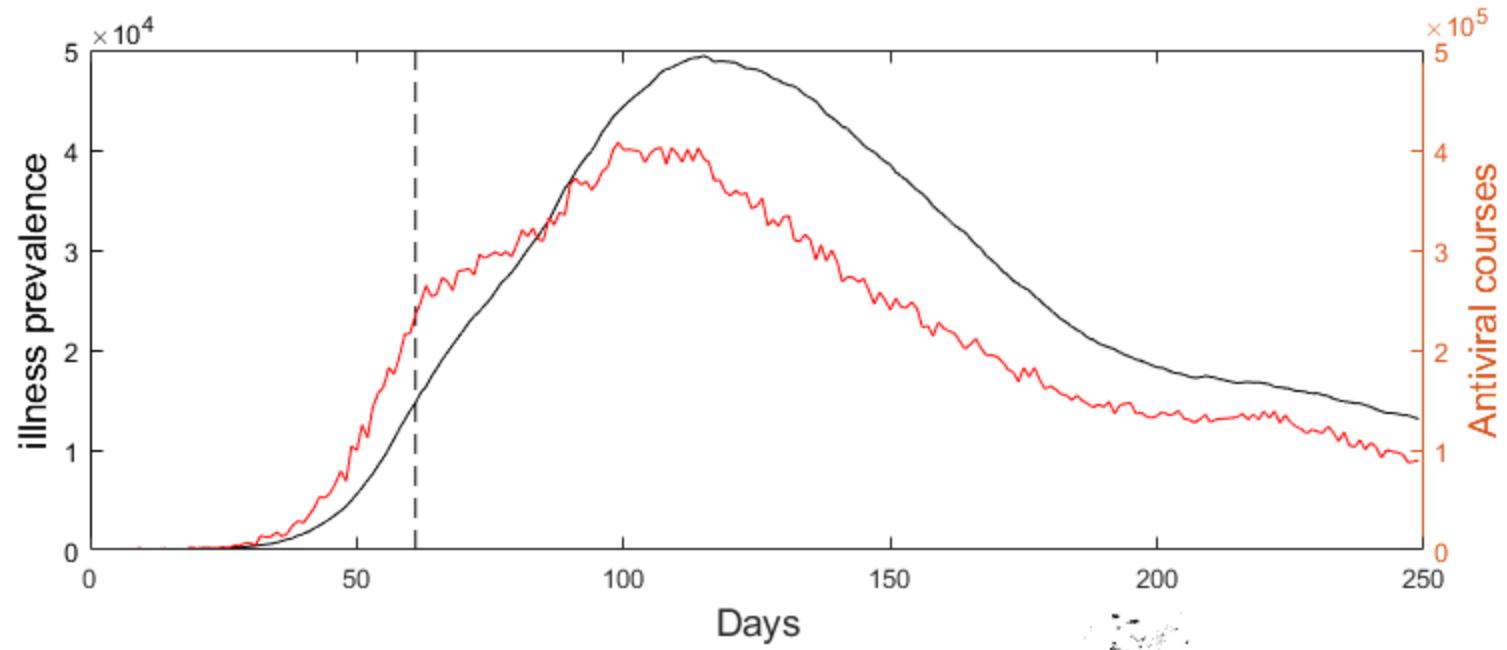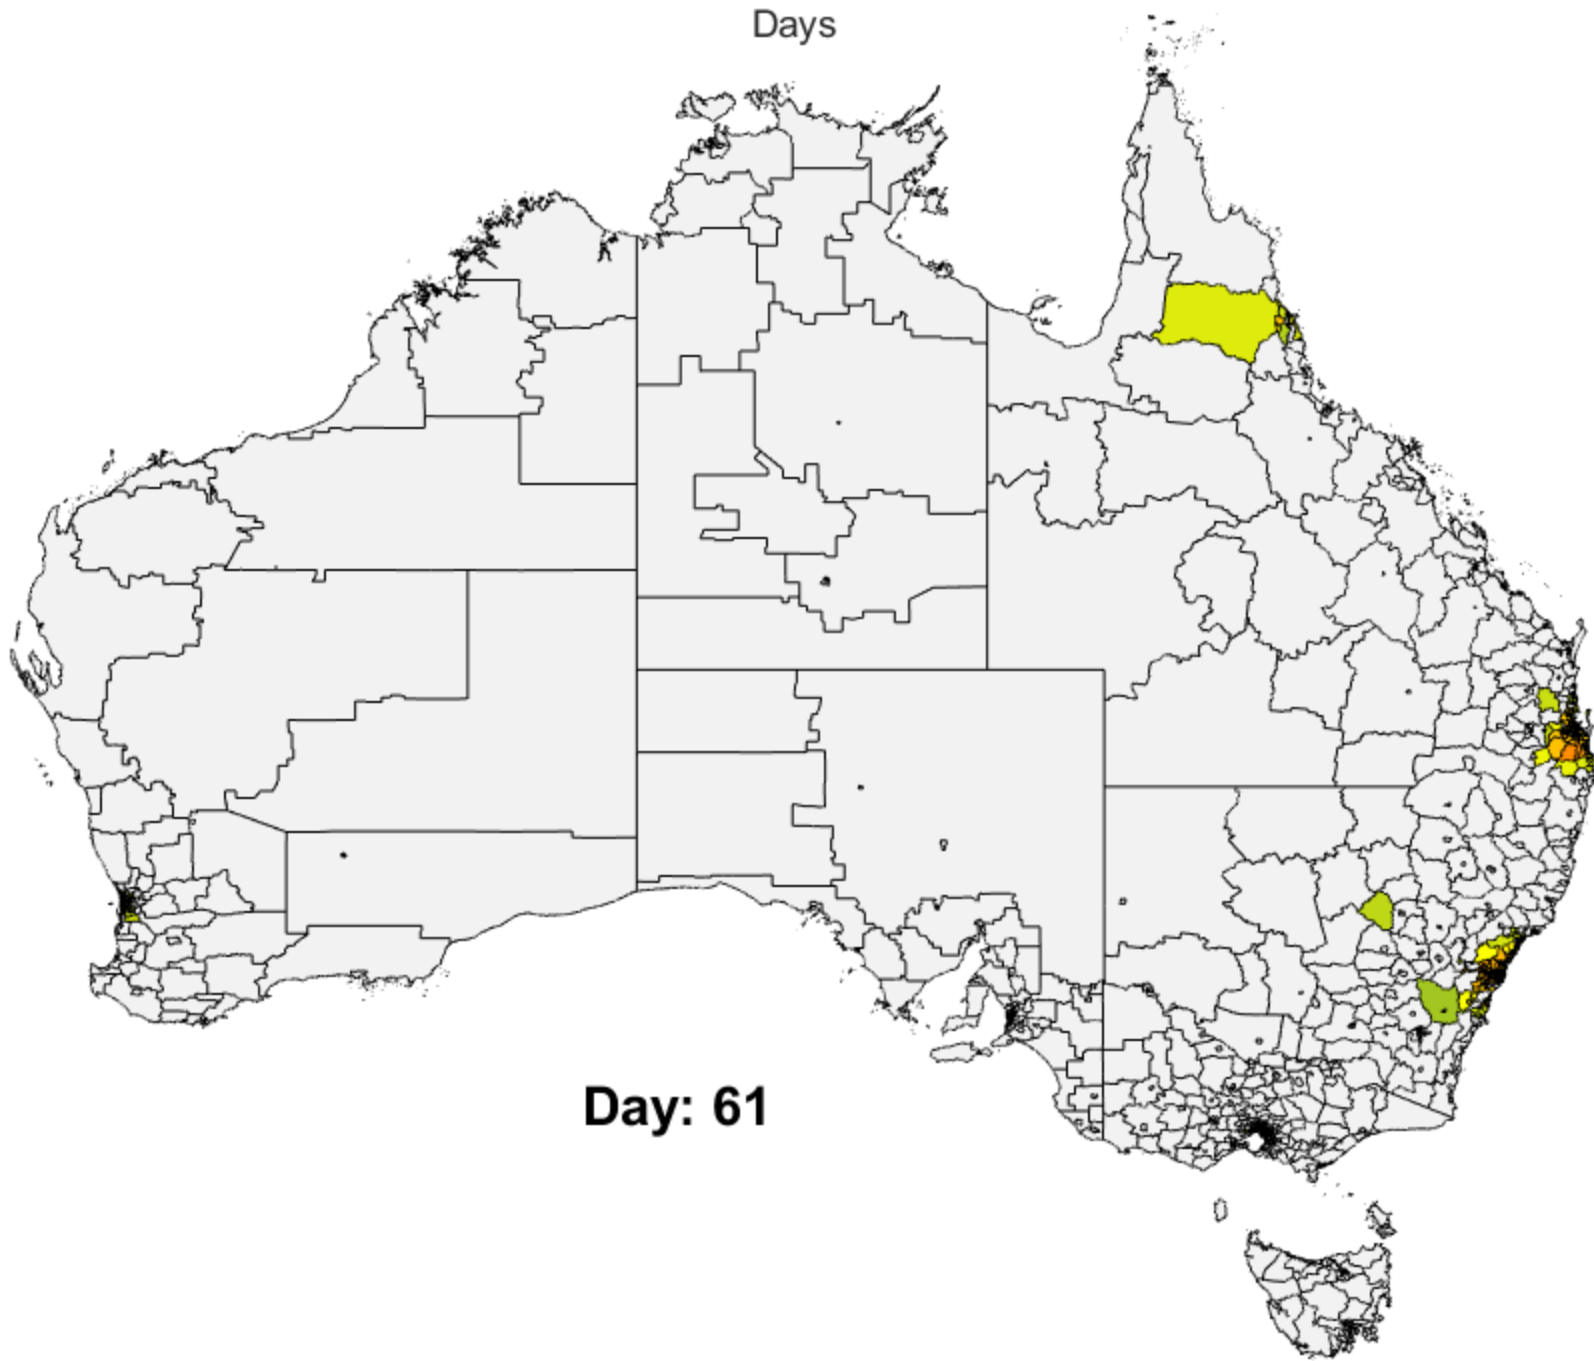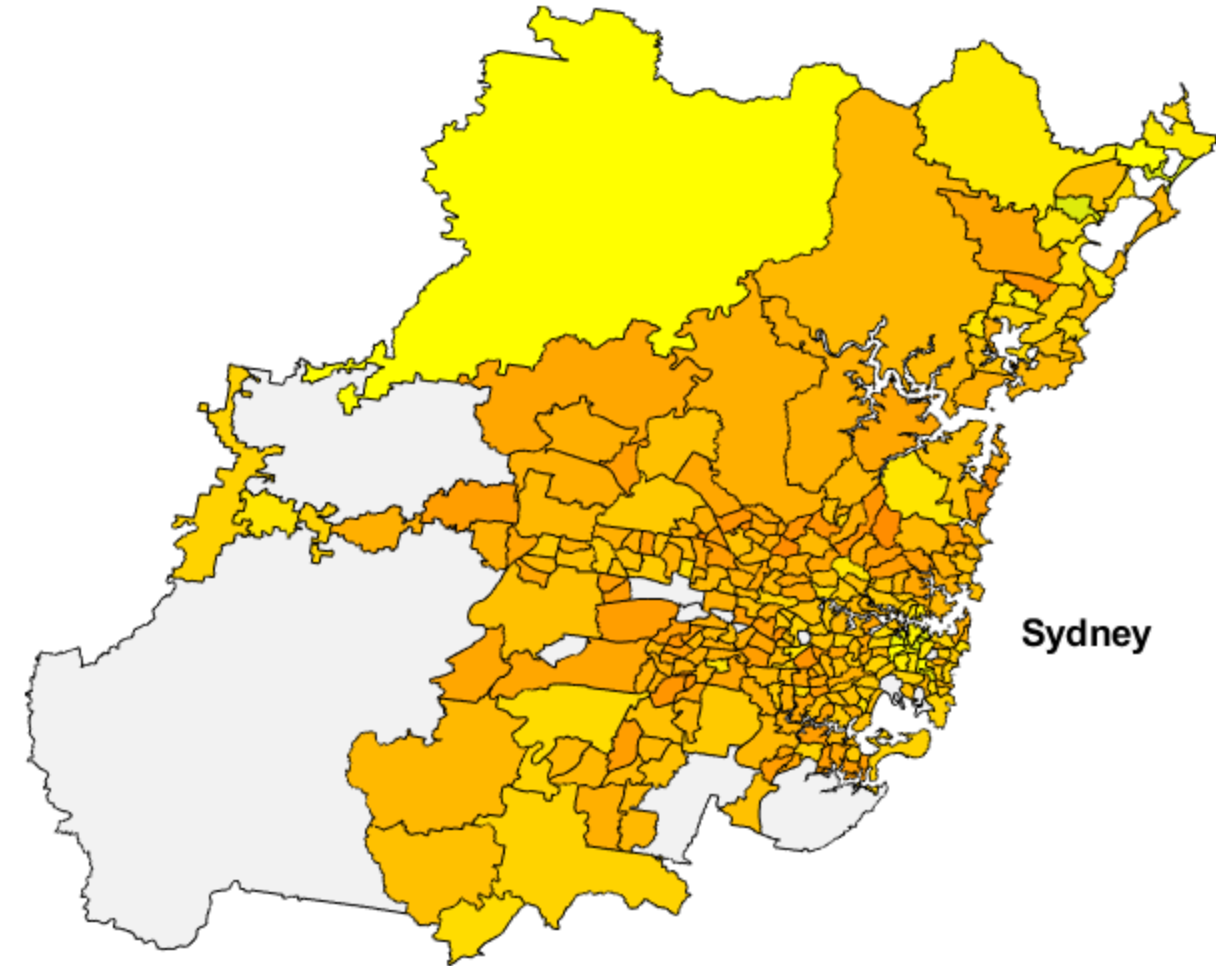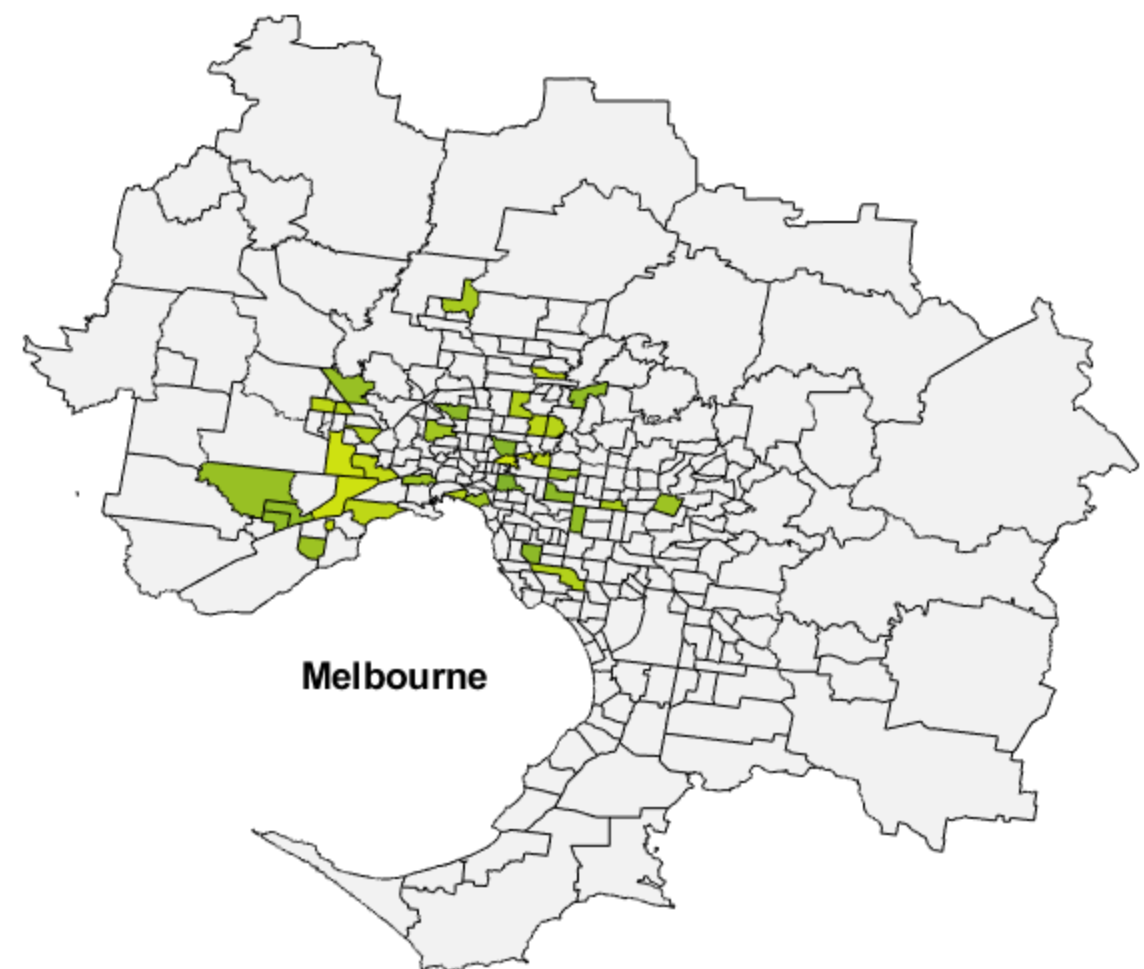

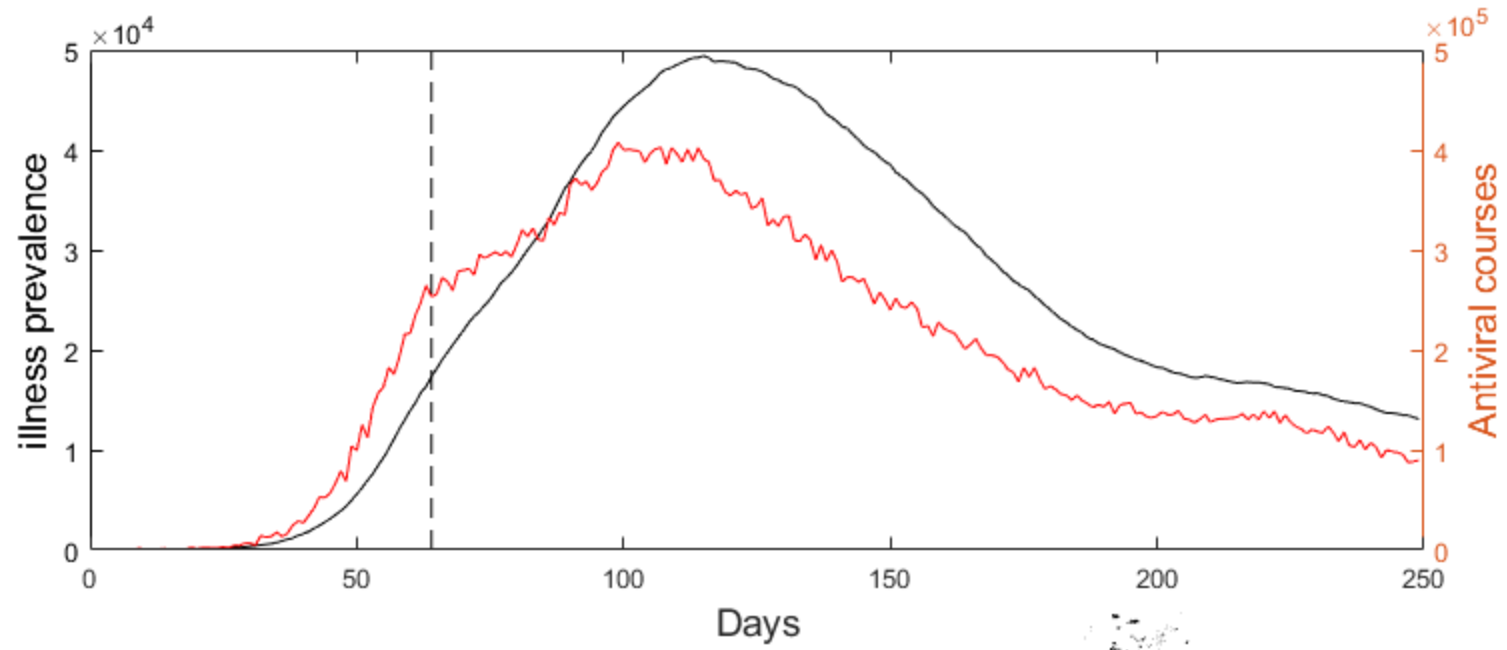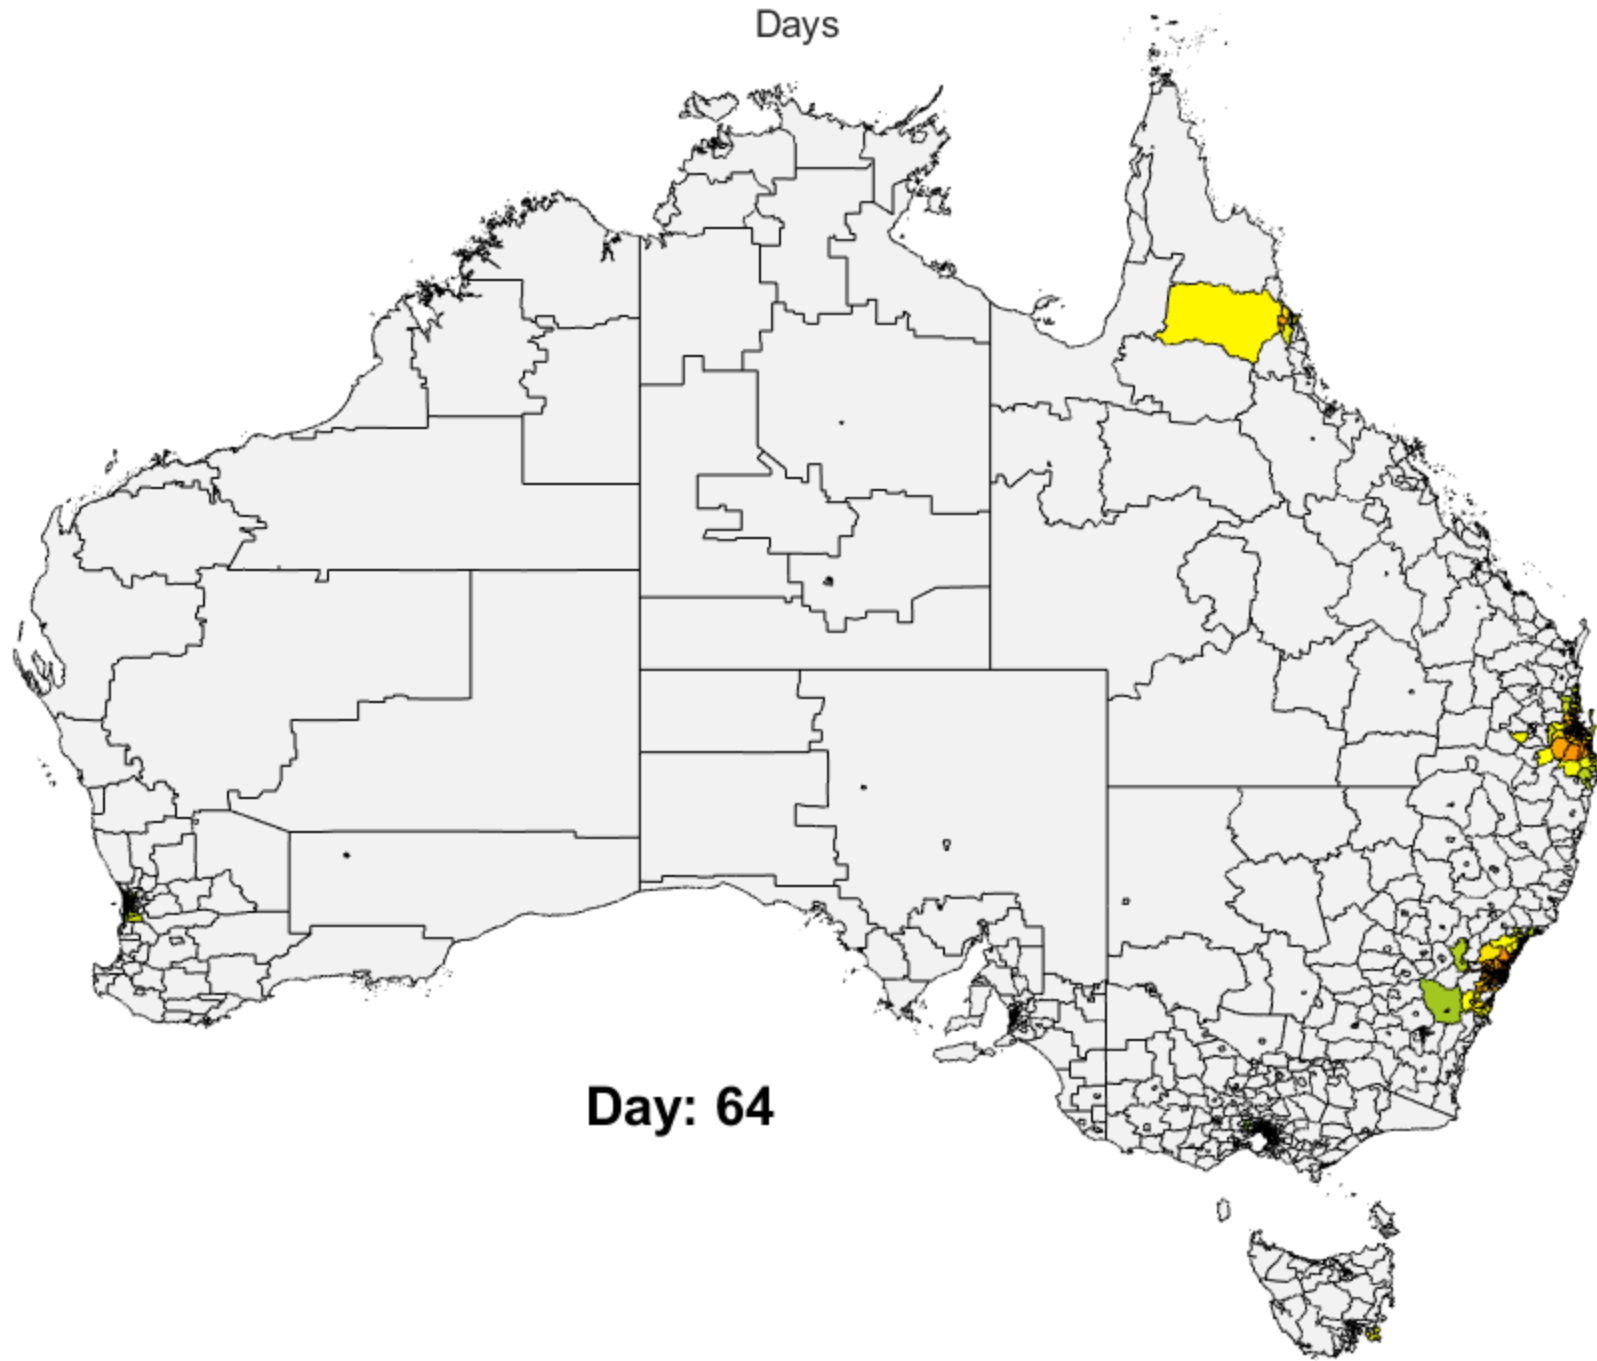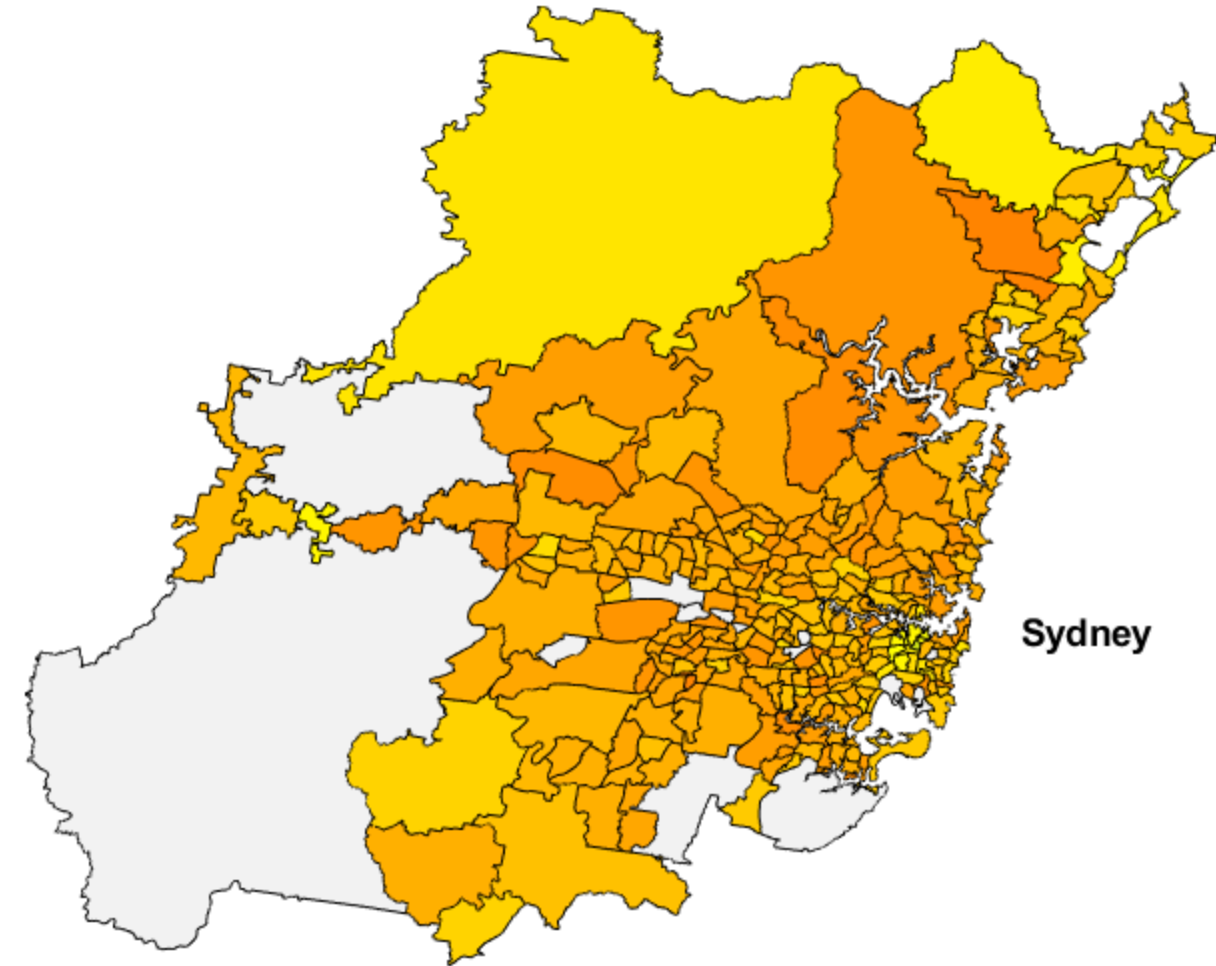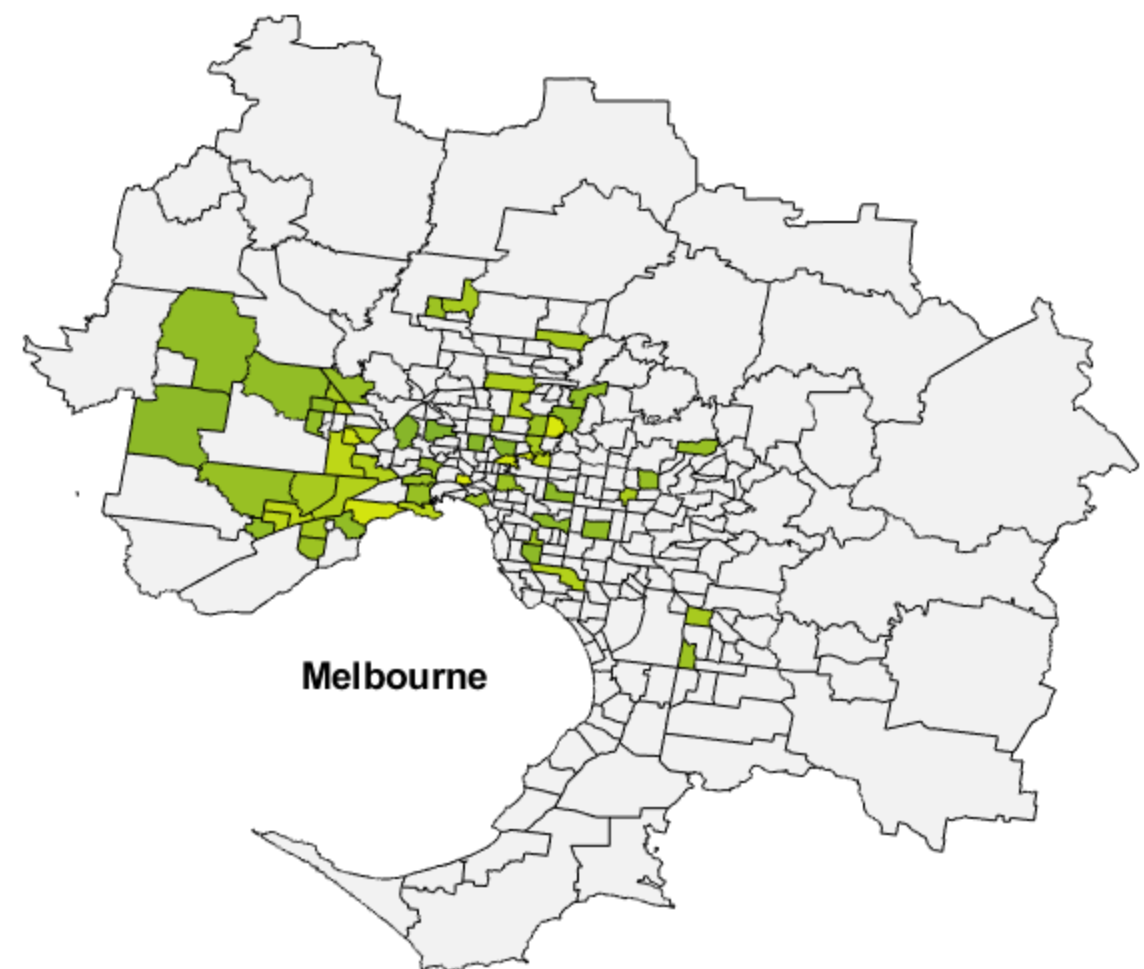

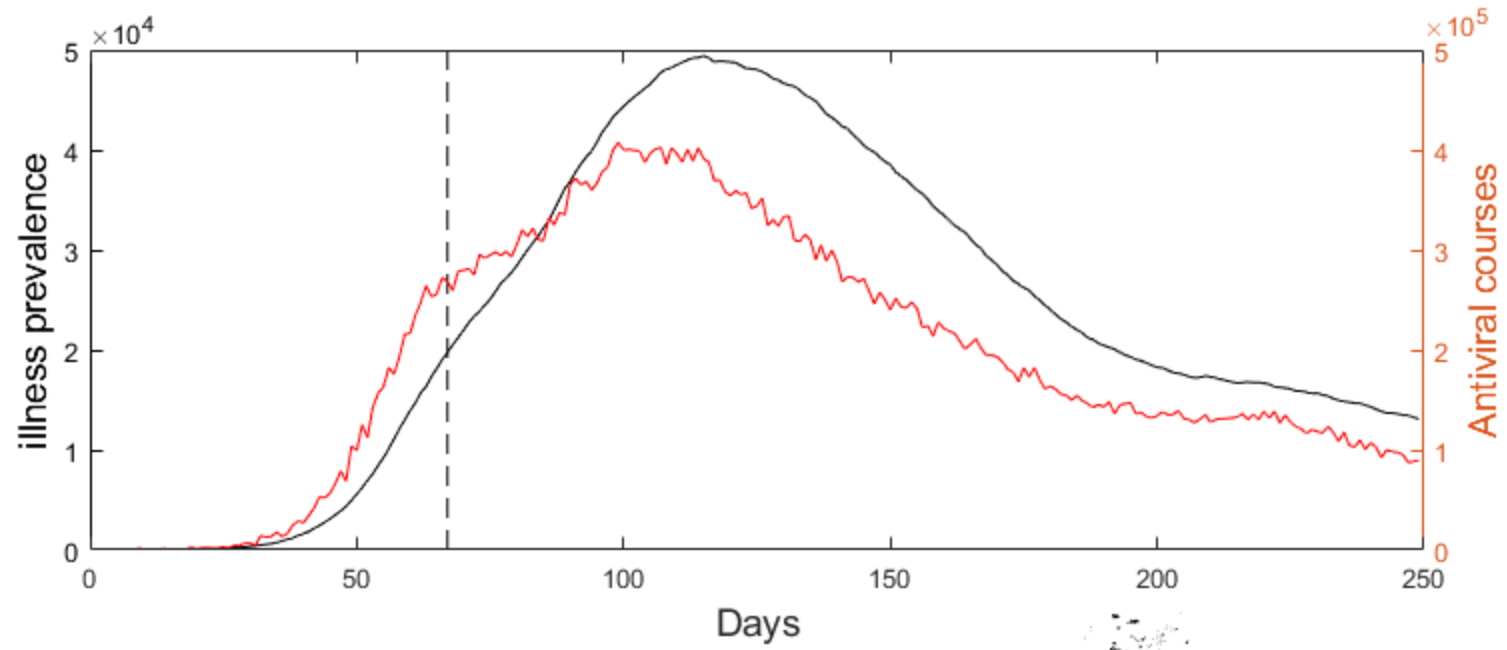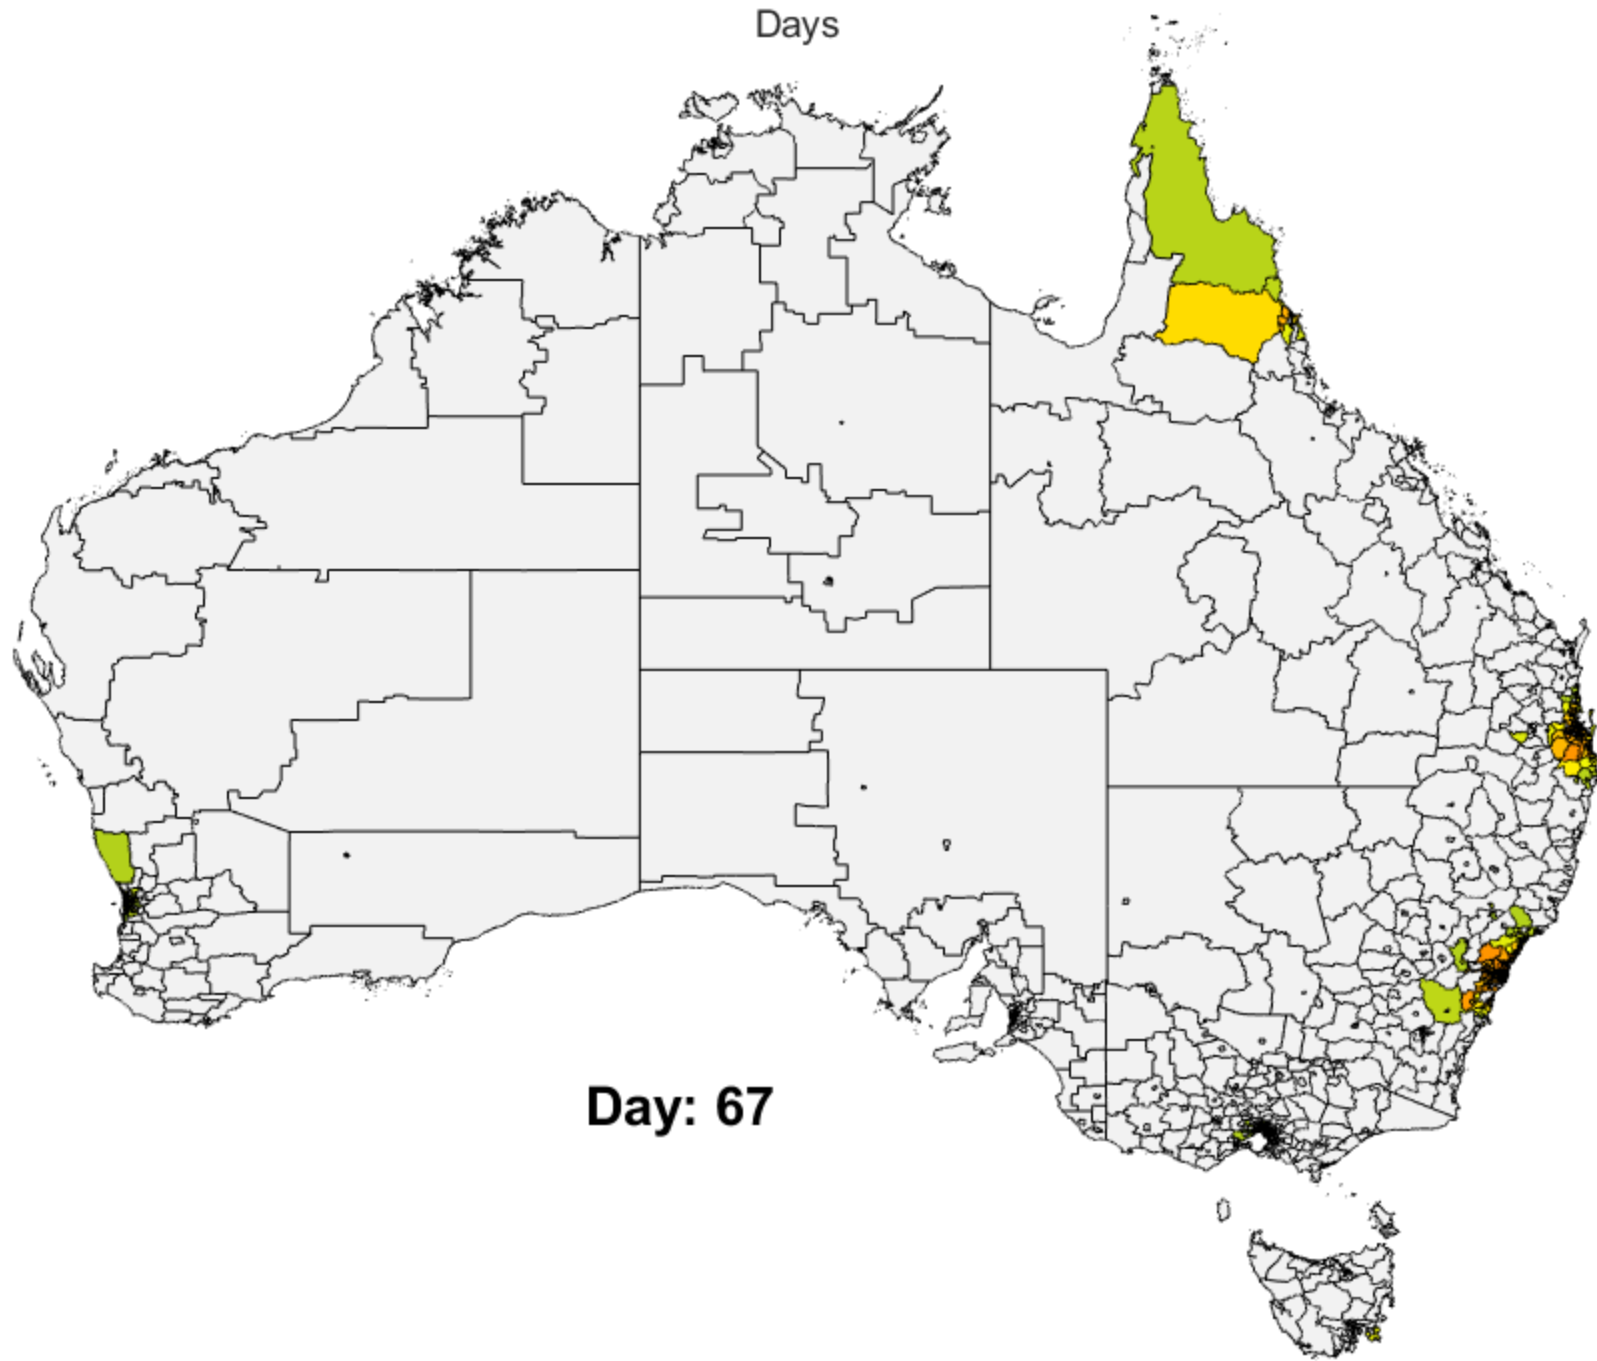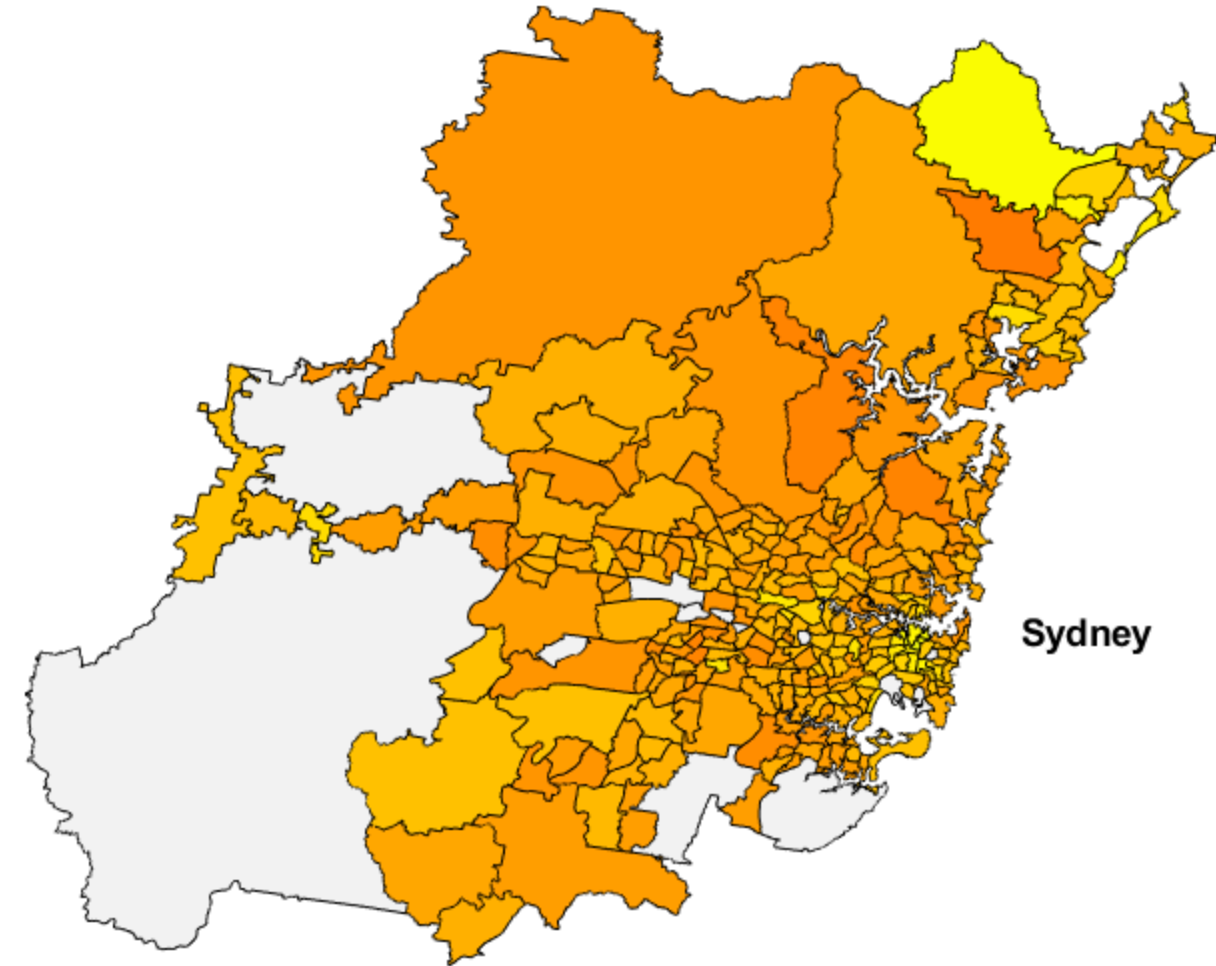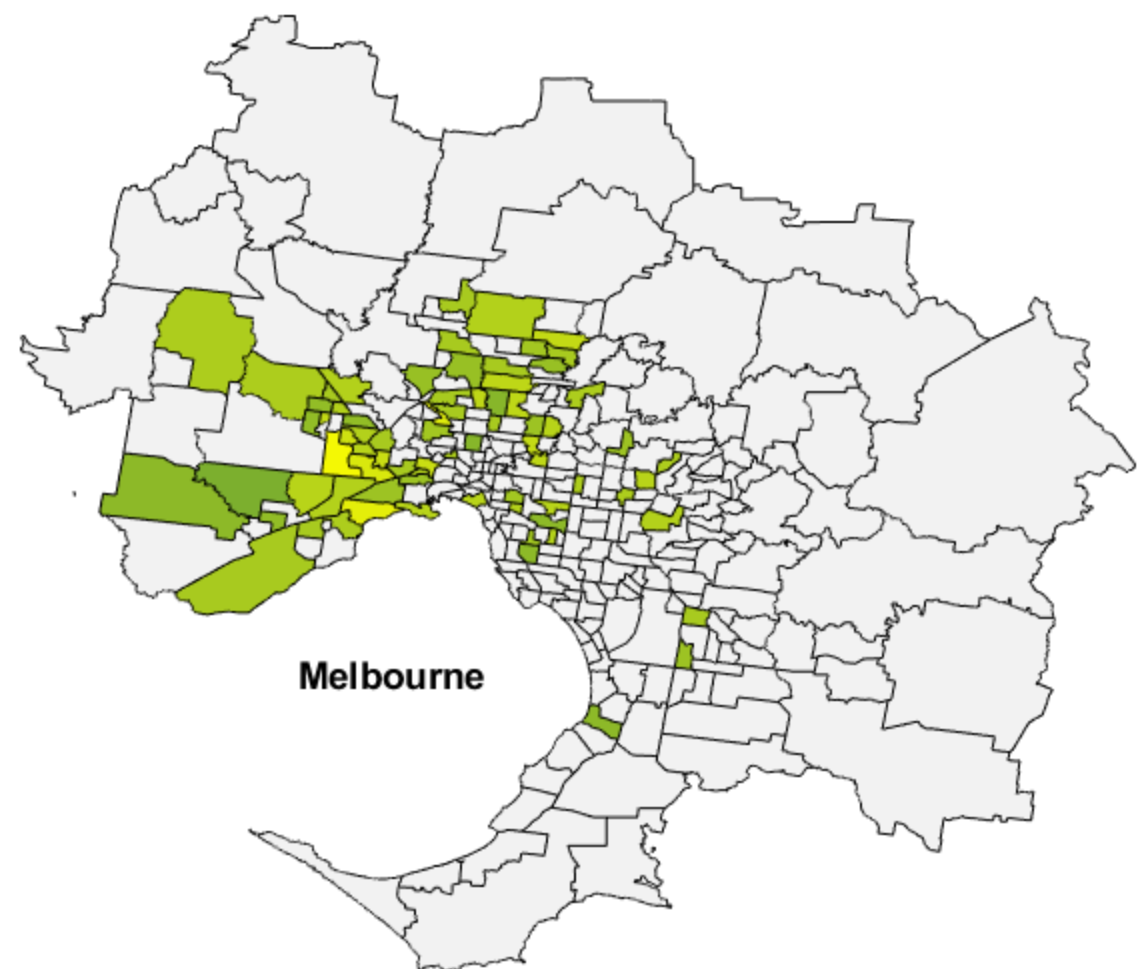

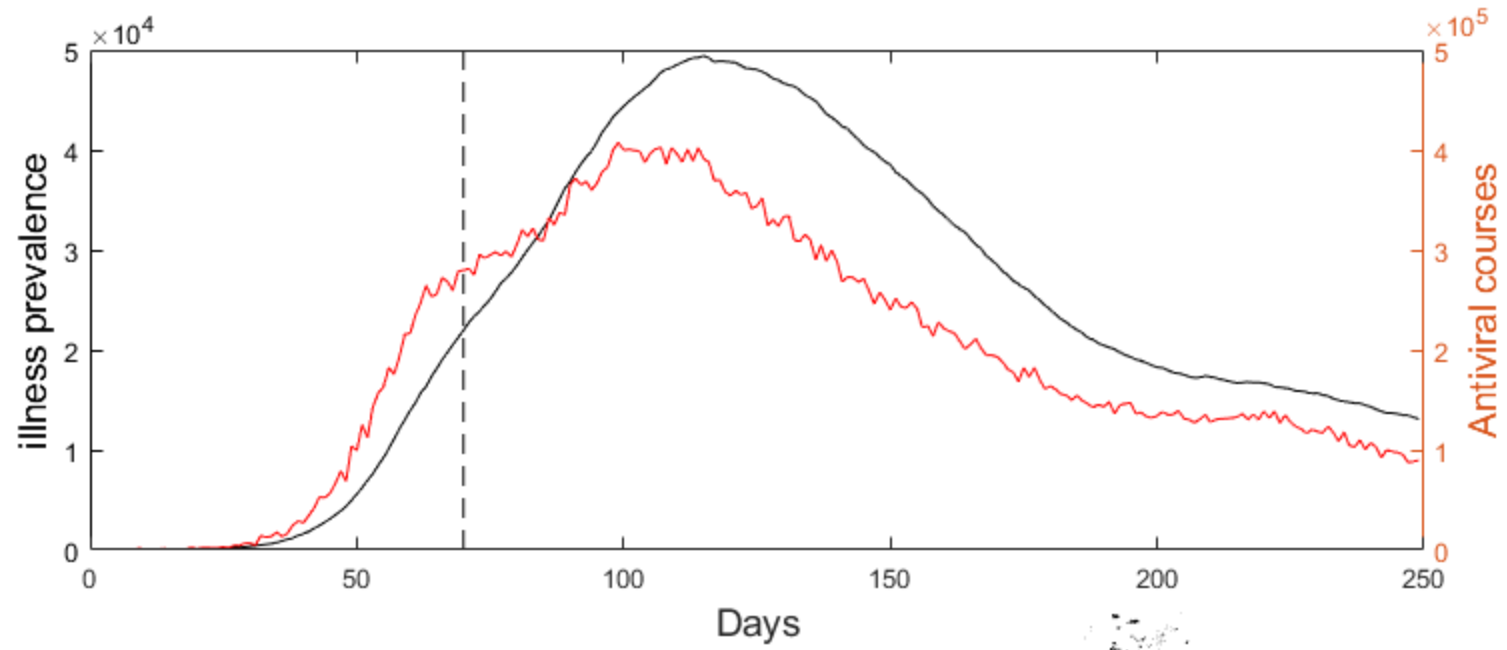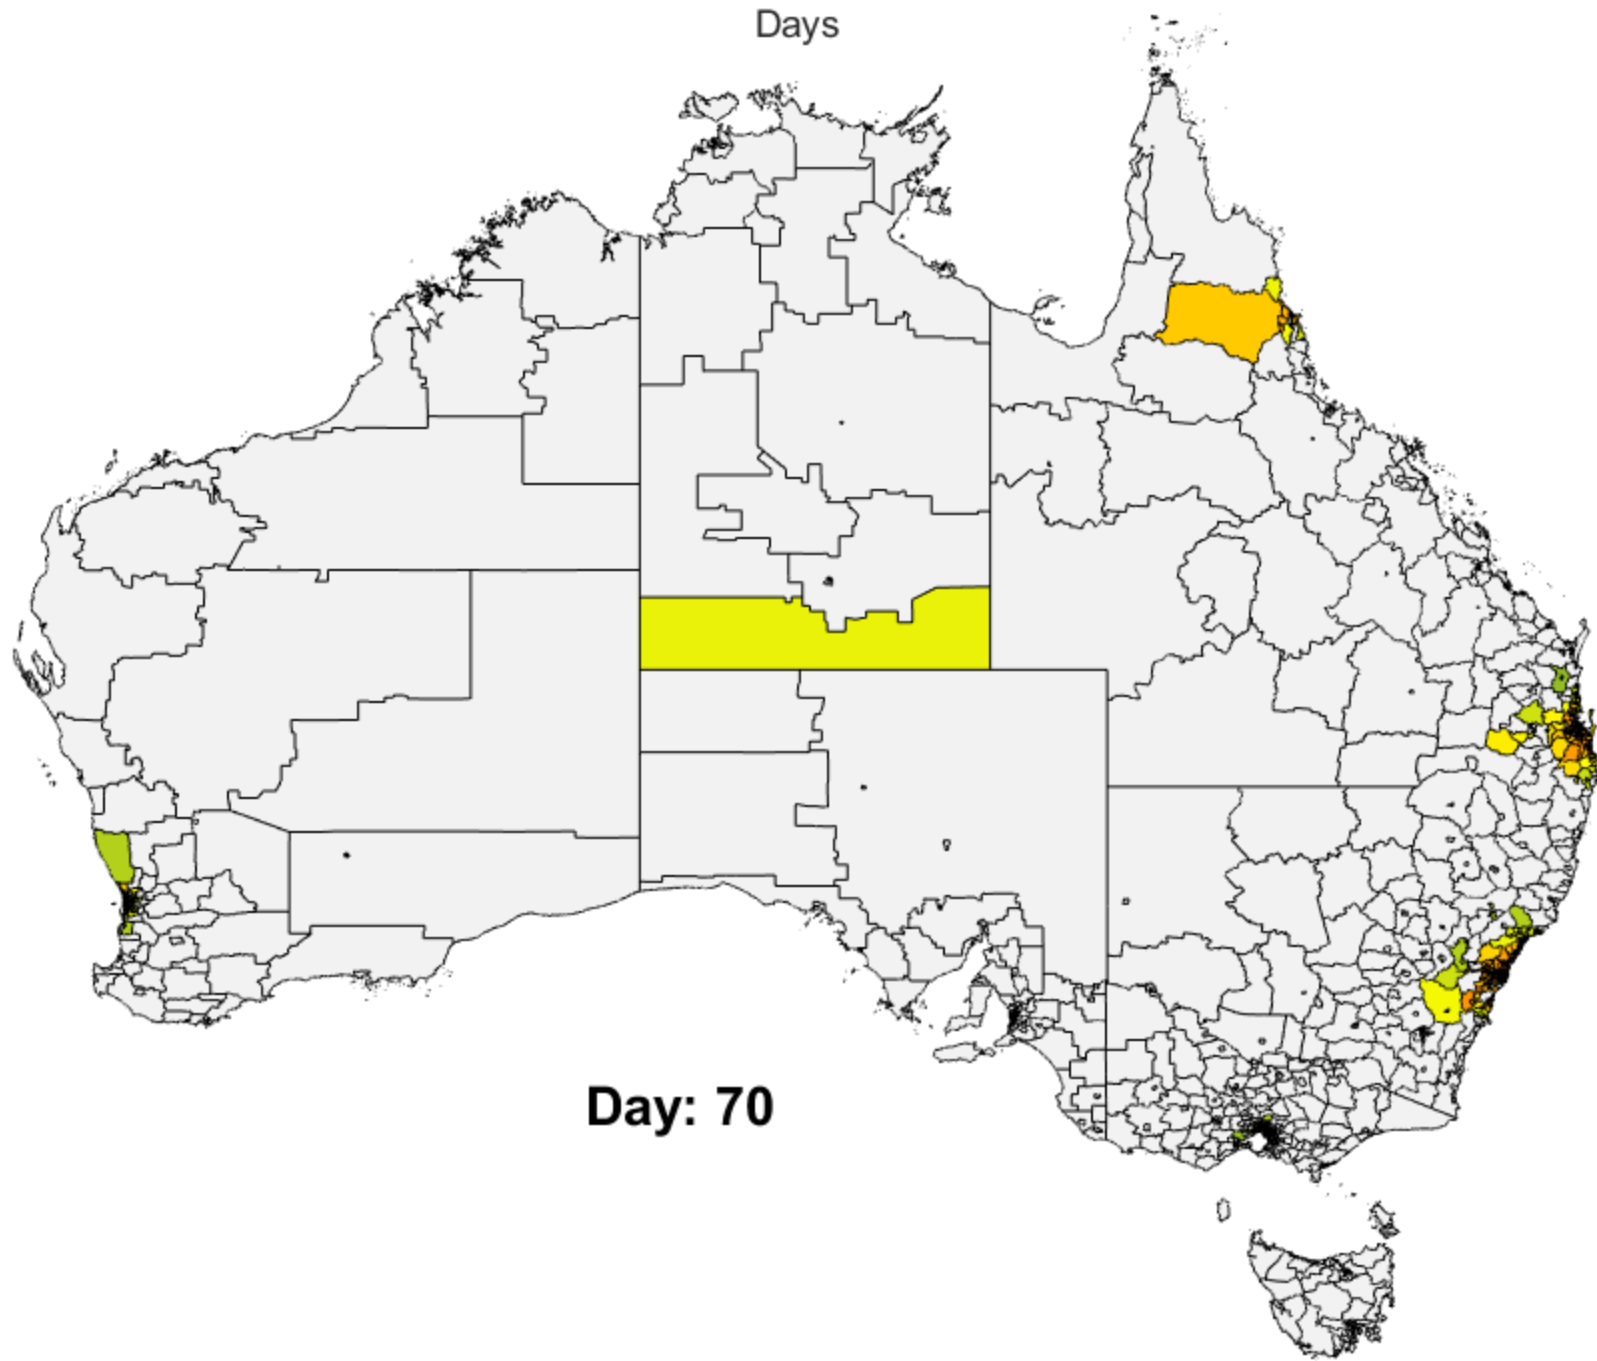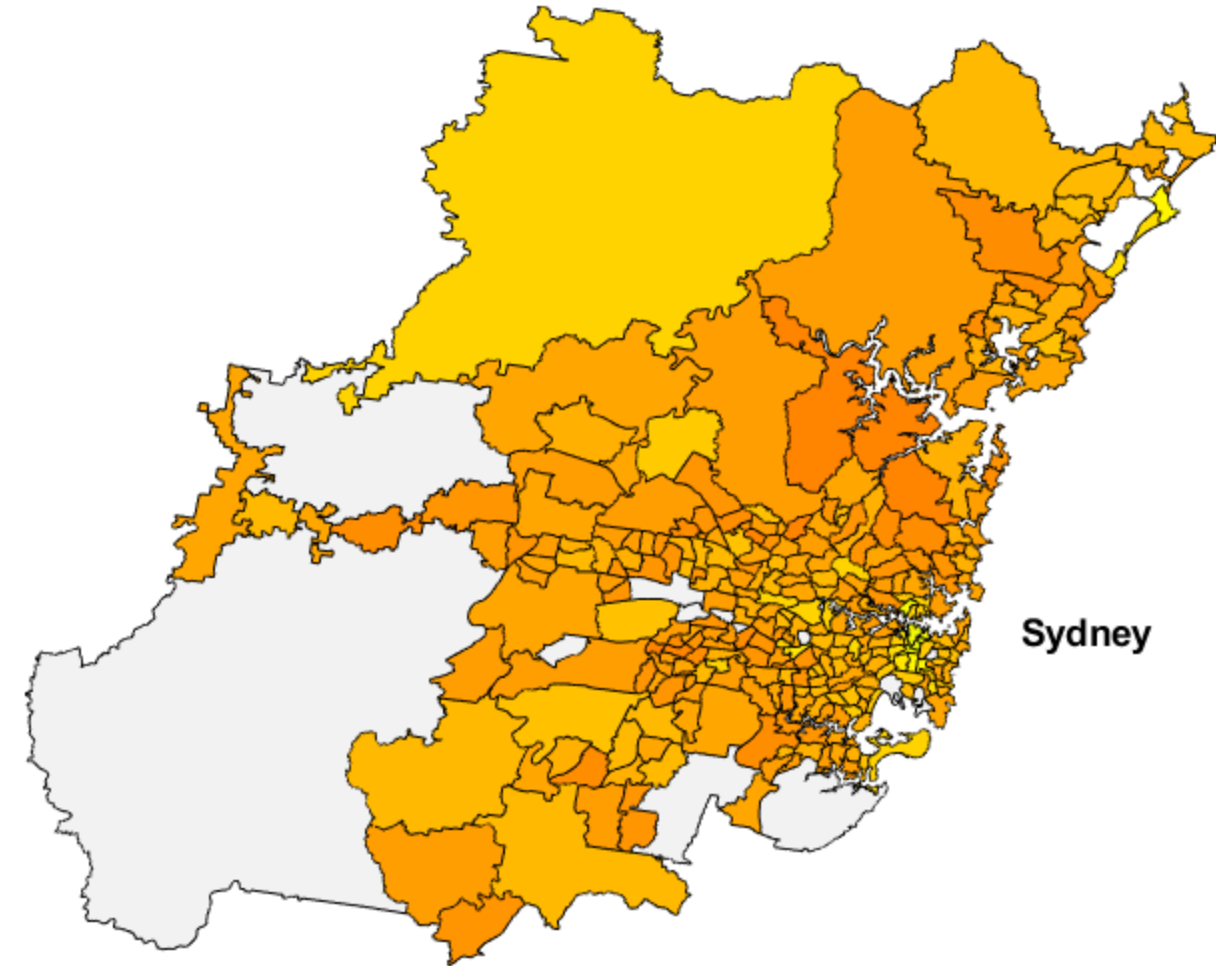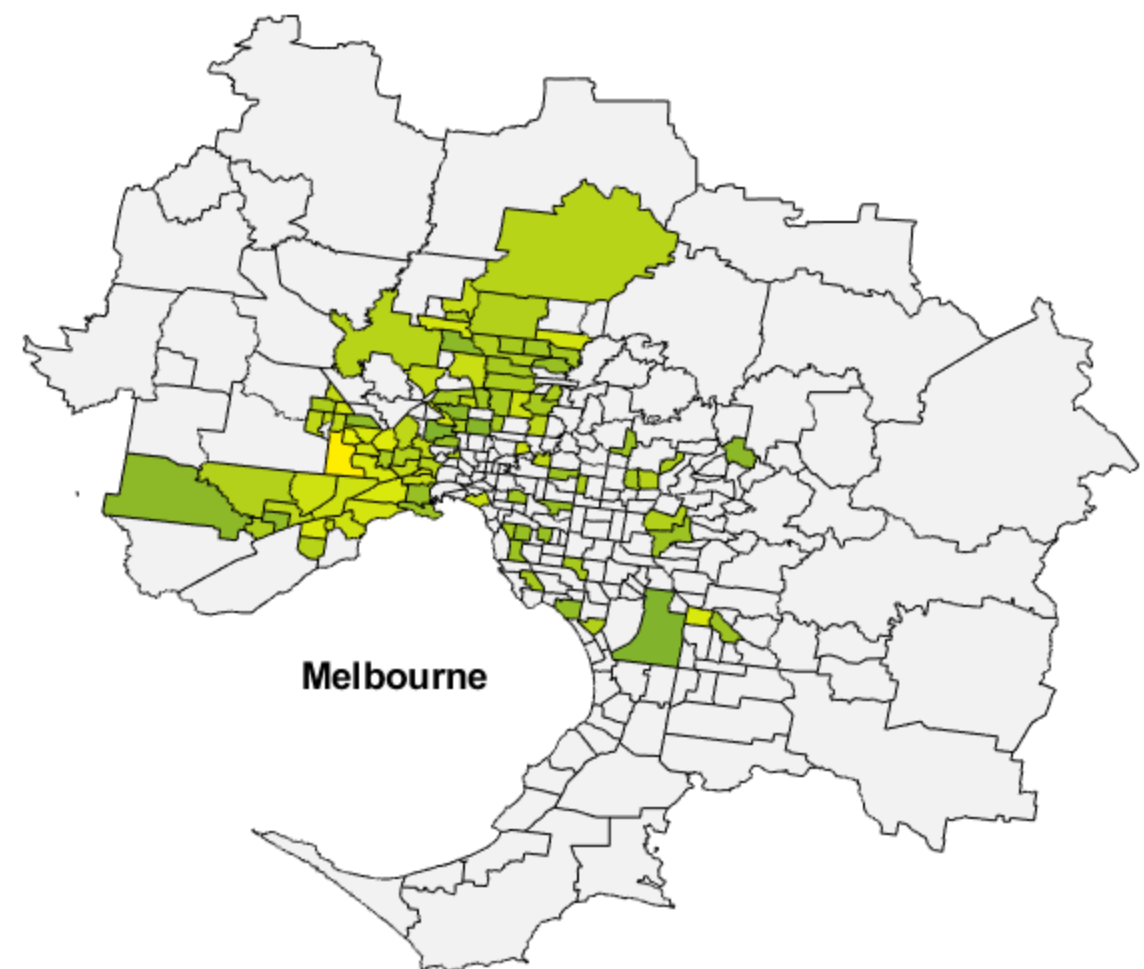



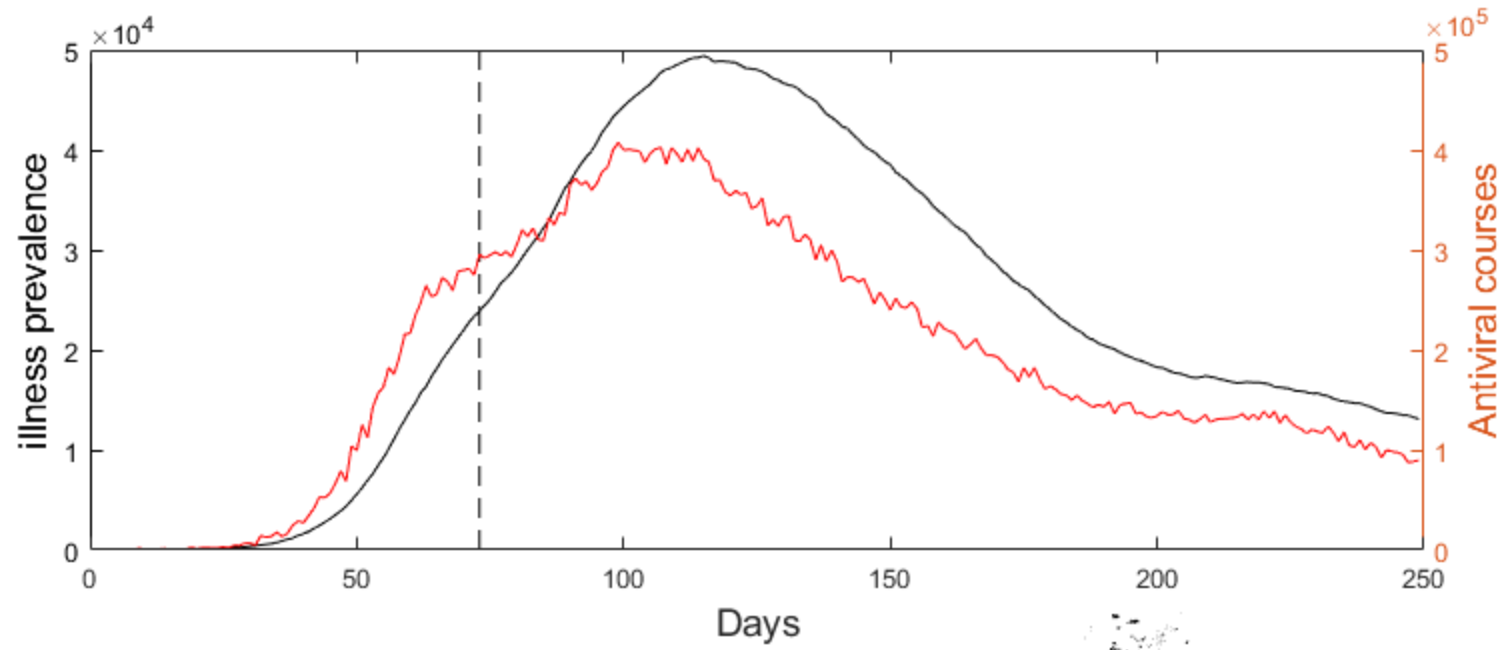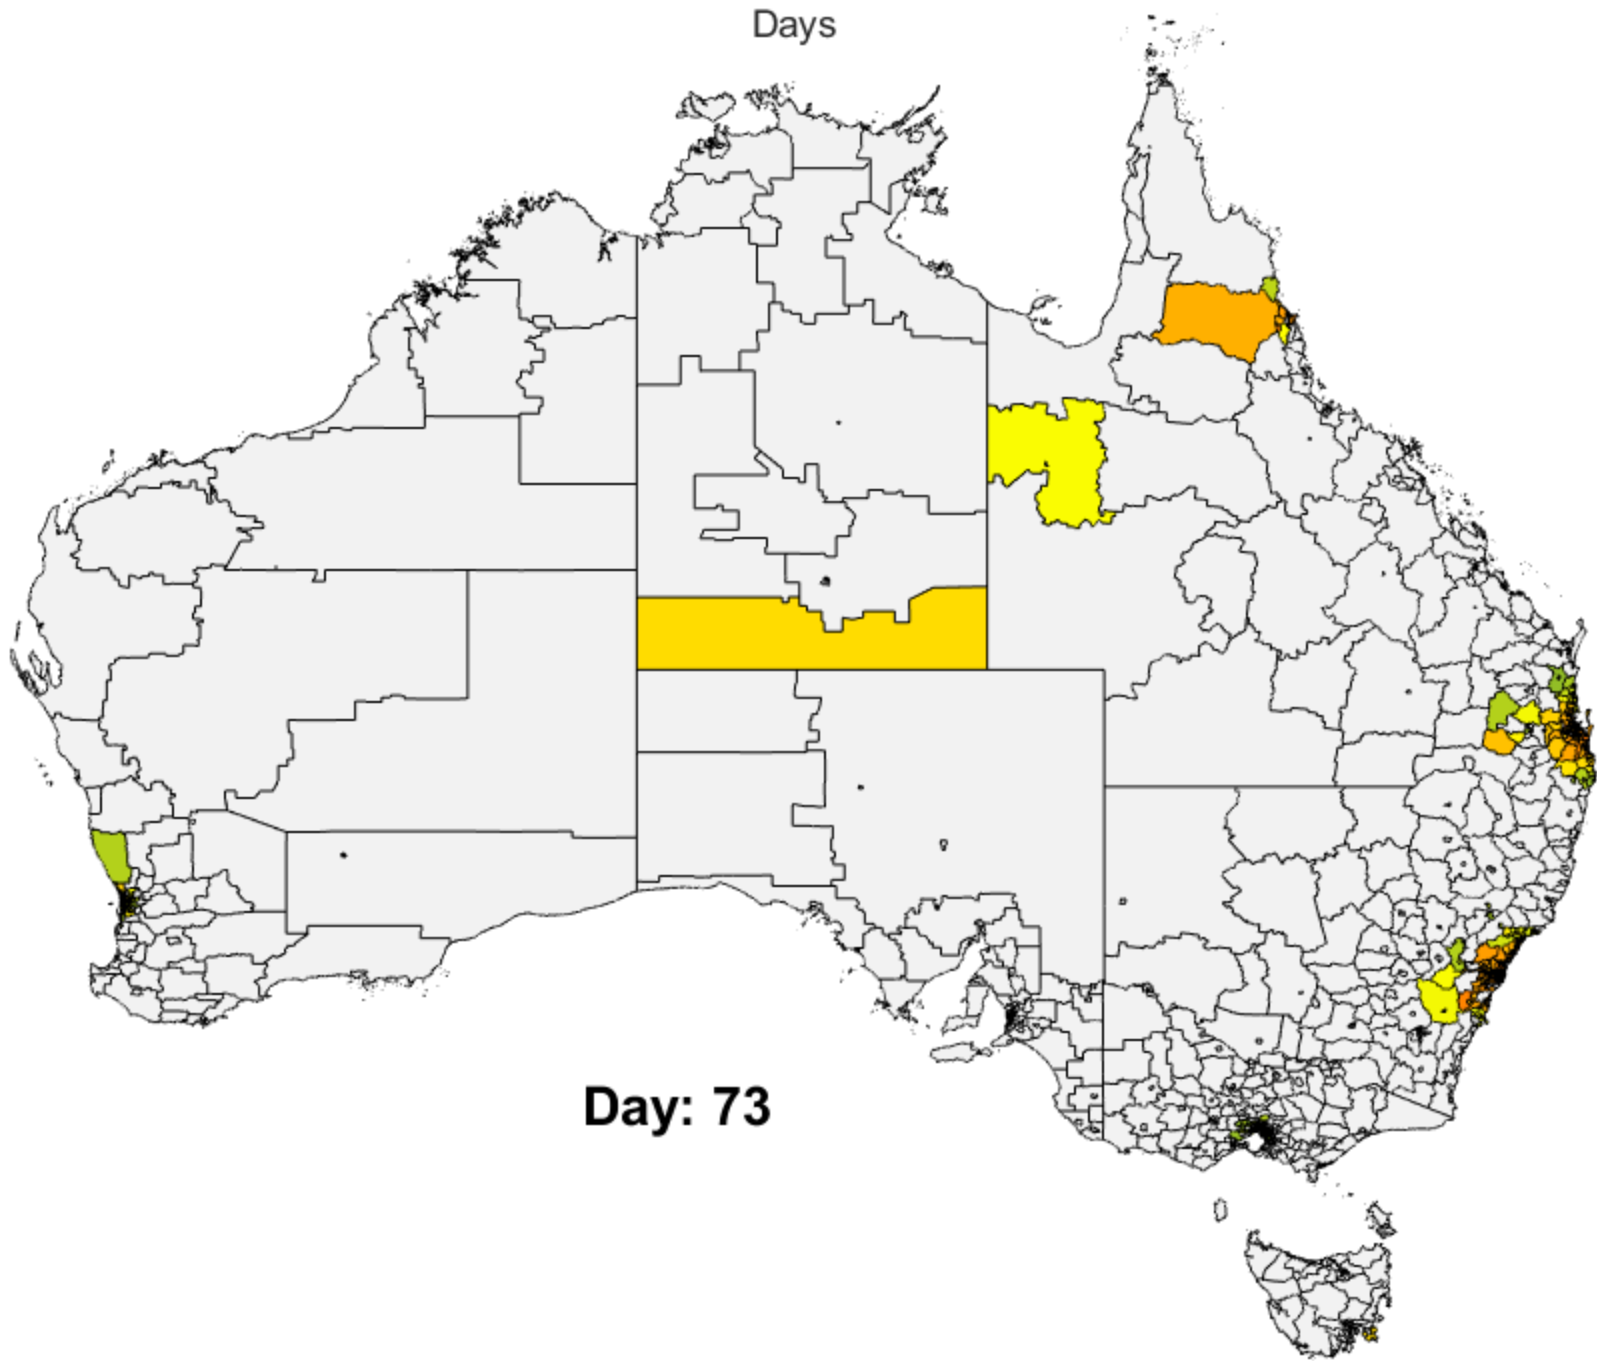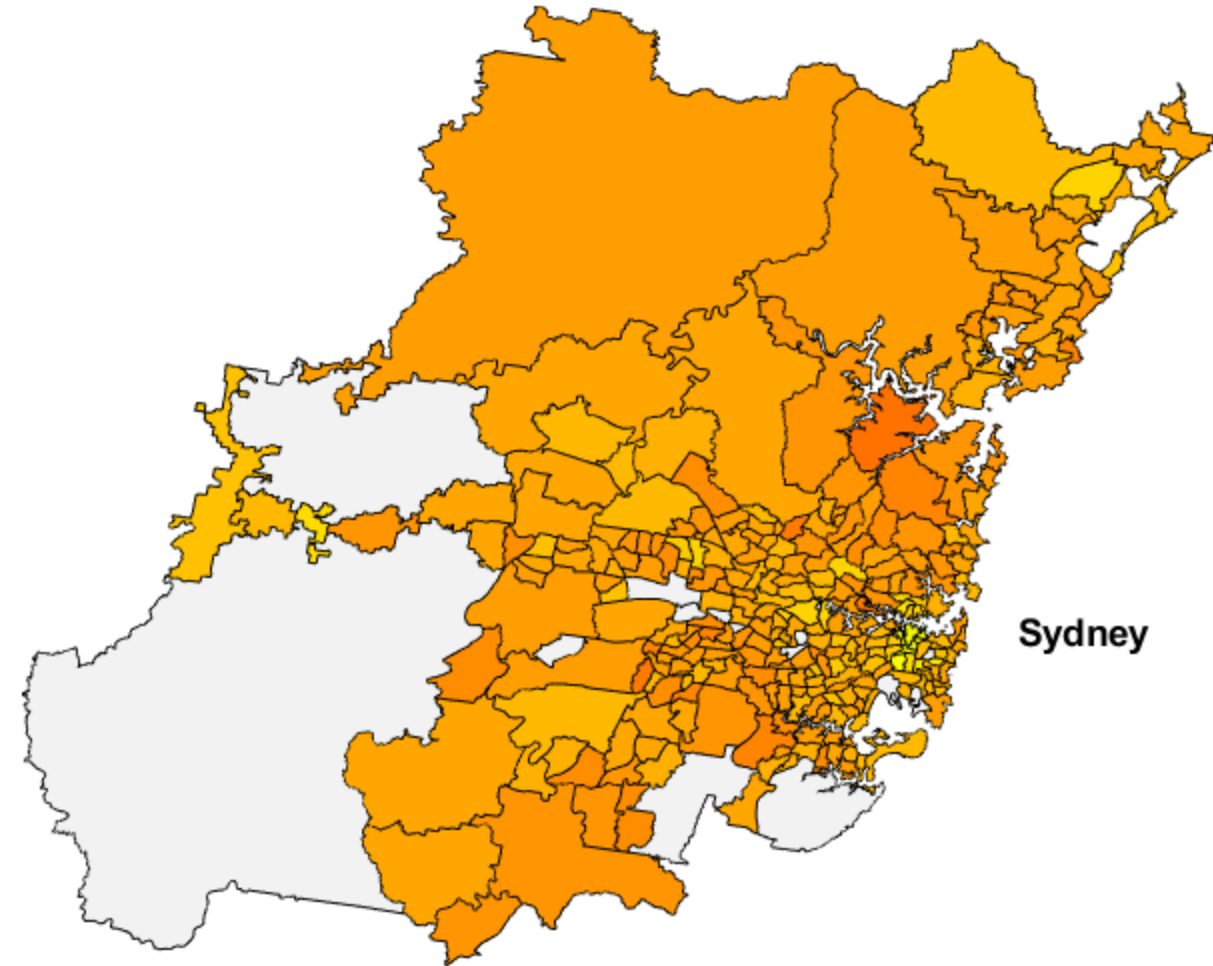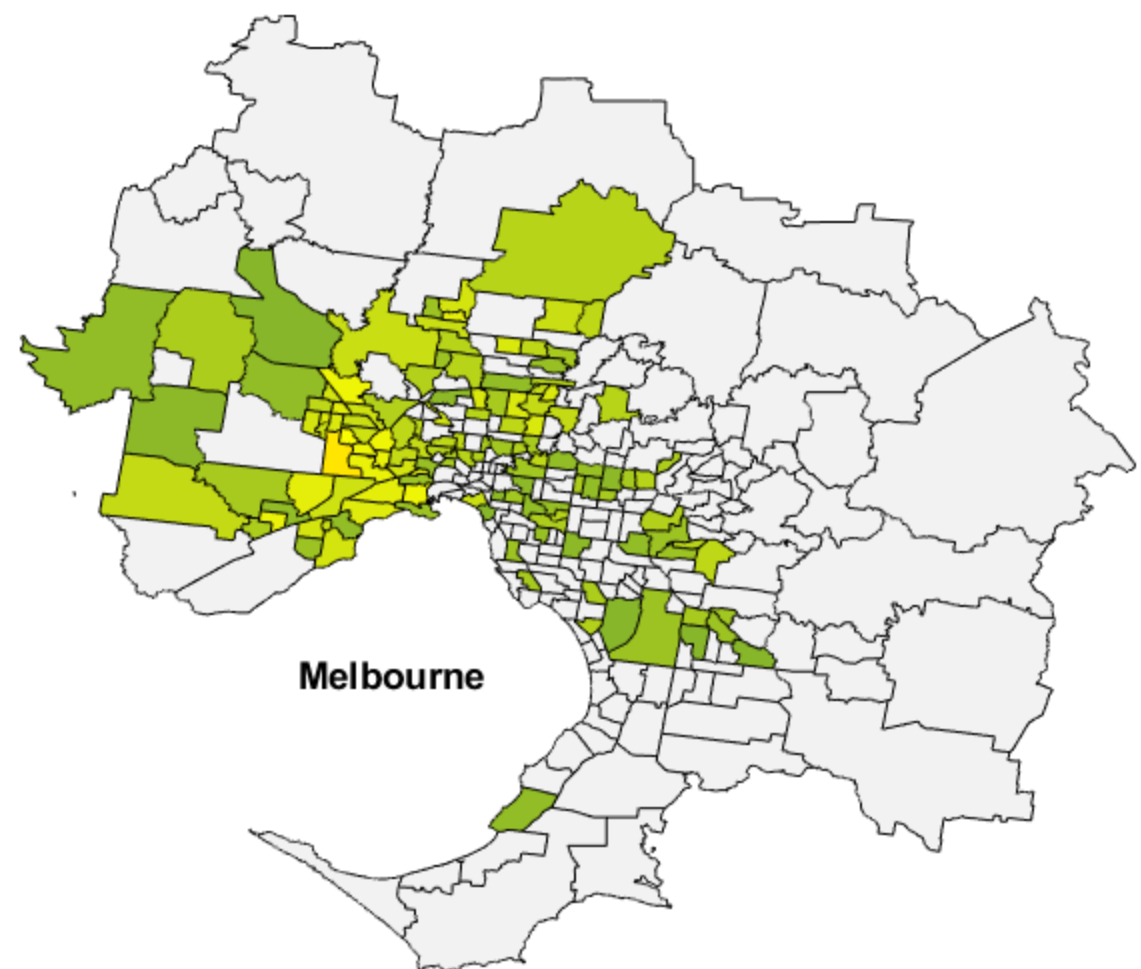

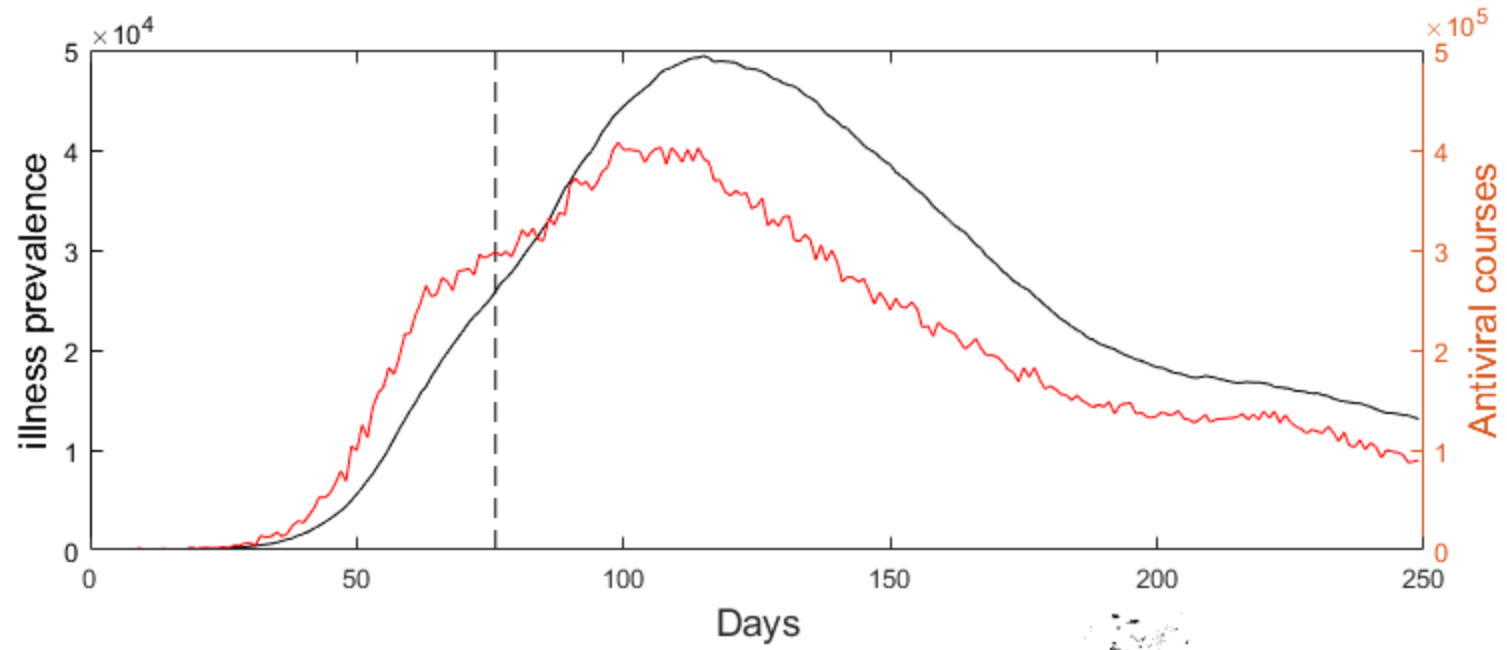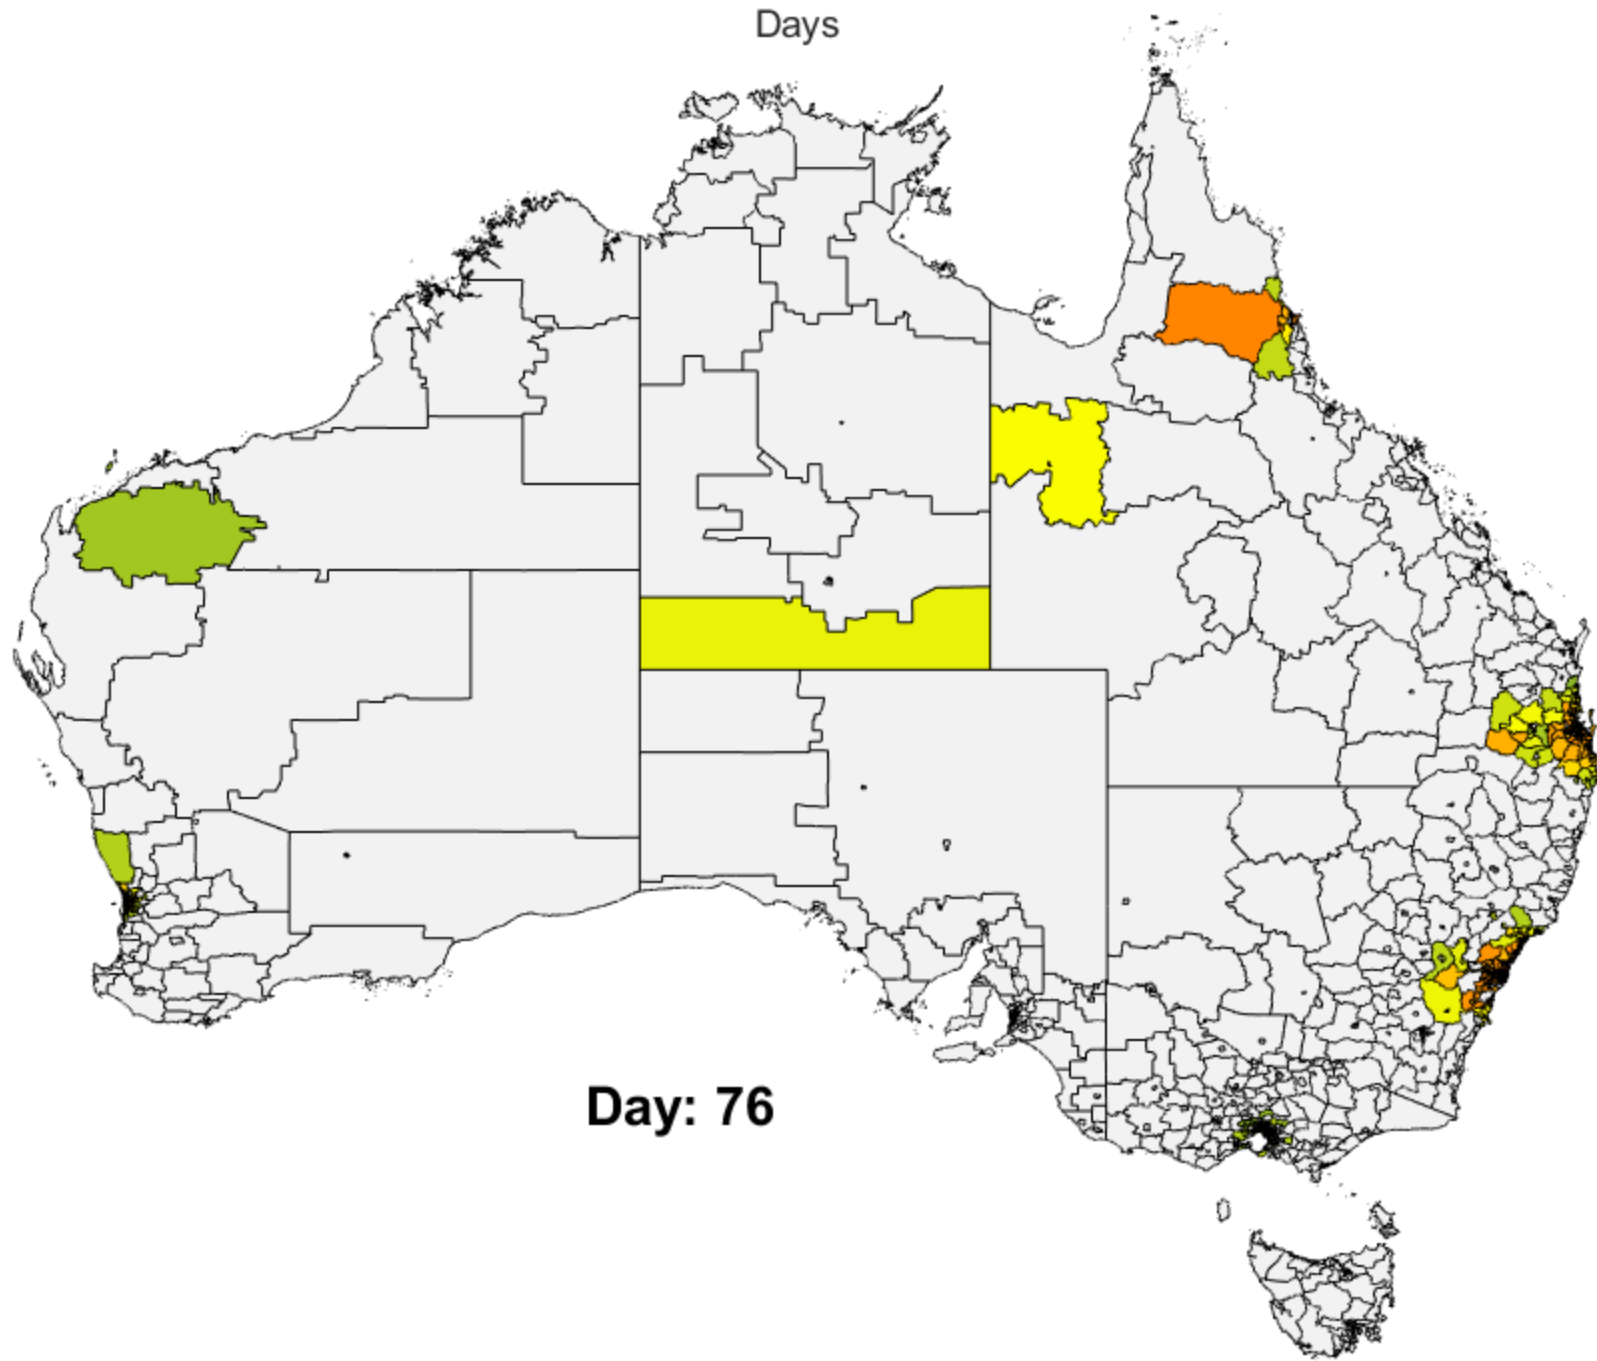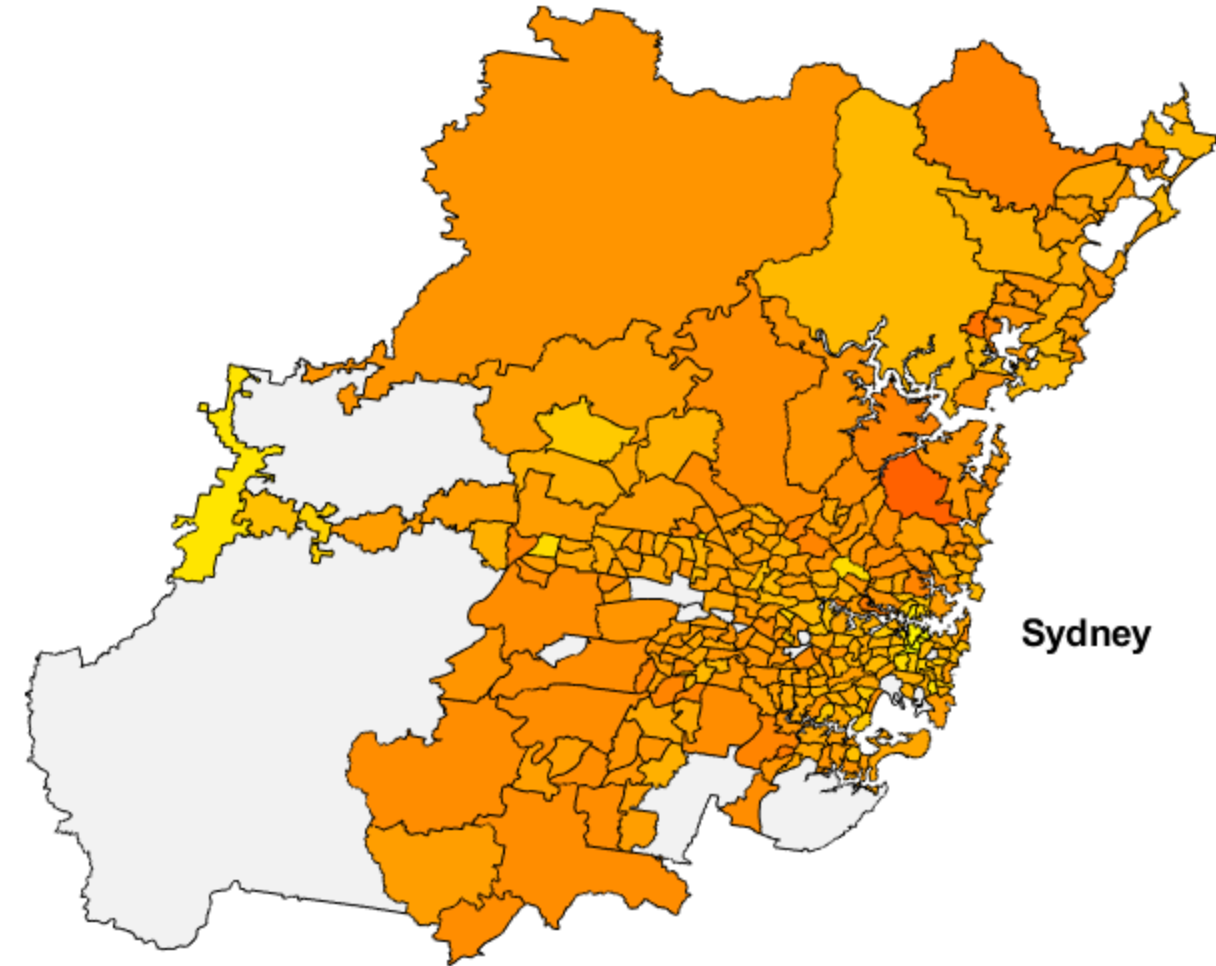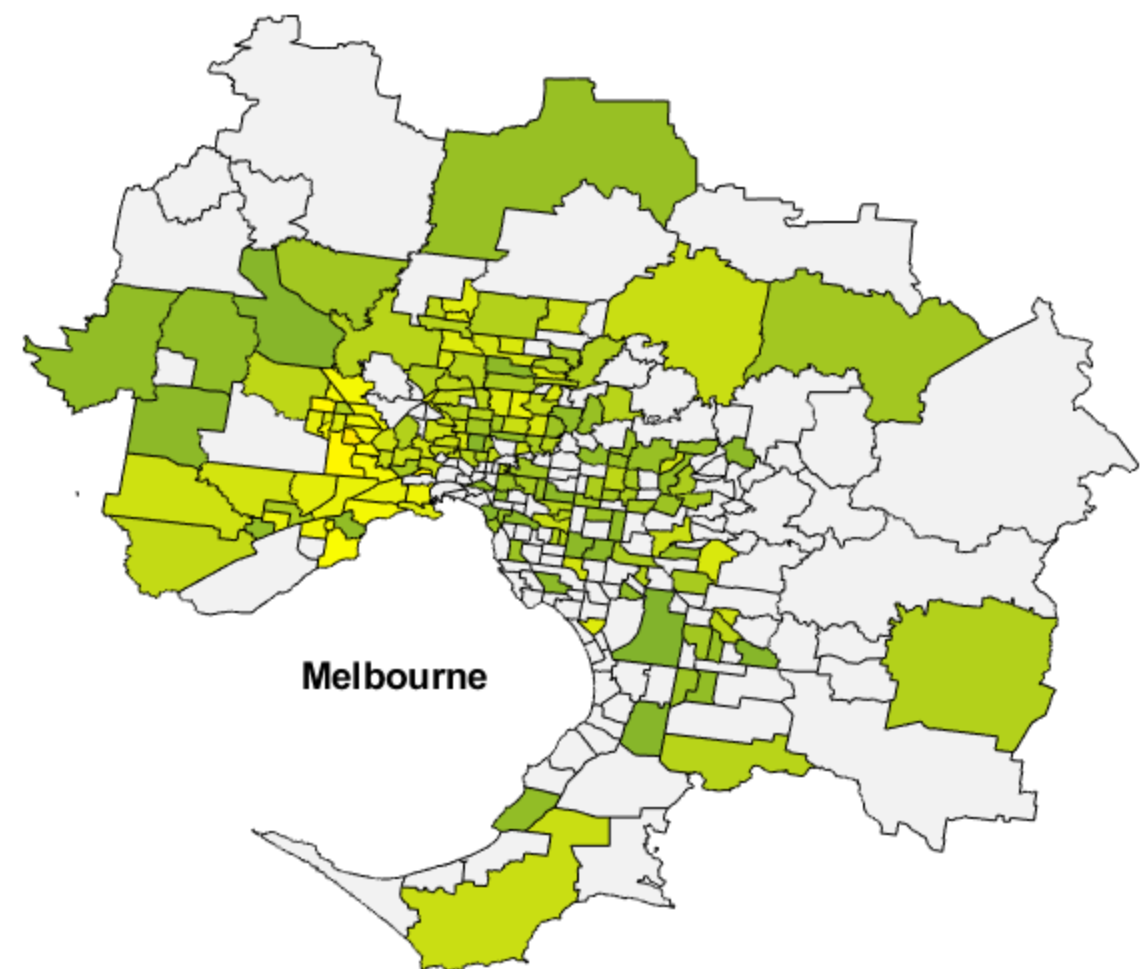

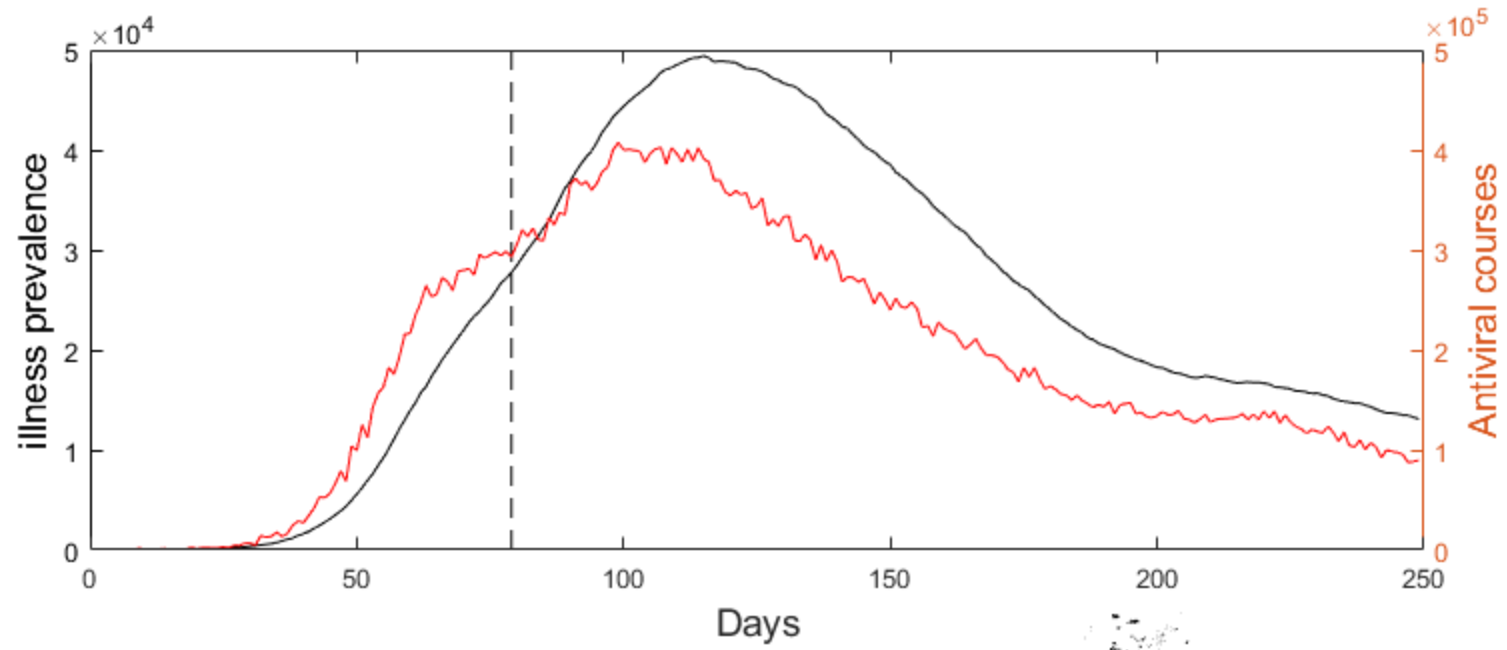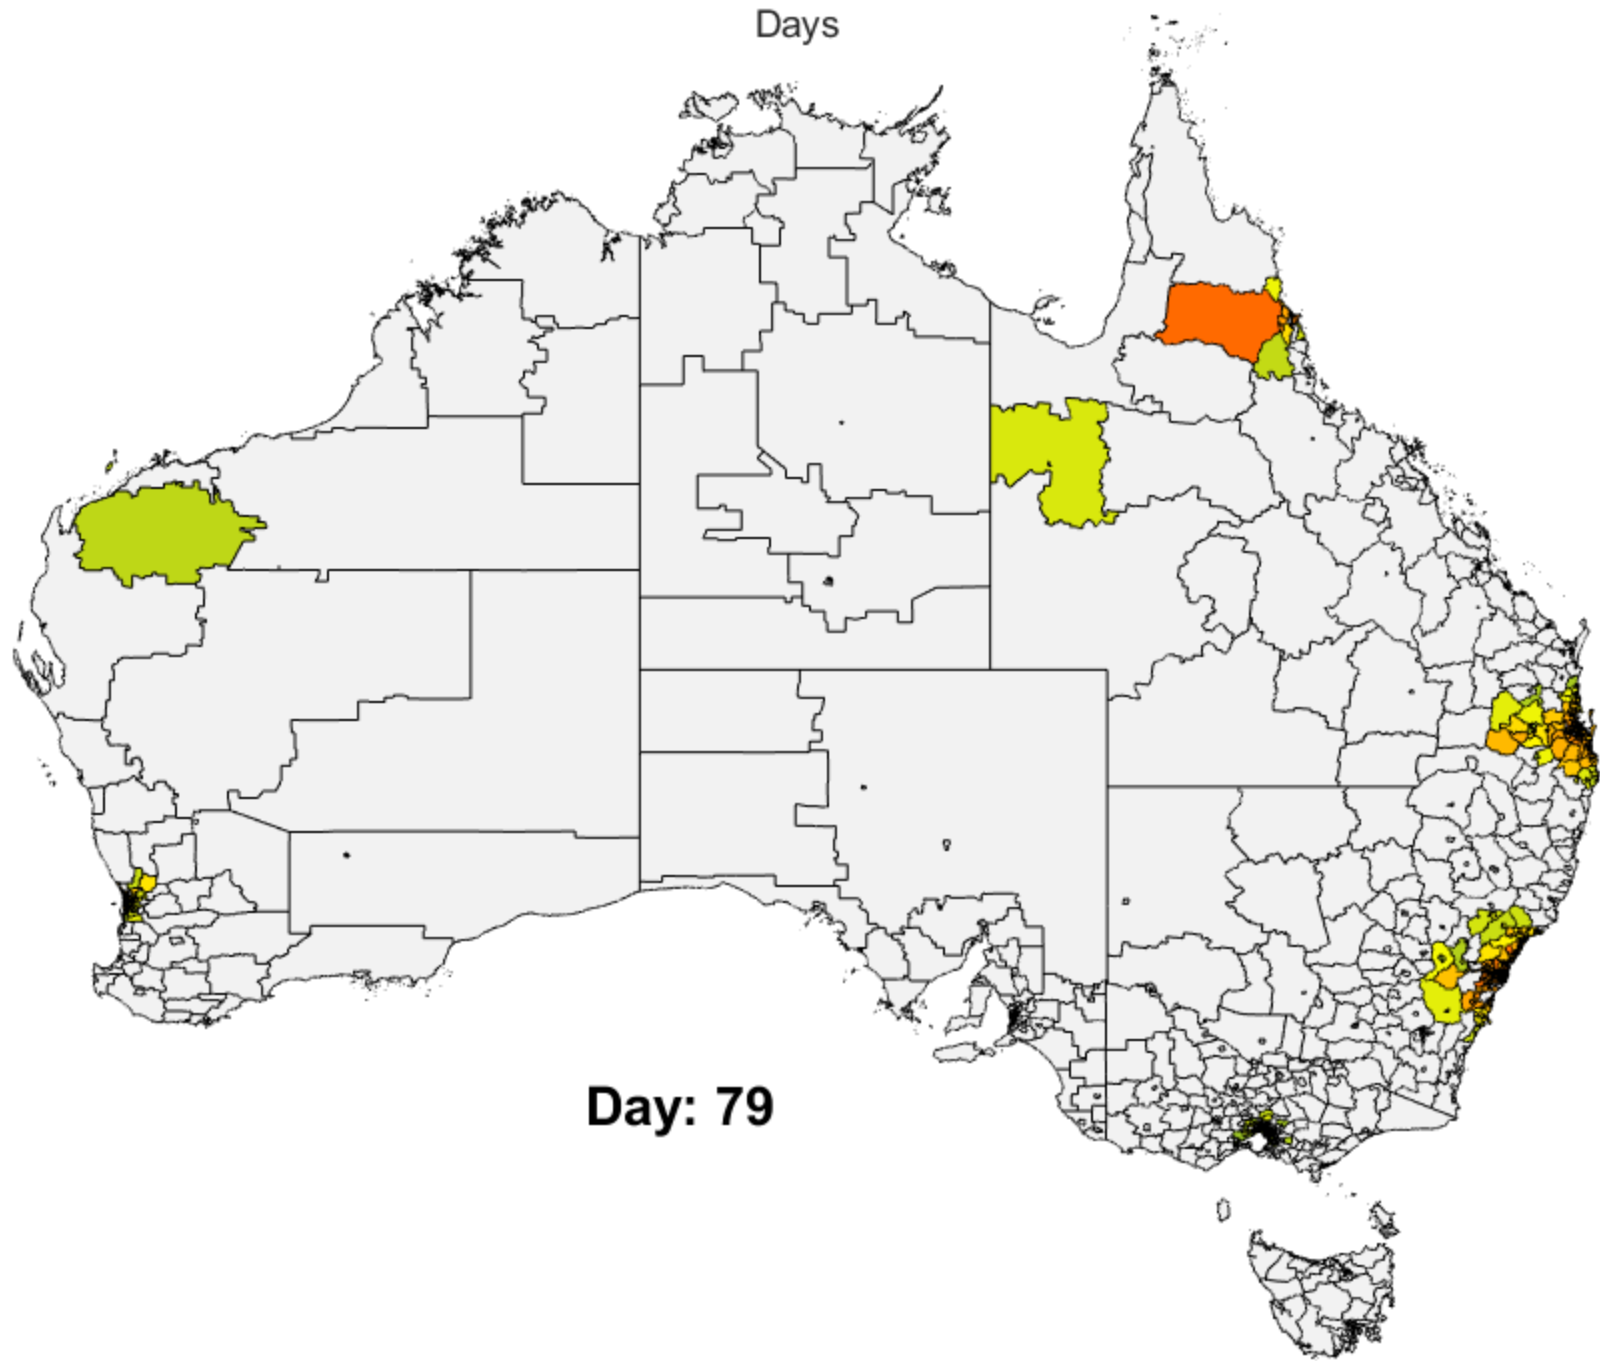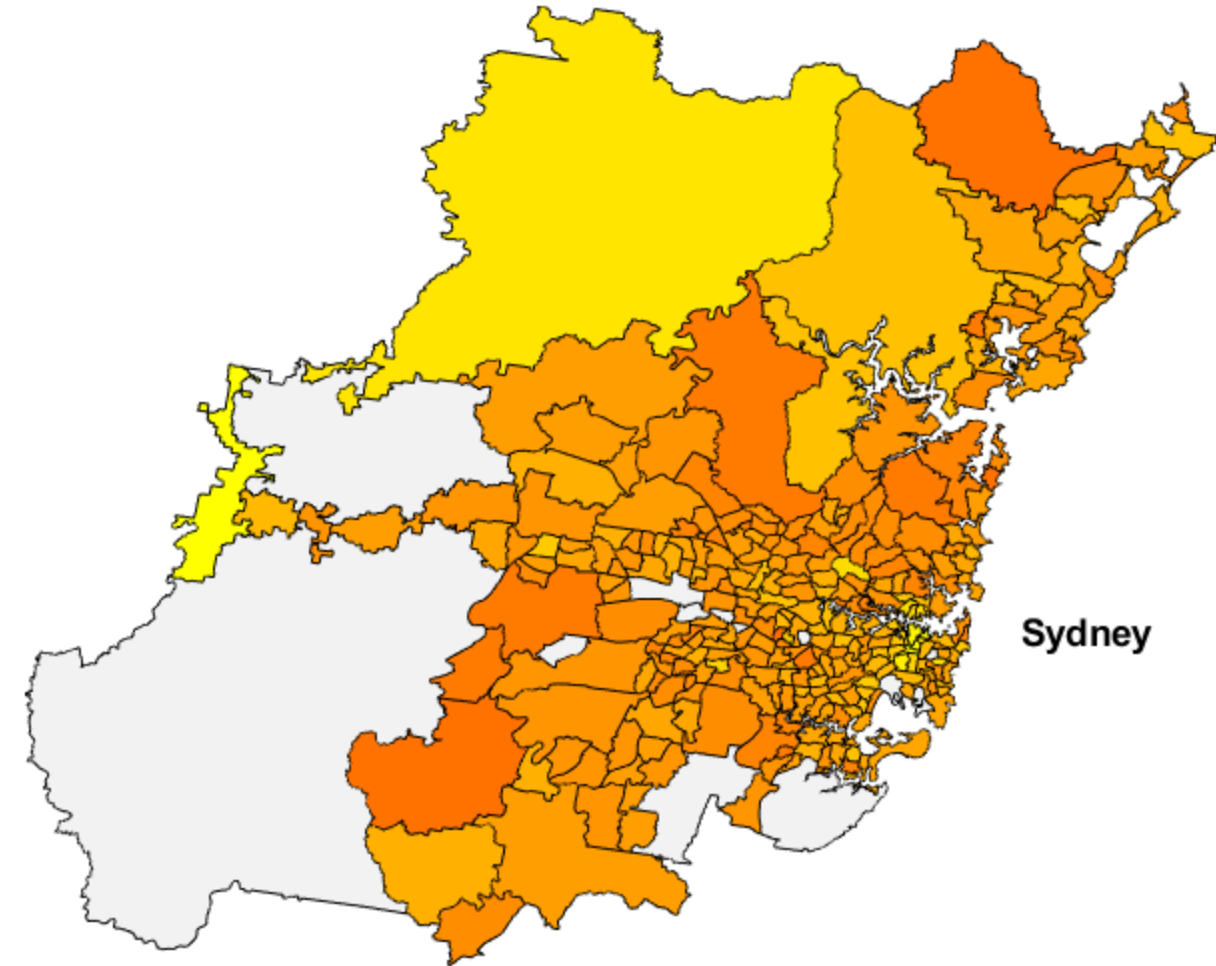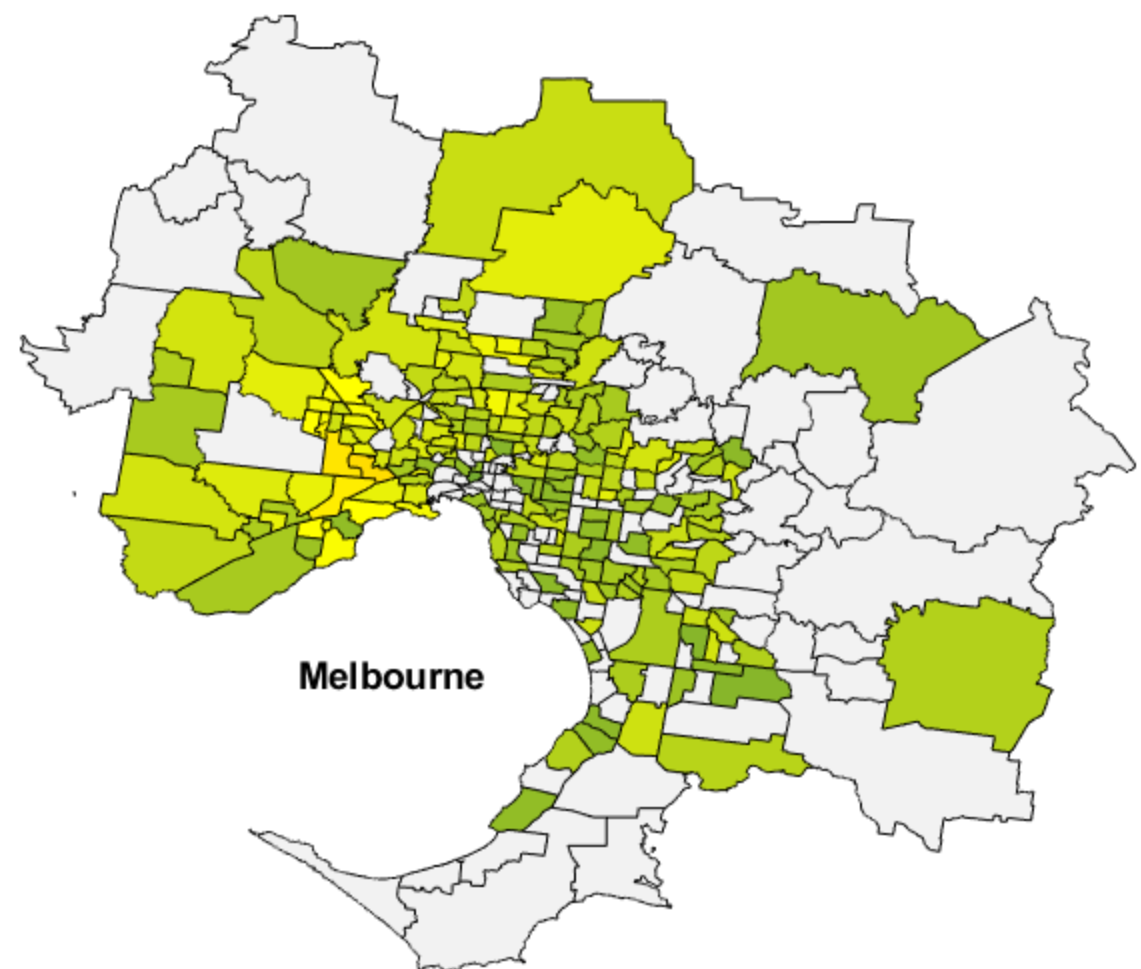

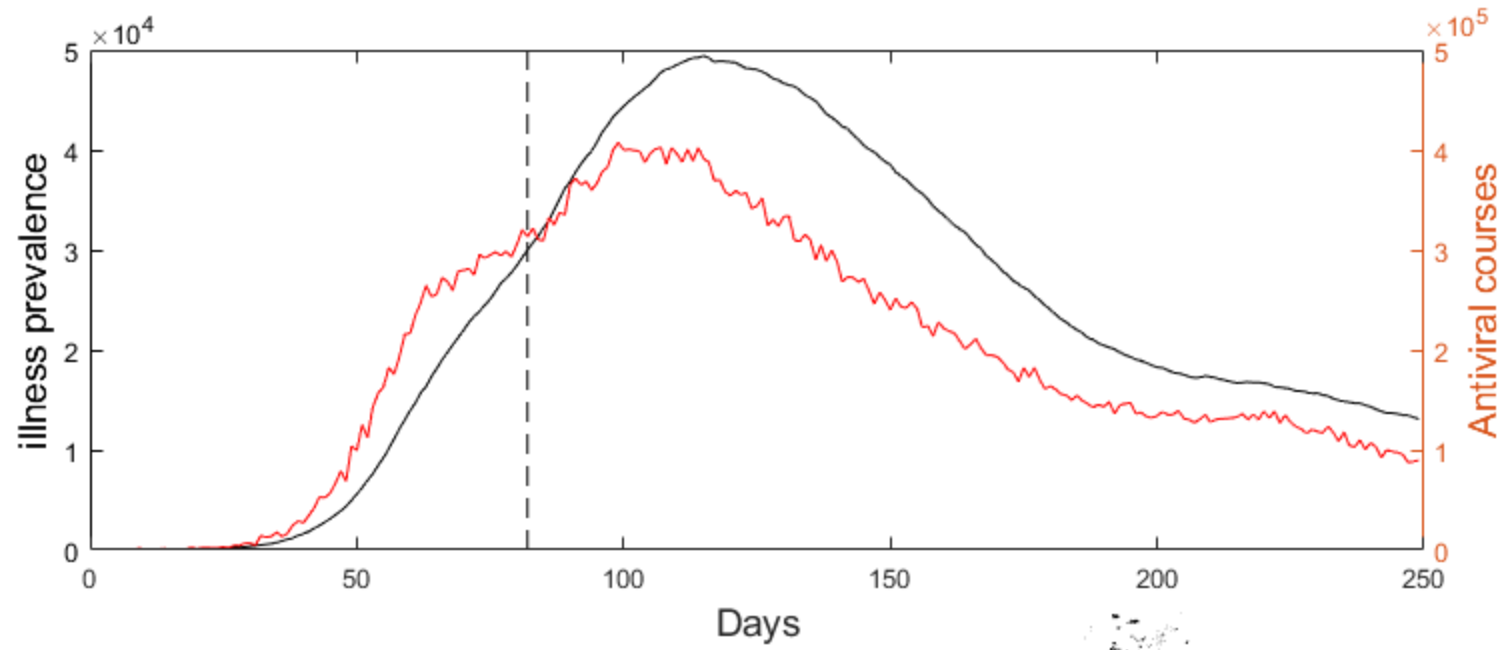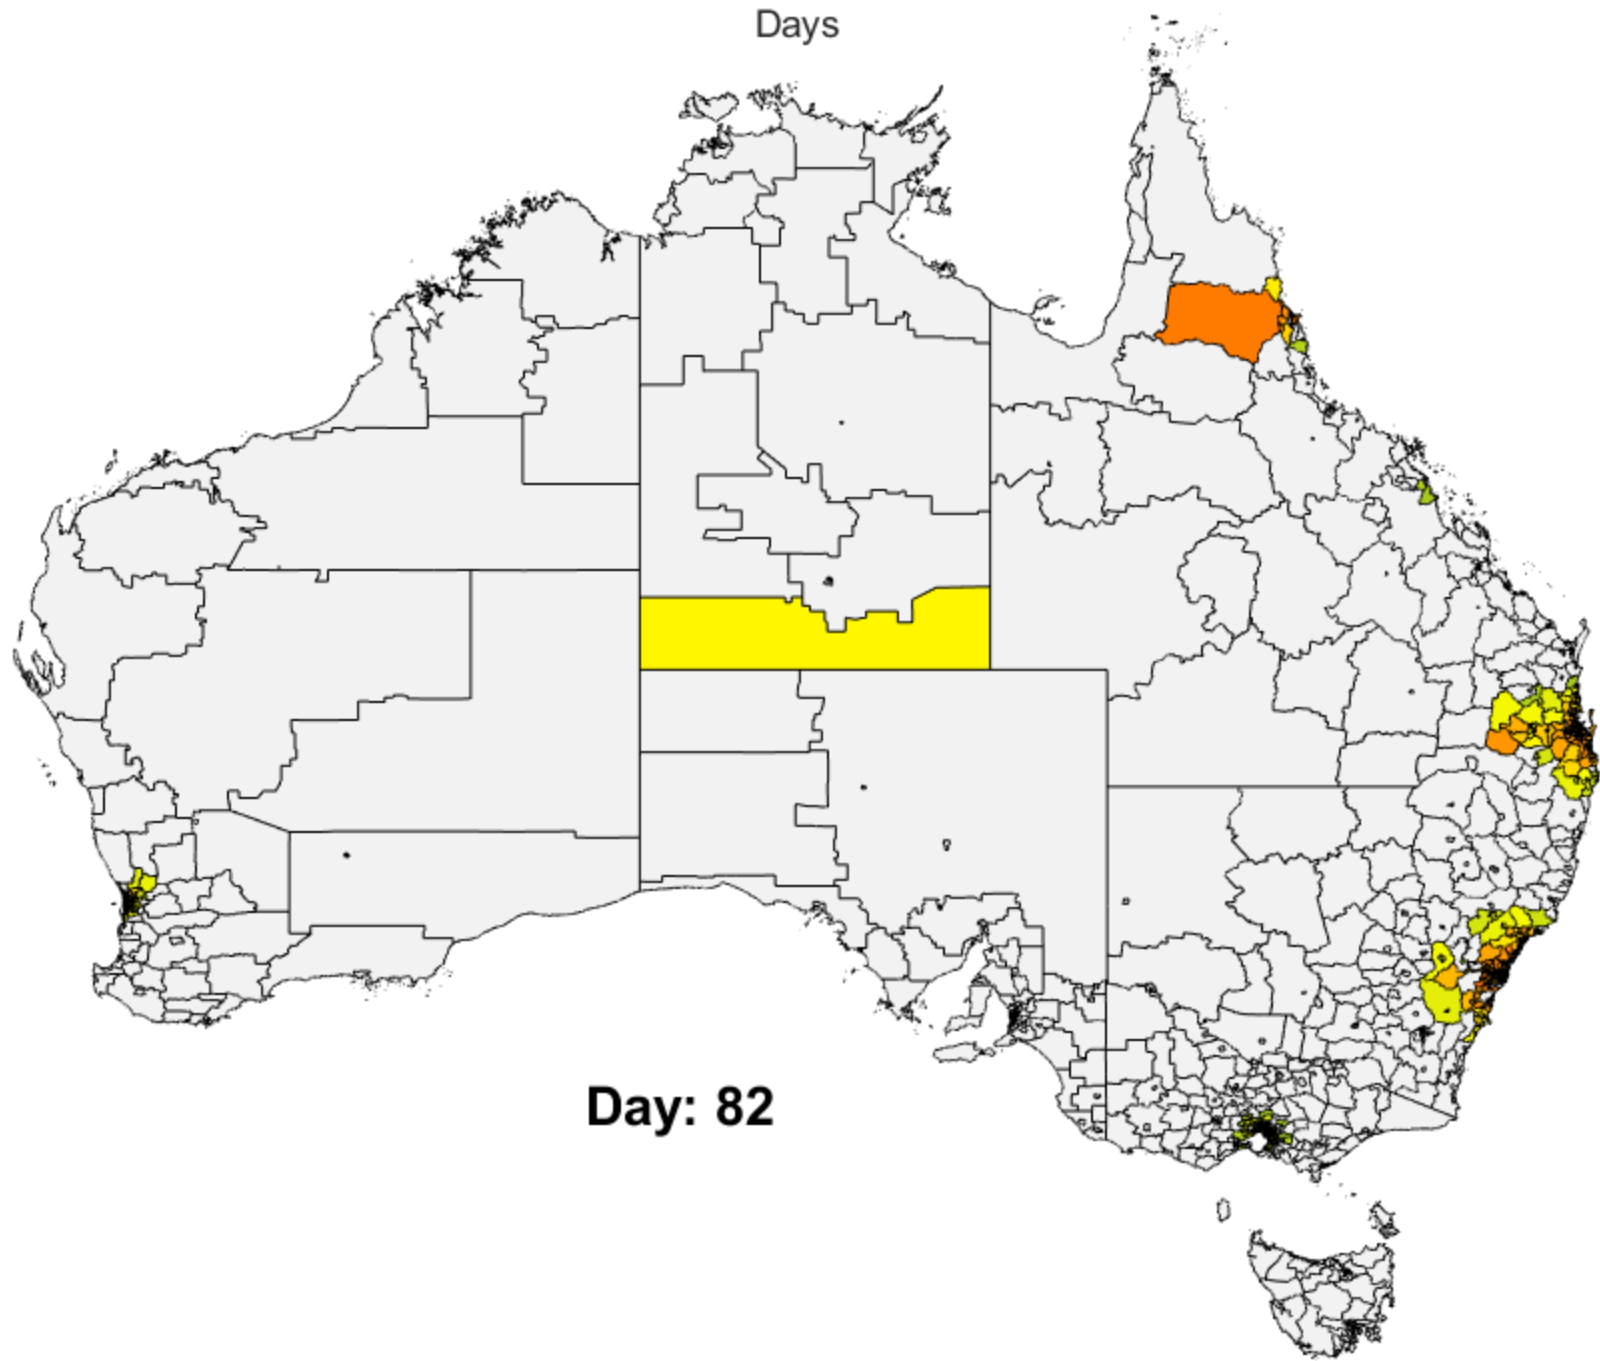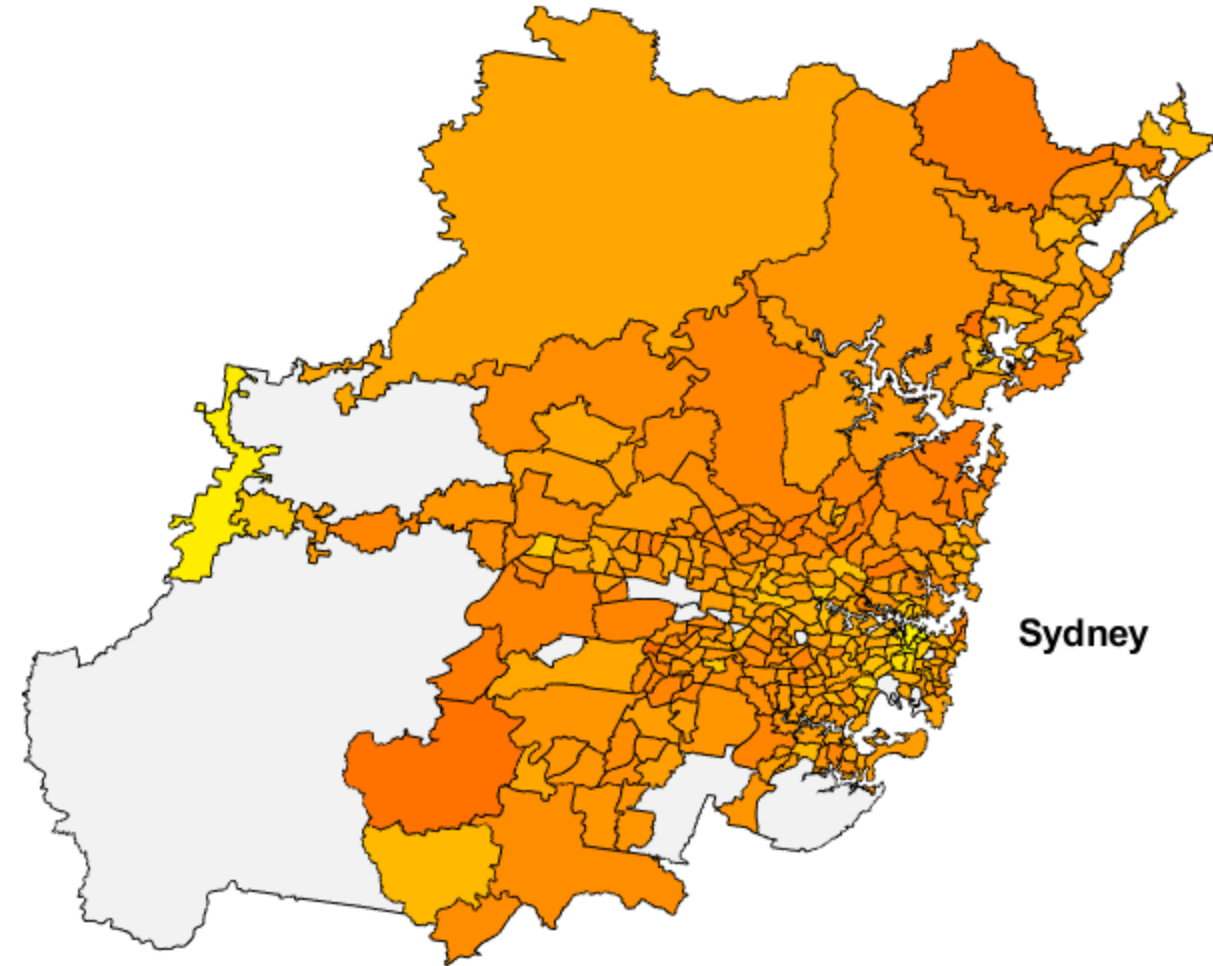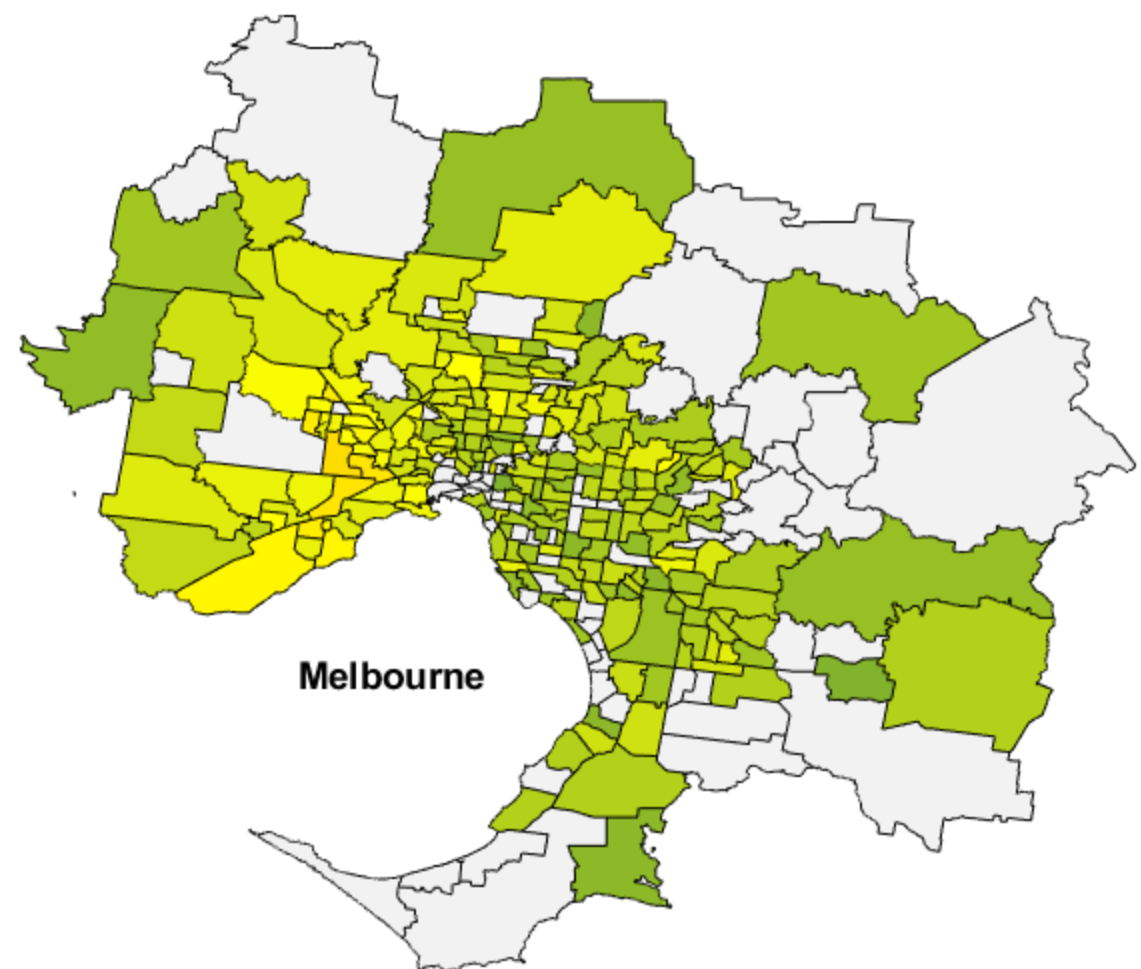

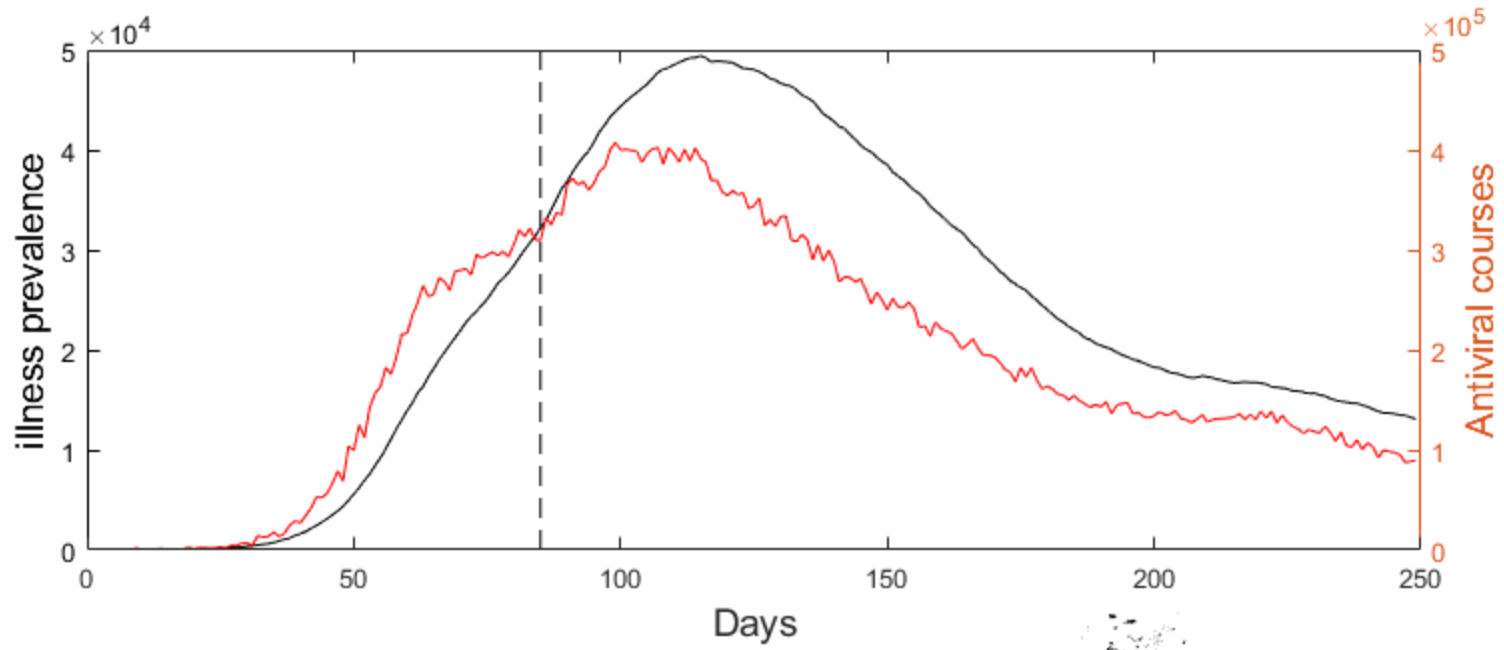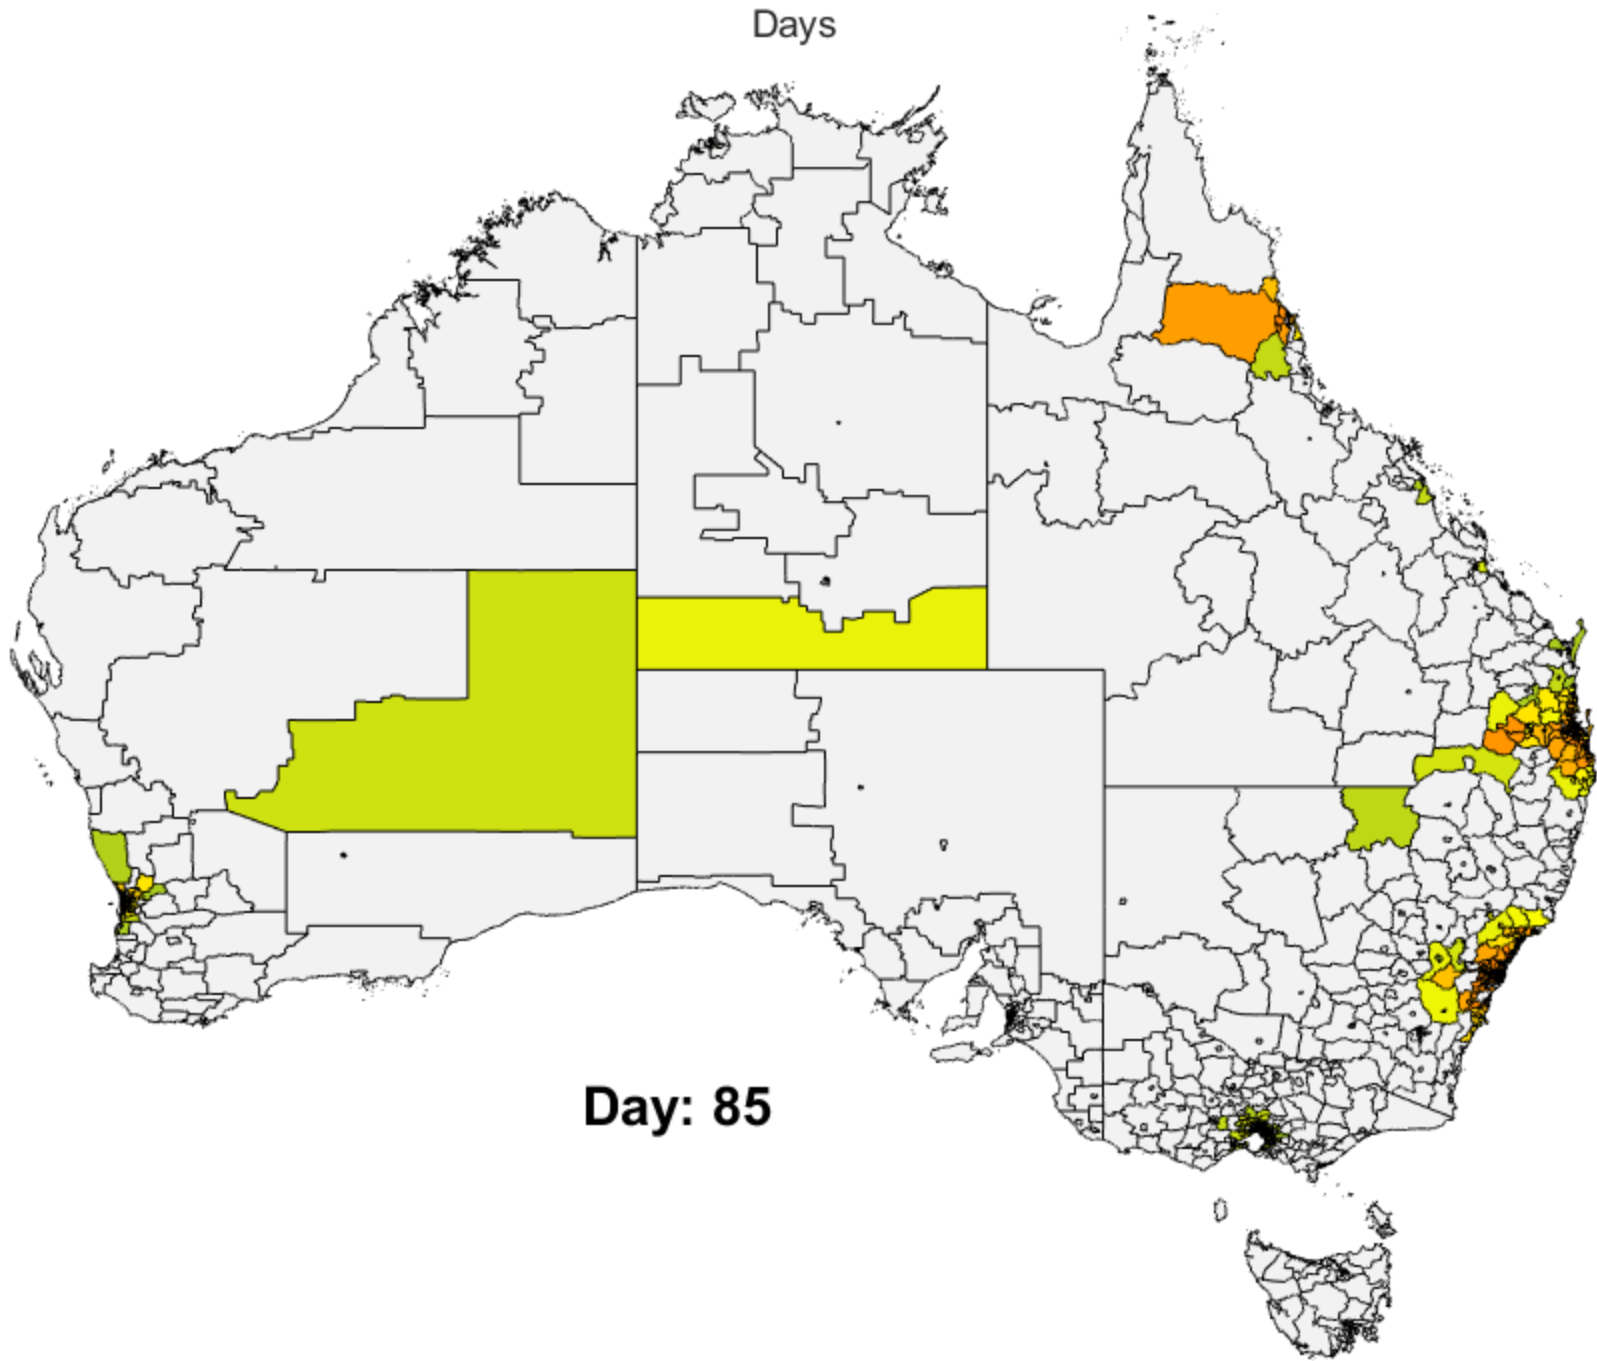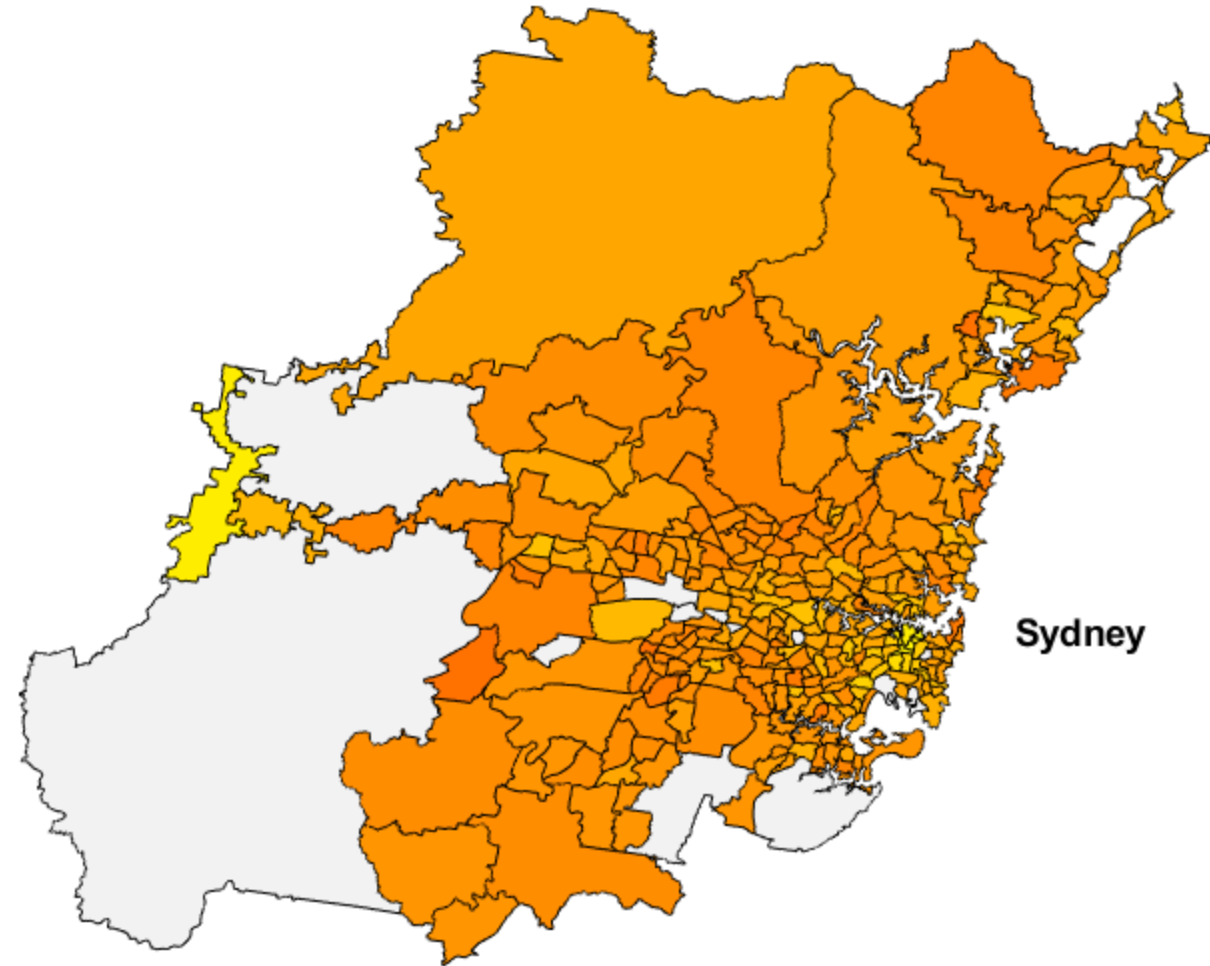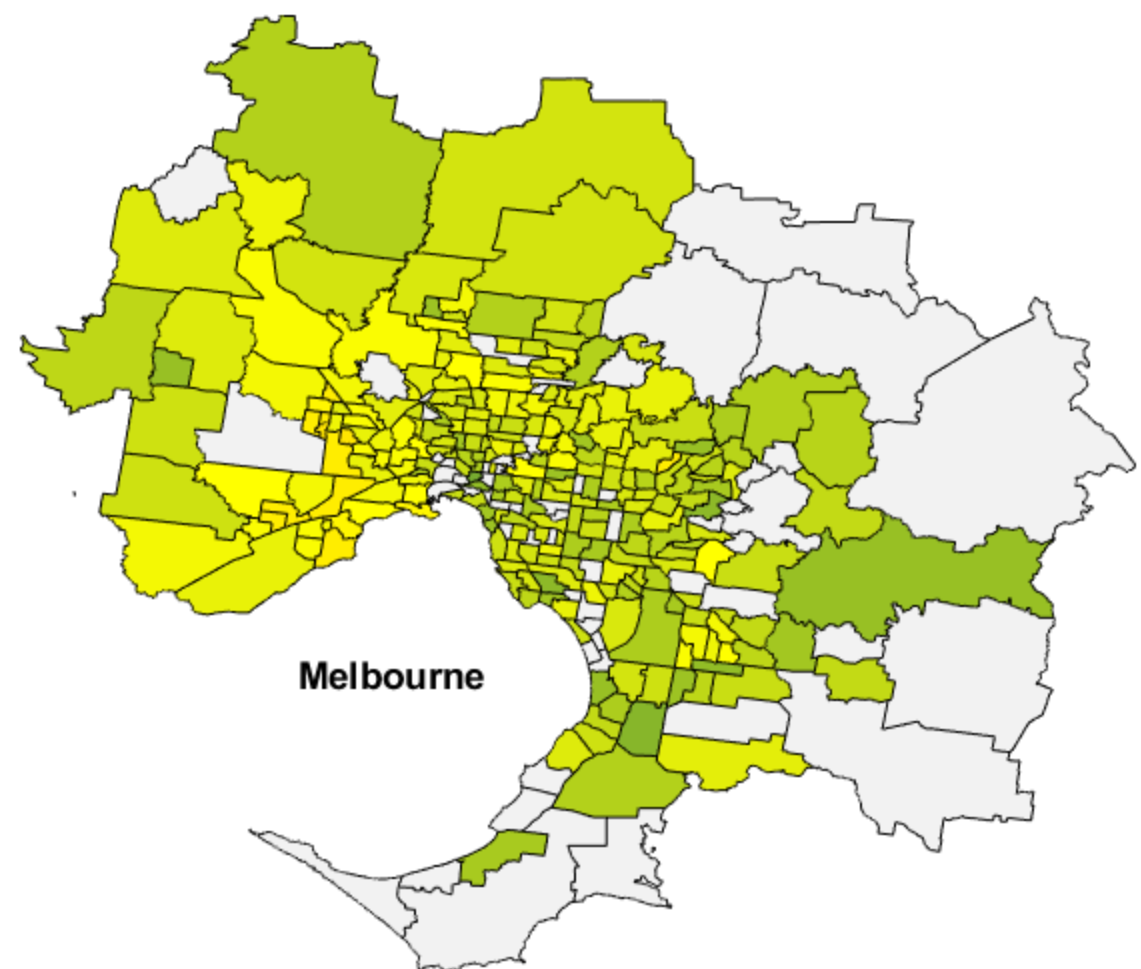

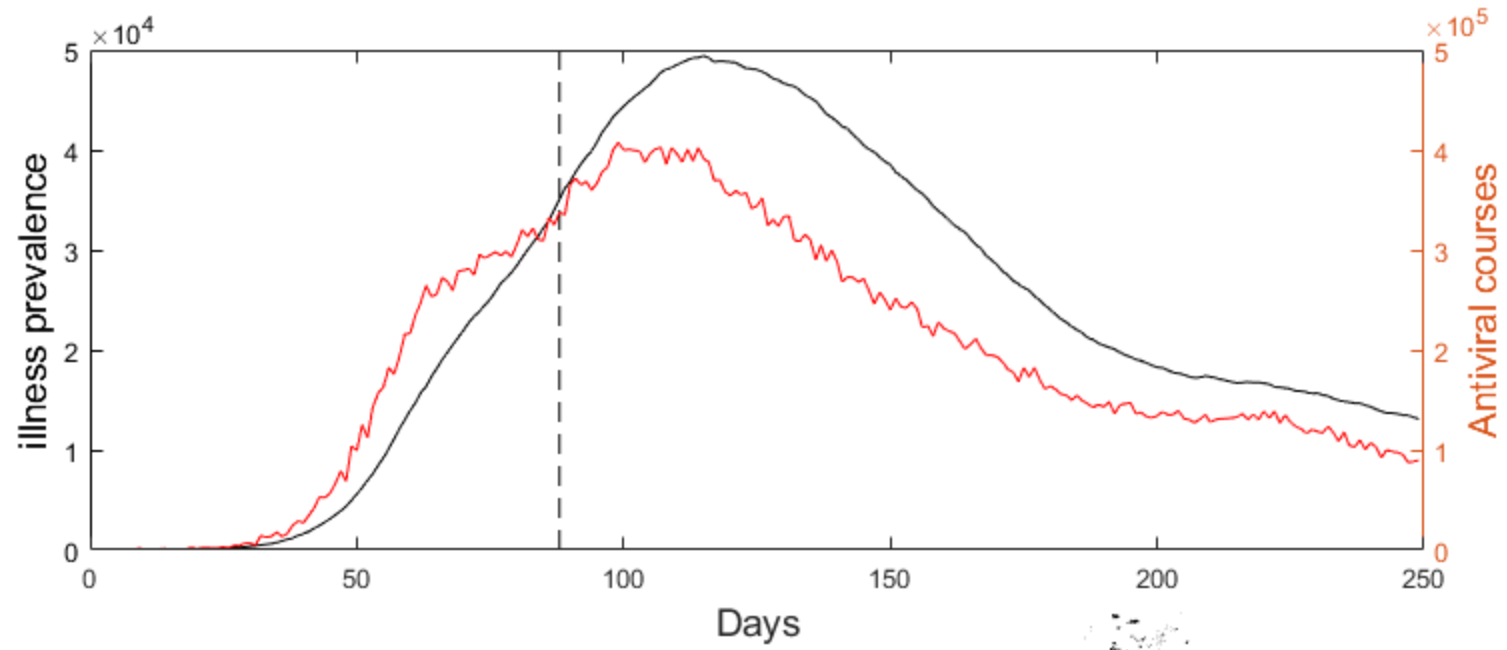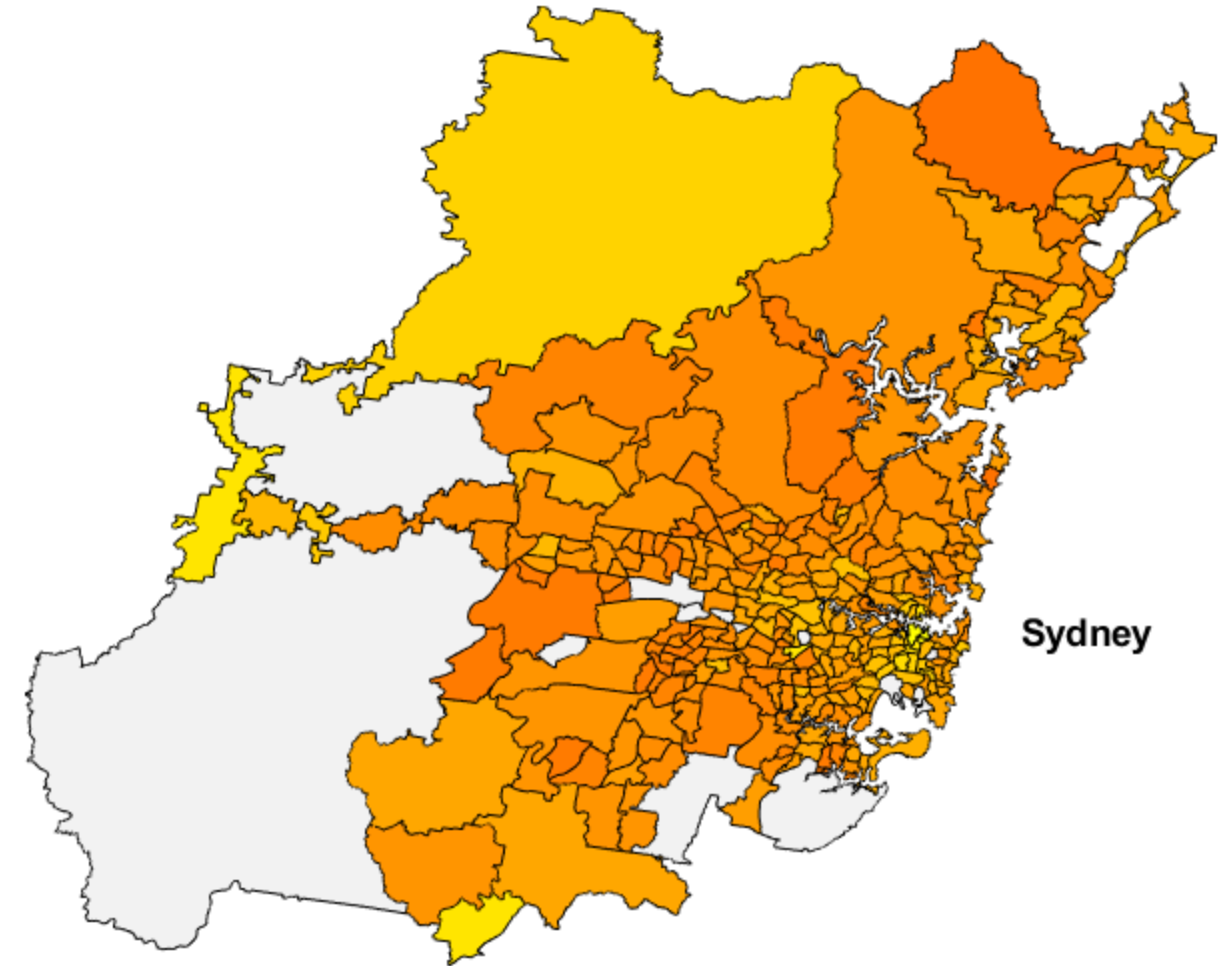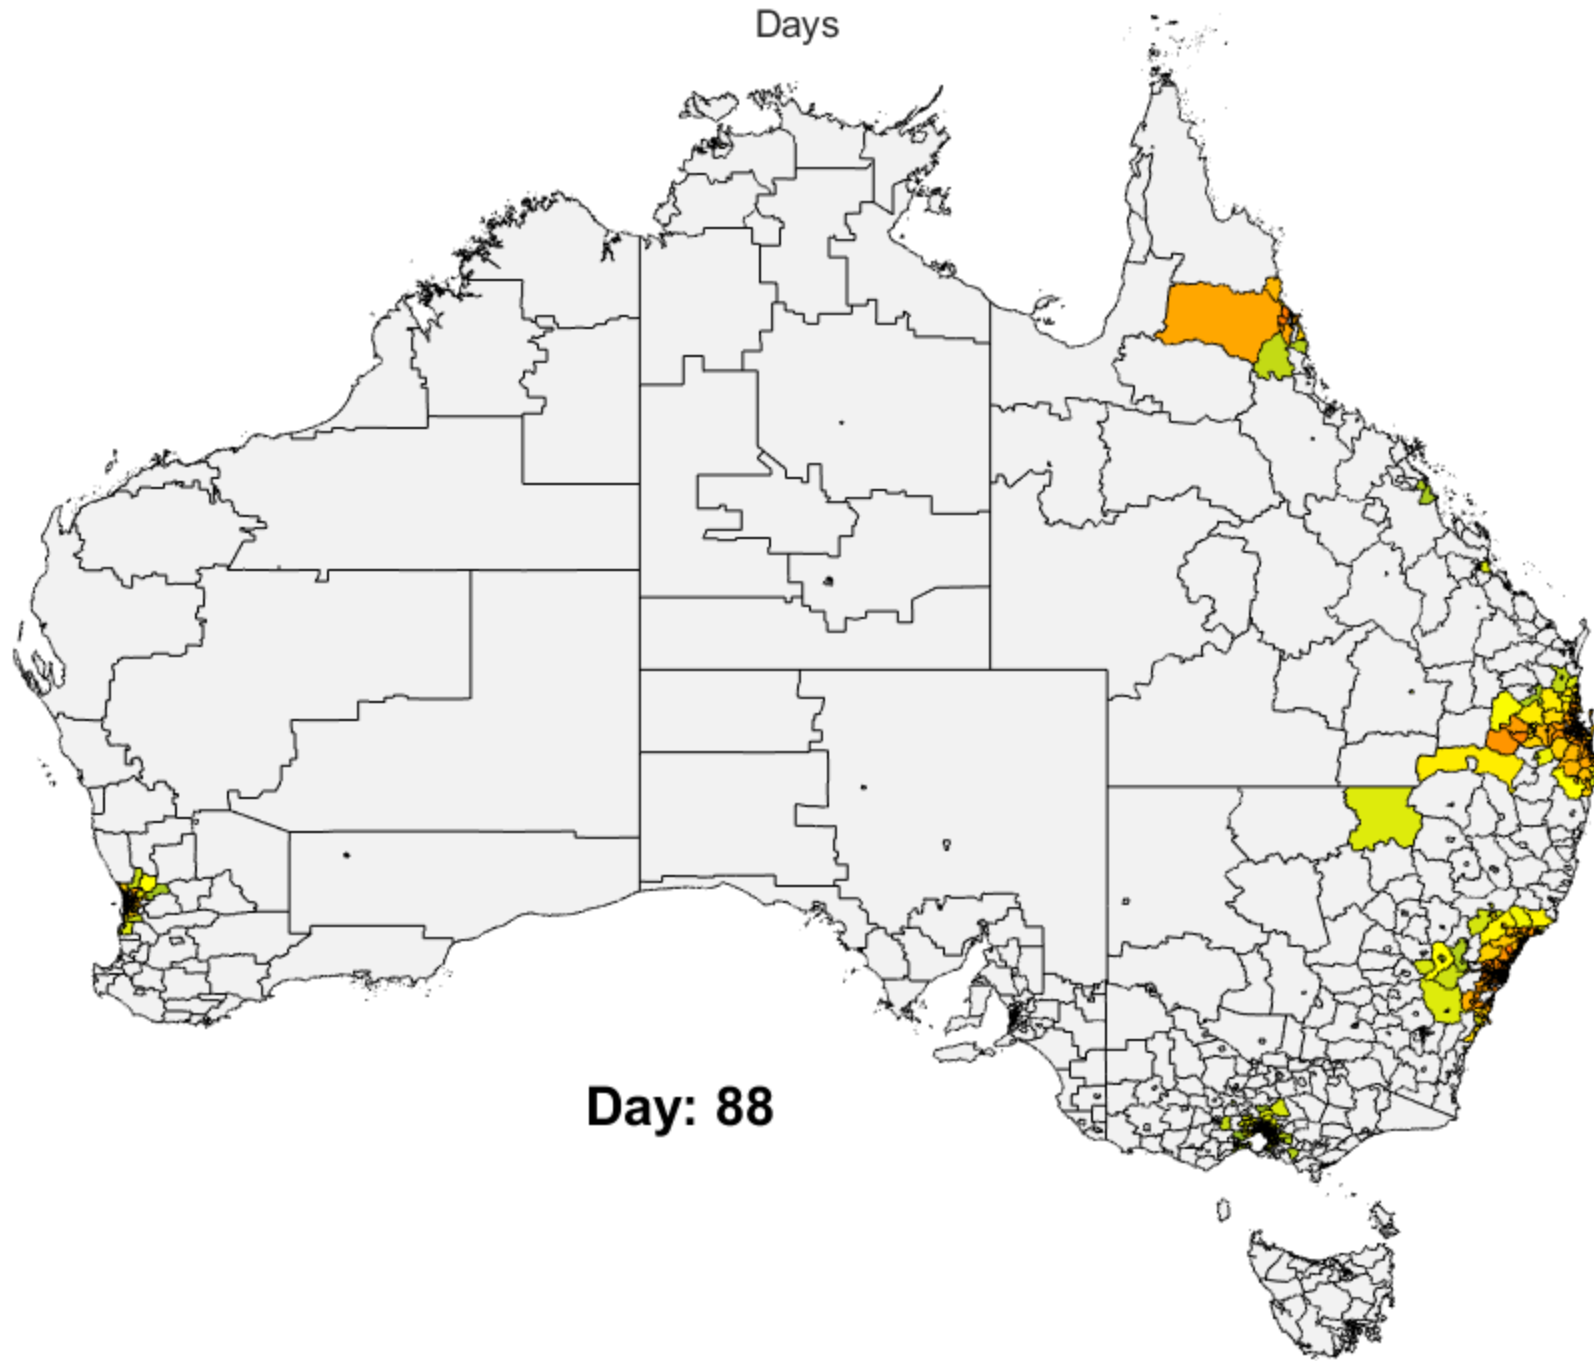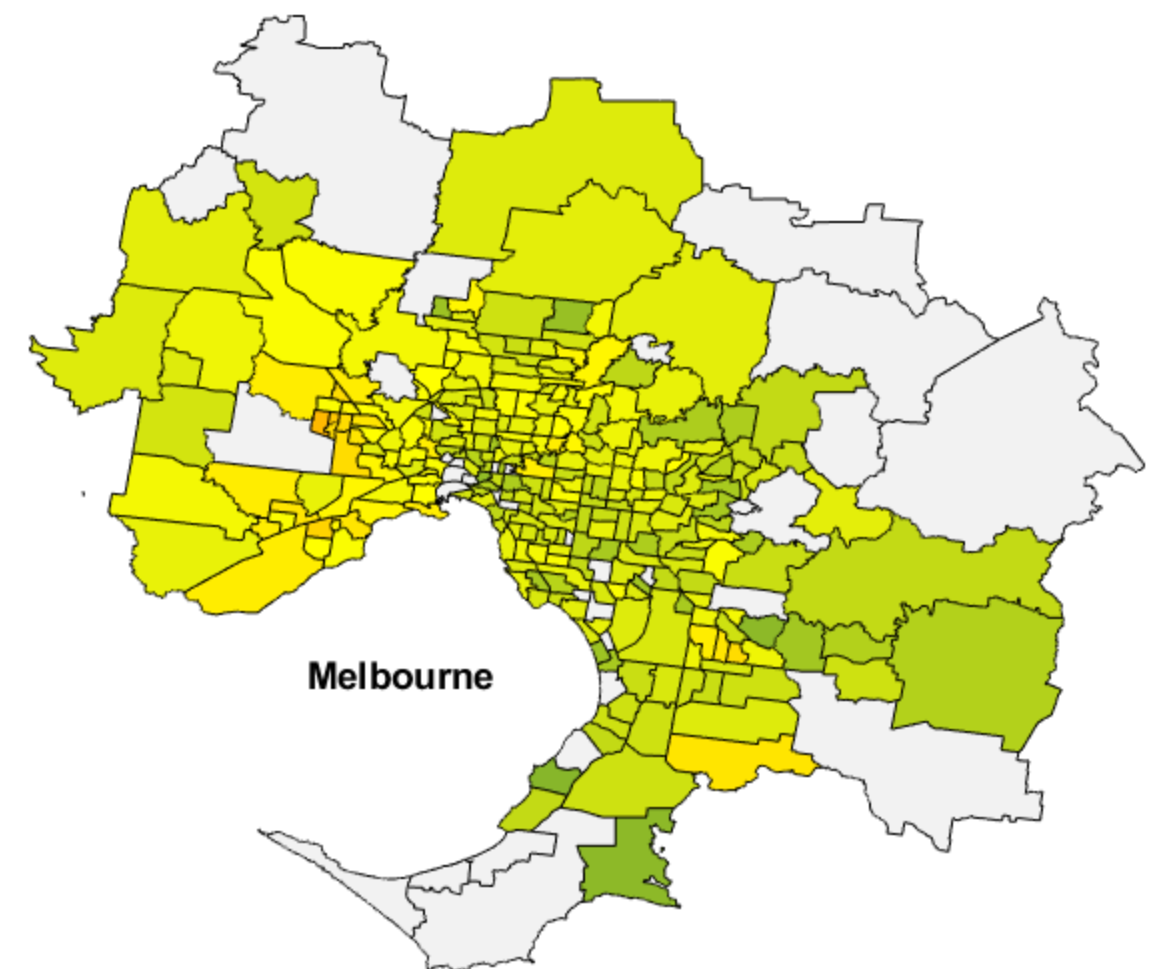

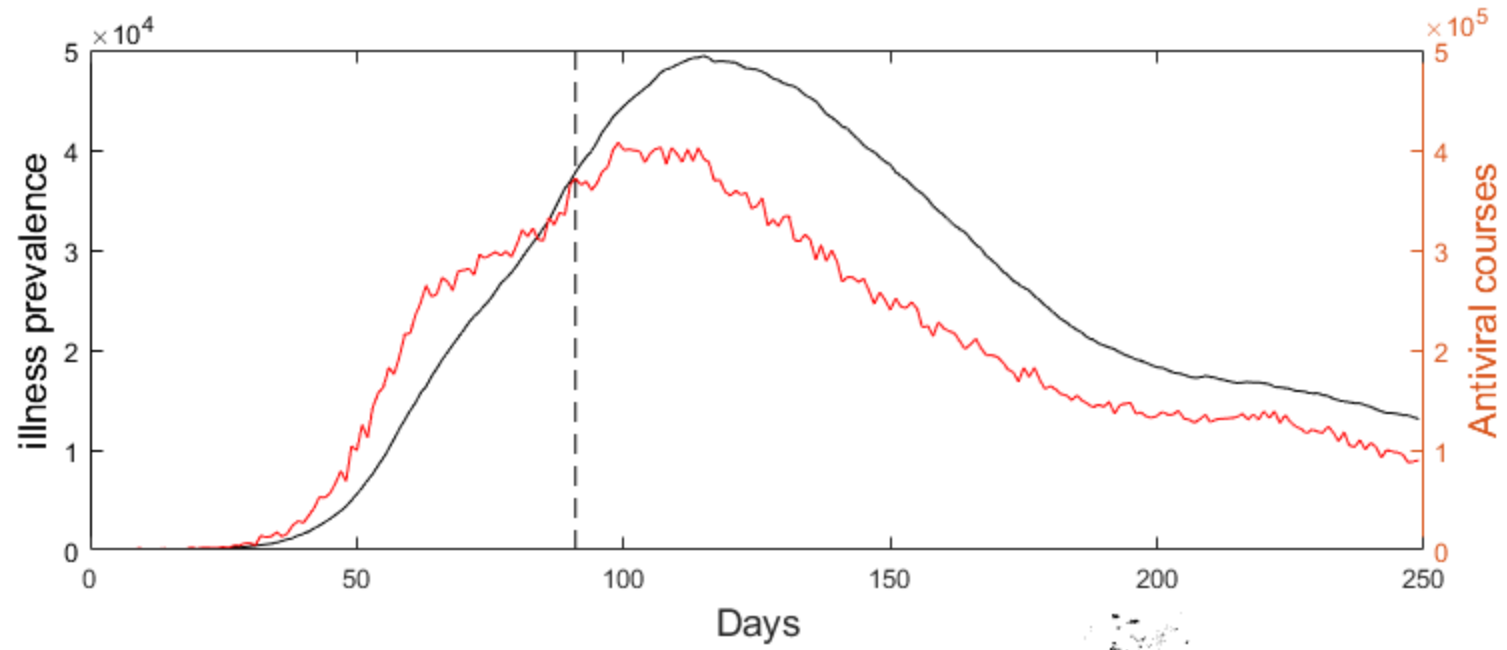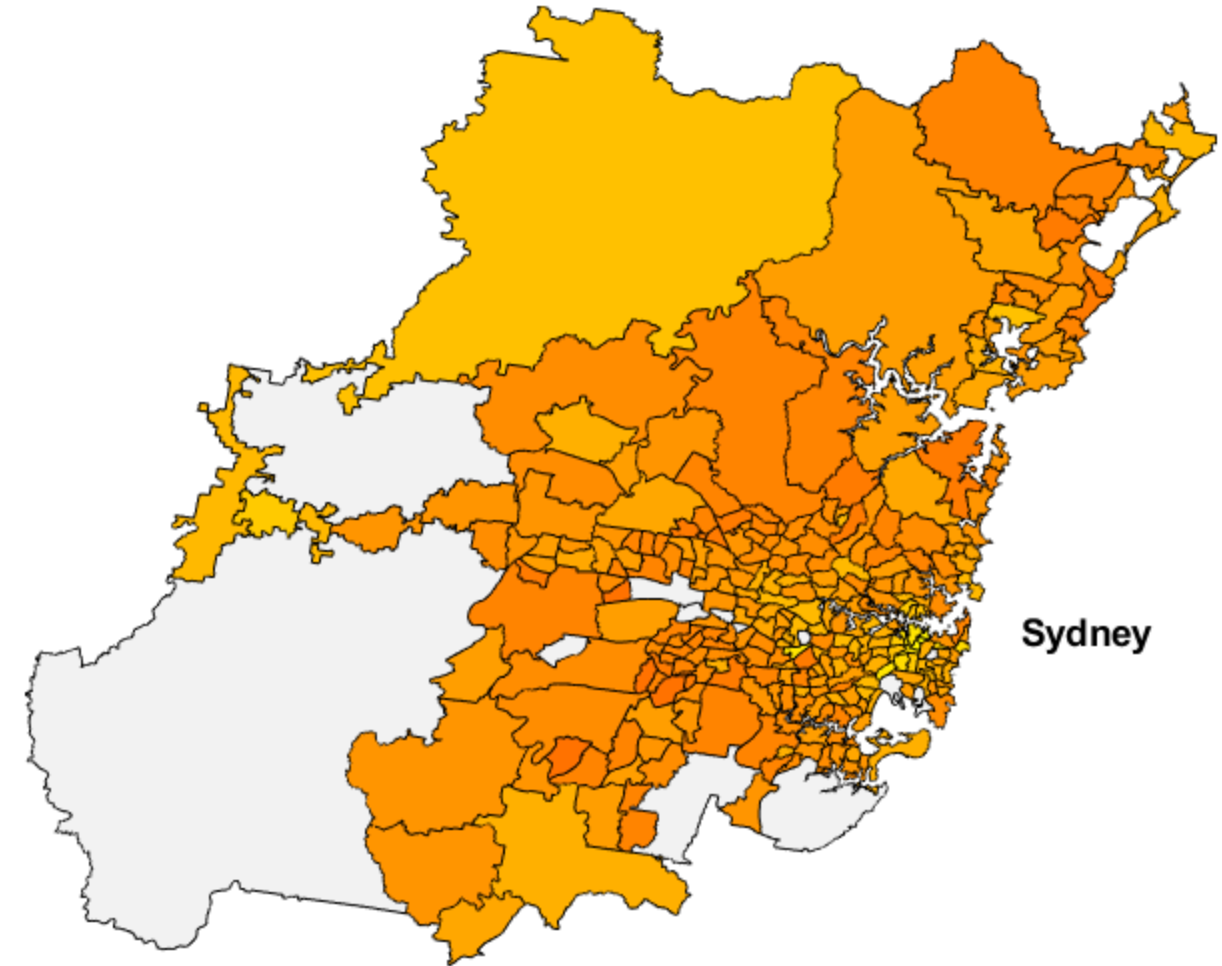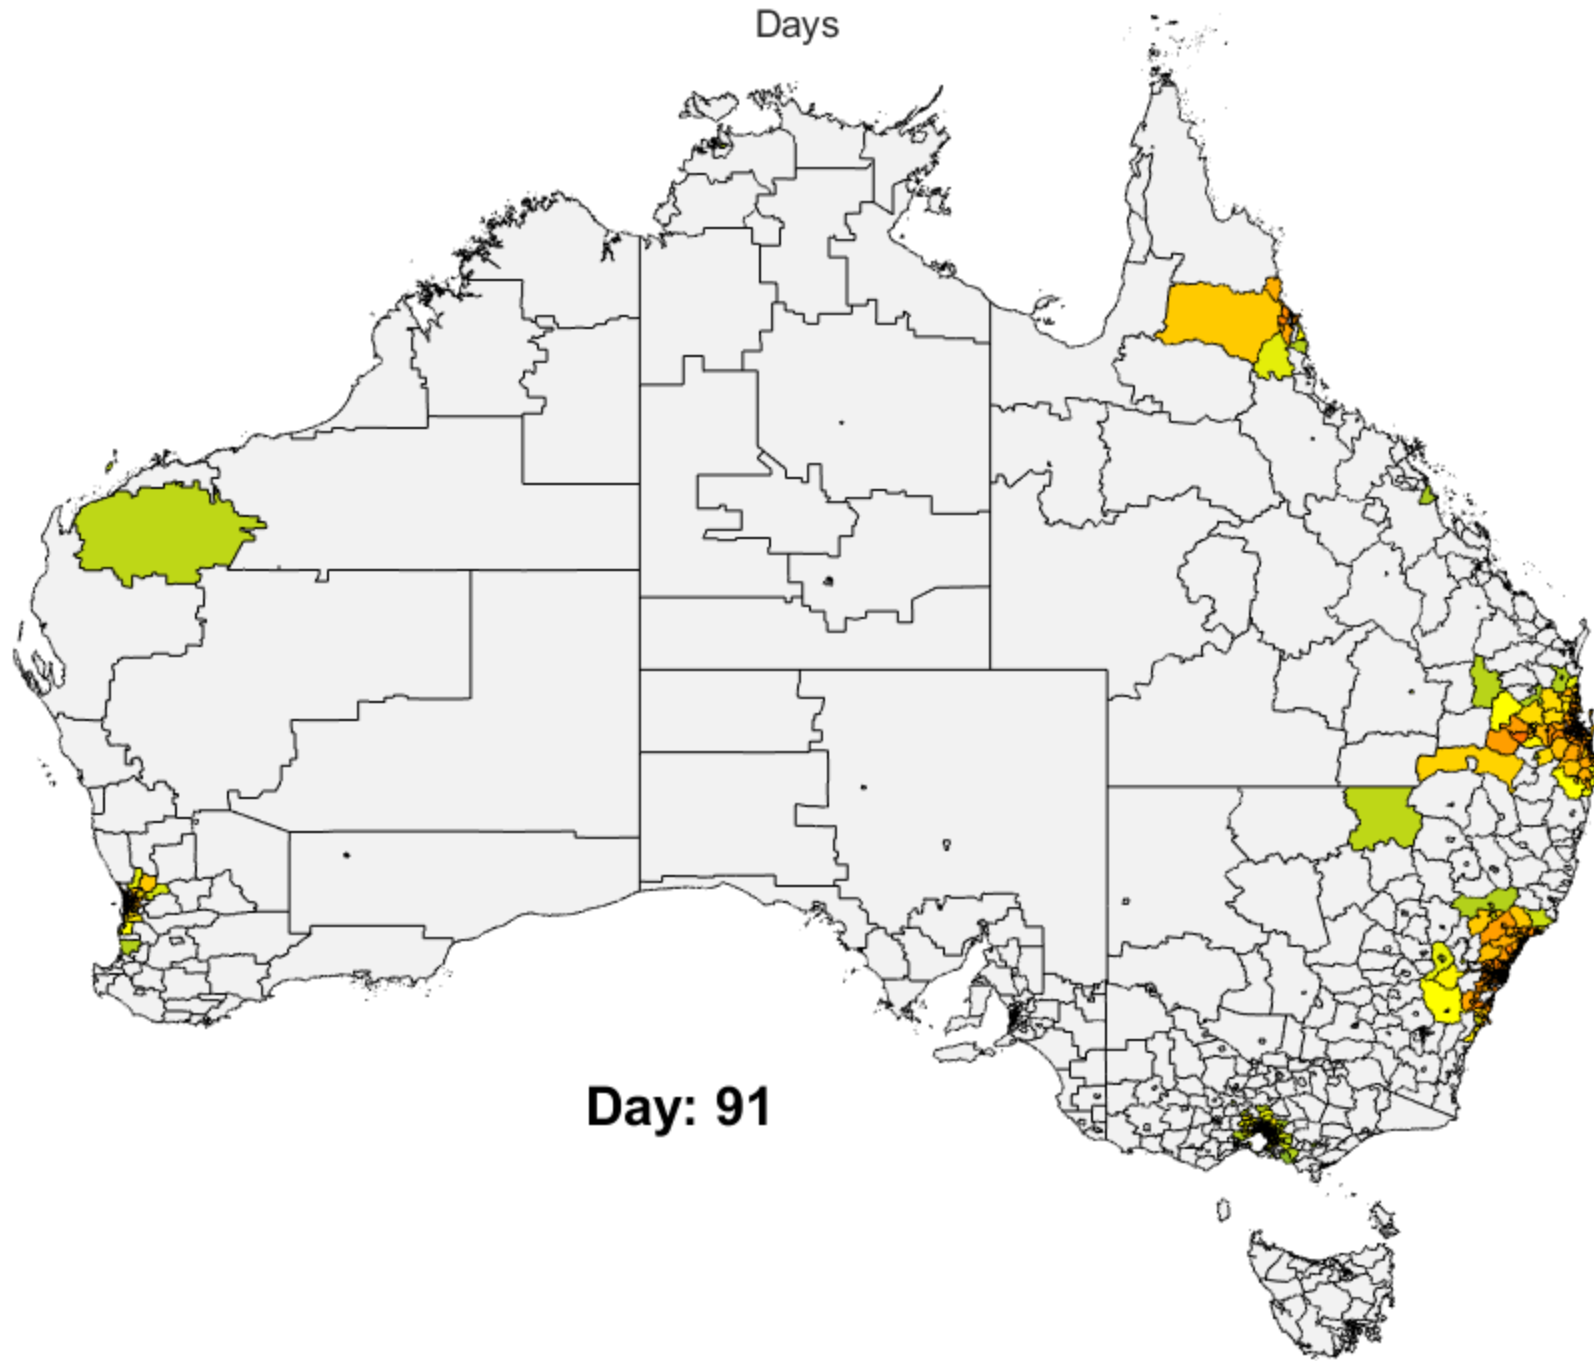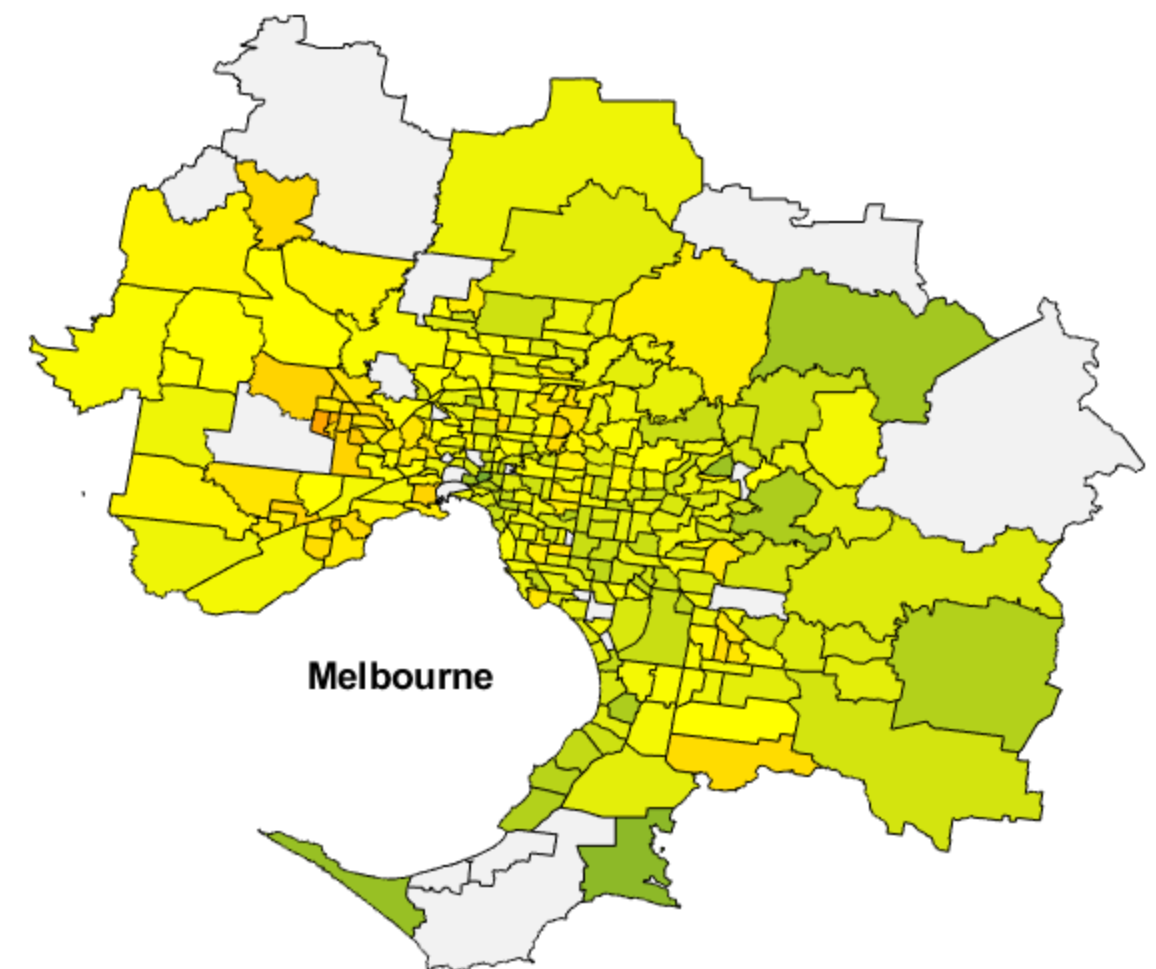

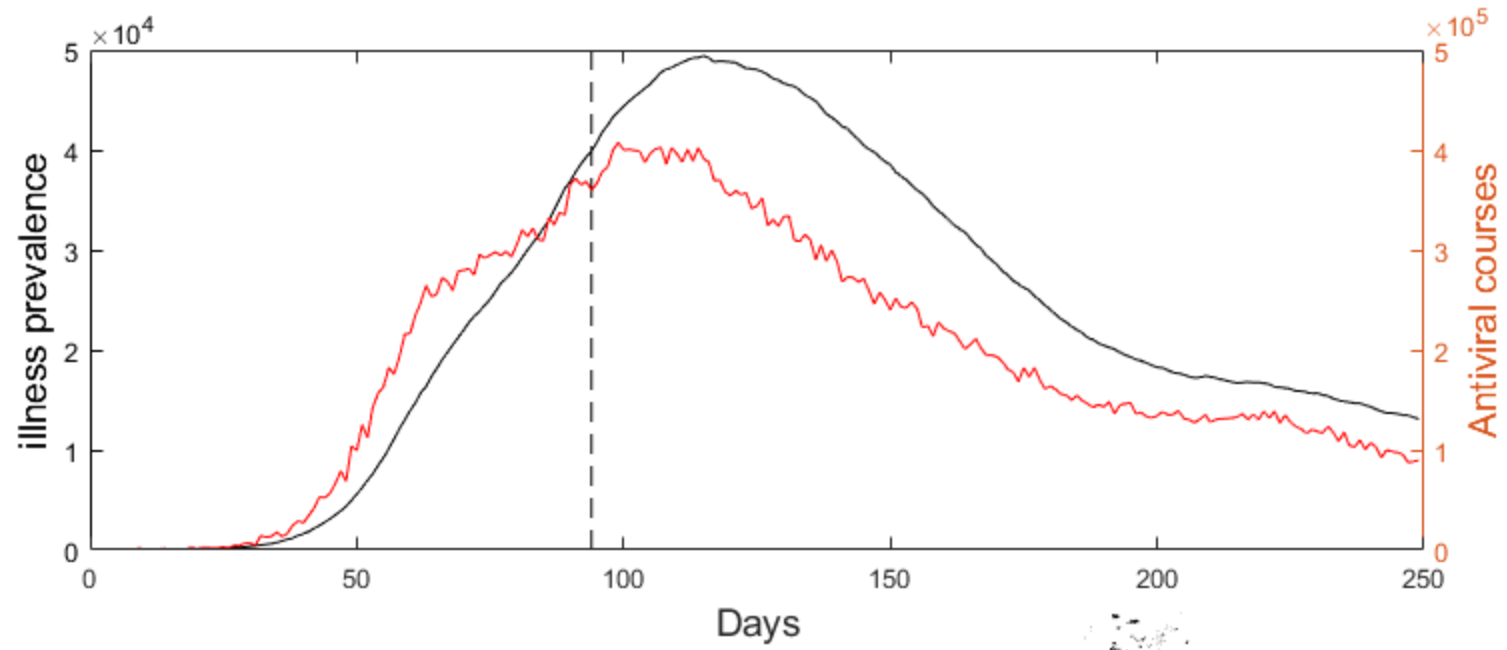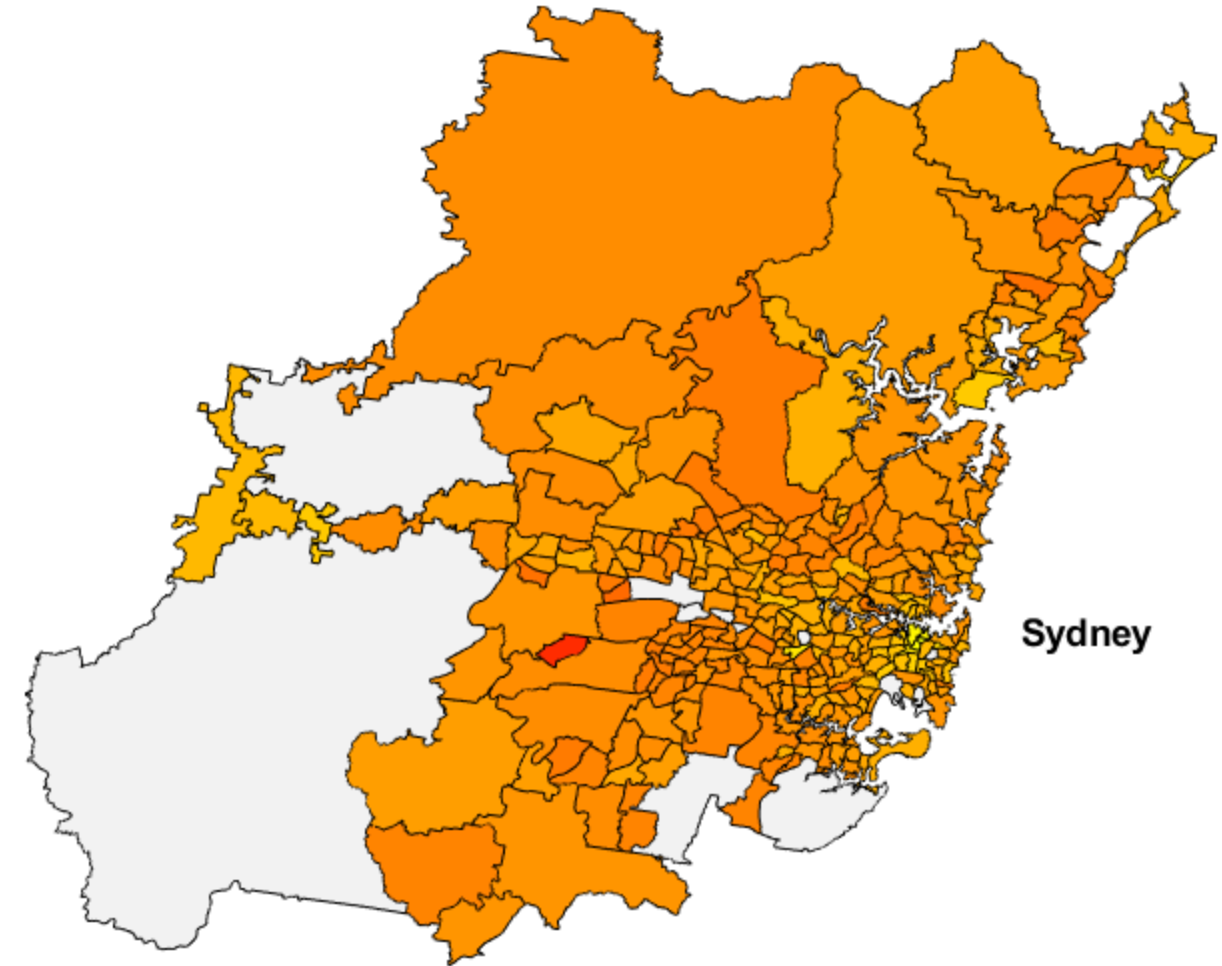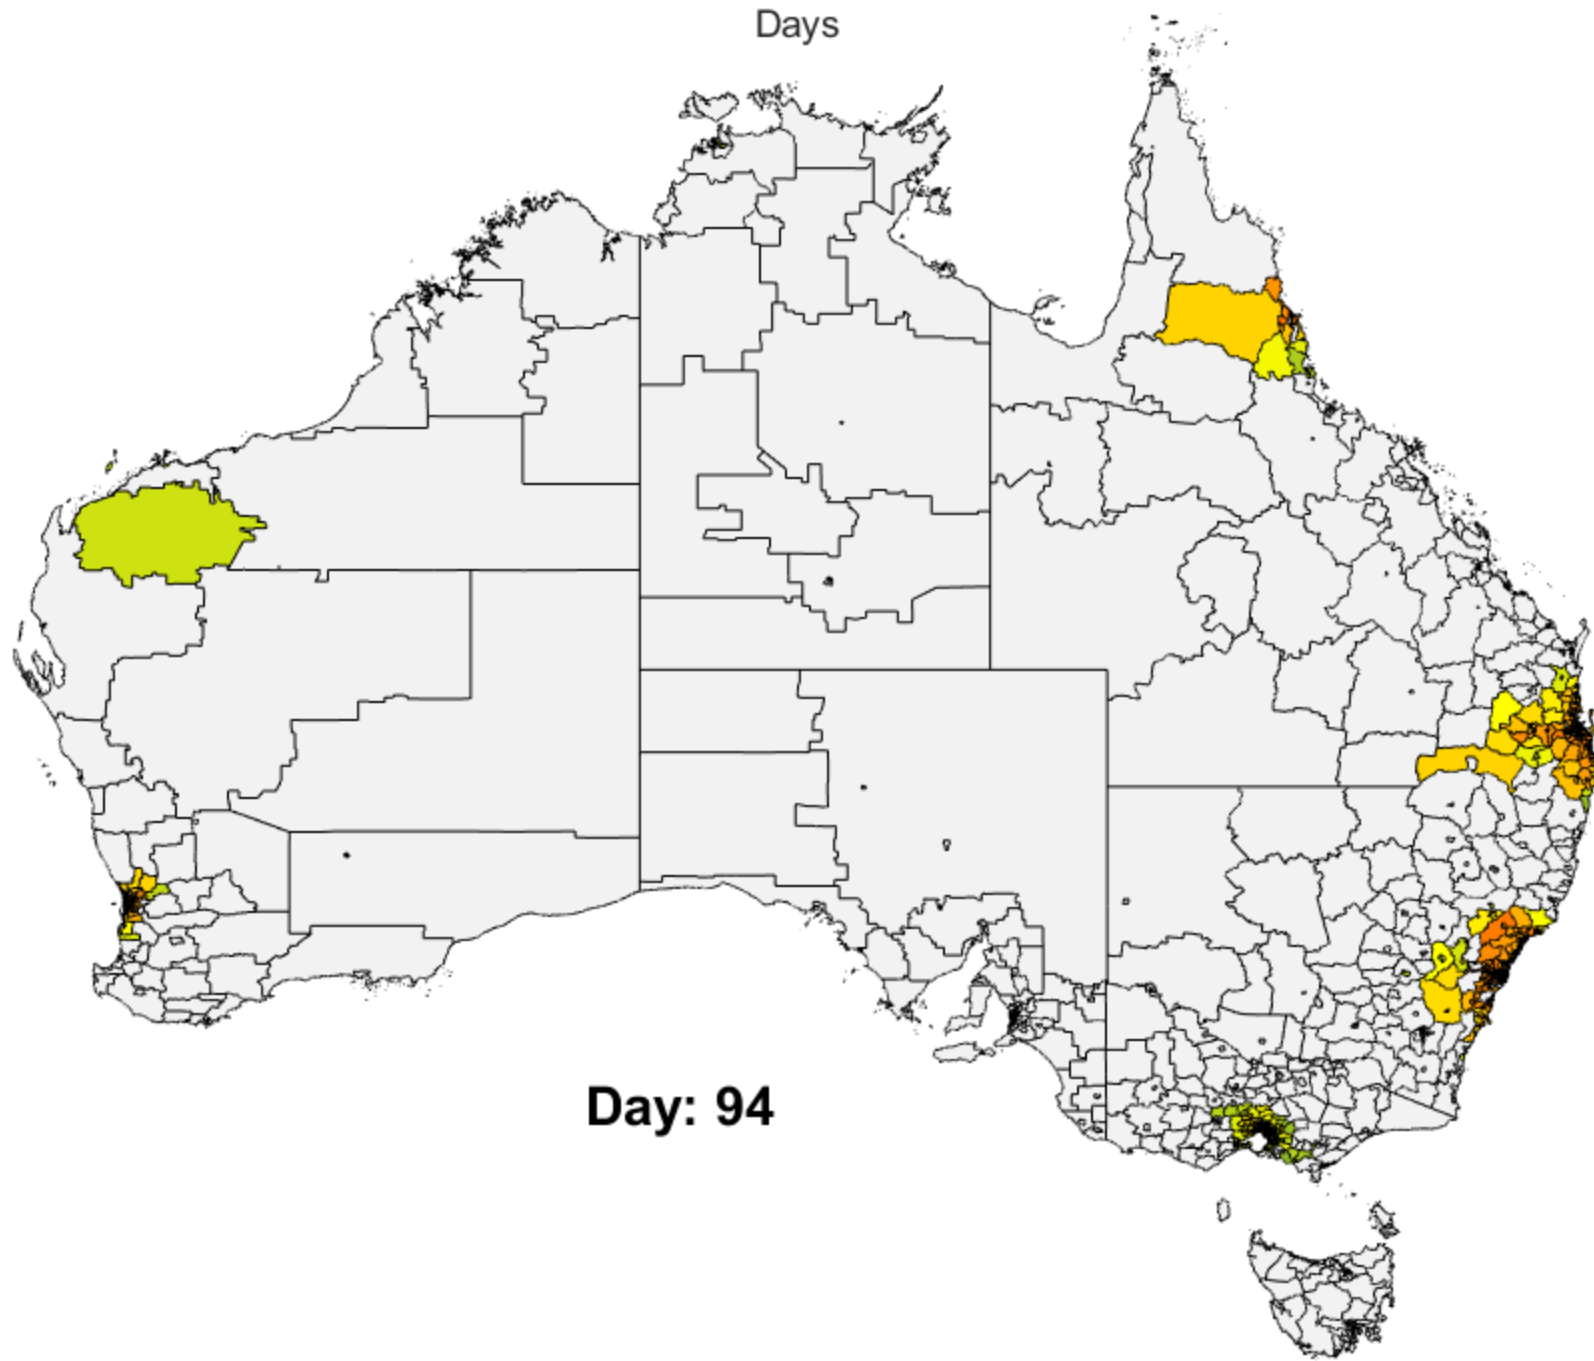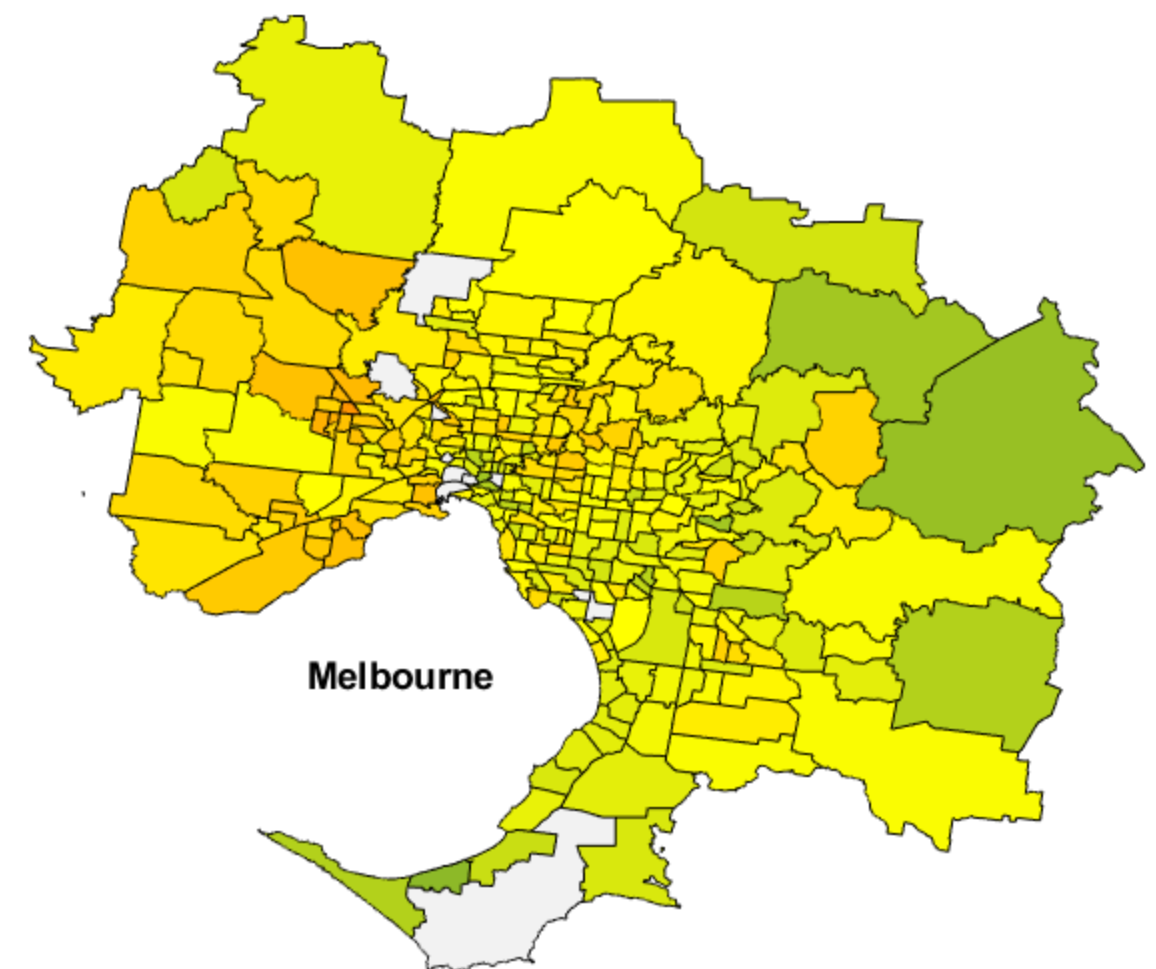



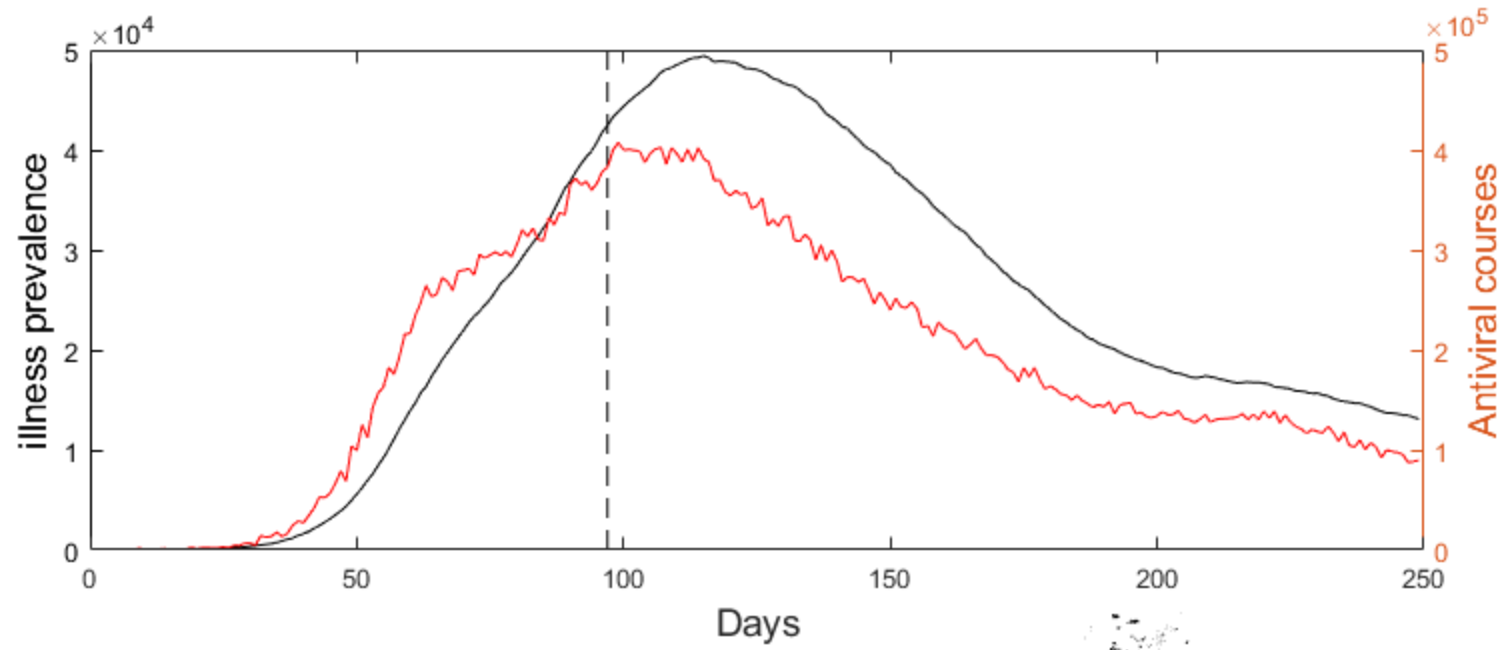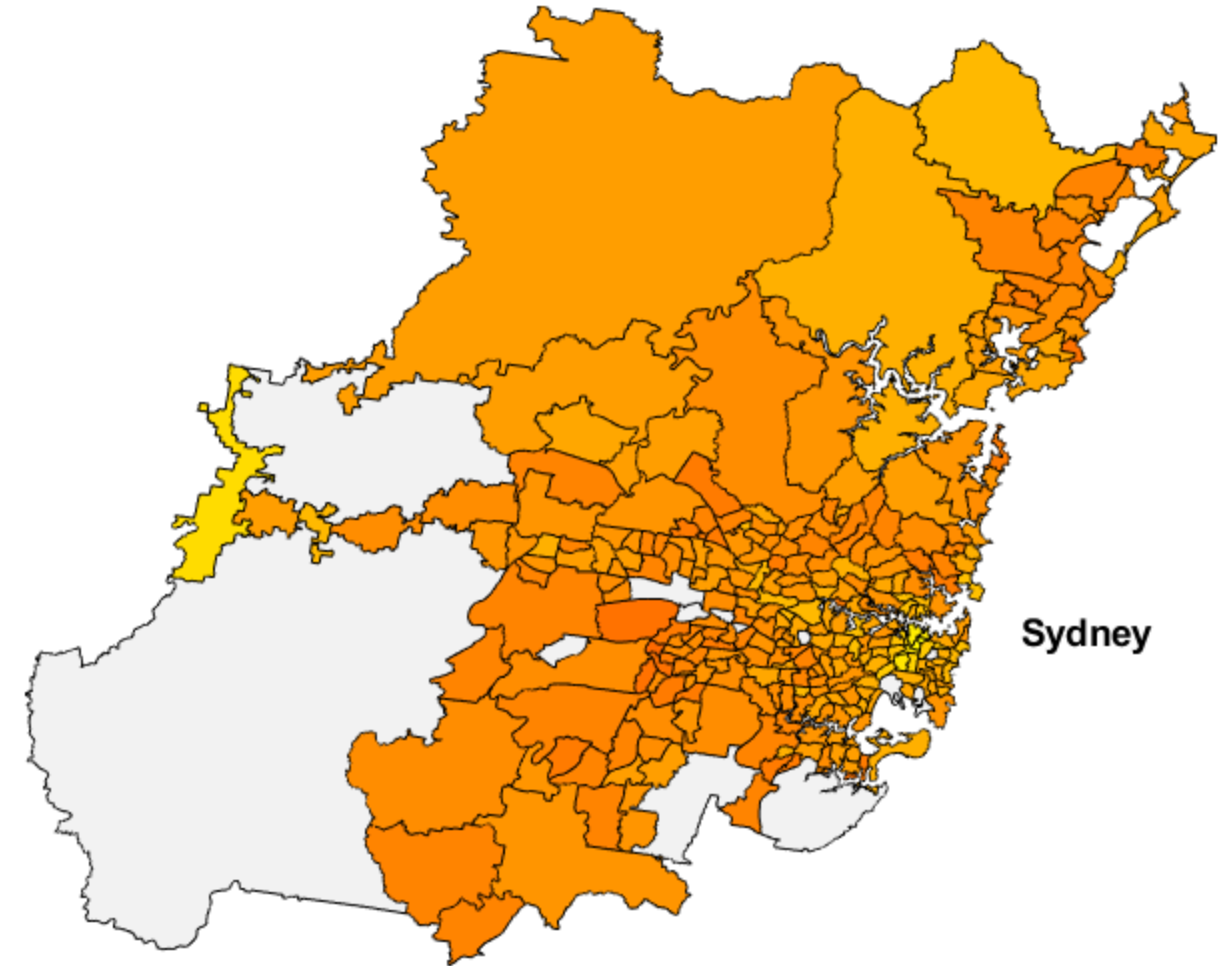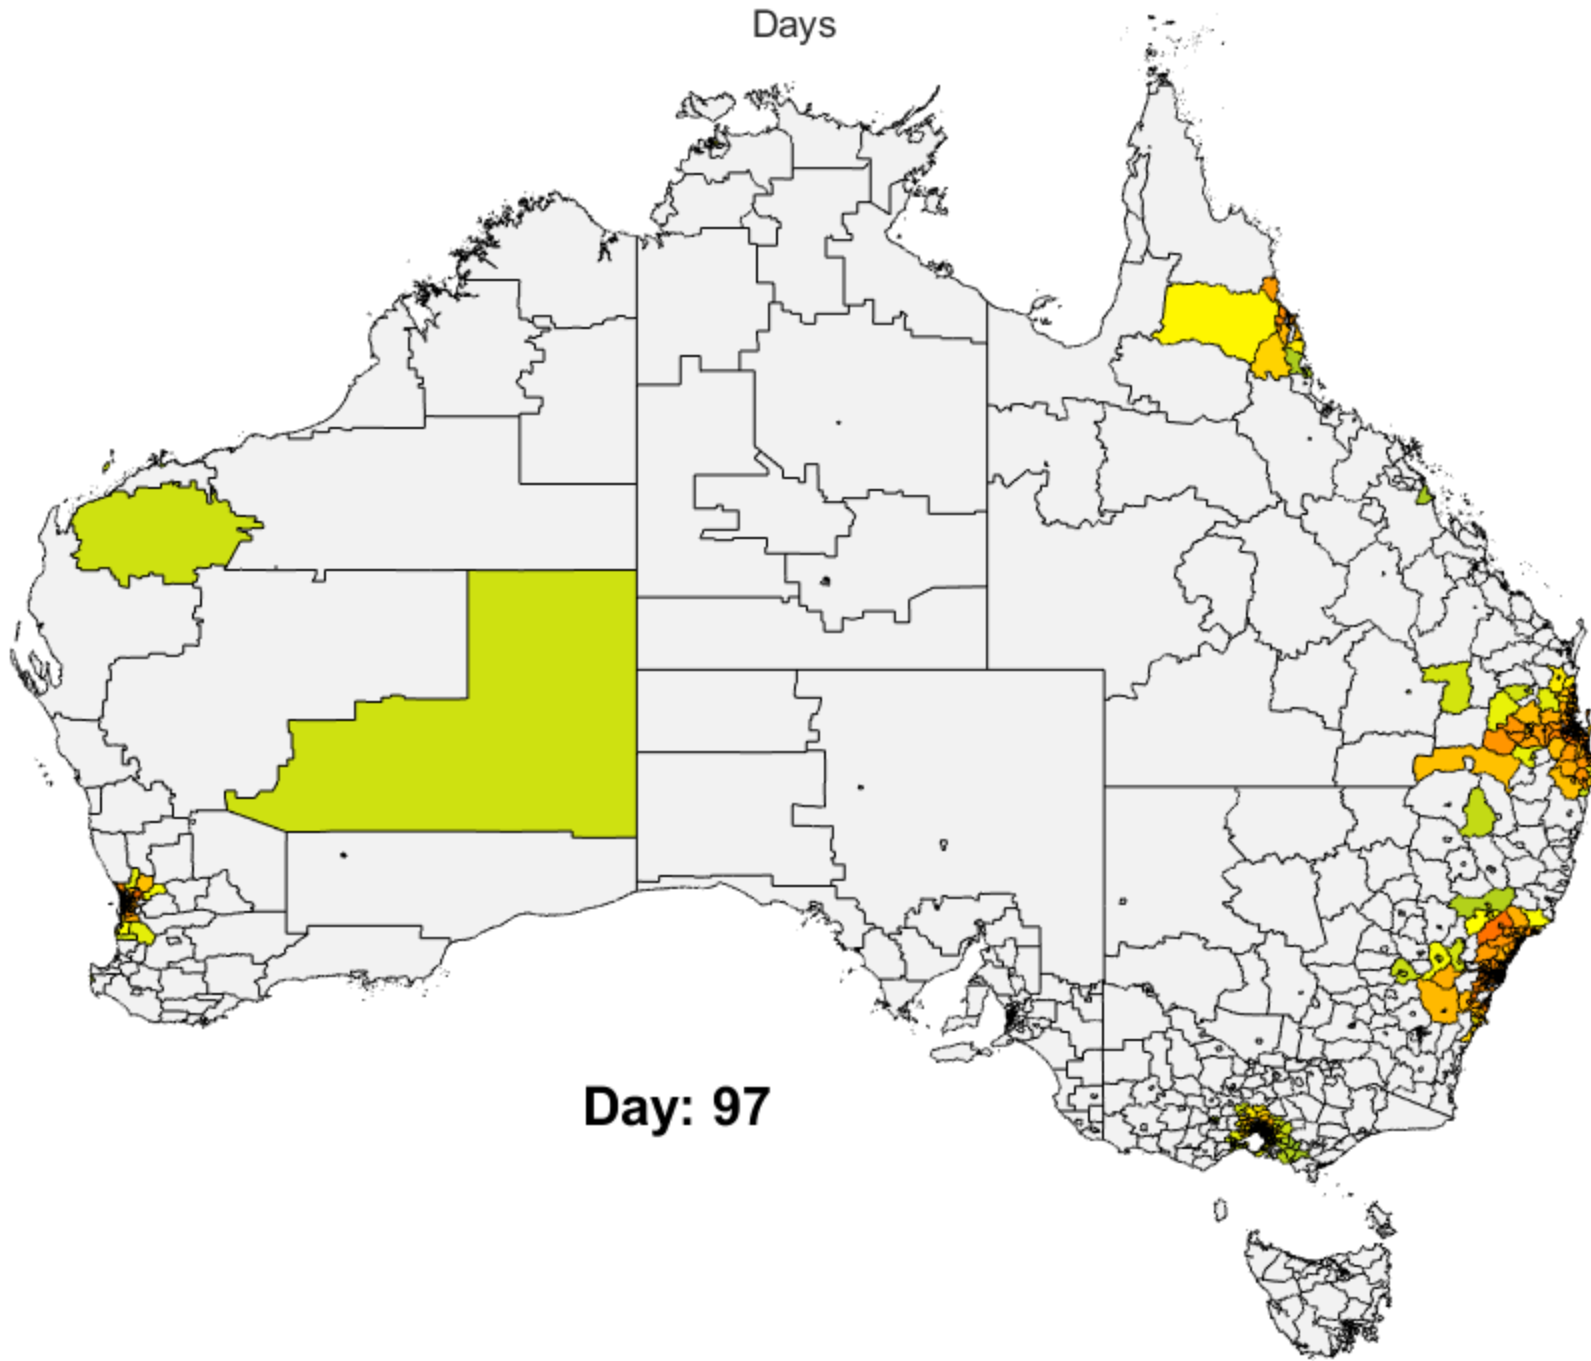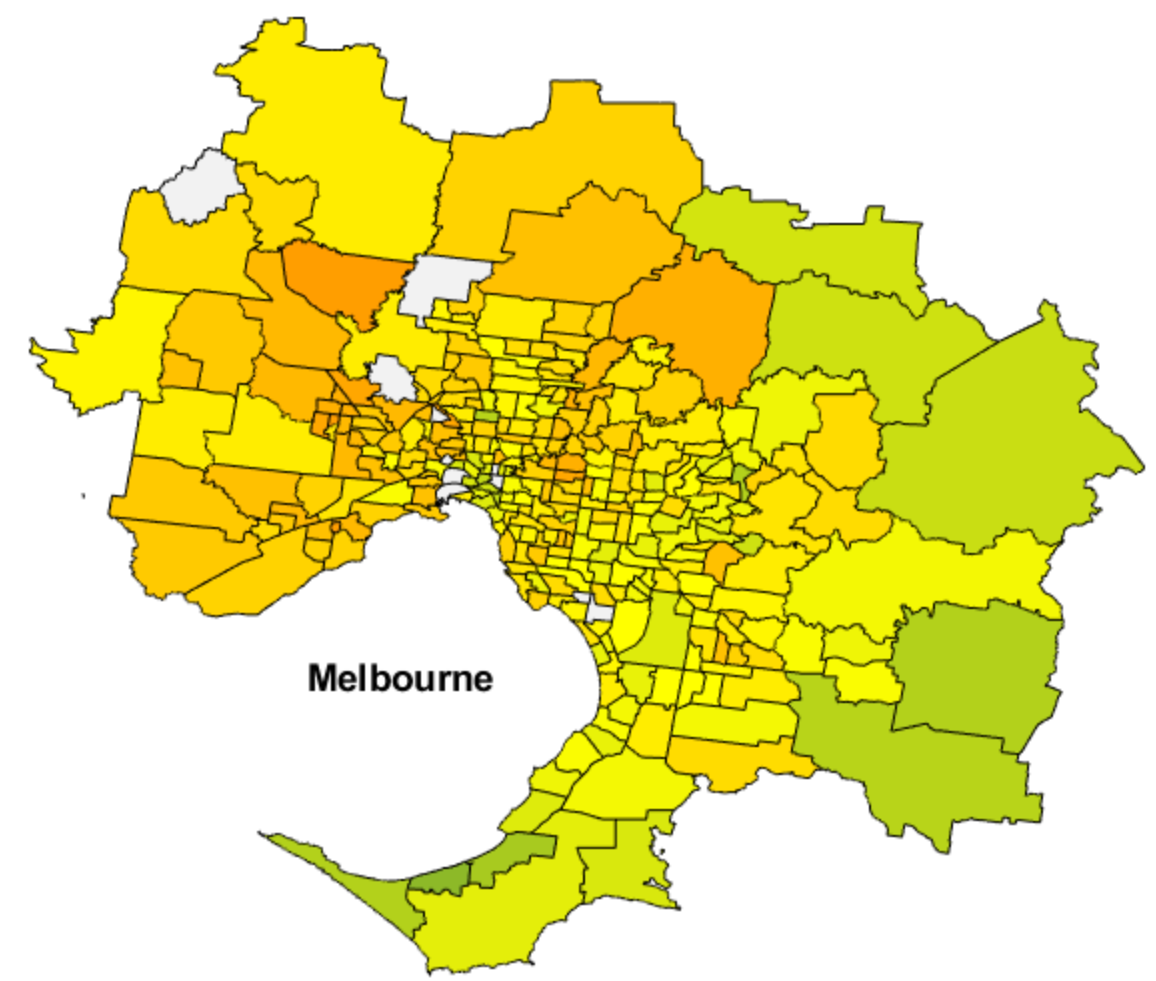

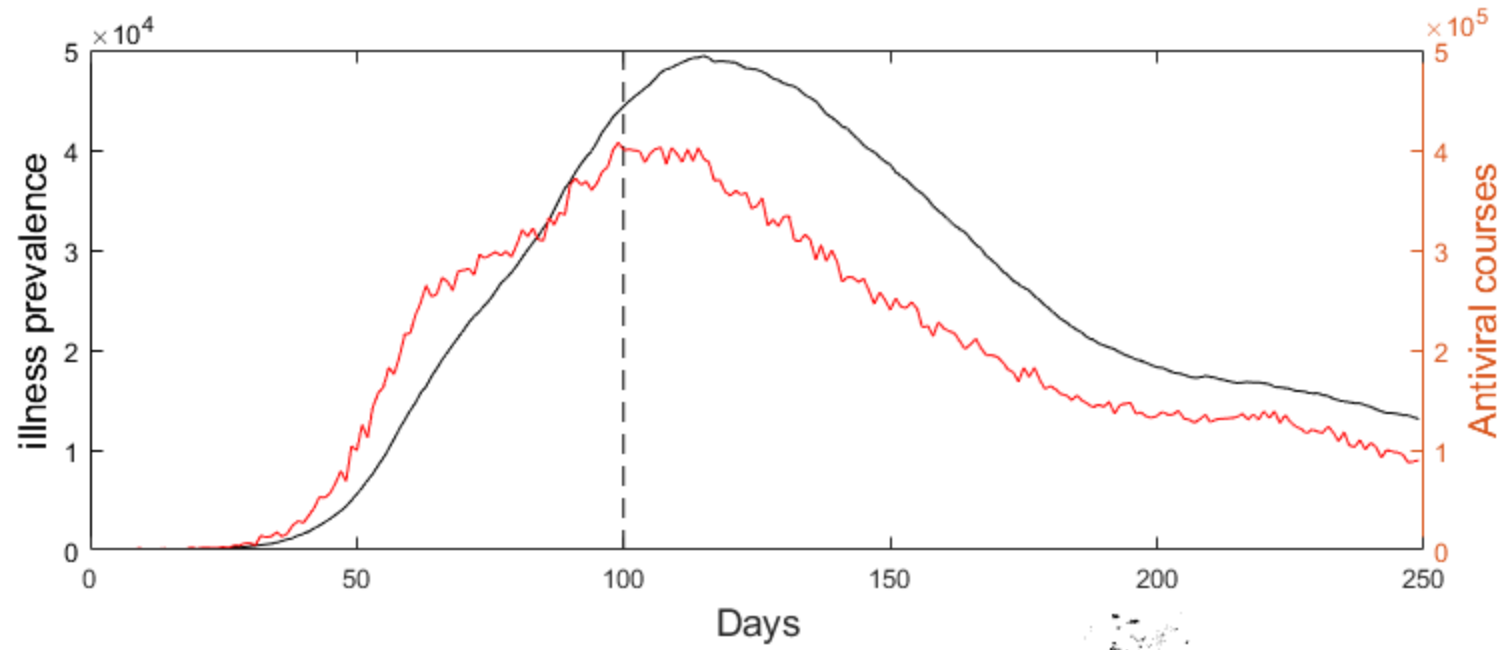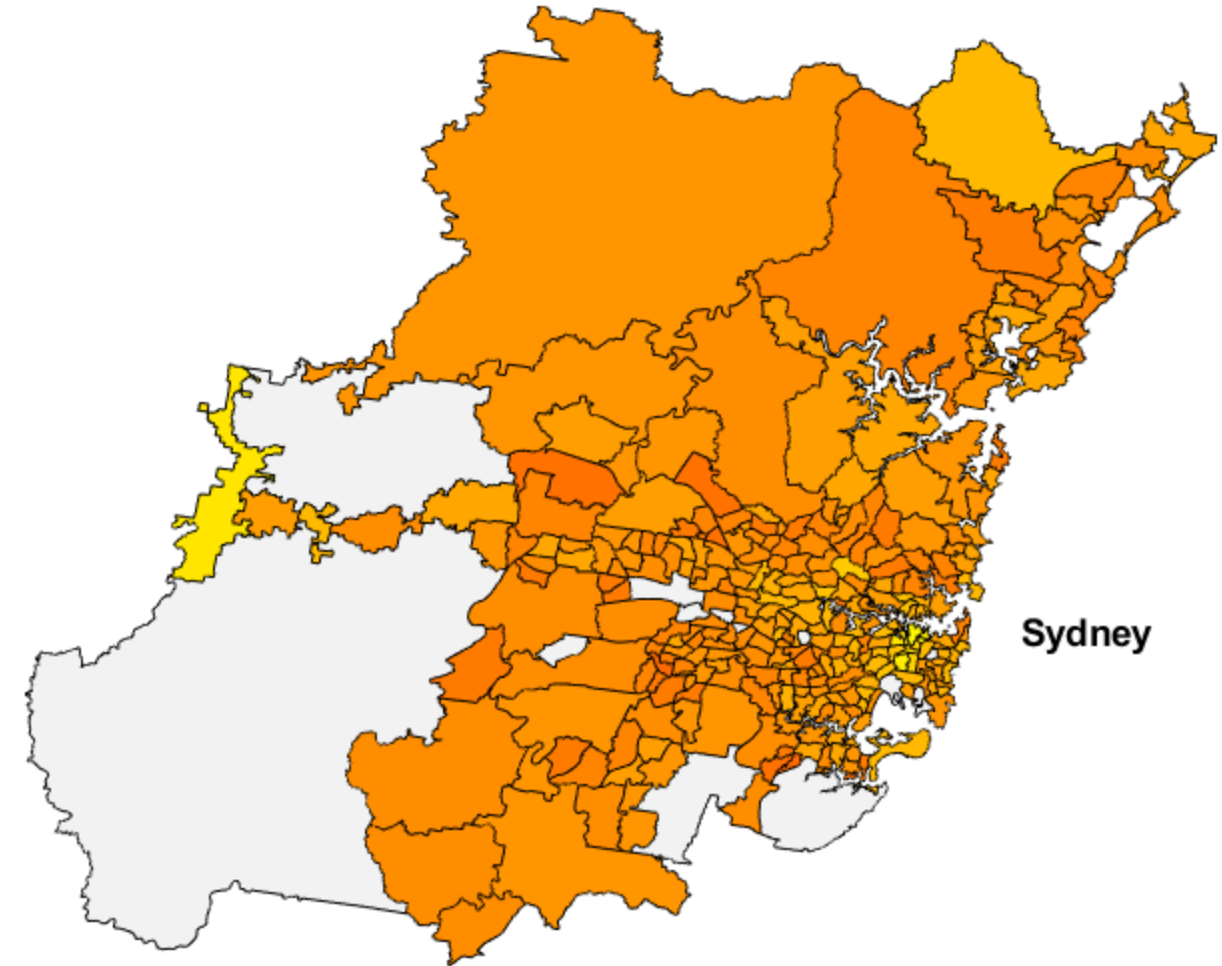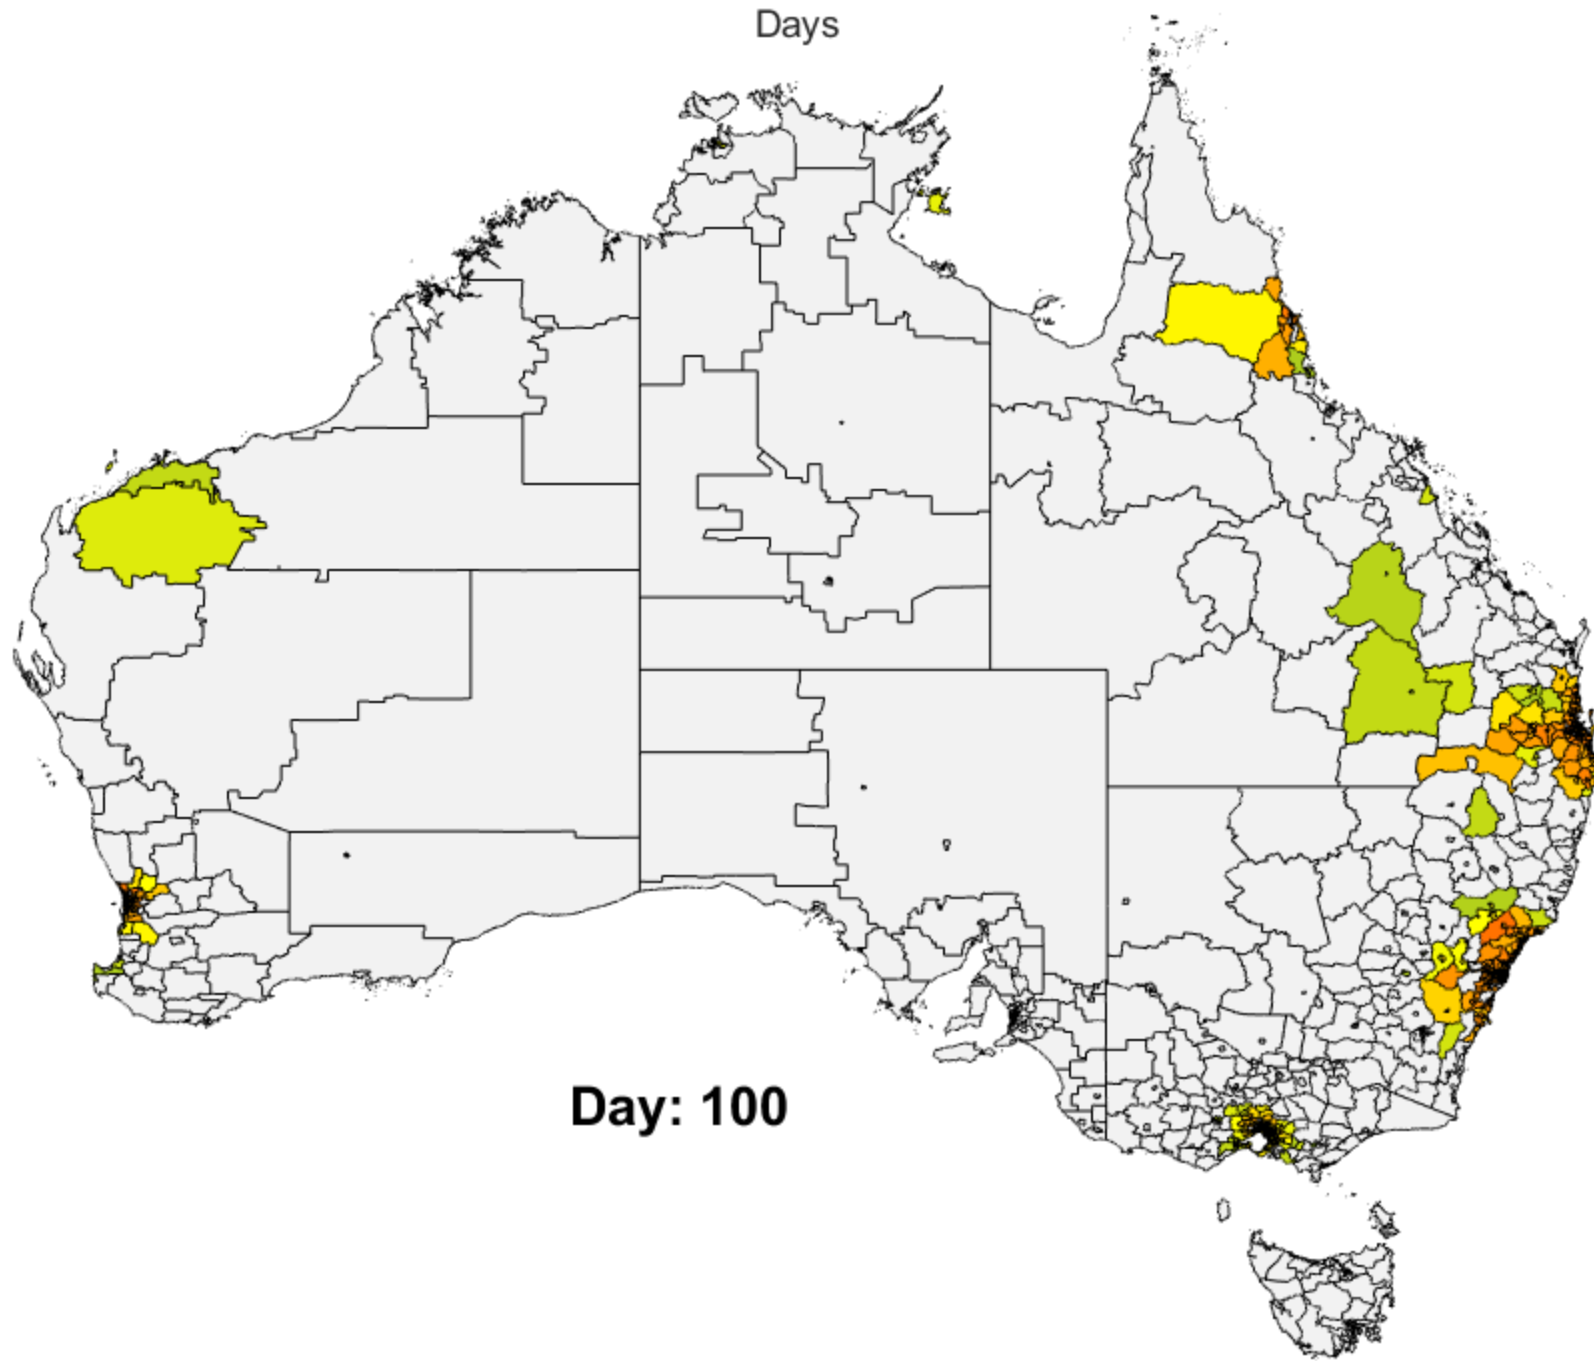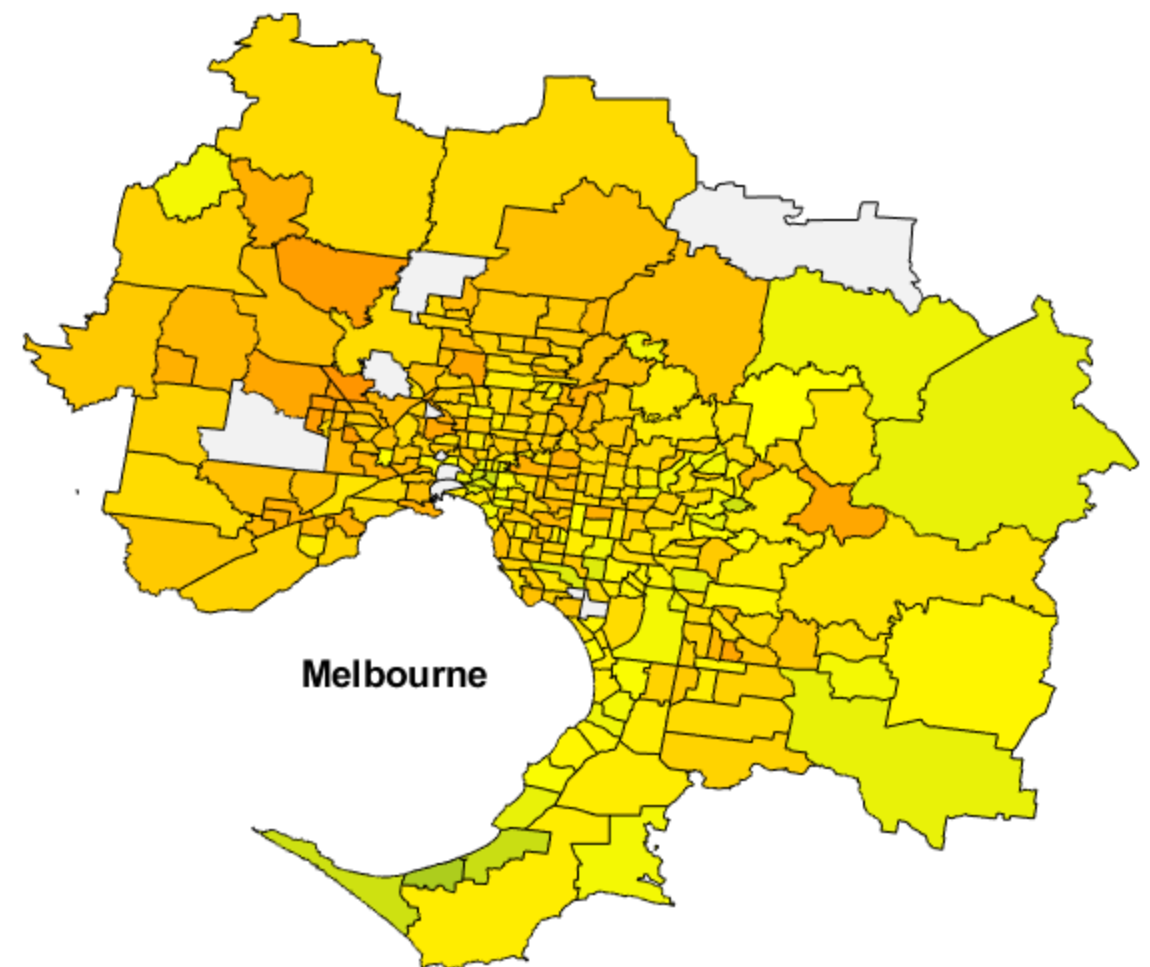

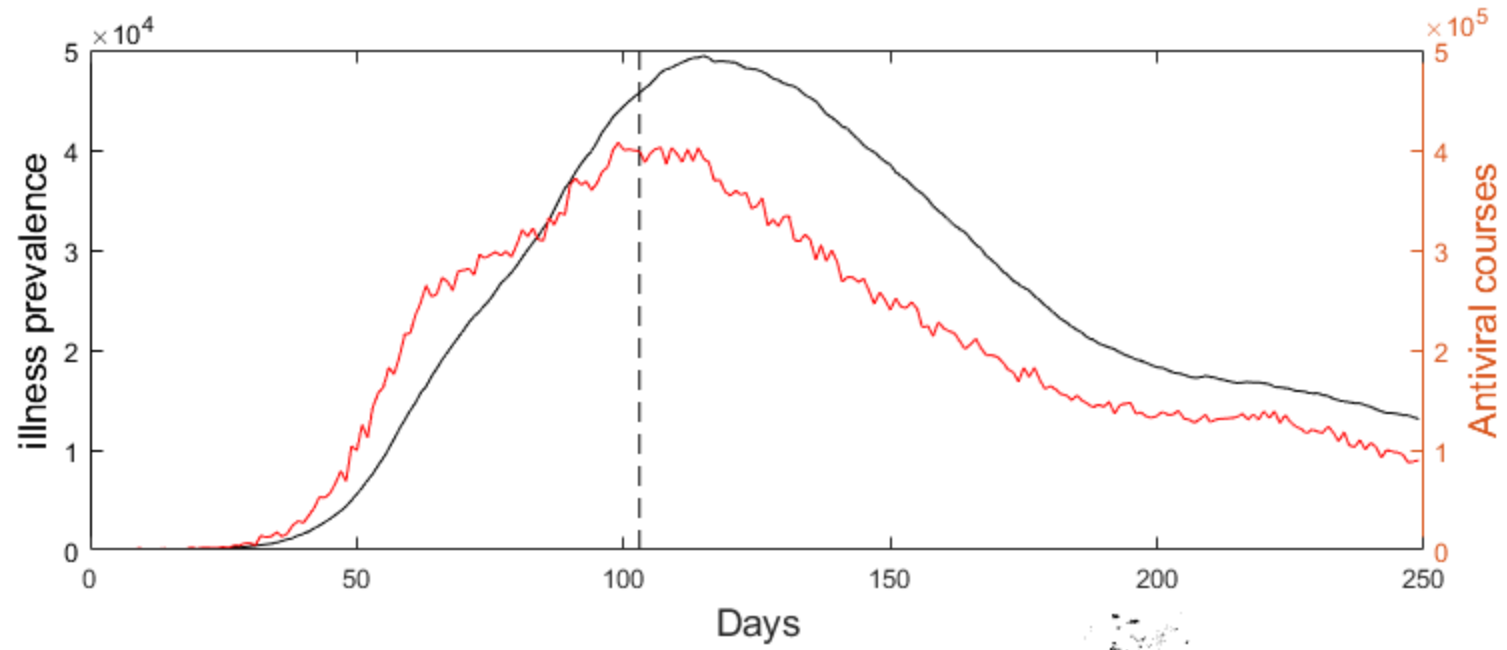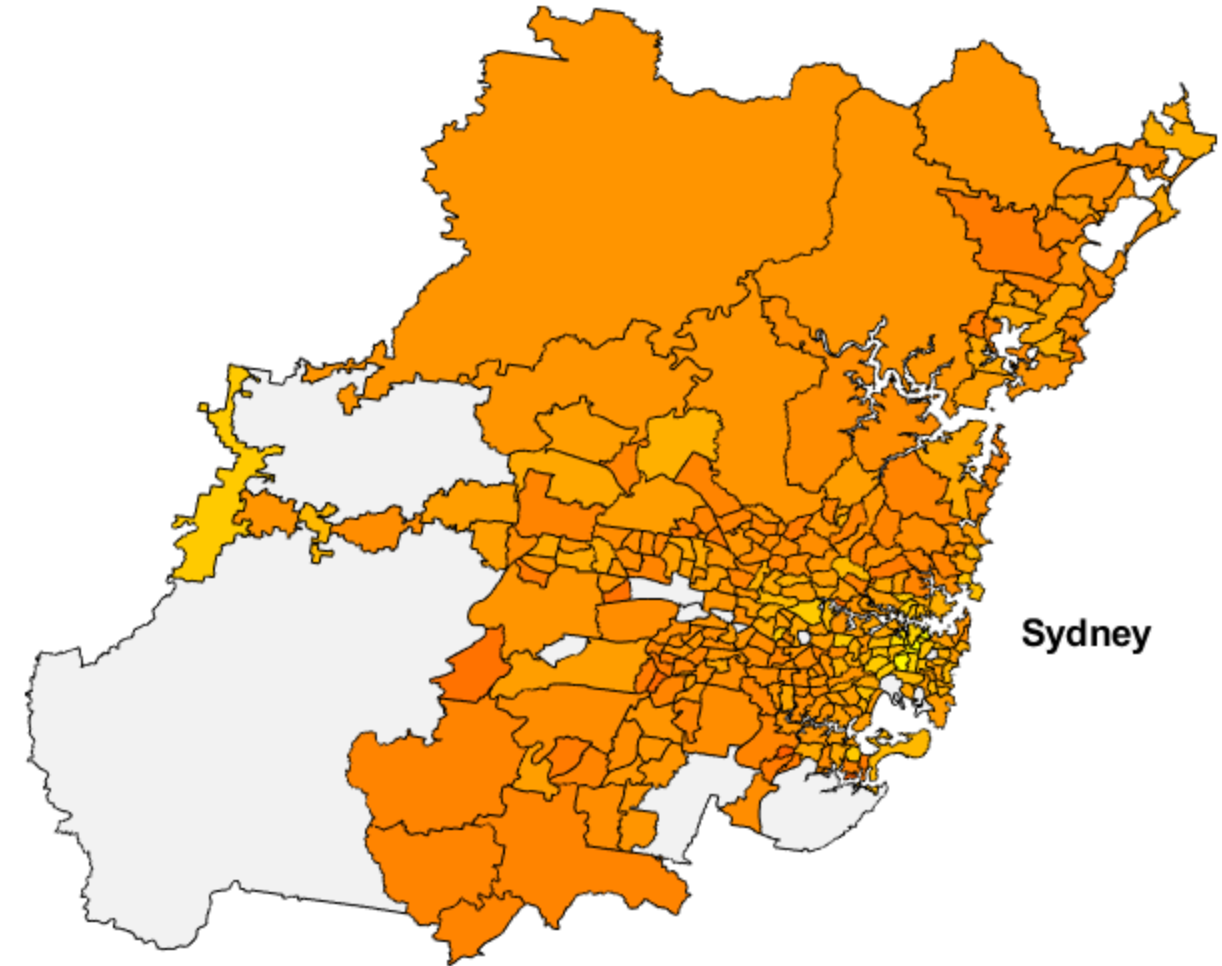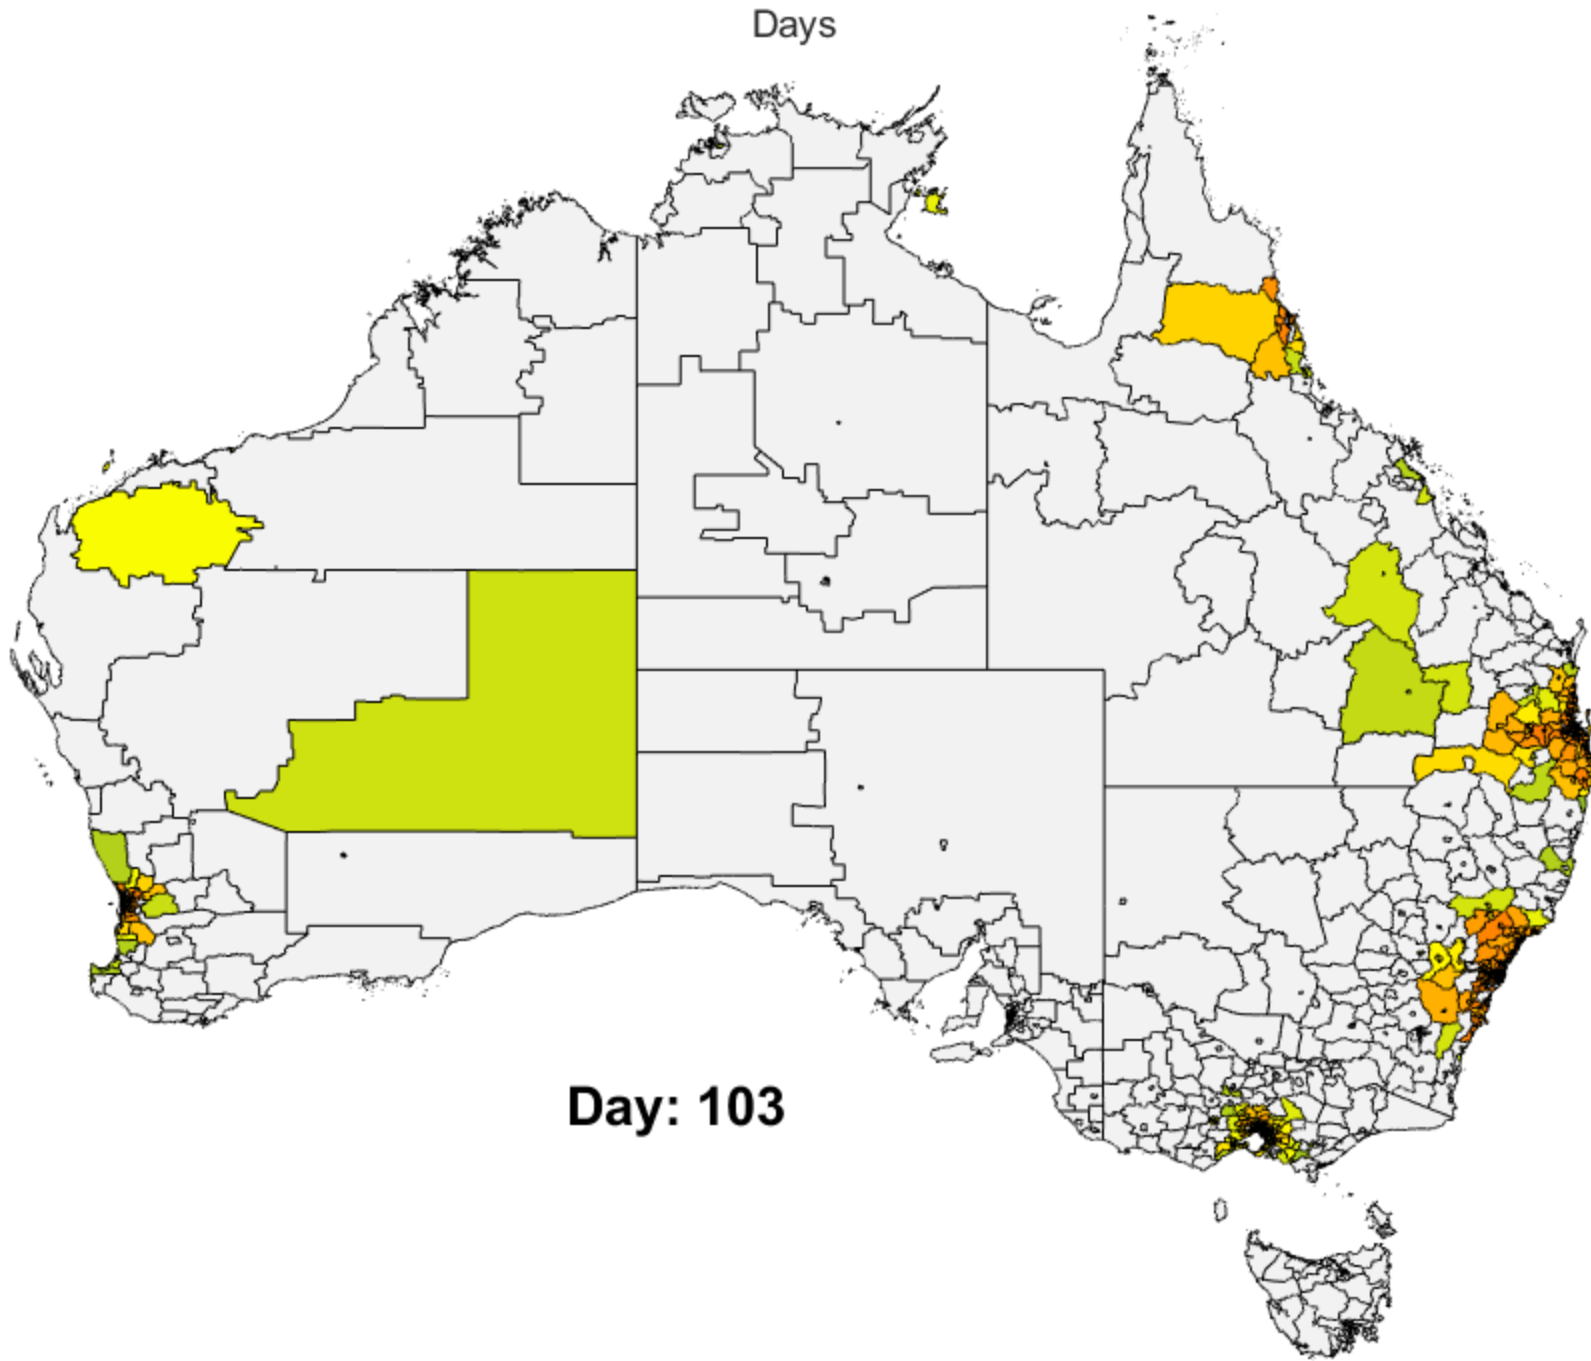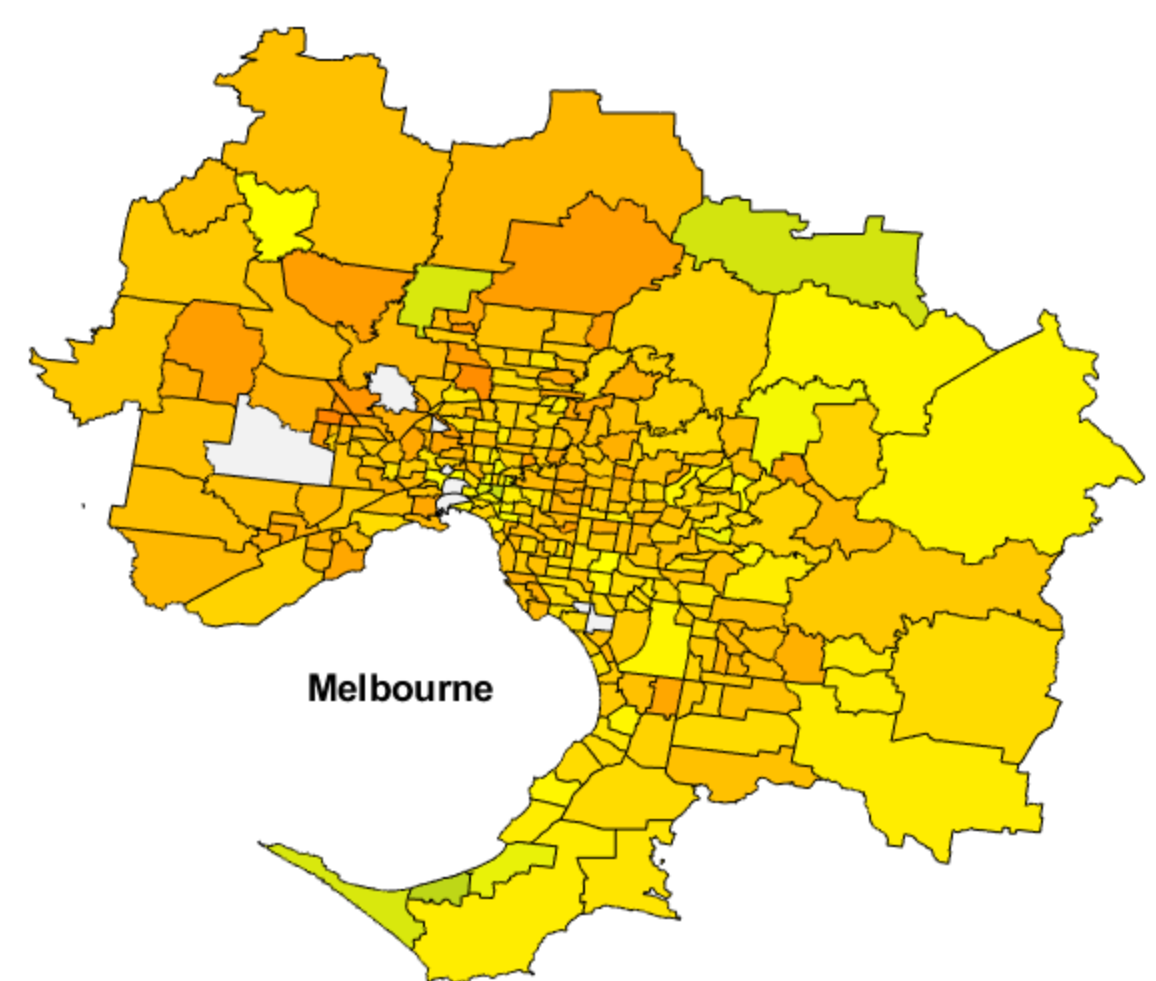

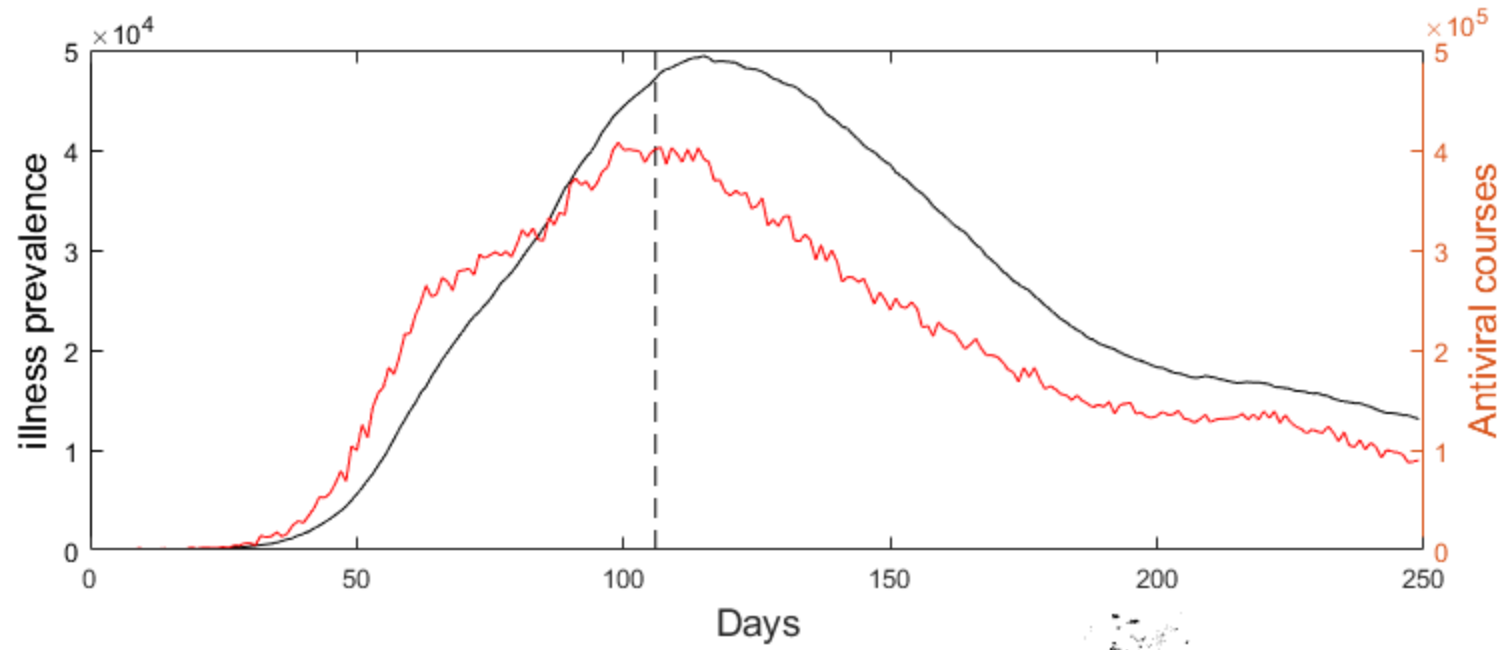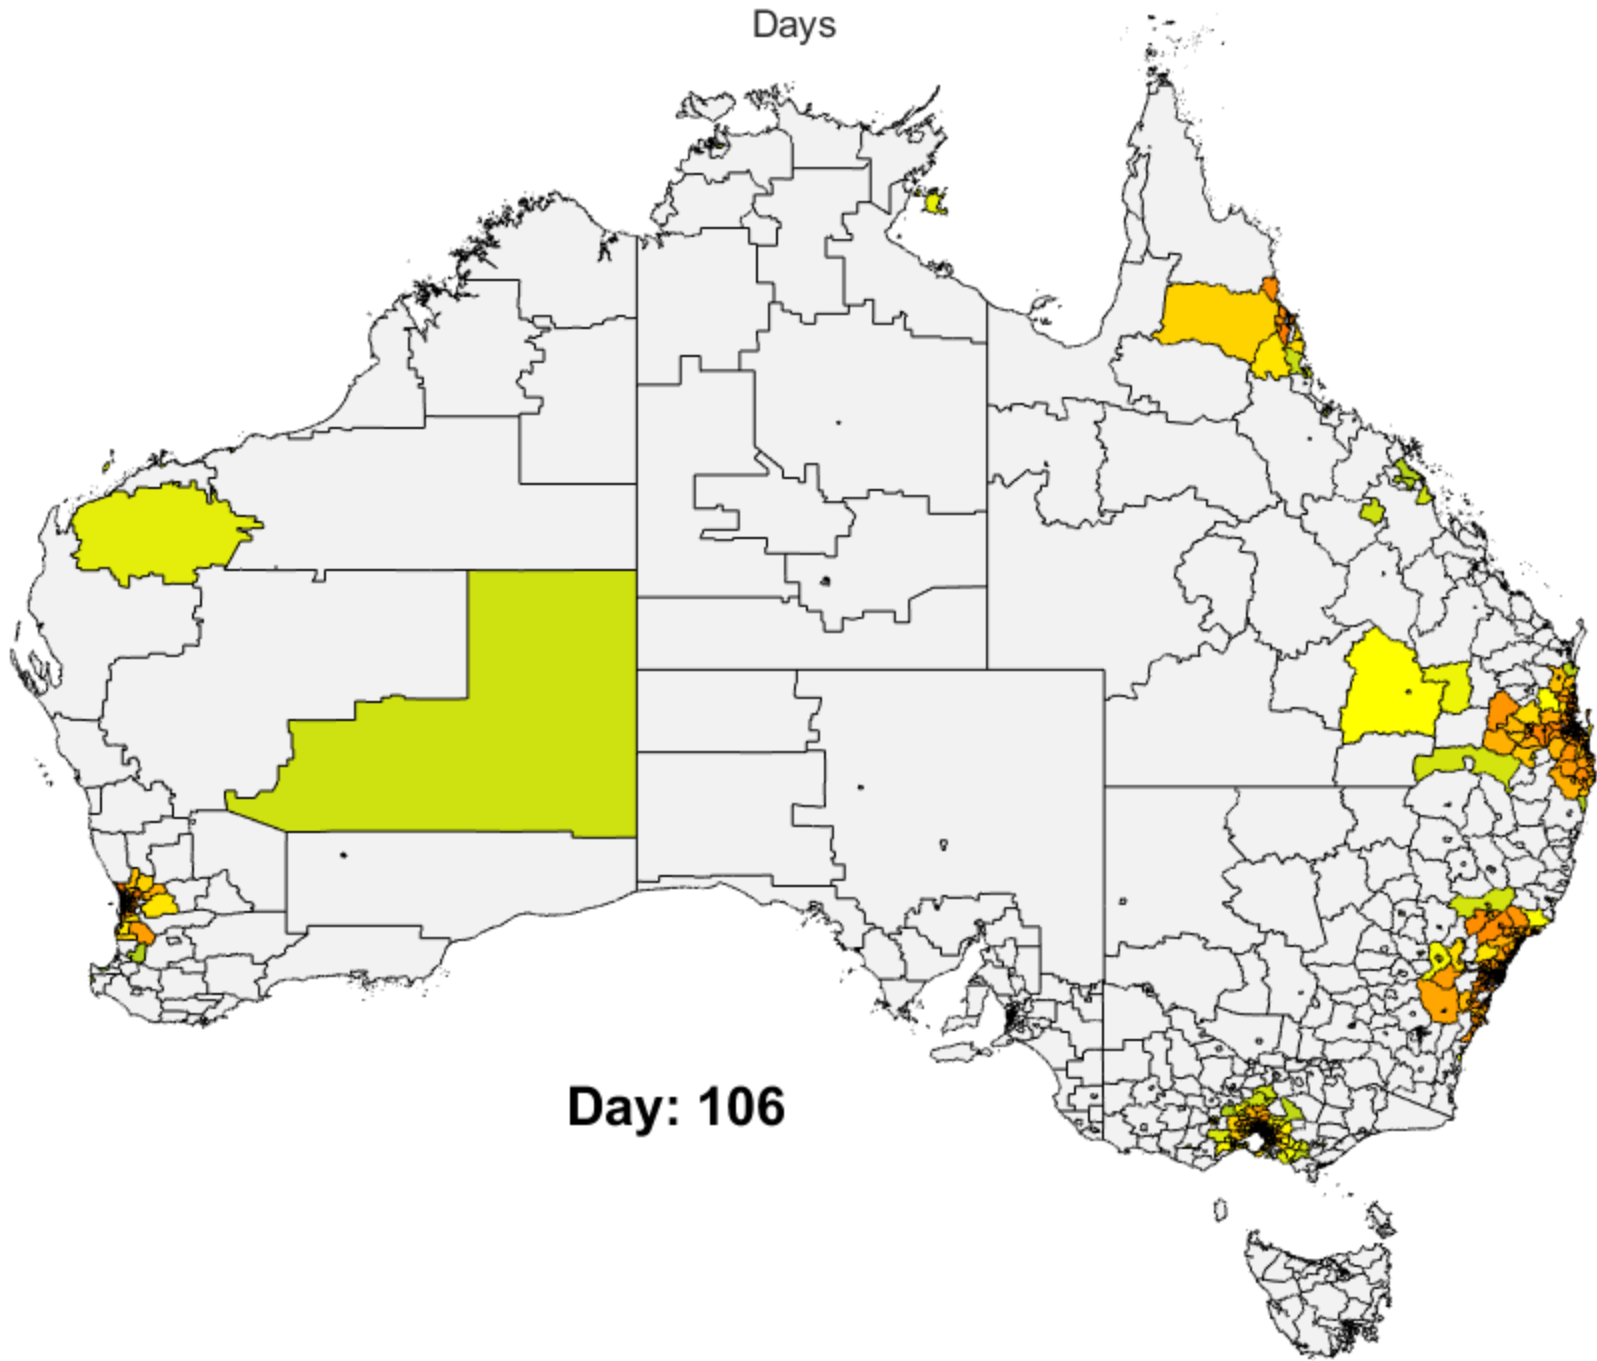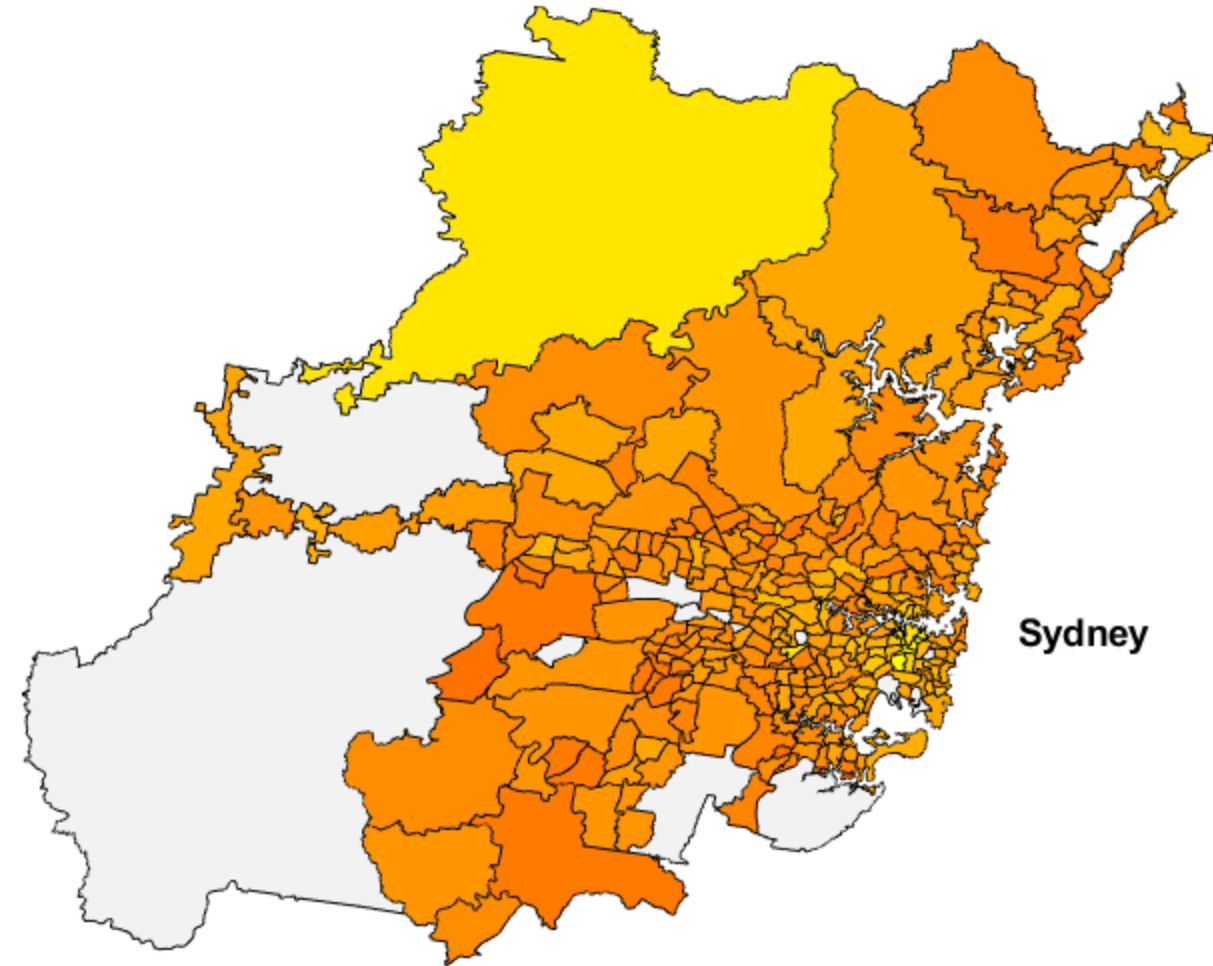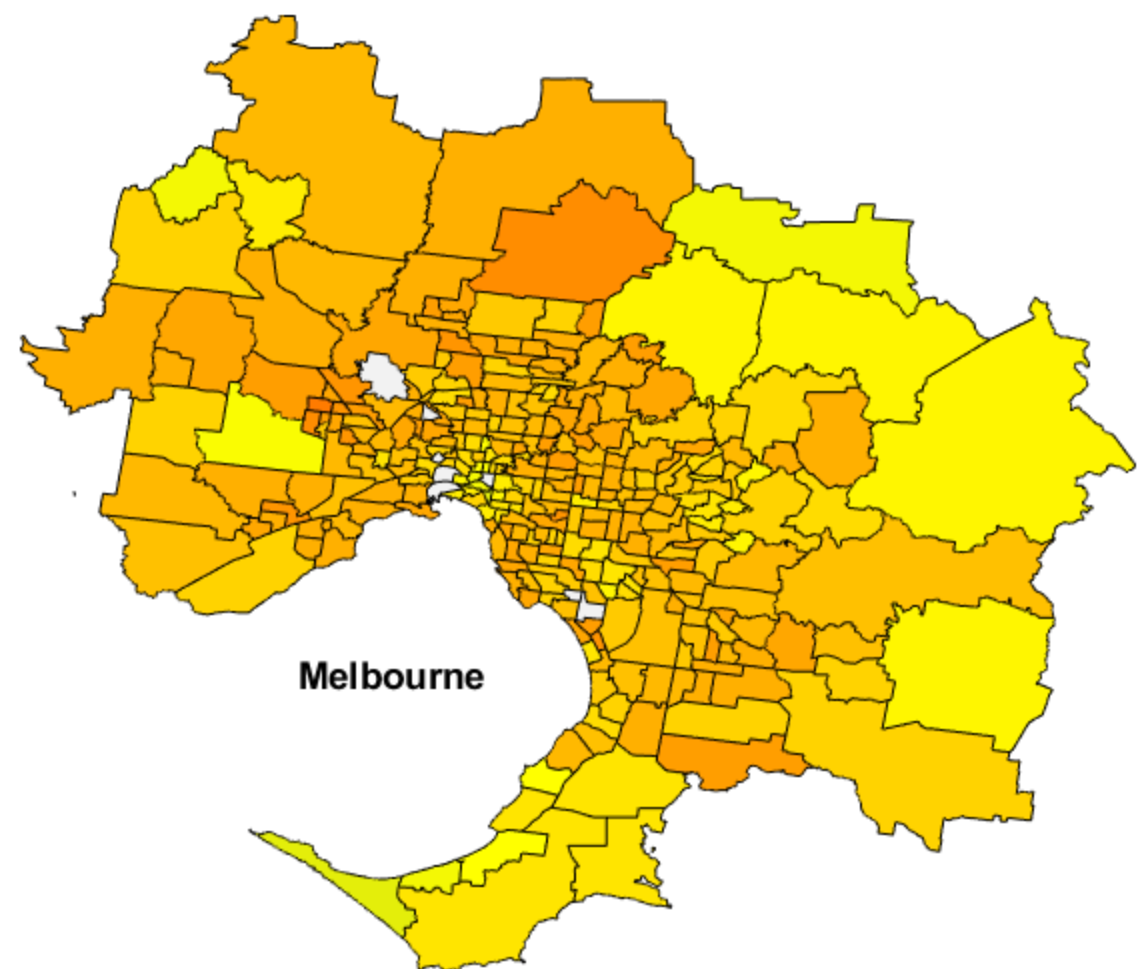

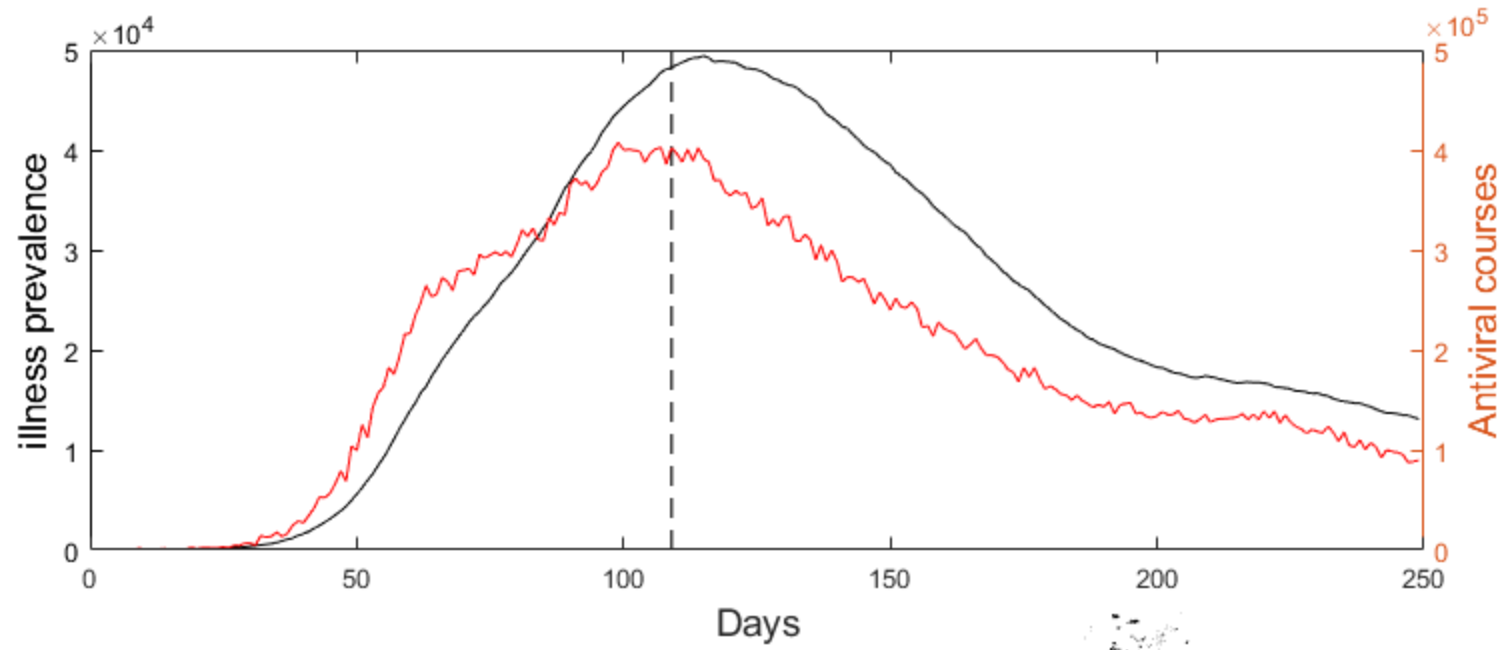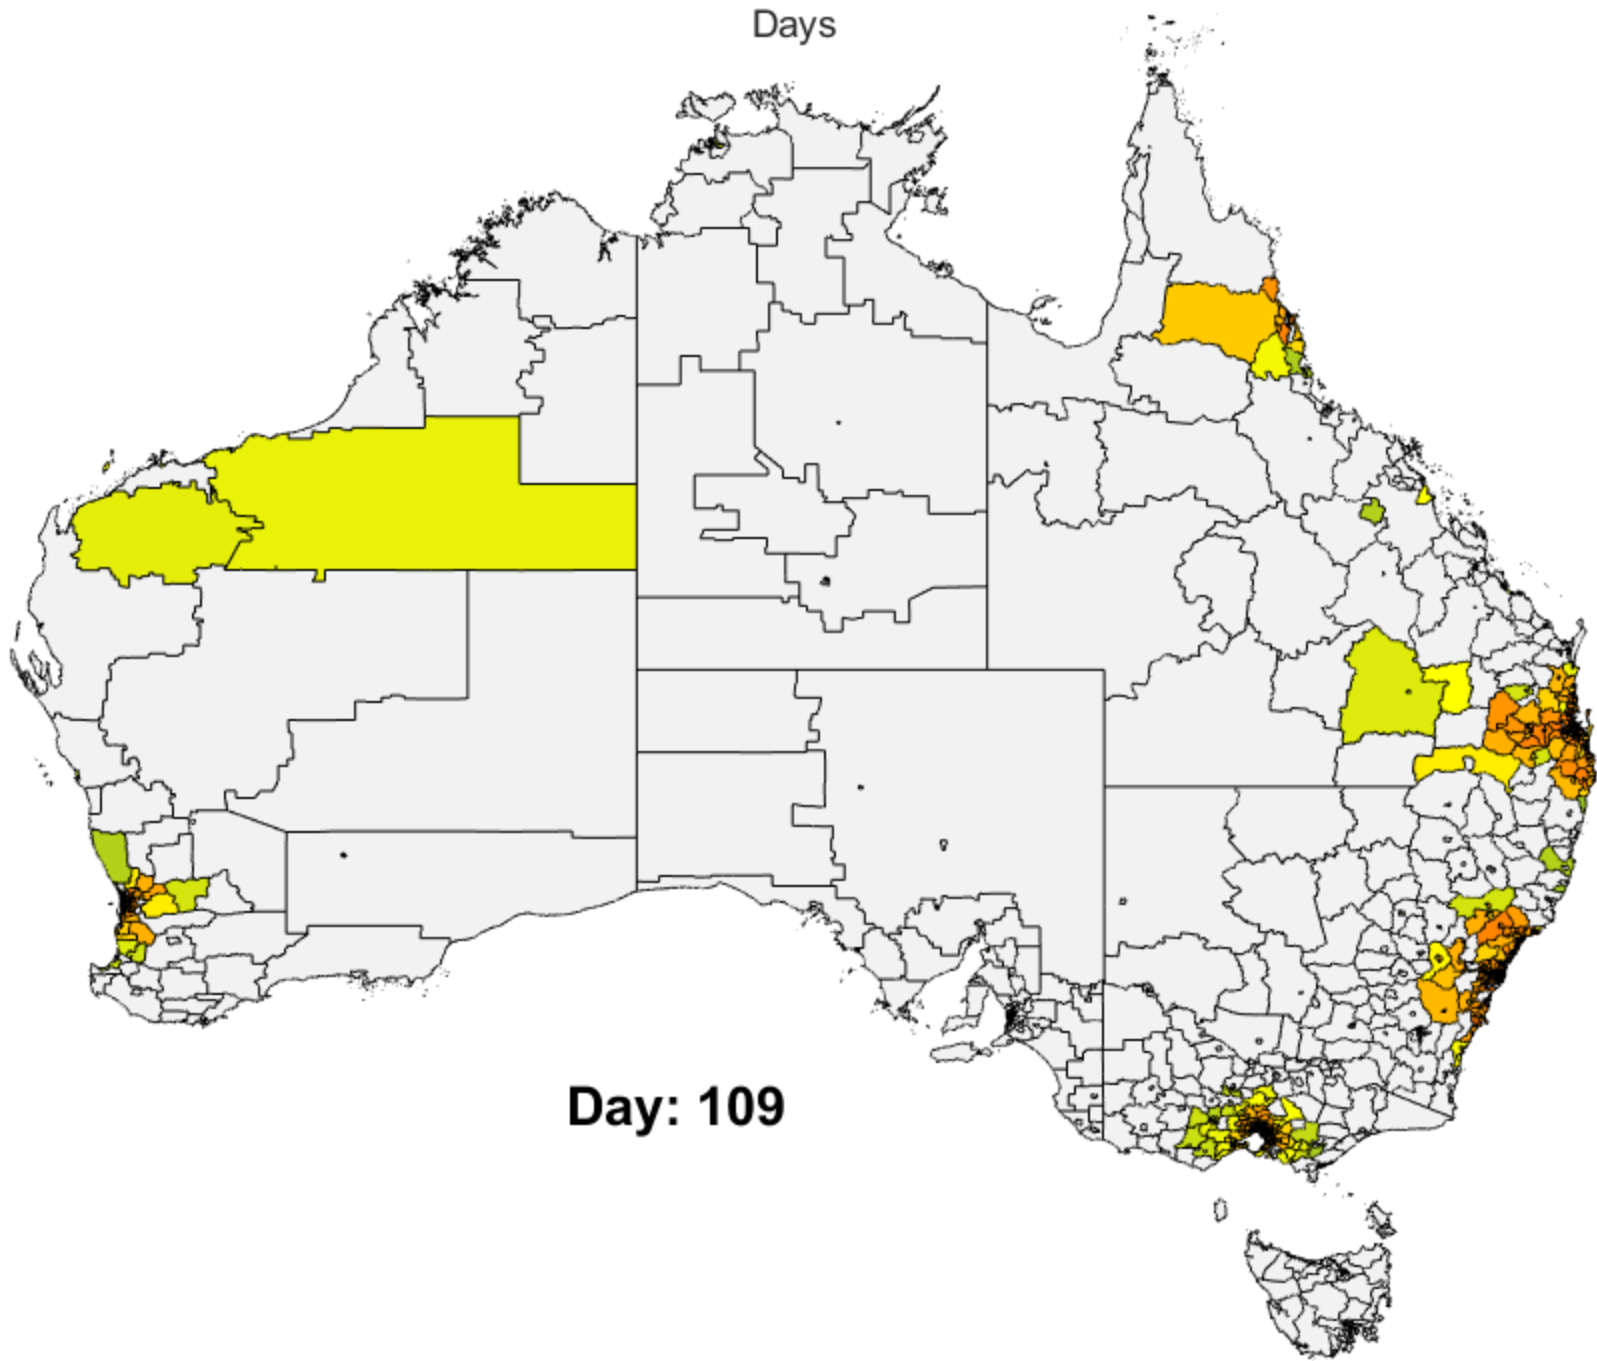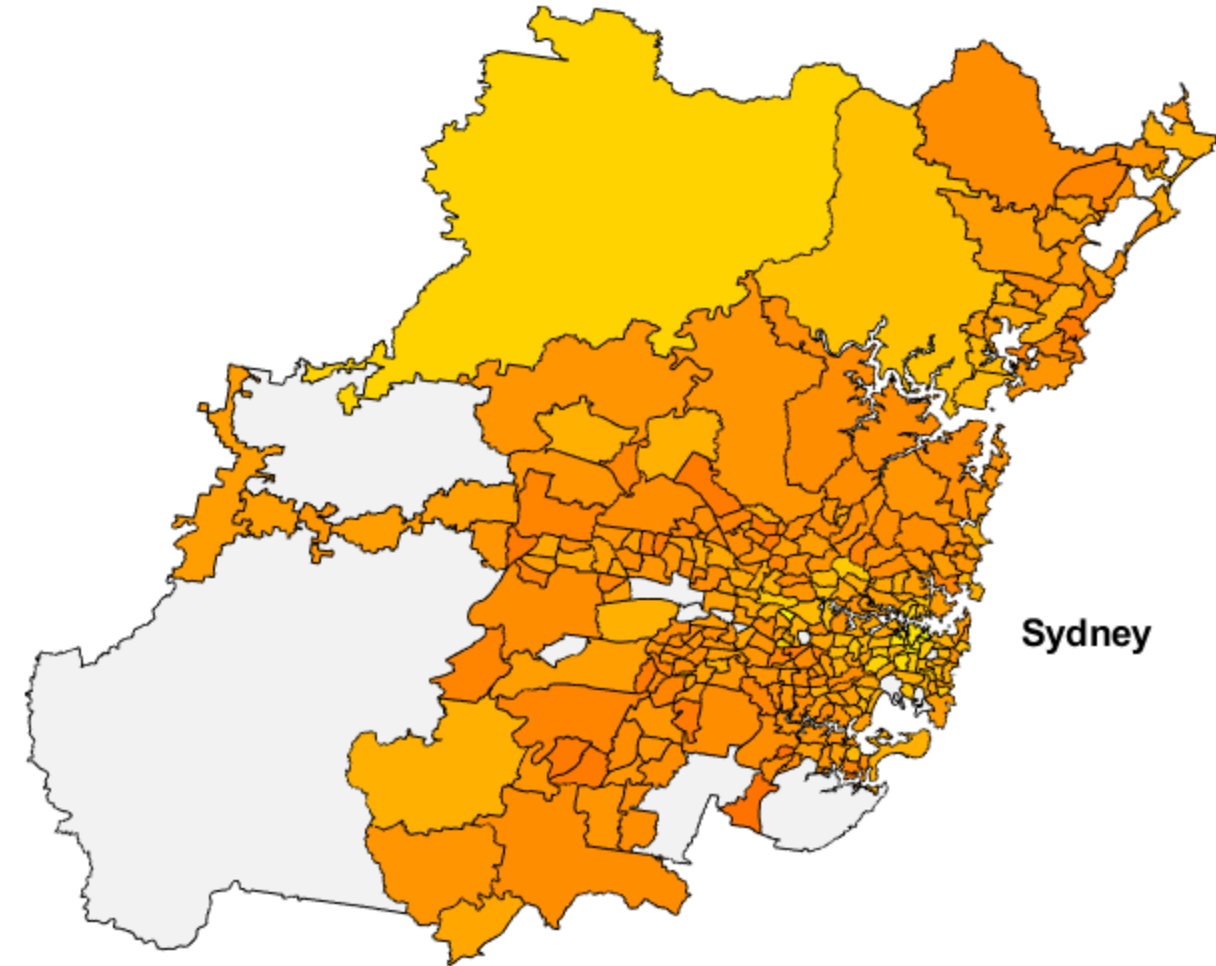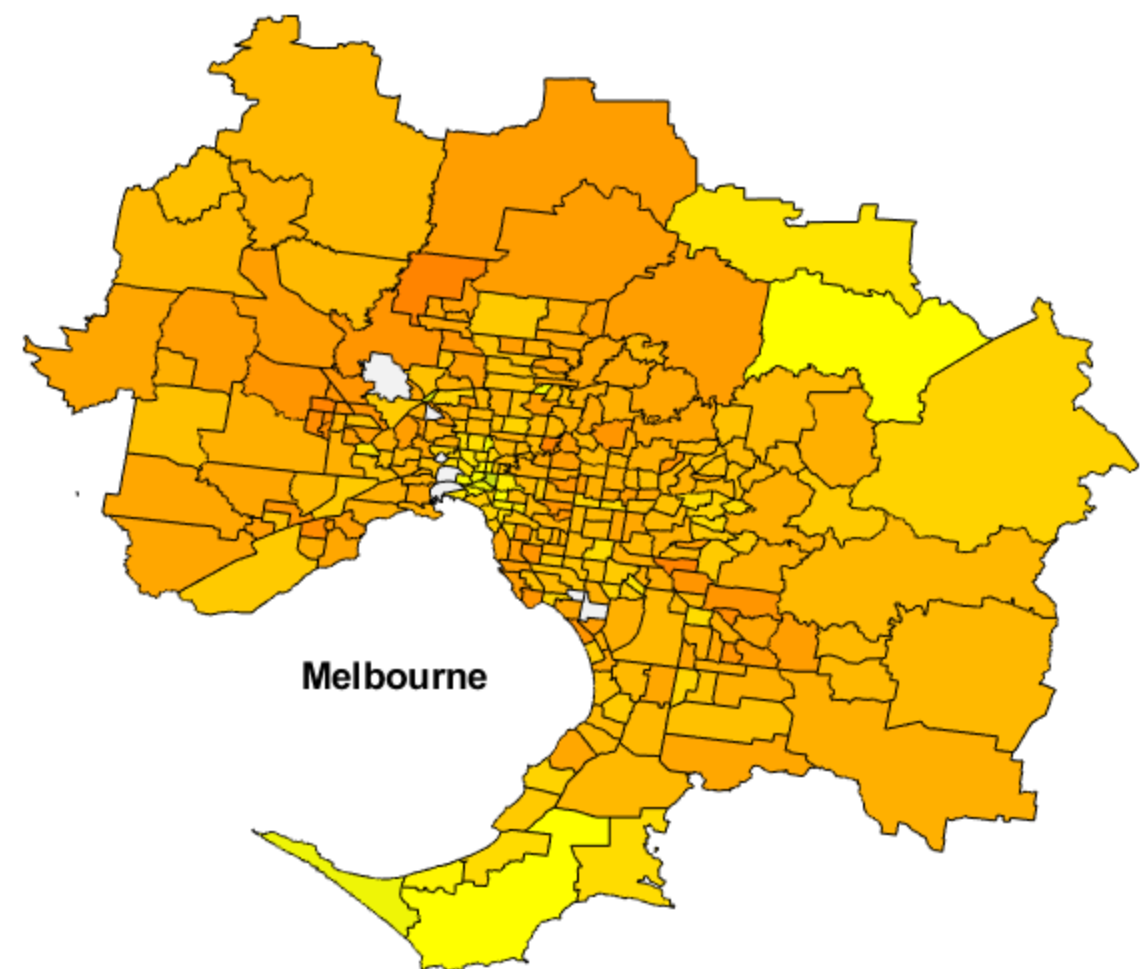

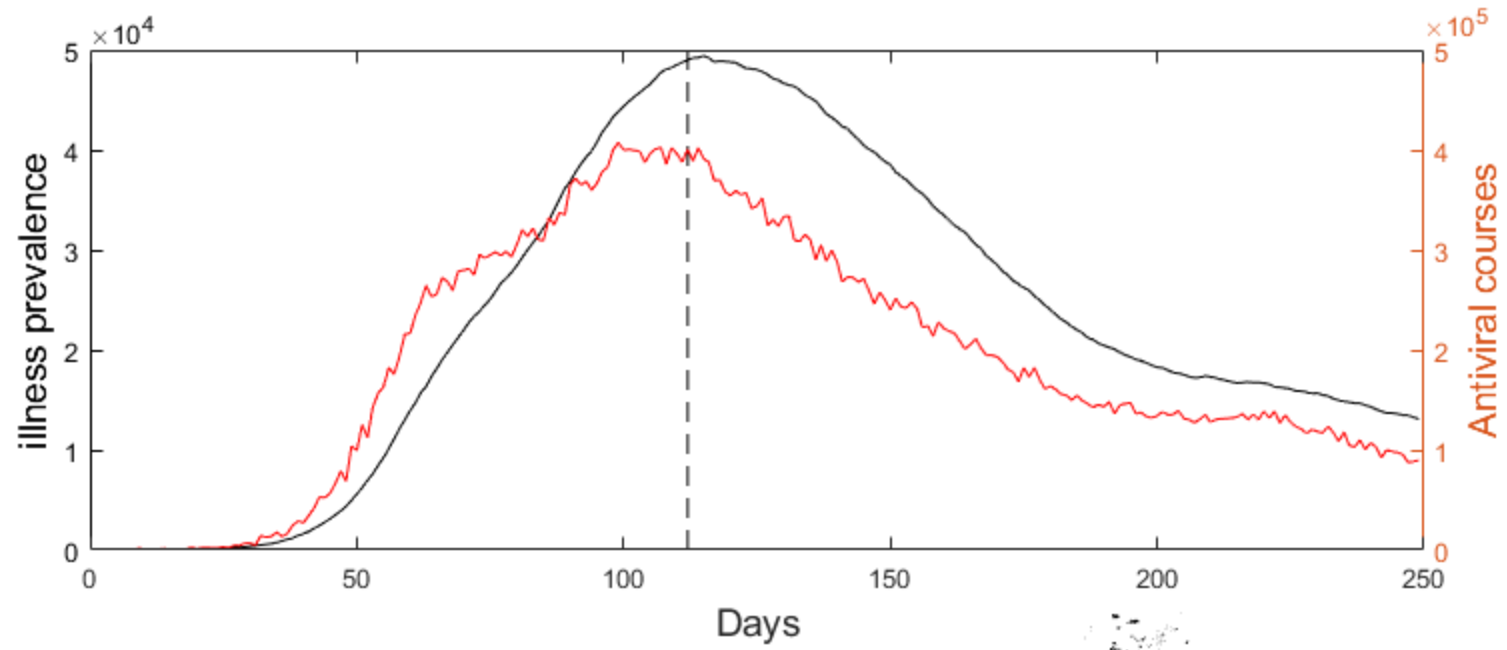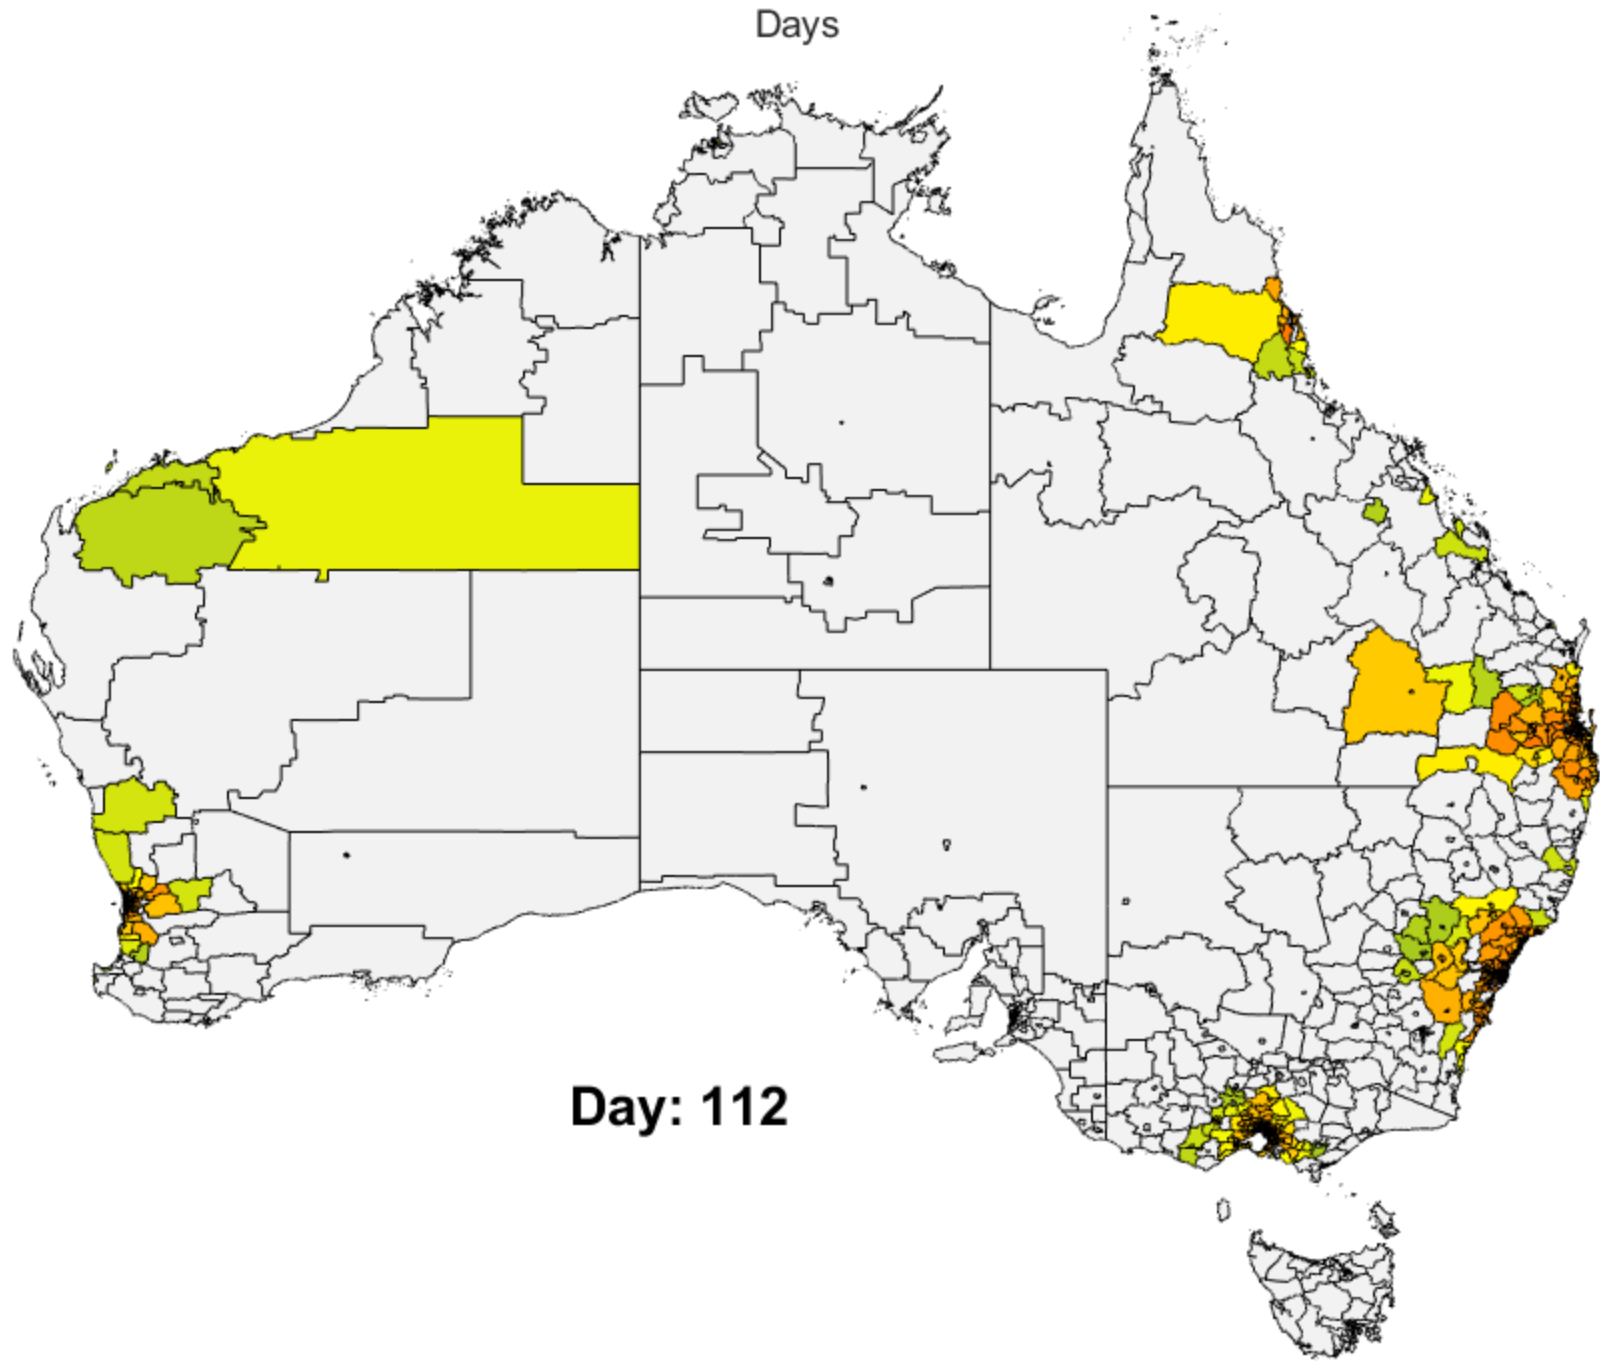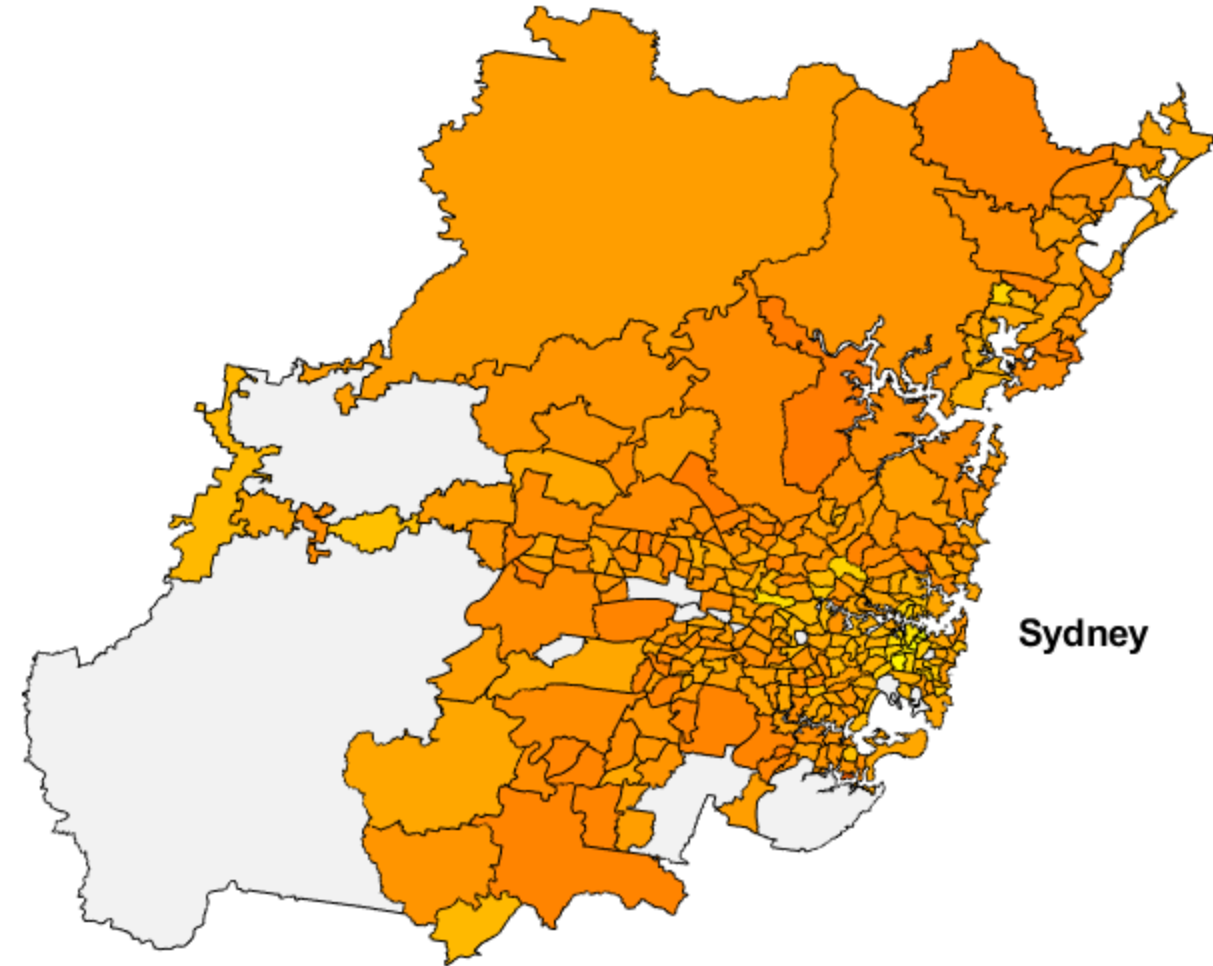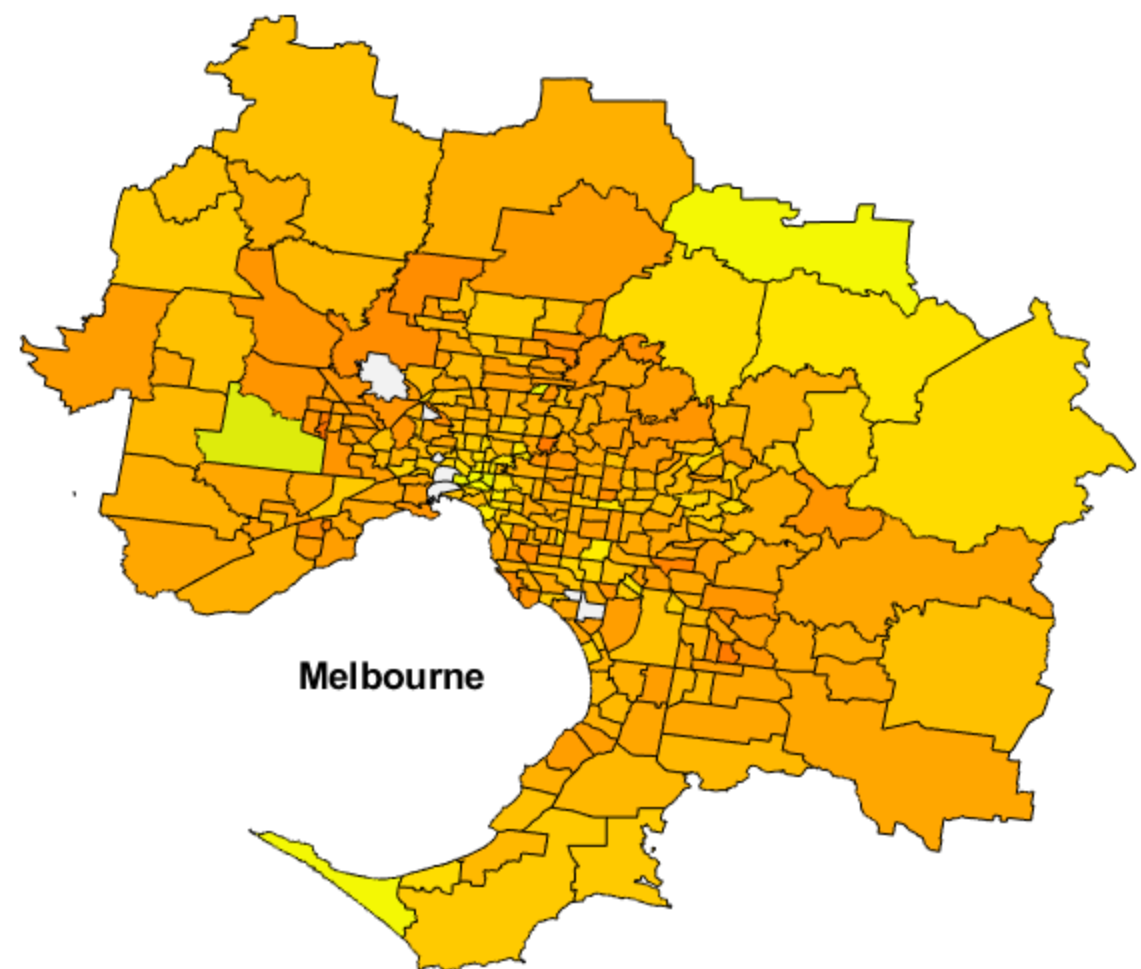

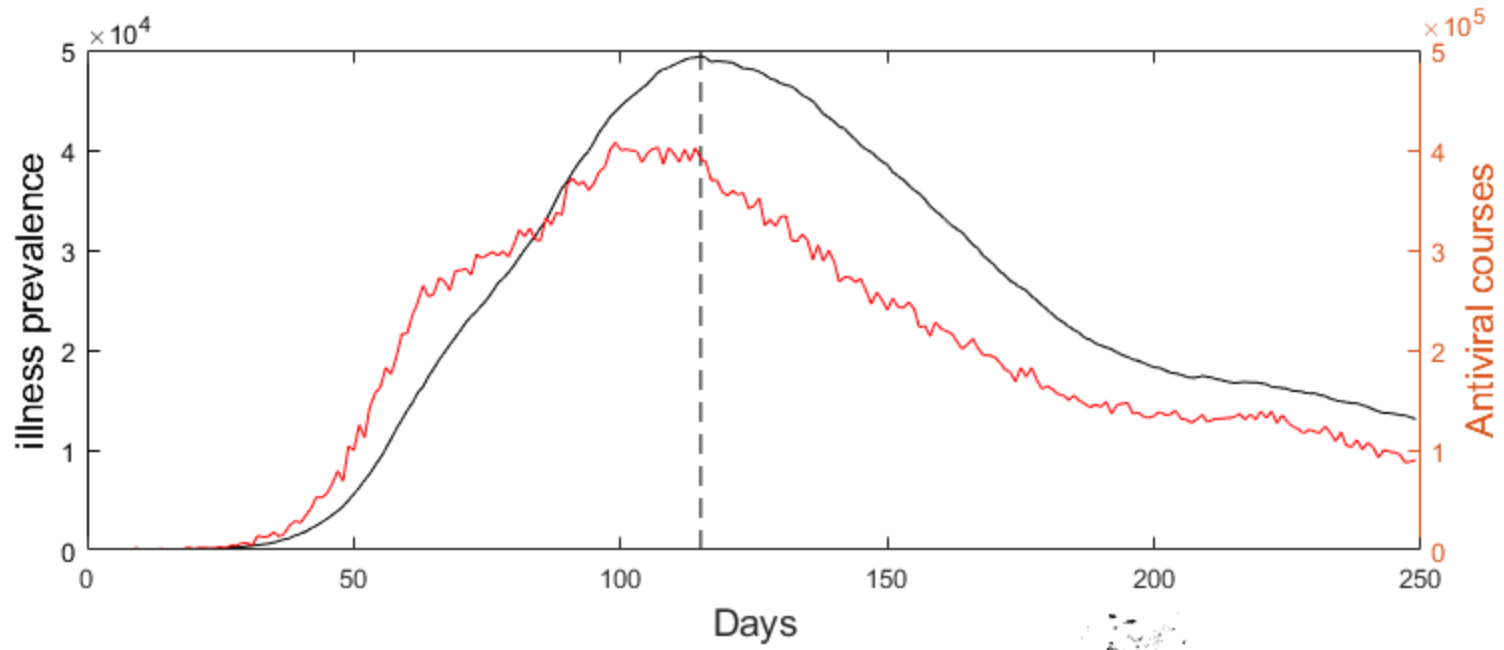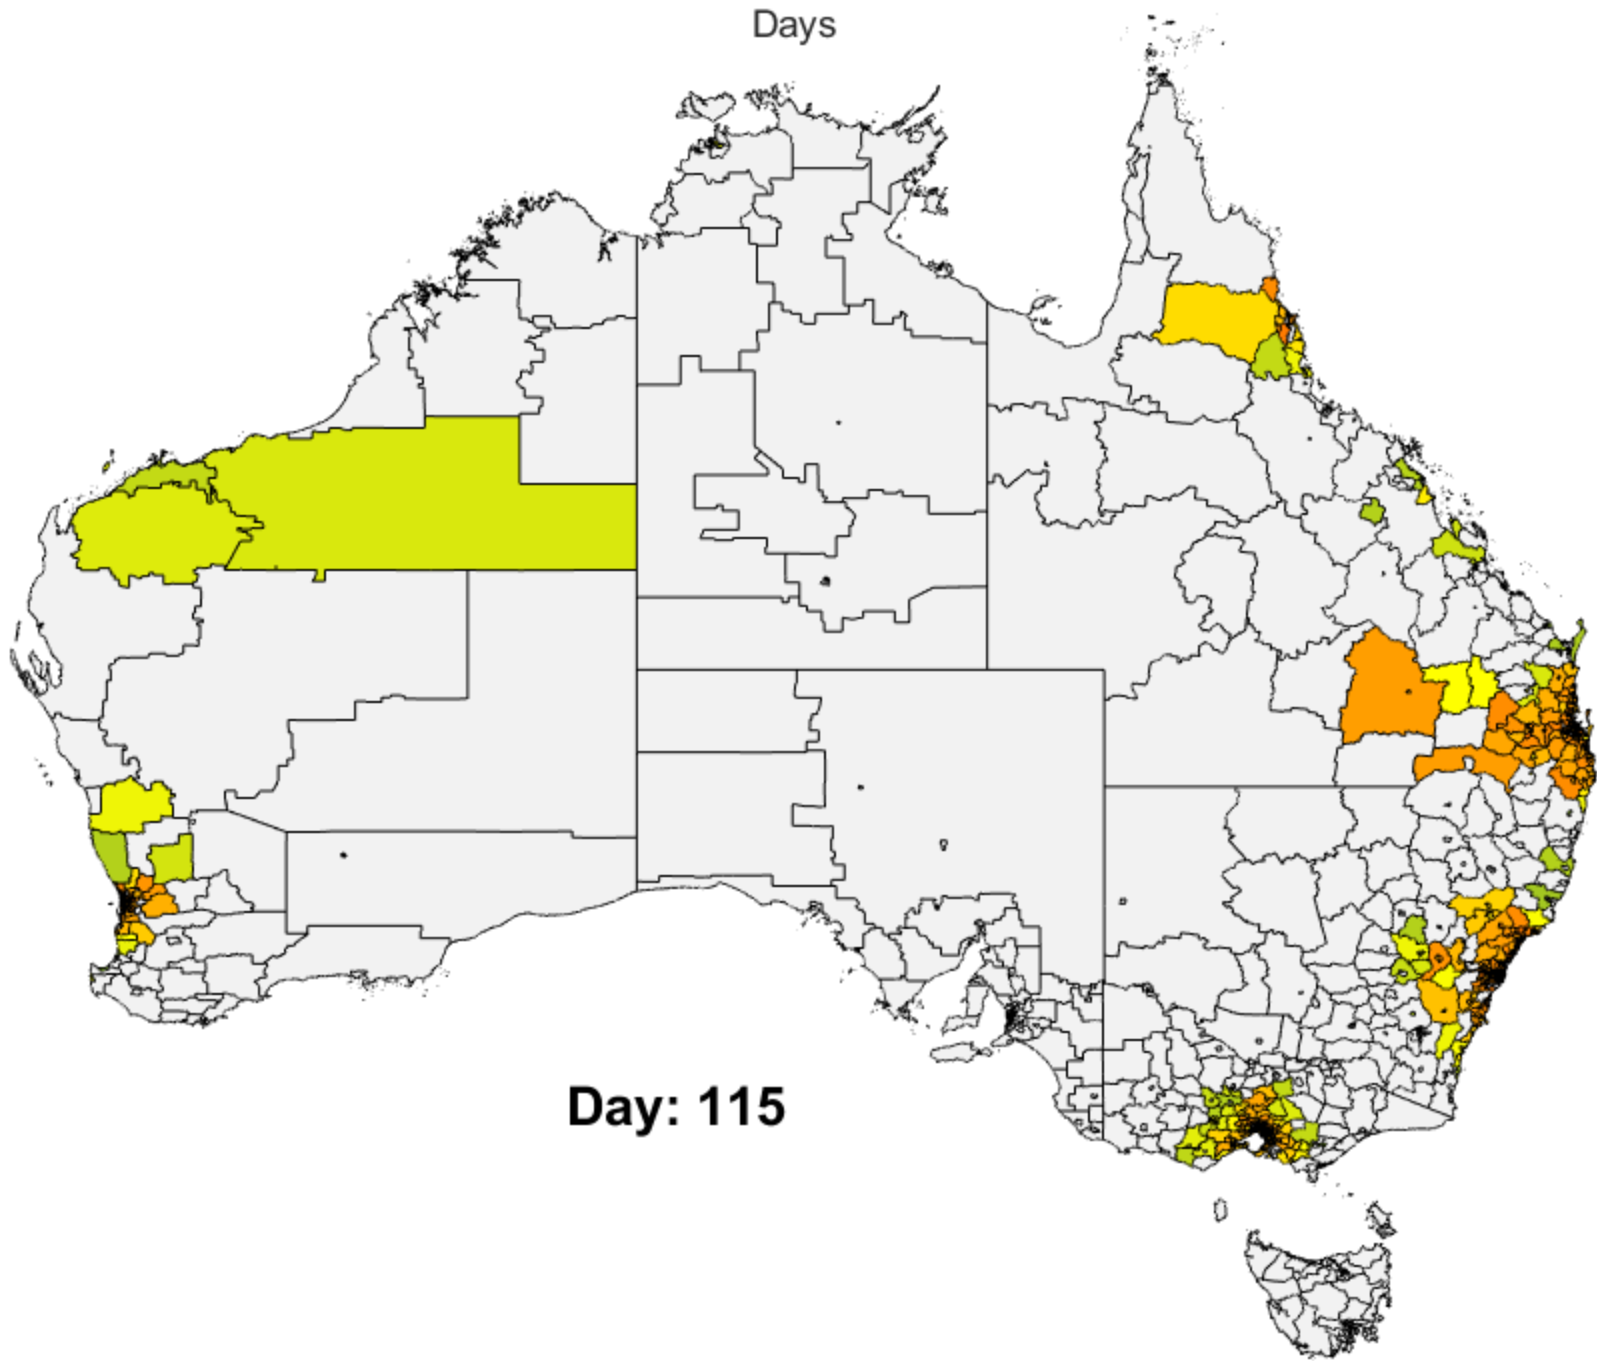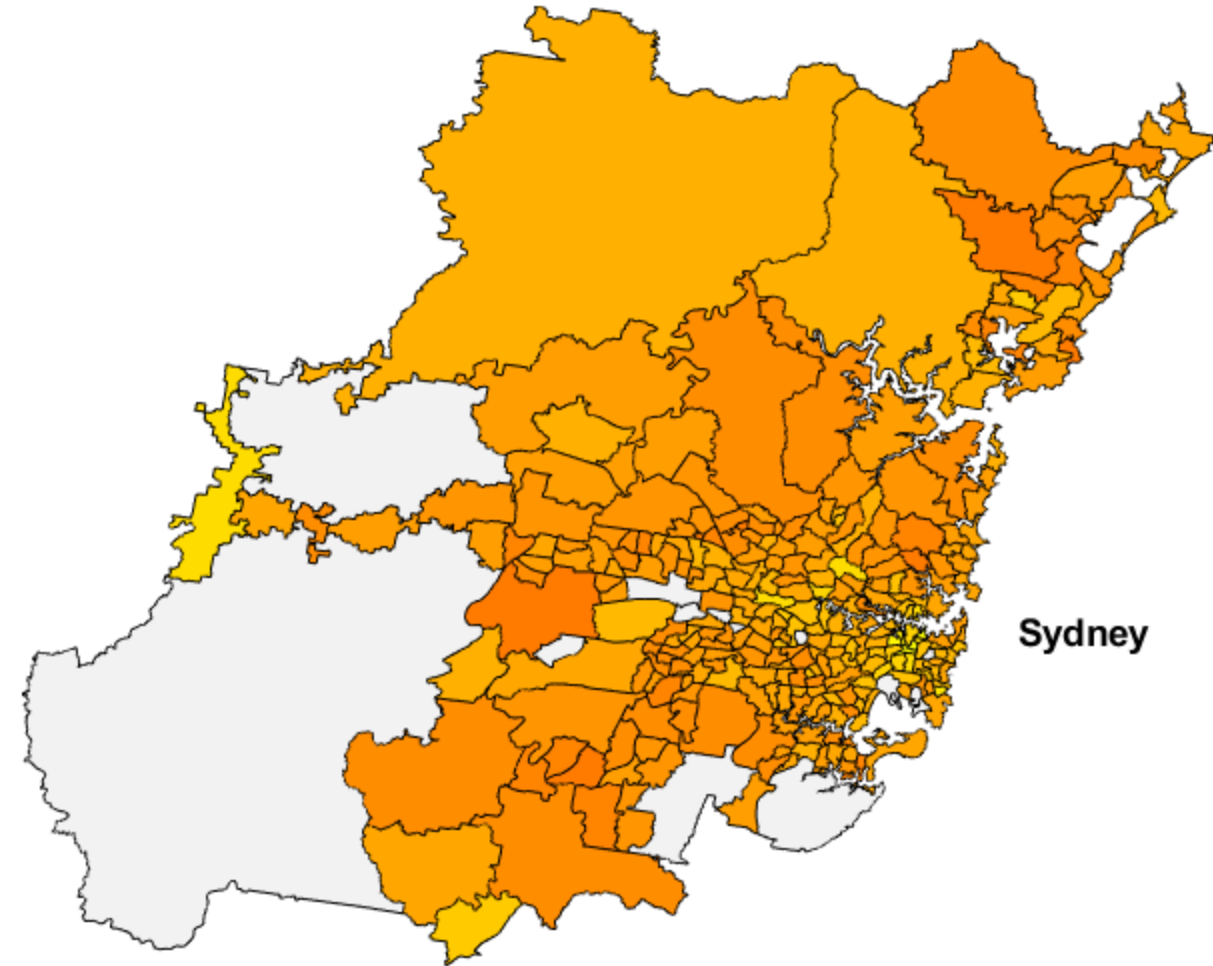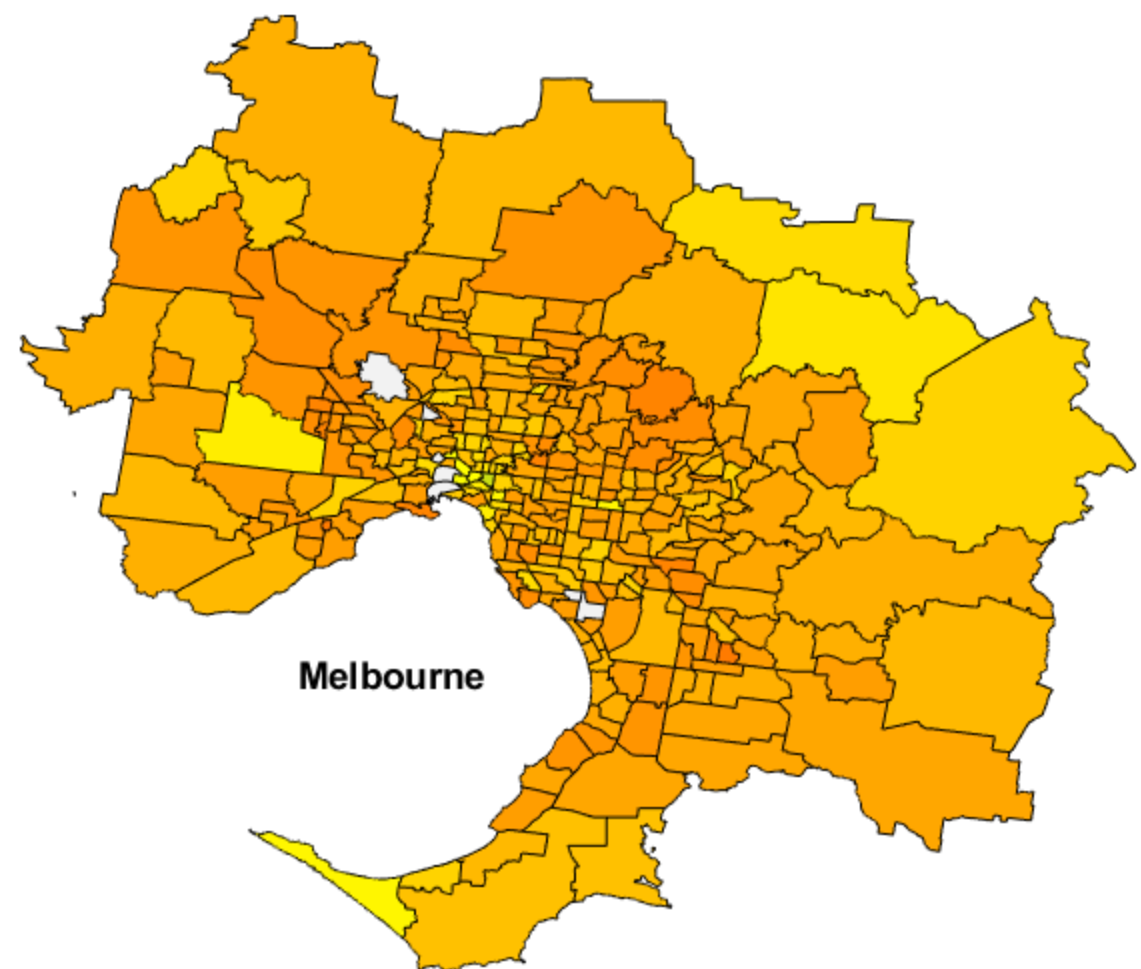

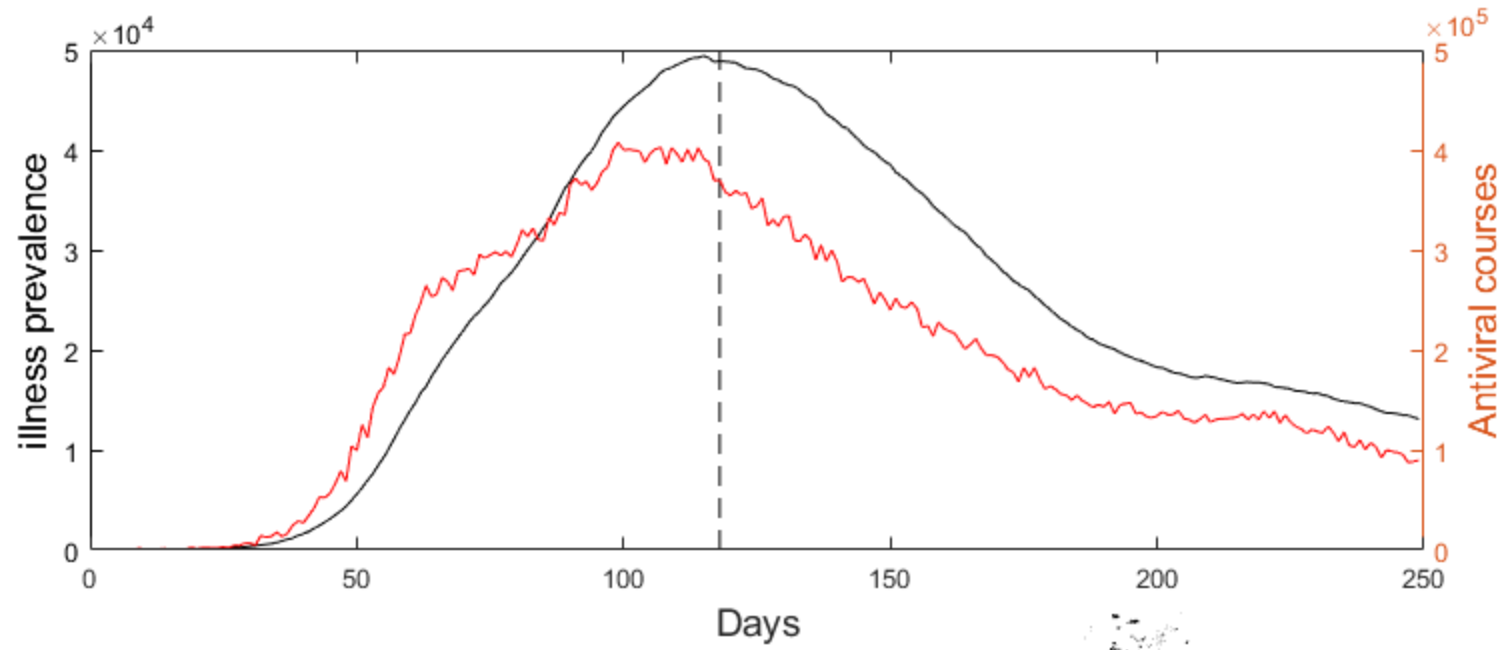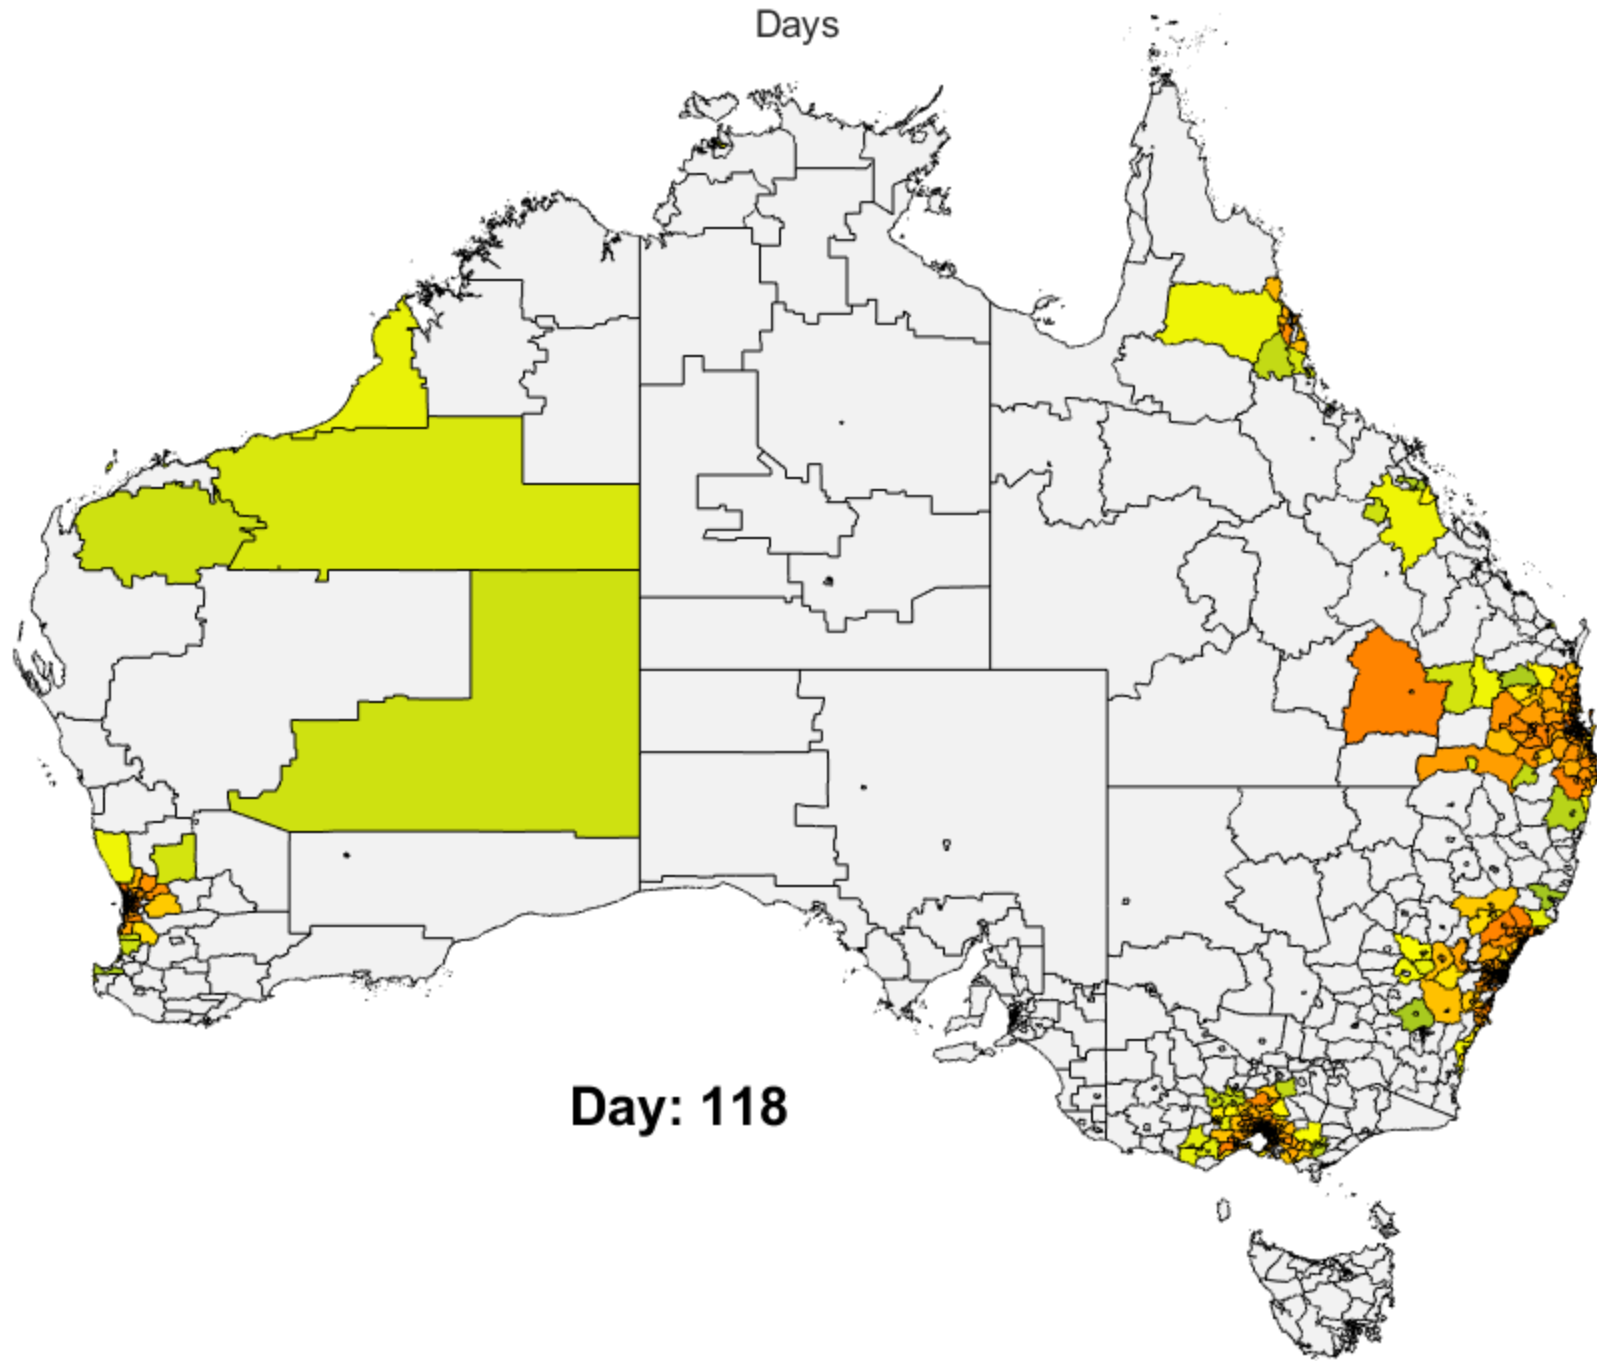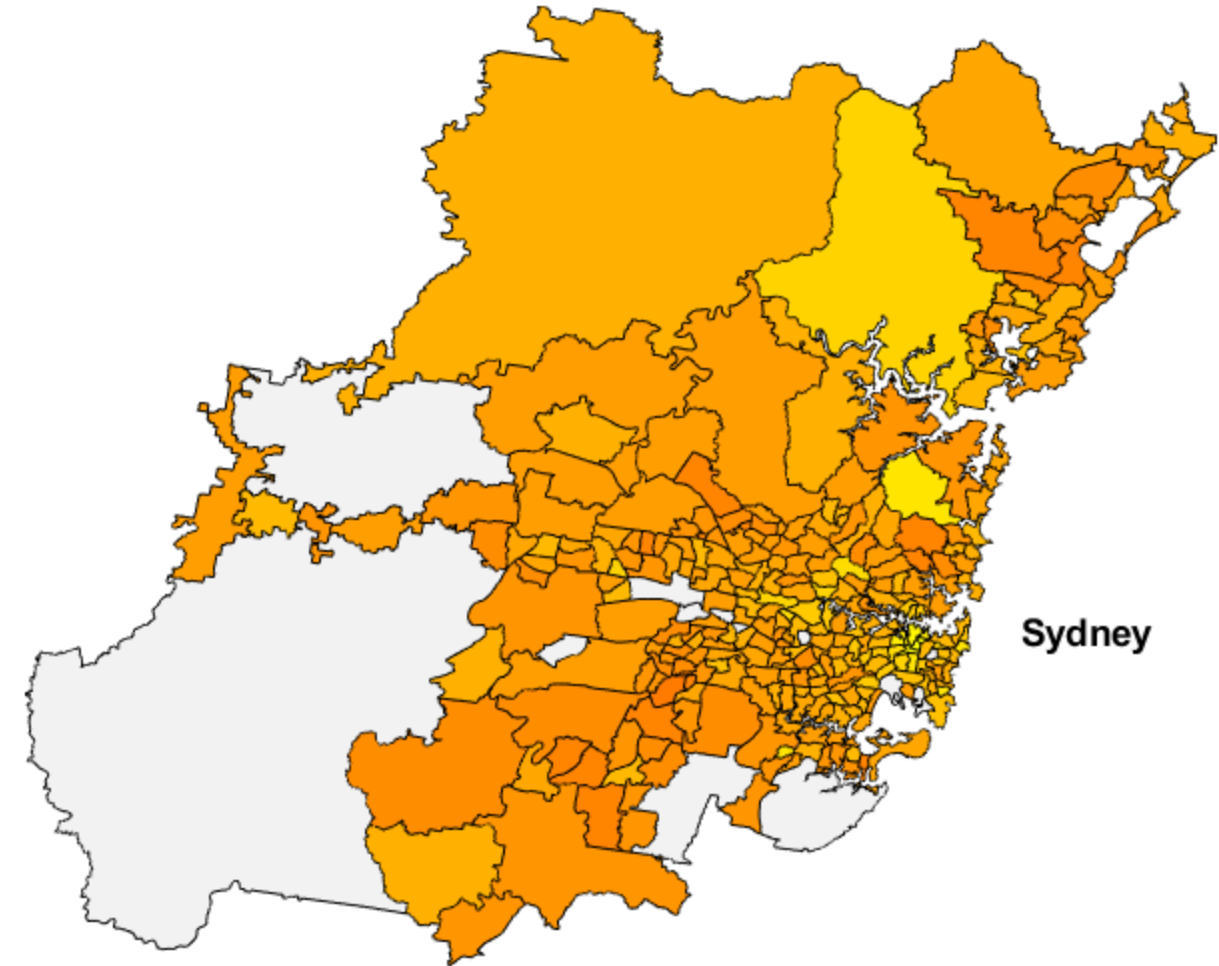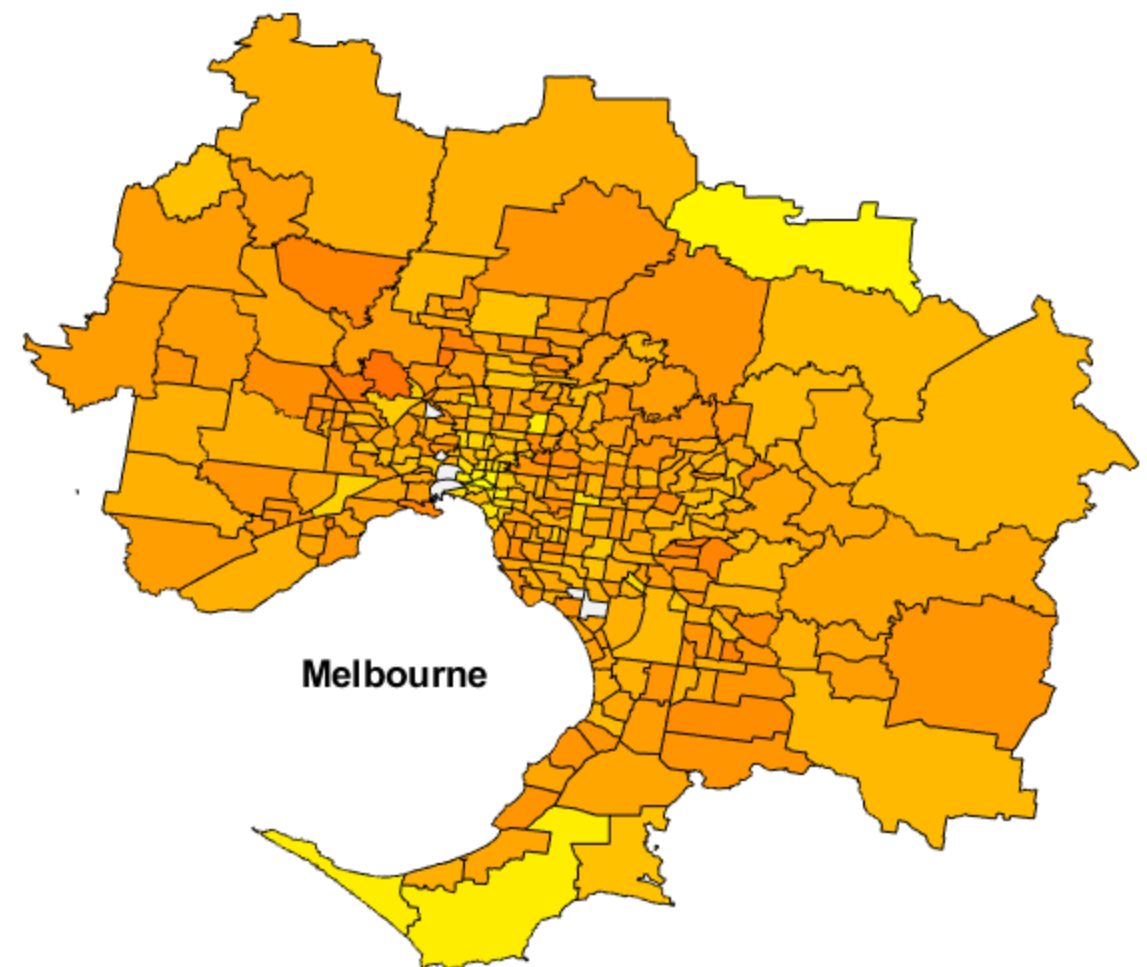



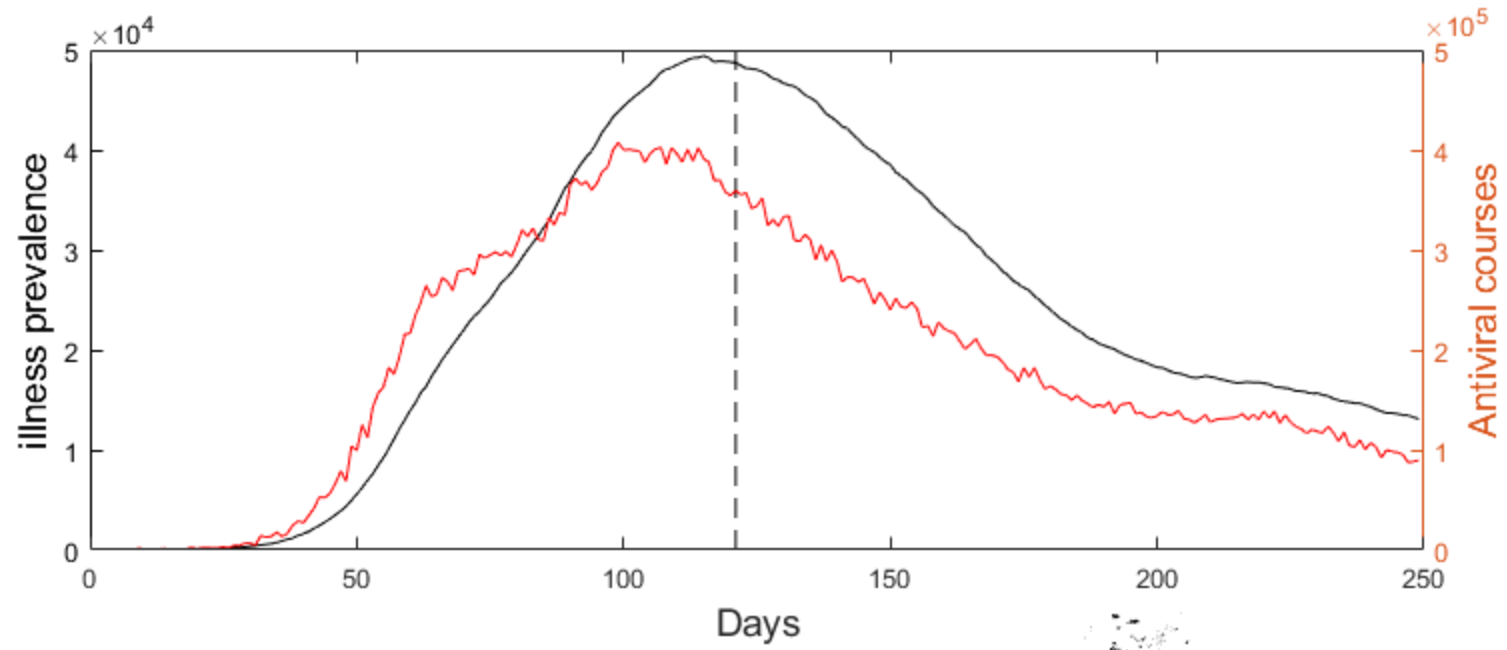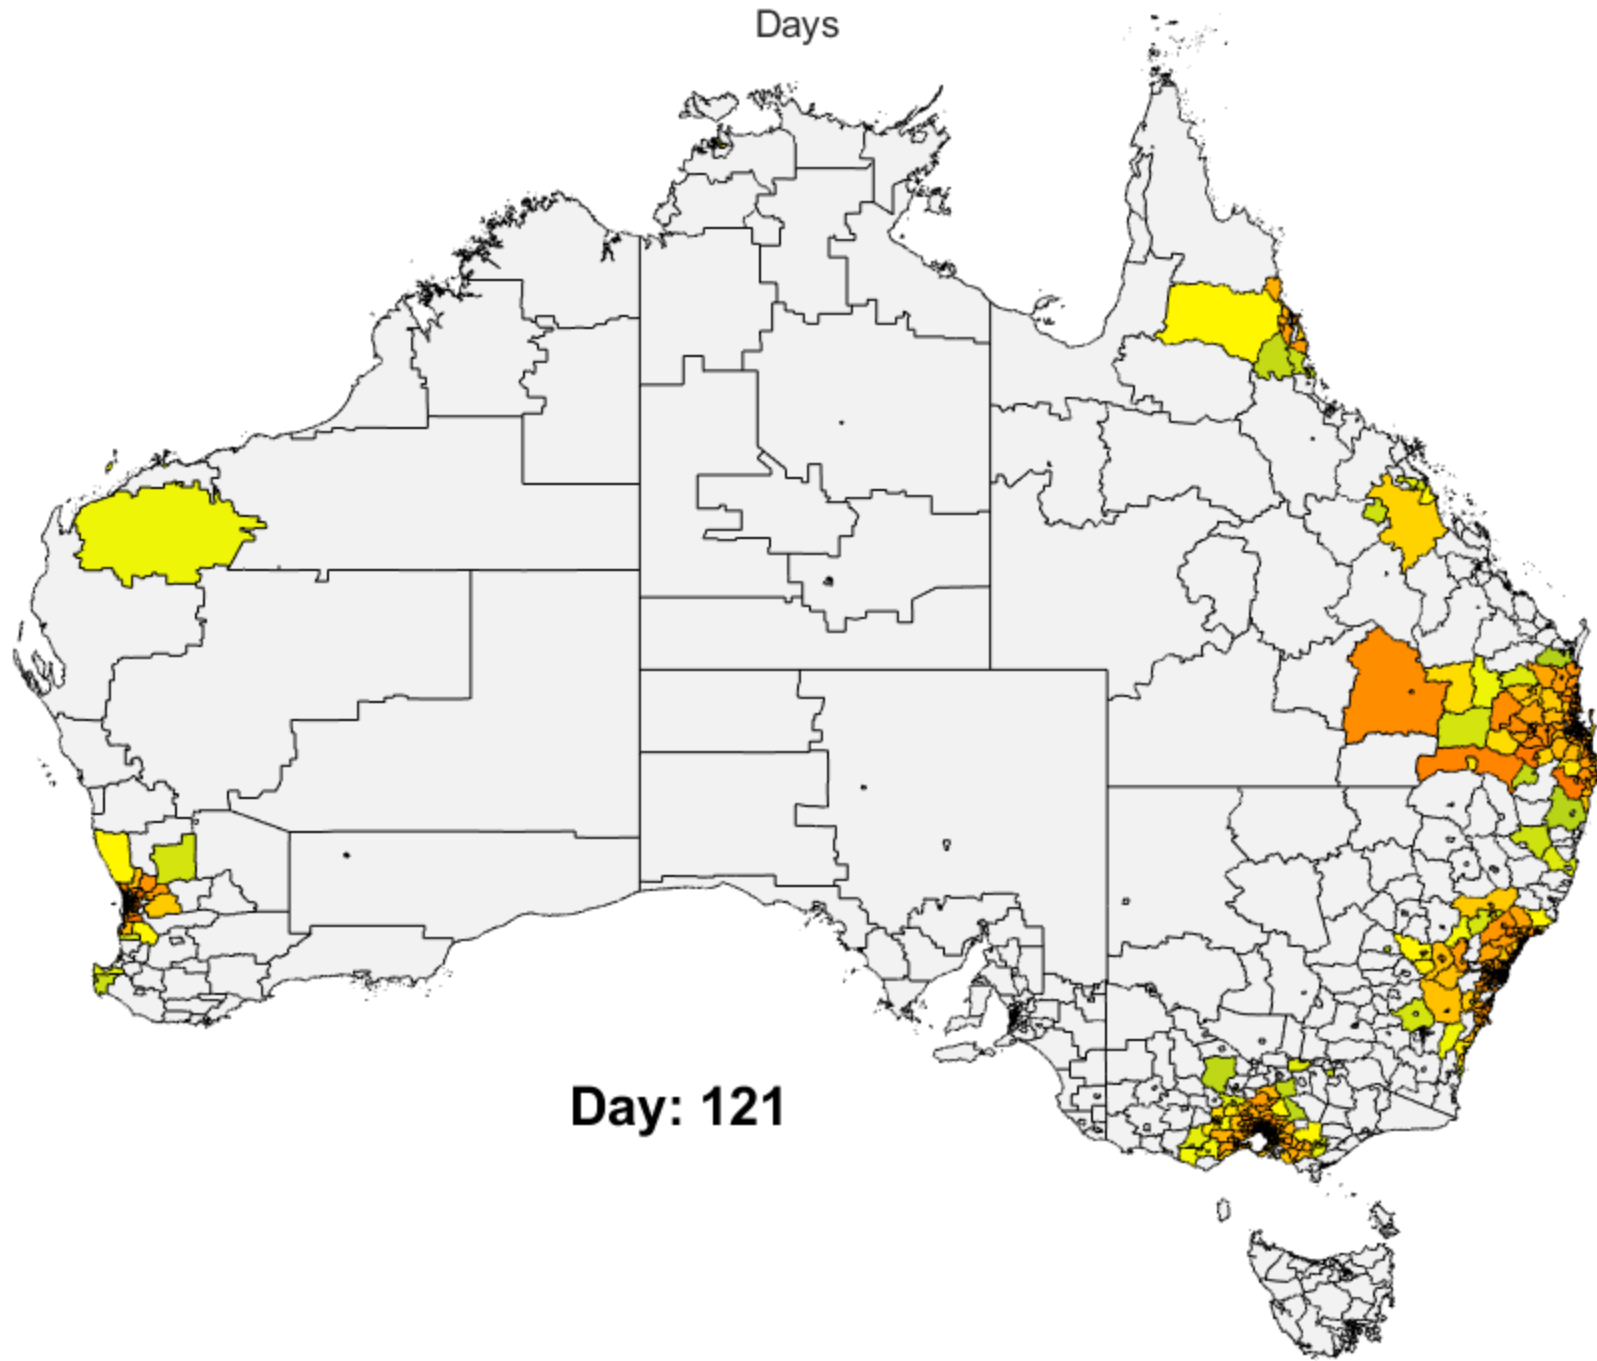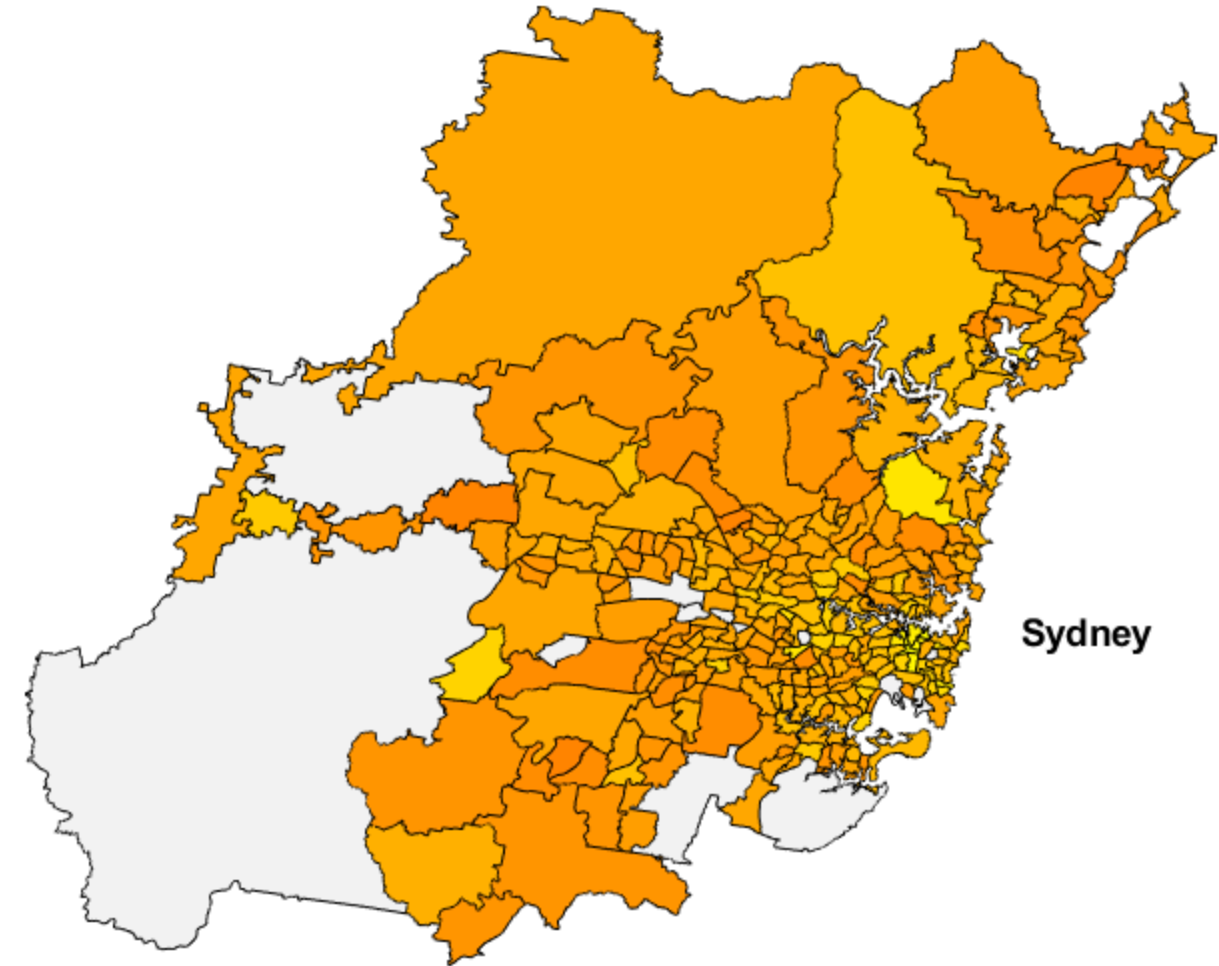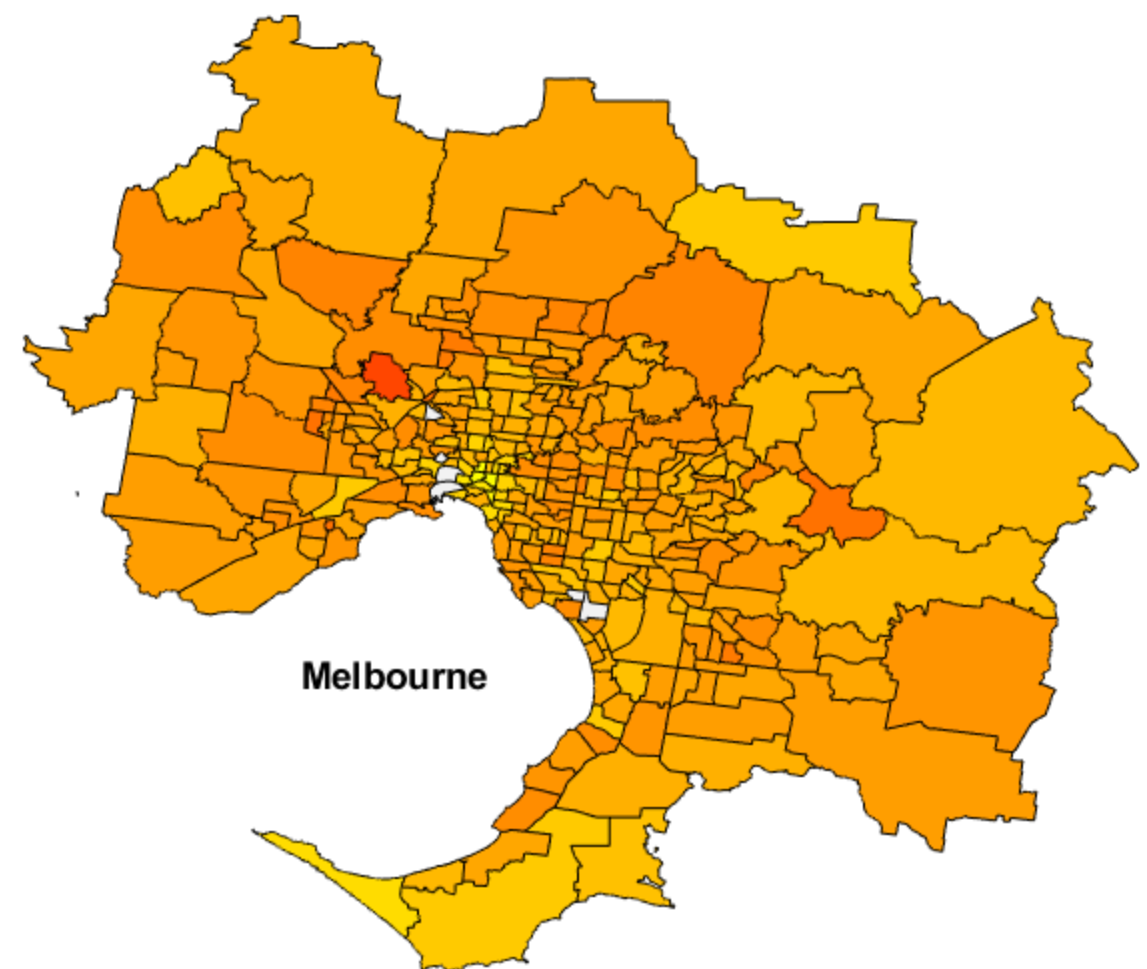

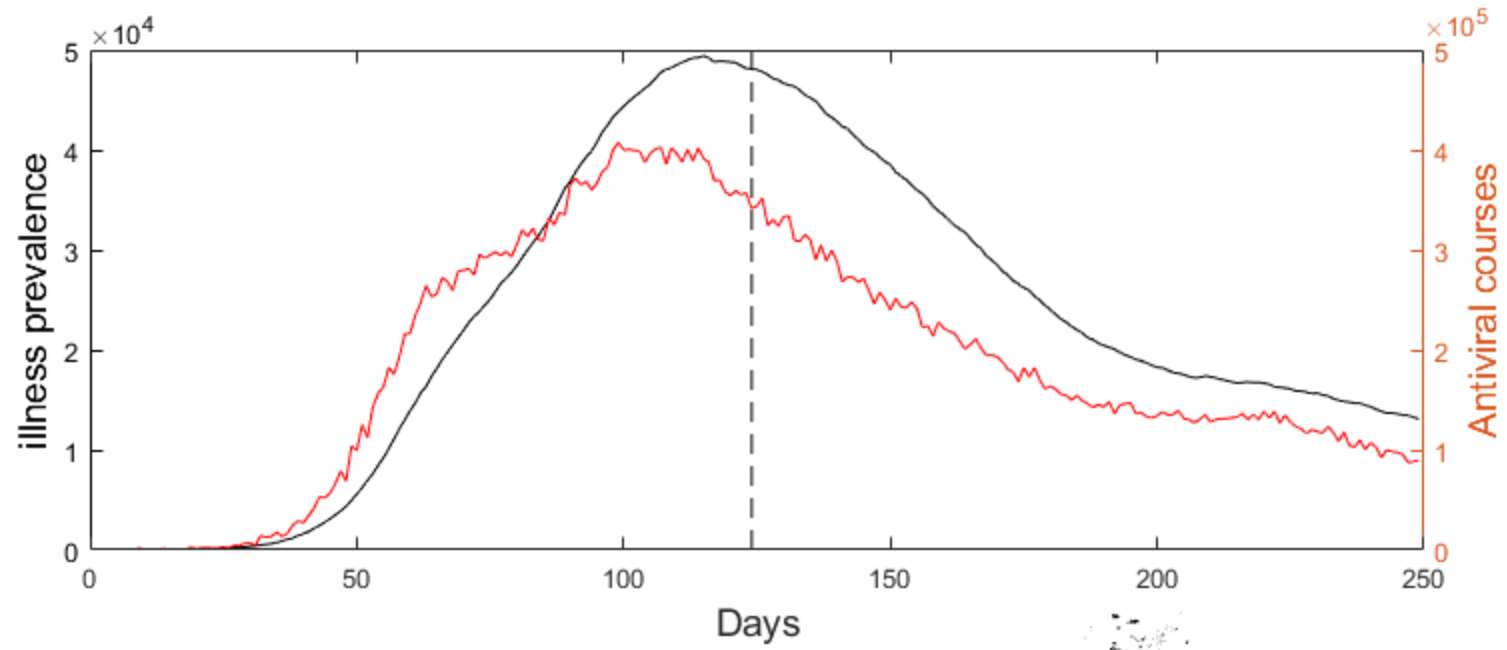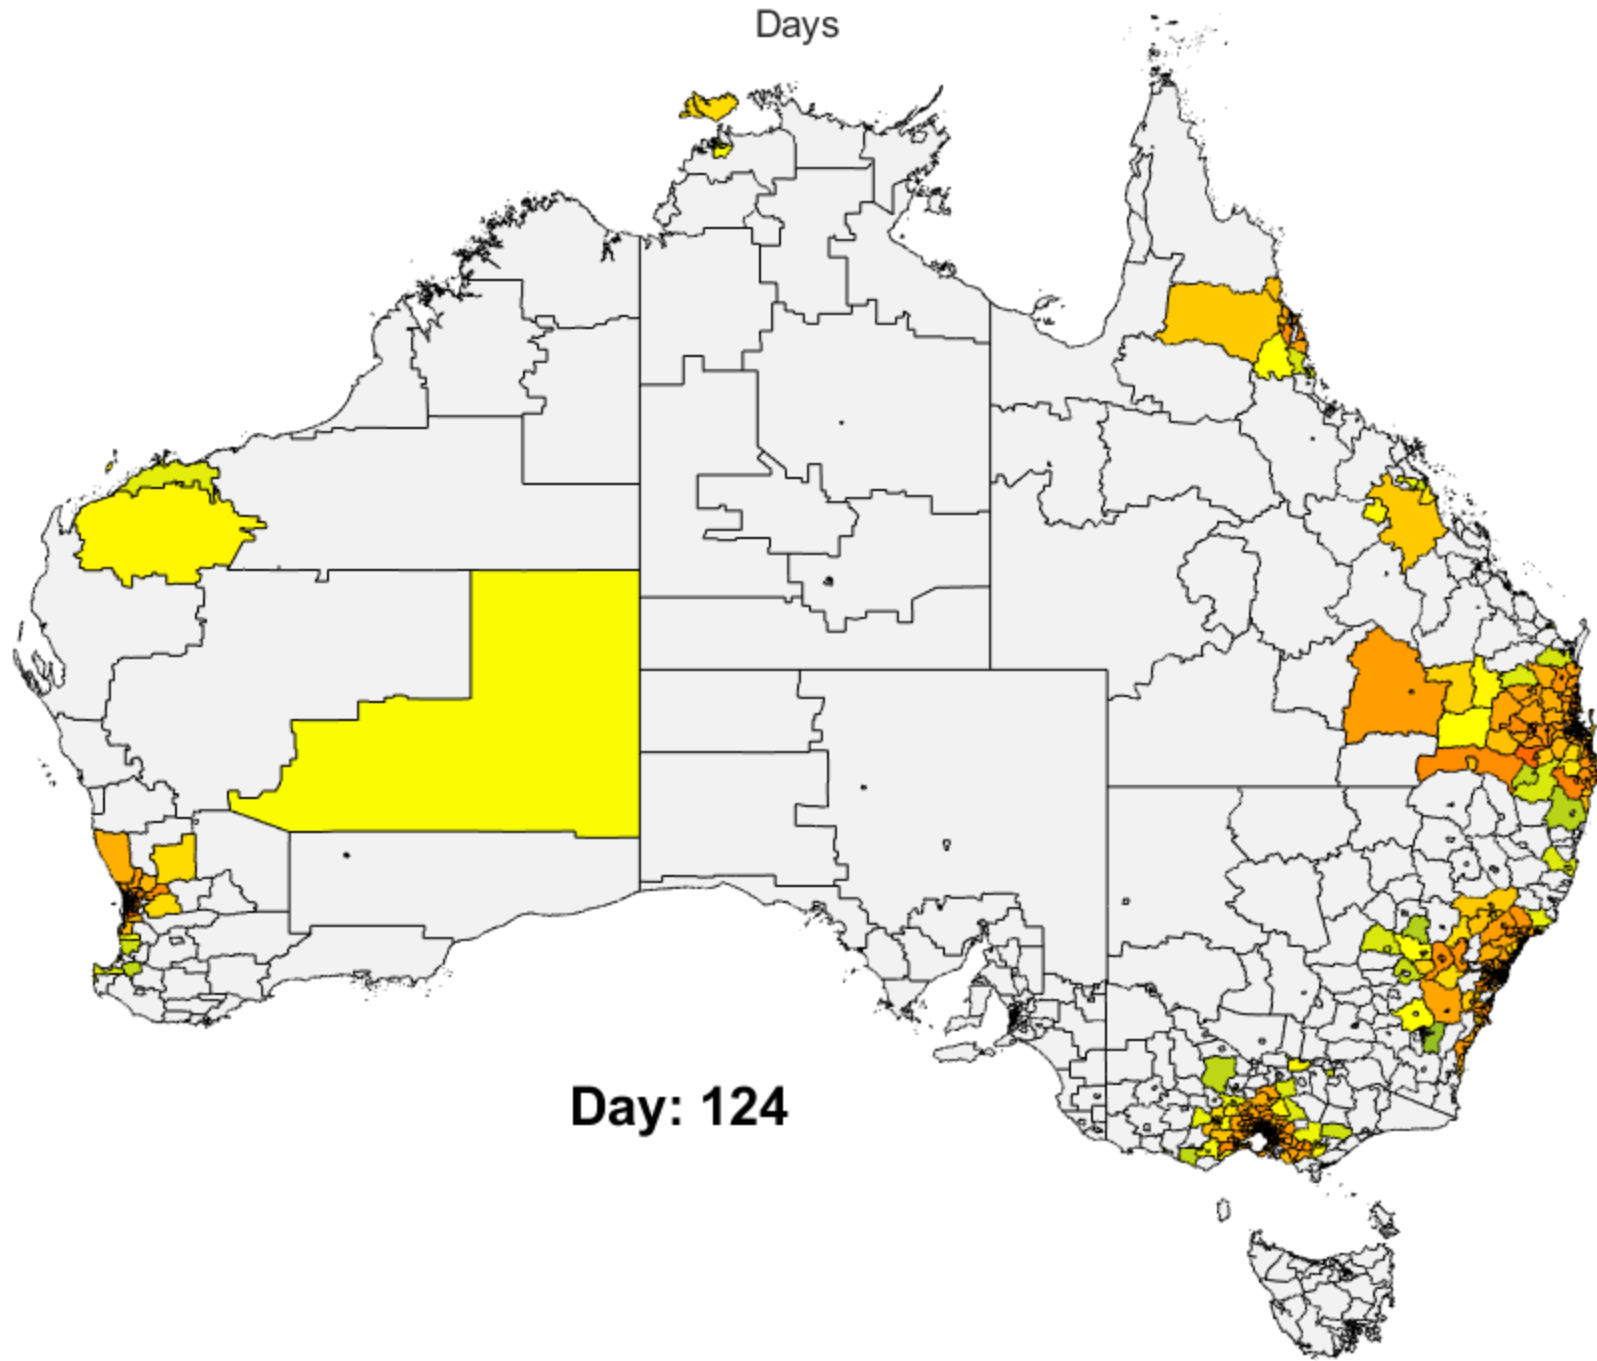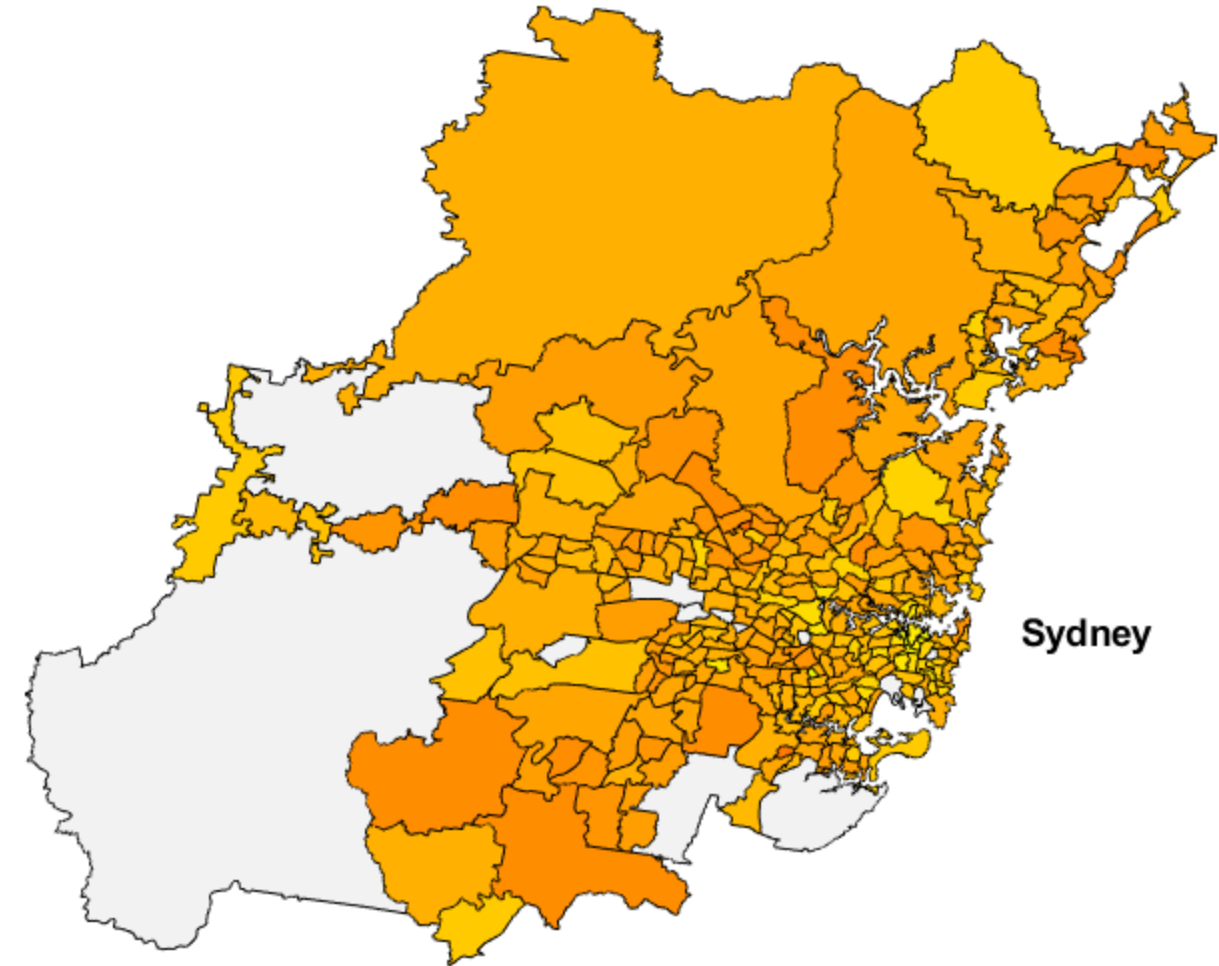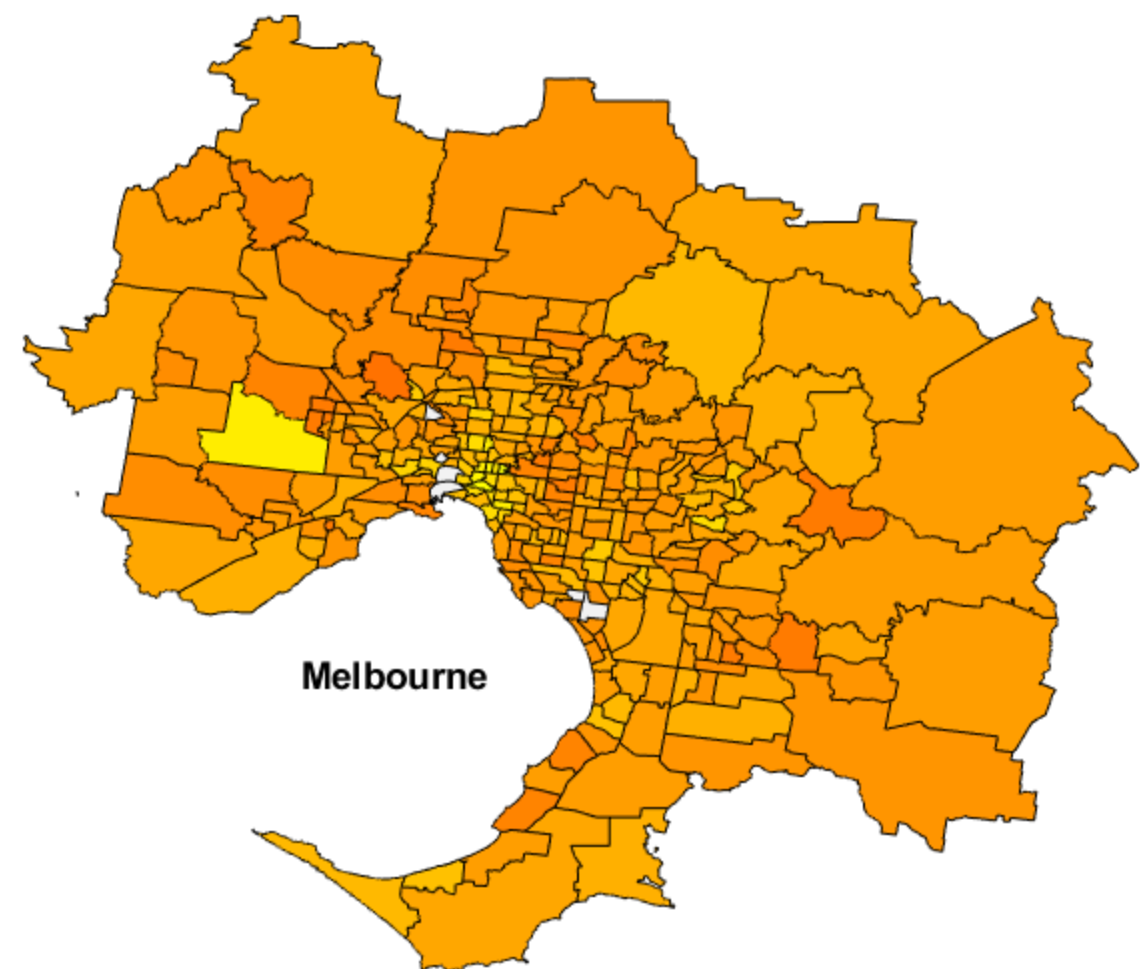

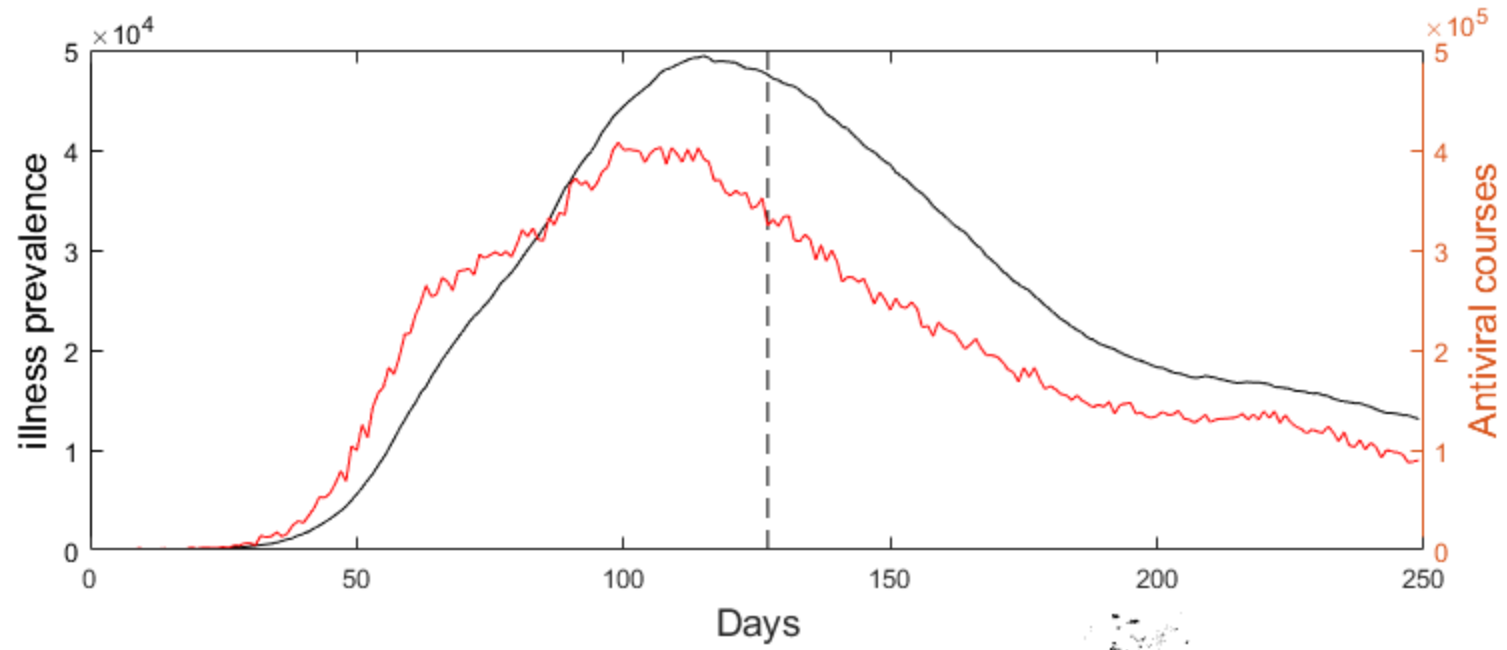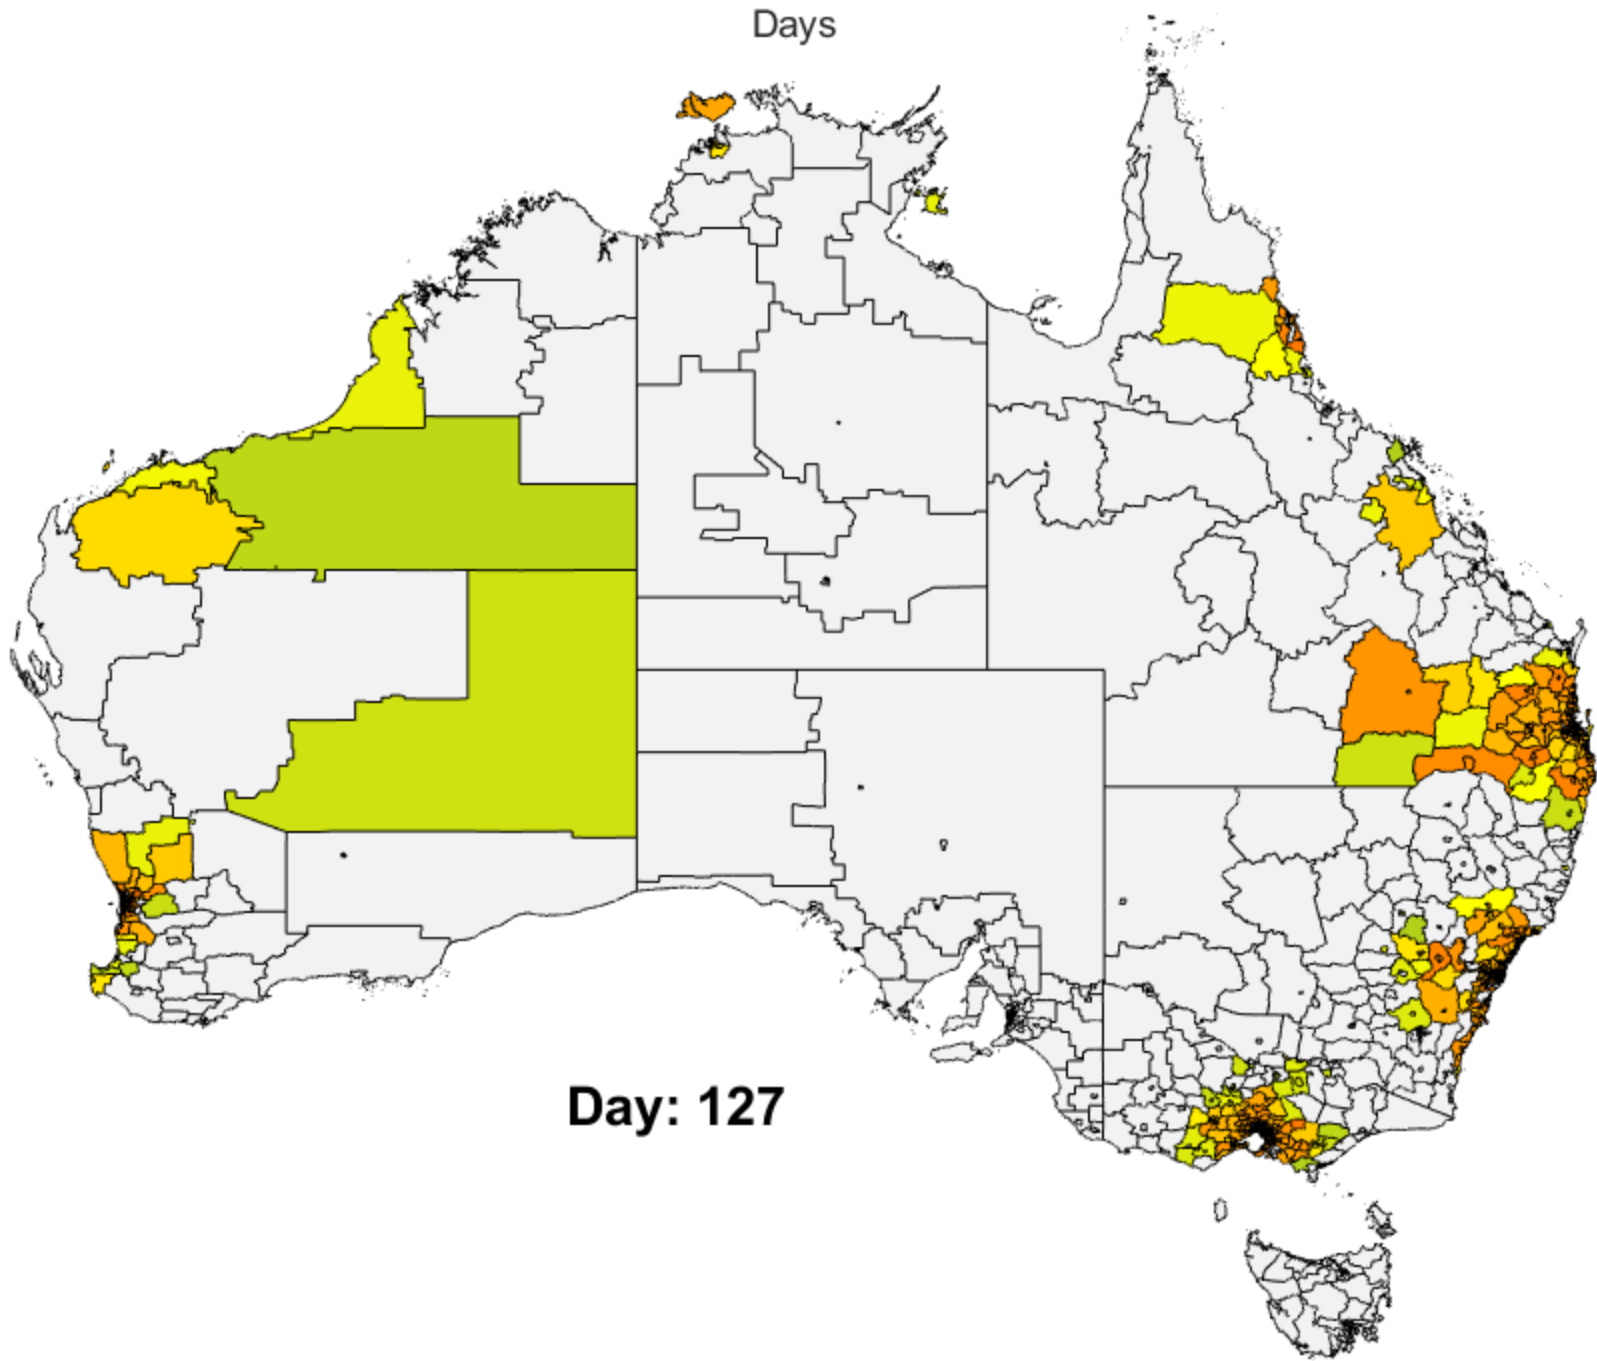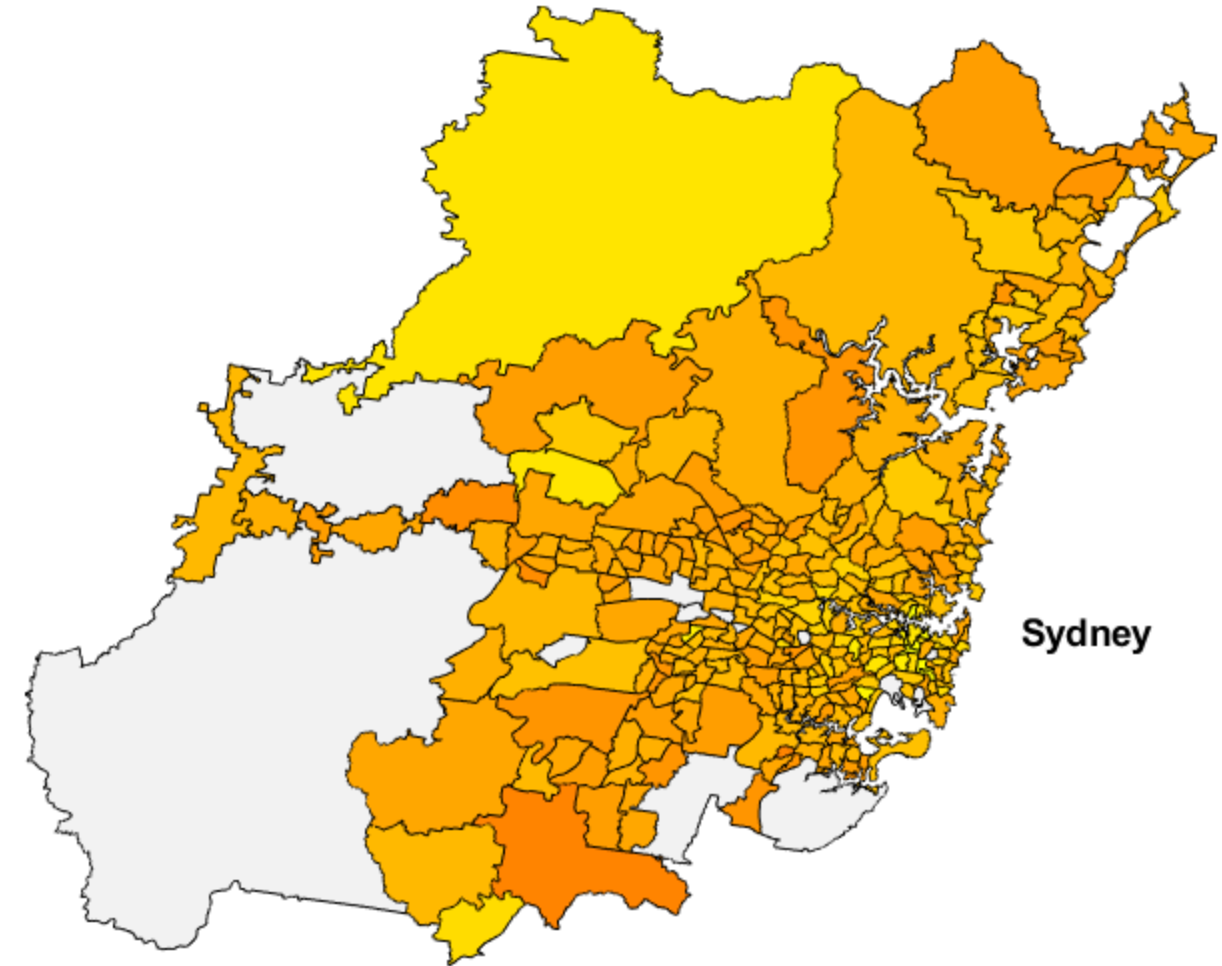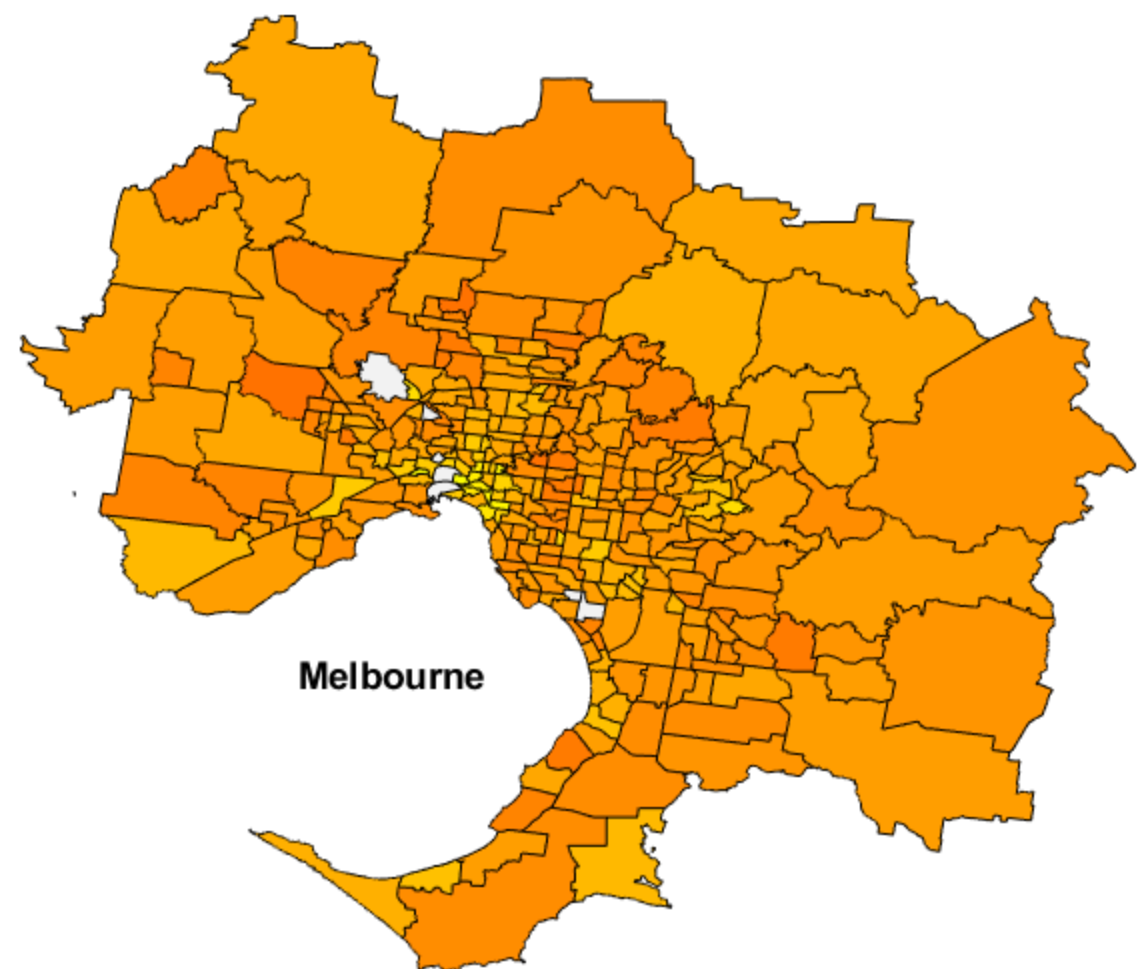

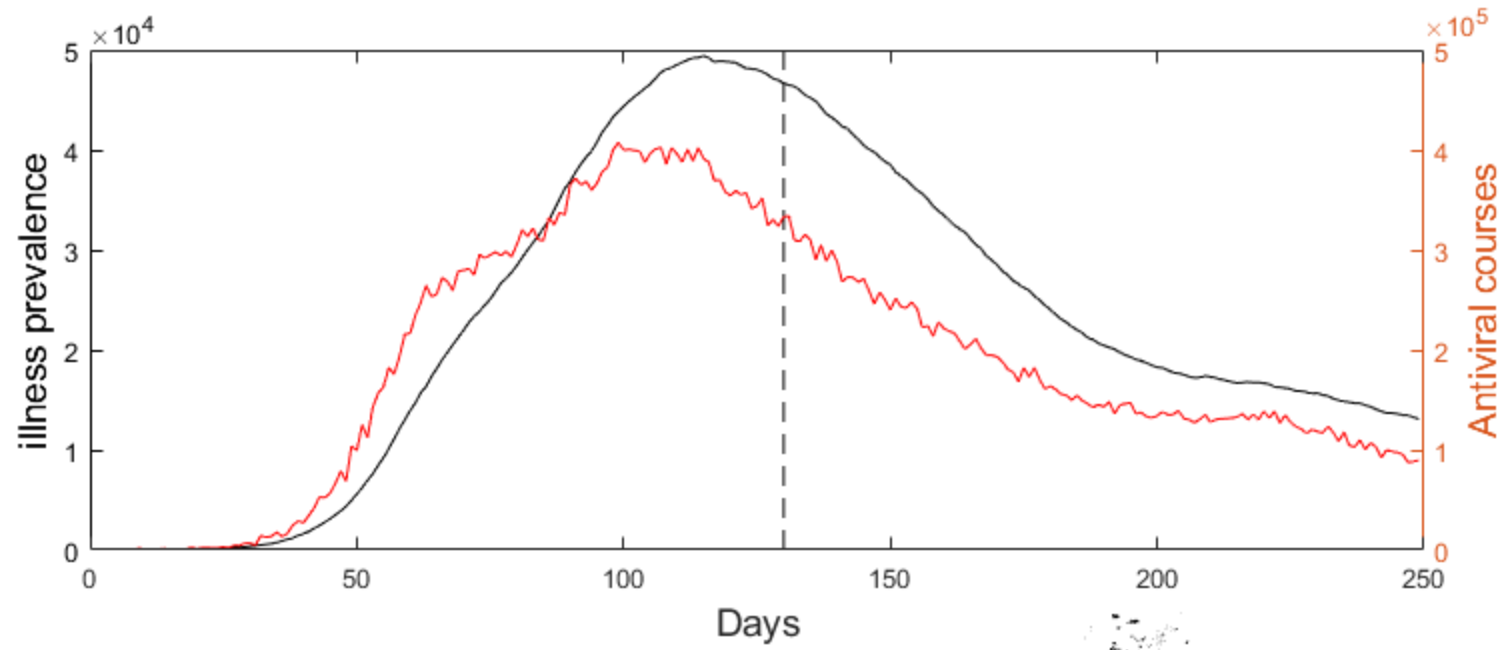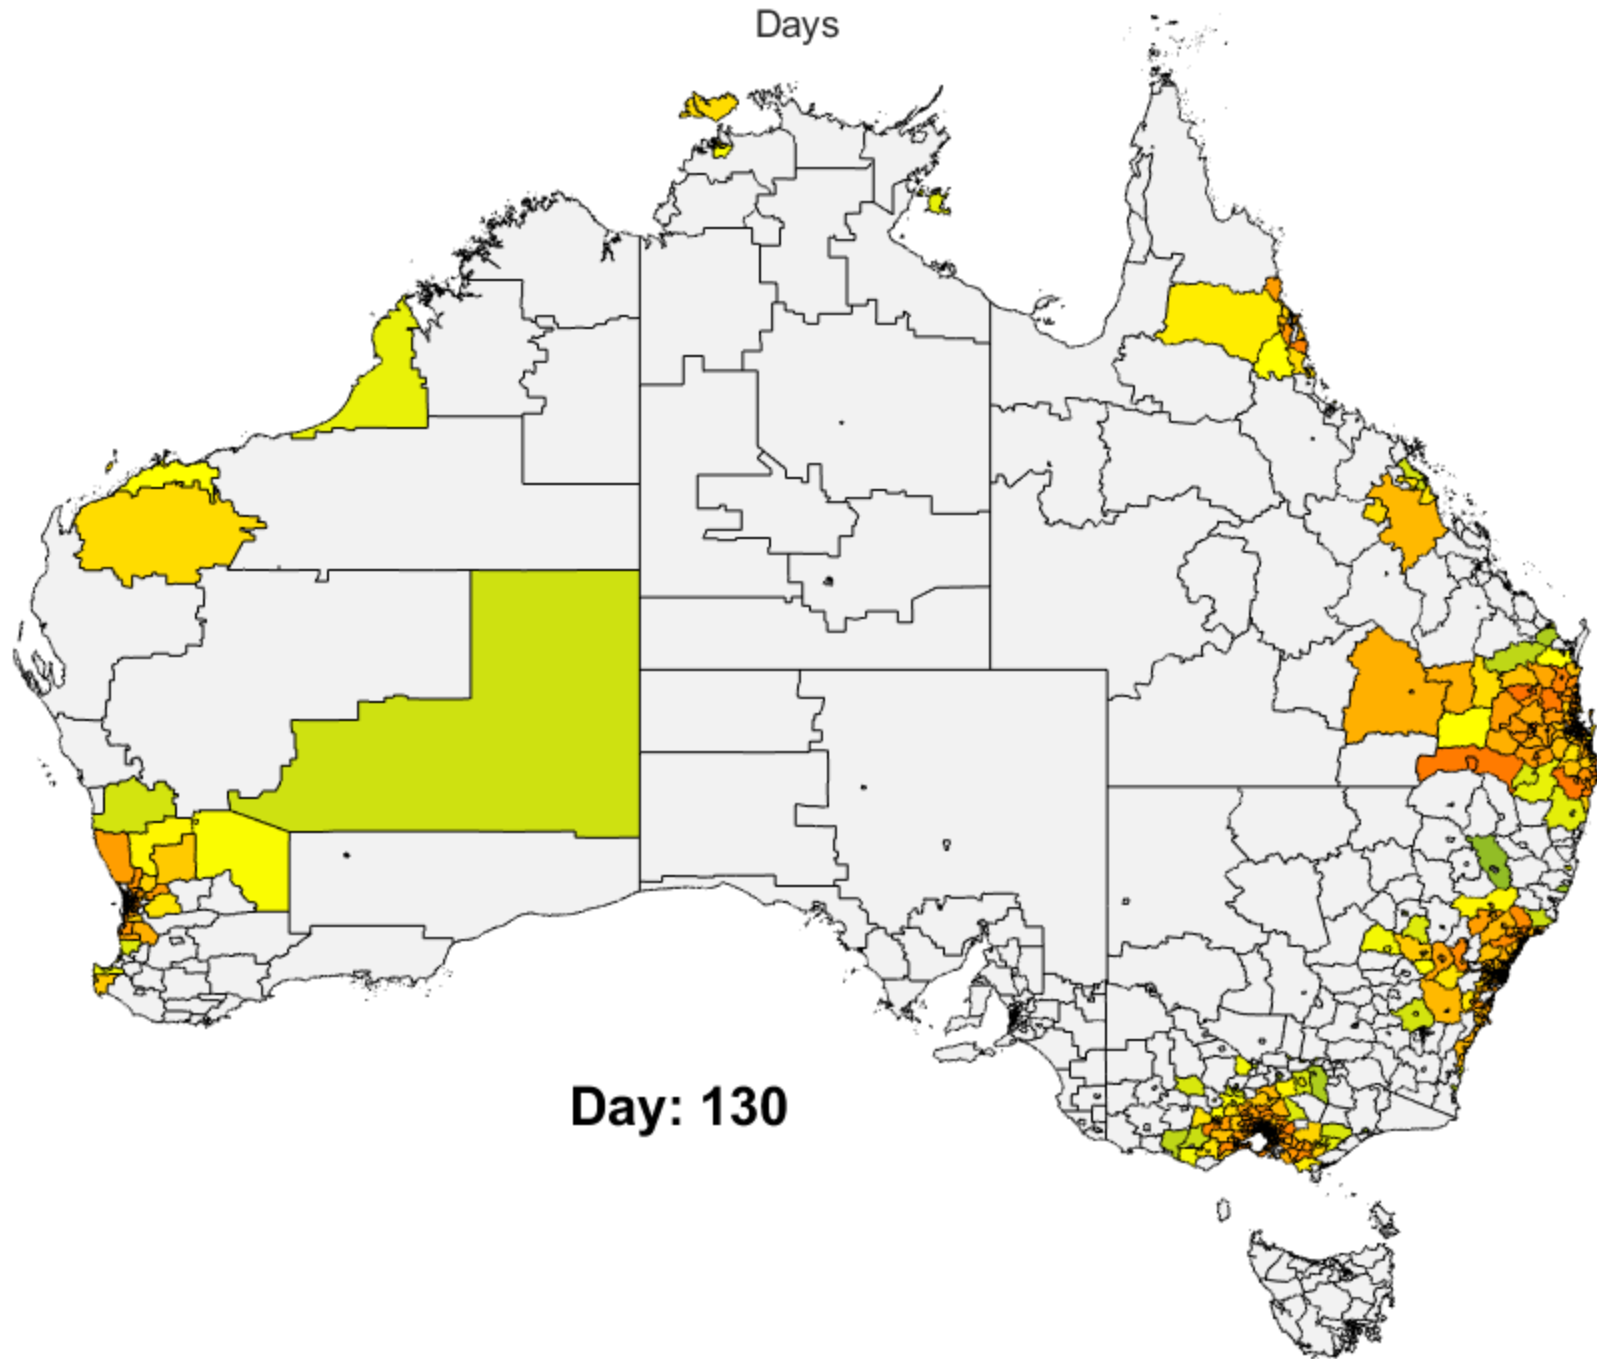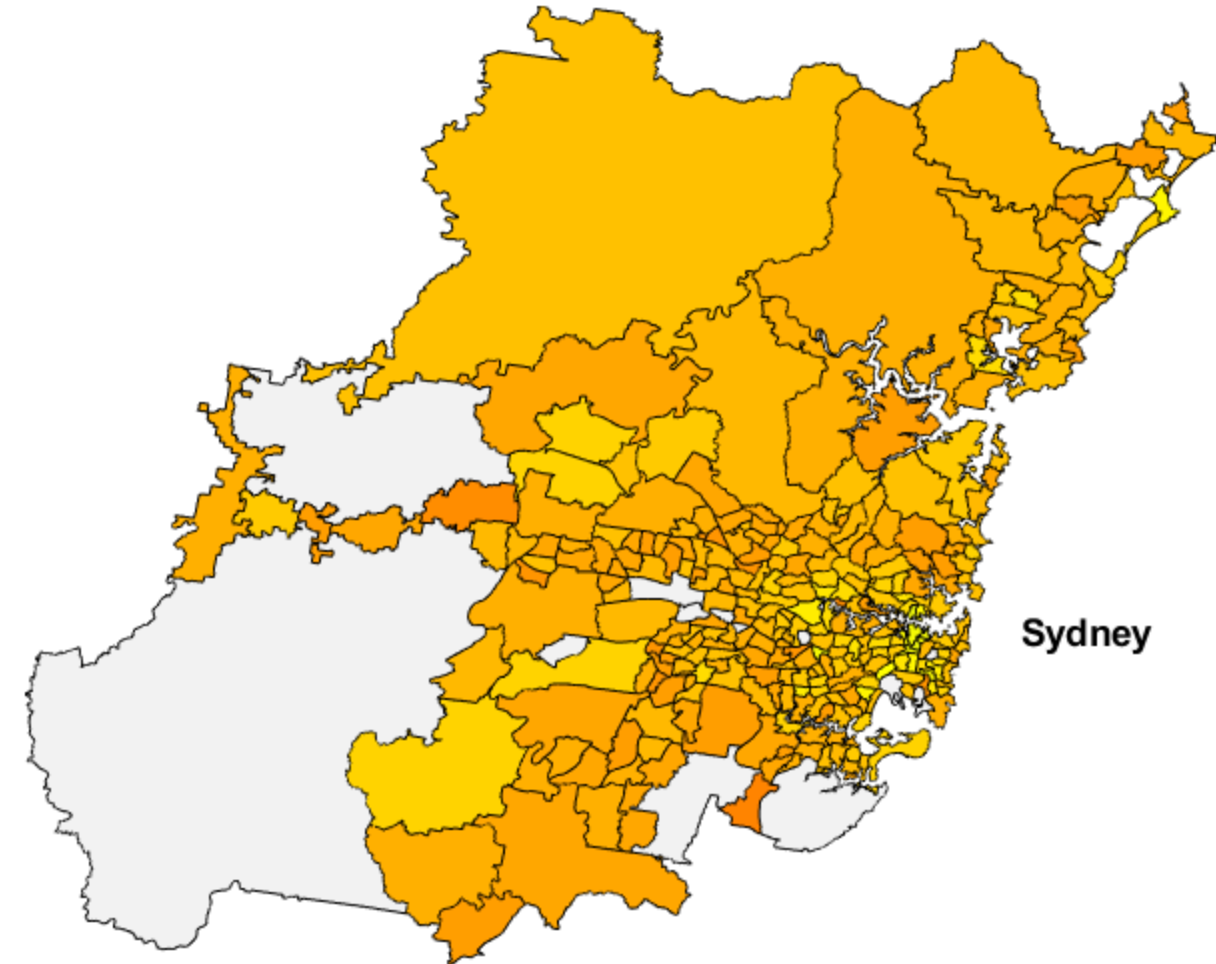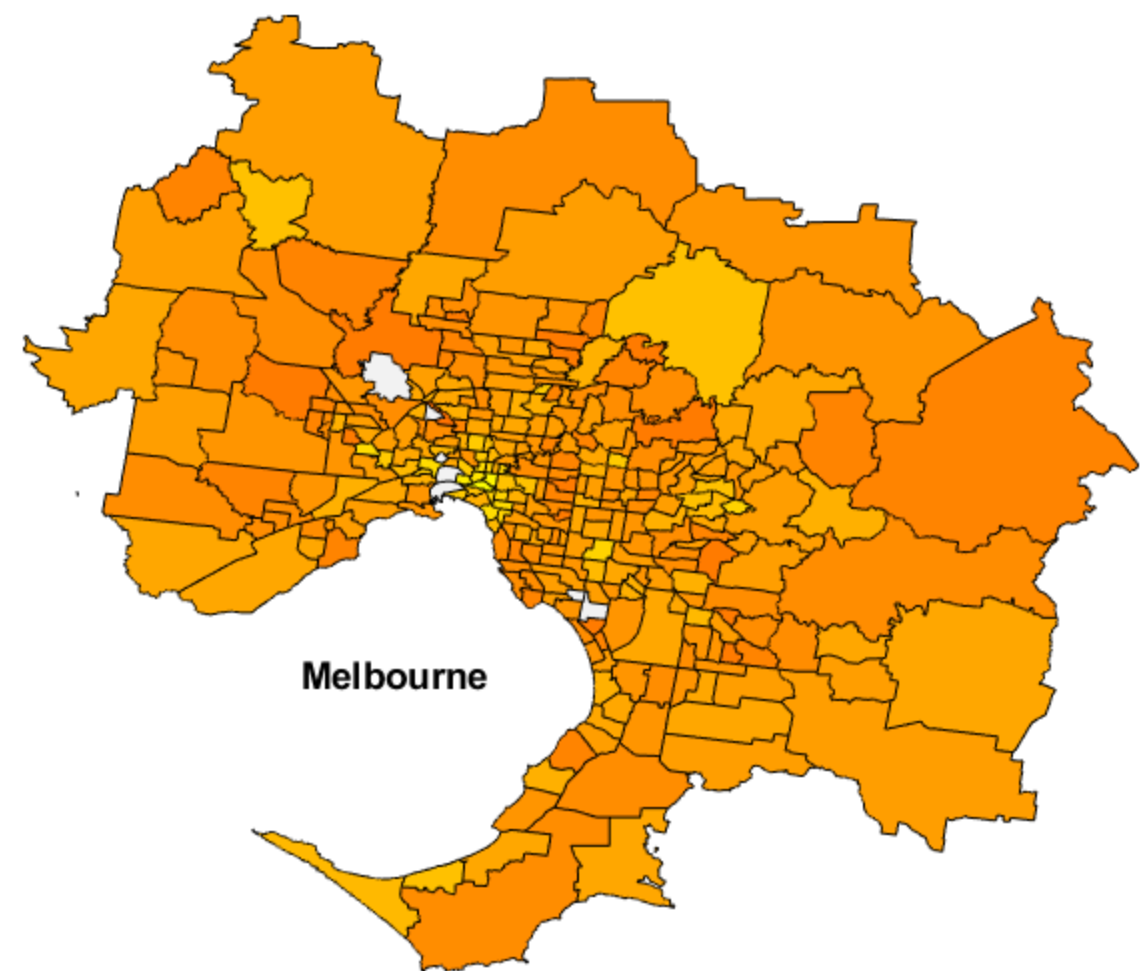

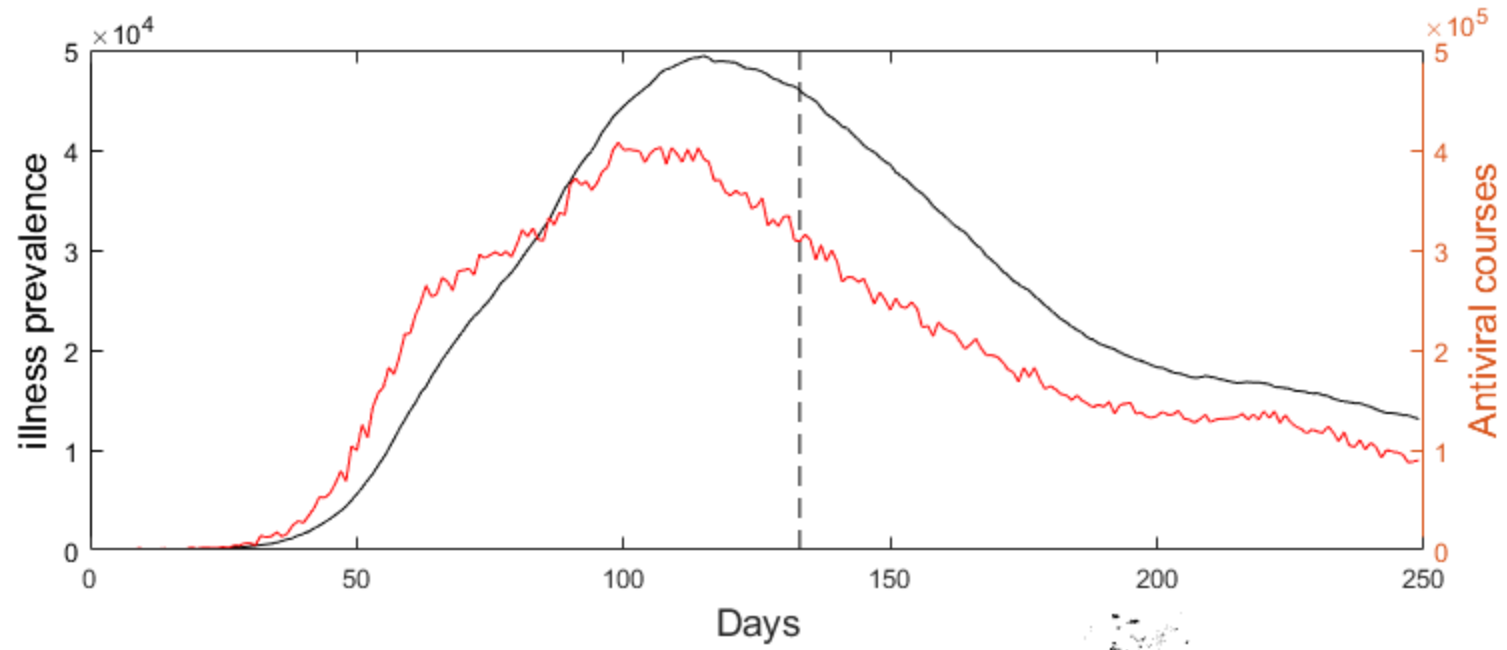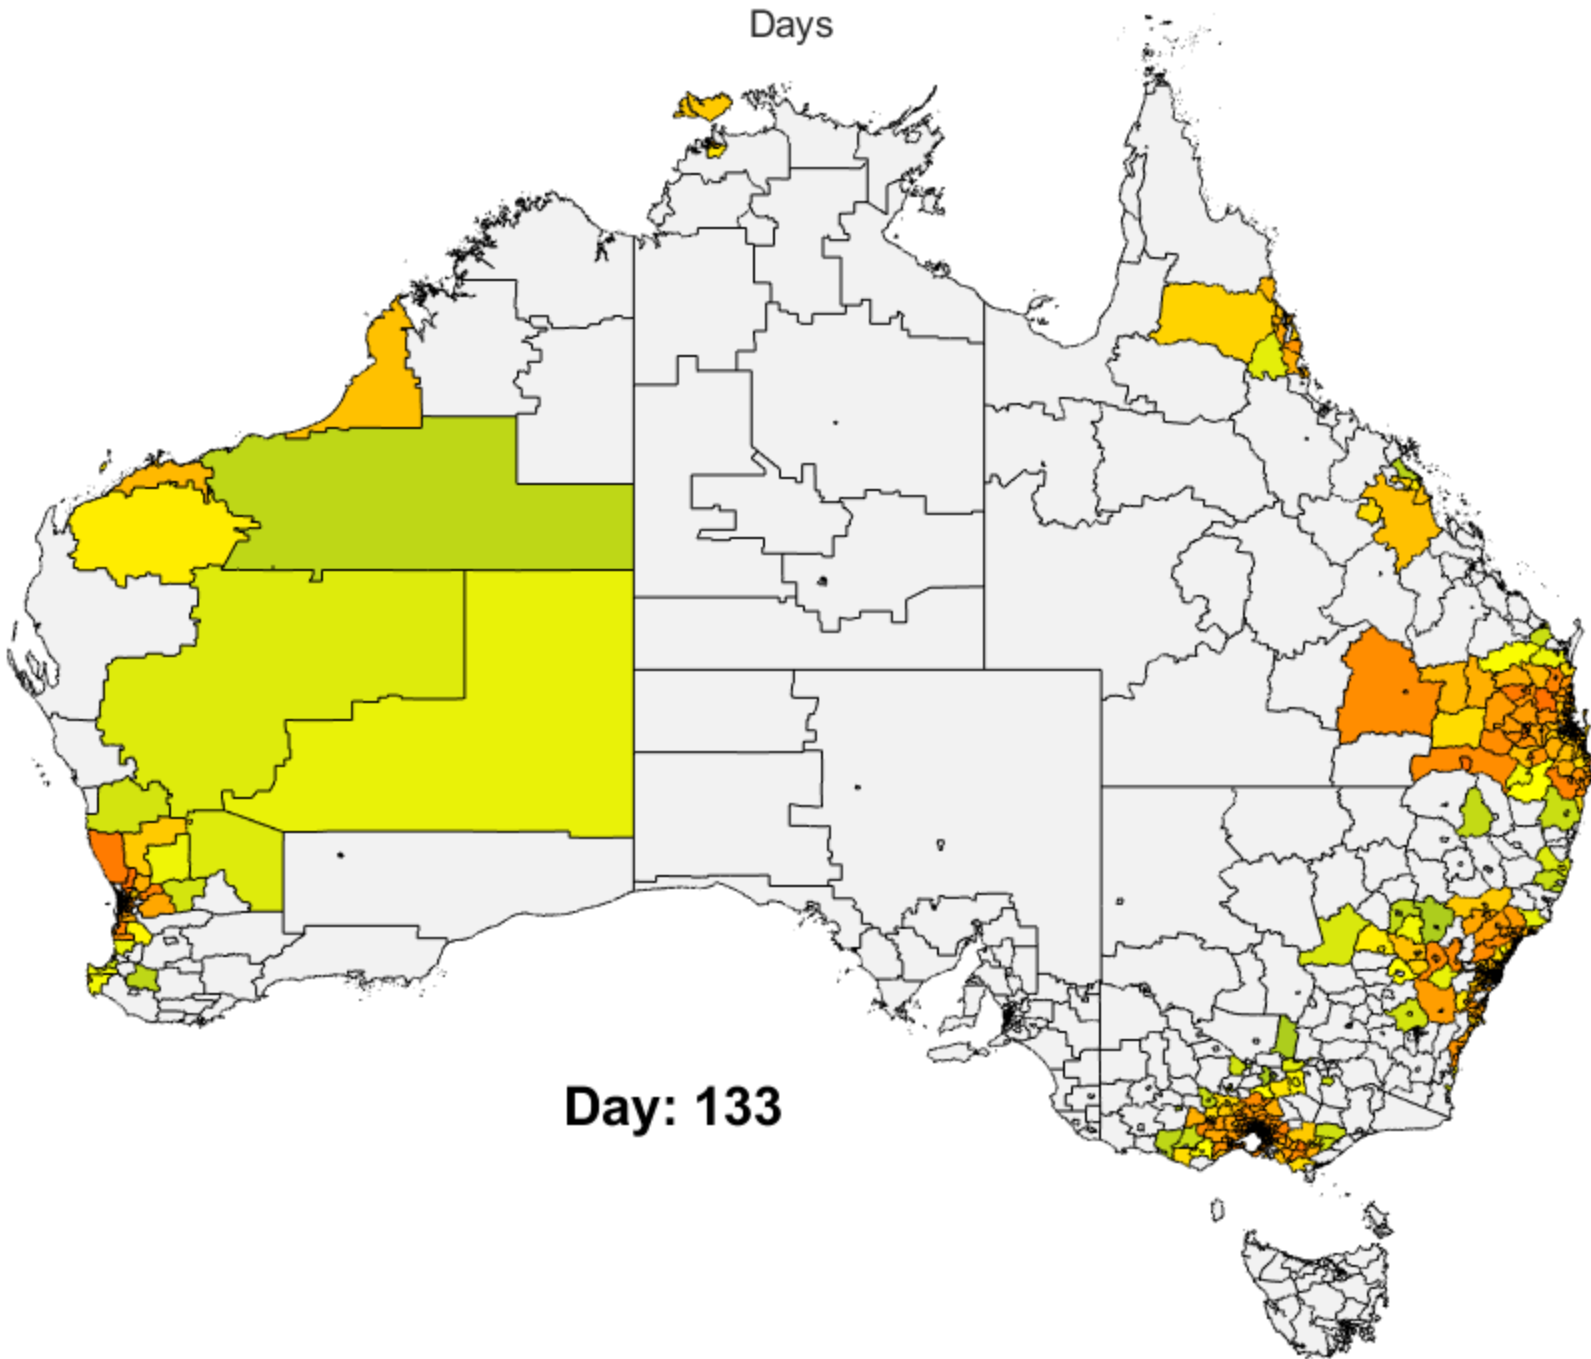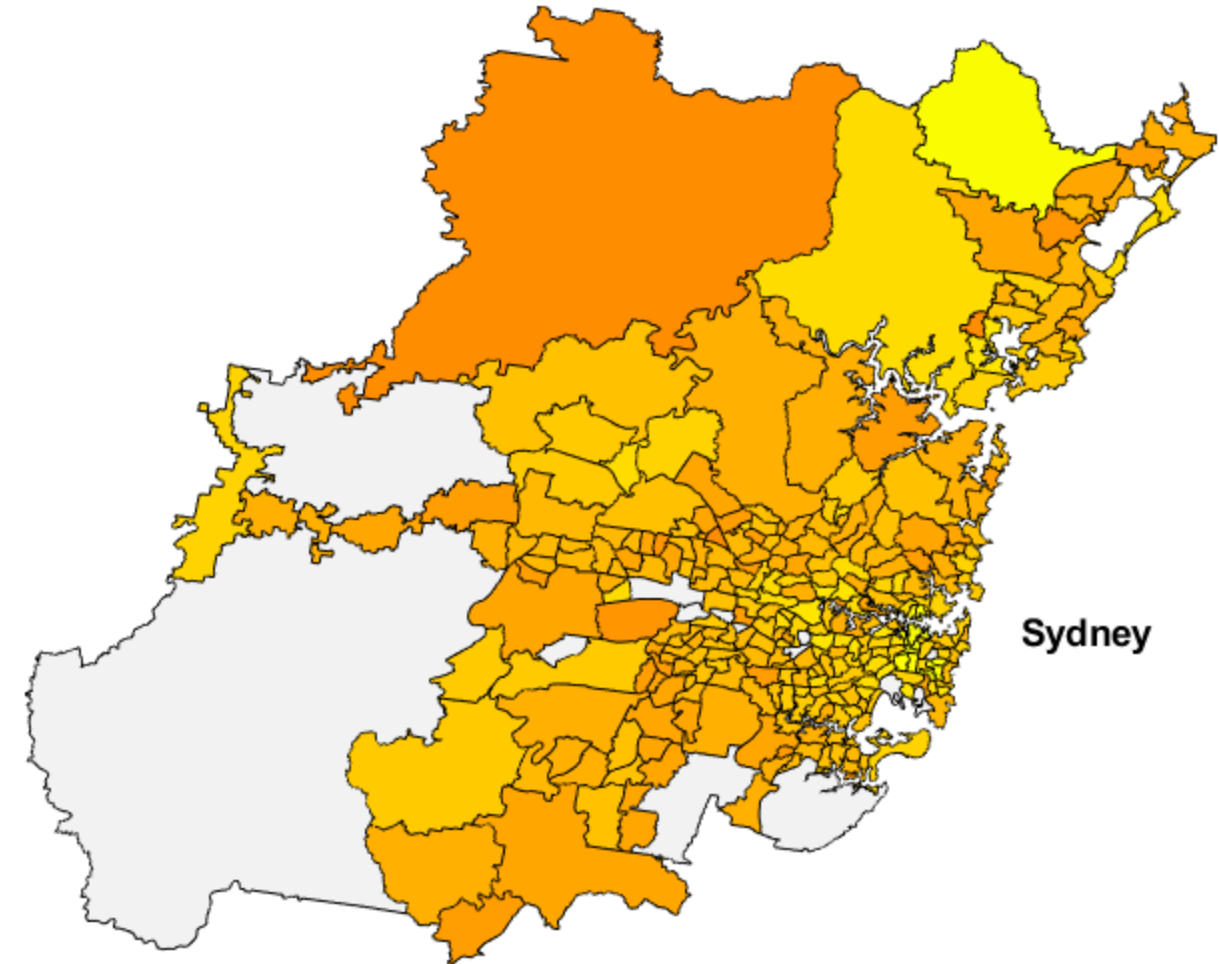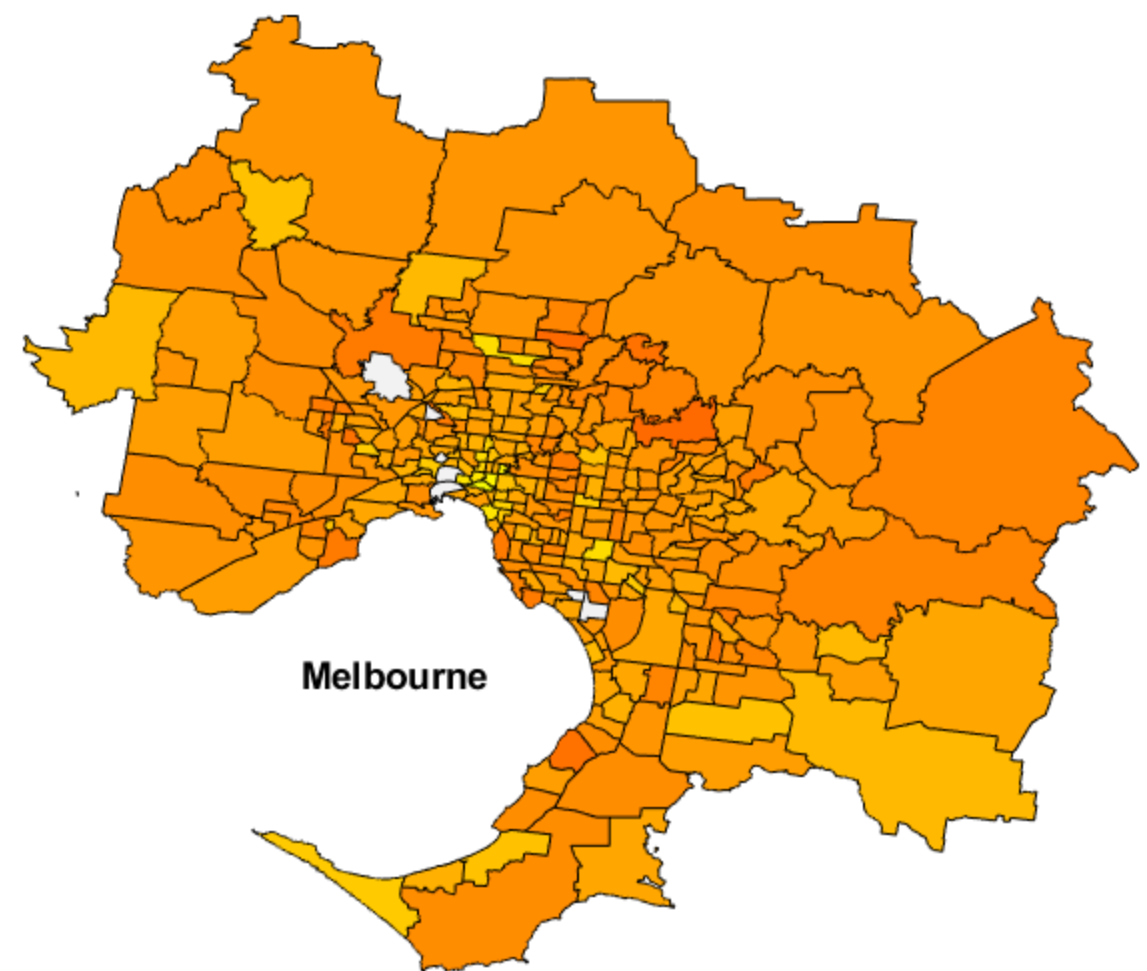

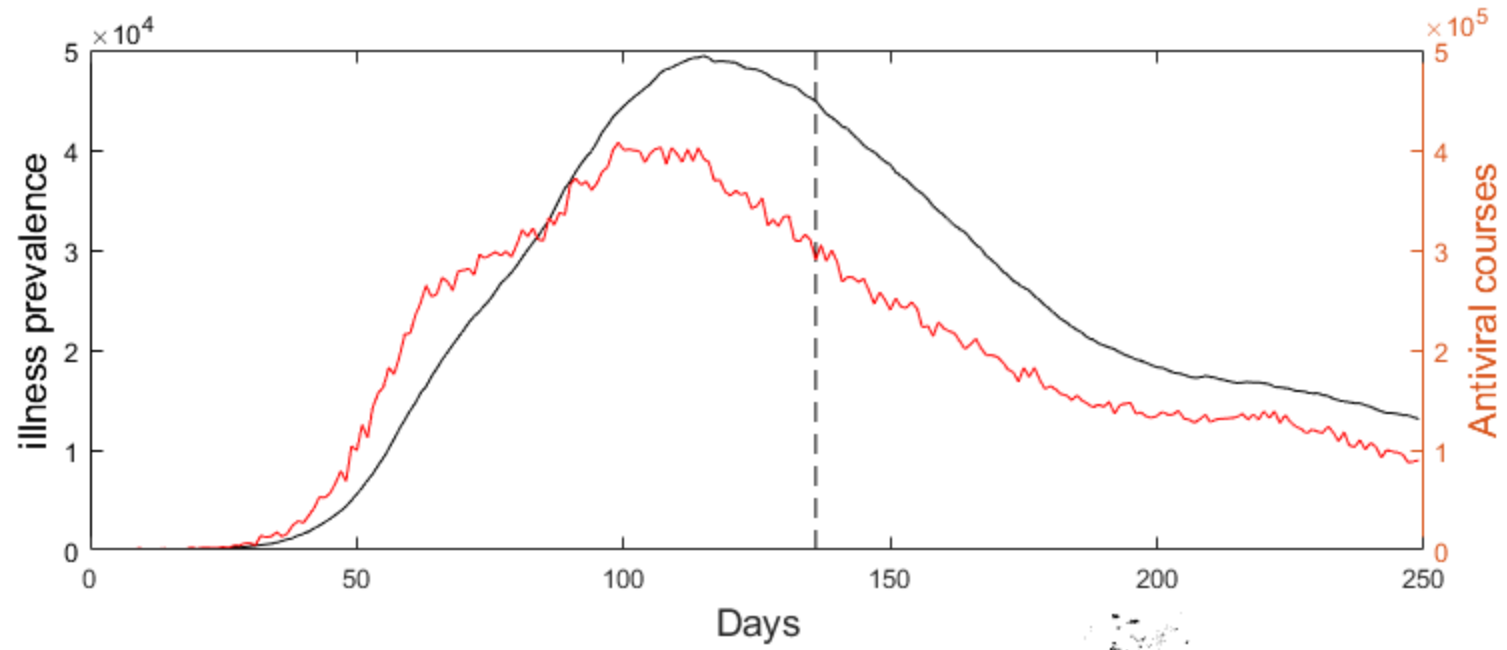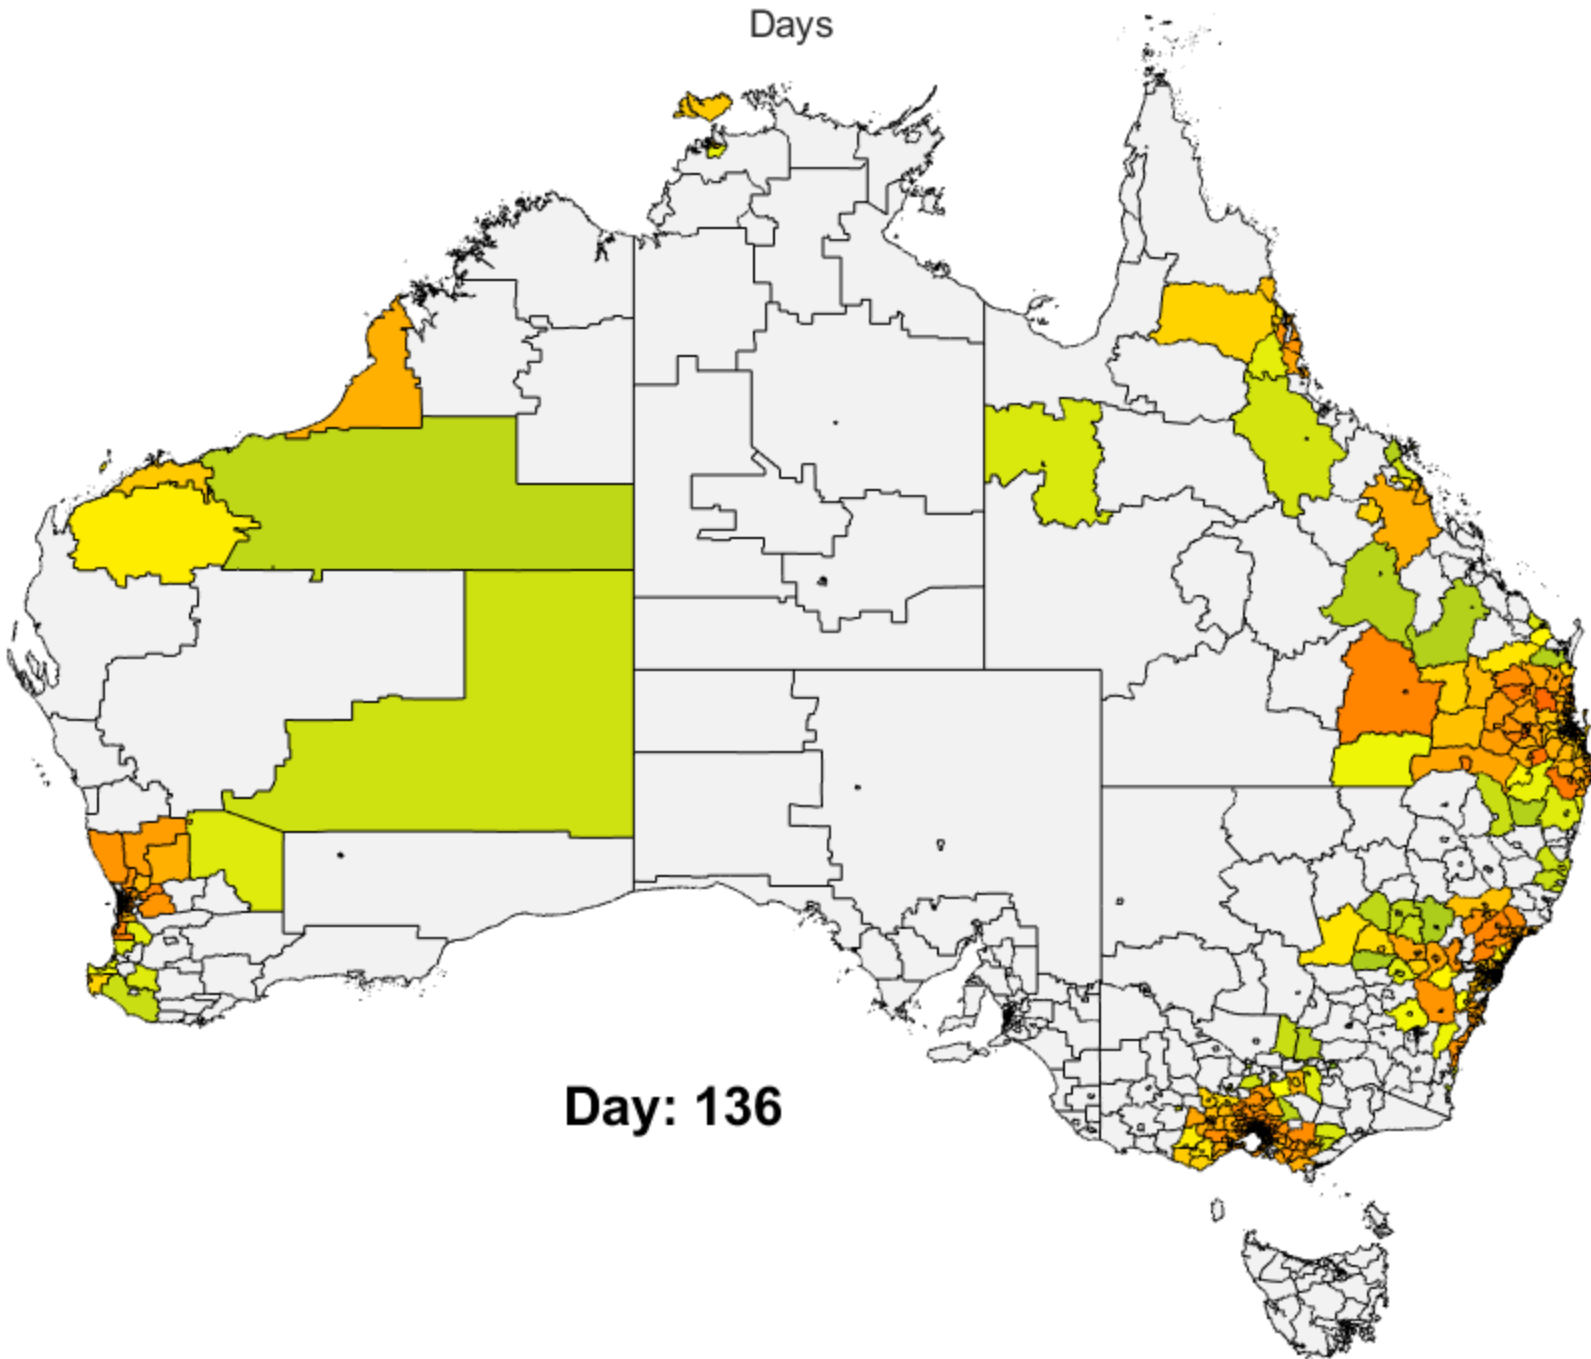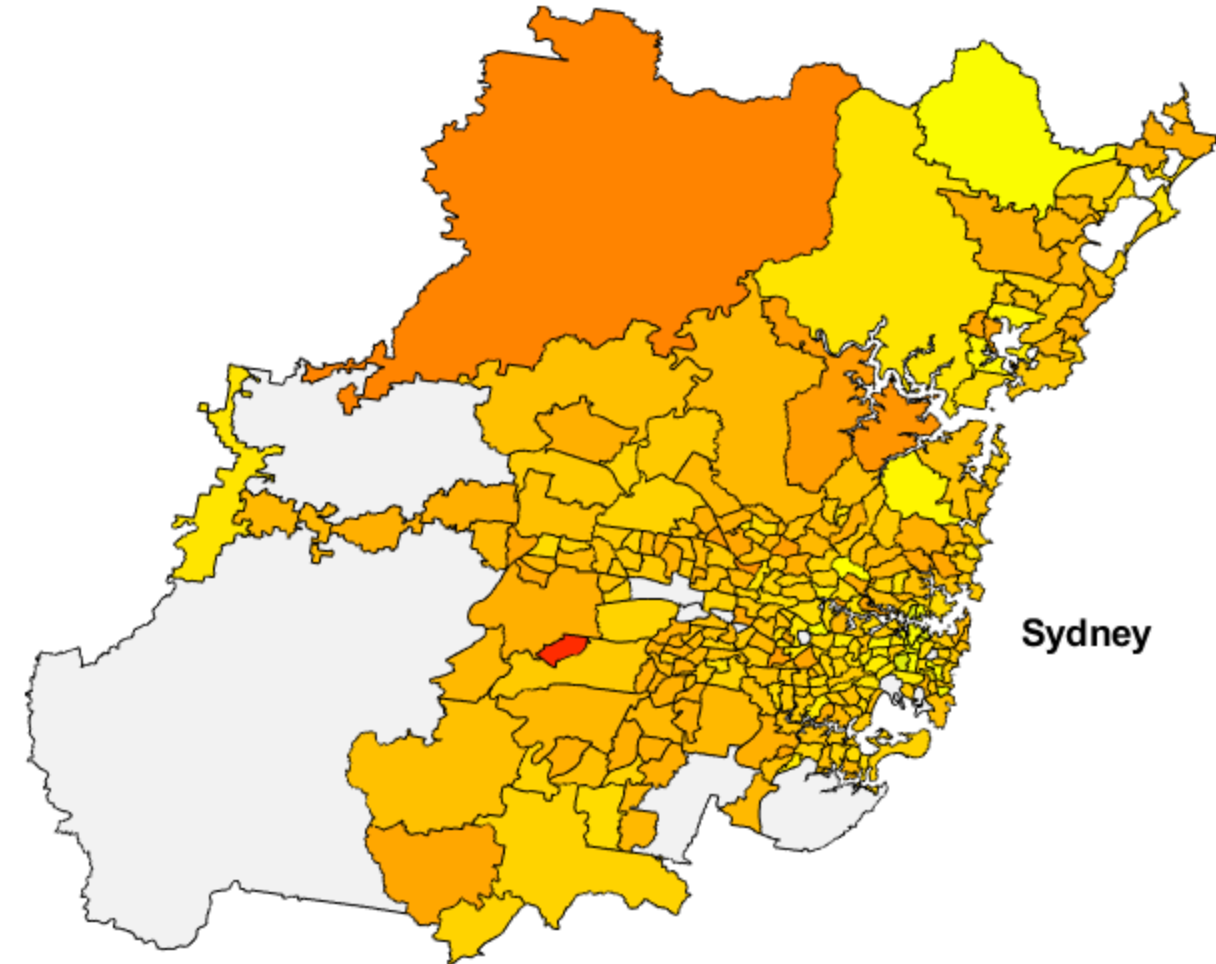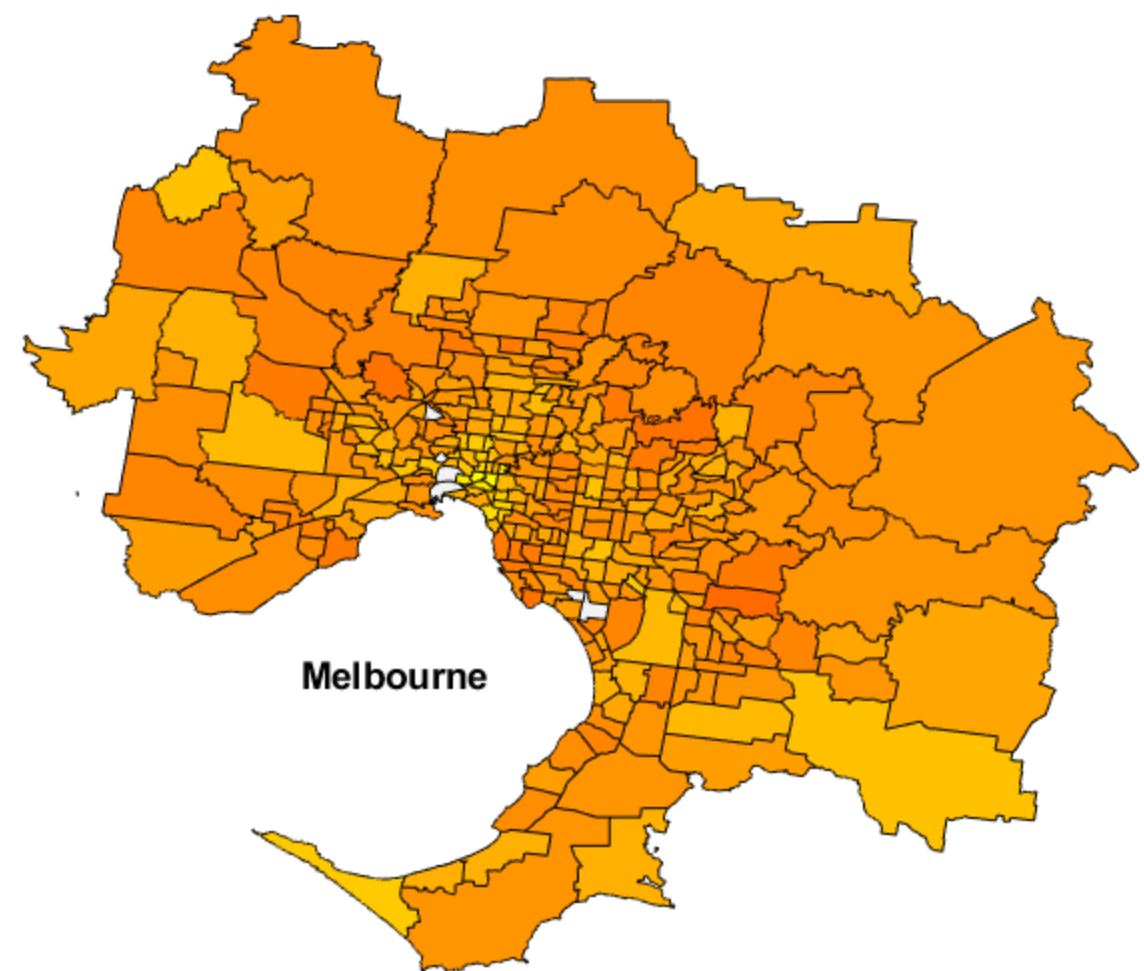

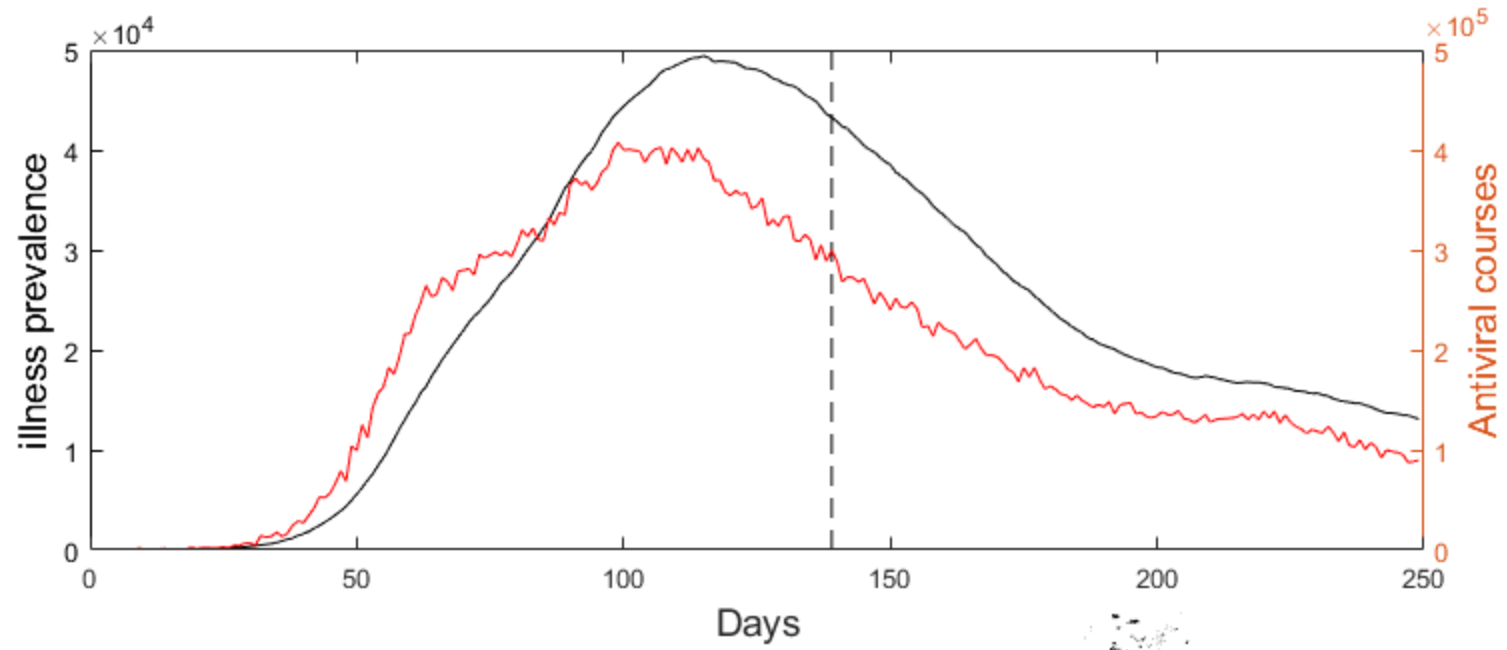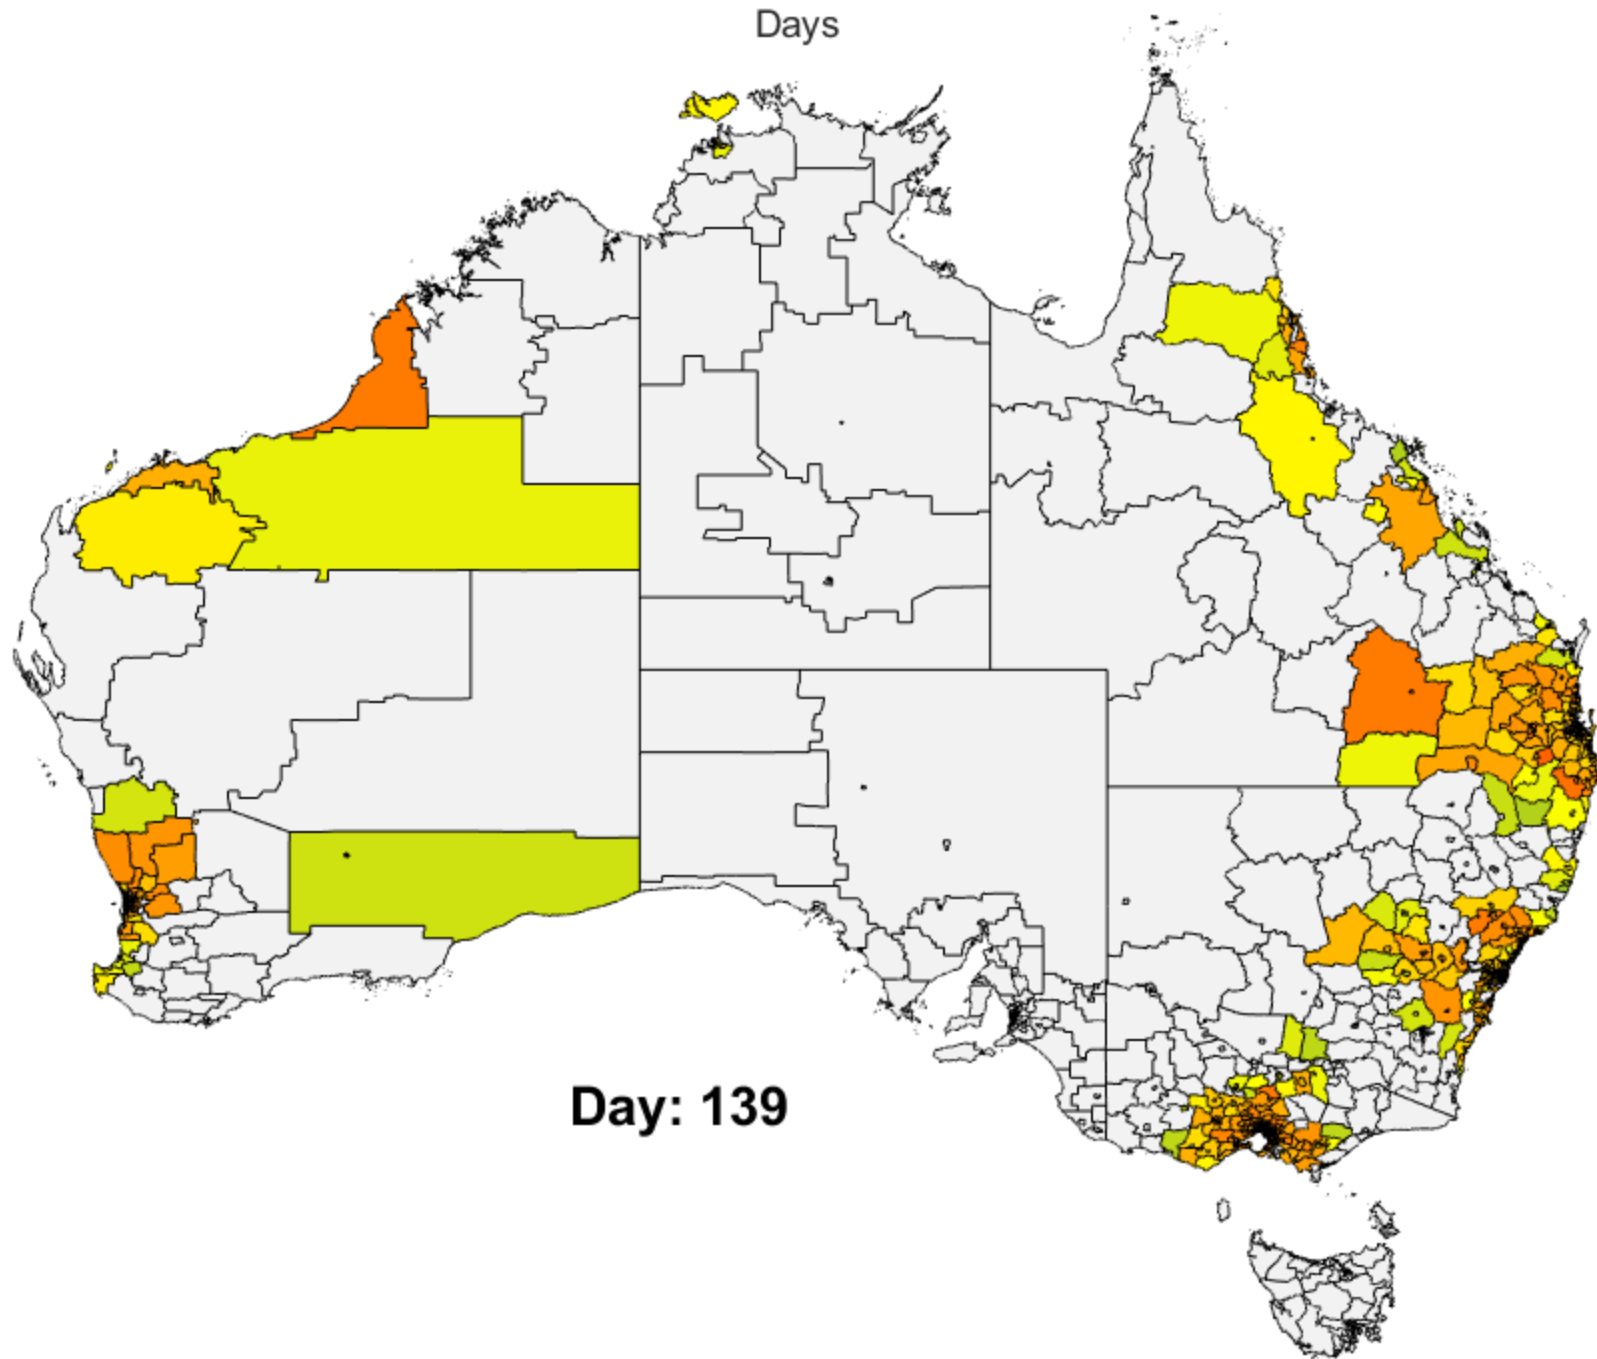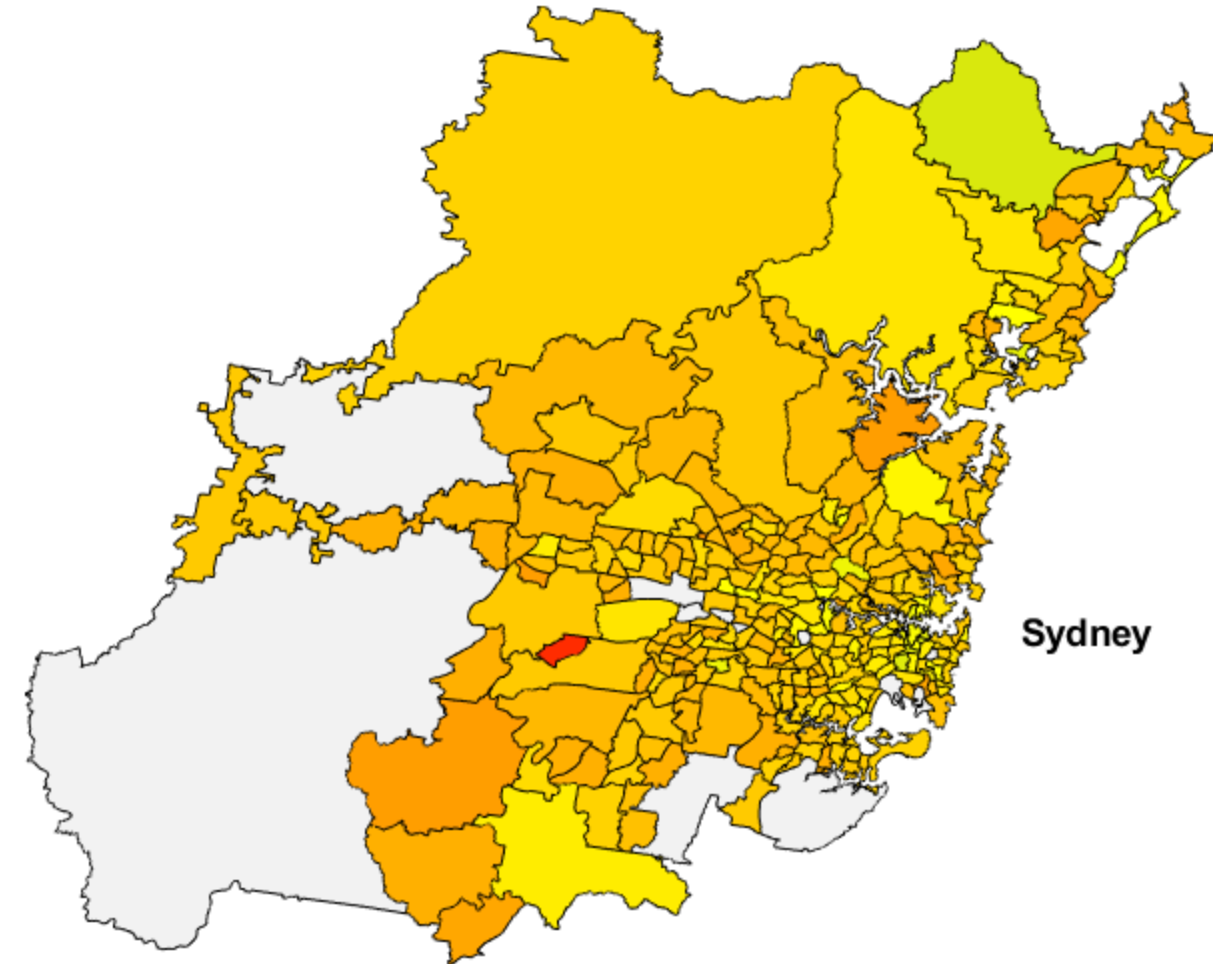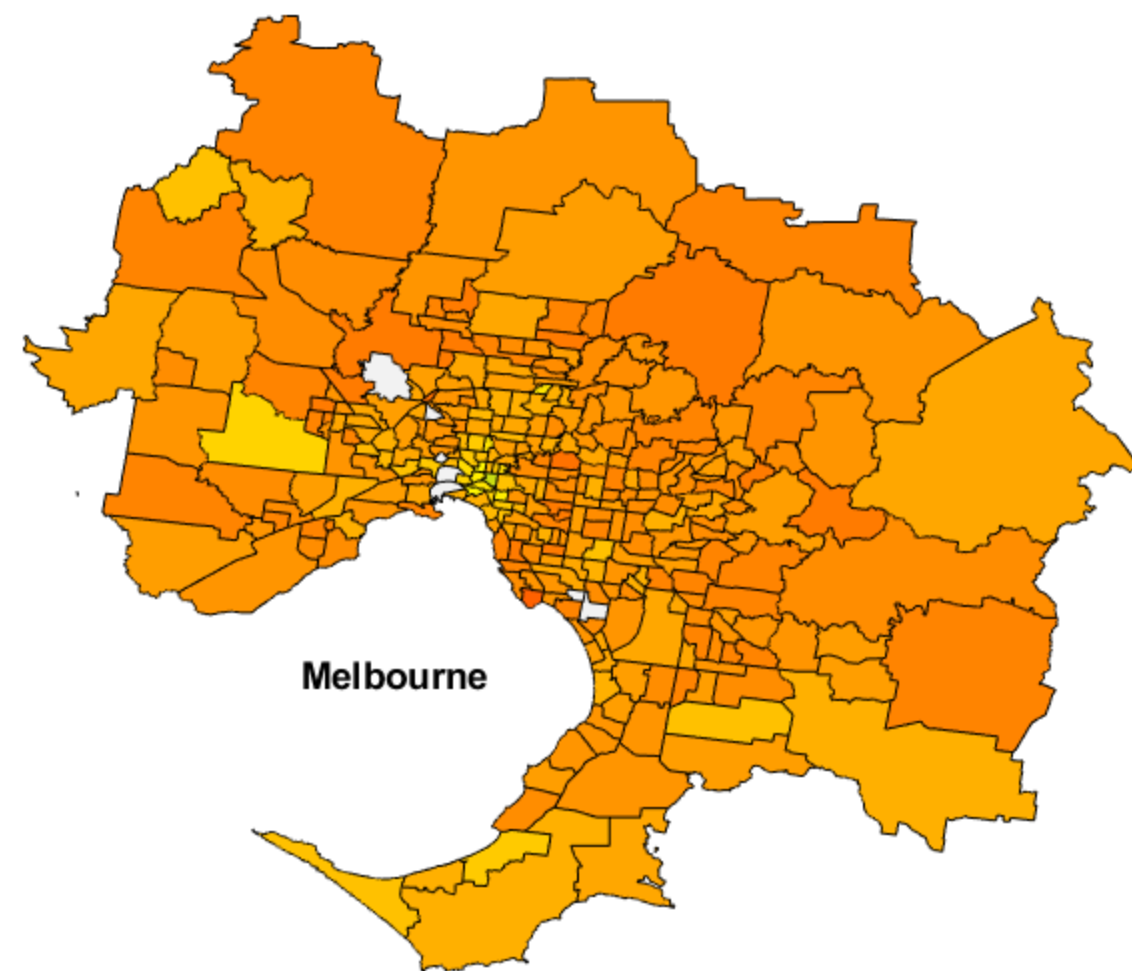

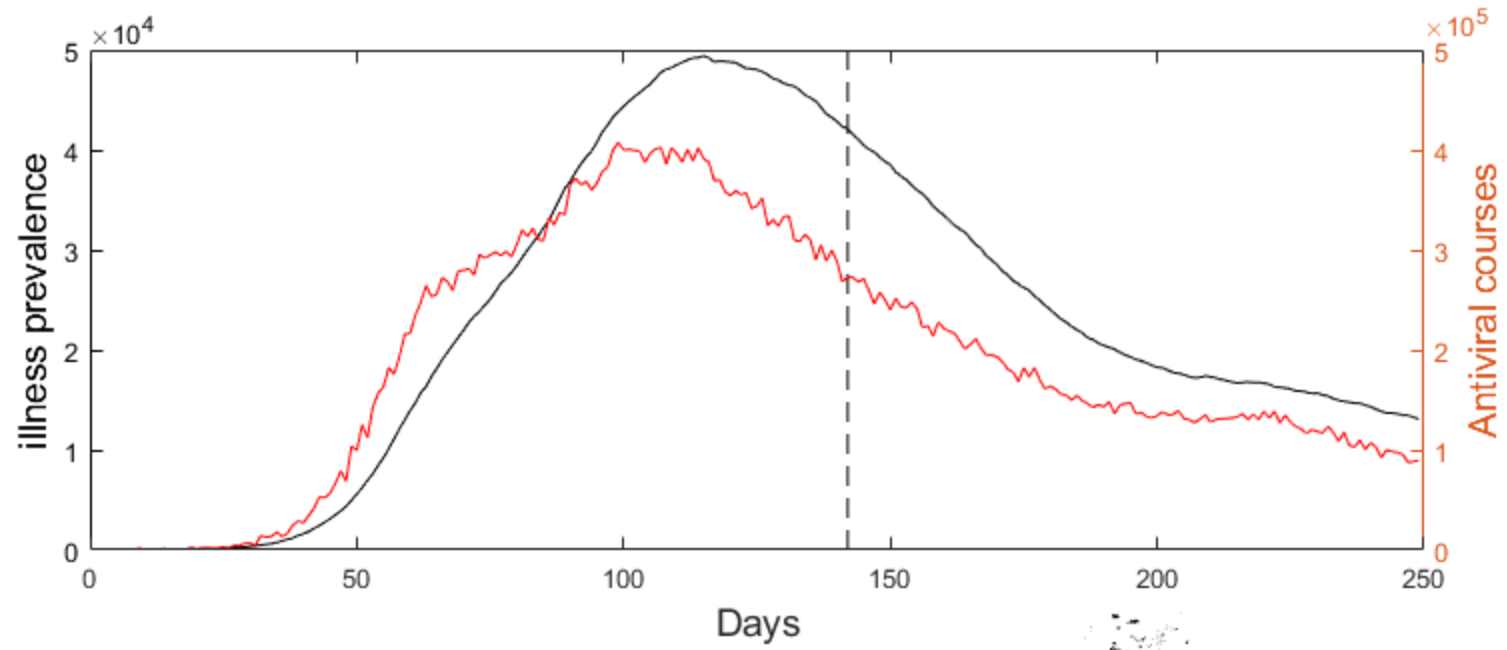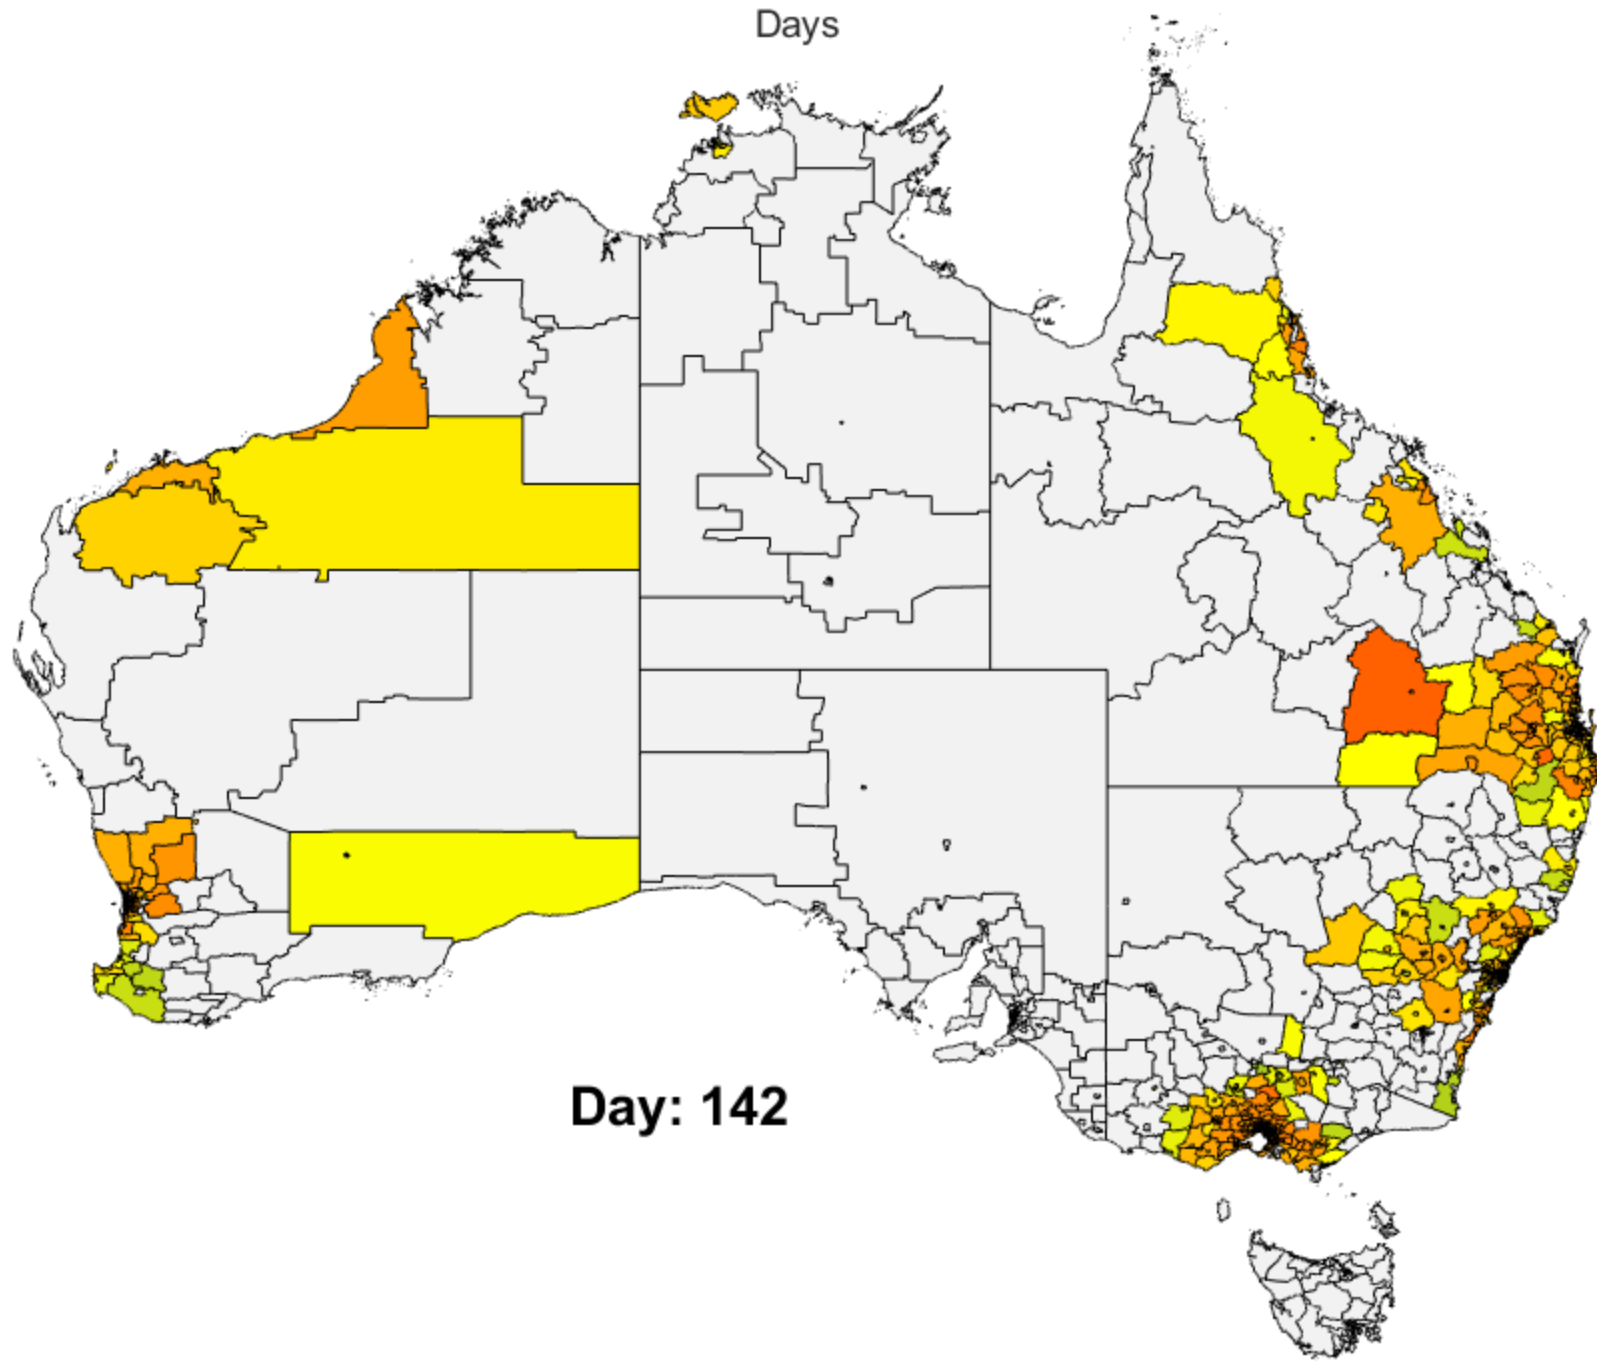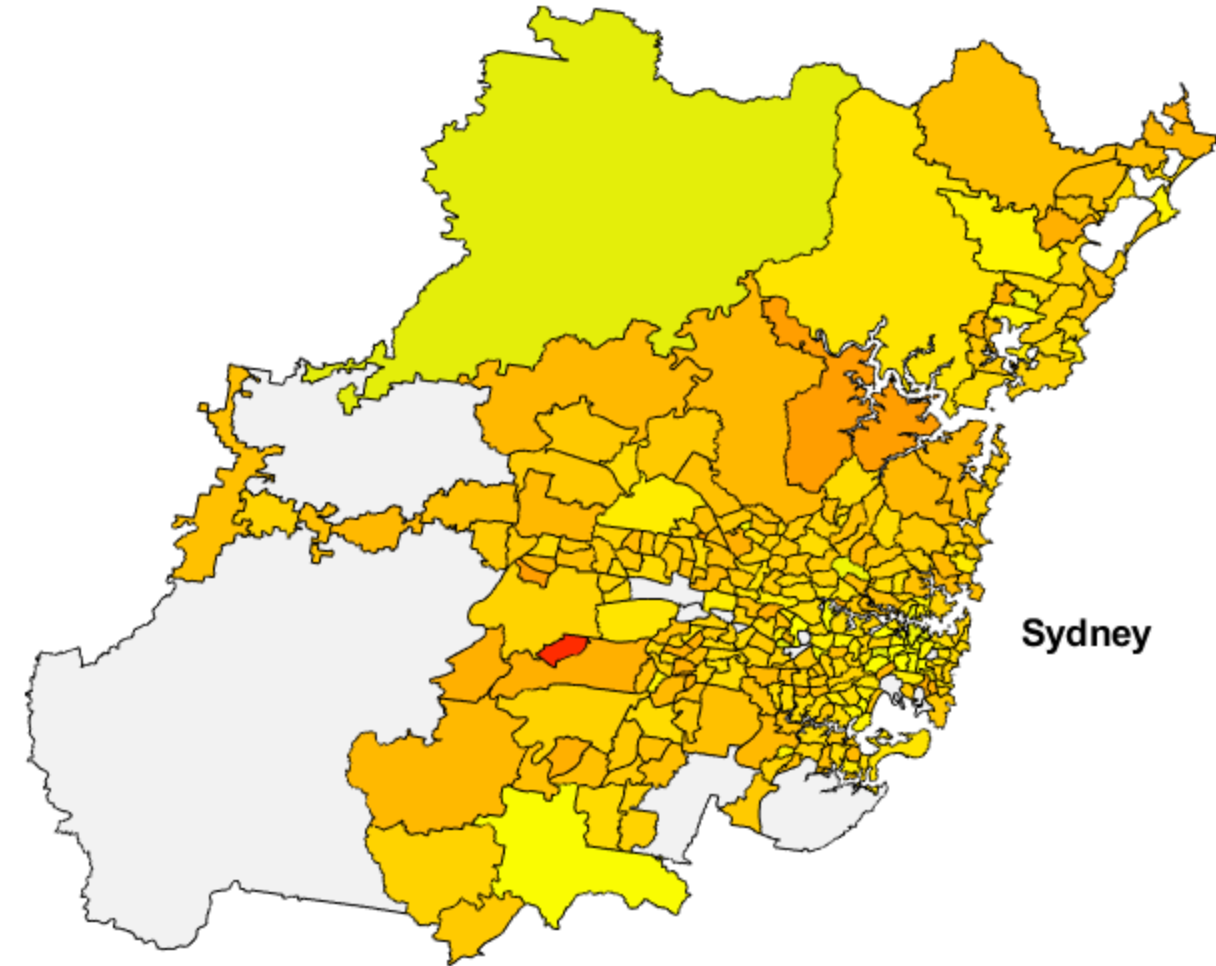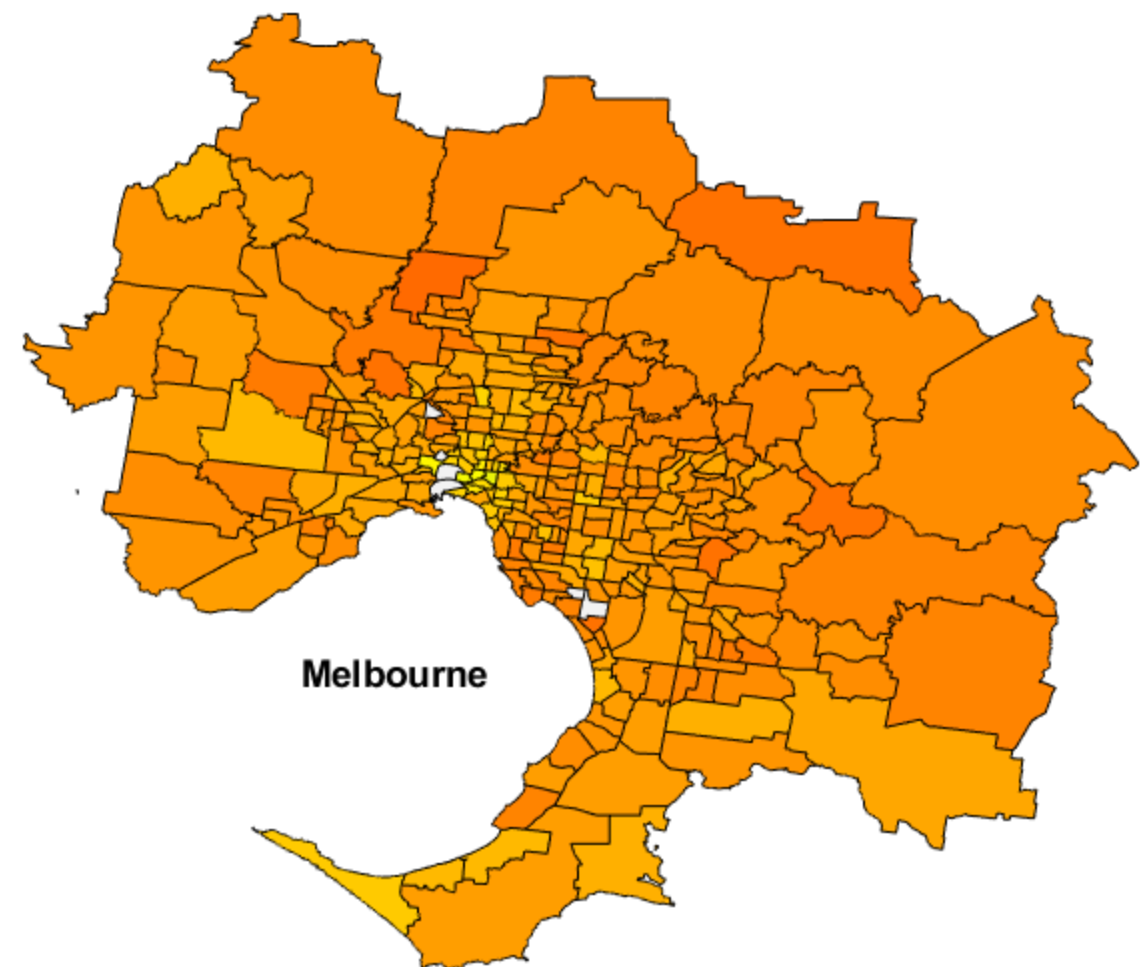



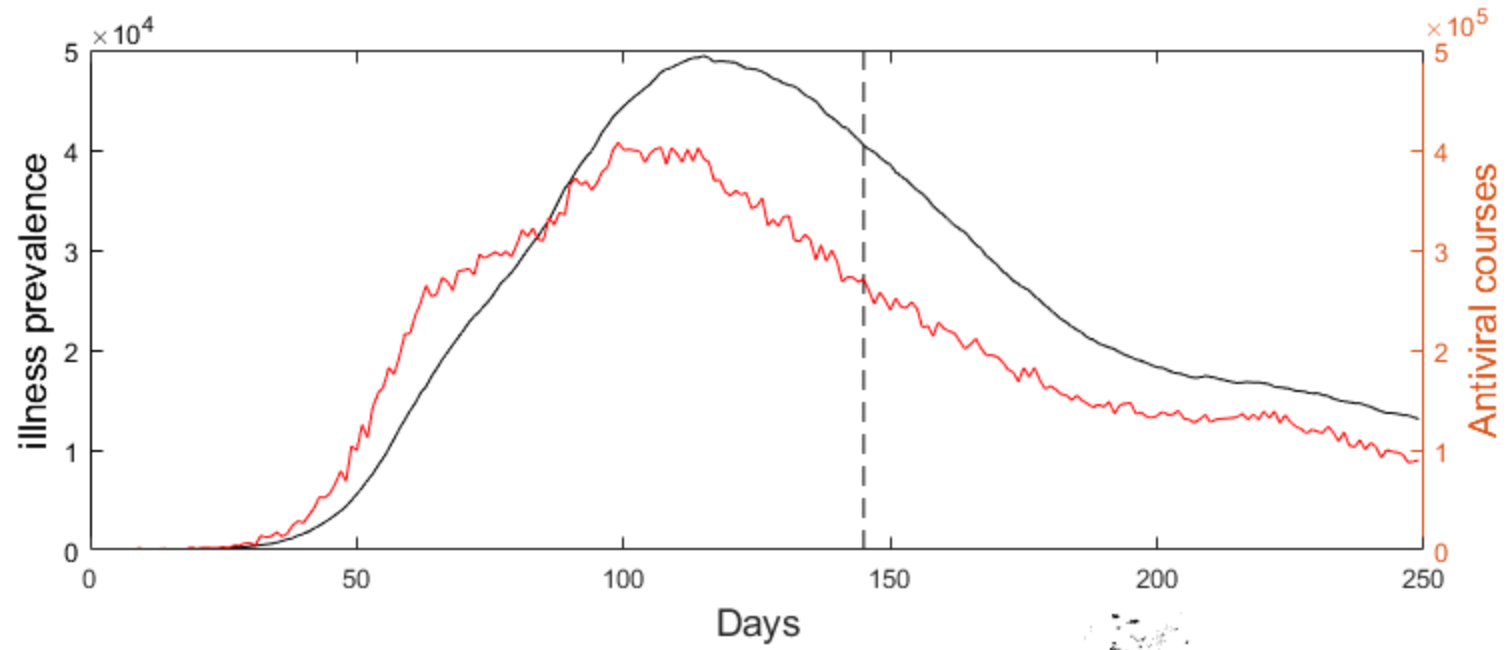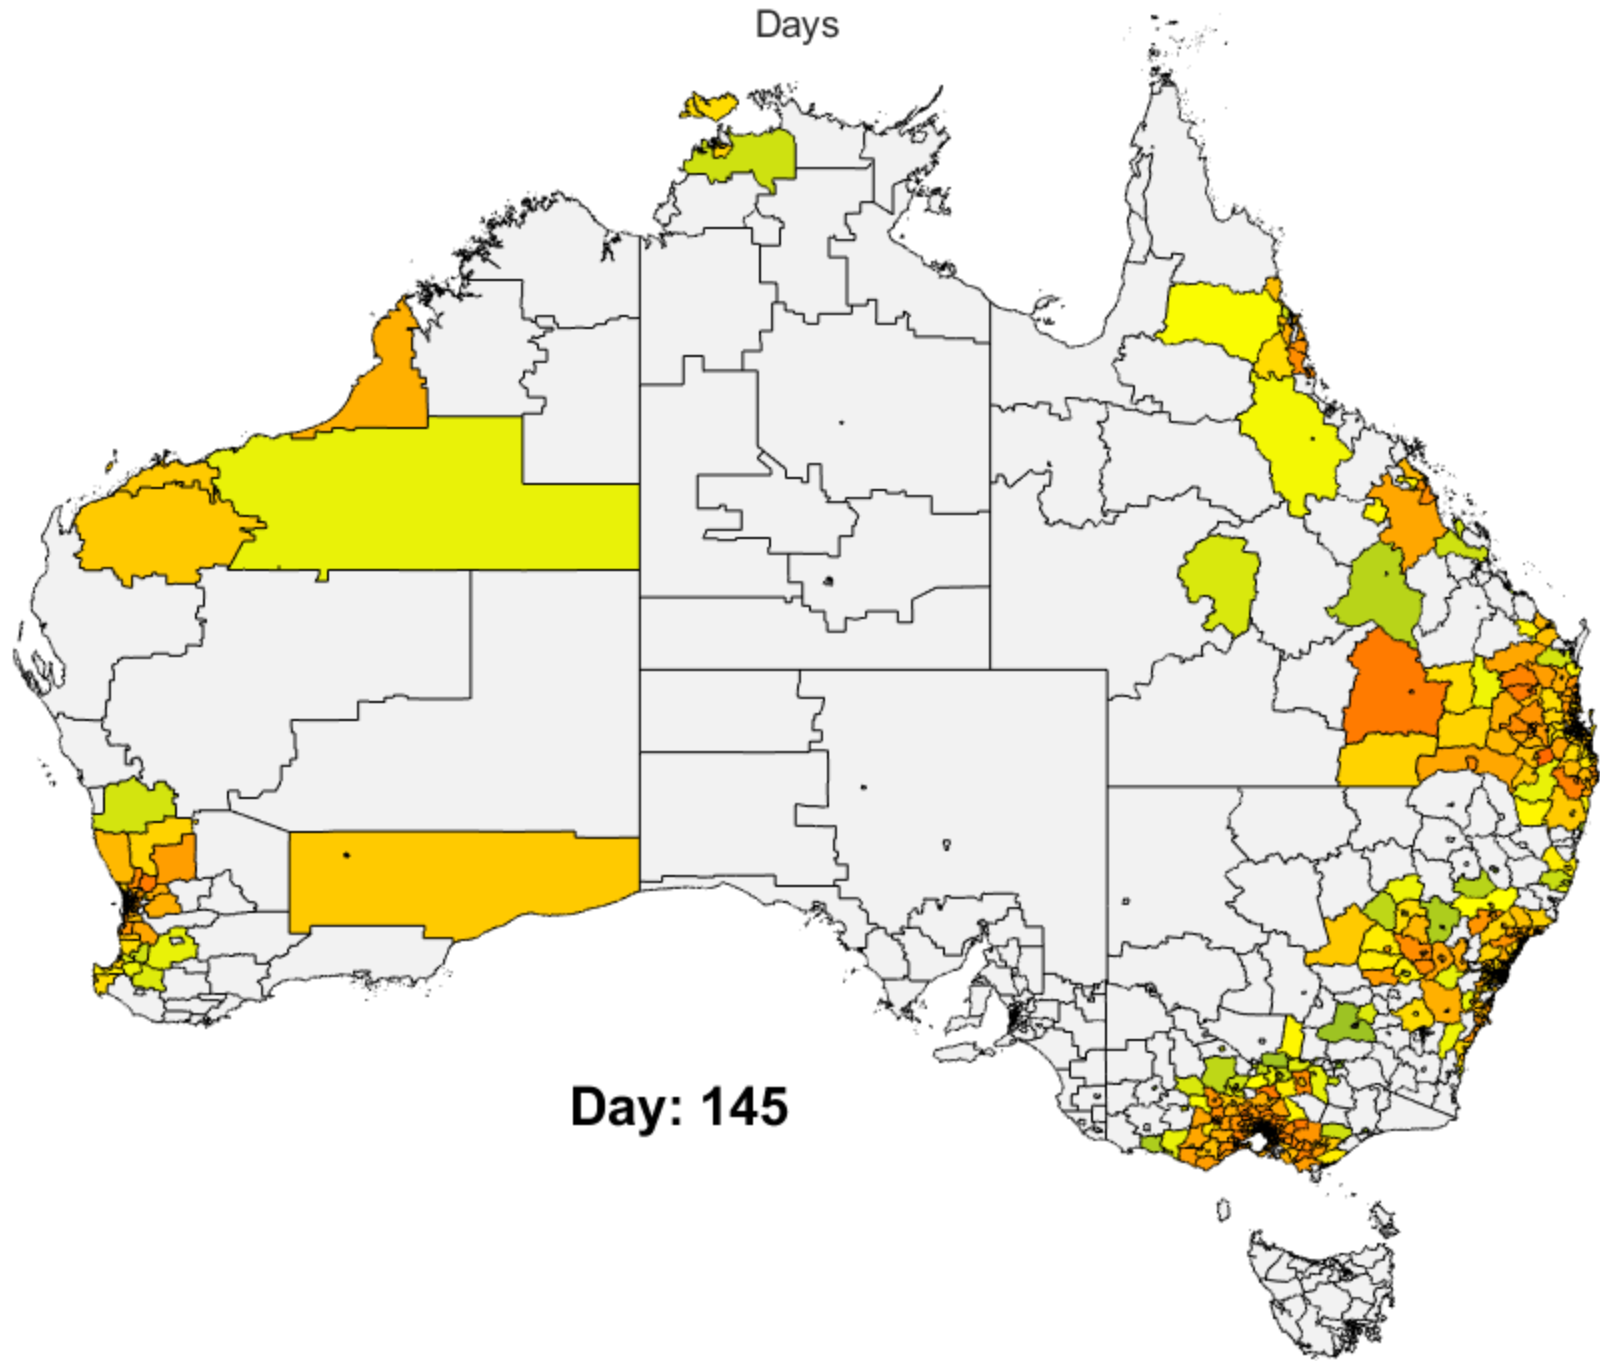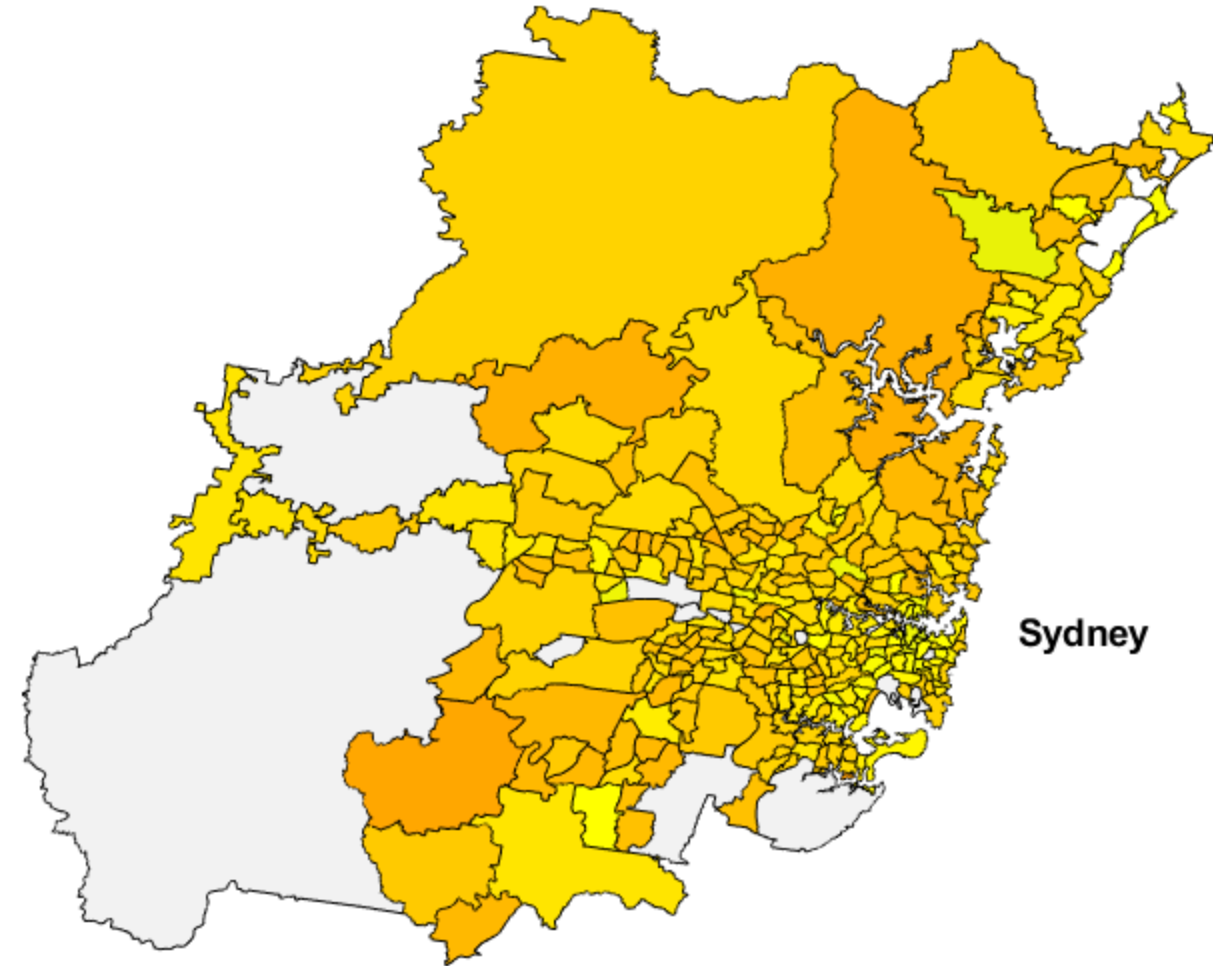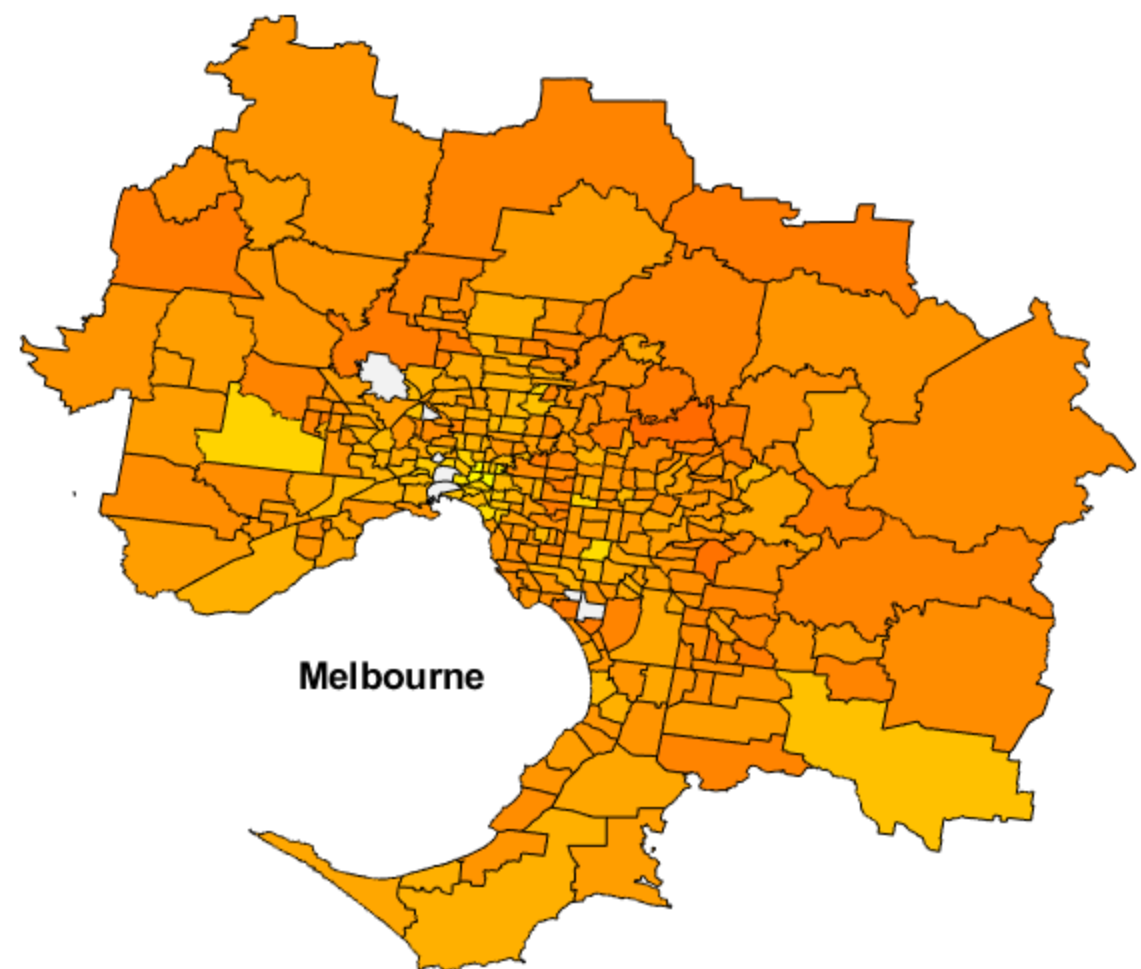

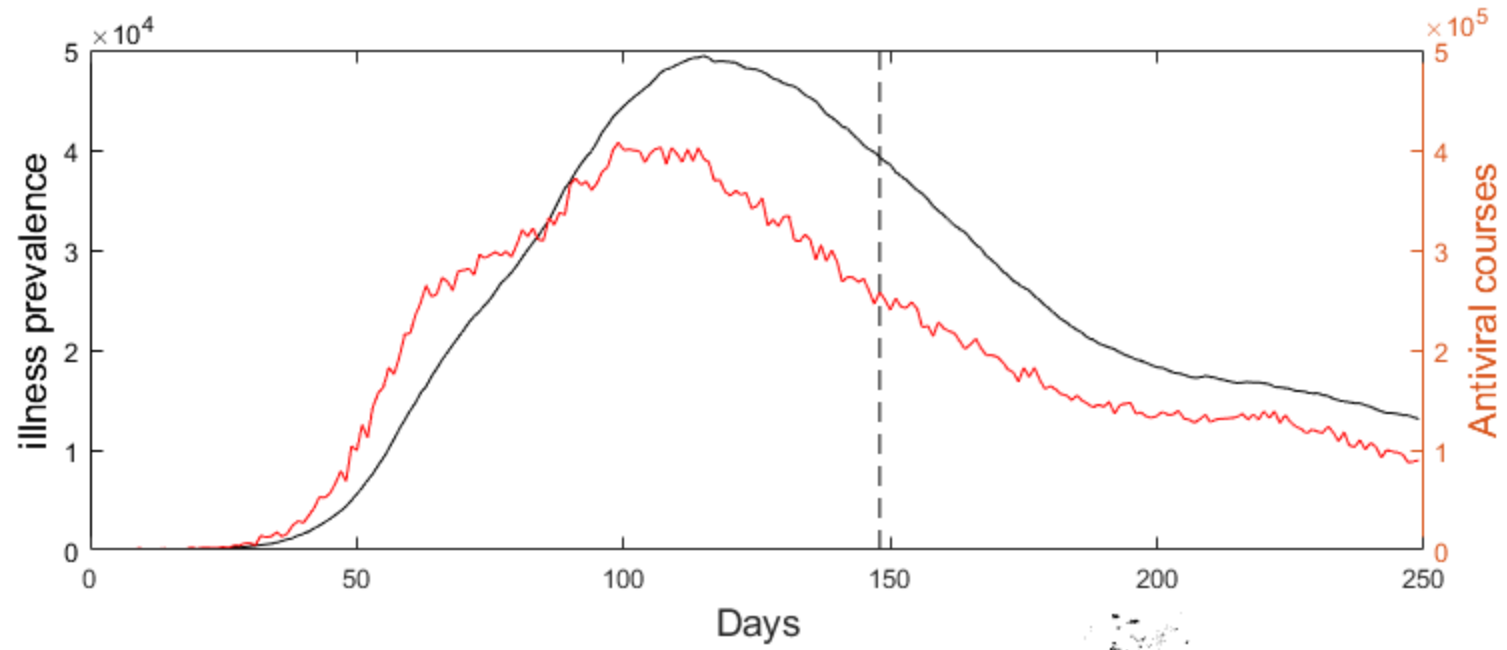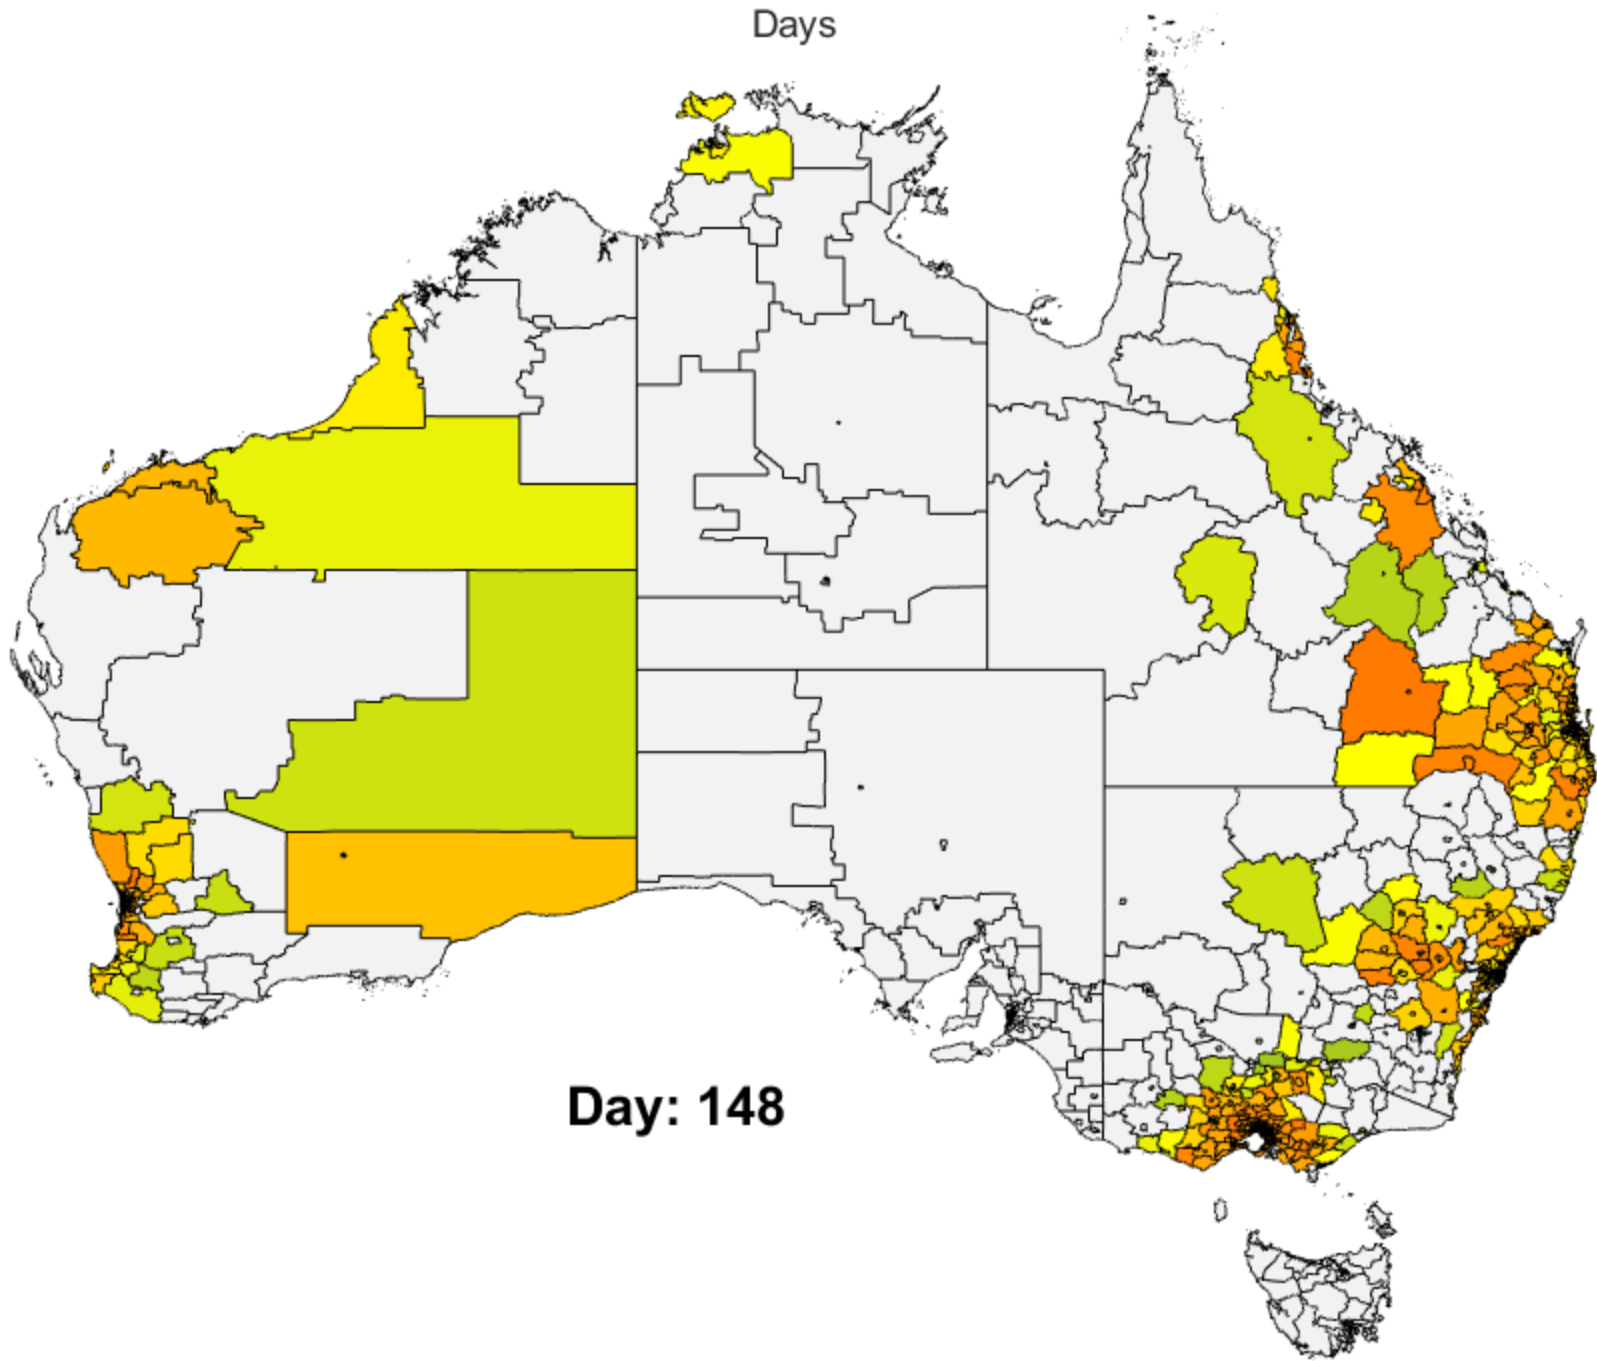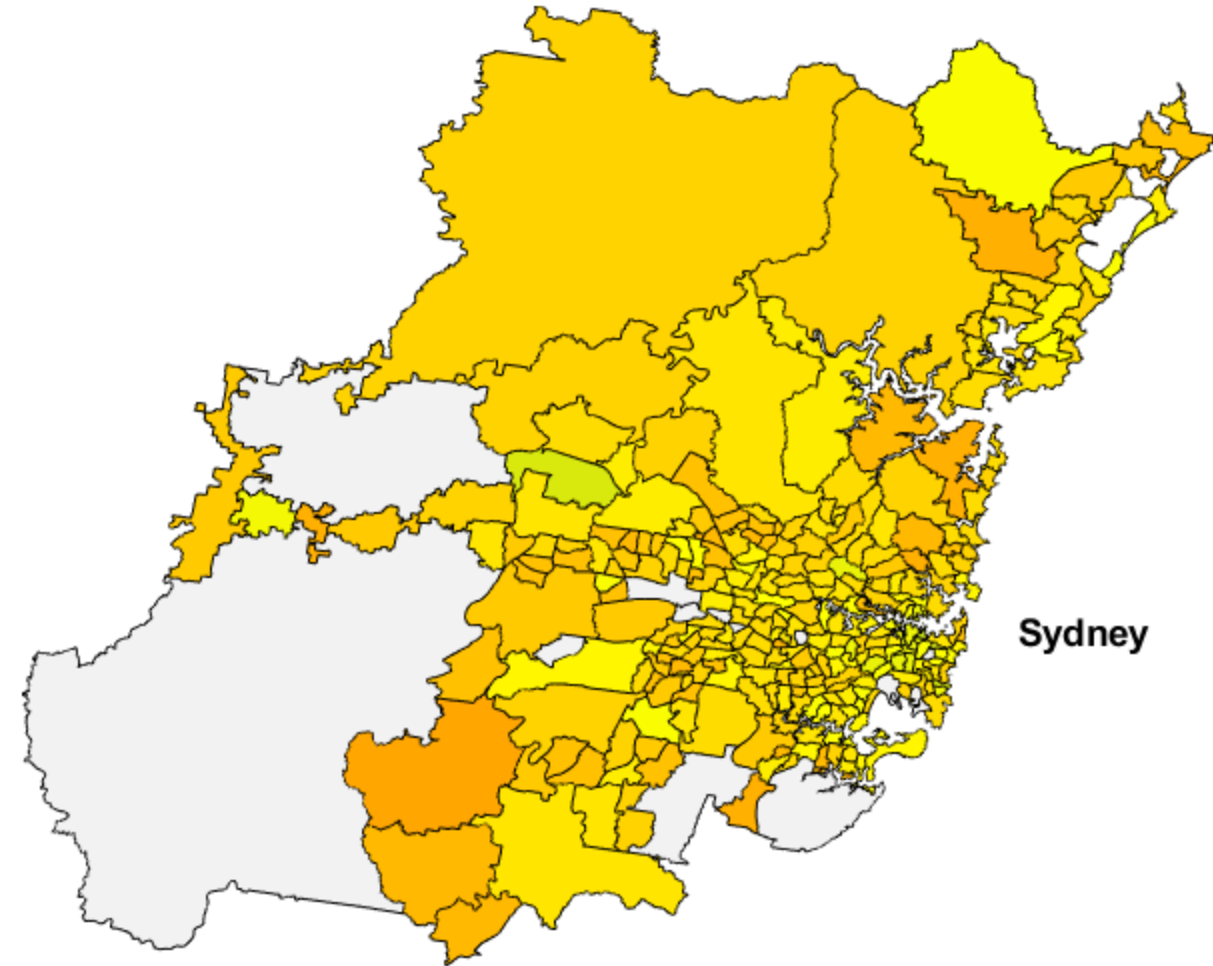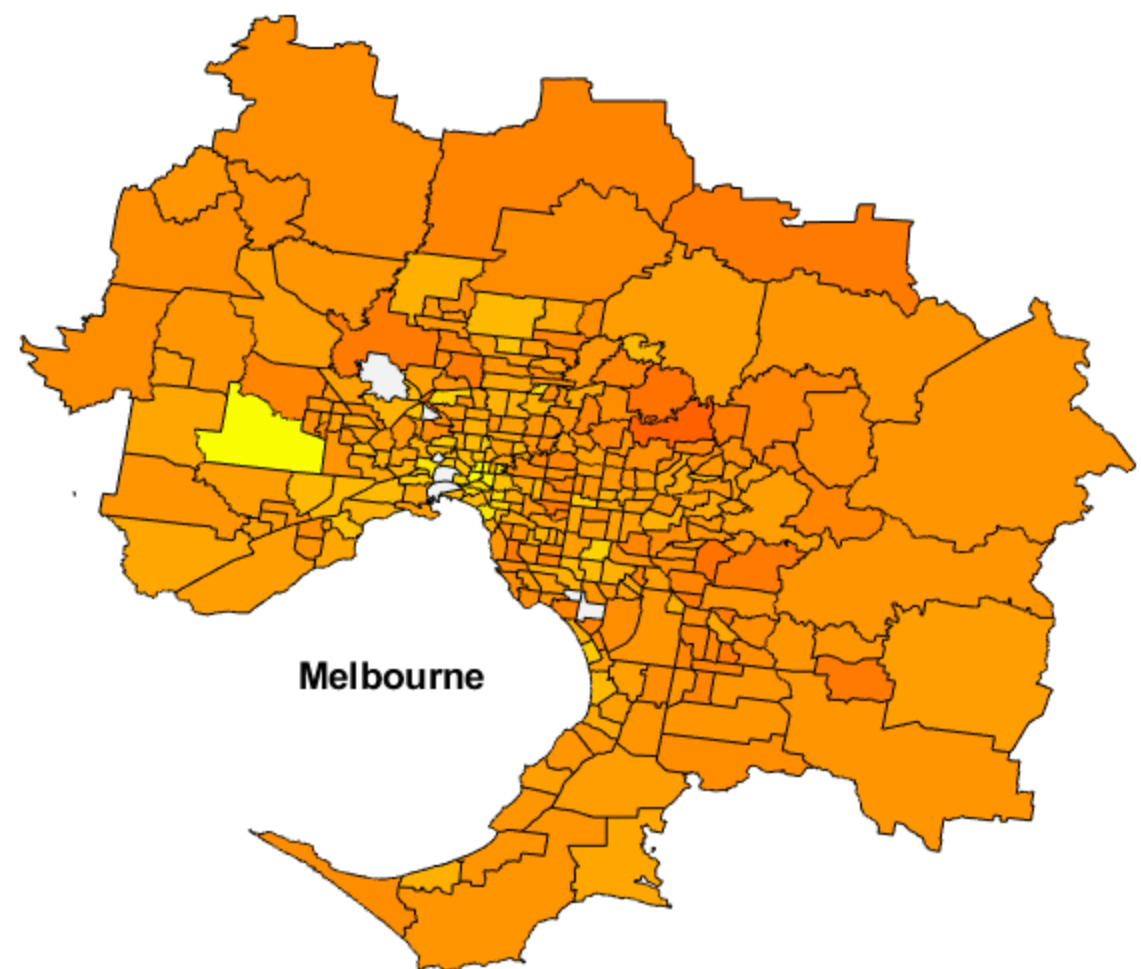

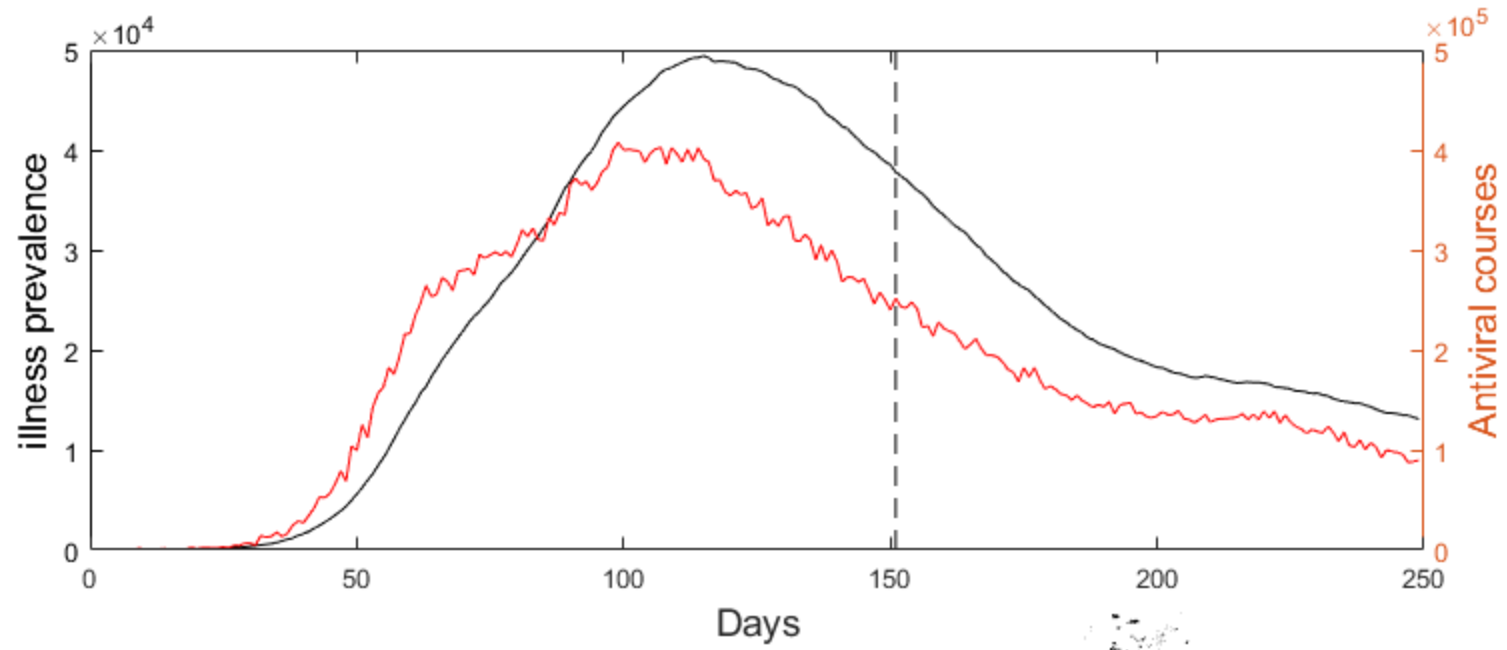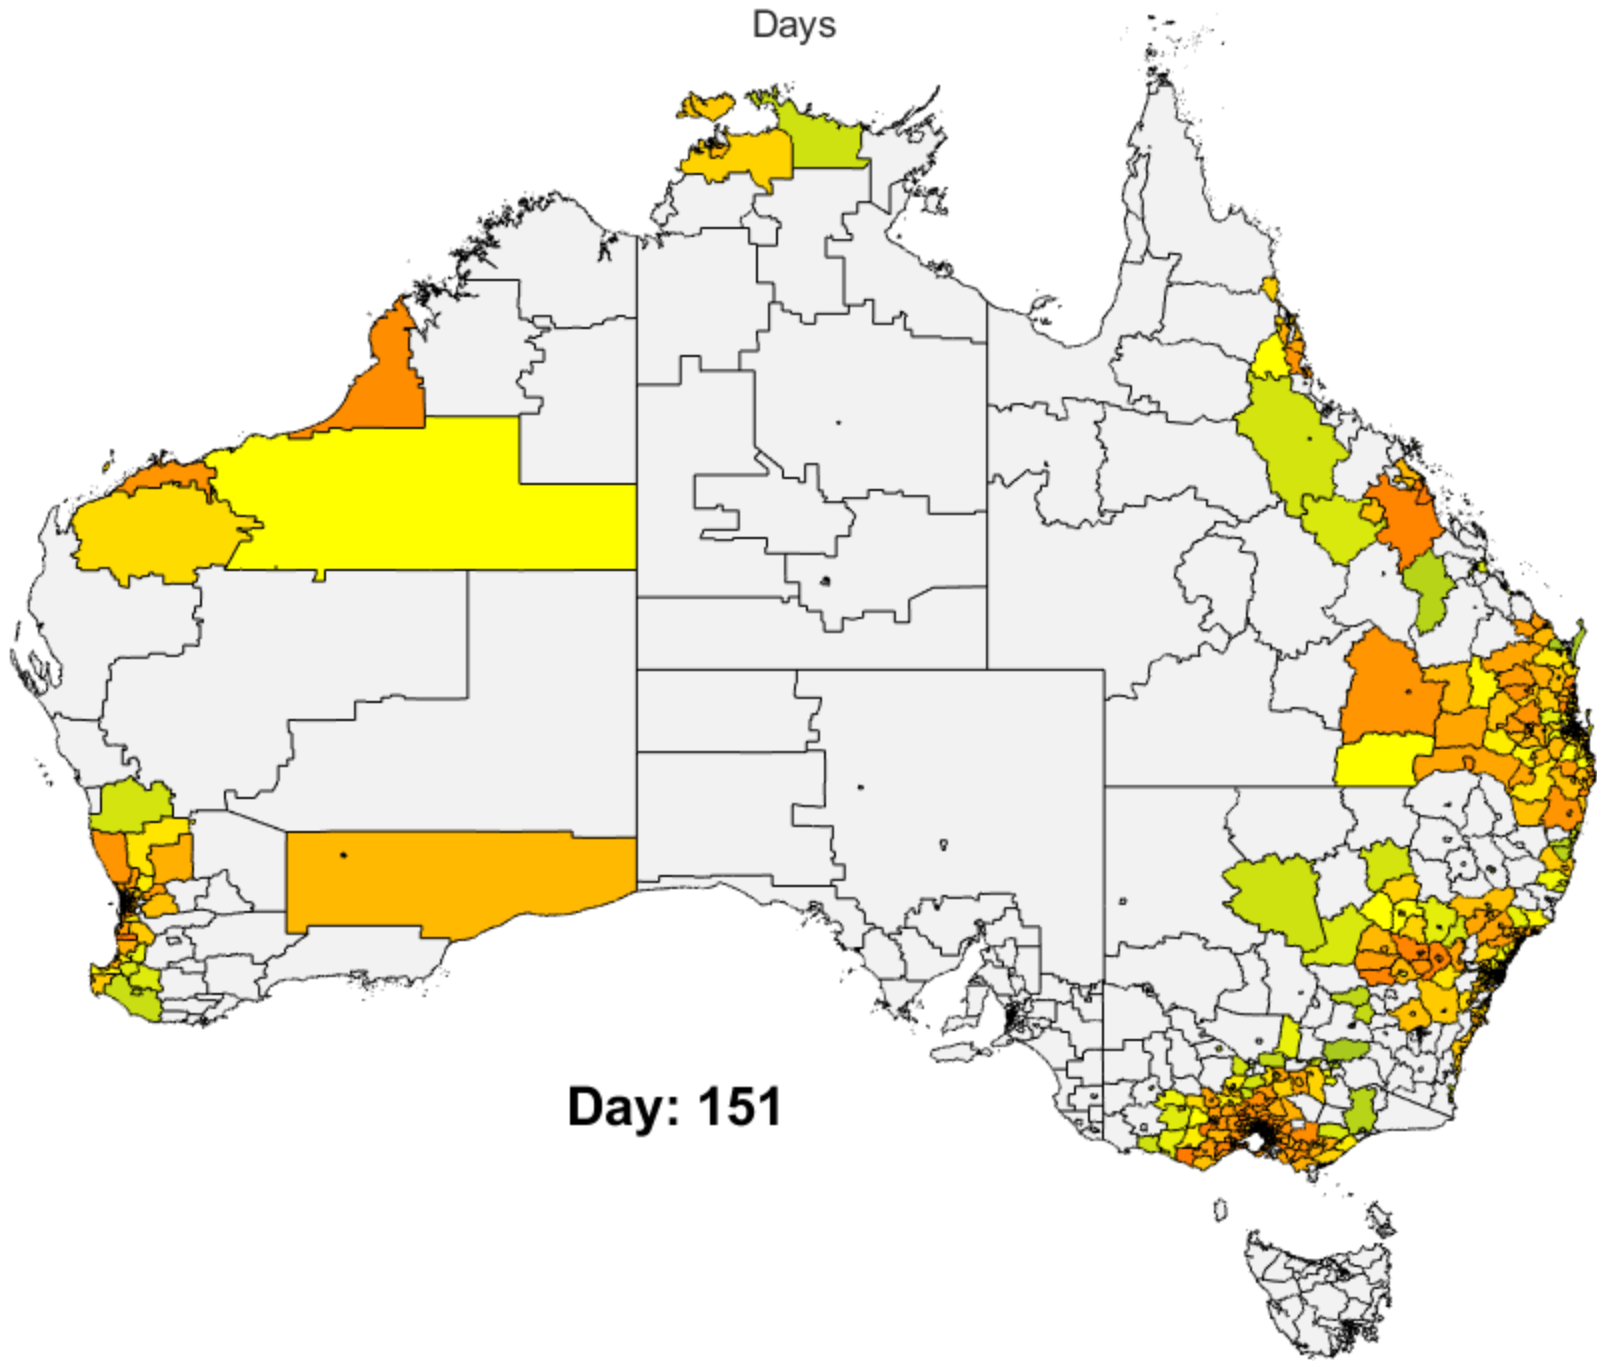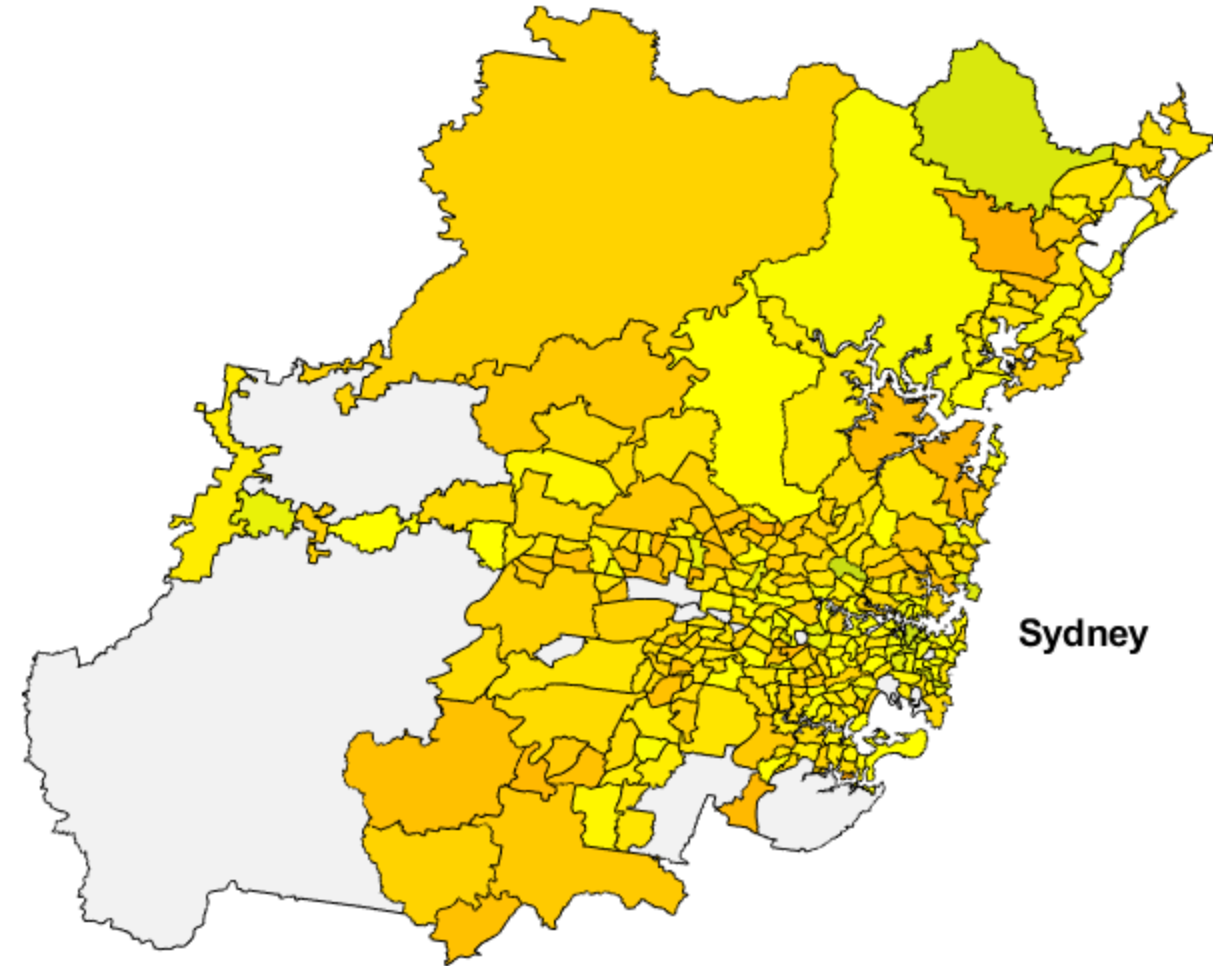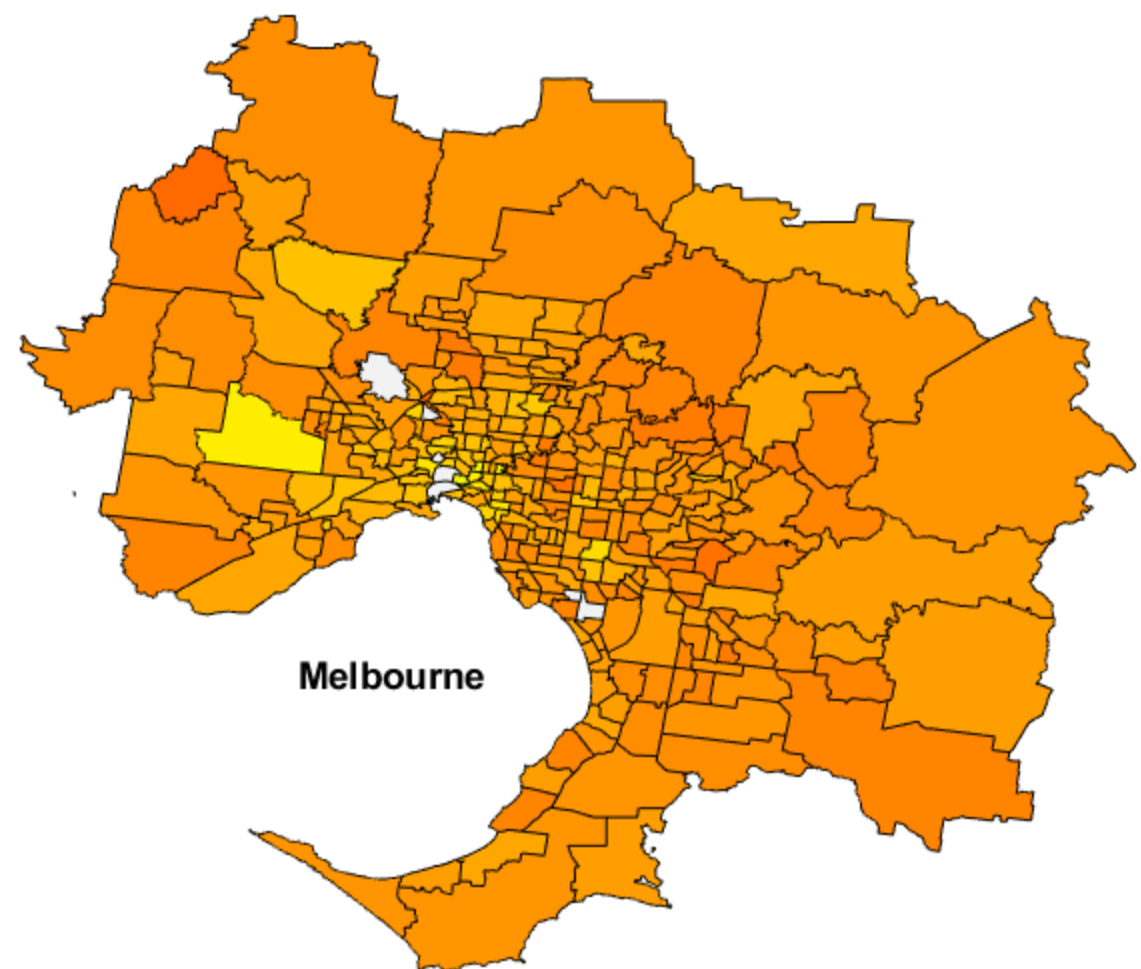

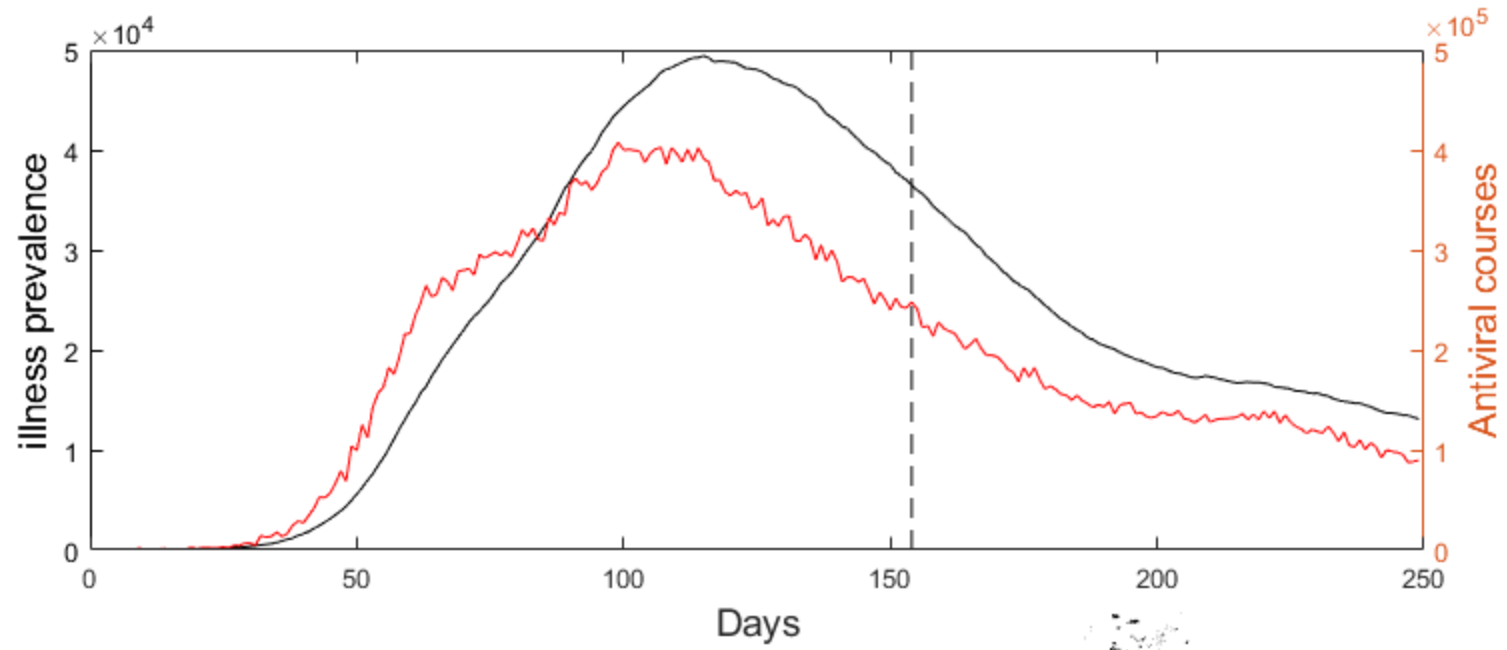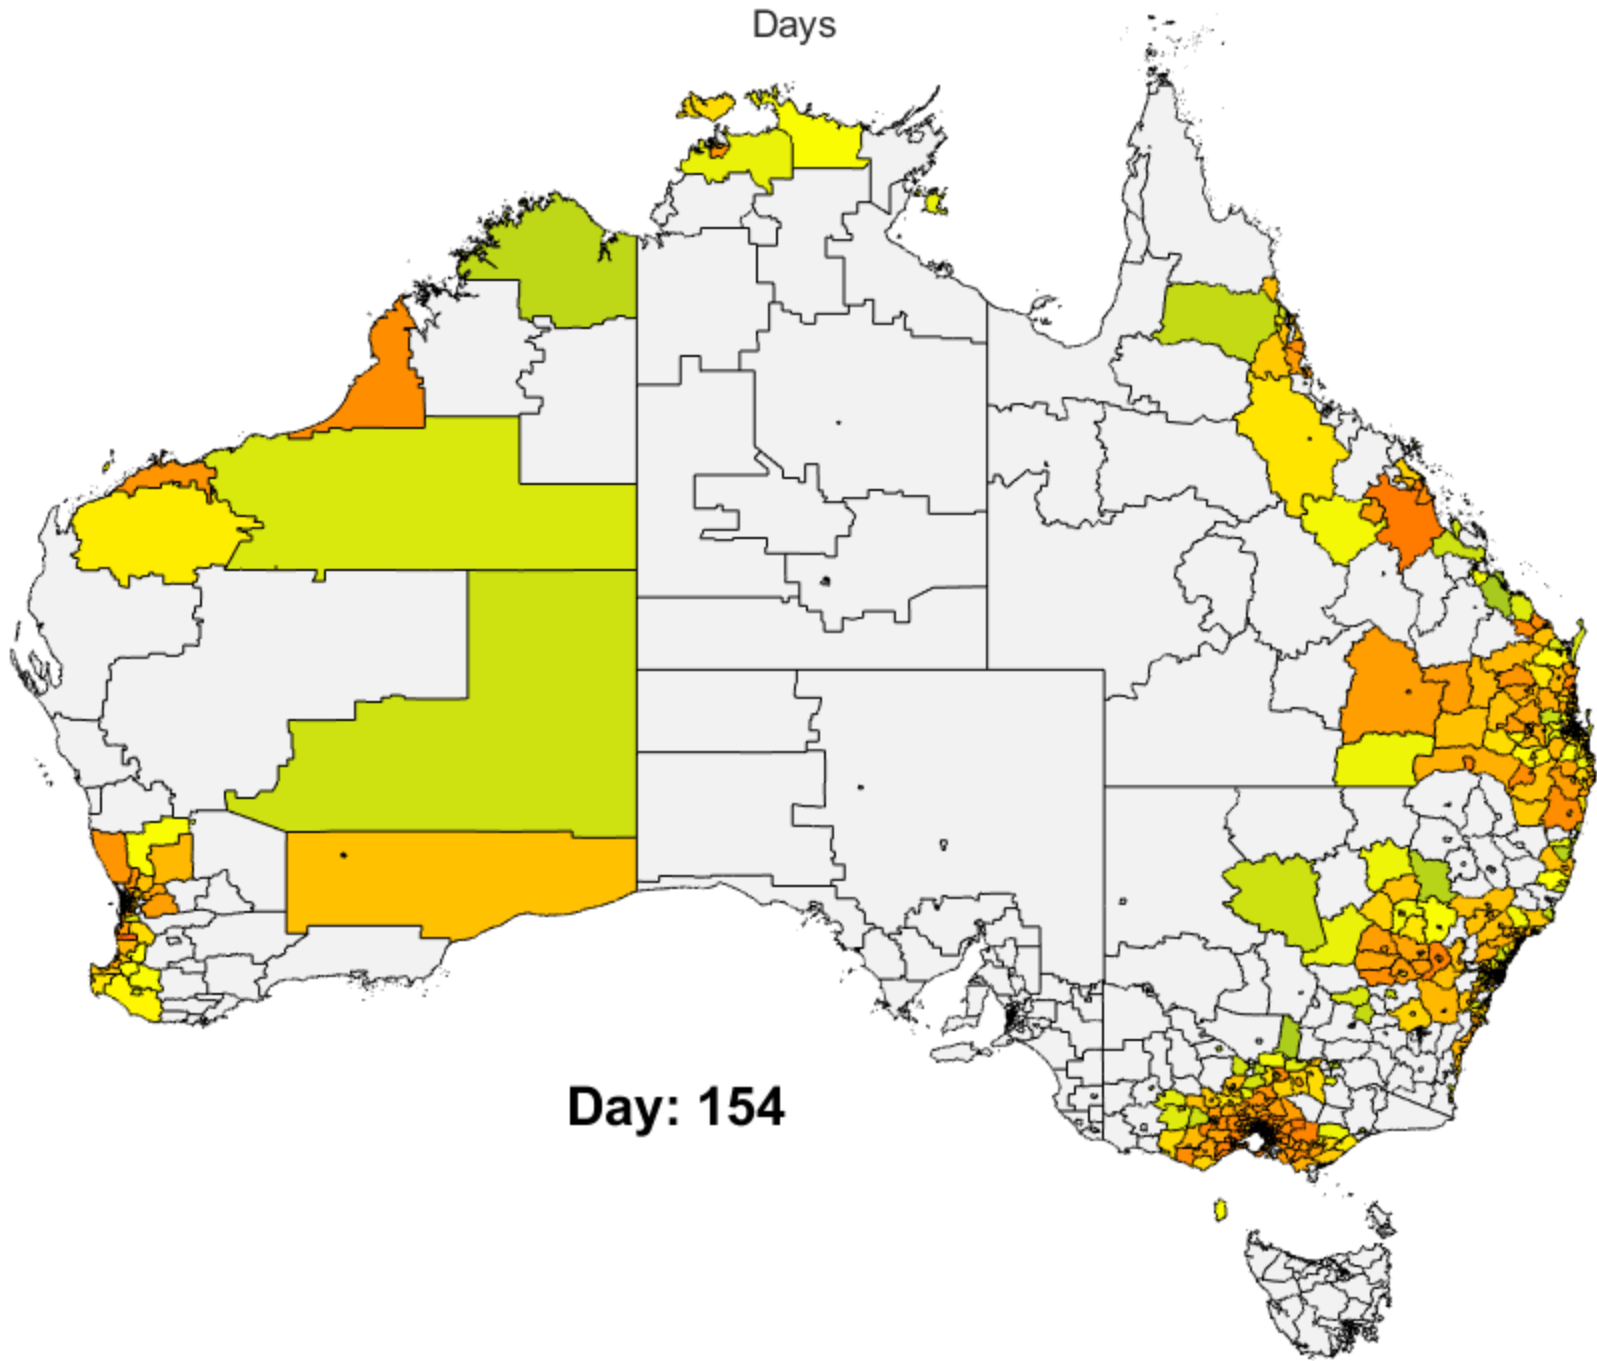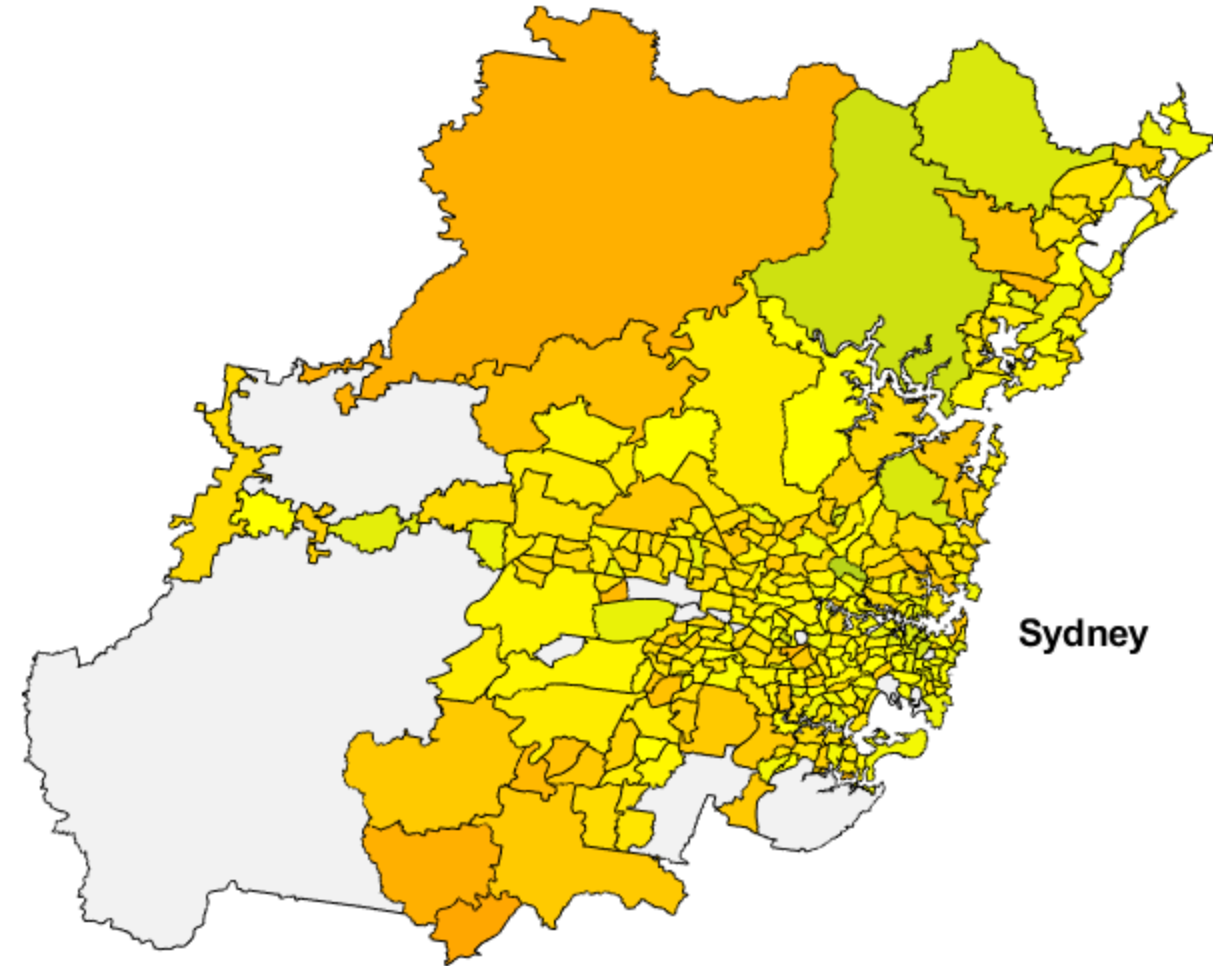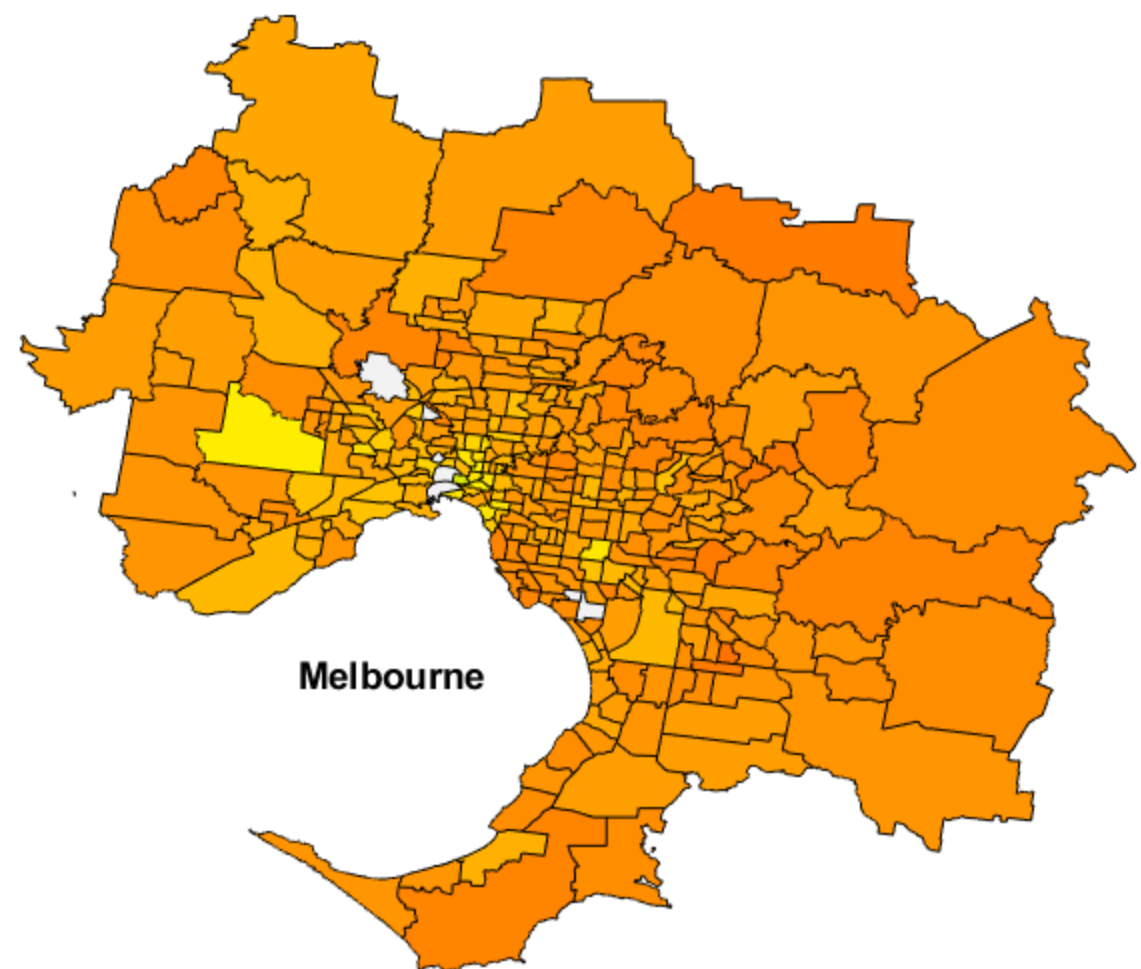

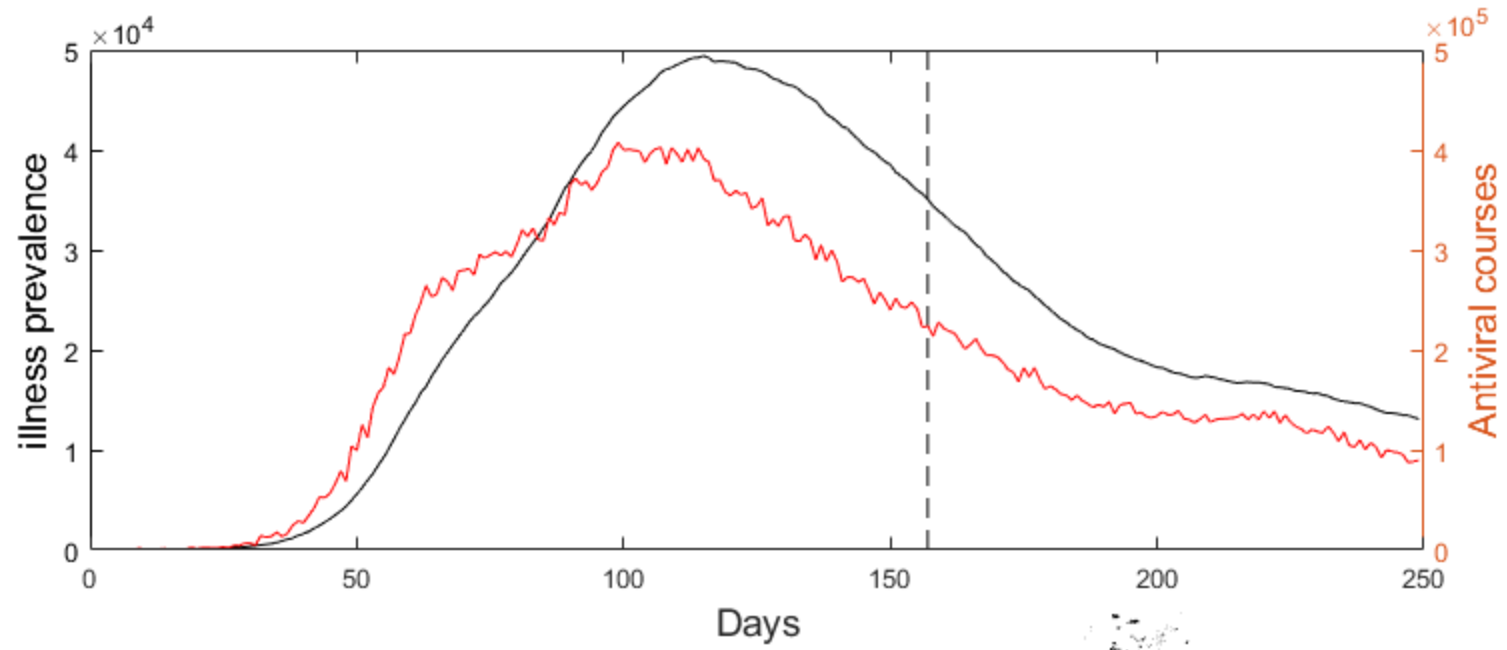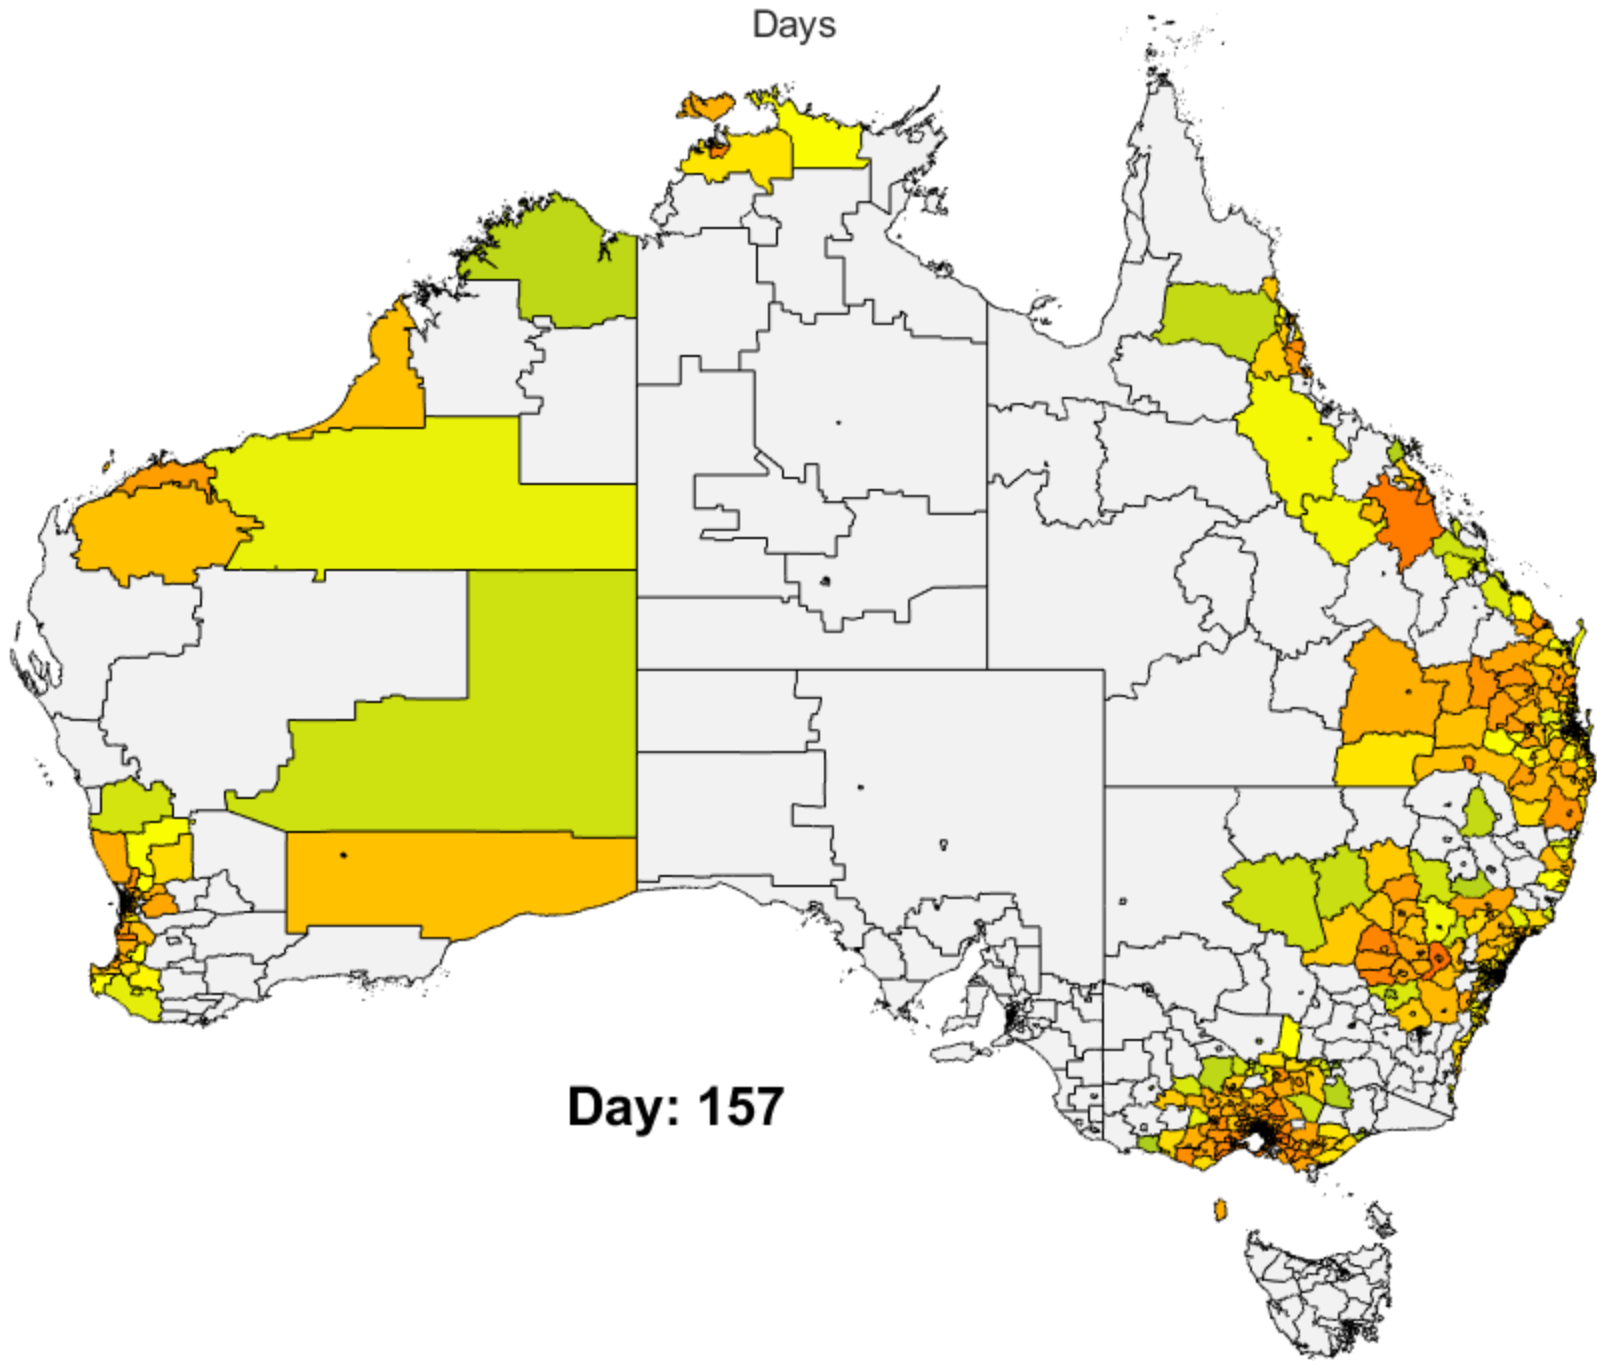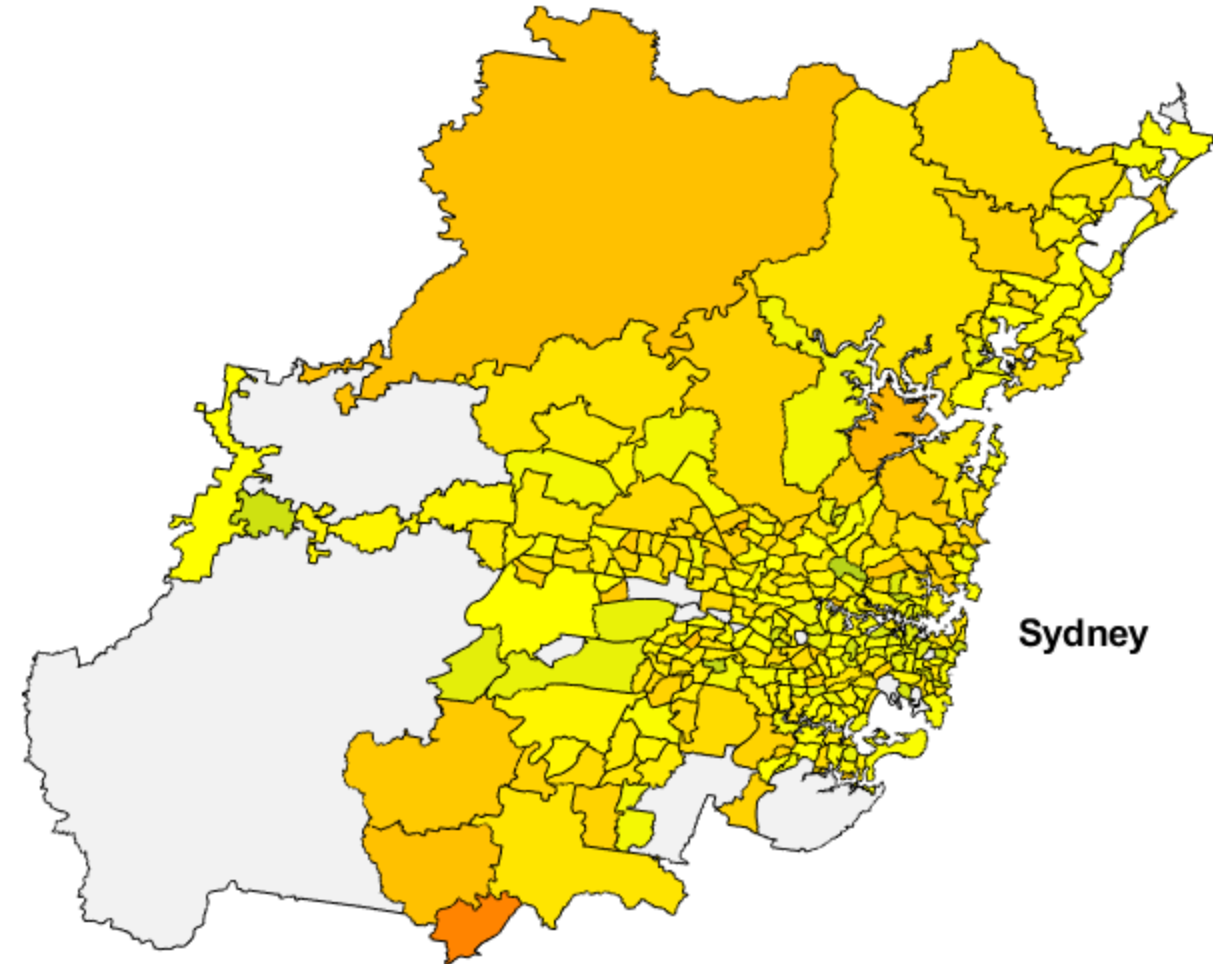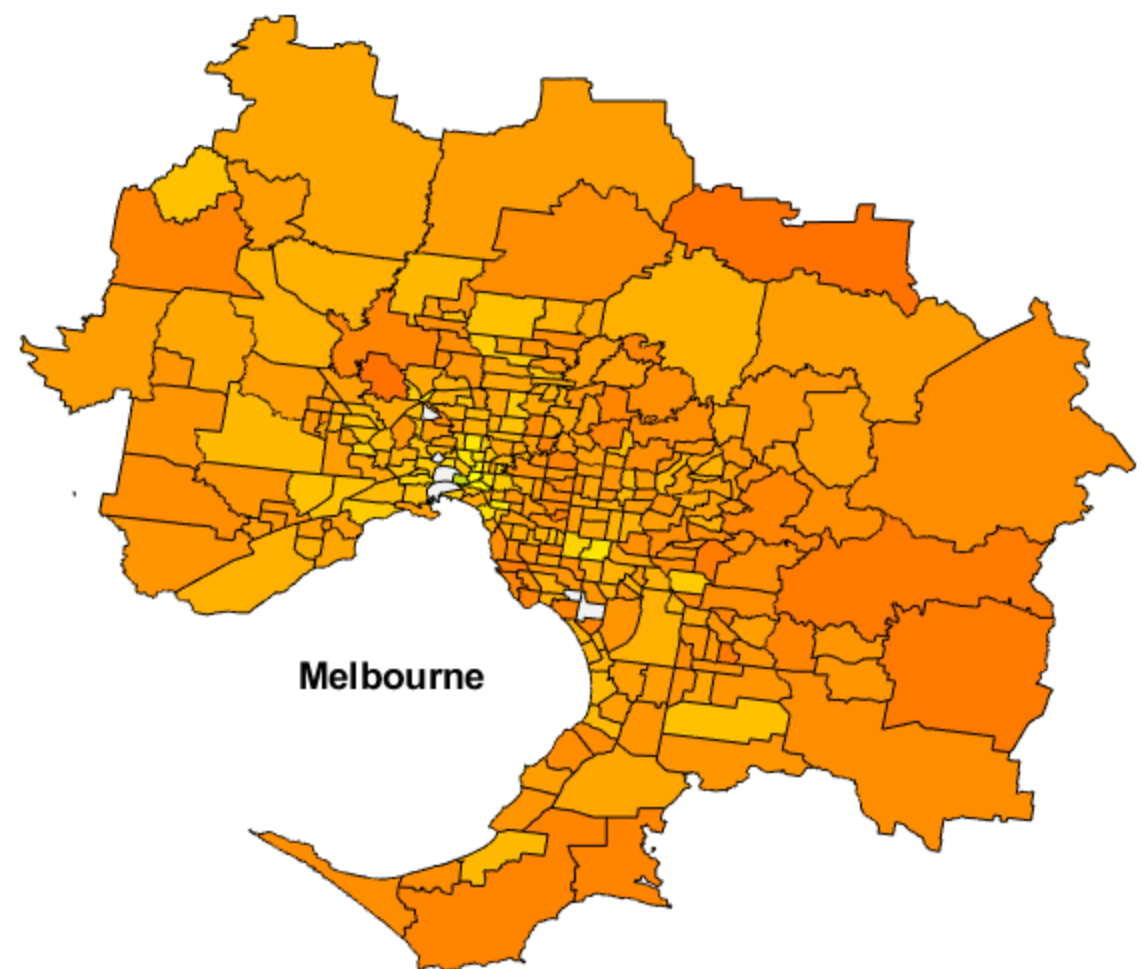

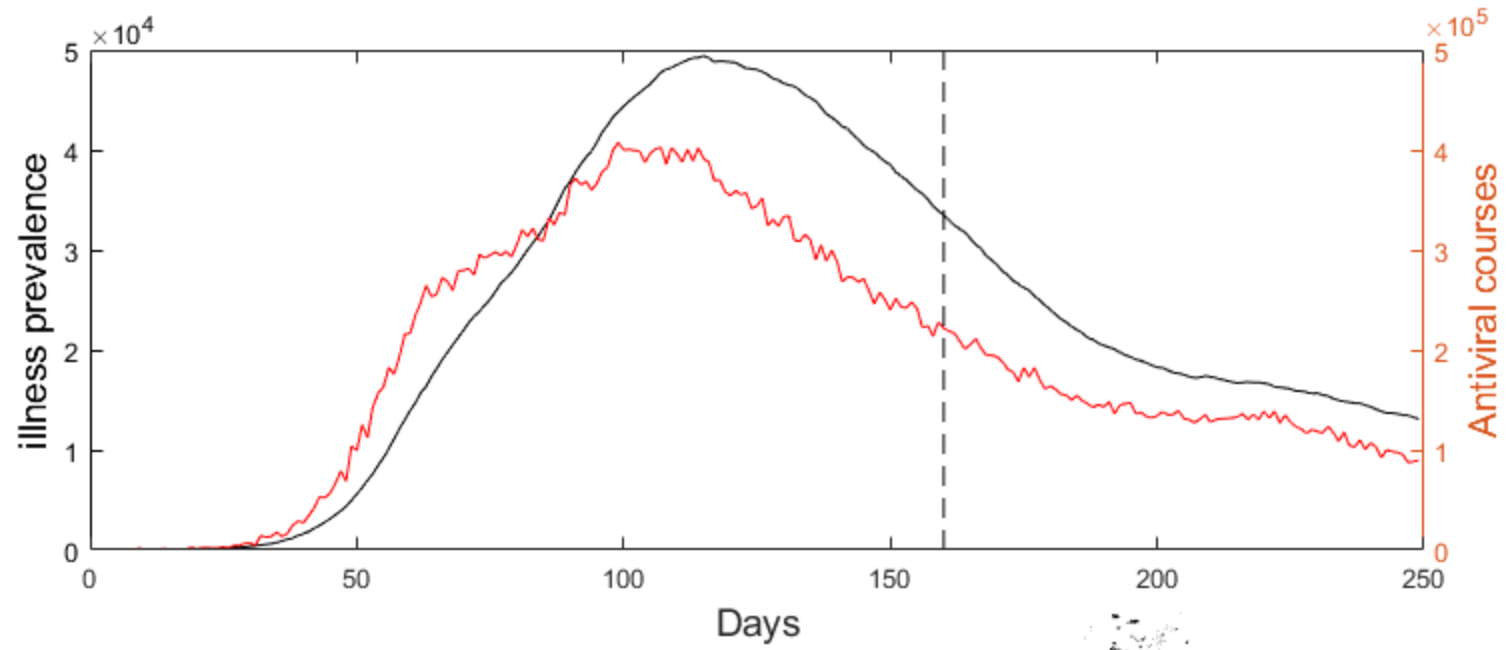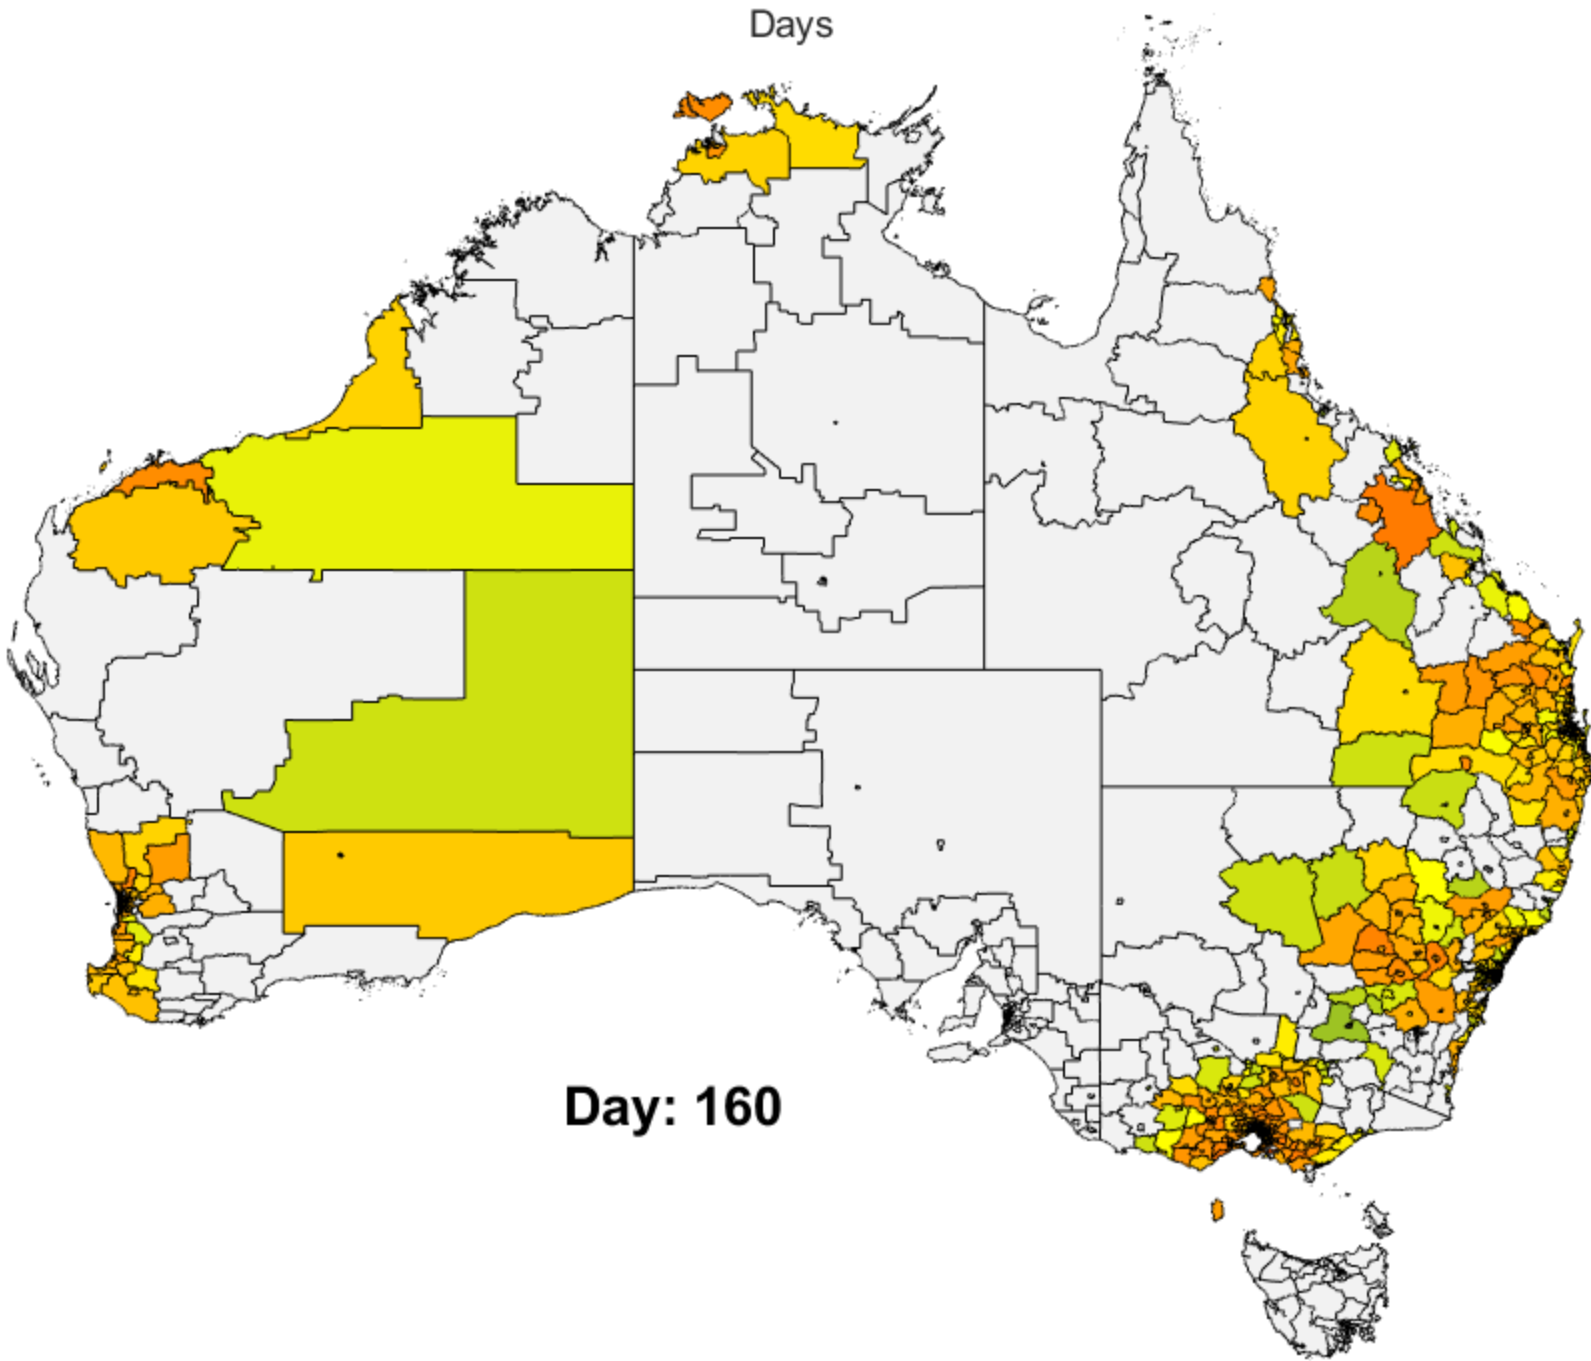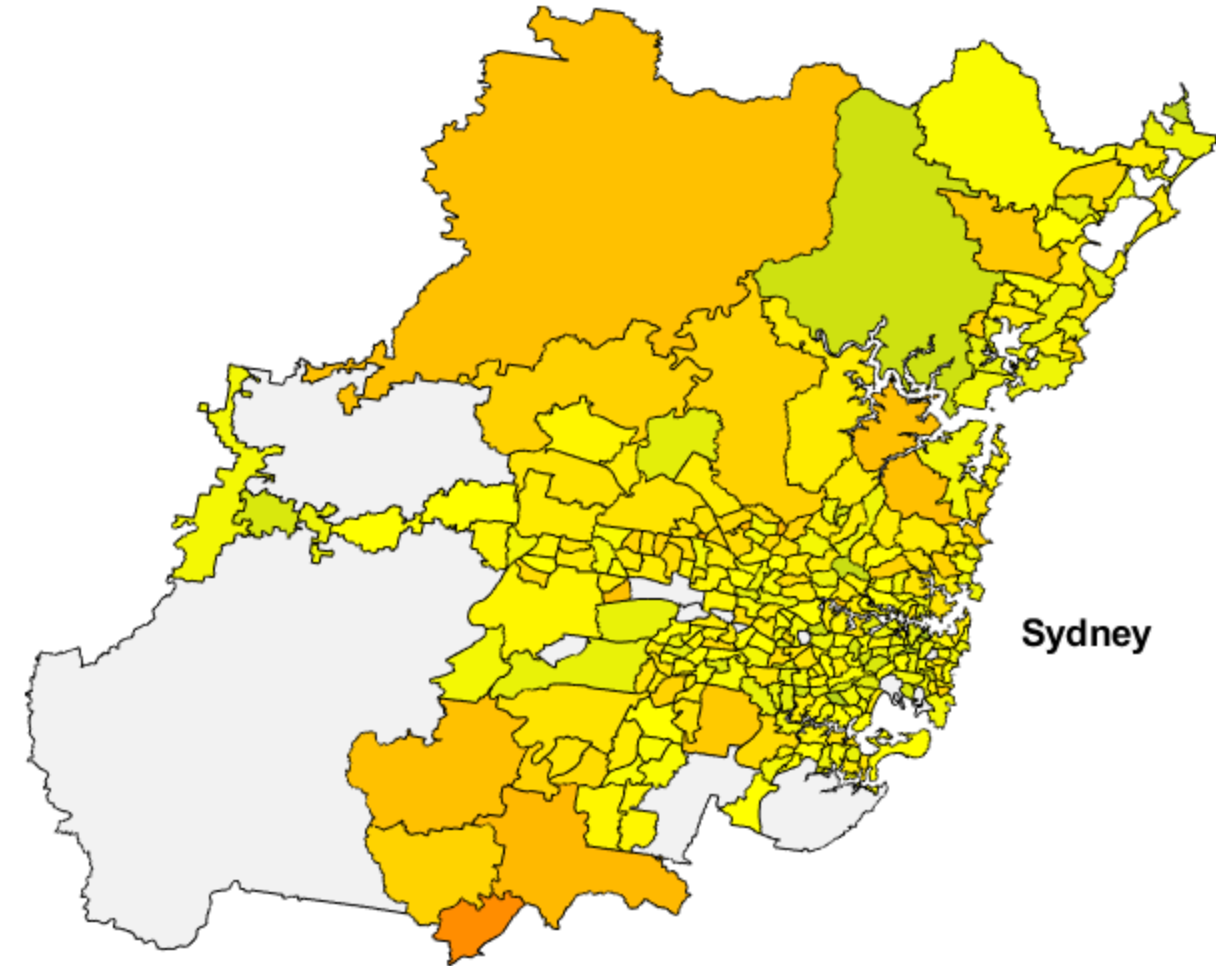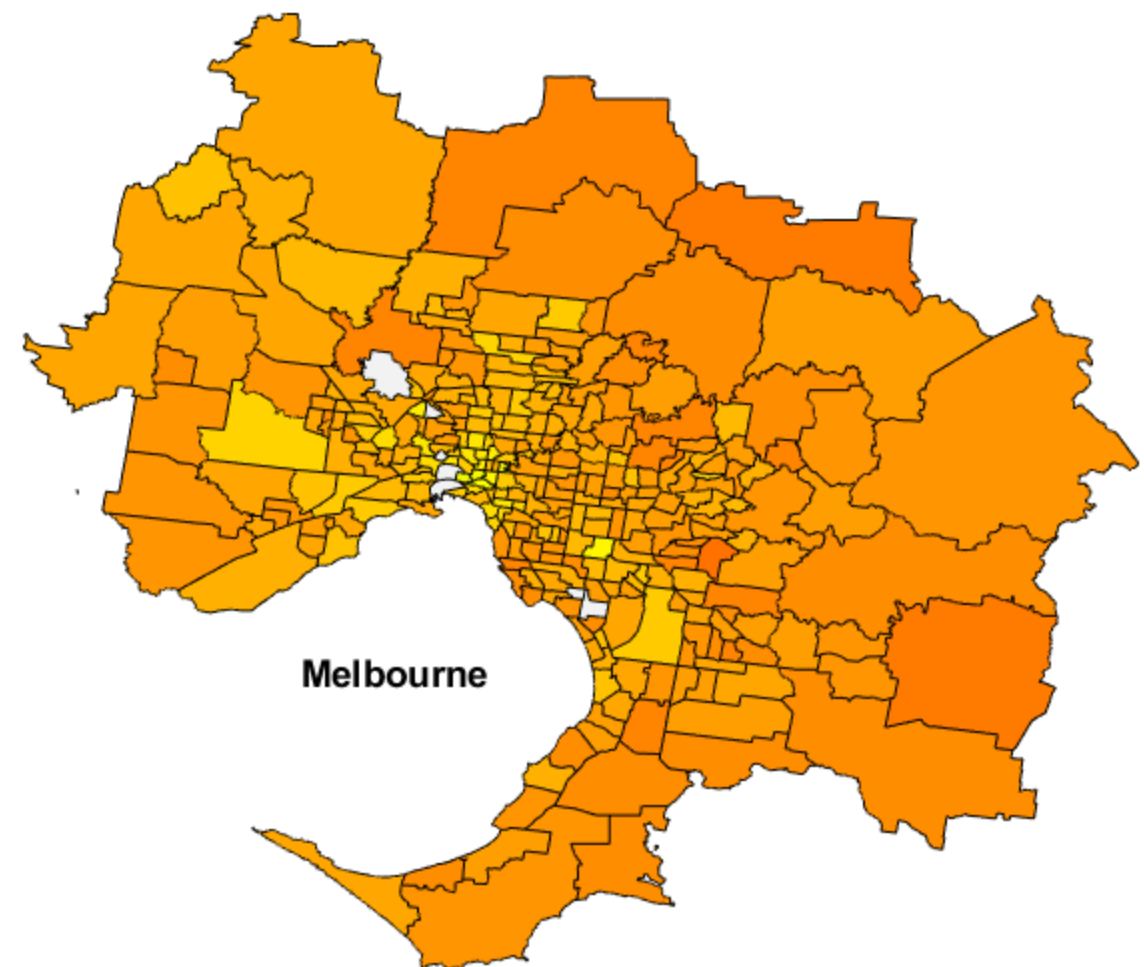

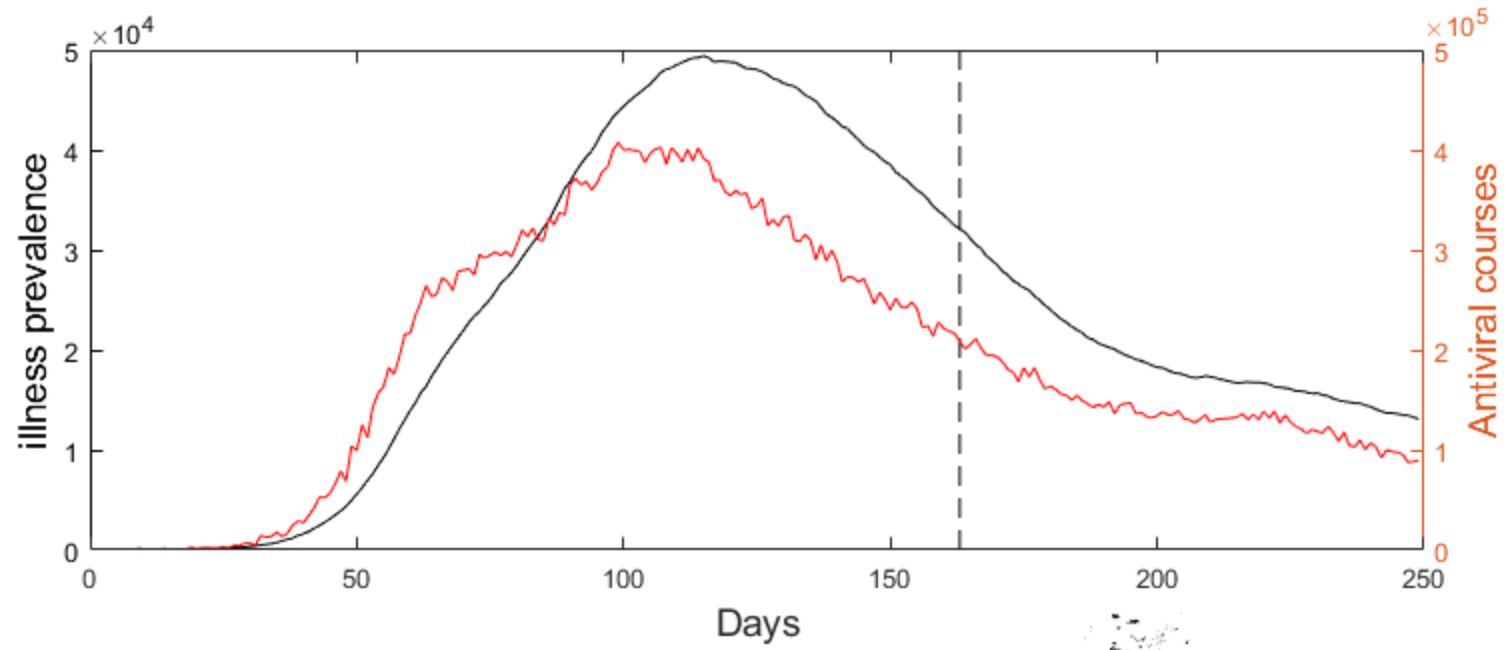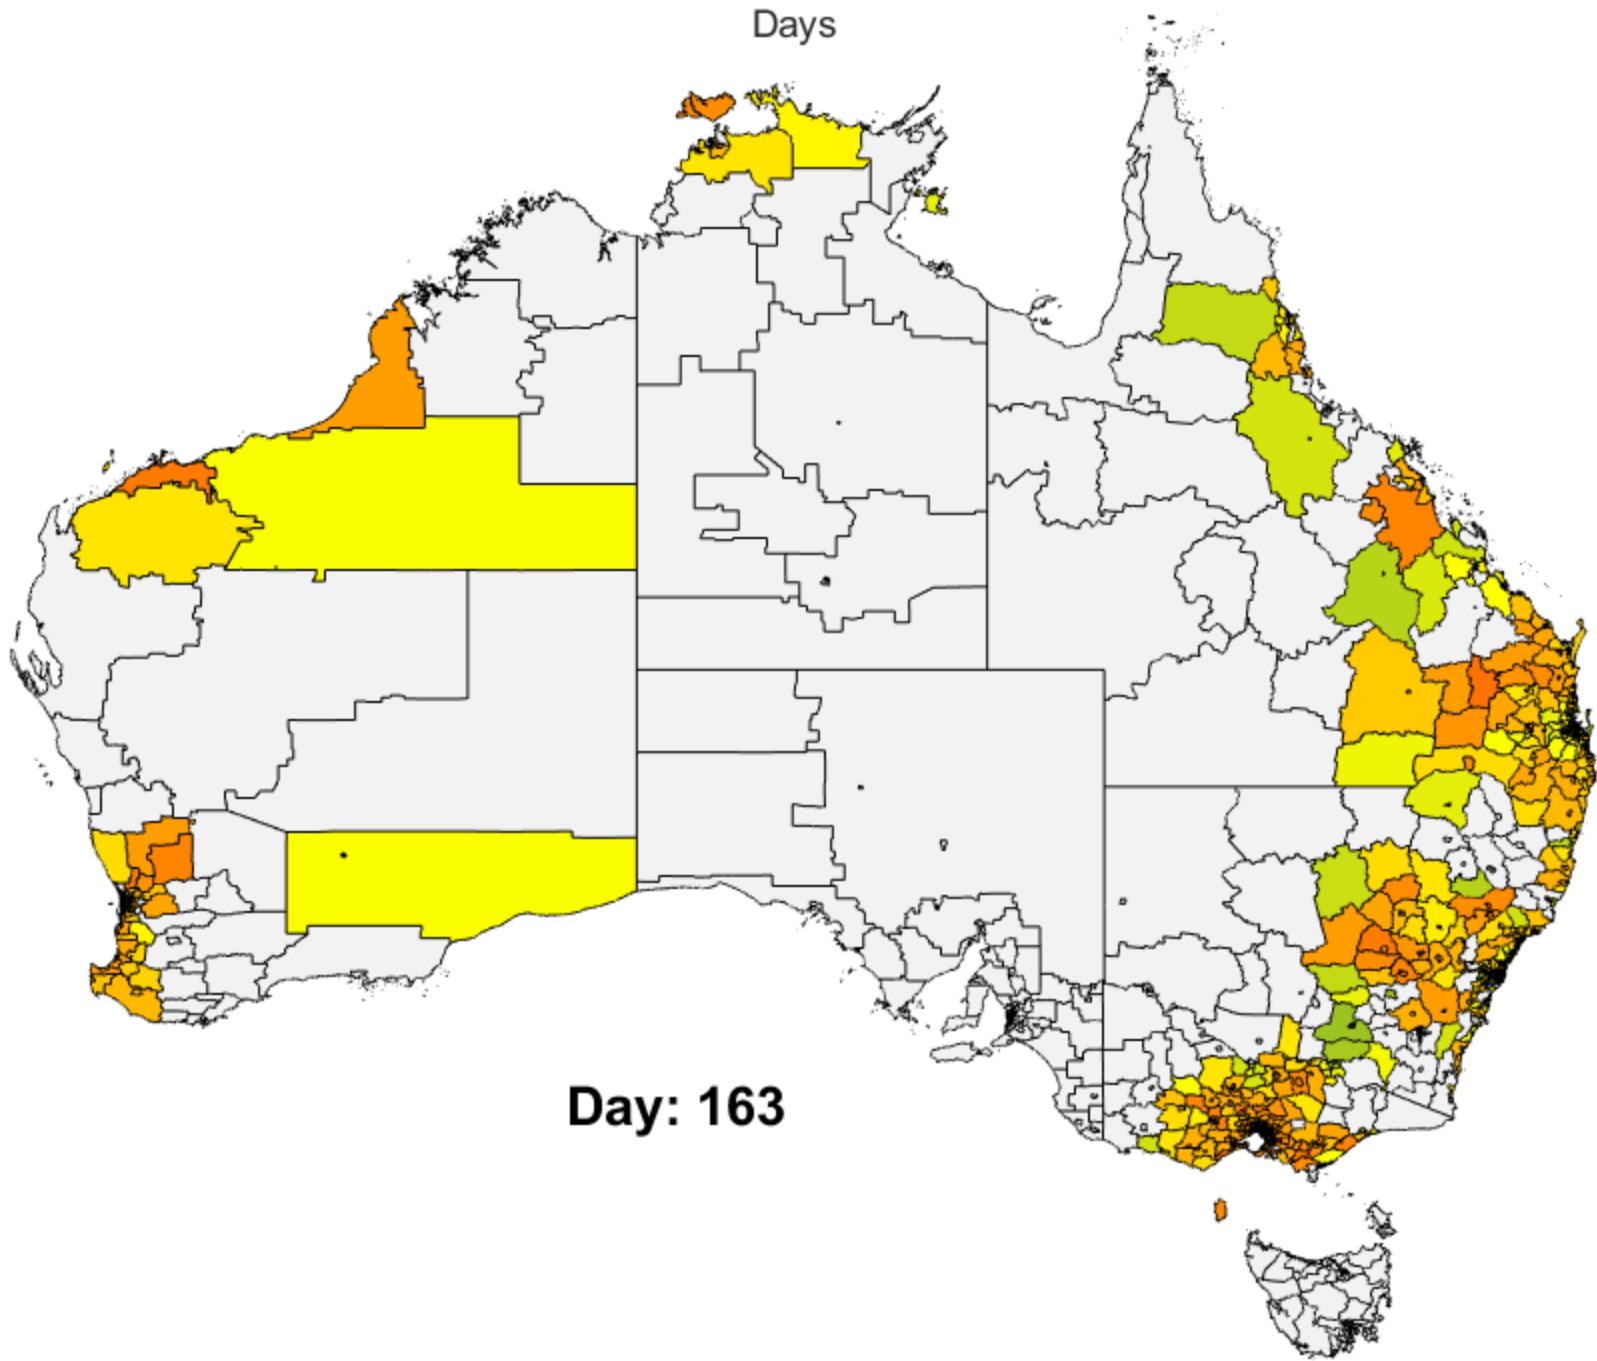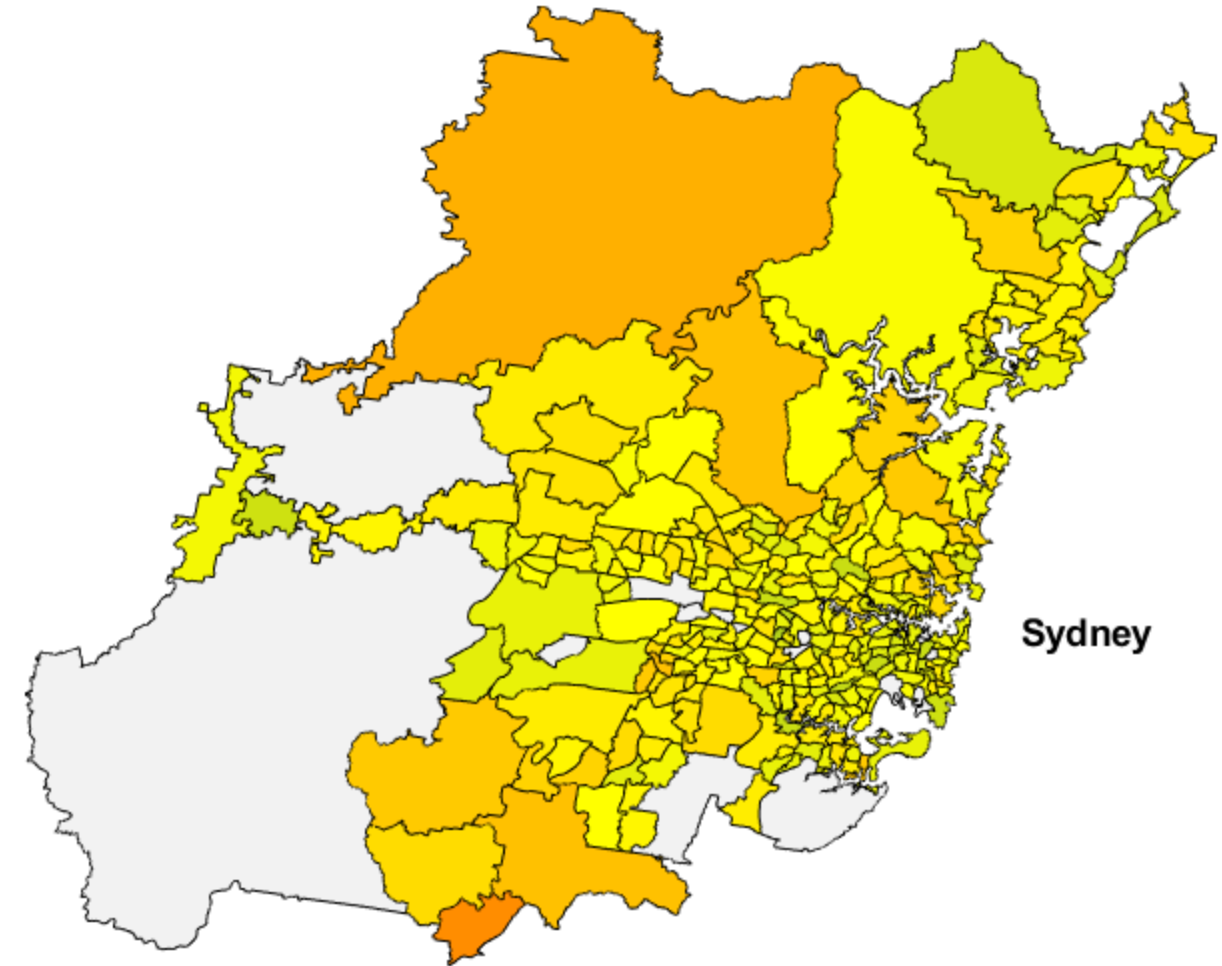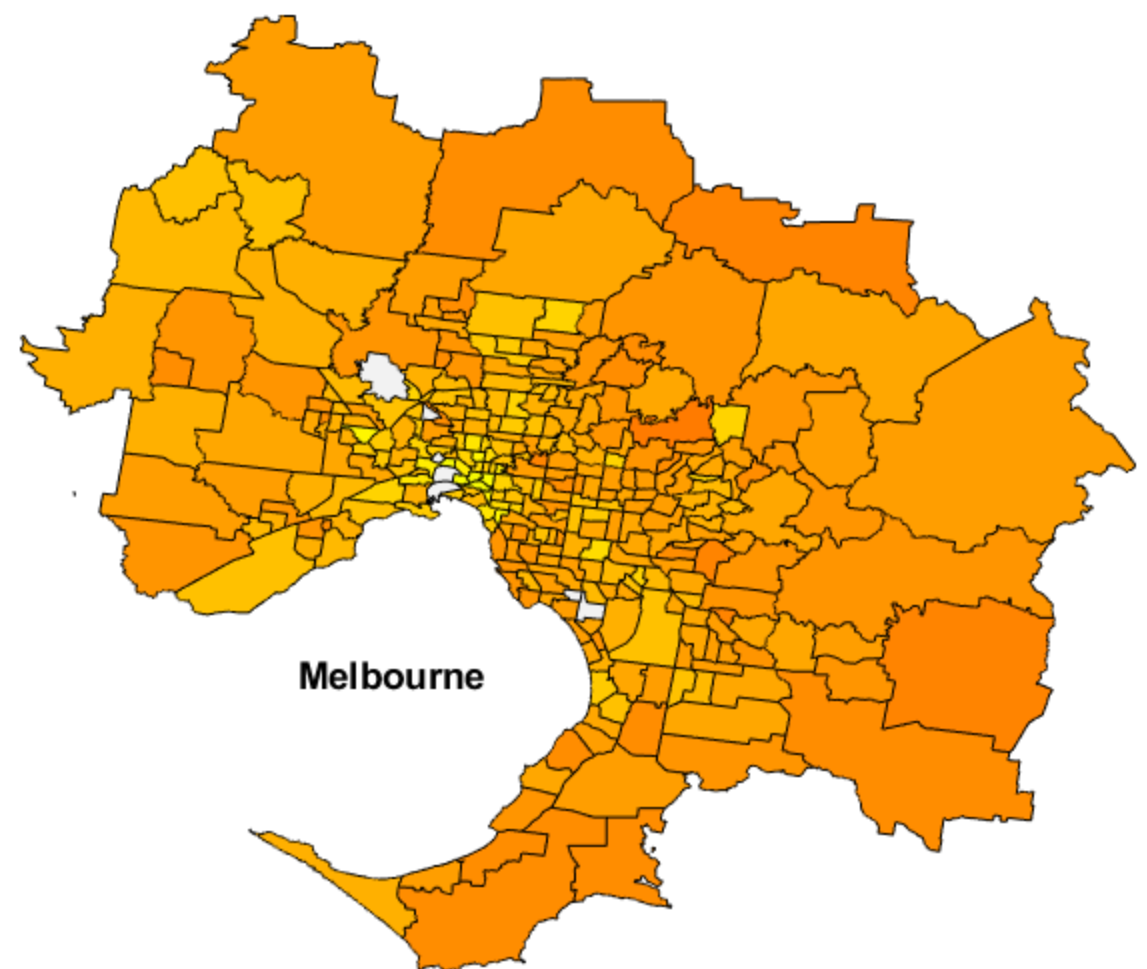

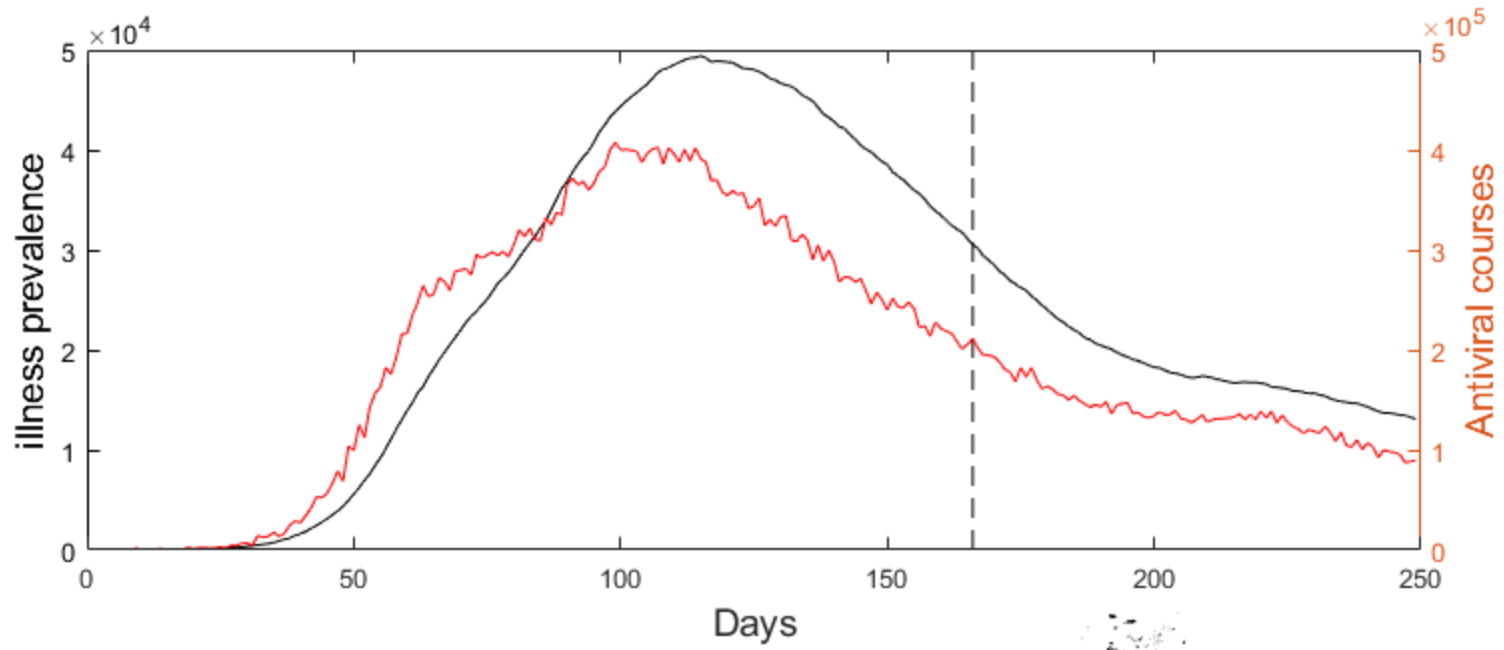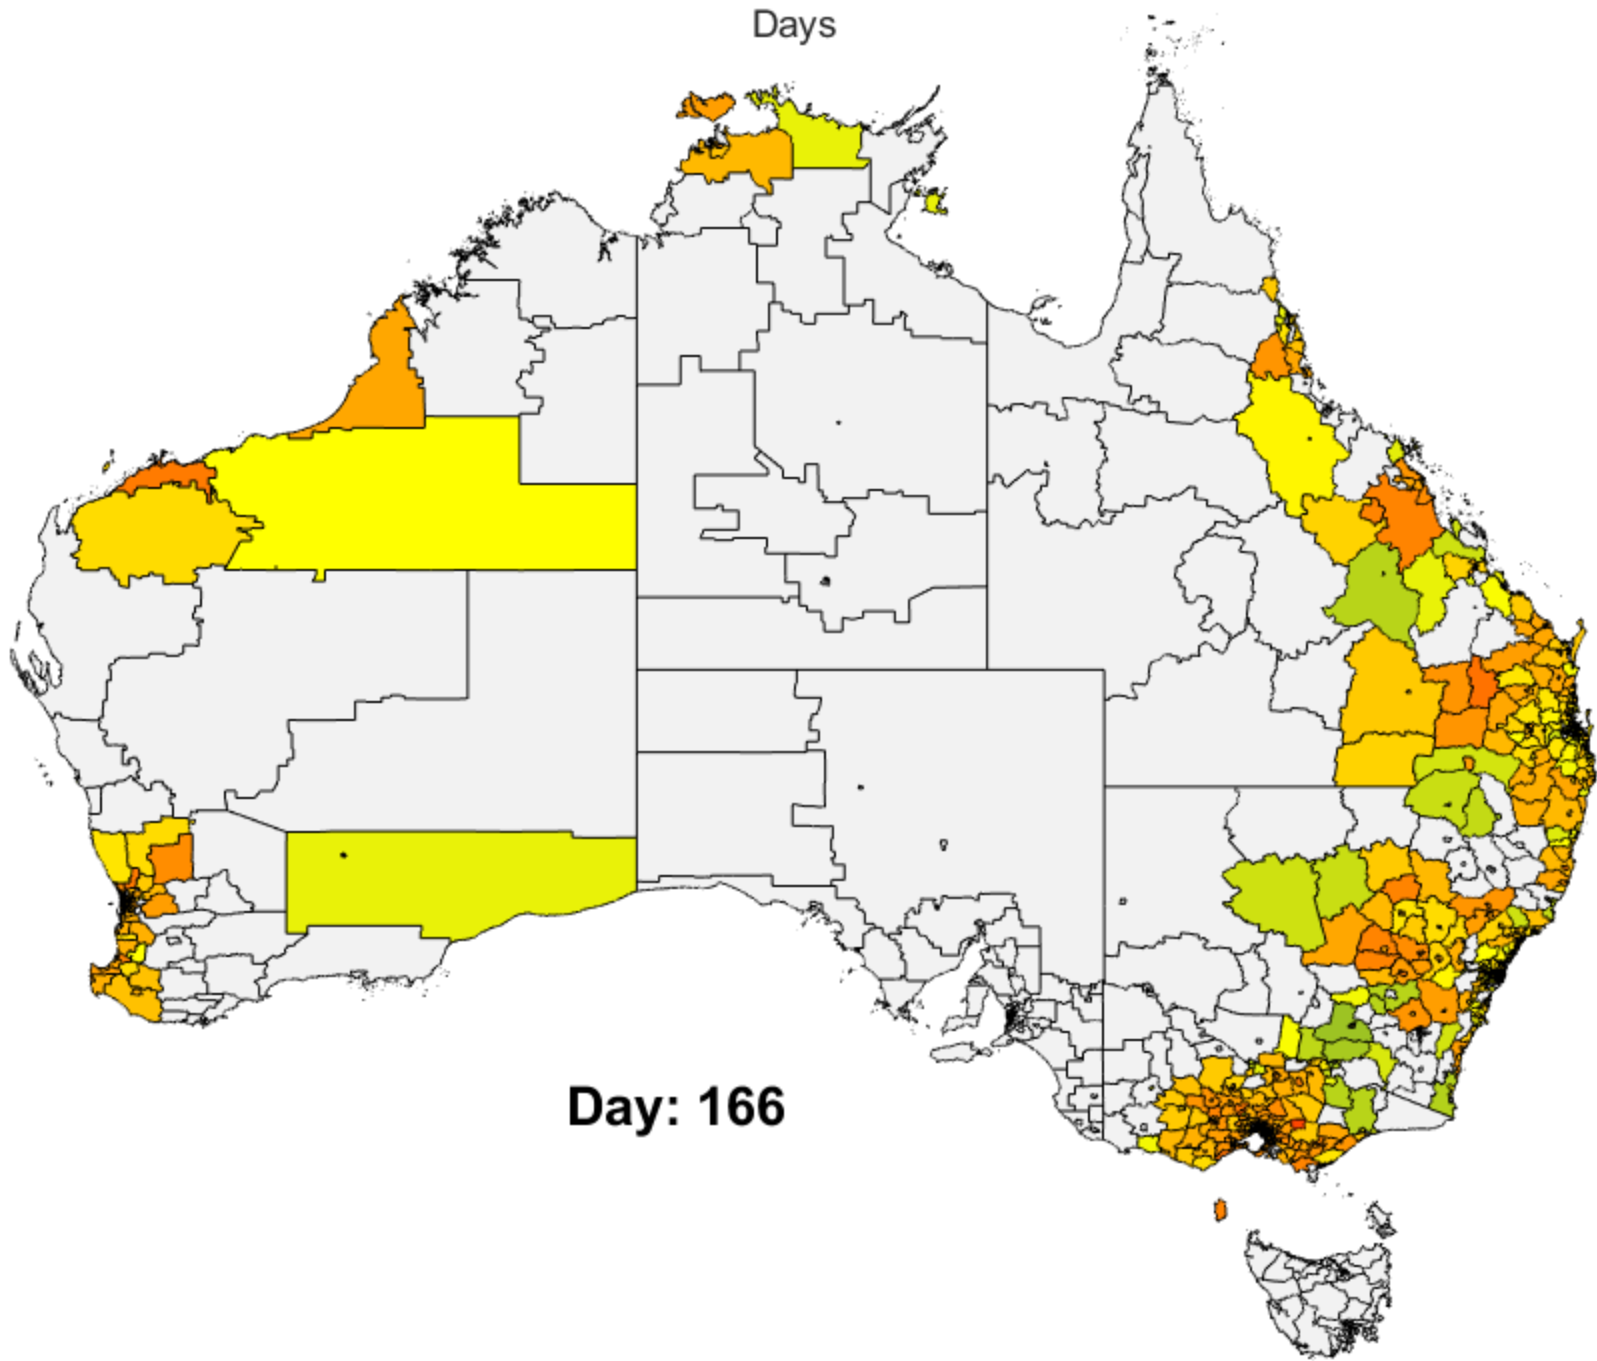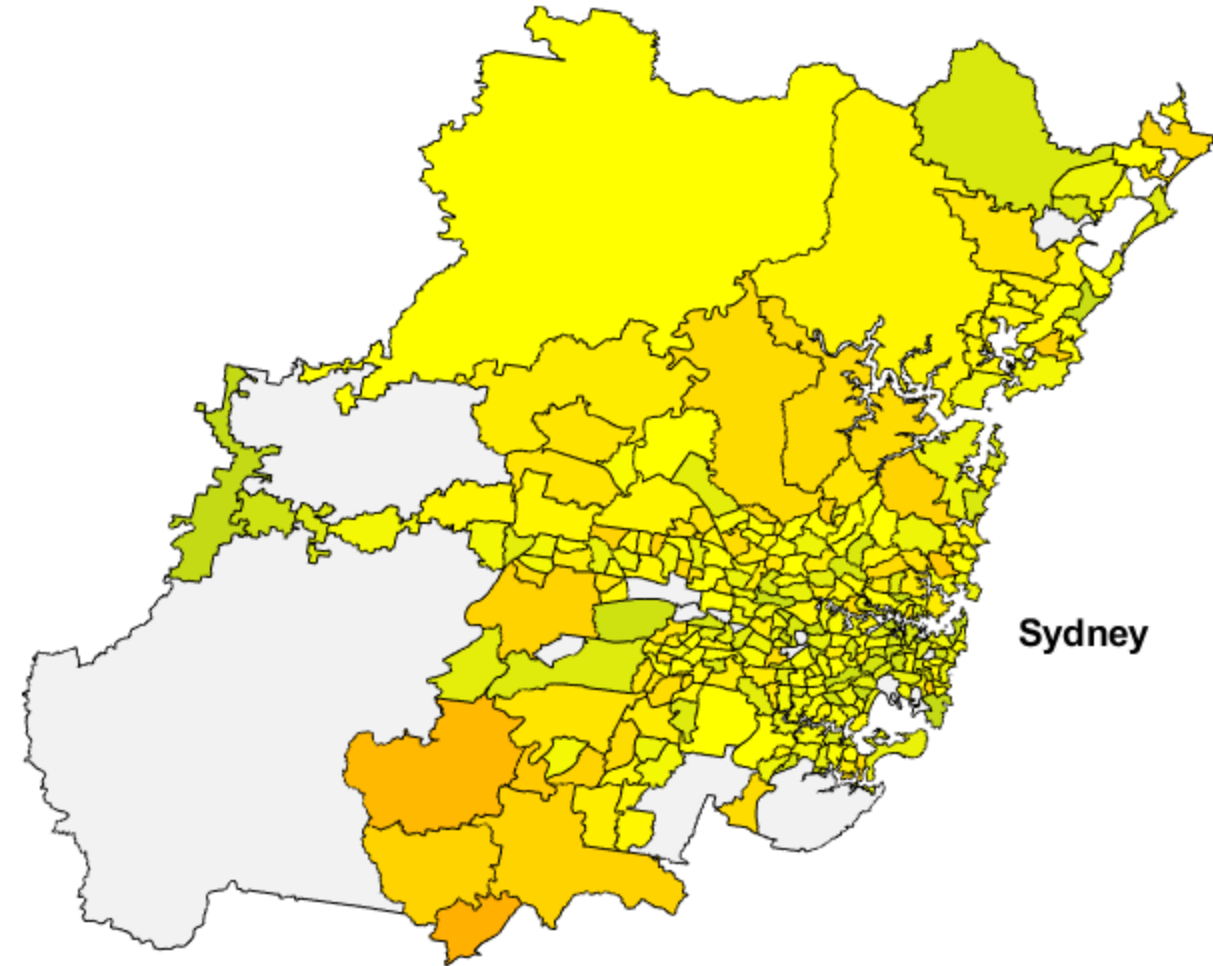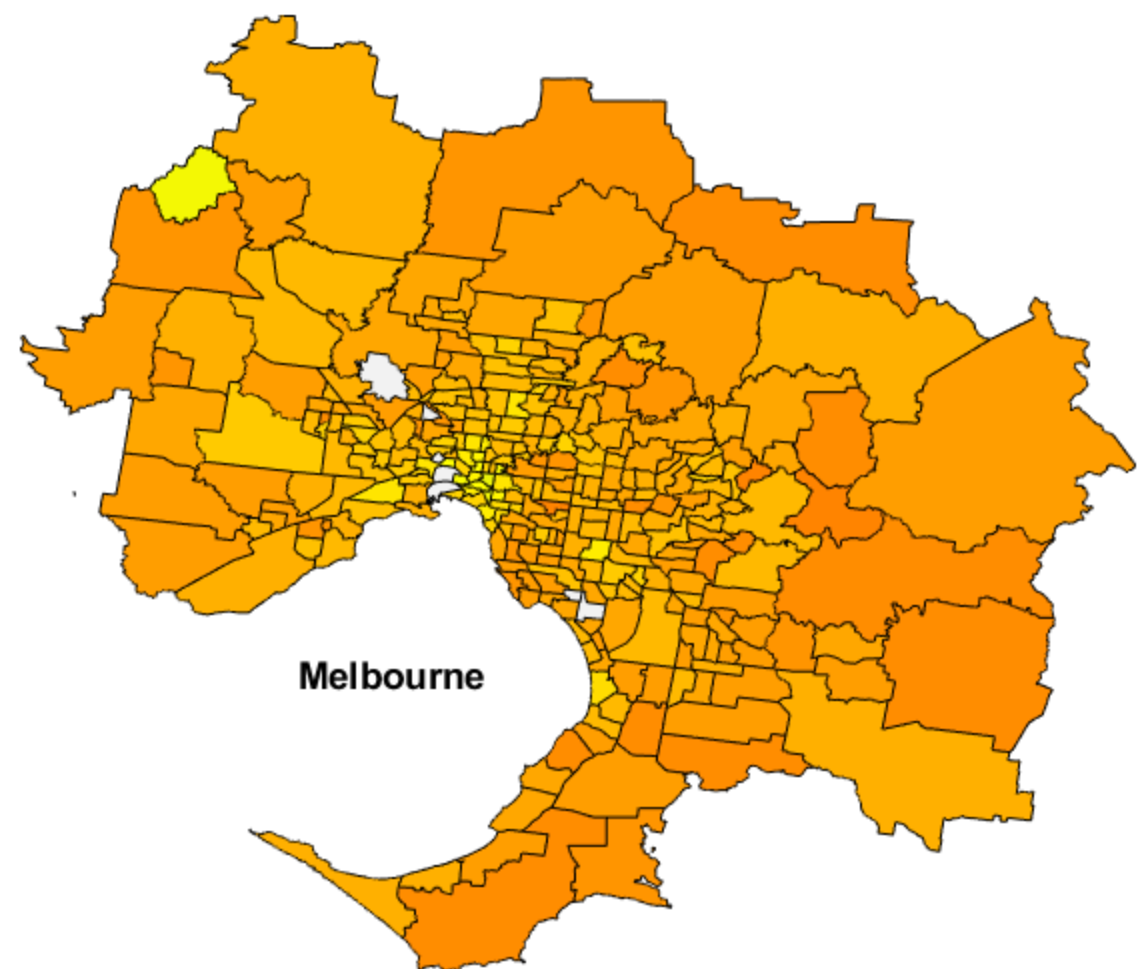



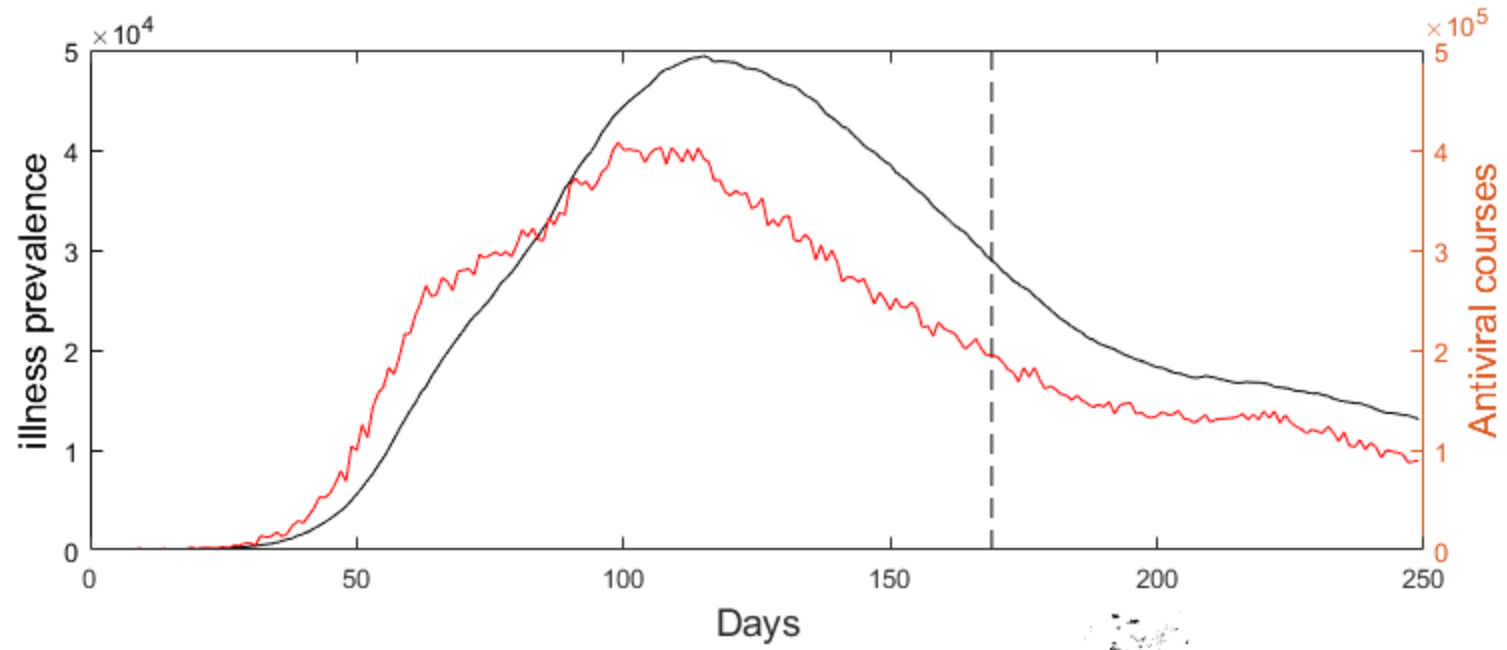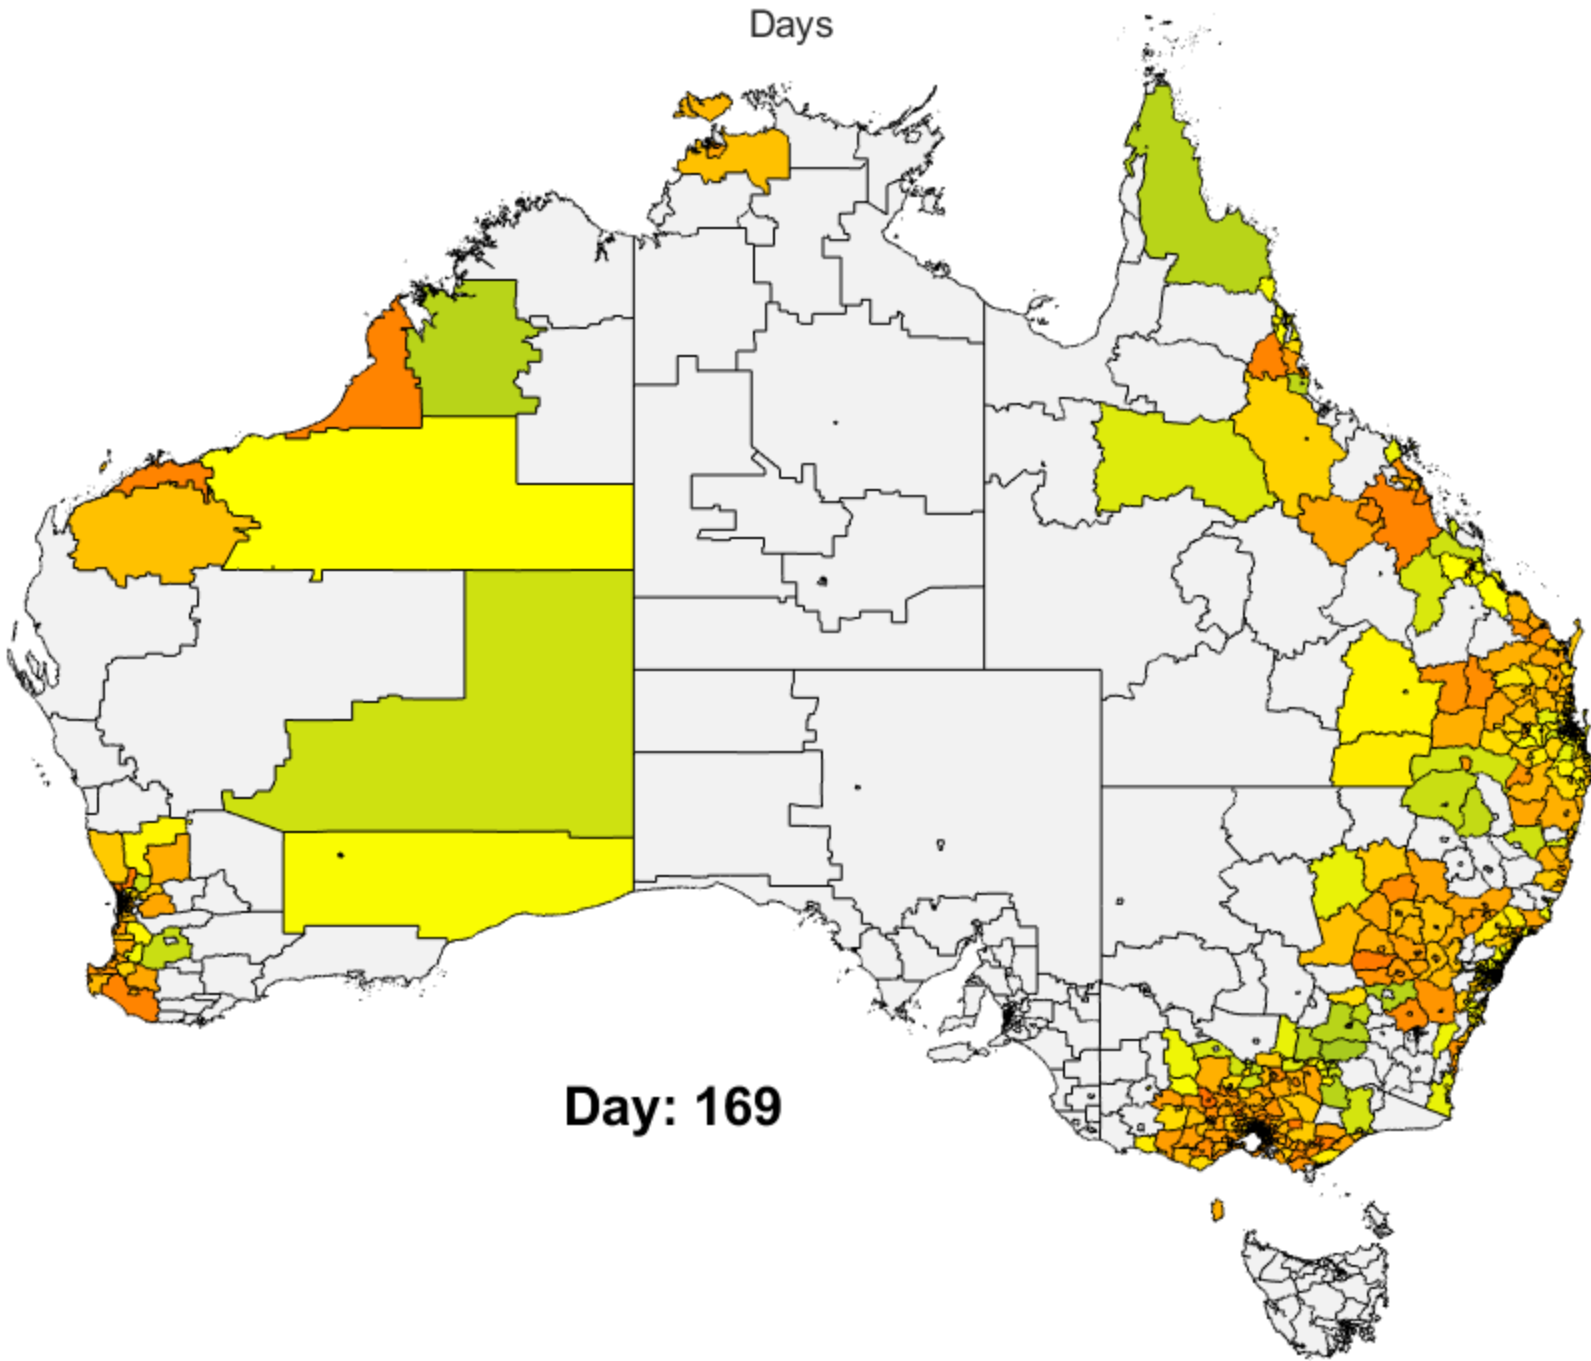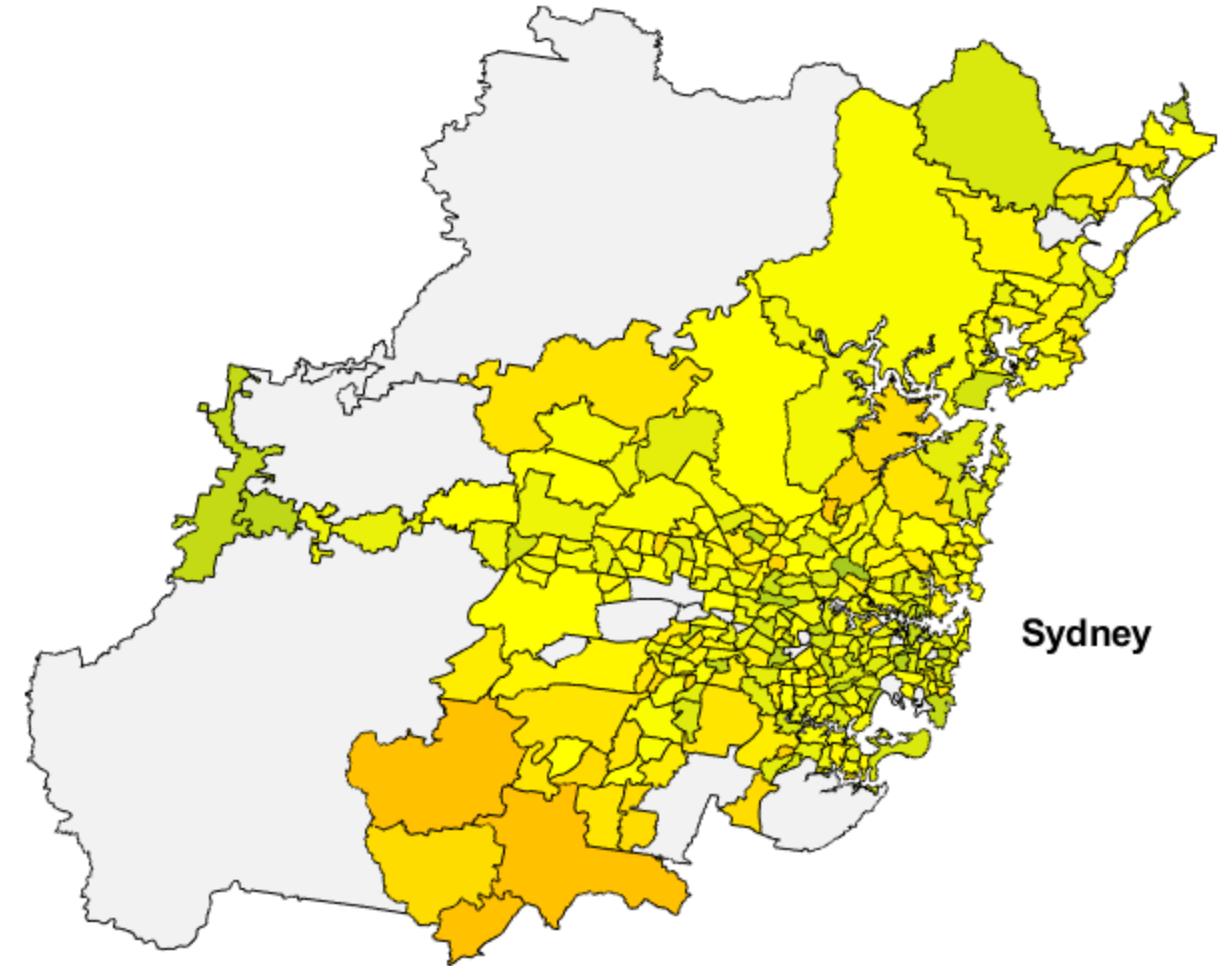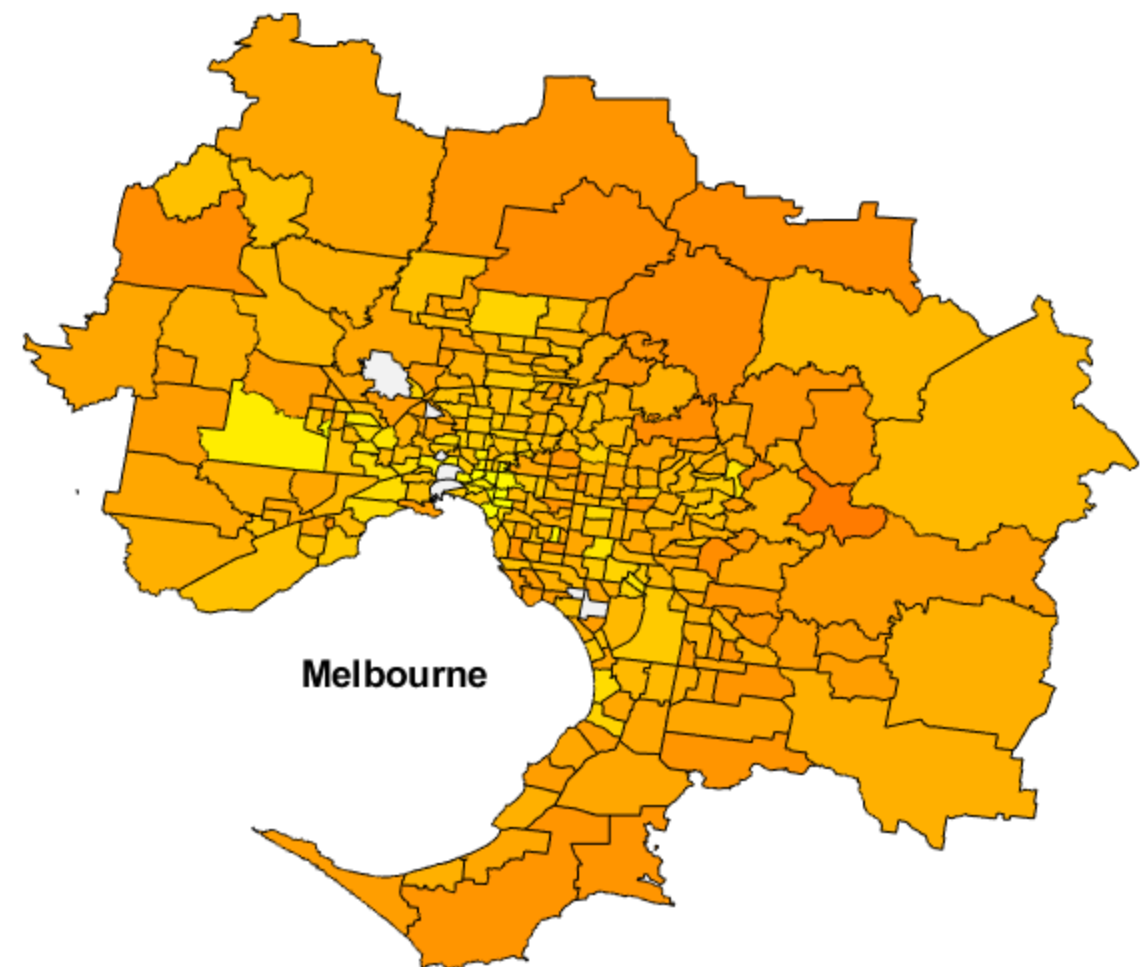

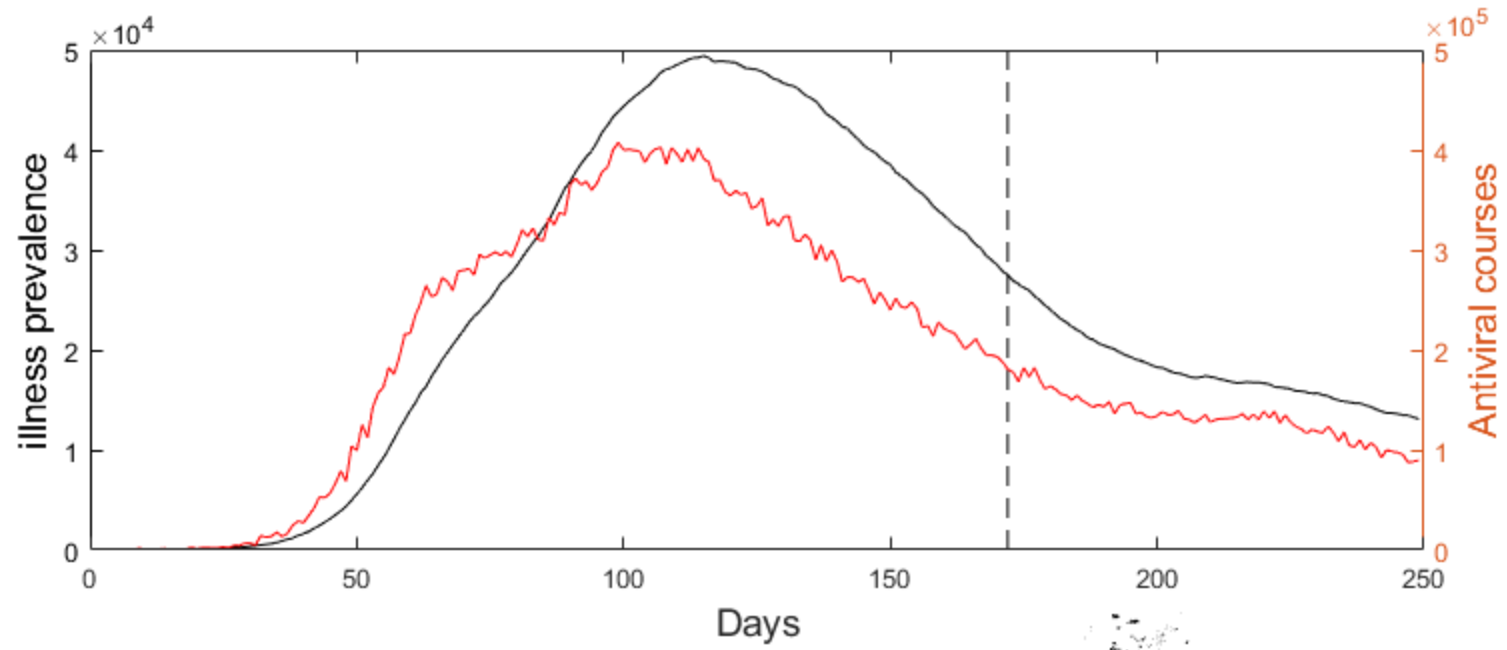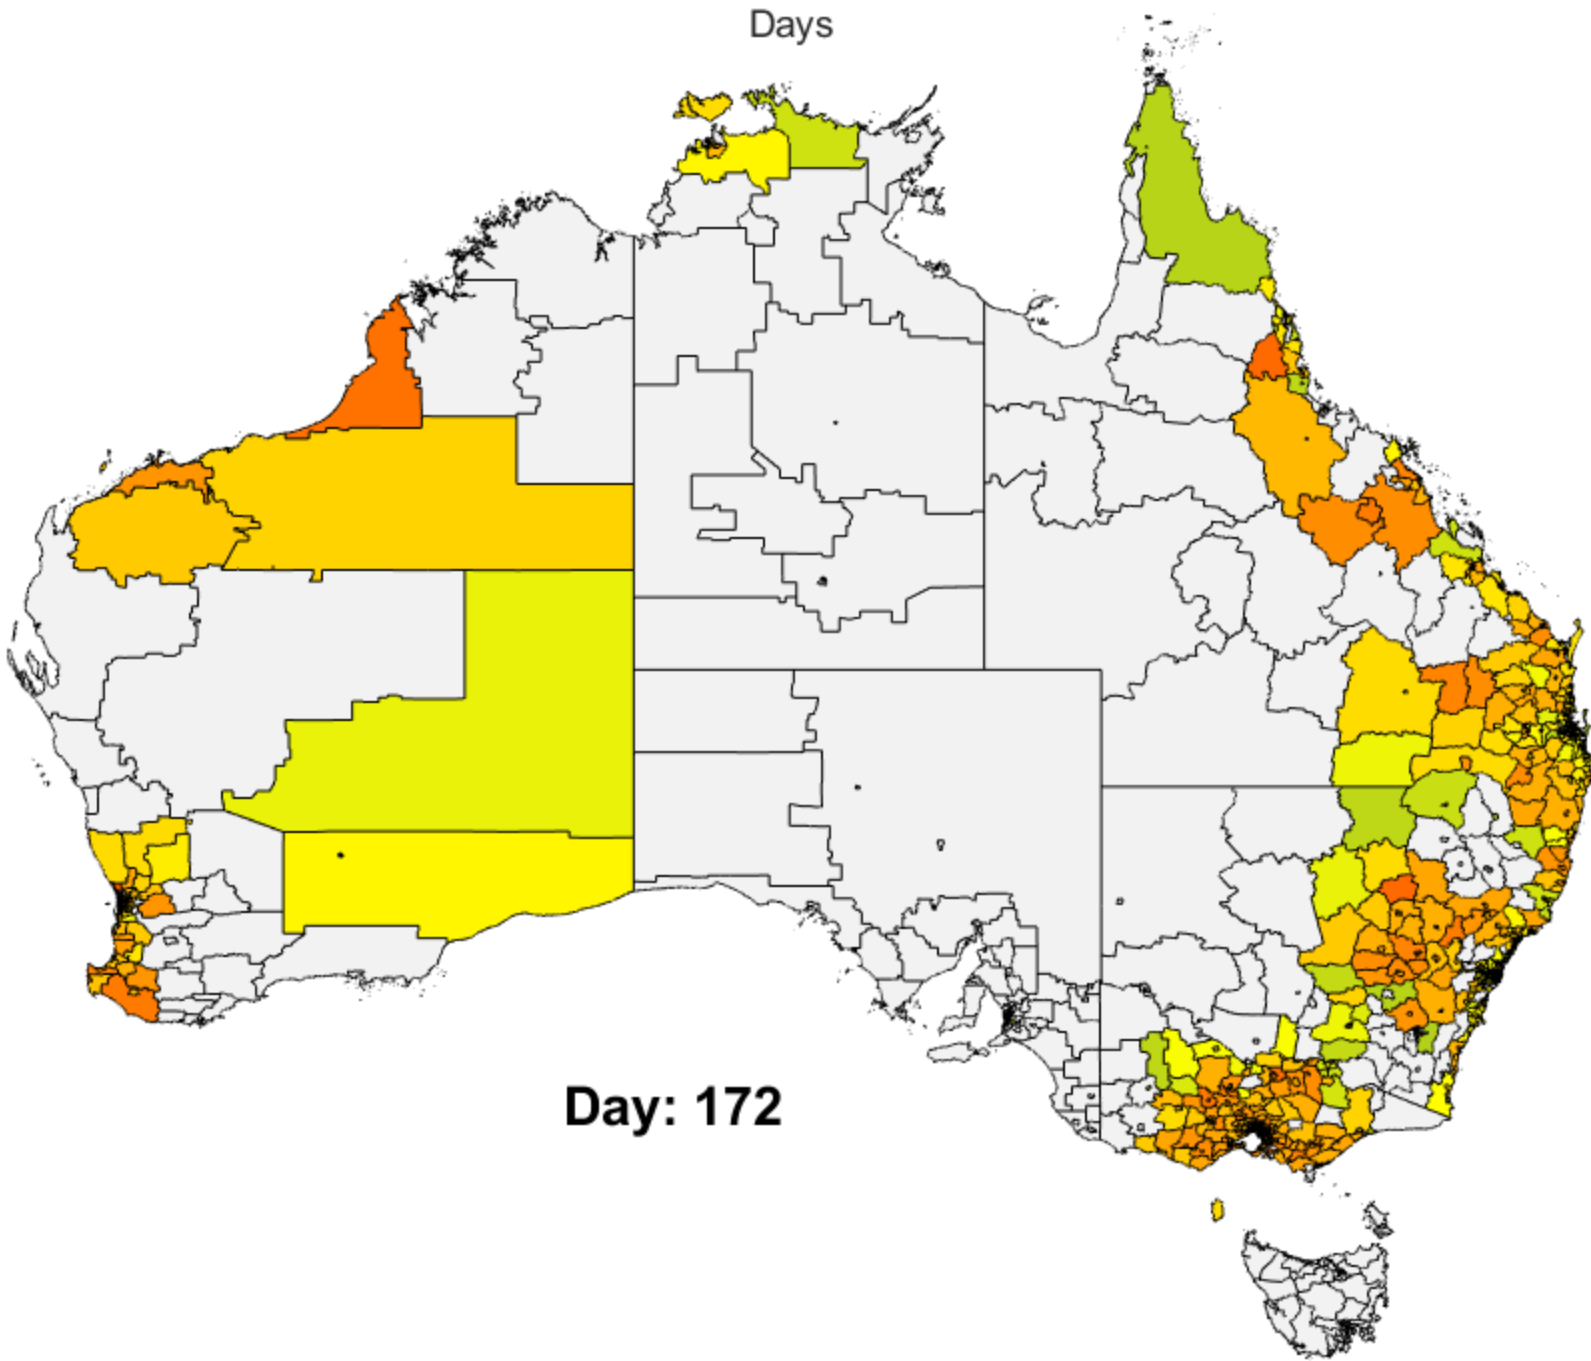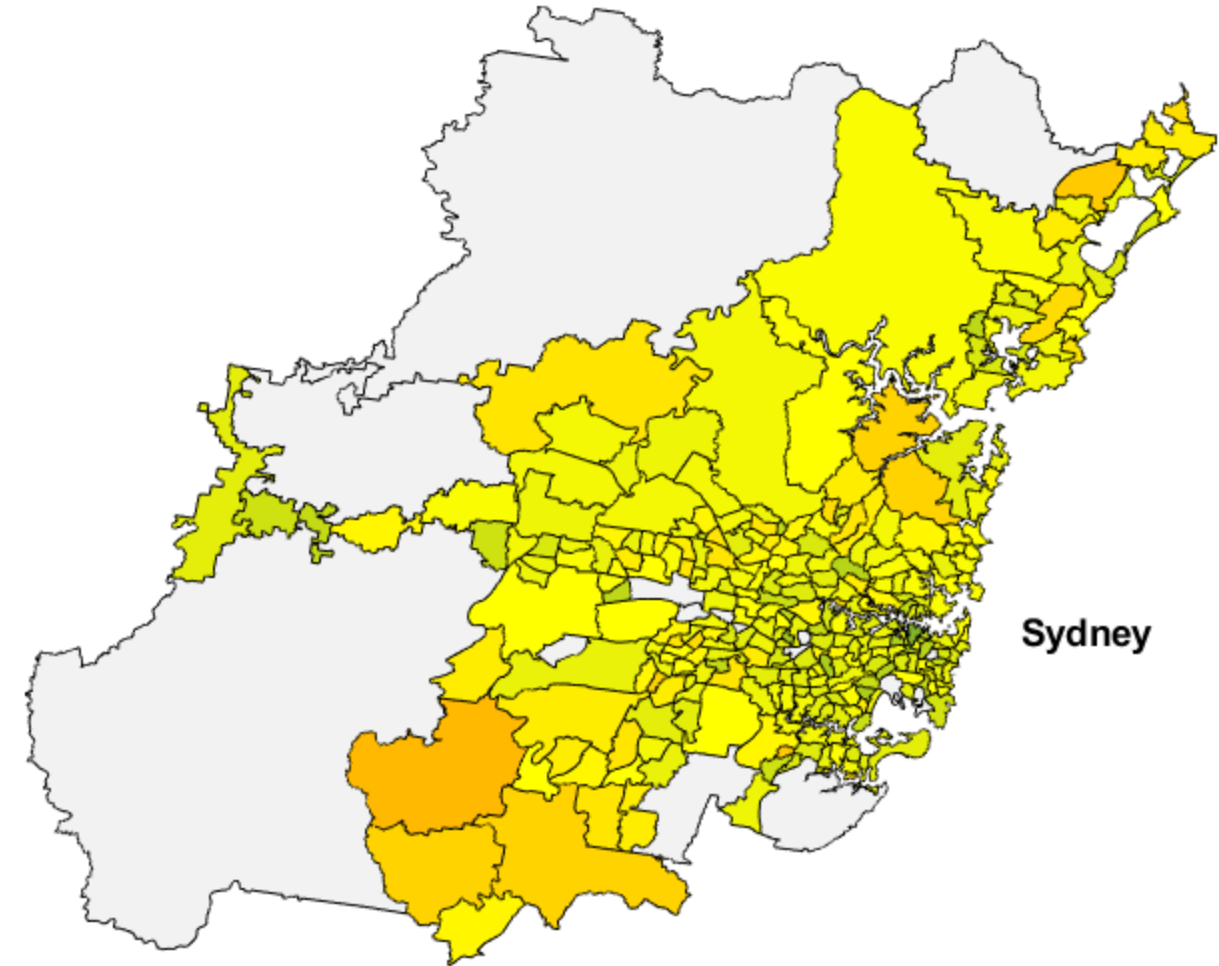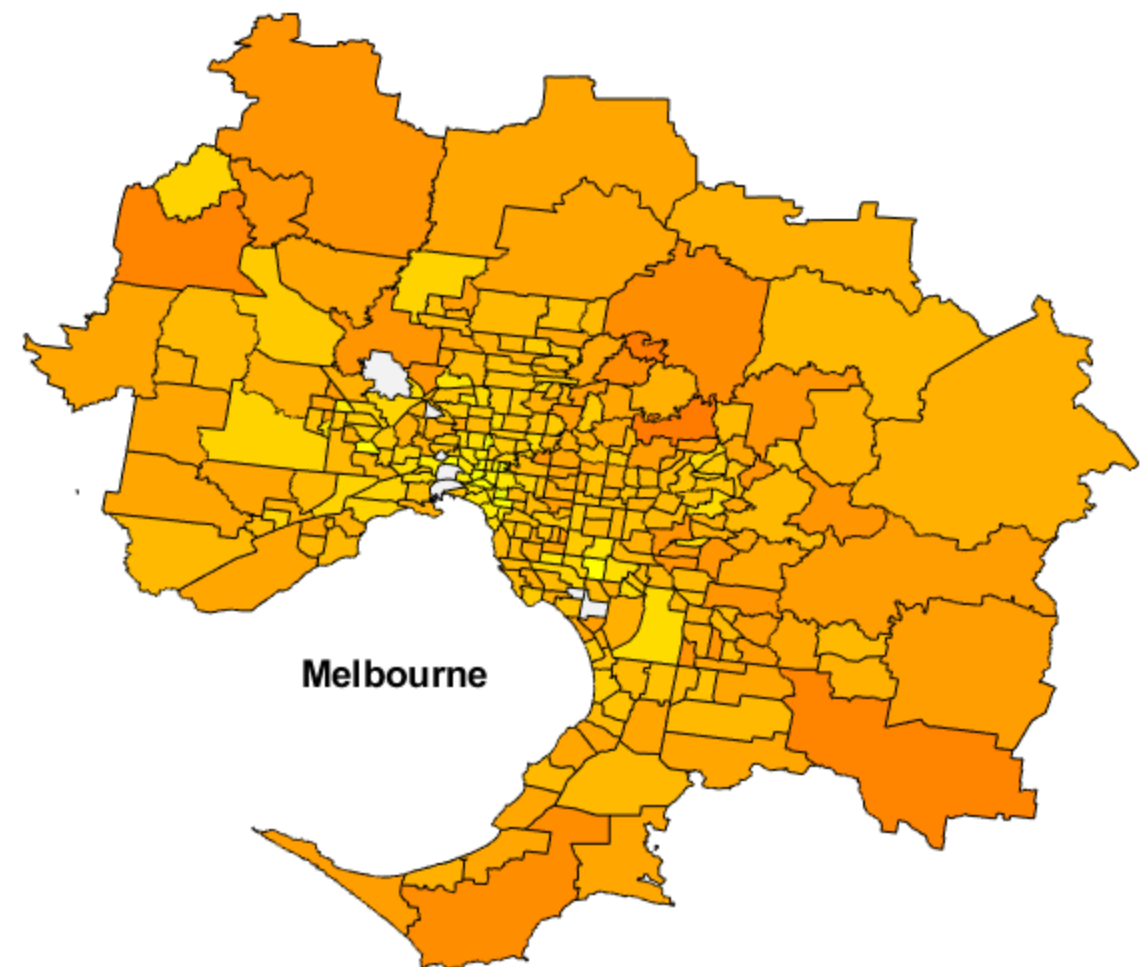

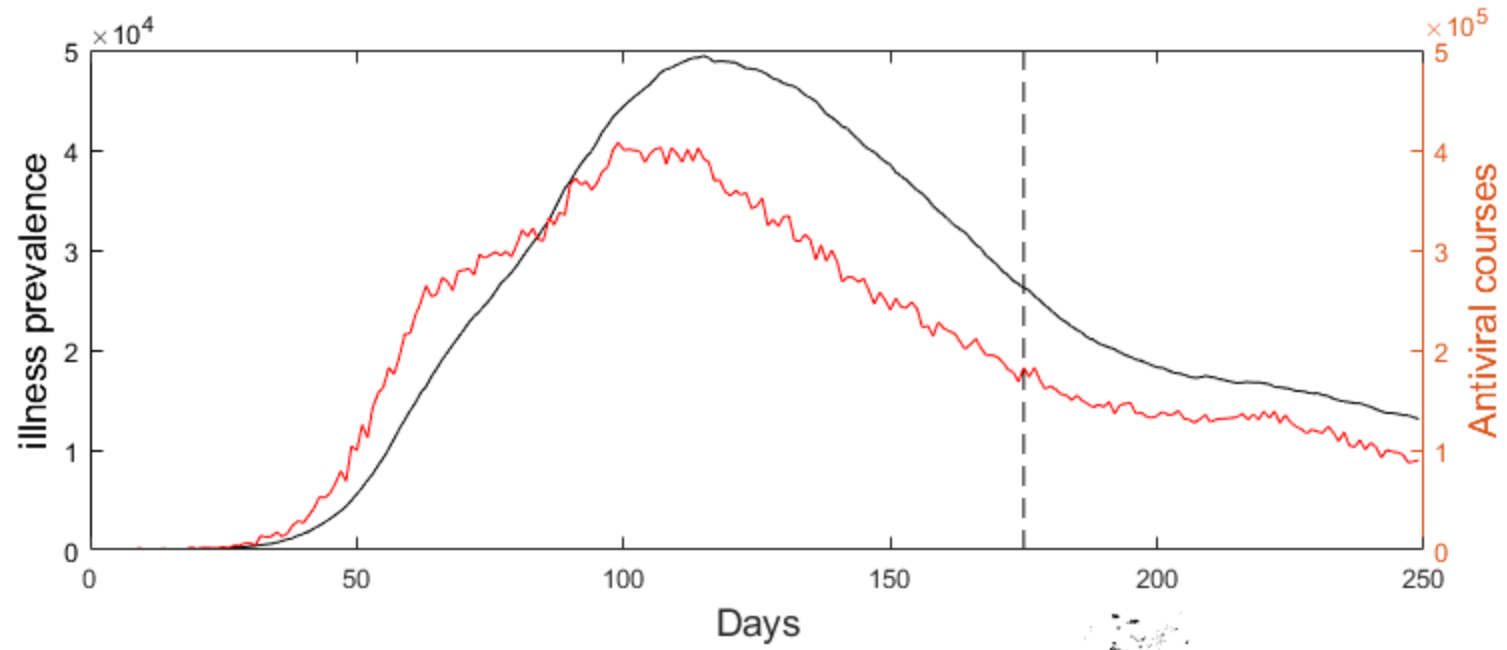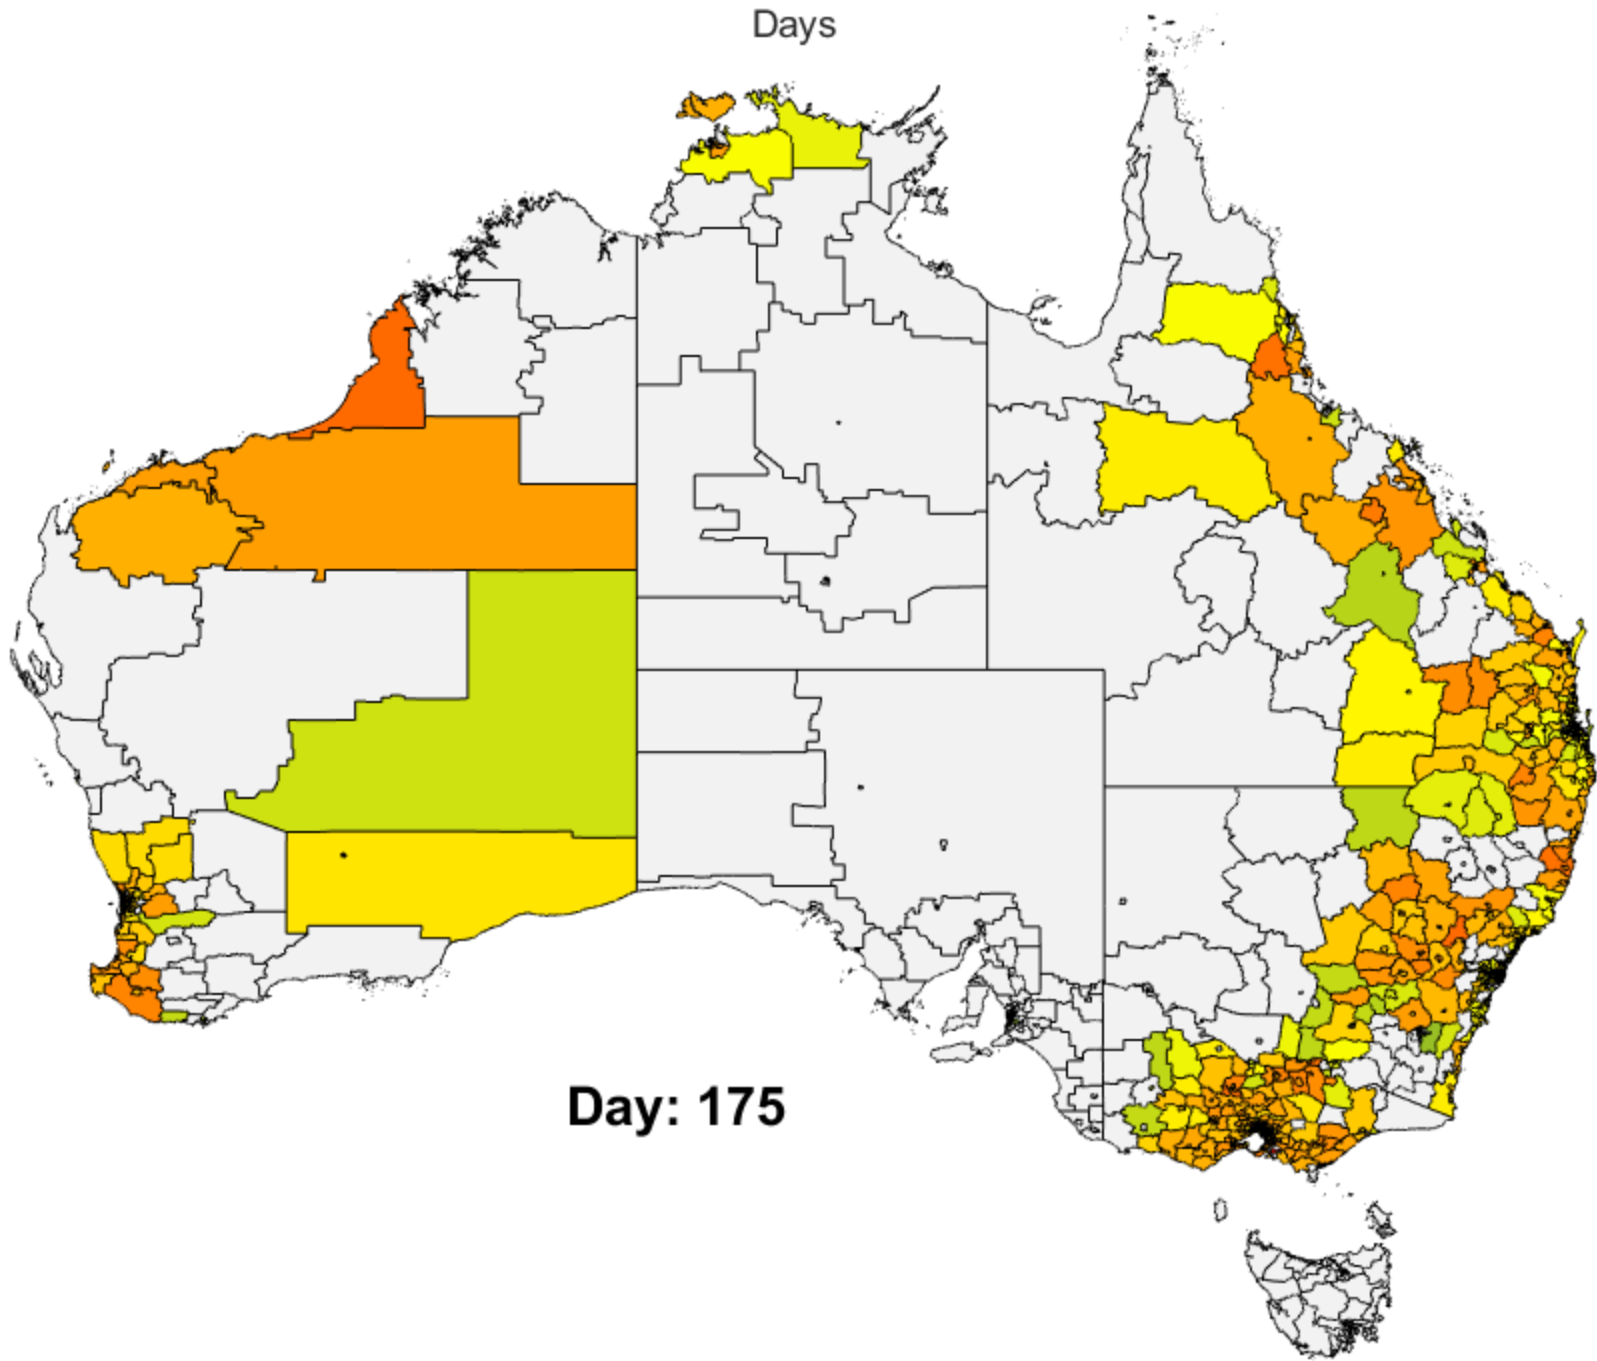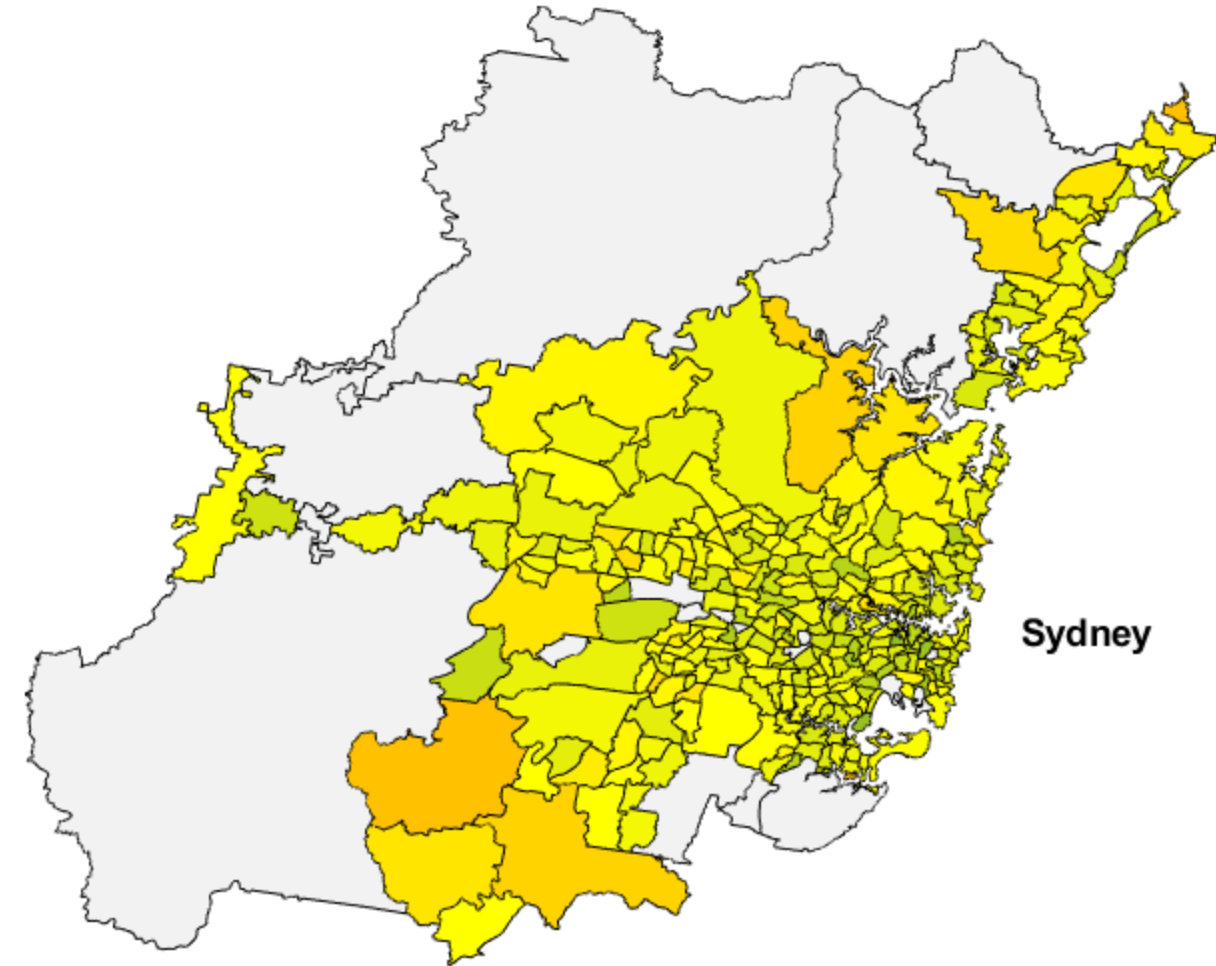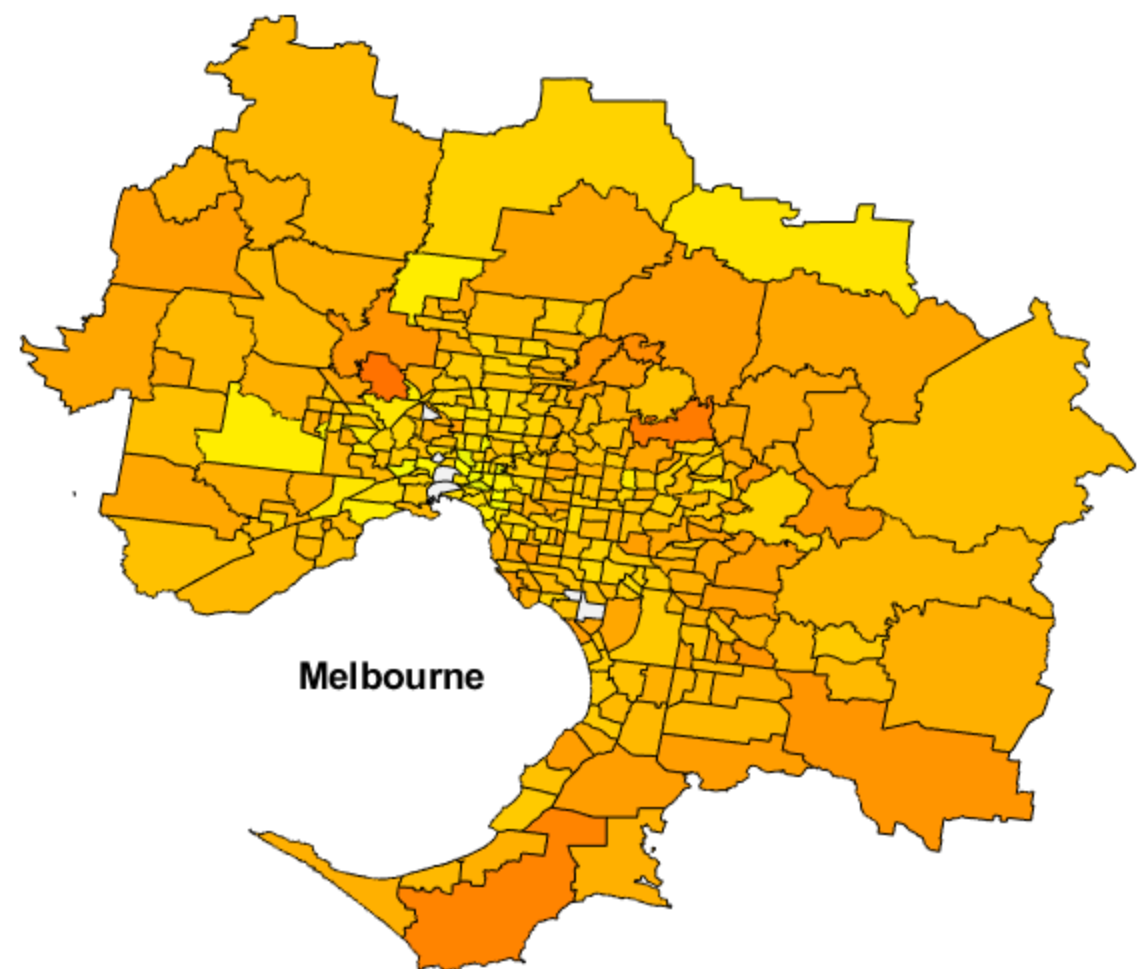

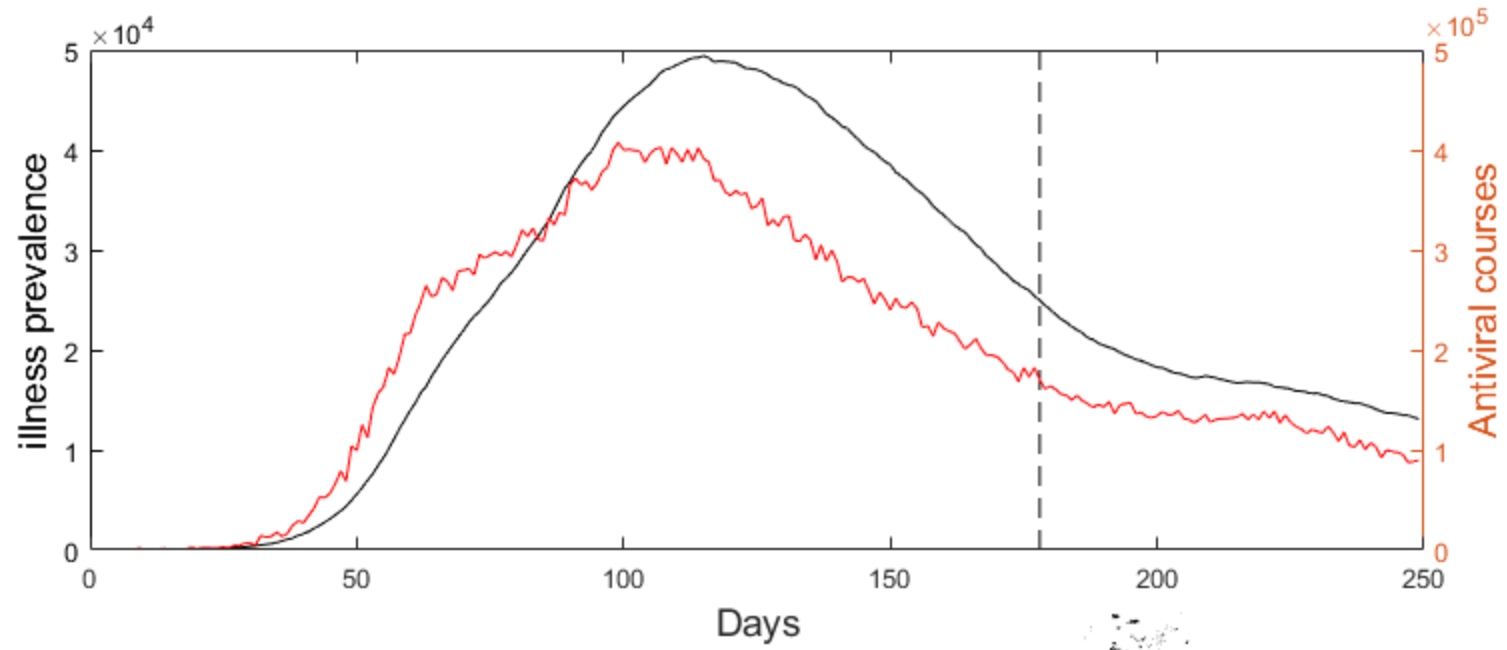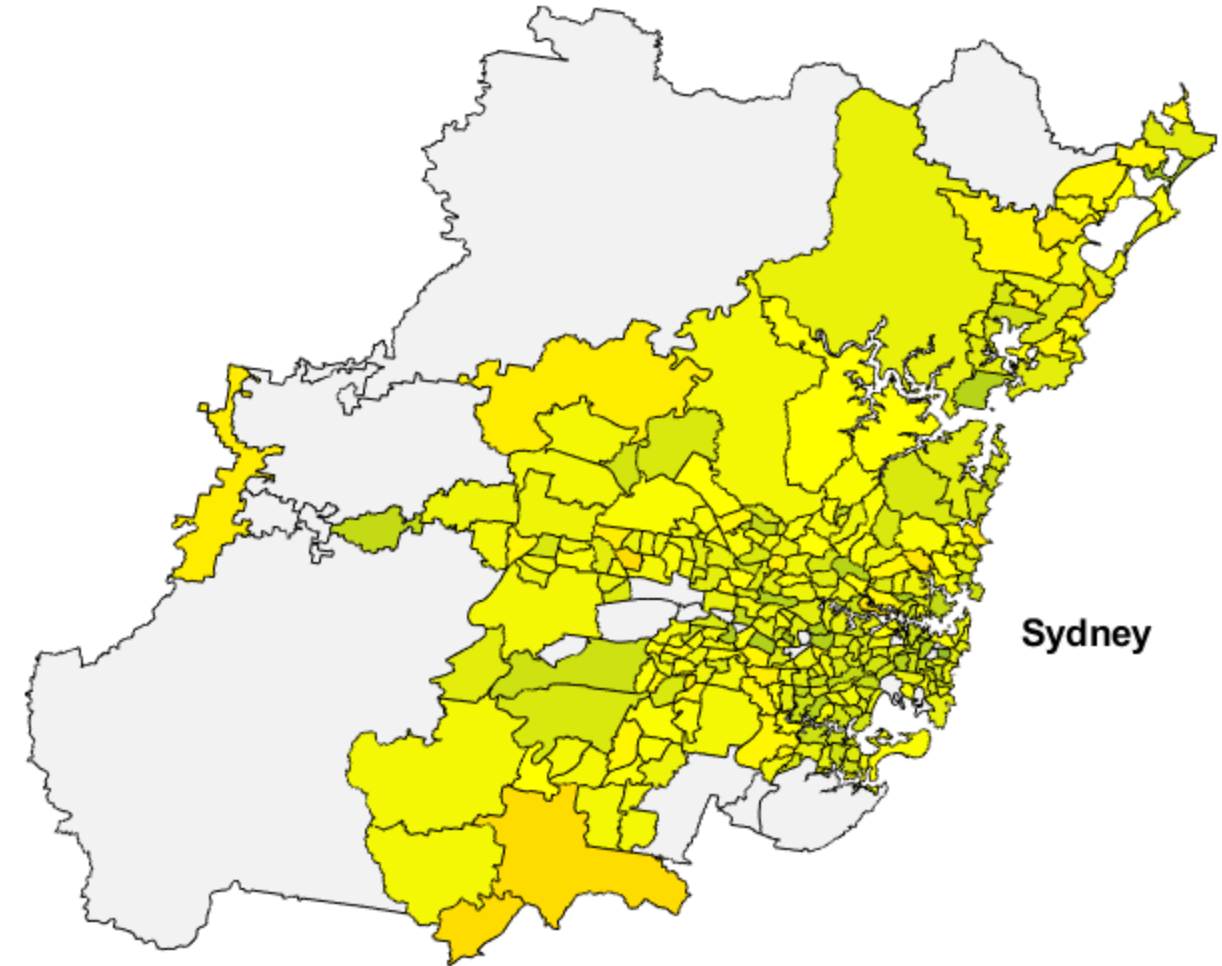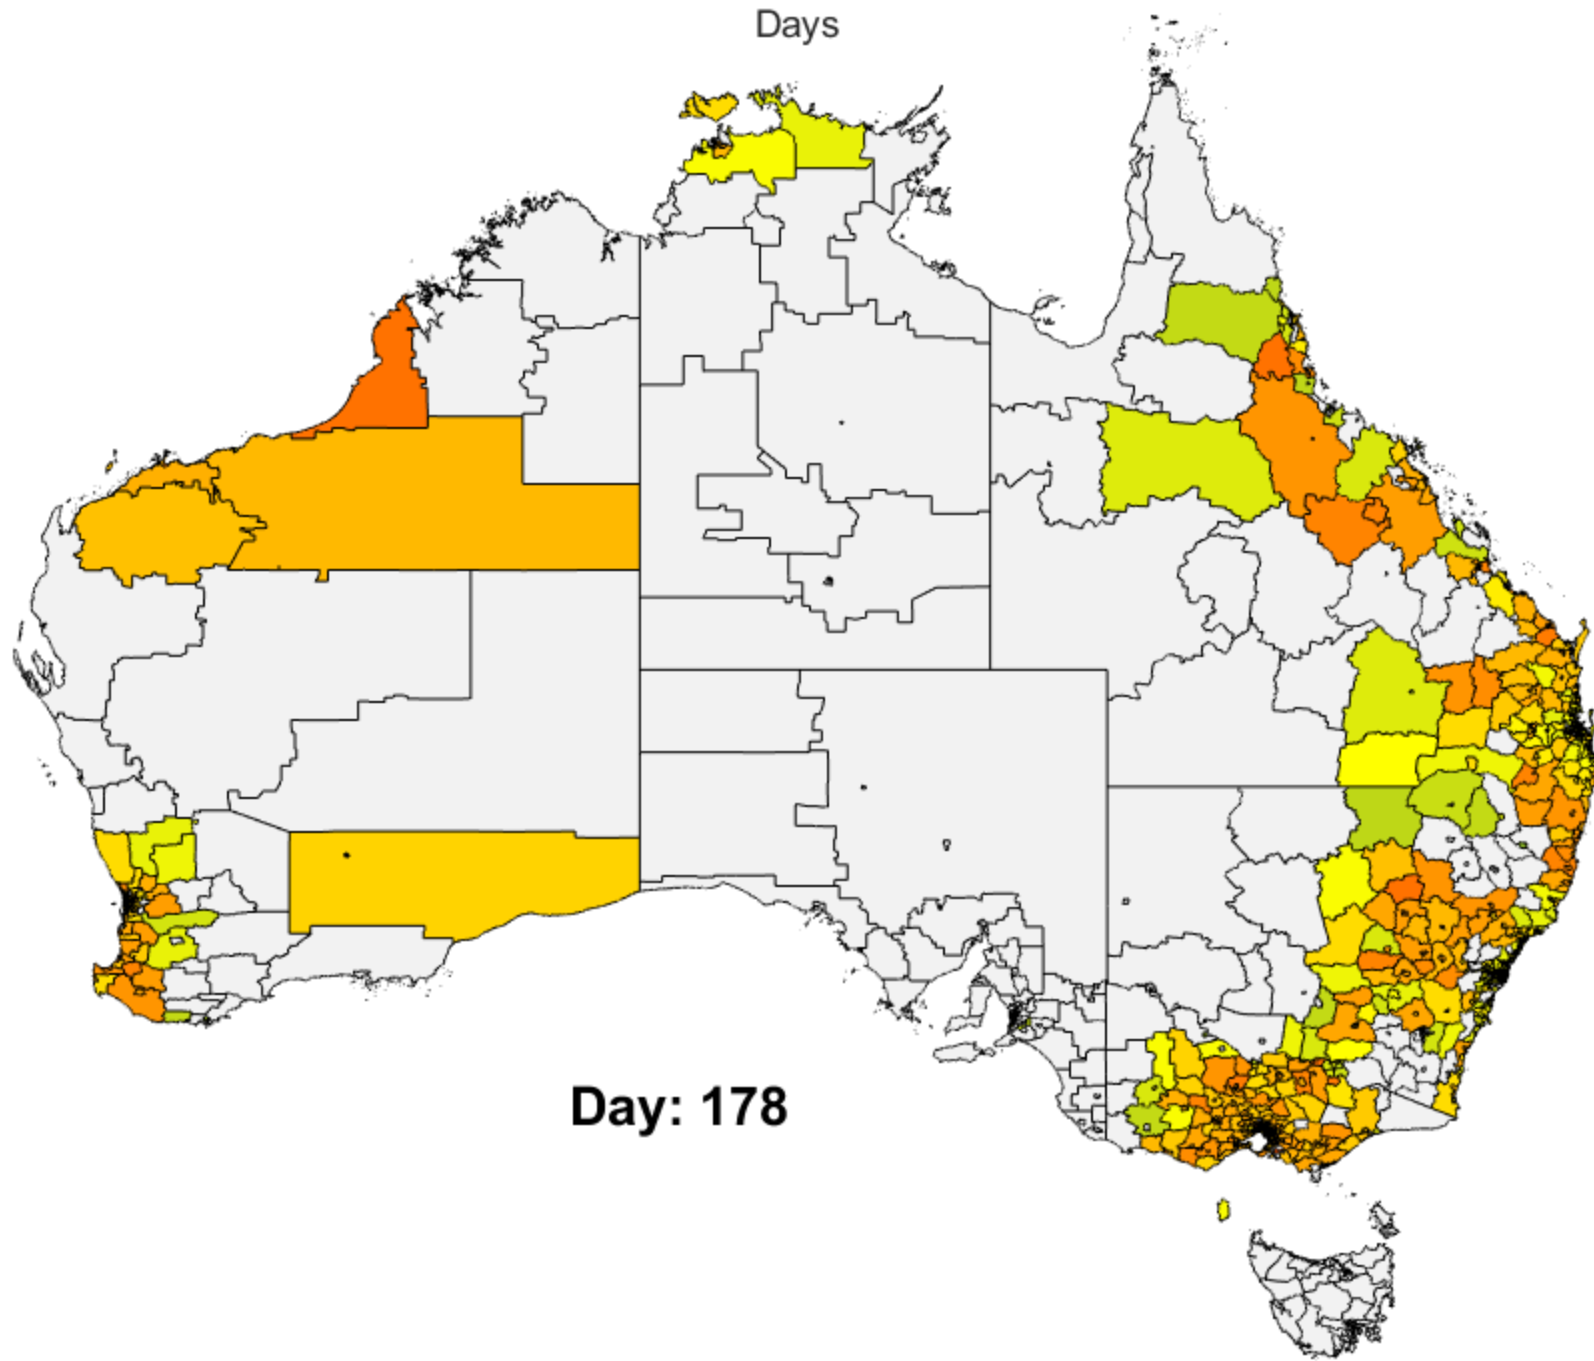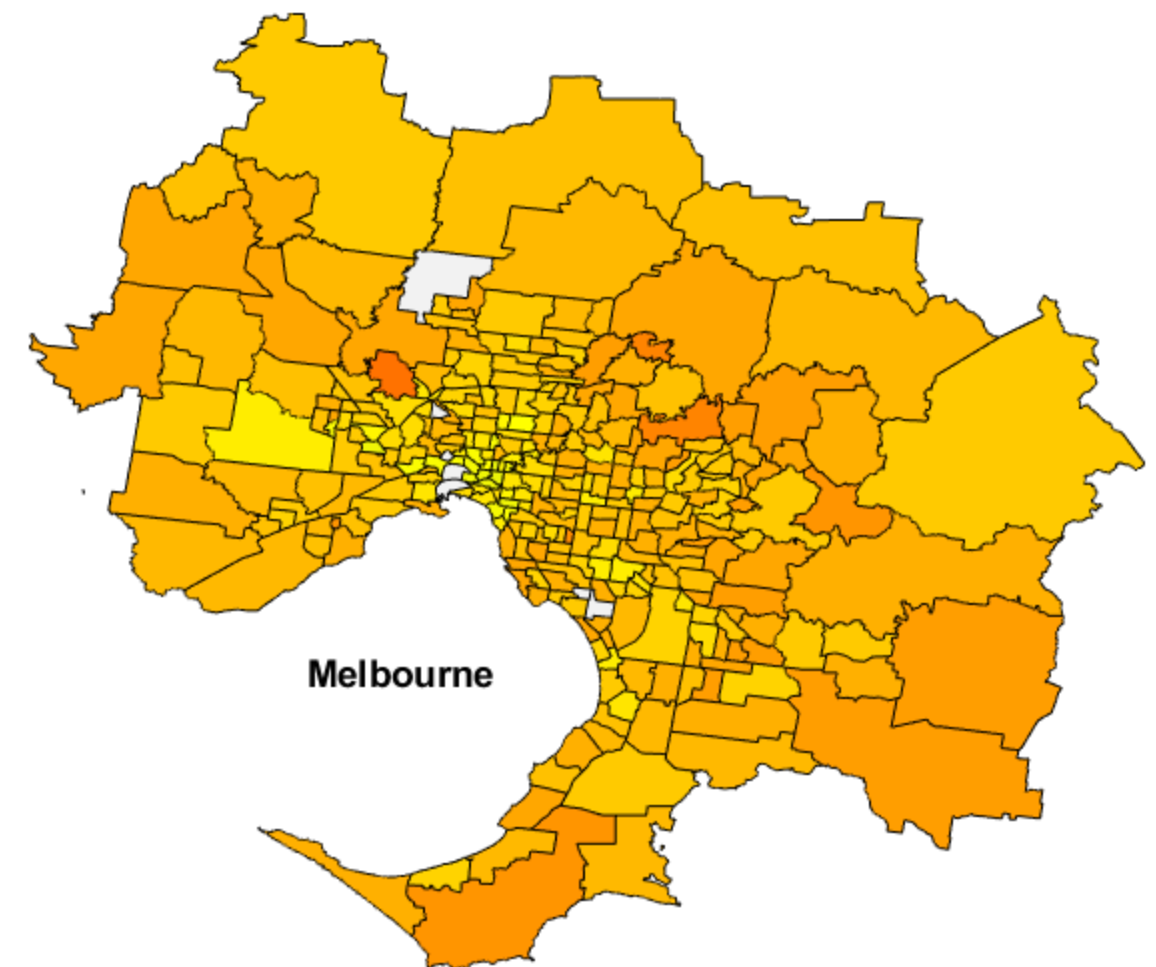

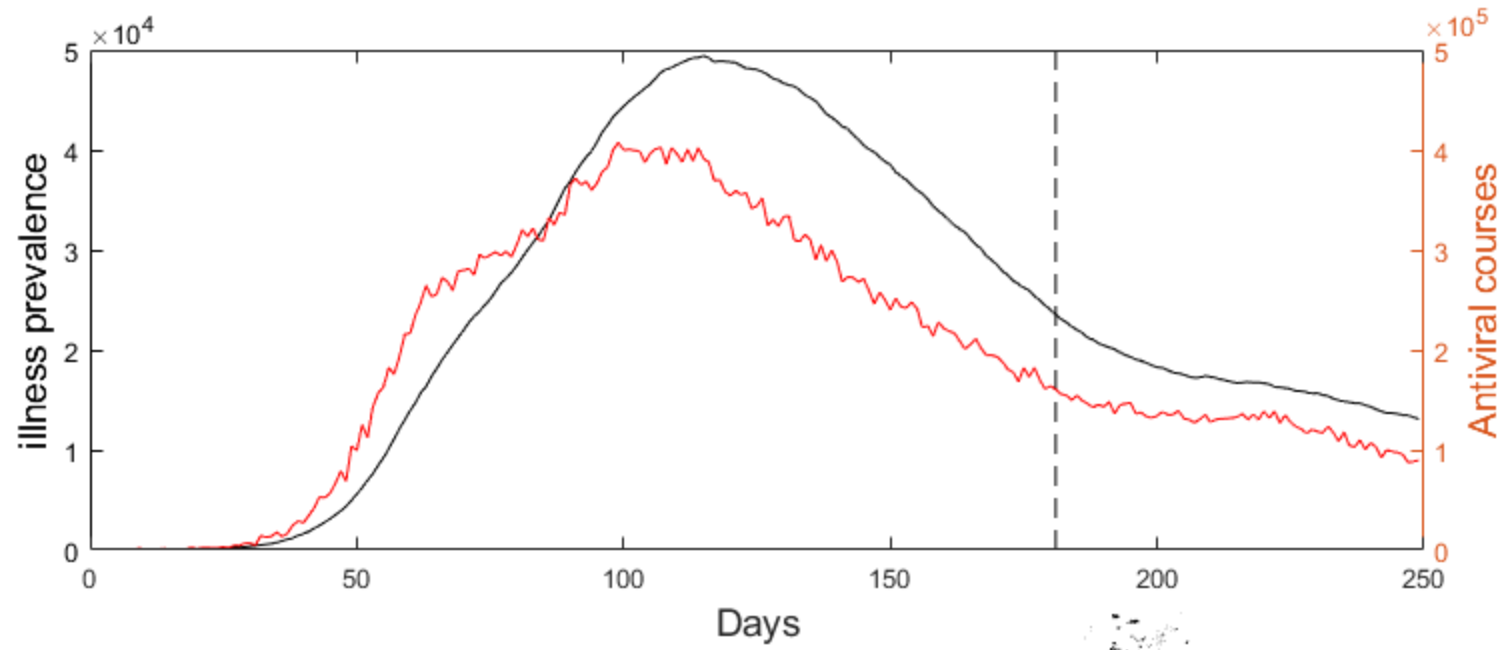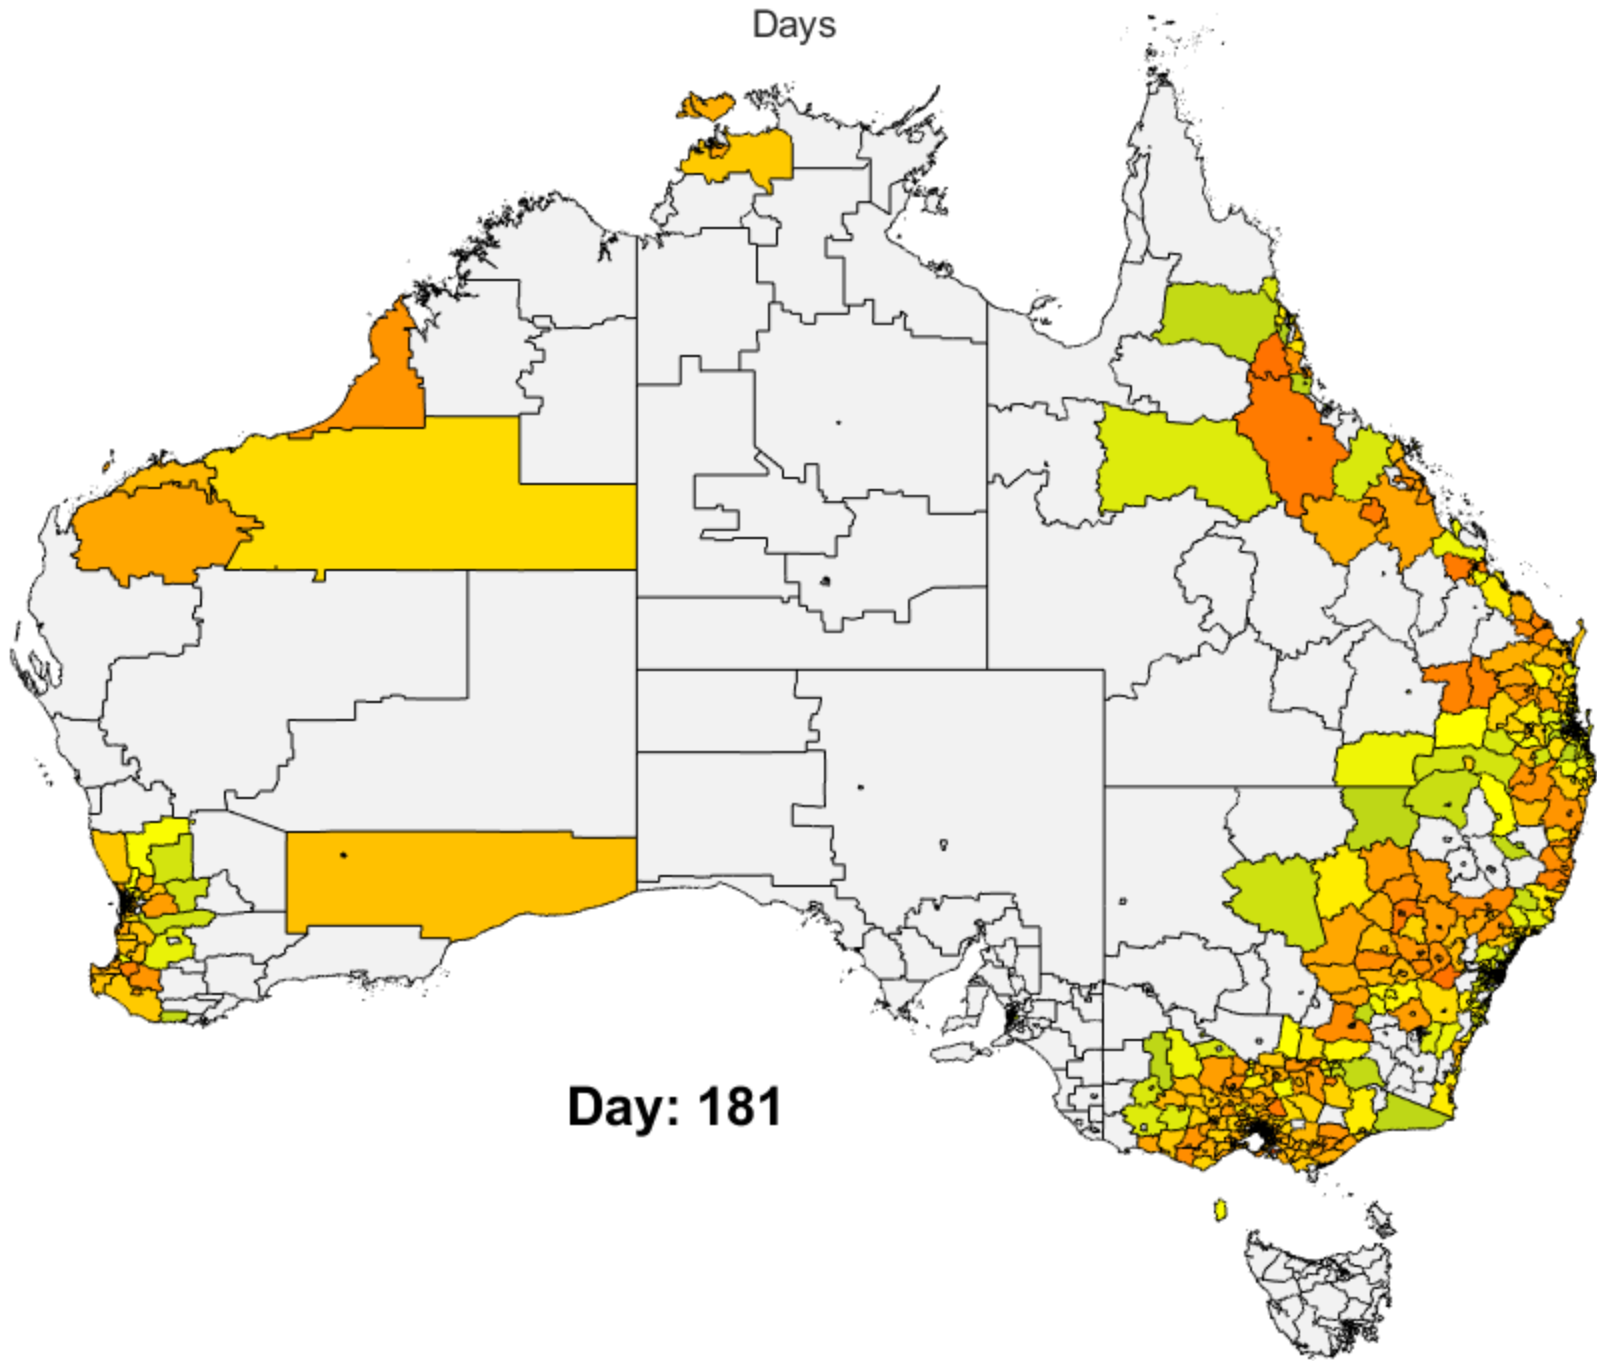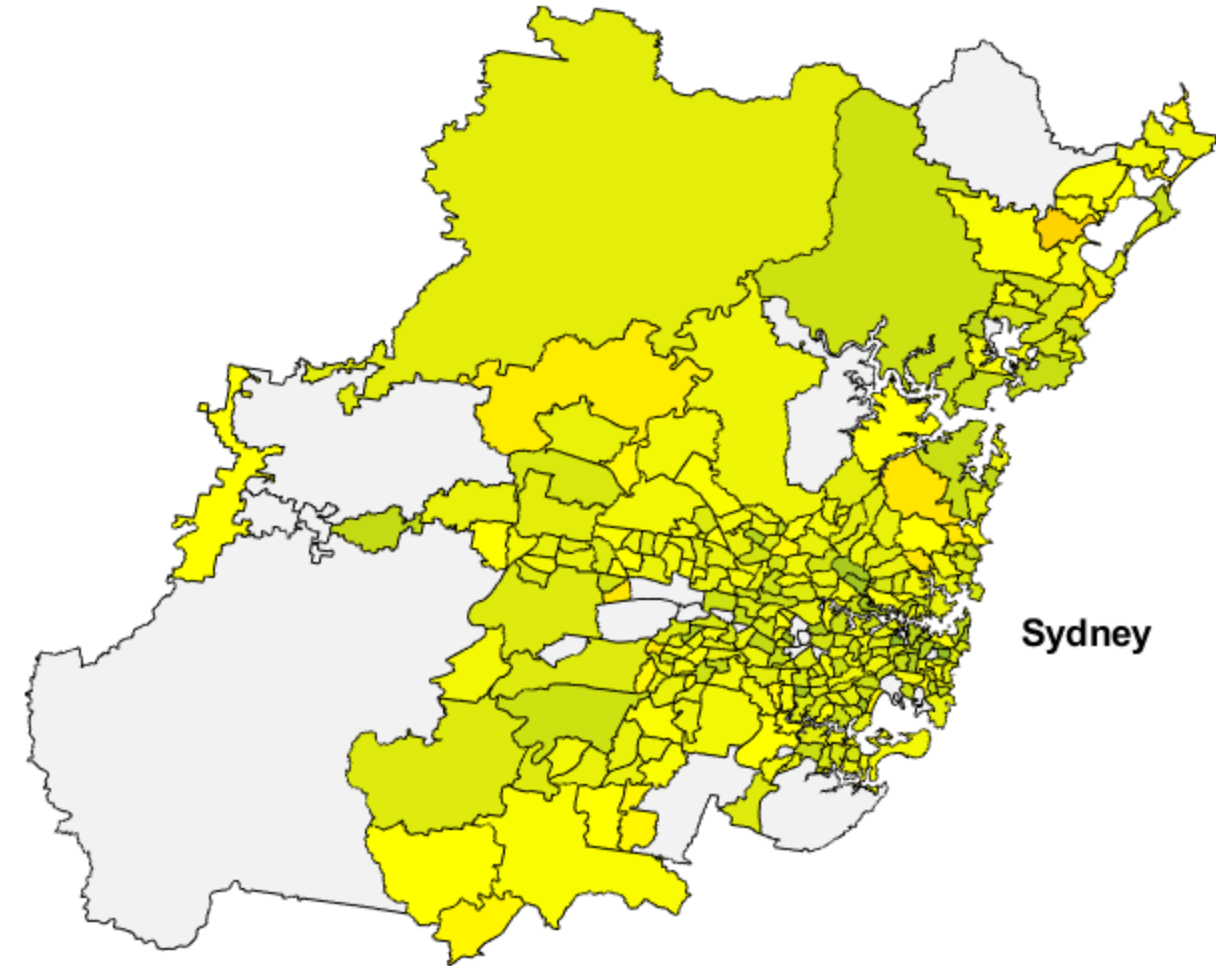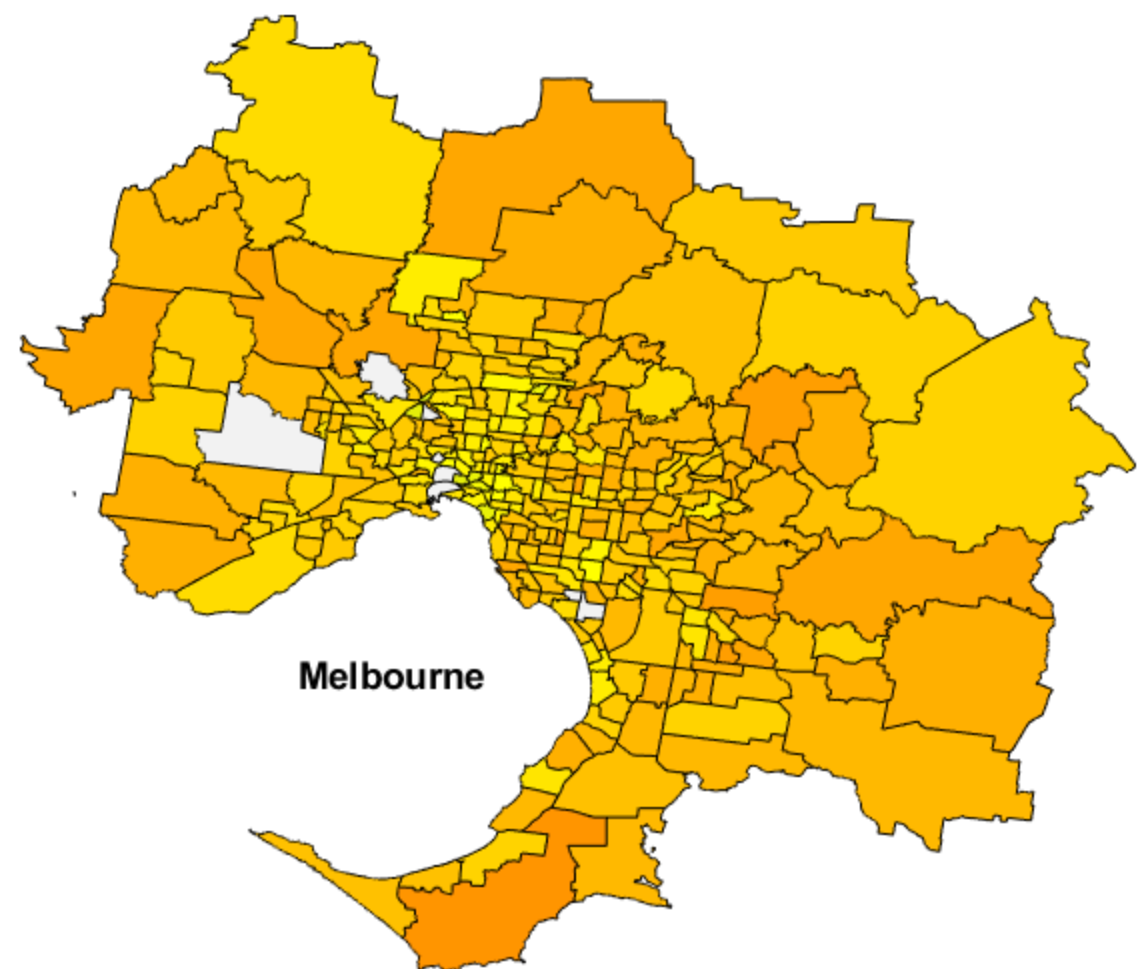

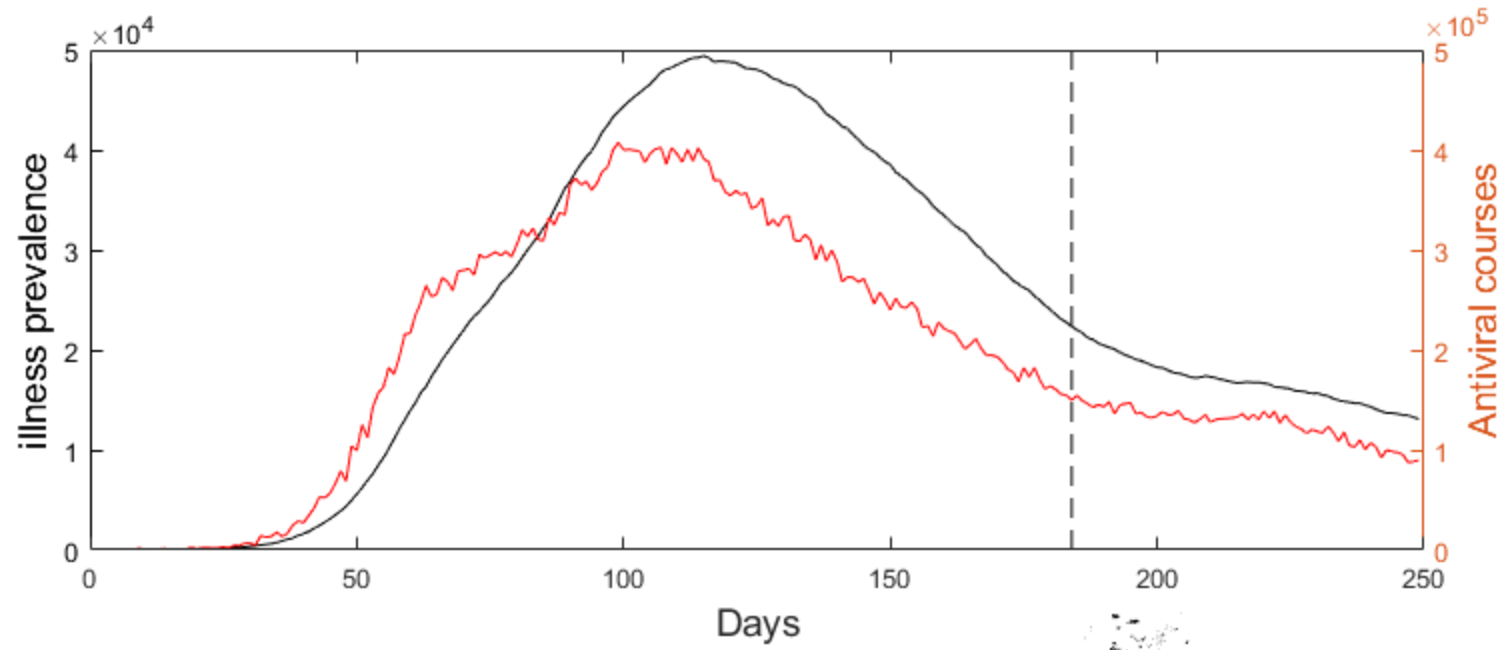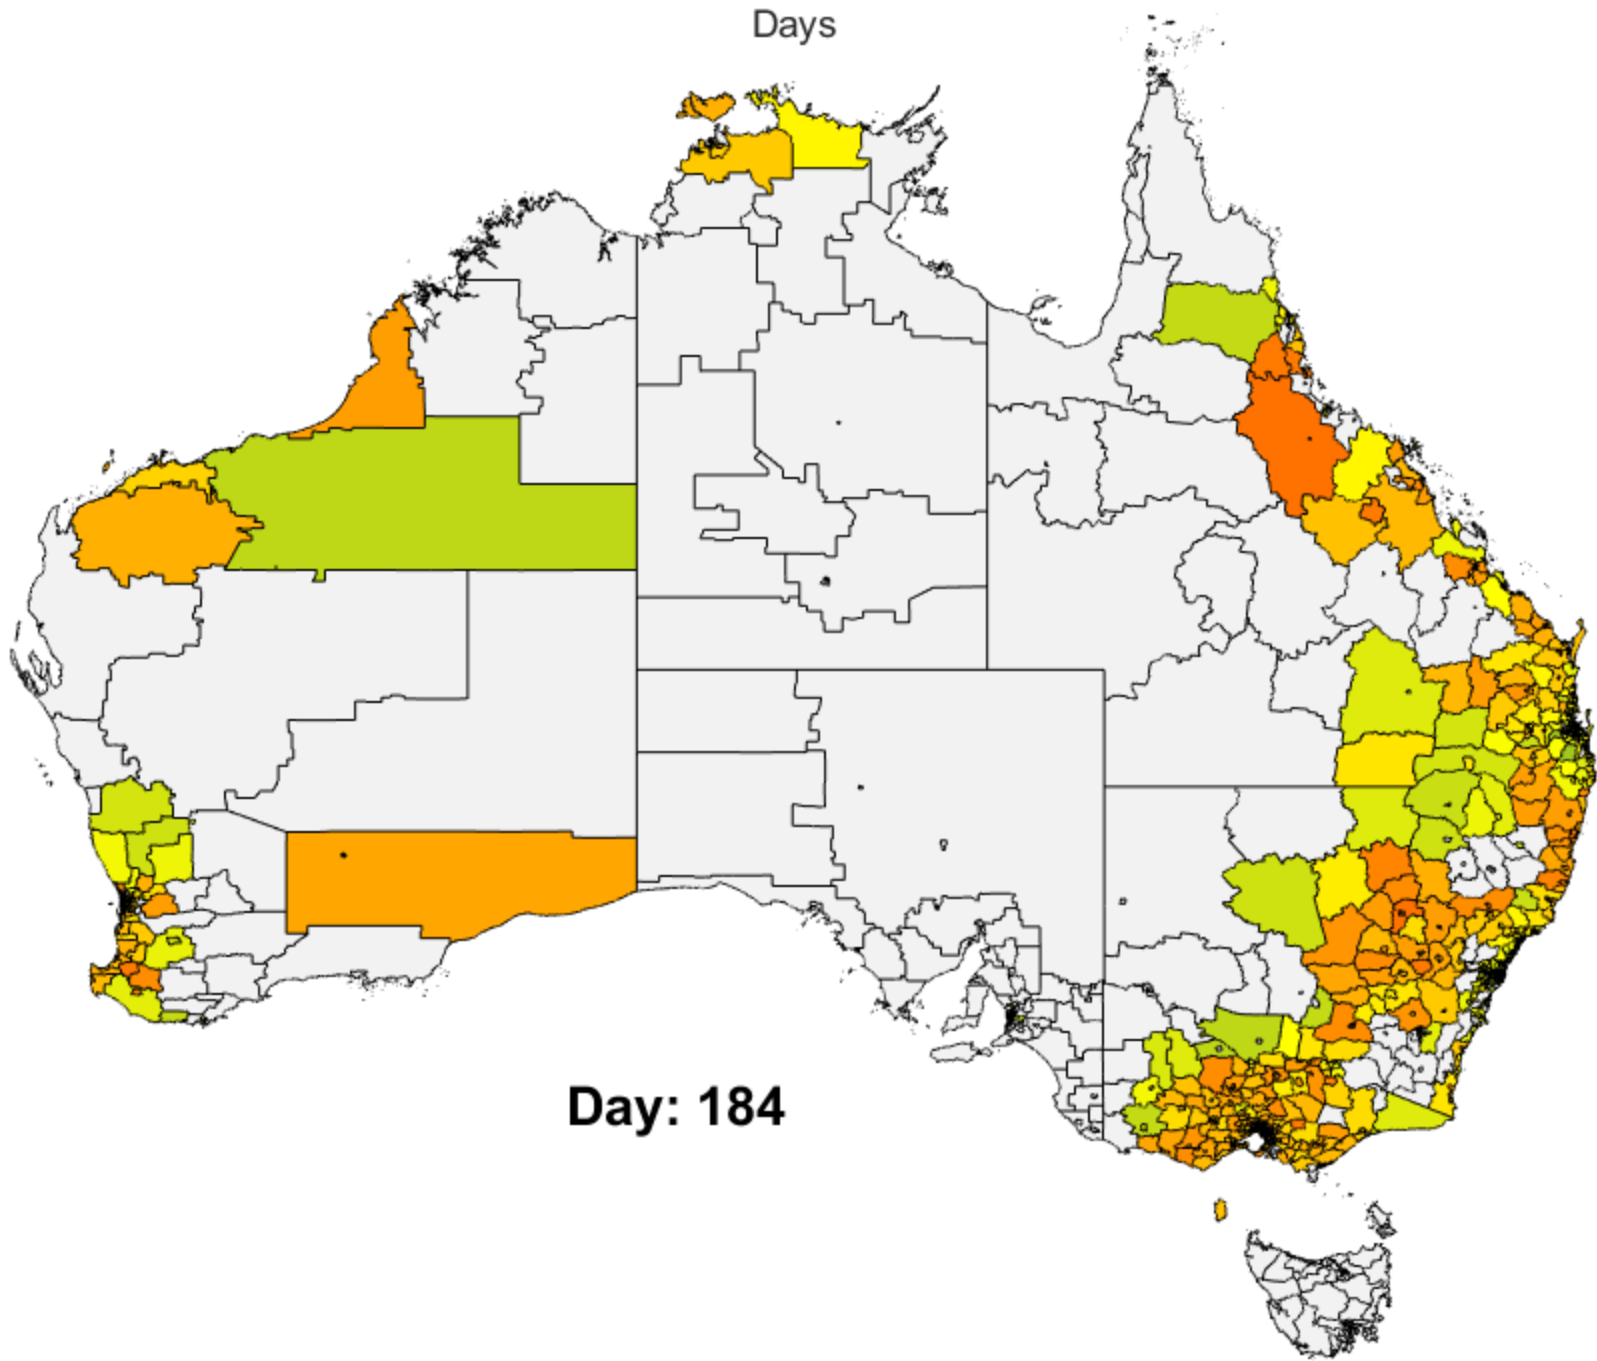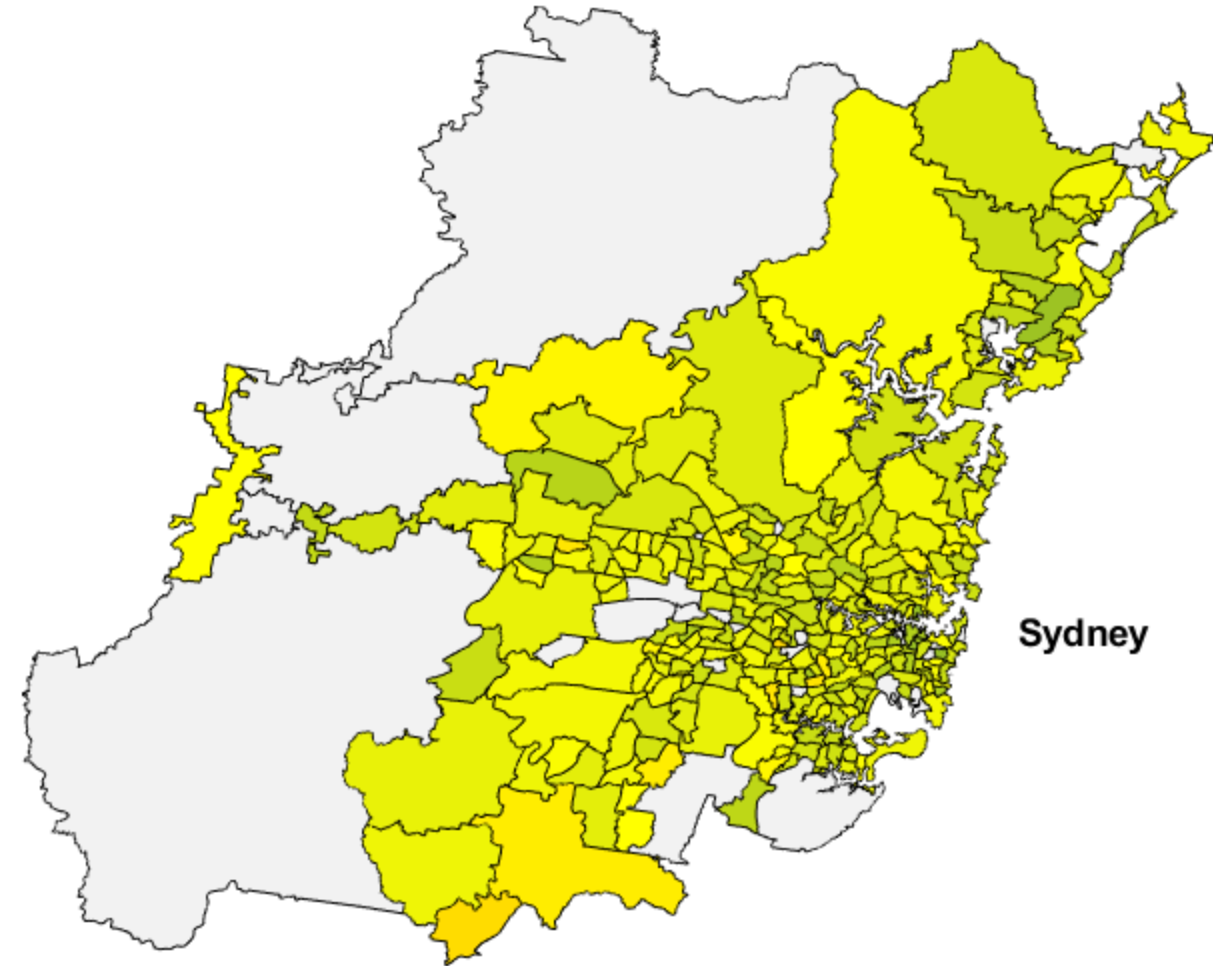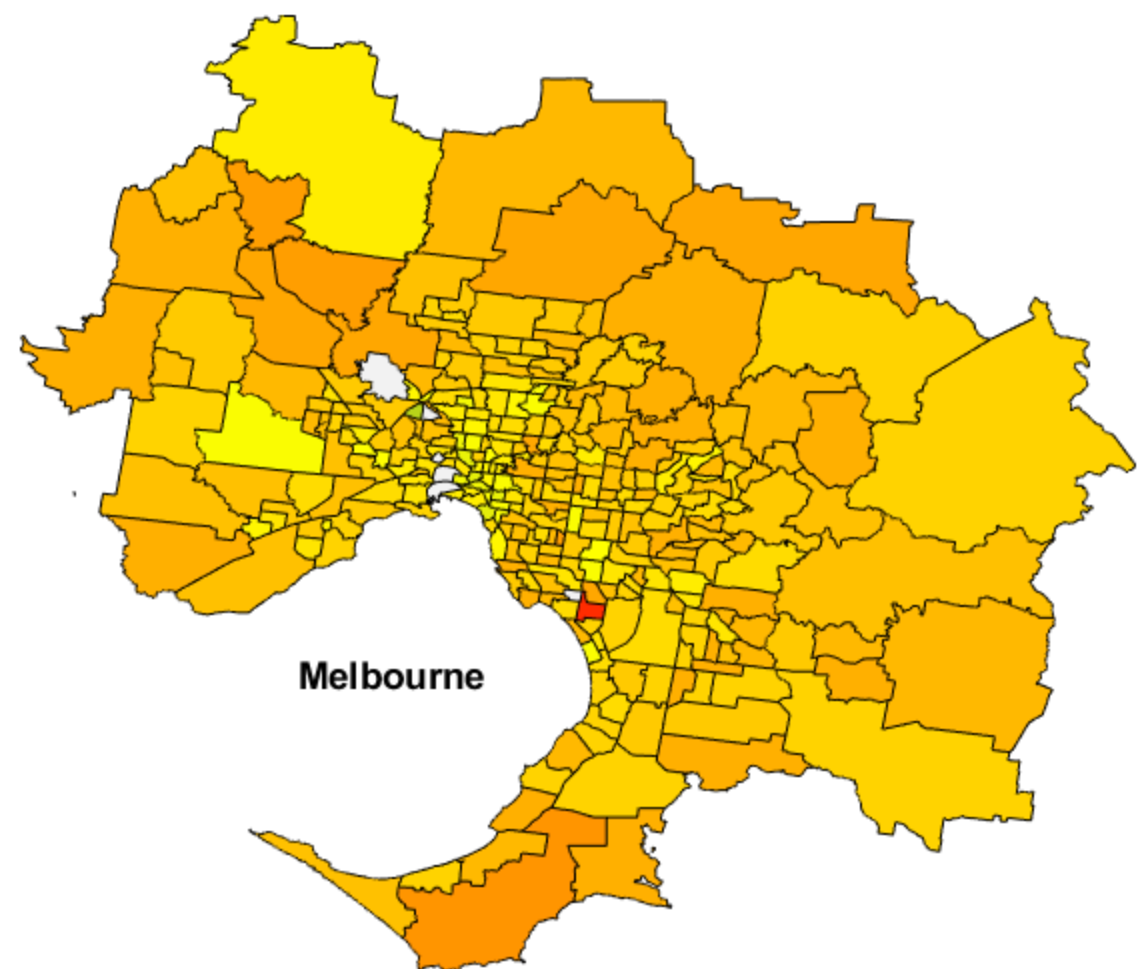

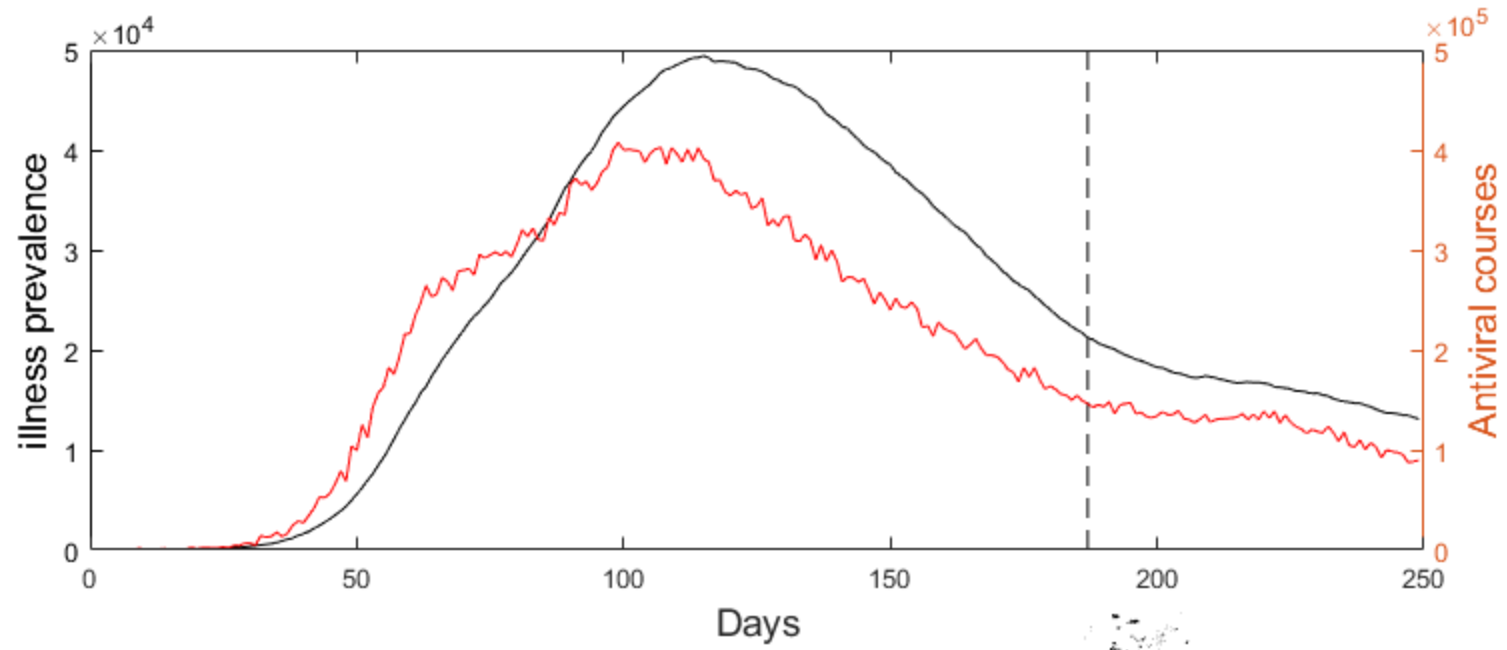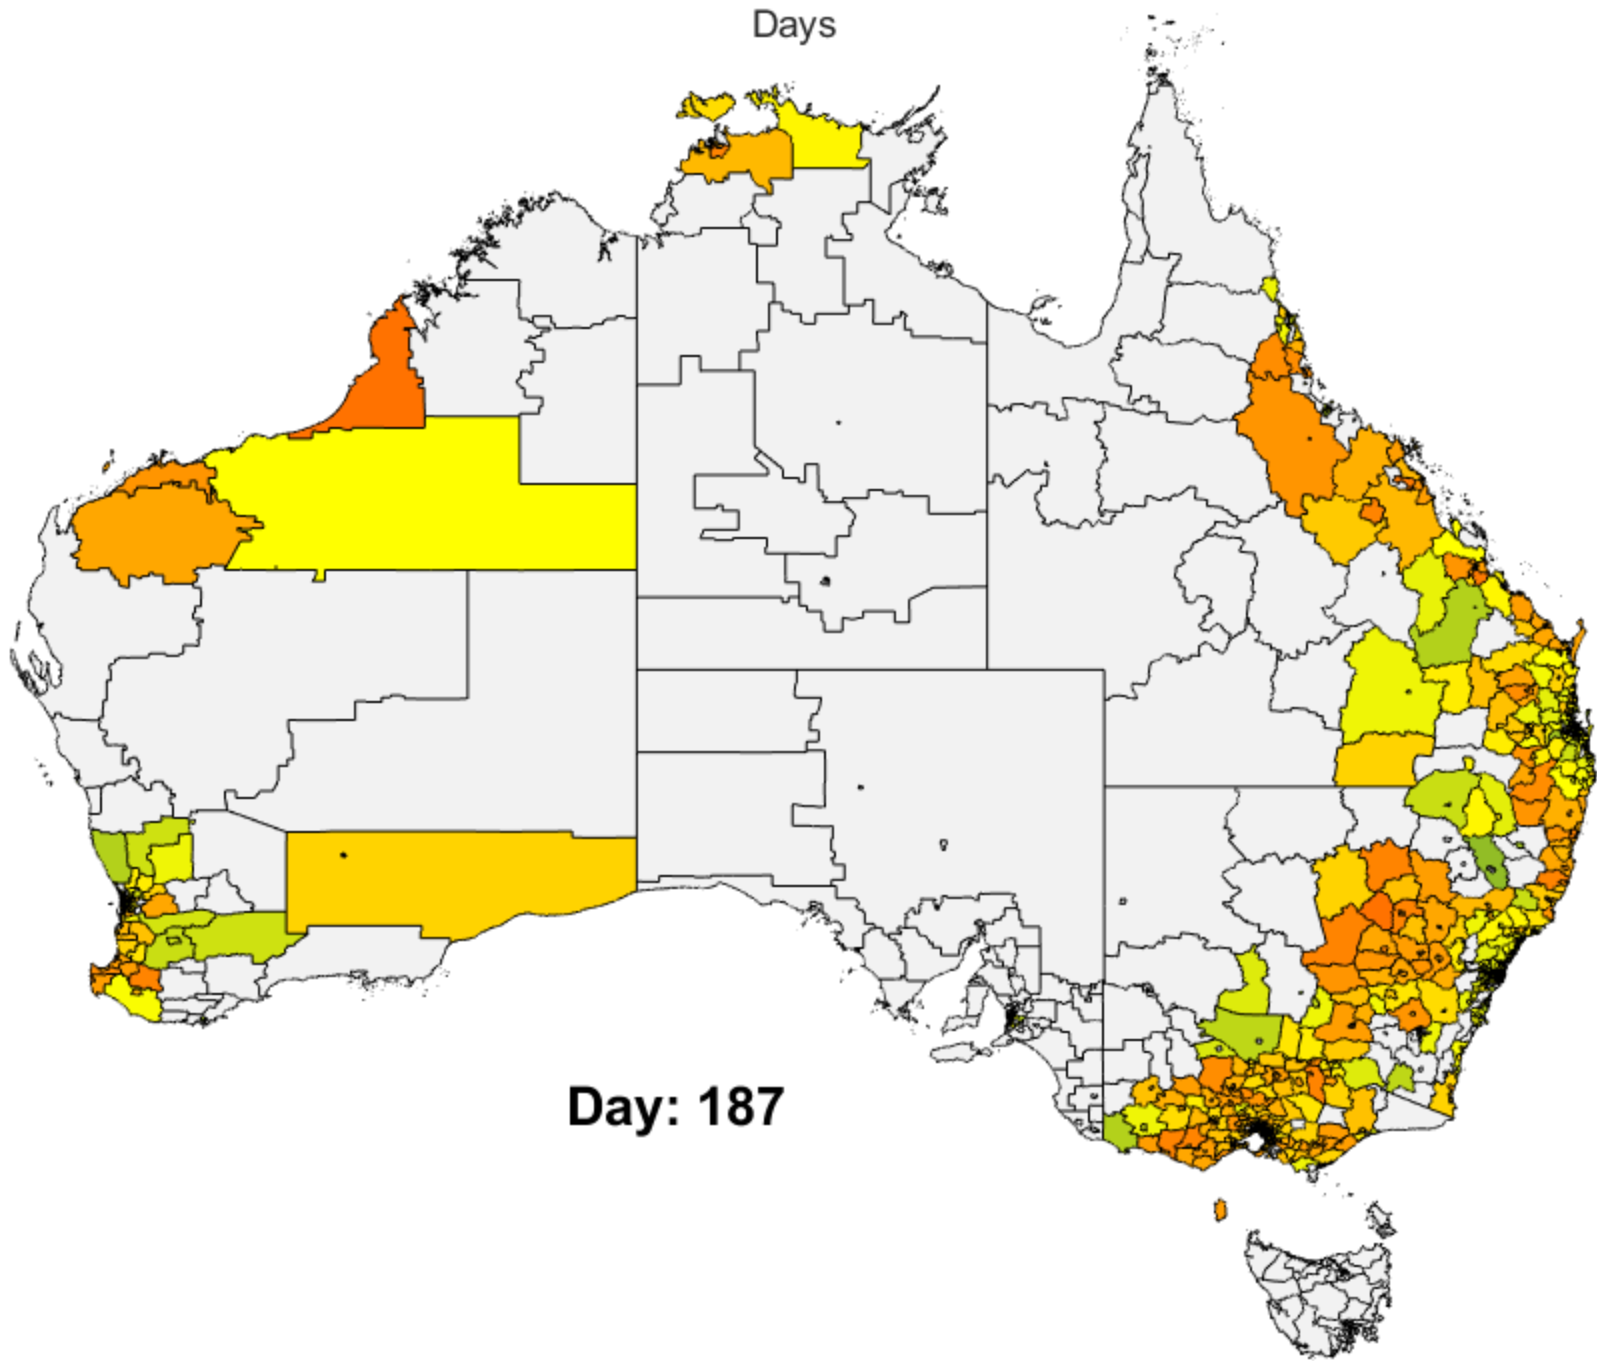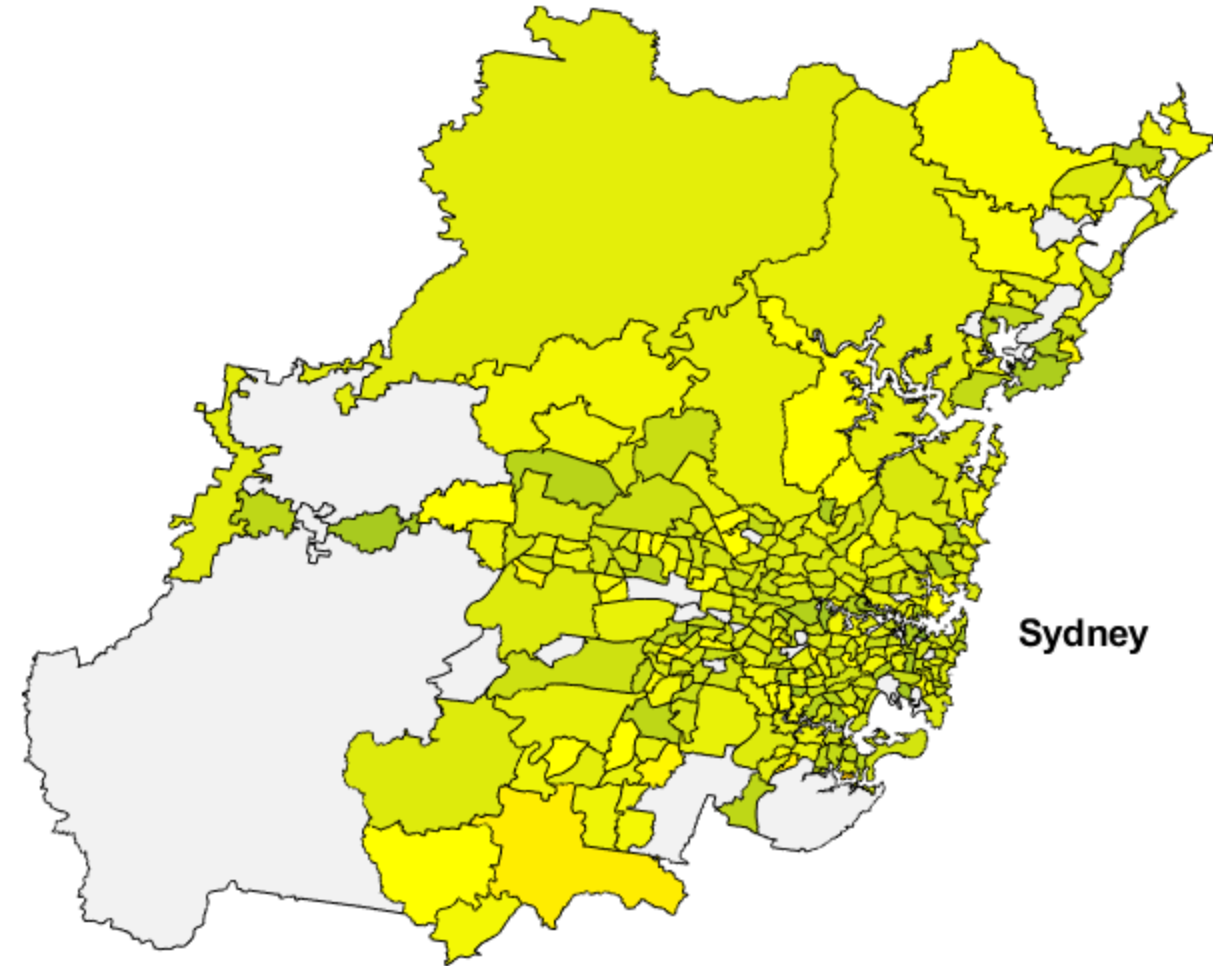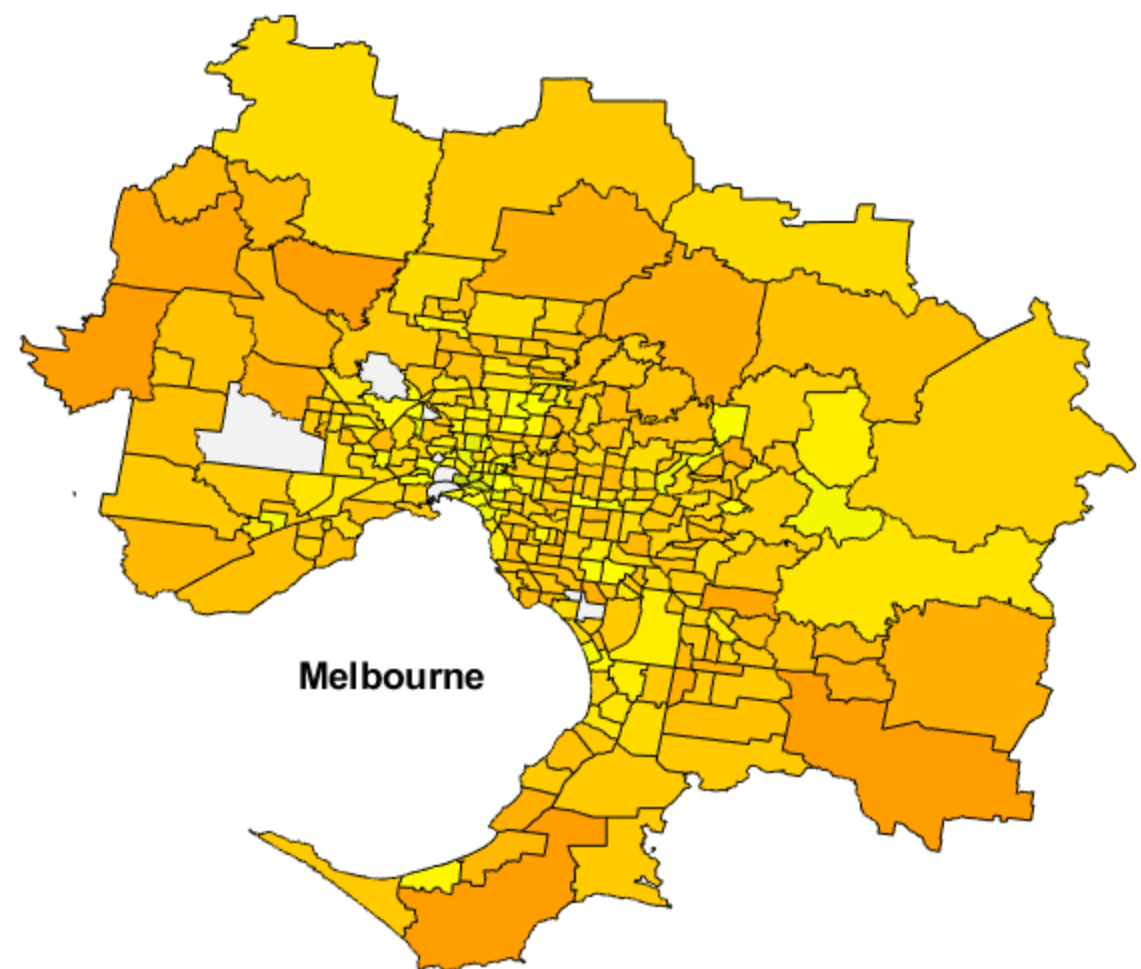

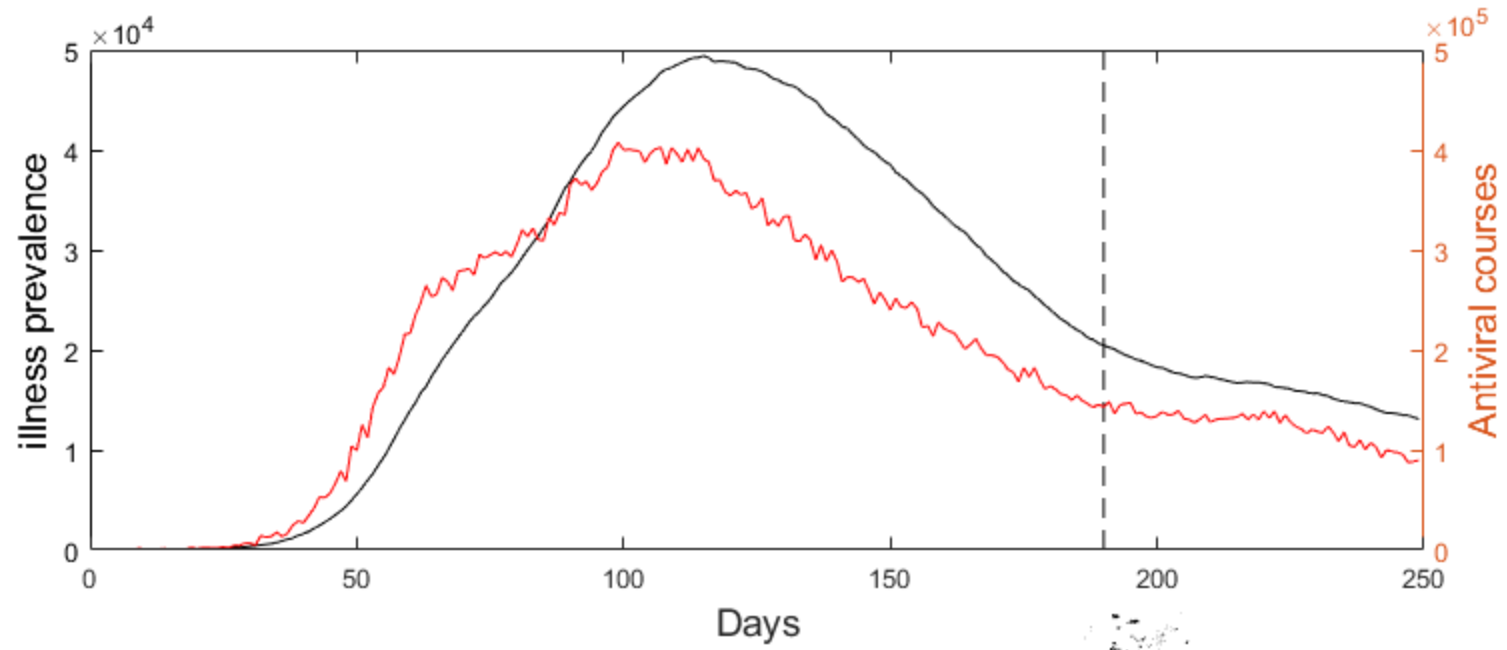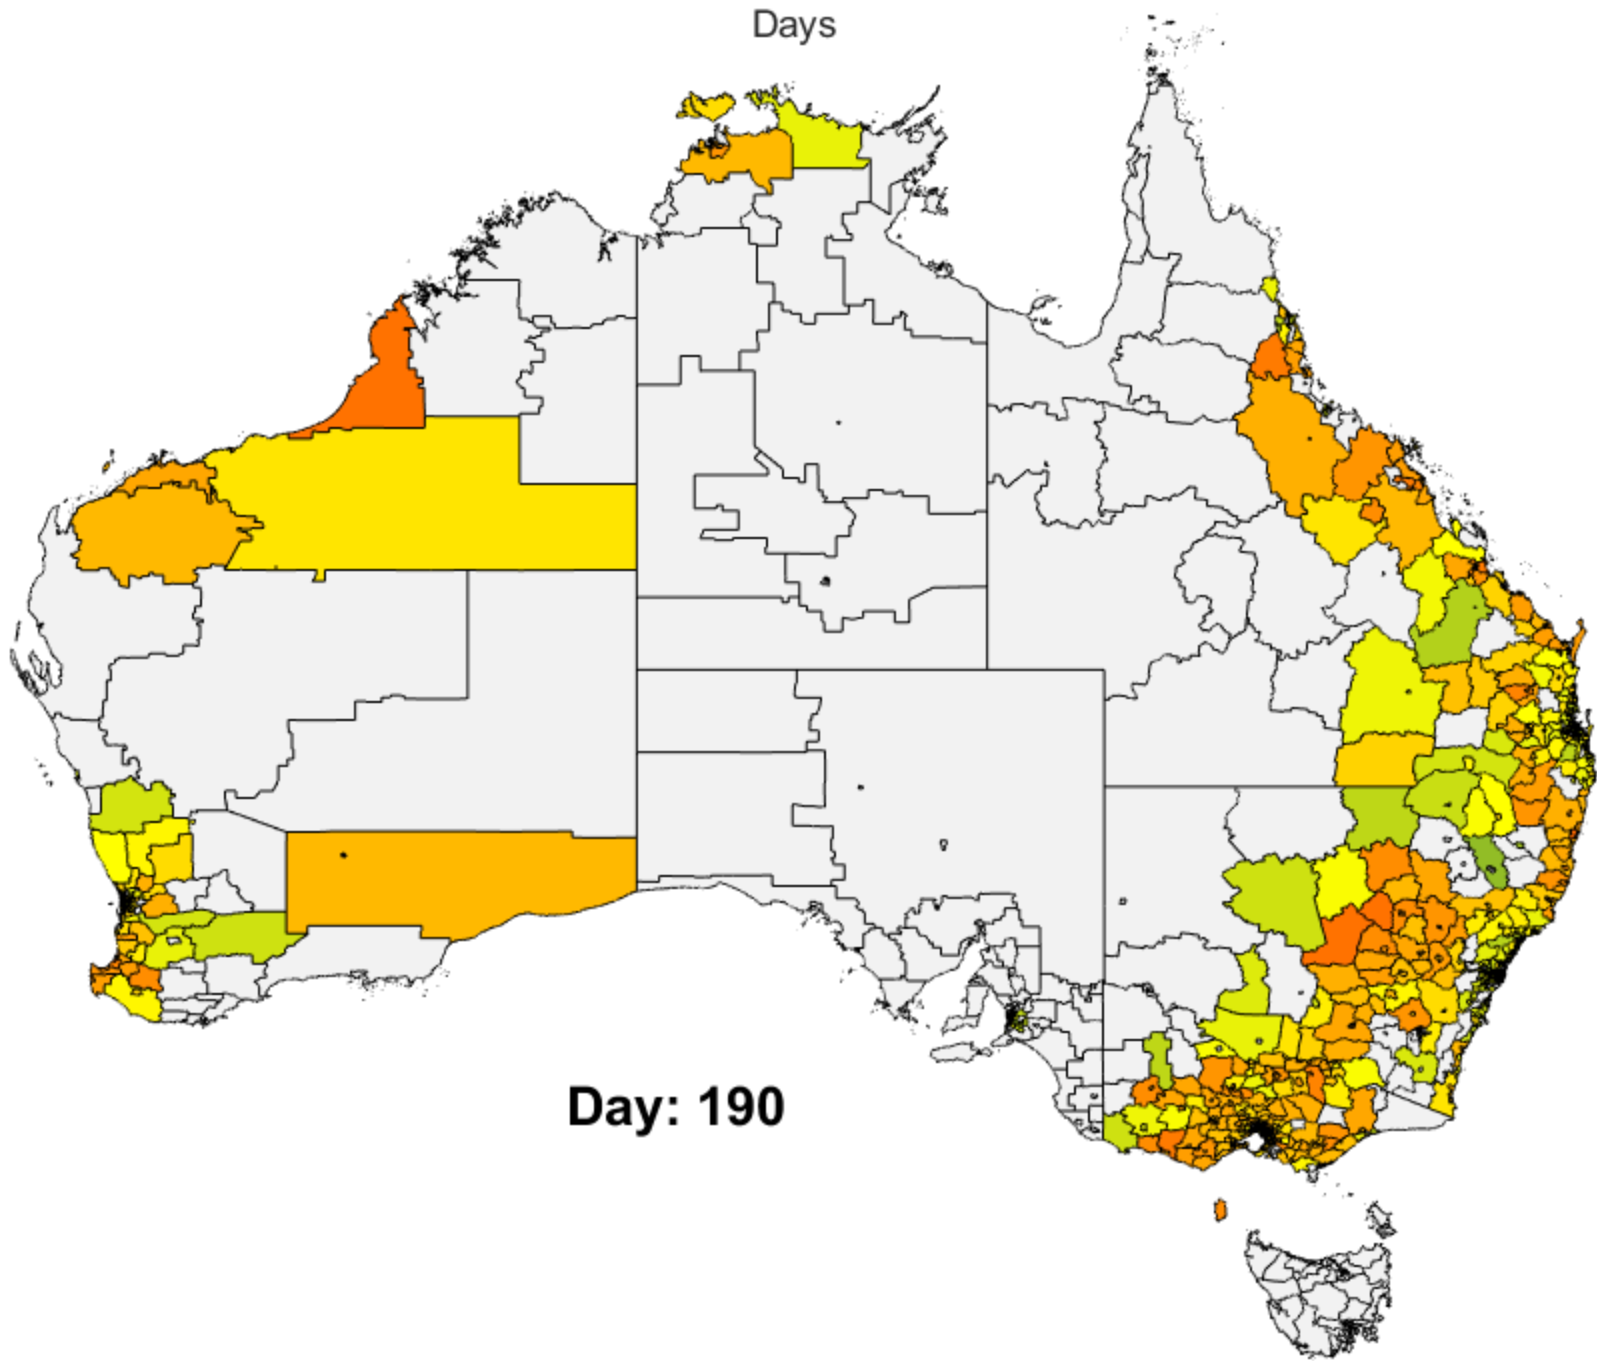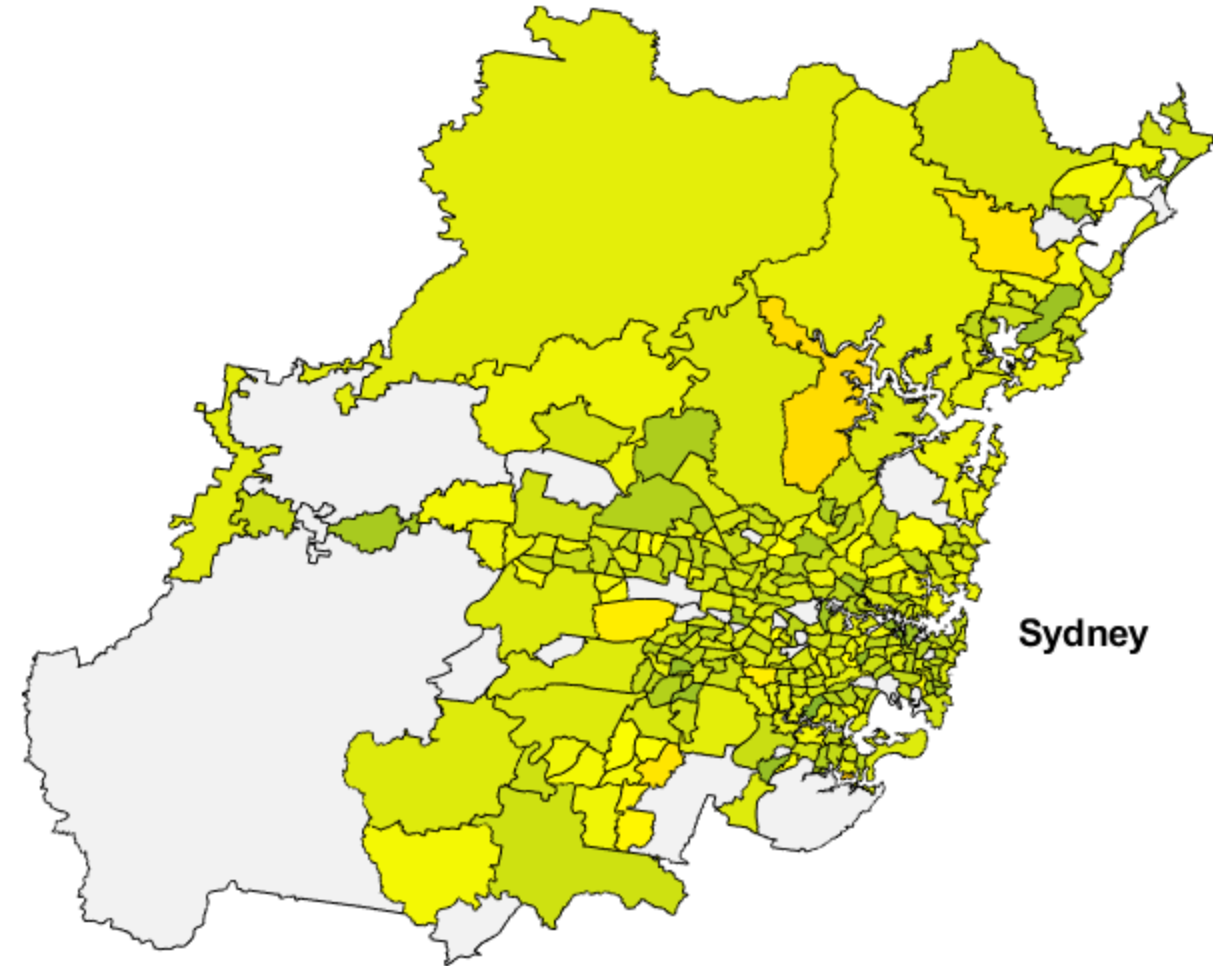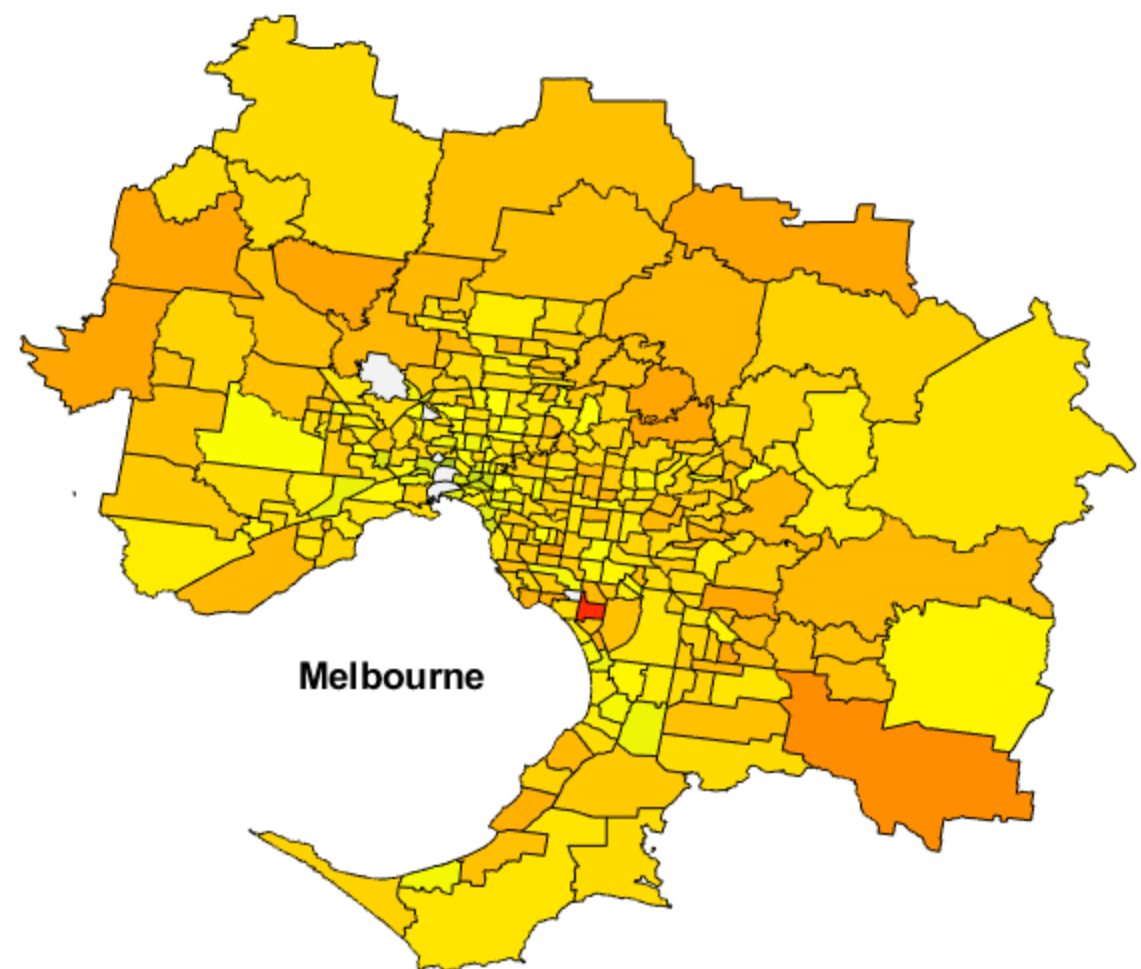



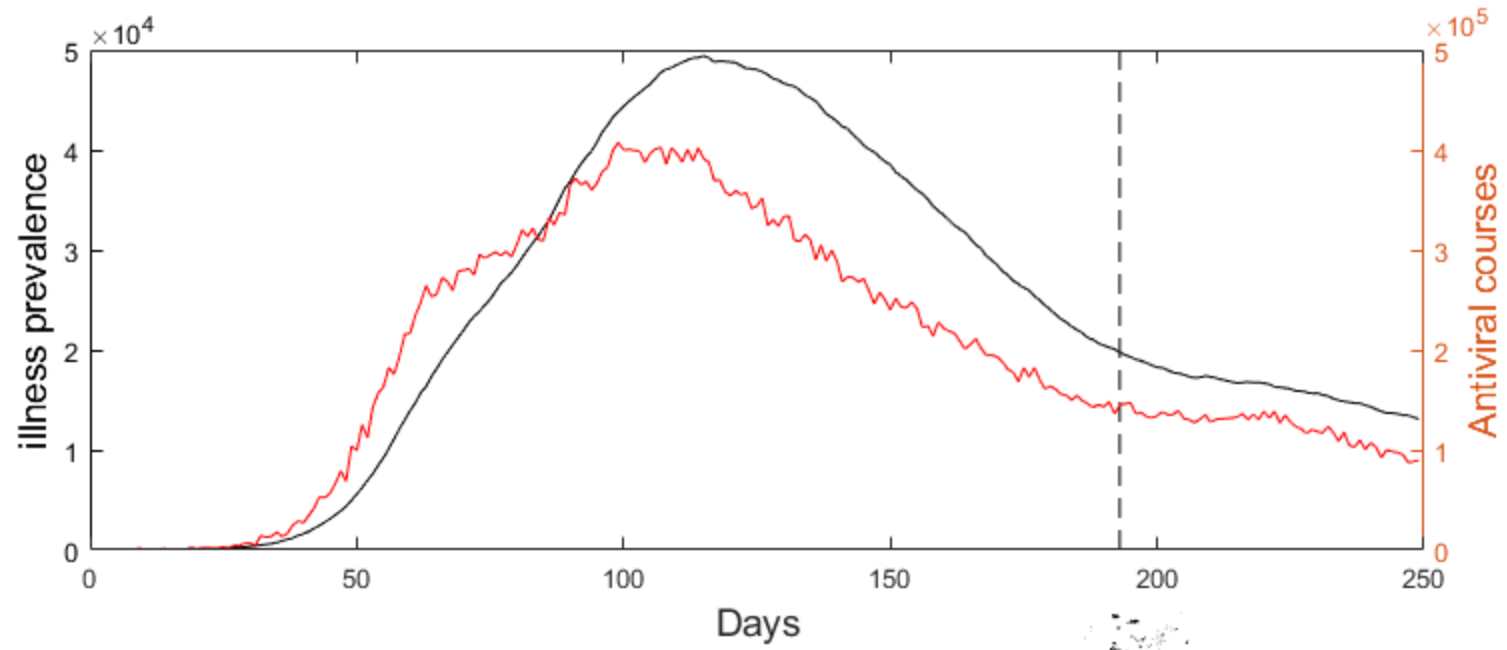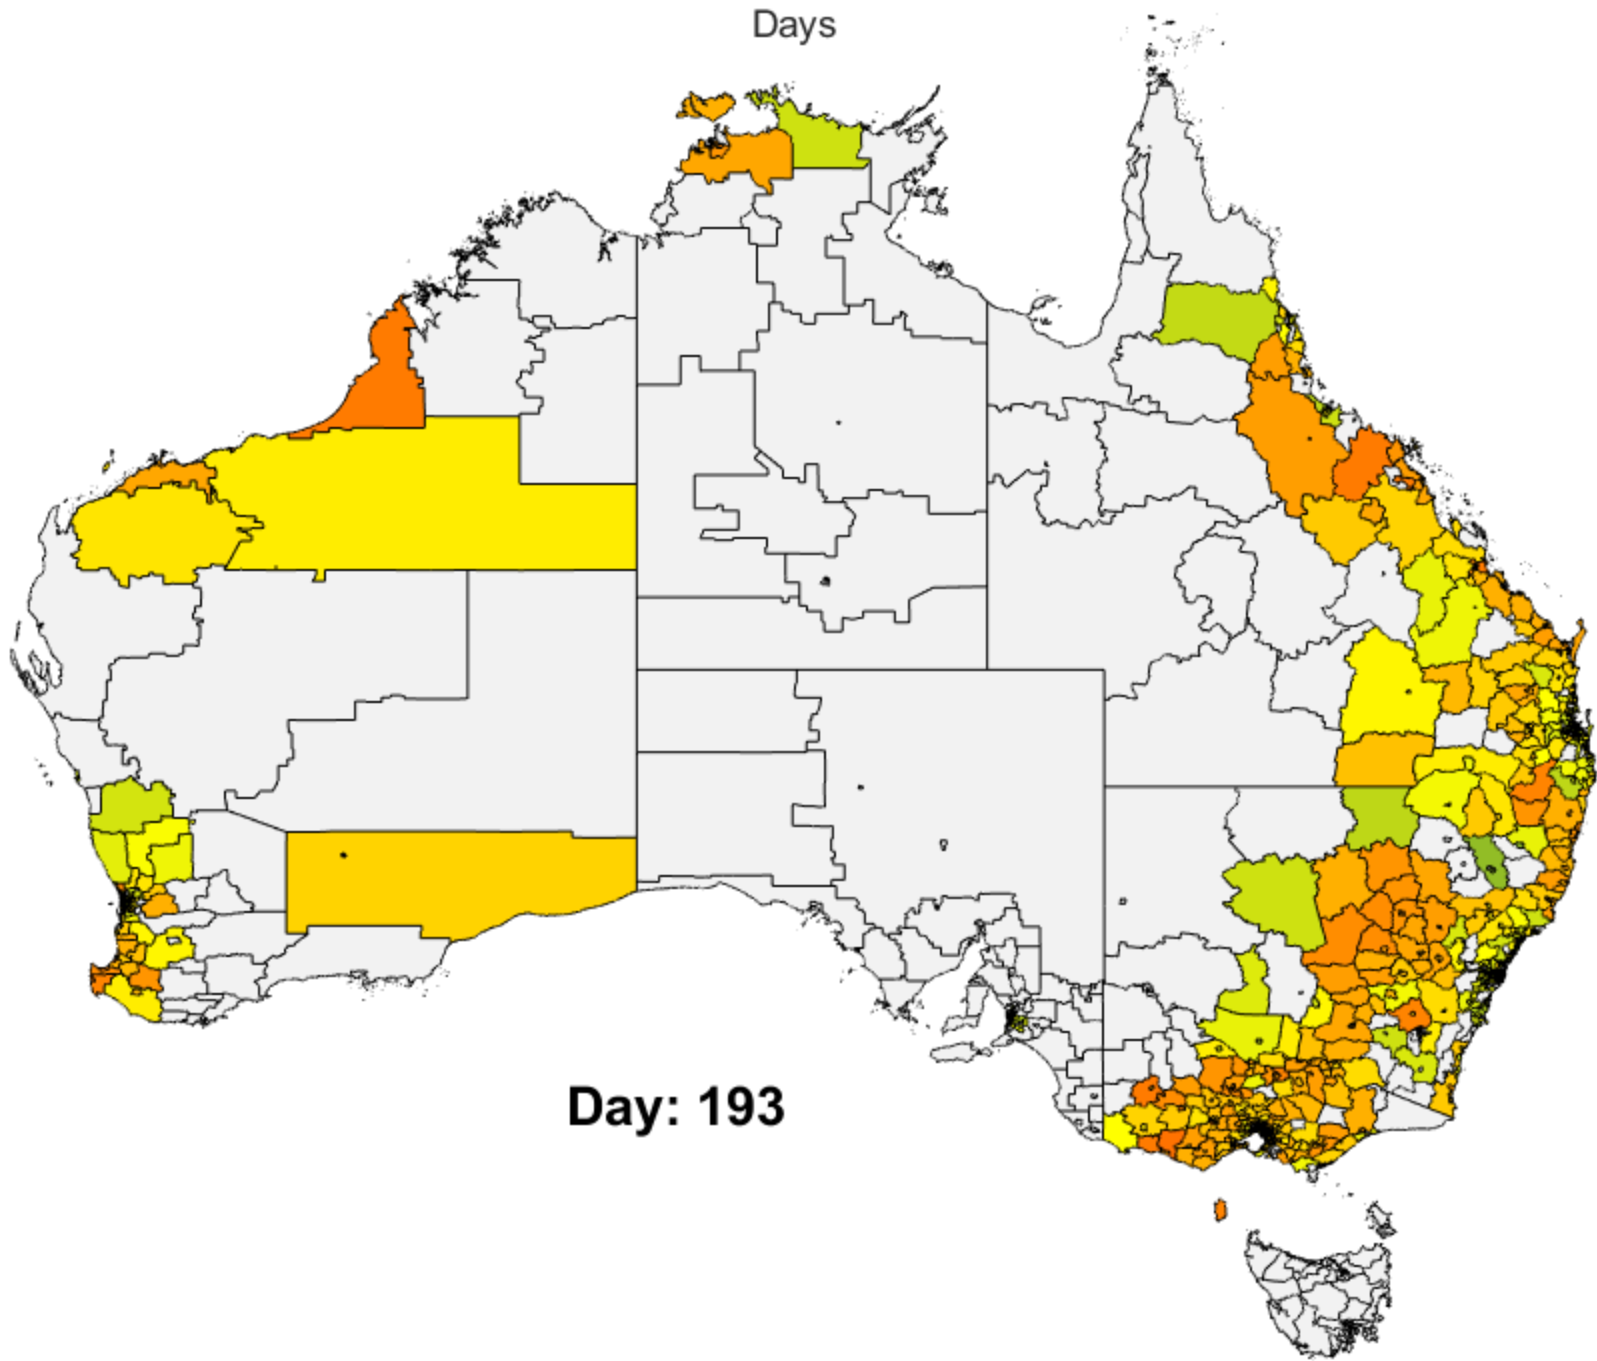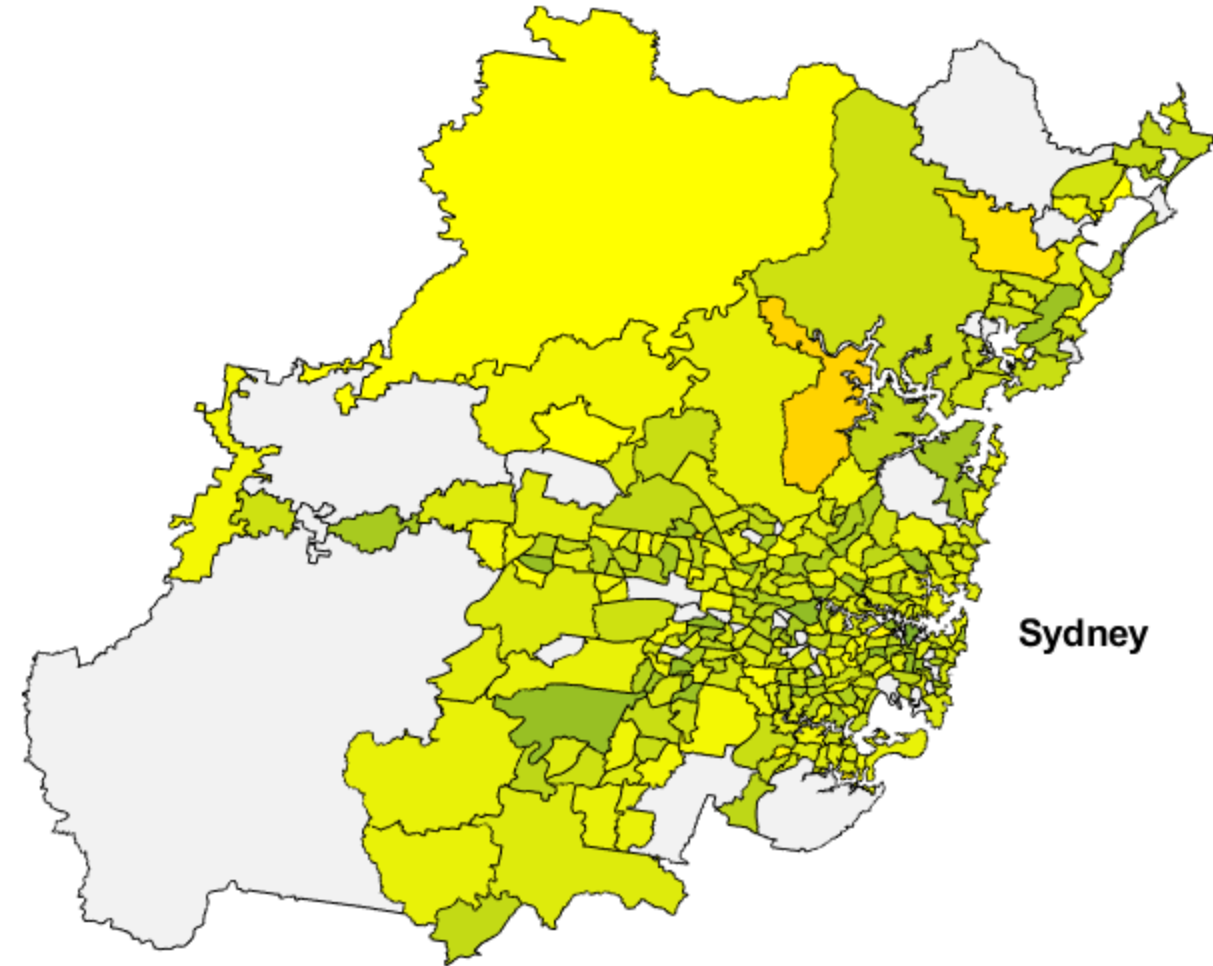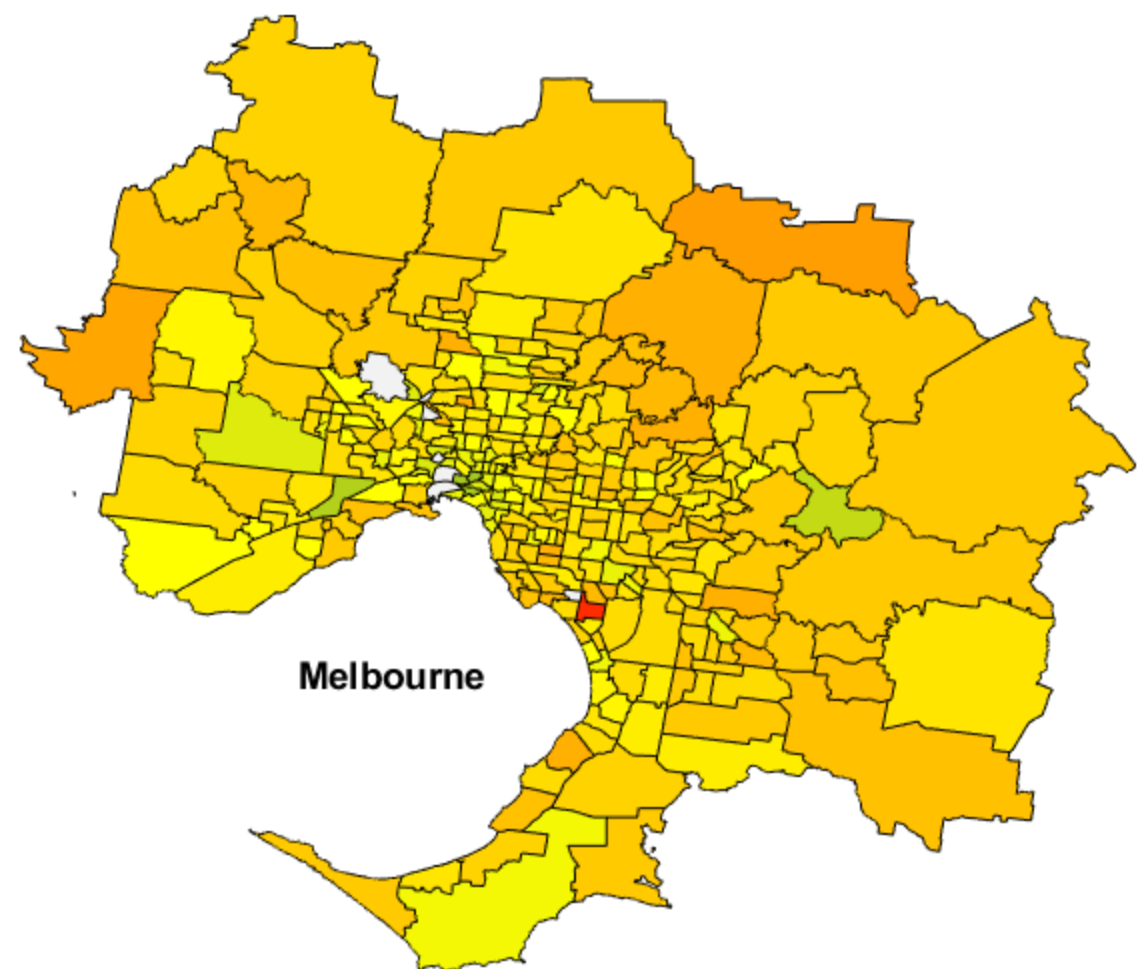

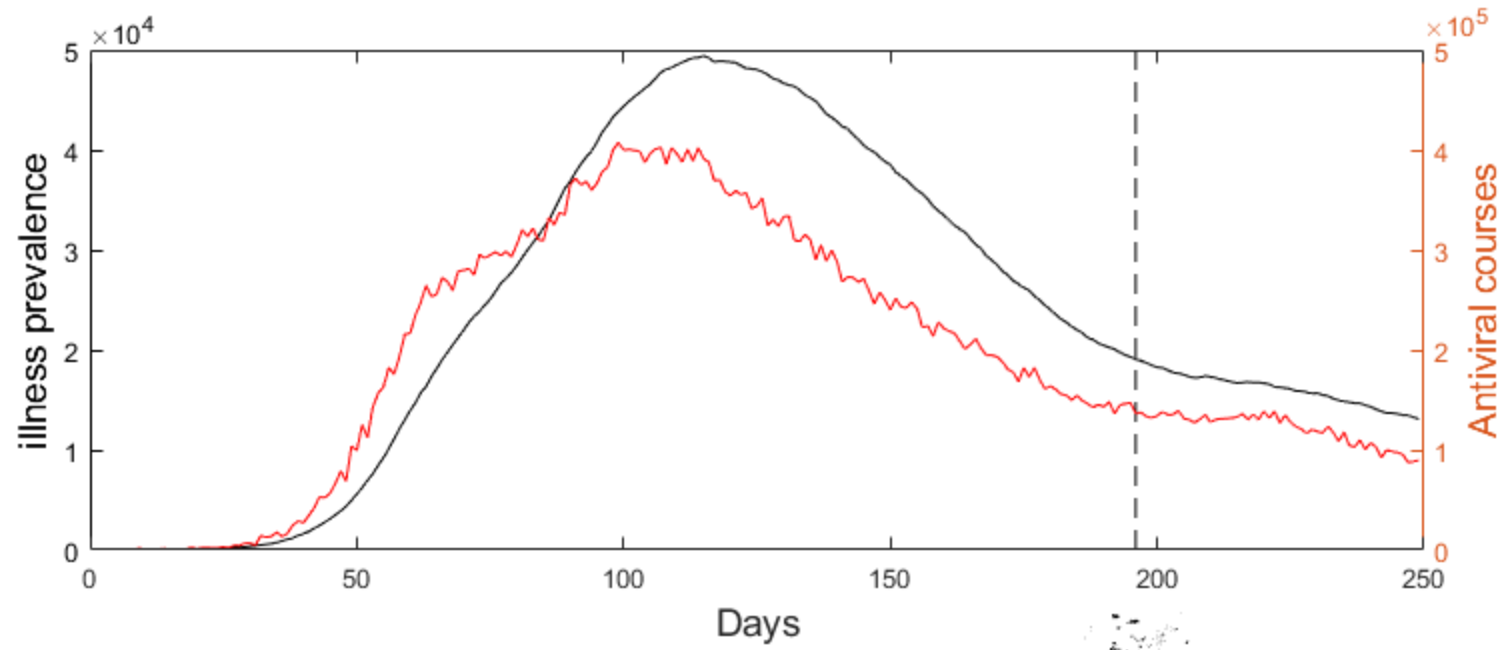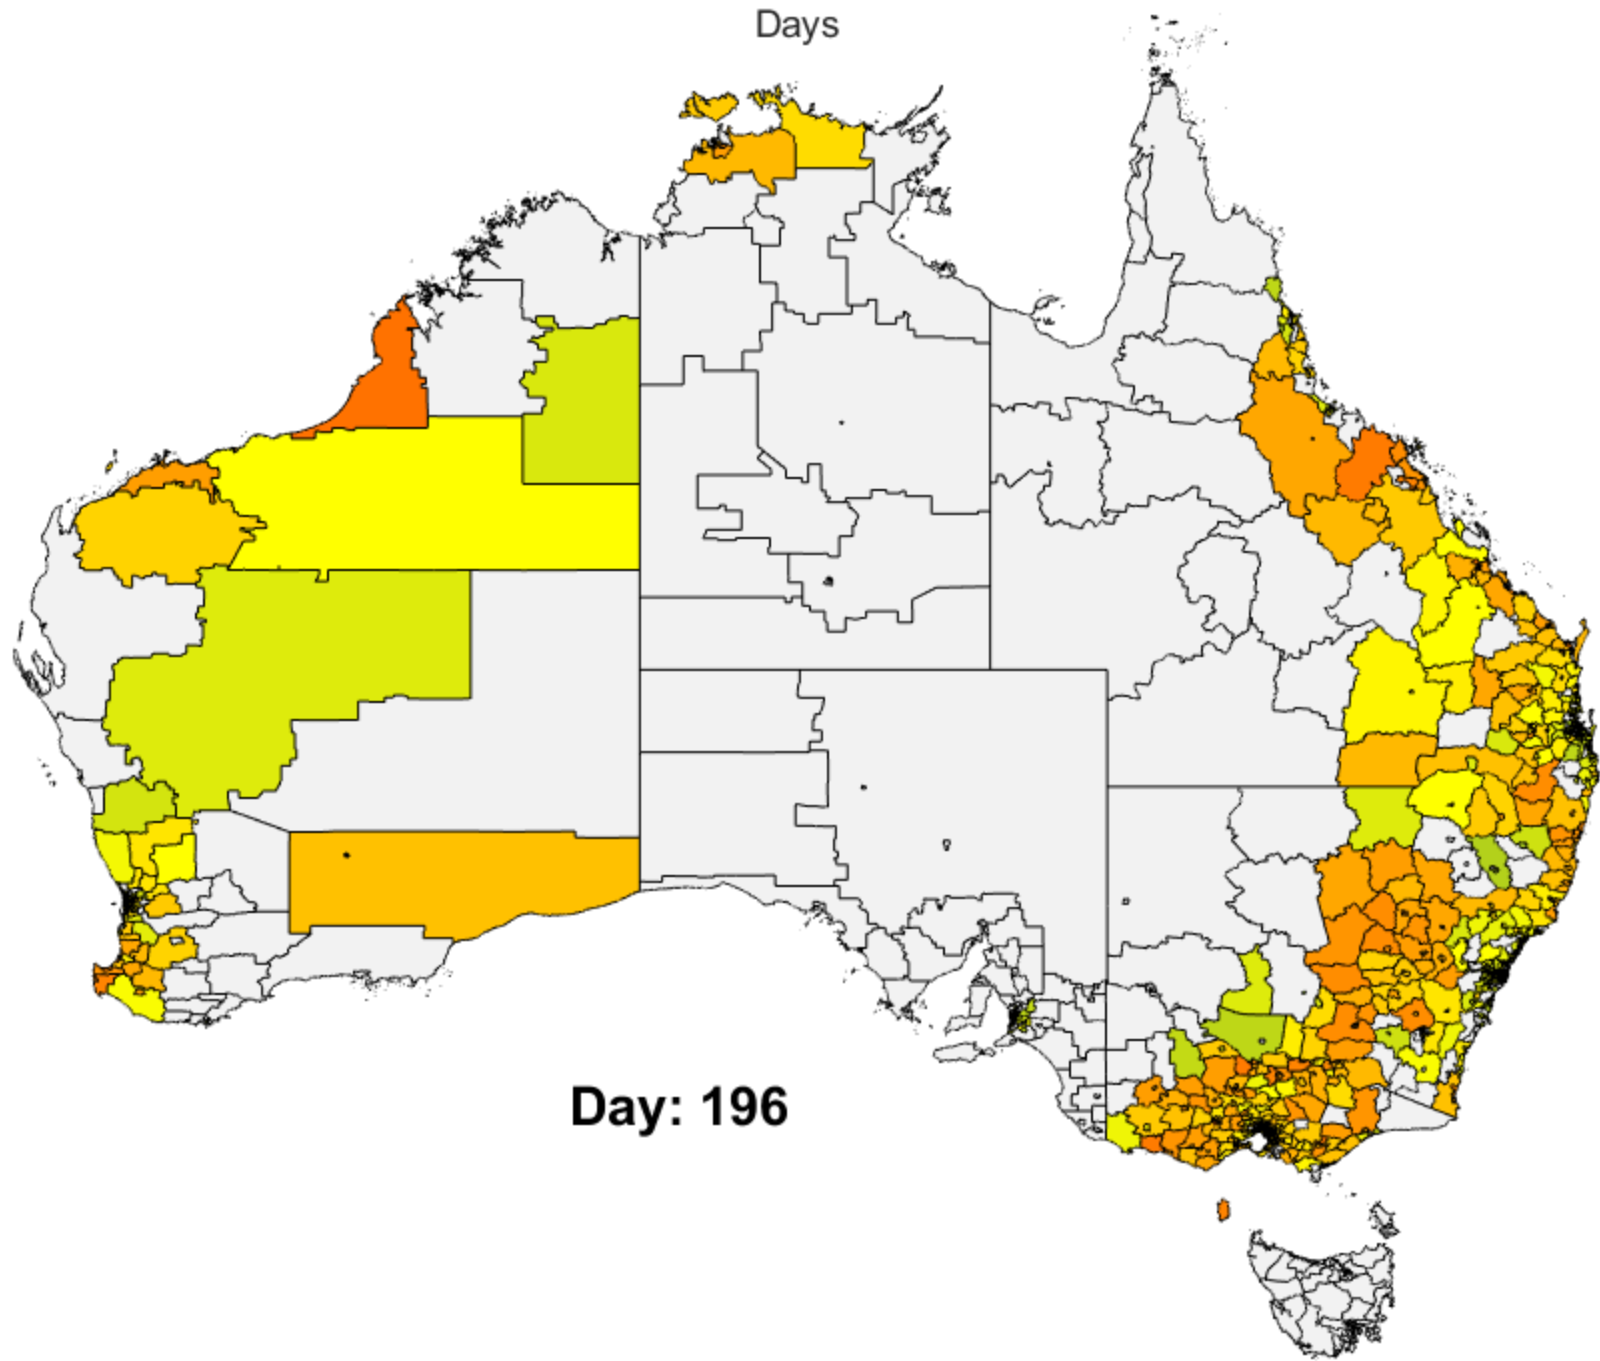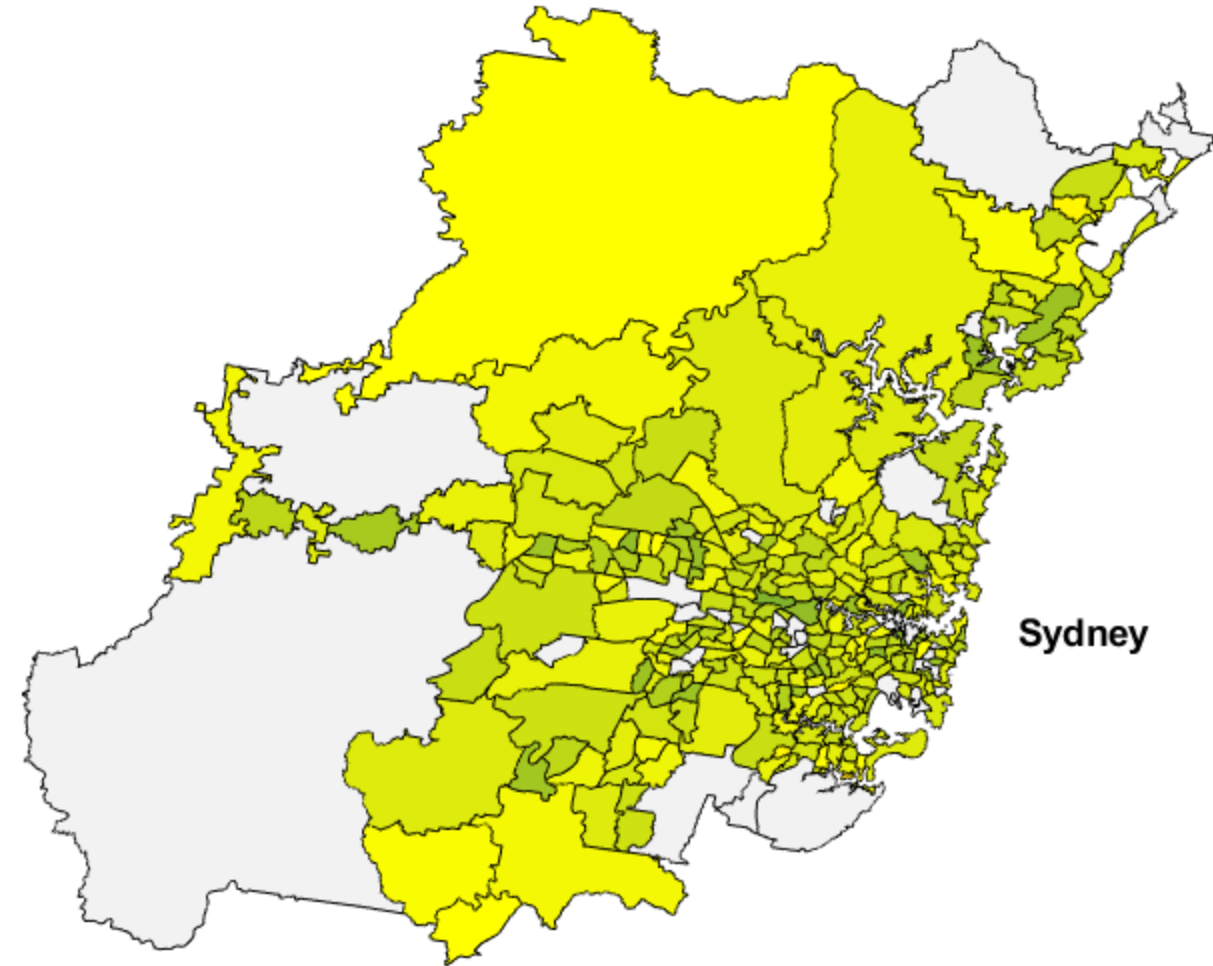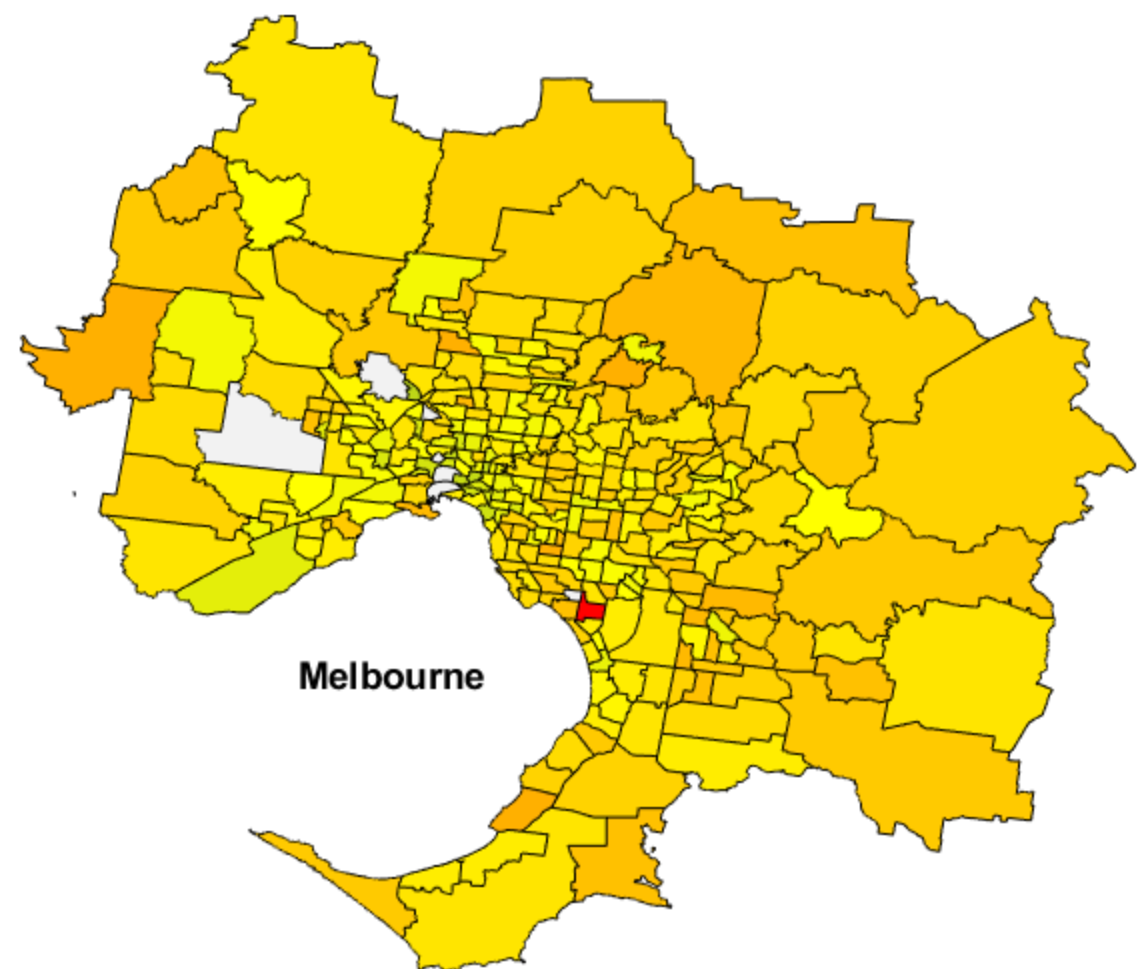

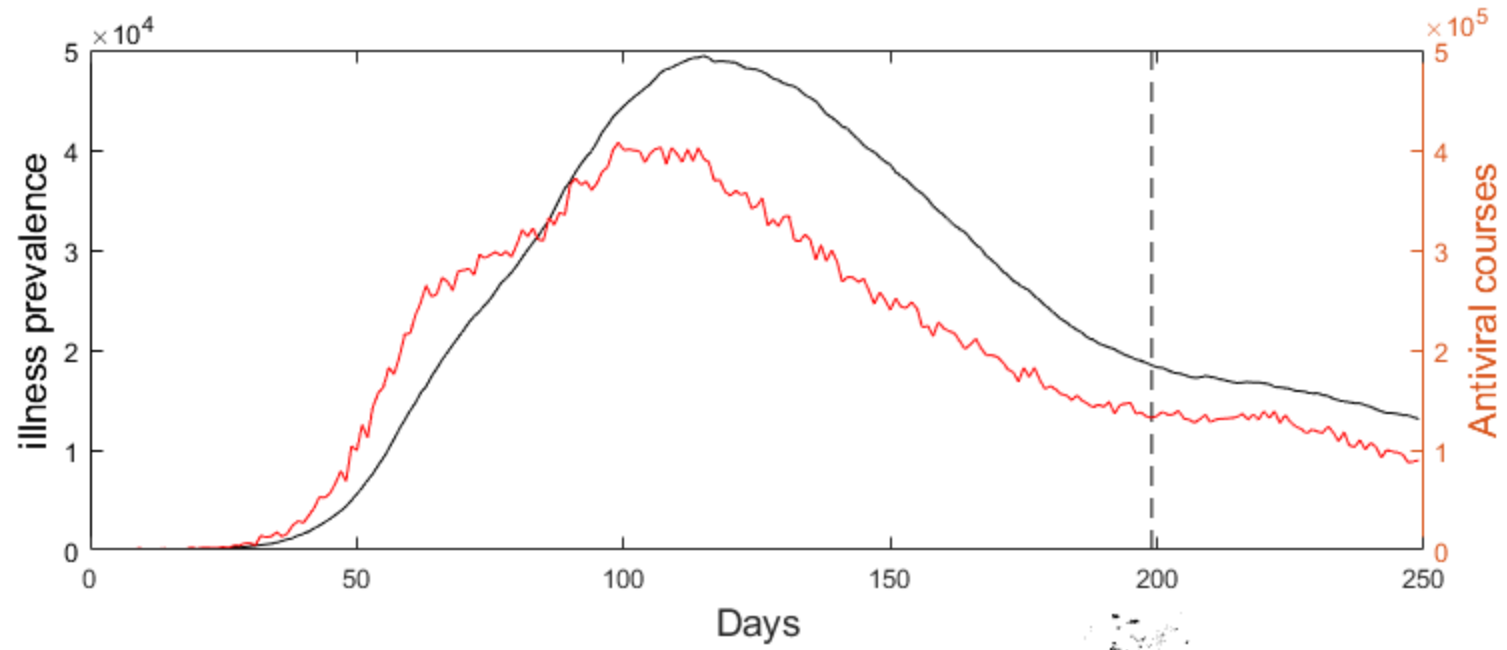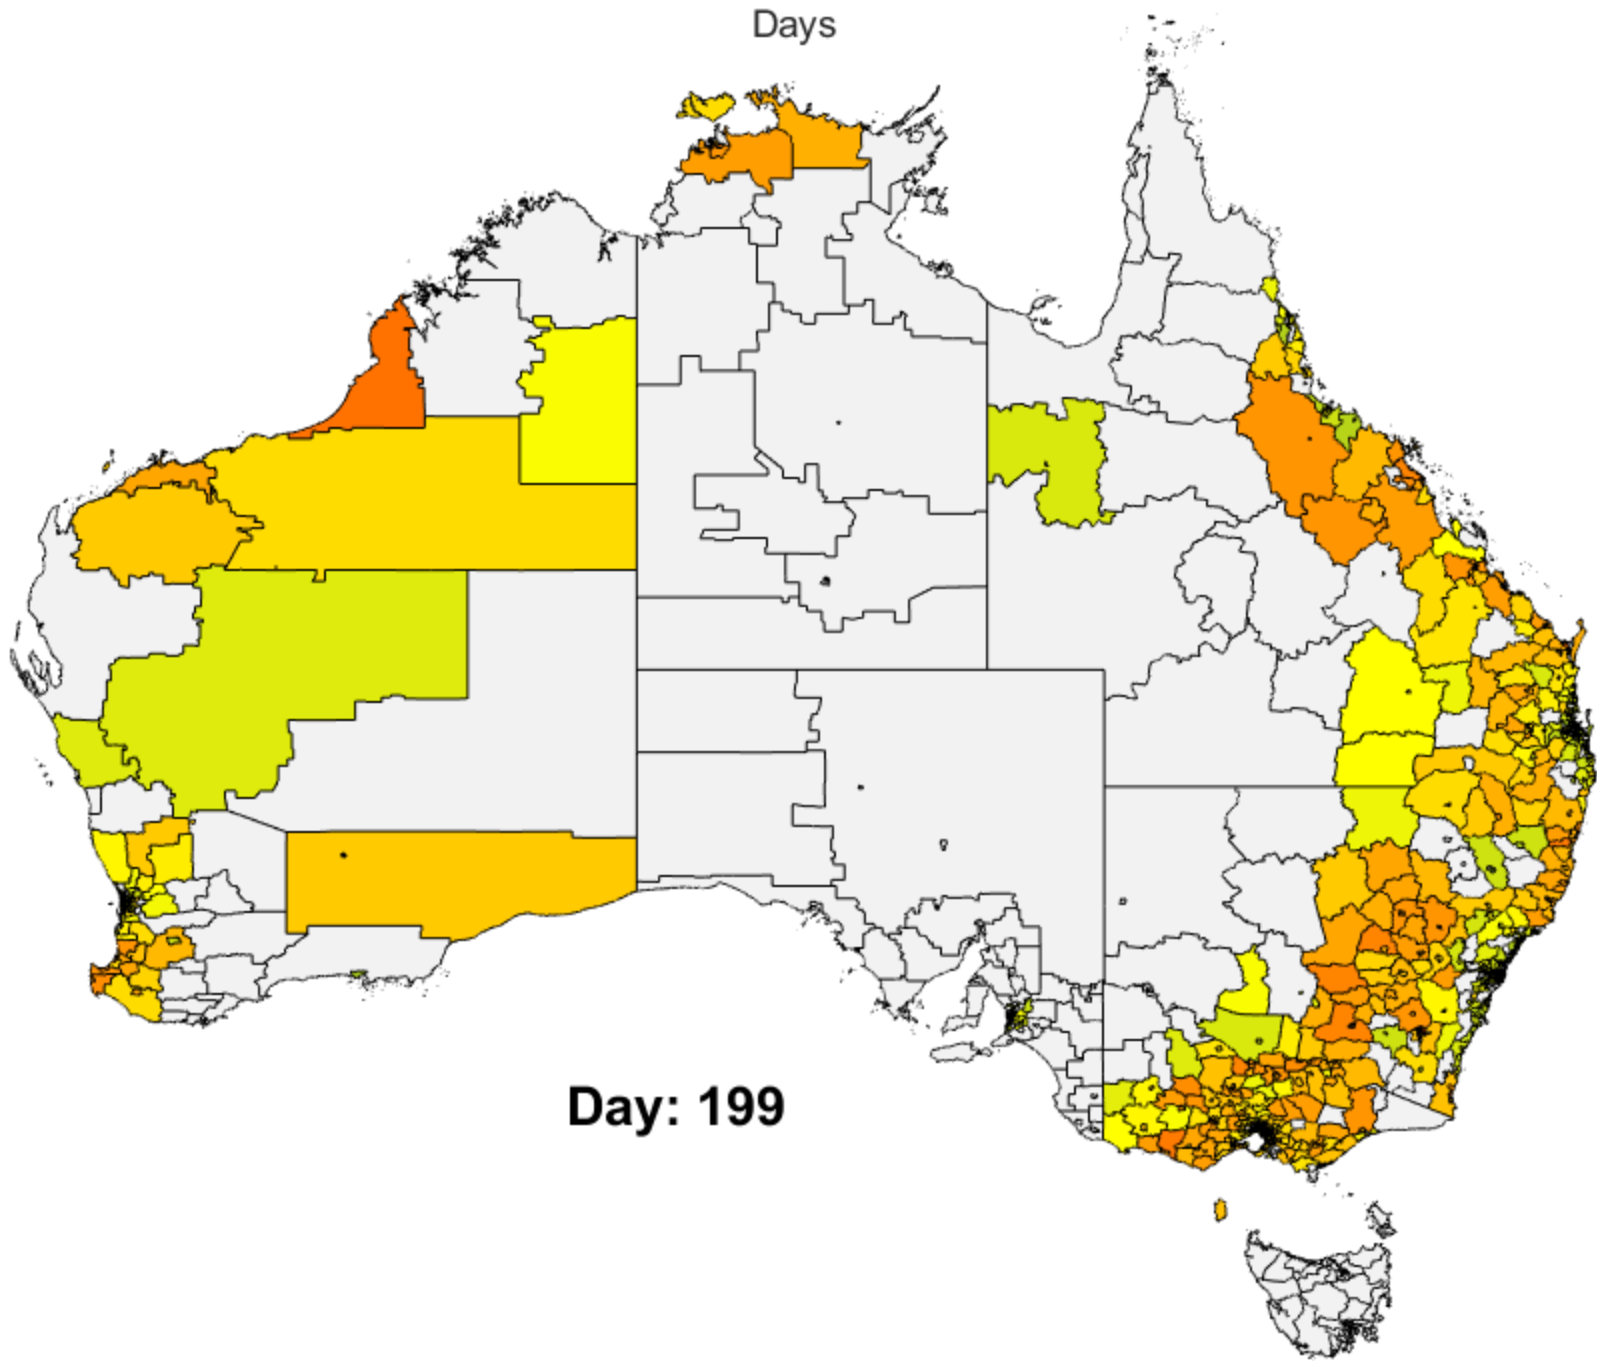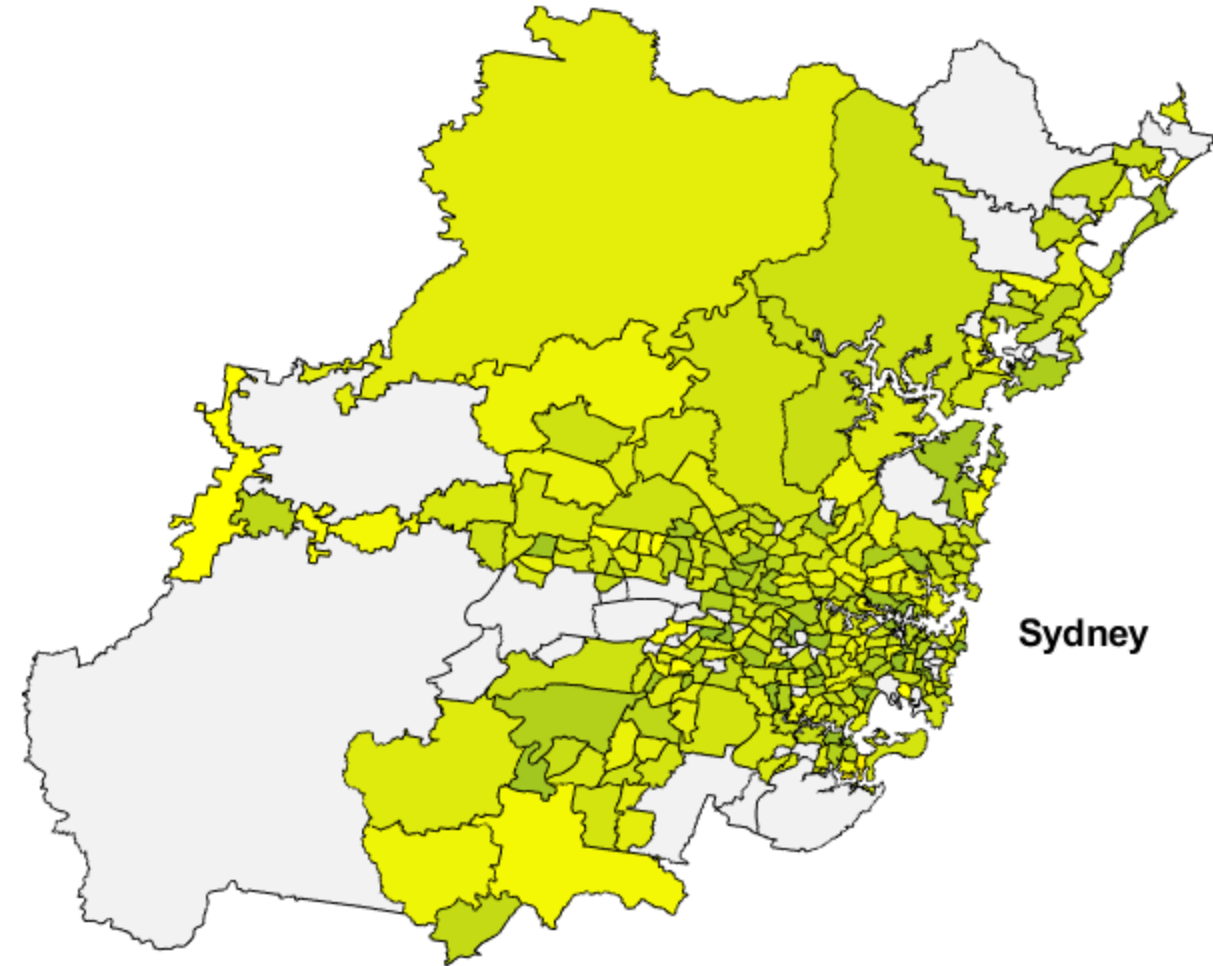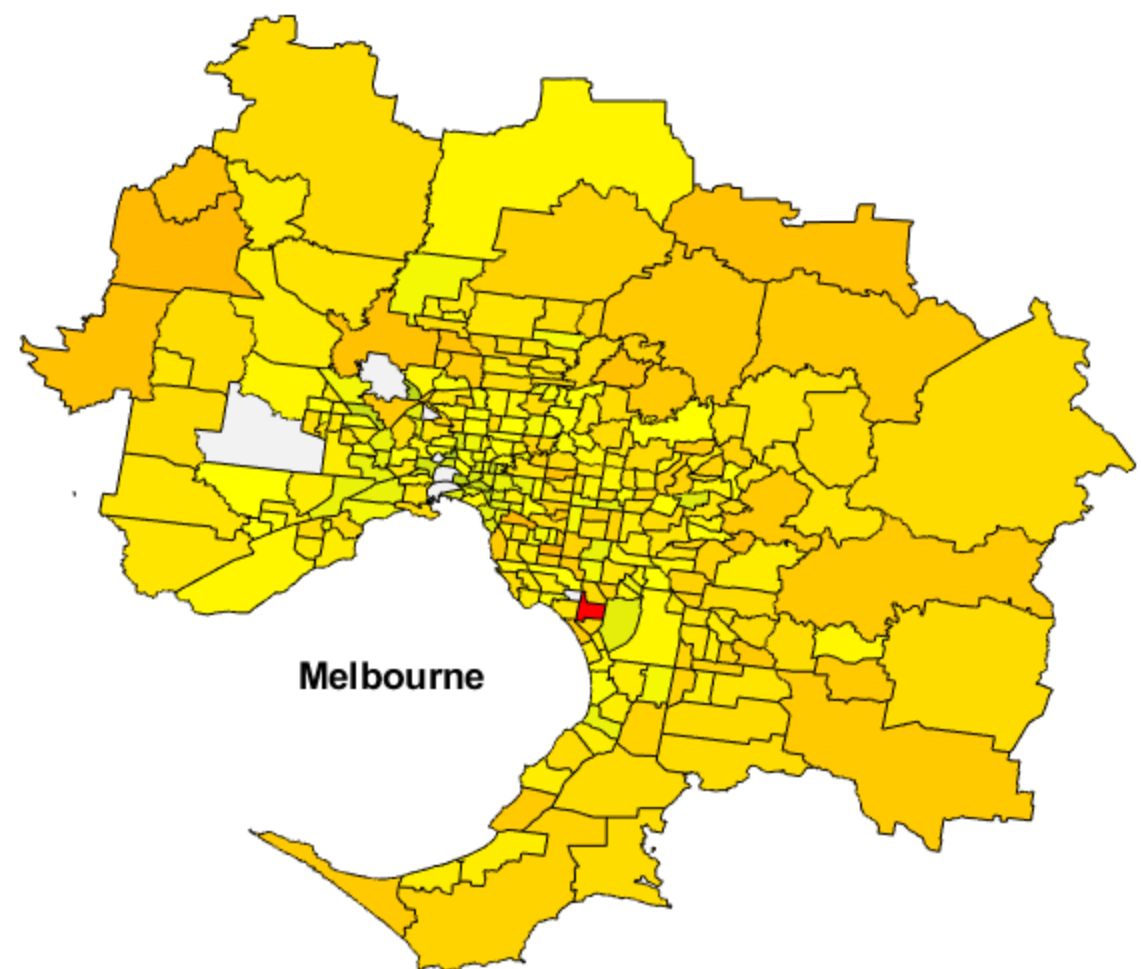

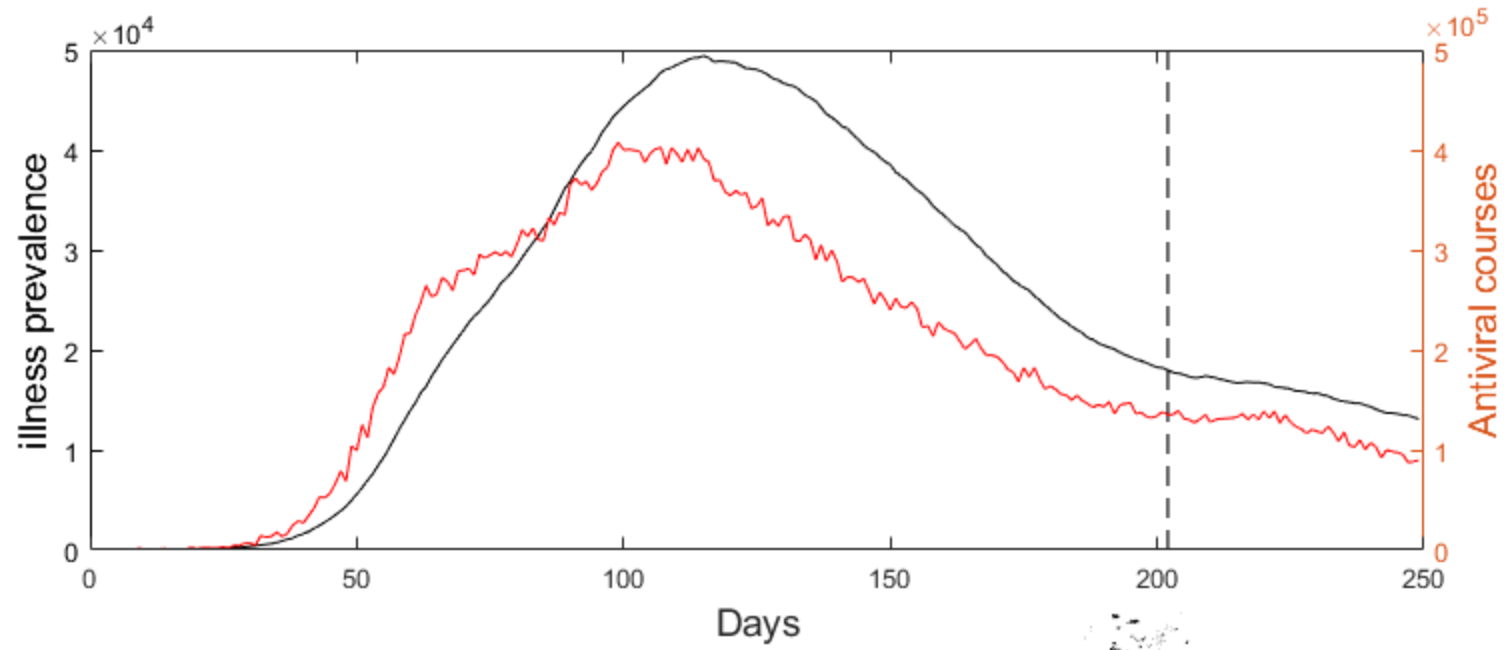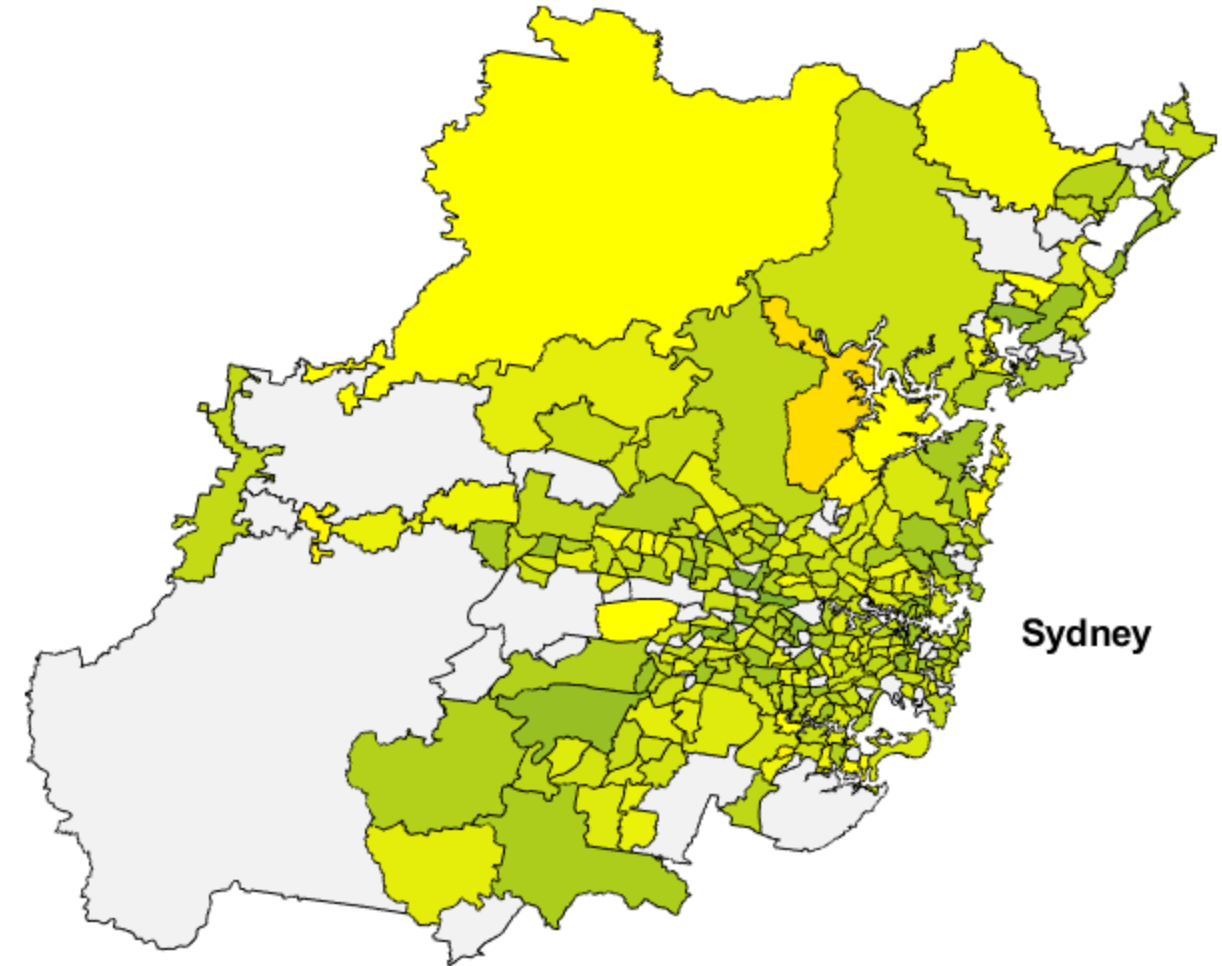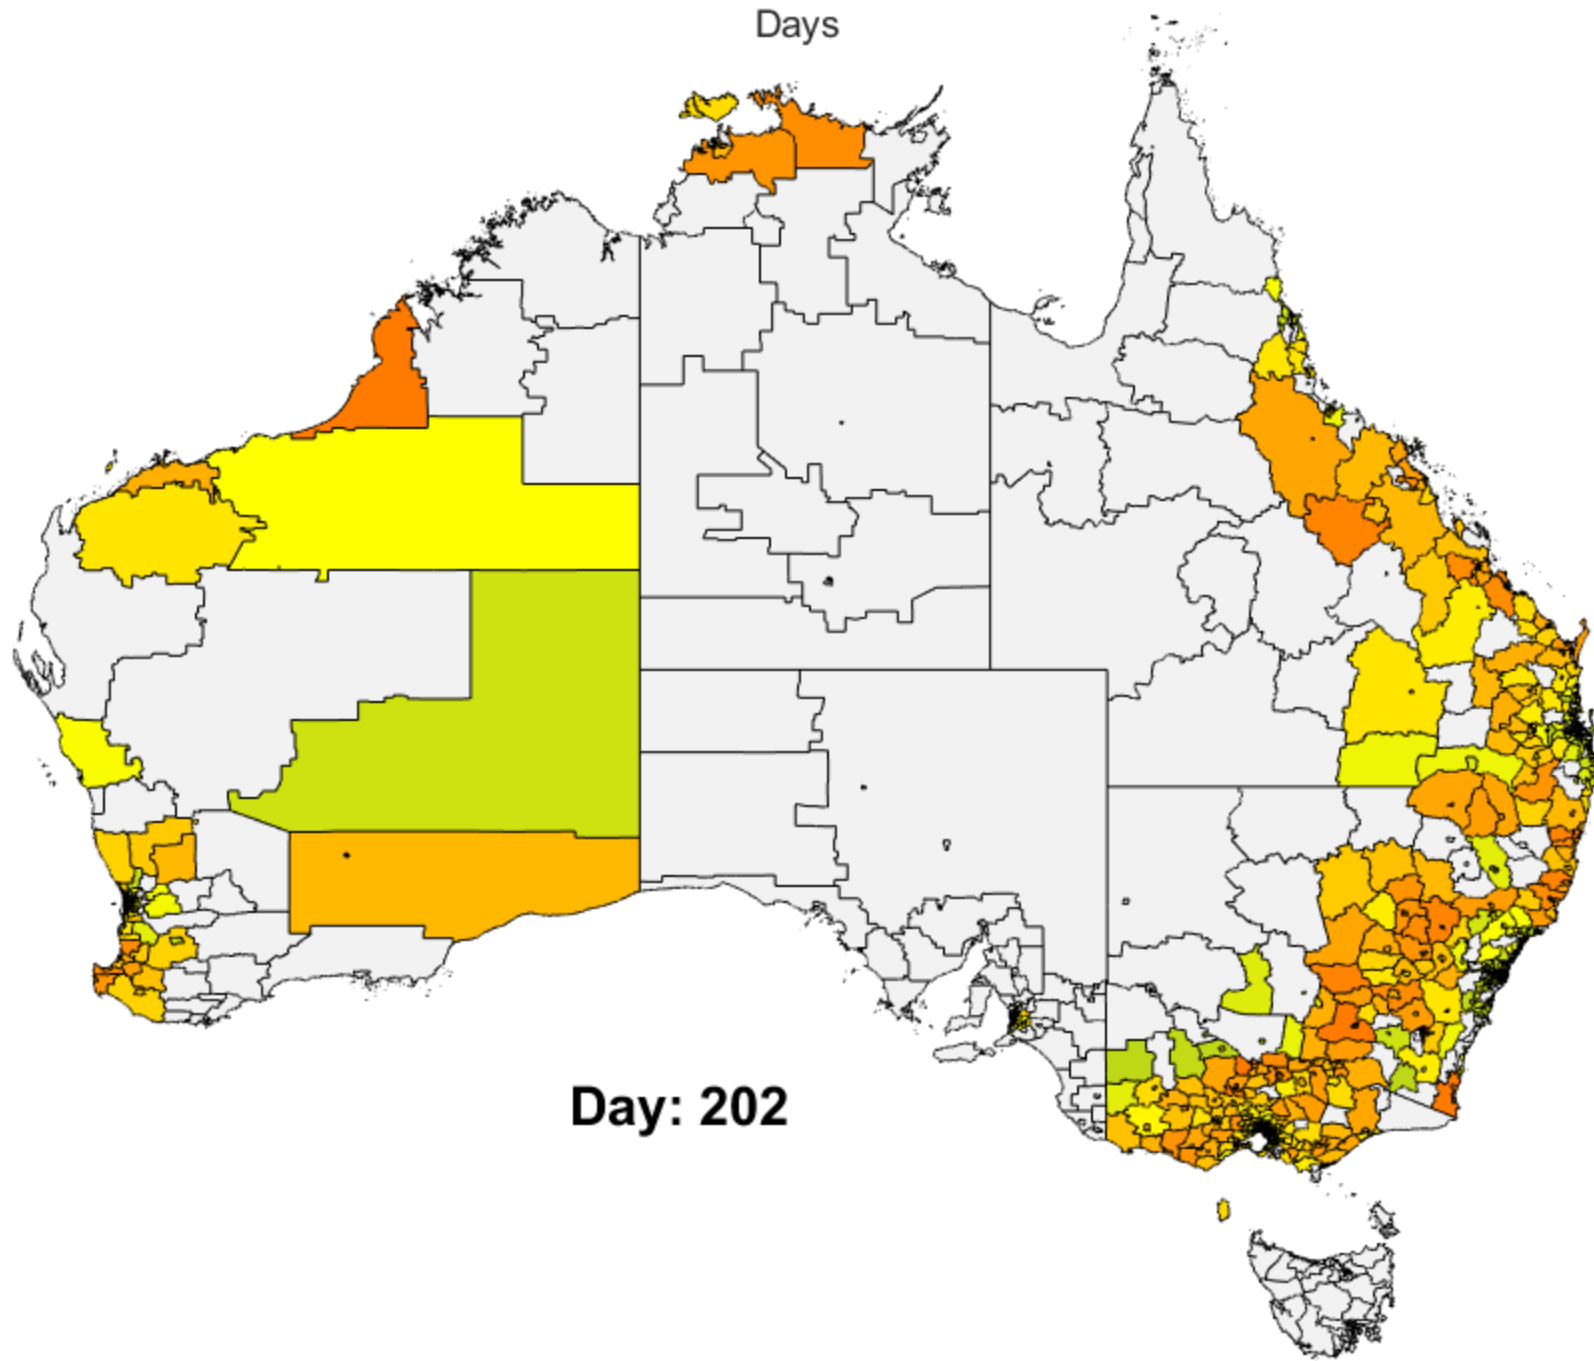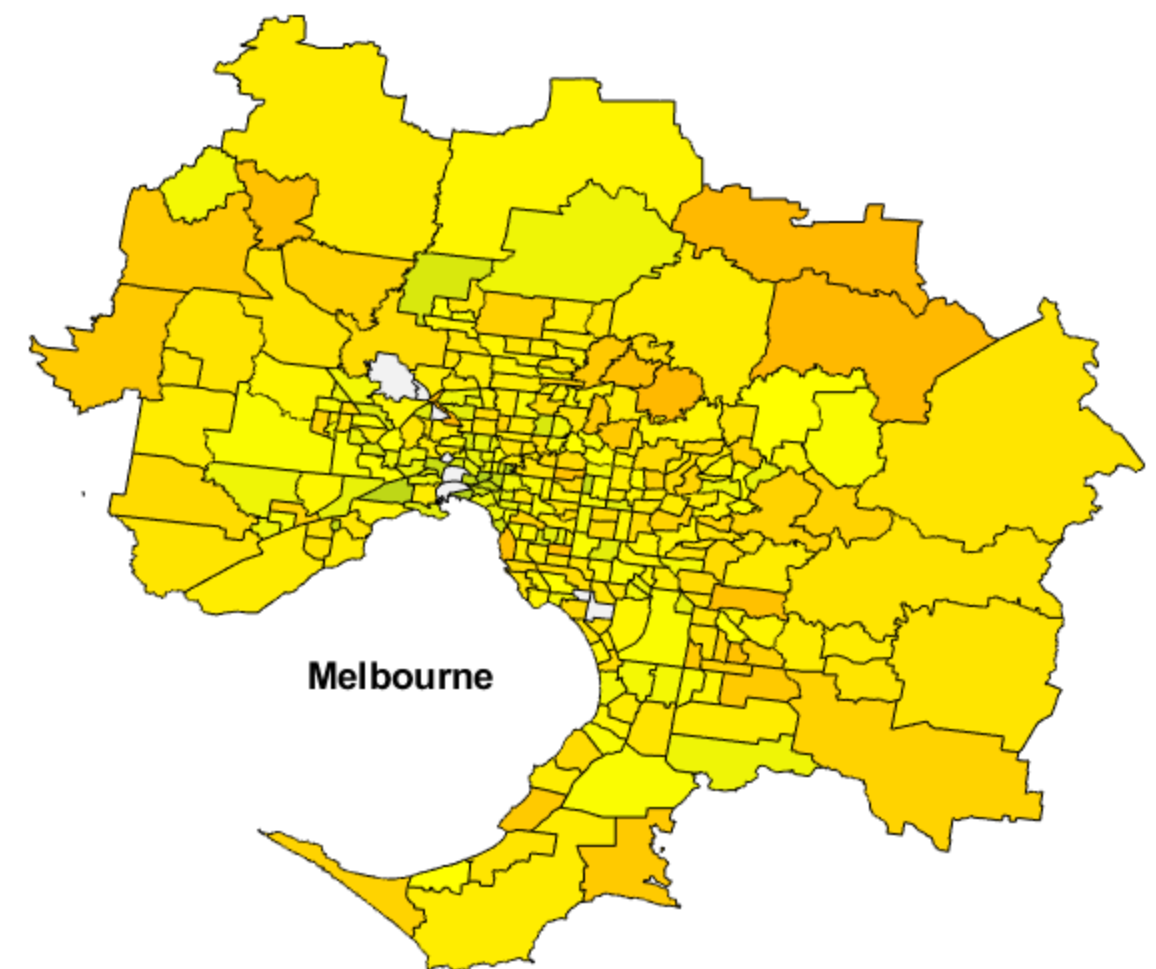

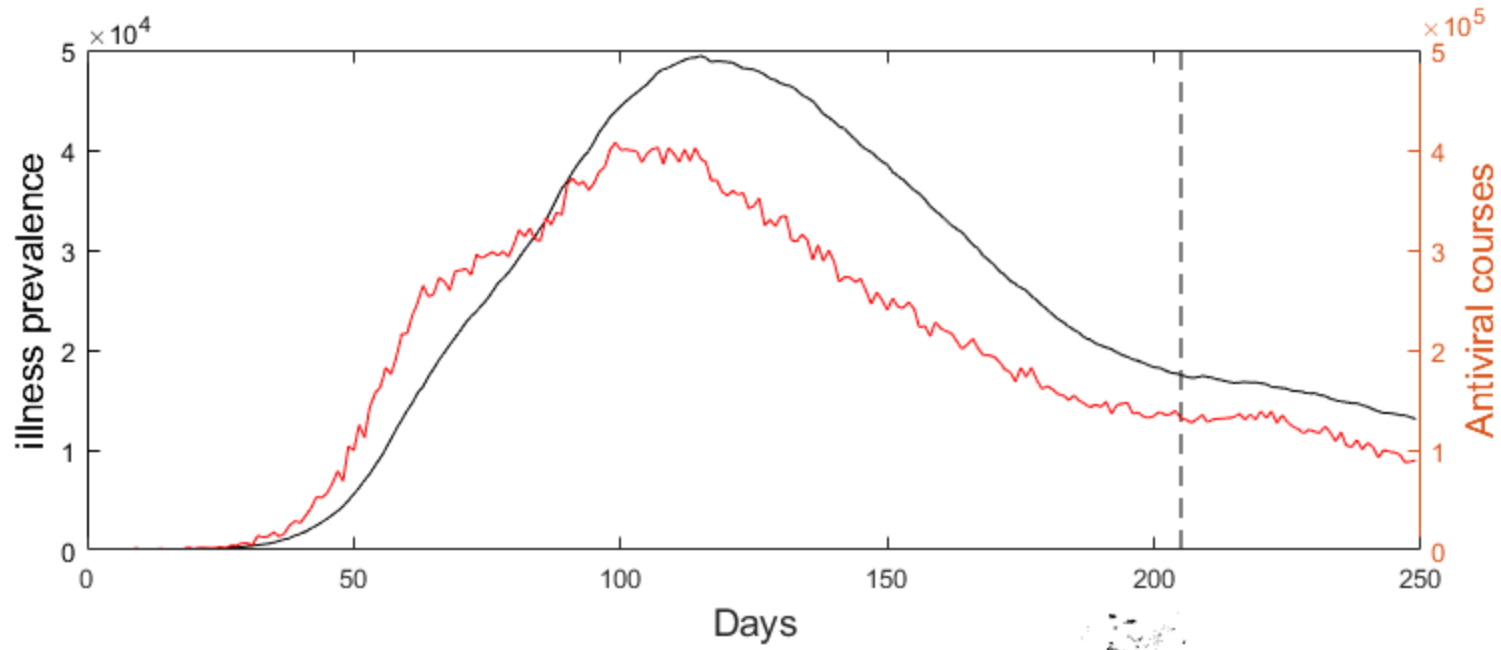

Days

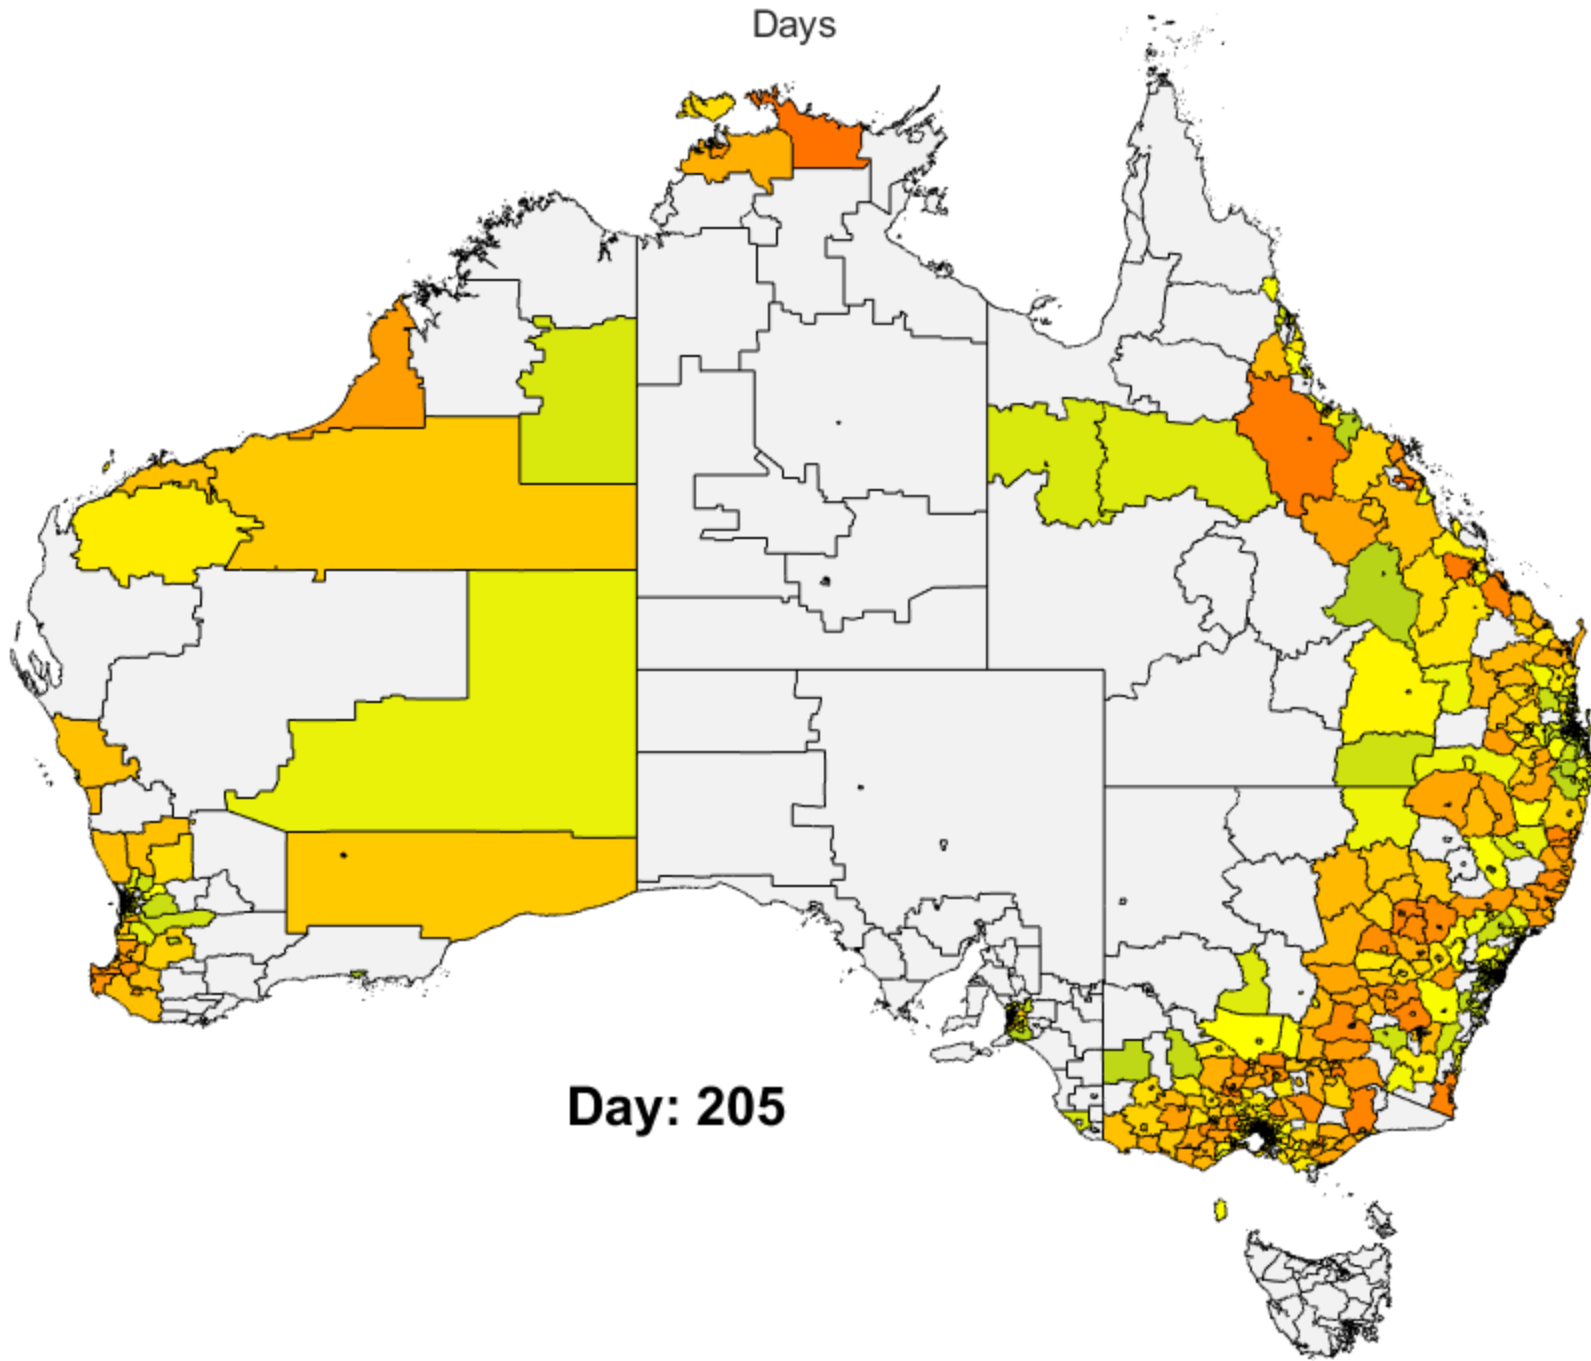

Day: 205

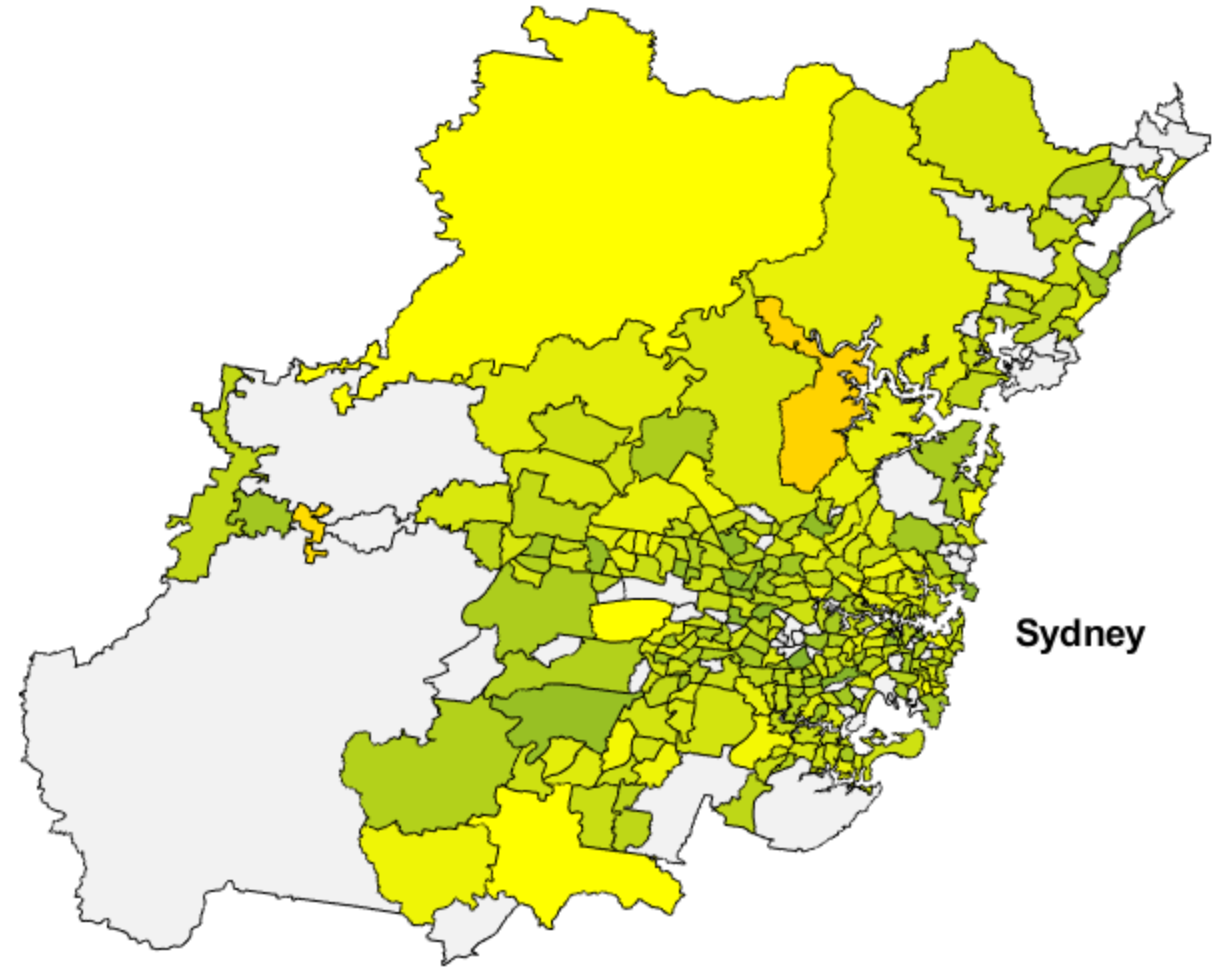

Sydney

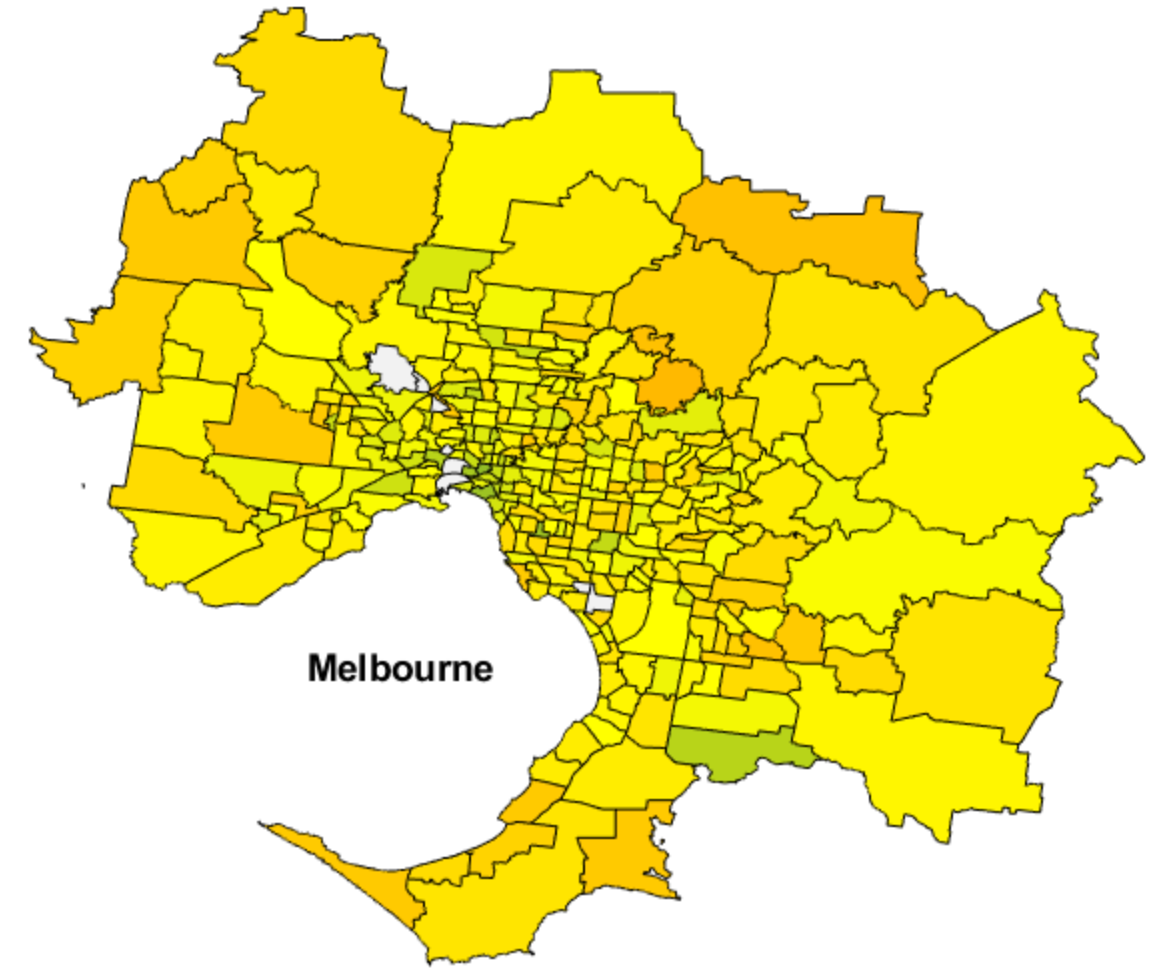

Melbourne

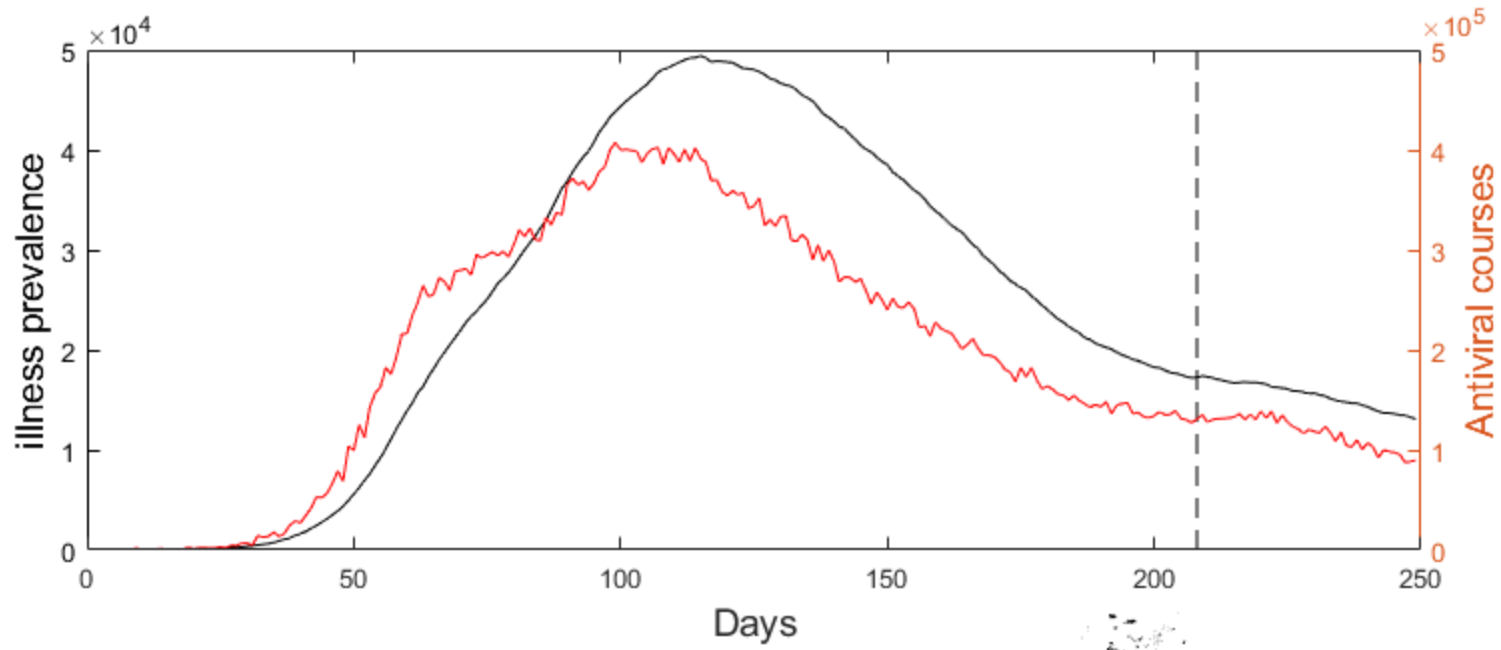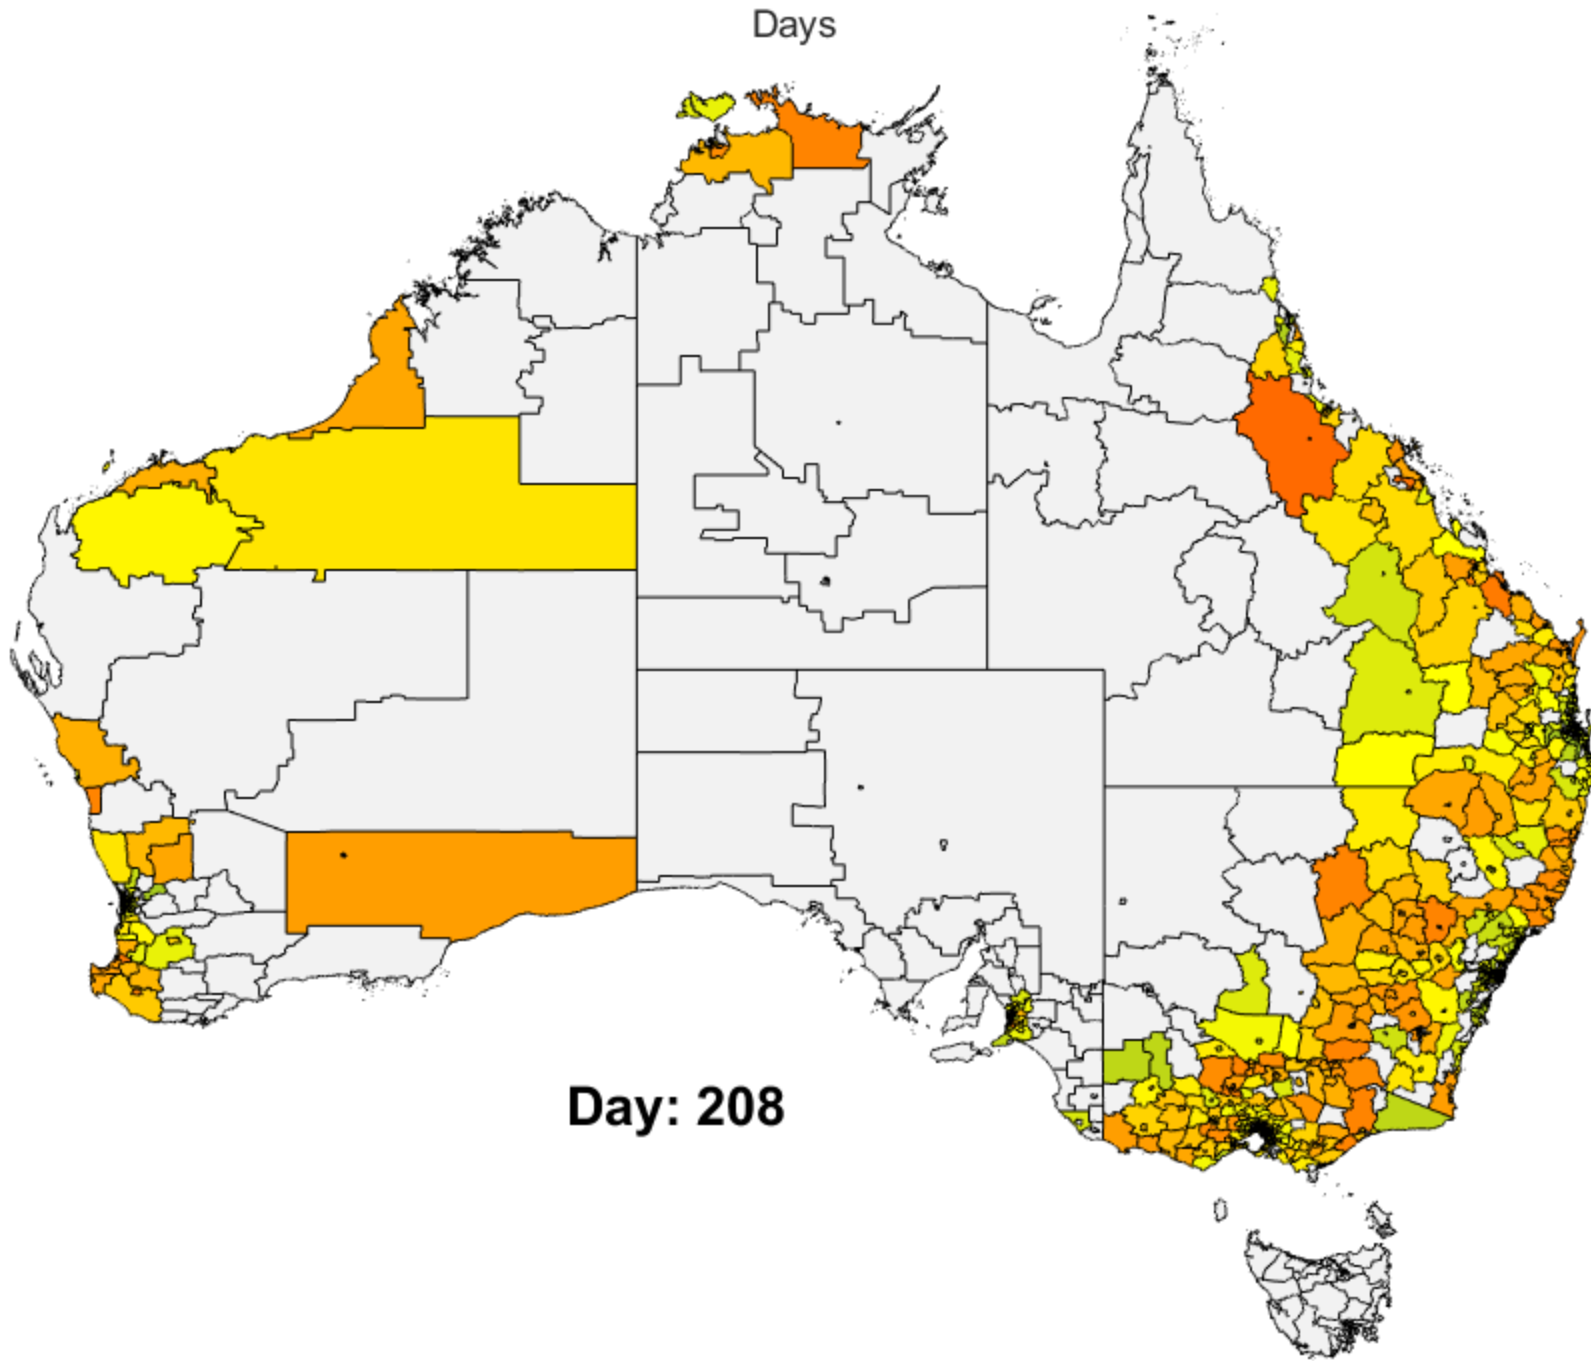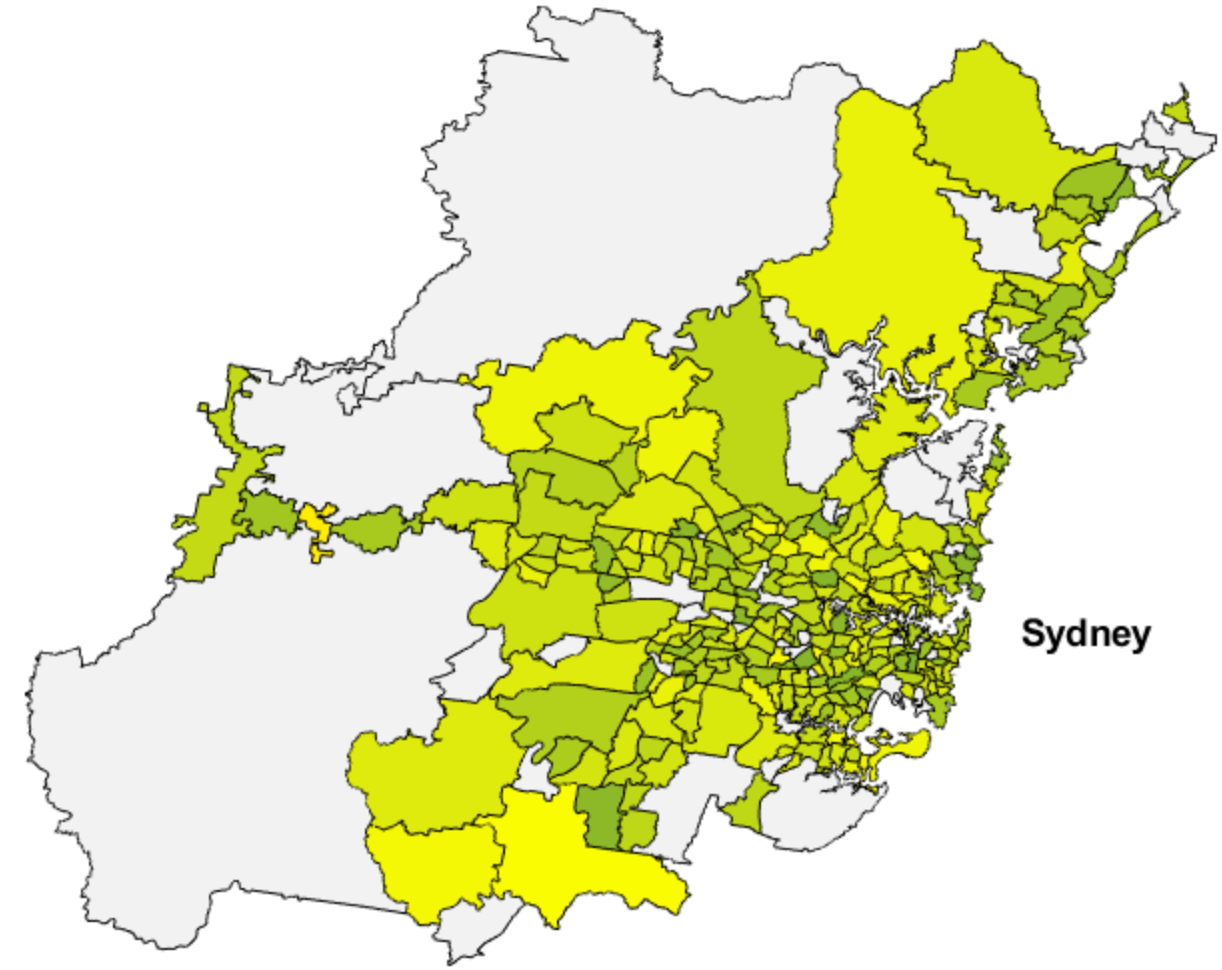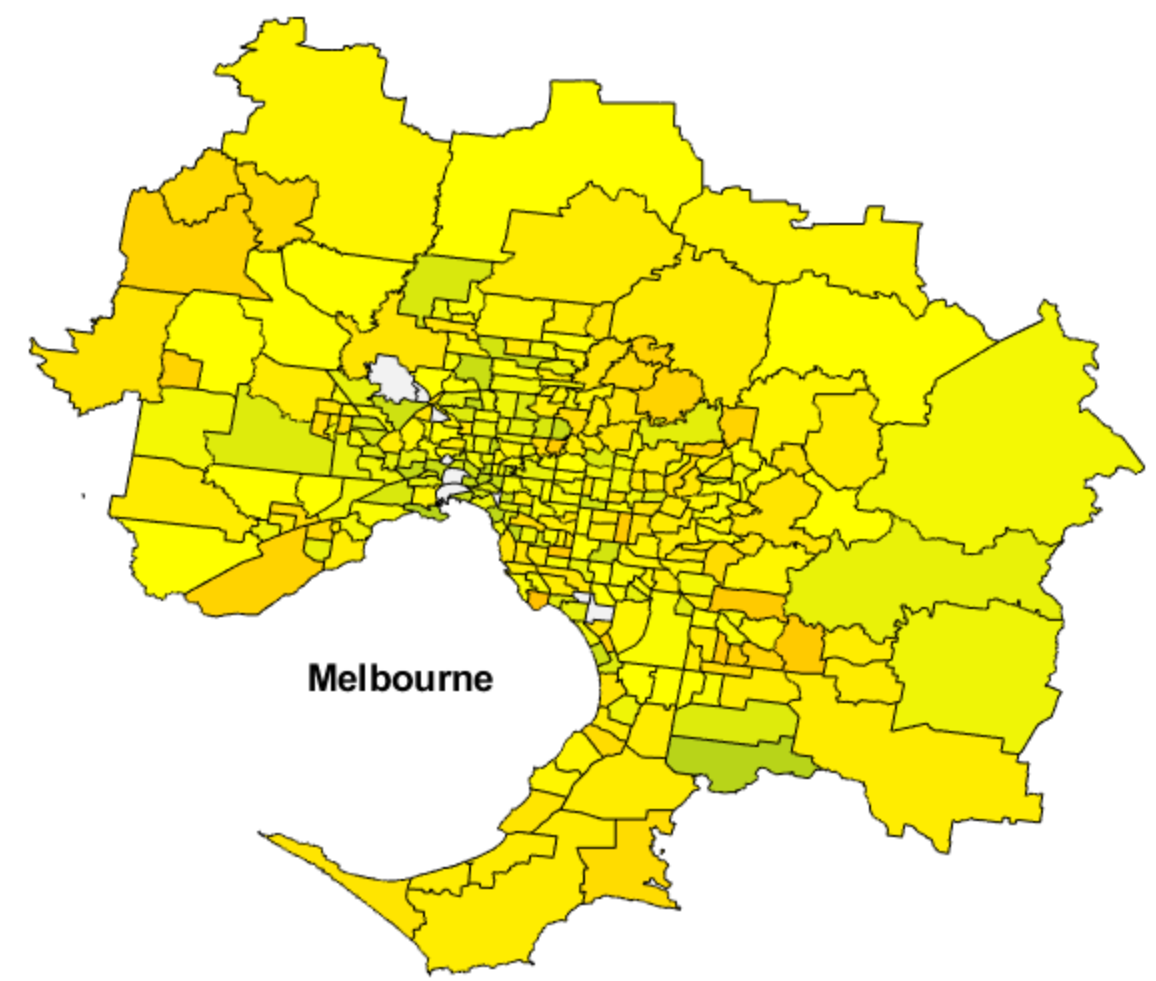

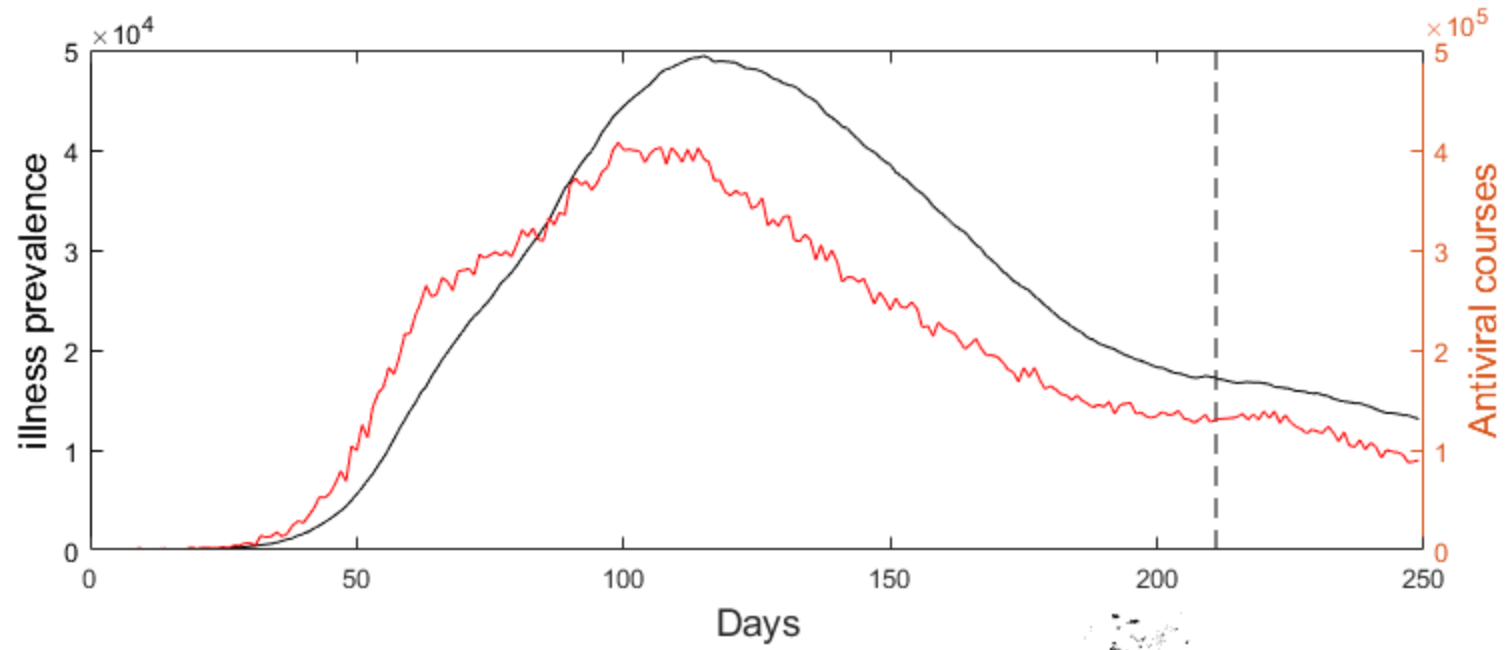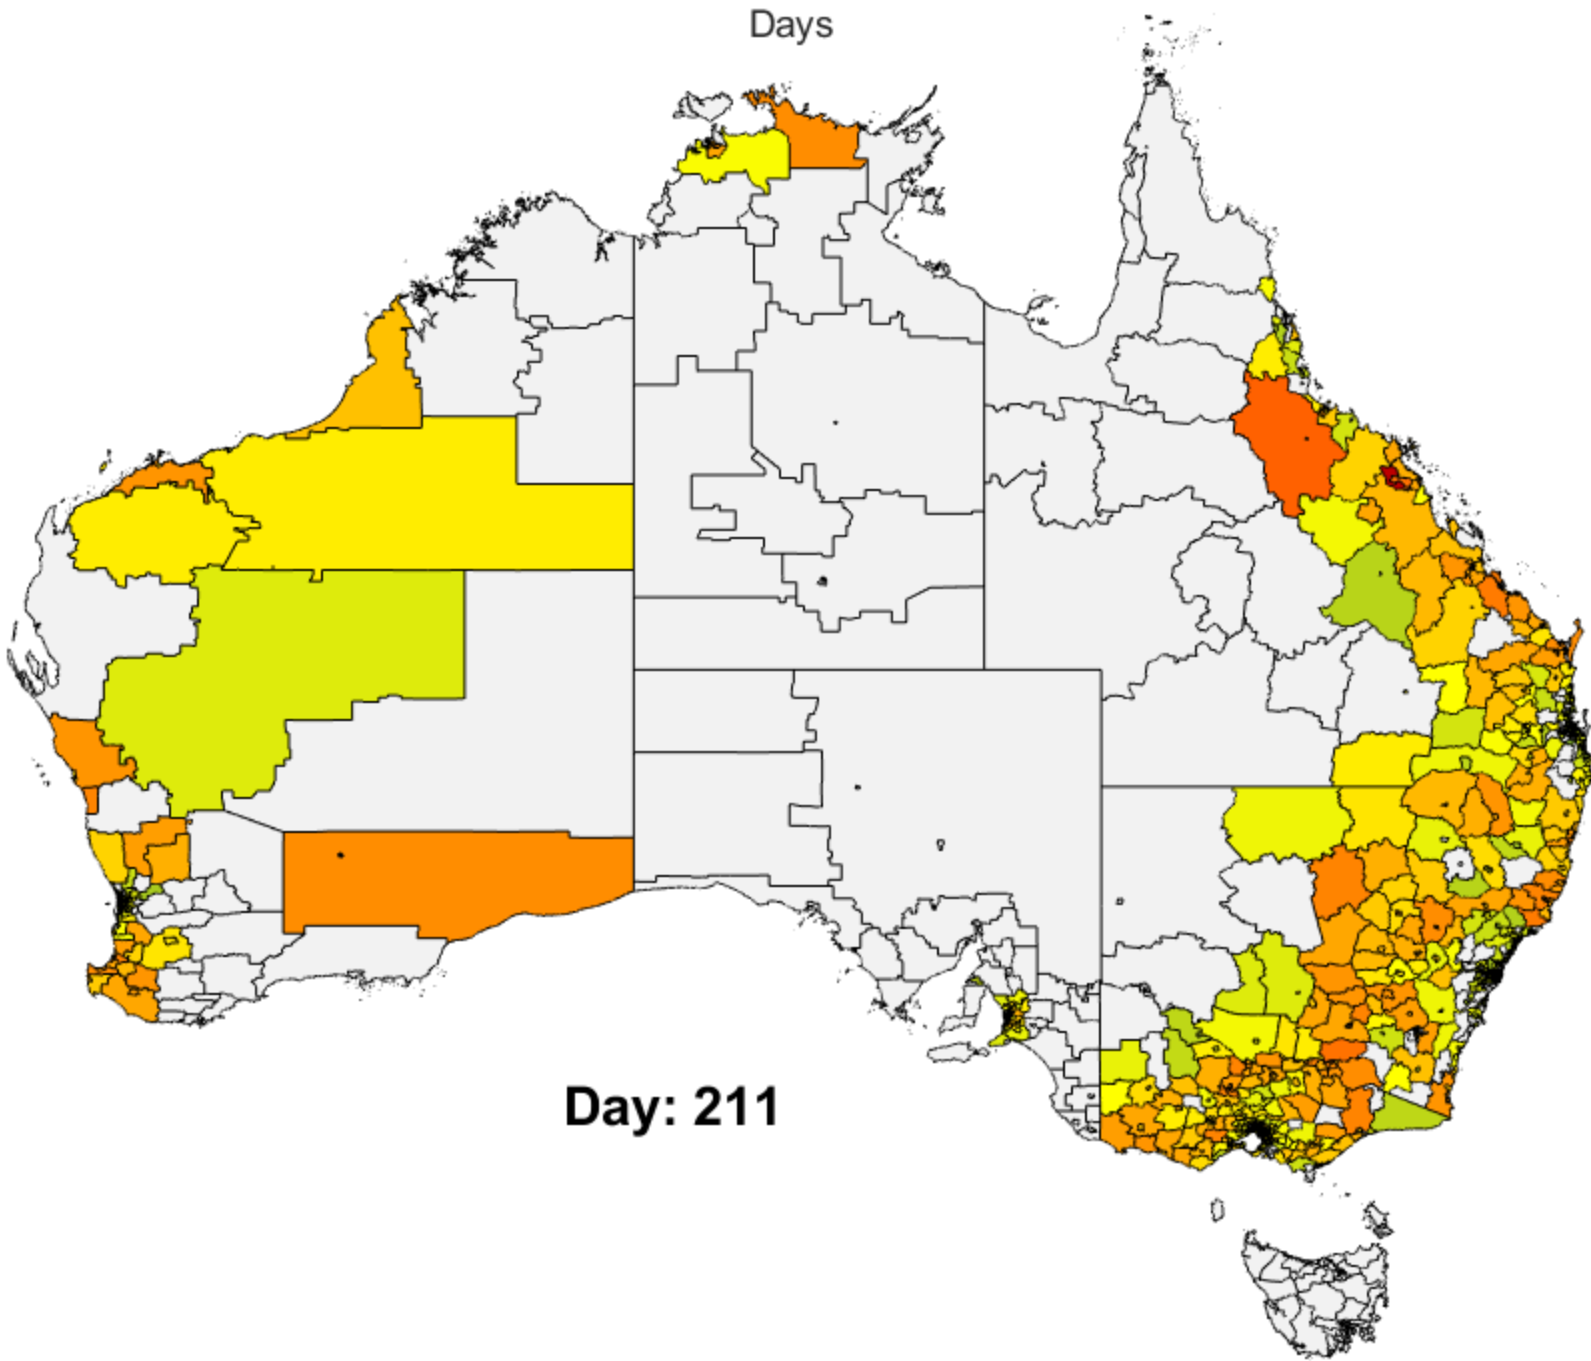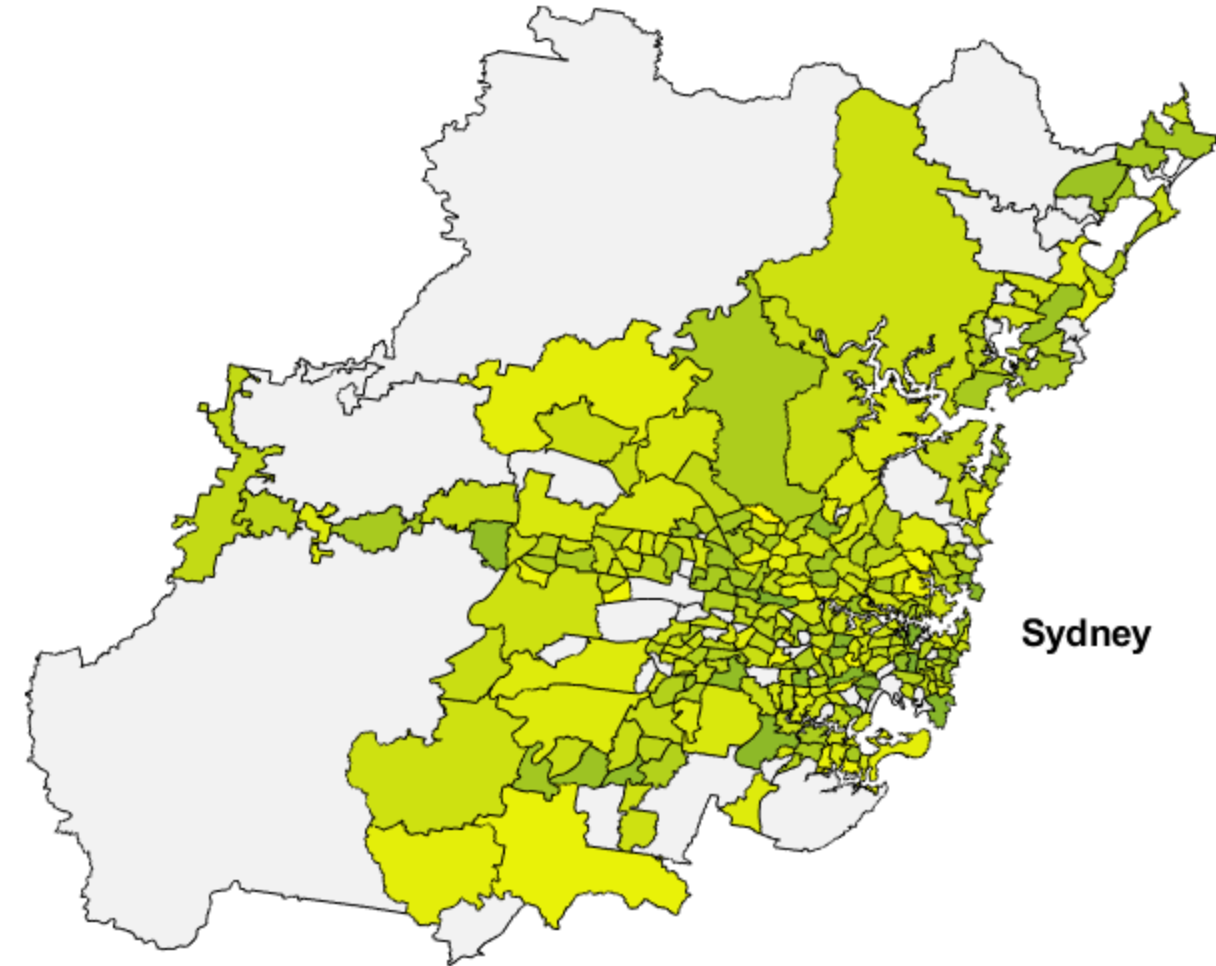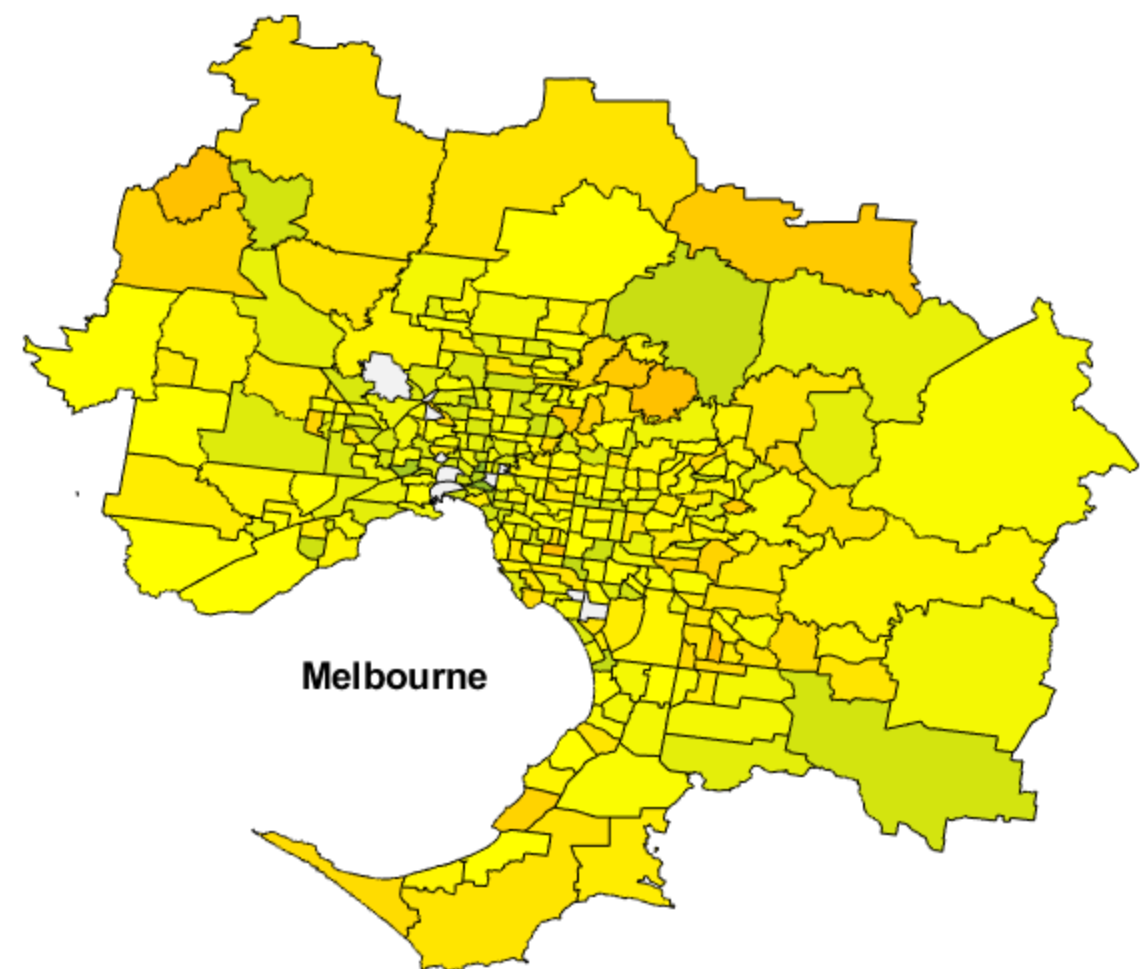

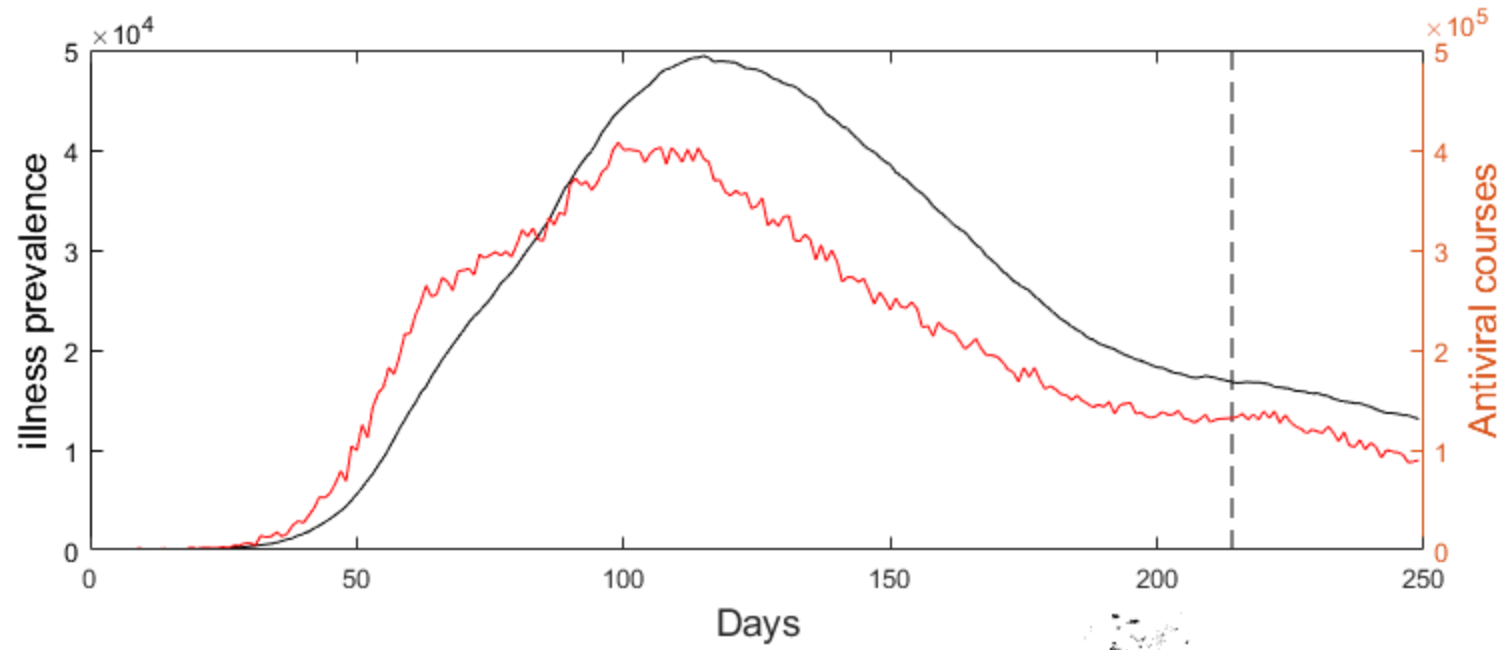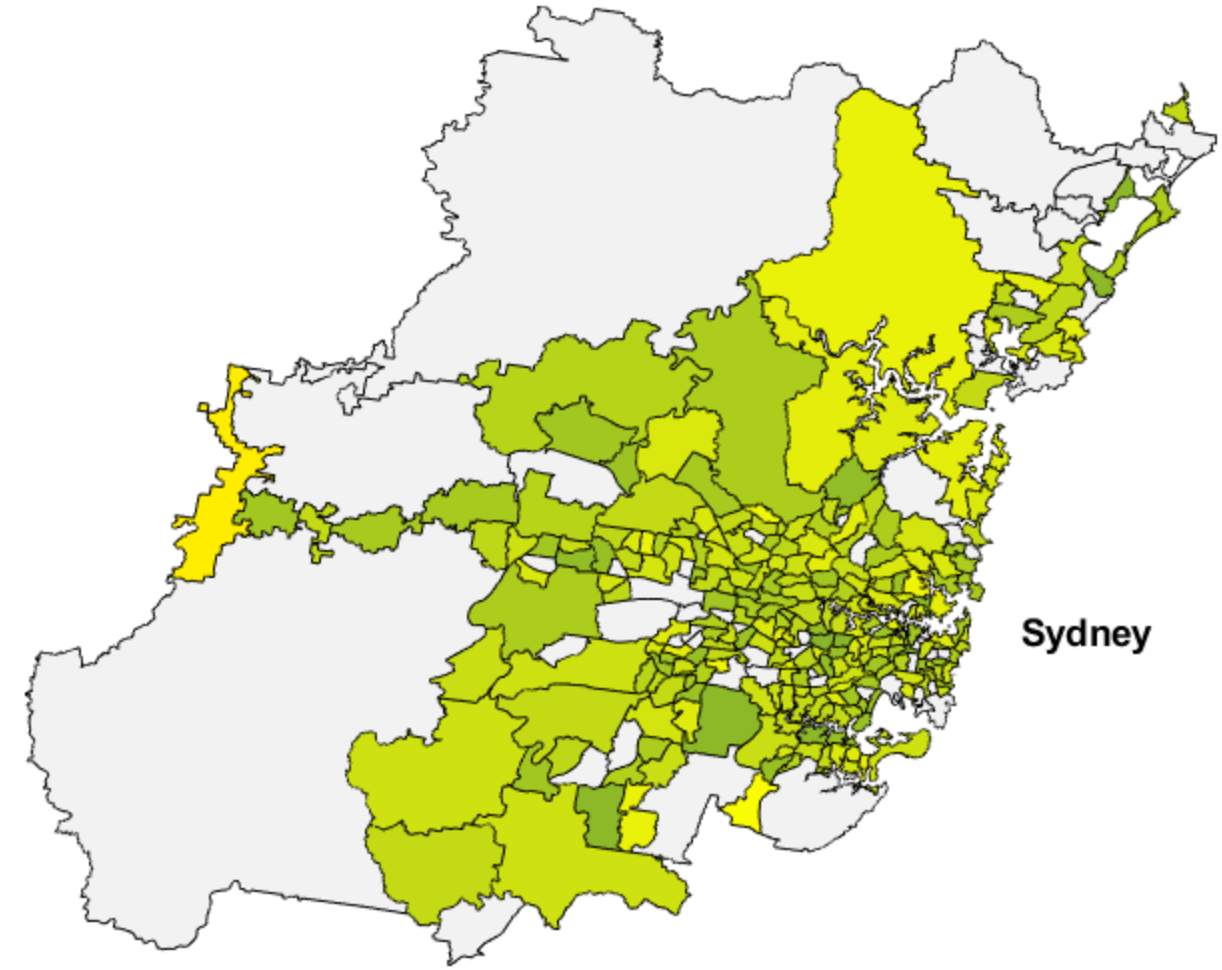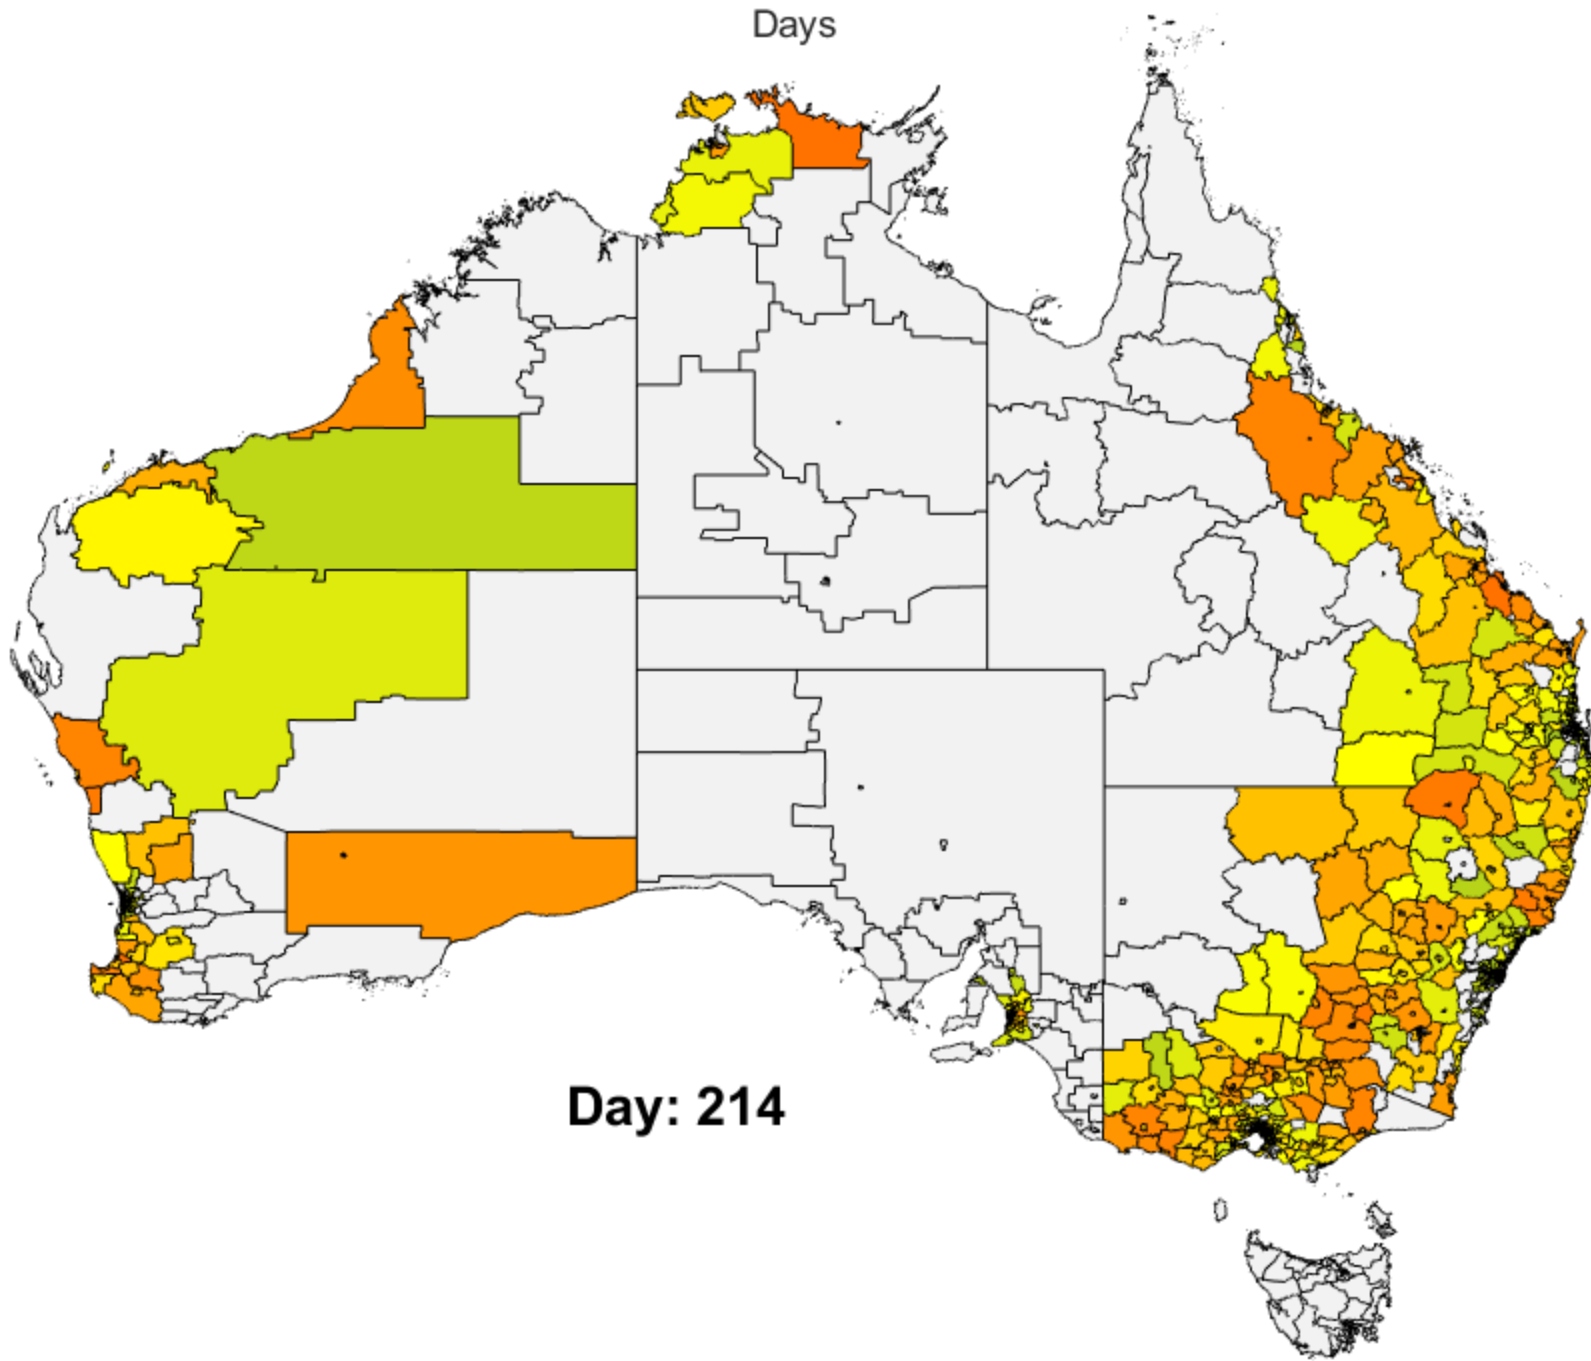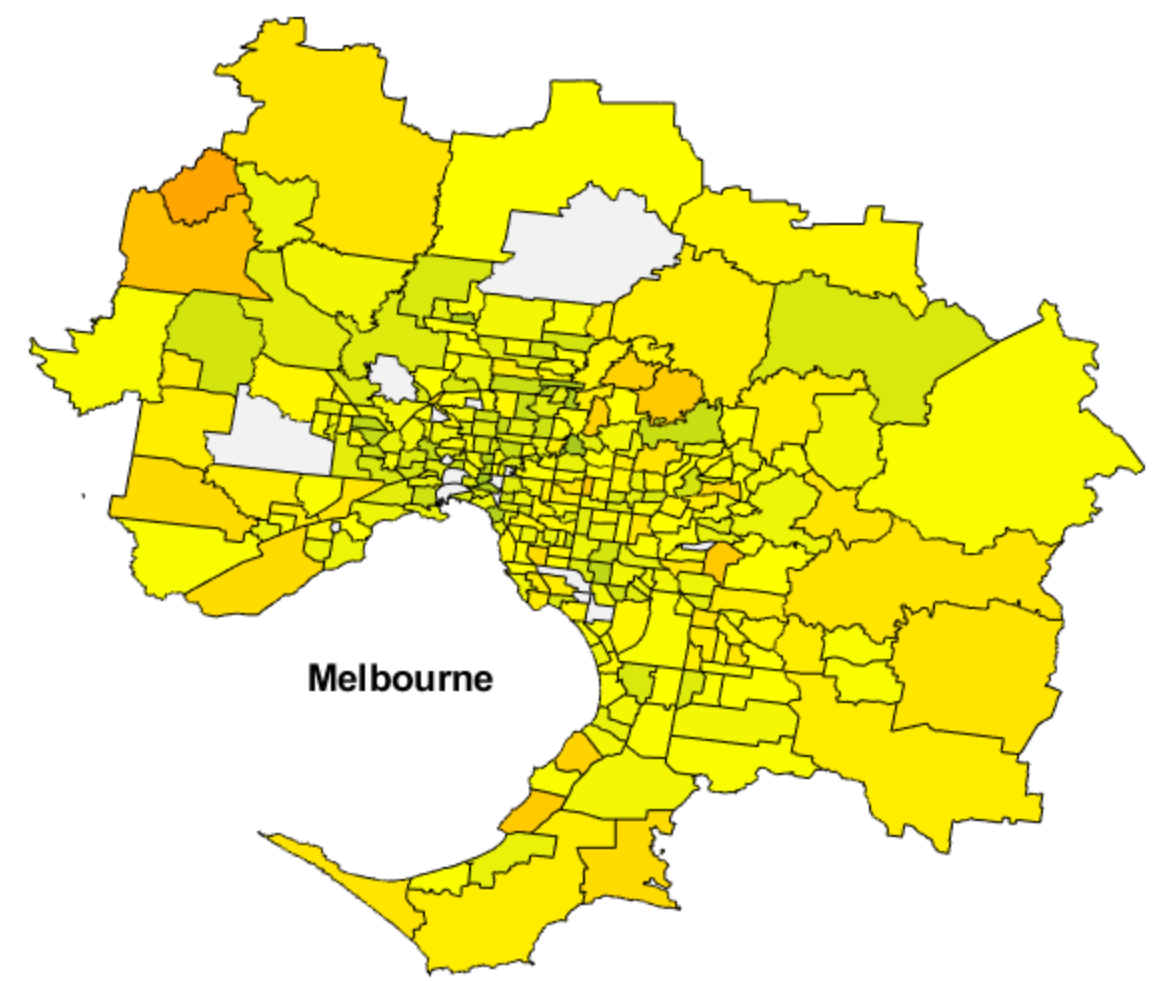



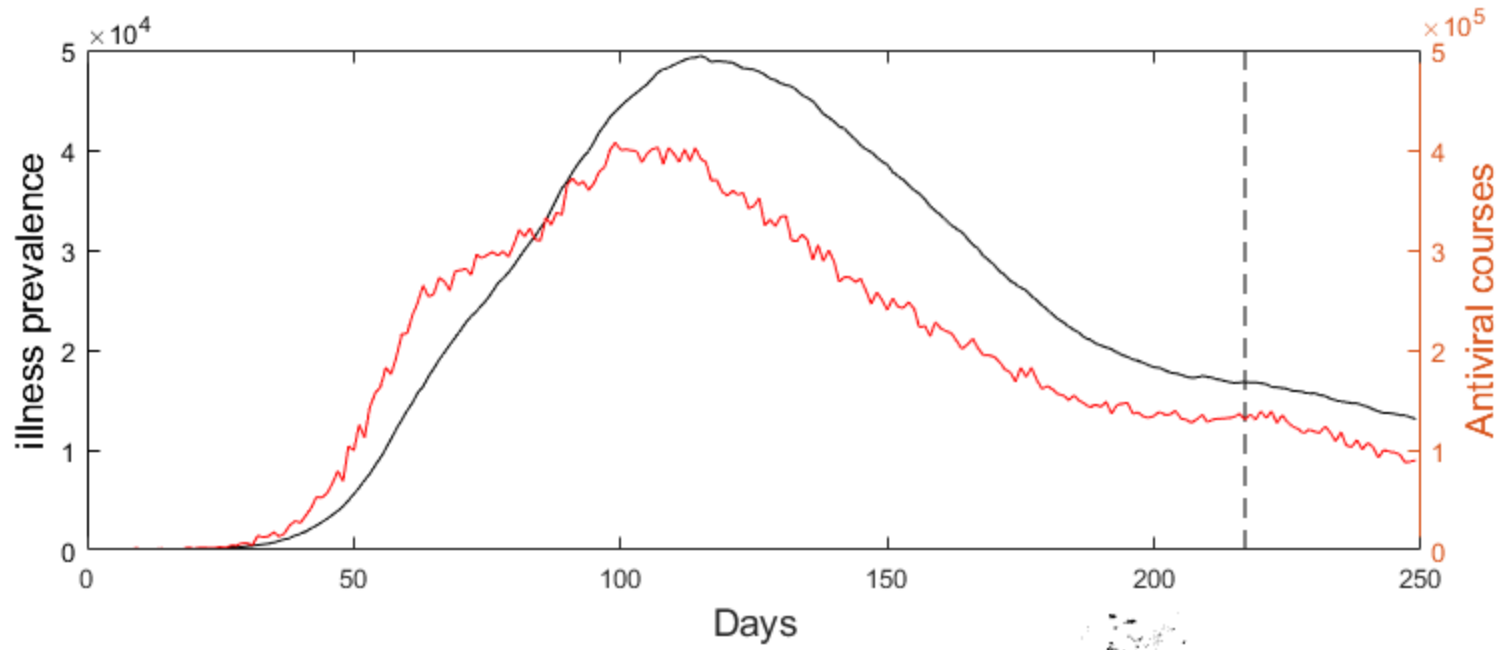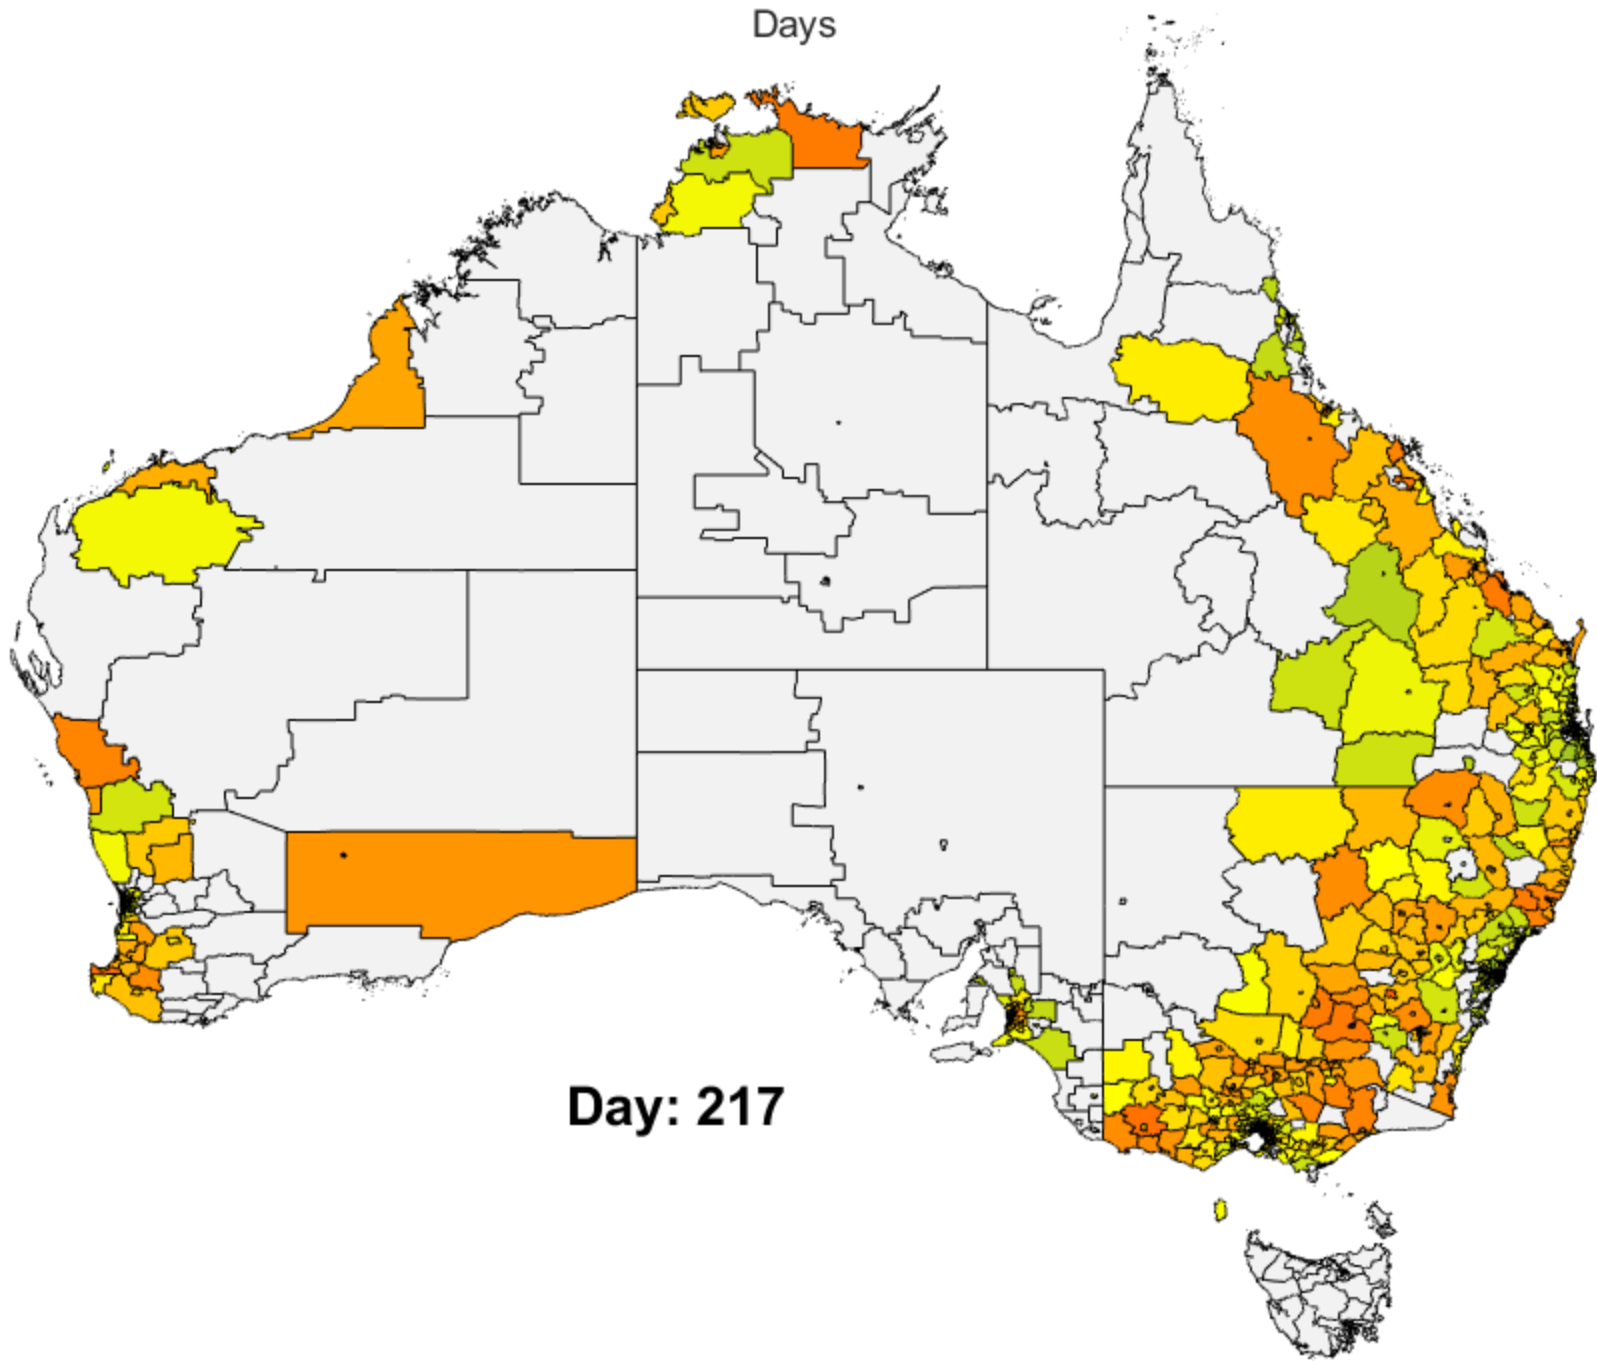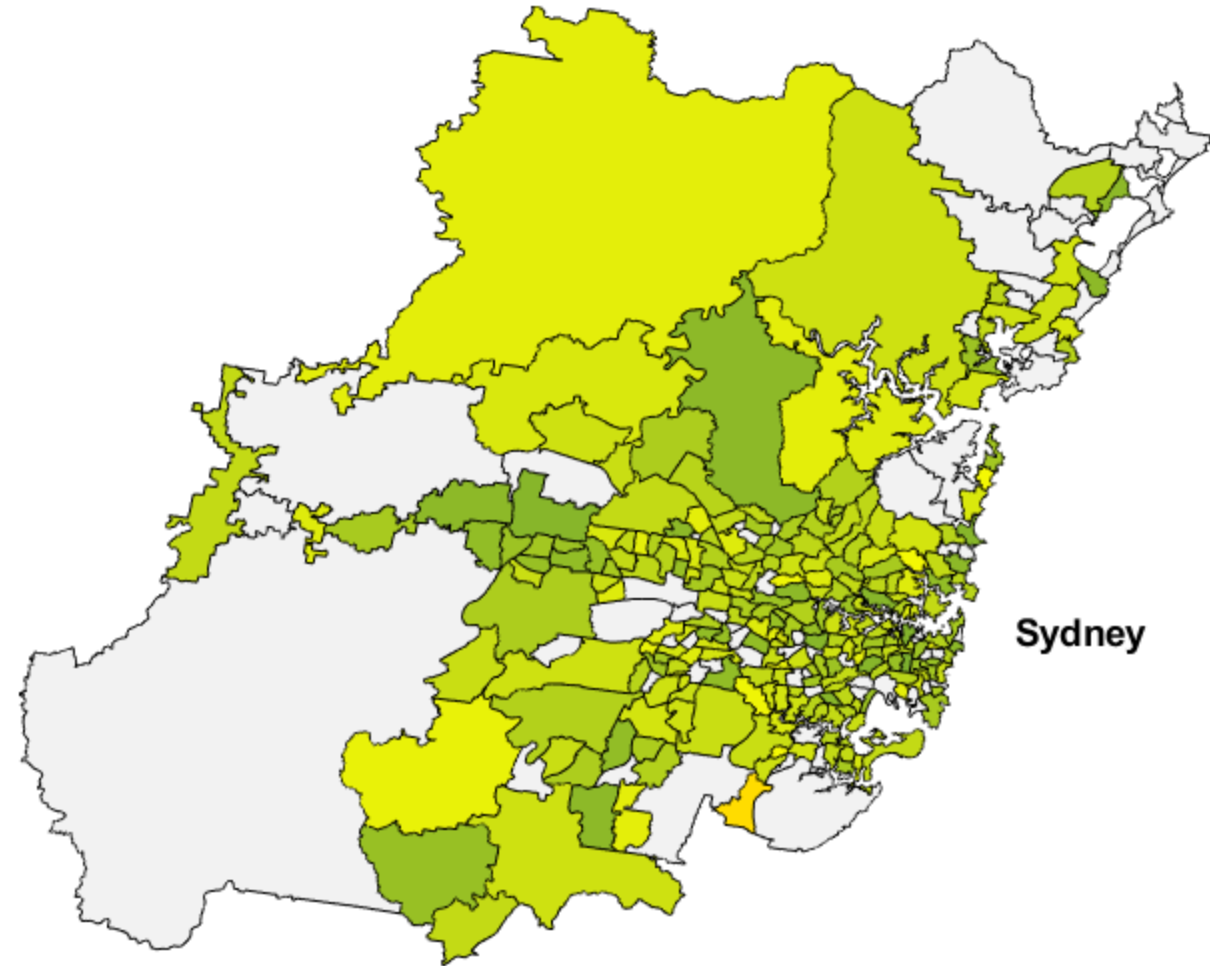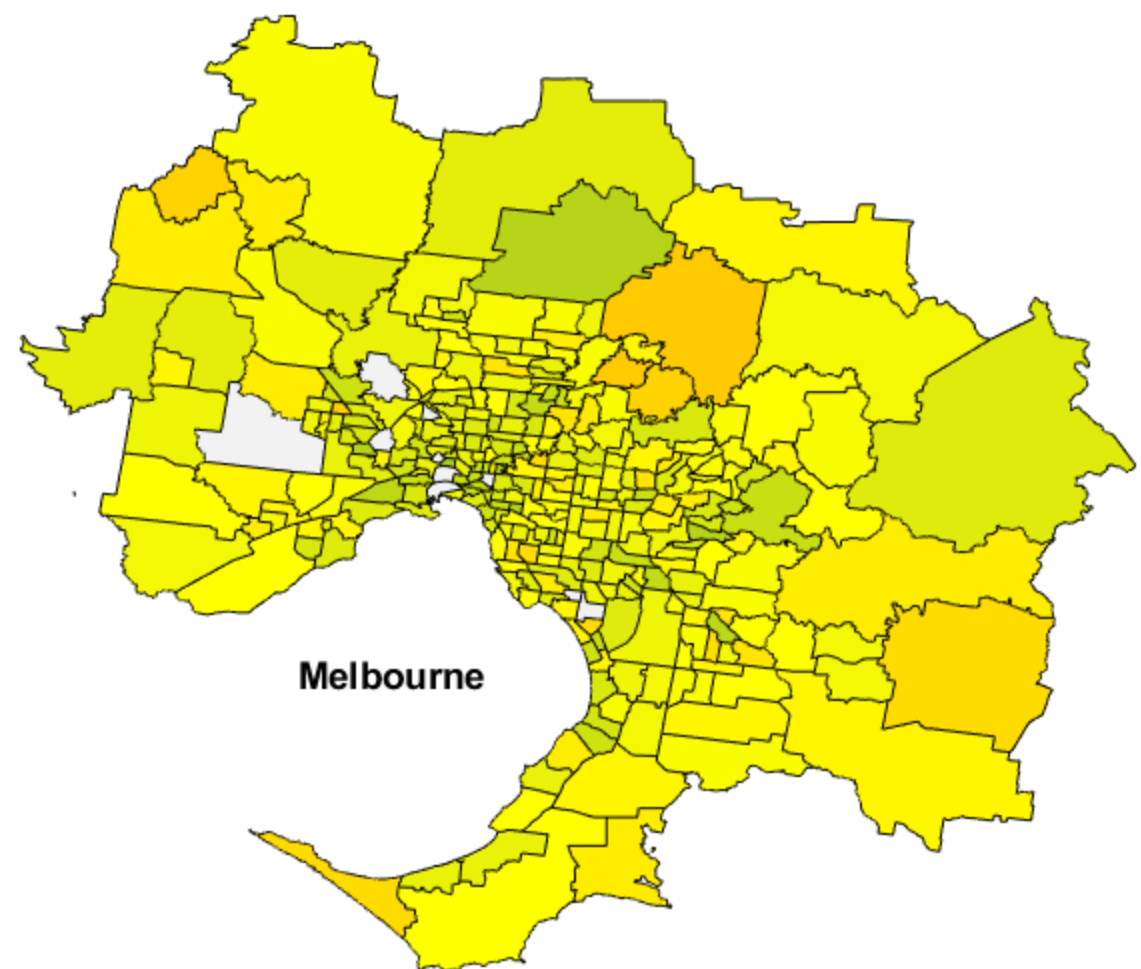

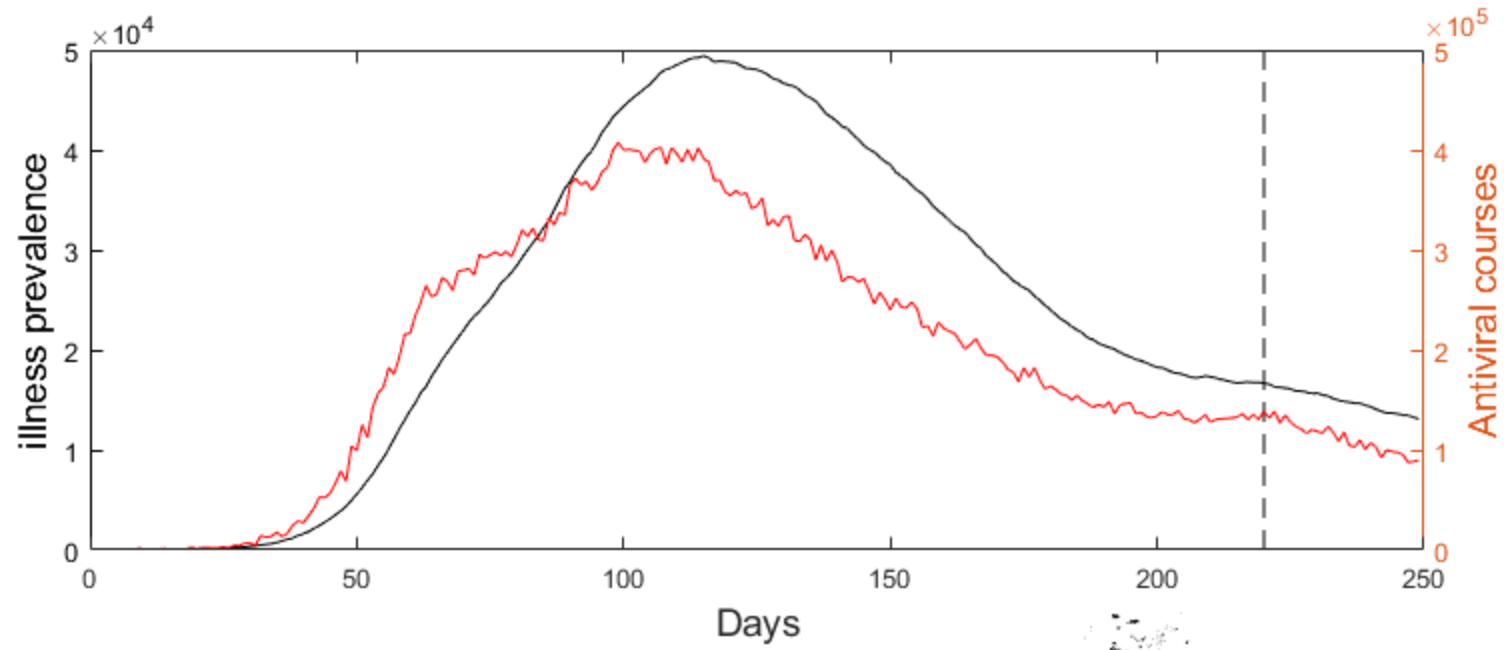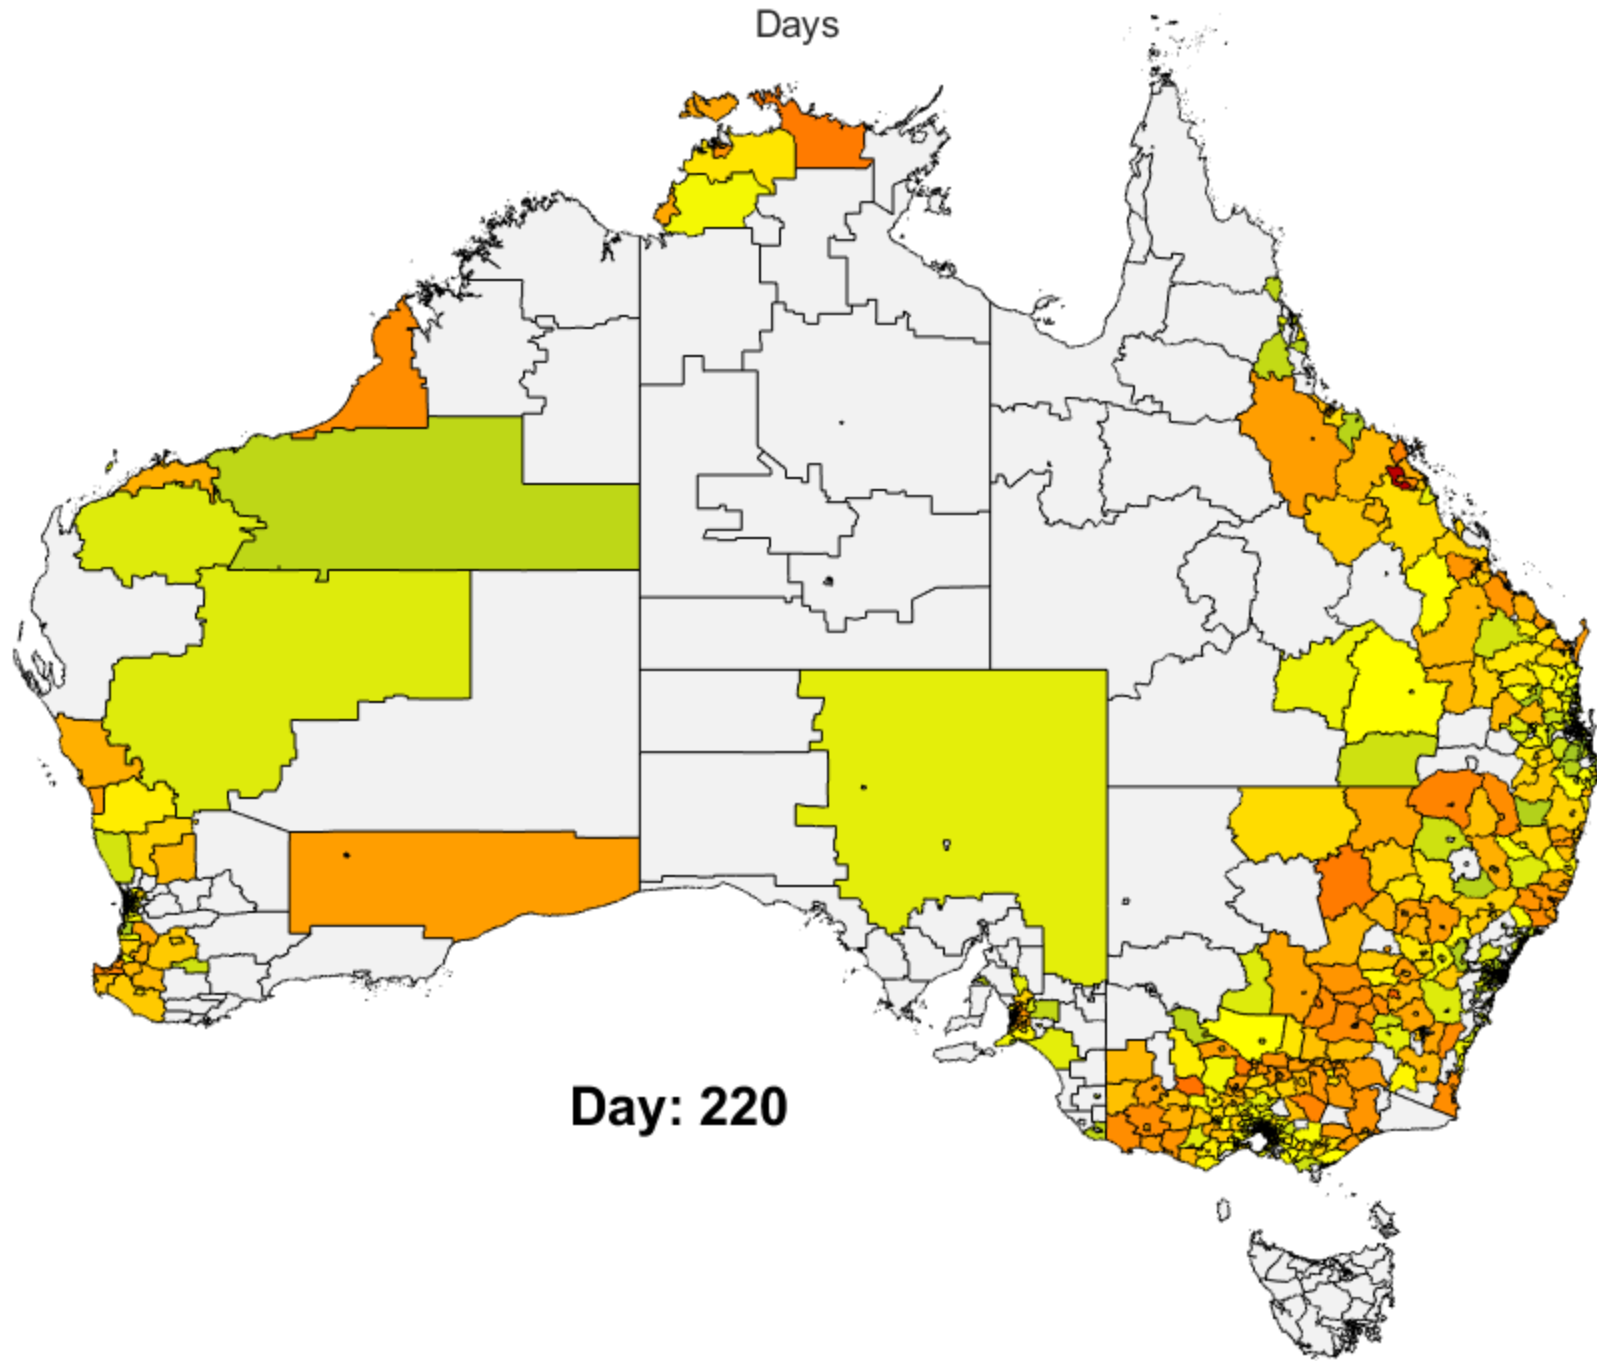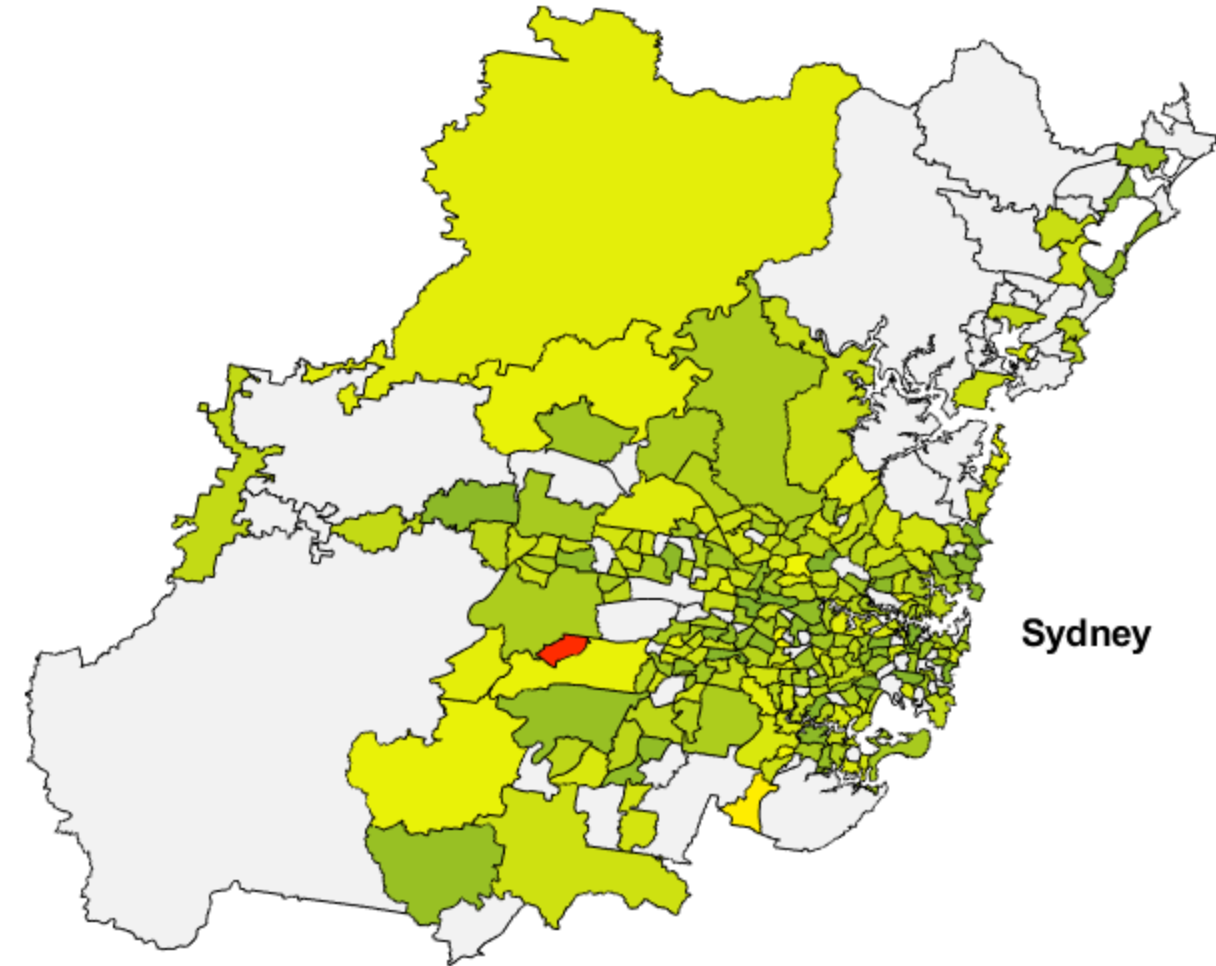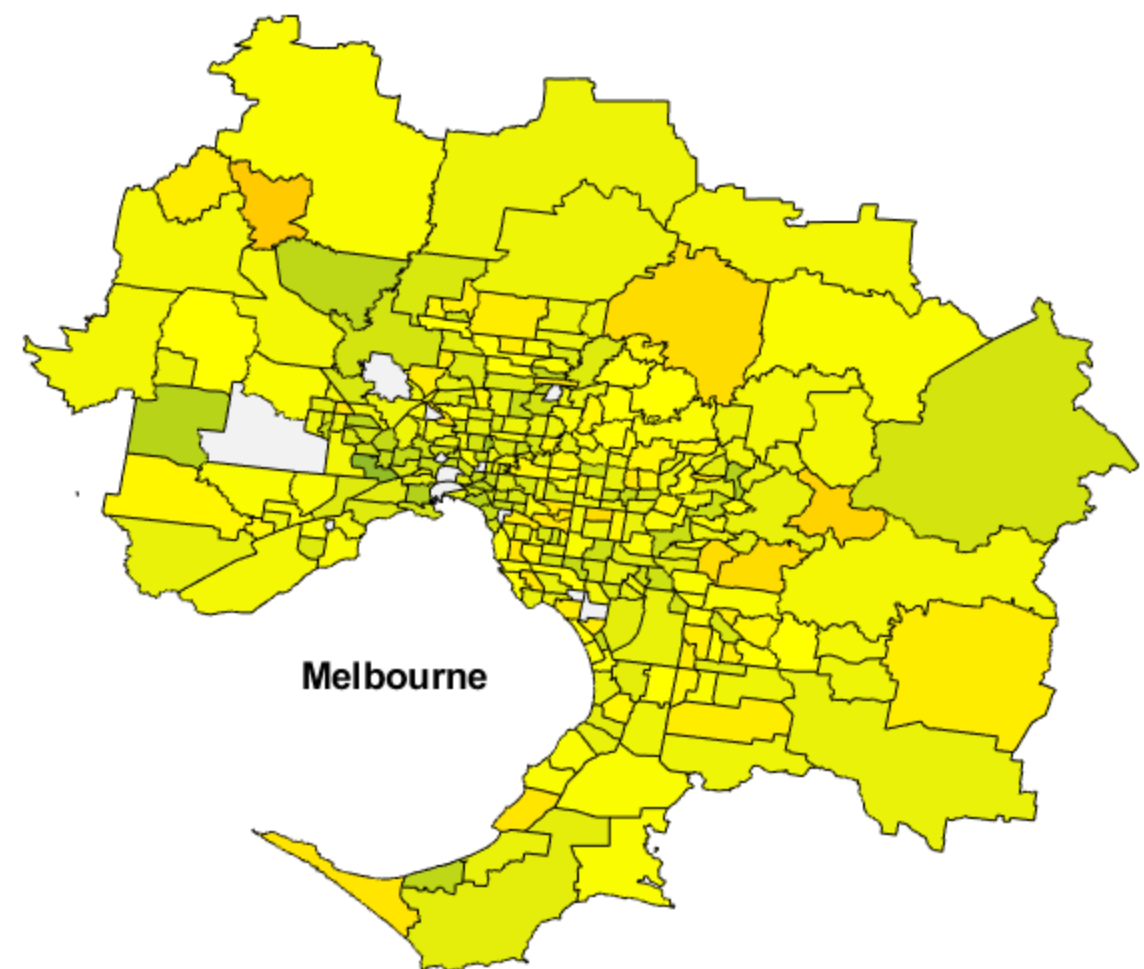

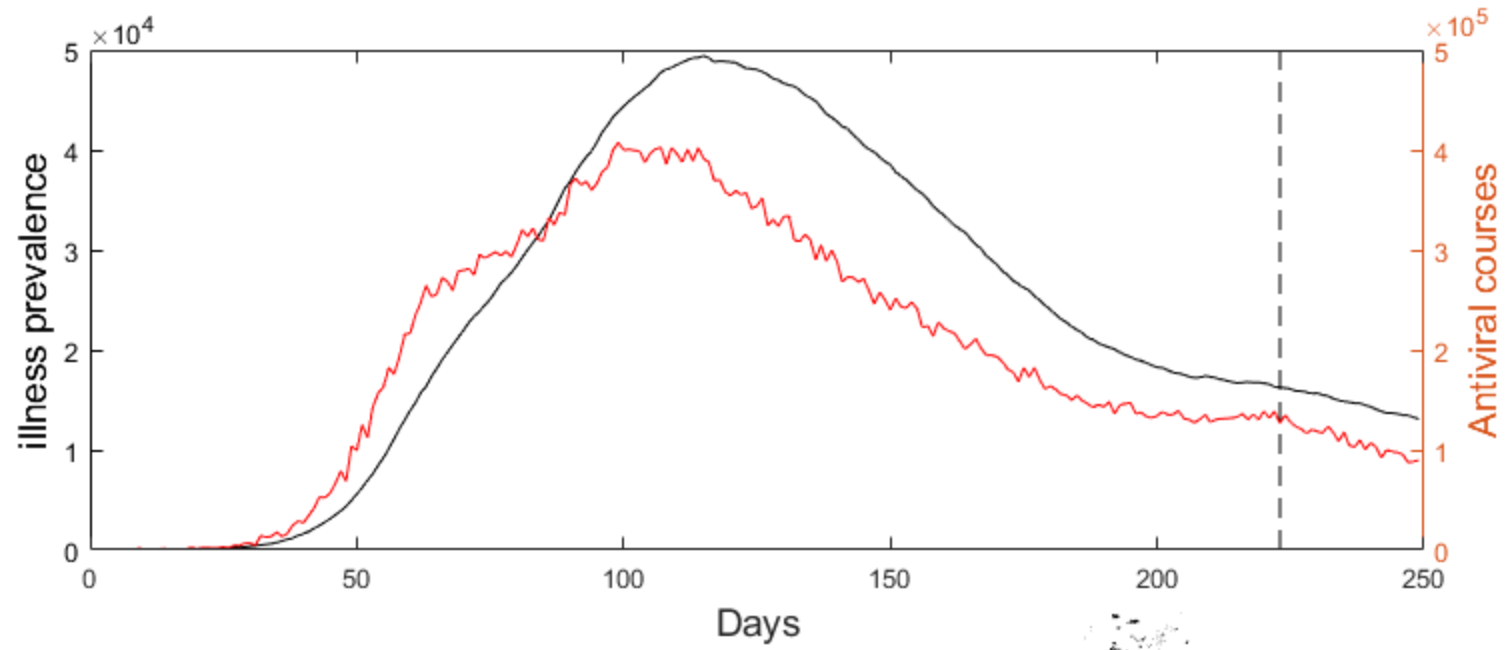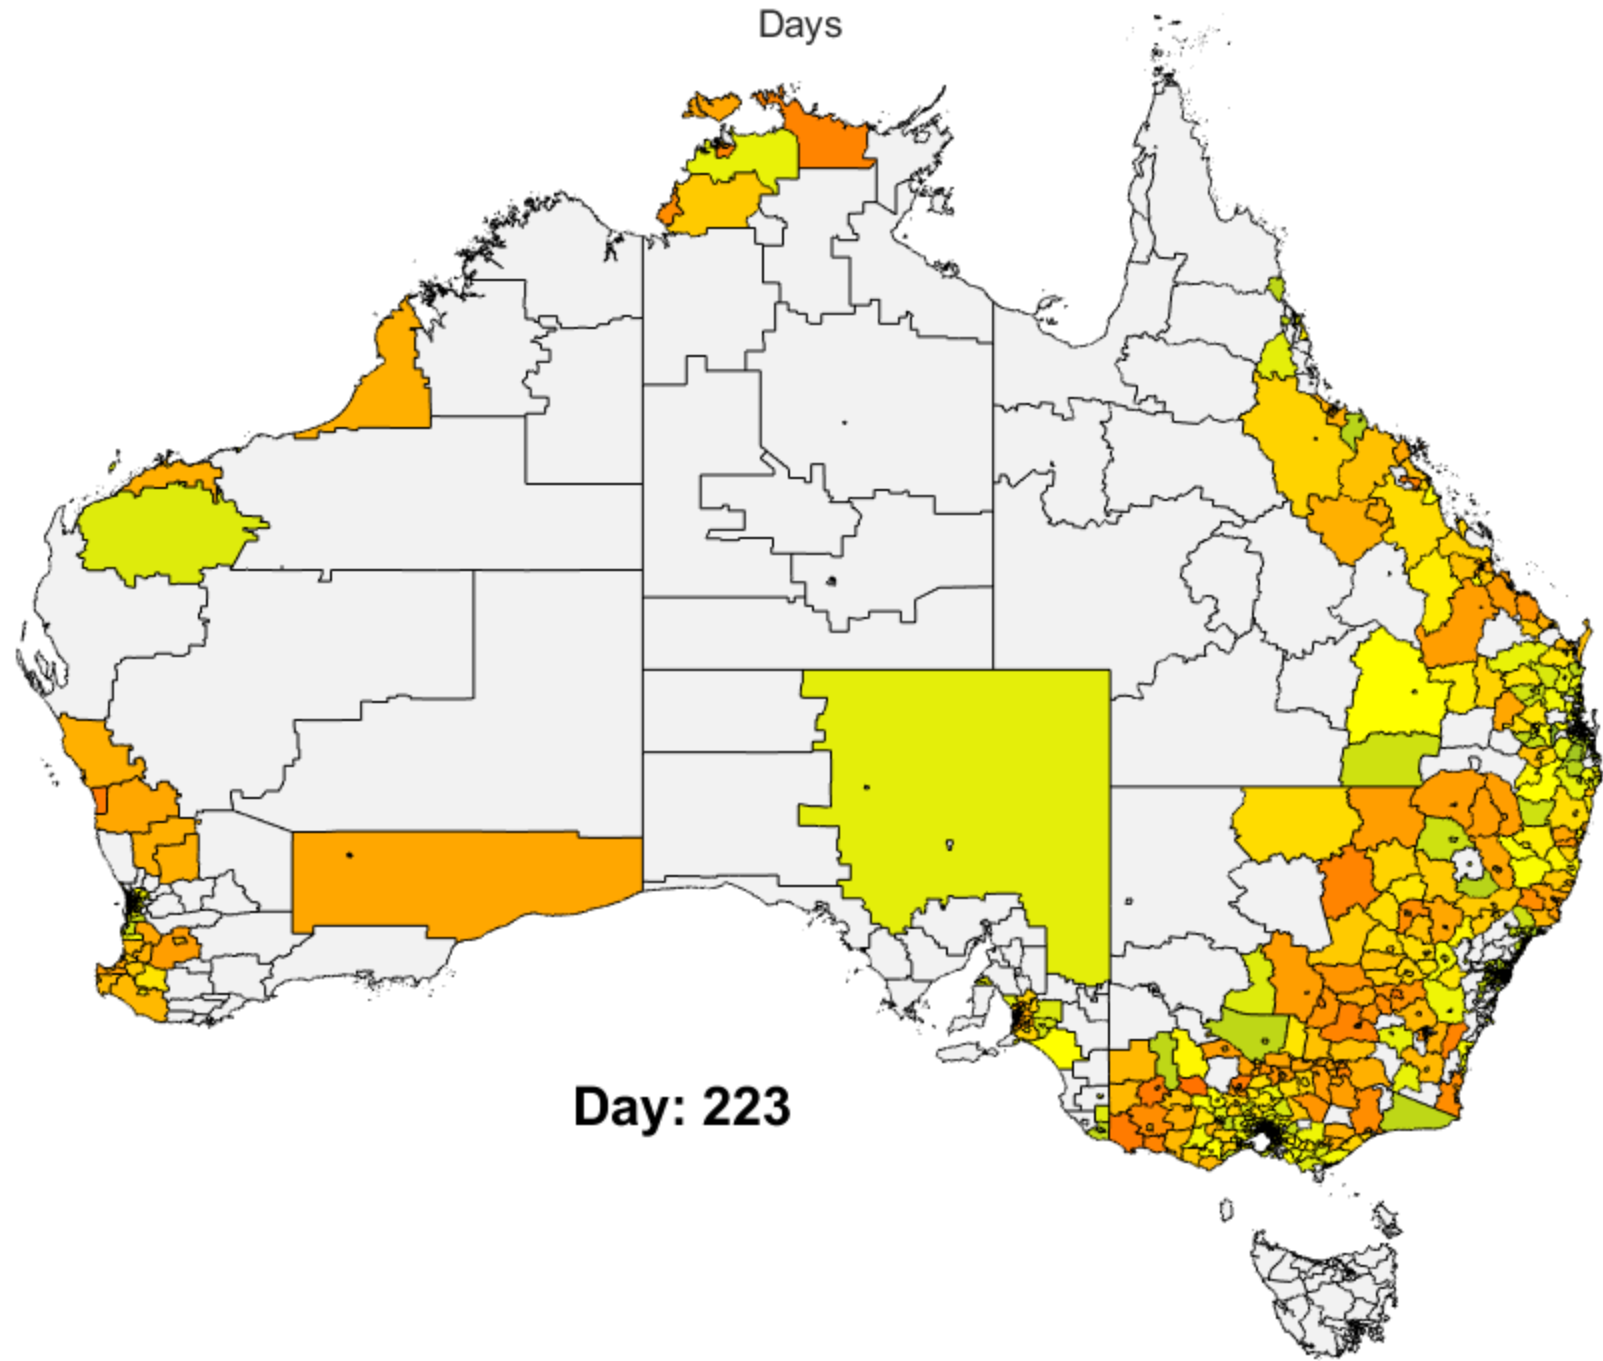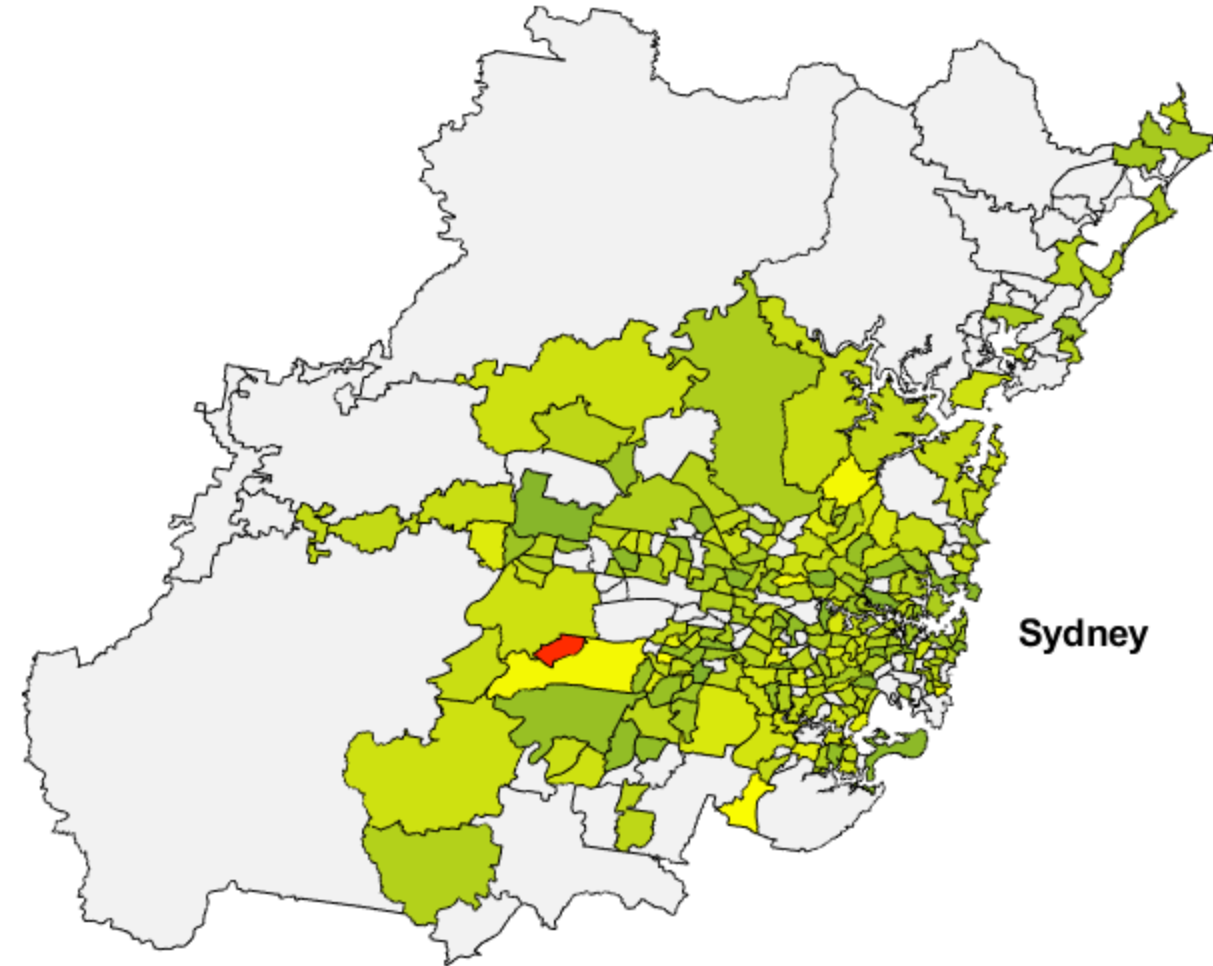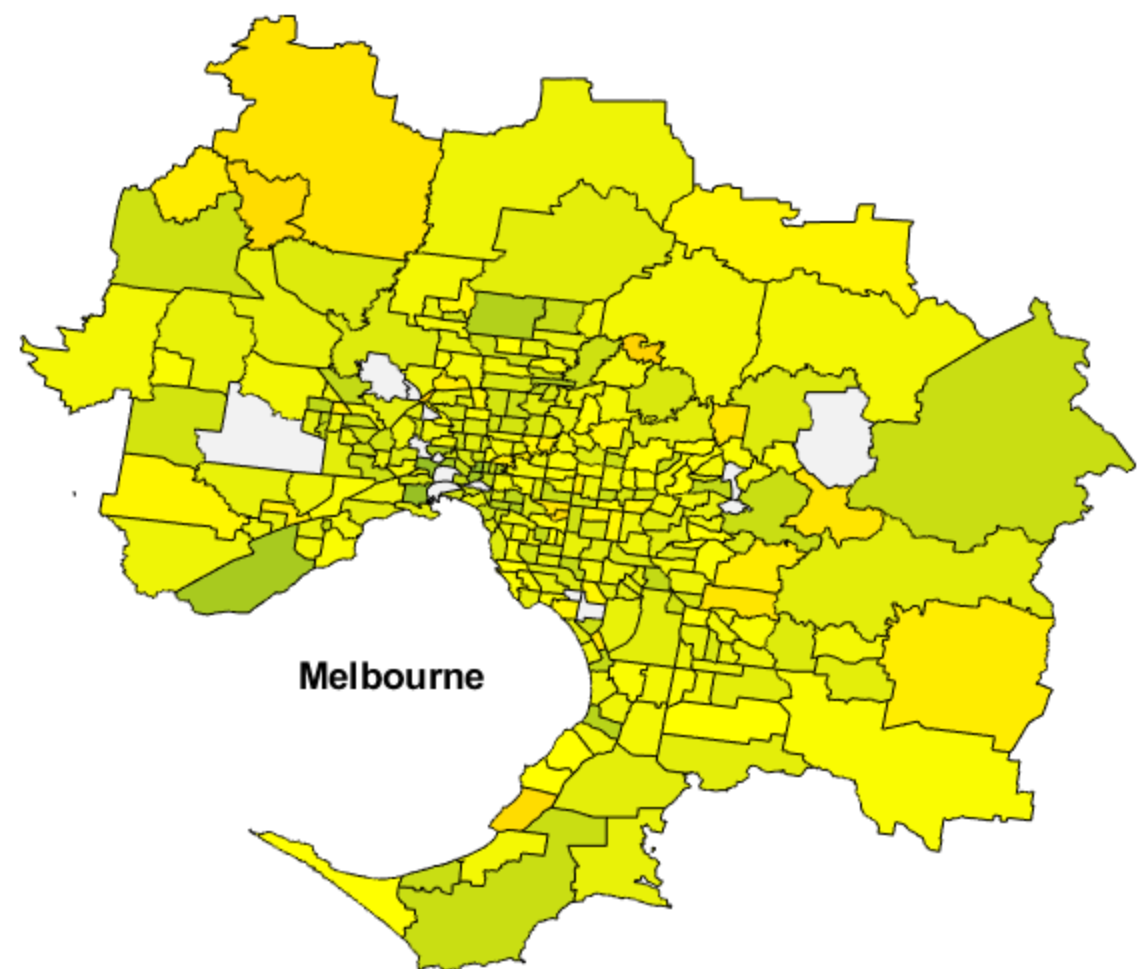

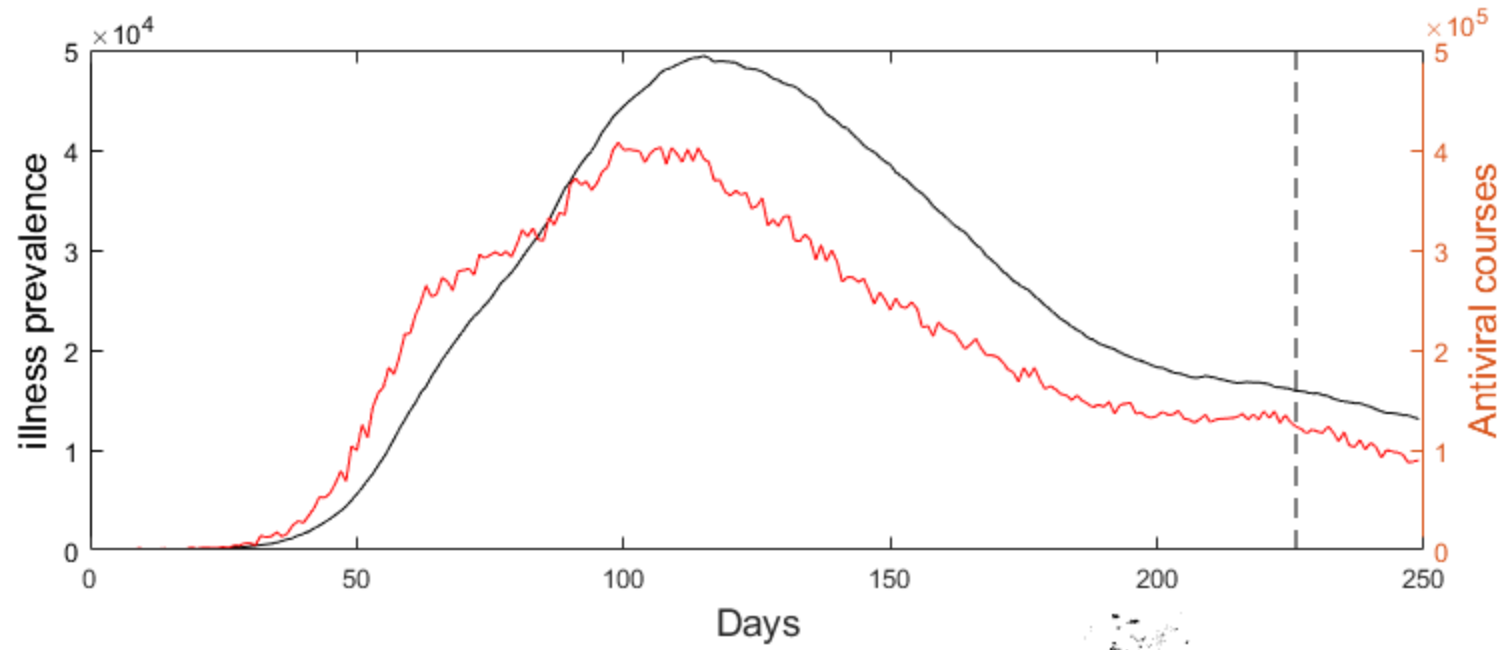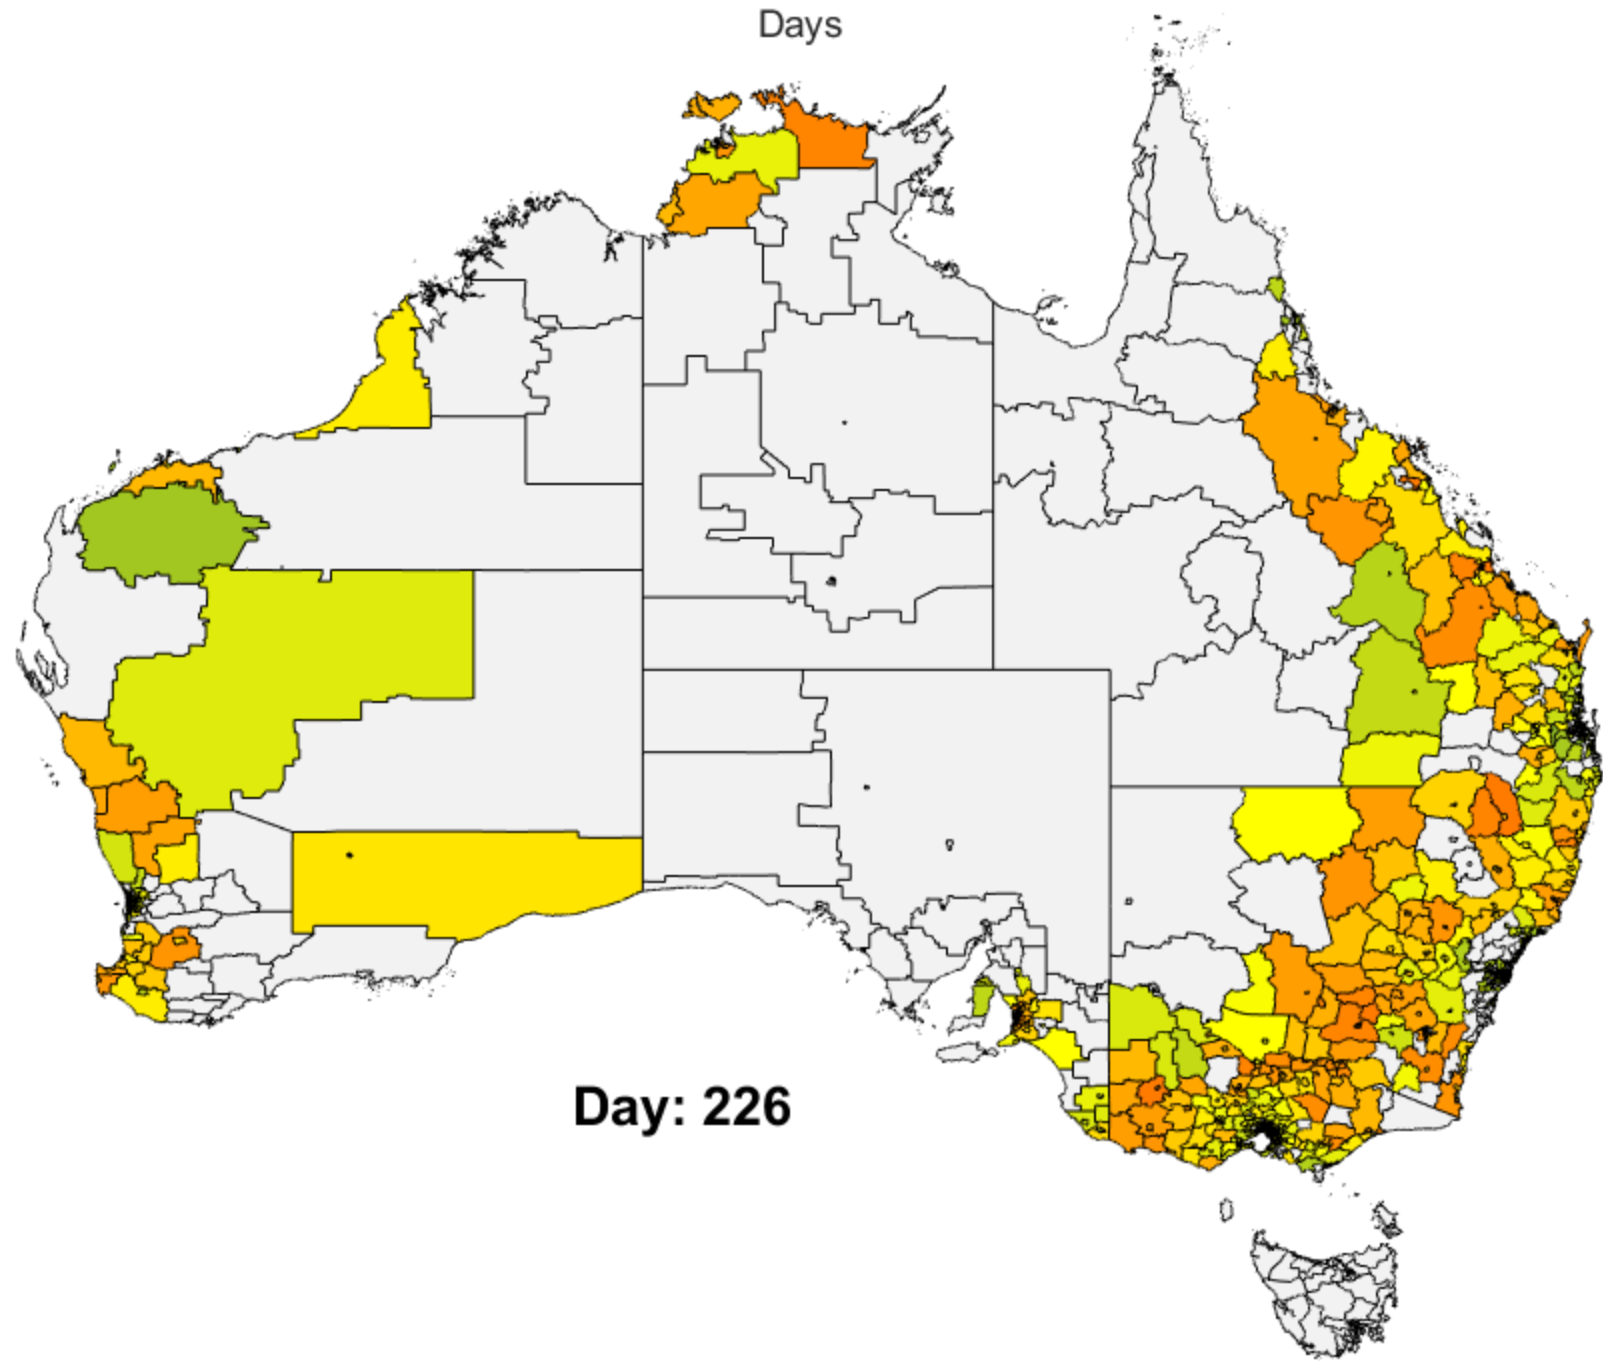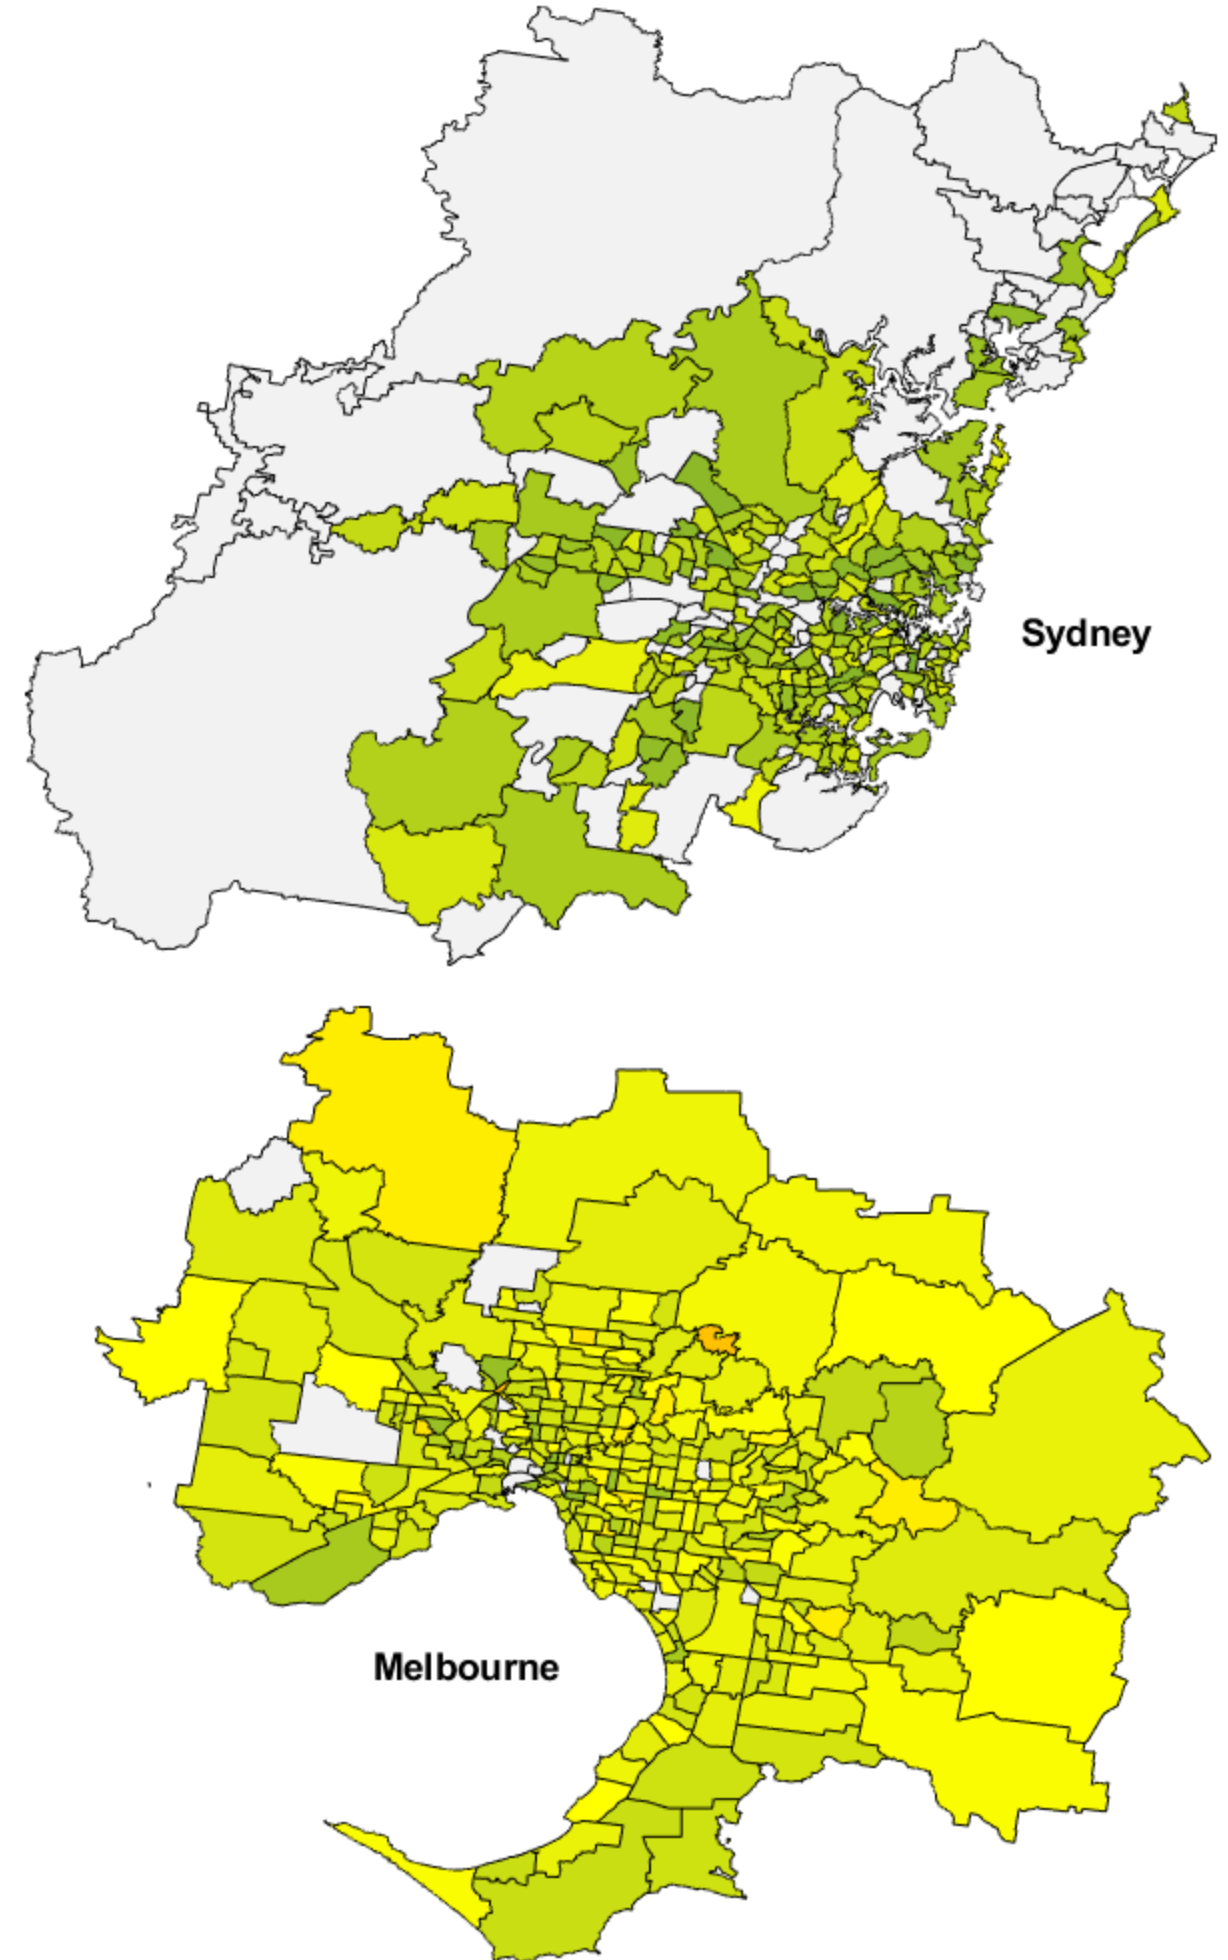

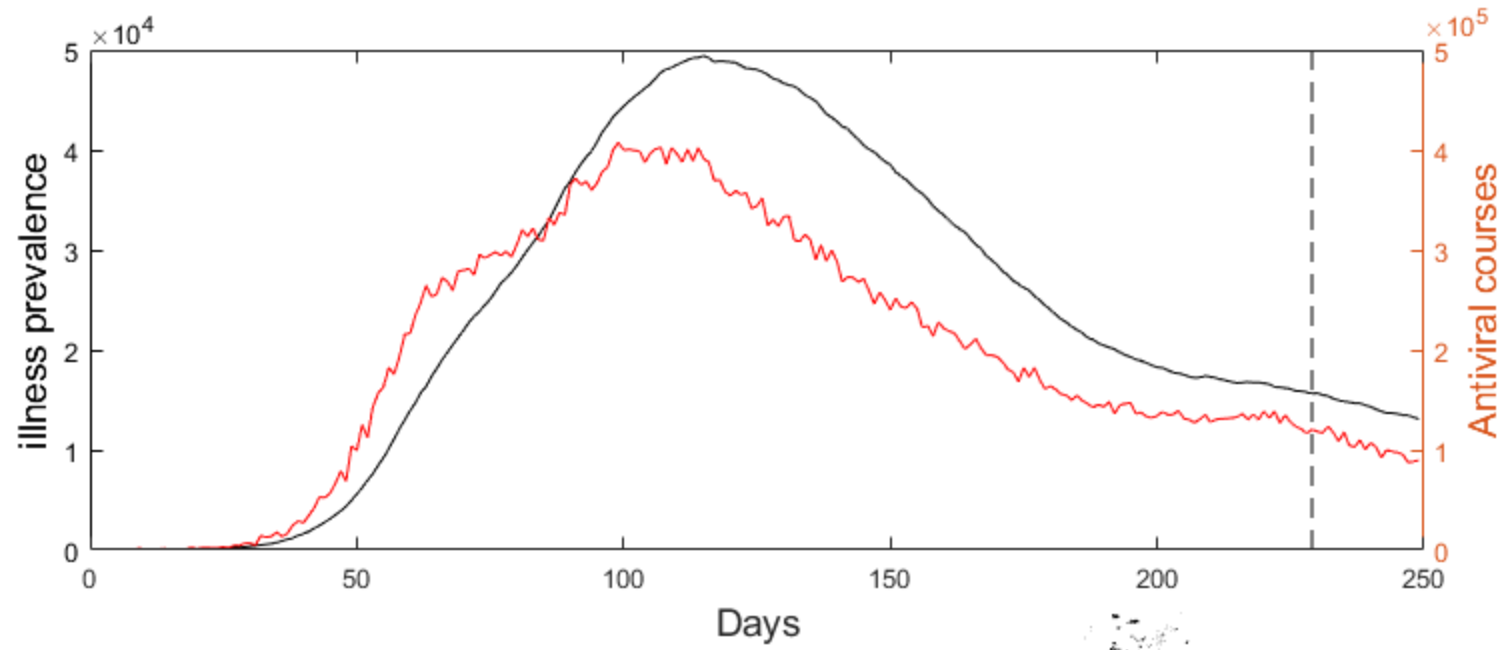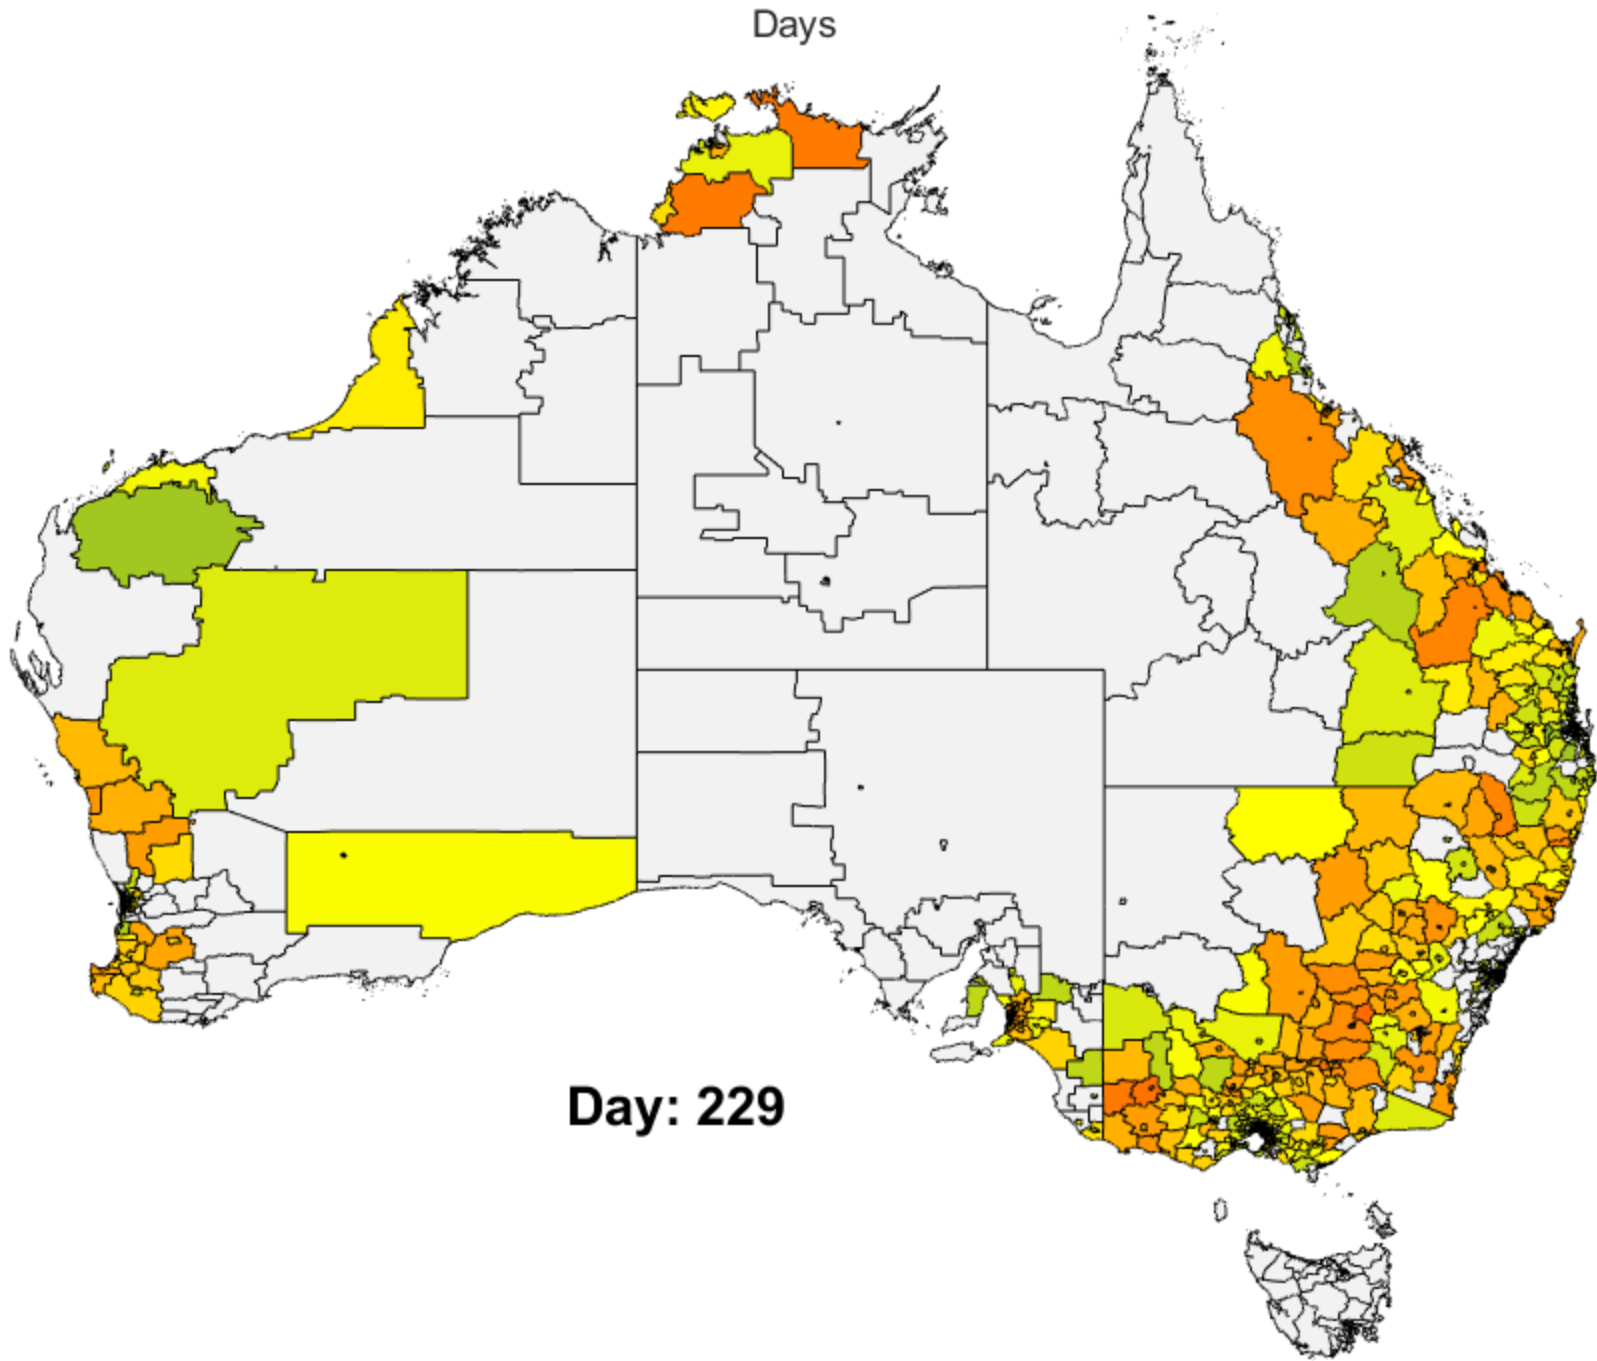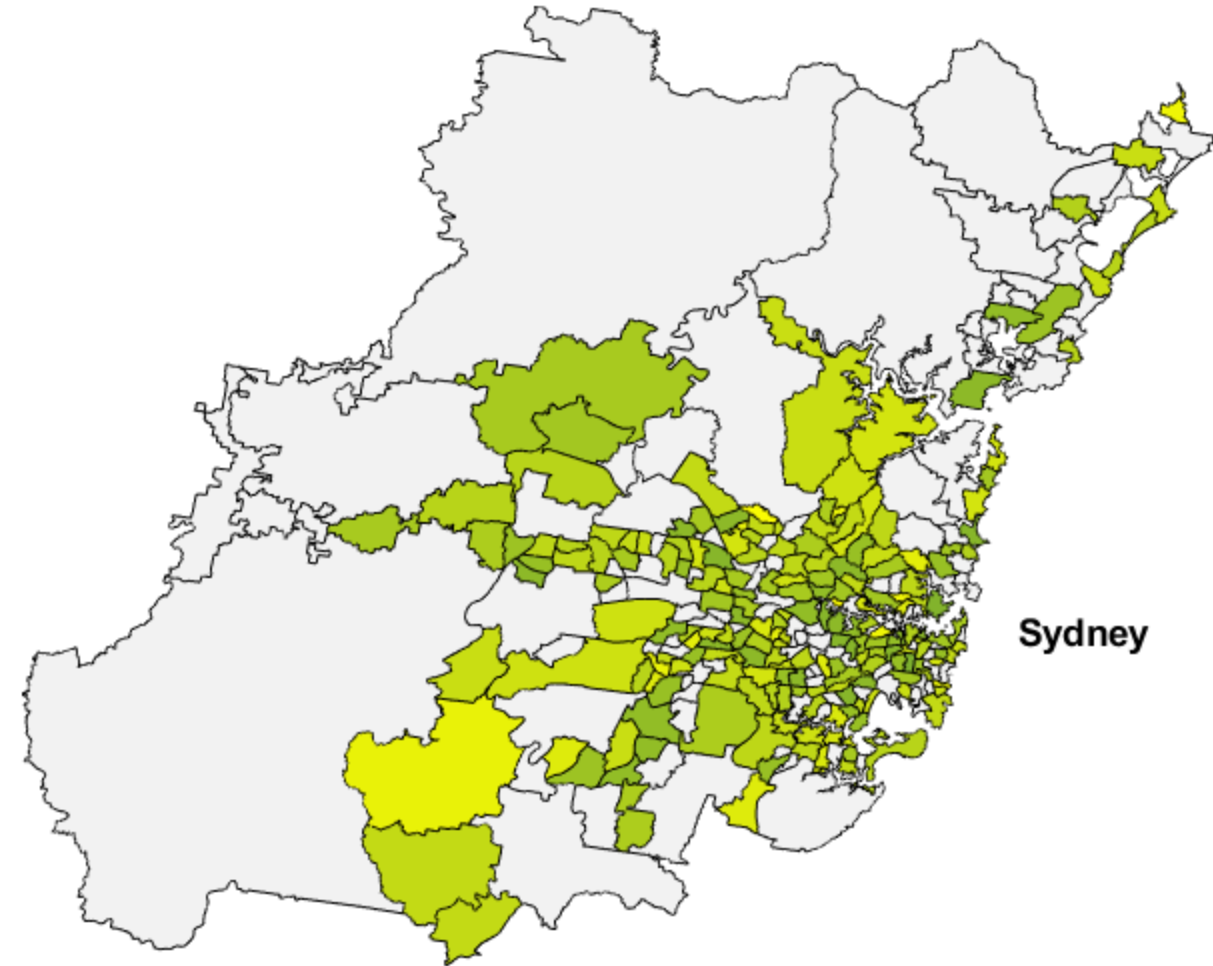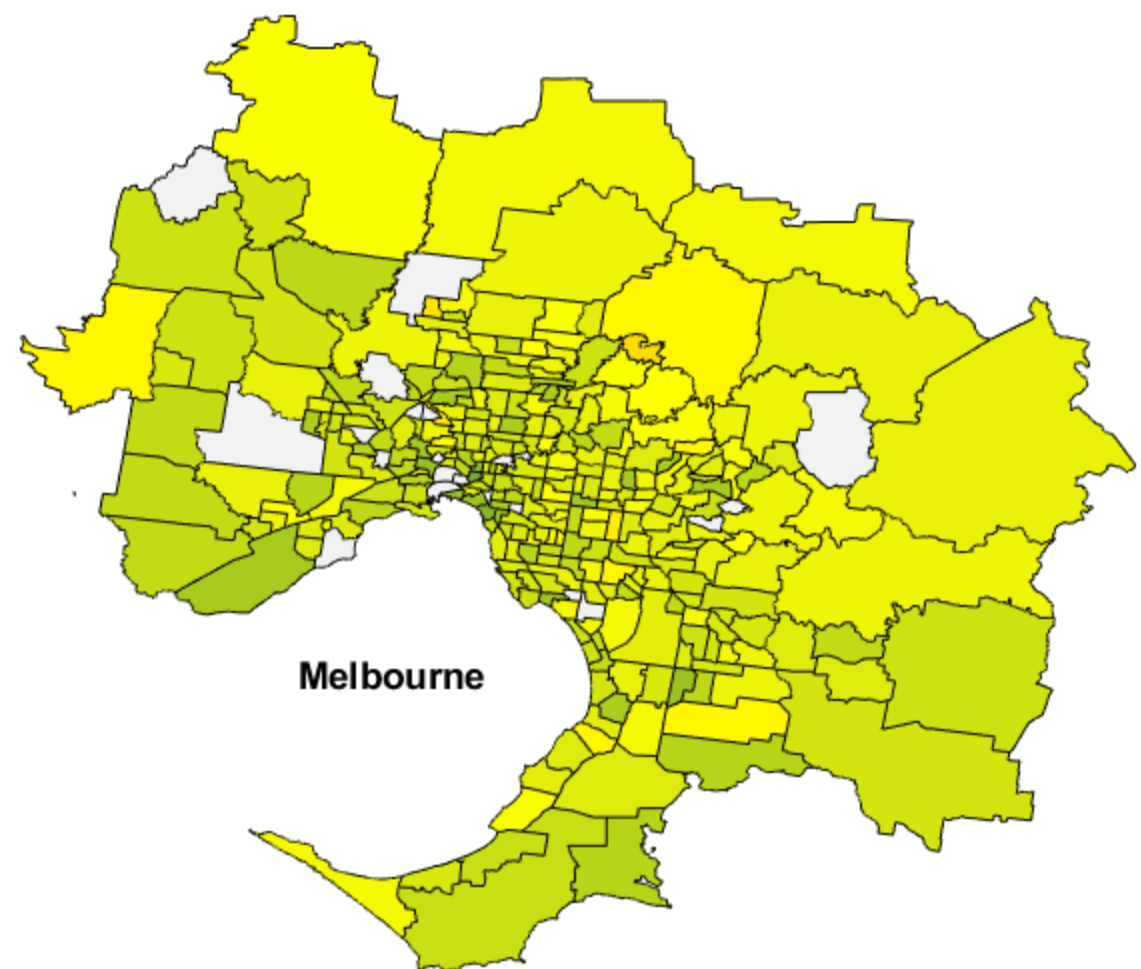

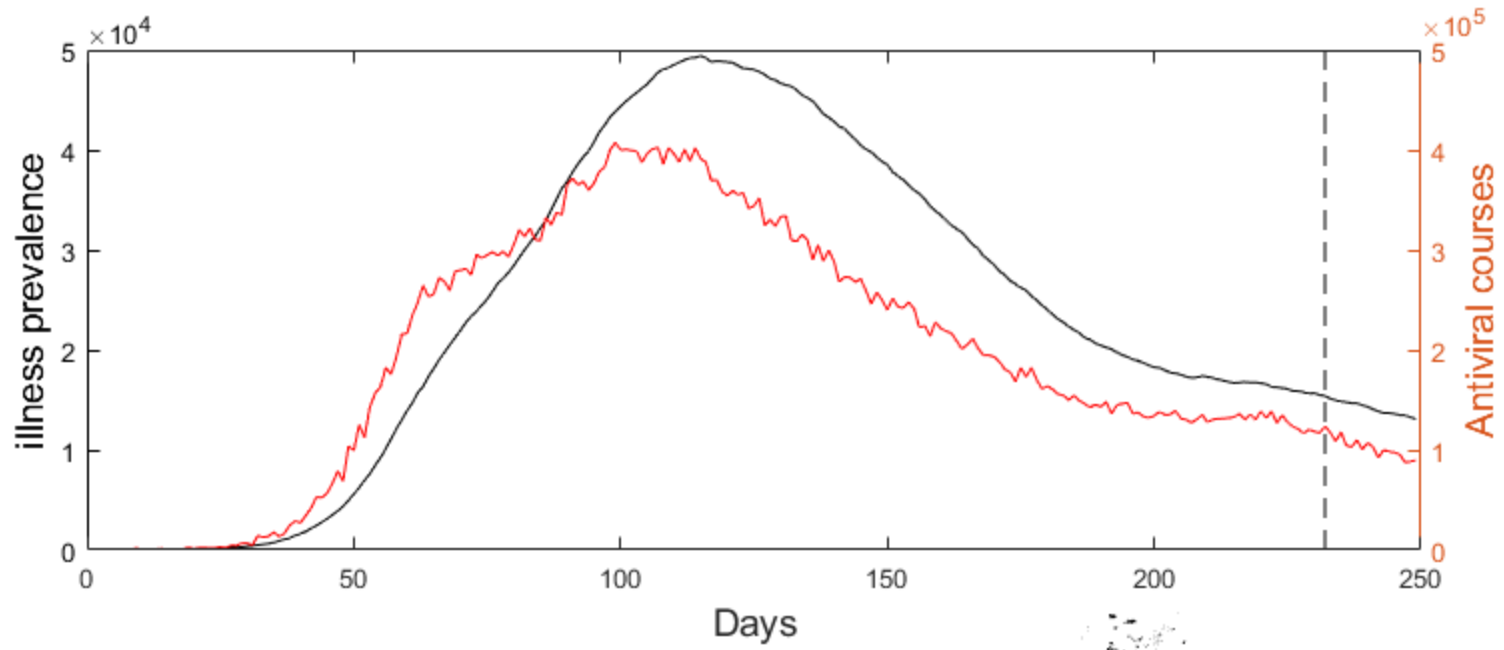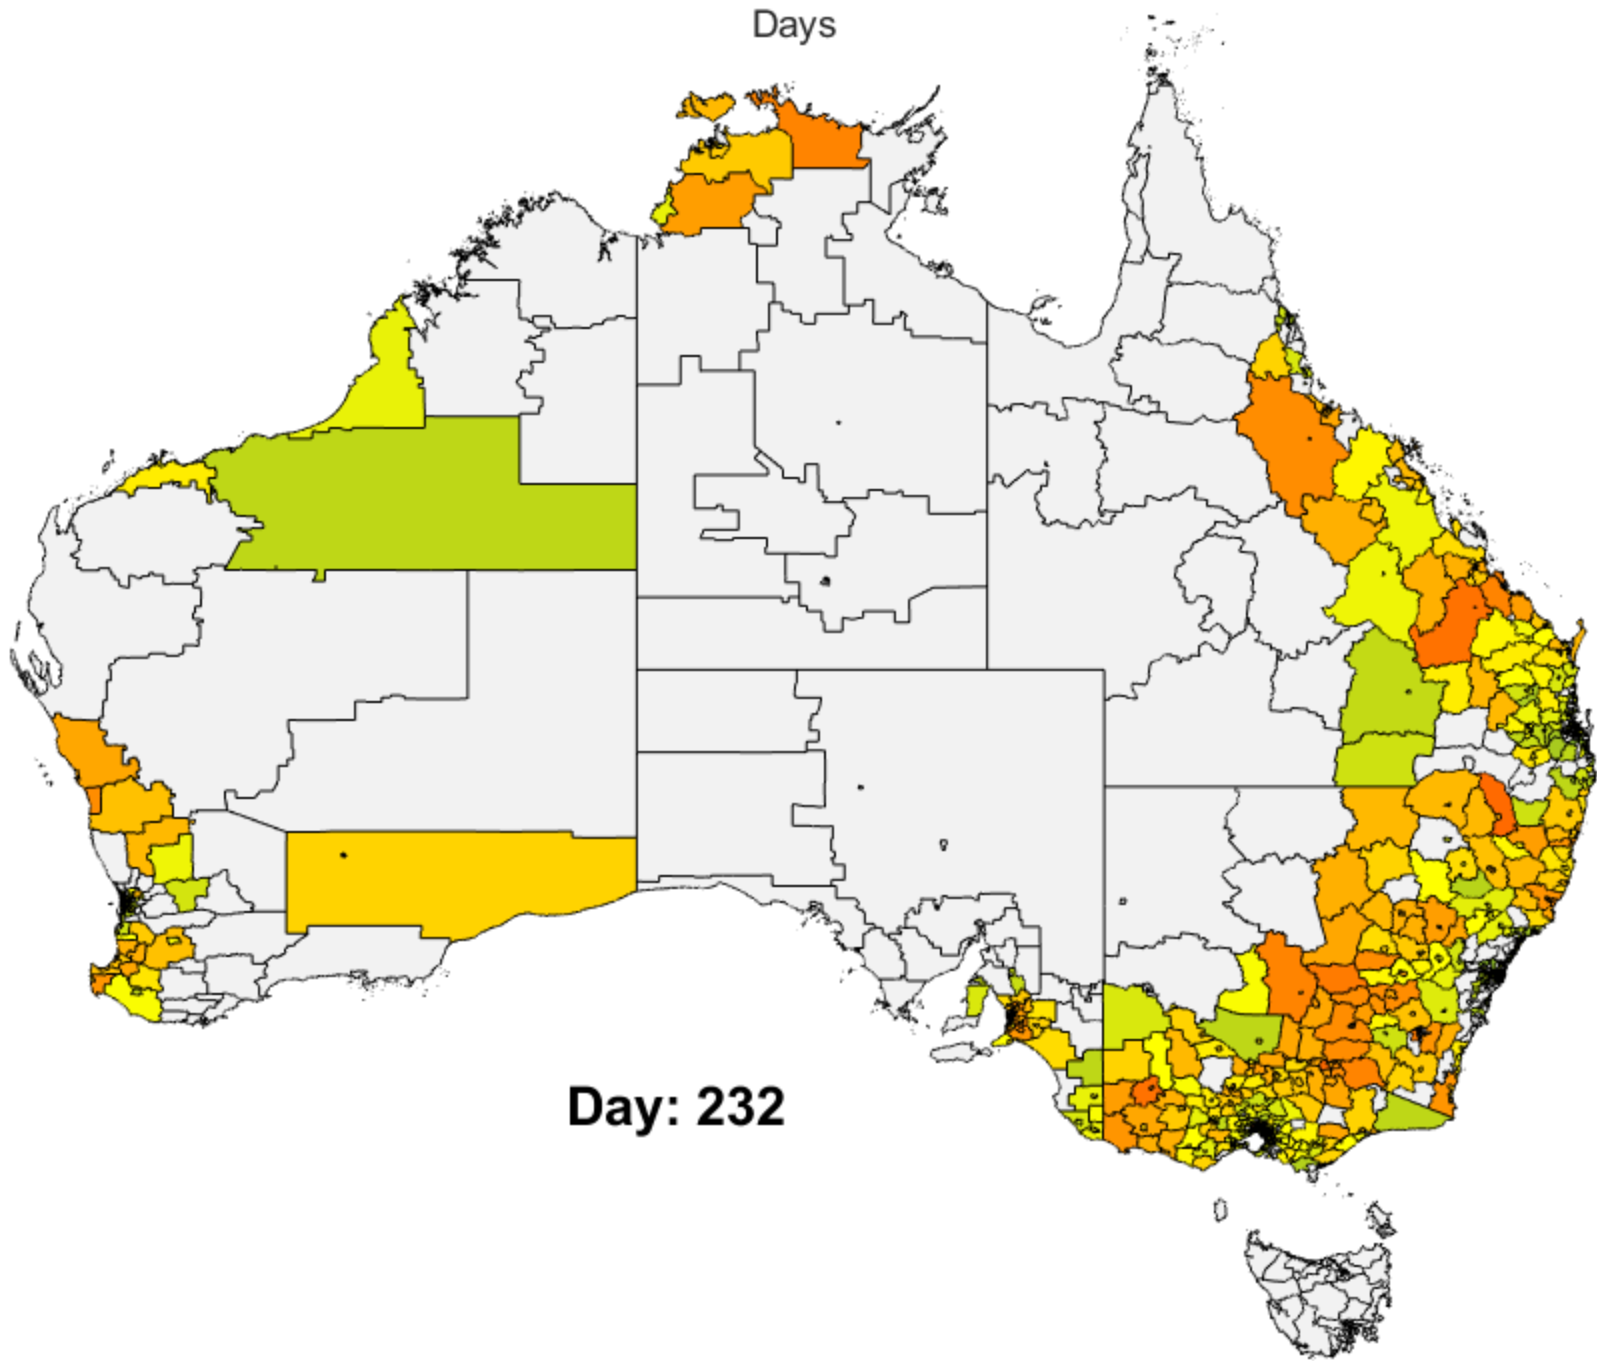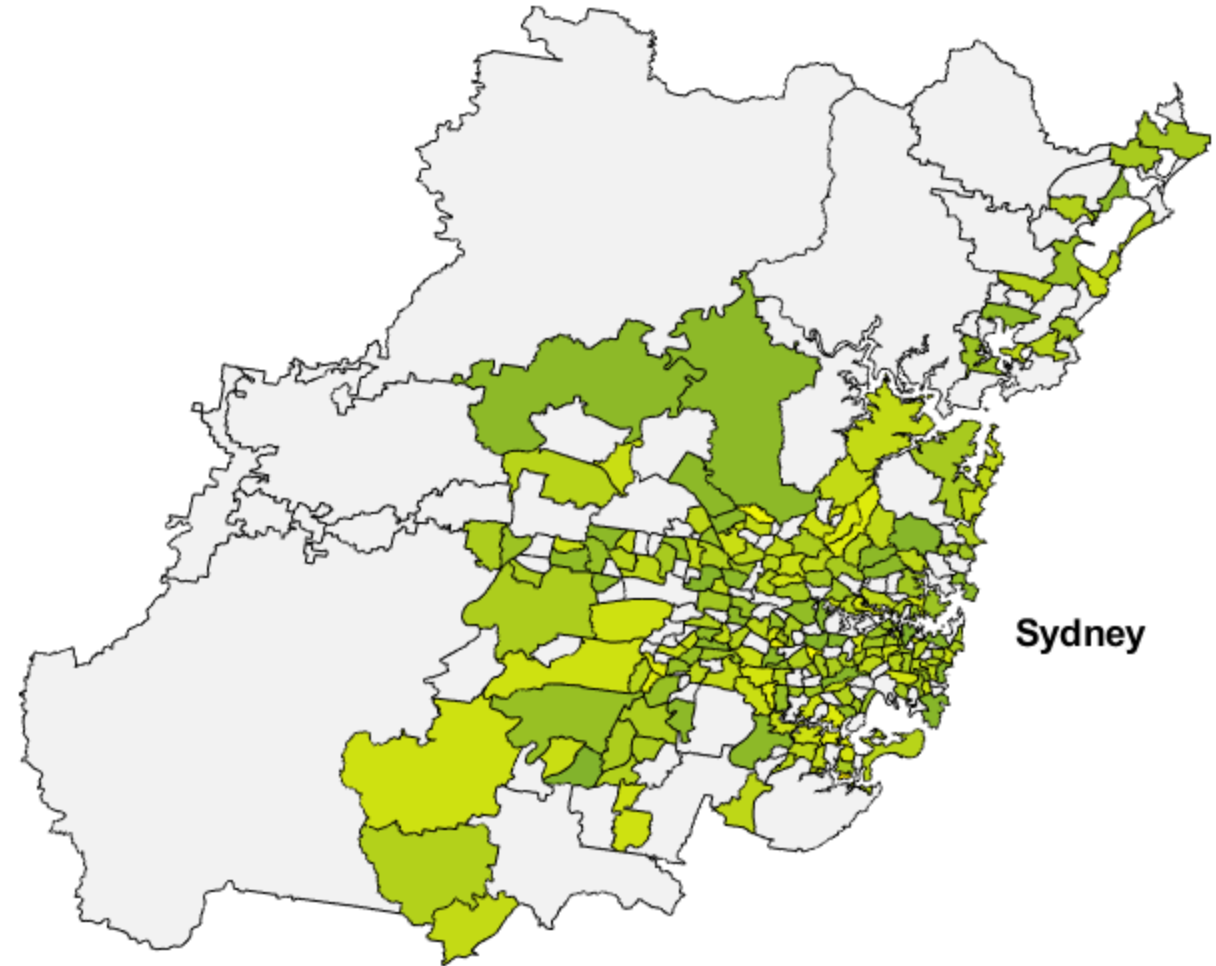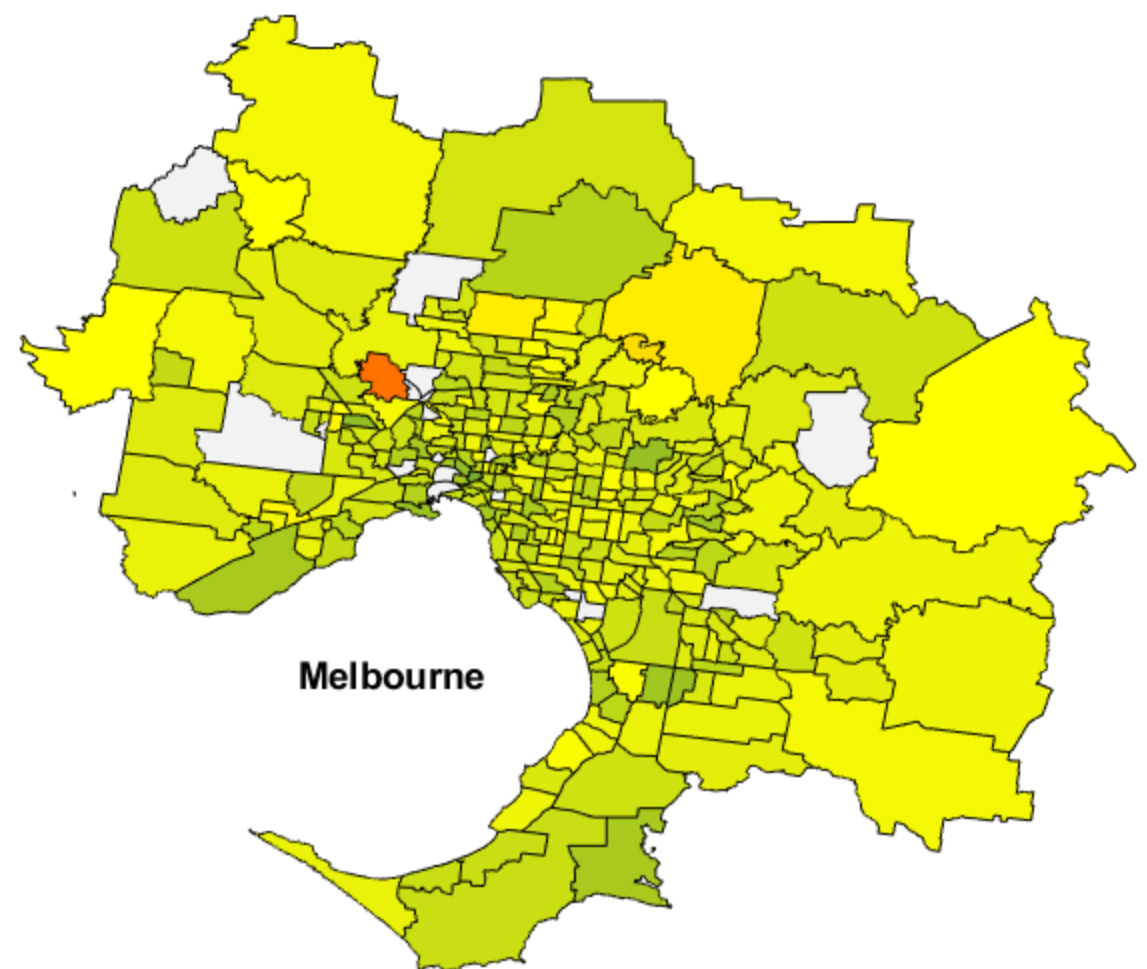

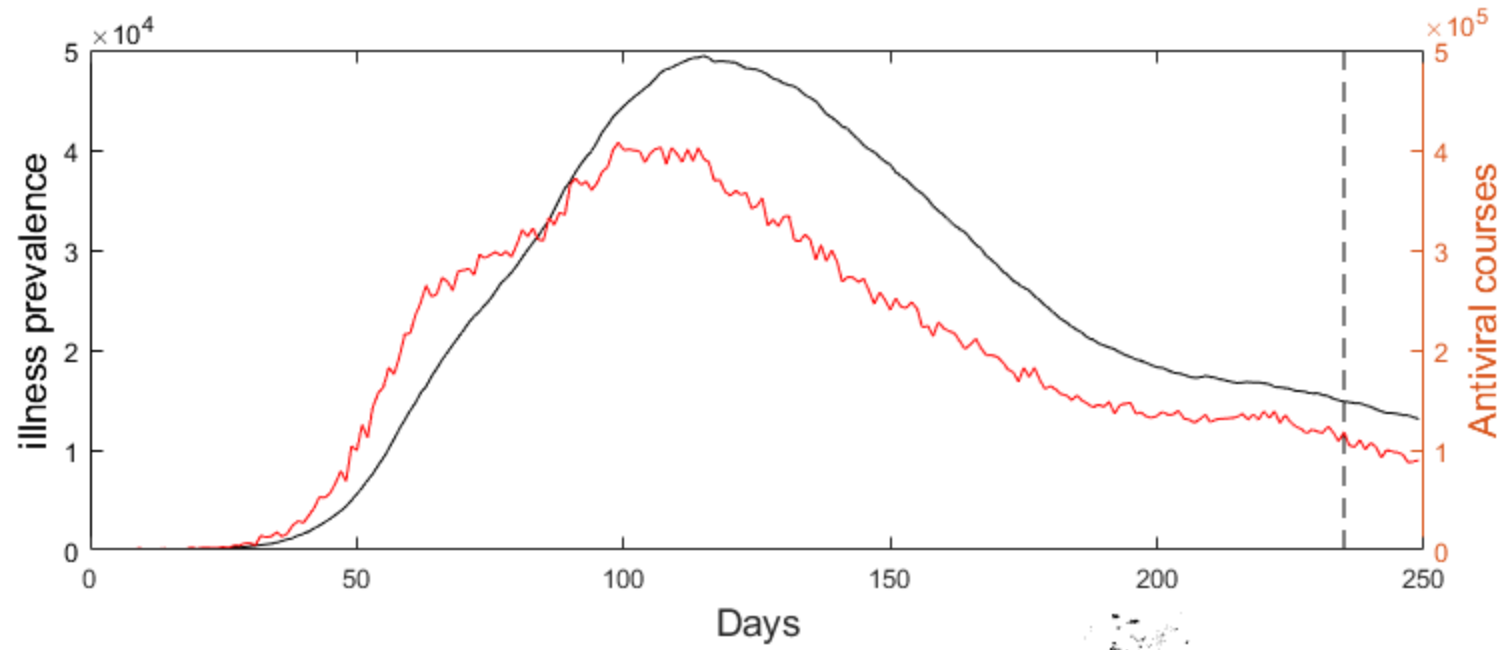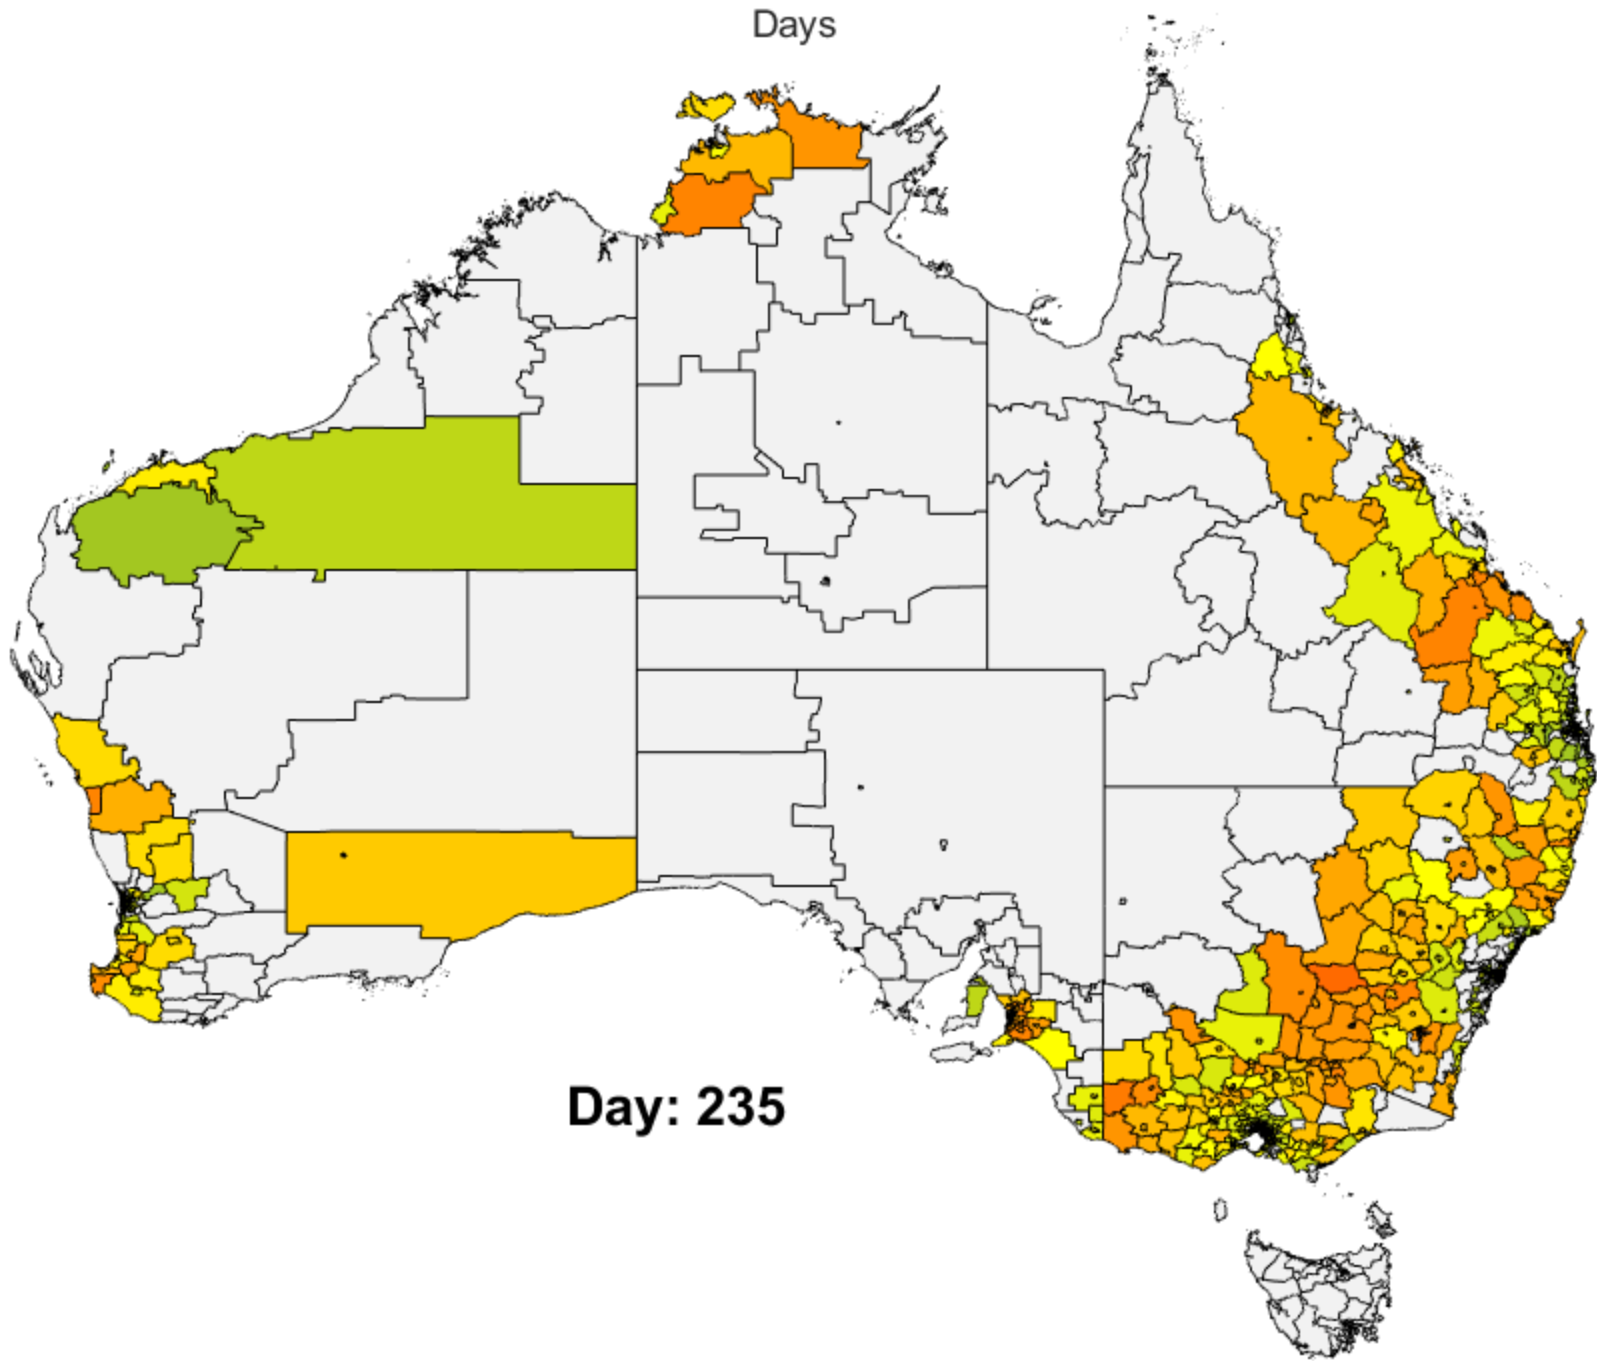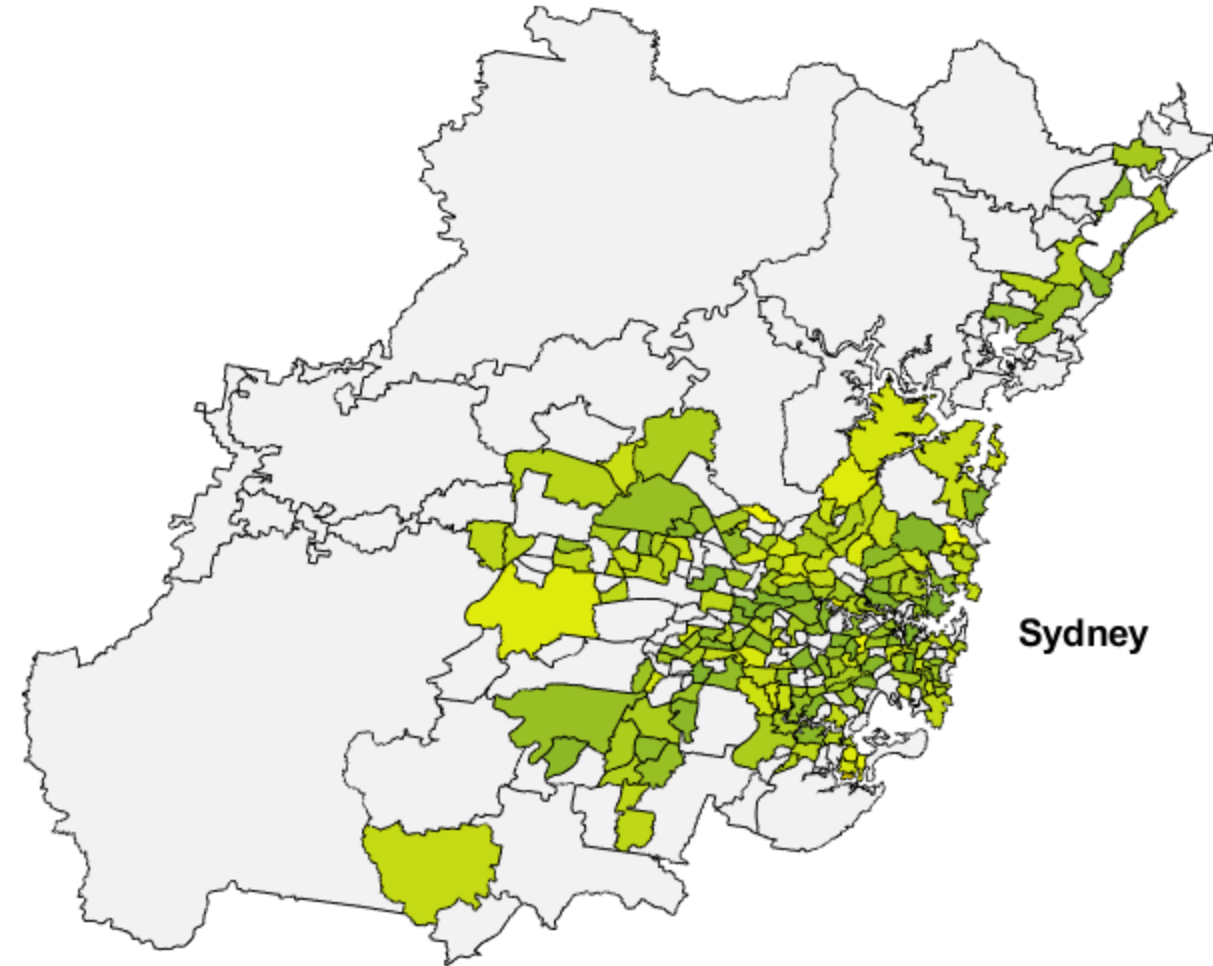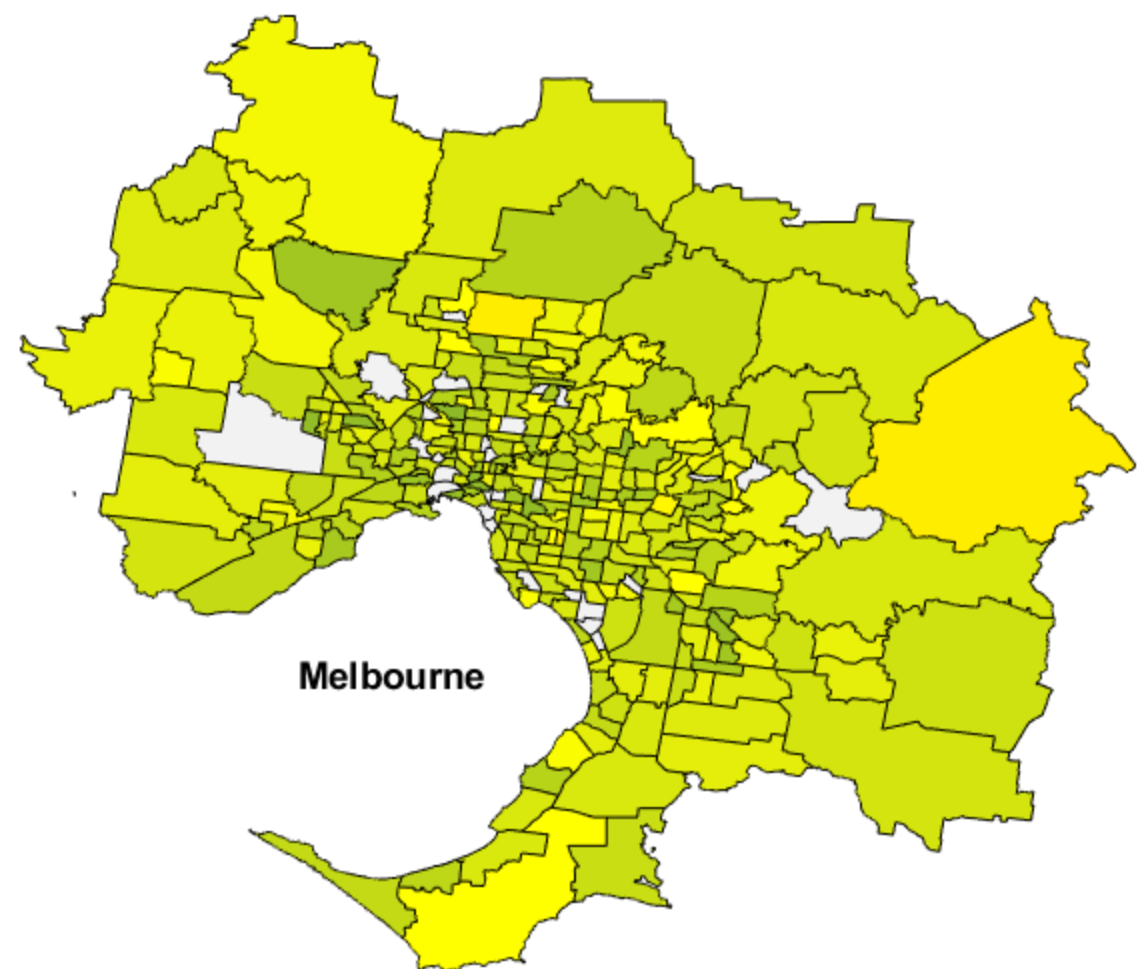

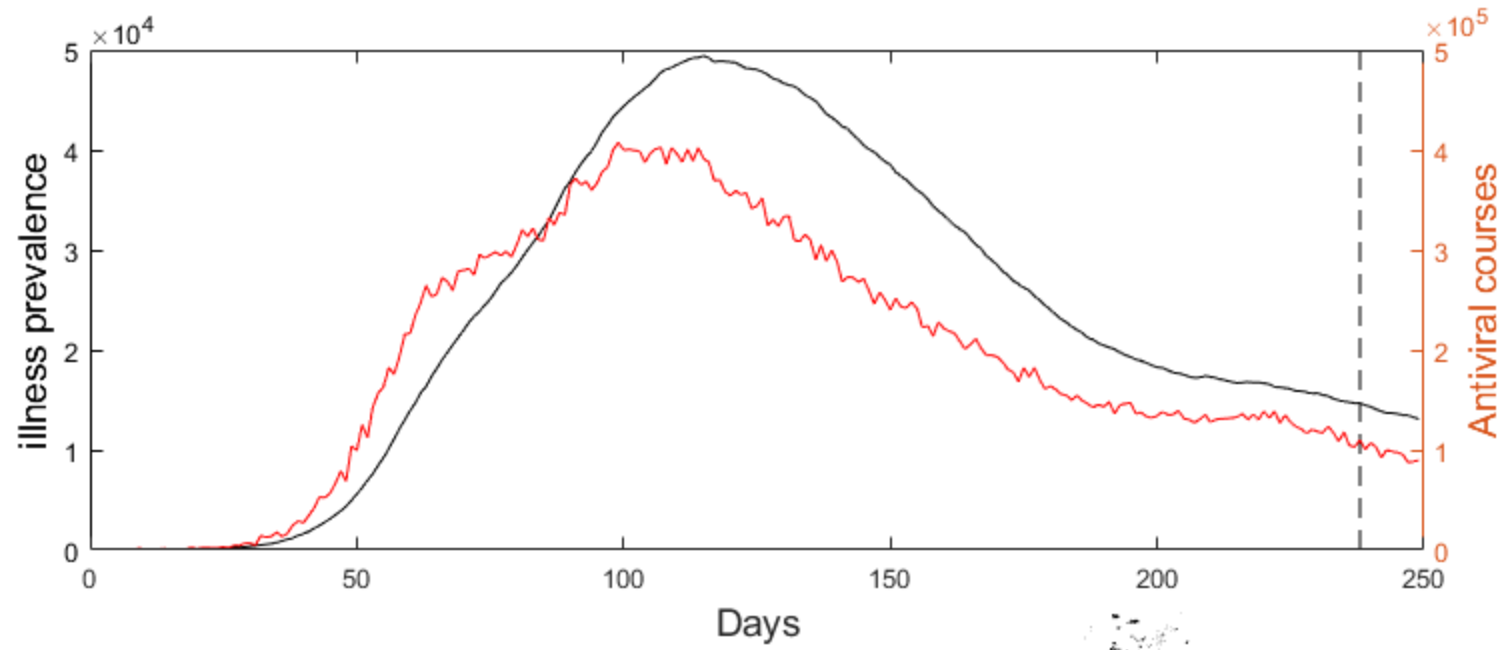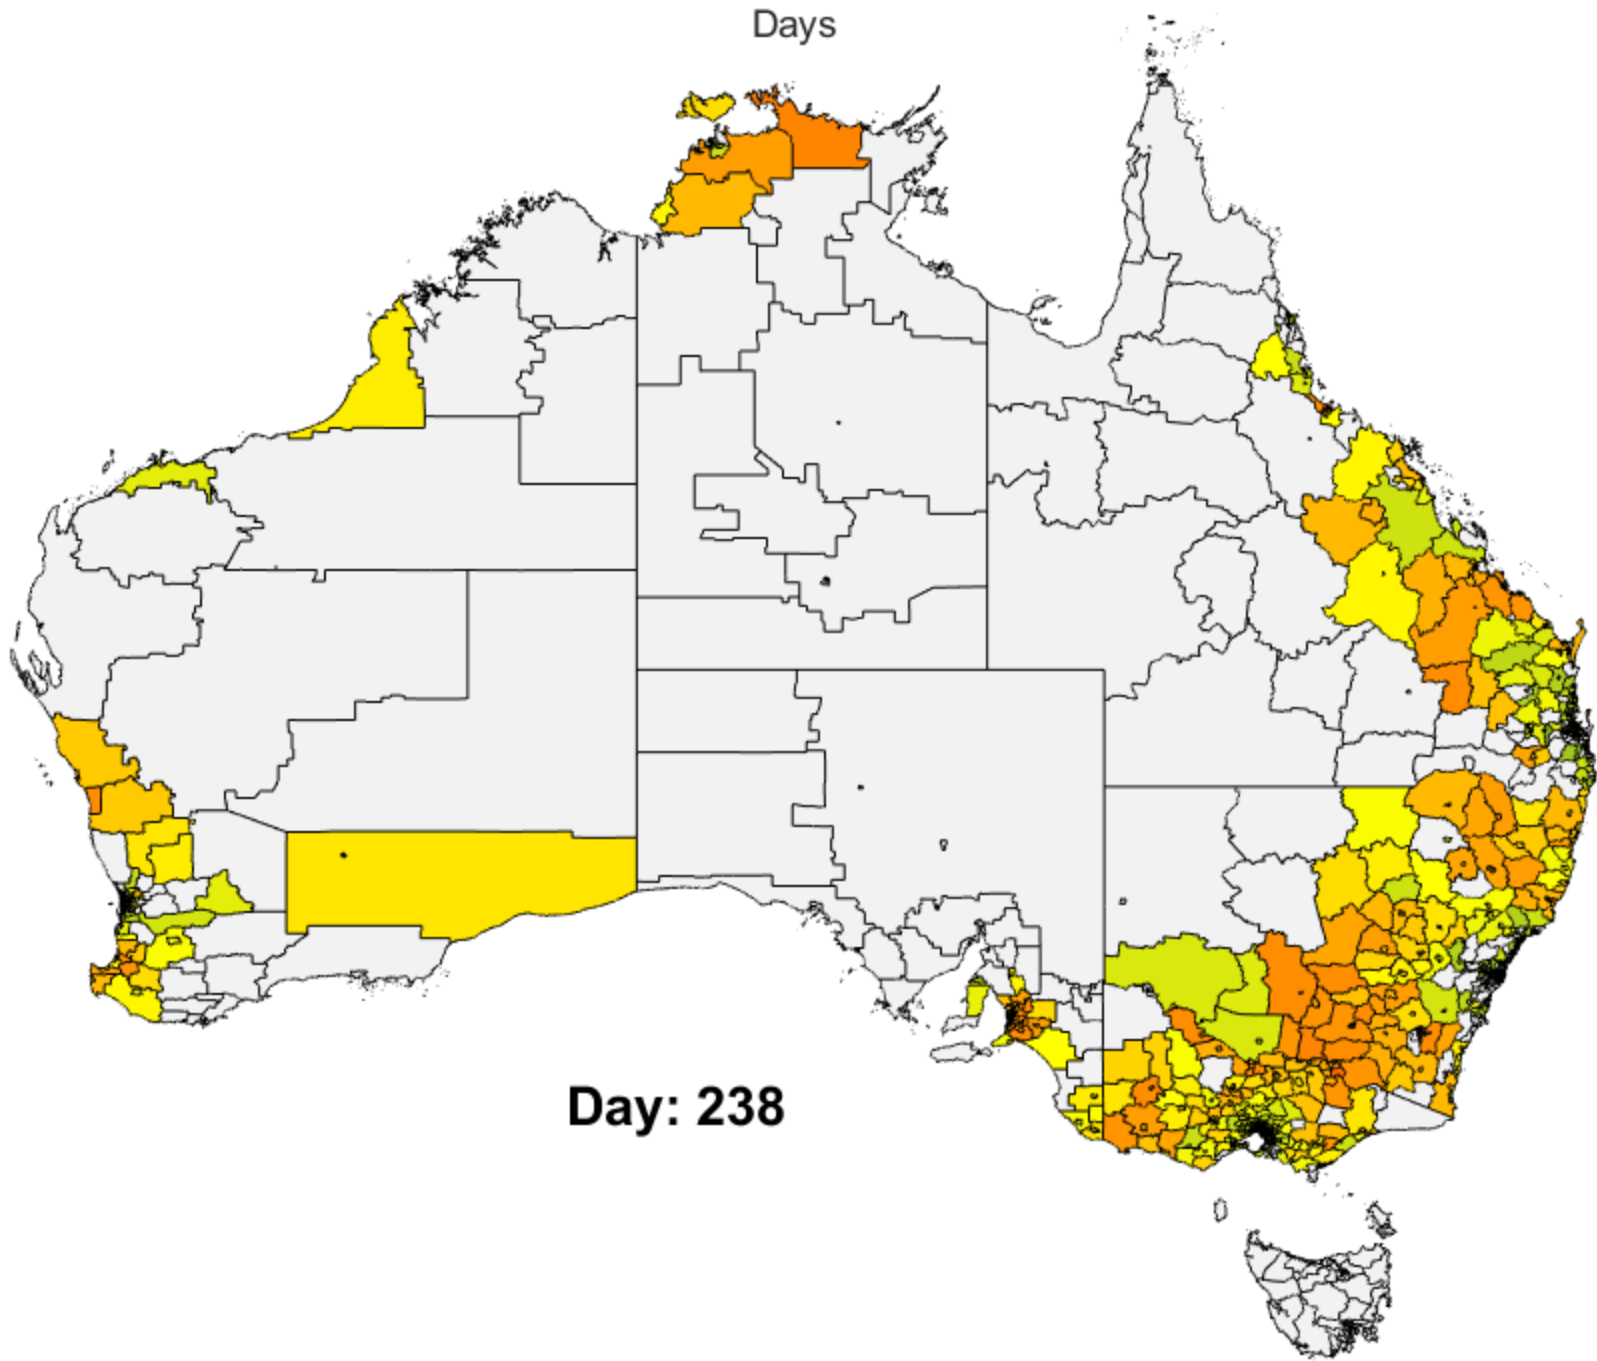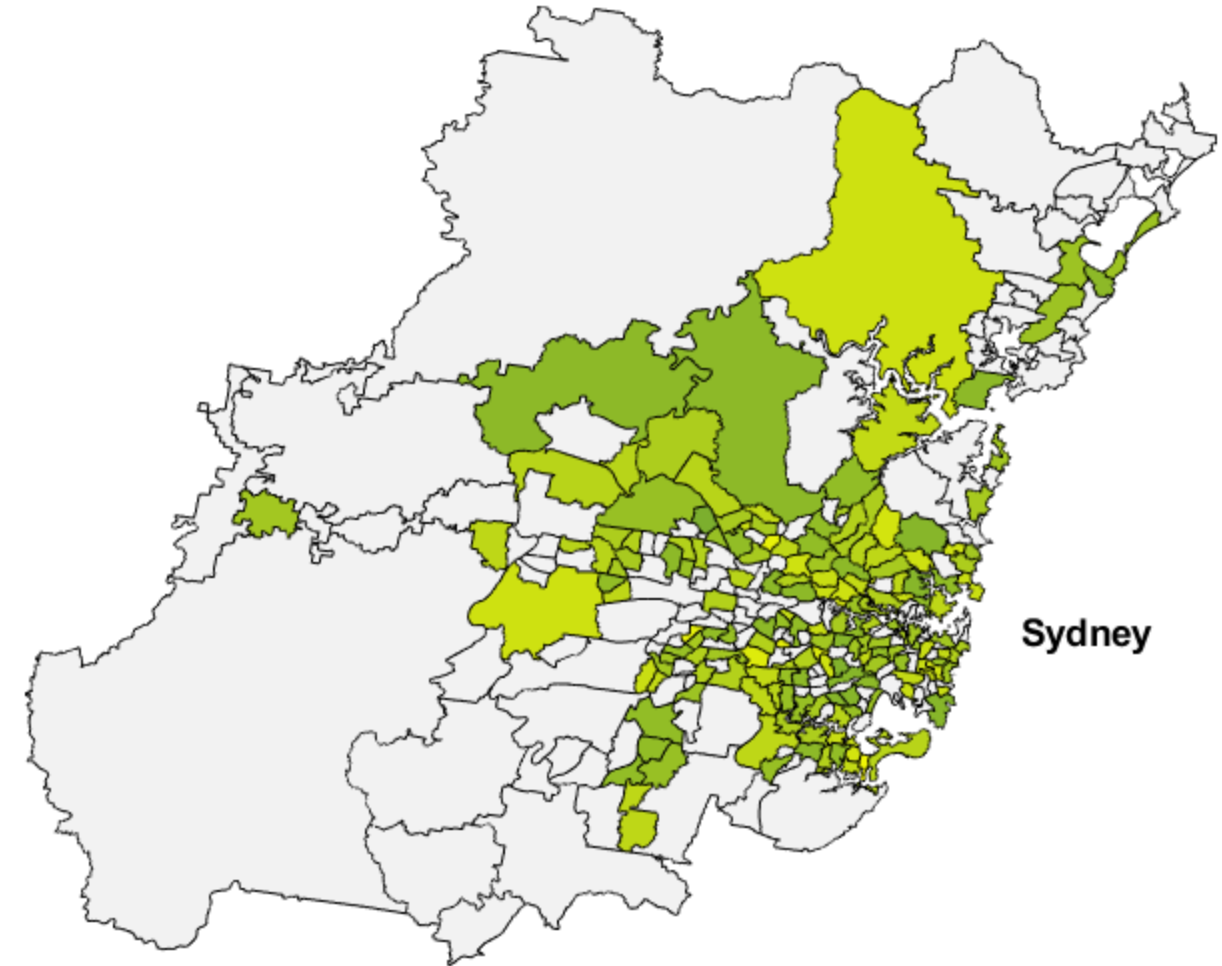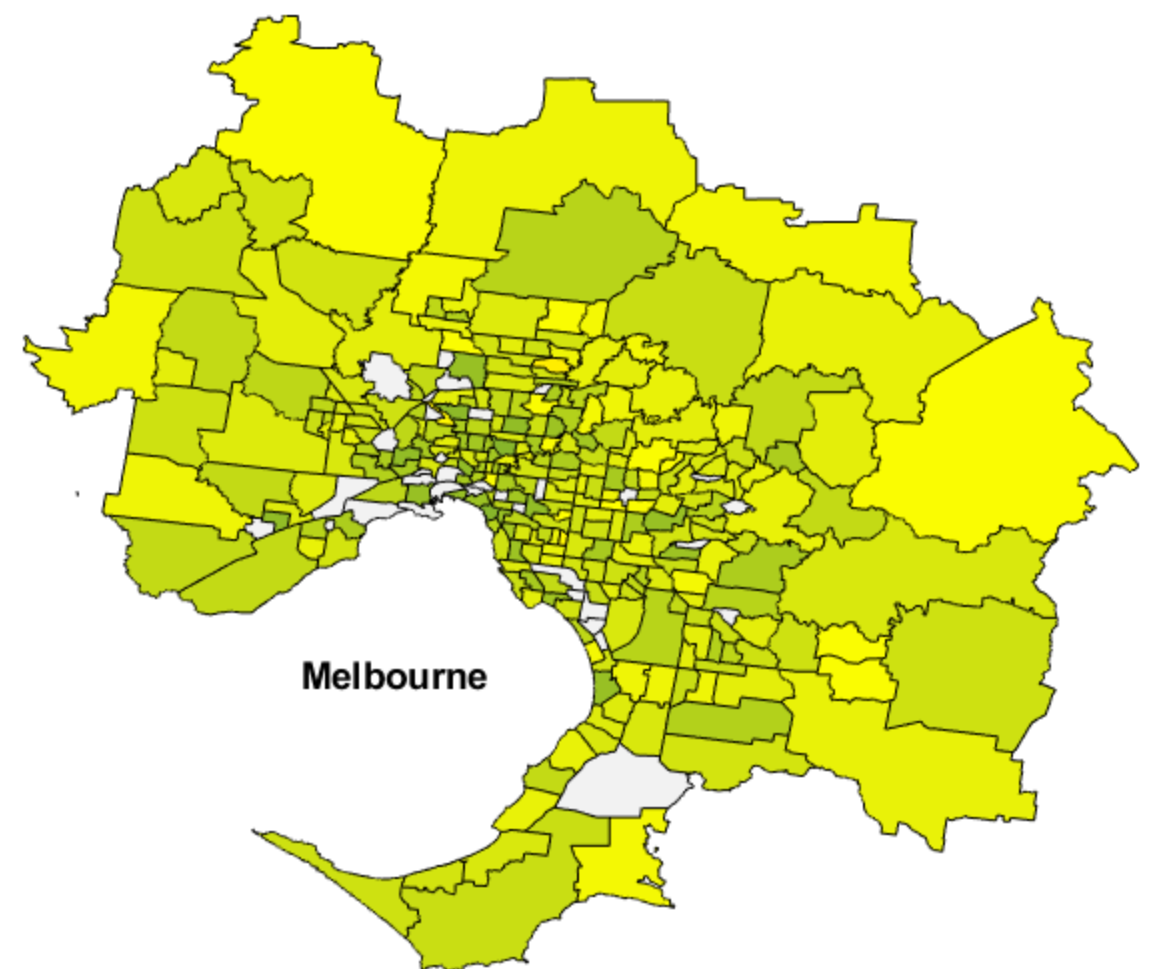



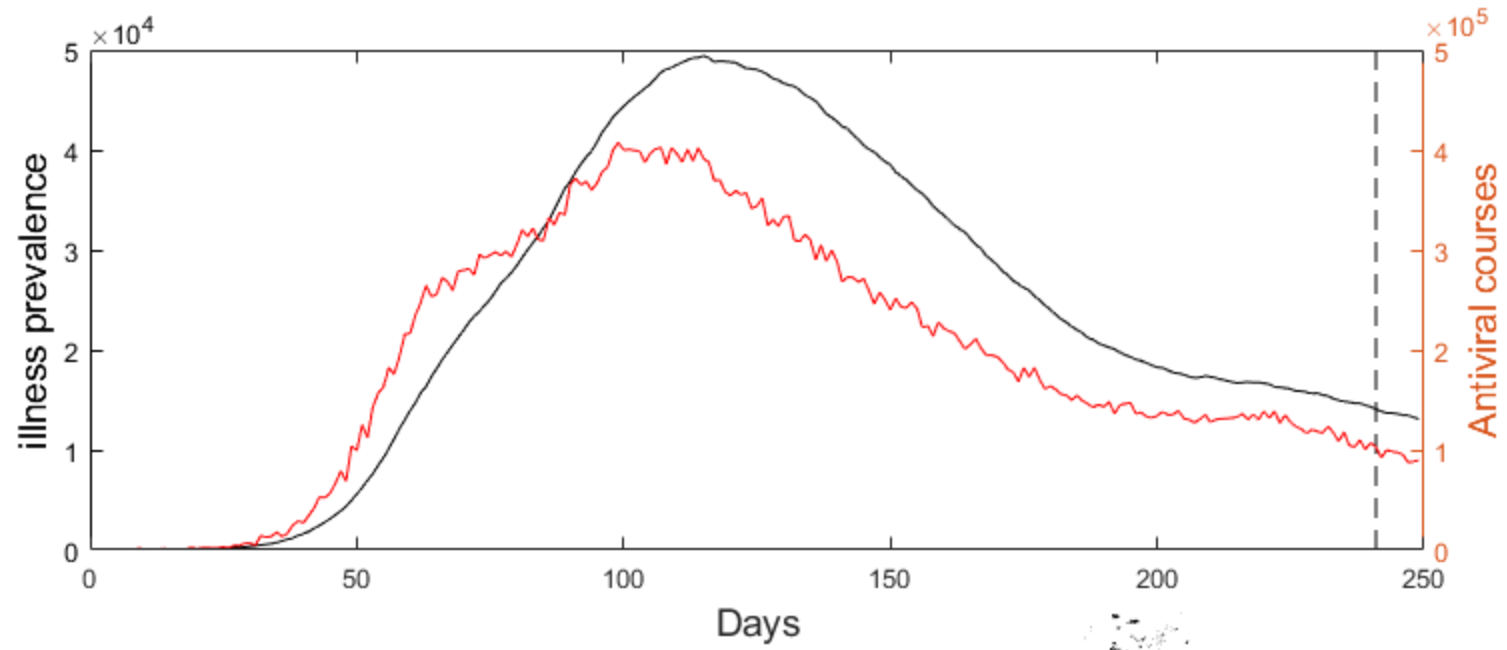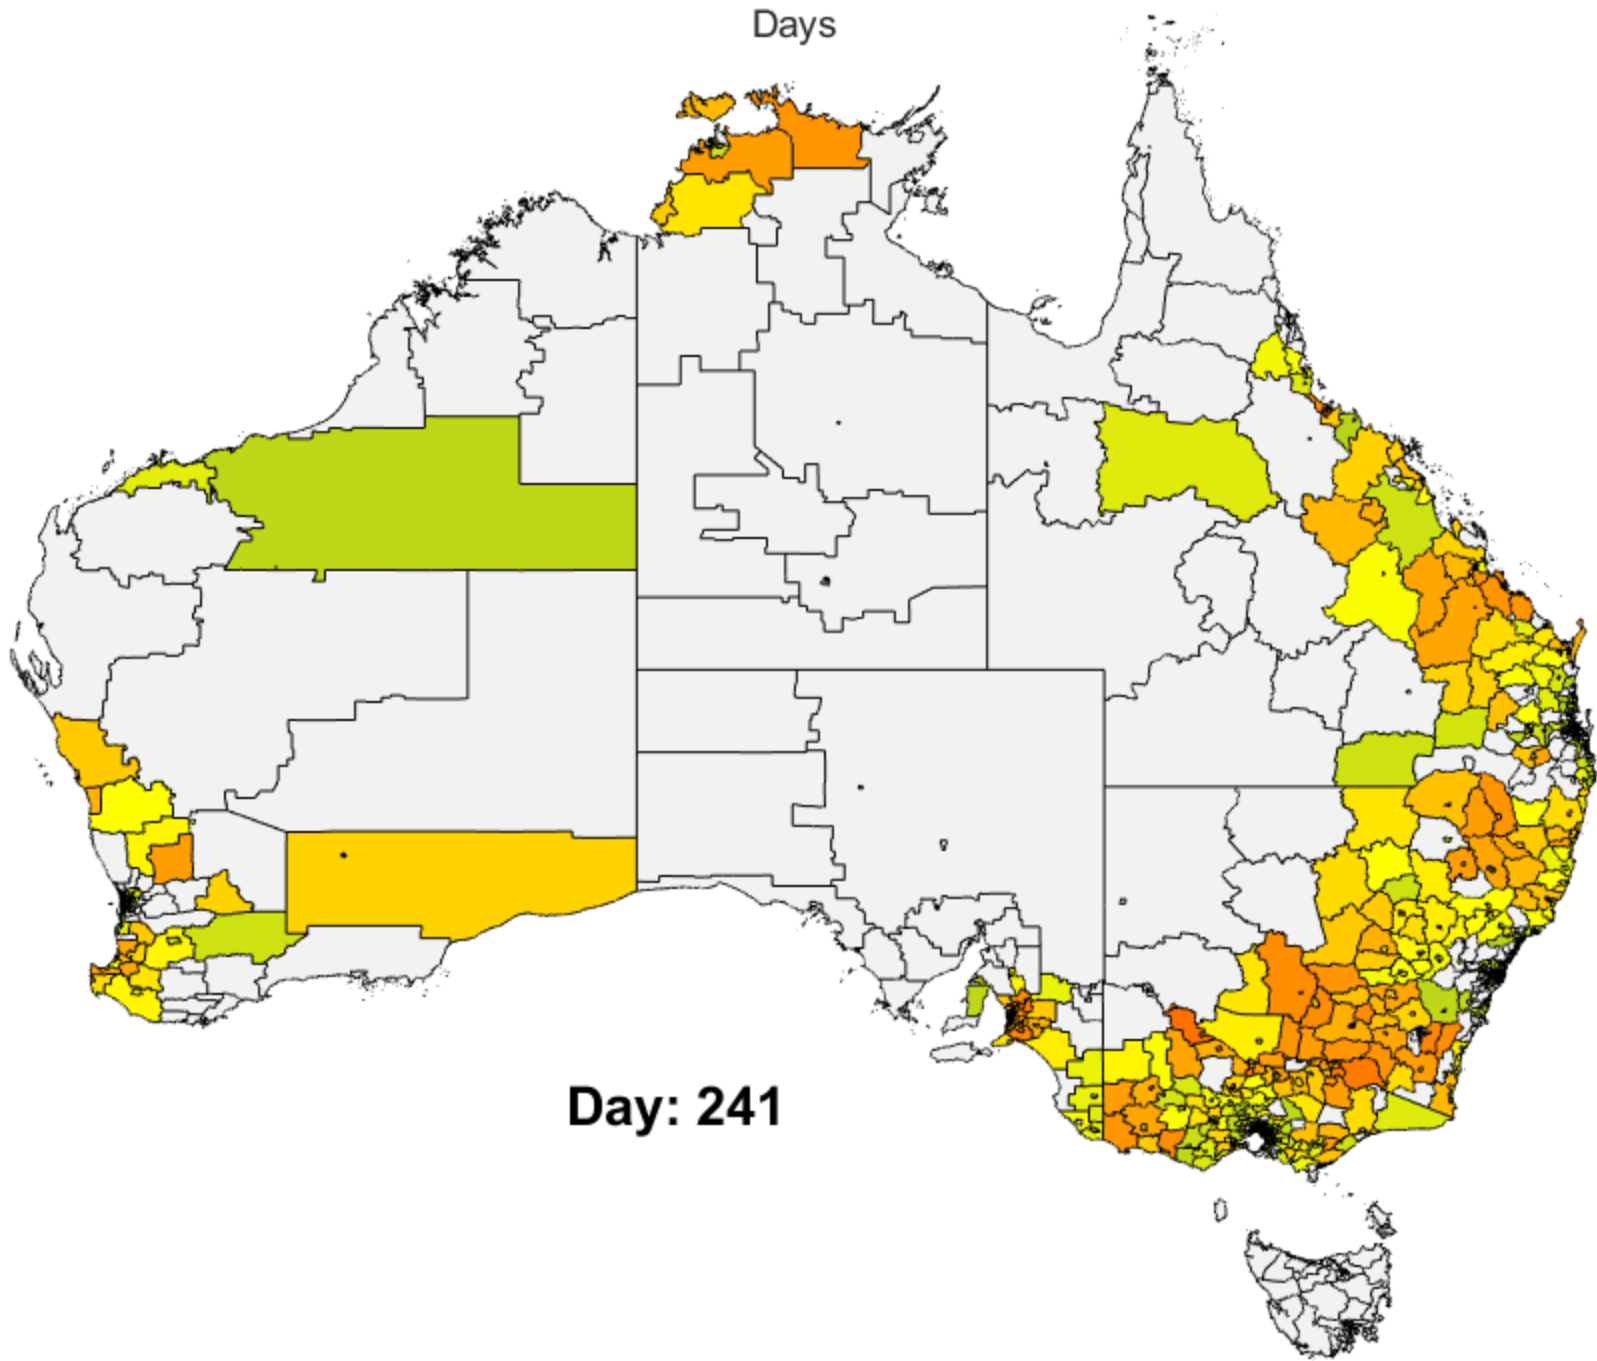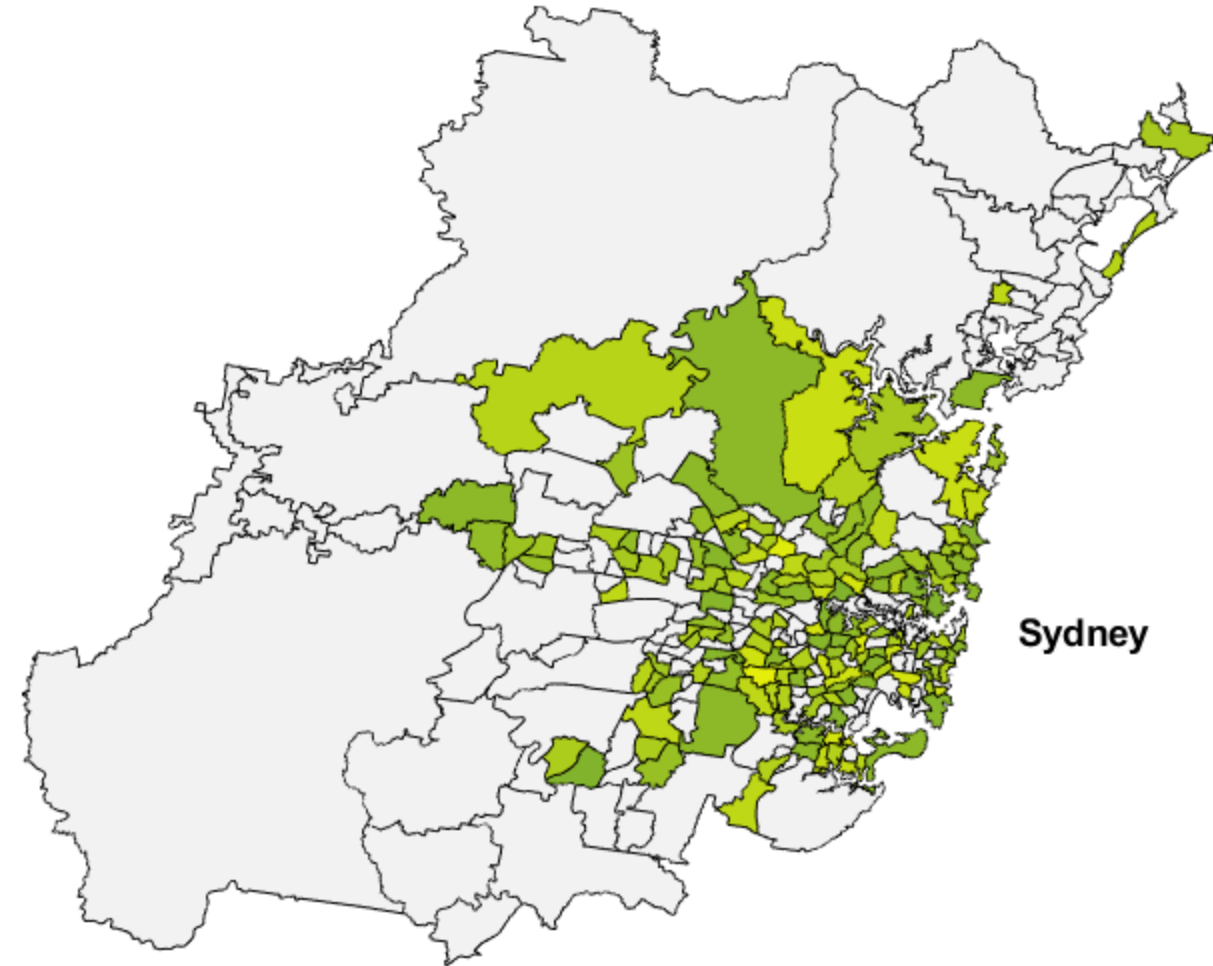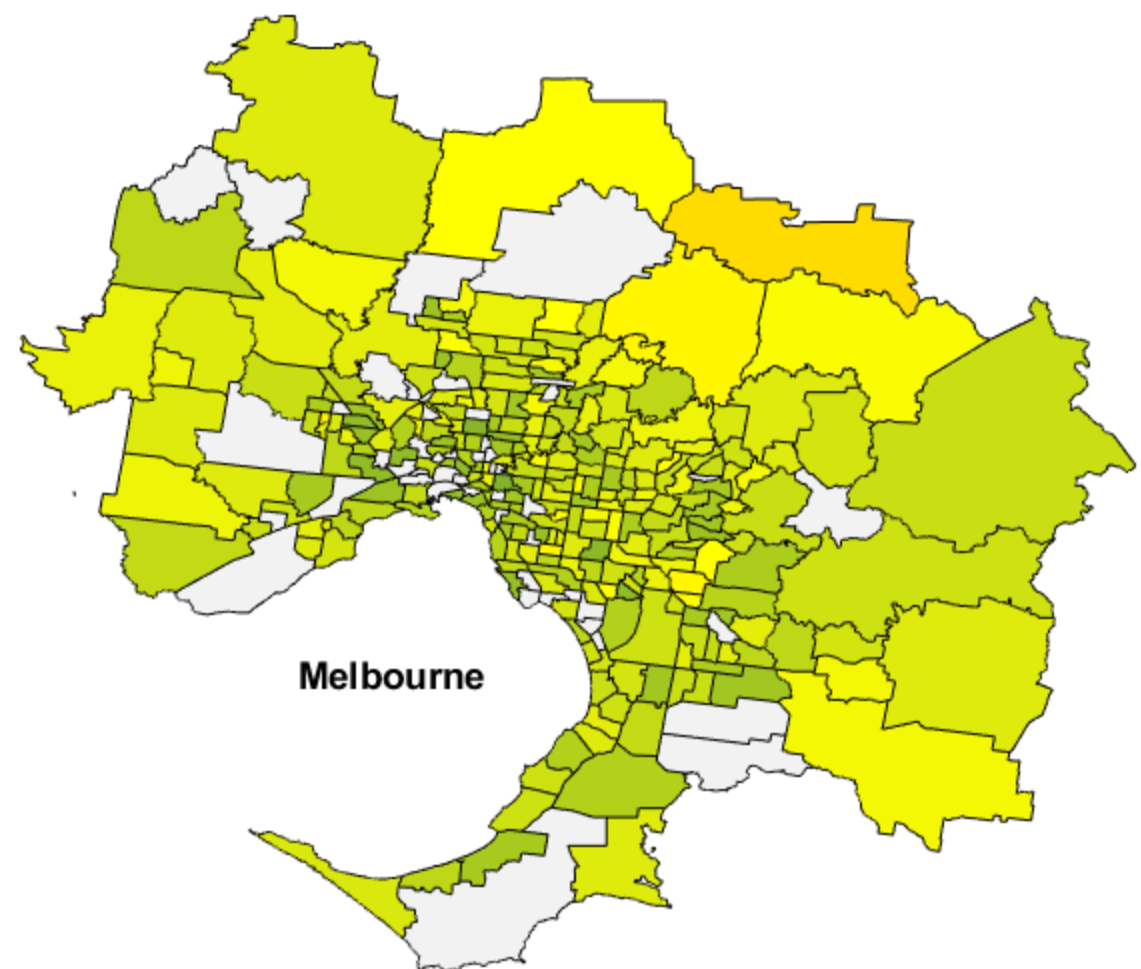

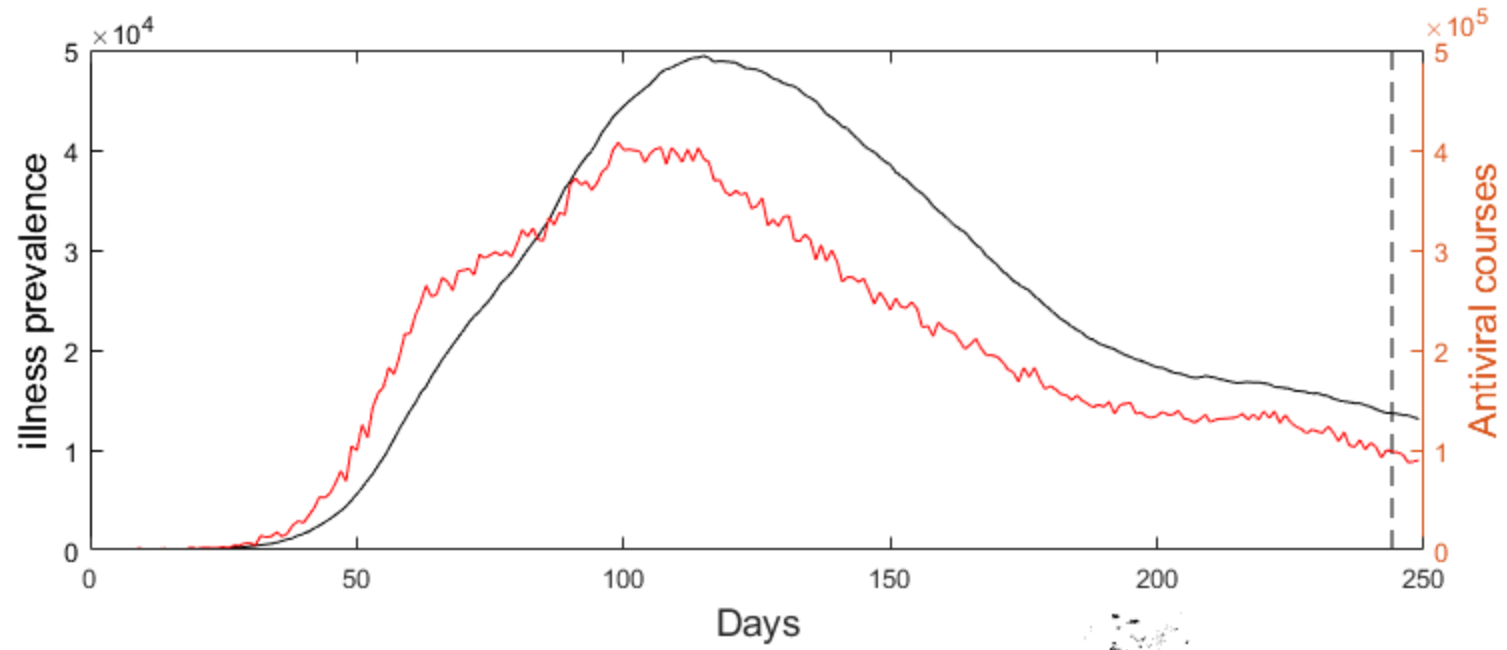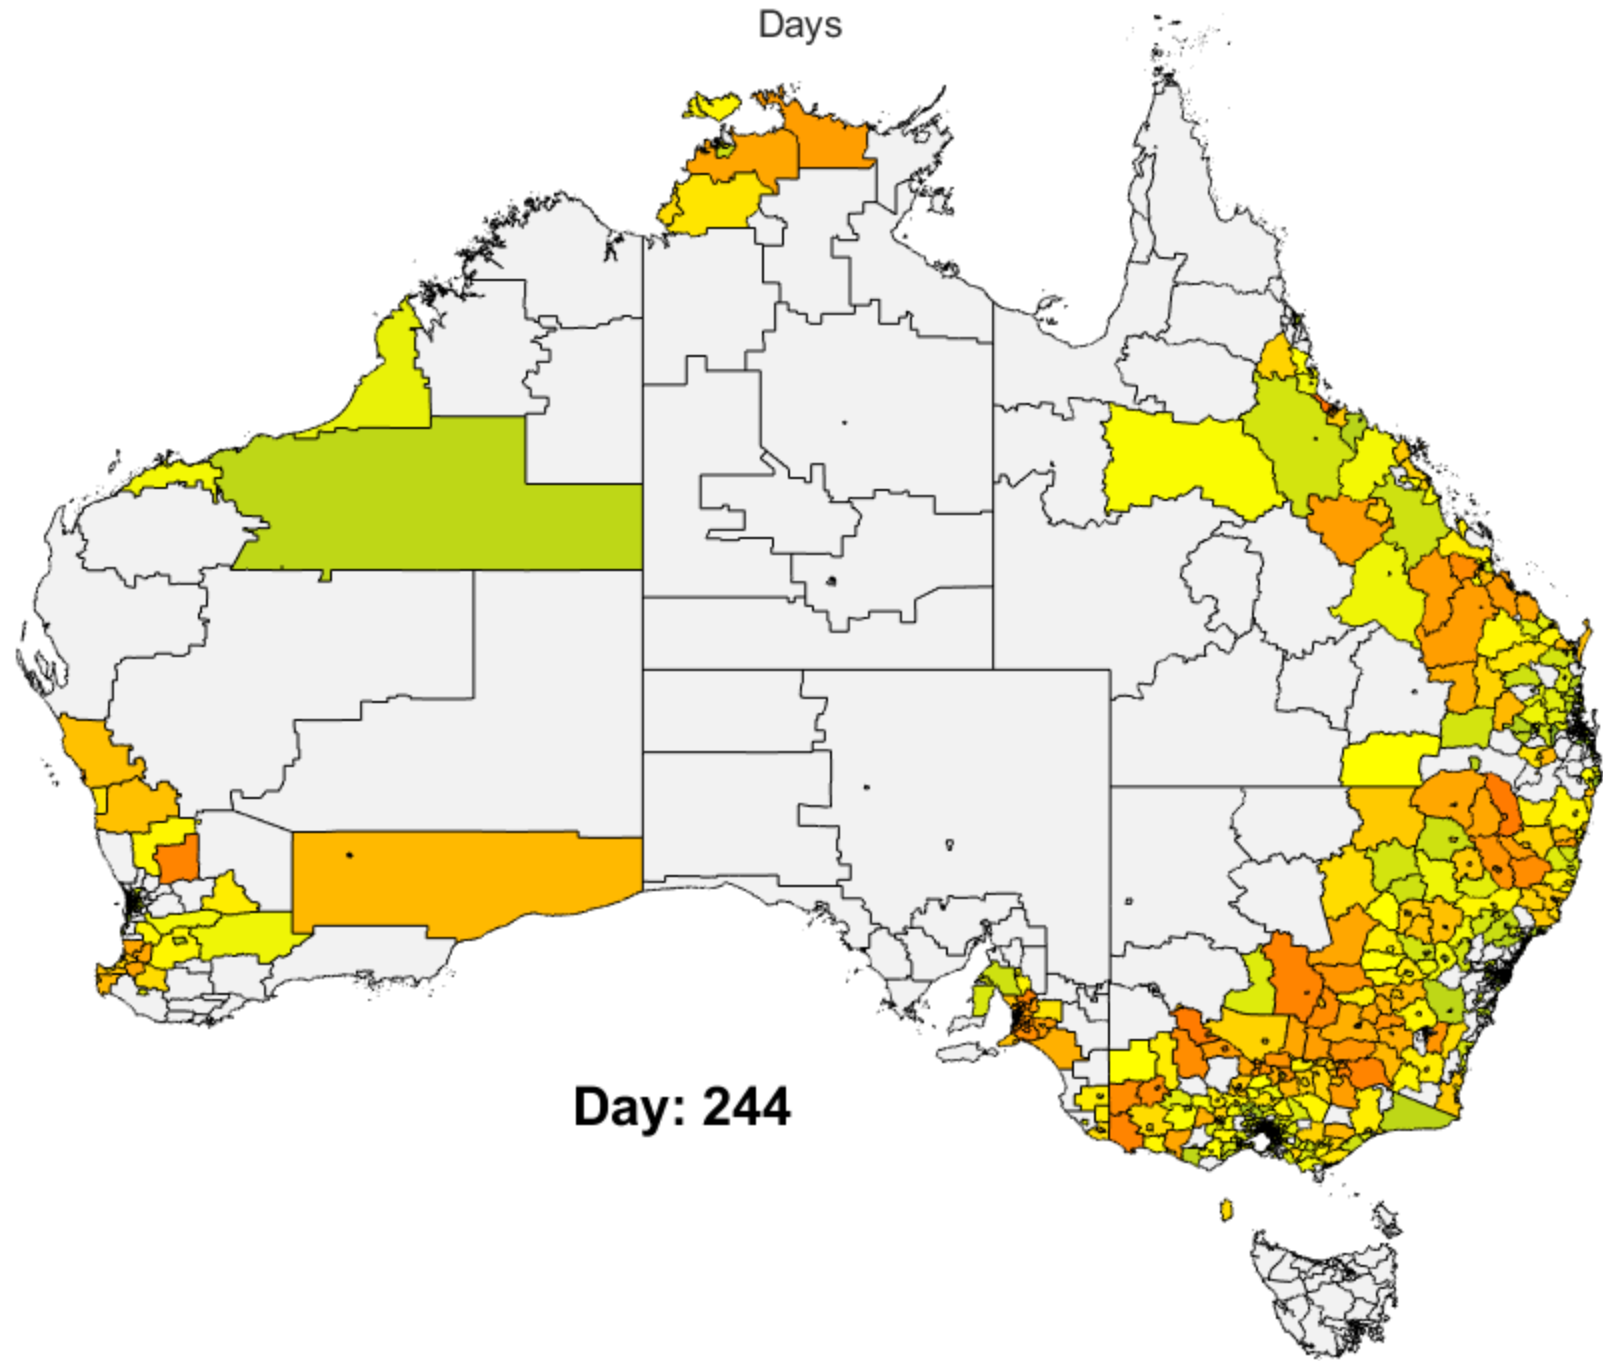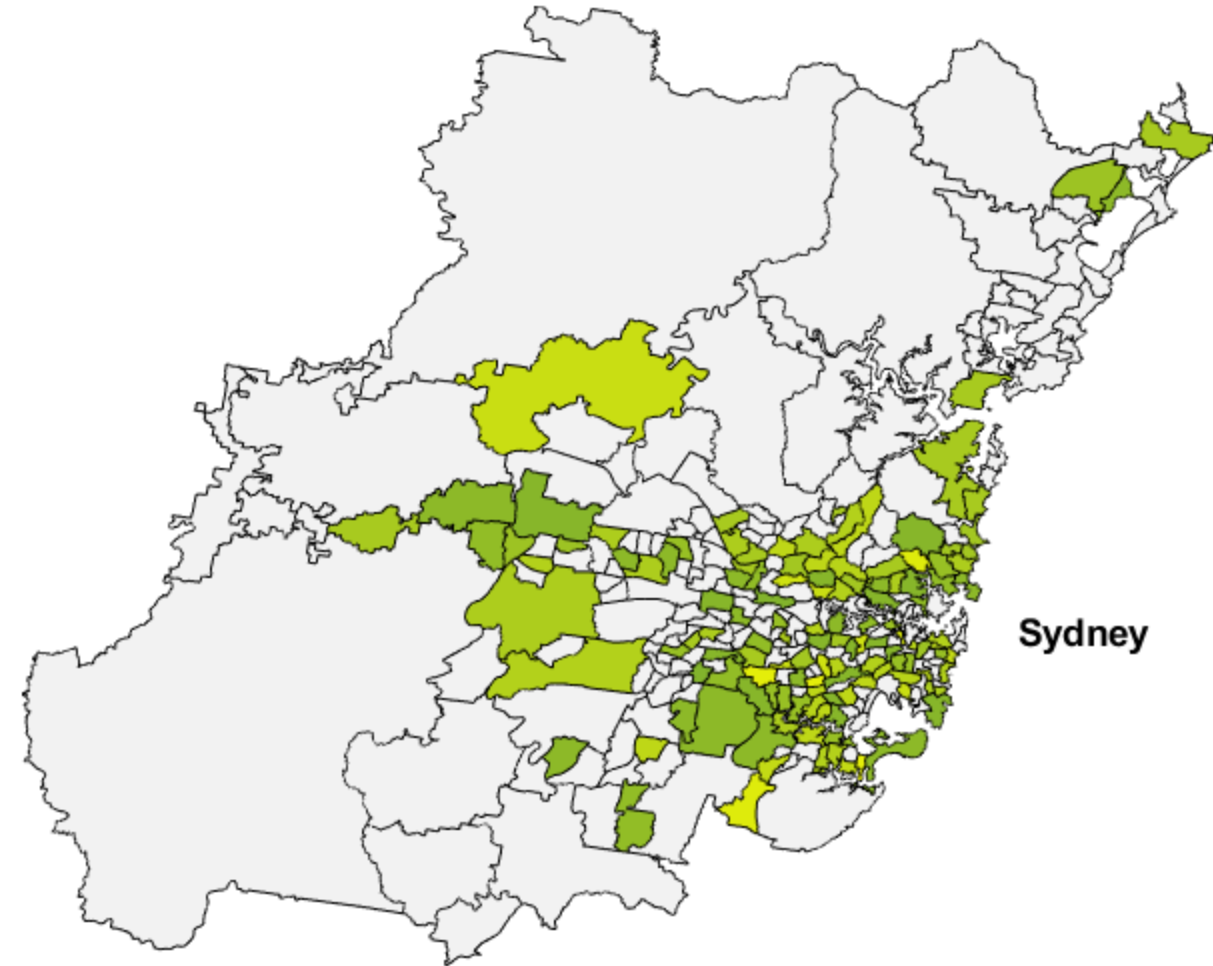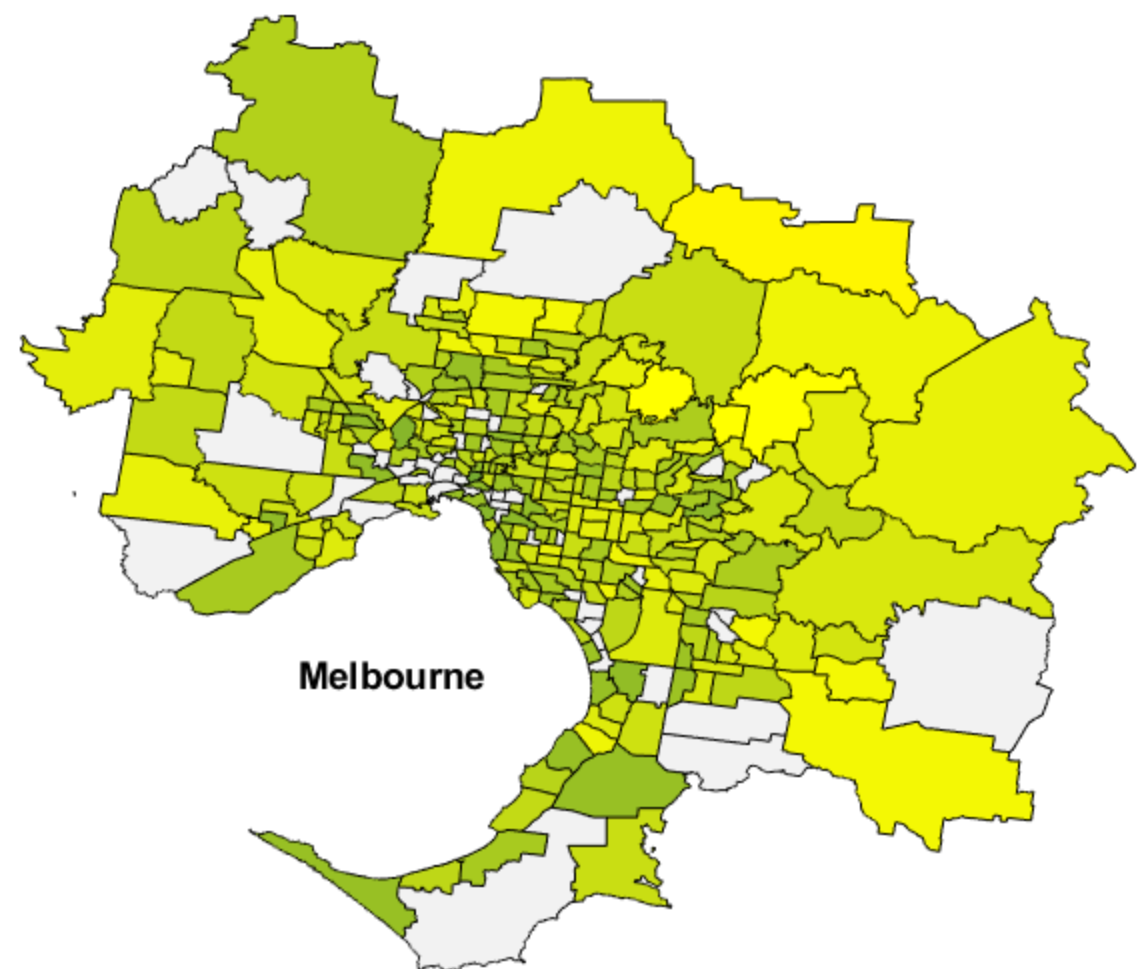

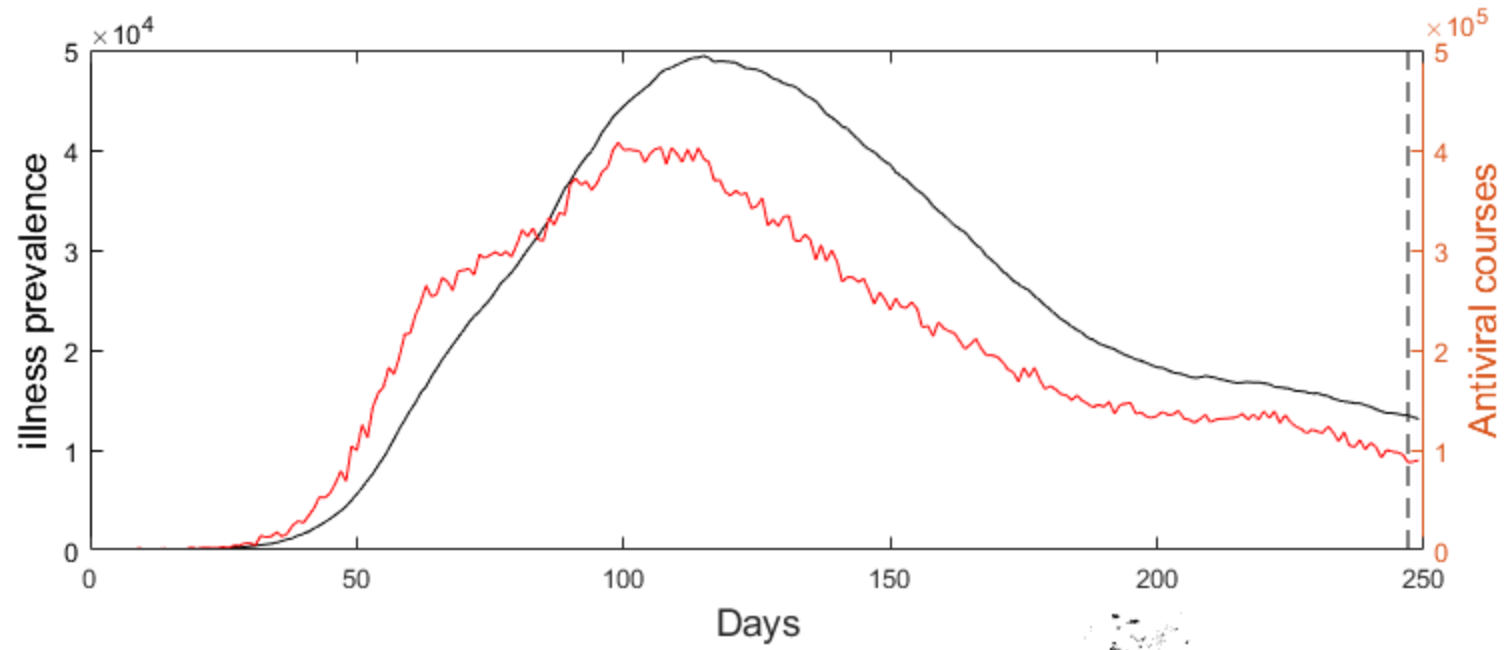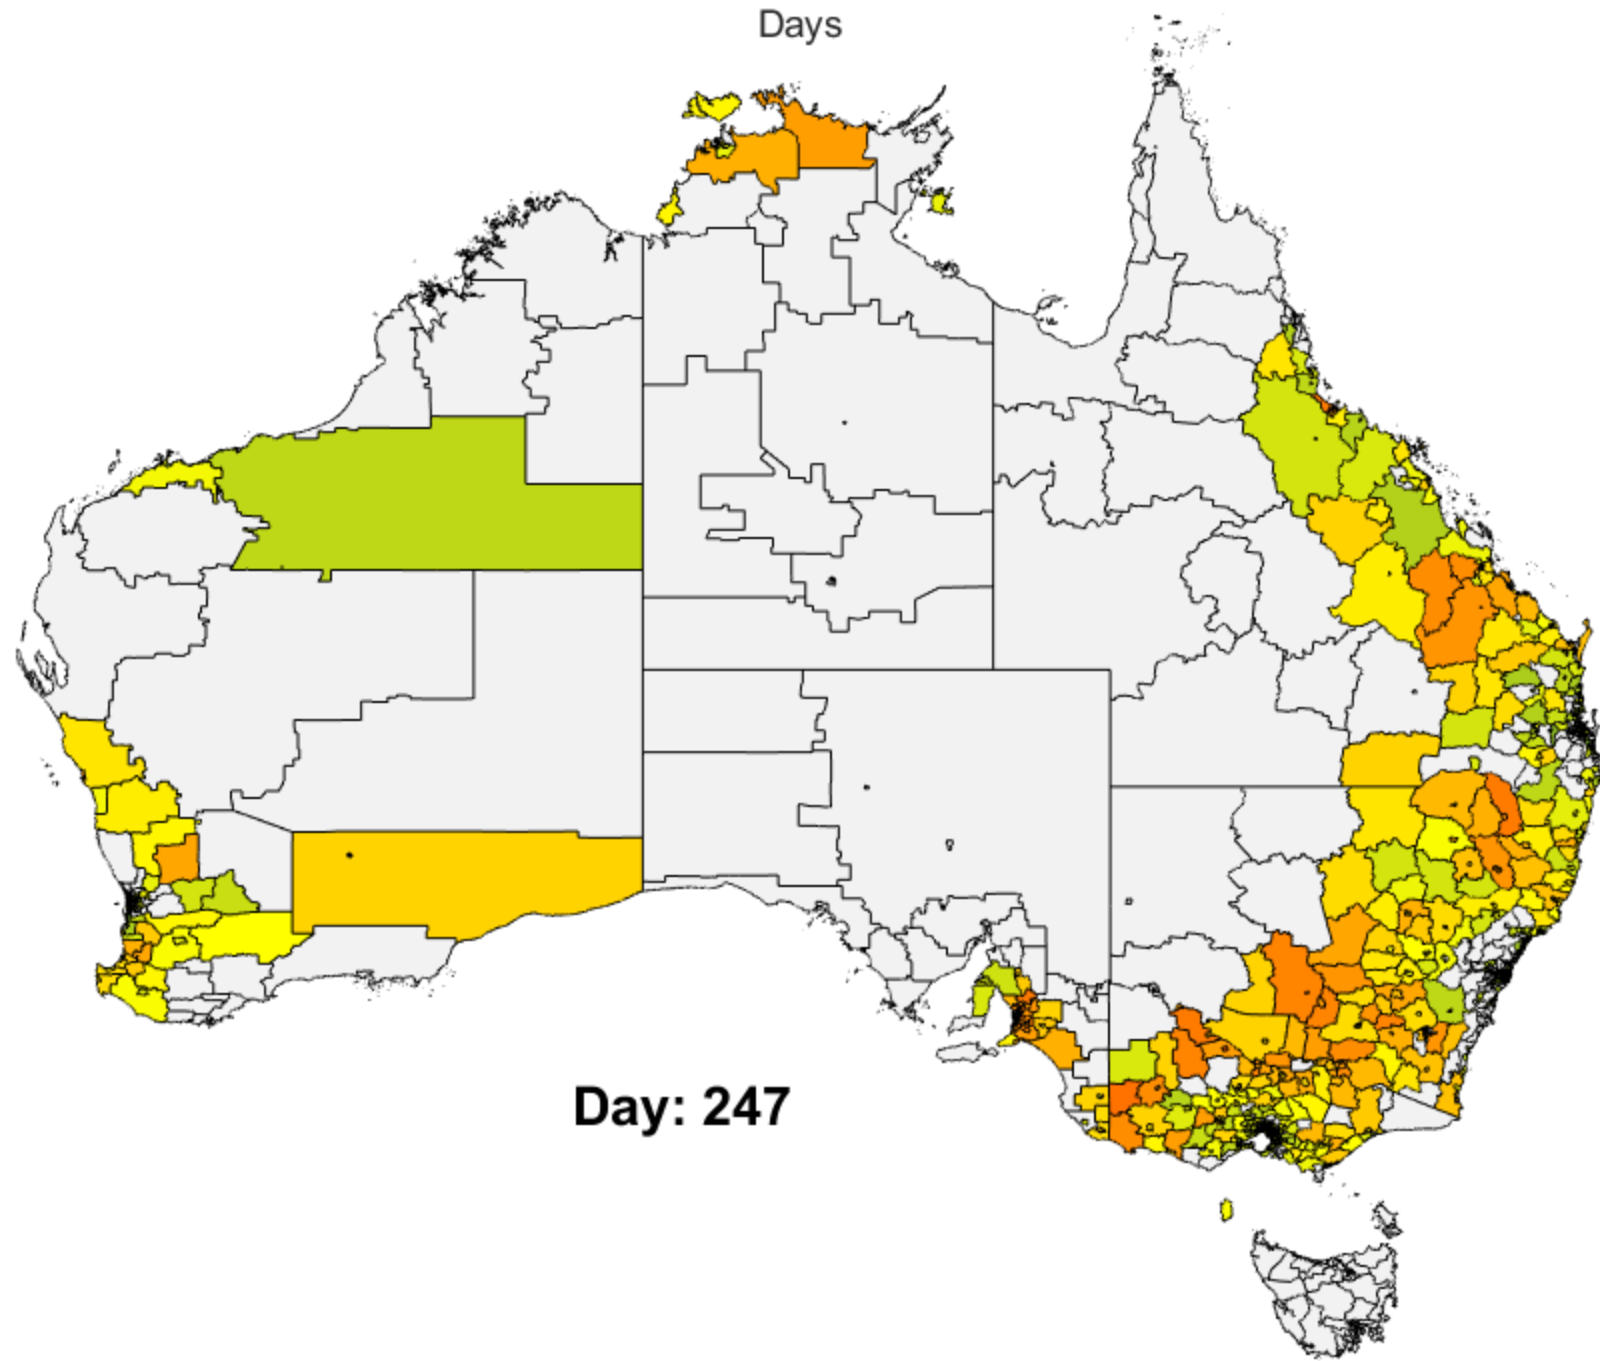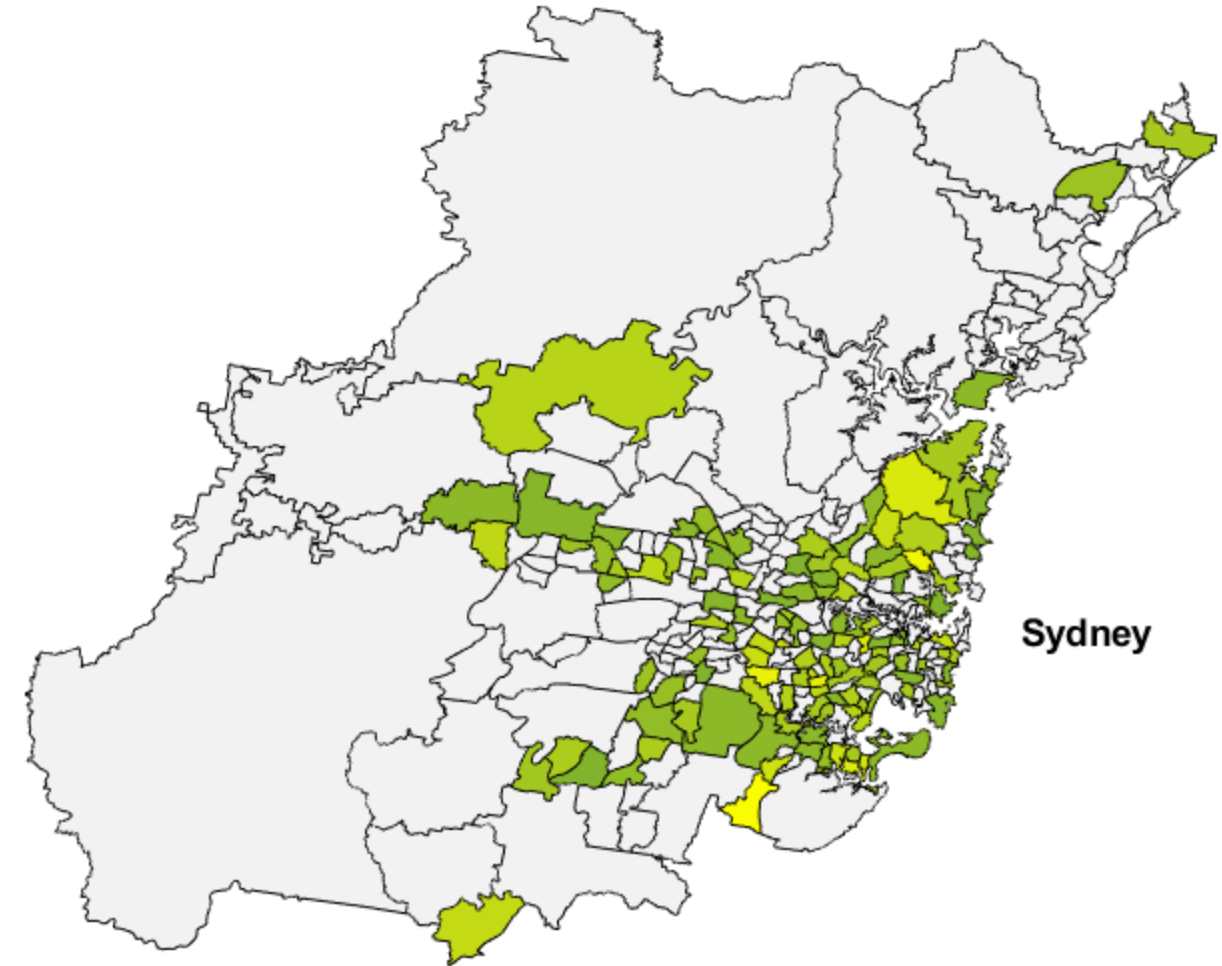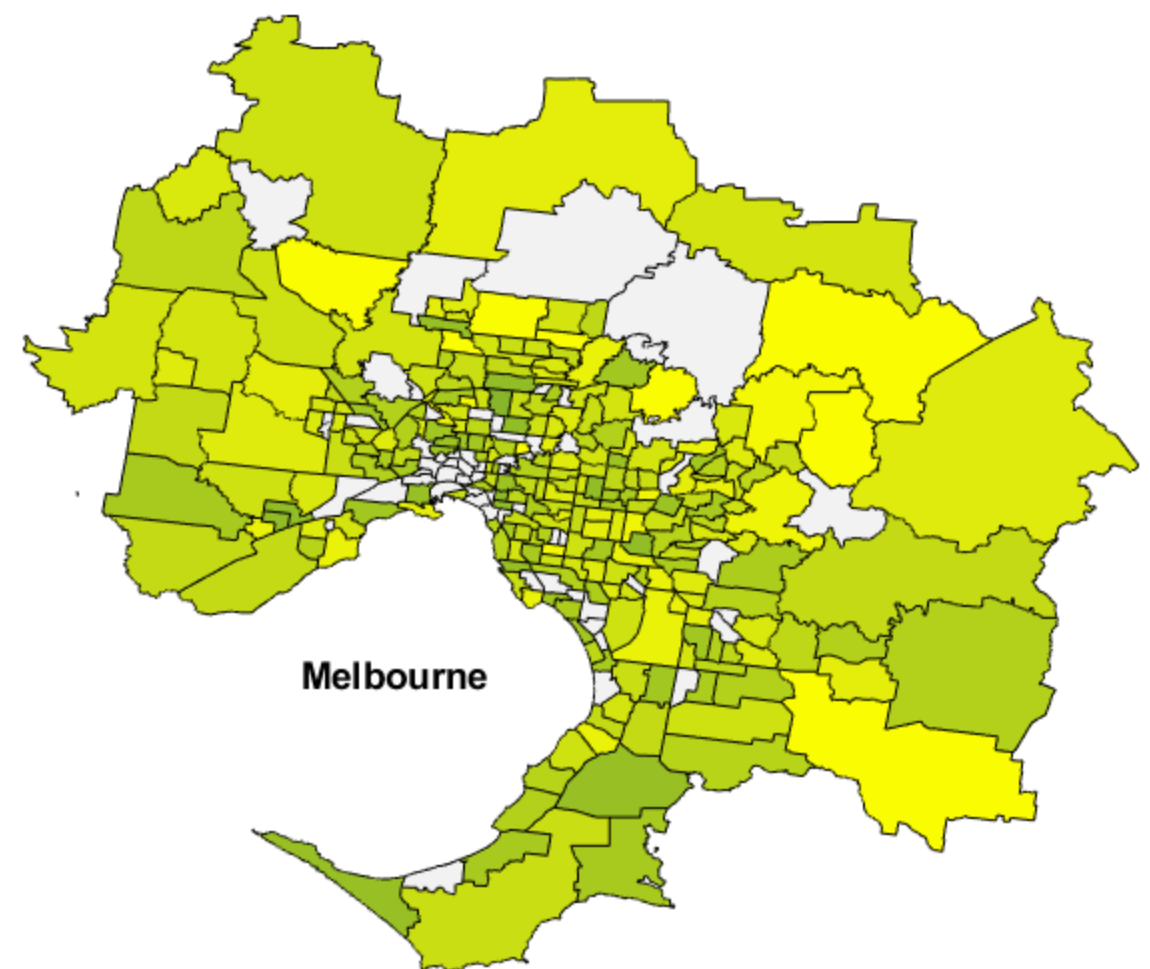

Supplement: rsif20190728supp8.pdf [file rsif20190728supp8.pdf]
